# Supplementary material
Source: PubMed Central journal article supplement (PMC3568538)
Supplement: AEM.03157-12_zam999104060so1.pdf [file AEM.03157-12_zam999104060so1.pdf]

## Supplementary Figure S1

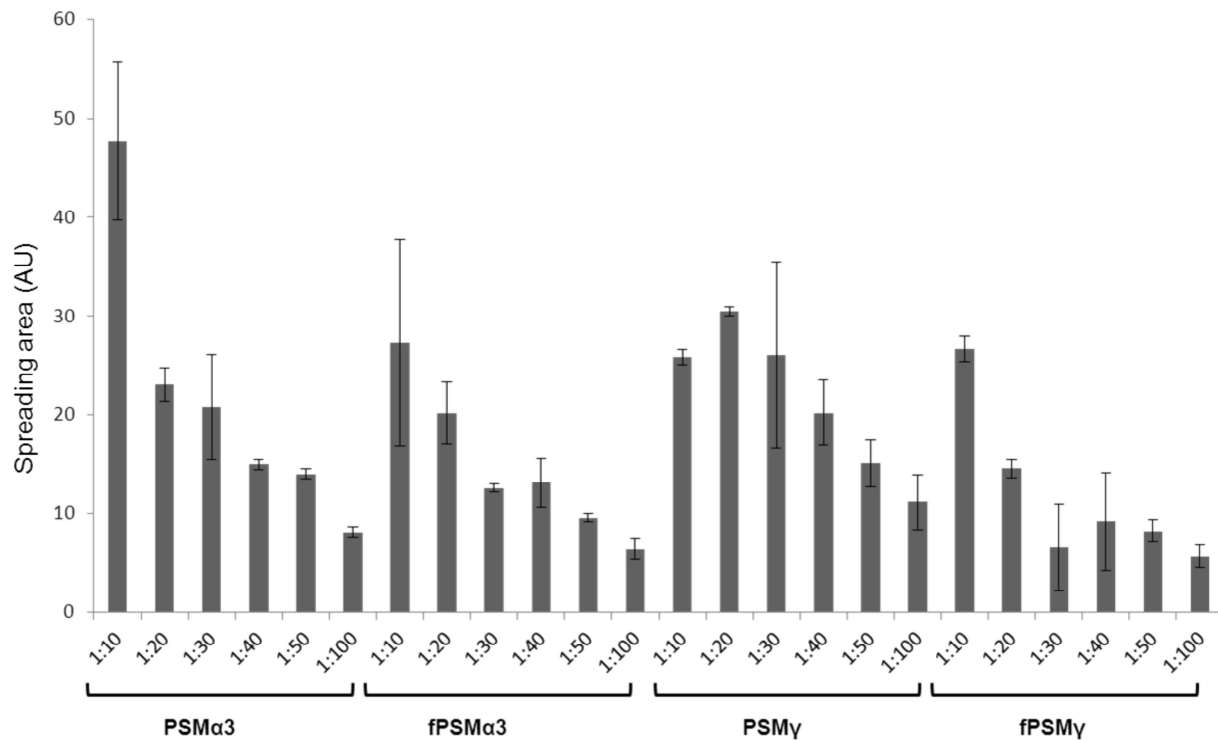

**Figure S1. Dose response curves of spreading motility promoted by synthetic PSM $\alpha$ 3 and PSM $\gamma$  peptides.** Chemically synthesized PSM $\alpha$ 3 and PSM $\gamma$  peptides from *S. aureus* were spotted in the centre of soft agar plates prior to the inoculation with cells of *S. aureus* SH1000 agr<sup>-</sup>. Both N-terminally formylated PSMs (marked with an ‘f’) and non-formylated peptides were used in the assay. Subsequently, the spreading areas were determined by ImageJ and statistical analyses were performed. The graphs show the areas covered in arbitrary units. All spreading assays were repeated at least three times.
