# Supplementary material
Source: PubMed Central journal article supplement (PMC3568538)
Supplement: AEM.03157-12_zam999104060so4.pdf [file AEM.03157-12_zam999104060so4.pdf]

**Table S3. Primers used in this study**

| <b>Primer</b>    | <b>Sequence (5'→3')<sup>a</sup></b>                                  |
|------------------|----------------------------------------------------------------------|
| psm $\alpha$ -FI | ctgcataacctccttatttctaac                                             |
| psm $\alpha$ -RI | <b>AATCGTCAGTCAGTCACCATGGCA</b> taagattacctccttgcttatga              |
| psm $\alpha$ -F2 | <b>TGCCATGGTGA</b> CTGACTGACTGACGTAAtaatttaagcgaattgaactctaaa        |
| psm $\alpha$ -R2 | ggctaggacatgtatgtctta                                                |
| psm $\beta$ -FI  | <u>GGATCC</u> gtaatcacggaactctttgttt                                 |
| psm $\beta$ -RI  | <b>AATCGTCAGTCAGTCACCATGGCA</b> tgaaaacactccttaaaatttaatt            |
| psm $\beta$ -F2  | <b>TGCCATGGTGA</b> CTGACTGACTGACGTAAataataactaatattctttaaaataaactggg |
| psm $\beta$ -R2  | <u>GGATCC</u> tgatacctgtttcttcagatataaatatc                          |
| GFPoptFR         | <u>GAATTCAAGGAGGAAAAACATATGTCAA</u> AAGGAGAAGAATTAT                  |
| GFPoptRV         | <u>GTCGAC</u> ttacttatataatcattcc                                    |

<sup>a</sup>The overlap in R1 and F2 primers used to merge flanking regions by PCR is shown in boldface. Restriction sites used for cloning are underlined. A ribosome-binding site is indicated in italics.
