# Supplementary material
Source: PubMed Central journal article supplement (PMC3568538)
Supplement: AEM.03157-12_zam999104060so5.pdf [file AEM.03157-12_zam999104060so5.pdf]

Tsompanidou\_et\_al\_Supplemental\_FASTA\_File

>sp|A5IPD1|LRGA\_STAA9  
mkqqkdaskpahffhqvivalvfvskiesfmpipmpasviglvllfvllctgavklgevekvgttltnnigllfvpa  
gjsvnslgvisqapflii  
gliivstllllictgyvtqiimkvtsrskgdkvttkkvkieeaqahd  
>sp|A5IPD2|LRGB\_STAA9  
minhlaIntpyfgillsvipfflatilfektnrfflfaplfvsmvfgvaflyltgipyktykiggdiiyfflepaticfa  
iplykkrevlvkhwhriig  
gigigtvallliiltfaklaqfandvilsm1pqaattaialpvsagiggikeltslavilngviiyalgnkflklfritn  
piargla1gtsghtlgvap  
akelgpveemasialv1vgvvvavvpvfvaiff  
>sp|A5IPD8|RBSD\_STAA9  
mkksavlnehiskaiatighfdlltindagmpipndhrridlavtknlprfidvlatvleemeiqkiylaeieikehnptq  
lqqikqlisseieiefiph  
eemksnlahplnkgnirtgettpysnialesnvtf  
>sp|A5IPU6|RS6\_STAA9  
mrtyevmyivrpnieedakka1verfngilategaeveleakdwgkrllayeindfkdgyfynivrvksdnkatdefqrla  
kisddiiryvmvirededk  
>sp|A5IPW7|XPT\_STAA9  
mellgqkvkedgvvikek1kvdglfnhqidaklmnevgrtfyeqfkdkgitkiltieasgiapaimaalhfdvpc1fak  
kakupstldgyyetsihsf  
tknktstviiskeflseedtvl1iddflangdaslglydiaqqanaktagigivveksfqngqrlaeagltvss1ckva  
slegnkvtlvvee  
>sp|A5IQ96|RPOB\_STAA9  
magqvvyqgrhrkrnyarisevlelplnieiqtkseywflregliemfrdispiedftgn1slefvdylgepkydlee  
sknrdatyaaplrvkvrli  
iketgevekeqevfmgdfplmtdtgtfvingaervivsq1vrspsvyfnekidkngrenydatiipnrgawleyetdakdv  
vyvridrtrklpl1tvllra  
lgfssdqeivdl1gdneylnrtlekdgtenteqalleiyerlrpgepvtvenaks1lysrffdpkrydlasvgyrktk  
l1khr1fnqklaepivnt  
etgeivveegtvl1drkideimdvlesnansevfe1hgsvidepveiqsikvyvpnddegrtttvignafpdsevkci  
tpadiasmsyffn11sgigy  
tdidh1gnrr1rsvge11qnqfrigl1rmervvrermsiqdtesitpqq1nirpviasikeffgssq1sqfmyqsn1  
sd1thkrr1salpgg1tr  
eraqmevrdvhyshygrmcpietpegpnig1ins1ssyarvnefgfietyrkvdl1dthaitdqidyltadeedsyvvaq  
anskl1dengrfmddevvcr  
frgnntvmakemdydvspkvvsaaatcipflenddsnralmganmqrqavpl1mpeapfvgtgmehvaardsgaait  
akhrgrvehvesneilvrr  
1veengvehegedryplakfkrsnsgtcynqrpivavgdvveyneiladgpsme1gema1grnvvgf1mtwdgynyeda  
vimserlvkddvysihie  
eyesear1tk1gpee1trdipnvsesa1kn1ddrgivyigaevkdgdilvgkvtpkgvteltaer1lhai1fgekarevr  
dts1rvphgaggiv1dvkv  
fnreegdd1spgvnq1vrvyivqkrkihvgdkmcrhgnkgviskiivpeedmpylpdgrpidim1nplgvpsrmnigqv  
le1h1gmaakn1gihvasp  
vfdgandddvstieeagmardgktvlydgrtgepfdnri1svgmym1klahmvddk1harstgpys1vtqqplggkaqf  
ggqrfgemevwa1eaygaa  
yt1qe1ltyksddt1vgrvkt1yeaivkgenisrpsvpsfrvlmkelqsl1gldvkvmdedqneiemtdvdddvdverkvdl  
qqndapetqkevtd  
>sp|A5IQH7|MNHC2\_STAA9  
mnl1111vigflvfigtymil1sin1irivigisiythagn1iismgtygssrsepl1itggng1fvdpl1qai1v1taivi  
fgmtafl11v1vyrtykvt  
kedeieg1rgeddak  
>sp|A5IQH9|MNHE2\_STAA9  
mnqiv1n1i1af1w1f1qdedhfkfstffsgylig1iviyl1hrffsddfyrkiwvaik1fgvylyqlitssistinyi  
1fktkdmnpg11syetr1t  
sdwaitf1t1i1i1tpgstvirisqdskkffihsidvsekekds11rsikhyed1ilevsr  
>sp|A5IQX2|CLPP\_STAA9  
mnl1ptvi1etn1rgeraydiysr11kdriim1lgsqiddnvansivsq11fl1qaadsekdi1y1inspggsvtagfaiydt  
iqhikpdvqt1c1igmaasm  
gsf1laagakgrfal1pnaevmihqpl1ggaaggateieiaanh1lktrek1nr1l1sertgqsiekiqkdt1drdn1ltaee  
akeyglidevmvp1etk  
>sp|A5IR07|AROD\_STAA9  
mthvevvatiapq1s1eet1liqkinhridaidvle1lridqienvtvdqvaem1tk1kvmdsfk11vtyr1tk1lqgygqf  
ind1y1n1is1d1aningid  
mid1ewqadid1ekh1qri1kh1lqqynkevvi1shh1festpp1de1lqfi1ffkmqkfnpeyvkl1avm1phnkndv1n1l1qams  
tfsdtm1dck1vvgi1smk1lg  
lisrtag1vfggal1tygc1gep1qagq1dvtd1kaqvtly  
>sp|A5IRC6|MNHE1\_STAA9  
mavq1v1n1f1i1avf1w1fvtnsytt1n1fv1lgfi1fg1v1v1y1llhrv1pgr1fyvit1lyriik1vi1flielikanf1dv1k1i1i

Tsompanidou\_et\_al\_Supplemental\_FASTA\_File

kpsiknepgffvyhtd1kk  
dwqiv11snlilt1tpgtv1lgsddrtkiyihaidfstkeqevesiktslekivrevgei  
>sp|A5IRD0|MNHA1\_STAA9  
msllhiavilplifaliipilyrffkrihlgwfvlpvpivifiym1tlikttmsgntvmktlnwmpfhgmndlyldglg  
llfslisgigs1vvlysi  
gylskseq1gnfycyl1l1fmgam1gvv1sdnviilylfweltsfssfl1isfwrerqasiygaqksliitvfggl1llgg  
iillaip1qsf1siqymiqh  
aseiqnspffifamilimigaftksaqfpfiwlpdameaptvpsay1hsatmvkaglyliarmtpifaasqgwvwtvtl  
vglit1l1fwas1natkqdd1  
kgilafstvsq1gmimam1gigaisyhyqgddskiyaaftaai1fhlinhatfkga1fmitgavdhstgtrdvkklgg1l  
timpisftitvitalsmag  
vppfngflskesf1ettftasqan1fsvdt1gylfpiigivgsvftfvysikfimhiffgqykeq1pkkahevsilm1l  
spailatlviv1glfpgil  
tnsiiepatssinh1iddvef1hmfhgl1tpaf1st1viyilgill1vtfsywvkl1lqrqpgk1ltnfywnrsanvipnys  
ekmtnsyvtdysrnn1vii  
fgal1l1l1tfvt1fsvpfn1nfkdvspirifevcivill1saaf1il1faksr1lfsiim1savgyavsv1lfi1ffkapd1alt  
qfvvesistal1l1cfyh1  
pn1lnrynekrsf1q1tnaliaggv1lsviiig1liaygnrhfesiskfyqehvyd1ahgknmvvn1lvdfrgmd1lfessv1  
giaglavytmik1l1rkk1rqt  
qgnevknhe  
>sp|A5IRJ1|Y1013\_STAA9  
milglalipsksf1q1eavdsyrkrydkqsrikphvtikapfeiedgd1dsvieqvraringipavevhatkassfkptnn  
viyfkvaktdd1eel1fnrf  
ngedfygeaehv1fvphfti1agg1lssqefedi1fgqvalagvdhkei1idel1l1rfdddedkwkvi1etf1kla  
>sp|A5IRV8|PUR5\_STAA9  
mskayeqsgvni1hagyevermsshvkrtmrkevigg1ggfgatfd1sqlnmtapv1vsgtdgvgtkl1klaidygkhdsi  
gidavamcvndi1ltgaep  
lyf1dyiatnkvvpevieqivkgis1dacvetntal1iggetaemgemyhegeydvagfavgavekddyvdgsevkegqvvi  
glassgih1sngys1lvrk1i  
nesgid1asnfdnrpfi1dvfleptklyvkpvl1al1kkevsikamnhitgggfyeni1pral1pagaarid1ttsf1ptk1fdw  
lqqgnid1tnemyni1fnmg  
igy1tviv1dekdasr1alki1laeqnveayqighivknestaie1llgv  
>sp|A5IS02|CTAA\_STAA9  
mfgkkn1kwlgvat1mmtfvq1lga1lvtktgsadgcgsswp1lchgalipeffpidtielshravsa1s1l1mv1l1vit  
awkhi1gyike1kpl1si1sv  
gf1l1l1qal1igaaaviwqndyv1al1hfgis1l1sfssvflit1li1fsidqkyeadelyikkp1lrr1l1tw1mai1iycgvytg  
al1vrhad1s1ayggw1lpf  
hd1lvphseqd1wvq1l1thrimafivfti1imityihavknyppnrtvhygytaafilv1ilqvitgalsimtnvnl1ialfhal  
fityl1fgmttyf1im1l1rs  
vr1s1dkq  
>sp|A5ISC6|RL19\_STAA9  
mtnhk1lieavtk1sq1l1rtd1lpsfrpgdt1rvhvri1iegtreri1qv1fegivikrrggv1setftvrkissgvgvertf1plht  
pkiekiev1krrgk1vrrak1  
yy1rs1rgkaari1qeir  
>sp|A5ISE9|RIMP\_STAA9  
mskiteqvev1vqpimed1l1fel1vdveyvkegrdh1flrisidkeggvd1ndct1asekiseam1dandpipemy1ldvasp  
gaerpikkeqdf1qnaitkp  
vfv1slyvpiegeke1w1lgi1l1gevnnetivvqvkikartkdieiprdkiakarhavmi  
>sp|A5ISH0|RNY\_STAA9  
mn1l1s1l1l1l1l1l1gi1l1gvvgyvvarn1l1l1qkqsarqtaedivnqahkeadnikkek1leakeenqil1reqteael1rerr  
sel1qrqetr1l1l1qkeen1ler  
ksd1l1dkkdei1leqkeskieekqqvdakessvq1l1mkheqelerisg1l1tqeeaineq1l1qrvee1l1sqdiav1l1vkekek  
eakekvdk1take1l1latavq  
r1laadhtse1stvsvn1l1pndemkgri1g1regrnirt1let1l1tgid1l1iddtpeavil1sgfdpirreiart1al1vn1l1vsdgri  
hp1griedmvekarkevdyi  
i1reagegat1fevna1nmhpd1lvki1vgr1l1nyrtsygnv1l1khsievah1asm1laaelgedet1akrag1l1hdvgkaidhev  
egshveig1velakkygene  
tvina1hshhgd1vepts1i1silvaada1saarpgarket1lenyir1rler1let1sesydgveka1fai1qagreir1v1vspe  
eid1l1ksyrlardi1knqie  
del1qypg1hikvtv1vretraveyak  
>sp|A5ISH9|MUTS\_STAA9  
msnvt1pmmqy1l1kiseyqdc1l1l1ffr1l1gdfyemfyedakeasrv1leit1l1tkrdakken1pipm1cgvp1yhsadsyid1l1vnn  
gykva1ceqmed1pkqt1kgm  
vrrevv1ri1vtpgtv1meqggvddkqnn1yl1sfvmnqpeia1l1sycdvstge1kvthfndeat1l1neittin1pnev1vndnis  
dn1lkrqin1mvtet1itvret  
l1ssei1svnqtehk1lmyqatq1l1l1dyihhtqkrd1shiedv1vqyaaidymkmdfyakrn1el1tesir1l1kskkgt1l1w1lmd  
etk1tpmgarr1l1kwi1drpl  
is1keqiear1divdef1sahfierdt1l1rty1l1nqvydier1l1vgrvsygnvnard1l1ql1khsiseipnikal1l1nsmnqnt1l1vq

Tsompanidou\_et\_al\_Supplemental\_FASTA\_File

vnqlep1dd1ldileqslv  
eepi svkdgg1fkvgfntqldeyleaskngktwlaelqakerqrtgikslkisfnkvfygfieitranlqnfepsefgy  
mrkqtl1snaerfitdelke  
kediilgaedkaieleyqlfvqlreevkkysterlqqqakiise1dclqsfaeiaqkynytrpsfsenktlelvesrhpv  
ervmdydyvpnnclrne  
tfiyli1tgpnm1sgkstyrmqvaiisimaqmgayvpckeavlpifdqiftrigaaddlvsgkstfmvemleaqkaltyate  
d1iifdeigrgrtstydg1  
alaaqamjeyvaetshakt1fsthyhel1ttdqa1ps1knvhvaaneykge1if1hkvkdgavdds1ygiqvaklad1pek  
israqvil1sefeasagkks  
sisn1k1mvenepeingen1n1sveettd1sqkdfeqasfd1fendqeseielqikn1n1snmtpiealvkl1selqnlk  
>sp|A5ISI2|GLPK\_STAA9  
mekyil1sidqgttssrail1fnqkgeiagvaqrefkqyfpqsgwvehdaneiwtsvlavmtevinendvradqiagigitn  
qrettvvd1khtgrpiya  
i1vwqsrqtq1scselkqgqyeq1frdktg111dpyfagtkvkwil1dnvegarekaeng11fgtid1tw1vwk1sgkaahi  
tdysnasrt1mfnihd1ew  
ddelle111tvpknm1pevkpsseiygk1tidyhfygqevpiagvagdqqaal1fgqacfecg1dvkntygtggf1mmtgdka  
vksesg111ttiaygidgk1v  
nyalegs1fvsgsaiq1w1rdg1rminsapqsesyatr1vdstegvyvvpafvg1gtpywdseargai1fg1trgtekeh1fir  
atles1cyqtrdvmeamsk  
dsgidvqsl1rvdgavkn1nfimqfqadi1vntsverpei1qetta1gaaf1ag1lavgfweskd1iaknwkleek1fdpkmd1eg  
erek1yrgwkkaveatqvf  
kte  
>sp|A5ISS8|DAPB\_STAA9  
mkil11igygamnqrvar1aekgheivgvi1entpkattpyqqyqhi1advkdadvaid1fsnpl11fp11deefh1pl1vvat  
tgekek11nk1de1sqn1p  
vffsanmsygvhaltki1laaav11ddfdie11teahhkkvdaps1g1leklydvivs1kenvtpvydrhel1nekrppqi  
gihsi1rggt1vgehev1fa  
gtdeti1qi1thraqskdi1fangai1qaaer1v1nkpngfy1tdfn1  
>sp|A5ISW6|EBH\_STAA9  
mnyrdki1qkfsi1rkytvgtfstviat1lv1flg1fntsqaha1aetnqpasv1vkqkqqs1nneqtenres1qvqnsqnsqnsq1s  
atheneqpnnsqan1vnqk  
vaqs1t1nde1qpasqvn1tkkdsataatt1qpdkeesk1hkqnesqsankngndnraahven1heanvvtas1dssdngnvqhd  
rne1qaffdanyhdyrfid  
renadsg1tfnyvkgi1fdkint11lgsndpinnkd1qlayke1eqavalirtmpqrq1tsrrsnriq1trsvesraaep1svs  
dyqnanssy1yvenand1gsg  
ypvgtyi1nasskgapyn1lpttpwnt1k1asdskeia1lmtakqtgdgyq1wvikfnkghaphqnmifw1falpadqvpvgrtdf  
vtvnsdgt1nvqwhgagag  
ankp11q1mwegv1vndpdrshdfki1rnrsgqvi1yswptvhvys1led1srasdyfseagatpatka1fgrqnfeyingqk1pae  
spgvpkvy1tf1gggdasyt  
isfktq1gptv1nk1lyaaag1ra1eynq1fmysq1lyvestqd1hqqr1ng1l1rqvnrtyr1igt1tkrvevsqgnvqtkk1vest  
n1nid1fdvddp1syvktps  
nkvl1gfyptnan1tna1frpggvqel1neyq1sq1lftdq1k1qeaartr1npir1lmi1gfdy1pdgygnset1vpvn11tv1pei1qhn  
i1kffknddtq1niaekpfsk  
qaghp1vfy1yagnqgnasvnl1ggsvtsi1qp1rin1tsnenftdkgwqit1giprt1hienstnrtnnarernielvgn11p  
gdyfg1tirfgrkeq1lfeir  
vkpht1pti1tttaeq1lrgtal1qkvpvni1sgip1dpsal1vylvapt1nqt1tnggseadq1ipsgytilatgtpdgvhntvtirp  
qdyv1vfippvgk1qiravvy  
ynkvvasnmsnav1tilpddippt1innpvginaky1yrgdevnftmgvsdrhsgiknttitt1lpsgwtsn1tksdnkngsla  
itgrvsmnqafnsd1tkfv  
satdnvnt1tndsqs1khvsi1hvgkise1dahpiv1lgn1tekvvvn1ptavsn1dekqsi1itafmnknqni1rgylastdpvtvd  
nngnv1t1hyrdgs1st1lda  
tnvmt1yep1vkseyqtana1aktatvtiakgqsfni1gdikqyft1sngqai1pngtftnitsdr1tipta1qevsqmnagtq1ly  
hivasnayhk1dtedfy1s1  
kivdvk1qpegd1qrvyrtsty1d1ttdeiskvkqafinanrdvit1laegdisvtntp1nganvstitv1ninkgr1l1tksfasn1  
anmfl1rwnfpqdy1vtw  
tnaki1anrptd1g1lswsddhks1liyrydat1lgtqit1tndil1tm1katt1vp1g1l1rnnit1gnek1aqaeag1rpnyrttgysq  
snattd1gqrqft1ngqviq  
ildii1npsngy1ggpvt1nsn1tranh1snstvvn1nepaangag1aftidh1vvksn1sthnas1davykaq1ly1ltpygpkqyveh  
l1nqntgnttdai1niyf1vps  
d1lvnpti1svgnyt1nhqvf1sgetftntitand1nfgvqsv1tvpntsqi1gtvdnn1hqhvsat1apnvtsatsktin1latdts  
gntatts1fnvtvkp1rdky  
rvgt1ssta1anpvri1ani1snnatvsqad1qtti1ns1l1tftsn1apnrny1atasaneitsktvsnv1srtg1nnanvtvtvthqdg  
ttstvtvp1kvhipeivah  
shyt1vq1gqdfp1ang1ssaady1fkl1sngsai1pdati1twvsg1qapnkdn1trigeditvtahilid1gettpitktatykvvrt  
vpkhvfetargv1lypgvsd  
mydakqy1vkpvnn1sws1tnaqhmn1fq1fvgyt1gpnkd1vvgi1strli1rvtydn1rqt1ed1tilskvkpdp1ridansvtykag1  
tnqei1kvnnv1ln1ssvkl1f  
kadnt1p1nvt1ni1thgsgf1ssvvtvsda1l1pnggikak1ssi1smnnvty1ttqdehg1qvvtvtrnesv1dsndsasvtvtpq1lqa

Tsompanidou\_et\_al\_Supplemental\_FASTA\_File

ttegavfikggdgdgdfghv  
erfiqnpghgatvawhdspdtwkntvgnthktavvtlpsggqtrnvevpvkvyvvanakapsrdrvkgqnlthgtnaidyi  
tfdpntntngitaawanrq  
qpnnqqagvqhlndvtypgisaakrvpvtvnvyqfefpqttyttvtggtlasgtqasgyahmqnasglptdgftykwnr  
dttgndanwaamknpnta  
qvnakydviynghtfatslpakfvvkdvqpakptvtetaagaitiappanqtvnthagnvttyadklvikrngnvvttf  
trrntspwvkeasadnvt  
givgtngitvaagtnpadtiqvvatqgsgetisdeqrsddftv vapqpnqattkiwqnghiditpnnpsghlinptqa  
mdiaYTEKVGNGAEHSKTI  
nvvrqgnnqwti ankpdvvtl daqtgkvtfnantikpnssititpkagtghsvssnpstltapaahvntteivkdygsn  
vtaaeinnavqvankrtat  
ikngtamptnlaggstttipvtvtyndgsteevqesiftkadkrelitaknhlddpvstegkkpgtitqynnamhnaqqq  
intakteaqqvinneratp  
qqvsdal tkvraaqtikidqakallqnkednsq lvt sknlqssvnqvpstagmtqqsidynakkreaeteitaaqrvid  
ngdataqqisdekhrvdna  
ltaInqakhdl tadthaleqavqqlnrtgtttgkkpasitaynnsiralqsd ltsaknsanaiiqkpirvtqvqsalt  
vnrvrnerltqainqlvpla  
dnslrtaktkldeeinksvtt dgmtqssi qayenakragqtettna qnvinngdatdq qiaaektkveekynslkqai  
gltpdlaplqtaktqlnd  
idqptsttgmtsasvaafndklsaartkiqeidrvlashpdvati rqnvtanaakta l dqarngl tvdkaplenaknql  
qhsidqtsttgmtqdsin  
aynakltaarnkvqqinqvlagsptvdqintntsaanqaksdl dharqaltpdkaplnaktqleqsinqptdttgmtta  
slnaynqlqaarqkltei  
ngvlngnptvqni ndkvaeanqakdqlntarqgl tldrqpalttlhgasnl nqaqqnftqqinaaqnhaaletiksni  
alntamtklkdsvadnnti  
ksgqnytdatpankqaydnavnakgvi gettnptmdvntvnqaasvstkda l dgqnlqrakteatnait hasdl nq  
aqkna l tqvnsaqnvqav  
ndikqtts lntamgl krgvanhnqvqs dnyvnadtnkknndynnaynhandi ingnaqhpvitpsdvnnal snvtske  
halngeaklnaakqeanta  
lghlnlnnvqrqlsqingahqidavntikqnatlnsamgnl r qavadkdqvkrtedyadadtakqnaynsavssae  
tiinqtanptmsvddvna  
tsavttksalngdek l vsktdaaraidalphlnnaqkadvkskinaasni agvntvkqqgtd lntamgnl qgaindeq  
tlnsqnyqdatpskktay  
tnavqaakdi l nksngqkktkdqvteamnqvnsaknndgtr l l dqakqtakqqlnmthl ttaqktnltnqingsgttva  
gvhtvqsnant l dqamnt l  
rqsianndatkasedyvdanndkqtaynnavaaaeti inansnpempst itqkaeqvns sktalngdenlatakqnakt  
ylnt ltsitdaqknlisq  
issatrvsgvdtvkqnaqhl dqamanl qnginnesqvkssekyrdadtnkqqeydnaitaakailnkstgpntaqnavea  
alqrvntakdalngdakli  
aaqnaakqhlgtlthittaqrndltnqisqatnlagvesvkqsans l dgamgnl qtaindksq l asqnl dadeqkrna  
ynqaisaeti l nkqtgpn  
taktaveqalnnvnsakhalngtqnl nnaqqaaitaingasdl nqkqkdal kaqangaqrvsnandvqrnate lntamgq  
lghaiadknt l asskyvn  
adstknayttkvtnaehi isgtptvvtppsevtaaanqvnsakqelngder lrvakqnantaidal tqlntppkaklke  
qvgqanrledvqsvqngq  
slnamkgl rysi anettvkasqnytdaspnnqstynsavsnakgi inqtnnptmdtsaitqattqvnnakngl ngaen l  
rnaqntakqnlnt lshltn  
nqksa issqi draghvsevtaaknaate lnaqmgneqaihdqntvkqgvnftdadkkrdaytnavsraeti l nktqga  
ntskqdveaai qnvtsakn  
alngdqvntnaknaaknalnntsinnaqkrdl ttkidqattvagveavsntgtqlntamanl qngindkant lasenyh  
dadsdkktaytqavtnaen  
ilnksgsn l dkaavenal sqvtnakgalngnhnl eqaksnanttingl qhl ttaqkdkl kqqvqqaqnvagvdtvkssa  
nt l ngamgt l rnsiqdnta  
tkngqny l daternktnynnavdsangvinatsnpnmdana inqiatqvtstkna l dgthnl tqakqtatnaidgatnl n  
kaqkdal kaqvt saqrvan  
vtsiqqtane lntamgql qhgi ddenatkqtqkyrdaeqskktaydqavaaakailnkqtgsnsdkaavdra lqqvstsk  
dalngdaklaeakaaarqn  
lgtlnhithaqrtalegqinqattvdgvntvktnant l dgamns l qgaindkdat l rnqny l dadeskrnaytqavtaae  
gilnkqtggntskadvna  
lnavtrakaalngaen l naktstntingl pntqlqkdn l khqveqaqnvvgvngvkdkgnt lntamgal rtsiqdn  
ttktsqny l dasdsnkny  
ntavnnangvinatnnpnmdana indmanqvnttkaalngaqlaqaktatntinnaqdl nqkqkdal ktqvnaqrvs  
dannvqhtate l ngamta l  
kaai adkrtkasgnyvnadqekrqaydskvtnaeni ingtpnat l tvndvnsaasqvnaakta l ngdnn lrvakehann  
tidglaql nnvqkaklkeq  
vqsatt l dgvtvknsq lntamgl rdsianeatikagqnytdaspnnrneydsavtaakai inqtsnptmepntitq  
atsqvttkehalngaqla  
qakttaknlnntsinnaqkdaltrnidgattvagvnetakate l nnamhs l qngindetqtkqtqky l daepskksa

Tsompanidou\_et\_al\_Supplemental\_FASTA\_File

ydqavnaakailtkasgqn  
vdkaaveqalqvnstktalngdaklneakaaakqtlgtlthinnaqrnalneitqatnvegvntvkakaqqldgamgq  
letsirdkdttlqsqnyqd  
addakrtaysqavnaaati lnktaggntpkadveramqavtqanta lngiqnlerakqaantaitnasdlnkqkealka  
qvtasgrvsaangvehtat  
elntamtaikraiadkadt kasgnyvnadankrqaydekvtaaehivsgtptptltpsdvtnaatqvtnakq lngnhnl  
evakqnantaidglts lng  
pqkaklkeqvggattl pnvqtvrdnaqt lntamkg l rdsianeatikagqnytdasqnkqndynnavtaakai igqttsp  
smiaqei nqakdqvtakqg  
alngqenl rtaqtnakqhlng lsdlnaakdaakrqiegathvnevtqaqnnadalntamtnlknngiqdqntikqgvnft  
dadeakrnaynavtqaeq  
ilnkagpntakdgvetal qnvqraknelngnqnvanakttaknalnlnltsinnaqkaalksqiegattvagvqvstma  
selntamsnlqrgi ndeaa  
tkaaqkyteadrkqtayndavtaakt lldktagssndnkveqalqrvntakta lngdarlneakntakqqlatmshlt  
naqkanlteqiergttvag  
vqgiqanagtlngamnl rqsiaskdatsedyqdanadlnayndavt naegii satnnpempd tinqkasqvnsak  
salngdek laaakqtaksd  
igr l t d l n n a q r t a a n e v d q a p n l a a v t a a k n k a t s l n t a m g n l k h a l a e k d n t k r s v n y t d a d q p k q q a y d t a v t q a e  
aitnangsnaetqvqaa l  
nqlnqaknd l ngdnkvaqaketakralasysnl nnaqstaatsqidnattvadvt aaqntanelntamgqlngindqnt  
vkqgvnftdadqgkdayt  
navtnaggi l dkangqnm tkaqveaalnqvttaknalngdanvrqaksdakanlgtlthlnnaqkqdltsqiegattvng  
vnsvktkaqldgamqrle  
saiankdqtkasenyidaptkktafdnaitqaesylnkdhgtnkdkqaveqai qsvtstena l ngdanlqcakteatqa  
idnl tq l n t p q k t a l k q q v  
naaqrvsgvtdl knsats l n n a m d q l k q a i g d h d t i v a g g n y t n a s p d k q g a y t d a y n a a k n i v n g s p n v i t n a a d v t a a  
tqrvnaets l ngdtnlat  
akqqakdal r q m t h l s d a g k s i t g q i d s a t q v t g v s v k d n a t n l d n a m n q l r n s i a n k d e v k a s q p y v d a d t d k q n a y  
ntavtsaeni inatsqpt l  
dpsavtqaanqvntkta l n g a q n l a n k k q e t t a n i n r l s h l n n a q k q d l n t q v t n a p n i s t v n q v k t k a e q l d q a m e r l  
ingiqdkdqvkqsvnftda  
dpekqtaynnavtaeeni nqangtnanqsqveaalstvtttkqalngdrkvtdaknnanqtlstl d n l n n a q k g a v t g n  
inqahtvaevtqaiqtage  
lntamgnl k n s l n d k d t t l g s q n f a d a d p e k k n a y n e a v r n a e n i l n k s t g t n v p k d q v e a a m n q v n t t k a a l n g t q n l e  
kakqhantaidglshltna  
qkealkqlvqqsttvaeeagqneqkannvdaamdkl rqsia dnattkqnqnytdaspnkkdaynnavttaaggi idqtt nps  
ldptvinqaagqvstskna  
l n g n e n l e a a k q q a t q s l g s l d n l n n a q k q a v t n q i n g a h t v d e a n q i k q n a q n l n t a m g n l k q a i a d k d a t k a t v n f t d  
adqakqqayntavt naeni  
iskanggnatqteveqaiqqvnaakqalngnanvqhakdeatalinnsndlnqaqkda l k q q v n a t t v a g v n n v k q t a q  
elnnamtqlkqgi adkeqt  
kadgnfvnadsdkqnaynqavakaeal isgtpdvvtpseitaalnkvtqaknd l ngntnlatakqnvqhaidqlpnl nq  
aqrdeyskqitqatlvpnv  
naiqqaatt l ndamtqlkqgi ankaqikgsenyhdadtdkqtaydnvtaae l l k q t t n p t m d p n t i q q a l t k v n d t n q  
alngnqkladakqdaktt l  
gtldh l n d a q k q a l t t q v e q a p d i a t v n n v k q n a q n l n n a m t n l n n a l q d k t e t l n s i n f t d a d q a k k d d y t n a v s h a e g  
ilskangsnasqteveqam  
qrvneakqalngndnvqrakdaakqvintandlnqaqkda l k q q v d a a q t v a n v n t i k q t a q d l n q a m t q l k q g i a d k d q  
tkangnfvnadtdkqnayn  
navahaeqii s g t p n a n v d p q q v a q a l q q v n q a k g d l n g n h n l q v a k d n a n t a i d q l p n l n q p q k t a l k d q v s h a e l v t g  
vnaikqnadalnnamgtlk  
qqiqansqvpqsvdftqadqkqaynnaanqaqqiangtptpv l apdvtkavttmnaqkda l ngdek l a q a k q d a l a n  
l d t l r d l n q p q r d a l r n q i  
nqaqal atveqtkqnagnvntamgnl k q g i a n k d t v k a s e n y h d a d v d k q t a y t n a v s q a e g i i n q t t n p t l n p d d i t r a  
l t q v t d a k n s l n g e a k l a t  
ekqnakdavsgmth l n d a q k q a l k q g i d q s p e i a t v n q v k q t a t s l d q a m d q l s q a i n d k d q i l a d g n y l n a d p d k q n a y  
kqavakaeal l n k q s g t n e  
vqaqvesi tnevnaakqalngndn l anakqqakqqlanlth l n d a q k q s f e s q i t q a p l v t d v t t i n q k a q t l d h a m e l l  
rnsvadnqttlasedyha  
taqrqndynkavtaanni nqttsp t m p d d v n g a t t q v n n t k v a l d g d e n l a a a k q q a n n r l d q l d h l n n a q k q q l q s q  
itqssdiaavngkhqtaes  
lntamgnl inai adhgaveqrgnfinadtdkqtayntavneaaamin k q t g q n a n q t e v e q a i t k v q t t l q a l n g d h n l q  
vaktnatqaidal t s l n d p  
qkta l k d q v t a a t l v t a v h q i e q n a n t l n q a m h g l r q s i q d n a a t k a n s k y i n e d q p e q q n y d q a v q a a n n i i n e q t a t l  
dnnaingvaatvnttkaal  
hgdkv l q n d k d h a k q t v s q l a h l n n a q k h m e d t l i d s e t t r t a v k q d l t e v q a l d q l m d a l q q s i a d k d a t r a s s a y v n a  
epnkqaydeavqnaesii  
aglnnptinkgnvssatqavisskna l dgver l a q d k q t a g n s l n h l d q l t p a q q q a l e n q i n n a t t r d k v a e i i a q a q a

Tsompanidou\_et\_al\_Supplemental\_FASTA\_File

lneamka1kesikdqpqte  
asskfinedqaqkdaytqavqvhakdl inktttdptlaksi idqatqavtdaknnlhgdqklaqdkqratetlnnl snlntp  
qrqalenqinnaatrgeva  
qkl teaqalngamealrnsiqdqqqtesgskfinedkpkqkdayqaavqnakdlinqgtgnptldkaqveqlthafkqakdn  
lhgdqkladdkqhavtdln  
qlnglnnpqrqalesqinnaatrgevaqlaeakaldqamqalrnsiqdqqqteagskfinedkpkqkdayqaavqnakd  
inqgtgnptldksqveqltq  
avttakdnlhgdqklardqqqavttvna1pnlnhaqqqt1tdainaaptrtevaqhvqtatel dhametlknkvdvntd  
kaqpnyteastdkkeavdq  
alqaaqsi tdptngsnankdaveqal tk1qekvnelngnervaeaktqakqtidqlthlnadqiatqaknidqatk1qpi  
aelvdqatqlnqsmdq1qq  
avnehanveqti dytqadsdkkaykqaiadaenvl kqnankqqvdqalqnilnakqalngdervalaktngkhdidqln  
alannaqqdgfkgri dqsnd  
lnqiqi vdeakalnramdq1sqe itgnegrtkgstnyvnadtqvkqvydeavdkakqaldkssgn1taeqvik1ndav  
taakka1ngeer1nrrkae  
alqrldqlthlnnaqrqlaiqqinnaetlnkasrainratk1dnamgavqqyideqhl gvisstnyinaddnlkanydna  
ianaaheldkvqgnaiaka  
eaeqlkqni idaqnalngdqlanakkanafvns1nglnqqqqd1ahkainnadtvsdvtdivnnqid1ndametlkh1  
vdneipnaeqtvnyqnadd  
naktnfddakrlant1lnsdntnvdngai qavndaihn1ngdqr1dqakdka1qsinqalank1keieasnatdqdk1  
iaknkaeelansi innink  
atsnqavsqvqtagnhaieqvhaneipkaki dankdvdkqvqalideidrnpnltdkekqalkdrinqilqqghndinna  
lteeieqakaqlaqa1qd  
ikdlvkakedakqdvdkqvqalideidqnpnltdkekqalkdrinqilqqghnginnamtkeeieqakaqlaqa1keikd  
lvkakenakqdvdkqvqal  
ideidqnpnltdkekqalkdrinqilqqghndinnamtkeeieqakaqlaqa1qdikdlvkakedaknaikalanakrdq  
insnpd1tpeqkaka1kei  
deaekralqvenaqtidqlnrgln1g1ddirnthvwevdeqpavneifeatpeqilvngelivhrddiiteqdilahin  
lidqlsaevitdpstatis  
dsltakvevt1ldgskv1vnpvkvvekel svvkqqaiesienaaqqkideinnsvt1tleqkeaaiaevnk1kqqaiddh  
vnapdvhsveeiqqgeqa  
yieqfnpeqftieqaksnaiksiedaiqhmi deikartd1tdkekqeaia1nqlkeqaiqai qraqsiseiteqleqfk  
aqmkaanptakelakrkqe  
aisrikdfsnek insirnseigtadekqaamnqineivletirdinnahtlqqveaalngiarisavqivisdrakqss  
stgnesnsh1ti gygtanh  
pfnstighkkk1dedddi dplhmrhfsnfnvgniknaigvvgisgllasfwwfiakrrrkedeeeee1eirdnnkdsike  
t1ddtkh1p11fakrrrke  
deedvtveekds1nges1dkvkhtpff1pkrrrkedeedvevtntentdekv1kdnehsp11fakrrkdeedvettsi  
eskdedvp111akkknqkd  
nqskdkksaskntskkvaakkkkkksskknk  
>sp|A5IT52|EX7L\_STAA9  
msdylsvsal tkyi kykfdqdp1qsvli kge1snfkkhssghlyfnvkdkesvisammfkgasklnfepkegdevlle  
arvsvferrgnyqiyvnm  
qldgignlyk1lea1kkk1teegcfdkanksi pkfpkkiavltastgaairdihstinsrfplaeqiqistlvqgekak  
ddiiekieyads1gvdtii  
vgrgggsied1wnfneeavvrai yncktpi isavghetdft1sdfaadiraatptqaaviatpdqyellqqiqyyqftlt  
rfikkhleqqrkhveh1ss  
yykfkkt1lydqqi qrrddlekr1kqqiqatfeqqrrhlml1qqryn1kallssvnqeqqnn1qltnqlvk1l1nskils  
yknd1knkven1nn1sptn  
tmlrgyai vnkdevitstkd1tendqlt1tmkdglvdakvtkvrcnd  
>sp|A5IT91|Y1621\_STAA9  
mekikiivasdsigetael varagisqfnpkqcknell rypyies fedvdeviqvakdtnaiivytlikpemkqymsekv  
aefqlksvdimgp1md11s  
asveekpynepgi vhr1ddayfkkidaiefavkyddgkdpkglpkadiv1l gisrtsktp1sqylahksykmnvpive  
vtpdglydidpkkia1k  
iseek1nrirker1kq1glgdtaryateari qeelnyfeeivseigcpvidvsqkaieetandiihyieqnksk  
>sp|A5ITB3|RS20\_STAA9  
maniksaikrvkttekaearnisqksamrtavknaktavsnadnknelvslavklvdkaaqsnlihsnkadriksqlmt  
ank  
>sp|A5ITE6|MNMA\_STAA9  
msnkdi rvvgmssgvdsstahv1keqgydvigi fmknwddtdengvctatedyndvievcnqigipyavnfekewd  
kvftyf1deykkgrtpnpd  
vmcnkeikfkaf1dhamn1gadyvatghyari hrhedghvem1rgvdnnkdqtyf1nqlsqqq1skvmfpigdieksevr  
riaeeqglvtakkkdstgi  
cfige knftf1sqylpaqpgdmi1dgkkmgkhsg1myytigqrhglgiggdgpwfvvgkn1kdnvlyveqgfhhda1  
ysdyl1asdysfvnpednd  
ldqgfektakfyrqkdtkvfkrendhalrvtfaepvraitpgqavvyqgdvc1lggati ddvfkneqglnyvv  
>sp|A5ITF4|SYD\_STAA9

Tsompanidou\_et\_al\_Supplemental\_FASTA\_File

mkrtrtycglvteafllgqeitlkgwvnnrrdlggli fvdldreregivqvfnpafseealkiaetvrseyvvevqgtvtk  
rdpetvnpkiktggvevqv  
tnikvinksetppfsineenvnvdendirkyryldlrrqelaqtfkmrhqitrsirqyl ddegffdi etpvltkstpega  
rdylvpsrvhdgefyalpq  
spqlfkqllm isgfdkyyqi vkcfrdedl radrqpeftqvdi emsfvdqedvmqmgemlkkvvkevkgveingafprmt  
ykeamrrygsdkpdrfem  
elidvsq lgrdmfdkvfkdtvendgeikaivakgaaeqytrkdmdal tefvniygakglawkvvedgl tgpigrffete  
nvetlltltgaeagdlvmf  
vadkpnvvaqslgalrvklake lglidetklnflwvtdwplleydedakryvaahpftspkeadiaklgtapeeaeana  
ydivl ngyelgggsirihd  
gelqekmfevl gftkeaqeqfgflldafkygapphggialgl drlvmlltrntrlnrdtiafpktasatclltnapgevs  
dkql eelslri rh  
>sp|A5ITF5|SYH\_STAA9  
miki prgtqdil pedskkwyrienql delmtfnykeirtpi festdl fargvgdstdvqkemytfdkkgdrsitlrpe  
gtaavvrsyiehkmggnpn  
qpiklyngpmpfryerkqkgryrqfnqfgveaigaenpsvdaevlamvmhiyqsfglkhklvinsvgdmasrkeyneal  
vkhfepvihfcscdqsr  
htnmpri l dckvdrkeai ktapritdf l neeskayyeqv kayl d d l gipyiedpnlvrgl dyythtafel mmdnpydg  
aittlcggrnglllell  
gpsetgigfalsierlllaeeegie l dieenldl fivtmgdqadryavkllnhlrhngikadkylqrkikgmkqadr  
lgakftivigdqelennki  
dvknmttgesetie l dalveyfkk  
>sp|A5ITM4|ACCD\_STAA9  
mfkdffnr tkkkyl tvqdsknndvpagimtkcpkckkimytkel aenlnvcfncdhhi altaykrieaisdegsftefd  
kgmts anl d f p sylekie  
kdqkgtgl keavvtgtaql dgmkgfvavmdsrfrmgsmgsvigekicriidyc tenrlpfil fsasggarmqegi islmq  
mgktsvslkrhsdagllyi  
sylthpttgvsasfasvgdinlsepka ligfagr rrvieqtinek l pddf qtaefll ehgql dkvvhrndmrqt l seilk  
ihqevtk  
>sp|A5ITN4|ACKA\_STAA9  
msklilainagsss lkfglirmpeee lvtkglieriglkdsiftievng ekvktvqdikhveavdimldafkahniind  
indidgtghrvvhggekfp  
esvaitdevekeiee lselaplhnpanlmgirafrkllpniphvai fdtahqtmpekaylslpyhykdygirkygfh  
gtshkfvsqraaemldkpv  
edlriischingasiaa idggksidtsmgftplagvtmtrsgnidpalipfimektgktaeqvleilnkesgllgls  
tssdlrdlseeaesgkars  
qmal d v faskihkyigsyaarmhgvdvifvtagi gensveirakvlegl efmgyvwdpkknennlrgkegfinyphspvk  
vviptdeesmiardvmtf  
gglk  
>sp|A5ITT0|SYL\_STAA9  
mlnynhnqiekkwqdydenktfktdnlgqkkfyaldmfypysgaglhvghpegyatdiisrykrmqgynvlhpmgwd  
afglpaeqyal dtgndpre  
ftkknitfkrqielgfydw drevnttdpeyykwtqwi fiql ynkg layvdevavnwcpalgtvl sneev idgvserg  
ghpvyrkpmkqwlki tey  
adqlladl ddldw pes l kdmqrnwi grsegakvsfdvntegkvevfttrpdti ygasflvl spehalvnsittdeykek  
vkayqteaskksdlertdl  
akdksvftgayainplsg ekvqiwi adyvl stygtgaimavpahddryefakkfdlpiievi egg nveeaaytgegkh  
insge l dgleneaa itkai  
qll eqkgagekkvnyklrdwl fsrqrywgepipvihwedgtmtt vpee l p l l l petdeikpsgtgesplanidsfvnvv  
dektgmkgrrretntmpqwa  
gscwyy l ryidpknenml adpek l khwlpvdlyiggvehavlhll yarfw hkvlyd l givptkepfqklfnqgmilgegn  
ekmskskgnvinpddivqs  
hgadt l rlyemfmgpldaaiawsekgldgsrrfl drvwr l m v n e d g t l s s k i v t t n k s l d k v y n q t v k k v t e d f e t l g f  
ntaisqlmvf inecykve  
vykpyiegfvkmlapiaphigeelwsklgheesityqpwp tydeallv ddeveivvqvn gkl rakikiakdtskeemqei  
alsndnvkasi egkdimkv  
iavpqlvnivak  
>sp|A5ITW0|Y1845\_STAA9  
mkkiflamihfyqrfl spltpptcrfyptcseytreai qyhgafkgl ylgirrilkchplhkggfdpvp lkkdksaskhs  
hkhnh  
>sp|A5IU40|MGT\_STAA9  
mkrsdrysnsnehfehmkhephyntyyqpvgkppkkkkskrillkilltiliialfigimyflstrdnvdelrkiens  
sfvsadnvpeyvkgafism  
ederfynhhgfdlkgtt ralfstisdrdvqggstiqqvknfydndrsftrkvelfvahrvekqynkneilsfyl n n  
iyfgdnqytleaanhyfg  
ttvnknsttmshitvlsailaskvnapsvyninmsenftqrvstnlekmkqnyinetqyqqamsqlnr  
>sp|A5IU61|DPO4\_STAA9  
mterriihidmdyffaqvemrdnplkgkpvi vggkassrgvstasyearkygvhsampmsqahklcpngyfvtsnfga

Tsompanidou\_et\_al\_Supplemental\_FASTA\_File

yretsaqimsifrsytdkv  
epmsldeaylditelvrpdlpaskiaqyirkdileqthltasagvsynkflaklasgmnkpdgltvldyqnvhdilmtd  
igdfpgvgkaskkvmhdng  
ifngrdlyektefelirfgrgrglynkargidhsevkssrvrksvgttertfatdvnddeeilrkvwelsgktaerlnk  
lqksaktvtvikityqfet  
lskqmslrdsvsseediyniayllyndlkdpdvpirligvtvgnleqstknmtiydfi  
>sp|A5IU67|GATA\_STAA9  
msiryevnlltlkdkkikpsdvkdiydaieetdptiksflaldkenaikkaqel delqakdqm dglfgipmgikd  
nii tnglettcaskmlegf  
vpiyestvmeklhkenavligklnmdefamggstetsyfkktnvpfdhkavpggssggsaaavaaglvpfslgsdtggsi  
rqpaaycgvvgmkptygrv  
srfglvafassldqigpltrnvkdnaivleaisgadvndstsapvddvdf tseigkdikglkvalpkeylgegvaddvke  
avqnavetlkslgavveev  
slpntkfgipsyviaseasnlsrfdgirygyhskeahsleelykmsrsefgkevkrri flgtfalssgyydayykk  
sqkvrtilkndfdkvfeny  
dvvggptapttafnlgeeiddpl tmyandllt tpvnlaglpgisvpcgqsngripiglfqfigkpfdektlyrvayqyetqy  
nlhdvyekl  
>sp|A5IUK6|LEUD\_STAA9  
maai kpi ttygkivplfndnidtdqi ipkvhlkrisksfgfpafdwrylpdgsdnpdfnnpkpykgasilitgdnf  
gcgssrehaawal kdygfh  
i i i agsfsdi fymnctknaml pivleksarehlaqyeeieidlpnqtvsdpdkrfhfeidetwknklvngl ddi a itlqy  
esliekyeks l  
>sp|A5IV03|TRUA\_STAA9  
mri lvei ayqgnnflgfqi qngrtvqqfekllqrmhkrhvri hpsrtdrgvhai qyfhfdtel nipmsqwqyamnr  
tlpddiyvnnvvtvdddfh  
crydcvgkryrykvyaqhrdpfqsglktfipetldldkmnraaqfigthdftgfcskteveskvrtylqseivktdd  
gfdyivtgsgfl ynmvrvl  
vafli evgkgrheis dvpkll esknrknvpftapaeglylekiyldene llkdfgndikihrkkslqnd  
>sp|A5IV20|RS8\_STAA9  
mtmtdpi adm ltrvrnanmvrhek lelpasnikkeiaeil ksegfiknveyveddkqgvrl flkygqndervitg lkri  
skpglrvyakasempkvl n  
glgia lvtstsegvitdkearkrnvggei iayvw  
>sp|A5IV25|RS17\_STAA9  
mserndrkvyvgkvsdkmdktitvlvetykthklygkrvkyskkykthdennsaklgdivkietrplsatkfrlvei  
veesvii  
>sp|A5IV33|RL4\_STAA9  
manydv lkl dgtksgsie lsdavfgiepnnsvl feainlqrasl rqqthavknrsavsgggrkpwkqkg tgrarqgtira  
pqwrgggi vfgptprsyay  
kmpkkmrrla lrsalsfkaqengltvvdafnfeapktkefknlstleqpkkvlvvtenedvnvelsarnipgvqvttaq  
glnvldi tnadslviteaa  
akkveevlg  
>sp|A5IV34|RL3\_STAA9  
mtkgilgrkigmtqvfngel ipvtvveakenvvl qkktvevdgynai qvgfedkkaykkdaksnyankpaeghakka  
daapkrfifrefrnvdvday  
evgqevsvdtfvagdvivdtgvskgkgfqaikrhgqsrpmsshshfrapdsvglmasdasrvfkgqkmpgrmggntvt  
vqnlevvqvdenkvilvk  
gnvpgpkkglveirtsikkgnk  
>sp|A5IV71|URE1\_STAA9  
msfkmtqnqytslygptvgdsirlgdtnl faqiekdyavygeeatfgggksirdgmaqnrvt rddvnavdlvisnavii  
dydkvvkadigikngyifa  
ignagnpdimdndvdi igsttdiaaegkivtaggidthvhfinpeqaeva lesgitthigggtgasegskattvtppgw  
hihrml eaaglpinvgft  
gkgqatnptal ieqinagaiglkvhedwgatpsalshaldvdefdvqial hadt lneagfmedtmaavkdrv lhm yhte  
gagghapdliksaafsnl  
lpsstnptlpythntvdehl dmvmi thhlnaaipediafadsrirketiaaedvlqdmgvfsmisssdqamgrvgevitr  
twqvahrmkeqrgpldgdf  
ehndnrikryiakytinpaithgiseyvg siepgkladivlwdpiffgvkpelvkkglinsavngdangsiptsepmk  
yrkmygqygnl tstsmtf  
vsktayenginra ln lkrmvrvkni rqlskadmknnsatpkldvdpqtevyv dgenitsnaatelpl tqryflf  
>sp|A5IVB2|HUTI\_STAA9  
mndli inhiaelilpkstdkplkgkel delnvvkngtvviki dgi vyagqhtddydatetid asgkvvspalvdahthlt  
fggsrehemslkrqgksyl  
eilemgggil stvnatretseddlfkkaehdl ltmikhgvlavesksygl drene l kqlkvsnr laekyd ldmkhtflg  
phavpkeassneafleemi  
allpevkqyadfadifcetgvftieqsqhymqakeagfkvki hadeidplgg le laideqaisadh lvasssdkgeklr  
nsdtvavll pattfvlge  
dyadargml dngai aladynpgssvtnnlqlvmaiaa lklklspsewnavtvnaakaidinagtintgdkanlviwd  
apnheyi pyhfgi nhaekv



Tsompanidou\_et\_al\_Supplemental\_FASTA\_File

ikdgkvi v d n t l s f k a  
>sp|A5IW5|PTU3C\_STAA9  
mfkklfgqlqri gka l m l p v a i l p a a g i l l a f g n a m h n e q l v e i a p w l k n d i i v m i s s v m e a a g q v v f d n l p l l f a v g t a  
l g l a g g d g v a a l a a l v g y l  
i m n a t m g k v l h i t i d d i f s y a k g a k e l s q a a k e p a h a l v l g i p t l q t g v f g g i i m g a l a a w c y n k f y n i t l p p f l g f f a g  
k r f v p i v t s v v a i a t g v l l  
s f a w p p i q d g l n s l s n f l l n k n l t l t t f i f g i e r s l i p f g l h h i f y s p f w f e f g s y t n h a g e l v r g d q r i w m a q l k d g v  
p f t a g a f t t g k y p f m m f g l  
p a a a f a i y k n a r p e r k k v v g g l m l s a g l t a f l t g i t e p l e f s f l f v a p v l y g i h v l l a g t s f l v m h l l g v k i g m t f s g g f  
i d y i l y g l l n w d r s h a l l v  
i p v g i v y a i v y y f l f d f a i r k f k l k t p g r e d e t e i r n s s v a k l p f d v l d a m g g k e n i k h l d a c i t r l r v e v d k s k v d v  
a g i k a l g a s g v l e v g n n m q  
a i f g p k s d q i k h d m a k i m s g e i t k p s e t t v t e e m s d e p v h v e a l g t t d i y a p g v g q i i p l s e v p d q v f a g k m m g d g i g f i  
p e k g e i v a p f d g t v k t i f p  
t k h a i g l e s e s g v e l i h i g i d t v k l n g e g f e s l i n v d e k v t q g q p l m k v n l a y l k a h a p s i v t p m i i t n l e n k e l v i e d  
v q d a d p g k l i m t v k  
>sp|A5IW37|BETA\_STAA9  
m s n k n k s y d y v i i g g g s a g s v l g n r l s e d k d e v l v l e a g r s d y f w d l f i q m p a a l m f p s g n k f y d w i y s t d e e p h m g r  
k v a h a r g k v l g g s s i n g m  
i y q r g n p m d y e g w a e p e g m e t w d f a h c l p y f k k l e k t y g a a p y d k f r g h d g p i k l k r g p a t n p l f q s f f d a g v e a g y h k t  
p d v n g f r q e g f g p f d s q v h  
r g r r m s a r a y l h p a m k r k n l t v e t r a f v t e i h y e g r r a t g v t y k k n g k l h t i d a n e v i l s g g a f n t p q l l q l s g i g d s e  
f l k s k g i e p r v h l p g v g e n  
f e d h l e v y i q h k c k e p v s l q p s l d i k r m p f i g l q w i f t r t g a a s n h f e g g g f v r s n n e v d y p n l m f h f l p i a v r y d g q k  
a a v a h g y q v h v g p m y s n r  
g s l k i k s k d p f e k p s i r f n y l s t e e d k k e w v e a i r v a r n i l s q k a m d p f n g g e i s p g p e v q t d e e i l d w v r r d g e t a l h p  
s c s a k m g p a s d p m a v v d p l  
t m k v h g m e n l r v d a s a m p r t t n g n i h a p v l m l a e k a a d i i r g r k p l e p q y i d y y k h g v h d e n e g a i e v k p y a k  
>sp|A5IWB6|Y2713\_STAA9  
m n y q v l l y y k y t t i d d e p e q f a q d h l a f c k a h h l k g r i l v s t e g i n g t l s g t k e e t e q y m a h m h a d e r f k d m v f k i d e a e g  
h a f k k m h v r p r k e i v a l d l  
e d d v d p r h t t g q y l s p v e f r k a l e d d d t v i i d a r n d y e f d l g h f r g a i r p d i t r f r d l p d w i k e n k a l f t d k k v v t y c t g  
g i r c e k f s g w l l k e g f e d v  
a q l h g g i a t y g k d p e t k g q y w d g k m y v f d d r i s v d i n q v e k t i i g k d w f d g k p c e r y i n c a n p e c n k q i l v s e e n e t k y l  
g a c s y e c a k h e r n r y v q a n  
n i s d n e w q q r l t n f d d l h q h a  
>sp|A6QD58|WALK\_STAAE  
m k w l k q l q s l h t k l v i v y v l l i i g m q i i g l y f t n l e k e l l d n f k k n i t q y a k q l e i s i e k v y d e k g s v n a q k d i q n l l  
s e y a n r q e i g e i r f i d k d q  
i i i a t t k q s n r s l i n q k a n d s s v q a l s l g q s n d h l i l k d y g g g k d r v w y n i p v k v d k k v i g n i y i e s k i n d v y n q l n n  
i n q i f i v g t a i s l l i t v i l  
g f f i a r t i t k p i t d m r n g t v e m s r g n y t q r v k i y g n d e i g e l a l a f n n l s k r v q e a q a n t e s e k r r l d s v i t h m s d g i a  
t d r r g r i r i v n d m a l k m f  
m a k e d i i g y m l s v l s l e d e f k l e e i q e n n d s f l l d l n e e e g l i a r v n f s t i v q e t g f v t g y i a v l h d v t e q q q v e r e r r  
e f v a n v s h e l r t p l t s m n s  
y i e a l e e g a w k d e e l a p q f l s v t r e e t e r m i r l v n d l l q l s k m d n e s d q i n k e i i d f n m f i n k i i n r h e m s a k d t t f i r d  
i p k k t i f t e f d p d k m t q v f  
d n v i t n a m k y s r g d k r v e f h v k q n p l y n r m t i r i k d n g i g i p i n k v d k i f d r f y r v d k a r t r k m g g t g l g l a i s k e i v e a  
h n g r i w a n s v e g g g t s i f i  
t l p c e v i e d g d w d e  
>sp|A6QE71|GUAA\_STAAE  
m e m a k e q e l i l v l d f g s q y n q l i t r r i r e m g v y s e l h d h e i s i e e i k k m n p k g i l s g g p n s v y e e g s f t i d p e i y n l g i  
p v l g i c y g m l t t k l l g g k  
v e r a n e r e y g k a i n a k s d e l f a g l p a e q t v m m s h s d k v i e i p e g f e v i a d s p s t d y a a i e d k k r r i y g v q f h p e v r h t e  
y g n d l l n n f v r r v c d c r g q  
w t m e n f i e i e i e k i r q r v g d r r v l c a m s g g v d s s v a v l l h k a i g d q l t c i f v d h g l l r k g e g d m v m e q f g e g f n m n i i r  
v n a k d r f m n k l k g v s d p e q  
k r k i i g n e f v y v f d d e a s k l k g v d f l a q g t l y t d v i e s g t k t a q t i k s h h n v g g l p e d m e f e l i e p i n t l f k d e v r k l g i  
e l g i p e h l v w r q p f p g p g l  
g i r v l g e i t e d k l e i v r e s d a i l r q v i r e e g l e r e i w q y f t v l p n i q s v g m g d y r t y d h t v g i r a v t s i d g m t s d f a r i  
d w e v l q k i s s r i v n e v d h v  
n r v v y d i t s k p p s t i e w e  
>sp|A6QEA9|Y419\_STAAE  
m t t q l n i n s v i e n a k r v i t p l s p i s i f a a r n p w e g l e a d t f e d v a k w l r d v r d v d i f p n k a l i e s a v a r g e l d e s v f n q l  
v t d m l l e h h y n i p q h y i n l  
y i d n i k t l k d v p a s y m n h s n v d v a d l l l e k s k r d m a e s y h h y d v r p m s d a i i d e q g e p l s e q v n r q m i k w t k l y i d q f l  
s s w t m p k r e q s f y h a w l h l  
a q h d s f t k a q r q v i k g l p n d p e m t i e s v l t h f s i d q e d y q a y v e g h l l a l p g w a g m l y y r s q q h h f e q h l l t d y l a i r l

Tsompanidou\_et\_al\_Supplemental\_FASTA\_File

vveqllvgdefksvakdce  
srsewfkqtvawscydsmpsdvllqhdvneiqt fihfaatmnknvfknlwliawemtyesqlkqkikaghesvagald  
vnqvnvsendnanqphsvl  
lndtqavdennselnqmgstkaqiafcidvrsepfrrhieaagpfetigiagffglpiqkdavdeqfkhdslpvmvppa  
yrikefadrydmnvyrqqq  
qtmssmfytfklmknvmpslllpe lsgpflslstivnsimprksraslqkikqkwllkpetkltidrefdrtsdlpvgf  
tegeqidfalqalklmdlt  
eafapfvvlaghashshnphaslecgacggassgfnakllami cnrpnvrqglkqsgvyipettvfavaehhtstdtl  
awvyvptlssialdayes  
lndampmihsehanrerldklptigrvnhpveeaqrfasdwsevrpewglaknasfiigrrqltkgidlegrtflhnydwr  
kdkdgtllntiisgpalva  
qwinlqyyastvaphfygsgnkatqvtvtsgvgmqgnasdlmyglswqsvmaadrmyhsprllvviqapdyvvarlla  
nnehfarkvsnhwlrlmsv  
neegrkswi  
>sp|A6QEE6|RSMA\_STAAE  
mldnkdiatpsrtralldkygnfkkslgqnfli dvniinniidasdidaqtgvieigpgigslteqlarhakrvlafei  
dqrliplvndtlspydnt  
vinedilkanikeavenhldcekimvvanlpyyittpillnlmqddipidgyvmmqkevgerlnaevgskaygslsiv  
vqyytetskvltvpksvfm  
ppnvdsivvklmqrteplvtvdneeaffklakaafaqrktinnyqnyfdgkqhkevilqwl eqagidprrrgetls  
iqdfaklyeekkkfpqlen  
>sp|A6QEIO|SYE\_STAAE  
msdri rvryapsptgylhignarta lfnlyakhyngdfviriedtdkkrnledgetsqfdnlkwlgl dwdesvdkdngy  
gpyrqserqhiyqplidql  
laedkaykcymteeeleaereaqi argempryggqhahlteeqrqqfeagrqpsirfrvpqntysfddmvkgnisfds  
ngigdwwivkkdgiptynf  
avaiddhymqisdvirgddhisntpkqimiyeafgwepprfghmslivneerkklskrdqilqfieqyrdlgy lpealf  
nfiallgwspegeeeifsk  
eefiki fdekr lskspaffdkqklawvnnqymkqkdtetvfqlal phlikanlipevpseedlswgrklialyqkemsya  
geivplsemffkempalge  
eeqqv ingeqvpe l mth l fsk lea lepfesaei kktikevqketgikgkqlfmpirvavtqgmhgpe l pntievl gkekv  
lnrlkqyk  
>sp|A6QEJ2|RL7\_STAAE  
manheqieaikemsvlelndlvkaieeefgvtaaapvavagaaggadaaaektefdveltsagsskikvvkavkeatgl  
glkdake lvdgapkvi kea  
lpkeeaeklkeqleevgatveik  
>sp|A6QEJ9|EFG\_STAAE  
marefslektrnigimahidagktttterilyytgrihki gethegasqmdwmeqe qdrgititsaattaaweghrvni i  
dtpghvdf tveverslrvl  
dgavtvldagsgvepqtetvwrqattygvprivfnkmdklganfeysvstlhdrlqanaapiqlpigaedefeaidlv  
emkc fkytndlgteieeie  
ipedhl draeearas lieavaetsdelmekylgdeeisvselkeairqattnevfypvlc gtafknkgvqlmldavidyl  
pspldvkpiighrasnpee  
eviakaddsaefaalafkvmtdpyvgkl tffrvysgtmtsgsyvknstkgkrervgrllqmhansrqeidtvysgdiaaa  
vglkdtgtgdtlcgekndi  
ilesmeffepvihlsvepkskadqdkmtqalvkl qeedptfhahtdeetgqvii gmgelhl dilvdrmkkefnvecnvg  
apmvsyretfkssaqvqgk  
fsrqsggrgqygdvhi eftpnetgagfefenaivggvpreyipsveaglkdamengvlagyp lidvkaklydgsyhvd  
ssemafkiaas lalkeaa k  
kcdpvilepmmkvti empeeymgdimgdvtsrrgrv dgmep rgnaqvvnayvplsem lgyatslrshtqgrgtytmyfdh  
yaeipksiaedi ikknkge  
>sp|A6QEK3|HCHA\_STAAE  
msqdvne lskqtpdkaedna ffp spys l s qy tapktdfdgvehkgaykdgkwvlmi aaeryvllengkmfstgnhpv  
emllplhh lmeagfdv dva  
tlsgypvklelwamptedeavistynklkek l kqpkkladviknelg pdsdylsvfipgg haavvgi sesedvqqtldwa  
lndrfivtlchgpaa lls  
aginreksplegysvcvfpdsldeganie igylpgrlkwlvadlltkqglkvvnddmtgrtlkdrkl l tgdsp lasnelg  
klavnemlnaiqnk  
>sp|A6QEK4|ARAB\_STAAE  
msysigidygtasgrvflintngqvsvkfvkpythgvieselnglkiphtyalqnsndyleimeegisyivreskidpd  
nivgigidftsstii ftde  
nl npvhn l kqfknnphayvklwkhhgaykeaklyqtai ennnkw lghygynvssewmi pkimevmnrapeimektayim  
eagdwivnk ltnknvrsnc  
glgfkafweeetgfhydlfdkidpk lskviqdkvsapvvnigeavgkl ddkmaqklgl sketmvspfiidahasllgigs  
ekdkemtvmgtstchlml  
nekqhqpvgisgsvkgaipel fayeagqsavgd l feyv akqapksyvdeae nrm tvfel mneki khqmpgesgliald  
whngnrsvl sdsnl tgcif  
gl t lqt khediyrayleatafgtkmimqqyqdw hmevekvfacggipkknvmm diyanvlnkklivmdseyapaigaa i

Tsompanidou\_et\_al\_Supplemental\_FASTA\_File

lgavsggahnsindavdam  
kepileinpeaekvqryetlfkaykalhdihgykkanimkdiqslrveg  
>sp|A6QER9|SYR\_STAAE  
mniidqvkgtlveeiaasinkagladeipdikevpkdtkngdyatniamvltkiakrnpreiaqaivdnldtekahvkq  
idiagpgfinfyldnqylt  
aiipeaiekgdqfghvneskgqnvllayvsanptgdhigharnaavgdalaniltaagynvtreyyindagnqitnlar  
sietrffeaigdnssymp  
dgyngkdiieigkdlækhpeikdyseearlkefrklgveyemaklkndlaefnthfdnwfssetslyekgeilevlakmk  
elgytyeadgatwlrttdf  
kddkdrvliknngtytyflpdiahyfdkvrkrgndilidlfgadhhgyinrlkasletfgvdsnrleiqimqmvrmlengk  
evkmskrtgnaitlreimd  
evgvdaaryfltmrspdshfdmelaqeqsdnpvyayaqaharicsilkakeqgievtaandfttitnekaieillkk  
vadfeptiesaaehrsahr  
itnyigdlashfhkfynaekvltddiektkahvamieavritlknalamvgvsapesm  
>sp|A6QEW8|GRAR\_STAAE  
mqillveddntlfqelkkelqwdfnvagiedfgkvmtdfesfnpeivildvqlpkdydgywcrkmrevsnvpilflssr  
dnpmqdvmsmelgaddymq  
kpfytnvliaklqaiyrrvyeftaekrtltwqdavvdlskdsiqkgdqtiflsktemiileilitkknqivsrtdiita  
lwddeafvsdntltvvnvr  
lrkk1seismdsaietkvgkgymahe  
>sp|A6QF82|PGK\_STAAE  
makkivsdldlkgktvlrvadfnvp1kdgeitndnrivqalptiqyieqggkivlfshlgkveesdkakltlrpvaed  
lskkldekvfvpetrgek  
leaaidkldkegdvllventryedlgkkeskndpelgkywaslgdvfvndafgtahrehasnvgisthletaagflmdke  
ikfiggvndphkpvaial  
ggakvsdkinviknlvniadkiiiggmaytflkaqgkeigisllleedkidfakdllekhgdkivlpvdtkvakefsnda  
kitvvpdsipadqegmdi  
gpntvklfadelegahtvvwngpmgvfefsnfaqgtigvckaianlkdaiteigggsaaaaislgfendfthistgga  
sleylegkelpgikainnk  
>sp|A6QFB2|AROD\_STAAE  
mthvevatiapqlsietliqkinhridaidvlelridqientvdqvaemtklkmqdsfkllvtyrtrlqgggyqf  
tndsylnlisdlaningid  
midiewqadidiekhqriithlqqynkevvi shhnfestppldelqfiffkmqkfnpeyvk1avmphnkndvlnllqams  
tfsdtmdckvvgismsklg  
lisrtaqgvfggaltygcigvpqapggqidvtdlkaqvtyl  
>sp|A6QFB6|GCSH\_STAAE  
mavpnelkyskehewkvegnvaiigiteyaqselgdivfvelpetddeinegdtfgsvsvktvselyapisgkvvevn  
eeledspefvnespyekaw  
mvkveisdesqiealltaekysemige  
>sp|A6QFF0|Y810\_STAAE  
mnpivefc1snmakggdyvfnqlendpdvdvleygclthcgicsaglyalvngdivegdspeellqniyahiketwif  
>sp|A6QFG2|MNHA1\_STAAE  
msllhiavilplifaliipilyrffkrihlgwfvlpvpivifiymtltikttmsgntvmktlnwmpfhgmndlyldglg  
llfsllisgigsllvlysi  
gylskseq1gnfycylll1fmgam1gvv1sdnviilylfweltsfssfl1isfwrerqasiygaqksliitvfggl1llgg  
iillaiptqsfisqymiqh  
aseiqnspffifamilimigaftksaqppfyiwpdameaptvpsaylshatmvkaglyliarmtpifaasqgwvwtvl  
vglitlfwalnatkqqdl  
kgilafstvsq1gmimam1gigaisyhyqgddskiyaaftaai fhlinhatfkgal fmitgavdhstgtrdvkklggll  
timpisftitvitalsmag  
vppfngflskesflettftasqan1fsvdtlgy1fpiigivgsvftfvysikfimhiffgqykeq1pkkahevsilm1l  
spailatlvivfglfpqil  
tnsiiapatssinhtviddvefhhmfhgltpaf1stlviyilgillivtfsywkllqrqpgkltfnwynrsanvipnys  
ekmtnsyvtdysrnnlvii  
fgalilltfvtifsvpfni1fkdvspirifevcivil1lsaaf1ilfaksrlfsiim1savgyavsvlfi1fkapdlalt  
qfvvesistal1lcfyh1  
pnlnrynekrsfqltnaliaggvg1sviiig1iaygnrhfesiskfyqehvydlahgknm1vnv1lvdfrgmdt1fessv1  
giaglavytmik1lrkkrt  
qgnevknhe  
>sp|A6QFL5|Y875\_STAAE  
mrlyneikikddilycytedsikglsevgqm1vdsdnyafaytlddgkayaylifvqetwtmlhenmtk1iindele1  
tefhqeltyildnikgnnn  
ygkefvatveetfdie  
>sp|A6QFQ3|MEND\_STAAE  
mgnhkaal1tkqvftfase1yaygvrevvispgsrstplalafeahpniktwhpdersaaffavgl1kgservpailcts  
gtaaanypaiaesq1ria  
pliv1tsdrphel1svgapqainqvmfnnysyefdm1piaddsketidaiyyqm1iasqylygphk1gpihfn1pfrdp1  
tpd1natel1tsemki1ph

Tsompanidou\_et\_al\_Supplemental\_FASTA\_File

yqksidasalrhilnkkkgliivgdmqhqveldqiltystiydlipladplshlrkfdhpnvictydllfrsgldlnvdfv  
irvgkpvisklqwlkkt  
dafqilvqndkidvfpiaadisyeisandffrslmedttvnrsvlkwqclekkgrkeikcyleqatdesafvge  
lik  
ktsekdaifisnsmprdv  
dnlllnknidvyanrgangidgivstalgmavhkritlligdlfsfyhdmngllmsklinni qmnivllnndgggifsylpq  
kesatdyferlfgtptgld  
feytaklyqfdkrfnsvsefnatllsetstiyelitnrednfkqhilyqklsemihdtl  
>sp|A6QFS9|PUR5\_STAAE  
mskayeqsgvni hageavermsshvkrtmrkevigglggfgatfdlsqlnmtapvlvsrgtdvgvgtklklaidyghkhsi  
gidavamcvndi lttgaep  
lyfl dyiatnkvvpevieqivkgsdacetntal iggetaemgemyhegeydvagfavgavekddyvdgsevkegqvvi  
glassgihsgyslvrkli  
nesgid lasnfdnrpfi dvfleptklyvkpvla l kkevsikamnhitgggyfenipralpagaaridttsfptkifdw  
lqqgnidtnemynifmg  
igyvvi vdekdv sralki laeqnveayqighivknestaie llg  
>sp|A6QFT1|PUR9\_STAAE  
mkkailsvsnktgives fakaltqlyelystggtkrildeanpvrvsvd lthfpeimdgrrvktlh pavhggiladrnkp  
qhlne lseqhidlidm vvv  
nlypfqqtvanp dvtmdeaienidiggptmlraaaknykhvttivhpadyqevl tllrnds ldesyrqslmikvfehtae  
ydeairvffk gdketlryg  
enpqqsayfvrt snakhtia gkqlhgkqlsynnikdadatla l vkkfdtpatvavkhmnp cvgvgigdtieqafqhaya  
dsqsi fggivalnrv tpe  
laeq l hsi fl evii apkftdealdil kqkknvrll eidmtidsneee fsvsvggylvqdkdnyvvpkeemkvvt evapt  
eqweaml l gwkvvpsvksn  
aii l snkqtvgigagqmrvgaakialeraieindhvalvsdgffpmgdtvelaaqhikai iqpggsikdqsidman  
khgiamvvtgtrhfkh  
>sp|A6QG41|RNH3\_STAAE  
manivfk lsdkdi t tmsrisfdtenlpqgmkarakyqnttvniyqsgkvmfqgnhaeavse llpqhsq lntnktkkkn  
mansfleqt lmydqfncig  
sdeagsgdyfgpl tvcaafvtkehvpilktlgvddskltdtkivelaeqlvtfiphsl ltlhnekyniqqakgwtqvkm  
kaal hneaikn vlekidss  
qldyividqfakrevyshyal sdip l pkktkfetkgesks laiavasii sryafvtymdqiskninmtipkgagakvdvi  
aaki ikkyg lsr ldtisk  
hfknrekaqkil kpl  
>sp|A6QG57|FLIPR\_STAAE  
mkknktk t iastviaaglltqtndakaffsyewkgleiaknl adqakkdderidklmkesdknltpykaetvndlyliv  
kklsggdvkkavvr ikddg  
prdytfd ltrpleenrkn ikvkngeidsitwy  
>sp|A6QG78|MRAZ\_STAAE  
mfmgeydhq ldtkg rmi ipskfryd lnerfiitrgldkclfgytldewqqieekmktl pmtkkdarkfmr mffsgave  
ldkqgrinipqn l rkyanl  
tkectvigsnr iewdretwndfyeesesfediaedlidfdf  
>sp|A6QG82|MRAY\_STAAE  
mifvya l lalvitfv lvpvl iptlkrmkfgqsireegpqshmkktgtptmggl tfl l sivit slvaiifvdqanpi lll  
fvtigfg l igfidy iiv  
kknngl tskqkflaqigiai i fvl snvfh l vnfstsihipftnvaip l sfayvifivfwqvgf snavn l t dgl dglat  
gl siigftmyaimsv lge  
taigifciim l fallgf l pynipakvfm gdtgslalggifatisim l nqels l ifiglvf viet l svmlqvasfkl t gk  
rifkmsp i h h h feligwse  
wkvvtvfwavglisglig l wgvh  
>sp|A6QGA5|PYRF\_STAAE  
mkdlpiialdfeskekv nqfld l fdes l fvkvgmel fyqegpql ineikerghdv l d l klhdipntvgkameglak l nv  
dlvnvhaaggvkmmseai k  
glrkhnqdtkijavtql t sttedml rheqniqtsieeav l nyak l anaagldgvvcsplesrml tek l gtsflkvtpgir  
pkgasqndqhr ittppear  
qlgsthi vvrpi tqsdnpvesyhkikeswlv  
>sp|A6QGF7|EFTS\_STAAE  
matisaklvkel rektgagmmdckkal tetdgdidkaidylrekgiakaakkadriaaeglvhvetkgn daviveinset  
dfvarnagfqelvkeianq  
vldtkaetvealmettl pngksvderikeaistigek lsvrrfairtktdndafgay l hmgrigv l tvvegstdeear  
dvamhiaainpkysvseqv  
seeinherevl kqqa l negkpenivekmvegr l rky l qeicavdqdfvknpdvtveaf l ktkggkl vdfvryevgegme  
kreenfadevkgqmk  
>sp|A6QGF8|PYRH\_STAAE  
maqiskykrvvlklsgel agekgfginpvii ksvaeqvaevakmdcei avivgggniwr gktgsdl gmdrgtadymgm l  
atvmnalalqdsleq l dcd  
trv l tsiemkqvaepyr rrair h l ekk rivi faagignpyfst d ttaal raaevadvi l mgknnvdgvysadpkvnd  
avkyeh l thi qmlqeg l qv

Tsompanidou\_et\_al\_Supplemental\_FASTA\_File

```

mdstassfcmndnipltvfsimeegnkravmgekigtltk
>sp|A6QGG5|RIMP_STAAE
mskiteqvevivkpmiedlnfelvdveyvkegrdhflrisidkeggvdlnctasekiseamdandpipemyylvasp
gaerpikkeqdfqnaitkp
vfvslyvpiegekewlgilgevnetivvqvkikartkdieiprdkiakarhavmi
>sp|A6QGG8|IF2_STAAE
mskqriyeyakeInlkskeideIksmnievsnhmqaleddqikaldkkfkkeqkndnkqstqnnhqsnqnqngqqk
dnkknqqqnnkgnkgnkkn
nrnkknknknkpnqpapkeipskvtyqegitvgefadklnvesseikkflflgivaninqslnqetieliaddygv
eveeevvieneedlsiyfed
ekddpeaierpavvtimghvdhgkttlndsirhtkvtagaggitqhiqayqiendgkkitfldtpghaaftmargaq
vtditilvvaaddgvmpqt
ieainhakeaevpiivavnkidkptsnpdrvmqelteyglipedwggetifvplsalsgdgiddllemiglvaevqelka
nknravgtvieaelksr
gpsasllvqngtlngdaiivvgntygri ramvndlgqriktagpstpveitgindvpqagdrfvvdsdekqarrigesrh
easiqqrqesknvsldnl
feqmkgemkdlnviikgdvqgsvealaaslmkidvegvnvriihtavgainesdvtlanasngiigfivrpdsgakra
aeaenvdmrlhrviynvie
eiesamkglldpefeeqvigqaevrqtfkvskvgtiagcyvtegitrnagvriirdgivqyegeldtldrfrkddakeva
kgyecgitiennyndlkegd
vieafemveikr
>sp|A6QGP1|LEXA_STAAE
mreltkrqseiynyikqvvtkgypsvreigeavglassftvhghlsrlleekgyiegdptkpraieivsdqtdninme
etihevpiqkvtagvpita
venieeyfplpehlststnsdifiInvvgdsmeagildgdkvivrstiaengdiivamteedeatvkrfykeknryrl
qpenstmpiyldnvavig
kviglyrem
>sp|A6QGP7|SBCD_STAAE
mkiihtadwhlgkilngkqlledqayildmfvekmkeeediiviagldydttypskdaimlleqaigklnlelripiii
isgnhdgkerlnygaswfe
hnqlfirtdftsinspieingvnfytlpyatvsemkhyfeddtiethqqgitrcietiapeidedavnishlvtvqggk
tsdserpltiqtvsvqg
vfdifdyvmghlhhpfsieddkikysgsllyqsfseagqakgyrrvtindgiindvfiplkplrqlleisgeyndvine
kvhvknkndnylhfklnms
hitdpmmslkqiyntlaltnetfnynennaieisekddmsiemfykhitdkeIsdiqskkiknileneIrked
>sp|A6QGU8|DAPH_STAAE
mvqhltaeeiqyisdakkstpikvyIngnfegitypesfkvfqseqskvifceaddwkpfyeyagsqfedieiemdrn
saipkldlntnaripegga
fi reqaiiedgavvmmgatinigavvgegtmidmnatlggrattgknvhvgagavlagviappsaspvieeddvligana
villegvrvgkgai vaagai
vtqdvpagavvagtpckvikaasevqdtkkeivaaIrkInD
>sp|A6QGW6|ODO1_STAAE
mtnerkevseapvnfganlgImldlyddfIqdpssvpedIqvlfstiknddsivpalkstssqnsdgtikrvmlidnir
qyghlkadiyvpnpkrkh
vpkleiedfdldqqtlegisagivsdhfadiydnayeaIlmekrykopiafeythinntergwIkrrietpykvtlnn
nekralfkqlayvegfyky
lhknfvgakrfsiegvdalvpmIqrtitiaakegikniqigmahrgrInvlthvlekpyemmisefmhtdpmkflpedgs
IqI tagwtgdvkyhlggik
ttdsygtmrialannpshleivapvvegrtraaqddtqragapttdhkhampi ihgdaaypgqginfetmnlgnlkgy
stgslhiitnrigftte
pidarsttystdvakgydvpifhvnaddveatieaidiamefrkefhkdvidlvgyrrfghnemdepsitnppvpyqnr
khdsvyvfqkklvnegvi
sedemhsfi eqvqkelrqahdkinkadkmdnmdmekpadlalplqadeqsftfdhlkeindalltypdgnilklnkvI
ekrhepfnkedglvdwaqa
eqlafatilqdgtpirltgqdsertfshrhavlhdeqtgetytplhhvpdqkatfdihnsplseaavvgfeygynvenk
ksfniweaqygd fanmsqm
ifdnflfssrskwgersgltlflphayegqgpehssarlerflqlaennctvvnIssssnyfhllraqaasldseqmrp
lvvm spksllrnktvakpi
deftsggfepiltesyqadkvtkvilatgkmfidIkeal aknpdesvllvaierylpfpeeeieallaqlpnl eevswvq
eepknqgawlyvpyvkvI
vadkydl syhgriqraapaegdgeihklvqnkii enalnkn
>sp|A6QGY4|EBHA_STAAE
mvqqsttva eagneqkannvdaamdI rqs i adnattkqnqnytdasqnk kdaynavttaqqiidqtsptldptvin
qaagqvsttknalngnenI
eaakqqasqslgslndlnnaqkqtvtldqingahtvdeanqiknaqnlntamgnlkqai adkdatkatvntftdadqakq
ayntavtnaeniiskangq
natqaeveqai kvnaakqalngnanvqhakdeatalinssndlnqaqkdaIkqqvqnattvagvnnvkqtaqelnamt
qlkqgiadkeqtkadgnfv

```

Tsompanidou\_et\_al\_Supplemental\_FASTA\_File

nadpdkqnaynqavakaealisatpdivvtpseitaalnkvtqakndlngntnlatakqnvqhaidq|pnlnqaqrdeys  
kqitqatlvpnvnaiqqaa  
ttlndamtq|kqgiankaqkgsenyhdadtdkqtaydnvtaeellkqttntmpntiqa|tkvndtnqalngnqk  
ladakqakttlgtldhln  
daqkqal|ttqveqapdiatvnnvkqnaqnl|namtnlnnalqdktet|nsinf|tdadqakkdaytnavshaegilskang  
snasqteveqamqrvneak  
qalngndnvqrakdaakqvitnandlnqaqkda|kqqvdaaqtvanvntikqtaqdlnqamtq|kqgiadkdqtkasgnf  
vnadtdkqnaynavahae  
qii|sgtpnanvdpqqaqalqqvnaqkd|ngnhnlqvakdnantaidq|pnlnqppkta|kdkqvshaelvtgvnaikqn  
adalnnamgt|kqgiqans  
qvpqsvdftqadqkqaynaanaqqaqiangiptpv|tpdvtqavttmqakda|ngdek|laqakqea|an|dt|rd|  
nqpprdal|rnqinqa|la  
tveqtkqnaqvntamsnlkqgi|ankdtkasenyhdadadkqtaytnavsqaegii|nqttnt|npdeitral|tqvtda  
kng|ngeak|latekqnakd  
avsgmth|ndaqkqal|kqgidqspeiatv|nvqkqtats|dqamdq|sqaindkaqt|ladgny|lnadpdkqnaykqavaka  
eal|nkqsgtnevqaqves  
itnevnaakqalngnd|lanakqqakq|an|th|ndaqkqs|fesqitqap|vtdvttinqaqt|ldhame|l|rnsvadn  
qtl|asedyhd|ataqrnd  
ynqavtaanni|nqtt|sptmnpddvngattqvntkvaldgden|laakqqannr|dq|dh|lnnaqkq|lqsqitqssdi  
aavngkqtaes|ntamgn  
|ina|adhqaveqrgnfi|nadtdkqtayntavneaaami|nkq|tgqnanqteveqaitkvq|tt|qalngdhnlqvaktat  
qaidal|ts|ndp|kta|kd  
qvtaat|vtavh|qieqnant|lnqamh|l|rqs|iqdnaatkanskyi|nedqpeqqnydqavqaanni|ineqtat|ldnna|inq  
aattvnt|tkaal|hg|dv|klq  
ndkdhakqtvsq|lah|lnnaqk|hmedt|idset|trtavkq|dl|teaqa|ldq|mda|lq|ssi|adk|datrassayvnaepnkkqs  
ydeavqnaes|i|ag|lnnpt  
inkgnvssatqavi|sskna|ldgver|laqdkqtag|sn|lh|dq|ltpaqqal|enq|innat|trgevaqk|l|teaqa|lnqamea  
l|rsi|qdqq|teagsk|fin  
edkppkdayqaavqnakd|i|nq|tnnpt|l|dkaqveq|l|tqavnaqakdn|hg|dqk|l|addkqhavtd|lnq|ng|lnnpqrqal|es  
qinnaat|rgevaqk|laeak  
aldqamqal|rsi|qdqq|tesgsk|fin|edkppkdayqaavqnakd|i|nq|tnnpt|l|dksqveq|l|tqavttakdn|hg|dqk|l  
ardqqavttvna|lp|nlh  
aqqaal|tda|ina|apt|rtevaqhvqtate|ldhame|l|knkv|dvnt|dkaq|pnyteast|dkkeav|dqal|qaaes|it|dp|tngs  
nankd|av|dqv|l|tk|lqeken  
e|l|ngner|vaeaktqakq|tidq|l|th|nad|qiat|akqni|dqat|k|lpia|e|lv|dqat|q|lnq|smdq|l|qqavnehanveq|tvdyt  
qadsdkqnaykqai|adaen  
v|l|kq|nankq|vdqal|qni|nakqalngd|ervalaktngk|h|idq|lnal|lnnaq|qdg|f|kgridq|snd|lnq|iqq|ivdeaka|ln  
ramdq|l|s|ei|tdnegr|tkg  
stnyvnadtqvkqvydetvdkakqal|dkstgqnl|takqvik|l|ndavtaakka|l|ngeer|l|nrk|aeal|qr|ldq|l|th|lnnaq  
rqlaiqqinnaet|lnkasr  
ainratk|l|dnamgavqy|ideq|h|l|gvisstny|inaddn|l|kanydnai|anaahe|l|dkvqgnai|akaeaeq|l|kqni|idaqna  
l|ngdqnl|anakd|kanafvn  
s|l|ng|lnqqq|d|ahka|innadtvsdvtdi|vnnq|id|l|ndamet|l|kh|lv|dneipnaeqtvnyqnaddnaktnfddakr|lant  
l|l|nsdnt|nvndingai|qav  
nda|ihnl|ngdqr|ldakdka|iqsinqalank|l|keieasnatdqk|liaknkae|l|ansi|inninkatsnqavsqvqtagn  
haieqvhaneipkaidan  
kdvdqyvqal|ideid|rnpnl|tdkekqal|kdrinqi|l|qqghngi|nnamtkeie|eqakaq|laqa|ldikd|lvkakedakqdv  
dkqvqal|ideid|qnpnl|td  
kekqal|kdrinqi|l|qqghndi|nnamtkeie|eqaker|laqa|ldikd|lvkakedakndi|dkrvqal|ideid|qnpnl|tdkek  
qal|kdrinqi|l|qqghndi  
nal|tkeie|eqakaq|laqa|ldikd|lvkakedaknaika|lanakrdq|insnpd|l|tpeqkaka|l|keideae|kra|lnqvenaq  
tidq|l|nrg|l|n|gl|ddi|rint  
hvwevdeqpavnei|featpeq|l|vngelivhrddi|iteq|dil|ahin|lidq|l|saevitdpstatisds|l|takvevt|l|dgs  
kvi|vnpvkvveke|l|svvk  
qqaiesi|enaqqk|ine|innsvt|l|leqkeaa|iaevnk|l|kqqa|idhvnnapdvhsvee|iqqqeqahieqfnpeqftieqa  
ksnai|ksieda|iqhmi|dei  
kartd|l|tdkekqea|iak|l|nq|l|keqaiqaiqraqs|ideiseq|leqfkaqmkaanptake|l|akrkqea|isrikdfsnkins  
ir|nseigtadekqaamnqi  
neiv|let|rdi|naht|l|qqvea|l|nngi|arisavqivtsdrakqssstgnesnsh|l|ti|gygtanhpfnssstighkkkl|de  
ddd|dp|l|hm|rhfs|nfn|gnv  
iknai|gvvgi|sg|l|las|fwffi|akrrr|kedeeeee|leir|dnkds|iket|l|ddt|khl|p|l|fakrrr|kedeedvtveekds|l|nn  
ges|l|dkv|khtp|ff|pkrrr  
kedeedvevt|nentdek|vl|k|dnehs|p|l|fakrrr|k|kedev|tts|ieskdedvp|l|l|akknqk|dnqskdkksaskntsk  
kvaakkkkkk|akknkk  
>sp|A6QGY5|EBHB\_STAAE  
mnyrdkiqkfsi|rkytvgtfstviat|lvfl|gfn|tsqaha|aetnqpasv|vkqkqqs|nneqtenresqvqnsqnsqngqsls  
atheneqpnisqan|lvdqk  
vaqssttnde|qpasqvntk|kdsataattqpdkeqskhkqnesqsankngndnraahvenheanvvtasds|sdngnvqhd

Tsompanidou\_et\_al\_Supplemental\_FASTA\_File

rne1qaffdanyhdyrfid  
renadsgtfnvkgifdkintlgsndpinnkdlqlaykeleqavalirtmpqrqtsrrsnriqtrsvesraaeprsvs  
dyqnanssyyvenandgsg  
ypvgtyinasskgapynlpttpwntlkasdskeialmtakqtgdgyqvwikfnkghaphqnmifwafalpadqvpvgrtdf  
vtvnsdgtvqwshgagag  
ankplqqmweygvndphrshdfkrrnsgqviydwptvhiysledlsrasdyfseagatpatkafgrqnfeyingqkpa  
spgvpkvytfigggdasyt  
isfktqgptvnllyaaagraleynqlfmysqlyvestqdhqqrlngrlqvvrtyrigttkrvevsqgnvqtkkvest  
nlnidfvddplsyvktps  
nkvlgfysnantnafrpggaqqlneyqlsqiftdqklqeaartrnpirlmigfdypdaygnsetlvpnltvlpeiqlh  
ikffknddtqniaekpfsk  
qaghpfvyvagnqgnasvnlggsvtsiqplrinltsnenftdkdwqitgiprtlhienstnrpnnarernielvgnllp  
gdyfgtirfgrkeqlfeir  
vkphtptitttaeqlrgtalqkvpvnisgipldpsalvylvaptntnggseadqipsytilatgtpdgvhntitirp  
qdyvvpfippvgkqiravvy  
ynkvasnmsnavtilpddipptinnpvginakyrgdevnftmgvsdrhsgiknttittlpngwtsnltkadknngsls  
itgrvsmnqafnsditfkv  
satdnvnttndsqskhvsihvskisedahpivlgnstekvvvnptavsndekqsiitafmnknqinrgylastdpvtvd  
nngnvtlhyrdgsstlda  
tnvmtypvvpkpeyqtvnaaktatvtiakgqsfsigdikqyftlsgqppisgftnitsdrtipaqevsqmnagtqly  
hitatnayhkdsedfyisl  
kiidvkqpegdqrvyrtstydlttdeiskvkqafinanrdvitlaegdisvtntpanganvstitvinkgrltskfasnl  
anmflrwvfpqdyvtv  
tnakianrptdgglswwsddhksliyrydatlgtqittndilmlkattvpglrnnitgneksqaeaggrpnfrttgysq  
snattdgqrqftlngqviq  
vldiinpsngyggppvtnsntrahsnstvvvnepaangagaftidhvksnsthnasdavykaqlyltpygpkyveh  
lnqntgnttdainiyfvs  
dlvnptisvgnynhqvfsgftntitandnfgvqsvtvpntsaitgtvnnhqhsatapnvtatnktilatdts  
gntattsfnvtvklrky  
rvgtssaanpvriani snatvsqadqttiinslfttetvpnrnyarasaneitsktvsnvrtggnanvtvtvyqdg  
ttstvtvpkvhipeivah  
shytvqqdfpagnqssasdyfklngsdiadati twvsgqapnkdntrigeditvtahilidgettpitktatykvrt  
vpkhvfetargvlypgvsd  
mydakqyvkpvnswsnaqhmnfqfvgygpnkdvvgistrli rvtydnrqteditliskvkpdpnidansvtykagl  
tnqei kvnnvlnssvklf  
kadntp lnvtni thsggfssvvtvsdalpnggikakssi smnvyttqdehgqvvtvtrnesvdsndsatvtvtpqlqa  
tegavfikggdgdffghv  
erfi qnpphgatvawhdspdtwknvgnthktavvtlpngqgtrnvevpkvypvanakapsrdvkgqnlngtdamnyi  
tfdpntntngitaawanrq  
qpnnqqagvqhl nvdvtypgisaakrvpvtvnyqfefpqttyttvtggtlasgtqasgyahmqnatglptdgytykwnr  
dtgtndanwsamnkpnva  
kvvnakydviynghtfatslpakfvvkdvpakptvtetaagaiti apganqtvnthagnvttiyadklvikrngnvttf  
trrntspwvkeasaatva  
giagtngitvaagtnpadiqvvatqgsgetvsdeqrsddftv vapqpnqattkiwqnghiditpnnpsghlinptqa  
mdia ytekvnggaehskti  
nvvrqgnqwtiankpdvyl daqtgkvtfnantikpnssititpkagtghsvssnpstltapaahvntteivkdygsn  
vtaaeinnavqvankrtat  
ikngtampntlaggstttipvtvyndgsteevqesiftkadkrelitaknhl ddpvstegkkpgtitqynnammhaqqq  
intakteaqqvinneratp  
qqvsdal tkvraaqtkidqakallqnkednsq lvtsknlqssvnpvsttagmtqqsidynakkreaeteitaaqrvid  
ngdataqqisdekhvrdna  
lta lnqakhdl tadthaleqavqqlnrtgtttgkkpasitaynnsiralqsd ltsaknsanaiiqkpirtvqevqsaltn  
vnrvnerltqainqlvpla  
dnasal ktaktkldeeinksvttldgmtqssi qayenakragqtestnaqvinngdatdqqiaaektkveekynslkqai  
gltplaplqtaktqlnd  
idqptsttgmtsasiaafneklsaartki qeivrlashpdvati rqnvtanaaksaldqarngl tvdkaplenaknql  
qhsidqtsttgmtqdsin  
aynakl taarnkiqqinqv lagsptveqintntstanqaksdl dharqaltpdkaplqtaktql eqsinqptdttgmtta  
slnaynqklqaarqkltei  
nqvlngnptvqni ndkvteanqakdqlntarqgl tldrqpalttlhgasnlnqaqqnftqqinaaqnhaaletiksnit  
alntamtkl kdsvadnnti  
ksdqnytdatpankqaydnavaakgvi gettnptmdvntvnqkaasvstkda ldgqqnlq rakteatnait hasdl nq  
aqkna lttqqvnsaqnvqav  
ndikttqslntamgtl krgvanhnqvvsdnyvnadtnkkndynnaynhandi ingnaqhpvi tpsdvnnal snvtske  
halngeaklnaakqeanta  
lghlnnlnnaqrqnlqsqingahqidavntikqnatlnsamgnl rqavadkdqvkrtedyadadtakqaynsavssae  
tiinqttntptmsvddvra  
tsavtsnkna lnyeklaqsktdaaraidalphlnnaqkadvkski naasni agvntvkqqgtdlntamgnlqga indeq

Tsompanidou\_et\_al\_Supplemental\_FASTA\_File

ttlnsqnyqdatpskktay  
tnavqaakdi lnksngqktdkqvteamnqvnsaknndgtrlldqakqtakqqlnmthl ttaqktnltnqinsgttva  
gvqtvqsnantldqamntl  
rqsiankdatkasedyvdanndkqtaynnavaaaeti inansnpempstittqaeqvnskta lngdenlaaakqnakt  
ylnltsitdaqknnlisq  
itsatrvsgvdtvkqnaqhl dqamas lnginnesqvkssekyrdadtnkqqeydnaitaakailnkstgpnatqavea  
alqrvnnakdalngdakli  
aaqnaakqhlgtlthittarndltnqisqatnlagvesvkqnansldgamgnlqtaindksqtlasqnfldadeqkrna  
ynqavsaaeti lnkqtgpn  
taktaveqalnnvnnakhalngtqnlnnakqaaitaingasdlngkqkda lkaqangaqrvsnaqdvqhnate lntamgt  
lkhaiadkntlasskyvn  
adstkqnayttkvtnaehi isgtptvttptsevtaaanqvnsakqelngderlreakqnantaidaltq lntppkaklke  
qvgqanrledvqtvqtnqq  
alnnamkgl rdsianettvksqnytdaspnnqstynsavsnakgi inqtnnptmdtsaitqattqvnnakng lngaenl  
rnaqntakqnlnlshltn  
nqksa issqidraghvsevtatknaate lntqmgnleqaihdqntvkvsvkftdadkakrdaytnavsraea ilnkttqga  
ntskqdveaai qnvssakn  
alngdqvtnaknaaknalnlnltsinnaqkrdl ttkidqattvagveavsntstqlntaman lngingindknt lasenyh  
dadsdkktaytqavtneaen  
ilnknsqsnldktavenal sqvanakgalngnhnleqaksnanttinglqhl ttaqkdklkqqvqqaqnvagvdtvkssa  
nlnngamgtlrnsiqdnta  
tkngqnyl daternktnynnavdsangvinatsnpnmdana inqiatqvtstknaldgthnl tqakqtatnaidgatnln  
kaqkda lkaqvtsaqrvan  
vtsiqqtane lntamgqlqhgiddenatkqtqkyrdaeqskkstaydqavaaakailnkqtgsnsdkaavdra lqqvtsk  
dalngdaklaeakaaakqn  
lgtlnhi tnaqrdlegqin qattvdgvntvktnantldgamns lqgsindkdat lrnqnyl dadeskrnaytqavtaae  
gilnkqtggntskadvna  
lnavtrakaalngadlnraktsatntidglpnl tqlqkdnlkqhveqaqnvagvngvdkkgnt lntamgalrtsiqdn  
ttktsqnyl dasdsnkny  
ntavnnangvinatnnpnmdana ingmanqvnttkaalngaqnlaqaktnatntinna hdlngkqkda lktqvnaqrvs  
dannvqhtate lnsamta l  
kaaiadkertkasgnyvnadqekrqaydskvtnaeni isgtpnat ltvndvnsaasqvnaakta lngdnnlrvakehann  
tidglaglnnaqkaklkeq  
vqsattldgvqtvknssqtlntamkgl rdsianeatikagqnytdaspnnrneydsavtaakai inqtsnptmepntitq  
vtsqvttkeqalngarnla  
qaktaknnlnltsinnaqkda ltrsidgattvagvnetakate lnnamhs lngingindetqtkqtqkyldaepskksa  
ydaqvnaakailtkasqgn  
vdkaaveqalqnvstktalngdaklneakaaakqtlgtlthinnarthal dneitqatnvegvntvkakaqql dgamgq  
letsirdkdtlqsqnyq  
addakrtaysqavnaaatilnktaggntpkadveramqavtqanta lngiqnl drakqaanta itnasdlntkqkealka  
qytsagrsvsaangvehtat  
elntamta lkraiadkaetkasgnyvnadankrqaydekvtaae in vsgtptpt ltpadvtnaatqvtnaktqlngnhnl  
evakqnanta idgltslng  
pqkaklkeqvgqattl pnvqtvrdnaqtlntamkgl rdsianeatikagqnytdasqkqtdynsavtaakai igqttsp  
smnaqein qakdqvtakqg  
alngqenl rtaqtnakqhlngl sldtaqkdavkrqiegathvnevtqaqnnadalntamtnlknqidqntikqgvnft  
dadeakrnaytnavtqaeq  
ilnkaqgpntskdgveta lenvqraknelngnqnvanaaktaknalnlnltsinnaqkealksqiegattvagvqvstta  
selntamsn lngingindeaa  
tkaaqkytdadrekqtayndavtaakt lldktagsndnkaaveqalqrvntakta lngderlneakntakqqvatmshlt  
daqkanltsqiesgttvag  
vqgiqanagtl dqamnl rqsias kdatkssedyqdanad lqnayndavtneaegii satnnpempdtingkasqvnsak  
salngdek laaakqtaksd  
igrldlnnaqrtaanaevdqapn laavtaaknkats lntamgnlkhal aekdntrsvnytdadqpkqqaydtavtqae  
aitnangsnaetqvqaa l  
nqlnqakndlngdnkvaqakesakralasysnlnnaqstaatsqidnattvagvtaaqntanelntamgqlqngindqnt  
vkqgvnftdadqgkdayt  
navtnaqqil dka hqqnmtkaqveaalnqvttaknalngdanvrqaksdakanlgtlthlnnaqkqdltsqiegattvng  
vngvktkaqdl dgamqrlq  
saiankdqtkasenyidaptkktafdnaitqaesylnkdhgankdkqaveqai qsvtstena lngdanl qraktea iqa  
idnlthlntppkta l kqqv  
naaqrsvgvt dlknsats lnnamdqlkqai adhdtivasgnytnaspdkqgaytdaynaaknivngspn vitnaadvtaa  
tqrvnnaetg lngdtnlat  
akqqakda l rqmthl sdaqkqsitgqidsatqvtgvsvkdnatn ldnamnl rnsiankddvkaspvydadrdkqnay  
ntavtneaeni inatsqptl  
dpsavtqaanqvstnkta lngaqnlan kqettaninq lshlnnaqkqdlntqvtnapnistvnqvktkaeqldqamerl  
ingiqdkdqvkqsvnftda  
dpekqtaynnavtaae inqangtnanqsqveaalstvtttkqalngdrkvtdaknnanqtlstlndlnnaqkgavtgn



Tsompanidou\_et\_al\_Supplemental\_FASTA\_File

inqahtvaevtgaiqtage  
IntamgnlkslnkdttlgsqnfadadpekknayneavhnaeniInkstgtnvpkdqveaamnqvnatkaalngtqnle  
kakqhantaidglshltna  
qk  
>sp|A6QGY6|NORB\_STAAE  
mekpsreafegnnklligivlsvitfwlfaqslnvvpiledsfntdigtvniavsitalfsgmfvvgaggladkygrik  
ltnigiilnllgslliiis  
nipllliigrliqglSaacimpatlsiiksyigkdrqralesywsigswggsgvcsffggavatllgwrwifilsiiisl  
ialflikgtpetksksisl  
nkfdikglvllvimllslnilitkgseIgvtsllfitllaiagsfslfivlekratnplidfkIfknkaytgatasnfl  
lNgvagtIvantfvqrgl  
gysslqagslsitylvmvlimirvgekllqtlgckkpligtgvlivgeclisltflpeifyvicciigyIffglglgiy  
atpstdtaianaplekvvgv  
aagiykmasalggafgvalsgavyaivsnmtniytgamialwlnagmgilsviilllvpkqndtql  
>sp|A6QH79|GCSPB\_STAAE  
mkskssplifersregryayslpksdiktnsvesllddkfirknkaefpevaeldlvrhytelSnknfgvndngfypIlgsc  
tmkynpkinekvaripgfs  
eshplqdedqvqgsleiiyslqeelkeitgmdevtlqpaagahgewtalMifkayhengeghrdevivpdsahgtnpas  
asfagfksvtvksnergev  
niddlkrvvnentaaimltnpntlgi feknimeireivhnaggllydganlnaimdkvrpgdmgfdavhlnlhktftgp  
hggggpgsgpvgvvelas  
ylpkpmvikdgdkfkyndiknsigrvkpfyngfyIraytyirtmgatglkevseavlnanyikarlshkfeipykq  
yckhefvlsgrvqkefgvr  
tldmakrlldfgvhpptiyfplnveegmmieptetesketldyfidtlisiaeeakndpdkvleaphttvdrIdeataa  
rkpilkfenlkqek  
>sp|A6QHB8|RS21\_STAAE  
mktvvrknesledalrrfrksvsksgtiqevrkrefyekpsvkrkkkseaarkrkfk  
>sp|A6QHC2|DNAJ\_STAAE  
makrdyyevlgi skdaskdeikkayrklskkyhpdinkeegadekfkeiseayevlsddnkrasydqfghdgpqgfgggg  
fngsdfggfsgfggggged  
ifssffgggrqrdpnappkqddlqytmtltfeavfgttkeisirkdvtcetchgdgkpgtskktcsycngaghvaveq  
ntilgrvrteqvcpkcngs  
gqefeeactchkgktenktvklekvpegvdneqqirlagegspgvnggpagdlyvfvrvkpssetfkrdgdidiyyklnv  
sfpqaalgdeikiptlnne  
vmltipagtqtgkqfrlkekgi knvhgygygdlyvdikvvtptkltdrqkelmkefaqlngeeineqpsnfkdrakrffk  
ge  
>sp|A6QHC7|LEPA\_STAAE  
mdneqr1krrenirnfsii ahidhgkstladri lentksvetrdmqdqlldsmderergitiklnavr1kyeakdgnty  
tfhli dtphgvdftyevsr  
slaacegai lvvdaaggieaqtlanvylaIdnelellpvinkidlpaaepervkqeedmigldqddvvasaksnigie  
eilekivevvpapdgdpea  
plkalifdseydpyrgvissirivdgvvkagdkirmmatgkefevtevgintpkqlpvdelvtgdvgyiasiknvdsr  
vgdtitlasrpaseplggy  
kkmpmvyvcglfpidnknyndlrealek1qlndaslefepessqalgfyrtgflgmlhmeiiqerierefgieliatap  
sviyqcvlrdgsevtvdp  
aqmpdrkidi kiefyvratmmvndyvgavmelcqrkrqqfinmdylddirvniyvelplaevvdfddqlksntkgya  
sfdyefienkesnlvkmdi  
llngdkvdalsfivhrdfayergkalvek1ktlprqqfevpvqaaigqkivartniksmgknlakcyggdisrkrkll  
ekqkagkakmkavgnveip  
qdaflavlkmdde  
>sp|A6QHH7|APT\_STAAE  
mdlkqvsevqdwkpgvsvfkdiittimdngaygyatdkiveyakdrdvdivvgpeargfiigcpvaysmgigfapvrke  
gklpreviryeydleygt  
vltmhkdaikpgqrvlitddllatggtieaaklveklggivvgiafielkylngiekikdydvmslisyde  
>sp|A6QHK9|TIG\_STAAE  
mtatwekkegneglltvtpaekvnkalDqafkkvkvqinvpgfrkgkvrpifeqrfgvealyqdaidillpdaygeai  
detdikpvaqpevsvtqie  
kgkdfifeatvtvepevklgdykgleiekqetelsddeIqeaidslhghlaemvokedgvvengdtvnidfsgsvdgeef  
eggqaegydlEi gsgsfip  
gfeeqlegmkvdeekdvvtfpeeyhaeelagkeatfktkveikfkevpeltdeianeI daeantvdeykenlrkr1ae  
qkatdaenvekeeaikat  
dnttidipeaminteldrmvsefaqriqqqglDlqtyfqi sgqdetqlreqmkddaeqrvtknltltaiaeaekieatde  
didkelekmskqfnisved  
ikntlgntdiikndvriqkvidllrdnakfvegteked  
>sp|A6QHN5|ACCD\_STAAE  
mfkdffnr1tkkkky1tvqdsknkdvpagimtkcpcckkimytkelaenlnvcfncdhhialtaykrieaisdegsftefd  
kgmtsanpldfpsylekie  
kdqqktglkeavvtgtaqlDgmkgfvavmrsfrmgsmgsvigekicriidyctenr1pfilfsasggarmqegiislmq

Tsompanidou\_et\_al\_Supplemental\_FASTA\_File

mgktsvs1krhsdagllyi  
sylthpttgvsasfasvgdin1sepka1igfagrrvieqtinek1pddfqttaef1lehqqldkvvhrndmrqt1seilk  
ihqevtk  
>sp|A6QHS6|Y1636\_STAAE  
mntfqmrklker1shldvdfkfnreeet1riyrtdnnkgitik1naivakyedkkekivdeivyyvdeaiamadt1e  
s1sssqimpviratsfdk  
tkqgvpfiydehtaetavyyavdlgksyr1idesmled1kl1teqqirems1fnvrk1snsyttdevkgnifyfinsndgy  
dasrilntaf1neieagcq  
gem1vavphqdv1i1adi1rnktgydvmaht1mefftkglvpits1sfgykqghlepifilgknnkqkrdpnviqr1ear  
rkfnkd  
>sp|A6QHU1|SYL\_STAAE  
m1nynhngiekkwqdywdenktfktndnlgqkkfyaldmfypysgag1hvghpegytatdi1srykrmqgynvlhpmgwd  
afglpaeqyaldtgnpre  
ftkkn1qtfkrqike1gfsydwrdrevnttdpeyykwtqwi1fiqlnkg1ayvdevavnwcpalgtvl1snevidgvserg  
ghpvyrkpmkqwv1ki1tey  
adq1lad1dd1dwpes1kdmqrnwigrsegakvsfdvdntegkvevfttrpdti1ygaf1vl1spehalvnsittdeykek  
vkayqteaskksd1ertd1  
akdksvftgayatn1lsgkvqiwi1adv1l1stygtgaimavpahddrdyefakkfd1pi1evieggnev1eaaytgegkh  
insge1dgl1enea1tkai  
q1leqkgagekkvnyk1rdw1fsrqrywgepipv1hwedgtmttvpeel1l1l1petdeikpsgtgesplanidsfvnv  
dektgmkgrr1retntmpqwa  
gscwyy1ry1dpknenm1adpek1khw1pvd1yiggvehav1h1lyarfwkvl1ydl1aivptkepfqk1fnqgmilgegn  
ekmskskgnv1npddivqs  
hgadt1r1yemfmgpl1daai1awsekg1dgsrr1fdrvr1lmvnedgt1sskivttnks1dkvynqtvkkvtedfet1gf  
ntaisq1lmv1f1inecyk1vde  
vykpyiegf1vkm1apiaphige1l1wsk1ghees1tyqp1wptyde1l1vddeveivvqngk1rakikiakdtskeemqei  
alsndnvkasi1egk1dimkv  
iavpql1vnivak  
>sp|A6QHX6|MENE\_STAAE  
mdfw1ykqaqqnghh1aitdgqesytyqnl1yceas1lakr1kayqqsrvglyidnsiqsi1li1hacwlanieiamintr1  
tpnemtnqmksidvq1ifc  
t1p1e1rgfqiv1s1lddie1fagr1dittns1l1dntmgi1qyetsnetv1vpkespsn1l1ntsf1n1ddiasimftsgttgpqkav  
pqtfrnhyasa1igckes1g  
fdrdtnw1sv1piyh1sg1sv1l1raviegtv1rivdkfnaeq1l1tmiknerithis1vpqt1nw1mqggl1hepyn1qk1l  
l1ggak1satm1eta1lqyn1  
pi1ynsf1gmtetcsq1fl1tatpem1harpdtvgmpsanvdvki1knpnkeghgel1mikganvmnv1lyptd1l1tgtfengyfnt  
gd1aeidhegyvm1ydrk  
d1i1isggeni1ypyq1etvakqfpgi1savcvghpddtwgqv1klyfvsedi1skaq1liay1sqh1akykvpkh1fekvdt1  
pytstgk1qrnk1lyrg  
>sp|A6QHZ5|SPLB\_STAAE  
mnknv1iks1laalt1l1tsvtgigt1l1veevqqtakaennv1tkvkdtni1fpytgvvafksatgfvvgkntil1tnkhvskny  
kvgdr1tahpnsdkgnnggi  
ys1ikki1inyppkedvsvi1qveera1iergpkgnfndnvt1pfkyaagakageri1kvi1gyphpyknkyv1yestgpmvsveg  
ss1ivysahtesgnsgspv1  
nsnne1vgi1hfasdvknddnrnaygv1yftpeikkfiaenidk  
>sp|A6QHZ6|SPLA\_STAAE  
mnknvmvkg1l1tal1l1til1ts1l1gfaeni1sqphsi1akaeknvkei1t1datkepynsvvafvggtgvvvgkntiv1tnkhiak  
sni1dfknrvsahhssk1gk  
ggn1ydvkdi1veypgked1aiv1vh1etsteg1l1fnknvsytkf1adg1kvkdrisv1igypkgaqtkykmfestgtin1hisgt  
fme1fdayaqpgnsgspv1n  
skhel1igi1lyagsgkdeseknfgv1yft1pql1kefi1qnniek  
>sp|A6QI15|DCUP\_STAAE  
mvhnknnt1l1kmi1kgeets1htp1vwfmrqagsqpeyrk1kekys1fdi1thqpe1lcayvth1pvdnyhtdaailykd1imtp  
l1kpigvdveiksgig1pvi1h  
npik1ti1qdvekl1sqid1perdvpyv1ldtik1l1teek1l1nvpl1igftgapft1asymieggpsknynftkammyrdeatw1fal  
mnh1l1vds1vkyvta1qveag  
ae1li1q1fdswvga1nvedyrry1ikphmir1isevkekhdvpv1il1fgvgash1inewnd1pidv1gl1dwrtsin1qaqq1lgv  
tk1t1l1qgn1dps1l1lapwnv  
ieer1l1kpi1ldqgmengkh1fn1lghgv1fpevqpet1l1rvsefvhtytqr  
>sp|A6QIC9|GATC\_STAAE  
mtkvtreevehian1ar1l1qispeeteemant1es1il1dfakqndsadtegv1eptyh1v1dl1qnv1redkaikgipqel1al1kn  
aketedgqf1kvpt1imneed  
1  
>sp|A6QID0|PUTP\_STAAE  
m1l1tmgtal1sqv1danwq1tyimi1avyf1li1livi1gfygykqatgn1seym1l1ggrs1igpyital1sagasdm1sgwmimel1pgsv  
ystg1samw1it1igl1t1gay  
inyf1v1vapr1l1rvy1tel1ag1dait1p1dffkn1r1ndknnv1ki1isg1li1iv1fft1lythsg1fvsggk1lfesafg1ldyhfg1l1lv  
afivi1fyt1ffggy1lavsit

Tsompanidou\_et\_al\_Supplemental\_FASTA\_File

dffqgvimliamvmvpiavammnlnwggtfhdvaamkptnlnlfgklsfigiislfswglgyfgqphiivrfsikshkm  
pkarrlgi swmavglgav  
avglgtiafvpayhikledpetlfivmsqvlfhp lvggflaaailaaimstissqllvtsssltedfyklirgeekakth  
qkefvmigr lsvlvvaiva  
iaiaawnpndtilnlgvawagfgasfspvlvfalywkgltragavsgmvsгалvvivwawikplahineifglyeiipg  
fivsvivtyvvs kltkpg  
afvetdlnkvrdivrek  
>sp|A6QID2|DNLJ\_STAAE  
madlssrvnelhdllnqysyeyvednpsvpdseydkllhelikeehpeyktvdsptvrvggeaqaasfnkvnhdtpml  
slgnafneddlrkfdgri  
eqignveymcelkidglavslkyvdgyfvqgltrgdgtteditenlktihaip lmkkep lnvevrgeaymprsrflrln  
eekendeqlfanprnaaa  
gs l rql dskl takrklsvfiysvndftdfnarsqsealdeldklgfttnknrarvnnidgvleyiekwtsqreslpydid  
givi kvndldqqdemgftg  
kspawaiaykfpaeevtkll die l sigrtgvvtptail epkvagttvsraslhnedlihdridrigdsvvkkagdi  
pevrsiperpedavtyh  
mpthcpscghelvriegevalrcinpkcqaqlveg lihfvsrqamnidglgtkiiqqlyqselikdvadifyl teedllp  
ldrmgqkkvdnllaa iqqa  
kdnslenllfglgrhlgvkasqvlaekyetidrlltvteaelveihdigdkvaqsvvtylenediraliklkdkhvm  
iykgiktsdieghpefsgk  
tiviltgklhqmrneaskwlasqgakvtssvtkntdvviagedagskltkaqslgieiweqqfvdkqnelns  
>sp|A6QID4|PCRB\_STAAE  
mydikwrhifkldpakhisdddldaicmsqtdaimiggtddvtednvihlmsrvrryplplvleisniesvmpgdfyf  
vptvlnstdvvhngtll  
alktyghsidfeevi fegyvcnadskvakhtkantdl ttedleayaqmvnhmyrlpvmyieysgiygdvskvqavseh  
tetqlfygggisseqqate  
maiadtiivgdiiykdikka lktvikessk  
>sp|A6QIG2|OMP7\_STAAE  
mkfkslitttla lgvlastganfnneasaakpldkssslhhgyskvhvp yaitvngtsqnillstfnknqni sykd  
ledrvksvlksdrgisdi  
lrlskqakytvyfngtkkvidlkagi ytadlintseikaininvdtkkvedkkdkanyqvpytitvngtsqnillsnl  
tfnknqni sykdledkvks  
vlesnrgitdvdrlrlskqakytvnfngtkkvidlksgiytanlinssdiks ininvdtkkhenkakrnyqvpsinln  
gtstnilsnlsf snkpwt  
yknltsqiksvlkhdr giseqdlkyakkaytyvfknngkri lqlnsknytanlvhakdvkrieitvktgtkakadryvp  
ytiavngtstpi lsdlkft  
gdprvgykdi skkvksvlkhdr girelkyakkatytvhfngtkkvininsisqllnlyvqdikkididvktgtkak  
adsyvyptiavngtstpi  
sklki snkqlisykylndkvksvlks ergisdlldlkfakqakytvyfknngkqvvn lksdiftpn lfsakdikkididvk  
qytkskknk  
>sp|A6QIG6|SCIN\_STAAE  
mki rksilagt laiv lasplvtnldkneaqasts lptsneyqneklanelksll delnvnelatgs lntykrtikisgq  
kamyalkskdfkkmseaky  
qlqkiyneidea lksky  
>sp|A6QIM7|CH60\_STAAE  
mvkqlkfsedarqam lrgvdqlanavkvtigpkgrnvldkeftap l itndgv tiakeieledpyenmgaklvqevant  
nei agdg tttatv laqami  
qeglknvtsganpvglrqgidkavkvaveal hensqkvenkneiaqvgaisaadeeigryiseamekvngdgvitieesn  
gln televevgmqfdrgyq  
spymvtds dkmvae l erpyi l vtdkki ssfqdi l plleqvvsnrp ilivadevegda ltnivlnrmrgtftavavkpg  
fgdrrkam ledla iltgag  
vitddlgldlkdasidmlgtaskvevtdnttvvdgdgdensidarvsq lksqieetesdfdrek lqerlaklaggvavi  
kvgaasetelkerklried  
alnstraaveegivagggtalvnyqkvseieagdi etgnivlkal tapvrqiaenag legsviverl knaepgvgn  
aatnewnmleegivdptk  
vtrsalqhaasvaamfltteavvasipeknndqpnmggmpgmm  
>sp|A6QIQ0|ILVD\_STAAE  
mrsdmikkgdhqaparsllhatgalksptdmnkpfvai cnsyidivpghvhlreladiakeaireagaipfeftigvdd  
giamghigmrys lpsrei  
adaaetvina hwdgvyfyipncdkitpgmi laamrtvnpaifcsggpmkaglsahgkaltlssmfeavgafkegsiskee  
fldmeqnacptcgsagmf  
tansmnc lmevlglalpyngtalavsdqrremi rqaafk lvenikndlkprdivtreaidafaldmamggstntv lhtl  
aianeagidy dlerinaia  
krtpylski apssysmhdvheaggvpai nelmkkdgtlhpdr itvtgk lrennegkeiknfdvihpldapydaqgl  
silfgniapkgavikvggy  
dpsiktfrkaicfnshdeaveaidnrtvraghvvvi ryegpkggpgmpemlaptssivgrglgkdvalitdgrfsgatr  
giavghispeaasgppial  
iedgdeitidlnrtilnvnpedvlarresltpfkakvktgylarytalvtsantggvmqvpenli

Tsompanidou\_et\_al\_Supplemental\_FASTA\_File

>sp|A6QIU9|ATPA\_STAAE  
maikaeisallrsqienyesevsvtdvgtvlqigdgialihgIndvmagelvehngvlglaqnleesnvgvivilgpyt  
gitegdevkrtgrimevvp  
geeligrvvnpilgqpidggppinttktrpvekkatgvmrksvdeplqtgikaidalvpigrgqreliigdrqtgkttia  
idtilnqkdqgticiyvai  
gqkdstvranveklrqagal dytivvaasasepsllyiapysgvtmgeefmfngkhvliydyddltkqaaayrelslllr  
rppgreaypgdvfylhsrl  
leraaklnddlgggsitalpietqagdisayvptnvisitdgqiflqsdllffsgvrpainaqqsvsvrvggsaqinamkk  
vagt1r1dlasyrelesfa  
qfgsdldetasklergkrtvevlkqdqnpk1pvehqvliiyaltkgylddipvvditrfedelnhwaesnatellneir  
etgg1pdaekfdtainefk  
ksfskse  
>sp|A6QIV1|ATPF\_STAAE  
mtetanlfvlgaggvewgtvivqvltfivlla1lkkfawgplkdvmdkrerdinrdiddaeqaklnaakleenkqk1k  
etqeevki1edakvqarq  
qqeqi1heanvrangmietaqseinsqkeraiadinngvselvliaskvlrkeiseqdkalvdki1keagdk  
>sp|A6QJ75|RS5\_STAAE  
marreetkefeervvtinrvakvvkgrrfrftalvvvgdkngrvgfgtgkaqevpeaikaveaakkd1vvvprvegt  
tphitgrygsgsvfmkpa  
apgtgviaggpvravlelagitdilskslgsntpinmvratidglqnlknaedvaklrgktvee  
>sp|A6QJ81|RL24\_STAAE  
mhikkgdnvkviagkdkgkegkviat1pkkdrvvvegvmk1khqkptq1npeggileteaaihvsnvq1ldpktneptr  
vgykfvdgkkvriakksge  
e1ksnn  
>sp|A6QJC9|URE2\_STAAE  
mipgeiitksteveinnhhpetvieventgdrpiqvghfhfyeanaldferemayghldipagaavrfevgdkkevq  
lveyagrki1fgfrgmvg  
pidesrvyrptdendeyagvfgdngaenvnkkgrks  
>sp|A6QJK2|HRTB\_STAAE  
mklaikeimfykfrylitlii1l1simvlfisglaqglgrenislfehfdndeyvvqkmkepqiexqlsdtqqnqikk  
vihqepymniqt1k1snk  
eqdvi1mndvkqqrilkkgdypknahevaindklaadni1rvgdr1hfknstsyrvsgilndtmyahssiv1lndngfn  
alnkvn1afypvkn1tggq  
rde1nk1ndvqvsekd1tgniasyqaeqap1nmivs1faitaiv1saffyvmtiqkisqigilkaigiktrh1l1salv  
lqil1t1iigvgiaviiiv  
glsfmpv1t1p1f1t1tqni1l1mvgifilvailgas1sfik1fkvdpieaigga  
>sp|A6QJK3|HSSR\_STAAE  
mvqcl1vdddprilnyia1shlqiehidaytqpsgeaalk1lekqr1vdiavvd1mmdgmdgflcnt1kndydipvim1ta  
rdalsdkerafisgtddyv  
tkpfevkelifrirav1rryninsnsemtign1t1nqsy1elqvsnktmt1pnkefql1flmaarpkqiftreqi1ekiw  
gydyegdertvdhikr1r  
qr1kk1nat1tietvrgggykvenhv  
>sp|A6QJQ7|SBI\_STAAE  
mknkyisk1l1vgaatit1latm1sngcakasentqqtstkhq1ttqnn1yvt1dqkafyqv1h1kgiteeqrnqyikt1rehp  
eraqevfses1kdsknpr  
rvaqqnafynv1kndnl1teqeknyia1qikenpdrsqv1vsvqsskakerq1nenadkaikdfqdnkaphdksaayea  
nsk1pkd1rdknnrfvekv  
siekaivrhdervksanda1sk1nekdsienr1laqrevnkapmdvkeh1qkq1dalvaqkdaekkvapkvapq1qspq  
iekpkvespkvevpq1qsp  
kvevpqsk1l1gyyqsk1kdsfnygykyltdtyksykekydtakyy1ntykykga1dq1tvl1tvl1gsgsksy1q1kvddkn  
gylak1syaqvrnyvtesin  
tgk1y1t1fygnpt1vktaikaqetassiknt1sn1l1sfwk  
>sp|A6QK47|COPA\_STAAE  
mantkk1t1d1tgmtcaacsnr1iekk1nk1ddvnaqvn1ttekatveynpdqhdvqefintiqlhgygvavetvel1ditg  
mtcaacs1r1iekv1nkmdg  
vqnatvn1tteqakvdyypeetdadk1lvtriqlk1gydasikdnkdqtsrkaealqhklikliisav1sl1pl1m1mfvh1  
fnmhipalftnpwfqf1la  
tpvqfi1igwqfyvgaykn1rngganmdv1lavgtsaayfysiyemvrw1ngsttqphlyfetsavlit1l1fgkyleara  
ksq1t1nal1gell1slqakea  
ril1kdgnevm1p1nev1hvgdt1ivkpgkipvdgki1kgmtaidesm1tgesipveknvddt1vigstmknkgtitmtatk  
vgd1talani1kvveeaqs  
skapiqr1ladi1sgyfvp1vvgial1t1fiw1t1vt1pgt1fepalvasisv1viacp1cal1gat1ptsimvgtgraaengil  
fkggefverthq1d1t1v1d  
ktgt1t1ngrpv1t1dyhgd1nq1l1q1lataekdsehplaeaivnyakekq1l1t1t1t1t1fkavpghgieatidhh1lvgnrk  
1madndis1pkhisdd1th  
yerdgktam1iavnys1tgi1avadtvdhakdaikq1l1hdmgievam1tgd1nkntaqaiakqvgid1tviadil1peekaaq  
iak1l1qqgk1kvamvgdgvn  
dapalvkadigiaigtg1tevaieaadi1t1l1ggd1m1lipkaiyaskatir1nir1qnl1fwafgyniagipiaal1g1lapwvag

Tsompanidou\_et\_al\_Supplemental\_FASTA\_File

aamalssvsvvtnalrlkk  
mrleprrkda  
>sp|A6QK86|PANB\_STAAE  
mktvsqli dmkqkqtki smvtaydfpsakqveaagidmilvgdslgmtvlgyesivqvtladmihhgravrrgapntfvv  
vdm pigavgi smtqdl nha  
lklyqetnanaikaegahitpfiekataigipvahlglt pqs vgvmyklqgatkeaaeqllidaknveqagavalvle  
aipndlaeeiskhltpvi  
gigagkgtdgqvlvyhdmlyngvehkakfvkqfadfsvgvdglkqydqevksgafpseeytykkkimnevnnd  
>sp|A6TXS4|DEOB\_STAA2  
mtrpfnrvhli vmdsvgigeapdaadfkdegshtlrhtlegfdqtlpnlek lglgnidklpvvnaveqpeaytklseas  
vgkdtmtghweimglnimq  
pfkvyngfpeeliqqieemtgrkvvankpasgtqi idewgehqmktgdli vytsadpvlqiaahediipleelydicek  
vreltkdpky ligriiar p  
yvgpgnftrtsnrhdyal kpfgktvl dh lkdggdviaigkindiydgegvtavrtksnmdgmdqlmkivkkdftgis  
flnlvdfdal yghrrdkpg  
yaqai kdfddrlpel fsnlkeddlviitadhgndptapgt dhtreyipvimyspkfkghalesdttfssigatiadnfn  
vtlpefgksylkelk  
>sp|A6TYV3|Y513\_STAA2  
mrgggnmqqmmkqmkmqkmaeqkk lkeerivgtaggmvavtvtghkevvdveikeeavdpddiemlqdlvlaatne  
amnkadel tqerlgkhtqg  
lnipgm  
>sp|A6TYW7|RSMA\_STAA2  
mlndkdiatpsrtrall dkygfnfkkslgqnflidvniinniidas didaqtgvieigpgmgs lteqlarhakrv lafei  
dqr lipvlndtlspydnt  
vinedilkanikeavenhlq dcekimvvanlpyyittpillnlmqdipidgyvmmqkevgerlnaevgskaygslsiv  
vqyytetskvltvpksvfm  
ppnvdsivvklmqrteplvtvdneeaffklakaaafaqrrktinnnyqnyfdgkqhkevilqwl eqagidprrrgetls  
iqdfaklyeekkkfpqlen  
>sp|A6TZ11|RL331\_STAA2  
mrkiplnceacgnrnyvnpkqegsatrltlkkycpkcnahthkesk  
>sp|A6TZ19|RPOB\_STAA2  
magqvvyqgrhrkrnyari sevl epnlieiqtksyewflregliemfrdispi edftgnlslefvdylgepykylee  
sknrdatyaaplrvkvrl i  
iketgevkeqevfmgdfplmtdtgtfv ingaervivsqlvrspsvyfnekidkngrenydatiipnrgawleyetdakdv  
vyvridrtrklpltvllra  
l g f s s d q e i v d l g d n e y l r n t l e k d g t e n t e q a l l e i y e r l r p g e p t v e n a k s l l y s r f f d p k r y d l a s v g r y k t n k k  
l h l k h r l f n q k l a e p i v n t  
etgeivveegtvl drrkideimdvlesnans evfelhgsvidepveiqsikvyvpnddegrttt vignafpdsevk citp  
adiiasmsyffnllsgigy  
tddidhlgrrrl rsvge llqnqfrigl srmervvrermsiqdtesitpqq linirpviasikeffgssqlsqfmdqanpl  
aelthkrrlsalpgggltr  
eraqmevr dvhshygrmcpietpegnig linslssyarvnefgfietyrkvdl dthaitdqidyltadeedsyvvaq  
anskl dengr fmddevvc r  
frgnntvmakekmdymdvspkqvvsatacipflenddsnralmganmqrqavplmnp eapfvgtgmehvaardsgaait  
akhrgrvehvesneilvrr  
lveengvehegldryplakfkrsnsgtcynqrpi vavgdvveyneiladgpsmelgemalgrnvvvgfmtwdgynyeda  
vimserlvkddvytsihie  
eyesardtkl gpeeitrdipnvsesal knl ddr giviyigaevkdgdilvgkvtpkgvteltaerllhaifgekarevr  
dtslrvphgaggivldvkv  
fnreegddtlspgvnqlvrviyivqkrkihvgdkmcrhgnkgviski vpedmpylpdgrpidimlnplgvpsrmnigqv  
lelhlgmaaknlgihvasp  
vfdgandddvstieeagmardgktvlydgrtgepf dnri svgvmymlklahmvddklharstgpyslvtqqplggkaqf  
ggqrfgemevwaleaygaa  
ytlqeilltyksddtvgrvktyeaivkgenisrpsvpesfrvlmkelqslgl d v k m d e q d n e i e m t d v d d d d v v e r k v d l  
qqndapetqkevtd  
>sp|A6TZ43|GCH4\_STAA2  
mtefdl stregrwkhfgsvdpi egtkpttknemtdlqsthkdf lfeieevgiknlvypvlvdqyqtagtfsfsts ltkde  
kginmsriiesvekyhdng  
ielefntlyqvlrtlqtnmkqnaagvdvsgkwffdryspntnikavgnadvtyglaidgdkvtrkel tieatvttlcpcs  
keiseysahnqrgvvtvkt  
yinkdqi vddyknkildameanassilypilkrpdekrvterayenprfvedlirliaadlvefdwldgfdiecrnees  
ihqhdafaklkyrk  
>sp|A6TZF9|Y721\_STAA2  
mthi idgdacpvvdsiidlttetgfv ttiirsfshfsnqlypphvstlyvddgpdavdykivqlstkddivvtqdygla  
sllvdkvli vmhhngkiyn  
skniqqlldkryinaqirkqggrhkgpppftkqdqkvfeqsllkvihrikeid  
>sp|A6U025|2NPD\_STAA2  
mwnknrltqm lsieypi iqagmagsttpklvasvsns gglgtigagyfntqqledeidyvrqltsnsfgvnnfvpsqqsy

Tsompanidou\_et\_al\_Supplemental\_FASTA\_File

tssqienmawl kpyrral  
hleppvkiieeqqfkchidtiikkqvpvccftfgipnesierlkeanikligtatsvdeai anekagmdaivaqgsea  
gghrgsf1kpknglpmvgt  
islvpqjvdvvsipviaaggimdgrgvlasivlgaegvqmgtafltsqdsnasellrdai insketdtvvtkafsgklar  
ginrfrjeemsgyegdipd  
ypiqnel tssirkaaanigdkelthmwsqgsprlatthpantimsniinqinqimqyk  
>sp|A6U057|MNHCl\_STAA2  
meimifvsgiltaisvylvlskslirivmgttllthaanlflitmgglkhgtvpiyeavksyvdipqaliltaivia  
fattaflv1afntykelg  
tdnvesmkgvpedd  
>sp|A6U074|ADDA\_STAA2  
mtipekppgviwtdaqwqsiyatgqdv1vaaagsgktav1veriiqkilrdgidvdrl1vvtftnl saremkhrvdqri  
qeasiadpanahlknqrik  
ihqaqistlshfclkiqhydvlnidpnfrtsseanillleqtidevieqhydil dpafielteqlssdrsdqfrmi  
ikqlyffsvanpnptnwl d  
qlvtpyeeeaqqaqliqlltdl skvfitaayda1nkaydlfsmmdgvdkh1aviederr1mgrvleggfidi pyltdhef  
gar1pnvtakikeanemmv  
daledak1qykkyks1idkvkndyfsreadd1kadmqlaprvkylarivkdvmsfmrkrsknildfsdyehfalqil  
tnedgspseiaesyqrhfg  
eilvdeyqdttrvqekilsciktgdehngnl fmvgdvkqsiykrqadpslfikeyqrftidgdgtgrridlsqnfrsrk  
evl sttnyi fkhmmdeqvg  
evkydeaaqlyygapydesdhpvn1kv1veadqehsd1tgseqeahfiveqvdilehqkvydmktgsyrsatykdivil  
ersfgqarn1qqafknedi  
pfhvnsregyfeqtevr1vlsflraidnplqdiylvg1mrsviyqfkedelaqirilspnddyfyqsivnyindeaada  
1vdkl1kmf1sdiqsyqqys  
kdhpyyq1idkfyndhyviqyfsq1iggrgrranlyglfnkaiefenssfrglyqfirfideli ergkdfgeenvvgpnd  
nvvrmmtihsskglepfv  
iysgl skdfnkrdlkqpvilnqqfg1gmdyfdvdkemafpslasvaykavaekelvseemrlvyvaltrakeqlyligrv  
kndks1leleqls1sgehi  
avner1tspnph1iysilskhqsasipddl kfekdiaqvedssrpnvnisiyfedvstetildnneysvnqletmqn  
gnevkaqikhqldyqpy  
vndtkkpskqsvselkrqyeteesgtsyervrqyrigfstyerpkflseggkrkaneigt1mhtvmqhl1pfkkeriseve  
1hqyidglidkhiieadak  
kdi rmdemtfinse1ysiiaeaevyrelpfvvnqalvdqlpqgdedvsiiqgmidlifvkdgvhyfvdyktdafnrrr  
gmtdeeiqt1knkykiqm  
kyyqnt1qtilnkevkglyffkfgt1q1  
>sp|A6U077|CDR\_STAA2  
mpki vvgavaggatcasqirrl dkesdiiiefkdrdmsfanca1pyvigevedrkyalvytpekfydrkqitvkythe  
viainderqtvtvlnrkt  
eqfeesydk1ilspgasans1gfesditftln1ledtdaidqfikanqvdkvlvigagyvslevlenlyergl1hptl1hr  
sdi k1mdadmnp1lde  
1dkreipyr1neeidaingneitfksgkvehydmiievgthpnskliessnikl drkgfipvndkfetnvpniyaigdi  
atshyrhvd1pasvplawg  
ahraasi vaeqi agndtiefkgflgnnivkffdytfasvkvkne1kqfdykmvevtqgahanyypgnsp1hlrvyydts  
nrqilraaavgkegatkri  
dvlsmammnq1tvdeltefevayappshpkd1inmi gykak  
>sp|A6U089|FABH\_STAA2  
mnvgikgfgayapekiidnayfeqfl dtsdewiskmtgikerhwaddqdtsdlayeasvkai adagi qpedidmiivat  
atgdmfpptvanmlqerlg  
tgkvasmdqlaacsgfmysmitakqyvqsgdyhnlvvgadkl skitd1tdrstavlfgdgagaviigevsegrgiisye  
mgsdgtggkhlyl dkdgtgk  
1kmngrevfkfavrimgdastrvvekan1tssdid1fiphqanirimesarerlgiskdkmsvsvnkygntsaa sip1si  
dqelkngklkdddtiv1vg  
fggg1twgamti kwgk  
>sp|A6U0A4|MECA\_STAA2  
mriervdttvk1fitysdieargfsred1wtnrkrgeeffwsmmdeineedfvveglwiqvahafekgvevtiskskn  
edmmnmsdddtdqfdeq  
qe1laqt1legedqlee1feqrtekeeaqgskrqkssarkntrtivkfn1ledvinayahsnpittefedllymvdgtyy  
yavhfdshvdqevindsys  
q1lefayptdrtevy1ndyakiimshnvtavrryfpette  
>sp|A6U0S4|Y1188\_STAA2  
mtkyt1fkpkdfkafnvegl darmealneyirpqlhelgeyfsdfftsqtgetfyphvakharrsvnppkdtwvafatskr  
gykm1phfqigmfedqlfv  
mfgimheakdkatrakvferkfaiqq1pddyrvcl dhmkpdkpfikdltddd1keaiqrainvkkgeffiaraitpdk  
r1ksdkafiafleetfdqf  
1pfysa  
>sp|A6U0U3|Y1207\_STAA2  
mksvgliteynpfhngqyhinqskl1tnadvtiaimgnfvmrgepaiynkftrakmalstad1viel patas1ssgdh

Tsompanidou\_et\_al\_Supplemental\_FASTA\_File

faelavkvadymsvdtiaf  
gsenndikt1kqlahsineieqsessfsqkvkegksypriisellehealaspnnilgisylkaiaknakninaisikre  
naqhhdslqhqqfasgts  
irtsiiqqdhdwhhvpkdiqhlvytphitlnqifpylkyqiamttdslkniyvtvegfenrlksniyeatdfhhfvkl  
lktkrythyigrllmnl  
lnikptdvtstnihavkvlamndrgrqylkh1ktaferqyitninksnahyftneikathiynaisgqqqtdfntpviiqq  
yr  
>sp|A6U0w1|MUTS2\_STAA2  
mrqktldvlefeikslvanetisd1glekvnqmpatnfetvfvqmeetdeiaqiynkhr1ps1sg1skvsafihradi  
ggvlnvselnlkrliqvq  
nqfktfynqlveedegvkypilddkmmq1pvltdlfhqinetcdtydlydnasyelqgirskisstnqrirqnldrivks  
qanqklsdaiivtrnern  
vipvkaeyrqdfngivhdqsasgq1yiepsvsvemnnqisrlrhdeaiekeriltq1tgyvaadkdallvteqvmgqld  
fliakarysrsikgtkpi  
keertvylpkayhpl1nretvantiefmedietviiitgpntggktvtlkt1gliivmaqsglliptldgsq1svfknvy  
cdigdeqsieqslstfssh  
mtniveilkhadkhs1vlfdelgagtdpsegaa1amsil dhvrkigs1vmatthypelkaysynregvmnasvefdvdt1  
sptyk11mgvpgsrnafdi  
skk1g1s1niinkaktmigtdkeinebieslerykrvetqr1eldr1vkeaeqvhd1skqyqqfqnyeks1ieeake  
kangkiikaatkeaddiikd  
1rq1reqkgadvkehelidkkkr1ddhyeaksikqnvqkqkydkivagdevk1sygqkgevl1eivndeeavqmg1ikm  
klpiedlekkqkekvkptk  
mvtqrnrqtikteld1rgyryeda1ieldqyldqavl1sneyqvy1ihgkg1galqkgvqqh1kkhksvsdfrgmpsegg  
fgvtvat1k  
>sp|A6U0Z7|Y1261\_STAA2  
mdckvvs1nekdqfipkikssdpvitgl1fqydaaqtsfekrmskenngreaalanvireymsd1k1sneqelnihlan  
gskvvi1ggqqag1fggply  
tfhki1fsi1i1tskeltdthkqqvvpvfw1agedhdfdevnhtfvynenhgs1hkvkyhtmempettvsryypdkaelkqt  
1ktmfihmketvhtqg1le  
icdri1dqydswtm1fka11hetfkaygv1fidaqfep1rkmeapmfk11kkhq11ddafratqqrtnqg1namiqtd  
tnvh1fl1ndenmrq1lvsyd  
gkhfk1nktdktyikeei1niaenqpe1fsnnvtrp1meew1fntvafvggpseikywaelkdvfel1dvempivm1pr1  
rity1ndriek11skynip  
lekvlvdgvegerskfi1reqashqfi1ekvegmi1eqrr1nkdl1devagnqnn11vnkneih1iqydy11kry11nie  
rendismkqfreiget1hp  
mglqeriwnp1qi1ndfgtdv1fkpstypp1sytdh1i1kp  
>sp|A6U129|RPOZ\_STAA2  
m1npp1nq1tsqiksky1i1attaakrareideqpete11seyhsfkpvgralee1adgk1rpvi1ssdygke  
>sp|A6U157|RS16\_STAA2  
mavki1rl1tr1gskrn1pfyri1v1vadarsprdgri1ieqigtyn1ptsanapeikvdeala1kw1ndgakptdtvhn1lskegi  
mkk1fdeqkkak  
>sp|A6U164|SUCC\_STAA2  
mniheygkei1frsmg1vavpegr1vtaeeavekake1nsdv1yv1vkaqihagrgkag1gvkiaks1sevetyake11gkt  
1vthqtgpegkei1krlyie  
egcaiqkeyyvgfvi1dratdqvt1maseeggteieevaaktpeki1fketidpvig1spfqarria1fninipkesv1nkaak  
f11al1ynvfi1ekdcsivei  
np1vt1tadgdv1a1ldakin1fdna1lfrhkdvve1rd1leedpkeieaskhd1sya1ldgdigcmvngag1amatmdtinh  
fggnpan1fl1daggsatrek  
vteafki1ilgdenvk1g1fvni1fggimkcdv1aegiveavkevd1t1p1lvvr1egt1nvelgk11k1dsg1aiepaatmaeg  
aqkivk1vkea  
>sp|A6U169|TRMFO\_STAA2  
mtqtvnv1gag1agseayq1aergikvn1iemrpvkqtpahhtdkfaelvc1sns1rgnal1tngvgv1keemrr1nsiii  
eaadkarvpagga1avdrh  
dfsgyi1tet1knhenitv1neeinaipdgyti1atgpl1ttet1aqeivditgkdqlyfydaaapiiekesidmdkvylks  
rydkgeaay1ncpmtedef  
nr1fydavl1eavapvns1fekeyfegcmpfevmaergrkt11fgpmkpvgl1edpktgkrpyavvq1rqddaagt1ynivg  
fqth1kwgaqkevik1lipg  
1envdivrygvmhrntfi1nspdv1nekye1isqni1qfagqmtgvegyvesaasgl1vagin1lahkilgkgevvfpretmi  
gsmayyishaknnknfqp1m  
nanfg11ps1etri1kdkkeryeaqanra1dy1knfkkt1  
>sp|A6U170|XERC\_STAA2  
mnh1qea1f1nt1kvern1fseht1ksyqdd1iqfnq1leqehlq1ktfeyrdarny1s1ylsnh1krtsvsrkist1rtfy  
eywmt1deni1n1p1fvq1lvh  
pkkeky1p1qffyeemea1l1ktveedtskn1rdrvile1lyatgirvselvnikkqdidfyangvtvlgkgskerfv1pfg  
aycrqsi1enylehfkp1iqs  
cnhdfl1ilnmkgea1tergvryv1ndivkrtagvseihphk1rhtfath11nqgad1rtvqsl1ghvn1sttgkythvsn  
q1l1rkvy1nahprakkene  
i

Tsompanidou\_et\_al\_Supplemental\_FASTA\_File

>sp|A6U174|RS2\_STAA2  
mavismkqllleagvhfghqtrrnwpmkkyifternngiyiidlqktrkvddeaynflkqvsedggqvlfvgtkkqaqesv  
kseaeagqfyinqrwlgg  
lltntyktiskrikriseiekmeedglfevlpkkevvelkkeydrlikflggi rdmksmpqalfvvdprkernaiaearkl  
nipivgividncdpdeidy  
vipanddairavklltakmadaillegqqgvsneevaaeqnidldekekseeteete  
>sp|A6U190|TRUB\_STAA2  
myngilpvykerlgtshdvfklrkilktkkightgtldpevagvlpvcignatrsvdyvmdmgkayeatsvigrsttte  
dqtgdtletkgvhsadfnk  
ddidrllenfkgvieqippmyssvkvngklyeyarnnetverpkrkvnikdigriseldfkenechfkirvicgkgyi  
rtlatdigvklgfpahmsk  
ltriesggfvkdsiltleqikelheqdslnkflpleyglkglpsikikdshikkri lngqkfnknefdnkikdqivfid  
ddsekvlaiymvhptkese  
ikpkkvfn  
>sp|A6U1G7|SBCC\_STAA2  
mkplhlklnnfgpflkeeidfskidnneflisgktgsgktmifdamtyalfgkasteqreendlrshfadgkqpmstvf  
efqlnhriykvhrqgpyik  
egntttknakfdvfemvdgkyeireskvisgtqfiellgvnadqfrqlfilpqgefkrflisnsrekqgilrtlfdek  
feaireilkeelkkegaqi  
enryqqidllwqeiesfddkikgllelatqqidklienipllqarskeilafvnesketaikeyeiiekktlennilkd  
ninglnknkidfvqlkeqq  
peideieaklkllditnllnyienrekietskanskdisktnkilnlcdkkrnidkekkmleengdliesktsfidk  
trvlfndinkyqqsylnie  
clitegeqlgdelnllikglekvedsignnesdyekielnnaitninneiniikenekakaeldkllgskqelenqine  
ettimknleikldhydksk  
ldlndkesfiseiksavkigdpcpicgneiqdlghhidfdisakrqneikeieanihaiksniavhseikfvnekisni  
niktqsdfslevlnkrll  
nena lnnqrdlnkfi eqmkeekdnltlqihnkqlrlnkneselklcrdlitefetlskynnittnfevdykkyvqdvnhq  
elskeiedklmqlsqrkli  
eqnlnhyenqletyndlelneqsiememsrlnltdndineiiawrgeqeeleqkrdykkryhefemeiarlesltk  
dke lldsklkdeyeqkke  
kmtlidesavhyqcqnniktqsivshinylnqelkdqgefqlaeivsgknnknltenfvliyyldqiaaqanrl  
atmsdnryqlirreavshg  
lsgleidvfdlshnksrhisslsggetfqsslalalglseivqqsggislesifidegfgtldqetleta ldtllnks  
tgrmvgiishvselknrip  
lvlevksdqyqsstrfkrn  
>sp|A6U1H4|PLSY\_STAA2  
mmiivmlllsy ligafpsgfvigklffkkdirqfsgntgatnsfrvlgrpagflvtfldifkfgfityvffplwlpvhadg  
pistfftnglivglfai lg  
hvyppykfqggkavatsagvlgvnpillilalaiiffivlki kyvslasivaaiccvigsliiqdyillvsvflvsii  
liirhrsniarifrgeepk  
ikwm  
>sp|A6U1H8|GLCT\_STAA2  
mgeyivtktlinnvvvctndqeviligkgigfnkkegmalndqtitiekiykleseqqkahykslveiaddnvlqviid  
slnfisntamnvdsqllv  
sltdhii faykrkqnqv snpfvmetmqlysdaihiakqvidqlnaaldvhfpedeigfialhiasntedlsmhemtli  
nnvikkgidiesdlvtv  
dkeslqyqrfirhvqflirrlrrkeyihaqddfvs miknhypicyntaykiltmiqkqfdvniseseiyltlhihhfee  
rinqs  
>sp|A6U1N4|ODO1\_STAA2  
mtnerkevseapvnfganlgmlldlyddf lqdpssvpedlqvlfstiknddsivpalkstssqnsdgtikrvmlidnir  
qyghlkadiypvnpkrkh  
vpkleiedfdldqqtlegi sagivsdhfadiydnayea ilrmekrykgpiafeythinntergwlkrrietpykvtlnn  
nekralfkqlayvegfevy  
lhknfvgakrfsiegvdalvpm lqrtitiaakegikniqigmahrgrlnvlthvlekpyemmisefmhtdpmkflpedgs  
lqltagwtgdvkyhlggik  
ttdsygtmqrialannpshleivapvvegrtraaqddtqragapttdhhkampiihgdaaypggqinfetmnlgnlkg  
stggs lhiitnrigftte  
pidarsttystdvakgydypi fhnaddveatieaidiamefrkefhkdvvidlvgyrrfghnemdepsitnpvpyqnr  
khdsvyvfkgklvnegv  
sedemhsfi eqvqkelrqahdkinkadkmdnmdmekpaelalplqadeqsftfdhlkeindalltypdgnilklnkv  
ekrhepfnkedglvdwaqa  
eqlafatildgtpirltgqdsertg fshrhavlhdeqtgetytplhhvpdqkatfdihnsplseaavvgfeygynvenk  
ksfnieweaqygd fanmsqm  
ifdnflfssrskwgersgl tlf lphayegqgpehssarlerflqlaennctvvn lssssnyfhllraqaasldseqmrp  
lvmspkslrnktvakpi  
deftsggfepiltesyqadkvtkvilatgkmfidlkeal aknpdesvllvaierlypfpeeeieallaqlpnleevswvq  
eepknqgawlyvpyvkv



Tsompanidou\_et\_al\_Supplemental\_FASTA\_File

vadkyd1syhgriqraapaegdgeihklvqnkiena1knn  
>sp|A6U1T3|AROA\_STAA2  
mvseqiidi sgplkgeievpgdksmthraimlaslaegtsniykp1lgedcrrtmdifrl1gvdikededklvvnspgyk  
afktpqhvl ytgns gtttr  
llagllsglgiesvls gdsigkrpmdrvl rplklmdaniegiednytpliikpsvikginyqmevasa qvksailfasl  
fsndttvikel dvsrnhte  
tmfrhfnipieaerlsitttpdaiqhikpadfhvpgdissaaffivaal itpesdvtihnvginptrsgiidivekmgn  
iq1fnqttgaeptasiriq  
ytpmlqpi tiegelvtkaidelpviallctqavgtstikdaeelkvketnridttadm1n11gfelqptndgliihpsef  
ktnatvds1tdhrigmm1a  
vas11ssepvkikqfdavnvsfpgflpk1k11eneg  
>sp|A6U1T5|AROC\_STAA2  
mrylts geshgpqltvivegipanleikvedinkemfkrqgygrgrmqiekdtveivsgvrngytlgspitmvvtndd  
fthwrkimgaapiseere  
nmkrtitkprpghadlvggmkynhrdlrnvlerssaretaarvagalckvllqql didiysrvveiggikdkdfydset  
fkanldrndvrviddsiaq  
amrdkideaknegdsiggvqvvenmpvgvgsyvyhydrkl dgkiaqgvvsinafkgvsfgegfkaaekpgsei qdeily  
nseigyrgsnhlgglegg  
msngmpiivngvmkpiptlykplnsvdintkedfkatiersdscavpaasivcehvvafeiakal1eefqsnhieqlqqq  
iadrrqlnvef  
>sp|A6U1X3|RNZ\_STAA2  
mevtffgtsag1ptkerntqaiainlepysnsiwlfdvgegtqhqil1hhaiklgkvthifithmghdhi fglpgllssrs  
fqggeqkpl1lvpgkgika  
yvemsmlseshlnypityieiddh1tyhhdgftveah1lnhgipsygyrvmappettgtinvealkniglep gkyqevk  
shdtfehngqvyqskdfrg  
eskqgpvvai fgdtkpcsnervisrdadvmvheatyidgekhlannyhshiedvfalikeanvkrtlith1snrynted  
ineiyqil1iqnedtpnfnf  
vkdfdsfkv  
>sp|A6U1Z4|EX7S\_STAA2  
mtketqsfeemm qeleqivqkl dnetvslees1dlyqrgmk1saacdt1knaekkvnd1ikeeaedvkndestde  
>sp|A6U200|EFP\_STAA2  
misvndfktgltisvdnawkvidf qhv kpgkgsafvrsk1rn1rtgai qektfragekvepami enrmqylyadgdnh  
vfmdnesfeqtelssdylk  
eelnylkegmevqi qtyegetigvelpktvel tvtetepgikgd tatgatksatvetgytlnvplfvnegdvl1intgdg  
syisrg  
>sp|A6U245|Y1665\_STAA2  
mfs1sfiviavi iival1ilfsfvpiglwisalaagvhvgigtlv gmlrrvsprkviaplikahkagla1tt nqlshy  
laggnvdrvvdaniaa qra  
did1pferaaaid1agr dvl eavqmsvnpkvi etpfiagvamngievkakaritvraniarlvggageeti iarvgegiv  
stigs khhtevlenp dni  
sktvl skgl ds gtafeilsidiadvdi sknigad1qteqal adkniaqakaeerramavateqemkarvqemhakvveae  
sevp1amaeal rsgnisvk  
dyyn1knieadtgmrnainkrtdqsddespeh  
>sp|A6U2D1|SYV\_STAA2  
memkpydpreveagryeewvkngyfkpsedksketyt ivippnv t gkl1hghawdt1l qdiitr mkrmqgydtlylpg  
mdhagiatqakveak1neq  
gitrydl grekf1eqawdwkeeyasfiraqwak1gl1gdysrerft1deg1skavkkvfvd1ynkgi iy rgeri inwdpk  
artalsdi evihedvqgaf  
yhfkyppadggefieiatrpetm1gdtaivvnpnderykdvigktvil pivgre1piladeyvid1dfgsgamkvtpahd  
pndfeigqrhqleniivmd  
engkmndkagkyegmdrfdcrkqlvkd1keqd1viki edhvhsvghsersgavvepyl1stqwfv rmed1akrs1dnqkt d  
dr1dfypqrfehtfnqwe  
nirdwtisrqlwghqipawyhketgeiyvgeeapt dienwqqdedv1dtwfssa1wpfst1gwpd1esedfkryyptna  
1vtgydi i1ffwarmi fqq  
leftdrppfndv1lhglvraedgrkmsks1ngvdpmdvideygads1ryfl atgsspghd1rystekvesvwnfinkiw  
ngarfs1mnigedfkvedi  
d1sgn1sladkwil1tr1netiatvtd1sdkyefgevg raly nfiwddfc dwiyemskipmnsndeeqkvtrsv1sytd  
nimrml1hpfmpfvtekiwq  
slphegd1ivkaswpevres1ifeeskqtmqqlvei iksvrqsrvevntpl skeipiliqakdkei ettsqnkdylikf  
cnpst1ni1stdveipekam  
tsvviagkvv1pleg1idmdkeisr1eke1ak1qse1drvdkk1snenfvskapekvineekrkkqdyqekydgvkarie  
qlka  
>sp|A6U2J8|FTHS\_STAA2  
mth1sdl1dianqst1qpikdiaasvgiseda1epyghyakidinkitprenk gkv1vtamsptpagegstvtv glad  
afhelknvmval repalg  
ptfgikggatgggyaqvl pmedin1hfngdfhaittanna1safidnihqgne1gidqrriewkrv1dmndralrhvvn  
glggptngvpredgfni tv  
aseimai1clsr1ikd1kdkisritigytrdrkpvtvad1kvqgalami1kdaikpn1vqsi egtpalvhggpfaniahg

Tsompanidou\_et\_al\_Supplemental\_FASTA\_File

cnsilatetardladiivvt  
eagfgsdlgakfmdikvteagfdlaavvvvatiralkmhggvakdnlkeenveavkagivnlerhvnnikkfgvepvva  
inafihtdaevevykswa  
kennvrialtewekggkvgvdlanevlevidqpnspfkyelelpleqkiekivteiygskvtfsskaqkqlkqfken  
gwdnypvcmaqtqysfsdd  
qtllgapsgfeiti releaktgagfivaltgaimtmgplpkpaaInmdvtddghaiglf  
>sp|A6U2R6|SPLF\_STAA2  
mnkniiiksiaaltitsitgvgttvvdgiqqtakaensvklitntnvapysgvtwmgagtgvvgnhtiitnkhvtyhm  
kvgdeikahpngfynggg  
lykvtkivdypgkediavvqveekstqpkgrkfkdfstskfniaseakenepisvigypnpngnkIqmyestgkvlsvngn  
ivssdaiiqpgssgspiln  
skheaigviyagnkpsgestrgfavyspeikkfiadnlk  
>sp|A6U2W8|GSA2\_STAA2  
mnfseserlqqIlsneyilggvnspersykvagggapvumkeghgaylyvdvgnkfidylqaygpiiaghahphitkaiqe  
qaakgvlfgtpteleiefs  
kklrdaipslekirfvnsgteavmttirvaraytkrniikfagsyhgshdlvlvaagsgpsqlgspdsagvpesvarev  
itypfndinaykeaiefwg  
deiaavIvepivgnfgmvmpqpgfleevneishngtIviydevitafrrfhygaaqdllgvipdltafgkivggglpigg  
ygrqdimequivapIgpayq  
agtmagnplsmkagiallevleqdgvyekldsIggqleegllkIiekhnitatinriygsItlyftdekvthydqvehsd  
geafgkffklmlnqginla  
pskfeawflttehteediqqtlkaadyafsqmk  
>sp|A6U304|GATB\_STAA2  
mhfetviglevhvelktdskmfspahfgaepnsntnvidIaypgvlpvvnkravdwamraamaInmeiateskfrkn  
fyfndpkayqisqfdqpi  
genyidi evdgetkrigitrIhmeedagksthkgeysIvdInrqgtplieivsepdIrspeayayleklrsiiqytgv  
sdvkmeegsIrcdanisItr  
pygqekfgtkaelknIlnsfnyvrkgIeyeekrqeeellnggeiqgetrrfdestgktilmrvekgsddyryfpepdivpl  
yiddawkerivrqtipeIpd  
erkakyvneIglpaydahvltltkemsdffestiehgadvkltsnwlmggvneyInknqvelldtkltpenIagmikIie  
dgtmsskiakkvfpeIaak  
ggnakqimednglvqisdeatlIkvfneaInneqsvedykngkgkamgflvgqimkaskgqanqIvnqllkqelkdr  
>sp|A6U3D4|GCP\_STAA2  
mtkdilIlavetscdetsvsvikngrdiIstnvlsqieshkrfggvpevasrhvegitttineaIvdadvsmididai  
avtepggIigallIgvnaa  
kalafaydklipvhhiaghiyanhieepItfpIialivsgghtelvymkdhIsfevigeItrddavgeaydkvartigIn  
yppggqvdrIaagedtys  
fprwldkdsydfsfsgIksavinqlhnqrqknipiIeanvatsfqnsvvevItfkaiqackeysvqrIivaggvasnkg  
IrgsladqckvndiqIltip  
spklctdnaamIgvaghylyqggrfadIalnghsnidIeaysae  
>sp|A6U3J8|GLYA\_STAA2  
msyItkqdkviaeaierefqrnnsnieliasevfseavmeaqqsvItnkyaegyppgrryyggcefvdvtesiaidraKa  
Ifgaehvvnqphsgsqan  
avyIvalimgdtvlgmnlshghIthgapvnfsgkfynfveygvdkdterinydevrklalehkpkIivagasaysrtid  
fkfkfkeiadevnakImvdm  
ahiagIvaagIhpnvveyadvtttthktIrgprggmIckeeykkdidktiIpgiqggplehviaakavaIgealennf  
ktyqqvvnknakvIaeali  
negfrivsggtdnhIvavdvkgsigItgkeaeetIsvgitcnkntipfdqekpfvtsgirIgtpaattrgfdekafeev  
akiisIalIknskdeekIqq  
akervakIlaeyplyq  
>sp|A6U415|UREE\_STAA2  
miveeiqgnianIlnsekqkhvekvyIensdlvkriqrvtvdhgteigirIkpIdIlygdilyaddhnmIivdvnseIdI  
IviqprtIqemgdiahqIlg  
nrhIpaqftetemIvgydyIvedIlsIlgipyvredrkvnkafrhIghshd  
>sp|A6U465|Y2408\_STAA2  
mlypififilagIceiggylIwlwlregqsslvgIlggailmlygviatfqsfpfgrvyaaayggvfIimsIifamvvd  
kqmpdkydvigaiicivgv  
Ivmllpsra  
>sp|A6U483|TCAA\_STAA2  
mkscpkcgqqaqddvqictqcgkhfdsrqalyrkstdediqtnnikmrkmpwaivffililililffllrnfnspaqI  
kiIvnaiennkqkvatI  
stkdnkvdsseeakvyniyIkdveglkqfvsdIknvtvhkInskstsvasyiqtrsgqnilrvskngtryiffdnmsftapt  
kqpiIvkpkektkyefksgg  
kkkmviaeankvtpignIipgtyripamkstengdfagylkfdfrqnssetvdvtedfeeanitvtIkgdtkInsskkv  
tindremafsssktygppy  
qnkdiIIsagkakgktfttqtktikasdlkynteitInfdsediedyvekkekeensInkklieffagyslannaafnq  
sdfdfvssyikkgssfydd  
vkkrvskgsImmisspqiidaekhgdkitativrInengkqvdkeyeIeqgsqdrIqliktsek

Tsompanidou\_et\_al\_Supplemental\_FASTA\_File

>sp|A6U4E8|SBI\_STAA2  
mknkyiskllvgaatitlatmisingeakasentqqtstkhqttqnnvytdqqkafyqvlhllkgiteeqrnqyiktirehp  
eraqevfseslkdknnpdr  
rvaqqnafynvlkndnlteqeknnyaiaikenpdrsqvwwvesvqsskakerqnieadkaikdfqdnkaphdksaayea  
nslpkdlrdknnrfvekv  
siekaivrhdervksandaisklnekdsienrrlaqrevnkapmdvkeh1qkqldalvaqkdaekkvapkvapqiqspq  
iekpkaespkevppqisp  
kvevpqskllgyyqslkdsfnygykyltdtyksykekydtakyyntyykykgaidqvtlvtlvgsgksyiqplkvddkn  
gylakyaqvrnyvtesin  
tgkvltyfyqnpvlvktaiqaetassikntlnllsfwk  
>sp|A6U4X8|PANC\_STAA2  
mtklittvkemqhvkaakrsgttigfiptmgaldghlmtvresvstnditvsvfvnplqfgpnedfdayprqidkdl  
elvsevgadivfhpavedi  
ypgelgidvkvgladvlegakrpghfdgvvtvvnklfnivmpdyayfgkkdaqqalaveqmvkdfnhaveiigidivre  
adglakssrnvylteqerq  
eavhlskslllaqalyqddgerqskviidrvteyleshisgrieevavysypqlveqheitgrifislavkfskarlidni  
iigae  
>sp|A6U4Y2|LDH2\_STAA2  
mktfgkvvliigdgsvgsyafamvtqgvadefviidiakdkvkadvqdlnhgtvhspspvdvkageyedckdadlvvit  
agapqkpgetrlqlveknt  
kimksivksvmdsgfdgyfliaanpvdltrfvkeytg1paervi gsgtv1dsarlqylisqelgvapssvdasiigehg  
dte1avwsqanvagi svyd  
tlkeqtgseakaeeiyvnrdaayei iqakgstyygialalmriskailnennvlnvsiqldgqygghkgvylgvptlv  
nqhgavkiyemplsaeeqa  
lfdksvki1edtfdsiky1led  
>sp|A6U515|ARCR\_STAA2  
mtenfilgrnnklehelkaladyinipysilqpyqsecfvrhytkgqviyfspqessniyf1iegniirehynqngdvyr  
yfnkeqv1fpisnl1fhpke  
vnelctaldctvlglprelmaf1ckanddif1tlfalindneqqhmnynmaltskfakdriik1lchl1cqtvgydqdef  
yeikqf1tiqlmsdmagis  
retaghi1helkdek1vvkdhknwlvskh1fndvcv  
>sp|A6U559|HIS4\_STAA2  
mielwpaiddlgstsvrltegydseekmsrsaeesiaysqfecvnrhivdligakaqyarefdyikslrrl1ttkdie  
vgggr1rtsqimdyfaagi  
nycivgtkgi1qtdw1kemahtfpgriylsvdaygedikvngweedtelnlfsfvrqlsdiplggi1ytdiakdgkmsgp  
nfeldtqqlvkattipvias  
ggrhqqdiqr1aslnvhaai1gkaahqasfwegle  
>sp|A6U564|HIS1\_STAA2  
mlriaiakgrlmdsl1nyldvieyttlsetlknrerqllsvdniecilvkgsvpiyveqgmadi1gvsdi1lderqyn  
vnnl1nmpfgachfavaak  
pettnyrkiatsyvhtaetyfkskgidvelik1ngsvelacvdmvdgividivqtgttlkanglvekqhisdinarlitn  
kaayfkksqlieqfirsle  
vsiana  
>sp|A7WWR5|RLMH\_STAA1  
mkjtilavgl1kekywkqiaieyekrlgpytkidievpdekapenmsdkeieqvkekegqrilakikpqstvit1ieiqg  
kmlsseglaqelnqrmtqg  
qsdvfvfvggsngl1hkdv1qrsnyalsfskmtfphqmmrvvlieqvyrafkimrgeayhk  
>sp|A7WX68|SBNA\_STAA1  
mieksqachds11dsvgqtpmvqlhql1fpkhevfa1eymnpqgsmkdrpakyi1iehgikhg1itenth1iestsgn1gi  
alamiakikg1kl1tcvvdpm  
kisptn1ki1ksyanvemveepdahggylmtriakvqellatiddaywinqyanelnwqshyhagatteivetikqpidy  
fvapvsttgsimgsrkik  
evhpnaqi1avdakgsvi1fgdkpinrelpgigasrvpeilnrseinqvihvddyqsalgcrklidyegi1faggstgsiia  
aieqlitsieegativt1l  
pdrgdry1dl1vysdtw1ekmksrqgvkse  
>sp|A7WXX6|AZOR\_STAA1  
makvlyi1tahpfnelvsnsmagkafietyqqhpddevkhid1fetyipvidkdv1tgwgkmsnget1tddeqmkvsr1  
sdileef1sadkyvfvtpm  
wnlsfppvvkayidaisiagktfkysaegpql1tdkkvl1h1qsrnggyt1tepaadfemgdry1rtimt1lgvpsyeti1  
ieghnaephkteekatsi  
naekl1attf  
>sp|A7WXZ6|NANE\_STAA1  
mlphg1livscqal1adep1hssf1mskmal1aayeggavgirantkedil1aketvd1pvigivkrdydhsvdfitatskev  
deliesqcevia1dat1lqq  
rpket1delvsi1rthapnveimadiatveeaknaar1gfdyigt1l1hgysytqgq1lyqndfql1kdv1qsvdakvia  
egnvi1tpdmykrvmd1lgvh  
csvvggait1rpkei1tkrfvqvmmed  
>sp|A7WYH9|Y451\_STAA1

Tsompanidou\_et\_al\_Supplemental\_FASTA\_File

mttqlninsvienakrvitp|spisifaarnpwegleadtfedvakw|rdvrdvdi|fpnkalisavargeldesvfnq|  
vtdm|lehhynipqhyin|  
yidnikt|kdvpsymhnsnvddvad|l|lekskrdmaesyhydvprmsdai|deqgeplseqvnrqmikwtklyidqf|  
sswtmpkreysfyhaw|h|  
aqhdhsftkagrqv|k|g|pndpemt|iesv|tyfs|idqedyqayvegh|l|alp|gwagm|lyrsqqhhfeqh|l|tdylair|  
vveq|l|vgdefksv|tkdce|  
srsewfkqtvas|l|cyysdmpsdv|l|qhdvneiqt|fihfaatmnknvfkn|l|w|liawemtyesq|l|kqkikaghesvagal|  
v|nqvnsendnangphsv|  
l|ndtqavdennsel|nqvgtstkaqiafcidvrsepfrrhieaagpfetigiagffg|l|piqkdavdeqfkhdslpvmvppa|  
yrikefadrydmnvyrqqq|  
qtmssmfyt|fklmknvmps|l|l|pelsgpfl|s|stivnsimprksras|l|qkikqkw|l|k|kpetk|l|tidrefdrtsd|l|pvgf|  
tegeqidfa|l|qal|k|l|md|l|t|  
eafapfv|l|aghashshnnp|has|l|ecgacggassgf|nak|l|lami|cnrpnvrqg|l|kqsgvyipettvfaaaehhtstd|l|  
awvyv|pdt|l|sala|ldayes|  
l|ndampmi|seqanrer|l|dk|l|ptigrvnhpveeaqrfasdwsevrpewglaknasfi|grrq|l|tkgid|legrtf|l|hnydwr|  
kdkdgk|l|l|nti|isgpa|l|va|  
qwin|l|qyyastvaphfygsgnkatq|tvt|sgvgvmqgnasd|l|mygl|swqsvmaadr|tmyhs|pir|l|l|vviqapdyvvar|l|fa|  
nnehfarkvsnhwl|l|r|l|msv|  
neegr|fkswi|  
>sp|A7WYP4|ISPE\_STAA1  
miyetapakinft|l|dt|l|fkrndgyhei|emittvd|l|ndr|l|tfhkrkdrkivveiehnyvpsnhkn|layraaq|l|fieqq|  
kqgv|t|isidkeipvsag|l|a|  
ggsadaaat|l|rg|l|nr|l|fdigas|lee|l|al|l|gskigtdipfc|y|nktal|ctgrgekie|f|l|nkppsaw|l|akpn|l|gisspdi|  
f|k|l|in|l|dkrydvhtk|mcye|  
alenrdyq|l|cqs|l|snr|l|epi|svskhpqi|dk|l|knm|l|ksgadga|l|msgsgptvyg|l|arkesqakniynavngcnevylv|  
r|l|g|  
>sp|A7WYX1|RS12\_STAA1  
mptinq|l|vrkprqsk|k|k|sdspa|l|nkgfnskkkkftd|l|nspqkr|g|v|ctr|v|gt|mt|pkpnsa|l|rkyarvr|l|snnieinayi|  
pgi|ghn|l|qehsv|l|vr|ggr|  
vkd|l|pgvryhi|vrga|l|dtsgvdgrrqgrs|lyg|tkkpkn|  
>sp|A7WZ56|SYR\_STAA1  
mni|l|dqvkqt|l|vee|l|aas|l|nkag|ladeipdiki|evpkdtkngdyatniamv|l|tkiakrnpreiaqai|v|dn|l|dtekahvkq|  
i|diagpgfi|nfy|l|dnqylt|  
ai|pea|l|ekgdqfghvneskgqnv|l|leyvsanptgd|l|higharnaavgdalanil|taagynvtreyyindagnqitnlar|  
siethffea|l|gdnsysmpe|  
dgyngkdi|e|gkd|laekhpei|kdyseear|l|kefrk|l|gveyemak|l|knd|laefnthfdnwfsets|lyekgeilevlakmk|  
elgytyeadgatw|l|rttdf|  
kdkkdrv|l|i|kndgtytyf|l|pdiayhfdkvkrngdi|l|id|l|fgadhgyinr|l|kas|l|etfgvdsnr|l|eiqimqmvr|l|mengk|  
evkmskrtgnait|l|reim|  
evgvdaryf|l|tmrspdshfd|l|dme|lakeqsqdn|pvyya|qyaharicsil|kqakeggi|evtaandfttitnekaie|l|l|kk|  
vadfeptiesaaehrsahr|  
itnyi|q|d|laahfhkfy|naekv|l|tddi|ekt|kahvami|eavrit|l|kna|l|amvgvsapesm|  
>sp|A7WZM9|MURB\_STAA1  
minkdiyqa|l|qq|l|ipnekikvdep|l|krytytk|tgnadfyi|t|ptkneevqavvykayqneipvtyl|ngnsiii|reggir|  
givi|s|l|s|l|dhi|dv|sddai|  
iagsgaai|l|dvsr|vardya|l|tg|l|efacgi|pgsiggavymnagayggevkd|c|idya|l|cvneqgs|l|lik|l|t|tke|l|eldyrnsi|  
iqeh|l|vv|lea|ft|l|ap|gk|  
mteiqakmdd|l|terreskq|l|leypscgsvfqrppghfagk|l|i|qdsn|l|qghriggvevstkhagfmv|v|dn|g|t|at|dyen|l|i|  
hyvqktvkekf|g|iel|nrev|  
ri|gehpkes|  
>sp|A7WZT2|ENO\_STAA1  
mpi|l|it|dvyarev|l|dsrgnptvevev|l|tesgafgra|l|vpsgastgeheave|l|rdgk|sryl|gkgv|tkavenvnei|l|i|apei|i|  
egefsv|l|dqvs|l|dkmmi|a|l|  
dgt|pnkg|l|ganai|l|gvs|l|avaraaad|l|l|gq|l|yky|l|ggfngkq|l|pvpmmni|vnggshsdapiaf|qefmil|pvgattfke|  
s|l|rwg|te|l|fhn|l|ksi|l|skr|  
g|l|etav|gdeg|g|fap|k|fegtedaveti|l|q|aieaagykpgeevf|l|g|fd|cassefyengvydyskfegehgakrtaaeqvdy|l|  
eqlvdkypi|l|i|t|iedg|mden|  
dwdgwk|l|q|l|terig|drv|l|vgdd|l|fv|tnte|l|lakgiengignsi|l|likv|nqigt|l|tet|fdaiemaqkagytavvshrsgete|  
dt|l|adi|avatnagg|l|ktg|  
s|l|s|rdriakynq|l|l|riede|l|fetakydgiks|fyn|l|dk|  
>sp|A7X0C7|LIPA\_STAA1  
matkneeilr|kpdw|l|kik|l|ntneny|tg|l|kkmmrekn|l|ntv|ceea|k|cpni|hecwgarrtatf|milgavctracr|fcavktg|  
l|pne|l|d|l|nepervaesve|l|  
mnlkhvvi|l|tavar|dd|l|rdagsnvyavtrkvrer|n|pfttie|l|lpsdmggdyda|l|et|l|masrpdil|nhnietvrr|l|tprvr|  
aratydr|l|lefl|rrs|kelq|  
pdiptkssimv|gl|getieeiyetmdd|l|randvdi|l|tigqyl|qpsrkh|l|kvqkytplefgk|l|rkvamdkgfk|hcqagplv|  
rssyhadeqvneaakekqr|  
qgeaq|l|ns|

Tsompanidou\_et\_al\_Supplemental\_FASTA\_File

>sp|A7X0T9|ATL\_STAA1  
mlgvnrmakkfnyklpsmvaltlvgsavtahqvqaettqdqttknvldsnkvkatteqakaevknptqnisgtqvyyq  
dpai vqpktannktgnaqv  
sqkvdtavngdtrangsattntqpvakststtapktntvtnagyslvddeednsehqipeliksaakpaaleatqyk  
aaapkakteatpkvttfsa  
saqprsvaatpktslpkykpqvnsindyirknnlkapkieedytsyfkyayrngvrpegivvhdtandrstingeis  
ymknyqnafvhafvdgdr  
iietaptdylswgvavgnpfrfinveivhthdyasfarsmnyadyaatqlqyyglkpdsaeydngntvwthyavskylg  
gtdhadphgylrshnysyd  
qlydlinekylikmgkvapwgtqftttpttspkpttspkpstgkltvaanngvaqikptnsglyttvydktgkatnevqk  
tfavsktatlgkqkfylyvq  
dynsgnkfgwvkegdvvyntakspvvnqsysiksgtklytvpwgtskqvagsvsgsgnqtfkaskqqqidksiylygsv  
ngksgwvskaylvd takpt  
ptpipkptptttnkltvsslngvaqinaknnglfttvydktgkptkevqktfavtkeaslggnkfylykdynsptligw  
vkqgdviynnakspsvnmq  
tytvkpgtklysvpwtgtykqegavsgtgnqtfkatkqqqidksiylyfgtvngksgwvskaylavpaapkkavaqpkta  
kayvtkpkpttqtvsikiaq  
vkpntgirasvyektakngakyadrtfyvtkerahgnetyvllnntshniplgwfnvkdlnvqnlgkevkttkyvtvk  
snnglsmvpwgtknqvil  
gniaqgtfnatkqvsvgkdvlygtinnrtgwnakdlaptavkpttsaakdynytyvikngngyyyvtpnsdtakys  
lkafneqpfavvkeqving  
qtwygklsngklawikstdlakeklykngtgmtnqvaqiqaglykqpvqrvpgkwt danfndvkhamdtkr laqpa  
lkyqflrldqpqnisisdi  
nqflkgkvlenqgaafnkaaomyginevylisshalletngtsglakgadvvnnkvvtnsntkyhvnfgiaaydndplr  
egikyakqagwdtvskai  
ggakfignsyvkagqntlykmrwnpahpgthqyatdvdwaninakiikgyydkigevgkyfdipqyk  
>sp|A7X149|ISDC\_STAA1  
mknilkvfnttilaliii atfsnsanaadsgtlnyevykyntndtsiandyfnkpakyikkngklyvqitvnhshwitg  
msieghkeniiskntakde  
rtsefevsklngkidgkidvyidekvngkpfkydhhyntykfngptdvaganapgkddknsasgsdkgsdgtttgqses  
nssnkdkvenpqt nagtpa  
yiyai pvaslalliaitl fvrkkskgnve  
>sp|A7X1E5|PYRR\_STAA1  
mseriimddaaigrvtriaheileynkgtdnlillgiktrgeylanriqdkihqieqqriptgtidityfrddiehms  
l ttkdaididtditdkvvi  
iiddvlytgrtvasldailnarpikiglaalvdrghre lpiradfvgniptskeetvsvyleemdqrnaviik  
>sp|A7X1F5|PYRF\_STAA1  
mkdlpialdfesekvngqldlfdeslfvkvgmelfyqegpqlineikerghdvlldklhdipntvgkameglaklnv  
dlvnvhaaggvkm mseaik  
glrkhnqhtkijavtqltsttedmlrheqniqtsieeavlnyaklanaagldgvvcsplesrmltek lgtstflkvtpgir  
pkgasqddqhrittppear  
qlgsthi vvrpitiqsdnpvesyhkikeswlv  
>sp|A7X1J9|RNC\_STAA1  
mskqkkseivnrfrkrfdtkmte l gftyqnidlyqqafshssfindfnmrldhnerleflgdavleltvsrylfdkhp  
lpegnl tkmrati vcepsl  
vifankiglnemillgkgeektggrtrpslisdafafigalyldqgldivwkfaekvifphveqnellgvvdfktqfqe  
yvhqknkgdvtynlikeeg  
pahhr lftsevilqgeaiaegkgkttkeseqraaksayqllkqik  
>sp|A7X1L0|TRMD\_STAA1  
mkidy ltlfpemfdgvl nhsimkraqennklqintvnrfdya inkhnqvddypygggmv l kpepvfnamedldvteqt  
rvilmcpqgepfshqkave  
lskadhivficghyegyderirthlvtdeismgdyvltggelpamtmdaivr lipgvlneqshqddsfsdgll efpqy  
trprefkgl tvpdvl lsgn  
hanidawrheqklirtynkrdliekyl tnedkqilerykiglkkg  
>sp|A7X1M6|TRMFO\_STAA1  
mtqtvnvi gaglaseaayqlaergikvnl iempvkqtpahhtdkfaelvcns lrgnal tngvgvlkeemrrlnsiii  
eaadkarvpagga lavdrh  
dfsgyitetlknhenitvineeinaipdgyt iiatgplttet laeivditgkdqlyfydaaapiiekesidmdkvyllks  
rydkgeaaylncpmtedef  
nrfydavleaeavpvnsefekeyfegcmpfevmaergrktllfgpmkpvgl edpktgkrpyavvqlrqddaagtlynivg  
fqthlkwgaqkevilkpig  
lenvd ivrygvmhrntfinspdvlnkeyelisqpn iqfagqmtgvegyvesaasglvaginlahkilgkgevvfpretmi  
gsmayyishaknnknfqpm  
nanfgllpsletrikdkkeryeaqanraldylenfkktl  
>sp|A7X1U8|MIAA\_STAA1  
mnknkpfivvvgptasgk telsielakringeiisgds mqvkyhmnigtaktvpeemdgi phhlidilnpddtfsayef  
kr laedlitd itnrgkvpi  
iaggtglyiqsliyneyledetvtpaqlsivkqklsalehldnqqldhylaqfdavsaienihpnrqrvlraieyylkktk

Tsompanidou\_et\_al\_Supplemental\_FASTA\_File

kllsnrkkvqgftenydtl  
llgiemsrktlysrinkrvdimldhglfrevqqlveqgyescqsmqaiigykelipvingqmiyedavndlkqhsrqyagr  
qmtwfkknkmsvhwldkenm  
slqmmldettqik  
>sp|A7X1Y2|KHSE\_STAA1  
msnvlletipastanlgvgfdsigmaIdkflhlsvketsgkweyifhddaskqlptdetnfiyhvaqqvaskysvdlpi  
lciemrsdiplarglgssa  
salvgaiyianyfgdiqlskhevqlateieghpdnvaptiyygliagfyndvsketsvahidipdvdivvtiptyelkt  
easrralpqlthseavks  
saisntmicalahnyelagklmqdgmepyrqhlaefdevktiasqhnayatvisgagptilifsrkensgelvrs  
nsqvvschselvdinisgv  
kerivyg  
>sp|A7X1Z1|GUAC\_STAA1  
mki fdyediqlipnkci vesrsecdttiqfgpkkfk l pvpanmqtmneklakwfaendyfyimhrfdeearipfikhm  
qns glfasisvkvkaefd  
fieklaqeklipeyitidiahghsdsvinmikhi knhipdsfviagnvgtpegvrelenagadatkvigigprvcitkik  
tgfgtgwqlaalnicaska  
arkplladggrthgdiaksi rfgasmvmigs lfaaheespgetvel dgkqykeyfgsasefqggehknvegkkmfvhek  
gslmdtlkemqqdlqssis  
yagkd lks lrtvdyvivrn si fngdrd  
>sp|A7X2F4|CCA\_STAA1  
mdks l feqarpileqiqdngfeayyvgsvrdivmgnihdidittsatpdeiesifsh tipvgkehgtinvv fndenye  
vttfraedyvdhrrpsgv  
tfvrdlyedlqrrdf tmai amdtayklydyfdgqqdinnrii rvtgiaeerfeda lrmirclrfqsqslfdiametfe  
amrtqmadikflsierivi  
eltklmrginveesfnh lks lkafnympyfeql dmnqinvtepidlelliaivsvkfdinysl kplkl snrqvkdingyi  
qimnalpsii tkeql kmfv  
ydydtnliknvmvaadv l kandi qgheplivnlqtidetl hrlpmhnrkdmmvnggv l mahlnaksgpw lkdvlrqieia  
ivtgkvsneete ilkwvdn  
hvki  
>sp|A7X2W2|SYG\_STAA1  
makdmti vs lakhr gfvfpgsdiygg l sntwdygp l gvelknnvkkawwkf itqspfnvgidaail mnpkvweasgh l  
nnfndpmi dnkdski ryra  
dkli edymqdvk gdenfi adgl s feqmkki iddegivcpvsktanwteir qfnl m fktfggvtedstneifl rpetaqgi  
fvnyknvqrsmrkkl pfgi  
ggigksfrneitpgnfi frtrefeqmeleffckpgeeie wqnywktfasdwlts lnmssenmrlrdhdedelshysnatt  
dieykpfgwgelwgiasr  
tdfdl rkhaehsgedfryhdpetnekyipycieps l gadrvt laflcdaydeegvegs kdartvl hfhpalapykaa ilp  
lskklsgaiki feqls k  
fsidfdesqsigkryrrqdeigt pycvtdfdsl ednqvtvrdrdsmeqvmpiseleaf l tektkf  
>sp|A7X2Y7|LEPA\_STAA1  
mdneqr lkrreni rnfisiahidhgk stladri lentksvetrdmqdql l dsmdlerergit ikl navrlkyeakdgnty  
tfhlidtpghdftyeivr  
slaacegailvvdaaggieaqtlanvylaldnelellpvinkid l paaepervkqeedmig l d qddvvasaksnigie  
eilekivevvpapgdgpea  
plkalifdseydpyrgvissirivdgvvkagdkir mmatgkefevtevgintpkqlpvdelvtvgdvgyiiasiknvdsr  
vgdtitlasrpaseplqgy  
kkmnpmyvcgl fpidnknynd l rea lek l qlndaslefepe ssqal gfyrtgfl gmlhmei i qerierefgieliatap  
sviyqcilrdgsevtvndp  
aqmpdrdki dki fepyvratmmv pndyvgavmelcqrkrqqfinmdyl ddirvni veyelp laevvdfddqlksntkgya  
sfdyefienkesnlvkmdi  
llngdkvdalsfivhrdfayergkalvek lktliprqqfevpvqaaigqkivartniksmgknvlakcyggdisrkrkl l  
ekqkagkakmkavgnveip  
qdaflav l kmde  
>sp|A7X2Z9|NADD\_STAA1  
mkkivlyggqfnpihtahmi vasevfhelqpdefyflpsfmsplkkhnnfidvqhr l tmiqmiidelgfgdicddeikrg  
ggsytydtikafkeqhkds  
elyfvigt dqynlekwyqiey l kemvtfvvnr dksqnvenamia iqiprvdisstmir qrvsegksiqvlvpksven  
yikgegl yeh  
>sp|A7X358|RUA\_STAA1  
myayvkgklthlypthvvvetagvyei qtpnsyrfqkhl dhev l irts livredaqllygfsseeekdmflsl ikvtgi  
gpkasalailatstpnevkr  
aienendtyl tkfpgigkktarqiv l dlkgkvkiteedsdsl l qvdatstvqdqfvqeam l alealgyskrelakvekt l  
nknkydsvdeavkag l qlv  
vs  
>sp|A7X3E5|THII\_STAA1  
mkdyhllvrygel l tlgksnrkkfvnql rnnvnks l klgdgvvkgkrdrmyielehadineityr l skifgiksispv l  
kvektieamsaaikfaqq

Tsompanidou\_et\_al\_Supplemental\_FASTA\_File

feenstfki dvkradknfpmdtyelqrelggvtl kqienvsnvkrpdheirvevrldaiymyeevvpqsgglpvgtggk  
tllmlsggidspvagmevm  
rrgytieaihfhspfpftsdakekvieltrilaervgpiklhivpftelqkqvnkvvhprytmstrmmrvadklvhq  
igalaivngenlgqvasqt  
lshmyainnvstpvlprrlltydkeeiiikskeigtffetsiqpfedcctiftpknpvtepnfekvvqyesvdfdeeminr  
avenietleitsdyktike  
qqtnglindfl  
>sp|A7X3I5|TRMB\_STAA1  
mrvrykpwaedyldhpeivdmegqhagemtebfdktpihieigsgmgqfittlaaqnphinyismereksivykvl dk  
vkemgltnlkiicndaie l  
neyfkdgevsriyl nfsdpwpknrhakrrl tyhtflalyqqilndegdlhfktdnrglfayslesmsqfgmyftkinlnl  
hqedgnsilteyekkfsd  
kgsriyrmeakfhsqk  
>sp|A7X3Q5|SPLF\_STAA1  
mnkniiiksiaalti tsvtgvgttmvegiqqtakaentvkqitntnvapysgvtwmgagtgvvgnhtiitnkhvtyhm  
kvgdeikahpngfynggg  
lykvtki vdygked iavvqveekstqpkgrkfkdfstskfniaseakenepisvigypnpgnklqmyestgkvlsvngn  
ivssdaiiqpgssgspln  
skheaigviyagnkpsgestrgfavyfspeikkfiadnldk  
>sp|A7X3U8|PRSA\_STAA1  
mkminkli vpvtasallgacgasatdskentlisskagdv tvadtmkkgkdqianasftemlnkiladkyknkvndkk  
ideqiekmqkqyggkdkfe  
kalqqggltadkykenlrtaayhkel lsdkiki sdeikedskkashilikvskksdkegl ddkeakqkaeeiqkevsk  
dpskfgeiakkesmdtgsa  
kkdge lgyvlgqtdkdfekal fklkdgevsevvkssfgyhi ikadkptdfnsekqslkek lvdqkvqknpkll tdaykd  
llkeydvdfkdrdiks vve  
dkilnpek l kqggaqggqsgmsq  
>sp|A7X435|PCRB\_STAA1  
mydikwrhifkl dpakhi sdddldaicmsqtdaimiggtddvtednvihlmskirryplplvleisniesvmpgdfyf  
vptvlnstdvafhngtll e  
alktyghsidfeevi fegyvvcnadskvakhtkantdl ttedleayaqmvnhmyrlpvmyieysgiygdvskvqavseh l  
tetqlfygggisseqate  
maiadtiivgdiiykdikka lktvkikessk  
>sp|A7X4L9|GCP\_STAA1  
mtkdililavetscdetsvsvikngrdil sntvlsqieshkrfggvpevasrhvegitttinealvdadvsmidai  
avteggpligalligvnaa  
kalafaydkplipvhiaghianhieep ltfplialivsgghtelvmkdhlsfevigetrddavgeaydkvartigln  
yppgpqvdrlaagedtys  
fprvwlkdsydfsfglksavinqlhnqrqknipieanvatsfqnsvvev ltfkaiqackeysvqrlivaggvasnkg  
lrgsladqckvndiq ltip  
spklctdnaami gvahslyqqgrfadlalnghsnidleaysae  
>sp|A7X4M5|ILVD\_STAA1  
mrdmikkgdhqaparsllhatgal ksptdmkpfvaicnsyidivpghvhlreladiakeaireagaipfefntigvdd  
giamghigmrys lpsreii  
adaaetvinahwfdgvfyipncdkitpgmi laamrtvnpaifcsggpmkaglsahgkaltlssmfeavgafkegsiskee  
fldmeqnacptcgs cagmf  
tansmnc lmevlglalpyngtalavsdqrremirqaafklvenikndl kprdivtreaidafaldmamggstntvlhtl  
aianea gidydlarinaia  
krtpylskiapssysmhdvheaggvpaiinelmkkdgtlhpdrivtvtgk lrennegkeiknfdvihpldapydaqgl  
silfgniapkgavikvggv  
dpsiktftgkaicfnshdeaveaidnrtvraghvvviryegpkgggmpemlaptssivgrglgkdvalitdgrfsgatr  
giavg hispeasggpia l  
iedgdeitid ltnrtlnvnqpedvlarres ltpfkakvtgylarytalvtsantggvmqvpenni  
>sp|A7X4N1|LEU1\_STAA1  
mshiqifdttlrdgeqtpgvnftfderlrialql ekwgdvieagfpasstgsfksvqai aqtltttavcglarckksd  
idavyeatkdaakpvvhvf  
iatspihle hklkmsqedv lasikehvtyakq lfdvvqfspdetrte lpfvlkcvqtavdagatvinipdtvgysyhe  
yahifktltesvtssneii  
ysahchddlgmavsnslaaieggarriegt vngigeragnaaleevalalyvrndhygaqta lnleetkktsdlisryag  
irvprnkai vgnafshes  
gihqdgvlkhretyeimtpqlvgvsttelplgklsgkhafsek lkalgynidkeaqid lfkqfkti adkkksvsdrdiha  
iiqgsehehqalyk letlq  
lgyvssglqsavvvvdkeghiyqdssigtgsivaiynavdri fketelidyrinsvtegt daqaevhvnlliegtvn  
gfgidhdi lqasckayvea  
hakfaaenvekvgn  
>sp|A7X4N7|SPRTL\_STAA1  
mnndklqrmvenlseekfgrtfrhcayfnkr lrttgryllkshdieinpkqyehygedavvkiilhelchylhiagkg  
yqhkdqdfkr lsqvgapr

Tsompanidou\_et\_al\_Supplemental\_FASTA\_File

fcnsiesyqgranyeyctkchakyrirkvdtmrncghcngklrmkrqlk  
>sp|A7X4S9|THIM\_STAA1  
mnylnkiriennplcticytndvknftangllsigaspamseapeeaeefykvaqallinigtltaqneqdiiaiaqtane  
aglpivfdpvavgastyrk  
qfcklllksakvsvikgnaseilaiddatmkgtdsdanldavaiakkayaiyktaivitgkedvivqdkaivlang  
pllarvtgagcllggiag  
flfretediealieavsvfniaaeavaaenencggpgtfspllldtlyhlnettyqqririqeve  
>sp|A7X4T7|FABZ\_STAA1  
metifdynqikqiiphrrqpfllidkvveyeegqrcvaikqvsqneffqghfpeyavmpgvlitealaqtgavailnsee  
nkgkialfagidkcrfkrq  
vvpqdtlitleveitkikgpiqgnakatvdgqlacscltfaiqdvk  
>sp|A7X575|LACC\_STAA1  
miltltnpsvdisypltalclldvnrqvsvsktaggkglvtrvrlaqvgepvasgfiggelgqfiakkldhadikhaf  
ynikgetrnrciaihleggg  
teileqgpeidnqeaagfikhfeqlllekveavaisgslpkglnqdyyaqiercqngvsvildcsgatlqtvlenpykp  
tvikpniseyqlnqpld  
esleslkqavsqplfegiewiivslgaggaafakhnhtfyrvniptinvlnpvgsgdstvagitsailnhendhdllkan  
tlgmInaqeaqtgyvnl  
ydelnqievlev  
>sp|A7X5W0|IDI2\_STAA1  
msdfqreqrknehveiamaqsdamhsdfdkmrfvhhsipsinvndidltsqtpdlmaysiyinamtgsgewtkninel  
avvaretrlamavgsthaa  
lnrprmaetftiarkmnpemifsnvgadvpekaleavealleaqalqihvnsqelvmpegnrefvtwldniasivsr  
svpviikevgfgmskelmh  
dlqqigvkyvdvsgkggtfnvdienerankdmdylsswgqstveslletayqseisvfasgglrtpldaikslalgak  
atgmsrpflnqvenngiah  
tvayvesfiehmsimtmldaknidldtqkqivfspeimswieqrslnihrg  
>sp|A7X5Z9|FENR\_STAA1  
mkdvtiiggppsglyasfyaglrmdsvrldivqselggkmriypekiidwiggiaapkpcheilkdtikqglyfkpevhln  
ervvdirrkaerhfevete  
ageiytskaviiagaginpqkldvkgveryqltnlhvvsyrrfkdkdvlisgggntaldwahdiakiaksvtvyr  
kedvsgheamktlvtdlnv  
klcpktrikylvgnddethisevlehvesgdrhtvfkddviishgfdrcntllsetssklmhdcdrvkfgntttsip  
giyacgdivyhdakshlia  
safsdganaanlaktiypdanaegyvsshhevfkeantivnkhl  
>sp|A7X624|NREB\_STAA1  
minedsiqldtllkkyehsiekiyfaddngkiiamndaakdilseednysavanaichrcegytnaydvqsckdcfl  
mqvqatnfgvmfktkdqkv  
mpftatyqlidqdrghaftlnqvssqieqqeklhqqhmmrktisagenerkrisrelhdsviqemlnvdvqlrllkyqe  
dtkllledaeniyevakl  
iddirmsvelrpalddlgleaafksyfkqfeenygikiiytsnikntrfdsdietvyrvvqeilnalkyadvnein  
vgirqtgrhlvaevidagn  
gfdpsskpkgsqglngymneraelvsgsvnietkigegtnvtlnipi  
>sp|A7X669|BIOB\_STAA1  
mnlakrilqgeqltketvkiyedtnidtdllneayilrkyhfgkkvklmilmaksgicpencgycgqsrdikqkqry  
alipeeqidgkvahdnh  
igtycivmsgrgpdskvedhisntvrtiksghpqlkicacgltndeqakklsagvdrynhnintsenyhdnvtthsy  
kdrtdtielmkanispc  
gvicmgesnqdivdmafalkemdadsipinflhpikgkfgsmddltpmklrivalfrlinptkeiriaggrevnrs  
lqplalakaansifvgdyl  
tggqpnqldydminldgfeidydtcenkenkndvsran  
>sp|A7X6K5|F16PC\_STAA1  
mtqitekelkkylldltsqnfdtpeklateiinlesilelpgktehfvsdlhgeyefqhvlnrgsgnvrakindifker  
lstkelndltalvyypedk  
lklikdfqscqglvwyittiehlieleikycsskytrsklrkalpkqvyiieellyksneyqnkksyyetlnqvlel  
kqaddliiglaysvqrllv  
dhlhvvgdiydrqppdkimdtlinyhsldiqwgnhdvllwvayagskvclanllricarydnldiiedayginlrpllt  
laekyydadnpafkpkkrp  
dkherltqreesqitkihqaiamiqfkleipiikrrpnfemeerlvlekvnydtneitvygntypkdtcfqtinrnpa  
ellpeeevmnkllsfqg  
seklrrhmsflmrkgslylpyngnllihgciipvdengemesfeidghtysgqelldvfeyhvrksfdekentddlstdlv  
wylwtgkysslfkgkramtt  
feryfiadkashkeeknpyyhlredvnmvrkmlsdfglndegriinghtpvkeingedpikadgkmlvidggfskayqs  
ttgiagytllynsgmqlv  
ahqqfnakekilsegideliskrvvdkelqrkkirdtnigkelqaqidilkmlmhdryld  
>sp|A7X7A8|MNME\_STAA1  
mdltditsistpmegaigivrslgppqaveiadklykgkhlldvpshtinyghiidpeskevveevmvsvlrapktftr  
edieinchggiltinrvl



Tsompanidou\_et\_al\_Supplemental\_FASTA\_File

eltmygarmapgeftkrafIngridlsqaeavmdfirsktdraskvamniegrlsdlikkqrqsileilaqvevnid  
yeyddvedattefllseqs  
keikqeinrlltdgaqgkimreglstvivgkpnvgkssmlnlnliqdnkaivtevagtttrdvleeyvnvrsvplrlvdtag  
iretedivekigversrka  
lsqadlilfvlnnealtqedytlvevknedvivivnkmdleqnidinevkdmgdtpliqtsmlkqegideleiqid  
lffggevqndmtyvsnr  
hisllkqarqtiqdaidaesgvpmvmqidltrtweilgeigetasadeliqdfsqfclgk  
>sp|A8YY02|DCUP\_STAAT  
mvhknntiikmikgeetshtpvmrqaqrsqpeyrklikeyslfdithqpelcayvthlpvdyhtdaailykdimp  
lkpigvdveiksgigpvi  
npiktiqdvklsqidperdvpyvldtikllteeklnvpligftgapftlasymieggpskynftkammyrdeatwfa  
mnhlvdsvkyvtaqveag  
aeliqifdswwgalnvedyrryikphmirliisevkgkhdvpvifvgvashlinewndlpidvlgldwrtsinqaqqlgv  
tktlggnldpsillapwv  
ieerlkpildqgmengkhi fnlghgvfpevqpetlrkvsefvhtytqr  
>sp|A8YY80|GLYA\_STAAT  
msyitkqdkviaeaierefqrqnsnieliasenfseavmeaagsvltnkyaegypgrryyggcefvdvtesiaidra  
lfgaehvnpqphsgsqanm  
avylvalgmgtvlgmnlshghlthgapvnfsgkfynfveygvdkdterinydevrklalehkpkliavagasaysrtid  
fkkfkeiadevnaclmvd  
ahiaglavaaglhnpveyadvtttthktlrgprggmilckeeykkdidkti fpgiqggplehviaakavafgealennf  
ktyqqvkvknakvlaeli  
negfrivsggtdnhlvavdvkgsigltgkeaeetldsvgitcnkntipfdqekpftvtsgirigtpaattrgfdekafeev  
akiislalkskdeeklqq  
akervakltaeyplyq  
>sp|A8YYS0|MNMG\_STAAT  
mvqeydviigaghagveaglasarrgaktlmltinldniafmpcnpvsggpakgivvreidalggqmaktidkthiqmr  
mlntgkqpavralraqadk  
vlyqqemkrviideenlhimgmvdeliiednevkgvrtnigteylskaviittgtflrgeiilgmkyssgpnhlpsi  
tldnrlrelgfdivrftkg  
tpprvnsktidyskteiqgddvgrafs fetteyildqlpcwltytnaethkviddnhlhsamysgmikgtgprycpsie  
dkfvrfndkprhqlflepe  
grntnevyyqglstslpehvqrqmetipglekadmmragyaieydaivptqlwptletmiknlytagqingtsgyeea  
agglmaginaagkvlntg  
ekilsrsdayigvliddlvtkgtnepyrlltsraeyrlllrhdnadlrldmgyelgmiseeryarfnekrqqidaekr  
lsdirikpnehtqaiieqh  
ggsrlkdgilaidllrrpemydiilelleehqlnadveeqveiqtkyegyinksqqvekvkrmeekkipedldyski  
ds lateareklsevkplni  
aqasrisgvnpadisilliylegklqrvsd  
>sp|A8YYT1|HUTH\_STAAT  
mtlyldgetltiediksflqqqskieiddalervkksravverieneetvygittgfglfsdvridptqynelqvnli  
rshacglgepfskevalm  
mirlnlntllkghsgatlelvrqqlffineriipiipqgslgasgdlaplshlalaaligegklyrgeekdsddvireln  
rqplnlqakeglalingtq  
amtaggvisyieaedlgyqsewaaalthqslngiidayrhdvhavrnfqeqinvaarmrdwlegstlttrqseirvqday  
tlrcipqihgasfqvfnyv  
kqqlfemnaandnplifeanetfvissgnfhgqpiafaldhklkgvselanvserrlerlvnpqlngdlpaflspepg  
lqsgamimqyaaalsven  
ktlahpasvdsitssanqedhvsmttaarhgyqienarrvlaiecvialqaaelkgveglspktrrkydefrsivpsi  
thdrqfhkdieavaqylkq  
siyqttach  
>sp|A8YZ02|COPB\_STAAT  
mnhsnqmhdnhashdhshghahhgnfkvkffvslifaipiillspimgvnlpfqftfpgsewvvlilstilffyygk  
flsggkdeiatkpgmmtl  
valgisvayislyafymnffsatghtmdffwelatlilimllghwiemnavgnagdalkkmaellpnsaikvmdngqr  
eevkiisdimtddivekag  
esiptdgiivggqtsideslvtgeskkvqknqndnviggsingsgtiqkvvtavgedgylsqvmglvnqaqndkssael  
sdkvaglyfyfavsvgis  
fiwvmlinqndvdfalerlvtlviacphalglaiplvtarstsigahngliiknresveiaqhidymmdktgtltegnf  
svnhyesfkndlsndtils  
lfaslesqshplaisivdfaksknvsftnpqdvnnipgvglegli dnkykitnvsyldkhklnyddlftklaqqgns  
isyliedqqvigmiaggdq  
ikesskqmvadllsrnltipvmgtgdnevahavakelgisdvhaqlmpedkesiikdyqsdgnkvmmvgdginapslir  
adigiaiagtdvavdsgd  
iilvksnpsdiihflltlnntmrkmvqnlwwgagynivavplaagilafiglilspaigailmslstiivainaftlklk  
>sp|A8YZD9|NANA\_STAAT  
mndklkglyaaillvpfdengqvneqglkqiaqnaieteeidglyvngssgenflnteqqkqvfkvakeavgdkvkliaq  
vgsldlneaieigkyatel

Tsompanidou\_et\_al\_Supplemental\_FASTA\_File

gydalsavtpfyypftfeeirdyfdieatqnmniyaipdlgtgnisieqfselfnhekivgvkytapnfflkerirk  
afpdklilsgfdemlvqat  
isgvdgaigstynvngrrarkifdlarqqqiqaayqlqhdnsdi etvlsmglyptlkeilrhrigidaglpkrpfpkpfne  
ahrqtdqliakyd1  
>sp|A8Z056|MNHD1\_STAAT  
miesnmlvltlvipvitailvfigkrpiikryvalgg11t1vaaiinlanvvkhgpirvelgswkapysivfvldifs  
alliiitsiitaivilysy  
qtigiereryyyyfsvlfm1igiigafittgdi fnlfvyfevflmssyfl1vigstkiqlqetikyvlvnnvsssffvmgv  
ailysvvgtl1nladisnkl  
anlsahdsglvnivfilfi fvfatkgavfpmfvlwpsayyappipiaffgalltkvgvyaiart1slffsdnvsfshyv  
ilflalltiifgcvgavay  
anikkii1ynvmiavgvilvgvamtesgmigaiyytlhdm1vklalfl1ligimikitgtadlrqfgglikrypvlgwsf  
fiaalslagipp1sgfygk  
ffivqstfergfylsgv1l1sslv1ysviriflqgffgqpkgydlnnkvdvlyl1tiaivavvitvlygl1sadylypm  
vkagaetfynpstyvkav1  
ggk  
>sp|A8Z0A3|MECA\_STAAT  
mriervdttvk1fitysdieargfsred1wtnrkrgeeffwsmmdeineedfvvegplwiqvhafekgvevtiskskn  
edmmnmsdddatdqfdeqv  
qe1laqt1legedqlee1feqrtkekeaqgskrqkssarkntrtiivkfn1edvinyayhsnpit1tefed1lymvdgtyy  
yavyfdshvdqevindsys  
q1lefayptdrtevy1ndyakiimshnvtaqvrryfpette  
>sp|A8Z0K3|LDH1\_STAAT  
mnkfkgnkvv1ingavgssyafslvnqsi vdelviid1dtekvrqdvmd1khatpysptt1rvkageysdchdad1vvi  
cagaaqkpgetr1d1vskn  
1kifksivgevmskfdgi flvatnpvdi layatkwfsglpkervigsgtildsarfr111seafdvaprsvdaqi1geh  
gdtelpvshaniaggp1k  
t1leqrpegkaqieqi fvtqtrdaaydi iqakgatyygvamglariteaifredav1tvsal1legeyeeedvyigvpavi  
nrngi1rvveip1ndeeqs  
kfahsakt1kdimaeaeelk  
>sp|A8Z0N3|RBSD\_STAAT  
mksai1nehiskaiatighfd11tindagmpipndhrrid1avtkn1prfidvlatvleemeiqkiylaeieikehnptq  
1qqikqlisseieii1fiph  
eemksnlahp1nkgnirtgettpysnialesnvtf  
>sp|A8Z145|MNHB2\_STAAT  
mkendv1rtvtklv1f11tfgfyvffaghnppgggfigg1ifssafilmlafnveevles1pidfrilmiigalvss  
itai1pmffgkpf1sqyet  
twilpi1gqihvst11felgil1svvgv1vtvml1slsggrs  
>sp|A8Z182|GRAS\_STAAT  
mn1kwvayflksrmnwi fwi1flnflm1gis1idydfpids1fyivs1n1sl1tmi111tyfkevlykxhfdkdeiee  
ikhkd1aetp1qrhtvdy1  
yrqisahkekvveqq1qlnmheqtitefvhdiktptv1tamk11idqeknqerkqallye1wrs1nsm1dtqlyitr1lesqrk  
dmyfdyvs1krmvideiq1  
trhisqvkig1fdvdfkvddyvytdikwcrmi1rq1lsnalkysenfnieigte1ndqhs1yikdygrgiskdkdmprif  
ergftstanrnettssgm1  
ly1vnsvkdg1gih1qvtstvgkgtt1vri1f1p1qneivermsevtn1sf  
>sp|A8Z1Q5|Y1059\_STAAT  
mn1iprts1vvy1khmkherqi rkyghivhsnrdrkfvimvneqdv1dqv1hklmqlkyvrhidgspykylkkyekeh  
e1yn  
>sp|A8Z1R9|SYFA\_STAAT  
mseqqtmse1kqqa1vdineandera1qevkvky1gkkgsvglmklm1kd1pnedkpa1fgqkvne1rqt1qne1lderqqm  
1vkek1nkq1laetidv1  
pgrhie1gskhpl1trtieeied1fl1gl1gyeivngyeveqdhyne1n1pkshpardmqdsfyitde111rthtspvqar  
tmesrhgqgpvki1icpgkv  
yrrdsdathshqftqieg1lvvdknvkmsd1kgt1el1akk1fgadreir1rpsyf1ftepsvevdvscfkckgkcnvc  
khtgwie1lgagmvhpnv1  
emagf1dsseysg1afgmgpdriam1kygied1rhfy1ndvr1fdqfkavedrgdm  
>sp|A8Z219|SBCC\_STAAT  
mkp1h1kl1nnfgp1f1kee1dfskidne1fl1sgktgsgktmi1fdamtya1fgkasteqreend1rshfadgkqpm1svtf  
efq1nhriykv1hrqgpyik  
egnttktnak1fdv1femvdgkye1reskvi1sgtqfi1e1lgvnadq1frq1fil1pqqefkrfl1snsrekqgilrt1fdsek  
feairei1keevk1kekaq1  
enryqqid1llwgeies1fddd1nkg11levatqqid1klienip1lqarskeilasvnesketaikefeiekk1tleni1kd  
ninq1nknki1dfv1q1keqq  
peiegieak1kl1qd1tn11nyienreki1etkianskkdi1sktnki1n1dcdkrid1kekkm1eengd1ieski1sfidk  
trv1fnd1inky1qgsy1nie  
r1rtegeq1lgde1nd1k1g1etvedsignnqsdyeki1e1nntit1ninneini1kenekakae1dk1l1gskqelenqine  
etsi1kn1eik1drydtk1

Tsompanidou\_et\_al\_Supplemental\_FASTA\_File

1d1ndkesfiseiksavniqdcpcigneiqlghhidfdisi akrqneikeieanihaiksniavhseikfvneki sni  
niktqsdfslevlnkr11e  
nena1nnqrd1nkfi eqmkeekdn1tlqihnkqlrlnknese1klcrdlitefetlskynnitnfevdykkyvqdvnhq  
elskeiedklmq1sqrkli  
eqnnlnhyenqletyndle1neqsiememsrln1tdndideiiawrgeqe1eqkrdytkkryhefemeiarles1tk  
dke11dsdk1kdeyelkkq  
kmnt1ideysavhyqcqnn1nktqsi vshinylnqelkdqqeifqlaeivsgknnkn1tlenfvliyyldqiaaqan1rl  
atmsdnryqlirreavshg  
1sgleidvfd1hsnksrhiss1sggetfqsslalalglseivqqsggislesifidegfgtldqetletaldt11n1ks  
tgrmvgiishvselknrip  
1vlevksdqyqsstrfkrn  
>sp|A8Z223|PLSY\_STAAT  
mmiivm111sy1igafpsgfvigklffkkdirqfgsgntgatnsfrvlgrpagflvtfldifkgfityvffplwlqvhadg  
pistfftnqlivglfailg  
hvyppylkfqqgkavatsagvvlgnp11111laiiffivlki kfyvs lasivaaiccvigsliiqdyillvvsflvsii  
liihrsnari frgeepk  
ikwm  
>sp|A8Z242|TRPC\_STAAT  
mtilseivkyqsl1qngyyqdk1nt1ksvkiqnkksfinaiekepklaiiaeikskstpvnd1perd1sqqisdydqy  
anavsi1tdekyfggsfer  
1qalttktt1pvlckdfiidplqidvakqagasmi11ivni1sdlkqldlynyaisq1lev1vevhdrheleraykvna  
1igvnnrd1krfvtnveht  
ntilenkktnhyyisesgihdasdvrki1hsgidgl1igealmrcdn1seflpqlkmqkvks  
>sp|A8Z2R6|PUTP\_STAAT  
mltmgtalsqqvdanwqyimiavyflilivigfygykqatgn1seym1ggrsigpyital sagasdmmsgwmimglpqsv  
ystgl1samwiti1gl1gay  
inyfvvaprlrvytelagdait1pddffknrlndknnv1kiisgliivvfftythsgfvsggklfesafgldyhfglilv  
afivifytffggylavsit  
dffqgvim1iamvmvipvamnn1ngwgtfhdvaamkptn1n1fkg1sfigiis1fswglgyfgqphiiirfmsikshkm1  
pkarr1giswmavgl1gav  
avg1tg1afvpayhik1edpet1fivmsqvl fhp1vggf11aa1laaimstissq11vtsss1tedfyklirgeekakth  
qkefvmigr1sv1vvaiva  
iaianpndti1n1vgnawagfgasfsp1vl1falywkg1tragavsgmvsгалvviwawikplahineifglyeiipg  
fivsvivtyvvs1tkkpg  
afvetd1nkvrdivrek  
>sp|A8Z2S0|PCRB\_STAAT  
mydikkrhifk1dpakhisddd1daicmsqtdaimiggtddvtednvihlmsrvrryp1plvleisniesvmpgdfdyf  
vptv1nstdvvhngt11e  
alktyghsidfeevi fegyvvcnadskmakhtkantd1tted1eayaqmvnhmyrlpvmyieysgiygdvskvqavseh1  
tetq1fygggisseqgate  
maiadti1vgdi1ykdi kka1ktvkikessk  
>sp|A8Z324|RS9\_STAAT  
mtlaqveyrgtgrrknsvarvrlvpgegntvnnrdvrey1pfes1il1dnqpfdv tetknydv1vnhgggftgqaqa  
irhg1aral1eadpeyrsg  
1krag11trdprmkerkkpg1kaarrspqfskr  
>sp|A8Z338|RL15\_STAAT  
mk1he1kpaegsrkernrvgrvatgngktsgrghkgqkarsgggvrpgfeggqlplfr1pkrgftnirkeyaivn1d  
q1nkfedgtevt1pallves  
gvkneksgiki1ngsldkkl1tvkahkfsasaaeaidakgahevi  
>sp|A8Z340|RS5\_STAAT  
marreetkefeervvtinrvakvvkggrrfrftalvvgdknrgvfgtgkaqevpeaikkaveaakkd1vvvprvegt  
tphtitgrygsgsvfmkpa  
apgtviaggpvra1lelagitdi1skslgsntpinmvratidglqn1knaedvak1rgktveelyn  
>sp|A8Z372|MOAC\_STAAT  
mtefthinqqghakmvdvsdkqitkr tavahssitvneti1fkqisntntkgnv1ntaqiagimaakntstlipmchplp  
1tgidvhfswdetnaplyt  
1niqtvtstgktgvemeal1taasatal1tydmtkavdkgmii getylesksggksgdfqrqsnq  
>sp|A8Z3F8|COPA\_STAAT  
mantkktt1d1tgmtcaacsnr1ekkl1nkl1ddvnaqvn1ttekatvey npdqhdvqefintiqlhgygvavetvelditg  
mtcaacs1riekvl1nkmdg  
vqnatv1tteqakvdyypeetdadklvtriqlgydasikdnkdqtsrkaealqhklikliisav1slpl1mlmfvh1  
fnmhipalftnpwfqfi1a  
tpvqfi1igwqfyvgaykn1rngganmdvlvavgt saayfysiyemvrw1ngsttqphlyfetsavl1tl1lfgkyleara  
ksqttnal1gells1qakea  
ri1kdgnevmip1nev hvgd1livkpgekipvdgki1kgmtaidesm1tgesipveknvddtvigstmknkgtitmtatk  
vggd1alani1kvveeaqs  
skapiqr1adi1sgyfvv1vgial1t1fiw1t1vtpgtfepalvasisv1viacpca1glatptsimvgtgraaengil  
fkggefverthqidt1vl

Tsompanidou\_et\_al\_Supplemental\_FASTA\_File

ktgtitngrpvvtdyhgndqtlqlataekdsehplaeavnyakekqliltetttfkavpghgieatidhhyilvgnrk  
lmadndislpkhisddlth  
yerdgktamliavnylstgiavadvkdhakdaikqlhdmgievamltgdnkntaqaiakqvgidvtiadiilpeekaaq  
iaklqqgkkvamvgdgvn  
dapa1vkadigiaigtgveaieaaditilggdlmlipkaiyaskatirnrqnlfwafgyniagipiaalgllapwvag  
aama1ssvsvtnalrkk  
mrleprrkda  
>sp|A8Z3J8|PANC\_STAAT  
mtkliittvkemqhi vkaakrsgttigfiptmga1hdghltmvresvstnditivsvfvnplqfgpnedfdayprqidkd1  
elvsevgadivfhpavedm  
ypgelgidvkvgladvlegakrpgfdgvvtvvnklfnivmpdyayfgkkdaqqalaiveqmvkdfnhaveiigidivre  
adglakssrnvylteqerq  
eavhlskslllaqalyqddgerqskviidrvteyleshisgrieevavysypqlveqheitgrifislavkfskarlidni  
igae  
>sp|A8Z3N3|LSPA\_STAAT  
mhkkyfigtsilivfvvifdqvtkyiattmkigdsfevipflnitshrnngaawgilsgkmtffffiitiialvy  
ffikdaqnlfmqvaisll  
fagalgnfidritgevvdfidtnifgydfpifniadsslitgiviliiiallkdt snkkekev  
>sp|A8Z3R4|PLSX\_STAAT  
mvlaidmmggdnadivleavqkavedfdkleiilfgdekkynlheriefrhcsekiemedepvraikrkkdssmvkm  
aeavksgeadgcvsagntg  
almsaglfi vgrikgvarpalvvtlptidgkgfvfldvganadakpehllqyaqlgdiyaqkirgidnpkisllnigtep  
akgnsltkksyellnhdhs  
lnfvgnieaktlmdgtdvvtgdgytgmvlknlegtaksigkmlkdtimsstknlagailkkdlaefakkmdyseegg  
svllglegtvvkahgssna  
kafysairqakiageqni vqtmketvgesne  
>sp|A8Z3S4|RNH2\_STAAT  
mtltikevtqlinavntieelenhecf1derkgvqnaiarrkalekeqalkekyvemtyfeneilkehpnaicgidev  
grgplagpvvacatilsn  
hnylglddskkvptkrlelnea1knevtafaygiataeeidefniykatqiamqraidglsvqpthllidamtldnalp  
qvslikgdarsvsiaaasi  
makvfrddymtqlskdypeygfeknagygkqhllaiddigimkehrksfepiksll  
>sp|A8Z414|EBH\_STAAT  
mnyrdkiqkfsirkyvtgftstviatlvlfgfntsqahaaetnqpasvvkqkqqsneqtenresqvqnsqnsqngqsls  
atheneqpni sqanlvdk  
vaqssttndeqpasqnvntkkdsataattqpdkeskhkqnesqsankngndnraahvenheanvvtasdsdngnvqhd  
rnelqaffdanyhdyrfid  
renadsgtfnyvkgifdkintlgsndpinnkdlqlaykeleqavalirtmpqrqtsrrsnriqtrsvesraaeprsvs  
dyqnanssyyvenandgsg  
ypvgtyinasskgapynlpttpwntlkasdskeialmtakqtgdgyqvwikfnkghaphqnmifwalpadqvpvgrtdf  
vtvnsdgtnvqwsghagag  
ankplqqmweygvndphrshdfkinnrsgqviydwptvhiysledlsrasdyfseagatpatkafgrqnfeyingqkpa  
spgvpkvytfiggdasyt  
isfktgqptvnlklyyaagraleynqlfmysqlyvestqdhqqrlngrlqvnrtyrigttkrvevsqgnvqtkkvl est  
nlnidfvddplsyvktps  
nkvlfgfysnnantnafrrpagaqqlneyqlsq1ftdqklqeaartrnpirlmigfdypdaygnsetlvpnltvlpei qhn  
ikffknddtqniaekpfsk  
qaghpfvyvagnqgnasvnl ggsvt siqplrinltsnenftdkdwqitgiprtlhienstnrpnnarernielvgnllp  
gdyfgtirfgrkeqlfeir  
vkphtptitttaeq1rgtalqkvpvni sgipldpsalvy1lvaptnqttnggseadqipsgytilatgtpdgvhntitirp  
qdyvvfippvgkqiravvy  
ynkvasnmsnavtilpddipptinnpvginakyrgdevnftmgvsdrhsgiknttittl pngwtsnltkadknngsls  
itgrvsmnqafnsditfkv  
satdvnnttndsqs khvsihvgkisedahpivlgn tekvvvnptavsndekqsi itafmnknqinrgylastdpvtvd  
nngvnt1hyrdgsstlda  
tnvmtiepvvkkpeyqt vnaaktatvtiakgqsfsigdikqyftl sngqipsgtftnitsdrtip taqevsqmnagtqly  
hitatnayhkdsedfyisl  
kiidvkqpegdqrvyrtstydlttdeiskvkqafinanrdvitlaegdisvntnpganvstitvinkgrl tksfasnl  
anmnflrwnfpqdyvtv  
tnakianrptdgg1swsddhksli yrydatlgtqittndil tmlkattvpgl rnnitgneksqaeaggrpnfrttgysq  
snattdgqrqftl ngqviq  
vldiinpsngyggqpvtnsntranhsnstvvvnepaangagaftidhvksnsthnasdavykaqlyltpygpkyveh  
lnqntgnttdainiyfvps  
dlvntp1svgnytnhqvfsgetfntitandnfgvqsvtvpnts qitgtvdnnhqhvsatapnvtsatnktinllatdts  
gntattsfnvtvklrky  
rvgtssaanpvriani snnatvsqadqtti inslfttetvprnsyarasaneitsktvsnvsrtgnnanvtvtvyqdg  
tstvtvpvkhvipeivah  
shyvtvqqqdfpangssasdyfk1sngsdi adati twvsqgapnkdntrigeditvtahilidgettpitktatykvvrt

Tsompanidou\_et\_al\_Supplemental\_FASTA\_File

vpkhvfetargvlypgvsvd  
mydakqyvkpvnnswnaqhmnfqfvgtygpnkdvvgistrli rvtydnrqteditilskvkpdpnidansvtykagl  
tnqei kvnnvlnnssvklf  
kadntp lnvtni thgsgfssvvtvsda l pnggikakssi smnnvtyttqdehgqvvtvtrnesvdsndsattvtvtpqlqa  
ttegavfikggdgdffghv  
erfi qnpph gatvawhds pdtwkn tvgnthktavvt l pngqgtr nvevpvkypvanakapsrdvkgqnl tngtdamnyi  
tfdpntntngi taawanrq  
qpnnqqagvqhl nvdvtypgi saakrvpvtvnyqfefpqttytttvggt lasgtqasgyahmqnatg l ptdgftykwnr  
dtgtndanwsamnpnva  
kvvnakydvi yngh tfats l pakfvvkdvq pakptvtetaagaiti apganqtvnthagnvttiyadkl vikrngnvttf  
trrntspwvkeasaatva  
gi agtngi tvaagtfnpadti qvvatqgsgetvsdeqrsddftv vapqpnqattkiwqng hiditpnnpsgh l inptqa  
mdia ytekvnggaehskti  
nvvr gqnnqwti ankpdvvt l daqtgkvtfnantikpnssititpkagtghsvssnpst l tapaahvntteivkdygsn  
vtaaeinnavqvankrtat  
ikngtampn laggsttipvtvtyndgsteevqesiftkadkrelitaknh l ddpvstegkkpgtitqynn amhnaqqq  
intakteaqqvinneratp  
qqvsdal tkvraaqtkidqakal l qnkednsq l vtsknl qssvnqvpstagmtqqsidnynakkreaete itaaqrvid  
ngdataqqi sdekhrvdna  
l talnqakhdl tadthaleqavqql nrtg tttgkkpasitaynnsiral qsd l tsaknsanai i qkpir tvqevqsaltn  
vnr vner l tqainql vpla  
dn sal ktaktkl deeinks vtt dgmtqssi qayenakragqtestnaqnv inngdatdqqiaaektkveekynsl kqai a  
gltpdlaplqtaktqlnd  
idqptsttgmtsasiaafnek l saartki qeidr vlashpdvati rqnvtanaaksa l dqarng l tvdkap lenaknql  
qhsidqtsttgmtqdsin  
aynak l taarnkiqqinqv l agsptveqintntstanqaksd l dharqal tpdkap l qtaktql eqsinqptdttgmtta  
sl naynql qaarkl tei  
ngv l ngnptvqn indkvteanqakdq l ntarqgl t l drqpal t l hgasn l nqaqqnftqqinaaqnhaaletiksnit  
al n tamtk l kdsvadnti  
ksdqnytdatpankqaydnavnakgvi gettnptmdvntvnqaasvkstkda l dgqnl qrakteatnait hasdl nq  
aqkna l tqvnsaqnvqav  
ndi kqtts l tamtg l krgvanhnqvvsdnyvnadtnkkndynnaynhandi ingnaqhpvi tpsdvna l snvtske  
hal ngeak l naakqea nta  
lgh l nn l nnaqrqn l qsqingahqi davnti kqnatn l nsamgn l rqavadkdqvkrtedyadadtakqaynsavssae  
ti inqttnptmsvddvna  
tsavtsnkna l ngyek l agsktdaaraida l ph l nnaqkadvkski naasni agvntvkqqgtd l n tamgn l qga indeq  
t l n sqnyqdatpskktay  
tnavqaakdi l nksngqktdkqvteamnqvnsakn l dgtr l l dqakqtakq l nmth l ttaqktn l tnqin sgttva  
gvqtvqsnant l dqamnt l  
rqsiankdatkasedyvdanndkqtaynnavaaeti inansnpempst itqkaeqvnskta l ngden l aaakqnakt  
yl n l tsi tdaqknl isq  
i tsatr vsgvdtvkqnaql dqamas l qngi nnesqvkssekyrdadtnkqqeydnaitaaka i l nkstgpntaqnavea  
al qrvnna kdal ngdak l i  
aaqnaakqh l gtl thi ttaqrnd l tnqi sqatn l agvesvkqnans l dgamgn l qta indksgt l asqnl l dadeqkrna  
ynqavsaaeti l nkqtgpn  
taktaveqal nrvnna khal ngtqn l nnaqaa ita ingasd l nqkqkda l kaqangaqrvsnaqdvqhnate l n tamgt  
l khai adktn l asskyvn  
adstkqayttkvtnaehi i sgtptvtt psevtaaanqvnsakqel ngder l reakqnanta ida l tq l ntpqkaki ke  
qvgqan r ledvqvvtngq  
al n namkgl rdsianettv ktsqnytdaspnnqstynsavsnakgi inqtnptmdtsaitqattqvnnakng l ngaen l  
rnaqntakqn l n l sh l n  
nqksa i ssqi draghvsevtatkaate l n tqmgn l eqa i hdqntvkvsvkftdadkkrdaytnavsraea i l nktqga  
ntskqdveaai qnvssakn  
al ngdqvntaknaakna l nn l tsinnaqkrdl ttkidqattvagveavsntstql n taman l qngindktn l asenyh  
dadsdkktaytqvtnaen  
i l nksngsn l dktavena l sqvanakga l ngnhn l eqaksnantting l qh l ttaqkdk l kqqvqqaqnvagvdtvkssa  
n l ngamgt l rnsiqdnta  
tkngqny l daternktnynnavdsangvi natsnpnmdana inqiatqvtstkna l dgthn l tqakqtatnaidgatn l n  
kaqkda l kaqvtsaqrvan  
vtsiqqtane l n tamgql qhg i ddenatkqtqkyrdaeqskktaydqavaaaka i l nkqtgsnsdkaavdra l qqvtsk  
dal ngdak l aeakaaakqn  
l gtl n h i tnaqrtd l eqq i nqattvdgvntvktnant l dgamns l qgsindkdat l rnqny l dadeskrnaytqavtaae  
gi l nkqtggntskadvna  
l navtrakaal ngadn l rnaktsatntidgl p n l tq l qkdn l khqveqaqnvagvngvkdkgnt l n tamga l rtsiqndn  
ttktsqny l dasdsnkny  
ntavnnangvi natnnpnmdana ingmanqvnttkaal ngaqn l aqaktatntinna h l nqkqkda l ktqvnaqrvs  
dannvghtate l nsamta l  
kaai adkertkasgnyvnadqekrqaydskvtnaeni i sgtpnat l tvndvnsaasqvnaakta l ngdnn l rvakehann

tidglaqlnnaqkakilkeq  
vqsattldgvqtkvknssqtlntamkglrdsianeatikagqnytdaspnnrneydsavtaakaiinqtsnptmepntitq  
vtsqvttkeqalngarnla  
qakttaknnlnnlsinnaqkdaletrsidgattvagvnetakateInnamhslnqngindetqtkqtqkyldaepsksa  
ydaqvnaakailtkasqgn  
vdkaaveqalqvnstktalngdaklneakaaakqtlgtlthinnaqrtaIdneitqatnvegvtvkakaqqldgamgq  
letsirdkdtllqsqnyqd  
addakrtaysqavnnaatlnktaggntpkadveramqavtqantaIngiqnldrakqaantaitnasdlnkqkealka  
qytsagrsvsaangvehtat  
elntamtaIkraiadkaetkasgnyvnadankrqaydekvtaaenivsgtptptltpadvtnaatqvtnaktqlngnhnl  
evakqnantaidgltslng  
pqkaklkeqvggattlprvqtvrdnaqtlnamkglrdsianeatikagqnytdasqkqtdynsavtaakaiigqttsp  
smnaqeinqakdqvtakqq  
alnggenlrraqtakqhlnglsltdaqkdavkrqiegathvnevtqaqnadaInntamtnlnkngiqdqntikqgvnft  
dadeakrnaytnavtqaeq  
ilnkaqgpntskdgvetaIenvqrakneIngnqvnanakttaknalnnltsinnaqkealksqiegattvagvqvstta  
selntamsnlqngindeaa  
tkaaqkytdadrekqtayndavtaaktllktagssndnkaaveqalqrvntaktaIngderlneakntakqqvatmshlt  
daqkanltsqiesgttvag  
vqgiqanagtlldqamnlrqsiasdatkssedyqdanadlnayndavtnaegiiisatnnpempndtinqkasqvnsak  
salngdeklaaakqtaksd  
igrldlnnaqrtaanaevdqapnlaavtaaknkatslnamgnlkhalaeakdntrsvnytdadqpkqqaydtavtqae  
aitnangsnanetqvqaa  
nqlnqakndlngdnkvaqakesakralasyslnnaqstaaIsqIdnattvagvtaaqntanelntamgqlqngindqnt  
vkqqvntfdadqgkdayt  
navtnaqqilndkaggnmtkaqveaalnqvttaknalngdanvrqaksdakanlgtlthlnnaqkqdltsqiegattvng  
vngvktkaqldgamgrlq  
saiankdqtkasenyidaptkktafdnaItqaesylnkdhgankdkqaveqaiqsvtstenaIngdanlqrakteaiqa  
idnlthlntpktaIkqqv  
naaqrvsgvtdlknatslnnamdqlkqaiadhdtivasgnytnaspedkqgaytdaynaaknivngspvItnaadvtaa  
tqrvnaaetglngdtnlat  
akqqakdalrqmthlsdaqkqsitgqidsatqvtgvqsvkdnatlnamnlrnsiankddvkasqpyvdadrdkqnay  
ntavtnaeniinatsqptl  
dpsavtqaanqvstnktaIngaqnlankqettaninqlshlnnaqkqdlntqvtnapnistvnqvktkaeqldqamerl  
ingiqdkdqvkqsvnftda  
dpekqtaynnavtaaeniinqangtnanqsqveaalstvtttkqalngdrkvtdaknnanqtlstldnlnnaqkgavtgn  
inqahtvaevtqaiqtage  
lnamgnlknslndkdtllgsqnfadadpekknayneavhnaeniInkstgtnvpkdqveaamnqvnatkaalngtqnle  
kakqhantaIdglshltna  
qkealkqlvqqsttvaeeagqneqkannvdaamdklrqsIadnattkqngnytdasqkdaynavttaqgiidqtspt  
ldptvinqaagqvsttkna  
Ingnenleaaqqasqslsldnlnnaqkqvtvdqingahtvdeanqikqnaqnlntamgnlkqaiadkdatkatvnftd  
adqakqqayntavtnaeni  
iskanggnatqaeveqaiqkvnaakqalngnanvqhakdeatalinsndlnqaqkdaIkqqvqnavttvagvnnvkqtaq  
elnnamtqlkqgiadkeqt  
kadgnfvnadpdkqnaynqavakaealisatpdivvtpseitaalnkvtqakndlngntnlatakqnvqhaidqlpnlng  
aqrdeyskqitqatlvpnv  
naiqqaattlndamtqlkqgiankaqikgsenyhdadtdkqtaydnvtaekaeellkqttntmpdpntiqqaltkvndtnq  
alngnqkladakqdkattl  
gtldhlnndaqkqalvtqveqapdiatvnnvkqnaqnlntamtnlnnalqdktetlnsinftdadqakdaytnavshaeg  
ilskangsnasqteveqam  
qrvneakqalngndvqrakdaakqvItandlnqaqkdaIkqqvdaaqtvanvntikqtaqdlngamtqlkqgiadkq  
tkangnfvnadtdkqnayn  
navahaeqisgtpnanvdpqqvaqalqqvnqakgdlngnhnlqvakdnantaIdqlpnlngppktaIkdvshaelvtg  
vnaikqnadalnnamgtlk  
qqiqansqvpqsvdftqadqdkqqaynnaanqaqqiangiptpvltptvtqavttmnqakdaIngdeklaqakqeaIn  
ldtldlnqpprdalrnqi  
nqagaLatveqtkqnaqvnntamsnlkqgiankdtkasenyhdadtdkqtaytnavsaqegiiinqttntpInpdeitra  
ltqvtdaknglIngeaklat  
ekqnakdavsgmthlnndaqkqalngqiddspeiatvnqvkqtatsldqamdqlsqaindkaqtladgnylnadpdkqnay  
kqavakaealInkqsgtne  
vqaqvesitnevnaakqalngndnlanakqqakqqlanlthlnndaqkqsfesqitqaplvtdvttinqkaqtlldhameIl  
rnsvadnqttlasedyha  
taqrqndynqavtaanniinqtsptmnpddvngattqvntkvaldgdenlaaakqqannrldqldhlnnaqkqqlsq  
itqssdiaavnghkqtaes  
lnamgnlinaIadhqaveqrnfinadtdkqtayntavneaaaminqkqgqnanqteveqaitkvqttlqalngdhnlq  
vaktnatqaidaltslnp  
qktaIkdvqtaatlvtavhqi eqnantlnqamhglrqsIqdnaatkanskyinedqpeqqnydqavqaanniineqtatl

Tsompanidou\_et\_al\_Supplemental\_FASTA\_File

dnnainqaattvnttkaal  
hgdvklqndkdhakqtvsqalahlnnaqkhmedtlidsettrtavkqdlteaqaIdqlmdalqqsiaadkdatrassayvna  
epnkkqsyeavqnaesi  
aglnnptinkgnvssatqavissknaIdgverlaqdkqtagnslnhldqltpaqqqalennqinnattrgevaqklteaqa  
lnqamealrnsiqdqqqte  
agskfinedkpkdayqaavqnakdlinqtnnptldkaqveqltqavnqakdnlhgdqkladdkqhavtdlnqInglInp  
qrqalesqinnaatrgeva  
qklaeakaldqamqalrnsiqdqqqtesgskfinedkpkdayqaavqnakdlinqtnnptldksqveqltqavttakdn  
lhgdqklardqqqavttvn  
alpnlnhaqqqaltdainaaptrtevaqhvqtateldhametlnknvdqvntdkaqpnysteaddkkaevdqalqaaesi  
tdptngsnankdavidqvl  
klqekeneIngnervaeaktqakqtidqlthlnadqiatkqnidqatklqpieIvdqatqlnqsmdqIqqavnehav  
eqtvdytqadsdkqnaykq  
aiaaenvlkqnankqqdqlqnlakqalngdervalaktngkhdidqlnalnaqqdgfkgridsndlnqiqqiv  
deakalnramdqIsqeid  
negrtkgstnyvnadtqvkqvydetvdkakqaldkstgqnlakqvikIndavtaakkaIngeerlnnrkaealqrldql  
thlnnaqrqlaiqqinnae  
tlnkasrainratkldnamgavqqyideqhlqvisstnyinaddnlkanydnaianaaheIdkvqgnaiakaeaeqlkqn  
idaqnalngdqnlanakd  
kanafvnsInglngqqqdlahkainnadtvsdvtdivnnqidIndametlnkhIvdneipnaeqtvnyqnaddnaktnfdd  
akrlantlInsdntvndi  
ngaiqavndaihnIngdqrlqadkkaIqsinqalanklkeieasnatdqdkliaknkaeelansiinninkatsnqavs  
qvqtaghhaieqvthaneip  
kaki dankdvdkqvqalideidrnpltdkekqalkdrinqilqqghnginnamtkeeieqakaqlaqaIqdikdlvkak  
edakqdvdkqvqalideid  
qnpnltdkekqalkyrinqilqqghndinnaIteeieqakaqlaqaIqdikdlvkakedaknaikaIanakrdqinsnp  
dltpaqkakaIkeideak  
ralqnvenaqtidqlnrgIngllddiInthvvevdeqpavneifeatpeqilvngelivhrddiiteqdilahinlidql  
saevitpstatidsIsta  
kvevtlIdgskvIvnypvkvvekelsvvkqqaiesienaaqqkineinnsvtltleqkeaaiaevnkIkqqaIdhvnnap  
dvhsveeiqqeqahieqf  
npeqftieqaksnaiksiedaiqhmiideikartdltkekqeaiaIlnqlkeqaiqaiqraqsideiseqlaqfkaqmka  
anptakeIakrkqeaIsri  
kdfsnekinsirnseigtadekqaamnqineivletirdinnahtlqqveaalngiarisavqivtsdrakqsstgne  
snshltigygtanhpfns  
tighkkkldeddidplhmrfhsnnfgnvi knaigvvgisglIasfwwfiakrrrkedeeeeeIeirdnnkdsiketlddt  
khlpllfakrrrkedeedv  
tveekdsInngesldkvkhtpfflpkrrrkedeedvevtntntdekvlkdnehspllfakrrrkedeedvettsieskde  
dvpIllaakknqkdnqskd  
kksaskntskkvaakkkkkkakknkk  
>sp|A8Z457|KCY\_STAAT  
mkainialdgpaagkstiakrvaseIsmiyvdtgamyraltkyklInktedfakIvdqttldItykadkgqcviIdne  
dvtdfIrnndvtqhvsvva  
skepvrsfavkkqelaekgi vmdgrdigtvIpdadIkvymiasveeraerrykdnqlrgiesnfedIkrdieardqy  
dmnrejsplrkaddavtId  
ttgksieevtdeIamvsqik  
>sp|A8Z464|NUSB\_STAAT  
msrkesrvqafqtlfqlemkdsdltineaIsfikddnpdldefihwlvsgvgkhepvldetispylkdwtiarllktdr  
iilrmatyeiIhstdtpakv  
vmneaveItkqfsdddhykfingvlsnikk  
>sp|A8Z477|AROK\_STAAT  
mnhdkspiilifmggtgkstigkyvadeqnlSfididsyieekyktipeifckhgeqyfrnleftclqecintadiiat  
gggieeseeafnflknqkn  
iIwldcnidiIysrinddphrpnanntikqlndlycsrnlryneiafkkfdshllsiseiyyellnliskasdqy  
>sp|A8Z497|END4\_STAAT  
mllgshvsmgkkmIegsaieaheygettfmIyTgapqnrksiedlnitkghevmekeyglSnivvhapyiinianttk  
petfnlgvdfIqqeiertq  
aigakdivlhpgahvgagvdaginkiiegInevltnnvnrialetmagkgteigrsfeelariidgvhnerIsvcfdt  
chthdagynvkedfdgvl  
efdkiIgvdrIkvvhndskndrgaakdrhenigfgyigfdalnIvvhdsfkdiPkiletpyvgedkknkppykleie  
mIkqqqfdpeIknkvmmq  
>sp|A8Z4A5|RECO\_STAAT  
mImrqkgiIikavdygesdkiiIInehgakvpImarrakkvktglqaqtqlfvylfiynqwrngmtInsvdvisqhyk  
Iqmdlyvssyaalaetie  
rsmdegdiapynyqlIqfvleki esgtsaqImsvvvmIkcmkrfgftasfnrcavsgndtqadIlgysfkfdgaisrqa  
skdvhaviIlnktlyIldv  
IqklpidkmnsInihqeiIdemsdiIlmlyreyagmffksqklInqlkrleq  
>sp|A8Z4A6|ERA\_STAAT

Tsompanidou\_et\_al\_Supplemental\_FASTA\_File

mtehksgfvsiiigrpnvgkfstfvnrvi ghkiaimsdkaqtrnrkiqgvmt rddaqiifidtpgi hkpkhkldgdy mmkvak  
ntlseidaimfmvnaneei  
grgdeyieimlknvktpvflvlnkidlvhpdelmpkieeyqsymdfteivpisa leglnvdhfidvlktylpegpkyy pd  
dqisdhpegfvvgeiirek  
ilhltseeiphaigvndrmvkesedrvhieatiyverdsqkgivigkggkklkevgrarrdiemllgskvylelvkv  
qrdwrnkvnfirqigyved  
qd

>sp|A8Z4B7|PRMA\_STAAT  
mnwte lsiinheavelatnilenhgsngvvi edsddlinqpedkygeiyalkkedypdkgvrlkayfnemyddklrqg  
ikdelnlndeldqhnvgfs  
eqiaetdwenewknyfhpfrskkftivpswetyakeadeelciel dpgmafgtgdhpttsmclkaie tyvlpqhsvid  
vgtgsgilsias hligvkr  
ikaldidemavsvakenfrnrh cetlieavpgnllkdetekfdivianilahiidemiedayntlneggyfitsgiikek  
yegiqshmervgfkiseq  
hdngwvc lvgqkvse

>sp|A8Z4K0|ARSC\_STAAT  
mtkktiyfictgns crsqmaegwakqil addwnvysagiethgvnpkaieamkevgidisnhtsd lidnniiknsnlvvt  
lcsdadvncps lptnvkke  
hwgfddpagkp wsefqrvrdeikiaiefksr

>sp|A8Z4V2|GCP\_STAAT  
mtkdililavetscdetsvsvikngrdilsntvlsqieshkrfggvpevasrhveg itatinealgdadvsiedidai  
avteggp ligalligvnaa  
kalafaydkplipvhhiaghiyanhieepltfplialivsgg htelvymkdhlsfevigetrddavgeaydkvartigln  
ypggpvdrlaagedtys  
fprvwlkdksydfsfsglksavinglnhnrqknipiieanvatsfqns vvevltfkaiqackeygvqrlivaggvasnkg  
lrqsladqckvndiqltip  
spklctdnaami gvaghylyqqgrfadlalnghsnidleesae

>sp|A8Z4V6|ILVD\_STAAT  
mrsdmikkgdhqaparsllhatgalksptdmnkp fvaicnsyidivpghvhlreladiakeaireagaipfefntigvdd  
giamghigmrys lpsreii  
adaaetvina hwfdfgyfypncdkitpgmi laamrtvnpaifcsggpmkaglsahgkaltlssmfeavgafkegsiskee  
fldmeqnacptcgs cagmf  
tansmnc lmevlgltlpyngtalavsdqrremi rqaafkivenikndl kprdivtreaidafaldmamggstntv lhtl  
aianeagidy dlerinaia  
krtpylskiapsssysmhdvheaggvpai inelmkkdgtlhpdrivtvtgk lrennegkeiknfdvihpldapydaqgg l  
silfgniapkgavikvggv  
dpsiktftgkaicfnshdeaveaidnrtvraghvvviryegpkgggpmplaptssivgrlgkdvalitdgrfsgatr  
giaavghispeasggpia l  
iedgdeitidlnrnlvngpedvlarresltpfkakvtgylarytalvtsantggvmqvpenni

>sp|A8Z4X8|ATKC\_STAAT  
mntirnsicltiitmv lcgflfplaitligqiffyqqangslitydnrivgskligqhw tetryfhgrpsavdynmpek  
lykngvssggsnesngnte  
liarmkhvkfgnsvtidaatssgsgldphitvenalkqapriadarhvstsrvadliqhrkqrgvltndyvvnlelni  
aldkmd

>sp|A8Z4X9|ATKB\_STAAT  
mhhvnyfnqtmvieal kmsfyklnlkqlikn pimfvvevgmiltlilicfpdifgtsylsrgylitifiillitilfan  
fseafaegrkkaqads lrq  
aqsnltarl iengayrivnate lkagqnrvengetipadgvvinglatvdesaitgesapvikesggdfdgviggtlv  
tsdwleirvseagtsfld  
kmialvegaernktpneialftlltltiiflvvvtlypiasyhlhlp iamlialtvclipttiggllsaigiagmdr  
vtqfnvlaksgravevcgd  
vdvmildktgtitygnriaseflpv nqqmleklivaaymssiyddtpegksivr lakqmyinelpkdidgtykpftaetr  
msgiitneisvfk gapnsm  
inlvkqqgniplnies lcmdvsskggtpliviennvmlgviylkdvikdglverftelrkmgietvmctgdnaltaati  
akeagvdrfvaeckpedki  
kvikdeqakghivamtgdgtndapalaqaniglamnsgtisakeaanlidlnsptk lievvkigkqllmtrgal ttfsl  
andvakyfa lpalmmsti  
pemtslnimhlsspskaiisalifnaliivalipiamkgvkvkgy sidri finnmliyglgglivpflgiklidmivqff  
v

>sp|A8Z4Y0|ATKA\_STAAT  
meiilfltmvmityv fsgylrvalvqssrvdliftrfenmcfkiigt dlehmsaktyvkhflafngfmgfitfvlliv  
qqwlf lnpnhlnqsidla  
fntaisfltnsnlqh yngesdvtyltqmi vmytlmftssasgyavciamlrrltg ltniignfyqdivrfivrllplsc  
lisillmtggvptlhanl  
mir t lsghiqhi afgpiaslesikh lgtngggflagnsatpfenpniwsnfi emgsml l pmsml flfgrmlsrhgkrvh  
rhaliifvamffia llt  
ltnwseyrgnpi lanlgiygnmegkevrfgaglsalftvittaftgsvnmhds ltpigg lgpmlmm lnnvfggegv  
glmnllifvlltvficslm



Tsompanidou\_et\_al\_Supplemental\_FASTA\_File

vgktpeylmpigaremkcivlvflihpililvfsalafmipgasesitnpsfhgismyemtsaaanngsgfeglkdd  
ttfwnistgiimllsryip  
iilq1miasslvnkksyhdkytiaidkpyfgvslivfivllsgltfipvlllgpigeftlk  
>sp|A8Z522|FOSB\_STAAT  
mlksinhicfsvrnlndsihfyrdil1gkll1tgkktayfelaglwialneekdiprneihfsythiaftiddsefkywh  
qr1kdnnvni1egrvrdir  
drqsiyftdpdghklelhtgtlenrlnyykeakphmtfyk  
>sp|A8Z552|HSSR\_STAAT  
mvqclvdddprilnyiaahlqtehidaytqpsgeaalkl1lekqrviavvdimdmgdgmqlcntlknidydipvimlta  
rdalsdkerafisgtdyvy  
tkpfevkelifriravlrryninsnsemtignltnqsyelqvsnktmtlpnkefql1fmlaarpkqiftreqiiekiw  
gydyegdertvdvhikrlr  
qr1kklnatltietvrgggykvenhv  
>sp|A8Z5J0|Y2691\_STAAT  
mnyqvlllykymtiddpeqfaqdh1afckahh1kgrilvstegingtlsgtkeeteqymahmheaderfkdmvfkiidaeg  
hafkkmhvrprkeivaldl  
eddvdrhttgqylspvefrka1edddtviidarndyefdlghfrgairpnitrfrdlpdwikenka1fadkkvvtctg  
gircekfsgwllkegfedv  
aqlhggiatygkdpetkgeywdgkmyvddrisvdinqvektiigkdwfdgkpceryincanpecnkqilvseenetkyl  
gacsyecakhernryvqan  
nisdnewqqr1tnfddlhqha  
>sp|A9JX05|PSMA1\_STAAW  
mgiagiikvikslieqftgk  
>sp|A9JX07|PSMA3\_STAAW  
mefvak1fkffkd1lgkflggn  
>sp|D3ERJ1|ECFT\_STAAH  
mknk1iigrylpinsfvh1dprak1mfvflfiiliffchsp1tylvwvalilfimrlakiqlwflikgltpiffflft  
lmmhifl1tkggyvlvewhg  
itietngileglyislr1igivmiatim1stspid1tdafer1lap1kmfklpvhq1smimsialrfipt1mdeldkii  
laqksrgseissgniatr  
ksfip1lvpl1safqraeelavamevrgydanvkrtsyrqlkwqlrdtis1tmiipiaailfv1kysgv  
>sp|E5QVT2|RIBU\_STAAH  
mngrrk1nmqqnkr1itism1saiav1tfikfip1ppyl1tdfsdvps1latftfgpvagiivalvkn1lnylfsmg  
dpvgpfanflagasfl1ta  
yayknkrstkslitgliativmtiv1silnyfv1lp1ygmifnladiann1kviivsgiiipfniikgivisivfilly  
rrlanflkri  
>sp|O07855|CRTN\_STAAE  
mkiavigagvtglaaaariasqghev1feknnvvggrmq1kkdgmftdmgptivmmpdvkdvftacgknyedyielr  
qlryidydyfdhddritvp  
tdlaelqgm1esiepgsthgfm1fldvykkyeiarryflertyrkpsdfynmts1vqgak1ktlnhadqliehyidnek  
iqk1lafqtlyigidpkrq  
pslysi1pmiemmfgvhfi1kggmygmaag1aq1nkd1gvnie1naeieqi1idpkfkradaikvngdirfkdkilctadf  
psvaes1mpdfapikkypp  
hkiad1dyscsaf1myigidi1dvt1dvr1h1nvi1fsddfrg1nee1fegr1sydpsiyvyvpavadks1apegktgiyvlm  
ptpelktgsgidwsdealt  
qqikei1yrklatievfedikshivseti1ftpndfeqtyhakfgsafgl1mpt1laqsnyyrpqnsr1dykdlyfagasthp  
gagvpiv1tsakitvdemi  
kdi1ergv  
>sp|O52582|CDR\_STAA8  
mpki1vvgavaggatcasqir1rdkesdii1fekdrmsfanca1pyvigevedrya1aytpekfydrkqitvktyhe  
via1nderq1tvs1lnrkt  
eqfeesydk1ilspgasans1g1fesditft1ln1edtdaidqfikanqvdk1lvvgagyvs1evlen1nerglhpt1ihr  
sdkink1mdadm1nqpi1de  
1dkreipyr1neeinaingneit1fksgkvehydmi1iegvgthpnskf1essnik1drkgfipvndkfetvnpniyaigdi  
atshyrhvd1pasvplawg  
ahraasi1vaeqi1agn1tie1fkgfl1gnni1vkffdyt1fasvgvpne1kqfdykmvevtqgahanyypgnsp1hlrvyydts  
nrqil1raaav1gkeg1adkri  
dv1smamm1nq1tvde1tefevayapp1shpkd1inmi1gykak  
>sp|O86487|SDRC\_STAAE  
mnnkktatnrk1gmipnr1nkfs1rkysvgtas1lvgtt1ifgl1sgheakaaehtngel1nqsknettapsenkttkkvsr  
q1kdntqtatad1qpkvtms  
dsatvketssnm1qpnatanq1sttks1nvt1ndks1sttys1netdks1n1tqakdv1sttpk1tttikprt1nrmavntvaap  
qqgt1nvndkv1hfsnidia1  
dkghvn1q1tgktefwat1ssdv1kl1kany1tiddsv1kegdt1ftfkygqy1frpgsvr1psqtq1n1ynaqgn1iakgiyd1stn  
tt1yft1nyvd1qyt1nrvgs  
feqva1fakrknat1tdktay1kmevt1gndty1seei1vdygnkkaq1plis1stny1innd1srnmtay1vnqpkntytkq1ftv  
n1tgyk1fnpn1akn1fki1yev  
tdq1q1fvds1ftpd1tsk1ldvtd1qfdvi1sndnktatvd1mkgt1ssnkqy1i1qqvay1p1dn1s1tdng1kidy1td1tdk1tkys

Tsompanidou\_et\_al\_Supplemental\_FASTA\_File

wsnsysnvngsstangdqk  
kynlgdyvwedtnkdgkqdanekgikgyvyvilkdsngkeldrtttdengkyqftglngtysvefstpagytpttanvg  
ddavsdgltttgvikdad  
nmtldsgfyktpkyslgdyvwydsnkdgkqdstekgikgvkvtlqnekgevigttetdengkyrfdnldsgkykvi fekp  
agltqtgtntteddkdadg  
gevdvtitdhddftldngyeeetsdsdsdsdsdsdsdsdsdsdsdsdsdsdsdsdsdsdsdsdsdsdsdsdsdsds  
sdsdsdsdsdsdsdsdsds  
dsdsdsdsdsdsdsdsdsdsdsdsdsdsdsdsdsdsdsdsdsdsdsdsdsdsdsdsdsdsdsdsdsdsdsdsdsds  
dsdndsdsdsdsdsdagkh  
tpakpmstvkdqhktakalpetgsennsnngtlfgglfaa|gs|ll|fgrkkqk  
>sp|O86488|SDRD\_STAAE  
mlnrenktaitrkgmvsnrlnkfsirktyvtgasilvgttlifglngqeakaaestnkelneattsasdnqssdkvdmq  
lnqedntkndnqkemvssq  
gnettsgnkli ekesvsttgknkevstaksdeqaspkstnedlntkqtisnqealqpdlqenksvvnvqptneenk  
daktesttlnvksdaiksn  
delvdnnsnnsnnennadiilpkstapkrlntrmriaavqpssteaknvnlditsnttlvtvdadknnkivpaqdylslk  
sqitvddkvsqdyftiky  
sdvtqvylmpediknigdikdpngetiatakhdannlitytftdyvdrfnsvqmginsiydadtivskndvefn  
vtigntttkttaniqypdy  
vneknsigsaftevtvshvgnkenpgyykqtiyvnpenslnaklkvqayhssypnnigqinkdvtidikiyqvpkgytl  
nkgydvntkeltdvtnqyl  
qkitygdhnsavifdgnadsayvmvntkfqytnsesptlvqmatlsstgnksvstgna|gftnnqsggagqevyikgny  
vwedtnkngvqelgekvg  
nvtvtfdnntntkvgeavtkedgsy|ip|n|p|ngdyrvefsn|pkgyevtpskqgnne|dsng|ssvitvngkdn|sad  
lgiykpkyngdyvwedtn  
kngiqdqdekqisgvtvtlkdenngv|ktvttadagkykftd|dngnykvefttpegytptvtsgsdi ekdsng|tttg  
vingadnmtldsgfyktpk  
ynlgnyvwedtnkdgkqdstekgisgvtvtlknengev|qttktkdkgkyqftglengtykvefetpsgytptqvgsgtd  
egidsngtsttgvikdkdn  
dtidsgyfkptyngdyvwedtnkngvqdkdekqisgvtvtlkdendkv|ktvttadagkykftd|nngtykvefetpsg  
ytpstvtsgndtekdsgl  
tttgvikdadnmtldsgfyktpkyslgdyvwydsnkdgkqdstekgikdvkvtllnekgevigttkt dengkycfdnlds  
gkykvi fekpagltqtgt  
tteddkdadggevdvtitdhddftldngyeeetsdsdsdsdsdsdsdrdsdsdsdsdsdsdsdsdsdsdsdsdsdsrd  
sdsdsdsdsdsdsdsdsds  
dsdsdsdsdsdsdsdsdsdsdsdsdsdsdsdsdsdsdsdsdsdsdsdsdsdsdsdsdsdsdsdsdsdagkhtpvkpmstt  
kdhhnkakalpetgnensg  
snnatlfgglfaa|gs|ll|fgrkkqk  
>sp|O86489|SDRE\_STAAE  
minrdnkkaiktkgmisnrlnkfsirktyvtgasilvgttlifglngqeakaaentstenakqddattsdnkevseten  
nsttenstnpikketntd  
sqpeakkestssstqkqnnvtattetkpnienkenvkpstktatedtsvileekapnntndvttkptstsepstsei  
qtkpttpqestniensqpq  
ptpskvdnqvtdatnpkepvnvskeelknpeklkelvrndsntdhstkpvataptsvapkrvna kmrfavaqpaavas  
nvnldikvktqtkvgdgk  
dnvaaahdgkdi eydteftidnkvvkgtmtinydknripsd|tdkndpiditdpsgeviakgftdkatkqitytftdyv  
dkyediksrltlysidkk  
tvpnetslnlftatagketsqnvtdvyqdpmvhgsniqisiftkl dedkqti eqqiyvnlkksatntkvdiagsqvddy  
gniklgnstiidqnteik  
vykvnqdq|lpqsnriydfsqyedvtsqfdnkksfsnnvat|dfgdinsayi ikvskytptsdgel diaagtsmrtdk  
ygyynyagysnfivtsndt  
gggdgtvkpeeklykigdyvwedvdkgvqgtdskekpmav|vt|typdgttksvrt danghyefgg|kdgetytkfe  
tptgylptkvngttdeged  
sngssvtvkingkddms|dtgfykepkyngdyvwedtnkdgiqdanepgikdvkvtlkdstgkvigtttt dasgkykft  
d|dngnytvfeftpagytp  
tvknttaddkdsng|tttgvikdadnmtldrgfyktpkyslgdyvwydsnkdgkqdstekgikdvvtlqnekgevigtt  
kt dengkyrfdnldsgkyk  
vifekpagltqvtntteddkdadggevdvtitdhddftldngyfeedtsdsdsdsdsdsdsdsdsdsdsdsdsdsdsds  
dsdsdsdsdsdsdsdsds  
sdsdsdsdsdsdsdsdsdsdsdsdsdsdsdsdsdsdsdsdsdsdsdsdsdsdsdsdsdsdsdsdsdsdsdsdsdsdsds  
sdsdsdsdsdsdsdsdsds  
dsdsdsdsdsdsdsdsdagkhtpvkpmsttkdhhnkakalpetgsennsnngtlfgglfaa|gs|ll|fgrkkqk  
>sp|P02976|SPA\_STAA8  
mkkknisyirklgvgiasvtlgtllisggvtpaanaaqhdeaqnafyqvlmpnl nadqrngfiqs|kddpsqsan|lg  
eaqk|nds gapkadaqqn  
fnkdqqsafyeilmpnl neaqrngfiqs|kddpsqstnl|geakk|nesqapkadnnfnkeqqnafyeilmpnl neeq  
rngfiqs|kddpsqsan|l  
seakk|nesqapkadnkfnkeqqnafyeil|h|pn|neeqrngfiqs|kddpsqsan|laeakk|ndaqapkadnkfnkeq

Tsompanidou\_et\_al\_Supplemental\_FASTA\_File

qnafyeihlhnplteegrn  
gfiqslkddpsvskeilaekklndaqapkeednnkpgkednnkpgkednnkpgkednnkpgkednnkpgkedgnkpgke  
dnkppgkedgnkpgkednk  
kpgkedgnkpgkedgnkpgkedngvhhvvpkgdvtndiakangttadkiaadnkladknmikpgqelvvdkkqpanhada  
nkaqalpetgeenpfigtt  
vfgglslalgaallagrrrel  
>sp|POA001|ACP\_STAAM  
menfdkvkdiivdrlgvdadkvtedasfkddlgsdliaelvmledefgteipdeeaekintvgdgvkfinslek  
>sp|POA005|ARSC\_STAAN  
mdkktiyfictgnsrscsqmaegwgkeilgegwnvysagiethgvnpkaieamkevididisnhtsdlidndilkqsdlvvt  
lcsdadnncpilppnvkke  
hwgfdpagkewsefqrvrdeiklaiekfklr  
>sp|POA007|ATKB1\_STAAM  
maettkifeshlvkqalkdsvlklpvyviknkpimfvvevgmlalaglitypdlfhqesvsrlyvfsifiilllvtlvan  
fsealaegrkaqanalrg  
tqtemkarrkqdgysemidasdlkkghivrvatgeqipndgkvikglatvdesaitgesapvikesggdfdnviggtsv  
asdwleveitsepghsfld  
kmiglvvegatrkktpneialftllmtltiiflviltmyplakflnfnlsiamliavalclipptiggllsaigiagmdr  
vtqfnilaksgrsvetcgd  
vnlildktgtitygnmadafipvkssferlvkaayessiaddtpegrsivklaykqidlpqevgeyipftaetrms  
gvkfttrevykgapnsmvk  
rvkeagghipvdldalvkgvskkggtpvvledneilgvilykdvikdglverfrelremgietvmctgdneltaatiak  
eagvdrfvaeckpedkinv  
ireeqakghivamtgdgtndapalaeanvglamnsgtmsakeaanlidlsnptklmevvligkqllmtrgslttfsian  
diakyfalpamfmaampa  
mnhlnimhlhspesavlsalifnaliiivllipiamkgvfkfgastqtilmknmlvyglggmivpfigiklidliiqlfv  
>sp|POA010|LACD\_STAAN  
mksnqkiasieqlsnnegiisafdqrgalkrmmakhqteptvaieqlkvlvaeeltqyassilldpeyglpasda  
rnkdcglllayektgydvn  
akgrlpdcvewsakrlkeqqanavkfllydvddaeeiniqkkayierigsecvaedipfflevltyddnipdngsvef  
akvkprkvneamklfsepr  
fnvdvlkvepvnmkyyvegfaegevvytkeeaqhfkqdaathlpyiylsagvsaelfqetlkfaheagakfngvlcgr  
atwsgavqvyyiegedaar  
ewlrrtgfkiddlnkvlkdtatswkqrk  
>sp|POA026|DTD\_STAAN  
mkvvvqrveasvntdlnnqikkgycllvgigqnsteqdadviakkianarlfeddnklnfniiqqmngelsvsqftl  
yadvkkgnrpgfsnknpd  
qavkiyeyfndalrayglvtktgefghmvsinnvgpvtiiyesqdgkiq  
>sp|POA034|FUR\_STAAW  
mntndaikilkenglkytdkrkdmldi fveedkyinakyiqqvmdenyppgisfdtiyrnlhlfkdlgiienteldgemkf  
riactnhhhhhficekcgd  
tkvidycpidqiklsllpgvnihhkhlevygvcescq  
>sp|POA054|TNPB\_STAAN  
mnasskrkiisqseiskkiavmneemqgfwannswdirkcphpsaieisknpalnrrwvrfervknlnlrltelkyfyfyh  
lnngiwnaktvwi rkgtvi  
nkmldfldlkypsitsitevpiekamteyrtylkrgrvritttnykitanqektpvkansyyvtnlkqfmefyenfyfdg  
eewdkdvdrrnlplpddk  
vnptqeytinfkgfrntyfkqlvkrycklrlnvdsfsyvsdiaqrkelffnfldmkfkqvrvhqltrveieaylse  
mmgikpstigtgrisilegl  
fstllrlwddvpskiliysedypki prakprfidfvleqlnshldklpeyiatmtmivqecgmriselctlkkgclle  
dkdgdfflkyyqwkmkkeh  
ivpiskevallikvredkvseefpdseylprkdgspkqetfrgelnklayeqnivdksgeiyrfhahafhrtvgtrmi  
nngmpqhi vqkflghespe  
mtrsyahifdetlknftkfqeklvtnngdvlldednevddvelqwfkkninaqvlpngycrlpvvaggcphanacldc  
thfctskqflpqheeqler  
teellaiakdkqwrqvetnsrvkerleqiigsltg  
>sp|POA059|ATKC2\_STAAM  
mqtirkslgvlvimfvlcgfi flptvta lgvvl fpeqangs lvkqdgkvisgkligqqwtepyfhgrisavnynmne  
vkesggpasggsnygnsp  
elkkrvqetkqegkissdavasgsgldpditvdnakqqvkriakernidaskinhli denkqaspmaddyvnlkn  
itldkl  
>sp|POA064|LEPH\_STAAN  
mkkvvkyli slilal iivlvqtfvighvipnndmsptlnkgdrvivnkikvtfnqlnngdiityrrgneiytsriiak  
pgqsmافرqqlyrddrpv  
dasyaknrkikdfslnrfkelgdgdiippnnfvvlnhdnqhdsrqfglidkkdiignislryppfskwtiqfks  
>sp|POA099|OTC\_STAAM  
mknlnrnsfltlldfsrqueveltltsedlkrakyigtekpmknkniallfekdsttrcafevaahdqganvtylgpt  
gsqmgkettkdtarvlgg

Tsompanidou\_et\_al\_Supplemental\_FASTA\_File

mydgieyrgfsqrtvetlaeysgvpwngltdedhptqvladfltakevllkkyadinftyvgdgrnnvanalmqgaaim  
gmfnhlcpckelnptdell  
nrckniaaenggnlittddidqgvkgsdviytdvwsmgpepdevkerlellkpyqvnkemmdktgnpnvifehclpsfh  
nadtkgqqifekeygi rem  
evtdevfeskavvfqeaenrmhtikavmvatlgf  
>sp|POA0B3|PCKA\_STAAM  
msvdytettkidkllkkptshfqlsttqlynkil dnegvltelgavnastgkytgrspkdkffvsepsyrnidwgei  
nqptideetflklyhkvldy  
ldkkdeiyvfkyagsdkdtmlklvtinelawhnlfaknmfirpeskeeatkikpnftivsaphfkadpevdgtksetfv  
iisfkhkviliggteyage  
mkkgifsvmnyllpmqdimsmhcsanvgekgdvalffglsgtgkttlsadphrkligddehgwnkngvfnieggcyakai  
nlskekeqgiffaikygai  
lentvvaedgsvdfednryentraaypinhidnivpskaahpntiifltadafgvippisklnkdqamyhflsgftsk  
lagtergvtepepsfstcf  
gapffplhptvyadllgelidldhdvdylvntgwtggkygvrrislhytrqmvnqaisgklknaeytkdstfglsipve  
iedvpktilnpinawsdke  
kykaqaedliqrfeknfekfgekvehiaekgsfnk  
>sp|POA0B6|AHPC\_STAAM  
mslinkeilpftagafdpkkdqfkevtqedlkgswsvvcfypadfsfvcpteledlnqyeeqlklgvnvsvstdthfv  
hkawhdhsdaiskitytmi  
gdpsqtitrnfdvleatglaqrgtfiidpdgvvqaseinadgigrdastlahkikaayvrknpgvecpakweegaktl  
qpgldlvgki  
>sp|POA0B8|LACC\_STAAM  
miltltnpsvdisypltalkliddvnrqvsvsktaggkglnvtrvlaqvgepvasgfiggelgqfiakkldhadikhaf  
ynikgetrncaialhegqq  
teileqqpeidnqeaagfikhfqlllekveavaisgslpkglnqdyaaqiercqngkvpvildcsgatltvlenpykp  
tvikpniseyqllnqpld  
esleslkqavsqplfegiewiivslgaggaafakhnhtfyrvniptisvlnpvgsgdstvagitsailnhendhdllkkan  
tlgm1naqeaqtgyvnlnn  
yddlfnqievlev  
>sp|POA0C6|PRE2\_STAAM  
msyavcrmqkvksaglkqmghnqrerksrtnddihertrenydlkndknidynervkeiiesqktgtrktrkdavl  
ellvtsdrdfefqldpgeq  
krffeesyklfserygqniayatvhndeqtphmhlgvvpmrdgklqgknvnrqellwlqdkfpehmkkqgfelkrger  
gsdrkhietakfkkqtlek  
eidfleknlavkkdewtaysdkvksdlevpakrhmsvevptgeksmfglgkeimktekkptknvviserdyknlvtaar  
ndr1lkqhvrlmstdmar  
eykkl1skehgqvkekygslverfnenvndyneleenkslkskisd1krdvsliyestkeflkertdglkafknvfkqfv  
dkvkdktaqfgekhdlep  
knfe1thnrevkkersrdqgmsl  
>sp|POA0E9|RELA\_STAAM  
mngvyhimneypysadevlhkaksylsadeyeyvlksyhiayeahkgqfrknglpyimhpiqvagiltemrldgptiva  
gflhdviedtpytfedvke  
mfneevarivdgvtlkkvkyrskeeqqaenhrklfiaiakdvrvilvkladrlnhmrtlkamprekqirisretleiya  
plahr1gintikweledta  
lryidnvqyfrivnlmkkkrserayietaidrirtemdrniegdingrpkhiysiyrkmmkqkkqfdqifdlairvi  
vnsindcyailglvhtlwk  
pmpgrfkdyiampkqnlqyslhttvgpngdpleiqirtfdmheiaehgvaahwaykegkkvsekdtqyqklnwlkela  
eadhtssdaqefmetkyd  
lqsdkvyaftpasdvie1pygavpidfayaihsevgnkmiagakvngkivpidyilqtgdiveirtsksygsrdwlkiv  
ksssakgkiksffkkqdrs  
sniekgrmmveveikeggfrvediltekniqvnekyfnaneddlfaavgfgvtslqivnk1terqrilkdqralneaq  
evtkslpikdnii tdsqvy  
veg1envlikl1skccnpipegdivgyitkghgikvhrtdcpnikneterlinvewvkskdatqkyqvdlvtaydrngll  
nevlqavsstagnlikvsg  
rsdidknaiinisvmvknvndvyrvvekikqlgdvytvtrvwn  
>sp|POA0F3|RL11\_STAAM  
makkvdkvvlqipagkanpappvgpalgqagvni mgfckefnartqdqagliipveisvyedrsftfitktpapvllk  
kaagi ekgsgepnkttkvat  
vtkdqvreianskmdlnaadeeamriiegtarsmgivve  
>sp|POA0K9|PARE\_STAAM  
mnkqnnsddsivlegleavrkrpgmyigstdkrglhllyeivdsvdevlgygneidvtinkdgsisiednrgmp  
tgihkskgtptveviftvlh  
aggkfgqgyktsgl hgvgasvvnal sewleveihrdgniyhqsfknggspssglvkkgkktktgkvtfkpddtifka  
stsfndv1serlqesaf1  
lkn1kitlnd1rsgkerqehyheegikefvsyvnegevlhdvatfsgeangi evdvafqyndqysesilsvnnvrtk  
dggthevgfktamtrvnd  
yarrine1ktkdknldgndiregl tavsvripee1lqfegqtksklgtsearsavdsvvadklpflyleekgqlskslvk

Tsompanidou\_et\_al\_Supplemental\_FASTA\_File

kaiqaqareaarkareda  
rsgkknkrkdtllsgkltpaqsknteknelylvegdsaggsaklgrdrkfqailplrgkvintekarledi fkneeinti  
ihtigagvgtdfkiedsny  
nrviimtdadtdgahiqvllltfffkymkplvqagrvia lpplyklekgkgtkrveyawtdeelnklqkelgkgftlq  
rykglgemnpeqlwettm  
petrtlirvqvedevrskrvtlmgdkvqprrewiekhvefgmqedsilndsevqvlendqfdeeei  
>sp|POA0L4|ENTC3\_STAAN  
mykr1f1srvilifalilvistpnvlaesqdpmpddlksseftgtmgnmkylyddhvsatkvsdkflahdliyni  
sdkk1knydkvkte11ned  
lakkykdevvdvygsnyvncyfsskdnvgkvtggktcmyggitkhegnhfdngnlqnv1rvvyenkrntisfevqtdkk  
svtageldikarnflinkk  
nlyefnsspyetgyikfiennngntfwydmmpagdkfdqskylmmyndnktvdskskievhl1ttkng  
>sp|POA0M7|Y906\_STAAN  
mfskvnqkmlעדcfyirkkvveeqvpeeseideyesesihligyngqpvtarirpinettvkiervavmkshrgq  
gmgrmlmqaveslakdegf  
yvattmaqchaipfyeslnfkmrngnifleegiehiemtckltsln  
>sp|POA0P3|PRMA\_STAAM  
mnwtel1siinheavelatnilenhsngvviedsddlinqpedkygeiyalkkedypdkgvrlkayfnemtyddklrq  
ikdel1n1deldqhniqfs  
eqiaetdwenewknyfhpfraskkftivpswetyakeadeelciel dpgmafgtgdhpttsm1kaietyvlpqhsvi  
vgtsgilsiashtligvkr  
ikaldidemavsvakenfrrnhcetlieavpgnllkdetekfdivianilahiidemiedayntlneggyfitsgiikek  
yegiqshmervgfkiiseq  
hdngwvc1vgkvse  
>sp|POA0Q4|Y996\_STAA8  
msrkyekianingmfmleqqihsqdmahfrseffynhehreyealliyyksidnpivdgacyilalpeifnsvd  
vfeselpfswvydengite  
tmks1sip1qylvaaalevtvni fkpsgftmgnmnnwniaqmri fwqytairkeal  
>sp|POC2W6|TOP3\_STAAB  
mkyli laekpsvardiada1qinqkrngyfennqyivtwa1ghlvtnatpeqydknlkewrledlpiipkymktvvigkt  
skqfktvkalil dnkvkdi  
i1atdagregelvarli1ldkvgnkplrrlwi ssvtkkaiqqsfknlkdgrqyndlyaa1arseadwivginatraltt  
kydaq1slgrvqtptiq1v  
ntrqqeinqfkpqyyt1sl1tvkgfdq1esnqrytnketleqivnn1knvdgkiksvatkhkksypqsl1n1tdlqqdm  
yrykiqpket1nt1qsl1y  
erhkvvtyprtdsn1l1tdmvdtkmeriqatmattykdqarplisktfsskmsifnnqkvsdhhaiiptevrpvmsd1sn  
re1klydmiverflealmp  
pheydaitvt1evaghtfv1kenvtv1gfk1s1rqgesitemqqpfsegdevkisktnirehettppeyfnegs1lkame  
npqnfiqlkdkkyaqtlkq  
tggigtvatradiidk1fnmnaiesrdgkikvtskgkqilelapeel1sp11taqweek111iergkyqaktfinemkgf  
tkdvngiknsdrkykhdn  
1tttecptcgkfmi kvtkngqm1vcqdpscktkknvqrktnarcpnckkk1t1fgkgkeavycvcghsetqahmdqrm  
kskssgkvsrkemkkymnk  
neg1dnnpfkda1kn1n1  
>sp|POC7Z6|PSMA2\_STAAC  
mgiaagikfikgliekftgk  
>sp|POC812|PSMA3\_STAAR  
mefvak1fkffkd1lgkflgny  
>sp|POC821|PSMA4\_STAAC  
maivgtiikiikaidifak  
>sp|POC947|MNHG2\_STAAR  
meitkeifsliaavm1l1gsfialisaigivkfqdvflrshaatksst1sv1l1t1ligvliyfvntgffsvr111slvfi  
n1tspvgmhlvaraayrng  
aymyrknddthas1l1ssneqnstka1qlrakkreeyrkkwyqnd  
>sp|P14738|FNBA\_STAA8  
mknn1rygirkhk1gaasvflgtmivvgmgqdkeaaaseqktttveengnsatdnktsetqtatnvnhieetqsynatv  
teqpsnatqvtteeapkv  
qapqtaqpanietvkeevvkeeakpvkettqsqdnsgdqrqvd1tpkkatqnqvaetqvevaqprtaseskprvtrsad  
vaeakeasnakvetgtdvt  
skvtveigsieghnntknkvephagqrav1kyk1kfenglhggdyfdft1snvnthgvstarkvpeikngsvvmatgevl  
eggkiryftfndiedkvdv  
taelein1fidpktvqtngnqtitst1neeqtskel1dvkykdgignyan1ngsietfnkannrfshvafikpnngkts  
vtvtgt1mkgsnqngnqpk  
vri feylgnnediaksvyanttdtskfkevt snmsgnl1n1qngsys1nien1dktyvvhydgeylngtdevdftrtqmvg  
hpeqlkyyydrgyt1twd  
ng1vlysnkangnekngpi iqnnkfeykedtiket1tgqydkn1vtteeeydsst1ldidyhtaidgggyvdgyietie  
etdssaididyhtavdsea  
ghvggytesseesnpi dfeesthenskhhadvveyeedtnpgggqvttesn1vefdeestkgivtgavsdh1ttvedtkey



Tsompanidou\_et\_al\_Supplemental\_FASTA\_File

>sp|P60107|TELL\_STAAM  
mtenksfkeshplddfisdkeIsnttiqkekltieqqkqvdtiskqinpldnegllafgsdlqkqmsqfshqmldevqsk  
dvpgigdtlsdlmsklksv  
npnelntdkpsmlkriksrakssineifsrmsqsvsaqvdritylqkqhthltrdielldtlydknkqyfdlslhiiiaa  
qqkklqleneklpqlqgga  
qqstnqmdiqqvsdmqgfdrldkriydqlsrqialqtapqirmiqvnqalaekiqssiltsiplwknqmaialtlmr  
qrnavaaqravtdttndll  
tanaemlkqnaietatenergividltlkrtrniietietliiqqhgreerqlaekelqqleqdlkshlvnikgpnkq  
S  
>sp|P60296|OAT1\_STAAN  
mnsiieItdyysnnyaplkIviskgkvkvwtdtgkqyidcisgfsvanqghchptivkamteqaskIsiisrvlysdn  
lgkweekichlakdkvlS  
InsgteaveaaiarkwgvsevkgitdgqveiamnnnfhgrtlgsIslnshdaykagfhpIlqgtttvdfgdieqltqa  
ispntaailepigqggv  
nippkgyiqavrqlcdkhqilmiadeiqvlgirtgkwfameweqvvpdiyilgkalgglypvsavlannvmrvltpgt  
hgstfggnplaiastaaI  
dvlkdeqlverserlgsflkallqlkhsikeirgrglfigielntdaapfdvdlqrgilckdthrtiirlspplvid  
keehqivaafqdvfkn  
>sp|P60379|SPX\_STAAN  
mvtlftspstscrkakawIqehdipyternifsehl tideikqilkmtdgtdeiistrsktyqklnvidslplqdy  
siiqdnpgllrrpiildnk  
rlqvgynedeirrfIprkvrtfqlqeaqrmvd  
>sp|P60650|LRGA\_STAAN  
mkqqkdaskpahffhqvialvlfvskiesfmpimpasviglvllfvllctgavklgevekvgttlnnigllfvpa  
gisvvnslgvisqapflii  
gliivstlllIctgyvtqiimkvtsrskgdkvtkkikieeaqahd  
>sp|P60890|GLNA\_STAAM  
mpkrtftkediirkfaeeenvrylrlqftdilgtiknvepvsqlkvldnemfdgssiegfvriesdmylhpdldtwv  
ifpwtaggkvarlicdvy  
ktdgtpfegdpranlkrvlkemedlgftdfnlgpepefflflkIdekgeptlelnddggyfdlaptdlgencrrdivlele  
dmgfdieashhevapqhe  
idfkvadavtacdniqtflvvtiarkhnIhatfmpkplfgvngsmhfvnsIfkgkenaffdpntemgltetayqfta  
gvlnkargftavcnplvns  
ykrIvpgyeapcyiawsgknrsplirvpssrgIstrievrsvdpaanpymalaail eagldgiknklkvpepvqnqiyem  
nreereavgidlpstlyt  
alkamrenevikkaIghniynqfinsksiewdyirtqvsewerdqymkqy  
>sp|P60961|LGT\_STAAM  
mgivfnyidpvafnlqplsvrwygiiIavgillgyfvaqralvkagIhkdtlvdiifysalfgfiaariyfviIqwpyya  
enpseikiwhggiaIhgg  
liggfIagvIckvknlnpfqigdivapsiilaaggIgrwgnfmnheahggpvSrafleqlhlnpfiienmyingqyyhpt  
flyesiwdvagfiilvnr  
khIklgetfflyItwysigrffiegIrtdslmltsnirvaqlvsillilisisIlyvrrikynpplyskvgalpwptkkv  
k  
>sp|P61384|CRCB1\_STAAN  
mhrqflssccqnIffkfkllIfevnmqyvyifiggaIgalIrylisflntdggfpigtlianltgafvmgllaltiaf  
fsnhptlkkaittgflgaI  
ttfstfqleIhmfdhqffitlllyavtsyvfgiIlyvgiklggglS  
>sp|P61598|PLS\_STAAN  
mrdkkgpvnrkrdvflsnklnkysirkftvgtasilgslmylgtqqeaaenienpttlkdnvqskevkieevtnkdt  
apqgveaksevtsnkdtie  
heasvkaediskkedtpkevanvaevqpkssvthnaeapkvrkarsvdegSfditrdsknvvestpitiqqkehfeagyS  
vdiqknptdlgvsevrfn  
vgnengligalqlknkidfskdfnfkvrvannhsnttgadwgflfskgnaeeyltnngilgdkgIvnsggfkidtgyl  
iytssmdktekqagqgyrg  
ygaIvknDssgnsqmvgenidksktnflnyadnStntsdgkfhgqrIIndviltvstgkmraeyagktwetsitdlglS  
knqaynflitssqrwglng  
ginangwmrtdIkgseftftpsaknnnrirkkveeipfkkerkfnpdIapgtekvrtregqkgektittptlknplgtgeii  
skgeskeetkdpineIte  
ygpetiapghrdefdpklptgekeevpgkpgiknpetgdvvrppvdsvtkygvpkgdsivekeeeipfekerknfnpdIapg  
tekvrtregqkgektittpt  
lknplgtgeiiskgeskeetkdpineIteygpetiapghrdefdpklptgekeevpgkpgiknpetgdvvrppvdsvtky  
gvpkgdsivekeeeipfeke  
rkfnpdIapgtekvrtregqkgektittptlknplgtgeiiskgeskeetkdpineIteygpetiapghrdefdpklptge  
keevpgkpgiknpetgdvvrppvdsvtkygvpkgdsivekeeeipfekerknfnpdIapgtekvrtregqkge  
rppvdsvtkygvpkgdsivekeeeipfekerknfnpdIapgtekvrtregqkgektittptlknplgtgeiiskgeskeetk  
dpineIteygpetiapghr  
efdpklptgekeevpgkpgiknpetgdvvrppvdsvtkygvpkgdsivekeeeipfekerknfnpdIapgtekvrtregqkge  
ktittptlknplgtgeiisk

Tsompanidou\_et\_al\_Supplemental\_FASTA\_File

geskeetkdpinelteygpeti pghrdefdpk lptgekeevpgkpgikn petgdvvrppvsvtkygpvkgsiveke  
eipfekerkfnpdlapgte  
kvtreggkgekittptlknpl tgeiiskgeskeetkdpvneltefggekippghkdi fdpnlptdqtekvpgkpgikn  
pdtgkvi eepvddvikhgp  
ktgtpetktveipfetkrefnpl qpgeervkqegqpgsktittpitvnl tgekvgegqpteeitkqpvdkivefggek  
pkdpk gpenpekpsrpthp  
sgvnpnpgl skdrakpngpvhsmdkndkvkkskiakesvanqekkraelpktglestqkglifssiigiaglmllarr  
rkn  
>sp|P63435|LEUC\_STAAM  
mgqtlfdkvwnrhvl ykglgepqll yidlhlihevtspqafeglrlqnrklrrpdl t fatldhnvptidifnikdei ank  
qittlqknaidfgvhi fdm  
gsdeggi vhmvgpetgl tppgktivcgdshtathgafgaiafgigtsevehvfatqtlwqtkpknlkidingtlptgvya  
kdiihl iktygvdfgtgy  
aleftgetiknlsmdgrmticnmaieggakygiiqpdditfeyvkgrp fadnfaksvdkwrelysd ddaifdrviel dvs  
tlepqvtwgt npe mgvnfs  
epfpeindindgraydymglepgqkaedidlg yvflgsctnarlsd lieashivkgnkvhpnitai vvpgsrtvkkeak  
lgldti fknagfewrepgc  
smclgmnpdq vpeghcastsnrnfegrqgkgarthlvspamaaaaaihgkfvdrkvvv  
>sp|P63469|ACPS\_STAAM  
mihgigvdlieidrikvlyskqpk lveriltkneqhkfnftheqrkieflagr fatkeafskalgtglgkhvafndidc  
ynde lgkpkidyegfivh  
sishtehyamsqv vleksaf  
>sp|P63489|GATA\_STAAM  
msiryvesvenlltikdkkikpsdvvkdiydaieetdptiksflaldkenaikkaqel delqakdmdgklfgipmgikd  
niitnglett caskmlgef  
vpiyestvmeklhkenavliglnmdefamggstetsyfkktvnpfdhkavpggssggsaaavaaglvplslsgsdtggsi  
rqpaa ycgvvgm kptygrv  
srfglvafassldqigpltrnvkdnai vlea isgad vndstsapvddvdf tseigkdikglkvalpkeylgegvaddvke  
avqnavetlkslgavveev  
slpntkfgipsyyvi asseasnlsrfdgirygyhskeahsleelykmsrsefggkevkrri flgtfalssgyy dayyk  
sqkvrtilkndfdkvfeny  
dvvgptapttafnlgeeiddpl tmyandll ttpvnlaglpgi svpcgqsngripiglqfigkpfdektlyrvayqyetqy  
nlhdvye k l  
>sp|P63511|DAAA\_STAAM  
mekifl ngefvspeakvsyndrgyvf gdgiyeyirvyngklftvtehyerflrsaneigldlnysveelie lsrklvdm  
nqietgaiyiqatrgvaer  
nhsfptpevepai vaytksydrpydh lengvngvtvedirwlr cdi ksl nllgnvlakeyavkynaveai qhrgetvteg  
ssnayaikdgviythpin  
nyilngitri vikkiaedynipfkeetftvdf lknadevsvsstaevtpvikldgepindgkvgpitrqlqegfekyie  
shsi  
>sp|P63525|MENE\_STAAM  
mdfwlykqaqqnqhhi aitdggesyqnl yceasllakr lkayqqsrvglyidnsiqsi ilihacwlanieiamintrl  
tpnemtnqmr sidvqlifc  
tlpl elrgfqivsl ddi efagrdittngll dntmgi qydtsetvvpkespsnil ntsfnl ddi asimftsgttgpqkav  
pqtfrnhya saigckeslg  
fdrdtwls vlp iyhisglsvll raviegftvri vdkfnaeqil tmiknerithislvpqtlnwlmqqglhepynlqkil  
lggaklsatmieta lqynl  
piynsfgmtetcsqfl tatpemlharpdtv gmpsanvdvki knpkkeghgelmikganvmnglyptdltgtfengyfnt  
gdiaeidhegyvmyidrrk  
dliisggeni ypyqietvakqfpgi sdavcvghpddtwgqvplyfvsesdiskaqli ay lskhlakykvpkhfekvdtl  
pytstgklqrnklyrg  
>sp|P63537|END4\_STAAM  
mllgshvsmgkkm legsaieayeygett fmiytgapqnt rrsiedlnitkghevme kygl snivvhapyi inianttk  
petfnlgvdf lqqeiertq  
aigakdivl hpgahvgagvdaginkieglnev l tndnvr ialetmagkgteigrsfeelari idgvhnerlsvcfdt  
chthdagynvkedfdgvl n  
efdkii gvdri kvvhvndskndrga qkdrhenigfgyigfdal nyivhhsfdk dipkilet pyvgedkknkppykleie  
mlkqqqfdpel knkvmqg  
>sp|P63583|ARLY\_STAAM  
msnkawggrf evqpeewvddfnasitfdqtl idqdiegsiahatmlanqqiisqqdseqi i qglksiqhdyhdqdiqfsa  
sledi hlniehelikrigd  
aggklhtgrs rndqvad mlytkkqvqdi aliks lqsvivdi asnnvdtimpgythl qraqpisfahhimtyfwmlqr  
dqgrfeds lkridinplga  
aalsgttypidrhettall nfgslyensldavsdryi ietlhnisl tmvhl srfaeii fwstdeakfitlsdafstgs  
simpqkknpdmaeli rgkv  
grttghlmsmlmtlkg lplaynkdmqedkegl fdavhtikgs lri fegmiqmtinkerlnqtvkedfsnateladylvt  
knipfrtaheivgkivlec  
iqqghyll dvplatyqqhssidadiydy lqpencl krrqsygstgqssvkqql dvakqllsq



Tsompanidou\_et\_al\_Supplemental\_FASTA\_File

>sp|P63585|AROA\_STAAN  
mvseqiidi sgplkgeievpgdksmthraimlaslaegtsniykp llgedcrrtmdifrl lgvdikededklvvnspgyk  
afktpqhvl ytgnsqttr  
llagllsglgiesv lsgdvsigkrpmdrv lrp lklmdaniegiednytpli ikpsvikginyqmevasaqvksailfas l  
fsndttvikeldvsrnhte  
tmfrhfnipieaer lsitttpdaiqhikpadfhvpgdissaffivaal itpesdvtihvnginptrsgiidivekmgn  
iq lfnqttgaeptasirig  
ytpmlqpi tiegelvpkaidelpviallctqavgtstikdaeelkvketnridttadm lnl l g felqptndgliihpsef  
ktnatvds ltdhrigmm la  
vasllssepvki kqfdavnvsfpgflpk lkl leneg  
>sp|P63605|AROK\_STAAM  
mnhdkspii l igfmg t gkst igkyvadeqn lsfididsyieeky kltipeifskhgeqyfrn leftclqecintadiiat  
gggieeseeafnflknqkn  
i i w l d c n i d i y s r i n d d p h r n a n n k t i k q l n d l y c s r i l r y n e i a f k k f d s h l l s i s e i y y e l l n l i k a s d q y  
>sp|P63620|ARSB\_STAAN  
mtlatl i f l v t l l f v l w q p k g l d i g i t a l t g a f i a v i t g v v s f s d v f e v t g i v w n a t l t f v s v i l i s l i l d k v g l f e w s  
a i h m l h a s k g n g l k m f v y i  
i l l g a i v a a f f a n d g a a l i l t p i v l a m v k n i g f s k r a i f p f i a s g f i a d t t s l p l i v s n l v n i i s a d y f h v g f v r y f s r  
m i i p n l f s l l a s i i v l w l y  
f r k a i p k t f d d n n i k h p k d a i n d l k l f k i s w i v l v i l l f g y l i s e f t k i p v s i f t g i a f i f l m l a r k s n a v n i k q v i k g  
a p w n i v l f s i g m y i v v f g l  
r n a g i t l i l a k i l e y i s n y g l f s t i l g m g f i s a f l s s i m n m p t v l i d a i a i g q s n v h g m l k e g l i a n v i g s d l g p k i t  
p i g s l a t l l w l h v l t q k d v  
k i s w g t y f k t g i i t i p v l f i t l i g l y l t l i i f  
>sp|P63644|ASSY\_STAAM  
mkekivlaysggldtsvavqwlidkgydvaccldvgegkdldivykaldmgavechiidatkefsdeyvsvaikgnlm  
yenayplvsal srpliakk  
lveiaektnsvgiahgctgkndqvrfevaikalnpslkafapvrewawsreeeidaikhnipvsinhdspysidqnlw  
granecgiledpyaapped  
afdlnaleetpdtadei l t f d k g i p v q i d g k t y e l d d l i l t l n a l a g k h g i g r i d h v e n r l v g i k s r e i y e a p a a e v i  
l k a h a l e t i t l t k d v a h f  
k p i i e k q f a e q l y n g l w f s p l t d s l k l f i d s t q q y v s g d v r i k l f k g n a i v n g r k s p y t l y d e k l a t y t k e d a f n q d a a v  
g f i d i y g l p t q v n a m l h g g  
ysneq  
>sp|P63683|ATKB2\_STAAM  
mhhvnkyfnqtmvieal k m s f y k l n p k q l i k n p i m f v e v g m v l t l i l i c f p d i f g t s y l s r g y l i t i f i l l i t i l f a n  
f s e a f a e g r g k a q a d l r q  
a q s n l t a r l i e g a n d a y r i v n a t e l k a g q n i r v e n g e t i p a d g v v i n g l a t v d e s a i t g e s a p v i k e s g g d f d g v i g g t l v  
t s d w l e i r v e s e a g t s f l d  
k m i a l v e g a e r n k t p n e i a l f t l l t t l t i i f l v v i v t l y p i a s y l h l i l p i a m l i a l t v c l i p t t i g g l l s a i g i a g m d r  
v t q f n l a k s g r a v e v c g d  
v d v m l d k t g t i t y g n r i a s e f l p v n q m l e k l i v a a y m s s i y d d t p e g k s i v r l a q m y i n e l p k d i d g t y k p f t a e t r  
m s g i i t n e i s v f k g a p n s m  
i n l v k q q g n i p l n i e s l c m d v s s k g g t p l i v i e n n v m l g v i y l k d v i k d g l v e r f t e l r k m g i e t v m c t g d n a l t a a t i  
a k e a g v d r f v a e c k p e d k i  
k v i k d e q a k g h i v a m t g d g t n d a p a l a q a n i g l a m n s g t i s a k e a a n l i d l d s n p t k l i e v v k i g k q l l m t r g a l t t f s l  
a n d v a k y f a i l p a l m m s t i  
p e m t s l n i m h l s s p k s a i s a l i f n a l i i v a l i p i a m k g v k v g y s i d r i f i n n m l i y g l g g l i v p f l g i k l i d m i v q f f  
v  
>sp|P63765|FTSA\_STAAN  
meehyvsv idigsssvktivgekfhngin v i g t g q t y t s g i k n g l i d d f d i a r q a i k d t i k k a s i a s g v d i k e v f l k l p i  
i g t e v y d e s n e i d f y e d t e  
i n g s h i e k v l e g i r e k n d v q e t e v i n v f p i r f i v d k e n e v s d p k e l i a r h s l k v e a g v i a i q s i l i n m i k c v e a c g v d v  
l d v y s d a y n y g s i l t a t e k  
e l g a c v i d i g e d v t q v a f y e r g e l v d a d s i e m a g r d i t d d i a q g l n t s y e t a e k v k h q y g h a f y d s a s d q d i f t v e q v d s  
d e t v g y t q k d l s d f i e a r v  
e e i f f e v f d v l q d l g l t k v n g g f i v t g g s a n l l g v k e l l s d m v e k v r i h t p s q m g i r k p e f s s a i s t i s s i a f d e l l d  
y v t i n y h d n e e t e e d v i d v  
k d k d n e s k l g g f d w f k r k t n k k d t h e n e v e s t d e e i y q s e d n h q e h k q n e h v q d k d k d e e s k f k k l m k s l f e  
>sp|P63797|HSLU\_STAAN  
mdtagir l t p k e i v s k l n e y i v g q n d a k r k v a i a l r n r y r r s l l d e e s k q e i s p k n i l m i g p t g v g k t e i a r r m a k v v g a  
p f i k v e a t k f t e l g y v g r d  
v e s m v r d l v d v s r l v k a q k s l v q d e a t a k a n e k l v k l l v p s m k k k a s q t n n p l e s l f g g a i p n f g q n n e d e e p t e e  
i k t k r s e i k r q l e e g l e k  
e k v r i k v e q d p g a l g m l g t n q n q m q e m m n q l m p k k k v e r e v a v e t a r k i l a d s y a d e l i d q e s a n q e a l e l a e q m g i i f  
i d e i d k v a t n n h n s g q d v s  
r q v q r d i l p i l e g s v i t k y g t v n t e h m l f i g a g a f h v s k p s d l i p e l q g r f p i r v e l d s l s v e d f v r i l t e p k l s l i k  
q y e a l l q t e e v t v n f t d e a

Tsompanidou\_et\_al\_Supplemental\_FASTA\_File

itr1aeiayqvnqtdnigarrlhti lekml edlsfeapsmpnavvdi tpqyvddk lksistnkdlsafil  
>sp|P63870|CYSK\_STAAM  
maqkpvnditqi iggtpvkv lrvvddnaadvvkle yqnp ggsvk drialami ekaeregk ikpgdtiveptsgntgig  
lafvcaakgykavftmpet  
msqerrnll kaygae lv tpgseamkgai k kake l keehgyfepqqfenpanpevhel ttgpell qqfegktidaf lagv  
gtggtlsgvgkv lkkeypn  
iei vai epeaspvlsggepgphklqglgagfipgtl nteiydsi ikvgn dtamemsrrvakeegilagissgaaiyaa iq  
kake l gkgktvvtv lpsng  
eryl stpl ysfdd  
>sp|P63947|DAPA\_STAAM  
mthl fegvgval ttpftnnkv nlea l kahvnfl lennaqai ivngttaesptl ttdekeril ktvid l vdkrvpvi agtg  
tndteksiqasfqakalga  
daimli tpyynktnqrg l vkhfeaitdavl pvvlynvpsrtnmtiepetveilsqhyival kdatndfeyleevk kri  
dtnsfalysgnddhvveyy  
qrggqvvisvianvipkefqa lydaqsg l diqdqfkipgtllsalsvdin pipikal tsylefgnyel r l plvsledtd  
tkvl reaydtfkagene  
>sp|P63952|HISX\_STAAM  
mlnaqqflnqfsl eap l deslypi ir di cvekv hgdka l kmyn l tfdhtktdh l eisheqikaafdt l dektkqal qqs  
yerikayqes ikqtnqgle  
esvecyeyihpl esvgiyvpggkasypstvlmtat laqvagveni vvtppqpngvsqev laacyi tqvnqvfvvgaqs  
iaa l tygtet ipkvdi vg  
pgnqfvayakyl fgqvgi dqi agpteial i iddtad l daivdvfaqaehdel artyvige daqv l kdlesriakalpn  
vdrydivskisianghyli h  
asn fdeachvmti apehasi qtvnpqpyi ekvkv ygal fighyspevigdyvagpshv l ptnrtarftng l svndfltr  
ntvihl skdtfeqi adsaq  
hia hveal yn hqqsil i rqs  
>sp|P63981|DPO3\_STAAM  
mamteqqkfkvl adqiki snql daei l nsgel tridvsnkrtwefhit l pqflahedy l l finaieqefkdianvtcrf  
vtngtnqdehaikyfg h  
idqta l spkvkgql kqkkl imsgkv l kvmsndi ernhfdkacngsl ikafrncgfdidki i fetndndqeqn lasleah  
iqeedeqsar l eatek l ekm  
kaekakqddnesavdkcqi gkpiqien ikpiesi eeefkvaiegv i fdin l kelksgrhiveikvtdytdslvl kmft  
rknkdd l ehfkal svgkwv  
raqgri eedtfi rdlvmmmsdi ee ikkatkdkkaekrvefhl htamsqmdgipnigayvkaadwghpai avtdhnvvq  
afpdahaaekhgikmi yg  
megml vddgvpi aykpqdv l kdatyvvdvettg l snqydkie laavkvhngei idkferfsnpher l setiin l thi  
tddm l vdapeieev l tefk  
ewvgdai fvahnasfdmgfidtgyer l gfgpstngvidt l elsr tinte yghg l nflakkygvel tqhhrai ydteata  
yifi kmvqqmkel gvl nhn  
einkkl snedaykrarpshvt l ivnqqgl kn l fkivsas l vkyfyrtpriprsl l de yreg l l vgtacdege l ftavmq  
kdqsqveki akyydfieiq  
ppalyqdl idrel i rdtet l heiyqr l ihagdtagipviatgnahyl feh dgiarkiliasqpgn l nrst l peahfrtt  
dem l nefhl geekaheiv  
vkn tnel adriervpikde lytprmeganeei relsytnarklyged l pqivid rlekelksi ingnfaviylisqr l v  
kks l d dgy l vgsrgsvgss  
fvatmtei tevnpl pphyi cpnck tseffndgsvgs gfd l pdktcetcgap l ikeggdipfet l fgfgkd kvpdid l nfs  
geyqpnahnytkvl fgedk  
vfragti gtvae kta fgyvkgyl ndqgi hkrgae idrlvkgctgvkr tttgqhpggi ivvpdy mdydftpiqypaddqns  
awmtthfd fhsihdnv l kl  
dilghddptmi rmlqdlsgidpkipvddkev mqi f stpes l gvtede il cktgtfgvpefgtgfv r qml edtkpttfse  
lvqi sgl shgt dvl gnaq  
eliktgicdl ssvigcrddimvylmyag l epsmaf kimesvrkgkg l teemietmkenev pdwyl dsc l kikymfpkaha  
aayvl mavriayfkvhhl  
yyyasyfti rasdfdli tmi kdktsi rntvkdmysrymdl gkkekdvl tvleimnemahrgyrmqpisleksqafefi e  
gdtl i p pfi svpg l genva  
krivearddgpfl sked l nkkag l sqki e y l del g l p n l pdkaql sifdm  
>sp|P64003|EZRA\_STAAN  
mlyi ilaiivi i liavgl fy l rsnkrqi i ekaierkneiet l pfdqn l aql sk l n l kgetkkydamkkd nvestnky  
lapveeki hnaeal l dkfs  
fnasqsei ddanel mdsyeqsqq l edvnei al ykdndelydkckvdyremkrdvl anrhqfgeaas l l eteiekfep  
r l eqyev l kadgnyvqahn  
hiaa l neqmkql r symeei peli retqkel pggfqdl kygc rdl kvegydl dhvkvdst l qslkte l sfveplisrlele  
eandk l anidkl d dmydl  
iehevka kndveetkdi i tdn l fkakdmny l t qteieyvrenyyi nesdaqsvrqfenei qslisvyddil kemsksvr  
yseqdn l qyl edhvtvin  
dkqek l qnhli q l redeaeaedn l lrvqskkeevyr l lasnltsvperfi imkneidhevrdvneqfserpihvkqlkd  
kvski v i qmnt fedeandv  
l vnavyaekli qygnryrkdysnvdksl neaer l fknrykraieiaeqvlesvepgvtkhieevikq

Tsompanidou\_et\_al\_Supplemental\_FASTA\_File

>sp|P64142|DHPS\_STAAN  
mtkktkimgilnvtppsfsdggkfnnvetainrvkamidegadiidvggvstrpghemvtleeelnrvlpvveaivgfdvk  
isvdtfrsevaeacklglv  
dmindqwaglydhrmfqivakydaeiilmhngnngnrdepvveemltsllaqahqakiagipsnkiwldpgigfaktrnee  
aevmarldelivateypvll  
atsrkrftkemmgdydtpverdevtaattaygimkgvravrvhvelnaklakgidflkenenarhnls  
>sp|P64173|FUMC\_STAAN  
msvriehdtfgeievpadkywgaqterskrnfpvgkermpievvygfaqlkraaalanfdlglkseakkdaivyacdqi  
sgeidehfp1vwwqtsgt  
qsnmnevsvsyvanmylkdhqidesihpnddvnesqssndtftamhvalyqevetklepalkllrntlkekedkfe  
ikigrthlqdatpiklgge  
isgwrymlrceimlsekkihlnlaiggtavgtginahpefgdkvahyisentgypfvssenkfhaltahdevvqlhgt  
lkalagdlmkvandrvwla  
sgpraglaeisipenepgssimpgkvnptqcemlrmvavqvmgndtvvgfassqgnfelnykpvimhntlqsiylladg  
metfnncavgiepieeni  
dnylnqslmlvta1nphigyekaaqiaakkahkegltlkesaiqtgyvteeqfeawikpedmvdph  
>sp|P64190|GPDA\_STAAM  
mtkitvfgmgsfgtalavlaenghdv1mwgknqdavdelntchnkkylyakldvniatsdmtkaiqfadiylmalp  
tkamrevatqindk1tskk  
tfihvakgiengtfrvsemiedsispeynagigvlsgpshaevvvkqpttvaasskdksvskltqdlfmndylrvytn  
ddl1gvelggalkniiaava  
sgivagigygdnaaka1mtrglaeisrlgek1gadpmtflglggigdlivtcisthsrntflgyklgqgesmdqalsemn  
mvvegiyttksvyhlakek  
nvdmpitnalryv1feni1svkecvkd1merdkkse  
>sp|P64218|GCSPA\_STAAN  
mshryipltekdqemlqtigaksigelfgdvpsdillnrdlniaegeaettllrrlnriasknitkethstflgagvyd  
hyapsvvdamisrsefyta  
ytpyqpeisqgelqai1fefqtl1celtdmdvanssmydgmstfaeacilafsqtkknkivvskglhyqalqvlhtyatr  
kefevveid1dgtvtdlkk  
leaavddetaavavqpnfygsiedlekiqsfiiedkka1fi1vyanpla1gl1tppgsfgadivvgdtqpfqipa1qfggph  
cgyfattkklmrkvpgrlv  
gqtqddegnrgfvl1lqareqhirrdkatsnicnqalnalassiamsal1gkqgiydiavqniehanyakqqfikkge  
ldgtsfnefvvfkdkpiqq  
vneelvkyni1ggfd1gvvsddfknhm1iavtelrtkdeid1fvekagelnd  
>sp|P64269|GPMI\_STAAM  
makkptali1ldgfanresehnavklankpnfdryynkypttqi1easgl1dvg1pegqmgns1evghmnigagrivyqsl1t  
rinksiedgdf1fendvlnn  
aiahvshdsalhi1fgl1sdggvhshykh1falle1akkqgvekvyvha1fdgrdv1dksal1kyieeteakfne1gigqf  
asvsgryyamdrdrwere  
ekaynai1rnfdptyatakegveasynegl1tdefvvpfivenqndgvndgd1tvi1fynfrpdraaq1seifanrafegfkv  
eqvkd1fyatftkyndid  
aai1vfevd1nntigeiaqnn1l1tql1riaetkyphvtyfmsggrneefkgerr1lidspkvatydl1kpemsayevkdal  
lee1nkgd1dli1lnfanp  
dmvghsgm1leptikaieavdec1gevdki1dmdgyai1tadhgnsdqv1tdddqpm1tth1t1npvpv1vtkegv1retg  
rlgd1apt11d1lnveqpe  
dmtges1ikh  
>sp|P64309|NTPA\_STAAM  
mkeiviasnngk1ndfkvi1fpdyh1vigi1selipdf1veetgst1feenai1kseaaka1nktvi1addsg1evfal1ngep  
giysaryagenksdeanie  
k1lnk1gnttdrraqfvcvi1smgpdmetkvfkg1tvsgei1adgkygengfgyd1pi1fyvpk1dktmaql1skeqkgq1shrr  
nain11qaf1legeknv  
>sp|P64318|PCRA\_STAAM  
mna11nhm1teqseavk1ttegpl1imagagsk1trv1lthriay11dekdvspynv1aitftnkaarem1kervqkl1vgdqa  
eviw1mstf1hsmcvr1lrrd  
adrigi1ernfti1dptdqk1svikdv1kneni1dskkfep1rmfigai1sn1kne1lktpadaqkeatdyhsqmvatvysgyqrq  
1srneal1dfdd1imttin1  
fervpev1eyyqnk1fqyihvdeyqdt1nkaqyt1vk1laskfkn1cvvgdsdqsiygwrgadiqni1l1sfekdypeant1fl  
eqnyrstkt1lnaanevik  
nns1erkp1kg1lwtantngeki1hyeamterdeae1fvi1reimkhq1rngkkyqdmai1lyrtnaqsrv1leetfmksn1mpytmvg  
gqkfydrkeikd1l1sy1lri  
iansddis1lqri1invpkrvgpssvekvqnyal1qnni1smfda1geadfig1l1skkv1tqec1l1fyeliqsl1ikeqef1eih  
eivdev1lqksyrem1lere  
ntlesrs1r1eni1defmsvpk1dyeent1pleeqs1l1nfl1td1sl1vadidead1tengvt1lmtmhsak1glefpiv1fimgmes1  
fphiraik1seddhemqeer  
ri1cyvai1traeev1lyi1thatsrml1fgrpqsn1mpsrfl1keipes11lenhssgkrqti1qpkakpfakrgfsqr1ttstkkqvs  
ssdwnvgdkvmhkawgegm  
vsnvnekn1gsi1eldi1fksqgpk1r1laqfapi1ekked  
>sp|P64334|HEM2\_STAAN

Tsompanidou\_et\_al\_Supplemental\_FASTA\_File

mkfdrhrrl rssatmrdrmvrenhvrkedliypi fvvekdvdvkeiks lpgvyqis lnllese lkeaydl giraimffgvp  
nskddigtgayihdgvivq  
atriakkmyddl livadtlceytdhghcgviddhthdvdndks lpllvktaisqveagadiiapsnmmdgfvaeirrgl  
deagyy nipimsygvkyas  
sffgpf rdaadsapsfgdrktyqmdpanrlea lrelesdlkegcdmmivkpa lsyldivrdvknhtnvpvvaynvsgeys  
mtkaaaqngwideervvme  
qmvs mkragadmiityfakdicryldk  
>sp|P64364|HIS5\_STAAN  
mivivdyglgnisnvrkrahelgyevvsnstskiidqaetiilpgvghfdamseikrlnlnailakntdkkmigiclgm  
qlmyehsdegdasglgfi p  
gnisriqtteyvp phlgwnnlvskhpm lndvyfvhsyqapmsenviayaqygadipaivqfnnyigiqfhpeksgtyglq  
ilrqaiqqgfind  
>sp|P64374|HIS7\_STAAM  
miyqkqrntaetqlnisiddqspshintgvglnhmlt lftfhsglslnieaqgidvddhhvtedigivigqlllemi  
kdkkhfvrygtmyipmdet  
larvvvdigrpylsfnaslskekvgtfdtelveeffravvinarlthhidlirggnthheieaifkafsralgialtat  
ddqrvpsskgvie  
>sp|P64375|ACUC\_STAAM  
mqhssktayvysdkllqyrfhdqhpfnqmrkl tte llnanllspeqivq priatgdelmlihydyveaikhashgi  
iseadeakkyglndeengqf  
khhmrhsativggaltladlimsgkv lngchl ggg lhaaqqgrasgfciyndiaitaqyiakeynqr vliidtdahhgdg  
tqwsfyadnhvttysihet  
gkflfpgsghytergedigyghtvnp l epytedasfl ecfkl tvepvvksfkpdiilsvngvdihyrdplthlncths  
lyeipyfvkyladsytngk  
vimfggggyniwrvvprawshvflslidqpiqsgylplewinkwkhyssellpkrwedrlndytyvprtkeiseknkla  
lhaswyestrq  
>sp|P64407|DNAK\_STAAM  
mskiigidlgttncsvtlvegdepkviqnpegsrttspvafknggetqvgevakrqaitnptvqsikrhmgtdykvdie  
gksytpqeisami lqnlnk  
taesylgekvdkavitpayfndaerqatk dagkiagleverineptaaalaygl dktkd ekvlvfdlgggtfdvsil  
elgdgvfevlstagnklg  
gddf dqviidy lvaefkkengvdlsqdkmalqr lkdaaekakkd lsgvsqtqis lpfisagengplhle vnltrskfeel  
sdsli rrtmeptrqamkda  
gltnsdi devilvggstripavqeavk keigkepnkgvnpdevvamgaa iqggvitgdvkdvvlldvtp lslgieilggr  
mntliernttiptsksqi y  
stavdnqpsvdvhv lqgerpmaadnktlgrfq l tdi ppaergkpqi evtf didkngivnvtakdlgt nkeqritiqsss  
lsdeei drmvkdaevnaea  
dkkrreevd l rneads l vfvqekt l tdlgenigeedkksaeekkdal ktalegqdi edikskkelekviqel sakvyeq  
aaqqqqqqaganagq nnds  
tvedae fkevkd d d d k k  
>sp|P64416|HUTH\_STAAN  
mtlyldgetl tiediksflqqskieiddalervkksravverieneetvygittgfglfsdvridptqynelqvnli  
rshacglgepfskevalvm  
milr lntllkghsgatlelvrq l qffineriipiipqqgs l gasgd laplsh lalaligegkvlyrgeeksd dvlreln  
rqplnlqakeglalingtq  
amtaggvisyiead lgyqsew iaal thqslngiidayrhdvhsvrnfqeqinvaarmrdwlegst l ttrqaeirvqday  
tlrcipqihgasfvfnvy  
kqql efemnaandnplifeeanetfvissgnfhgqpi afaldhklkgvselanvserrler l vnpqlngdlpaf l spepg  
lqsgamimqyaaas lvsen  
ktlahpasvdsi tssanqedhvs mgttaarhgyqienarrv laiecvialqaaelkgveglspktrrkyeefrsivpsi  
thdrqfhkdieavaqylkq  
siyqtta ch  
>sp|P65169|IMDH\_STAAM  
mweskfakes ltfddvll ipaqsdilpkdvd lsvqlsdkvkl nipvisagmdtvteskma iamarqgg lgvihknmgvee  
qadevqkvkrsengvisnp  
ffl tpeesvyeeal mgkyrisgvpi vdnkedrnlvgiltnrd lrfiedfsikivdmtqenlitapvnttleaekilq  
khkieklplvk dgrlegli  
tikdiekviefpnaakdehgrllvaaagisktdiraqlveagvdvlvidtahghskgvidqvkhikkttypeitlvag  
nvataeatkd l feagadi v  
kvgigpgsicttrvavgvqp itaiydcatearkhgkaiiadggikfsgdi ikalaagghavmlgsllagteespgate  
ifqgrqykvyrqmgslgam  
ekgsndryfqedkapkfvpegi egrtaykga l qdtiyqlmggvragmgytgshdlrelreeaqftrmgpaglaeshphn  
iqitkespnysf  
>sp|P65219|KGUA\_STAAM  
mdnekgllivlsgpsgvkgvtvrkri fedpstsykysis mtrq mregevdgvdyffktrdafaalikddqfiyaeyvg  
nyygtpvqyvkd tmdeghd  
vfl eievegakvrkkfpdal fflappsldh l rerlvgrgtesnekiqsrinearkevemmnlydyvvvndevelaknr  
iqciveaehlkrerveaky

Tsompanidou\_et\_al\_Supplemental\_FASTA\_File

rkmileakk  
>sp|P65237|KPRS\_STAAN  
mlnneyknsslkifslkgnealaevadqvgielgkcsvkrfsdgeiqinieesirgcdvfiiqptsypvnhlhmelim  
idackrasaatinivvpyy  
gyarqdrkarsrepitaklvnlietagatrmialdlhapqioggffdididhlmgvpilakhfkddpninpeecvvvspd  
hggvtrarkladiiktpra  
iidkrprprnvaevmni vgeiegrtaiiiddiidtagtitlaaqaikdkgakevyaccthpvlsgpakeriensaikeli  
vtnsihldekrkpsntkel  
svagliagaiirvyeresvsvlfd  
>sp|P65256|LDH1\_STAAN  
mnkfkgnkvvligngavgssyafslvnqsvdelviidldtekvrgdvmdlkhatpyspttvrkageysdchdadlvvi  
cagaaqkpgetrldlvskn  
lkifksivgevmaskfdgflvatnpvdi layatwfkfsglpkervigsgtildsarfrlllseafd vaprsvdaqiigeh  
gdteipwshaniaggplk  
tllqrpegkaqieqifvqtrdaaydi iqakgatyygvamglariteaifrneda vltvsallegeydeedvyigvpavi  
nrngirrvveiplndeeqs  
kfahsaktlkdimaeaeelk  
>sp|P65289|LIP1\_STAAN  
mksqnkysirkfsvgassiliatllflsggqaqaakqvmngnsqedtvtasigdqqtrenanyqrengvdeqqhtenl  
tknlhndktiiseenhrktid  
dlnkdqllkdknsslknkniqrtdtknnpnsdvnqgleqaindgkqskvasqqqskevdnsqdsnannlpsqsltk  
apslnksdqtsqreivnet  
eiekvppqnnqandkitnhfnneqevkpkdektlsvsdlnknqkspveptkdndknglnllkssavatlpnkgtk  
l takakddqtnkvakggqy  
knqdpi vlvhgfnfgtddinpsvlahywggnkmnirqdleengykayeasisafgsnydravelyyyikggrvdygaaha  
akygherygktyegiykdw  
kpgqkvhlvghsmggqti rgleellrngnreeieyqkkhggeisplfkgndnmisittlgtphngthasdlagnealv  
rqivfdigkmfgnknsrvd  
fglaqwglkqkpnesyidyvkrvkqsnlwkskdngfydltregatdlnrktslnpnivyktytgeathkalsndrqkadl  
nmffpfvigtngligkatek  
ewrendglvsvissqhpfnqaytnatdkiqkgiwqvtptkhdwdhdfvgqdsdvtvrtreelqdfwhhladdlvktekv  
tdtkqa  
>sp|P65343|METE\_STAAN  
mttiktsnlgfprlgrkrewkkaiesywakkiskeeldqtltdlhkenlllqkyyhldsipvgdfslydhildtsllfni  
iperfqrtdiddllfdia  
rgnkdhvasalikwfnntnyhyivpewdnvepkvsrvnlldrfkyaqslvna hpv ivgpitfvkl skgghqtfeekvktl  
lplykevfeslidagaeyi  
qvdepi lvtddseyeni treaydyfekagvakkliqityferahlkflsslpvgglgldfvhdngynlkqieagdfdks  
ktlyagiidgrnvasdie  
akkvllidkllahtnelviqpssslhvpsl ddetldtsvgeglsfateklde l dalrrllnqndsvkydklkaryerfq  
nqsfknl dydfesvrtsrq  
spfaqrieqqqrlnl pldlptttigsfpqsrevrkyradwknkritdeayetflkneiarwikiqedigldvlvhgefer  
ndmveffgeklqgfvltkf  
gwwqsygsravkppiiygdvkwtapl tvdetvyaqsltdkpvkgmltgpvtilnwsfervd lprkvvdqialaineevl  
aleaagikviqvdepalre  
glplrseyheqylkdavlsfklatssvrdeqihthmcysqfgqiihaihdldadvisietsrshgdlikdfedinydlg  
iglgvydihspriptkeei  
ttainrslqqidrs lfwvnpdcglktrkeeevkda ltvlnavkkrqe  
>sp|P65404|MOBA\_STAAM  
mkaiilagghsvrfgkpkafaevngetfysrviktlestnmfneiiistnaqlatqfkypnvviddenhndkgplagiyt  
imkqhpeee lffvsvdtp  
mitgkavstlyqflvshlienhl dvaafkedgrfiptiafyspnal gaitkalhsdnysfkniyhelstdyldvrvdap  
sywykninyqhdldal i qk  
l  
>sp|P65456|MURA2\_STAAM  
maqevikirggrtlngenvnsgaknsavaiipatl laqghvkleglpqisdvktlvslledlnikaslngtelevdttei  
qnaalpnkveslrasyym  
mgamlgrfkkcviglpggcplgprpidqhikgfkalgaeidessttsmkieake lkgahifldmvsvat inimlaavya  
tgqtvienaakepevvda  
nfltsmganikgagtstikingvelhgseyqvipdri eagtymciaaacgenviln n ivpkhvetltakf selgvnvdv  
rderirinnapyqfvdik  
tlvypgfatdlqqpitpllfmangpsfvtdtiyperfkhveelkrmganievdegdatikpstlhgaevyasdlragacl  
iia gli aegvttiynvkh  
yrgytdivehkalgaditwte v  
>sp|P65481|MURG\_STAAM  
mtkiaftgggtvghsvnlsliptalsqgyealyigskngieremiesqlpeikyypissgklrryislenakdvfkvlk  
gil darkvlkkekpdllfs  
kggfvsvpvviaakslnpti ihesdltpglankialkfakkiyttfeetlnylpkekadfigatiredlknghangyq

Tsompanidou\_et\_al\_Supplemental\_FASTA\_File

ltgfneknkvllvmggslg  
skklnsiirenldallqqyqvihtgkglkdaqvkksgyiqyefvkedltdllaitdtvisragsnaiyefltrlipmll  
vplgldqsrqgdindanhf  
adkgyaktideeqqltaqillqelnemeqertrinmksyeqsytkaelfdkmikdaIn  
>sp|P65495|MUTS2\_STAAM  
mrqktldvlefekikslvanetisdglgkvnqmpatnfetvfvqmeetdeiaqiynkhrllpslsglskvsafihradi  
ggvlnvselnlkrliqvq  
nqfktfynqlveedegvkypilddkmnqlpvltdlfhqinetcdtydlydnasyelqgirsksistnqrirqnldrivks  
qanqkklstdaivtvrnern  
vipvkaeyrqdfngivhdqsasgqlyiepssvemmnsrllrhdeaiekervltqltgyvaadkdallvaeqvmgqld  
fliakarysrsikgtkpi  
keertvylpkayhpllnretvvantiefmedietviitgpntggktvtlktlglivmaqsglliptldgsqslsvfkny  
cdigdeqsieqslstfssh  
mtniveilkhadkhsllvfdelgagtdpsegaaIamsilhdhvrkigsIvmatthypelkaysynregvmnasvefdvdtl  
sptykllmgvpgnsafdi  
skkllgslniinkaktmigtdekeinemieslernykrvetqrleldrIvkeaeqvhdlskqyqqfnyeksIieeake  
kanqkikaatkeaddiikd  
lrqllreqkgadvkehelidkkkrlddhyeaksikqnvqkqkydkivagdevkvlsygqkgevlvndeaaivqmgikm  
klpiedlekkqkekvpkptk  
mvtqrnrqtikteldlrgyryedaIeldqyldqavl sneqvyi ihgkgtgalqkgvqqhlkhhksvsdfrggmpsegg  
fgvtvatlk  
>sp|P65628|OXAA\_STAAM  
mkkkallplflgimvflagcdyskpekrgsffyntfvdpmknlldwlgnnllndnyglaiiilvlviriillpflmsnyk  
nshmmrkmkvakpevekI  
qekvkrartqeeqmaangeImqvykkydmpiksmIgcIplmlIqIpiimglyfvIkdqlvdglfkyphflwfdlgrpdIw  
itiiagvlyfiqayvsskt  
mpdeqrqmgymmmvIspimiIwisIssasaIglywsvsaaflvvqthfaniyyekvakkevqpfieayerehnggsnkkg  
kntqvvskkkkk  
>sp|P65647|LACB\_STAAN  
mkialgcdhivtdtkmrvseflksgkhevidvgtydftrthypifgkkvgeqvvsngadlgvcicgtgvginnavnkvpq  
vrsalvrdmtsalyakeel  
nanvigfggriigelImcdiidafinaeykateenkliakikhletsnadqadphffdeflekwdrgeyhd  
>sp|P65664|PAND\_STAAM  
mirtmnakihrarvteslnyvgsitidsdileavdilpnekvaivnnngarfetyviagergsgkicIngaasrlve  
vgdvviimtyaqIneeek  
nhapkvavmednviemihektivl  
>sp|P65695|K6PF\_STAAM  
mkkIavltsggdspgmnaavravvrtaiyneievygyhygqllnddihklelsgsvgdtiqrggtflysarcpefkeqe  
vrkvaienlrkrgiegllv  
iggdgsyrqaqriseeckiqtigipgtidndingtdftigfdtalntiiglvdkirdtasshartfiieamgrdcgdla  
lwagIsvgaetivvpevkt  
dikeiadkieggiIkrkkhsivIvaegcmtaqdcqkelsqyinvdnrvsvIghvqrggsptgadrvlasrlggyavdlIm  
qgetakvgviknnkivats  
fdeifdgkdhkfdyslyelankIIsi  
>sp|P65798|HSLV\_STAAM  
msnttlhattiyavrhngkaamagdgqvtlgqqvimkqtarkvrrlyegkvlagfagsvadaftlfekfetklqqfsgnl  
eraavelaqewrgdkqlrq  
IeamIivmdkdaIlvsgtgeviapdddIaigsggnyalsagraIkrhashI saemayesIkvaadIcvftndnivve  
tl  
>sp|P65819|LEXA\_STAAM  
mreltkrqseiynyiIqvvmkgypsvreigeavglasstvhghlsrleekgyirrdptkpraieivsdqtdndinme  
etiIhvpvigvtagvpita  
venieeyfplpehlstthnsdifiInvgdsmieagildgdkvivrstiaengdiivamteedeatvkrfykeknryrl  
qpenstmepiylndnavig  
kviglyrem  
>sp|P65901|PURL\_STAAN  
mskfiepsveeklekvyqdmglsdqeyekvcdilgrqpnftetgifsvmsehcsykshkpfIkqfptsgehvImgpge  
gagvvdigdnqavvfkves  
hnhpsaiepyqgaatgvvggiirdivsigarpinllnsIrfgelndkqnqrllkgvvgiggygncigipttageiefder  
ydgnpIvnamcvgvinhdm  
Iqkgtakgvgnsviyvglktgrdgihgatfaseelteeseskrpsvqigdpfvgkklmeatleaitfdelvgiqdmgaag  
I tssseemaakggsgllrl  
leqvptrepgispyemmlsetqermllvvekgneqkflldlfdkheldsavigevtdtnrfvltyddevyadipveplade  
apvyilegeekdyntsknd  
ythidvkdttffkllkhptIaskhylydqydqqvgantiIkpglqasvvrvegtnkaiastidgearyvynnpyeggkmv  
aeayrnIiavgatplamtd  
cInygspekkeiyqqlidstkgmaeacdiIktpvvsgnsvlynetkgtsifptpvvgmvglienvnylndfepqvgdkly  
Iigdkddfdggsqleklly

Tsompanidou\_et\_al\_Supplemental\_FASTA\_File

gkvnhefesldlissevekgesiktai regllshvqvtvgkglitlaklsahyglgkssiditnaqlfsetqgryvsv  
ksgktlnidnaieigltd  
sdnfvttptyteisenvsdikwiwegaiaqclttqd  
>sp|P65906|PYRC\_STAAN  
mklknkvlnqngelqqadilidgkvikqiapaiepsngvdiidakghfvspgfvdvvhvlnrepgeyketietgkkaa  
rggfttvcmpntrpvpds  
vehfealqkclidnaqrvlpyasittrqlgkelvdfpalvkegafaftddgvgvqtasmyegmieaakvnkaivahce  
dnllyggamhegkrskel  
gipgipnicesvqiardvllaeaagchvhvchvstkesvrvi rdakragihvtaevtphlllleddipgnnaiykmnpp  
lrstedrealleglldgti  
dciatdhaphardekaqpmekapfgivgsetafpllythfvkngdwtlqqldvlytikpcetfnleygtlkengyadlti  
idldseqeikgedflskad  
ntpfigykyvgnpilmvegevkfegdk  
>sp|P65951|QUEA\_STAAN  
mnieefdydlpesliaqtplkdrdhsrllvmdretgemkhlhfkdiieyfrpgdtlvlnldrvmprlfglkeetgakve  
mlmltqiendwevllkpa  
krikvgnklnfgngkii aecikemdqgrimrlyhegilqerldelgemplpyikerlddpdryqtvakesgsaaapt  
aglhftdelteikngv  
iafvtlhvglgtrpvsdvndhemhseyyqmtqetadllndtkskghriisvgttstrtletirrdhdkfvetsgwn  
ifiyppgfdfkaidgqitnf  
hlpkstlvmvsafstrenvlnayktavnleyrffsfgdamlii  
>sp|P65986|RECO\_STAAN  
mlmrqkgiikavdygesdkii tilnehgakvplmarrakkvktglqaqtqlfvyglfiynqwrngmtlnsvdvisqhyk  
lqmdlyvssyaslaetie  
rsmdegdiapynyqlqfvlekiegsaqlmsvvvmlkcmkrfgftasfnrcavsgndtqadligysfkfdgaisrqa  
skdvhavi lsnktlyllvd  
lqklpidkmnslnihqeiidemsdiilmlyreyagmffksqklnqlkrleq  
>sp|P66012|AHPF\_STAAM  
mlnadlkqqlkqlllelmegnvefvaslgsdekskelkellteisdsprlslsekslkrtpsfsvnrpgeetgvtfagip  
lghfnslvlalqvsgra  
pkekgsiidqiknlegs fhfetfisltcqkcpdvqa lnmsvinpnithsmidgavfreesenimavpavflngeefgn  
grmtiqdilsklgstadas  
efenkepydvli vgggspasgaaityarkglrtgivadriggqvndtagienfitvkettgsefssnlaahidqydidam  
tgi ratdi ektdeai kvtl  
engavlesktviiatgagwrkl nipgeeq linkgvafcpdgp lfenkdvavigggngsveaaidlagivnhvtl fefa  
selkadnvlqdr lrs lsnv  
diktnakttevgedhvtgiryedmstgeehl nldgifvqigllpntswlkdavelnergeividrnntnvpgifaag  
dvtqknkqiiismagan  
aalnafdyiirn  
>sp|P66062|RL7\_STAAM  
manheqii eai kemsve lndlvkaieeefgvtaaapvavagaaggadaaaektefdveltsagsskikvvkavkeatgl  
glkdake lvdgapkvi kea  
lpkeeaeklkeqleevgatvelk  
>sp|P66153|RL28\_STAAN  
mgkqcfvtgrkastgnrrshalnstkrrwnanlqkvri lvdgkpkkvwsaralksgkvtrv  
>sp|P66195|RL31B\_STAAM  
mkqgi hpeyhqivil dtttnfkflsgstkssemwedgkeypvirldi ssdshpftytrqkfaaadgrverfnkkfgl  
ksnn  
>sp|P66211|RL32\_STAAM  
mavpkrrtsktrknkrrthfki svpgmtepcncgeyklshrvckncgsyngeevaak  
>sp|P66230|RL332\_STAAM  
mrvnvtlactecgdrnyittknkrnperiemkkycprlnkylhretk  
>sp|P66254|RL34\_STAAM  
mvkrtyqpnkrkhskvhgfrkrmstkngrkvlarrrrkgrkvl sa  
>sp|P66319|RL9\_STAAM  
mkviftqdvkgkgekgevpvgyanfllkknaveatpgnlkqlelqkkrakqerqqeiedakal ketl snieevs  
aktgeggklfgsvstkqia  
eal kaqhdiki dkrkmdlpngihslygtnvpkldkevegtirvhtveq  
>sp|P66358|RS11\_STAAM  
markqvsrkrvvkknienhvahirstfnntivtitdefgnal swssagal gfkgskkstpfaaqmasetasksamehglk  
tvevtvkgppggresaira  
lqsaglevtai rdvtpvphngcrppkrrrv  
>sp|P66645|RS9\_STAAM  
maqveyrgtgrrknsvarvr lvpgegni tvnrdvrey lpfeslil dlnqpfdv tetknydvlnvvhgggftgqaqair  
hgjaral leadpeyrslk  
raglltrdprmkkerkkpglkaarrspqfskr  
>sp|P66655|RIMM\_STAAM  
mrvevgqivnthgikeikvksnsdftdvr fppgqvltvvhnndleytvkshrvhkg lhm ltfeginnindiehlkgs

Tsompanidou\_et\_al\_Supplemental\_FASTA\_File

iyqerdhedivleenefyy  
sdiigctvfdqetpigrvini fetgandvvikskeylipiyiadvvkevdenkiiitpmeglld  
>sp|P66675|RNH2\_STAAM  
mtltikevtqlinavntieelenhecflderkgvqnaiarrkalekeqalkeyvemtyfeneilkehpnaiicgidev  
grgplagpvvacatilsn  
hnylglddskkvptkrlelnealknevtafaygiataeeidefnikatqiamqraidglsvqpthllidamtldnalp  
qvslikgdarsvsiaaasi  
makvfrddytmqlskdypeygfeknagygkqhllaiddigimkehrksfepiksll  
>sp|P66715|RPOE\_STAAM  
mkiqdytkqmvdexsfdmaytllndkgetmnllydiidefraalgdyeyeeienrvvqfytdlntdgrflnvgenlwgld  
wysvddieekiaptiqkfd  
ildaddeedqnlkllgedemdddipaqtddqeeIndpedeqveeeinhsvdiveededeldedeefdedefnd  
>sp|P66766|METK\_STAAM  
mlnkr1ftsesvteghpdkiadqvsdaildailkddpnarvacettvtgmaliageistttyvdipkvvretikeigy  
trakgydyetmailtaid  
eqspdiaggvdkaleyrdkseeieatgagdqglmfgyatnetetymplaiylshqlakrlsdvrkdgtlnylrpdgkv  
qvtveydendpvriddti  
vstqhaddvtleiqikedikahviyptvpenlineqtkfyinptgrfviqggpqqdagltgrkiivdygyarhgggcfsg  
kdptkvdrsaayaaryvak  
nivaagladqcevqlayaigvaepvsiaidftgtgkvsegqlveavrkhfdlrpagiikmldlkqpiykqtaayghfgrt  
dvlfpweklkveelkdav  
ky  
>sp|P66919|THIE\_STAAM  
mfngsylvnyficgtsdvpshrtihevleaalkagitlfqfrekgesalkgndklvlakelqhlchqydvpfivnddvs  
akeinadgihvgddakvk  
eiaqyftdkiiglsisdldeyaksdlthvdyigvgpiyptpskhdahipvgpemi atfkempqlpivaiggintnnap  
iveagangisvisaiskse  
niektvnrfdkdfnn  
>sp|P66936|GYRB\_STAAM  
mvtalsdvnntdnygagqivlegleavrkrpgmyigstserglhhlvweivdnsidealagyankievviiekdnwikvt  
dnrgripvdiqekmgrpav  
eviltvlhaggkfgggykvsqglhgvgsstvna1sqdlevyvhrnetiyhqaykkgvpqfdlkevgttdktgtvirfka  
dgeiftettvnyetlqqr  
irelaflnkgiqtllrderdeenvredsyhyeggiksyvellnenkepihdepiyihqskddieveiiaiqynsgyatnll  
tyannihtyeggthedgfk  
raltrvlnsyglsskimkeekdr1sgedtregmtaiisikhgdpqfegqtktklgnsevrqvvdklfsehferflyenpq  
vartvvekgimaaravaa  
kkarevtrrksaldvaslpgkladcsskspeeceiflvegdsaggstksgrdsrtqailplrgkilnvekarldrilnn  
eirqmitafgtgiggdfd  
akaryhkiivmtdadvdgahirtlllftfyrfmrplieagyvyiaapplykltqgkqkyvyndrelklkse1nptpkw  
siarykglgemnadqlwet  
tmnpehral1qvkledaieadtqfemlmgdvvenrrqfiednavyanldf  
>sp|P66973|MNME\_STAAM  
mldtitsistpmegaigivr1sgpqaveiadklykgkhl1ndvpshtinyghiidpeskevveevmvs1rapktftr  
edieinchggiltinrvl  
eltmtygarmaepgeftkraf1ngrid1sqaeavmdfirsktdraskvamnqiegr1sdlikkqrqsileilaqvevnid  
ypeyddvedattefl1eqs  
keikqe1nr1ldtgagk1mreg1stvivgkpnvgkssmln1liqdnkaivtevagtttrdvleeyvnrvgvplrlvdtag  
iretedivekigverska  
1sqad1ilfvlnnealtqedytlyevvknedvivivnkmd1eqnidinevkdmiqdtpliqtsmlkqegideleiqid  
1ffggevqnqdmtyvsnr  
his1lkqarqtiqdaidaesgvpmdmvqid1trtweilgeiigetasad1idqlfsqfclgk  
>sp|P66982|TRPA\_STAAM  
mtklfipyimgndlienatllsengadiieigvpfsdpvadgpvimeagqqaikqgitidyifnqlekhgdqikcnyvl  
mtyyniichygeqaffekc  
rdtgvygliipdlpyelsqr1kqqfshygvkiislvamttddkrikdivshaegfiyvtmnattgqngafhpelkrkie  
sikaianvpvvgfirtp  
qhvadikevadvigseivkrfsntreeiiry1lqsiaqtl1n  
>sp|P66997|TRPD\_STAAM  
mtlltriktetill1esdikelidil1spsigtdikyell1ssysereiqqqeltyivrs1intmyphqpcyegamvcgtg  
gksnsfnisttvafvvas  
agvkvikhgnksitsnsgstd1lnqmniqtttvdtpnqlnekdlvfigatesypimkymqpvkrkmigkptilnlvgpli  
npyh1tyqmvgvfdptklk  
1vaktikdlgrkraiv1hgangmdeat1sgdn1liyel1tedgeiknyt1natdyglkhapnsdfkgspeen1ais1n1ln  
gkdqssrrrdv1lnag1s1  
yvaekvdtiaegielatt1idngealkkyhqmrge  
>sp|P67006|TRPF\_STAAM  
mklkfcgftsikdvtaasqlpidaigfihyekskrhqtitqikk1asavpnhidkvcvmvnpd1ttiehv1sntsintiq



Tsompanidou\_et\_al\_Supplemental\_FASTA\_File

lhgtesidfiqeikkkys  
ikitkalaadeniqninkykgfvdlfidtpsvsyggtgqtydwtilkhikdipyliagginseniqtvnqklshqgy  
dlasgievngrkdiekmta  
ivnivkgdrdne  
>sp|P67041|SYFB\_STAAN  
mlisnewlkeyvtiddsvsdlaeritrtgievddlidtykdiknlvvgfvkskekhpdadklncqvdigedepvqivcg  
apnvdagqyvivakvggrl  
pggikikraklrgersegmicslqeigissnyipksfesgiyvfsesqvpqgdalqalylddqvmefdltpnradaismi  
gtayevaalyntkmtkpet  
tsnelelsandelvtienedkvpysarvvhdvtiEspiwmarlikagirpinnvdisnyvllaygqplhmfqdqda  
igsqqivvrqanegekmtt  
lddterelltsdivitngqtpialagvmggdfsevkeqtsniviegaidpvsirhtsrnlrsessrfekgiatefv  
deavdracyllqtyangkv  
lkdrvssgelgafitpiditadkinrtigfdlsqndivtifnqlgfdteinddvitvlvpsrrkditikedlievari  
gyddipstlpvfdkvtsgq  
ltdrkyktrmvkevlegagldqaityslvske datafsmqqrqtidllmpmseahaslrqslphlieaasynvarknkd  
vklfeignvffangegeelp  
dqveylsgiltgdyvvnqwgkktvdfylakgvvdrvseklnlefsyrradidglhpgtraeillenkvvgfigelhpt  
laadndlkrtyvfeinfda  
lmavsvgyinyqiprfpmsrdialevdqnipaadllstihahggnilkdtlvfdvyqgehlekkgksiairlnyldte  
etltdervskvqaeieaal  
ieggavir  
>sp|P67075|UNG\_STAAM  
mewsqifhdittkhdfkamhdflekeystaivypdreniyqafdltpfenikvvilgqdpvhgpnqahglafsvqpnakf  
ppslnrmykeladdigcvr  
qtphlqdwaregvlllntvltrqgeanshrdigwetftdeikavsydkehvvfilwgkpaqqkiklidtskhciiksv  
hpsplsayrgffgskpysk  
anaylesvgkspnwcesea  
>sp|P67136|RRMF\_STAAM  
mftidfsdhtglvkdawykqiedllefakkeehieddaelsvtfvdkqeiqeinrtyrdkdkvtdvisfaleedepeidf  
sgldiprvlgdiiictdva  
qeqannyghsferehgflahgfhlhlyghmteadekemfgrqdtilynaygltrd  
>sp|P67371|Y1258\_STAAN  
mtkqiivtdstdlskeyleannihvipslstiegasvvdqvditseeфинhiendedvksqpaigefisayeelgkdg  
seiisihlssglsgtynta  
yqasqmvdanvtvidsksisfslgyqiqhlvelvkegvstseivkklnhlreniklfvvigqlnqlikggrisktkglig  
nlmkikpigtlddgrlelv  
hnartqnsisqylkkeaiefigidheiksigvahanvieyvdklkkvfneafhvnydinvttpvisahtgqgaiglvvlk  
k  
>sp|P67390|UPPP\_STAAM  
mfiielikgiilgvvegltefapvsstghmilvddmwksseflgsqsaftfkiviqlgsvfaaawvfrerfleilhighk  
hkhvegendqrrsrkprl  
nllhvlgmvpagilglldfdfeehlfsvptvmiglfvgaiymiiadkysvkvknpqtdqinyfqaavfigisqavamw  
pgfsrsgstistgvlmkl  
hkaasdtftimavpimlaasglslkhyqdiqiadipfyllgflaafvtvlglaiaktflhlinkiklipfaiyrivlvifi  
ailyfgfgigkgi  
>sp|P67407|URE2\_STAAN  
mipgeiitksteveinnhpetvieventgdrpiqvgshfhfyeanaldferemaygkhlidipagaavrfevgdkkevq  
lveyagrki fgfrgmvg  
pidesrvyrptdendayagvfgngaenvnkkggkrs  
>sp|P67425|UVRB\_STAAN  
mtmvehypfkishdfepqgdqpaakeivdgikagkrhqtllgatgtgktftmsnvikevgkptliiahnktlagqlyse  
fkeffpenrveyfvssydy  
yqpeayvpstdtfiekdasindeidqlrhsatsalferddviiiasvsciylgnpeeykdllvsvrvgmendrseilrk  
lvdvqytrndidfqrgrtfr  
vrgdvveifpaskeelciveffgdeidrirevnyltgevlkerehfai fashfvtreeklkvaieriekeleerlkel  
rdenkll eaqrleqrtnyd  
lemmremgfcsgienysvhltrplgstpytll dyfgddwlvmideshvtlpqvrngmyngdrarkqvlvdhgfrlpsald  
nrplkfeefeektkqlvyv  
satpgpyeihtdkmveqirptglldpkievrptenqidllseiqrternervlvttltkkmsedltytmkeagikv  
nylhseiktlerieiidl  
rmgtydvivginllregidipevslvvil dadkegflrsnrsliqtigraarndkgevimyadkmtsdsmkyaidetqrrr  
eiqmkhnekhgipktink  
kihdlisatvendenndkaqtvipkmtkkerqktidniekemkqaakldfekate lrdmlfelkaeg  
>sp|P67472|ALF1\_STAAM  
mnkeqlekmkngkgfiaaldqsggstpkalkeygvnedqysnedemfqlvhdmrtrvvtspsfspdkilgailfeqtmdr  
evegkytadyladkgvvpf  
lkvdkglaeeqngvqlmkpidnldslldranerhifgtkmrsnilelneqqikdvveqqfevakqiaakglvpiiepevn

Tsompanidou\_et\_al\_Supplemental\_FASTA\_File

inakdkaeiekvlkaelkk  
gldslnadqlvmlkltiptepnykelaehpnvrvvvlsggysrekanelldndeliasfsralasdlnradqskeefd  
kalgdavesiydasvkn  
>sp|P67513|SYL\_STAAN  
mnynhnqiekkwqdydenktfktndnlqgkfyaldmfpypsgaglhvghpegytatdiisrykrmqgynvlhpmgwa  
fglpaeqyaldtgnpref  
tkkniqtfrqikelgfsydwdrevnttdpeyykwtqwi fiqlynkglayvdevavnwcpalgtvl sneevldgvsergg  
hpyyrkpmkqvwlki teya  
dqlladldldwpeslkdqnrnwigrsegakvsfdvntegkvevfttrpdtiygasflvlspehalvnsittdeykekv  
kayqteaskksdlerdla  
kdksgvftgayainplsgekvqiwiadyvlstygtgaimavpahddrdyefakkfdlpiiieviiegnveeaaytgegkhi  
nsgeldgleneaaitkaig  
lleqkgagekkvnyklrdwlfsrqrywgepipvihwedgtmttveeelp111petdeikpsgtgesplanidsfvnvvd  
ectgmkgrrretntmpqwg  
scwyylyryidpknemladpek1khwlpvdlyiggvehavlh1lyarfwhkvllydlgivptkepfqklfnqgmilgegne  
kmskskgnvinpddivqsh  
gadt1lyemfmgpldaaiawsekgldgsrrflrdvwr1mvnedgtlsskivttnksldkvynqtvkkvtedfetlgfn  
taisqlmvfinecykvdv  
ykpγιegfvkmlapiaphigee1wsklgheesityqpwptydeallvddeveivvqvnk1rakikiakdtskeemqeia  
lsndnvkasiegkdimkvi  
avpqlvni vak  
>sp|P67527|Y1250\_STAAN  
mpivnvkllegrsdeqlknlvsevtavekttgarrqaihvvieemkpnhygvagvrksdq  
>sp|P67571|SYN\_STAAN  
mkttikqakdhlnqdvti gawltnkrssgiaf1qlrdgtgfmqgvvkvseveevfklakeiaqesslyvtgtitednr  
sdlyemqvksievisah  
dypitpknhgteflmdhrhlwl rskkqhavmki rneviratyeffnkdgftkvdppil tasapegtse1fhtkyfdqdaf  
lsqsgqlyleaaamahkv  
fsfgptfraeksktrrh1iefwmi egemaftnhaesleiqeqyvthvksvlencklelki lerdtsklekvatpfpris  
yddae1f1kaegfddi ewg  
edfgaphetaianhyd1pvfitynyptkikpfymqpneneetv1cadliapegygeiiggsservddle1leqrvkehgl  
eeaysyld1rrygsvphc  
gfg1glertvawisgvehvretapfpr1lnrlyp  
>sp|P67585|SYT\_STAAN  
meqiniqfpdgnkkafdkgttediaqsispgl rkkavagkfngqlvd1tkpletdgsigivtpgseealevlrhstahl  
mahai krlygnvkgvgvpv  
ieggfydfdi dqi ssddfeqiektmkqivnenmkierkvvsrdeakelfsndeylelidaipedenvtlysqgdfd  
lcrghvpstakikefk11  
stagaywrgdsnnkmlqriygtaffdkkelkah1qmleerkerdhrkigkele1ftnsq1vgag1plw1pngatirreie  
ryivdkevsmgydhvytpv  
lanvdlyktsghwdhyqedmfppmqldetesmlrpmncphhmmiyankphysyrelpiriaelgtmhryeasgavsglqr  
vrgmt1ndsh1fvrpdqik  
eefkrvnmii dvykdfgedysfr1syrdpedkekyfdddmmnkaenmlkaadelglsyeeai geaafygpkl dvqv  
ktamgkeet1staqldf11  
perfd1tyigqdgehrpvvihrgvvstmerfvaf1teetkgafptw1apqkvqipvnd1hydyarqlqdelksqgvr  
vsidrnemgykireaqm  
qkipyqi vvgdkevennqvnrqygsdqdetvekdefiwnlvdeir1kkhr  
>sp|P67621|FAPR\_STAAN  
mk1kkdkrreairqqidsnpfitdhe1sd1fqvsiqtir1drtylnipelrkrik1vaeknydqissieeqefigdlivq  
nrvnkaqsi1ditsdsvfh  
ktgiarghv1faqans1cvalikqptv1thessi qfi ekvklndtvraearvvnqtakhyyvevksyvkht1vfkgnfkm  
fydkrg  
>sp|P67622|Y1605\_STAAN  
mrvdlncdlgeafgnysfggdhqi ip1itsanvacgf hagdenvmetvklakahnvavgahpglpdlkgfgrnidisn  
deiylnmiyqlgalqgfc  
ihq1kinhvkphgalymgakdreianviaqavydfps1vlvlg1ansyliseaknvg1itasevfadrredgqlvsr  
kesdavitdtdealkqvlk  
mvkenkvisknkev1lqadticvhgdgehal1fvskireilmkegidiqs1  
>sp|P67631|XERC\_STAAN  
mnhieaf1nt1kvernfseltksyqdd1iqfnqfleqehlqlktfeyrdarnylslysnh1krtsvsrkist1rtfy  
eywmt1deni1nfvqlvh  
pkkeylpqffyeemealfktveedtskn1rdrvile1lyatgirvselvnikkqdidfyangvtvlgkgskerfvpfg  
aycrqsi enylehfkpiqs  
cnhdflinmkgeaitergvryv1ndivkrtagvsei hphklrhtfath1lnqgad1rtvqs1lghvn1sttgkythvsn  
qqlrkvylnahprakkene  
t  
>sp|P67744|LACR\_STAAN  
mnkher1deiaklvnkgtirtneiveglvnsdmtvrrdlielenkgil1tkihggarsnstfykeishkekhtirqiaek

Tsompanidou\_et\_al\_Supplemental\_FASTA\_File

ryiarkaasliedgdtlff  
gpgttvellaeevnhhtltiitnc1pvykillekqtahfrvyliggemrhiteafvgemanamleklrfskmffssnavn  
kgavmtstldeaytqqla1  
snsiekyllidhtkvgkedftsfcqlneltavvmdyedeekvetiktyievvd  
>sp|P67760|Y1295\_STAAN  
msetlnqikesfielyllfqrfsksriavwvlnyikvneaklanihfvdtkinhetleiaevgshasaiqftkrniklmn  
tneifdyianhncafdqi  
hfanvskreqlddlivaqltespsyqtylhdlnsmaidrkhallidyllhnidls1qmnekqrfyqltqilntlklvn  
khnqfedladd  
>sp|P68792|HRCA\_STAAM  
mitdrqlsilnaivedyvdffgqpvgsktlierhlnvspatirnemkqledlnyiekthsssgsrpsqlgfryyvnrll  
qtskqtknlrrlnql1ve  
ngydvssaltyfadelsnisqyttlvvphnkqdiinnvhliranpnlvimvivfssghvehvhasdipfsndk1ntis  
nfvtnkltefnqlgddiv  
sfvqseqeefinkl1ntmnnhisnqsnsiymggkvlidalnesnvssiqipilqyiesnriaellqdisspninvkign  
eiddslsdisivtsqyhfd  
etlkggiavigptamhyqnvil1nrw  
>sp|P68822|TPIS\_STAAM  
mrtpiagnwkmktvqeakdfvna1ptlpdskevesvicapaildal1ttavkegkaagleigaqntyfedngaftget  
spvalad1gvkyvviqhse  
rrelfhetdeeiinkahai fkhgmpii cvgetdeeresgkandvvgeqvkkavag1sedqlksvviayepiwaigtgks  
stsedanemcafvrqtia  
1skevseatriqygsvkpnnikeymaqtdidgalvggas1kvedfvqllegak  
>sp|P68866|DNAA\_STAAN  
msekeiwekvleiagekl savsystflkdte1ytikdgeaiv1ssipfnanwlnqqyaeiiqailfdvvyevkphfitt  
eelansnnetatpkettk  
pstettednhvl1greqfnahntfdt1fvi ggnrfphaas1avaeapakaynplfiyggvg1gkth1mhaighhv1dnnpd  
akviytssekftnefiksi  
rdnegeafre1ryrnidvl1iddiqfiqnkvqtqeeffytfnel1hqnnkqivissdrppkeiaqledr1rsrfewglivdi  
tppdyetrmal1qkkiee  
kldippeal1nyianqisnirelegal1tr1laysql1gkpittel1taealkdi1qapkskkiti1qdi1qivgqyynvrie  
dfsakkrtsiayprqiam  
ylsreltdfs1pkigeefggrdhttvihahekiskd1kedpifkqeven1ekeirnv  
>sp|P72360|SCDA\_STAA8  
minkndivadvtdypkaadifrsvgidfccggqvsieaaa1ekknvd1nel1qr1ndveqtn1tpgs1npkflnvssliq  
yiqsayheplreefkn1tp  
yvtkl1skvhgpn1hpy1velketydtfkn1gm1ehm1qkddvd1fpl1k1kyeqgevd1intvid1vsdhiatgell1vkms  
1tsyep1ieacgtw1r1lv  
qr1ka1ev1thevh1lenh1lfkkvs  
>sp|P99080|TIG\_STAAN  
mtatwekkeg1neg11tvtvpaekvna1dqafkkv1kqinvpgfrk1gk1vprpifeqr1fgvealyqdaid1illpdaygeai  
detdikpvaqpevs1vtqie  
kgkdfi1featv1vepe1vkl1gdyk1geiek1qetel1sddel1qea1dhs1gh1aemv1kedgv1vengdtv1nidfsgsvd1geef  
eggqaegy1d1e1igs1sfip  
gf1eeq1egmkv1deek1dvvt1fpeeyhae1lag1eat1fk1tkvne1ik1fke1vpe1l1tde1iane1l1daeant1vdeyken1rkr1ae  
qkatdaenve1keeaitkat  
dnt1dipeamv1nte1drmv1sefaqri1qqg1dl1qtyf1qisg1qdet1ql1reqmk1d1aeqr1vkt1n1l1taiae1aekieatde  
didke1lekmsk1qfnis1ved  
iknt1l1gnt1di1kndvri1qkvid1l1rdnak1fveg1tked  
>sp|P99087|GLMM\_STAAN  
mgkyfgtdg1vrgvanqel1tpela1fk1gryggy1lahnk1gek1hpr1vl1vgr1dtr1vsgem1lesali1aglis1igaevm1rgiis  
tpgvay1l1trdm1gae1gvmi  
sashnpvadng1kffgsd1gfl1sdeqeneiea1ldqenpe1l1prpv1gndiv1hysdy1fegaqkyl1sy1k1stvd1vn1feg1kiv  
ldgangst1s1ap1fl1fgd1  
ead1tet1igcsp1dgy1n1ekc1gsthpek1aek1vvetes1dfg1afdgd1gdri1avdeng1qid1gdqim1fi1igqem1hknqel1n  
ndmiv1stvmsn1lgfykale  
qegiksn1k1tkvg1dryv1veem1rrgnyn1lggeqs1ghiv1mmdy1nt1tgdl1tgi1qlas1vikmt1gks1selag1qm1k1kyp1qs1in  
vrvt1dkyr1veenv1dv1kev1m  
tkve1vem1ngegri1l1vrps1g1tep1l1rv1mvea1at1dedaer1faqqi1adv1vd1kmg1ldk  
>sp|P99108|FTSZ\_STAAN  
m1efe1q1gn1h1lat1k1vig1vggg1navnrmi1dhg1mn1ve1fia1ntdg1qal1n1skaeski1q1igek1l1trg1lgagan1pe1igk1k  
aaes1reqi1eda1iqg1adm1v  
fv1tsg1m1gg1gt1ga1ap1v1vaki1kemga1l1tv1gv1tr1p1fs1fegr1kr1qt1qaa1agve1amka1avdt1l1vip1ndr1l1div1dk1st1pm  
meaf1kead1nv1l1rg1gv1q1gis  
d1liav1sgevn1ld1adv1kt1msn1qgsa1l1mg1ig1v1ssgen1ravea1akka1iss1p1lets1ivga1qgv1l1mni1tgges1sl1fea1qea  
adiv1qda1aded1vnmi1fgt1v  
in1pel1qde1iv1vtviat1g1fdd1kpt1shg1rks1gst1g1f1gts1vnt1ssn1atsk1des1fts1nss1naq1at1dsv1ser1th1tt1ked1d1ips1fi  
rnre1err1sr1rr1tr

Tsompanidou\_et\_al\_Supplemental\_FASTA\_File

>sp|P99171|EFTS\_STAAN  
matisaklvkelrkktagmmddckkal tetdgdidkaidylrekgiakaakkadriaaeglvhvetkgndaviveinset  
dfvarnegfqelvkeianq  
vldtkaetvealmettlpngksvderikeaistigeklsvrrfairtktdndafgaylhmggrigvltvvegstdeear  
dvamhiaainpkysseqv  
seeinherevllkqgalnegkpenivekmvegrlrkylqei cavdqdfvknpdvtveafllkktggklvdfvryevgegme  
kreenfadevkgqm  
>sp|P99173|ZDH1\_STAAN  
mkmgfepfkleeagnfkvyeqrktpenddilvknsisvnpvdtkqrqmkvtqaprvgfdaigtveaigpdtlfs  
pgdvvyagspnrggsnat  
yqlvseai vakaphnisaneavslptgitayetffdtfkishnpsenvgksvliingaggvgsiatqiakryglvtitt  
asrqettewcekmgadivl  
nhkedlvrqfkekeiplvdyifctyntdlyntmielikplghittivafnedqdl nal klksitfthefmfarpihrt  
dmikqheyledi tkniegl  
hyqptttqvfe glspenlyqahqll ekqsmigklvini  
>sp|P99178|SYS\_STAAN  
mldirfrnepdtkvskielrgddpkvdeileldeqrrklisateemkarrnkvsseeialkkrnkenaddviaemrtlg  
ddikekdsqllneidnkmtg  
ilcripnli sddvpqgesdednvevkkwgtprefsfepkahdiveelk madfdraakvs garfvyltnegaqleralmn  
ymitkhtthgytemmvpq  
lvnadtmgtgqllpkfeedl fkvekeglytiptaevpltnfyrnei i qpgvlpekftgqsacfrseagsagrdr glir l  
hqfdkvemvrfeqpedsw  
aleemttnaeail eelglpyrrvilctgdigfsasktydievwlpsyndykeisscsnctdfqarranirfkrdkaakpe  
lahtlngsglavgrtfaai  
venyqnedgtvtipealvpfmggktqiskpvk  
>sp|Q2FDE8|MNME\_STAA3  
mdl dtitsistpmgegaigivr lsgpqaveiadklykgkhllndvpshtinyghiidpeskevieevmvsvlrapktftr  
edieinchggiltinrvl  
eltmtygarmaepgeftkraf l ngridlsqaeavmdfirsktdraskvamnqiegrlsdlikkqrqsileilaqvevnid  
ypeyddvedatteflleqs  
keikqeinrlldtgaqgkimgregl stvivgkpnvgkssmlnlnliqdnkaivtevagtttrdvleeyvnrvgvplrlvdtag  
iretedivekigverska  
lsqadlilfvlnnealtqedytl yevvknedvivivnkmdleqnidinevkdmgdtp liqtsmlkqegidelei qird  
lffggevqnqdmtyvsnr  
hisllkqarqtigdaidaaesgvpmdmvqidl trtweilgeiigetasad lidqlfsqfclgk  
>sp|Q2FDI2|HIS1\_STAA3  
mlriaiakgrlmdslinyldvieyttl setlknrerqllsvdniecilvkgsvpiyveqgmadigivgsdilderqyn  
vnnlnmpfgachfavaak  
pettnyrkiatsyvhtaetyfkskgidvelikngsvelagvdmvdgividvqtgttlkanglvekqhisdinarlitn  
kaayfkksqllieqfirsle  
vsiana  
>sp|Q2FDM7|ARCC2\_STAA3  
mkekivialggnaigtteataeaqqtaircamqnlkplfdsparivishngnpqigslliqqaksnsdttpampldtcga  
msqgmigywleteinrilt  
emnsdrvtgvtivtrvevd kddprfdnptkpi gpytkeeevelqkeqpdsvfkedagrgyrkvvasplpqsilehq lirt  
ladgkniviacgggipvi  
kkentyegveavldkdfaseklatl ieadt lmi ltnvenvfinfnepnqqiddidvatlkkyaaqgkfvegsmlpkiea  
airfvesgenkkvii tnl e  
qayea l i g n k g t h i m  
>sp|Q2FDS6|Y2518\_STAA3  
metlelqqaklryhqvggqpvli fipgangtgdi flplaeqlkdhftvvavdrdygeseltep l pdsasnpdsdyrvkr  
daqdiaelaks l sdepvyi  
lgssgsivamhvlkdypevvkkaifheppintflpdstywkdknddivhqi lteglekgmktfgetlniapidakmmsq  
padteegrieqykrtmfwl  
efeirqythsni tlddftkysdki tllngtdsrgsfpqdvnyinketgipivdipgghlgyiqkeg fadvllnmwg  
>sp|Q2FDS9|Y2515\_STAA3  
mrkdakenrqrieiahkl fdeegvenismnriakelgigmgtlyrhfkdksdlycyviqrdldifithfkqikddyhsn  
yevmqvsldyl l qfkidnk  
allqcieagnkllrfyqsafyqel fdfyydl fksdddtytkfktmdl l qslstsvfafqiehrhisieayrnyllniyld  
evgrnd  
>sp|Q2FDU4|CRTQ\_STAA3  
mkwlsriltvivotmsmacgalifnrrhq l kaktlnfnhkal t i i p a r n e e k r i g h l l h s i i q q v p v d i v m n d g s t d e  
tarvarsy gatvvdvddt  
dgkwygkshacyqgvthactnr iafvdadvtf l rkdavet l i n q y l l q g e k g l l s v q p y h i t k r f y e g f s a i f n l m t v v g  
mnvfstl d d g r t n q h a f g p  
vtltnkedyatgghksanrhi iegfalgsaytsqslpvtvyegfpfvafmyqegfqs l qegwtkhlstgaggtkpkim  
taivlwlfgsiasilglcl  
slkyrqmsvrkmvalylsyttqfiylhrrvgqfsnllmvchpl l f m f f t k i f i q s w k q t h r y g v v e w k g r q y s i s k e q

Tsompanidou\_et\_al\_Supplemental\_FASTA\_File

>sp|Q2FDU9|COPZ\_STAA3  
msqeilnvegmscghcksavesalnnidgvtsadvnlengqvsvqyddskvavsqmkdaiedqgydvv  
>sp|Q2FDV8|CLPL\_STAA3  
mngffnsdfdsifrrmmkdmqgsnqvgnkkyiingkevspeelaqltqqgnhsaeqsaqafqaaarqqgqggngny  
leqigrnlteardgllp  
vigrdkeiqetaevlsrrtknnpilvgeagvgktaiveglaqaivegnvpaaikdeii svdissleagtqyrgafeeni  
qk liegvkssqnavlffde  
ihqiigsgatgsdsgskgl sdi l kpa lsrgeisi igattqdeyrn nilkdsaltrrfnevlvnepsakdtveilkgirek  
feehhgvklpddvlkacvd  
lsiqyipqrllpdkaidvlditaahlsaqspavdkvetekriselendkrkavsaeeykkaddiqneikslqdklensng  
ehtavatvhdisdtigrll  
gipvsqmdndierlnknsnr l rski igdqavemvsrairrrnragfddgnrpigsflfvpgtgvgktelekqlaidlfg  
nkdalirldmseysdttav  
skmigttagyvgyddnsntl tekvrnpysvil fdeiekanpqiltlllqvmdgdnltdgqgnvinfkntiictsnagf  
ngndaekdimhemkfff  
rpeflnrfrngiveflhlkdka l qdivnlll d d v q v t l d k k g i t m d v s q d a k d w l i e e g y d e e l g a r p l r r i v e q q v r d k i  
tdyyl d h t d v k h v d i d v e d  
nelvvkgk  
>sp|Q2FDW8|PTU3C\_STAA3  
mfkklfgqlqrigkalm l pva il paagi l la fgnamhneqlveiapwlkndiivmissvmeaagqvfdnlpllfavgta  
lglaggdgvaa laalvgyl  
imnatmgkvlhitiddifsyakgake l sqaakepahalvlgiptlqtgvfggiimgalaawcynkfynitlppflgffag  
krfvpivtvsvaiatgvll  
sfawppi qdgl nslsnfllnknl t l t t f i f g i e r s l i p f g l h h i f y s p f w f e f g s y t n h a g e l v r g d q r i w m a q l k d g v  
pftagafttgkypfmmfgl  
paaafaiyknarperkkvvgglmlsag l t a f l t g i t e p l e f s f l f v a p v l y g i h v l l a g t s f l v m h l l g v k i g m t f s g g f  
idyilygl nwd rshallv  
ipvgiyvai vyyflfdfa irkfk l k t p g r e d e e t e i r n s s v a k l p f d v l d a m g g k e n i k h l d a c i t r l r v e v d k s k v d v  
agikal gasgvlevgnmq  
aifgpkdqikhdmakimsgeitk p s e t t v t e e m s d e p v h v e a l g t t d i y a p g i g q i i p l s e v p d q v f a g k m m g d g v g f i  
pekgeivapfdgtvktifp  
tkhai gl e s e s g v e v l i h i g i d t v k l n g e g f e s l i n v d e k v t q g q p l m k v n l a y l k a h a p s i v t p m i i t n l e n k e l v i e d  
vqdadpgkl imtvk  
>sp|Q2FE81|GPMA\_STAA3  
mpklilcrhgqsewnaknlftgwedvnlseqgineatragekvrenniaidvaftslltral dtthyilteskqqwipvy  
kswrlnerhygg l qgl nkd  
darkefgeeqvhiwrrsydvkppaeteeqreayladrrynhl dkrmpyses l k d t l v r v i p f w t d h i s q y l l d g q t v l v  
sahgsiraliky ledvsd  
ediinyeiktgaplvye l t d d l e v i d k y y l  
>sp|Q2FEE1|TCAA\_STAA3  
mkscpkcgqqaqddvqictqcghkfdsrqalyrkstdediqtnnikmrkmpwaigffililililffllrnfnspeaqt  
kilvnaienndkqkvatll  
stkdnkvdeekvyinyikdevglkqfvsdlnktvhklnksktsvasyiqtrsgqnilrvskngtryiffdnmsftapt  
kqpi v k p e k t k y e f k s g g  
kkkmviaeankvtpignfipgtyripamkstengdfaghlkfdfrqnssetvdvtedfeanisvtlkgdtklndsskkv  
tindhema f s s s k t y g p y p  
qnkditi sasgakkdtfttqtktikasdlkynteitlnf dsedi edyvekkekeenslnknlieffagyslannaafnq  
sdfdfvssyikkgssfydd  
vkkrvskgs l m m i s s p q i i d a e k h g d k i t a t v r l i n e n g k q v d k e y e l e q g s q d r l q l i k t s e k  
>sp|Q2FEJ9|URED\_STAA3  
mdeqqwtgqldl tvffdg n r s v s r d i f f e k a l k v i r p v y l n q s t i p t f y i v n v g g y l d g d r y r m n v n v e d n a k v t l t s q  
gatkiyktpsnhveqyqtf  
nlkdnayleyvadpi i a y e n a k f y q h n t f n l n s s s l f y t d i l t p g y s k t g e a f k y q m h l i n e i y i e d e l v t y d n l l l n  
pnkgsineigymehyshyg  
sayfihedvnqklidsvyetissysntfdcrvaisqlpthgfavri fayrtqiiekilgtiqsyiaenydrkl d f l r k y  
>sp|Q2FEK3|URE1\_STAA3  
msfkmtqnqytslygptvgdsirlgdtnlfaqiekdyavygeeatfgggksirdgmaqnprvtrddvnavdlvisnavii  
dydkvkkadigikngyifa  
ignagnpdimndvdi igsttdiaaegki v t a g g i d t h v h f i n p e q a e v a l e s g i t t h i g g g t g a s e g s k a t t v t p g p w  
hihrmleaaeglpinvgft  
gkgqatnptalieqinagaiglkvhedwgatpsalshaldvadefdvqialhadtlneagfmedtmaavkdrv l hmyhte  
gagggghapdliksaafsni  
lpsstnptlpythntvdehl dmvmi thh l n a a i p e d i a f a d s r i r k e t i a a e d v l q d m g v f s m i s s d s q a m g r v g e v i t r  
twqvahrmkeqrgpldgdf  
ehndnri k r y i a k y t i n p a i t h g i s e y v g s i e p g k l a d i v l w d p i f f g v k p e l v v k g g l i n s a v n g d a n g s i p t s e p m k  
yrkmyggyggnl t s t s m t f  
vsktayenginralnlkrmrvpkni rqlskadmknnsatpkldvdpqtyevyv d g e k i t s n a a t e l p l t q r y f l f  
>sp|Q2FEX1|GLMM\_STAA3

Tsompanidou\_et\_al\_Supplemental\_FASTA\_File

mgkyfgtdgvrngvanqeltpelafklgryggyvlahnkgekhrvlgvrdtrvsgemlesaliaglisigaevmrlgiis  
tpgvayltrdmgaelgvmi  
sashnpvadngikffgsdgfkl sdeqeneiealldqenpelprpvgndivhysdyfegaqkylsylvkstdvdfeglkia  
ldgangstsslapflfgdl  
eadtetigcspdgyninekcgsthpeklaekvvetesdfglafdgddgriiavdengqidvgdqimfiiggemhknqeln  
ndmivstvmsnlgyfkaie  
qegiksnktkvgdryvveemrrgnynlggeqsgshivmmdynttgdlgtigqlasvikmtgksl selagqmkkypqslin  
vrvtdkyrveenvdvkevm  
tkvevemngegrilvrpsgtepivrvmveaatdedaerfaqqiadvvdkgmldk  
>sp|Q2FF18|ATP6\_STAA3  
mdhksplvswnlfgfdivfnlssilmlilvtaflvflaiictrnlkkrptgkqnfvewifdfvrgiiegnmawkkggqfh  
flavtlilyifianmlglp  
fsivtkdhtlwwksptadatvtltl sttiillthfygikmrgtkqylkgyvqpfwplaiinvfeftstltlglrllygni  
fageiilltlaglfnepa  
wgwiisipgliwqafsvfgtiqayifimlsmvymshkvadeh  
>sp|Q2FF56|MAZF\_STAA3  
mirrgdvyladlspvggseggvrvpvviiqndtgnkysptvivaaitgrinkakiphveiekkkykl dkdsvilleqir  
tl dkkrlkeklylsddkm  
kevdnalmslglnavahqkn  
>sp|Q2FF67|LEU1\_STAA3  
msshqiqfdttlrdgeqtgpnftfderlrialqlekvgdvieagfpasstgsfksvqiaaqtltttavcglarckksd  
idavyeatkdaakpvvhvf  
iatspihlehklmsqedvlasikehvtiakqlfdvvqfspdattrtelplfvkcvqtavdagatvinipdtvgysyde  
yahifktltesvtssnei  
ysahchddl gmavns laaieggarriegtvngigeragnaaleevalalyvrndhygaqta lnleektsdlisryag  
irvprnkai vgnafshes  
gihqdgvlkhretyeimtpqlvgvsttelplglksghafsek lkalgydidkeaqidl fkdqkaiadkkksvsdrdiha  
iiqqsehehqalykletlq  
lgyvssglqsavvvkdkeghiyqdssigtgsivaiynavdrifkete lidyrinsvtegt daqaevhvnlliegtvn  
gfgidhdilqasckayvea  
hakfaaenvekvgn  
>sp|Q2FFF7|CHIPS\_STAA3  
mkkklattvialslftagisthhsakaftfepfptneeiesnkml ekekaykesfkns glpttlgkl derl rnylkkg  
tknsaqfekmviltenkgy  
ytvylntplaedrknevl gkmyktyffkkgeskssyvingpgktneyay  
>sp|Q2FFH9|SDCS\_STAA3  
mayfnqhqsmskryl tffskskkkpf sagqlig l ilgp l l fl l t l l f f h p q d l p w k g v y l a i t l w i a t w i t e a i p i  
aatsllpivllplghilt  
eqvsseygndiiflflggfilaiamerwnlhrvaltiinligastskillgfmvatgflsmfvsntaavmimipiglai  
ikeahdlqeantnqtsiqk  
feks l v l a i g y a g t i g g l g t l i g t p p l i i l k g y m q h f g y e i s f a k w m i v g i p t v i v l l g i t w l y l r y v a f r h d l k y l p g  
gqtlkqkl delgkmkyef  
kvvqti fvl as l w i t r e f l l k w e v t s s v a d g t i a i f i s i l l f i i p a k n t e k h r r i d w e v a k e l p w g v l i l f g g g l a l  
akgisesglakwlgeqlks  
l ngvspiliviviti fvlfltevtsttatatmilpilatlsavgvhplllmapaamaancaymlpvgtppnaiifgsgk  
isikqmasvgfwvnlsai  
i i l v v y v m p i v l g i d i n q p l p l k  
>sp|Q2FFI4|Y1892\_STAA3  
msfvtenpwlmvltifiinicyvtfltmrtiltlkgryiaasvsflevlvyivglglvmsnl dhiqniia yafgfsigi  
ivgmkieeklalgytvvnv  
tsaeyeldlpnelrnlggyvthyaafgrdgsmvmqiltpkrkyerk lmdtiknldpkafiiayeprihggfwtkgirrr  
klkdyepeelesvveheiq  
sk  
>sp|Q2FFL5|Y1861\_STAA3  
mamtneekvlai reklnivngglldpekyknaneeltdiydfvqsrerlspsevtaiaadalglrhe  
>sp|Q2FFS9|SPLA\_STAA3  
mnknvmvkgltaltltslgfaenisqphsiakaeknvkeitdatkepynsvvafvggtgvvvgkntivtnkhiaksnd  
ifknrvsahhsskgkgggn  
ydvkdiveypgedlai vvhvetsteglnfnknvsytkfadgakvkdrisvigypkgaqtkykmfestgtinhisgtfme  
fdayaqpgnsgspvlnskh  
eligi lyagskdeseknfgvyftpqlkefiqnniek  
>sp|Q2FFT3|SPLE\_STAA3  
mnkni i i k s i a a l t i l t s v t g v g t t v e g i q t a k a e h n v k l i k n t n v a p y n g v s i g s g t g f i v g k n t i v t n k h v v a g m  
e i g a h i i a h p n g e y n n g g f  
ykvkkivrysggediai lhvedkavhpknrnfkdytgilkiaseakenerisivgyepeyinkfqmyestgkvlsvkgnm  
iitdafvepgnsgsavfns  
kyevgvvhfgngpgnkstkggyvyfspeikkfiadntdk  
>sp|Q2FFT4|SPLF\_STAA3

Tsompanidou\_et\_al\_Supplemental\_FASTA\_File

mnkniiiksigaltitltsitvgvttmvegiqqtakaentvkqitntnvapysgvwtmgagtgfvvgnhtiitnkhvtyhm  
kvgdeikahpngfynggg  
lykvtki vdypgkediavvqveekstqpkgrkfkdfstskfniasakenepisvigypnpngnklqmyestgkvlsvngn  
ivssdaiiqpgssgspln  
skheaigviyagnkpsgestrgfavyspeikkfiadnlk  
>sp|Q2FFZ8|MURC\_STAA3  
mthyhfvgi kgs gms llaqimhd l ghevqgsdienyvftevalrnkgikil pfdannikedmvviqgnafassheeivra  
hq1klldvvsyndflgqi id  
qytsvavtgahgkts ttg l lshvmngdkkts fligdg tgmgl pesdyfafeaceyrrhflsykpdya imtnidfdhpdyf  
kdindvfda fgemahnvkk  
giawgddeh l rkieadvpiyyygfkdsddiyaqniqitdkgtafdvvyvdgef ydhflspqygdhtvlnalaviaisyle  
kl dvtnikealetfggvkr  
rfnettianqvi vddyahhpreisatietarkkyphkevavfqphtfsrtqaf l nefaes l skadr vflceifgsiren  
tgaltiqdlidkiegasli  
nedsinvleqfdnavil fmgagdiqklqnayldklgmknaf  
>sp|Q2FG56|IF3\_STAA3  
mstiakdtqindkirake l rligd geqigvkskreal emaervdl dlvv vapnakppvarimdygkfkfeqqkkekem  
kkkqkiinvkeir l sptie  
ehdfqt kl ngrkfltkgdckvsi rfrgrait hkeigqr v l ekyadeckdiatveqkpkmdgrqm f iml aptaek  
>sp|Q2FG64|HEM1\_STAA3  
mhfi aisinhrta dvalreqvaf rddalriahedlyetksilenvil stc nrtevyavvdqihtgryyiq rflarafgfe  
vddikamsevkvgdeaveh  
llrvts gl dsiv l getqilgqirdafflaqstgtt gti fnh l f kqait fakrahnetdiadnavsvsyaavelakkvfgk  
lkskqai i igagemse l s l  
lnllgs g i tdi tvnr t ienamklaakhqvkydelsslpl n l lesadivissts aqsyiitnemieriaenrkqds l v lid  
iavprdiepgisaitnifn  
ydvdd l kg l vdan l rerqlaaatiseqipaeihahnewism l gvvpviralrekamaiqaetm dsidrk l pglsererki  
iskhtks i inqm l kdpikq  
akelssdkksnek l e l f qni fdieaepheqakqqkeskvkeisarri fsfe  
>sp|Q2FGB5|URK\_STAA3  
mkattigiaggsgskttvtneimknleghsvallaqdyyykdqkhl t fder letnydhpfafdnd l lien l kdlkngk  
avevptydyashtrsditi  
dfkpkdviivegifa lenkv l rdmmdvkiyvdt dad l r l r l r l r t r dtkergrsm dsvinqylsvvrpmhdqfieptkky a  
diipeggsnkva idimtt  
kiqslvskq  
>sp|Q2FGI5|GCST\_STAA3  
mssdlkqtplyqnyvdr g akivefggwampvqfssikeehnavryeig l fdvshmeievtgkdasqfvqyl l sndtdn l  
ttskalytal cneegg i id  
dlviykladdny l lvnaantekdfnwi l khkekfdveqvnsnyqgqlaiiqgp kard l inqlvdedvtemkmfefkqgv  
klfganvil sqsgytgedg  
feicynidtek i wdgl l eynvmpcglgardt l rleag l plhgqdltesitpyeggiafaskplidadfigksvlkdqke  
ngapr rrv g l e l l ekgiar  
tgyevmd l dgni igevtsgtqspssgksialamikrdefemgre l l vqrkrqlkakivkknqidk  
>sp|Q2FGN7|SCPA\_STAA3  
myevkl da fngpl d l l l h l i qkfeidiy dipmqa l teqymqyvhamkql e iniasey l v lase l l mikskm l l p qstsdm  
dvddd pred l vgr l ieyqn  
ykeytai l ndmkeerd fyftkrpt d l sh letdeswdpnhtid l telivayqrvknrvel ntpksveir ketftiqqateq  
vtsr l kdkdhfnffs l ftf  
sepieqv vthflailemskagi inieqqrnfediniirgvnyhfg  
>sp|Q2FGW7|DER\_STAA3  
mtkpi vaivgrpnvgksti fnrivger vsivedtpgvtrdriy ssgew l thdfni idtggieigdapfqtqiraqaeiai  
deayvii fmvnvregl tq s  
demvaqilyksskpv l avnkvdnmemrtdvydfys l gfgepy p i sgshglglgd l l davvshfgeeedpydedtir l s  
iigrpnvgkss l vna ilge  
drv i v s n v a g t t r d a i d t e y s y d g q d y v l i d t a g m r k k g k v y e s t e k y s v l r a l k a i e r s n v l v v i d a e q g i e q d k r v  
agyaheqgkavvi vvnkwd  
tvekdstmkk fedevrkefqf l dyaqiafvsakertr l r t l fpyineasenhkkrvqsst l nevv tgaism nptptdkg  
rr l n v f y a t q v a i e p p t f v  
vfvndvelmhfsykrylenqiraafgfegtpihiarkrn  
>sp|Q2FGX3|NDK\_STAA3  
mertflmikpdavqrnligevisrierkg l klvggklmqvpme laethygehqqkpfynd l isfitsapvfamvvegeda  
vnvsrh i gstnpseasp g  
sirgd l g l tvgrni ihgsds l esaerein l wfneneitsyasprawl ye  
>sp|Q2FGX6|ARO\_STAA3  
mvneqi idisgpl kgeievpgdksmthraim las laegvstiykpl l gedcrrtmdif r l l gveikeddeklvvtspgyq  
sfntphqvl ytgns g t t t r  
llag l l s g l i e s v l s g d v i s i g r p m d r v l r p l k l m d a n i e g i e d n y t p l i i k p s v i k g i n y q m e v a s a q v k s a i l f a s l  
fskeptiikel d v s r n h t e

Tsompanidou\_et\_al\_Supplemental\_FASTA\_File

tmfkhfnipieaeglsinttpeairyikpadfhvpgdi ssaaffivaalitpgsdvtihvnginptrsgiidivekmgn  
iqflnqttgaeptasirig  
ytpmlqpitiegeivpkaidelpvia11ctqavgtstikdae1kvketnridttadm1n11gfelqptndgliihpsef  
ktnatvds1tdhrigmm1a  
vas11ssepvkikqfdavnvsfpgf1pk1k11eneg  
>sp|Q2FGY6|SYN\_STAA3  
mkttikqakdh1nqdvtigaw1tnkrssgiaf1q1rdgtgfmqgvvkvseveevfklakeitqesslyvtgtitednr  
sd1gyemqvksieviseah  
dypitpknhgteflmdhrh1w1rskkqhavmki rnevi ratyeffnkdgftkvdppil1tasapegtse1fhtkyfdqdaf  
1sqsgq1yleaaamahgkv  
fsfgptfraeksktrrh1iefwmi egemaftnhaes1e1qeqyvthvkvsvlenckle1kilerdtsklekvatpfpris  
yddae1f1kaegfddi ewg  
edfgaphetaianhyd1p1vfi tnyptki kpfymqnpeneetv1cad1iapegygei iggservdd1e1leqrvkehgl d  
eeaysy1d1 rrygsvphc  
gfg1g1ertvawisgvehvretapfpr11nr1yp  
>sp|Q2FH09|CVFC\_STAA3  
me11rieptpsntmkv1sytrek1sntykkveetqprfinq11sidgitsifhvmn1lavdkapkadwevilpdika  
afsdankv1esvnepqidn  
hfgeikael1tfkgipyqi k1tsadqelreq1pqtyvdhmtqaqtahdnivfmrkw1d1gnrygni qevmdgv1eev1tt  
ypesq1p1vkha1eenha  
tnnyhfyrhvs1deyhatdnwkr1rmlnhfpkptfedip11d1alsdekvpvrrqai v11gmieskei1pylykg1rdk  
spvrrtagdc1sd1gype  
a1pemv111ddpqkivrwraamfi fdegnaeq1palkahindnafevk1qi emaisriengdealgsvwkqmanrti  
>sp|Q2FH17|Y1314\_STAA3  
mknysfyqfvm1vgrhddkgr1aeefdd1afpkhddd1fn1sdyiethgdft1pmsv1dd1yeeytew1kf  
>sp|Q2FH20|MURG\_STAA3  
mtkiaftgggtvghsvn1s1ipta1sqgyealyigskngieremiesq1peikyypissgk1rryis1enakdvfkv1k  
gildarkv1kkekpd11fs  
kggfvsvpvviaaks1nipt1ihesd1tpglankia1kfakkiyttfeet1ny1pkekadfigatired1kngnahngyq  
1tgfnenk1kv11vmggs1g  
skk1nsi1ren1da1lqqyqvi h1tgkg1kdaqvkksgyiqyefvked1td11aitdtvisragsnaiyef1t1ripm11  
vp1g1dqsrgdqidnanhf  
adkgyakaid1eeq1taq11lqel nemeqertri inmksy1eqsytk1ealfdkmikda1n  
>sp|Q2FH43|DAPA\_STAA3  
mth1fegvgval1t1pftnknvniea1kthvnf11ennaqai ivngttaespt1ttdekeri1ktvid1vdkrvpvi agtg  
tndteksi qasi qaka1ga  
daim1i1tpyynktnrg1lvkhfeai adavk1pvv1ynvpsrtnmtiepetvei1sqhpyiva1kdatndfey1eevkri  
dtnsfalysgnddnvveyy  
qrgggqvisvianvipkefqa1ydaqqsg1diqqdfkpi g1t11salsvdin pipika1t1sy1lfgfnyel1r1p1vs1edtd  
tkv1retydtfkagene  
>sp|Q2FH51|PSTB\_STAA3  
maq1laqtq1sqsh1fdvsqshhktppddt1nshsviystq1n1d1wygenhalq1n1diyenqitai igpsgcgkstyik  
t1nrmvelvpsvktagk1l  
yrdq1fdqkyskeq1rt1nvgmvfqqnpfpksiyd1nitygpkihgiknkv1deiveks1rgaaiwde1kdr1htnays  
1sgggqqrvci arc1aiep  
ev11md1eptsal dp1st1rvee1vqe1kekyti imvthnmqqaarvsdktaff1ngyvneyddtdki fsnpsnkktedyi  
sgrfg  
>sp|Q2FH63|TRPA\_STAA3  
mtk1f1pyimgknd1ienat11sengadi e1igvpfsdpvadgpvimeagqqaikqgitidyifnq1ekhgdqikcnyv1  
mtyyni1chygeqaffekc  
rdtgvyg1i1pd1pye1sqr1kqfshygvki i1svamttddkrikdivshaegfiyvtm1nattgqngafhpelkrkie  
sikaianvpv1vagf1girtp  
qhvadikevadg1v1gseivkrfksntreei1kyl1qsiqqt1nn  
>sp|Q2FH88|SBCC\_STAA3  
mkp1h1k1nnfgp1f1kee1dfskidnne1f1isgktgsgktmi fdamtya1fgkasteqreend1rshfadgkqpm1svtf  
efq1nhriykv1hrggpyik  
egnttktnak1fdvfemvdgkye1reskvi sgtqfi e11l1gvnadqfrq1f1il1pqgefkrflisnsrekqg1l1rt1fdsek  
feairei1keevk1kkaq1i  
enryqqid1llwgeiesfdd1n1kg11levatqqidk1lienip11qarskei1lasvnesketaikefeiekk1t1enn1kd  
ninq1lnknk1dfvq1keq1  
peiegieak1k1l1qdi1tn1nyienreki etkianskkdi sktnk1iln1dcdkridkekkm1eengd1ieskisfidk  
trv1fndinkyqgsy1nie  
r1rtegeq1gde1nd1ikg1etvedsignqsdyeki e1l1nntit1nneini ikenekakae1dk1l1gskqelenqine  
ets1lkn1eik1drydktk  
1d1ndkesfisei ksavn1gdqpc1gnei qd1ghhidf1dsiakrqneikeieani haiksni avh1nseikfvneki sni  
n1ktqsd1fs1ev1nkr1le  
nena1nnqrd1nkfi eqmkeekdn1t1qihnkq1r1lnknese1k1l1crd1itefet1skynni t1nfevdykkyvqdv1nqhq  
e1skeiedk1mq1sqrk1i



Tsompanidou\_et\_al\_Supplemental\_FASTA\_File

eqnlnhyenql etynndle lneqsiememsrlnl tddndidei iawrgeqe leqkrdytkkryheimeiarlesl tk  
dke lldsklkdeyelkkq  
kmtl lideysavhyqcqnniktqsi vshinylnqelkdqqeifqlaeivsgknnknl tlenfvliyyldqiaaqanlr l  
atmsdnryqlirreavshg  
lsgleidvfdl hsnksrhisslsggetfqsslalal glseivqqsggislesifidegfgtldqetleta ldtlln lks  
tgrmvgiishvselknrip  
lvlevksdqyqsstrfkrn  
>sp|Q2FHH5|SYP\_STAA3  
mkqskvfiptmrdvpseaeaqshrlllks glkqstsgiy splatrvlnnitaivr qemeridsveilmpalqqaelw  
eesgrwgaygpe lmr lqdr  
hgrqfalgptheelvtsvrne lksyqlpmtl fqi qskfrdekrprfgllrgrefimkdaysfhadeasldqtyqdmq  
aysrifervginarpvvd  
sgaiggshthefma lsaigedti vysesdyaaniekaevvyepnhkhttvqpleki etpnvktaqeladflgrpvdeiv  
ktmifkvdgeyimvlvrgh  
heindiklksyfgtdnie latqdeivnlvganpgslgpvidkeikiyadnfvqdl nlnlvganedgyhlinvvngrdfnv  
deygdfrfilegeklsdgs  
gvahfaegievqqvfk lgtkysesmatfl dnqgkaqslimgcygigisrtl saiveqnhddngivwpksvtpfdlhlis  
inpkddqreladal yaef  
ntkfdvlyddr qeragvkfnadliglplrivvgkrasegivevkerl tgdseevhiddlmtvitnkydnlk  
>sp|Q2FHM9|KGUA\_STAA3  
mdnekgl livilsgpsgvkg tvrkri fedpstsykysis mtrq mregevdgvydffktrdafaalikddqfiyaeyvg  
nyygtpvqyvkd tmdeghd  
vfl eievegakvrkkfpdal fflappsleh lrerlvgrgtesdekiqsrinearkevemmnlydyvvvndevelaknr  
iqciveaehlkrerveaky  
rkml eakk  
>sp|Q2FHU2|SYFB\_STAA3  
mlisnewlkeyvtiddsvsnlaeritrtgievdd lidytkdiknlvvgfvkskekhpdadkl nvcqv digedepvqivcg  
apnvdagqyvivakvggrl  
pggiki krakl rgersegmics lqeigissnyipksfesgiyvf seaqvpgtalqaly lddqvme fdltpnradal smi  
gtaye vaalyntkmtkpet  
tsnel dlsandel tvtieneskvpysarvvhdtiepsiwmarlikagirpinnvdisnyv lleygqplhmfqdqda  
igsqqivvrqanegekmtt  
lddterell tsvitngqtpialagvmggdfsevkeqtsniviegaidpvsi rhtsrlnl rse ssrfekgiatefv  
deavdracyllq tyangkv  
lkdrvssgelgafitpiditadkinrtigfdl sqndivtifnqlgfdte inddvitvlpvsrrkditiked lievari y  
gyddipstlpvfdkvtsgq  
ltdr qykrmvkevlegagldqaityslvskedatafsmqqrqtidllmpmseahaslrqsl lphlieaasynvarknkd  
vklfeignvffangege lp  
dqvey lsgiltgdyvvnqwdk ketvdfylakgvvdrvseklnlefsyrradidglhpgtrae illenkvvgfigel hpi  
laadndlkrtyvfe lnfda  
lmavsvgyinyqpi prfpgmsrdial evdqnipaadllstihahggnilkdtlvfdvyqgehlek gkksiairlnyldte  
etltdervskvqaeieaal  
ieggavir  
>sp|Q2FHX4|Y1006\_STAA3  
mtkyt fkpdkfkafnvegldarmealneyirpqlrelgeyfsdfftsqtgetfyphvakharrsvnppkdtwvafatnkr  
gykmlphfqi gmfedqlfv  
mfgimheakdkatrakvferkfka iqqlpddyrvcl dhmkpdkpfikdl tddd lieaiqrainvkkgeffiaraitp qdk  
rlksdkafiafleetfdqf  
lpfysa  
>sp|Q2FI05|PUR9\_STAA3  
mkkailsvsnktgive fakaltqlnye lystggtkrildeanvpvrsvsdlthfpeimdgvrktlh pavhggiladrnkp  
qhlne lseqhid lidmvvv  
nlypfqqtvanp dvtmdeaienidiggptmlraaaknykhvttivhpadyqevltrlnrnds ldesyrqslmikvfehtae  
ydeavirffkgdketlryg  
enpqqsayfvrt snakhtiagakqlhgkqlsynnikdadatla lvkfdtpatvavkhmnp cvgigdtieqafqhayea  
dsqsi fggivalnrvtpe  
laeq lhsi fl evi iapkftdealdilkqkknvrll eidmtidsneee fsvsvsggylvqdkdnyvvpkeemkvvtev aptd  
eqweamllgwkvvpsvksn  
aiilsnnkqtvgi gagqmrvgaakialeraieindhvalvsdgffpmgdtvelaaqh gikaiiqpsgsikd qdsidman  
khgiamvvtgtrhfkh  
>sp|Q2FI55|HTRAL\_STAA3  
mdigkkhvipsqyrrkrreffhnedreenlnqh qdkqni dnttskkadkqihkdsidkherfkns lsshleqnrndvne  
nkaeesknqdsksaynrd  
hyltddvskkqns ldsvdqdtvkskyeqnseatlstkstdkvestemrk lssdknkv gheeqhvl skpsehdketrids  
essrtdsdssmqtekkd  
ssdgnkssnlksevisdksntvpkl sesddevnnqkpl t lpeeqlkrqqsneqtktytygdseqndksnhend lshhi  
psisddkdnvmrenhivdd  
npdndintpsl sktdddrkldekihvedkhkqnadssetvgyqsqstashrstekrnisindhk l ngqktntktsann

Tsompanidou\_et\_al\_Supplemental\_FASTA\_File

qkkatsklnkgratnnnys  
dilkkfwmmywplvilmgiiilivilnai fnnvnkndrmndndadaqytttmknantvksvvtvenetskdsslpk  
dkasqdevgsgvvykksgd  
tlyivtnahvvgdkenqkitfsnksvvgkvlgkdkwsdlavvkatsdssvkeiaigdsnnlvlgepilvvgnpvgdf  
kgtvtegiisglnrnvpid  
fdkdnkydmkafqidasnpgnsggavvnregkligvvaakismpnvenmsfaipvnevqkivkdletkgkidypdv  
vkmkniaslnsfergavkl  
pgkvkngvvvdqvdngladqsglkkgdviteIdgklleddIrfraqiifshkddlksitakiyrdgkekeinikl  
>sp|Q2FIA5|CDR\_STAA3  
mpki vvgavaggatcasqirrl dkesdii fekd rdm s fanca lpyvigevedrryalaytpekfydrkqitvktyhe  
viainderqtvsvl nrktn  
eqfeesydkliispgasanslgfesditftlnledtdaidqfikanqvdklvvgagyvslevlenlyerglhptlihr  
sdkinklmdadmngpilde  
ldkreipyrlineinaingneitfksgkvehydmiiegvgthpnskfinessnikldrkgfipvndkfetvnpniyaigdi  
atshyrhvdI pasvplawg  
ahraasivaeqiagndtiefkgflgnnivkffdytfasvgvkpnelkqfdykmvevtqgahanyypgnspIhIrvyydts  
nrqilraaavgkegadmri  
dvlsmammngltvdeltefevayappshpkdlinmi gykak  
>sp|Q2FIA8|ADDA\_STAA3  
mtipekpggviwtDAQWQSIYATGQDVLVAAAAGSGKTAVLVERIIQKILRDGIDVDRLLVVTFTNLSAREMKHRVDQRI  
QASIADPANAH LKNRIK  
ihqaqistIhSfclklIqqhydvlnidpnfrtsseaenllleqtidevieqhydil dpafielteqlssdrsdqfrmi  
ikqlyffsvanpnkpwld  
qlvtpyeeeaqqaqlIqlItdl skvfitaaydaInkaydlfsmmdsvdkhlaviederrImgrvleggfidi pylvltghef  
garlpnvtakikeanemmv  
dale daklqykkykslidkvsdyfsreaddlkadmqaI aprvkylarivkdvmsenrkkrsknildfsdyehfalqil  
tnedgspseiaesyqrhfq  
eilvdeyqdt nrvqekilsciktgdehngnl fmvgdvksiykfrqadpslfiekyqrftidgdgtgrridlsqnfrsrk  
evlsttnyifkhmmdeqvg  
evkydeaaqlyygapydesdhpvnIkvIveadqehsdltgseqeahfiveqvkdilehqkvydmktgsyrsatykdivil  
ersfgqarnlqqafknedi  
pfhvnsregyfeqtevrIvlsflraidnplqdiyIvglmrsviyqfkedelaqirIlspnddyfyqsivnyindeaadaI  
IvdklkmfI sdiqsyqqys  
kdhpyqI idkfyndhyviyqfsgI iggrgrranlyglfnkaiefenssfrglyqfirfideli ergkdfgeenvvgpnd  
nvvrmmtihsskgIefpfv  
iysgl skdfnrklqkpvIlnqqfgIgm dyfdvdkema fpslasvayravaekelvseemrlvyvaltrakeqlyIgrv  
kndksllleqIlsisgehi  
avnerI tsnpnfhIysiI skhsasipddl kfekdiaqiedssrpnvni sivyfedvstetI dndeyrsvnqIetmqn  
gnevkaqi khqI dyrypy  
vndtkkpskqsvsIkrqyeteesgtsyervrqrigrfstyerpkflseggkrkaneigtImhtvmqhIpfkkeriseve  
IhqyidgI idkhiieadak  
kdi rmdemtfinseIysiiaaeqvyrelpfvvnqaIvdqlpqgdedvsiiqgmidlifvkdgvhyfvdyktdafnr  
gmtdeeigtqlknkykiqm  
kyyqntIqtIlnkevkglyffkfgtIql  
>sp|Q2FIB5|ARLY\_STAA3  
msnkawggrfevqpeewddfnasitfdqtlidqdiegsiahatmlanqqiisqqdseqiIqglksiqhdyhqdqiqfsa  
sIedihIniehelikrigd  
aggkIhtgrsrndqvadtmhlytkkqvqdiIaliksIqsvivdiasnvdtimpsythIqraqpisfahhimtyfwmlqr  
dqgrfedsIkridinplga  
aalsgttypidrhettalInfgslyensI davsdrdyiIetIhniIstmvhI srfaeeiI fwstdeakfitI sdaftsgs  
simpqkknpdmaeIirgkv  
grttghImsmlmtIkgIplaynkdmqedkeglfdavhtikgsI riefegmiqtminkerInqtvkedfsnateladyIvt  
knipfrtaheivgkiVlec  
iqqghyIldvplatyqqhssidadiydyIqpenclkrqsygstgqssvkqqldvakqllsq  
>sp|Q2FIC1|PPI1\_STAA3  
manypqInkevqqgeIkvvmhtnkgdmtfkI fpniapktvenfvthakngyydgitfhrvIndfmiqggdptatgmges  
iyggafedefsInafnlyg  
al smansgpntngsqffivmqkevpmnI sqI adggwpqpi vdaygekgtplwI dqkhtvfgqi idgettlediantkv  
pqdkplhdvviesidvee  
>sp|Q2FIE3|DLTA\_STAA3  
mtdiinkIqafadanpqsIavrhttdeltyqqImdessklahrIqgskkpmIlfghmspymivgmigaikagcgyvpvdt  
sipedrikmiinkvqpefv  
fnttdesfesIegevftiediktsqdpviI fdsqikdndtvytiftsgstgepkgvqieyasIvqftewmlelnksgneqq  
wlnqapfsfdIsvmaiypc  
lasggtlnIvdknmiinkpklInemI tatpiniwvstpsfmemclllptIneeqygsInefffcgeI lphraakaIvnrfp  
satiyntygpteatvavs  
iqitqeiI dqyptI pvqverp garI sttdegeI vieqgsvsI gyI kndqktaevfnfddgirtyhtgdkakfengqwfIq  
gridfqikIngyrmeleei

Tsompanidou\_et\_al\_Supplemental\_FASTA\_File

etqlrqsefvkeai vpvpykndkvihligai vpttevt dnaemtknikndlksrlpeymiprkfewmeqlpltsngkidr  
kkiaeving  
>sp|Q2FIG2|Y816\_STAA3  
madeskfeqakgnvketvgnvtdnknlenegkedkasgkakefvenakekatdfidkvkgnkge  
>sp|Q2FIJ2|OHRL\_STAA3  
maihyetkatnvgrkghvytdra ldidivppaqadgkatnpeqlfaagyascfngafd lilkqnkvrdahpevtltvr  
ledsdsespklsvsdat  
iknvisqeeaekeylqmahefcypyskatqgninvdlnvnvvd  
>sp|Q2FIM6|WHIA\_STAA3  
msfasemkneltridveemnaealsalirmngalslnqqfvinvqtenattarriyslikrvfnveveilvrkkmklk  
knniycrtkmakeilde  
lgilkdgifttheidhsmiqddemrrsylrgaflaggsvnpetssyhleifsqneshaegltklnmsyelnakhlerkkg  
sitylkeakisdfslislig  
gyqallkfedvri vrdmrnsvrlnvcetanl nktvsaamkvesiklidkeigienl pdr lreiarirvehqeis lkel  
gemvstgpi sksgvnhrlr  
klnldadkirngeqiel  
>sp|Q2FIR2|QUEF\_STAA3  
mahgrqqdelqditlignqndntynfdyrpdvlesfdnk hqgrdyfvkfncpefts lcpitgqpdfatiyisyipnvkmve  
skslklylfsfrnhgdfhe  
dcmniimndlie lmdphyievwgkftprggisidpytnygrpnskyekmaehrlnmhdlypekidnr  
>sp|Q2FIV6|UPPP\_STAA3  
mfiielikgiilgvvegltefapvsstghmilvddmw lksseflgsqsaftfkiviqlgsvfaaawvfrerfleilhighk  
hkhvegnddqrrskprrl  
nllhvlvgmpagilglfddfi eehlfsvptvmig lfvgaiymi adkysakvknprtvdqisyfqa fvigisqavamw  
pgfsrsgstistgv lmkln  
hkaasdtfimavpimlaasglslkhyqdiqi adipfyilglflaafvtv gliaktflh linkiklipfaiyrivlvifi  
ailyfgfgigkgi  
>sp|Q2FJ50|Y575\_STAA3  
mknrtfl icdecqavnirtlqkklekldpdaeivigcqsycpgrrktftfvnnrplaa lteeeliekvsqq lkkprdpee  
eerlkrheerkrkveqd  
rk lkek lekrkaqq  
>sp|Q2FJ78|SDRD\_STAA3  
mlnrenktaitrkgmvsnrlnkfsirk ytvgtasilvgttl ifglgnqea kaaestnkelneattsasdnqssdkvdmqq  
lnqedntkndnqkemvssq  
gnettsngnkli ekesvqsttg nkvevstaksdeqaspkstnedlntkqtisnqea lqpd lqenksvvnvqptneenkvv  
daktesttl nvk sdaiksn  
detlvdnnsn snennadi ilpkstapkr lntmria avqpssteaknvd l itsnttl tvvdadknnkivpaqdy lslk  
sqitvddkvks gdyftiky  
sdtvqvyl npedi knigdi kdpnneti atakhdtann litytftdyvdrfns vqmginsiy m dadt ipvskndvefn  
vtigntttkttaniqypdy  
vneknsigsaf tetvshvgnkenpgyykqtiyvnp sensltnak lkvqayhssypnnigqinkdvtdikiyqvpkgyt l  
nkgydvntkeltdvtnqyl  
qki tygdhnsav idfgnadsayvnmvntkf qytnsesptlvqmat l sstgnksvstgna l gftnnqsggagqevy kigny  
vwedtnkngvqelgekgvg  
nvtvtvfdnntntkvgeavtkedgsy lipnlpngdyrvef snlpkgyevt pskqgnneel dsngl ssvitvngkdn l sad  
lgiykp kynlgdyvwedtn  
kngiqdqdek gisgvtv lkdengv lktvtt dadgkykftd l dngnykvefttpegytpttvtsgs diekdsngl tttg  
vingadnmt l ds gfyktpk  
ynlgn ywedtnkdgkdstekgisgvtv lknengev lqtktkdkgkyqftgl engtykvefetpsgytptqvsgsgtd  
egidsngtsttgvikdkdn  
dtidsgfykptynl gdyvwedtnkngvqdkdek gisgvtv lkdendkv lktvtt dengkyqftd l nngtykvefetpsg  
ytpsvtsgndtekdsngl  
tttgvikdadnmt l ds gfyktpkys l gdyvwydsnkdgkdstekgikdvkvt llnekgevigttktdengkycfdnl ds  
gkykvi fekpag lqtgt n  
ttedkdadggevdvtidhddft l dngy yeeetsdsdsdsdsdsdsdrdsdsdsdsdsdsdsdsdsdsdsdsdsdsdsds  
dsdsdsdsdsdsdsdsdsdsdsdsdsdsdsdsdsdsdsdsdsdsdsdsdsdsdsdsdsdsdsdsdsdsdsdsdsdsdsdsds  
dsdsdsdsdsdsdsdsdsdsdsdsdsdsdsdsdsdsdsdsdsdsdsdsdsdsdsdsdsdsdsdsdsdsdsdsdsdsdsdsds  
dsdsdsdsdsdsdsdsdsdsdsdsdsdsdsdsdsdsdagkhtpvkpmsttkdhhnkakal petgnensgsnnat l fgg l faa l  
gs lll fgrkkqkq  
>sp|Q2FJ79|SDRC\_STAA3  
mnkktatnrkgmipnrlnkfsirk ysvgtasilvgttl ifglsgheakaaehtngel nqsknettapsenkttkkvdr  
qlkndtqtatadqpkv tms  
dsatvketssnmqspqnat anqsttktsnvtndkssttysnetdk snltqakdvsttpktttikprt l nrmavntvaap  
qqgtvndkvhfsnidiai  
dkghvnttgktefatssdv lklkanytidsvkegdi ftfkygyfrpgsvr lpsqtqn lynaqgnii akgiydsttn  
tttytftnyvdqytnvrgs  
feqvafakrknattdktaykmevt l gndtyseei ivdygnkkaqpl isstnyinned lsrnmtayvnqpkntytkqtftv

Tsompanidou\_et\_al\_Supplemental\_FASTA\_File

```
nltgykfnpnknfkiyev
tdqnfvdstfdpskldvtdqfdviysndnktatvdlmkgtssnkqyiiiqqvaypnsstdngkidytldtdktkys
wsnysvngsstangdqk
kynlgdyvvedtndkdgkdanekgikgvyvilkdsngkeldrtttdengkyqftglngtysvefstpagytppttanvgt
ddavdsdgltttgvikdad
nmtldsgfyktpkyslgdyvwydsnkdgkqdstekgikgkvvtlqnekgevigttdengkyrfdnldsgkykvi fekp
agltqgtnttteddkdadg
gevdvtildhddftlndgyeetsdsdsdsdsdsdsdsdsdsdsdsdsdsdsdsdsdsdsdsdsdsdsdsdsdsdsdsdsdsds
dsdsdsdsdsdsdsdsdsdsdsdsdsdsdsdsdsdsdsdsdsdsdsdsdsdsdsdsdsdsdsdsdsdsdsdsdsdsdsdsds
dsdnndsdsdsdsdagkh
tpakpmstvkdqhtakalpetsennnsngtlfgglfaalgslllfgrrkkqk
>sp|Q2FJ96|RXL7_STAA3
mskekvarfnkqhfvglketlkalkkdqvtsliiaedveyvlmtrvlsqinqnipvsffkskhalgkhvginvnativ
alik
>sp|Q2FJB5|CLPC_STAA3
mlfgrlteraqrvalahageearlhnshnigtehlllglmkpegiaakvlesfnitedkviieevklighgqdhvgtlhy
tprakkviesmdearklh
hnfygtehllglijrenegvaarvfanldlnitkaraqvkalgnpemsnknaqasksnntptlslardltviakdgtl
dpvigrdkeitrvielrs
rtknpvlipepgvgktaiaeglaqaiavnepetlkdkrvmsldmgtvvagtkyrgefeerllkvmeeiqqagnvilfi
delhtlvgaggaegaidas
nilkpalargelqciqattdleyrniekdaalerfqpqvdepsvvdvailkgldryeahhrinisdeaieaavkl
snryvsdrfllpkaidliid
easskvrllsksttpnllkeieqiekvknekdaavhagefenaanlrkdqtklekqyeeknewknaqngmstslseedi
aeviaagwtgipltkinete
sekllslethervigqkdavniskavrraraglkdpkrpigsfilgptgvgktelara laesmfgdddami rvdms
efmekhavsrlvgappgyv
ghddggqltekvrkpkysvllfdeiekahpdvfnillqvlddghltdtkgrtvdfntiitimsnvgaqelqdqrfagfg
gsddgqdyetirktmlkel
knsfrpeflnrddiivfhlktkeelkeivtmvnltnrlseqniniivtdkakdkiaegydppeygarpliraiqkti
ednlseilidgnqieggkv
tvdhdgkefkydiaeqtsetktpsqa
>sp|Q2FJB8|CTSR_STAA3
mhnmsdiieqyikrllfeesnedvveiqraniaqrfdcvpsqllnyviktrftnehgyeieskrvgggyiritkienkdatg
yinhllqligpsisqqqay
yidglldkmlinereakmiqavidretlsmdmvsrdiiraniikrllpviny
>sp|Q2FJC9|HSL0_STAA3
mthdyivkalafdgeirayaalttetvqeaqrthytptasaamgrtmtatammgamlkgdqklvtvdggqpgiriad
anakgevravdhpqthfp
lneqgklavrravgtngsimvkvdmkdyfsgaspivsgegedftyyyatseqtpssvglvlnpdntikaaggfii
qvmgakdetisklekais
emtpvsklieggltpegllneilgedhvqilekmpvqfecncshekflnaikglgeaeiqnmikedhgaeavchfcgnky
kyteeeInvlllesla
>sp|Q2FJD8|MFD_STAA3
mtillttlikednhfqdlnqvfgqantlvtaglspakvtmiaekyaqsnqlllitnlnlyqadkletdllqfidaeelyky
pvqdimteefstqspqlms
erirtltaaqgkglfivplnglkkwltpvemwqnhamtllvgediddvqflnklvnmgykresvvshige flrggii
diffligepirielfdtei
dsirdfdvetqrskdnveevdittasdyiiteevishlkeelktayentrpkidksvrndlketyesflfestyfdhqi
lrrlvafmyetpstiief
qkdaiiavdefnriketeesltvesdsfisniiesngngfigqsfi kyddfetliegyptvyfslfattmpiklnhiikfs
ckpvqqfygydimrsefq
ryvnqnyhivlvetetkvermqamls emhipsitklh rsmssgqaviiegs lsegfelpdmglvvitelerfkskqkkq
rkrtkaisnaekiksyqd1
nvgdyivvhhgvgrylgvetlevgqthrdyiklqykgtdqlfvpvdqmdqvqkyvasedktpklnk lggsewkktkakv
qqsvediaee lidlykere
maegyqyedtaeqttfeldfpyeltpdqaksid eikddmqsrpmdrllcgvdygyktevavraafkavmegkqvaflv
pttllaqqhyetliermqd
fpveiqllmsrfrtpkeikqtkgeglktgfvdivvgthkllskdiqykdlllvdeeqrfgvrhkeriktikhndvltlt
atpiprtlhmsmlgvrdls
vietppenrfpvqyvleqnmsfikealere lsrdgqvfylnkvqsiyekreqllmlpdania vahqgmterdleem
lsfinneydiltttiiet
gvdvpnantliiedadrfgl sqlyqlrgrvgrssrigayflhpankvl tetaedrlqaikeftelsgsfkiamrdlnir
gagnllgkqqhgfidtvgf
dlysqmleeavnekrigikepesevpevevdlnl daylpteyiane qakieiykklrktetfdqi idikdelidrfndypv
evarlldiveikvhalhsg
itlikdkgkiidihlsvkatenidgevlfkatqplgrtmkvgvqnnamtitltkqnqwlslkflvkcieesmrisdea
```

Tsompanidou\_et\_al\_Supplemental\_FASTA\_File

>sp|Q2FJI0|METN1\_STAA3  
miefrqvsctfnkkkqkidalkdvsftvrndifgviygsgagkstlvrlnhleasngqvivdghditnysdkmmrdi  
kkdigmifghfnllnsatv  
fknvamppllskkskteikqrvtemlefvglstdkdkqfpdelsggqkqrvaiaaralvtnpkillcdeatsaldpattasi  
l1lknvngtfgitimit  
hemrvikdicnravmekgkvvetgtvkevshpkttiaqnfsvstviqtepstslirrlndeqvdfkdykifveetqvt  
qpiindliqicgrevkilf  
ssmseiqgntvcymwlrfrnmdqqfedtainqyfkekniqfeevh  
>sp|Q2FJI9|Y426\_STAA3  
mttqlninsvienakrvitplspisifaarnpwegleadtfedvakwlrdrvdvdi fpnkaliesavargeldesvfnql  
vtdmllehynipqhyinl  
yidnikt1kdvpasymhnsndvvd1l1lekskrmaesyhydvprmsdaiideqgeplseqvnrqmikwtklyidqfl  
sswtmpkreysfyhawlhl  
aqhdhsftkaqrqvikglpndpemtiesv1thfsidqedyqayvegllalpgwagmlyyrsqqhyfeqhlltdylairl  
vveqllvgdefksvakdce  
srsewfkqtvaswcyysdmpsdvllqhdvneiqt fihfaatmnknvfknlwliawemtyesqlkqkikaghesvagald  
vngvnsendnanqphsvl  
lndtqavdennselnqmgstkaqiafcidvrsepfrrhieaagpfetigiagffglpiqkdavdeqfkhdslpvmvppa  
yrikefadrydmvyrqqq  
qtmssmfytflmknvmpslllpe1sgpflslstivnsimprksraslqkikqkwlkkpetkltidrefdrtsdlpvgf  
tegeqidfalqalklmdlt  
eafapfvvlaghashshnnpphaslecgacggassgfnakllami cnrpnvrqglkqsgvyipettvfavaehhtstdt1  
awvyvptlssialdayes  
lndampmihanrerldklptigrvnhpveeaqrfasdwsevrpewglaknasfiigrrqltkgidlegrtflhnydwr  
kdkdgtllntiisgpalva  
qwinlqyyastvaphfygsgnkatqvtvsgvgvmqgnasd1myglswqsvmaadrmyhsprllvviqapdyvvarlla  
nnehfarkvsnhwlr1msv  
neegrfskwi  
>sp|Q2FJJ8|Y417\_STAA3  
mgyikrmalymsvfl1iifivgcrnmkdeqkkeeqtntktdskeeqikksfektldmypi knleelydkegyrdgefkkgd  
kgmwtiytdfaksnkqgg1  
snegmvlyldrntrtakghyfvktfynkgkfpdrknykvemknkiilldkvedtnlkkrienfkffgqyanlkelknyn  
ngdvsinenpsydakfkm  
snkdenvkqlrsryniptdkapvlkmhidgn1kgssvgykkleidfskggksd1svidslnfqapakvedde  
>sp|Q2FJK1|Y414\_STAA3  
mksikriglcisll1sifvtscdgdnkitgdsketqikksfsktldmypi knledlydkegyrdgefkkgdkgmwtiyt  
dfakgnksdeldddegmvl  
ldrntrtakgyfvkkfyekdklpdrknykvemknkiilldkvedpnlkkrienfkffgqyanfkdenyngdvsinw  
nvpsydveykmsnkdenk  
qlrsryniptekapmlkmhidgd1kgssvgykrleidfskegrdisvidylsykpakk  
>sp|Q2FJK2|Y413\_STAA3  
mgy1kr1vlyivimvmsvfiigcdkssdtaekskedsketqikksfaktldmysiknleelydkegyrdgefekgdkgmw  
tiytdfaksnkpgelstneg  
mvlyldrntrtakgyfvrtfyrkdklpdrknykvemknkiilldkvedkklkqkienfkffsyanlkelknysngdv  
sinenpsydvkykmsnk  
envkqlrsryniptdkspvlkmhidgn1kgssvgrkleidfskrensh1svidslidyqaktnkdde  
>sp|Q2FJK4|Y410\_STAA3  
mgy1krfalyisvm1ifaiagcgknetkedskeeqikksfaitldmypi knledlydkegyrdsefkkgdkgmwtiyt  
dfaksnkpgeldddegmvl  
ldrntrtakghyfvttfyrngklpdeknykiemknkiilldevkddklkqkienfkffgqyanlkelrkyngdvsine  
nvpsydveykmsnkdeivk  
elrsrynistekspilkmhidgd1kgssvgyrkleidfskrensk1svief1sykpakk  
>sp|Q2FJQ7|METE\_STAA3  
mttiktsnlgfprlgrkrewkkaiesywakkiskeeldqtltdlhkenlllqkyyh1dsipvgdfslydhildtsllfni  
iperfqqrtidd1lfdia  
rgnkdhvasal1kwfntnyhyivpewdnvepkvsrvll1drfkyaqslnvnahpviogp1tfvkl1skgghqtfeekvtl  
lplykevfeslidagaeyi  
qvdepi1vtddesyeni1treaydyfekagvakk1viqtyferahlkflssl1pvggigldfvhdngynl1kqieagdfdks  
ktlyagiidgrnwasdie  
akkvlidkl1lahtnelviqpsssl1hvpvs1ddet1dtsvgeg1sfatekl1del1dalrr1fnqndsvkydk1karyerfq  
nqsfkn1dydfesvrtsrq  
spfaqr1eqqqr1n1lpd1ptttigsfpqsrevrkyradwknkri1deayet1l1kneiarwikiqedigldvlvhgefer  
ndmveffgek1qgf1vtfk  
gwwqsygsravkppi1ygdvkw1tap1tvdetvyaqsl1tdkpvkgm1tgpvtilnwsfervd1prkvvdqiala1ineevl  
aleaag1kviqvdepalre  
glp1rseyheqyl1kdav1sfl1atssvr1detqih1thmcysqfgqi1haihd1dadvisi1etsrshgd1ikdfedinyd1g  
1glgydihspri1ptkee1  
ttainrs1qqidrs1fwvnpdcg1ktrkeeevkdal1tv1navk1krqe

Tsompanidou\_et\_al\_Supplemental\_FASTA\_File

>sp|Q2FJS9|MEPA\_STAA3  
mkdeqlyyfekspvfkmhfslpmmigtllsviygilniyfigfledshmisaisltlpvfailmglnlfgvgagtyi  
srllgakdyskskfvsfs  
iyggialgliviltlpsdqiaailgargetlaltsnylkvmlsapfvilffileqfaraigapmvsmigmlasvgn  
iildpilifgfdlnvvgaa  
lgtaisnvaaalffiyfkmnsdvsvniklakpnkemlseifkigipafmlsilmgftglvlnlflahygnfaiasygi  
sfrlvqfpeliimglcegv  
vpliyafmankgrmkdvikavimsigvifvvcmsavftighmvglfttdqaivematfilkvtmasllngigflftg  
mlqatgggrgatimailqg  
aiiipvlfimnalfgltgviwslliaeslcalaamlivyllrdrltvdtselieg  
>sp|Q2FJU6|NANE\_STAA3  
mlphglivscqalpdeplhssfimskmalaayeggavgirantkedilaiketvdlpvigivkrdydhsdvtatskev  
deliesqceviaaldatlqg  
rpketldelvsyirthapnevemadiatveeknaarlgfdyigtllhgytsytqgqlllyqndfqflkdvlsvdakvia  
egnviptdmykrvmdlgvh  
csvvggaitrpkeitrqvimed  
>sp|Q2FK70|PTXBC\_STAA3  
mtkeqqlaerianaavggmdnidsvmncmtrvrikvldenkvddqelrhidgvmgviheriqvvvgpgtvnkvanhmael  
sgvklgdpihhhdsekm  
dyksyaadkakankeahkakqngklnkvlksiani fiplipafigagliggiaavlnlmvagyisgawitqlitvfnv  
ikdgm laylaiftginaak  
efgatpglggviaggttlltgiagkni lmnvftgeplqpggggiigvifavwilsivekrhkhivpnaidivtptialli  
vglltifiimlagfvds  
lsvvngiisiggvfsgfiigasflplvmglhhi ftphieminqsgatyllpiaamagagvgaalalwvrckrnttl  
rntlkgalpvgflgigep  
iygvtlplgrpfltaciggiggaviggighigakaignsgvsllplisdmylgyiagllaayaggfvctylfgttkam  
rqtdllgd  
>sp|Q2FK94|ALDA\_STAA3  
mavnvrnyaenyglfingefvkgssdetievtnpatgetlshitrakdkdvdhavkvaqeaefeswsltskseraqmlrd  
igdklmaqkdkiamietln  
ngkpi rettaidipfaarhfyfasvieteeegt vndidkdtmsivrhepigvgavvawnfpmllaawkiapaaagnti  
viqpsstplsllevakif  
qevlpkgvvniltgkgsesgnainfhgdgvdksftgstdvgyqvaaeahlvpattelggksaniilddanldlavegi  
qlglnfnqgevcagsrll  
vhekiydqlvprlqeaafsnikvgnpqdeatqmsqtgkdqldkiqsyidaakesdaqilagghrltengldkgfffeptl  
iavpdnhhklageeifgpv  
ltvikvkddeaidiandseyglaggvfsqnitralniakavrtgriwintynqvpegapfggykksigiretykga lsn  
yqvkniyidtsnalkgly  
>sp|Q2FKB7|PHNC\_STAA3  
msqiefknvskvypnghvglnkninlniekgefavivglsgagkstllrsvnrldhitsgeifiqgksitkahgkallemr  
rnigmi fghfnlvkrssvl  
rnvlsgrvgyhptwkmvlglfpkedkikamdalervnildkynqrsdelsggqqrisiaralqeseiiladepvasld  
plttkqvmddl rkinqelg  
itilinhfvdlakeygttriiglrdegyvdpaseatddvfsei ygrtikedeklgvn  
>sp|Q2FKF1|NORG\_STAA3  
mkipshrqlaiqynvrvtiiksie llaegfiytkvsgstyvndylneahitnkwsemmllwssqrsqytvqlinkiet  
ddsyi hiskge lgislmph  
iqllkamsntashiedl sfgynggygyiklrdivermaskqginvgrenvmitsgalhaiql llsigflgqdaiiisntps  
yihstnvfeqlnfrhidvp  
ynqineidtiidrfinfknkaiyieprfnptgrsltneqkknii tyserhni piieddifrdiffsdptpsiktydklg  
kvi hissfsktiapairig  
wivasekii egladvrmdidygs silsqmvvyemlnknsydkhlvklryvlkdkrdfmlnilnlnfkdiahwevpsggyf  
wlvfkididikiylfye ll  
skekilinpgyiygskeksirlsfafesnenikhalykiytyvkkv  
>sp|Q2FKQ0|GYRA\_STAA3  
maelpgsrinernitsemresfldyamsvivalpdvrdglkpvhrriylgln eqgmpdksykksarivgdvmgkyhp  
hgdlsiyeamvrmaqdfsy  
ryplvdggngfgsmgdgaaamrytearmkitlellrdinktidfidnydgnerepsvlparfpnllangasgiavgm  
atnippnl telingvls l  
sknpdisiaelmedi epgdfptag l ilgksgirrayetgrgsiqmrsravieergggrqrivvteipfqvnkarmieka  
elvrddkidgittldets  
lrtgvrvvdivrkdanasvilnnykqtplqtsfgvnmialvngprklnlkealvhylehqktvrrrtqynlrkakdr  
ahileglrialdhideiis  
tiresdtkvameslqqrfklsekqaqaildmrlrrltglerdkieaeynellnyiseleailadeevllqlvrdeltei  
rdrfgddrrteiqlggfen  
lededlipeequivitlshnnyikr l pvstyraqnrggrgvqgmntleedfvsq lvtlsthdhv lfftnkgrvyklkgyev  
pelsrqskgipvnaiele  
ndevistmiavkdlesednflvfatkrvkralsnfsrinrngkiaisfredde liavr ltsqgedilig tshas lir

Tsompanidou\_et\_al\_Supplemental\_FASTA\_File

fpestlrlplgrtatgvkgi  
tlregdevglvdahansvdevlvvtengygkrtpvndyrlnsrggkigktatiterngnvvcittvtgeedlmivtnag  
viirlvdadisqngraaqq  
vrlirlgddqfvstvkvkedaedetnedeqststvsedgteqqreavvndetpgnaihtevidseendedgrievrqdf  
mdrveediqqssdee  
>sp|Q2FKQ2|REFC\_STAA3  
mklntlqlenyrnydevtlkchpdvniligenaaggktnllesiytlalakshrtsndkelirfnadyakiegelesyrhgt  
mpltmfittkkgkqvkvnhl  
eqsr1tqyighlnvvlfapedlnivkgsppqirrrfidmelmqisavylnlqaqqrilkqknylkqlqlgqkkdlmle  
vlnqqfaeyamkvtdkrah  
fiqeleslakpihagitndkealslnylpslkfdyaqnearleeimsilsdnmqrekergislfghrddisfdvngmd  
aqtygsqgqrrttalsikl  
aeielmnievgeypi111ddv1se1ddsrqth111stiqhkvqtfvttsvdgidheimnnpklyrinqgeiik  
>sp|Q2FUQ1|RNPA\_STAA8  
mllekayrikknadfqriykkghsvanrqfvvycnkeidhfrlrgisvscklgnavlrnkikrairenfkvhkshilak  
diiviarqpakdmttlqig  
nslehv1kiakvfnkkik  
>sp|Q2FUQ4|RSMG\_STAA8  
mtvewlaeqlkehniqltetqkqfqtyr11vewnekmltsitdehdvylkhfydsiapsfyfdnqpisicdvgaga  
gfpsip1kimfpq1kvtiv  
dslnkriqf1nhlase1qlqdvsvfihdraetfkgvyresydvtaravar1sv1selc1plvkkggqfvalksskgeee  
leeakfa1sv1ggvnteth  
tfe1pedagerqmfiidkkrtppkkyprkpgtppnktpllek  
>sp|Q2FUS6|PCP\_STAA8  
mhilvtgafpfdnqinpsweavtqlediigtthidklklptsfkkvdniinktlasnhydvvlaigqaggrnaitperv  
ainiddaripdnnddfqpid  
qaihlhgapayfslpvkamtsiinqlpgalnsagtfcvntlyh1gylqdkhyph1rfgfihvpyipeqvigkpd  
psmplekivag1taaieai  
snded1h1algtte  
>sp|Q2FUS8|DRP35\_STAA8  
mmsqqdlpt1fysgksnsavpiisese1qtitaepwleiskkg1qlleglnfdrqq1f11dvfegni1fkinpetkeikrp  
fvshkanpaaiki1hkdg1  
fvcylgdfkstggifaatengdn1qdiied1stayciddm1vfdskggfyftdfrgystn1pggyv1vspdf1rtvtpi1qn  
isvangialstdek1lvwt  
ettan1hria1eddgvt1qpfgatipyftghegpdscidsddn1yvamygg1rv1vfnkrgyp1gq1lipgrdeghm  
1rsthpq1fipgt1nq1iics  
ndiemgg1sm1ytvngfakgh1sfqf1  
>sp|Q2FUS9|Y3022\_STAA8  
mtnftfdgahsslefq1khlmvskvkg1fdqfdvavegd1ndfst1katati1pssintkneardn1h1ksgd1ffgt1defd  
kitfvtksvsesk1vvgd1t  
ikg1tneet1dvefn1gvs1knpmd1gs1vtgi1ivt1gtin1rekygin1fnq1aletgg1vm1gkdvk1feasa1efsise  
>sp|Q2FUW1|SRAP\_STAA8  
mskrqkafhds1anek1trvr1lyksgknwvks1gikei1emfk1mg1lpfish1svsqdn1qs1skmt1gy1lkttav1ggaftv  
nm1hdqqa1faas1dapl1tse  
1ntqset1vgn1qnst1tieast1stad1stsvtkn1sssv1qts1nsdt1vssek1sekv1tst1tn1stns1qqek1tst1sest1sknt1tss  
sdtks1vast1sste1qp1ints  
tnqst1asn1tss1qst1tp1ssv1lnkt1stt1st1stap1vkl1rtfs1rlam1stfasa1ttt1tav1tant1itvn1kdn1lkqym1tts1gnaty  
dqst1g1vt1tq1days1qkga  
it1lgt1rid1snks1fhfsg1kvn1lgnky1egh1nggd1gig1fafsp1gv1get1gln1gaav1gig1l1snaf1gfk1ldtyh1ntsk1pnsaa  
kanad1psnv1ag1gaf1gafv  
tt1dsy1gvatt1yts1ss1tad1naak1lnvq1ptn1nt1fqd1fd1inyng1dtk1vmt1vky1ag1qt1wtr1nis1dwi1aks1g1t1n1fs1smt1ast1g  
gat1nl1qqv1qf1gt1fey1tesa  
vt1qvry1vd1vt1gkdi1ppk1tys1gnv1dq1vvt1dn1qqa1l1tak1gyn1yts1vd1ss1yast1ynd1tn1kt1vk1m1nag1qs1v1ty1ft1dvk  
apt1vt1vg1nqt1ievg1ktm1p  
iv1l1tt1dng1tgt1vnt1vt1gl1psg1l1syds1atns1i1gt1pt1k1ig1qst1vt1v1st1dq1ann1k1st1t1ft1inv1d1tt1apt1vt1pid1qs  
sev1ys1pi1sp1ki1at1qd1nsg  
nav1tnt1vt1gl1psg1l1fd1st1nnt1is1gt1pt1n1igt1st1is1iv1st1das1gn1k1t1t1t1fkyev1trns1ms1ds1v1st1sg1st1qqs1sv1st1sk  
ads1qs1ast1st1sg1s1iv1st1s  
ast1sk1st1sv1l1sds1vs1asks1l1st1ses1nv1ss1st1st1l1vns1qsv1ss1ms1ds1ask1st1l1sds1is1nss1stek1ses1l1st1st1ds  
l1rst1st1l1sds1l1sm1st1sg1l  
sk1sq1l1st1is1gs1sst1as1l1sd1st1sna1ist1st1l1ses1ast1sds1is1is1nians1qs1ast1sk1sds1qst1sis1l1st1sds1ks1m1st  
ses1l1sd1st1st1sg1sv1sg1s1l  
iaas1qsv1st1st1sd1sm1st1se1iv1sds1ist1sg1l1sas1dks1ms1v1ss1m1st1sq1sg1st1ses1l1sds1qst1sds1sk1l1sq1st1sq1sg  
t1st1st1st1sas1vrt1ses1qst  
sg1ms1as1qds1ms1ist1fsd1st1sds1k1ast1asses1is1qs1ast1st1sg1sv1st1st1l1st1nsert1st1ms1d1st1l1st1ses1di  
ses1t1st1sds1ise1ais1ases  
tf1is1les1n1st1sds1es1qs1as1f1ses1l1se1st1se1st1ses1vs1st1se1st1l1sd1st1ses1g1st1st1l1sn1st1sg1st1s1ist1st1s1is  
est1st1fk1ses1v1st1l1sm1st





Tsompanidou\_et\_al\_Supplemental\_FASTA\_File

ydapavlsmlfhmqqegglwyveggihhlanaleklareegvtihtgarvndiktyqrrvtgvrldtgefvcadyiism  
eviptykylihdtrlnk  
lerefepassgyvmhlgvacqypqlahhfffftenaylnyqqvfhekvlpddptiylvntnktqapvgyenikvlph  
ipyiqdqpfttedyakfrd  
kildklekmgldlrkhiyedvwtpedieknyrsnrgaiygvvadkkknkgfkfpkesqyfenlyfvggsvnpgggmpm  
vtlsgqqvadkinareakn  
rk

>sp|Q2FVA4|Y2829\_STAA8  
msnmqtimdafhrhatkqfdpqqkvskefetesgrlspsslglepwkfvviqdqalrdelkahswgaakqldtas  
hfvli farknvt rsrpyvq  
hmlrdikkyaqtipaveqkfda fad fhis dndqalydwsskqtyialgnmmttaallgidscpmegfsltdvt dilan  
kgildteqfglsvmvafgy  
rqeppknktrqayedviewvpke

>sp|Q2FVB2|F16PC\_STAA8  
mtqitekelkkylldltsqnfdtpeklateiinlesilelpgktehfvslhgeyefqhvlnrgsgnvrakindifker  
lstkelndltalvyypedk  
lklik sdfqncgqlnvwyittiehlielekyccsskytrsklrkalpkqyvyiieellyksneyqnkksyyetlnqvie  
kqaddliiglaysvqrllv  
dhlhvvgdi ydr gppdkimdtlinyhsldiqwgnhdv l vwgayagskvclanllricarydnldiiedayginlrpllt  
laekyyadn pafkpkkrp

dkherltqreesqtkihqaiamiqfkleipiikrrpnfemeerlvlekvnydtneitvygntypkdtcfqtvnrndpa  
ellpeeevnmkl11sfqg  
seklrrhmsfmrkgslylpyngnllihg cipvdengemesfeidghtysgqelldv feyhvrksfdekentddlstdlv  
wylwtgkysslfgkramtt  
feryfi adkashkeeknpnyhl redvnmvrkmlsdfgl n pdegri inghtpvkeingedpikadgkmlvidggf skayqs  
ttgiagytllynsfgmqlv  
ahqqfnakekilsegidelsikrvvdkelqrkki rdt nigkdlqaqidilkmlmhdryld

>sp|Q2FVC4|Y2789\_STAA8  
mihskr1rlwlylvllavfigacgmkkeesskdkqikenfnktslyptknl edfydkegfrdqefekgdkgtwiishkm  
tietngknmesrglvlyvd  
rnrtrtkgefivrelwedkkgysrskekeypvkmehnkiiptkpiaddklrkeienfkffvqygd fkdindykdgd isyn  
pnvpsysakyqlnnddynv  
kqlrkrydiptkkapkllikgdgd lkgssighknleftfi enkeenyftdsinfkpte

>sp|Q2FVC5|Y2788\_STAA8  
mihskkl1tligclvlliiiligcvimtktngrnaqikenfnktsvyltknl ddfydkegfrdqefdkrdkgtwi ysem  
viepkgnmesrgmlyin  
rnrtrtkgnfi vteitedskgysrskekkypvkmennriiptkpi pddklkkeienfkffvqygnfkdfkdykngdi syn  
pnvpsysakyqlnnddynv  
qq1rkryhiptkqapelklkgsgnlkgssvgskdleftfvenqeeniyfsdsveftpseddk

>sp|Q2FVH6|FLP\_STAA8  
mttkklyf1sisiilvaisaiyitlnsntktrltn dsqqqidtiiehd lqkghipgasilivkngkvflnkgygyqdv  
dkkvkaspttkyeiasntk  
aftglailklaqegrlnldavskhvphfkmnyngqnetitikql laqts gipsditsedsvtsknrlndvthaimgde  
lhhkpgeefeysnmyd11  
gliiqnvtkqsytkyitnswl kplhmthtsfkqtny skhdaigyelqgstpvvskpefnlwdtps ay mmtstedle hwi  
kfqlnppdkykslvqqshk  
nlsstige pnanayasgwftndehlvfhsgtldnfssfillnpkqnygivvlanlnseyvpklvehlntqivnhkryst  
vasmlnqyk dqfnivtvlm

ttlillafif sayrawqmrhgqillrrskriavlswlslcicialalilyalpylilgsnwsfvltwlpieiklalitt  
lialfstlivillflhtki  
tkt

>sp|Q2FVJ7|BIOB\_STAA8  
mnlakrilqgeqltketvkiyedtnidtdllneayilrkhyfgkkvklnmilnaksgicpencgycgqsr dikqkqry  
alipeeqi idgakvahdnh  
igtyci vmsgrgpsdkevdhisntvrtiks qhpqlkicac lgltn deqakk lksagvdrynhnintsenyhdnvvtthsy  
kdrtdtielm kanni spcs  
gvicgmgesnqdivdmafalkemdadsipin flhpi kgtkfgs mddltpmkcl rivalfrlinptkeiriaggre vn lrs  
lqplal kaansifvgdyl i  
tggqpnql dydmindlgfei dydtcenkenknevsran

>sp|Q2FVQ7|Y2645\_STAA8  
mmkl nlf inanetes yidi hapkmndnvqsiinavnd lkshtlvgyidkeihi invsdvitfqvinkvtaitsnqkfk  
lklrlyelekqlpqhfiri  
skseivnkyyieklllepnglirmylkdahtysssrylksikerl si

>sp|Q2FVQ8|HSSS\_STAA8  
mfktlyariaiysitvllfsalisfvlnvyhyhnlkasndakimktlkearqyeqsakpthiqqyfkhlgqmnyqimti  
dqkghktfygepfredt1s  
qnainnvlnnqdyhgikdkpfa lfvgtgffdnvtdntvgin fktkdgsiavfmrpdigetfsefrtflavllmlll fisis  
lviastysii rpvkklkla

Tsompanidou\_et\_al\_Supplemental\_FASTA\_File

terlidgdfetpikqtrkdeigtlyqhfknmreslgqvdmrghfvqnsheiktpthihhllselqqtstktlrqqyi  
ndiytittqslgttellell  
lseidnhghllfddkiqvnqlikdiirheqfaadeksliiladlesinflgnqrllhqaalsnllinaikytdvvgaidia  
lqshhnniiftisndgspi  
spqaearlferfykvskhdsnglglaitksiielhgtiqftqsneyvtftitlpnsl  
>sp|Q2FVR9|IDI2\_STAA8  
msdfqreqrknehveiamagsdamhsdfdkmrfvhhsipsinvndidltsqtpdlmavpvyinamtggsewtkninekl  
avvaretglamavgsthaa  
lnprmaetftiarkmpegmifsnvgadvpekaleaveleaqalqihvnsqelvmpegnrefvtwldniasivsr  
svpvikevgfgmskelmh  
dlqqigvkyvdvsgkggtfvdienerrankdmdylsswgqstvesllettayqseisvfassgglrtpldaikslalga  
atgmsrpflnqvenngiah  
tvayvesfiehmkimtmldaknidltqkqivfspeilswieqrnlnihrg  
>sp|Q2FVS1|3MGH\_STAA8  
mdfvnndtrqiaknlvgkviyqdtqttytygivetaylgndraahgygkkitpkvtslykrnggtiyahvmhthllin  
fvtksegipegvliraiep  
eegl samfrnrgkkyevtngpgkwtkafnpraiddgatlnrcrlsidtknrkypkdiasprigipnkgdwthkslryt  
vkgnpfvsrmrksdcmfpe  
dtwk  
>sp|Q2FVT2|HUTG\_STAA8  
mykqgepnltwgrldsetdpkkfrhfqtvtfedlsklekssmpsgvgilgyavdkgvalnkgrigakegpdaikqafagl  
pdlnqcetlvdygnvyhdh  
eelidtkqefamlaaksianhrqtflggghdiayaqlatrkvpytqsigvinidahfdtraeqqstsgtsfrqileed  
entdyvlvgiaqggntqsl  
fdyakekkidyvfadelshvsptikdmierfvhehdvdimfticmdvidsafapgvsapavlglyphtvlelakriipsd  
kvsvsiaemntydadnr  
taklvanlvhhflk  
>sp|Q2FVY4|MOBA\_STAA8  
mkaiilagghsvrfgkpkafaevngetfysrviktlestnmfneiiistnaqlatqfkypnvviddenhndkgplagiyt  
imkqhpeeeffvsvdtp  
mitgkavstlyqflvshlienhdvaafkedgrfiptiafyspnalgaitkalhsdnysfknvyhelstdyldvrdvdap  
sywykninyqhdldalqk  
l  
>sp|Q2FW03|TOP3\_STAA8  
mksliilaekpsvardiadalqinqkrngyfennqyivtwalghlvtnatpeqydknlkewrledlpiipkymktvvigkt  
skqfktvkalildnkvkdi  
iatdagregelvarliidkvgnkkpirrlwssvtkkaiqqgfknldgrqyndlyyaalarseadwivginatraltt  
kydaqlslgrvqtptiqvl  
ntrqqeinqfqpqqyftlsltvkgfdqlesnqrytnketleqmvnlnkvdgkiksvatkhkksypqsllyntdlqqdm  
yrryigpketlntlqsl  
erhkvvtyprtdsnlyttmdvdtmkeriqvtmattykdqarpmsktfsskmsifnnqkvsdhhaiiptevrpvmsdl  
relklydmi verflealmp  
pheydaitvtlevaghtfvkenvttvlgfksirqgesitemqqpfsegdevkisktnirehettpeyfnegsllkame  
npqnfqikdkkyaqtlkq  
tggigtvatradiidklnmnaiesrdgkikvtskgqilelapeeltsp11taqweek111iergkyqaktfinemkdf  
tkdvngiknsdrkykhdn  
l ttecptcgkfmikvktkngqmlvcqdpscktkknvqrktnarcpnckkkltlfgkgkeavyrvcghsetqahmdqrm  
kskssgkvsrkemkkymnk  
negldnnpfkda1knlnl  
>sp|Q2FW35|ECFA1\_STAA8  
mtirfdnvsytyqkgtpyqhqaiahvntefeqgkyyaivgqstgsgkstliqninallkpttgvttvdditithktdkkyi  
rpvrkrigmvfqpesqlf  
edtveremifgpknfkmnldeaknyahrllmdlgfsrdvmsqspfqmssggqmrkiaivsilampdiivvdeptagldpq  
skrqvml1kslqtdenka  
iilishdmnevaryadevismkegsivsqtspkelfkdkkkladwhiglpeivqlqydfeqyqtklkdia1teeafvs1  
ykewqhek  
>sp|Q2FW96|MTLD\_STAA8  
mkavhfgagnigrfgiyiladnnkvtfadvneeinalahdhqydviladesktttrvnnvdainsmqpsealkqail  
eadiittavgvni1piiak  
sfapflkektnhvni vacena imatdtlkkavlditgplgnnihfansavdrivplqknenildmvepfyewvekdw  
ygpelnhikyvddltpyie  
rklltvntghaylayagkfagkatvldavedssieaglrsvlaetsqyitnefdfteaeqagyvekiidrfrnsylsdev  
trvgrgtl rkigpkdriik  
pltylynkd1ertgl1ntaa11kyddtadqetveknyikehglkaf1seyakvddgladeiieayns1s  
>sp|Q2FWC1|PDP\_STAA8  
mrmidiiekkrdghtlteeinffiggyvkgdipdyqasslamaiyfqdmndderaaltmamvnsqdmidlsdikgvkvd  
khtggvgdtttlv1aplv  
aadvvpvakmsgrglghtggtidk1eaidgfhveideatfvklvnenkvavvgqsgnltpadkklyalrdvtgtvnsip1

Tsompanidou\_et\_al\_Supplemental\_FASTA\_File

iassimskkiaagadaivl  
dvktgsgafmktledaealahamvrignnvgmntmaismnqplgraignalelqeaidthkqggpkdltelvtlgsq  
mvv1ankaetleearalli  
eainsgaalekfkftiknqggdetvidhperlpqaqyqieyakaksgyvtelvsndigvasmm1gagr1tkeddidlavg  
ivlnkkigdkveegesllt  
ihsnrqdvddvkkldssitiadhvvsptlihiite  
>sp|Q2FWD1|PYRG\_STAA8  
mtkfi fvtggvsslgkjitasslgrllkdrgl nvtiqkfdpylnvdpgtmspyqhgevfvtddgaetdldlghyerfid  
inlnkfsnvtagkvyslv  
kkerrgdylggtvqviphitneikerlllgestnadvviteiggttdieslpfieairqirsdlgrenvmyvhctllp  
yikaagemtkptqhsvke  
lrglgtqpdlivvrteyemtqldkia1fcdinkesviecrdadslyeiplqlsqnmddivikrlqlnakyetqldew  
kqlldivnldgkitiglv  
gkyvs1qday1svves1khagypfakdidi rwidssvtdenaae1advdgilvpggfgfrasegkisaikyarennvp  
ffgic1gmqlatvefsrvn  
lglegahsael dpatpypidllpeqkdiedlggtlrlglyscsikegtlaqdvvgkaeieerhrhryefndyreqlea  
ngmvisgtspdgrlvemve  
iptndffiaccfhpeflsrpnrphpi fksfieas1kyqqnk  
>sp|Q2FWE0|RF1\_STAA8  
mfdqldiveeryeq1nel1sdpdvndsdkl rkyskeqadlqktvdvyrnykakkeeladieemlsetddkeevemlkee  
sngikaelpnleee1k1ll  
ipkdpnddkdiveiraaggdeaaifagdlmrmyskyaesqgfkteiveasesdhggykeisfsvsnggaysk1kfeng  
ahrvqrvpetesggrihts  
tatvav1pevedveieirnedlki dtyrsgaggqhvnttdsavrihtlptgviatsseksiqnrekamkvlkarlydm  
kvqeeqqkyasqrksavgt  
gdrserirtynypqsrvtldhri gltlqklgqimeghleeiidal t1seqtdklkelnngel  
>sp|Q2FWE7|ATPD\_STAA8  
mvkvankyakal fdvsl dtnn1etinee1tvineavkdkieqlrmvdsnptqtaeqrrelingvftdinpyiknmmyvla  
dnrhisl1advfkafqsl  
nghynqdfatiestyelsqeeldkivklvtqqtkl skvivdtkinpdliggfrvkvgttvldgsvrndlvqlqrkfrvn  
>sp|Q2FWG0|TENA\_STAA8  
mefsqklyqaakpiindiyeddfiqkmlsgdigadal rhylkadaaylkeftnlyallipkmnsmdvkflveqiefmve  
gevlahdil aqivgesyee  
iiktkvwppsgdhyikhmyfqahsrenaiytiaamapcpyiaelakrsqsdhkl nrekdtakwdfsystemddiinvfe  
aimnklaesmsdkeleqv  
qvflesciherrffnmamtleqweffgkvnd  
>sp|Q2FWG2|THIM\_STAA8  
mnylnkiri enpl ticytndvknftangll sigaspamseapeeaeefykvaqallinigt1taeneqdiiaiaqtane  
aglpivfdpvavgastyrk  
qfcklllksakvsvikgnaseila1iddatmkgtdsdanldavaiakkayatyktaivitgkedvivqdnkafvlang  
pllarvtgagc1lggviag  
flfretepdiealieavsvfniaaeavaaenencggpgtfspllltdlyhlnettyqqriri qeve  
>sp|Q2FWK2|LEU3\_STAA8  
mtyni valpgdgipeilngslslleisnkynfnyqiehhffggasidtfgepltektlnackradaillgaiggpkwt  
dpnnrpeqgllklrkslnl  
fvnirpttvvkgasslsp1keervegtdlvivreltsgiyfgeprhfnhealdsltytreeierivhvafklaasrrgk  
ltsvdkenvlassklwrkv  
vnevsqlypevtvnh1fvdacsmlhitnpkqfdvivcenlfgdil sdeasvipgs1glspasfsndgprlyepihgsap  
diagknvanpfgmilslam  
clreslnqpdadeleqhiysmiehgqttadlggklnnttdifeilsqklnh  
>sp|Q2FWN4|CH60\_STAA8  
mvkqlkfsedarqam1rgvdqlanavkvtigpkgrnvldkeftaplitndgvtiakeieledpyenmgaklvqevant  
neiagdgtttatv1aqami  
qeglnkvtsganpvg1rqgidkavkvaveal hensqkvenkneiaqvgaisaadeeigryiseamekvngdgvitieesn  
gln1televvegmgfdrgyq  
spymvtdsdkmvae1erpyflvtddkissfqdilplleqvqsnrpilivadevegda1tnivlnrmrgtftavavkapg  
fgdrkamledlailtgaq  
vitddlgld1kdasidm1gtaskvevtdnttvvdgdgdensidarvsq1ksqieetesdfdreklqerlaklaggvavi  
kvgaasetelkerklried  
alnstraaveegivaggta1vnvyqkvseieagdi etgvnivlkal tapvrqiaenaglegsviverlknepgvgn  
aatnewnmleegivdptk  
vtrsalqhaasvaamfltteavvasipeknndqpnmggmpgmm  
>sp|Q2FWV5|CHIPS\_STAA8  
mkkl1attv1alsfltagi sthhsakaftfepfptneeiesnkll ekekaykesfkns1p1ttlgklderlnrylkk  
tknsaqfekmvil tenkgy  
ytvyln1tp1aedrknevl1gkmyktyffkkgeskssyvingpgktneyay  
>sp|Q2FWX8|Y2143\_STAA8  
mtngyigsytkkngkgyrfelnenqsridlletgfleasty1vrnnevlyginkegeqcgvaslkiddngelhllnk

Tsompanidou\_et\_al\_Supplemental\_FASTA\_File

lsskagtgcyvsisedkry  
lfeavygagiirme1nthtgeiirliqelahdfptgtherqdhphahyinqtpdgkyvavtdlgadrivtykfddngfe  
fykeslfkdsdgrhiehf  
dngkfayvvhelstvsvaeyndgkfeelerhltipenfdgdtklaavr1shdqqlfvsnrghdsiaifkvlndngqhle  
lvtitesggqfprdfnias  
sddl1vcaheggdsvvtvfernkctgkitlcdntrvasegvcvif  
>sp|Q2FXC8|SPLF\_STAA8  
mnkniiiksiaaltitstgvgttmvegiqqtakaentvkqitntnvapysgvtwmgagtgfvvgnhtiitnkhvtyhm  
kvgdeikahpngfynngg  
lykvtkivdypgkediavvqveekstqpkgrkfkdfstskfniaseakenepisvigypnpgnk1qmyestgkvlsvngn  
ivssdaiiqpgsgspi1n  
skheaigviyagnkpsgestrgfavyspeikkfiadnldk  
>sp|Q2FXE6|CRCB1\_STAA8  
mqyvyifiggalgalrylisflntdggfpigtlian1tgafvmglltaltaffsnhptlkkaittgflgalttfstfq  
1elihmfhdqqfittlly  
vtsyvfgi11cyvgik1ggg1s  
>sp|Q2FXF2|SIGS\_STAA8  
mkfndvynkhkiihy11kkynisyndeyyq111ikmwqlsqiykpskqslssflftr1nfyliidlfrqqnq1kdvil  
cennspt1teqptyfneh  
1r1qdi1k11nqrer1w1k1y1legykqfeiaeims1s1stiklikmsvkrkcqhnfn  
>sp|Q2FXJ2|ISDH\_STAA8  
mnkhhpk1rsfysirkst1gvasvivst1flitsqhaqaqaentntsdki senqnnatttqppkdtntqpatqpanta  
knypades1kdaikdpa1  
enkehdiqpreqvnfq11dknnetqyyhffsikdpadvyytkkkaeveldintastwkkfevyennq1pvr1vsyspvp  
edhayirfpvsdgtqelki  
vsstqi1d1geetnydytk1vfakpiyndps1vksdtdavvtndqsssvasnqtntntsnqnistinnannqpqattms  
qpaqksstnadqassqa  
hetnsngntndktnessnqsdvnqyppades1qdaiknpaiidkehtadnrpidfqmknkgerqfyhyastvepatv  
iftktgpi1e1glktastw  
kkfevyegdkk1pvelvsydsdkdyayirfpvsngtrevkivssieygenihedydylmvfaqpitnnpddyvdeety  
n1k11lapyhkaktlerqvy  
e1ek1qek1pekykaeykkk1dqtrveladqvsavtefenvtptndq1td1qeahfvvfeseensesvmdgfvehpft  
at1ngqkyvmmktkdds1y  
kd1ivegkrvtvskdpknnsrt1ifpyipdkavynaivkvvvanigyegqyhvriinqdintkdddtsqntsep1nvq  
tgqegkvadtvaenssta  
tnpkdasdkadviepesdvkdadnni1dkdvqhdvdh1sdmsdnnhfdkyd1kemdtqiakdtdrnvdkdadnsvgmsn  
vtdkdsnknkdkviq1nh  
iadknhtgkaak1dvvkqnyntdkvtdkktteh1psdi1hktvdktvktekagtpskenk1sqskm1pktgettssqs  
wwg1ya11gm1a1fipkfr  
kesk  
>sp|Q2FXK8|EZRA\_STAA8  
mvlyi1laiivi1i1avgv1fy1rsnrqi1ekai1erkneiet1pfdqn1aq1fk1n1kgetkkydamkkdtvestnky  
lapveekihnaeal1dkfs  
fnasqseiddanelmsyeqsqq1ledvneiialykndelydkckvdyremkrdvl1anrhqfgeas1leteiekfep  
r1eqyev1kadgnyvqahn  
hiaalneqmkq1rsymeeipeli1retqkelpgqfd1kygcrd1kvegyl1dhvkvdst1qslkte1sfveplisr1ele  
eandk1anindk1ddmyd1  
iehevka1ndveetkdi1tdn1fkakdmnyt1qteieyvrenyinesdaqs1vrfeneiqslisvydd1lkemsksvr  
yevqdn1qy1ledhvtvin  
dkqek1qnh1iq1redeaeaedn1rvqskkeevyr1lasn1tsvperfiimkneidhevrdvneqfserpihvkq1kd  
kvs1kivi1qmntfedeandv  
1navyaek1iqygnryrkdy1svdks1neae1fknrykraieiaeqalesvepgv1tkhieevikq  
>sp|Q2FXL1|THII\_STAA8  
mkydh11vrygel1lksnrkkfvnq1rnnvnks1kg1dgvvkgkrdrmyieledhadineityr1skifgiksispv1  
kvektieaisaaikfaqq  
feenstfki1dvkradknfpm1dtyelqrelggav1khfdn1svnvkrpdheirvevr1daiymyeevvp1gsgg1pvgtgk  
t11m1sggidspv1agmevm  
rrgyt1eai1hfhsp1p1tsdqakekviel1trilaervgpi1khivpftelqkqvnkvvhprytmtstrmmmrvadk1vhq  
igalaivngen1gqvasqt  
1hsmya1nnvtstpv1r1p11tydkee1i1kskeigt1fetsiqpfedccti1ftpknpvtepnfdkvvqyesvfdfeeminr  
aveniet1e1tsdyktike  
qqtnq1lindf1  
>sp|Q2FXP7|SYT\_STAA8  
meqini1qfpdgnkka1fdkgtttdiaqsispg1rkkavagkfnq1vdl1tkp1letdgsieivtpgseealev1rhstah1  
mahai1kr1ygnv1kfgvgpv  
ieggfy1dfdi1dqi1ssddfeqiektmkqivnenmkierkvsvrdevkel1fsndeykle1lidaipedenvt1ysqgdftd  
1crgv1hvpstakikefk11  
stagaywrgdsnnkmlqriygtaffdkkelkah1qm1eerkerdhrkigkele1ftnsq1vgag1p1w1pngatirreie

Tsompanidou\_et\_al\_Supplemental\_FASTA\_File

ryivdkevsmgydhvytpv  
lanvdlyktsghwdhyqedmfppmqldetesmvlrpmncphhmmiyankphysyrelpiriaelgtmhryeasgavsglqr  
vrgmtlndshifvrpdqik  
eefkrvvnmiidvykdfgfyedysfrlsyrdpedkekyfdddmwnkaenmlkeaadelglsyeeageaafygpkladvq  
ktamgkeetlstaqldfll  
perfdltyigqdgehrpvvihrgvvstmerfvaflteetkgafptwlapkqvqiipvndlhdyarqlqdelksqgvr  
vsidrnemgyki reaqm  
qkipyqi vvgdkevennqvnrqygsdqdetvekdefiwnlvdeirllkhr  
>sp|Q2FXP9|IF3\_STAA8  
mstiakdqqtindkirakelrligqdgeqigvkskrealmaervdldlvvnapnakppvarimdygkfkfeqqkkekem  
kkkqkiinvkeirllsptie  
ehdfqtklkngrkfltkgdkckvsirfrgraitkheigqrvlekyadeckdiatveqpkmdgrqmfilaptaek  
>sp|Q2FXQ9|HEM1\_STAA8  
mhfiainhrtdvalreqvfrddalriahedlyetksilenvilstcnrtevyavvdqihtgryyiqrflararfge  
vddikamsevkvadaveh  
llrvtsgl dsivlgetqilgqirdafflaqstgttgi fnhlfkqaitfakrahnetdiadnavsvsyaavelakkvfgk  
lkskqaiigagemseisl  
lnllgsgitditvvnrtienamklaakhqkydelsslpnllesadivisstsasqsyiitnemieriaenrkqdsllid  
iavprdi epgisaitnifn  
ydvddlkgldvanl rerqlaaatiseqipteihahnewismlgvvpviralrekamaiqaetmsidrklpglsererki  
iskhtksinqmlkdpikq  
akelssdkksneklelfqni fdieaepheqakqqkeskvkeisarri fsfe  
>sp|Q2FXT1|OBG\_STAA8  
mfvdqvkisllkagdgngitayrrekyvpfggpaggdggkgasvvfevdeg lrtlldfryqrhfkaskgengqssnmhgk  
naedlvllkvpvggtiiknve  
tdevladlvedggravvakgrrgrgnsrfatprnpapdfsekgepgeel dvslelklladvglvgfsvgkstllsivs  
kakpkigayhfttikpnlg  
vvstpdqrsfvmadlpgliegasdgvglghqflrhvertkvivhmidmsgsegrepiedykvinqelaayeqrledrpqi  
vvankmdl pesqdnlnlfk  
eeigedvpvipvstitrndiqllayiadkleeykdvdftveeesvginrvlykhtpsqdkftisrdddgayvvsgnai  
ermfkmtdfnsdpavrrfa  
rqmrsmgiddal rergckngdivrilggefefve  
>sp|Q2FXU5|SYD\_STAA8  
mskrttycglvteafllgeitlkgvnnrrdlggli fvdldreregivqvfnpafseealkiaetvrseyvvevqgtvtk  
rdpetvnpkiktggvevqv  
tnikvinksetppfsineenvvdenirlyryldlrrqelaqtfkmrhqitrsirqyl ddegffdi etpvltkstpega  
rdylvpsrvhdgefyalp  
spqllfkqllmsgfdkyqyivkcfredel radrqpeftqvdiems fvdqedmqqmgeemlkkvvkevkgveingafprmt  
ykeamrrygsdkpdrfem  
elidvsqllgrmdfkvfkdtvendgeikaivakgaaeqytrkdmdal tefvniygakglawkvvedgltpigrffete  
nvetlltltgaeagdvmf  
vadkpnvvaqslgalrvklakeglidetklnflwvtdwplleydedakryvaahpftspkeadiaklgtapeeaeana  
ydivl ngyelgggsirihd  
gelqekmfevl gftkeqaeqfgflldafkygapphggialglrdlvmlltnrtnlrdtiafptasatclltnapsevs  
dkqlleelslrirh  
>sp|Q2FXX2|Y1708\_STAA8  
mrvdlncdlgeafgnysfggdhqiip litsanvacgf hagdenvmnetvklakahnvavgahpglpdlkgfgrnidisn  
deynlmiyqlgalgqfcr  
ihqvkinhvkphgalymgakdreianviaqavydfpslvlgv lansyliseaknvg litasevfadrrieddggqlvsr  
kesdavitdtdealkqvlk  
mvkenkvisknnkevtlqadticvhgdgehallfvskireilmkegidiqsl  
>sp|Q2FXY1|AROE\_STAA8  
mkfavignpishslspvmhranfnslglddtyealn ipiedfhlkeiiskelegfnitiphkeriipyldyvdeqain  
agavntvlkdgkwigynt  
dgiyvkgllhsyvpdl enayililgaggaskgiayelakfvkpkltvanrtmarfeswnlninqisladaekylaefdiv  
inttpagmagnnesiinlk  
hlsptlmsdiviypktpileeaerkgnhiyngldmfvyqgaesfkiwtnkdadinsmktavlqqlkge  
>sp|Q2FY06|ERA\_STAA8  
mtehksqfvsii grpnvgkstfvnrvi ghkiaimsdkaqttrnkiqgvmt rddaqiifidtpgi hkpkhkldgymmkvak  
ntlseidaimfmvnaneei  
grgdeyi emlknvktpvflvlnkidlvhpde lmpkieeyqsymdfteivpisa leglnvdhfidvlktylpegpkyydpd  
dqtsdhpeqfvvgeiirek  
ilhltseeiphaigvndrmvkesedrvhieatiyvergsqkgivigkggkklkevgrarrdiemllgskvylelvkv  
qrdrnrknvnrqiygyved  
qd  
>sp|Q2FY10|Y1664\_STAA8  
mekikiivasdsigetaelvaragisqfnpkqcknellrypyiesfedvdeviqvakdtnaiivytlikpemkqymsekv  
aefqlksvdimgp lmdlls

Tsompanidou\_et\_al\_Supplemental\_FASTA\_File

asveekpynepgivhrlddayfkkidaiefavkyddgkdpkglpkadivllgisrsktpslsqylahksykvmpivpe  
vtpdglydinpkckialk  
iseeklnrrikerlkqglgdtaryateariqeelyfeeivseigcpvidvsqkaieetandiihyieqnksk  
>sp|Q2FY80|SRRB\_STAA8  
mmsrlnsvviklwltilivttvllllsialitfmqyyftqetenairedarrisslveqshnkeaikysqtlienpgg  
lmiinnkhrqstaslnik  
kqmlnevvndhfddvfdkgsvtrnvtikekgsstyillgyptkaqknshskysgvfiykdlsiedtnnaitiitii  
tavifltittvfafflssr  
itkplr1rdqatrsvsegdysykpstvttkdeigqlsqafnqmsteieehvdalstsknirdslinsmveglginesrqi  
ilsnkmandimndidedak  
afllrqiedtfkskqtemrdlemnarffvvttsyidkieqggksgvvvtvrdmtnehlndqmkdfianvshe1rtpisl  
lqgytesivdgivtepdei  
keslaiivdeskrlnrlvnelnvarmdaeglsvnkevqpiaalldkmkikyqqaddlgnmtfnyckkrvwsydmdrm  
dqvlnlidnasrytkpgd  
eiaitcdenesedilyikdtgtgiapehlqqvfrfykvdartrgkqgtglglfickmii ehggsidvkselgkgttf  
iiklpkpe  
>sp|Q2FYF1|EBPS\_STAA8  
msnnfkddfeknrqsidtshqhdtedvekdqselhqdtienteqqfpprnaqrkr1rdlatnhkqvhnestsedn  
vqneagtiddrvqsshst  
esqepshqdstpqheeyknafamdkshepiedndkhdtknaentehstvsdkseaeqsqqpkpyfttganqset  
sknehndsvkqdddepke  
hhngkkaaagagtagvagaagamaaskakhsndaqnksnsgkannstedkasqdkskdhngkkaaigagtaglagg  
aaksasaaskphasnas  
qnhdehdnhrdkerkkgmakvllpliaavliigalafggmalnnhngtkenkiantknknadeskdkdtskdaskd  
kkskstdskskedqdkatk  
desdndqnnanqannqanqqanqqqqqqrqggqrhtvngqenlyriaiyygsgspenvekirranglsgnn  
irngqativp  
>sp|Q2FYH0|AROB\_STAA8  
mklqttypsnyyiveghaidhistryidqfdqsfilidehvnqyfadkfddilsyenvhkvii pagekktkfeqqetl  
eylshhvtrntaiiavgg  
gatgdfagfiaatlrgvhfiqvpttilahdssvggkvginskqgnligafyrptaviydlvflktlpfeqilsgyaev  
ykhallngesatqdieghf  
kdreilqslngmdkyiakgietkldiviadekeqgvrkflnlghtfghaveyyhki phghavmvgiiyqfivana1fdsk  
hdinhyyqyliqlypldm  
itdldfetlyqym1sddkndkqgvqmvli rqfgdivvqhvdqltlqhaceqlktyfk  
>sp|Q2FYH3|Y1479\_STAA8  
msetlnqikesfielylfgyrfsriavwlnyikvneaklanihfvdtkinhetleiaevgshasaiqftkrniklmn  
tneifdyianhncafdiqi  
hfanvskreqrlddli vaqltespsyqtylhdlnsmaidrkhallidyllhnid1slqmnekqrfyqltqilntklvn  
khnqfedladdn  
>sp|Q2FYJ2|DHA1\_STAA8  
mlvavvkelkqgegrvactpenvrkltdaghkvi veknagigsgfsndmyekegakivtheqaweadlvikvkephesey  
qyfkknqiiwgflhlassk  
eivekmqevgvtaisgetiikngkaellapmsaiagqrsaimgayyseaqhgqgtlvtgvhenvdipgstyvi fgggva  
atnaanvalgnakviie  
lnddrikyledmyaekdvtkstpenlaeqikkadvfistilisgakppklvtremvksmkkgsvlidiaidqgggtiet  
irpttisdpvyeeegviy  
gvpnqpgavprtstmalaggnidyileicdkgleqaikdnealstgvniyqgqvtnqglasshdldykeilnvie  
>sp|Q2FYJ6|EBH\_STAA8  
mnyrdkiqkfsi rkytvgtfstviatlvlfgfntsqahaaetnqpasvvkqkqqsneqtenresqvqnsqnsqngqsls  
atheneqpnisqanlvdqk  
vaqsttndeapasqvntkkdsataattqpdkeqskhkqnesqsankngdnraahvenheanvvtasdsdngnvqhd  
rne1qaffdanyhdyrfid  
renadsgtfnyvkgifdkintlgsndpinndklqalaykeleqavalirtmpqrqtsrrsnriqtrsvesraaeprsvs  
dyqnanssyyvenandgsg  
ypvgtyinasskgapynlpttpwntlkasdskeialmtakqtdgyqvwikfnkghaphqnmifwafalpadqvpvgrtdf  
vtvnsdgtnvqwhgagag  
ankplqqmwegvndphrshdfk1rnrsgqviydwptvhiysledl srasdyfseagatpatkafgrqnfeyingqkpa  
spgvpkvytfiggdasyt  
isfktqgptvnllyaaagraleynqlfmysqlyvestqdhqqr1ngl rqvvrtyrigttkrvevsqgnvqtkkvest  
nlnidfvddplsvktps  
nkvlfgfysnantnafrpqgaqqlneyqlsq1ftdqklqeaartrnpir1m1gfdypdaygnsetlvpn1tlvpei qhn  
ikffknddtqniaekpfsk  
qaghpfvyvagnqgnasvnl ggsvtsiqplrinltsnenftdkdwqitgiprtlihenstnrpnarernielvgnllp  
gdyfgtirfgrkeqlfeir  
vkphtptitttaeq1rgtalqkvpvni sgip1dpsalvylvaptntnggseadqipsgytilatgtpdgvhntitirp  
qdyvvfippvgkqiravvy  
ynkvasnmsnavtilpddipptinnpvginakyrgdevnftmgvsdrhsgiknttittlpngwtsnltkadknngsls

Tsompanidou\_et\_al\_Supplemental\_FASTA\_File

itgrvsmnqafnsditfkv  
satdvnnttndsqs khvsihvgkisedahpivlgn tekvvvnptavsndekqsiitafmnknqirgylastdpvtvd  
nngnvtlhyrdgsstlda  
tnvmtypvkvpeygtvnaaktatvtiakgqsf sigdikqyftlsngqpi ps gftfnitsdrtip taqevsqmnagtqly  
hitatnayhkdsedfyisl  
kiidvkpegdqrvyrtstydlttdeiskvkqafinanrdvitlaegdisvtntpnganvstitvinkgrl tksfasnl  
anmnflrwnfpqdyvtw  
tnakianrptdggls wsdhksli yrydatlgtqittndil tmlkattvpglrnnitgneksqaeaggrpnfrttgysq  
snattdgqrqftlngvviq  
vldiinpsngyggpvtnsntrahsnstvvnepaangagaftidhvksnsth nasdavykaqlyltpygpkyveh  
lnqntgnttdainiyfvps  
dlvntp isvgnytnhqvfsgetfntitandnfgvqsvtvpnts qitgtvdnnhqvsatapnvtsatnktinllatdts  
gntattsfnvtvklrdky  
rvgtss taanpvriani snnatvsqadqtti inslfttetvpnr syarasaneitsktvsnvsrtg nnanvtvtvyqdg  
tstvtvpkhvipeivah  
shyvtqgqdfpangssasdyfkl sngsdiadatitwvsgqapnkdntrigeditvtahilidgett pitktatykvvrt  
vpkhvfetargvlypgvsd  
mydakqyvkpvnswstnaqhmnfqfv gtygpnkdvvgistrli rvtydnrqteditliskvkpdp pridansvtykagl  
tnqei kynnvl nssvklf  
kadntp l nvtni thsgsfsvvtvsdal pnggikakssi smnvtyttqdehgqvvtvtrnesvdsnds atvtvtpqlqa  
ttegavfikggd gdfghv  
erfi qnpph gatvawhds ptdwkn tvgnthktavvtl pngqgrnvevpkvypvanakapsrdvkgqn l tngtdamnyi  
tfdpntntngi taawanrq  
qpnqagvqhl nvdvtypgi saakrvpvtvnyqfefpqttytttvggt lasgtqasgyahmqnatgl ptdgftykwnr  
dtgtndanwsamnkpnva  
kvnakydvi yngh tfatsl pakfvkdvq pakptvtetaagaiti apganqtvnthagnv ttyadklvikr ngnvttf  
trrntspwvkeasaatva  
giagtngi tvaagtfn padti qvvatqgsgetvsdeqrsddftv vapqpnqattkiwqng hiditpnnpsghl inptqa  
mdia ytekvng aehskti  
nvvrqgnnqwti ankpdvvtl daqtgkvtfnanti kpnssititpkagtghsvssnpstl tapaahvntteivkdygsn  
vtaaeinnavgvankrtat  
ikngtampnlaggstttipvtvtyndgsteevqesiftkadkreli taknhl ddpvstegkkpgtitqynn amhnaqqq  
intakteaqqv inneratp  
qqvsdal tkvraaqtkidqakal lqnkednsq l vtsknnl qssvnqvpst agmtqqs idnynakkreaete itaaqrvid  
ngdataqqi sdekhvrdna  
l talnqakhdl tadthaleqavqql nrtg tttgkkpasitaynnsiral qsd ltsaknsanai iqkpi rtvqevqsaltn  
nrvnr l tqainqlvpla  
dn salktaktkl deei nksvtt dgmtqssi qayenakragqtestnaqnv inngdatdq qiaaektkveekynslkqai a  
gltpdlaplqtaktqlnd  
idqptsttgmtsasiaafneklsaartki qe idrvl ashpdvati rqnvtanaaksaldqarngl tvdkap lenaknql  
qhsidqtsttgmtqdsin  
aynakl taarnkiqqinqv lagsptveqintntstanqaksdl dharqal tpdkaplqtaktqleqsinqptdttgmtta  
slnaynqlqaarqkltei  
ngvl ngnptvqni ndkvteanqakdq lntarqgl tldrqpalttl hgasnl nqaqqnftqqinaaqnhaaletiksnit  
alntamtkl kdsvadnnti  
ksdqnytdatpankqaydn avnaakgvi gettnptmdvntvnqkaasvkstkda ldgqqnl qrakteatnait hasdl nq  
aqkna l tqqvnsaqnvqav  
ndikqtqslntamtg lkrvanhnqvvsdnyv nadtnkkndyn naynhandi ingnaqhpvi tpsdvnnal snvtske  
halngeaklnaakqeanta  
lghlnnlnnaqrqnlqsqi ngahqi davntikqnatlnsamgnl rqavadkdqvkrtedyadadtakqnaynsavssae  
tiinqttntptmsvddvnr a  
tsavtsnkna l ngyeklaqsktdaaraidal phlnnaqkadvkskinaasni agvntvkqggtdlntamgnl qgaindeq  
tlnsqnyqdatpskktay  
tnavqaakdi l nksngqntkdqvteamnqvnsaknnldgtrll dqakqtakqqlnmthl ttaqktnltnqinsgttva  
gvqtvqsnantldqamntl  
rqsiankdatkasedyvdanndkqtaynnavaaeti inansnpempst itqkaeqvns sktalngdenlaaakqnakt  
ylntltsitdaqknnl isq  
itsatrvsgvdtvkqnaqhl dqamas l ngi nnesqvssekyrdadtnkqqeydnaitaakailnkstgpntaqnavea  
alqrvnnakdalngdakli  
aaqnaakqhlgtlthittaqrndltnqisqatnlagvesvkqnansldgamgnlqtaindksgt lasqnl dadeqkrna  
ynqavsaaeti l nkqtgpn  
taktaveqal nvnna khalngtqn l nnaqqaaitaingasdl nqkqkdal kaqangaqrvsnaqdvqhnate lntamgt  
lkhai adktnl asskyvn  
adstkqnayttkvtnaehi isgtptvvt psevtaaanqvnsakqel ngderl reaknanta idal tq l ntpqkakl ke  
qvgqanrl edvqtvtngq  
alnnamkgl rdsianettv ktsqnytdaspnnqstynsavsnakgi inqtnptmdtsaitqattqvnnakngl ngaenl  
rnaqntakqnlnt lshltn  
nqksai ssqidraghvsevtat knaate lntqmgnleqai hdqntvkvsvkftdadkakrdaytnavsraeailnktqga

Tsompanidou\_et\_al\_Supplemental\_FASTA\_File

ntskqdveaaiqnvsakn  
alngdqvntaknaaknalnlnltsinnaqkrdlttkiddqattvagveavsntstqlntamanlqngindkntlasenyh  
dadsdkktaytqavtnaen  
ilnkngsnldktavenalsqvanakgalngnhnlmaqksnanttinglqhlттаqkdklkqqvqqaqnvagvdtvkssa  
ntlngamgtlrnsiqdnta  
tkngqnyldaternktnynnavdsangvinatsnprmdanainqiatqvtstknaIdgthnlтqakqtatnaidgatln  
kaqkdaIkaqvtsaqrvan  
vtsiqqtaneIntamgqlqhgiddenaatkqtqkyrdaeqsdkktaydqavaaakailnkqtgsnsdkaavdraIqqvtstk  
dalngdakIaeakaaakqn  
lgtlnhitaqrtdlegqinqattvdgvntvktnantIdgamnslqgsindkdatlrnqnyldadeskrnaytqavtaae  
gilnkqtggntskadvna  
lnavtrakaaIngadlnraktsatntidglpnlтlqkdnIkhqveqaqnvagvngvkdkgntIntamgalrtsiqdn  
ttktsqnyldasdsnkny  
ntavnngvinaatnnpmdanaingmanqvnttkaaIngaqnlmaqktnatntinnahtlnqkqkdaIktqvnaqrvs  
dannvqhtateIlnsamtaI  
kaaiadkertkasgnyvnadqekrqaydskvtnaeniisgtpnatIтvndvnsaasqvnaaktaIngdnnIrvakehann  
tidglaqlnnaqkakiIkeq  
vqsattIdgvqtvknssqtIntamkglrdsianeatikagqnytdaspnnrneydsavtaakaiinqtsnptmepntitq  
vtsqvttkeqalngarnIa  
qakttaknnlnltsinnaqkdaItrsidgattvagvnetakateIlnnamhsIqngindetqtkqtqkyIdaeppksa  
ydvavnaakailtkasqgn  
vdkaaveqalqvnstktalngdakIneakaaakqtlgtIthinnaqrtaIdneitqatnvegvntvkakaqqIdgamgq  
letsirdkdtIqsqnyqd  
addakrtaysqavnaaatiInktaggntpkadveramqavtqantaIngiqnlDrakqaantaitnasdIntkqkealka  
qvsagrsvsaangvehtat  
eIntamtaIkradkaetkasgnyvnadankrqaydekvtaaeivsgtptptItpadvtnaatqvtnaktqlngnhnl  
evakqnantaIdgltsIng  
pqkakIkeqvggattIpnvqtvrdnaqtIntamkglrdsianeatikagqnytdasqkqtdynsavtaakaiigqttsp  
smnaqeiinqakdqvtakqg  
alngqenIrtaqtnakqhlngIlsdItdaqkdavkrqiegathvnevtqaqnnadaIntamtnIknqidqntikqgvnft  
dadeakrnaytnavtqaeq  
ilnkaqgpntskdgvetaIenvqrakneIngnqnvanaaktaknalnlnltsinnaqkealksqieqattvagvqvstta  
seIntamsnlqngiIndeaa  
tkaaIngtnleakqhantaIdglshItnaqkealkqlvqqsttvaeeagqneqkannvdaamdklrqsIadnatkqng  
nytdasqkdaynavvt  
aqgiIdqtsptIldptvinqaagqvsttknalngnenIeaakqqasqslgsIdnlInnaqkqtvtDqingahtvdeanqik  
qnaqnlntamgnIkaIad  
kdatkatvnftdadqakqqayntavtnaeniiskanggnatqaeveqaiIkvnaakqaIngnanvqhakdeataIlnssn  
dInqaqkdaIkkqqvqnat  
vagvnnvkqtageInnamtqlkqgiadkeqtkadgnfvnadpdkqnaynqavakaealisatpdivvtpeitaalnkvt  
qakndIngntnIatakqnv  
qhaIdqlpnlngaqrdeyskqitqatIvpnvnaIqqaattIndamtqlkqgiankaqikgsenyhdadtdkqtaydnvt  
kaeellkqttntmpnti  
qqaItkvndtnqalngnqladakqdakttIgtIhdIndaqqaIтtqveqapdiatvnnvkqnaqnlInnamtnInnaIq  
dktetIlnsinftdadqakk  
daytnavshaegiIlskangsnasqteveqamqrvneakqaIngndnvqrakdaakqvItinandInqamtqlkqgiadkq  
tkangnfvnadtdkqnayn  
navahaeqiisgtpnanvdpqvaqalqqvnaqkglngnhnlqvakdnantaIdqlpnlngppktaIkdqvshaelvtg  
vnaIknadaInnamgtIk  
qqiqansqvpqsvdftqadqdkqqaynnaanaqqaqiangiptpvItpdtvtqavttmqakdaIngdekIaqakqeaIan  
ItdIrdInqpprdaIrnqi  
nqaqalaveqtkqnaqvntamsnlkqgiankdtkasenyhdadadkqtaytnavsqaegiiinqttntIlnpdeitra  
IтqvtDakngIngeaklat  
ekqnakdavsgmthIndaqqaIkgqIdqspeiatvnqvkqtatsIdqamdqlsqaindkaqtIadgnyInadpdkqnay  
kqavakaealInkqsgtne  
vqaqvesitnevnaakqaIngndnlanakqqakqqlanIthIndaqkqsfesqitqapIтvtdvtInqkaqtIdhameI  
rnsvadnqttIasedyhda  
taqrqndynqavtaanniinqttsptmnpddvngattqvnttkvaIdgdenIaakqqannrIdqldhInnaqkqqlsq  
itqssdiaavnghkqtaes  
IntamgnIlnaIadhqaveqrnfinadtdkqtayntavneaaaminqkqgqnanqteveqaitkvqttIqaIngdhnIq  
vaktnatqaidaltsIndp  
qktaIkdqvtaatlvtavhqiEqnantInqamhgIrsiqdnaatkanskyinedqpeqqnydqavqaanniineqtatI  
dnnaInqaattvnttkaaI  
hgdkvlqndkdhakqtvsgIahInnaqkhmedtIIdsettrtavkqdlteaqaIdqImdaIqqsiadkdatrassayvna  
epnkkqsydeavqnaesiI  
agInnptInkgnvssatqavissknaIdgverIaqdkqtagnslnhIdqltpaqqqaIenqinnattrdkvaeiIaqaqa  
IneamkaIkesikdppqte  
asskfinedqaqkdaytqavqhakdIlnkttDptIaksiIdqatqavtdaknnIhgdkIaqdkqratetInnlslntp



Tsompanidou\_et\_al\_Supplemental\_FASTA\_File

qrqal enqinnaatrgeva  
qkl teaqal nqameal rnsiqdqqqteagskfinedkppkdayqaavqnakdlinqtnnptldkaqveqltqavnqakdn  
lhgdqkladdkqhavtdln  
qlngl nnpqrqalesqinnaatrgevaqklaeakaldqamqal rnsiqdqqqtesgskfinedkppkdayqaavqnakdlinqtnnptldksqveqltq  
avttakdnlhgdqklardqqqavttvna l p n l n h a q q q a l t d a i n a a p t r t e v a q h v q t a t e l d h a m e t l k n k v d q v n t d  
kaqpnysteatsdkkeavdq  
alqaaesitdptngsnankdavidqvl tk l q e k e n e l n g n e r v a e a k t q a k q t i d q l t h l n a d q i a t a k q n i d q a t k l q p i  
a e l v d q a t q l n q s m d q l q q  
avnehanvegtvdytqadsdkqnaykqaiadaenvlkqnankqqvdqalqni lnakqalngdervalaktngkhdidqln  
alnnaqqdgfkgridqsdn  
lnqiqqvdeakalnramdqlsqeitdnegrtkgstnyvnadtqvkqvydetvdkakqaldkstgqnl takqviklndav  
taakka l n g e e r l n n r k a e  
alqrldq l t h l n n a q r q l a i q q i n n a e t l n k a s r a i n r a t k l d n a m g s v q q y i d e q h l g v i s s t n y i n a d d n l k a n y d n a  
i a n a a h e l d k v q g n a i a k a  
eaeqlkqniidaqnalngdqnlanakdkanafvns l n g l n q q q q d l a h k a i n n a d t v s d v t d i v n n q i d l n d a m e t l k h l  
vdneipnaeqtvnyqadd  
nakt n f d d a k r l a n t l l n s d n t n v n d i n g a i q a v n d a i h n l n g d q r l q d a k d k a i q s i n q a l a n k l k e i e a s n a t d q d k l  
i a k n k a e e l a n s i n n i n k  
atsnqavsqvtagnhaieqvhaneipkaidankdvdkqvqalideidrnpnltdkekqalkdrinqilqqghnginna  
mtkeeieqakaqlaqa l q d  
ikdlvkakedakqvdvkqvqalideidqnpnltdkekqalkdrinqilqqghndinnamtkeaeieqakerlaqa l q d i k d  
lvkakedakndidkrvqal  
ideidqnpnltdkekqalkdrinqilqqghndinnaltkeeieqakaqlaqa l q d i k d l v k a k e d a k n a i k a l a n a k r d q  
insnpdl t p e q k a k a l k e i  
deakralnqvenaqtidqlnrglnlgl d d i r n t h v e w d e q p a v n e i f e a t p e q i l v n g e l i v h r d d i i t e q d i l a h i n  
l i d q l s a e v i d t p s t a t i s  
ds l t a k v e v t l l d g s k v i n v p v k v e k e l s v v k q q a i e s i e n a a q q k i n e i n n s v t l t l e q k e a a i a e v n k l k q q a i d h  
v n n a p d v h s v e e i q q q e q a  
hieqfnpeqftieqaksnaiksiedaiqhmiideikartdltdkekqaeiaklnqlkeqaiqaiqraqsideiseqleqfk  
aqmkaanptake l a k r k q e  
aisrikdfsnekisnrneigtadekqaamnqineivletirdinnahtlqqveaalnngiarisavqivtsdrakqss  
stgnesnshltigygtanh  
pfnstighkkk l d e d d i d p l h m r h f s n n f g n v i k n a i g v v g i s g l l a s f w f f i a k r r r k e d e e e e l e i r d n n k d s i k e  
t l d d t k h l p l l f a k r r r k e  
deedvtveekds l n g e s l d k v k h t p f f l p k r r r k e d e e d v e v t n e n t d e k v l k d n e h s p l l f a k r r k d k e e d v e t t s i  
eskdedvp l l l a k k k n q k d  
nqskdkksaskntskkvaakkkkkkakkknk  
>sp|Q2FYQ7|OPPD2\_STAA8  
mslidiqnl tikntsekslikgidlki fsqqinaligesgagksliakalleylpfdlsctydsyqfdgenvsr l s q y y g  
htigyisqnyaesfndhtk  
lgkqltaiyrkhykgskeea l s k v d k a l s w v n l q s k d i l n k y s f q l s g g q l e r v y i a s v l m l e p k l i i a d e p v a s l d a l n  
gnqvm d l l q h i v l e h g q t l  
fiithnlshvlkycqiyvlkegqiierngnihfkyeh l h p y t e r l i k y r t q l k r d y y d  
>sp|Q2FYQ8|OPPF2\_STAA8  
mie l k h v t f g y n k k q m v l q d i n i t i p d g e n v g i l g e s g c g k s t l a s l v l g l f k p v k g e i y l s d n a v l p i f q h p l t s f n p d  
wtiets l k e a l y y r g l t d  
ntaqdql l l q h l s t f e l n a q l l t k l p s e v s g g q l q r f n v m r s l l a q p r v l i c d e i t s n l d v i a e q n v i n i l k a q t i t n l n  
h f i v i s h d l s v l q r l v n r i  
ivlkdgmivddfaiee l f n v d r h p y t k e l v q a f s y  
>sp|Q2FYS1|TYRA\_STAA8  
mttv l f v g l g l i g g s l a s n i k y h n p n t n i a y d a d i s q l d k a s i g i i n e k c l n y s e a i k k a d v i i y a t p v a i t n k y l s e  
l i d m p t k p g v i v s d t g s t k  
amiqqhecn l l k h n i h l v s g h p m a g s h k s g v l n a k k h l f e n a y y i l v y n e p r n e q a a n t l k e l l s p t l a k f i v t t a e e h d  
y v t s v s h l p h i v a s s l v h  
vsqkngqehh l v n k l a a g g f r d i t r i a s s n a q m w k d i t l s n k t y i l e m i r q l k s q f q d l e r l i e s n d s e k l l s f f a q a k s  
y r d a l p a k q l g g l n t a y d l  
y v d i p d e s g m i s k v t y i l s l h n i s i n l r i l e v r e d i y g a l k i s f k n p t d r e r g m a l s d f d c y i q  
>sp|Q2FYS7|Y1349\_STAA8  
mqieltdaavtwfknelelpennkv l v f f v r y g g e f q l k q g f s p a f t v e p k e d v d i g y e q q y d d l n v v v a e k d l w y f e d d  
h i i v n v d h e d e i s y s t k  
>sp|Q2FYT3|SBCC\_STAA8  
mkplhkl l n n f g p f l k e e i d f s k i d n n e l f l i s g k t g s g k t m i f d a m t y a l f g k a s t e q r e e n d l r s h f a d g k p m s v t f  
e f q l n h r i y k v h r g g p y i k  
egnttktnakfdvfemvdgkyei reskvisgtqfiel l g v n a d q f r q l f i l p q g e f k r f l i s n s r e k q g i l r t l f d s e k  
f e a i r e i l k e e v k k e a q i  
enryqqid l l w q e i s f d d n i k g l l e v a t q q i d k l i e n i p l l q a r s k e i l a s v n e s k e t a i k e f e i i e k k t l e n n i l k d  
n i n q l n k n k i d f v q l n e q q

Tsompanidou\_et\_al\_Supplemental\_FASTA\_File

peiegieaklkllqditnllnyienrekietkianskkdi sktnkilnlcdkrdnkkekkmleengdlieskisfidk  
trvlfndinkyqgsylnie  
r1rtegeqlgdelndlikgletvedsignqsdyekiieInntitninneiniikenekakaeldkllgskqelenqine  
etsilknleikldrydtkk  
ldlndkesfjseiksavnigdqpcigneiqlghhidfdisiqrqneikeieanihaiksniavhseikfvnekisni  
niktqsdfslevlnkrll  
nenalnqrdrlnkfiegmkeekdnltlqihnkqlrlnkneselklcrdlitefetlskynnitnfevdykkyvqdvnhq  
elskeiedklmglsqrkli  
eqnlnhyenqletynndlelneqsiememsrlnltdndideiiawrgeqeelqkrdytkkryhefemeiarlesltk  
dkelldsdklkdeyelkk  
kmntli deysavhyqcqnniktqsivshinylnqelkdqqeifqlaeivsgknnkntlenfvliyyldqiaaqanrl  
atmsdnryqli rreavshg  
lsgleidvfdlhnksrhisslsggetfqsslalalglseivqqqsggisltsifidegfgtldqetletaldtllnlks  
tgrmvgiishvselknrip  
lvevksdqyqsstrfkrn  
>sp|Q2FYZ9|MUTS\_STAA8  
msnvtppmmqqylkikseyqdc1lffrldgdfyemfyedakeasrvleiltkrdakkenpipmcgvpyhsadsyidtlvnn  
gykvaiceqmedpkqtkgm  
vrrevvri vtpgtvmeqggvddkqnniylsfvmnqpeialsydcvstgelkvthfndeatlneittinpevvindnis  
dnlkrqinmvtetitivret  
lssseisvntekhlmyqatqllldyihhtqkrdlshiedvvqyaaidymkmdfyakrnleltesirllskkgtllwmd  
etktpmgarrlkqwidrpl  
iskeqiearldivdefshafierdtlrtylnqvydierlvgrvsygnvvardliqlkhsiseipnikallnsmnqntlvq  
vnqleplddlldileqslv  
eepisvkdgglfkvgfntqldeyleaskngktwlaelqakerqrtgikslkisfnkvfygfieitranlqnfepsefgy  
mrkqtl snaerfi tdelke  
kediilgaedkaieleyqlfvqlreevkyterlqqqakiiseidclqsfaeiaqkynytrpsfsenktlelvesrhpv  
ervmdydyvpnnrldne  
tfiyli tgpnm sgksty mrvai isimaqmgayvpckeavlpifdqiftrigaaddlvsgkstfmvemleaqkalyate  
dsl iifdeigrststydg  
alaaqamieyvaetshaktlfsthyhel ttdqalpslknvhvaaneykge liflhkvkdgavddsygiqvakladlpek  
israqvillsefeasagkks  
sisnlkmvenepeingenlnlsveettdtlsqkdfeqasfdlfendqkseielqiknlnlsmnptiealvkl selqnglk  
>sp|Q2FZ32|TOP1\_STAA8  
madnlvivespakaktiekylgkkykviasmghvrdlprsqmgvdtednyepkyitirgkpvvkelkkhakkaknvfla  
sdpregeaiawhlskile  
ledskenrvvfneitkdavkesfknpreiemnlvdaqqarri ldrlvgnispvlwkkvkglsagrvqsvalrvidre  
neirnfkpeeywtiegefr  
ykkskfnakflhyknkpfklktkkdvekitaaldgdqfeitnvtkkektrnpanpfttstlqqeaarklnfkarktmmva  
qqlyegidllkqgtigit  
ymrtdstrisd takveakqyitdkygesytskrkasgkqgdqdaheairpsstmrtppdmksfltkdqrlykliwerfv  
asqmapaildtvsl ditqg  
dikfrangqtikfkgfmitlyvetkddssekenlplkleqgdktatqiepaqhytqpppry tearlvktleelkigrps  
tyaptidtiqrnyvkl  
krfyptelgeivheqvkeyfpeiidveftvmetlldkiaegditwrkvidgffssfkqdvraeeemekieikdepage  
dceicgspmvikmgrygkf  
macsnfpdcrtkai vksigvkcpkndgdvverkskkrvfgygcskypecdfiswdkpi grdcpkcnqylvenkkgtt  
qvicsncdykeaaqk  
>sp|Q2FZ44|RIMM\_STAA8  
mrvevgqivnthgikgeikvksnsdftdvrfaqgqvl tvvhnnndleytvkshrvhkgllhmltfeginnindiehlkgss  
iyqerdhedivleenefyy  
sdiigcavfddqktpigrvini fetgandvvikskeylipyiadvvkevdvenkkiiitpmeglld  
>sp|Q2FZ92|MURD\_STAA8  
mlnytglenknvlvvglaksgyeaakllsklganvtvndgkdl sqdahakdlesmgisvsvsgshpl tll dnp iivknp  
ipytsiideavkrqllki  
tevelsylimseapiiavtngtktvtsligdmfksrltgrlsgnigyvaskvaqevkptdylvtelssfqllgiekyk  
phiaiitniysahl dyhen  
lenyqnakkqiyknqteedylicnyhrqviesee laktlyfstqqevdgiyikdgfivykgvriintedlvlpgehn  
enilaavlacilagvpika  
iidsl ttfsgiehrlyqyvgtnrtnkyyndskatntlatqfalnsfnqpi iwlcggldrgnefdelipymenvramvvfgq  
tkakfaklgnsqgksviea  
nnvedavdkvqdiiepndvllspacaswdqystfeergekfierfrahpsy  
>sp|Q2FZ98|Y1139\_STAA8  
mdckvvslnekdqfipkikssdpvigtlfqydaaqtsefkrmskenngreaalanvi reymsdlklslsseqelnih  
langskvvi gggqaglfgg  
plytfhki fsiitlskeltdthkqqvvpvfwagedhdfdevnhtfvnenhgslhkvkyhtmempettvsryypdkael  
kqtlktmfihmketvhtqg  
lleicdriidqyds wtdmfka llhetfkaygvlfidaqfep lrkmeapmfkklkqhllddafratqqrtnqnglnami

Tsompanidou\_et\_al\_Supplemental\_FASTA\_File

qtdtnvhlflhdenmrglv  
sydgkhfklntdktyikeeiiniaenqpefsnnvtrplmeewlfntvafvggpseikywaelkdvfeifdvempivm  
prlriylnndriekllsky  
niplekvlvdgvegerskfi reqashqfiekvegmieqqrlnkdlldevagnqnninlvnknneihiqqydyllkryll  
nierendismkqfreiget  
lhpmggleriwplqilndfgtdvfkpstypplsytfdhiikp  
>sp|Q2FZA9|ARCC1\_STAA8  
makivvalggna lgkspqeqlvknaks lvg litkgheivishngnpqvg sinlglnyaaehnqgpafpfaecgamsq  
ayigyqlqeslqnelhsig  
mdkqvvtlv tqvevdendpafnnp skpiglfynkeaeqikekgfifvedagrgyrrvpsppisiele siktlkn  
dtlviaaggggipvireqh  
dgfkgidavidkdktsallganiqcdqililtaidyvyinfntenqqplkttndelkryidenqfakgsm lpkieaa is  
fiennpkgsvlitslneld  
aa legkvgtvikk  
>sp|Q2FZE5|ISDF\_STAA8  
mmiknkkllflcllvi liatayisfvgtiklsfndlftkfttgsneavdsiidlr lprilialmvgamlavsgallqa  
alqnp laeaniigvssgal  
imralcm lfi pqlfyflpllsfigglipflililshkfrnavsmilvgvalfvllngvleiltqnp lmkipqgltmki  
wsdvylavsa llgliltl  
llspklnllnlddiqarsifnidryrwl tgl lavflasatvaivgqlaf lgiivhvrklvggnyrvlipfstvigawl  
llvadllgrviqppleipa  
nailmivggpmliylicsqsrnri  
>sp|Q2FZF1|RL32\_STAA8  
mavpkrrtsktrknkrthfki svpgmtecpncgreyk lshrvckncgsyng ee vaak  
>sp|Q2FZJ3|PUR7\_STAA8  
mtll yegkakrafstnqene l rveykdevtagngakkdtmagkgrlnnqitsiifkylqengieshfikqlseteqlvkp  
vkiiplevvvrniasgsit  
krlgfengev freplveffyknda lndplittddhvkllniasdedieilkskalkinnvlkqlmdamnlklvdfkiefgk  
tetgqilladeis pdtcri  
wdkatnanfdkdvyrnntgs lietyqiflnkledlk  
>sp|Q2FZK3|FMTA\_STAA8  
mkfnkvklvihacvllfi isialifhrlqtkthsidpihketklsdnekylvdrnkek vapsklkevynskdpkykkid  
kylqsslfn gsvaiyengk  
lkmskgygyqdfekgikntpntmfligsaqkfstglllkqleehkinindpvs klylpwfkt skpipkdlmlhqsglyk  
ykskdyknl dqavkaiqk  
rgidpkkyk khmyndgnylvlakvieevtgksyaenytkigdpklqhtafydeqpfkylakgyaynstglsflr pni  
ldqyygagnlymtp tdmgk  
litqiqqyklf spkitnpl l hefgtkky pdeyrygyakptlnrlnggffgqvftvyyndkyvvv lalnvkgnnevri kh  
iyndilkqnkpyntkgv iv  
q  
>sp|Q2FZK7|ATL\_STAA8  
makkfnyklpsmvaltlvgsavtahqvqaaettqdqttnknvl dsnkvkatteqakaevknptqnisgtqvyqdpai vqp  
ktannktgnaqvsqkvdta  
qvngdtr anqsattntpvakststtapktntnvt nagyslvddeddn senqinpeliksaakpaaletqy ktaapkaa  
ttsapakteatpkvttfs  
asaqprsvaatpkts l pkykpqv nssindyicknllkapkieedytsyfpkyayrngvgrpegivvhdtandr stingei  
symknnyqna fvhafvdgd  
rietapt dylswgv gavnprfinveivhthdya sfarsmnyadyaatqlqyyglkpd saeydgngtvwthyavsky l  
ggt dhadphgyl rshnysy  
dqlydlinekylikmgkvapwgtqstttpttspkpttspkpstgkl tvaanngvaqikptnsglyttvydktgkatnevq  
ktfavsktat lgnqkfy lv  
qdynsgnkfgwvkegdvvyntakspvvnqsys ikpgtklytvpwgt skqvagsvsgsgnqtfkaskqqqidksiylygs  
vngksgwvskaylv dtakp  
tptptkpstptt nknltvsslngvaqinaknnglfttvydktgkptkevqktfavtkeas lggnkfy lvdynsptlig  
vkggdviynn akspvnm  
qytyvkpgtklysvpwgtykqeagavsgtgnqt fkatkqqqidksiy lfgtvngksgwvskaylavpaapkkavaqpkta  
vkayvtk pqtqtvs k ia  
qvkpntgi rasvyektakngakyadr t fyv tkerahgnetyvll nntshniplgwf nvdlnvqnl gkevkt tqytvn  
ksnnglsmvpwgtknqvil  
tgnniaggtfnatkqsvgkdvlygtinnrtgwnakdl taptavkptt saakdyny tyvikngngyyyvtpnsdtaky  
slkafneqpfavvkeqvin  
ggtwy ygk l sngklaw i kstdlake likynqtgmtlnqvaqi qaglykypqvrvpgkwt dakfndvkhamdtkrlaqdp  
alkyqflrldqpqn isidk  
inqflkgkgl enqgaafnkaa qmyginevyl ishalletgn gtsqlakgadvvnnkvvt nsntkyh nvfgiaay dndpl  
regikyakqagwdtvs kai  
vggakfignsyvkagqntlyk m rwnpahpgthqyatdvdwanaki ikgyydkigevgkyfdipqyk  
>sp|Q2FZL2|SSPA\_STAA8  
mkgkflkvssl fvatlttatlvsspaana lsskamdnhpqqtqsskqqt pkiqkgnl kpleqrehanvilpnndrhqit

Tsompanidou\_et\_al\_Supplemental\_FASTA\_File

dttnghyapvtyiqveapt  
gtfiasgvvvgkdtlltnkhvvdathgdphal kafpsainqdnypnggftaeqitkysgedlaivkfspneqknhigev  
vkpatmsnaetqvnqnit  
vtgyppgdkpvatmwskgkitylkgeamqydlsttggngsgspvfneknevigihwggvpnefngavfinenvrnflkqni  
edihfanddqpnnpdnpdn  
pnpdpnpnpdepnpdpnpnpdpndngdnnsdnpdaa  
>sp|Q2FZP2|HTRAL\_STAA8  
mdigkkhvipksqyrrkrreffhnedreenlnqhdkqnidnttskkadkqihkdsidkherfknslsshleqrnrdrvne  
nkaeesksnqdsksaynrd  
hyltddvskkqnsldsvdqdtekskyeqseatlstkstdkvestemrklsdknkvgheeqhvlskpsehdketrids  
essrtdsdssmqtekikkd  
ssdgnkssnlksevisdksntvpkl sesdevnnpkl t lpeeqlkrqqsneqtktytygdseqndksnhendlshhi  
psisddkdnvmrenhivdd  
npndintpslsktdddrkldekihvedkhkqnadssetvgyqsqstashrstekrnisindhdklngqkntktsann  
qkkatsklngkratnnys  
dilkkfwmmypkvlvimgiilivilnai fnnvnkndrmndndadaqytttmknantvksvvtvenetskdsslpk  
dkasqdevgsgvvvykkskd  
tlyivtnahvvgdenkqitfsnksvvgkvlgkdkwsdlavkatssdssvkeiaigdsnnlvlgepilvvgnpvgvdf  
kgtvtegiisglrnrnypid  
fdkdnkydm1mkafqidasnpgnsggavvnrregkligvvaakismpnvenmsfaipvnevqkivkdletkgkidypdv  
vkmknivslnsferqavkl  
pgkvkngvvdqvdnngladqsglkkgdvite1dgkl1edd1rfrqiiifshkdd1ksitakiyrdgkekeinikl  
>sp|Q2FZP9|Y951\_STAA8  
milglalipsksfgeavdsyrkrydkysrikphvtikapfeikdgdldsvieqvraringipavevhatkassfkptnn  
viyfkvaktddleelrnr  
ngedfygeaehfvphftiaag1ssqefedifgqvalagvdhkeiidel1l1rfdededkwkvietfkl  
>sp|Q2FZQ3|FABI\_STAA8  
mlnlentkyvimgiankrsiafgvakvldq1gaklvftyrrkersrkelek1leq1nqpeahlyqidvqsdeevingfeqi  
gkdvgnidgvysiafanm  
ed1rgrfsetsregfl1aqdissys1tivaheak1mpeggisvattylggefavqynvmgvakas1eanvky1ald1g  
pdnirvnaisaspir1sa  
kgvggfnti1keieeraplkrnvdqvevgktaay11sd1ssgvtgenihvdsgfhaik  
>sp|Q2FZU0|G6PI\_STAA8  
mthiq1dfskt1effgehelkqqeivksihktihegtgagsdf1gwid1pvdvdykeefsriveaskrikensdvlvvg  
iggylgaraaie1m1tssf  
rnsneypei1fvgnh1sstytke1vdy1adkdfsvnvisksgtttepavafr1fkq1veerygkeeaqkri1fattedkeg  
alkq1atnedyetfivpdd  
vggrysv1tavgl1piataginieammigaakaree1ssdk1eeniayqyati1rni1yakgyttem1inyepsmqyfnew  
wkq1fgesegkdfkgiyps  
sanytd1hs1ggyvqegrrf1fetvkvnhpkyditi1ekdsdd1dg1nylagkti1devntkafegt11ahtdggvpmv  
vni1p1deetfgyvvyffe  
1acamsgyq1gvn1pfn1qpgveaykqnmfal1gkpgfed1kke1eer1  
>sp|Q2FZW4|DLTC\_STAA8  
mefreqv1n11aevaendivkenpdveifeegi1dsfqtvg111eiqk1ndievsimdfdrdewatpnkivealeer  
>sp|Q2FZX0|NAGD\_STAA8  
mkqykay1id1dgtmymgtdeidgakqfidyl1vkgiph1lyvtnnstktpeqvtek1remhidakpeevvtsalatadyi  
seqspgasvym1ggsg1nt  
al1teagl1v1kndehvdyvvg1ldeqvtyek1aiat1gvrngatfistn1pdvsipker1l1pgngaitsvsvstgvspqf  
igkpepi1mvkalei1gl  
ksevavmgd1ytd1msg1nv1gmdtihvqtgvst1edvqnknvptysfkd1neaiaelek  
>sp|Q2FZX9|2NPD\_STAA8  
mwnknr1tqm1sieypi1iqagmagsttpk1vasvsnsggl1gtigagyfntqql1edeidyvrq1tsnsfgvnnfvpsqqsy  
tssqienm1naw1kpyrra1  
hleepvki1teeqqfkchidti1ikkqvpcctf1gipseqi1sr1kaanvkl1igtatsvdeai1anekagmdaivaqgsea  
gghrgs1fl1kpnq1lpmvgt  
is1lvpg1vdvvs1pviaaggim1dgrgvl1asiv1gaegvqmgtaf1tsqdsnasel1rdai1nsketdvtitkafsgklar  
ginnrf1eemsqyegdipd  
ypiqnel1tss1rkaaan1gdke1ihmwsqspr1latthpantimsni1inqinqimqyk  
>sp|Q2G015|CLFA\_STAA8  
mmkkkkehairkksigvasv1vgt1igfg1l1sskeadasensvtqdsdsasnesksndsssvsaapktddtnvsdtkts  
ntnngetsvaqnpaqqett  
qssstnatteetpvtgeat1tttntqantpattqssntnaeel1vnqtsnettsnd1ntvssvsn1pqnstnaenvsttqds  
teatpsnnesapqstdasn  
kdvvngavntsaprmrafs1aavaadapvagtdi1tnq1tnvtvgi1dsgttvyphqagyvkl1nygfsvpnsavkgdtfkit  
vpkel1n1ngvtstakvppi  
magdqv1angv1dsdgnv1yftdyvntkddvkat1tmpayidpenvkk1tgnvt1atgigstt1anktv1vdyekygfyn  
1sikgtidq1dktntnyrq  
tiyvnpsgdnvi1apv1tgn1kpn1tdsna1idq1qnts1ikvykvdnaad1sesyfvnpenfedvtnsvnitf1pnpnqykvef

Tsompanidou\_et\_al\_Supplemental\_FASTA\_File

```
ntpddqittpyivvngghi  
dpnskgdla1rstlygynsni iwrsmwdneva fngngsggdg idkpvvpeqpdepgeiepipedsdsdpgsdsgsdsns  
dsgdsdgsdstsdsgdsda  
sdsdsasdsdsasdsdsasdsdsasdsdsdndsdsdsdsdsdsdsdsdsdsdsdsdsdsdsdsdsdsdsdsdsdsd  
sdsdsdsdsdsdsdsdsd  
dsdsdsdsdsdsdsdsdsdsdsdsdsdsdsdsdsdsdsdsdsdsdsdsdsdsdsdsdsdsdsdsdsdsdsdsdsasdsd  
dsdsdsdsdsdsdsdsd  
sdsdsdsdsdsdsdsdsdsdsdsdsdsdsdsdsdsdsdsdsdsdsdsdsdsdsdsdsdsdsdsdsdsdsdsdsds  
ngtnasnknkneakdskep1p  
dtgsedeantsliwgl1asigs111frrkkenkdkk  
>sp|Q2G030|TPIS_STAA8  
mrtpi1agnwkmktvqeakdfvnt1pt1pdskevesvicapaiqldal1ttavkegkaagleigaqntyfedngaftget  
spvaladlgvkvvighse  
rrelfhetdeei nkahai fkhgmtpi1cvgetdeeresgkandvveqvkkavag1sedqlksvviayepiwaigtgks  
stsedanemcafvrqtiad  
1sskevseatriqggsvkpnnikeymaqtdidgalvggas1kvedfvq1legak  
>sp|Q2G039|Y787_STAA8  
mdnnekekskse11vvtglsgagks1viqcledmgyfcvdn1ppv11pkfvelmeqgnps1rkvaiaid1rgkel fns1v  
avvdvkvsesdviidvmf1  
eastek1isryketrrahp1meqqkrs1ina indereh1sqirsianfvidttk1spkelkerirryyedeefetftinv  
tsfgfkhg1qmdad1lfdv  
rflpnpyyvvd1rpltg1dkdvynvwmkwete1ffek1td1ldfmipgykkegksqlviaigtgqhrsvalaer1gn  
ylnevfeynvyvhhrah  
esgekk  
>sp|Q2G044|LGT_STAA8  
mgivfnyidpvafnlqplsvrwygii1avgi11gyfvaqralvkag1hkdt1vdi1fysal1fgfiaariyfvi1fqwpyya  
enpsei1kiwhggia1hgg  
liggf1agv1ckvkn1nppf1qgidivapsi11aqq1grwgnfmnheahggsvsraf1eq1h1nfn1ienmyingqyyht  
fliesiwdvagfi1lvni  
khlklgetff1yltwysigrffieglrt1d1m1t1sn1rvaqlvs11111111111111111111111111111111111111  
k  
>sp|Q2G064|PEPT_STAA8  
mknqlidrl1tryttid1tqsdpk1sttp1stekqwd11h1leke1lq1gl1ptd1ldengyl1fat1lesnidvdvptvg1lahvd  
tspdfnasnvk1pqi1enyd  
gkpyk1gntkrv1dpkvfpe1nslvght1mvtdgts11gaddkagiveimeaicyl1qehpeikhgt1rigftpdeeigr  
phkfdvd1rfnad1faytmdg  
sqygelqyes1fnaaeav1tchgvnvhpgsaknamvna1rlgeqf1ds11pdsevpertegyegfyh1m1nfegtvekat1qy  
i1rdhdkkqf1elrkri1e  
i1rddinah1fenyp1kvdi1sdqyfnmaek1lp1phi1di1pkrv1fak1di1pante1pirggt1dgsq1s1fmg1lpt1n1ftg1cgn  
fhgpyeyas1dvme1kavq  
i1gi1vedia1enh  
>sp|Q2G069|MURB_STAA8  
minkdi1yalq1lipnek1kvd1ep1krytytk1tgnadfyi1tptknee1qvavkyayqne1pvty1lgnsgnsii1ireggi1r  
givis11s1d1hie1vsddai  
1agsga11idvs1rvardya1tg1efacg1pgs1iggavymnagaygge1vkdci1dya1lc1vneqgs1lik1ttke1el1dyrnsi  
iqkehl1vv1lea1aft1lapgk  
mtei1qakmdd1terresk1p1leypscgsvf1qrppgh1fagk1liqdsn1lqghrigg1vevstkhag1fm1nv1dng1tad1yenli  
hyvq1tvk1ek1fgie1lnrev  
ri1geh1pk1es  
>sp|Q2G0B1|MGRA_STAA8  
msdqhn1keq1cfs1ynaqrqvnryysnkvfkkyn1typq1flv1tilwdespvnvkkvtelaldt1gtvsp11krmeqv1d  
likrersevdqrevfi1h1t  
dkset1rpe1l1sn1sdkvasass1sqdevke1lnr11lgkvi1hafdetkek  
>sp|Q2G0L1|GCH4_STAA8  
mtefd1streg1rwkhfgsvd1piegk1p1tknemtd1qsthkdf1feieevgikn1lvypv1vdqyq1tagt1fsf1sts1tkde  
kginms1ri1iesve1khydn1g  
i1elefnt1lyqvlrt1qtnm1kqnaagvd1vsgkwff1drysp1t1nikavn1ad1vtyglaidg1dkv1trkel1tieatv1t1cpcs  
keiseysahn1qrgvvtvkt  
yinkdq1divdyknk1ldameanass1lyp1lkrp1dekrv1terayenprfved1ir1liaad1vefdw1ldgfdiecrnees  
ihqh1dafak1kyrk  
>sp|Q2G0L4|SDRD_STAA8  
m1nrenk1tai1trkgmvsnr1n1kfs1rkytv1gtas1ilvgtt1if1g1ng1qeaka1aestnke1lneatts1sdn1qssdkvdm1mq  
1nqedntkndngkemvss1q  
gnettsngnk11ikesv1qsttgknevstaksdeqaspkstned1ntkqt1isnqea1lqpd1lqenksvvnv1qptneenk1kv  
daktest1l1nvksdai1ksn  
det1vdnnsn1snennadi1lpk1stapkr1ntrmriaav1qpssteaknvnd1itsntt1tvvdadknnkivpaqdy1slk  
sqitvd1dkvksgdyfti1ky  
sdtvqvyg1lpedi1knig1d1kdpn1ngeti1atakhd1tann1itytftdyvdrfnsvqmg1inysiy1mdadt1pvskndvefn
```

Tsompanidou\_et\_al\_Supplemental\_FASTA\_File

vtigntttktaniqyppy  
vvneknsigsaftetvshvgnkenpgyykqtiyvnpensltnaklkvqayhssypnigqinkdvdikiyqvpkgytl  
nkgydvntkeltdvtnqyl  
qki tygdnsavidfngadsayvmmvntkfqytnsesptlvqmatlsstgnksvstgna l gftnqsggagqevyki gny  
vwedtnkngvqelgekvgv  
nvtvtfvdntntkvgavtkedgsylipnlpngdyrvefsnlpkgyevtspkqgnne l dsng l ssvitvngkdn l sad  
lgiykpkyngdyvwedtn  
kngiqdqdekgsivgtvltkdenngv l ktvttadagkykftd l dngnykvefttpegytptttvtsgsdi ekdsng l tttg  
vingadnmt l ds gfyktpk  
yn l gnyvwedtnkdgkqdstekg isgvttv l knengevlqtkttdkdgkyqftg l engtykvefetspgytpqvsgsd  
egidsngtsttgvikdkdn  
dtidsgfykptyn l gdyvwedtnkngvqdkdekgsivgtv l kdendkvlktvttengkyqftd l nngtykvefetspg  
ytptsvtsgndtekdsgnl  
tttgvikdadm l ds gfyktpkys l gdyvwysndkgkqdstekgikdvkv l l nekgevigttkt dengky cfdn l ds  
gkykvi fekpagl tqtvtn  
tteddkdadggevdtitdhdfft l dngyfeedtsdsdsdsdsdsdsdsdsdsdsdsdsdsdsdsdsdsdsdsdsdsdsds  
sdsdsdsdsdsdsdsdsdsdsdsdsdsdsdsdsdsdsdsdsdsdsdsdsdsdsdsdsdsdsdsdsdsdsdsdsdsdsdsds  
dsdsdsdsdsdsdsdsdsdsdsdsdsdsdsdsdsdsdsdsdsdsdsdsdsdsdsdsdsdsdsdsdsdsdsdsdsdsdsdsds  
dsdsdsdsdsdsdsdsdsdsdsdsdsdsdsdsdsdsdsdsdsdsdsdsdsdsdsdsdsdsdsdsdsdsdsdsdsdsdsdsds  
sdagkhtpvkpmsttkdhkaka l petgsennsnat l fgg l faa l gs l l l fgr rkkqk  
>sp|Q2G0L5|SDRC\_STAA8  
mnnkktatnrkgmpnr l nkfsirkysvgtasilvgt l l ifg l sgeakaaehtngel nqsknettapsenkttkkvsr  
qlkdnqtatadqpkvtms  
dsatvketssnmqspqnatanaqsttktsnvtndkssttysnetdksn l tqakdvsttpktttikprt l nrmavntvaap  
qgtnvndkvhsfnidiai  
dkghvnttgktefawatssdv l klkanytidsvkegdftfkyyqyfrpgsvr l psqtqn l ynaqgn i akgiydsttn  
ttytftnyvdqytvrgs  
feqva fkrknattdktaykmevt l gndtysee i vdygnkkaqpl i sstnyinned l srnmtayvnqpkntytkqtfvt  
n l tgykfnpnaknfyev  
tdqnqfvdstptdsk l kvtdqfdviysndnktatv l mkgqtssnkqyi i qqvayp d n sst d n gki dy t l dt d ktkys  
wsnsysnvnngsstangdqk  
kyn l gdyvwedtnkdgkqdanekgikgyvyl kdsngke l drttt dengkyqftg l sngtysvefstpagytpttanvg  
ddavdsdgl tttgvikdad  
nmt l ds gfyktpkys l gdyvwysndkgkqdstekgikgkv l l nekgevigttet dengky rfdn l ds gkykvi fekp  
agl tqtgtntteddkdadg  
gevdviti dhdfft l dngyeeetsdsdsdsdsdsdsdsdsdsdsdsdsdsdsdsdsdsdsdsdsdsdsdsdsdsdsdsdsds  
sdsdsdsdsdsdsdsdsdsdsdsdsdsdsdsdsdsdsdsdsdsdsdsdsdsdsdsdsdsdsdsdsdsdsdsdsdsdsdsds  
dsdsdsdsdsdsdsdsdsdsdsdsdsdsdsdsdsdsdsdsdsdsdsdsdsdsdsdsdsdsdsdsdsdsdsdsdsdsdsdsds  
dsdsdsdsdsdsdsdsdsdsdsdsdsdsdsdsdsdsdsdsdsdsdsdsdsdsdsdsdsdsdsdsdsdsdsdsdsdsdsdsds  
sdagkhtpakpmstvkdqhtakal petgsennsnng  
l fgg l faa l gs l l l fgr r  
kkqk  
>sp|Q2G0Q0|PDXT\_STAA8  
mki gvl a l qgavrehi rhielsghegiavkveqleeieg l l l pggest l r l r l m l y g f k e a l q n s t l p m f g t c a g l i v  
l a q d i v g e e g y l n k l n i v  
q r n s f g r q v d s f e t e l d i k g i a t d i e g v f i r a p h i e k v g q g v d i l c k v n e k i v a v q q g y l g v s f h p e l t d d y r v t d y f i  
n h i v k k a  
>sp|Q2G0S3|GLMU\_STAA8  
mrrhai l laagkgtrmkskkykvlhevagkpmvehv l esvkgsgvdqvvtivghgaesvkgh l gers l y s f q e e q l g t a h  
avqmaksh l edkegttiv  
cgdtp l i t k e t l v t l i a h h e d a n a q a t v l s a s i q p p y g r i v r n a s g r l e r i v e e k d a t q a e k d i n e i s s g i f a f n k t  
l f e k l t q v k n d n a g g e y l  
p d v l s l i l n d g g i v e y r t n d v e e i m g v n d r v m l s q a e k a m q r r t n h y m l n g v t i i d p d s t y i g p d v t i g s d t v i e p g v  
r i n g r t e i g e d v v i g q y s e  
i n n s t i e n g a c i q q s v n d a s v g a n t k v g p f a q l r p g a q l g a d v k v g n f v e i k k a d l k d g a k v s h l s y i g d a v i g e r t n i  
g c g t i t v n y d g e n k f k t i v  
g k d s f v g c n v n l v a p v t i g d d v l v a a g s t i t d d v p n d s l a v a r a r q t t k e g y r k  
>sp|Q2G0X1|Y402\_STAA8  
mgy l k r f a l y i s v m i l i f a i a g c g k g n e t k e d s k e e q i k s f a k t l d m y p i k n l e d l y d k e g y r d g e f k k g d k g m w t i y t  
d f a k s n k q g g l s n e g m v l y  
l d r n r t a k g h y f v k t f y n k g f p d r k n y k v e m k n n i i l l d k v e d t n l k k r i e n f k f f g q a n l k e l k n y n g d v s i n e  
n v p s y d a k f k m s n k d e n v k  
q l r s r y n i p t d k a p v l k m h i d g n l k g s s v g y k k l e i d f s k g g k s d l s v i d s l n f q p a k v d e d e  
>sp|Q2G131|U409\_STAA8  
mkk l t l l l a s t l l i a a c g n d d s k k d d s k t s k k d d g v k a e l k q a t k a y d k y t d e q l n e f l k g t e k f v k a i e n d m a q a k a  
l y p k v r m y e r s e p v a e f  
g d l d p k i d a r l a d m k e e k k e k e w s y h k i e k a l y e d k k i d d v t k k d a q l l k d a k e l h a k a d t l d i t p k l m l q g s v d l l n  
e v a t s k i t g e e i y s h t d l

Tsompanidou\_et\_al\_Supplemental\_FASTA\_File

ydfkanvegaqkiyd1fkpi lekdkk1sddiqmfnfdkvnq11dkykdnnnggyesfekvskkdrkafadavnalgeplsk  
mavite  
>sp|Q2G1F3|Y172\_STAA8  
mkahki fwl nlaaiiisivvsgdmflamkweqihlkdglkkvlstypiknetlyeidghdnphyenndqdtwyiessy  
svvgsdel1kedrml1kvd  
knthkitgeydtttndrknatdstyksypkvvnkivftkdvkdpalkqkiennqfliqsgdltsilnsndlkvthdpt  
tdyyn1sgk1sndnprvkq  
1krrynipknastkvelkgmsdlkgnnhqdqklyfyfsspgkdqi iykesltynkiseh  
>sp|Q2G1N7|SARS\_STAA8  
mkynnhdki rdfiieaymfrfkkkvkpevdmtikefilltylfhqgentlpfkki vsdlcykqsdlvqhikvlvkhsyi  
skvrskiderntyisisee  
grekiaervtlfdqiikqfnladqsesqmi pkdskefln1mmytmyfknikkhltsfveftilaiitsqnkniv11kd  
lietihhkypqtvralln1  
kkqgylikerstederki1ihmdaqqdhaeq1laqvnq1ladkdh1h1vfe  
>sp|Q2G1P9|Y054\_STAA8  
mkr1nk1vlgiif1flvisitagcgigkeakikksfekt1smypiknedlydkegyrdeffdkndkgtwiigsematqn  
kgeal kvkgmvl ymnrntk  
ttkgyyyvnaikndkgprqenekrypvmvdnkiiptkeikdnikkeienfkffvqygnfkdl skykdgd isynpevp  
sysakyql tnddynvkqlr  
krydiptnkapk111kgtgn1kgssvgykdieftfvekkeeni yfsdglifkpsedk  
>sp|Q2G236|NADE\_STAA8  
msklqdvivqemkvkkridsaeeime1kqfiknyvqshsfiks1vlgisggqdst1vgklvqmsvnelreegidctfiav  
klpygvqkdadeveqalrf  
iepdeivtvnikpavdqsvqslkeagivltdfqqgnekare rmkvqfsiasnrqg ivvgtdhsaenitgfytkygdgaad  
iapifglnkrqgrq1layl  
gapkelyektptad1eddkpqlpdedalgvtyeaidnylegkpvtpreekvienhyirnahkrelaytrytwpk  
>sp|Q2G261|SODM2\_STAA8  
mafklpn1pyaydalepyidqrtmefhhdhkhntyvtk1natvegtelehqs1admiandkvpreamrsvrnnggghfn  
hs1fweilspnseekggvi  
ddikaqwt1defknefankatt1fgsgwt1lvndgkleivttnqdn1tegtkpi11fdvwehayylkyqnkrpdym  
tafwnivnwkkvde1yqaa  
k  
>sp|Q2G296|FTHS\_STAA8  
mth1sdl dianqst1qpikdiaasvgiseda1epygyhkakidinkitprengkvvlvtamsptpagegstvtvglad  
afhel nknvmvalrepa1g  
ptfgikggatgggyaqvlpmedin1hfngdfhaittanna1safidnhihgne1gidqrriewkrvl dmndralrhvvn  
glggptngvpredgfnitv  
aseimailc1srsikdlkdkisritigytrdrkpvtvad1kvegalamilkdaikpn1vqsi egtpalvhggpfaniahg  
cnsilatetard1adivvt  
eagfgsd1gaekfmdikareagfdpaavvvvatira1kmhggvakdn1keenveavkagivn1erhvnnikkfgvepvva  
inafi htdaeveyvkswa  
kennvria1tevwegggggvd1anev1evidqpn1fkplye1elpleqkiekivteiyggskvtfsskaqk1kqfken  
gwdnypvcma1tqysfdd  
qt11gapsgfeiti1releaktgagfiva1tgaimtmg1pkkpaa1nmdvtddghaig1f  
>sp|Q2G2A2|Y1044\_STAA8  
meyeypid1dwsneem1svinffnhvekyyesgvtagdfmgaykrfkeivpakaekqifntfekssgynsykavqdvkt  
hseeqrvtakk  
>sp|Q2G2B1|SART\_STAA8  
mnd1ksksnik1mkrv1t1tyelrky1kkyfcl1tdny1vlay1dvfkndegkyfmr1diisyigidqsrivksvkd1skkg  
y1nkcrdphdsrnvi1vvs  
vkqhnyikn11seininet  
>sp|Q2G2B2|SASG\_STAA8  
mrddk1gpvnkrvdf1snk1nkysirkftvgtasiligs1mylgtqqeaaenienptt1kdnvqskevkieevtnkdt  
apqgveaksevtsnkdtie  
hepsvkaediskkedtpkeadvae1vqpkssvthnaetpkvrkarsvdegsfditrdsknvestpitiqqkehfe1gygs  
vdiqqkptd1gvse1vtrfn  
vgnen1g1igal1k1nkidfskdfnfkvr1vannhqsnttgadwg1flfsknaeey1tnggilgdkg1vns1ggfkid1tgy  
iytssmdktekqag1gyrg  
ygafvkn1dssgn1smvgenidksktn1f1nyad1stntsdgkfhgqr1ndvilt1y1vastgkmraeyagktwetsitd1g1s  
knqayn1f1tss1qrwg1nq  
ginangw1m1rd1kgseft1tpeapktite1lekkvee1pfkkerkfn1pd1apgtekv1tregqkgektit1tpt1knp1tgvi  
iskgepkeeitkdpine1t  
eygpeti1apghrdefdpk1ptgekeevpgkpgiknpetgdv1rppvds1v1kyg1pvk1gds1ivekee1pfeker1kfn1pd1ap  
gtekv1tregqkgektit1tpt  
t1knp1tge1iskgeskeeitkdpine1tey1gpeti1tpghrdefdpk1ptgekeevpgkpgiknpetgdv1rppvds1v1k  
y1g1pvk1gds1ivekee1pfek  
erkfn1pd1apgtekv1tregqkgektit1tpt1knp1tgvi1iskgepkeeitkdpine1tey1gpeti1tpghrdefdpk1ptg  
e1keevpgkpgiknpetgdv

Tsompanidou\_et\_al\_Supplemental\_FASTA\_File

vrppvdsvtkygppvkgsivekeeeipfkkerkfnpdlapgtekvtrregqkgektittptlnkplngeiiskgeskeeitk  
dpinelteygpetitpghrdefdpklptgekeevpgkpgiknppetgdvvrppvdsvtkygppvkgsivekeeeipfkkerkfnpdlapgtekvtrregqk  
ektittptlnkplngeiis  
kgeskeetkdpinelteygpetitpghrdefdpklptgekeevpgkpgiknppetgdvvrppvdsvtkygppvkgsivek  
eeipfkkerkfnpdlapgt  
ekvtregqkgektittptlnkplngeiiskgeskeetkdpinelteygpetitpghrdefdpklptgekeevpgkpgik  
nppetgdvvrppvdsvtkyg  
pvkgsivekeeeipfkkerkfnpdlapgtekvtrregqkgektittptlnkplngeiiskgeskeetkdpinelteygp  
etitpghrdefdpklptgek  
eevpgkpgiknppetgdvvrppvdsvtkygppvkgsivekeeeipfkkerkfnpdlapgtekvtrregqkgektittptlnk  
plngeiiskgeskeetkdp  
vneltefggekippqhkdifdpnlpdqtekvpgkpgiknpgtdgkviiepvddvikhgkgtgtpetktveipfetrkn  
pklpqgeervkqegqgsk  
tittptlnkplngeiiskgeskeetkdpinelteygp  
vhsmdkndkvkkskiakes  
vanqekkraelpktglestqkglifssiiagiaglmllarrkn  
>sp|Q2G2F6|ATPL\_STAA8  
mnliaaaiaiglsalgagignglivsrvtvegvarqpearqqlmgimfigvglvealpiigvviafamttag  
>sp|Q2G2K7|UREF\_STAA8  
midhthlrflfqfcdsqfptgafshsfletyiqrniihddhtfiawlkmlfqltysdglamrlvydalenddtqkvlh  
idklnfvqnlpketrvgak  
qmgtarmvklalelynspwiawyhqqmqdkkaklnpaicftmlghlvgdietiidylyqnvssltqnavraiplgqtag  
qkivthmipyiegtrkqif  
elkeadfgmtapglelnqmahenvvri fis  
>sp|Q2G2M2|MPRF\_STAA8  
mnqevknkifsilkitfatalfivaityrelsginfdtlfvskinrmslvsllfigggaslvilsmydvilsralkm  
dislgkvlrvsyinaina  
ivfgggfigagvramvyknythdkklvhfisilismltgslsllivfhvfdaslildkitwvrvlyvvsfflplf  
iismvrrppdknrrfvgl  
ctlvscvewlaavvlyfcgvivdahvsfmsfiaifiaalsglvsfipggfgafdvlvlfgftlgvpeekvlmllly  
rfayfvpvialilssfe  
fgtsakkyiegskyfipakdvtsflmsyqkdiakipslslailvfftsmiffvnltivydalvdgnhlytyillaiht  
saclllllnvvgiyqsr  
aifamisillitvatfftyasyilitwlaifvllivafrrarrlkrpvrnrnivamllfslfilyvnhifiagtyal  
diytiemhtsvlryyfwlt  
iliiiaiiigmiawlfdyqfsvkrisskiedceeiinqyggnylshliysgdqfftnenktafmyrykasslvlgdp  
gdenafdelleafynyaey  
lgydvi fyqvt dqhmplyhnfgnqffklgeeaidltqfstsgkkrrgfratlnkfdelnisfeieppfstefinelqh  
vsdlwldnrqemhfsvgef  
neeylskapigvrneeneviafcsImptyfndaivsdliwlpeldlplmdglylhmllwskeqgytkfnmgmatlsn  
qqlyhsylrerlagrvfeh  
fnglyrfqglrrykskynpweprflvyrkdnslweslskvmrvirk  
>sp|Q2G2Q0|GYRA\_STAA8  
maelpqsrinernitsemresfldyamsvivaralpdrvrdgkpvhrriylglnqqmtpdksyksarivgdvmgkyhp  
hgdssiyeamvrmaqdfsy  
rypIvdqgnfgsmgdgaaamrytearmtkitlellrdinktidfidnydgnerepsvlparfpnllangasgiavgm  
atnippnlltelingvls  
sknpdisiaelmediegdftagllgksgirrayetgrgsiqmrsravieerggrqrivvteipfvnkarmiekia  
elvrddkidgtdlrdets  
lrtgvrvidvrkdanasvilnnykqtpIqtsfgvnmialvngprklnlkealvhylehqktvrrrtqynlrkakdr  
ahileglrialdhideiis  
tiresdtkvameslqqrflsekqaqaildmrlrrltglerdkieaeynellnyiseleailadeevllqlvrdeltei  
rdrfgddrrteiqlggfed  
lededlipeequivitlshnnyikrIpvstyraqnrggrgvqgmntleedfvsqIvtIsthdhvlfftnkgrvyklkgyev  
peIrsqskgipvvnaiele  
ndevistmIavkdlesednflvfatkrgvvkrasalnsfrinrngkiaisfreddeliavrltsgqediligtshasIir  
fpestlrlpIgrtatgvkgi  
tlregdevvgldvahansvdevlvvtengygkrtpvndyrIlsnrggkgiktatiterngnvvcittvtgeedlmivtnag  
vIrlrdvadisqngraaqg  
vrIrlgddqfvstvakvkededetnedeqststvsedgteqqreavvndetpgnaihtevidseendedgrievrqdf  
mdrveediqqssdee  
>sp|Q2G2T3|RL9\_STAA8  
mkviftqdvgkgkkgkgevkevpvgyanfllkknaveatpgnlkqlelqkkrakqerqqeiedakalketlsnieve  
vsaktgeggklfgsvstkq  
iaeaIkaqhdiIdkrkmdlpngihsIgytnvpvklIkevegtIrvhtveg  
>sp|Q2G2U9|SARA\_STAA8  
maItkindcfellsmvtyadklksIikkefsisfeefavItyisenkekeyyIkdiInhInyqppvvkavkilsqedyf



Tsompanidou\_et\_al\_Supplemental\_FASTA\_File

dkkrnehdertvliilvnaq  
qrkkiesllsrvnkriteanneiel  
>sp|Q2YS64|Y533\_STAAB  
mklfiilgalnammavgtgafgahlgqkisdhylsvwekattyqmyhglalligvisgttsinvnwagwlifagiiff  
sgslyilvltqikvlgtit  
pigvvlfiigwimliiatfkfag  
>sp|Q2YS77|Y537\_STAAB  
msqaaetldgwyslhlfyavdwaslr1apkderdalvtelqsflentatvrssksqdqaiynitgqkadlllwlfrpemk  
slnhienefnklriadfli  
ptysyvsvielsnylagksdedpyenphikar1ype1phsdyicyfpmnkrrnetynwym1tmeerqklmydhgmigrky  
agkikqfittgsvgfddfew  
gvtlfsddvlqfkkivyemrfdettarygefsgffvghiintnefdqffais  
>sp|Q2YS94|HPS\_STAAB  
melqlaidllnkedaalankvkdvdiveigtptiyneglpavkhmadnisvkv1admkimdaadyevsqaikfgadv  
itilgvaedasiktaieea  
hknnkqllvdmiavqdlekrakeldemgadyiavhtgydlqaegqsplslrtvksviknskavaggikpdtikeivae  
spdlvivgggianaddpve  
aakqcraaiegk  
>sp|Q2YS95|NAGB\_STAAB  
mkvlnlgskkqasfyvace1ykemafnqhcklglatggtmtdlyeqlvkllnknq1nvdnvtfnldeyvgl1tashpqsy  
hyymdaml1fkqpyfnrkn  
ihipngdaddmnaeaskyndvleqqgqrdiqilgigenghigfnepgtpfsvthivdltestikansryfeneddvpkq  
aismg1anilqakriilla  
fgekakraait1l1nqeisvdvpat1lhkhpneviylddeacpknvakihvdemd  
>sp|Q2YSA8|Y504\_STAAB  
mkkimitgalgqigtelvvkcreiygtdnvl1atdi1repeadspvqngpfeildvt1drdrmfel1vrdfeads1mhmaalls  
ataeknp1lawdlnmgglm  
naleatrtynlhfftpssigafgdstpkvntpqvtiqqpttmygvnkvagellcqqyfrfgvdtrsvrfp1glishvkep  
gggttdyaveiyfkavreg  
hytsfidkgtymdmymddaieaik1meaddak1etrngyn1samsfdpemvkeaiqeyypnftldydvdpirqgians  
wpdsidtncsrgewgfdpk  
ydlasmtk1mleai1eqkdtvknkn  
>sp|Q2YSA9|ARAB\_STAAB  
msysigidygtasgrvflinttngqvsvkfvkpythgvieseln1k1phtyalqnsndyleimeegisyivreskidpv  
nivgigidftsstii1ftde  
ninpvhn1kqfknphayvklwkhhgaykeaklyqtaiennknw1ghygyvnssewmipkimevmnrapeimektayim  
eagdwi1vkn1tnknvrsnc  
glgfkafweeetgfhyd1fdkidpk1skviqdkvsapvvnigeavgl1ddkmaqk1gl1sketmvspfiidahas1lgigs  
ekdkemt1v1gtstch1m1  
nekqhqvpgisgsvkgaiipe1fayeagqsavgd1feyvakqapksyvdeaanrntvfe1mnekikhqmpgesgliald  
whngnrsv1sdsn1tgcif  
gl1t1qtkhedi1ray1eataf1g1tkm1mqy1qdw1mevekv1facg1p1kkn1avm1diyanv1nkk1ivm1dseyapa1gaa1  
1gavsggahns1indavdam  
kepi1ye1npeaek1vqryet1fkayka1hdi1hgykkanimkdiq1srveg  
>sp|Q2YSB0|HCHA\_STAAB  
msqdvne1skqptpdkaedna1ffpspys1sqt1apkt1fdgvehkgaykdgkwkvl1miaa1eeryv1lengkm1fstgnhpv  
em1l1pl1hh1meag1fdvda  
t1sgypak1el1wamptedeavittynk1kek1kqpk1ladvikne1lgpdsdy1svfipgghaavvgisesedvqkt1dwa  
lendr1fi1vt1chgpaa1ls  
ag1nreks1plegysvcvfpds1degani1eigy1pgr1kwl1vae1l1tkqg1kvvnddm1tgr1tkdrk1l1tgdsplasne1g  
k1lavnem1naiqnk  
>sp|Q2YSB5|RS7\_STAAB  
mprkgs1vpkrdv1pdp1hnsk1lvtk1linkim1dgkr1gtaqri1ysafn1veqrsgrdalevfeeainnimpv1levkarrv  
ggsnyqvpvevrperrt1l  
gl1rw1lvnyar1rgekt1medr1lane1l1daanntgavkkredthkmaeanka1fahyrw  
>sp|Q2YSB8|RPOC\_STAAB  
midvnn1fhymk1g1aspek1rsws1fgevkkpet1nyrt1kpekdg1l1fceri1fgptkdwecscgkykrvrykgm1vcdrcgv  
evtkskvr1rermghie1laa  
pvshiyw1fkgips1rmg1l1ldmspra1e1e1y1fasyv1vvd1pgptg1lekt1l1seae1frdy1dkypgq1fvakmgaegik1d1l  
eeid1dee1k1l1rde1lesa  
tqgr1traikr1evves1frnsgnkpswmi1dv1lpi1ppe1rpmvq1ldggr1fatsd1nd1lyrrvinrnr1kr1l1d1lgag  
i1ivqnekrm1qeavdalid  
ngrrgr1pvtgpgnr1pls1shm1kgkqgr1frqn1lgkrvdysgrsviavgps1kmyqcg1pkemale1fkpfvmkelvqr  
eiatniknaks1kiermdde  
vwdv1leevi1rehpv1lnrapt1hr1lgi1qafep1t1vegrair1hpl1vttaynad1fdgdq1mavhvp1skeaqaearm1mlaa  
qni1lnpkdgk1pvv1tspqdm  
v1lgnyy1t1lerkdavntgaf1nntnev1kayangfvh1htrigv1hassfn1ptfteeqnk1ilatsvgki1ifnei1pdsf  
ayineptqen1lerktprny

Tsompanidou\_et\_al\_Supplemental\_FASTA\_File

fidpttlgeggkeyfeneleiepfnkqflgniaevfnrfsitdtsmmldrmkdlgfkfsskagitvgvadivvlpdqk  
qildeheklvdritkqfnr  
gltteerynavveiwtdakdqiqgelmqsldktnpifmmsdsgargnasnftqlagmrglmaapskgiieelpitssfre  
glvtleyfisthgarkgla  
dtaiktadsgyltrrlvdvaqdivreedcgtgrglvsvdikegtemiepfieriegrysketirhpetdeiiirpdeli  
tpeiakkittdagieqmyir  
saftcnarhgvcekcygknlategkevgeavgtiaaqsigepgtqltmrtfhtggvagsditqglpriqEIFearnpkg  
qaviteiegvediklakd  
rqqeivvkganetrsylasgtsriiveigqpvqrgevltegsiepknylsvglNatesyllkevqkvymqgveiddkh  
vevmvrqmlrkvriieagd  
tkllpgslvdihnftdanreakhrkrpatakpvllgitkasletesflsaasfgettrvltDaaikgkrddllglkenv  
iigklipagtgmrmysdvk  
yektakpvaevesqteve  
>sp|Q2YSC3|RL1\_STAAB  
makkgkkyqeaaskvdrthysveeaiklaketsianfdasvevafrlgidtrkndqqirgavvlpngtgksqsvlvfak  
gdkiaeaeaagadyvgeae  
yvqkiqqgwfdvvdvtpdmmgevgklgrvlgpkglmpnptgtvtmdvkkaveeikagkveyraekagivhasigkvs  
ftdeqlienfntlqdvlak  
akpssakgtyfksvavtttmppgvkidasfk  
>sp|Q2YSC4|RL11\_STAAB  
makkvdkvvlqi pagkanpappvgpalgqagvni mgfckefnartqdqagliipveisvyedrsftfitktpapvllk  
kaagiekgsgepnkakat  
vtkdqvreianskmqdlNaadeeamriiegtarsmgivve  
>sp|Q2YSD1|SYC\_STAAB  
mitlyntltrqkevfkpiepgkvmyvcgptvynyihignarpainydvrryfeyqgynveyvsnftdvddklikrsqe  
lnqtvpEiaekyiaafhed  
vgalnvrkatsnprvmdhmdidiqfikdlvdqgyayesggdvyrtrkfkfegyglshqsiddlkvgaridagehkedald  
ftlwkakpgeiswdspfg  
egrpgwhiecsvmafhelgptidihaggsdlqfpheneiaqseahnhapfsnywmhngfinidnekmskslgnfilvhd  
iikevdpdvlrffmivshy  
rspinylnelvesarsglerirnsyqlieraqiatnienqqtyidqidaillrfetvmnddfntanaitawydaklan  
kyvlenttstevdkfkav  
yqifsdvlgvplksnade1ldedvekliEernearknkdfaradeirdmlksqniiledtpqgvrfkrg  
>sp|Q2YSD3|SYE\_STAAB  
msdrirrvryapsptgylhignarta1fnlyakhyngdfviriedtdkkrnledgetsqfdnlkwlglDwdesvdkdngy  
gpyrqserqhiyqplidql  
laedkaykcymteeelevereaqiargempryggqhahlteeqrqqfeagrqsirfrvpqntysfddmvkgnisfds  
ngigdwvkvkkgdiptynf  
avaiddhymeisdvirgddhisntpkqimiyeafgwepprfghmslivneerkklskrdggqilqfieqyrdlgy1pealf  
nfiallgwspegeeeifsk  
eefiki1fdekr1skspaffdkqklawvnnqymkqkdtetvfqlalphiikanlipevpseed1swgrk1ialyqkemsya  
geivplsemffkempalge  
eeqqvingeqvpe1mth1fsklealepfevaeikktikevqketgikgkqlfmpirvavtqgmhgpelpntievlgkekv  
1nr1kqyk  
>sp|Q2YSD6|CLPC\_STAAB  
mlfgrlteraqr1ahageear1nhsnigteh1llglmkepegiaakvlesfnitedkvieevk1ighgqdhvgtlhy  
tprakkvie1smdeark1h  
hnfygtehi1lglirenegvaarvfan1dlnitkaraqvkalgnpemsnknaqasksnntpt1dslard1tviakdgt1  
dpvigrdkeitrvielr  
rtknpvl1igepgvktaiaeglaqai vnevpet1kdkrvms1dmgtvavagtkyrgefeer1kkvmeeiqqagv1lfi  
de1ht1vgaggaegaidas  
nilkpalargelqcigatt1deyrkniekdaalerrfqpvqvdpsvvdvta1lkg1rdryeahhrinisdeaieaavk1  
snryvsdrf1pdkaid1d  
easskvr1kshttpnn1keieqiekvknekdaavhaqefenaan1rdkqtklekqyeeaknewkntqngmsts1seedi  
aeviaagwtgip1tkinete  
sek11s1led1hervigqkdavnsiskavrrarag1kdpkrpigsfiflgptgvgtelara1aesmfgdddami1rvdms  
efmekhavs1rgappgyv  
ghddggq1tekvrrkpysv1fdeiekahpdvfn1llqv1ddgh1tdtkgrtvdfnti1i1m1tsnvgaqelqdrfagfg  
gssdgqdyet1rktm1kel  
knsfrpeflnrddiivfhl1tkee1keivtmvvnk1tnr1seqniniivtdkakdkiaeegydpaygarpliraiqkti  
edn1seli1ldgnqiegkkv  
tvhdhgkefkdydiaeqtsetktpsqa  
>sp|Q2YSD9|CTSR\_STAAB  
mhnmsdiieqyikr1feesnedvveiqraniaqrfdcvpsqlnyviktrftnehgyeieskrnggggyir1tkienkdatg  
yinh1l1q1igpsisqqay  
yidg1ldkmlinereakmihavidret1smdmvsrdi1ranilkr1lpviny  
>sp|Q2YSF0|TPIS\_STAAB  
mrtpi1agnwkmnktvqeakdfvna1pt1pdskevesvicgpa1q1dal1ttavkegkaqgleigaqntyfedngaftget

Tsompanidou\_et\_al\_Supplemental\_FASTA\_File

spvaladlgvkvvighse  
rrelfhetdeeinkkahaifkhgmpici vgetdeeresgkandvvgeqvkkavaglseeqlksvviayepiwaigtgks  
stsedanemctfvrqtia  
lsskevseatriqggsvkpnnikeymaqtdidgalvggaslkvedfvqllegak  
>sp|Q2YSF1|PGK\_STAAB  
makki vsdldlkgktvivrdfnvp lkdgeitndnrivqalptiqyieeggkivlfshlgkvkeesdkakltlrpvaed  
lskkl dkevfvpetrgek  
leaakdlkegdvllventryedldgkkeskndpelgkywaslgdvfvndafgtahrehasnvgisthletaagflmdke  
ikfiggvvndphkpvvai  
ggakvsdki nvi knlvni adkii gggmaytflkaagkeigisll eedkidfakdllekhgdkivlpvdtkvakefsnda  
kitvvpdsipadqegmdi  
gpntvkl fadelegahtvvnwngpmgvfefs nfaqgtigvckaianlk daiti igggdsaaaaislgfendfthistggga  
sleylegkelpgikainnk  
>sp|Q2YSF6|Y724\_STAAB  
mkqylitgggmvgsqlvneikkdsshitilrhdqisndkkisyvnwaksgwehkvpqnidvvinlagatlnkrwtpey  
kqtlmlsrigtqalyelf  
ksrnkapkvlfnasatgyppdlfmsytesyktlpdfldsvyqwerfaqqfeqlgtrvvigrfgiilsneggalqtmk  
lpyeyiggk lsggqwys  
wihindliqailflinnesasgpfnl tapiperqnlfgyt laramhkphetwaps lamrlilgqmstvvldtqkvlpnki  
qalgfqfksnlkialedl  
isk  
>sp|Q2YSG2|Y719\_STAAB  
mdnnekeksk sellvvtglsagakslviqcl edmgyfcvndlppvllpkfvelmeqgnpslrkvaiaidlrgekelfnslv  
avvdkvkseidviidvmfl  
easteklisryketrrahplmeqgkrs linainderehlsqirsianfviddttklspeklerirryedeefetftinv  
tsfgfkhgiqmdadlvfdv  
rflpnpyyvvd lrp lgtgldkdvynyvmkwketeiffekltdlldfmi pygkkekgsq lviaigctggqhrsvalaerlgn  
ylnevfeynvyvhhrdahi  
esgekk  
>sp|Q2YSG7|LGT\_STAAB  
mgivfnyidpvaflgp lsvrwygii avgillgyfvaqralvkaglhkdtlvdiifysalfgfiaariyfvifqwpyya  
enpgeiikiwhggiaihgg  
liggfia givckvknlpfqi gdivapsiilaqgigrwgnfmnheahggpvsrafleqlhlpnfii enmyinsqyyhpt  
flyesiwdvagfiilvnir  
khklgetfflyltwysigrffieg lrtdslmltsnirvaqlvsillilisislivyrrikynpplyskvgalpwptkkv  
k  
>sp|Q2YSI3|HIS8\_STAAB  
mkeqlnqlsayqpglspralkekygiegdlyk lasnenlygpspkvkeaisahlde lyyypetgsptlkaaiskhlnvdq  
srilfgag ldevi lmisra  
vltpgditvtseatfgqyyhnaivesanviqvp lkdgdfldlegil kqvneds lwlncpnnptgtyfnhesl dsflsqv  
pphvpviideayfefvtae  
dypdtlalqqydnafllrtf skayglaglrvgyv vasehaiekwni irppfnvtriseyaavaaledqqylkevthkns  
vererfyqlpqskhflpsq  
tnfifvktkrvnelyeallnv gci trpfptgvritigfkeqndkml evl snfkye  
>sp|Q2YSI6|PEPT\_STAAB  
mknqlidrltryttidtsdpksttptstekqwdllhllere lqqglp tldengylfatlesnidadvptvgflahvd  
tspdfnasnvkpgiienyd  
skpyklgntkrvldpkvfpe lns lvghtlmvtdgtsllgaddkagiveimeaicylqehpeikhgtirigftpdeeigr  
phkfdvdrfnadfatmdg  
sqygelqyesfnaaeavi tchgvnvhpgsaknamvnairlgeqf dsllpdsevpertegyegfyhlmnfegtvekatlqy  
iirdhdkkqfelrkkri le  
irddinahfenypkvdisdqyfnmaekilplphiidipkrvfakldipantepirgtdgsqslsfmg lptpni ftgcn  
fhgpyeyasidvmekavq  
iigivediaenn  
>sp|Q2YSK5|Y675\_STAAB  
menkythgvlfyehsglkninqigevttalssickhlsiqlsenegdiikycqeiktknyakdvdlfilggdgvne  
lingvmtndlqlpigi lpg  
gtfndftktlni apnhkqaseqmi saqvgydvikinnyalnfvg lglivqnaenvqdgskdifgklsyigstvtklln  
ptqfnqylsiddktyset  
smil sangpfiggsripltdlspqde lntfi fneqsfsilndi fkkrdsmnwneitqgiehipgkksl ttdpamkvdi  
dgeisletpidievipnai  
qlltvndl  
>sp|Q2YSL9|QUEC\_STAAB  
mesvlnnekai vvfsggdsttclfyakkhfkevelvtfn ygqrhdteievakqiaqdqgmkhvldmsllsq ltpnal t  
qhdmeitnnedgipntfvp  
arnllflsfagalayqigakhi itgv cetdfsgypdc rdsfiskmvtlslamd kdcvihtplmwlnkaetwkl sdelev  
ldyirtktl tcyngi igdg  
cgcepachlrqrglnqyleskga l

Tsompanidou\_et\_al\_Supplemental\_FASTA\_File

>sp|Q2YSM6|SAES\_STAAB  
mvlsirsqiiigvssilltstilaiayilmwfnghmtltltlttiitscltllicsifinpliqlikikqfniktkqfang  
nyasndktfnspkeiyeln  
qsfnmaseitqqmqikseqekteiqnlahdltkplasiyseglrdgiitkdheikesydilikqanrlstlfd  
mthiitlntgktyppeliq  
ldqllvsilqpyeqrikhenrtlevnfcseidafyqyrtpleriltlndnalksnvgsridinisenkdqdtidiais  
degigiipelqerifertf  
rvensrntktggsglgyiane laqqnaki svssidvgttmtvtlhlkdits  
>sp|Q2YSP8|UPPP\_STAAB  
mfiielikgii lgvvegltefapvsstghmilvddmwksseflgsqsafthkiviqlgsvfaaawvfrerfleilhighk  
hkhvegqndqrrskprrl  
nllhvlvqmpagilglfddfieehlfsvptvmiglfvgaiymi adkysvkvnqptvdqinyfqafvigisqavamw  
pgfsrsgstistgvlmkl  
hkaasdfthimavpmlaasglslkhyqdiadiapfiylglfaaftvgliaiktflhlinkiklipfaiyrivlvifi  
ailyfgfgigkgi  
>sp|Q2YSR3|SARX\_STAAB  
mnteletllgfykqykalseyidkkyklslnlavldlmtkhckdekvlmqsflktamdelldsrkllvsirrlieke  
rlskvrsskderkiyiyl  
dddiskfnal fedveqfni  
>sp|Q2YSS1|GRAS\_STAAB  
mnlkwwayflksrmnwi fwi lflnllmlgisli dydfpidslfyivslslstmi flil tyfkevlykhfdkdeiee  
ikhkdfaetpqrhtvdy  
yrqisahkekvvqqqlnmheqtitefvhdiktptvta mlidqeknqerkqallyews rinsml dtqlyitrlesqrk  
dmyfdyvs lkrmvideiq  
trhisqvkigigfdvdfkvddyvtdikwcrmi irqil snalkysenfnieigte lndqhvsl yikdygrgiskkdmpri  
ergftstanrnettssgm  
lylvnsvkdg lghlqvtstvgkgttvlrli flqlneivermsevtnlsf  
>sp|Q2YST2|MNHA2\_STAAB  
mslvyl liai lvmami lmskr ralakyagyali apvissiyfmi qipsvakl qylst sipwikt ldi nldl rldgls  
lmfsl iisligi avffyat  
qylssrkdn lprfyfyt lfmfsmigiv lsdntil myi fweltsvssfl isywynngdnqfgai qsfmitvfgglallv  
gfimlyimtgtnitdlg  
qadhikhng lfm pmi fmfll gافتksaqpfhiw lprama aptpvsay lhsatmvkagiflllrftpllglsnmyiyivt  
fvglitmlfgsitalkqwd  
lkgilaystisqlgmimvmvgiggyaqhqqdaiasiytfvlfgal fhlmnhaifkcal fmgvgildheagsrdilse  
mrqlfpkmlvmtiaalsm  
agvpflngflskemfldal tqtgqlsqfslismiaivfvgviasvftftyalymvkevfwtkydskvftkknihewlfs  
lpsliimvlvpviffvpni  
fgkgiivpal ravsaghnqidqlaphvsqwhgfniplllti iillgsvlaikvdwkkvftgkirqisvksyemvyrhf  
ekfatkrfkrmqdrlnqy  
iimt lgi fmvii gygiri glpkvhqlhvsefgplevil aivtvtigislifirqltmvilngvigfvvtllfi amkap  
dlatqlvvetittlfi v  
sfsrlpnpvrnsnankkrei ikisvsllmalivsvlifitqqtdglssisd fylkadkl tggknivnailgdfraldtlfe  
glvliitglgiytllyqd  
rrgqdere  
>sp|Q2YSW8|SYR\_STAAB  
mniidqvktlveeiaasinkagladeipdikev pkdtkngdyatni amvltkia krnpreiaqaivndltekahvkq  
idiaggfifnylndqylt  
aiipeaiekgdqfgyvneskgqnv lleyvsanptgd lhigharnaavgdalanil taagynvtreyyindagnqitnlar  
sietrffea lgdnsysmpe  
dgyngkdi e igkd laekrpeikdyseear lkefrkl gveyemak lkn d laefnthfdnw fsetslyekgeilevlakmk  
elgytyeadgatwlrtdf  
kddkdrvlikndgtytyflpdiayhfdkvkrndilid lfgadhgyinrlkasletfgvdsnrleiqimqmvr lmeng  
evgvdaryfltmrspdshfdme lakeqsqdnpyyaqyaharicsilkakeqgievaaandfttitnekaie llk  
vadfeptiesaaehrsahr  
itnyi qdlashfhkfynaekvl tddiektkahvami eavritl knalamvgvsapesm  
>sp|Q2YSZ2|GCST\_STAAB  
mssdlkqtplyqnyvdr gakeivefggwampvqfssikeehnaaryeiglfdvshmgievtgkdasqfvqyllsndtdn  
ttskalytal cneeggvid  
dlviykladdyllvnaantekdfnwil khkekfdvevqnvsnqygqlaiqqpkardlinqlvdedvtemkmfefkqgv  
klfaanvilsqsgytgedg  
feiycniddtekidwgl leynvm p cglgardt lrl eaglp lhgqdltesitpyeggiafaskplid adfigksvlkdqke  
ngaprvtvglelllekgiar  
tgyevmdl dgni igevtsgtqspssgksialamikrdefemgrellvqvrkrqlkakivkknqidk  
>sp|Q2YSZ4|GCSPB\_STAAB  
mtskssplifersregryayslpsidiktnsvesllddk firknkaefpevae ldlvrhytel snknfgv dngfyp l gsc  
tmkynpkinekaripgfs

Tsompanidou\_et\_al\_Supplemental\_FASTA\_File

eshplqdedqvqgsleiyslqeelkeitgmdevtlqpaagahgewtalmfikayhengeghrdevivpdsahgtnpas  
asfagfksvtvksnergev  
diddlkrvvnentaaimltnpntlgi feknimeireivhnaggllyydganlnaimdkvrpgdmgfdavhlnlhktftgp  
hgppgpgspvkvkela  
ylpkpmvikgdgtfkyndiknsigrvkpfyngfyilraytyirtmgatglkevsevavlnanyikarlsehfeipykq  
yckhefvlsgrqkefgvr  
tldmakrlldfgvhpptiyfplnveegmmieptetesketldyfidtlisiaeeakndpdkvleaphttvdrldataa  
rkpilkfenlkqek  
>sp|Q2YT06|Y1445\_STAAB  
mfslsfiviaviivva1lilfsfvpiglwisalaagvhvgigtlvgmrlrrvsprkviaplikahkagla1ttnqlshy  
laggnvdrvdaniaaqr  
didl pferaaaidlagrdvleavqmsvnpkvi etpfiagvamngievkakaritvraniarlvggageetiarvgegiv  
stiggskhhtevlenpdni  
sktvlskgl ds gtafeilsidiadvdisknigadlqteqaladkniaqaka eerramavateqemkarvqemhakvveae  
sevlamaealrsgnisvk  
dyynlknieadtgmrnainkrtdqsddespeh  
>sp|Q2YT09|RRMF\_STAAB  
mftidfsdhtglvkdawykqiedllefakkeehieddaelsvtfvdkqei qeinrtyrdkdkvtdvisfaleedepdidf  
sgldiprvlgdiiictdva  
qeqannyghsfere1gf1ahgf1h1lgydhmteadekemfgrqdtinaygltrd  
>sp|Q2YT12|ERA\_STAAB  
mtehksqfvsii grpnvgkstfvnrvig hki aimsdkaqttrnkiqgv mtrddaqiifidtpgi hkpkhklgdymm kvak  
ntlseidaimfmvnaneei  
grgdeyieimlknvktpvflvlnkidlvhpdelmpkieeyqsymdfteivpisa1dglvndhfidv1ktylpegkyypd  
dqisdhpeqfvvgeiirek  
ilh1tseeiphaignvdrmvkesedrvhieatiyverdsqgivi gkggkklkevgrarrdiemllgskvyle1wkv  
qrdwrnkvnfirqigyved  
qd  
>sp|Q2YT13|RECO\_STAAB  
mlmrqkgiikavdygesdkiiitlnehgakvplmarrakkvktglqaqtqlfvyglfiynqwrngmtlnsvdvisqhyk  
lqmdlyvssyaslaetie  
rsmdegdiapynyql1qfvlekiesgtsaq1msvvm1kcmkrfgftasfnrcavsgndtqadligysfkfdgaisrqa  
skdvhavilsnktly1ldv  
lqklpidkmnslnihqeiidemseii1mlyreyagmffksqk1inq1krleq  
>sp|Q2YT14|SYG\_STAAB  
makdmdivslakhrqfvfpgsdiygl1sntwdygplgvelknnvkkawwqkfitqspfnigidaailmpkvweasgh1  
nnfndpamidnkdsikirya  
dkliiedymqdvkkgdenfiadgl1sfeqmkkiiiddegivcpvsktanwteirqfn1mfktfqqvtedstneiflrpetaqgi  
fvnyknvqrsmrkk1lpfqi  
ggigksfrneitpgnfi frtrefeqme1effckpgeeiewqnywktfasdw1ts1nmssenmrlrdhdedelshysnatt  
dieyfkpfwgelwgiasr  
tdfdl1rkhaehsgedfryhdpetnekiypyciepslgadrvt1af1cdaydeegvegsdartv1hfhpalapykaa1lp  
1skkl1sgeaiki feqlssk  
fsidfdesqsigkryrrqdeigtpycvtfd1ds1lednqvtrdrdsmeqvrmpise1eaf1tektkf  
>sp|Q2YT29|MTNN\_STAAB  
migiigameeevti1knk1tql1seisvahvkfytgilkdrevitqsgigkvnaaistt1linkfkpdi1intgsagald  
es1nvgdvl1sddvkyhda  
datafgyeygq1pmpvafqsskpliekvsqvqqq1takvg1ivsgdsfigsveqrqkikka1f1namavemeataiaq  
tcyqfnvpfvvravsd1a  
ngeaeisfeaf1lekaavssstvealvsq1  
>sp|Q2YT32|AROE\_STAAB  
mkfavignpishslspvmhranfnslglddtyealnipiedfhl1ikei1skkel1dgnitiphkeri1pyl1dyvdeqain  
agavntvl1kdgkwigynt  
dgi gyvkg1hsvypd1enayil1l gaggaskgiayelakflkl1ktvanrtmarfeswn1ninqisladaenylae1div  
inttpagmagnesi1nk  
h1spnt1msdi1yipyktpi1leaerkgnhiyng1dmfvyqgaesfkiwtnkdadinsmktav1qq1kge  
>sp|Q2YT34|NADD\_STAAB  
mkkivlyggqfnpihtahmivasevfhe1qpdefyflpsfmsplkkhnnfidvqhr1tmiqmiidel1gfgdicddeikrg  
gqsytydt1kafkeqhkds  
elyfvigt1dqng1lekwyqiey1kemvtfvvnr1dknsqvdnamiaiqiprvdisstmirqrvsegksiqvlvpskven  
yikgeglyeh  
>sp|Q2YT45|HRCA\_STAAB  
mitdrqlsilnailedyvd1fgqpvgskt1ierhlnvspatirnemkqled1nyiekahsssgsrpsqlgfryyvnr1le  
qts1hqktnklrr1nq1lve  
ngydvssal1tyfadel1sni1syt1lvvphhkqdi1nvh1iranpn1vimvif1ssghvehv1hasdipfsndk1ntis  
nfvtnkl1tefnq1lqddiv  
sfvqseeeif1nk1intmnnhisnqnsiymggkvklid1alnesnvssi1qil1qyiesnriae1l1qdisspn1invkign  
eiddslsdisivtsqyhfd

Tsompanidou\_et\_al\_Supplemental\_FASTA\_File

etlkgqiavigptamhyqnvigllnriw  
>sp|Q2YT46|GRPE\_STAAB  
mtnkdesvekttestvevtvknidssveqteeskghlqdeaieetsdenvieeidpkdqkineqqladeneekylrl  
yaefenykrriqkeneink  
tyqaqrvtldilpaidnieraalqiegddetfkslqkgvqmveslinaikdngleviktegeafdpnihqavvqddnpdf  
esgeitqelqkgyklkdrv  
lrpsmvkvng  
>sp|Q2YT47|DNAK\_STAAB  
mskiigidlgttnscvtvlegdepkviqnpegrsttspvafkngetqvgevakraqaitnptvqsikrhmgtdykvdie  
gksytpqeisami lqnln  
taesylgekvdavitvpayfndaerqatkdagkiagleverineptaaalayglktdkdekvlvfdlgggtfdvsil  
elgdvfevlstagnklg  
gddfdqviidyvaeffkengvdlsqdkmalqrkdaaekakkdlsqvsqtqislpfisagengplhleवलtrskfeel  
sdsli rrtmgptrqamkda  
gltnsdi devilvggstripavqeavkkeigketnkgvnpdevvamgaaigggvitgdvkdvllldvtpslngieilggr  
mntliernttiptsksqiy  
stavdnqpsvdvhvlggerpmaadnktlgrfqldippaergkpqievtfdidkngivntakdlgtinkeqritiqssss  
lseeidrmvkdaevnaea  
dkkrreevdlrneedslvfqvektltdlgenigeedkksaeekkdalktalegqdi ediskskeelekviqelsakvyeq  
vaqqqqagqanagqnds  
tvedae fkevkdddkk  
>sp|Q2YT48|DNAJ\_STAAB  
makrdyyevlgi skdaskdeikkayrklskkyhpdinkeegadekfkeiseayevlsddnkrasydqfghdgpqgfgggg  
fngsdfggfsgfggggged  
ifssffgggrqrdpnasqkddlqytmtltfeeavfgttkeisirkdvtcetchgdgkpgtskktcsycngaghvaveq  
ntilgrvrteqvcpkngs  
gqefeeactchkgktenktvklekvpegvdneqqirlagegspgvnggpagdlyvfvrvkpssetfkrdgdidiyyklnv  
sfpqaalgdeikiptlnne  
vmltipagtqtgkqfrlkekgi knvhgygygdlyvdikvvtptkltdrqkelmkefaqlngeeineqpsnfkdrakrffk  
ge  
>sp|Q2YT49|PRMA\_STAAB  
mnwteIsi inheavelatnilenhgsngvvi edsddl inqpedkygeiyaalkkedypdkgvr lkayfneltyddklrqr  
ikdelnlndeldqhnvgfs  
ekiaetdwenewknyfhpfrskkftivpswetyakeadeelciel dpgmafgtgdhpttsmcl kaietyvlpqhsvid  
vgtgsgilsiaslhigvkr  
ikal didemavsvakenfrnrhctlieavpgnllkdetekfdivianilahiidemiedayntlneggyfitsgiikek  
yegiqshmervgfkiseq  
hdngwvc lvqkvse  
>sp|Q2YT57|MNMA\_STAAB  
msnkdi rvvvgmssggvdssvtahvlkeqgydvi gfmknwddtdengvctatedyndvievcnqigipyyavnfekeywd  
kvftyfldeykkgrtpnpd  
vmcnkeikfkafldhamnl gadyvatghyarihrhedghvemlrgvdnnkdqtyflnqlsqqqlskvmfpigdieksevr  
riaeeqglvtakkkdstgi  
cfige knfktflsqylpaqpgdmitldgkkmghsglmyytigqrhglgiggdgpwfvvgknlkdnvlyveqgfhdal  
ysdylia sdysfvnpednd  
ldqgfektakfryrqkdtkvfvkrendhalrvtfaepvraitpgqavvfyqgdvclggaiiddvfknegqlnyv  
>sp|Q2YT60|SYA\_STAAB  
mklkaseirqkyl dffvekgmvepsaplvpiddtllwingsvatlkkyfdgretppkprivnsqkairtndienvgf  
tarhhtffemlgnfsigdy  
fkqeaiefawefltsdkwmgmepdklyvtihpedmeayniwhkdigleesriiriegnfwdigegpsgpnteifydrgea  
yqddpaeemyppgenery  
levwnlvfsefnhkdhsytp lpnknidtgmglermasvsqvrtnyetdlfmpimniekvsgkqylvneeqdva fkv  
adhirtiafaisdgalpan  
egrgyvlrrllravrfsqtlginepfmyklvdivadimepyypnvkekadfikrvikseerfhetledglailnelik  
kakattneingkdafklyd  
tygfpielteeiavqaglkvdm ttfesemqqqrdrarqarqnsqsmqvqsevlnkntsastfvgyd tataqtllthliyn  
geevsqveagetvyfmlte  
tpfyavsggvadtgivyndnfeiavsevtkapngqnlhkgavqfgqvnvgatvsaevnqndrrdiqknsathllhaal  
ksvlgdhvnqagslvadr  
lrfdfshfgpmtnde idqverlvneeiwkgidvniqemdiasakemgama l fgekygdvrvvnmapfsielcggihvrn  
tseiglfkivsesgtgagv  
rriealtgkaaflylediqekfntmksqmkvksddqvidkltqlqdeekallkql eqrdkeitslkmgniedqveeingy  
kvlvtevdvpnakairstm  
ddfksklqdti iilasnvddkvsrvatvpskltnnvkagdl ikmapivsgkgggrpdmaqqggtqpeniskslsfikdy  
ikn  
>sp|Q2YT62|RUVX\_STAAB  
mlqhkilgl dvgstrvgiaisdimgwtaqgl dtrineenne lgidqlvdiikkhnvgtvvg l pknmnsigfrgeas l  
tyekll eaypsieivmwd

Tsompanidou\_et\_al\_Supplemental\_FASTA\_File

er1stmaaers1leadvsrqkrkqliidkmaavfilqgylds1h  
>sp|Q2YT73|Y1476\_STAAB  
mrvd1ncd1geafgnysfggdhqiip1itsanvacgfhadenvmnetvklakahnvavgahpglpdlkgfgrnidisn  
eeiynlmiyqlgalqgfc  
ihqvkinhvkphgalymgakdreiasviaqavydfpslv1vlg1ansyliseaknvg1itasevfadrryeddgqlvsr  
kesdavitdtdealkqvlk  
mvkenkvisknnkevt1qadticvhgdgehallfvskireilmkegidiqs1  
>sp|Q2YT78|Y1521\_STAAB  
meikemvtsemprer11shgaks1ntellailintgrkgflsidisnellksasn1nelkkssindliqvkig1qkai  
tlkaafelgermgraenn  
rikitqpsdvadymiptmkdl1tqehfvil11nknvvikescvfkg1nssivhpreifsiavrenanaiavhnhpsgd  
vtspqedii1ttmr1kesg1  
ilgid1ldhii1gdnrfts1veagyfdend  
>sp|Q2YT86|OBG\_STAAB  
mfvdqvkis1kagdgngitayrrekyvpfggpaggdggkgasvvfevdegst1ldfryqrhfkaskgengqssnmhgk  
naed1vlkvppgti1knve  
tdevlad1vedgqravvakggrrgrnsrfatprnpapdfsekgepge1dvs1elk1ladvg1vgfsvgkst11sivs  
kakpkigayhfttikpnl1g  
vvsapdqrsfvmad1pg11egasdvg1ghqflrhvertkvi1vhmidmsgsegrepiedykvinqelaayeqr1edrqqi  
vvankmdl1pesqdn11fk  
eeigedvpvipvst1trdnidq1lyaiadkleeykdvdftveeesvginrvlykhtpsqdkft11rdddgayvvsnai  
ermfkmtdfnsdpavrrfa  
rqmrsmgiddal1regckngdivri1lggefefve  
>sp|Q2YT89|RUVB\_STAAB  
mnermvdqsmhseetdfe1s1rptr1rqyigqnsiks1nlevfikaak1rhepldhv11fgppglgktt1snii1anemevn  
irtvsgps1lerpgd1aai1  
sg1qqgdvl1fideihr1ssvveev1ypamedff1di1igkgdears1rid1ppft1vgattrags1tgpl1rdrfgvhl1r1  
eynesd1kei1irtaev1  
gtgiddesai1elakrsrgtprvanr11krvrdfqvnedeqiyi1ettkhalg11qvdaqh1dyidhkmmnci1kqynggp  
vg1dtiavt1geeritied  
vyepfliqkgflertprgrkatplayghfaksneere  
>sp|Q2YT91|TGT\_STAAB  
mpavtyehiktckqsgar1g1vhtphgsfetpmfmpvgtkatvktmspeel1rqieaki1l1gntyhl1w1qqgndi1khagg  
1hkfmnwdgpil1tdsggfg  
vflsn1rki1teegvefrhhtngsk1fl1speksmqi1qnd1gsdimmafdecppmpaeydyvkksierttrwakrc1dahq  
rpedqal1fgi1qggehed1  
reqsakd1vel1dfpgya1ig1svgepkpvmymvehte1qfmpkdkp1ry1mgvgs1pdal1iecs1rgmdm1fdcv1p1triarn  
gtcmts1qgr1v1knakfad  
dl1rp1denc1d1cytcqnsrayi1rh1likaet1fgi1r1tti1h1n1hf11k1l1medir1qairedr11df1keeffeqygl1nvenpk  
nf  
>sp|Q2YT95|APT\_STAAB  
md1kqyvsevqdw1pkpgv1skfditt1mdngeaygyatnkiveyakdrdvdivvgpeargfi1gcpvaysmgig1fapvrke  
gk1previ1ryeyd1leygt1n  
v1tmhkda1kpgqr1v1itdd1latggtieaa1k1vek1ggivvgiafi1elky1ngiekikdyd1vms1lisyde  
>sp|Q2YT97|DTD\_STAAB  
mkvvvqrvkeasv1ndt1lnnq1kkgyc11vgig1qd1sted1advi1akkianar1feddnk1lnfni1qqvnge1ilsvs1qft1  
yadvkkgn1rpgf1snsknpd  
qavki1yeyfnda1raygl1tvktgefg1thm1vn1nndgpvti1yes1qd1gki1q  
>sp|Q2YTA0|SYV\_STAAB  
memkpkypd1preveagryeew1vkngy1fkpsedksketyt1vipppnvtgk1hl1ghawdt1l1qdi1trmkrmqgyd1t1ylpg  
mdhagi1atqakveak1nek  
gi1tryd1lgrek1fleqawd1weeyas1firaqwak1gl1g1dys1rerft1deg1lskavkkv1fd1ynk1gi1yrgeri1nwdpk  
arta1sdi1evi1hedv1ggaf  
yhfkyp1yad1geg1fie1at1trpet1mgdta1ivvn1pndery1kd1vig1ktv1ilpiv1gre1lpiladey1vdi1dfg1sgam1kvtpahd  
1ndfe1ig1qrh1q1leni1ivmd  
engkmnd1kag1kyegmd1rfd1crk1ql1ved1keq1d1viki1edh1v1svgh1sers1gav1vepy1stq1w1fvr1med1laks1rdn1qkt1d  
dr1idf1yp1qr1feh1tfn1q1wme  
ni1rdwt1is1rg1lw1gh1qipaw1y1hketge1iyv1gee1apt1dien1w1q1ded1v1dtw1f1ssa1lwp1fst1lgwp1d1les1dfkry1ptna  
1vtgy1di1ffw1armi1fqg  
left1dr1rp1fnd1v1l1hg1lvraed1grk1msks1l1ngv1dp1md1v1dey1gads1ry1flat1g1ssp1ghd1rystek1ves1vwn1finkiw  
ngarf1s1ln1nig1ed1fk1ved1i  
d1sgn1s1ladkwi1ltr1neti1atv1td1s1dky1ef1gev1gral1ynfi1wdd1fcd1wyi1emskip1mng1ndee1qk1itrs1v1syt1d  
ni1mr1ml1hp1fmp1fv1teki1wq  
s1l1pheg1dti1vkas1wpe1vres1life1sk1qt1mq1lvei1iks1vr1qs1rve1vnt1pls1kei1pili1qak1dei1ett1sqn1kdy1likf  
cnp1st1n1ist1dve1ipekam  
tsvvi1agk1v1l1pleg1lid1md1kei1sr1leke1lak1qsel1drv1dk1l1snen1fv1skape1kvine1ekrkk1qdy1qeky1dgv1karie  
q1ka  
>sp|Q2YTA2|COAE\_STAAB

Tsompanidou\_et\_al\_Supplemental\_FASTA\_File

mpkvi gltggi asgkstvsel svfgfkvvdadkaareavkkgskgl aqvrevfgdeaidengemnrwymgd lvfnhpek  
rlelnai ihpivrdimeee  
kqeylkqgynvimdipll fene lentvdevvviytsesiqmdrlmqrnsl ledakarvysqisidkksrmadhvidnlg  
dklelkqnlerllkeegy  
ekpnygeed  
>sp|Q2YTA7|SYT\_STAAB  
meqiniqfpgnkkafdkgtttedi aqsi spgl rkkavagkfngqlvdltkplet dgsieivtpvseealev lrhstahl  
mahaikrlygnvkfgvgpv  
ieggfydfdidqni ssddf eqiektmkqivnenmkierkvvsrdeake lfsndeykle lidai pedenvt lysqgdftd  
lcrghvpstakifekll  
stagaywrgdsnnkmlqriygtaffdkkel kah lqm leerkerdhrkigkele lftnsq lvgaglp lwl pngatirreie  
ryivdkevsmgydhvytpv  
lanvdlyktsghwdhyqedmfppmq ldetesml rpmncphhmmiyankphsyrelpiriaelgtmhryeasgavsglqr  
vrgmtlndshifvrpdqik  
eefkrvvnmi idvykdfg fedysfr l syrdpedkekyf dddd mwnkaenml keaadel g l syee aigeaafygpkl dvqv  
ktamgkeetlstaql dfl  
perfdl tyigqdgehrpvvihrgvstmerfvaf l teetkgafptwlapkqvqi ipvvnv d l hydyarql qdelksqgvr  
vsiddrnekmyki rea qm  
qktpyqi vvgdkevennqvnrqygsdqdetvekdefiwnlvdeir lkkhr  
>sp|Q2YTB5|CLPX\_STAAB  
mfkfnedeelnkcsfcgkdqdvkklvagsgvyi cnecielcseiveelaqntseaitel ptpkeimdh lneyvigqek  
akkslavavynhykriqq  
gpkeddvelqksnialigptsgsktllaqtlakt lnpvfaiadats lteagyvgddvenillrliaadfdidkaekgii  
yvdeidkiarksentsitr  
dvsgegvqqa llkil egttasvppqgrkhpqemiqidttnilfilggafgdiedvikrrlgekvigfssneadkydeq  
allaqirpedlqaygl ipe  
figrvpivanletldvtalkniltqpknalvkqytkmlel dddvle fteea lsa isekaiertkgarglrsiieetlidi  
mfdvpsnenvtkvitaqt  
ineetepe lydaegn linnsktsa  
>sp|Q2YTB6|ENGB\_STAAB  
mkvnpnnielii savkeeqypete lseval sgrsnvgkstfinsmigrnk martsqqpgktqt lfnynideqlifvdvpg  
gyakvsktqrekfgkmi e  
eyitkrenlqlv iq lvd l rhdptqddi l myny lkhfdipt lvi ctkedkipkgkvqkhikniktql dmdpddtivsyssi  
qnnkqqqiwnli epyis  
>sp|Q2YTB7|HEM1\_STAAB  
mhfi aisinhrta dval reqvaf rddalriahedlyetksilenvil stcnrtevyavvdqihtgcyiqrflarafgfe  
vddikamsevkvgdeaveh  
llrvtsgl dsivl getqil gqirdafflaqstgtt gti fnh lfkqait fakrahnetdi adnavsvsyaavel akkvfgk  
lkskqai iigagemse lsl  
lnllgsgitdi tvvnrtienamklaakhqvkydelssl pnllesadivisstsqaqy iitnemieriaenrkqds lvlid  
iavprdiepgisaitnifn  
ydvddlkg lvdan lrerqlaaatiseqipaeihahnewism lgvvpviral rekamaiqaetm dsidrk lpglsererki  
iskhtksiinqm lkdpiq  
akelssdkksnekle l fqnifdieaepheqakqqkeskvkeisarri fsfe  
>sp|Q2YTB9|HEM3\_STAAB  
mrklvvgrrsklaltqsqqfidklkavepnleieikeivtkgdrivdkqlskvvggklfvkeiqhel fekni dmaihs l  
kdvpsvipegl tlgcipdr  
elpfdaysktht p lsqlpeg siigtsslrrgaqilskypnleikwirgnidtrlek lqtedydai llaag lrrmgwsd  
divtsyldiditllpaigg  
algiecrsdeell tllskvhndevakcvtaertflaemdgsqvpia gyatisdqkeieftgl imtpdgkerfeytmng  
tdpvelgkkvsnk lkeqga  
yeiikr lneqh  
>sp|Q2YTC2|GSA1\_STAAB  
mrytkseeamkvaet lmpggvnspvrafksvdtpai fmdhggksgkiydidgneyidyv lswgplilghrdpqvishlhea  
idkgt sf gast l lenklaq  
lvidrvpsiekvr mvsstgeat ldtlrlargytgrnkivkfegcyhghsds llikagsgvat lglpdspgvpegiaknti  
tvpynldalkiafekfgd  
diagvivepvagm gvi ppi egflqglrdit teygallifdevmtgfrvgyhcaqgyfgvtpdl tclgkviggg l pvgaf  
ggkkeimdqia plgniyqa  
gtlsgnplamtsgyet lsqlapetyeyf nmlgdiledglkrvfakhnvpitvnrag smigyflnegpvtnfeqanksdlk  
lfaemyremakegvlpps  
qfegtflstahtkedi ektiqafdtal srivk  
>sp|Q2YTD1|DHA2\_STAAB  
mki gtpreiknnenrvgl spsgvhalvesghtvlvetnagsgsffedvdykeagaeiva eqakvwdvdmvikvkeplese  
ypyfkeglv lfty l h lane  
ekltqal idrkvisiayetvqlpdrslpl l spmsevagrmsaqvgaeflqklnggmgi l lggvpgvpkgkvti igggqag  
tnatkialglgadvt l dv  
npkr lqq l d d l fggrvhtimsnplnie l yvkqsd l v igav l i pgakapr l vtedmikmqmngsvi idiaidqggi fettd



Tsompanidou\_et\_al\_Supplemental\_FASTA\_File

kitthddptyikhgvvhyav  
vanmpgavprstlalnna1p1p1m1ankgyreaafksnqplslglntykghvtnkgvaeafemeyksveea1q1  
>sp|Q2YTD2|Y1567\_STAAB  
mtkiskiiidelnngqadaawittp1nvyyftgyrsepher1fallikkdgkqvlfcpkmeveevkassftgeivgyldte  
npfslpqtinkllieseh  
1tvarqkqlisgfnvnsfgdvdltikqlrniksedeiskirkaaeladkcieigvsylkegvtereavnhieqtikqygv  
nemsfdtmv1fgdhaasph  
gtpgdr1ksney1fdlgviyehycsdmtrtikfgepnkeaqeiyniv1eaetsaiqaikpgiplkdidhiarniisek  
gygeyfp1rhg1glqeh  
eyqdvstnsn1leagmvi1tepgiyvpgvagvrieddiltnegyev1thyek  
>sp|Q2YTD3|Y1566\_STAAB  
mkl1sfhgqstiy1legnnkkv1vd1p1f1s1nnpkcd1ni1etvqvd1yiv1lthghfdhfgdvvelakktgatvigsamady1ss  
yhgvenvhgm1niggkanfd  
fgsvkfvqafhsssfthhengipvylgmpigivfevegktiyhtgdtglfsdmsliakrhpdvvcfvpigdnftmgiddas  
yainefikpkisvpihydt  
fp1ieqdpqqfkdavnv1gdvq1lkpgesvqf  
>sp|Q2YTE1|ACCA\_STAAB  
m1dfekplfe1rnkies1kesqdkndvd1qeeidm1eas1eretkkiytn1kpwdrvqiar1qerptt1dyipyifdsfm  
e1hgdrnfrddpamiggig  
f1ngravtv1ggqrgkdtkdn1yrnfgmahpegyrka1rlmkqaekfnrpi1ftfidtkgaypgkaaerqsesiatn1i  
emas1kvpviai1vigeeggs  
ggalgi1ankv1m1enstysvispegaaal1wkdsn1akiaetmkitahdikqlgiiddviselggahkdieqqala  
iksafveq1ds1es1srde  
iandrfe1kfrnigsyie  
>sp|Q2YTF0|THII\_STAAB  
mkydh11vrygel1tkgsnrkkfvnq1rnnvnks1kg1dgvvkgkrdrmyieledhadineityr1skifgiksispv1  
kvekt1eamsaaikfaqq  
feenstfk1dvkradknfpm1dtyelqrelggav1khfdnisv1nkrpdheirvevr1daiymyeevvagagglpvgtgk  
t1m1sggidspv1agmevm  
rrgyt1eai1hfhsp1p1tsdqakekvieltrilaervgpi1k1hivpftelqkqvnkvvhprytmtstrmmmrvadk1vhq  
igal1ayngen1gqvasqt  
1hsm1ainnvtstpv1rpl1tydkee1i1kskeigt1fetsiqpfedccti1ftpknpvtepnfdkvvqyesvfdfeeminr  
aveniet1e1tsdyktike  
qqt1nq1indf1  
>sp|Q2YTF6|FTHS\_STAAB  
mth1sd1dianqst1lqpi1kdiaasv1g1seda1epygyhkakidinkitpr1dskgkv1vtamsptpagegkstvtv1glad  
afhel1kknvmval1repalg  
ptf1g1k1ggatgg1yaqvl1pmedin1hfngdfhaittanna1safidn1hihqne1gidqrriewkrv1dmndra1rhv1v  
glggptngv1predgfn1tv  
asei1mai1cl1sr1sik1dk1kdisrit1igytrdrkpvtvad1kvqgalami1kdaikpn1vqsiegtpalvhggpfaniahg  
cns1latetard1adivvt  
eagf1gsd1gaekfmd1kareagfdpaavvvvati1ra1kmhggvakdn1keenveavkagivn1erhvnnikkfgvepvva  
inafi1hdtdaevevykswa  
kennvria1tevwekggk1ggvd1anev1ev1idq1pnsf1kpl1ye1el1pleqkiekivteiygskvtfsskaqk1kqfken  
gwdnypvc1maktqysf1sdd  
qt1l1gapsgfei1t1releaktgagfiva1l1tgaimt1mpg1pkkpaal1nmdvtd1dghaig1f  
>sp|Q2YTF7|ISDH\_STAAB  
mnkhhpk1r1sfys1rkst1lgvasvivst1fl1itsqhqaaeaentntsdki1senqnsnatttqppkdnqtqpatqpanta  
ktpaades1kdaiknpav  
enkeh1digpreqvnf1l1ldknnetqyyhffs1kdpadvuytkkkaevel1dintastwkkfevyennqk1pvr1lvsysvpv  
edhay1rfpvsdgtqelki  
vsstq1iddgaetnydytk1lvfakpiy1ndps1lvksd1ndavatndqsssdasnq1tntntsnqntsttntnsdqppattnms  
qpaqk1sanadqassqpa  
hetnsngntndktnessnqsdvnqyppades1qdaiknpai1dkehtadnwrpidf1qmkn1dkgerqfyhyastvepatv  
iftktgpi1e1glktaltw  
kk1evyegdkk1pve1lvsydsdkdyay1rfpvsngtrevkivssi1eygenihedydylmvfaqpitnnpddvdeety1n  
lqk1l1apyhkakt1erqvy  
e1ek1qek1pekykaeykkk1dqtrve1ladqvsavtefenvtptndq1tdvqeahfvfeseennesvmdgfvehpfyt  
at1ngqkyv1mktkdds1yw  
kd1ivegkrvt1vskdtknnsr1l1fpyipdkavynaivkvvvanigyegqyhvriinqdiktdddtsqntseh1ngq  
tvqednvtatdtatn1sie  
t1preatdkvd1iepesdmvkdadssvdkdahhdvdh1sdmsgnthfdkyd1kemdtqiakdtdkgv1dsvgmssnv1dtd  
kdsnknkdkvi1gl1dhiadk  
nkvnntgtetn1dtmk1yhip1stikvtdkktteh1psdi1hktvdkvktkekastpsken1lsqskm1pktgettssqsw  
slyal1gm1al1fipkfrke  
sk  
>sp|Q2YTH2|EZRA\_STAAB  
mvlyi1ilaiivi1il1iavgv1fy1rsnrq1iekaierkneiet1pfdqn1aq1sk1n1kgetkkydamkkdnvestnky

Tsompanidou\_et\_al\_Supplemental\_FASTA\_File

lapveekihnaea1ldkfs  
fnasqseiddanelmsyeesyqqqledvneiialykndelydkckvdyremkrdvlanrhqfgeaas1leteiekfep  
r1eqyevlkadgnyvqahn  
hiaalneqmkqlrsymeeipeli retqkelpgqfqdlkygcrdlkvegydl dhvkvdstlqslkte1sfveplisrlele  
eandk1anindkl ddm1  
iehevkaakndveetkdiitdn1fkakdmnyt1qteieyvrenyyinesdaqsrvrfeneiqslisvyddilkemsksavr  
yseqdn1qy1edhvtvin  
dkqek1qnh1iq1redeaeaedn1rvqskkeevyrr1lasn1tsvperfiimkneidhevrdrvneqfserpihvkq1kd  
kvs1ki1vi1qmntfedeanv  
1vnavyaekliqygnryrkdyndvks1neaer1fknrykraieiaeqalesvepgvtkhieevikq  
>sp|Q2YTH9|SYL\_STAAB  
mnyhnhqiekkwqdywdenktfktndn1gqkkfyaldmfpypsgag1hvghpegyatd1isrykrmqgynv1hpmgwda  
fg1paeqyal dtgndpref  
tkkniqt1fkrqielgfsydwdevnttdpeyykwtqwif1q1ynkglayvdevavnwcpalgtv1sneevidgvsergg  
hpvyrkpmkqvw1k1teya  
dq1lad1dd1dwpes1kdmqrnwigrsegakvsfdvntegkvevfttrpdtiygasflv1spehalvnsittdeykekv  
kayqteaskksd1ertd1a  
kdksgvftgayain1sgekvqiwiadyv1stygtgaimavpahddrdeyefakkfd11ieviieggvveeaaytgegkhi  
nsgel dgleneaa1tkaiq  
11eqkgagekkvnyk1rdw1fsrqrywgepipvihwedgtmttvpeel111petdeikpsgtgesplanidsfvnvvd  
ektgmkgrrretntmpqwg  
scwyy1ry1dpknem1adpek1khw1pvd1yiggvehav1h1lyarfwhkvlyd1g1vptkepfqk1fnqgmilgegne  
kmskskgvni1pddivqsh  
gadt1r1yemfmgp1daaiawsekg1dgsrrf1drvwr1ivnedgt1sskivttnks1dkvynqtvkkvtddfet1gfn  
taisq1mvfi1necykvdv  
ykpyiegf1vkm1apiaphiee1wsk1gheesityqpwytydeal1vddeveivvqngk1rakikiakdtskeemqeia  
1s1ndv1kasi1egk1dimkvi  
avp1q1v1nivak  
>sp|Q2YTI5|PEPVL\_STAAB  
mwkekvqqyedqi1nd1kg1laiesvrddakasedapvgpprka1dymyeiahrdgftthdvdhiagri eagkndvlg  
i1chvdvvpagdgwdsnpf  
epv1tedai1argt1lddkgptiaayyaiki1edmnvdwkkrihmi1igtdeesdwkctdryfkteempt1g1fapdaefpci  
hgekgit1tfd1lvqnklaed  
qdesdye1it1fksgerymv1pdhaearv1vkenmtdvi1qdfeyf1eqnh1qgdstvdsig1v1tvegvkavhgmdpsigv  
ag1y11k1f1as1n1dnnaq  
afvafsnry1fnsdfgekmgmkfhtdvmgdvtt1nigvitydnenag1fgin1rypegfefekamdrfaneiqqygfevk1  
gkvqpphyvd1kndp1fvqk1  
vtayrnq1tndmtepyt1ggtyarn1dkgva1fgamf1sdsed1mhqkneyit1kkq1fnatsiyleaiys1cvee  
>sp|Q2YTJ3|Y1603\_STAAB  
mntf1qmr1dk1ker1sh1dvd1fknreeet1riyrt1dn1kgit1ik1nai1v1vkyedk1kekivdeivyyvdeai1aqmadk1le  
s1sss1q1imp1v1rats1fnkk  
tkqgy1pfi1ydehtaetavyyavd1gksyr1ides1med1k1lteqqi1rems1fnvrk1s1nsyttdevkgnify1fins1dgy  
das1ril1nta1flneieaqc1q  
gem1lav1phqdv1li1adi1rnktgydv1mah1tmeff1tkg1vpits1sfgykqgh1epifilgknnkqkrdpnvi1q1r1eanr  
rk1fnkdk  
>sp|Q2YTK0|PCKA\_STAAB  
msvdyt1yett1k1dk1l1kkptsh1fq1sttq1lynki1dnnegv1telgavnastgkytgrspkdkffvsepsyr1nidwgei  
nq1pideet1f1k1yhkv1dy  
1dkkde1yv1fkg1yagsdkd1tm1k1tvine1awh1faknmf1rpeskeatk1kpnftivsvphfkadpevdgtksetfv  
i1sfkhk1vil1iggt1eyage  
mkkgi1fsvmny1l1pmq1d1msmhcsanvgekgdval1ffg1sgt1gktt1sadphr1k1igddehgwnkngvfnieggcyakai  
n1skekepqi1fdaikygai  
1entvvaedgsvdfednrytentraaypinhidnivvpskaahpnti1if1tadafgvippisk1nkdaqmyh1f1sgftsk  
lagtergvtepeps1fstcf  
gapffp1hptvyad1l1ge1id1hdvdvylvntgwtggkygvgrris1hytrqmvnqaisgk1knaeytkdstfg1sipve  
iedvpk1tilnpi1nawsdke  
kykaqaed1iqrfeknfekfgekvehi1akkgsfnk  
>sp|Q2YTK5|CRCB1\_STAAB  
mqyvy1figgal1gallry1is1f1ntdggf1pig1t1van1tgafim1g1l1taltiaffsnhpt1kkaittg1fgal1ttfstfq  
1eli1hmf1dhq1qfi1t1l1lya  
itsyv1fgi1l1cyvgi1k1ggg1s  
>sp|Q2YTL0|SIGS\_STAAB  
mkfndvynkhhk1i1hh1l1kkyni1synydeyyq1l1likmwq1sqiykpskqs1ss1f1ftr1nfylid1lfrqqn1kdvil  
cennspt1teqpty1fneh1d  
1r1lqdi1fk1f1nhrer1w1k1ly1legykqfeiaeims1s1stik1liktsvkrkcqhnfk  
>sp|Q2YTL3|ARSC\_STAAB  
mtkktiyfi1ctgns1crs1maegwakqi1aedwnvysagiethgvnpkaieamkevgid1snhtsd1idn1i1kns1lvvt  
1csdad1vncps1panvkke

Tsompanidou\_et\_al\_Supplemental\_FASTA\_File

hwgfdnpagkpwsefqrvrdeikiaienfksr  
>sp|Q2YTM3|SPLB\_STAAB  
mnknvvikslatltitlsvagigtllveevqqtakaennvtkikdtnifpytgvvafnsatgfvvgkntiltknkvskny  
kvgdritahpnsdksnggi  
ysikkiiinygkedsvikveehaiergpkgnfndnvtpfkyaagakagdrikvivyphpyknkyvlhestgpvmsveg  
ssivysahtesgnsqspv  
nsnelvgihfasdvknddnrnaygvyftpeikrfiaenidk  
>sp|Q2YTM4|SPLC\_STAAB  
mnkniviksmaalaitlsvtginaavvdetqqianaeknvtqvkdtnvfpyngvvsfkdatgfaiekntiitknkvskdy  
kvgdritahpngdkngnggi  
yknknisdypgnedisvmnveenavergangynfnenvqafnfakdakvddkikvigyp1paqntfkqfestgtvksikd  
nlnfdaiyepngsgspv  
nlnnevvgvvyggigkigseyngavyftpqikefiqkhiq  
>sp|Q2YTP0|MENE\_STAAB  
mdfwlykqaqqnghhiaitdgqesytyqnlyceaslakrlkayqqsrvglyidnsiqsiilihacwlanieiamintr1  
tpnemknqmrsvdvqlifc  
tlplelrgfqivllddiefagrditmgllndtmdiqydtsetvvpkdspsnilntsnliddiasimftsgttgpqkav  
pqtfrnhyasaigckeslg  
fdrdtnwlsvlpiyhigslsvllravieghtvrvdkfnaeqiltmiknerithislvpqtlnlmqgglhepydlqkil  
lggaklsatmieta1qynl  
piynsfqmtetcsqfltatpqlharpdvtgmpsanvdvki knpnkeghgelmikganvmnglyptdltgtfengyfnt  
gdiaeydygyvmydrck  
dliisggeniypyqietvakqfpgisdavcvghpddtwgqvpklyfvsesdiskaqliaylsqhlakykipkhfekvdtl  
pytstgklqrnklyrg  
>sp|Q2YTZ1|Y1779\_STAAB  
mna1fiiiimivvgaiiggitnviairm1fhpfkpyyifkfrvpftpglipkrreeiatkigqviehlltetlineklk  
seqsqqaiesmiqqqlqkl  
tkdq1sikqitseqididieqvlqtngnqyasqlnnyytkhqntiasllpnqlvtfldqhdvdatd1l1cdrarnylssa  
kgtqdi1ndm1dtffnekkg  
ligmlqmfmtkesiadriqqelirltshpkaravt1itneyqtfkdkplnelldasqfneiaen1svyvttyaskqan  
kpvvt1mpqfvdylegqls  
sklan1iieq1sih1stikkkvd1rglieeqintfd1dyiek1iieiankelklims1gfilggiigffqglvai1fv  
>sp|Q2YU04|TRAP\_STAAB  
mkklytsygytgn1nqikinnpshh1fqfstadssvifeeteentv1kspsiyevikeigafnedhfycaifipstedhv  
yqlekk1isvddnfknfgg  
fksyr1l1rpvkgttykiyfgfadrqtyedfknsdafkdhfskealshyfgssgqhsyfyerylypike  
>sp|Q2YU05|DCUP\_STAAB  
mvhnknnti1kmi1kgeethtpvmfmrqagsrqpkyrk1kekys1fdithqpe1cayvth1pvdnyhtdaailykd1mtp  
1kpi1gdveiksgigpvi1h  
npi1kti1qdvk1sq1dperdvpyv1dtik1l1teek1nvp1ig1ftgapft1asymieggpsknynftkammfrdeatwfa1  
mnh1lvdsvkyvtaqveag  
aeliqi1fswvga1nvedyrryikphmir1isevkekhdvpi1lfgvgash1inewnd1pidvlg1dwrtsin1qaqq1gv  
tk1l1gn1dps1l1lapwv  
ieer1kpi1l1dgmengkh1fn1ghgvfpevhpet1l1kvsefvhtytqr  
>sp|Q2YU20|Y1799\_STAAB  
mikry1qfvkpykyri1fati1vgi1kfgipml1ip1li1kya1idgvinnh1alttdekvh1h1tia1gial1fi1fv1rppie1fi  
rqy1laqwt1snki1lydi1rkk  
lyn1hl1qal1sarfyann1qvgqv1sr1v1ndve1qtkdf1iltg1lmi1nw1l1dciti1i1alsim1ff1ldvkl1t1laal1fi1pfy1iltvy  
vffgr1rkl1trersqalae  
vqgf1l1hervqgi1svvksfa1iedneaknfdkknan1fl1tra1lkhtrwnaysfatintvtdigpi1ivigvgayla1isgsitvg  
t1laafvgy1e1l1fgp1lrr1  
vasft1l1tqsfasmdrvfql1idedy1dikngvgaqpieikqgridiyhvn1fyndneapil1kdi1n1sieketva1fvgmsg  
ggk1st1in1l1prfydv1tsg  
q1l1idghnikdf1l1tgs1l1rnqig1lvqqd1n1l1fsdtvken1l1l1grptatdeevvevakvanahdfimn1l1pqgydtevgerv  
k1l1sggkqr1l1siar1fl1n  
ppi1l1l1deatsal1d1lesesi1qea1ldv1l1skdr1t1l1vah1r1st1ithadki1vvi1enghiv1etg1thre1liakqgayeh1ysi  
qn1  
>sp|Q2YU22|GSA2\_STAAB  
mnfseser1l1q1l1sney1l1ggvn1spsr1sykavggg1apv1vm1kegrgay1ydv1dgnkfi1dyl1qaygpi1itghahphitkai1qe  
qaakg1v1l1fgt1pte1le1iefs  
kk1l1rda1ips1leki1rfvn1sgteavmtti1rvaraytkrnki1k1fagsy1hghsd1l1v1laags1gpsql1gspdsagvpesvarev  
itvpfn1dinaykeai1efwg  
deiaav1l1vepi1vgn1fgm1vmpqpgf1leevne1shnngt1l1viydevi1tafr1fhygaaqd1l1gvipd1l1tafgki1vggg1l1pigg  
yggrq1dimeqvap1l1gpayq  
agt1magnp1l1smkagi1al1lev1leqd1gyek1lds1lgqql1eeg1l1k1liekhnitatinriygs1l1tyftdekvt1hydqv1ehsd  
geafgk1ffk1l1m1nqgin1la  
psk1feawf1l1ttehte1edikqt1l1kaadyafsqm1k  
>sp|Q2YU27|GATB\_STAAB

Tsompanidou\_et\_al\_Supplemental\_FASTA\_File

mfhetviglevhvelktdskmfspahfgaepnsntnvidlaypgvlpvvnkravdwamraamaInmeiateskfrkn  
yfypdnpkayqisqfdqpi  
gengyidi evdgetkrigirtrlhmeedagksthkgeyslvdlnrqgtplieivsepdirsapieayayleklrsiiqytgv  
sdvkmeeegslrcdanislr  
pygqekfgtkaelknlnsfnyvrkgleyeekrqeeellnggeigqetrrfdestgktilmrvekgsddyryfpepdivpl  
yiddawkkrvrqtipeelpd  
erkakyvnelglpaydahvltltkemsdffestiehgadvkltswlmggvneylnknqvelltdkltpenlagmiklie  
dgtmsskiakkvfpeLaak  
ggnakqimednglvqisdeatllkfvneaIdnneqsvedykngkgkamgflvgqimkaskgqanpqlvnqllkqeldkr  
>sp|Q2YU29|DAGK\_STAAB  
mrkrariinyntsgkeqfkrelpdaliklekagyetsayatekigdatleeramhenydvliaaggdgtlnevngiae  
kpnrpklgvi pmgtvndfg  
ralhipndimgaldivieghstkvdigkmnryfinlaaggqltqvsyetpsklksivgpfayyikgfemlpqmkaavl r  
ieydgnavfggeallfflg  
tnsmagfeklvpdaklddgyftliiveksnlaelghimtlasrgehtkhpkiyekakainissltdlqlnvdgeyggkl  
panflnlerhidvfapndi  
vneelisndhvddnliee  
>sp|Q2YU32|DPO4\_STAAB  
mterriihidmdyffaqvemrdnpklkgkpvi vggkassrgvvstasyearkygvhsampmsqahklcpngyfvtsnfga  
yretsaqimsifrsytdkv  
epmsldeaylditelvrpdlpaskiaqyrkdi lenthltasagvsynkflaklasgmnpkygmtvidyqnvhdilmtd  
igdfpgvgkaskkvmdng  
ifngrdlyektefelirifgkrgrglynkargidhsevkssrvrksvgttert fatdvnddeeilrkvwelsgktaerlnk  
lqksaktvtviktyqfet  
lskqmslrdsvsseediyniayllyndlkdp  
>sp|Q2YU46|PTPA\_STAAB  
mvdvafvclgnicrspmaeaimqrklkdrnihdikvhsrgtgswnlgepphegtqkilnkhnipfdgmisel featddfd  
yivamdqsnvdnikfinpn  
lkgqlfkllfnsmeesdvpdpuytnnfegvydmvlsscdnlidyivkdanlkeg  
>sp|Q2YU47|Y1812\_STAAB  
mamtneekvlai reklnivngll dpekyknaneeqltdiydfvqsrerlspsevtaiadalqqlrhd  
>sp|Q2YU51|GATA\_STAAB  
msiryvesvenlltikdkkikpsdvkdvdaieetdptiksflaldkenaikkaqel delqakdmdgklfgipmgikd  
niitnglettcaskmleef  
vpiyestvmeklhnenavligklnmdefamggstetsyfkkvtnpfdhkavpggssggsaaavaaglvpfslgsdtggsi  
rqpaaaycgvvmkptygrv  
srfglvafassldqigpltrnvkdnaivleaisgadvndstasvddvdf tseigkdikglkvalpkeylgegvaddvke  
avqnavetlkslgavveev  
slpntkfgipsyyvi asseasnlsrfdgirygyhskeahsleelykmsrsefggkevkrriiflgtfalssgyydayykk  
sqkvrtlikndfdkvfeny  
dvvgptapttafnlgeeiddpl tmyandllt tpvnlaglpgisvpcgqsngripiglqfigkpfdektlyrvayqyetqy  
nlhdvyekl  
>sp|Q2YU56|SDCS\_STAAB  
mayfnqhqs miskryl tffskskkkpf sagqligililgp llfl ltlffhpqdlpwegvyv laitlwiatwwiteaipi  
aatsllpivllplghiltp  
eqvsseygndiiflflggfilaiamerwnlht rvalt iinligastskillgfmvatgflsmfvsntaavmimipiglai  
ikeahdlqeantnqtsiqk  
feksylvlaigyagtiggltigtppliilkgqymqhfgehisfakwmivgiptvivllgitwlylryvafrhdlkylpg  
gqtlkqkldelgkmyee  
kvvtifvlasllwi trefllkkwevtssvadgtiaifisillfvipakntekhriidwevake lpgvllifggglal  
akgisesglakwlgeqlks  
lmgvspiliviviti fvlfltevtstatatmilpilatlsavgvhplllmapaamaancaymlpvgtpnnaiffsgk  
isikqmasvgfwnlisai  
iiilvvyvmpivlgidingplpk  
>sp|Q2YU61|Y1848\_STAAB  
msfvtenpwlmltifiinvcyvtfltmrtitlkgryiaasvsflevlvyivglvlmsnl dhinqniityafgfsigi  
ivgmkieekla lgytvvnv  
tsaeyeldl pnelrnlygvvthyaafgkdgsrmvmqiltprkyerk lmdtiknldpkafiiayeprihggfwtkgirrr  
klkdyepeelesvveheiq  
sk  
>sp|Q2YU68|PCRB\_STAAB  
mydikwrhifkldsakhisdddldai cmsqtdaimiggtddvtednvihlmsrvrryplplvleisniesvmpgdfyf  
vptvlnstdvafhngtll e  
alktyghsidfeevi fegyvvcnadskvakhtkantdl ttedleayaqmvnhmyrlpvmiyeysgiygdvskvqavseh  
tetglfygggisseqgate  
maaiadtiivgdiiykdikka lktvikessk  
>sp|Q2YU70|DNLJ\_STAAB  
madlssrvnelhdllnqysyeyvednpsvpdseydkllheliki eehpeyktvdsptvrvggeaqaasfnkvnhdtpml

Tsompanidou\_et\_al\_Supplemental\_FASTA\_File

s1gnafneddlrkfdqri  
eqignveymcelkidglavslkyvdgyfvqgltrgdgtteditenlktihaip1kmkeplnvevrgeaymprsrflrln  
eekendeqlfanprnaaa  
gs1rqlskltakrklsvfiysvndftdfnarsqsealde1dklgttnknrarvnnidgvlleyiekwtsqreslpydid  
givikvndldgqdemgftq  
ksprwaiaykfpaeevvtkl1ldielsigrtgvvtptailepvkvagttvsraslhnedlihdrdirigdsvvvkkagdi  
pevvrriperrpegavtyh  
mpthcpscghe1vriegevalrcinpkcqaqlveg1ihfvsrqamnidglgtkiiqqlyqselikdvadifyl1teed1lp  
ldrmgqkkvdnl1laaiqqa  
kdns1en1lfglgrh1lgvkasqvlaekyetidr11tvteaelveihdigdkvaqsvvtylenediraliqklkdkhvm  
iykgiktsdieghpefsgk  
t1v1tgk1hqmrneaskwlasqgakvtssvtkntdvviagedagskl1tkaqslgieiwtqqfvdkqnelns  
>sp|Q2YU74|PUTP\_STAAB  
mltmgtalsqqvnanwqtiymiavyflilivigfygykqatgn1seym1ggrsigpyital1sagasdm1sgwmimg1pgsv  
ygtgl1samwiti1gl1gay  
inyfvvapr1rvytelagda1t1pddfknr1ndknnv1kiisg1iivff1tythsgfsvsgkl1fesafgl1dyhfgl1lv  
afivifytffggylavsit  
dffqgvim1iamvmvpi1vammn1ngwgtfhdvaamkptn1n1fkg1sfigtis1fswgl1gyfgqphi1ivr1fmsikshkm1  
pkarr1giswmavgl1gav  
avg1tgi1afvpayhik1ledpet1fivmsqvl1fhp1vggf1laailaaimstissq1lvtss1tedfykl1rgeekakth  
qkefvmigr1sv1lvvaiva  
iaiaawnpndt1n1lvgnawagfgasfsp1vl1falywkg1tragavsgmvsgal1vvivwiawik1lahineifg1yei1pg  
fivsvivtyvvs1tkkpg  
afvetd1nkvrdivrek  
>sp|Q2YU76|Y1858\_STAAB  
mtngyigsytkkngkiyrfelnenqsridd1etgfeleasty1vrnevlyginkegeqcgvas1kiddngel1h1lnc  
1sskagtgcysis1edkry  
lfeavygdgi1rmyel1nhtgei1r1iqel1ahdfptgtherqdhphahyinqtpdgkyvavtd1gadrivtykfdngfe  
fykes1fkdsdgr1hiefh  
dngkfayvvhel1sntvs1vaeyndgkfeelerh1tipesfdgdtklaavr1shdqflyvsnrghdsiaifkvl1dngqhle  
lvtitesggqfprdfnias  
sdd1lvcaheqgds1vvtvfernk1etgkit1cdntrvasegvcvif  
>sp|Q2YU83|LUKL2\_STAAB  
mknkkrv1iass1sca1l1l1saattqansahkdsqdkqkkehvdksqkdkrnvtkdknstvpddigkngkitkrte  
ydekt1n1qn1qf1df1iddp  
tydknvl1lkkqgsi1hsn1kfeshkeeksnw1kypseyhvd1fvkrrnrkte1ldq1pknk1stakvdstfsyssgkfd  
stk1girtssnsysktisy  
nqkydtia1igknnwhv1hsviand1kyggevkrrnde1l1fyrn1riatvenpelsfaskyrypal1vrsgfnpefl1tyl  
sneksnektqfevtytrng  
di1knrpgi1hyappi1eknkdgqr1ivtyevdwknktkvvd1kysddnkpykeg  
>sp|Q2YU84|LUKL1\_STAAB  
mikqlyknit1ics1t1staltvfpatsyak1nseikavsekn1dgdtkmytrtatt1sdsqknitqsl1qfn1tepyndke  
tvfikakgt1igs1rl1dp  
ngywnst1rwp1gs1vs1qnvddnntnvt1dfapknqdesrevkytygyktggdfsinrggl1pgnitkesnysetisyqq  
psyrt1ldqstshkgvgwk  
veah1innmghd1htrq1tndsdnrtkseifsl1trngn1wakdnftpknkmpvtvse1gnpeflavmshdkkdegkskf1v  
hykrsmdefk1idwnrhgfw  
gywsgenhvd1kkeek1salyevdwkthdvkfvk1ndnekk  
>sp|Q2YUD1|AGRB\_STAAB  
mnyfdnk1dqfaty1lqkrn1ldhiq1flqvr1gmqi1vgnfl1kilvtysis1ifsvflytlvth1sym1lirynahgahaks  
s1lcyiqs1il1fvf1vpyfl  
inid1nfty1l1alsi1ig1isvviyapaatkkq1pipik1lvrkkyvsi1imy1lvmil1sli1ihpfyaqfm1l1gilvesit1l  
p1ffpked  
>sp|Q2YUD8|CH60\_STAAB  
mvkq1kf1sedarqam1rgvdq1lanavkvt1gpkgrnv1ldkeftap1itndgvti1akeieledpyenmgak1vqevankt  
nei1agdg1ttatv1lagami  
qeg1knvtsganpvg1l1rqgidkavkvaveal1hensqkvenkneiaqvgaisaadee1gryiseamekvngdgvitieesn  
gl1nte1levveg1mqfdr1gyq  
spymvtds1dkmva1elerpy1lvtdkk1ssf1qdil1p1leqvvsnrp1ilivadevegda1tniv1nr1mrgtftavavkapg  
fgdrrkam1led1ail1tgaq  
vitdd1gl1d1kdasid1m1gtaskvevtdknttv1dgdgdensidarvsq1lksqieetesdf1drek1qer1ak1laggvavi  
kvgaasetel1kerk1ried  
al1nstraaveegi1vagg1tal1nvvyqkvseieaegdi1etgvn1vl1kal1tapvrq1iaenag1legsviver1knaepgvgn  
aatdewvnm1leag1vdptk  
vtrsal1qhaasvaam1f1tteavvasi1pekndqpn1m1gg1mpgmm  
>sp|Q2YUE5|REX\_STAAB  
msdqvk1iprat1kr1p1lyrfvss1lkskgidrvnska1sda1qidsat1rrdfsyfge1lgkkgygynids1ldffk1sels  
esdmvki1aivgvgn1lga1

Tsompanidou\_et\_al\_Supplemental\_FASTA\_File

ltynfsihddmtiteafdvkedvigqkignvkvkndelittlkkeeidvviittpervaqvadelvqagvkgilnftp  
grintpsdvqvhqidlgie  
lqsllffmknyse  
>sp|Q2YUE8|THD1\_STAAB  
mtvktvtstkdi eaf1rlkdivketplql dhy1sqkydckvylkredlqwvrsfklrgaynaisvlsdeakskgitcas  
agnhaqgvvytakklnlna  
vifmpvttplqkvngvkffgnsnvevvtgdtfdhclaealtytsehqmfnfdpfnvhtisgggtlakemleqsksdnv  
nfdylfaaigggglisgis  
tyfksyspntkiigvepsgassmyesvvvnqvittl pnikfdvdgasvarvgditfei akknvdnyvqvdegavcstild  
myskqai vaepagalsva  
lenykdhikgktvvcvisggndinrmkeieersllyeemkhyfilnfpqrrgalrefvndvlgpqdditkfeylkssq  
ntgtviiqilkdhdliq  
lkqrnhfdpsniyinenkmlhs11i  
>sp|Q2YUE9|LEUD\_STAAB  
maai kpi ktykgkivplfndnidtdqipkvhlkrisksfgpafedwrylpdgsdnpdfnpnkpykgasilitgdnf  
gcgssrehaawal kdygfh  
iia gsf sdi fymnctknamlpivl eknarehlakyveievdlnqvtvsspdksfhfeidetwknklvngl ddi a itlqy  
esli ekyeks1  
>sp|Q2YUF1|LEU3\_STAAB  
mtnyivalpgdgigpeilngslsll e i snkynfnyqie hhefggasidtfgepltektlnackradail lgaiggpkwt  
dpnnrpeqgl1klrksln1  
fanirpttvfkgasslsp1kqervegtdlvivreltsgiyfgeprhfnnhealdsltytreeierivhvafklaasrrgk  
ltsvdkenvlassklwrkv  
vnevsqlypevtvnhllvdacsmhli tnpkqfdvivcenlfgdilsdeasvpgslglspasfsndgprlyepihgsap  
diagknvanpfgmilslam  
clreslnqpdadeleqhiynmiengqttadlggkln ttdifeilsqklnh  
>sp|Q2YUF2|LEU1\_STAAB  
mssh i q i f d t t l r d g e q t p g v n f t f d e r l r i a l q l e k w g v d v i e a g f p a s t g s f k s v q a i a q t l t t t a v c g l a r c k k s d  
i d a v y e a t k d a a k p v v h v f  
i a t s p i h l e h k l k m s q e d v l a s i k e h v t y a k q l f d v v q f s p e d a t r t e l p f l v k c v q t a v d a g a t v i n i p d t v g y s y h d e  
y a h i f k t l t e s a t s s n e i i  
y a h c h d d l g m a v s n l a i e g g a r r i e g t v n g i g e r a g n a a l e e v a l a l y v r n d h y g a q t a l n l e e t k k t s d l i s r y a g  
i r v p r n k a i v g q n a f s h e s  
g i h q d g v l k h r e t y e i m t p q l v g v s m t e l p l g k l s g k h a f s e k l k a l g y d i d k e a q i d l f k q f k a i a d k k k s v s d r d i h a  
i i q g s e h e h q a l y k l e t l q  
l q y v s s g l q s a v v v v k d k e g h i y q d s s i g t g s i v a i y n a v d r i f q k e t e l i d y r i n s v t e g t d a q a e v h v n l l i e g k t v n  
g f g i d h d i l q a s c a k y v e a  
h a k f a a e n v e k v g n  
>sp|Q2YUF6|ILVD\_STAAB  
mr s d m i k k g d h q a p a r s l l h a t g a l k s p t d m n k p f v a i c n s y i d i v p g h v l r e l a d i a k e a i r e a g a i p f e f n t i g v d d  
g i a m g h i g m r y s l p s r e i i  
a d a a e t v i n a h w f d g v f y i p n c d k i t p g m i l a a m r t n v p a i f c s g g p m k a g l s a h g a l t l s s m f e a v g a f k k g s i s k e e  
f l d m e q n a c p t c g s c a g m f  
t a n s m n c l m e v l g l a l p y n g t a l a v s d q r r e m i r q a a f k l v e n i k n d l k p r d i v t r e a i d d a f a l d m a m g s t n t v l h t l  
a i a n e a g i d y d l e r i n a i a  
k r t p y l s k i a p s s s y m h d v h e a g g v p a i i n e l m k k d g t l h p d r i v t g k t l r e n n e g k e i k n f d v i h p l d a p y d a q g g l  
s i l f g n i a p k g a v i k v g g v  
d p s i k t f t g k a i c f n s h d e a v e a i d n r t v r a g h v v v i r y e g p k g g p g m p e m l a p t s s i v g r g l g k d v a l i t d g r f s g a t r  
g i a v g h i s p e a s g g p i a l  
i e d g e i t i d l t n r t l n v n q p e d v l a r r e s l t p f k a k v k t g y l a r y t a l v t s a n t g g v m q v p e n l i  
>sp|Q2YUG0|GCP\_STAAB  
m t k d i l i l a v e t s c d e t s v s v i k n g r d i l s n t v l s q i e s h k r f g g v v p e v a s r h h v e g i t t t i n e a l v d a d v s m e d i d a i  
a v t e g p g l i g a l l i g v n a a  
k a l a f a y d k p l i p v h h i a g h i y a n h i e d l l t f p l i a l i v s g g h t e l v m k d h l t f e v i g e t r d d a v g e a y d k v a r t i g l n  
y p g g p q v d r l a a e g e d t y s  
f p r v w l d k s y d f s f s g l k s a v i n q l h n q r q k n i p i e a n v a t s f q n s v v e l t f k a i q a c k e y g v q r l i v a g g v a s n k g  
l r q s l a d q c k v n d i q l t i p  
s p k l c t d n a a m i g v a g h y l y q q g r f a d l g l n g h s n i d l e e y s a e  
>sp|Q2YUH3|Y1965\_STAAB  
m q n f k e l g i s d n t v q s l e s m g f k e p t p i q k d s i p y a l g g i d i l g a a q t g t g t g a f g i p l i e k v v w k q g v q s l i l a p t r e  
l a m q v a e q l r e f s r g g v q  
v v t v f g g m p i e r q i k a l k k g p q i v v g t p g r v i d h l n r r t l k t d g i h t l i l d e a d e m m n m g f i d d m r f i m d k i p a v q r q t m  
l f s a t m p k a i q a l v q q f m k  
s p k i i k t m n n e m s d p q i e e f y t i v k e l e k f d t f t n f l d v h q p e l a i v f g r t k r r v d e l t s a l i s k y k a e g l h g d i t q a k  
r l e v l k k f k n d q i n i l v a t  
d v a a r g l d i s g v s h v y n f d i p q d t e s y t h r i g r t g r a g k e g i a v t f v n p i e m d y i r q i e d a n g r k m s a l r p p h r k e v l q a  
r e d d i e k e v n w m s k e s e s  
r l k r i s t e l l n e y n d v d l v a a l l q e l v e a n d e v e v q l t f e k p l s r k g r n g k p s g s r n r n s k r g n p k f d s k s k r s k g y s s k

Tsompanidou\_et\_al\_Supplemental\_FASTA\_File

kkstkkfdrkekssggsrp  
mkgrtfadhqk  
>sp|Q2YUH6|ATKA\_STAAB  
meilfltmvmiayvfgslyrvalvqssrvdliftrfenmcfkiigtdlehmsaktyvkhflafngfmglitfvlliv  
qqwflnphnlnqsidla  
fntaisfltnsnlqhyngesgvtyltqmivmtylmftssasgyavciamlrrltgltgniignfyqdivrfivrllplsc  
lisillmtggvpgtlanl  
mirtlsghiqhiafgpiaslesikhltngggflagnsatpfenpniwsdfiemgsmllpmsmlflfgrmlsrhgkrvh  
rhailflvamffiffiailt  
ltmwseyrgnpi lanlgiygnmegkevrfgaglsalftvittaftgsvnmhds ltp lgg lgp mvlmm lnvfv ggegv  
g lmn lliyv lltvficslm  
vgktpeylmpigaremkcivlvflihpililvsa lafmi pgasesitnpsfhgisqvmymtsaaanngsgfeglkdd  
ttfwnistgiimllsryip  
iilqlliasslvnkksyhdkytiaidkpyfgvslivfivllsgltfipvlllpgigefltk  
>sp|Q2YUH7|ATKB\_STAAB  
mhhvnkyfnqtmviealkmsfyklnpkqliknpmfvvevgmiltilicfpdifgtsylsrlylitifiillitilfan  
fseafaegrqkaqadslrq  
aqsnltarlieengayrivnatekagqni rvengetipadgvvinglatvdesaitgesapvikesggdfdgviggtlv  
tsdwleirveseagtsfld  
kmialvegaernktpeialftlltltiiflvivtlypiasylhlilpiamlialtvclippttiggllsaigiagmdr  
vtqfnvlaksgravevcgd  
vdvml dktgtitygnriaseflpvnqqmwekli vaaymssiyddtpegksivr lakqmyinelpkdidgtykpftaetr  
msgiitneisvfkgapnsm  
inlvkqqqgdiplniesicmdvsskgtpliviennvmlgviylkdvikdglverfaelrkmgietvmctgdnaltaati  
akeagvdrfvaeckpedki  
kvikdeqakghivamtgdndapalaqaniglamnsgtisakeaanlidlsnptk lievvkigkqllmtrgal ttfsl  
andvakyfaillpalmmsti  
pemtllnimhlsspsksaiisalifnalivaalipiamkgvkvkgy sidrifinnmliyglgglivpflgiklidmivqff  
v  
>sp|Q2YUH8|ATKC\_STAAB  
mntirnsicltiitmvlcgflplaitligqiffyqqangslitydnrivgskligqhwdtryfhgrpsavdynmpek  
lykngvssggsnesngnte  
liarvkhvhkfgnsnvtidaatssgsgldphitvena lqapriadarhistrsrvdliqhrmqrgvltndyvnl elni  
aldkmky  
>sp|Q2YUI5|MAZF\_STAAB  
mirrgdvy ladlspvqgseggvrpvvi qndtgnkysptvivaaitgrinkakiphveiekkkykl dkds vil leqir  
tl dkkrlkeklyl sddkm  
kevdnal mislglnavah  
>sp|Q2YUJ1|GLYA\_STAAB  
msyitkqdkviaeaierefqrqnsnie liasenf vseavmeaagsv ltnkyaegypgrryyggcefvdvtesiaidra ka  
lfgaehvqvphsgsqanm  
avylval emgdvlgmnl rhghlthgapvnfsgkfynfveygvdkdterinydevrklalehkpk livagasaysrtid  
fkfkeiadevna l mvdm  
ahiaglv aaglhpnvpeyadvfvtthktlrgprggmilckeeykkdidktifpgiqgplehviaakavafgealennf  
ktyqqvknakvl aea li  
negfri vsgtdnhlvavdvkgsigltgkeaeet ldsvgitcnkntipfdqekpftvtsgir lgtpaatrgfdekafeev  
akiisla l knskdeeklqq  
akervakltaeyplyq  
>sp|Q2YUJ8|ATPD\_STAAB  
mvkvankyakal fdvsl dtnnletineeltvineavkdkieqlkmvdsnptqtaeqrrelingvfidinpyiknmmyvla  
dnrhisl iadvfkafqsl y  
nghynqdfatiestyelsqeeldkivklvtqtkl skvividtkinpdliggfrvkvgttvldgsvrndlvqlqrkfrvn  
>sp|Q2YUJ9|ATPA\_STAAB  
maikaeeisalrsqienyesevsvtdvgtvlqigdgialihg lndvmagelvfhnvgvlgaqnleesnvgvvilgpya  
gitegdevkrtgrimevvpv  
geeligrvvnplgqpidgggpi nttktrpvekkatgvm drksvdep lqtgikaidalvpigrgqreliigdrqtgkttia  
idtilnqkdqgticiyva i  
gqkdstvranveklrqagal dyti vvaasasepsllyiapysgvmtgee fmfngkhvli vyddltkqaaayrelsllr  
rppgreaypgdvfylhsrl  
leraaklnddlgggsitalpietqagdi sayvptnvisitdgqiflqsd lffsgvrpaina gqsvsvrvggsaqikamkk  
vagt l rld lasyrelsf a  
qfgsd l deftask lergkrtvevlkqdqnp l pvehqvl iya ltkgy lddipvvditr fedel nhwaesnatellneir  
etgg l pdaekfdta inefk  
ksfkskse  
>sp|Q2YUK0|ATPG\_STAAB  
maslkeidtrikstkkmkqitkamnmvssskl rraekntkqftpymdkmqda itavagassntnhpmlrprkitrsgylv  
itsdkglagaysanvlkk l  
itdieakhqdsseyg ivvlgqqgvdf lknrgydi eysqvdvpdqpsfksvqalanhaidlyseeidelniyyshyvsvl

Tsompanidou\_et\_al\_Supplemental\_FASTA\_File

enkptsrqvlp1sqedssk  
ghghlssyefepdkesilsvilpqyvesliygtildakasehatrmtamknatdnateliddlsleynrarqaeitqqit  
eivggsaale  
>sp|Q2YUK4|MURA1\_STAAB  
mdkivikggkntgevkvvegaknavlpi1tasllasdkpsklvnpalsdvetinnvlttlnadvtykkdenavvvdatk  
t1neeapyeyvskmrasi1  
vmgp1larlghaivalpggcaigsrpieqhikgfealgaeihlengniyanakdglkgtsihldfsvgatqniimaas1  
akgk1lienaakepeivd1  
anyinemggritgagtdtingveslhgvehaiipdrieagt1liagaitrgdifvrgaikemaslvykleemgveld  
yqedgirvraegd1qpvd1  
kt1phpgfptdmqsqmma11tanghkvtetvfenrfmhvaeefkrmaninvegrsaklegksqlggaqvkatd1raaa  
alilaglvadgktsvteln  
hldrgyvd1hgklkqlgaeierind  
>sp|Q2YUK8|SCED\_STAAB  
mkk11lass1avglg1vagnagheahaseadlnkaslaqmaqsndqtlnqkpieagaynytfdyegftyhfesdgthfaw  
nyhatgangadmsaqapat  
nnvapsadqanqvqsqeveapqnaqtqppqastsnnsqvtatpteskassegssvvnvdh1kqiaqresggnihavnptsg  
aagkyqf1qstwdsvapak  
ykgvspanapesvqdaaavklyntggaghwvta  
>sp|Q2YUL0|TENA\_STAAB  
mefsqklyqaakpiindiyyeddfiqkml1gniqadalrhy1qadaaylkeftnlyallipkmsmndvkl1veqiefmve  
gevlahdilaqivgesyee  
iintkfwppsgdhyikhmyfqahsrenaiytiaamapcpyiaelakrsqsdhkl1nrekdtakwdfsystemddiinvfe  
almnklaesmsdkeleqv  
qv1lesciherrffnmamt1eqwefggkvnd  
>sp|Q2YUL1|THIM\_STAAB  
mnylnkiriennplti1cytndvknftang11sigaspamseapeeaeefykvaqallinigt1taqneqdiiaiaqtane  
aglpivfdpvavgastyrk  
qfckl11ksakvsvikgnaseila1iddatmkgtdsdayldavaiakkayaiyktaivitgkedvivqgdkaivlang  
p1larvtgagc11ggia1g  
flfretepd1eal1eavsvfniaaevaenencggpgtfspl11d1yhl1nettyqqr1ciqeve  
>sp|Q2YUL2|THIE\_STAAB  
mfngsylvnyf1cgtsnvpshrtihevleaalkagit1lfqfrekgesalkgndklvlakelqhl1chqynvpfivnddvs1  
akeinadgihvgddakvk  
eiaqyftdki1g1s1sd1geyaksd1thvdyigvgpiyptpskhdahtpvgpemi1atfkempq1pivaiggintsnav  
iveagangisvisaiskse  
niektvnr1fkdfn1  
>sp|Q2YUL6|DEOC2\_STAAB  
mnsakli1dht11kpestrtqidqi1deakayn1fkvcvnpthvkyaer1ddsgvl1vctvigfpl1gasttatkafeteda  
iqngadeidmvinigalkd  
grfdvqddi1eavvkaakghtvkvi1ietv11nhdeivkase1tkaagadfvktstg1faggataedvkl1mkdvtgadvev  
kasggvrn1ledfnkmveag  
atrigasagvqimqgleadsy  
>sp|Q2YUL7|PDP\_STAAB  
mrmidi1iekkrdg1t1ttee1nffidgyvkgdipdyqass1amaiyfqdmndderaaltmamvns1gdmid1sdikgvkvd  
khstggvgd1t1t1v1lap1v  
aavdvpvakmsgr1lghtggtidk1lea1dgfhveideatfvkl1vnenkvavvgqsgn1tpadkkiya1rdvtgtvnsip1  
iassimskkiaagadaiv1  
dvktgsgafmkt1ledaealahamvr1gnvgrntmai1sdmnp1lgraignal1eqaidt1kgqgpkd1telv1t1lgsq  
mvv1ankaet1leearal1i  
eaids1gaa1ekfkt1fknqggdetvidhper1pqaqyqieykakks1gyvtelvsndigvasmml1gagr1tkeddid1avg  
iv1nkkigdkveeges11t  
ihsnrqdvddvkk1dssitiadhvspt1ihkiite  
>sp|Q2YUL9|LUXS\_STAAB  
mtkmnvesfn1dhtkvvapfir1lagtmeg1ngdv1ykydirfkqpnkehmdmpg1hsl1ehlmaenir1hskvvd1spmg  
cqtgfyvsf1nhdnyddv1  
niveat1ndv1natevpacnevqcgwaashs1legaktiaqaf1dkrnewhdv1fgtgk  
>sp|Q2YUM3|COAW\_STAAB  
mkvgidaggt1iki1ieqdnqrtfkte1tknidqv1vew1nqqqiek1cltgg1nagviaen1nipaqi1vfe1daasq1lgi  
11keqghd1ady1fanvgt  
gts1hyfdgqsrrvvgg1tgggmiq1lgy11sqitdykq1tdma1qhgdrntid1kvrhiykdteppipgd1taanfghv  
1hh1dadftpsnk1laav1g  
vvgevt1tmai1tvarefkteniv1yigss1fhna11rkvvedytv1rgckpyy1vengafsgaigaly1lek  
>sp|Q2YUM5|RPOE\_STAAB  
mkiqdytkmqm1vdeksf1dmayt11ndkgetm1lydi1defra1lgyeyee1etrvvqfytd1ntdgrf1nvgen1wg1rd  
v1daddeedq1k11gedemddd1paqtd1dqe1ndpedeqveee1nhsdivieedede1dedeedfedeedfka  
>sp|Q2YUN1|ALD1\_STAAB



Tsompanidou\_et\_al\_Supplemental\_FASTA\_File

mrdytkqingewvesnsnetievinpateevigkvakgnkadvdkaadnaylefrhtsvkerqalldkivkeyenr  
kddivqaitdelgaplsls  
ervhyqmglnhfvaardaldnyefeerrgddlvvkeavigvsgltpwnfptnqtslklaaafatgspvvlkpseetpfaa  
vilaeifdkvgyvpgkvnfl  
vngdgagvgnplsehpkmmsftgsgptgskimekaakdfkksvlelggksyivlddvdikeaakattgkvvnntgqv  
ctagtrvlvpnkikdafla  
elkeqfsqvrvgnpredgtqvgpmiskkqfdqvqnyinkgieegaelfyggpgkpeglekgyfarptifinvdnqmtiaq  
eeifgpvmvityndldea  
iqiandtkyglagyvigkdketlhkvarsieagtveineagrkdplpfggykqsglgrewgdygieeflevksiagyfk  
>sp|Q2YUN8|RECF\_STAAB  
mklntlqlenyryndevtlkchpvdniligenaagktnllesiytlalakshrtsndkelirfnadyakiegelesyrhgt  
mpltmfittkkgkqvkvnhl  
eqsr1tqyighlnvlfapedlnivkgsqpirrrfidmelgqisavylndlaayqrilkqknylkqlqgkkdltmle  
vlnqgfaeyamkvtdkrah  
fiqellellakpihagitndkealslnylpslkfdyaqnearleeimsilsdnmqrekergislfghrddisfdvngmd  
aqtygsqgqrrttalsikl  
aeielmnievgeypillliddvselddsrqthllstiqhkvtftttsvdgidheimnaklyrinqgeiik  
>sp|Q2YUP1|DNAA\_STAAB  
msekeiwekvlkiaqeklsavsystflkdtelytikdgeaivlssipfnanwlnqqyaeiiqailfdvvyevkphfitt  
eelansnnetatpkettk  
pstettednhvlgregfnahntfdtfviggpnrpphaaslavaepakaynplfiyggvlgkthlmhaighhvlndnnpd  
akviytssekftnefiksi  
rdnegeafreryrnidvlliddiqfiqnkvqtqeeffytfnelhqnnkqivissdrppkeiaqledr1rsrfewglivdi  
tppdyetrmalqkkiee  
klidippealnyiandiqsnirelegaltrllaysqllgkpitteltaealkdiiqapkskkitiqdiqkivgqyynvrie  
dfsakkrtsiayprqiam  
ylsreltdfs1pkigeefggrdhttvihahekiskd1kedpifkqevenlekeirnv  
>sp|Q2YUQ6|RL9\_STAAB  
mkviftqdvkkgkgevevpgyannfl1kknaveatpgnlkqlelqkrakqerqqeiedakalketlsnievevs  
aktgeggklfgsvstkqia  
ealktqhdiki1dkrkm1pangihs1gytnvpvkl1dkevegtirvhtveq  
>sp|Q2YUR2|SYS\_STAAB  
mldir1frnepdtkskielrgddpkvdeileldeqrrkliiateemkarrnkvseeialkkrnkendddviaemrtlg  
ddikekdsq1neidnkmgt  
ilcripnlissdvpqgesdednvekkwgtprefssepahwdiveelkmadfdraakvsgarfvy1tnegaqleralmn  
ymitkhtthqgytemmvpq  
1vnadtmygtgq1pkfeed1fkvekeglytiptaevpltnfyneiiqpgvlpekftgqsacfrseagsagrdrtrglir1  
hqfdkvemvrfeqpedsw  
aleemttnaeai1eelglpyrrvilctgdigfsasktyd1evw1psyndykeisscsncmdfqqarranirfkrdkaakpe  
laht1ngsglavgrtfaai  
venyqnedgtvtipealvpfmggtqiskpvk  
>sp|Q2YUR3|HUTH\_STAAB  
mtlyldget1tiediksf1qqskveiddalervkksravverieneetvygittgfglfsdvriddptqynelqvnli  
rshacglgepfskevalvm  
milr1nt1lkghsgatlelvrq1qffineriipiipqgslgasgd1aplsh1alaligegkvlhrgeeksdvdlreln  
rqplnlqakeglalingtq  
amttagv1syieaed1gyqsew1aalthqslngiidayrhdvhavrn1feqinvaarmrdwlegst1ttrqaeirvqday  
t1rcipqihgasfqvfnv  
kqql1efemnaandnpl1feevnetfvisggnfhgqpi1afaldh1kl1gvselanvserrler1vnpq1ngd1paf1spepg  
1qsgamimqyaaas1vsen  
ktlahpasvds1tssangedhvsmttaarhgyq1ientrrv1aiecvialqatelkgveglspktrrkydefrsivpsi  
thdrqfhrdieavaqylkq  
siyqtach  
>sp|Q2YUS3|NORG\_STAAB  
mkipsqrqlaiqynvrvtiiksie1leaegfiytkvsgstyvndylneahitknwsemmlwssrqsqytvqlinkiet  
dasyihiskge1gqplmph  
iq1kkamsntashied1sfgynngygyik1rdiivermskqginvgrenvmitsgalhaiq1lsigflgqdaaiisntps  
yihstnvfeq1nfrhidap  
yngineinti1drfinfnkal1yieprfnptgcs1tneqkqni1tyserhnipiieddi1frdiffsdptpaiktfdklg  
kvihiissfskti1apairig  
wivasekiieq1advrmq1dygss1lsqmvvyem1knksydkh1vk1ryvlkdkrdfm1ni1nn1fkdiahwevssgyf  
v1lvfkidid1kylfye1l  
skekilinpgy1ygskeks1r1sfafesnenikhal1ykytyvkkv  
>sp|Q2YUT0|Y040\_STAAB  
mikrvnl1vigis1lflvis1tagcgm1gkeee1kksfekt1smypikn1ledlydkkgyrddqfdkndkgtwivrssmsiq  
pngkdmnvkgm1vlymi1rnt  
rttngyyv1dvi1eredk1ghrdnekrypvmvdnki1iptkeiedekikkeienfkffvqygnfkdl1skykdgd1synpea  
piysakyql1tndynvkq1

Tsompanidou\_et\_al\_Supplemental\_FASTA\_File

rkryniptnkakp111kgtgnlkgssvgykdi eftfvekkgeniyf sds1h1epsedk  
>sp|Q2YUU0|SBNA\_STAAB  
mieksqachds11dsvgtqpmvqlhqlfpkhevfa kleympnggsmkdrpakyiiehghkhlitenthliestsgnlg  
alamiakikg1klctcvdp  
kisptn1kiiksygvnvenveepdahggy1mtriakvqellatiedaywinqyanelnwqshyhggagteivetikp  
fvpvsttgsimgsrkik  
evhpnvqivavdakgsvi fgdkpinrelpgigasrvpeilnrseinqvihvddyqsalgcrklidyegifaggstgsiiv  
aieqlitsieegativtil  
pdrgdry1dlvysdtwlekmksrqgvkse  
>sp|Q2YUU4|DEOC1\_STAAB  
mkfkyidht11kpestrtqidqideakaynfksvcvnpthvkyaerladsevlvctvigfplgasttatka feteda  
iqngadeidmvinigalkd  
grfddvqqdieavvkaakghtvkvi etil1dhdeivkase1tkaagadfvktstg faggataedvklmkdtvgadvev  
kasggvrnledfnkmveag  
atrigasagvqimgleasdy  
>sp|Q2YUU9|SODM2\_STAAB  
mafklpn1pyaydalepyidqrtmefhhdhkhntyvtklnatvegtelehqs1admian1dkvpeamrsvrnnggghfn  
hs1fweilspnseekggyi  
ddikaqwt1defknefankatt1fgsgwt1lvnngkleivttpnqdn1tegktpi11fdvwehay1kyqnkrpdym  
tafwnivnwkkvdelyqaa  
k  
>sp|Q2YUY7|PHNC\_STAAB  
msqiefknvskvypnchvg1knin1niekgefaviv1sgagkst11rsvnr1hditsgeifiqgksitkahgkallkmr  
rnigmi fghfn1vkrssv1  
rnv1sgrvgyhptwkmvlg1fpkedkikamdalervnildkynqrsdelsggqqrisiaral cqeseiiladevas1d  
plttkqvmdd1rkinqelg  
itil1nlhfvd1akeygttri1g1rdgevvdygpaseatddifsei ygrtikedeklgvn  
>sp|Q2YUY9|MURQ\_STAAB  
mmensttear neatm1hdemtveea1itmnkedqqvplavqkaipqltkvikktiaqykkgrliyigagtsgr1gv1da  
aecvptfntdpheigiia  
ggqhamtmavegaedhkk1aed1knid1tskdvvigiaasgktpyvigg1tfantigattvsiscnehaviseiaqypv  
evkvgevl1tgstr1ksgt  
aqk11lnmisti1mvgvgkyvdn1midvkatnqk1idrsvri1qeicaitydeamalyqvsehdkvatvmgmcskee  
atrr11nngdivkra1rdr  
qp  
>sp|Q2YUZ1|PTG3C\_STAAB  
mrkkl1fgqlqrigkalm1pvailpaag111aigtamqgealqhy1l pfiqnggvqtvak1mtgaggi1fdn1pmi1fal gva  
ig1aggdgvaai1aafvgyi  
imnktmgdflqvtpknigdpasgyasilgipt1qtgvfggi1igalaawcynkfynin1psylgffagkrfvpmatts  
filafpma1iwptiqsg1n  
afstg11dsntgvavf1fgfikr11ipfg1lhi1fhapfwefgswknaagei1hgdqri1fieqiregahl1tagkfmqgef  
pvmmf1g1paa1aiyhtak  
penkkvvag1mgsaal1ysf1tgitepl1efsf1fvap11ffihav1dgl1sfl1tly11dl1hlyt1fsggf1dy11gil1pnk  
tqww1vipvg1vyaviyyf  
vfr1li1vkl1kyktpgre1kqsqaatasatel1pyav1eamggkanikh1ldacitr1rvevndkskvdvpg1kdl1gasgve  
vgnmqai1fgpsdqikhe  
mqqimngqvvenpttmeddkdetvvaedksatse1shivhap1tgevtp1sevpdqvfsekmmgdgiaikpsqgevrp  
fngkvqmi1fptkhaig1vs  
dsg1e11ihig1dtvk1ngegft1hveegqevkqgd11infd1dyirkhaksditpiivtqgnitn1dfkqgehgnisfg  
dq1feak  
>sp|Q2YUZ7|ARGB\_STAAB  
mkfivikiggst1sdmhpssiinnikh1rsnnyipiivhgggpfinea1snqqiephfvng1rvtdkatmtitkhtliadv  
ntalvaqfnqhqcsaig1c  
gl1daql1feikrfdqqgygvvptt1nids1sylctkfvp1insigfnnhdgefyninadtlayfiaasleapiyv1snia  
gv1indvvi1pql1pladinq  
yiehgdi1yggmi1pkv1daknaiengcpkviiasgnkpn1ieaiynndfvgttilkslv  
>sp|Q2YV11|ALDA\_STAAB  
mavnvr1dy1aenyg1fingefvkgssdetievtnpatget1shitrakdkvdhavevaqefeswsltskseraqm1rd  
igdkl1maqkdkiamiet1n  
ngkpi1rettaid1ipfaarh1fhyfasvieteegt1vndidkdtmsiv1rhepigvgavvawnfpm1laawkiapaa1agnti  
viqpsst1p1s11levakif  
qev1lpkgvvn1ltgkgsesgnai1fnhdgvdk1sftgstdvgyqvaaakhl1vpat1elggksani1lddan1dlavegi  
qlg1lfnqgevc1sagsr1l  
vhekiyd1qlvpr1lqea1fsnikv1gdpqdeatq1mgsqtgkd1ldki1qsyidvakesdaq1lagghr1teng1dkgfffept1  
iavp1dnhhk1laqee1fgpv  
1tvikv1kddqea1diandskyg1aggv1fsqni1tra1niakavrtgriwintynqvpegap1fgykksig1gretykga1sn  
yq1vkn1iyid1tsna1kgly  
>sp|Q2YV12|PTXBC\_STAAB

Tsompanidou\_et\_al\_Supplemental\_FASTA\_File

mtkeqqlaerriaavggmdnidsvmncmtrvrikvldenkvddqelrhidgvmgviheriqvvgpgtvnkvanhmael  
sgvklgdpihnhndsekm  
dyksyaadkakakankeahkqkngklnkvlksianifiplipafigagliggiaavlsnlmvagyisgawitqlitvfnv  
ikdgm laylaiftginaak  
efgatpglgvggttlltgiagkni lmnvftgeplqpggggiigvifavwilsivekr lhkivpnaidivtpaialli  
vglltifi fmp lagfvds  
lsvvngiisigvgfsgfiigasflplvmglhhi ftpihieminqsgatyl l piaamagagqvgaalalwvrckrnttl  
rntlkgalpvglgigep  
iygtlplgrpfltaciggiggaviggighigakaignsgvsllplisdmylgyiaglltayaggfvctylfgttkam  
rqtdllgd  
>sp|Q2YV20|AZOR\_STAAB  
makvlyitahpfnelvsnsmagkafietyqqhpddevkhidlfetyipvidkdvltgwgkmsngetltdeeqmkvsrl  
sdileeflsadkyvfvtpm  
wnlsfppvkvayida isia gktfkysaegpqltdkkvlhiqsr ggyte gpaanfemgdryl r t im t fl g v p s y e t i  
ieghnaephkteekatsi  
nnaeklattf  
>sp|Q2YV38|LDH1\_STAAB  
mnkfkgnkvvligngavgsyafslvnqsisvdelviidldtekvrgdvmdlkhatpyspttrvkageysdchdadlvvi  
cagaaqkpgetrldlvskn  
lki fksivgev maskfdg i flvatnpvdi lvyatw k f s g l p k e r v i g s g t i l d s a r f r l l l s e a f d v a p r s v d a q i i g e h  
gdte l p v s h a n i a g p l k  
t l l e q r p e g k a q i e q i f v q t r d a a y d i i q a k g a t y y g v a m g l a r i t e a i f r n e d a v l t v s a l l e g e y d e e d v y i g v p a v i  
nrngi rnvveiplndeeqs  
kfahsaktlkdimaeaeelk  
>sp|Q2YV55|Y162\_STAAB  
mtaykpyrhqlrrslfastifpvflviiiglvsfyayiwiehrthqhvnesqsslhhi ekq i q t f i t q h n n s f q e l d l  
tnhhdvttatkrellk l i h q  
qpattlye l s g p n g f i t n n y e h l n t k n m y l f s t h q l k f k n s t y m l k i y m a n t p r l s e i k k d s r q f a l i v d r y d n i l y a n d  
drftige kyrpqqfgf mne  
svklnhanhrliiykdiheniedgitllivmavlvllvifgfisadnmakrqtkdietiiykiyyaknrhlgtyp lkn  
nseleeinnyidlfesne  
qlihsiehterrldiqleikerqfphflfntmqtiqylitlspklaqtvvqqlsqmlryslrtshtvelneelnyie  
qyvaiqnirfddmiklhie  
sseeahqtigkmm l q p l i e n a i k h g r d t e s l d i t i r l t l a r q n l h v l c d n g i g m s s r l q y v r q s l n n d v f d t k h l g l  
nhlnkamiqygshar l h i  
fskrnlgtlicykip l s r g n v d v  
>sp|Q2YV56|Y161\_STAAB  
mfkvvicdderiireglkqiipwgdyhfntiytakdgvealsliqqhpe l v i t d i r m p r k n g v d l l n d i a h l d c n v i i l  
ssyddfeymkagiqhhvld  
y l l k p v d h a q l e v i l g r l v r t l l e q s q n g r s l a p c h d a f q p l l k v e y d d y y v n q i v d q i k s y q t k v t v s d l i q h i d v s  
esyamrtfkdhvgitvdy  
lnryrilqslqlldrhykhyeiadkvfseymfshfkky l q m a p s d y c k q a k  
>sp|Q2YV67|LYTR\_STAAB  
mkaliiddeplarneltyllneiggfeeinaenvketleallinqydiifldvnlmdengielgakiqkmkeppaiifa  
tahdqyavqafelnatdyi  
lkpfgqkrieqavnkvratkaddnsanaivndmsanfdqslpveiddkihmlkqgniigigthngittihhttnkyett  
eplnryekrlnptyfiri h  
rsyiintkhikevqqwfnyty m v i l t n g v k m q v g r s f m k d f k a s i g l l  
>sp|Q2YV68|LYTS\_STAAB  
mlsltmlllervgliiilayvlmnipyfkn l m n r r r t w k a r c q l c i i f s l f a l m s n l t g i v i d h q h s l s g s v y f r l d d d v  
slantrvltigvaglvggp  
fvg l f v g v i s g i f r v y m g g a d a q v y l i s s i f i g i i a g y f g l q a q r r k r y p s i a k s a m i g i v m e m i q m l s i l t f s h d k a y a  
vd l i s l i a l p m i i v n s v g t  
aifmsiistlkqeeqmkavqthdv l q l m n q t l p y f k e g l n r e s a q q i a m i i k n l m k v s a v a i t s k n e i l s h v g a g s d h h  
iptneiltslskdvlks g k  
lkevhtkeeigcshpncplraaivipl emhgsivgtlkmyftnpndltfverqlaeglanifssqielgeaetqskllkd  
aeikslqaqvsphffnsi  
ntisalvrinsekarelllelsyffranlqgskqhtitldkelsqvraylsleqarypgrfnininvedkyrdv l v p p f l  
iqilvenaikhaftnrkqg  
ndidvsviketathvriivqdnqgiskdkmhl l g e t s v e s e s g t g s a l e n l n l r l k g l f g k s a a l q f e s t s s g t t f w c v  
lpyerqeee  
>sp|Q2YV69|SCDA\_STAAB  
minkn divadvtdypkaadifrsvgidfccggqisieaaslekknvdlnellqr lndieqtntpgslnpkflnvssliq  
yiqayheplreefknlt p  
yvtklsvhgpnhpylvelketydtfkngml ehmqkeddvd f p k l i k y e q g e v d d i n t v i d d l v s d h i a t g q l l v k m s d  
l t s s y e p p i v a c g t w r l v y  
qr l k a l e v l t h e h v h l e n h v l f k k v s  
>sp|Q2YV73|ISPD2\_STAAB

Tsompanidou\_et\_al\_Supplemental\_FASTA\_File

mkyagilaggigsrnmgvnlpkqf1d1dnkplihleklefilndfekiiiatpqqwmthtkdt1rkfkisderieviqg  
gsdrndtimnivkhiestn  
gindddivivthdavrpf1thriikeniqaa1eygavdtvidaidtivtskddqtdaipvrnemyqqgtpqsfni1lke  
syaqlsdeqksilsdacki  
ivetnkpvr1vkgelynikvttpyd1kvanaiirggiadd  
>sp|Q2YV76|ISPD1\_STAAB  
miyagilaggigsrnmgvnlpkqf1d1dnkplihleklefilvsefneiiiatpaqwishtqdilkkyntdqrkvvag  
gtdrnetimniidhirvn  
ginnddivivthdavrpf1tqriikenievaakygavdtvieaidtivmskdkqnihsipvrnemyqqgtpqsfnik1lqd  
syra1sseqkeilsdacki  
ivesghavklvrgelynikvttpyd1kvanaiiqgdiadd  
>sp|Q2YVA8|NANE\_STAAB  
mlphglivscqalpdeplhssfimskmalaayeggavgirantkedilaiketvdlpvigivkrdydysdvfitatskev  
deliesqcevia1dat1qq  
rpket1delvsyir1thapnveimadiatveeaknaar1gfdyigt1l1hgytsytqgq1lyqndfqlkdv1qsvdakvia  
egnvi1tpdmykrvmd1gvh  
csvvggaitrpketkrfvqmed  
>sp|Q2YVB1|NANA\_STAAB  
mnkd1kglyaa1lvpfdengqvneqg1kqiaqntietee1dglyvngssgenf1l1nteqqkqvfkvakeavgdkvkliaq  
vgs1d1nea1elgkyatei  
gyda1savtpfypftfeeirdyyfdieatqnmi1yaipd1tgvnisieqfse1fnhekivgvkytapnff1lerirk  
afpdk1ilsgfdem1vqat  
isgvdga1gstynvngrrarki1fd1arqqq1qeaq1qhdnsdi1etv1smgiypt1kei1lhrigidag1pkrp1kpfne  
ahrqt1dq1iakyd1  
>sp|Q2YVF5|THLA\_STAAB  
mtrvv1aaayrtp1gvfgafkdvpayd1gat1iehiiketg1npseinevi1gnv1qagqqnpariaamkgl1petvp  
vftv1nkvcgsg1ksiq1ay  
qsi1vtgendi1v1aggmenmsqspm1vnns1rfg1fkmghqsmvds1mvydgl1tdvfnqyhmgitaen1veqygisreeqdtfa  
vnsqkkaanaqqnggf1dse  
ivpvs1ipqrkgepi1vvtkdegvrenvsvek1sr1rpafkkdgtvtagnasgindgaamm1vmsedkake1nieplav1dg  
fgshgvdpsimgiapvgav  
eka1lkrskke1sdi1d1vfe1neafaaqslavdre1kl1ppekv1nkgaia1lghpi1gasgarv1vt1l1hq1lndevetg1ts1  
c1gggqai1aavvsky  
>sp|Q2YVH4|MEPA\_STAAB  
mkdeq1lyfeks1pvfkammhfs1lpmmitg1l1sviyg1lniyfig1ledshmisais1t1lpvfailmg1gn1fdvgagtyi  
sr1lgakdyskskfvsfs  
iyggia1gl1v1lvalpfsdqiaa1larget1a1tsny1kvml1sapvilffileqfaraigapmismigmlasvs1n  
i1ldp1il1fgfd1nvvgaa  
lgtaisnvaal1ffii1ymknsdvsvnik1lakpnkem1sei1fkigipaf1msil1mgftg1v1n1flahygnfaiasygi  
sfr1lvqfpe1liimg1cegv  
vplia1ynfms1nkg1rmdvikavimsig1v1fvvcmi1avft1ghmvg1lfttdqai1vemat1filkvtmts1l1ngig1lftg  
mlqat1gggrgat1mailqg  
vvi1pvl1fimnal1fg1tgvmws1liaes1calaam1livy1l1rdrl1vtdtse1ieg  
>sp|Q2YVH7|METE\_STAAB  
mttiktsn1g1fpr1grkrewkkaiesywakkiskeel1dqt1td1lhen1l1lqkyyh1dsipvgdfs1ydhil1dts1l1fni  
iperf1qgrt1idd1l1fdia  
rgnkdhvasa1likw1fntnyhyi1vpewdnvepkvsr1v1l1drfkyaqsl1vna1hpvi1vgpit1fvkl1skgghqt1feekvt1  
l1pykevfes1idagaeyi  
qvdepi1vt1dd1sesyeni1treaydyfekasvakk1vi1qtyferah1kfl1ss1lpvgg1gl1dfvhdngyn1kqi1eagdf1dks  
kt1lyagi1dgr1nvwasdie  
akkv1l1dk1l1ahtne1lv1qpss1l1hvpvs1l1ddet1dtsvgeg1sfatek1de1dal1r1l1fnqndnfkydk1lkaryer1fq  
nqs1fkn1dydfesvrts1rq  
spfa1qrieqqk1r1n1lpd1pttt1g1sfpqs1revrkyradwknk1ritdeayet1fl1knei1arwiki1qedig1ldv1vhgefer  
ndmve1ffgek1lqg1flvtkf  
gww1qs1ygs1ravkppi1yg1dvkw1tap1tv1detv1yaqsl1tdkpv1kgm1tg1pvt1l1nws1fervd1prkv1vqdqia1laineev1  
a1leaag1kvi1qvdepa1lre  
gl1pr1seyheqy1kdav1s1fkl1atssvr1detqih1thmcysqfgq1ihai1hd1dadvisi1etsrshgd1likdfediny1dg  
ig1lgvy1dihsp1riptkee1i  
ttainrs1lqqi1drsl1fwvnpdcg1l1ktrkeeevkdal1tv1l1navk1akrqe  
>sp|Q2YVL5|GUA\_STAAB  
memakeqel1il1v1dfgsqynq1l1trri1remgyse1hdhe1sige1ikkmpkgi1l1sggpns1vyeegsftidpeiyn1gi  
pv1lgi1cygm1l1ttk1l1ggk  
veranereygkai1intksde1fag1paeqt1vwmshsd1kvie1iepegfevi1adsp1st1dyaai1edkkri1ygvqf1hpevr1hte  
ygn1d1l1nnf1vrr1vcdckgq  
wtmen1fie1ieiki1qr1rvgdrr1v1camsg1gd1ss1vvav1l1hka1gdq1l1tcifvdh1g1l1rk1gegdm1vmeqf1gegfn1mi1r  
vna1kdr1f1mnk1l1kgvs1dpeq  
krki1gn1efvy1v1fd1eask1l1kgvd1f1laqgt1y1tdviesg1tkaqt1kshh1v1gg1pedme1feliepi1nt1fkdevr1k1gi  
el1gipeh1l1vwr1qp1fpgpg1l

Tsompanidou\_et\_al\_Supplemental\_FASTA\_File

girvlgeitedkleivresdailrqvireeglereiwqyftvlpniqsvgvmgdyrtydhtvgiravtsidgmtsdfari  
dwevlqkissrivnevdhv  
nrvyditskppstiewe  
>sp|Q2YVL8|XPT\_STAAB  
mellgqkvkedgvvidekilkvdgflnhqidaklmnevgrtfyeqfkdkgitkiltieasgiapaimaalhfdvpc1fak  
kakpstltdgyyetsihsf  
tknktstvivskeflseedtvliddflangdaslglyditqanaktagigivveksfqngqarleeagltvss1ckva  
slegnkvtlvgee  
>sp|Q2YVM4|NFRA\_STAAB  
msdyvynlvkhhsvrkfknkplsedvkk1veagqsastssflqaysiigiddekikenlrevsgqpyvvengylfifv  
idyyrhhlvdqhaetdmen  
aygstegllvgaidaalvaeniavtaedmgygivflgslrndvervreildlppyvfpvfgmavgepaddengaakprlp  
fdhvfhhnkyhadketqya  
qmadydqtiseydqrtngrketwsqqiemflgnkarldmleqlqksgliqr  
>sp|Q2YVQ4|Y396\_STAAB  
meyikk11ctmsv111iifiggcgmkdqkkeeqtntktdskeeqikksfaktldmypi knledlydkegyrdgefkkgd  
kgtwtistdfaksnkpgem  
dsegmv1hlnrnrtratgyyti rttydevgkmtreknyrvelknnkiv1ldkvedenlkhkienfkffgqyadfdk1kny  
kngritinenppyaeayk  
innsdgnvkk1renypitakkspilk1hidgdikgssvgykqieytsfkekedetfmsdf1nfgptkggnd  
>sp|Q2YVQ5|Y395\_STAAB  
mkcfqklyifililivlmagcesnkitgdsketqikksfaktldvyptknledfydregyrdgefkkgdkgkwirseit  
telknenmvskgmvirlnr  
nsrtctgeyfvri vkedsegkvysderkypvmennkiiplkpiddekvkkeieefkffvqygnfkelenykedevsynp  
evpiysakyqlknsdynve  
qlrkryniptkkapkl11kgsgn1kdssvgyknieftfienkeeniyftdsiyfnpsvd  
>sp|Q2YVQ6|Y394\_STAAB  
mrylkrvlyrivm1svfiigcdkssdtsepkedskeaqikksfaktldmypi enledfydkegyrdgefkkddkgtw  
lirseivkqpkgkvmktrg  
mqlyinrntktakgffvlkeisennrvnkdeekyevkmvgnkiipteqindekikkeienfkffvqygnfknekyenn  
gefsynpeapiysakyqlh  
nddynvrq1rkryeistkeapkl11kgggd1kdssvgqndieftfverkgeniyfndsvefipsk  
>sp|Q2YVQ7|Y393\_STAAB  
mnfrqcalcigtv111vsgcsgvfdtpedsketqikksfaktldmypi knledlydkegyrdgefkkddkgmwtiyt  
dfaksnksdellddegmvln  
ldrnrtrtakgyyfvkkfyekdkfsdrknykvemknnki1ldkvndpn1kerienfkffgqyanfkdenyngdvsinw  
npsydveykmsnkdenk  
qlrsryniptdkapmlkmhidgd1kgssvgykrleidfskedrdi svidylsykpack  
>sp|Q2YVQ8|Y392\_STAAB  
mgyllkvgmcis11iviifvtscgggnkitgdsketqikksfaktldmypi knldlydkegyrdgefkkgdkgwtgiss  
amvkqpkgkimrsgmylf  
lnrnrtrtakgyfi vdvtsndtlkktedkekrypvkmvnnkiipigpindegikkeienfkffsqygd fkg1knyqngdys  
ynseaptysakfqlsddy  
nvkqlrkmydiqtkkapkl11kctgd1kgssighkdieftfvenqeenvfftds1leftpsedy  
>sp|Q2YVR0|Y390\_STAAB  
mgylkrfalyisilv1ivm vagcgsdetkedskeeqikksfaktldmypi knldlydkegyrdgefkkgdkgwt11t  
sfaksnkpgviddegmvlf  
lnrntkkatgyyyskvhdefnekehqnimln1kiikiv1ldnvedek1kqkienfkflsqyadfdk1knyqdsittn  
envpsyaeafklnsdenv  
kk1revy pittkspv1k1hidgdikgssigykniefnsvkdeetavrdvfnfgpsdens  
>sp|Q2YVR1|Y389\_STAAB  
mgyikriglyisifilivm vagcgsdneikysketqiknsfaktldmypi knledlydkegyrdgefkkgdkgwt11t  
sfaksnkpgviddegmvly  
lnrntkkatgyyfvnkiyddi sknqekkyrvelknnkiv1ldnvedek1kqkienfkffsqyadfdk1knyqdsittn  
envpsyaeayklnsdntv  
kk1rdiypittkkaailk1hidgdikgssvgykkiye fskvkdqettlrdylnfgpsdeds  
>sp|Q2YVS1|Y403\_STAAB  
mttqlninlvienakrvitp1spisifaarnpwegleadtfedvakwlrdrvrdvdi fpnkali esavargel desvfnq1  
vtdmllehhy nipqhyinl  
yidnkt1kdvpasymhsvndvvd11lekskrmaesyhydv rpsmdaiideggeplseqvnrqmikwtklyidqfl  
sswtmpkreqs fyhawlhl  
aqhdhsftkaqrqvidlpndpkmtiesvlnhfsiaqedyqayvegh11alp gwagmlyyrsqqhhfeqh11tdylairl  
vveq11vgdefksvtdkce  
srsewfkqtvaswcyysdmpsdv11qhdvneiqt fihfaatmnknvfkn1wliawemtyesqvkqkikagheslagald  
vnqvnvtendnangshsvs  
lndtqavdennselnqvdstkaqiafcidvrsepfrrhieagpfetigiagffglpiqkdavdeqfkhdslpvmvppa  
yrikefadrydmnvyrqqq  
qtmsmfytfklmknvmps111pelsgpfls1stivntimprksras1qkikqkw1kpetk1tidrefdrtsdlpvgf

Tsompanidou\_et\_al\_Supplemental\_FASTA\_File

tegeqidfalqalklmdlt  
eafapfvvlaghashshnnpahaslecgacggassgfnakllamincnrpnvrqglkqagvyipettvfaaaehhtstdt  
awvyvptt1sala1dayes  
lndvmpmisehanrerldklptigrvnhpveeaqrfasdwsevrpewglaknasfiigrrqltkgidlegrtflhnydwr  
kdkdgtllntiisgpvlva  
qwinlqyyastvaphfygsgnkatqvtvtsgvgvmqgnasd1myglswqsvmaadrtyhspirllvviqapdyvvarlla  
nnehfarkasnhwlr1msv  
neegrfski  
>sp|Q2YVT4|SLE1\_STAAB  
mqkkviaaiigtsaisavaatqanaatthtkpgesvwaisnkygisiaklkslnnltsnlifpnqvlkvsgssnstsns  
srpstnsgggsyytvqagd  
s1sliaskygttyqnmrlnglnnffiyppgqklkvsqtasssnaasnsrpstnsgggsyytvqagds1sliaskygtty  
qkims1nglnnffiyppgqk  
lktgnatssnsasatttngyntpvsfqhnltytgqctyhfvrnaeigkgistywnannwdnaaaadgytidnrptv  
gsiaqtdvgyyghvmfver  
vnndgsilvsemnysaapgiltyrtvpayqvnyryih  
>sp|Q2YVT7|METN1\_STAAB  
miefrqvsksfhkkkqtdalkdvsftvnrndifgviygsgagkstlrvlnhleasngqvivdahditnysdkmmrdi  
kkdigmifqhfllnsatv  
fknvamp1i1skkskteikqrvtem1efvg1sddkqfped1sggqkqvaiara1vtnpkillcdeatsaldpstasi  
1t1lknvngtfgitimit  
hemrvikdicnravmekgqvvetgtvkevshpkkttiaqnfsvstviqtepstslirr1ndeqvdfkdykiveetqvt  
qpiindliqicgrevkilf  
ssmseiqgntvcymw1rfnmddqfddtainqyfkekniqfeevh  
>sp|Q2YVU6|GLMU\_STAAB  
mrrhaiilaagkgtrmkskkykv1hevagkpmvehvlesvkgsgvdqvvtivghaesvkghlgerslysfqeeqlgtah  
avqmakshledkkgttiv  
cgdtp1itketlet1iahhedanaqatv1sasiqqpygygrivrnasgr1driveekdatqaekdineissgifafnkt  
1fek1tqvkn1naqgey1  
pdv1s1l1ndggivevyrtdveeimgvndrvmlsqaekamqrrtnhyhmlngvti1dpdstfigpdviigsdtviepgv  
ringrteigedvvigqyse  
innstiengaciqqsvvndasvgantkvgpfaqlrpgaqlgadvkvgnfveikkad1kdgakvsh1syigdavigertni  
gcgtitvnydgenkfitiv  
gkdsfvgcnvnlvapvtigddv1vaagst1ddvpnds1avararqttkegyrk  
>sp|Q2YVV0|ISPE\_STAAB  
miyetapakinftldt1fkrndgyheiemittvd1ndr1t1fhrkrdrkiiveiehnyvpsnhknlayraaq1fieyq1  
kqgt1sidkeipvsagla  
ggsadaaat1rglnr1fdigaslee1aq1gskigt1dipfciynkta1ctgrgekief1nkppsawvilakpnl1gisspdi  
fklin1dkrydvhtkmcye  
alenrdyqqlcqs1snr1ep1svskhpqi1dk1knm1ksgadga1msgsgptvyglarkesqakniynavngcnevylv  
r1lg  
>sp|Q2YVV2|RSMA\_STAAB  
m1dnkdiatpsrma1ldkygfnfkks1gqnf1idvni1nni1das1daqtg1vie1gpgmgs1teqlarhakrv1afei  
dqr1lipv1ndt1spydnt  
vined1kanikeavenh1qdcekimvvan1pyy1t1p1lln1mqd1pidgyvmmqkevger1naevgskaygs1siv  
vqyytetskv1tvpksvfm  
pppnvds1ivk1mqrt1vtvdneeaffk1lakaafaqrrkt1nnyqnyfkdgkqhkevilq1wleqagidprrrget1s  
iqdfak1yeekkkf1pqlen  
>sp|Q2YVW6|Y428\_STAAB  
mrggnmqmmkqmqkmaqkmaeqek1keerivgtagggmvavtvtghkevvdveikeeavdpddiem1qdlv1laatne  
amnkadel1tqer1gkhtqg  
1n1pgm  
>sp|Q2YVY2|MFD\_STAAB  
mt1l1t1kednh1fqd1nqvf1gqant1vtg1spsakvtmiaekyaqsnq1ll1itn1lyqadk1etd1l1qfidaeelyky  
pvqdimteefstqspqlms  
erirt1talaqgkgl1fi1v1p1ng1lkkw1tsvemwqnhqmt1rvged1dvdqf1nk1lvnmgykresvshigefslrggi  
difp1igepiriel1fdtei  
ds1r1fdvetqrskdnieevdittasdyiiteevir1h1kee1ktayentrpkidksvrnd1ketyesfk1festyfdhqi  
1rr1vafmyetpstiidyf  
qkdai1avdefnr1ketees1tvesdsfi1sniesgngf1gqsfikiyddfet1iegypvtyfs1fattmpik1nhiikfs  
ckpvqfygydimrsefq  
ryvnqnyhi1v1vetetkvermqam1semhipsitk1hrsmssgqavi1egs1segfel1pdmgl1v1terel1fkskqkqk  
rkrtkai1snaekiksygd1  
nvgdy1vhvhgvgry1lgvet1evgqthr1dyik1qykgtdq1fv1pvdqmdqvqyvasedktpk1nk1ggsewkktkakv  
qqsvediaeel1d1ykere  
maegyqygedtaeqttfel1dfpyel1tpdqaks1dei1kddmqksr1pmdr1l1cgdvgygktevavraafkavmegkqvaf1v  
ptt1laqghyet1iermqd  
fpveiq1msr1frtpkeikqtkegl1ktgfvdi1vvgthk1l1skdiqykd1gl1l1vdee1qrf1gvrhkerikt1khnvdv1t1t

Tsompanidou\_et\_al\_Supplemental\_FASTA\_File

atpirtlhmmlgvrldls  
vietppenrfpvqtyvleqmsfikealereelsrdgqvfylnkvqsiyekreqlqmlmpdaniavahgqmdterdleetm  
lsfinneydilvtttiie  
gvdvnpantliiedadrfglsqlyqlrgrvgrssrigyayflhpankvltetadrqaikeftelgsgfkiamrdlnir  
gagnllgkqhgfidtvgf  
dlysqmleeavnekrigikepesevpevevdlnldaylpteyianeakieiykklrktetfdqiidikdelidrfndypv  
evarlldiveikvhalhsg  
itlikdkgkiidihlsvkatenidgevlfkatqplgrtmkvqvqnnamtitltkqnqwlslkflvkcieesmrisea  
>sp|Q2YVY3|PTH\_STAAB  
mkcivglgnigrfeltrhnigfevdyileknfslkdkqkfgaytiermngdkvlfiepmtnmlsgeavapimdyyn  
vnpedlivlyddldlegqg  
vrlrqksagghngmksiikmlgtdqfkriirigvgrptngmtvpdyvlqrfndemvtmekviehagraiekfvetsrfd  
hvmnefngevk  
>sp|Q2YVY8|BIOW\_STAAB  
mysikmrssnqdvhisgaeticefdkieqtvqrfynkgffhengqpdflnikiqkimepiqqikalqiieddkanlqhl  
qecgvteqalnqgntykn  
etvytgaiilsaisgrkrlsfgqrgirathfsfedmnnkgdlnervtalaiascinahpyvkgelcvsdldtyttgyfa  
sakiyhrldfkpvntry  
ggriifvddridlnhyisflestpkqvvyetv  
>sp|Q2YVZ4|SBI\_STAAB  
mknkyiskllvgaatitlatmisingeakasantqqtstkhqttqnyitdqkafyqvlhllkgiteeqrnqyiktirehp  
eraqevfseksdknpr  
rvagqnafynvlkndnlteqeknyiaqikenpdrsqvvesvqsskakerqnieadkaikdfqdnkaphdksaayea  
nslpkdlrdknnrfvekv  
siekaivrhdervksandaisklnekdsienrrlaqrevnkampdvkehllkqldalvaqkdaekkvapkeapqispq  
iekpkaspkveppqisp  
kvevpqskllgyyqskdsfnkykyldtysykykytdkyfykykgtidktvqsvfgngykyiqplkvedqk  
nyvksyaqvrnyvtetln  
tgklyafyqnpklvnaaittaetatsiknifssftsffk  
>sp|Q2YW62|FNBA\_STAAB  
mknllrygirkhkllgaasvflgtmivvgmgqdkeaatseqktttveengnsatdnkvsetqttttvntidetqsysata  
teqpsnatqvitteeapkav  
qapqtaqpanletvkeevvkeekpqqkettqsqdnsgdqrqvdltppkatqnqaaetqvevaqprtvseskprvtrsad  
vaeakeasdvtevkgtv  
skvtvtessi eghnntnkvephagqravlykylkfedglhggdyfdftlnsnvnthgvstarkvpeikngsvmatgkil  
edgkiyrtftndvehkve  
tanleinflidpktfqsngeekvtsslngskteknlqieyknvgtyyanvngsietfdkeknkftthvayvklpqfklg  
tvvtvsgtvtqgsnpngekp  
tvkiyevtndgkdlpqsvyl dasdknkykdvtnemqskltvqengnytlndtldksyvihsgeylngtnevnfrtqm  
gypegrygyyynsyqltwd  
nglvlysnkadngkngqi iqnndfeykedltetvtggydekqiieteenqdnpldidyhtaidgegyadgyietie  
etdssaididyhtavdsea  
ghvggytesseesnpidfeestkgivtgavsdhthvedtkeyttesnlielvdelphehgqaqgpieeitennhishsg  
lgtenghngyvieeieen  
shvdi kselgyeggqnsqnsfeedteedkpkyeqgnnididfdsvppiqgqnnqnsfeedtekdkpkyeqgnnidi  
dfdsppqihgfnkheie  
edtnkdkpnyqfgghnsvdfeedtlpkvsgnqegqti eedttptptpvepsepetptptpvepsepetptptp  
psepetptptpvepsepe  
tptptpvepaeppgkpppaeepkpkpveqgkvvtvieinekvkavaptkqkqskselpetggestnkgmifgg  
lfsilglallrrnkknka  
>sp|Q2YW63|GTAB\_STAAB  
mkkikkaiipaaglgtrflpatkampkemlpil dkptiqyiveearagiediiivtgrhkraiedhdsqkelenvlke  
kgksellekvqystelani  
fyvrqkeqkglghaissarqfignepfvllgddivesevpavkqlidvyeetghsvigvqevpeadthrygiidpltkn  
grqyevkkfvekpqgtap  
snlaimgryvltpeifdylktqkegagneiqltdaiermnndnqvyaydfegerydvgeklgfvkttieyalkddsmree  
ltrfikelgl  
>sp|Q2YW66|PGCA\_STAAB  
mkgclatmdkelwierandslvkhfyeqqsgieqrdgfesklftgtagirgkfglgegrlnkftieklaalglarylnaqt  
nptivihydirhlstefa  
qianvlanhqi tvylpdttykttpe lsfavrnlntaagimitashnpkdyngikvygsdgaqlstdaselasryieevgd  
plqidipiskantsyikpf  
pksvtdmymkhinqmigiypksdlqvfts lhgtsvpivpellqslfnfnqfnlveaqckpdpnfssvqsanpedhrafq  
avelankshadllistdpd  
adrlgiaecdahghityfngnqigallnyriqqtsqlrhrmliqsivsseltslarynnveykevtgfkfiaqei  
lddhqnmifafeesyglf  
epfvrdkdavqivplii kyasekllygkltkdaleqiyqtvgrhedtlfshlleglegkkkinaimtkfrsnppqeiqgl  
kvkaiedytlsevyqldkd

Tsompanidou\_et\_al\_Supplemental\_FASTA\_File

ttsqinspknsvirvlfdegfialrpsgtepkiklyvslkcpnfddvaqkinamifs  
>sp|Q2YW94|F16PC\_STAAB  
mtqiterekkkyldllsqrfdtpeklateiinlesilelpgktehfvsdlhgeyefqhvlnrgsgnvrakindifkdk  
lstkelndltalvyypedk  
lqlikcdfqnygglnvwyittiehlqlikycsskytrsklrralpegyvfiveellyknefknkksyyetlnqvie  
kqaddliiglaysvqrllv  
dhlhvvgdiydrpgpdkimdtlinyhsldiqwgnhdvllwvayagskvclanllricarydnldivedayginlrpllt  
laekyydadnpafkpkkrp  
dkherltqreesqitkihqaiamiqfkleipvikrrpnfemderlvlekvnydtneitvyrktyplkdtcfqtvnrndpa  
ellpeeeevmnl11sfqg  
seklrrhmsflmrkgslylpcngnllihgcipvdengemesfeidgqtsyggellvdfeyhvrksfdekentddlstldv  
wylwtgkysslfgkramtt  
feryfiadkashkeeknpyyhlredvnmvrkmlsdfglpdegriinghtpvkeingedpikadgkmlvidggfskayqs  
ttgiagytllynsgmqlv  
ahqqfnakekilsegieelsikrivdkelqrkki rntnkgkelqaqidilkmlmhdryld  
>sp|Q2YWA3|COPA\_STAAB  
mantkkttdigtmtcaacsnrkeklnklddvnaqvnlttekatveynpdqhdvqefintiqlhgygvavetvelditg  
mtcaacsstriekvlnkmdg  
vqnatvnlteqakvdyypeetdadklvtriklgydasikdnkdqtsrkaealqhklikliisavlsiplllmfmvhl  
fmmhipalftnpwfqfila  
tpvqfiigwqfyvgayknlrngganmdvlavgtsaayfysiyemirwlngsttqphlyfetsavlitlilfgkyleara  
ksqttналгеллs1qakea  
rilkdgne1mip1nev hvgtlivkpgkipvdgkiikgmtaidesmltgesipveknvddt vigstmknkgtitmtatk  
vggdalanikvveeaqs  
skapiqr1adiisgyfvpivvgialltfiwvitlvtpgtfepalvasisvlviacpcalglatptsimvgtgraaengil  
fkgefvverthqidtivld  
ktgtitngrpvvtdyhgddqtlqllataekdsehplaeavnyakekqltltetttfkavpghgieatidhhhilvgnrk  
lmadndislpkhisddlth  
yerdgktamliavnysltgiiavadtlknhakdaikqlhdmgievamltgdnkntaqaiakqvgidtviallpeekaaq  
iaklqqgkkvamvgdgvn  
dapa1vkadigiaigtgtevaieaagitilggdlmlipkaiyaskatirnrqnlfwafgyniagipiaalgllapwvag  
aama1ssvsvtnalrlkk  
mr1eprrkda  
>sp|Q2YWB1|CLPL\_STAAB  
mnnffnsdfdsilrrmmqdmqnsnqtsnkkyyingkevsqeelaqftqqgnhsaeqsaqafqqaalrqggqsgngny  
leqigrnlteqardgllp  
vigrdkeiqetaevlrrtknnpilvgeagvgktaiveglaaqavegnvpaaikdkeiisidissleagtqyrgafeeni  
qklvegkssqnavlffde  
ihqigsgatgsdsgskgl sdi1kpa1srgeisiigattqdeyrn1lkdaaltrrfnevlvnepsakdtveilkgirek  
fethhqvklpddvlkacvd  
lsiqyipqrl1pdka1dvlditaah1saqspaidkvatekriselhdkrkavsaeeykkaddiqneikslqdklensng  
ehtavatvhdisdtiqr1t  
gipvsqmdandier1knissr1rskiigqdkavemvsrairrnragnfddgnrpigsflfvpgtvgktelekqlaidlfg  
nkealir1dmseysdtta1  
skmigttagyvygddnsnt1tekvrnpysvilfdeiekanpqilt1llqvmddgn1tdgqgnvinfknti1ictsnagf  
gngtdqeyddimqemkkff  
rpeflnr1fngiveflh1dkda1qdivn11ddvqvt1dkkgitmnvsqdakdwlieegydeelgarplrriveqqvrcki  
tdyyl1dhtdvkhvd1died  
nelv1vkgks  
>sp|Q2YWC1|PTU3C\_STAAB  
mfkkl1fgqlqr1gkalm1pvailpaagilla1fgnamhneqlveiapwlkndiivm1ssvmeasgqvfdn1p1lfavgta  
lglaggdgvaalaa1vgyl  
imnatmgkvlh1tiddi1fsyakgake1sqaakepahalv1gipt1qtgvfggiimgalaawcynkfynit1ppflgffag  
krfvpivtsvva1atgvvl  
sfawppiqdgl1ns1snfl1nkn1t1ttfi1fgi1ers1ipfg1lhi1fysp1fwefgsytnhagel1vrgdqriwmaqlrdgv  
pftagafttgkypfmmfg1  
paaafaiyknarperkkvvgg1mlsag1tafltgiteplefs1fvapvlygihv1lagtsflvmh1lgvkigmtfsggf  
idyilygl1nwdrshallv  
ipvgi1vyai1vyf1fdfai1rkfk1ktpgredeeteir1nssvak1pfdv1damggkenikh1dacitr1rvevvdkskvdv  
agikalgasgvl1evgnnmq  
aifgpk1sdq1khdmak1msgeitkpsettvteemsdepvhvealgttdiyapgvqqi1p1sevpdqvfagkmmgdgvf1  
pekgeivapfdgtvkti1fp  
tkhaig1lesgsgvev1ihigidtvk1ngegfes1invdekvtqggp1mkvn1ay1kahapsivtpmiitn1enkelvied  
vqdadpgk1imtvk  
>sp|Q2YWC8|Y2455\_STAAB  
metle1lggak1ryhqvgqrpvl1fipgangtgdi1flp1aeqlkdhftvavdrdygesel1tep1pdsasnpdsdyrvkr  
daqdiaelaks1sdepvyi  
lgsssgsivamhvlkdyevvkkia1fheppintfl1pdstywkdknddivhqi1teglekgmktfget1niapidakmmsq



Tsompanidou\_et\_al\_Supplemental\_FASTA\_File

padtekgriegykrtmfws  
efeirgqythsditlddfstkysdkitl1ngtdsrdsfpqdvnyfinketgipivdipgghlgyiqkpegfadvllnmwg  
>sp|Q2YWD0|Y2452\_STAAB  
mrkdaienrqrieiahklfdeegvenismnriakelgigmgtylrhfkdkdscfvyiqrdlntfitqfkqikddyhsd  
yevmkvsldyl1gfkidnk  
tllhcieagnklrfyqsafyqelfdfyydlfksdddfstkfktdmllqslstsvfafqiehrhisieayrnyllniyld  
evernd  
>sp|Q2YWE4|CRTO\_STAAB  
mktmkkyiktaffcsmywlvqlnianlgtripdkyfrqkhiifksfnfekhgkfwkwyvrkwkhkilgdhqlnrniy  
dqrhlmtinsdeiekmiie  
tkraelihwisilpvii fnkgprlvkyini fyamianvpriivqrynrrprtql1rilkrgerhd  
>sp|Q2YWE5|CRTP\_STAAB  
mtkhiiviggg1ggisaairmaqsgysvslyeqnnhiggkvnrheshdgfgfdlgpsiltmpyifeklfeyskkqmsdyvt  
ikr1phqwrsvffpdgttid  
lyegiketgqhna1lskkdieelqnylnytrridritekgyfnygltdl1sqiikfhgplnalinydyvhtmqaidkris  
npylrqmlgyfikyvgsss  
ydapav1smlfhmqqegglwyveggihhlanaleklareegvtihtgtrvndikiyqrhvtgvrldtgefvcadyiism  
eviptykyllh1gtqrlnk  
lerefepassgyvmhlgvacqypqlehnfffttenaylnyqqvfhekvlpddptiylvntnkt dhtqapvgyenikvlph  
ipyiqdpfttedyakfrd  
kildklekmg1tdlrkhiyedvwtpedieknyrsnrgaiygvvadkkknkgfkftkesqyfenlyfvggsvnpgggmpm  
vt1sgqqvadkinareakn  
rk  
>sp|Q2YWE6|CRTQ\_STAAB  
mkwl1sril1tvivamsmacgalifnrrhq1kaktlnfnhksltiiparneekrighl1hsiiqqqvpdvivmndgstde  
tarvarsyगतvvdvdda  
dgkwygkshacyqgvthactnriafvdadvtf1rkdavet1inqy1qgekgllsvqpyhitkrfyegfsaifn1mtvvg  
mnvfst1ddgrtnqhafgp  
vt1tnkedyyatggkhsanrhiiegfalgsaytsqs1pvtvyegfpvfafcmqegfqs1qegwtkh1stgaggtkpkim  
aav1w1fgsiasilglcl  
slkyrqmsvgkml1tvylsyttqfiylhrrvqgfsn1lmvchp11fmfftkifiqswkqthrygvvewkgrqsiskeq  
>sp|Q2YWE7|CRTM\_STAAB  
mtmmdm1fkychkimkksksfsyafdl1pedqrkavwaiyavcrkiddsidvygdiqf1nqikediqsiekypyehhhf  
qsdrimma1qhvaqhkn1  
afqsfyn11d1tvkydqhftmfetdaefgycygvagtvev1tpil1sdhethqtydvarr1ges1qlinil1rdvgedfen  
eriyfskqr1kqyevdiae  
vyqngvnnhyid1weyyaaiaekdfrdvmdqikvfsieaqpiie1aariyieildevrqasyt1hervfvykrkkak1fh  
einskyhri  
>sp|Q2YWE8|CRTN\_STAAB  
mkiav1gagvtglaaaariasqghev1fekntnvggrrnq1kkdgtfdmgptivmmpdvkydvftmcgknyedyielr  
qlryiydvfydrddritvp  
tdlaelqhm1lesiepgsthgfm1tdvykkyeiarryflertyrkpsdfynmts1vqgak1kt1nhadqliehyidnek  
iqk1lafqtlyigidpkrq  
ps1ysiipmiemmfgvh1kkgmygmaqglaq1nkdl1gvnie1naeieqi1idpkfkradaikvngdirkfdkilctadf  
psvaes1mpdfapi1kkypp  
hkiad1dyscsaf1myigidi1dvtqdvr1hnvi1fsddfrgniee1fegr1sydpsiyvyvpavadks1apegktgiyvlm  
ptpelktgsgidwsdealt  
qqikei1yrklatievfedikshivseti1ftpndfeqtyhakfgsafgl1mpt1aqsnyrppqnsrdykdlyfagasthp  
gagvpi11tsakitvdemv  
kd1eqgv  
>sp|Q2YWF3|ALF1\_STAAB  
mnkeq1ekmknkgfiaa1dqsggstpkalkeyginedqysnedemfqlvhdmrtrvvtsp1fspdkilgailfeqtmdr  
evegkytady1adkgvvpf  
1kvdkgl1aeeqngvqlmkpidn1ds11dranerhi1fgtkmrsnile1neqqikdvveqqfevakqiakglvpiiepevn  
inakdkaeiekv1kaelkk  
gl1ds1nadql1vm1k1tipteanlykd1aehpnvrv1v1sggysrekanel1kdnaeliasfsralasdl1ragqskeefd  
kalgdavesiydasvnkn  
>sp|Q2YWF9|PANB\_STAAB  
mktvsq1idmkqkqtki1smvtaydfpsakqveaagidmi1vgds1gmtv1ggestvqvt1admihhgravrrgapntfvv  
vdmpigavgi1smtqdl1nha  
1klyqetsanaikaegahi1tpfiekataigipvah1gl1tpqsvgmgyk1lqgatkeaaeq1ildaknveqagaval1ve  
aipnd1aeiskh1tipvi  
gigagkgtdgqv1vyhdm1nygvehkakfvkqfadfsvgvdgl1kqydvksgafpseeytykkkimnevnnnd  
>sp|Q2YWG0|PANC\_STAAB  
mtk1ittvkemqhi1vkaakrsgttig1iptmga1hdgh1tmvresvstnditvsvfvnpl1qfgpnedfdayprqidkd1  
el1vsevgadiv1fhpavedm  
ypgel1g1dvkvgpladv1legakrpgfdgvvtvvnk1fni1vmpdyayfgkkdaqq1aiveqmvkdfnhaveiigidivre  
adglakssrnvyl1teqerq

Tsompanidou\_et\_al\_Supplemental\_FASTA\_File

eavhlskslllaqalyqddgerqskviidrvtqyleshisgrieevavysypqlveqheitgrifislavkfskarlidni  
igae  
>sp|Q2YWH4|ARCC2\_STAAB  
mkekiiviaIlggnaiqtkeataeaqqtairramqnIkpIldsparivishgngppqigsIliqqaksnsdttpampIldtcga  
msggmigywleteinriIt  
emnsdrvtvgtivtrvevdKndprfdnptkpiGpfytkeeeveIqkeqpdsVfkedagrgyrkvvasplpqsilehqIirt  
IadgkniViaCgggggIpiV  
kkentyegveavidkdfaseklatIeadtImIltvenvfinfnepnqqqiddidvatIkkyvaaggkfaegsmIpkiea  
airfvesgenkkviiItne  
qayealignkgthim  
>sp|Q2YWJ9|AROD\_STAAB  
mthvevvatiapqlyieetliqkinhridaidvleIridqienvtvnqvaemItkIkvmqdsfkllvtyrtkIqgggygqf  
tndlyInIIsdIaningid  
midiewqadidiekhriithIqqynkevviShhifestppldeIqfiIffkmqkfnpeyvklavmphnkndvInIqqams  
tfsdtmdckvvgIsmskIlg  
IisrtaqgvfggaItygcIgeppagqIidvtdIkaqvtIy  
>sp|Q2YWK0|OHRL\_STAAB  
maiHyetkatnvGgrkghvytdraIdiIvppaqadgkatnpeqIfaagyascfnGafdIilKqnkvrdahpevtItr  
IeddpdespqlsvsIat  
iknvisqeeaeKyIqmahefcypskatqgnIvdInvnvvd  
>sp|Q2YWL4|EMP\_STAAB  
mkkkIlfvIImstIlfatqIinsnhanastesvdknfvvpesginkiIptydefkKapkvnvgsIadnknfvasedkIksia  
dpsaaskIvdknfvvpesk  
IgnIvpeykeInnrVvatnnpasqqvdkhfvakgevnrfItqnkvnhpfIttqthykkvitsyksthvhkhvnhatgs  
inkhfiVkpseaprytqps  
qslminhyfavpgyhahkIvtppghasikiNhfcvvpqinsfkviPpyghnshrmhvpsfnnttathqnakvkkaydyky  
fysykvvgvkkysfsqs  
ngykiGepsInIknvnyqyavpsyspthyvpefkgsIpaprv  
>sp|Q2YWN2|Y778\_STAAB  
makkapdvGdykygfHdddvsIfrsergItenivreiSnmknepewmIdfrIksIkIlykmpmpqwggnIseInfdDity  
yvkpseqaerswdevpeeI  
krtfdkIgiPeaeqkyIagvsaqyesevvyhnmekeIleekgiIfkdtdsaIqeneelFkkyfasvvpaadnkfaalnsav  
wsggsfiyvknIklDtpI  
qayfrinsenmgqfertIiIadegasvhyvegctapvyttssIhsavveiIvhkdahvryttiQnannvynIvtkrtfv  
yengnmewvdgnIgskIltm  
kypncvIlegakgstIsiafagkgqvqdagakmiHkapntsstivsksisKnggkviyrgivhfgrkKakgarsniecdt  
IIdnestsdtIpynevfn  
dqisIleakvskvseeqIlyImrgiseeeatemIvmgfiepfkteIpmeyavemnrIikfemedsig  
>sp|Q2YWN8|Y772\_STAAB  
madeskfeqakgnvketignvtdnknIenegkedkasgkakefvenakekatdfidkvkgnkge  
>sp|Q2YWP2|METN2\_STAAB  
mielkevkeyrtnknevIavdhvnIsiragsiygvigfsgagkstIirmfnhleaptsgeviIdgdhigqIlskngIrak  
rqkvsmiIqhfnlIwsrtv  
IknimfpIeiagvprrrakqkaIelvelvgIkgrekaypseIsggqkqrvgiaraIandptvIldceatsaldpqttdel  
IdIlliIkiIreqqnIltivIit  
hemhvirricdevavmesgkviEhgpvtqvfenpghtvtrkfvkedInddfetsIteleplekyayivrIvfagstttep  
ivssIstaydikiIlean  
ikntkngtvglvlhipyissvdfgkfekeIierqvkmelrhg  
>sp|Q2YWP4|GCSH\_STAAB  
mavpneIksnehevwkvegnvatigiIteyaqselgdivfvelpetddeinegdtfgsvsvktvselyapIsgkvvevn  
eeIedspefvnespyekaw  
mvkveIsdesqIealltaekysemige  
>sp|Q2YWP9|Y807\_STAAB  
maqdrkkvlvlGagyagIqtvtklqktIsteaeitIinkneyhyeatwlheasagtInyedvlypvesvlkdkvnfvq  
aevtkidrdakkvetnqgi  
ydfdiIvvalgfVsetfgIegmkdhafqienvitarelsrhiedkfanyaaskekddndIsilvggagftgveflgeItd  
ripeIcskygvdqnkvt  
cveaapkmlpmfseeIvnhavsyIedrgvefkIatpivacnekgfVvevdgekqqlnagtsvwaagvrGsklmeesfegv  
krgrivtkqdItingydni  
fvIgdcsafIpageerpIpttaqIamqqgesvaknikriIngesteefeyvdrgtvcsIlgshdgvGmvfgkpiagkkaaf  
mkkvidtravfkiggigla  
fkkgkf  
>sp|Q2YWQ8|DLTA\_STAAB  
mtdiinkIqafadanpqsIavrhttdeltyqqImdesskIahrIqgskkpmIlfghmspymivgmigaiKagcgyvpvdt  
sipedrikmiInkvqpefv  
fnttdesfesIegevftiediktsqdpviIidsqikdndtvytiIftsgstgepkgvqieyasIvqftewmleInksgneqq  
wlnqapfsdIsvmaiypc  
IasggIInIvdknmiInkpkIlnemIltspiniwvstpsfmemcIllptIneeqygsInefffcgeilphraakaIvsrfp

Tsompanidou\_et\_al\_Supplemental\_FASTA\_File

satiyntygpteatvavts  
iqitqeildqyptlpvgverpgarlsttdegeleviegqsvslgylkndqktaevfnfddgirtyhtgdakfengqwfia  
gridfqikngyrmeleei  
etqlrqsefvkeai vvpvykndkvihligai vpttevt dnaemtknikndlksrlpeymi prkfewmeqlpltsngkidr  
kkiaeving  
>sp|Q2YWR1|NAGD\_STAAB  
mkqykaylidldgtmymgtdeidgakqfidylnvkgiphlyvtnnstktpeqvtek lremhidakpeevvtsalatadyi  
seqspgasvymlgsglnt  
al teaglvikndehvdyvvg ldeqvtyekiaiatlgvrngatfistn pdvsipker gflpgngaitsvsvstgvspqf  
igkpepiimvka leilgl d  
ksev amvgdlydt dimsginvgmdti hvqtgvst ledvqnknvptys fkd lneaiaelek  
>sp|Q2YWR5|LIPA\_STAAB  
matkneeilr kpdwlkik lntnenytglkmmrkkn lntvceea kcpni hecwgarrtatf milgavctracr fca vktg  
l pnel lneparaesvel  
mnlkhvvi tava rdd lrdagsnvyaetvrkvrernpfttieilpsdmggdydaletlmasrpdilnhnietvrrl tprvr  
aratydrtleflrrske lq  
pdiptkssimvg lgetieeiyetmdd lrandvdil tigqylqpsrkh lkvqkytplefgklrkvamdkgfkhcqagplv  
rssyhadeqvneaakekqr  
qgeaq lns  
>sp|Q2YWS3|G6PI\_STAAB  
mthiqldfsktleffgehelkqqqevksihkti hegtgagsdf lgvwdlpvdydkeefsriveaskrikensdvlvvig  
iggsylgaraaiemltssf  
rnsneypeivfvghl sstytkelvdy l adkdfsvnvisks gtttepavafr lfkqlveerygkeeaqkri fattdkekg  
alkqlatnegyetfi vpd d  
vggrysvl tavgllpiataginieammigaakareelssdkleeniayqyatirnil yakgyttemlinyepsmqyfnew  
wkqlfgesegkdfkgiyps  
sanytt d l hslgqyvqegrrfl fetvvkvn hpydi tiekdsdd l d glnylagkti devntkafe gtl lahtdggv p nmi  
vnipqldeetfgyvvyffe  
l acams gyqlgvn pfnqpgveaykqnmfallgkpgfed l kkeleer l  
>sp|Q2YWS4|ASSY\_STAAB  
mkeki v l aysgg l dtsvavqwl idkgydvacc l dvgegkd l divykka l dtgaiechi idatkefsdeyvsva ikgnlm  
yenayplfsal srpliakk  
lveiaektnsvgia hgtgkgn d qvrfevaika l nps l kafapvrewawsreee idyaikhnipvsinhdspysidqnlw  
granecgiledpyaapped  
afd l tna leetpdtadei i l tfvk gipvqidgktye l d d l i l t l n a l a g k h g i g r i d h v e n r l v g i k s r e i y e a p a a e v i  
l kahkaletit ltkdvahf  
kpiiekqfaeqlyng l w f s p l t d s l k l f i d s t q q y v s g d v r i k l f k g n a i v n g r k s p y t l y d e k l a t y t k e d a f n q d a a v  
g f i d i y g l p t q v n a m l n g g  
ysneq  
>sp|Q2YWS5|ARLY\_STAAB  
msnkawgrfevqpeewvddf nasitfdqtlidqdiegsiahatmlanqqiisqqdseqi iqglksiqhdyhdqdiqfsa  
sle d i h l n i e h e l i k r i g d  
agg l h t g r s r n d q v a t d m h l y t k k q v d i i a l i k s l q s v i v d i a s n n v d t i m p g y t h l q r a q p i s f a h h i m t y f w m l q r  
d q r f e d s l k r i d i n p l g a  
a a l s g t t y p i d r h e t t a l l n f g s l y e n s l d a v s d r d y i i e t l h n i s l t m v h l s r f a e e i i f w s t d e a k f i t l s d a f s t g s  
s i m p q k k n p d m a e l i r g k v  
g r t t g h l m s m l m t l k g l p l a y n k d m q e d k e g l f d a v h t i k g s l r i f e g m i q t m t i n k e r l n q t v k e d f s n a t e l a d y l v t  
k n i p f r t a h e i v g k i v l e c  
i q q g h y l l d v p l a t y q q h h s s i d a d i y d y l q p e n c l k r r q s y g s t g q s s v i q q l d v a k q l l s q  
>sp|Q2YWT4|MNHA1\_STAAB  
msllhiavilplifvliipilyrffkrihlgwfvlpvpivifiym l t l i k t t m s g n t v m k t l n w m p h f g m n f d l y l d g l g  
l l f s l l i s g i g s l v v l y s i  
g y l n k s e q l g n f y c y l l l f m g a m l g v v l s d n v i i l y l f w e l t s f s s f l l i s f w r e r q a s i y g a q k s l i i t v f g g l s l l g g  
i i l l a i p t q s f s i q y m i q h  
a s e i q n s p f f i f a m i l i m i g a f t k s a q p f y i w l p d a m e a p t p v s a y l h s a t m v k a g l y l i a r m t p i f a a s q g w i w t v t l  
v g l i t l f w a s l n a t k q q d l  
k g i l a f s t v s q l g m i m a m l g i g a i s y h y q g d d s k i y a a f t a a i f h l i n h a t f k g a l f m i t g a v d h s t g t r d v k k l g g l l  
t i m p i s f t i t v i t a l s m a g  
v p p f n g f l s k e s f l e t t f t a s q a n l f s v d t l g y l f p i i g i v g s v f t f v s i k f i m h i f f g q y k p e q l p k k a h e v s i l m l l  
s p a i l a t l v i v f g l f p g i l  
t n s i i e p a t s s i n h t v i d d e v f h m f h g l t p a f l s t l v i y i l g i l l i v t f s y w k l l q r q p g k l t f n y w y n r s a n v i p n y s  
e k m t n s y v t d y s r n n l v i i  
f g a l i l l t f v t v f s v p f n i n f k d v s p i r i f e v c i v i l l l s a a f l i l f a k s r l f n i m l s a v g y a v s v l f i f f k a p d l a l t  
q f v v e s i s t a l f l l c f y h l  
p n l n r y e n e k r s f g l t n a l i a g g v g l s v i i g l i a y g n r h f e s i s k f y q e h v y d l a h g k n m v n v i l v d f r g m d t l f e s s v l  
g i a g l a v y t m i k l r k k r q t  
q g n e v k n h e  
>sp|Q2YWT5|MNHB1\_STAAB

Tsompanidou\_et\_al\_Supplemental\_FASTA\_File

mnrqqndlilqfaaviiffmvmvfgfslflaghytpgggfvvgllfasslviitiafdietmrkispldfkiligiglvf  
ciatpiaswflgknffthv  
tfdiplfilepvhmttavffdfgvlcavvgvtmtiisigene  
>sp|Q2YWT8|MNHE1\_STAAB  
mavqlvlnfiavfwlftnsyttnnfvlgfifglvlyllhrvlpgrfyvitlyriikliiiflielikanfvdvliiii  
kpsiknepgffvyhtdlkk  
dwqivllsnlittpgtvvlgvsddrtkiyihaidfstkeqevesiktslekivrevgei  
>sp|Q2YWU2|ADDB\_STAAB  
mtlhaylgragtgkstkmlteikqkmkadplgdpiiliaptqstfqleqafvndpelngslrtevlhferlshrifqevg  
syseqklskaatemmiyni  
vgeqqkylklyqsqakyygfsekleteiqdfkkyavtpehlesfiadknmqrtrtknledialiyrefeqriqnefitge  
dalqyfidcmpksewlkca  
diyidgfhnfstieyliikglyaksvtiilttdgnhdqfslfrkpsevlrhiieianelnisierqyfkqsyrfnnd  
lkhlegfdalqinrvacq  
ghinilesatmreeineiarriivdirdkqlryqdiailyrdesaylfdsilplynipynidtkrsmthhpvmemirs  
ieviqsnwqvnpmrlrllkt  
dvltsaylksaylvdllenfvlergiygkrwlddelnvehfsmgrkahlterderntfeqvklkkdvidkilhfekq  
msqaatvkdfatafyesme  
yfelpnqlmterdelldngyhekaeeidqiwnqliqilddlvlvfgdepmsmerflefvdigleqlfsvipqtlldqvs  
gtmdlakvdnkqhvylygm  
ndgtmpqpvttasslitedekkyfeqqanvelsptsdilqmdeafvcyamtrakgnvtfsyslmgssgddkeisplnqi  
qslfnqlei tnlpqyhev  
plslmqhakqtkitlfealrawldeivadswldayqvirsdhlnqglldylmsaltfdnetvklgetlskdlygkeina  
svsrfeqyqcpfkhyash  
gklnertkyelqnfldgdi fhsvlkyiseringdfkqldlkkirqltnealeeilpkvqfnllnssayrylsrrigai  
vettlsalkyqgtyskfm  
khfetsfrkrprtndeliagtltttqgipinirgqidridtytkndtsfvniidykssegsatl dtkvyymqmqmmt  
mdivlqnkqrlgltdivkp  
gglllyfhvheprikfkswadidedkleqdlkkfkfsglvnadqtvidaldirlepftsdivpvglnkdglskrqsq  
adeatiyfkfqnkenfie  
tasnimdghtevaplkqkqkpcafcsyqsvchvdgmiskryrtvdetinpieaiqniniddefgq  
>sp|Q2YWW1|CDR\_STAAB  
mpkivvvgavaggatcasqirrlkdesdiiifekdrdmsfanca lpyvigevedrkyalaytpekfydrkqitvktyhe  
viainderqtvsvlrkt  
eqfeesydkliispgasanslgfesditftlnledtdaieqfikanqvdklvvgagyvslevlenlykrglhptlihr  
sdkinklmdadmngpilde  
ldkreipyrlneeivaingneitfksgrvehydmiiegvgthpnskfiesnikldrkgfipvndkletnvpniyaigdi  
atshyrhvdlpasvplawg  
ahraasivaeqiagnntiefkgflgnnivkffdytfasvgvpnelkqfdykmvevtqgahanyypgnspnlhrvyydts  
nrqilraaavgkegvdkri  
dvlsmammnqltvdeltefevayappshpkdlinmi gyak  
>sp|Q2YWW2|Y838\_STAAB  
mlhhliswvliilfiatylnisknqgtpyfkplhmvlrlfmlmlisgfwiliqsfmngganhmltlkmlcgvavv  
glmevsiakrkrheqsh  
fwitialiitmvlgvilplgp lsklfgig  
>sp|Q2YWW4|ADDA\_STAAB  
mtipekpgqviwtdaqqs yatgqdvlaaaagsktav lveriiqkilrdgidvdrllvvtftnl saremkhrvdqri  
qeasiadpanahlknqrik  
ihqaqistlhfscflkligqhydvlnidpnfrtsseaenillleqtidevieqhydil dpafielteqlssdrsddqfrmi  
ikqlyffsvanpnptnwd  
qlvtpyeeeaqqaqliqiltdlsvfitaaydalnkaydlfsmmdgvdkhlaviederrlmgrvleggfidi pylvltghef  
garlpnitakikeanemmv  
dalkdaklqykykslidkvksdyfsreaddlkadmqlaprvky larivkdvmsenrkkrsknildfsdyehfalqil  
tnedgspseiaesyrqhfq  
eilvdeyqdttrvqekilsckitgdehngnl fmvgdvksiykfrqadpslfikeyqrftidgdgtgrm dlsqnfrsrk  
evlsttnyifkhmmdeqvg  
evnydesaqlyygapydesdhpvnlvkvi eadqehsdltgseqeahfiveqvkdilehqkvydmktrsyratykdivil  
ersfggarnlqqafknedi  
pfhvnsregyfeqtevr lalsflraidnplqdiy lvglmrsviyqfkedelaqir ilspnddyfyqsivnyindeaada  
lvdklkmf lsdiaqsyqqs  
kdhpyyqlidkfyndhyviqyfs gliggrrranlyglfnkaiefenssfrglyqfirfideli ergkdfgeenvvgpnd  
nvvrmmtihsskglefpfv  
iysglskdfnkrdlkqpvilnqqfglgmdyfdvdkemafpslasvayravaekelvseemrlvyvaltrakeqlyligrv  
kndkslleleqlsisgehi  
avnerltsppnphliysi lskhqsasipddl kfekdiaqvedssrpnvnisi iyfedvstetildndeyrsvnqletmqn  
gnedvkaqikhqldyqpy  
vndtkkpskqsvselkrqyeteesgtsyervrqrigrifstyerpklfseqgkrkaneigtlmhtvmqhlpfkkeriseve  
lhqyidglidkhiieadak

Tsompanidou\_et\_al\_Supplemental\_FASTA\_File

kdirmdemtfinseleysiaaeaeqvyrelpfvvnqalvdqlpqgdedvsiiqgmidlifvkdgvhyfvdyktdafnr  
gmtdeeiqtqlnkkykiqm  
kyyqntlqtilnkevkglyffkfgtlq  
>sp|Q2YWW6|UGTP\_STAAB  
mvtqnkkiliiitgsfngmqtvsivnqlndmnlhdlsviehdlfmeahpiltsickkwyinsfkyfrnmykgfyysrp  
dkldkcfykyglnklinl  
likekpdliilftfptpmsvlt eqfninipvatvmtdyrlhknwitpystryvatketkkdfidvgidpstvkvvgipi  
dnkfetpinqkqlidnll  
dpdkqtilmsagafgvskgfdtmitdilaksanaqvmicgkskelkrsltakfksnenvlilgytkhnewmassqlmi  
tkpggititegfarcipmi  
flnpagqelenaalyfeekgfgkiadtpeeaikivasltngneqltmistmeqdkikyatticrdlldlighssqpqe  
iygkvplyarffvk  
>sp|Q2YWW7|LTAA\_STAAB  
mqdsslmyanhnfilmliilflmefargmyilsyinfptvtsiavaitslafsihfiadastnfvigflkkfntki  
vlttgfilafstflviwf  
paspfiiifsammlgiavspiwvimlssveedkrqkmgvyvfwllglvgmvfmllikvhptrfafmmslvvliawi  
lyyfvdkltnytrpvka  
qlrqivdvtkrhlllfpqlllqgaiaaalpilyatkvinvstieyvtaiiggigcavsmflsklidnrsrnfmyg  
vilsqfilymliiftlsmi  
vnihwiialaiglmgyllpawntfmarfiksideqetwgvfnsiqgfgsmigplfgglitqftnnlntfyfsalif  
lvlavfygsyfiarekak  
>sp|Q2YWX8|Y871\_STAAB  
mrlyineikikddtlycytedtikglsevgqmlvdsdnayafaytlddgkayaylifvqetwtmlhenmtkkiiindelel  
tefhqeltyildnikgnn  
ygkefvatveetfdie  
>sp|Q2YWY4|MECA\_STAAB  
mriervdttvkllfitysdieargfsredlwtnrkrgeeffwsmmdeineedfvvegplwiqvahafekgvevtiskskn  
edmmnmsdddtdqfdeqv  
qellatlegedqleel feqrtekeeaqgskrqkssarkntrtiivkfnlledvinyayhtn pittefedllymvdgtyy  
yavhfdshvdqevindsys  
qllefayptdrtevylnyakiimshnvtaqvrryfpette  
>sp|Q2YWY9|MURE\_STAAB  
mdastlkkkvkkrvlgsl eqqidditdsrtaregsifvasvytvdshkfcqsvadqgcklvvnkeqslpanvtqv  
vpdtrvasilahtlfdyp  
shqlvtfgvtgngktsiatmihliqrklqknsaylgtngfqinetkktganttpetvsltkkikeavdagaesmtlevs  
shglvlgrlrgvefdvaf  
snltdhldfhtmeayghaksllfsqgedlskeyvvlnddsfseylrvtptyevfsygiddeaqfmaeniqeslqg  
vsfdvtpfgttypvkspyv  
gkfnisnimaamiavwskgtsletikavenlepvegrlevldpslpidliidyahtadgmklidavqpfvkqkliflv  
gmagerdltktpemgrvac  
radyviftpdnpanddpkmltaelakgathqnyiefddraegikhaidiaepgdvvlaskgrepyqimpghikvphrdd  
ligleaaykkfgggpvqg  
>sp|Q2YX06|HTRAL\_STAAB  
mdigkhhvipksqyrrkrreffhnedreenlnqhdkqnidnttlkkaekqihkdsidkherfknsllshleqnrndvne  
nkaeesknqdsksaynr  
hyltddvskkqnsldsvdqdteksskyeqnseatlstkstkvessdmrklspdknkvghheqhvlskpsehdketridf  
essrtdsdsmqtekikkd  
ssdgnessnlksevisdksntvpkl sesddevnnqkpltlpeeqlkrqqsneqtktytygdseqndksnhendlshht  
psksddkdnmredhivd  
npdndintpslskiddrkldekihvedkhkqnadssetvgyqsqssvshrstekrnmaindhkllngqklntktsann  
qkkatsklngkgratnnys  
dilkkfwmmypklvilmgiiilivilnai fnnvnkndrmndndadaqytttmknantvksvvtvenetskdsslpk  
dkasqdevgsgvvykksqd  
tlyivtnahvvgdkengkitfsnksvvgkvlgdkwslavvkatssdssvkeiaigdsnnlvlgpilvvgnpvgdf  
kgtvtegiisglrrnvlid  
fdkdnkydmlmkafqidasvnpngsggavvnrregkligvvaakismpnvenmsfaipvnevqkivkdletkgkidypdv  
vkmkniaslnsferqavkl  
pgkvkngvvdqvdnngladqsslkkgdvitelgklledlrfraqiifshkddlksitakiyrdgkekeinikl  
>sp|Q2YX11|FOLD\_STAAB  
myakilgdgqiakdyrqglqnqvealkekgtfplsvilvngdgasqsyvrskkkaekigmiseivhleetateevln  
elnrlnndsvsgilvqvp  
lpkqvseqkileainpkdvdfhpinigklyideqtfvpctplgimeilkhadidlegknnavvigrshivgqpvsklll  
qknasvtihsrskdmasy  
lkdadvivalsvgkplvtkdvvkegaviidvgntpdengkkgdvdydavkeiagaitpvpgvgpltitmvlntllae  
kmrrgvds  
>sp|Q2YX14|QOX2\_STAAB  
mskfkslillfgtliilsgcsnieifnakgpvassqkflilysivfmlvicfvvlgmfaifykysynknaesgkmhna  
iietiwfvipiiivaalai

Tsompanidou\_et\_al\_Supplemental\_FASTA\_File

ptvktlydyekppksekdpmvvyavsagykwffaypdehietvntltipkdrpvvfkqamdtmtsfiwpqlggqkyamt  
gmtmwtleasqtgtfrgr  
nsfngegfsrqtfkvnavsqkdydkwvkevkgkktldqdtfdkqllpstpnlalefngthmafvdpaadpeyifyaykr  
fnfelkdpnftseenmfkd  
vsekpkiparkaqtanykrhgmklmigndepynnefkdesknakemkkiskdaqdqndddhggh  
>sp|Q2YX30|MEND\_STAAB  
mgnhkaalkqvftfaseiyaygvrevvispgsrstplalafeahpniktwhpdersaaffavglkgservvailcts  
gtatanytpaiaesqisri  
plivltsdrphelrsvgapqainqvmfnnyvsyefdpiaddsketidaiyyqmiasqylygphkgpihfnlprfdpl  
tpdlnatelltsemkilph  
yqksidasalrhilnkkgliivgdmqhqveldqiltystiydlpiladplshlrkfdhpnvictydl1frsgldlnvdfv  
irvgkpvisklnqwlkkt  
dafqilvqndkidvfpiaadisyeisandffrslmedtrvnrsvwlekwqciekkgrkeikcyleqatdesafvgeik  
ktsekda1fisnmpirdv  
dnlllnknidvyanrgangidgivstalgmavhkritlligdlsfyhdmgllmskl1nniqmnivllnndgggifsylpq  
kesatdyferlfgtptgld  
feytaklyqfdkfrfnsvsefnatllsetstiyelitnrednfkqhqiylqklsemihdtl  
>sp|Q2YX35|RNJ1\_STAAB  
mkqlhpnevgyalgggeigkntyaveykdeiviidagikfpddnllgidyvipdytylvqnqdkivglfithghedhi  
gvpfllkqlnipiyggpl  
alglirnkleehhllrtaklneinedsvikskhltsfylvttshipetygvivdtpgkvvhtgdfkdfdfpvkpania  
kmaqlgeegvllsdstn  
slvpdftlserevgnvdkifrnckgriifafasniyrvqqaveaaiknnrkivtfgrsmennikigmelgyikappet  
fiepnkintvpkhe1l1lc  
tgsqgepmaalsriangthkqikiipedtvvfssspipgntksinrtinslykagadvihskisnihtsghgsqgdqqlm  
lrlikpkyflpihgeyrml  
kahgetgvecvvednvfidigdvla1thdsarkagripsgnvlvdgsgigdigvvirdrkl1seeglvivvvsidfn  
tnkl1sgpdiisrgfvymr  
esgqliydaqriktdvisklnqnkdiqwhqikssiietlqpylfektarkpmilpvimkvneqkesnk  
>sp|Q2YX52|PUR5\_STAAB  
mskayeqsgvnihagyeavermsshvkrtrkeviglggfgatfdlsqlnmtapvlvsgtdvgvgtklklaidygkhdsi  
gidavamcvndi1ttgaep  
lyfldyiatnkvvpevieqivkgsidacvetntaliggetaemgemyhegeydvagfavgavekddyvdgsevkegqvvi  
glassgihsgyslvrkli  
nesdid1asnfdnrpfdvfl1eptklyvkpval1kkevsikamnhitgggyfyenipralpagaaridttsfptkifdw  
lqqqgnidtnemynifnmg  
igytvivdekdvsral1laeqnveayqighivknestaie1l1gv  
>sp|Q2YX54|PURL\_STAAB  
mskfiepsveeiklekvyqdmgl1sdqeyekvcdilgrqpnftetgifsvmwsehcsykhskpflkqfptsgehv1mgpge  
gagvvdigdnqavvfkves  
hnhpsaiepyqgaatgvvgiirdivsigarpinllns1rfgelndkqnqrllkgvvkgiggygncigipttageiefder  
ydgnp1vnamcvgvindhmt  
1qkgtakgvgnsviyvglktgrdgihgatfase1teeseskrpsvqigdpfvgkklmeatleaitfdelvgiqdmgaag  
1tsssemaakgsgl1lr  
1eqvptrepgispyemmlsetqerm1lvvekgteqkfl1ldfdkheldsavigevtdtnrfvltyddevyadipveplade  
apvfilegeeknyntsknd  
ythidvkdttffk1lkhptiaskhylydqyqqvgantiikpglqasvrvvegtnkaiastidgearyvynnpyeggkmv  
aayrn1iavgatplamtd  
c1nygspekkeiyqqlidstkgmaeacdi1ktpvvsngvslynetkgtsiftpvvgmvglienvny1ndfepqvgdkly  
1igdtkddfsgsqleklly  
gkvnhefes1dlssesekgesiktaregvlshvqtvgkgl1litlaklsahyglgkssiditntqlfsetqgryvsv  
ksgkt1nidnaieig1ltd  
sdnfvkvttepyteisenvsdikqiwegaiac1ttqd  
>sp|Q2YX55|PURQ\_STAAB  
mkfav1vfpgsncdrdmfnaaiksgveaeyvdyrets1sgfdgvlipggfsfgdylrsgamasvapiiisevkr1aagkp  
v1gvcngfqi1teig1lpg  
al1hdsh1f1srnee1eivnnhtaftnlyeqgekviypvahgeghyctdeiyqqlkannqi1kyvnnpngsyddiag  
ivnekgnvcgmmphpera1  
et1l1gtdsgvklfeamvkswreghv  
>sp|Q2YX57|PUR7\_STAAB  
mt1lyegkakrifstnqene1rveykdevtagngakkdtmagkgr1nnqitsiifkylqengieshfikqlseteq1vkp  
vki1plevvvrniasgsit  
kr1gfengevfres1veffyknda1ndpl1iddhik1lniatdkdiet1k1tkaleinqvlkk1mdamn1kl1vdfkiefgk  
tetgqi1ladeispd1cri  
wdkatnanfdkdyrntgs1ietyqif1nk1led1k  
>sp|Q2YX60|CTAA\_STAAB  
mfqkkn1kw1gvvat1mmtfvq1ggalvktgtsadgcgsswplchgalipeffpidtielshravsa1s1lmlv1lvit  
awkhigyike1kplsiisv

Tsompanidou\_et\_al\_Supplemental\_FASTA\_File

gflllqaligaaaviwqndnyvlaahfgislsfssvflitliifsidqkyeaaelyikkplrlltwlmaiicygvytg  
alvrhadaslgygwpplpf  
hdlvphseqdwwqlthrimafivftiimityihavknyppnrtvhygytaafilvilqvitgalsimtnvnlialfhal  
fitylfgmttyfimlmlrs  
vrskq

>sp|Q2YX69|MNTH\_STAAB  
mnkrhstneqlsldeinntikfdrssnkqkflsflpgglvavgymdpgnwitsmqggaqygytllfvilisslsaml  
lqsmtvrlgiatgmdlaqm  
trhylsrpiaiiwiiaelaiiatdiaevigsaialnllfniplivgalitvldvflllfimkygfrkieaivgtliftv  
lfiifefvysppqlnavl  
ngfiphseiitnngilyialgiigatimphnlylhssivqsrtysrhneeksqaikfatidsniqlsiafvnclllv  
gaslffnsnaddlggyfdl  
yhalktepvlgatmgaimstlfavallasgqnstigttagqivmegflrlhipnwlrllitrslavipvivclsifkgn  
aakieqllvfsqvflsial  
pfcfliplqlatsnkdlmgpfynktwvniiswtliiilsilnvyliivqtfqelqg

>sp|Q2YX76|Y963\_STAAB  
meyeypidlwsneemsvinffnhvekyyesgvtagdfmgaykrfkeivpakaekqifntfekssgynsykavqdvkt  
hseeqrvkakk

>sp|Q2YX86|SYFB\_STAAB  
mlisnewlkeyvtiddsvsnlaeritrtgievddlidytkdiknlvgfvkskekhpdadklncqvdigedepvqivcg  
apnvdagqyvivakvggrl  
pggikikraklrgersegmicslqeigissnyipksfesgiyvfesqvpqgdalqalylddqvmefdltpnradalsmi  
gtayevaalyntkmtkpet  
tsnelelsandelvtienedkvpysarvvhnvtiepspiwmqarlikagirpinnvdisnyvllaygqplhmfddqda  
igsqqivvrqanegekmtt  
lddtere11tsdivitngqtpialagvmggdfsevkehtsniviegaidsvsirhtsrrlnlrseessrfekgiatefv  
deavdracyllqtyangk  
lkdrvssgelgafitpiditadkinrtigfdlsqndivtifnqlgfdteinddivitvqvpsrrkditikedlievari  
gyddipstlpvfevtsgq  
ltdrkyktrmvkevelegaldqaityslvske datafamqqrqtidllmpmseahaslrqslphlieaasynvarknd  
vklfeignvffangegeelp  
dqveylsigitgdyvvnqwggkktvdfylakgvvdrvseklnlefsyrradidglhpgrtaeillenkvvgfigelhpt  
laadndlkrtyvfe1nfd  
lmavsvgyinyqpipifpgmsrdialevdqnipaadllstihahggnilkdtlvfdvyqgehlekkgksiairlnyldte  
etltdervskvqaeieaal  
ieggavir

>sp|Q2YX87|SYFA\_STAAB  
mseqtmse1kqqa1vdi neanderalqevkvylgkkgsvsglmlkmdlpneekpafgqkvnelrqtique1derqqm  
lvkeklnkqlaetvds1  
pgrhieigskhplrtieeied1flglgyeivngyeveqdhynefnl1lpkshpardmqdsfyitdeillrhtspvqar  
tmesrhgqgpvkiicpgkv  
yrrdsddathshqftqieg1vvdknvkmsdlkgtlellakk1fgadreir1rpsyfptepevevsvcfckkgkcnvc  
khtgwieilgagmvhpnv1  
emagfdsseysgfa1gmppdriam1kygiedi rhfytdvrf1dqfkavedrgdm

>sp|Q2YX91|ISDF\_STAAB  
mmiknkkk11flc1llviliatayisfvtgtik1sfnd1ftkfttsneavdsiid1rlprilialmvgamlavsgallqa  
alqnp1aeaniigvssgal  
imralcm1fipqlyf1p1l1sfigglipfl1iiv1hskfrfnavsmilvgvalfv1l1ngvleiltqnp1mkippqgl1tmki  
wsdvyilavsallgl1l1t1  
11s1k1n1n1n1ddvqarsigfnidryrw1tg1lavflasatvaivgqlaf1giivphvvrklvggnyrv1lipfstvigaw  
11lvad1lgrv1qpp1eip  
ana1lmi1vgpp1li1y1lic1qsqrnri

>sp|Q2YX92|ISDE\_STAAB  
mriikyltilvisv1l1tscqssssqestksgefri1vpttval1tmt1dk1dlpivgkptsykt1pnrykdvpeigqpmep  
nveavkkl1kpth1svsti  
kdemqpfyk1n1mkgyfydfds1kgmqksitq1lgdqfnrkaqake1ndh1nsvkqkienkavkqkhhpkv1l1mgvpgsy  
1vatdksyigdlvk1agge  
nvikvkdry1ssnten1lninpd1ilr1phgmpeevkkmf1qkefkqndiwkhfkavknnhvyd1leevpfgitanvdadk  
amtqlyd1fykdkk

>sp|Q2YX94|ISDC\_STAAB  
mkn1l1kvfntt1l1a1i1i1iatfnsanaadsgt1nyevykyntndtsiandyfnkpakyikkngklyvqitvnhshwitg  
msieghkeni1skntakde  
rtsefevsk1ngkvdgkidvyidekvngkpfkydhynitykfn1gptdvaganapggkddknsasgsdkgsdgattgqses  
nssnkdkvenpqt1nagtpa  
yiyaipvas1a1l1ia1t1fvrkkskgnve

>sp|Q2YX95|ISDA\_STAAB  
mtkhylnskyqse1r1ssamkkitmgtasi1l1gs1vyigadsqqvnaateatnannn1saqvsqatsqpin1fqvqkdg1sse  
kshmd1ymq1hpgk1vik1qnn

Tsompanidou\_et\_al\_Supplemental\_FASTA\_File

kyyfqavlnnasfwkeykfynannqelattvvnddkkadtrtinavavepgykslttkvhivvpqinyhrytthlefeka  
iptladaakpnnvkpvqpk  
paqtktpteqtkpvqpkvekvtvttskvednhstkvvstddtkdqtktahtvkaqtaeqnkvqtpvkdasak  
sesnnqavsdnksqqtnkv  
tkqnespkqaskakelpktgltsvdfnistvafatla1lgs1s111fkrkesk  
>sp|Q2YX96|ISDB\_STAAB  
mnkqqkefksfysirksslgvasvaist1111msngeaqaeeetggnteaqpkteavaspstttekapeaksvanavsv  
snkeveaptsetkevkaa  
ksdnntypilnqelreaiknpaikdkdhsapnsrpidfemkkengeqqfyhyassvkarviftdskpeielglqsgqfw  
rkfevyegdkklpiklvsvy  
dtvkdyayirfsvsngtkavkivssthfnkeekydyt1mefaqpiynsadmfkteedykaekllapykkaktlerqvy  
1nkiqdklpek1kaeykkk  
leetkka1deqvksaitefqnvqptnekmtld1qdtkyvvyesvennesmmdt1fvkhpiktgm1ngkymvmettnddywk  
dfmveqgrvrtiskdaknn  
trt11fpyvegk1lydai1kvvhvkti1dydgqyhvri1vdkeaf1kanadktnkkeqqdnsakkett1patpskpttppveke  
sqkqdsqkddnkqspvek  
endassesgkdktpakpakgeveess1tptkvsttqnaakpttassettkdvvqtsagsseakdsaplqkanikntnd  
ghtqsennkntqenkaks1  
pqtgeesnkdm1plms11a1ssiafv1prkrkn  
>sp|Q2YX99|Y990\_STAAB  
mksvgliteynpfhngqyhinqskl1tnadvtiaimgnfvrmgepaiynkftrakmalstad1vielpatas1ssgdh  
faelavkvadymsvdtiaf  
gsennikt1kqlahsineieqsesfsqkvkegkyspriisellehealaspnnilgisylkaiakhakninaisikre  
naqhhdsl1qhhqfasgts  
irts1isqddhwhhvpkdiq1lyvtphit1nq1fpylkyq1iamttes1kn1y1tvnegfen1k1stineatdfhhfvks  
1ktkrytythiqr11m1v1  
1nikptdvtrni1ravk1lamndrgrqylkh1ktafperqy1tn1k1snahyftneikathiynaisgqqqtdfntpviqq  
yr  
>sp|Q2YXC0|FLIPR\_STAAB  
mkn1kt1iastviaag11tq1ndakaffsyegkgleiakn1adqakkdderidk1mkesdknqtpykaetvnd1y1iv  
kk1sqgdvkkavvri1kdgg  
prdy1tfd1trpleenrkn1kvkng1eidsiywd  
>sp|Q2YXC5|MURI\_STAAB  
mnkpi1gidsgvgg1tvakeimrq1pnetiyy1gdi1grcpygprpgeqkvqytveiar1k1mgfdik1lviacntatava1  
eylqkt1sipvi1gvi1epga  
rtaimttrnqnv1lv1gtegtikseayrthikrinphvevhgvacpgfv1lveqmrysdp1titsivihq1lkrwnsesdt  
vilgcthypl1lykpi1dyf  
ggkktvissg1etarevs11tfsnehasy1tephdrffatgdtthitni1kew1n1svnverisvnd  
>sp|Q2YXC9|UVRC\_STAAB  
medykqrikn1nvpmp1egcy1mkdrndqvi1yvgkakk1rn1rsyftgahdaktr1lve1irrfefivtssetes111  
e1n1likqyqpry1n11kdd  
ksy1fik1tkekypr1lvtr1vkqgtgkyfgpypnaysaqetk1ldriypyrkcdkmpdk1cl1yyhigqclgpcvydv  
1skyaqmtkei1tdf1nged  
kt11ks1leer1mtases1dferakeyrd1iqhiq1n1tnkqkimssdk1tir1dvfgysvdkgwmc1qvffir1qgmikrdtt  
mip1qqteeeefyt1figgf  
ys1nqhilpkevhvprn1dkemi1qsvvdtkivqpar1gpkdkmvd1aahnakvs1n1nkfelisrdesrtikaieelgtqmg  
iqtpir1ieaf1d1sn1iqgvd  
pvsamvt1fdgkpd1knyrkyik1tvk1g1pddyksmrevrrrrysrv1neg1pl1pd1i1vdggkghmngvidv1qnelgld  
ipvag1qkndkhqtsel1y  
gasaeiv1pl1kksqafy11hri1qdevhrfai1t1fhrqtrqktg1ksil1ddidg1gskrkt111rsf1g1sikk1meat1edfk  
nigipenvakn1heq1lhk  
>sp|Q2YXD0|THIO\_STAAB  
mai1kvtdad1fdskvesgv1lvdfwatw1cgpc1kmi1apv1lee1adyegkad1kl1dvd1enp1staak1yevmsi1pt1liv1fd  
gqpvdkv1vgf1qpen1aev  
1dkh1  
>sp|Q2YXD1|MUTS2\_STAAB  
mrqkt1dv1efekiks1vanet1isd1gl1ekvnq1mmpat1nfetv1vfqmeet1deiaq1ynkhr1ps1sg1skvsafihradi  
ggv1nvse1n1likr1liq1vq  
nqfkt1fyng1lveedegvkyp1l1ddk1mnq1lpv1td1fqq1netcdtyd1ydnasyelqg1rskis1stnq1r1rqn1drivks  
qanqk1sdaiv1tvnrn1s  
vipvkaeyr1qdfng1ivhdq1sasgq1t1yie1pssv1emnnq1sr1rhdeaiekeri1ltq1l1tgyvaadkda11lvaehvmgq1d  
f1liakarys1rsikg1tkpif  
keertv1ylpkayh1p1nretv1vantief1medietv1itgpntggktvt1kt1gl1i1imaqsg1lipt1dgsq1svfknvy  
cd1igdeq1sieq1s1tfssh  
mtnivei1khadkhs1lv1fdel1gagtdp1segaa1amsi1dhvrk1igs1lvmatthypel1kayscn1regvmnasvefdvdt1  
sptyk1l1mgvp1grsnafdi  
skk1gl1s1ni1inkaktm1g1tdeke1inemies1lernykrvetqr1le1dr1lvkeaeqvhd1skqyqqf1qnyeks1lieeake  
kanqkikaatkeaddi1kd



Tsompanidou\_et\_al\_Supplemental\_FASTA\_File

lrglreqkgadvkehelidkkkrlddhyeaksikqnvqkqkydkivagdevkvl sygqkgevleivndeeai vqmg i km  
klpiedlekkqkekvkptk  
mvtqrnrqtikteldlrgyryedalie ldyldqavl snyeqvyi ihgkgtgalqkgvqqhlk khksvsdfrggmpsegg  
fgvtvatlk  
>sp|Q2YXE0|MRAY\_STAAB  
mifvyallalvitfvlpvliptlkrmkfgqsireegpqshmkktgtptmggl tflsivitslvaiifveqanpiilll  
fvtigfgligfidyivv  
kknngltskqkflaqigiaiffvl snvfhlnvfstsihipftnvaiplsfayvifivflqvgfnavnltdgl dglat  
glsii gftmyaimgsvlge  
taigifc iiml fallgflpyninpakvfmgdtgsalggifatisimlnqelslifiglvfvietsvmlqvasfkltgk  
rifkmspihhhfeligwse  
wkvvtvfwavglisgliglwigvh  
>sp|Q2YXE3|RSMH\_STAAB  
mfhhismnetidylnvkengvyidctlggaghalyl nqlnddgrliaidqdqtaidnakvlkeh l hkvtfvhsnfr  
eltqilkdlniekvdgiyy  
dlgvsspql dipergfsyhhdatl dmrmdqtqeltayeivnwsyealvkifyrygeekfskqi arrieahreqppittt  
lelvdiikegipakarrkg  
ghpakrvfalriavndelsafedsieqaielkv dgrisvitfhsledrlckqv f qeyekgpevprglpvipeaytpkl  
krinrkpitateedldnn  
rarsaklrvaeilk  
>sp|Q2YXE5|Y1041\_STAAB  
mdckvvslnkdqfipkikssdpvitglfqydaaqt sfekrmskenngreaalanvi reym sd l k l sseqelnihlan  
gskvvi gggqaglfggply  
ifhki fsiitlskeltdthkqqvvpvfw i agedhdfdevnhtfvynenhs l hkvkyht m e p t t i s r y p d k a e l k q t  
l k t m f i h m k e t v h t q g l l e  
icdriidqydswt dmfka l l h e t f k a y g v l f i d a q f e p l r k m e a p m f k i l k k h q l l d d a f r a t q q r t q n q g l k a m i q t d  
tnvhlflhdenmrqlvsyd  
gkhfklnktdktyvkee i i n i a e n q e l f s n n v t r p l m e e w l f n t v a f i g g p s e i k y w a e l k d v f e l f d v e m p i v m p r l  
ritylndriekilskynip  
lekvlvdgvegerskfi relashqfi ekvegmieqrrlnqdlldevagnqnninlvknnei hi q y d y l l k r y l l n i e  
rendismkqfreigetlhp  
mglqeriw nplqi l n d f g t d v f k p s t y p p l s y t f d h i i k p  
>sp|Q2YXF2|ARCC1\_STAAB  
makivvalggna l g k s p q e q l e l v k n t a k s l v g l i t k g h e i v i s h g n g p q v g s i n l g l n y a a e h n q g p a f p f a e c g a m s q  
ayigyqlqeslqnelhsig  
mnkqvvtlvtqvevdendpafnnp skp i g l f y n k e e a e q i q k e k g f i f v e d a g r y r r v v s p p q p i s i e l e s i k t l i k n  
dtlviaaggggipvireq  
dgfkgidavidkdktsal lganiqcdql i i l t a i d y v y i n f n t e n q p l k t t n v d e l k r y i d e n q f a k g s m l p k i e a a i s  
fiennpkgsvlitslneld  
aa legkvgtvik  
>sp|Q2YXG4|PYRF\_STAAB  
mkdlpialdfeskekvnrfl d l f d e s l f v k v g m e l f y q e g p q l i n e i k e r g h d v f l d l k l h d i p n t v g k a m e g l a k l n v  
dlvnvhaaggvkmseaik  
glrkhnhtkiiavtqltsttedmlrheqniqtsieeavlnyaklanatgldgvvcsplesrmlteklgasflkvtpgir  
pkgasqddqhrittppear  
qlgsthi v v g r p i t q s d n p v e s y h k i k e s w l v  
>sp|Q2YXG5|CARB\_STAAB  
mpkrndikt i l v i g s p i i g q a a e f d y a g t q a c l a l k e e g y r v i l v n s n p a t i m t d k e i a d k v y i e p l t h d f i a r i i r k  
eqpdallptl g g t g l n m a  
iglheshglqdnvqllgtel t s i q q a e d r e m f r t l m n y l n v p v p e s d i v n t v e q a f k f k e q v g y p l i v r p a f t m g g t g g  
gichndeelheivsnghy  
spatqclleksia g f k e i e y e v m r d k n d a i v v c n m e n i d p v g i h t g d s i v v a p s q t l s d v e y q m l r d v s l k v i r a l g i e  
ggcnvqaladphsfdyyi  
evnprvsrssalaskatgypiaklaakiavgl t l d e m l n p i t g t s y a t f e p t l d y v i s k i p r f p f d k f e k g e r e l g t q m k  
atgevmaigrtyeesllka  
irsleygvhhlgln gesfdldyikerishqdderlffigeairrgttleeihmtqidyfflhkfqnidiehq lkehq  
gdleylkyakdygfsdkti  
ahrfnmteeevyqlrmendikpvyk m v d t c a a e f e s s t p y y y g t y e t e n e s i i t d k e i l v l g s g p i r i g g v e f d y a t v  
havwaiqkageaiivnnn  
petvstdfsisdklyfep l t e e d v m n i i n l e k p k g v v v q f g g q t a i n l a d k l a k h g v k i l g t s l e n l n r a e d r k e f e a l l  
rkinvpqpqgktatspeea  
lanaaeigypvvvrpsylvlggrameivdndkelenymtqavkaspehpvlvdryltgkeievdaicdgetviipgimehi  
eragvhs g d s i a v y p p q t l  
tedelttledytiklakgl niigliniqfviahdgvyvlevnprssrtvpflskitdipmaqlamraii gek l t d m g y q e  
gvqpyaegvfkapv f s f n  
klknvdi t l g p e m k s t g e v m g k d t t l e k a l f k g l t g s g v e v k d h g t v l m t v s d k d e e v v k l a q r l n e v g y k i l a t s g t a  
nklaeydipaevvgkigge  
ndlltriqngdvqivintmtkgkeverdgfqi rrttvengipcltsldtanaltnviesmtftmrqm

Tsompanidou\_et\_al\_Supplemental\_FASTA\_File

>sp|Q2YXH0|PYRR\_STAAB  
mseriidmdaaigrvtvriaheileynkgtdnlllgiktrgeylanriqdkihqieqqriptgtidityfrddiehms  
ltkdaididtditdkvvi  
iiddvlytgrtvasldai llnarpikiglavlvdrghrelpiradfvgniptskeetvsvyleemdqrnaviik  
>sp|Q2YXH2|LSPA\_STAAB  
mhkkyfigtsiliavfvvifdqvtkyi iattmkigdsfeviphflnitshrngaawgilsgkmtffffiitiilialvy  
ffindaqynl fmqvaisll  
fagalgnfidrvltgevvdfidtnifgydfpifniadsslitgiviliiiallkdt snkkekev  
>sp|Q2YXH4|SYI\_STAAB  
mdyketllmpktdfpmrgglpnkepqi qekwdaedqyhka lekknknetfilhdgppyangnlhmghalnkil kdfivry  
ktmqgyfapypvgwdthgl  
pieqal tkgvdrkkmstaefrekckefaleqielqkkdfrl gvrdfndpyitlkpeyeeaqirifgemadkgliykg  
kkpvywspssesslaeedi  
eyhdkrsasiyavfdvkkdgvdadakfi iwtttpwtipsnvaitvhpelkygqynvngkyiiaealsdavaealdwd  
kasielekeytgkeleyvv  
aqhpfldreslv ingdhvtt dagtgcvtapghgeddyivgqkyelpvispidkdvteeggqfegmfydkankavtdl  
ltekga llkldfi thsyph  
dwr t kkpvi fratp qwfasi skvrqidi ai entnfkvnwgktri ynmvrdrgevwisrqrwgvplpvfyaeengeiimt  
ketvnhvadlfaehgsniw  
fereakdl lpegfthpgsngtftketdimdvfdsgsshrgvletrpelsfpadmylegsdqyrgwfnssittsvatrg  
vspykfl lshgfvmdgegk  
kmskslgnv i vpdqvvkqkgadiarlwsst dyladvrisdeilkqtsdvyrkirntlrfmlgnindfnpdt dsipesel  
levdryllnr lreftasti  
nnyenf dyl niyqevqnl nvelsnfyldygkdilyieqrds hirmsqtvlyqilvdm tkl lapilvhtaeevwshtph  
vkeesvhladm pkvvevdq  
alldkwr t f m n l rddvnr a letarnekvigksleakvtiasndkfnasefltsfdal hql fivsqkvvdkl d d qataye  
hgdiviehadgekercwn  
ysedlgavde l th l cprcqqvkslv  
>sp|Q2YXI3|RNC\_STAAB  
mskqkksei inrfrkrfdtkmte l gftyqnidlyqqafshssfindfnmrldhnerleflgdavle l tvsrylfdkhn  
lpegnl tkmrati vcepsl  
vifankiglnemil l gkgeektggrtrpsl isdvfeafigalyldqgl di vwkfaekvifphveqnel lgvvdfktqfqe  
yvhhqqnkgdvtynlikeeg  
pahhr l ftsevil ggeaiaegkgktkkeseqraaesaykqlkqik  
>sp|Q2YXI7|PLSX\_STAAB  
mvklaidmmggdnadpdivleavqkavedfkdleilfgdekkyklnheriefrhcsekiemedepvraikrkkdssmvkm  
aeavksgeadgcvsagntg  
almsagl fivgrikgvarpalvvtlptidgkgfvfldvganadakpehllqyaqlgdiyaqkirgidnpkisllnigtep  
akgnsltkksyellnqdh  
l n f v g n i e a k t l m d g d t d v v t d g y t g n m v l k n l e g t a k s i g k m l k d t i m s s t k n l a g a i l k k d l a e f a k k m d y s e y g g  
svllg l e g t v v k a h g s s n a  
kafysairqakiageqni vqtmketvgesne  
>sp|Q2YXJ0|Y1090\_STAAB  
miskingklfadmi i qgaqlsnadlvds l n v y p v p d g d t g t m n l t m t s g r e e v n n l s k n i g e l g k t f s k g l l m g a r  
g n s g v i l s q l f r g f c k n i e  
seseinskllaesfqagvetaykavmkpvegti l tvakdaaqaavekanntedcielmeiyivkaneslentpnllavlk  
evgvvds g g k g l l c v y e g f  
l k a l k g e k v e a k v a l d k d e f v h d e h d f h g v i n t e d i i y g y c t e m m v r f g k n k k a f d e q e f r q d m s q f g d s l l v i n d e e i  
vkvvhvhteypgkvfnygq  
ygelikl kvenmreqhrevi rkeqhtakpmetvetaitiismgegiseifksmgathiisggqtmnpstedivkvieqs  
kckraii l p n n k n i l m a s e  
qaasivdaevv i p t k s i p g g i s a l f q y d v d a t l e e n k a q m a d s v n n v k s g s l t y a v r d t k i d g v e i k k d a f m g l i e d k i  
v s k s d q l t t v t e l l n e m l  
aedseil t v i i g q d a e q a v t d n m i n w i e e q n p d v e v e v h e g g q p i y q y f f s v e  
>sp|Q2YXJ8|RLMN\_STAAB  
mitaekkkknkflpnfdkqsiyslrfdemqnwlveqqqkfrakqifewlyqkrvdsidemtnl skdlrqllkdnftvtt  
l t t v v k q e s k d g t i k f l e  
l q d g y t i e t v l m r h d y g n s v c v t t q v g c r i g t f c a s t l g g l k r n l e a g e i v s q v l t v q k a l d a t e e r v s q i v i m g i g e p  
f e n y d e m m g f l r i v n d d n s  
l n i g a r h i t v s t g i i p r i y d f a d e d i q i n f a v s l h a a k d e v r s r l m p i n r a y n v e k l i e a i q y y q e k t n r r v t f e y g l f  
g v n d q l e h a r e l a h l i k g  
l n c h v n l i p v n h v p e r n y v k t a k n d i f k f e k e l k r l g i n a t i r r e q g s d i d a a c g q l r a k e r q v e t r  
>sp|Q2YXK0|FMT\_STAAB  
mtkiifmgtpdfsttvlem liaehdviavvtqpdrpvgrkrvmtpppvkkmkydlpvyyqpek lsgseeleqllqldvd  
l i v t a a f g q l l p e s l l a l p  
k l g a i n v h a s l l p k y r g g a p i h q a i d g e q e t g i t i m y m v k k l d a g n i i s q q a i k i e e n d n v g t m h d k l s v l g a d l l k e t  
l p s i i e g t n e s v p q d d t q a  
t f a s n i r r e d e r i s w n k p g r q v f n q i r g l s p w p v a y t t m d d t n l k i y d a e l v e t n k i n e p g t i e t t k k a i v a t n d n e a

Tsompanidou\_et\_al\_Supplemental\_FASTA\_File

vaikdmqlagkkrmlaany  
lsgaqnilvgkkl  
>sp|Q2YXK2|RIMM\_STAAB  
mrvevgqivnthgikgeikvksnsdftdvrffqpgqvltvvhnnndleytvkshrvhkgllhmltfeginnindiehlkgs  
iyqerdhedivleeneyyy  
sdiigctvfdqetpigrvini fetgandvvikskeylipyiadvvkevdenkkiiitpmegll  
>sp|Q2YXK4|DPO3\_STAAB  
mamteqqkfkvladqikisnqldaeilnsgeitridvsnkrtwefhitlpqflahedyllfihaieqefkdianvtcrf  
tvtngtngdehaikyfgbc  
idqta l spkvkgqlkqkklmsgkvlkvmvsndiernhfdkacngslikafncngfdidkii fetndndqeqnlasleah  
iqeedeqsarlateklekm  
kaekakqdnnesavdkcqi gkpiqienikpiesieeefkvaiegvidinlkelksgrhiveikvtdytdslvlkmft  
rknkddlehfkalsvgkwv  
raqgrieedtfirdlvmmsdieeikkatkdkkaekrvefhlhtamsqmdgipnigayvkqaadwghpaiavtdhnvq  
afpdahaaekhgikmiyg  
megmlvddgapiaykpqdvvlkdatyvfvdtvettglsnqynkiielaavkvhngeiidkferfsnpherlsetiinlthi  
tdmldvapeieevl tefk  
ewvgdai fvahnasfdmgfidtgyerlgfgpstngvidtlel sr tinte ykghl nflakkygvel tqhhrai ydteata  
yifimvqqmkelgvl nhn  
einkkl snqdaykrarpshvtlivqnqqglnl fki vsalvkyfyrtpriprsl ldeyregllvgtacdegel ftavmq  
kdqsqvekiakyydfieiq  
ppalyqdlidreli rdtetlhei yqrl ihagdtagipviatgnahylfeh dgiarkiliasqpgnplnrstlpeahfrtt  
demlnefhflgeekaheiv  
vkn tnel adriervvipkde lytpmegane ei relsyanarklygedlpqi vidrlekelksi igngfaviylisqrlv  
kkslddgylvgsrgsvgss  
fvatmtei tevnplpphyi cpncktseffndgsvsgfdlpdktcetcgaplikegq dipfetflgfk gdkvpdidlnfs  
geyqpnahnytkvlfgedk  
vfragtig tvaektafgyvkgylndqgi hkrgaeidr l vkgctgvkr t t gqhp ggi ivvpdy m di ydf tpi qypaddqns  
awmtthfd fhsihdnlkl  
dilghddptmi rmlqdlsgidpkipvddkevmqifstpeslgvtedeilcktg tfgvpefgtgfv r qml edtkptt fse  
lvqisglshgtvdwlgnaq  
eliktgicdlssvigcrddimvylmyaglepsmaf kimesvrkgkgleemi etmkenev pdwyl dsc l kiky m fpkaha  
aayvlmavriayfkvhhl  
yyyasyftirasfdl itmikd ktsirntvkdmysrymdl gkkekdvl tvleimnemahrgyrmqpisleksqafefiie  
gdtlippfivspglgenva  
krivearddgpflskedlnkkaglsqkii e y l delgs l p n l p dkaqlsifdm  
>sp|Q2YXK5|SYP\_STAAB  
mkqskvfiptmrdvpseaeaqshrlllksqliqstsgiy s y l p l a t r v l n n i t a i v r q e m e r i d s v e i l m p a l q q a e l w  
eesgrwgaygte l m r l q d r  
hgrqfalgptheelvtsvrne lksyq l p m t l f q i q s k f r d e k r p r f g l l r g r e f i m k d a y s f h a d e a s l d q t y q d m y q  
aysrifervginarpvvd  
sgaiggshthefmal saigedti vyskesdyaaniekaevvyepnhkhttvqsleki etpnvktaqel adflgrpvdeiv  
ktmikvdgeyimvlvrgh  
heindiklksyfgtdnie latqdeivnlvganpgslgpvidkeikiyadnfvqdl n n l v v g a n e d g y h l i n v n v g r d f n v  
deygdf r f i l e g e k l s d s s  
gvahfaegievqvfklgtkysesmatf l d n g g k a q p l i m g c y g i g i s r t l s a i v e q n h d d n g i v w p k s v t p f d l h l i s  
inpkkddqreladal yaef  
ntkfdvlyddr qeragv k f n d a l i g l p l r i v v g k r a s e g i v e v k e r l t g d s e e v h i a d l m t v i t n k y d n l k  
>sp|Q2YXL1|EFTS\_STAAB  
matisaklvkelrektgagmmdckkal tetdgdidkaidylrekgiakaakkadriaaeglvhvetkgsdaviveinset  
dfvarnegfqelvkeianq  
vldtkaetvealmettfpngksvderikeaistigeklsvrrfairnkndkdafgaylhmggrigv l avvegstdeear  
dvamhiaainpkvysseqv  
seeinherevlkqqa l negkpenivekmvegrl rky l q e i c a v d q d f v k n p d v t e a f l k t k g g k l v d f v r y e v g e g m e  
kreenfadevkgqmk  
>sp|Q2YXL3|CODY\_STAAB  
msllsktre l n t l l q k h k g i a v d f k d v a q t i s s v t v t n v f i v s r r g k i l g s s l n e l l k s q r i i q m l e e r h i p s e y t e r l m  
evkqt esnididnvl t v f p  
penrelfidsr t t i f p i l g g g e r l g t l v l g r v h d d f n e n d l v l g e y a a t v i g m e i l r e k h s e v e k e a r d k a a i t m a i n s l  
sysekaiehi feelggt e  
glliaskvadgvgitrsvina l r k l e s a g v i e s r s l g m k g t f i k v k e k e f l d e l e k s k  
>sp|Q2YXL4|HSLU\_STAAB  
mdtagirltpkeivsklneyivgqndakrkvaialnrnyrrsl l d e e s k q e i s p k n i l m i g p t g v g k t e i a r r m a k v v g a  
pfikveatkftevgvgrd  
vesmvrldvsvrlvkaqkkslvqdeatakaneklvkllvpsmkkkasqtnnpl es l f g g a i p n f g q n n e d e e p t e e  
ikt krseiqrleegklek  
ekvrikveqdpgalmlgt n q n q m q e m n n l m p k k k v e r e v a t e t a r k i l a d s y a d e l i d q e s a n q e a l e l a e q m g i i f  
ideidkvatnnhnsqgdvs

Tsompanidou\_et\_al\_Supplemental\_FASTA\_File

rqqvqrdilpilegsviqtkygtvntehmlfigagafhvskspsdlipelqgrfplrvelsdsvedfvriltepklslik  
qyeallqteevtnftdea  
itr1aeiayqvnqtdnigarrlhti lekml edlsfeapsmpnavvdi tpyvddklsistnkdlsafil  
>sp|Q2YXL5|HSLV\_STAAB  
msnttlhattiyavrhngkaamagdgqvtlqqvimkqtarkvrrlyegkvlagfagsvadaftlfekfetklqqfsgnl  
eraave1aqewrgdkqlrq  
leamli vmdkda1lvsgtgeviapddd1iaigsggnyalsagra1kxhash1saemayes1kvaadicvftndnivve  
t1  
>sp|Q2YXL6|XERC\_STAAB  
mnh1qeaflnt1kvernseht1ksyqddliqfnqfleqehlq1ntfeyrdarnylslysnh1krtsvsrkist1rtfy  
eywmt1deni1npfvqlvh  
pkkeky1pqffyeemea1fktveedtsks1rdrvile1lyatgirvselvnikkqdidfyangvtvfgkgskefvfpg  
aycrqsieny1ehfkpiqs  
cnhdflivnmkgeaitergvryv1ndivkrtagvsei hphklrhtfath1nqqad1rtvqs1lghvn1sttgythvsn  
qqlrkvy1nahprakkene  
t  
>sp|Q2YXL8|TOP1\_STAAB  
madn1vivespakaktiekylgkkykvi asmghvrd1prsqmgvdtednyepkyitirgkpvvkelkkhakkaknvfla  
sdpdregeaiawh1skile  
ledskenrvvfneitkdavkesfknpreiemn1vdaqqarri1dr1vgynispvlwkkvkkgl sagrvqsva1rlvidre  
neirnfkpeeywiiegefr  
ykkskfnak1fhyknkpfk1ktkkdiekitaaldgdqfeitnvtkketrnpanpfttst1qqeaark1nfkarktmmva  
qqlyegid1kkqgtiglit  
ymrtdstri1sdtaeakqyitdkygesytskrkasgkqgdqdahea1rpsstmrtppdmks1f1tkdqrlykliwerfv  
asqmapai1d1tvs1ditqg  
dikfrangqtikfkgfntlyvetkddidseken1pk1eqgdkvtatqiepaqhytqpppry1tear1vkt1eelkigrps  
tyaptid1tiqrnyvkl1es  
krfvptelgeivheqvkeyfpei1dveftvmet1ldkiaegditwrkvidgffsfkqdvraeeemekieikdepage  
dcevcgspmvikmgrygkf  
macsnfpcrntkai1vksigvkcpkndgdvverkskkrvfygcskypecdfi1swdkpigrdcpkcnqylvenkkgktt  
qvisncdykeaaqk  
>sp|Q2YXM1|SUCC\_STAAB  
mniheygqkei1frsmgvavpegrvaf1taeeavekakefnsdvvkaqihaggrgkaggvkiaks1seveyake1l1gkt  
lvthqtgpegkeikrlyie  
egcaiqkeyyvgfvidratdqv1lmaseeggteieevaaktekifketidpvi1g1spfqarria1fninipkesvnaak  
f1lalynvfiekdc1sivei  
nplvtadgdv1vl1dak1fddna1frhkdvvelrd1eedpkeieaskhd1syal1gd1gcmvngaglamatmd1inh  
fgnpanf1daggsatrek  
vteafki1lgdenvk1gf1vni1fggimkcdviae1giveavkevd1t1pl1vr1egt1nvelgk1k1kdsglaiepaatmaeg  
aqkivklvkea  
>sp|Q2YXM2|RNH2\_STAAB  
mt1t1kevtq1inavntieelenhecf1derkgvqna1arrkalekeqal1kekyvemtyfene1lkenpnai1cgidev  
grg1lagpvvacapi1n1sn  
hny1gl1dds1kvpv1tkr1el1nea1knevtaf1afgiatae1idefniykatqiamqraid1g1svqph1l1idam1dna1p  
qvs1l1kgdarsvs1iaaasi  
makvfrddy1mtq1l1skdypeygfeknagyg1tkqhl1a1iddigimkehrks1fepiks11  
>sp|Q2YXP2|PNP\_STAAB  
msqekkv1fktewagrs1ti1etgqlakqangav1vrygdtv1l1stata1skeprdgdf1fp1tvnyee1kmyaagkipggf1kkr  
egrpgdat1tar1idrpi  
rpl1fpkykhdvqimnmv1sadpdcspqmaamigssma1svsdi1pfqgpiagv1ngyidgkyi1nptvee1kevsr1dlev  
aghkdavn1mveagaseite  
qem1eai1ffghee1qr1vdfqqqivdhi1qpvkqefipaerdeal1veriks1teekgl1ketv1tfdkqqrden1dn1keei  
vnefi1deedpenel1likev  
yailnelvkeevrr1iadek1rpdgrkpdeirql1dsevgil1prthgsgl1ftrgqtqalsv1t1lgalgdyqlidgl1gpee  
krfmhhynf1pnfsvgetgp  
vrapgrreighgalgeral1kyi1pdtadfp1y1tirivse1vlesngsssqasicgst1almdagvpikapvagi1amgl1vtre  
dsyt1l1tdiqgmedal1gdm  
dfkvagtkegitai1qmdikidgl1trei1ieea1eqarrgr1eimnhml1qtidqprt1elsayapkvvtmtikpdkir1dvigp  
ggkkine1id1etg1vkl1die  
qdgti1figavdqaminrare1iee1itreaevgq1tyqatvkrieky1gafv1g1fpgkdal1hisqisknriekvedv1kigd  
tievkiteidkqgrvnash  
ralee  
>sp|Q2YXP5|TRUB\_STAAB  
myngi1lpykergl1tshdv1vfk1rki1l1k1k1ghtgt1dpevagv1pvcignatrvsdyvmdmgkayeanvsigrstt1te  
dqtgd1lemkgvhsadfn1n  
ddidr1lenfkgv1ieq1ppmyssvkvngk1lyeyarnnetverpkrkvnikdigri1sel1dfkenechf1kirvicgkgyi  
rt1atdi1gvkl1gfpahmsk  
l1triesggfv1kds1t1leqike1l1heqds1lqnk1l1f1eygl1kg1lpsikikdshikkri1ngqkfnknefdnkikdqivfid

Tsompanidou\_et\_al\_Supplemental\_FASTA\_File

ddsekvlaismvhptkese  
ikpkkvfn  
>sp|Q2YXP6|RBFA\_STAAB  
mssmaervgeqmkkelmdinnkvdprvgfititdvvtndlsqakvfltvlgndkeventfkaldkakgfikselgs  
rmrlrimpeImeydqsie  
ygnkiermiqdlhkqdr  
>sp|Q2YXR3|MIAA\_STAAB  
mnknkpfivvi vgtasgkelsielakringeiisgdsmqvykhmigtaktvpeemdgiphhlidilnpddtfsayef  
krlaedlitditnrgkvp  
iaggtglyiqsliyneledetvtsaqsvvkqklsalehldnqqldhylaqfdeasaknihpnrqrvlraieyfyfktk  
kllsnrkkvqqftenydtl  
ligiemsrktlysrinkrvdimldhglfrevqqlveqgyescrsmqaiigykelipvingqmiyedavndlkqhsrqykr  
qmtwfkknkmsvhwldkenm  
slqmmldetitqik  
>sp|Q2YXR6|GLPK\_STAAB  
mekyilsidqgttssrailfnqkgeiagvaqrefkqyfpqsgwvehdaneiwtsvlavmtevinendvradqiagigitn  
qrettvvdkhtgrpiya  
iwwqsrtqsi cselkqqgyeqtfrdktgllldpyfagtkvkwilndvegarekaenggllfgtidtwlvklskaahi  
tdysnasrtlmfnihdlew  
ddelelltvpknmlpevkpssevygktidyhfygqevpiagvagdqqaalfgqacfergdvkntygtggfmlmntgdka  
vksesgllttiaygidgkv  
nyalegsifvsgsaiqwlrdglrminsapqsesyatrvdstegvyvvpafvlgtpywdseargai fgltrgtekehfir  
atleslcyqtrdvmeamsk  
dsgidvqslrvdggavknfifmqfadi vntsverpei qetta lgaaylaglavgfweskd diaknwkleekfdpkmd eg  
ereklyrgwkkaveatqvf  
kte  
>sp|Q2YXR9|MUTS\_STAAB  
msnvtppmmqqylkikseyqdc11ffrlgd fyemfyedakeasrvleitlkrdakkenpipmcgvpyhsadsyidtlvnn  
gykvai ceqmedpkqtkgm  
vrrevvri vtpgtvmeqggvddkqnyilsfvnmqpeialsycdvstgelkvthfndeatl1neittinpevvindnis  
dh1krqinmvtetitvret  
lsseiysvntehklmfqatqllldyihhtqkrdlshiedvvqyaaidymkmdfyakrnleltesir1kskkgtllw1md  
etktpmgarrlkqwidrpl  
iskeqiearldivdefsa hfierdtl rtylnqvydierlvgrvsygnvnardliqlkhsiseipnikallnsnmqdtlvq  
vnqllep1dd1ldileqslv  
eepisvkdgg1fkvgfnmqldeyleaskngktwlaelqakerqrtgikslkisfnkvfygyfieitran1qnfepsefgy  
mrkqtl snaerfitdelke  
kediilgaedkaieleyqlfvqlreevkyter1qqqaki isel dclqsfaeiaqkynytrpsfsenktlelvesrhpvv  
ervmdyndyvppncr1dne  
tfiylitgppnmsgkstymrqvai isimaqmgayvpckeav1pifdqiftrigaaddlvsgkstfmvemleaqkaltate  
dsliifdeigrststydg1  
alaaqamieyvaetshakt1fsthyhel1tdqa1ps1knvhvaaneykgel1flhkvdgavdds1ygiqvak1ad1pek1v  
israqvilsefeasadkks  
sisn1kmvenepinqensn1sveettd1sqkdfeqasfd1fendqeseielqikn1n1snmpiealvkl1selqnlk  
>sp|Q2YXS2|MIAB\_STAAB  
mneeqrkassvd1aerdkaekdyskyfehvyqppn1keakkrqkqvrynrdfqidekyrgmgnertfl1ktygcqmn  
ahdteviagilealgyqat  
tdintadv1lintcairenaenkvfseign1kh1kkerpdiligvcgmsqeesvvnkilksyqnvdmifgthnihlpe  
ileayl skamvvevwske  
gdvien1pkvregnikawvnimygcdkfctycivpftrgkerrpediidevrelaregykeit1llgqnvnsygd1qd  
1eyd1gd1l1qaiskiaipr  
vrfttshp wfdtdhmidvisegnivphih1pvqsgnav1kimgrkytresyl1lvkrikdripnval1ttdiivgypne  
seeqfeet1tlydevgfeh  
aytyl1sqr dgt paakmdnvp1dvkker1qr1nkkvghysqiamskyegqvtv1cegsskkddqvlagytdknk1vnf  
kapkemi gklvevr1deak  
qys1ngsfvkeepemviq  
>sp|Q2YXS9|GUAC\_STAAB  
mkifdyediqlipnkcivesrsecdttiqfgpkkfk1pvvpanmqtvmneklakwfaendfyimhrfdeearipfikhm  
qns glfasivsgvkaef1d  
fieklaqek1ipeyitidi ahghsdsvinmik hikhthipdsfvi agnvgtp egvrelenagadatkvigipgrvcitkik  
tgfgtggwqlaalnic ska  
arkpl1adggi rthgdiaksi rfgasmvmigs1faaheesppetvel dgkqykeyfgsasefqkgehknvegkkmfvhek  
gs1mdt1kemqqdlqssis  
yaggkd1ks1rtvdv1vvrnsifngdrd  
>sp|Q2YXT1|RL332\_STAAB  
mfnvr1vnt1lactecgdrny1ttknkrnperiemkkycpr1nkyt1hretk  
>sp|Q2YXT6|KHSE\_STAAB  
msn1le1kipastan1gv gfdsigma1dkf1h1svketsgkweyi fhddaskqlptdetnfiyhvaqqvaakysvd1pn

Tsompanidou\_et\_al\_Supplemental\_FASTA\_File

lciemrdsiplarglgssa  
salvgaiyianyfgdiqlskhevlqlateieghpdnvaptiyggliisgyyndvsketsvahidipdvdivvtiptyeikt  
easrralpqklthseavks  
saisntmicalahnyelagklmqdgmfhepyrqhliaefdevktiasqhnayatvisgagptilifsrkensgelvral  
nrvvtchselvdinvsgv  
kerivvyq  
>sp|Q2YXU8|TRPF\_STAAB  
mk1kfcgftsiedvtaasqlpidaigfihyekskshqtitqikklasavpehidkvcvvvnpdlttiehvlsntpintiq  
lhgtesidfiqueikkyss  
ik1tkalaadeniqninkygfvdlfiidtpsvsygggtgqtdwtlkhikdipyliagginseniqtvnqklshqgf  
dlasgievngrkdiemta  
ivnivkgdrene  
>sp|Q2YXU9|TRPC\_STAAB  
mtilaevkykqslqngyyqdklntlksvkiqnkksfinaiekerklaiiaeikskspvndlperdlssqisdyekyg  
anavsiltdkeyfggsfer  
lqalttkttlpvlckdfiidplqidvakqagasmillivnilsdqkldlynyaisqnlevlvevhdrhelervyknak  
ligvnrndlkrfvtnveht  
ntilenkpnhyysesghdasdvrkilhsgidglligealmrcdnlseflpq1kmqkvks  
>sp|Q2YXV4|TYRA\_STAAB  
mttv1fvglglliggs1asnkyhnpntniaydadtsqldkaksigiineklnyseaikkadviiyatpvaitnkylse  
lidmptkpgvivsdtgstk  
amiqqhecsllknhihlvsghpmagshksvglnakkhlfenayyilvyneprneqaantlke1l1sptlakfivttaehd  
yvtsvshlphivasslvh  
vsqkngqehh1vnl1aaggfrd1triassnvqmwditl1snktyilemigqlksqf1dlek1iesndsek1ssffaeaks  
yrdalpakqlgglntaydl  
yvdipdesgmiskvtyi1slh1nisisn1rilevrediygalkisfknptdrermqalsdfdcyiq  
>sp|Q2YXW0|GLCT\_STAAB  
mgeyivtkl1nnvvtctndqeviligkgigfnkkegmalndqtitiekiykleseqqkahyks1veiaddnvlqviid  
slnfi1sntamnvdsq1lvi  
sltdhiifaykr1kqnqvisn1pfvmetmqly1sdayhiakqv1dq1naaldvhfpedeigfialh1asnted1smhemtli  
n1vikkgidi1iesdlvtv  
dkes1qyqrf1rhvqf1lrr1rkeyihaqddf1smiknhypicyntaykiltmiqkqfdvn1sesei1y1lthihhfee  
rinqs  
>sp|Q2YXW4|PLSY\_STAAB  
mmiivm111s1y1ligafpsgfvigklffkkdirqfsgntgatnsfrvlgrpagflvtfl1dfk1gfitvffplwlpvhadg  
pistfftngl1v1glfai1g  
h1vypv1k1f1q1g1kavatsagv1lgvnp111111ai1ff1ilki1kyvs1asiva1accv1gsl1iqdy1llv1sflvs1i  
1i1rhrsniari1frgeepk  
ikwm  
>sp|Q2YXX0|SBCC\_STAAB  
mkp1h1k1nnfgpfl1keeidfskidnne1flisgktgsgktm1fdamtya1fgkasteqreend1rshfadgkqpm1svtf  
efq1lnhriykvhr1gppyik  
egnttktnakfdv1emvdgkye1reskvisgtqf1ie1llgvnadqfrq1f1l1pqgefkrfl1s1nsrekqg1l1rt1fdsek  
feaireil1keevk1kekaq1  
enryqqid1llwgeiesfdddki1g1levatqqidkvienip1llqvr1skeilafvnesketaikeyeiekk1lennikd  
ni1q1lnknkidfv1q1keqq  
peieeieak1k1l1qdi1t1l1nyienrekietkianckkdi1sktnkiln1ecdkrtidkek1mleengd1ieskisfidk  
trv1fndinkyqqsyl1nie  
r1rtegeq1gde1lnn1ikg1lekvedsignnesdyekie1lnnaitninneinvikenekakaeldk1l1gskqelenqine  
ekt1ilkn1eik1drydksk  
ld1ndkesfiseik1savkigdqcpicg1neiqd1lghhidf1dsiakrqneikeieanihtmsniavhnfeikfvnekisni  
niktqsd1s1lev1nkr1le  
nena1nnqrd1nkfi1eqmkeekdn1tlqihnkq1rl1nkneselki1crd1itefet1skynnitnfevdykkyvqdv1nqh  
ehskeiedk1liq1sqrk1li  
eqn1nhyenq1letynnd1le1neqsiememsr1n1tdndine1iawrgeqe1eqkrdykkryhefemeiar1les1tk  
dke1l1dsdk1lidey1lkk1g  
kmnt1lideysavhyqcqnn1kktq1sivshiny1nqelkdq1eif1qlaeivsgknnkn1t1enfvl1iyy1ldqiaaqan1rl  
atmsdnryq1l1rreavshg  
1sg1e1dvfd1h1snksrh1ss1sggetf1qss1ala1gl1seivqqqsggis1lesi1fidegfgt1dqet1eta1dt1l1n1ks  
tgrmvgi1shvselknrip  
lv1evksdq1qsstrfkrn  
>sp|Q2YXX1|SBCE\_STAAB  
mki1htadwh1gk1l1ngkq1ledqty1ldmfvekmkeepdi1vi1agdlydt1t1pskdaim1leqaigk1ln1elripiim  
isgnhdgker1nygaswfe  
hnq1firtdfts1inspie1ngvnyf1t1pyatvsemkhyfeddtiethqqg1itrciet1apaidevavn1lish1tvqqgk  
tsdserp1tig1tvesvq1g  
vfd1fdyvm1gh1h1pfs1ieddkikysg1llqysfseagqakgyrrvtindgi1ndvfiplks1lrq1lei1sgeyndvine  
kvhvknkndy1lhfk1knms

Tsompanidou\_et\_al\_Supplemental\_FASTA\_File

hitdpmsl kqiy pntla ltnetfnyneenttieisekddmsiemfynhitdkklsdiqskkiknilene l rked  
>sp|Q2YXX2|TRPB\_STAAB  
mnkqi qteadelgffgeyggvypet lmpaiielkkaykeakadpefqreleyylseyvgrttpltyaasyteslggaki  
ylkredlnhtgahkinna l  
ggallakrmgkkklvaetgagqhgvasatvaal fdmelvvfmgssedikrqqlnvfrmel l gakkvavedgggtlsdavnk  
alqyvwshvddthyl l gsa  
l gdpdptivrdfqsvigkeiks qil kkegrlpdaivacigggsnaigt fypfikddvalygveaagggedtdkhalaig  
kgspgv l hgtkmyliqdeg  
ggvqlahs isag l dypgigpehsyyhdigrvt fenasdtqamnal inftkhegtipaesahalsyver l aptmskedi i  
vvtisgrgd kmeti r qym  
aergland  
>sp|Q2YXX3|DAPB\_STAAB  
mkilliygammqrvar laeekgheivgvi eptprattpyqqy qhiadvkdadvaid fsnpl l fpl l deefh l plvvat  
tgekek l l nkl del sqmp  
vffsanmsygv hal tki laaavpl l ddfdi elteahhkkvdaps gtleklydvivsl kenvtpvydrhel nek rppqi  
gihsirgg t i vgehev l fa  
gt detiqi thraqskdi fangai qaaer l vnkpngfy t f d n l  
>sp|Q2YXX4|DAPA\_STAAB  
mth l fegvgval ttpftnnkvn l ea l kahvn f l lennaqai ivngttaespt l t tdekel i l k t vid l vdkrvpvi agtg  
tndteksiqasiqakalga  
daim l i t t y n k t n r g l v k h f e a i a d a v k l p v v l y n v p s r t n m t i e p e t v e i l s q h p s i v a l k d a t n d f e y l e e v k k r i  
d t n s f a l y s g n d d n v v e y y  
q r g g k g v i s v i a n v i p k e f q a l y d a q q s g l d i q d q f k p i g i l l s a l s v d i n p i p i k a l t s y l g f g n y e l r l p l i t l e d t d  
t k v l r e a y n i f k a g e n e  
>sp|Q2YXX9|PSTS\_STAAB  
mkkwqfvgttalgat l l l gacggnggsgnsd l kgeakgdgsstvapivek l nekwaqdhsdakisagqagt g a g f q k f i  
agdi d f a d a s r p i k d e e k q  
k l q d k n i k y k e f k i a q d g v t v a v n k e n d f v d e l d k q q l k a i y s g k a k t w k d v n s k w p d k k i n a v s p n s s h g t y d f f e n e v  
m n k e d i k a e k n a d t n a i v s  
s v t k n k e g i g y f g y n f y v q n k d k l k e v k i k d e n c k a t e p t k k t i q d n s y a l s r p l f i y v n e k a l k d n k v m s e f i k f v l e d  
k g k a e e a g y v a a p e k t y k  
s q l d d l k a f i d k n q k s d d k k s d d k k s e d k k  
>sp|Q2YXY7|OPPB2\_STAAB  
mfii k s m l y r l m q m i v v l f v i s t l t f i l m k l s p g n p v d k i l h l d v a q v s m e q i n a t k d k l g l n d s l l v q w w h m n h l l h f  
n l g k s f e s k e p v t q i l f n y  
a p i t l l i s f s t l v l s l c i s i p l g i a a k r f h k l s d k v i r v i s t l s i s l p a f f i g i i l l f i v t n l m n i d s v i l s q f i l p v i  
t l s l g m c a y i i r l v r s n l l  
m l l q s n i v q a s r l r g m n e r y i l i h d l l k p t i l p i i p l l g i s l g s l i g g t v v i e n l f d i p g i g y l l m d s i k s r d y p v i q g c  
v l f i g f f v v i i n t i a d l l t  
l l l d p k q r l q l g n p k s k a n t p l i s e s s d r h a  
>sp|Q2YXY8|OPPC2\_STAAB  
mhki f s k n n l i f f v f g a f i f m i v l q f f v s s e n a t k v n l s q t f e p i s w l h l l g t d d y g r d l f t r i i g a r s t l f v t v l t l  
i a i v v i g v t l g l f a g y k g  
w i e r l v l r f i d v g l s i p e f i i v i a l a s f f q p s l w n l v i s i t i i k w m n y t r l t r s i v n s e m n k p y i k m a q l f h v p t r t i l i  
r h l t p k i i p a i i v l m v v d f  
g k i i l y i s s l s f i g l g s q p p t e w g a m l q q g r d f i s s h p i m l i a p a s v i a i t i l i f n l t g d a l r d r l l k q r g e y d e s h  
>sp|Q2YXY9|OPPD2\_STAAB  
ms l i d i q n l t i k n t s e k l i k g i d l k i f s q q a l i g e s g a g k s l i a k a l l e y l p f d l t c t y s y q f d g e n v s r l s k y y g  
h t i g y i s q n y a e s f n d h t k  
l g k q l t a i y r k h y k s s k e e a l s k i d k a l s w n l q s k d i l n k y s f q l s g g q l e r v y i a s v l m l e p k l i i a d e p v a s l d a l n  
g n q v m d l l q h i v l e h g g t l  
f i i t h n l s h v l k y c q y i n v l k e g q i e q g n i d h f k y e h l h p y t e q l i k y r t q l k r d y y d  
>sp|Q2YXZ0|OPPF2\_STAAB  
mielkhvtfgynkkqmv l q d i n i t i p d g e n v g i l g e s g c g k s t l a s l v l g l f k p v k g e i y l s d n a v l p i f q h p l t s f n p d  
w t i e t s l k e a l y y r g l t d  
n t a q d q l l i q h l s t f e l n a q l l t k l p s e v s g g e l q r f n v m r s l l a q p r v l i c d e i t s n l d v i a e q n v i n i l k a q t i t n l n  
h f i v i s h d l s v l q r l v n r i  
i v l k d g m i v d d f t i e e l f n v d r h s y t k e l v q a f s y  
>sp|Q2YXZ4|FEMB\_STAAB  
mkfte l t v t e f d n f v q n p s l e s h y f q v k e n i v t r e n d g f e v v l l g i k d d n n k v i a a s l f s k i p t m g s y v y s n r g p v m d f  
s d l g l v d y y l k e l d k y l q q  
h q c l y v k l d p y w l y h l y d k d i v p f e g r e k n d a l v n l f k s h g y e h g f t t e y d t s s q v r w m g v l n l e g k t p e t l k k t f d s q  
r k r n i n k a i n y g v k v r f l e  
r d e f n l f l d l y r e t e e r a g f v s k t d d y f y n f i d t y g d k v l p l a y i d l d e y v l k l q q e l n d k e n r r d q m m a k e n s d k q m  
k k i a e l d k q i d h d g h e l l n  
a s e l s k t d g s i n l a s g v y f a n a y e v n y f s g g s s e k y n q f m g p y m m h w f m i n y c f d n g y d r y n f y g l s g d f t e n s e d y g v  
y r f k r g f n v q i e e l i g d f y  
k p i h k v k y w l f t t l d k l r k k l k k

Tsompanidou\_et\_al\_Supplemental\_FASTA\_File

>sp|Q2YXZ5|FEMA\_STAAB  
mkftnlakefgaftdsmtpyshftqvtghyelklaegyethlvgiknnneviaac1ltavpvmkvfkyfysnrgpvidy  
enqelvhffffneliskyvkk  
hrclylhidpylpyqylnhdgeitgnasndwffdkmsnlgfehtgfhkqfdpvlqiryhsvldlkdktaddiiknmdglr  
krntkkvkkngkvrylse  
eelpirsfrmedtseskafadrddkfyynrlkyykdrvlpvlayinfdeyikelneerdiInkdlnkalkdiekrpenkk  
ahnkrndlqqqldaneqki  
eegkr1qeeghnelpisagffffinpfvvyaggtstnafrhfagsyavqweminyalnhgidrynyfygvsqgftedaedt  
gvvkfkkgyanaeiieyvgd  
fikpinkpvyaaytalkkvkdrif  
>sp|Q2YXZ6|TRPA\_STAAB  
mtklfipyimgkdlienatllsengadiieigvpfsdpvadgpvimeagqqaikqgitidyifeqlekhgnqikcqv1  
mtyynii chygeqaffekc  
rdtgygliipdlpfelsqr1kqqfshygvkiislvamttddkrikeivshaegfiytvtmnattgqngafhpelkrkie  
sikainvpvvagfirtp  
qhvadikevadgiviigseivkrfksntreeiikylqsiqqtlnn  
>sp|Q2YXZ7|DAPH\_STAAB  
mvqhltaeeiiqyisdakkstpikvylngnfegitypesfkvfgseqskvifceaddwkpfyetygsqfedieiemdrn  
saip1kd1tntnariieppa  
fi reqaiiedgavvmmgatinigavvgegtmidmnatlggrattgknvhvgagavlagvieppsaspvieddvligana  
villegvrvgkagai  
vtqdvpagtvvagtpakvikqasevqdtkkeivaalrk1nd  
>sp|Q2YXZ9|CTPAL\_STAAB  
mddkqhtsssdderaeiatsnqdaqntsskrvhlkrwqfisiligtilitavitvayifinqinglnktdqanlnkie  
nvykilnsdykkqssdk1  
skaaidgmvkelkdpseyelkteqtksfnegsvdgvfvgigaemqkndqimvtspmkgspaeragirpkdvtkvngksi  
kgkaldevvkdvrgkente  
vt1tvqrgseekdvkikrekihvksveykkkgvgvitinkfndtsgelkdav1kahkdglkkivldlrnppglldea  
vkmanifidkgktvvk1ek  
gkdteaiqtsnda1keakmdisilvnegsasasevftgalldynkakvygsktfgkgvvqttrefkdgsllkytemkw1  
tpdghyihgkikpdvtid  
tpkyqslnviptktfkvgdddkniktikig1salgykvdnestqfdqalenqvkaqqtnklevtgefnetnkftel  
1vekankhdvldk1ini1  
k  
>sp|Q2YY01|MURG\_STAAB  
mtkiaftgggtvghsvnlsliptalsqgyealyigskngieremiesqlpeikyypissgk1rryislenakdvfkvlk  
gildarkvlkkekd1lfs  
kggfvsppvviaakslnptiiesd1tpglankialkfakkiyttfeetlnylpkekadfigatired1kngnahsgyq  
1tgfnenkkv11vmggs1g  
skk1nsiiren1dal1qqyqvihtgkg1kdnqvkksgyiqyefvked1td11aitdtvisragsnaiyef1t1ripm11  
vp1g1dqsrgdqidnanhf  
adkgyakaiddeeq1tvqi11qelnemeqertriiinnmksyeqsytkaelfdkmikda1n  
>sp|Q2YY04|ARLS\_STAAB  
mtkrk1hnwiiivttmitfv1f1fcliiiff1kdt1hnse1ddaerssdiinn1fhskpvd1sald1nas1gnfqiie  
iydehnnk1fetsndntvr  
vepgyehryfdrvikrykgidyliekepittqdfkgs11hs1enydnivkslyiialafgviatiitatisyvfstq  
itkplvs1snkmierrdg  
fqnlq1ntnyeeidn1antfnemmsqieesfnqqrqfvedashe1rtplqi1qgh1n1iqrwgkdpavlees1nisie  
emrriik1veel1eltkgd  
vndisseaqtvhindeirsrihs1kq1lhpdyqfdtd1tskn1eikmkphqfeqlflifidnaikydvknkkikvkr1kn  
kqk1ieitdhgigipeedq  
dfifdrfyrvdksrsrsqggng1g1siaqkiiq1nggsikikseinkgttfkiif  
>sp|Q2YY05|ODO1\_STAAB  
mtnerkevseapvnfgan1g1m1d1ydd1lqdpssvpelqvlfstikndsivps1kstssqnsdgtikrvmlidnir  
qygh1kadiypvppkrkh  
vpkleiedfd1dqqt1legisagivsdhfadiydnyea1lrmekrykgpiafeythinntergwlkrietrykv1lnn  
nekralfk1layvegfeqy  
1hknfvgakrfsiegvdalvpm1qrtitiaakegikniqigmahrgr1nvlthvlekpyemmisefmhtdpmk1lpedgs  
1q1tagwtgdkyh1ggik  
ttdsygtmqria1annpsh1eivapvvegrtraaqddtqragapttdhhkampiiihgdgaypgqginfetm1gn1kgy  
stggs1hiitnri1gftte  
pidarsttystdvakgydypi1fhvnaddveatieaidiamefrkefhkdvvid1vgyrrfghnemdepsitnppvpyqnr  
kndsveyvfgk11vnegvi  
sedemhs1fi1eqvkel1rqahdkinkadkmdnpdmekpaelal1plqadeqsftfdh1keinda11typdgfn1kk1nkvl  
kkrhpefnkedg1vdwaqa  
eqlafati1lqdgtpi1rtgqdsertg1fshrhav1hdeqtgetytp1hhvnpqkatfdihnsplseaavvgfeygynvenk  
ksfniweaqygd1fanmsqm  
ifdn1f1ssrskwgersg1t1f1phayegqgpehssar1erf1qla1aennctvvn1ssssnyf111raqaas1dseqm1rp



Tsompanidou\_et\_al\_Supplemental\_FASTA\_File

lvmspksl1rnktvakpi  
deftsggfepiltesyqadkvtkvilatgkmfidlkealaknpdesvllvaierlypfpeeeietllaqlpnleevswvq  
eepknngawlyvypyvkv1  
vadkydlsyhgrigraapaegdgeihklvqnkiena1knn  
>sp|Q2YY06|ODO2\_STAAB  
mpevkvpelaesitegtiaewlknvgdsvekgeaileletdkvnvevseeagvlseq1asegdtvevgqaiavigegsg  
naskensndntpqqneetn  
nkkeettnksadnaevnqndynqqrnatpsarryarengvnlaevsptndvvrkedidkkqqapastqttqqapake  
ekkyngyptkpvi rekmsr  
rkktaakk1levsnntamlttfnevdmtnvme1rkrkkeqfmdhdgktlgfmsfftkasvaalkkypevnaeidgddmi  
tkqyydigvavstddgl1v  
pfvrddckknfaeieaeianlavkarekk1glldmvngsfittngg1fgsmstpiingnqaailgmhsiiitriaidqd  
tienrpmmyialsydhrii  
dgkeavgf1ktikelienped11les  
>sp|Q2YY09|Y1265\_STAAB  
malkhyknsdstvfndakalfdlnkni11kgptgsgktklaet1sevvdtpmhqvnsvldtes11gftiktnaegqq  
eivf1dgpvikamkeghil  
yideinmakpet1pv1ngv1dyrrqitnpytgevikavpgfnviaaainegyvgtlpmnealknrfvvi hvdyidgdilkn  
vikeqs11qddkqieqiik  
fned1rtmskqgqiseeasira11d1cdlitvmpveraikrti1dkledereqqaiynave1nf  
>sp|Q2YY11|BRNQL\_STAAB  
mnkntwvigft1famffgagn1ifppn1g1dsgqffwpailafvltgid1p11g1v1galdkegyigalnkispkfsilf  
lii1y1tig1p1faiprtas  
tsfemtitpiihsnssialfifti1yfivvlyic1npsklidrigs11tp111itilamiikgyldfsgntagkgnealy  
hsnfssfaegftqgyltmd  
aiaaiafsmivvnavklgtiktqnqifkqtltagliaavalifiyis1gyignhmpvsdmt1dq1kskdrnigty11ttm  
astgfgsfgkyl1giival  
aclttacgligavseyfhrivpkvsykafvlvfilmsfianqg1navismsipv1sivypvaitv111iliakfiptkr  
isqqipviivfilsifsvi  
sk1gw1kinfies1p1rays1ewfpvaiiatilgy1vg1fvkqdpikyqqe  
>sp|Q2YY12|TELL\_STAAB  
mtensfkeshp1ddfisdke1snttiqkek1tieqqkqvdtiskqin1dneg1lafgsd1qkqmsqfshqmldevqsk  
dvgpigdt1sd1msklksv  
npne1ntdkpsmlkri1fsrakssineifsrmsvsaqvdritiq1qkhqth1trdie11dtlydknkqyfd11slyiaa  
qqk1q1enek1pq1qqqa  
qqstnqmdiqqvadmqqfidr1dkryd1q1srqialqtapqirmiqnvnqalaekiqssiltsiplwknqmaialt1mr  
qrnavaaqravtdtnd11  
tanaem1kqna1etatenergivd1dt1krtqrni1etieet1iiqqhgreerq1aekelqq1eqd1ksh1vnikgpnkq  
s  
>sp|Q2YY17|MSA\_STAAB  
mky1i1s1van11vfgv1saig1nini1aamm11vipit1sig1lffktn1dkty1iffn1l1fidfy1y1ynvhl1malprf  
nsyikaemmeledidv1it  
skdfgfde11fft1y11111111y1lkkqvktks  
>sp|Q2YY21|Y1253\_STAAB  
mne1efvtkhrh1hghpels1hefettayikaf1ds1nikydc1letgviay1legndshtiayradidalpileendvp  
yrsqsdhvmhacghdghtt  
a1m1fvqrckdmqdsq1pqnvvfi1fpaee1tgganr1ikagafdkypieavf1ghvnpfadegiavirdeeitasate  
yrff1tg1sshvadkeqgh  
scgealghv1tq1sqiqqf1hng1lkrnivhighfkageaintvpsngylegtirtydidd1tivknqmkiavesk11fn  
vdcev1kfaegy1p1t1nspk  
1rtqieda1ikad1nvydkptp1f1gedfsfygq1lapayfv1figtrnedkgfv1tg1htsh1nfdekvl1invnfyen11  
nnykev  
>sp|Q2YY38|CVFC\_STAAB  
me11rieptpspntmkv1sy1tredk1sntykkveetqpefinq11sidgits1f1hvmn1flavdkspkadwevilpdika  
afsdankv1lesvnepqidn  
hfgeikaell1tfk1g1pyq1k1tsadqel1req1p1q1tyvdqmtqaq1tahdniv1fmrkw1d1gnrygnieevmdgv1eevlat  
ypesq1p1v1kha1leenha  
tnnyhfyrhvs1deyh1atdnw1ktr1rt1nhf1pkptfedip11d1alsdekvpvrrqav11lgmieskeilpy1ykg1rdk  
spavrrtagdc1sd1gype  
alpemv111ddp1k1ivrwaamf1fdegnaeq1palkahindnafevkl1qiema1sriengdealgsvwkqmanrti  
>sp|Q2YY44|MSRB\_STAAB  
m1kkdkse1tdiey1vtqengteppfmneywnhfdkgvyvdki1sgkpl1tseek1fhsecg1wpsfska1dddeie1elvdk  
fgm1rtevrseesnsh1gh  
v1fndgpkesg1ryc1nsaa1qfipyek1lee1gygd1ishfdk  
>sp|Q2YY45|NORB\_STAAB  
mekpsreafegnnk11igiv1svitfw1faqs1vnnv11iledsfntd1dig1tvniavsital1fsgmfvvgvggladkygrik  
1tnigi11ni1gs11iis  
nip1111igr1iqg1saacimpat1siiksy1yigkdrqra1syws1gswgsgvcsffggavat11gwrwifilsiiis1

Tsompanidou\_et\_al\_Supplemental\_FASTA\_File

ialflikgtpetksksis1  
nkfdikglvllvimllslnilitkgseIgvtsllfitllaiagsfslfivlekratnplidfkIfknkaytgatasnfl  
lmgvagtIivantfvqrgl  
gysllqagslsitylvmlimi rvgekllqtlgckkpmIigtgvlivgeclisltflpeilyvicciigyIffglglgiy  
atpstdaianaplekvvgv  
aagiykmasalggafgvalsgavyaivsnmtniytgamialwlnagmailsfviilllvpkqndtql  
>sp|Q2YY49|CCA\_STAAB  
mdkslfeqarpiIeqiqdngfeayyvgsvrdyvmgrnihdidittsatpdeiesifshtipvgkehgtinvvfnnenye  
vttfraeedyvdhrrpsgv  
tfvrdlyedlqrrdfmnaIamdtayklydyfdgqqdinrriirtvgiaaerfedaIrmircIrfqsqIsfeiatetfe  
amrtqmadikflsierivi  
eItklmrginveksfnhIkslkafnympyfehldmnqinvtepidlelliaivsvkfdinyslkplklsnrqvkdiinqyi  
qimnalpsiftkeqlkifv  
ydydtnIknimvaadvlkandi qgheplivnlqtidetlhhIpmhnrkdmmvnggvImahlnaksgpwIkdvlrqieia  
ivtgkvsneeteilkwvdn  
hvki  
>sp|Q2YY51|DING\_STAAB  
mgmatyavvdIettgnqldfdidiqigitfvnrniqiidtyhsmirtnleippfiqaltsieenmlqqapyfnqvaaggiyd  
nmkdcifvahnvdfInfi  
kkafkdcniqyrpkrvidtleifkiafptdksyqlselaeahgitlanahradedaattaklmilafekfekIpldtlkq  
lyylskqlkydlydffem  
vrqydakplaksyekfeqiIyrkqvdfkkpttnyngslkslyskavdqIgltyrpqqlylaetil dqImhsekamieasI  
gsgkslayllaaImyniet  
gkhvmistntkllqsqIlekdi pamnealnfkinaIlikksdyisIglisqilkdtsnyevniIkmqlliwi tetpsg  
diqelnIkggqkmyfdqi  
etyvparhdvhyynfikrnaqniqigitnhahIhsvdenvsiyqlfddcivdeahrIpdyaInqvtneIlyadikyqlgl  
igknenekllkaIdqlekq  
riIekldiapidifglkasmneihelneqIfstiftiindsdyddihrfhnvftfetkdilkdIhaiidklnktleif  
ngishktvksIrkqlllylk  
dkfknieqslkaghtsfisiknlsqkstirlyvkdyavkdvltkqvlekfkslifisgtIkfnhsfdafkqlfnkdvhfn  
tfevntsIqsakntsvfip  
sdvasyqkniideyvasivsyiIeyttitsskclvlftsykmmhmvdmlnelpefedyvvl tqqnqnykivqqfnfd  
kaiIlgststffegfdqan  
gikcvmiakIpfmknkhakywImdseftstfkeyvlpdavtrfrqglgrIirndrgiivsfdrlinsnykni feqtI  
enyraqkgdiqqfgkllrq  
iqkkkk  
>sp|Q2YY52|SYN\_STAAB  
mkttikqakdhInqdvti gawltnkrssgiaflqlrdgtgfmqgvvkvseveevfklakeitqesslyvtgtitednr  
sdIgyemqvksieiviseah  
dypitpknhgteflmdhrhlwl rskkqhavmkirneviratyeffnkdgftkvdppil tasapegtseIfltkyfdqdaf  
lsqsgqlyleaaamahkv  
fsfgptfraeksktrrhIiefwmi egemaftnhaesleiqeqyvthvkvsvlenckleIkilerdtsklekvatpfpris  
yddaiefIkaegfdiIewg  
edfgaphetaianhydIvpfitnyptkikpfymqnpeneetvl cadIiapegygeiiggsservdIelleqrvkehgl d  
eeaysyldlrrygsvphc  
gfgIglertvawisgvehvretapfrllnrlyp  
>sp|Q2YY59|Y1311\_STAAB  
mvktvyvtgyksfelni fkdapeihylkqfikhkieqll deglewvliqqmgieIwttevvieIqrtydsIkfavitp  
fghtekwnehnqskyani  
ikhadyvdsifhtsyqgpfqfkqadqfmIehsdqtlIlydeeqeaspkffkqmlvdfmdktnytcdIvtfdeI tafi ndI  
qwsedqsf  
>sp|Q2YY66|DHA1\_STAAB  
mlvavvkeIkggegrvactpenvrkltaaghkvi veknagIsgsfsndmyekegakivtheqaweadlvikvkephesey  
qyfkknqi iwgfIhIassk  
eivekmqgvviaisgetiikngkaelIapmsaiagqrsaimgayyseaqhgggtIvtgvhenvdipgstyvi fgggva  
atnaanvalgl nakviie  
IddrikyIedmyaekdvtkstpenIaeqikkadvfistilipgakppklvtremvksmkkgsvIidiaidqggti et  
irpttisdpvyeeegvihy  
gvnqpgavprtstmaIaqqni dyileicdkgleqai kdnealsagvniyqqgetnqglatshdI dykeilnvie  
>sp|Q2YY67|THD2\_STAAB  
mtntvtIqtahivslgdieeakasikpfi rrtpliksmylsqsitkgnvflklenmqftgsfkfrgasnkinhl tdeqk  
ekgiIaasagnhaqgvalt  
akllgI dativmpetapqakqqatkgygtkvilkgknfnetrlymeeIakengmtivhpyddkfvmagqgtigleilddi  
wnvntvivpvggggliagi  
atalksfnpshIigvqsenvhgmasesfykrdltehrvdstiadgcdvkvpggeqtyevvkhIvdefilvieeeiehamkd  
ImqrakiItegalptaa  
IIsqkinnkwl edknvvalvsngnvdItrvsgviehgl niadtskgvvg  
>sp|Q2YY76|EBPS\_STAAB

Tsompanidou\_et\_al\_Supplemental\_FASTA\_File

msnnfkddfeknrqsidtshqdhtevekdqselehqdtienteqqfpprnaqrkrrrrdlatnhnkqvhnesqtsedn  
vqneagtidhqvesshst  
esqepshqdstpqqheeyynknafamdkshepiedndkhetvkdaenntehstvsdkseaeqsqqpkpyfatganqant  
skdkhddvtvkqykdeskd  
hhsqkkaaigagtagvagamaaskakhsndaqnsnsgkannstedkasqdksekhngkkaaigagtaglaggaas  
ksasaaskphasnasqnh  
dehdhdrdkerkkggmakvllpliaavliigalafggmalnnhngtkenkiantknknadeskdkdtskdaskdksk  
stdskskedqdkatkdes  
dndqnnanqannqaqnnqanqqanqanqqqqqrrqgggrhtvngqenlyriaiqyygsgspenvekirranglsgnir  
gqqivip  
>sp|Q2YY79|KCY\_STAAB  
mkainialdgpaaagkstiakrvaseismiyvdtgamyraltykyklklnktdfaklvdqttldltykadkgqcvil  
dvtfdlrrndvtqhvsvya  
skepvr1favkkqkelaekgvi vmdgrdigtvvlpdadlkvymiasveeraerrykdnqlrgiesnfedlkrdi  
eardqy  
dmnreisplrkaddavtld  
ttgktieevtdeilamvsqik  
>sp|Q2YY82|GPDA\_STAAB  
mtk1tvfgmgsfgtalavlaenghdv1mwgknqdavdelntchtnkkylyakldvniatsdmtkaiqfadiyl  
malp  
tkamrevatqindkltskk  
tfihvakgiengtfrvsemiedsispeynagigv1sgpshaevvvkqpttvaasskdknvskltqdlfmndyl  
rvytn  
ddl1gvelggalkniiaava  
sgivagigygdnaakaalmtgrlaeisrlgek1gadpmtflglggigdlivtctsthsrnf1lgyklgqgesmdqal  
semn  
mvvegiyttksvylakek  
nvdmpitnalrv1feni svkecvkd1merdkkse  
>sp|Q2YY85|UBIE\_STAAB  
madnkankeqvhrvfqniskkydr1nniisfeqhkvwrkrvmkdmgrkgtkaldvccgtgdwtialskav  
gptgevtgi  
dfsenmlevgkektasmen  
vklvhgdame1pfgdnsfdyvtigfg1rnvpdy1valkemnr1kpggmvvcl1etsqpt1pafkqmyalyfk  
fvmpifgk  
1fakskeeyew1qqstfnf  
pgkeelkrmfefagfinvr1rsftggvaamh1gykekdntkgd  
>sp|Q2YY88|AROC\_STAAB  
mry1tsgeshgpq1tvivegvan1evkvedinremfkrqgygrgrrmqiekdtveivsgvrngytlgspit  
mvvtndd  
fthwrkimgaapisdeere  
nmkrtitkprpghad1vggmkyhrd1rnv1erssaretaarvagalckv1leqldieiyrvveiggikdkdfy  
dset  
fkan1drndrvridg1aq  
amrdki deakndgds1ggvvqvvvenmpvgvgsyvhdrk1dgriaqgvvsinafkgsfgegfkaaekpgse  
iqdeily  
nte1gyyrgsnh1gg1egg  
msngmpii1vngmkp1tlykplnsvdintkedfkatiersdsca vpaasivcehvvafeiakal1eefqsn  
hieqlkqq  
iierrq1nief  
>sp|Q2YY89|AROB\_STAAB  
mk1qttypsnypiyvehgaikyigtylnqfdqsfl1ideyvnyfankfddifsyenvhkvii1pagekktk  
teqyqet1  
eyilshhvtrntai1avvg  
gatgdfagvaat1lrgvfiqvpttilahdssvggkvgin skqgknl1igafyrptaviydl1dflkt1pfeq  
ilsgyaev  
ykhallngesatqdieghf  
kdreilqslngmdkyiakgi etkl1divvadekeqgvrkfl1n1ghtfghaveyyhki1phghavmvgi  
iyqfivana1fdsk  
hdinhyiqy1l1q1gypldm  
itdl1dfetlyqym1sddkndkqgvqmv1ir1qfgdivvqhdvq1t1qhaceq1ktyfk  
>sp|Q2YY90|AROA\_STAAB  
mvneqi1disgpl1kgeievpgdksmthraim1as1aegvstiykpl1gedcrrtmdif1llgveikedde  
klvvtspgyq  
sfntphqvlytgnsgttr  
llag1lsg1giesv1sgdvsigkrpmdrv1rplksmnaniegi ednytpliikpsvikginykmevasaqvks  
ailfas1  
fskeati1kel1dvsrnhte  
tmfrhfnipieaeg1sitttpeariykpadfhvpgdi1ssaaffivaal1tpgsdvtihvnginptrsgii  
divekmgn  
iq1fnqttgaeptasiriq  
ytpm1qpiti1ege1vpkaide1lpvia1lctqavgtstikdae1kvketnridttadm1n1l1gfelqpt  
ndgliihpsef  
ktnatvds1tdhri1gmm1a  
vas1l1ssepvki1kqfdavnvs1fpgf1pk1k11eneg  
>sp|Q2YYB7|NUSE\_STAAB  
msrkesrvqafq1l1fqlemkdsd1tinea1sfikdgnpd1dfefihw1vsgvkdhepv1detispyl1kdw  
tiar1l1ktdr  
i1l1rmatye1l1hsdtpakv  
vmneave1tkqfsdddhykfingv1snikk  
>sp|Q2YYB8|EX7L\_STAAB  
msdy1svsa1tky1kykfdqdp1h1qsv1ikge1snfkkhssghly1fnvkdkesvisammfkgask1nfep  
kegdev1le  
arvsvferrgnyqi1yvnm  
q1dgi1gnlyqk1lea1kkk1teegcfdkankksipkfpkkiav1tastgaairdihstinsrf1laeqi  
qistlvqgekak  
ddi1ekieyads1gvdtii  
vgrgggsied1wnfn1eavvraiyncktpi1savghetdft1sdfaadi1raatptqaaviatpdqye1l1  
qqi1qqyqft1t  
rfikkh1leqqrk1hiehl1ss

Tsompanidou\_et\_al\_Supplemental\_FASTA\_File

yykfkqptllydqqiqrddlekr1kqqiqatfeqqrhr1ml1lqqryn1kallssvnqeqqnn1qltnqlvkl1nkskils  
ykndlknkvenl1n1sptn  
tm1rgyai1vkkdevitstkdl1tendql1t1tmkdg1vdakvtkvrcnd  
>sp|Q2YYE6|GLMM\_STAAB  
mgkyfgtdgvrvganqel1tpela1k1gryggyv1ahnkgekhrv1vgrdtrvsgemlesaliaglisigaevmrlgiis  
tpgvay1trdmgaelgvmi  
sashnpvadng1kffgsdgfkl1sdegeneiea1ldqenpel1prpvgndivhysdyfegaqkyl1sy1kstv1dv1nfe1gkiv  
ldgangstss1ap1f1fgd1  
eadtetigcspdgyn1nekcgsthpek1aekvvetesdfg1afdgdgdr1iavdengqivdgdqimfiigqemhknqel1n  
ndmivstvmsn1gfykale  
qegiksnktkv1gdryvveemrrgnyn1gqe1qsg1hivmmdy1nttg1d1l1tgi1qlasvikmtgk1selagqmkkypqsl1n  
vrvtdkyrveenvdvkev1m  
tkvevemngegr1lvrpsg1tep1vrv1mveaatdedaeryaqqiadvvqdkm1g1dk  
>sp|Q2YYE8|MTLD\_STAAB  
mkavhfgagnigrf1gyiladn1nvktfadvnee1inalahdhqydv1ladesk1tttrv1n1vdain1smq1psealkqai1  
egdi1ttavgvni1pi1ak  
sfap1f1kek1th1vn1vacena1matd1tkav1d1itg1p1gn1ih1fansavdr1v1p1qknen1ldvm1vep1fyewv1vek1daw  
ygpel1nh1ikyvd1l1tpy1e  
rk1l1tvntghay1layagk1fadkatv1davkdssieag1rrv1laetsqy1itnefd1fteaq1agyveki1idr1fn1s1yl1sdev  
trvgrgt1rk1igpkdri1k  
p1ty1ynkd1ertg1l1ntaa1l1kyddtadqetveknny1kehgl1kaf1seyakvddg1ladei1eayns1s  
>sp|Q2YYH4|URTF\_STAAB  
m1dknq1ak1yqnh1ceyeki1msnnekealeekias1ld1dfiak1ynd1yink1tiddvsav1sevkydik1sqmsd1eikr  
1eeqg1qai1kegg1fav1l1m  
aggqg1tr1gyk1gpkgs1fe1egvs1fel1qan1q1kt1nhq1sght1i1qwy1imis1din1heet1ay1feah1sy1fyd1qea1ih1ffk1qd  
niva1seeg1kl1l1nq1gri  
metp1ng1ggv1fks1dk1agy1leems1nngv1kyi1f1n1ni1dn1lvk1v1dp1f1ag1ft1veh1dyd1itsk1ti1qpk1gesv1gr1vn1vdc  
kdtv1ley1se1dpevan1qfn  
nanig1ih1af1kl1g1fi1navnre1lpyh1aikn1kq1lden1fgv1ieqpt1kfel1fyfd1itygts1fvt1lqv1preef1sp1knke  
gkds1vatated1rrm1gli  
>sp|Q2YYH7|MDEP\_STAAB  
mi1vny1knk1fyn1l1ttm1v1f1fiv1sga1f1t1f1l1g1fg1lyg1sr1ili1yfr1l1gd1ftyn1rsmydn1llyygsyi1ifgyfi1fav  
ehl1mdy1frkm1penay1frg  
atfh1l1sy1tvatt1fyfi1ih1nyvy1inid1fwim1vi1g1f1y1vck1l1q1f1ypesk1n1nrk  
>sp|Q2YYJ4|LACB\_STAAB  
mkialgc1dhiv1tdtkmr1vse1f1k1skg1hevi1dv1gty1df1tr1thyp1ifgk1kvge1qv1vsgnad1gvci1cgt1gv1ginnavn1kvpg  
vrsal1vrd1mts1alyake1l  
nanv1ig1fggri1gel1mcdi1dafinaeyk1pteenk1liak1ikh1etrnad1qad1phffdef1lekwd1rgeyhd  
>sp|Q2YYJ5|LACC\_STAAB  
mi1l1t1l1npsvd1syp1l1talk1l1ddvnr1vqev1sktaggk1l1nvtr1v1aqv1gepv1lasg1figgel1gqfi1akk1ld1lagik1haf  
ynik1getrnci1al1hegg1q  
te1leqg1pe1dn1gea1agfi1khfeq1l1ekveava1isg1l1pkg1lnq1dyyaqi1ierc1qnkg1vpv1ildcsgat1qtv1lenpyk1p  
tvikpn1se1lyq1l1nq1pld  
es1les1kqavs1qpl1fegvewi1ivs1lgaqg1afakhnht1fyrvnipt1isv1l1npv1sgdst1vagitsail1nhend1d1l1kkan  
t1gm1n1ageaq1tgyv1n1n  
ydd1fn1qie1v1ev  
>sp|Q2YYJ6|LACD\_STAAB  
mksnqkias1ieq1l1snnegi1sala1fdqrga1krmmak1hqteept1vaqieq1klv1vae1l1tqyass1l1dpeygl1pasda  
rnkdcg1l1layektgydvn  
akgr1pdc1l1vewsakr1keqganavk1f1lyydvddtee1invqkkayierig1secvaed1pff1lev1tyddn1pdngs1vef  
akvkprkvneamk1f1sepr  
fnvdv1kvevpvnmkyvegfae1gevv1ytkeea1aqh1fdqdvath1lpyiyl1sagvsael1fget1kfaheagakfngv1cgr  
atwsgavqvyieggedaar  
ewl1rttg1fknidd1nkvl1kdtatswkqrk  
>sp|Q2YYL3|RL18\_STAAB  
mi1skidknkvr1krharvrt1n1sgtaekpr1nvyr1snkhiyaqi1iddnkgvt1laqasskdsdiattatkvelatkvgeai  
akkatdkgikeivfdrggy  
lyhgrvka1laeaaresg1lef  
>sp|Q2YYM2|RPOA\_STAAB  
mi1eiekprietie1sedak1fgkfvvep1leryggt1l1gnsl1rrill1ss1lsgaavkyieiegvl1hefsavdnvvedvstiim  
nikqla1kiyseekt1lei  
dvrdegevtasdi1thdsdve1l1npe1lkiatvskggh1k1ir1lvankgrgyalaeqnn1tsd1lpigvipvds1lyspvervny1t  
ventrv1gqssdfdk1l1tdv  
wtngs1tpqesvs1laakimteh1nifvg1l1deaqnae1imi1eekedqkekv1lemsiee1d1svrsync1kraginsvqela  
dkseadm1mkvrn1lgrks1le  
evkyk1led1gl1rked  
>sp|Q2YYM4|ECFA2\_STAAB  
medkns1v1fknvs1fqyqs1dasft1kdvs1fni1pkgqwt1sivghngsgkstiak1lmi1giekvksgeifynnqaitddn1fek

Tsompanidou\_et\_al\_Supplemental\_FASTA\_File

l rkdigivfqnpdnqfvgs  
ivkydvafglenhavphdemsrrvsealkqvdm leradyepnalsggqkqrvaivasvla lnpsviildeatsml dpdarq  
nll dlvrvkvksehnitiis  
ithdlseameadhvi vmnkgtyvege taieifdhaeglttigldl pfpikinqlghqtsfltyeglvdq  
>sp|Q2YYM5|ECFA1\_STAAB  
mtirfdnvsytyqkgtpyqh qaih dvntefeqqkyyaivgqtsgskstliqninal lkpttgvttvdditithktdkkyi  
rpvrkrigmvfqpesqlf  
edtveremifgpknfkmnldeaknyahr lmdlgfsrdvmsqspfqmsggqmrkiaivsilamnpdiivvdeptagldpq  
skrqvmrllkslqtdenka  
iilishdmnevaryadevilmkegsivsqtspkelfkdkkeladwhialpeivqlqydfeqkhqtklkdia lteeafvsl  
ykewqhek  
>sp|Q2YYM7|TRUA\_STAAB  
mri lveiyaggnnflgfqi qngrtvqqqfekllqrmhkrhvr ihpsrtdrgvhaiqqyfhfdtel nipmsqwqyamnr  
tlpvd iyvnnvvtvdddffh  
crydcvgkryrykvvyqahrdp fqr glktfi pep ldl dkmnraaqqfigthdftgfcskteveskvr tlyqseivktdd  
gfdyivtgs gfl ynmvrvl  
vaf lievgkgrhevsvdpkl lesknrknvpftapaeglylekiyl dene llkdfgndikihrkkslqnd  
>sp|Q2YYN5|FEMX\_STAAB  
mekmhitnqehdafvkshp ngdlqltkwaetkkltgwyarriavgrd geiqgvaqllfk kvpklyptlcyisrgfvvdy  
snkealnalldsa keiaka  
ekayaiki dpdvevdkgtdalqn lka l gfk hkgfkegl skdyi qprmtmitpidknddel lnsyerrnrskvr lalkrgt  
tversdreglktfaelmki  
tgerdgfltrdisyfeniyda lhedgdaelfvk ldpkeniakvnqel nelhaeiakwqqkmetsekqakkaqn mindaq  
nkiaknedlkrdlea leke  
hpegiylsgallmfagsksylygassnefrdfl pnhhmqytmmyarehgattydfggtdndpdkdsehyglwafkkvw  
gtylsekigefdyvlnqpl  
yqlieqvkr ltkakiki srklkrk  
>sp|Q2YYQ6|URE1\_STAAB  
msfkmtqnqytslygptvgdsirlgdtnl faiekdyavygeeatfgggksirdgmaq nprvtrddvnvadlvisnavii  
dydkvvkadigikngyifa  
ignagnpdimdndvdi igsttdiaaegki vtaggidthvhfinpeqaeva lesgitthigggtgasegskattvtppgw  
hihrml eaaeglpinvgft  
gkgqatnptal ieqinagaiglkvhedwgatpsalshaldvade fvdqialhadtlneagfmedtmaavkdrvlhmyhte  
gaggghtpdliksaafsnl  
lpsstnptlpythntvdehldmvmithhlnaaipediafadsrirketiaaedvlqdmgvfsmisssdqamgrvgevit  
twqvahr mkeqrgpldgdf  
ehndnrikryiakytinpaithgiseyvgsiepgkladivlwdpiffgvkpelvkvkglinsavngdangsiptsepmk  
yrkmygyggnltsstmf  
vsktayenginra ln lkrmvrvpknirqlskadmknnsatpkldvdpqtyevyv dgeki tsnaatelpl tqryflf  
>sp|Q2YYQ7|URE2\_STAAB  
mipgeiitksteveinnhpetv eventgdrpiqv gshfhfyeanaa l dferemaygkhl dipagaavr fepgdkkevq  
lveyagrki fgfrgmvg  
pidesrvyrptdendeyagvygdngdenvnkkggkrs  
>sp|Q2YYQ8|URE3\_STAAB  
mhftqreqdklmivvaaevarrkarglkl nhpealalisdelle gardgktvae lmsygrqilnkedvmdgvehmitdi  
eieatfpdgtklitvhphi  
v  
>sp|Q2YYR6|FDHD\_STAAB  
mnkdvs lggpivryedgkl fnttdqyvtefltimvngeefatvicsptnleelvigflasegailkrdelksvliddsk  
gfahvgnkd l gdrfqyst  
krmiasccgksrefyfqndaaia ktsmskitltpiqiinmmtr lqsashiyqetgglhnaaisdgl tffvhrqdigrhna  
ldklygfcirqhitvrkv  
lifsgrisseilikaakigvgvilksapttlavtlandlnitavgfirnggfniyshperiidseq  
>sp|Q2YYs2|MOAC\_STAAB  
mtefthinqqghakmvdvskqitkrtavahssitvnetiykqisnntntkgnvln taqiagimaakntstiipmchplp  
ltgidvhfswdetnaplyt  
lniqttvsttgktgvemeal taasataltiydmtkavdkgmigetylesksggksgdfqrsqg  
>sp|Q2YYs7|MOBA\_STAAB  
mkaiilagghsvrfgktafaevngetfysrviktlestnmfnei iistnaqlatqfkypnvviddenhndkgplagiyt  
imkqhpeee l ffvsvdtp  
mitgkavstlyqflvshlienhdvaafkedgrfiptiafyspnal gaitkahlhsdnysfknyhelstdyl dvr dvdap  
sywykninyqhdldaliq  
l  
>sp|Q2YYs8|MOAA\_STAAB  
mveqikdklgrpir dlr lsvtdrcnfrcdycmpkevfgddfvlpknelltdemariakvyaelgvkkiritggeplmr  
rdldvliaklnqidgiedi  
glttnglllkkhgklydaglrrinvsldaiddtlfqsinnckattileqidyatsiglnvkvnvviqkginddqiip  
mleyfkdkhieirfiefmd

Tsompanidou\_et\_al\_Supplemental\_FASTA\_File

vgndngwdfskvvtkddmltmi eqhfeidpvepkyfgevakyrrhkdnvgqfglitsvsqsfcstctrarlssdgkfygc  
lfatvdgfnvkafirsgvt  
deetkeqfkalwqirddrysdertaqtvanrqrkkinmnyigg  
>sp|Q2YYS9|UREF\_STAAB  
midhthlr1fqfcdsqfptgafshsfgletyiqrni ihddhtfiawlkmflqeqltsydg lamrlvydalenddtqkv1h  
idklmfvqn1pketrvgak  
qmgtrivklalelynspwiawyhqmqdkkaklnpaicftmlghylgvdietidylyqnvssltnavraiplgqtag  
qkivthmipyieetrkqif  
elkeadfgmtapglelnqmahenvnvrfis  
>sp|Q2YYT1|FDHL\_STAAB  
mqehlvtldgkdy1vepgtn1lefiksqdtfvpsicynesmgpiqtcdtctveidgkierscstvidrpmvntvndv  
kdaqkealdri1ekhmlcy  
tvcdynngdceihntmdawglqhqtyeykekpyekdygpfyrydpnqci1cgrcveacqdievnetiridwdrehprviw  
dndvpinesscvscgqcat  
vcpcnammevnmegnagymtdtepgslaamvd1tkkaepgygplfaisdseaemrkerikkktktvctycgvgsfevwtk  
dreilkvqpsdspankia  
tcvkgkfswhinsdqr1tkplvrkngefhevewdealnviadnftsikekygpda1sfisskatneesy1mqklarqv  
igtndvncsrycqpak  
glfrtvghggdsgsiedlekaamsv1igtntaeahpviasrmkraqlfgqkihvfdirkhemaeradr fyqpkpgtdla  
wlsavtky1idhd1hdka  
ieewvedfdeyyksletftmafaeatgipeaelikfaecakaesvviwamgitqqdigsdsstaisn111vtgnyrr  
pstgayplrgnnavgqcsd  
mgsmpdkitgyqsieaddirakfekeygvk1npkvgkdnhemvegvdgeihslylygedtgivdsn1fvqaafe1df  
mvvqdef1tftatfadv1  
paspslekdgftnterriqrlyqa1kplgeskpdwki1fqaiank1gfdwnykhpseimdeiar1tplyagvsyerlegf  
nslqwpvhpdgtdepi1yl  
egfnfdngkak1fplsfndnyfkqdevydhvnngr1lehfhegnmtypmi1kykvprafveispelaedrgihegaevk  
1isetgeav1qvhvtdrvk  
gkeiyip1nndamengdlgain11tnsdvdqytdtpsyrtsr1leviakrgksp1npnnfrvnkkrhpqysvqvqkkwe  
rpdv1fpgnqvdk  
>sp|Q2YYT9|Y2178\_STAAB  
mekvyvagaipevg1k11qehfevemyegk1vdkdt1ikgvknatalis11stnvdkdvidagkd1kii anygagfnni  
dieyareksidvnttpkas  
tnatad1tig1v1aiarrivegdq1srttgfdgwap1ffrgrevsgktigi1glgeigsavarrarafmdvlytgprk  
eekereigakyvd1dt11k  
nadfitinaaynpkmh1idteqfkmmkstay1inasrgpivheqalvqalkdneiegaal1dvyefepditdd1ks1nnv  
v1tphignatfeardmmsk  
ivanaaisavqgekpqfvvn  
>sp|Q2YYV1|URED\_STAAB  
mdeqqwtgq1dl1tvffdgnrsvsrdi1ffekalkvirpvy1nqstiptfyivnvgggy1dgdryrmvniednakvt1tsq  
gatkiyktpsnhveqyqtf  
n1kdnayleyvadpi1ayenakfyqhnt1n1nssslfytdi1tpgysktgeafkyqymh1ineiyiedel1vtydn111n  
pnkqsi1eigymehyhyg  
sayfihedv1nqk1idsvyetissysntf1dcrvaisq1lpthgfavri1fayrtqi1ekilgtiqsyiaeni1drk1df1rky  
>sp|Q2YYV2|UREG\_STAAB  
manpikig1ggpvgagktq1iekvvkr1skemsigvitndiytkedekil1nsgv1pesri1gvetggcphtairedasm  
nfaaidel1erhddielif  
iesggdn1aatfspe1vdfsiyi1dvaqgek1prkggqgmiksdffvinktd1apyvgas1eqmaedtkvfrdkrpf1ft  
n1ktdeg1devidwikrdt  
11kg1s  
>sp|Q2YYV4|HUTG\_STAAB  
mykqgepn1wtgr1dsetdpkk1frhfqtvtfed1sklekssrpsgv1lgyavdegvalnkgri1gakegpdaikqafag1  
pd1nqceal1vdygnvyhdh  
eelid1tqkefam1aaksianhrqt1f1lggghdiayaqylatrkvpytqsigvinidahfdtraeqqstsgtsfrqileed  
entdy1v1giaqggntqs1  
fdyakek1k1dyvfadellshvsptikdmierfvhehdv1mfticmdvidsafapgvsapav1glyphtv1elakri1psd  
kvssvsiaemntydadnr  
tak1van1vhhf1k  
>sp|Q2YYV8|HUTI\_STAAB  
mnd1iin1hael1ilprstdkpl1kgkelde1nvvkngtvv1kdgkivyagqhtddydatetidasgkvvspalvdahth1t  
fgsrehems1krqgksy1  
e1lemgggi1stvnatretsedd1fkkaehd11tmi1khgvlavesksygl1drene1kq1kvsnr1aekhd1dmkht1fg  
phavpkeassneaf1eemi  
a1lpevkqyadfad1fcetgvftieqsqhy1mqakeagfkvki1hadeidp1gg1elaideqaisadh1vassdkgek1r  
nsdtvav1lpattfy1lge  
dyadargm1dnngai1alatdynpgssvtnn1qlvmaiaalk1k1spnevnavtvnaakaidinagtintgdkan1viwd  
apnhey1pyhfg1nhaekv  
ikdgkvi1vdt1sfka

Tsompanidou\_et\_al\_Supplemental\_FASTA\_File

>sp|Q2YYX7|LYRA\_STAAB  
mknknksgfqwamtifvffvitmaalsimlrdfqsiigvkhfifevtdlapliaaiciilvfkykkvqlaglkfsislkvi  
erlllaalilpliiliigmy  
sfntfadsfillqstglsvpithilighilmafvefgfrsylvqivetkmtffasivvglmvsvfsanttygtefaay  
nflytfsfsmilgelirat  
kgrtiyiattfhasmtfgliflseeigdlfsikviaistaivavgyiglsliirgiaylttrrnleelepnnyldhvnd  
deetnhtraeksssnikda  
ektgvstastvgiaksdteentvadepsihegtektepqhhdnqtesnhdedhditsesvesaesvkhtlqsddltndsn  
edekqslkepatykedrrs  
svvidaekhiekteeqssdknk  
>sp|Q2YYX9|TCAA\_STAAB  
mkscpkcgqaqddvqictqcghkfdsrqalyrkstdediqtnnikmrkmpwaigffililililffl1rnfnspqaqt  
kilvnaienndkqkvatll  
stkdnkvdeekvyinyikdevglkqfvsdlnktvhklnksktsvasyiqtrsgqnilrvskngtryiffdnmsftapt  
kqpi vkpkektkyefksgg  
kkkmviaeankvtpignfipgtyripamkstengdfaghlkfdfrqsnsetvdvtedfeanisvtlkgdtklndsskkv  
tindremafsssktygppy  
qnkditisasgakgkftttqtktikasdlkysteitlnfdsedi edyvekkekeenslnkklieffagyslannaafnq  
sdfdfvssyikkgssfydd  
vkkrvskgs1mmisppqiidaekhgkitatvrlnengkqvdkyeleqgsqdrllqiktsek  
>sp|Q2YYY9|IDI2\_STAAB  
msdfqreqrknehveiamagsdamhsdfdkmrvhhsipsinvndidltsqtpdlmdaypyinamtggsewtkninekl  
avvaretglamavgsthaa  
l1rnprmaetftiarkmpegmifsnvgadvpekaleave1leaqa1qihvnspe1vmpegnrefvtw1dniasivsrv  
svpviikevgfgmskelmh  
dlqqigvkyvdvsgkgtfnfdienerrankdmdylsswgqstveslletayqskisvfasgglrtpldaikslalgak  
atgmsrpf1nqvenngiah  
tvayvesfiehmsimtmldaknidldtqkqivfspeilswieqrnlnihrg  
>sp|Q2YYZ2|3MGH\_STAAB  
mdfvnndtrqiaknllgvkviyqdtqttytgyiveteaylg1ndraahgyggkitpkvtslykrnggtiyahvmhthllin  
fvtksegipegliraiept  
edgl1samfrnrngkkyevetngpgkwtkafn1praidgat1ndcr1sidtknrkypkdii1asprigipnkgdwthks1ryt  
vkgnpfvsrmrksdcmfpe  
dtwk  
>sp|Q2YYZ8|Y2216\_STAAB  
mlypififilaglceiggyliw1l1regqcs1vg1l1ggailmlygviatfqs1f1s1fgrvyaayggvfi1ms1ifamvvd  
kqmpdkydvigaiicivg  
1vm11psra  
>sp|Q2YZ12|FENR\_STAAB  
mkdvtiiggpgslyasfyaglrdmsvr1idvqselggkmriypekiidwiggia1pkpcheilkdtikqglyfkpevhln  
ervvdirrkaerhfevete  
ageiytskavii1agagi1n1pkql1dvkgveryq1tn1hyvvqsyr1fkdkdv1isgggntal1dwahdiakiaksvtvvyr  
kedvtgheamkt1vtdlnv  
k1cpktriky1vgnddethisev1lehvesgdthtvkfddvi1shgfdrcnt1l1setssk1dmhddcrvkgfgntttsip  
giyacgdivyhdaksh1ia  
safsdganaan1aktyiqpdanaegyvs1shhev1fkeantivnkhl1y  
>sp|Q2YZ16|Y2248\_STAAB  
mkr1vtg1la1s1fla1acgqdsdqkdsnekddkakteqqdektndsskdkkdkkddskdvnkdnkdnnsandnqqqsns  
natnndqntnnnqssnnq  
annnqkssy1vapyggnaapvvrqi1pfngnktqal1q1pnfqtal1nsanneank1fgsnkkyvndysieehngnykyv1fs  
fkdpnangkysiv1tvdytg  
qamvtdpnyqq  
>sp|Q2YZ23|HSSS\_STAAB  
mfktlyariaiysitv1lfsal1sfv1tnvyhyhnlkasndakimktl1kearqyeqsakpthiqqyfkhl1gqmnymqimtv  
dqkghktfygepfredtl1s  
qna1nnv1nnkdyhgi1kdkpfa1fv1tgffdnvtdntvgin1fktkdgsi1avfmrpdigetfsefrtflav1llm1llfisis  
1viasthsii1rpvk1k1a  
ter1ldgdfktpikqtrkdeigt1qyhfnkmres1gqvdmr1qhf1vqnsheikt1plthihh1l1selqatsdkt1rqyi  
ndiytittq1sg1tte1ll  
1sel1nhqsl1l1fddkiqvdq1likdi1rheqfaadeks1li1ladlesin1flgnqr1lhqal1sn1linaikytdvggaidia  
1qshhni1iftisndgspi  
spqvear1ferfykvs1khdnsng1glaitksie1l1hggtiqftqsneyittftit1pnns  
>sp|Q2YZ24|HSSR\_STAAB  
mvqc1vvdddsri1nyiash1qtehidaytqpsgeaalk1lekqr1vdi1avidimmdgmdgf1q1cnt1kndy1dip1vim1ta  
rdal1s1dkeraf1sgtd1dyv  
tkpfevkel1fri1rav1rryninsnsemtign1t1nqsy1el1qvs1nktmt1pnkef1q1l1fml1atrpkq1ftreqi1ekiw  
gydygdertvd1vhikr1r  
qr1kk1nat1tietvrgqgykvenhv

Tsompanidou\_et\_al\_Supplemental\_FASTA\_File

>sp|Q2YZ25|HRTB\_STAAB  
mklaikeimfykfryilitlii111simvlfisglaqglgrenislfefhdndeyvvqkmkepqiexqlsdtqqnqikk  
vihqepykmnvqt1k1snk  
eqdvtmndvkqqr1q1kkgdypknahevaindklaadni rvgdr1hfknnstsyrvsgilndtmyahssiv11ndngfn  
alnkvntafypvknltggq  
rdelnkindvqvsekdltniasyqaeqaplnmmivslfaitaivlsaffyvmtiqkisiqigilkaigiktrh11salv  
lqiltltiigvgiaviiiv  
glsfmmvtvmpfyllttqni11mvgifilvailgaslsfiklfkvdpieaigga  
>sp|Q2YZ26|HRTA\_STAAB  
malvvedivknfgeglsetkvlkginfeveqgefvi1ngasgsgktt11tilgg11sqtsgvtlyndtplfdkqhrpsd1  
rledigfi1qssh1vpylk  
vieq11vgqeamtkqqsskraiql1knigledr1nvyphqlsggekqrva1mra1fmnpki1ladeptas1dadratk  
vvemirqq1keqqmigi1mi  
thdr11feyadrvieledgkitd  
>sp|Q2YZ42|NREC\_STAAB  
mki1vi1addhavvrtgfsmi1nyqndmev1vataadgveayqkvmeypdv11md1smppgesgliatskiadsfpetkili  
1tmfddeey1fhw1rngak  
gyilknapeq111airtvykgetyvdmk1tts1vnefvsn1qdtantsdpfk1skrele11pliakgygnkeiaek1  
fsvsktveahkthimtklg  
1kskpe1veya1kkk1lef  
>sp|Q2YZ45|NART\_STAAB  
myktkggq11t1qt11svvgfmaws1iap1mpfikqdvntegqisi1laipvilgsv1rvpfgyltnivgkwvfftsf  
iv11fpi1ff1sqaqtpgm1  
masgff1gvvgai1fsvgvtsvpkyfpkekvglangi1ygmgnigtavssflappiagi1gwqttvrsyliiialfalimfi  
fgdtqerki1kvp1maqmk1  
1sknyklyy1sywyf1tfgafvafgi1fpny1vnhfgidkvdag1rsgvfialat1f1rpiggilgdkfnavkv1midfvv  
miigai1lgisdhialftv  
gclt1isicag1ngli1fk1vpsyfsneagsangivsmmg1lgffpp1lvityvan1tgssh1af1flavfgcialftmrh  
1yqkeyg1kn1g  
>sp|Q2YZ70|HIS4\_STAAB  
mielwpa1d1ig1stsvr1tegydseekmsrsaeesiayysqfecvnr1hivd1ligakaqharefdyiks1rr1ttkdie  
vgg1irtksqimdyfaagi  
nyc1vgtkgi1qdt1w1kemaht1fpgriyfsvdayged1kvngweedte1n1fsfvkq1sdiplgg1iythiakdgkmsgp  
nfe1tgq1vkattipvias  
gg1rhq1diqr1as1nvhaai1gkaahqasfweg1k  
>sp|Q2YZ71|HIS6\_STAAB  
mikkri1pc1dvkdgrvvk1gi1qfkg1rdi1gnpvd1amyneagade1v1fdiskteeghs1m1levieqtasr1fip1ltvg  
gg1qs1ddi1tq11nhgadk  
vs1nssa1kn1pq1kqasdkfgrq1c1cia1dsy1dperkahyccthg1gk1kmt1nikvyd1wvqqveq1lgagel1vtsmghdg  
mk1ggfdie1h1akikslvni  
pi1asgg1gnaq1hfve1fdqtdvsag1laasi1hdrettvqsikevirqggiavr  
>sp|Q2YZA2|PCP\_STAAB  
mhi1vtgfapfdnq1d1npsweavtq1ledi1gtht1dk1kl1ptsfkkvdtminkalasnhydiv1lsigqaggrsaitperv  
ain1ddar1pdnddfqpi1d  
qai1hdgapayfsn1pvkamtqsi1nqgl1pga1snsagt1fvcnhvlyh1lgy1ldkxhyp11rfgfihvpyipeqidgksdt  
psmt1eni1vtg1taaieai  
sddd1ria1gtte  
>sp|Q2YZA3|Y2565\_STAAB  
mnyqv11yykymt1iddpeq1faadh1afckahh1kgri1lvsteging1t1sgtkeeteqymahmhaderfkdmvfkideag  
hafkkmhvrprkeivald1  
eedvdprh1ttgqy1spvefrka1edddtvi1darndyefdlghfrgairpni1trfrd1lpdwikenka1fadkkvvtyctg  
gircekfsgw11kegfedi  
aq1hgg1atygkdpetkgqywdgkmyvddri1svdinevekti1igkdwfdgkpceryincanpecnkqilvseeneaky1  
gacsyecakhernryvqan  
nisdnewqhr11tnfdd1lhqha  
>sp|Q2YZA4|DRP35\_STAAB  
mmsqqd1pt1fysgksnsavpi1sese1qtitaepwle1skkg1ql1eg1n1fdrqq1fl1dvfegni1fkvnpetkeikqp  
fvshkanpaa1ki1hkdgr1  
fvcylgd1fkstggi1faatengdni1qdi1ed1stt1yc1iddmvf1dskggfyftd1frgystn1pggyvyv1apdf1rtvtpi1qn  
isvangial1stdek1lwvt  
ettanr1hria1eddgvt1ipfgat1pyyftghegpd1scid1rddn1lyvamygg1rv1vfnkr1gypigqilipgrdeghm  
1rsthpq1fipgtnq1li1ca  
ndiemgg1sm1lytvng1fakghqs1fqfq  
>sp|Q2YZA5|Y2563\_STAAB  
mtnftfdgahss1lefq1kh1mvskvkg1sfdqfdvavegd1ndfst1lkatati1pssintkndardnh1ksgdffgtdefd  
kitfetksvtenkvvgd1t  
ikg1tneetfd1vefn1gvskn1pmdgsqvtgi1vtgtin1rekyginfnqa1etggvmlgkdvkfeasaefsi1se  
>sp|Q2YZA7|Y2561\_STAAB



Tsompanidou\_et\_al\_Supplemental\_FASTA\_File

mkkqdisvktvvaigigaavfvlgrfvvptgfpntnietsyafalalisai fgp fag lmtglvghaikdfttygsawws  
wvicsgiigclygwiglkl  
nlssgrfsrksmyfnigqiiianiicwaliaptldilinynepankvvtqgvisavl niisv giigtillkayassqikkg  
slrkk  
>sp|Q2YZB2|HISZ\_STAAB  
mnseqlialkesetaflkyfnkadye lvdsvvekldwkqlnhedlqqmgernfwqhehqiyairndftdql lryysmy  
ptaatkvyatgliirnea  
avqvglenyapslanvqqs lklfiqfiqqqlrdnvyfvvlghyqlldalldkslqtpdilsmieernlsglvtylstehp  
ivqilkentqqqlnvlehy  
ipndhpalvelkiwerwlhtggykdihlditaqpprsyytglfiqchfaenesrvltggyykg siegfglgltl  
>sp|Q2YZB3|HIS1\_STAAB  
mlriaiakgrlmsl inyl daiefttlsetlknrerqllsvdniecilvkgsvpiyveqgiadigivgsdilderhyn  
vnnlldmpfgachfavaak  
pettnyrkiatsyvhataeyfkskgidvelikngsvelacvdmvdgividvqtgttleanglvekqhisdinarlitn  
kaayfkksqlieqfirsle  
vsiana  
>sp|Q2YZB4|HISX\_STAAB  
mlnaqqflnqfsleapldeslypiirdicqevkvhdka lkmynltdhtkt dhl eisheqikaafdtldektkqalqqs  
yerikayqesikqtnqgle  
ksvecyeyhplesvgyvpggkasypstvlmtatlaqvagveni vvtppqpngvsqevlaacyitqvnqvfvvgaqs  
iaaltytgetipkvdkivg  
pgnqfvayakylfgqvgidqagpteialiiddtadldaivydvfaqaehdelartyvisedaqvlkdlesritkalpn  
vdrydivskisianqhylih  
asnfdachvmntiapehasiqtvpqpyiekvkyvgalfighyspevigdyvagpshvlpntnrtarftnglsvndfltr  
ntvihlskdtfeqiadsaq  
hiahvealynhqqsilirqs  
>sp|Q2YZB7|RNPA\_STAAB  
mllekayrikknadfgriykkghsvanrqfvvytcnkeidhfrlgisvskklgnavl rnkikrairenfkvhkshilak  
diiviarqpakdmttlqiq  
nsl ehv lkiakvfnkksk  
>sp|Q2YZB8|MNME\_STAAB  
mdl dtitsistpmgegaigivr lsgpqaveiadklykgkhllndvpshtinyghiidpeskevveevmvsvlrapktftr  
edieinchggiltinrvl  
eltmtygarlaepgeftkraf l ngridlsqaeavmdfvrskt draskvamnqiegrlsdl ikkqrqsileilaqvevnid  
ypeyddvedatteflleqs  
keikqeinrlldtgagkimreglstv ivgkpnvgkssmlnliqdnkaivtevagtt rdvleeyv nvr gvplrlv dtag  
iretedivekigversrka  
lsqadlilfvlnnealtqedytlyevvknedvivivnkmdleqnidinevkdmgdtpliqtsmlkqegideleiqird  
lffggevqnqdmtyvsnr  
hisllkqarqtiqdaidaesgvpmdmvqidl trtweilgeiigetasad lidqlfsqfclgk  
>sp|Q2YZB9|MNMG\_STAAB  
myqeydivivigaghagveaglasarrgaktlmltinldniafmpcnpsvsggpakg ivvreidalggqmaktidkthiqmr  
mlntgkqpavralraqadk  
vlyqqemkrviedeenhimqgmvdeliiednevkgvrtnigteylskaviittgtflrgeiilgnmkysgpnhq lpsi  
t lsdn lrelgfdivrftgt  
tpprvnsktidyskteiqpgddvgrafs fett eyel dqlpcwltyt naethkviddn lhl samysgmikgtgprycpsie  
dkfvr fndkprhqlflepe  
grntnevyvqglstslpehvqrqmletipglekadmragyaieydaivptqlwptletkmiknlytagqingtsgyeea  
aggglmaginaagkv lntg  
ekllsrsdayigvliddlvtkgtnepyrlltsraeyrlllrhdnadlrltdmgyelgmiseeryarfnekrqqidaaikr  
lsdirikpnehtqaiieqh  
ggsrlkdgilaidlrrpemydiileileehqlnadveeqveiqtkyegyinks lqqvekvkrmeekkipedldyski  
ds lateareklsevkplni  
aqasrisgvnpadisilliy leqglqrvsy  
>sp|Q2YZC0|RSMG\_STAAB  
mtvewlaeqlkehnie l tetqkqfqtyycllvewnekmltsitdehdvylkhfydsiapsfyfdfnqpsicdv gaga  
gfpsiplkimfpqlkvtiv  
dslnkriqflnhlase lqlqdv sfihdraetfgkgvyresydvvtaravarlsvl selclplvkkggfvalksskgeee  
leakfaivlggnvteth  
tyelpedagerqmfiidkkrqtpkkyprkpgtpnktpllek  
>sp|Q3V7T5|THD1\_STAAR  
mtvkttvstkdideaf lrlkd ivketplql dhylsqkydckvylkredlqwrsfklrgaynaisvlsdeakskgitcas  
agnhaggvaytakkl nlna  
vifmpvttplqkv nqv kffgnsnvevvtgdtdfhclaeal tytsehqmfnidpfnvhtisgggtlakemleqaksdnv  
nfdylfaaigggglisgis  
tyfksyspntki igvepsgassmyesvvnnqv itl pni d kfv dgasvarvgdit feiakknv dnyvqvdegavcstild  
myskqai vaepagalsvsa  
lenykdhikgktvvcvisggndinrmkeieersllyeemkhyfilnfpqrpgalrefvndvlgpqdditkfeylkssq

ntgtviiigiqlkdhdldliq  
lkqrnhfdpsniyinenkmlysl1i  
>sp|Q53588|CRTO\_STAAE  
mktmkkyiktaffcsmywlvivqlnianlgtripdkyfrqkyiifksfnfekhgkfwkfwyvrkwwkhkilghqlnqniy  
dqrhlmintdejekmie  
tkraelihwisilpviiifnkgrlvkyinifyamianvpriivqrynrrprtqllrilkrkgerhd  
>sp|Q53653|CLFA\_STAAE  
mnmkkkekhairkksigvasvlgvligfgllsksedasensvtqsdsasnesksndsssvsaapktddtnvsdtktss  
ntnngetsvaqnpaqqett  
qssstnatteetpvtgeatttttntqantpattqsntnaeelvnqtsnetttfndtntvssvnsqpnstnaenvsttqdt  
teatpsnnesapqstdasn  
kdvvngavntsaprmafslavaadapaagtditnqltnvtvgidsgttvypqhagyvklnygfsvpnsavkgdtfkit  
vpkelnlngvtstakvppi  
magdqvlangvidsdgnvytftdyvntkddvkatlmpayidpenvkktnvlatgigsttanktvlvdyekykfyfyn  
lslkgtidqidktnntyrq  
tiyvnpsgdnviapvlgnlkpntdsnalidqqntsikvykvdaadlsesyfvnpenfedvtnsvnitfpnpnqykvef  
ntpddqittpyivvnghi  
dpsnkgdlairstlygynsniiwrmswdnevafnngsgsgdgidkpvvpeqpedgeiepipedsdsdpgsdsgsdns  
dsgsdsgsdstsdsgsd  
sdsdsasdsdsasdsdsasdsdsasdsdsdndsdsdsdsdsdsdsdsdsdsdsdsdsdsdsdsdsdsdsdsdsdsds  
sdsdsdsdsdsdsdsdsdsds  
dsdsdsdsdsdsdsdsdsdsdsdsdsdsdsdsdsdsdsdsdsdsdsdsdsdsdsdsdsdsdsdsdsdsdsdsds  
sdsdsdsdsdsdsdsdsdsdsdsdsdsdsdsdsdsdsdsdsdsdsdsdsdsdsdsdsdsdsdsdsdsdsdsdsds  
sdsdsdsdsdsdsdsesdsdsesdsdsdsdsdsdsdsdsdsdsdsdsdsdsdsdsdsdsdsdsdsdsdsdsdsds  
ppnspkngtnasnkeakd  
skelpdtgsedeantsliwglasigslllfrkkenkdkk  
>sp|Q53700|NPD\_STAA8  
mkhdletlkhiiidssnritfftgagvsvasgvpdfrsmgglfdeiskdglspellysrdyleddpegfinfchkrllfvd  
tmpnvhdwialernqqs  
lgvitqnidglsdagsqhvdelhgtlnrfycnvchksytksvdivdrtlkhdncggairpdivlygemldqptiiraln  
kiehadtlvvlgsslvvqp  
aaglishfkgdnliinkdrtpydsdatlvihddmvsvvkslnte  
>sp|Q5HCI2|RNPA\_STAAC  
mekayrikknadfqriykkghsvanrqfvvytcnkeidhfrlgisvskklgnavlrnkikrairenfkvkshilakdi  
iviarqpakdmttlqiqns  
lehvlkiakvfknkik  
>sp|Q5HCK8|Y2713\_STAAC  
mnyqvlllykymtiddepeqfaqdhlafckahlkgriylvstegingtlsgtkeeteqymahmhaderfkdmvfkideaeg  
hafkkmhvrprkeivaldl  
eddvdprrhttggylspvefrkaleddtviidarndyefdighfrgairpnitfrdlpdwikenkalfadkkvvtctg  
gircekfsgwllkegfedv  
aqllhggiatygdpetkseywdgkmyvfdriisvdinqvektiigkdwfdgkpceryincanpecnkqilvseenetkyl  
gacsyecakhernryvqan  
nisdnewqqrlnfnfddlhqha  
>sp|Q5HCL2|Y2709\_STAAC  
mkkqdsvktvvaigigaavfvlgrfvviptgfpntnietsyafalalisai fgp fag lmtglvghaikdf ttygsawws  
wvicsgii gcl ygw iglk l  
nlssgrfsrksmvyfnigqianii cwaliaptldilinyepankvytqgvisavl niisvgiigtill kayassqikg  
slrke  
>sp|Q5HCL3|Y2708\_STAAC  
mtepiisfkdfsfgyhsqatptlnqinvidiypgekvlvvgasgsgkstfancinglipfktkgnitgelyinnqdatvsc  
lhdsnvvgtvlgdtgqf  
igltaaedmafllennceveqddmknvsywaekvgmiehlnhrpqdlsggkqrvslggilihrtpilildeplanldpa  
tghetlrl1nniheetkst  
miivehrleeslddtfdrvllfdkgkiianttpsdllkssk1keagireplyctalkyaevdvesidnlanlrdvcmh  
vkfkvkkwidetsanndnk  
yksep1le1nevcvqysdysnsvlnnvqlnvyrrmlsivghngagkstlakaicgfliditgniqfcnrgfnqlsisers  
efvgymqnpnhmi sekmi  
ydevalglrargmkesdikirvenvlkicglyafnwpiaalsygqkkrvtiasvvl1npeiildeptagqdfyhynei  
msflie1nrqqktiimith  
dmhllseyssrtvvlskgqvadtppvvlndkkiceiaslqrtslfemaeyigisepqklvqlfinhdrkvrrq  
>sp|Q5HCL7|HISZ\_STAAC  
mnnseq1ialkesetaf1kyfnkadyelvdfsvvekldwkqlnhedlqqmgernfwqhehqiyalrndftdqllryssmy  
ptaatkvvaytgliirnea  
avqvg1enyapslanvqqs1klfiqfiqqqlrdnvhfvlghyqlldalldkslqtpdilsmieernlsglvtylstehp  
ivqilKentqqqlnvlehy  
ipndhpalve1kiwerw1hkqgykdihlditaqpprsyytglfiqchfaenesrvltggyykgisiegfglgltl  
>sp|Q5HCL9|HISX\_STAAC

Tsompanidou\_et\_al\_Supplemental\_FASTA\_File

mpm1naqqf1nqfsleapldeslypiirdicqevkvhgdkalkmynltfdhtktdh1eisheqikaafdt1dektkqalq  
qsyerikayqesikqtnqq  
leesvecyeyihp1lesvgiyvpggkasypstvlmtatlaqvagveni vvvtpqpngvsqevlaacyitqv dqvfqvgga  
qsaaltytgtetipkvdk  
vgpgnqfvayakylfgqvgidqiaqpteialiidetadldaivdvfaqaehdelartyaisedaqvlkdlesriakal  
pnvdrydivsksianghyl  
ihasnfdeachvmtiapehasiqtvnpqpyiekvkvvgalfighyspevigdyvagpshv1ptnrarfnglsvndf1  
trntvihlskdtfeqiads  
aqhiahvealynhqqsilirqs  
>sp|Q5HCM4|HIS6\_STAAC  
mikkriipc1dvkdgrvvkqifkglrdignpvd1amyneagadelvfldiskteeghslmlevieqtasrlfip1ltvg  
ggiqsldditq1lnhgadk  
vs1nssal knpqlikqasdkfgrqciciaidsyydperkahyccttgkkmtnikvydvwqqveqlgagellvtsmghdg  
mkggfdiehlanikslni  
piiasgggnahfvelfdqtdvsaglaasilhdrettvqsikevirqqgiavr  
>sp|Q5HCM9|ICAB\_STAAC  
mkyrkfiilv1silii1pvstldghhianaddspk1kykensa1alnyhrvrkanflnfiyffssskeiknysvsqs  
qfesqikw1kshdakfl1  
keflyykkkgkfkprsvw1nfdmdetiyenaypilkykipatgfii1ghvgeenfh1dmiskkelkemyktglwefe  
ththd1hn1sknnks1mk  
aseatiikd1nkseky1tknfnksqktiaypyglmnddk1pvikkag1kygfsleekavtpnsndyyiprilisddafeh  
likrwdgfhekdet  
>sp|Q5HCN0|ICAD\_STAAC  
mvkprgreypt1kss1nivretaliaiscvfwiyclv1lvyigtifeihdesintirvalnienteildifetmgifai  
iifvfftisilqkwqrgr  
es  
>sp|Q5HCP3|SRAP\_STAAC  
mskrqkafhds1anektrvr1lyksgknwvksigikeiemfkimglpfishslvsqdnqsiskmtgyglkttaviggafv  
nm1hdqqafaasdapl1tse  
1ntqsetvgnqnsttieaststadstsvtknsssvqtsnsdtvsseksekvststnstsnnqek1tstsestssknttss  
sdtksvastsssteqints  
tnqstasntsqs1tppssv1nktsttststapvk1rtfsrlamstfasaatttavtanti tvnkdn1kqymttsgnaty  
dqstg1vt1tqdaysqkga  
itlgridsnksfhfsgkvn1gnkyeghgnggdgigfafspgvlgetglngaavgigg1snafgfk1dtyhntskpnsaa  
kanadpsnvagggafgafv  
ttdsygvattytssstadnaak1nvqptnntfqdfdi nyingdtkvmtvkyagqtwrnisdwiaksgttnfslsmtastg  
gatn1qqvqfgtfeytesa  
vtqvryvdvtgkdi1ppktysgnvdqvvtidnqqsaltakgynytsvdssyastyndtnktvkmtnagqsvtyyftdvk  
aptvtvgnqtievgktmnp  
iv1ttdngtgv1ntvtglpsgl1sydsatnsiigtptkigqstvtvstddqannksttftinvvdtaptvtpigdq  
sevyspispikiatqdnsg  
navtntvtglpsgl1tfdstnntisgtpntigtstisivstdasgnktttftkyevtrnsmsdsvstsgstqqsqsvstsk  
adsqaststsgsivstst  
astskstsvs1sdsvsasks1stsesnsvsststslvnsqsvssmsdsaskstslsdsisnssstekses1ststsd  
1rtstslsds1smstsgsl  
sksqslstsisgssstas1sdstsnai1ststslsesastdsisisnsiansqsastsksdsgstsis1stsdsksmst  
ses1sdststsgsvsgsl  
iaasqsvststsdsmstseivdsistsgslsasdsksmsvssmstsqsgstses1sdsqstsdskslsqstsqsg  
tstststasvrtseseqst  
sgmsasqsdmsistfsdstsdskastassesisqaststsgsvststslstinsertstmsdts1stsesdsi  
seststsdiseaisases  
tfis1sesnstdsesqsasaf1ses1sestsestsesvssstsests1sdstsesgts1snstsgstsisststsis  
eststfksesvstslsmst  
stslsdstslstslsdstsdsksdslstsmstsdistskdsiststslsgstseskdsstmsismsqstsgststst  
stslsdststslsasmn  
qsgvdsnasqsan1stststsesdsqstssytsqstsqsestststslsdstsisks1sqsgsvstas1sgseseds  
qs1stsasestsesastsl  
sdststnsgaststslnsasasesd1sstslsdstasmqssedsqstas1sds1ststsnrmstias1stsvst  
segstsestsedstst  
1sdsqstsrstasgastststsdrrstaststsmrtstsdsgms1stststmsdts1sdsvd1stsdstasts  
gmsvsi1sdstststsa  
sevmsasi1sdqsmsevndsesvsesnesdsksmstsvsdsgslsvstslrksevsessslscsqmsdsvstsd  
sss1svstslrsvsvses  
ds1sdskstsgstststsgslststslsgsesvsests1sdsismststsd1sgsis1sgstslstsdslsdks  
1sssqsmstseststsvsd  
sqssstsnqfdmsisasesdmstsdssisgnststslstsdsmstsvststslsdsigstsvdssststst  
1sdsmsqstststasgs  
1stststmsastsssqstsvstslstsd1sdstsis1sgstsvsests1sdse1stsd1stststsd

Tsompanidou\_et\_al\_Supplemental\_FASTA\_File

tsgststsiseststsgsg  
stsvsdstsmesnsstsvmsqdkdsstsisdsesvstststststsdststseslstsmsgsqsisdstststmsgstst  
sesnsmhpsdmsmhhths  
ttsrslsseattstsesqstlsatsevtkhngtpaqsekrldptgdsikqngllggvmtllvglglmkrkkkkdendqdd  
sqa  
>sp|Q5HCP8|SECA2\_STAAC  
mkhkl dvtinelrlksirkivkrintwsdevksysdda lkqktiefkerlasgvdtldtllpeayavareaswrvlgmyp  
kevqligai vlhegniaem  
qtgegkltatmplylnalsgkgy l ittdnylakr dfeemqplyewlgltaslgfvdivdyeyqkgekrniyehdiiyt  
tngrlgfdy lidnladsae  
gkflpq lnygiidevdsi ildaaqtp lvisgaprlqsnl fhivkefvdtliedvhfkmkktk keiwl l nqgieaaqsyfn  
vedlyseqamvlvrninla  
lraqylfesnvdyfyngdiv lidritgrmlpgtklqaglhqai eakegmevstdksvmatitfqnl fklfesfsgmtat  
gklgeseffdlyskivvq  
ptdkaiqr idepdkvfrsvdekni amihdive lhetgrpv l l itrtaeaaeyfskvl fqm dipnlliaqnvakeaqmia  
eagqigsmtvatsmagrgt  
diklgegvealgg lavi ihehmensrvdrql rgrsgrqgdpgssciyisl ddy l vkrwsdsnl aennqlysl daqr l sqs  
nlfnrkvkqi vvkqarise  
eggvkaremanefeksis iqr d l vyeernrv l eiddaenqdfkal akdvfemfvneekvl tksrvveyiyqnl sfqfnkd  
vacv nfkdkqavvtflleq  
fekqlalnrknmqsayyyni fvqkvflka idscwleqvdy lqq l kasvnrqngqrnai feyhrvaldsfevmtrnikkr  
mvkn icqsmi tfdkegmpv  
ihfp  
>sp|Q5HCR6|ARCR\_STAAC  
mtenfilgrnnklehelka ladyinipysilqpyqsecfv rhytkgqv iyfspqessniyfliegnii rehynqngdvyr  
yfnkeqvlfpisnl fhpke  
vnelctaltdctvlg lprelmaf lckanddi flt l fal indneqqhmynmaltskfakdriiklichl cqtvgydqdef  
yeikqfltiqlmsdmagis  
retaghi ihe l kdek l vvkdhknw l vskh l fndvcv  
>sp|Q5HCR7|CLFB\_STAAC  
mkkridylsnkqnkysirrtvgttsv ivgatilfgighnhaqaseqsndttqsskn nasadseknmi etpqlnttand  
tsdisantnsanvdsttkp  
mstqtsntttt tepastnetp qptaiknqataakmqdqtvpqeansqvdnkttdansiatnse l knsqtl d l p qsspqi  
snaqgtskpsvrtravrs l  
avaepvnaadakgtvndkvtasnfklekt t fdpnqsgntfmaanftvtdkvksgdyftak l pds l tngngvdysnnsn  
tmpi adikstngdvvakat  
ydi ltktyt fvf tdyvnnken ingqfs l pl ftdrakapksgydan ini ademfnnkitynysspi agidkpnganissq  
iigvdtasgqntykqtvfv  
npkqrv l gntwvyi kgyqdkieessgkvsatdtk l rifevndtskl sdsyyadpndsn l kevtdqfknriyyehpnvasi  
kfgdi tktyvvl veghyd n  
tgkn l ktqviqenvdpvtrndysifgwnnenvvrygggsadgdsavnkpdptgppvdpepspdpepeptpdpepspdpe  
pepspdpdsdsdsdsds  
dsdsdsdsdsdsdsdsdsdsdsdsdsdsdsdsdsdsdsdsdsdsdsdsdsdsdsdsdsdsdsdsdsdsdsdsdsdsdsdsdsds  
edsdsdsdsdsdsdsdsdsdsdsdsdsdsdsdsdsdsdsdsdsdsdsdsdsdsdsdsdsdsdsdsdsdsdsdsdsdsdsdsdsds  
sdsdsdsdsdsdsdsdsdsdsdsdsdsdsdsdsdsdsdsdsdsdsdsdsdsdsdsdsdsdsdsdsdsdsdsdsdsdsdsdsdsds  
sdsdsdsdsdsdsdsdsdsdsdsdsdsdsdsdsdsdsdsdsdsdsdsdsdsdsdsdsdsdsdsdsdsdsdsdsdsdsdsdsdsds  
dsdsdsdsdsdsdsdsdsdsdsdsdsdsdsdsdsdsdsdsdsdsdsdsdsdsdsdsdsdsdsdsdsdsdsdsdsdsdsdsdsds  
alpetgksentnat l fga  
mma l lgs l l l frkrkqdhkeka  
>sp|Q5HCV3|PANB\_STAAC  
mktvsq l idmkqketki smvtaydfpsakqveaagi dmi l vgdslgmtv l gvestvqvt l admihhgravrrgapntfvv  
vdmpigavgismtqdl nha  
lkllyqetnanai kaegahitpfi ekataigipvahlg ltpqsvgvmgyklqgatkeaaeq lildaknveqagavalvle  
aipndlaeeiskhl t i pvi  
gigagkgt dgqvlvyhdm lnygvehkakfvkqfad fsvgdglkqydqevksgafpseeytykkkimnevnnnd  
>sp|Q5HCY1|ISAA\_STAAC  
mkktimass lava l gvtgyaagtghqahaaevnv dqah l vdlahnhqdqlnaapi kdgaydihfvkdg f qynftsngttw  
swsyeaangqtagfsvag  
adyttsynqgsnvqsvsynaqsnsnveavsaptyhnyststtsssvr l sngntagatgssaaqimaqrtgvsastwaa i  
iaresngqvnaynpsgasg  
l fqtmpgwgptntvdqqi naavkaykaqglgawgf  
>sp|Q5HCY9|CRTN\_STAAC  
mkiavigagvtg laaaariasqghev ti feknnnvggcmnqlkkdgftfdmgptivmmpdv ykdvftacgknyedyielr  
qlryiydvfydhddritvp  
tdlaelqgmlesiepgstghfmsfltdvykkyeiarryflertyrkpsdfynmts l vqgaklkt lnhadqliehydnek  
iqkllafqtl yigidpkrig  
pslysiipmi emmfgvhfi kggmygmaqgl aq l nkd l gvn ielnaeieqi i idpkfkradaikvngdir kfdkilctadf  
psvaes lmpdfapikkypp

Tsompanidou\_et\_al\_Supplemental\_FASTA\_File

hkiadldyscsaf1myigidi dvtvdqvrlnhvi fsddfrgnieei fegrlsydspsiyvyvpavadkslapegktgiyvlm  
ptpelktgsgidwsdeal t  
qqikei iyrklatievfedikshivseti ftpndfeqtyhakfgsafglmptlaqsnyyrpqnvrsrdykdlyfagasthp  
gagvpivltsakitvdemi  
kdiervg  
>sp|Q5HD01|FEOB\_STAAC  
menycilgnpnvgktslnfaltgsyeyignwsgvtvekkvgklkenvgqlidlpqtydlspiskdetvvtdy11ndsfsq  
iinivdasqlkrnmqltvq  
llelnqpiyiglnmidvatkrigiki dyhklmkk1ktpi fpvvar tkgktyllgeikhlggyqphfkinygekieetik  
nmcqii mtetshdkygarf  
iaiqfllnmmqianel nsevnklsslrdqvaeqvgavsvrremerirnhietllqdvvtypdedkqyfssridkilth  
kyigmpiflaimwli fqt t  
ftwigtplsdql dafiggftdsvktimnylgvipflqdlitdgiagvgsvlvfvppqivvlfffisll edsgymariav  
lmdrimesfglsgksfipm  
iigfgcnvpsimaarsienekerlttiliapfmscarlpvya1fvgif fkenqslvvlsl yvlgiimaf1vstvltkti  
lkndnaifive1ptyrvps  
ikt1wrstwekakgfvrkagtfifggsvviwllsyvgphginvninqsf1hmvgssffgm1vqplgfgtwqagatlvpgfl  
akevivssmai1yssgdag  
lvnviqngftpl sayafmi fill yipcvstvaa irketyswkwtalavayplvtayvltfifyqvghlfv  
>sp|Q5HD55|SARU\_STAAC  
mdyqtfekvnkf invkayiff1tqelkqqy1slkellilayfyknehsislkei igdilykqsdvkniks1skkgfi  
nksrreaderrifvsvtpi  
qrkkiacvine1dkiikgfnkerdyikywapkyskeffilfmnimyskdf1kyrfnl tfl d1silyvissrkneilnlk  
dlfesirfmyppqivrsvnr  
lnnkgmlikersladerivlikinkiyntikisiftdt skilkprkfff  
>sp|Q5HD61|PGCA\_STAAC  
mkgclatmdkelwierandslvkhfyeqqsdieqregfeskl tfgtagirgkfglgegrlnkftiekla1glarylnaqt  
nsptivihydirhlstefa  
qianv1anhqitvylpdykttpels favrn1nttagimitashnpkdyngikvygsdgaqlstdaselasryieevgd  
plqidipiskqnts yikpf  
pksvtd dymkhiqnmigiypksdlqv vfts1hgtsvipvpellqslnfnqfn1veaqckpdpnfssvqsanpedhrafdq  
avelankshadllistdpd  
adrlgiaerdahghityfngnqigall1nyriqtsqlrhr1miqsisvsel tkslarynnveykevtgfkfiaqairq  
lddhqnmifafeesygf1s  
epfvrdkdavqivplii kyase1klygk1kdeleqiyqtvrhedtlfshtlegfegkkkinaimtkfrsnppqeiqgl  
kvkaiedyltseyh1dkd  
ttsqinspksnvirvl fdegfiarpsgtepkiklyvs1kcpnfddvaqkinamifs  
>sp|Q5HDB2|FLP\_STAAC  
mttkklyflsisi1iivaiaiyitlnsntktr1tndsqqqidti ehdlqkghippgasilivkngkvflnkggyqdv  
dkkvkaspttkyeiasntk  
aftglai1klaqegrln1ndavskhvphfkmnyngqnetitikqllaqts gipsditsedsvt sknnr1ndvtraimgde  
1hhkpgeefeysnmnyd1l  
g1i1qnvtkqsytky1nswl kplhmthtsfkqtny skhdaigyelqgstpvvskpefn1wdtps ay mmtsted1ehwi  
kfq1nppdky1svqqshk  
n1sstige pnanayasgwftnndeh1vfhs gtl dnfssfilln1pkqnygi v1an1nseyvplveh1ntqivnhkryst  
vasmlnqyk dqfnivtvlm  
tt1illafif sayrawqmrhgqillrrskriav1sw1slcicialalilyalpylilgsnwsfv1twl pieiklalitt  
lialfst1iv11flhtki  
tk t  
>sp|Q5HDD1|BIOW\_STAAC  
mysikmrssnqdvhisgaetic efdkieqtvr fyngkffhengqpdf1nikiqkimepiqqikalqieiddkanlqhl t  
qecgvteqalngqmt yikn  
etvytgai1lsa1sgkr1dsfgqrgi rathfs fedinnkgdl nervtdalaiascinahpyvkge1cvssdl tyttgyfa  
aaki gyhr1fdikpvntry  
ggriifvddcidlnhyisf1lestpkqvvyetv  
>sp|Q5HDD4|HLGC\_STAAC  
mlknkil ttt1svs1laplanp1lenakaandtedigkgsdieiikrtedktsnkwgvtqniqdfvkd kkyndalilk  
mqgfissrttyynykktnh  
vkamrwpfqyni glktndkyvs1iny1pknkiestnvsqilgyni ggnfqsaps1ggngsf nysksisytqqnyvseveq  
qnsksvlwgvkansfates  
gksafdsd1fvgykphskdprdyfvpdse1pp1vqsgfnpsfiatvshekgssdtsefeitygrnmdvthaikrsth yg  
nsyldghrvhnafvnrny t  
vkyevnwkt heikvkggn  
>sp|Q5HDJ9|TCAA\_STAAC  
mkscpkcgqqaqddvqi ctqcghk fdsrqafyrkstdediqt nnikmrkmpwaigffililililff11rnfnsp eaqt  
kilvnaienn dkqkvat1l  
stkdnkvds eeakvyinyi kdevglkqfvsd1kntvhk1nksktsvasyiqtrsgqnilrvskngtryiffdnmsftapt  
kqpi vkpkektkyefksgg

Tsompanidou\_et\_al\_Supplemental\_FASTA\_File

kkkmviaeankvtpignfipgtyripamkstengdfaghlkfdfrqsnssetvdvtedfeeanisvtlkgdtklndsskkv  
tindhemaafsssktygpyp  
qnkdtisasgkdkdtfttqtktikasdlkynteitlnfdsedi edyvekkekeenslnkklieffagyslannaafnq  
sdfdfvssyikkgssfydd  
vkkrvskgslnmmisspqiidaekhgdkitatvrlnengkqvdkyeleqgsqdrqliktsek  
>sp|Q5HDM1|RPIA\_STAAC  
mkdvkalklmtlndvlsqingdmtlgigtgstme11lpqmaqlikergynitgvctsnkiaflakelgikiceindvdhi  
dlaidgadevdpnlaiikg  
gggalfrkvidemasrfvvvvdetkivqylgetfklpvevdkfnwyqilrkiesyadikverrvnedvafitdngnyil  
dcklpgkidpykfheylih  
ltgvfetgyflmadqvivgtqegvki lek  
>sp|Q5HDM2|LYRA\_STAAC  
mknnkisgfwamti fvvfvitma1simlrdfqsiigvkhfifevtdlapliaaici1lvfkykkvqlaglkfsislkvi  
er111alilplii1igmy  
sfntfadsf11qstg1svpithilighilmafvefgfrsylvqivetkmtffasivvg1mysvfsanttygtefaay  
nflytfsfsmilgelirat  
kgtriyiattfhasmtfgliflseeigdlfsikviaistaivavgyig1sl1irgiaylttrrnleelepnnyldhvnd  
deetnhteaksssnikda  
ektgvatastvgvakndtentvadepsihegtektepqhhignqtesnhdedhditsesvesaesvkqapqsddlndsn  
edeieqs1kepvykedrr  
ssvvidaekhiekteeqssdknk  
>sp|Q5HDP9|FDHL\_STAAC  
mqehlvt1dgkdylvepgtn1lefiksqdtfvpsicynesmgpiqtcdtctveidgkierscstvidrpmvntvndv  
kdaqkealdri1ekhmlyc  
tvcdynngdceihntmdawglqhqtyeykekyekdygpfyrydpnqci1cgrcveacqdievnetiridwdrehprviw  
dndvpinesscvscgqcat  
vpcnammevnmegnagymtdtepgslaamid1tkkaepgygplfaisdseaemrkerikkktvtctygvgsfevwtk  
dreilkvqpsdshspankia  
tcvkgkfswhinsdqr1tkplvrkngfhevewdealnviadnftaiekhgpda1sfi1sskatneesy1mqklarqv  
igt1nvdncsryc1qapatk  
glfrtvghggdsgsiedlekaamsvl1igtntaeahpviasrmkraqlfgqkihvfdirkhemaeradr1fyqpkpgtdla  
w1savtky1i1dh1hd1kaf  
idewddfdyyks1etftmafaeeatgipeselikfaecakaesv1cwamgitq1digsdsstaisn111vtgnyrr  
pgtgayplrg1h1nvqgcsd  
mgsmpdkitgyqsieaddirakfekeygvk1n1pkagkdnhemvegihdgevh1lylygedtgivdsn1fvqaafekl1df  
mvvqdef1tftatyadv1  
pasps1ekdg1tnterriqrlyqa1ep1g1dskpdkw1fqaianr1gfdwnykh1pseimdevar1t1plyagvsydr1legf  
ns1qwpvqpdgtdepi1yl  
egfnfdngkak1fpl1sfdnyfkqdeiydihv1nng11ehfhegnmtyqtpmi1kykvprafve1spe1aedrgihegaevk  
1isetgeav1qvhvtdrvk  
gkeiy1p1nndameng1lgain11t1nsdvdytdt1psykrtscr1levit1kr1gksp1n1pnnfrv1nkk1rqp1qysv1qv1qkkwe  
rsdyv1fpg1nqvdk  
>sp|Q5HDU6|FEMX\_STAAC  
mekmhitnqehdafvkshp1ngd11q1tkwaetk1ltgwyarriavgrd1gevqgvaq11fkkvpl1pyt1cyisrgfvvdy  
snkealnal1dsakeiaka  
ektyaikidpdvevdkgtdalq1n1ka1lgfkhkgfkegl1skdyiqprmtmitpidkndde11nsferrnrskvr1al1krgt  
tversdreg1ktfael1mki  
tgerdg1fltrdisyfeniydalhedgdael1fvk1dpkeniakvnqelnelhaeiakwqqkmtsekqakkaqn1mindaq  
nkiakned1krd1lealeke  
hpegiy1sgal1mfagsksy1lygassnefrdf1pn1hmqytm1mkyarehgattydfggtdndpdkdsehyglwafkkvw  
gty1seki1gefdyv1nqpl  
yqlieqv1kpr1tkakikisrk1krk  
>sp|Q5HDV7|RS10\_STAAC  
makqk1rir1kaydhrvidqsaekivetakrsgadvsgpi1p1teksvyti1ravhmykdsreqfeqrthkr1l1divnpt  
pktvdal1mg1n1lpsgvdie  
ik1  
>sp|Q5HDV8|RL3\_STAAC  
mtqvfgenge1ipvtvveakenvv1qkktvevdgynai1qv1fedkkaykdkdaksnyankpaeghakkadaapkr1f1ref  
rnvdvdayevgqevsvdtf  
vagdv1dvtgvs1kgkf1ggaikrhgqsr1gpmshgshfhrapgs1vgmasdasrv1fkgqkmpgr1mgntvtvqn1evvqvdt  
enkvi1vkgnvp1gpkkg1v  
eirts1kkgnk  
>sp|Q5HDW4|RS3\_STAAC  
mgk1n1pi1glrvgi1rdweakwyaekdfas11hed1kirkfidnel1keasvshveieraanrini1ahtgkpgm1vigkgg  
seiek1rnk1nal1tdkkvh  
invi1ekkvdl1dar1vaeniarq1lenrasfrrvqkqaitramk1lgakigtqisgr1lggadiaraeqyseg1vpl1ht1ra  
di1dyahaeadttyg1lgvk  
wviyrgev1ptkntsgggk

Tsompanidou\_et\_al\_Supplemental\_FASTA\_File

>sp|Q5HDY5|RL17\_STAAC  
mgyrklgrtsdqrkamrlratsliiseriettearakevrsvveklitlgkkgdlasrrnaaktlrnveilnedettqt  
alqklfgeiaeryterqgg  
ytrilkqgprrgdgaesvielelv  
>sp|Q5HE00|Y2196\_STAAC  
mskrlllfdfdetyfkhntneedlshlremekllekltnnnevitavltgstfqsvmkmdqvnmtfkplhifsdlskm  
ftwmngeyvesetykkkv1  
sepf1fediedi1rhisaqnvfipqrafegnethynfyfhstgnhndsri1ealvryandqnytarfsrsnplagdp  
enaydidftpsnagklyat  
qflmrkynipvksi1gfgdsgndeaylsylehaylmsnsrdea1kqkfrl1tkypyyqgit1hvkfvegkydy  
>sp|Q5HE07|NPD\_STAAC  
mkhd1et1khiidssnritffftgagvsvasgvpdfsrmsgglfdeiskdgl1speyllsrdyleddpegfinfchkrllfvd  
tmpn1vhdwia1k1ernqqs  
lgiitqnidgl1hdsagsqhvde1hgt1nrfycnvchksytksdvidrt1khcdncggairpdivlygem1dqptiira1n  
kiehad1lv1l1gss1lvvqp  
aaglishfkgn1liiinkdrtpydsdat1vihddmvsvks1mte  
>sp|Q5HE16|LAGG\_STAAC  
mtk11pedfi1fggataayqaegatntdgkgrvawdtyleenywyaepasdfdrypvd1elsekfgvngiris1awsri  
fpngygevpnk1gveyyhk1  
faechrhvepfvt1hhfdtpevl1hkdgdflnrktidyfvdyaecfkefpevkywttfneigpigdgqylvgkfpngik  
ydfekvfqshhnmvaha  
avk1fkdggykgeigvva1lptkypfdpsnpedvraae1edi1hnkfil1datylgkysretmegvqhilsvnggk1nitd  
edyai1daak1ndf1gin  
yym1sdwrmrgydgesei1thnatgdkggsyq1kgvgqrefdvdp1rtdwdwmiypqglydqimrvvkdyppyhkiyiteng  
1gykdefi1esektvhd1dar  
idyvrgh1nviada1idganvkgfyiws1mdv1fswsngyekrygl1fyvdfetqerypkksaywykel1aetkeik  
>sp|Q5HE48|PTMCB\_STAAC  
msqteekkgig1rrvqafgsf1ssmimpnigafiawgfiaa1fidngwlpnk1dat1lagpmitylip1liafsggr1iyd1  
rggi1aatatmgvival1pd  
t1pml1gamimg1lvglw1mkkt1dq1iqprtpqgfem1fn1fsagil1gfimtiagfki1lap1mkf1mhi1svavealvhah1  
1plvs1il1vepakiv1flna  
inhgvft1pl1gadqaakaggsi1lytiesnpgpg1gil1laymi1fgkgtakttsy1gagi1ih1f1ggi1heiy1fpyv1mrp1l1fia  
vi1lgmt1gvatyqat1gfgf  
kspaspgs1fivyc1naprgef1hm1lgv1flaa1lvs1fvvaa1imk1ftrepk1qd1leaataqment1kgk1kss1vask1lvss1dkn  
vnteenasgnv1set1ss1dd  
dpea1ldnynted1vdahny1nni1nhvi1facdagm1gss1amgasm1rnk1fk1kagi1ndi1tv1nta1inq1lpk1daq1vit1qk1k1td  
raik1qtpna1hi1svdn1fln  
sprye1ell1nn1kkdd1qa  
>sp|Q5HE63|DEOC2\_STAAC  
mnsak1lidht1lkpestr1tqidqi1ideakayh1fksvcvnp1thvkyaer1adsevl1vctvig1fpl1gasttat1kafeteda  
iqngade1dmvin1igalkd  
grfddvqqdi1eavvkaakght1vkvi1ietv1ldhdeiv1kase1l1tkaagad1fvkt1stgf1aggataedv1k1mkdtvgadi1ev  
kasggvrn1ledf1nkm1veag  
atrigasagv1qim1qgl1eadsdy  
>sp|Q5HEA4|SCED\_STAAC  
mkk1t1lass1lavgl1ivagnagheahasead1nkas1laqmaqsndqt1nqkpieagaynyt1fdyeg1fthy1fesdg1th1faw  
nyhat1gtngadmsaqaptt  
nnvapsavqanqv1qsq1eveapqnaqt1qqp1qast1snn1sqvtat1ptesks1segssv1vnah1lkqiaqresggn1ihavn1ptsg  
aagkyq1flqst1wds1vapak  
ykgvspanapesv1qdaaavk1lyntggaghwta  
>sp|Q5HEC5|ATKC\_STAAC  
mnti1rnsic1t1i1tmv1l1cgf1flp1ait1ligqi1ffyq1qangsl1itydn1rivgsk1ligqht1etry1fhgrpsav1dynm1pek  
lykngv1ssggsnesngnte  
l1jarmkh1hvk1fgns1v1tidaat1ssesg1ldphi1tvenal1kqapriadar1hv1stsr1vad1liqhrk1qrgv1l1ndy1v1n1le1ni  
a1ldk1mkd  
>sp|Q5HED1|ALR1\_STAAC  
msdky1rsaym1nvd1navas1nfkv1fst1l1hp1nktvmavvkanaygl1gsvkvarh1mengat1ffavat1l1deaie1lrmhgita  
ki1lv1gv1pak1dikai1qh  
rval1tvp1skqwl1keai1kni1sgeqek1lw1hik1ldtgm1r1gik1dtktyqevie1i1qqyeq1lvfegv1fth1facade1pgdmt  
teqyqr1fkdmv1nea1kpey  
ihc1qnsags1l1mdc1qf1cna1irpgis1lygyyp1seyv1qqkv1vh1kpsv1qlianv1vtkt1l1qagesv1sygatytat1dpttia  
l1lpig1yadgy1l1rim1qgsfv  
nvng1hqcevi1grvcmd1q1ivkvpdqvkagds1vil1idnhres1pqsvev1vaekqht1inyev1l1cn1srr1lpriyhd1gdq1rfvt  
ne1lk  
>sp|Q5HEG5|AGRB\_STAAC  
mnyfdnk1idq1fatyl1qkrnn1ldhi1qfl1qvr1l1gmqvl1aknig1klivmytiayil1ni1fl1ft1lit1n1l1tfyl1irrahgahaps  
sfwcyvesi1l1fi1l1plvi  
vnfhin1flimi1iltvis1lgvis1yapaat1kkk1pipvr1likrkkyyai1ivs1l1fi1it1li1ikep1faqfi1qlgi1ieait1l

Tsompanidou\_et\_al\_Supplemental\_FASTA\_File

pi ffikedlk  
>sp|Q5HEH9|LUKL2\_STAAC  
mknkkrvliasslscaillsaattqansahkdsqdqkkehvdksqqkdkrnvtknkdnstapddigkngkitkrtevtv  
ydektnilqnlqfdfidp  
tydknvlvkkqgsihsnlkfeshkeeksnwlpypseyhvdfqvrnrkteildqlpknkistakvdstfsyssggkfd  
stkgigrtssnsysktisy  
nqnydtiasgknnwhvhwsviandlkyggevknrndellfyrntriatvenpelsfaskyrypalvrsgfnpefltyl  
sneksnektqfevtytrnq  
dilknrpgihyappileknkdqgrlivtyevdwknktkvvdskysddnkpykeg  
>sp|Q5HEI2|OMP7\_STAAC  
mkfkslittlalgvastganfnneasaaakpldkssslhghgyskvhvpyaitvngtsqnilssltnfnknqnisykd  
ledrvksvlksdrgisdi  
lriskqakytvyfknngtkkvidlkagiytadlintseikaininvdtkkqvedkkkdkanyqvpytitvngtsqnilsnl  
tnfnknqnisykdledkvks  
vlesnrgitdvdrlskqakytvnfknngtkkvidlksgiytanlinssdiksininvdtkkhenkakrnyqvpysinln  
gtstnilsnlsfsnkpwt  
yknltsqiksvlkhdrigiseqdlkyakkaytyvfknngkriqlnsknnytanlvhakdvkrieitvktgtkakadryvp  
ytiavngtstpi lsdlkft  
gdprvgykdiskkvksvlkhdrigerekyakkatyvhfknngtkkvininsnisllyvqdikkididvktgtkak  
adsyppytiavngtstpi  
sklki snkqlisykylndkvksvlksergisdlldlkfakqakytvyfknngkqvvnlsdiftpnlfakdikkididvk  
qytkskknnksnkvfpvt  
inkfenivsnefvynaskitindlsiklksamandqgitkhdiglaeravykvyfknngsskyvdlkteykdervfkatd  
ikkvdielkf  
>sp|Q5HEL8|DNLJ\_STAAC  
madlssrvnelhdllnqysyeyvednpsvpdseydkllhelikeehpeyktvdsptvrvggeaqaasfnkvnhdtpml  
slgnafneddlrkfdgri  
eqignveymcelkidglavslkyvdgyfvqgltrgdgtgeditenlktihaipmkkepInvevrgeaymprsrflrln  
eekendeqlfanprnaaa  
gslrqldskltakrklsvfiysvndftdfnarsqsealdeInklgfttnknrarvnnidgvleyiekwtsqreslpydid  
givikvndldqqdemgftq  
ksprwaiaykfpaeevtklldiel sigrtgvvtptail epkvagttvsraslhnedlihdrdirigdsvvkkagdi  
pevrsiperpedavtyh  
mptpcscghelvriegevalrcinpkcqaqlveglihfvsrqamnidglgtkiiqqlyqselikdvadifyl teedllp  
ldrmgqkkvdnllaaigqa  
kdnslenllfglgrhlgvkasqlaekyetidrlltvteaelvei hdigdkvaqsvvtylenediraliklkdkhvm  
iykgiktsdieghpefsgk  
tiviltgklhqmtrneaskwlasqgaktssvtkntdviagedagskltkaqslgiei wteqqfvdkqnelns  
>sp|Q5HEW3|SPLD\_STAAC  
mnkni iiksiaaltitsitgvgttvvdgiqqtakaensvklitntvapysgvtwmgagtgvvgnqtiitnkhvtyhm  
kvgdeikahpngfynggg  
lykvtkivdypgkediavvqveekstqpkgrkfkdfstskfniaseakenepisvigypnpngnklqmyestgkvlsvgn  
ivtsdavvpgsgspiln  
skreaigvmyasdkptgestrsfavyfspeikkfiadnlk  
>sp|Q5HEY9|METK\_STAAC  
mlnkriftsesvteghpdkiadqvsdaildailkddpnarvacettvttgmaligeisttvyvdipkvvretikeigy  
trakyydyetmailtaid  
eqspdiaagvdkaleyrdkseeieatgagdqglmfgyatnetetymlaiylshqlakrlnsdvrkdgtlnl rpdgkv  
qvtveydendnpvritiv  
vstqhaedvtleiqedikahviyptvpenlineqtkfyinptgrfvi ggpqgdagltgrkiivdytgygyarhgggcfsg  
kdptkvdrsaayaaryvak  
nivaagladqcevqlayaigvaepvsiaidftgtgkvsegqlveavrkhfdlrpagiikmldlkqpiykqtaayghfgrt  
dvlfpwekl dkveelkdav  
k  
>sp|Q5HEZ2|CRCB2\_STAAC  
misiilvmigggfgaiarsaitdyfnhkftsklpiatlivnlvgsfligltiglsistswfpaffvtgflgglttfstla  
keltlmmtpkfninlflny  
slqfiigfiacyigyhi  
>sp|Q5HF12|ROT\_STAAC  
mhklahtsfgivgmfvntcivakyviinwemfsmkkvnndtvfgilqlletllgdinsifseieseykmsreeililltlw  
qkgfmlkemdrfvevkpy  
krtrtynnllvelewi ykerpvdertviihfnekllqqekvellnfisdaiasratamqnslnaiav  
>sp|Q5HF23|PEPVL\_STAAC  
mwkekvqyedqiindlkgllai esvrddakasedapvggprkaldymyeiahrdgtthdvdhiagri eagkndvlg  
ilchvdvvpagdgwdsnpf  
epvtedaii argtlddkgptiaayyaikiledmnvdwkkrihmiigtdeesdwkctdryfkteemptlgfapdaefpci  
hgekgttfdlvqnklted  
qdepdyelitfksgerynmpdhaearvlvkenmtdviqdfeyfleqnhlqgdstvdsgilvltvegvkavhgm dpsigvn



Tsompanidou\_et\_al\_Supplemental\_FASTA\_File

aglyllkflaslndnnaq  
afvafsnrylfnsdfgekmgmkfhtdvmgdvttngvitydnenaglfginlrypegfefekamdrfaneiqqygfevkl  
gkvqpphyvdkndpfovkl  
vtayrnqndmtepytigggtyarnldkgvafgamfedsedlmhqkneyitkkqlfnatsiyleaiyslcvve  
>sp|Q5HF31|Y1793\_STAAC  
mntfqmrklkerlshldvdfkfnreeetlriyrtdnnkgitiklnaivakyedkkekivdeivyyvdeaiamadtke  
sissqimpviratsfdkk  
tkqgypfiydehtaetavyvavdlgksyrlidesmledlklteqqiremslfvrklnsnyttdevkgnifyfinsndgy  
dasrln taflineieaqc  
gemlvavphqdvliiadi rnktydvmahtmefftkglvpitslsfgykqghlepifilgknnkqkrdpnviqrleanr  
rkfdkdk  
>sp|Q5HF42|FTHS\_STAAC  
mthlsdl dianqstlqpi kdiasvgisedalepygyhkakidinkitprenkgkvvlvtamsptpagegstvtvlgad  
afhelknvmvalrepalg  
ptfgikggatgggyaqvlpmedinlhfnngdfhaittanna lsafidnhihqnelgidqrriewkrvlmdndralrhvvn  
glggptngvpredgfnitv  
aseimailclsriskldkdkisritigytrdrkpvtvadlkegalamilkdaikpnlvqsiegtptlvhggpfaniahg  
cnsilatetardladi vvt  
eagfgsdlgakfmdikv reagfdpaavvvvatiral kmhggvakdnlkeenveavkagivnl erhvnnikkfgvepvva  
inafi htdaeveyvkswa  
kennvri altevkkggkvgvdlanevlevidqpsfkplyelelpleqkiekivteiygskvtfsskaqkqlkqfken  
gwdnypvc maktqysfsdd  
qtl l gaps gfeiti releaktgagfivaltgaimtmpglpkkpaal nmdvtd dghaiglf  
>sp|Q5HF45|SYY\_STAAC  
mtnvl iedlkwr gliyqqtdeggiedlnkeqvtlycgadptadslhighllpfltlrrfqehghrpivligggtgmidg  
psgkseervlqtteeqvdkn  
iegiskqihni fefgtdhgavlvnnrdwlgqislsiflr dygkhvgnymlgkdsiqsrlehgisyteftytilqaidfg  
hlnrelncki qvggsdqwg  
nitsgielmrrmygqtdaygltiplvtksdgkfkgsesgavwldaektspyefyqfwinqsdedvikflkyftflgee  
idrleqskneaphlreaqk  
tlaeevtfihgedalndairisqal fsgdlsksakelkdgfkdvppvtlsndttniveli etgispskrqaredvnn  
gaiyingerqqdvnyalap  
edkidgeftiirrgkkkyfmvnyq  
>sp|Q5HF67|Y1756\_STAAC  
mtkiskide lnnqgadaawittp lnvyftgyrsepherlfallikkdgkqvlfcpkmeveevkaspftgeivgyldte  
npfsl ypqtkllieseh  
ltvarqkqlisgfnvnsfgdvdltikqlrniksedeiskirkaaeladkcieigvsylkegvtecevvnhieqtikygv  
nemsfdtmvlfgdhaasph  
gtpgdrrlksneyvlf dlgv iyehycsdmtrtikfgepskeaqeiynivleatsaiqaikpgpi lkdidhiarniisek  
gygeyfphrlghglqeh  
eyqdvstnsnlleagm vitiepgiyvpgvagvrieddiltnegyevlthyek  
>sp|Q5HFA2|HEM3\_STAAC  
mrklvvgrrsklaltqsqfidklkavepnleieikeivtkgdrivdkqlskvggkglfvkeiqhel feknidmaihs  
kdvpvipegl tlgcipdr  
elpfdayiskthtqlsq lpegsiigtsslrrgaqilskypnleikwirgnidtrlekltedydaiilaaglrmmgwsd  
divtsyl drdtllpaiggg  
algiecrsdeelltl lskvhndevakcvtaertflaemdgsqvp iagyatisdqneieftglimtpdgkerfeytmng  
tdpvelgktvsnk lkeqga  
yeiikr lneqh  
>sp|Q5HFB9|OBG\_STAAC  
mfvdqvki slkagdgngitayrrekyvpgggpaggdggkgasvvfevdeg lrtlldfryqrhfkaskgengqssnmhgk  
naedlv lkvppgtiiknve  
tdevladlvedgq ravvakggrgrgnsrfatprnpapdfsekgepgeeldvslelklladvglvgfsvgkstllsivs  
kakkpigayhfttikpnl  
vstpdqrsfvmadlpgl iegasdvgvlghqfl rhvertkvivhmidmsgsegrepiedykvinqelaayeqrledrpqi  
vvankmdl pesqdnlnlfk  
eeigedvpvipvstitrndidqll yaia dkleeykdvditveeesvginrvlykhtpsqdkftisrdddgayvvsnai  
ermfkmtdfnsdpavrrfa  
rqmrsmgid dalrergckngdivrilggefefve  
>sp|Q5HFC2|RUVB\_STAAC  
mnermvdqsmhseetdfe lsrptrlrqyigqnsiks nlevfikaaklrhepldhvllfgppglgkttlsnii anemevn  
irtvsgpslerpgdlaail  
sglqqgdvlfideihr lssveevlypamedffldi iigkgdearsiridlp pftlv gattragsltgpl rdrfgvhlrl  
eynesdlkei iirtaevl  
gtgideesaie lakrsrgtprvanrllkrvrdfqvnedeqiyi ettkhalgllqv dqhgl dyidhkmmnci ikqynggp  
vgldtiavtigeriaitied  
vyepfliqkgflertprgrkatplayehfaksneere  
>sp|Q5HFC3|QUEA\_STAAC

Tsompanidou\_et\_al\_Supplemental\_FASTA\_File

mnieefdydlpesliaqtpkdrdhsrllvmdretgemkhlhfkdiieyfrpgdtlvlnldrtrvmparlfglkeetgakve  
m1mltqi egndwevllkpa  
krikvgnkl nfgngkii aecikemdqggrimrlhyegilqerlde l gemplpyikerl ddpdryqtvakesgsaaapt  
aglhftdellieikngvn  
iafvtlhvgltfrpvsddvndhemhseyyqmtqetadllndtkskghriisvgttstrtletirrdhdkfvetsgwtn  
ifiyppgfdfkaidgqitnf  
hlpkstlvm lvsafssrenvlnayktavnleyrffsfgdamlii  
>sp|Q5HFE4|SYA\_STAAC  
mkk1kaseirgkyldffvekghmvepsaplvpidddtllwingsvatlkkyfdgretppkprivnsqkairtndienvgf  
tarhhtffemlgnfsigdy  
fkqeaiefawefltsdkwmgmepdklyvtihpedmeayniwhkdiglesriiriegnfwdigegpsgpntefidyrga  
ygqddpaeemyppgenery  
levwnlvfsefnhkhdsytp1pnknidtgmglermasvsqvrtnyetd1fmpimneiekvsgkqylvneqdvafkvi  
adhirtiafaidsgalpan  
egrqyvlrrllrravrfsqtlginepfmyklvdivadimepyypnvkekadfikrvikseerfhetledglailnelik  
kakattneingkdafklyd  
tygfpie1teeiavqaglkvdmttfesemqqqrdrarqarqnsqsmqvqsevlnkntsastfvgydtataqt1thliyn  
geevsqveagetvyfmlte  
tpfyaisggqvadtgivyndnfeiavsevtkapngqn1hkgvvqfgqvnvgatvsaevnqndrrdiqknsathllhaal  
ksvlgdhvnqagslveadr  
1rfdshfgpmtndeidqverlvneeiwkgidvniqemdiasakemgama1fgekygdvrvvnmapfsielcggihvrn  
tseigl1fkivsesgtgagv  
rriaeltgkaaflylediqekfntmksq1kvksddqvvdkt1qlqdeekallkqleqrdeits1kmgni edqveeingy  
kvlvtevdvpnakairstm  
ddfksklqdti1i1asnvddkvsrvatvpks1tnnvkagdlikmapivggkgggrpdmaqqgggtqpenisks1sfikdy  
ikn1  
>sp|Q5HFH9|GRPE\_STAAC  
mtnkdesvkkntestveetnvkqni ddsveqaeeskghlqdeaieetsdenvieeidpkdqkine1qq1adeneekylr1  
yaefenykrriqkeneink  
tyqaqrvt1d1lpaidniera1qiegd detfks1qkgvqm vhes1ina1kdngleviktegeafdpnihqavvqddn pdf  
esgeitqelqkgyklkdrv  
1rpsmvkvnq  
>sp|Q5HFI2|PRMA\_STAAC  
mnwte1si1inheavelatni1enhgsvngvi edsdglinqpedkygeiya1kkedypdkgvrlkayfnemyddk1rq  
ikde1n1de1dqhnvqfs  
eqiaetdwenewknyfhpfraskkftivpswetyakeadeelci eldpgmafgtgdhpttsm1kaietyvlpqhsvi d  
vgtgsgilsiash1igvkr  
ika1didemavsvakenfrrnhcet1ieavpgn1lkdetekfdiviani1ahi idemi edaynt1neggyf1tsgii keek  
yegiqshmervgfkiiseq  
hdngwvc1vgqkvse  
>sp|Q5HFM3|GCSA\_STAAC  
mshryipltekdkqem1qtigaksigelfgdvpsdillnrd1niaegeaett1lrr1nriasknitkethsflgagvyd  
hyapsvvdamisrsefya  
ytpyqpeisqgelqai fefqtl1celtdmdvanssmydgm1tsfaeacilafsqtkknkivvskglhyqalqv1lhtyatr  
kefevveid1dgtvtd1kk  
leaavddetaavavqypnfygsied1kkih1sfiedkka1fivyanplalgl1tppgsfgadivvgdtqpf1gipa1qfggph  
cgyfattkk1mrkvpg1rv  
gqtqddegnrgfv1tlqareqhirrdkatsnicsnqalnalassiamsal1gkqgiydiavqniehanyakqffikkgfev  
1dgt1sfnefv1kfdkpiqq  
vne1lvkyni1ggfd1gvvsddfknhm1iavtelrtkdeid1tfevkegelnd  
>sp|Q5HFR8|RNZ\_STAAC  
mevtffgtsag1ptkerntqai1al1nepysnsiwlfdvgegtqhqil1haik1gkvthifithmghdhi1fglpg1lssrs  
fqggeqkpl1tlvgpk1gika  
yvemsml1sesh1nypityieiddh1tyhhdgftveah1lnhgipsygyrvmapettgtinvealknig1leppkyqevk  
shdtfehngqvyqskdfrg  
eskqgpvvaifgdtkpcsnervi1rdadv1mveatyidgekhlannyhshiedv1alikeanvkrt1lith1snrynted  
ineiyqt1liqnedtpnfnf  
vkdfdsfki  
>sp|Q5HFS8|SCPB\_STAAC  
mdnhgiles1lftagdeg1dekq1lei1dmskdq1velienysshg1miqrfgmtyv1ttkkeaatyieq1lieqksqm1  
sqaamev1s1iaynq1sr  
sdiel1rsinsdgavkt1iakglveakvvneqrsqql1itt1d1flnvfgisnie1d1ptteeddeemda1ffsn1vnqkgenn  
d  
>sp|Q5HFU9|GPDA\_STAAC  
mtk1tvfgmgsfgtal1anv1aenghdv1mwgknqdavde1ntcht1nkky1kyak1dvni1atsdm1tkai1qfadiy1malp  
tkamrevasq1ndk1tsk1em  
tfihvakgieng1tfrsk1semi edsispeynagi1gv1sgpshae1evv1kqpttva1assk1dksvsk1tqdl1fmdy1rvytn  
dd1igve1l1gga1kni1iava

Tsompanidou\_et\_al\_Supplemental\_FASTA\_File

sgivagi gygdna kaal mtr glaei srl gek lgad pmt fl gl gg ig dl ivt ct sth sr nft l gy kl gq ges md qa l semn  
mvvegi yttks vyh lakek  
nvdmp i tna l yrv l feni sv kecv kd l mer dkk se  
>sp|Q5HFV7|AROC\_STAAC  
mryl tsgesh gpg l tvive gvpa nie ik ved ink em fkr qggy gr rrm qie kdt veiv sgv rnygt l gsp it mvt ndd  
fthwr kim ga ap i see ere  
nmkrti tk prp ghad l vgg mk yn hrd l rnv lers sare taarv avga lckv ll qql didi ysrv veigg ikd kdfyd set  
fkan ldr ndr vrid ds iaq  
amrdki deak neg ds iggvv qv ven mpvgvgsy vhydr kl dgkia aqgvvs ina fkgvs fgeg fkaaekpg sei qdeily  
nseigyrgsn hlgg legg  
msgmp i vngv mkip tlykpl nsvdint ked fkat iers ds cav paas ivce hvvafe iaka ll eefqsn hieqlkqq  
i ierr ql nief  
>sp|Q5HFV9|AROA\_STAAC  
mvneqi idi sgpl kgeiev pgdks mthra im las laegv stiyk pl lged cr rtm di fr ll gveiked dek l vvt spgyq  
sfntphqv l ytgns gtttr  
llag llsg l giesv lsgdvs igkrp mdrv l rpl k l m danie gied nyt pl iikpsvik giny qmevasa qvksail fas l  
fskept iikel dsvr nhte  
tmfkhfn ipie ae g l sintt peai ry ik pad fhvpg di ssaaffiva alitpgsdvtihvnginptrsgiidivekmgn  
yqlfnqt tga eptasi rig  
ytpmlqpi tiegelv pkaide l pvia ll ctqavgtstik daeel kvketn ridttadm l nllgfelqptndgliiypsef  
ktnatvds l t dhri gmm la  
vas ll ssepvki kqfdavnvs fpgflpk l k l leneg  
>sp|Q5HFV8|GPSB\_STAAC  
msdvs lkl sakdi yekdfekt margyrreevda fl ddi iadyqk madmnevkl seenhklkkel eel r lrvatsr p qd  
nksfssn tttntssnvd  
ilkrisn lekavfgk  
>sp|Q5HFY7|NORB\_STAAC  
mekpsreafe gnnk ll igiv lsvitfw l faqs l vnvvpileds fntdigtvnia vsital fsgmfvv gagg l adkygrik  
ltnigi ilni lgs lliiis  
nipllliigr liqg lsaac impat lsiiksy yigkdrqra l sywsigswgsgvcsffggavat ll gwrwifilsi iis l  
ialfl ikgt petksksis l  
nkfdik glv llvim lsl nilitk gselgvts ll fit ll aiaigs fs l fivlekratn pl idfkl fknkaytgatasnfl  
l ngvagt livantfvrg l  
gysslqags l sitylvmv l imi rvgek ll qt l gckkpligtgv livgeclis l tfl peifyvicci igyl ffg l g l giy  
atpstdtaianap lekvgv  
aagi ykmasa lggafgvalsgavyaivsnmtniytgamialw lnaamgilsvi illlvpkqndtql  
>sp|Q5HFY8|EBH\_STAAC  
mnyrdkiqkfsi rkytvgtfstviatl vfl gfn tsqaha aetnq pasv vkqkqqsneqtenresqvqnsqnsqngqsls  
atheneqpnisqan lvdqk  
vaqsstnde qpasqnvntkkdsataattqpdkeqskhkqnesqsankngndraahvenheanvvtasdsdngnvqhd  
rnelqaffdanyhdyrfid  
renadsgtfn yvkgi fdkint llgsndpin kdlqlaykeleqavalirtmpqrqtsrrsnriqtrsvesraaeprsvs  
dyqnanssyvvenandgsg  
ypvgtynasskgapyn l pttpwnt l kasdskeialmtakqtgdgyqvwikfnkghaphqnmifwfa l padqvpvgrtdf  
vtvnsdgtnvqws h g a g a g  
ankplqqmwegvndphrshdfk i rnrsgqviydwptvhiys led l srasdyfseagatpatka fgrqnfeyingqkpa e  
spgvpkvytfiggdasyt  
isfktqgptvnl yyaaggra leynql fmysqlyvestqd hqqr l ngl r qvvnrtyrigt tkrvevsqgnvqt kkv l est  
nl niddfvddpl syvktps  
nkvl g fgsnnantna frp ggaqq l neyql sq l ftdqkl qeaartrnpir l m igfdypdaygnset lvpvnl tv l peiqhn  
ikffknddtqniaekpfsk  
qaghpfvyvagnqgnasvnl ggsvtsiqpl rin ltsnenftdkdwqitgiprt l hienstnrpn narernielvgnllp  
gdyfgtirfgrkeql feir  
vkphtptit ttaeq l r gta l qkv pni sgip l dpsalvy l vaptnqt tnggseadqipsgytilatgtpdgvhntitirp  
qdyvvfippvgkqiravvy  
ynkvvasnmsnavtilpddipptinnpvginakyyrgdevnftmgvsdrhsgiknttittl pngwtsn ltkadknngsls  
itgrvsmnqafnsditfkv  
satdvnnttnds qskhvsihvgkisedahpiv l gntekvvvnptavsndekqsii tafmknqnirgy lastdpvtvd  
nngnvt lhyrdgsstllda  
tnvmt yepvvpkyqt vnaaktatvtiakgqsfsigdikyft l sngqpi psgtftnitsdrtipta qevsqmnagtqly  
hitatnayhkdsedfyis l  
kiidv kqpegdqrvyrtstydl t tdeiskvkqafinanrdvitlaegdisvtntpnganvstitvinkgrl tksfasn l  
anmfl rwnvfpqdyvtw  
tnakianrptdgg l swsddhks liyrydat lgtqittdil tm l k atttvpg l rnnitgneks qaeaggrpnfrttgysq  
snattdgqrqft l ngqviq  
vldi inpsngyggqpvtns ntrahnsstvvvnepaangagaftidhv vksnsthnasdavykaqly l tpygpkqyveh  
l nqntgnttdainiyfvps  
dlvnptisvgnyt nhqv fsgetftntitandnfgvqsvtvpnts qitgtv dnnhqhsatapnvtsatnktin ll atdts

Tsompanidou\_et\_al\_Supplemental\_FASTA\_File

gntattsfnvtvklrdky  
rvgtssstaanpvriani snnatvsqadqtti insltftetvpnr syarasaneitsktvsnv srtgnnanvtvtvyqdg  
ttstvtvpkhvipeivah  
shyvtvggqdfpangssasdyfkl sngsdi adati twvsqgapnkdntrigeditvtahilidgett pitktatykvvrt  
vpkhvfetargvlypgvsd  
mydakqyvpvnnswna qhmnfqfv gtygpnkdvvgi strlirvtydnrqt edlti lskvkpdp pridansvtykag l  
tnqeikvnnvlnssvklf  
kadntp l nvtni thsgsfsvvtvsda l pnggikakssi smn nvtyttqdehgqvvtvtrnesvdsnds atvtvtpqlqa  
ttegavfikggd gdfghv  
erfi qnpph gatvawhds pdtwkn tvgnthktavvt l pngqgtr nvevpkvypvanakapsr d vkgqn l tngtdamnyi  
tfdpntntngi taawanrq  
qpnnqqagvqh l nvdvtypgi saakrvpvtvnyqfefpqttytttvggt lasgtqasgyahmqnatg l ptdgftykwnr  
dtgtndanwsamnkpnva  
kvnakydvi ynhtfats l pakfvkdvq pakptvtetaagaiti apganqtvnthagnv ttyadkl vikrngnvttf  
trrntspwvkeasaatva  
giagtngi tvaagtfn padti qvvatqgsgetvsdeqrsddftv vapqp nqattkiwqng hiditp nnp sg h l nptqa  
mdia ytekvnggae hskti  
nvrvgqnnqwti ankpdv ytl daqtgkvtfnantikpnssititpkagtghsvssnpst l tapaahvntteivkdygsn  
vtaaeinnavqankrtat  
ikngtampnlaggstttipvtvyndgsteevqesiftkadkreli taknhl ddpvstegkkpgt itqynn amhnaqqq  
intakteaqqv inneratp  
qqvsdal tkvraaqtkidqakal l qnkednsq l vtsknn l qssv nqv pstagmtqqs idnynakkreaete itaaqrvid  
ngdataqqi sdekh rvdna  
l talnqakhd l tadthaleqavqq l nrtg tttgkkpasitaynnsira l qsd l tsaknsanai iqpi r tvqevqsaltn  
vnrver l tqainqlvpla  
dnslktaktkldeeinksvtt dgmtqssi qayenakragqt estnaqnv inngdatdq qiaaektkveekynslkqai a  
gltpdlaplqtaktqlnd  
idqptsttgmtsasiaafnek l saartki qe idrv l ashpdvati rqnvtanaaksa l dqarng l tvdkap lenaknql  
qysidqtsttgmtqdsin  
aynak l taarnkiqqi nqvl agsptveqintntstanqaksdl dharqal tpdkap lqtaktql eqsinqptdttgm tta  
slnaynqlqaarqkltei  
ngvlngnptvqni ndkvteanqakdq l ntarqgl tldrqpalt l hgasn l nqaqqnftqqinaaqnhaaletiksnit  
alntamtkl kdsvadnnti  
ksdqnydatpankqaydnavaakgvi gettnptmdvntvnqkaasvsktkdal dggqn l qrakteatnait hasdl nq  
aqkna l tqqvnsaqnvqav  
ndikqttqslntamgt l krgvanhnqvvsdnyvnadtnkkndynnaynhandi ingnaqhpvitpsdvnnal snvtske  
halngeak l naakqeanta  
lghl n l nnaqrnlqsqin gahqi davntikqnatn l nsamgn l rqavadkdqvkrte dyadadtakqnaynsavssae  
tiinqtt nptmsvddv nra  
tsavtsnkna l ngyek laqsktdaara idal ph l nnaqkadvk skinaasni agvntvkqggtd l ntamgn l qgaindeq  
t l nsqnyqdatpskktay  
tnavqaakdi l nksngqntkdqvteamnqvnsaknn l dgtr l l dqakqtakqql nmmth l ttaqktn l tnqinsgttva  
gvqtvqsnant l dqamnt l  
rqsiankdatkasedyvdanndkqtaynnavaaaeti inansnpempst itqkaeqvns sktalngden l aaakqnakt  
ylnt l tsi tdaqknn l isq  
itsatrvsgvdtvkqnaqhl dqamas l ngi nnesqvkssekyrdadtnkqqeydnaitaakailnkstgpn taqna vea  
alqrvnnakdalngdakli  
aaqnaakqhlgt l thi ttaqrnd l tnqisqatn lagvesvkqnans l dgamgn l qta indksgt lasqnl dadeqkrna  
ynqavsaaeti l nkqtgn  
taktaveqal nvnna khalngtqn l nnaqqaaita ingasd l nqkqkdal kaqangaqrvsnaqdvqhnate l ntamgt  
lkhai adknt l asskyvn  
adstkqnayttkvtnaehi isgtptvvt psevtaaanqvnsakqelngder l reakqnanta idal tq l ntpqkak l ke  
qvgqanr l edvqtvqtngq  
alnnamkgl rdsianettv ktsqnytdaspnnqstynsavsnakgi inqtnnptmdtsaitqattqvnnakng l ngaen l  
rnaqntakqn l ntlsh l tn  
nqksai ssqidraghvsevtat knaate l ntqmgn l eqaihdqntvkvsvkftdadkkrdaytnavsraeailnktqga  
ntskqdveaai qnvssakn  
alngdqnvtnaknaaknal nntsinnaqkrdl ttkidqattvagveavsntstql ntaman l qngindknt l asenyh  
dadsdkktaytqavtnaen  
ilnknsn l dktavena l sqvanakgal ngnhn l eqaksnanttingl qhl ttaqkdk l kqqvqqaqnvagvdtvkssa  
nt l ngamgt l rnsiqdnta  
tkngqny l daternktnynnavdsangvi natsnpnmdana inqiatqvtstknal dgthn l tqakqtatnaidgatn l n  
kaqkdal kaqvtsaqrvan  
vtsiqqtane l ntamgql qhgid denatkqtqkyrdaeqskktaydqavaaakailnkqtgsnsdkaavdra l qqvstsk  
dalngdak laeakaaakqn  
lgt l nhi tnaqrtd l eqgnnqattvdgvntvktnant l dgamns l qgsindkdat l rnqny l dadeskrnaytqavtaae  
gilnkqtggntskadvna  
lnavtrakaalngadn l rnaktsatntidglpn l tq l qkdn l khqveqaqnvagvngvkdkgnt l ntamga l rtsiqndn

Tsompanidou\_et\_al\_Supplemental\_FASTA\_File

ttktsqnyldasdsnkny  
ntavnangvinatnnpnmdanaingmanqvnttkaalngaqlaqaktnatntinnahtlnqkqkdaiktqvnaqrvs  
dannvghtateinsamta  
kaaiadkertkasgnyvnadqekrqaydskvtnaeniisgtpnatltvndvnsaasqvnaaktaingdnnlrvakehann  
tidglaqlnnaqkalkkeq  
vqsattldgvqtkvnsstlntamkglrdsianeatikagqnytdaspnrrneydsavtaakaiinqtsnptmepntitq  
vtsqvttkeqalngarnla  
qakttaknnlnltsinnaqkda1trsidgattvagvnetakate1nnamhs1lqngindetqtkqtqkyldaepskksa  
ydaqvnaakailtkasgq  
vdkaaveqalqvnstktalngdak1neakaaqktlgtlthinnaqrta1dneitqatnvegvntvkakaqqldgamgq  
letsirdkdtl1qsqnyqd  
addakrtaysqavnaaati1nktaggntpkadveramqavtqanta1ngiqn1drakqaantaitnasd1ntkqkealka  
qytsagrsvsaangvehtat  
e1ntamta1kraiaadkasgnyvnadankrqaydekvtaaenivsgtptpt1tpadvtnaatqvtnaktq1ngnhn1  
evakqnanta1dgl1ts1ng  
pqkak1keqvgqatt1pnvqtvrdnaqt1ntamkglrdsianeatikagqnytdasqkqtdynsavtaakaiigqttsp  
smnaqei1nqakdqvtakqg  
a1ngqen1rtaqtnakqh1ng1sd1tdaqkdavkrqiegathvnevtqaqnada1ntamtn1kngiqdqntikqgvnft  
dadeakrnaytnavtqaeq  
i1nkaqgpntskdgvetalenvqrakne1ngnqnvanakttakna1nnltsinnaqkealksqiegattvagvqvstta  
se1ntamsn1lqng1ndea  
tkaaqkytdadrekqtayndavtaakt1ldktagssndnkaaveqalqrvntakta1ngder1neakntakqqvatmsh1t  
daqkan1tsqiesgttvag  
vqgiqanagtl1dqamnl1rqsiaskdatsedyqdanad1qnayndavtnaegii1satnnpempd1inqkasqvnsak  
sa1ngdek1aaakqtaksd  
igr1td1nnaqrtaanaevdqapn1aavtaaknkats1ntamgn1khalaeakdntkrsvnytdadqpkqqaydtavtqae  
a1tnangsnanetqvqaa1  
nq1nqaknd1ngdnkvaqakesakra1asysn1nnaqstaatsqi1dnattvagvtaaqntane1ntamgql1qngindqnt  
vkqgvnftdadqgkdayt  
navtnaqqi1dkahgqnm1tkaqveaa1nqvttakna1ngdanvrqaksdakan1gtlth1nnaqkqd1tsqiegattvng  
vngvktkaqdl1dgamgr1q  
sa1ankdqtkaseny1dadptkktafdnaitqaesy1nkdhgankdkqaveqai1qsvtstena1ngdan1qrakteaiqa  
idn1th1ntppkta1kqqv  
naaqrvsgvtd1knsats1nnamdq1kqaiadhdtivasgnytnaspdkqgaytdaynaaknivngspnvi1tnaadvtaa  
tqrvnaetg1ngdtn1lat  
akqqakda1rqmth1sdaqkqsitgqidsatqvtgvqsvkdnatn1dnamnl1rnsiankddvkasqpyvdadrdkqnay  
navtnaeni1natsqpt1  
dpsavtqaanqvstnkta1ngaql1ankkqettaninq1sh1nnaqkqd1ntqvtnapni1stvnqvktkaeq1dqamer1  
ingiqdkdqvkqsvnftda  
dpekqtaynavtaaeni1nqangtnanqsqveaa1stvttkqalngdrkvtdaknnanqtl1st1dn1nnaqkgavtgn  
inqahtvaevtqai1qtaqe  
1ntamgn1kns1ndkdtl1gsqnfadadpekknayneavhnaeni1nkstgtnvpkdqveaamnqvnatkaa1ngtqn1e  
kakqhanta1dgl1sh1tna  
qkealkq1vqsttvaeaqgneqkannvdaamd1rqsia1dnattkqnqnytdasqkdaynavttaqgi1dqtspt  
1dptvinqaagqvsttkna  
1ngnen1leaakqqasqslgs1dn1nnaqkqvtvdq1ngahtvdeanqikqnaqn1ntamgn1kqaiadkdatkatvntfd  
adqakqqayntavtnaeni  
iskanggnatqaeveqai1kqvnaakqalngnanvqhakdeatal1nssnd1nqaqkda1kqqvqnatvavgvnnvkqtaq  
e1nnamtq1kqgi1adkeq  
kadgnfvnadpdkqnaynqavakaeali1satpdvvvtpseita1nkvtqaknd1ngntn1atakqnvqhaidq1pn1nq  
aqrdeyskqitqat1vpnv  
nai1qqaatt1ndamtq1kqgi1ankaqikgsenyhdadtdkqtaydnvtaae11kqtnptmpnti1qqa1tkvndtnq  
a1ngnqk1adkqadakt1  
gt1dh1ndaqkqal1ttqveqapdi1atvnnvkqnaqn1nnamtn1nna1dqktet1nsinftdadqakdaytnavshaeg  
i1skangsnasqteveqam  
qrvneakqalngndnvqrakdaakqvitnand1nqaqkda1kqqvdaaqtvanvntikqtaqd1nqamtq1kqgi1adkq  
tkangnfvnadtdkqnayn  
navahaeqi1sgtpnanvdpqqvaqalqqvnqakgd1ngnhn1qvakdnanta1dq1pn1nqpqkta1kdqvshae1vtg  
vnaikqnada1nnamgt1k  
qqiqansqvpqs1vftqadqdkqqaynnaanqaqqi1angi1ptv1tpdtvtqavttmnqakda1ngdek1aqakqea1an  
1dt1rd1nqpprdal1rnqi  
nqaqal1atveqtkqnaqvntamsn1kqgi1ankdtkasenyhdadadkqtaytnavsqaegi1inqttnt1npdeitra  
1tqvtdakng1ngeak1at  
ekqnakdavs1gmth1ndaqkqal1kqgidqspei1atvnnvkqtats1dqamdq1sqaindkaqtl1adgny1nadpdkqnay  
kqavakaeali1nkqsgtne  
vqaqvesi1tnevnaakqalngndn1anakqqakqqlan1th1ndaqkqs1fesqitqap1vtdvttinqkaqtl1dhame11  
rns1vadnqtt1asedyhda  
taqrqndynqavtaanni1inqtsptmpddvngattqvntkva1dgden1aaakqqannr1dq1dh1nnaqkqql1sq

Tsompanidou\_et\_al\_Supplemental\_FASTA\_File

itqssdiaavngkhqtaes  
Intamgnlinaidhqaveqrnfinadtdkqtayntavneaaaminqktgqnanqteveqaitkvqttlqalngdhn1q  
vaktnatqaidalstlndp  
qkta1kdqvtaatlvtavhqi eqnantlnqamhg1rqs1qdnaatkanskyinedqpeqqnydqavqaanni ineqtatl  
dnna1nqaattvnttkaal  
hgdvk1qndkdhakqtvsq1lah1nnaqkhmedtlidsettrtavkqdlteaqa1dq1mdalqqsiadkdatrassayvna  
epnkkqsydeavqnaesi  
ag1nnp1inkgnvssatqav1sskna1dgver1aqdkqtagnslnh1dq1tpaqqqa1enq1nattrgevaqk1teaqa  
1nqamealrns1qdqqqte  
agskfinedkpkdayqaavqnakd1inqtnnpt1dkaqveq1tqavnqakdn1hgdk1addkqhavtd1nq1ng1nnp  
qrqalesqinnaatrgeva  
qk1aeaka1dqamqa1rns1qdqqqtesgskfinedkpkdayqaavqnakd1inqtgnpt1dksqveq1tqavttakdn  
1hgdk1ardqqqavttvn  
alpn1nhaqqal1tdainaaptrtevaqhvqtate1dhamet1knkvdqvntdkaqpnysteaddkkeavdqalqaaesi  
tdptngsnankdavidqvl  
k1qekene1ngnervaeaktqakqtidq1th1nadqiatqaknidqatk1qpiaelvdqatq1nqsmdq1qqavnehav  
eqtvdytqadsdkqaykq  
a1adaenv1kqnankqqvdqalqni1nakqa1ngdervalaktngkhdidq1na1nnaqqdgfkg1ridqsnd1nq1qqiv  
deaka1nramdq1lsg1e1td  
negrtkgs1nyvndatqvkvydetvdkakqa1dkstgqnl1takvik1ndavtaakka1ngeer1nrrkaea1qr1dq1  
th1nnaqrq1laiqq1nnae  
t1nkasrainratk1dnamgavqqy1deqhl1gvisstny1naddn1kanydnaianaahe1dkvqgnaiakaeaeq1kqn  
i1daqna1ngdq1lanakd  
kanafvns1ng1nqqqqd1ahkainnadtvsdvtdivnnqid1ndamet1kh1vdneipnaeqtvnyqnaddnaktnfdd  
akr1ant1l1nsdntvndi  
ngaiqavnda1h1n1ngdq1rdakdkaiqsinqalank1keieasnatdqdk1iaknkaeelansiinninkatsnqavs  
qvqtaganhaieqvthaneip  
kaki1dankdvdkqvqal1deidrnpn1tdkekqa1kdrinqi1lqqghnginnamtkeeieqakaqlaqa1qdikdlvkak  
edakqdvdkqvqal1deid  
qnpn1tdkekqa1kdrinqi1lqqghndinnamtkeaeieqaker1aqa1qdikdlvkakedaknidkrvqal1deidqnp  
n1tdkekqa1kdrinqi1lq  
qghndinnal1tkeeieqakaqlaqa1qdikdlvkakedaknaika1anakrdqinsnpd1tpeqkaka1keideakra1  
qvenaqtidq1nrg1n1g  
l1ddi1rnthvvevdeqpavnei1featpeqi1vngelivhrddi1iteqdi1lahin1lidq1saevitdpstatisds1takve  
vt1ldgskvi1vnpvkvve  
kelsv1vkqqaiesi1enaagqkine1nsvt1tleqkeaaiaevnk1kqqa1dhvnnapdvhsveeiqqqeqahieqfnpe  
qftieqaksnaiksiedai  
qhmi1deikartd1tdkekqea1ak1nq1lkeqaiqaiqraqsideiseq1eqfkaqmkaanptakelakrkqea1srikdf  
sneki1nsi1rnseigtadek  
qaamqineiv1letirdinnaht1qqveaalngi1arisavqivtsdrakqsstgnesnsh1tigyg1tanhpfnst1g  
hkkk1dedddi1dplhmrhf  
snnfgnvi1kna1gvvg1sg1lasfwffiakrrrkedeeeee1eirdnnkdsiket1ddtkh1p1l1fakrrrkedeedvtve  
ekds1nnges1ldkvkhtpf  
f1pkrrrkedeedvevtntentdekvlkdnehspl1fakrrrkedeedvettsieskdedvp1l1lakkknqkdnqskdkks  
asknts1kka1kkkkkkk  
knkk  
>sp|Q5HFZ9|PTGA\_STAAC  
mfkkl1fgkgkevqkdi1aiyap1tgef1vki1edipdpvfaqkmmgegfginptegevvspiagr1vndv1fptkhaig1kadng  
1el1vhig1ldtvq1dgeg1f  
ev1vssgdevnv1gdp1lvr1fn1leyinnaksvi1spii1tntdqaasiniydenavikgetkvidvtm  
>sp|Q5HG01|CTPAL\_STAAC  
mddkqhtss1sdderaei1atsnq1dgetnsskrvh1krwqfisi1lig1tilitavitvayifinq1sig1nkt1dqsn1kie  
nvyki1nsdykkqdsdk1  
skaa1dgm1vkel1dpysey1tkeqtks1fnegvsgdfvg1gaemqkkn1dqimv1tspmkgspaerag1rpkdv1tkvngksi  
kgka1devvkdvr1gkente  
vt1tvqrg1seekdvki1kreki1hvsveykkkgkv1gvitinkf1qndt1sgel1kdav1kahkd1g1kkiv1d1l1rnp1gg1l1dea  
vkmani1fidkgkt1vvk1lek  
gkdteai1qtsnda1lkeakd1mdisi1lvnegsasasevftga1kdynekakvygskt1fgkgv1vq1trefkdgs1lkytemkw1  
tpdghy1hgk1gk1pdvtid  
tpkyqs1nvi1pntkt1fkvg1ddd1kn1tik1ig1s1algykvdnestq1fdka1enqvka1fqqank1levt1gef1nketnk1fte1  
l1vekankhddv1dk1ini1  
k  
>sp|Q5HG22|Y1433\_STAAC  
mne1efvtk1hrrh1l1hqhpel1sh1fettayika1flds1lnikydcpl1etgviay1legngshtiayradida1lpileendvp  
yrsqsdhvm1hacghdght  
a1m1fvqrckdm1qdag1l1pqnvvfi1fqpaetggan1l1kagafdkypieavf1gihvnp1fadegiavirdee1tasate  
yrf1l1tg1sshvadkeqgh  
scgealqhv1ltqisqi1qqf1h1ng1lkrni1vhighfkageaintvpsngy1legtir1tydidd1l1tivknqm1hiaesvkl1l1fn

Tsompanidou\_et\_al\_Supplemental\_FASTA\_File

vdcevkfaegyptinspk  
lrtqiedalikadlnvydkptpflfgedfsfygqqlapayfvfigtrnedkgfvtglhtshlnfdekvlinvinfyenll  
nykev  
>sp|Q5HG24|DAPB\_STAAC  
mkilligygamnqrvarlaeekgheivgvientpkattpyqqyqhiadvkgadvaidfsnpllp1l1dedfhlp1lvvat  
tgekekllnk1delssnmp  
vffsanmsygvhaltki1aaavp1l1ddfdielteahhkkvdapsgtleklydvivslkenvtpvydrhelnekrqpqi  
gihsirggativgehevlfa  
gtdetiqtithraqskdifangaiqaerlvnkpngfytdn1  
>sp|Q5HG38|OPP2\_STAAC  
mfiiksmlyrlmqmivvlfvistlftilmk1spgnpvdki1h1dvaqvsteqinatkdkg1g1nds1lvqwwhwmh1l1hf  
nlgksfeskepvtqilfny  
apitllisfstlvslcisiplgiaakrfhkwtddkvirvistlsislpaffigi1llfivtnlmidsvilsqfilpvi  
t1slgmcyi1rlvrsl1  
mllqsnivqasrlrgmneryl1hd1lkptilpiip1lgis1gsliggtvvien1fdipgigyl1msiksrdypviqgc  
vlfigffvviintiad1lt  
l1ldpkqr1q1gnpkiktntplisessdrha  
>sp|Q5HG64|PARC\_STAAC  
mseiqd1s1ledvlgdrfgryskyi1qeralpdvrdglkpvqrrilyamyssgnthdknfrksaktvgdvigqyphgds  
svyeamvr1sqdwk1rhv1  
iemhgnngsidndppaamryteak1s1lae1l1rdinketvsfipnyddttlepmlpsr1p1llvngstgisagyatdi  
pphn1aeviqat1kyidnp  
ditvnq1mkyikgpdfptggi1qgidgikkayesgkgriv1rskveet1rngrkqliiteipyevnksslvkridelra  
dkkvdgivevrdetdr1g1  
riaie1kkdvnsesiknylyknsd1qisynfnmvaidsgrpk1mgirqiidsylnhqievvanrtkfeldnaekrmhive  
g1ika1s1ldkvielirss  
knkrdaken1ievteeqaeavm1q1lyr1tntdivalegehkelealik1qrh1ldnhdall1nvikeelneikkkfk  
ser1s1ieaeieeikidke  
vmvpseev1smtrhgyikrts1rsfnasgvedig1kdgds1lkhqevntqdtvlvftnkgryl1fipvhkladirwkelg  
qhvsgivpiieedevvinvf  
nekdfntdafyvfatqngmikkstvp1fkttrfnkpliatkvkenddlisvmrfekdq1itvitnkgms1tyntsel1sd1  
g1raagvksin1kaedfvv  
mtegvsendtilmatqrgs1krisfki1qvakraqrgit1lkelknphrivaahvvtgehsqytl1ysksneehglindi  
hkseytngsfivtdddfg  
ev1dmyis  
>sp|Q5HGC7|BSAA\_STAAC  
metiydfvvetnkgvtyk1daykgdvm1ivntasecgfts1qfeg1qsl1ykykdqgfvi1g1fpcnqfggqepgsgeaaq  
nck1nygvtfpmhki1dvk  
gehq1p1fry1taaqhgffneki1kwnftk1f1vdregnvkr1fapqk1pviereiek1l1  
>sp|Q5HGD9|MIAB\_STAAC  
mneeqrkassvd1aerdkkaekdyskyfehvyqppn1keakkrqkqvrynrdfqidekyrgmgnertf1liktygcqmn  
ahdteviagi1lea1gyqat  
tdintadvil1ntcaireanenkvfseign1kh1lkkerpdil1igvcgmsqeesvvnki1ksyqnvdmifgthnihlpe  
i1leay1skamvvevwske  
gdvien1pkvregni1kawvni1mygcdk1fctycivpftrgkrsrrpedi1idevrelaregykeit1llgqnvnsygd1qd  
i1eyd1gd1l1qaiskiaipr  
vrfttshp1wdf1tdhmidvisegnivphih1lpvqsgnav1kimgrkytresyl1dvkrikdripnval1ttdiivgypne  
seeqfeet1t1ydevgfeh  
ayt1lys1qrdgtpaakm1kdnvp1nvkker1qr1nkkvghysqiamskyegqtv1v1cegssk1kddqvl1agytdknk1vnf  
kapkemi1gk1levri1deak  
qys1ngs1fikevepemi1q  
>sp|Q5HGG0|TRUB\_STAAC  
myngi1lpykerg1tshdv1fkl1rki1lktk1ghtgt1dpevag1lpvcignatrvsdyvmdmgkayeatsigrsttte  
dqtgd1letkgvhsadfnk  
ddid1r1les1fkgi1eqippmyssvkvngk1lyeyarnnetverpkrkvnikdigrises1dfkenechfki1rvicgkgyi  
rtlatdigv1k1gfpahmsk  
l1triesgg1fv1kds1tleqike1heqds1qnk1lp1eyg1kg1psikikdshikkri1ngqkfnknefdnkikdqivfid  
ddsekv1aiymvhptkese  
ikpkkvfn  
>sp|Q5HGG7|DPO3\_STAAC  
mamteqqk1fkvladqiki1snq1daei1nsgel1tridvs1nknrtwefhit1lpq1flahedy1l1finaieqefkdi1anvtcrf  
tvtngt1nqdehai1kyfghc  
idqta1spkvkgq1kqkkl1msgkv1kvmvsndi1ernhfdkacngs1likafrncgfdidki1ifetndndqeqn1asleah  
iqeedeqsar1atek1lek1m  
kaekakq1qdnnesavdkc1qigkpi1qieni1kpiesi1eeefkvaie1gvi1fdin1kelksgrhiveikvtdytds1vlkmft  
rknkdd1ehfka1svgkvm  
raqgr1eedt1f1rd1vmmmsdi1eeikkatkkdkaekrvef1lhtamsqmdgipni1gayvkqaadwghpai1avtdh1nvq  
afpdahaa1aekhgikmi1yq

Tsompanidou\_et\_al\_Supplemental\_FASTA\_File

megmlvddgvpiaykpdvvlkdatyvfvfdvettglsnqydkieelaavkvhngeiidkferfsnpherlsetiinlthi  
tddmlvdapeieevltefk  
ewvgdai fvahnasfdmgfidtgyerlgfgpstngvidtlelstrinteygkhglnflakkygveltqhhrai ydteata  
yifikmvqqmkelgvlnhn  
einkklsnedaykrarpshvtlivqnqqglnklnfkivsaslvkyfyrtpriprslldeyregllvgtacdegelftavmq  
kdqsqvekiakyydfieiq  
ppalyqdlidreli rd tetlhei yqrli hag dtagipviatgnahylfeh dgiarkiliasqpgnplnrstlpeahfrtt  
demlnefhflgeekaheiv  
vkn tneladriervvpikde lytprmeganeeirelsyanarklygedlpqividrlekelksiingnfaviylisqrlv  
kkslddgylvgsrgsvgs  
fvatmteitevnp lpphyicpncktseffndgsvgs gfdlpdktcetcgaplikeggdipfetflgfgkd kvpdidlnfs  
geyqpnahnytkvlfgedk  
vfragtig tvaektafygvky lndqgi hkrgaeidr lvkgctgvkr tttgqhpggiivvpdy mdiydf tpiqypaddqns  
awmtthfdhfsihdvnkl  
dilghddptmirmlqdlsgidpktipvddkevmqifstpeslgvtedeilcktg tfgvpefgtgfv rql edtkpttfse  
lvqisg lshgtdvwl gnaq  
eliktgicdlssvigcrddimvylmyag l epsmaf kimesvrkgkglteemietmkenev pdwyl dsc l kiky mfpkaha  
aayvlmavriayfkvhhl  
yyyasyftirasfdl itmikd ktsirntvkdmysrymdl gkkekdvltvleimnemahrgyrmqpisleksqafefiie  
gdtlippf isvpglgenva  
krivearddgpflskedlnkkaglsqkieylde lgs l p n l p dkaqlsifdm  
>sp|Q5HGG8|SYP\_STAAC  
mkqskvfip t mrdvpseaea qshrlll ksglikqstsgiy s y l p l a t r v l n n i t a i v r q e m e r i d s v e i l m p a l q q a e l w  
eesgrw gaygpel mrlqdr  
hgrqfalgptheelvt si vrnelksyqlpmtl fqi qskfrdekrprfgllrgrefimkdaysfhadeasldqtyq dmyq  
aysrifervginarpvvd  
sgaiggshthefma lsaigedti vyskesdyaanikaevvyepnhkhttvqplekietp nvktaqeladflgrpvdeiv  
ktmikvdgeyimvlvrgh  
heindiklksyfgtdnie latqdeivnlvganpgslgpvidkeikiyadnfvdlnnlvvganedgyhlinvvnvgrdfnv  
deygdrfilegeklsdgs  
gaahfaegievqqvfk lgtkysesmnatfl dnqgkaqslimgcygigisrtl saiveqnhddngi vwpksvtpfdlhlis  
inpkddqreladalyaef  
ntkfdvlyddrgeragvkfndadliglplrivvgkrasegivevkerltgdseevhiddlmtvitnkydnlk  
>sp|Q5HGH4|EFTS\_STAAC  
matisaklvkelrektgagmmdckkal tetdgdidkaidy lrekgiakaakkadriaaeglvhvetkgndaviveinset  
dfvarnegfqelvkeianq  
vldtkaetvealmettlp ngksvderikeaistigeklsvrrfairtktdndafgaylhmgrigvltvvegstdeear  
dvamhiaainpkysvsseqv  
seeeinherevlkqqa lnegkpenivekmvegrl rky l qeicavdqdfvknpdvtveaf l k t k g g k l v d f v r y e v g e g m e  
kreenfadevkgqm  
>sp|Q5HGH6|RS2\_STAAC  
mavismkqlleagvhfghqtrrnwpmkkyifterngiyid lqktvkkvdeaynflkqv sedggqvl fvgtkkqaqesv  
kseaeragqfyinqrwlgg  
lltnyktiskriseiekmeedglfevlpkkevelkkeydrlikflggi rdmksmpqalfvvdprkerniaaearkl  
njpivgividtncdpdeidy  
vipandda iravkl l takmadail egqqgvsneevaaeqnidldekekseeteateate  
>sp|Q5HGI5|LYTN\_STAAC  
mflyyckecf imnkqskvrysirkvsigil sisigmflal gmsnkayadeidkskdftrgyeqnvfakselnanknttk  
dkiknegavktsdtslkld  
nksaisngneinqdiki sntpknssqgnlvinne l tkeikianleaqnsnqkktnkvtnyfygysfreapktqi ytv  
kkgdtlsaialkykttvsn  
iqntnnianpnli figqklvpmptlvepkptvssnksnsnstlnylktlenrgwdfdgsywgqcfdlvnyvnhly  
ghglkgygakdipyannfn  
seakiyhntptfkaepgdvvfsg rfggyghtaivlngdydgklmkfqsldqnwnngwrkaevahkvvhnyendmifi  
rpfkka  
>sp|Q5HGJ1|RL19\_STAAC  
mtnhk lieavtksqlrtdlpsfrpgdtlrhvriiegtreri qvfegvvikrrggvsetftvrkissgvgvertfplht  
pkiekievkr rgkvr rakl  
yylrs lrgkaari qeir  
>sp|Q5HGK6|RECG\_STAAC  
makvnliespysllqlkgigpkkievlqqlnihtvedlvlylptriedntvidlnqaedqsnvtieggvy tapvvaaffgr  
nkskltvhlmvnniavkci  
ffngpylkkkie l nqtitvkgkwnrvkqeitgnrvffnsqgtqtqenadvql epvyrikegikqkqirdqirqa lndvti  
hewl tdelrekyketldf  
tln tlh h p k s k e d l l r a r r t y a f t e l f l f e l r m q w l n r l e k s s d e a i e i d y d i d q v k s f i d r l p f e l t e a q k s s v n e i f r  
dlkapi rmhrllqgdvgs  
ktvvaai cmyal ktagyqsal mvp tei laeqhaes l m a l f g d s m n v a l l t g s v k g k r k i l l e q l e n g t i d c l i g t h a l i  
qddvi fhnvglvitdeqhr



Tsompanidou\_et\_al\_Supplemental\_FASTA\_File

fgvnrqgllrekgamtnvlfmtatpirtlai svfgemdsvsikqlpkgrkpiittwakheqydkvlmqmtselkkgrqa  
yvicpliessehledvqnv  
valyeslqqyygvsrvglhglksadekdevmqkfsnheinvlvsttvvegvnvpnatfmmiydadrfglstlhqlrgr  
vgrsdqqsyvliaspkte  
tgermtimtqttdgfeiserdl emrgpgdffgvkqsglpdfvanlvedyrmlevardeaaeliqsgvffentyqhlrh  
fveenlhrsfd  
>sp|Q5HGQ2|RSMH\_STAAC  
mfhhisvmlnetidylnvkengvyidctlggaghalyl nqlnddgrliaidqdqtaidnakevlkdhlhrtvfhsnfr  
eltqilkdlniekvdgiyy  
dlgvsspql dipergfsyhhdattldmrmdqtqeltayeivnwsyealvkifyrygeekfskqiarrieahreqppittt  
lelvdiikegipakarrkg  
ghpakrvfqa lriavndelsafedsieqaielvkvdgrisvitfhsledrlckqvfeyekgpevprglpvipeaytpkl  
krvnrkpitatedldnn  
rarsaklrvaeilk  
>sp|Q5HGQ4|Y1190\_STAAC  
mdckvvslnekdqfipkikssdpvitglfqydaaqtstfekrmskenngreaalanvi reymsdlklsseqelnihlan  
gskvviggqaglfggply  
tfhkifsiitlskeltthkqqvvpvfwagedhdfdevnhtfvynenhgslhkvyhtmempettvsryypdkaelkqt  
lktmfihmketvhtqgll  
icdriidqydswtmfmka lhetfkaygvlfidaqfep lrkmeapmfkilkkhqllddafratqqrtnqglnamiqtd  
tnvhlflhdenmrqlvsyd  
gkhfklnktdktyikeeiiniaenqel fsnvvtrplmeewl fntvafvggpseikywaekdvfel fdvempivmprl  
ritylndriekllskynip  
lekvlvdgvegerskfi reqashqfi ekvegmieqqrlnkdlldevagnqnninlvknneihiqqydyllkryllnie  
rendismkqfreigetlhp  
mglqeriwnllqilndfgtdvfkpstypplsytfdhiiikp  
>sp|Q5HGT2|NTPA\_STAAC  
mkeiviasnngkndfkvipdyhvigselipdfdveetgstfeenailkseaakalnktviaddsglevfalngep  
giysaryagenksdeanie  
kllnklnnttdrraqfvcvismsgpdmekvfkgtvsgeiadgkygengfydpyfyvpkldkmaqkskeqkgqishrr  
nainllqaflegdknv  
>sp|Q5HGU0|MUTS2\_STAAC  
mrqktdvlefekikslvanetisdglgkvnqmpatnfetvfvqmeetdeiaqiynkhr lpslsglskvsafihradi  
ggvlnvselnlkrliqvq  
nqfktfynglveedegvkypilddkmmqlpvltdlfqqinetcdtydlydnasyelqgirsksistnqrirqnl drivks  
qanqklsdaivtvrnern  
vipvkaeyrqdfngi vhdqsasgqlyiepssvemmngisrlrhdeaiekeriltqltgyvaadkdallvaeqvmgqld  
fliakarysrsikgtkpi f  
kedrtvylpkayhpllnretvvantiefmedietviitgpntggktvtlktlglivmaqsglliptldgsqsvfknvy  
cdigdegsieqslstfssh  
mtniveilkhadkhs l vlfde l g agtdpsegaa lamsil dhvrkigs l vmatthype l kaysynregvmnasvefdvtl  
sptykllmgypgrsnafdi  
skklglslniinkaktmigtdkeinemies l ernykrvetqrleldr l vkeaeqvhd l skqyqqfnyeks l ieeake  
kangkikaatkeaddiikd  
l rqlreqkgadvkehelidkkkr l ddhyeaksikqnvqkqkydkivagdevkvl sygqkgevl eivndeeai vqmg i km  
klpiedlekkqkekvpkptk  
mvtqrnrqtikteldlrgyryeda l ieldqyldqavl snyeqvyi ihgkgtgalqkgvqqhlkhhksvsdfrggmpsegg  
fgvtvatlk  
>sp|Q5HGV3|ISDC\_STAAC  
mknilkvnttilaliiiia tfsnsanaadsgtl nyevykyntndtsiandyfnkpakyikkngklyvqitvnhshwitg  
msieghkeniiskntakde  
rtsefevsklngkidgkidvyidekvngkpfkydhynitykfngptdvaganapgkddknsasgsdkgsdgtttgqses  
nssnkdkvenpqt nagtpa  
yiytipvasal l iait l fvrkkskgnve  
>sp|Q5HGV4|ISDA\_STAAC  
mtkhylnskyqseqrssamkkitmgtasi l gslvyigadsqqvnaateatnapnnqstqvsqatsqipinfvqkdgsse  
kshmdmymqhpqkvikqnn  
kyyfqtvl nnsfwkeykfyannqelattvndnk kadtrtin vavepgyks l ttkvhivvpqinynhrytthlefeka  
iptladaakpnnvkpvqpk  
paqpktpetqtkpvqpkvekvkptvttskvednhstkvvstddtkdqtktahtv ktaqtaeqnkvtpvkdvatak  
sesnnqavsdnksqqt nk v  
tkhnetpkqaskakelpktgltsvdfnistvafat l allgslsl l l fkrkesk  
>sp|Q5HGV9|COAD\_STAAC  
mehtia vipgsfdpi tygh l diierst drfdeihvcvl knskkegtfsl eermd l ieqsvkh l pnvkvhqfsgllvdyce  
qygaktiirglravsdfe y  
elrltsmkklnneietylmsstnysfissivkevaayradisefvppyveka l kkkfk  
>sp|Q5HGX2|Y1121\_STAAC  
makqatmknal kqltkdadel hlikvqldnl t l pscplyeev l dtqmfglqkevdfavklglvdredgkqim l rleke

Tsompanidou\_et\_al\_Supplemental\_FASTA\_File

lsklheaftlv  
>sp|Q5HGZ0|ODPB\_STAAC  
maqmtmvqaindalktelkndqdvli fgedvgvnggvfrvteglqkefgedrvfdtplaesgigg lamglavegfrpvme  
vqflgfvfevfdaiagqia  
rtrfrsrggktapvtirgpfggvhtpelhadnlegilaqspglkvvipsgpydakgl lissirsndpvvylehmklyrs  
freevpeeytidigkanv  
kkegndisii tygamvqesmkaaeelekdgysvevidl rvtvqpidvdtivasvektgravvvqeaqrqagvgaavvaels  
eraillsleapigrvaaadt  
iypftqaenwlpnkndiiekaketlef  
>sp|Q5HH10|PUR2\_STAAC  
mnvlvigaggrehalayklnqsnlvkqvfvipgneamtpiaevhteisepdhqaildfakrqnvdivvigpeqplidgla  
dilrangfkvfgpnkqaaq  
iegsklfakkimekyniptadykeverkkdaltyiencelpvvvkkdglagkgviiadtiearsaieimygdeeeegt  
vftflegeefs lmtfvng  
dlavpfdciaqdhkrafhdhegpntggmgaycpvphisddvkltnetiaqpiakamlnegyqffgvlyigailtkdgp  
viefnarfgdpeaqvllsr  
mesdlmqhiiddegkrtefkwnesivgvm laskgypdayekghkvsgfdlnenyfvsglkkqgdftvtsggrvilaig  
kgdnvqdaqrdaykkvsqi  
qsdhlfyrhdiankaalqlk  
>sp|Q5HH16|PURQ\_STAAC  
mkfavlvfpgsncdrdmfnaaiksgveaeyvdyretslsgfdgvlipggfsfgdylrsgamasvapii sevr laaegkp  
vlgvcngfqilteigllpg  
allhndshlfisrneelevnnqtaftnl yeqgekviypvahgeghyctdeiyqqlkannqiilkvnnpnngsyddiag  
ivnekgvncgmmpheral  
etllgtdsgvklfeamvkswreqhv  
>sp|Q5HH24|QOX1\_STAAC  
mnfpwdqllvkgnwmi tmaqigapflvigliavityfklwkylykewftsvdhkkigvmylicavl mfvrggidallira  
qltvpdnkflesnhyeif  
sthgvimii fampfi fglniivvplqigardvafpvl nnsfwlffagmilfnlsfiiggspaagwtnyaplagefspg  
pgvnyy liaiqisglgla  
tginffvtl rcktpmkfmqmpmftvtffittlivilafppl tvalalmttdridtafft vahggmpmlwanffwvwg  
hpevyivilpafgiysei  
ptfarkrlfghqsmwatagiaflsflvwvhfftmngalinsffsistmligiptgvklfnwlltlykgritfespm  
fslafipnflggvtgvm  
amasadyqyhntylvahfhytltvgvfac laglifwypkmmgyklnetlnkwcffwfmigfnvcflpqfilgldgmp  
rlytympsdgwflnlist  
igallmaigflflvsviyshfkspreatgdndwglgrtlewttasaippkynfaitpdwndydtfvdmkehgrhlydnh  
nykdi hmpnntpvfwi gi  
fmtiggffli fetvipal icl fgi fgtmiyrsfqidhgyhipaaevaetearl rearikereavshes  
>sp|Q5HH31|ATL\_STAAC  
makkfnyklpsmvaltlvgsavtahqvqaaettqdqttnknvldsnkvkatteqakaevknptqnisgtqvyqdpai vqp  
ktannktgnaqvsqkvda  
qvngdtranqsattntntpvakststtapktntnvtnagyslvddeddnseqinpeliksaakpaaletqyktaapkaa  
ttsapakkteatpkvttfs  
asaqprsvaatpktslpkykpqvnsindyirknllkapkieedytsyfkyayrngvgrpegivvhdtandrstingei  
symknnyqnafvhafvdgd  
riietaptdylswgv gavnprfinveivhthdyasfarsmnyadyaatqlqyyglkpsdaeydngntvwthyavskyl  
ggtddhadphgylrshnysy  
dqlydli nekylikmgkvapwgtqstttptpskptpskpstgkl tvaanngvaqikptnsglyttvydktgkatnevq  
ktfavsktatlgnkfyly  
qdynsgnkfgwvkegdvvyntakspvnnqsysikpgtklytvpwgtskqvagsvsgnqtfkaskqqqidksiylygs  
vngksgwvskayl vdtakp  
tpttpkpstpttnkl tvsslngvaqinaknglfttvdydktgkptkevqktfavtkeaslggnkfylykdynsptlig  
wvkqgdviynnakspvnm  
qytyvkpgtklysvpwtgtykqagavsgtgnqt fkatkqqqidksiyly fgtvngksgwvskaylavpaapkkavaqpkta  
vkayvtkptttqtskia  
qvknntgirasvyektakngadydrftfyvterahgnetyvllnntshniplgwfnvkdlnvqnl gkevkttkqyvtvn  
ksnglsmvpwgtnqvil  
tgnniaqgtfnatkqvsvgkdvlygtinnrtgwnakdl taptavkpttsaakdynytyvikngngyyyvtpnsdtaky  
slkafneqpfavvkeqvin  
gqtwyygklsngklawikstdlake likynqtgmalnqvaqiqaglykypqvrvpgkwtganfndvkhamdtkrlaqdp  
alkyqflrldqpqn isidk  
inqflkgkgvlenqgaafnkaaomyginevyl ishalletgnqtsqlakgadvvnnkvvtnsntkyhvfgiaydndpl  
regikyakqagwdtvska  
vggakfignsvkagqntlykmrwnpahpgthqyatdvdwani nakiikgyydkigevgkyfdipqyk  
>sp|Q5HH35|SSPA\_STAAC  
mkglf1kvssl fvatlttatlvsspaana lsskamdnhpqqtqsskqqt pkiqkgnl kpleqrehanvilpnndrhqit  
dttnghyapvtyiqveapt

Tsompanidou\_et\_al\_Supplemental\_FASTA\_File

gtfiasgvvvgkdtlltnkhvvdathgdphalkafpsainqdnypnggftaeqitkysgegdlaivkfspneqkhi gev  
vkpatmsnaetqvnqnit  
vtgypgdkpvatmweskgkitylkgeamqydltstggngsgspvfneknevigihwggvpnefngavfinenvrnflkqni  
edihfanddqpnnpdnpdn  
pnnpdnpnnpdepnnpdnpnnpdnpdngdttnsdnpdaa  
>sp|Q5HH63|HTRAL\_STAAC  
mdigkhhvipksqyrrkrreffhnedreenlnqhqdqkqnidnttskkadkqihkdsidkherfknslsshleqrnrdrvne  
nkaeesksnqdsksaynrd  
hyltddvskkqnsldsvdqdtekskyyeqseatlstkstdkvestemrklsdknkvgheeqhvlskpsehdketrids  
essrtdsdssmqteki kkd  
ssdgnkssnlksevlsdksntvpkl sesddevnnpkpl tlpqeqklkrqqsneqtktytygdseqndksnhendlshhi  
psisddkdnvmrenhivdd  
npdndintpslsktdddrkldekihvedkhkqnadssetvgysqstasthrstekrnisindhdklngqkntktsann  
qkkatsklngkratnnns  
dilkkfwmmypkplvilmgiiilivilnainfnvknndrmdndadaqytttmknantvksvvtvenetskdsslpk  
dkasqdevgsgvvykksgd  
tlyivtnahvvgdenqkitfsnksvvgkvlgkdkwsdlavkatssdssvkeiaigdsnnlvlgpilvvgnpvgdf  
kgtvtegiisglrnrnpid  
fdkdnkydmlmkafqidavnpngsggavvnrregkligvvaakimpnvenmsfaipvnevqkivkdletkgkidypdv  
vkmkniaslnsferqavkl  
pgkvkngvvvdqvdnngladqsglkkgdviteidgkllreddlrfrqiiifshkddlksitakiyrdgkekeiniklk  
>sp|Q5HH70|LTAA\_STAAC  
mqdssl nnyanhknfilmlilflmfefargmyilsyinfptvtsiavaitslafsihfiadastnfvigflkkfgtki  
vlttgfilafstflviwfw  
paspfvii fsammgiavspiwvimlssveedkrqkmgvyvfwllglvgmvfmnlkvhptrfafmmslvvliawi  
lyyfvdkltnytrpvka  
qlrqivdvtkrhlllfpqllqgaaiialvpilptyatkvinvstieyvtvaiiggigcavsmflsklidnrsrnfmyg  
vilsgfilymilitlsmi  
vnihilwialaiglmgyllpawntfmarfiksddeqetwgvfnsiqgfgsmigplfgglitqftnlnntfyfsalif  
lvlavfygsyfi vnrekak  
>sp|Q5HH83|Y1006\_STAAC  
mage lrimenksredinlspvskieiyffdpfssdcfklsailsklrie nqyirirhilnpslklvtkcqaqsts nfd  
nialaykaaelqgrvrver  
fihlmqnei ipkrdiitesmicdcignagidlevfkddlqksklteslkidliharemeieqapslvffsedvheeglkv  
eglypyhiytyiinelmgk  
piknlppkletyiqqqqlvtmee lltiyewpekllnkelkkilaiqqkieklkypdgdfwkskmpkisk  
>sp|Q5HH86|MECA\_STAAC  
mriervddttvklfitysdieargfsredlwtnrkrgeeffwsmmdeineedfvvegplwiqvha fdkgvevtiskskn  
edmmnmsdddtdqfdeqv  
qellaqtlegedqleel feqrtekeeaqgskrqkssarkntrtiivkfnlledvinyayhsnpittefedllymvdgtyy  
yavyfdshvdqevindsys  
qllefayptdrtevy lndyakiimshnvtaqvrryfpette  
>sp|Q5HHB4|CDR\_STAAC  
mpki vvgavagatcasqirrldkesdiiifekdrdmsfanca lpyvigevedrryalaytpeefydrkqitvkythe  
viainderqtvsvlnrktn  
eqfeesydklilspgasanslgfesditftlnledtdaidqfikanqvdklvvgagyvslevlenlyerglhptlihr  
sdkinlmdadmnpilde  
ldkreipyr lneeinaingneitfksgkvehydmiiegvgthpnskfinessnikldrkgfipvndkfetvnpniyaigdi  
atshyrhvd l pasvplawg  
ahraasivaeqiagndtiefkgflgnnivkffdytfasvkvkpnelkqfdykmvevtqgahanyypgnsp lhlrvyydts  
nrqilraaavgkegadmri  
dvlsmammngl tvdeltefevayappshpkdlinmigyak  
>sp|Q5HHB5|Y974\_STAAC  
mlhlhilswlailfiatylnisknqgrspffkplhmilrlfml ltlisgfwiliqsfmngganhml ltlkmlcgvavv  
glmevsiakrkrheqshtm  
fwitiali iitmvlgvilplgpi sklfgig  
>sp|Q5HHB7|ADDA\_STAAC  
mtipekpggviwtdaqwsiyatgqdvlvaaaagsgktav lveriiqkilrdgidvdrl lvtftnl saremkhrvdqri  
qeasiadpanahlknqrik  
ihqaqistl hsfclkiqqhydvlnidpnfrtsseaienllleqtidevieqhydil dpafielteqlssdrsdqfrmi  
ikqlyffsvanpnptnwd  
qlvtpyeeeaqqaqliqlldl skvfitaayda lnkaydlfsmmdsvdkhlaviederrlmgrvleggfidi pylvltghef  
garlpnvtakikeanemmv  
dal edaklqykkykslidkvksdyfsreaddlkadmql aprvky larivkdvmsfnrkkrsknildfsdyehfalqil  
tnedgspseiaesyqhfc  
eilvdeyqdt nrvqekilsciktgdehngnl fmvgdvksiykfrqadpslfikeyqrftidgdgtgrridlsqnfrsrk  
evl sttnyifkhmmdeqvg  
evkydeaaqlyygapydesdhpvn lkv lveadqehsdltgseqeahfiveqvkdilehqkv ydmktgsyrsatykdivil

Tsompanidou\_et\_al\_Supplemental\_FASTA\_File

ersfgqarnlqqafknedi  
pfhvnsregyfeqtevr1vsflraidnplqdiy1vg1mrsviyqfkedelaqir1lspnddyfyqsivnyindeaadaai  
1vdk1kmf1sdiqsyqqys  
kdhpyq1ldkfyndhyviqyfsg1iggrgrranlyglfnkaiefenssfrglyqfirfidelierngkdfgeenvvgpnd  
nvvrmtihsskglefpfv  
iysglskdfnkrdlkqpvilnqqf1g1gmdyfdvdkemafpslasvayravaekelvseemrlvyvaltrakeqlyligrv  
kndks1leleqlsisgehi  
avner1tspnpfh1iys1lshqsasipdd1kfkediaqiedssrpnvnisivyfedvstetildndeysvnlqletmqn  
gnedvkaqikhqldyrypy  
vndtkkpskqsvselkrqyeteesgtsyervrqrigrfstyerpkflseqgkrkaneigt1mhtvmqhl1pkkeriseve  
1hqi1dglidkhiieadak  
kdirmdeimtfinse1ysi1aeaeqvyrelpfvvnqalvdq1pqgdedvsiiqgmidlifvkdgvhyfvdyktdafnrrr  
gmtdeeigtq1knkykiqm  
kyyqnt1qt1lnkevkglyffkfgt1q1  
>sp|Q5HHB8|ADDB\_STAAC  
mt1hay1gragt1gkstkmlteikqkmdkpad1gdp1iliaptqstfq1eqafvndpelngslrtevlhfer1shrifqevg  
syseqk1skaatemmiyni  
vqe1qkyl1yqsqakyygfsek1teqi1qdfkkyavtpehle1hfiadknmqrtrknk1ledialiyrefeqriqnefitge  
ds1qyfidcmpk1sew1kra  
diy1dgfhnfstiey1liikg1likyaksvti1l1tdgnhdqfslfrk1psevlr1hieeianelnisierqyfnqlyrfnq1d  
1kh1eqefdalqinrvacq  
ghini1lesatmreeineiarriivdi1rdkq1ryqdia1lyrdesyay1f1dsil1plynipynidtkrsmthhpvmemirs1  
iev1qsnwqvnpm1rl1kt  
dvl1tasy1ksay1vd1lenfv1lgeriygkrw1ddel1fnvehf1skmgrkghk1tederntfeqv1k1kkdvidk1lhfeq  
msqaetv1kdfatafyesme  
yfel1pnq1mterde1ld1ngnhekaeeidqiwnq1liq1idd1vl1vfgdepmsmer1levfdig1eq1efvmipqt1dqvs1  
gtmd1akv1dnkqhvy1vgm  
ndgtmpqpvtass1t1deekyfeqqanvelspts1dil1qmd1eafvcyamtrakgdvtfsys1mgssgddkeisplnq1  
qs1fnq1leitn1pqyhev1n  
pl1slmqhakqt1k1t1feal1raw1ydeivadsw1dayqvi1rdsdh1nqg1dy1msal1tfdnetv1k1get1skd1ygkeina  
svsr1fegyqqcp1fkhyash  
g1k1ner1tkyel1qnfd1gdi1fhs1v1kyiser1ngdfkq1ld1k1k1r1q1tneal1eel1pkvqfn1l1nssayry1l1srrigai  
vett1sal1kyqgtysk1fmp  
khfets1frrkpr1ndel1iaqt1tttqg1pini1rgqidridtytkndtsfvni1dykssegsat1d1tkvy1ygm1qm1mmt1y  
mdiv1qnkqr1gl1tdivk1p  
gg1ly1fhvheprik1fkswsd1dedk1leq1d1ikk1fk1sg1vnadqt1vidaldir1lep1kftsd1ivpvg1nkdgs1skrgsqv  
adeatiy1kfiqhnken1fie  
tasni1mdghtevap1kykq1l1pca1fcsyqsvchvdgm1dskryrtv1detin1pieaiqnin1defg1geq  
>sp|Q5HHD1|PPI1\_STAAC  
manypq1nkevqg1eikv1mhtnkgdmtfk1fpni1apktvenfv1thakngyydg1itfhrv1ndfmi1qggdptatgm1gges  
iyggafedef1s1nafn1lyg  
alsmansgpntngs1qff1ivqmkev1pqnmlsq1tdggwpp1ivdaygekggtpw1dqkhtvfgq1idgett1ediantkv1g  
pqdkp1hdv1vies1dvee  
>sp|Q5HHD6|MNHD1\_STAAC  
miesnml1vl1t1vipvita1ll1v1figkrp1ikryvalgg1t1l1t1vaai1nlanv1khgpir1velgswkapysivfv1ldifs  
all1iits1iitaiv1ilyss  
qtigiereryyyy1fsv1l1m1ligi1gaf1ttgdi1fn1fv1ffev1l1mssy1fl1vigstki1ql1qetiky1v1nvnvsss1ffvmgv  
ailysv1vgt1n1ladisn1k1l  
an1sahdsg1lvni1v1fil1fi1fvfat1kagv1fpm1fvw1lpsayyappi1iaffa1ll1tkvgvyaiart1sl1ffsdnvs1fshyv  
il1flall1ti1fgcv1gavay  
anikk1i1lynvm1iavgv1l1vgvam1tesgm1igaiyyt1hdml1vk1al1fl1ligimikitgtad1rqfgg1likryp1v1gwsf  
fiaals1lag1pp1sgfygk  
ffivqst1fergfy1lsgv1v1l1ss1lv1lysviri1flqg1ffg1ppkgyd1lnkvdv1kyl1ttiaivavvitvlyg1sadylypm  
vkagaetfynpstyvkav1  
ggk  
>sp|Q5HHH0|CSD\_STAAC  
maehsfdvnevi1kdfp1ldqkvngkr1lay1dstatsqtpvq1v1n1vedyykrynsnvhr1gvht1lgs1latdgyenaretv1r  
rfinakyfee1i1ftrgtta  
sin1lvahsygdanveeg1dei1vvt1emehhani1vpwq1l1akrknat1k1fipmtadgel1niedikqtindk1tkivaiahisn1v  
lgt1indvkt1iae1iahq1ga  
i1svdgaqaaphm1k1dmqemnadfys1fsg1hkm1gptg1igv1l1fgkre1l1qkmepie1fggmidfvskydatwad1ptkfea  
gtpl1iaq1ig1laeai1ryle  
rigfdai1hkyeqel1tiy1eqmsaiegieiygppkdr1ragvitfn1lqdv1hphdvatavdtegvavraghhcaqp1mkw1n  
vsstarasfyiyntkedvd  
qlinalkqtkeffsyef  
>sp|Q5HHN6|SSRP\_STAAC  
makkkspgt1aenrkarhdyniedtieagiv1lqgteiks1irrgsan1kdsyaqv1kngemy1lnmhi1apyee1gnrfnhdp1  
rsrk1l1l1hkrei1k1lgdqt

Tsompanidou\_et\_al\_Supplemental\_FASTA\_File

reigysivp1klylkhghckv1lgvargkkkydkrqa1kekavkrdvardmkary  
>sp|Q5HHQ8|HPRK\_STAAC  
mltteklvet1klldi ageeglskpi knadisrpglemagyfshyasdriql1gttelsfyn1lpdkdragrmrklcrpe  
tpaiivtrglqppeelvea  
ake1ntplivakdattslmsr1ttflehalakttslhgvlvdvygvglitgdsgigksetalelvkrghrlvaddnvei  
rqinkdeligkppk1ieh1  
leirglgiinvmt1fgagsiltekri1n1n1enwnkqklydrvglneet1sildeitkktipvrpgrnvaviievaam  
nyr1nimgintaeefer1  
nee1knshksee  
>sp|Q5HHR0|UVRB\_STAAC  
mtmvehypfk1hsdfepggdqpa1keivegikagkrhqt1lgatgtgkftmsvikevgkpt1iahnktlagglyse  
fkeffpenrveyfvsvydy  
yqpeayvpstdtfiekdasindeidqlrhsatsalferddviiiasvsciylgnpeeykdlvsvrvgmendrse11rk  
1vdvqytrndidfqrgtfr  
vrgdvveifpaskeelcirveffgdeidrirevnyltgevlkerehfai fashfvtreek1kvaieriekeleer1kel  
rdenk1leaqrleqrtnyd  
lemmremgfcsgienysvhl1t1rplgstpyt1ldyfgdwlvmideshvt1pqvrgmyngdrarkqvlvdhgfr1psald  
nrplkfeefeektkqlvyv  
satpgpyeiehtdkmveq1rptgl1dpkievrptenqid11seiqrtrvernerv1vtt1tkkmsed1ttymkeagikv  
ny1hseiktlerieiiird1  
rmgtydvivgin1lregidipevslvvl1dadkegflrsnrsl1qitigraarndkgevimyadkmtsdmkyaidetqrrr  
eiqmkhnekhg1tpkt1nk  
kihdl1satvendenndkaqtvipkmtkkerqktidniekemkqaakdl1dfekate1rdm1felkaeg  
>sp|Q5HHR8|Y815\_STAAC  
mirfeihgdn1t1tdairnyieekigkleryfndvnavahvkvktysnsatkievtiplknvt1raernddlyagidl  
innk1erqvrkyktr1nrk  
srdrgdqevfvaelqemqetqvndayddneie1irskefs1kpm1dseeavlqmn1lghdffvfidretgdgtsivyrkd  
gkygl1qtseq  
>sp|Q5HHS1|Y812\_STAAC  
mkiavmtdstys1sqdl1dkyniqiaplsvtfddgknftesneiaieefynkmassqt1pttsqpaigewitkyem1rdq  
gytdiivic1ssgisgsyq  
ssyqagemveg1vnhafdsklaami1egcyvlraiemveegyepqqi1dd1tmrehtgaylivdd1kn1qksgritgaqa  
wvgt11kmpv1kfedgki  
ipeekvrkkra1qt1lekkv1divkdfvevt1fv1ngdhfedgqalykk1qddcpsayqvaysefgpvvaah1gsggl1  
gyvgrk1r1t  
>sp|Q5HHT2|MURB\_STAAC  
minkdiyqalqq1ipnek1kvddep1krytytktggnadfy1tptkneevqavvkyayqneipvtylgnsgni1ireggi1r  
givis11s1dhiev1sddai  
1agsgaai1dvsrvaldya1tg1efacgipgsiggavymnagayggevkdci1dya1cvneqgsl1k1ttkele1dyrnsi  
iqkeh1vv1leaft1lapgk  
mteiqakmdd1terreskqpleypscgsvfqrppghfagk1iqdsnlqghriggvevstkhagfmv1vndngtatdyen1i  
hyvqktvkekgf1elnrev  
ri1gehpkes  
>sp|Q5HHY5|UPPP\_STAAC  
mfiielikgi1lgvveg1tefapvsstghmi1vddmwlksseflgsqsaftfkiviqlgsvfaaawvfrerfleilhighk  
hkhvegnddqrrskpr1  
n1lhv1vgmpagi1gl1fddfi1e1h1fsvptvmig1fvgaiymi1adkysakvkn1pqtvdqisyfqa1fvigisqavamw  
pgfsrsgst1stgvlm1kn  
hkaasdf1f1mavpim1laasgl1l1khyqdi1qi1adipf1y1lg1fla1aftvg1iaikt1fhq1ink1k1lipfai1yriv1vifi  
a1lyfgfgigkgi  
>sp|Q5HI42|MNHD2\_STAAC  
m1sn11il1pml1pflcal1ilv1lknndri1sky1ly1gtmtitti1isl1m1liyvrhrpit1dfggwsapfgiq1fgds1s1  
imvttasfvit1imaygfg  
rgehkanryh1psfi1fl1svgvigs1f1tsd1fn1lyvmfeim1lasfv1lit1gqsveqlraai1yv1v1ni1gsw1f1llgig  
1lyktvgt1nfshiamr1n  
dmgdnrvtvmis1l1flvafsakaalv1fmw1pkayav1ntelaal1faalmtkvgayalirfft1l1fdqhnd1ihp1latm  
aa1tmvigaigviaykdik  
kiaayqvi1sigfi1lg1gtntfagingaifylvndivvkt1l1ffi1gslvyitgyr1qyqylng1lakkeplfgvafi1mi  
faiggvppfsgfpgkvlif  
qgalqngnyig1al1mi1ts1iamys1fril1fymyfgdkdgeevnfkkiplyrkrilsilvvvviaigiaapv1lvnt1sda  
telntsdqlyqk1vnph1k  
ged  
>sp|Q5HI45|MNHA2\_STAAC  
ms1vy1li1ai1lvimami1lmskrralakyagyialvapvissiyfl1iqipsvak1qyl1stsipwikt1din1dl1rdg1s  
1mfs1li1s1ligi1avffyat  
qyl1ssrkdn1prfyf1y1l1fmfsmigiv1sdnt1lmyi1fwel1tsvss1fl1isywynngdsqfgai1qs1fmi1tvfgg1allv  
gfim1lyim1tgtnn1te1lg  
qadhiknhg1fipmi1fmf1l1gaf1tksaqf1pfi1w1lprama1ptpsay1hsatmvkagif1l1l1rft1p1l1g1snmyvyivt

Tsompanidou\_et\_al\_Supplemental\_FASTA\_File

fvgli tmlfgsitalkqwd  
lkgilaystisqlgmimamvigggyaqhqdaiasiyvflfgal fhlmnhaifkcal fmgvgildheagsrdirilsg  
mrqlfpkmlvmtiaalsm  
agvpflngflskemfldaltqtgqlsqfslismiaivfvgviasvftftyalymvkevfwtkydskvftkknihewpfls  
lpslilmvlpviffvpni  
fgkgiivlaalravsggnhqidqlaphvsqwhgfnipllltiiiiillgsvlaikvdwkkvftgkirqisvksyemvyrhf  
ekfatkrfkrvmqdrlnqy  
iimt1g1fmi1igygyiriglpkvhq1hvsefgaleiilaivtvtigis1ifirqr1tmvilngvigfvvt1ffiamkap  
d1altq1lvvetitt1lfiv  
sfsr1p1nvprsnankkreikisvs1lmalivvs1lfitqqtdg1ssisdfylkadkl1tggnknivna1lgdfra1d1lfe  
glvliit1glgiyt1l1nyqd  
rrgqdere  
>sp|Q5HI88|PTAS\_STAAC  
mad1lnv1kdk1sgknvki1lpegederv1taatq1qatdyvtpiv1lgdetkvqslaql1d1disniel1npatse1kae  
1vqs1fverrk1gkateeqaq  
e1lnnvnyfgtm1vyagkadgl1vsgaahstgdtvrpalqi1k1tkpgvsrtsgiffmikgdeqyifgdca1npe1ldsqgla  
eiavesaksal1fgmdpkv  
am1s1fstksaksddvtkvqevak1laqqkaeeek1eai1idgef1qfdaa1vpgvaekkapgak1qgdanvf1vps1eagni  
gykiaqr1lgydavgpvlq  
gl1nspvnd1srgcsiedvyn1siitaaqalq  
>sp|Q5HIA0|VRAB\_STAAC  
mnqavi1vaakrta1fgkyggt1kh1lepeq1l1kp1fqhfkekyepviskid1dv1lgnvvgnggni1arka1leag1kdsipgv  
tidrcqsg1lesvqyacrm  
iqagagkv1y1agvestsrapwki1krphsvyeta1lpefyeras1fapemsdpsmi1qgaenvakmydvsrg1qdefayrshq  
ltaenvkn1gn1sqe1ilpit  
vkgei1fntdes1ksh1pkdnfgrf1kpvikggtvtaanscmkndgav1l1imekdmaye1lgfeh1l1fdgvtvgvdsnfp  
gigpvpaisn1l1krnq1lti  
eni1evie1inea1fsaqqvacqa1lnisntq1niwgga1asghpygasgaq1lvtr1fymfdketmi1asmgigg1gnaa1lft  
rf  
>sp|Q5HIB2|SDRE\_STAAC  
minrdnkka1tkkgmi1snr1nkfsi1rkytvgtasi1lvgtt1l1fg1ngqeakaaent1stenakqddattsdnkevseten  
n1stenn1stnp1ikketntd  
sqpeakkest1sss1tqkqnnvtattetkpn1ekenvk1pstdktatedt1svileekkapnnt1ndvttk1pstsepstsei  
qtkpt1tpqestni1ensqpq  
ptpskvdn1qvtatnp1kepvnvskee1lknpekl1kelvrndsntdh1stkpvataptsvapkrvna1kmrfavaqpaavas1n  
nvnd1likvtkqt1kvgdgk  
dnvaaahdgkdi1eydteft1dnkvkkgdtmt1inydkn1vpsd1tdkndp1iditdpsgevi1akgtfdkatkqi1tytftdyv  
dkyed1ksr1t1lysi1dkk  
tvpnets1n1l1fatagketsqnvtvdyqdp1mvhgdsni1qsi1ftk1dedkqtieqqi1yvnp1l1kksatntkvdiagsqvd1y  
gnik1ngst1iidqnte1ik  
vykvn1sdq1l1pqs1nriydf1sqyedvtsqfdnkks1fsnvat1dfgd1insayi1kvvskyt1ptsdgel1diaagtsmrttdk  
ygyyn1yagysn1fivtsndt  
ggdgtv1kpeek1lyk1gdyvwedvdkdg1vqgtdskekpmanv1lvt1typdgttksvrt1danghyefgg1kdgety1tkfe  
tptgy1lptkvn1gtdgekd  
sngssv1tking1kddms1dtgfy1kepyn1lgdyvwedtnkdgi1qdanepgikdvkvt1kdstgk1vigt1tttdasgkykft  
d1dngny1tvefet1pagytp  
tvknt1taddk1dsng1l1ttgvik1dadnmt1drgfy1ktpkys1lgdyvwydsnkdgk1qdstekgikdv1vt1lqnekgevi1gtt  
ktdengkyr1fdn1l1dsgkyk  
vi1fekpag1l1qtvtnttdk1dadggev1dvt1tdhddft1l1ngyfeedt1sdsdsdsdsdsdsdsdsdsdsdsdsdsdsds  
dsdsdsdsdsdsdsdsdsdsdsdsdsdsdsdsdsdsdsdsdsdsdsdsdsdsdsdsdsdsdsdsdsdsdsdsdsdsdsdsdsds  
dsdsdsdsdsdsdsdsdsdsdsdsdsdsdsdsdsdsdsdsdsdsdsdsdsdsdsdsdsdsdsdsdsdsdsdsdsdsdsdsdsds  
dsdsdsdsdsdsdsdsdsdsdsdsdsdsdsdsdsdsdsdsdsdsdsdsdsdsdsdsdsdsdsdsdsdsdsdsdsdsdsdsdsds  
dsdsdsdsdsdsdsdsdsdagk1htpvk1pmsttkd1hnhkaka1l1petgsenngs1nna1l1fgg1l1faa1l1gs1l1l1fgr1rkkqnk  
>sp|Q5HIB4|SDRC\_STAAC  
mnkk1tatnr1kgmi1pnr1nkfsi1rkysvgtasi1lvgtt1l1fg1sgheakaaehtnge1lnqsknettapsenkttkkvsr  
q1k1dntqtatad1qpkv1tms  
dsatv1ket1ssnm1qspqnat1anqst1tktsnv1ttndks1sttysnet1dksn1l1tqakdv1sttpk1tttikprt1nrmavnt1vaap  
qggt1nvnd1kv1hfsn1idiai  
dkghv1nqt1tgktef1watss1dvl1kl1kany1t1dsv1kegdt1ftfkygqy1frpgsvr1lpsqtq1n1ynaqgni1iakgiy1dsttn  
tt1ytft1nyvd1qyt1nvr1gs  
feqva1fakr1knatt1dktayk1mevt1l1gndty1seei1vdygn1kkaqpl1sstny1inned1srnmtayvn1qpkntytkqtfvt  
n1l1tgyk1fnp1nakn1fki1yev  
tdqnq1fvds1f1tpdtsk1l1kdvt1dqfdv1ysndnktatvd1l1mkgqt1ssnkqy1i1qqvayp1dns1stdngki1dyt1l1dtdk1tkys  
wsn1sysn1vngs1stang1dqk  
kyn1lgdyvwedtnkdgk1qdanekgi1kgyvy1l1kdsngke1l1dr1tttdengkyq1ftg1l1sngtysve1fst1pagytp1ttanvg1t  
ddav1dsdgl1tt1tgvik1dad  
nmt1l1dsgfy1ktpkys1lgdyvwydsnkdgk1qdstekgikgvkvt1l1qnekgevi1gtt1dengkyr1fdn1l1dsgkykvi1fekp  
ag1l1tqt1gtnttdk1dadg



Tsompanidou\_et\_al\_Supplemental\_FASTA\_File

nvgdyivhvhgvgrylgvetlevgqthrdyiklqykgtdqlfvpvdqmdqvqkyvasedktpklnklggsewkktkakv  
qqsvediaeeleidlykere  
maegygygedtaeqttfeldfpyeltpdqaksideikddmqksrmpdrllcgdvgygktevavraafkavmegkqvaflv  
pttllaqqhyetliermqd  
fpveiqlmsrfrtpkeikqtkeglktgfvdivvgthkl1skdiqykdlgllivdeeqrfgvvrhkerikt1khnvdvltlt  
atp1prt1hmsmlgvrd1s  
vietppenrfpvqyvleqnmsfikealere1srdgqvfylynkvqsiyekreqlqmlmpdaniavahgqmterdleem  
1sfinneydilvtttiet  
gvdvnpantliiedadrfgl1sqlyqlrgrvgrssrigyayflhpankvl1tetaedr1qaikeftelgsgfkiamrdlnir  
gagnllgkqqhgfidtvgf  
dlysqmleeavnekrigikepesevpevevdln1daylpteyianeakieiykklrktetfdqiidikedl1drfndypv  
evarl1diveikvhalhsq  
itlikdkgkiidih1svkatenidgevlfkatqplgrtmkvqvnamtitl1tkqnqwl1skflvkciesmrisdea  
>sp|Q5HIH3|PTH\_STAAC  
mkcivglgnigrfeltrhnigfevdyileknfsl1dkqkfgaytiermngdkvlfiepmtn1sgeavapimdyyn  
vnped1ivlydd1d1leqqg  
vrlrqkgsagghngmks1ikm1gtdqfkri1rigvgrptngmtvpdyvlqrf1s1ndemvtmekviehaaraiekfvetsrfd  
hvmnefngevk  
>sp|Q5HIH5|KPRS\_STAAC  
m1nneyknss1kifsl1kgneal1aqevadqvge1lgkcsvkrfsdgeiqinieesirgcvfiiqptsypvn1hlmellim  
idackrasaatinivvpyy  
gyarqdrkarsrkpitak1vanlietagatrmiald1hapqi1ggffdi1dh1mgvpilakhfkddpninpeecvvvspd  
hggvtrarkladi1ktpia  
i1dkrrprpnvaevmni1vgeiegrtaii1ddi1dtagtit1aaqal1kdkgakevyac1thp1lsgpakeriensaike1i  
vtnsih1dedrkpsntke1  
svag1iaqai1rvyeresv1fd  
>sp|Q5HIN1|Y486\_STAAC  
meyikkialymv1l1i1figgcnmkdeqkkee1qntktdskee1qkksfakt1dmpikn1ed1ydegyrdgefkkgd  
kgtwt1l1tgfsksnkp1gv1  
ddegm1v1l1nrntk1katgy1fvnkvyddi1sknhnekkyrve1lknkiv1l1dnvedk1k1kqkienfkffsqyadfk1kny  
qdgn1ttnenvpsyeagy1k  
mnsdknvk1k1reiyp1ttnspn1k1lyidgd1kgssvgyk1k1eykfskdkgqett1rdy1l1nfgpsegenve  
>sp|Q5HIN5|Y482\_STAAC  
meylkr1a1l1isvi1l1ti1fimgcdsqsdaenpkegskea1qkksfakt1dmpikn1ed1fydegyrdgefkkddkgw  
l1irseivk1qpk1gkv1mktrg  
mqly1nrntet1akgff1v1keisennrvnk1dkeekyevk1mvgnki1pteq1indek1ikkeienfkffvqygnfk1nfekynn  
gefsynpeapiysaky1lh  
nddynvrq1l1rkrydi1stketpk1l1l1kgggd1knssvgqndieft1fverkgeniyfndsvef1psk  
>sp|Q5HIN6|Y481\_STAAC  
mgy1krfa1y1ism1li1fai1agcgknetkedskee1qkksfakt1dmpikn1ed1ydegyrdgefkkdkgmwtiyt  
dfakgnksde1ddegm1v1n  
l1drnr1takgy1fvkkfyekdk1pdrknykvemknki1l1dkvedpn1kkrienfkffgqyanfk1denyngdvsinw  
npsydveykmsnkdenvk  
q1l1rsryn1ptdkapm1k1mhidgd1kgssvgykr1e1dfskegrdi1svidy1syk1pakk  
>sp|Q5HIQ9|XPT\_STAAC  
mell1gkvk1kedgv1ideki1k1kvdgf1nhq1idak1l1mnevgrt1fyeqfkdkgitki1l1tieasgiapa1maal1hfdvpc1fak  
kakpst1l1tdgyyetsi1hsf  
tknktstvi1vskef1seedtvl1i1ddflangdas1glydiaqqanaktagigivveksf1qng1hqr1leag1tvss1ckva  
s1legnkvt1vgee  
>sp|Q5HIR0|UP355\_STAAC  
madi1tvvndt1gely1nvinqk1segy1leselti1sksk1h1lnd1hdseis1lists1g1tfsdrmtk1l1tgedgehav1sryn1  
apde1lekyq1l1l1ddkm1v  
vavrdk1sshqevhennsayee1dithfaeaskgpka  
>sp|Q5HIR4|NFRA\_STAAC  
msehvyn1vkkh1svrkfknkp1sedv1vkk1veagqsastss1flqaysi1giddekiken1revsgqpyvveny1lfvfv  
idyrrh1l1vdqhaetdmen  
aygsteg1l1vgaidaa1vaeniavtaedmg1yiv1flgs1r1ndvervrei1d1l1pdyvfpvfgmavgepaddengaakpr1p  
fdhv1fh1hkyhadketqya  
qmadydq1tiseyydqr1tngnrketwsq1emf1gnkar1dm1leq1ksg1liqr  
>sp|Q5HIU0|THLA\_STAAC  
mtrvv1aaayrtp1gvfggafkdvpayd1gat1liehi1ketg1lnpseidevi1ignv1lqagqqnpariaamk1ggl1petvp  
aftvnkvcgsg1k1siq1lay  
qsiv1tgendi1v1aggmenmsq1spm1vnnsr1fgfkmghqsmvds1mvydgl1tdvfnqyhmgitaen1aeqygisreeqdtfa  
vnsqqkavraqqng1efds  
ivpvs1ipqrkgepi1vvtkdegvrenvsvek1sr1rpafkkdgtvtagnasgi1ndgaamm1vmsedkake1nieplav1dg  
fgshgvdps1imgiapvgav  
eka1l1rskke1l1sdi1dvfelneafaaqsl1avdre1k1l1ppekv1nvkggaia1l1ghpigasarv1vt1l1hq1l1ndevetg1ts1  
ci1gggqai1aavvskyk



Tsompanidou\_et\_al\_Supplemental\_FASTA\_File

>sp|Q5HIV4|Y411\_STAAC  
maslknkhfmiglsltfivalfsflaaklpildkvgaltiailiailyrhfrgypeqyssgitfsskyllrfaiilyglk  
lnifdiigqgskllaidvg  
vvi fsivmm lfvnkl lhgdknia lllgvgtgvcgaaiaavapifksrekdtaisigialigtifsliytaiyaifsmt  
tnvygawsgvs l hejahvv  
laggf ggsdalkiall gklgrvfl lip l tiv l ilimrfrs sessskgrisy flygf vimalvntyvtipsallnilnt  
vsticllmamvalglnvaf  
kdlnral kplmti iitsic lsslafivvhwlys  
>sp|Q5HJ26|SSBP\_STAAC  
mlnrtvlvgrl t kdpelrstpn gvnvgtftlavnrftnaqgereadfinvvvfkkaenvknylskgs lagvdgrlqtr  
sydnkegrrrvfvtevads  
vqflepknnnkqnnqhggtqtgnnpfdnteedfsdlpf  
>sp|Q5HJ48|LIP2\_STAAC  
mlrgqeerkysirkysigvsvlaatmfvvs sheaqasektstnaaaqketlnqpeqgnaitshmqsgkqlddmhken  
gksgtvtegkdtlqsskhq  
stqnskti r t qndnqvkdserqgskqshqnnatnnterqndqvqnthhaerngsqsttsqsndvdkqspsipaqqvipn  
hdkaaptsttppsndktap  
kstkaqdattdkhp nqqdthqahqi idakqddtvrqseqkpqvgdlskhidgqnspekptdkntdnkqlikda lqapkt  
rsttnaaadakkvrplkan  
qvqplnkypvvfvhgflglvgdnapa lypnywggnkfkvieelrkqgynvhqasvsafgsnydravelyyyikggrvdyg  
aahaakygherygktykgi  
mpnwepgkkvhlvghsmggqtirlmeefl r ngnkeeiayhkahggeisplftgghnmvasittlatphngsqaadkfgn  
teavrkimfalnr fmgkny  
snidlgltqwgfklpnesyidyikrvskskiwtssdnaaydl tldgsaklnm tsmnpnityt tytgvsstgplgyen  
pdltgfflmattsriighd  
arewrkndgvvpvisslhpsnqpfvntndepatrrgiwqvkipi igwdhvdfigvdfldfkrkgaelanfytgiindl  
l rveateskgtqlkas  
>sp|Q5HJ90|ESAA\_STAAC  
mkkknwiyalivtliiiiavsmi ffvqtkygdqsekgsqsvsnknkiahiaivnedqpttyngkkvelgqafikrlane  
knykfetvtrnvaesglkn  
ggyqvmivipenfsklamgl daktpskislqyktavqkeevakntekvsvnlndfnkn lveiy ltsiidnlhnaqknv  
gaimtrehgvnskfsnyll  
npindfpe l ftdtlvnsi sankdi tkwfqtynksllsands tfrvntdynvstliekqns l fdehtamdkmlqdyksqk  
dsvel dnyinalkqmdsqi  
dqqssmqdtgkeeykqtvkenldkl rei iqsqes pfskgmi edyrkqltes l qdelannkd l qdalnsikmnaqfaen l  
ekqlhddivkepdt dttfi  
ynmskqdfiaag l negeankyeaivkeakrykneynlkkplaehin l tdydnqvaqdtssl indgvkvqrtetiksndin  
qltvatdphfnfegdikin  
gkkydikdqsvaldtsnkeykvevngvaklkkdaekdf l kdktmhlqllfgqanrqdepndkkatsvvdvtlnhnldgrl  
skdalsqqlsalsrfdahy  
kmytdtkgre dkpfdnkr lidmmvdqvindmesfkddkvav l hqid smeenskliddi l nnknttknedisklidql  
envkktfaeepqepkidrg  
kndefntmssnlkeisr i sekstql l sdtqesksi adsvsgqlnqv dnnvnlhatgralgvrandlnrqmakndkdne  
l fakefkklvlnskdgdrg  
nqal kafmsnpvqkkn l envlanngntdvispt l fvllmyllsmi tayifysyerakgqmnfikddyssknhlnwnvits  
gvi gttglveg l ivgl iam  
nkfhv l agyrakfi l mvi l tmmvfv l inty l l r qvksigmflmiaa l glyfvamn l kaagqgvtnkisp l syidnmffn  
ylnaehp i glvlv l tvlv  
i igfv l nmfikhfkkerli  
>sp|Q5HJ99|LYTM\_STAAC  
mkk l taaaiatmgfatftmahqadaaettntqqahtqmstqsqdv sygtyy tidsngdyhhtpdgnwnqamfdnkeysyt  
fvdaqghthyfyncypkna  
nangsgqtyvnpatagdnndytasqsqhi nqygyqsnvgpdasyshsnnnqaynshdngkvnypngtsnqnggsask  
atasghakdaswltsrkql  
ppygqyhggahygvdyampenspvys l tdgtvvqagwsnygggnqv tikeansnyqwymhnr l tvsagdkvkagdq i  
aysgstgnstaphvhf qrm  
sgg i gnqyavdptsylqsr  
>sp|Q5HJK5|ISDI\_STAAC  
mfmaenrlqlkgsaetierfynrqgi etiegfqmfvtkl lnted tdevki l tiwesedsfnwlnsdvfkeahknvr  
lksdddqqspi l snkvfk  
ydiyhyqk  
>sp|Q5HJR8|Y084\_STAAC  
mqr dy l i rvetesmsdfkr l nslmigfvikgeahiydenmtqcns gdi fi inhrdlyrfqlqqdgiicyiqfqmkylad  
kfdv hcl yfhl t datttk  
nihqlr nimarlvsthirhnel sk l teqq l viql l mhmihyvprtyhsnqsilnddkvnqvcdyielhfhed l slselse  
yvgwsesh l skkftes l gv  
gfhf l ntt r i ehak l d l ty t det i t dia l qngfssaasfartfkhfthqtpkqyr gdrpaitenqqsaqhd yhdrelil  
l lndyieemnhfiediekm

Tsompanidou\_et\_al\_Supplemental\_FASTA\_File

nykeiafqptnhqlnqfnhiqvgylrnllntqyqsqlltchhdqfvnevlaydvipyimkklNapftydaeisnifydi  
dlcldfllldhnfsltmhld  
qydsrdyidafkifihhvalhvshrkdlkfnlyvttlhtsliemidyfkaIfpngglyihldqaterhlp1lkrlephid  
hfvfdansndavdfnkmd  
defktasqmi inktnylidlmhrhr1krpl1llnwnltgdtfitngeyfrggiieqllklsskvegigywlnydlhvs  
hcknerdymnsiel fhqyn  
gkrpvyftallfnkltsni lysddtcivtgdtsnfqillydakhfnpylaIdnqmmratemihlninal eegmykikhf  
tldkengalfnlwrkhhti  
hgmdkdsidyvnrmsfpklevydiditdtlaInikmitngihlievkrypss  
>sp|Q5HJR9|Y083\_STAAC  
mkrlnk1vllyisflilvisftagcgigkeaevkksfektlsmpiknledlykegyrdefdkndkgtwiigsemvvpq  
kgermkskgmvl ymnrntk  
tttgkyivsetlhdedgrpkskdkeypvkmvdnkiiptkgikdenikkeienfkffaagygsfkdl skykdgdisynevp  
sysakyqltnddynvkqlr  
krykiptnkakplllkgsgdlkgssvgykdi eftfvekkgentfftdslhlepse  
>sp|Q5HJS0|Y081\_STAAC  
mkrlnk1vlgiiflflvisitagcgigkeakikksfektlsmpiknledlyekrrlfvmtkfdkndkgtwiigsematq  
nkgealvkgmvl ymnrnt  
kttkgyyyvnaikndkgrpqenekrypvmvdnkiiptkeikdknikkeienfkffvqygnfkdl skykdgdisynev  
psakyqltnddynvkql  
rkrydiptnkakplllkgtnlkgssvgykdi eftfvekkeenyfsgdlifkpsedk  
>sp|Q5HJU7|PLS\_STAAC  
mnkskkklfdlfnkylkysirrfvtgtasilvgatligvandqaeaaennttqkqddssaskvkgvqtieqssans  
nesdipeqvdtkdteq  
steekanteqasteekadtteqatteeapkaegt dkveteapkaetdkateapkteetdkatteapkaetdkat  
eapkteetdkatteapa  
aeetskaateapkaeetskaateapkaeetektateapkteetdkveteapkaeetskaatekapkaeetnkve  
eapaaetnkaateetpav  
edtnaksnsnaqpsertqvvdvtvakdlykksevteaeaeiekvlpkdisnlsneeikkaalsev1ketankenapr  
atfrsvssnarttnvnysa  
talraaaqdtvttkkgtnftahgdi ihktykeefpnegtltafntfnfnptgtkga leyndkidfnkdf titvpannq  
gnttgadgwgfmftqngq  
dflnqggilrdkgmanasgfkidtaynnvngkvdkl dadktnlsqigaakvgygtfvkngadgvtnqvgqnalntkdkp  
vnki iyadnttnhldgqfh  
gqrlnvvl nydaatstiatyagktwkattddl gidksqkynflitsshmqrnsngimrtnlegvtittppadliddv  
evtkqpi phkti refdptl  
epgsdvivqkgedgekttttptkvdptgdvvergepttevtknpvdeivhfapeevpqqhkdefdpnlpidgteevpg  
kpgiknpetgevvtpvdd  
vtkhgpkagepevtkeeipfekkrfnpd1kpgeekvtqegqtgekttttpttinpltgkekvgegepttevtkepvdeit  
qfggeevpqqhkdefdpnl  
pidgteevpgkpgiknpetgevvtpvddvtkhgpkagepevtkeeipfekkrfnpd1kpgeekvtqegqtgektttt  
ttinpltgkekvgegeptte  
vtkepvdei tqfggeevpqqhkdefdpnlpidgteevpgkpgiknpetgevvtpvddvtkhgpkagepevtkeeipyet  
krvldptmepgspdkvaqk  
gengekttttpttinpltgkekvgegepttevtkepvdeivnyapeiiphgtreeidpn1pegetkvi pggdglkdpetge  
iieppqdeviihgakdds  
adsdsdadsdsdadsdsdadsdsdadsdsdadsdsdadsdsdadsdsdadsdsdadsdsdadsdsdadsdsdadsdsdadsdsdad  
sdsdsdsdsdadsdsds  
dsdadsdsdadsdsdadsdsdadsdsdadsdsdadsdsdadsdsdadsdsdadsdsdadsdsdadsdsdadsdsdadsdsdadsds  
dsdsdsdsdsdsdsdrd  
sdadsdsdadsdsdsdsdsdadsdsdsdsdadsdsdadsdsdsdsdadsdsdadsdsdadsdsdadsdsdadsdsdadsdsdadsds  
sdsdsdsdsdsdadsds  
dadsdsdadrdhndktdkpnkelptgndaqngtlfgs1faalgglflvgrrrknknneek  
>sp|Q5HJY7|SYS\_STAAC  
mldir1frnepdtkskielrgddpkvdeileldeqrrklisateemkarrnk vseeialkkrnkenaddviaemrtlg  
ddikekdsq1nei dnkmtg  
ilcripn1sddvpqgesdednvekkwgtprefsfepkahwdivelk madfdraakvsgarfvy1tnegaqleralmn  
ymitkhtthgytemmvpq  
1vnadtm ytgq1pkfeed1fkvekeglytiptaevpltnfyrnei i qpgvlpekftgqsacfrseagsagrdrtrglir1  
hqfdkvemvrfepedsw  
aleemttnaeai leelglpyrrvilctgdigfsasktydlewlpsyndykeisscsnctdfqarranirfkrdkaakpe  
lahtlngsglavgrtfaai  
venyqnedgtvtipealvpfmggkqtqiskpvk  
>sp|Q5HJZ0|GYRA\_STAAC  
maelpqsrinernitsemresfldyamsvivaralpdrvrdglkpvhrrilyglneqgmtpdksykksarivgdvmgkyhp  
hgdssiyeamvrmaqdfgy  
ryp1vdggngfsgmdggaamrytearmkitlellrdinktidfidnydgnerepsvlparfpnllangasgiavgm  
atnipphntelingvls1

Tsompanidou\_et\_al\_Supplemental\_FASTA\_File

sknpdisiaelmediiegpdfptaglllgksgrarayetgrsigrsraieveergggrqrivvteipfqvnkarmiekia  
elvrddkkgidtdlrdets  
lrtgvrvidvrkdanasilnnykqtpqtstfgvnmialvngprkllnlkealvhylehqktvrrrtqynlrkakdr  
ahileglrialdhideiis  
tiresdtdkvameslqgrfklskqaqaildmrlrrltglerdkieaeynellnyiseleailadeevllqlvrdeltei  
rdrfgddrrteiqggfen  
lededlipeequivitlshnnyikrllpvstyraqnrggrgvqgmtleedfvsqvlvltsthdhvlfftnkgrvyklkgyev  
pelsrqskgipvnaiele  
ndevistmiavkdlesednflvfatkrvkvksalsnfsrinrngkiaisfreddeliavrlltsgqediligsthaslir  
fpestlrlplgrtatgvkgi  
tlregdevvgldvahansvdevllvtengygkrtpvndyrlnsrggkgiktatiterngnvvcittvtgeedlmivtnag  
viirlvdadisqngraaqg  
vrlirlgddqfvstvkvkedaedetnedeqststsvsedgteqqreavvndetpgnaihtevidseendedgrievrqdf  
mdrveediqqssdee  
>sp|Q5HJZ1|GYRB\_STAAC  
mvtalsdvnntdnygagqivlegleaarkrpgmyigstserglhhlvweivdnsidealagyanqievviiekdnwikvt  
dnrgripvdiqekmgrpav  
evlltvlhaggkfggggykvsgglhgvgsvvnaalsqdllevyvrnetiyhqaykkgvpqfdlkevgttdktgtvirfka  
dgeiftettvnyetlqrr  
irelaflnkgiqtllrdeenvredsyhyeggiksyvellnenkepihdepiyihqskddieveiaiqynsgyatnll  
tyannihtyeggtthedgfk  
raltrvlnsyglsskimkeekdrllsgedtregrmtaiisikhgdpqfegqtktklgnsevrqvvdklfsehferflyenpq  
vartvvekigimaararvaa  
kkarevtrrksalldvaslpgkladcsskspeceiflvegdsaggstksgrdsrtqailplrgkilnvekarldrilnn  
eirqmitafgtgiggdfdl  
akaryhkiivimtdadvdghairtlllffyrfmrplieagyvyiaapplykltqgkqkyvyndrelklkselnptpkw  
siarykglgemnadqlwet  
tmnpehralqvkledaieadtqfemlmgdvvenrrqfiednavyanldf  
>sp|Q6G5W4|MNME\_STAAS  
mdltditsistpmgegaigivrlsgpqaveiadklykgkhllndvpshtinyghiidpeskevveevmvsvlrapktftr  
edieinchggiltinrvl  
eltmtygarmaepgeftrkrafllngridlsqaeavmdfirsktdraskvamnqiegrlsdlikkqrqsileilaqvevnid  
ypeyddvedatteflleqs  
keikqeinrlltdgagkimreglsvivgkpnvgkssmlnliqdnkaivtevagtttrdvleeyvnrvgvplrlvdtag  
iretedivekigversrka  
lsqadlilfvlnnealtgedytleevknedvivivnkmdleqnidinevkdmgdtpliqtsmlkqegideleiqird  
lffggevqndmtvysnr  
hisllkqarqtiqdaidaaesgvpmdmvqidltriweilgeiigetasadeldqlfsqfclgk  
>sp|Q6G5Z1|Y2569\_STAAS  
mtepiisfkdfsfgyhsqatptlqkinvdiypgekvllvgasgsgkstfancinglipfktkgnitgelyinnqdatvsc  
lhdrsnvgtvlqdtgqf  
igltaaedmafllennceveddmkknvsywaekvgmiehlnhrpqdlsggkqrvsllggilihrtplilildeplanldpa  
tghetrlrllnniheetkst  
miivehrleeslddtfdrvllfkdgkiianttpsdllkssklikeagireplyctalkyaevdvesidnlanlrdvcmh  
vkfkvkkwidetsanndnk  
yksepillenevqvysdysnsvlnnvqlnvyrremlsivghngagkstlakaicgfliditgniqfcnrgfnqlsisers  
efvgymqnpnhmiseskmi  
ydevalglrargmkesdikirvenvllkicglyafnwpivalisygqkkrvtiasvllnpeiildeptagqdfyhynei  
msflieInrggkiiimith  
dmhllseyssrtvvlskgqvadtptvlvlnkkiceiaslrqtslfemaeyigisepqklvqlfinhdkvrrq  
>sp|Q6G5Z5|HISZ\_STAAS  
mnseqllialkesetaflkyfnkadyeivdfsvvekldwkqlnhedlqqmgernfwqhehqiyalrndftdqllryssmy  
ptaatkvyatgllirnea  
avqvglenyapslanvqqsllkifiqfiqqqlrdnvhfvlghyqlldalldkslqtpdilsmieernlsglvtylstehp  
ivqilkentqqqlnvlehy  
ipndhpalvelkiwerwlhtggykdihlditaqpprsyytgllfiqchfaenesrvltggyykgisiegfglgll  
>sp|Q6G5Z7|HISX\_STAAS  
mpmlnaqqflnqfsleapldeslypiirdicqevkvhgdkalkmynltdhtktdhleisheqikaafdtldektkqalq  
qsyerikaygesikqtnqg  
leesvecyeyhplsvgyvpggkasypstvlmtatlaqvagveniivvtpqpngvsqevlaacyitqvnqvfvqgga  
qsiaaltgytetipkvdkl  
vgpgnqfvayakylfgqvgidqagpteialiiddtdaldaiyvdfvfaqaehdelartyvigeaqlvldlesriakal  
pnvdrydivsksianghyl  
ihasnfdeachvmtiapehasiqtvnpqpyiekvkvvgalfighyspevigdyvagpshvlpnrtarftnglsvndfl  
trntvihlskdtfeqiads  
aqhiahvealynhqqsilirqs  
>sp|Q6G601|HIS4\_STAAS  
mielwpaiddigstsvrltegydseekmsrsaeesiaysqfecvnrihidvligakaqharefdyikslrrlittkdie

Tsompanidou\_et\_al\_Supplemental\_FASTA\_File

vgggi rtksgimdyfaagi  
nycivgtkgiqdttdwlkemahtfpgriylsvdaygedikvngweedtelnlfsfvrrlsdiplggiyytdiakdgkmsgp  
nfe1tgq1vkattipvias  
ggi rhqqdiqr las lnvhaai gkaahqasfweglk  
>sp|Q6G604|LIP1\_STAAS  
mksqnkysirkfsvgassiliatllflsggqaqaekqvmngnsqedtvtasigdqqtrenanyqrengvdeqqhtenl  
tknlhndktiseenhrkt  
dlnkdq1kddksslnnkniqrtdtknnanpsdvnqgleqaindgkqskvasqqqskeadnsqdsnannlpsqsrike  
apslnkl dqt sqreivnet  
eiekvqpqqnqandkitnynfnneqevkpkdektlsvsdlnknqkspveptkdndknglnllkssavatlpnkgtk  
ltakakddqtnkvakggqy  
knqdpivlvhgfngftddinpsvlahywggnkmnirqdleengykayeasisafgsnydravelyyyikggrvdygaaha  
akygherygktyegiykdw  
kpgqkvhlvgfsmggqti rql eelrngnreeieyqkkhggeisplfkgnhdnmissittlgtphngthasdlagnealv  
rqivfdigkmgfnknsrvd  
fglaqwglkqkpnesyidyvkrvkqsnlwkskdngfydltregatdlnrktslnpnivyktytgeathkalsndrqkadl  
nmffpfvigtngligkatek  
ewrendglsvsissqhpfnqaytkatdkiqkgiwqvtpkhdwdhdfvgqdsdvtvrtreelqdfwhhladdlvktekl  
tdtkqa  
>sp|Q6G606|ICAB\_STAAS  
mkyrkfiilvl siliiilpvstldghhi anaddspkklkykensa la lnyhrvrkanflnfnfiyffssskeiknysvsqs  
qfesqikwlkshdakfltl  
keflyykkkgkfpkrswinfdmdeti y enaypil kkykipatgf iitghvgeenfhnl dmiskkelkemyktglwefe  
ththdlhnl sknksklmk  
aseatiikdlnksekyltkfnkksqktiaypyglmddklpvikkaglk y gfsleekavtpnsndyyiprilisddafeh  
likrwdgfhkd  
>sp|Q6G608|ICAA\_STAAS  
mqffnfllyfpvfmsiywivgsiyfyftreiryslnkkpdinvelegitfl lacynesdtiedtl snvlalkyekkei  
iindgssdntaeliykike  
nndfi fvd lqenrgkana lnqgikqasydyvmcl dadi v d q d a p y m i e n f k h d p k l g a v t g n p r i n k s s i l g k i q t i  
eyasligcirkrsqtlagav  
ntisgvftl f k k s a v d v g y w d t d m i t e d i a v s w k l h l r g y r i k y e p l a m c w m l v p e t l g g l w k q r v r w a q g g h e v l l r d  
ffstmktkrfplyilmfeg  
iisilwvyivllylgy l f i t a n f l d y t f m t y s f s i f l l s s f t m t f i n v i q f t v a l f i d s r y e k k n m a g l i f v s w y p t v y w  
iinaavvlvafpkalkrkk  
ggyatwsspdrngtqr  
>sp|Q6G620|SRAP\_STAAS  
mskrqkefhds lanektrvrlyksgknwvks g i k e i e m f k i m g l p f i s h s l v s q d n q s i s k k m t g y g l k t t a v i g g a f t v  
nm1hdqqafaasadapl tse  
lntqsetvgnqnsttjeaststadstsvtknsssvqtsnsdtsvsseksekvststntstsnqqekltstsestssknttss  
sdtksvastsssteqpints  
tnqstasntsqsttpssvnl nktsttststapvklrtfsrlamstfasaatttavantitvnkdnlkqymttsgnaty  
dqstgivtltdaysqka  
itlgttridsnksfhfsgkvnlnkyegnnggdgigfafspgvlgetglngaavgigglsnafgfkldtyhntskpnsaa  
kanadpsnvagggafgafv  
ttdsygvattytssstadnaaklvqptnntfqdfdi yngdtkvmtvtyagqtwrnisdwiaksgttnfslsmtastg  
gatnlqqvqfgtfeytesa  
vtqrvyvdvtgkdiippktysgnvdqvvtidnqqsaltakgynytsvdssyastyndtnktvkmtnagqsvtyyftdvk  
aptvtvgnqti evgktmnp  
vlltttdngtgtvntvtglpsgl sydsatnsiigtptkigqstvtvst dqannksttftinvvdtaptvtpigdq  
sevyspispikiatqdng  
navtntvtglpsgl t f d s t n n t i s g t p t n i g t s t i t i v s t d a s g n k t t t t f k y e v t r n s m s d s v s t s g s t q q s q s v s t s k  
adsqsaststsgsi v v s t s  
astskstsvslsdsvsaskslstsesnsvsststslvnsqsvssmsdsaskstslsdsisnssstekseslststsdsl  
l r t s t s l s d s l s m s t s g s l  
skskslststsesstaslsdstsnaitstseslesaststsisisnsiansqsastsksdsgstsislstsdsksmst  
seslstdststsgsvsgsls  
iaasqsvststsdsmstseivdsistsgslsasdksmvsssmstsqsgstseslstdsqstsdskslslstsqsgs  
tstststasvrtseqst  
sgmsasqsdmsiststfstdstsdksastassesisqaststsgsvststslstnsertstsmststststsedsi  
seststsdiseaisases  
tfislse n s t s d s e s q s a f l s e l s e s t s e s t s e s v s s t s e s t s l s d s t s e s g t s t s l s n s t s g s a s i s t s t s i s  
eststfkse v s t s l s m s t  
stslsdstslstslsdstsdsksdslstsmstsdistskdsiststslsgstsesesdts sseskdsstmsismsq  
stsgststststslsdstsl  
tslslsamnqsgvdsnasqasntststsesdsqstssytsqstsqsestststslsdstsis k s t s q s g s v s t s a s  
lsgsesedsqsistse  
stsesastslsdststsnsgaststslnsasasesdssstslsdstasmqssedsqstsaslsdslststsnrmst

Tsompanidou\_et\_al\_Supplemental\_FASTA\_File

iasltsvstsesgstses  
tsesdststslsdsqstsrtsasgsastststsdrrtsaststsmrtstsdsgmsltsststmsdstslsdsvsds  
tsdstsastsgmsvsi  
sdststtsasevmsasidsqsmsevndsesvsesnsesdsksmgtsvsvdsgslsvstslrksevsessslsgsq  
smdsvstsdssslsvst  
lrsesvsesdlsdskstsgtststsgslststslsgsesvsestsldsismdststsdslsgsislsgstsls  
tsdlsdskslsssqsmsg  
seststsvsdsgssstnsqfidsmsisasesdmsdssisgsnststslstsdmsgsvsvststslsdsisgsts  
sdssstststslsdmsqs  
qststasgslstststmsmsastsssqtstsvstslstsdslsdstsisisgsgstvesestsdtsisdseslstds  
dstststsdstsgtstsi  
sesltsgsgstsvdtsmsesdstsvmsqsmgstynstsvsdsevstststslstdststsesltsmsgsqsi  
sdststsmgtsstsesns  
mhpsdmsmhthststsrllseattstsesqstlsatsevtkhngtpaqsekrldptgdsikqngllggvmtllvgll  
mkrkkkkdendqddsqa  
>sp|Q6G642|ARCC2\_STAAS  
mkekivialggnaigtkeataeaqqtairramqnlkplfdsparivishngnpqigslliqqaksnsdttpampldtcga  
msqgmigwleteinrlt  
emnsdrvtgvtivtrvevdkddprfnnpkpiqpfytkeeevelqkeqpdsvfkedagrgyrkvvasplpqsilehqllirt  
ladgkniviaccgggipvi  
kkentyegveavikdfaseklatlleadtlmiltnvenvfinfnepnqqiddidvatlkkyaaqgkfaegsmkpiea  
airfvesgenkkviiitnle  
qayeaingkgthim  
>sp|Q6G644|CLFB\_STAAS  
mkkridylsnkqnkysirrfvtgtsvvgatilfgighnqaqaseqsndttqssknasadseknmietsqlnttand  
tsdisantnsanvdstakp  
mstqtsnttttepastnetpqltaikdataakmqdqtpvqansqvdnkttndansiatnseknppqtdlppqsspqi  
snaqgtskpsvrtravrl  
avaepvnaadakgtvndkvktakdfqlkttfdpnqsgntfmaanftvtgqvksgdyftaklpdsvtgngdvdsnsnn  
tmpiadiyndknevvakat  
ydltktytfvftdyvndkqningkfsplftdrakapksgydaniniademfnkitynysspiagidkpnganissq  
iigvdtasgqntykqtvfv  
npkqrvlgnwvwiigyqdkieessgkvsatdtklri fevndtskl sdsyyadpndsnlkevtdqfkdkitykyqvasi  
nfgdinktyvvlveghyd  
tgknlktqviqenvdpatgkdysi fgwnnenvvrygggsadgdsavnpkdptgppvdpepsdppepsdpdpeptpd  
pepsdpdpdsdsdsdsgs  
dsdsdsdsdsdsdsdsgsdsdsdsdsdsdsdsdsdsdsdsdsdsdsdsdsdsdsdsdsdsdsdsdsdsdsdsdsds  
dsdsdsdsdsdsdsdsdsdsdsdsdsdsdsdsdsdsdsdsdsdsdsdsdsdsdsdsdsdsdsdsdsdsdsdsdsds  
dsdsdsdsdsdsdsdsdsdsdsdsdsdsdsdsdsdsdsdsdsdsdsdsdsdsdsdsdsdsdsdsdsdsdsdsdsds  
dsdsdsdsdsdsdsdsdsdsdsdsdsdsdsdsdsdsdsdsdsdsdsdsdsdsdsdsdsdsdsdsdsdsdsdsdsds  
dsdsdsdsdsdsdsdsdsdsdsdsdsdsdsdsdsdsdsdsdsdsdsdsdsdsdsdsdsdsdsdsdsdsdsdsdsds  
dsdsdsdsdsdsdsdsdsdsdsdsdsdsdsdsdsdsdsdsdsdsdsdsdsdsdsdsdsdsdsdsdsdsdsdsdsds  
sentnatlfgamallgs  
llfrkrkqdhkeka  
>sp|Q6G664|BETA\_STAAS  
msnknksydyviigggsagsvlgnrlsedkkevvlvleagrsdyfwdlfiqmpaalmpsgnkfydwiystdeephmgr  
kvahargkvlggssingm  
iyqrgnmdyegwaepegmetwdfahclpyfkklektygaapydkfrghdgpiklkrpatnplfqsffdagveagyhkt  
pdvngfrqegfgpfdsqvh  
grrmsaraylhpamkrknltvetrafvteihyegrratgvtykngklhtidakevilsggafntpqllqlsgigdse  
flkskgiervhlpvgen  
fedhlevyiqhkckepvslqpsldikrmpfiglqwi ftrtgaaasnhegggfvrsnnevdpnlmfhflpiavrydgqk  
aavahgyqvvhgpmysnr  
gslkikskdpfekpsirfnylstedkkewveairvarnilsqkamdpfnggeispgevtdeeildwvrrdgetalhp  
scsakmgpasdpmavvdp  
tmkvhgmenlrvdasamprrtngnihapvlmlaekaadiirgrkplepqiidykhgvhdenegaievkpyak  
>sp|Q6G674|LDH2\_STAAS  
mktfgkqvvligdgsvgssyafamvtqgvadefviidiakdkvkadvqdlnhgtvhspspvdvkageyedckdadlvvit  
agapqkpgetrlqlveknt  
kimksivksvmdsgfdgyfliaanpvdltrfvkeytg lpaervigsgtvldsarlqylisqelgvapssvdasiigehg  
dte lavwsqanvagi svy  
tlkeqtgseakeeiyvnrdaayei iqakgstyygialalmriskailnennvlnvsiqldgqygghkgvylgvptlv  
nqhgavkiyemplsaeqa  
lfdksvktledtfdsikylled  
>sp|Q6G679|PAND\_STAAS  
mirtmnakihrarvteslnyvgstitdsdileavdilpnekvaivnnnngarfetyviagergsgkiclngaasrlve  
vgdvviimtyaqlneeig  
nhapkvavmnednviiemihekentivl  
>sp|Q6G693|Y2467\_STAAS

Tsompanidou\_et\_al\_Supplemental\_FASTA\_File

metlelqgaklryhqvggqpvli fipgangtgdi flplaeqlkdhftvvavdrdygeseltep lpsasnpdsdyrvkr  
daqdiaelaks l sdepyvi  
lgsivamhvlkdypevkkiafheppintflpdstywkdknddivhqi lteglekgmktfgetlniapidakmmsqpadt  
eegrieqykrtmfwsefei  
rqythsditl ddfstkysdkit l lngtdsrgsfpqdvnyfinketsipiv dipgghlgyiqkegfvad l lnmwg  
>sp|Q6G6B0|CRTP\_STAAS  
mtkhiiviggglggisaai rmaqs gysvslyeqnnhiggkvn rhesdgfgfdl gpsi l t mpyifek l feyskkqmsdyvt  
ikr l phqwsffpdgttid  
lyegiketgqhna l skqdieelqny l nytrridritekgyfnygl d t l sqiikfhgplnalinydyvhtmqaidkris  
npy l r qm l gyfi kyvgsss  
ydapav l sm l fhmqqegglwyveggihh l anal ek l areegvtihtgarv d niktyqrrvtgvr l dtgef v kadyi i sm  
evipyky l ih l dtqr l nk  
lerefepassgyvmh l gvacqypq l ahnfffttenay l nyqqvfhekvl pddptiy l vntnkt dhtqapvgyenikvlph  
ipyiqdpfttedyakfrd  
kil d k l ekmg l t d l rkhi yedvwtpedi eknyrsnrgai ygvvadkkknkgfkfpkesqyfenlyfv ggs v n pgggipm  
vt l sgqqvadkinareakn  
rk  
>sp|Q6G6B9|ATRF2\_STAAS  
mtekekm l aekwydanfdqylinerarakdicfelnhtrpsatnkrkelidqlfqtttdnvsisipfdtdygnvklgkn  
yvntncyfmdggqitigd  
nvfigpncgfytathplnfhrnegfekagpihigsntwfgghvav l p gvtigegsvigagsvvtkdipphslavgnpck  
vvrkidnd l pset l ndeti  
k  
>sp|Q6G6C0|ROCA\_STAAS  
mvvefknepgydfsvqenvdmfkka l kdvekelgqdiplvingeki fkd d k i k s i n p a d t s q v i a n a s k a t k q d v e d a f k  
aaneaykswktwsandrae  
l m l r v s a i i r r r k a e i a a i m v y e a g k p w d e a v g d a a e g i d f i e y y a r s m m d l a a g k p v l d r e g e h n k y f y k s i g t g v t i p  
pwnfpfaimagttlapvva  
gniv l l k p a e d t p y i a y k l m g i l e a a g l p k g v n f v p g d p k e i g d y l v d h k d t h f v t f t g s r a t g t r i y e r s a v v q e g q n  
flkrviaemggkdaivvde  
nidtdmaaeai v t s a f g f s g q k s a c s r a i v h k d v y d e v l e k s i k l t k e l t l g n t v d n t y m g p v i n k k q f d k i k n y i e i g  
keegkleqgggtddskgyf  
vepti i s g l k s k d r i m q e e i f g p v v g f v k v n d f d e a i e v a n d t d y g l t g a v i t n n r e h w i k a v n e f d v g n l y l n r g c t s a  
vgyhpfggfkmsgtdakt  
gspdy l l h f l e q k v v s e m f  
>sp|Q6G6C4|FEOB\_STAAS  
menycilgnpnvgkts l f n a l t g s y e y i g n w s g v t e k k v g k l e n v g q l i d l p g t y d l s p i s k d e t v v t d y l l n d s f s g  
i i n i v d a s q l k r n m q l t v q  
l l e l n q p i y i g l n m i d v a t k r g i k i d y h k l m k k l k t p i f p v v a r t g k g t k h l l g e i k h l g e g y q p h f k i n y g e k i e e t i k  
n m c q i i m t e t s h d k y g a r f  
i a i q f l l n n m q i a n e l n s e v v n k l s s l r d q v d k q e a v s v r r e m e r i r n h y i e t l l q d v v t y p d e d k y f s s r i d k i l t h  
kyigmpiflaimw l i f q t t  
ftwigtp l s d q l d a f i g g t f t d s v k t i m n y l g v i p f l q d l i t d g i i a g v g s v l v f v p q i v v l f f f i s l l e d s g y m a r i a v  
l m d r i m e s f g l s g k s f i p m  
i i g f g c n v p s i m a a r s i e n e k e r l t t i l i a p f m s c a r l p v y a l f v g i f f k e n q s l v v l s l y v l g i i m a f l v s t v l t k t i  
l k n d n a i f i v e l p t y r v p s  
i k t l w r s t w e k a k g f v r k a g t f i f g g s v v i w l l s y v g p h i n v n i n q s f l h m v g s f f g m l v q p l g f g t w a g a t l v p g f l  
akevivssmai yssgdag  
l v n v i q n q f t p l s a y a f m i f i l l y i p c v s t v a a i r k e t y s w k w t a l a v v y p l v t a y v l t f i f y q i g h l f v  
>sp|Q6G6C6|CLPL\_STAAS  
m n n g f f n s d f d s i f r r m m q d m q s n q v g n k k y y i n g k e v s p e e l a q l t q q g g n h s a e q s a q a f q q a a q r q q g g g n g n y  
l e q i g r n l t q e a r d g l l d p  
v i g r d k e i q e t a e v l s r r t k n n p i l v g e a g v g k t a i v e g l a q a i v e g n v p a a i k d k e i i s v d i s s l e a g t q y r g a f e e n i  
q k l i e g v k s s q n a v l f f d e  
i h q i i g s g a t g s d s g s k g l s d i l k p a l s r g e i s i i g a t t q d e y r n n i l k d a a l t r r f n e v l v n e p s a k d t v e i l k g i r e k  
f e e h h q v k l p d d v l k a c v d  
l s i q y i p q r l l p d k a i d v l d i t a a h l s a q s p a v d k v e t e k r i s e l e n d k r k a v s a e e y k k a d d i q n e i k s l q d k l e n s g  
e h t a v a t v h d i s d t i q r l t  
g i p v s q m d d n d i e r l k n i s n r l r s k i i g q d q a v e m v s r a i r r n r a g f d d g n r p i g s f l f v g p t g v g k t e l a k q l a i d l f g  
n k d a l i r l d m s e y s d t t a v  
s k m i g t t a g y v g y d d n s n t l e k v r r n p y s v i l f d e i e k a n p q i l t l l l q v m d d g n l t d g q g n v i n f k n t i i i c t s n a g f  
g n g n d a e e k d i m h e m k k f f  
r p e f l n r f n g i v e f l h l d k d a l q d i v n l l l d d v q v t l d k k g i t m d v s q d a k d w l i e e g y d e e l g a r p l r r i v e q q v r d k i  
t d y l d h t d v k h v d i d e d  
n e l v v k g k  
>sp|Q6G6F1|LDHD\_STAAS  
m t k i m f f g t r d y e k e m a l n w g k k n n e v t t s k e l l s s a t v d q l k d y d g v t t m q f g k l e d d v y p k l e s y g i k q i a q r t a g f  
d m y d l d l a k k h n i v i s n p

Tsompanidou\_et\_al\_Supplemental\_FASTA\_File

syspetiaeysvsialglvrrrpfdierrvqahdftwqaeimskpvknmtvaiigtgrigaatakiyagfgatitaydayp  
nkldfltykdsvkeaidk  
adiislhvpankesyhlfdkamfdhvkkgaillvnaargavintpdliaavndgtllgaaidtyeneaayftndwtnkdid  
dktllelieherilvtphi  
affsdeavqnlvegglnaalsvintstcetrln  
>sp|Q6G6H6|SARU\_STAAS  
mdyqtfekvnkfivneyaifflltqelkqqyklslkellilayfyyknehsislkeiigdilykqsdvvknikslskkgfi  
nksrtheaderrifvsvtpi  
qrkkiacvine1dkiikgfnkerdyikyqwapkyskeffilfmnimyskdflykrfnlftldlsilyvissrkneilnlk  
dlfesirfmyppqivrsvnr  
lnnkgmlikersladerivlikinkiyntikisiftdtskilkprkfff  
>sp|Q6G6I7|Y2374\_STAAS  
mmhskkl1t1giclvllilivgyvmtkangqnaqikdtfnqtlklyptknlddfydkegfrdqefkkgdkgtwivnsgm  
niqlkkgalksremvlyin  
rnrttkgyfivgeitkdkkgythdkdkkgythdkdkkypvmehnkiiptkpikdek1kkeienfkffvqygnfkdfkd  
yknngdisynpnvpsysaky  
qlsnddyniqqlrkrydiptkkapel1lkgdgd1kgssigskdleftfvqnkreniyftdsveftpsedtsyesn  
>sp|Q6G6J1|Y2370\_STAAS  
mtvltdkiaavvtgagsgigeaiatl1heegakvvlagrnekelnvanqlsqdsvkvvptdvtinkeevdelikiaaqtfg  
gldivinsagmlsskitd  
yqvdewdsmdvnikgtlytvqaalpmlqessghliniasisgfevtsstiyatkaavhtitqglekelaktgvkvt  
sispgmvdtaitaaynpsd  
rkkldpqiadaevlyaltqpsvhnvneitvrpv  
>sp|Q6G6M9|FLP\_STAAS  
mttkklyflsisiiilvaisiaihitlnsntktr1tndsqqqidtiehd1qkghipgasilivkngkvflnkgygyqdv  
dkkvkaspttkyeiasntk  
aftglailklaqegrln1ndavskhvphfkmnyngqnetitikqllaqtsgpsditsedavtnknr1ndvtraimgde  
1hhkpggeefeysnmnydl1  
g1iinqvntkqsytyitdhw1kplqmkh1tkqtnykskhdaigye1qgstpvvskpefn1wdtpsaymmtsted1ehwi  
kfq1nppdky1slvqqshk  
nlstige1panayasgwftnndeh1vfhs1g1dnfss1f1lnpkqnyg1v1an1nseyvpk1veh1ntqivnhkryst  
vasi1nqyk1dqfn1vtv1m  
ttl1l1lafi1sayrawqmrhgq1l1rrskriav1sw1t1cl1ciaialilyalpy1l1lgsn1nwsf1vtw1l1pieik1lalitt  
lialfst1liv1l1flhtki  
tk1  
>sp|Q6G6P8|BIOW\_STAAS  
mysikmrssnqdvhisgaeticfdkieqtvqrfynkgffhengqpdf1nikiqkimepiqqikalqiieddkanlqhl1t  
qecgvtegalnqgmtyikn  
etvytgai1lsaisgkrlsdfgqrgi1rathfsfedinnkgd1nervtdal1ascinahpyvkge1cvsd1lyttgyfa  
saki1gyhr1fdikpvntry  
ggri1fvddrid1nhyis1f1lestpkqvvyerv  
>sp|Q6G6Q1|HLGC\_STAAS  
mlknkilatt1svs1laplan1lenakaandteeigkgsdieiikrtedktsnkwgvtqniqdfvdkkynkdalilk  
mqgf1ssrttyynkkt1n  
vkamrwpfqyn1g1k1tndkyvs1iny1lpknkiestnvsqt1gyn1gnfnqsaps1ggngsfnyksisytqqnyvseveq  
qnsksv1wgvkansfates  
gqksafds1fvgykphskdprdyfvpdse1pp1lvqsgfnpsfiatvshekgssdtsefeitygrnm1dvthaikrsthgy  
nsy1dghrvhna1fvnryt  
vkyevnwkt1heikvkgqn  
>sp|Q6G6Q3|SBI\_STAAS  
mknkyisk1l1vgaat1tlatmi1ngeakasentqqtstkhq1tqnyvtdqqkafyqv1hlkgiteeqrnqyikt1rehp  
eraqevfses1kdskn1pdr  
rvaqna1fynv1kndn1teqeknyiaqi1kenpdrsqv1vsvqsskakerqni1enadkaikdfqdnkaphdksaayea  
nsk1pkd1rdknnrfvekv  
siekaivrhder1vksanda1sk1nvkdsienr1laqrevnkapmdvkeh1qkq1dalvaqkdaekkvapkvapqi1qspq  
iekpkaespkvevpqi1qsp  
kvevpqsk1l1gyyqsk1kdsfn1ygyky1tdtyksykekydtakyy1ntykykgaikav1t1l1gdgsksyi1qplkvddkn  
gylaksyaqvrnyvtesin  
tgkvlyt1fyq1npt1vktaikaqetassikntitg1fnsfwk  
>sp|Q6G6T3|NART\_STAAS  
myktkggfq1t1qt1s1lvvgfmaws1iap1mpfikqdvntegqisi1laipvilgsv1rvpfgyl1tnivgakwvfftsf  
iv1l1fpi1ff1sqagtpgm1  
masgff1lgvggaisv1gvtsvpkyfpk1ekvg1angi1ygmgnigtavss1flappiagi1gwq1t1vrsy1liialfalimfi  
fgdtqerki1kvpl1maqmkt  
l1sknykly1sywyf1tfga1fva1fgi1f1pny1lvnhfgi1dkvdagi1rsgvfialat1f1rpiggilgd1kfnavkv1midfvv  
mi1gailg1sdhialftv  
gc1t1s1icag1ing1l1fk1lvpsy1f1neagsangivsmmg1lggffpp1lvityvan1tgssh1af1flavfgialftmrh  
lyqke1ygs1kng

Tsompanidou\_et\_al\_Supplemental\_FASTA\_File

>sp|Q6G6T5|SARZ\_STAAS  
myvensylskqlcflfyvsskeiikkytnylkeydlytytgyivlmaiendeklnikklgervfldsgtltpllkklekdd  
yvrvtreekdernlqislt  
eggkaiksp|aeisvkvfnfnisereasdiinnlrnfsvsknfdysdkk  
>sp|Q6G6U7|FENR\_STAAS  
mkdvtiiggppsglyasfyaglrdmsvrldvqselggkmriypekiiwdiggiapkpcheilkdtikqglyfkpevhln  
ervvdirkkaerhfevete  
ageiytskaviiagagiinpkqldvkgveryqltnlhyvvsyrrfkdkdvlisgggntaldwahdiakiaksvtvyr  
kedvsgheamktlvtlInv  
klcpktriky|vgnddethisevlehvesgdthtvkfddviishgfdrcntllsetssklmhdcdcrvkgfgntttsip  
giyacgdivyhdakshlia  
safsdganaanlaktiypdanaegyvsshhevfkeantivnkhly  
>sp|Q6G6V2|Y2259\_STAAS  
mkr|vtg|l|a|s|l|f|a|c|g|d|s|d|q|k|d|g|n|e|k|d|d|k|a|k|e|q|d|k|k|t|n|d|s|s|k|d|k|d|n|k|d|d|s|k|d|v|n|k|d|n|s|a|n|d|n|q|q|s|n|s|  
natnndqnqtnnnnqannq  
kssyvapyygqnaapvarqiyfngnktqalqqlpnfqtalnaanneankfgsnnkvyndysieehngnykyvvsfkdpn  
angkysivtvdytgqamvt  
dpnyqq  
>sp|Q6G6V5|MQ01\_STAAS  
mttghsktdviliggimsatlgtllkel|speknikvfe|klaqgeessvwnnagtg|hsalcelnytkegkdg|tvd|c|s|k|  
aikineqyqiskqfwaylv  
ktgqldnpdrfiqavphmsfvigednvafiksrvatllkksvlfekmkl|sqdeemkswvp|miegrksdepialtydetg  
tdvnfgaltaklfenleqr  
gygiqyqnvl|dikkqksgaw|lvkvk|letnetttyesdfvfigaggas|pllqktgikqskhiggfpvsg|flrctnqe  
vidrhakvygkaavgapp  
msvph|dtrfvdgkrs|l|fgpfagf|spk|f|ktgshmd|liksvkpnnivtm|sagikem|stky|lvsq|lms|ndermdd|l|r|  
vffpnaknedwevitagqr  
vqvikdtedskgn|qfgtevit|sddgt|laa|l|gaspgastavdimfdv|lrcyrdefkgwepkikemvpsfgyr|tdhed  
lyhkiineevtkylqvk  
>sp|Q6G6V8|HSSS\_STAAS  
mfktlyariaiysitvilfsal|sfv|tnvyhyhnlkasndakimktl|kearqyeqsakp|thiqy|fkh|lqgmnyqimtv  
dqghktfygepfredtl|s|  
qna|nnv|lnnkdyhgi|kdkpfa|lvtgffdnvtdntvgin|fktkdgsi|avfmrpdigetfsefrtflav|llm|lll|f|is|is|  
lviastysii|rpvkl|kla|  
ter|l|dgdfetpik|qtrkdeigt|lyhf|nkmres|lgvqd|mrqhf|vqnv|sheikt|plthi|hh|l|sel|q|qts|dnt|lrq|yi|  
ndiytittq|sgl|tte|lll|  
lse|l|nhqh|l|l|fdd|kiqvd|q|likdi|rheqfaadeks|i|ilad|lesin|flgnqr|llhqa|sn|llina|ikytdv|ggaidia|  
lqshhnniift|sndgspi|  
spqaear|ferfykvs|khdnsng|lg|l|aitks|i|el|h|hg|ti|qft|qsneyv|ttftit|lpnns|l|  
>sp|Q6G6W4|TCAA\_STAAS  
mkscpkcgqaqddvqictqcghkfdsrqalyrkstdediqttnikmrkmpwaigffililililffllrnfnspeaqt  
kilvnaienndkqkvatl|l|  
stkdnkvdseeakvyinyikdevglkqfvsd|l|kntvhk|lnksktsvasyiqtrsgqn|lrvskngtryiffdnmsftapt  
kqpi|v|k|p|k|e|k|t|k|y|e|f|k|s|g|g|  
kkktviaeankvtpignfipgtyripamkstengdfagylkfdfrqnssetvdvtedfeeanitvtlkgdtklndsskkv  
tindremafsssktygpyp  
qnkdit|isasg|akdk|tft|t|q|t|k|t|k|a|s|d|l|kynteit|l|n|f|d|s|e|d|e|d|y|v|e|k|e|k|e|e|n|s|l|n|k|l|e|f|f|a|g|y|s|l|a|n|n|a|a|f|n|q|  
sdfdfvssyikkgssfydd  
vkkrvskgs|lmm|isspqi|daekhgd|kitatvr|l|n|eng|k|q|v|d|k|e|y|e|l|e|q|g|s|q|d|r|l|q|l|k|t|s|e|k|  
>sp|Q6G6Y7|HUTG\_STAAS  
mykqgepn|wtgr|l|dset|p|k|k|fr|hf|qtvt|fed|sk|lek|ssmp|sgv|gil|gyav|dkgvaln|kgrigakeg|pdaikqafag|l|  
pd|n|q|c|e|t|l|v|d|y|g|n|v|y|h|d|h|  
eel|d|t|q|k|e|f|a|l|a|a|k|s|i|a|n|hr|q|t|f|l|l|g|g|h|d|i|a|y|a|y|l|a|t|r|k|v|y|p|t|q|s|i|g|v|i|n|i|d|h|f|d|t|r|a|e|q|e|s|t|s|g|t|s|f|r|q|i|l|e|e|d|  
dntdy|l|v|l|g|i|a|q|g|g|n|t|q|s|l|  
fdyakekkidyvfadel|lnhvsppikdmierfvhehdv|imfticm|dvids|afap|gvsapav|l|glyphtv|le|lakriipsd  
kvssvsiaemnptydadnr  
tak|l|van|l|v|h|h|f|k|  
>sp|Q6G723|SSAA2\_STAAS  
mkk|a|t|a|t|i|a|t|a|g|f|a|t|i|a|iasgnqahaseq|dnygynpndpts|sysy|tyt|idaqgn|yhtwkgnwhpsql|nqdn|gyys|yyyy|  
ngynynynynngysynn  
ysrynysnnnsynynnsyntnsyrtggl|gasyst|ssnnvqvt|tmap|ssngrs|issgyt|sgrnlyt|sgqcty|yvfd|  
rvggk|g|s|t|w|g|n|a|s|n|w|a|n|a|  
aaragy|tvnnt|pkagaim|q|t|t|q|g|ay|ghvay|vesvnsngsvrvsemnygygp|gvvtsrt|isasqaagynfih  
>sp|Q6G727|SARR\_STAAS  
mskind|nd|l|vnat|fqv|k|k|f|rd|t|k|k|k|f|n|nyeei|y|l|nh|l|rses|ne|isskei|akcsef|kpyyl|tka|l|q|k|l|k|d|l|k|l|s|k|  
krs|l|q|d|e|r|t|v|v|y|v|t|d|t|q|k|  
an|q|k|l|s|e|l|e|y|k|n|  
>sp|Q6G728|URED\_STAAS



Tsompanidou\_et\_al\_Supplemental\_FASTA\_File

mdeqwtgqldlvtffdgnsrsvsrdiffekalkvirpvylnqstiptfyivnvvggylgdryrmvvnvednakvlttsq  
gatklyktpsnehvegyqtf  
nlkdnayleyvadpiayenakfyqhntfnlnssslfytdiltpgysktgeafkyqymhlineiyiedelvtynlln  
pnkqsineigyemehyshy  
sayfihedvnqklidsvyetissysntfcdrcvaisqlpthgfavrifayrtqiiekilgiiqsyiaenydrklldflrky  
>sp|Q6G742|FDHD\_STAAS  
mnkdvsllgqpiivryedgklfnttdqyvtefpltimvngeefatvicsptnleelvigflasegailkrdelksvliddsk  
gfahvelnkdldgrfgyst  
krmiaccgksrefyfqndaaiaktsmskitltpmqiinmmtrlsashiyqetgghnaaisdglttffvhrqdigrhna  
ldklygfcigrhitvrk  
lifsgrisseilikaakigvgvilsksapttlavtlandlnitavgfirnggfniyshperiidseq  
>sp|Q6G747|MOAB\_STAAS  
mgehqnklrntvkaavltvsdtrdfdtkggqcvrqlqaddvevsdahytivkdekvaittqvkkwleedidviittg  
gtgiagrvtieavkpllt  
keiegfelfrylsyvedvgrallsravagtvnklifsigstgavklaaleklikpelnhliheltk  
>sp|Q6G757|Y2155\_STAAS  
mlsqeffnfsfityrpylklapilekhniiyggwllrldiakhqpttlieshraiekptarktlkaliendlitven  
sledkrqkfltltpkghe  
yeivcldvqklqqavaktinisqdmqetinvmqihkilkethnd  
>sp|Q6G770|RS10\_STAAS  
makqkiririrkaydhrvidqsaekivetakrsgadvsgpiplpteksvytiiravhkykdsreqfeqrthkrlidivnpt  
pktvdalmglnlpsgvdie  
ikl  
>sp|Q6G781|RL14\_STAAS  
miqqetrllkvadnsgarevltikvlggsggrktanigdvivctvknatpggvvkkgdvkvavivrtksgrvrrndgsyikfd  
enacviiirdkqprgrtrif  
gpvarelregnfmkivslapevl  
>sp|Q6G783|RL5\_STAAS  
mnrllkekfntevtenlmkkfnysvmevpkidkivnmvgvdavqnskvldnaveelelitgqkplvtkakksiatfrlr  
egmpigakvtlrgermeyf  
ldklisvslprvrdffqgvskkafdgrgnytlgvkeqlifpeidydkvskvrgmdivivttantdearellanfmpfrk  
>sp|Q6G7B8|LACR\_STAAS  
mnkherldeiaklvnkkgtirtneiveglvnsdmtvrrdlielenkgiltkihgarsnstfykeishkekhrqiaek  
rfiakkaasliedgdtlff  
gpgttvelaeevnhhtlitiitncilpykillekqtahfrvyliggemrhiteafvgemanamleklrfskmffssnavn  
kgavmtstldeaytqqlal  
snsiekyllidhtkvgkedftsfcqlneltavvmdyedeekvetiktyievvd  
>sp|Q6G7C2|LACD\_STAAS  
mksnqkiasieqlsnnegiisafldqrgalkrmmakhqteptvaieqlkvlvaeeltqyassilldpeyglpasda  
rnkdcglllayektgydn  
akgrlpdclevsakarlleqganavkfllyydvddaeiniqkkayierigsecvaedipfflevltyddnipdngsvef  
akvkprkvneamklfsepr  
fnvdvlkvevpnmkyvegfaegevvytkeeaahfknqdaathlpyiylsagvsaelqetlkfaheagakfngvlcgr  
atwsgavqvyieggedaar  
ewlrrtgfkniddlnkvldkdtatswkqrk  
>sp|Q6G7C8|ZDH1\_STAAS  
mkmigfekpflkeegnlfkvyeqrkptpenddilvknsisvnpvdtkqrqmevtqaprvgfdaigtveaigpdtlfs  
pgdvvyfagspnrqgsnat  
yqlvseavakaphnisaneavslptgitayetffdtfkishnpaenegksvliingaggvgsiatqiakrygltvitt  
asrqettewcekmgadivl  
nhkedlvrqfkekeiplvdyifctyntdlyyntmielikplghittivafnedqdlinalklsitfthefmfarpihrt  
dmikqheyleditkniesg  
hyqptttqvfeqlspenlyqahqllekqsmigklvini  
>sp|Q6G7E6|MDEP\_STAAS  
mivnylkhkfyllttmvvlfifvlsgai fltflgfglyglriliyfrlgdftynrsmynllyygsyifgyfiifav  
ehlmdyfrkmlpenayfrg  
atfhllisyvattllyfyfiihlnvyinidfwvimviigflyvcklqfypesklnnrk  
>sp|Q6G7F3|MTLD\_STAAS  
mkavhfgagnigrfgiyiladnnkvtfadvneeinalahdhqydviladeskttrvnnvdainsmqpsealkqail  
eadiittavgnilpiak  
sfapflkekthvniacenaimatdtlkkavlditgplgnnihfansavdrivplqknenildvmvepfyewvvekdaw  
ygpehnikyvddltpyie  
rklltvntghaylayagkfagkatvldavkdssieaglrsvlaetsqyitnefdfteaqagyvekiidrfnnsylsdev  
trvgrgtlrgkigpkdriik  
pltylnkdlergtlntaalllkyddtadqetveknyikehglkaflseyakvddgladeieaynsls  
>sp|Q6G7F6|PTMCB\_STAAS  
msqteekkgigrvraqfgsfllssmimpnigafiaawgfiaaifidngwlpnkdlatlagpmityliplliafsggrliydl  
rggiaaatatmgvivalpd

Tsompanidou\_et\_al\_Supplemental\_FASTA\_File

tpmllgamimgplvgwlmkktdqliqprtpqgfemlfnnfsagilgfmintiagfki laplmkfimhilsvavealvhahl  
lpivsilepakivflnna  
inhgvftplgadqaakaggsilytiesnpgpglgillaymifgkgtakatsyagaihflggiheiyfpyvlmrpllfia  
vilggmtgvatyqatgfgf  
kspaspgsfivyclnaprgefhlmlvgvflaalvsfvvaalimkftrepkqdleataqmentkgkksvasklvssdkn  
vnteenasgnvsetssdd  
dpealldnyntedvdahnynninhvifacdagmgssamgasmrnkfkkgaginditvtntainqlpkdaqlvitqkkltd  
raikqtpnaihsvdnfln  
spryeellnnlkddqa  
>sp|Q6G7H4|PDP\_STAAS  
mrmidiiekkrdghtltteeinffidgyvkgdipdyqasslamaiyfqdmndderaaltmamvnsqdmidlsdikgvkvd  
khtggvgdtttlvlaplv  
aavdvpvakmsgrglghtgttdkleaidgfhveideatfvklvnenkvavvgqsgnltpadkklyalrdvtgtvnsipl  
iassimskkiaagadaivl  
dvktgsgafmktledaealahamvrignnvgrntmaissdmnqplgraignalelqeaidthkgqgpkdltelvtltsq  
mvvlankaetleearalli  
eainsgaalekftfkknqgdetvidhperlpqaqyqieykaksgyvtevsndigvasmmलगagrltkeddidlavg  
ivlnkkgdkveegesllt  
ihsnrqdvddvkkldssitiadhvsptlihkiiie  
>sp|Q6G7I0|COAW\_STAAS  
mkvgidaggtlikivqeqdnrtfkteitknidqvvelnqqqiekcltggngviaeninipaqifvefdaasqglgi  
llkeqghdladyifanvg  
gtslhyfdgqsrrvvgigtggmiqglgyllsqitdyqkldmaqhgdrintidlkvrhiykdteppipgdltaanfghv  
lhhldadftpsnklaavig  
vvevvtmaitvarefktenivyigssfhnaallrkvvedytvrgckpyyvengafsgaigalylek  
>sp|Q6G7J6|Y2017\_STAAS  
mkdltmlldelkdmfknkgdicligcstsevigekigtvgsmevaetifnaldivsketgvtfafqgcehinraitiek  
sqynpltmeevsvpdvha  
ggslatyafqhmkdpiivvehitvpcgidigqtligmhikhvcvprtsvkqvgqaivtiatsrpkkiggerakyq  
>sp|Q6G7K4|ATPD\_STAAS  
mvkvankyakalfdvsltdnnletineeltvineavkdkieqlkmvdsnptqtaeqrrelingvftdinpyikmmyvla  
dnrhislidvfkafqsl  
nghynqdfatiestyelsqeeldkivklvtqqtklskviwdtkinpdliggfrvkvgttvldgsvrndlvqlqrkfrvn  
>sp|Q6G7L6|TENA\_STAAS  
mefsklyqaakpiindiyyedfiqkmlsgdigadalrhylkadaaylkeftnyallipkmnsmdvkflveqiefmve  
gevlahdilaqivgesyee  
iiktkvwppsgdhyikhmyfqahsrenaiytiaamapcpyiaelakrsqsdhklnrekdtakwfdsystemddiinvfe  
almnklaesmsdkeleqv  
qvflesciherrffnmamtleqwefggkvnd  
>sp|Q6G7L8|THIM\_STAAS  
mnylnkiriennplticytndvvknftangllsigaspamseapeeaeefykvaqgllinigtlaeneqdiiaiaqtane  
aglpivfdpvavgastyrk  
qfcklllksaksvikgnaseilaliddatmkgtdsdanldavtiakkayatyktaivitgkedvivqdnkaivlang  
pllarvtgagcllgviag  
flfretedpialeavsvfniaaevaenencggpgtfspllltdlyhlnettyqqririqevkyv  
>sp|Q6G7L9|THIE\_STAAS  
mfngsylvvyfictsdvpshrtihevleaalkagitlfqfrekgesalkgndklvlakelqhlchqydvpfivnddvs  
akeinadgihvgddakvl  
eiaqyftdkiiiglsisdleyaksdlthvdyigvgpiyptpskhdahivpgpematfkempqlpivaiggintnnap  
iveangisvisaiskse  
nientvnrfdkdfn  
>sp|Q6G7M7|DDL\_STAAS  
mtkenicivfgkksaehevsiltaqnlinaidkkyhvdiyitndgdwrkqnnitaeiistdelhengealeisqllk  
esssgqpydavfpilhgn  
gedgtiqglfevldvpyvngvlsaassmdklvmkqlfehrglpqlyisflrseyekyehnilklvndklnypvfvkpa  
nlgssvgiskcneaelke  
gikeafqdrklvieggvnareievavlgndypeatwpgevkdvafydykskykdgvqlqipadldedvqltrnmal  
eafkatdcsglvradffvt  
ednqiynetnampgftafsmypklwenmglsypelitklielakerhqdkqknkykid  
>sp|Q6G7N3|ATKB\_STAAS  
mhvnkyfnqtmviealkmsfyklnpkqliknpmfvvevgmiltlilicfpdifgtsylsrgylitifiillitilfan  
fseafaegrqkaqadslrq  
aqsnltarlieengayrivnatekagqnrvengetipadgvvinglatvdesaitgesapvikesggdfdgviggtlv  
tsdwleirvseagtsfld  
kmialvegaernktpneialftlltltiiflvvvtlypiasyhlhllpiamlialtvclipptiggllsaigiagmdr  
vtqfnvlaksgravevcgd  
vdvmitdktgtitygnrtaeflpvnqqllekliavaaymssiyyddtpegksivrakqmyinelpkdidgtyktftaetr  
msgiitneisvfkgapnsm

Tsompanidou\_et\_al\_Supplemental\_FASTA\_File

inlvkqqgniplnieslcmdvsskggtplivienmvlgviylkdvkdglverftelrkmgietvmctgdnaltaati  
akeagvdrfvaeckpedki  
kvikdeqakghivamtgdgndapalaqaniglamnsgtisakeaanlidldsnptk lievvkigkqllmtrgalttfsl  
andvakyfai l palmmsti  
pemtslnimhlsspsksaiisalifnaliiivalipiamkgvkvkgyisidrifinnmliyglgglivpflgiklidmivqff  
v  
>sp|Q6G7P0|MAZE\_STAAS  
mlsfsqnrshsleqskegysqmadlnlslaneafpieceacdcnetylssnstne  
>sp|Q6G7P8|LEUD\_STAAS  
maai kpit tykgki vpl fndnidtdqi ipkvhlkrisksfgpfa fde wrylpdgsdnpdfnpnkpykgasilitgdnf  
gcssrehaawal kdygfh  
i i i agsfsdi fymnctknamlpivleknarehlakyveievdlnqtvsspdkrfhfeidetwknklvngl ddi aitlqy  
esliekyeks l  
>sp|Q6G7P9|LEUC\_STAAS  
mgqt l fdkvwnrhvlygkl gepqllyid l hlihevtspqafeglrlqnrlrrpdl t fat l dhvptidifnikdeiank  
qit t l qknaidfgvhi fdm  
gsdeggivhmvgpetgltpqgktivcgdshtathgafgaiafgigtsevehvfatqtlwqtkpknlkidingt l p t g v y a  
kdi i l h l i k t y g v d f g t y  
a l e f t g e t i k n l s m d g r m t i c n m a i e g g a k y g i i q p d d i t f e y v k g r p f a d n f v k s v d k w r e l y s d d d a i f d r v i e l d v s  
t l e p q v t w g t n p e m g v n f s  
e p f p e i s d i n d q r a y d y m g l e p g q k a e d i l g y v f l g s c t n a r l s d l i e a s h i v k g n k v h p n i t a i v v p g s r t v k k e a e k  
l g l d t i f k n a g f e w r e p g c  
s m c l g m n p d q v p e g v h c a s t s n r n f e g r q g k a r t h l v s p a m a a a a a i h g k f v d r k v v v  
>sp|Q6G7Q2|ILVC\_STAAS  
mttvyydqdvktdalqgkkiavvygysqghahaqnlkdngydvvigirpgrsfdkakedgfdvpvaeavkqadvimvl  
pdei qgdvykneiepnlek  
hna lafahgfni hfgvi qppadvdvflvapkgpghlvrrt fvegsavpslfgiqqdasgqarnialsyakgigatragvi  
ettfkeetetdlfgeqavl  
cggvskliqsgfetlveagyqpe layfevlhemklivdlmyeggtenvrysisntaefgdvysgprvitpdvkenmkavl  
tdiqngnfsnrriednkn  
fkefyklreeqhghqiekvgre l remmpfiksksie k  
>sp|Q6G7Q8|GCP\_STAAS  
mtkdililavetscdetsvsfikngrdil sntvlsqieshkrfggvpevasrhvvegitttinealvdadvsiedidai  
avteggpligalligvnaa  
ka lafaydkplipvhhiaghiyanhieep l t f p l i a l i v s g g h t e l v y m k d h l s f e v i g e t r d d a v g e a y d k v a r t i g l n  
y p g g p q v d r l a e g e d t y s  
f p r v w l d k d s y d f s f s g l k s a v i n q l h n q r q k n i p i e a n v a t s f q n s v v e v l t f k a i q a c k e y g v q r l i v a g g v a s n k g  
l r q s l a d q c k v n d i q l t i p  
s p k l c t d n a a m i g v a g h y l y q q g r f a d l a l n g h s n i d l e e y s a e  
>sp|Q6G7S1|AGRB\_STAAS  
mnyfdnkidqfatylqkrnldhiqflqvr l g m q v l a k n i g k l i v m y t i a y i l n i f i f t l i t n i s f y l i r r y a h g a h a p s  
s f w c y i e s i t l f i v l p l l v  
l h f h i n e t l m m f l a l i s v g v v i k y a p a a t k k k p i p a r l v k q k r y f s i i i s t i l f i i t l f v k e p y t q f i q l g i i i q a i t l l  
p i y y s k e d  
>sp|Q6G7S7|CH10\_STAAS  
mlkpignrviekkkeqeqttsksgiv l t d s a k e s n e g v i v a v g t g r l l n d g t r v t p e v k e g d r v v f q q y a g t e v k r d n e t  
y l v l n e e d i l a v i e  
>sp|Q6G7S8|CH60\_STAAS  
mvkqlkfsedarqam l r g v d q l a n a v k v t i g p k g r n v l d k e f t a p l i t n d g v t i a k e i e l e d p y e n m g a k l v q e v a n k t  
n e i a g d g t t t a t v l a q a m i  
q e g l k n v t s g a n p v g l r q g i d k a v k v a e a l h e n s q k v e n k n e i a q v g a i s a a d e e i g r y i s e a m e k v g n d g v i t i e e s n  
g l n t e l e v v e g m q f d r g y q  
s p y m v t d s d k m v a e l e r p y i l v t d k k i s s f q d i l p l l e q v v s n r p i l i v a d e v e g d a l t n i v l n r m r g t f t a v a v k a p g  
f g d r r k a m l e d l a i l t g a q  
v i t d d l g l d l k d a s i d m l g t a s k v e v t k d n t t v d g d g d e n s i d a r v s q l k s q i e e t e s d f d r e k l q e r l a k l a g g v a v i  
k v g a a s e t e l k e r k l r i e d  
a l n s t r a a v e e g i v a g g g t a l n v v y q k v s e i e a e g d i e t g v n i v l k a l t a p v r q i a e n a g l e g s v i v e r l k n a e p g v g f n  
a a t n e w v n m l e a g i v d p t k  
v t r s a l q h a a s v a a m f l t t e a v v a s i p e k n n d q p n m g g m p g m m  
>sp|Q6G7Z1|SAK\_STAAS  
mlkrs l l f l t v l l l f s f s i t n e v s a s s f d k g y k k g d d a s y f e p t g p y l m v n v t g v d g k g n e l l s p h y v e f p i k p g t  
t l t k e i e y y v e w a l d a t a  
y k e f r v v e l d p s a k i e v t y y d k n k k k e e t k s f p i t e k g f v v p d l s e h i k n p g f n l i t k v v i e k k  
>sp|Q6G811|Y1845\_STAAS  
mtngyigsyt k n g k g i y r f e l n e n q s r i d l l e t g f e l e a s t y l l r n n e v l y g i n k e g e q c g v a s l k i d d n g e l h l l n k c  
l s s k a g t g c y s i s e d k r y  
l f e a v y g a g i i r m y e l n t h t g e i i r l i q e l a h d f p t g t h e r q d h p a h y i n q t p d g k y a v t d l g a d r i v t y k f d d n g f e  
f y k e s l f k d s d g t r h i e f h

Tsompanidou\_et\_al\_Supplemental\_FASTA\_File

dngkfayvvhelsntvsvaeyndgkfeelerhltipenfdgdtklaavrshdqqlfvsnrghdsiaifkvlndngqhle  
lvtitesggqfprdfnias  
sddllvcaheggdsvvtvfernkctgkitlcdntrvasegvcvif  
>sp|Q6G824|SSPP\_STAAS  
mkrnfpkliaslilsvtpianaesnsnikakdkkhvqvnvedksiptevrnlaqkdylsyvtsldkiynkekasytl  
gepfkiyfnkksdgnyyf  
pvlntegnidiyvtispkvtkysssksytinvspflskvlngykdqqitiltnskgyyvvtqnhkaklvltktrledkk  
lkktesiptgnvtqlkqk  
asvtmptsqfksnnytyneqyvnklenfki retqgnngwcagytsaallnatyntnkyhaeavmrflhpnlqqgrfqftg  
ltpremiyfgqtqgrspql  
lnrmttynevndltknnkgiavlgsvresrngmhaghamaavvgnakldngqeviiwnpwndngfmtqdaknnpivpsngd  
hyqwysygy  
>sp|Q6G836|Y1819\_STAAS  
mqaiakndiktgtvvdlt heghgvkidrfpifipqalineqieykiikvknfaigkllnintrsenrvappciyyerc  
ggcqlqhl syeaql emkke  
qvinl fqrkahfdnskindvtvgmt dpwyrnksqipvgkneqnevimgfyrqrshdiidmescliqdsqhqevmnevksi  
lkdlnvsiyqeqlkkglmr  
hlvvrtyhtdemmiifvtngkkwpqnavvekil dafpnvtsikqnindshsnvimgrqsitlygkdtiidqldstfk  
isdqsfyqinseqtekyln  
kaieyaqltgnvldtycigigtiglymaphakhvygvevpsaiedaqqnatinqcnnttfvcgkaeevilqwaqgik  
pdvvmvdprrkgcdefiq  
tlltlepkriyiscnpatqqrda11laekyqleevtpvdmfqtthvetvalfnlk  
>sp|Q6G859|Y1797\_STAAS  
mtkkvai ilanefedi eysspealenagfntvvgdtansevvgkhgekvtvdvgiaekpedydallipggfspdhlr  
gdegrgygtfakfyftkndv  
ptfai chgpqilidtdldkgrltavlnvrkdlnagahvdesvvdnnivtsrvpddlddfnreivkqlq  
>sp|Q6G861|RECX\_STAAS  
mpkiki evqkknkerfnlfldeqfemgididtlvkfnlkkggqleadamai qkydhyriglnkaiqylsykkktekev  
iqylqkeeiseqaisevie  
ycyrekli dhqdaeslknmtmi rttkdgpkikyqklyqlgiepnii eiftelyreqqelddi iqiaekisktkkqpqnkv  
kekvmqsl iqkgfemetih  
avlnemdf tqdeavlddl lqrdlekiynknrkytqqklisktieglmrkgykydkikakleesgiadgteie  
>sp|Q6G867|Y1789\_STAAS  
mvresipkegenikiqsykhdkihrvwsettilkgtdhvviggn dhtlvtesdgrtwitrepai vyfhseywfnvicmf  
redgiyyycnlsspvcde  
ealkyidyldi kvypngkyhl dedeyeqhmqmnyphdidi ilrrnvdi lqqwieqkkgpfpdfikvwnerykkirq  
y  
>sp|Q6G884|FUMC\_STAAS  
msvri ehdtfgeievpadkywgaqterskrnfpvgkermpievvygfaqlkraaalanfdlglkseakkdaivyacdqi l  
sgel dehfp lvvwqtgsgt  
qsnmrvnevvsyvanmylkdhqidesihpnddvnsqssndt fptamhvalyqevetklepalkllrntlkekedkfdsi  
ikigrthlqdatpiklgge  
isgwrymlrceiml seskhillnlaiggtavgtginahpefgdkvahyisentgypfvssenkfhal tahdevvqlhgt  
lkalagd lmkilandvrwla  
sgpraglaeisipenepgssimpgvnptqceml tmvavqvmgndtvvgfassqgnfelnykpvimhntlqsiylladg  
metfnncavgiepieeni  
dnylnqslmlvta lnp higyekaaqia kkahkegl tlkesaiqtgyvteeqfeawikpedmvdph  
>sp|Q6G889|Y1767\_STAAS  
mna l f i i f m i v g a i g g i t n v i a i r m l f h p f k p y y i f k f r v f t p g l i p k r r e e i a t k i g q v i e h l l t e t l i n e k l k  
seqsqqaiesmiqqqlkkl  
tkdqslsqit sqididleqlqtngnyiesqlnnyytkhqntiasllpnqlvtfldqhvdnatdlldrarnylssa  
kgtqdin dml dtffnekkg  
lfgmlqmfmtkesiadriqqelirltshpkartivtslitneyqtfkdkplnell dasqfneiaenlsvyvtt yaskqan  
kpvtlmpqfvdyleggls  
sklanliieklsihlstimkkvd lrglieeqintfdldyiekliieiankelklims l g f i l g g i i g f f q g l v a i f v  
>sp|Q6G8C1|SPLA\_STAAS  
mnenvmvgltaltiltslgfaenisqphsiakaeknvkeitdatkepynsvvafvvggtgvvvgkntivtnkhiaksnd  
ifknrvsahhsskgkgggn  
ydvkdiveypgkedlavhvhetsteglnfnknvsytkfadgakvkdrisv igypkgaqtkykmfestgtin hisgtfme  
fdayaqpgnsgspvlnskh  
eligilyagsgdeseknfgvyftpqlkefiqnniek  
>sp|Q6G8C2|SPLB\_STAAS  
mnknvviks laaltiltsvtgigitlveevqqtakaennv tkvkdtni fpytgvvafksatgfvvgkntiltnkhvskny  
kvgdritahpnsdkngggi  
ysikki inypgkedsvigveeraiergpkgfnfndnvt pfkyaagakagerikv igyphpyknkyvlyestgpvmsveg  
ssivysahtesgnsgspvl  
nsnne lvgihfasdvknndnrnaygyvftpeikkfiaenidk  
>sp|Q6G8C3|SPLC\_STAAS

Tsompanidou\_et\_al\_Supplemental\_FASTA\_File

mnkniviksmaalailsatginaavveetqianaeknvtqvkdtmfpyngvvsfkdatgfvigkntiitnkhvskdy  
kvgdritahpdgdkngggi  
ykiksisdypgdedisvmnieeqavergpkgnfnenvqalnfakdakvddkikvigyp1paqnsfkqfestgtikrikd  
nilnfdaiyiepgnsgspvl  
nsnnevigvvyggigkigseyngavyftpqikdfiqkhiq  
>sp|Q6G8D6|MENE\_STAAS  
mdfwlykqaqqnqhhiatdggesytyqnlyceasllakr1kayqqsrvglyidnsiqsiilihacwlanieiamintr1  
tpnemknqmrsvdq1ifc  
tlplelrgfqivslldiefagtditmgllndtmdiqydtsetvvpkespsnilntsfnllddiasimftsgttgpqkav  
pqtfrnhyasaigckeslg  
fdrdtnwlsvlpiyhisglsvllraviegtvrvdkfnaeqil1tiiknerithislvpqtlnwlmqqglhepynlqkil  
lggaklsatl1ietalqynl  
piynsfgmtetcsqfltatpemlharpdtvgmpsanvdvki knpnkeghgelmikganvmnglyptdl1tgtfengyfnt  
gdiaeidhegyvmiydrk  
dliisggeniyqyietvakqfpgisavcvghpddtwgqvpklyfvsesdiskaqliaylsqhlakykvpkhfekvdt1  
pytstgklqrnklyrg  
>sp|Q6G8E2|PCKA\_STAAS  
msvdytetttkidkl1kkptshfq1sttqlynkil1dnegv1telgavnastgkytgrspkdkffvsepsyrnidwgei  
nqpidetflkllyhkvldy  
ldkkdel1yvkgyagsdkdtmlkl1tvine1awhnl1faknmfirpeskeeatkikpnftivsaphfkadpevdgtksetfv  
iisfkhkviliggteyage  
mkkgifsvmnyl1pmqdimsmhcsanvgekgdvalffglsgtgktt1sadphrkl1gddehgwnkngvfni eggcyakai  
nlskekeqifdaikygai  
lentvvaedgsvdfednryentraaypinhidnivvpskaahpntiifltadafgvippisklnkdqamyhflsgftsk  
lagtergvtepepsfstcf  
gapffplhptvyadl1ge1idlhdvdvylvntgwtggkygvrris1hytrqmvnqaisgklknaeytkdstfglsipvk  
iedvpktl1npi1awsdke  
kykaqaedliqrfeknfekfgekvehiaekgsfnk  
>sp|Q6G8F3|SIGS\_STAAS  
mkfndvynkhhki1hh1lkkynisyndeyyq1llikmwqlsqiykpskqslssflftr1nfyli1dlfrqqnq1kdvil  
cennspt1teqptyfnehd  
lr1qdi1fk1lnqrer1wlklylegykqfeiaeims1slstiklikmsvkrkcqhnfn  
>sp|Q6G8F6|ARSB\_STAAS  
mttlatl1flvt1l1fv1wqpkgl1digitaltgafiavitgvvsfsdvfevtg1vwnat1tfvsvil1sil1ldkvgl1fews  
aihm1haskgnl1kmfayi  
illgai1vaaffandgaal1ltpiv1lamvknigfskraifpfi1asgf1adtt1plivsn1vni1sadyf1higf1iryf1sr  
mi1pn1fs1l1as1iv1lwly  
frkai1pkt1fddn1khp1kda1nd1kl1fki1swiv1vill1fgy1l1seft1kip1vs1ft1gia1fi1fl1m1arks1nal1nik1qv1kg  
apwni1v1fs1igmy1iv1vfg1  
rnagi1l1il1aki1ley1isnygl1fsti1lmg1fis1af1ssim1nmpt1v1ida1ia1ig1qs1nv1hgm1l1kegl1ian1vig1sd1lgpk1t  
pi1gs1at1l1w1hv1l1tq1kdv  
k1swg1ty1fkt1g1i1it1pv1l1fit1l1ig1yl1t1li1if  
>sp|Q6G8G1|RIBBA\_STAAS  
mqfdn1dsal1mal1ngeti1ivv1dden1reneg1dvav1tew1mdnt1in1fmake1arg1licap1vsk1dia1qr1dl1vqm1vdd1ns1di  
fgt1qft1vs1id1hvt1tt1gis  
ayert1l1tak1lid1ps1seak1dfnr1pgh1f1p1vaq1dkg1v1arng1tea1av1lak1ltg1ak1pag1vice1imnd1dgt1mak1gq1dl1qk  
f1kek1h1q1kmit1idd1li1eyr  
kk1le1pe1ief1kak1v1kmp1td1fgt1f1dmy1g1fkat1yt1dee1iv1l1tkg1air1qhen1vr1hsa1l1tg1di1fhs1qrc1dc1ga1ql1ess1mky1i  
nehg1mi1iy1l1pqe1rg1ig1l  
l1nk1l1raye1lie1qgy1dt1vtan1al1g1fded1l1rdy1hia1aq1ilky1fn1ehin1l1sn1psk1feg1lkqy1gid1aer1iev1iv1pet1vh  
nh1dym1et1k1k1kmgh1i  
>sp|Q6G8G9|SYL\_STAAS  
mny1nh1qi1ekkw1qdy1nden1kt1fkt1nd1lg1qkk1fy1aldm1fpyp1sg1ag1lvgh1peg1yat1d1is1ry1kr1mqg1yn1v1hpm1gw1da  
fg1l1pae1qya1ldt1gnd1pref  
tkk1ni1qt1fkr1qike1l1gfsy1dwd1rev1nt1d1peyy1kwt1qwi1fi1q1lyn1kgl1ay1vdev1avn1wcp1al1gt1v1snee1vid1gv1ser1gg  
hp1vyr1k1pm1qvw1l1ki1teya  
dq1l1lad1ld1d1wpes1l1kdm1qr1nwi1gr1seg1ak1vs1fdv1dnt1ea1eg1k1vev1ft1tr1pdt1iy1gas1fl1v1spe1hal1vns1itt1dey1ke  
kv1kay1qte1ask1ks1dl1ert1d  
l1ak1dks1gv1ft1gay1ain1l1sgek1v1qi1wi1ady1v1l1sty1gt1gaim1av1pah1ddr1dy1ef1akk1fd1pi1ie1vie1gg1nvee1aay1t1ge1gk  
hins1ge1ld1gl1ene1aait1ka  
iq1l1leq1kg1age1kk1vny1k1rdw1l1fs1rq1ry1w1ge1pip1vih1wed1gt1mt1tv1pee1l1p1l1l1pet1de1ik1ps1gt1ges1plan1ids1fv1nv  
vde1kt1gm1kgr1ret1nt1mp1qvw  
ag1sc1wyy1l1ry1id1pk1nen1ml1ad1pek1l1khw1lpvd1ly1igg1veh1avl1h1l1yar1fwh1kvl1ydl1g1iv1pt1kep1fq1kl1fn1qgm1l1geg  
nek1ms1ks1kg1nvin1pdd1iv1q  
sh1gad1t1rl1yem1fmg1pl1daa1iaw1se1kg1ldgs1rr1fl1dr1vwr1lmv1ned1gt1l1ssk1iv1tt1nks1ldk1vyn1qt1vkk1vted1fet1lg  
fnta1is1ql1mv1fin1ecy1kvd  
evy1kpy1ie1gfv1kml1api1ah1igee1l1wsk1l1ghe1sity1qp1wpty1dea1l1vd1de1iv1vq1vng1kl1rak1iki1ak1dts1keem1qe  
ia1l1snd1nv1kas1ieg1kd1imk

Tsompanidou\_et\_al\_Supplemental\_FASTA\_File

viavpqlvniavak  
>sp|Q6G8H7|DAAA\_STAAS  
mekiflmgfvspspeakvsyndrgyvfgdgiyeyirvyngklftvtehyerflrsaneigldlnysveelielesrklvdm  
nqietgviyiqatrgvaer  
nhsfptpevepaiyaytksydrpydhlgvngvtvedirwlrcdikslnllgnvlakeyavkynaveaiqhrgetvtteg  
sssnayaikdgvitythpin  
nyilngitriivikkaedynipfkeetftvdflnadevivsstsaevtpvikldgepvndgkvgpitrqlqegfekyie  
shsi  
>sp|Q6G8I8|Y1665\_STAAS  
mdwilpiagiiiaaifliicigivavlnsvkknldyvaktldgvegqvqgitrettdllhkvnrltediqgkvdrlnsvv  
davkgigdsvtlnssvdr  
vtnsithnisqnedkissvqwsnvameiadkwqnrhyrrgsanykannvatdanhsytsrvdk  
>sp|Q6G8J2|ACUC\_STAAS  
mqqhssktayvysdkllqyrfhdqhpfnqmrklkttelllnanllspeqivqpriatddelmlihkydyveaikhashgi  
isedeakkyglndeensqf  
khhmrhsativggaltladlimsgkvlnghlggglhhaqpggrasgfciyndiaitaqylakeynqrvliidtdahhgdg  
tqwsfyadnhvttsihet  
gkflfpgsghytergedigyghtvnpvlepytedasflecfltvpevvksfkpdiilsvngvdihyrdplthlnctlhs  
lyeipyfvykladsytngk  
vimfggggyniwrvpprawshvflslidqpiqsgylplewinkwkhyssellpkrwedrlndytyvprtkeiseknkla  
lhiaswyestrq  
>sp|Q6G8J5|FTHS\_STAAS  
mthlsdldianqstlqpikdiaasvgisedalepygghyakidinkitprenkgkvvlvtamsptpagegstvtvglad  
afhelknkvmvalrepalg  
ptfgikggatgggyaqvlpmedinlhfnqdfhaittannalsafidnihqgneidqrriewkrvlmdndralrhvvn  
glggptngvpredgfntv  
aseimailcslrsikldkdkisritigytrdrkpvtvadlkvqgalamilkdaikpnlvqsiegtpalvhggpfaniahg  
cnsilatetardladvvt  
eagfgsdlgakfmdikareagfdpaavvvvatiialkmhggvakdnlkeenveavkagivnlerrhvnnikkfgvepvva  
inafihtdaeveyvkswa  
kennvrialtevwegggkggvdlanevleviqpnsfkplyelelpleqkiekivteiyggskvtfsskaqkqlkqfken  
gwdnypvcmakttqysfsdd  
qtlgapsgfeiti releaktgagfivaltgaimtmgplpkpaaalnmdvtdgdhaiglf  
>sp|Q6G8J7|ISDH\_STAAS  
mnkhhpkllrsfysirksilgvasvivstflitsqhqaqaentntsdkisenqnnatttqppkdtntqpatqpanta  
ktypaadeslkdaikdpa  
enkehdiqpreqvnfqlldknnetqyyhffsikdpadvuytkkkaeveldintastwkkfevyennqklpvrllvsyspvp  
edhayirfpvsdgtqelki  
vsstqiddgeetnydytklvfakpiyndpslvksdtdavvtndqsssdasnqntntntsnqntstinnannppqattms  
qpaqpkssanadqassqa  
hetnsgntndktnessnqsdvnqqyppadeslqdaiknpaidkehtadnrpidfkmkndkgerqfyhyastvepatv  
iftktgpielglktastw  
kkfevyegdklpvelvsydsdkdyayirfpvsngtrevkivssieygenihedydtlmvfaqpitnnpddyvdeety  
lqklapyyhaktlerqvy  
eleklqeklpekykaeykkldqtrveladqksavtefenvtptndqldtvqeahfvfeseensesvmdgfvvehpyfyt  
atlngqkyvmmktdkdsyw  
kdlivegkrvtvskdpknnsrtlifpyipdkavynavkvvvanigyegqyhvriinqdintkdddtsqntsepnlvq  
tgqegkvadtvaenssta  
tnpkdasdkadviepdsvvkdadnnidkdvqhdvdhlsdmsdnhfdkydlkemdtqiaktdrinvdkgadnsvgmssn  
vtdkdsnkndkviqlnh  
iadknnhngkaakldvvkqynntdkvtdkkttehlpdsihktvdkvtkkekagtpskenklsqskmlpktgettssqs  
wwglyallgmialfipkfr  
kesk  
>sp|Q6G8K8|RS4\_STAAS  
marfrgsnwkkrrlgislsgtgkelekrpyapqghgnqrkklseyglqlrekqklrylygmterqfrntfdiagkkfg  
vhgenfmillasrlavvy  
slglartrrrqarqlvnhghi lvdgkrvidpsysvkggqti svreksqklniivesveinnfvpeylnfdadsltgtfvrll  
perselepaieqliveyy  
sr  
>sp|Q6G8L2|THII\_STAAS  
mkydhllvrygeltlkgsnrkkfvnqlrnnvnkslkgldgfvvkgkrdrmyielehadineityrllskifgiksispvl  
kvektieamsaaikfaqq  
feenstfkidvkradknfpmdtyelqrelggailkhfdnisvvnkrpdheirvevrl daiymyeevvpqsgglpvgtgk  
tllmlsggidspvamevm  
rrgytjiaihfhsppftsdaqekvieltrilaervgpiklhivpftelqkqvnkvvhprytmtstrmmmrvadklvhq  
igalainngenlgqvasqt  
lshmyainnvstpvllrlltydkeeiiikskeigtftsiaqpfedcctiftkpnvtepnfdkvvqyesvdfdeeminr  
avenietleitsdyktike

Tsompanidou\_et\_al\_Supplemental\_FASTA\_File

qqtnqlindf1  
>sp|Q6G8L8|DHA2\_STAAS  
mki gipreiknnenrvgl spsgvhalvesghtvlvetnagsgsffedvdykeagaeiva eqakvwdvdmvikvkepl ese  
ypyfkeglvlflythlane  
ekltqalidrkvisiayetvqlpdrslp11spmsevagrmsaqvgaeflqklnggmgi11ggvpgvpkgkvtiiggqag  
tnaakialglgadvtildv  
npkrlqqlddlfggrvhtimsnplnieelyvkqsdlvigavlipgakapr1vtedmikqmknsviidiadqggifettd  
kitthddptyikhgvvhy  
vanmpgavprst1alnna1lpyalm1ankgyrea fksnqplslglntykghvtnkgvaeafemeyksveea1ql  
>sp|Q6G8M4|DPO3A\_STAAS  
mvaylnihtaydl1nsslkiedavr1avsenvdala itdtnvlygfpkfydaciannikpifgmtiyvtnglntvetv1  
aknndg1kdlyqlssei km  
nalehvsfellkrfsnmii fkkvgdqhrdivqv fethndtymdh1sisiqgrkhvwiqnvcyqtrqdad tisa laair  
dntkl1d1hdqedfgahf1  
tekeinq1dinqeyltqvdivaqkdaelkyhqs11pqy etpndesakylwrvlvtqlkklelnydvyl erlkyeykvi  
tnmgfedyflivsdlihya  
ktndvmvgpgrgssags1vsy11gittidpikfn11ferflnpervtmpdididfedtrrervi qyvqekygelhvsgiv  
tfghllaravardvgrim  
fdevt1neiss1iphk1git1deayqiddfkkfvhrnrherwfsickkleglprhtsthaagi iindhplyeyap1tkg  
dtg11tqwtmteaerig11  
kidflglrn1siihqil tqvkkd1ginidiekpfdqkvfellsqgdttg1fql esdgvrsvlkk1kpeh fedivavts  
lyrpgpmeeiptyitrhd  
pskvqylhphlepi1kntygviiyqeqimqia stfanfsygeadilrramskknravleserqhfiegakqngyhedisk  
qifdli1kfadygfpraha  
vsyskiayimsflkvhyppyfyanil snvigsekktaqmieeakkqgitilppnineshwfykpsqegiylsigtikvgv  
yqsvkvi deryqngkfkf  
ffdfarripkrvkrk1lealilvgafdafgktrst11qaidqvl dgd1nieqdgflfdiltpkqmyedkeelpdalisq  
yekeylgfyvsqhpvdkkf  
vakqylti fkl1snaqnnkpi1vqfdkvkqir tknqgnmafvt1ndgi etldgvi fpnqfkkyeellshnd1fivsgkfdh  
rkqqrqliineiqtlatfe  
eqklafakqii1rnksqidmfeemikatkenandv1sfydetikqmtt1gyinqdsmfnnfiqsfnpsdirli  
>sp|Q6G8M7|ACCA\_STAAS  
m1dfekplfeirnki eslkesqdkndvd1qeeidmleas1eretkkiytn1kpwdrvqiar1qerptt1dyipyifdsfm  
elhgd1rnfrddpamiggig  
f1ngravtvi gqqrkdtkdniyrnfgmahpegyrka1rlmkqaekfnrpi ftdtkgaypgkaaeergqsesi atnli  
emas1kvpviai vige ggs  
gga1gigiankvlmlenstsvi spegaaal1wkdsnlakiaetmkita hdkqlgiiddvis eplggahkdieqqala  
iksafvaql dsles1srde  
iandrfe kfrnigsyie  
>sp|Q6G8N2|IDH\_STAAS  
mtaekitqgtegl nvpnepi ipfi igdgi gpd1wkaasrvidaavekayngekriewkevlagqkafdttgewlpqetld  
tikeyliavkgpl ttpigg  
girs1nvalrqeld1ftclrpvrwfkgvpsvpkrpqdvdmvi frentediyagiefkegttevkavidflqnemgatnir  
fpetsgigikpvskegter  
lvraai qyaiddnrrksvt1vhkgnimkftesgfkqwygd1al sefgdqvftwqqydeivekegrdaanaaqekaekgki  
iikdsiadi flqqil trpa  
ehdvvatm1ngdyi sdalaaqvggigi apganinyetghaifeathgtapkyag1nkvnpsvilssvlml ehlgwqea  
adkitdsiedti askvvt  
dfar1mdgae evstsa fadeliknlk  
>sp|Q6G8N9|G3P2\_STAAS  
mstniaingmrigrmvlria1qnkn1nvvainasyppetiah1inydtthgkyn1kvepi englqvgdhki klvad rnp  
en1pwkel didiaidatgk  
fnhgdkai ahikagakkv11tgpskghvqm vvkgvndnq1dieafdi fsnascttncigpvakvl ninqfgivnglmttv  
hai tndqknidnphkd1rr  
arscnesi iptstgaaka1kev1pelegk1hgma1rvptknsv1vd1vvd1lekvtaeevnqafenaglegiievehqpl  
vsdfntnpsai idakst  
mvm1sgnkvkvi awydnegysnr vvdvaeqiga11tsketvsas  
>sp|Q6G8Q1|CLPX\_STAAS  
mfkfnede en1kcsfcgkdqdvkklvagsgvyi cneci elcseivee1laqntseamteltpk eimdh1neyvigqek  
akks1avaynhykriqq1  
gpkeddvelqksnia1igptsgskt11aqt1akt1nvpfai adats1teagyvgddvenil1rliaadfdidkaekgii  
yvdeidkiarksentsitr  
dvsgegvqqa11kilegttasvppqgrkhpqemiqidttnil filggafdgieevikrr1gekvigfssneadkydeq  
a11aqirped1qaygl ipe  
figrvpivanlet1dvta1kni1tqpknalvkqytkml eldnvd1efteea1sais ekaiertkgarglrsiieesli di  
mfdvpsnenvtkvvi taqt  
ineetepe1ydaegn1innsktsa  
>sp|Q6G8Q5|HEM3\_STAAS

Tsompanidou\_et\_al\_Supplemental\_FASTA\_File

mrklvvgrrsklaltqsqqfidklkavepnleieikeivtkgdrivdkqlskvvggkglfvkeiqhel fekndmaihsl  
kdvpsvipegltlgcidpr  
e1pfdayskthtp1sq1pegsiigtsslrrgaqilskypnleikwirgnidtrlek1qtedydai1laag1rrmgwsd  
divtsylrdrt1lpaiggg  
algiecrsdee11t1lskvhndevakcvtaertflaemdgsqcvpiagyatisdqkeieftglimtpdgkerfeytmng  
tdpve1gktvsnk1keqga  
yeiikr1neqh  
>sp|Q6G8Q8|GSA1\_STAAS  
mrytkseeamkvaet1mpggvnsprafksvdtpai fmdhgkgskiydidgneyidyv1swgpl1lghrdpqvish1hea  
idkgtsgast1lenklaq  
lvidrvpsiekvrmsvgteat1dt1rlargytgrnkivkfegcyghgsd1likagsgvat1glpdsppgvegiaknti  
typynd1da1kiafekfgd  
diagvivepvagnmgvppieglqglrnitteygallifdevmtgfrvgyhcaqgyfgvtpd1tclgkviggg1pvga  
ggkkeimdhia1plgniyqa  
gt1sgnplamtsgyet1sq1tpetyeyfmlgdiledglkrvfakhnvpitvnragsmi gyf1negpvtnfeqanksd1k  
1faemyremakegvflpps  
qfegt1lstahtkediectiqafdta1srivk  
>sp|Q6G8S2|RL21\_STAAS  
mfaiietggkqi kveeggei fvek1dvnegdtftfdkv1fvggdsvkvvgaptvegatvtatvnkqgrgkkitvftykrnk  
nskrkkghrqpytkl1tik  
ina  
>sp|Q6G8S4|RL27\_STAAS  
mlk1n1qffaskkgvsstkngrdseskr1gakradgqfvttggsilyrqrgrtkiypgenvgrggddt1fakidgvkferk  
grdkkqvsyavae  
>sp|Q6G8V1|SYA\_STAAS  
mkk1kasei rky1dfffvekghmvepsap1vpiddt1lwinsgvat1kkyfdgretpkkprivnsqkairtndienvgf  
tarhhtffem1gnfsigdy  
fkqeaiefawef1tsdkwmgmepdklyvtihpedmeayniwhkdiglesriiri egnfwdigegpsgpntei fydrgea  
ygqddpaeemyppgenery  
1evwn1vfsefnhkhdsytp1pnkni dtgmglernasvsqvrtnyetd1fmpimneiekvsgkqylvneeqdvafkvi  
adhirtjafaisdgalpan  
egrqyv1rr11rravrfsqt1ginepfmyk1vdivadimepyypnvkekadfikrvikseerfhet1edglailnelik  
kakattneingkdafklyd  
tygfpielteeiavqag1kvdmttfesemqqrrdrarqarqnsqsmqvqsev1knitsastfvgydtataqt1lthliyn  
geevsqveagetvyfmlte  
tpfyavsggqvadtgi vyndnfei avsevtkapngqnlhkgvvqfgqvngatvsaevnqndrrdiqknsath1lhaal  
ksvlgdhvnqags1veadr  
1rfdfs1hfgpmtndeidqver1vneeiwkgidvniqemdiasakemgama1fgekygdvrvvnmapfsielcggihvrn  
tseigl1fk1vsesgtgagv  
rrieal1tgkaafly1lediqekfntmksq1kvksddqvvdkt1qlqdeekal1kqleqrdeits1kmgni enqveeingy  
kv1vtevdvpnakairstm  
ddfksk1qdti11lasnvddkvsmtvtpks1tnnvkagd1kqmapivggkgggprpdmaqqgggtqpenisks1sfikdy  
ikn1  
>sp|Q6G8W4|Y1541\_STAAS  
mrvd1ncd1geafgnysfggdhqi ip1itsanvacgf hagdenvmnetvklakahnavgahpg1pd1kgfgrnridisn  
deiy1nmiyq1galqgfc  
ihqvkinhvkphga1yqmgakdreiasviaqavydfps1lvlg1ansyliseaknvg1itasevfadrryeddgq1vsr  
kesdavitdtdealkqvlk  
mvkenkvisknknevt1qadticvhgdgehallfvskireilmkegidiqsl  
>sp|Q6G8Z7|RRMF\_STAAS  
mft1dfsdtgl1vkdawykqied1lefakkeehieddaelsvtfvdkqei qeinrtyrdkdkvtdvisfaleedepeidf  
sg1diprv1gdiiictdva  
qeqannyghsfere1gl1alhgf1h1lgydhmteadekemfgrqdt1lnaygltrg  
>sp|Q6G904|PRIM\_STAAS  
mridqs1ineikdktid1d1vseyvklekrgrnyig1cpfhdektpsftvsedkqichcfckkgnvfqftqeikdisf  
veavke1gdrvnvavdiea  
tqfnsniqiasdd1qmiemhel1qefyya1tktvegeqal1tylqergftdalikergigfapdsshfchdf1qkrgydi  
el1ayeag11srneenfsy  
drfrnr1mfpl1knaqgrivgysgrtytgqepky1nspetpi fqrk1lyn1dkarksirk1deiv1legfmdviksdtag  
1knvatmg1q1sdehitf  
irk1t1nit1mfdgd1fagseat1ktgqhl1qqgl1nvfviq1psgmpdeyigkygndaftafvknkksfahykvsi1kd  
eiahd11syeryl1kelsd  
is1mkssi1qqka1ndvapffnvspeqlaneiqfnqapanyyppddegygydegygyiepepigmaqfdn1srqekaerf  
1kh1mrkd1t1nyyesvd  
kdnftnqh1fkyvfev1hd1fyandqyni sdavqyvnsnelret1is1leqyn1ndepyeneidyyvvinkegqeties1n  
hk1reatrigdvelqkyyl  
qq1vaknkerm  
>sp|Q6G907|Y1497\_STAAS



Tsompanidou\_et\_al\_Supplemental\_FASTA\_File

mkjadlmtll dhhyfstaeswdnvglligdedvevtgvltaaldctlevvneaiekgyntiishhplifkgvtslkangy  
gliirkliqhdinliamht  
nldvnpygvmmlakamglnknsiinqqdvvykvqtiypkdnvgpfdklsenglaqegnyeycffeseqrqgfkpvge  
anptigqtdkieyvdevki  
efmidayqksraeqlikqyhyetpvfdfieikqtslyglvmaevdnqmtledfaadiksklnipsvrfvgesnqkikr  
iaii gsgigyeyqavqqg  
advfvtgdi khhdaldaki hgvnlidinhyseyvmkeglktllmnrnftekinidveastintdpfqi  
>sp|Q6G915|RL331\_STAAS  
mrnvntlactecgdrnyittknkrnnpervemkkfcsrenkqtlhretk  
>sp|Q6G930|GCSA\_STAAS  
mcivshryipltekdkqemlqtigaksigelgdvpsdillnrdlniaegeaettllrrlnriasknitkethstflgag  
vydhyapsvvdamisrsef  
ytaytpyqpeisqgelqai fefqtl iceltmdvanssmydgmtsfaeacilafsqtkknkivvskglhyqalqvlhtya  
ktrkefevveidldgtvtd  
lkkleaavddetaavavqypnfysiedlekihsfiedkka lfi vyanplalgltppgsfgadivvgdtqpfqipaqfg  
gphcgyfattkklmrkvpg  
rlvgqtqddegnrqfvltlqareqhirrdkatsnicsnqalnalassiamsalgkqgyidiavqniehanyakqqfikkg  
fevldgtsfnefvfkfdk  
iqqvneelvky niiggfdlgvssddfknhmliavtelrtkdeidtfvekage lnd  
>sp|Q6G961|P5CR\_STAAS  
mklvfygagnmagai ftgi inssnldandiyltnksneqalkafaeklgvnysyddatllkdadyvflgtkphdfdalat  
rikphitkdnfcisimagi  
pidyikqql ecqnpvarimpntnaqvghsvtgi sfsnfdpkskdeindlvkafgsvievsedhlhqvta itgsgpafly  
hvfegyvkagtklglekeq  
veesirnliigt skmiersdl smaqlrknitskggttagldt lsqydlvsifedc lnaavdrsiel snvedq  
>sp|Q6G983|EBPS\_STAAS  
msnnfkddfeknrqsidtshqdh tedvekdqsel ehqdtienteqqfpprnaqrkr rrdlatnhnkqvhn esqtsedn  
vqneagtiddrqvessht  
esqepshqdstp qheeyynknafamdkshpepi edndkhetikeaentehstvsdkseaeqsqqpkpyfatganqant  
skdkhddvtvkqdkdeskd  
hsgkkgaai gagtagvagaagamgvskakkhsndaqnsnsdksnnstedkvsqdkskdhngkkgaai gagtaglagg  
aaksasaaskphasnna  
qnhdehdnhd rdkerkkggmakvllpliaavliigal aifggmaln nhngtkenkiantnknadeskdkdtskdaskd  
kskstdskskedqdkatk  
desdndqnnanqannqanqqanqanqqqqqqrqggqrhtvngqenlyriai qyygsgspenvekirranglsgn  
irngqqivip  
>sp|Q6G994|NDK\_STAAS  
mertflmikpdavqrnligevisrierkgklvvggklmqvpme laethygehqqkpfyndl isfitsapvfamvvegeda  
vnvsrhii gstnpseasp  
sirgdgl tvgrniihgds ldsaereinl wfneneitsyasprawl ye  
>sp|Q6G996|AROC\_STAAS  
mrylts geshgpqltvivegipanleikved inkemfkrqgygrgrmqiekdtveivsgvrngytlgspitmvvtndd  
fthwrkimgaapiseeere  
nmkrtitkprpghadlvggmky nhrdlrnvlerssaretaarvagalckvllqql didiysrvveiggikdkdfydskt  
fkanldrndrvviddsiaq  
amrdkideakndgds iggvvqvvenmpvgvgsyvhdrkldgriaqgvvsina fkgvsfgegfkaaekpgsei qdeily  
ntelgyyrgsnhlggl egg  
msngmpii vngvmkpiptlykplnsvdintkedfkati ersdscavpaasivcehvva feiakalleefqsnhieqlkqq  
iierrqlnief  
>sp|Q6G997|AROB\_STAAS  
mklqttypsnny piyvergaidhistyidqfdqsfilideyvnyqfankfddilsyenvhkvii pagektktfhqyqetl  
eyilshvtrntaiiavgg  
gatgdfagfvaatllrgv hfiqvpttilahdssvggkvgin skqgknligafyrptaviydl dflktl pfeqilsgyaev  
ykhallngesttgeieqhf  
kdreilqslngmdkyiakgi etkldivvadekeqgvrkflnlghtfghaveyyhki phghavmgviyqfivana lfdsk  
heinhyiqyliqlypldm  
itldfetlyeymls dkkndkqgvqmvli r qfgdivvqhvdqltlqhaceqlktyfk  
>sp|Q6G9A5|CCA\_STAAS  
mdkslfeqarpi leqi qdngfeayyvggsvr dyvmgrnih didittsatpdeiesi fshtipvgkehgtinvvfndenye  
vtfraeedyvdhrrpsgv  
tfvrldlyedl qrrdfmna iamd tayklydyfdgqqdinnri irtvgiaeerfeda lrmirc lrfqsqslsfdiatetfe  
amriqmadi kflsierivi  
eltkl mrginveksfnhlks lkafnympyfehldm qinvtea idlelliaivsvkfdinyslkplklsnrqvkdingyi  
qimnalpsiitkeqlkmfv  
ydydthliknvmvaadvi kandi qgheplivnlqtidetlhr lpmhnrkdmmvnggvlmahlnaksgpwlkdvlrqieia  
ivtgkvsneeteilkwvdn  
hvki  
>sp|Q6G9A7|DING\_STAAS

Tsompanidou\_et\_al\_Supplemental\_FASTA\_File

mgmatyavvdlettgnqldfdiddiqigitfvrrnqi idtyhsmirtnleippfiqal tseenmlqqapyfnvqaqei yd  
kikdcifvahnvdfdl nfi  
kkafkdcniqyrpkvidt leifkiafptdk syqlselaeahgitlanahradedaattaklmilafekfeklpldtlkq  
lyylskqlkydlydffem  
vrqydakpldk syekfeqi yrkqvdfk kpttnyngslkslyskavdq lgltyrpqqlylaetildqlmhsekamieas l  
gsgkslayllaalmyriet  
gkhvmitstntkl lqsqlllek dipamnealnfkina llikssdyislg llsqilkd dtsnyevnilkmq lliwitetpsg  
diqelnlkggqkmyfdqki  
etyvparhdvhyynfikrnaqniqigitnhahlihsdvensiyql fddcivdeahr lpdya lnqvtne lsyadikyqlgl  
igknenekllka idglekq  
rilekldiapidifglkasmneihelneqlfstifti indsdvyddihrfhnvftfetkdilkd lhaiidklnktleif  
ngishktvkslrkq llylk  
dkfknieqslkaghtsfisiknlsqkstirlyvkdyavkdvltkqvlekfkslifisgtlkfnhsfeafkqlfnkdvhfn  
tfevntslsakntsvfip  
sdvasyqknideyvasivsyiieyttitsskclvlf tsykmmhmvqdm lnelpefedyvvl tqqnqnykivqqfnfd  
kailgtstffegfdqan  
gikcvmiaklpfmmkhnakylmdseftstfkeyvlpdavtrfrqglgrlirsendrgiivsfddrlinsnyknffeql  
enyraqkkgdiqqfgklrq  
iqkkkk

>sp|Q6G9A8|SYN\_STAAS

mkttikqakdhlnqdv tigawltnkrssgiaflqlrdgtgfmqgvvkvseveevfklakeitqesslyvtgtitednr  
sdlyemqvksievisedh  
dypitpknhgteflmdhrhlwlrskkqhavmkirnev iratyeffnkdgftkvdppil tasapegtse lfhkyfdqdaf  
lsgsqglyleaaamahgkv  
fsfgptfraeksktrrhliefwmiegemafinhaesleiqeqyvthvvksvlencklelkilerdtsklekvatpfpris  
ydaief lksegfddiewg  
edfgaphetaianhyd lpfvfi tnyptki kpfymqpneneetvl cadliapegygei iggservddlelleqrvkehgl d  
eeaysyldl rrygsvphc  
gfglglertvawisgvehvretapfprllnrlyp

>sp|Q6G9C3|DHA1\_STAAS

mlvavvkelkqgegrvactpenvrkltdaghkviveknagisgfsndmyekegakivtheqaweadvikvkephesey  
qyfkknqiiwgflhl assk  
eivekmqevgvtaisgetiikngkaellapmsaiagqrsaimgayyseaqhgqgtlvtgvhenvdipgstyvi fgggva  
atnaanvalgnakviiie  
lnddriky lqdmaekdvttvkstpenlaeqikkadvfistilipgakppklvtremvksmkkgsvlidiaidqgg tiet  
irpttisdpvyeegvihy  
gvpnqpgavprtstmalaggnidyileicdkglea ikdnealstgvniyqqvtnqg lasshdldykeilnvie

>sp|Q6G9C6|NORB\_STAAS

mekpsreafegnkl ligivlsvitfwlfaqslnvvpiledsfntdigtvniavsitalfsgmfvvgaggladkygrik  
ltnigiilnigsl liiis  
nipllliigrliqglsaacimpatlsiiksyigkdrqra lsywsigswgsgvcsffggavatllgwrwifilsiiis l  
ialflikgtpetksksisl  
nkfdikglvllviml nilitkgse lgvssllfitllaitigsfslfivlekratnplidfk lfnkaytgatasnfl  
l ngvagtli vantfvrgl  
gysslqagslsitylvmlimrvgekllqtlgckkpm ligtgvlivgeclisltflpeilyvicci igylfffglglgiy  
atpstdtaianaplekvgv  
aagiykmasalggafgvalsgavyaivsnmtniytgamialwlnagmgilsviilllvpkqndtql

>sp|Q6G9D5|DYR\_STAAS

mtlsilvahdlqrviqfenqlpwhlpndlk hvklstghtlvmgrktfesigkplpnrnrvv ltsdtsfnvvgvdvhsi  
ediyqlpghvfi fggqilf  
eemidkvddmyitvi egkfrgdtffppyt fedwevassvegkldekntiphtflhlirkk

>sp|Q6G9E1|CTPAL\_STAAS

mddkqhtsssdderaeiatsnqdetnsskrvh lkrwqfisiligtilitavitvayifinqisglnktdqanlkie  
nvykilnsdykkqdsdkl  
skaaidgmvkelkdpseyl tkeqtksfnegvs gdfvgigaemqkndqimvtspmkgs paeragirpkd vitkvnksi  
kgkaldevvkdvrgkente  
vtl tvqrgseekdvkikrek ihvksveykkkgvgvitinkf qndtsgelkdavlkahkdglkkivldl rnpngglldea  
vkmanifidkgktvvk lek  
gkdteaiqtsnda lkeakmdisilvnegsasasevftgal kdynkakvygsktfgkgvvttrfk dgsllkytemkw l  
tpdghyihgk gikpdvtid  
tpkyqslnvipntktfkvgddd kniktikiglsalgykv dnettqfdqal enqvka fqqanklevtgefnketnkftel  
lvekankhddvldk llini l  
k

>sp|Q6G9G3|Y1339\_STAAS

mnelefvtkhrrhlhqhpelsh efettayikafldslnikydcpletgviay legngshtiayradidalpileendvp  
yrsqsdhvmhacghdghtt  
almlfvqrckdmqdagl pnvvfi qpaeetgganrl ikagafdkypieavf gihvnpfadegiavirdeetasate  
yrffltglsshvadkeqgh

Tsompanidou\_et\_al\_Supplemental\_FASTA\_File

scgealqhvltqisqigqfhlnglkrnivhighfkageaintvpsngylegtirtydiddltivknqmhkiaesvkllfn  
vdcevkfaegyptinspk  
lrtqiedalikadlnvydkptpflfgedfsfygqqlapayfvfigtrnedkgfvtglhtshlnfdekvlinvvnfyenll  
nnykev  
>sp|Q6G9G4|DAPH\_STAAS  
mvghltaeeiqyisdakkstpkvylngnfegitypesfkvfgseqskvifceaddwkpfyeyagsqfedieiemdrn  
saipkdltnnaripegga  
fireqaiiedgavmmgatinigavvgegtmidmnatlgrattgknvhvgagavlagvieppsaspviieddvligana  
vilegvrvgkgaivaagai  
vtqdvpagavvagtpakvikqasevqdtkkeivaalrkln  
>sp|Q6G9G5|DAPB\_STAAS  
mkillogygamnqrvarlaeekgheivgvientpkattpyqqyqhiadvkdadvaidfsnplfp1ldeefhlp1lvvat  
tgekekllnkldelsqip  
vffsanmsygvhaltkilaavpl1defdielteahnkkvdapsgtleklydvivslkenvtpvydrhelnekrqpqi  
gihsiirggtivgehevlf  
gtdeiqithraqskdifangaiqaaerlvnkpngfytdfn  
>sp|Q6G9H8|OPPB2\_STAAS  
mfiiksmlyrlmqmivvlfvistltilmklspgnpvdkihl1dvaqvsteqinatkdkg1g1nds1lvqwwhmnh1lhf  
nlgksfeskepvtqilfny  
apitllisfstlvslcisiplgiaakrfhkwtckvirvistlslslpaffigiillfivtnlmnidsvilsqfilpvi  
t1slgmcaiyir1vrsl  
mllqsnivqasrlrgmneryilhd1lkptilpiip1lgis1gsliggtvvienv1fdipgigy1lmsdiksrdypviqgc  
v1figffvviintiad1l  
1l1dpkqr1q1gnpkiktntl1svssdrha  
>sp|Q6G9I1|OPPF2\_STAAS  
mielkhvtfgynkkqmv1qdinitipdgenvgilgesgckstlas1vlglfkpakgeiylsdnavlpi1fghpltsfnpd  
wtietslkealyyyrgltd  
ntaqd111qhlstfelnaq11tk1psevsggqlqrfnmrs1laqprvl1cdeitsn1dviaeqvvinilkaqtitn1n  
hfvishd1sv1qr1vnri  
iv1kdgmivddfaieel1fnvdrhpytkel1vqafsy  
>sp|Q6G9I7|TRPB\_STAAS  
mnkqi1qteadelgffgeyggqyvpelmpaiielkkaykeakadpefqreleyylseyvgratpltyaasytes1gsaki  
ylkred1nhtgahkinna1  
gqal1akrmgkkk1vaetgagqhgvasatvaa1fdmel1vfmgsed1krqq1nvfrmel1gakvavedgqg1sdavnk  
alqyvwshvddthyl1gsa  
1gdpdpftivrdfqsvigkeiksqi1kkegr1pdavacigggsnaigt1fypfikddvalygveaagqgddtdkhalai1g  
kgspgv1hgtkmyli1qded  
gqv1ahs1sag1dypgi1pehsyyhdi1grvtfenasdtqamnal1nftkhegi1paiesahalsyver1aptmskedi1  
vvt1sgrgdkdmeti1rqym  
verglan  
>sp|Q6G9K4|PARC\_STAAS  
mseiiqdl1s1ledv1gdrfgryskyi1qeralpdvrdglkpvqrrilyamyssgnthdknfrksaktvgdvigqyphgds  
sveyamvr1sqdwk1rhv1  
iemhgnngsidndppaamryteak1s1laeel1rdinketvsfipnyddttlepmv1psr1fn1llvngstgisagyatdi  
pph1laeviqat1kyidnp  
ditvnq1mkyikgpdfptggii1qgidgikkayesgkriiv1rskveet1rngrkqliiteipyevnkssl1vkridelra  
dkkvdgivevrdetdrtg1  
riaie1kkdvnsesiknylyknsdlqisynfnmvaisdgrpklmgirqiidsylnhqievvantkfeldnaekrmhive  
glikalsildkvielirss  
knkrdaken1lievyefteeqaeavm1qlyrl1ntdivalegehkelealikqlrhildnhdall1nvikeelneikkkfk  
ser1slieaeieeikidke  
vmvpseev1smtrhgyikrts1rsfnasgvedig1kdgds1llkhqevntqdtvlvftnkgryl1fipvhkladi1rkelg  
qhvsi1vpieedevvinv1  
nekdfntdafyv1fatqngmi1kkstvp1fktrfnkpli1atkvkenddl1svmrfekdq1litvitnkgms1tyntsel1sd  
g1raagvksin1kaedfv1  
vtegvsendtilmatqrgs1krisfki1qvakraqrgit1llkelknphrivaahvvtgehsqytl1ysksneehgl1indi  
hkseytngsfiv1tdddfg  
ev1dmyis  
>sp|Q6G9K5|PARE\_STAAS  
mnkqnnysdds1qv1leg1eavrkrpgmy1gstdkrgl1hl1vyeivdnsvdev1ngygneidvtinkdgsisiedngrgmp  
tgi1hks1gkptvev1ftvlh  
aggkfgqgyktsgg1hgvgasvvnal1sew1leveihrdgniyhqs1fknggspssgl1vkk1gkktktg1tkvt1fkpddti1fka  
stsfnfdv1ser1qesaf1  
1kn1kit1nd1l1rsgkerqehyhyeegi1kefvsyvnegkev1hdvatfsgeangi1evdvafqyndqyses1lsvnnvrtk  
dgg1thevgfktam1rvfnd  
yarrine1ktkdkn1dgndi1reg1tavsvri1peel1qfegqtsk1gtsearsavds1vadkl1pfyleekgq1sks1vk  
kaikaqqareaar1kareda  
rsgkknkrkdt1l1sgk1tpaqsknteknel1y1vegdsaggsak1grdrkfqail1plrgkvintekar1ledi1fkneeinti

Tsompanidou\_et\_al\_Supplemental\_FASTA\_File

ihrtigagvgtdfkiedsnyn  
nrviimtdadtdgahiqvlltffffkymkplvqadrvfialpplyklekgkgtkrveyawtdeelnklqkelgkgtlq  
rykglgemnpeqlwettmn  
petrtrtirvqvedevrskrvtlmgdkvqprrewiekhvefgmqedqsildnsevqvlendqfdeeee  
>sp|Q6G9L1|MSCL\_STAAS  
mlkefkfalkgnvldlaiavvmgaafnkiisslveniimpiligkifgsvdfakewsfwgikyglfiqsvidfiiiafal  
fifvkiantlmkkeeae  
avveenvvllteirdllrekk  
>sp|Q6G9L2|SBCC\_STAAS  
mkplhklklnnfgpflkeeidfskidnneflisgktgsgktmifdamtyalfgkasteqreendlrshfadgkqpmstf  
efqlnhriykvhrqgpyik  
egnttktnakfdvfemvdgkyeireskvisgtqfiellgvnadqfrqlfilpqgefkrflisnsrekqgilrtlfdek  
feaireilkeevkkeqad  
enryqqidllwqeifdddnikgllgvatqqidklieniplqarskeilasvnesketaikefeiekktlennilkd  
ninqlnknkidfvqlkeqg  
peiegieaklkllqditnllnyienrekietskanskdkstnkninldcdkrnidkekkmleengdlieskifidk  
trvlfndinkyqgsylne  
rlrtegeqlgdelndlikgletvedsignnesdyekielntitninneiniikenekakaeldkllgskqelenqine  
etsilknleikldrydtkk  
ldlndkesfiseiksavnigdpcpicgneiqdlghhidfksiakrqneikeieanihaiksniavhseikfvnekisni  
niktqsdfslevlnkrll  
nenaInnqrdlnkfiemkeekdnltlqihnkqlrlnkneselklcrdlitefetlskynnitnfevdykkyvqdvnhq  
elskeiedklmqlsqrkli  
eqnlnhyenqletyndlelneqsiememsrlnltdndideiawrgeqeelqkrdykkryhefemeiarlesltk  
dkelldsdklkdeyelkkg  
kmtlidesavhyqcnninktqsivshinylnqelkdqgefqlaeivggknnknltenfvliyyldqiiaganrl  
atmsdnryqlirreavshg  
lsgleidvfdlshnksrhisslsggetfqsslalalglseivqqsggislesifidegfgtldqetletaldtllnks  
tgrmvgiishvselknrip  
lvlevksdqyqsstrfkrn  
>sp|Q6G9M8|KHSE\_STAAS  
msnvlletipastanlgvgfdsigmaldkflhsvketsgkweyifhddaskqlptdetnfiyhvaqqvaskysvdlpn  
lcjemrsdiplarglgssa  
salvgaiyianyfgdiqlskhevqlateieghpdnvaptiyygliagyndvsketsvahidipdvdivvtiptyelkt  
easrralpklthseavks  
saisntmicalahnyelagklmqdgmfhepyrqliaefdevktiaiqhnayatvisgagptilifsrkensgelvrs  
nsqvschselvdinisgv  
kerivyq  
>sp|Q6G9R0|MIAA\_STAAS  
mnknkpfivvvgptasgktelesielakringeiisgdsmqvykhmngitaktvtpeemdgiphhlidilnpddtfsayef  
krlaedlitditnrgkvp  
iaggtglyiqsliynyeledetvtpaqlsivkqlsalehldnqqlhdylaqfdavsaienihpnnrqglraieyylktk  
kllsnrkkvqqftenydtl  
llgiemsrktltsrinkrvdimldhglfrevqqlveqgyescsqmgaigykelipvingqmiyedavndlkqhsrqykr  
qmtwfkknkmsvhwldkenm  
slqmmldetitqik  
>sp|Q6G9R3|GLPK\_STAAS  
mekyilsidqgttssrailfnqkgeiagvaqrefkqyfpqsgwehdaneiwtsvlavmtevinendvradqiagigitn  
qrettvwdkhtgrpiya  
ivwqsrtqtsicselkqgyeqtfrdktgllldpyfagtkvkwildnvegarekaengdlfgtidtwlvklskaahi  
tdysnasrilmfnihdlew  
dellelltvpknmpevkpssevygktidyhfygqevpiagvagdqqaalfgqacfergdvkntygtggfmlmntgdka  
vksesgllttiaygidgkv  
nyalegsifvsgsaiqlrdglrminsapqsesyatrvdstegvyvvpafvlgtpywdseargai fglsrgtekehfir  
atieslcyqtrdvmeamsk  
dsgidvqslrvdggavknfimgfqadi vntsverpei qetta lgaaf laglavgfweskd diaknwkleekfdpkmd eg  
ereklyrgwkkaveatqvf  
kte  
>sp|Q6G9R7|MUTL\_STAAS  
mgkikelqtslankiaageverpssvkel lenaidagateisievesgvqsirvvdngsgieaedlglvfhrhatsk  
ldqdedlfhirlgfrgea  
lasissvakvtlktctdnangneiyvengeilnhkpakakkgt dilveslfyntparlkyikslytelgkitdivnrmam  
shpdirialisdgkmlst  
ngsgrtnevmaei ygmkvardlvhisgdt sdyhi egfvakpehsrsnkhyisifingryiknfm lnkailegyhtlltig  
rfpicyniemdpi lvdvn  
vhptklevr lsk eeql yql ivskiqeafkdri lipknnldyvpkknkv lhsfeqqkiefeqrqntennqektfsseesns  
kpfmvenqndeivi redsy  
npfvtktsesliadessgynntrekdedyfkqqe ilqemdqt fdsnddt svqnyenkasddyvdndikgtskdpkr

Tsompanidou\_et\_al\_Supplemental\_FASTA\_File

ripymeivgqvhgtyiiaq  
nefgmymidqhaaquerikyeyfrdkigevtnevqdl1ipltffhskdeqlvidqyknelqqvgimlehfgghdyivssyp  
vwfpkdeveeiiikdmieli  
leekkvdiikkredvaimmsckksikanhy1qkhemsdlidqlreaedpftcphgrpiiinfskyelek1fkrvm  
>sp|Q6G9T7|FTSK\_STAAS  
maqakkkstakkkttsskrtnsrkkkndnpiryviailvv1mvlvgvqlgiigr1idsffnylfgysryltyilvllat  
gfityskripktrrtagsi  
vlqiall1fvsq1vfhfnsigikaerep1syvyqsyqshfnpfnggv1gfy1le1svplis1lfgvciitill1cssvill  
tnhghrevakv1lenikaw  
fgsfnekmserngekq1kreekar1keeqkarqneqpqikdvdsftevpqerdipiyghtenesksqsqsprkkrvfae  
nssnnivnhhqadqqeqlt  
eqthnsvesentieeagevt1nsyvvpp1t1lnqakqkatskaevqrkgqvlent1kdfgvnakvtqikigpavtqyei  
qpaaqgvk1svi1n1hndia  
lalaakdvrieapipgrsavgievpnekis1vs1kevldekf1psnkl1evgl1grdisgdpitvp1nemph1lvagstgsg  
ksvc1ngiits1llnakph  
evklm1l1dpkmv1nvyngiph1lipvvt1nphkaaalekivaemerryd1fqsstrnikgynelirkqnqeldekqpe  
1pyivv1vdelad1mmvag  
kevenaiqritqmarag1h1ivatqrpsvdvitgi1kknipsria1favssqtdsrtiigtggaek1l1gkgdm1lyvngd  
ssqtri1qgaf1sdqevqdv  
vnyvveqgqanyvkemepdapvdksemkseda1ydeay1fvveqqkasts1l1qrqfrigynrasr1mddlernqvigp1qk  
gskprqvl1d1nndev  
>sp|Q6G9T9|PNP\_STAAS  
msqekkvfktewagrs1tietgqlakqangav1vrygd1tv1statakeprdgdf1p1tvnyeekmyaagkipggfkk  
egrpgdat1tar1idrpi  
r1l1f1pkgykh1dvqim1mv1sadpdcspqmaamigssmal1svsdi1pfqgpiagv1nvygidgkyi1nptveekevsr1d1lev  
aghkdavn1mveagaseite  
qem1eai1ffghee1qr1vdfqqq1vdhi1qpvkqefi1pverdea1vervks1teekgl1ketv1tfdkqqrden1dn1kee  
vnefi1deedpenel1likev  
yai1ne1lvkeevrr1iadeki1rpdgrkpdei1r1dsevgi1lprthgsg1ftrgqtqal1sv1t1lga1gdyq1lidg1gpee  
krfm1h1h1n1fp1n1fsvgetgp  
vrapgrreighgalgeral1kyi1p1tdad1fpytirivse1vlesngss1qasicgst1al1mdagvpikapvagi1amglv1tre  
dsy1til1tdi1q1meda1l1gdm  
dfkvag1tkegi1taiqmd1kidg1ltreieealeqarr1r1leimnhm1lqtidqprtelsayapkvvtmtikpdkir1dvigp  
ggk1kine1i1detg1vkl1die  
qdgti1figavdqamin1rareiiee1itreaevg1q1yqatvkrieky1gafvg1l1fpgkda1l1hisqisknriekvedv1kig1d  
tievki1teidkqgrv1nash  
ralee  
>sp|Q6G9U2|TRUB\_STAAS  
myngi1lpvykerg1tshdv1vfk1rki1lktkkightgt1dpevag1lpvcignatr1vsdyvmdmgkayeatvsigrsttte  
dqtgd1tlekkgv1h1sadfnk  
ddid1r1les1fkgi1ieq1ppmyss1vk1vngk1lyeyarnnetverpkrk1vnikdigri1seldfkenechfki1rvicgkgyi  
rtlat1digv1kl1gfpahmsk  
l1triesg1fv1kds1l1teqike1l1heqds1qnk1l1f1leygl1kg1l1sikikdshikkri1ngqk1fnknefdnk1kdqivfid  
ddsekv1aiymv1hptkese  
ikpkkvfn  
>sp|Q6G9U4|IF2\_STAAS  
mskqriyeyake1n1lkskei1ide1lksmni1evsnhmqa1eddqika1dkkfkkeqkndnkqstqnnhqsnqnqkqgqk  
dnkknqqqnnkgnkgnkkn  
nrnnkknknknkpqnqpaapeipskvtyqegitvgefak1l1vessei1kk1l1l1givaninqs1nqetieliaddygv  
eveeev1v1need1siyfed  
ekddpeaierpavvtimghvdhgktt1l1dsirhtkv1tageaggitq1higayqiendgkkit1f1l1dtpghaafttmrargaq  
vtdi1til1vaaddg1ympqt  
ieainhakeaevpi1ivavnki1dkptsnpdrvmqel1teygl1pedwggeti1fvpl1salsgdgidd1lemiglvaevqelka  
npknravgtvieael1dksr  
gpsas1l1vqngt1lvgdai1vvgntygri1ramvnd1lgqrikmagp1st1pveitg1indvpqagdrfv1fsdekqarrigesrh  
easivqqrqesknvs1dn1  
feqmkggemkd1nvi1kgdvqgsvealaas1mkidvegvn1vriihtav1gainesdvtlanasngi1ig1fnvrpdsgakra  
aeaenvdmr1hrviy1nvie  
eiesamkg1ldpefee1qvig1qaevrqt1fkvskvgti1agcyvtegi1trnagvri1rdgivqyegel1d1lkrfkddakeva  
kgyecgi1tieny1ndl1kegd  
vieafemveikr  
>sp|Q6G9V0|SYP\_STAAS  
mkqskvfiptmrdvpseaeaqshr1l1ksglikqstsgiy1s1platr1v1nnitairqemeridsveilmpalqqaew  
eesgrwgaygpe1l1mr1lqdr  
hgrqfal1gptheel1vtsiv1rne1ksykq1lpmt1l1fq1skfrdekrpr1f1g1l1rgrefimkdays1fhadeas1dqtyqdm1yq  
aysri1fervginarpv1vad  
sgaig1gsh1thema1lsaigedti1vyskesdyaanikaevvyepnhkystvqpleki1etpnv1ktaqelad1l1grpvdeiv  
ktmi1fkvdgeyi1mv1lvrg1h

Tsompanidou\_et\_al\_Supplemental\_FASTA\_File

heindiklksyfgtdnie latqdeivnlvganpgslgpvikeikiyadnfvqdl nllvvganedgyhlinvvngrdfnv  
deygdfrrfilegeklsdgs  
gvahfaegi evgqvfk lgtkysesmnatfl dnqgkaqplimgcygigisrtlsai veqnhddngivwpksvtpfdlhlis  
inpkddqreladalyaef  
ntkfdvlyddrgeragvkfnadliglplrivvgkrasegivevkerltgdseevhiddlmtvitnkydnlk  
>sp|Q6G9W1|XERC\_STAAS  
mnhieafnlntlkvernfhsehtlksyqddliqfnqfleqehlqlktfeyrdarnylslylnhkrtsvsrkistlrty  
eywmtldeninpfvqlvh  
pkkeylppffyeemealfktveedtskslrdrvilellyatgirvselvnikkqdidfyangvtvlgkgskerfvpfg  
aycrqsi enylehfkipqs  
cnhdfli vnmkgeaitergvryvlndivkrtagvsei hphklrhtfathllnqgadlrvtqslghvnlsttgkythvsn  
qqlrkvylnahprakkene  
t  
>sp|Q6G9W6|LYTN\_STAAS  
mfvyckecfimmkqskvrysirkvsigilsisigmflal gmsnkayadeidkskdftrgyeqnvfakselnanknttk  
dkiknegavktsdtslkl  
nksaisngneinqdikisntpknssqgnlvinneptkeikianlea qnsnqkktknvtnyfygysfreapktqiytv  
kkgdtsai alkyyttvsn  
iqntnnianpnli figqklkvpmtp lvepkptvssnksnsstlnylktlenrgwdfdgsywgqcfdlvnyvwnhly  
ghglkgygakdipyannfn  
seakiyhntptfkaepgdllvvsgrfgyggyghtaivlngdydgklmkfqsldqnwnngwrkaevahkvvhnyendmifi  
rpfkka  
>sp|Q6G9W9|RNH2\_STAAS  
mtltikevkqlinavntieelenhecflderkgvqnai arrrka lekeqalkekyvemtyfeneilkehpnaicgidev  
grgplagpvvacatilsn  
hnylglddskkvpvtrlelnealknevtafaygiataeeidefniyatqiamqraidglsvqpthllidamtldnalp  
qvslikgdarsvsiaaasi  
makvfrddymtqlskdypeygfeknagygtkqhllaiddigimkehrksfepiksl  
>sp|Q6G9X7|Y1170\_STAAS  
mgqndlvktlrmnylfdyqsl ltnkqrnylelfyledyslsei adtfvsvrqavydnirrtgd lvedyekklelyqkfe  
qrreiydemkqhl snpeqi  
qryiqql edle  
>sp|Q6G9Y3|FABD\_STAAS  
msktaiifpgggaqkvmaqdlnfnndqateiltsaaktldfdiletmftdeegklgetentqpallthssallaalknl  
npdftmghslgeysslva  
dvl sfedavkivrkrqglmaqafptgvgsmaavlgldfdkvdicks lssddkiepanincpgqivvsghkalidelve  
kgkslgakrvmp lavsgpf  
hsslmkvi eedfssyinqfwerdakfpvvqnvnaqgetdneviksnmvkqlyspvqfinstewlidqgvdhfieigpgkv  
lsglikkinrdvkltsiq  
ledvkgwnend  
>sp|Q6G9Z8|DEFL\_STAAS  
maikklypashpiltkkaqavikfdds lkrllqdl edtmyaqeaaglcappinqslqvaiidmemegllqlvnpkiisqs  
netitdlegsitlpdyge  
vtrskmi vvesydvngkvel tahedvarmilhiidqmgipfteradri ldtkeveyafind  
>sp|Q6GA08|PYRE\_STAAS  
makeiakslldieavtlspndlytwssgikspiycdnrvtlgylvrgairdglinlikehfpevevisgtatagiphaa  
fiaeklklpmnyvrssnks  
hgkqnqiegaksegkkvviedlistggssvtavealklagaevlgvvaiftyglkkadtfnsiqlpftytsdyselie  
vaenegkissediqt lvev  
rdnla  
>sp|Q6GA25|Y1121\_STAAS  
mndnfkkqphli yee llqqgitlgittrgdgl sdypknafmaryidrpynitqhqlqlaeeiafdrknwvfpiqthe  
nkvacitkddigtndtlt  
dalhgidamytydsnl ltmcyadc vpyfystkhhfialahagwrgtyteivkevlkhvnfdlkd lhvvigpstssye  
inddiknfetlpidany  
ietrgrdrhgidlkkanaallnyygvpeniyttayatsehlelffsyrlekqgtgrmlafiqq  
>sp|Q6GA27|FTSA\_STAAS  
meehyvsvidigssvktivgekfhnginvi gttgtytsigikngliddfdiarqaikdtikkasiasgvdi kevfklpi  
igtevydesneidfyedte  
ingshiekvlegirekndvqetevinvpfirfivdkenevdpkeliarhslkveagviaiqksilinmikcveacgvdv  
ldvysdaynygsiltatek  
elgacvidigedvtqvafyergelvdadsiemagr ditddiaqglntsyetaekvkqhgyghafydsasdqdi ftveqvds  
detvqytqkdl sdfiearv  
eeiffefvfdvldgl tkvnggfivtggsanllgvkellsdmvsekvrihtpsqmgirkpessaisstissiafde lld  
yvtinyhdseeteedvidv  
kdkdnesklggfdwfkrrktnkddthenevestdeeiyqsednhqehkqnhehvqdkdkdkeeskfklmkslfe  
>sp|Q6GA29|MURD\_STAAS  
mlnytgl enknvlvvg laksgyeaakllsklganvtvndgkdl sqdahakdlesmgisvsvsgshpl tll dnpniivknpq

Tsompanidou\_et\_al\_Supplemental\_FASTA\_File

ipytvsvsideavkrglki  
tevelsyliaseapiavtngktvtsligdmfksrlltgrlsgnigyvaskvaqevkptdylvtelssfqllgikeyk  
phiaiitniysahldyhen  
lenyqnakkqiynqteedylicnyhqrqvieseeilkaktlyfstqqevdgiyikdgiyikgvriintedlvpgehn  
enilaavlacilagvpika  
iidslttfsgiehrlyvgtnrtnkyyndskatntlatqfalnsfnqpiiwlcggldrgnefdelipymenvramvfgq  
tkakfaklgnsgqksviea  
nnvedavdkvqdiiepndvllspacaswdqystfeergekfierfrahlpsy  
>sp|Q6GA30|MRAY\_STAAS  
mifvyallalvitfvlpvliptlkrmkfgqsireegpqshmkktgtptmgglftllsivitslvviiifvdqanpiilll  
fvtigfgligfiddyiivv  
kknngltskqkflaigiaiiffvlnsvfhlvnfstsihipftnvaiplsfayvifivfwqvgfnavnltdgldglat  
glsiigtmyaismfvlge  
taigifciimlfallglflyninpakvfmgtgslalggifatisimlnqelslifiglvvietlsvmlqvasfkltgk  
rifkmspihhhfeligwse  
wkvvtvfwavglisgliglwgvh  
>sp|Q6GA45|OTC\_STAAS  
mknlnrnsfltlldfsrqueveltltsedlkrakyigtekpmknkniallfekdstrtrcafevaahdqganvtylgpt  
gsqmgkettkdtarvlgg  
mydgieyrgfsqrtvetlaeysgvpvwngltdedhptqvladfltakevlkkdyadinftyvgdgrnnvanalmqgaaim  
gmfnhlvcpkelnptdel  
nrckniaaenggnilitdnidqgvkgsdviytdvwwsmgepdevwkerlellkpyqvnkemmdktgnpnvifehclpsfh  
nadtikiqqifekygi rem  
evtdevfeskasvffqeaenrmhtikavmvatlgef  
>sp|Q6GA59|FLIPR\_STAAS  
mkknitkviiastviatglltqndakaffsyewkgleiaknladqakkdderadklikeadeknehykgktvedlyvia  
kkmgkgntiavvki kdgk  
ngyytfditrpleehrknipvvkngheidsitwy  
>sp|Q6GA74|RNH3\_STAAS  
manivfkl sldkditlmsritfdtenlpqgmkarakyqnttvniyqsgkvmfqnhaeavskellpqhsqlnntkttkkn  
mansfleqlmydqfncig  
sdeagsdyfgpltvcaafvtkehvpilktlgvddskltdtkiveladqlvtfiphsltlhnekyniqqakgwtqvk  
kavlhneai knvlekidss  
qldyividqfakrevynhyalsdiplpkktkfetkgeskslaiavasii sryafvtymdqiskninmtipkgagakvdvi  
aakiikkyglshldtisk  
hfnrekaqkilkpl  
>sp|Q6GA86|ISDB\_STAAS  
mnkqkqkfkfysirkssl gvasvaistllllmsngeaqaaaetggnteaqpkteavasptttsekapetkpvnavs  
vsnkeveaptsetkeakev  
kevkapketkevkaakatnntypilnqelreaiknpaikdkdhsapnsrpidfemkkkdggtqqfyhyassvkparvft  
dskpeielglqsqgfwrkf  
evyegdkkllpiklvsydtvkdyairfsvsngtkavkivssthfnkeekydytlmefaqqiynsadmfkteedykaekl  
lapykkaktlerqvyelnk  
iqdklpeklaeykkkledtkkaldeqvksaitefqkvqptnekmtldqtkyvvyesvennesmmdtfvkhpiktgm  
gkkymvmettnddywkdfm  
vegqrvrtiskdnntrtii fpyvegklydaivkvhvtidydgqyhrivdkeafkntdksnkkeqqdnsakkea  
tpatpskptpspvekesqk  
qdsqkddnkqlpsvekendassesgkdktpatkptkgeveesssttpkvsttqnvakpttasskttkdvvqtsagssea  
kdsaplqkanikntndght  
qsqnnktqenkakslpqtgeesnkdmtpmlalla ssvafvlprkrkn  
>sp|Q6GA99|CTAA\_STAAS  
mfgkknlkwlgvvatlmmfvlqggalvktgsgadgcgsswplchgalipeffpidtielshravsa slmlvlvit  
awkhigyikeikplsii sv  
gflllqaligaaviwqqndyvalhfgislisfssvflitliifsidqyeadeyikkplrlltwlmai iycgvtyg  
alvrhadaslayggwplpf  
hdlvphseqdwvqlthrimafivftiimiyihavknyppnrtvhygytaafilvilqvitgalsimtnvllialfhal  
fitylfgmttyfimlmlrs  
vrskq  
>sp|Q6GAA8|Y1041\_STAAS  
mkyt fkpdkfka fnevgl darmealneyirpqlhelgeyfsdfftsqtgetfyphvakharrsvnppkdtwvafatnkr  
gymllphfqi gmfedqlfv  
mfgimheakdkatrakvfernfkaiqqlpddyrvcl dhmkpdkpfikldtdddlkeaiqrainvkkgeffiaraitpqdk  
rlksdkafialeetfdqf  
lpfysa  
>sp|Q6GAD9|PUR2\_STAAS  
mnvlvigaggrehalayklnqsnlvkqvfaipgneamtpiaevhteisesdhqaildfakrqnvdivigpeqplidgla  
dilrangfkvfgpnkqaaq  
iegsklfakkimekyniptadykeverkkdaltyiencelpvvkkdglagkgviiadtieaarsaieimygdeeeegt

Tsompanidou\_et\_al\_Supplemental\_FASTA\_File

vfetflegeefs lmtfvng  
dlavpfdciaqdhkrafhddegpntggmgaycpvphisddvklktnetiaqpiakamlnegyqffgvlyigailtkngpk  
viefnarfgdpeaqvllsr  
mesdlmqhiidldegkrtefkwnesivgvmlaskgypdayekghkvsqgfdlnenyfvsglkkqgdftvtsggrvilaig  
kgdnhvqdaqrdayekvsqi  
qsdhlfyrhdianka lq lk  
>sp|Q6GAE1|PUR3\_STAAS  
mvkiaifasgsgsnfenivehvesgk lenievtalytdhqna fcidrakkhdipvyinepkqf dskaayeqhlvsllned  
kvewiilagymligpdll  
asfegkjl nihpsllpkykgidaigqayhsgdtitgstvhvdcgmdtgeieqrqcdirpddskeql eekvkkleyely  
psviakivk  
>sp|Q6GAE5|PURQ\_STAAS  
mkfavlvfpgsncdrdmfnaaiksgveaeyvdyrets lsgfdgvlipggfsfgdylrsgamasvapiisevkr laaegkp  
vlgvncngfqlteigllpg  
allhndshl fisrneleivnnqtaftnl yeqgekv iyvahgeghyuctdeiyqqlkannqiilkvnnpnsgsyddiag  
ivnkkgnvcmmphepa l  
etllgt dsgvklfeamvkswreqhv  
>sp|Q6GAF4|QOX3\_STAAS  
mshdntntidsrthege lnl gfwifitae fal fgtl fatlltlqhggydagkmttel felplvlimtfallfssytcgia  
iymr qekqklmmfwmiit  
lllg l vfgvfeiyefahyasegvnptigsywsffillgthgchvs lgi vwaiclliqi qrrgl dkynapklfivsl ywh  
fldvwwvfi ftavymigmv  
ysg  
>sp|Q6GAG0|ATL\_STAAS  
makkfnyklpsmvaltlvgsavtahqvqaaettqdqttnknvl dsnkvkatteqakaevknptqnisgtqvyqdpai vqp  
ktannktgnaqvsqkvdt a  
qvngdtranqsatntntqpvakststtapktntnvt nagysl vdedd nsenqinpeliksaakpaale tqykaaapkaa  
ttsapakteatpkvtfts  
asaqprsvaatpkts l pkykpqvnsindyir knnlkapkieedytsyfpkyayrngvgrpegivvhdtandr stingei  
symknnyqna fvhafvdgd  
rietapt dylswgv gavnprfinveivhthdyasfarsmnyadyaatqlqyyglkpd saeydngntvwthyavskyl  
gtdhadphgylrshnysy  
dqlydlinekyl ikmgkvapwgqtstttptpskpstgkl tvaanngvaqikptnsglyttvydktgkatnevqktfavs  
ktatlg nqkfy l vqdynsg  
nkfgwvkegdvvyntakspvnnqsys ikpgtklytvpwgtskqvagsvsgsgnqtfkaskqqqidksiylygsvngksg  
wvskayl vdtakptptptp  
kpstpttnkl tvssl ngvaqinakngl fttvydktgkptkevqktfavtkeas l ggnkfy l vkdysptligwvkqgd  
viynnakspvnmqytytk  
pgtklysvpwgtykq eagavsgtgnqt fkatkqqqidksiy l fgtvngksgwvskaylavpaapkkavaqptavkaytv  
tkpqtqtvs k iaqvkn  
tgrasvyektakngakyadrtfyv tkerahgnetyvll nntshn iplgwfnvkdlnvqnlgkevkt tqy tvnksngl  
smvpwg tknqviltgnnia  
qgtfnatkqvs vkgdvlygtinnrtgwvnakdl taptavkpttsaakdyny tyvikngngyyyvtpnsdtakys l kafn  
eqpfavvkeqv ineqtwyy  
gklsngklawikstdlake likynqgmtlnqvaqiqaglykqpqvrvpgkwtdanfndvkhamdtkrlaqdpalkyqf  
lrl dqpqn isidkinqflk  
gkglvlenqgaafnkaaqmyginevyl ishalletgnqtsqlakgadvvnnkvvt nsntkyhvf g iaaydndplregiky  
akqagwdtvskaivggakf  
ignsvykagqntlyk m rwnpahpgthqyatdi dwan iaki ikgyydkigevgkyfdipqyk  
>sp|Q6GAG4|SSPA\_STAAS  
mkgkflkvssl fvatlltatl vsspaana lsskamdnhpqqsqsskqqt pkiqkgnl kpleqrehanvilpnndrhqit  
dttnghyapvtyiqveapt  
gtfi asgvvvgkdtlltnkhvvdathgdphal kafpsainqdnypnggftaeqitkysgedlaivkfspneqnkhi gev  
vkpatmsnaetqvnqnit  
vtgypgdkpvatmweskgit ylkgeamqyd l sttgngsgspvfneknevigihwggvpnefngavfinenvrnflkqni  
edihfanddqpnnpdnpdn  
pnnpdnpnnpdnpnnpnnpdnpdngdnnsdnpdaa  
>sp|Q6GAG5|SSPB\_STAAS  
mnssykrsvfnii siimvsm l i lslgafannkakadshskql einvksdkvpqkvkdlaqqqfagyakal dkqsna ktg  
kyelgeafkiykfngedn  
syyypvikdgi vyltl l spknkddl nkskedmnysvki snfiakdl dqikdknsnitvltdekgyfeedgkvr l vkat  
plpgnvkekesaktvsskl  
kqelkntvtptkveenea iqedqvqyentlnkfkireqqfdnswcagfsmal lnatkntdtynahdimrtlypevseqd  
l pncstf p nqmi eygksg  
rdihyqegvpsyeqv dqltkdnvgimilaqsvsqnpndphlghalavvgnakindqekli ywnp wdtel siqdadsllh  
lsfnrdynwygsmigy  
>sp|Q6GAG7|MENB\_STAAS  
mtnrqwetl reydeikyefyegi akvtinrpevrnaftptvsemi dafsrarddqnvsvivltgedglafcsggdqkkr



Tsompanidou\_et\_al\_Supplemental\_FASTA\_File

ghggyvgedqiprlnvldl  
qrliiriipkpviamvkgvavgggnvlnvcdltiaadnaifgqtgpkvgsfdagygsylarivghkkareiwylcrqyn  
aqealdmglnvntvvp1ekv  
edetvqwckeimkhsptalrf1kaamnadtdglag1qqmagdatllyttdeakegrdafkekrpdfdqfpkfp  
>sp|Q6GAG9|MEND\_STAAS  
mgnhkaalkqvftfase1yaygvrevvispgsrstplalafeahpniaktwihpdersaaffavgligserpvailcts  
gtaaanytpaiaesqisri  
plivltsdrphelrsvgapqainqvmfnnyvsyefdmpiaddsketinaiyyqmiasqylygphkgpihfnlpfrdp1  
tpdlnatelltsemkilph  
yqksidasalrhilnkkgliivgdmqhqvvdqiltystiyd1piladplshlrkfdhpnvictyd1lfrsgldlnvdfv  
irvgkpvisklnqwlkkt  
dafqilvgnndkidvfpiapdisyeisandffrslmedttinrvswlekwqrlekkgrkeikcyleqatdesafvge1ik  
ktsekda1fisnsmprdv  
dn11lnknidvyanngidgivsta1gmavhkrit1ligd1sfyhdmg1lmsk1nniqmniv11nndgggifsylpq  
kesatdyfer1fgtptgld  
feytaklyqfdkrfnsvsefknat11setstiyelitnrednfkqhqi1yqk1semihgt1  
>sp|Q6GAQ9|MURE\_STAAS  
mdast1fkkvkkrv1gs1eqqiddittsrtaregsifvasvgytvdshkfcqsvadqgcklvvvneqslpanvtqvv  
vpdt1rvasilahtlydyp  
shq1vtfgvtgngktsiatmih1iqrklqknsay1gtngfqinetkktganttpetvsltkkikeavdagaesmt1evs  
shglv1gr1rgvefdvaif  
sn1tqdh1dfhgtmeayghaks11fsq1ged1skekyv11nndsfsy1rtvtpcevfsygideea1fmakniqes1qg  
vsfdvtpfgtysvkspyv  
gkfnisnimaamiavwskgts1etiikaven1epvegr1ev1dps1pid1i1diyahtadgmkn1idavqpfvkqk1if1v  
gmagerd1tktpemgrvac  
radyv1ftpdnpanddpkmltaelakgathqnyiefddraegikhaidiaepgd1v1askgrepyqimpghikvphrdd  
1ig1leaaykkfgggpvqg  
>sp|Q6GAS0|PPNK\_STAAS  
mrytiltkgdsksna1khkmmnymkdfmiedsenpeivisvggdgt11qafhqyshmlskvafvgvhtghlgfyadwlp  
hevekl1ieinnsefqvie  
yp1leimryndngyetry1al1neatmktengst1vvdvnlrgkhferfrgdglcvstpsgstaynkalgga1ihpslea  
mqiteiasinnrvfrtvgs  
plv1pkhhtclispvnhd1rmtidhvsikhknvnsiqyrvanekvrfarfrpfpfwrkvhd1sfissdeer  
>sp|Q6GAV9|ADDA\_STAAS  
mtipekpqgviwtdaqwsiyatgqdv1vaaagsgktav1veriiqkilrdgidvdrl1lvvtftnl1saremkrvdqri  
qeasiadpanahlknqrik  
ihqaqist1hsfcl1iqghydv1nidpnfrtsseae1111eqtidevieqhydi1dpafiel1teqlssdrsd1qfrmi  
ikqlyffsvanpnptnwld  
qlvtpyeeeaqqaqliq11td1skvfitaayda1nkayd1fsmmdsvdkh1laviederr1mgrv1leggf1dipy1tghef  
gar1pnvtak1keanemmv  
da1edak1qykkys1idkvksdyfsreadd1kadmq1aprky1arivkdvms1efnrkkrskn1ldfsdyehfalqil  
t1nedgspse1aesyrqhfq  
ei1vdeyqdt1nrveki1sciktgdehngn1fmvgdvkqs1ykrqadps1fiekyqrftidgdgtgrrid1sqnfrsrk  
ev1sttnyi1fkhmmdeqvg  
evkydeaaq1ygydesdhpvn1kv1veadqehsd1tgse1qeah1f1veqvkd1lehqkv1dmktgsyrsatykd1vil  
ersfgqarn1qqafknedi  
p1fhvns1regyfeqt1evr1v1s1fl1raidnpl1qdiyl1vg1mrsviy1qf1kedelaqir1ilspnddyfyqsivny1indea1dai  
1vdkl1kmf1sdiqsyqqys  
kdhpyq1idkfyndhyvi1qyfs1g1iggr1rran1ygl1fnkaie1fenss1frg1yq1fir1fideliergkdf1geenv1vgpnd  
nv1rmm1tihssk1g1efpfv  
iysg1skdfnkr1dkqpv1lnqqfg1gm1dyfd1vd1kema1f1slasvayravaekel1vseem1rvyval1trakeq1yligrv  
kndks11le1eq1sisgehi  
avner1tspn1pfh1iys1l1skhqsas1pdd1k1fekdia1qvedss1rpnvnsi1iyfedvstet1ldnneyrsvnq1letmqn  
g1nedvkaq1khq1dyqypy  
vndtkkpsk1qsvselkrqyeteesgtsyervr1qyrig1fstyerpk1fl1seqgkrkaneigt1mhtvmqhl1pfkkeriseve  
1hg1yidg1lidkhi1eadak  
kdirmde1imt1finse1lysi1iaeaeqvyre1lpfvnqa1vdq1pqgdedvs1iqgm1d1ifvkdgvhy1fvdyktdafnrrr  
gmtdeeigt1q1knkyki1qm  
kyyqnt1qt1lnkev1kgy1lyffkfgt1q1  
>sp|Q6GAW0|ADDB\_STAAS  
mt1hay1lragt1gkstkmlteikqk1kadpl1gdpi1liaptqst1fq1eqafvndpe1ngs1rtevl1hfer1shrif1qevg  
syseq1kskaatemmi1yni  
vqe1qqkyl1k1yqsqakyyg1fsekl1teqi1qdfkkyavt1pehle1fiadknm1qtrtkn1kledialiyrefeqriqnefitge  
ds1qyf1dcmpk1sew1kra  
diy1idg1fhn1fstiey1li1kgl1ikyaks1vti1l1ttdgn1hdq1fsl1frkpse1v1rhiee1iane1lnisierqyfnq1lyrfn1qd  
1kh1leqefdv1lqinrvacq  
ghin1ilesat1mree1nei1arriivdi1rdkq1lryqdia1ilyrdesyay1f1dsil1plyn1ipynid1tkrsmth1hpvmemirs1  
1evi1qsnwqvn1pmlr1l1kt

Tsompanidou\_et\_al\_Supplemental\_FASTA\_File

dvltasyksaylvdl1lenfvlergiygrwlddelfnvehfsmgrkahl1ederntfeqvvlkkdvidkilhfekq  
msqaetvkdafatafyesme  
yfelpnq1mterdel1ngnhekaeeidqiwnqliqilddlv1vfgdepmsmerfle vfdigleqlfvmipqtl1dqvsi  
gtmdlakvdnkqhvflvgm  
ndgtmpqpv tassli1deekkyfeqqanvelsptsdil1qmdaefvcyamtraraqdvtsyr1mgssgddkeisplnqi  
qslfnqle1tnipqyhev  
plslmqhakqtktlfealrawlydeivadswl1dayqvirdsdhlnqgldylmsaltfdnetvklgetlskdlygkeina  
svsrfegyqqcpfkhyash  
g1klnerkyelqnf1d1gdi1fhsvlkyiseri1ngdfkqldlkkirqltnealeeilpkvqfn11nssayrylsrrigai  
vettlsalkyqgtyskfmp  
khfetsfrrkprndeliaqtl1tttqgipinirgqidridtytkndtsfvni1dykssegsatl1dtkvyymqmqmmtym  
mdiv1qnkqrl1g1tdivkp  
gg1lyf1vhhepr1kfkswsdidedkleqdl1kkfk1sg1vnadqtv1daldirdlepkftsdivpvglnkdgs1skrgsqv  
adeatiykfiqhnkenfie  
tasnimdghte vap1kykqk1pcafc1syqsvchvdgm1dskryrtv1detinpieaiqnin1defggeq  
>sp|Q6GAW1|LEP\_STAAS  
mkkel1lewi1siavafv1l1fivgk1fivtpytikgesmdpt1kdgervavni1igyktgglekgnvvvf1hanknddyvkrvi  
gvpqdkveykndt1yvngk  
kqdepylnyn1khkqgdy1tgtfqvkd1pnanpksnvipkgkyl1vgdnrevskdsraf1g1idedqivgkvsfrfwfse  
fkhfn1pentkn  
>sp|Q6GAX7|MNHD1\_STAAS  
m1esnmlv1t1vipvita11lvf1gkrpiikryvalgg1t1t1vaai1nlanvvkhgpirvelgswkapysivfv1d1f1s  
a1l1i1tsi1i1taiv1ilysy  
qtigiereryyyyfsv1fml1igi1gaf1ttgdi1fn1fvf1fev1f1mssy1f1l1vig1stki1ql1qet1ikyv1lvnv1vss1ffvmgv  
a1l1ysv1vg1t1n1lad1isnk1  
an1sah1dsg1lvn1v1f1l1fi1fvfat1kag1v1f1m1fw1l1psay1yappi1ia1ffa1ll1tkvg1vyai1art1sl1ffs1dnv1sfshyv  
i1fl1a1ll1ti1fgcv1gavay  
an1kk1i1lynvm1iavgv1lvgvam1tesgm1igai1y1t1hdml1vk1a1l1f1l1igim1ikitgtad1rqf1gg1likryp1v1gwsf  
fi1aa1sl1ag1pp1sgfy1gk  
ff1vq1st1ferg1fyl1sgv1v1l1ss1lv1ysv1iri1fl1qg1ff1g1qpk1gyd1lnnk1vdv1kyl1ttia1ivav1itv1lyg1sady1lypm  
vkagaetfynpstyvkav1  
ggk  
>sp|Q6GAY5|Y811\_STAAS  
ma1qdr1kkv1lv1gagy1ag1qtvt1kl1qka1iste1eae1it1inkney1hyeatw1l1heas1agt1nyed1v1ypves1v1kkdkv1nf1vq  
aev1tkid1rd1akkvet1nqgi  
ydf1dil1vva1lgfv1set1fgi1egm1kdha1fq1envi1tare1l1srh1iedk1fanya1aske1kddnd1sil1vgg1ag1ftg1vef1l1ge1td  
ripel1csky1gd1qnk1vk1it  
cvea1apk1ml1pm1f1see1lvn1havs1y1ledrg1vef1kiatp1ivac1nek1gfv1ved1gek1qql1nag1tsv1waag1vrg1sk1lmees1fegv  
krgr1iv1tkq1d1t1ingy1dni  
fv1gd1csa1f1page1erp1pt1taq1iamq1gesv1ak1nikri1ngest1eef1yvdrg1tvcs1lgsh1dgv1gm1vfdkpi1agk1kaaf  
mkk1vid1trav1fk1igg1gla  
fkk1gk1f  
>sp|Q6GB05|2NPD\_STAAS  
mwnkn1rtqm1s1ieyp1iqag1mag1sttpk1vasvs1nsg1lgtig1agy1fnt1qq1lede1dyvr1ql1tsns1fgv1nv1fvps1qqsy  
tssq1ienm1naw1kpyrra1l  
h1leep1vki1teeqq1fkch1id1ti1ikk1qv1pvc1cft1fgips1esi1ikr1kean1ik1igt1atsv1deai1anek1agmd1aiva1qg1sea  
gghrg1s1fl1pkng1l1pmvgt  
i1sl1vp1qi1vdv1s1ip1via1agg1imd1grg1v1asiv1lgaeg1v1qm1gta1fl1tsq1dsna1sell1rdai1n1sket1dtv1vtk1afsg1klar  
ginnr1fieems1qyeg1dip  
ypiq1nel1tss1rkaaa1n1gdkel1thm1wsg1spr1lat1thpant1ivsni1ninq1inqim1qyk  
>sp|Q6GB43|EMP\_STAAS  
mkkk1l1v1tm1st1fat1qimns1hakasv1tesvd1k1fv1pes1gink1i1ptyne1fkkap1kv1nvg1n1adnkn1fv1asedk1lnki  
vd1ssa1aski1vdkn1fav1pes  
kl1gni1v1pey1kein1nr1v1vat1nnpas1qqvd1khfv1k1gpe1vn1r1fit1qnkv1nhh1f1itt1q1thy1kkv1itsy1ksth1vhkh1vn1hakd  
s1inkh1fi1vkps1es1pr1ythp  
sq1sli1ikh1fav1pgy1hah1kfvt1pgh1as1ik1nhf1cv1pp1q1ins1fkvi1ppy1ghn1shr1mh1vps1fq1nnt1tath1qnak1vn1kay1dyk  
yf1ysy1kv1vk1gv1kky1fs1fsq  
sngy1ki1gkps1lnik1nv1ny1qy1av1psys1p1th1yv1p1ef1kgs1lpap1rv  
>sp|Q6GB45|CLFA\_STAAS  
mmk1k1k1k1ek1hai1rkks1ig1vas1lvgt1l1ig1fg1l1sske1adas1ensv1tq1sds1asnes1knd1sss1sv1saap1ktd1dt1nvs1dtk1tss  
nt1nng1ets1vaq1npa1qq1gett  
qs1al1tnat1teet1pvt1geatt1atn1qant1patt1q1ssnt1nae1l1vnq1ts1net1tsnd1tntv1ssv1nsp1qn1stna1env1st1tq1dt1st  
eat1ps1nnes1apq1std1asnk  
dv1vnq1av1nts1ap1rm1raf1s1sava1adapa1ag1kdi1tnq1l1tnvt1vgi1dsg1dtv1yph1qagy1vkl1ny1g1fsv1pns1av1kg1dt1fki1tv  
pke1ln1ngvt1stak1vpp1im  
ag1dq1v1ang1vid1sdg1nvi1y1ftdy1vdt1ken1vtani1tmpay1idpen1vtkt1gnvt1ttg1ig1st1tank1tv1ldy1eky1gk1fyn1  
s1ikgt1idq1idk1tnnt1yr1qt  
iy1vnp1sg1dnvi1apv1l1tgn1lkpnt1dsna1lidq1nts1ikvy1kvd1naad1sesy1fvn1pen1fed1v1t1nsv1nit1fpnp1nqy1kve1fn

Tsomanidou\_et\_al\_Supplemental\_FASTA\_File

tpddqittpyivvvnghid  
pnskgdlairstlygydsrfvwrmswdneva fnngsgsgdgidkpvvpeqpdepegeiepipedsdsdpgsdsgsdnsd  
sgsdsgsdstsdsdsgdsas  
dsdsasdsdsasdsdsasdsdsasdsdsasdsdsasdsdsasdsdsasdsdsasdsdsasdsdsasdsdsasdsdsasdsdsasdsdsasdsds  
dsdsdsdsdsdsdsdsdsd  
sdsdsdsdsdsdsdsdsdsdsdsdsdsdsdsdsdsdsdsdsdsdsdsdsdsdsdsdsdsdsdsdsdsdsdsdsdsdsdsdsdsdsasdsdsd  
sdsdsdsdsdsdsdsdsds  
dsdsdsdsdsdsdsesdsdsdsdsdsdsdsdsdsdsdsasdsdsgsdsgsdssdsdsesdsnsdsesgsnnnvppnsp  
kngtnasnknkneakdskep  
pdtgsedeantsliwgl lasigslllfrkckenkdkk  
>sp|Q6GB55|GPMI\_STAAS  
makkptaliiidgfandreseghnavklankpnfdryynkypptqieasgl dvglpegqmgnevghmnigagrivyqslt  
rinksiedgdfvendvlnn  
aiahvnsdhsalhi fgl sdggvhshykhlfallelakkqgvekvyvhafldgrdvdqksalkyieeteakfnelgiggf  
asvsgryyamdrkrwere  
ekaynai rnfdaptyatakegveasynegl tdefvvpfivenqndgvndgdavi fynfrpdraaq lseifanrafegfkv  
eqvkdlyatftkyndnid  
aai v fekvdl nntigeiaqnnl tq l riaet keyphvtyfmsggrneefkgerrlidspkvatydlkpemsayevkdal  
leelnkgdl dlii lnfanp  
dmvgshgml eptikaieavdec lgevvdkildmdgyai itadhgnsdqvl tdddqpm tthttnpvvvtkegvtl retg  
r l gdl apt l l d l l nveqpe  
dmtgeslikh  
>sp|Q6GB61|Y734\_STAAS  
mkqyli tgg tgm vgs qlv nei kksdshitil trhdqisndkki syvnwaksgwehkvpqnidvvinlagatlnkrwtpey  
kqtlmlsr i qstqalyelf  
ksrnkapkvlfnasatgyppdl fmsy tevyktlpfdf l sdivyqwerfaqqfeql gtrvvigrfgmil sneggalqtmk  
lpykyyiggrlgsgqqwys  
wihindliqail flinnesasgpfnl tapiperqnl fgyt laramhkphetwaps lamrlilgqmvstvl dtqkvlpnki  
qal g f q f k y s n l k m a l e d l  
ike  
>sp|Q6GBB8|QUEC\_STAAS  
mesvlnnekai vvfsgqdsttclfyakkhfkevelvtfnygqrhdteievakqiaqdqgmkhhlvdmsllsq l t p n a l t  
qhdmei t n n e d g i p n t f v p  
arnlflsfagalayqigakhi itgv cetdfsgypdc rdsfiksmnvt lslamd kdfvihtplmwlnkaetwkl sdelev  
ldyirktl tcyngi igdg  
cgcepachlrqrglnqyleskga l  
>sp|Q6GBD5|NORA\_STAAS  
mnkqifvlyfni fliflgivlpvylkd l g l t g s d l g l l v a a f a l s q m i i s p f g g t l a d k l g k k l i i c i g l i l f s v  
sefmfavghnsvlmlsr  
iggmsagmvmpgtgl i adispshqak n f g y m s a i i n s g f i l g p g i g g f m a e v s h r m p f y f a g a l g i l a f i m s i v l i h d  
pksttsqfkl epqltk  
inwkvfitpvil tlvls l g l s a f e t l y s l y t a d k v n y s p k d i s i a i t g g g i f g a l f q i y f f d k f m k y f s e l t f i a w s l l y  
svvli l l v f a n g y s i m l  
isfvvf igfdmi rpa itnyfsniagerqg fagg l nstftsmgnfigpliagal f d v h i e a p i y m a i g v s l a g v v i v l i e k  
qhraklkeqnm  
>sp|Q6GBE7|UPPP\_STAAS  
mfiielikgii lgvvegltefapvsstghmilvddmw lksseflgsqaftfkiviqlgsvfaawvfrerfleilhigh  
khkvegdnqqrskprrl  
nlhvlvgmpagilgl l f d d f i e e h l f s v p t v m i g l f v g a i y m i a d k y s a k v k n p q t v d q i n y f q a f v i g i s q a v a m w  
pgfsrsgstistgv lmkln  
hkaas d f t f i m a v p i m l a a s g l s l k h y q d i q i t d i p f y i l g f l a a f t v g l i a i k t f l h l i n k i k l i p f a i r i v l v i f i  
ail y f g f g i g k g i  
>sp|Q6GBH0|GRAS\_STAAS  
mnllkwvayflksrmnwi fwi flnlmlgis lidydfidslfyivslnsl tmi flil tyfkev klykhfdkdeiee  
ikhkdl aetpqrhtvdyl  
yrqisahkekvveqql gl nmheqtitefvhdikt pvtamkl lidqeknerkqallye wsrinsm ldtqlyitrlesqrk  
dmyfdyvs lkrmvideiq l  
trhisqvk g i g f d v d f k v d d y v y t d i k w c r m i i r q i l s n a l k y s e n f n i e i g t e l n d q h v s l y i k d y g r g i s k k d m p r i f  
ergftstanrnettssgm  
lyl v n s v k d q l g i h l q v t s t v g k g t t v r l i f p l q n e i v e r m s e v t n l s f  
>sp|Q6GBJ0|TAGX\_STAAS  
mrlti iiptcneati rgl l s i e s k e h y r i l c i d g g s t d q t i p m i e r l p r e l k h i s l i q l q n a s i a t c i n g l m d i k m t  
dphdsdafmvinptsivlp  
gkl dr l t a a f k n n d n i d m v i g q r a y n y h g e w k l s a d e f i k d n r i v t l t e q p d l l s m m s f d g k l f s a k f a e l q c d e t l a n  
tynti l v k a m q a t d i h l  
vsqmi vgdndid thatsndedfnryiteimki rqrvmem lllpeqr llysdmvdri lfnslkyymnehpavthttiqlv  
kdyimsmqhsdyvsqnmfd  
iintvefigenwdreiyelwrqtliqvginrptykkfliqlkgrkfahrtksmlkr

Tsompanidou\_et\_al\_Supplemental\_FASTA\_File

>sp|Q6GBJ3|TAGH\_STAAS  
mnsvsniknvtkeyriyrtnkermkda1ipkhknktffa1ddis1kayegdviglvgingsgkst1sniiggs1sptvgk  
vdrngevsviaisag1sgq  
1tgjeniefkmlcmgfrkeikamtpkiefse1gefiyqpvkkyssgmraklgfsinitvnpdilvidealsvgdqtf  
qkcldkiyefkeqnktiff  
vsh1ggvrfctkiawieggk1kdyge1ddv1pkyeaf1ndfkkkskaeqkefrnk1desrfvik  
>sp|Q6GBK7|MNHA2\_STAAS  
mslvyl1ia1lvimam1lmskr1alakyagyialvapvissiyfliqipsvak1qyl1stsipwikt1din1dl1rdg1s  
1mfs1iis1ligiavffiyat  
qylssrkdnlprfyfyt1l1mfsmigiv1sdnt1lmyifweltsvssfl1isywynngdsqfgamqsfm1tvfgg1allv  
gfim1yimtgtntite1lg  
qadhiknhg1fipm1fmf1l1gaf1tksaqfpfhiw1pramaaptvsay1hsatmvkagif111rftpl1g1snmyvyivt  
fvg1itml1fgs1tal1kqwd  
1kgilayst1sq1gm1amv1gigg1yaqhqda1asiyvf1lfga1fhl1mhai1fkca1fmgvg1ldheagsrd1rilsg  
mrq1lfpkml1vmt1aa1sm  
agvp1l1ng1f1skem1f1dal1tqtgq1sqf1s1ismia1ivfvg1viasvftftya1ymvkevfwtkydskvftkkn1hepw1fs  
1ps1il1mv1vpv1iffvpni  
fgkgi1v1al1ravsg1nhq1d1q1aphvsqwhgfn1p111t1i1i1l1gsv1aikvdwkkvftgk1rq1svsksyemvyrhf  
ekfatkrfkrvmqdr1nqy  
i1mt1gi1fmi1i1gy1ir1gl1pkvhq1lhvsefgalei1laivtvtig1is1l1firqr1l1tmv1l1ngv1igfvvt1ffiamkap  
d1al1tq1lvvet1t1l1fiv  
sfsr1l1pnvprsnankkrei1kisvs1l1malivvs1l1fitqqt1d1g1ss1sd1fy1lkadk1l1tggknivnailgdfrald1t1fe  
g1v1l1it1g1giy1t1l1nyq  
rrgqdere  
>sp|Q6GBM1|SYR\_STAAS  
mni1dqvkq1t1vee1iaas1nkag1ladeipdiki1evpkdtkngdyatniamv1t1kiakrnpreiaqaivdn1dtekahvkq  
idiagg1f1infyl1dnqylt  
aiipea1iekdg1qfghvneskgqnv1leyvsanptgd1higharnaavgdalanil1taagynvtreyyindagnqitnlar  
sietrff1eal1gdnsysmpe  
dgyngkdi1e1gkd1laekhpei1kdyseear1kefrk1lgveyemak1knd1laefnthfdnwfsets1yekceilevlakmk  
elgytyeadgatw1rttdf  
kdkdrv1l1kndgtytyf1l1pdiayhfdkvkrngdi1l1d1l1fgadhgyinr1l1kas1etf1gvd1snr1lei1qimqmvr1l1mengk  
evkmskrtgnait1l1reim  
evgvd1aaryf1l1tmrpsdshfd1dme1akeqsqdn1pvyya1qyaharics1l1kqakeggi1evtaandfttitnekaie1l1kk  
vadfept1iesaaehrsahr  
itnyiqd1ashf1hkfy1naekv1l1tddi1ektkahvami1eavrit1kna1lamvgvsapesm  
>sp|Q6GBP9|Y546\_STAAS  
msqaaet1dgwys1h1fyavdw1s1r1lvpkderda1vtefqs1f1entatvrssks1gdqaiynitgqkad1l1l1w1f1r1pemk  
s1nhienefnk1l1riadf1l1  
ptysyvsvie1sny1lagksdedpyenphikar1l1pelpshdyic1fypmknrrnetynwym1tmeerk1l1mydhgmigrky  
agkikqf1itgsv1gfd1d1few  
gvt1f1sddv1l1qfkk1ivyem1rfdettaryge1fgs1ffvgh1intnefdqffais  
>sp|Q6GBQ6|UNG\_STAAS  
mewsqifhdi1ttkhdfkamhdf1e1keystaivypdreniyqafd1l1tpfenikv1il1gqdp1yhgnqahg1afsvqpnakf  
pps1l1rnmykel1addigc1vr  
qtp1h1qdwareg1v1l1ntv1l1tvrqgeanshrdigwetftdei1kav1sdykehvv1f1l1wgkpaqqk1l1idtskhci1ksv  
hps1l1sayrgffgskpysk  
anay1esvgk1l1pinwcesea  
>sp|Q6GBR1|VRAB\_STAAS  
mnqavivaakrtaf1gkyggt1l1khl1epeq1l1kpl1f1qh1fkeky1levi1skiddv1l1gnvvgnggni1arka1l1leag1kdsipgv  
tidr1qc1gsg1lesvqyacrm  
iqagagkvyi1agvestsrapwk1k1rphsvyeta1l1pefyer1asfapemsdp1smi1qgaenvakmydvsrel1qdefayrshq  
l1taenvkngnisqe1l1pit  
vkgei1fntdes1kshipkdnfgrf1kpvikggtv1taanscmkndgav1l1l1imekdmayel1gfeh1l1l1fdgvtvgvdsnfp  
gigpvpaisn1l1krnq1ti  
eni1evie1ineafsaqv1vacqqa1lni1sntq1l1niwgga1asghpygasgaql1vtr1l1fymfdketmiasmgigg1g1gnaal1ft  
rf  
>sp|Q6GBR4|PROP\_STAAS  
mdfnkeninmvdakkaktv1vatg1ignamewfd1gvyayttayiganffspvenadirqml1tfaal1aiaf1l1rpiggv1vf  
gi1gdkygrkv1l1tst1i1l  
maf1st1l1tig1l1psydg1ilwapi1l1l1larv1l1qgf1stg1geyagamyvaesspdkrns1lgsg1leigt1sgyiaasimiav  
l1tff1l1tdegmasfgwripf  
l1gl1f1gl1fg1yl1rrk1leespvfendvatqperdn1inflqi1r1fyyidi1fvcfvavff1nvtnymvtayl1ptyleqv1k1  
datt1tsv1l1itcvmaim1p1l  
al1mf1gk1ladkige1kkv1f1igtg1l1t1fsi1afm1l1hsqs1fvvivi1gifi1l1gff1l1styeatmpgs1l1ptmfyshir1yrt1sv  
tfnisvs1f1gg1t1plvatw  
l1vtktgd1pl1apay1l1ta1svig1fl1vit1fl1h1stags1l1kgsypnd1neqdrayyaehpkeal1wwvkerkn  
>sp|Q6GBS4|SDRE\_STAAS

Tsompanidou\_et\_al\_Supplemental\_FASTA\_File

minrdnkkaiktkgmi snrlnkfsirkvgtasi lvgttlifglgnqeakaaentstenakqddattsdnkevsean  
nsttendstnpikketntd  
sqpeakeestksstqqqnvttattetkpnienenvkpstktatedtsvileekkapnntndvttkptstseiqtktpt  
tpqestniensqpqptpsk  
vdnqvtatnpepvnvskee lknpek lkelvrndsntdhtkpvataptsvapkrvnakmrfavaqpaavasnnvnd l  
ikvktqtkvvgdkdnvaa  
ahdgkdi eydteftidnkvvkgtmtinydknvipsdltdkndpiditdpsgeviakgtfdkatkqitytftdyvdkyed  
iksr ltllysyidkktvpne  
tslnl tfatagketsqnvtdvyqdpmvhgsniqsi ftkl dedkqtieqqiyvnp l kksatntkvdiaagsqvddygnik l  
gngstiidqnteikvykvn  
sdqqlpqs nriydfsqyedvtsqfdnkksfsnnvat l dfgdinsayi ikvsvkytptsdgel diaagtsmrttdkygyyn  
yagysnfi vtsndsgggd  
tvkpeeklykigdyvvedvdkdgvqgtdskekpmav lvt l typdgttksvrt dakghyefgg lkdgetytkfetptgy  
lptkvngtt dgekdsngs  
vtvkingkddms l dtgyfyekepn l gdyvvedtnkdgi qdanepgikdvkvt lkdstgkvi gtttt dasgkykftd l dng  
nytvefetp agytptvknt  
taedkdsng l tttgvikdadnmt l ds gyfkytpkys l gdyvwydsnkdgkqdstekgikdvvt l qnekgevigttkten  
gkyrfdn l ds gkykvi fek  
pag l tqvtntteddkdadggevdti tdhddft l dngyfeedtsdsdsdsdsdsdsdsdsdsdsdsdsdsdsdsdsdsds  
dsdsdsdsdsdsdsdsdsdsdsdsdsdsdsdsdsdsdsdsdsdsdsdsdsdsdsdsdsdsdsdsdsdsdsdsdsdsdsdsdsds  
dsdsdsdsdsdsdsdsdsdsdsdsdsdsdsdsdsdsdsdsdsdsdsdsdsdsdsdsdsdsdsdsdsdsdsdsdsdsdsdsdsds  
dsdsdsdsdsdagkhtpvk  
pmttkdhhkakal petgsennsgnna l fgg l faalgs lll fgrkkqnk  
>sp|Q6GBS5|SDR\_STAAS  
mlnrenktairkgmvsnrlnkfsirkvgtasi lvgttlifglgnqeakaaestnkelneattsasdnqssdkvdmqq  
lnqedntkndngkemvssq  
gnetsngnksiekesvqsttgkvevstaksdeqaspkstned lntkqtisnqea l qpd l qenksvnaqptneenkvv  
daktest l nvksdaiksn  
aet l vdnnsnsnennadi i l pkstapkr l ntrmriaavqpssteakvnd l itsnt l tvvdadknnkivpaqdy l elk  
sqikvddkvksgdyftiky  
sdtvqvyg l npediknigdikdpngetiatakhdann litytftdyvdrfnsvqmginsiydadtivskndvefn  
vtigntttkttani qyppy  
vvneknsigsaftetvshvgnkenpgyykqtiyvnpnsen ltnak l kvqayhssypnnigqinkevtdikiyqvpkgyt l  
nkgydvntkeltdvtnqyl  
qki tygdnsav i dfgnadsayvnmvntkfqytt sespt l vqmv l ssnsksasmgnal gftnnqsggagqevyki gny  
vvedtnkngvqelgekgyv  
nvtvtfdnntntkvgeavtkedgsy l ipn l pngdyrvefns l pkgyevt pskqgnnee l dsng l ssvi tvngkdn l sad  
l giykpky n l gdyvvedtn  
kngiqdqdek g i sgvvt l kdengv l ktvttdadgkykftd l dngnykvefttpegytptvtsgsdi ekdsng l tttg  
vingadnmt l ds gyfkytpk  
yn l gnyvvedtnkdgkqdstekg i sgvvt l knengev l qttktdkdgyqftg l engtykvefetpsgytptqvgsgtd  
egjdsngtsttgvikdkdn  
dtidsgfykptyn l gdyvvedtnkngvqdkdek g i sgvvt l kdendkv l ktvttdengkyqftd l nngtykvefetpsg  
ytpsvtsngdtekdsng l  
tttgvikdadnmt l ds gyfkytpkys l gdyvwydsnkdgkqdstekgikdvkvt l l nekgevigttkten dengkyrfdn l ds  
gkykvi fek pag l tqgt n  
tteddkdadggevdti tdhddft l dngyfeedtsdsdsdsdsdsdsdsdsdsdsdsdsdsdsdsdsdsdsdsdsdsdsdsds  
dsdsdsdsdsdsdsdsdsdsdsdsdsdsdsdsdsdsdsdsdsdsdsdsdsdsdsdsdsdsdsdsdsdsdsdsdsdsdsdsdsds  
dsdsdsdsdsdsdsdsdsdsdsdsdsdsdsdsdsdsdsdsdsdsdsdsdsdsdsdsdsdsdsdsdsdsdsdsdsdsdsdsdsds  
dsdsdsdsdsdsdsdsdsdsdsdsdsdsdsdsdsdsdsdsdsdsdsdsdsdsdsdsdsdsdsdsdsdsdsdsdsdsdsdsdsds  
dsdsdsdsdsdsdsdsdagkhtpvk pmttkdhhkakal petgnensgnna l fgg l faalgs lll fgrkkqnk  
>sp|Q6GBS6|SDR\_STAAS  
mnkktvtnrkgmi pnrlnkfsirkvgtasi lvgttlifglsgheakaaehtngel nqsknettapsenkttekvd sr  
qlkdntqtatadqpkvms  
dsatvketssnmqspqnatasqsttqtsnvttdkssttysnetdksnl tqakdvsatpktttikprt l nrmavntvaap  
qgtnvndkvhfsnidai  
dkghlnkdtgktefwatssdv l klkanytidsvkegdtftfkyggyfrpgsvr l psqtqnl ynaqgniiakgiydsttn  
tttftftnyvdqytnvsgs  
feqvafakrenattdktaykmevsl gndtyseei ivdygnkkaqpl isstnyinned l srnmtayvnpkntytkqtfvt  
nl tgykfnpnaknfkiyev  
tdqnfvdsftpdt sk l kdvt nqfnitysndnktatvd l mngqtssnkqy i iqqvayp dntstdngki dyt l dtdkkykys  
wsnsysnvngs stangdqk  
kyn l gdyvvedtnkdgkqdanekgikgyvvi l kdsngkel drtttdengkyqftg l sngtysvefstp agytpttanagt  
ddavdsdgl tttgvikdad  
nmt l ds gyfkytpkys l gdyvwydsnkdgkqdstekgikgvkvt l qnekgevigttetdengkyrfdn l ds gkykvi fek p  
ag l tqgtntteddkdad  
gevdvti tdhddft l dngyeeetsdsdsdsdsdsdsdsdsdsdsdsdsdsdsdsdsdsdsdsdsdsdsdsdsdsdsdsdsdsds  
dsdsdsdsdsdsdsdsdsds



Tsompanidou\_et\_al\_Supplemental\_FASTA\_File

qtmsmfyftklmknvmpslllpelsgpflslstivnsimprksraslqkitqkwkkpetkltidrefdrtsdlpvgf  
tegeqidfalqalklmdlt  
eafapfvvlaghashshnphhaslecgacggassgfnakllamincnrpnvrqglkqsgvyipettvfaaaehtstdt  
awvyvptlssialdayes  
Indampmihannerldklptigrvnhpveeaqrfasdwsevrpewglaknasfiigrrqltkgidlegrtflhnydwr  
kdkdglntiisgpalva  
qwinlqyyastvaphfygsgnkatqvtvtsgvgvmqgnasdlmyglswqsvmaadrmyhsprllvvvqapdyvvarlla  
ndhfarkvsnhwlrlmsv  
neegrfswi  
>sp|Q6GC46|Y401\_STAAS  
meylkralfisviiitfimgcdsqsdtaenpekskaeqikksfsktdmypi knledlydkegyrdgefkkgdkgw  
tistdfaksnkpgemdseg  
mvlhlrnrmrtatghyirttydelgkmtreknyrvelknnkivvldkvedvnlkhkienfkffsqyadfdlknykng  
isinenpvyeyaeykrns  
dgnvklrekypittkqspilkhidgdikgssvgykqieymfskekedetfmsdflnfgpshn  
>sp|Q6GC48|Y399\_STAAS  
mgylkgfalyisililivfiagcgskdtkedskaeqikksfektldmypi knledlydkegyrdgefkkgdkgwtllt  
sfaksnkpgeiddegmvlf  
lnrnkkatgyytskvhdfekehqkkyhvelknnkivlldnvedsklnkienfkffsqyadfrdfknykngnissa  
dnvpsfdaeyqisntdknv  
kklrevypittkspvilkhidgdikgssigykniefnfskvkdeetavrdvfnfgpsdgv  
>sp|Q6GC90|NFRA\_STAAS  
msehvyvnlvkkhsvrkfknkplsedvkkiveagqsastssflqaysiigiddekikenlrevsgqpyvngylyfvf  
idyrrhhlvdqhaetdmen  
aygstegllvgaidaalvaeniavtaedmgygivflgslrndvervreildlpdyvfpvfgmavgepaddengaakprlp  
fdhvfhhnkyhadketqya  
qmadydqtiseyyqrtngrketwsqqiemflgnkarldmleqlqksgliqr  
>sp|Q6GC92|AHPF\_STAAS  
mlnadlkqqlkqllelmegnvefvaslgsdekskelkellteisdmprlslsekslkrtpsfsvnrpgeetgvtfagip  
lghfnslvlalqvsgra  
pkekgsiidqiknlegs fhfetfisltcqkcpdvqaInlmsvinpnithsmidgavfreesenimavpavflngeefgn  
grmtiqdilsklgstadas  
efenkepydvlivgggpasgsaaiytarkglrtgivadriggqvndtagienfitvkettgsefssnlaahidqydidam  
tgi ratdi ektdeai kvtl  
engavlesktviiatgagwrkl nipgeeqlinkgvafcpdgp lfenkdvaviggngsgveaaidlagivnhvtl fefa  
selkadnvlqdr lrs lsnv  
diktnakttevgedhvtgiryedmstgeehl nldg ivqigllpntswlkdavelnergeividcnntnvp gifaag  
dvt dqknkqiiismagan  
aalnafdyiirn  
>sp|Q6GCB8|THLA\_STAAS  
mtrvvl aayrtpigvfggafkdvpaydlgatliehiiketglnpseideviignvlqagggqnpariaamkglpetvp  
aftvnkvcsqglsiqlay  
qsi vtgendivlagmenmsqspmlvnnsrfgfkmghqsmvdsmydgltdvfnqyhmgitaenlveqygisreeqdtfa  
vnsqkavraqqngefdse  
ivpvsipqrkgepi lvtkdegvrenvsveklsrlrpafkkdgtvtagnasgindgaammvlmsedkake lnieplavldg  
fgshgvdpsimgiapvgav  
ekalrskkelsdidvfe lneafaaqslavdreklppekvnvkggaialghpigasgarvltllhq lndevetg ltsl  
ciggqai aavvsky  
>sp|Q6GCC9|U409\_STAAS  
mkl tllastlliaacgnddskkddsktskddgvkaelkqatkaydytdeqlneflkgtekvkaienndmaqaka  
lypkvrmyersepvaeaf  
gdldpkidarladmkeekkeewsgyhkiekalyedkkiddvtkkdaqqllkdakel hakadtlditpkmlqgsvdlln  
evatskitgeeeiyshtdl  
ydfkani egaqkiydlfkpilekkdkklsddiqmndkvnqlldkykdnggyesfekvskdrkafadavnalgeplsk  
mavite  
>sp|Q6GCD1|Y317\_STAAS  
maslknkhfmigltlftivalfsflaaklpildkvgaltiaailiayrhfrgypeqyssgitfsskyllrfaiilyglk  
lnifdiigggsrllaidvg  
vvi fsivmm lfvnkl lhgdknia lllvgvtgvcgaaiaavapifksrekdtaisigialigtifsliytaiyaismt  
tnvygawsgvslheiahvv  
lagffgsdalkiallgklgrvfl lip lti vli limrfrssessngrisipyfligfvimalvntyvtipsallnilnt  
vsticllmamvalglnvaf  
kdlknral kplmtiitsic lsslafivvhwly  
>sp|Q6GCD7|MEPA\_STAAS  
mkdeqlyyfekspvfkammhfs lpmmigtlsviyglniyfigfledshmisaisltlpvfailmglnlfgvgagtyi  
srllgakdyskskfvsfs  
iyggialglivlvtl pfsdqiaailgargetlaltsnylkvmlsapfvilffileqfaraigapmismigmlasvgn  
iildpili fgfdlnvvgaa

Tsompanidou\_et\_al\_Supplemental\_FASTA\_File

lgtaisnvaalffivymknsdvsvniklakpnkemlseifkigipafmsilmgftglvlnflahygnfaiasygi  
sfrlvqfpeliimglcegv  
vpliaynfmankgrmkdvikavimsigvifvvcmiavftighmvglfttdqdivematfilkvtmtsllngigflftg  
mlqatgggrgatimailqg  
aiipvlfimnalfgltgviwlliaeslcalaamlivyllrdrltvdtselieg  
>sp|Q6GCE6|Y302\_STAAS  
metlksnkarleylindmhrerndndvlmpssfedlwelyrglanvrpalpvsdeylavqdamlsdlnrqhvtdlkdIk  
pikgdni fvwggdittlki  
dai vnaansrflgcmqanhdcidni ihtkagvqvrldcae iirqqgrnegvgkakitr gynlpakyiihtv gppqirrlpv  
skmnqdl lakyl sclkla  
dqhslnhvafccistgvfafpqdeaaeiavrtvesylketnstlkvvfnvftdkdlqlykeafnrdae  
>sp|Q6GCF1|LIP2\_STAAS  
mlrgqeerkysirkysigvsvlaatmfvvs sheaqasektptnaavqketlnqpggegnaitshmqsgkqlddmhken  
gksgtvttegdttlqlskyq  
stqnsktirtqndnqvkdserqgskqshqnnatnnterqndqvqnthhaerngsqsttsqsndvdksqpsipaakvlpn  
hdkaaptsttppsndktap  
kstkaqdattdkhpngqdtthqahqi idakqddtvrqseqkpqvgdlshidgqnspekptdkntdnkqlikdalqapkt  
rsttnaadakkvrplkan  
qvqplnkypvvfwhgflglvgdnapalypnywggnkfkvieelrkqgynvhqasvsafgsnydravelyyyikggrvdyg  
aahaakygherygktykgi  
mpnwepgkvhlvghsmggqti rlmee flrngnkeeiayhkahggeisplftgghnmvasittlatphngsqaadkfgn  
teavrki mfa lnr fmg nky  
snidgl tqwgfklpnesyidyikrvskskiwtssdnaaydl tldgsaklnm tsmnpnityt tytgvsstgplgyen  
pdltgtfflmdttsriighd  
areewrkn dg vvpvisslhpsnqpfvntndepatrrgiwqvkipi iggdhvdfigvdfldfkrkgaelanfytgi indl  
lrveateskgtqlkas  
>sp|Q6GCI3|ESXB\_STAAS  
mggykgi kadggkvdqakqlaaktakdieacqkqtqqlaeyiegsdwegqfankvkdvllimakfqeelvqpiadhqkai  
dnlsqnlakyd t l s i k q g l  
drvnp  
>sp|Q6GCI5|ESSC\_STAAS  
mhkli ikynkqlkm l n l r d g k t y t i s e d e r a d i t l k s l g e v i h l e q n n q g t w q a n h t s i n k v l v r k g d l d d i t l q l y t e a  
dyasfaypsiqdtmtigpn  
ayddmviqslmna i i k d f q s i q e s q y v r i v h d k n t d v y i n e l q e q l t n k a y i g d h i y v e g i w l e v q a d g l n v l s q n t v  
asslirtqemphaqaddy  
ntyhrspriihreptddikierppqpiqknntviwrsiipplvmialtvviflvrpigiylmmigmssvtivfgittyf  
sekkkynkdvekrekykd  
yldnkskeinakaikarflnyhyptvaeikdivetkapriyektshhhdflhyklgianveksfkldyqeeefnqrde  
lfddakelyefytdveqap  
lindlnhgpiayigarhlileelekmliq l s i f h s y h d l e f l v t r e d e v e t l k w a r w l p h m t l r g q n i r g f v y n q r t r d  
qiltsiysmikeriqavre  
rsksnegqiftpqlvfvitdmsliidhvileyvndlseygis lifvedvieslpehvdtiidiksrtegelitkekelv  
qlkftpenidnvdkkeyiar  
rlanlihvehlknai p d s i t f l e m y n v k e v d q l d v n r w r q n e t y k t m a v p l g v r g k d d i l s l n l h e k a h g p h g l v a g t t  
gsgkseiqsyi l s l a i n f  
hphevafl lidykgggmanl fkd l v h l v g t i t n l d g d e a m r a l t s i k a e l r k r q r l f g e h d v n h i n q y h k l f k e g i a t e p  
mphlfiisdefaelksepp  
dfmkelvstarigrslgihlilatqkpsgvddqiwsnskfklalkvqdrqdsneilktpdaaditlpgraylqvgnnei  
yelfqsawsgatydiegdk  
levedktiyminydgqlqainkdlsgledeetkenqteleavidhiesittrleieevkrpwlpplpenvyqedlvetdf  
rk l w s d d a k e v e l t l g l k d  
vpeeqyggpmvlqlkkaghialigspgygrttflhniifdvarhhrpdqahmylfdfgtnglmpvtdiphvadyftvdqe  
dkiakairifndeidrrkk  
ilsqyrvtiseyrklgetiphvfilidnfdavkdsppqevfenmmikmtreglaldmqvtltasranamktpmyinmk  
triamflydksevsnvvgq  
qkfavkdvvgrallssddnvsfhiqqpfkhdetsyndqindevsamtefykgetpsdipmpmpeikyedyreslslpdi  
vangalpigldyegvtlqk  
ikltepamissenpreiahiaeimmkeidilnekyaciadssgef kayrhqvanfaeredikaihq l m i e d l k q r e m d  
gpfekdslyiindfktfid  
ctyipeddvkklitkgpelglnilfvgi h k e l i d a y d k i d v a r k m i n q f s i g i r i s d q q f f k f r f i q r e p v i k e n e a y m  
vanqayqki r w f k  
>sp|Q6GCI9|ESAA\_STAAS  
mkkknwiyalivtl i i i a i v s m i f f v q t k y g d q s e k g s r s v s n k n k i h i a i v n e d q p t t y n g k k v e l g q a f i k r l a n e  
knykfetvtrnvaesglkn  
ggyqvmivi penfsklamqldaktpskislqyktavqqkeevakntekvsvsnvln d f n k n l v e i y l t s i i d n l h n a q k n v  
gaimtrehgvnskfsnyll  
npindfpe l f t d t l v n s i s a n k d i t k w f q t y n k s l l s a n s d t f r v n t d y n v s t l i e k q n s l f d e h n t a m d k m l q d y k s q k  
dsvelndnyinalkqmdsqi



Tsompanidou\_et\_al\_Supplemental\_FASTA\_File

dqqssmqdtgkeeykqtvkenldklreiisqsespfskmgiedyrkqlteslqdelannkdldqalnsikmnaqfaenl  
ekqlhddivkepdtdttfii  
ynmskqdfiaaglnedeankeyaivkeakrykneynlkkplaehinltdydnvaqdtsslindgvkvqrtetiksndin  
qltvatdphfnfegdikin  
gkkydikdqsvaldtsnkeykvevngvaklkkdaekdfldkktmhlqllfgqanrqdepndkkttsvvdvtlnhnldgrl  
skdalsqqlsalsrfdahy  
kmytdtkgredkpfndkrli dmmvdqvindmesfkddkvavlhqidsmeensdkliddilnnknttknkedisklidql  
envkktfaeepgepkidkg  
kndefntmssnldeksrisekstqllsdtqesktiadsvsqqlnqldnvnklhatgralgvrاندlnrqmakndkdne  
lfakefkkvlqnskdgdrq  
nqal kafmsnpvqkknlenvlannngtdvisptl fvlmyllsmitayifysyerakgqmnfikddyssknhlnnvnits  
gvgttglvegllvgliam  
nkfhvlagyrakfilmvil tmmvfvlinty llrqvksigmflmiaalglyfvamnllkaagqgvtnkisp lsyidnmffn  
ylnaehpialalviltvl  
igfvlnmfikhfkkerli  
>sp|Q6GCL0|LRGA\_STAAS  
mvvkqkdaskpahffhqvialvl fvskiiesfmpipmpgsviglvllfvllctgavklgevekvgttlttnigllfv  
pagisvvnslgvisqapfl  
igllivstlillictgyvtqiimkvtsrskgdkvtkkikieeaqahd  
>sp|Q6GCL1|LYTR\_STAAS  
mkaliiddeplarne ltyllneiggfeeinaenvketleallinqydiifldvnlmdengielgakiqkmkeppaiifa  
tahdqyavqafelnatdyi  
lkpfgqkrieqavnkvratkaddnsasaiandmsanfdqslpveiddkihmlkqgniigigthngittihhttnkyett  
eplnryekrlnpayfiri  
rsyiintkhikevqqwfnymvil tngvkmqvggrsfmkdfkasigll  
>sp|Q6GCL3|SCDA\_STAAS  
minkndivadvtdypkaadifrsvgidfccggqvsieaslekknvdlnellqrln dveqnttpgslnpkflnvssliq  
yiqaa yheplreefknlt  
yvtklsvhgpnhp ylvelketydtfkngml ehmqkddvdfpklikyeqgevddintviddlvsdhiatgqllvkmsd  
ltsyeppeieacgtrlv  
qrllkalevlthevhlenhvl fkkvs  
>sp|Q6GCM3|ISPD1\_STAAS  
miyagilaggi grmgnvplpkqfl didnkpilihtiekfilvsefneiiatpaqwishtqdilkky nitdqrkvvag  
gtdrnetimniidyirvn  
ginnddivthdavrpf l tqriikenievaekygavdtvieaidtivmskdkqnihsipvrnemyqqgtpqsfnikllqd  
syralssaakeilsdacki  
ivesghpvklvrgelynikvttpyd lkvanaiiqgdiadd  
>sp|Q6GCQ3|Y198\_STAAS  
mfkvvicdderiireglkqipwgdyhfntiytakdvealsliqqhqpelvitdirmpkrngvdllndiahldcnvii  
ssyddfeymkagiqhhvl  
yilkpvdhaqllevilgrlvrtlleqqsqngrs laschdafqllkveyddyvnqivdqikqsytktvsvdliqhidvs  
esyamrtfkdhvgitivy  
lnryrilqslqlldrhykhyeiadkvgfseykmfsyhfkyllqmspsdyckqak  
>sp|Q6GCT1|HSDR\_STAAS  
mayqseyalenemngleqlgyervtirndkqlldnfrtilnerhadklegnpltdkefqrlltmidgksifesarilrd  
klplrrdesevylsfltd  
kswcknkfqvtnqvsvedtykarydvtilinglplvqvelkrrgidineafnqvkrkrqnytglfryiqmfiiingvet  
ryfsnndselkshmfyws  
dkqnnrintlqsfaefmrpcqlakmi srymiinetdrilmamrpyqvyavealiqqatetgnngyvwhhttgsgkltstf  
kasqilsqddikkviflv  
drkdldsqtееefnkfakgavdktfntsqlvrqln dkslplivtti qkmakaiqgnahlleqyktknkvfiidechrsqf  
gdmhrlvkqhfknaqyfgf  
tgtprfpenssqdgrttadifgrclhty lirdaih dgnvlgfsvdyintfknalkaednsmveaidteevwladkrvel  
vtrhiinnhdkytrnrqys  
siftvqsihalikyeytfrlnkkleqpltiagiftfkpneddrdgevpyhsrekleimisdynkkfetnfstdttneyf  
nhisknvkkgvkskidi  
ivvnmfltgfdskvlnltyvdknlmyhldiqaysrtrnrvekeskpfkivnyrdlkketdda lrvfsqntdtdtilmsy  
eeykkefmdayrelkmi vp  
tphmddiqdeee lkrfveayrllakiilrlkafdefeftideigmdeqenedykskylavydqvkrataeknkvsilnd  
idfeiemrntdinvnym  
nilrqidledkaeqnrqeqirril dhaddptlrlkrdlirefidnrvpslnkddd idqeyvnfesikkeae fkgfager  
sideqalktisndyqysgv  
vnphhllkmi gdlplkekrkarkaiesfvaettekygv  
>sp|Q6GCT7|PTG3C\_STAAS  
mrkklfgqlqrigkalmplvai lpaaglllaigtamqgeslqhy l pfiqnggvqtvaklmtgaggiifdnlpmi falgva  
iglaggdgvaai aafvgyi  
imnktmgdflqvtpkni gdpasgyasilgiptlqtgvfggiiga laawcynkfyninlpsylgffagkrfvpimmatts  
filafp maliwptiqsgln

Tsompanidou\_et\_al\_Supplemental\_FASTA\_File

afstgll dsntgvavflfgfikrllipfglhhifhapfwefgswknaagei ihgdqri fieqiregahl tagkfmqgef  
pvmmf glpaaa lai yhtak  
penkkv vagl mgsaal ts fltgitepl efs flfvapllffihavldgls fltlyll dlhlgyt fsggfidy flgilpnk  
tqwwlvipvglvyaviyyf  
vfrflivklkyktpgre dkqsqaatasatel pyavleamggkanikhldacitr lvevndkskvdvpglkd lgasgvl e  
vgnmqai fgpk sdqike  
mqqimngqvvenpttmeddkdetvvaedksatse lshivhapltgevtplsevpdqvfsekmmgdgiaikpsqgevrp  
fngkvqmi fptkhaiglvs  
dsglellihigldtvklngegftlhveegqevkqgdllinfdldyirnhaksditpiivtqgnitnldfkqgehg n isfg  
dq l feak  
>sp|Q6GCU1|OAT1\_STAAS  
mnsiie l tdyysnnyaplk lviskgkvkvwtdgkqyidcisgfsvanqghchptivkamteqasklsiisrvlysdn  
lgkweekichlakdkvlp  
lmsgteaveaai kiarkwgvsevkgitdgqveii amnnfnhgrt lgs lsnhdaykagfhp llqgtttvdfgdieqltqa  
ispntaa iilepiqqeggv  
nippkgyiqavrqlcdkhqil liadeiqvlg rgtgkwfameweqvpdiyilgkalggg lypvsavlannv mrvltpgt  
hgstfggnplai aistaal  
dvlkdeql verser lgs fl lkal lqkhpsikeirgrglfigielntdaapfdq liqrgilckdthrtiirlspp lvid  
keehqi vaafqdvfkn  
>sp|Q6GCU4|ARGB\_STAAS  
mkfivikiggst lsdmhsi innikh lrsnniypii vhgggpfinea lsnqqiephfvng lrvtdkatmtitkhtliadv  
ntalvaqfnqhqc saiglc  
gl daql feitsfdqqygyvgvptalnkda lqylctkfvpi insigfnhdgefyninadt layfiasslkapiyv lsnia  
gvlindv vipqlplvdihq  
yiehgdiyggmi pkvldaknaiengc pkvii asgnkpnii esiyndfvgttilns  
>sp|Q6GCV9|ALDA\_STAAS  
mavnvr dy aenygl finge fvkgs sdetievt npatget lshitrakdkvdhkvavaqda fefsws ltskseraqm lrd  
igdk lmaqdk diamietln  
ngkpi rettaidipfaarhfhyfasvieteegtvndi dkdmtsivrhepigvgavvawnfpm llaawkiapaaagnti  
viqpsstplsllevakif  
qevl pkvvni l tkggsesgnai fnhdgvdk l sftgst dvgyqva eaaakhlvpatle lggksani lddanldlavegi  
qlgilfnqgevc sagsrl  
vhekiydqlvpr lqea fsnikv gdpqdeatqmsqtgkdql dkiqsyidaakesdaqilagg hrltengldkgfffeptl  
iavpdnhhkl aqeeifgpv  
l tvi kvkddqea idandsey laggv fsqnitralni akavrtgriwintynqvpegapfggykks gigritykga lsn  
yqqvkniiyidsnal kgly  
>sp|Q6GD21|Y078\_STAAS  
mqrdyl irvetesmpdfkr l ng lmi gfvikgeahiydenmtqcns gdi fi inhrdlyrfqlqqdgi icyiqf qmky lad  
kfdahc lyfh l tdat ttk  
nihqlr nimarlvsthirhnel sklteqq lviql l mhmihyvprtyhsnqsilnddkvnqvcdyielhfhed lslselse  
yvgwsesh lskkf teslgv  
gfqh flnttr iehak ldl tyt detidialqngfssaasfartfkfhthqtpkqyrgdrpaitenqqsaqhnyhdrelil  
llndyieemnhfiediekm  
nykeiafkptnqqlnqfnhi iqvgylrn l lntqyqsqll tchhdfqvnevl aydvmpyimkkl napftydaeisnifydi  
dlcldflldhnfsltmhln  
qydsr dyidafkvfi hvalhvshrkdlkfnlyvtt lhnaliemidyfka lfpngglyihldqaterhpl lkrlephid  
hfvfdansndavdfnkmd  
defktasqmi inktnyfidlihrhn lkrplil l nwt l tgd tfitng eyfrggiieql lklsskvegigywlnydlhvs  
hcknerdymnsiel fhqyn  
gkrpyftal lfnk ltsni lysddtcivtgdtsnfqil llydakhfnpyal dnqmmratemihlninal eegmykikhf  
tldkengalfnlwrkhhti  
hgmdkdsidyvrmsfpllevydiditdt lalnikmitngihlievkrypss  
>sp|Q6GD25|Y074\_STAAS  
mkr lkkivlcjs flflti figgcgm gkeaeikks fekt lsmypikn ledlydkegyrddqfdkdkgtwi insematqnk  
gealkikgmvl ymnrntkt  
tkgyyyvnaikndkgrpqenekrypvmi dnkviptkeikdenikteiknfkffvqygnfkdlknykdgd isynpeapi  
ysakyql tnddynvkqlre  
rydiptnkakpl l lkgsgn lkgssvgyknieftfveekgkni yfsds ldykksgev  
>sp|Q6GD27|Y072\_STAAS  
mkr lnlvlgiiflflvisitagcgigkeae vkks fekt lsmypikn ledlydkegyrddqfdkndkgtwi insemviqp  
nedmvakgmvl ymnrntkt  
ttngyyyv dvtkdedegkphdnekrypvmvndki iptkeikdekikkeienfkffvqygd fkn l knykdgd isynpevp  
sysakyql tnddynvkqlr  
krydiptskakpl l lkgsgn lkgssvgykdieftfvekkeeni yfsds ldykksgdv  
>sp|Q6GD81|SYS\_STAAS  
mldirlfrnepvtvkskielrgddskvdeileldeqrrklisateemkarrnk vseeialkkrnkenaddviaemrtlg  
ddikekdsq lneidnkmgtg  
ilcripn l isddvpqgesdednvekkwgt p refs fepkahwdivelk madfdraakvsgarfvy l tneqaqleralmn

Tsompanidou\_et\_al\_Supplemental\_FASTA\_File

ymitkhtttqhytemmvpq  
lvnadtmygtgglpkfeedlfkvekeglytiptaevpltnfyrneiipgvlpekftgqsacfrseagsagrdrgrlirl  
hqfdkvmvrfeqpedsw  
aleemttnaeai leelglpyrrvilctgdigfsasktydlewlpsyndykeisscsnctdfqarranirfkrdkaakpe  
lahtlngsglavgrtfaai  
venyqnedgtvtipealvpfmggkqtiskpvk  
>sp|Q6GD94|RSMG\_STAAR  
mtvewlaeqlkehnieletetqkqfqtyrllvevnekmltsitdehdvylkhfydsiapsfydfnqpisicdvga  
gfpsiplkimfpqkvtiv  
dslnkriqflnylaseqlqdvsvihdraetfgkgvyresydvtaravarlsvlselelplvkkggqfvalksskgee  
leeakfaisvlggnvteth  
tfeipedagerqmfiidkkrrtppkkyprkpgtppnktpillek  
>sp|Q6GDB5|Y2771\_STAAR  
mnyqvllykyttiddpeqfaadhlaefckahlkgriilstegingtlsgtkeeteqymahmaderfkdmvfkideaeg  
hafkkmhvrprkeivaldl  
eedvdprhttgqylspvefrkaledddtviidarndyefdlghfrgairpnitrfdrldpdwikenkalfadkkvvtctg  
gircekfsgwllkegfev  
aqlhggiatygdpetkgywdgkmyvddrisvdinqvektigkdwfdgkpceryincanpecnkqilvseeneakyl  
gacsydcakhernryvqan  
nisgnewqqrlnfddlhqha  
>sp|Q6GDB6|DRP35\_STAAR  
mmsqqdlptlfysgksnsavpiiseseletitaepwleiskkgllqleglnfdrqqqlflldvfegnikvnpetkeikrp  
fvshkanpaaikihkdgrl  
ficylgdfkstggifaatengdniqdielsteycidmvdskggfyftdfrgystnplggvyyvtpdfktvtpiiqn  
isvangialstdekvlwvt  
ettanrlhrialedgdvtipfgatipyftghegpdscidsddnlyvamyqgrvlvfnkrqypigqilipsrdeghm  
lrsthpqfipgtngliics  
ndiemdggsmltyvngfakghksyqfq  
>sp|Q6GDC4|HISZ\_STAAR  
mnseqlialkesetaflkyfnkadyelvdflvekldwkqlnhedlqqmgernfwqhehqiyalrndftdqllyryssmy  
ptaatkvyatgliirnea  
avqvglenyapslanvqslkflfiqfiqqqlrdnvhfvlghyqlldalldkslqtpdilsmieernlsglvtylstehp  
ivqilkentqqqlnvlehy  
ipndhpalvelkiwerwlhtggykdihlditaqpprsyytglfiqchfaenesrvltggyykgisiegfglgltl  
>sp|Q6GDD0|HIS4\_STAAR  
mielwpaiddigstsvrltegydseekmsrsaeesiaysqfecvnrihivdligakaqharefdyikslrrlittkdie  
vgggrtksqimdyfaagi  
nycivgtkqiadtewilkemahtfpgriylsvdaygedikvngweedtelnlfsfvkqlsdipiggiytdiakdgkmsgp  
nfeltgqlvkattipvias  
ggirhqddiqrlaslnvhaaiigkaahqasfweglk  
>sp|Q6GDD3|LIP1\_STAAR  
mksqnkysirkfsvgassiliatlflsggqaqaekqvmngmsqedtvtasigdqqtrenanyqrengvdeqqhtenl  
tknlhndktiseenhrktl  
dlnkdqlkddkkslnknkniqrddtknnpnprdnqgleqaindgkqskvasqqqskeadnsqdlannnlpssqrktv  
spslnksdqtsqreivnet  
eiekvppqqknqandkitdhfnneqevkpkdektlsvsdlnknqkspeptkdndknglnllkssavatlpnkgtk  
latakagdqtnkvakggqy  
knqdpivlvhfgngftddinpsvlahywggnkmnirqdleengykayeasisafgsnydravelyyyikggrvdygaaha  
akygherygktyegiykdw  
kpgqkvhlvgshmggtirgleellrngsreeieyqkkhsgeisplfkgndnmissittlgtphngthasdlagnealv  
rqivfdigkmfgnknsrvd  
fglaqwgllkqkpnesyidyvkrvqsnlwkskdngfydltregatdlnrktslnpnivykytgeathkalsndrqkadl  
nmffpfvitgnligkatek  
ewrendglvsvissqhpfnqaytnatdkiqkgiwqvtptkhdwdhdfvgqdsdvtvrtreelqdfwhhladdlvktekv  
tdtkqa  
>sp|Q6GDD5|ICAC\_STAAR  
mkkirlelylraicaiivthlltqitlkhennmeggsvlqfyirnivifgtpcfiilsqllttlnyqkvtyrylstr  
vkiilipyilmglfysyse  
slltdtsfqkqfienvllgqwygyfivvimqffilsyifkinylnfnskillllsfilqqsfllyftnntafhdtvlhy  
yplsentii fgwifyfflg  
aymgynyervlnflerylvimivlavatyvfialangdywnvtsfsysltpynsimfivilgicthfktmlfntiqmis  
afsffiyllhpiildsifa  
ytnifedntmvlaisllfilglcigvgmilrefyifrfiigkqpyklninay  
>sp|Q6GDD6|ICAB\_STAAR  
mkyrklilvlslililpvstldghhiannaddppkklkykensaala nyhrvrkanflnnfiyffssskeiknysvsqs  
qfesqikwllkshdakfltl  
kefllykkgkfpkrswinfdmdetiyanaypilkykipatgfii tghvgeenfhndmi skkelkemyktglwefe  
ththdmhnl sknksklmk



Tsompanidou\_et\_al\_Supplemental\_FASTA\_File

maksnskdvlvlgagvltstffgsmkleepdwnihvyerl drpaiessnerrnagtghaalcelnytvlpdgsidieka  
kvineefeiskqfwghlvk  
sgsienprefinplphisvyrknkvfkdryeamkafpmfdnieytedievmkkwiplmmkgrednpgimaaskideg  
tdvnfgeltrkmaksieah  
pnatvqfnhevvdfeqlsngqwevtvknrltgekfkqvtdyvf igaggaipllqktgipeskhlggfpisgqflactnp  
qvieqhdakvygkeppgtp  
pmtvphldtryidgqrtl fgpfanvgpkflkngsnldl fksvktynttllaaavknlp likysfdqvimtkegcmnhl  
rtfypearnedwqlytagk  
rvqvikdtphegkfgifgtevnsqdhtvia l l gespgastsvsval evlernfpeyktewapkkimpsygeslied  
eklmrki rkqtskdlelgy  
yen

>sp|Q6GDN3|SSAA1\_STAAR

mkkivtatiataglatiafaghdaqaeeqnngynsndaqsystytidaqgnyhytwtgnwnpsqltqnntyyynnynt  
ysynnasynnyhnygyq  
nytnnsqtatnnytggsasyststsnvhttaapssngrsingsyasgnyltsgqctyyvfdrvggkigstwgngas  
nwasaaassgytvnntpka

gaimqttqgyghvayvegvnsngsvrvsemnyghgagvvtstisanqagsynfih

>sp|Q6GDN7|CRTN\_STAAR

mkiavigagvtglaaaariasqghevtefeknnnvggmrnqlkkdgtfdmgaivmmpdvkdvftmcgknyedyielr  
qlryiydvfyfdrddcitvp  
tdlaelqhmlesiepgsthgmsfltdvykkyeiarryflertyrkpsdfynmtslvqgaklktlnhadqliehyidnek  
iqkllafqtlyigidpkrq  
pslysiipmiemmfgvhfikggmygmaaglaqlnkdlgvnielnaeieqi idpkfkradaikvngdirkfdkilctadf  
psvaeslmpdfapikkypp  
hkiadldyscsafmyigidi dvt dqvrlnhvi faddfrgnieeifegr lshdpsiyvyvpavadkslapqggtgiyvlm  
ptpelktgsgidwsdealt  
dqikdvyrklatievfedikshivsetift pndfeqtyhakfgsafglmptlaqsnyyrrpqnvsrdykdlyfagasthp  
gagvpivltsakitvdemi  
kdieqgv

>sp|Q6GDP1|COPA\_STAAR

mantkktlditgmtcaacsnrkeklnklddvnaqvnlttekatveyndrhvqefintiqlhgygvavetvelditg  
mtcaacsnrkeklnkmdg  
vqnatvnl tteqakvdypeetdadklvtriqlgydasikdnrdqtsrkaealqhklikliisavlslpllmfmvhl  
fnmhipalftnpwfqfila  
tpvqfi igwqfyvgayknlnnganmdvlvavgt saayfysiyemvrwlngsttqphlyfetsavlitlilfgkyleara  
ksqttналгеллs lqakea  
rilkdgnevmp lnev hvgtlivkpgkipvdgkiikgmtaidesmltgesipveknvddtvigstmknkgtitmtatk  
vggdta lani ikvveeaqs  
skapiqrladiisgyfvpivvgialltfiwvitlvtpgtfepalvasisvlviacpcalglatptsimvgtgraaengil  
fkggefverthqiditvld  
ktgtitngcpvtdyhgdqtlql latakdehplaeavnyakekqltltetttfkavpghgieatidhhhilvgnrk  
lmadndislpkhisddlth  
yerdgktamliavnysltgiiavadtvkdhakdaikqlhdmgievamltgdnkntaqaiakqvgidtviallpeekaaq  
itklqqgkqvamvgdgvn  
dapalvkadigiaigtgevaieaaditilggdlmlipkaiyaskatirnrqnlwfafgyniagipiaalgllapwvag  
aamalssvsvtnalrlkk  
mrleprrkda

>sp|Q6GDP3|ATRF2\_STAAR

mtekekm laekwydanfdqdl inerarakdicfel nhtkpsdknrkelidel fqttdnvsisipfdtdygnvklgkn  
vyvntncyfmdggqitigd  
nvfigpncgfyatathplnfhrnegfekagpinigsntwfgghvavlpvgvtigegsvigagsvvtkdippshlavgnpck  
vvrkidnevpsealndetl  
n

>sp|Q6GDP8|FEOB\_STAAR

menycilgnpnvgktslnfaltgsyeyignwsgvtvekkvgklkenvgqlidlpqtydlspiskdetvvtdyllndsfsg  
iinivdasqlkrnmqltvq  
llelnqpiyiglnmidvatkrigiki dyhklmkk lktpi fpvpartgkgtkhllgeikhlggyqphfkinygekieetik  
nmcqiimtetsdkygarf  
iaiqfllnmqiane lnsevvnlsslrdqvaeqveavsvrremerirnhyietllqdvvtypdedkqyfssridkilth  
kyigmpifla imwli fqt  
ftwigtplsdqldafiggtftdsvktimnylgvipflqdlitdgi iagvgsvlvfvpqivvlfffisllledsgymariav  
lmdrimesfglsgksfipm  
iigfgcnvpsimaarsienekerlttiliapfmscsarlpvya lfvgi fffkenqslvvlslvylgiimaflvstvltktv  
lkndnaifive lptyrvps  
ikt lwrstwekakgfvrkagtfiggsvviwllsyvgphginvni nqsf lhmvg sffgm l vqplgfgtwqagatlvpgfl  
akevivssmai iyssgdag  
lvnviqnqftpl sayafmi fill yipcvstvaa irketyswkwtalavayplvtayvltfifyqvghlv  
>sp|Q6GDQ0|CLPL\_STAAR

Tsompanidou\_et\_al\_Supplemental\_FASTA\_File

mnnffnsdfdsilrrmmqdmqnsnqtsnkkyingkevspeelaqftqqgnhsaeqsaqafqqaalrqggqsgngny  
leqigrntqeadglldp  
vigrdkeiqetaevlsrrtknnpilvgeagvgktaiveglaqaivegnvpaaikdkeiisidissleagtqyrgafeeni  
qklvegkssqnavlffde  
ihqiigsgatgsdsgskglstdilpkalsrgeisiigattqdeyrnimkdaaltrrfnevlvnepsakdtveilkgirek  
fethhqvklpddvlkacvd  
lsiqyipqrlldpkaidvlditaahlsaqspaidkvtttekriselhdkrkavsaeeykkaddiikeikslqdklensng  
ehtavatvhdisdtigrllt  
gipvsqmdandierlknissrlnskiigqdkavemvsrairrrragfddgnrpigsflfvpgptgvgkteiakqlaidlfg  
nkealirlmseysdttav  
skmigttagygyddnsntltekvrnnpysvilfdeiekanpqiltlllqvmddgnltdggqgnvinfkntiictsnagf  
gngndteekdimhemkkff  
rpeflnrfngiveflhldkdaalqdivnlllddvqvtldkkgitmdvsqakdwlieegydeelgarplrriveqqvrcki  
tdyylhdtdvkhvdidved  
nelvvkkgk  
>sp|Q6GDQ8|CIDB\_STAAR  
mndyvqallmlltvvlyyafakrlqqkypnpflnपालiaslgiifvllifgisnyngymkggswinhilnatvvclyaply  
knrekikdnvsiiifasvlt  
gymlnfmvlftlkafgyskdvivtllprsitaaevshelggtdtmtvlfiiittgligsilgsmllrfgrfessiak  
gltynashafgtakalem  
diesgafssigmiltavissvlipvliilfy  
>sp|Q6GDR0|PTU3C\_STAAR  
mfkkllfgqlqrigkalmplvailpaagillaafgnamhneqlveiapwlkndiivmissvmeaagqvfdnllfavgta  
lglaggdgvaaalavgy  
imnatmgkvlhitiidifsyakgakeksaakepahalvligiptlqtgvfggiimgalaawcynkfynitlppflgffag  
krfvpiivtsvvaivatgvvl  
sfawppi qdglnslnfllnknltlftfi fgiierslipfglhhifyspwwefgsytnhagelvrqdqriwmaqlkdgv  
pftagafttgkypfmmfgl  
paaafaiyknarperkkivggllmsagltafitgiteplefsflfvapvlygihvllagtsflvmhllgvkigmtfsggf  
idyilygllnwdrshallv  
ipvgiyvayvyf1fdfairkfkltktpgredeeteirnsavklpfdvldamggkenikhldacitr lrvevvdkskvdv  
agikalgasgvlevgnmq  
aifgpkdqikhdmakimsgeitkpsettvteemsdepvhvealgttdiyapgvqqiiplsevpdqvfagkmmgdvgvfi  
pekgeivapfdgtvktifp  
tkhaiglesesgvevlhigidvtklnggefeslinvdekvtggqplmkvnlaylkahapsivtpmiitnlenkelvied  
vqdadpgklimitvk  
>sp|Q6GDS2|LDHD\_STAAR  
mtkimffgtrdyekemalnwgkknnevttskellssatvdqldkydgvttmqfgklendvypklesygikqiaqrtaf  
dmydldlakkhnivisnvp  
syspetiaeysvsialqlvrrfpdierrvqahdftwqaeimskpvknmtvaiigtgrigaatakiyagfgatitaydayp  
nkldf1tykdsvkeaidk  
adijshvpankesyhlfdktmfdhvkkgaivnaargavintpdlidavndgtllgaaidtyeneayftndwtknkid  
dktl1lelieherilvtphi  
affsdeavqnlvegglnaalsvintgtcetrln  
>sp|Q6GDU5|FNBA\_STAAR  
mknnlrygirkhkllgaasvflgtmiviigmqgdkaaaseqktttveengnsatdnkvsetqttttvntidetqsysata  
teqpsnatqvtteeapkv  
qapqtaqpanvetvkeevvkeeanpvkettqsqdnsgdqrqvdltpkkatqnqvaetqvevaqprtalekprvtrstd  
vaeakeasdakvetgdvt  
skvtvedeskieapkgnnvphegqrvvlykylkfqdgllktgdyfdftlsnnvnthgvattrkvpdikngslvmakqvl  
dngriryftdyikdkvvn  
tanleinlfi dpktvqsngqqtitsklngetsgtmqitykgvknqytnvngsietfdkeknkfthvayikpingnsd  
svtvgtmltqgsnengtq  
nvkiyeyvgvenglpqsvyantvdstqlkdvtnqmgdklkvqngsyslnfdkl dktyvihytgdylngtsevnfrtqlt  
gypenryktyyyynngyt  
twdnglvlysnkangdkgygpivdsnnfefsedsgngsisgqydakqiieteenqdnpldidyhtaidgegyvdgyie  
tieetdsaididyhtavd  
seaghvggytesseesnpi dfeesthenskhhadvveyeedtnpgggqvtttesnlvefdeestkgivtgavsdhthvedt  
keyttesnl ielvdelp  
hgqagqpveeientehhisgslgtenghnygvieeieenshvdikselgyeggqnsngqsfeedteedkpkyeqgn  
ididfsvpqihgfnkhne  
iieedtnkdkpnyqfgghnsvdfeedt1pkvsgqnegqqtieedtppptpvtpevpsepptpvtpevpsepptpvt  
pevpsepptpvtpevpsepptpvtpevpsepptpvtpevpsepptpvtpevpsepptpvtpevpsepptpvtpevpsepptpvt  
kpskpveqgvvtpvieinekvkavaptkqkqakkse1petggeestnkgmlfgglf silglallrrnkknhka  
>sp|Q6GDU6|GTAB\_STAAR  
mkkikkaiipaaglgtrflpatkampkemlpildkptiqyieeaaragiediiivtgrhkraiedhfsqkelemvlke  
kgkse1lekqvystelani  
fyvrqkeqkg1ghaissarqfignepfavllgddivevsevpavkqlidvyeetghsvigvqevpeadthrygiidpltkn

Tsompanidou\_et\_al\_Supplemental\_FASTA\_File

grqyevkkfvekpaggtag  
snlaimgryvltpeifdylktqkegagneiqldaiernmndnqvaydfegerydvgekfgvkttieyalkddsmree  
ltrfikelgl  
>sp|Q6GDU9|PGCA\_STAAR  
mkgclatmdkelwikrandslvkhfyeeqsdieqregfesklftgtagirgkfglgegrlnkftieklaalglarylnaqt  
nntpivihydirhlstefa  
qianvlanhqiivylpdykttpeisfavrnnttagimitashnpkdyngikvyssdgaqlstdaselvsryieevgd  
plqidipiskqntsypkf  
pksvtddymkhiqnmigyipksdlqvftsllhgtsvpivpe1lkslnfnqfnlveaqckpdpnfssvqsanpedhrafdq  
avelankshadllistdpd  
adrlgiaerdahghityfngnqigallnyriqqtsqlrhr1miqsivsseltsklarynnveykevlgtgfkaieqirg  
lddhqnmifafeesygf1s  
epfvrdkдавqivp1iikyase1klygk1kdeleqiyqtvrhedt1fshtleglegkkkiesimthfrsnppqeiqgl  
kvkaiedyltseyqldkd  
ttsqidspknsvirvlfdegfiarpsgtepki1yvs1kcpdfddvaqkinamifs  
>sp|Q6GDV2|Y2573\_STAAR  
mihskr1kmc1cli1svfigacgmkkeesskdkqikenfnk1slyptkn1edfydkegfrdeefdkgdkgtwivdsem  
vvelkdkkmesrsmvlyin  
rnrtttkgnfivrelwedskgyaqskdtkypvmehnriiptkqiaddk1rkeienkffvqygd1kdindykdgd1syn  
pnvpsysaeyq1snndynv  
kq1rkryniptkkap11ikgdgd1kgssighkn1eftfvenkeeni1yftdsinfkpte  
>sp|Q6GDV3|Y2570\_STAAR  
miqskk1t1gic1v1i1i1ivgyvimtktngrnaqikd1fnq1klyptkn1dgfydkegfrdqefkkgdkgtwivnsem  
viepkgkdm1etrgmvlyin  
rnrtttkgyyfi1semtdsngprkdekrypvkmehnki1ptkplndk1kkeienkffvqygnfk1indykdgd1syn  
pnvpsysakyq1nndynv  
qqlrkrydiptkqap111kggdgd1kgssvgsknief1fvenkeeni1yftds1vqytpsedtryesn  
>sp|Q6GDZ1|FLP\_STAAR  
mttkklyf1s1i1i1i1va1siaiyit1nsntktr1tndsqqqid1tiehd1kqghipgasilivkngkvf1nkgygyqdv  
dkkvkaspttkyeiasntk  
aftglai1k1laqegr1n1nddvskhvphfkmnyngqnetit1kq1laqtsgipsd1tsedsvtknknr1ndvtraimgde  
1h1k1pgeefeysnmnyd11  
g1i1qnvtkqsytkyitnsw1kplhmthtsfkqnnkskhdaigyelqgstpvvskpefn1wdt1psaymmtsted1ehwi  
kfq1nppdky1k1vqqshk  
n1sstige1pnanayasgwftnndeh1vfhs1g1dnfssfi11n1pkqnyg1v1an1nseyvpk1veh1ntqivnhkryst  
vasm1nqyk1dqf1n1vt1m  
t1l1i1l1afi1say1rawqmrhgki1lrksk1ttf1sw1t1cl1ciaialilyalpy1ilgsn1nwsfv1tw1pieik1t1tta  
fia1fsm1i1t1l1i1l1h1ttt  
ikkp  
>sp|Q6GE10|BIOW\_STAAR  
mys1k1mrssnqdi1hisgaetic1efdkieqtvr1fynkgffhengqpdf1nikiqkimepikqikalqiieddkan1qhl1t  
qkcgvteqal1nqgmty1kn  
etvytgai1l1sa1sgkr1dsfghrgi1rathfsfedinnkgd1nervtdal1ascinahpyvkge1cvssd1tyttgyfa  
saki1gyhr1fdi1kpv1ntry  
ggri1fvddrid1nhyi1fl1estpkqvvyetv  
>sp|Q6GE12|HLGB\_STAAR  
mnmnk1vk1ssvatsma1l111sntanaegkitpvs1vkkvddkvtlykttatadsdkfkisqil1tnfikdksydkd1vlk  
aagn1nsgerpnpkdydf  
skiywgakynvs1ssqnsdsvnvdyapknqneefvqnt1gytfggd1sisng1sgg1ngntafsetinykqesyrtt1  
srntnyknvgwgveahkim  
nngwgpygrds1fhptygne1flagrqssayagqnfiaqhqmp1l1srnfnpe1fsv1shr1qdgakkskitvtyqremdly  
qirwngfywaganyknfkt  
rtfks1tye1dwenhk1k1l1dtketennk  
>sp|Q6GE14|HLGA\_STAAR  
miknk1l1tat1avg1iaplanpfi1skaenkiedigqgaei1krtqd1tskrlaitqni1qfd1vkdkkynkda1v1vkmq  
gf1ssr1t1tysd1kkyp1yik  
rmiwpf1qyn1s1l1ktkdsnvd1iny1lpkn1idsadvsq1l1gyn1ignfqsapsigsgsf1nysktisynqknvtevesqn  
skg1vkwg1vkansfvtpngq  
vsaydq1l1faqdptgpaardyfv1pdnq1l1p1liqsgf1npsfitt1shek1gkgdksefeitygrnm1dttyayvtrhr1lavdr  
khdafkn1rv1tvkyevnwk  
thevki1ks1tpk  
>sp|Q6GE41|NREB\_STAAR  
mineds1q1lea1l1kkyehs1iekivfaddsgk1iamndaakd1l1seednysavana1chrcegytnaydvqsckdcf1es  
mqvqatn1fqv1f1mktkdqkv  
mpftatyq1lidqdr1ghaft1qn1vssqieqqek1lhqqrmmrktisagenerkrisrelhds1viqem1nvdvq1r1l1kyqe  
dtak1l1ledaen1eyivak1  
iddi1nms1vel1rps1ldd1gl1eaafksyfkqfeenygvki1ytsnikntrf1dsdi1etv1vrvvqea1lna1kyadvnein  
vgi1rqtgrh1l1vaevidagn

Tsompanidou\_et\_al\_Supplemental\_FASTA\_File

gfdpsskpkgsglglygmneraelvsgsvnietkigegtnvtlnipi  
>sp|Q6GE44|NART\_STAAR  
myktkggfqltltqlsllvvgfmawsiiaplmpfikqdvntegqisiilaipvilgsvlrvpfgyltnivgakwvfftsf  
ivllfpi fflggagtpgm  
masgfflvggai fsvgvtsvpkyfpkekvglangi ygmgnigtavssflappiagi igwqttvrsyliialfalimfi  
fgdtqerki kvplmagmkt  
lsknyklyl sywyfitfgafvafgflpnlylvnhfgidkvdagirsqvfialatflrpiggilgdkfnavkvlmidfvi  
miigavilgisdhialftv  
gcltisisagignl ifklvpsyfsneagsangivsmmglggffpplvityvanltgsshlaflavfgcialftmrh  
lyqkeygslkhs  
>sp|Q6GE46|SARZ\_STAAR  
myvensylskqlcflfyvsskeiikkytnylkdydltytgyivlmaiendeklnikklgervfldsgtltplkklekkd  
yvvrtreekdernlqisl  
eggkaiksp lae isvkvfnefnisereasdivnlnrfvsknfdnsdkk  
>sp|Q6GE59|FENR\_STAAR  
mkdvti igggpsglyasfyaglrdmsvr lidvqselggkmriypeki iwdiggiapkpcheilkdtikqglyfkpevhln  
ervydi rkkserhfevete  
ageiytskavii aigagi inpkqldvkgveryqltnlhyvvqsyr rfdkdvli sgggntaldwahdiakiaksvtvvyr  
kedvsgheamktlvtdln  
klcpktriky lvgnddethisevvl ehvesgdthavkfddvi ishgfdr cntllsetsskl dmhddcrvkgfgntttsip  
giyacgd ivyhdakshlia  
safsdganaan laktyiqpdanaegyvs shhevfkeantivnkhl y  
>sp|Q6GE63|Y2457\_STAAR  
mklvtgllalslflaacgqdsdqkdsnekddkakteqqdkktndsskdkkdnkddskdvndkndnsandnqqqsns  
natnndqngqtnnnqnsngq  
ttnnqkssy vapyyqnaapvarqi ypfngnksqalqqlpnfqta lnaanneankfgnghkvyndysieehngnykyvfs  
fkdpnvngkysitvdtyg  
qamvtdpnyqq  
>sp|Q6GE71|Y2449\_STAAR  
mmklnlfinanetes yidi hapkmndhvqsi inavnd lkshtlvgyidkeihi invsdvitfqvinknvtait snqkfk  
lklrl yelekqlpqhfiri  
skseivnkyyieklllepnglirmylkdahytyssrrflksikerl si  
>sp|Q6GE72|HSSS\_STAAR  
mfkltlyariaiysitvil fsal isfv ltnvyhyhnlkasndakimktl kearqyeqsakpthiqqyfkhlgqmnyqimti  
dhkgkhtfygepfredtl s  
qnainnvlnnkdyhgi kdkpfal fvtgffdnvtdntvgin fktndgsi avfmrpdigetfsefrtflavllil lllfisis  
lvia stysii rpvkklkla  
terlidgdfetpikqtrkdeigt lqyhfnkmreslgqvdmrqhf vqnvshiektplthihhl selqqt sdktlrqqyi  
ndiytittqlsglttel l  
lseidnhqhl fddkiqvdl ikdi irheqfaadeksli iladlesidflgnqrllhqa lsnllinaikytdvggaidia  
lqshhnniiftisndgspi  
spqaearlferfykvs khdnsnglg laitksii elhhgti qftqs nayvttftitl pnhsh  
>sp|Q6GE73|HSSR\_STAAR  
mvqclvvdddprilnyia shlqtehidaf tqpsgeaalklllekqr vdiavvdimmdgmdgfql cntlkn dydipvimlta  
rdalsdkerafisgtddyv  
tkpfevkelifrirav lrryninsnsemtignltnqsy lelvsnktmtlpnkefql lfm laarpkqiftreqiiekiw  
gydyegdertvdvhikrlr  
qrllklnatltietvrgggykvenhv  
>sp|Q6GE78|TCAA\_STAAR  
mkscpkcgqqaqddvqi ctqcg hkfdsrqal yrkstdedi qtnnikmrkmpwaigffililililffll rfnfspeaqt  
kilvnai enndkqkvatl l  
stkdnkv dseeakvyinyikdevglkqfv sdlkntv hkl nsktsvasyiqtrsgqnilrvskngtryi ffdnmsftapt  
kqipvkpektkyefksgg  
kkkmviaeankvtpignfipgtyripamk stengdfaghlkfdfrqsnsetvdvtedfeanitvtlkgdtklndsskkv  
tindremafsssktygpy  
qnkdit isasgkagktfttqtktikasdlkynteitl nfdsediedyvekkekeenslnkklieffagyslannaafnq  
sdfdfvssyikkgssfydd  
vkkrvskgslmmi sspqiidaekhgdkit atvrlvnengkqv dkeyeleqqpqrllqiktsek  
>sp|Q6GE88|IDI2\_STAAR  
msdfqreqrknehveiamaqsdamhsdfdkmrvhhsipsinvndid ltsqtpdl tmtypvyinamtggsewtkninekl  
avvaretglamavgsthaa  
l rnp rmaetfti arkmp egmi fsnvgadvpveka leave lleaqlqihvns pqelvmpegnrefvtwldniasivsr v  
svpviikevgfgmskelmh  
dlqqigvkyvdvsgkggt nfvdi enerrankdmdyl sswgqstveslletayqseisvf asgglrtpldaikslalgak  
atgmsrpf lnqvenngiah  
tvayvesfiehmks imtmldakniddl tqkqivfspeil swieqrslnihrg  
>sp|Q6GE90|3MGH\_STAAR  
mdfvnndtrqiaknllgvkviyqdtqttytgyiveteaylg lndraahgyggkitpkvtslykr ggtiyahvmhthllin



Tsompanidou\_et\_al\_Supplemental\_FASTA\_File

fvtksegipegvli raiep  
edglsamfrnrngkkyevtngpgkwtkafnpraiddgarlndcrlsidtknrkypkdii asprigipnkgdwthkslryt  
vknprfvsmrksdcmfpe  
dtwk

>sp|Q6GEA0|LYRA\_STAAR  
mknknsqfawantifvffvitma lsiml rdfqsvigvkhfifevtdlapliaa icilvfkykkiqlaglkfsislkvi  
erlllalilpliliigmy  
sfntfadsfillqstglsvipthilighilmafvefgfrsylvnivetkmtffasivvglmysvfsanttydtefaay  
nflytfsfsmilgelirat  
kgrtiyiattfhasmtfgliflseeigdlfsikviaistaivavgyiglsliirgiaylttrrnlelepnnyldhvnd  
deetnhteaksssni kda  
ektgvatastvgiakndtentvadepsihegtektesqhhidnqtesnhdedhditsksvesaesvkhapqsddl tndsn  
edeteqslkepattykedrr  
ssvvidaekhiekteeqssdknk

>sp|Q6GEA1|HUTG\_STAAR  
mykqgepnltwgrldsetdpkkfrhfqtvtfedlsklekstpsvgvilgyavdkgvalnkgri gakegpdai kqafagl  
pdlnqcetlvdygnvyhdh  
eelidtkkefatlaaksivnhrqtflggghdiayaqylatrkvpytqsigvinidahfdtraeqqstsgtsfrqileed  
entgylvlgiaqggntgsl  
fdyakekkidyvfadelshvsptikdmierfihehdvimfticmdvidsafapgv sapavlglyphtvlelakriipsd  
kvssvsiaemnptydadnr  
taklvanlvhhflk

>sp|Q6GEA2|FOSB\_STAAR  
mlksinhicfsvrnlndsihfyrdilgkllltgkktayfklaglwialneekdiprneihfsythiaftidsefkywh  
qrldnvnvni legrvdir  
drqsiyftdpdghklelhtgtlenrlnyykeakphmtfyk

>sp|Q6GEA4|HUTU\_STAAR  
mrkiqakkglsieckgweqeavlrmlynnldtevaerpedlvvyggigkaarnweafeaiektlrelesdetmlvqsgkp  
vavfktheeaprvlisns  
lvpewanwdhfne ldkkglimyqmtagswi yigsqgi vqgtyetfaelgnqhfngdlagvtvltaglgmggaqplait  
mnhgvai cvdvdetrvdkr  
iatkycdiktanldealkeakekergegl siglvgnavdlhqail ekgfki diitdqtsahdplngyvpqgysveeakv  
lrekdpkkyvelsqasmak  
hvelmlefhkrgavafdygnnirqva fngvrnafdfpgfvpayirplfcegkpprfaalsgdpkdieradeemrklfp  
enekllrwldlaeekisyg  
glpsriawlggerakmgla lnrlvrdgeisapivigrdhldagsvaspnretesmkdgsdavgdwavlnalintaaggs  
wisfhggvgmgyslhag  
mvvadgseraerrlerlvtttdpgmgvarhvdagydiaiqtakekghihipmidkagdk

>sp|Q6GEA5|HUTI\_STAAR  
mndliinhiaelilprstdkplkgkeldelnvvkngtvvikdgkivyagthtddydatetid asgkvvspalvdahthlt  
fggsrehems lkrqgksyl  
eil emgggilstvnatretseddlfkkaehdl ltmikhgvlavesksygl drene lqqlkvsnr laekydldmkhtflg  
phavpkassneafleemi  
allpevkhyadfadi fctegvftieqsqhymqakeagfkvihadeidplgg lelaideqaisadhlvassdkgek l r  
nsdtvavllpattlylgke  
dyadargmlndngaialatdynpgssvtnniqlvmaiaalklklspnevnavtvnaakaidinagtintgdkanlviwd  
apnheyipyhfgin haekv  
ikdgkvi vdn t lsfkv

>sp|Q6GEC4|FDHL\_STAAR  
mqehl vvtldgkdy lvepgtnllefiksqdtfvpsicynesmgpiqtcdtctveidgkierscstvidr pmtvntvndv  
kdaqkealdri lekhmlyc  
tvcdynngdceihntmdawglqh qtyeykekyepdygpfrydpnqci lcgrcveacqdielnetiridwdrehprviw  
dndvpinesscvscgqcat  
vcpcnammevnmegnagymtdtepgslaamid ltkkaepgygpl faisdseaemrkerikktktvctygv gcsfevwtk  
dreil kvqps hds pankaia  
tcvkgkfwghinsdqr ltkplvrkngefheve wdealnv iadnftsikekhgpda lsfisskatneesy lmqklarqv  
igtannvdncsryc qapatk  
glfrtvghggdsgsiedlekaamsvligtntaeahpviasrmkraqlfgqki hvfdirkhemaeradr fyqpkpgtdla  
wlsavtky iidhd lhd kaf  
ieewvedfdeyyksletftmafaeeatgipeaelikfaecakaesvvicwamgitqqdigsdstaisnlllv tgnyr r  
pgtgaypl rghnnvqgcsd  
igsmprki tgyqsieaddi rakfekeygvkl npkagkdnhemvegihdgqihslylygedtgivdsninfvqaa fekl df  
mvvqdefl tftatyadv l  
pasp l ekgdgtfnterriqrlyqal kplgdskpdwki fqaiank lsfdwnykhpseimdeiar ltplyagvsyer legf  
nslqwpvhpdgtdepi ly l  
egfnfdngkakl fplsf dnyfkqdevydi hvnng rll ehfhegnmtyqtpmlkykvprafveispelaedrgihegaevk  
lissetgeavlqvhvtdrvk  
gkeiyiplnndamengdl gainllt nsdv d qytdtpsykrts crmevitkr gksp lnpnnfrvnkkrhpqysvqvqkkwe

Tsompanidou\_et\_al\_Supplemental\_FASTA\_File

rpdyvfpngqvdK  
>sp|Q6GED5|SSAA2\_STAAR  
mkkiatatiatagfatiaiasgnqahaseqdnvgynpndptsysytytidaqgnhytwkgnwhpsqlnqdnngyysyyy  
ngynnysynnyngsynn  
ysrynnysnnnqsynnnynsyntnsyrtgglgasystssnnvqvtttmapssngrsissgytsgrnlytsgqctyyvfd  
rvggkigstwgnaswana  
aaragytvnntpkagaimqttqgayghvayvesvnnngsvrvsemnygyggvvtstrtisasaagynfih  
>sp|Q6GEE2|UREF\_STAAR  
midhthlr1fqcfsqfptgafshsfgletyiqrniihddhtfiawlkmflqeqltysdglamrlvydalenddtqkv1h  
idklmfvqnlpketrvgak  
qmgrmvklalelynnpwiawyhqmqdkkaklnpaicftmlghylgvdietiidylyqnvssltnqnavraiplgqtag  
qkivthmipyieetrkqif  
elkeadfgmtapglelnqmahenvvrfis  
>sp|Q6GEE4|URE1\_STAAR  
msfkmtqnqytslygptvgdsirlgdtnlfaqiekdyavygeeatfgggksirdgmaqnrvtddvnavdlvisnavii  
dydkvkvadigikngyifa  
ignagnpdimdndvdiigsttdiaaegkivtaggidthvhfinpeqaevalessgitthigggtgasegskattvtppgw  
hihrmlaeaeglpinvgt  
gkgqatnptalieqinagaiglkvhedwgatpsalshaldvadefdvqialhadtlneagfmedtmaavkdrvlhmyhte  
gagghapdliksaafpni  
lpsstnptlpythntvdehldmvmithhlnaapediafadsrirketiaaedvlqdmgvfsmisssdqamgrvgevitr  
twqvahrmkeqrgpldgdy  
vhndnrikryiakytinpaithgiseyvgisepgkladivlwdpiffgvkpelvkvkgglinsavngdangsiptsepmk  
yrkmygyggnltsstmf  
vsktayenginralnlkrmvrpvknirqlskadmknnsatpkldvdppqtevyvdgekitsnaatelplrtqryflf  
>sp|Q6GEF4|FDHD\_STAAR  
mnkdvs1gqpi1vryedgklfnttdqyvtefp1timvngeefatvicsptnleelvigflasegailkrdelksvliddsk  
gfahvelnkd1gdrfgyst  
krmiasscgksrefyfqndaavaktsmskitltpqqiinnmtr1qsashiyqetgghnaalsdgl1ffvhrqdigrhna  
ldklygfc1qrhitvrdkv  
lifsgrisseilikaakigvgvilksapttlavtlandlnitavgfirnggfniyshperiidseq  
>sp|Q6GEF9|MOAB\_STAAR  
mgehqnvl1nrtvkaav1tvsdtrnfdtdkggqcvl1l1qvdnvevsdahy1tkdekva1ttqvk1kweevdvi1ttg  
gtgiaqr1dvtieavkp1lt  
keie1gfge1fry1syvedvgtrallsravagt1vndkl1f1sipgstgavklalek1k1kpelnh1h1hel1tk  
>sp|Q6GEG0|MOAC\_STAAR  
mtefth1nqqghakm1dv1sd1kq1tkrtavahss1tvnetiykq1sntntkgnv1ntaqiagimaakntst1ipmchp1p  
1tg1dv1hfnw1detn1ap1yt  
1n1q1ttv1st1g1ktg1veme1altaasata1tiydm1tkav1dkgm1igety1lesksggksgdfqrq1ldq  
>sp|Q6GEG6|MOAA\_STAAR  
mveq1kdk1grp1rd1r1svtdrcnfrcdycmpkevfgddfvl1pkne1l1tdemariakvyaelgvkk1ritg1geplmr  
rd1dv1jak1nq1dig1edi  
g1ttng1l1kkhgqk1ydag1rrinvs1daiddt1fqsinnrikattileq1dyatsig1nvkv1nvv1qkg1inddqiip  
m1eyfkdkhie1rfie1fmd  
vgndngwdfskvvtkdem1tmi1eqhfe1dpvepyk1fgevaky1rhk1dngvq1fgl1itsvsq1sf1cst1ctrar1ssdgk1fygc  
l1fatad1gfnv1kaf1irsgvt  
de1leq1fka1lwq1rddrysdertaq1tvanr1qrkkinmny1gg  
>sp|Q6GEG7|SARV\_STAAR  
msnkvr1fieaere1sq1khwl1kthk1sieefv1l1fkvy1eaek1sgkel1rdt1hfem1wdt1skidvi1rkiy1kkel1sk  
l1rsetderq1vfyf1ystsq  
k1ldk1tke1ev1svtn  
>sp|Q6GEG9|Y2349\_STAAR  
m1sqeffn1sf1tiyrp1ylk1tepe1lekhn1y1y1gqwl1l1rdiakhq1ptt1ieishra1iekptark1tkaliend1litven  
s1ledkrqk1f1t1tpkg1hel  
ye1vc1dvqk1lq1qav1vakt1nisq1dqm1qet1inv1m1qi1he1ll1keahnd  
>sp|Q6GEH2|FEMX\_STAAR  
mekm1h1t1qehda1fvksn1p1ngd1l1q1tkwaetk1k1tgwyarriavgrd1geiqgvaq1l1fk1kv1k1pyt1cyisrgfvvdy  
snkeal1na1ldsakei1aka  
ekaya1ki1dpdvevdkg1tda1qn1ka1lgfkhkgfkeg1skdyi1qprmt1mitpidkndde1l1nsferrnrskvr1al1krgt  
tversdreg1lktfae1lmki  
tgerd1gl1trdi1syfeni1yda1hedgdael1flvkl1dpkeni1akvne1ne1lhaei1akwqkmetsekqakkaqn1mindaq  
nkiakned1krd1lea1leke  
hpegi1yl1sga1l1mfagsksy1lygassne1frd1fl1pn1hmqyt1mmkyarehgattydfggtdnd1pdkd1seh1yglwafkkvw  
gt1yl1seki1gef1dyv1lnq1pl  
yq1lieqv1kpr1tkakiki1srk1lkrk  
>sp|Q6GEH9|TOP3\_STAAR  
mks1li1laekpsvardi1ada1qin1qkrngy1fennqyiv1twa1lgh1vtnatpeqydkn1kewr1led1piipkymktv1vigkt  
skqfktv1kai1ildnk1vkdi

Tsompanidou\_et\_al\_Supplemental\_FASTA\_File

iatdagregelvarlilkdvgnkkplrriwi ssvtkkaiqqgfnlkdgrqyndlyyaaarseadwivginatraltt  
kydaqlslgrvqtptiqvlv  
ntrqqeinqfkkpqqyytllstlvkgfdqlesnqrytnketleqivnnlknvdgkiksvatkhhksypqslynltdlqqdm  
yrrykgpketlntlqsl  
erhkvvtyprtdsnlyttmdvtdmkeriqatmattykdqarpmskftfsskmsifnnqkvsdhhaiiptevrpvmsdln  
relklydmiverflealms  
pheydaitvtlevaghtfvlnkenvttvlgfksirqgesitemqqpfsegdevkisktnirehettppeyfnegsllkame  
npqnfliqldkkyaqtlkq  
tggigtvatradiidklfnmaiesrdgkikvtskgqilelapeeltsp11taqweek111iergkyqaktfinemkdf  
tkdvngiknsdrkykhdn  
l1ttecptcgfmikvktkngqm1vcqdpscktkknvqrktnarcpnckkk1t1fgkgkeavycvcghsetqahmdqrm  
kskssgkvsrkemkkymnk  
negldnnpfkda1kn1n1  
>sp|Q6GEI4|RL4\_STAAR  
manydv1klldgtksge1sdavfgepnnsvlfeainlqraslrgthavknrsavsgggrkpwkqkgtrarqgtira  
pqwrgggyivfgptprsyay  
kmpkkmrr1a1rsalsfkvqengltvvdafnfeapktkefnv1stleqpkkvlvvtenedvnnelsarnipgvqvttaq  
glnv1ditnads1viteaa  
akkveevlg  
>sp|Q6GEJ6|RS14Z\_STAAR  
maktsmvakqkkqkyavreytrcercgrphsvyrkfk1cricfrelaykqgipgvrkasw  
>sp|Q6GEL3|ECFA2\_STAAR  
medknsvivfknvsfqyqsasftlkdvsfnipkgqwtisvghngsgkstiaklmigiervksgeifynnqaitddnfek  
l1rkdigivfqnpdnqfvgs  
ivkydvafglenhavphdemhrrvsealeqvdmleradyepnalsggqkqrvaivasv1alnpsvii1deatsmldpdarq  
n1ld1vrkvksehnitiis  
ithd1seameadhvi vmnkgtykegtateifdhaeelttigld1pfpikinqlghqtsfltyeglvdq1  
>sp|Q6GEL4|ECFA1\_STAAR  
mirfdnvsytyqkgtpyqhahdvntefeqqkyaiavgqtsgkstliqninal1kpttgtvtvdditi1thktdkkyi  
rpvrkrigmvfqpesqlf  
edtveremi fgpnfkml1deaknyahr1lmdl gfsrdvmsqspfqmssggmrkiaivsilampdiivvdeptagldpq  
skrqvmr11ks1qtdenkt  
i1l1shdmnevaryadev1vmkegsivsqtspkel fkdkek1adwhiglpeivqlqydfeqkhqtklkdialteeafvs1  
ykewqhek  
>sp|Q6GEM5|Y2294\_STAAR  
mskr111fdfdetyfkhtneed1sh1remek1lek1tnnneiv1tv1tgstfqsvmkmdqvnmtfklhifsd1sskm  
ftwnngeyvesetykkkv1  
sepf1fedi1lhi1saqynvefipqrafegnethynfyfhtgnhndrri1evlvryandqnytarfsrsnplagdp  
enaydidftpsnagklyat  
qf1mkkynipvks1lgfgdsgndeay1sylehaylmsnsrdealkqkfr1tkypyqqgit1hvkefvegkydy  
>sp|Q6GEN2|NPD\_STAAR  
mkhd1et1khi1dssnritfftgagvsvasgvpdfrrsmgglfdeiskdgl spey11srdyleddpegfinfchkr11fvd  
tmpn1vhdwia1klernqqs  
1gvitqnidg1hsdagsqhvde1hgt1nrfycnachksymksdvidrt1khcdncggairpdivlygemldqptiira1n  
k1edadt1vv1gss1lvqp  
aag1isn1fgdn1i1inkdrtpydndat1vihddmvs1vks1mte  
>sp|Q6GEN4|LACA\_STAAR  
mai1igsdeagr1keviksy1ldnkydvvdvteggqevdfvdat1lavakdvqsqegnlgivida1fgagsfmvatkikgmi  
aevsdersgymtrghns  
rmitmgsei1vgdt1aknvvkgfvegkydgrhqi1rvdm1nkm  
>sp|Q6GER1|MDEP\_STAAR  
mny1khkfy1n1tti1v1fi1fv1sgaif1t1f1gfglyg1sriliy1r1gdftynrsmyn11yygsy1ifgy1v1faveh  
1mdy1rkm1penay1frgat  
fh1isymvatt1fyfi1h1nyvyinidfwvimvi1gf1yvck1qfypeskn1n1nrk  
>sp|Q6GER8|MTLD\_STAAR  
mkavhfgagnigrf1gyiladnkvktfadvnee1inalatghqydviladesktttrvnnvaainsmqpsee1kqail  
eadi1ttavgn1lpiak  
sfap1f1kek1thv1vacenaimatdt1kkav1ditgplgnnihfansavdriv1lqknen1ldvmvepfyewvvekdw  
ygpelnhikyvd1ltpyie  
rk1l1vntghay1ayagkfagkatv1davkdssieaglrrv1aetsqyitnefdfteaqagyveki1drfnnsy1sdev  
trvgrgt1rkigpkdriik  
p1ay1ynkd1ertg1l1ntaa11kyddtadqetveknnyikehg1kaf1seyakvddgladeiieayns1s  
>sp|Q6GES3|GLMS\_STAAR  
mcg1vg1y1gydnake111kg1lek1eyrgydsagiavvnddnttvfkekgriae1rkvadssfdgpgvightrwathgvp  
nhenshpqssngrftlvh  
ngvienyee1kgeylqgvsfi1setdtevi1v1veyfsnqgl1steaftkvvs1lhgsyalg1ldaedkdiyvknksp1  
11gvgegf1nvi1asdalaml  
qvtseykeihdheivivkkdevi1kdadgnvverdsyiaeidasdaekgyvahym1keiheqpavmrriiqeyqdaegn1

Tsompanidou\_et\_al\_Supplemental\_FASTA\_File

kidqdiindvkeadriyv  
aagtsyhaglvgkeflekwaqvptevhvasefvynmp11seklfvvysqsgetadsravlvtnklghksltitnvags  
t1sreadht111hagpeia  
vastkaytagiavlslsqivakehgreadd11relakvttaieaivddapimeqiatdflettrnaffigrtidynvs  
legalklkeisyiqaeqga  
ggelkhtialieegtpvvglatqekvnlsirgnvkevvargahpciismeglekegdyviphvhe11tp1vsvvt1q1  
isyaa1hrd1dvdkprn1  
aksvtve  
>sp|Q6GET9|PDP\_STAAR  
mrmidiiekkrdghtltteeinffidgyvkgdipdyqasslamaiyfqdmndderaaltmamvnsqdmid1sdikgvkvd  
khstggvgdttt1v1aplv  
aavdvpvakmsgrglghtggtidk1eaidgfhveideatfvklvnenkvavvgqsgn1tpadkklya1rdvtgtvnsip1  
iassimskkiaagadaiv1  
dvktgsgafmkt1edaealahamvrignvgrntmaiisdmnqplgraignalelqeaidt1kgqgpkd1telv1t1gsg  
mv1lankaet1leear11i  
eaidsgaalekfkftiknqggdktvidhper1pqaqyqieykakksyvtelvsndigvasmmlgagr1tkeddidlavg  
iv1nkkigdkveeges11t  
ihsnrqdvddvkk1dssitiadyvvsptlihkite  
>sp|Q6GEV3|ALD1\_STAAR  
mrdytkqyingewvesnetievinpateevigkvakgnkadvdkaevadnylefrhtsvkerqalldkivkeyenr  
kddivqaitdelgap1s1s  
ervhyqmg1nhfvaarda1dnyeefeerrgdd1vvkeagvsglitpwnfptnqts1klaaafaagspv1k1pseetpfaa  
vilaeifdkvgvpkgvfn1  
vngdgagvgn1sehpkvrmsftgsgptgskimekaakdfkkvs1elggkspyiv1ddvdikeaakattgkvvnntgqv  
ctagtrv1vpnkikdafa1  
elkeqfsqrvrvgnpredgtqvgpiiskqfdqvqnyinkgiegae1fyggpgkpeg1ekgyfarptifinvdnqmtiaq  
eeifgpvmsvitynd1dea  
iqiandtkyglagyvigdkket1hkvvarsieagtveineagrkd1pfggykqsg1grewgdygieeflevksiagyfk  
>sp|Q6GEV6|KITH\_STAAR  
myetyhsgwiecigtmsfsgkseelirr1rrgiyakqkvvfkpaiddryhkekvvshngnaieainiskaseimthd1t  
nvdvigiidevqffddeivs  
ivekl1sadghrvivag1dmdfrgepfepmpk1mavseqvtklqavcavcgsssrtr1ngkpkakiddpi1lvganesy  
eprcrahhivapsdnnee  
1  
>sp|Q6GEW0|PTPB\_STAAR  
mkilfvctgntcrsp1aesiakevmpnhqfesrgifavnnqgvsnyved1veehhlaett1sqqftead1kadiiltmsy  
shkelieahfg1qnhvft1  
heyvkeagevidpyggtkemyvhtyeelvs1ilk1kdiic  
>sp|Q6GEW8|ATPF\_STAAR  
mtetan1ff1gaaggvewgtv1vqv1tfiv11a11kkfawgp1kdvmdkrerdinrdiddaeqak1naqkleenkqk1k  
etqeevqk1ledakvqarq  
qqeqi1heanvrangm1etaqseinsqkeraiadin1nqvsel1svliaskvlrkeiseqdqkalvdky1keagdk  
>sp|Q6GEW9|ATPD\_STAAR  
mvkvankyakal1fdvs1dtn1etinee1tvineavkdkieq1kmvdsnptqtaeqrrelingvftdinpyiknmmyv1a  
dnrhisl1advfkafqsl1  
nghynqdfatiestyel1sqeelvkivklvtqqt1skvidtkinpd1iggfrvkvgttv1dgsvrnd1vqlqrkfrvn  
>sp|Q6GEX9|SCED\_STAAR  
mkk11lass1avgl1vagnagheaqasead1nkas1aqaqsndqt1nqkpieagayntfdyegftyhfesdgthfaw  
nyhatgangadmsaqapat  
nnvapsadqsnqvqsqeveapnaqtqppqastsnnsqvtatpteskasegssvvn1dh1k1iaqresggnihavnptsg  
aagkyqf1qstwdsvapak  
ykgvspanapesvqdaavk1yntggaghwta  
>sp|Q6GEY2|THID\_STAAR  
mikpkialtiagtdptggagvmad1ksfhscgvymgvvtsivaqnt1gvqhihn1nhqwvdeq1dsvfndt1phaiktg  
miatadtmetirh1ymqhe  
sipyv1dpvm1aksgds1mdnntkqnlqht11pladvvtpn1peaeitgltidseekimqagrifineigskgviikgg  
hsndadiakdy1ftkegvq  
tfenerfktkthgtgctfsavitaelakgrp1feavhakkfismsiytpeigrgrgvnhfay1kkegl1d1el1sk  
>sp|Q6GEY4|THIE\_STAAR  
mfnqsy1nvyf1cgt1dvpshrt1hev1eaa1kagit1fqfregesalkgndk1vlake1qh1chqydvpfivnddvs1  
akeinadgi1hvgddakvk  
eiaqyftdki1gfs1sd1deyaksd1thvdyigvgpiyptpskhdahtpvgpemi1atfkemnpq1pivaiggintsnavp  
iveagangisv1saiskse  
niektvnr1fkdfn1  
>sp|Q6GEY5|OXAA\_STAAR  
mkkkt11p1f1gimv1flagcdyskpekrgffyntfvdpmknv1dw1gn11ndnyglaii1lv1iri11lpfml1snyk  
nshmmr1qk1mkvakpevek1  
qekvkrartqeeqmaange1mqvykkydmnpiksm1gcl1pml1q1p1imglyfv1kdq1vdgl1fkyph1wfd1grpd1w

Tsompanidou\_et\_al\_Supplemental\_FASTA\_File

it iagvlyfiqayvsskt  
mpdeqrqmgymmmv i spimi iwislssasa l glywsvsaaflvvqthfaniyyekvakkevqpfieayerehnggsnkkg  
kntqvvskkkkk  
>sp|Q6GEY7|CLS2\_STAAR  
miellsialkhsniilnsifigafinllfaftiifmerrsansiwawllvlvflplfgfilylllgrqirdqifkidk  
edkkglelivdeqlaalkn  
enfsnsnyqivfkemiqmllynnaafllttdndlkvytdgqekfddliqdirnatdyihfgyyiqndelgrtilnelgk  
kaeggvevki lyddmgsrg  
lrkkglhpfvrnkghaeaffpsklpllnlrmnrrnrhkivvidgqigyvggfvngdeylgskskkfgywrwthlrivgdav  
nalqlrfildwnsqatrdh  
isyddryfpdvnsnggtigvqiassgpdeeweqikygy l km issakksiyiqspsyfipdqafldsikiaalggvdvnimip  
nkpdpfvfwatlknaas l  
ldagvkvfhydnfgflhsktlviddeiasvgtanmdhrsftlnfevnafiydqqiakklkqafiddlavsseltkaryakr  
slwikfkegisqllspi  
>sp|Q6GEZ1|DDL\_STAAR  
mtkenicivfggksaehevsiltaqvnlnaidkdkyhvdiiytndgdwrkqnnitteikstdehlhengealeisqllk  
esssgppydavfpllhgn  
gedgtiqglfevldvpyvngvlsaassmdklvmkqlfehrglpqlyisflrseyekyehnilklvndklnypvfvkpa  
nlgssigiskcsnevelke  
gikeafqfdrklvieggvnareievavlgndypeatwpgevvkdva fydykskykdgvqlqipadl dedvqltlnmal  
eafkatdcsglvradffvt  
ednqiynetnampgftafsmypklwenmglsypelitklielakerhqdkqknkykid  
>sp|Q6GEZ3|Y2168\_STAAR  
mqnfkelgisdntvqslesmgfkeptpiqkdsipyalqgidilgqaqtgtgktgafgpi liekvvgkqgvqslilaptre  
lamqvaeqlrefsrgggvq  
vvtvfgmpierqikalkkgpqivvgtpgrvidhlnrrtlktgdihlildeademnmgfiddmrfimdkipavqrqtm  
lfsatmpkaiqalvqqfmk  
spkiiktmmnemsdpqieefytivkelekfdtftnflvdhqpelaivfgrtkrrvdeltsaliskgykaeglhgditqak  
rlevlkkfkndqinilvat  
dvaargldisgvshvynfdipqdtesythrigrtgragkegiavtfvnpiemdyirqiedangrkmsalrpphrkevlqa  
reddikekenwmskeses  
rlkristellneyndvdlvaallqeliandevevqltfekplsrkgrngkpsgsrnrnskrngpkfdskskrskgyssk  
kkstkkfdrkekssggsrp  
mkgtrtfadhqk  
>sp|Q6GEZ6|ATKA1\_STAAR  
meilfltmvmiayvfsgylrvalvqssrvdliftrfenmcfkiigtdehmsaktyvkhflafngfmgvitfvlliv  
qqwflnphnlngsidla  
fntaisfltnsnlqhyngesvtyltqmi vmtylmftssasgyavciamlrrltgltniignfyqdivrfivrllplsc  
lisillmtggvppqtlhanl  
mirtlsghiqhiafgpiaslesikhlgtngggflagnsatpfenpniwsnfiemgsmmlpmsmlflfgrmlsrhgkrvh  
rhalilfvamffifiailt  
lrmwseyrgnpi lanlgighanmegkevrfgaglsalftvittafttgsvnmhds ltpgglgpmvlmm lnnvfvgggvg  
glnmllyvlltlficslm  
vgktpeylmpigaremkcivlvflihpililv fsalafmipgasesitnpsfhgisqvmymtsaaanngsgfeglkdd  
ttfwnistgiimllsryip  
iilqlmissslvnkksyhqdkhtiaidkpyfgvslivfivllsgltfipvlllpgigefltlk  
>sp|Q6GEZ7|ATKB2\_STAAR  
mhhvnkyfnqtmvieal kmsfyklnpkqliknpimfvvevgmltlilicfpdifgtsylsrgylitifiillitilfan  
fseafaegrkqaqadslrq  
aqsnltarlieengayrivnatelkagqni rvengetipadgvvinglatvdesaitgesapvikesggdfdgviggtlv  
tsdwleirvseagtsfld  
kmialvegaernktpeialftlltltiiflvvvtlypiasyhlilpiamlialtvclipttiggllsaigiagmdr  
vtqfnvlaksgravevcgd  
vdvml dktgtitygnriaseflpvnqqmmeklivaaymssiyddtpegksivrlakqmyinelpkdidgtykpftaetr  
msgiitneisvfkgapnsm  
inlvkqqgniplniesicmdvsskggtp liviennvmlgvilylkdvikdglverfaelrkmgietvmctgdnaltaati  
akeagvdrfvaeckpedki  
kvikdeqakghivamtgdgtndapalaqaniglamnsgtisakeaanlidlnsntk lievvkigkqllmtrgal ttfsl  
andvakyfaillpalmmsti  
pemtlnimhlsspkσαιisalifnaliivalipiamkgvkvkgy sidri finnmliyglgg livpflgiklidmivqff  
v  
>sp|Q6GF03|ALR1\_STAAR  
msdkyrsaymvdlnavasnfkvfstlhpntvmavvkanayglsvkvarhlmengatffavat ldeaielrmhgita  
kilvlgvlpakdidkaiqh  
rvaltvpskqwlkeakni sgeqekklwlhikldtgmgrlgikdtktyqevieeiqqyeqlvfegvfthfacadepgdm  
teqyhrfkdmvneaikpey  
ihcnsagsllmdcqfcnairpgislygyypseyvqqkvkvhlkpsvqlianvvqtktlqagesvsyगतytatdpttia  
llpigyadgy lrimqgsfv

Tsompanidou\_et\_al\_Supplemental\_FASTA\_File

nvngqhcevigrvcmdqti vkvdpdqvkagds vilidnhrespqsvevaaekqhtinyevlcnlsrrlpriyhdgdqrfvt  
ne1lk  
>sp|Q6GF11|SPRTL\_STAAR  
mnneilqrmvenlseekfgrtfqhrayfnkr1rttggryl1kshdieinpkqyehygedavvkiilhelchylhiagkg  
yqhkddqfkr1sqvgapr  
fcnsiesyqgranyeyctkchakyirirkvdtmrnrcghcngklrmkrq1k  
>sp|Q6GF13|LEUD\_STAAR  
maaikpittygkivplfndnidtdqipkvhlkrisksfgpafadewrylpdgsdnpdfnpnkpykgasilitgdnf  
gcgssrehaawalldygfh  
i1iagsfsdi fymnctknamlpivleknarehlakyeievd1pnqtvsspdksfhfeidetwnklvnglddiait1qy  
eslikeyeks1  
>sp|Q6GF14|LEUC\_STAAR  
mgqtlfdkvwrrhvllygklgepqllyid1h1hevtspqafeglrlqnrklrrpdl1fatldhnvptidifnikdei ank  
qit1lqknaidfgvhi1fdm  
gsdeqg1vhmvpgpetgl1tpgktivcgdshtathgafgaiafgigtsevehvfatqtlwqtkpkn1kidingt1ptgvya  
kdi1h1liktygvdfgtgy  
a1leftgetikn1smdgrmticnmaieggakygi1qpdditfeyvkgrpfadnfaksvdkwrelysnddaifdrviel1dvs  
t1lepqvtwgt1pempgvnfs  
epfpeind1ndgraydymgl1epgqkaedid1gyvflgsctnar1sd1ieashivkgnkvhpnitai1vvpgrsvtkkeak  
1gldti1fknagfewrepgc  
smc1gmnpdq1pegvhcasts1nrfegrqgkgarth1vspamaaaiahgkfvdrkvvv  
>sp|Q6GF15|LEU3\_STAAR  
mtynivalpgdgigpeilngs1s1lei1snkynfnyqiehhffggasid1t1fgepl1tekt1nackradai1l1gaiggpkwt  
dpnnrpeqg1l1k1rks1n1  
fanirpttvk1gass1spl1kaervegtd1vivrel1tsgiyfgepryfnhealds1tytreeierivhvafklaasrrgk  
1tsvdkenv1assklwrkv  
vnevsq1ypevtvnh1l1vdacsmh1itn1pkqfdvivyen1fgdi1sdeasv1pgs1gl1spsasfsndgpr1yepihgsap  
di1agknvanpfgmi1slam  
c1res1nqpdade1eqhiynmiehgqttad1ggk1nttdi1feilsqk1nh  
>sp|Q6GF16|LEU1\_STAAR  
mssh1qi1fdt1l1rdgeqt1pgvnft1fder1ria1q1lekvgdvieagfpas1tsg1fksvqai1aqt1ttt1avcgl1arckksd  
i1davyeatk1daakpvvhvf  
i1atspi1h1ehk1kmsqedv1asikehvt1yakq1fdv1vq1spedat1rte1p1fl1vkcvt1avdagat1vinipdt1vgysy1hde  
yah1fkt1tesvt1ssnei1  
ysahchdd1gmavsn1s1laaieggarr1iegtvng1igeragnaaleeva1al1yirndhygaqta1n1leetk1ktsd1isryag  
irvprnka1ivgqna1fshes  
gi1hdgv1l1khretye1imtpq1vgvstte1p1lgk1sgkhafskk1ka1gydidkeaqid1fkqfkai1adkkksv1sdrdi1ha  
i1iqgsehehqa1lyk1let1q  
l1qyvssg1qsavvvi1kdkeghiyq1dssigt1gsivai1ynavdri1fqetel1dyrinsv1tegt1daqaevhvn1l1iegktvn  
gfgidhdi1l1qasckayvea  
hakfaaenvekvgn  
>sp|Q6GF19|ILVD\_STAAR  
mr1sdm1kkgdh1qapars1l1hatga1ksptdm1kpfvai1cnsyidiv1pghvh1reladi1akeaireagaip1fefnt1igvdd  
giamghig1mrys1lpsrei1  
adaaetv1inahwfdg1vfyipncdki1tpgmi1laamrt1nvpai1fcs1ggpmkag1sahgkalt1ssmfeav1gafkeg1siskee  
f1dmeqna1c1ptcgscagmf  
tansmnc1mev1gl1alpyngtalavsdqr1remi1raa1fklveniknd1kprdiv1treaid1dafa1ldmamgg1stntv1ht1  
a1aneagi1dydlerina1ia  
krtpy1l1skiap1ssysmh1dveaggvpai1nelmkkdgt1lhpr1itvtgkt1renneg1keiknfdvihs1ldapyda1qgg1  
sil1fgni1apkgavikvggv  
dpsikt1ftgkaic1fnshdeavea1dnrtvraghv1vvi1ryegpk1ggg1mpem1lapt1ssivgr1lgkdvalit1dgrfsgatr  
giavghis1peaas1gpi1al  
i1edgdei1tid1tnrt1kvnqpedv1larres1tpfkakvkt1gylaryta1l1vtsant1ggvmq1vpen1i  
>sp|Q6GF33|AGRA\_STAAR  
mk1ificed1dpkqren1mvti1iknyimieek1pmeialatdn1pyev1eqaknmndig1cyf1ldiql1st1dingik1lgseirk1hdp  
vgn1i1fv1tshsel1tyl1tfv  
ykvaamd1fi1fkddpae1lrtriid1c1leta1htr1ql1l1skd1nsvetiel1krgs1ns1vyvqy1ddim1ffes1stksh1ria1hdn1rq  
i1efygn1ke1l1sq1l1ddr1ffr  
ch1nsf1vnr1rh1niesid1skeriv1yfknkehcyasvrn1vkki  
>sp|Q6GF36|AGRB\_STAAR  
mnyfdnki1dqfaty1l1qkrnn1dhiqf1l1qvr1l1gmqvlaknig1klivmyt1layil1nif1ft1itnis1fyli1r1ryahgahaps  
sfwcy1iesit1l1fiv1pl1lv  
l1hfhi1net1l1mmf1al1l1svgv1vikiyapaat1kkk1pipar1lvkqkryfsi1iistil1fiit1l1fvkepyt1qfi1ql1giii1qait1l1  
pi1yysked  
>sp|Q6GF37|HLD\_STAAR  
maqdi1istig1dl1vkwi1dtvnk1ftkk  
>sp|Q6GF49|LUKL2\_STAAR  
mknkkrvfi1ass1lscv1l1l1saanteans1ankdsq1dqtkkehvdkaqqkekrnvndkdkntpgpddig1kngkvtkrtvse

Tsompanidou\_et\_al\_Supplemental\_FASTA\_File

ydketnllqnlqdfdidp  
tydknvl1vkkqgsihsnlkfeshrnetnaswlkypseyhvdqvrnpkteildqlpknkistakvdstfsyslggkfd  
stkgigrtsnsysksisy  
nqqnydtiasgknnnrhvhsvvandlkynneiknrndeflfyrnr1stvenpelsfaskyrypalvrsgfnpefltyi  
sneksnektrfevtytrnq  
dilknkpgihyggpilleqkdgqrfi vvyevdwknktvkvvekysdqnkpykeg  
>sp|Q6GF50|LUKL1\_STAAR  
mikqvckniticslalstaltvpassyaeikskittvseknldgdtkmytrtattsdekkisqslqfnfltepyndke  
tvfikakgtigsqliklnp  
ngywnstlrwpgsysvsiqnvddnnnstnvtdfapknqdesrevkytygyktggdfsingrgltnitkeknyseti syq  
qpsyrtildqpttnkgvaw  
kveahsinmghdhrqltndsddrvkseifsltrngnlwakdnftpknkmpvtvsegfnpeflavmshdkndkgksrfi  
vhykrsmddfklwnkhgf  
wgywsgenhvdqkeeklsalyevdwkthdvkiktindkeqk  
>sp|Q6GFB8|MAP1\_STAAR  
mkfkslitttialgvlstganfntneasaaakqidkssslhghyskiqipytitvngtsqnilssltfnknqqisykd  
ienkvksvlyfngisdid  
lr1skqakytvhfngtkrvvd1kagihtadlntsdikaisvndtkkqvkdkeakanvqvpytitvngtsqnilsnt  
fkknqqisykd1ennvksv  
lksnrgitdvd1r1skqakftvnfngtkkvid1kagiytan1intgdiknininvetkkqakdkeakannqvpsinln  
gtttniqsnlafsnkpwt  
ykn1takvksv1ksdrgvserdlkhakkaytyvfknngkrvihlnsniytanlvhakdikkievtvtgskanaeryvp  
ytiavngtstpnl1sd1kfk  
gdsrvsysdtkkvksv1kydrigere1kyakkatyvhfngtkkvinlnskisq1n11fvkdikkidvdvtgskak  
adsyppytiavngtstpia  
sk1k1snkq1igyqdl1nkkvksv1khdrgindielkfakqakytvhfngtkqvvd1ksdiftrnl1fsvkdkkididvk  
qhtksnkalnksniatkv  
kfpvtingfsnvsnefaflhphkittndlnaklr1alasdqgitkhdig1sertvykvfykdgsskfvdl1kaakqdkv  
fkadikkvdieikf  
>sp|Q6GFE0|SDCS\_STAAR  
mayfnghqsmiskryl1tffskskkkkpfstgq1ig1ilgp11fl1t11ffhpqdl1pwkgvyvla1t1w1atw1iteaipi  
aats11piv11plgh1tp  
eqvsseygndiif1f1ggf1aiamerwn1htrvaltiinligastskillgfmvatgflsmfvsntaavmimipiglai  
ikeahdlqeantnqtsiqk  
feks1v1aigyag1igg1gt1igtpp1i1kgqymqhfghes1fakwmivgiptviv11gitwly1ryvaf1rhdl1kylpg  
gqtl1kqk1delgkmyee  
kvvtifv1as11witref11kkwevtssvadgtiaifis11fi1pakntekhrridwevake1pwgv11f1gg1al  
akgisesglakw1geq1ks  
1ngvsp11iviviti1fv11tevt1ntatat1m1pilat1svavgvhp111mapaamaancayml1pvgtppnai1f1gsgk  
is1kqmasvgfwn1isai  
i111vvy1impiv11gidinq1p1k  
>sp|Q6GFE2|NOSO\_STAAR  
m1fkeaqafienmykecheyetqi1nkr1hdieleiketgythtee1iyakmawrnsnrcigr1fws1nvidardvt  
deasf1ssinyhiaqatne  
g1k1kpy1tiyapkgpki1fnq1iryagydcngdpaeketr1anhlgwkkgtnfdv1p1iyq1pnesvkyyeypts1i  
kevpi1ehdhypl1rk1n1k  
wyavpi1snmd1k1ggi1vyptapfngwymvte1gvrnf1ddyryn11ekvadafefdt1knnsfnkdralvelnyavyhs  
fkkegvs1vdh1taakqfe  
1ferneaqqrqvtgksw1app1spt1tsnyhhgydntvkdpnffykksnanqcpfh  
>sp|Q6GFE4|NADE\_STAAR  
msk1qd1v1qemkvkkr1dsaeie1kqf1kisyvqshsfiks1v1lg1sggqdst1vgk1vqmsvnelreegidctfiav  
k1pygvqkdadeveqalqf  
iepde1vtvni1kpavdqsvqsl1keagiv1tdf1qknekarermkvqfsiasnrqg1vvgtdhsaenitgyfkygdgaad  
i1api1fg1nkrqgrq1lay1  
gapkq1yektptad1eddkpql1pdeda1gvtyea1dny1legkpvtp1eeqkvi1enhy1rnahkrelaytrytwps  
>sp|Q6GFE5|Y2004\_STAAR  
msfvtenpwl1mvti1fi1nvcyvt1tmrti1t1kgyryiaasvs1flev1vyivgl1lmsn1dh1qni1aya1fgfsigi  
ivgmki1eek1al1gytvvnv  
tsaeyel1d1pne1rn1lgygvthyaaf1grdgsrmvmqil1tprkyerk1mdtikn1dpkafi1ayepri1hggfwtkgi1rr  
k1kdyepeel1esvveheiq  
sk  
>sp|Q6GFF2|PCRA\_STAAR  
mna11nhmnteqseavkttegp11imagagsktrv1thriay11dekdvspynv1aitftnkaaremker1vqk1vgdqa  
eviw1mstf1hsmcvri1rrd  
adri1giernfti1idptdqk1svikdv1kneni1dskkfep1rmfigai1sn1kne1lktpadaqkeatdyhsqmvatvysgyqrq  
1srneal1dfdd1imttin1  
fer1ypev1leyyqnk1fy1ihvdeyqdt1nkaqyt1vk11askfkn1cvvgdsdqsiy1gwr1gadi1qnil1sfekdy1peanti1fl  
eqnyrstkti1naanevik

Tsompanidou\_et\_al\_Supplemental\_FASTA\_File

nnserkpkglwtantngekihyyeamterdeaeefvireimkhqngkkyqdmailyrtnaqsrvleefmksnmpytmvg  
gqkfyrkeikdllylri  
iansnddislqriinvpkrvgpssvekvqnyalqnnismfdalgeadfiglskkvtqeclnfyeliqslieqefleih  
eivdevlqksyremlere  
ntlesrslrenidefmsvpkdyeentpleeqslinfltdlslvadideadtengvtlmtmhsakglefpivfimgmesl  
fphiraiakseghemqeer  
ricyvaitraeevlyithatsrmlfgrpqsnmpsrflkeipesllenhssgkrqtiqpkakpfakrgfsqrttstkkqvs  
ssdwnvgdkvmhkawgegm  
vsnvneknsgielidifksqgpkrl1aqfapiekked  
>sp|Q6GFF3|DNLJ\_STAAR  
madlssrvnelhdlnqysyeyvednpsvpdseydkllhelikeeehpefktvdsptvrvggeaqasfnkvnhdtpml  
slgnafnedlrfkdqri  
eqignveymcelkidglavslkyvdgyfvqgltrgdgtteditenlktihaiplkmkeplnvevrgeaymprsrflrln  
eekendeqlfanprnaaa  
gs1rqldskltakrklsvfiysvndftdfnarsqsealdeldklgfttnknrarvsdidgvlleyiekwtsqreslpydid  
givikvndldqqdemgftq  
ksprwajaykfpaeevvtklldielsigrtgvvtptailpevkvagttvsraslhnedlihdrdirigdsvvvkkagdi  
pevvsiperpedavtyh  
mthpcpscghe1vriegevalrcinpkcqaqlveglihfvsrqamnidglgtkiiqqlyqselikdvadifylfeedllp  
ldrmgqkkvdnl1aaiqqa  
kdnslenllfglgrhlgvkasqvlaekyetidrlltvteaelveihdigdkvaqsvvtylenediraliqklkdkhvm  
iykgiktsdieghpefsgk  
tiviltgk1hqmrneaskwlasqgakvtssvtkntdviagedagskltkaqslgieiwteqqfvdkqnelns  
>sp|Q6GFF5|PUTP\_STAAR  
mltmgtalsqqvdanwqyimiavyflilivigfygykqatgnlseymlggrsigpyital sagasdmmsgwmimglpgsv  
ystgl samwiti gltlay  
inyfvapr1rvytelagdaitlpdffknrlndknnv1kiisgliivvfftythsgfvsggklfesafgl dyhfglilv  
afivifytffggylavsit  
dffqgvim1iamvmvipvamnlngwgtfhdvaamkptnl1fkg1sfigiis1fswglgyfgqphiivrfmsikshkm1  
pkarr1giswmavgl1gav  
avgltgiafvpayhik1edpet1fivmsqvl fhp1vggf11aailaaimstissqllvtsssltedfyklvrgeekakth  
qkefvmvgr1svlavai va  
iaiaawnpndtilnlvgnawagfgasfsp1vl1falywkg1tragavsgmvsgalvviwawikplahineifglyeipg  
fivsvivtyvvskl1tkkpg  
afvetd1nkvrdivrek  
>sp|Q6GFF6|GATC\_STAAR  
mtkvtreevehianlar1qispeeteemantlesildfakqndsadtegeptyhvl1dlnvlredkaikgipqela1kn  
aketedgqfkvptimneed  
a  
>sp|Q6GFF8|GATB\_STAAR  
mhfetvig1evhvelktdskmfspahfgaepnsntnvidlaypgvlpvvnkravdwamraama1nmeiateskfdrn  
yfydpnpkayqisqfdqpi  
gengyidievdtgetkrig1tr1hmedagksthkgeys1vdlnrqgtp1ieivsepd1rspkeayaylek1rsiiqytgv  
sdvkmeegs1rcdanis1r  
pygqekfgtkaelkn1nsfnvyrkgleyeekrqueel1sggeigqetr1rfdestgktilmrvekgsddyryfpepd1vp1  
yiddawkervrqtipe1pd  
erkakyvne1gl1paydahv1t1tkemsdffestiehgadvk1tsnw1mggvney1nknqve1ldtkltpen1lagmiklie  
dgtmsskiakkvfpe1laak  
ggnakqimedng1vqisdeat1lkfvnea1dneeqsvedykngkgkamg1lvqgimkaskgqanpqlvnqllkqeldkr  
>sp|Q6GFG0|Y1988\_STAAR  
mqaiakndiktgtvvd1theghgvk1drfpi1fipqal1neqieyk1ikvknfaigk1lnintrsenrvappciyyerc  
ggcqlqhl1syaql1emkke  
qv1n1fqrkahfndsk1ndtvgmtdpwyrnksq1pvgkneqnevimgfyrqrshdi1dmgscli1qdsqhqvemnevksi  
1kd1nvs1yqeql1kkg1mr  
h1vvrtyhtdemmv1fvtnknwpqknavekil1dafpnvtsikqnindshsnvimgrqsit1lygkdti1dq1tdstfk  
isdqsfyq1inseqtek1yn  
kaieyaq1tgnev1ldtycgigt1g1ymaphakhvygvevpsaiedaqqnatinqcnntt1fvcgkaeevil1qkkaqgik  
pdv1vmdpprkgcdetfiq  
t11t1lepkrivyiscnpstqqrda11laekyq1leevtpvdmfpqtthvetval1fn1k  
>sp|Q6GFG2|DPO4\_STAAR  
mterrii1hidm1dyffaqvemrdnpl1kgkpv1vgkassrgvstasyearkygvhsampmsqahk1cpngyfvtsnfga  
yretsaqims1frsytdkv  
epms1deay1di1telvrpd1paskiaqy1rkdi1leqth1tasagvsynkflak1asgmnpkgm1tvidyrnvhd1lmt1d  
igdfpgvgkaskkvmdng  
ifngrd1yektefel1r1f1gkrgrg1ynkargi1dhsevkstrvrksvgttert1fatdvnddee1l1rkvwel1sgktaer1nk  
1qksaktvtvk1ktyqfet  
1skqms1rdsvsseediy1niay1lynd1kdpdvpir1ligvtvgn1leqstyknmtiydfi  
>sp|Q6GFG4|FTN\_STAAR



Tsompanidou\_et\_al\_Supplemental\_FASTA\_File

m1skn1lea1ndqmnheyfaahaymamaaycdkesyegfanffiqakeerfhgqkiynyindrgahaefravsapkidf  
ssiletfkds1sgeqevtr  
rfyn1seiarqdkdyatisf1nwfldeqveeamfethinyltrigddsna1lyeke1gtrtfdee  
>sp|Q6GFJ0|Y1957\_STAAR  
mvresipkegenikiqsykhgkihrvwsettilkgtdhvvigndhtlvtesdgrtwitrepaiyvfhseywfnvicmf  
redgiyyycn1sspfcvde  
ealkyidydl1kvypngkyh11dedeyeqhmnqmnyphdidi1lrrnvdi1qqwieqkkgpapdfikvkwdrykkrq  
y  
>sp|Q6GFK5|FUMC\_STAAR  
msvriehdtfgeievpadkywgaqterskrnfpvgkermpievvygfaqlkraaalanfd1gklseakkdaivyacdqi1  
sgeldehyplvvwtgsgt  
qsnm1vnevvsyvanmy1kdhsdesihpnddvksqssndtftamhvalyqevetklepalk1l1rnt1kekedkfdsi  
ikigrth1qdatpiklgqe  
isgwrym1dracetm1seskhi1n1aiggtavgtginahpefgdkvaqyisentgypfvssenkfhal1tahdevvq1hgt  
1kalagd1mkiandrwl1a  
sgpraglaeisipenepgssimpgvnptqcem1tmvavqvmgndtvvgfassqgnfel1nykpvimhnt1qsiy1ladg  
metfnncavgiepieeni  
dnylnqsl1m1vta1nphigyekaaqiakkahegl1lkesaiqtgyvteeqfeawikpedmvdph  
>sp|Q6GFL0|Y1937\_STAAR  
mna1f1i1fmivvgai1ggvtv1ai1rm1fhpfkpyy1fkfrvpftg1ipkrreeiatkigqvieeh11tet1linek1k  
seqsqqaiesmiqq1k1k1  
tkdq1sikq1tsq1did1leq1vtngnqyiasq1nnytkhqntias11pnq1vtf1dqhdnatd11cdrarny1ssa  
kgtq1d1ndm1dtffnek1gk  
1ig1m1qm1f1m1t1kesi1adri1qqel1irt1shp1karai1vts1lit1ney1q1t1fk1dks1nk11dts1q1f1ne1iaen1smy1v1t1y1ask1qan  
kp1v1t1mp1q1f1v1d1y1es1q1s  
sk1lan1li1ieq1sih1st1imkkvd1rg1ieeq1int1fd1dy1ek1li1eian1kel1k1ims1lg1fil1ggi1ig1ff1q1gl1vai1fv  
>sp|Q6GFL5|PRSA\_STAAR  
mkmin1k1liv1p1v1t1asa11lg1ac1gas1at1dskent1lissk1ag1dvt1vad1tmkk1ig1kdq1ianas1f1tem1nk1il1ad1ky1kn1kv1nd1kk  
i1deq1iek1mq1k1y1gg1k1dk1fk  
ka1l1qq1g1t1ad1ky1ken1l1r1ta1y1hke1l1sd1k1iki1sd1e1iked1sk1kash1lik1vks1k1sd1ke1g1dd1ke1ak1q1kae1iq1kev1sk  
dps1kf1ge1iak1kes1md1t1gsa  
kk1d1ge1lg1yv1l1kg1q1td1kd1feka1fk1kd1gev1sd1v1k1ss1f1gy1hi1kad1k1pt1df1n1sek1q1s1kek1ld1v1dq1k1v1k1np1k1l1t1day1kd  
11key1d1vd1fk1dr1di1ks1vve  
dk1il1n1pek1l1k1q1g1g1a1q1g1g1sg1ms1q  
>sp|Q6GFM4|HEMH\_STAAR  
mtkkmg11lv1ay1gt1py1kes1di1epy1y1tdi1rhg1kr1p1see1l1qd1l1k1dry1ef1ig1gl1sp1lag1t1dd1q1ada1l1vsa1nk1ay1ad1ve1fk  
ly1gl1k1hi1sp1fi1ed1ave1q1m  
hk1d1gi1tea1it1v1l1aph1y1q1ss1f1sv1gs1y1d1kr1ade1ea1ky1gi1q1l1th1vk1hy1ye1q1pk1fi1ey1wt1nk1v1net1la1q1ipe1eh1k1dt1v1l1vs  
ah1sl1pk1gli1ek1n1nd1pyp1qe  
le1hta1l1ike1qs1nie1hia1ig1w1q1seg1nt1g1tp1w1lp1d1v1qd1l1tr1d1y1ekh1q1y1kn1fi1y1tp1vg1fv1ce1h1ev1ly1d1nd1ye1ck1v1v1c1d1d  
ig1any1rp1k1mp1nth1pl1fi1g  
ai1v1de1i1ks1if  
>sp|Q6GFN8|SPLC\_STAAR  
mnkn1l1vik1s1ma1la1i1t1sv1t1gi1sa1av1ve1et1q1i1aka1eh1vt1q1vk1d1tn1vf1py1h1gv1af1k1dat1gf1vig1k1nt1i1tn1kh1v1sk1dy  
k1vg1dr1i1tah1p1ng1dk1g1ng1gi  
yk1iks1is1dyp1gn1ed1ism1nie1eq1av1erg1s1ng1fn1fnd1v1q1af1k1fak1dak1vd1dk1ik1vig1yp1pa1qns1fk1q1fest1gt1ik1rik1d  
ni1ln1fd1ay1ie1pg1n1sg1sp1l  
ns1n1nev1ig1v1y1gg1ig1k1vg1se1yng1avy1ft1pq1ik1df1iq1k1hie1q  
>sp|Q6GFP0|SPLE\_STAAR  
mnkn1i1iks1ia1alt1t1sv1t1gv1gt1m1ve1gi1q1t1aka1eh1n1k1lik1nt1v1apy1ng1iv1sig1sg1tg1f1iv1g1k1nt1iv1tn1kh1v1v1gm  
ei1gah1i1ah1p1nge1y1n1ng1gf  
yk1v1k1k1iv1ry1ag1k1edia1i1h1ved1kav1hp1k1nr1nf1k1dy1t1gil1ki1ase1ak1ener1is1iv1g1ype1py1ink1f1q1my1est1gk1v1sv1k1gn1m  
i1isd1af1ve1pg1n1sg1sav1f1ns  
ky1ev1vg1vh1fg1ng1p1ank1st1k1gy1gy1v1fs1pe1ikk1fi1ad1n1ld1k  
>sp|Q6GFR5|PCKA\_STAAR  
msvdy1t1y1t1et1tk1id1l1kk1pt1sh1fq1l1st1t1q1lyn1ki1ld1n1neg1v1tel1gavn1ast1gky1t1gr1sp1k1dk1ff1v1se1ps1yr1dn1id1w1gei  
nq1p1ide1et1f1k1ly1h1kv1ldy  
l1dk1k1de1ly1v1fk1gy1ags1dk1d1tm1k1l1tv1ine1law1h1n1f1ak1nm1fir1pes1kee1atk1ik1pn1ft1ivs1aph1k1ad1pe1vd1gt1k1set1fv  
i1is1f1kh1k1vil1ig1gte1y1age  
mkk1gi1f1sv1m1ny1l1pm1qd1im1sm1h1cs1an1v1gek1gd1val1ff1gl1sg1tg1k1t1l1sad1ph1rk1l1ig1dde1hg1wn1k1ng1v1f1nie1gg1cy1ak1ai  
n1ls1ke1ep1qi1f1da1iky1gai  
l1ent1v1va1ed1gs1v1df1ed1n1ry1tent1ra1ay1pi1nhi1dni1v1vp1ska1ah1p1nt1i1if1l1tada1fg1v1ipp1isk1l1nk1dq1amy1h1f1sg1ft1sk  
lag1ter1gv1te1pe1ps1f1st1cf  
gap1ff1p1h1pt1vy1ad1l1gel1id1l1hd1vd1v1lv1nt1gwt1gg1ky1gv1grr1is1l1hy1tr1qm1vn1q1ais1gk1l1kna1ey1tk1dst1fg1l1sip1ve  
i1ed1vp1k1ti1ln1pin1aws1dke  
ky1kt1qa1ed1li1qr1fek1nf1fek1f1gek1veh1iaek1gs1fnk  
>sp|Q6GFR6|METK\_STAAR  
m1ln1kr1l1fts1es1v1te1gh1pd1ki1ad1q1vs1dai1ldai1k1dd1pn1ar1vac1ett1vt1tg1mali1age1ist1t1ty1vd1ip1kv1v1ret1ike1igy

Tsompanidou\_et\_al\_Supplemental\_FASTA\_File

trakygydyetmailtaid  
eqspdiagvdkaleyrdkseeieatgagdqglmfgyatnetetymplaiylshqlakrldsivrkdgtlnylrpdgkv  
qvtveydendnpvridti  
vstqhaddvtleqiqedikahviyptvpenlineqtkfyinptgrfviqggpqqdagltgrkiivdytgygyarhgggcfsg  
kdptkvdrsaayaaryvak  
nivaagladqcevqlayaigvaepvsiaidtfgtgkvsqglveavrkhfdlrpagiikmldlkqpiykqtaayghfgrt  
dvlfpweklkveelkdav  
k  
>sp|Q6GFR9|CRCB2\_STAAR  
misiilmiggglgaiarsaitdyfnhkftsklpiatlivnlvgsfligltiglsisiswfpaffvtgflgglttfstla  
keltlmmtpkfninlflny  
sllqfiigfiacyigyhi  
>sp|Q6GFS0|CRCB1\_STAAR  
mhrqflsrrcnlffkfkllfevnmqyvyifiggalgallrylisflntdggfpigtlianltgafvmglltaltiaf  
fsnhptlkkaittgflgal  
ttfstfqlelihmfhdqqfitlllyavtsyvfqillcyvgiklgggl  
>sp|Q6GFS7|SIGS\_STAAR  
mkfndvynkhhkiihhllkkynisyndeyyqllikmwqlsqiykpsnsqslssflfmrlnfyliidlfrqqkrlnidi  
cenhsplteqptyfneyd  
lrldvcallnhrerqwlmlylegykqyeiadimslststiklikasvkrkcqrfk  
>sp|Q6GFT0|ARSB\_STAAR  
mtlatfiflvtllfvlwqpkgldigftalagafiavitgvvsfsdvfevtgivwnatltfvsvilislildkvglfews  
aihmthaskgsglkmfvyi  
illgavvaaffandgaaliltpivlamvknigfskraifpfiasgfiadttslplivsnlvniisadyfnisfsqylsr  
miipnlfslasllvlwly  
frkajpksfdanhikkpidaindlkfkiswivlviillfgyliseftkipvsiftgiiafiflilarksnavnkqvikg  
apwnivlfsigmyivvfgl  
rnagitlilakileyisnyglfstilgmgfisafssimnmptvlidaiaigqsnvhgmlekgliyanvigsdlgpkit  
piglatllwlhvltqkdv  
kismgtyfktgiiitipvlfftllgyltllif  
>sp|Q6GFT6|RISB\_STAAR  
mnfegkligkelkvviivsrfdnitgrllegakdtlirhdvnednidvafvpgafeiplvakklassgnydavitlgcv  
irgatshfdyvcnevakgv  
skvndqtnvpvifgilttesieqaveragtkagnkgaeaavsaiemanllksika  
>sp|Q6GFU3|SYL\_STAAR  
mnyhnhqiekkwqdywdenktfktndnlqkkfyaldmfypsgaglhvghpegytatdiisrykrmqgynvlhpmgwa  
fglpaeyaldtgnpref  
tkkniqtfrqikekgfsydwdevnttdpeyykwqwi fiqlynkglayvdevavnwcpalgtvl sneevldgvsergg  
hpvyrkpmkqvwlkiteya  
dqlladldldwpeslkdmqrnwigrsegakvsfdvndsegkvevfttrpdtiygasflvl spehalvdsittdeykdv  
kayqteaskksdlerdla  
kdksgvftgayainplsgekvqiwiadyvlstygtgaimavpahddrdyefakkfdlpiiievieggnevaaaytgegkhi  
nsgeldgleneaaiktaiq  
llekkgagekkvnyklrdwlfsrqrywgepipvihwedgtmttvpeelplllpetdeikpsgtgesplanidsfvnvvd  
ektgmkgrrretntmpqwg  
scwyylryidpknenmladpekklhwlpvdlyiggvehavhllyarfwhkvlydlgivptkepfqklfnqgmilgegne  
kmskskgvniipddivqsh  
gadtlrlyemfmgpldaaiawsekgldgsrrflrdvwrilmvnedgtlsskivttnnksldkvynqtvkkvtedfetlgfn  
taisqilmvfinecykvdev  
ykpyiegfvkmlapiaphigeelwsklgheesityqpwptydeallvddeveivvqvnkrlakikiakdtskeemqeia  
lsndvksiegdikmvi  
avpqlvni vak  
>sp|Q6GFV0|PEPVL\_STAAR  
mwkekvvqyedqiindlkgllai esvrddakasedapvggprkaldymyeiahrdgttthdvdiagri eagkndvlg  
ilchdvvpagdgwdsnpf  
epvvtedaiiargtlddkgptiaayyaikiledmndwkkrihmiigtdeesdwkctdryfkteemptlgfapdaefpci  
hgekgttfdlvqnklaed  
qdepdyeliftksgerymvdpdhaearvlvkenmtdviqdfeyfleqnlqgdstvdsgilvltvegkavhgm dpsigvn  
aglyllkflaslndnnak  
afvafsnrylfn sdfgekmgmkfhtdvmgdvttnigvitydenaglfginlrypegfefekamdrfaneiqqygfevkl  
gkvqpphyvdkndpfvqkl  
vtayrnqtdmtepytigggtyarnldkgvafgamfssedlmhqkneyitkkqlfnatsiyleaiyslcvve  
>sp|Q6GFV3|TRMB\_STAAR  
mrirykpwaedyldkhpelvdmdgqhagemtewfdktqpihieigsgmgqfittlaaqnphinyismereksivykvlk  
vkemgltnlkiicndaie  
neyfkngesriylfn sdpwpknrhakrrlyhtflalyqqilndegdlhfktdnrglfayslesmsqfgmyftkinlnl  
hqedgsnilteyekkfsd  
kgsriyrmeakfhsqk

Tsompanidou\_et\_al\_Supplemental\_FASTA\_File

>sp|Q6GFW8|MURC\_STAAR  
mthyhfvgi ksgmsslaqimhdlghevqgsdienyvftevalrnkgikilpfdannikedmvviqgnafassheeivra  
hq1kl dvvsyndflgqi id  
qytsvavtgahgktsttggllshvmngdkktsfligdggtgmglpesdyfafeaceyrhflsykpdyaimitnidfdhpdyf  
kdindvfadafgemahnvkk  
giawgddehlrkieadvpiyyygkesddiyaqniqitdkgtafdvyvdgef ydhflspqygdhtvlnalaviaisyle  
kl dvtnikealetfggvkr  
rfnettianqvi vddyahpreisatietarkkyphkevavfqphtfsrtqaflnefaeslskadrvflceifgsiren  
tgal tiqdli dkiegasli  
nedsinvleqfdnavil fmgagdiqklqnayldklgmknaf  
>sp|Q6GFX2|CCPA\_STAAR  
mtvtiydvarearvsmatvsrvvngnqnvkaetknkvnevikrlnyrpnavaarglaskkttvtvgviipdisniyysqlar  
glediaimykyhsii nsnd  
ndpekekeifnnllskvddgiifl ggtiteemkelinqssvpvvsngtkdahiasvni dftaakeitgk liekgaks  
falvggehskkqaqedvlag  
ltevlnkns lqldtln csgaesykegvkafakmgnlpdailcisdeeaigimhsamdagikvpeelqiisfntr lve  
mvrpqlssviqplydigav  
gmrlltkymndekieepnvvlphrieyrgttk  
>sp|Q6GFX3|ACUC\_STAAR  
mqhlsktayvysdkllqyr fhdqhpfnqmrkl tte lllnanllspeqivq priatd delml i hkydyveaik hashgi  
isedeamkyg lndeengqf  
khhmrhsat ivggaltladl imsgka lngchl gggllhhaqpg rasgfciyndia itaqylakeynqr vliidtdahhg dg  
tqwsfyadnhvttsi het  
gkflfpgsghytergedi gyghtvnp l epytedssfl ecfkl tvepvvksfkpdi ilsvngv dihyrdpl thlnct lhs  
lyeipyfvkyl adtytngk  
iimfggggyniwr vprawshvflslidqpi qsgylpl ewinkwkhysse llpkrwedrl ndytyvprtkeiseknkla  
lhaswyestrq  
>sp|Q6GFY8|RS4\_STAAR  
marfrgsnwkk srrl gis lsgtgelekrpyapqhgpnqrkklseyglqlrekqklrylygmterqfrntfdiagkkfg  
vhgenfmill asrl davvy  
slglartrrrqarqlvnhghi lvdgkrvdi psvsvkpsqtisvrexsklnvivesveinnfvpeyl nfdads lgtgfvr l  
perse l paeineqliveyy  
sr  
>sp|Q6GFZ2|THII\_STAAR  
mkydhllvrygel t l kgsnrkkfvnql rnnvnks lkgldgfvvkgkrdrmyieledhadineitnr lskifgiksispv l  
kveksieamsaetikfaqg  
feenstfki dvkradknfpm dtyelqrel ggtvlkqi envsvnvkrpdheirvevrl daiymye evvp gsgglpvgtg gk  
tllmlsggidspvagmevm  
rrgv tieaihfhsppfts dqakekviel tri laervg piklhi vpf telqkqvnkvvhprytm tstrmmrvadklvhq  
igayai vngenlgqvasqt  
l hsmayainnvtstpv lrp lltydkee i i ikskeigt fetsiqpfedccti ftpknpvtepnfdkvvqyesvfdfeeminr  
avenietleitsdyktike  
qqt nql indfl  
>sp|Q6GFZ4|TPX\_STAAR  
mteitfkggpihlkgqqi negdfapdf tvl dndlnqvt l adyagkkklisvpsidtgvc dqqrkfnseaskeegivlt  
isadlpfaqrwc asagld  
nvtl sdrhd lsfgenygvvmeel rllaravfv l dadnk vvykeivsegtdf pfd daa laaykni  
>sp|Q6GFZ8|DHA2\_STAAR  
mkigipreiknnervg l spsgvhalvesghtvlvetnagsgsffedvdykeagaeiva eqakvwdvdmvikvkepl ese  
ypyfkeglv lfty l h lane  
ekltqal idrkvisiayetvql pdrs l pl spmsevagrmsaqvgaeflqklnggmgi l lggvpgvpkgkvti igggqag  
tnaakialglgadvtildv  
npkr lqqld l fgg rvtimsnplnie lyvkqsd l v igav l ipgakapr l vtedmikqmknsvi idiaidqggifettd  
kitthddptyikhgvvhya  
vanmpgavprtst lalnnat l p ya l mlankgyrea fksnqplslglntykghvtnkgvaeafemeyksveealhl  
>sp|Q6GFZ9|Y1786\_STAAR  
mtkiskii delnqqadaawittp l nvyvftgyrsepher l fall ikkdgkqvl fcpkmeveevkaspftgeivgyldte  
npfsl ypq t inkllieseh  
l t varqkql isgfnvnsfgdvd l tikql rniksedeinkirkaaeladkcieigvsylkesvtere vnhieqtikqygv  
nemsfdtmvlfgdhaasph  
gtpgdr r lksneyv lfdlgviyehycsdmtrtikfgepsqeaqeiynivleatsaiqaikpgiplkdidhiarniisek  
gygeyfphrlghglqeh  
eyqdvssstnsnl e agm vitiepgiyvpgvagvrieddilvtnegyevlthyek  
>sp|Q6GG00|Y1785\_STAAR  
mkl sfhgqstiy legnkkvi vdpf i snpkcd l ni etvqvdyiv l thghfdhfgdvvelakkteatvigsaemady l ss  
yhgvenvhgm niggkanfd  
fgsvkfvqafhsssfthengipvylgmpmgivfevegktiyhtgdtglfsdmsliakrhpvdvcfvpigdnftmgiddas  
yainefikpkisvpihydt

Tsompanidou\_et\_al\_Supplemental\_FASTA\_File

fplieqdpqqfkdavnvqdvqilkpgesvqf  
>sp|Q6GG04|DPO3A\_STAAR  
mvaylnihtayd1lnsslkiedavr1avsenvdala1tdtnvlygfpkfydtciannikpifgmtiyvtnglnnietvvl  
akdnyglkdlyqlssei km  
nalehvsfellkrfsnmmi iifknvadehrdivrvfdshedtyldhsvsvlvgqikhwiqdvcyqtrhdadtisalaair  
dntklldlhdqedfgahfl  
teneihqldvnpeyftqadriaqknaelkyhqsllpqyqtpndesakky1wrvlvtqlkklelnydvylerkleykvi  
tnmgfedyflivsdlihya  
ktndvmvpggrgssags1vsyllgittidpikfnllferflnpervtmpdididfedtrrekviqyvqekygelhvsiv  
tfghllaravardvgrim  
fdevt1neissliphklgitldeayqiddfkkfvhrnrherwfsickleglprhtsthaagiindhplyeyapltkg  
dtglltqwtmteaerigl  
kidflglrnlsiihqiltqvkklginidiekpiddqkvfellsqgdttgifiqlesdgvsvlkk1kpehfevivavts  
lyrpgpmeeiptyitrhd  
pskvqylhphlepi1kntygviiyqeqimqiaastfanfsygeadilrramskknravleserqhfiegkqngyhedisk  
qifdli1kfadygfpraha  
vsyskiayimsflkvhypnyfyani1snvigsekktaqmieeakkqgitilppnineshwfykpsqegiy1sigtikvgv  
yqsvkvi1veeryqngkfkf  
ffdfarripkrvkrkllea1ilvgafdafgktrstllqaidqvlgdlnieqdgflfdiltpkqmyedkeelpdalisq  
yekeylgfyvsqhpvdkkf  
vakqyltik1snaqnnkpi1vqfdkvkqirtkngqnmafvt1ndgielt1dgvi1fnqfkkyeellshnd1fivsgkfd1  
rkqqrq1i1ineiqtlatfe  
eqklafakqii1rnksq1dmfeemikatkenandv1sfydetikqmtt1gyinqkdsfnnfiqsfnpsdirli  
>sp|Q6GG09|KPYK\_STAAR  
mrktkivctigpaseseemiek1inagmvar1nfshgsheehkgridtirkvakrldkivailldtkgpeirthnmkdg  
i1elergnevivsmneveg  
tpekfsvtyen1indvqgsy1l1ddglielqvkdi1hakkevkc1d1nsgel1knkkgvn1pgvrsv1pgitekdaedir  
fgikenvdfiaasfvrrps  
dv1eire1leeqkani1svfpkienqegidniee1levsdg1mvargdmgei1ppekvpmvqkd1irqcnk1gkpvitatq  
m1dsmqrnpratreaasdv  
ana1ydgtdavm1sgetaag1ypeeavk1tmrni1avsaaaqdyk1l1sdrtk1vets1vnaigisvahta1n1nvkaiva  
atesgstarti1skyrphsd  
i1avtpseetarqcs1vwgvqpvvkkgrkstda1l1navatavetgrvtngd1i1itagvptgetgttnmmkih1vgdei  
anggg1grgs1vvgtt1vae  
tvkd1egkd1sdkvivt1nsidet1fvp1veka1gl1iteengit1spsaiv1g1ekgipt1vvgve1kavknis1nvl1vtidaaag  
kifegyav1  
>sp|Q6GG12|IDH\_STAAR  
mtaekitqgteg1nvpnepi1pfi1gdgigpdiwkaasrvidaavekayngekriewkevlagqkafdttgew1pgetld  
tikeyliavkgp1t1tpigg  
girs1nva1rqeld1ftc1rpvrw1fgvpspvkrpqdvdmvi1frentedi1yagiefkegttevk1vidfl1qnemgatnir  
fpetsgig1kpvskegter  
1vraa1qya1dnrksvt1vhkgnimk1ftegs1fkqwyd1a1tefgdqv1ftwqydeivekegrdaanvaqekaekgki  
i1kdsiadi1flqil1trpa  
ehdvvatm1ngdy1sda1aaqvggigi1apganinyetghaifeathgtapkyag1nkvnps1vil1ssvl1mlehl1gwqea  
adkitdsi1edti1askvvti  
dfar1mdgae1evsts1afadel1ikn1k  
>sp|Q6GG18|COAE\_STAAR  
mpkvi1gtg1asgk1stvse1l1svfg1kvvdadkaareavkkg1skglaqvrevfgdeaidengemnr1rymgdl1vfnhpek  
r1elnai1h1pivrdimee  
kqey1kqy1nvim1dip1l1fenelentvdevvvytsesi1qmdr1mqrn1sl1edakarvysqisidkksr1madhvidn1g  
dk1elkqn1er1leeegy1  
ekpnyged  
>sp|Q6GG20|NRDR\_STAAR  
mkcpkcnstqskv1vdsrhadel1nairrrrecencgr1t1tfehievsq1livvkkdgtreqfsreki1ngl1vrscekrpvr  
yq1ledit1nkveq1rdeg  
hte1vssrd1gehvm1l1mhvdqvsy1vrfasvykefkdv1d1l1asmqg1l1senkrsda  
>sp|Q6GG23|SYT\_STAAR  
meqini1qfpdgnk1kafdkgtt1tediaqsi1spg1l1rkkavag1fngq1vdl1tkp1letdgsieiv1tpgseealev1rhstah1  
mahai1kr1lygnv1kfgvgpv  
ieggfy1ydfdi1dqi1ssddfeqiektmkqiv1nenmkierkvsvrdeake1fsndeykle1lidaipedenvt1ysqgdftd  
l1crgv1hvp1stakikefk1l  
stagaywrgds1nkm1l1qriygt1affdkkel1kah1qm1leerkerdhrkigkele1lftnsq1lvag1pl1w1pngatirreie  
ry1vdkevsmgydhv1tvp  
lanvd1lyktsghwdhyqedm1fppmq1detesmv1rpmncphhmmi1yankphsyrel1piriae1lgtmhryeasgavsg1qr  
vrgmt1ndsh1fvrpdgik  
ee1fkrvnm1i1divykd1fgfedys1fr1syrdpedkeky1fddd1mwnkaen1l1kaade1gl1syee1aigea1fygpk1dvqv  
k1tamgkeet1staq1ldf1l  
perfd1tyig1qdgehrp1vvi1hrgv1stmer1fva1f1teetkgafptw1lapkqvqi1pvnv1d1hydyarq1lqdel1ksqgv

Tsompanidou\_et\_al\_Supplemental\_FASTA\_File

vsiddrnekmgyki reaqm  
qkipyqi vvgdkevennqvnrqygsdqdetvekdefiwnlvdeir1kkhr  
>sp|Q6GG25|IF3\_STAAR  
mstiakdqqtqindk1raker1rlisqdgeqigvkskrealemaervd1dlvvvapnakppvarimdygkfkfeqqkkekem  
kkkqkiinvkeir1sptie  
ehdfqtk1kngrkfltkgdkckvsirfrgraitkheigqrvlekyadeckdiatveqpkmdgrqmflaptaek  
>sp|Q6GG33|HEM1\_STAAR  
mhfiaisinhrtaadvalreqvafreddalriahedlyetksilenvilstcnrtevyavvdqihtrgyyiqrflararfge  
vddikamsevkvgeaveh  
llrvtsq1dsiv1getqilgqirdafflaqstgttgi fnh1fkqaitfakrahnetdiadnavsvsyaavelakkvfgk  
lkskqaiiigagemse1  
l1l1gsgitdi tvnrtienamklaakhqkydelss1pn1lesadivisstsasqsyiitnemieriaenrkqds1vlid  
iavprdi epgisaitnfn  
ydvdd1kg1vdan1rerq1laaati seqipaeihahnewvsm1gvvpviralrekamaiqaetmidsidrklpg1sererki  
iskhtks1inqmlkdpikq  
akelssdkksnekfelqni fdieakcpheqakqqkeskvkeisarri fsfe  
>sp|Q6GG38|GSA1\_STAAR  
mrytkseeamkvaet1mpggvnsprafksvdtpai fmdhgkgskiydidgneyidyv1swgpl1lghrdpqvish1hea  
idkgtsgast1lenk1aq  
lvidrvpsiekvrmvssg1eat1dt1rlargytgrnkivkfegcyhghsds1likagsgvat1glpdspgvpegiaknti  
tvpyn1dal k1afekfgd  
diagvivepvagnmgvppieglq1rdit teygallifdevmtgfrvgyhcaqghfgvtpd1tclgkviggglpvgaf  
ggkkeimdhia plgniyqa  
gt1sgnplamtsgyet1sq1tpetyeyfmlgdiledglkrvfakhnvpitvnragsmigyflnegpvtnfeqanksd1k  
1faemyremakegvflpps  
qfegtfl1stahtkedi ektiqafdtal srivk  
>sp|Q6GG42|SYV\_STAAR  
memkpkypdpreveagryeewvknqyfkpsedksketyt ivippnvtkl1h1ghawdtt1qdiitrmkrmqgydt1ylpg  
mdhagi atqakveak1neq  
gitryd1grekfl eqawdwkeeyasfi raqwak1gl1dysrerft1deg1skavkkvfd1ynkgi1yrgeri1nwdpk  
artalsdi evihedvggaf  
yhfkyppadvvegfi eia1trpetm1gdtaivvnpnderykdvigktvil pivgre1pil adeyvdi dfgsgamkvtpahd  
pndfe1gqrhqleni ivmd  
engkmnknagkyegmdrfdcrkq1ved1keqd1viki edhvhsvghsersgavvepy1stqwfvrmelakrs1dnqkt  
dr1dfypqrfehtfnqwm  
nir dwtisrqlwghqipawyhketgeiyvgeeaptdienwqqdedv1dtwfssalwpfst1gwpd1esedfkryyptna  
1vtgydi1ffwvarmi fgg  
1eftdrprfndv1lhglvraedgrkmsks1gngvdpmdvideygads1ryfl atgsspghd1rystekvesvwnfinkiw  
ngarfs1mnigedfkvedi  
d1sgn1sladkwil1tr1netiatvtd1sdkyefgevgralynfiwddfc dwiyemskipmngndeeqkvtrsv1sytd  
nimrml1hpfmpfvtekiwq  
s1phegetivkaswpevres1ifeeskqtmqqlveii ksvrqsrvventplskeipiliqakdkei ettsqnkdylikf  
cnpst1n1stdveipekam  
tsvviagkvv1pleglidmdkeisr1lekelak1qsel drvdck1snenfvskapekvineekrkkqdyqekydgvkari e  
q1ka  
>sp|Q6GG71|DTD\_STAAR  
mkvvvqrvkeasvntd1lnnqikkgyc1lvigiqdsteqdadviakkianar1feddnk1lnfn1qqmngel1svsqft1  
yadvkkgnrpgfsnknpd  
qavkiyeyfndal raygl1vktgfgthmnvni ndgpvti1yesqdgkiq  
>sp|Q6GG73|SYD\_STAAR  
mskrtycglvteaf1gqei1tkgwvnnrrd1ggli fvd1rdregivqvfnpafseealkiaetvrseyvvevqgtvtk  
rdpetvnpkiktqgvevq  
tnikvinksetppfsineenvvdeni r1kyryd1lrrqelaqt fkmrhqitrsirqyl ddegffdi etpvt1kstpega  
rdylvpsrvhdgefyalpq  
spq1fkq1l1m1sgfdkyyqi vkcfrded1radrqpeftqvdi emsfvdqedvmqmgem1kkvvkevkgveingafrmt  
ykeamrrysdkpdrfem  
elidvsq1grdmdfkvfkdvtvendgeikaivakgaaeqytrkdmdal tefvniygakglawkvvedgltpigrffae  
nvet1l1tgaeagd1vmf  
vadkpnvvaqslgalrvklake1glidetak1nflwvtdwpl1eydedakryvaahpftspkeadiak1gtapeeaeana  
ydiv1ngyelgggsiri h  
ge1qekmfev1gftkeaqeqfgf1ldafkygapphggialgl dr1vm1l1tnrt1n1rdtiafpkatasat1l1tnapgevs  
dkq1eel1srirh  
>sp|Q6GG85|SYA\_STAAR  
mkk1kasei rky1d1ffvekghmvepsaplvpiddt1lwinsgvat1kkyfdgretpkkprivnsqkairtndienvgf  
tarhhtffem1gnfsigdy  
fkqeaiefawef1tsdkwmgmepdklyvtihpedmeayniwhkdiglesriiri egnfwdigegpsgpntei fydrgea  
ygqddpaeemyppgenery  
1evwn1vfsefnhkhkdhstytp1pnkni dtgmglernasvsqvrtny etd1fmpimnei kvsgkqylvneeqdvafkvi

Tsompanidou\_et\_al\_Supplemental\_FASTA\_File

adhirtiafaisdgalpan  
egrqyvlrrllrravrfsqtlginepfmyklvdivadimepyypnvkekadfikrvikseerfhetledglailnelik  
kakattneingkdafklyd  
tygfpieleteeiavgaglkvdmddfesemqqqrdrarqarqnsqsmqvqsevlnkntsastfvygdttataqttlthliyn  
geevsqveagetvyfmlte  
tpfyavsggqvadtgivyndnfeiavsevtkapngqnlhkgvvqfgqvnvgatvsaevnqndrrdiqknsathllhaal  
ksvlgdhvngagslveadr  
lrfdfshfgpmtndeidqverlvneeiwkgidvniqemdivsakemgamaifgekygdvrvvnmapfsielcggihvrn  
tseigl fki vsesgtgagv  
rriealtgkaaflylediqekfntmksqkvsksdnqvvdktqlqdeekalkqleqrdekitslkmgniedqveeingy  
kvlvtevdpnakairstm  
ddfksklqdtiil lasnvddkvsrvatvpskltnnvkagdlkqmapivggkgggrpdmaqqggtqpeniskslsfikdy  
iknl  
>sp|Q6GG98|Y1684\_STAAR  
mrvdlncdlgeafgnyffggdhqiip l itsanvacgf hagdenvmnetvklakahnvavgahpglpdlkgfgrnidisn  
eeiynlmiyqlgalggfcr  
ihqknhvkphgalymgakdreiasviaqavydfpslvlgv lansyliseaknvglitasevfadrryeddgqlvsr  
kesdavitdtdealkqvlk  
mvkenkvisknkevltqadticvhgdgehallfvskireilmkegidiqsl  
>sp|Q6GGA2|MTNN\_STAAR  
migiigameeevtlknkltqlseisvahvkfytgilkdrevvitqsgigkvnaaisttllinkfkpdiiintgsagald  
eslnvgdvli sddvkyhda  
datafgyeygqvpmpvafqsskpliekvsqvqqqqltakvglivsgdsfigsveqrqkikka f pnamavemeataiaq  
tcyqfnvpfvvravsdla  
ngeaemsfeaflekaavsssqtvealvsq  
>sp|Q6GGC2|PRMA\_STAAR  
mnwte l si inheavelatni lenhgsngvvi edsydlinqpedkygeiyalkkedypdkgvrlkayfneltyddklrqr  
ikdelnlndeldqhnvqfs  
eqiaetdwenewknyfhpf raskkftivpswetyakeadeelciel dpgmafgtgdhpttsmcl kaietyvlpqhsvid  
vgtgsgilsi asyligvkr  
ikaldidemavsvakenfrnhcetlieavpgnllkdetekfdivianilahiidemiddayntlneggyfittsgiikek  
yegiqshmervgfkiiseq  
hdngwvclvgqkvse  
>sp|Q6GGD4|RECO\_STAAR  
mlmrkgi i ikavdygesdk i itilnehgakvplmarrakkvktglqaqtqlfvylfiyknwrgmgtlnsvdvisqhyk  
lqmdlyvssyaslaetie  
rsmdegdvapynyqlqfvlekie sgtsaq lmsvvvmlkcmkrfgftasfnrcavsgndtqadligysfkydgaisrqa  
skdvhavi lsnktlylldv  
lqklpidkmnslnihqeiidemsdiilmlyreyagmffksqklnlqlrleq  
>sp|Q6GGD8|RPOD\_STAAR  
msdntvkikkqtidptl tledvkkqliekgkkeh l sheeiaek l qnfdisdqmddffdq lndndisl vnekdsstde  
klnpsdl sappgvk indpv  
rmylkeigrvnlisageeielakrieggdevaksrlaealnrlvvsiakryvgrm l fldliqegnmglikavekfdfnk  
gfkfstyatwwi r qaitra  
iadqarti ripvhmv etinklirvqrqlldlgrdpapeeigeemd l paekvreilkiaqepvsletpigeeddshlgdf  
iedqeaqpsdhaayellk  
eqledvldt l dreenvlrlrfgl ddrtrtle evgkvfgvtrerir qieakalrklrhpsrskrlkdfmd  
>sp|Q6GGE0|Y1636\_STAAR  
mkjadlmtll dhvpfrtaeswdnvglligdedvevtgvlta l dctl evvneaiekgyntiishhplifkgvtslkangy  
gliirkliqh dinliamht  
nl dvnphgvnmmlakamglnkni s i nnqqdvvykvqtyipkdnvgp fdk l sengl aqegnyeycffesegrqgfkpvge  
anptigqidkieyvdevki  
efmidacqkswaeqlikqyhyetpvfdfeiekqtslyglvmaevdnqmtledfaanisklnipsvrfvgesnqkikr  
ia i ggsgigyeyqavqqg  
advfvtgdikhhdaldaki hgvnlidinhyseyvmkeglktllmnwfn tekinidveastintdpfeyi  
>sp|Q6GGG1|AROK\_STAAR  
mnhdkspi iligfmggtgkstigkyvadeqn l sfididsyieekyktl tpeifskhgeqyfrnleftclqecintadiat  
gggiieseefnflknqkn  
i i w l dcnidi i ysrindphrpnannktikqlndlycsrilryneiafkkfdshllsiseiyyellnliskasdqy  
>sp|Q6GGG3|GCSPA\_STAAR  
mcivshryipl tekdkqem l qtigaksigelfgdvpsdillnrdlniaeseaettllrrlnriasknitkethtsflgag  
vydhyapsvvdamisrsef  
ytaytpyqpejsqgelqai fefqtl iceltdmdvanssmydgmtsfaeacilafsqtkknkivvskglhyqalqvlhtya  
ktrkefevveidldgtvtd  
lkkleavdddtaavavqypnfysiedlekihsfiedkka l fivyanplalgl l tppgsfgadivvgdtqpfgipa qfg  
gphcg yfat tklmrkvpg  
rlvgqtqdddegrgfv l t l qareqhi rrdkatsnic snqalnalassiamsal gkqgiydiavqniehanyakqqfikkg  
fevldgtsfnefvfkdkp

Tsompanidou\_et\_al\_Supplemental\_FASTA\_File

iqqvneelvkyniiggfdlgvvsddfknhmliavtelrtkdeidtfvekageInd  
>sp|Q6GGH4|NUSB\_STAAR  
msrkesrvqafqtlfqlemkdsdltineaifkddnpdldefihwlvsgvkdhepvldetispnlkdwtiarllktdr  
iilrmatyeilhsdtpakv  
vmneaveltkqfsdddhykfingvlsnikk  
>sp|Q6GGH6|EX7S\_STAAR  
mtketqsfeemmqelerivqkldnetvsleesldlyqrgmklsaacdttlknakkvndlikeeaedvkndestde  
>sp|Q6GGI4|Y1592\_STAAR  
mdmndlymngvveqarneiesagyeqlttaedvdkvlkqdgttlvmnsvcgaggiarpaashalhydvlpdrvtvf  
agqkheatqrareyfeqya  
psspsfalvkdgnitemierhqiieghdvmnvinqltlfnkycer  
>sp|Q6GGJ4|RNZ\_STAAR  
mevtfqgtsaglpkerntqaialnlepysnsiwlfdvgegtqhqlhhaiklgkvthifithmghdhi fglpgllssrs  
fqqgeqkpltlvgpkika  
yvemsmlshllypiytyieiddhlyhhdgftveahlhngipsygyrvmappettgtinvealknigleppkyqevk  
shdtfehngqvyqskdfrg  
eskqgpivai fgdtkpcsnervisrdadmveatyidgekhlannyhshiedvfallikeanvkrtlithlsnrynted  
ineiyqtlinqnedtpnfnf  
vkdfdsfki  
>sp|Q6GGK3|SCPA\_STAAR  
myevkl dafngpldlhliqkfeidiy dipmqa lteqymqyvhamkqleiniaseylvlase llmikskmlpqsdsdi  
dvdddpredlvgrlieyqn  
ykeytailndmkeerdfyftkrptelshletdeswdpnhtidl telivayqrvknrvelntpsksveirketftiqgateq  
vtsrlkdkdhfnffs lftf  
sepieqvvthflailemskagiinieqqrnfedinivrgvnyhfg  
>sp|Q6GGK4|SCPB\_STAAR  
mdnhgileslftagdegldekqllleildiskdqlvelienysshgliiqrfgttyvlttkkeasmyieqlieqksqmk  
sqaamevlsiiaynqplsr  
sdielirsinsdgavktliakglveakvvneqrsqqlittdlflnvfgisniedlptteeddeemdaaffsnlvnqkgenn  
d  
>sp|Q6GGT1|EBPS\_STAAR  
msnfnkddfeknrqs idtshqhdtedvekdqselhqdtienteqqfpprnaqrkr rdlatnhnkqvhnestsedn  
vqneagtidrqvesshst  
esqepshqdstpqheegyknafamdkshpepiendkhetikeaentehstvsdkseaeqsqqpkpyfatganqant  
skdkhddvtvkqdkdeskd  
hhsqkkaaigagtagvagaagamgvskakkhsndaqnksnsgkvnnstedkasedkskehngkkkaaigagtaglagg  
aasnsasaaskphasnns  
qnndehdhdrdkerkkggmakvllp liaavliigalai fggmalnnhngtkenkiantnknadeskdkdtskdaskd  
kkskstdskskddqdkatk  
desdndqnnanqannqaqnnqanqqanqanqqqqqqrqggqrhtvngqenlyriaiqyygsgspenvekirranglsgnn  
irngqqivip  
>sp|Q6GGT4|KCY\_STAAR  
mkainialdgpaaagkstiakrvasel smiyvdtgamyraltykyklklnktedfaklvdqttldltykadkgqcvil dne  
dvtdf lrrndvtqhvsyva  
skepvrsfavkkqkelaekgivmdgrdigtvvlpdadlkvymiasveeraerrykdnqlrgiesn fedlkrdieardqy  
dmnreisplrkaddavtld  
ttgktieevtde ilamvsqik  
>sp|Q6GGT6|DER\_STAAR  
mtkpivai vgrpnvgksti fnrivgersivedtpgvtrdriyssgewlthdfni idtggieigdapfq tqiraqaeiai  
deadviifmvnregltqs  
demvaqilykskkpavlavnkvdnmemrtdvydfyslgfgepypisgshglglgdlldavvshfgeeedpydedtir ls  
iigrpnvgksslva ilge  
drvi vsnvagttrdaidteysydgqdyvlidtagmrkkkgyestekysvlraalkaiersnvvlvvidaeqgieqdkrv  
agyaheggkavvivnkwd  
tveksktmkkfedevrkefqfldyaqiafvsakertr lrtl fpyineasenhkkrvqsstlnevvt daismnp tptdkg  
rrlnvfyatqvaiepptfv  
vfvndvelmhfsykrylenqiraafgfegtpihiiarkn  
>sp|Q6GGT7|GPDA\_STAAR  
mtkivtfgmgsfgtalavlaenghdv lmwgknqeavdelntchtnkkylyakldvni iatsdmtkaiqyadiylmalp  
tkamrevatqindkltskk  
tfihvakgiengtfrvsemi edsi speynagigv lsgpshaevvvkqpttvaasskdknvskl tqdl fmndylrvytn  
ddlvgvelggalkni iava  
sgivagigygdna kaal mtrglaeisrlgek l gadpmtflglggigdlivtctsthsrnftlgyklgqgesmdqal semn  
mvvegiyttksvyhlakek  
nvdmpitnal yrvl feni svkecvkd lmerdkkse  
>sp|Q6GGU0|UBIE\_STAAR  
madnkankeqhvrvfqni skkydrlnni isfeqhkvwrkrvmkdmgvrkgmkaldvccgtgdwtialskavgstgevtgi  
dfsenmlevgkektasmen

Tsompanidou\_et\_al\_Supplemental\_FASTA\_File

vk1vhgdame1pfdensfdyvtigfglrvnpdylvalkemnrvlkpggmvcletsqptlpvfkqmyalyfkfvmpifgk  
lfakskeeyewlqqstfnf  
pgkeelkrmfieadfinvrsvftggvaamhlykekdntkgd  
>sp|Q6GGU3|AROC\_STAAR  
mryltsghshgpglvtivegvanleikvedinkemfkrqggygrgrmqiekdtveivsgvrngytlgspitmvvtndd  
fthwrkimgaapisdeere  
nmkrtitkprpghadlvggmkynhrdlrvlrsaretarvavgalckvlleqldieiysrvveiggikdkdfydset  
fkanldrndvrviddgiag  
amrdkiideakndgdsiggvqvvenmpvgvgsyvhdrklgdriaqgvvsinafkgsfgegfkkaekpgseiqrdeily  
ntelgyyrgsnhlgglegg  
msgmpii vngvmkpiptlykplnsvdintkedfkatiersdscavpaasivcehvafeiakal1eefqsnhieqlqqq  
iadrrqlnvef  
>sp|Q6GGU4|AROB\_STAAR  
mklqttypsnnypi fvehgaidhistyidqfdqsfilidehvnyfadkfdilsyenvhkvii pagekktkfeqyqetl  
eyilshhvtrntaiiavgg  
gatgdfagfvaatlrgvfhivqpttilahdssvggkvginskggnligafyrptaviydlfdlktlpfeqilsgyaev  
ykhallngesatqdieqhf  
kdreilqslkqmdkyiakgi etkldivvadekeqgvrkflnlghtfghaveyyhkipghavmvgiyqfivana1fdsk  
hdinhyyqlylqlypldm  
itdl dfetlyqym1sdkkndkqgvqmvli rqfgdivvqhvdqltlqhaceqlktyfk  
>sp|Q6GGU5|AROA\_STAAR  
mvneqi idisgplkgeievpgdksmthraimlaslaegvstiykpllgedcrrtmdifrl1gvdikededklvvnspgyk  
afktpqhvl ytgnsqgtrr  
llagllsglgiesv1sgdvsigkrpmdrvl rplksmnaniegi ednytpliikpsvikginykmevasaqvksailfasl  
fskeatiikel dvsrnhte  
tmfrhfnipi eaeglsittipeairyikpadfhvpgdissaaffivaal itpgsdvtihvnginptrsgiidivekmgn  
iq1fnqttgaeptasiriq  
ytpmlqpikiege1vpkaide1pviallctqavgtstikdae1kvketnridttadm1n1lgfelqptndgliihpsef  
ktnatvds1tdhri gmm1a  
vas11ssepvki kqfdavnvsfpgflpk1k11eneg  
>sp|Q6GGU7|Y1473\_STAAR  
msetlnqikesfi eyllfgyrfsriavwvlnyikvneaklanihfvdtkinhetleiaevgshasaiqftkhnklmn  
tneifdyianhgafdiqi  
hfanvskreqlrd1livaqltespsyqtylhdlnsmaidrkhallidy1l1hnid1slqmnekqrlyq1tqilnt1k1vn  
khnqfed1add  
>sp|Q6GGV2|CCA\_STAAR  
mdks1feqarpi1eqiqdngfeayyvgsvrdyvmgrnihdidittsatpdeiesifsh tipvgkehgtinvvfn denye  
vttfraeedyvdhrrpsgv  
tfvrdlyed1qrrdf1tmnai amdtanklydyfdgqqdinnri irtvgiaeerfeda1rmirc1rfqsq1sfdiatetfe  
amrtqmadikflsierivi  
e1tk1mrginveksfnh1ks1kafnympyfeh1dmnqinvtepidle1liaivsvkfdinys1kplk1snrqvkdingyi  
qimnalpsii tkeqlkmfv  
ydydtn1iknvmvaadv1kandi qgheplivn1qtidet1hr1pmhnrkdmmvnggv1mah1naksgpw1kd11rqieia  
ivtgkvsneete1lkwvdn  
hvk1  
>sp|Q6GGV5|SYN\_STAAR  
mkttikqakdh1nqdv1tigaw1tnkrssgiaf1ql1rdgtgfmqgvvkvseveevfklakeitqesslyvtgtitednr  
sd1gyemqvksie1viseah  
dypitpknhg1ef1mdhrh1wl1rskkqhavmkirnev1ratyeffnkdgftkvdppil1tasapegtse1fhtkyfdqdaf  
1sqsgq1yleaaamahgv  
fsfgptfraeksktrrh1iefwmi egemaftnhaes1e1qeqyvthvkvsvlenckle1kmlerdtsklekvatpfpris  
yddai e1kaegfd1ewg  
edfgaphetaianhyd1p1vfi1nyptki kpfymqpnpenetv1cad1iapegygei1ggservd1le1leqrvkehgl1d  
eeaysy1dl1rrygs1phc  
gfg1glertvaw1sgvehvretapfpr11nr1yp  
>sp|Q6GGW0|RECU\_STAAR  
mnyngkpyrknsaidggktaafsnieygggrgms1ekdiehsnafylksdiavihkkptpvqivvnvnyprskavinea  
yfrtpsttdyngvyggyyi  
dfeaketknktsfpl1ni1hdhqvehmknayqqk1g1vflmi rft1devy11pyskfei1wkrykdnikksitvdeirkng  
yhipyqyqpr1dylkavdk  
l1l1desedrv  
>sp|Q6GGW9|DHA1\_STAAR  
m1lavvke1kqgegrvactpenvrk1tdaghkviveknag1sgfsndmyekegakivtheqawead1vikvkephesey  
qyfkknqi1iwg1h1l1assk  
eivekmqevgyta1sgeti1kngkae1lapmsai1agqrsai1mgayysea1hgqgg1tvtgvhenvdipgstyvi1fggva  
atnaanval1gnakvii1e  
1nddriky1edmyaekdv1vkvstpen1aeqikkadv1stilipgakppk1vtremvksmkkgs1v1idiaidqgg1tiet  
irp1ttisdpvyeegviyh



Tsompanidou\_et\_al\_Supplemental\_FASTA\_File

gvpnqpgavprtstmalaggnidyileicdkgleqaikdnealstgvniyqgqvtnqglatshdldykeilnvie  
>sp|Q6GGX2|NORB\_STAAR  
mekpsretfegnnklligivlsvitfwlfaqlvnnvpiledsfntdigtvniavsitalfsgmfvvgaggladkygrik  
ltnigiilnllgsliliis  
nipllliigrliqglsaacimpatlsiiksyigkdrqralyswysigswgsgvcsffggavatllgwrwifilsiiisl  
ialflikgtpetksksisl  
nkfdikglvllvimllslnilitkgseigvtsllfitilaaivsfslfivlekratnplidfklfknkaytgatasnfl  
lmgvagtliantfvqrgl  
gysslqagslsitylvmvlimirvgekllqtfqckkplmigtavlivgeclisltflpeilyvicciigylyffglglgiy  
atpstdtaianaplekvgy  
aagiymasalggafgvalsgavyaivsnmtnidtgamialwlnagmgilsviilllvpkqndtql  
>sp|Q6GGX3|EBH\_STAAR  
mnyrdkiqkfsirktyvgtfstviatlvlglntsqaaetnqpasalkkqkqngdtqtenrevevqnsqngqslsapi  
eneqpnntnhdasavq  
sstehdqpvsnqekakdtaaaptqsakaaskheqsesraankkendnkathvesheanvvtasdsdsgnvqhdrne  
lqaffdanyhdyrfidren  
adsgtfnyvkgifdkintlsgsndpinndlqlaykeleqavalirtmpqrqqtssrssiqrtsiesraaeprsvsdyq  
nanssyvenandgsgypv  
gtyinasskgapynlpttpwntlkasakeialitakqtdggyqwwikfnkghaphenmiywfalpagqtpvgrtefvv  
nadgtnvqwsngagagank  
plpemwpygvndrswdyki rnrsgqviydwptvhinslkdlarasdyfseagatpatkafgrqtfeyingerptespgv  
pkvytfigkgdasytisfk  
tqgptidklyaaaggraleynqlfmysqlyvestqdyqqrlnqlrqvnrtyrigttrvevsqgnvqtkkvestnlni  
ddfmddplsyvktpsnkvl  
gfyptsantnafprggvnlneyqlsqiftddklqqaartgspirlmigfdypdafgngetlvpnltvlpeiqlhnikff  
knddgqniadkpkaskqagh  
pvfyvyagnqgnasvnlsgsvtsiqplrinltsnenftdkdwqitgiprtlhienstnrtnnarernielvgnllpgdyf  
gtirfgrkeqlfeirvkph  
tpriittaeelrgtalqkvpvtvdipldpsalvlyviptsqtrdggseadqipsgytkiatgtpdgvhsttitorpedyv  
vfippvgnqirali fyinnv  
vasnmsnavtilpddipptinnpvglnakyyrgdevsftmgvsdrhsglksttittlpsgwtsnltsdkkngslaisgr  
vsmnqaynsditfkvsatd  
nvnttndsqs khvtvhvgkiddahpivlgnsekvvvvnpaltgdekqrittafmknqnirgylassnpvtdnhgn  
vtlqyrdgsstl datnm  
tyepvvpkpeyqtanaaktatvtiakgqsfniqdkyftlsgqai psssfntitsdrtipaqevsqmnagtqlyhiva  
tnayhkdtedfyitlkiid  
vkqpegdqrvmstydittdeiskvkqafinardaisfaegdisvntnpgnsnstitvninkgrltskftslnnmn  
flrwnfpqdytvtwtak  
ianrptdggls wsdhksli yrydatlgtqittndil lllkattvpglrnniagnekaqaeaggrpnkyttgysqsnt  
sdgqrqftlngqviqimdi  
inpsngfggpvtnsnvransstvs vnesaangagaftidhvkvnnstthnaadavykaqlylspygpkqyvehlnqn  
tdntneainiyfvpdln  
ptisvgnynthqvfsgetfntitandnfgvqsvtvpttsqltgvdnhqhvsatapnvtsttnktinlvatdtsgnta  
ttsfnvtikplrdkyrvgt  
sstaanpvrianisnnavsqadqta insltftsnapnrnyatasaneitsktvsnvrtgnaqvttvtyqdgttst  
vtvpkrvipeivahshyt  
vqqdfptngasadyfklngsaipdatitwvsgqapknnttigqdinvtahilidgettpitktatykvvrtvpkq  
vfetargvlypgvsdmyda  
kqyvkpvnnswstnaqhmnfqftnsygpskdvgistrdirvtydnhqtiikilskvkpdpriidgnsvtykagltngq  
ikinnlssssikl fkadn  
tpltinttygsgntavvtvsdalpngeikarssismnnvtyttqdehgraidvtrnesvdsndsasvhvtpqlqatteg  
avfikggdgdffghverfi  
qnpqhgtavahndpdtwknvgnthktavvtlpgqgtrnvevpvkvyppvanakapsrdvkgqnlngtdainyitfdp  
ntntngitavwanrqppn  
qqagvqhlndvtypgisaakrvpvtvnyqfefpqtstttvggtlasgtqasgyahiqnatglptdgftykwnaatg  
tndanwaamnkpnatqvin  
akydviynghtfatslpakfvkdvqakptvtetaagvitiapganqtvnthagnvttiyadklvikrngnvttftrhn  
ntspwvkeasaanvagiag  
tnngitvaagtfnpadtiqavatqgsgetisdeqrsddftv vapqpnqattkiwqnghvdi tpnpsghlinptqamdia  
ytekvgngaehsktlnavr  
gqnnqwtiankpdvvtl dahtgkvtfnantikpsaititpkagtghsasnpsltapaahvntteivkdygsnvtaa  
einnavqvankrtatikng  
tamptnlaggstttipvtvtyndssteevqesiftkadkrelitaknhl ddpvstgdgkkggtitqynnaihnaqqqinta  
kteaqqvinderatpqqvn  
aalskvqaaqtkineakallqnkednsqlvtsknnlqssvnqvpsttgmtqqsidynakkreaeseitaaqrvidngda  
taqqisdekhrvdnalta  
nqakqnl tadthelegavhqlnrtgtttgkpasitaynnsiralqsdlt saknsanaiiqkpirsvqevqaltvnrv  
ndrltlninqlvpladnsa

Tsompanidou\_et\_al\_Supplemental\_FASTA\_File

lrtaktkldeeiinksvttdgmtqssi qayenakragqtestnaqnvinnngdatdqqi aakktkveekynglkqaiaglt p  
dlaplqaaktqlqndidqp  
tsstgmtsavaafndkl saartkiqeidr vlashpdvati rqnvtaanatktaldqarngl tvdkaplenaknqlqssi  
dtqtsttgmtqdsinayna  
kltaarnkiqqinqv lagsptvdqintntsaanqaksdl dharqalt pdkapltaktql eqsinqptdttgmttaslna  
ynqklqaarqkl teinqvl  
ngnptvqni ndkvaeanqakdq lntarqgl tldrqpaf tll hgasnl nqaqqnftqq inaapnhaaletiksnitalnn  
amtklkdsvadnnsiksgq  
nytdattankqaydnavaakgvi gettnptmdvntvnqaetvskstkga ldgqqnl qrakteatnait hasdl nqtqkn  
altqqvnaqnvqavndik  
qttqs lntamgtl krgvanhnqvvsdnyvnadtnkknndynnaynhandi ingnaqhpvi tpsdvnaal snvtskeqaln  
geaklnaakqeantal ggl  
nnlnnaqrqn lqsqingahqietvntikqnatlnsamgnl rqavadkeqvkrteyadadtakqnaynsavssaeti in  
qtnptmsvndvnsatsav  
ttknkna lngdek laqsktdaasaidal phlnnaqkadvkskinaasni agvntvkqqgtd lntamgnl qgaindeqttl n  
sqnyqdatpskktaytnav  
qaakdi lnskngqkktkdqvteamnqvnsaknndgtr lldqakqtakqql nmthl ttaqkthl tnqingsgttvagvht  
aqsnantldqamntl rqs  
ankdatkasedyvdandkqtaynnavaaaeti inansnpempst itqkaeqvnsskta lngdenl ataklnaktyl nt  
ltsitdaqknnl isqissa  
trvssvdtvkqnaqhl dqamas lngi nnesqvkssekyrdadtnkqqeydnaitaakail nkqhgpn taqnaaveaalqr  
vktaknalngdakliaaqn  
aakqhlgtl thi ttaqrndl tnqisqatnl agvesvkqsans ldgamgnl qta indksgt lasqnl dadeqkrnaynqa  
vsnaeti l nkqtgpntakt  
aveqal nnvnsakhalngtqn lnnakqaaita ingasdl nqhqkda lkaqangaqrvsnaqdvqrnate lntamgql qha  
iadktttl asskfvnadst  
kqnyvttkvtnaehi isgtptvtt psevtaaanqvnsakqel ngderl rvakqnantaidal tq lntppkakl keqvqg  
anrledvqsvqtngqsl nn  
amkg l rdsianettvkasqnytdaspnnqstynsavsnakgi inqtnnptmdasaitqattqvnnakng lngaenl rnaq  
ntakqnl ntlshl tnnqks  
aissqidraghvsevtaaknaate lntqmgnl eqaih dqntvkqgvnftdadkakrdaytnavsraeti l nktqgantpk  
qdveaai qsvtsaknalng  
dqrvtnaknaakhal nntsi nnaqkrdl ttkidqattvsgveavsntgtql ntaman lngi indkntl asenyhdads  
dkktaytqavtnaeni l nk  
nsgsl dkaavenal sqvtnakgal ngnhnl eqaksnanttingl qhl ttaqkdkl kqqvqqaqnvagvdtvkssantln  
gamgtl rnsiqdnaatkng  
qnyl datesnktynnavdsangvinatsnpnmdana inqiatqvtstknal dgthnl tqakqtatnaidgatnl nkaqk  
dal kaqytsaqrvanvtsi  
qqtane lntamgql qhgi ddenatkqtqkyrdaeqskktaydqavaaakail nkqtgsnsdkaavdra lqqvtstkda l n  
gdaklaeakaaakqnlgtl  
nhitnaqrtd legqinqattvdgvntvktnantldgamns lqgsindkdatl rnqnyl dadeskrnaytqavtaae gi l n  
kqtggntskadvdnal nav  
trakaa lngadnl rnaktsatntingl phl tq l qkdnl khqveqaqnvagvngvkdkgnt lntamgal rtsiqndnttkt  
sqnyl dasdi nknyntav  
nnangvinatnnpnmdana ingmanqvnttkaal ngvqnl aqaktnatntinna hdl nqkqkda lktqvnaqrvsdann  
vqhtate lngamtv lkaai  
adkertkasgnyvnadqekrqaydskvtnaeni ingtpnatl tvndvnsatsqvnaaktvl ngdnnl rvakehanntidg  
laql nnaqkakl keqvqsa  
ttl dgvtvknssqtl nntamkg l rdsianeatikagqnytdaspnnrneydsavtaakai inqtsnptmepntitqatsq  
vtkeqalngaql aqakt  
taknnlnnltsinnaqkda ltrsidgattvagnqetvkate lnnamhsl qngi ndetqtkqtqkyldaepskksaydqa  
vnaakailtkasqnvdka  
aveqal qnvstktalngdakl neakaaakqtlgtl thinnqrta l dneitqatnvegvntvkakaqql dgamgql ets  
irdkdttlqsnyqdadda  
krtaysqavnnaati l nktsgntpkadveramqavtqantal ngiqnl erakqaantaitnasdl ntkqkealkaqvts  
agrsvangvehtate lnt  
amtal kraialkadt kasgnyvnadankrqaydekvtaae nivsgtptptl tpsdvtnaatqvtnaktql ngnhnl evak  
qnantaidglts lngpka  
klkeqvqgattl pnvqtvrdnaqt lntamkg l rdsianeatikaeqnytdaspnnrseydsavtaakai igqtsptmna  
qei nqakdqvtakqqa lng  
qenltnaqinakhq l ng lsd ltnaqkdaakrqie gathvsevtqaqnada lntamtnl kngiqdqntikqgvnftdade  
akrnaytnavtqaeqi l nk  
vqgpntakdnvesal qnvqraknd lngnqvnakttaknal nntsi nnaqnea lksqidsattvagnqvsvatase l n  
tamsnl qngi ndeaatkaa  
qkytdadsdkqtayndavtaakt lldktagtndnkaaveqal qrvntakta lngdar l nqakntakqql atmshl tdaqk  
anltsqiergttvagvqgi  
qanagtl neamnl rqsias kdatkasedyhdantdl qnayndavtnaegi isatnnpempd tinqkasqvnsaksal n  
gdeklaaakqtaksdigrl

Tsompanidou\_et\_al\_Supplemental\_FASTA\_File

tdlnnaqrtaanaevdqapnlaavtaaknkatslntamgnlkhalaeakdntrsvnytdadqpkqqaydtavtqaeaitn  
angsnanetqvqaalnqln  
qakndlngdnkvaqaknetakra lasysnlnnaqstaatsqidnattvagvtaaqntane lntamgqlqngindqntvkqq  
vnftdadqgkdaytnavt  
naqqildkahgqnmkagveaalnqvttaknalngdanvrqaksdakanlgtlthlnnaqkqdltsqiegattvngvngv  
kkaqdldgamgrlqsaia  
nkdktkasenyidaptnktafdnaitqaesylnkdhgankdkqaveqaiqsvtstena lngdanlqrakteatqaidnl  
thlntppkta l kqqvnaaq  
rvsgvtdlksatslnnamdq lkqaiadhdtivaggnyt naspdkqgaytdaynaaknivngspn vitnaadvtaatqrv  
nnaetg l ngdtnlatakqq  
akdalr qmthl sdaqkqsitvqidnatqvtgvqsvkdnatn l dnamnql rnsiankdevkasqpyvdadr dkqayntav  
tsaeniinat sqpt l dpsa  
vtqaanqvntnktalngaqlankkqettaninq lshlnnaqkqdlntqvtnapnistvsqvk tkaeq l dqamer l ingi  
qdkdqvkqsvnftdadpek  
qtaynnavtaaeniinqangtnanqsqveaalstvttkqalngdrkvt daknnanqtlst l dnl nnaqkgavtgninqa  
htvaevtqaiqtaqelnta  
mgnlks l ndkdt l gsqnfadadpekknayneavrnaeni l nkstgtnvskdqveaamnqvnttkaalngtqnlekakq  
hanta idg lsh l tnaqkea  
lkqlvqqsttvaeeagqneqkannvdaamdklrqs iadnattkqnqnytdsspnkkdaynnavttaqgiidqtspt l dpt  
vinqaagqvsttknalngn  
enleakqatqslgsl dnl nnaqkqavtdqingahtvdeanqikqnaqnlntamgnlkqaiadkdatkatvnftdadqa  
kqqayntavtnaeniiska  
nggnatqteveqaiqqvnaakqalngnanvqhakdeatalinssndlnqaqkda l kqqvqnatvavgnnvkqtaqelnn  
amtqlkqgiadkeqtkadg  
nfvnadpdkqnaykavakaeal isgtpdvvt pseitaa l nkvtqakndlngntnlattkqnvqhaidqlpnl nqaqrd  
eyskqitqatlvpvnaiq  
qaatt l ndamtqlkqgi ankaqikgsenyhdadtdkqtaydnv tkaeelkqttnptmdpntiqqal tkvndtnqalng  
ngkladakqaaktnlgt l d  
h l ndaqkqal t t qveqapdiatvnnvkqnaqnl nnamtn l s n l qdktet l nsinftdadqak kdaytnavahaegilsk  
angsnasqteveqamqrvn  
eakqalngndnvrakdaakqv itnandlnqaqkda l kqqvdaaqtvanvntikqtaqdl nqamtqlkqgiadkdktkan  
gnfvnadtdkqnaynnava  
haeqi isgtpnnavdpqgvaqalqqvtqakgd l ngnhnlqvakdnantaidqlpnl nqtqkta l kdqvshaelvtgvnai  
kqnadal nnamgt l kqgiq  
ansvppqsvdftqadqdkqqaynnaanqaqqiangtptpvltpdavnqavttmnqakda l ngdek laqakqdaian l dt l  
rdlnqpprdalrnqinqaq  
alatveqtkqnaqvntamsnlkqgi ankdtvkasenyhdadadkqtaytnavsqaegii nqtt n p m l n p d d i t r a l t q v  
tdakng l ngeak l atekqn  
akdavnamt h l ndaqkqal kqgidqspeiaivnqvktats l dhamdq l sqaindkaqtladgnylnadpdkqnaykqav  
akaeal l nkqsgtnevqag  
vesitnevnaakqalngndnlanakqqakqqlanlth l ndaqkqs fesqitqap l vtdvttninqaqa l dhamdq l sqai  
ndkaqtladgnylnadpdk  
qnaykqavakaeal l nkqsgtnevqaqvesitnevnaakqalngndnlanakqqakqqlanlth l ndaqkqs fesqitqa  
plvtdvttninqaqa l dha  
mell rnsvadngat l asedyhdataqrqndynqavtatnniinqtsptmnpdevnrattqvntkvaldgden l vaakq  
qannr l dq l dh l nnaqkq  
lqsqitqssdiaavngkqtaes lntamgn l inaiadhqtveqlgnfvnadtdkqtayttavn eaeaminkqtgqnanqt  
eveqaitkvqttlqalngd  
hnlqvakanatqaidalst l ndppkta l kdqvtaatlvtavhqieqnant l nqamhglresiqdnaatkanskyinedqs  
eqqnydqavqaanniineq  
tat l dnnainqaattvnttkaalhgdvklqndkdhakqtvsq l th l nnaqkhmedtlidsettrtavnhdlteaqa l dq l  
mdalqqs i adkdatrassa  
yvnaepnkksydeavqnaes i iag l n n p t i n k g n v t s a t q a v t s s k n a l d g v e r l a q d k q t a g n s l n h l d q l t p a q q q a  
l e n q i n n a t t r d k v a e i i a  
qqa l n e a m k a l k e s i k d q p q t e a s s k f i n e d q a q k d a y t q a v q h a k d l i n k t t d p t l a k s i i d q a t q a v t d a k n n l h g d  
q k l d q d k q r a t e t l n n l s n  
l n t p q r q a l e n q i n n a a t r g e v a q k l t e a e a l n q a m e a l r n s i q d q q q t e a g s k f i n e d k p q k d a y q a a v q n a k d l i n q t  
n n p t l d k a q v e q l t q a v n q  
a k d n l h g d q k l a d d k q h a v t d l n q l n g l n n p q r q a l e s q i n n a a t r d e v a q k l a e a k a l d q a m q a l r n s i q d q q q t e s g s  
k f i n e d k p q k d a y q a a v q n  
a k d l i n q t g n p t l d k s q v e q l t q a v t t a k d n l h g d q k l a r d q l q a v t t v n a l p n l n h a q q q a l t d a i n a a p t r t e v a q h v  
q t a t e l d h a m e t l k n k v d q  
v n t d k a q p n y t e a s t d k k e a v d q a l q a a e s i t d p t n g s n a n k d a v d q a l t k l q e k v n e l n g n e r v a e a k t q a k q t i d q l t  
h l n a d q i a t a k q n i d q a t k  
l q p i a e l v d q a t q l n q s m d q l q q a v n e h a n v e q t v d y t q a d l d k q n a y k q a i a d a e n v l k q n a n k q q v d q a l q n i l n a k q  
a l n g d e r v a l a k t n g k h d i  
e q l n a l n n a q q d g f k g r i d q s n d l n q i q q i v d e a k a l n r v m d q l s q g i t g n e g r t k g s t n y v n a d t q v k q v y d e a v d k a k  
q a l d k s t g q n l t a e q v i k l

Tsompanidou\_et\_al\_Supplemental\_FASTA\_File

ndavtaakkaIngeeklnnrksealqrldqlthlnnaqrqlaiqqinnaetlnkasrainratkldnamgavqqyideqh  
lgvisstnyinaddnlkan  
ydnaianaaheldkvqgnaiakaeaeqlkqniidaqnalngdqnlanakdkanafvnslnqlnqqqqlahnainnadv  
sdvtdivnnqidlnamet  
lkhldvneipnaeqtvnyqnaednaktfnddakrlantllnsdntvndingaiqtvdaiqnlnqdqrlqdakdkaiqs  
inqalanklkeieasnatd  
qdkliaknkaeelansiinninkatsnqdvsvqvtagnhaieqvthaneipkaidankdvdkqvqalideidrnpiltdk  
ekqalkdrinqilqqghnd  
innamtkeeeiqakaqlggaqlqdkldlvkakesakqdidkqvqalideidrnpiltdkekqalkdrinqilqqghnginn  
amtkeeeiqakaqlggaqlq  
dikldlvkakesakqdidkqvqalideidrnpiltdkekqalkdrinqilqqghnginnamtkeeeihakaqlaqaqlqdk  
dlvkakedaknaikalana  
krdqinsnpdltleqkakaakeideaekraleniernaqtkdqlnqqlnlglddirnthvvevdaqpavneifdatpeqil  
vngelivhrddiiteqdi  
ahlnldqltaeiidtpstatisdsltakvevtllgskvivnvpkvvekelvtvvkqqaiesienaaqqkineinnhat  
ltpqkeaaiaevnk1kqq  
aieqinnaadvhtveevqhgeqahieqfnpdqftidqaksnaiksisdaiqhmidenaskdltkekqeaisklnqlkd  
qsiqaiqraqsidaeiaql  
eqfkaqlkaanpfakelelrkkaaaiskikdistdkidrinrstigtaerqaamnrineivletikdinnaqtpqqveaa  
lnngiarilavqivtsdhs  
kpsnsdgqsns1hvgvgvtnhpfnsppighkkldqddeidplhmrfhgdriqgnviknalgvvgisgllasfwwfiak  
rrrkedeeeeeieirdnskd  
kkkgsiegtkhlp1lfakrrrkedeedaiveekdslnndesldkvkhtpfflpkrrrkedeedvevtntentdekvlqne  
hspvliakr1kdkdgnvet  
ttsieskdedvp1llakknqkdnqskgkksaskkpskvaakkkkkkkskknk  
>sp|Q6GGX8|CVFC\_STAAR  
meilriepspntmkvvl1sytreklsntykkveenqprfinql1sidgitsifhvmnflavdkapkadwedilpdika  
afsgesqvl1esgkdpqdn  
hfgaikael1tfkgyipyqikltsadqelreqlpqtyvdhmtqaqtkhdnivfmrkwldlgnrygnieevmdgvleevlat  
ypesqlpv1vkhaleenha  
tnnyhfyrhvs1deyhatdnwktlrm1nhfpkptfedipl1dlalsdekvpvrrqaiv1lgmieskeilpylykglrdk  
spavrrtagdcisdlgype  
alpemv111ddpqiivrwaamfi1fdegnaeqlpalkahindnafevklqiemaisriengdealgsvwkqmntrti  
>sp|Q6GGX9|Y1441\_STAAR  
mnaydaymkeiaqmqrgeltqngfts1etseevseymnqvnaaddttfvvinstcgcaaglarpaavavatqnehrptntv  
tvfagqdkeatatmrefiq  
qvpsspsyal1fkgrdlvyfmprefiegrdiindamd1kdafdenck  
>sp|Q6GGY4|MSRB\_STAAR  
mlkkdkseltdieyivtqengteppfmeywnhfakgiyvdkisgkplftseekfhsecgwpsfskalddeieielvdk  
fgmvrtevrseesnshlgh  
vfdgpkessg1rycinsaaifipyeklee1gygdli1shfdk  
>sp|Q6GGY8|CTPAL\_STAAR  
mddqhttsdderaenatsnqddqtsskrvh1krwqfisiligtiiitavitvvayifinqisglnktdqan1kie  
nyki1nsdykkqnsdkl  
skaaidgmvkelkdpseyeltkeqtksfnegvsgdfvgigaemqkndqimvtspmkgspaeragirpkdvitkvngksi  
kgkaldevvkdvrgkente  
vt1tvqrgseekdvkikrekihvksveykkkgkvgitinkfndtsge1kdav1kahkdglkkivld1rnnpgg1ldea  
vkmani1fdkgtvkvlek  
gkdteaiqtsnda1keakmdisilvnegsasasevftgal1kdyndakvygsktfgkgvvqttrefkdgs1lkytemkw1  
tpdghyihgkikpdtid  
tpkyqs1nvipntktfkvgdddkniktikig1salgykvdnestqfdqalen1vkafqqank1evtgefnketnknfte1  
1vekankhddv1dk1ini1  
k  
>sp|Q6GGZ0|MURG\_STAAR  
mtkiaftgggtvghsvnl1slipta1sqgyevlyigskngieremiesqlpeikyypissgklrryislenakdvfkvlk  
gildarkvl1kkekpdl1fs  
kggfsvsvpvvaaks1nipti1hesd1tpglankialkfakkiyttfeet1ny1pkekadfigatired1kngnahngyq  
1tgfnenkv11vmggs1g  
skkl1nsi1ren1dal1qqyqvi1htgkglkdaqvkksgyiqyefvked1td1laitdtvisragsnaiyef1t1ripm11  
vp1gl1dqsrgdqidnanhf  
adkgyaktideeq1taqi1lqe1nkmeqertri1nmmksyeqsytkael1fdkmikda1n  
>sp|Q6GGZ4|ARLS\_STAAR  
mtkrkl1rnnwi1vtmt1fvti1f1fcl1i1ff1kdt1hnselddaerssdi1n1fhskpvd1sald1nas1gnf1qei1  
iydehnnk1fetsndntvr  
vepgyehryfdrvikrykgydyl1ikepittqdfkgs1l1hs1enydnivkslyiialafgviatiitatisyvfstq  
itkplvs1snkmierrdg  
fqnlq1ntnyeeid1n1antfnemmsqieesfnqqrqfvedashe1rtplqiiqgh1n1iqrwgkdpavlees1nisie  
emnriik1veelle1tkgd

Tsompanidou\_et\_al\_Supplemental\_FASTA\_File

vndisseaqtvhindeirsrihslkqlhpdqfdtdltsknleikmkphqfeqlflifidnaikydvknkkikvktrlkn  
kqkieitdhgigipeedq  
dfifdrfyrvdksrsrsqngnglgsiaqkiiqlngsikikseinkgttfkiif  
>sp|Q6GGZ5|ODO1\_STAAR  
mtnerkevseapvnfganlgmlldlyddf1qdpssvped1qvlfstiknddsivpalkstssqnsdgtikrvmlidnir  
qyghlkadiypvnpkrkh  
vpkleiedfdldqqtlegisagivsdhfadiydnayeailrmekrykgpiafeythinntergwlkrrietpykvtl  
nekralfkqlayvegfeky  
lhknfvgakrfsiegvdalvpm1qrtitiaakegikniqigmahrgrlnv1thvlekpyemmisefmhtdpmkflpedgs  
lqltagwtgdkyhlggik  
ttdsygtmqrilannpshleivapvvegrtraaqddtqragapttdhhkampiihgdaaypgqginfetm1gn1kgy  
stggs1hiitnriqftte  
pidarsttystdvakgydvpifhvnaddveatieaidiamefrkefhkdvvidlvgyrrfghnemdepsitnvpvyqnr  
khdsvyvfqk1vnegii  
sedemhsfieqvke1rqahdkinkadkmdnmdmekpaelalplqadeqsftfdhlkeindalltypdgnilk1nkvl  
ekrhepfnkedglvdwaqa  
eqlafatilqdgtpirltgqdsertgfsrhavlhdeqtgetytplhhvpdqkatfdihnsplseaavvgfeygynvenk  
ksfniweaqygdfanmsqm  
ifdn1fssrskwgersgl1flphayegqgpehssarlerflqlaennctvvn1ssssnyfh11raqaas1dseqm  
lvmspks11rnktvakpi  
deftsggfepiltesyqadkvtkvilatgkmidlkealaknpdesv11vaierlypfpeeeieallaqlpnleevswvq  
eepknqgawlyvpyvkv1  
vadkyd1syhgriqraapaegdgeihklvqnkiiena1kn  
>sp|Q6GH01|BRNQL\_STAAR  
mnkntwvigft1famffgagn1fppn1g1dsgqffwpailafvltgig1pl1gvivgal1dkegyigal1nkispkfsilf  
liiyltiqplfaiprtas  
tsfemtipihsnsialfiftiivvlyic1npsklidrigs11tp11litilamiikay1dfsgnsagkgnealy  
hsnfssfaegftqgyltmd  
aiaaiafsmivnavkltgiktqnqifkq1tagliaaialifiyis1gyignhmpvsdmk1nelkshdrnigty11ttm  
astgfgsfgkyl1giiva1  
aclttacglivavseyfhrivpkvsykafvlvfilmsfianq1navismsipv1sivypvaitv111liakfiptkr  
itqipviiivfilsifsvi  
sklgwlkinfies1plrays1ewfpvaiiatilgy1vgifvkqdpikyqqe  
>sp|Q6GH10|Y1410\_STAAR  
mnel1efvtkhrrh1hqhpelsh1fettayikaf1ds1nikydc1letgviay1legngshtiayradidalpileendvp  
yrsqsdhvmhacghdghtt  
t1m1fvqrckdmqdag1pqnvvfi1qpaetgganr1kagafd1kypieavf1ghvnpfadegiavirdeeitasate  
yrf11tg1sshvadkeqgh  
scgealqhv1tqisq1qqf1hng1krnivhighfkageaintvpsngylegtirtydidd1tivknqmhkiasvkl1fn  
vdcevkfaegypt1insp  
1rtqiedal1kad1nvdyktp1f1gedfsfygq1lapayfv1figtrnedkgfvtg1htsy1nfdekvl1invnfyen11  
nnykev  
>sp|Q6GH11|DAPH\_STAAR  
mvqhl1taeeiiqy1sdakkst1pikvy1ngnfegitypes1fkvfgseqskvifceaddwkp1fyeaygsqfgdieiemdrn  
saip1kdl1tntnari1epga  
fi1reqai1iedgavvmmgat1inigavvgegtm1dmnat1ggrattgknvhvgagav1agvieppsaspvii1eddv1ligana  
vi1legvrv1kgai1vaagai  
vtqdv1pagavv1agtpakv1kqasev1qdtk1keivaal1rk1nd  
>sp|Q6GH13|DAPA\_STAAR  
mth1fegvgval1t1pftnknvn1eal1kahvn11ennaqai1vngttaespt11tdekel1lktvid1vdkrvpviagt  
tndteksi1qasi1qakalga  
daim1it1pyynk1tnqr1glvkhfeai1adavk1pvv1ynvpsrtnmt1iepetvei1sqhpyiva1kdatndfey1leevk1ri  
dtnsfalysgnddnvvey  
qrggqgv1svianv1pkefqa1ydaqqsg1ldiqdqf1kpi1gt11salsvdin1pipikal1tsyl1gfgnyel1rl1plvs1ledt  
tkv1reaydt1fkagene  
>sp|Q6GH17|CVFB\_STAAR  
mal1dkdivgs1ef1levvg1qgsty11kgp1ngenvk1nqsemndd1levgeeysf1fiy1pnrsge1fatq1nmpdi1tkdkyd  
fakv1ktdrdgar1divglp  
rev1vpwed1pkvks1wpqpgdh11vt1ridrenhmygr1asesvvenmftpvhddn1knevieakpyrv1rigsf11se  
sgyki1fvheserkaepr1g  
esvqvr1i1ghndkge1ngs1flp1aher1ddd1gqvi1fd11veydge1p1fdksspea1ikevfnmskgsfkraighlyk1hki  
inietgk1it1tkgws1rie  
ske  
>sp|Q6GH31|FEMA\_STAAR  
mkf1tn1takefga1ftd1smpy1shftqt1vghye1k1laegyeth1vgik1nnnevia1aac11tavpvmkv1kyfysnr1gpvidy  
enqel1vhffne1lskyvkk  
hrc1ly1hi1dpy1pyqy1nhdgeit1gnagn1dwffdkmsn1gfeht1ghkgfdpvl1qiryhsv1dl1kdk1taddi1knmd1glr  
krntk1kvk1ng1kvry1se

Tsompanidou\_et\_al\_Supplemental\_FASTA\_File

eelpifrsfmedtseskafaddrddkfyynrlkykervlvplayinfdeyikelneerdiInkdlnkalkdiekrpenkk  
ahnkrdnlqqqldaneqki  
eegkr1qeehgnelpisagffffinpfevvyaggt снаfrhfagsyavqweminyaInhgidrynfgyvsgkftedaeda  
gvvkfkkgyanaeiieyvgd  
fikpinkpvyaaytalkkvkdrif  
>sp|Q6GH32|TRPA\_STAAR  
mtklfipyimgnkdlienatllsengadieigvpfsdpvadgpvimeagqqaikqgitidyifeqlekhgnqikcqv1  
mtyyniichygeqaffekc  
rdtgvygliipdlpfelsqr1kqqfshygvkiislvamttddkrikdivsyaegfiyvtmnattgqngafhpelkrkie  
sikaianvpvvgfgrsp  
qhvadikevadvigseivkrfksntreeiiky1qsiqqtlnn  
>sp|Q6GH33|TRPB\_STAAR  
mnkqiqteadlgffgeyggqyvpelmpaiielkkaykeakadpefpreleyylseyvgratpltyaasyteslggaki  
ylkredlnhtgahkinnal  
gqallakrmgkkk1vaetgagqhgvasatvaalfdme1vfvmsedikrqqlnvfrmel1gakvvavedgqgt1sdavnk  
alqyvwshvddthyl1gsa  
lgpdpfptivrdqsvigkeiksqi1kkegrlpdaivacigggsnaigtfypfikddvalyveaagqgedtdkhalaign  
kgsqgv1hgtkmyli1qdeg  
gqvqlahsisagldypgigpehsyhdigrvtfenasdtqamnalinfkhegiipaiesahalsyver1aptmskedi  
vvtisgrgdmetirqym  
aerg1and  
>sp|Q6GH34|TRPF\_STAAR  
mk1kfcgftsikdvtaasq1pidaigfihyekskrhqtitqikk1asavpdhidkvcvvnplttiehv1sntpinti1q  
1hgtesidfiqeikkkyss  
iki1tkalaadeni1qinikykgfvd1fiidtpsvsyggtgqtdwt1knikdipyliagginteniqtvnqfklshqgf  
d1asgievngrkdiekmta  
ivni1vkgdrene  
>sp|Q6GH35|TRPC\_STAAR  
mti1eeiveyq111qngyyqdk1nt1ksvniqnkksfinaiekepklaiiaeikskstpvnd1perdl1sqq1sdyeqy  
anavsil1tdekyfggsfer  
1qal1tktt1pvl1ckdfi1dp1q1dvakqagasm11ivni1sdq1kd1ynya1sqn1ev1vevhdrheleraykvna  
1igvnnrd1krfvt1neht  
nti1enkknhyysesi1hdvsdvrki1hsgidg11igeal1mrcdn1sefl1pq1kmqkvks  
>sp|Q6GH43|MSRR\_STAAR  
m1ketndneyrrqsehrtsapkrkkkkkirk1pi11ivvillia1lvvyivhsynsgveyakkhakdvkvhqfngpvknd  
gkisi1vl1gadkaqggqsr  
tdsimvvqydf1nk1kmm1svmr1yadi1pgygkhk1insaya1ggpe11rkt1dkn1ginpeyyavvdf1gfekmide1m  
pegvp1nvekdmskn1gvs  
1kkg1nhr1ngkel1gyar1frhdpegdfgrvrrqqvmt1kkemvnfrtvvk1pkvagilrgyvntnipdsgifqtg1sf  
girgekdvks11vpi1knsy  
edvntntdgsa1qin1kntnkqaikdf1ded  
>sp|Q6GH48|GLCT\_STAAR  
mgeyivtk11nnvvctnndqev1ligkigfnk1kegmt1ndqtiti1eki1ykleseqqkahyks1vei1addnv1qviid  
s1nfi1sntamnv1dsk1lvv  
s1tdhi1faykr1kqnqvisn1p1fmetmq1lysd1yahakqvidq1naaldvh1fpedeigfialh1asnted1smhemt1i  
nnvikgid1iesd1vttv  
dkes1qyqrfi1rhvqf1irrl1rkeyi1haqddf1vsmiknhy1picyntayki1l1tm1qkqfdvnisesei1y1l1hihhfee  
ring1s  
>sp|Q6GH50|PARC\_STAAR  
msei1qd1s1ledv1gdrfgryskyi1qeralpdvrdg1kpvqrrilyamyssgnthdknfrksaktvgdvigqyphgdf  
svyeamvr1sqdwk1rhv1  
iemhgnngs1dndppaamryteak1s1lae11rdinketvsf1snyddtt1epmv1psrfpn11vngstgisagyatdi  
pph1laevi1qat1kyidnp  
di1tvnq1mkyikgpdf1tgg1iqgidgikkayesgkgriiv1rskveet1rngrkqliiteipyevnkssl1vkridelra  
dkkvdg1ivevrdetdr1tg1  
ria1ielkkdvnsesikny1lyknsd1qi1synf1nmvai1sdgrpk1mgirqi1dsy1nhqievvantkfel1dnaekrmhive  
g1ika1sil1dkvie1irss  
knkr1daken1lievyefteeqaeavm1qlyr1ntndiva1legehke1eal1kqlrhi1ldnhda11nvikeelneikkkfk  
ser1s1lieaeieeikidke  
vmvpseev1lsm1trhgyikr1tsirsynasgvedig1kdgds11khqevntqdtv1vftnkgryl1fipvhk1ladi1rkelg  
qhvsqiv1pieedevvin1vf  
nekdfntdafy1vfatqngmi1kkstv1flkttrfnkpliatkvkend11svmrfekdq1liti1tnkgms1tyntsel1sdt  
g1raagvksin1kaedfvv  
mtegvsendt1imatqrgs1krisfki1qvakraqgit11kelkknphrivaahvvtgehsqyt1lyksneehg1lindi  
hkseqytngsfiv1dtddfg  
evidmy1s  
>sp|Q6GH51|PARE\_STAAR  
mnkqnnysdds1qv1leg1eav1rkrpgmyig1stdkrg1lhh1vyeiv1d1ns1vdev1ngygneidvtinkdgsisiednrgmp

Tsompanidou\_et\_al\_Supplemental\_FASTA\_File

tgihksqkptvevifvvlh  
aggkfgqggyktsqglhvgasvvnal sewleveihrdgniyhqsfknggspssglvkkkgkktktgkvtfkpddti fka  
stsfndvlserlqesaf1  
lknlkitlndlrsgkerqehyhyeegi kefvsvnegkev lhdvatfsgeangi evdvafqyndqysesilsvfvnvrk  
dggthevgfktamtrvnd  
yarrinelktdkndgndiregl tavvsvripee llqfegqtksklgtsearsavdsvadklpfyleekgqlskslvk  
kai kaqqareaarkareda  
rsgkknkrkdtllsgkltpaqskntdknelylvegdsaggsaklgrdrkfqailplrgkvintekar ledifkneeinti  
ihtigagvgtdfkiedsny  
nrviimtadtdgahiql lltfffkymkplvqagrvia lpplyklekgkgtkrveyawtdeelnklqkelgkgftlq  
rykglgemnpeqlwettm  
petrtli rvqvedevrsskrvtlmgdkvqprrewiekhfefgmqedqsildnsevqlendqfdeeei  
>sp|Q6GH53|Y1364\_STAAR  
mqieltdaavtwfknel lepennkvlvffvryggefqlkqgfspaftvepkedvdigyeyyddlnvviaekdlwyfedd  
hiivnvvdhedeisyskk  
>sp|Q6GH55|ACON\_STAAR  
maanfkeqskkhfdlngqsytyydlkaveeqgitkvsklpysirvlllesllrqeddfvitddhikal sqfgkdgnegevp  
fkpsrvilqdfgtgpavvd  
laslrkamddvggdi tkinepvvd lvidhsvqdsyanpealer nmkleferyeryqflnwatkafdynavppatgi  
vhqvnley lasvvhvrdvd  
gektafpdtlvgt dshttm ingivlgwgvggi eaeagmlgqpsyfpipevigvrlvns lppgatatdla lrvtqelrkk  
gvvgkfveffgpgvqhlpl  
adrati anmapeygatcgffpvddes lkmkl tgrsdehialvkeylkqnhmffdvokedpnytdviel dlstveas lsg  
pkrpqdlifl sdmkssfen  
svtapagnqghgl dksefddkkae infkdgskatmktgdiaiaaitstntsnpyvmlgaglvakkavekg lkvpeyvks  
lpgskvvtgylrgaglqp  
ylddlgfnlvgygcttcignsgplpeiekaiaadedllvtsvlsgrnrfegrihplvkany laspqlv vaya lagsv did  
lqnepigkgn dgedvylkd  
iwpsikev sdtvds vvtpe lfi eeynnvynne lwn eidvtdqpl ydfdpnstyiqnpsffqgl skepgt ivplng lrvm  
gkfgds vtt dhis pagai g  
kdtpagkyl qdhqvp i refnsygsrrgnhev mvr gtfaniriknql apgt eggfttywptnevmpif daamkykedgtgl  
vvl agndygmgsr dwaak  
gtnllgvktviaqsyerihrsnlvmmgvlp lefkkgesads lgl dgteei svni denvqphdyvkv takkqgdglvefda  
mvr fds l vemyrhhggl  
qmv l rnk laq  
>sp|Q6GH60|SBCC\_STAAR  
mkplhlklnnfgpfl kee idfskidne lfl isgktgsgktmi fdamtyal fgkasteqreend l rshfadgkqpmstv f  
efqln nrriykvhrqgpyik  
egnttktnakfdvfemvdgkyeireskvisgtqfiellgvnadqfrql filppqgefkrflisnsrekqgilrtlf dsek  
feaireil keevkkenaqi  
enryqqidllwqei sfdddki gllevatqqidkvienipllqarskeilafvnesketaikdyeiekk tlennilkd  
ninqlnknkidfvqlkeqq  
peieieaklllqdi tnl nyienreki etkianskkdisetnki lnl ecdrnidkekrml eengdlieskisfidk  
trvl fndinkyqqsyl nie  
rlrtegeql adeln lieglekvedsignnesdyekie llnaitninne invikenekakael dkl lsgkqelenqine  
etstlknleikldrydksk  
ldndkesfiseiksavkigdqcpicgneiqdlghhidfdisi akrqneikeieanihtmsniavhnsaikfvnekisni  
niktqsdfslevlnkrll e  
nena lnnqrelnkfi eqmkeekdnltlqihnkqlrlnkneselklcrnlitefetl skynnitnfevdykkyvqdv nqhq  
ehsnqiedk liqlsqrkli  
eqnlnhyekqletyndle lneqsiememsrlnltdnndineiiawrgeqe eleqkrdytkryhefemeiarlesl tk  
dke l ldsdklkdeyelkkg  
kmntlideysavhyqcanniktqsivshinylnqelkdq qeifqlaeivsgknnknl tlenfvliyyldqiaaqanrl  
atmsdnryqlirreavshg  
lsgleidvfdl hsnksrhisslsggetfqs slalagl seivqqsggislesifidegfgtldqetletaldtlln lks  
tgrmvgiishvselknrip  
lvlevksdqysstrfkrn  
>sp|Q6GH61|SBDC\_STAAR  
mkihtadwhl gklingkql ledqayildmfvekmkeepdiivi agdlydttypskdaimlleqaigkl nlelripiim  
isgnhdgkerl nygaswfe  
nnqlfirtdfstinspiefingvnfytlpyatvsemkyfeddtiethqqgitrcietiapeidegainilishltvqggk  
tsdserpl tigtvesvqg  
vfdi fdyvmlghl hhpfsieddkikysgsl lqysfseagqakgyrrvtindgi indvfiplkplrql e isgeyndvine  
kvhvkndnylhfklnms  
hitdpmm slkqiypntlal tnetfsyneennaieisekddmsi emfynhitdke lsd i qsnkiknilene l rked  
>sp|Q6GH64|TKT\_STAAR  
mfnekdlavdtl ralsid tiekansghpglp mgaapmaytlwtrhlnfnpqskdyfnrdrfvlsaghgsallysllhvs  
gsleleelkqfrqwgsktp

Tsompanidou\_et\_al\_Supplemental\_FASTA\_File

ghpeyrhtdgvettgplggfmsvglaalaedhlagkfnkegynvvdhytyvlasdgdlmegisheaasfaghnlslk  
vlydsndisldgelnkaf  
sentkarfeaygwnyl1vkdgndleeidkaiittaksqegptiievkttigfgspnkagtngvhgaplgederkltfenyg  
ldpekrfnvseevyeifqn  
tmlkranedesqwnsllekyaetype1aefk1aisgk1pknykdelprfefghngasradsgtviqaisktvpsffggs  
ad1agsnksnvndatdyss  
etpegknvwfgvrefamgaavngmaahgg1hpygatffvfsdylkpa1rlssimg1natfifthdsiavgedgpthepie  
qlag1raipnmv1rpadg  
netrvavevalesepts1vl1trqn1pvl1dvpedvveegvrkgaytvygseetpef111asgsevs1aveaakdlekgg  
ksvrsvsmpnwnafeqqse  
eykesvipssvtkrvaiemasplgwhkyvgtagkviaidgfgasapgd1vvekygftkeni1nqvm1  
>sp|Q6GH70|RS14\_STAAR  
makkskiakerkree1vnkye1rke1kakgdyet1rk1prds1p1tr1rckvtgrprgvl1rkfemsria1frehahkgg  
ipgvkkssw  
>sp|Q6GH72|CATA\_STAAR  
msrqdkk1tgvfghpvsdrensmtagprgp11mqdiyfleqmsqfdrevipermmhakgsgafgtftvtkditkytnaki  
fseigkqtemfarfstvag  
ergaadaerdirgfa1kfyteegnwd1vgntpvfff1rdpkl1fvs1nravkrdrtnmrdaqnwdftglpealhqvti  
1msdrqipkdl1rhmhgfgs  
htysmyndsgervwvkhf1rtqqgien1tdevaaei1atdrdssqrd1feaiekgydpkwtmyiqvmteeqaknhkdnf  
d1tkvwyhdeyplievgef  
elnrnpdnyfmdveqaafaptni1pg1dfspdkmlqgr1fsygdaqyr1gvnhwqipvnqpkvgvienicpfsrdgqmr  
vvdnnqgggthypnngk  
f1sqpey1kpp1fptdgygyeynqrqddnyfeqpgkl1r1qsedakeriftntanamegvtddvkrri1rhcykadpeyg  
kgvaka1gidinsid1ete  
ndetyenfek  
>sp|Q6GH76|KHSE\_STAAR  
msnvl1eltipastan1gvgfdsigma1dkf1h1svketsgkweyi1fhdaskq1ptdetnfiyhvaqqvaakysvd1pn  
1ciemr1sdi1plarg1gssa  
salvgaiy1anyfgdi1q1skhevl1q1ateieghpdnvapti1ygg1iagyndvtketsvahidipdvdivvtiptye1kt  
easrral1pkl1thseavks  
sai1ntmi1calaqhnyelagk1mqd1gfhepyrqh1iaefdevktiasqhnayatvisgagpti1ifsrkensgelvra1  
nrnvvtchse1vdi1nsvg  
kerivyg  
>sp|Q6GH88|CLS1\_STAAR  
mqfsfsnd1gt1fti1laigfiin1v1afii1flernrrtasstwaw1fv1fv1pligfily1ffgrtvsark1nkngn  
v1tdfdg11kqqiesfdk1  
nygt1dnk1qvqkhh1d1vrm11mdqdg1f1tennkvdh1fidgnd1ydqvl1kdiknakeyih1eyytfal1dgl1gkri1haleek  
1kqglevki1lyddvgsknv  
kmanfdh1fks1ggeveaffask1p11nfrmn1nrnrh1kii1idgq1gyvggfnigdeyl1g1gk1gywr1dth1riqgdavda  
1q1r1f1idwns1qahr1p1qfe  
ydvkyf1pkngp1lgnspi1qiaasgpas1dwh1qieygytkm1imsakksv1lqspyf1ipdn1syina1kiaaksgvdv1h1mip1c  
kpdh1p1vywat1fsnas1d1l  
ssgvki1y1tyeng1f1hskm1l1iddeiv1svgtan1mdfr1sfe1nfevna1fyden1akd1rvayeh1ditksq1l1teesyanr1p  
1svk1fkes1lak1vsp1l  
>sp|Q6GHC6|GLNA\_STAAR  
mpkrt1ftkddi1rkfaeeenvry1r1qftd1lgt1knvevpvs1q1ekvl1dnem1fdgssie1gfvrie1esdmy1hpd1d1twv  
i1fpwt1agq1gkvar1icdv1  
ktdgt1p1feg1dpran1krv1kemed1gft1dn1gpepeff1fk1dekgept1e1nddggyf1d1apt1d1gencr1div1e1e  
dmg1fdieash1hev1apg1he  
id1fkyadav1tac1dni1qt1fk1lvkti1arkhn1hat1fmpk1p1fgvng1sgmh1fnvs1fkgken1aff1dpntem1gt1etayq1fta  
gv1knarg1ftav1cnp1lvns  
ykr1lvpye1apcy1iawsgkn1rsp1lrvpssrg1lstriev1rsvd1paan1pymalaai1esgl1dgikn1k1kvpepv1nq1iyem  
nreereav1gi1qd1lpst1yt  
a1lkamrenev1ikka1lgnhi1nqf1nsksie1wdy1rtqv1sewerd1qymk1qy  
>sp|Q6GHD2|MIAA\_STAAR  
mnknkp1fi1vvi1vgpt1asgkte1s1elak1ringe1i1sgdsm1qv1ykhm1nigt1aktv1peem1dgi1phh1ligi1lnpddt1fsayef  
kr1aed1it1di1tnrg1kvpi  
i1aggt1gly1q1s1i1nye1ledetv1tpaq1svvk1q1s1aleh1dnq1l1hey1laqf1deasak1nihpn1nrqrv1raieyy1fktk  
k1l1snrkkv1qqft1enydt1l  
l1giemsrkt1l1sr1nkr1dim1dhg1frev1qq1l1veqgyesc1sqm1aigykelip1vingqmi1yedavnd1kqhsr1qyakr  
qmtw1fknkmsv1hwd1kenm  
s1lqmm1de1itt1qik  
>sp|Q6GHD4|GLPD\_STAAR  
mal1stf1krehi1kkn1rnde1ydl1vi1iggi1tgagi1aldaserg1mkval1vemqd1faqgt1ssrstk1lvhgg1ryl1kqf1qigvv  
aetg1kerai1vyeng1phv1tt  
pewm1l1pmhkggt1fgk1fst1sig1lmydr1lagvk1serkkm1skket1lakep1lvk1keg1k1gggyy1veyr1tdar1tievmk  
raaekgae1inytk1sehft



Tsompanidou\_et\_al\_Supplemental\_FASTA\_File

ydknqqvngvnnvidkltneenytikakkvnaagpwwddvrsdyarnkkrlrtkghvvidqskfplgqavyfdtekdg  
rmi faipregkayvgtdtd  
fydnikssplttqedrdylidainymfsvnvtddiestwagirpliyeegkdpseisrkdeiwegksglltiaggklt  
gyrhmaqdivdvskrllk  
dygltfspcntkglaissgdvvgksnfda fveqkvdvakgfgidedvarrlaskygsnvdel fniaqtsqyhdsklplei  
yvelvysiqqemvykpnf  
lvrrsgkmyfni kvldykdsiidimadmldyspaqieayteeveqaikeaqhgannpavke  
>sp|Q6GHD9|MUTL\_STAAR  
mgkikelqtslankiaagevverpssvvelenaidagateisievesgvqsirvvdngsgieaedlglvfhrhatsk  
ldqdedlfhirltgrgea  
lasissvakvtlktctdnangneiyvengeilnhkpakakkgtdiveslfyntparlkyikslytelgkitdivnrmam  
shpdirialisdgktmlst  
ngsgrtnevmaeygmkvardlvhisgdsdyhiegvakpehsrsnkhyisifingryiknfmInkailegyhtlltig  
rfpicyniemdpilvdvn  
vhptklevrllskeeqlvskiqeafkdrilipknnldyvpkknkvlsfeqqkiefeqrqntenkqektfsseesns  
kpfmaenqndeivikedsy  
npfvtktsesliaddegynttrekdedyfkkqqeqlqemdqtfsnddtsvqnyenkasddyvdndikgtskdpkr  
ripymeivgqvhgtyiiag  
nefgmymidqhaaqerikyeyfrdkigevtneiqdllipltfhfskdeqlvidqyknelqqvgimlehfgghdyivssyp  
vwfpkdeveeikdmieli  
leekkvdkklredvaimmsckksikanhyllqkhemsldldlreaedpftcphgrpiifnskyeleklfkrvm  
>sp|Q6GHG0|RNJ2\_STAAR  
mslikkknkdi riipggvgeiaknmyivevddemfmdaglmfpedemlgidivipdisyvenkekkgiflthgheh  
aigavsvyleqldapyvgs  
kltialikenmkarnidkkvryytvnnndsimrfknvnissfntthsispds lgvcihtsygaivytgefkdqslhghyap  
dikrmaeigeegvflisd  
steaekpgyntpenviehmydafakvrgrlivscyasnfiriqqvlniasklnrkvsflgrslessfniarkmgyfdip  
kdllipitevdnyknevi  
iatgmqgepvealsqmaqhkhhkimnieegdsvlaitasanmeviiantlnelvragehiipnkkiihasshgcmelk  
mmnimkpeyfi pvqgef  
mqiahaklaaeagvapekiflevkgdvinyngkdmilneknvsgnilidgigigdvgnivlrdrhllaedgifiavvtld  
pknrriaagpei qsrgrfv  
vresedllreaekvreiveaglqekriewseikqnmrdqiskllfestkrpmpipvisei  
>sp|Q6GHG1|PNP\_STAAR  
msqekkvfktewagrs lti etgqlakqangavlvrygdvvlstatakeprdgdfpltvnyeeekmyaagkipggfkk  
egrpgddatltarlidrpi  
rplfpkyghdvqimnmvl sadpdcspqmaamigssmal svsdipfqqpiagvngyidgkyiinptveekevsrldlev  
aghkdavnmvveagaseite  
qemleai ffgheeigrldvfqqqivdhiqpvkqefipterdealvervkslteekglketvltfdkqqrdenldnlkeei  
vnefideedpenellikev  
yailnelvkeevrrliadekirdpgrkpdeirpldsevgilprthgsglftgrqtqalsvltl galgdyqlidglgpeee  
krfmhhyfnfnsvgetgp  
vrappreighgalgeralky iipdtadfp ytirivsevl esngsssqasicgstlalmdagvpikapvagi amglvtre  
dsytilltdiqgmedal gdm  
dfkvagtkegitai qmdikidgl treieealeqarrgrleimnhmlqtidqprtelsayapkvvtmtikpdki rdvigg  
ggkkineiidetgvkl die  
qdg tifi gavgd qamin rareiee itreaevgq tyqatvkrieky gafv glfpgkdall hisqisknriekvedvlkigd  
tievki teidkqgrvnash  
ralee  
>sp|Q6GHG4|TRUB\_STAAR  
myngilpvyker gltshdvvfk l rki l ktkkightgtldpevaglvpcignatrsvdyvmdmgkayeatvsigrsttte  
dqtgd tlemkgvhsanfnn  
ddidrll esfkgiieqippmyssvkvngklyeyarnnetverpkrkvnidigrisel d fkenechfkirvicgkgyi  
rtlatdigvkl gfpahmsk  
ltriesggfv l kds ltleqike l heqds l qnkl fpleygl kglpsikikdshikkri l ngqkfnknefdnkikdqivfid  
ddsekv laiymvhptkese  
ikpkkvfn  
>sp|Q6GHG6|IF2\_STAAR  
mskqriyeyakeln lkskei ide lksmnievsnhmqaleddqikal dkkfkkeqkndnkqstqnnhqsnqnqngqqk  
dnknqqqnnkgnkgnkn  
nrnkknknknkpqsqaapkeipskvtyqegitvgefadk l nvessei ikkl fl l givaninqsl nqetiel iaddygv  
eveeevvi need l si yfed  
ekddpeaierpavvtimghvdhgkttll dsirhtkvtageaggitqhi gayqi endgkkit fl dtpghaafttmrargaq  
vtditilvvaaddgvmpqt  
ieainhakeaevpi ivavnki dkptsnpdrvmqel teygl ipedwggeti fvp l salsgdgidd l lemigl vaevqelka  
npknravgtvieael dksr  
gpsasllvngtlnvgdai vvgntygri ramvndlgqriktagpstpveitgindvpqagdrfvv fsdekqarrigesrh  
easivqqrqesknvsldnl

Tsompanidou\_et\_al\_Supplemental\_FASTA\_File

feqmkqgemkdlnviikgdvqgsvealaaslmkidvegvnvrriihtavgainesdvtlanasngiigfnvrpdsgakra  
aeenvdmrhrviynv  
eiesamgll1dpefeeqviggaevrqtfkvskvgtiagcyvtegitrnavriirdgivqyegeldtlkrfkddakeva  
kgyecgitienyndlkegd  
vieafemveikr  
>sp|Q6GHH1|DPO3\_STAAR  
mamteqqkfkvladqikisnqldaeiInsgeltridvsnkrtwefhitlpqflahedyllfinaieqefkdianvtcrf  
vtngtnqdehaikyfgbc  
idqta1spkvkgqlkqkklimgskvlkvmvsndiernhfdkacngslikafnrcgfdidkiifetndndqeqnlasleah  
iqeedeqsarlateklekm  
kaekskqddnesavdkcqigkpiqienikpiesieeeykvaiegvidinlkelksgrhiveikvtdytdslvlkmft  
rknkddlehfkalsvgkwv  
raqgrieedtfirdlvmmsdieeikkatkdkkaeekrvefhlhtamsqmdgipnigayvkqaadwghpaiavtdhnvvq  
afpdahaaekhgikmiyg  
megmlvddgvpiaykpqdvvlkdatyvfdvettglsnqydkieelaavkhngeiidkferfsnpherlsetiinlthi  
tddmlvdapeieevltefk  
ewvgdai fvahnasfdmgfidtgyerlgfgpstngvidtlelstrinteygkhglnflakkygvel tqhhrai ydteata  
yiflkmvqmqke1gvlnhn  
einkklsnedaykrarpshvtlivqnqqglnl fki vsalvkyfyrtpriprslldeyregllvgtacdegel ftavmq  
kdqsvekiakydfieiq  
ppalyqdlidreli rd tetlhei yqrli hag dtagipviatgnahylfeh dgiarkiliasqpgnlnrstlpeahfrtt  
demlnefhflgeekaheiv  
vkntneladriervvpikde lytprmeganeeirelsyanarklygedlpqividrlekelksiingnfaviylisqrlv  
kkslddgy1vgsrgsvgs  
fvatmteitevnp1pphyscpnckteffndgsvgsfdlpdktcetcgaplikegqdipfetflgfgkdkvpidlnfs  
geyqpnahnytkvlfgedk  
vfragtig tvaektafygvkgy1ndqgihkrgaeidr1vkgctgvkrttgqhpoggiivvpdymdiydftpiqypaddqns  
awmthfdfs1hdnvlk1  
dilghddptmirmlqdlsgidpkipvddkevmqifstpes1gvtedeilcktgftgvpefgtgfvrqmledtkpttfse  
1vqi1sg1shgtdvwl1nag  
eliktgicdl1ssvigrddimvylmyaglepsmaf kimesvrkkg1teemietmkenev pdwyl dsc1kikymfpkaha  
aayvlmavriayfkvhhl  
yyyasyftirasdfdlitmi kdktsirntvkdmysrymd1gkkekdv1tvleimnemahrgyrmqpis1eksqafefiie  
getlipf1svpg1genva  
kriveardgpf1skedlnkkag1sqk1ieylde1gslpn1pdkaqlsifdm  
>sp|Q6GHH3|Y1238\_STAAR  
msylvtiafiivfgv1vtvheyghmffakragimcpefaigmgpkisfrknetlytir11pvgyvrmagdgleppv  
epgmrvkik1neeneithi  
ilddhkhfqqieaievkkcdfkddlfi egitaydnerhhfkiarksffvengslvqiaprdrqfahkkpwpkfltlfagp  
1fnfilalv1f1g1layyqg  
tptstveqvadkypaqgagiqkgdki vqi gkyki sefddvdka1dkvkdnkttvkferdgktsveltpkkterkltkvs  
setkyv1gfgpaseht1fk  
pivygfs1f1gsty1fsavvgmlasi ftggfsfdm1ngpvgiyhndsvvkagii1ligytaal1svnl1gimn1lipal  
dgril1fviyea1frkpvn  
kkaettia1gai1fmvimi1vtwndi1ryf1  
>sp|Q6GHH5|UPPS\_STAAR  
mfkkl1inkkntinnynee1dssnipehiaai1mdgngwrakkrkmprikghyegmqtikkitrvasdigvlytlyafste  
nwsrpesevnyimn1pvnf  
1ktfl1peliekvkvvetigftdk1pkstieainnakektanng1klifainygraelvhsiknmfde1hqglnsdii  
detyinnh1mtkdypdpe1  
1irtsgeqrisnfl1iwqvsysefi1fnq1lwpdfdedel1kikiyqsrqrrfgg1see  
>sp|Q6GHI1|HSLU\_STAAR  
mdtagir1ltpkeivsk1neyivgqndakrkvaialrnryrrsl1deeskqeispknimigptgvgkteiarrmakvvga  
pfikveatkftevgvgrd  
vesmvr1vdsvr1vkaqkks1vqdeatakanek1vk11vpsmkkkasqtnples1fggaipnfgqnnedeeeppte  
iktkrseikrqleegklek  
ekvr1kveqdpgalgm1gtnnqqmqemmq1mpkkkverevavetarkiladsyadelidqesanqeale1aeqmgii1f  
ideidkvatnnhnsqdv  
rqgvqr1lpilegsviqtkygtvntehmlfigagafhvsksd1lpe1lqgrfpirvelslavedfvriltepk1slik  
qyeallqteevtnftdea  
itr1aeiayqvnqtdnigarr1htilekml ed1sfeapsmpnavvdi1tpqyvddk1ksistnkdl1safi1  
>sp|Q6GHI3|XERC\_STAAR  
mnhiqeaflnt1kvernseht1ksyqdd1iqfnqfleqehlq1ntfeyrdarnylslysnh1krtsvsrkist1rtfy  
eywmt1deni1nfvqlvh  
pkkeky1pqffyeemea1fktveedtsks1rdrvile1lyatg1rvselvnikkqdidfyangvtvlgkgskerfvpfg  
aycrqsieny1ehfkpiqs  
cnhdflivnmkgea1tergvryv1ndivkrtagvsei1hphkl1rhtfath1lnqgad1rtvqs1lghvn1sttgythvsn  
qq1rkvyl1nahprakkene

Tsompanidou\_et\_al\_Supplemental\_FASTA\_File

t

>sp|Q6GHI4|TRMFO\_STAAR  
mtqtvnvigaglagseaayqlsergikvnliemrpvkqtpahhtdkfaelvcnslnrgnaltngvgvlkeemrlnsiii  
eaadkarvpaggalavdrh  
dfsgyitetlknhenitvineeinaipdgytariatgplttetlaqeivditgkdqlyfydaaapiiekesidmdkvyllks  
rydkgeaaylncpmtedef  
nrfydavleaeaapvnsfekeyfegcmpfevmaergrktllfgpmkpvgldepktgkrpyavvqlrqddaagtlynivg  
fqthlkwgaqkevikiipg  
lenvdivrygvmhrntfinspdvlnkeyelisqpniqfagqmtgvegyvesaasglvaginlahkilgkgevvpfetmi  
gsmayyishaknnknfqpm  
nanfgllpsletrikdkkeryeaqanraldylenfkktl

>sp|Q6GHI8|LYTN\_STAAR  
mfyyckecfvnmkqskvrvysirkvsigilssigmflalgsnKayadeidkskdftrgyeqnvfakselnanknttk  
dkikneavvktstsdkld  
nksaisngneinqdmkintsipknsnqgnlvvnnneptkeikianleaqnsnqkknkgtnnyfygysfreapktqiyytv  
kkgdtlsaialkykttsvn  
iqntnnianpnlifigqklkvpmtplvepkptvpsnksnsnstlnylktlenrgwdfdgsywgqcfdlvnyvnhly  
ghglkgygakdipyannfn  
seakiyhntptfkaepgdvvfsgfrfggyghaivlngdydgklmkfqsldqnwnngwrkaevahkvvhnyendmifi  
rpfkka

>sp|Q6GHJ0|SUCC\_STAAR  
mniheyqgkeifrsmgvavpegrvafteaeavekakeInsdvyvvaqihaggrgkaggvkitkslsevetyakellgkt  
lvthqtgpegkeikrlyie  
egcaiqkeyyvgfvidratdqvltmaseeggteieevaaktepeki fketidpvgispfparriaafninpkesvnkaak  
flalalynvfi ekdcsivei  
np1vttadgdv1aldakinfdnalfrhkdvvelrdleedpkeieaskhdlsyialdgdigcmvngaglamatmdtinh  
fgnpanfl daggsatrek  
vteafkiilgdenvkgifvni fggimkcdviaegiveavkevdltp1lvvrlegtnvelgkikldsglaiepaatmaeg  
aqkivklvkea

>sp|Q6GHJ5|TRMD\_STAAR  
mkidy1t1fpemfdgvl nhsimkraqennklqintvnfrdyainkhnqvddy pygggggmvlkpepvfnamedldvteqa  
rvilmcpqgepfshqkave  
l skadhivficghyegyderirthlvteismgdyvltggelpamtmdaivr1lipgvl gneqshqddsfsdgll efpqy  
trprefkg1tvpdv1lsgn  
hanidawrheqklirtnkrpd1iekyp1tnadkqilerykig1kkg

>sp|Q6GHJ6|RIMM\_STAAR  
mrvevgqivnthgikgeikvksnsdftdvr1fpggqv1tvvhnnndleytvkshrvhkg1hmltfeGINNidiehlkgs  
iygerdhediv1eenefyy  
sdiigctvfdqetpigrvini fetgandvvikeskeylipyiadvvkevdenkiiitpmeGllD

>sp|Q6GHK5|FABD\_STAAR  
msktaii fpgggaqkvmaqd1ynndqateiltsaantldfdiletmftdeegklgetentqpa1lthssa1laalkn1  
npdftmghs1geysslva  
d1s fedavkivrkrqqlmaaqafpsgvgsmaav1gl dfdkveicks1ssddkii epanincpgqivvsghkalidelve  
kgs1gakrvmp1lavsgpf  
hss1mkvieedfssyinqfewrdakfpvqvnaqgetdkevixnmvqklyspvqfinstewlidqgvdhfieigpgkv  
1sglikkinrdvkltsiq  
1edvkgwnend

>sp|Q6GHK6|PLSX\_STAAR  
mvk1aidmmggdnadiv1eavqkavedfdk1ei1lfgdekkyn1heriefrcsekiemedepvraikrkkdssmvkm  
aavksgeadgcvsagntg  
almsag1fivgr1kgvarpa1vvt1ptidgkgfv1ldvganadakpeh1lqyaqlgdiyaqkirgidnpkis1lnigtep  
akgn1tkksyellngdhs  
1nfvgnieakt1mdgtdvvt1dgytgnmv1kn1legtaksigkm1kdtimsstknkiagailkkd1aefakkmdyseegg  
sv1l1g1egtvvkahgssna  
kafysairqakiageqnivqtmketvgesne

>sp|Q6GHL9|FMT\_STAAR  
mtkii fmgtpdfsttv1em1iaehdviavvtqprpvrkrvmtpppvkkmkyd1pvyqpek1sgsee1eq1lq1dvd  
1ivtaafgq1l1pes1la1p  
klgainvhas1l pkyrggapihqaiidgeqetgitimymvkk1dagnis1sqaikiendnvgtmhdksvlgad1lket  
1psii egtnesvpqddtqa  
t fasnirrederiswnkpgqrqvfniq1rg1spwpvayttmddtn1kiydaelvetnkinepgt1iettkkaiivatndnea  
vaikdmq1agkkrmlaany  
1sgaqt1vgkkl1i

>sp|Q6GHM6|KGUA\_STAAR  
mdnekg1l1iv1sgpsgvkgvtvrkri fedpstsykysismttrqmregevdgvdyffktrdafaalikddqfiyaeyvg  
nyygt1pvqyvkdtmddegd  
v1lei1evgakvrkkfpdal1f1lapps1dh1rer1vgrgtesdekiqsrinearkevemnlydyvvvndevelaknr  
iqciveaeh1krerveaky

Tsompanidou\_et\_al\_Supplemental\_FASTA\_File

rkmileakk

>sp|Q6GHN2|CARB\_STAAR

mpkrndiktllvlgspiiigaaefdyagtqac la lkeegyrvilvnsnpatimtdkeiadkvyieplthnfiariirk  
eqpdallptlggqglnma  
iq lhesgv lqdnvql lgtel tsiqqaedremfrtlmnd lnpvpesdivntveqafkfkeqvgyp lvrpaftmggtgg  
gichndee lhevsnghy  
spatqclleksiagfkeieyevmrkdndai vvcnmenidpvgihtgdsivvapsqtl sdveyqml rdrvslkviralgie  
ggcnvqlaldphsfdyyii  
evnprvsrssalaskatgyiaklaakiavgl tldem lnpitgtsyaafept ldyviskiprfpfdkfe kgerelgtqmk  
atgevmaigrtyeesllka  
irsleygvhh lglpngesfd ldyikerishqdder lffigeairrgttleeihmtqidyfflhkfqniidiehqlkehq  
gdleylkyakdygfsdkti  
ahrnmtteevyqlrmendi kpyvmvdtcaafesstpyyygtyetenesivtdkekilvlgsgpirigggvefdyatv  
havwaiqkagyaeiivnnn  
petvstdfsisd klyfep lteedvmni inlekpkgvvvqfggqtain l adklakhgvkilgtslen l nraedrkefeall  
rkinvpqqgktatspeea  
lanaaeigyvvvrpsvyl ggrameivdndkel enymtqavkaspehpvlvdryl t gkeievdaicdgetviipgimehi  
eragvhs gdsiavppqt l  
tedelatledytiklagl niigliniqfviahdgvyvlevnprsrtpvflskitdipmaqlamraige k l tdmgyqe  
gvqpyaegvf vkapv f sfn  
klknvdi t l gpmkstgev m g d t t l eka l f k l t g s g v e k d h g t v l m t v s d k d e e v k l a q c l n e v g y k i l a t s g t a  
nklaeydipaevvgkigge  
ndlltrinqgdvqivintmtkgkeverdgfqi rrrttvengipcl t s l d t a n a l t n v i e s m t f t m r q m

>sp|Q6GHN3|CARA\_STAAR

mqs kryl v l e d g s f y e g y r l g s d n l t v g e i v f n t a m t g y q e t i s d p s y t g q i i t f t y p l i g n y g i n r d d f e s l v p t l n g i  
v v k e a s a h p s n f r q q k t l h  
d v l e l h q i p g i a g v d t r s i t r k i r q h g v l k a g f t d r k e d i d q l v k h l q q v e l p k n e v e i v s t k t p y v s t g k d l s v v l v d f  
g k k q n i v r e l n v r g c n v t v  
v p y t t t a e e i l a m a p d g v m l s n g p g n e v v e c a i l m i q g i l g k i p f f g i c l g h q l f a l s q g a s s f k m k f g h r g a n h p v k n  
l e t g k v d i t s q n h g y a i d i  
d s l k s t d l e v t h l a l n d g t v e g l k h k t l p a f s v q y h p e a n p g p s d s n y l f d d f v a m m t n f k e k e r h i n a

>sp|Q6GHN4|PYRC\_STAAR

m k l i k n g k v l q n g e l q q a d i l i d g k v i k q i a p a i e p s n g i d i d a k g h f v s p g f v d v h v h l r e p g g e y k e t i e t g t k a a a  
r g g f t t v c p m p n t r p v p d s  
v e h f e a l q k l i d d n a q v r v l p y a s i t t r q l g k e l v d f p a l v k e g a f a f t d d g v g v q t a s m m y e g m i e a a k v n k a i v a h c e  
d n s l i y g g a m h e g k r s k e l  
g i p g i p n i c e s v q i a r d v l l a e a g c h y h v c h v s t k e s v r v i r d a k r a g i h v t a e v t p h l l l t e d d i p g n n a i y k m n p p  
l r s t e d r e a l l e g l l d g t i  
d c i a t d h a p h a r d e k a q p m e k a p f g i v g s e t a f p l l y t h f v k n g d w t l q q l v d y l t i k p c e t f n l e y g t l k e n g y a d l t i  
i d l d s e q e i k g e d f l s k a d  
n t p f i g y k v y g n p i l t m v e g e v k f e g d k

>sp|Q6GHP2|SYI\_STAAR

m d y k e t l l m p k t d f m p r g g l p n k e p q i q e k w a e d q y h k a l e k n k g n e t f i l h d g p p y a n g n l h m g h a l n k i l k d f i v r y  
k t m q g f y a p y v p g w d t h g l  
p i e q a l t k k g v d r k k m s t a e f r e k c k e f a l e q i e l q k k d f r r l g v r g d f n d p y i t l k p e y e a a q i r i f g e m a d k g l i y k g  
k k p v y w s p s s e s s l a e a e i  
e y h d k r s a s i y v a f n v k d d k g v d a d a k f i i w t t t p w t i p s n v a i t v h p e l k y g q y n v n g e k y i i a e a l s d a v a e a l d w d  
k a s i k l e k e y t g k e l e y v v  
a q h p l d r e s l v i n g d h v t t d a g t g c v h t a p g h g e d d y i v g q y e l p v i s p i d d k g v f t e e g g q f e g m f y d k a n k a v t d l  
l t e k g a l l k l d f i t h s y p h  
d w r t k k p v i f r a t p q w f a s i s k v r q d i l d a i e n t n f k v n w g k t r i y n m v r d r g e w i s r q r v w g v p l p v f y a e n g e i m t  
k e t v n h v a d l f a e h g s n i w  
f e r e a k d l l p e g f t h p g s p n g t f t k e t d i m d v w f d s g s s h r g v l e t r p e l s f p a d m y l e g s d q y r g w f n s s i t t s v a t r g  
v s p y k f l l s h g f v m d g e g k  
k m s k s l g n v i p d q v v k q k g a d i a r l w s s t d y l a d v r i s d e i l k q t s d v y r k i r n t l r f m l g n i n d f n p d t d s i p e s e l  
l e v d r y l l n r l r e f t a s t i  
n n y e n f d y l n i y q e v q n f i n v e l s n f y l d y g k d i l y i e q r d s h i r r s m q t v l y q i l v d m t k l l a p i l v h t a e e v w s h t p h  
v k e e s v h l a d m p k v v e d q  
a l l d k w r t f m n l r d d v n r a l e t a r n e k v i g k s l e a k v t i a s n d k f n a s e f l t s f d a l h q l f i v s q v k v d k l d d q a t a y e  
h g d i v i e h a d g e k c e r c w n  
y s e d l g a v d e l t h l c p r c q q v v k s l v

>sp|Q6GHP6|SEPF\_STAAR

m s h l a l k d l f s g f f v i d d e e e v e p d k q q v n e a p a k e q s q t t k q n a i k s v p q k s a s r y t t t s e e r n n r m s n y s k n n s r  
n v v t m n n a t p n n a s q e s s k  
m c l f e p r v f s d t q d i a d e l k n r r a t l v n l q r i d k v s a k r i i d f l s g t v y a i g g d i q r v g t d i f l c t p d n v e v a g s i t d h i  
e n v e h s f d

>sp|Q6GHQ6|RSMH\_STAAR

m f h h i s v m l n e t i d y l n v k e n g y i d c t l g g a g h a l y l l n q l n d d g r l i a i d q d q t a i d n a k e v l k d h l h k v t f v h s n f r

Tsompanidou\_et\_al\_Supplemental\_FASTA\_File

eltqilkdlniekvdgiyy  
dlgvsspql dipergfsyhdatl dmrmdqtqel tayeivnnwsyealvkifyrygeekfskqiarrieahreqppittt  
lelvdiikegipakarrkg  
ghpakrvfqalriavndelsafedsieqaielvkvdgrisvitfhsledrlckqvfqeyekgpevprglpvipeaytpkl  
krvnrkpitatedldnn  
rarsaklrvaeilk  
>sp|Q6GHQ8|Y1153\_STAAR  
mdckvvslnekdqfipkikssdpvitglfqydaaqisfekrsmkenngreaalnvireyndlklisseqelnihlan  
gskvviaggqaglfggply  
tfhkifsiitlskeltdthkqqvvpvfwagedhdfdevnhtfvynenhgslhkvkyhtmempettvsryypdkaelkqt  
lktmfihmketvhtggle  
icdriidqydswtmfkallhetfkaygvlfidaqfeplrkmeapmfkklkqhllddafratqkrtqnqglkamiqtd  
tnvhlflhdenmrqlvsyd  
gkhfrlnktdkkyikeeiiniaenqpefsnvvtrplmeewlntvafiggpseikywaekdvfelldvempivmprl  
ritylndriekllskynip  
lekvlvdgvegerskfi reqasdqfi ekvegmieqrrlyqdlldevagnqnninlvnknneihqqydyllkryllnie  
rendismkqfreigetlhp  
mgglqeriwplqilndfgtdvfkpstypplsytdhiikp  
>sp|Q6GHR6|ARCC1\_STAAR  
makivvalggnaigkspqeqlklnktakslvglitkgheivishgngpqvgsinlglnyaahnggpaafpfaecgamsq  
ayigyqlqeslqnelhsig  
mdkqvvtlvtqvevendpafnnpkspiglfynkeaeqikekgftfvedagrgyrrvpsppisielestlikn  
dtlviaaggggipvi reqh  
dgfkgidavidkdktsallganiqcdqliiltaidyvyinfntenqqplkttndelkryidenqfakgsmkpieaaais  
fiennpkgsvlitslneld  
aallegkvgtvik  
>sp|Q6GHT4|NTPA\_STAAR  
mkeiviasnngkndfkvipdyhviselilfdveetgstfeenailkseaaakalnktviaddsglevfalngep  
giysaryagenksdeanie  
kllnklgnttdrraqfvcvismsgpdkmetkvfkgtsveiadgkygengfydpyfyvpldrtmaqlskeqkgqishrr  
nainlleaylagdqv  
>sp|Q6GHT5|MURI\_STAAR  
mnkpiavidsgvgglvtakeimrqlpnetiyyldigrpcyprpgeqvkqytveiarklmefdikmlviacntataval  
eylqktslipvigiepga  
rtaimttrngnlvlgtegtikseyarthikrinphvevhvacpgfvpolveqmrysdptitsivihqtlkrwrnsedt  
vilgcthypllykpiydyf  
ggkktvissgletarevsalltfsnehasytehpdhrffatgdtthitniikewlnlsvnverisvnd  
>sp|Q6GHT9|UVRC\_STAAR  
medykkriknlvvpmpgcylnkdrndqviyvgkakklnrnlrsyftgahdaktrlvgeirrfefivtsseteslll  
elnlikqyqprynillkdd  
ksyfpikitkekyprllvtrtvkqgtgkyfgypnaysaqetkllldriypyrkcdkmpdklclyyhigqclgpcvydvd  
lskyaqmtkeitdfnged  
ktilksleermltasesldferakeyrdliqhiqnltnkqkimssdktirdivfgysvdkgwmcivffirqgnmikrdtt  
mipqqteeeefytfiggf  
yslnghilpkevhvprnldekemiqsvvdtkivqpargpkkdmvdlahnakvslnnkfelisrdesrtikaieelgtqmg  
iqtpirieafdnsniqgv  
pvsamvtfdgkpdkknyrkykiktvgpddyksmrevrrrsrvlneglpdpdiivdggkghmngvidvlqnelgld  
ipvaglqkndkhqtseily  
gasaeivplkksnqafylhriqdevhrfaitfhrqtrqktglksilddidgigskrktlllrsfgsikkmeatledfk  
nigipenvaknlheqlhk  
>sp|Q6GHU1|MUTS2\_STAAR  
mrqktldvlefdkikslvanetisdglgkvnqmpatnfetvfvqmeetdeiaqiynkhrplsplsksvsafihradi  
ggvlnvselnlkrliqvq  
nqkftfynqlveedegvkypilddkmnqlpvltdlfqqinetcdtydlydnasyelqgirsksstnqrirqnldrivks  
qanqklsdaitvrnern  
vipvkaeyrqdfngivhdqsasgtlyiepssvemnnqisrlrhdeaiekeriltqltgyvaadkdallvaeqvmgqld  
fliakarcsrsikgtkpi  
keertvylpkayhpllnretvvantiefmedietviitgpntggktvtlktlglivmaqsglliptldgsqslsvfkny  
cdigdeqsi eqslstfssh  
mtniveilknadkhsllvldelgagtdpsegaalamsil dhvrkigslvmatthypelkaysynregvmnasvefdvdtl  
sptykllmgvppgrsnafdi  
skklglslniinkaktmigtdekeinemieslernykrvetqrleldrlykvaevhddlskqyqqfnyeksliedake  
kangkikaatkeaddiikd  
lrqlreqkgadvkehelidkkkrlddhyeaksikqnvqkqkydkivagdevkvl sygqkgevl eivndeeavqmgii km  
klpiedlekkqkekvkptk  
mvrqrnrqtiktelldrgyredalie ldqyldqavl snyeqvyi ihgkgtgalqkgvqqhlkhhksvsdfrggmpsegg  
fgvtvatlk  
>sp|Q6GHU5|RNH3\_STAAR

Tsompanidou\_et\_al\_Supplemental\_FASTA\_File

manivfklskdittlmsrisfdtenlpqgmkarakyqnttvniyqsgkvmfqnhaeavsee1lpqhsq1ntnktkkkn  
tansleqt1mydqfncig  
sdeagsdyfgplvtcaafvtkehvpilktlgvddskltdtkivelaeqlvtfiphs11t1hnekyniqqakgwtqvk  
kavlhneaiknvlekidss  
qldyividqfakrevyshyalsdip1pkktkfetkgeskslaiavasiiisryafitymdqiskninmtipkgagakvdvi  
aakiiknygisr1dsisk  
hfnrekaqkilkpl  
>sp|Q6GHU6|SYFB\_STAAR  
mlisnewlkeyvtiddsvsnlaeritrtgievddlidytkdiknlvvgfvkskekhpdadklncqvdi gedepvqivcg  
apnvdagqyvi vakvggr1  
pggikikraklrgersegmicslqeigissnyipksfesgiffvsesqvpqgdalqaly1ddqvmeftltpnradalsmi  
gtayevaalyntkmtkpet  
tsnelelsandelvtienedkvpyysarvvhdvti epspiwmqvrlikagirpinnvdisnyv1leygqplhmfqdq  
igsqqivvrqanegekmtt  
1ddterelltsdivitngqtpialagvmggdfsevkehtsniviegaidpvsirhtsr1n1rsessrfekgiatefv  
deavdracy1lqtyangkv  
lkdrvssgelgafitpiditadkinrtigfd1sqndivtifnqlgfdteinddvitvqvpsrrkditikedlievari  
gyddipst1pvfekvtsgq  
1tdrqyktrmvkevelegaldqaitys1vskedatafamqqrqtid1lmpmseahas1rqs11phlieaasynvarknd  
vklfeignvffangege1p  
dqvey1sgiltgdyvvnqwgkktvdfylakgvvdrvsek1n1efsyrradidglhpgtrae11lenkvigfigel1ht  
laadnd1krtyvfe1nfda  
1mavsvgyinyqpi1prfpgmsrdialevdqnipaad11stihahgnilkdt1vfdvyqgeh1ekgkksiair1ny1dte  
et1tdervskvqaeiea1  
ieggavir  
>sp|Q6GHV0|ISDG\_STAAR  
mkfmaenr1t1tkgtakdierfytrhgi etlegfdgmfvqt1leqedfdevkil1tvwkskqaftdw1ksdvfkaahkhv  
rsknedesspiinnkvity  
digysymk  
>sp|Q6GHV3|ISDE\_STAAR  
mriiky1tilvisv1l1tscqssssqestksgefri vpttval1tmt1dk1d1pivgkptsykt1pnrykdvpeigqpmep  
nveavkk1kpthv1svsti  
kdemqpfykq1nmkgyfydfds1kgmqksitq1gdqfnrkaqake1ndh1nsvkqkienkaakqkkhpkv11lmgvpqsy  
1vatdksyigdlvkiagge  
nvikvkdrgy1ssnten11ninpdii1r1phgmseevkkmf1qkefkqndiwkhfkavknnhvyd1leevpfgitanvdadk  
amtqlyd1fykdkk  
>sp|Q6GHV6|ISDA\_STAAR  
mtkhy1n1skyqseqrssamkk1tmgtasi1lgs1vyigadsqqvnaateatnatnqstqvsqatsqip1nfqvqkdsse  
kshmdymqhpqkvikqnn  
kyyfqav1nnasfwkeykfyannqe1attvnddkkadtrtinvavepgyks1ttkvhivvpqinynhrytth1efeka  
ipt1adaakpnnvkpvqpk  
paqpktp1teqtkpvqpkvekvkpvavtapsknenrqt1tkvvsseatkdqqsqtqsartvkt1tqtaqdqkvqtpvkdvatak  
sesnqavsdnksqntkv  
tkqnev1hkqgpskdsake1pktgl1tsvdfn1stvfat1a1l1gs1s111fkrkesk  
>sp|Q6GHV7|ISDB\_STAAR  
mnkqqk1efksfys1rkss1gvasvai1st1111msngeakaaeetgvnteaqpkteavaspt1111tekapeakpvakpva  
navsvsnkevvap1ttetke  
akevkavkevk1pkeakee1kpaakadnntyp1lnqe1reai1knpaikdkdhsapnsrpidfemkkkdgtqqfyhyassvk  
parviftdskpeie1glqs  
qqfwrkfevyegdkk1pik1lvsydtvkdyayirfsvsngtkavkivssthfnkeekydyt1lme1faqpi1nsadkfktee  
dykaek1l1apykkakt1er  
qvyel1nkiqdk1pek1kaeykk1leetkka1deqvksaitefqn1vqptnekmt1d1qdkyvvyesvennesmmdafvkh  
iktgm1ngkkyvm1metnd  
dywkdfmveqqrvt1iskdaknnt1ri1fpyvegk1lydai1kvvhvkt1dydgqyh1rivdke1ftkanadktnk1keqqd  
nsakk1etpampsk1pttp  
vekesqk1qdsqkddnk1qsp1svkendassesgkdkmpv1tkpakaevess1tptkv1sttqnvak1pttassetkdv1vqt  
sagsseak1dsap1lqkanik  
ntndg1htq1sqnnk1ntqen1kaks1l1pqtgees1nkdm1t1pl1malia1ssiva1fv1lprkrkn  
>sp|Q6GHW0|Y1099\_STAAR  
mksv1gli1teyn1pfhng1hqyh1inqskk1tnadv1tia1msgn1fvm1rgepai1ynk1ftrak1mal1stad1vie1lpatas1ssgdh  
fae1lavk1vadym1svdt1af  
gsenn1ikt1kq1lahs1ineieq1sesfsqkv1kegk1sypr1iselle1hhealasp1n1ilg1sylv1kai1akhak1nina1sikre  
naqh1hds1liq1hkh1fasgts  
irtsi1sqddh1whh1vvpk1diq1hlyvt1phit1lnqi1fpy1kyqi1amtt1es1kni1ytv1tegf1enr1ksy1ineat1dfhh1fvks  
1ktkry1tythi1gr1l1m1nv1  
1nik1ptd1vtr1ni1havk1v1amndr1grqy1kh1lktv1fperqy1itn1inks1nahy1ftne1ikathiy1nais1gqq1tdf1ntpv1iqq  
yr  
>sp|Q6GHX9|Y1080\_STAAR

Tsompanidou\_et\_al\_Supplemental\_FASTA\_File

mtkytfkpkdfkafnvegldarmeavneyirpqlhelgeyfsdfftsqtgetfyphvakharrsvnppkdtwvafatskr  
gykmlphfqigmfedqflv  
mfqimheakdkatrakvferkfkaiaqqlpddyrvcldhmkpdkpfikdltdddlkeaiqrainvkkgeffiaraitpqdk  
rlksdkafiafleetfdqf  
lpfysa  
>sp|Q6GHY0|MNTH\_STAAR  
mnkrhstneqlsldeinntikfdrssnkqkflsflgpgllvaggymdsgnwtismqggaqygytllfnglislrsaml  
lqsmtrvrlgiatgmdlaqm  
trhylsrpiaiiwiiaelaiiatdiaevigsaialnllfniplivalitvldvflllfimkygfrkieaivgtliftv  
lfiifefvyisspqlnavl  
ngfiphseiitnngilyialgiigatimphnlylhssivqsrtysrhneekaqaikfatidsniqlsiafvnclllv  
gaslffnsnaddlggyd  
yhalktepvlgatmgaimstlfavallasgnstigttagqivmegflrlhipnwlrllitrslavipvivcliifkgn  
aakieqllvfsqvfslal  
pfcfliplqlatsnkdlmgpfynktwniiswtliiilsilnvyliivqtfqelqg  
>sp|Q6GHY8|Y1071\_STAAR  
meyeypidlwsneemilvinffnhvekyyesgvtagdfmdaykrfkeivpakaekqifntfekssgynsykavqdvkt  
hseeqrvtakk  
>sp|Q6GHY9|DLDH\_STAAR  
mvvgdfpietdtivigagpggyvaairaaqlgqkvativeknglvgvcinvgcipskallhashrfveaqhsenlgviaes  
vslnfqkvqefkssvvnkl  
tggvegllkgnkvniivkgeayfvdnnslrvmdeksaqtnfknaiiatgsrpieipnfkfgkrvidstgalnqevpgkl  
vvvggyigselgtafanf  
gsevtilegakdilggfekqmtqpvkkgmkekgeivteamaksaetdngkvtyeakgeektieadyvlvtvgrpnt  
delgleelgvkfadrll  
vdkqsrtisniyaiigdipglplahkasyeakvaaeidgqaaevdyigmpavcftepelatvgyseaakeeglaika  
skfpyaangralslddtng  
fvkliitlkeddtligavvgtgasdiiselglai eagmnaedialtihahtl gemtmeaaekaigypihm  
>sp|Q6GHZ0|ODP2\_STAAR  
mafefrlpdihegeivkwfvkagdtieeddvlavqndksvveipspvsgtveevmveegtavvgdvivkidapd  
aedmqfkgdhddsskeep  
akeepaeqapvatqteevdenrtvkampsvrkyarekgvnikavsgsgkngritkedvdayl nggaptasnesaasatn  
eevaetpaapaavslegdf  
petteki pamrraiakamvnskhtaphvtl mdeidvqalwdhrkkfkeiaaeqgkltflpyvvalvsalkkypalnts  
fneeageivhkywnigia  
adtdrgllvpvkhadrksifqisdeinelavkardgkltademkgatctisnigsaggqwfptvinhpevailgigria  
qkpi vkdgeivaapvalsl  
lsfdhrqidgatgqnamhikrllnnpellmeg  
>sp|Q6GHZ2|ODPA\_STAAR  
mapklqagfdavkvln dtqskfemvqil dengnvnedlvpdltdeqlvelmermvwtrildqrsisl nrrqrglgyapt  
agqeasqlasqyalekedy  
ilpgyrdvpgiwhglplteaf lfsrghfkgnqfpegvna l spqiiigaqyiqtagvafalkkrknavaitytgdgss  
qdfyeginfaaykapai  
fviqnnnyai stprsktaetlaqkaiavgi pgi qvdgmdalavyqatkeardravageptlietmtyrygphtmagd  
dptryrtsdedaewekdp  
lvfrfkflenkglwnedkenevierakadikaaik eadntekqtvtslmeimyedmpqnl aeqyeiykekesk  
>sp|Q6GHZ6|RNJ1\_STAAR  
mkqlhpnevgyalgg lgeigkntyaveykdeivi idagikfpddnllgidyvipdytylvqnqdkivglfithghedhi  
ggvpfllkqlnipiyggpl  
alglirnklee hllrtaklneinedsvikskhtisfylvttshipetygvivdtpegkvvhtgdfkdfdtpvgkpania  
kmaqlgeegvllsdstn  
slvpdftl serevgqvdkifrnckgriifafasniyrvqqaveaaiknnrkivtfgrsmennikigmelgyikappet  
fiepnkintvpkhe lllc  
tgsqgepmaalsriangthkikiipedtvvfssspipgntksinrtinslykagadvihskisnihtsghgsqgdqqlm  
lrlikpkyflpihgeym  
kahgetgvecgveednvfi fdigdvalthdsarkagripsgnvlvdgsgigdigvvir drkllseeglvivvvsidfn  
tnkllsgpdiisrgfvymr  
esgqliydaqrkikt dvisklnqnkdiqwhqikssiietlqpyl fektarkpmlpvimkvneqkesnk  
>sp|Q6GI01|PT1\_STAAR  
msklkigiaasdgvaia kayllvepdltfdknekvt dvegevakfnaieaskveltkirnaevqlgadkaafdahl  
vlldpeliqpiqdkiknen  
anaasaltdvttqfvti fesmdneymkeraadi rdvskrvlshilgvelnpnsmidesvvivgndltpsdaqlnkefvq  
gfatniggrtshsaimsrs  
leipaivgtksitq eakqgdmiivdg l ngdvivnptedeliayqdkreryfadkkelqklrdadtvtvdgvhaelaanig  
tpndlpvgviengaqqigly  
rteflymgrdqmpteeeqfeaykevl eamdgrvvvrtldiggdke l sylvnlpeempflgyairlclaqddifrpqlr  
allrasvygklnimfpmva  
tinefreakailleekenlkneghdisddielgimveipataaladvfakevdfsigtndliqytl aadrmservsly

Tsompanidou\_et\_al\_Supplemental\_FASTA\_File

qpynpsilr1vkqvieash  
kegkwtgmcmagdataip1llglg1defsmatsilkarqinglsknemtelanravdcatqeevie1vnnyvk  
>sp|Q6GI10|PUR2\_STAAR  
mnv1vigaggrehalayklnqsnlvkqvfvipgneamtpiaevhteisesdhqgildfakqqnvdivvipeqplidgla  
dilrangfkvfgpnkqaaq  
iegsklfakkimekyniptadykeverkkdaltyiencefpvvvkkdglagkgviiadtieaarsaieimygdeegtv  
vfetflegeefs1mtfvng  
elavpfdciaqdhkrafhddegpntggmgaycpvphisddv1kltnetiaqpiakamlnegyqffgvlyigailtkdgp  
viefnarfgdpeaqv11sr  
mesdlmqhiid1degkrtefkwkneaivgvm1askgypdayekghkvsqfdlnenyfvsglkkqgdtfvtsqgrv1aig  
kgdnhdaqrdayekvsqi  
qsdh1fyrhdianka1q1k  
>sp|Q6GI11|PUR9\_STAAR  
mkkailsvsnktgivesfakaltq1nyelystggtkri1deanpvrsvsd1thfpeimdgvrkt1hpavhggiladrnkp  
qh1nelseqhid1idm1vvv  
nlypfqqtvanpdtmdeaenidiggptmlraaknykhvttivhpadyqevl1tr1rnds1desyrqslmikvfehtae  
ydeav1rffkqdket1ryg  
enpqqsayfvrtsnakht1agakqlhgkqlsynnikdat1alvkkfdtpaavavkhmnpvcgvigdt1eqafhaya  
dsqsi1fggiva1nrvtpe  
laeq1hsiflevi1apkf1tdea1ni1kqkknvr11eidmtidsneee1fsvs1ggy1vqdkdnyvvpkeemkvvtvapt  
eqweam1lgwkvvpsvksn  
ai1snnkqvtvgigagqmnrvgaaialeraieindhvalvsdgffp1mgdtvelaaqhgikai1qp1ggsikdqdsidman  
khgiamvvtgtrhfkh  
>sp|Q6GI12|PUR3\_STAAR  
mvkia1fasgsgsnfenivehvesgk1n1evtal1ytdhqnafci1drakkhdipvyinepkqf1gskaaye1q1vt11ned  
kvewi1lagymr1igpd11  
asfegki1ni1hps11pk1ykgida1gqayhsgdt1tgst1vhyvds1gmtgei1eq1rqcdi1rpddskeq1eekvkk1eyely  
psviakivk  
>sp|Q6GI13|PUR5\_STAAR  
mskayeqsgvni1hageavermsshvkr1tmrkevi1gg1ggf1gatfd1sq1nmtapv1vsgtd1gvgtk1kl1aidy1gkhd1si  
gidavamcvndi1ltgaep  
lyf1dyiatnk1vpevieqivk1gsd1acvetnta1iggetaem1gemyhegeydvag1fav1gavekddyvd1gsevkegqvvi  
glassgih1sngys1vrk1i  
nesgid1asnfdnrpfidv1fleptk1lyvkpva1alkkevsikamnhitgg1fyeni1pra1pagaarid1ttsf1ptpkifdw  
lqqqgnietnemyin1f1nm1g  
igy1tvivdekdapra1ki1laeqnveayq1ighivk1nestaie1llg1v  
>sp|Q6GI14|PUR1\_STAAR  
mfnysg1neecgvf1giwnhpeaaq1tym1g1hs1qhr1gqegagivvsdqne1kger1gl1l1teaikddqmer1kgyqhaig  
hvryatsg1nkg1eni1qp11  
yhf1dmsvg1ichngn1inaks1lrqn1lekqgai1fhsssdtevimh1irrs1kapt1feea1kes1rkikggft1failtkdaly  
gavdpna1rpl1vvgk1mkdg  
tyi1asetca1jdv1gaefvqdi1hageyv1indkgitvksy1thttta1isameyiyfarpd1stiagknv1havrkasgk1la  
qespvkadm1vigp1nss1s  
aasgyaee1g1lpyem1lvknqyvartfi1qptqel1reqgvrvk1savkdivdgkni1ilvddsivrgttirrivk1mkdsga  
nkvhvri1aspe1mfpsfyg  
idvsttae1isaks1speeikdyigadslay1svdgliesig1ldydapysglcvesftgdypaglydyeanykah1shrqk  
qyisknkhyfd1segn1nv  
>sp|Q6GI15|PURL\_STAAR  
mskfi1epsveeik1lekvyqdm1g1sdqeyekvcdi1lgrqpnftetgi1fsvm1sehcsyk1hskpfl1kqfptsgehv1mgpge  
gagvvd1gdnqav1vfkves  
hnhpsaiepyqgaat1vgggi1rdi1vsigarpin1l1ns1lrfgel1dnkqnqr1l1kgv1vkgiggy1ncigiptt1ageiefder  
ydg1npl1vamcv1gvinhdm  
iqkgtak1gignsviyv1g1ktgrdgi1hgatfasee1teeseskrpsvq1gdpf1vgkkl1meat1ea1itfdelvg1iqdmgaag  
1tss1ssemaakggsg1hl1r  
1eqvptrepg1spyem1setqerm1lvvek1gteqkfl1d1fdkhe1ldsavige1vtdtnrfv1lyede1vyadipveplade  
apvyi1legeeknyntsknd  
ythidvkd1tffk1l1khpti1askhy1lydqy1dqvganti1kpg1lqasvvrvegt1nkaiastidgealyvynnp1yeggk1mvv  
aeayr1n1iavgat1plamt  
c1nygspek1keiyq1ladstkgmaeacdi1ktpv1vsngv1slynetk1gtsi1fptpivgmvg1ienvdy1lndf1ppqvgdkly  
vigdtkdd1fggsq1lek1iy  
gkvnhefesid1lssekkgesiktai1rqgv1shvqt1vgkgl1it1lak1sahy1gl1ks1lidi1tnaql1fsetq1gryvsv  
ksgkt1nidnaie1g1lltd  
sdnfvk1t1pyte1isen1vsdik1qiwegaiaq1l1ttqd  
>sp|Q6GI16|PURQ\_STAAR  
mkfav1lvfpgsn1cdrdmfnaa1ksgveaeyvdyrets1sgfdgv1ipgg1fsfgdy1l1rsgamasvapvisevkr1lae1gkp  
vl1gvcngf1q1l1teig1llpg  
a1l1hdsh1l1fisrnee1ivnnqtaftn1lyeqgekv1y1pvahgeghy1ctdeiyqk1kannqi1ilkyvnnp1ngsyddi1ag  
ivnekgnvc1gmmph1pera1



Tsompanidou\_et\_al\_Supplemental\_FASTA\_File

etllgtdsgvklfeamvkswreqhv  
>sp|Q6GI18|PUR7\_STAAR  
mtlllyegkakraifstnqenelrveykdevtagngakkdtmagkgrlnnqitsiifkylqengieshfikqlseteqlvkp  
vkiiplevvvrniasgsit  
krlgfengevfreplveffykndaIndplittddhikllniatdkdietlktkaleinqvlkqlmhamslklvdfkiefgk  
tetgqilladeispdtcri  
wdkatnanfdkdvyrrntgslietyqiflnkledlk  
>sp|Q6GI23|QOX2\_STAAR  
mskfsllllfgtllllsgcsnieifnakgpvassqkflilysivfmlvicfvvlgmfaifiykysynknaesgkmhna  
iietiwfvipiiivaalai  
ptvktlydyekppksekdpmvvyavsagykwffaypdehietvntltipkdrpvvfkqlqamdtmtsfiwplqggqkyamt  
gmtmnrwtleasqtgtfrgr  
nsfngegfsrqtffknavsqkdydkwvkevkgkktldqdtfdkqllpstpnkalefngthmafvdpaadpeyifyaykr  
fnfelkdpnftseenmfkd  
vsdkpliparkaqtananykrhgmklmllgndepynnefkdesknakemkkskdaqdqndddhgggh  
>sp|Q6GI24|QOX1\_STAAR  
mnfpwdqllvkgnwmitmaqigapflvigliavityfklwkylykewftsvdhkkigimylcavlmfvrggidallira  
qltvpdnkflesnhyeif  
sthgvimiiimampfi fglnivvplqigardvafpvlinnvsfwlffagmilfnlsfiiggspaagwtnyaplagefspg  
pgvnyyliaiqisglgla  
tginffvtlircktptmkfmqmpmftvtffittlivilafppltvallamttdridftafftvahggmpmlwanffvwg  
hpevyivilpafgiyseii  
ptfarkrlfghqsmwatagialfslvwvhfftmngalinsffsistmliigiptgvklfnwlltlykgritfespm  
fslafipnflggvtgvm  
amasadyqyhntylvahfhytltvgvfaclaglifwypkmmgyklnetlnkwcffmifnvcflpqfilgldgmp  
rlytympsdgwflnlist  
igallmaigflflvsviyshfkspreatgdndwglgrtlewttasai ppkynfaitpdwngydtfvdmkehgrhlydnh  
nykdihmpnntpvfgwigi  
fmtiggffli fetvipaliclfgi fgtmiyrsfqidhgyhipaaevaetearlrearikereavshes  
>sp|Q6GI27|FMTA\_STAAR  
mkfnkeklvihacvllfiiisiglvfhrlqtktnsiepihketklsdnakylvdrnkkgkgepskakevynskdpkykkid  
rylqnslnfngsvavyengk  
lkmskgygyqdfekgikntpntmfligsaqkfstglllkqleehkinindpvskeyipwfktskpipkdlmlhqsglyk  
yksskdyknl dqavraiqk  
rgidpkkykhhmyndgnylvlakvieevtgksyaenytykigdpklqlhsafydeksfrkyfakgysynstglsflkpnv  
leqyygagniytmptdmgk  
litqiqqyklfspkitnplhefgtkqypdeyrygyfvkptlnrlngglfgqvftvyndkyvvvialnvkgnnevrikh  
iyndilkqnkpyntkgvivi  
q  
>sp|Q6GI31|ATL\_STAAR  
makkfnyklpsmvaltlvgsavtahqvqaaettqdqttnknvl dsnkvkatteqakaevknptqnisgtqvyqdpai vqp  
kaantgnaqvnqkvdtqt  
vngdtratqsttsnnaqvtkstnttapktnnnvtsagyslvddednsenqinpeliksaakpaaletykaapkatp  
vapakteatpkvttfsas  
aqprsaapkslpkykpqvnsindyirknllkapkieedytsyfpkyayrngvgrpegivvhdtdandrstingeisy  
mknnynqafvhafvkdgri  
ietaptlylswgvavgnprfinveivhthdyasfarsmnyadyaatqlqyyglkpdsaeydngntvwthyavskylyg  
tdhadphgylrshnysydg  
lydlinekylkimgkvapwgqstttptpskpstpskpststgkl tvaanngvaqikptnsglyttvydktgkatnev  
qktfavsktatlgnqkfy  
vqdynsgnkfgwvkegdvvyntakspvvnqsysikpgtklytpwgtskqvagsvsgsnqtfkaskqqqidksiylyg  
svngksgwvskayl vdtak  
ptptpkpstpttnkltvsslngvaqinaknglfttvydktgkptkevqktfavtkeaslggnkfyvkdynsptli  
gwkqgdviynnakspnv  
mqtytvkpgtklsvvpwgtykqagavsgtgnqtfkatkqqqidksiylygtvngksgwiskaylavpaapkkavaqpk  
avkayavtkpqtqttski  
aqvknntgirasvyektakngakyadrtfyvterahgnetyvllnntshniplgwfnvkdlnvqnlgkevkttkyvt  
nrsnnglsmvpwgtnqvi  
ltgnnaaggtfnatkqvsvgkdvylygtinnrtgwnskdlaptavkpttsaakdynytyvikngngyyyvtpnsdak  
yslkafneqpfavvkeqvi  
ngqtwyglngklawikstlakeklynqigmtlnqvaqiqaglykpvqrvpgkwt danfndvkhamdtkr laqd  
palkyqflrldqpqnisisd  
kinqflkgkglenggaafnkaaomyginevylis halletngtsqlakgadvvnnkvvtnsntkyhvnvfgiaayndp  
lregikyakqagwdtvska  
ivggakfignsyvkagqntlykmrwnpahpgthqyatdvdwani nakiikgyydkigevgkyfdipqyk  
>sp|Q6GI34|SSPA\_STAAR  
mkgkflkvsslsvatlttatlvsspaanalsskamdnhpqqtqtdkqtpkiqkgnlklpleqreranvilpnndrhqit  
dtnghyapvtyiqveapt

Tsompanidou\_et\_al\_Supplemental\_FASTA\_File

gtfiasgvvvgkdtlltnkhivdathgdphalkafasainqdnypnggftaeqitkysgedlaivkfspneqkhigev  
vfkpatmsnaetqvnqnit  
vtgypgdkpvaatmweskgiitylkgeamqydltstggngsgspvfneknevighwggvnpqfngavfinenvrnflkqni  
edinfanndhpnpdpdpdpn

pnpdpnnpdpnnpdpnnpdpnnpdpnnpdpnnpdpnnpdpnnpdpnnpdpnnpdpnnpdpnnpdpnnpdpnnpdpnaa  
>sp|Q6GI35|SSPB\_STAAR  
mnsscktrvfnisiimvsmliislgafannkakadshskqlleinvksdkvpqkvkdlaqqqfagyakaldkqsnaktg  
kylgeafkiykfngeedn  
syyypvikdgiyytltlspknddlnkskedmnysvki snfiaklddikdksnitvltdekgyfeedgkvrivkat  
plannikekesaktvspql  
kqelkttvtptkveeneaiqedqvqyentlnfkfireqqfdnswcagfsmalnatkntdtynahdimrtlypevseqd  
lpcatfnpqmi eygksqg  
rdihyqegvpsynqvdltkdnvgimilaqsvsqnppndphlghalavvanakindqekliwynpwdtel siqdadsllh  
lsfnrdynwygsmigy

>sp|Q6GI36|SSPC\_STAAR  
myqlqfinlvdytltkthleqtninlfignwsnhqlqksicirhgddtshnqy hilfidtahqrikfssfdneeiiyild  
yddtqhilmtsskqgigt  
srpivyerlv

>sp|Q6GI39|MEND\_STAAR  
mgnhkaal tkqvftfaseiyaygvrevvispgsrstplalafeahpni ktwihpdersaaffavgligserpvailctc  
gtaaanytpaiaesqisri  
plivltsdrp helrsvgapqainqnmfnnyvsyefdm piaddsketidaiyyqm qiasqylygphkqip hfnlpfrdp  
ltpdlnatelitsemkilph  
yqksidasalrhilnkkgliivgdmqh qevdqiltystiyd lpiladplshlrkfdhpnvictydllfrsgldlkvdfv  
irvgkpvisklnqwlkkt  
dafqilvqndkidvfp apdisyeisandffrsl medttvnrsvwlek wqrie kkrkeikcyleqatdesafv gelik  
ktskdalefisnsmprdv  
dnlllnkni dvyangangidg ivsta l gmavhkrvtlligdl sfyhdmg llmsk lnniqmnivll nndgggifsylpq  
kesatdyferl fgtptgl  
feytaklyqfdfkrfnvsefnatllsetstiyel itnrednfkqh qilyqkl semihdtl

>sp|Q6GI62|HTRAL\_STAAR  
mdigk khvipksqyrkrreffhnedreenlnqh qdkqnidnttsk kadkqihkdsidkherfkns lsshleqrndvne  
nkaeesksnqgksaynk d  
hyltddvs kqns ldsvdq dtekskyeqnteat l stnstdkvestdmrkl sssdknkvghee qhv lskpsehdketridf  
essrtdsds smqtekikkd  
ssdgnkssnlksevisdksnsvpil sesddevnnqkp ltlpeeql klrqqsqneqtktytygdseqndksn hendl shht  
psidddkdyvmredhivdd  
npdndintps lskidddrkl dek ihvedk hkqnads setvgyqsqssashrstekrmaindhdk l ngqk pntktsann  
qkatskl nkgratnny s  
ailkkfwmm ywplvil mgiiilivilnai fnnvkn drmdndadaqkytttmknannavksvvt venetskdssl pk  
dkasqdevgsvvykksgd  
tlyivtnahvvgdkenqkitf snnksvvgkvl gkdkwsdlavvkatssds svkeiaigdsnnlv lgepilvvg nplgvdf  
kgtvtegiisglnrnvpid  
fdkdnkydm lmkafqidasvnpgnsg gavvnregkl igvvaak i smpnvenmsfaipvnevqkivkel etkgkidypdv g  
vkmknias lnserqavkl  
lgk vknvgvvvdvq dnnl adqsg l kkgdv iteldgk ll eddl rfrqii fshkddl ksitakiyrdgkekeiniklk

>sp|Q6GI64|RF3\_STAAR  
mnlkqevesrktfaiishpdagkttltekll yfsga ireagtvk gkktgkfatsdwmkveqergisvtssvmqfyddyk  
inildtpghedfsgedtyrt  
lmavdsavmvidcakg epqtkl kfvckmrg ipiftfinkl drvgkep felleieetlniety p mwpigmgqsf fgi  
idrksktiepfrdeenilh  
lnddfeleedhai tndsafaqaeelm lveeageafndal lsgdl t pvffgsalan fgvqfnlnayvdfapmpnaratk  
eevevspfdds fs gfi fki  
qanmdp kh rdria fmrsvs gaf ergmdvt lqrtnkkqki trsts fm addketvnhavagdi iglydtgnyqigdtlv gggk  
qtysfqdl p qftpei fmkv  
sahnvmkqkhfhkgieql vqegai qykt lhtnqii l gavgql qfevf e hrmkney nvdv vmepvgrki arwienedqit  
dkmntsr silvk dryddl v  
flfenefatrwfeekfp eik l ysl l

>sp|Q6GI66|MURE\_STAAR  
mdastl fkkvkvkrv lgsleqq idditdsrtaregsi fvasvgytv dshkfcqsvadqgck l vvvneqs l sanvtqvv  
vpdtl rvasi lahtlfdyp  
shqlvtfgvtgngktsiatmhli qrk l qknsay lgtngfqinetkktganttpetvsltkkikeavdagaesmtlevs  
shglv lgrlrgvefdvaif  
snltqdh ldfhgtmeayghaks ll fsq lged l skekyvvl nnddsfsey l r tvtpyevfsygi deeaqfmaeniqes l qg  
vsfdfvt p fgt yqvkspyv  
gkfnisnimaami avwskgts leti ikavenlepvegrlev l dpslpidli idyahtadgmnk lidavqp fvkqkliflv  
gmagerdl tktpemgrvac  
radyviftpdpndpdkmltaelakgathqnyiefddraegikhaidiaepgdttv laskgrepyqipghikvphrdd

Tsompanidou\_et\_al\_Supplemental\_FASTA\_File

ligleaaykkfgggppvgg  
>sp|Q6GI67|UGTP\_STAAR  
mvtqnkklitgsfngghmqvtsivnqlndmndhlsviehdlfmeahpiltsickkwyinsfkyfrnmykgfyysrp  
dklnkcfykyglnklinl  
likekpdlllftfptpvmvslteqfninipvatvmtdyrlhknwitpystryyvatketkqdfidvgidpstvkvgtgipi  
dnkfetpinqkqwlidnnl  
dpdkqtilmsagafgvskgfdtmitdilaksanaqvvmicgkskelkrsltakfksnenvlilgytkhnewmassqlmi  
tkpggititegfarcipmi  
flnpapqgelenaalyfeekgfgkiadtpeeaikivasltngneqltnmistmeqdkikyatticqdllldighssqpqe  
iygkvplyarffvk  
>sp|Q6GI68|LTAA\_STAAR  
mqdsslannyhknfilmlilflmfargmyilsyinflptvtsiavaitslafsihfiadastnfvigflkkfgtki  
vlttgfilafstflviwf  
paspfvii fsammliavspiwimlssveedkrqkmgvyvfwllglvgmvfmllikvhptrfafmmslvvliawi  
lyyfvdkltnytrpvka  
qlrqivdvtkrhlllfpqllqgaaiaalpilptyatkvinvstieyvtaiiggigcavsmflsklidnrsrnfmyg  
vilsgfilymiliftlsmi  
vnihivwialaiglmgyllpawntfmarfiksdeqeetwgvfnsiqgfgsmigplfgglitqftnnlntfyfsalif  
lvlavfygysfianrekak  
>sp|Q6GI84|Y969\_STAAR  
mage1rimenksredinlspvskieisffdpfssdcfklisailsklrieynqyirirhilnpslklvtkcqaqstsndf  
nialaykaaelqgrlraer  
fihlmqneiipkrdiitksmicdcinqagidlevfkddlqsklteslkidliharemeieqapslvffsedvheeglkv  
eglypyhiytyiinelmgk  
pieknlppkletyiqqqqlvtmee1ltiyewpekllnkelkkilaiqqkieklkypdgdfwkskmpkisk  
>sp|Q6GI89|SYW\_STAAR  
metlfsqgipsgiptignyigalkqfvdvqndydcyfcivdqhaitmpqdrklrkqtrqlaaiylasgidpdkatlfiq  
sevpahvqagwmlttiasv  
gelermtykdkaqkavegipaglltypplmaadivlyntnivpvgddqkqhie1trnlvdrfnrsryndvlvkpeirmpk  
vggrvmslqdptrkmsksd  
dnaknfislldepnvaakkiksavtdsdgiikfdrdnkpgitnlisiyag1tdmpikdieakeyeggygkfkgdlaeivk  
af1vefqekyesfynsdkl  
ddildqgrdkahkasfktvkkmekamglgrkr  
>sp|Q6GIA3|FABF\_STAAR  
msqnrvvitgmgalspigndvkttwenalkgvngidkitridtephysvhlage1knfniedhidkkaarndrftqyai  
vaareavkdaqldinenta  
drigvwiiggsgimetfeiahkqlmdkgprrvspffvpmliipdmatgqvsidlgakgpngatvtacatgtnsigeafkiv  
qrdadami tggteapith  
ma1agfsasralstnddi etacrpfaqegrdgvmgegagilvieslesaqarganiyaeivgyg1ttdayhitapapege  
ggsramqaamddagiepkd  
vqylnahgtstpvglnevkaikntfgeaakhlkvsstksmtghllgatggieaifsa1sikdskvaptihavtpdped  
ldivpneaqldityamsn  
slgfgghnavlvfkkfea  
>sp|Q6GIB2|CLPB\_STAAR  
mdinkmtyavqsalqqavelssqhk1qnieieailsaalneseslyksileranievdq1nkayedk1ntyasvegdniq  
ygqyisqqanl1itkaesy  
mkeyedeyismehilrsamdidq1tkhyinnkvevikeiikkvrgghvtsqnpevnyea1akygrdlveevrqgkmdpv  
igrdeei1rntirilsrktk  
nnpv1igepvgktaiveglagrivkkdvpe1ldktvfe1d1salvagakyrgefeerlkavlkevkesdgri1lfide  
ihmlvgagktdgamdagnm  
lkpmlarge1hcigatt1neyreyiekdsalerrfqkvavsepdvdtisilrglkeryevyhgvr1qdralvaae1sd  
ryitdrflpdkaidlvdq  
catirtemgsnptel1dqvnrrvmqleieesalknesdnaskqr1qelqee1lanekekqaalqsrvesekedian1qekra  
qldesrqaledaqt1nnle  
kaaelqygtipq1lekel1lednfqdeqgedsdrmi revvtdee1gdivsqwtgipvsk1veterek1llh1sdilhkrvv  
gqdkavdlvsdavvrag  
ikdpnrpigsfl1fgptgvkte1aks1aas1fdsekhmiridmseymekhavsrligappgyighdeggq1teavrrnp  
ysv111devekahtdvfnv  
llqildeg1r1tdskgrsvdfknti1imtsnigsqvl1envketgeit1estekavmts1nayfkpeil1nrmddiv1fkpl1s  
iddmsmivdk1ltq1nir1  
leqrisievsddakaw1gqeayepqygarp1krfvqrqietplarmmikeg1peggttikvn1nsdn1l1fnvekihe  
>sp|Q6GIB3|OTRF1\_STAAR  
m1nktkgftkykkmrympgldglraivlgi1iyhlnkqwl1tggl1gvd1ffvisgyl1ts111keyddtgi1k1ksfwir  
r1kr11paviv11mvvgta  
t111ksdn11rvkhdi1a1fyvsnw1yiakdvnyfeqfsfmp1kh1wsl1aieeqfy1ffpvilvt111tikkykigfi  
fwgvs1is1glmmfiysin  
gdhsrvyfgtdtr1qt111gvilaf1wppfk1kndppkvkyvidsigs1sfiv1111ffi1ndetnwiydggfylisil  
t1fiiasvvh1pstwiakif

Tsompanidou\_et\_al\_Supplemental\_FASTA\_File

snpvlvfigkrsyslylwhfavisfvhsyyvdgqipvyvyfidisltiifaelsyrfietspfrkegikalnwrssyipqf  
irmvivvtllipfmllilvg  
afnkkygkdiigekansfdttiednysmriapidnihidglvsekkkessdvynnikplligdsvmvdigesfkssvpksr  
idgkvgrqlyqtllplvkan  
ysqykkssdqvlelgtngdftvkqlddlnqfgkakiylnvtrvpriyeavnrladaakrksnvtlidwykrsqghs  
eyfapdgvhleykgvialk  
deilkaikkk  
>sp|Q6GIB9|Y931\_STAAR  
mlhlhilswwlaiilfiatylnisknqggtpyfkplhmvlrlfmltllisgfwiliqsfmngganhlltlkmlcgvavv  
glmevsjakrkrheqshmt  
fwitialiitmlvgvilplgpiisklfgig  
>sp|Q6GIC0|Y930\_STAAR  
mkflsfkyndktsygvkvkredavwdltqvfadfaegd fhpktllagllqqnhtldfqqevrkavvaaeds gkaedykisf  
ndieflppvtppnnvifg  
rnykdhanelnheverlyvftkaassltgdnakipnhkditdqldyegelgivi gksgekipkalahdyvygytiindit  
drkaqseqdqafllsksltg  
gcpmpgyivtkdelplpenvnivtkvneir qdngtgemilkidelieeiskyvalhpgdiiatgtpagvgagmqqpkfl  
qqgdevkvtidnigtltty  
iak  
>sp|Q6GIC1|ADDA\_STAAR  
mtipekpqqviwtdaqwgsiyetgqdvlvaaaagsgktavlveri iqkilrdgidvdrllvvtftnl saremkhrvdqri  
qeasiadpanahlknqrik  
ihqaqistlhfcklliqqhydvlnidpnfrtsseaenillleqtidevieqhydildpafielteqlssdrsddqfrmi  
ikqlyffsvanpnptnwl  
qlvtpyeeeaqqaqlqlltdliskvfitaayda lnkaydlfsmmdgvdkhlaviederrl mgrvleggfidisyltghef  
garl pntakikeanemmv  
daledaklykkykslidkvksdyfsreaddlkadmqq laprvkylarivkdv msefnrkkrsknildfsdyehfalqil  
tnedgspseiaesyqrhfh  
eilvdeyqdttrvqekilsciktgdehngnl fmvgdvksiykfrqadpslfi ekyqrftldgdgtgrridlsqnfrsrk  
evlsttnyi fkhmmdeqvg  
evrydeaaqlyygapydesdhpvnlkvlveadqehsdltgse qeahfiveqvkdilehqkvfdmktgsyrsatykdivil  
ersfgqarnlqqafknedi  
pfhvnsregyfeqtevrllvslraidnplqdiy lvglmrsviyqfkedelaqirils pnddyfyqsivnyindeaada i  
lvdklkmflsdiqsyqqys  
kdhpvyqlidkfyndhyviqyfsgliggrrranlyglfnkaiefenssfrglyqfirfideli ergkdfgeenvvgpnd  
nvvrmmtihsskglefpfv  
iysglskdfnrkdlkqpvinqqfglgmdyfdvdkemafpslasvaykavaekklvseemrlvyvaltrakeqlyligrv  
kndksllleleqlsige hi  
avnerltsppnhliysi lskhqsasipddlkfekdiaqiedssrpnvnisi iyfedvstetildndeysv nqletmqn  
gnedvkaqikhqldyqyp  
vndtkkpskqsvselkrqyeteesgtsyervr qyrigfstyerpkflseqgkrkaneigtlmhtvmqhl pfkkeriseve  
lhqyidg lidkhiieadt k  
kdi rmdemtfinse lysiiaeaevyrelpfvvnqalvdqlpqgdedvsiiqgmidlifvkdgvhyfvdyktdafnrrr  
gmtdeeigtqlknkykiqm  
kyyqntlqtilnkevkglyffkfgtlq l  
>sp|Q6GIC4|LEPH\_STAAR  
mkkvvkylisllilaiiivlvqtfvighvipnndmsptlnkgdrvivnkikvtfnqlnngdiityrrgneiytsriiak  
pgqsmافرqqlyrddrpv  
dasyaknrkikdflrnfkklgd diippnnfvvlnhdnqnqhsrqfglidkkdiignislryypfskwtiqfks  
>sp|Q6GIC7|ASSY\_STAAR  
mkeki vlaysgldtsvavqwlidkgydvvacldvgegkdldivykka ldmravechiidatkefsdeyvsva ikgnlm  
yenayplvsalsrpliakk  
lveiaektnsvgiahgctgkndqvrfevaikalnpslkafapvrewawsreee idyaikhnipvsinhdspysidqnlw  
granecgiledpyaapped  
afdlnaleetpdtadeiiltfdkgipvqidgktyelddliltlnalagkhgigr idhvenrlvgiksreiyeapaaevi  
lkahkaletitl tkdvahf  
kpiiekqfaeqlynglwfsp ltdslklfidstqqyvs gdvriklfkgnaivngrkspytlydeklatytkedafnqdaav  
gfidiyglptqvnamlhgg  
ysneq  
>sp|Q6GIC8|ARLY\_STAAR  
msnkawgrfevqpeewvddf nasitfdqtlidqdiegsiahatmlanqqiisqqdseqi iqglksiqhdyhdqdiqf sa  
slelihlniehelikrigd  
aggklhtgrsrndqvadtmhlytkkqvqdiialikslqsvivdiasnndtimpgythlqraqpisfahhimtyfwmlqr  
dqqrfe dslkridinplga  
aalsgttypidrhettal nfgslyensldavsdrdyi ietlhnisl tmvhl srfaeeiifwstdeakfitlsdafstgs  
simpqkknpdmaelirgkv  
grttghlmsmltkglplaynkdmqedkeglfdavhtikgs lri fegmiqmtinkerlnqtvkedfsnateladylvt  
knipfrtaheivgkivlec

Tsompanidou\_et\_al\_Supplemental\_FASTA\_File

iqqghy1ldvp1styqqhssidadiydlqpenclkrqsygstgqssvkqqldvakql1sq  
>sp|Q6GID1|OAT2\_STAAR  
mtksekiieltnhygahnylp1pivi seaegvwkdpegnkymdm1saysavnqghrhpkiiqalkdqadkvtlvsrafh  
sdnlgeyekicklagkdk  
alpmntgaeaveta1kaarrraydvkgeipnkaeiiafngnfhgtrmapvslsseayqrgygp1ldgfrkvdfgdvda1  
kaainkntaav1vepiqge  
aginippegy1kai relcdehnlfiadeiqag1grsgklfardwdnvkpdvylgkalgggvfpi svvladkevl dvft  
pgshgstfggnplacaasi  
aaldivvded1pgrslelgdyfkeq1kqidhpsikevrgrglfigvelnesarpycea1keegllckethdtvirfapp1  
iitkeeld1alek1rhvfq  
>sp|Q6GID9|MNHD1\_STAAR  
miesnmlv1tlvipvitaillvfigkrpiikryvalggt11tlvaaiinlanvvhgplrvclgswkapysivfvldifs  
alliitsiitaivilysy  
qtigiereryyyfsvlfligiigaf ttgdi fnl fvffevflmssyfl1vigstkiqlqetikyvlvnnvsssffvmgv  
ailysvvt1nladisnkl  
an1sahdsg1vnivfilfi fvfatkagvfpmfvwlpsayyappipiaffgalltkvgvyaitrt1slffsdnvsfshyv  
ilflalltiifgcvgay  
anikkii1ynmiavgvilvgvamtesgmigaiyytlhdmlvklalf1ligimikitgtadlrqfgglikrypvlgwsf  
fiaalslagipp1sgfygk  
ffivqstfergfylsgv1v11sslvlysviriflqgffgqpkgydlnnkvdvlylttiaivavvitvlygl sadylypm  
vkagaetfynpstyvkav1  
ggk  
>sp|Q6GIF6|DLTA\_STAAR  
mtdiink1qafadanpqsiavrhttdeltyqq1mdessklahr1qgskkpm1lfghmspymivgmigaikagcgyvpvdt  
sipedrikmi inkvqpefv  
fnttdesfes1agevftiediktsqdpvi fdsqikdndtvyti ftsgstgepkgvqieyaslvqftewml elnksgneqq  
wlnqapfsfd1svmaiypc  
lasggt1nlvdknminkpk1lnem1tatpinivwstpsfmemcl11pt1neeqygs1nefffcgeilphraakalvsrfp  
satiyntygpteatvavts  
iqitqeil dqypt1pvgverpgar1sttdege1viegqsvslgy1kndqktaevfnfddgirtyhtgdkakfengqwf1q  
gridfqik1ngyrmeleei  
etq1rqsefvkeavvpykndkvih1igai vpttevt dnaemtkniknd1ksr1peymi prkfewmeq1pltsngkidr  
kkiaeving  
>sp|Q6GIH0|Y880\_STAAR  
makkapdvgykygfhdddvsifrsergltenivreismknepewm1dfr1ks1klfykmpmpqwggd1selnfddity  
yvkpseqaerswdevpee1  
krtfdkl1gipeaqky1agvsagyesevvyhnmekeleekgi i fkdtdsalgeneel fkyfasvvpaadnkfaalnsav  
wsggsfiyvknik1ldtp1  
qayfrinsenmgqfert1i adegasvhyiegctapvyttss1hsavveiivhkdahvrytti qn wannvynlvtkrtfv  
yengnmewvdgn1gskl1tm  
kypncv11gegakgst1siafagkgvqdagakmihkapntsstivsksis knggkviyrgivhfgrkakgarsniecdt  
11ldnestsdtipynevfn  
dqis1leheakvskvseeq1fylmsrgiseeate mivmgfiepfteklpmeyavemnr1likfemegsig  
>sp|Q6GIH9|METN2\_STAAR  
mielkevkeyrtnkevlavdhvn1siragsiygvigfsgagkst1irmfnhleaptsgeviidgdhigq1skng1rak  
rqkvsmi fqhfn1lwsrtv  
1knimfpleiagvprrrakqkalelvelvg1kgrekaypselsggkqrvgiaralandptv11cdeatsaldpqttdel  
1d111ki reqn1tiilit  
hemhvirricdevavmesgkvi ehgpvtqvfenpqhavtkrfvkd1nddfets1teleplekdayivr1vfagstttep  
ivss1staydikinilean  
ikntkngtvgf1vlhipyissidfgkfekel1erqvkmelrhg  
>sp|Q6GII7|AROD\_STAAR  
mthvevvatitpql1ieetliqkinhridaidvlelridqfenvtvdqvaemtk1kvmqdsfk1lvtyr1tklqgygqf  
tndsyln1isdlaningid  
midiewqadidiekhqriith1qqynkeviishhnfestpp1delqfi f1fkmqkfnpeyvklavmphnkndv1n11qams  
tfsdtmdckvvgi smsklg  
lisrtaqgvfggaltygc1gepqapqgidvtd1kaqv1ly  
>sp|Q6GIK1|NUC\_STAAR  
mteyl1sag1cmaivs11ligma1snvskeqyakrffffatsclv1tlvass1sssanasqtdngvnrsgseyptvysa  
tstkk1hkepat1ika1idg  
dtvk1mykgqpm1tfr111vdtpetkhpkkgvekygpeasftkkmvenakkievefdkgqrtdkygrglayiyadgkmvn  
ealvrqglakvayvykpnn  
theq11rkseaqakkek1niwsednadsgq  
>sp|Q6GIK4|CLFA\_STAAR  
mmkkqekhai rkk1sigvas1vgt1igfg11sskeadasensmtqtentsnesksndpssvnaapkt dntnvsdsnttt  
ntnsdetnvaqnpaqqett  
qsastnatteetpvtgevttatnqantpattqssntnaeesvntqtsnettsndtntvssvnsqpnstnaenvsttqdis  
teatpsnnesapqstdasn

Tsompanidou\_et\_al\_Supplemental\_FASTA\_File

kdvvnqavntsaprmmrafslaavaadapaagkdi tnqltnvtvgi dsgdtvyphqagyvklngyfsvpneavqgdtfk it  
vpkelnlngvtstakvppi  
magdqvl angvi dsgnviyftdyvntkddvkatlmpayidpenvtktgnvtlatgigsttanktvlvdyekygkfy n  
lsikgtidqidktnntyrg  
tiyvnpsgdnvjapvl tgnlkpntdsnalidaqntsikvykvdnasdl sesyvn pndnfedvtdsvnitfpnpnqykv ef  
ntpddqittpyivvvnghi  
dpnsgdla lrstlygynsniwrsmswdneva fngsgsgdgidkpvvpeqpdepgeiepipedsdsdpgsdsgsdsgs  
dsnsdsgsdsgsdstsdsg  
sdsasdsasdsasdsasdsasdsasdsasdsasdsasdsasdsasdsasdsasdsasdsasdsasdsasdsasdsasdsasdsasds  
sdsdsdsdsdsdsdsdsds  
dsdsdsdsdsdsesdsdsdsdsdsdsdsdsdsdsdsdsdsdsdsdsdsdsdsdsdsdsdsdsdsdsdsdsdsdsdsdsdsdsds  
dsdsdsdsdsdsdsdsds  
sdsdsdsdsdsdsdsdsdsdsdsdsdsdsdsdsdsdsdsdsdsdsdsdsdsdsdsdsdsdsdsdsdsdsdsdsdsdsdsdsdsds  
sdl dsdsdsdsdsdsdsds  
asdsdsdsdsdsdsesdsdsdsdsdsdsdsasdsdsdsasdsdsdsstsdsgsdnsdsesdsnsdsdsgsnnnvppn  
spks gtnasnknakeske  
plpdtgsedeantsliwgl laslgslllfrkkenkdkk  
>sp|Q6GIL2|SECG\_STAAR  
mhtflivlliidcialitvvlleqekssgfsgaisggaeqlfgkqkqrgvdlflnr ltiilsilffvlmicisylgm  
>sp|Q6GIL5|GPMI\_STAAR  
makkptal iildgf anre sehnavklankpnfdryynkypttqieasgl dvg lpegqmg nsevghm n iagrivyqsl t  
rinksiedgdf fendvlnn  
aiahvnshdsal hifgl sggvhshykhlfallelakkqgvekvyvhafldgrdv dqsalkyieeteakfnelgigqf  
asvsgryyamdrkrwere  
ekaynai rnf dptyatakegeveasyne gl tdefvvpfivedqndgvndgdavi fynfrpdraaq lseifanrafegfkv  
eqvkd lfyatftkyndnid  
aai vfekvdl nntigeiaqnnnl tq lriaet keyphvtyfmsggrneefkgerrrlidspkvatydlkpemsayevkdal  
lee lnkgdldli jlnfanp  
dmvghsgml eptikaieavdec lgevvkildmdgyai itadhgnsdqvl tdddqpm tthttnpvpvivtkegv t lretg  
rlgd laptll dlnveqpe  
dmtgeslikh  
>sp|Q6GIM1|Y825\_STAAR  
mkqyli tgggtgmvgsqlvneikk sdshiti ltrhdqisnkkisyvnwaksgwehkvpqnidvvinlagatlnkrwtpey  
kqtlm lsr iqtqalyelf  
ksrnkapkv lfnasatgyppdl fmsytevyktlpdf lsdivyqwerfaqqfeqlgtrvvigrfgi ilsneggalqtmk  
lpyeyyiggkl gsgqwy s  
wihindliqail flinnesasgpfnl tapi perqnl fgyt laramhkphetwvps lamrl ilgq mstvvl dtqkvlpnki  
qal gfqfkysnl kmaledl  
isk  
>sp|Q6GIM6|Y820\_STAAR  
mdnnekeksk sel lvvtgl sgagks lviqc ledmgyfcvdnl pvp llpkfvel meqgnpslrkvaiaid lrgkel fnslv  
avvdvkksesdvi idvmfl  
eastek l isryketrrahpl meggkks lina inderehl sqirsianfv idttkl spkelker irryedeefetftinv  
tsfgfk hgi qmdad l vfdv  
rflnpnyyvdl rpl tgl dkdvynyvmkwketei ffekl tdl ldfmipygk kegsq l viaigctggqhrsvalaer lgn  
ylnev feynvyvhhrdahi  
esgekk  
>sp|Q6GIM7|TRXB\_STAAR  
mteidfdia iigagpagmtaavyasranl ktvmiergipggqmanteevenfpgfem itgpd l stkmfehakkfgavyqy  
gdiksvedkgeykv infgn  
kel takav iiatgaeykkgv pgeqelggrgvsycavcdgaffknkr lfvigggdsaveegt fltkfadkvtivhrdel  
raqril qdrafkndkidfi  
wshl tksinekdgkvsvt l tstkdgseetheadgvfi yigmkpl tapfkdl gitndvgyivtkddmttsapgi faagdv  
rdkg l rqi vtatgdgsiaa  
qsaeyiehl ndqa  
>sp|Q6GIM9|ATRF1\_STAAR  
mrkfl skeyhrtnpl whvyr l vkfskvfk nvi iiefskfipsmvl krhiyqil ninignqssiaykv mldi fypel iti  
gnsvignvtil thealv  
defrygpvtigsnt liganat ilpgit igdnvkvaagt vvs kdi pdngfaygnpmyikmirr  
>sp|Q6GIN7|RF2\_STAAR  
mel seikr nidkynqdl tqi rgsld lenketni qeyeemmaepn fwdnqtkaqdi idkna lkaivngykt l qaevdmd  
atwdll qeefdgemkedle  
gevinfkakvdeyel ql lldgphdannail elhpgaggtesqdwam l frmyqrycekkgfkvktvdy lpgdeagiksvt  
llikghnaygy lkaekgvh  
rlvri spfdssgr rhtsfascdvi pdfnndei ei epddi tvdt frasgaggqhinktesairithpsg ivvnnqner  
sqiknreaamkml ksklyq  
lkleeqaremaei rgeqke igwgsqir syvfhpysmvkdhrtneetgkv davmdgidigpfiesyl rqtmshd  
>sp|Q6GIP8|PEPT\_STAAR

Tsompanidou\_et\_al\_Supplemental\_FASTA\_File

mknqldrltryttidqsdpksttppstekqwdllhlllekelqqlglptdl dengylfatlesnidadvptvgflahvd  
tspdfnasnvkppqiienyd  
gkpyklgntkrvldpkvfpeInslvghtlmvtdgtsllgaddkagiveimeai cyclqehpeikhgtirigftpdeeigr  
phkfdvdrfnadfaytmdg  
sqygelqyesfnaaeavit chgvnvhpgsaknamvnairlgeqfdsllpdsevpertegyegfyhlmnfegtvekatlqy  
iirdhdhkkqfelrkkri le  
irddinahfenypvkvdisdqyfnmaekilplphiidipkrvfakldipantepirggtgdgsqslsfgmlptpniftgcgn  
fhgpyeyasidvmekavqv  
iigivedtaenn  
>sp|Q6GIR5|Y780\_STAAR  
menkythgvlfyhehsglkninqigevtta lssickhlsiqlsenegdiikycqeikakdyakdvdlfilggdgtvne  
lingvmthdlqlpigi lpg  
gtfndftktlniapnhkqaseqmisavqgtydvikinnqyalnfvglg livqnaenvdgskdifgklsyigstvtlln  
ptqfnqslsiddktyset  
tmilsangpfiggsrip ltdlspqdelntfi fneqsfsilndifkkrds mwnweitqgiehipgkksl ttdptmkvdi  
dgeisletpidievipnai  
qlltvndl  
>sp|Q6GIR8|HIS8\_STAAR  
mkeqlnqlsaypglspralkekygiegdlyk lasnenlygppskvkeaisahldelyyy petgsptlkaaiskhlndq  
srilfgagldevilmisra  
vltpgdttvtseatfgqyyhnaivesanviqvp lkdggfdldgilkevnddtslvwlcnpnntgtyfnhesl dsflsqv  
pshvpvl ideayfefvtae  
dypdtla lqqkydnafllrtf skayglaglrvgyv vasehaiekwniirppfnvtriseyaavaaledqqylkevthkns  
vererfyqlpqsehflpsq  
tnfi fvktrvne lyealnv gcit rpfptgvritigfkeqngkml evlsnfkye  
>sp|Q6GIT7|SAES\_STAAR  
mvlrsrsqi igvssilltstilaiayilmwfnghmtl tltl ttiitscltllicsifinpli qkikqfniktkqfang  
nyasndktfnspkeiyeIn  
qsfnmaseitq qmnqikseqekte liqnlahd lktplasiis yseg lrdgiitkdheikesy dilikqanrlstl fdd  
mthiitlntgktyppe liq  
ldqllvsilqpyegrikhenrtlevnfcseidafyqyrtp leri ltnlldnalkfsnvgsridinisenkdqdtidia is  
degigiipelqerifertf  
rvensrntktggsgl glyiane laqqnnakisvssdidvgttmtvtl hkl ditt  
>sp|Q6GIU7|NORA\_STAAR  
mnkqifvlyfni flifl gigl vipvlpyv lkd lgl tgsdl gl lvaafalsqmi ispf ggtladkl gkkl iicig l ilfsv  
sefmfavghnfsvlmlsr v  
iggmsagmvmpgvtgl iadvspshqaknfgymsai insgf ilpggiggfmaevshrm pfyfagal gilafimsvvl ihd  
pkkstts gfklepqltk  
inwkvfi tpaillvlafgl safetly slytsykv nyspkdisia itggg ifgal fqi yffdkfmyk fsel tfiawsl iy  
svivl vllvi adgywtimv  
isfavfigfdmi rpa itnyfsni agdrqgfagglnstftsmgnfigpli agal fdvhieapi ymaigvslagvviv liek  
qhraklkqqdl  
>sp|Q6GIW1|Y734\_STAAR  
mthi idgdacpvvdsiidl ttetgifvti irsfshfsnqlypphvstlyvddgpdavdykivqlstk ddivitqdygla  
sllvdkvli vmhngkjyn  
skniqqll dkrymnaqirkqggrhkgpppftkqdqkvfeksllrvihrikeld  
>sp|Q6GIX1|CADA\_STAAR  
mdssaktl tedkqyrvveg fscancagk feknvq lagvqdkvnfgaskidvygnasvqelekagafenl kvfpeklan  
ssmqavkedtkapkeekip  
fykkhstll fatlliafgy lshfvngednlvtsmlfvgsiviggyslfkv gfnlirfd fdmktlmtvavigaai igewa  
easivvvlfaisealerfs  
mdrarqsirs lmdiapkealvmrngqeimihvddiavgdimivkpg ekiamdgiingvsavnqaa itgesvpvaktvdd  
evfagtlneegll evkitk  
yvedtti skiihlveeaggerapaqafvdkfakyytpi imviaalvavvplffggs wdtwvyqglavlvvgcp calvis  
tpisivsaignaakkgvli  
kggvyleelgai kai afdkgtl tkgvpvtdfklv lndqveeke lfsi italeyrsqhp lasaimkkaeqdnitysdvrv  
edftsitgrgiqgnidgtt  
yyigsprlfkelnv sdfs lefenkvkvlqnqgktami igtdqtilgviavadevretsknviqklhqlgikqtiml tgdn  
qgtaeai gahvgvsdiqse  
lmpqdkldyikmkaehgnvam igdg vndapalaastvgi amggagtdtaietadialmgddl sklpfavrlsrktlnii  
kanitfaigikiiallvi  
pgwl t lwiailsdmgatilvalns lrlmrvkdk  
>sp|Q6GIX3|MCO\_STAAR  
mmdmkendqkrndmmdmkshderkn l nssqgkneitfpkv ldpkkdnngyksyt lkaqkgktefykgnfsntlgyngnll  
gptlklkkgdkvki lvnv  
ldenttfwhg leidgkvdggsqv ikpgkektik fevkqeaatlwyhphspntakqvynglsgllyieddkknypsn  
ygnkndlpii qdktfsvkk  
lntytktdedgtqgdv l vngkvdpk lttkegkirlrl nngsnardlnlkl snnqsfeyiasegghlektklleinlap

Tsompanidou\_et\_al\_Supplemental\_FASTA\_File

sarkeividlskmkeekvn  
lvndetvilpiinkekstndttpkvdkkiklegmddnvtngkkfdpnridftqkvnrketweienvkdksmgmkhpf  
hihgtqfklvsdgkkpse  
dmrgkkdvisleppgkakievfvkntgtymfhchilehedngmmgqikvtk  
>sp|Q6GIX4|COPB\_STAAR  
msnnkkhqnhehshqehenhtshgnhehhhgfnfskffisli faipiiilspmmgvklpfqisftgsdwivlilatil  
ffygkpfllsgakdeistk  
kpgmmtlvalgisvayiylyafymnnfsgssthtmdffwelatllilimllghwiemnavgnagnalkkmaellpntavk  
lidnngreevki sdihidd  
ivevragesiptdgiivrgetsideslvtgeskkvhkthnddviggsingsgtvqvkvatgengylsqvmglvnqaqnd  
kskaellsdkvagylfyfa  
vsiglisfiwmlignnvdfalerlvtvlviacphalglaiplvtarstsigahngliiknresveiaqhidyimmdktg  
tltegnfsvnhyesftdel  
neei ls lfaslesnshpl atgividfakgnisyatp qevn n i p g v l e g t v d n k k l k i v n v s y l d k s n f d y n e q f t n  
laqqnsisylihdrrvig  
iaagdkikesskqmvsdllsrnitpvm l t g d n k e v a q t v a e e l g i s d v h a q l m p e d k e s i i q d y q s n g s k i m m v g d g i n  
dapsli radigmaigagt  
vaiesgdvilvksnpsdiinflslskntmkkmvqnllwwgagynviavplaagilasiglislpavgailmslstiivain  
aftlklk  
>sp|Q6GJ11|GRAR\_STAAR  
mqillveddntlfqelkkeleqwdfnvagi edfgkvmdtfesfnpeivil dvqlpkydgywcrkmrevsnvpilflssr  
dnpmdqvmsmelgaddymq  
kpfytnvliaklqaiyrrvyeftaekrtltwqdauidlskdsiqkgdqtiflsktemiileilitkknqivsrdtiita  
lwdeafvsdntltvvnvr  
lrkklseigmdsaietkvgkgymahe  
>sp|Q6GJ30|TAGX\_STAAR  
mrltiiptcneatirgllisieskehyrilcidggstdqtipmierlqrelkhisliqlqnasiatcinkglmeikmt  
dphdsdafmvnptsivlp  
gkl dr l t a a f k n n d n i d m v i g q r a y n y h g e w k l s a d e f i k d n r i v t l t e q p d l l s m m s f d g k l f s a k f a e l q c d v t l a n  
tynheilvkamqkatdihl  
vsqmi v g d n d i d t h a t s n n e d f k r y i t e i m k i r q r v m e m l l l p e q r l l y s d m v d r i l f n n s l k y m n e h p a v t h t t i q l v  
kdyismqhsdyvsqnmfd  
iintvefngenwdreiyelwrqtliqvginrptykrfliqlkgrkfahrtksmlkr  
>sp|Q6GJ33|TAGH\_STAAR  
mnsvniknvtkeyriyrtnkermkdaliphkknktffa l d d i s l k a y e g d v i g l v g i n g s g k s t l s n i i g g s l s p t v g k  
vdrngevsviaisaglsqg  
ltgieniefkmlcmgfrkeikamtpkiefse l g e f i y q p v k y s s g m r a k l g f s i n i t v n p d i l v i d e a l s v g d q t f a  
qcl d n i y e f k e q n k t i f f  
vshnlqqrqfctkiawieggklkdyge l d d v l p k y e a f l n d f k k k s k a e q k e f r n k l d e s r f v i k  
>sp|Q6GJ34|TAGA\_STAAR  
mtveersntakvdi l g v d f d n t t m l q m v e n i k t f f a n q s t n n l f i v t a n p e i v n y a t t h q a y l e l i n q a s y i v a d g t g v v  
kashrlkqplahripgie l  
mdc l k i a h v n h q k v f l l g a t n e v g e a a q y a l q q r y p n i s f a h h g y i d l e d e t v v k r i e l f k p d y i f v g m g f p k q e e w i  
mthenqfeskvmmgvgs l  
evfagakkrapyifrklniewiyralidwkrigr l k s i p i f m y k i a k a k r k i k k a k  
>sp|Q6GJ44|MNHD2\_STAAR  
mlsnllilpmlpflcalilvflknndriskyllygtmtittiislmlliyvrhrpitldfggwtapfgiqflgds l s l  
imvttasfvitlimaygfg  
rgehkanryhlpsfilflsvgigsfltsdlfnlyvmfeimllasfv litlgqsveqlraaiiyvvl niigswlfl l g i g  
llyktvgtlnfshiamrln  
dmgdnrvtvmisli flvafsakaa l v l f m w l p k a y a v l n t e l a a l f a a l m t k v g a y a l i r f f t l l f d q h n g l i h p l l v t m  
aatmvigaigviaykdik  
kiaayqviiisigfiilglgtntfagingaifylvndivvktllffiigs l v y i t g y r q y q l n g l a k k e p f f g v a f i i m i  
faiggvppfsgfpgkvli f  
ggalqngnyigla l m i i t s l i a m y s l f r i l f y m y f g d k d g e e v h f k k i p q y r k g i l s i l v v v v i a i g i a a p v l l k i t n d a  
telntndqlyqklvnshlk  
gee  
>sp|Q6GJ80|PTAS\_STAAR  
madllnv l k d k l s g k n v k i v l p e g e d e r v l t a a t q l a t d y v t p i v l g d e t k v q s l a q k l n l d i s n i e l i n p a t s e l k a e  
l v q s f v e r r k g k t t e e q a q  
el l n n v n y f g t m l v y a g k a d g l v s g a a h s t g d t v r p a l q i i k t k p g v s r t s g i f f m i k g d e q y i f g d c a i n p e l d s q g l a  
eiavesaksalsfgmpkv  
am l s f s t k g s a k s d d v t k v q e a v k l a q q k a e e e k l e a i i d g e f q f d a a i v p g v a e k k a p g a k l q g d a n v f v f p s l e a g n i  
gykiaqr l g g y d a v g p v l q  
gl n s p v n d l s r g c s i e d v y n l s f i t a a q a l q  
>sp|Q6GJ92|VRAC\_STAAR  
mqhyll ds n r l n v s f s k d s a a y y h c f n q p y s k e v p p l m c a s l w s k f d l f k k y a n s e l i l t k s v i n q t q k i k v d t i y v g  
hlediocrqirnitrytma



Tsompanidou\_et\_al\_Supplemental\_FASTA\_File

1t1tkndqhvitvtqtfikamk  
>sp|Q6GJ93|VRAB\_STAAR  
mnqavivaakrtafgkyggtlkhlepeqllkplfghfkekyypeviskidvvlgnvvngngniarkalleaglkdsipgv  
tidrqcsglesvqyacrm  
iqagagkvyiaggvestsrapwkikrphsvyetalpefyerasfapemsdpsmiqgaenvakmygvsrelqdefayrshq  
ltaenvkngnisqeilpit  
vkgeifntdeslkshipkdnfgrfkpvikggtvtaanscmkndgavllimekdmayelgfdhgllfdkgvtvgvdsnlp  
gigpvpaishnllkrnqlti  
eniievieneafsaqvaccqaalni sntqlniwgga lasghpygasgaqlvtrlfymfdkesmiasmgiggglgnaalft  
rf  
>sp|Q6GJ94|VRAA\_STAAR  
mdvileqlethtgnkpnidialhiddetitysqlnaritsaveslqkyslnpvvainmkspvqsiiicylalhrlhkvpmmm  
egkwqstihrqlikeygik  
dvigdtclmqnidspmfidstqlqhypnlhigftsgttglpkayrddedswlasfevnmmlknenaiaapglshsl  
tlyallfalssgrtfiqgt  
tfhperllnqcrkissykvamflvptmiksllvynnehtiqsffssgdklyssifkkiknqandinlieffgtsetsfi  
synlnqqapvesvgvlfpn  
velkttndhngigticvksnmmfsgyvseqcinndewfvtnrngyveqylyltgrqhdmliggqniypahverlltq  
sssidaaiigipnerfgq  
igvllysgdvtlthknvkqflnkkvkryeipsmihhvekmytasgkiarekmmsmylrgel  
>sp|Q6GJ96|PROP\_STAAR  
mdfnkeninmvdakkaktvvtatgignamewfdgvyayttayiganffspvesadirqmltfaalafiafllrpiggvfvf  
giigdkygrkvvltstii  
mafstltigllpsydqiglwapi111larvlqgfstggeyagamtyvaesspdkrnslgsgleigtlsgyiaasimial  
lffltdeqmasfgwrifp  
llglflglfglylrrkleespvfendvatqperdninflqiirfyykdivcfvavffnvtnymvtaylptyleqvikl  
dattsvlitcvmaimipl  
almfgkladkigekkvfligtggtlfsiafmlhsqsfvvivi gfgl gfflstyeatmpgslptmfyshiryrtlsv  
tfnisvsi fggttplvatw  
lvaktgdplapayyltaisvigflvitflhlstagslkgsypndneqdrayyvehpkealwwvkerkd  
>sp|Q6GJA6|BBP\_STAAR  
minrdnkkaikkgmi snrlnkfsirkyvtgtasilvgttlifglngqeakaaentstenakqdeasasdnkevveten  
nstqkndltnpikketntd  
shqeakeaptsstqqqnnattstetkqniekenvpstdktatedtsvileekkapnntndvttkpstseiqtpt  
tpqestniensqpqptpsk  
vdnqvtdatnpkepvnskeelknnpek1kelvrndsntdrstkpvataptsvapkrvnakirfavaqpaavasnnvndl  
itvtkqmi tegikddgviq  
ahdgehi iyt sdfki dnavkagdtmtvkydkhtipsdi tddftpvdi tdpsgevi akgtfdlntkkitykftdyvdryen  
vnaklelnsyidkkevpe  
tnlnlftatadketskvnkveyqkpi vkdesniqsi fshldttkheveqtiyvnplkl nakntnvtiksggvadngdyt  
gdgstiidsnteikvykva  
sgqqlpqsnkiydysqyedvtnsvtinknygtmanifgdidsayivkvvskytpgaeddlavqqgvrmtttknynys  
yagytntilsttdsggdg  
tvkpeeklyki gdyvwedvkdgvqgtdskekpmavlvltltpdgttksvrtdanghyefggldkgetytkfetpagy  
lptkengttgkedngss  
vtvkingkddmsldtgfykepkynlgdyvwedtnkdgiqdanepgikdvkvtlkdstgkvigttdtdasgkykftdlng  
nytvefetpagytpvkn  
taedkdsngl tttgvi kdadnwtldsgfyktpkyslgdyvwydsnkdgkqdstekgikdvtvtlqnekgevigttkten  
gkyhfdnldsgkykvi fek  
paglqtgtntteddkdadggevdtitdhddftldngyfeedtsdsdsdsdsdsdsdsdsdsdsdsdsdsdsdsds  
sdsdsdsdsdsdsdsdsdsdsdsdsdsdsdsdsdsdsdsdsdsdsdsdsdsdsdsdsdsdsdsdsdsdsdsdsdsdsds  
sdsdsdsdagkhtpvkpsa  
tkdhhnkaka1petgsennsnat1fgglfaalgslllfgrrkkqnk  
>sp|Q6GJA7|SDRC\_STAAR  
mnkktatnrkgmi pnrlnkfsirkyvgtasilvgttlifglsgheakaaehtngelnqskneatapsenkttekvdr  
qqnnveqsttsnqpkvnes  
dntsvketteepqnttstqptkknndatankdnlaaqnistqandvsatpkktttikprtlnrmavntvaapqqgtvnndk  
vhfsnidiaidkghvnstt  
gktefwatssdv1klkanytidsvkegdtftfkyggyfrpgsvrlpsqtqnl ynaqgniiakgiydstnttttytftny  
vdqytnvsgsfeqvafakr  
enattdktaykmevtlgn dayseeiivdygnkkaqplisstnyinnedlsrnmtyvynqpkntytketfvstltgykfnp  
daknfkiyevtdqngfvds  
ftpdtsklidvtdkfkitysndnktatvd1mngqtnsnkqyiqqvaypdntstdngkidytldtdkkykyswsnsysvsn  
gsstangdqkkyngdyvw  
edtnkdgkqdanekigkvyvilkdsngkeldrtttdengkyqftglngtyvstlagypttvnagtddavsdgl  
tttgvikdadnmtldsgfy  
ktpkyslgdyvwydsnkdgkqdstekgikgvkvtlqnekgevigttetdengkyrfdnldsgkykvi fekpaglqtgtg



Tsompanidou\_et\_al\_Supplemental\_FASTA\_File

makkkgkkyqeaaskvdrtqghysveeaiklaketsianfndasvevafrlgidtrkndqqirgavvlpngtgksqsvlvfak  
gdkiaeaeaagadyvgeae  
yvqkiqgwfdfdvvatpdmmevvgklgrvlgpkglmpnptgtvtmdvkkaveeikagkveyraekagivhasigkvs  
ftdeqlienfntlqdvlak  
akpssakgtyfksvavtttmgpgvki dta1  
>sp|Q6GJD9|SYC\_STAAR  
mitlyntltrqkevfkpi epgvkmyvcgptvynyihignarpainydvvriryfeyqgynveyvsnftdvddklikrsqe  
lnqtvpeiaekyiaafhed  
vgalnvrkatsnprvmdhddi iqfikdlvdqgyayesggdvyfrtrkfegyglshqsiddlkvgaridagehkedald  
ftlwkakpgeiswdspfg  
egrpgwhiecsmafhelgatidihaggsdlqfpheneiaqseahnhapfanywmhngfinidnekmskslgnfilvhd  
iikevdpdvlrffvisvhy  
rspinynl elvesarsglerirnsyqlieraqiatnienqqtyidqidailnrfetvmnddfntanaitawydaklan  
kyvlenttstevidekfkav  
yqifsdvlgvplkskkadell dedvekleerneckndfaradeirdmlksqniiledtpqgvrfkrg  
>sp|Q6GJF4|SYK\_STAAR  
mseemndqmlvrrqklqelydlgidpfgskfdrsglssdlkeewdqyskeelvekeadshvaiagrlmtkrkgkagfah  
vqdlagqiqiyvrkdqvgd  
defdlwnadlgdivgvegmfktntge lsvkakkftlltkslrlpdkfhglqdieqyrqryldlitnedstrtfir  
skiiqemrnylnnkqflev  
etpmmhqiaggaaarpfvthhna ldatlymriaielhlkrli vgglekvyegrfrnegvstrhnpeftmielyeayad  
yhdimd ltesmvrhianev  
lgsakvqyngetidlesawtrlhivdavkeatgvdfyevksdeekalakehgieikdtmkyghilneffeqkveetliq  
ptfiyghpteisplaknp  
edprftdrfel fivgrehanafte lndpidqgrfleaqlaekaagndeahemdedyiealeygmptgglgigidrlvm  
ltdspisirdvllfpymrqk  
>sp|Q6GJF6|FOLB\_STAAR  
mqdtiflkgmrfygygha lsaeneigqifkvdvtlkvd lseagrtndvidtvhygevfeevksimegkavnll ehlaeri  
anrinsqynrvmetkvrit  
kenppipghydgvgieivrenk  
>sp|Q6GJG2|TILS\_STAAR  
mqlnsngwhvddhi vavstgidsmc llyql lndykdsyrkl tclhvnhgvr sasieearfleaycerhhidlhikkldl  
shslnrnsiqnearikry  
ewfdemmnvleadvll tahhlddq letimyri fngkstrnkl gfdel skrnqyqiyrpllavskkeikqferyhipyfe  
desnkdknyvrndirnrri  
paidennq lkvshllklkqhdeqydlqysakqfiqefvkfdeqskylevsrqafnlnpslkmvvl dcll skyeylfn  
isaktyeewfkqfsskkaq  
fsinltdkwii qiygkli imaknngdyfrvqtiekpgnyi fnkyrleihsnlpkclfp ltrtrqsgdtfk lnrddgy  
kkvnr lfidckvqqwvrdq  
mpivldkqqrii avgdlyqqqtikwii skngde  
>sp|Q6GJG8|MFD\_STAAR  
mtilttikednhfqdl nqvfgqantlv tgl spsaktmiaekyaqsnqll llttnlyqadkletdl lqfvdveelyky  
pvqdimteefstqspqlms  
erirtlta laqgkgl fivplnglkkw ltpvemwqnhqmt lrvgedidvdqflnklvnmgykresvshigefslrggi  
difpligepiriel fdtei  
dsirfdvetqrskndieevdittasdyi iteevishl keelktayentrpkidksvrndlketyesfkl festyfdhqi  
lrrlvafmyetpstiidyf  
qkdaiiavdefnr ketees ltvessfinsviesngngfiggsfikyddfet liegypvtyfsl fattmpiklnhiikfs  
ckpvqqfygqydimrsef  
ryvnqnyhi vvlvetetkvermqam lsemhipsitklhrsmssgqaviiegs lsegfel pdmglv vitere lfkskqkq  
rkrtkaisnaekiksyqdl  
nvgdyivvhhgvgrylgvetlevgqihrdyiklqykgtqdl fvpvdqmdqvqy vasedktpklnklggsewkktkakv  
qqsvediaeelidlykere  
maegyqygedaqgttfe ldfpyeltpdqaks ideikddmqsrpmdrllcgdvgygktevavraafkavmegkqvaflv  
pttilaqghyetliermq  
fpveiq lmsrfrtpkeikqtkeglktgfvdvvgthkl lskdiqykdgl llivdeeqrfgvvrhkerikt lkhndvltlt  
atpiprthmsmlgvrdls  
vietppenrfpvqyvleqnmsfikealere lsrddgvfylynkvqsiyekreqlqmlmpdaniavahgqmterdleetm  
lsfinneydi lvttti et  
gvdvpnantliiedadrfg lsqlyql rgrvgrssrigyayflhpankv ltetaedr lqaikeftelgsgfkiamrdlnir  
gagnllgkqqhgfidtvgf  
dlysqm leavnekr gi kepesevpevevdln lday lpteyiane qakieiykklrktetfdqi idikdelidrfndypv  
evarll diveikvhalhsg  
itlikdkgkiidih lsvkatenidgevl fkatqplgrtmkvgvqnnamtitl tkqnqwlslklvlkcieesmrisdea  
>sp|Q6GJH0|RL25\_STAAR  
maslksi irgkqtrsd lklrkskvpavvygygtnksvkvdevefikvi revcrngv ielgvgsktikvmvadyqfd  
plknqithidflainmsee  
rtvevpvqlvgeavgakeggvveqplfnlevtatpdni peai evditelninds ltvadvkvtgdfkiendsaesvvtv

Tsompanidou\_et\_al\_Supplemental\_FASTA\_File

aptepteeeiamegeqq  
teepevvgeskedeektee  
>sp|Q6GJH2|GLMU\_STAAR  
mrrhaiilaagkgtrmkskkykvlhevagkpmvehvlesvkgsgvdqvvtivghgaesvkgghlgerslysfqeeqlgtah  
avqmakshledkegttivv  
cgdtplitketletliahedanaqatvlsasiqqpygygrivrnasgrleriveekdatqaekdineissgifafnkt  
lfekltqvkndnaqgeyy  
pdvlsliindggiiveyrtdndveeimgvndrvmlsqaenamqrrtnhyhmlngvtiidpdstyigpdtvigsdtviepgv  
ringrteigedvvigqyse  
innstiengaciqqsvndasvgantkvgpfaqlrpgaqlgadkvgnfveikkadlkdgakvshlsyigdavigertni  
gcgtitvnydgenkftiv  
gkdsfvgcnvnlvapvtigddvvaagstitddvpndslavararqttkegyrk  
>sp|Q6GJH3|SP5G\_STAAR  
mkvtdvr1rkiqtdgrmkalvsitldeafvihdlrviegnsflfvampskrtpdgefrdiahpinsdmrqi qdavamkvy  
deidevvpdknatsedsee  
a  
>sp|Q6GJH6|ISPE\_STAAR  
miyetapakinf1tdtlfkrndgyheiemittvdlnr1tlfhkrkdrkivveiehnyvpsnhknlayraaq1fieqq1  
kqgv1sidkeipvsagla  
ggsadaaat1rglnr1fnigaslee1al1gskigt dipfciynkta1ctgkgekieflnkppsawvilakpnl1gisspdi  
fklin1dkrydvhtkmcye  
alenrdyq1cqs1snr1episvskhpqi d1knm1ksgadgalmsgsgptvyglaqkesqakniynavngcnevylv  
r11g  
>sp|Q6GJH8|RSMA\_STAAR  
m1dnkdiatpsrtra1ldkygfnfkks1gqnflidvniinniidasdidaqtgvieigpgmgs1teqlarhakrv1afei  
dqr1lipv1ndt1spydnt  
vinedilkanikeavenh1qdcekimvvan1pyyittp1ln1mqdipidgyvmmqkevger1naeigskaygs1siv  
vqyytetskv1tvpksvfm  
pppvds1vvlmqrtep1vtvdneeaffklakaafaqrrktinnnyqnyfdkgkqhevi1qwleqagidprrrget1s  
iqdfak1yeekkkfpqlen  
>sp|Q6GJI1|SYM\_STAAR  
maketfyittpiyypsgn1highaystvagdviarykrmqgydvryltgtdehgqkiqekaqkagkteieyldemiagik  
qlwak1eisnddf1rttee  
rhkhvveqvfer1lkqgd1y1geyegwysvpdetyytesqlvdpqyengkiiggkspdsghelve1kreesyffniskytd  
r11efydqnpdfiqppsrk  
neminnfi kpglad1avsrtsfnwgvhvpsnpkhvvywidalvnyisa1gylsddes1fnkywpadihlmakeivrfhs  
i1wpi1lmal1d1p1pkkvf  
ahgwi1mkdgmkskgnvvdpn1lidryglatryylmrelpfgsdgvftpeafvertnfdland1gn1vnr1tismink  
yfdgel1payqgp1heldee  
meama1etvksytesmes1qfsvalstvkwf1srtknyidettpw1lakddsqkdm1gnvmah1veniryaav1l1rpf1t  
hapkeifeqlni1nnpqfme  
fss1eqygv1tepi1mvtgqpkpi1fpr1dseaeiayikesmqppateeekeei1pskppid1kdfdkveikaati1daehvk  
ksd1l1kiqvd1d1seqrqi  
vsgiakfyt1pddi1gkkvavvtn1kpak1mgqksegmi1saekdgv1t1vs1psaipngavik  
>sp|Q6GJI9|KTHY\_STAAR  
msafit1fegpegs1kttvinevyhr1vkdydvim1repggvptgee1rkiv1legndm1dirteam1faasrreh1vlkvip  
a1kegkv1cdry1dss1la  
yqgyarg1gveevra1nefaing1ypd1tiy1nvsaevgreri1knsrdqnr1dqed1kfhekvi1egyqe1ihnesqrfk  
svnadqplenvvedtyqti  
iky1eki  
>sp|Q6GJJ3|RECR\_STAAR  
mhypepisk1insfml1pgigpktaqr1afht1dmkeddv1qfakalvdvkreltyc1svchitendpcyicedkqdrds  
vi1cvveddkdvi1amekmre  
ykglyh1lhgs1pmdgigpedinips1lier1kndevsel1lamnp1legestamyis1rvk1pigikvtr1laqg1svggd  
leyadevt1ska1agrtem  
>sp|Q6GJK9|SLE1\_STAAR  
mqkkviaa1igtsaisavaatqanaatth1tkpgesvwaisnkygisiak1ks1ln1tsn1l1fpnq1lvk1vsgssn1stsns  
srp1stnsgg1syytvqagd  
s1s1iaskygttyqni1mr1ng1lnffiyppqk1kvsgtass1sn1stsn1srp1stnsgg1syytvqagds1s1iaskygtty  
qni1mr1ng1lnffiyppqk  
1kvtgnastnsg1stt1nrgyntp1vfnhqn1lytwgqctyh1vfnrae1igki1stywnannwdnaaaadgyti1dnrptvg  
siaqtdvgyyghvmf1verv  
nndgs1lvsemnysa1pgi1ltyrtvpayqvnyryih  
>sp|Q6GJL2|METN1\_STAAR  
miefrqysks1fhkkkt1dal1kdvsftvnrndi1fgvi1gysgagk1st1vr1lvnh1leaasngqv1vdghditnysdkm1r1di  
kkd1gmi1fqhfn1l1nsatv  
fknvamp1l1skksktei1kqvtem1efvg1sddk1dqfpe1sggqk1rvaiara1vt1nki1l1cdeatsal1dpattasi  
l1t1l1knvnt1fgit1immit

Tsompanidou\_et\_al\_Supplemental\_FASTA\_File

hemrvikdicnravamekqgvvetgtvkevshpkttiaqnfsvstviqtspsslirrlndkqvdfkdykifveetqmt  
qpiindliqicgrevkilf  
ssmseiqgntvcymwlrfnmdqqfdgtainqyfkekniqfeevh  
>sp|Q6GJM1|Y453\_STAAR  
mttqlninsvienakrvitp|spisifaarnpwegleadtfedvaklrdvrdvdi fpnkaliesavargeldesvfnq|  
vtdmllehhyinipqhyin|  
yidniktlkdv pasymhnsnvddvadlllekskrmaesyhydv rpsmdaiideqgeplseqvnrqmikwtklyidqf|  
sswtmpkreqs fyhawl|  
aqhdhsftkaqrqvikglpndpkmtiesvlnhfsiaedyqayveghlla|pgwagilyrsqqhhfeqhlltdylair|  
vveqllvgdefksvtdkce  
srsewfkqtvaswcyysdmpsdvllqhdvneiqt fihfaatmnknvfkn|wliawemtyesqlkqkikaghesvagal|  
vnqvnvtendnanqshsvs  
lnatqavdennselnqvgstkaqiafcidvrsepfrrhieaagpfetigiagffglpiqkdavdeqfkhdslpvmvppa  
yrikefadrydmnvyrqqq  
qtmssmfytfklmknvmpslllpe|sgpflslstivnsimprksrsv|lqkikqkw|kkpetk|tidrefdrtsd|pvvgf  
teqeqidfa|qalklmd|t  
eafapfvv|laghashshnphhas|ecgacggassgfna|llami|cnrpnvrqglkqagvyipettvfaaaehhtstdt|  
awvyvpt|sala|dayes  
lndvmpmisehanrer|dk|lptigrvnhpveeaqrfasdwsevrpewglaknasfi|grrqltkgid|egrtflhnydwr  
kdkdgk|lnti|sgpalva  
qwin|qyyastvaphfygsgnkatq|vtvsgvgvmqgnasd|mygl|swqsvmaadr|tmyhs|pir|llvvvqapdfvvar|la  
nnehfarkvsnhw|rlmsv  
negrfkswi  
>sp|Q6GJM8|Y445\_STAAR  
meyikkialymsvllliifiggcgnmkdeqkkeeqtnktdskeeqikksfakt|dmpikn|led|ydegyrdgefekgd  
kgmw|lyssivsefkges|  
ksrgmi|kl|drnkrtakgsy|i|relkedknhdvqknekky|pvkl|vnki|iptedvkned|kreienfkl|fsqygefks|n  
tdritn|synpnapsae  
yk|inddnn|kq|knrfniksnknpk|l|fk|gagnikgssvgykei|qi|ifnrnkeesvscidsie|fkpsegdyne  
>sp|Q6GJM9|Y444\_STAAR  
mksikrigl|c|s|l|l|i|i|fvtscdgdnki|tgdskeeqikksfakt|emypikn|led|ydegyrdgefkkgdkgtw|irs  
emkiq|l|kgen|lesrgv|le  
inrnr|rtakgny|ivrevvedsgm|thnhtkry|pvkmennki|ip|lkq|ivdekvk|keieefk|ffvqygn|fke|lenykdgevt  
ynpeapiysaqy|q|knsdy  
nveq|l|rkryniptq|kapk|l|l|kgsgn|l|kgssvgyknieft|venkgeni|yftds|vyfnpsedkyny  
>sp|Q6GJN0|Y443\_STAAR  
mryl|nr|rvly|i|vm|l|svfi|gcdkssdt|sepkeds|keaqi|kksfekt|dmpikn|led|ydegsrdgefkkgdkgmw  
tiytdfaksnkqgg|l|sneg  
mvl|yl|drnr|rtakghy|fvktfyekdkf|pdrkkykvemknnki|l|l|dkvedpk|l|kkrienf|kffgqyan|l|kelknyngdv  
sinenvpsydakfkmsnk|d  
envk|q|l|rsryniptd|kapv|l|kmhidgn|l|kgssvgyk|le|idfsk|geksd|l|svids|l|nfq|pakvnedde  
>sp|Q6GJN1|Y442\_STAAR  
mgy|l|krfaly|ism|l|mfai|agcgknet|kegsketq|kksfakt|dmpikn|led|ydegyrdgefekgdkgmwtiyt  
dfaksnk|sde|l|degm|vl  
l|drnr|rtakgyy|fvkkfyekdkf|sdrknykvemknnki|l|l|dkvndpn|l|kerienf|kffgqyan|f|k|denyngdvs|inw  
npsydveykmsnk|denvk  
q|l|rsryniptd|kapm|l|kmhidgd|l|kgssvgyk|le|idfsk|edrdi|svi|dylsykpakk  
>sp|Q6GJN2|Y439\_STAAR  
mgy|l|krfaly|ism|l|mfai|agcgknet|kegsketq|kksfakt|dmpikn|led|ydegyrdgefekgdkgmwtiyt  
dfaksnk|pge|l|degm|vl  
l|drnr|rtakghy|fvttfy|rngk|l|pdeknykiemknnki|l|l|devkddk|l|kqkienf|kffgqyan|l|kelknyngdvs|ine  
npsydvefkmsnk|denvk  
q|l|rsryniptd|kapm|l|kmhidgd|l|kgssvgyk|le|idfsk|rensk|l|svie|flsykpakk  
>sp|Q6GJN3|Y438\_STAAR  
mgn|k|s|faly|isi|l|l|l|ivv|vagcgksd|tkeds|keeqikksfakt|dmpikn|led|ydegyrdgefkkgdkgtw|llt  
sfsk|snkp|de|iddegm|vl  
l|nrntk|katgyy|fvnkiy|ddi|sknqekkyr|velknnki|v|l|dnvedek|l|kqkienf|kffs|qyad|fkd|l|knyq|dgs|ittn  
enipsy|eaeyk|l|nnsdenv  
kk|l|rdi|ypi|ttk|kapi|l|kl|hidgi|kgssvgyk|k|eyk|fsvk|kdqett|l|rdy|l|nfg|psdeds  
>sp|Q6GJQ6|GUA\_STAAR  
memakeqel|l|l|v|dfgsqyn|l|l|trri|remgyse|l|hdhe|isie|ekmnpk|gi|l|sggpns|vyeegs|ftid|peiyn|lgi  
pv|lgi|cygm|q|l|ttk|l|lggk  
veranerey|gkai|inaks|del|fag|l|paeqt|vwmshs|dkvie|iepeg|fevi|adsp|styaai|edkkrriy|gvqf|hpevr|hte  
ygn|d|l|nnf|vrrv|cdckgq  
wtmen|fie|ie|eki|qr|v|gdr|rv|l|camsgg|vd|ssv|vav|l|l|hka|igdq|l|tci|fv|dhg|l|l|rk|geg|dmvmeq|fgeg|fmni|ir  
vna|kdr|f|mnk|l|kgv|sdpeq  
krki|ignef|vyv|fd|eask|l|kgv|df|laqgt|lytd|vie|sgt|ktaqt|ikshh|nvgg|l|pedme|felie|pint|l|fkdevr|k|lgi  
elgipeh|l|vwr|qp|fpgpg|l

Tsompanidou\_et\_al\_Supplemental\_FASTA\_File

girvlgeitedkleivresdailrqvireeglereiwqyftvlpniqsvgmgydyrtydhtvgiravtsidgmtsdafari  
dwevlqkissrivnevhdhv  
nravyditskppstiewe  
>sp|Q6GJQ9|XPT\_STAAR  
mellgqkvkedgvviderilkvdgflnhqidaklmdvgrtfeqfkdkgitkiltieasgiapaimaalhfdvpcifak  
kakpstltdgyyetsihsf  
tknktstvivskeflseedtvliddflangdaslgydiaqqanaktagigivveksfqngqhrleagltvsslckva  
slegnkvtlvee  
>sp|Q6GJR6|NFRA\_STAAR  
msdhvynlvkhhsvrkfknkplsedvkkiveagqsastssflqaysiigiddeqikenlrevsgqpyvvengylfvfv  
idyrrhhlvdqhaetdmen  
aygstegllvgaidaalvaeniavtaedmgygivflgslrndvarvreildlppyvplfgmavgepaedengaakprlp  
fdhvfhhnkyhadketqya  
qmadydqtiiskyddrtngnrketwsqqiemflgnkarldmleqlksgliqr  
>sp|Q6GJX5|U409\_STAAR  
mkklttlllastlliaacgnddskkddsktskkddgvkaelkqatkaydytdeqlneflkgtefkvkaienndmaqaka  
lypkvrmyersepvaeaf  
gdldpkidarladmkeekkekewsgyhkiekalyedkkiddvtkkdaqllknakelhakadtlditpklmlqgsvdlln  
evatskitgeeeiyshdtl  
ydfkanvegaqkiydlfkpilekkdkklsddiqmndkvnklldkykdnggyesfekvskkdrkafadavnalgeplsk  
mavite  
>sp|Q6GJX7|Y338\_STAAR  
maslknkhfmiglsltfivalfsflaaklpildkvgaltiailiailyrhfkgyepeyssgitfsskyllrfaiilyglk  
lnifdiiggqsrllaidvg  
vvi fsivmm lfvnkllrgdknia lllvggtgvcgaaiaavapifksrekdtaisigiialigtifsliytaiyaismt  
tnvygawsgvslheiahvv  
laggfgsdalkiallglgrvflilpltililimrfrsnessskgrisyfpligfvimalvntyvtipsvllnilnt  
vsticllmamvalglvaf  
kdlknralkpmtiitsicllsllafivvhwlys  
>sp|Q6GJY2|MEPA\_STAAR  
mkdeqlyyfekspvfkammhfslpmmigtllsviyglniyyfigfledshmisaisltlpvfailmglnlfgvgagtyi  
srllgakdyskskfvssfs  
iyggialglivilvalpfsdqiaailgargetlaltsnylkvmlsapfvilffileqfaraigapmismigmlasvgn  
iildpilifgfdlnvvgaa  
lgtainvaaalffiyfkmnsdvsvniklakpnkemlseifkigipafmsilmgftglvlnlflahygnfaiasygi  
sfrlvqfpeliimglcegv  
vpliaynfmsnkgmrdvikaivmsigvifvvcmiavftighmvglfttdqaivematfilkvtmtslllngigflftg  
mlgatgggrgatimailqg  
vviipvlfimnalfgltgviwsliaeslcalaamlivyllrdrldvttselieg  
>sp|Q6GJZ6|LIP2\_STAAR  
mlrgqeerkysirkysigvsvlaatmfvvtshaqasekipttnaaaqketlnqpeqgnaitshmqsgkqlddmhke  
ngksgtvtegkdmqlsskh  
qstqnskiirtqndnqvkdqserqgskqshqnnatnkterqndqiqnthhaerngsqsttsqsndvdkspqsiqaqvip  
nhdkaaptsttppsndkta  
pkstkeqdattdkhpngqdtqhpahqidakqddnvhsnqkppvgdlskhdgqnspekptdkntdnkqlikadalqapk  
trsttnaadakkvrplka  
nqvqplnkypvfvhgfllvgdnapalypnywggnykvielrkqgynvhqasvsafgsnydravelyyyikgrvdy  
gaahaakygherygkytg  
imnpwepgkvhlgvsmgqqtirlmeeflringnkeiayhkahgeispftgghnmvasittlatphngsqaadkfg  
nteavrkimfalnrimgnk  
ysnidlgl tqwgfklpnesyidyirkvskskiwtssddnaaydltlngsaklnmmtsmnpnityttytgvsstgplgye  
npdltgfflmdttsriigh  
darewrkndgvvpvisslhpsnqpfvntndepatrrgiwqvkpiiqgdhvdfigvdfldfkrkgaelanfytgiind  
llrveateskgtqlkas  
>sp|Q6GK24|ESSC\_STAAR  
mhkliikynkqlkmlnlrdgktytisederaditlkslgevihleqnnqgtwqanhtsinkvlvrkgdlldditlqlytea  
dyasfaypsiqdtmtign  
ayddmviqslmnaaiikdfqsiqetqyvrihdkntdvyinyelqeqltnkayigdhiyvegiwlevqadglvlsqntv  
asslirltqemphaqaddy  
ntyhrspriihreptddikerppqpiqnntviwrsiippvlmialtvviflvrpigiylmmigmstvtivfgittyf  
sekkkynkdvekrekdyka  
yldnkskeinikaqrflnyhyptvaeikdivetkapriyektshhhdflhyklgianveksfkldyqeeefnqrde  
lfddakelyefytdvegap  
lindlnhgpiayigarhliilee lekmliaqlstfhsyhdleflvtrdevetlkwarwlphmtlrgqnrgrfvynqrtrd  
qiltsiysmikeriqavre  
rsrsneqii ftpqlfvitdmsliidhvileyvndlseygislifvedvieslpehvdtiidiksrtegelitkekelv  
qlkftpenidnvdkeyiar  
rlanlihvehlknaiipsitflernynvekdqldvnrwrqnetyktmavplgvrkgddilslnlhekahghglvagtt

Tsompanidou\_et\_al\_Supplemental\_FASTA\_File

gsgkseiigsyilslnainf  
hpheavflldykgggmanlfkdvlhlgvtitnldgdeamraltsikaelrkrqrlfgehvnhinqykhlfkegvatep  
mphlfiisdefaelkseqp  
dfmkelvstarigrslgihlilatqkpsgvddqiwsnskfklalvkvdrqdsneilktpdaaditlpgraylqvgnnei  
yelfqsawsgatydiegdk  
levedktiymindyqqlqainkdlsngledeetkenqteleavidhiesittrleieevkrpwlpplpenvyqedlvetdf  
rklsddakeveltlglkd  
vpeeqyggpmvlglkkaghialigspgygrttflhniifdvarhhrpdqahmylfdfgtnglmpvtdiphvadyftvdqe  
dkiakairkihdiiserkr  
llsqervvnieqynketgnsipnvfliidnydtvkespfmeeyeemmskvtregralgyviiilsgsrssaiksaiftnik  
trvalylfenneltniigs  
ykkgykdvkgraaiddnftqfqiapfelaegqtyneriknevaqmkefyvgdypkhipmmpdkvfmedi reaydleki  
iheehklplgldefdelv  
sdlstsssiyvtaiaktekemndvimsslsvysknqfvilvdaednmsqysedvtsyysapsdlsnirlgfkqeiarkn  
geksieeckivfinnikrf  
nqltgmtedeirvlfnegqkvniiasglsydtigafdrskmmvrtinqalishkiseqefirvkdrfgepelkvgem  
yyinnqeyqkiklmeg  
>sp|Q6GK35|LYTM\_STAAR  
mkltaaaiaatmgfatftmahqadaaettntqqahtqmstqsqdvsgtyyitidsngdyhhtpdgnwnqamfdnkeysyt  
fvdaqghkhyfyncypkna  
nangsgqtyvntagdnndytasqsqghinqygyqsnvgpdasyshsnnnqaynshngngkvnypngtsnqnggsask  
atasghakdaswltsrkql  
qpygyhgghahgydvampenspvysltdgtvvqagwsnygggnqvtikeansnyqwymhnnrltvsagdkvkagdq  
aysgstgnstaphvhfqr  
sggignqyavdptsylqsr  
>sp|Q6GK41|RBSU\_STAAR  
msivalliglgpligwffptvaskfggkpvhqiiigatvgtlifailavvtssgfptgtnllfallsgagwfgqiitf  
kafelvgssrampvttafq  
llgaslwgvfalgnwpgighkiigftalvviligarmtwserkeasnaknlrravllligefgywlysaapqatsidg  
ltaflpqamgmviavaiyq  
fmmkaenpfrnkjtwlqisgffafgaltylisapnmnglatgfilstsvlatltgiyflkqhktkemvitiig  
lvilvaasvtvfi  
>sp|Q6GK50|LRGA\_STAAR  
mvvkqkdaskpahffhqviaialvlfvskiesfmpipmpasviglvllfvllctgavklgevekvgttlttnigllfv  
pagisvvnslgvisqapfl  
iigliivstlilictgyvtqiimkvtsrskgdkvtkkikieeaqahd  
>sp|Q6GK51|LYTR\_STAAR  
mkaliiddeplarneltyllneiggfeeinaenvketleallinqydiifldvnlmdengielgakiqkmkeppaiifa  
tahdqyavqafelnatdyi  
lkpfgqkrieqavnkvratkaddnsanaianmsanfdqslpveiddkihmlkqgniigigthngittihhtnkyett  
eplnryekrlnipayfiri  
rsyiantkhikevqqwfnytmviltngvkmqvggrsfmksdfkasigll  
>sp|Q6GK73|LDH1\_STAAR  
mnkfknkvvligngavgsiyafslvnqsiidelviidldaekvrgdvmdlkhatpyspttvrkageysdchdadlvi  
cagaaqkpgetrldlvskn  
lkifksivgevmaskfdgflvatnpvdi layatwfkfsglpkervigsgtildsarfrllseafdvaprsvdaqiigeh  
gdtelpwshaniagpplk  
tllqrpegkaqieqifvqtrdaaydiqakgatyygvamglariteaifrnedaavltsallegeydeedvyigvpavi  
nngirrvveiplndeeqs  
kfahsaktlkdimaeeelk  
>sp|Q6GK92|Y215\_STAAR  
mtaykpyrhqlrrslfastifpvflviiiglvsfyayiwiehartihqhvdessslhhtekqitftiqhnnsfqeldl  
tnhhdvtatkrellklihq  
qpatlyyelsgpnqfitnnyehlntknmylfsthqlkfknstymkiiyantprlseikkdsrqfalivdqydnilyand  
drftigekyrpqgfgfmne  
svklnhadhrliiykdiheniedgitllivmavvlvllvifgfisadnmakrqtkdietiiqkiyyaknrhlgtypkln  
nseleeinnyiydlfesne  
qlihsiehterrldiqlkeierqfphflfntmqtiqylitlspklaqtvvqqlsqmlryslrtnshtvelneelyie  
qyvaqnirfddmiklie  
sseeahqtigkmmqlpienaikhgrdteslditirltlarqnlhvlvcdngigmssrlqyvrslnndvfdtkhlg  
nhlhnkamiyqgsharlhi  
fskrnqgtlicykiplsrgnvdv  
>sp|Q6GKA4|AZOR\_STAAR  
makvlyitahpfnelvsnmaagkafietyqqhpedevkhidlfetyipvidkdvltgwgkmsngetltdeeqmkvsrl  
sdileeflsadkyvlvtpm  
wnlsfppvkvayidaaisagktfkysaegpqltdkkvlihsrggyytegpaadfemgdrylrtimtflgvpsyeti  
ieghnaephkteekatsi  
nnaeklattf

Tsompanidou\_et\_al\_Supplemental\_FASTA\_File

>sp|Q6GKB4|PTXBC\_STAAR  
mtkeqqlaeriaavggmdnidsvmncmtrvrikvldenkvddqelrhidgvmgviheriqvvvpggtvnkvanhmael  
sgvklgdpi phnhndsekm  
dyksyaadkakankeahkakqngkl nkv lksiani fi pl ipafigagliggiaavlsnlmvagyisgawitqlitvfnv  
ikdgm lay laiftginaak  
efgatpgl ggviggttlltgiagkni lmvftgepl qpggggi igvifavwilsivekr l hkivpnaidiivtptialli  
vglltifi fmp lagfvds  
lsvvngi isiggvfgfi igasfl pl vml gl hhi ft pi hi eminqsgatyl l piaamagagqvgaalalwvrckrnttl  
rntlkgalpvglgigep  
iygvtl pl grpfltaciggiggaviggighigakaigpsgvsll pl isdnmylgyiagllaayaggfvctylfgttkam  
rqt dl lgd  
>sp|Q6GKC2|ARGC\_STAAR  
mikvgivggsgygaie lirl lqthphvtiahiyshskvdeplkl t fphl qhimqhfealtvdnndcdviffatpapvskt  
cjpplvekgihvidlsgaf  
riknreiyeayyketaaaqddl nhaiysi sewqsl dngtkl isnpgcfptatlla l hplisekivdlssiiidaktgvs  
gagrslsqrvhfsemnenl  
sayaignhkhkpeieqyls iagqdvsvi ftphl vpmargil stiyvkl sseyttes l hklmtsyyanqpfvri rdigt f  
pttkevlgsnycdigi yvd  
ettqtailsvi dnlvkgasgqaiqn lni lydfevttglkqspvyp  
>sp|Q6GKE0|ISDI\_STAAR  
mfmaenrlqlkgsaetierfynrqgi etiegfqmfvkt lntkdtdevki ltiwesedsfnwlnsdvfkeahknvr  
lksdddggqspi lsnkvfk  
ydiyhyqk  
>sp|Q6GKG3|PHNC\_STAAR  
msqikfknvskvypnghvg lknin lniekgefavivglsgagkstllsvnr lhditsgeifiqgksitkahgkalle m r  
rnigmi fghfnlvkrssvl  
rnvl sgrvgyhptwkmvlg lfpkedkikamdaler vni ld kynqrsdelsggqqqrisi aral cqesei il adepvasld  
plttkqvmdl rkinqelg  
itil in lhfvd lakeygt rii gl rdgevydgpaseatddvfski ygrtikedeklgvn  
>sp|Q6GKG7|DEOC1\_STAAR  
mkfekyidhtllkpestrtdiqi ideakaynfksvcvnpthvkyaerladsevlvctvigfplgasttatkvfeteda  
iqngadeidmvinigalkd  
grfddvqqdieavvkaaeghtvkvii etvll dhdeivkase l tkaagadfvktstg faggataedvklm kdtvgadvev  
kasggvrn ledfnkmveag  
atrigasagvqimqgleadsdy  
>sp|Q6GKH9|BUTA\_STAAR  
mtnnkvalvtggaggigfkiaer l vedgfkvavvdfneegakaaalkl ssdgtkaia ikadvsnrddvfnavr qtaaqfg  
dfhvmvnnaglgpttpid t  
iteeqfktvygvnvagvlwgi qaaheqfkkfnhggi inatsqagvegnpglsl ycstk favrgltqvaaqdlasegitv  
nafapgi vqtpmmesiava  
taeeagkpeawgweqfts qialgrvsqpedvsnvvsfl agkdsdyitgqtiivdggmrfr  
>sp|Q6GKK2|Y106\_STAAR  
mkrlnklvlginlflvis itagcmgkeaeikksfekt lsmypiknedlydkegyrddqfdkndkgtwivrssmsiqp  
ngkdmnvkgmvl ymnrnsr  
ttngyyyyvdvierqdkghrdnekkypvkmvdnki iptkdikdenikkeienfkffaqygsfkdlskykegd isynpevp  
sysakyql tnddynvkqlr  
krydiptnkapkl l lkg tgn lkgssvgykdi eftfvekkgeniyfsdshlepsedk  
>sp|Q6GKL1|Y097\_STAAR  
meknqrkkr sdaeynqqi lttmedl leggedistkmsdiaki sgvgvtlyrhfesktllcqaimdkkvdqmfi eied  
ilaentqwpvr dkinvilt  
kyldlkeanfttlnfi ekssshsssvinipffer lknlliqqfenvhsiadldfkl nlmnafssdfyyfvkhnqkltkq  
qfldklldlylk  
>sp|Q6GKM5|YM4C6\_STAAR  
mleli tdfskksfknysmkeelkfnaini iygvnrgktslargikeiieennpds lryfytdyihel lllledsnkfkgv  
katfgtknveienkiiklk  
nevvdmtdtkkl lvekrkl relineihksrkgnlkiplkssnksieeviaiyeknlkdakkiehniesirnfvetl  
ynkynsiyevmipslkiet  
ydvdr ltki lqnytdikipsfevidwlrngle lhnveesickfcgnlnynlikeieiyllnekkkdfdyldkveksi  
eqlsdnye qylsnidifvn  
elgvqksveeslgds ideikrilkqklngm endnlkfpsddyitl isrlseieeekkkkiklkelnkkteninvitg  
sisleilenqsi reelssi  
qyeeneckkqeq lneeinakis lhenqsdyndfkiylngvfesinlhir lksdettqnylyhdlenislnikdisege  
knliaflffylfedekq  
etiksni ktl iiddpinsfdeanrfyvlelikkv lkskfnqififthswndfcdityrlkgedhnfyevykdhqgtsfle  
kfkkvktpykklfqeiye l  
srksqkdi veedcyyyhsinsirrvfeefl sflknsdl aqksnqpeieevyrkmtgnemsnnkkiklgsfltiinvlsh  
kpyraidvigsakflmryi  
edvdkahydakmd



Tsompanidou\_et\_al\_Supplemental\_FASTA\_File

>sp|Q6GKN4|ATKA2\_STAAR  
msivflivfillslivsrylsvainvpskidvfnpielikliyqligtklehmsgkyikhflfnglmgglsfvllli  
qqwflnnpnhlnqsvsla  
fntmasfltnnlqhyagetdlsytlqmcvitflmftsaasgyavciamlrrltgmdvignfyqditrfivrvlipfal  
iisflisqgtpqtkgnl  
vietlsgvkqtiaygpmaslesikhltngggfngansstpfenptywsnyaeaalsmmlipgslvflfgrmlkklqihp  
haimifvamfvfifglvt  
clyfefagnpvlhhlgiaggnmegketrfgiglsalfttittafttgvtnmhdsltplggmvpmvlmmlnavfggegvg  
lmmllyvmltvficslmi  
gktpsylgmkiegkemkliasflvhp11ilvfsalafivpgasdaltnpqfhgvsqvyeftsssangsgfegldnt  
vfnistgivmlaryipi  
vlqilivsslvnkkttyqghtqdvpinlffssvliifiillsgltflpdlmlgpigeql11ha  
>sp|Q6GKT9|GYRA\_STAAR  
maelpqsrinernitsemresfldyamsvivaralpdivrdglkpvhrriylglneggmtpdksykksarivgdvmgkyhp  
hgdlsiyeamvrmaqdfsy  
ryp1vdgqgnfgsmddgaaamrytearmktitelldrinkdtidfidnydgnerepsvlparfpnllangasgiavgm  
atnippnlteingvsl  
sknpdisiaelmediqpdfptag1ilgksgirrayetgrgsiqmrsravieergggrqrivvteipfqvnkarmiekia  
elvrddkidg1tdlrdets  
lrtgvrvidvrkdanasvilnnlykqtplqtsfgvnmialvngprk1inlkealvhylehqktvrrrtqynlrkakdr  
ahileg1rialdhideiis  
tiresetdkvameslqqrfklsekqaqaildmr1rrltglerdkieaeynellnyiseleailadeevllqlvrdeltei  
rdrfgddrrteiq1ggfed  
lededlipeequivitlshnnyikr1pvstyraqnrggrgvqgmntleedfvsq1vltlsthdhv1fftnkgrvyklkgyev  
pelsrqskgipvnaiele  
ndeiistmiavkdlesedflvfatkrvkralsnfsrinrngkiasfredde1iavr1tsgqediligtshas1ir  
fpest1rplgrtatgvkgi  
tlregdevvgldvahansvdevlvvtengygkrtpvndyr1snrggkigtatiterngnvvcittvtgeedlmivtnag  
vi1rldvad1sqngraag  
vr1irlgddqfvstvkvkedadeenedeqstvsedgteqqreavvndetpgnaihtevidsevndedgrievrqdfmdr  
veediqqssdde  
>sp|Q6GKU0|GYRB\_STAAR  
mvtalsdvntdnygagqivlegleavrkrpomyigstserglhhlvweivdnsidealagyanqievviiekdnwikvt  
dnrgripvdiqekmgrpav  
eviltvlhaggkfggggykvsgl1hvgvssvna1sqd1levyvrnetiyhqaykkgvppfd1kevgttdktgtvirfka  
dgeiftettvnyetlqqr  
irelaf1nkgiqt1lrderdeenvredsyhyeggiksyvellnenkepihdepiyihqskddieveiaiqynsgyatn1l  
tyannihtyeggthedgfk  
raltrvlnsyglsskimkedkdr1sgedtregrmtaiisikhgdpqfegqtktklgnsevrqvvdklfsehferflyenpq  
vartvvek1gimaaravaa  
kkarevtrrksaldvas1pgkladcsskspeeceif1vegdsaggstksgrdsrtqailplrgkilnvekarldrilnn  
eirqmitafgtgiggdfdl  
akaryhki1vmtdadvdgahirt1l1tffyrfmrplieagyvyiaqpplyk1tqgkqkyvyndrel1klk1se1nptpkw  
siaryk1gemnadqlwet  
tmnpehral1qv1ledaieadqtfem1mgdvvenrrqfiednavyan1df  
>sp|Q7A005|SART\_STAAR  
mnd1ksksnik1mkrv1t1tyelrky1kkyfcl1tdny1vlay1dvfkndegkyfmr1diisyigidqsrivksvkel1skg  
ylnkcrdphdsrnvi1vvs  
vkqhn1yikn1l1seininet  
>sp|Q7A019|HLGC\_STAAR  
m1knkilatt1svs1laplanp1lenakaandtedigkgsdieiikrtedktsnkwgv1tqniqfd1fvkdkkynkdal1k  
mqgfissrttyynkktnh  
vkamrwpfqyn1g1k1tndkyvs1iny1lpknkiestnvsqt1gyn1ggfnqsaps1ggngsfnysksisytqqnyvseveq  
qnsksv1wgvkansfates  
gqksafdsd1fvgykphskdprdyfvpdse1pp1vqsgfnpsfiatvshekgssdtsefeitygrnm1dvthaikrsthyg  
nsy1dg1hrv1hna1fvnrny1t  
vkyevnw1kthe1kvk1ggn  
>sp|Q7A012|PTPA\_STAAR  
mvdvafvcl1gni1crspmaeaimrqr1kdrni1hdikvhsr1gtgsw1lgepphegtqk1lnkhn1pfdgm1sel1featddfd  
yivamdqsnvdn1k1sinp1  
1kgq1fk1l1efsnmees1vdpdyt1nnfegvydm1v1sscdn1idy1vkdan1keg  
>sp|Q7A011|Y1806\_STAAR  
mikry1qfvkpykyri1fati1vgi1kfgipm1lip1li1kya1dgvinnh1alttdekvh1h1tia1gialfi1fvirppiefi  
rqy1laq1wtsnki1ydi1rkk  
1ynh1qa1sarfyann1gvq1visrv1ndveqtkdf1iltg1lmi1w1dciti1ialsimff1ldvkl1tlaal1fipfy1iltvy  
vffgr1rkl1trersq1lae  
vqgf1her1vqgi1svk1sfa1iedneakn1fdkkt1nfl1tra1lkh1trwnaysfa1aintv1tdigpi1ivigvgay1aisgsitvg  
t1aafvg1yle1l1fgp1rr1

Tsompanidou\_et\_al\_Supplemental\_FASTA\_File

vasfttlqtgsfasmdrvfqlidedydikngvgaqpieikqgridihvsfyndneapilkdinlsiekgetvafvmsg  
ggkstlinliprfydvtsq  
qilidghnikdflltgslnrniqlvqqdnifsdvtkenillrptatdeevveaakmanahdfimnlpqgydtevgerv  
klsggqqrllsariflnn  
ppilildeatsaldlesesiiealdvlskdrttlivahrllstithadkivvienghivetgthreliakqgayehlysi  
qn1  
>sp|Q7A0L8|ROT\_STAAW  
mhk1ahtsfgivgmfvntcmvakyviinwemfsmkkvnndtvfgilqlletllgdinsifseieseykmsreeililltlw  
qkgsmtlkemdrfvevipy  
krtrtynnllvelewiyperpvdertviihfnekllqqekvellnfisdaiasratamqnslnaiav  
>sp|Q7A0N0|Y1653\_STAAW  
mitykni1iavdgsheaewafnravgvakrndakltivnvidsrtysseyvydaqftekskhfae1l1ngykevatnagv  
kdvetrlefgspksiipkk  
laheinadlimsgtsglnaverfivgsvsesivrhapcdvlvrteelpadfpqpvattqlrekyqn  
>sp|Q7A0V5|Y1336\_STAAW  
mvktvyvtgyksfelni1fkddapevhy1kqfikkkieqlldeglewl1iqggmgie1lwaevv1elqrtydskfavitp  
fgghtekwnehnqskyani  
ikhadyvdsifhtsyqgpfqfkqadqfmlehsdqtlliydeeqeaspkffkqmlvdfmdktnytcdivtfdeltafindl  
qwsedqsf  
>sp|Q7A0W8|Y1299\_STAAW  
mal1khyknsdstvfndakal1fdlnkni1llkgptgsgtklaet1sevdtpmhqvnscsvldtes1llgftikt1naegqq  
eivfvdgppvikamkeghil  
yideinmakpetlpv1ngv1dyrrqitnpytgevikaavgfnviaa1negyvgt1pmneal1knrfvvi1hdv1dgdilkn  
vikeqsl1qddkqieqii1k  
fnd1rtmskqgqiseeasira1ld1cdlitvmpveraikrti1dkledereqqaiynave1nf  
>sp|Q7A0W9|BRNQL\_STAAW  
mnkntwv1gft1famffgagn1ifppn1gl1dsgqffwpailafv1tgig1pl1lgv1vga1dkegyiga1nkispkfsilf  
lii1y1tig1pl1faiprtas  
tsfent1tpi1hsns1ial1fifti1y1fiv1vlyic1npsk1idrigs1l1tp1l1l1tilami1kgyl1dfsgnsagkgnealy  
hsnf1ssfaegftqgyl1tmd  
aiaa1afsm1vnavk1lgt1ktnqi1fkqt1tag1iaava1l1fiy1is1gy1ghmpvsdmt1dq1kskdrnigty1l1ttm  
astgfgsfgky1l1gi1val  
acl1ttacg1livavseyfhrivpkvsykafv1lvf1lmsf1ianqg1navismsip1vsivypvaitv1l1l1liakf1ptkr  
isqqipv1iivf1ilsifsvi  
sk1gw1kinf1ies1pl1rays1lewfpvaiiatil1gyl1vgifvkqdpikyqqe  
>sp|Q7A166|MNTN\_STAAW  
mnkrhstneq1sl1dein1tikf1dhrssnkqkfl1sfl1pgg1lvavgympgnwitsmqggaqygyt1l1fvil1iss1sam1  
lqsm1vr1giatgmd1laqm  
trhy1srp1ai1fwia1el1aiat1diaev1gsaia1n1l1fn1pl1vga1litv1ldv1l1l1f1imkygfrkieaivgt1l1ftv  
l1fif1fevy1issp1q1nav1  
ngf1iph1sei1tngi1yial1gi1gat1imphn1yl1hssiv1qsrtysrh1nneekaqaikfatidsniq1lsiafvnc1l1l1v1  
gas1l1ffns1nadd1ggfyd1l  
yha1ktep1vgatmgaim1st1fava1llasgqnst1itgt1lagqivmegfl1rlhipnw1lrr1l1trslavipv1vcl1iifkgn  
aakieq1llv1fsqv1lsial  
pfc1lip1qlatsnk1d1mgpfynktwvni1swt1lii1lsilnvy1livqt1fqelqs  
>sp|Q7A169|POTA\_STAAW  
mep1l1slksv1sksydd1ni1l1ddididiesgyfyt1l1gpsgcgktt1k1liagfeypdsgeviyqnpign1ppnkrkvnt  
vfqdyal1fph1nvydn1iaf  
g1k1kk1skte1dqkvtea1klvkl1sgyekrn1nemsggqqrvaia1raivnepe1l1l1des1sald1kl1rtemqyelre  
l1qsr1git1fiv1thd1qeea  
l1alsdf1l1fv1kdgki1qqfgt1ptdi1ydepvnr1fvadfigesnivegrmvr1dyvvn1yqgdfecvdm1gipenkkvev1rpe  
dis1likaeeg1fk1atv1dsm  
l1frg1vhye1icci1dnkg1yewv1iqt1tkkaev1gsevg1yfdpea1himvp1getee1fdkriesyeev1dna  
>sp|Q7A1B9|DHE2\_STAAW  
mtenn1l1vtstqgi1keal1hkl1gfdegmyd1likep1rm1lqvripvr1mddgtvktftgyraqhndav1gptk1ggvr1fhp1dvd  
eeevka1smwmt1kcgivn  
l1pygggk1g1vcdprqms1i1hever1srgyvra1sqfvgnk1dipadv1ftnsq1imawmmdeysal1dkfns1pgf1itgkpiv  
l1ggshgrdr1sta1lgv1iai  
eqaakrrnm1qiegakvvi1qgfgnags1flak1flyd1lgakiv1gisdayga1hdpng1ldidy1l1drds1fgtv1n1feet1sn  
kel1fel1dcd1ilvpaa1isnq  
i1tedna1hdikasivveaangpttpeatri1lterg1illvpdv1lasaggvtvsy1fewvqnnqgyy1wseeevnek1rek1lea  
fdtiy1elsqn1rkidmr1laa  
yi1gikrtaea1aryrgwa  
>sp|Q7A1J1|SAER\_STAAW  
mth1l1ivddeg1divd1cq1tyfeyegykv1ttts1gkeais1l1sndi1dimv1ldimpevngydivkemkrqk1dipfiy1lta  
ktqehdti1yal1lgaddyv  
kkpfspre1lv1rin1l1trmkkyhhq1pveq1sfdel1tin1skvvtvnghevpm1rikef1ellwylasrenev1sksel1le  
kvwgydy1yedantv1nvhih

Tsompanidou\_et\_al\_Supplemental\_FASTA\_File

rireklekesfttytittvwglgykfersr  
>sp|Q7A2K9|ATRF2\_STAAM  
mtekekm1aekwydanfdqdlinerarakdicfelnhkpsdtnkrkelidqlfqttdnvsisipfdtdygnvklgkn  
vyvntncyfmdggqitigd  
nvfigpncgfyatphlnfyhrnegyekagpihigsntwfgghvavlpvgvtigegsvigagsvvtkdipphslavgnpck  
vvrkidndlpsetlndeti  
k  
>sp|Q7A2Q9|SPLD\_STAAM  
mnkniiiksiaaltitstigtvgttvvdgiqqtakaensvklitntnvapysgvtwmgagtgfvvgnhtiitnkhvtyhm  
kvgdeikahpngfynggg  
lykvtkivdypgkedivvqveekstqpkgrkfkdfstskfniasenepisvigypnpgnklqmyestgkvlsvngn  
ivtsdavvqpgssgspiln  
skreaigvmyasdkptgestrsfavyfspeikkfiadnlk  
>sp|Q7A2R3|Y1889\_STAAM  
mndqwykhligartiktgiaifltavfcmaldltpiyailtavvtieptakaslikgyrrlpatvigagfavlflylfgd  
qspftyalsatftilfctk  
lk1qvgtnvavltslamipgihdayifnflsrtltaiiglvtsglinfmvfppkyygqveeklsktdalmyklfynrcqe  
lilsrlqsdkseayknif  
nlnnqvetsisyqrde1syhkkkecdwkllnqltkraytnrlfithlsniy1pkntrvnfsgdekmal1kissikdif  
ydgtfkreddsvelrsti  
kaleisgenqikshilyevlmiyrllsrya  
>sp|Q7A3E0|CRTQ\_STAAN  
mkwlsriltvvtmsmacgalifnrrhq1kktlfnfhkaltiiparneekrighllhsiiqqvvpdvivmndgstde  
tarvarsygatvvvdvddt  
dgkwygkshacyqgvthactnriafvdadvtf1rkdavet1inqy1qgekgllsvqpyhitkrfyegfsainlmtvvg  
mrvfst1ddgrtnghafgp  
vtltnkedyatgghksanrhiiegfalgsaytsqslpvtvyegfpfvafmyqegfqs1qegwtkh1stgaggtkpkim  
taiv1w1fgsiasilglcl  
s1kyrqmsvrkmalysyttqfiylhrrvgqfsnllmvchp1l1mfftkifiqswkqthrygvvewkgrqysiskeq  
>sp|Q7A3E6|COPA\_STAAN  
mantkkt1d1tgmtcaacsnr1ek1nk1ddvnaqvn1ttekatveyndqhdvqefintiqlgygvtvetvelditg  
mtcaacs1r1ek1v1nk1mng  
vqnatvn1tteqakvdypeetdadklvtri1q1k1gydasikdnkdqtsrkaealqhklikliisav1slp1l1m1mfvh1  
fnmhipalftnpwfqf1la  
tpvqfi1gwqfyvgaykn1rngganmdvlvavgt1saayfysiyemvrw1ngsttqphlyfetsav1l1l1fgky1eara  
ksq1tnal1gell1slqakea  
ri1kdgnevmp1lnev1hvgdt1ivkpgk1pvdgk1ikg1mtaidesm1tgesipveknvddt1vigstmknkgt1tmtatk  
vgd1tal1ni1kvveeaqs  
skapiqr1ladi1sgyfvp1vvgial1l1fi1vwit1vt1pgt1fepalvasisv1viacp1cal1gat1pts1imvgt1graaeng1l  
fk1g1gef1verth1qid1t1v1d  
ktgt1itngr1pvt1dyhgd1nqt1q1l1ataek1dsehp1lae1ivnyakek1q1l1t1t1t1t1fkavpgh1gieat1idh1h1lvgnrk  
1madnd1slpkh1sdd1l1th  
yerdgktam1iavny1l1gtgi1avadt1vkdhakdaik1q1l1hdm1gievam1tgd1nkntaqaiak1qvg1d1tviad1l1peeka1q  
i1ak1l1qqg1k1vam1vgd1gn  
dapal1vkad1gia1igt1teva1ieaadi1l1ggd1m1lipkaiyaskatir1nir1qnl1fwafg1yniag1ipiaa1gl1lapw1vag  
aama1l1ssv1vt1nal1r1kk  
mr1epr1rkda  
>sp|Q7A3G4|PTU3C\_STAAN  
mfkk1l1fgq1l1qrigka1ml1pvail1paag1l1afgnam1hneq1l1vei1apw1l1kndi1v1missv1meaag1qv1fdn1l1p1l1favg1ta  
l1gl1aggd1g1vaa1laal1vgyl  
imnat1mgk1vl1h1t1iddi1fsyak1gake1l1sqaakepaha1vl1gipt1l1qtg1v1fggi1imgalaawc1ynk1fynit1l1pp1l1fg1ffag  
kr1fv1p1v1tsv1vai1at1gv1l1  
sfawp1pi1qd1g1ln1sn1fl1nkn1l1t1t1t1fi1g1i1ers1lip1fg1l1h1h1fysp1fw1ef1gsy1tnhage1lvrgd1qriw1ma1q1kdgv  
pftag1aft1tgkyp1fmm1fg1l1  
paaaf1ai1yknarperkk1vvg1l1msag1l1taf1l1tgi1tepl1efs1fl1fvap1vlygihv1l1agts1fl1vmh1l1gvk1igmt1fsggf  
idy1lyg1l1nwd1rsha1l1v  
ipvgi1vya1ivvy1fl1dfai1rk1fk1l1ktpgredeeteir1nssvak1pfdv1ldamggkenikh1ldacitr1rvev1vdkskv1dv  
agika1l1gas1v1levgn1mq  
a1fgpksd1q1khd1maki1msgei1tkpsett1vteemsdep1vhveal1gttdiyap1vgg1qi1p1l1sevp1dq1vfag1kmm1gd1g1gfi  
pekgei1vap1fdgt1vkt1ifp  
tkha1ig1leses1gvev1l1h1gid1tvk1l1ngegfes1l1invdek1vtqaq1p1mkvn1lay1l1kahapsiv1tpmiit1n1lenkel1vied  
vqdad1pgk1l1imt1vk  
>sp|Q7A3J7|FNBA\_STAAN  
mkn1l1rygi1rk1h1k1gaas1v1l1gtmi1vvgm1gd1keaaaseq1t1t1t1t1veeng1nsat1d1nkt1set1qt1tat1vn1hieet1qsyn1atv  
teqps1nat1qv1ttee1ap1kav  
qap1q1taq1panvet1vkeee1kp1vkett1qp1qd1ns1gn1qr1qv1d1l1tpkk1vt1qn1qgt1tet1qveva1qprt1asesk1pr1v1trs1ad1vaeak  
eas1dv1sev1kg1td1vts1kvtv  
esgsi1eap1qgn1k1v1phag1qr1v1l1kyk1l1kfad1gl1kr1g1dy1fd1ft1l1sn1vnt1y1gv1stark1v1pei1kng1sv1mat1gei1l1gn1nir

Tsompanidou\_et\_al\_Supplemental\_FASTA\_File

ytftneiehkvevtanlei  
nlfidpktvqsngeqkitslNgeetektipvvynpgvsnsytnvngsietfnkesnkfthiayikpmngnqsntvsvtg  
t1tegsnlaggqptvkvyey  
ylgkdelpqsvyantsdtnkfkdvtkemngklsvqdngsyslnldklldktyvihtygeylqgsdqvnfrtelygypera  
yksyyvyggyrltwdnglv  
lysnkadngkngqi iqndnfeykedtakgtmsggydakqiieteenqdntpldidyhtaidgegyvdgyietieets  
saididyhtavdsevghvg  
gyteseesnpi dfeesthenskhhadvveyeedtnpgggqvttesn lvefdeestkgivtgavsdhtti edtkeyttes  
nlielvdelphehgqagp  
ieejtennhhishsglgtenghngnygvieeieenshvdikselgyeggnsgnqsfeedteedkpkyeqgnivdidfds  
vpqihgqkngdqsfeedte  
kdkpkvehggnii didfdsvpqi hgfknkneiieedtnkdkpnyqfgghnsvdfeedtlpkvsgqnegqqtieedttpt  
pptpevpsepetsmpptpe  
vpsepetspptpevpsepetspptpevpsepetspptpevpsepetspptpevpsepetspptpevpsepetspptpevp  
qkvvtpvieinekva  
ptkkaqskkselpetggeestnkgmlfgglfsilglallrrnkknka  
>sp|Q7A3K7|PGCA\_STAAN  
mkgclatmdkelwierandslvkhfyeqqsdieqregfesklftgtagirgkfglgegrlnkftiekla lglarylnaqt  
nsptivihydirhlstefa  
qii anvlanhqitvylpdykttpelsfavrn lnttagimitashnpkdyngikvygsdgaqlstdaselasryieevgd  
plqidipiskantsyikpf  
pksvtdmymkhiqnmigyipksdlqvfts lhgtsvpivpellslnfnqfnlvdaqckpdpnfssvqsanpedhrafdq  
avelankshadllistdpd  
adrlgiaerdahghityfngnqigallnyriqtsqlrhr lmiqsivsseltslarynnvkykevtgfkfiaaeirq  
lddhqnmifafeesygfsl  
epfvrdkdavqivplii kyase lkygk l kdel eqiyqtvrhedtlfshtleglegkkiesimthfrsnppqeiqgl  
kvkaiedyltseyhldkd  
ttsqinssksnvi rvlfdegfi alrpsgtepkiklyvs l kcpdfddvaqkinamifs  
>sp|Q7A3L2|Y2274\_STAAN  
mmhskklmlgiclvllii livgyvimtkinsrsaqikdtfnqtlklyptknl edfydkegfrdqefekgdkgnwivdsem  
vielkdkkmesrsmvlyin  
nrtrttkgnfi vrelwedsqyaqskdtkypvkmehnriiptkpi addklrkeienfkffvqygd fkdindykdgd isyn  
pnvpsysakyqlknddyv  
kqlrkryniptnkakplllkgdgd lkgssigskn leftfvenkeeni yfsdsinfkpte  
>sp|Q7A3L9|Y2266\_STAAN  
mtv l tdkiaavvtgagsgigeaiatllheegakvvlagrnkdklqnvanqlaqdsvkvvptdvt nkeevdelmkiaaqtfg  
gldivinsagqmlsskitd  
yqvdewds midvnikgtlytaqaalptmleqssghliniasisgfevtsstiy satkaavhtitqglekelaktgvkvt  
sispgmvdta itaaynpsd  
rkkldpqdiaeavlyaltqpkhvvnveitvrpv  
>sp|Q7A3W1|FENR\_STAAN  
mlqsi gggpsglyasfyag lrdmsvr lidvqselggkmriypeki iwdiggiapkpcheilkdtikqglyfkpevhne  
rvd irkkaerhfevetea  
geiytskavii aigagi inpkqldvkgveryqltnlhyvvqsyr rfdkdv l isggntal dwahdiakiaksvtvvyrk  
edvsgheamktlvtdlnvk  
lcpktriky lvgnddethisevvl ehvesgdrhtvkfddvii shgfdrcntllsetsskl dmhddcrvk gfgntttsipg  
iyacgd ivyhdakshlias  
afsdganaanl aktyiqpdanaegyvs shhev fkeantivnkhlly  
>sp|Q7A4D4|COAW\_STAAN  
mkvgidaggtlikivqeqdnrtfkte ltknidqvvelnqqqiek lcltgg nagviaeninipaqifvefdaasqglgi  
llkeqghdladyifanvg  
gts lhyfdgqsqrrvggigtggmiqglgyllsqitdykqltdmaqhgd rntid lkv rhiykdteppipgd ltaanfghv  
lhhldadftpsnklaavig  
vvgevvttma itvarefkteniviyigssfhna llrkvvedy tvlrgckpyyvengafsgaigalylgk  
>sp|Q7A4G4|ATKA1\_STAAN  
mei ilfltmvmityvfsgylrvavqssrvdliftrfenmcfki igtdlehmsaktyvkhflafngfmgfitfvlliv  
qqw lflnphilnqsidla  
fntaisfltnsnlqhngesdvtyltqmi vmtylmftssasgyavciamlrrltgltni ignfyqdivrfivrllplsc  
lisillmtggvqt lhanl  
mir t lsg h iqhiafgpias lesikh lgtngggfl agnsatpfenpniwsnfi emgsml l pmsml flfgrmlsrhgkrvh  
rhalilfvamffifiailt  
l tmwseyrgnpi lanlgiygnmegkevrfgaglsalftvittafttgsvnmhds ltpigg l gpmvlmm l nvvf ggegv  
glmn lli fvlltvficslm  
vgktpey l nmpigaremkcivlvflihpililvf salafmipgasesitnpsfhgisqvm yemtsaaanngsgfeglkdd  
ttfwnistgiimllsryip  
iilqlmiasslvnkksyhqdytiaidkpyfgsvlivfivllsglftfivlll gpigefl t l k  
>sp|Q7A4Q9|Y1713\_STAAN  
mqaiakndiktgtvvd l theghgvvki drfpi fipqalineaieyki ikvknfaigklln intrsenrvappciyyerc

Tsompanidou\_et\_al\_Supplemental\_FASTA\_File

ggcqlqhl syeaql emkke  
qvinlfrkahfdnskindvgtmtdpwrnrnsqipvgkneqnevimgfyrqrshdiidmescliqdsqhqvemnevksi  
lkdlnvsiyqeqlkkglmr  
hlvvtgyhtdemmiifvtngkkwpqknavvekil dafpnvtsikqnindshsnvimgrqsitlygkdtiidqltdstfk  
isdqsfyginseqteklyn  
kaieyaqltgnevldtycgitiglymaphakhvygvevvpssiedaqqnatinqcntttfvcgkaeevilqwkaaggik  
pdvvmvdprrkgcdetfiq  
tlltlepkrivyiscnpatqqrda11laekyqleevtpvdmfqtthvetvalfnlk  
>sp|Q7A4V3|Y1663\_STAAN  
mavnlydyanqleqalreseeykaikeafanvkaneeskklfdefretqinfqqkqmgeeiaeedlqkaqeqaqai ekd  
enisalmnaeqkmsqvfe  
inqiivkpldeiyad  
>sp|Q7A4Y1|SPLB\_STAAN  
mknkviks latltiltsvtgigtllveevqqtakaennvtkiqdt nifpytgvvafksatgfvvgkntiltnkhvskny  
kvgdritahpnsdkngggi  
ysikkii nypgkedvs viqveeraiergpkgnfndnvt pfkyaagakagerikvi gyphpyknkyvlyestgpvmsveg  
ssivysahtesgnsqspvl  
nsnne lvgihfasdvknddnrnaygyftpeikkfiaenidk  
>sp|Q7A5M1|EBHB\_STAAN  
mnyrdkiqkfsi rkytvgtfstviatl vflgfnstqaha aetnqpasv vkqkqqsneqtenresqvqnsqnsqnsqsls  
atheneqpnsqanlvnqk  
vaqsstndeqpasqnvntkkdsataattqpdkeeskhkqnesqsankngndnraahvenheanvvtasdsdngnvqhd  
rnelqaffdanyhdyrfid  
renadsgtfnyvkgi fdkintllgsndpinnkdlqlaykeleqavalirtmpqrqtsrrsnriqtrsvesraaeprsvs  
dyqnanssyyvenandgsg  
ypvgtyinasskgapynlpttpwntlkasdskeialmtakqtgdgyqvwikfnkghaphqnmifwfalpadqvpvgrtdf  
vtvnsdgtvqws hqagag  
ankplqqmwegvndpdrshdfkinnrsgqviyswptvhvysledlsrasdyfseagatpatkafgrqnfeyingqkpa  
spgvpkvytfiggdasyt  
isfktqgptvnllyaaagraleynqlfmysqlyvestqdhqqrlngrlqvvrtyrigttkrvevsqgnvqtckvlest  
nlnidfvddplsyvktps  
nkvlgyfptnantnafprggvqelneyqlsq lftdqklqeaartrnpir lmi gfdydpdgygnsetlvpnltvlpei qhn  
ikffknddtqniaekpfsk  
qaghpfvyvagnqgnasvnl ggsvtsiqplrinltsnenftdkdwqitgiprtlhienstnrtnnarernielvgnllp  
gdyfgtirfgrkeqlfeir  
vkphtptitttaeq lrgtalqkvpvni sgipldpsalvylvaptnqttnngseadqipsgytilatgtpdgvhntitirp  
qdyvvfi pppvgkqiravvy  
ynkvasnmsnavtilpddipptinnpvginakyryrgdevnftmgvsdrhsgiknttittlpsgwtsnltsdknksla  
itgrvsmnqafnsditfkv  
satdvnnttndsqs khvsihv gkisedahpivlgn tekvvvnptavsndekqsii tafmknqnirgylastdpvtvd  
nngnvtlhyrdgsstllda  
tnvmtypvkvkseygtanaaktatvtiakgqsfnigdikqyftl sngqai pngtftnitsdrtipta qevsqmnagtqly  
hivasnayhkdtedfyisl  
kivdvkqpegdqrvyrtstydlttdeiskvkqafinardv itlaegdisvtntpnganvstitvinkgrltskfasnl  
anmnflrwnfpqdyvtw  
tnakianrptdgg lswsddhksli yrydatlgtqittdi ltmlkattvpgl rnnitgnekaqaeagrpnyrttgysq  
snattdgqrqftlngqviq  
ildi inpsngyggpvtnsntrahsnstvvvnepaangagaftidhv vksnsthnasdavykaqlyltpygpkyveh  
lnqntgnttdainiyfvps  
dlvnptisvgnytqhvfsgetftntitandnfgvqs vtpnts qitgtvdnnhqhvsatapnvtsatsktinllatdts  
gntattsfnvtvklrdky  
rvgtssaanpvrianisn natvsqadqtti inslftsnaprnyatasaneitsktvsnvrtgnnanvtvtvhqdg  
tstvtvpkhvipeivah  
shyvtvggqdfpagn gssaadyfkl sngsaipdati twvsgqapnkdntrigeditvtahilidgett pitktatykvvrt  
vpkhvfetargvlypgvsd  
mydakqyvkpvns wstnaqhmnfqfv gtygpnkdvvgi strli rvtydnrqt edltilskvkpdp pridansvtykagl  
tnqeikvnnvlnssvklf  
kadntp lnvt nthsgsfssvvtvsda lpnggikakssi smnnvtyttqdehgqvvtvtrnesvdsndsasv tvtpqlqa  
ttegavfikggd gdfghv  
erfi qnpph gatvawhdspdtwkntvgnthktavvtl psgqgtrnevvpkvypvanakapsrdvkgqnlthgtnaidyi  
tfdpntntngi taawanrq  
qpnnqqagvqhl nvdvtypgi saakrvpvtvnvyqfefpqttyttvtvggt lasgtqasgyahmqnasglptdgftykwnr  
dtgtndanwaamnk pnta  
qvvnakydvi yngh tfats l pakfvvkdvq pakptvtetaagaiti apganqtvnthagnvtt yadklvikr ngnvttf  
trrntspwvkeasadvnt  
givgtngi tvaagtfnpadi qvvatqgsgeti sdeqrsddftv vapqpnqattkiwqng hiditpnnpsghlinptqa  
mdia ytekvngae hskti  
nvvrqnnqwti ankpyvtl daqtgkvtnant ikpnssiti tpkagtghsvssnpstl tapaahvntteivkdygsn

Tsompanidou\_et\_al\_Supplemental\_FASTA\_File

vtaaeinnavqvankrtat  
ikngtamptnlaggstttipvtvtyndgsteevqesiftkadkrelitaknhlddpvstegkkpggtitqynnamhnaqqq  
intakteaqqvinneratp  
qqvsdal tkvraaqtkidqakallqnkednsqlvtsknnlqssvnqvpstagmtqqsidynakkreaeteitaaqrvid  
ngdataqqisdekhvrdna  
ltaInqakhdl tadthaleqavqqInrtgtttgkkpasitaynnsiralqsdItsaknsanaiiqkpirtvqevqsalt  
vnrvrerltqainqlvpla  
dnalrtaktkldeeinksvttdgmtqssi qayenakragqtettnaqvinngdatdqqiaaektkveekynslkqai  
gltpdlaplqtaktqlqnd  
idqptsttgmtsasvaafndkl saartkiqeidrvlashpdvati rqnvtanaaktaIdqarngltvdkaplenaknql  
qhsidqtsttgmtqdsin  
aynakl taarnkvqqinqv lagsptvdqintntsaanqaksdl dharqalt pdkaplnaktqleqsinqptdttgmtta  
slnaynqklqaarqkltei  
nqvlngnptvqinidkvaeanqakdqlntarqgl tldrqaaltlhgaslnqaqqnftqqinaaqnhaaletiksnit  
alntamtklkdsvadnnti  
ksgqnytdatpankqaydnavaakgvi gettntmdvntvnqkaasvkstkdaIdgqqnlqrakteatnait hasdlnq  
aqknaItqqvnsaqnvqav  
ndikqttslntamtg lkrqvanhnqvvsdnyvnadtnkknndynnaynhandiingnaqhpvitpsdvnnalsnvtske  
halngeaklnaakqea  
lghlnnlnnvqrqnlqsqin gahqidavntikqnatlnsamgnlrqavadkdqvkrtedyadadtakqaynsavssae  
tinqtanptmsvddvna  
tsavttknalngdek lvsqktdaaraidalphlnnaqkadvkskinaasniagvntvkqqgtdlntamgnlqgaindeq  
tlnsqnyqdatpskktay  
tnavqaakdilnksngqktdqvteamnqvnsaknldgtrlldqakqtakqqlnmthl ttaqknltnqinsgttva  
gvhtvqsnantldqamnt  
rqsianndatkasedyvandanndkqtaynavaaeti inansnpempstittkaeqvnssktaIngdenlatakqnakt  
ylntltsitdaqknlisq  
issatrvsgvdtvkqnaqhl dqamanlqnginnesqvssekyrdadtnkqqeydnaitaakailnkstgpnatqavea  
alqrvntakdaIngdakli  
aaqnaakqhlgtlthittaqrndltnqis  
>sp|Q7A5M9|CTPAL\_STAAN  
mddkqhtsssdderaeiatsnqdetnsskrvhlkrwqfisiligttlitavitvvayifinqkisglnktdqanlnkie  
nvykilnsdykkqdsdkl  
skaaidgmvkelkdpseyl tkeqtksfnegvsdfvgigaemqkknqimvtspmkgspaeragirpkdvitkvnkgsi  
kgkaldevvkdvrgkente  
vtltvqrgseekdvkikrekihvsdykkkgkvgvitinkfndtsgelkdavlkahkdglkkivldlrnppgglldea  
vkmanifidkgtvkvlek  
gkdteaiqtsnds lkeakmdisilvnegsasasevftgal kdynkakvygsktfgkgvvqttrefkdgsllkytemkw  
tpdghyihgkkipdvtid  
tpkyqslnvipntktfkvgdddkniktikiglsalgykvdnestqfdqalenqvkaqqanklevtgefnetnkftel  
lvekankhddvldklinil  
k  
>sp|Q7A5Q9|OPPF2\_STAAN  
mielkhvtfgynkkqmvldinipdgenvgilgesgckstlaslvlglfkpvkgeiylsnavltifqhp ltsfnpd  
wtietslkealyyrgltd  
ntaqdqlllqhlstfelnaql ltklpsevsggqlqrfnmrsllaqprvl icdeitsnl dviaeqnvinilkaqtitln  
hfiivishdlsvlqrlnvri  
ivlkdgmivddfaieelfnvdrhpytkelvtfsy  
>sp|Q7A5W3|MIAB\_STAAN  
mneeqrkassvdvlaerdkaekdyskyfehvyqppnlkeakkrqevrynrdfqidekyrgmgnertfliktygcqmn  
ahdteviagi lealgyqat  
tdintadvilintcairenaenkvfseignlkh lkkerpdiligvcgmsqeesvnkilksyqnvdmifgthnihhlpe  
ileeaylskamvvevwske  
gdvienlpkvregnikawvni mygcdkfcctycivpftrgkrsrrpediidevrelaregykeitllgqnvnsygdldq  
ieydlgdllqaiskiaipr  
vrfttshp wfdthmivdi seggnivphihlpvqsgnavlkimgrkytresyldlvkrikdripnvaltt diivgypne  
seeqfeetl tlydevgfeh  
aytylvsrdgtpaakmkdnvplnvkkerlqrlnkkvghysqiamskyegqvtv lcegsskkddqvlagytdknklvnf  
kapkemigklvevrideak  
qyslngsfvkevepemviq  
>sp|Q7A5X7|PNP\_STAAN  
msqekkvfktewagrslti etgqlakqangavlvrygdvvlstatakeprdgdfp ltvnyeeekmyaagkipggfkr  
egrpgddatltar lidrpi  
rplfpkgykhdvqimnmvlsadpdcspqmaamigssmal svsdipfqqpiagvngyidgkyiinptveekevsrldlev  
aghkdavn mveagaseite  
qemleai ffgheeigr lvdqqqivdhiqpvkqefipaerdealvervkslteekglketvltfdkqqrdenldnlkeei  
vnefideedpenelli ke  
yailnelvkeevrrliadekirdpgrkpdeirpldsevgilprthgsglfrgqtqalsvltl galgdyqlidglgpeee

Tsompanidou\_et\_al\_Supplemental\_FASTA\_File

krfmhhyfnfnsvgetgp  
vrapgrreighgalgeralgyiipdtadfpytirivsevlesngsssqasicgstlaldagvpikapvagiampglvtre  
dsytildtiqmedaldgm  
dfkvagtkegitaiqmdikidgltreieealeqarrgrleimnhmlqtidqprtelsayapkvvtmtikpdkirdivgp  
ggkkineiidetgvklidie  
qdgti figavdqaminrareiieeitreaevgqtyqatvkriekyga fvg l fpgkdal hisqisknriekvedvlkigd  
tievkiteidkqgrvnash  
ralee  
>sp|Q7A655|ISDA\_STAAN  
mtkhylnskyqseqrssamkkitmgtasiilgslyvigadsqqvnaateatnatnngstqvsqatsqipinfvqkdsse  
kshmdymqhpqkvikqnn  
kyyfqtvl n nasfwkeykfyannqelattvvdnk kadtrtin vavepgykslttkvhivvpqiny nhrytthle feka  
iptladaakpnnvkpvqpk  
paqpktpetqtkpvqpkvekvkptvttskvednhstkvvstddtkdqtktahtv ktaqtaeqnkvtptvkdvatak  
sesnnqavsdnksqtknk  
tkhnetpkqaskakelpktgltsvdfnistvafatla l l g s l s l l l fkrkesk  
>sp|Q7A6B1|MEND\_STAAN  
mgnhkaalkqvftfasel yagvrevvi spgsrstplalafeahpnikt wihpdersaaffavgl igkserpvailcts  
gtaaanypaiaesqisri  
plivltsdrphelrsvgapqainqvmfnnyvsyefdm piaddsketinaiyyqm qiasqylygphkgpihfnlpfrdp l  
tpdlnate l l tsemki l ph  
yqksidasalrhilnkkgliivgdmqh qevdqiltystiydlpiladplshlrkfdhpnvictyd l l frsgldlnvdfv  
irvgkpvisklnqwlkkt  
dafqilvqndkidvfpiapdisyeisandffrslmedttinrvswlekwclekkgrkeikcyleqatdesafv gelik  
ktsekdal fisnsmpirdv  
dnlllnknidvyanrgangidgivstalgmavhkritlligdl sfyhdmgllmskl nni qmniv l l nndgggifsylpq  
kesatdyferlfgtptgl  
feytaklyqfdfrfnsvsefknatllsetstiyelitnrednfkqhqiylqklsemihdtl  
>sp|Q7A6M2|METN2\_STAAN  
mielkevkeyrtnkevlavdhvnlsiragsiygvigfsgagkstlirmfnhleaptsgeviidgdhigqlsknglrak  
rqkvnmi fqhfnllwstrv  
lknimfp leiagvprrrakqkalelvelvlgk grekaypse lsggqkqrvgiaralandptvllcdeatsaldpqttd ei  
ldlllki reqqnl tivlit  
hemhvirricdevavmesgkvi ehgpvtqvfenpghtvtrkfvkedlnddfetslteleplekdayivr l v fagstttep  
ivss l staydikini lean  
ikntkngtvglvlhipyissvdfgkfeke l ierqvkm evl rhg  
>sp|Q7A6Q6|WHIA\_STAAN  
msfasemkneltridvdenakael salirmngalslnqqfvinvqtenattarriyslikrvfnveveilvrkkmklk  
knniyicr tkmkakeilde  
lgilkdgiftheidhsmiqddemrrsy lrgafl aggsvnnpetssyhleifsqneshaeg ltklmsyelnakhlerkk g  
sitylkeakisdf lslig  
gyqallk fedvri vrdmrrnsvr l vncetan l nktvsaamkqvesiklidkeigienlpdr l reiarirvehqeislkel  
gemvstgpi sksgvnhrlr  
klndladki rngeqiel  
>sp|Q7A722|MNHG2\_STAAN  
meitkeifsliaavmlllgsfialisaigivkf qdvflrshaatksstlsvlltligvliyfvntgffsvrlllslvfi  
nltsvpvghlvaraayrng  
aymyrkndahthasilssneqNSTEALqlrakkreehrkkwyqnd  
>sp|Q7A754|Y550\_STAAN  
mkntfl icdecqavnirtlqkklek l dpdaeivigcqsycpgprkrktftfvnnrplaa l teeliekvsqqlkkprdpee  
eerlkrheerkr rkeeqd  
rk lkek l ekrkaqq  
>sp|Q7A768|VRAB\_STAAN  
mnqavivaakrtafgkyggtlkhlepeql l kpl fqh fkekyevi skiddv l gnvvgnggniarkalleaglkdsipgv  
tidrcgsglesvqyacrm  
iqagagkvyiagvestsrapwki krphsvyetalpefyerasfapemsdpsmi qgaenvakmydvsrelqdefayrshq  
ltaenvkngnisqeilpit  
vkgeifntdesl kshipkdnfgrfkpvikggtvtaanscmkndgav l l l imekdmayel gfehgl l fkdgv tvgvdsnfp  
gigpvpa isnl l krnqlti  
eni evieineafsaqvvacqa l n i sntql niwggal asghpygasgaqlvtr l fymfdketmiasmgigg l gnaalft  
rf  
>sp|Q7A780|SDRD\_STAAN  
mlnrenktairkgmvsnr l nkfsirkytvgtasilvgttlifglngqeka aestnkelneattsasdnqssdkvdmqq  
l nqedntkndnqkemvssq  
gnettsngnksiekesvqsttgnkvevstaksdeqaspkstned l ntkqtisnqeg l qpd l lenksvvnvqptneenkvv  
daktest l n vksdaiksn  
aet l vdnnsnennadii l pkstapks l ntrmrmaai qpnstsknvd l itsnt l tvvdadnsktivpaqdy l slk  
sqitvddkvksgdyftiky

Tsompanidou\_et\_al\_Supplemental\_FASTA\_File

sdtvqvyglnpediknigdikdpnnetiatakhdannlitytftdyvdrfnsvkmginsiyumdadtipvdkkdvdfs  
vtignqittttaditypav  
keadnnsigsaftevtvshvgnvedpgyynqvvyvnpmdkdlkgaklkveayhpkypntnigqinqvntnikiyrvpegytl  
nkgydvntndlvdtdefk  
nkmtygnsqsvnlfdgdi tsayvnmvntkfqytnsesptlvqmatlsstgnksvstgna l gftnnqsggagqevyikigny  
vwedtnkngvqelgekvgv  
nvtvtvfdnntntkvgeavtkedgsy lipn lpngdyrvefsn lpkgyevtpskqgnne ldsng lssvitvngkdn l sad  
lgiykpkyngdyvwedtn  
kngiqdqdekgs gvtvt lkdengv lktvttdadgkykftd l dngnykvefttpegytpttvtsgsdi ekdsng l tttg  
vingadnmt l ds gfyktpk  
yn l gnyvwedtnkdgkqdstekgs gvtvt l knengev l qttktkdgkyqftg l engtykvefetpsgytptqvgsgtd  
egidsngtsttgvikdkdn  
dtids gfyktpyn l gdyvwedtnkngvqdkdekgs gvtvt lkdendkv lktvttdengkyqftd l nngtykvefetpsg  
ytpstvtsgndtekdng l  
ttgvikdadnmt l ds gfyktpkys l gdyvwydsnkdgkqdstekgikdvkvi l nekgevigttkt dengkyrfdn l ds  
gkykvi fekptg l tqgt n  
ttedkdadggevdti t dhddft l dngyeeetsdsdsdsdsdsdsdsdsdsdsdsdsdsdsdsdsdsdsdsdsdsdsds  
sdsdsdsdsdsdsdsdsdsdsdsdsdsdsdsdsdsdsdsdsdsdsdsdsdsdsdsdsdsdsdsdsdsdsdsdsdsdsdsdsdsds  
sdsdsdsdsdsdsdsdsdsdsdsdsdsdsdsdsdsdsdsdsdsdsdsdsdsdsdsdsdsdsdsdsdsdsdsdsdsdsdsdsdsds  
sdsdsdsdsdsdsdsdsdsdsdsdsdsdsdsdsdsdsdsdsdsdsdsdsdsdagkhtpvkpmsttkdhhnkakalpetgnensgsnna l fgg l  
faalgs l l l fgrkkqk  
>sp|Q7A781|SDRC\_STAAN  
mnkktatnrkgmipnr l nkfsi rkysvgtasilvgtt l ifg l sgeakaaehtngel nqsknettapsenkttekvdsr  
qlkndtqtatadqpkvms  
dsatvketssnmqspqnatasqsttqtsnvtndkssttysnetdksn l tqaknvsttpktttikqralnrmavntvaap  
qqgtvndkvhftnidiai  
dkghvnkttgntefwatssdv l k l kanytidsvkegdtftfkyggyfrpgsvr l psqtqnl ynaqgniiakgiydskt n  
ttytftnyvdqytnvsgs  
feqvafakrenattdktaykmevt l gndtyskdvi vdygnqkqql isstnyinned l srnmtvyvnpkkytyktetfvt  
nltykfnpdaknfkiyev  
tdqnfvdsftpdtsklkdvtgqfdviysndnktatvd l l ngqssdkqy i iqqvaypdsst dngkidytletqngkss  
wsnsysnvngsstangdqk  
kyn l gdyvwedtnkdgkqdanekgikgyvvi l kdsngkel drtttdengkyqftg l sngtysvefstpagytpptanagt  
ddavdsdgl tttgvikdad  
nmt l ds gfyktpkys l gdyvwydsnkdgkqdstekgikgvkvt l qnekgevigttetdengkyrfdn l ds gkykvi fekp  
ag l tqgtnttedkdadg  
gevdvti t dhddft l dngyeeetsdsdsdsdsdsdsdsdsdsdsdsdsdsdsdsdsdsdsdsdsdsdsdsdsdsdsdsdsdsdsds  
sdsdsdsdsdsdsdsdsdsdsdsdsdsdsdsdsdsdsdsdsdsdsdsdsdsdsdsdsdsdsdsdsdsdsdsdsdsdsdsdsdsdsds  
dsdsdsdsdsdsdsdsdsdsdsdsdsdsdsdsdsdsdsdsdsdsdsdsdsdsdsdsdsdsdsdsdsdsdsdsdsdsdsdsdsdsds  
sdagkhtptkpmstvkdqhktakalpetgsennnsngt l fgg l faalgs l l l fgrkkqk  
>sp|Q7A7E3|METN1\_STAAN  
miefrqvsksfhkkktidalkdvsftvnrndifgviygsgagkstlvrlvnhleasngqvivdghditnysekgmrei  
kkdigmifqhfnl l nsatv  
fknvamp l i l skkskteikqrvtem l efvgl sddkqfpdelsggqqrvaia r alvtnpkil l cdeatsal dpattasi  
l l l knvngtfgitimit  
hemrvikdicnravmekgqvvetgtvkev fshpkttiaqnfvstviqtepstslirr l ndeqvggfkdykifveetqvt  
qpiindliqicgrevkil f  
ssmseiqgntvcymw l rfnidqqfdtainqyfkekniqfeevh  
>sp|Q7A7I6|UP355\_STAAN  
maditvndtgel ynvinqksegylese l tiisksk l h l nd l h dseis l listsgtfsdrmtk l l tgedgehav l srynl  
apdelekykq l i l ddkm l v  
vavrdksshkevqehnsayeeidithfaeaskgpka  
>sp|Q7A7L2|THLA\_STAAN  
mtrvvl aayrtpigvfggafkdvpaydlgat l iehiiketg l npseidevi gnv l qagqgnpariaamkgglpetvp  
aftvknvcgsg l k s i q l ay  
qsivtgendiv l agmenmsqspm l vnns rfgfkmghqsmvdsmydgltdvfnqyhmgitaen l veqygisreeqdtfa  
vnsqhkavraqqngfedse  
ivpvsipqrkgepi l vtkdegvrenvsvekl sr l rpa fkkdgtvtagnasgindgaamm l vmsedkake l nieplav l dg  
fshgvdpsimgiapvgav  
ekalrskkelsdi dvfelneafaaq l l avdre l k l ppekvnvkggaialghpigasgarv l vt l l h q l ndevetg l ts l  
ciggqai aavvskyk  
>sp|Q7A7S2|ESSA\_STAAN  
mlmnsval tfl tassnng l ni dvqqeeekrinnd l nqydt l fnkdskevndaiakqkkerqqqikndmfqnqashst  
r l netkklv l fsksnlekt s  
esdkspyiqnkqekki fpyi l msvgaf l t l gfvifsihgrrrtknesarksni  
>sp|Q7A7T0|LYTM\_STAAN



Tsompanidou\_et\_al\_Supplemental\_FASTA\_File

mkl1taaaiaatmgfatftmahqadaaettntqqahtlmstqsqdvsgtyyitidsngdyhhtpdgnwnqamfdnkeysyt  
fvdaqghthyfyncypkna  
nangsgqtyvnpatagdnndytasqsqhiinqygyqsnvgpdasyshsnnnqaynshdngkvnyngtsnqnggsask  
atasghakdaswltsrkql  
ppygyhgghgahygvdypenspvysltdgtvvqagwsnygggnqvtikeansnyqwymhnrnltsvagdkvkagdq  
aysgstgnstaphvhfqrn  
sggignqyavdptsylqsr  
>sp|Q7A825|ALDA\_STAAN  
mavnvrnyaenyglfingefvkgssdetievtntpatgetlshitrakdkdvdhavkvaqefeswsltskseraqmlrd  
igdklmaqkdkiamietln  
ngkpi rettaidipfaarfhyfasvietegtvndidkdtmsivrhepigvgavvawnfpmllaawkiapaaagnti  
viqpsstplsllevakif  
qevlpgkvvniitgkgsesgnafnhdgvdklsftgstdvgyqvaeeaaakhlvpatlelggksaniilddanldlavegi  
qlgilfnqgevcsgsrll  
vhekiydlvprlqeaafsnikvqdpqdeatqmsqtgkdqldkiqsyidaakesdaqilagghrltengldkgffffeptl  
iavpdnhhklaqeeifgpv  
ltvikvkddeaidiandseyglaggvfsqnitralniakavrtgriwintynqvpegapfgykksigigretykgaalsn  
yqvkniyidtsnalngly  
>sp|Q7A883|Y096\_STAAN  
mkrlnk1vlyisflilvisftagcgmgeaeikksfektlsmpiknledlydkegyrddqfdkndkgtwiinsemvvqp  
kgermkskgmvlmnrntk  
tttgkyivsetlhdedgrpskdkeypvkmvdnkiiptkgikdenikkeienfkffaagygsfkdlskykdgdisynevp  
sysakyqltnddynvklr  
krykiptnkakplllkgsd1kgsvgykdi eftfvkkgentfftdslhlepedk  
>sp|Q7A8D1|BLE\_STAAN  
mlqsipa1pvgdikksigfyckl gftlvhhedgfavlmcnevrihlweasdegwrsrnsdpvctgaesfiagtascri  
evegide1yqhi kplgiln  
pntslkdqwwderdfavidpdnnlisffqkiks  
>sp|Q7A8E0|WALK\_STAAN  
mkwlkqlqslhtklvivyvlliiigmqiiglyftnnlekelldnfkknitqyakqlaisiekvydekgsvnaqkdiqnll  
seyanrqeigeirfidkq  
iiiattkqsnrslinqkandssvqkalslgqsnhdhilkdygggkdrvwvynipkvdkkvigniyieskindvynqlnn  
inqifivgtaisllitvil  
gffiartitkpitdmrntqvemsrgnytqrviygndeigela1afnnlskrvqeaqantesekrrldsvithmsdgiia  
tdrrgririvndmalkmlg  
makediigymlsvslledefkleeiqenndsflldlneeegliarvnfstivqetgfvtygiavlhdvteqqqvererr  
efvanvshe1rtp1tsmns  
yiealeegawkdeelaqf1svtretermir1vndllqlskmdnesdqinkeiidfnmfinkiinrhemsakdttfird  
ipkkti ftefdpdkmtqv  
dnv1tnamkysrgdkrvef1hvkqnp1ynrmtirikdngigipinkvdki1drfyrvdkartrkmggtglglaiskeivea  
hngriwansvegqtsifi  
tlpcevi edgdwde  
>sp|Q840P7|SAES\_STAAE  
mvl1sirsqiiigvssip1tstilaiayilmwfnghmt1t1t1ttiitscltllicsifinpliqkikqfniktkqfang  
nyasndktfnspkeiyeln  
qsfkmaseitqmqnikseqqekteliqnlahd1ktp1asiyseglrdgiitkdheikesydilikqanrlst1fdd  
mthiit1ntgktyppeliq  
ldqllvsilqpyeqrikhenrtlevnfcneidafyqyrtp1eriltnlldnalkfsnvgsridinisenqdtdidiais  
degiiipelqerifertf  
rvensrntktgsg1glyiane1aqnna1svssdidvgttmtvt1hklidits  
>sp|Q8NUH3|Y2609\_STAAW  
mnyqvllykyttiddpeqfaadh1afckahh1kgri1vstegingtlsgtkeeteqymahmhaderfkdmvfkideag  
hafkkmhvrprkeivald1  
eddvdrh1tggylspvefrka1edddtviidarndyefdlghfrgairpnitrfrdlpdwikenkal fadkkvtyctg  
gircekfsgwllkeg fedv  
aq1hgg1atygdpetkgeywdgkmyvddrisvniqvaktiigkdwfdgkpceryincanpecnkqilvseenetky1  
gacsyecakhernryvqan  
nisdnewqqr1tnfdd1hgha  
>sp|Q8NUH4|DRP35\_STAAW  
mmsqqlpt1fysgksnsavpiisese1qtitaepwleiskglqlleglnfdrqqqlf1ldvfegnikinpetkeikrp  
fvshkanpaaiki hkdgrl  
fvcylgdfkstggi faatengdniqdiiedfsttyciddm1vdskggyftdfrgystnplggvyv1vapdf1rtvtpi1qn  
isvangialskdeklvvt  
ettanr1hria1eddgvti1qpfgatipyftghegpdscidsddnlyvamygggrvlvfnkrgy1pigqilipgrdeghm  
1rsthpqfipdtnqliics  
ndiemgggsmlytvngfakghqs1fqf  
>sp|Q8NUH6|Y2606\_STAAW  
mtnftfdgahss1efqikh1mvskvkg1fdqfdvavegd1ndfst1katati1pssintkneardnh1ksgdfff1gtdefd

Tsompanidou\_et\_al\_Supplemental\_FASTA\_File

kitfvtksvseskvvgdlt  
ikgitneetfdvefnvsknmpdgsqvtgvi vtgtinrenyginfnqaletggvmlgkdvkfeasaeftsise  
>sp|Q8NUJ3|SRAP\_STA  
mskrqkefhds lanektrvrlyksgknwvks gikeiemfkimglp fishslvsqdnqsis kkmtygylkttaviggafv  
nmldhqqafaasdapl tse  
lntqsetvgnqnsttieaststadstsvtknsssvqtsnsdvtvsseksekvststnsts nqqekltstsestssknttss  
sdtksvaststteqpi nts  
tnqstas nntsqsttpssvnl nktsttststapvkl rtfsr lamstfasaat tvtantitvknkdlkqymttsgnaty  
dqstgivi tltqdaysqkga  
itlgt ridsnksfhfsgkvnlnkyegngnggdgigfafspgvl getglngaav ggglnafgfkldtyhntskpn saa  
kanadpsnvaggafgafv  
ttdsygvatty tssst adnaaklvqptnntf qdfdi nyngdtkvmtvtyagqt wtrnis dwiaksgttnfsl smtastg  
gatnlqqvqfgt feytesa  
vtqvrvydvttgkdi ppktysgnvdqvvtidnqsa l takgynytsv dssyastyndtnktvkmt nagqsvtyyftdvk  
aptvtvgnqtievgktnmp  
vvl ttt dngtgvtntvtgl psglsydsatnsi igtpkigqstvtv vstdqannkstttftinvv dttaptvtpigdq  
sevyspispikiatqdnsg  
navtntvtgl psgl t fdstntt isgtptnigtst itivstdasgnk tttt fkyevtrnsmsdsvstsgstqqsqsvstsk  
adsqsaststsgsvst  
astskstsvsl dsvsasksl stsesnsvsststsl vnsqsvssmsdsaskstsl dsisnsssteksesl ststsd  
lrtstsl ds lsmstsgsl  
sksqsl ststsesstsl sdstsnai stsesl sesastdsis isnsiansqstsksdsgstsis l stsdsksmst  
sesl sdststsgsvsgsl  
iaasqvststsdsmstseivdsistsgsl sasdsksmvsssmstsqsgstses l dsqstsdsksl sl stsqsg  
tstststasvrtsest  
sgmsasqdsmsistf dsdstsdksastasses isqaststsgsvststsl stnsertstmsdstsl stsesdi  
seststsdiseaisases  
tfisl esnstdsesqsasaf lsesl sestsestsesvssstsestsl dsdstsegststsl snstsgsasiststsis  
eststfksestvstsl smst  
stsl dsstsl stsl dsdstsdsksdsl stsmstsdstsksdststsl sgstsesedstssesksdstmsismsq  
stsgstststsl dsst  
tstsl smnqsgvdsnsasqsan stststsesdsqstssytsqstsqsestststsl dsstis kstsqsgsvstas  
lsgsesedsqststase  
stsesastl dsdststnsgaststsl nsasasesdssstsl dsdstasmqssedsqstas l ds l ststsnrmst  
iasl stsvstsestses  
tse dststsl dsqstsrstasgastststsdrrstaststsmrtstsdsgms l stststmsdstsl dsdvds  
tdstastsgmsvstsl  
sdstststasevmsasi dsqsmsevndsesvsesnesdsksmstsvsdsgsl svstsl rksevsestsl sgsg  
smsdsvstsdss l svstsl  
lrsesvsesd l dsdkstsgstststsgsl ststsl sgse vsestsl dsis mststsdstsl ds l sgsgstsl  
tsd l dsdksl sssqsmg  
seststsvdsqststnsqfdsmis asesdmsdtdssis gsnststsl stsdsmstsvststsl dsis gstsl  
dsstststsl dsmsq  
qststasgsl stststmsastsss qstsvstsl stsdstststststststststststststststststststst  
dstststsdstsgststsi  
ses l stsgstsvsdstmsedstsvmsqsmstynstsvsdseststststststststststststststststststststst  
sdststsmstststststst  
mhpsdmsmhhthststsr l seattstsesqstlsatsev tkhngtpaqsekr l pdtgdsikqngllggvmtllvgll  
mkrkkkkdendqddsqa  
>sp|Q8NUJ8|SECA2\_STA  
mkhkl dvtinel r lksirkivkrintwgdevksysdda l kqkie fkerlasgvd l dtllpeayavareaswrv l gmy  
kevqligai vlhegniaem  
qtgegk l tatmp l ylnal sgkgty l ittdyl akrdfeemqpl yewl g l tas l gfvdivdyeyqkgekr nlyehdi iyt  
tng r l gfdy l idnladsae  
gkflpqlnygi idevdsi l daaqtp l v i sgapr l qsn l fhivkefvdt l iedvh fkmkktkkeiwl nqqieaaqsyfn  
vedlyseqamvlvrninla  
lraqylfesnvdyfyngdiv l idritgrmlpgtklqaglhqaeakegmevstdksvmatitfqn l fklfesfsgmtat  
gklgeseffdlyskivvq  
ptdkaiqridepdkvrsvdekniami hdivelhetgrpv l l i trtaeaaeyfskvlfqmdipnlliaqnvakeaqmia  
eagqigsmvatsmagrgt  
diklgegvealgg lavi iehemensrvdrqlrgsrgrgdpgssciyisl ddy l vkrwsdnlaennqlysl daqr l sqs  
nlfnrkvkqivvkaqrise  
eggvkaremanefeks isiqrd l vyeernrv l eiddaenqdfkalakdvfemfvneekvltksvveyiyqn l sfqfnkd  
vacvnfkdqavvtflleq  
fekqlalnrknmqsayyyni fvqkvflkaidsawl eqvdy l qqlkasvnrqngqrnaifeyhrvaldsfevmttrnikr  
mvknicqsmi tfdkegmpv  
ihfp  
>sp|Q8NUK7|ARCA\_STA

Tsompanidou\_et\_al\_Supplemental\_FASTA\_File

mtdgpi kvnseigalktvllkrpgkelenlvpydlgllfddipylevaqkehdfhaqv lreegvevlyleklaaesien  
pqrsefidvllaeskktti  
lgheeeikal fatlsnqelvdkimsgvrkeeinpkcth lveyddkypfyldmpnlyftrdpqasighgitinrmfwa  
rrresi fiqyivkhhrfk  
danipwldr dcpfnieggdelvlskdvlaigvsertsaqai ek larri fenpqatfk kvvaieiptsr t f m h l d t v f t m  
idydkftmhsailkaegnm  
nifiieyddv nk dia ikqssh l k d t l e d v l g i d d i q f i p t g n g d v i d g a r e q w n d g s n t l c i r p g v v v t y d r n y v s n d l l  
rqkgikviejsgselvgr  
ggprcmsqplfredi  
>sp|Q8NUK9|ARCR\_STAAW  
mtenfilgrnk lehelkaladyinipysilqpyqsecfv rhytkgqv iyfspqessniyfliegni irehynqngdvyr  
yfnkeqvlfpisnl fhpke  
vnelctaldctvlglprelmaf lckandifl t l falindneqqhmynmalt skfakdriik l fch l cqtvgydqdef  
yeikqfltiqlmsdmagis  
retaghi ihelkdek l vvkdhknwlvskh l fndvcv  
>sp|Q8NULO|CLFB\_STAAW  
mkkridylsnkqnkysirrfvtvgttsvivgatilfgignhaqaseqsndttqsskn nasadseknmi etpqlnttand  
tsdisantnsanvdstakp  
mstqtsnttttepastnetpqltaikdqataakmqdqtvpqeansqvdnkttndansiatnselkn pqtldlpqsspqti  
snaqgtskpsvrtravrsl  
avaepvnaadakgtvndkv takdfqlekttf d p n q s g n t f m a a n f t v t g q v k s g d y f t a k l p d s v t g n g d v d y s n s n n  
t m p i a d i v n d k n e v v a k a t  
y d i l t k t y t f v f t d y v n d k q n i n g k f s l p l f t d r a k a p k s g t y d a n i n i a d e m f n n k i t y n y s s p i a g i d k p n g a n i s s q  
i g v d t a s g q n t y k q t v f v  
n p k q r v l g n t w v y i k g y q d k i e e s s g k v s a t d t k l r i f e v n d t s k l s d s y y a d p n d s n l k e v t d q f k d k i t y k y q n v a s i  
n f g d i n k t y v v l v e g h y d k  
t g k n l k t q v i q e n v d p a t g k d y s i f g w n n e n v v r y g g s a d g s a v n p k d p t p g p p v d p e p s p d p e p e p s p d p d p e p t p d  
p e p s p d p d p s d s d s d s g s  
d s d s d s d s d s d s d s d s g s d s d s d s d s d s e s d s e s d s d s d s d s d s d s d s d s d s d s d s d s d s d s d s d s d s d s  
d s d s d s d s e s d s d s d s d s e  
s d s d s d s d s d s d s d s d s d s d s d s d s d s d s d s d s d s d s d s d s d s d s d s d s d s d s d s d s d s d s d s e s d s d s d  
s d s d s d s d s d s d s d s d s  
d s d s d s d s e s d s d s d s d s d s d s d s d s d s d s d s r v t p p n n e q k a p s n p k g e v n h s n k v s k q h k t d a l p e t g  
d k s e n t n a t l f g a m m a l l g  
s l l l f r k r k q d h k e k a  
>sp|Q8NUM4|MQO2\_STAAW  
maksnskdivligagvlstf g s m l k e i e p d w n i h v y e r l d r p a i e s s n e r n n a g t g h a a l c e l n y t v l q p d g s i d i e k a  
k v i n e e f e i s k q f w g h l v k  
s g s i e n p r g f i n p l p h i s y v r g k n n v k f l k d r y e a m k a f p m f d n i e y t e d i e v m k k w i p l m m k g r e d n p g i m a a s k i d e g  
t d v n f g e l t r k m a k s i e a h  
p n a t v q f n h e v v d f e q l s n g q w e v t v k n r l t g e k f k q v t d y v f i g a g g g a i p l l q k t g i p e s k h l g g f p i s g q f l a c t n p  
q v i e q h d a k v y g k e p p g t p  
p m t v p h l d t r y i d g q r t l l f g p f a n v g p k f l k n g s n l d l f k s v k t y n i t t l l a a v k n l p l i k y s f d q v i m t k e g c m n h l  
r t f y p e a r n e d w q l y t a g k  
r v q v i k d t p e h g k g f i g f g t e v v n s q d h t v i a l l g e s p g a s t s v s v a l e v l e r n f p e y k t e w a p k i k k m i p s y g e s l i e d  
e k l m r k i r k q t s k d l e l g y  
y e n  
>sp|Q8NUM5|ALF1\_STAAW  
mnkeqlek m k n g k g f i a a l d q s g g s t p k a l k e y g v n e d q y s n e d e m f q l v h d m r t r v v t s p s f s p d k i l g a i l f e q t m d r  
e v e g k y t a d y l a d k g v v p f  
l k v d k g l a e e q n g v q l m k p i d n l d s l l d r a n e r h i f g t k m r s n i l e l n e q g i k d v v e q q f e v a k q i a k g l v p i e p e v n  
i n a k d k a e i e k v l k a e l k k  
g l d n l n a d q l v m l k l t i p t e p n l y k e l a e h p n v r v v l s g g y s r e k a n e l l k d n a e l i a s f s r a l a s d l r a g q s k e e f d  
k a l g d a v e s i y d a s v n k n  
>sp|Q8NUN2|PANC\_STAAW  
mtklittvkemghi vkaakrsgttigfiptmgalhdghl tmvresvstnditvsvfvnplqfgpnedfdayprqidkd l  
elvsevgadivfhpavedm  
ypge l g i d v k v g p l a d v l e g a k r p g h f d g v v t v v n k l f n i v m p d y a y f g k k d a q q l a i v e q m v k d f n h a v e i i g i d i v r e  
a d g l a k s s r n v y l t e q e r q  
e a v h l s k s l l l a q a l y d g e r q s k v i i d r v t e y l e s h i s g r i e e v a v y s y p q l v e q h e i t g r i f i s l a v k f s k a r l i d n i  
i g a e  
>sp|Q8NUP5|Y2501\_STAAW  
metlelqqaklryhqvggqplvifipgangtgdi flplaeqlkdhtvavdr rdygeseltep l p d s a s n p d s d y r v k r  
d a q d i a e l a k s l s d e p v y i  
l g s s s g s i v a m h v l k d y e v v k k i a f h e p p i n t f l p d s t y w k d k n d d i v h q i l t e g l e k g m k t f g e t l n i a p i d a k m m s q  
p a d t e e g r i e q y k r t m f w s  
e f e i r q y t h s d i t l d d f t k y s d k i t l l n g t d s r g s f p q d v n f y i n k e t s i p i v d i p g g h l g y i q k p e g f a d v l l n m w g  
>sp|Q8NUQ3|CRTP\_STAAW

Tsompanidou\_et\_al\_Supplemental\_FASTA\_File

mtkhiiviggglggsaairmaqsqsvslyeqnnhiggkvrhesdgfgfdlgspsiltmpyifeklfeyskkqmsdyvt  
ikrlphqwrstffpdgttid  
lyegiketqghnaiiskqdieelqnylnytrridritekgyfnygltdltsqiikfhgplnalinydyvhtmqaidkris  
npylrmqlyfykiyvgsss  
ydapavlsmlfhmqqegglwyveggihhlanaleklareegvtihtgarvdniktyqrrvtgvrldtgefvykadyiism  
evipkykylhldtqrlnk  
lerefepassgyvmhlgvacqypqlahhnffftenaylnyqqvfhekvlpddptiylvntnktqapvgyenikvlph  
ipyiqdqpfttedyakfrd  
kildklekmgldlrkhiyedvwtpedieknyrsnrgaiygfvadkkknkgfkfpkesqyfenlyfvggsvnpgggipm  
vtlsgqqvadkinareakn  
rk

>sp|Q8NUQ5|CRTM\_STAAW

mtmmdmfnkychkimkkhksfsyaafdllpedqrkavwaiyavcrkidssidvygdiqflnqikediqsiekypyehhh  
qsdrrimmalqhvaqhkni  
afqsfnlidtvykdqhfetfetaelgygyvagtvgeltpilsdhethtydvarrlgeslqlinilrdvgedfdn  
eriyfskqrllkqyevdiae  
vyqngvnnhyidlweyyaaiaekdfqdvmdqikvfsieaqpiielaariyieildevrqanytlhervfdkrkkaklfh  
einskyhri

>sp|Q8NUQ6|CRTN\_STAAW

mkiavigagvtglaaaariasqghevtfeknnvvggrmnlkkdgtfdmgptivmmpdvkykdvftacgknyedyielr  
qlryiydyfdhddritvp  
tdlaelqmmlesiepgsthgmsfldtvykkyeiarryflertyrkpsdfynmtslvqgaklktlnhadqliehyidnek  
iqkllafqtllyigidpkrq  
pslysiipmiemmfgvfhikggmygmaaglaqlnkdlgvnielnaeieqiidpkfkradaikvngdirkfdkilctadf  
psvaeslmpdfapikkypp  
hkiadldyscsafimiyigidiavtdqvrlnhvifsdffrgnieeifegrlysydpsiyvyvpavadkslapegktgiyvlm  
ptpelktgsgidwsdealt  
qqikeiyrklatievfedikshivsetiftpnfdqtyhakfgsafglmptlaqsnyyrrpqnvsrkykdyfagasthp  
gagvpivltsakitvdemi  
kdieqgv

>sp|Q8NUQ9|COPA\_STAAW

mantkkttditgmtcaacsnrrieklnklddvnaqvnlttekatveyndqhdvqefintiqlhgygvavetvelditg  
mtcaacssriekvlnkmdg  
vqnatvnlteqakvdyypeetdadklvtriklgydasikdnkdqtsrkaealqhklikliisavlsplllmfmvhl  
fnmhpalftnpwfqflla  
tpvqfiigwqfyvgayklnrngganmdvlvavgtsaayfysiyemvrwlngsttqphlyfetsavlitlilfgkyleara  
ksqttналgellsqakea  
riikdgnevmpinevhvgdtlivkpgkipvdgkiikgmtaidesmltgesipveknvddtvgstmknngtittmtatk  
vggdalanikvveeags  
skapiqradiisgyfvpivvgiallftiwiwltvtpgtfepalvasisvlviacpcalglatptsimgtgraengil  
fkgegfverthqitidvl  
ktgtitngrpvvtdyhgdnqtlqllataekdsehplaeaivnyakeqtlttetttfkavpghgieatidhhhilvgnrk  
lmadndislpkhisddlty  
yerdgktamliavnysltgiiavadtkdhakdaikqlhdmgievamltgdnkntaqaiakqvgidvtiadilpeekaaq  
iaklqqqgkkvamvgdgvn  
dapalvkadigiaigtgtevaieaaditilggdlmlipkaiyaskatirnrqnlwafgyniagipiaalgllapvwag  
aamalssvsvtnalrlkk  
mrleprrkda

>sp|Q8NUR2|ROCA\_STAAW

mvvefknepgydfsvqenvdmfkkaikdvekelgqdiplvingeki fkddkiks inpadtsqvia naskatkqdvadafk  
aadeaykswktwsandrae  
lmrlvsaiirrrkaeiaaimvyeagkpwdeavgdaaegidfiyyarsmmdlaagkpvl dregehnykyfksigtgvtip  
pwnfpfaimagttlapvva  
gntvllkpaedtpyiayklmeileaglpkgvvnfvpgdpkeigdyldvhkdthfvftgstratgtriyersavvqegqn  
flkrviaemggkdaiyvde  
nidtdmaaeavtsafgfgsqkcsacsraivhkdvyleksiklktelngntvdntymgpvinkkqfdkiknyieig  
keegkleqgggtddskgyf  
veptiisglkskdrimqeeifgpvvgfvkvndfdeaievandtdygltgavittnnrehwikavnefdvgnlylnrgctsa  
vvyhpfggfkmsgtakt  
gspdyllhfleqkvvsemf

>sp|Q8NUU7|FNBA\_STAAW

mknllrygirkhklgaasvflgtmivvgmgqdkeaaaseqktttveengnsatenkvnetqttttntntidetqsysata  
teqpsnatqvtteeapkav  
qapqtaqpanletvkeevvkeeakpvkettqsqdnsgdqrqvdltpkkatqnqvaetqvevaqprtaseskprvtrsad  
vveakeasdekvetgtdvt  
skvtvesgsieapqgnkvephagqrvvlykylkfadglkrgdyfdftlssnvntygstarkvpeikngsvvmatgeilg  
ngniyfttnei ehkvevt  
anleinlfdpktvqsngaqkistklngteetkiptvynpgvsnsytnvngsietfnkesnkfthiyikpmngnqnsnt

Tsompanidou\_et\_al\_Supplemental\_FASTA\_File

vsvtgtl tegsnl aggqpt  
vkvyeylgkkdel pqsvyantsdtnkfkdvtkemngklsvqdngsyslnldkl dktyvihtgeylqgsdqvnfrtelyg  
yperayksyyvygyr1tw  
dnglvlysnkadngkngqi iqndfeykedtakgtmsggydakqiieteenqdntpl didyhtaidgeggvydgyiet  
eedssaididyhtavdse  
aghvggytesseesnpidfeesthenskhhadvveyeedtnpgggqvttenslvefdeestkgivtgavsdhhtiedtke  
yttesnlielvdelpheh  
qagppi eei tennhishsglgtenghnygvieeieenshvdikselgyeggqnsngqsfeedteedkpkyeqgnivd  
idfdsvpqiaggqngnqsf  
eedtekdkpkyeqgnii didfdsvpqi hgnfkhteieeedtnkdkpnyqfgghnsvdfeedtlpkvsgqnegqqtieed  
ttpptpptpevpsepetpt  
pptpevpsepetptpptpevpsepetptpptpevpaepgkpvppakeepkpkpskveqgkvvtpvieinekvkavaptkk  
aqskkselpetggeestnk  
gm1fgglfsilglal1rrnkknka  
>sp|Q8NUU9|GTAB\_STAAW  
mkkikkaiipaaglgtrf1patkampkemlpil dktiqyiveearagiediiivtgrhkraiedhfsdqel emvlke  
kgksellekvqstelani  
fyvrqkeqkg1ghaissarqfignepfavllgddivesevpavkqlidvyeetghsvigvqevpeadhrygiidpltkn  
grqyevkkfvekpaggatp  
sn1aimgryv1tpeifdylktqkegagneiqltdaiernndnqvyaydfegerydvgeklgfvkttieyalkddsmree  
1trfikelgl  
>sp|Q8NUV0|PLS\_STAAW  
mrdkkgpvnrkvdflsnklnkysirkftvgtasiligs1mylgtqqeaaenienpttlkdnvqskevkieevtnkdt  
apqgveaksevtsnkdtie  
hepsvkaediskkedtpkevadvavqpkssvthnaetpkvrkarsvdegfsditrdsknvvestpitiqqkehfe gygs  
vdiqsnped1kvsevtrfn  
nksigknel tgalq1knkvsfkndfegni rvannhqsvttgadwgwflf skgdgneylqkggilgpkgmensagfkidtg  
ynfkdpmdkeekqagggfk  
gygtfvktgadgttakvgtniptrgkadsfqyadnsidtdgkfhgq1ln1klayneks gimraeyagkiweanisdl  
gl dkseaynflitssqrqg  
tsqgyangwmrtdlnnstfkltpn1vnktetktveipfetkrefnplqpggeervkqegqpgsktittpitvnp1tgek  
vgegqteeitkqpvdkiv  
efggekippghkdi fdpn1ptdqtekvpqpgikn pdtgkvi eepvddvikhgpktgtpetktveipfetkrefnplq  
geervkqegqpgsktittp  
itvnp1tgek vgegqteeitkqpvdkivefggekippghkdi fdpn1ptdqtekvpqpgikn pdtgkvi eepvddvik  
hgpktgtpetktveipfet  
krefnplqpggeervkqegqpgsktittpitvnp1tgek vgegqteeitkqpidkivefggekippghkdi fdpn1ptd  
qtekvpgkpgikn pdtgkv  
ieepvddvikhgpktgtpetktveipfetkrefnplqpggeervkqegqpgsktittpitvnp1tgek vgegqteeitk  
qpvdkivefggekippghk  
difdpn1ptdqtekvpqpgikn pdtgkvi eepvddvikhgpktgtpetktveipfetkrefnplqpggeervkqegqpg  
sktittpitvnp1tgek v  
egqteeitkqpidkivefggekippghkdi fdpn1ptdqtekvpqpgikn pdtgkvi eepvddvikhgpktgtpetkt  
veipfetkrefnplqpg  
ervkqegqpgsktittpitvnp1tgek vgegqteeitkqpvdkivefggekippghkdi fdpn1ptdqtekvpqpgik  
n pdtgkvi eepvddvikhg  
pktgtpetktveipfetkrefnplqpggeervkqegqpgsktittpitvnp1tgek vgegqteeitkqpvdkivefgge  
kpkdpkpenpekpsrpth  
psgpvnpdnp1skdraknepvhsmdkndkvkkskiakksvanqekkraelpktgaestqkglifssiigiaglm1lar  
rrkn  
>sp|Q8NUV4|PGCA\_STAAW  
mkgclatmdkelwierandslvkhfyeqqsdieqregfesklftgtagirgkfglgegrlnkftiekla1glarylnaqt  
nsptivihydirhlstefa  
qianv1anhqitvylpdykttpe1sfavrnlnttagimitashnkpdyngikvygsdgaqlstdaselasryieevgd  
plqidipiskqntsikpf  
pksvtdymkhinqmigi yipsdlqvfts1hgtsvpi vpe1lqs1nfnqfn1veaqckpdpnfssvqsanpedhrafdq  
ave1ankshad11istdpd  
adr1giaerdahghityfngnqigal1nyriqtsqlrhr1miqsisvseltslarynnveykevl tgfki faeairq  
1ddhqnmifafeesygf1s  
epfvrdkdavqivp1iikyaselkygk1kdeleqiyqtvrhedt1fshtldglegkkiesimthfrsnppqeiqgl  
kvkaiedyltsevyl dkd  
ttsqinspksnvi rvlfdegfia1rpsgtepkiklyvs1kcrnfd dvaqkinamifs  
>sp|Q8NUV6|Y2408\_STAAW  
mihskr1r1wlylv1lavfi sacgmkedkqikenfnk1slyptkn1ddf ydkegfrdqefekgdkgtwivdsemvvelk  
dkkmesrsmvlyinrnrtrt  
tkgnfivrelwedskgyaqsdktkypvmehnriiptkpiaddklrkeienfkffvqygd fkdindykdgd1synpnpvs  
ysaeyq1snndynvkqlrk  
rydiptkkapk11ikgdgd1kgssighknleftfvenkeeniyftdsinfkptk

Tsompanidou\_et\_al\_Supplemental\_FASTA\_File

>sp|Q8NUV7|Y2407\_STAAW  
mmhskkltlgiclvlliiilvgvymtkangqnaqikdtfnqtlklyptknlddfkdkegfrdqefkkgdkgtwivnsgm  
niqlkkggalksremvlyin  
rntrrktkgyfi vgeitkdkkgythdkdkkypvkmehnkiiptkpkdek lkeienfkffvqygnfkdfkdykngdisyn  
pnvpsysakyqlsddyni  
qqlrkrydiptkkapel lllkgdgd lkgssigskd leftfvqnkreniyftdsveftpsedtsyesn  
>sp|Q8NUV8|Y2406\_STAAW  
mihskr lklclclii lsvfigacgmkkeesskdkqikenfnki lsllyptknl edfydkegfrdeefekgdkgtwi i hskm  
i ietnnsnmesrgmvlyin  
rntrrttkgnfvvreit edskgyshskdtkypvkmehnriiptkpiaddklrkeienfkffvqygd fkdindykdgd isyn  
pnvpsysakyqlsddynv  
kqlrkryniptnkakpl lllkgdgd lkgssvgskn leftfvenkeeni yftds vqytps edtsyesngi snksw  
>sp|Q8NUZ4|FLP\_STAAW  
mttkklyfls i i lva isia i hit lnsntktr l tndsqqqid t i i e h d l q k g h i p g a s i l i v k n g k v f l n k y g y q d v  
dkkvkaspttkyeiasntk  
aftglailkl aqegr l n lndavskhvphfkmnyngqnetit i k q l l a q t s g i p s d i t s e d a v t n k n r l n d v t r a i m g d e  
l h h k p g e e f e y s n m n y d l l  
g l i i q n v t k s y t q y i t d h w l k p l q m k h t t f k q t n y k s k h d a i g y e l q g s t p v v s k p e f n l w d t p s a y m m t s t e d l e h w i  
k f q l n p p d k y k s l v q q s h k  
n l s t i g e p n a n p y a s g w f t n d e h l v f h s g t l d n f s s f i l l n p k q n y g i v v l a n l n s e y v p k l v e h l n t q i v n h k r y s t  
v a s i l n q y k d q f n i v t v l m  
t t l i l l a f i f s a y r a w q m r h g q i l l r r s k r i a v l s w l t l c l c i a i a l i l y a l p y l i l g s n n w s f v l t w l p i e i k l a l i t t  
l i a l f s t l i v i l l f l h t k i  
t k t  
>sp|Q8NV45|Y2284\_STAAW  
mmkln l f i n a k e t e s y i d i h a p k m n d h v q s i i n a v n d l d k s h t l v g y i d k e i h i i n v s d v i t f q v i n k n v t a i t s n q k f k  
l k l r l y e l e k q l p q h f i r i  
s k s e i v n k y y i e k l l l e p n g l i r m y l k d a h y t y s s r r y l k s i k e r l s i  
>sp|Q8NV47|HRTA\_STAAW  
malvvedivknfgeglsetkvlkginfeveqgefvi l ngasgsgktt l l t i l g g l l s q t s g t v l y n d a p l f d k q h r p s d l  
r l e d i g f i f q s s h l v p y l k  
v i e q l t l v g q e a g m t k g s s t r a i q l l k n i g l e d r l n v y p h q l s g g e k q r v a i m r a f m n p k i i l a d e p t a s l d a d r a t k  
v v e m i r q q i k e q q m i g i m i  
t h d r r l f e y a d r v i e l e d g k i t d  
>sp|Q8NV48|TCAA\_STAAW  
mkscskcgqqaqddvqi ctqcghkfdsrqalyrkstdediqttnikmrkmpwaigffililililffllrnfnspqaqt  
kilvnaienndkqkvatll  
s t k d n k v d s e a k v y i n y i k d e v g l k q f v s d l k n t v h k l n s k t s v a s y i q t r s g q n i l r v s k n g t r y i f f d n m s f t a p t  
k q p i v k p e k t k y e f k s g g  
k k k t v i a e a n k v t p i g n f i p g t y r i p a m k s t e n g d f a g y l k f d f r q s n s e t v d v t e d f e a n i t v t l k g d t k l n d s s k k v  
t i n d r e m a f s s s k t y g p y p  
q n k d i t i s a s g k a k d k t f t t q t k t i k a s d l k y n t e i t l n f d s e d i e d y v e k k e e n s l n k n l i e f f a g y s l a n n a a f n q  
s d f d f v s s y i k k g s f y d d  
v k k r v s k g s l m m i s s p q i i d a e k h g d k i t a t v r l i n e n g k q v d k e y e l e q g s q d r l q l i k t s e k  
>sp|Q8NV55|IDI2\_STAAW  
msdfqreqrknehve i a m a q s d a m y s d f k m r f v h s i p s i n v n d i d l t s q t p d l t m a y p v y i n a m t g g s e w t k n i e k l  
a v v a r e t g l a m a v g s t h a a  
l r n p r m a e t f t i a r k m n p e g m i f s n v g a d v p v e k a l e a v l l e a q a l q i h v n s p q e l v m p e g n r e f v t w l d n i a s i v s r v  
s v p v i i k e v g f g m s k e l m h  
d l q q i g v k y v d v s g k g g t n f v d i e n e r r a n k d m d y l s s w g q s t v e s l l e t t a y q s e i s v f a s g g l r t p l d a i k s l a l g a k  
a t g m s r p f l n q v e n g i a h  
t v a y v e s f i e h m k s i m t m l d a k n i d d l t q k q i v f s p e i l s w i e q r s l n i h r g  
>sp|Q8NV65|HUTI\_STAAW  
mndliinhiaelilprstdkplkgkel delnvvkngtvvikdgkivyagthtddydatetid asgkvvspalvdahthlt  
fggsrehems lkrqgksyl  
e i l e m g g g i l s t v n a t r e t s e d d l f k k a e h d l l t m i k h g v l a v e s k s g y g l d r e n e l k q l k v s n r l a e k y d l d m k h t f l g  
p h a v p k e a s s n e a f l e e m i  
a l l p e v k q y a d f a d i f c e t g v f t i e q s q h y m q k a k e a g f k v k i h a d e i d p l g g l e l a i d e q a i s a d h l v a s s d k g k e k l r  
n s d t v a v l l p a t t f y l g k e  
d y a d a r g m l d n n g a i a l a t d y n p g s s v t n n l q l v m a i a a l k l k l s p n e v n a v t v n a a k a i d i n a g t i n t g d k a n l v i w d  
a p n h e y i p y h f g i n h a e k v  
i k d g k v i v d n t l s f k a  
>sp|Q8NV88|UREG\_STAAW  
manpiki g i g g p v g a g k t q l i e k v v k r l s k e m s i g v i t n d i y t k e d e k i l v n s g v l p e s r i i g v e t g g c p h t a i r e d a s m  
n f a a i d e l l e r h d d i e l i f  
i e s g g d n l a a t f s p e l v d f s i y i i d v a g g e k i p r k g g g m i k s d f f i i n k t d l a p y v g a s l e q m a e d t k v f r g k r p f t f t  
n l k t d e g l d e v i d w i e r d t  
l l k g l s

Tsompanidou\_et\_al\_Supplemental\_FASTA\_File

>sp|Q8NVA0|MOAC\_STAAW  
mtefthinqqghakmvdvsdkqitkrtavahssitvnk.tifkqisntntkgnvlnaqaigimaakntstiipmchplp  
ltgidvhfswdetnaplyt  
lniqttvsttktgvemealtaasataltydmtkavdkgmigetylesksggksgdfqrsnq  
>sp|Q8NVA1|MOEA\_STAAW  
mvvekrnpipvkeaiqrivnqqssmpaitvalekslnhilaedivatydiprfdkspydgfairsvdsqgasqgnriefk  
vidhigagsvsdklvgdhe  
avrimtgaqipngadavvmfeqtieleedtftirkpfsknenislkgeetttdvvlkkgqvinpgaiavlatygyaevkv  
ikqpsvaviatgse1ldvn  
dvledgkirsngpmiralaeklglevgiyktqkddldsgiqvvkeamekhdivittggvsvgdfdy1peiikavkaevl  
fnkvamrpgsvttvafvdg  
kylfglsgnpsacftgfe1fvkpavkhmcalaevfpqiikatlmedftkanpfrfirakatlsagatvvpvsgfnksa  
vvaiahancmvm1pggsrg  
fkaghtvdiiltesdaeeel11  
>sp|Q8NVA9|FEMX\_STAAW  
mekmhitnqehdafvkshpngd1lq1tkwaetkk1tgwyarriavgrdgevqgvaq11fkkvk1pyt1cyisrgfvvdy  
snkealnalldakeiaka  
ekayaiki dpdevdkgtalqn1kalgfkhhkgfkeglskdyiqprmtmitpidknddel1nsferrnrskvr1alkrgt  
tversdreglktfaelmki  
tgerdgfltrdisyfeniyadalhedgdael1vklpkeniakvnqelnelhaeiakwqqkmetsekqakkaqnmindaq  
nkiaknedlkrdlea1e1e  
hpegiylsgal1mfagsksyylgassnefrdf1pnhhmqytmmyarehgattydfggtdndpdkdsehyglwafkkvw  
gtylsekigefdyvlnqpl  
yqlieqvkpr1tkakikisrk1krk  
>sp|Q8NVB5|ECFA2\_STAAW  
medknsvivfknvsfqyqsdasft1kdvsfsipkqwtisvghngsgkstiaklmigi ekvksgeifynnqtitddnfek  
1rkdigivfqnpdnqfvgs  
ivkydvaflenhavphdemhrrvgealkqvdm1eradyepnalsggqqrvaivasv1alnpsviil1deatsml1dpdarq  
n1ld1vrkvksehnitiis  
ithd1seameadhvi1vmnkgtyvegtaieifdhaeel1ttig1d1pfpikinqlgyqtsf1tyeg1vdq1  
>sp|Q8NVB7|TRUA\_STAAW  
mri1veiayqgnf1gfiqqngrtvqqqfek11qrmhkrhvrihpsrtdrgvhaiqqyfhdte1nipmsqwqyamnr  
t1pddiyvnnvvtvdddfh  
crydcvgkryrykvyqaqhrdpfqsglktfipet1d1dkmnraaqqfigthdftgfcqsqkteveskvtlyqseivktdd  
gfdyivtgsf1ynmvrv1  
vaf1ievkgkrheisdvk1lesknrknvpftataegly1ekiyl1dene11kdfgndikihrkks1qnd  
>sp|Q8NVC8|NPD\_STAAW  
mrnd1et1khi1dssnr1tfftgagvsvasgvdpdfrsmgglfdeiskdgl1spey11srdyleddpegfinfchkr11fvd  
tkpni1vhdwia1k1ernqgs  
lgvitqnd1g1hsdagsqhvde1hgt1nrfycnachksytskdv1dr1tkhcdncggairpdivlygem1dqpti1rs1n  
kiehad1lv1lgss1vvqp  
aag1isn1fkgdn1i1inkdrtpydrdat1vi1hddmvs1vks1mte  
>sp|Q8NVC9|LACD\_STAAW  
msksnqkiasieq1snnegi1sala1fdqrga1krmmakhqteeptvaqieqlkv1vae11tqyass11dpeygl1pasda  
rnkdcg11layektgydvn  
akgr1pdc1vqwsakr1kegganavk11lyydvddae1iniqkkayierigsecvaedipff1ev1tyddnipdngsvef  
akvkprkvneamk1fsepr  
fnvdv1kvevpvnmkyvegfaegevytkeeaqhfknqdaath1pyiylsagvsael1fet1kfaheagakfngv1cgr  
atwsgavqvy1eggedaar  
ew1rttg1knidd1nkvl1kdtatswkqrk  
>sp|Q8NVE3|ARGI\_STAAW  
mtktkaidi1gapstfgqrklgvd1gptairyag1isr1kq1d1dvdydkgdikvpvvniekfhseqgl1rnydei1dvng  
k1nkevsasiennr1fplv1  
ggdhsia1vgs1saiskhynn1gviwydahgd1nipeespsgnihgmp1riltgegpkel1el1nsnvikpeniv1ligmrd1  
dkgerqf1kdhniktftms  
didk1gikevienti1eylksr1nvdgvh1s1ldvda1d1p1etpgtgrv1lg1syreshfale11hqsh1issmd1vevnp1  
idsnnhtaeqavs1vgtff  
get11  
>sp|Q8NVE6|GLMS\_STAAW  
mcg1vgiygydnake111kg1lek1eyrgydsagiavvndnttvfkekgriae1rkvadssdfdgpgvightrwathgvp  
nhenshphqssngrft1vh  
ngvienyee1kgeylqgvsfisetdtevivq1veyfsnqgl1steeaftkvvs11hgsyalg11daedkdtiyvaknkspl  
11lgvgegfnviasda1am1  
qvtseykeihdheiv1vkkdevi1kdadgnvverdsyiaeidasdaekgyvahym1keiheqpavmrr1iqeyqdaegn1  
kidqdi1ndvkeadrivy1  
aagtsyhag1vgkeflekwagvptevhvasefvynmp11sekl1fv1isqsgetadsrav1vetnklghks1titnvags  
t1sreadht111hagpeia  
vastkaytaqia1v1s1sqivakehgreaid11relakvttaieaivddapimeqiatdf1ettrnaffigrtidynvs

Tsompanidou\_et\_al\_Supplemental\_FASTA\_File

legalklkeisyiqaeqfa  
ggekghgtialieegtpvvglatqekvnlsirgnvkevvargahpciismeglekegdtyviphvhelltplvsvvalql  
isyaa1hrd1dvdkprnl  
aksvtve  
>sp|Q8NVF5|DEOC2\_STA  
mhsaklidhtllkpestrtqidqiideakayhfkscvnpthvkyaaerladsevlvctvigfplgasttat kafeteda  
iqngadeidmvinigalkd  
grfddvqqdieavvkaakghtvkviievvlldhdeivkasetkaagadfvtstg faggataedvklmkdtvgadvev  
kasggvrnledfnkmveag  
atrigasagvqimqgleadsdy  
>sp|Q8NVG3|MURA2\_STA  
maqevikirggrtlngevnisgaknsavaiipatl1aqghvkleglpqisdvktlvsllledlnikaslngmelevdttei  
qnaalpnkveslrasyym  
mgamlgrfkkcviglpggcplgprpidqhikgfkalgaeidessttsmkieakelkgahifldmvsvatini mlaavya  
tgqtvienaakepevvda  
nfltsmganikgagtstikingvkelhgseyqvipdrieagtymciaaacgenvilnnivpkhvetltakf selgvnvdv  
rderirinnapyqfvdik  
tlvypgfadtlqqiptl1fmangpsfvtdtiyperfk hveelkrmganievdegdatikpstlhgaevyasdlragacl  
iiaagliaegvttiynvkh  
yrgytdiveh1kalgadiwtetv  
>sp|Q8NVG4|ALD1\_STA  
mrdytkqyingewvesnsnetievinpateevigkvakgnkadvdkaevadnvy1efrhtsvkerqalldkivkeyenr  
kddivqaitdelgap1s1s  
ervhyqmglnhfvaardaldnyefeerrgddl1vveaigvsglitpwnfptnqts1klaaafaagspvvlkpseetpfaa  
vilaefdkvgyvpgvfnl  
vngdgagvgnplsehpkrmsftgsgptgskimekaakdfkkslel1ggkspyivl1ddvdikeaakattgkvvnntgqv  
ctagtrvlvpkkikdaf1a  
elkeqfsqrvvgnpredgtqvgpi1skkqfdqvqnyinkgieegael1fyggpgkpeglekgyfarptifinvdnqmtiaq  
eeifgpvmsvitynd1dea  
iqiandtkyglagyvigkdetlhkvarsieagtveineagrkd1pfggykqsglgrewgdygieeflevksiagyfk  
>sp|Q8NVH3|THID\_STA  
mikpkialtiagtdptggagvmd1ksfhscgyvgmvvtsivaqntlgvqihnl1nhqwvdeq1dsvfndt1phaiktg  
m1atadtmetirhylmqhe  
sipyvidpvm1aksgds1mdndtkqn1qht11pladvvtpn1peaeitgltidseekimqagrifineigskgviikgg  
hsndtdiakdylftnegvq  
tfenerfktkthgtgctfsavitaelakgrrl1feavhkakkfismsiqytp eigrgpvnhfayl1kkegl1delsk  
>sp|Q8NVI1|ATKA\_STA  
mei11f1tmvmityvfsgylrvalvqssrvd1iftrfenmcfkiigt1lehmsaktyvkhflafngfmgfitfv11iv  
qqw1f1nphnl1nqsid1a  
fntais1f1tnsn1qhngesdvty1tqmivmty1mftssasgyavciam1rr1tgl1tni1gnfyqdivrfivrv11p1sc  
1is11mtgqvpqt1han1  
mir1t1sghiqhiaf1gpias1lesikh1gtnggg1flagsatpfenpniwsn1fiemgsmm11pmsm1f1fgrm1srhgkrvh  
rhal11fvamff1fia1lt  
1tmwseyrgnpi1an1giygnmegkevrfgag1salfvtvittafttgsvnmhds1tp1gg1gpmv1mm1nvvf1ggeg  
glmn11iyv11tvfics1m  
vgktpey1nmpigaremkciv1vfl1hpil1ilv1salfm1pgases1tnps1fhgis1qvmymtsaaanngsgfeg1kdd  
ttfwn1stgi1m11sryip  
i1lq1miass1vnkksyhqdytiaidkpyfgvslivfiv11sg1t1fipv111gpigef1t1k  
>sp|Q8NVI3|ATKC\_STA  
mntirnsic1ti1tmv1cgl1f1plait1igq1ffyqqangslitydnrivgskligqhtetryfhgrpsavdynmpek  
lykngvssggsnesngte  
liarmkhvkfgnsvt1daatssgsg1dphitvenalkqapriadarhist1svad1iqhrkqrgv1tndyvvn1elni  
aldkmd  
>sp|Q8NVI5|RSBW\_STA  
mqskedfiemrvpasaeyvs1ir1t1sgv1sragatyddiedak1avseavtnavkhaykennnvgi1niyfeiledkik  
iv1s1dkgds1fdyettkski  
gpydknenid1f1reggl1gl1f1ies1mdev1tykesgvt1smtkyikkeqvrnngerveis  
>sp|Q8NVI8|THD1\_STA  
mtvkttvstkdideaf1r1kdivketpl1q1dhyl1sqkydckvyl1kred1qwwrsfkl1rgaynaisv1sdeakskgitcas  
agnhaqqvaytakk1n1na  
vifmpvttpl1qkvngvkffgnsnevvl1tgdtfdhcl1ea1tytsehqm1fidpfnvht1isgggt1akem1eqsktdnv  
nfdyl1faa1ggggl1sgis  
tyfktyspttki1igvepsgassmyesvvnnqvvt1pnidk1fdgasvarvgdit1feiakenvddyvqvddegavcst1ld  
myskqai1vaepaga1svsa  
1enykdhikgktvvcv1sggnnd1nrmkeieers11yeemkhyfi1nfpqrpga1refvndv1gpqddit1kfeyl1kssq  
ntgtvi1igi1q1kdhd1liq  
1kqrvnhfdpsniyi1nenkm1lys11i  
>sp|Q8NVJ0|LEU3\_STA



Tsompanidou\_et\_al\_Supplemental\_FASTA\_File

mtynivalpgdgigpeilngslsleisnkynfnyqieheffggasidtfgepltektlnackradaillgaiggpkwt  
dpnrpeggllklrkslnl  
fanirpttvvkasslspkeervegkdlvivreltsgiyfgeprhfnhealdslytreeierivhvafklaasrrgk  
ltsvdkenvlassklwrkv  
vnevsqlypevtvnhllvdacsmhli tnpkqfdvivicenlfgdilsdeasvipgslglspsasfsndgprlyepihgsap  
diagknvanpfgmilslam  
clreslnqpdadeleqhiynmiehgqttadlggklnnttdifeilsqklnh  
>sp|Q8NVK6|HLD\_STAAW  
maqdiistisdlvkwiidtvnkftkk  
>sp|Q8NVL7|DAPE\_STAAW  
mttfsekekiqladivelqtenneidvcnylkdldkydikseilkvnehranivaeigngsplalsghmdvvdagn  
qdnwtypffqktekagkly  
grgttdmkggmalvitlielkeqnqlpogtirllatageekeqegaklladkgylddvdgliaeptgsgiyahkgs  
sckvtatgkavhssvfig  
dnaidtllfynlfkekyseikqadtkehdvapmfksligkeiseedanyasgl tavcsiinggkqfnsvpdeaslefn  
vrpvpeyndnfiesffqni  
indvsnklsldipsnhrpvtstdknsk littikdvassyveqdeifvsalvgatdassflgdnkdnvdlaifgpgnplma  
hqideyiekdmlykyidif  
keasikylkek  
>sp|Q8NVL8|LUKL2\_STAAW  
mknkkrvliasslscaillsaattqansahkdsdqdnkkehvdksqqkekrvtnkdknstvpddigkngkitkrte  
ydektnilqnlqfdfidp  
tydknvlvkkqgsihsnlkfeshkeeksnwlykypseyhvdfqvrnpkteildqlpknkistakvdstfsyssgkfd  
stkgigrtssnsysktisy  
nqqnydtiasgknwhvhwsviandlkyggevknrndellfyrnriatvenpelsfaskyrypalvrsgfnpefltyl  
sneksnektqfevtytrnq  
dilknrpgihyappileknkeqrlivtyevdwknktkvvdksdnksfreg  
>sp|Q8NVL9|LUKL1\_STAAW  
mikqlykni tictlaistftvlpatsyak in seikavseknl dgdtkmytrtattsdsqknitqslqfnfltepydke  
tvfikakgtigsglri ldp  
ngywnstl rwpgsysvsiqnvddnntnvt dfapknqdesrevkytygyktggdfs inrggl tgnitkesnysetisyqq  
psyrtildqstshkgvkwk  
veahlinmghdhtqr l tndsdnrksei fsltrngnlwakdnftpknkmpvtvse gfnpeflavmshdkkdegkskf  
hykrsmdefkidwnrhgfw  
gywsgehvdkkeeklsalyevdwkthnvkfvkln dnek  
>sp|Q8NVN2|SSB\_STAAW  
mlnrtilvgrl trdpe lrttqsgvnvasftlavnrfttnagereadfiniivfkkqaenvnyl skgslagvdgrlqtr  
nyenkeqrvyvt evvads  
iqflepkntddnqqdlyqqqaqtrgqsqysnnkpvkdnpfanancpieiddndlpf  
>sp|Q8NVR2|SAK\_STAAW  
mlkrsllfl tvlll fssitnevsasssfdkgykkgdasyfepgylmvnvtgvdgkgnellsphyvefpikpgt  
tltkekiyyvewaldata  
ykefrvveltsakievtyydknkkeetksfpitekgvvdp lshiknpgfnl itkvviekk  
>sp|Q8NVS5|SDCS\_STAAW  
mayfnqhqsmskryl tffskskkkpf sagqlig l ilgp ll fl l t l l f f h p q d l p w k g v y v l a i t l w i a t w w i e a i p i  
aatsllpivllplghilt  
eqvsseygndiifl fggfilaiamerwnlhtrvaltiinligastskillgfmvatgflsmfvsntaavmimipiglai  
ikeahdlqeanntqtsiqk  
feksllvlagyagtiggltlgtppliilkgymqhfghesfakwmivgiptvivllgitwlylryvafrhdlkylpg  
gqtlkqkldelgkmyee  
kvvqti fvl asllwitrefllkwevtssvadgtiaifisillfvipakntekhriidwevake l p w g v l i l f g g g l a l  
akgisesglakwlgeqlks  
l ngvspiliviviti fvl fl tevtstatatmilpilat lsvavgvhp lllmapaamaancaymlpvgtppnaiifgsgk  
isikqmasvgfwvnlisai  
i i i l v v y y v m p i v l g i d i n q p l p l k  
>sp|Q8NVT1|PCRA\_STAAW  
mnallnhmnteqseavkttegp llimagagsktrvlthriaylldekdvspynv l a i t f t n k a a r e m k e r v q k l v g d q a  
eviwstfhs mcvrilrrd  
adrigiernfti idptdqsvikdv l kneni dskkfepmfigaisnlknelktpadaqkeatdyhsqmvatvysgyqrq  
lsrnealdfddlimttinl  
fervpevleyyqnfqyihvdeyqdt nkaqytlvkllaskfknlcvgdsdqsiygwrgadiqnilsfekdypeantifl  
eqnyrstkti lnaanevik  
nnsrkpkglwtantngekihyeamterdeae fvi reimkhqrngkkyqdmailyrnaqsr v l e e t f m k s n m p y t m v g  
gqkfydrkeikdllylri  
iansnddislqriinyprkgvgpssvekvqnyalqnnismfdalgeadfigl skkvtqec l nfyeliqsl likeqefleih  
eivdevlqksgyrem lere  
ntlesrsleni defmsvpkdyentpleeqslin fltdlslvadideadtengvt lmtmhsakglefpivfimgmesl  
fphiraiseddhemqeer

Tsompanidou\_et\_al\_Supplemental\_FASTA\_File

ricyvaitraeevlyithatsrmlfgrpqsnmpsrflkeipesllenhsgrkrtiqpkakpfakrgfsqrttstkkqvl  
ssdwnvgdkvmhkawgegm  
vsnvneknsgsieldiifksqgpkrl1aafapiekked  
>sp|Q8NVU6|GSA2\_STAAW  
mnfseserlqqlsneyilggvnspsrsykavgggapvumkeghgaylydvdgnkfidylqaygpiitghahphitkaiqe  
qaakgvlfgtpteleiefs  
kk1rdaipslekirfvnsgteavmttirvaraytkrnkiikfagsyhgshdlvlvaagsgpsqlgspdsagvpesvarev  
itvpfndinaykeaiefwg  
deiaav1vepivgnfgmvpqpgfleevneishnngtlviydevitafrrfhygaaqdllgvipdltafgkivggglpigg  
yggrqdimeqvaplgpayq  
agtmagnplsmkagiallevleqdgvyeklds1gqqleegllk1iekhnitatinriygs1tlyftdekvthydqvehsd  
geafgkffklm1nqginla  
pskfeawflttehteediqq1kaadyafsqmk  
>sp|Q8NVW1|TRAP\_STAAW  
mkk1ytsygygflhqikinnpthqlfqsasdtsvifeetdgetvlksptkydvikeigefsehffycailfipstedha  
yqlekk1isvddnfrnfgg  
fksyr11rpakgttykiyfgfadrhayedfkqsda1fndhfskdalshyfgssgqhsyferlypikie  
>sp|Q8NVX7|SPLC\_STAAW  
mnkniviksmaal1tsvtginaavveetqqianaeknvtqvkdtnifpyngvvsfkdatgfvigkntiitnkhvskdy  
kvgdritahpdgdknggg  
yk1ksidsyppgdedismnieeqavergpkgnfnenvqalnfakdakvddkikviygy1paqnsfkqfestgtikrikd  
nilnfdai1epngsgspvl  
nsnneivgvvyggigkigseyngavyftpqikdfiqkhiEQ  
>sp|Q8NVX8|SPLF\_STAAW  
mnkniiiksiaal1tsitvgvttvvdgiqqtaentvkqitntnvapysgvtwmgagtgvvgnhtiitnkhvtyhm  
kvgdeikahpngfynngg  
lykvtki1vdypgkediavvqveekstqpkgrkfkdfstskfniaseakenepisvigypnpgnk1qmyestgkvlsvngn  
ivssdai1qpgssgsp1n  
skheaigviyagnkpsgestrgfavyspeikkfiadn1dk  
>sp|Q8NW03|CRCB2\_STAAW  
misiilvmiggfgaitrsaitdyfnhkftsk1piatlivnlvgsflign1glisiswfpaffvtgflgglttfstla  
kel1mmtpkfn1n1flny  
s11qfi1gfiacyigyhi  
>sp|Q8NW09|ARSB\_STAAW  
mt1lat1if1vt11fv1wqpkgl1digitaltgafiavitgvvsfsdvfevtgivwnat1tfvsvilisl1ldkvglfews  
aihm1haskng1kfmvyi  
illgaivaaffandgaal1tpiv1amvknigfskrai1pf1iasgfiadtts1plivsn1vniisadyfhigfiryfsr  
miipn1fs1lasii1vlwly  
frkai1pktfddn1khpkdain1kl1fki1swiv1villfgyliseftkipvsiftgia1f1mlarksnalnikqvikg  
apwniv1fsigmyivvfgl  
rnagit1ilaki1leyisnyglfstilgmgifas1f1ssimnmptvlidaiaigqsnvhgm1kegliyanvigsdlgpkit  
pigs1at11wl1hvl1tgkdv  
kiswgyfktgii1tipvlfit1igly1t1iif  
>sp|Q8NW17|SYL\_STAAW  
m1nynhnqi1ekkwqdywdenktfktndn1gqkkfyal1dmfpypsgag1lvghpegytatdi1srykrmqgynvl1hpmgwd  
afgl1paeqyal1dtgndpre  
ftkkn1qt1fkrqike1gfsydwdrevnttdpeyykwtqwi1fi1qlynkglayvdevavnwcpal1gtvl1sneev1dgvserg  
ghpvyrkpmkqwv1k1tey  
adq11ad1dd1dwpes1kdmqrnwi1rsegakvsfdvdnteaegkvevfttrpdtiygas1fl1vspehal1vnsittdeyk  
ekvkayqteaskksd1ert  
dlakdksgvftgaya1npl1sgekvqiwi1adyvl1stygtgaimavpahddrdyefakkfd1pi1evieggnev1eaaytgeg  
khinsge1dgl1enea1tk  
aiq11leqkgagekkvnyk1rdw1fsrqrywgepi1vihwedgtmtt1vpeel1pl11petdeikpsgtgesplanidsfvn  
vvdektgmkgrr1retntmpq  
wagscwyy1ryidpknen1ladpek1khw1pvd1yiggvehav1h1lyar1fwhkvlyd1givptkepfqk1fnqgmilge  
gnekmskskgvni1ppd1v  
qshgadt1r1lyemfmgpl1daaiawsekg1dgsrrf1drvwr1mvnedgt1sskivtt1nks1dkvynqt1vkkvtedfet1  
gfntaisq1mvfinecykv  
devykp1y1egfvkml1api1aphigeelwsk1gheesityqpwptydeallv1ddeveivvqvnk1rakikiakdtskeemq  
eia1sndnvkasi1egkdim  
kviavp1k1vn1vak  
>sp|Q8NW23|PEPVL\_STAAW  
mwkekvqyedqi1ind1kg1laiesvrddakasedapvggprka1dymyehardgftthdvdhiagri1eagkgndvl1g  
il1chvdvvpagdgwdsnpf  
epv1tedai1argt1ddkgptia1aayaiki1ledm1vdwkkri1hmi1gtdeesdwkctdry1fkteempt1gfapdaefpci  
hgekgt1tfd1lvqn1laed  
qdep1ye1it1fksgerynmpvdhaearv1vkenmtdvi1qdfey1leqn1lqgdstvds1gilv1tvegkavhgm1dpsigvn  
ag1ly11k1fl1as1n1ldnnaq

Tsompanidou\_et\_al\_Supplemental\_FASTA\_File

afvafsnryl fdsdfgekmgmkfhtdvmgdvtnnigvi tydenaglfginlrypegfefekamdrfaneiqqygfevk1  
gkvqpphyvdkndpfovqkl  
vtayrnqtdndmtepytiggytarnldkgvafgamfedsedlmhqkneyitkkqlfnatsiyleaiyslcvve  
>sp|Q8NW24|DAAA\_STAAW  
mekifl ngefvspeakvsyndrgyvf dgiyeyirvyngklftvtehyerflrsaneigldlnysveelielsrklvdm  
nqietgaiyiqatrgvaer  
nhsfptpevapai vaytksydrpydh lengvngvtvedirwlrcdikslnllgnvlakeyavkynaveaiqhrgetvteg  
sssnayaikdgvitythpin  
nyilngitrvikkiaedy nipkeetftvdf lrnadevvsstsaevtpvikldgepvndgkvgpitrqlqegfkyie  
shsi  
>sp|Q8NW26|TRMB\_STAAW  
mrvrykpwaedy lkdhpelvdmdgqhagkmtewfdktqpihieigsgmgqfittlaaqnphinyismereksivykvldk  
vkemsltnlkiicndaie l  
neyfkdgevsriyl nfsdpwpknrhakrrl tyhtflalyqqilndegd lhfkt dnrgl fayslesmsqfgmyftkinlnl  
hqedgsni lteyckfsn  
kgsriyrmeakfhsqk  
>sp|Q8NW30|Y1686\_STAAW  
mntfqmrklkerlsh lvdvdfknreeet lriyrtdnnkgitiklnaivakyedkkekivdeivyyvdeai aqmadktle  
sissqimpviratsfdkk  
tkqgvpfiydehtaetavyavdl gksyrlidesmledlklteqqiremslfnvrklsnsyttdevkgntfyfinsndgy  
dasrln taf lneieaqc  
gemlvavphqdvli iadirnktgydvmahl tmefftkg lvpitsl sfgykqghlepifilgknnkqkrdpnvirleanr  
rkfnkd  
>sp|Q8NW49|THII\_STAAW  
mkydhllvrygel t lkg snrk kfvnql rnnvnks lkgldgfvvkgkrdrmyieledhadineityr lskifgiksispv l  
kvektieamsaaaikfaqq  
feenstfki dvkradknfsmdtyel qrelggailkhfdni svnvkrpdheirvevrl daiymyeevvp gsgglpvgtgk  
tllm lsggidspvagemv  
rrgytieaihfhspftsdakekviel tri laervgpiklhivpftelqkqvnkvhp rymtstrmmmrvadklvhq  
igalainngenlgqvasqt  
lshmyainnvstpv lrp llydkee i ikskeigt fetsiqpfedccti ftpknpvtepnfdkvvqyesvdf feemir  
avenietleitsdyktike  
qqtnqlindfl  
>sp|Q8NW51|TPX\_STAAW  
mteitfkggpihlkgqqi negdfapdf tvl dndlnqvt ladyagkkklisvsvsidtgvc dqqrkfn dsaskeegivlt  
isadlpfaqkrwcasagld  
nvtl sdhrd lsfgenygvmeel rllaravfv l dadnkvvkykeivsegtdf pfd daalaaykni  
>sp|Q8NW55|Y1651\_STAAW  
mtkiskii delnngqadaawittp lnvyyftgyrsepher lfallikkdgkqvl fcpkmeveevkaspftgeivgyldte  
npfsl ypqtkllieseh  
l tvarqkqlisgfnvnsfgdvd l tikql rniksedeiskirkaaeladkcieigvsylkegvtere vnhieqtikqygv  
nemsfdtmvlfgdhaasph  
gtpgdr r lksneyvlfdlgviyehycsdmtrtikfgepskeaqeiynivleatsaiqaikpgiplkdidhiarniisek  
gygey fphrlghglglqeh  
eyqdvstnsnlleagm vitiepgiyvpsvagr ieddi lvtnegyevlthyek  
>sp|Q8NW59|ACCD\_STAAW  
mfkdfnrntkkkky ltvqdsknndvpagimtkcpcckkimytkelaen lncvncdhhialtaykrieaisdegsftefd  
kgmts anl d fspylekie  
kdqkqtglkeavvtgaql dgmkgfvavmdsrfrmgsmgsvigekicriidyctenr l p fil fsasggarmqegiislmq  
mgktsvslkrhsdagllyi  
sylthpttggsasfasvgdin lsepka ligfagr rrvieqtinek l pddf qtaefll ehgqldkvvrnrmrqt l seilk  
ihqevtk  
>sp|Q8NW73|ENGB\_STAAW  
mkvnpnnielii savkeeqypkte lseval sgrsnvgkstfinsmig rknmartsqqpgktqt l nfynideqlifvdvpg  
gyakvsktqrekfgkmie  
eyitkrenlqlv iqlvd l rhdp tqddi l mynylkhfdipt l victkedkipkgkvqkhikniktql dmdpddtivsyssi  
qnnkqqqiwnliepyis  
>sp|Q8NW84|MNMA\_STAAW  
msnkdi rvvvgm sggvdssvtahvl keqgydvigi fmknwddtdengvctatedyndvievcnqigipyav nfekeywd  
kvftyfldeykkgrtpnd  
vmcnkeikfkaf l dhann l gadyvatghyari hrhedghvem l rgv dnnkdqtyflnqlsqqq l skvmfpigdiekievr  
riaeeqglvtakkdstgi  
cfige knfktflsqyl paqpgdmit l dgkkmghsglmyytigqrhglgiggdgpwfvvgkn l kdnvlyveqgfhhda l  
ysdyl iasdysfvnpednd  
ldggfectakfryrqkdtkvfvkrendhal rvtfaepvraitpgqavvf ygqdvclggatiddvfkneqglnyvv  
>sp|Q8NWA1|AROE\_STAAW  
mkfavignpishsl spvmhranfns l glddtyeal nipiedfhl likeiiske l dgfnitiphkeriipy l dhvdeqain  
agavntvlikddkwigynt

Tsompanidou\_et\_al\_Supplemental\_FASTA\_File

dgigvkg1hsvypdlenayililgaggaskgiayelakfvkpkltvanrtmarfeswnlninqisladaekylaefdiv  
inttpagmagnnesiinlk  
hlspntlmsdiviipyktpileeaerkgnhiyngldmfvyqgaesfkiwtnkdadinsmktavlqq1kge  
>sp|Q8NWA7|LEPA\_STAAW  
mdneqr1krrenirnfsiahidhgkstladri lentksvetrdmqdqlldsmderergitiklnavr1kyeakdgnty  
tfh1idtpghvdftevsr  
slaacegai1lvdaagqieaqtlanvy1aldnelellpvinkidlpaaepervkqeiedmigldqddvvasaksnigie  
eilekivevvpapgdpea  
plkalifdseydpyrgvissirivdgvvkagdkirmmatgkefevtevgintpkqlpvdelvtvgdvgyiasiknvddsr  
vgdtitlasrpaseplqgy  
kkmpmvyvcp1fpidnknynd1rea1ek1qlndas1efepessqalgfyrtgflgmlhmei1qerierefgieliatap  
sviyqci1rdgsevtvdp  
aqmpdrdkidki1fepyvratmmvpndyvgavmelcqrkrqgfinmdylddirvniyvelplaevvdfddq1ksntkgya  
sfdyefienkesnlvkmdi  
11ngdkvdalsfivhrdfayergkalvek1ktl1prqqfevpvqaaigqkivartniksmgknlakcyggdisrkrk11  
ekqkagkakmkavgnieip  
qdaflav1kmdde  
>sp|Q8NWA9|GRPE\_STAAW  
mtnkdesvekttestveetnvkqniddsveqaeeskghlqdeaieetsdenvieeidpkdqkinelqqladeneekylr1  
yaefenykrriqkeneink  
tyqagrvt1d1paidniera1qi egddetfks1qkgvqmvhes1ina1kdn1leviktegeafdpnihqavvqddnpdf  
esgeitqelqkgyk1kdrv  
1rpsmvkvnq  
>sp|Q8NWB5|RECO\_STAAW  
mlmrqkgi1ikavdygesdkii1inehgakvplmarrakkvktglqaqtq1fvylfiynqwrngmt1nsvdvisqhyk  
1qmd1fvssyaslaetie  
rsmdegdiapynyq11qfvl1ekiesgtsaq1msvvvm1kcmkrfgftasfnrcavsgndtqad1igysfkfdgaisrqa  
skdvhavi1snkt1yl1dv  
1qk1pidkmns1nihqei1demsdi1lm1yreyagmffksqk1in1ql1kr1eq  
>sp|Q8NWB7|PRIM\_STAAW  
mridqsi1inei1kdktdi1dlvseyv1lekrgrnyig1cpfhdektpsftvsedkqi1chcfgckkgnvfqftqeikdisf  
veavkelgdrvnvavdiea  
tqfnsnvqiasdd1qmiemheliqefyya1tktvegeqal1tylqergftdalikergigfapds1shfchdf1qkkgydi  
elayeag11srneenfsy  
drfrrn1mfp1knaqgrivgysgrtytgqepky1nspetpi1fqkrk11lyn1dkarksirk1deiv11legfmdviksdtag  
1knvatmgtq1sdehtf  
irk1t1ni11mfdgdfageat1ktgqh11qqg1nvfv1q1psgmpdteyigkygndaftafvknkksfahykvsi1kd  
eiahd11syery11kelshd  
is1mkssi11qka11ndvapffnvspeqlaneiqfnqapanyppddeyggydeyggyiepepigmaqfdn1srqekaeraf  
1kh1mrkd1t1f1nyyesvd  
kdnftnqh1fkyvfev1hd1fyandqyni1sdavqyvnsnelret11sleqyn1ndepyeneid1dyv1vinekgqetie1n  
hk1reatrigdvelqky1  
qqi1vaknkerm  
>sp|Q8NWC8|AROK\_STAAW  
mnhdkspi11igfmg1gk1st1igkyvadeqn1sfididsyieeky1ktipeifskhgeqyfrn1leftclqecintadiat  
gggi1eeseafn1knqkn  
i1w1dcnidi1ysr1ind1p1hrnannktik1q1nd1lycsr1n1rynei1afkkfdsh11siseiyye11n1likasdy  
>sp|Q8NWE6|RNZ\_STAAW  
mevtf1gtsag11ptkerntqai1n1lepysnsi1w1fdvgegtqhq11lhaik1lgkvthi1fithm1hgdhi1fg1pg11ssrs  
f1g1geqk1p1t1vgpk1gika  
yvems1m1sesh11nyp1itye11iddh11tyh1hdgftveah11nhgvpsygyrvm1apettgtinveal1knig1lep1gkyqevk  
shdtfe1hng1vyqskdfrg  
esk1g1pvvai1fg1tk1pcs1nervi1rdadvm1heaty1idgek1h1annyh1hshiedv1falikeanvkrt1ith1snrynted  
i1neyqt11iqned1pnfnf  
vkdfds1fkv  
>sp|Q8NWF2|SCPB\_STAAW  
mdnhg1iles11ftagdeg1dekq11le1ldmsknq1velienysshg1miqrfgttyv1ttk1keaatyieq1lieqksqm1  
sqaamev1s1iaynq11sr  
sdiel1rs1nsdgavk1t1iakg1veakvvneqrsq11itt1d1fl1nvfgi1snied1ptteeddeemda1ffsn1vnqkgenn  
d  
>sp|Q8NWP3|SYN\_STAAW  
mktti1kqakdh1nqdv1tigaw1tnkrssgkia1flq1rdgtgfm1qgvvkvseveevfklakeitqesslyvtgtitednr  
sd1gyemqvk1sie1viseah  
dyp1tpknhgte1f1mdhrh1lw1rskkqhavmkirnev1ratyeffnkdgftkvdpp11tasapegtse1fhtkyfdqdaf  
1sqsgq1yleaaamahgk1v  
fsfgpt1fraeksktrrh1iefwmi1egemaftnhaes1e1iqeqyvthvvksvlenckle1kilerdtsklekvatpfpris  
yddaief1k1segfddi1ewg  
edfgaphetaianhyd1lpvfi1tnyptki1kpfymqpnpenetv1cad1iapegygei1ggsservdd1le1leqrvkehgl1d

eeaysyldlrrygsvphc  
gfglglerfvawisgvehvretapfrllnrlyp  
>sp|Q8NWQ5|NORB\_STAAW  
mekpsreafegnkliligivlsvitfwlfaqslnvvpiledsfntdigtvniavsitalfsgmfvvgaggladkygrik  
ltnigiilnllgsllyiis  
nlpillliigrliqglsaacimpatlsiiksyigkdrqraalsywsigswgsgvcsffggavatllgwrwifilsiiisl  
ialflikgtpetksksisl  
nkfdikglvllvimllslnilitkgseigvssllfitllaiaigsfslfivlekratnplidfklfknkaytgatasnfl  
lmgvagtlivantfvqrgl  
gysslqagslsitylvmvlimirvgekllqtlgckkplmigtgvlivgeclislftlpeilyvicciigyloffglglgiy  
atpstdaianaplekvvgv  
aagykykmasalggafgvalsgavyaivsnmtniytgamialwlnagmgilsviilllvpkqndtql  
>sp|Q8NWQ6|EBH\_STAAW  
mnyrdkiqkfsirktyvtgfstviatlvlfgfntsqahaatnqpasvkvkqqsneqtenresqvqnsqnsqnsqsls  
atheneqpnisqanlvdqk  
vaqssttndeqpasqnvntkkdsataattqpdkeegkhkqnesqsankngndnraahlenheanvvtasdsdngnvqhd  
rnelqaffdanyhdyrfid  
renadsgtfnyvkgifekintlgsndpinnkdlqlaykeleqavalirtmpqrqtsrrsnriqtrsvesraaeprsvs  
dyqnanssyvenandgsg  
ypvgtyinasskgapynlpttpwntlkasdskeialmtakqtgdgyqvwikfnkghaphqnmifwfalpadqvpvgrtdf  
vtvnsdgtnvqshgagag  
ankplqqmwegvndpdrshdfkinnrsgqviyswptvhvysledlsrasdyfseagataatkafrqnfeyingqkpa  
spgvpkvytfiggdasyt  
isfktqgptvnllyaaagraleynqlfmysqlyvestqdhqqrlngrlqvvrtyrigttkrvevsqgnvqtkkvest  
nlnidgfvddplsyvktps  
nkvlgyptnattnafrrpgvqelneyqlsqiftdqklqeaartrnpirlmigfdydpdgygnsetlvpnltvlpei qhn  
ikffknddtqniaekpfsk  
qaghpvfyvyagnqgnasvnlggsvtsiqplrinltsnenftdkdwqitgiprtlhienstnrtnnarernielvgnllp  
gdyfgtirfgrkeqlfeir  
vkphtptitttaeqlrgtalqkvpvnisgipldpsalvylvaptnqttnggseadqipsytilatgtpdgvhtitirp  
qdyvvfippvgkqiravvy  
ynkvasnmsnavtilpddipptinnpvginakyryrgdevnftmgvsdrhsgiknttittlpngwtsnltskdnkngsla  
itgrvsmnqafnsditfkv  
satdvnnttndsqs khvsihvgsi sedahpivlgn tekvvvnptavsndekqsii tafmknqnirgylastdpvtvd  
nngnvtlhyrdgsstllda  
tnvmtypvkvkseyqtanaaktatvtiakgqsfnigdikqyftlsngqai psgtftnitsdrtiltaqevsqmnagtqly  
hivasnayhkdtedfyisl  
kivdvkqpegdqrvyrtstydlttdeiskvkqafinanrdvitlaegnisvtnpanganvstitvinkgrltskfasnl  
anmnflrwnfpqdyvtwt  
tnakianrptdgglswsddhksli yrydatlgtqittndilmlkattvpglrnnitgnekaqaeaggrpnfrttgysq  
snattdgqrqftlngqviq  
vldiinpsngyggpvtnsntrahsnstvvvnepaangasaftidhvksnsthnasdavykaqlyltpygpkqyveh  
lnqntgnttdainiyfvps  
dlvnptisvgnynthqvfsgetftntitandnfgvqsvtpntsquitgtv dnnqhvsatapnvtsatnktinllatdts  
gntattsfnvtvklrdky  
rvgtssaanpvrianisnnavsqadqtaiinslfttetvpnr syarasaneitsktvsnvsrtgnnanvtvtatyqdg  
ttstvtvpkhvipeivah  
shyvtvgqdfpagnssasydfklngsaipdatitwvsgqapnkdntrigeditvtahilidgett pitktatykvst  
vpkhvfe trngavfpgvsd  
vydakqyvkpvndswtqnaqrmnfqftnsygpskdvvgistrdirvtydnhtqiikilakvkpdpbridgnsvtykagl  
tnqqikinnvlssssiklf  
kadntp lti tnttygsgntavvtvsdalpngvikarssitmnvtyttqdehgraidvtrnesvdsnds atvtvtpqlqa  
ttegavfikggdgd fghv  
erfiqnpph gatvawhdspdtwkntvgnthktavvtlpngqgtrnevvpvkypvanakapsrdvkgqnlngtdamnyi  
tfdpntntngitaawanrq  
qpnnqqagvqhlndvtypgisaakrvpvtvnvyqfefpqttyttvtvggtlasgtqasgyahmqnatglptd gftykwnr  
dtgtndanwsamnkpnva  
kvnakydvi yngh tfatslpakfvvkdvqpakptvtetaagaiti apganqtvnthagnvttiyadklvikr ngnvttf  
trrrntspwvkeasaatva  
giagtngi tvaagtfnpadtiqvvatqgsgetvsdeqrsddftv vapqpnqattkiwqng hiditpnnpsghlinptqa  
mdia ytekvngae hskti  
nvvrgqnnqwti ankpdvyl daqtgkvtnantikpnssititpkagtghsvssnpstltapaahvntteivkdygsn  
vtaaeinnavqvankrtat  
ikngtampnlaggstttipvtvtyndgsteevqesiftkadkrelitaknhl ddpvstegkkpgtitqynnaihnaqqq  
intakteaqqvinnratp  
qqvsdal tkvraaqtkidqakallqnkednsq lvt sknllqssvnqvpst agmtqqsidynakkreaete itaaqrvid  
ngdatppqi seekhrvdna  
lta lnqakqnl tadthtleqavqqlnrtg tttgkkpasitaynns mhalqaeltsaknsanai iqkpirsvqevqalt n

Tsompanidou\_et\_al\_Supplemental\_FASTA\_File

vnrvrerltqainqlyppla  
dnsalrtaktkldeeinksvttldgmtqssi qayenakragqtestnaqnvinnngdatdqgiaeektkveekynslkqai a  
gltpdlaplqtaktqlnd  
idqptsttgmsttsiaafnekl saartkiqeidrvlashpdvati rqnvtanaakta l dqarngltvdkaplenaknql  
qhsidtqtsttgmtdqsin  
aynakl taarnkiqqinqv lagsptveqintntsaanqaksdl dharqaltpdkapltaktql eqsinqptdttgmmta  
slnaynqklqaarqkltei  
ngv l ngnptvqni ndkvteanqakdq l ntarqgl t l drqpal t t l hgasn l nqaqqnftqqinaaqnhaaletiksnit  
a l n tamtk l kdsvadnnti  
ksgqnytdatpankqaydnavaakgvi gettntptmdvntvnqkaasvstkda l dgqqn l qrakteatnait hasdl nq  
aqkna l tqqvnsaqnvhav  
ndikqtts l n tamtg l krgvanhnqvvsdnyvnadtnkknndynnaynhandi ingnaqhpvitpsdvnnal snvtske  
halngeak l naakqeanta  
l ggl n l nnaqrqnl qsqi nsahqietvntikqnatn l nsamgn l r qavadkdqvkrtedyadadtakqnaynsavssae  
t i i nqttnptmsvddvnr a  
tsavtsnkna l ngdek l aqsktdaaraidal ph l nnaqkadvkskinaasni agvntvkqqgtd l n tamgn l qgga indeq  
t l n sqnyqdatpskktay  
tnavqaakdi l nksngqktdqvteamnql nsakn l dgtr l l dqakqtakqql nmth l ttaqktn l nqi nsgttva  
gvhtvqsnant l dqamnt l  
rsi ankdatkasedyvdandnkqtaynnavaaaet i i nansnpempst i tqaeqvnskta l ngden l atakqnakt  
y l n t l t s i t d a q k n n l i s q  
i s s a t r v s g v d t v k q n a q h l d q a m a s l q s g i n n e s q v k s s e k y r d a d t n k q q e y d n a i t a a k a i l n k q h g p n t a q n a v e a  
a l q r v n t a k d a l n g d a k l i  
aaqnaakqhlgt l thi ttaqrnd l nqi sqatn l agvesvkqnans l dgamgn l qta i n d k s g t l a s q n f l d a d e q k r n a  
ynqavsaaet i l n k q t g p n  
taktaveqal n n v n n a k h a l n g t q n l n n a k q a a i t a i n g a s d l n q h q k d a l k a q a n g a q r v s n a q d v q r n a t e l n t a m g t  
l k h a i a d k t n t l a s s k y v n  
adstkqnayttkvtnaehi i s g t p t v t t p s e v t a a n q v n s a k q e l n g d e r l r v a k n a n t a i d a l t q l n t p q k a k l k e  
q v g q a n t l d d a m n s l q g a i  
ndkdat l r n q n y l d a d e s k r n a y t q a v t a a e g i l n k q t g g n t s k a d v d n a l n a v t r a k a a l n g a e n l r n a k t s a t n t i n g  
l p n l t q l q k d n l k h q v e q a  
q n v a g v n g v k d k g n t l n t a m g a l r t s i q n d n t t k t s q n y l d a s d s n k n n y n t a v n n a n g v i n a t n n p n m d a n i n g m a n q  
v n t t k a a l n g v q n l a q a k t  
n a t n t i n n a h d l n q k q k d a l k t q v n n a q r v s d a n n v q h t a t e l n g a m t a l k a a i a d k e r t k a s g n y v n a d q e k r q a y d s k  
v t n a e n i i n g t p n a t l t v n  
d v n s a t s q v n a a k t a l n g d n n l r v a k e n a n t i d g l a q l n n a q k a k l k e q v q s a t t l e g v q t v k n s s q t l n t a m k g l r d s  
i a n e a t i k a g q n y t d a s p t  
n r n e y d s a v t a a k a i i n q t s n p t m e p n t i t q a t s q v t t k e h a l n g a q n l a q a k t t a k n n l n n l t s i n n a q k d a l t r s i d g  
a t t v a g v n q e t a k a t e l n n  
a m h s l q n g i n d e t q t k q t q k y l d a e p n k k s a y d q a v n a a k a i l t k a s g q n v d k a a v e q a l q n v n s t k t a l n g d a k l n e a k  
a a a k q t l g t l t h i n n a q r n  
a l d n e i t q a t n v e g v n t v k a k a q q l d g a m g l e t s i r d k d t t l q s q n y q d a d d a k r t a y s q a v n a a a t i l n k t a g g n t p k  
a d v e r a m q a v a q a n t a l n g  
i q n l e r a k q a a n t a i t n a s d l n t k q k e a l k a q v t s a g r v s a a n g v e h t a t e i n t a m t a l k r a i a d k a d t k t s g n y v n a d a  
n k r q a y d e k v t a a e s i v n g  
t p t p t l t p s d v t n a a t q v t n a k t q l n g n h n l e v a k n a n t a i d g l t s l n g p q k a k l k e q v g q a t t l p n v q t v r d n a q t l n  
t a m k g l r d s i a n e a t i k a g  
q n y t d a s p n n r s e y d s a v t a a k a i i g q t t s p s m n a q e i n q a k d q v t a k q q a l n g q e n l r t a q t n a k q h l n g l s d l t n a q k  
e a a k r q i e g a t h v n e v t q a  
q n n a d a l n t a m t n l k n g i q d q n t i k q g v n f t d a d e a k r n a y n a v t q a e q i l n k a q g p n t a k d n v e s a l q n v q r a k n e l n  
g n q n v a n a k t t a k n a l n n l  
t s i n n a q k e a l k s q i e g a t t v a g v n q v s t t a s e l n t a m s n l q r g i n d e a a t k a a q k y t d a d r d k q t a y n d a v t a a k t l l d  
k t a g t n e n k a a v e q a l q r v  
n t a k t a l n g d a r l n e a k n t a k q v a t m s h l t d a q k a n l t s q i e s g t t v a g v q g i q a n a g t l d q a m n q l r q s i a s k d a t k s  
s e d y q d a n a d l q n a y n d a v  
t n a e g i s a t n n p e m n p d t i n q a s q v n s a k s a l n g d e k l a a a k q t a k s d i g r l t d l n n a q r t a a n a e v d q a p n l a a v t a  
a k n k a t s l n t a m g n l k h a l  
a e k d n t k r s v n y t d a d q p k q q a y d t a v t q a e a i t n a n g s n a n e t t v q a a l n q l n q a k n d l n g d n k v a q a k e s a k r a l a s y  
s n l n n a q s t a a t s q i d n a t  
t v a g v t a a q n t a n e l n t a m g l q n g i n d q n t v k q q v n f t d a d q g k k d a y n a v t n a q g i l d k a n g q n m t k a q v e a a l n q v  
t t a k n a l n g d a n v r q a k s d  
a k a n l g t l t h l n n a q k q d l t s q i e g a t t v n g v n s v k t k a q d l d g a m q r l e s a i a n k d q t k a s e n y i d a d p t k k t a f d n a i  
t q a e s y l n k d h g t n k d k q a  
v e q a i q s v t s t e n a l n g d a n l q r a k t e a t q a i d n l t h l n t p q k t a l k q q v n a a q r v s g v t d l k n s a t s l d n a m d q l k q g i  
a d h d t i v a g g n y t n a s p d k  
q g a y t d a y n a a k n i v n g s p n v i t n a a d v t a a t q r v n n a e t s l n g d s n l a t a k q q a k d a l r q m t h l s d a q k q s i t g q i d s a  
t q v t g v q s v k d n a t n l d n a  
m n q l r n s i a n k d e v k a s q p y v d a d t d k q n a y n t a v t s a e n i i n a t s q p t l d p s a v t q a a n q v n t n k t a l n g a q n l a n k k q

ettaninglshlnnaqkqd  
lntqvtnapnistvngvktkaeqldqamerlingiqdkdqvkqsvnftdadpekqtaynnavtaeniinqangtnanqs  
qveaalstvtttkqalngd  
rkvtdaknnanqtlstldnlinaqkgavtgninqahtvaevtqaiqtaqelntamgnlknslndkdttlgsqnfadadpe  
kknayneavrnaenl nks  
tgtvnpkdqveaamqvnttkaalngtqnlekakqhantaidglshltnaqkealkqlvqqsttvaeaaqgneqkannvda  
amdklrqsianattkqng  
nytdaspnkkdaynavttagqidiqttsptldptvinqaagqvsttknalnsnenleakqqatqslgsldnlinaqkq  
avtdqingahtvdeangik  
qnaqnlntamgnlkqaiadkdatkatvnftdadqakqqayntavtanaeniiskanggnatqteveqaiqqvnaakqalng  
nanvqhakdeatalinssn  
dlnqaqknaikqqvgnattvagvnnvkqtaqelnnamtqlkqgiadkeqtkadgnfvnadpdkqnaynqavakaealig  
tpdvvtptseitaalnkvt  
qakndlngntnlatakqnvghaidqlpnlngaqrdeynkqitqathvpvnaiqqaattlndamtqlkqgiankaqikgs  
enyhdadtqkqataydnvt  
kaeelkqttntmpntiqaalkvndtnqalngnqkladakqaaktnlgtldhlnndaqkqalttqveqapdiatvnnv  
kqnaqnl nnamtnlnnalq  
dktetlnsinfddadqakdaytnavshaegilskangsnasqteveqamqrvneakqalngndnvqrakdaakqvina  
ndlnqaqkdaikqqvdaaq  
tvanvntikqtaqdlngamtqlkqgiadkqtkangfnvadtdkqnaynavahaeqii sgtpnanvdpqqvaqalqqv  
nqakgdlnghnlqvakdn  
antaiddqlpnlngpqtalldqvshaelvtgvnaikqnadal nnamgtlkqgiqansqvpqsvdftqadqdkqqaynaa  
nqaqqiangtptvlapdt  
vtqavttmqakdalngdeklaqakqda lantldlrdlnqpprdalrnqinqaalatveqtkqnaqnvntamgnlkqgi  
ankdtkasenyhdadvk  
qtaytnavsqaegii nqttntptlnpdditra l tqvtdaknslngeaklatekqnakdavnamtlnndaqkqal kqgidqs  
peiatvngvktatsldha  
mdqlsqa indkaqtladgnylnadpdkqnaykqavakaealnkqsgtnevqaqvesitnevnaakqalngndnlanakq  
qakqqlanlthlnndaqkqs  
fesqitqaplvtdvttingkaqtl dhame ll rnsvadnqttlasedyhdataqrqndynqavtaanniinqttstmpnd  
dvngattqvntkvaldgd  
enlaakqganrldqldhlnnaqkqqlsqitqssdiaavngkhqtaetlntamgnlinaiadhqaveqrgnfinadtd  
kqtayntavneaaaminqk  
tgqnanqteveqaitkvqttlqalngdhnlvaktatqaidalstlnpqqtalldqvtaatlvtavhqi eqnantlnq  
amhglrqsiaqnaatkans  
kyinedqpekqnydqavqaanniineqtatldnainqaaatvnttkaalhgdvklqndkdhakqtvsqalahlnnaqkkm  
edtldsettrtavkqdl  
eaqaldqldmalqssiadkdatrassayvnaepnkkqaydeavqnaesiiaglnnptinkgnvssatqavtsskna ldgv  
erlaqdkqtagnslnhldq  
ltpaqqaalenqinnattrdkvaeiiaqqaalneikaikesikdqpqteasskfinedaqakdaytqavqhakdlinkt  
tdptlaksiidqatqavtd  
aknlnhgdklaqdkqrattetlnlnslntpprqalenqinnaatrvevaqklteaqaalnqamealrnsiqdqqqteags  
kfinedkppkdayqaavqn  
akdlninqtnptldkaqveqltqavnqakdnlhgdqkladdkqhavtdlnqlnglnnpqrqaalesqinnaatrdevaql  
aeakaldqamqalrnsiqd  
qqtesgskfinedkppkdayqaavqnakdlninqtnptldkaqveqltqavttakdnlhgdqklardqqqavttvna lp  
ninhaqqqaltdainaapt  
rtevaqhvqtatel dhame tlnknvdqvntdkaqpnysteaddkkaevdqaalqaesitdptngsnankdaveqal tklq  
ekvnelngdervaeaktqa  
kqnidqldhlnadqiatkqni dqtqlqpiaelvdqatqlnqsmdqalqqavndhtnveqtvdytqadsdkkaykqaiia  
daenvlkqnankqqvdqal  
qnilnakqalngdervalaktngkhdiddqalnalnaqqdgfkgri dqsndlnqiqivdeakalnramdq lseeitgneg  
rtkgstnyvnadtqvkqvy  
deavdkakqal dktgqnltaeqviklndavtaakqalngeerlnnrksealqrl dqlthlnnaqrqlaiqqinnaetln  
kasrainratkldnamgav  
qqyideqhl gvisstnyinaddnlkanydnai anaaheldkvqgnaiakaeaeqlkqniidaqnalngdqnlanakdka  
afvnslnqlnqqqgdlahk  
ainnadtvsdvtdivnnqidlndametlkhldvneipnaeqtvnyqnaddnaktnfddakrlana ll nsdntvndinga  
iqavndaiahlnngdqlrd  
akdkaiqsinqalanklkeiasnatdqdkliaknkaeelansiinninkatsnqdvsvqqtagnhaieqvhaneipkak  
idankdvdkqvqalideid  
rnpnltdkekqal kdrinqilqqghndinna l tkeieqakaqlaqa lqeikdlvkakenakqdvdkqvqalideidqnp  
nltdkekqal kdrinqilq  
qghndinnamtkeieqakaqlaqa lqdikdlvkakedaknaikalanakrdqinsnpdl tpeqkaka lkeideakra l  
qrvnaqtidqlnrglnlg  
lddirnthvvevdeqavneifeatpeqilvngelivhrddiiteqdilahn lidqlsaevitdpstatisds l takve  
vtll dgskvivnvpvkvve  
kelsvkkqaiesienaaqkineinnsvtl tleqkeaaiaevnk l kqqaidhinnapdvhsveeiqqqeqahieqfnpe

Tsompanidou\_et\_al\_Supplemental\_FASTA\_File

qftieqaksnaiksiedai  
qhmideikartdltdekekgeaiaklnqlkeqaiqaiqraqsideiteqleqfkaqmkaanptakelakrkqeaaisrikdf  
snekmsirnseigtadek  
qaamngineivletirdinnahtlqqveaalnngiarisavqivisdrakqsstgnesnshltigygtanhpfnsstig  
hkkkidedddidplhmrf  
snfngviknaigvvgisglasfwffiakrrrkedeeeeeieirdnnkdsiketlddtkhlp11fakrrrkedeedvtve  
ekdslnngesldkvkhtpf  
flpkrrrkedeedvevntentdekvldknehspl1fakrrrkedeedvettsieskdedvp111akkknqkdnqskdkks  
askntskkvaakkkkkkksk  
knkk  
>sp|Q8NWR1|PTGA\_STAAW  
mfkklfgkgkevqkdiaytpltgefsvkiedipdpvfaqkmmgegfginptegevsvpiagrvidnvfptkhaiglkadng  
lellvhiqldtvqldgegf  
evlvssgdevnvgdplvrfnleyinnaksvispiitntdqaasiniydenavikgetkvidvtm  
>sp|Q8NWR6|ODO1\_STAAW  
mtnerkevseapvnfganlgmlldlyddf1qdpssvpedlqvlfsiiknddsivpalkstssqnsdgtikrvmlidnir  
qyghlkadiyvpnpkrkh  
vpkleiedfdldqqtlegisagivsdhfadiydnayeailrmekrykgpiafeythinntergwlkrrietpykvtlnn  
nekralfkqlayvegfeke  
lhnkfvgakrfsiegvdalvpm1qrtitiaakegikniqigmahrgrlnvlthvlekpyemmisefmhtdpmkflpedgs  
lqltagwtgdvkyhlggik  
ttdsygtmqrialannpshleivapvvegrtraaqddtqragapttdhhkampiihgdaaypgqginfetmnlgnlkyg  
stggs1hiitnrigftte  
pidarsttystdvakgydypi fhnaddveatieaidiamefrkefhkdvvidlvgyrrfghnemdepsitnpvpyqnr  
khdsvyvfkgklvnegvi  
sedemhsfieqvqkelrqahdkinkadkmdnmdmekpadlalplqadeqsftfdhlkeindalltypdgnilklnkv  
ekrhepfnkedglvdwaqa  
eqlafatildqgtpir1tgqdsertgfsrhavlhdeqtgetytplhhvpdqkatfdihnsplseaavvgfeygynvenk  
ksfniweaqygdfanmsqm  
ifdnflfssrskwgersgl1flphayegqgpehssarlerflqlaennctvvn1ssssnyfh11raqaasldseqmrp  
lvmspks11rnktvakpi  
deftsggfepiltesyqadkvtkvilatgkmfidlkealaknpdesvllvaierlypfpeeeieallaqlpnleevswvq  
eepknqgawlyvypvkv1  
vadkyd1syhgriqraapaegdgeihklvqnkiiena1knn  
>sp|Q8NWS1|TELL\_STAAW  
mtenksfkeshplddfdiskelsnttiqekeltieqqkqvdtiskqinpldnegllafgsdlqkmsqfshqmldevqsk  
dvgpigdt1sd1sklksv  
npne1ntdkpsmlkrisrakssineifsrmsvsavqdritiqlqkhqthltrdie1ldtlydknkqyfd1slhiiaa  
qqkklq1leneklpqlqqa  
qqstnqmdiqhvadmqgf1dr1dkryd1qlsrqialqtapqirmiqvnqalaekiqssiltsiplwknqmaialt1mr  
qrnavaaqravtdtnd11  
tanaem1kqnaietatenergivd1dt1krtqrnietieetliiqqhgreerqlaekelqqleqdlkshlvnikgtknq  
S  
>sp|Q8NWS5|DAPA\_STAAW  
mth1fegygvalltptfnkiniealkthvnfl1ennaqaiivngttaespt1ttdekerilktvidlvdkrvpviagt  
tndteksiqasiqakalga  
daim1itpyykntrqglvkhfeaiadavklpvvlynvpsrtm1tiepetveilsqhyiva1kdatndfeyleevkri  
dtnsfalysgnddnvvey  
qrgggvisvianipkefqa1ydaqqsgldiqdqfkipgt11salsvdinpipikaltsylgfgnyelr1plvsledtd  
tkvlreaydtfkagene  
>sp|Q8NWS9|CVFB\_STAAW  
maldkdivgsieflevvg1qgsty11kgpngenvkl1nqsemndd1evgeeysffiyprnrgel1fatqnpdi1tkkyd  
fakvlktdrdgaridvg1p  
rev1vpwed1pkvks1wpqpgdh11vt1ridrenhmygr1asesvvenmftpvhddn1knevieakpyrv1rigsf11se  
sgyki1fvheserkaep1g  
esvqvri1ghndkgelngs1pl1aher1dddgqvi1fd11veydgel1pfdksspea1kevfnmskgsfkraighlykqi  
inietgki1tkkgwsrmd  
ske  
>sp|Q8NWT5|OPPD2\_STAAW  
ms1idiqnl1tikntseks1ikgid1kifsqqinaligesgagksliakalley1pfd1sctydsyqfdgenvsr1sqyyg  
htigyisqnyaesfndhtk  
1gkql1taiyrkhykgskeea1skvdka1swvn1qskdi1nkysfqlsggqlervyiasv1vlepkl1iadepvas1da1n  
gnqvm11qhi1v1ehggt1  
fi1thn1shv1kycqiyv1kegq1iergn1nhfkyeh1hpyter1ikyrtq1krdyd  
>sp|Q8NWU0|FEMB\_STAAW  
mkfte1vtvtefdnfvqnp1leshyfqvkenivt1rendgfev11gikddnkvias1fskiptmgsyvyysnrgpvmdf  
sd1gl1vdy1ke1dkylqg  
hqcl1yvkl1dpyw1yh1ydkdivpfegreknda1vn1fkshgyehhgftteydtssqvrwmgv1n1legktpet1kktf1dsq



Tsompanidou\_et\_al\_Supplemental\_FASTA\_File

rkrninkainygvkvrfl  
rdefnlfldlyreteeragfvsktddyfynfidtygdkvlvplayidldeyvlklqqelndkenrrdqmmakenksdkqm  
kkaealdkqidhdqhelln  
aselsktdgpi ln lasgyfanayevnyfsggssekynqfmgpymmhwmfminycfdngydrynfyglsgdftensedygv  
yrfkrqfngvqieelgdfy  
kpihkvkywfttdklrkkllk  
>sp|Q8NWU7|MPRF\_STAAW  
mqevknkifsilkitfatalfi fvvitlyrelsginfkdtlvefskinrmslvllfigggaslvilsmydvilsralkm  
dislgkvlrvsyiinalna  
ivgfggfigagvramvyknythdkkklvhfisililismltgslslsllivfhvfdaslildkitwvrvwlyvvsfflplf  
iismvrppdknrfvgly  
ctlvscvewlaaavvlyfcgvi vdahvsfmsfiaifiaalsglvsfipgggafdlvllgftlgvpeekvllmllly  
rfayyfvpiiailssfe  
fgtsakkyiegskyfipakdvtsflmsyqkdiiakipslsailvfftsmiffvnnltivydaalydgnhltyyillaiht  
saclllllnvvgiykqsrr  
aifamisillitvatfftyasyilitwlaifvllivafrarrlkrpvrnrnivamllfslfilyvnhifiagtlyal  
diytiemhtsvlryyfwlt  
illiaaiigmiawlfdyqfsvkrisskiedceeinqyggnylshliysgdkqfftnektafmyrykasslvlgdp  
gdenafdeleafynyaey  
lgydvifyqvt dqhmplyhfnfnqffklgeeaidltqfstsgkkrgrfratlnkfdelnisfeieppfstefinelqh  
vsdlwldnrqemhfsvgqf  
neeylskapigvmrneeneviafcsImptyfndaisvdlirwlpeldlplmdglylhmllwskeqgytkfmgmatlsnv  
gqlhysylrerlagrvfeh  
fnglyrfqglrrykskynpnwepflvyrkdnslweslskvmrvirk  
>sp|Q8NWU8|PARC\_STAAW  
mseiidlsledvlgdrfgryskyiiqeralpdvrdglkpvrriilyamyssgnthdknfrksaktvgdvigqyphgds  
svyeamvrlsqdwklrhv  
iemhgngsidndppaamryteaklsllaellrdinketvsfipnyddttlepmlpsrfpnllvngstgisagyatdi  
pphlaeviqatlkylidnp  
ditvnqlmkyikgpdfptggiqgidgikkayesgkgrivrskveetlngrkqliiteipyevnksslvkridelra  
dkkvdgivevrdehtrgl  
riaieilkkdvnsesiknylyknsdlqisynfnmvaisdgrpklmgirqiidsylnhqievvantkfeldnaekrmhive  
glikal sildkvielirss  
knkcdakenlievyefteeqaeaimlqlyrlntdivalegehkelealikqlrhildnhdallnvikeelneikkkfk  
serlslieaeieekidke  
vmvpseevil smtrhgyikrtsirsfnasgvediglkdgdsllkhqevntqdtvlvftnkgrylfipvhkladirwkelg  
qhsqvipieedevvinvf  
nekdfntdafyvfatngmikstvp lfktrfnkpliatkvkenddlisvmrfekdq litvitnkgmsltyntsel sdt  
glraagvksinlkaedfvv  
mtegsenttilmatqrgslkrisfki lqvakraqgitllkelknphrivaahvvtgehsqytl ysk sneehglindi  
hkseytngsfivtdddf  
evidmyis  
>sp|Q8NWV1|SBCC\_STAAW  
mkplh1kl nngfpflkeeidfskidnneflisgktsgsktmi fdamtyalfgkasteqreendlrshfadgkqpmstvf  
efqlnhriykvhrqgpyik  
egnttktnakfdvfemvdgkyeireskvisgtqfiiellgvnadqfrqlfilpqgefkrflisnsrekqgilrtlfdek  
feaireilkeevkkekag  
enryqqidllwqeiesfdddnikgllvatqqidklienipllqarskeilasvnesketaikefeiekktlennilkd  
ninqlnknkidfvqlkegg  
peiegieaklkllditnllnyienrekiеткиanskdkstnki lnldcdkrnidkekkmlengdlieskisfidk  
trvlfndinkyqgsylne  
rlrtegeqlgdelndlikgletvedsignnesdyekieelnntitninneiniikenekakaelkllgskqelenqine  
etsilknleikldrydtk  
ldlndkesfiseiksavnigdqpcigneiqdlghhidfdisiakrqneikeieanihaiksniavhnseikfvnekisni  
niktqsdfslevlnkrll  
nena lnnqrdlnkfi eqmkeekdnltlqihnkqlrlnkneselklcrdlitefetlskynnittnefvdykkyvqdvnhq  
elskeiedklmqlsqrkli  
eqnnlnhyenqletyndlelneqsiememsrlnltdndideiiawrgeqe leqkrdykkryhefemeiarlesltk  
dke lldsklkdeyelkkg  
kmntlideysavhyqcqnninktqsivshinylnqelkdqgeifqlaeivsgknnkntlenfvliyyldqiaaqanrl  
atmsdnryqlirreavshg  
lsgleidvfdlshnksrhisslsggetfqs slalalglseivqqsggislesifidegfgtldqetletaldtllnlks  
tgrmvgiishvselknrip  
lvlevksdqysstrfkrn  
>sp|Q8NW7|GLPK\_STAAW  
mekyilsidqgttssrailfnqkgeiagvaqrefkqyfpqsgwvehdaneiwtsvlavmtevinendvradqiagigitn  
qrettvwdkhtgrpiya  
ivwqsrtqsiscelkqqgyeqtfrdktgllldpyfagtkvki ldnvegarekaengdl lfgtidtwlvkls gkaahi

Tsompanidou\_et\_al\_Supplemental\_FASTA\_File

tdysnasrtlmfnihdlew  
dellelltvpknmlpevkpssevygkti dyhfygqevpiagvagdqqaalfgqacfergdvkntygtggfmlmntgdka  
vksesgl1ttiaygidgkv  
nyalegsifvsgsaiqwlrdglrminsapqsesyatrvdstegvyvvpafvlgtpywdseargai fglsrgtekehfir  
atleslcyqtrdvmeamsk  
dsgidvqslrvdggavknfifmqfqadivntsverpei qetta lgaaf laglavgfweskd diaknwkleekfdpkmd eg  
ereklyrgwkkaveatqvf  
kte  
>sp|Q8NWZ0|TRUB\_STAAW  
myngilpvykergltshdvvfk l rki l ktkkightgt l dpevag l pvcignatrsvdyvmdmgkayeatsigrsttte  
dqtgdtletkgvhsadfnk  
ddidrll esfkgiieqippmyssvkvngklyeyarnnetverpkrvnikdigri se l d fkenechfkirvicgkgyi  
rtlatdigvklgfpahmsk  
ltriesggfv l kds l tleqikelheqds l qnk l fpleyglkg l psikikdshikkri l ngqkfnknefdnkikdqivfid  
gdseklaiymvhtkese  
ikpkkvfn  
>sp|Q8NWZ4|Y1145\_STAAW  
msylvtiiafiivfgvltvtvheyghmffakragimcpefaigmgpkifsfrknetlytirllpvgyvrmagdg leppv  
epgmnvkiklneeneithi  
ilddhkfqqieaievkkcdfkd l fiegitaydnerhhfkiarksffvengslvqiaprdrqfahkkpwpkfltlfagp  
lfnfilalvlfiglayyqg  
tptstveqvadkypaqgag l qkgdkivqigkykisefddvdka l dkvkdnkttkferd gktsveltpkkterkltkvs  
setkyvlgfqpasertl f k  
pivygfesflkgstl iftavvgmlasi ftggfsfdm l ngpvgiyhndsvvkagiisligy tallsvnl gimnlipal  
dggri l fviyeaifrkpv n  
kkaettii aigai fmvvimi lvtwndi rryfl  
>sp|Q8NX01|SUCD\_STAAW  
msvfidkntkvmvggitgsta l fhtkqml dygtkivagvtpgkqgvvegvv fntveeaknetgatvsvi yvpapfaad  
sileaadad l dmviciteh  
ipvl dmvkvr y l qgrktr l vgpncpgvitadeckigimpgyihkkghvgvvsrsgtltyeavhqlteegigqttavgig  
gdpvngtnfidv l kafned  
detkavvmigeiggtaeaaewikanmtkpvvgfiggqtappgkrmhagaiisggkgtaeekikt l nscgvktaatps  
eigstlieakeagiyeal  
l tvnk  
>sp|Q8NX10|PLSX\_STAAW  
mvklaidmmggdnadpivleavqkavedfkdleilfgdekkyn l nheriefrhcsekiemedepvraikrkkdssmvkm  
aeavksgeadgcvsagntg  
almsaglfi vgrikgvarpalvvtlptidgkgfv l dvganadakpehllqyaqlgdiyaqkirgidnpkisllnigtep  
akgnsltkksyellnqdh s  
l nfvgni eakt l mdgdtdvvvt dgytgnmv l knl egtaksigkml kdtimsstknklagailkkdl aefakkmdyseygg  
svllg l egtvvhahgssna  
kafysairqakiageqni vqtmketvgesne  
>sp|Q8NX11|RECG\_STAAW  
makvnli espysl l qlkgigpkkievlqqlnihtved l vly l ptryedntvid l nqaedqsnvtieggvytapvva ffg r  
nnsk l tvh l m vnniavkci  
ffnqpylkkkiele nqtitvkgkwnrvkqeitgnrvffnsqgtqtqenadvql epvyrikegikqkqirdqirqa l ndvti  
hew l tdelrekyk l et l df  
t l ntlhhpksked l l rarrtyafte l flfelrmqwl n rlekssdeaieidygl dqvksfidr l p feltea qkssvneifr  
d l kapir mhr l l qgdvgs g  
ktvvaai cmyal ktagyqsa l mvpteila eqhaes l malfgdsmnval l tgsvkgkkrkilleqlengtidcligthali  
qddvi fhnvglvitdeqhr  
fgvnrq l l rekgamt nvlfmtatpiprt l a i svfgemdvssikqlpkgrkpiittwakhegydkvlmqmtselkkgrqa  
yvicpliesseh ledvqnv  
valyes l qyygvsrvgl l hgkl sadekdevmqkfsnheidv l vsttvvegvnvpnat fmmiydad rfg l st l hq l rgr  
vgrsdqqsycv l iaspkte  
tgiermtimtg ttdgfel serd l emrgpgd ffgvkqsg l pdf l van l vedyrm l evardeaae l i qsgvffentyqhlrh  
fveen l l hrsfd  
>sp|Q8NX12|Y1109\_STAAW  
miskingklfadmi i qgaqlsnad l vds l nvyvpdgdgtgnml tmtsgreevennl sknigelgktfsg l l mgar  
gns gvil s q l frgfcnie  
seseinsk l laesfqagvetaykavmkpvegti l tvakdaaqaiekanntedcielme yiivkanes l entpn l l av l k  
evgvvdsggk l l cvyegf  
lka l kgekveakvaki d kdefvhdehdfhg vintedi i ygyc temmvr f gknkka fdeqefrqdmsqfgds l l vindeei  
vkvhvhteypgkvfn yggq  
ygelikl kvenmreqhrevi rkeqhtakpkmetvetai itismgegi sei fksmgathi isggqtmnpstedivkvieqs  
kckra i l pnnkn l mase  
qaasivdaevv i ptksi ppgi sa l fqc d vdat l eenkaqmadsvnnvks gsl tyavrtdki dgveikkda fmg l iedki  
vssqsdqlttvtellnem l

Tsompanidou\_et\_al\_Supplemental\_FASTA\_File

aedseiltviigqdaeqavtdnminwi eeqypdvevevheggqpiyqyffsve  
>sp|Q8NX16|RLMN\_STAAW  
mitaekkkknkflpnfdkqsiyslrfdemqnlveqqqkfrakqifewlyqkrvdsidemtnlskdlrqllkdnftvtt  
lttvvkgeskdgtikflye  
lqdgtyietvlmrhdygnsvcvttqvqgrigctfcastlglkrlnleageivsqvltvqkaldateervsqivimgigep  
fenydemmdflrivndns  
lnigarhitvstsgii priydfadediqinfavslhaakdevrsrlmpinraynveklieaiqqyqektnrrvtfeyglf  
ggvndq]eharelahlkig  
lnchvnlipvnhvpernyvktakndi fkefelkr]ginatirreqgsdidaacq]l rakerqvetr  
>sp|Q8NX18|FMT\_STAAW  
mtkii fmgtpdfsttvl emliaehdviavvtqprpvrkrvmtpppvkkmkydlpvyqpek]sgsee]eqllq]ldvd  
livtaafgq]l]pes]l]al]p  
klgainvhas]l]pkryggapihqai idgeqetgitimymvkk]ldagnii]sqaikieendnvgtmhd]k]sv]lgad]l]ket  
lpsii]egtne]svp]qdd]t]q  
tfasni]rrederi]wnk]pgr]qvfn]qir]gl]spwp]vay]ttm]dd]tn]l]ki]y]d]a]e]l]v]e]t]n]k]i]n]e]p]g]t]i]e]t]t]k]k]a]i]i]v]a]t]n]d]e]a  
vaikdm]q]l]ag]k]k]r]m]l]a]a]n]y  
l]sg]a]q]n]t]l]v]g]k]k]l]i  
>sp|Q8NX29|SYI\_STAAW  
mdyket]l]l]m]p]k]t]d]f]p]m]r]g]g]l]p]n]k]e]p]q]i]q]e]k]w]a]e]d]q]y]h]k]a]l]e]k]n]k]g]n]e]t]f]i]l]h]d]g]p]p]y]a]n]g]l]h]m]g]h]a]l]n]k]i]l]k]d]f]i]v]r]y  
k]t]m]q]g]f]y]a]p]y]v]p]g]w]d]t]h]g]l  
p]i]e]q]a]l]t]k]k]g]v]d]r]k]k]m]s]t]a]e]f]r]e]k]c]k]e]f]a]l]e]q]i]e]l]q]k]k]d]f]r]l]g]v]r]g]d]f]n]d]p]y]i]t]l]k]p]e]y]e]a]a]q]i]r]i]f]g]e]m]a]d]k]g]l]i]y]k]g  
k]k]p]v]y]w]s]p]s]s]e]s]l]a]e]a]e]i  
e]y]h]d]k]r]s]a]s]i]y]v]a]f]d]v]k]d]d]k]g]v]d]a]d]a]k]f]i]w]t]t]t]p]w]t]i]p]s]n]v]a]i]t]v]h]p]e]l]k]y]g]q]y]n]v]d]g]e]k]y]i]i]a]e]a]l]s]d]a]v]a]e]a]l]d]w]d  
k]a]s]i]k]l]e]k]e]y]t]g]k]e]l]e]y]v]v  
a]q]h]p]l]d]r]e]s]l]v]i]n]g]d]h]v]t]t]d]a]g]t]g]c]v]h]t]a]p]g]h]g]e]d]d]y]i]v]g]q]k]y]e]l]p]v]i]s]p]i]d]d]k]g]v]f]t]e]e]g]g]q]f]e]g]m]f]y]d]k]a]n]k]a]v]t]d]l  
l]t]e]k]g]a]l]l]k]l]d]f]i]t]h]s]y]p]h  
d]w]r]t]k]k]p]v]i]f]r]a]t]p]q]w]f]a]s]i]s]k]v]r]q]d]i]l]d]a]i]e]n]t]n]f]k]v]n]w]g]k]t]r]i]y]n]m]v]r]d]r]g]e]w]i]s]r]q]r]v]w]g]v]p]l]v]f]y]a]e]n]g]e]i]m]t  
k]e]t]v]n]h]v]a]d]l]f]a]e]h]g]s]n]i]w  
f]e]r]e]a]k]d]l]l]p]e]g]f]t]h]p]g]s]p]n]g]t]f]t]k]e]t]d]i]m]d]v]w]f]d]s]g]s]s]h]r]g]v]l]e]t]r]p]e]l]s]f]p]a]d]m]y]l]e]g]s]d]q]y]r]g]w]f]n]s]i]t]t]s]v]a]t]r]g  
v]s]p]y]k]f]l]l]s]h]g]f]v]m]d]g]e]g]k  
k]m]s]k]s]l]g]n]v]i]p]d]q]v]k]q]k]g]a]d]i]a]r]l]w]s]s]t]d]y]l]a]d]v]r]i]s]d]e]i]l]k]q]t]s]d]v]y]r]k]i]r]n]t]l]r]f]m]l]g]n]i]n]d]f]n]p]d]t]d]s]i]t]e]s]e]l  
l]e]v]d]r]y]l]l]n]r]l]e]f]t]a]s]t]i  
n]n]y]e]n]f]d]y]l]n]i]y]q]e]v]q]n]f]i]n]v]e]l]s]n]f]y]l]d]y]g]k]d]i]l]y]i]e]q]r]d]s]h]i]r]r]s]m]q]t]v]l]y]q]i]l]v]d]m]t]k]l]l]a]p]i]l]v]h]t]a]e]e]v]w]s]h]t]p]h  
v]k]e]e]s]v]h]l]a]d]m]p]k]v]e]v]d]q  
a]l]l]d]k]w]r]t]f]m]n]l]r]d]d]v]n]r]a]l]e]t]a]r]n]e]k]v]i]g]k]s]l]e]a]k]v]t]i]a]s]n]d]k]f]n]a]s]e]l]t]s]f]d]a]l]h]q]l]f]i]v]s]q]v]k]v]d]k]l]d]d]q]a]t]a]y]e  
h]g]d]i]v]i]e]h]a]d]g]e]k]c]e]r]c]w]n  
y]s]e]d]l]g]a]v]d]e]l]t]h]l]c]p]r]c]q]q]v]v]k]s]l]v  
>sp|Q8NX35|MURD\_STAAW  
m]l]n]y]t]g]l]e]n]k]n]v]l]v]v]g]l]a]k]s]g]y]e]a]a]k]l]l]s]k]l]g]a]n]v]t]v]n]d]g]k]d]l]s]q]d]a]h]v]k]d]l]e]s]m]g]i]s]v]s]g]s]h]p]l]t]l]l]d]n]n]p]i]i]v]k]n]p]g  
i]p]y]t]v]s]i]i]d]e]a]v]k]r]g]l]k]i]l  
t]e]v]e]l]s]y]l]i]s]e]a]p]i]i]a]v]t]g]t]n]g]k]t]t]v]t]s]l]i]g]d]m]f]k]k]s]r]l]t]g]r]l]s]g]n]i]g]y]a]s]k]v]a]e]v]k]p]t]d]y]l]v]t]e]l]s]s]f]q]l]l]g]i]e]k]y]k  
p]h]i]a]i]i]t]n]i]y]s]a]h]l]d]y]h]e]n  
l]e]n]y]q]n]a]k]k]q]i]y]k]n]q]t]e]e]d]y]l]i]c]n]y]h]q]r]q]v]i]e]s]e]l]k]a]k]t]l]y]f]s]t]q]q]e]v]d]g]i]y]i]k]d]g]f]i]y]k]g]v]r]i]i]n]t]e]d]l]v]l]p]g]e]h]n]l  
e]n]i]l]a]a]v]l]a]c]i]l]a]g]v]p]i]k]a  
i]i]d]s]l]t]t]f]s]g]i]e]h]r]l]q]y]v]g]t]n]r]t]n]k]y]n]d]s]k]a]t]n]t]l]a]t]q]f]a]l]n]s]f]n]q]p]i]i]w]l]c]g]g]l]d]r]g]n]e]f]d]e]l]i]p]y]m]e]n]v]r]a]m]v]v]f]g]q  
t]k]a]k]f]a]k]l]g]n]s]q]g]k]s]v]i]e]a  
n]n]v]e]d]a]v]d]k]v]q]d]i]i]e]p]n]d]v]l]l]s]p]a]c]a]s]w]d]q]y]s]t]f]e]r]g]e]k]f]i]e]r]f]r]a]h]l]p]s]y  
>sp|Q8NX50|FIB\_STAAW  
m]k]n]k]l]i]a]k]s]l]l]i]a]a]i]g]i]t]t]t]i]a]s]t]a]d]a]s]e]g]y]g]p]r]e]k]k]p]v]s]i]n]h]n]i]v]e]y]n]d]g]t]f]k]y]q]s]r]p]k]f]n]s]t]p]k]y]i]k]f]k]h]d]y]n]i]l]e  
f]n]d]g]t]f]e]y]g]a]r]p]q]f]n]k]p]a]a  
k]t]d]a]t]i]k]k]e]q]k]l]i]q]a]q]n]l]v]r]e]f]e]k]t]h]t]v]s]a]h]r]k]a]q]k]a]v]n]l]v]s]f]e]y]k]v]k]k]m]v]l]q]e]r]i]d]n]v]l]k]q]g]l]v]k  
>sp|Q8NX55|UVRC\_STAAW  
m]e]d]y]k]q]r]i]k]n]k]l]n]v]v]m]e]p]g]c]y]l]m]k]d]r]n]d]q]v]i]y]v]g]k]a]k]l]r]n]r]l]s]y]f]t]g]a]h]d]a]k]t]t]r]l]v]g]e]i]r]r]f]e]f]i]v]t]s]s]e]t]e]s]l]l]l  
e]l]n]l]i]k]q]y]q]p]r]y]n]i]l]l]k]d]d  
k]s]y]p]f]i]k]i]t]k]e]k]y]p]r]l]l]v]t]r]t]v]k]q]g]t]g]k]y]f]g]p]y]n]a]y]s]a]q]e]t]k]k]l]l]d]r]i]y]p]y]r]k]c]d]k]m]p]d]k]l]c]l]y]y]h]i]g]q]c]l]g]p]c]v]y]d]v]d  
l]s]k]y]a]q]m]t]k]e]i]t]d]f]l]n]g]e]d  
k]t]i]l]k]s]l]e]e]r]m]l]t]a]s]e]l]d]f]e]r]a]k]e]y]r]d]l]i]q]h]i]q]n]l]t]n]k]q]k]i]m]s]s]d]k]t]i]r]d]v]f]g]y]s]v]d]k]g]w]m]c]i]q]v]f]f]i]r]q]g]n]i]k]r]d]t]t  
m]i]p]l]q]t]e]e]e]e]f]y]t]f]i]g]q]f  
y]s]l]n]q]h]i]l]p]k]e]v]h]v]p]r]n]l]d]k]e]m]i]q]s]v]v]d]t]k]i]v]q]p]a]r]g]p]k]k]d]m]v]d]l]a]a]h]n]a]k]v]s]l]n]n]k]f]e]l]i]s]r]d]e]s]r]t]i]k]a]i]e]e]l]g]t]q]m]g  
i]q]t]p]i]r]i]e]a]f]d]n]s]n]i]q]g]v]d  
p]v]s]a]m]v]t]f]i]d]g]k]p]d]k]k]n]y]r]k]y]k]i]k]t]v]k]g]p]d]d]y]k]s]m]r]e]v]r]r]r]y]s]r]v]l]n]e]g]l]p]l]p]d]l]i]i]v]d]g]g]k]g]h]m]n]g]v]i]d]v]l]q]n]e]l]g]l]d  
i]p]v]a]g]l]q]k]n]d]k]h]q]t]s]e]l]l]y  
g]a]s]a]e]i]v]p]l]k]k]n]s]q]a]f]y]l]h]r]i]q]d]e]v]h]r]f]a]i]t]f]h]r]q]t]r]q]k]t]g]l]k]s]i]l]d]d]i]d]g]i]g]n]k]r]k]t]l]l]l]r]s]f]g]s]i]k]k]m]k]e]a]t]l]e]d]f]k  
n]i]g]i]p]e]n]v]a]k]n]l]h]e]q]l]h]k  
>sp|Q8NX56|MUTS2\_STAAW  
m]r]q]k]t]l]d]v]l]e]f]e]k]i]k]s]l]v]a]n]e]t]i]s]d]l]g]l]e]k]v]n]q]m]m]p]a]t]n]f]e]t]v]v]f]q]m]e]e]t]d]e]i]a]q]i]y]n]k]h]r]l]p]s]l]g]l]s]k]v]s]a]f]i]h]r]a]d]i  
g]v]l]n]v]s]e]l]n]l]i]k]r]l]i]q]v]q  
n]q]f]k]t]f]y]n]q]l]v]e]e]d]e]g]v]k]y]p]i]l]d]d]k]m]n]q]l]p]v]l]t]d]l]f]h]q]i]n]e]t]c]d]t]y]d]l]y]d]n]a]s]y]e]l]q]g]i]r]s]k]i]s]s]t]n]q]r]i]r]q]n]l]d]r]i]v]k]s

Tsompanidou\_et\_al\_Supplemental\_FASTA\_File

qanqkklsdaivtvrnern  
vipvkaeyrqdfngivhdqsasgqtliepsvsvemnnqisrlrhdeaiekeriltqltgyvaadkdallvaeqvmgqld  
fliakarysrsvkgtkpif  
kedrtvylpkayhpllnretvvantiefmedietviitgpntggktvtlktlglivmaqsqglliptldgsqsvfknvy  
cdigdegsieqs1stfssh  
mtniveilkhadkhs1vlfdelgagtdpsegaa1amsil dhvrkigs1vmatthype1kaysynregvmnasvefdvdt1  
sptykllmgvpgsrnafdi  
skklglslniinkaktmigtdekeinemieslernykrvetqrleldr1vkeaeqvhd1skqyqqfqnyeks1ieeake  
kangki kaatkeaddiikd  
1rq1reqkgadvkehelidkkkr1ddhyeaksikqnvqkqkydkivagdevkvl sygqkgevl eivndeeavqmgikm  
klpiedlekkqkekvpkptk  
mvtqrnrqtikteld1rgyryeda1iel dqyl dqavl snyeqvyi ihgkgtgalqkgvqqh1kkhksvsdfrggmpsegg  
fgvtvatlk  
>sp|Q8NX59|RNH3\_STAAW  
manivfk1skditt1msritfdten1pqqmkarakyqnttvniyqsgkvmfqqnhaeavskellpqhsq1ntnktkkkn  
mansfleqtlmydqfncig  
sdeagsgdyfgpltvcaafvtekehvpilktlgvddskk1tdtkivelaeqlvtfiphs11tlhnekyniqqakgwtqvkm  
kavlhneaiknvl ekidss  
qldyividqfakrevynhya1sdip1pkktkfetkgesks1aiavasiasryafvtymdqiskninmtipkgagakvdvi  
aakiikkyglshldtiskk  
hfknrekaqkilkp1  
>sp|Q8NX60|SYFB\_STAAW  
mlisnew1keyvtiddsvsn1aeritrtgievdd1idytkdiknlvvgfvkskdkhpdadklncvqvdigedepvqivcg  
apnvdagqyvivakvggr1  
pggikikrak1rgersegmics1qeigissnyipksfesyivfsvsesqvpqgdalqaly1ddqvmeftltpnrada1smi  
gtayeavaalntkmtkpd1  
tsnel1sandeltvtienedkvpysarvvhdvtepspiwmar1ikagirpinnvvd1snyv1leygqplhmfqdqda  
igsqqivvrqanegekmtt  
1ddtere11tsdivitngqtpialagvmggdfsevkeqtsniviegaidpvsirhtsrr1nlrsessrfekgiatefv  
deavdracyllqtyangkv  
1kdrvssgelgafitpiditadkinrtigfd1sqndivtifnqlgfdteinddvitvlvpsrrkditikedlievari  
gyddipst1pvfdkvtsgq  
1tdrqykrmvkevelegagldqaitys1vskedatafsmqqrqtid1lmpmseahas1rqs11phlieaasynvarknd  
vklfeignvffangege1p  
dqveyls1itgdyvvnqwqgkktvdfylakgvvdrvsek1n1efsyrradidglhpgrtae11lenkvvgfigelhpt  
1aadnd1krtyvfe1nfda  
1msvsvgyinyqpi1prfpgmsrdia1evdqni1paad11stihahggn1kdt1vfdvyqgeh1ekgkksiair1nyldte  
et1tdervskvqaeieaa1  
ieggavir  
>sp|Q8NX64|ISDF\_STAAW  
mmiknkkk11flc11lviliatayisfvtgtik1sfndlitkfttgnneavdsiid1rlprilialmvgamlavsgallqa  
alqnp1laeani1igvssgal  
imralcm1fipqlyf1p11sfigg1lipf1i11l1hskfrfnavsmilvgvalfv11ngvleiltqnp1mkippqgl1tmki  
wsdvyilavsallgl11t1  
11spk1n11n1ddiqarsigfnidryrw1tg1lavflasatvaivgqlaf1lgiivphvvrklvggnyrv1lipfstvigaw  
111vad11grviqppleip  
ana1imivggpm1iyl1icqsqrnri  
>sp|Q8NX79|Y973\_STAAW  
mavfkvfyghnrdevivrentqsl1yveaqteeqvrrylkdrnfniefitklegah1dyekensehfneviak  
>sp|Q8NX83|PT1\_STAAW  
mskl1kgiaasdgvaiaakay11vepd11fdknekvt1dvegevakfnsaieaskveltkirnaevqlgadkaaf1dah11  
v1ddpe11iqpiqdkiknen  
anaata1tdvt1qfvt1fesmdneymkeraadi1rdvskrv1shilgvel1pnpsmidessv1v1vgn11tpsda1q1nkefvq  
gfatn1gg1rtshs1aimsrs  
1eipav1gtks1tqevkqgdm1ivdg1ngdv1v1npted1iayqdkreryfadkkelqkl1rdadtvtvdgvhaelaanig  
tpnd1pgviengaqqigly  
rtefl1ymgrdqmp1teeeqfeaykeve1eamdgkrvvrt1diggdkelsyl1n1peemp1flgyrair11claqqdi1frpqlr  
a11rasvygk1n1imfpmva  
tinefreaka11leeken1kneghdi1sddielgimveipataaladvfakevdf1fsigtnd1liqytlaadrmservsly  
qpynps11rlvkqvieash  
kegkwtgmcgemagdetai1p111glgl1defsmsatsil1karrqing1sknemtelanravdcatqeevie1lvnnyvk  
>sp|Q8NX87|PUR2\_STAAW  
mnv1eigaggrehalayk1nqsn1vkqvfaipgneamtpiaevhteisesdhqaildfakrqnv1dwv1igpeqplidgla  
di1rangfk1vfgpnkqaaq  
iegskl1fakkimekyniptadykeverkkda1tyiencel1pvvkkdgl1aagkgvi1adtieaarsaieimygdeeeegt  
v1fetflegeefs1mtfvng  
d1avpfdci1aqdhkraf1hd1degpntggmgayc1pvphi1sddv1kl1t1netia1qpiakam1negyqffgvlyigailtkngpk  
viefnarfgdpeaqv11sr

Tsompanidou\_et\_al\_Supplemental\_FASTA\_File

mesdlmqhiiddegkrtefkwnesivgvmlaskgypdayekghkvsgfdlnenyfvsglkkqgdtfvtsgrvilaig  
kgdndvqdaqdayekvsqi  
qsdhlfyrhdianka1q1k  
>sp|Q8NX90|PUR5\_STAAW  
mskayeqsgvni hagyeavermsshvkrtrmkevigglggfgatfdlsqlnmtapvlvsgtdgvgtklklaidyghkhsi  
gidavamcvndil ttgaep  
lyfldyiatnkvvpevieqivkgis dacvetntal iggetaemgemyhegeydvagfavgavekddyvdssevkegqvvi  
glassgihsngyslvrkli  
nesgidlasfnrpfidvflptklyvkpvlalkkevsikamnhitgggyfyenipralpagaaridttsfptpkifdw  
lqqqgnidtnemynifnmg  
igyvtivdekdasralki laeqnveayqighimknestaiellgv  
>sp|Q8NX94|PURK\_STAAW  
msfnklkfgatigigggqlgkmmaqsaqkmgkykvvvl dpsedcpcryvahefiqakydeka1nqlgqkcdvityefen  
isagqlkl1cekyntpggy  
qaiqlqdr1teketlksagtkvvpfi svkestdidkaietlgypfivktrfgydgkgqvl innekdlqegfklietse  
cvaekylnikkevs1vtvr  
gnnnqitffplqenehrnqil fktivparidktaeakeqvnkiiqsihfigtftveffidsnnqlyvneiaprphnsghy  
sieacdsqfdthilavtg  
qslpnsiel1kpavmmnl1gkdl1l enefnehpewhlihygkserkdsrkmgmtvl tndvnqteqdm yakfegsn  
>sp|Q8NX96|ATL\_STAAW  
makkfnyklpsmvaltlvgsavtahqvqaaettqdqttnknvl dsnkvkatteqakaevknptqnisgtqvyqdpai vqp  
ktannktgnaqvsqkvda  
qvnqgdransatntntqpvakststtapktntnvt nagysl vddeddnseqinpeliksaakpaaletqykaaapkaa  
ttsapakteatpkvttfs  
asaqprsvaatpkts1pkykpvnssindyirkn1kapkieedytsyfkyayrngvgrpegivvhd tandrstingei  
symknnyqnafvhafvdgd  
riietaptdylswgv gavnprfinveivhthdyasfarsmnyadyaatqlqyyglkpdsaeydngntvwthyavskyl  
ggtdhadphgylrshnysy  
dqlydlinekyl1kmgkvapwgtqstttptpskptpskpstgkl tvaanngvaqikptnsglyttvydktgkatnevq  
ktfavsktatlgngkfylyv  
qdynsgnkfgwvkegdvvyntakspvvnqsysikpgtklytvpwgtkskvagsvsgsgnqtfkaskqqqidksiylygs  
vngksgwvskayl vdtakp  
tptptpkpstpttnklvtssl ngvaqinaknngl fttvydktgkptkevqktfavtkeaslggnkfylyvkdynsptlig  
wvkqgdviynnakspvnm  
qytkvpgtklysvpwgtkyqeaavsgtgnqtfkatkqqqidksiylyfgtvngksgwvskaylavpaapkkavaqpkta  
vkayvtkptqtvtvskia  
qvkpnntgirasvyektakngakyadrtfyvterahgnetyvl1nntshniplgwfnvkdlnvqnl gkevkttkqytvn  
ksnnglsmvpwgtknqvil  
tgnniaqgtfnatkqvsvgkdvylygtinnrtgwnakdl taptavkpttsaakdynytyvikngngyyyvtpnsdtaky  
slkafneqpfavvkeqvin  
gqtwyygklsngklawikstdlake1ikynqtgmtlnqvaqiqaglykypqvrpvgkwt danfndvkhamdtkrlaqdp  
alkyqflrldqpqnisidk  
inqflkgkgl enqgaafnkaaomyginevyl ishalletgnqtsqlakgadvvnnkvvtnsntkyhvfgi aaydndpl  
regikyakqagwdtvska  
vggakfignsyvkagqntlykmrwnpahpgthqyatdi dwaninaki ikgyydkigevgkyfdipqyk  
>sp|Q8NX98|SSPA\_STAAW  
mkgkflkvssl fvatl tttatlvsspaana1sskamdnhpqqsqsskqtpkiqkgnl kpleqrehanvilpnndrhqit  
dttnghyapvtyiqveapt  
gtfi asgvvvgkdtl1tnkhvvdathgdphal kafpsainqdnypnggftaeqitkysgedlaivkfspneqnkhi gev  
vkpatmsnaetqvnqnit  
vtgypgdkpvatmweskgkityl kgeamqydl sttgngsgspvfneknevigihwggvpnefngavfinenvrnflkqni  
edihfanddqpnnpdnpdn  
pnnpdnpnnpnpdnpdngdnnsdnpdaa  
>sp|Q8NXB8|HTRAL\_STAAW  
mdigkkhvipksqyrrkrreffhnedreenlnqhqdqkni dnttskkadkqihkdsidkherfkns1sshleqrndvne  
nkaeesksnqdsksaynr  
hyltddvskkqns1dsvdqdteskyyeqnseat1stkstdkvestdmrkl1ssdknkvgheeqhvl skpsehdketridf  
essrtdsdsmqtekikkd  
ssdgnkssnlksevisdksntvpkl sesddevnnqkpl t1peeqlkrqqsneqtktytygdseqndksnyend1shhm  
psisddkdnvmrenhivdd  
npndintps1sktdddrkldek ihvedkhkqnadssetvgyqsqssashritekrnaindhdklngqkpnaktsann  
qkkatsklnkgratnnys  
dilkkfwmmywplvilmgiiilivilnai fnnvnkndrmndndadaqytttmknantvksvvtvenetskdsslpk  
dkasqdevgsgvvykksgd  
tlyivtnahvvgdenkqitfsnnksvvgkylgkdkwsdlavvkattssdssvkeiaigdsnnlv1gepilvvgnp1gvdf  
kgtvtegiisgl nrvpid  
fdkdnkydmlmkafyldasvnpngsggavvnregkl igvvaakismpnvenmsfai pvnevqkivkdletkgkidypdv  
vkmnias1nsferqavkl

Tsompanidou\_et\_al\_Supplemental\_FASTA\_File

pgkvkngvvvdqvdnngladqsglkkgdviteIdgkllreddlrfrrqiiifshkddlksitakiyrdgkekeiniklk  
>sp|Q8NXC2|MURE\_STAAW  
mdastl fkkvkvkrvlgsl eqqiddittsrtaregsifvasvgytvdshkfcqsvadqgcklvvvneqslpanvtqvv  
vpdtlrvasilahtlydyp  
shqlvtfgvtgngktsiatmihliqrklqknsaylgtngfqinetkktganttpetvsltkkikeavdagaesmtlevs  
shglvlgrlrgvefdvai f  
snltqdhldfhgtmeayghaksllfsqgedlskekyvvl nnddsfseyl rvtvtpyevfsygiddeaqfmakniqeslqg  
vsfdfvtpfgtysvkspyv  
gkfnisnimaami avwskgtsletii kavenlepvegrlevldpslpidliidyahadgmnkli davqpfvkqkliflv  
gmagerdltktpemgrvac  
radyvi ftpdnpanddpkmltaelakgathqnyiefddraegikhaidiaepgdttvaskgrepyqimpghikvphrdd  
ligleaykkfgggpgvqg  
>sp|Q8NXC7|CLPB\_STAAW  
mdinkmtiyavqsalqaveIsqqhklqnieieailsaalneseslyksileranievdqlnkayedkIntyasvegdnig  
ygyisqqanqli tkaesy  
mkeyedeyismehilrsamdidqttkhyinnkvevikeiikkvrggnhvtsqnpevnykalakygrdlveevrqgkmpv  
igrdeei rntirilsrktk  
nnpvligeppvgktaivegl aqrivkkdvpeslldktvfeldlsalvagakyrgefeerlkavlkevk esdgrilfide  
ihmlvgagkt dgamdagnm  
l kpm large lhcigattlneyreyiekdsalerrfqkvavsepdvedtisilrglkeryevyhgvrirdralvaaeIsd  
ryitdrflpdkaidlvdq  
catirtemgsnptel dqnrrvmql eieesa lkn esdnaskqr lqelqee lanekekqaalqsrvesekekianlqekra  
qldesrqaledaqt nnnle  
kaaelqygtipqlekelrelednfqdeqgedtdrmi revvtdeei gdivsqwtgipvsklvetereklhl sdi l hkrvv  
gqdkavdlvsdavvrag  
ikdnpnrpigsflflgptgvkte l akslaas lfdsekmi ridmseyekhavsrligappgyighdeggqlteavrnp  
ysvilldevekahtdvfnv  
llqildegrltdskgrsvdfknti iimtsnigsqvl lenvketgeit estekavmtslnayfkpeilnrmddivlfkpls  
iddmsmi vdkiltqlnir l  
leqrisievsddakawlgqayepqygarplkrfvqrqietplarmmikegfpegt tikvnl nsdnnl tfnvekihe  
>sp|Q8NXC8|CDR\_STAAW  
mpkivvvgavagatcasqirrl dkesdiiifekdrdmsfanca lpyvigevedrkyal aytp ekfydrkqitvkythe  
viainderqtvtvlnrkt n  
eqfeesydklil spgasans l gfesditftlnledtdaidqfikanqvdklvvgagyvslevlenlyerglhptlihr  
sdkinklmdadmnpilde  
ldkreipyr lneeidaingneitfksgkvehydmi iegvgthpnskfinessnikldrkgfipvndk fetnvpniyaigdi  
atshyrhvd l pasvplawg  
ahraasivaeqi agndtiefkglgnnivkffdyt fasvgkpnelkqfdykmvevtqgahanyypgnsp lhlrvyydts  
nrqilraaavgkeg adkri  
dvlsmammnql tvdeltefevay appyshpkdlinmi gyak  
>sp|Q8NXC9|ADDA\_STAAW  
mtipekpgqviwtdaqwgsiyatgqdv lvaagsgktav lveri iqkilrdgidvdrllvvtftnl saremkhrvdqri  
geasi adpanah lknqrik  
ihqaqistl hsfclkiqghydvlnidpnfrtsseanenillleqtidevieqhydi ldpafielteqlssdrsddqfrmi  
ikqlyffsvanpnptnwl d  
qlvtpyeeeaqqaql iql l tdl skvfitaayda l nkaydl fsmm dsvdkh l aviederr l mgrv l eggfidipy l t ghef  
gar l pntaki keanemmv  
dale dak l qykyks l idkvksdyfsreadd l kadmqql aprvkylarivkdv m sefnrkk rskni l d fsdyehfalqil  
t nedgspseiaesy r qhfq  
eilvdeyqdt nrvqeki l sciktgdehngnl fmvgdv ksqisykfrqadps l fi ek yqrftidgdgtgrrid l sqnfrsrk  
evl sttnyi fkhmmdeqvg  
evkydeaaql yygapydesdhpvn l kv l ve adqehsd l t gse qeah fiveqvkdil ehqkv ydmktgsyrsatykdivil  
ersfgqarn l qqafknedi  
p fhnvs regyfeqtevr l v l sflraidnpl qdiylvg l mrsviyqf kedelaqir ilspnddyfyqsivnyindeaada i  
l vdk l kmf l sdi qsyqqys  
kdhpyq l idkfyndhyvi qy fsg l iggr rranlyglfnkaiefenssfrglyqfirfideli ergkdfgeenvvgpnd  
nvvrmmti hsskglefpfv  
iysgl skdfnkrd l kqpvil nqqfg l gmdyfdvdkema fps lasvayravae kelvseeirlvyval trakeqlyligrv  
kndks l leleql sige hi  
avner l t spnpfhl iysil skhqsasipdd l kfekdiaqvedssrpnvnisi iy fedvstetildnneysvnqletmqn  
gnevkaqikhq l dyqppy  
vndtkkpskqsvselkrqyeteesgtsyervr qy r igfstyerpkfl seqgkrkaneigt l mhtvmqhl p fkkeriseve  
lhqyidgl idkhiiead ak  
kdirmdeimt f inselys iiaeaevyrel pfvnqa l v dql p qgdeds i iqgmidi l fvkdgvyhyfvdyktdafnrrr  
gmtdeeigtqlknkykiqm  
kyyqntlqt ilnkevkgyl yffkfgtlq l  
>sp|Q8NXC0|ADDB\_STAAW  
mtlhaylgragt gkstkmlteikqk m kadplgdpi l i aptqstfqleqafvndpelngslrtevlhferlshrifqevg

Tsompanidou\_et\_al\_Supplemental\_FASTA\_File

syseqklskaatemmiyni  
vqeqqkylklyqsqakyygfseklt eqiqdfkkyavtpehlehiadknmqrtrtknkledialiyrefeqriqnefitge  
ds1qyfidcmpksew1kra  
diyidgfhnfstieyliikglikyaksvtiilttdgnhdqfs1frkpsevlrhieeianelnisierqyfnqlyrfnnqd  
lkhleqefdv1qinrvacq  
ghinilesatmreeineiarriivdirdkqlryqdiaailyrdesyay1fdsilplynipynidtkrsmthhpvmemirs1  
ieviqsnwqvnpm1rl1kt  
dvl1tasy1ksay1vd1lenfv1lerygygkrw1dde1fnvehfsmgrkahl1tederntfeqvvl1kkdvidkilhfekq  
msqaetvkdffatafyeme  
yfelpnqlmterdel1ngnhekaeeidqiwnqliqildd1vlvfgdepmsmerfle vfdigleqlefvmpqtldqvs1  
gtmdlakvdnkqhvflvgm  
ndgtmpqpytass1itdeekkyfeqqanvelsptsdilqmdeafvcyamtrarqdvtfssylmgssgddkeispflnqi  
qslfnqle1tnipqyhev1  
plslmqhakqtkt1lfealrawlydeivadsw1dayqvirdsdh1nqgl1dylmsaltfdnetvklget1skdlygkeina  
svsrfeqyqccpfkhyash  
g1k1nertkyelqnf1d1gdi1fhsv1kyiseringdfkq1d1kkirqltnealeeilpkvqfn11nssayry1srrigai  
vett1sal1kyggtyskfm  
khfetsfrrkprtdeli1aqt1tttqgipinirgqidridtytkndtsfvniidykssegsat1d1tkvyymqmqmmtym  
mdiv1qnkqr1gl1tdivkp  
gg1lyf1vhheprikfkswsdidedkleq1likkfk1sg1vnadtvidaldirlep1kftsd1vpvg1nkdg1skrgsqv  
adeatiykfiqhnkenfie  
tasnimdghte1vap1kykqk1pcafc1syqsvchvdgm1dskryrtv1detinpieaiqnin1defgqeg  
>sp|Q8NXF1|G6PI\_STAAW  
mthiq1dfsktleffgehelkqqeivksihktihegtgagsdf1gwvd1pvdydkeefsriveaskrikensdvlvvg  
iggsylgaraaiem1tssf  
rnsneypei1fvgnh1sstytke1vdy1adkdfsvnvisksgtttepavafr1fkq1veerygkeeaqkri1fattdkekg  
alkq1atnegyetfi1vppd  
vggrysv1tavgl1piataginieammigaakareel1ssdkleeniayqyatirni1yakgyttem1inyepsmqyfnew  
wkq1fgesegkdfk1giyps  
sanytt1d1hs1gqyvqegrr1fetvkvnhpkyditi1ekdsdd1dgl1nylagkti1devntkafegt11ahtdggvpmv  
vni1pqldeetfgyvvyffe  
1acamsgyq1gvn1pfnqpgveaykqnmf11gkpgfed1kke1eer1  
>sp|Q8NXF2|ASSY\_STAAW  
mkekiv1aysggl1dtsvavqwl1dkgydvacc1dvgegkd1divykka1dmgavechi1datkefsdeyvsva1kgn1m  
yenaypl1vsal1srpliakk  
1veiaektnsvgiahgctgkgn1dqvrfevaika1nps1kafapvrewawsreee1dyaikhnipvsinhdspysidqnlw  
granecg1ledpyaapped  
afd1tnaleetpdaadei11tfdkgipvqidgktyeldd1l1l1tnalagkhgigr1dhvenr1vgiksreiyeapaaevi  
1kahkaletit1tkdvahf  
kpiiekqfaeq1yng1w1fsp1tds1kl1fidstqyvsgdvrik1fkgnai1vnrkspyt1ydeklatytkedafnqdaav  
gfidiy1g1ptqvnsm1hgg  
ysneq  
>sp|Q8NXF3|ARLY\_STAAW  
msnkawgr1fevqpeewvddfnasitfdq1tlnqdiegsiahatm1anqgiisqqdseqi1qglksiqhdyhdqdi1qfsa  
s1ledih1niehelikrigd  
aggk1htgrsrndqv1atdmhlytkkqvqdi1aliks1qsvivdiasn1vdtimpgyth1lraqapisfahhimtyfwm1lqr  
dqqr1feds1kr1idin1lga  
aa1sgttypidrheta11nfgs1yens1davsdrdyi1iet1hni1sltmvhl1srfaeei1fwstdeakfit1s1dafstgs  
simpqkkn1pmael1irgkv  
grttgh1msm1mt1kg1playnkdmqedkegl1fdavhtikgs1lri1fegmiqmtinker1nqtvkedfsnatelady1vt  
knip1frtaheivgkiv1lec  
iqqghy11dvplatyqqh1ssidadiydy1qpenc1krrqsygstgqssv1kqql1dvakq11sq  
>sp|Q8NXG7|2NPD\_STAAW  
mwnknr1tqm1sieypi1qagmagsttpk1vasvsnsggl1gtigagyfntqq1edeidyvrq1tsnsfgv1vfvpsqqsy  
tssqien1mnaw1kpyrra1  
h1leepvki1teeqqfkchid1ttikkqv1pccftfg1psesi1kr1keanik1igtatsvdeai1anekagmdaivaqgsea  
gg1hrgs1fl1kpknq1lpmvgt  
is1lvpi1vdvvs1ipviaaggim1dgrgvasiv1gaegvqmgtaf1tsqdsnase11rdai1nsketd1tvvtkafsgklar  
ginnr1fieemsqyeg1dipd  
ypiqne1tss1irkaaan1gdke1thmwsqgspr1latthpantimsni1inqinqimqyk  
>sp|Q8NXH7|GCSH\_STAAW  
mavpne1kyskehew1kvegnvatigiteyaqselgdi1v1vel1petdde1inegdtfgsvsvktvse1yapisgkvvevn  
ee1edspe1fvnespyekaw  
mvkve1sdesqiea11taekysemige  
>sp|Q8NXI0|AROD\_STAAW  
mthvev1atiapq1s1eet1liqkinhridaidv1el1ridqienvtvdqvaem1tk1kvmqdsfk11lvtyrtkl1qgyyqgf  
indly1n1isdlaningid  
midiewqadidiekh1qriith1lqqynkevvi1shhnfestpp1delqfi1ffkmqkfnpeyvklavm1phnkndv1n1l1qams





Tsompanidou\_et\_al\_Supplemental\_FASTA\_File

tnfi fvktrvnel yea ll nvgcitrpfptgvr itigfkeqndkml evl snfkye  
>sp|Q8NXS7|TAGA\_STAAW  
mtveersntakvdi lgvdfnttm lq mveniktffanqstnn lfi vtanpeivnyatthqayle linqasyivadgtgvv  
kashrlkqplahripgiel  
mdec lki ahvnhqkvfl l gatnevveaaqyal qqrypni sfahhhgyid ledetvvkrik lfkpdyi fvgmgfpkqeewi  
mthenqfestvmmgvgs l  
evfagakkrapyifrkl ni ewiyra lmdwkrigr lksipi fmyki akakrkkak  
>sp|Q8NXW4|PTAS\_STAAW  
madllnv lkd k lsgknvki v lpegederv ltaatql qatdyvtpiv l gdetkvqsla qkl d ldisnielinpatse lkae  
lvqs fverrk gkateegaq  
e llnvnyfgtm lvyagkadgl vsgaahstgdtrpa lqi iktkpgvsrtsgiffmikgdvqyifgdcainpel dsqgla  
e iavesaksa lsf gmdpkv  
am lsfstkg sak sddvtkvqea v l aqqkaeeek leai idgef qfdaa ivpgvaek kpagak l qgdanvf vfps leagni  
gykiaqr l ggydavgpv l q  
g l nspvnd l srgcsiedvyn l si itaaqal q  
>sp|Q8NXX6|SDRD\_STAAW  
mlnrenktaitrkgmvsnr l nkfs irkytvgtasil vgtt l ifgl nqea kaaestnkel neattsasdnqssdkvdmqq  
l nqedntkndnqkemvssq  
gnettsngnks iekesvqsttgnkvevstaksdeqaspkstned l ntkqtisnqeal qpd l qenksv vnaqptneenk v  
daktest l nvksdaiksn  
aet l vdnnsnsnnennadi i l pkstapkr l ntrmriaavqpssteaknvd l itsntt l tvvdadknnkivpaqdy l el k  
sqikvddkvksgdyftiky  
sd tvqvyg l npediknigdikdpngeti atakhd tann litytftdyvdrfnsvqmg inysi ymdadt ipvskndvefn  
vtign tttkt tani qypdy  
v vnekn sigsaftetvshvgnkenpgyykqtiyi npsens ltnak l kvqayhssypn nigqinkevtdikiyqvpkgyt l  
nkgydvntkel t dvt nqyl  
qk l tygdnsav i dfgnadsayvmmvntkf qyttse spt l vqmv t l ssdnksasmgnal gftnnqsggagqevy kigny  
vwedtnkngvqel gekvgv  
nvtvtvfdnnttkvgeavtkedgsy l ipn l pngdyrvef sn l pkgyevt pskqgnnee l dsng l ssvi tvngkdn l sad  
l giykpky n l gdyvwedtn  
kngi qdqdek gi sgv tvt l kdengv l ktv ttdadgkykftd l dngnykvefttpegytpttvtsgsdi ekdsng l tttg  
v ingadnmt l ds gfyktpk  
yn l gnyvwedtnkdgkqdstekgi sgv tvt l knengev l qttkt dkdgkyqftgl engtykvefetpsgytptqvgsgtd  
egidsngtsttgvikdkdn  
dti ds gfykpty n l gdyvwedtnkngvqdkdek gi sgv tvt l kdendkv l ktv ttdengkyqftd l nngtykvefetpsg  
ytptsvtsgndtekd sng l  
tttgvikdadnmt l ds gfyktskys l gdyvwydsnkdgkqdstekgi kdvkvt l nekgevigttkt dengkyrfdn l ds  
gkykvi fekpag l tqtgtn  
t teddkdadggevdti t dhddft l dngyfeedtsdsdsdsdsdsdsdsdsdsdsdsdsdsdsdsdsdsdsdsdsdsdsds  
sdsdsdsdsdsdsdsdsds  
dsdsdsdsdsdsdsdsdsdsdsdsdsdsdsdsdsdsdsdsdsdsdsdsdsdsdsdsdsdsdsdsdsdsdsdsdsdsdsdsdsdsds  
dsdsdsdsdsdsdsdsds  
agkhtpvkpmsttkdhhkakal petgnensgnnat l fgg l faalgs l l l fgrkkqnk  
>sp|Q8NXX7|SDRC\_STAAW  
mnnkktvtnrkgmipnr l nkfs irkysvgtasil vgtt l ifgl sgeakaaehtnge l nqsknettapsenkttekdvdsh  
q l kdntqtatadqpkv tms  
dsatfketssnmqspqnatasqsttqtsnvtndkssttysnetdksn l tqakdvsatpktttikprt l nrmavntvaap  
qqgtvndkv hfsnidia i  
dkgh l nkdtgktefawtsdv l k l kanyti ddsvkegd tftfkygyfrpgsvr l psqtqnl ynaagnii akgiydsttn  
tttytftnyvdqytnvsgs  
feqvafakrenattdktaykmevsl gndtyseei ivdygnkkaqpl isstnyinned l srnmtayvnqpkntytkqtfvt  
n l tgykfnpnaknfiyev  
tdqnqfvdsftpdtsk l kdvt nqfnit ysndnktatvd l mngqtssnkqy i iqqvaypdntstdngki dyt l dtdktykys  
wsnsysnvngsstangdqk  
kyn l gdyvwedtnkdgkqdanekgi kgyvyv i l kdsngkel drtttdengkyqftgl sngtysvefstpagytpptanagt  
ddavdsdgl tttgvikdad  
nmt l ds gfyktpkys l gdyvwydsnkdgkqdstekgi kgvkvt l qnekgevigttetdengkyrfdn l ds gkykvi fekp  
ag l tqtgtn tteddkdadg  
gevdti t dhddft l dngyeeetsdsdsdsdsdsdsdsdsdsdsdsdsdsdsdsdsdsdsdsdsdsdsdsdsdsdsdsdsdsdsds  
sdsdsdsdsdsdsdsdsds  
dsdsdsdsdsdsdsdsdsdsdsdsdsdsdsdsdsdsdsdsdsdsdsdsdsdsdsdsdsdsdsdsdsdsdsdsdsdsdsdsdsdsds  
dsdsdsdsdsesadsdt d  
sdsdagkhtpakpmstvkdqhtakal petgsennsnngt l fgg l faalgs l l l fgrkkqnk  
>sp|Q8NXY1|ARAB\_STAAW  
msysigidygtasgrvfl inttngqvvs kfvkpythgvi esel ng l kiphya l qnsndyleimeegisyivreskidpd  
n i vgi gidftsst i f tde  
n l npvhnl kqfknnphayvkl wkhhgaykeaklyqta i ennkw l ghygynvssemipkimevmnrapeimektayim  
eagdwivnkltnknirsn c

Tsompanidou\_et\_al\_Supplemental\_FASTA\_File

glgfkaeweetgfhydlfdkldpklskviqdkvsapvvnigeavgkl ddkmaqkglglsketmvspfiidahasllgigs  
ekdkemtvmvgtstchlm  
nekqhvpvgi sgsvkga ipe l fayeagqsavgd l feyvakqapksyvdeaanrntvfe l mnekikhqmpgesgliald  
whngnrsvlsdsnlgtcif  
gltlqt khediyrayleatafgtkmimqqyqdw hmevekvfacggipkknvmm diyanvlnkklivmdseyapaigaa i  
lgavsggahnsindavdam  
kepileinpeaekvqryet lfkayka lhdihgykkanimkdiqslrveg  
>sp|Q8NXY2|HCHA\_STAAW  
msqdvne lskqptpdkaedna fffspys l sqytapkt dfgvehkgaykdgkwkvlmiaa eeryvllengkmfstgnhpv  
emllplhh lmeagfdvdva  
tlsgypvkle l wamptedeavistynk lkek l kqpk ladvikne l gpsdylsvfipgg haavvgisesedvqqt l dwa  
l dndrfivt l chgpaa l s  
agl nrekst legysvcvfpds l deganie igylpgr l kw l vad l ltkqglkvvnd dmtgrt l kdrkl l tgdsp lasnelg  
klavnem l naiqnk  
>sp|Q8NXY7|SYC\_STAAW  
mitlynt l trqkevfkpi epgvkmyvcgptvynyihignarpainydvvrry feyqgynveyvsnftdvddk l iksqe  
l nqsvpeiaekyiaafhed  
vga l nvrkatsnprvm d h m d d i i q f i k d l v d r g y a e s g g d v y f r t r k f e g y g k l s h q s i d d l k v g a r i d a g e h k e d a l d  
f t l w k k a k p g e i s w d s p f g  
e g r p g w h i e c s v m a f h e l g p t i d i h a g g s d l q f p h e n e i a q s e a h n h a p f a n y w m h n g f i n i d n e k m s k s l g n f i l v h d  
i i k e v d p d v l r f f m i s v h y  
r s p i n y n l e l v e s a r s g l e r i r n s y q l i e e r a q i a t n i e n q q t y i d q i d a i l n r f e t v m n d d f n t a n a i t a w y d l a k l a n  
k y v l e n t t s t e v i d k f k a v  
y q i f s d v l g v p l k s k n a d e l l d e d v e k l i e e r n e a r k n k d f a r a d e i r d m l k s q n i i l e d t p q g v r f k r g  
>sp|Q8NXY8|CLPC\_STAAW  
mlfgr l t e r a q r v l a h a g e e a i r l n h s n i g t e h l l l g l m k e p e g i a a k v l e s f n i t e d k v i e e v e k l i g h g q d h v g t l h y  
t p r a k k v i e l s m d e a r k l h  
h n f v g t e h i l l g l i r e n e g v a a r v f a n l d l n i t k a r a q v v k a l g n p e m s n k n a q a s k s n n t p t l d s l a r d l t v i a k d g t l  
d p v i g r d k e i t r v i e v l s r  
r t k n n p v l i g e p g v g k t a i a e g l a q a i v n n e v p e t l k d k r v m s l d m g t v v a g t k y r g e f e e r l k k v m e e i q q a g n v i l f i  
d e l h t l v g a g g a e g a i d a s  
n i l k p a l a r g e l q c i g a t t l d e y r k n i e k d a a l e r r f q p v q v d e p s v v d t v a i l k g l r d r y e a h r i n i s d e a i e a a v k l  
s n r y v s d r f l p d k a i d l i d  
e a s s k v r l k s h t t p n n l k e i e q e i e k v k n e k d a a v h a q e f e n a a n l r d k q t k l e k y e e a k n e w k n a q n g m s t s l s e e d i  
a e v i a g w t g i p l t k i n e t e  
s e k l l s l e d t l h e r v i g q k d a v n s i s k a v r r a r a g l k d p k r p i g s f i l g p t g v g k t e l a r a l a e s m f g d d d a m i r v d m s  
e f m e k h a v s r l v g a p l g y v  
g h d d g g q l t e k v r r k p y s v i l f d e i e k a h p d v f n i l l q v l d d g h l t d t k g r t v d f r n t i i i m t s n v g a q e l q d q r f a g f g  
g s s d g q d y e t i r k t m l k e l  
k n s f r p e f l n r v d d i i v f h k l t k e e l k e i v t m m v n k l t n r l s e q n i n i i v t d k a d k i a e e g y d p e y g a r p l i r a i q k t i  
e d n l s e l i d g n q i e g k k v  
t v d h d g k e f y d i a e q t s e t k t p s q a  
>sp|Q8NXZ6|MFD\_STAAW  
mti l t t l i k e d n h f q d l n q v f g q a n t l v t g l s p s a k v t m i a e k y a q s n q l l l i t n n l y q a d k l e t d l l q f i d a e e l y k y  
p v q d i m t e e f s t q s p g l m s  
e r i r t l t a l a q g k g l f i v p l n g l k k w l t p v e m w q n h q m t l r v g e d i d v d q f l n k l v m g y k r e s v v s h i g e f s l r g g i i  
d i f p l i g e p i r i e l f d t k i  
d s i r d f d v e t q r s k d n v e e v d i t t a s d y i i t e e v i s h l k e e l t a y e n t r p k i d k s v r n d l k e t y e s f k l f e s t y f d h q i  
l r r l v a f m y e t p s t i i e y f  
q k d a i i a v d e f n r i k e t e e s l t v e s d s f i s n i e s g n g f i g q s f i k y d d f e t l i e g y p v t y f s l f a t t m p i k l n h i i k f s  
c k p v q q f y g q y d i m r s e f q  
r y v n q n y h i v v l v e t e t k v e r m q a m l s e m h i p s i t k l h r s m s s g q a v i i e g s l s e g f e l p d m g l v v i t e r e l f k s k q k k q  
r k r t k a i s n a e k i k s y q d l  
n v g d y i v h v h g v g r y l g v e t l e v g q t h r d y i k l q y k g t d q l f v p v d q m d q v q y v a s e d k t p k l n k l g g s e w k k t k a v  
q s v e d i a e e l i d l y k e r e  
m a e g y q y g e d t a e q t t f e l d f p y e l t p d q a s i d e i k d d m q s r p m d r l l c g d v g y g k t e v a v r a a f k a v m e g k q v a f l v  
p t t i l a q q h y e t l i e r m q d  
f p v e i q l m s r f r t p k e i k q t k e g l k t g f v d i v v g t h k l l s k d i q y k d l g l l i v d e e q r f g v r h k e r i k t l k h n v d v l t l t  
a t p i p r t l h m s m l g v r d l s  
v i e t p p e n r f p v q t y v l e q n m s f i k e a l e r e l s r d g q v f y l n k v q s i y e k r e q l q m l m p d a n i a v a h g q m t e r d l e e t m  
l s f i n n e y d i l v t t t i e t  
g v d v p n a n t l i i e d a d r f g l s q l y q l r g r v g r s s r i g y a y f l h p a n k v l t e t a e d r l q a i k e f t e l g s g f k i a m r d l n i r  
g a g n l l g k q q h g f i d t v g f  
d l y s q m l e a v n e k r g i k e p e s e v p e v e d l n l d a y l p t e y i a n e q a k i e i y k k l r k t e t f d q i i d i k d e l i d r f n d y p v  
e v a r l l d i v e i k v h a l h s g  
i t l i k d k g k i i d i h l s v k a t e n i d g e v l f k a t q p l g r t m k v g v q n n a m t i t l t k q n q w l d s l k f l v k c i e e s m r i s d e a  
>sp|Q8NY05|KTHY\_STAAW  
msafit f e g p e g s g k t t v i n k v y h r l v k d y d v i m t r e p g g v p t g e e i r k i v l e g n d m d i r t e a m l f a a s r r e h l v l k v i p

Tsompanidou\_et\_al\_Supplemental\_FASTA\_File

alkegkvvlcdryidssla  
yqgyargigveevralnefainglypdltiylnvsaevgreriiknsrdqnrldqedlkfhekviogyqei ihnesqrfk  
svnadqplenvvedtyqti  
ikyleki  
>sp|Q8NY21|METN1\_STAAW  
miefrqvsctfnkkkqkidalkdvsftvnrndifgviygsgagkstlvrlnvleasngqvivdghditnysdkmrdi  
kkdigmifqhfllnsatv  
fknvamp1ilskksktejkrvtemlefvglsdkkdqfpeelsggqkqrvaiaaralvtnpkillcdeatsaldpattasi  
l1lknvngtfgitimit  
hemrvikdicnrvamekgqvvetgtvkevshpkkttiaqnfsvstviqtepstslirrlndeqvgdfkdykifveetqvt  
qpiindliqicgrevkilf  
ssmseiqgntvcymwlrfnmddqfddtainqyfkekniqfeevh  
>sp|Q8NY35|Y401\_STAAW  
meyikkialymvllliifiggcgnmkdeqkkeeqtnktdskeeqikksfaktldmypi knledlydkegyrdgefkkgd  
kgmwtiytdfaksnkadel  
snegmvlyldrnrtrtakghyfvktfyekdkfprkkykvemknnkiilldkvedpkllkrienfkffgqyanlkelknyn  
ngdvsinenvpsydakfkm  
snkdenvkqlrsryniptdkapvlkmhidgnlkgssvgykklaidfskgeksdlsvidslnfqapakvdeder  
>sp|Q8NY36|Y400\_STAAW  
mgyfkrvlllyiivmvsfiiigcdksdtsekskgsdkaqikksfaktldmyptenledfydkegyrdgkfkkgdkgtw  
virsemttelknenmvskg  
mvirlnrnsrtctgeyfvrvkedsegkvsderkypvkmennkiiplkpiddekvkkeeieefkffvqygnfkelenykd  
gevtynpeapiysaqyqlk  
nsdynveqlrkryniptqkapklllkgsgnlkgssvgyknieftfvenkeeni yftdsvyfnpsedk  
>sp|Q8NY38|Y398\_STAAW  
mgylkrigmcisllivii fvtscgggnkitgdsketqikksfaktldmypi knledlydkegyrdgefkkgdkgmwtiyt  
dfaksnkpgellddegmvl n  
ldrnrtrtakgyyfvkkfyekdklprknykvemknnksilldkvedpnlkrienfkffgqyanfkdlenyngdvsinw  
nvpsydveykmsnkdenvk  
qlrsryniptdkapmlkmhidgdnglkgssvgykrleidfskedrdi svidylsykpakk  
>sp|Q8NY70|IMDH\_STAAW  
mweskfakesl fddvllipaqsdi lpkdvdlsvqlsdkaklnipvisagmdtvteskmaiamarqgglgvihknmgvee  
qadevqkvkrsengvisnp  
ffltpesvyeealmgkyrisgvpivdnkedrnlgilntrdlrfiedfsikivdmtqenlitapvnttleaekilq  
khkieklplvkdgrlegli  
tikdiekviefpnaakdehgrllvaaagiskdtdiraqlveagvdvlvidtahghskgvidqvkhikkttypeitlvag  
nvataeatkd lfeagadv  
kvgi ggsicttrrvvagvvpqitaiydcatearkhgkaiiadggikfsgdiikalaagghavmlgsllagteespgate  
ifqgrqykvyrmgmslgam  
ekgsndryfqedkapkfvpegiegrtaykga lqdtiyqlmggvragegmgysgdhrelreeaqftrmgpaglaeshphn  
iqitkespnysf  
>sp|Q8NY94|METE\_STAAW  
mttiktsnlgfprlgrkrewkkaiesywakkiskeeldqtltdlhkenlllqkyyhdsipvgdfslydhildtsllfni  
iperfagrtiddl lfdia  
rgnkdhvasalikwfnntnyhyivpewdnvepkvsrnvlldrfkyaqslnvna hpvavgp itfvkl skgghqtfeekvtl  
lplykevfeslidagaeyi  
qvdepi lvtddsesyeni treaydyfekagvakk lviqtyferahlkflsslpvgglgldfvhdngynlkqieagdfdks  
ktlyagiidgrnvwadie  
akkvlidkllahntelviqpssslhvpvslddetldtsvgeglsfateklde ldalrrlfnqndsvkydklkaryerfq  
nqsfknldydfesvrtsrq  
spfaqrieqqkrlnl pldlptttigsfpqsrevrkyradwknkritdeayetflkneiarwikiqedigldvlvhgefer  
ndmveffgek lqgf lvtkf  
gwwqsygsravkppi iygdvkw tapl tvdetvyaqsltdkpvk gmltgpvtilnwsfervd lprkvvdqialaineevl  
aleaagikviqvdepalre  
glplrseyheqylkdavlsfklatssvr detqihthmcysqfgqiihaihdldadvisietsrshgdlikdfedinydlg  
iglgvydihspriptkeei  
ttainrslqqidrs lfwvnpdcglktrkeeevkdal tvlnavkkrqe  
>sp|Q8NYC4|NANE\_STAAW  
mlphglivscqalpdeplhssfimskmalaaayeggavgi rantkedil aiketvdlpvigivkrdynhsdvfitatskev  
deliesqcevia ldatlqq  
rpketlde lvsyir thapnveimadiatveeaknaar l gfdyigtllhgysytqgqll yqndfqflkdvlqsvdakvia  
egnvi tpdmykrvmdlgvh  
csvvggai trpkei trfvqmed  
>sp|Q8NYD0|PSUG\_STAAW  
manlqkyieysrevqalennqpival estiishgmpypqnvemattveqii rngaipatiaiidgkikiglesedlei  
latskdvakvsrrl aevv  
amkcvgattvattmi caamagi qffvtggiggvhkgahtmdisadlee lsktnvtvicagaksil dlpktmeyletkgv  
pvigyqtne l pafftresg

Tsompanidou\_et\_al\_Supplemental\_FASTA\_File

vkltssvetperladihltkqqlnleggi vvanpi pyehalskayieaiineavveaenqgikgkdatpfllgkivektn  
gkslaaniklvannaalga  
kiavavnkll  
>sp|Q8NYF2|ESAC\_STAAW  
mnfndietmvkskfkdkkhaeeiaheievrsgylrkaeqykrlefnlsfalddiestakdvqtaktsankdsvtvkga  
pntlyiekrnlmkqkleml  
gedidknkeslqkakei agekaseyfnkamn  
>sp|Q8NYG1|LYTM\_STAAW  
mkkltaaaiatmgfatftmahqadaaettntqqahtqmstqsqdvsgtyyitidsngdyhhtpdgnwnqamfdnkeysyt  
fvdaqghthyfyncypkna  
nangsgqtyvnpaiagdndytasqsqghi nqygyqsnvgpdasyshsnnnqaynshdngngkvnypngtsnqngglask  
atasghakdaswltsrkql  
qpygqyhgggahygvdyampenspvysltdgtvvqagwsnygggnqv tikeansnyqwymhnnrltvsagdkvkagdq  
aysgstgnstaphvhfqrn  
sggtgnqyavdptsylqsr  
>sp|Q8NYH2|LRGA\_STAAW  
mkqqkdaskpahffhqvivalvlfvskiesfmpipmpgsviglvllfvllctgavklgevekvgttlttnigllfvpa  
gisvvnslgvisqapflii  
gliivstlillictgyvtqiimkvtsrskgdkvttkkikieeaqahd  
>sp|Q8NYJ8|Y199\_STAAW  
mtaykpyrhqlrrslfastifpvflviiiglvsfyayiwiehrtiqhvdesslhtekqiqtfittqhnsfqeldl  
tnhhdvtatkrqlklh  
qpattlye lsgpnqfitnyehlntknmylfsthqlkfnstymkiymantrp lseikkdsrqfalivdqydnyland  
drftigekeyrpgqfgfme  
svklnhadrliiykdiheniedgitllivmavvlvllvifgfisadnmakrqtkdietiiykiyyaknrhlgtyp lkn  
nseleeinnyiydlfesne  
qlihsiehterrlrdiqlkeierqfphflfntmqtiqylitlspklaqtvvqqlsqmlryslrtshtvelneelnyie  
qyvaiqnirfddmiklhie  
sseeahqtigkmm lqplienaikhgrdteslditirltlarqnlhvlvcdngigmssrlqyvrrslnndvfdtkhgl  
nhlhnkamiqygsharlhi  
fskrnqgtlicykip lsrngvdv  
>sp|Q8NYK7|AZOR\_STAAW  
makvlyitahpfnelvsnsmaagkafietyqqqhpdddevkhd l fetyipvidkdvltgwgkmsngetltddeqmkvsrl  
sdileeflsadkyvfvtpm  
wnlsfppvkvayidaisiagktfkysaegpqltdkkvlhiqsrnggyte gpaadfemgdryl rtimtflgvpsyetii  
ieghnaephkteekatsi  
naeklatif  
>sp|Q8NYK8|Y186\_STAAW  
mkahki fwlnlaaiiisivvsggmflamkweqihlkdglkkvlstypiknetlyeidghdnphyenndqdtwyiessy  
svvgsdel lkedrml lkv  
knthkitgeydtttndrknatdstyksypkvvnkivftkdvkdpa l kqkiennqfliqsgdltsilnsnd l kvthdpt  
tdyynlsgkl sndnpnvkq  
lkrryniprnastkvelkgmsdlkgnnhdqdklyfyfsspgkdqiiykes l tynklseh  
>sp|Q8NYM6|ARGC\_STAAW  
mikvgivggsgygaie lirlqthphvtiahiyshskvdeplkltfphlqhmqhfealtvdnndcdviffatpapvskt  
cipplvekgihvidlsgaf  
riknreiyeayyketaaagddl nhaiysisewqsfdnngtkl isnpgcfptatlla l hplisekivdlssiiidaktgvs  
gagrs l sgrvhfsemnenl  
sayaighkhkpeieqyls iagqdvsviftp hlvpmtrgilstiyvkl sseyttes l hklmtsyyanqpfvri rdigt f  
pttkevlgsnycdigi yvd  
ettqtailsvvidnlvkgasgqaiqnlnilydfevttglnqspvyp  
>sp|Q8NYM7|ARGJ\_STAAW  
mkhqettsqqynfsiikhgdistpqgftaggmhi glrankkdfgwiysssl asaaavytl nqfkaaplivtedtlqkskg  
klqalvvn sanansctgqg  
giddarqtqtwaqqlqipsehvavastgvigeyl pmdkiktgtehikdanfatpgafneail ttdtctkhiavslkidg  
ktvtiggstkgsgmi hpnm  
atmlafitt dasiesntlhqllksstdhtfnmitvdgd tstdmvlvmanhqvehqilsqdhpqwetfvdafnfvctfla  
kaiardgegatklisvnvs  
gaksisdarkigktivssnlvksaifgedanfgri itaigysgeidpnctyvqlnqipvvdkgmav l fdeqamsntlth  
envtidvqlglgnaaatay  
gcdlsydyvrinasyr  
>sp|Q8NYR1|DEOC1\_STAAW  
mkfekyidhtllkpestrtqidqideakayn fksvcvnpthvkyaerladsevlvctvigfplgasttatka feteda  
iqngadeidmvinigalkd  
grfddvqqdieavvkvakghtvkvi ietvll dhdeivkase l tkaagadfvktstg faggataedvklmkdtvgadvev  
kasgvrnledfnkmveag  
atrigasagvqimqgleadsy  
>sp|Q8NYU1|Y072\_STAAW

Tsompanidou\_et\_al\_Supplemental\_FASTA\_File

mikrvnklvlgisllflvisitagcgmgeaeiiksfektlsmypiknledlydkegyrddqfdkndkgtwivnsqmaiq  
nkgealkikgmllkidrnt  
rsakgfyytneiktekyevaadnqkkyvpkminnkfisteevkeenikkeienfkffaqsfnkdlnmykdgdisynev  
psysaqyqltnddynvkql  
rkrydipntkapklllkgtnlkgssvgykkieftflenkeniyftdsllhkpsedk  
>sp|Q8NYV4|DUS\_STAAW  
mkenfwselprpffi lapmedvtdivfrhvvsearpdvffteftntesfchpegihsvrgrltsfedeqpmvahiwgdk  
peqfretsiaqlakmgfkgi  
dlnmgcpvanvakkkgsglilrpdvaeiiqatkagglpvsvktrlggyeidewkdwlkhvfeqidianlsihlrtrkem  
skvdahwelieaiknlrde  
iapntlltingdipdrktglelaekygidgvmigrigifhnpfafekprehtske1ld1lr1h1s1fnkyekdeirqfks  
lrrffkiyvrgirgase1r  
hqlmntqisiaearal1defeaqmdedvkie1  
>sp|Q8NYX2|RLMH\_STAAW  
mkitilavglkekywkqaiayekrlgpytkidievtdekapenmsdkeieqvkekegqrilakikpqstvit1eiqq  
kmlsseglaqelnqrmtgq  
qsdvfviggsnglhkdvlqrsnyalsfskmtfphqmmrvvieqvyrafkimrgeayhk  
>sp|Q8NYY2|SYS\_STAAW  
mldir1frnepvtvkskielrgddpkvvdeileldeqrrklisateemkarrnkvsseeialkkrnkenaddviaemrtlg  
ddikekdsq1neidnkmtg  
ilcripn1isddvpqgesdednvekkwgtprefssepahwdiveelkmafdraakvsгарfvy1tnegaqleralmn  
ymitkhtqhgysmmvpg  
1vnadtmygtgq1pkfeed1fkvekeglytiptaevpltnfyneiiqpgvlpekftgqsacfrseagsagrdrgrlir1  
hqfdkvemvrfeqpedsw  
aleemtnaeai1eelglpyrrvilctgdigfsasktydlevw1psyndykeisscsnctdfqarranirfkrdkaakpe  
laht1ngsglavgrtfaai  
venyqnedgtvtipealvpfmggktqiskpvk  
>sp|Q8NYY3|HUTH\_STAAW  
mtlyldget1ti ediksflqqskieiddalervkksravverieneetvygittgfglfsdvridptqynelqvnli  
rshacglgepfskevalvm  
milr1nt1lkgshgatlvrqlqffineriipiipqgslgasgd1aplsh1alaligegklyrgeekdsddv1reln  
rqln1qakeglal1ngtq  
amtaggvisyiesed1gyqsewialthqslngiidayrhdvhavrnfqeqinvaarmrdwlegst1ttrqaeirvqday  
t1rcipqihgasfvfnyv  
kqql1efemnaandnplifeanetfvissgnfhgqpiafaldh1kl1gvselanvserrler1vnpq1ngd1paf1spepg  
1qsgamimqyaaas1vsen  
ktlahpasvdsitssanqedhvsmttaarhgyqienarrv1aiecvialqaaelkgveglspktrrkyeefrsivpsi  
thdrqfhkdieavaqylkq  
siyqtach  
>sp|Q931E6|PANB\_STAAM  
mktvs1lidmkqkqtkismvtaydfpsakqveaagidmilvgdslgmtvlgystvqvtladmihhgravrrgapntfvv  
vdmpigavgismtqdlha  
1klygetnanaikageti1pfiekataigipvvahlg1tpqsvgmgyklqgatkeaaeq1ildaknveqagavalvle  
aipndlaeeiskh1tipvi  
gigagkgtdgqv1vyhdm1nygvehkakfvkqfadfsvgdglkqydqevksgafpseeitykkkimnevnnnd  
>sp|Q931E9|PLS\_STAAM  
mrdkkgpvnkrvdf1snk1nkysirkftvgtasiligs1mylgtqqeaaeaennienptt1kdnvqskevkieevtnkdt  
apqgveaksevtsnkdtie  
heasvkaediskkedtpkevanvaevqpkssvthnaepkvrkarsvdegsfditrdsknvestpitiqqkehfeqygs  
vdiqknptdlgvsevrfn  
vgnennglialq1knkidfskdfnfkvrannhqsnttgadwgglf1skgnaeey1tnggilgdkg1vnsggfkidtg  
iytssmdktekqaggyrg  
ygafvkn1dssgnsmvgenidksktnflnyadn1tsd1gkfhgqr1ndviltyvastgkmraeyagktwetsitdlgl  
knqaynflitssqrw1ng  
ginangwmrtd1kgseftftprsaknnnri1kkveeipfkerkfnpd1apgtekv1regqkgektittpt1knpl1tgei  
iskgeskeetkdpine1t  
eygpetiapghrdefdpk1ptgekeevpgkpgikn1petgdvvrppvdsvtkygvpkgdsivekeeipfeker1kfnpd1ap  
gtekv1regqkgektittpt  
1knpl1tgei1skgeskeetkdpine1teygpetiapghrdefdpk1ptgekeevpgkpgikn1petgdvvrppvdsvtky  
gvpkgdsivekeeipfkerk  
rkfnpd1apgtekv1regqkgektittpt1knpl1tgei1skgeskeetkdpine1teygpetitpghrdefdpk1ptge  
keevpgkpgikn1petgdv  
rppvdsvtkygvpkgdsivekeeipfeker1kfnpd1apgtekv1regqkgektittpt1knpl1tgei1skgeskeetk  
pvn1tefggek1pqqhk  
ifdpn1ptdqtekvpkpgikn1pdtgkvi1eepvddvi1khgpkgtpetktveipfeterkfnpk1qpgervkqegqpgs  
ktittpt1vnp1tgekvge  
gqpteetkqpvdkiv1efggekpkdpkpenpekpsr1p1hpsgvn1p1npg1skdrakp1ngp1v1h1sm1k1nd1k1vk1k1sk1ake  
svanqekkrael1pktgles

Tsompanidou\_et\_al\_Supplemental\_FASTA\_File

tqkglifssiigiaglmllarrkn  
>sp|Q931F4|SBI\_STAAM  
mknkyiskllvgaatitlatmnsgeakasentqqtstkhqttqnnvtdqqkafyqvlhllkgiteeqrnqyiktlrhp  
eraqevfseslkdsknpr  
rvaqqnafynvlkndnlteqeknnyaiaikenpdrsqqvsvsqskakerqnieadkaikdfqdnkaphdksaayea  
nsk1pkdlrdknnrfvekv  
siekaivrhdervksandaisklnekdsienrrlaqrevnkampdvkeh1qkqldalvaqkdaekkvapkveapqispq  
iekpkaespkvevpqskll  
gyyqslkdsfnygykyltdtyksykeydytakyntyykykgaidqvtlvtlvgsgksyiqplkvddkngylaksyaqv  
rnyvtesintgkvltyfyq  
nptlvktaikaqetassikntlnllsfwk  
>sp|Q931G1|HUTU\_STAAM  
mrkiqakkglsieckgweqavlrmlynnldpevaerpedlvvyggigkaarnweafeaiektlrelesdetmlvqsgkp  
yavfktheeaprvlisnv  
lvpewanwdhfne1dkkglimyqmtagswiyyigsqgivaqgyetfaelgnqhfngd1agvtv1taglggmgaqplait  
mnhgvaicvdvdrvdkr  
idtkycdvktad1dealklaeeakergeglsiglvgnavdihqailkqgfkidi1tdqtsahdp1ngyvpqgysveeakv  
1rekdpkkyvelsqasmak  
hvelm1efqkrgavafdygnnirqva1fngvknafdfpgfvpayirplfcegkqfrfaalsgdpkdieradeemrklfp  
enek11rwd1laeekisyq  
glpsriawlggerakmg1alnrlvrdeisapivigrdh1dagsvaspnretesmkgdsdavgdwavlnalintaaggs  
wisfhhggvgmgyslhag  
mvvadgseraerr1erv1ttdpgmgvarhvdagydiaiaqtakekghipmidkagdk  
>sp|Q931G2|FDHL\_STAAM  
mqehlvtldgkdy1vepgtn1lefiksqdtfvpsicynesmgiqtcdtctveidgkierscstvidrmpmtvntvndv  
kdaqkealdri1lekhl1yc  
tvcdynngdceihntmdawglqhqttyeykekyepkydypfyrydpnqci1cgrcveacqdievnetiridwdrehprviw  
dndvpinesscvscgqcat  
vcpcnammevnmegnagymtdtepgslaamid1tkkaepgygplfaisdseaemrkerikkktvctycgvgsfevwtk  
dreilkvqpshdspanki  
tcvkgkfswhinsdqr1tkplvrkngfheveudealnv1adnftsikekygpda1sfi1sskatneesy1mqklarqv  
igt1nvdncsrycqapat  
glfrtvghggdsgsiedlekaamsv1igtntaeahpviasrmkraqlfgqkihvfdirkhemaeradr1fyqpkpgtdla  
w1savtkyi1dhdlhdkaf  
idewvddfdeyyks1etftmafaeeatgipeselikaecakaesv1cwamgitqqdigsdsstaisn111vtgnyrr  
pgtgayplrg1hnnvqgcsd  
mgsmpdki1tgyqsieaddirakfekeygvk1n1pkagkdnhemvegihdgevhsl1ylygedtgivdsn1nfvaafekldf  
mvvqdef1tftatyadv1  
pasp1lekdg1tnterriqrlyqaleplg1dskpdwki1fqaiar1gfdwnykhpseimdevar1t1plyagvsydr1legf  
ns1qwpvqpdgtdepily1  
egfnfdngkak1fpl1sfdnyfkqdeiydihvnngr1lehfhegnmt1yqtpmikykvprafveispe1aedrgihegaevk  
1isetgeav1qvhvtdrvk  
gkeiy1p1nndamengd1gain11tnsdvdqytdt1psykrtsr1levitkr1gksp1n1pnnfrv1nkk1rh1p1qysv1qv1qkkwe  
r1dyv1fpg1nqvdk  
>sp|Q931G4|MOAA\_STAAM  
mveqikdklgrpir1dlr1svtdrcnfrcdycmpkevfgddfv1lpkne11tfdemariakvyaelgvkkir1tggeplmr  
rd1dv1iak1nq1idgiedi  
gl1tng111kkhggelydag1rrinvs1daiddt1fqsinnrn1kattileq1dyatsig1nvkvnvviqkg1nddq1ip  
m1eyfkdkhieir1fiefmd  
vgndngwdfskvvtkdem1tmi1eqhfeidpvepkyfgevaky1rhkdn1gvqf1g1litsvsqsfcstctrar1ssdgkfygc  
1fatvdgfnvkaf1rsgvt  
de1lkeqfka1wq1rddrysdertaq1tvanrqrkk1n1ny1igg  
>sp|Q931G8|Y2173\_STAAM  
mamtvkkdnnevri1qwrvadikiptseiknitqdqdi1havpk1dskdvs1rigstfgktrvi1dtedheyi1ytqndqkv  
yne1tk  
>sp|Q931H9|AGRA\_STAAM  
mkificeddpkqrenmvti1knyimieekpmeialatdnpyevleqaknmndigcyf1ldiql1stdingik1lgseirkhdp  
vgn1ifvtshselty1t1f  
ykvaamd1f1kddpaelr1tridc1leta1htr1ql1skd1nsvetielkrgsnsvy1vyqyddimffesstkshrlia1hdnrq  
1efygn1kelsq1ddrffr  
ch1sfvnrh1niesidskeriv1yfnkehcyasvr1nvkkk  
>sp|Q931I4|DAPE\_STAAM  
mttfsekekiq1l1adive1lqtenneidvcny1kdl1fdkydikseil1kvnehranivae1igngs1pila1sghmdvvdagn  
qdnwt1yppf1q1tekag1ly  
grgttdmkgg1malv1t1iel1keqnq1lpqgt1r1latagee1keqegak1ladkgy1ddvdg1liaeptgsgiy1yahkgsm  
sckvtatgkavh1ssvpfig  
dn1aidt11efynqfkekyse1lkkhdtkhe1ldvapmfks1ligkeiseedanyasg1tavcsi1nggkqfnsvpdeas1efn  
vrpvpeydn1dfiesffqni

Tsompanidou\_et\_al\_Supplemental\_FASTA\_File

indvdsnklsldipsnhrpvtsdknslittikdvassyveqdeifvsalvgatdassflgdnkdnvdlaifgpgnplma  
hgiideycltvniqiststf  
slik

>sp|Q931I5|LUKL2\_STAAM

mknkkrvliasslscailllisaattqansahkdsdqkqkkehvdksqqkdkrnvtnkdknstvpddigkngkitkrtevt  
ydektnilqnlqfdfidp  
tydknvlvkkqgsihsnlkfeshkeeksnwlkypseyhvdfqvrnrkteildqlpknkistakvdstfsyssgkfd  
stkigirtssnsysktisy  
nqnydtiasgknnwhvhsviandlkyggevknrndellfyrntriatvenpelsfaskyrypalvrsgfnpefltyl  
sneksnektqfevtytrng  
dilknrpgihyapsileknkdgqrlivtyevdwnkntkvvdskysddnkpykeg

>sp|Q931K4|SSB\_STAAM

mlnrtilvgrltrdpeirrttqsgvnvasftlavnrftnaqgreadfiniivfkkqaenvnkylskgslagvdgrlqtr  
nyenkegqrvyvtviads  
iqflpknsndtqqdlyqqvqtrgqsqysnnkpvkdnpanangpielnddldpf

>sp|Q931P6|ACKA\_STAAM

msklilainagsssikfqlirmpeelvtkglrieriglkdsiftievngekvktvdikdhveavdimldafkahniind  
indivgtghrvvhggekfp  
esvaitdevekeieelseaplhnpanlmgirafkllpniphvaifdtafhqtmpekaylslpyhykdygirkygfh  
gtshkfvsqraaemdkpi  
edlrishchigngasiaaidggsidtsmgftplagvtmgttrsgnidpalipfimektgktaeqvleilnkesgllgls  
tssdlrdlseeaesgkars  
qmaldivfaskihkyigsyaarmhgvdvifvtagigensveirakvleglefmgvywdpkknellrgkegfinyphspvk  
vvviptdeesmiardvmtf  
gglk

>sp|Q931Q1|SYV\_STAAM

memkpydpreveagryeewvkngyfkpsedksketytivi pppnvtgklhlgawdttlqdiitrmmkrmqgydtlylpg  
mdhagiatqakveaklneq  
gitrydlgrekflaqawdweeyasfiraqwaklgldysrerftldeglskavkkvfdlynkgiirgeriinwdpk  
artalsdievihedvggaf  
yhfkyppyadgegfielatrpemlgdtaivvnpnderykdvigktvilpivgrepliladeyvdiidfgsgamkvtpahd  
pndfeigqrhqleniivmd  
engkmndkagkyegmdrfdcrkqlvkdllkeqdlviki edhfhsvglhsersgavvepylstqwfvrmedlakrsldnqkt  
dridfypqrfehtfnqwm  
nirdwtisrqlwwghqipawyhketgeiyvgeeaptdienwqqdedvldtwfssalwfpstlgwpdlesedfkryyptna  
lvtgydii ffwarmifq  
leftdrppndvllhglvraedgrkmskslgnvdpmdvideygadslryflatgsspghdlystekvesvwnfinkiw  
ngarfslnnigedfkvedi  
dlsnslsladkwiltrlnetiatvtdlsdkyefgevgralynfiwddfcdwiyemskipmnsndeeqkvtrsvlsytl  
nimrmlhpfmpfvtekiwq  
slphgedtivkaswpevreslifeeskqtmqqlveiki svrqsrvvntplskeipiliqakdeiettsqnkdylikf  
cnpstlnistdveipekam  
tsvviagkvvplleglidmdkeisrlekelaklqseldrvdkkl snenfvskapekvineekrkkqdyqekydgvkarie  
qlka

>sp|Q931Q4|RELA\_STAAM

mngvyhimnneypysadevlhkaksylsadeyeyvlksyhiayeahkgqfrknglpyimhpiqvagiltemrldgptiva  
gflhdviedtpytfedvke  
mfneevavirdgvtklkkvkyskeeqqaenhrklfiaiakdvrvilvkladrlnhmrtilkamprekqirisretleiya  
plahlglintikweledta  
lryidnvqyfrivnlmkkkrserayietaidrirtemdrniegdingrpkhisyirkmmkqkkqfdqifdlairvi  
vnsindcyailglvhtlw  
pmpgrfkdyiampkqlyqslhttvgpngdp lei qirtfdmheiaehgvaahwaykegkkvsekdqtyqklnwlkela  
eadhtssdaqefmetkyd  
lqsdkvyaftpasdvie lpygavpidfayahsevgnkmgakvngkivpidyilqtgdiveirtsksygsrwdlkiv  
kssakgkiksffkkqdrs  
sniekgrmmveveikeqgfrvediltekniquvnekynfaneddlaavgfgvtslqivnk lterqril dkqralneeq  
evtkslpikdnii tdsqvy  
veglenvlikl skccnpi pgdivgyitkghgikvhrtdcpnikneterlinvewvkskdatqkyqvdlvtaydrngll  
nevlqavsstagnlikvsg  
rsdidknaiini svmvknvndvyrvvekikqlgdvytvtrvwn

>sp|Q931Q6|MNMA\_STAAM

msnkdivvvgmssgvdssvtahvlkeqgydvigifmknwddtdengvctatedyndvievcnqigipyavnfekywd  
kvftyfldeykkgrtpnd  
vmcnkeikfkafldhamnl gadyvatghyarihredghvemlrgvdnkdqtyflnqlsqqlskvmfipigdieksevr  
riaeeqglvtakkdstgi  
cfige knfktflsqylpaqgdmitldgkkmghsglmyytigqrhglgiggdgpwfvvgknlkdnvlyveqgfhhda  
ysdylia sdysfvnpednd  
ldqgfektakfryrqkdtkvfvkrendhalrvtfaepvraitpgqavvyqgdvclggatiddvfkneqqlnfvv

Tsompanidou\_et\_al\_Supplemental\_FASTA\_File

>sp|Q931R6|EBHA\_STAAM  
mgnlqtaindksqtlasqfildadeqkrnaynqaisaetlnkqtgpnaktaveqalnnvnsakhalngtqnlnnakq  
aaितािंगासदलंनककदा  
lkaqangaqrsvnandvqrnateIntamgqlqhaiadkntlasskyvnadstkqnayttkvtnaehiisgtptvvtpps  
evtaaanqvnsakqelngd  
erlrvakqnantaidaltqIntppkaklkeqvgqanrledvqsvqtnngqslnnamkglrdsianettvkasqnytdaspn  
nqstynsavsnakgiinqt  
nnpmtsaistqattqvnnaknglngaenlrnaqntakqnlntlshltnnqsaisssidraghvsevtaaknaateIna  
qmgnleqaihdqntvkqgv  
nftdadkkrdaytnavsraetlnktqgantskqdveaaiqnvtzaknalngdqvntnaknaaknalnlnltsinnaqr  
dlttkidqattvagveavs  
ntgtqIntamanlqngindkantlasenyhdadsdkktaytqavtnaenlnknsgsnldkaavenalsqvtnakgalng  
nhnleqaksnanttinglq  
hltaaqdklkkqqvqqaqnvagvdtvkssantlmgamgtlrsiqdntatknqnyldaternktnynnavdsangvina  
tsnprmdanainqiatqvt  
stknaIdgthnltaqqtatnaidgatlnkaqkdaalkaavtsaqrvanvtsiqqtanelntamgqlqhgiddenatkqt  
qkyrdaeqskktaydqava  
aakailnkqtgsnsdkaavdraqqvtstkdaIngdakraeakaaarqnlgtlnhitnaqrtalegqinqattvdgvntv  
ktnantldgamslqgain  
dkdatlrrnnyldadeskrnaytqavtaegiInkqtggntskadvdnalnavtrakaalngaenlrnaktsatntingl  
pnltaqlkdnlkhqeqaq  
nvvgvngvkdkgntIntamgalrtsiqdnttktksqnyldasdsnknyntavnnangvinatnprmdanaindmanqv  
nttkaalngaqlaqaktn  
atntinnaqdlngkqkdaIktqvnaqrsvdannvqhtateIngamtaIkaaiadkertkasgnyvnadqekrqaydskv  
tnaeniingtpnatltvnd  
vnsaasqvnaaktaIngdnnlrvakehanntidglaqlnnvqkaklkeqvqsattldgvqtvknssqtIntamkglrdsi  
aneatikagqnytdasppn  
rneydsavtaakainqtsnptmepntitqatsqvttkehalngaqlaqakttaknnlnltsinnaqkdaItrnidga  
ttvagvnetakateInna  
mhsIqngindetqtkqtqkyldaepskksaydqavnaakailtkasgqnvdkaaveqalqnvstktalngdakIneaka  
aakqtlgtlthinnaqrna  
ldneitqatnvegvtvkakaqaqldgamgqletsirdkdtlqsqnyqdaddakrtaysqavnaaatilnktaggntpka  
dveramqavtqantlqngi  
qnlerakqaantaitnasdlntkqkeaalkaavtsagrsvsaangvehtateIntamtaIkraiadkadtkasgnyvnadan  
krqaydekvtaaeihvsgt  
ptptltpsdvtnaatqvtnaktqIngnhnlevakqnantaidgltslngppkaklkeqvgqattlpnvqtvrdnaqtInt  
amkglrdsianeatikagq  
nytdasqnkqndynnavtaakaiigqtspsmiaqeinqakdqvtakqqaIngqenlrtaqtnakqhlnglsltnaqkd  
aakrqjegathvnevtqag  
nnadalntamtnlknqidqntikqgvnftdadaekrnaytnavtqaeqilnkaqgpntakdgvetaIqnvqrakneIng  
nqrvanakttaknalnlnl  
sinnaqkaalksqieqattvagvqvstmaseIntamsnlqrgindeaatkaaqkyteadrkqtayndavtaaktlldk  
tagsndnkvaveqalqrvn  
taktalngdarlneakntakqqlatmshltnaqkanlteqiergttvagvqgiqanagtlngamnlrqsiaskdats  
edyqdanadlqnayndavt  
naegiiatnnpemnpdtinqkasqvnsaksaIngdeklaavqktaksdigrltdlnnaqrtaanaevdqapnlavtaa  
knkatsIntamgnlkhal  
ekdntkrsvnytdadqpkqaydtavtqaeaitnangsnanetqvqaalnqInqakndIngdnkvaqaketakraIasys  
nlnnaqstaatsqidnatt  
vadvtaaqntanelntamgqlqngindqntvkqgvnftdadqgkdaytnavtnaqqildkangqnmkaqveaalnqvt  
taknalngdanvrqaksda  
kanlgtlthlnnaqkqdltsqieqattvngvsvktaqldgamqrlesaiankdqtkasenyidadptkktafdnait  
qaesylnkdhgtnkdkqav  
eqaiqsvtstenaIngdanlqcakteatqaidnltaqIntppktaIkkqvnaaqrsvgtldlksatslnnamdqIkkqai  
dhdtivaggytnaspdkq  
gaytdaynaaknivngspvinaadvtaatqrvnaetsIngdtnlatakqqakdaIrmthlsdaqkqsitgqidsat  
qvtgvqsvkdnatlnam  
nqIrsiankdevkasqpyvdadtdkqnayntavtsaeniiinatsqptldpsavtqaanqvntnktalngaqlankkqe  
ttaninrlshlnnaqkqdl  
ntqvtnapnistvngvktkaeqldqamerlingiqdkdqvkqsvnftdadpektaynnavtaaeeniinqangtnanqsq  
veaalstvttkqalngdr  
kvtdaknnanqtlstlndlnnaqkgavtgninqahtvaevtqaiqtaqelntamgnlkslnkdttlgsqnfadadpek  
knayneavrnaenlnkst  
gtvnpkdqveaamqvnttkaalngtqnleakqhantaidgIshltnaqkealkqlvqqstvaeaqqneqkannvdaa  
mdklrqsiaadnatkqnq  
ytdasppnkdaynavttaggiidqtnpsldptvinqaagqvstsknalngnenleakqqatqslgslndlnnaqkqa  
vtngingahvtvdeanqikq  
naqnlntamgnlkqaiadkdatkatvntdadqakqayntavtnaeniiiskanggnatqteveqaiqqvnaakqaIng



Tsompanidou\_et\_al\_Supplemental\_FASTA\_File

anvqhakdeatalinnsnd  
lnqaqkda1kqqvgnattvagnnkvqtaqelnnamtqlkqgiadkeqtkadgnfvnadsdkqnaynqavakaealisgt  
pdvvtptsei taalnkvtq  
akndlngntnlatakqnvghaidq1pnlnqaqrdeyskqitqat1vpvnvaiqqaatt1ndamtqlkqgiankaqikgse  
nyhdadtdkqtaydnatk  
aeellkqttntptmdpntiqqa1tkvndtnqa1ngnqkladakdakt11gt1dh1ndaqkqalttqveqapdiatvnnvk  
qnaqnl1namtnlnnalqd  
ktet1nsinftdadqakkddytnavshaegilskangsnasqteveqamqrvneakqa1ngndnvqrakdaakqvitan  
d1nqaqkda1kqqvdaaqt  
vanvntikqtagd1nqamtqlkqgiadkdkqtkangfnvnadtddkqnaynavahaeqiisgtpnanvdpqqvaqalqqvn  
qakgd1ngnhnlqvakdna  
ntaidq1pn1nqpqkta1kdqvshaelvtgvnailkqnadal1namgt1kqqiqansqvpqsdfd1qadqdkqqaynaan  
qaqqiangtptp1apdtv  
tkavttmnqakdalngdek1aqakqda1an1dt1rd1nqpqrda1rnqinqaqa1atveqtkqnaqnvntamgn1kqgia  
nkdtvkasenyhdadvdkq  
taytnavsqaegiiinqttnt1npddi1tra1tqvtdakns1ngeak1atekqnakdavsgmth1ndaqkqal1kqqidqsp  
eiatvngvktats1dqam  
dq1sqaindkdq1ladgny1nadpdkqnaykavakaeal1nkqsgtnevqaqvesitnevnaakqa1ngndn1anakqq  
akqq1an1th1ndaqkqs1f  
esqitqap1vtdvt1nqkaqt1dhame11rnsvadnqtt1asedyhdataqrqndynkavtaanni1inqttsptmnpdd  
vngattqvntkvaldgde  
n1aaakqqannr1dq1dh1nnaqqq1qsqitqssdiaavngkhqtaes1ntamgn1ina1adhqaveqrgnfinadtdk  
qtayntavneaaaminkqt  
gqnanqteveqaitkvqtt1qa1ngdhn1qvaktatqaidv1ts1ndp1kta1kdqvtaat1vtavh1qieqnant1nqa  
mhg1rqs1qdnaatkansk  
yinedqpeqqnydqavqaanni1neqtat1dnainqvaatvnttkaal1hgdk1qndkdhakqtvsqlah1nnaqkhme  
dt1idsettrtavkqdlte  
vqal1dq1mdal1qgs1adkdatrassayvnaepnkqaydeavqnaes1iag1nnp1tinkgnvssatqavisskna1dgve  
r1aqdkqtagns1nh1dq1  
tpaqqqal1enqinnattcdkvaei1aqaqa1neamka1kesikdqpqteasskfinedaqakdaytqavqhakd1inktt  
dpt1aks1idqatqavtda  
knl1hgdk1aqdkqratet1nn1sn1ntpqrqa1enqinnaatrgevaqkl1teaqa1nqameal1rnsiqdqqqtesgsk  
finedkpkqdayqaavqna  
kd1inqtgnpt1dkaqveq1thafkqakdn1hgdk1addkqhavtd1nq1ng1nnpqrqa1esqinnaatrgevaqkla  
eakal1dqamqa1rnsiqdq  
qqteagskfinedaqakdayqaavqnakd1inqtgnpt1dksqveq1tqavttakdn1hgdk1ardqqqavttvna1pn  
1nhaqqqt1tdainaptr  
tevaqhvqtate1dhamet1knkvdqvntdkaqpnysteaddk1eavdqal1qaaq1s1tdptngsnankdaveqal1tk1qe  
kvne1ngnervaeaktqak  
qt1dq1th1nadq1atakqnidqat1kq1piae1vdqat1nq1smdq1qqavnehanveq1tidy1tqadsdkqkaykqaiad  
aenv1kqnankqqvdqal1q  
ni1nakqa1ngderva1aktngkhd1dq1na1nnaqqdgfkg1ridq1snd1nq1qq1vdeaka1nramdq1sqe1itgnegr  
tkgstnyvndtqvkkqyvd  
eavdkakqa1dkssgn1taeqvik1ndavtaakka1ngeer1nrrkaeal1qr1dq1th1nnaqrq1aiqqinnaet1nk  
asrainratk1dnamgavq  
qyideqhl1gvisstny1naddn1kanydnai1anaahe1dkvqgnai1akaeaeq1kqni1idaqna1ngdq1n1anakdkana  
fvns1ng1nqqqqd1ahka  
innadtvsdvt1vnnq1d1ndamet1kh1vdne1pnaeqtvnyqnaddnaktnfddakr1ant1l1nsdntvndingai  
qavnda1hn1ngdq1r1qda  
kdkaiqsinqa1ank1keieasnatdqdk1iaknkae1ansi1inninkatsnqavsqvqtagh1aieqv1hane1pkaki  
dankdvdq1qvqal1ideidr  
npl1tdkekqa1kdrinqi1lqqghnd1nna1tkeeieqakaq1aqa1ldi1kd1lvkakedakqdvdkqvqal1ideidqnpn  
1tdkekqa1kdrinqi1lqq  
ghnginnamtkeeieqakaq1aqa1keikd1lvkakenakqdvdkqvqal1ideidqnpn1tdkekqa1kdrinqi1lqqghn  
dinnamtkeeieqakaq1a  
qa1ldi1kd1lvkakedaknaika1lanakrdq1nsnpd1tpeqkaka1keideakra1qnvenaqt1dq1nrg1n1ng1ddi  
rnthvwevdeqpavneife  
atpeq1lvngelivhrddi1iteqdi1lahin1ldq1saev1dtpstatisds1takvevt1ldgskv1vnpvkvveke1s  
vvkqqaies1enaqqk1id  
einnsvt1tleqkeaa1aevnk1kqqa1dhvnnapdvhsvee1qqeqayieqfnpeqftieqaksnaiksiedaiqhmi  
deikartd1tdkekqeaia  
k1nq1lkeqaiqaiqraqsiseiteq1eqfkaqmaaanptakelakrkqea1srikdfsnkinsir1nseigtadekqaam  
nqineiv1etirdinnaht  
lqqveaa1nngiarisavqivisdrakqssstgnesnsh1tigyg1tanhpfnss1tighkkk1dedddi1dpl1hmrhfsnnf  
gnviknaigvvgisg1las  
fwffiakrrrkede1e1erdnnkdsiket1ddtkh1p1l1fakrrrkedeedvtveekds1nnges1dkvkhtpff1pk  
rrrkedeedvevtntende  
kv1kdnehsp1l1fakrrrkedeedvettsieskdedvp1l1lakkknqkdnqskdkksasknts1kvaakkkkkkkkknkk

Tsompanidou\_et\_al\_Supplemental\_FASTA\_File

>sp|Q931R7|CVFC\_STAAM  
meilrieptpsntmkvvl sytre dkl sntykkveetqprfinql lsidgitsifhvmnflavdkapkadwevilpdika  
afsdankvlesvnepqidn  
hfgeikael ltfkgipyqik ltsadqelreqlpqtyvdhmtqaqtahdnivfmrkwldlgnrygnieevmdgvleevlat  
ypesqlpvlvkhaleen  
tnyhfyrhvs ldeyhatynwktr lrm lnhfpkptfediplld lalsdekvpvrrqaivllgmieskeilpylykglrdk  
spavrrtagdcisdl gype  
alpemvlll ddpqkivrwaamfi fdegnaeqlpalkahindnafevklqiemaisriengdealgsvwkqmanrti  
>sp|Q931S1|MSRR\_STAAM  
mdketndneyrrqsehrtsapkrkkkkkirk lpiillivillialvvyivhsynsgveyakkhakdvkvhqfngpvknd  
gkisi l vlgadkagggqsr  
tdsimvvydfi nkkmkmsvmrdiyadi pgygkhkinsaya lggpkllrktldkn lginpeyyavvdf tgfekmidelm  
pegvpinvekdmsknigvs  
lkkgnhr l ngkel lgyarfrhdpegdfgrvrrqqvmqt lkkemvnfrtvvklpkvagilrgyvntnipdsgifqtgl sf  
girgekdvks l tvpiknsy  
edvntntdgsalqinkntnkqaikdf lded  
>sp|Q931S2|PARC\_STAAM  
mseiiqdl sl edvlgdrfgryskyiiqeralpdvrdglkpvqrrilyamyssgnthdknfrksaktvgdvigqyhphgdf  
svyeamvr l sqdwklrhv l  
iemhgngsindppaamryteak lsl laeellrdinketvsfipnyddt lepmvlpsrfpnllvngstgisagyatdi  
pphnl aeviqat lkyidnp  
ditvnqlmkyikgpdfptggiiqgidgikkayesgkriivrskveet lnrgrkqliiteipyevnksslvkridelra  
dkkvdgivevr detdrtgl  
riaie lkkdvnsesiknylyknsdlqi synfnmvaisdgrpk lmgirqiidsylnhqievvanrtkfeldnaekrmhive  
glikal sildkvie l irss  
knkrdaken l ievfefteeqaeavmlqlyr lntdivalegehkelealikqlrhildnhdallnvikeelneikkkfk  
ser l slieaeieeikidke  
vmvpseevil smtrhgyikrtsirsfnasgvedig lkdgds l lkhqevntqdtvlvftnkgrylfipvhkladirwkelg  
qhvsvipieedevvinvf  
nekdfntdafyvfatqngmikkstvp lfktrfnkpliatkvkenddlisvmrfekdq l itvitnkgs l tyntsel sdt  
glraagvksin lkaedfvv  
mtegvsendtilmatrgslkrisfki lqvakraqgit l lkelknphrivaahvvtgehsqytl ysksneehglindi  
hkseqytngsfivdtddfg  
evidmyis  
>sp|Q931T2|Y1176\_STAAM  
mseikrleinykt del fen frafgnk dlymvnelngqmi dassdspfygifvgdq l garmal l kkgdveeiyfpdfedyi  
llwklev l pkyqnr gase  
lidfaksfnmpikaigrnskdff lhhgftdveaknieghdvl l lwkpir  
>sp|Q931T9|MNTH\_STAAM  
mnkrhstneql sldeinntikfdrssnkqkflsf l gpgllvavgymdpgnwitsmqggaqygyt l lfviliss l sam l  
lqsmtvrlgiatgmdlaqm  
trhylsrpiaiifwiae laiatdiaevigsaialn l lfniplivgalitvldvfl l l fimkygfrkieaivgtfiftv  
l fifevyisspqlnavl  
ngfiphseiitngilyialgiigatimphnlylhssivqsrtysrhneekaqaikfatidsniqlsiafvnc l l l l v l  
gas l ffn snaddlggydl  
yhalktepvl gatmgaimst l faval lasgqnstitgtlagqivmegflrlhipnw l rrlitrs lavipvivcl iifkgn  
aakieql l v fsvf l sial  
pfc l iplqlatsnkdlmgpfynktwvniiswtlii l silnvy l ivqt f qelqs  
>sp|Q932A8|SSBP\_STAAM  
mlnrtvlvgr ltkdpe l rstpngvngvtftlavnrftnaqgereadfinvvvfkkqaenvkny l skgs lagvdgr l qtr  
nyenkdgqrvfvtevvads  
vqfl epknnnqqnnnyqqqrqtqtgnnpfdnnadsied l pf  
>sp|Q932C5|CLFA\_STAAM  
mmkkkkehairkksigvas l vgt l igfg l l sskedasensvtqsdsasnesksndsssvsaapktddtnvsdtkts  
ntnngetsvaqnpaqett  
qssstnatteetpvtgeat tttntqantpattqssntnaeelvnqtsnettsndtntvssvnsqpnstnaenvsttqds  
teatpsnnesapqntdasn  
kdvvsqavnpstprmrfa l laavaadapaagtditnqltdvkv tidsgttvyphqagyvklngy fsvpnsavkgdtfkit  
vpkelnlngvtstakvppi  
magdqvl angvidsdgnvyftdyvdkenvtani tmpayidpenvtktgnvt l ttgigtntasktv l idykygqfhn  
l sikgtidqidktnntyrg  
tiyvnpsgdnvvl pal tgnlipntksnalidakntdikvyrvdnand l sesyyvnp sdfedvtnqvrisfpanqykev f  
ptdddqittpyivvng hi  
dpastgd l alrstfygydsnf iwrmswdneva f nngsgsgdgidkpvvpeqpedepgeiepipedsdsdpgsdsgsdns  
dsgsdsgsdstsdsgsdas  
sdsdasdsdsasdsdsasdsdsasdsdsasdsdsasdsdsasdsdsasdsdsasdsdsasdsdsasdsdsasdsds  
sdsdasdsdsasdsdsasdsdsasdsdsasdsdsasdsdsasdsdsasdsdsasdsdsasdsdsasdsdsasdsds  
sdsdasdsdsasdsdsasdsdsasdsdsasdsdsasdsdsasdsdsasdsdsasdsdsasdsdsasdsdsasdsds  
sdsdasdsdsasdsdsasdsdsasdsdsasdsdsasdsdsasdsdsasdsdsasdsdsasdsdsasdsdsasdsds

Tsompanidou\_et\_al\_Supplemental\_FASTA\_File

dsdsesdsdsdsdsdsdsds  
sdsdsdsdsesdsdsdsdsdsdsdsdsdsdsasdsdsgsdsdssdsdsdsdtsdtdgsdndsdsdsnsdsesgsnnn  
vvpnspkngtnasnknea  
kdskep1pdtgsedeantsliwgl1as1gs111frrkkenkdkk  
>sp|Q932F1|GRAR\_STAAM  
mqi11veddnt1fqe1kke1eqwdfnvagiedfgkvmtdfesfnpeivildvqlpkydgyfwrkmrevsnvpilflssr  
dnpmdqvmse1gaddyq  
kpfytnvliak1gaiyrrvyeftaekrt1twqdavvd1skdsiqkgddtiflsktemiileilitkknqivsrdtiita  
1wddeafvsdnt1tvnvsr  
1rkk1seismdsaietkvgkgymahe  
>sp|Q932F8|RPOB\_STAAM  
magqvvygrhrkrrnyarisevle1pn1ieiqtksyewflregliemfrdispiedftgn1s1efvdyrlgepkydlee  
sknrdatyaap1rvkvr1i  
iketgevkeheglmdyplakfkrnsngtcynqrpiavgdvveyne1ladgpsme1gema1grnvvvgfmtwdgynyeda  
vyvridrtrk1p1tv11ra  
1gfssdqeivd1lgdneylrnt1ekdgtenteqalleiyer1rpegeptvenaks11ysrffdpkryd1asvgyrktk  
1h1khr1fnqklaepivnt  
etgeivveegtvl1rrkideimdvlesnansevfelhgsvidepveiqsikvyvpnddegrtttvignafpdsevkcipt  
adiiasmsyffn11sgigy  
tddih1gnrr1rsvge11nqfriglrmervvrermsiqdtesitpqq1inirpviasikeffgssq1sqfmdqanp1  
aeltykr1rsalpgg1tr  
eraqmevrdvhyshygrmcpietpegpnig1ins1ssyarvnefgfietyrkvdl1dthaitdqidy1tadeedsyvvaq  
anskl1dengrfmddevvcr  
frgnntvmakemdydvspkqvsaatacipflenddsnralmganmqrqavp1mpeapfvgtgmehvaardsgaait  
akhrgrvehvesne1lvr  
1veengvehege1dryplakfkrnsngtcynqrpiavgdvveyne1ladgpsme1gema1grnvvvgfmtwdgynyeda  
vimser1vkddvytsihie  
eyesear1tk1gpee1trdipnvsesa1kn1ddrgivyigaevkdgdilvgkvtpkgvteltaer11hai1fgekarevr  
dts1rvphgaggiv1dvkv  
fnreegdd1spgvnq1vrvyivqkrkihvgdkmcrhgnkgviski1vpeedmpy1pdgrpidim1nplgvpsrmnigqv  
1elh1gmaakn1gihvasp  
vfdgandddvws1ieagmardgktv1ydgtrtgepfdnr1svgvym1klahmvddk1harstgpys1vtqqp1ggkaqf  
ggqrfgemevwa1eaygaa  
yt1qe11tyksddtvgrvktyeaivkgenisrpsvpsfrv1mkelqslg1dvkvmdeqndneiemtdvdddvdvverkvdl  
qqndapetqkevtd  
>sp|Q932G3|RECR\_STAAM  
mhypepisk1idsfmlpgigpktaqr1afht1dmkeddvqfakalvdvkre1tycvcghitendpcyicedkqrdr  
vicvveddkdviamekmre  
ykglyh1hgsispmdgigpedinips1ier1ksdevsel1lamnp1legestamyisr1vkpigikvtr1aqq1svggd  
1eyadevt1skaitgrtem  
>sp|Q932J9|ESSC\_STAAM  
mhk1iikynq1kmln1rdgktytisederadit1ks1gevi1h1eqnnggtwqanhts1nkvlvrkgd1ddit1qlytea  
dyasfaypsiqdtmtigpn  
ayddmviqs1mna1iikdfsqisqesqyvri1vhdkntdvyn1elqe11tnkayigdh1yvegiw1levqadgl1n1sqntv  
ass1ir1tqemphaqaddy  
ntyhrs1pri1h1reptddikierppqi1qknntviwrs1i1pplvmialtv1vif1vrpigiyl1mmigmstvtivfgittyf  
sekkkynkdvekrekdyka  
y1dnkske1nkaikaqrfs1nyhyptvaeikdivetkapriyektshhhd1flhyklgianveksfk1dyqeeefnqrde  
1fddake1yefytdveqap  
1ind1nhgpiayigarh1le1elekml1q1stfhsyhd1ef1fv1tredevet1kwarw1phmt1rgqnr1gfvynqrtrd  
q1ltsiysmikeriqavre  
rsrsneq1i1ftpq1lvf1vtdms1i1dhv1leyvnd1seygis1l1fvedvies1pehvdti1diksrtegelitkekelv  
q1kftpenidndvkeyiar  
r1lan1ihveh1knaipds1t1flemynvkevdq1dvvn1rwrqnetyktmavp1gvr1gkdd1s1n1l1hekahgphglvagtt  
gsgksei1qsy1l1s1ainf  
hpheva1f11idykggman1fkdl1vh1vgtitn1dgdeamra1tsikael1rkrq1rfgehdvnhin1qyhk1lfkegvatep  
mph1fi1sdefae1kseqp  
dfmkelvstarigr1slgih1il1atqkpsgvvddqiwsnskf1al1kvqdrqdsne1l1ktpdaadit1pgray1lqvgnnei  
yelfqsawsgatydiegdk  
1evedktiym1indygg1qa1nkdl1sg1edeetkenqteleavidhiesittr1e1eevkrpw1ppl1penyqed1vetdf  
rk1wsddakevel1t1glkd  
vpee1yqggpmv1q1kkaghia1ligspgygrtt1flhni1fdvarhhrpdqahmy1fdfgtng1mpvtd1phvadyftvdqe  
dkiakair1fnde1drkk  
i1lsqyrvt1seyrkt1getipyvfi1idnfdavkds1pfqevfenmmikmtreg1aldmqvt1tasranamktpmyinmk  
triamflydksevsnvvgq  
qkfavkdvvgral1ssddnvsf1higqpfkhdetksyndq1indevsamtefykgetpndipmmpdeikyedyres1slpdi  
vanga1pig1dyegvt1qk  
ik1tepami1ssenpreiahae1immkeidil1nekyaci1adssgef1kayrhqvanfaeredikaihq1mied1kqremd

Tsompanidou\_et\_al\_Supplemental\_FASTA\_File

gpfekdslyiindfkyid  
ctyipeddvkklitkgpelglnilfvghkelidaydkqidvarkminqfsigirisdqffkfrfiqrepvikeneaym  
vanqaykiriwfk  
>sp|Q932K6|Y210\_STAAM  
mkthkifwlnlaaiiisivvsggmflamkweqihlkdgllkklvstypiknetlyeidghdnphyenndqdtwyiessy  
svvgsdelkedrmlkvd  
knthkitgeydtttndrkdtdstyksypkvvnkivftkdvkdpalkqkiennqfliqsgdltisilnsndlkvthdpt  
tdyynlsgklsndnpvkq  
lkrrynipsnastkvelkgmsdlkgnnhdqklyfyfsspgknqiiykesltynklseh  
>sp|Q932L5|MECI\_STAAM  
mdnktyeissaewefmniwmmkkyasannieeiqmkdwspktirtlitrlykkgfidrkkdnkiqyyslveesdiky  
ktsknfinkvykggfnslv  
lnfvekedlsqdeieelrnilnkk  
>sp|Q932M0|GYRA\_STAAM  
maelpqsrinernitsemresfldyamsvivaralpdivrdgkpvhrriylglneqgmpdkssyksarivgdvmgkyhp  
hgdlsiyeamvrmaqdfsy  
ryp|vdggngfgsmddgaaamrytearmtkitlellrdinktidfidnydgnerepsvlparfpnllangasgiavgm  
atnipphntelingvsl  
sknpdisjaelmediqepdfptagligksgirrayetgrgsiqmrsravieergggrqrivvteipfqvnkarmiekia  
elvrddkidgtdlrdets  
lrtgvrvidvrkdanasvilnnykqtplqtsfgvnmialvngprkllnkealvhylehqktvrrrtqynlrkakdr  
ahileglrialdhideiis  
tiresdtdkvamkslqqrflsekqaqaildmrlrrltglerdkieaeynellnyiseletiladeevllqlvrdeltei  
rdrfgddrrteiqlgged  
lededlipeequivitlshnnyikr|pvstyraqnrggrgvqgmtleedfvsq|vtlsthdhv|fftnkgrvyklkgyev  
pelsrqskgipvnaiele  
ndevistm|avkd|esednflvfatkrvkvksalsnfsrinrngkiaisfreddeliavr|tsgqediligtshas|ir  
fpestl|rp|grtatgvkgi  
tlregdevvgldvahansvdevlvvtengygkrtpvndyr|snrggkigtatiterngnvvcittvtgeedlmivtnag  
viirlvdadisqngraaqg  
vrlirlgddqfvstvakkedaedetnedeqststsvsedgteqqreavvndetpgnaihtevidseendedgrievrqdf  
mdrveediqqssdedee  
>sp|Q93KF4|PARC\_STAAM  
mseiqd|sl|edv|gdrfgrysky|i|qeralpdivrdgkpvqrrilyamyssgnthdknfrksaktvgdvigqyphgds  
svyeamvr|sqdwk|rhv|  
iemhgnngsi|ndppaamryteak|sl|lae|llrdinketvsfipnyddttlepmvlpsrfpnllvngstgisagyatdi  
pphnl|aeviqat|lkyidnp  
ditvnq|lmyikgpdfptggi|iqgidgikkayesgkriivrskveet|l|nrgkqliiteipyevnksslvkridelra  
dkkvdgivevrdetdrtg|  
riaie|lkkdvnsesiknylyknsdlqi|synfnmva|sdgrpklmgirqi|dsylnhqievvanrtkfel|dnaekrmhive  
glikal|sil|dkviel|irss  
knkrdaken|lievfefteeqae|ivmlq|lyrl|ntdivalegehkeleal|kqlrhildnhdall|nvikeelneikkkfk  
ser|sl|ieaeieeikidke  
vmvpseevils|mrhgyikr|tsirsfnasgvedig|lkdgds|llkhqevntqdtvlvftnkgrylfipvhklad|irwkelg  
qhvsqivpi|eedevvinvf  
nekdfntdafyv|fatqngmik|kstvpl|fktrfnkpliatkvkenddlisvmrfekdq|litvitnkgs|ltyntsel|sdt  
glraagvksin|lkaedfvv  
mtegvsendtilmatqrgs|lkrisfki|lqvakraqgit|llkelknphrivaahvvtgehsq|tlyksneehgl|indi  
hkseytngsfiv|dtddfg  
evidmyis  
>sp|Q99QS1|MAP1\_STAAM  
mkfks|litt|algviastganfntneasaa|kpl|dkssst|lhghsni|qipytitvngtsqn|lssl|tfnknqn|isykd  
ienkvksvly|fnrgis|di  
lrlskqaeytv|hfngtkrvid|lksgiytad|lntsdika|isvndt|kkqpkdkakanvqvpytitvngtsqn|lssl|tfnknqn|isykd  
nknqn|isykd|legkvksv|  
esnrgitdvd|lrlskqakytvn|fngtkkvid|lksgiytan|l|nssdiks|in|vndt|kkhien|kakrnyqv|pysin|l|ngt  
stn|l|sn|l|sfsnkpwt|nyk  
n|ltsqiksv|lkhdr|giseq|lkyakkay|tyvyf|knggkri|l|q|lnsknytan|lvhakdvkrie|itvktg|tkakadryvpyt  
iavngtstpi|l|skl|k|snk  
q|lisyky|lndkvksv|lks|ergis|dl|l|kfakqakytvyf|kngkkqvvn|lksdi|ftpn|l|fsakdikkid|idv|kqytk|skkk  
>sp|Q99QV6|Y2685\_STAAM  
mkkqdisvktvva|igigaavfvi|lgrfvv|iptgfpntnietsyafla|l|isai|fgpfag|lmtglvghaikdf|t|tysawws  
wvicsg|iigc|lygw|ig|k|l|  
n|lssgl|fsrksmiyfn|igqii|iani|icw|aliapt|l|dili|ynepankvytqgvisav|lni|svgi|igtill|kayassq|ikk  
slrke  
>sp|Q99QV7|Y2684\_STAAM  
mtepiisfkdfs|fqyhsqatp|tlqn|invdiypgekv|lvvgasgsgk|stfancing|lipfktkgnitgely|innqdatvsc  
lhd|rsnv|vgtvl|qdt|dgqf

Tsompanidou\_et\_al\_Supplemental\_FASTA\_File

igltaaedmafllennceveqddmkknvsywaekvgmiehlhrpqdlsggqkqrsvlsggilihrtplildepnanlpa  
tghetrlrlnniheetkst  
miivehrleeslddtfdrvlfkdgkiianttpsdllkssklikeagireplyctalkyaevdvesidnlanlrdvcseh  
vkfkvkwidetsanndnk  
yksep1le1nevcvqdsynsvlnnvqlnvyrrmlsivghngagkstlakaicgfliditgni qfcnrgfnqlsisers  
efvgymqnpnhmiskmi  
ydevalglrargmkesdikirvenvlkicglyafnwpiaalsyggkkrvtiasvlnpeiiildeptagqdfyhynei  
msflielnrggkttiimith  
dmhllseyssrtvvlskgqvadtptvlilndkkiceiaslrqtslfemaeyigisepqklvqlfinhdrkvrq  
>sp|Q99QX2|ICAB\_STAAM  
mkyrklilvlslililpvstldghhianadddspkklkykensa1alnyhrvrkanflnfiyffssskeiknysvsqs  
qfesqikwlskshdakfltl  
keflyykkkgkfkprsvwifddmdetiyeaypilkykipatgfiiitghvgeenfhnlmiskkelkemyktglwefe  
tthdlnhlsknksklmk  
aseatiikdlnksekyltknfkksqktiaypyglmnddklpvikkaglkgygfsleekavtpnsndyypirilisdafeh  
likrwdgfhek  
>sp|Q99R73|CRTP\_STAAM  
mtkhiiviggglgisaairmaqsgysvlyeqnthiggkvrnesdgfgfdlgsiltmpyifeklfeyskkqmsdyvt  
ikrlphqwrstffpdgttdie  
lyegiketgqhna1lsgkqieelqnylnytrridritekyfnygltdlsqiikfhgplnalinydyvhtmqaidkris  
npylrqmlgyfikyvgsss  
ydapavlsmlfhmqqegglwyveggihhlanaleklareegvtihtgarvdniktyqrrvtgvrldtgefvcadyiism  
eviptykylihldtqrlnk  
lerefepassgyvmhlgvacypqlahhnffftenaylnyqqvfhekvlpddptiylvntnkdhtqapvgyenikvlph  
ipyiqdpfttedyakfrd  
kildklekmgldlrkhiiyedvwtpedieknyrsnrgaiygvvadkkknkgfkfpkesqyfenlyfvggsvnpgggmpm  
vtlsgqqvadkinareakn  
rk  
>sp|Q99R75|CRTM\_STAAM  
mtmmdmfnkychkimkkhsksfyafdlpedqrkavwaiyavcrkidssidvygdiqflnqikediqsiekypyehhh  
qsdrimma1qhvaqhkni  
afqsfynlidtvykdhftmfetdaelfgycygvagtvgeltpilsdhethqtydvarrlgeslqlinilrdvgedfdn  
ervyfskqrlkqyevdiae  
vyqngvnnhyidlweyyaiaekdfqdvmdqikvfsieaqpielaariyieildevrqanytlhervfdkrkkaklfh  
einskyhri  
>sp|Q99RE8|Y2485\_STAAM  
mihskk1tlgiclvlliliggciimtkinsrnaikdtfnqtlvnyptknlddfydkegfrdqefdkrdkgtwiinsgm  
yiq1kggalksramvlyin  
rnrtrtakgyflisettedkkgvvhndkkypvkmernriiptkpitdek1kkeienfkffvqygnfkdfkdykdgdi  
syn  
pnvpsysakyqlnnddynv  
qq1rkrydistkrapelklrgsgdlkgssvgskelefnvrnkeenvyfsdginfkpteemneqn  
>sp|Q99RN8|NREC\_STAAM  
mkiviadhdavrtgfsmi1nyqndmevataadgveayqkvmeykpdvlmdlsmppgesgliatskiadsfpetkili  
1tmfddeeylfhvlrngak  
gyilknapdeq111airtyvyketyvdmk1ttslvnefvsnqnqdtanttdpfi1skreleilpliakgygnkeiaek1  
fsvktveahkthimtklg  
1kskpelveyalkk1lef  
>sp|Q99RS0|TCAA\_STAAM  
mkscpkcgqqaqddvqictqcgkhfdrqalyrkstdediqtnnikmrkmpwaigffililililffllrnfnspaq  
kilvnaienndkqkvat11  
stkdnkvdsseeakvyinyikdevglkqfvsdlnkntvhl1nksktsvasyiqtrsgqnilrvskngtryiffdnmsftapt  
kqpvkpktekyefksgg  
kkkmviaeankvtpignfilgtyripamkstengdfagylkfdfrqsnssetvdvtedfeanitvtlkgdtklndsskkv  
tindremafsssktygyp  
qnkditi1sasgkagktfttqtktikasdlkynteit1nfdsediedyvekkekeenslnkklieffagyslannaafnq  
sdfdfvssyikkgssfydd  
vkkrvskgslmm1sspqiidaekhgdkitatvrlinengkqvdkyeleqgsqdr1qliktsek  
>sp|Q99RT8|LYRA\_STAAM  
mknnkisgfwamti1fvffvitma1sim1rdfqsiigvkhfi1fevtdlapliaa1icilvfykkvqlaglkfss1kvi  
er111alilpliliiigmy  
sfntfadsf111qstglsvpithilighilmafvefgfrsylvnivetkmtffasivvg1mysvfsanttygtefaay  
nflytfsfsmilgelirat  
kgrtiyiattfhasmtf1flfseeigdlfsikviaistaivagyig1sl1irgiay1ttrrnlelepnnyldhvnd  
deetnhteaksssnikda  
ektgvatastvgvakndtentvadepsihgtektepqhhi1gnqtesnhdedhditsesvesaesvkqapqsd1tndsn  
edeieqslkepatykedrr  
ssvvidaekhi1ekteeqssdknk  
>sp|Q99S30|RS17\_STAAM

Tsompanidou\_et\_al\_Supplemental\_FASTA\_File

mserndrkvyvgkvvsdkmdkti tvlvetykthklygkrvkyskkykthdennsaklgdivkiqetrplsatrfrivei  
veesvii  
>sp|Q99S77|PTLCB\_STAAN  
mmqk liaqiek gkpffeklsrniylrairdgfisampvilfssifllia yvpnifgfkwdkgmeailmkpnytmglvaf  
lvagttaksltdsfnrkle  
stnqinfistmlaamcgflflaspakdggflsafmgtkglltaflsafvtvivynfcvkrnitikmpkevppnisqvfk  
dlipfsaviiilyaldlvi  
rnsfksnvaegilkfep lftaadwigvtiifgafal fvfvgihgpsivepaiaaityanieanfkl lqagehadkiit  
sgtqmfivtfggatlvv  
pffmfmwmtkskrnkaigrasvptffgvnepilfgaplvl nppvffipfvlapivnwfiklfvevlginsfsvnlpwttp  
gplgimgtgfglwsfvla  
itllivvdii yypflkvydseildeeegrkesndlkekvaanfdtkkadsilaasgvsddaakasniteqtnvlvlcag  
ggtsgllana l nkaaeeyh  
vppvkaaggygahmdimkeyql iilapqvasnyedikqdt rlgiklaktqgaeyikltrdgqaaldfvqqqfen  
>sp|Q99SQ9|SSB\_STAAN  
mlnrtilvgrl trdpe lrttqsgvnvasftlavnrftnaqgereadfiniivfkkqaenvnky lskgs lagvdgrlqtr  
nyenkegqrvyvteviads  
iqfl epknsndtqqdlyqqqvqqrtrgqsqsnnkpvkdn pfanangpieiddndlpf  
>sp|Q99SX1|SDCS\_STAAM  
mayfnghqsmiskryl tfffsksskkkpf sagqlig l ilgp l l fl l t l l f f h p q d l p w k g v y v l a i t l w i a t w w i t e a i p i  
aatsllpivllplghiltp  
eqvsseygndiifl fggfilaiamerwnl htrvaltiinligastskillgfmvatgflsmfvsntaavmimipiglai  
ikeahdlqeantnqtsiqk  
feks l v l a i g y a g t i g g l g t l i g t p p l i i l k g y m q h f g h e i s f a k w m i v g i p t v i v l l g i t w l y l r y v a f r h d l k y l p g  
gqtl ikqkl delgkmkyee  
kvvqti fvlasllwitrfl lkkwevtssvadgtiaifisillfi ipakntekhrriidwevake l p w g v l i l f g g g l a l  
akgisesglakwlgeqlks  
l ngvspiliviviti fvfl ftevtstatatmilpilat lsvavgvhp l l l m a p a a m a a n c a y m l p v g t p p n a i i f g s g k  
isikqmasvgfwnl isai  
i i l v v y y v m p i v l g i d i n q p l p l k  
>sp|Q99T92|SIGS\_STAAM  
mkfndvynkhhki ihhllkky nisyndeyyq l l l i k m w q l s q i y k p s s k q s l s s f l f t r l n y y l i d l f r q q n q l k d v i l  
cennsptlteqptyfnehd  
lrlqdi fkl l n h r e r l w l k l y l e g y k q f e i a e i m s l s l s t i k l i k m s v k r k c q h n f n  
>sp|Q99TD3|ISDH\_STAAN  
mnkhhpk l r s f y s i r k s t l g v a s v i v s t l f l i t s q h q a a a e n t n t s d k i s e n q n n a t t t q p k d t n q t q p a t q p v i t a  
knypaades l k d a i k d p a l  
enkehdigpreqvnfql ldknnetqyyhffs ikdpadvyytkkkaevel d i n t a s t w k k f e v y e n n q k l p v r l v s y s p v p  
edhayirfpvsdgtqelki  
vsstqid dgeetnydytklv fakpiyndpslvksdtdavvtndqsssdasnqtntntsnqntsttnnannqpqattnms  
qpaqpkssanadqassqpa  
hetnsngntndktnessnqsdvnqyppades l q d a i k n p a i i d k e h t a d n w r p i d f q m k n d k g e r q f y h a s t v e p a t v  
ifktgpvie l g l k t a s t  
kkfevyegdkk l p v e l v s y d s d k d y a i r f p v s n g t r d v k n v s s i e y g e n i h e d y d t l m v f a q p i t n n p d d y v d e e t y n  
l q l l a p y h k a k t l e r q v y  
eleklqek l p e k y a e y k k k l d q t r v e l a d q v k s a v t e f e n v t p t n d q l t d l q e a h f v f e s e n s e s v m d g f v e h p f y t  
at l n g q k y v m k t k d d s y w  
kd l i v e g k r v t t v s k d p k n n s r t l i f p y i p d k a v y n a i v k v v a n i g y e g y h v r i i n q d i n t k d d d t s q n n t s e p l n v q  
tggegkvadtvdvaenssta  
tnpkdasdkadvipesdvvkdadnni dkdvdhdvdh l s d m s d n n h f d k y d l k e m d t q i a k d t r n v d n s v g m s s n v d t d  
kdsnkndkviqlahiadk  
nnhtgkaak l d v v k q n y n n t d k v t d k k t t e h l p s d i h k t v d k t v k t e k a g t p s k e n k l s q s k m l p k t g e t t s s q s w w g l  
y a l l g m l a l f i p k f r k e s k  
>sp|Q99TE8|THII\_STAAN  
mkydhllvrygel t l k g s n r k k f v n q l r n n v n k s l k g l d g f v v k g r d r m y i e l e d h a d i n e i t y r l s k i f g i k s i s p v l  
kvektieamsaaaikfagg  
feenstfki dvkradknfpm d t y e l q r e l g g t v l k q i e n v s v n k r a d h e i r v e v r l d a i y m y e e v v p g s g g l p v g t g g k  
t l l m l s g g i d s p v a g m e v m  
rrgv tieaih f h s p p f t s d q a k e k v i e l t r i l a e r v g p i k l h i v p f t e l q k q v n k v h p r y t m t s t r m m m r v a d k l v h q  
igalainngenlgqvasqt  
l h s m y a i n n v t s t p v l r l l t y d k e e i i k s k e i g t f e t s i q p f e d c c t i f t p k n p v t e p n f e k v v q y e s v f d f e e m i n r  
avenietleitsdyktike  
qqtnqlindfl  
>sp|Q99TF4|DHA2\_STAAN  
mkigipreiknnenrvgl spsgvhalvesghtvlvetnagsgsffedvdykeagaeivaeqakvwdvdmvikvkeplese  
ypyfkeglv l f t y l h l a n e  
ekltqalidrkvisiayetvqlpdrssp l l s p m s e v a g r m s a q v g a e f l q k l n g g m g i l l g g v p g v p k g k v t i i g g g q a g  
tnaakialglgadvtildv

Tsompanidou\_et\_al\_Supplemental\_FASTA\_File

npkr1qqldd1fggrvhtimsnplnie1yvkqsd1vigav1pgakapr1vtedmikqmkngsvi1diaidqggi1fett  
ki1thddp1tyikhgvvhy1a  
vanmpgavprtst1a1nna1lpya1mlankgyrea1fksnq1sls1glntykghvtnkgvae1femeyksveea1ql  
>sp|Q99TF5|Y1708\_STAAM  
mtkiskii1delnngg1adaawit1tp1nvyyftgyrsepher1fallikkdgkqvl1fcpkmeveevkas1pftgeivgyldte  
npfsl1ypqtink1lieseh  
1tvarqkql1isgfnvnsfgdvd1tikql1rniksedeiskirkaae1adkcieigvsyl1kegvtere1vvnhieqtikqygv  
nemsfdtmv1fgdhaasph  
gtpgdr1r1ksneyv1fd1lgviyehycsdmtrtikfgepskeaeiy1niv1leaetsaiqaikpgiplkdidhiarni1sek  
gygeyfphr1lghgl1qeh  
eyqdvss1t1nsn1leagm1viti1epgiyvpgvagvri1eddi1vtnegyev1lthyek  
>sp|Q99TG3|ACCA\_STAAM  
m1dfekpl1fei1rnkies1kesqdkndvd1qeeidm1leas1eretkkiytn1kpwdrvqiar1lqerptt1ldyip1ifdsfm  
e1lhgd1rnfrddpam1iggig  
f1ngra1vtvigqrgkdtkdniyrnfgmahpegyrka1rlmkqaekfnr1piftfidtkgaypgkaae1ergqsesi1atn1i  
emas1kvpviai1vige1ggs  
gga1lgigiankv1mlenstysvi1spegaa1llwkdsn1akiaetmki1tahdikql1giiddvis1ep1lggahkdveqqa1a  
1ksafva1ql1ds1les1srde  
iandr1fekfrnig1syie  
>sp|Q99TT5|RPOD\_STAAN  
msdntv1kikkqt1idpt1t1ledvkkql1iekkgkegh1sheeiaek1qnfdi1dsdqmd1ffdq1lndndi1slvnekds1sdte  
k1npsd1sappgvki1ndpv  
rmy1lkeigrv1n1lsaqee1elakrie1ggdevaks1raean1rlvsviakryvgrgm1fld1liqegn1m1likavek1dfnk  
gfkf1styatwwi1rqaitra  
i1adqarti1ripvhmvetink1lrvqrq1l1qd1grdpapee1igeemd1paekvrev1kiaqepvs1etpigeed1dsh1gdf  
i1edqeaqpsdhaaye1llk  
eq1ledv1dt1tdreenv1rl1rfg1ddgrtrt1leevgkvfgvtr1erir1qieaka1rk1lrhpsrskr1kdfmd  
>sp|Q99U14|RS1\_STAAM  
mteefnes1m1ndikegdkvtge1vqqvedkqvvhing1gkfn1gii1pisi1q1sthi1dspsev1vkegdeveayvtkvef1deen  
etgay1lsrrq1leteksys  
ylqek1dnnei1eakvte1vkvkg1lvvdvqrgfvpa1s1istdfiedfsvfdgqt1irikve1dpennrv1lsrkave1qee  
ndakkdq1ll1qs1negdvi1h  
gkvar1l1tqfgafid1iggvdg1lvhvse1shehvqtpeevvsig1qdvkviks1idrdteris1sikdt1lptpfenikgqf1he  
ndvi1egvvvr1anfgafve  
i1apgvqg1lvhisei1ahkhigt1pgeve1lpgqqv1nvki1lgideener1vs1ikat1pnedvves1dpsttkay1leneed1npt  
i1gdm1gd1kl1kn1kl  
>sp|Q99U54|EBHA\_STAAN  
mgn1lq1taindks1gt1lasqnf1ldadeqkrnaynqaisa1eti1nkqtgpntaktaveqa1lnnvnsakha1ngtqn1lnnakq  
aa1taingasd1nqkqkda  
1kaqangaqr1vsnandvqrnate1ntamgq1lqhai1adk1tnt1asskyvna1dstkqnayttkvtnaehi1sgtptv1tpps  
ev1taaanq1vnsakqel1ngd  
er1rvakq1nanta1da1l1tq1lntppkak1keqv1gqanr1ledvqsvq1tngqs1lnnamkg1lrd1sianettv1kasqnytdas1pn  
nq1stynsavs1nakgi1inqt  
nnptm1dtsai1tqattqvnnakng1ngaen1rnaq1ntakqn1nt1sh1ltnnqksai1ssqidraghv1sevtaaknaate1na  
qmgn1leqai1hdqntv1kqgv  
nftdadk1krday1navsraeti1nktqgantsk1qdveaa1iqnvtsakna1ngdqnv1tnaknaakna1lnn1tsinnaqkr  
d1l1ttki1dqattv1agveavs  
ntgtq1l1ntaman1lqngi1ndkant1lasenyhdads1dkktaytqav1tnaeni1lnknsgsn1l1dkaavena1lsqvt1nakga1ng  
nh1leqaks1nantt1ing1lq  
h1l1ttaqkdk1lkq1vqqaq1nvagvdtv1kssant1ngamgt1l1nsiqdntat1kngqny1l1daternk1tnynnavdsangvina  
ts1n1pnmdana1inqiatqvt  
st1kna1ldg1thn1l1tqakq1tatna1idgatn1lnkaqkda1lkaqvtsaqr1vanvtsi1qqtane1ntamgq1lqhg1iddenat1kqt  
qkyr1dae1qs1kktay1dqava  
aaka1l1nkq1tgsns1dkaavdra1lqqvt1stkda1ngdak1laeakaaarq1n1lgt1l1nhi1tnaqrta1legqin1qattv1dgvntv  
k1tnant1l1dgamns1lqgain  
dkdat1l1rnqny1ldadeskr1naytqav1taaegi1lnkq1tggntskad1vdna1l1navtrakaa1l1ngaen1l1rnaktsat1nting1l  
pn1l1tq1lqkdn1lkhqve1qaq  
nv1vgvngv1kdkgnt1ntamga1l1rtsiqdnt1tktsqny1ldas1dsnknnyntav1nnangvina1tn1n1pnmdana1indmanqv  
nt1tkaa1l1ngaqn1laqak1tn  
at1nt1innaq1d1nqkqkda1lktqv1nnaqr1vsd1annvqhtate1ngamta1lkaai1adkertkasgny1vnadqekrqay1dskv  
tnaeni1ng1tpnat1l1tvnd  
vnsaasq1vnaakta1l1ngdnn1lrvakehan1ntidg1laq1l1nnvqkak1keqvqsatt1ldgvq1tvknssqt1ntamgq1l1rd1s  
aneati1kagqnytdas1pnn  
rneydsav1taakai1inqtsn1ptmepnti1tqatsqvt1tkeha1l1ngaqn1laqak1taknn1lnn1tsinnaqkda1l1trnidga  
ttv1agv1ngetakate1lnna  
mhs1lqngi1ndetq1tkqtqkyl1daeps1kksaydqavnaakai1l1tkasq1nv1dkaaveqa1l1qnvst1kta1l1ngdak1l1neaka  
aakq1l1gt1l1thi1nnaqrna  
l1dnei1tqatn1veg1vntv1kakaq1ldgamgq1lets1rdkdt1l1qsqny1qdaddak1rtaysqavnaaati1lnk1taggnt1pka

dveramqvavtqantaIngi  
qnlerakqaantainasdlntkqkealkaqvtsagrsvsaangvehtateIntamtaIkraiadkadtkaasgnyvnadan  
krqaydekvtaaehevsgt  
ptptltpsdvtnaatqvtnaktqIngnhnlevakqnantaidgltsIngpqkaklkeqvgqattlPnvqtvrdnaqtInt  
amkglrdsianeatikagg  
nytdasqnkqndynnavtaakaiigqtspsmiaqeinqakdqvtaqqalngqenlrtaqtnakqhInglSdltnaqkd  
aakrqjegathvnevtqag  
nnadalntamtnlknigdqntikqgvnftdadeakrnaytnavtqaeqilnkaqgpntakdgvetaInqvqrakneIng  
nqrvanakttaknalnlt  
sinnaqkaalksqiegattvagvqvstmaseIntamsnlqrgindeaatkaaakyteadrkqtayndavtaaktlldk  
tagsndnkveqalqrvn  
taktaIngdarIneakntakqqlatmshlnaqkanlteqiergttvagvqgiqanagtlInqamnlrqsiasdatkss  
edyqdanadInayndavt  
naegisatnnpemnpdtinqkasqvnsaksaIngdeklaaakqtaksdigrldInnaqrtaanaevdqapnlaavtaa  
knkatsIntamgnlkhal  
ekdntkrsvnytdadqpkqqaydtavtqaeaitnangsnanetqvqaalngInqakndIngdnkvaqaketakraLasys  
nInnaqstaatsqidnatt  
vadvtaaqntaneIntamgqlngindqntvkqgvnftdadqgkdaytnavtnaqqildkangqnmkaqveaalnqvt  
taknalngdanvrqaksda  
kanlgtlthlnnaqkqdltsqiegattvngvsvkkaqldgamqrlesaiankdqtkasenyidadptkktafdnait  
qaesylnkdhgtnkdkqav  
eqaigsvtstenaIngdanlqcakteatqaidnlTqIntpqktaIkqqvnaaqrsvsgvtdlksatslnnamdqlkqaig  
dhdtivaggnytnaspdq  
gaytdaynaaknivngspnviTnaadvtaatqrvnnaetsIngdtnlatakqqakdalrQmthlsdaqqsitgqidsat  
qvtgvqsvkdnatnldnam  
nqlrnsiankdevkasqpyvdadtdkqnayntavtsaeniinatsqptldpsavtqaanqvntnktaIngaqnlankkqe  
ttaninrlshlnnaqkqdl  
ntqvtnapnistvngvktkaeqldqamerlingiqdkdqvkqsvnftdadpeqqtaynnavtaaaeniinqangtnanqsq  
veaalstvtttkqalngdr  
kvtdaknnanqtlstldnlnnaqkgavtgninqahtvaevtqaiqtaqelntamgnlkslnkdttlgsqnfadadpek  
knayneavrnaeniInkst  
gtnvpkdqveaamnvnttkaaIngtqnleakqhantaIdglshlnaqkealkqlvqqsttvaeeagqneqkannvdaa  
mdklrqsiaadnatkqngn  
ytdaspnkkdaynnavttaaggiidqttntpsldptvinqaagqvstsknalngnenleaakqqatqslgsldnlnnaqkqa  
vtngingahtvdeanqikq  
naqnlntamgnlkqaiadkdatkatvntftdadqakqqayntavtnaeniiskanggnatqteveqaiqqvnaakqalngn  
anvqhakdeatalinnsnd  
lnaqkdaIkqqvqnavttagvnnvkqtaqelnnamtqlkqgiadkeqtkadgnfvnadsdkqnaynqavakaealisgt  
pdvvtptseitaaInkvtq  
akndIngnlnlatakqnvqhaIdqlpnlnqaqrdeyskqitqatlvpnvnaiqqaattlndamtqlkqgiankaqikgse  
nyhdadtdkqtaydnvntk  
aeellkqttntmpntiqqalTkvnDtnqalngnqkladakqdakttlgtldhlnDaqkqalTtqveqapdiatvnnvk  
qnaqnlnamtnlnnalq  
ktetlnsinftdadqakddytnavshaegilskangsnasqteveqamqrvneakqalngndnvqrakdaakqvitan  
dlnaqkdaIkqqvdaaqt  
vanvntikqtaqdlInqamtqlkqgiadkdkangfnvnadtdkqnaynnavahaeqiisgtpnanvdpqqvvaqalqqvn  
qakqdlngnlnlvakdna  
ntaidqlpnlnqppktaIkdvshaelvtgvnailqnadalnnamgtlkqgiqansqvpqsvdftqadqdkqqaynnaan  
qaqqiangtptpvlapdty  
tkavttmqakdaIngdeklaqakqdaInldtlrdlnqpprdaInrqinqaqaLatveqtkqnaqnvntamgnlkqgia  
nkdtvkasenyhdadvdkq  
taytnavsqaegiiinqttntpddiTraItqvtdaknsIngeaklatekqnakdavsgmthlnDaqkqalKggidqsp  
eiatvngvktatsldqam  
dqlsqaindkdqiladgnylnadpdkqnaykqavakaealInkqsgtnevqaqvesitnevnaakqalngndnlanakqq  
akqqlanlthlnDaqkqsf  
esqitqaplvtdvttingkaqtlDhameIlrnsvadnqttlasedyhdDataqrqndynkavtaanniinqttsptmnpdd  
vngattqvntkvaldgde  
nlaakqqannrldqldhlnnaqkqqlqsqitqssdiaavnghkqtaesIntamgnlinaiadhqaveqrgnfinadtdk  
qtayntavneaaaminqkt  
gqnanqteveqaitkvqtlqalngdhnlvaktntatqaidvltlnDppktaIkdvtaatlvtavhqiEqnantlnqa  
mhglrqsiaqnaatkansk  
yinedqpeqqnydqavqaanniineqtatldnnaInqvaatvnttkaalhgdkvlqndkdhakqtvsqIahlnnaqkhme  
dtlidsettrtavkqdlte  
vqalDqlmdalqqsiadkdatrassayvnaepnkqaydeavqnaesiiaglnnptinkgnvssatqavissknaIdgve  
rIaqdkqtagnslnhldqI  
tpaqqaalenqinnatrrdkvaeiiaqaqalneamkaIkkesikdqpqteasskfinedaqkdaytqavqhakdlinktt  
dptlaksiiDqatqavtda  
knnlhgdqklaqdkqrattetlnlnsnlntpprqaalenqinnaatrgevaqklteaqaInqamealrnsiqdqqttesgsk



Tsompanidou\_et\_al\_Supplemental\_FASTA\_File

finedkppkdayqaavqna  
kdlingtgnptldkaqveqlthafkqakdnlhgdqkladdkqhavtdlnqlnglnnpqrqalesqinnaatrgevaqkla  
eakaldqamqalrnsiqdq  
qqteagskfinedkppkdayqaavqnakdlnqgtgnptldksqveqltqavttakdnlhgdqklardqqqavttvna1pn  
lnhaqqqtldainaaptr  
tevaqhvqtateldhametlknkvqvntdkaqpnysteaddkkaevdqa1qaaqsitdptngsnankdaveqaltklqe  
kvnelngnervaeaktqak  
qtidqlthlnadqiatatknlqpiavelvdqatqlnqsmdq1qqavnehanveqtidytqadsdkqkaykqaiad  
aenvlkqnankqqvdqalq  
nilnakqalngdervalaktngkhdidqlnalnnaqqdgfkggridqsndlnqiqivdeakalnramdq1sqeitgnegr  
tkgstnyvnadtqvkqvdyd  
eavdkakqaldkssgnltaeqviklndavtaakka1ngeerlnnrkaealqrlldqlthlnnaqrqlaiqqinnaetlnk  
asrainratkldnamgavq  
gyideqhlqvisstnyinaddnlkanydnaianaaheldkvqgnaiakaeaeqlkqniidaqnalngdqnlanakdkana  
fvns1nglnqqqqd1ahka  
innadtvsdvtdivnqid1ndametlkh1vdneipnaeqtvnyqnaddnaktnfddakr1ant1lnsdntvndingai  
qavnda1hn1ngdqrlqda  
kdkaiqsinqalanklkeieasnatdqdkliaknkae1ansiinninkatsnqavsqvqtagnhaieqvthaneipkaki  
dankdvdkqvqalideidr  
npnltdkekqalkdrinqilqqghndinnaltkeeieqakaqlaqa1qdikdlvkakedakqdvdkqvqalideidqnpn  
1tdkekqalkdrinqilqq  
ghnginnamtkeeieqakaqlaqa1keikdlvkakenakqdvdkqvqalideidqnpnltdkekqalkdrinqilqqghn  
dinnamtkeeieqakaqla  
qa1qdikdlvkakedaknaikalanakrdqinsnpdltpaqkaka1keideaekralqnvnaqtidqlnrgln1glddi  
rnthvwevdeqavneife  
atpeqilvngelivhrddiiteqdilahn1ldqlsaevitdpstatisds1takvevt1ldgskvivnvpkvveke1s  
vvkqqaiesienaaqqkid  
einnsvt1tleqkeaaieavnlkqqa1dhvnnapdvhsveeieqqeqayieqfnpeqftieqaksnaiksiedaiqhmi  
deikartdltdkekqeaia  
klnqlkeqaiqaiqraqsiseiteqleqfkaqmkaanptakelakrkqea1srikdfsnekinsirneigtadekqaam  
nqineiv1letirdinnaht  
1qqvea1nngiarisavqivisdrakqssstgnesnsh1tigygthanpfnssstighkkkldeddd1dplhmrhfsnnf  
gnviknaigvvgisgllas  
fwffiakrrrkedevee1eirddnksiket1ddtkh1p11fakrrrkedeedvtveekds1nnges1dkvkhtpff1pk  
rrrkedeedvevtentde  
kvlkdnehsp11fakrrrkedeedvettsieskdedvp11lakkknqkdnqskdkksasknts1kvaakkkkkk1skknk  
>sp|Q99U73|ARLR\_STAAN  
mtqilivedeqnlarf1le1elthenynvdteydgqgd1dka1shyyd1iild1mlpsingleicrkiqqqstpiiiita  
ksdydkvagldygaddy  
vkpfdieel1arirailrrpqkdiidvngt11kvtvngaeie1tkteyd1ly11laenknhvmqreqilnhvwgynseve  
tnvvdvyirylnklkpyd  
rdkmietvrgvgyvir  
>sp|Q99U74|ODO1\_STAAN  
mtnerkevseapvnfgan1glm1dlyddf1qdpssvped1qvlfstikrvmlidnirqyghlkadiypvnpkrkhvpk  
leiedfd1dqqtlegisag  
ivsdhfadiydnayea1lrmekrykqpi1afeythinntergwlkrrietpykvt1nnekra1fkq1ayvegfekylhk  
nfvgakrfsiegvda1vpm  
1qrtit1iaakegikniqigmahrgr1nv1thvlekyemmi1sefmhtdpmkflpedgslq1tagwtgdvkyhlggiktt  
sygtmqrialannpshlei  
vapvvegrtraaqddtqragapttdhhkampiiihgdaaypgqginfetm1gn1kgystggs1hiitnrigfttepid  
arsttystdvakgydvpif  
hvnaddveatieaidiamefrkefkhkdvid1vgyr1fghnemdepsitnppvpyqnikhdsveyvfgkl1vnegvised  
emhsfieqvqkelrqahdk  
inkadkmdn1pdmekpaela1plqadeqsftfdh1keindal1typdgn1lkk1nkvl1ekrhpfnkedglvdwaqaeql  
afat1lqdgtpir1tgqds  
ergt1fshrhav1hdeqtgetytp1lhhvdpdqatfdihnspl1seaavvgfeygynvenkksfniweaqygd1fanmsqmi1fd  
nfl1fssrskwgersg1t1f  
1phayegggpehssar1erflq1laennctvvn1ssssnyfh11raqaas1dseqmrv1vmspks11rnktvakpidef  
tsggfep1ltesyqadkvt  
kv1latgkmfid1keal1aknpdesv11vaier1ypfpeeeiea1laqlpk1leevswvqee1pknggaw1yvypvkv1vad  
kyd1syhgriqraapaegd  
geihk1lvqnki1ena1knn  
>sp|Q99U87|Y1398\_STAAM  
mnel1efvtkhrrh1lqhpe1s1hefettayikaf1ds1nikydc1letgviay1legngshtiayradid1alpileendvp  
yrsqsdhvmhacghdght  
a1m1fvqrckdmqdag1lpqnvvfi1fqaee1tggan1likagafdkypieavf1gihvnpfadegiavirdeeitasate  
yrf1l1tg1sshvadkeqah  
scgealqhv1tqisq1qqfh1ng1krnivhighfkageaintvpsngylegtirtydidd1tivknqmhkiaesvkl1fn

Tsompanidou\_et\_al\_Supplemental\_FASTA\_File

vecevkfaegyptinspk  
lrtqiedalikadlnvydkptpflfgedfsfygqqlapayfvfigtrnedkgfvtglhtshlnfdekalinvvnyfenll  
nyykev  
>sp|Q99UM1|TOP1\_STAAM  
madnlvivespakaktiekylgkkykviasmghvrdlprsqmgvdtednyepkyitirgkpvvkelkkhakkaknvfla  
sdpdregeaiawhlskile  
ledskenvvfneitkdavkesfknpreiemnlvdaqqarrildrlygynispvlwkkvkkgl sagrvqsvalrlvidre  
neirnfkpeeywtiegefr  
ykkskfnakflhyknkpfklkttkdvkitaaldgdqfeitnvtkkekrnpanpfttstlqqeaarklnfkarktmmva  
qqlyegidlkkqgtiglit  
ymrtdstrisdtaeakqyitdkygesytskrkasgkqgdqdaheairpsstmrtpddmksfltkdqyrlykliwerfv  
asqmapaildvtvsliditgg  
dikfrangqtikfkgfmllyvetkddssekenlplkleqgdktvatqiepaqhytqpppry tearlvktleelkigrps  
tyaptidtiqkrnyvkl  
krfvptelgeivheqvkeyfpeiidveftvmetlldkiaegditwrkvidgffsfskqdvraeeemekieikdepage  
dcevcgspmvi kmgrygkf  
macsnfpcrntkai vksigvkcpkndgdvverkskkrvfygcskypecdfiswdkpi grdcpkcnqylvenkkgtt  
qvicsncdykeaaqk  
>sp|Q99UM3|LYTN\_STAAM  
mfiyyckecsimmkqskvrysirkv sigilsisigmflalgmsnkayadeidkskdftrgyeqnvfakse lnanknttk  
dkiknegavktsdtslkld  
nksaisngneinqdikisntpknssqgnnlvinneptkeikianleaqnsnqkktknvtnyfygysfreapktqi ytv  
kkgdtsaiaklykttvsn  
iqntnnianpnli figqklkvpmtplvepkptvssnksnsstlnylktenrgwdfdgsywgqcfdlvnyvnhly  
ghglkgygakdipyannfn  
seakiyhntptfkaepgdllvvsgrfgyggyghtaivlngdydgklmkfqsldqnwnngwrkaevahkvvhnyendmifi  
rpfkka  
>sp|Q99UN8|FABD\_STAAM  
msktaiifpggaqkvmaqdlnfnndqateiltsaaktldfdiletmftdeegklgetentqpal lthssallaalknl  
npdftmghslgeysslva  
dvl sfedavkivrkrqqlmaqaftvgvsgmaavlgldfdkvdicks lssddkiepanincpgqivvsghkalidelve  
kgkslgakrvmplavsgpf  
hsslmkvi eedfssyinqfewrdakfpvqvnaqgetdkeviksnmvkqlyspvqfinstewlidqgvdhfieigpgkv  
lsglikkinrdvkltsiq  
ledvkgwnend  
>sp|Q99US8|Y1187\_STAAM  
mndnfkkqphli yee llqqgitlgi ttrgdgl sdypknafnmaryidrrpynitqhqlqlaeieafdrknwvfiqthe  
nkvacitkddigtntidtl  
dalhgidamytydsnvl ltmcyadc vpyfystkhhfialahagwrgtyteivkev lkhvnfdlkd lhvvigpstssye  
inddiknkfetl pidsany  
ietrgrdrhgidl kkanael lnyygvpeniyttayatsehlelffsyrl ekgqtgrmlafigqq  
>sp|Q99UZ6|Y957\_STAAM  
mtkyt fkpkd fka fnevgl darmeal neyirpqlhelgeyfsdfftsqtgetfyphvakharrsvnapkdtwvafatskr  
gykm lphfqigmfedqlfv  
mfgimheakdkatrakvferkfka iqq lpddyrvcldhmkpdkpfikld tddd lkeai qrainvkkgeffiaraitp qdk  
rlksdkafialeetfdqf  
lpfysa  
>sp|Q99V34|FOLD\_STAAM  
mvaki ldgkqi akdyrqgl qdqvael kekgtfplsvilvngd gasqsyvrskkkae kigmiseivhleete eevln  
elnrl nndsvsgilvqvp  
l pkqvseqkileainpekdvdfhpinigklyideqtfvpctplgimeil khadidleaknavvigrshivgqpvsklll  
qknasvti lhrsksdmasy  
lkdadvivsavgkpslvtkdvvkegavi idvgntpdengk lkgdvdydavkei agaitpvpggvpl titmvlnntllae  
kmrrgids  
>sp|Q99VB5|CLPB\_STAAM  
mdinkmtyavqsalqqavel sqqhlqnieieailsaalneseslyksileranievdqlnkayedkln tyasvegdniq  
ygqyisqqanqlitkaesy  
mkeyedeyismehilrsamidqttkhyinnkvevikei ikkvrggnhvtsqnpevnyealakygrdlveevrqgkmdpv  
igrdeeri rntiril srktk  
nnpvligepvgktaivegl aqrivkkdvpe lldktvfeldl salvagakyrgefeerlkavl kevk esdgriil fide  
ihmlvgagktdgamdagnm  
l kpm large lhcigattlneyreyiekdsalerrfqkvavsepdv edtisilrglkeryevyhgvr iqdralvaaaelsd  
ryitdrflpdkaidlvdq  
catirtemgsnpteldqvnrrvmql eieesal knesdnaskqr lqelqee lanekekqaalqsrvesekekianlqekra  
qldesrqaledagtnnlle  
kaaelqygtipql ekelre lednfqdegedtdrmi revvtdee igdivsqwtgipvsklveterekl lhl sdi l hkrvv  
gqdkavdlvsdavvrag  
ikdpnrpigsflflgptgvgktelekslaas lfdsekmi ridmsey mekhavsrligappgyighdeggqlteavrnrp

Tsompanidou\_et\_al\_Supplemental\_FASTA\_File

ysvilldevekahtdvfnv  
llqildegrrtdskgrsvdfknti i imtsnigsqvl lenvketgeitstekavmtlnayfkpeilnrmddivl fkp ls  
iddmsmi vdkiltqlnir l  
leqrisievsddakawlggeayepqygarplkrfvqrqietplarmmikegpeggttikvlnsdnntfnvekihe  
>sp|Q99VB6|OTRF1\_STAAM  
mktkgftkykkmrympgldglraiavlgiiiyhlnkqwl tggflgvd tffvisgylitslllkeyddtgiiklksfwir  
rlkrllpavivllmvgta  
tlllksdniirvkhdiaaifvsnwwyiakdvnyfeqfsfmp lkh lws laieeqfyiffvilvtllltikkrykigfi  
fwgvsii slg lmmfiysin  
gdhsrvyfgtdtr lqtlllgvilaf lwp p fklkndppkvvkyvidsiglsfivlillffi indetnwi ydggyflisil  
tlfiiasvvhpstwiakif  
snpvlvfigkrsyslylwhfavisfvhsyyvdgqipvyvyfidisl tiifael syrfi etpfrkegikalnrpsyipqf  
irmaivvtllipfmlilvg  
afnkyygkdi igekandti ednyl mriapidnihidglvsekkkesdvy nnikplligdsvmvdigesfkssvpksr  
idgkvgrqlyqt lplvkan  
ysqykkssdqvvl e lgtngdftvkql d d l l nqfgkak i y l ntrvpriyeavnrl ladaakrksnvt lidwnkrsqghs  
eyfapdgvhleykgv lalk  
deilka lkkk  
>sp|Q99VC0|CDR\_STAAM  
mpki vvgavaggatcasqir r l dkesdii i fekdrmsfancalpyvigevedrkyal aytp ekfydrkqitv ktyhe  
viainderqtvtvl nrktn  
eqfeesydklil spgasans l g f e s d i t f t l r n l e d t a i d q f i k a n q v d k v l v i g a g y v s l e v l e n l y e r g l h p t l i h r  
s d k i n k l m d a d m n q p i l d e  
l d k r e i p y r l n e e i d a i n g n e i t f k s g k v e h y d m i e g v g t h p n s k f i e s s n i k l d r k g f i p v n d k f e t n v p n i a i g d i  
atshyrhvd l pasvplawg  
ahraasi vaeqi agndti e f k g f l g n n i v k f f d y t f a s v g v k p n e l k q f d y k m v e v t q g a h a n y p g n s p l h l r v y y d t s  
nrqil raaavgkeg adkri  
dvl smammnql tvdel tefevay appy shpkd l i n m i g y a k  
>sp|Q99VJ4|CLFA\_STAAN  
mmkkkkehha i r k k s i g v a s v l v g t l i g f g l l s s k e a d a s e n s v t q s d s a s n e s k s n d s s s v s a a p k t d d t n v s d t k t s s  
ntnngetsvaqnpaqqett  
qsstnatteetpvtgeat t t t t n q a n t p a t t q s s n t a e l v n q t s n e t t s n d t n t v s s v n s p q n s t n a e n v s t t q d t s  
teatpsnnesapqntdasn  
kdvsqavnps t p r m r a f s l a a v a a d a p a a g t d i t n q l t d v k v t i d s g t t v y p h q a g y v k l n y g f s v p n s a v k g d t f k i t  
vpkel n l n g v t s t a k v p p i  
magdqvlangvi dsdgnviyftdyvdnkenvtan i t m p a y i d p e n v t k t g n v t l t t g i g t n t a s k t v l i d y e k y g q f h n  
l s i k g t i d q i d k t n n t y r q  
tiyvnpsgdnvvl pal t g n l i p n t k s n a l i d a k n t d i k v y r v d n a n d l s e s y y v n p s d f e d v t n q v r i s f p n a n q y k v e f  
ptdddqi ttpyi vvvng hi  
dpastgd l a l r s t f y g y d s n f i w r s m s w d n e v a f n n g s g s g d g i d k p v v p e q p d e p g e i e p i p e d s d s d p g s d s g s d s n s  
d s g s d s g s d s t s d s g s d s a  
s d s d s a s d s d s a s d s d s a s d s d s a s d s d s a s d s d s a s d s d s a s d s d s a s d s d s a s d s d s a s d s d s d s d  
s d s d s d s d s d s d s d s d s  
d s d s d s d s d s d s d s d s d s d s d s d s d s d s d s d s d s d s d s d s d s d s d s d s d s d s d s d s d s d s d s d s d s  
d s d s d s d s d s d s d s d s d  
s d s d s d s d s d s d s d s d s d s d s a s d s d s d s e s d s d s d s d s d s d s d s d s d s e s d s d s d s d s d s e s d s d  
s d s d s d s a s d s d s g s d s  
d s s d s d s d s t s d t g s d n d s d s d s n s d s e s g s n n n v p p n s p k n g t n a s n k n e a k d s k e p l p d t g s e d e a n t s l i w g l l a  
l g s l l l f r r k k e n k d k k  
>sp|Q99VK3|SECG\_STAAM  
mhtflivll i d c i a l i t v v l l q e g k s s g l s g a i s g g a e q l f g k q k q r g v d l f l n r l t i i l s i l f f v l m i c i s y l g m  
>sp|Q99VK8|Y769\_STAAM  
mkqylitgg tgmvgqlvneikk sdshiti ltrhdqisndkki syvnwaksgwehkvpqnidvvinlagatlnkrwtpey  
kqtlmlsr i q s t q a l y e l f  
ksrnkapkv lfnasatgyppd l fmsytevykt l p f d f l s d i v y q w e r f a q q f e q l g t r v v i g r f g m i l s n e g g a l q t m k  
lpykyi ygk l g s g q q w y s  
wihindli qai l f l i n n e s a s g p f n l t a p i p e r q n l f g y t l a r a m h k p h e t w a p s l a m r l i l g m s t v v l d t q k v l p n k i  
qal g f q f k y s n l k m a l e d l  
ike  
>sp|Q99VP7|Y726\_STAAM  
menkythgv lfyhehsg lkninqgigevtta lssickh lsiqlsenegdi ikycqeiktknyakdvdi lfilggdgtvne  
lingvmshdlqlpigi lpg  
gtfndftkt lniapnhkqaseqmi saqvgytdvikinnqyalnfvg lglivqnaenvqdgs kdi fgk l syigstvtk lln  
ptqfnyqlsiddktyset  
tmiltangpfiggsripltd l spqdelntfi fneqsfsi lndi fkkrdsmmwneitqgiehipgkksisl ttdpamkvdi  
dgeisletpidievipnai  
qlltvnd l  
>sp|Q99VY9|MNHD2\_STAAM



Tsompanidou\_et\_al\_Supplemental\_FASTA\_File

mtilttlikednhfqdlnqvfqgantlvgtlspasakvtmiaekyaqsnqqlllitnnylqadkletdllqfidaelyky  
pvqdimteefstqspqlms  
erirtlalaqgkglfivplnglkkwltpvemwqnhqmtlrvgedidvdqflnklvnmgykresvshigefslrggii  
difpligepirielfdtei  
dsirfdvetqrskdnieevdittasdyiiteevirhlkeelktayentrpkidksvrndlketyesfklfestyfdhqi  
lrrlvafmyetpstiieyf  
qkdaiiavdefnricketeesltvesdsfisnieesngngfigqsfikeyddfetliegypvtyfslfattmpiklnhiikfs  
ckpvqqfyggydimrsefq  
ryvnqnyhiivlvetetkvermqamlsehipsitklhrsmssgqaviegssegfelpdmgllviterelfkskqkqk  
rkrtkaisnaekiksygd  
nvgdyihvhhgvgrylgvetlevgqthrdyiklqykgtdqlfvpvdqmdqvqkyvasedktpklnklggsewkktkakv  
qqsvediaeelidlykere  
maegyqygedaqettfeldfpyeltpdqaksideikddmqksrpmrdllcgdvgygktevavraafkavmegkqvaflv  
pttilaqghyetliermqd  
fpveiqlmsrfrtpkeikqtkeglktgfvdivvgthklksdiqykdllivdeeqrfgvrhkeriktikhndvltlt  
atpiprthmsmlgvrdls  
vietppenrfpvqtyvleqnmsfikealerealsrdgqvfylnkvqsiyekreqlqmlmpdaniavahgqmterdleetm  
lsfinneydilvtttiie  
gvdvnpantliiedadrfglsqlyqlrgrvgrssrigyayflhpankvltetadrlqaikeftelgsgfkiamrdlnir  
gagnllgkqghfidtvgf  
dlysqmleeavnkrgikepesevpevevdlnldaylpteyianeakieiykklrktetfdqiidikdelidrfndypv  
evarlldiveikvhalhsg  
itlikdkgkiiidihlsvkatenidgevlfkatqplgrtmkvgvqnnamtitltkqnqwlslkflvkcieesmrisdea  
>sp|Q99WC3|RECR\_STAAM  
mhypepisklidsfmlpgigpkaqrlafhtlmdkeddvqfakalvdvkrelytcsvcghitendpcyicedkqdrds  
vicveddkdviamekmre  
ykglyhvlhgsispmdgigpedinipslierlksdevselilampnlegestamyisrlvkpigikvtrlaqglsvggd  
leyadevtlskaigrtem  
>sp|Q99WF7|Y445\_STAAM  
meyikkialymsvllliifiggcgmkeeqkkeantnktdskeekikksfaktldmypi knleelydkegyrdgefekgd  
kgmwtiytdfaksnkpgel  
snegmvlyldrnrtrtakgyfvrtyfyrkdklprdknykvemknnkiilldkvedpnllkrienfkffgqyanlkelknys  
ngdvsinenypsdyvkykm  
snkdenvkqlrsryniptdkspvlkmhidgnlkgssvgrkleidfskrenshlsvidsldyqpakvdeder  
>sp|Q99WF8|Y444\_STAAM  
mksikriglclisllliifatscgsnkitgdskeeqikksfaksldkyptenleefydkegyrdgefekddkgtwlirse  
mkiqlkgenlesrgavieid  
nrnrtrtakgnyivrevvedsdgmthnhtkrypvmennkmiplksiddekvkkeieefkffvqygnfkelenykedevsy  
npevpisyagylknsdyn  
veqlrkryniptqkapklllkgsgnlgkssvgyknieftfvenkeeniyftdsyfnpsedk  
>sp|Q99WG5|Y437\_STAAM  
mgylkklalafisviiigifiigcdsssdtaekakedskeeqikksfaktldmypi knledlydkegyrdgefkkgdkgw  
tlltsfsksnkpgeiddeg  
mvlylnrntkktgyfvrnknyyddisknqnekkyrvelknkiilldnvedeklkqkienfkffsqyadfdlknyqdg  
itnenvpryaeyklnns  
dtnvkkldritypitkkapiklhidgdikgssvgykkieyfkfskvkdqettlrdylnfgpsdeds  
>sp|Q99WT7|ESXB\_STAAM  
mggykgikadggkvnqakqlaakiakdieacqkqtqqlaeyiegsdwegqfankvkdvllimakfqeelvqpmadhqkai  
dnlsqnlakydtsikqgl  
drvnp  
>sp|Q99WU3|ESAA\_STAAM  
mkkknwiyalivtliiiiavsmiffvqtkygdqsekgsqsvsnknknhiaivnedqpttyngkkvelgqafikrlane  
knykfetvtrnvaesglkn  
ggyqvmivipenfsklamglaktpskislqyktavgqkeevakntekvvsnlndfnknlveiylltsiidnlhnaqknv  
gaimtrehgvnksfsnyll  
npindfpeiftdtlvsisankditkwfqtynksllsandsdfrvntdynvstliekqnsldfdehtamdkmlqdyksqk  
dsvelndyinalkqmdsqi  
dqqssmqdtgkeeykqtvkenldklreiiqsqespsfsgmiedyrkqlteslqdelannkdldalnsikmnaqfaenl  
ekqlhddivkeptdtttfi  
ynmskqdfiaagleneankyeaivkeakrykneynlkkplaehinltdydnvaqdtsslindgvkvqrtetiksndin  
qltvatdphfnfegdikn  
gkkydikdqsvaldtsnkeykevngvaklkkdaekdfldkktmhlqllfgqanrqdepndkkatsvvdvtlnhnlmgrl  
skdalsqqlsalsrfdahy  
kmytdtkgredkpfndkrliidmmvdqvindmesfkddkvavlhqidsmeensdkliddilnnknttknkedisklidql  
envkktfaeepqepkidgk  
kndefntmssnldeksrisestqllsdtqesktiadsvsgqlnqldnvnklhatgralgvrandlnrqmakndkdne  
lfakefkklvlnskdgdrg  
nqalkafmsnpvqkknlenvlanngtevisptlflvllmyllsmi tayifysyerakgqmnfikddyssknhlwnnvits

Tsompanidou\_et\_al\_Supplemental\_FASTA\_File

gviqgtglvegllivgliam  
nkfhvlagyrakfjlmviltmmvfvlinty1l1rqvksigmflmiaalglyfvamn1kaagqgvtnkisp1syidnmffn  
y1naehp1glalviltvlv  
iigfvlnmfikhfkkerli  
>sp|Q99X99|SBNA\_STAAN  
mieksqachds1l1dsvqgtpmvqlhq1fpkhevfa1kleympnggsmkdrpakyyiehgikhg1itenth1iestsgn1gi  
alamiakikgl1k1tcvvdv  
kisptn1ki1ksyganvemveepdahggy1mtriakvqellatiddaywinqyanelnwqshyhagatteivetikpidy  
fvapvsttgsimgsrkik  
eghpnaiqvavdakgsvifgdgkpinre1pgigasrvpeilnrseinqvihvddyqsalgrcklidyegifaggstgsia  
aieqlitsieegativtil  
pdrqdry1d1vysdtw1ekmksrqgvkse  
>sp|Q99XF3|WALR\_STAAM  
markvvvddekpiadi1efn1kkegydvycaydgdavd1iyeepdiv1ldim1pgrdgmevcrevrkkyempiim1t  
akdseidkv1gl1elgaddy  
vtkpfstrel1arvkan1rrhysqpaqdtgnvtneitikdiviypdaysikkrgedieltthrefelfhy1skhmqgmtr  
eh1l1qtvwgydyfgdvrtv  
dvtir1r1rekieddpshpeyivtrrgvgyflqqhe  
>sp|Q9EYW6|SSPC\_STAA8  
myqlqfin1vydttkl1thleqtn1n1fignwsnhqlqksicirhgddtshnqyhilfidtahqrikfssidneeiiyild  
yddtqhilmtsskqig1t  
srpivyerlv  
>sp|Q9EZ08|ALR2\_STAA8  
mtatwsvnk1f1qna1tvknnq1mavvknnayhyd1efavtqfihagidtfstts1reaiqirqlapdatif1mnavy  
efd1vrehqihmt1ps1ty  
yynhknd1lagihvh1efen1l1hrsgfd1neikev1kdhhnqnakmi1sg1wthfgyadefdvsdynversqwmivea  
1l1segyqfd1ihaqnsasf  
yregq1l1phhtharvgialygsrpyss1nqhd1vqsl1tkahviqvrevqagdygcysfafevtknntklavvdigygd  
g1l1rtrakhealingkryp  
ira1mmshmfvevdgnvhaqdevi1ynndi1ridey1fkgvganseq1samnhds1kkeyisndc  
>sp|Q9F1K0|DPO3A\_STAA8  
mvay1nihtayd1l1nss1kiedavr1lavsenvdala1tdtnv1lygfpkfydaciannikpi1fgmtiyvtng1ntvetv1  
aknndg1kd1yq1s1seikm  
nalehvsfel1krfsnmi1i1kkvgdqhrdivqv1fethndtymdh1sisiqgrkhvwiqnvcyqtrqdad1salaair  
dntk1d1ihdqedfgahf1  
tekeinq1dinqey1tqvdivaqkcdaelkyhqs1l1pqyetpndesakky1wrv1vtq1kk1elnydv1yer1kyeykvi  
tnmgfedy1f1vsd1ihya  
ktndvmvgpgrgssags1vsy1l1gittidpikfn1l1ferf1n1pervtmpdididfedtrrervi1yvqekygelhvsgiv  
tfgh1laravardvgrimg  
fdevt1neiss1liphk1git1deayqiddfkefvhrnrherwfsick1leg1prhtsthaagi1indhplyeyap1tkg  
dtg1l1tqwtmteaerig1l1  
kidf1gl1rn1s1ihqi1tqvkkd1ginidiek1pfddqkvfel1sqgdt1tgi1fql1esdgvrsv1kk1kpeh1fedivavts  
lyrpgpmeeyt1y1trrh  
pskvqyl1hph1lepi1kntygv1iy1qeqimq1astfanfsygead1l1rramskknrav1leserqhfiegakqngyhedisk  
qifd1l1kfadygfpraha  
vsyskiayims1f1kvhypnyfyani1snvigsekktaqmieeakkqgit1l1ppnineshwfykpsqegiy1sigtikvgv  
yqsvkvi1deryqngkfkf  
ffdfarr1pkrvkr1k1leal1lvga1fda1fgktrst1l1qaidqvl1dgd1nieqdg1f1fd1l1tpkqmyedkeel1pdal1sq  
yekey1gfyvsqhpvdkkf  
vakqyl1t1fk1snaqnykpi1lvqfdkvkqi1rtkngqnmafvt1ndgi1et1dgvi1fpnqfkkyeel1shnd1fivsgkfdh  
rkqqrq1li1ineiq1t1atfe  
eqk1afakqi1i1rnksq1dmfeemikatkenandv1l1sfydet1kqmt1lgy1nqkds1mfn1fiqs1fnpsdir1i  
>sp|Q9KWK8|VRAS\_STAA1  
mnhynrt1gsm1l1lvsmlaaf1f1dkvfvni1yf1qgmfy1tqi1fgipv1f1fl1n1i1ill1ciivgsv1laykinqqndwikt  
qiersmegetvg1indqnie  
iyset1d1lyht1vp1nqe1l1hkl1r1ktqn1l1tenyn1ndvkvk1i1ederq1rlare1hdsvsqql1faasm1l1saiketkle  
pp1dq1q1pi1lek1mvqdsq1l  
emra1l1h1rp1gl1kdk1s1legikd1l1vid1l1qkvpmkvv1hei1qdfkvpkgiedh1l1fritqea1snt1l1rshngtkvtvelf  
nkddy1l1l1riq1dngk1gfnv  
dek1leqsyg1knmrera1leigatf1hivs1l1pds1gtr1evkap1lnkedsydd  
>sp|Q9KWZ4|TRMB\_STAAC  
mrvrykpwakdy1kdhpe1l1vdm1dgq1hagkmtewfdktqpi1hie1gsgmgqf1itt1laaqnphinyismereksivykvldk  
vkemgl1tn1ki1icnda1iel  
neyfk1dgevs1riy1l1nfsdpwpkn1rhakrr1tyht1fla1lyqqi1l1ndeg1d1hfkt1dnrg1lfays1lesmsq1fgmyftkin1l1  
hqeddgsn1l1teyekkfsd  
kgsriyrmeakfhsqk  
>sp|Q9RFJ6|ROT\_STAA8  
mhklahtsf1g1v1gmfvntcivakyyi1nwemfsmkkvnndtvfgil1qlet1l1gdinsifseieseykmsreeil1l1l1tlw

Tsompanidou\_et\_al\_Supplemental\_FASTA\_File

qkgsmtlkemdrfvevkpy  
krtrtynnlvelewiyperpddertviihfneklqqekvellnfisdaiasratamqnslnaiiav  
>sp|Q9RL77|TRPD\_STAAC  
mtlltriktetilllesdikelidilispstgtdikyellssysereiqqqeltyivrslnintmyphqpcyegamvcvgtg  
gdknsfnisttvafvvas  
agvkvikhgnksitsnsgstdllnqmniqttdvdpnqlnekdllvfigatesypimkymqvrkmigkptilnlvgpli  
npyhltyqmvgvfdptklk  
lvaktikdlgrkraivlhgangmdeatlsdnliyeltedgeiknytlnatdyglkhapsdfkgspeenlaislniln  
gkdqssrrdvvl1nagls1  
yvaekvdtiaegielattlidngealekyhqmrge  
>sp|Q9RL78|TRPC\_STAAC  
mtilseivkyqsllngyyqdklntlksvkiqnkksfinaiekepklaiiaeikskspvndlperdlsqqisdydqyg  
anavsiltdekyfsgsfer  
lqalttkttlplvckdfiidplqidvakqagasmillivnilsdqkldlynyaisqnllevlvevhdrhelerayknak  
ligvnnrdlkrfvtneht  
ntilenkktnhyyisesgihdasdvrki1hsgidglligealmrcdn1seflpq1kmqkvks  
>sp|Q9ZAH6|ACPS\_STAA8  
mihgtgvdlieidriqalyskqpk1veriltkneqhkfnftheqrkieflagrfatkeafskalgtglgkhvafndidc  
ynde1gkpkidyegfivhv  
sishtehyamsqv1leksaf  
>tr|A5INP4|A5INP4\_STAA9  
mvqevvvegdi1lgqflktegiiessgqakwflqdevlingvretrrgkklhqdridipelpedagsfliihqgeq  
>tr|A5INP7|A5INP7\_STAA9  
maelpgsrinernitsemresfldyamsvivaralpdrvdlgkpvhrriylg1neqgmtpdksykksarivgdvmgkyhp  
hgd1siyamvrmaqdfsy  
ryp1vdgggnfgsmgdgaaamrytearmkitle1lrdinktidfidnydgnerepsvlparfpnllangasgiavgm  
atnippnhtelingvls1  
sknpdisiaelmediogpdpftag1ilgksgirrayetgrgsiqmrsravieergggrqrivvteipfqvnkarmiekia  
elvrddkidgit1rdets  
1rtgvrvvdivrkdanasvilnnykqtplqtsfgvnmialvngprk1inlkealvhylehqktvrrrtqynl1rkakdr  
ahileglrialhideiis  
ti1resdtkvameslqqrflsekqaqaildmr1rrltglerdkieaeyne1lnyiseletiladeev1lqlvrde1tei  
rdrfgdrrrteiq1ggfed  
leded1ipeeqiviti1shnnyikr1pvstyraqnrggrgvqgmnt1eedfvsq1vt1sthdhv1fftnkgrvyklkgyev  
pel1srqskgipvvnaie1e  
ndevistm1avkd1esedn1lvfatkrgvvkras1snfsrinrngkiaisfredde1iavr1tsgqed1iligtshas1ir  
fpest1rplgrtatgvkgi  
t1regdevvg1dvahansdev1lvvtengygkrtpvndyr1snrggkgiktatiterngnvvcittvtgeed1mivtnag  
vij1rdvad1sqngraag  
vr1ir1rgddqfvstvkvkedaedetnedeqststvsedgteqqreavvndetpgnaihtevidseendedgrievrqdf  
mdrveedi1qssdedee  
>tr|A5INQ1|A5INQ1\_STAA9  
math1sfrgqvqecipt1lgyagvgisfgivassqnfsilei1llclviyagaaqfimcalfiagtpisaiv1tvfivns  
rmf1l1sms1apnfktgyfw  
nrvg1gslvtdefgvaitpyl1kgeaindrwmhgl1nitay1fwaiscvagal1fgeyisnpqt1gl1dfaitamfi1flaiaq  
fesitksr1riyiv1liiav  
ivmm1s1smfmpsy1ailiaatisaalgvmmr  
>tr|A5INQ4|A5INQ4\_STAA9  
mgvayvfskiqpkati1atitlvfalaly1vpg1gl1fal1fatipg1v1wnksiqsfgvsal1tviittv1gntfv1sa  
i1lv1ias1iig1llkert  
skerm1yvttvams1is1iafm1lqtfgrippsasivkpfkqt1lheatmsgadanmtqileegfrqatv1lpgf1i1it  
fliv1in1ivt1fpv1rkfk  
iatpvfkpl1fawqmsg1llwiyiiviic1l1ftgqpsvfqs1llnfqlv1slvmyiqg1svihffgkag1l1pnavt1l1li  
igt1l1tptthiv1lgvid  
1s1n1krimknnsk  
>tr|A5INR1|A5INR1\_STAA9  
mtakmdtti1tpfqi1hskndhpegtiatvsnvk1tkpl1knkevksvehvrrdhnl1mpd1ssdf1l1fdftyd1pl1styl  
ggv1n1mnakvpnhfn1nr1  
vidhdaddni1v1yaiskdrhdvkl1ttttkndhfl1dalaavkkdmqpytdi1tnkdtidrtthvfapskpek1ktyrmvf  
ntisvekmnail1fddstiv  
rssksgvttynntgvanyndknekyhykn1sedeasskmeetipgtfd1inghggf1nedfr1fstnqsgel1tyqrf  
1ngyptfnkegsnq1qvtw  
gek1gvfdyrrs1l1rtdv1lnsednkt1pklesvrss1lansdinfekvt1niaigyemqdnsdhnhievqinse1lvprwyv  
eydgewy1yndgr1e  
>tr|A5INS0|A5INS0\_STAA9  
mkkiki1vpl1ilivvvvgfgyfyaskdeinntidai1edknfkqvykdssyisksdngevemterpikiynslgvkdini  
qdrki1kvsknkkrvdaqy  
kik1tnygni1drnvqfnfvkedgmwkl1dwdhsvi1pgmqkdqsihi1enlksrgkil1drnnvelantgtayeigivpknvs

Tsompanidou\_et\_al\_Supplemental\_FASTA\_File

kkdykaiakelsisedyik  
qqmdqnvvdtdfvplktvkkmdelysdfakkfhlttnetesrnyplgkatshllgyvgpinseelkqkeykygkddavi  
gkkgleklydkklqhedgy  
rvtivddnsntiahtliekkkkdgkdiqltidakvqksiynmkndygshtaihpgtgeellaivstpsydvpfmygmsn  
eeynkltedkkepllnkfq  
ittspgstqkiltamiglnnktlddksykidgkgwqkdkswggynvtryevvngnidlkqaiessdniffarvalelgs  
kkfekgmkklgvgedipsd  
ypfynaqisnknldneilladsgygggeilinpqvilsiyalenngninaphllkdtknkvwkkniskeninlltdgm  
qqvvnkthkediyrnyanl  
igksgtaelkmgqgetgrqigwfi sydkdnpmmmainvkdvdqdkgmasynakisgkydeleyengnkkydide  
>tr|A5INS3|A5INS3\_STAA9  
mlreiyhnhnistrqisknleinkatissilnklykslvnevgegdstksggrkpi11kvnhlygyfislldtyssvev  
mnyfdgnvikhesydldp  
ekvssilsiiikkhidigekldtyngllgvsvisihgvvneqhvtylphfetegisiakkikeitnvpvvvneanlsaly  
ernfnhlnsynnlialsih  
kgigaglinnqlyrgangeageigtlvskvsdneifhkiedifsqeallhnlnsqlnekmtlskliqfyneknpvvv  
eemeqfinkiaavlhnlnl  
qfnpnaiyincplfnempeileaiknqfkqysrneiqikltsnvkfatllggtlaiiqvlqindiylidika  
>tr|A5INT4|A5INT4\_STAA9  
mtiktityteaifskdekhryllkktwdekkpactvitymphldgvlslldttvli1nqlanserygavylvnlfsnik  
tpenlkhikeydkhtdih  
lmkaisesdvtvlaygayakrpvverveqvmemlkphkkkvkklipatneimhplnpkarqkwtkla  
>tr|A5INT8|A5INT8\_STAA9  
mkqvigylrqstmkqqs1aaqkaieaiaekhhqhinfysdkqsgkrkdnrsgyrqmtqliqqgqcdilccyrlnrlnhrn  
lknal1k1k1cqtyhvhil  
svhdgyfdmdqafdrfklnifislaelesdnigeqvrnglqekakqgrlitthapfgyeyhngafiinqnesptvkavfn  
yyikghgykkaiaqllleadn  
tyinrqpyqvrniinpnycgrvnnqygqfdnmfsvstsiyeaqrlrsqkqikqtssdnqlkqkikpcpcnttltm  
tvrkknhtlryyvcpknmn  
asrfvcdfkginaqtlekvlevckdfyqnqriytkikgaidkrikqrniekhhtltqeqlieklaaggiidaetfreqt  
qslrqppqrtsinghqiq  
htiqni1qkrftlni1ypyietihitkdknligiyfkneplnivnqtmqssia  
>tr|A5INU1|A5INU1\_STAA9  
mnnkdysddfqnalvdiilnidkinvkevfdscravdqdnkkdtlnrspkdfsinisdivrysilcmenlssdkieen  
inmiknhsselnndmficq  
eknnfttnfnkfcnalginianfksgksyvfkpkslfvlydilsnsvylhffkngindkdidssnrikenlyyfinhei  
tdqrdehaltnyylyflv  
dsnieigiksiiikiftekitskdklqileyyildeiddlnteistkiadahvknstnflenekvsinsnlakyithrtd  
rasapknmlslilnsdlv  
spkleeke1kypkkitkehdklikeinkaldyndnnttpsdyfyitsd  
>tr|A5INU4|A5INU4\_STAA9  
mkrvsysvetkykavemkaagfstkeimkelniknrtqvettwrrwyrngesyrfshvgkqytygkgleel1seveq1kle  
nkrkdiel1dkkykaler  
kwyq  
>tr|A5INU5|A5INU5\_STAA9  
mgstfstinpfsvviasnaagttftdglywrigaciigafvisylfwyckkikkdpkssysyedkaafekqswvlhddg  
sseftlrkkiiltlflvlpf  
pimvwgvmtdqwwfpvmasafliftivimfiagtqgyglgekgtvdafvngasslvgsliiglarginlvlnkgmisdt  
ilhfssivqhmgsplfii  
vllfiffc1gfivpssglavlsmplafpladtvgiprfvivtvyqfgqyamflap1tvlmatlqmlnvryshwlr1fvw  
pvvafvli1fggllitqv1  
iys  
>tr|A5INU7|A5INU7\_STAA9  
mestykkrkgl1tiylgyspgvgktyeml1sngidqyqegadikigyiephqrpeta1vqqlpeistssrkfgshtfhyid  
vskii1eanpdvvlidelah  
tniskerh1krykdieelshgidwttlniqhieslsgqialmtgiqvtervpdqf1tsadafevvd1spnml1qrlka  
gkvykker1etafsnffty  
en1telrel1rtvadimsqkgqykhtd1tphiava1sgsiynervi1rearraaykehakftavyidvfetpsesrk  
qdhyvhkn1mlakalgaef  
kvlyaqdiakaltdwcdlafv1k1v1lgqseqprwkdyfkqslieqinhvphh1kleivpihyih1sdkptntpkqaqkssr  
1tveimkmlviqticv1lg  
iwvyn1dksessai1l1mffigiiv1siwtqsy1ligffasi1nvfvfn1yfft1vprft1emyrfeypitfatsifasif1ts  
ai1kn1khqhs1terqlyr  
tnim1qfn1sikesysier1lniagdqihq1lnqdv1vfl1qskkvaasnsf1gnrsiss1sdkthdaet1swvienesrag  
kl1tdt1fpgskf1cipigt1n  
pvkgvisi1rftdetyidtydnsi1dsm1ndit1laienv1llkqtrqsi1lkaereatrsn1fhsishdir1t1tsimgn1d  
mlkyhneh1ndqqae1lt  
asygeaqylht1vtni1sltklessdiq1rtpylvee1leefeeg1l1rrhqanhv1ieneddas1inidsk1l1qlv1fn



Tsompanidou\_et\_al\_Supplemental\_FASTA\_File

lidnalkhaeshseiklhv  
qhetnkikfemidcgkgipeerqlifnpyysgdnfkdnkksdglgllylvqllilkqhnsleyqpntpqgsifyfyfylv  
npiemegamdenniigr  
>tr|A5INU8|A5INU8\_STAA9  
msivlflivfillslivsrlysvainvpskidvfnpiekliyqligtklehmsgkytikqfllfnglmgglsfvllli  
qqwflnnpnhlnqsvsla  
fntmasfltnlnlqhyagetdlsytlqmcvitflmftsaasgyavciamlrrltgmdvignfyqditrfivrvlipfal  
iislflisqgtpqtlkgnl  
vietlsgvkqtiaygpmaslesikhltngggfngansstpfenptywsnyaealsmmlipgslvflfgrmlkklqihp  
haimifvamfvfmgflvt  
clyfefagnpvlhhlgiaggmegtfrfgiglsalfttittafttgvtvnmhds1tp1ggmvpmlmmlnavfggegvg  
lmmliiyvmltvficslmi  
gktpsylgmkiegkemkliasflvhp1lilvfsalafivpgasdaltnpqfhgvsqvyeftsssanngsgfegldnt  
vfnistgivmlaryipi  
vlqilivsslvnkkttyqhtqdvpinnlffssvliifiillsgltflpdlmlgpigeqllha  
>tr|A5INV1|A5INV1\_STAA9  
miqshiiivnkndhslilylnemesllyvysvlinvtsinklflyeetntvfrcitssinenmdciinhspnellmfly  
dleqrfnnfinrlnlkepk  
nrhtyptlnsvyielnplqlsedtyfssinvaelinrqsirknlfk  
>tr|A5INV2|A5INV2\_STAA9  
mqt1askfedldidshdnlnsfkarigstidklakapplnkytftelmiisiyfknyigrldkpsrkkkggnlife  
ivynnqmlnsstakl  
>tr|A5INW9|A5INW9\_STAA9  
mksnpekesdemikrvnlvlgisflfliisifagcgtgkeaeikksfektlsympiknedlydegyrddqfdkndkg  
twivrssmsiqsngkdmni  
kgmvlmnrnrtrtngyyvdvieredkghrdnekrypvmvdnkiiptkeikdekikkeienfkffvqygdfdklsky  
kdgd1synpevpsysakyq  
ltnddynvkqlrkrynipnkapk1llkgtgnlkgssigykkieftfvekkgeniyfsdglhfnpsedk  
>tr|A5INX9|A5INX9\_STAA9  
mkippqrqlaiqynvrvtiiksie1leaegfiytkvsgtyvndylneahitknwsemmlwssqrsqyvtvqlinkiet  
ddsyihiiskgelgislmph  
iq1kkamsntashedlsfgynngygyiklrdiivermskqginvgrenvmitsgalhai1llsigflgqdaiisntps  
yihstnveq1nfrhidvp  
ynqineinti1drfinfnkaiyieprfnnpngrsltneqkknii1tyserhni1ieddi1frdi1fsdptpaiktydklg  
kvihi1ssfskti1pairig  
wivasekii1eqladvrmq1dygssil1sqmvvyem1knksydkh1vk1ryv1kdkrdfm1n1ln1fkdiahwevpsgyf  
wlvfki1didi1ky1fyel1  
skeki1lnpgyi1ygskeksir1lsfafesnenikha1lyki1tyvkkv  
>tr|A5INY0|A5INY0\_STAA9  
mskirsfti1sl1liylammcytvvtysk1ptkvp1hynlagdadnfadkw1llinsafiviwl1ffiagryyerfakws  
hynhtprei1raik1fl1st1  
nleimsymsi1ftvleiwq1qhhq1n1l1wfnmi1fiii1gl1t1vifc1l1ptihk1mrdsq  
>tr|A5INY2|A5INY2\_STAA9  
mmt1qihtggin1kkkn1yisirk1lgvgiasvt1gt1l1sggvtpaanaaqhdeaqqnafyqvl1nmpn1nadqrngfiqs1  
kddpsqsan1lgeaqk1nd  
sqapkadaqqnfnkdqqsafyei1nmpn1neaqrngfiqs1kddpsqstnvlgeakk1nesqapkadnnfnkeqqnafy  
ei1nmpn1neeqrngfiqs  
1kddpsqsan1l1seakk1nesqapkadnkfnkeqqnafyei1h1pn1neeqrngfiqs1kddpsqsan1l1aeakk1ndaq  
apkadnkfnkeqqnafyei  
1h1pn1teeqrngfiqs1kddpsvskei1aeakk1ndaqapkeednkkpgkedgnkpgkedgnkpgkednkkpgkedgnk  
pgkednknkpgkedgnkpgk  
ednknkpgkedgnkpgkedgnkpgkedgnkvhv1kpgdtvndiakangttadkiaadnk1ladknmikpgqe1vvdkkqpan  
hadankaqa1petgeenpf  
igt1vfgg1sl1algaal1agrre1  
>tr|A5INY4|A5INY4\_STAA9  
mtekin1k1dnyh1lifa1l1f1aivs1vsmm1gss1fi1p1qr1v1my1fin1pnds1mdq1ft1ev1rl1p1rit1ail1agaal1gms1gm  
1qn1v1kn1pi1asp1di1igitg  
gas1sav1fia1ffsh1t1ih1l1p1fav1lggavamm1ll1vf1qtkgq1ir1pt1il1i1ig1smq1t1fia1lvq1ll1ttk1q1saaka  
yt1w1vg1s1ygat1fkdti1l  
gm1v1lav1p1l1fl1vip1kmi1s1il1ddp1va1ig1gl1hv1qrm1k1li1q1lit1stil1vs1mais1lvgn1ig1fv1gli1phi1akt1ivr1gsya  
k1ll1ms1am1ig1ais1ivi1ad1l  
ig1rt1fl1pke1vp1ag1v1fa1af1gap1ffiy1ll1tvkk1l  
>tr|A5INZ1|A5INZ1\_STAA9  
mqnke1li1qha1yaa1eri1ney1freen1yqvppqn1hqs1i1q1se1let1tgefrywsamgh1myh1pevw1lidgk1sk1itty  
keai1ari1lqhm1ags1adn1qt  
av1qqh1maq1msd1idns1ih1rtary1qsnt1idyvedry1v1seqs1yl1ghp1fh1pt1ks1as1gf1sead1eky1apecht1sf1q1hyl  
av1hqdv1ll1try1vegkedq1v  
ek1v1yq1lad1idise1ipkdfi1ll1p1thpy1qin1vl1rqhp1qym1qyse1qgl1kd1lgvsgd1lypt1ssvr1tvfska1lniy1kl1pih

Tsompanidou\_et\_al\_Supplemental\_FASTA\_File

vkintfirntndleqierti  
daaqviasvkdevetphfklmfeegyralpnpplgqtvepemdlltnsamivregipnyhadkdihvlaslfetmpdsp  
sklaqvieqsglapeawle  
cylrdrtllpiklfsntgisleahvqntlielkdgipdvfcvrdlegiclsrtiatekqlvpnvvaasspvyahdeawh  
rlkyvvvnhlghlvstig  
katrnevvlwqlvahrmtwkkeyannavfvdcvedlyqtptiaakanlmsklndcganpiythipnpi cynkevsyces  
nns  
>tr|A5INZ6|A5INZ6\_STAA9  
meknveksfikiglyfqiayivlmaitlcfvicyglifglfyllsgsradylivtivisaisifviilsivpvivlas  
dlfkeriskgvi livlaii  
alvlcnfvsaillwfvsaissilgrkklvaaadtttiqsksgnanqashkdtckkel dsqdmehpevknpttknlegfnee  
ihkdeattkvvsdntepi  
eskghvskkd  
>tr|A5INZ8|A5INZ8\_STAA9  
mervlitggagfigshlvddlqqdydyvyl dnyrtgkreniksladdhvfeldireydaveqimktyqfdyvihlaalvs  
vaesvekpilsqeinvvat  
lrllieikkynshikrfifassaavygdldpdpksdqslilplspya idkyygerttlnycslyniptavvkffnvfgpr  
qdpksqysgviskmfdfsfe  
hnkpftffgdglqtrdfvyvydvqsvr limehkdaighgynigtgtftnllevyriigelygksvehefkearkgdikh  
syadislkalgfvpktyv  
etglkdyfnfevdnieevtakevems  
>tr|A5IP01|A5IP01\_STAA9  
menghsklltlllglavfiqqssviagvnvsiadfitllilvyl lffanhllkanhflqffiiilythrmiitlcllff  
ddlifitvkevlaskvya  
fvviyfy lgmii fklngskkvivtsyiissvtiglfciaglnksp lmklllyfdeirskglmndpnyfamtqiitlvla  
kyihnyi fkv lacgillw  
sltttgsktafiilivlaiyffikk lfsrnsvsvmlvimlillcftfyninyllfq lsdldavpsldrmasifeegfa  
slndsgsersvwinailv  
ikytlgfvgvlvdyvhigsqingillvahntylqifaewgilfgal fii fmllyllfel frfnisgknvtaivvmltmiy  
fltvsvfnnsryvafilgii  
vfivqyekmerdrnee  
>tr|A5IP08|A5IP08\_STAA9  
mkfeyidhtllkpestrtqidqideakaynfksvcvnpthvkyaerladsevlvctvigfplgasttatka feteda  
iqngadeidmvinigalkd  
grfdvqqdieavvkaakghtkvviietvll dhdeivkase ltkaa gadfvktstg faggataedvklmkdtvgadvev  
kasggvrnledfnkmveag  
atrigasagvqimqgleadsdy  
>tr|A5IP15|A5IP15\_STAA9  
msniafyvsvdhgyi fptdfts rnqyqpmglllanhvieqdr rrydqsfkidngdf lqgspfcnyliahsgssqplvdf  
ynqmafdfgtlgnhefnyg  
lpylkd tlrlnypvlcaniyendst ldnvgvyfvgdqtvgvig lttqfiphweqpehiqsltfhsafetlqqhlpem  
krhadiivvcyhggfekdl  
engtptevl tgenegyamleafskdidi fitghqhrqiaerfkqtaviqpgtrgttv gkvvlstdeyenvsvescellpv  
iddstftideddqlrkql  
edwldyeittlpydmtinhafearvaphpftnfmnyalleksdadvactal fdsasgfkqvvtmr dvinnyfpntfkvl  
avsgaklkeaiersaeyfd  
vqnde vsvs adflgpkpqhfnfydi yggvsy ti hvgrpkgqrvsnmmiqghavdlkqytyicvnyravgggqydmfidap  
vvkdiqvegaql lldflsn  
nmlmrpqvvd fkvk  
>tr|A5IP18|A5IP18\_STAA9  
mltipekenrgskeqevaimidaladkgkalealskksqeeidhivhqmslaavdqhmvlaklaheetgrgiyedkaik  
nlyaseyiwnsikdnktvg  
i igedkekg ltyvaepigvicgvtptnptsttikami aiktgnpii fafhpsaqesskraaevvleaamkagapkdi  
qwi eypsieatkqlmnhkg  
ialvlatgsgmvksaystgkpalgvpgnvp syiektahikravndi igsktfdngmicaseqvvidkeiykdvtnef  
kahqayfvkkdelqrlena  
imneqktgikpdivgksaveiaelagipvpentk lli aeisgvgsdyp lsrklspv lalvkaqstkqafqicedtlhfg  
glghtavihtedetlqkdf  
glrmkacr vlnvtpsavggigdmynelips ltlgcgsygrnsi shvsatdl lniktiakrrntqifkvpaiyfeena  
ims lttmdkiekvmivcdp  
gmvefgytktv envl rqrteppqiki fsevepnpstntvykglemmvdfqpdtiialgggsamdaakamw mffehpetsf  
fgakqkfl digkrtykigm  
penatficip tsgtgsevtpfavitdsetnvkyp ladfaltpdvai idpqfvmsvpksvtadtgm dvlthamesyvsvm  
asdytrglslqaiklftfey  
lkssvk gdkvs rek mhnast lagmafana flgi ahsia hkggygiphgranail lphi irynakdpqkhal fkyef  
fradtdyad iakflglkgn  
ttealveslakavyelgqsvgiemnlksqgvsee lnesidrmaelafedqcttanpkeal iseikdiiqtsydykq  
>tr|A5IP20|A5IP20\_STAA9

Tsompanidou\_et\_al\_Supplemental\_FASTA\_File

mskkenttttlfvyekpkstisekfrgirsnimfskangevkrllvtsekpggagkstvsvnvaityaqagyktlvidgdm  
rkptqnyifneqnnnglss  
liigrttmseaitsteienldlltagpvppnpseeligserfkelvdlfnkrydiiivdtpvntvtdaqlyaraikdsll  
vidsekndknevkakalm  
ekagsnilgvilnktkvdksssyhygyde  
>tr|A5IP22|A5IP22\_STAA9  
mahlsvklrllilalidslivtfsvfvyyilepyfktysvkl1lilaaislfishhisafifnmyhraweyasvselili  
vkavttsivitmvtvt  
gnrpfrrlylitwmmhliiliggrlfrwiryrylggksfnkkptlvvgagqagsmlirqmlksdemklepvlavdddehk  
rnititegvkvvgkiadip  
elvrkyikkkiiiaiptiggerlkeinni chmdgvelkmpniedvmsgelevnqlkkvevedllgrdpvelmdmdisne  
ltnktlvtgaggsigsei  
crqvcnfyperiillghgensiylinrelrnrfgknvdivpiadvqnrarmfeimetykpyavyhaaahkhvplmednp  
eeavhnnlgtkntaeaaak  
naevkkfvmistdkavnppnvmgaskriaemiqsIndethrtnfvavrfgnvlgsrgsviplfksqieeggpvvtvthe  
mtryfmtipeasrlvlqag  
alaeggefvldmgepvkivdlarnliklsgkkeddiritytgirpgekmfeelmkdevhpeqvfekiyrgkvqhmkn  
eveaiiqdivndfskekii  
nyangkkgdnyvr  
>tr|A5IP27|A5IP27\_STAA9  
mrilnivssnivqdprvlkqietikgvtndyki vgmnsqatnrrlenldcnyrllgskvdpknisklikrirfatgvi  
reikafkpdvihandfdvl  
lmyvlsnykkanivydaheiyaknafinkvpliskfvesiekhivkhrvnafvtvshaakeyyqskgykkanvitnapi  
lndsrefkeienfkeivyg  
qqivmdrgyeeffiaassafkqnapsfiirgfgpheevelisysenirldkpvekelvdklaesngviltkpsin  
feytvsnkifecihaglpv  
ilspvkehilynekykfgivlkevtpleiekavrklrdhndlfnhlrqnaikaskilnwqieserlvelykf  
>tr|A5IP28|A5IP28\_STAA9  
mkffvlcaissnifivistftkevlgfpipevyystmvgialittvfaiykiivtqeiprglilliaiclllylafyyfs  
pdkeeklaknnlfflftwa  
vpaaissgiyikyinkatverffklvffifsisfivilipklteipsyinfglmnyqnasylsaftaglgifyfimgsv  
khkwiyvltftiidipivfi  
pggrggaillylgylfafilitfkrigipiavksimyifalsissvliyflftkgsntrtfsylqggtnlegtsgrgpiy  
ekgiyfiqqspllgygpf  
yykligniiphniielilfsflgffiiimicilllvymirnydpntidllvmfiaiy pitllmfssnylvvsefwvlf  
yfitkgrrhg  
>tr|A5IP34|A5IP34\_STAA9  
mkkimvifgtrpeaikmaplvkeidhngnfeanivitaqhrdmlsdvlsifdiqadhdlnimqdqqtadltanalakld  
siineeqpdmilvhgdttt  
tfvgslaafyhgipvgheaglrthqkyspfeelnrvmvsniaelnfaptviaaknllfenkdkerifitgntvidals  
ttvqndfvstii khkgkk  
villtahrrenigepmhqifkavrdladeykdvvfiypmhrnpkvraiaekylsgrnrielielpdaiefhnftnqsyv  
ltdsggiqeeaptfgkpv  
vlrnhterpegveagtsrvigt dydnivrnkqlieddeayqrmsqannpygdgqasrri ceaieyyfglrsdkpdefvp  
lrhk  
>tr|A5IP42|A5IP42\_STAA9  
mkrllsiiviigifiitgcdwqrtskepsknaqnqqvikigylpithsanlmmtkkllsqynhpkylelvkfnwpdlmd  
alnsgridgastlielamk  
skqkgsnikavallghhegnvimgqkghlnefnngddyhfgiphysthyllleelrkqlkikpghfsyhemspaempaa  
lsehritgysvaepfgalg  
eklgkgtlkhgddvipdayccvlvlrge lldqhkdvaaqfvqdykksqgmndrkqsvdimthhfksrdvltqsaawt  
sygdltikpsgygeittlv  
kqhhlfnpayddfvpslykeasrs  
>tr|A5IP46|A5IP46\_STAA9  
mdmkivalfpeaveggenqlntkkaiglkftleerghefiiladngedldkhlpdmdviisapfypaymtreriekapn  
lklaitagvgsdhvdlaaa  
sehni gvvevtgsntvsvaehavmdllillrnyeeghrqsvegewnlsqvgnhahelqhk tigi fgfgrigqlvaerlap  
fnvtlghydpinqdhlsl  
kfvsfdelvsstdaitihapltpetdnlfdkdvl srmkkhsylvntargkivnrda lvealasehlqgyagdvwyppap  
adhprwrtmprnamtvhysg  
mtleaqkriedgvkdi lerffnhepfqdkdiivasgriasksytak  
>tr|A5IP57|A5IP57\_STAA9  
mkqrigaylidafhragvdki fgvpgdfnlaflddiisnrvdwvntnelnasyaadgyarlnglaalvtftfgvgelsa  
vngiagsyaeripviaitg  
aptraveqagkyvhslgegtfddy rkmfahitvaqgyitpenatteiprlintai aerrpvhlhlpidvaiseieiptp  
fevtatkdtdastyella  
tklhqakqpiiitgheinsfhlhqeledfvnqtqvpvaqlslgkafneenpyymgiydgkiaedkir dyv dndsilni  
gakltdsatagfsyqfnid

Tsompanidou\_et\_al\_Supplemental\_FASTA\_File

dvvm1nhhnikiddvtndeis1ps1lkq1sni sytnsatfpayhrptspdytvgtepl1tqqtyfkmmqnf1kpnvdvi ad  
qgtsffgaydlalyknntf  
igqplwgsigytlpatlgsq1adkdrn1lligdgs1q1tvqai stmirqhikpvlfvinn dgytverlihgmyepynei  
hmdykalpavfggknevi  
hdvesskd1qdtfnainghpdmhfvevkmsvedapkk1idiakafsqqnk  
>tr|A5IP59|A5IP59\_STAA9  
mtgfsvylgqpldeayikrmikqgyqmi ftsvqi peeddetkyhyftk11n1lkyeqvtylidanpsil tpsfyehl rgy  
daqfmiridhstsjeaiea  
imagglkcc1nasiisrellts1hqqlndft11sfchnyprpdtg1svdlvknkneliyqfnpkaqiygfivgsglrgp  
lhkg1ptieatrshshpva  
ak11qetgvsevlvgdsliemrqakq1idfckhrhft1cieevf dttvty1fdmchkvrpdnpenvirsetsrqicphsi  
qpqfttqrrigsvtvdn1n  
ngryqgemqivrqt1sahdnvvnvaqiked1pl1sci epndtfdfqktreckk  
>tr|A5IP60|A5IP60\_STAA9  
mensttear neatm1demtveed1itmnedqqvplavrkaipq1tkvikktiaqykkggrliyigagtsgr1gvl daa  
ecvptfntdpheigi iag  
gqhamtmavegaedhkk1aeed1knid1tskdvvigiasgktpyvigg1tfantigattvsiscnehaviseiaqypve  
vkvgpevl1tgstr1ksgta  
qk11lnmisti1mvgvgkvydn1midvkatnqk1idrsvri1qeicaitydeamalyqvsehdkvatvmgmcgiskeea  
trr11nngdivkrairdrq  
p  
>tr|A5IP65|A5IP65\_STAA9  
ms1sk1pl1fnhfani riqpk1iik1fl1t1liivtyt1fvsg1svdyk11seagl1sets1aqiki fsqis1ffsrvfsv1f  
tfl1ilvisrimrsdantk  
s1fsat1syilftnais1i1ltiqisag1slidysits1nifakgnrilgtfd1qffvqayil tvm1ligtsk1sirasti  
wgiiyl1i1itfslisisi  
q  
>tr|A5IP67|A5IP67\_STAA9  
mie1knvyrtfknkdni1rv1kdi nihinagefiaimgpsgsgkst1n1ilgfidreyhgeyl fegsnyqtqsdnqlani  
rnktvgfvfqnfk1ihnt  
ilenismp1vntm1tjerknkvm1tv1savgl dgkgdftpsk1sggqqrvaiarai innpkfii adeptgal dsdtski  
imd1fts1nrdnh1t1ilv  
thdrkvaekadrii1h1ldgriqheevik  
>tr|A5IP75|A5IP75\_STAA9  
myhkafykfv1sv1slpi1flyavik1fffsakrknfyannseiseiera1hqyky1sqqsstqihkealki fkaqsnt  
ssknieqahfstyfen1lf  
hkfimikvilalpfill1tiylqplvryi ferivmavivi igv1svftilyf spldaaysil gqnatkaqihqfnvlhh  
1nepyfiq1wdtikgvftf  
dlgttyknevvtkavgeripitiivav1alivaliaaipigiisamkrnswldit1miialig1sipsfwqgl1filaf  
s1kl1dilpps1ymphep1sl  
ilpvl1vigt1siaas1trmtrsv1levmrsdyv1tayakgl1sttqvvikh1lknaiipiv1t1vg1llvae1l1ggsavteqvf  
ningigryivqkq1lipdip  
avmggvv1yis1vislan1i1idifyalidpk1rseinerk  
>tr|A5IP79|A5IP79\_STAA9  
mkahki fw1n1laaii1isivsggmflamkweqih1kdg1kkv1stypik1netlyeidghdnphyenndqdtwyiessy  
svgsde1l1kedr1m1lkvd  
knthkitgeydt1tndrkdatdstyksypkvvnkivftkdvkdpa1kqkiennq1liqsgd1tsilnsnd1kvthdpt  
tdyyn1sgk1s1ndnpnvkq  
1krrynipsnastkvelkgmsd1kgnnhqdqklyfyfsspgknqi iykes1tynk1seh  
>tr|A5IP84|A5IP84\_STAA9  
mtkrnpk1laa1lsvipgl1gqfynkrpikgtiffiffisf1svfysf1nigfwgl1ft1gtvpk1l1ddsr1llaqgiis1llv  
afaimlyvin1l1dayrnae  
rfnrneeikdpkarmvatwdktfpy1lispgtf1l1fvv1fpl1fmfgvaftnyn1ynapprht1lewgl1dnfkt1lftig  
vwrktffsv1tw1lvwt1v  
att1qialgl1flaiivnhpvvkgk1firtv1l1pwavpsfvtilifval1fndefgainndilqpl1lgvapaw1sdpfwak  
valigiqv1w1gfpfvfal1f  
tgv1qs1ssdwyeadmdgasswqkfrnitfphviyatap1limqyagnfnfn1liyl1fnkggppvsgq nagst dilisw  
vyn1l1tfe1fnnfnmgavvs1  
igfivaivafiq1frtstfkdegg1  
>tr|A5IP91|A5IP91\_STAA9  
mfkvvicdderi1reg1kqi1ipwgdyhfntiytakdgvea1sliqqhqpelvitdirmpkrngvd1l1ndia1l1dcnvii1  
ssyddfeymkagiqh1hvl1d  
y1l1kpvdhaq1lev1lgr1vrt1leqqsqngrs1laschdafqpl1kveyddyvvnqivdqikqsytktvtvsd1liqidvs  
esyamrtfkdhvgitivgy  
1nryrilqs1q1l1drhykhyeiadkvfseymf1syhfky1qm1sp1sdyckqak  
>tr|A5IP95|A5IP95\_STAA9  
m1kgh1hsves1gtvdgpg1ryi1lftqgc1l1rclychnpdtwki1sepsrev1tdemvnei1lpykpyfdasgggvtvsge  
p1l1qmp1f1ek1faelkeng

Tsompanidou\_et\_al\_Supplemental\_FASTA\_File

vhtcl dtsagcandtkafqrhfeelqkhtdliilldikhindkhirltgkpnthilnfarklsdmkqpwi rhvlpvpgys  
ddkddliklgefinsldnv  
ekfeilpyhqlgvhkwtlgiayeledveapddeavkaayryvnfkgkipve1  
>tr|A5IP98|A5IP98\_STAA9  
mkkqiislgalavasslftwdnkadaivtkdyskesrvnekskkgatvsdyyywkiidsleaqftgaidlledykygdp  
ykeakdr1mtrvlgedqyl  
lkkkideyelykkwykssnkntnmltfhkynlynltmneyndifnslkdavyqfnkevkeiehkndvlkqfdkdgedkat  
keyvd1vseidtlvvytya  
dkdygehakelrakldliilgtdnphkitnerikkemiddlnsiiddffmetkqnrpsitkydptkhnfkeksenkpnf  
dklveetkkavkeadeswk  
nktvkkyeetvtskspvkeekveepqlpkvgnqqevkttagkaeettqpvaqplvkippetygetvkgpeyptment  
lqgeivqgpdf1tmeqnrp  
slsdnytqpttpnpi leglsgsskleikpqqtestlkgiqgessdi evkqatetteasqygprpqfnktpkyvkyrda  
gtgi reyndgtfgyearpr  
fnkpsenaynvttnqdgtsygarptqkpsenaynvtthangqvsygarptqkpsktnaynvtthangqvsygar  
tqkpsktnaynvtthang  
qvsygarptykpsenaynvtthangqvsygarltqkpsenaynvtthadgtatygpvrtk  
>tr|A5IP99|A5IP99\_STAA9  
mqeayivaygrsaakakgagal fherpddvaakalqgv1kridgkfnknmiedvivgtafpeg1qqniartialragls  
dtpvgqtvnrycsglqti  
aiaanqimagqgdilvaggvelmsavpmggnepntnptlqyddigasypmgltaenasqfdvsredqdayavrshqray  
daqrdgrfkdeipirvns  
veytnagpkvhtnifdqdefirpdtmealakl rtvfkadgtvtagsaplsdgagfvvlmsgdkvkelgvtpiarfvgy  
kavgvdpkimgipayai p  
evlslsnlsvetidlielneafasqtiasikevgldisrtnvnggaialghplgatgamltarllnemgrrpdsrygmvt  
mcigvgmgaaai feyvr  
>tr|A5IPA0|A5IPA0\_STAA9  
mtinkvtvl gaggtmgaqlaalvfnag1kvk1ldivvdkndpnliakksydkitdkkrp1lfdlnlvshltygnfdddln  
ddadlyieavkedieikha  
vwqqvlqhakedal fatntsgipinai aqafnekdqerffglhffnpprimklveliptshtkesiildvknfaqnvlgk  
gvi vndvpgfvanrvgtq  
tmndimyraeqhklsvdvdal tgqaigrpktgtyalsdlvgldi avsvikgmqqvpeetpyfhdvkivntlfdngalgr  
ktkqgyfykkdketkarlvy  
dvekqdyvpsqpqlpilnefnkd1vhn1dvi fnaqdeag1flwet1rnnfyysainvpkatddfrdidralvwgfnwk1  
gpfq1wdamgyervktrme  
delgd1pqwisd1ggfykqdetieyatpvshfvkdelwdkgdak1svthddq1llklqsknnvitdefndalvdaid1l  
endhytsmviyadgnnfsv  
gan1flmkkahedglvddvvaqsidklhysfnrlkys1kpvvtavqgralgggcelvlyspivvaasetyig1veagvg1  
lpsggglaemadri1rtsh  
kfdkqasmtkv1tniafakvstnafearrygylrdtdtiifntaqrvevalkrakyeaetnyipnprhqiya1gedfka  
1iqgq1daqrrghfisdh  
yhi1niatilaggdlprntfinqryiqslekigfid1lkskksyeriahm1ktgkplrn  
>tr|A5IPC7|A5IPC7\_STAA9  
mmkfsvivptynseyitellns1akqdfpktefevvvddcstdqt1qivekyrnk1nlkvsq1etnsggpgkprnval  
kqaegefvl fvdssdyink  
et1kdaafidehhsdvl1ikmkgvngrgvpqsmfketapevt1lnsriiytlspktkiyrta1lknddiyfeelksaed  
qlftmkaylnanrisv1sd  
kayyyatkreghmssayvspedfyevmriaveilnadleeahkdqilaeflnrhfsfsrtngfslkvkleeqpwina  
lgdfiqavpervdalvmsk  
1rpl1hyarakdidnyrtveesyrgqyyrfdivdgklniqfnegepyfegidiakpkvkmatafkfdnhkivtel1nef  
migeghydvr1klhsrnkk  
htmyvplsvnankqyrfnimledikay1pkekiwdf1levqigtevfevrvgnrnkyaytaetsalih1nndfyr1tpy  
ftkdfnnislyftait1td  
sismk1kgknki1ltgl drgyvfeegmasv1kddmimgmlsqtseveve1lskdikkrdfknivk1ntahmtyslk  
>tr|A5IPE3|A5IPE3\_STAA9  
mctgftiqt1lnqv1lgrtmdydyp1dgs pavtprnyrwrtsrtgttgqtqygfigtgtdmegfiygdgvnehgvaistqy  
frgyssygsthkadamnit  
qneivtwilgyttsiedmkqqasqihvvavy1ndigevpplhyhvsdatghsvevsfkegevvikdnpigv1tnhpdldw  
hysnlrqyini spypatak  
1legvtieplgneagtfg1pggftsterfvrmafkaniaqndkemd1mnafy1ldavnipigivrphdadnhytmyqt  
vin1ttrtlyikyysnei  
valkltd1lnrkdmti1fkpekhitirklndnq  
>tr|A5IPF8|A5IPF8\_STAA9  
mmkdvkridyfsyeelt1lggsk1plvnfel dpsnfeakvaliekelvtendkltdagfkvatlvreyisaivnirin  
dmyfapfsyekdey1l1sr  
fknggfqiri1nkdiawsv1vqsyp1lmrqeksndwdfkqiddeilen1nnesidtigrvleieiynehqgdppqslyniy  
eqnd1l1lryplkdkv1nv  
higvintfirelfgfdtdenhinkae

Tsompanidou\_et\_al\_Supplemental\_FASTA\_File

>tr|A5IPG0|A5IPG0\_STAA9  
mtkdielyltadydnkssiqsvidaiegqdfldvdttdmdavsdvssldedgaisltssvvgpqqsklmgyyyqnelydya  
sqldskmkeiidtpfiedi  
dkafkgitnvkleniliknggghgrdtygasgkiakgdakksdsvsideilksdqefvkvividqhykemkkedkklksk  
dfekmmtggascdymtvae  
aeieeekkkkeeaeieaalgmvvlscinpvagavaigaysaysaanaatgknivtgrklskeerimeglsliplpgmgf  
lkgagkslmlkgfkggekf  
avktglqktmqqavsrispkmgmmknsvlngsrnfaqnthvgqmlsnmrgqathtvqqsrnwigqqaqnvkrivnngldk  
eiahpfkqqlapagmggik  
faetttlrnmqgnmkravtpqnhvthgpkdsvrsegkhsvsseinlskyvespnytkvkygeqyarlrpkklkaniey  
ttptghiyrt dhkgriev  
yvdlslkdgrrnhaqrvtvggedrlddddghliarmfggskdidnlvaqskyinrsfkengdwykleklwekaiksgk  
sienikievkykgnsrpt  
ifkveyeingkrnirriInk  
>tr|A5IPH0|A5IPH0\_STAA9  
mmkriIvvlmlailagcsnkgekyqkdidkvykeqnmkiaskvqntikt dikqedsnthvykdgkvivigiqlykd  
rekmyyfayeikdgkaein  
reidpikymkdhkadyedenvevekd  
>tr|A5IPH4|A5IPH4\_STAA9  
mnkiskyiaiaslsvavtsapqtnstafakssaevqqtqqasipasqkanlgnqnimavawyqnsaeakalyIqgyns  
aktqldeikknkgkhkla  
ialdldevl dnspyqgyasihnkpfepegwhewvqaakakpvygakeflkyadkkgvdiyyisdrdkekdIkatqknIkg  
qgipqakkshtllkgkddk  
skesrrgmvgkdhklvmlfgdnldftdpkeataesrealiekhkddfgkkyiifpnpmygsweatiynnykasdkakd  
klrknaikqfdpktgevk  
>tr|A5IPI7|A5IPI7\_STAA9  
mlrgqeerkysirkysigvsvlaatmfvvsheaqasektptsnaaaqketlnqpgeqgnaitshmqmsgkqlddmhke  
ngksgvtvegkdtIqsskh  
qstqnsktirtqndnqvkdserqgskqshqnnatnnterqndqvqnthhaerngsqsttsqsndvdksqpsipaakvlp  
nhdkaaptsttppsndkta  
pkstkaqdattdkhpngqdtthqahqiidakqddtvrqseqkpqvgdlshkidgqnspekptdkntdnkqlikdaIqapk  
trsttnaaadakkvrplka  
nqvqplnkypvfvhgfIglvgdnapalypnywggknfkviieelrkqgynvhqasvsafgsnydravellyyyikggrvdy  
gaahaakygherygkytg  
impnwepgkvhIvghsmggqtirlmeeflrngnkeeiayhkahgeisplftgghnmvasittlatphngsqaadkfg  
nteavrkimfalnrfrmgkn  
ysnidlglqwgfkgIpnesyidyikrvskskiwtsddnaaydltdgsaklnmmtsmnpniyttytgvsstgplgye  
npdlgtfflmdttsriigh  
dareewrknkgvvpvisslhpsnqpfivntndepatrrgiwqvkpiiqgd  
>tr|A5IPI8|A5IPI8\_STAA9  
mwfekfkknknetkyryyeykykdpkytdkwkrvsvlnkntkqsqkeamfrleekikeklnkssselktltfhalldewI  
eyhiktsgfkvtldnIkt  
riknikknssqnlInkidtkymqtfinel snvysanqvrqIghmkeaikyavkfynypnehlsvtlpkksktiedi  
ekeakmynylemeqviqi  
rdfilndnmmqyrarilvagavevqaltgmrigellaIqvkdvdlnkntiaingtihrikcnagfghkdttktagkrki  
ainsrianvIkkimlenkk  
mqqwepsyvdrqfi ftccqgnpmqgsrlnkrIssaeslninkvtthtlrhthisllaemnisIkaimkrvghrdekt  
ikvythvtekmdreleqkl  
eklv  
>tr|A5IPI9|A5IPI9\_STAA9  
mcvkftdaeiyikesvenyssefdiyddeqelklkiyeqimlkikseykdyIfrlin  
>tr|A5IPJ0|A5IPJ0\_STAA9  
mkrllslllasalilsacgsndgdkkgeskkteky  
>tr|A5IPJ1|A5IPJ1\_STAA9  
mqvvpndkltvkeswtagkIrgklngqkqvfdrmsisekrdiiekfnnipfeveiernqetkykiiektlnkreInt  
msesgkdmllknkvqfId  
sfstrfsssfspnngqmfyeminqnfvlIemIdehlknenkieeqneeiInlkqiankgv  
>tr|A5IPJ7|A5IPJ7\_STAA9  
mnaIyktllIImavvtkwvkiekhtrkpvisralsdylnksItpkdaenstesarrllkfaeqtisk  
>tr|A5IPK4|A5IPK4\_STAA9  
mtneIlnknmgdnlsvrktIeaqgdIqfpanyspenamksamlqlqelkgskkdgykpalefatstsianalmdmvv  
qglnpaknqgyfImygdkv  
qfqrshygtmavtkrvagaeinaevifegdevkyktnkgkiveIhtqsfgnrntqniigayatvfkdesrnyteimt  
feeieeawkqsqmvynvgf  
kedgthrrfpqemakktvinrackklnstddasllsnqikeseqrqrkevIdaeveenaneqqldfepvfeeaytel  
enekpidvsdfeeikepak  
ekeseepf  
>tr|A5IPL0|A5IPL0\_STAA9

Tsompanidou\_et\_al\_Supplemental\_FASTA\_File

mtdsarkeylsrffgskrylyqdnervahihvngtyyfhghivpgwqgvkktfdtaeelekyikqhgleyeeqkqltlf  
>tr|A5IPL5|A5IPL5\_STAA9  
mnrekieqsvisasayngndtegl1kevedvykkaqafdeileglpnamqda1kedieldeavgimtgvvykyeeaqe  
nd  
>tr|A5IPL6|A5IPL6\_STAA9  
mtnt1tidqlqellqikefddriptrn1ndtvasmiiefvewintleffknwkkqpgkpldtqldeiadylafslqltl  
tivdeedleettevmvdl  
enevtlplk1hsvyfvhvmht1teqfvkigidsivqvlimpflyantyysidqlidaykkkmkrnherqdgtdtagkgyv  
>tr|A5IPL8|A5IPL8\_STAA9  
mfntpkmlpekhtevfktykngtpeekakieddfikeindkdfyspmanmnehelramlrmmps1idtdgdgndd  
>tr|A5IPM0|A5IPM0\_STAA9  
mikqilr11f1lamye1gkyvteqvyimmtanddveapsdfaklsdqsd1mraevse  
>tr|A5IPM3|A5IPM3\_STAA9  
mtkkkyg1k1stvrk1led1cdypnyhkqled1rseimtpwiptdtniggefvsntskskemavtnylcsirrgkilefk  
saieriintssrkerefiq  
eyyfnkkt1ivvcydihisestahrikkivsklaeelgey  
>tr|A5IPM6|A5IPM6\_STAA9  
mypsqtqteifdaiivrtnnkpetleemivryikqhleklpeisigqeyeqrpdivkepkipvatgavdplkpddrmit  
nphan1vdqkvsvyivgkpi  
afkhtddevvkr1dev1gnrfrddk1hsv1tgasnkiewlhpyldeegefk1frvpaeggipiwtdeheeleafirmyk  
1enetkveywdkvtvnyyv  
yengslipdysnnlenskthfstgswgkipfipfknndleisdi fmykt1idaynr1sd1sntfkdsneltyv1knydd  
qelpefkr11ryygaikvs  
dnggvdtiqvevpvenskkyldelyqkim1fgqavdfssdkfsgapsval1eflytn1n1kadklarkakvaiqellwfv  
fehfdikgehndvdisfny  
nkvante1qvtaqqsng1vshetv1enhpaved1qaelerieeqemeynkq1pn1ddggadgaqqqersnnkese  
>tr|A5IPM7|A5IPM7\_STAA9  
mpnnkkl1tikngndideyids1iskaekpieqlfanr1keikq1iadmfekyqsddvyvtwtefnkynr1nkeltrigt  
mltdyrqiakmiqksqd  
ayiekflms1lyletvsqtsmqfdvpskevitsaieqpiefir1vpt1qkhrdev1kkir1hitqgimsgegyskiakai  
rddigmskaqslrvarte  
gramsqag1dsalvaqng1qmykywqatkdrtrrdthrh1dgakkridepfkssgcigqapklfvgnnsakenincrc  
1myyidend1pstrvrkd  
dgttevipqmyrewekykrkrk  
>tr|A5IPM8|A5IPM8\_STAA9  
mdlyt11gqfkdgeidkqkvidaidesksmvprsr1ndknteieelkeeiskrdeqivklqdsvkddseiqlkeleelkn  
qns1etkyketq1nnavk  
lavakeandandi1afinkde1lvdgdtkg1dkaiet1keskpyl1fasskpvgktpqgggnpdssvtkekfdnmsvae  
rnely1ndretfek1vnqn  
>tr|A5IPN1|A5IPN1\_STAA9  
mdakdvkming1s1ndssndeqiey1ieeykgaedycnqkfdkvepsgvkka1aekicfgttgnisartmgvnsytyv  
tdipssayay1mpyrklsw  
gkryv  
>tr|A5IPN2|A5IPN2\_STAA9  
mfnpfdefphtieigevevagtfpkeyerfksnetikgfmtdptsset1kfhqmskdfdrnlytppyhipitnkt1fnieg  
ktyevvgepvdqggqhein  
1tr1rvrsigk  
>tr|A5IPN4|A5IPN4\_STAA9  
mwsvvery1fnkvynk1ksnpi1qkq1dgrvfcdvqkdavypyivvgetnvtnketttsmvedvgit1hvysqarnrdea  
sqi1qf1gfv1nneieidy  
ysfiksr1dtqevitdigqytkhg1ir1vfkyrhnt1qrsvtngag  
>tr|A5IPN5|A5IPN5\_STAA9  
maqdkyivalqiadk1lakk1tieeat11gslaegghtisnd1aei1qggkkdysrnsveeeik1t1dvvpdkgq1alk  
esvkqfkq1rvwiwetkkr  
dgkhhgvfayvvi1eehwsfddednk1eitakvkfnsadgtind1pkew1npsal1apvvefedmnayedsyenrtkkta  
gssd1sm  
>tr|A5IPN6|A5IPN6\_STAA9  
mtettfnpits1tinneevkakatfmdktakkfateqednkrkqktsqftnvynal1erdtvaivdfwecatay1gks  
apkredieaeimeieren  
dt1n1lqgal1vmnnsqf1kqsr1fwtqmnqaps1akedekegakagiemmknnykeimtvapy  
>tr|A5IPN8|A5IPN8\_STAA9  
meknflaritari1sdfkrnmrtaqrmaktdipdeiktevtanirdyqrel1traksmaqrwrehkvnidadaskvkqv1sf  
vkvelsn1rrkkveidgda  
sg1krnvatskam1agwrkhtvk1dfdtgmkmqval1tagkral1dqyqstmdgiasnirtfgtifaqqvkg1mias1qa  
1ipviag1vpaimav1nav  
gv1gggvvg1agafsvagvgamaitalkmvkdgt1avtkevqnfrdasdqlkttwqg1vkenqas1fnamsagir  
gvtsamsq1kpf1sevsml  
veanarefedwvkhsetakkafealnsiggai1fgd11naagrfgd1vn1ltq1mpl1kfvsg1qnm1s1afqnwansva

Tsompanidou\_et\_al\_Supplemental\_FASTA\_File

gqnaikafidytttnlpmki  
gqifgnvfagignlmiafaqnssni fdwlvkltsqfrawseqvgqsqgfkdfisyvqengptimqligniikalvafgta  
mapiasklldfi tnlagfi  
aklfethpaiagvagvmgilggvfwalmapivaissvltvnvfgls lfsvvekilefvrtssltvgalealtgvfgtisap  
ilaviavigafigvlyvlyw  
ktnenfrntiteawngvktavsgaiqgvvgwltelwgkiqstlqpimpilqvlqgqifmqvlgvlgvigiitnmniiqglw  
tltitafqaigtvisvavq  
iivglftaliqlltgdfsgawetikttvtnvldtiwqymqsvwesii gfltgvmnrtslsmfgtswsqiwstittfvssiw  
nsvtswfsrvassvaekmg  
qalnfiitkgsewvsnwntvtsfaskvadgfkrrvsvngdgmknaldkiksffsdflnagaeligkvaegvanaahkvv  
savgdai ssawdsvtsvs  
ghggsglqkglavsqakvmatsfgkftselgstltdgfnds ltpsvdghmtndvqshmkennrpivnvtvrnegdlnm  
ikshiddmdakdgsfnlm  
>tr|A5IPN9|A5IPN9\_STAA9  
miahdveikngvkyrvsdnphtykh lrvldynvigsgykrnyspldgvdgrfhnakeeykkvelrlryevpkiaayah  
lksdiqtlyfygrfy lrela  
tpdntikfenmfeplegefel dyvdgrql fvglvsevsfdttktsgeitl tfettel pffesigystdlesdndleksw  
pdrialnendrsrqmtfyn  
tssgdvyyngdval tqfnqfnvveie laedvkaddkgftfymdkgnisvikdvd lkagdkii fdnkhtykdnlnidlyn  
ktleqpvlypgwnhfkannr  
lmkki vfrhkl yyr  
>tr|A5IPP0|A5IPP0\_STAA9  
mpvllkslqgvghaiyvntkl neklnedstldidmienastfdaigaitkmwtitnvkgeddlnyvivmldkstignki  
klsikarqkelddlnnsri  
yqeynesftgveffntvfkgtgykyvlhtkvdaskfeglgkgdtrleifkkg leryhleyeydaktktfhlydel skvan  
yyiksgvnadnvkiqedas  
kcytyirgygdfdgqqtft eaglqfefthplaqligkreapplidgrikkedvllksmelvikksvtasisldfvaaqeph  
fpeanpri gdvvrvaepti  
gyndlvriveitthrdaynni ikqdvvlgdftmrdryrkai heatnyvknvktktsdpakyl relnakvnaslsinnelv  
kqnekinakvdkmstktvt  
tangtimydfstsqssirniksigtigdsvargshaktnftemlgkklakttnlakggatmatvpigkeavensiyrae  
qirgdlii lqgtdddwlhg  
ywagvpigtkttdktfygafcsaievi rknnpdskilvmtatrqcpmsgtthrktdtknklgl tledyvnaqilacse  
ldvpvfdayhtdyfkpynp  
afrkasmedglhpnekghvimeylikdyysfyd  
>tr|A5IPP1|A5IPP1\_STAA9  
mayglitsl hsmtgrkivaqheynrlldegmsklekmfiyhqeeiyahsakqiky lndsvedyl tylngrfsnmi lgh  
ngdginevkdaridntgyg  
hktlqdrlyhdystldaftkkvekavdehykeyrateyrfepkeqepelit dlspytnavmqsfwdprtkiiymtqarp  
gnhym lsr lkpngqfidrl  
lvknngghgthnayryidgelwiysavl dsnkknkfvr fqrtygeitygnemqdvmpnifndrytsaiynpienlmifre  
ykaserqaknsl nfi evrs  
addidkgidkvl yqmdipmeytsdtqpmqgitydagi lywytgdsntanpnylqgfdiktke llfkrridiggvnnnfkg  
dfqeaegldmyydl etgrk  
alligvtigpgnnrhhsisysigqrgvnqfl kniapqvsmtdsgrvklp iqnpaylsditevghyiytqdtqnaldfp  
lpkafrdagwffdvlpghy  
ngalrqvltrnstgrnm lkfervidi fnkknngswfnpq sagywehipksitklsdlkivgl dfyitteeskrfsdfpk  
dykgiagwvlevksntpgn  
ttqvlrrnnfasahqffvrnfgtggngsws iiegkeve  
>tr|A5IPP4|A5IPP4\_STAA9  
mmkmiyptfkdi ktfyvvgcykneqikwyvdmgvidkeeyalitgekypeakdeksqv  
>tr|A5IPQ1|A5IPQ1\_STAA9  
mdf1dfkrkgaelanfytgi indllrveateskgtqlkas  
>tr|A5IPQ3|A5IPQ3\_STAA9  
myrykp1lqsihlpngiki snrfvl spmtvnastkegyitkadlayaarrsnsagmqvtgaayiepygkl feygnidhd  
acipgltnmastmkqhs l  
aiiq lahagrfsnqai l nfgkvypspmtlhspiehvviamshekinsiiqqyrdatlraikagfdgveisiaqrlligt  
ffstfsnr rtdhygads lk  
nrarlclevmravqevideapdnfilgfratpeetrsgdlygtidefnqlidwvmdvsniqylaiaswgrhiyqntsrt  
pgdhfgrpvni vyehlag  
ripliasgginspesaldalqhadvmgms spfvtepdfvhklaeqrphdinle fsmadledlaiphaafkdivkmmdyge  
glkkhtrdalrqleqnyhd  
sss  
>tr|A5IPQ4|A5IPQ4\_STAA9  
menifkielmngicrsenmnmkkknkgeki  
>tr|A5IPR2|A5IPR2\_STAA9  
mki l vvcghglgssfmvemnaqea l rqlnapdsdievhsdimtaspeadlfi cgrdlaenaerlgdvlvldnil dkael  
qqklsek lqq l nmi



Tsompanidou\_et\_al\_Supplemental\_FASTA\_File

>tr|A5IPR4|A5IPR4\_STAA9  
mlsyrqieilylliehqtfipintianqlgvsprtitydiayieqyaetyhyqvsrnkaagikvttahatl1nelehnlt  
nqihfskderlthialklf  
ettdpvstkqlagdvnsrriaddikmiqaqldqyhkl1nyvhnkgfnvigeedhyrkayahfihqymkqaapfieadi  
fnseialvrraiiktlns  
enyhlvqsaidglyhiliaiqrlnenfsfdipineidkwrhtnqyaiaskmienlerscnvtfpeseiifitlhl1gsk  
mtehtassitfeyhdlsqn  
iheliticvsqelgidmskdnk1htslithikpaihrikydm1qpnlrqevmrrypqiieavskhispieqdaairfnd  
eltyitihfassiervath  
kqsmikvvl1cgsgigtsqllksklnhlypefhiwdaysiyqleesrllqdnidyvistvpceisavpvihvdpfinqqs  
rqklnqiindsreqrvmk  
atdgksladl1pehriineqpl1siesaiavavqplindgivyntyaaalkqfeqfgsymvisphialihagtdyvqng  
vgfaltyftegiifgskan  
dpvhlvitlatdhpnah1kalgqlsec1sndlyrqfdldgnifkikqhialtmtkev  
>tr|A5IPT5|A5IPT5\_STAA9  
mtrvvl1aaayrtpigvfggafkdvpaydlgatliehiiketglnpseideviignvlqagggqnpariaamkgg1pekvp  
aftvnkvcgsglksiqlay  
qsiivtgendivlagmenmsqspmlvnnsrfgfkmghqsmvdsmydgltdvfnqyhmgi1taen1veqygisreeqdtfa  
vnsqhkavraqqngfedse  
ivpvsipqrkqepilvtkdegvrensvekl1sr1rpa1kfdgtvtagnasgindgaam1vmsedkake1nieplavldg  
fgshgvdp1imgiapvgav  
ekal1krskkelsdivfelneafaaq1lavdre1kl1ppekv1vkggaialghpigasgarv1vt1lhq1ndevetg1ts1  
cigggaiaavvskyk  
>tr|A5IPV2|A5IPV2\_STAA9  
mkt1lktityal1tiigayaa1f1lktidshg1tdqfnplvkeddsyvkttevestrmdq1rsytqsa1fnkegketq1my  
tatfdv1kphry1ki1thkgh  
hvetfeevekeevpkka1dk1sr  
>tr|A5IPV8|A5IPV8\_STAA9  
mkkrl11stflasa1l1tgcasdqsdnedhhtstgihapksak1letkdi1fnsdkknsdi1sdaemkqai1ekyl1svnsdi1  
dnkyimqhk1dkqidsqtk  
vteqqaet1sh1sn1lavknd1hfkkfvtennipkeykkpvelmnyfka1nstianvdediek1syqpqnkinvvdvptk  
yagdv1kkq1qdk1kdf1ks  
kg1ksdvidk  
>tr|A5IPX4|A5IPX4\_STAA9  
mnimvpeekgsit1skeaa1ifatakfkpfknriknp1ktnpf1kl1henkks  
>tr|A5IPZ0|A5IPZ0\_STAA9  
mkfk1kv1vatamvgv1atgvvygnqadavvsqng1vl1hddan1lehel1syidv1ldknadqatkdn1rsyfadkgl1hs  
ikdi1nkakqdgfdvskyey  
hvk  
>tr|A5IQ01|A5IQ01\_STAA9  
mmfnq1nknkne1leesyekkr1ene1hn1nel1hrtrkenersydvfy1lkhemnysedaqrk1mtrnieaye1eqe1nei1  
rkqew1leeyked1kksye  
kq1dk1sd  
>tr|A5IQ07|A5IQ07\_STAA9  
mkrtkgeieae1skaitqwekdf1grgs1svksdi1rdmvi1slqg1ltpaeyrv1cstneg1lnik1rtrselvesgeqdl  
ndi1lkitg1kvmsfhsd1  
stvtgeri1vfk1ledn1lekhi  
>tr|A5IQ08|A5IQ08\_STAA9  
mlsi1smchkfhftdniki1kfill1cilqikhci1eitifcyf1qfstiyiytegvrrinrvifvyial1iit1vrfftpi  
hpsfsn1iywi1fvlyfipi  
ilcvigfkaek1iatmvi1pnf1gilyr1yayvthilfm  
>tr|A5IQ10|A5IQ10\_STAA9  
mriktpspsyl1kgtnghai1ll1hsftgtnrdvkh1lae1ndqg1fscyapnypgh1ll1kdfmtynvddweevekayqf1  
vnegyes1satgvs1lg1lm  
t1kl1aghyp1kriavmsapkeksddg1ieh1vyysqrmsni1n1dq1qassaql1aaid1yegeitkfqh1fiddimtn1nvi  
kipan1lfggkdepsyets  
ahfiyeh1gsvdke1ng1kdshh1mthgegrdi1leenvirffna1t  
>tr|A5IQ11|A5IQ11\_STAA9  
mmkrqqsq1wksstgfi1lasagsa1glgamwkfpymagi1ygggafl1amflifti1fvgl1pl1imeftvgk1mgrtyttqiysk  
l1tgk1kwni1igwngn1lavf  
il1fgfysv1ggwivi1yigq1lwq1lvi1qrinh1qem1nfeavi1snpw1l1vlgqgi1fi1fatmi1vml1gvekg1lekaskvmmp  
l1fvf1lii1v1ks1t1ldga  
legvkfi1lqprvse1tadg1il1falqgsfft1sl1gttgmi1tyasyaskdmtik1ssaisivmni1fsv1lag1aipal1hsf  
gyepqegp1l1fkvl1pmvf  
sqm1h1gt1l1fy1gfl1vl1fl1faalt1ssis1le1nvsnftkndntkrkkvavigsil1vfi1sipat1sfgil1kdvr1fgagtif  
dnmdfiv1svn1lmp1galgt  
t1v1gq1l1dkk1l1qy1fgkdrfr1fngwyy1likyampvvi1l1vfiv1qlfs  
>tr|A5IQ30|A5IQ30\_STAA9

Tsompanidou\_et\_al\_Supplemental\_FASTA\_File

mnyqalymrppgsfedvvgqehvktlRnaiskekqshayifsgprgtgktsiakvfakainclnstdgepcnechick  
gitqgtnsdvieidaasnn  
gvdeirniRdkvkyapseskyvyiidevhlmttgafna11ktleppahafilattephkipptiisraqrdfkais  
ldqiverlKfvadaqqiec  
edealafjakaseggmrda1simdqaiafgdgt1tlqda1nvtgsvhdealdh1fddivqgdvqasfkkyhqfitegkev  
nr1indmiyfvrtdimnkt  
sekdeyralmnlldmlyqmidlindtlvsirfsvnqnvhfevllvklaeqikgppqviauvaepaqiasspntdvllq  
rmeqlqeqlktlkaggvsv  
apaqksskkpargiqksknafsmqqiakvldkankadik11kdhwqevihaknndkks1vs11qnsepvaasedhvlvk  
feeeihceivnkdkdekrss  
iesvvcnivknkvvgvpsdqwrvtreylnqrknegddmpkqqaqtdiaqakdlfgeetvhvidee  
>tr|A5IQ42|A5IQ42\_STAA9  
maketfyittpiyypsgnlhighaystvagdviarykrmqgydvryltgtdehgqkiqekaqkagkteieyldemiagik  
qlwakleisnddfirttee  
rhkhvveqvfer11kqgdiylgeyegwysvpdetyytesqlvdpqyengkiiggkspdsghelvkreesyffniskytd  
r1lefydqnpdfiqppsrk  
neminnfikpgladlavsrtsfwgvhvpsnpkhvvywidalvnyisalgy1sddes1fnrywpadihlmakeivrfhs  
iiwpillmaldlplpkkvf  
ahgwi1mkdgmkskskgnvvdpnili drygl datryylmrelpfgsdgvftpeafvertnfdlandlgnlvnrtismvnk  
yfdgelpayqgplheldee  
meamaletvksytesmes1qfsvalstvwkfi srtnkyidettpwvlakddsqkdm1gnvmahlveniryaav11rpflr  
hapkeifeqlninnpqfme  
fss1eqygv1tesimvtgqpkpifpr1dseaeiayikesmqppateeekeepskpqidikdfkveikaatiidaehvk  
ksdk11kiqvd1dseqrqi  
vsgiakfytppdi1gkkvavvtn1kpak1mgqksegmil saekdgv1tlvs1psaipngavik  
>tr|A5IQ90|A5IQ90\_STAA9  
mseevgakrwyavhtysgyenkvnk1lekrvesmmteqifrvvi peeeetqvkdgkakttvkktpgyv1velimtdes  
wyvvrntpgvtgfvgsaga  
gskpnp11peevrf11kqmg1lektidvelevgeqvriksgpfanqvgevqei etdkfkl tvlvdmfgrpvevefdqi  
ek1  
>tr|A5IQ95|A5IQ95\_STAA9  
mshyydedpsvisneqr1qyqlnhhkid1itdngvfskdkvdygsdvlvtflkahppgskriadvvcgygpig1miak  
vsphhsitml dvnhrala1  
veknk1ngidnivkesdal savedksfdfiltnppi ragketvhri feqalhr1dsngel fvv1qkkqgmpsakkrmn  
el fgnvevvnkdkgyyilr  
sika  
>tr|A5IQ97|A5IQ97\_STAA9  
midvnnfhymki glasperksrswsfgevkkpetinyrtlkpekdg1fcerifgptkdwecscgkykrvrykgmvcdrcgv  
evtkskvrrermghielaa  
pvshiywfkgyipsrmg11ldmspraleeviyfasyvvvdpgptglekkt11seae frdydykypgqfvakmgaegikd11  
eed1deek11rdelesa  
tgqr1traikr1evvesfrnsgnkpswmi1dv1piippeirpmvqldggrfatsd1ndlyrrvinrnnr1kr11dlgagg  
iivqnekrm1qeaavdalid  
ngrrgrpvtgpgnrplks1shmlkgkqgrfrqn11gkrvdysgrsviavgps1kmyqcg1pkemal1fkpfvmkelvqr  
eiatniknaks kiermdde  
vwdvleevi rehpl1nrapt1hr1giqafept1vegrair1hplvttaynadfdgdqamavhvp1skeaqaearm1mlaa  
qni1npgdkpvtvpsqdm  
vlgnny1t1erkdavntgai fnntnev1kayangfvhlhtrigvhassfnntfteeqnk kilatsvgkiifneipdsf  
ayineptqenlerktprny  
fidptt1legglkeyfeneeli epfnkkf1gniaevfnrfsitdtsmm1drmkdlgfkfsskagitvgvadiv1pdkq  
qil dehek1vdritkqfnr  
gliteerynavveiwtdakdqiqgelmqsl dktnpi fmmSDSgargnasnftqlagmrg1maapsgkiielpitssfre  
gl tvleyfisthgarkgla  
dtalktadsgyltrr1vdvaqdvivreedcgtdrg11vsdikegtemi epfieri egryskktirhpetdeiirpdeli  
tpeiakkitdagieqmyir  
saftcnarhgvcekcygknl atgekvevgeavgtiaaqsigepgtqltmrtfhtggvagsditqglpriqei fearnpgk  
qaviteiegvedik1akd  
rqqeivvkganetr sylasgtsriiveigqpvqrgevl tegsiepkny1svagl natesy11kevqkvymqgveiddkh  
vevmvrqm1rkvri eagd  
tk11pgslvdi hnftdanreakhrkrpatakpv11gitkas1etesflsaasfgettrv1tdaaikgkrdd11glkenv  
iigklipagtgmrrysdvk  
yektakpvaevsqtteve  
>tr|A5IQA4|A5IQA4\_STAA9  
mvqslhefleeniylkenglyneidtiegangpeikingxyin1ssny1glatned1ksaakaaidthgvagavrt  
ingt1dlhdeleetlakfk  
gteaaia yqsgfncnmaai savmnkndai1sdelnhasi idgcr1skaki irvnhsdmd1rakakeavesgqynkvmyi  
tdgvfsmgdvak1peive  
iaeefg11tyvddahgsgvmgkagtvkhfg1qdkidfqigt1skaigvvggyvagtkelidw1kaqsrpflfsts1apg



Tsompanidou\_et\_al\_Supplemental\_FASTA\_File

mnvlikkfyhlvvrilskmitpqqvdkphivfmmtpedikpiikalnssyqktvlttqkqapylseisdvdvdiemtn  
rtlvkqikalksaqmiiid  
nyy11l1ggynktsnqhivqtwhasgalnfgltdhqvdvsdkamvqqyrkvyqatdfylvgeqmsqcfkqslgateeqm  
lyfglprinkyytadtratv  
kaelkdkygitnklvlyvptyredkadnraidkayfekclpgytlinklhpisiedsiddvssidststlmlmsdiiisdy  
sslpieaslldiptifyvy  
degtydkvrglnqfykaipdsykyvyteedlimtiqekehllsplfkdwkhyntdkslhqlteyidkmvtk  
>tr|A5IQL1|A5IQL1\_STAA9  
mkpkvllaggtgyigkylseviendaelftiskypdnkktddvemtwiqcdfhyeqvvaamnqidiavffidptknsak  
itqssardltliaadnfrg  
aaainqvkkviyipgsrydnetierlgaygtpvettnlvfkrslvnelqvskyddvrstmkvvlpkgwtlknvvnhfia  
wmgytkgtfvktekshdqf  
kiyiknkvprlavfkietadgiitlilsgslvkkytvnqgelefrlikesavvyihlydyiprlfwpiyyfiqapmqk  
mmihgfevdcrikdfqsr1  
ksgenmkytk  
>tr|A5IQL5|A5IQL5\_STAA9  
mtfneiifknfrqnlshyaiylfslitsvlyfsfvalkyahklmtesypiikegsqvgysylffiiiafllyanvlfi  
krrsyelalyqt1glskfn  
iiyilmleqllifiitailgiiigifgsklllmivftllgikekvpiifslravfetlmligvayfltsaqnfilvfkqs  
isqmsknnqvkethnkkit  
feevvlgilgivilitgyylslnivqyydsigilmfillstvigaylffkssvslvfkmvkkfrkgvisvndvmfssim  
yrikknafslvmaiiisai  
tvsvlcfaaisraslsseikytaphdvtikdqkanqlaselnnkiphfnykevihtklykdnlfdvakepynvtit  
sdkiypntdlkrqadlfv  
aegsikdlvkhkkgkaiigtckhhvniklrkdinkiyfmdtdvlggptfvlnkdqyeirkytkakhivsqfgfdlkhk  
kdala1ekvknkvksikt  
rseaiississltgillfvtsflgitfliavcciiyikqidetedelenysilrklgftqkdmarglkkfkmfnfglplvi  
vlshayftslaymklmgtt  
nqipvfi vmglyicmyavfavtaynhskrtirhsi  
>tr|A5IQN0|A5IQN0\_STAA9  
mrtlnkdehnyikqianihetllsqaesnykctklisialryemiscrlehtndkiyiyenegqliafiwghfsneksmvn  
iellyvepqfrklgiatql  
kialekwtmnaKRisstihknnlpmislnkd1gyqvshvkmkykid  
>tr|A5IQN9|A5IQN9\_STAA9  
mktr1kfqvdkd111aiivvgvcgslvalamfflsgymvtqsalgaplyalmilvvtvklfgflraitryverlishkatf  
tmlrdirvqffgklvnpv  
nyvrklsssd1srmsrvealqniylrvyppvvgltalvtvivlafisighallimvsmftllivpwlsskkartl  
kkhaaneqarf1nhfydyk  
agmdelrrfnqinhyrdnlmaklnhfdklqlkeqrfltiydfilniamlsifgslvlgliqinagqlniiymtsivlmi  
l1lfeqavpmtnvayykad  
tdqalhdinevisvpstngkkr1ndkydatniyevkdasfkywnqptyvlsdinfnvrgekiaivgpsgsgkstllqim  
aglyqldsgsvrfenmdmf  
eiddkdfeslnvl1qsqq1fdgtirqlftdekdeavqaifkqldlehalerqidldghtlsggeiqlaitrml1kd  
tastwildepttaldkqns  
lkvmdlieahaetlivathd1t11srfetiiivmingkivekgyqqlanqgalwnmiqyna  
>tr|A5IQP5|A5IQP5\_STAA9  
maiavllnrmfrmhnp1feyiyqqkedi dacyfiipeedmssasdlkaqfyrgtlqrfyqslhaekltpyvmsyddiis  
fckennisvviagdimy  
hleeedyilhqrs1fneariavt1irgnhyfkasktmnqqgepykvfimsfyrkwrpylrhrdvyhyd1ksfedfviaspdd  
1vfddiafsgssqvieqkw  
qhfl1dqdiqnyesgrdy1pevltsqlsvalayglldiieifndllarydedeanheafirelifrefyyv1mtqypetsy  
qafkpkyrqikwsqneanf  
nawcegqtgfpiidaaimeltqtgfmhnrmmvvsqfltkdlfidwtwgekffrkhli dydaasnihgqwsastgt dav  
pyfrmfnp1rqserfdaka  
lyiktylpi fnqidakylhdtqrnesnlfeqqielgshyprqmvdhqeKrtqvl atfkald  
>tr|A5IQP9|A5IQP9\_STAA9  
mnkqifvlyfni fliflgiglvipvlpyv1kd1gl1tgds1gl1vaafalsqmiispfggtladklgkkl1icig1ilfsv  
sefmfavghnfvslmlsr  
iggmsagmvmpgvtgliadi spshqaknfgymsai insgf1lpggisgfmaevshrmphyfagalgilafimsivlihd  
pkksttsqfql1epq11tk  
inwkvti1pvi1t1v1sfgl1safet1yslytadkvnyspkdisiaitggigfalqiyffdkfmyfse1tfiaws1ly  
svv1l11vfangywsim1  
isfvvfigfdmi rpa1tnyfsniagerqgfag1nstftsmgnfigpliagalfdvhieapiymaigvslagvvivliek  
qhrak1keqnm  
>tr|A5IQS1|A5IQS1\_STAA9  
msiieksglfssfggfgrrgyehdgvipcgaldt1aheianrlvandkneatlemtnkmatirfteptlialaggnvka  
yehmtispykly11dkgd  
vlkfredsyt1rvylavgggfeldaw1gsnstdfnkvig1gfgkgrt1qdgdeik1krdytarhhklfenlahtkqtdwgid

Tsompanidou\_et\_al\_Supplemental\_FASTA\_File

gyalsfnmsdvfhvknk  
gtedfkedaigrfvkhdykvtskanrmgmmlegekikafyedmpyqtvkkgtiqikrdgtpiillndhytlgsypqigt  
iasyhltklaqkpqgsrlk  
fqfidiltaeknlvkysnwlnqlfhgieyrmqlmkm  
>tr|A5IQS8|A5IQS8\_STAA9  
mtrksiaidmdevladtlgeiidavnfradlgikmealngqklkhvipehdglitevirepgffrhlkvmphaqevvkl  
tehydvyiataamdvpstf  
sdkyewlleffpfldpqhfvcgrknivkadylidnprqlieiftgtpimftavhninddrfervnswkdveqyflndie  
k  
>tr|A5IQU5|A5IQU5\_STAA9  
maiklssidqfeqvieenkyvflkhsetcpisanaydqfnkflyerdmdgyylivqgerldsdiakktvkhspqaf  
yfvngemvwnrdhgdivs  
slaqaee  
>tr|A5IQV4|A5IQV4\_STAA9  
mdnvtrykitesssqssqayyhlsefelseqqsyasehivrairmrqtilliyavtgagktemmfqgiqyarrqgdniaivs  
prvdvvveiskrikdafiln  
edidilhqqssqqfeghfvcvthqlyrfkqhfdtifidevdafplsmdkslqqaalkssskvehatimyatppkqlse  
ipheniiklparfhkkslp  
vpkyryfklhnnkiqkmllyrilqdqinnqrytlvffnietmiktfsvyqkkitklyvhsedvfrfekveqlrnghfdv  
iftttilergftmanldv  
vidahqytqeaaliqigrvgrklecpagkvlfhegvsmmiqakkeiqrmknlalkrgwide  
>tr|A5IQY9|A5IQY9\_STAA9  
miniisaigsigtfimalfyfvsvsvqlyqmkiisflpalgnqillerekdqlnimsateehhkyiklynlgggaak  
kiaievlngndkviqkkyv  
nilpskegympinknvyeeletienngyeadlnvrmtyyhnvsrkqevilkqqidrfntynnkeiydlqfi  
>tr|A5IQZ2|A5IQZ2\_STAA9  
mknkllvlslgalcvsqiwesnhasavvsgeknpyvskaletkdknsksnsyenyrdsleslisslsfadyekyeepeye  
kavkkyqqkfmaeddaln  
flneekki knadisrksndllgltherysyifdtlknkqeflkdieeiqlknsdlkdfnnteqhnadveinnlenkvlm  
vgytfyntnkdeveelyse  
ldlivgevdqksdkkravnqrmlnrkkedlefiidkffkqi qqerpesipaltseknhnqtmaiklkadteaakndvskr  
skrsln tqnnksttqeise  
eqkaeyqrkseal kerfinrqsknesvsvliddedndendrqlvvsapskkpttpttytetttqvpmptverqtqqqiv  
yktpkplaglngeshdftt  
thqspttsnhthnnvfeetsalprksgslvgisqidsshltrekrvikrehvreaqklvdnykdthsykdrlnaqq  
kvntlseghqkrfnkqink  
vnygk  
>tr|A5IQZ8|A5IQZ8\_STAA9  
mneltkeqkytiakfyklyiersnnetetvanffgdakdarenyfcdryqdfntncqilinqkyltgeilddniynis  
ilnktfief  
>tr|A5IR03|A5IR03\_STAA9  
maktlylmrhgqtlfnfkgliqggfdspitelgiaqaqkarsyyetkginfdlyasstqerasdtlenvapnqsyqrfkg  
lkewhfgifegesvylfdn  
lykpedlfgdripvfkgearqqveerivktlhdimsqtknallvshgtingvflryclkldealkhnigcnilkfeyd  
ngtfkfvelidpnl  
>tr|A5IR05|A5IR05\_STAA9  
mieiktlnndfneykrlvstvnneeftqdshysqtmtdtlhdilnqgspkcivfgcyenetliataaleqiryvgkehk  
slikynfvtnndksinse  
infiiynarqnyeslltsivsnigakvfysalgfdilgfeaknaignayfdehwlfydlink  
>tr|A5IR12|A5IR12\_STAA9  
mkenllgtiwsiatfyysrmmkimnlaikikiggs  
>tr|A5IR14|A5IR14\_STAA9  
mmaivnkviivegksdkkrvqqviaepvniicthtgmsidklldmieslydkqvfvladsddegdri rnwfkrylseseh  
ifidktycqvancpkqyla  
hvlshgftckketp1lpninnerlvlvne  
>tr|A5IR27|A5IR27\_STAA9  
mcvkftdaeiayikesvenyssefdiyddeqelklkiyeqimlkieseykdiylfrlin  
>tr|A5IR28|A5IR28\_STAA9  
meenktlkeylnrflegkyvvenryiyqfssnpeafpfrkddykisifylnqsffeepcivvisndsklkeiynfrnt  
dikhlskhftsyyidskky  
veeqslldfnnyiytsyygkyigtviiqnldlffnygkrl andhyntlisksekl inkahdei qpfnhldlnsmk  
kivdditfsyqieqglqay  
krelylpaaatfavaietfliklkkvnikkhkdtstmytkllgeltkegkvnyrtkkrveiaysmrniinhsqagavak  
gcdflntlkdivdener  
ilteysksinke  
>tr|A5IR35|A5IR35\_STAA9  
mntlykttllit mavvtkwkwkierntkrpvinrndfskestaetierhsdpdsgikllkafsdftkqaekqkptlgevy  
rrnkpelptvtldenglfi

Tsompanidou\_et\_al\_Supplemental\_FASTA\_File

ndfrvpyvleegvnnkksmnnlykvsldffaksiiadnyeadnpenqqlf  
>tr|A5IR36|A5IR36\_STAA9  
mmkns1qake1avi1svskskagqiiirelnkeledegyiairgripvqlarkkfpyhd1sdqrimeelkkene  
>tr|A5IR38|A5IR38\_STAA9  
mtknykdmtdqdeikdl1seksgeylelakeikgeskfdillfssigvidgdylagsnsvightfdlas1ldstksykdiv  
nvlqmcksqkf1giddke  
d  
>tr|A5IR39|A5IR39\_STAA9  
myyeigeiirknihvngfdk1f1lkgmgisiqvkdmnnpikhayvvdend1dmasd1fnqaidewieentdeqdrli  
n1vmrw  
>tr|A5IR41|A5IR41\_STAA9  
mteqt1feq1nksknvdhteqngltylawsyahqelkkidpnytkvhfphpdintenyfvpylatpegyfvqsvtv  
kdstetew1pvl dfrnks1  
akgsattfdinkaqrkcfkasa1hg1glyinygeelpsasnditeleeringfvn1sqekgrdatidktrw1kisni  
nk1sqkqiaeahqk1dag1  
kq1dseekq  
>tr|A5IR50|A5IR50\_STAA9  
mqqqayinatidiripteveykhfgdvndekdaladylynnpneileydn1kirnvieve  
>tr|A5IR54|A5IR54\_STAA9  
mkvnyetgfg1gvmear1kkmrkqrdackkqrdelivdiak1rerneelenmwrtvkne1lgryefyfr1nelqiesra  
nkavainmgakinasa1ly  
rmdk1dgtnefyef1gqmeddtne  
>tr|A5IR56|A5IR56\_STAA9  
mkkfnvqitytgmi eeteieaes1deaeneahdiarme vpfcd eyeiyvdveqend  
>tr|A5IR62|A5IR62\_STAA9  
mmwlviai11v111fgvm1qaeq1kgdvkver  
>tr|A5IR64|A5IR64\_STAA9  
mnk1tkkqr1faevytipgtecygnatksavhagysektaysqgqrm1knveiqnyikevetk1fdenimgkevlyr1t  
rtargehteveavvktgd  
ykenpdtgkmlvydehiq1vtkspki sdqna1em1grhkh1ftdkqevdhkipmfvdnipedd  
>tr|A5IR69|A5IR69\_STAA9  
meen1kfn1qffadqsddepqgdgkkrdpdnkendegteitftpeqqkvdeler rvahekkkadeyarekaeaa  
keaak1akmnkdqkdeyer  
eqmekeleq1rsekq1nemrsearkm1seavdssdevvn1vtdtaeqtk1nveafsnvkkavneavkinarqsp1tg  
gdsfnhstknkpqn1aeia  
rqkriikn  
>tr|A5IR75|A5IR75\_STAA9  
mtpn1q1ynkayem1ggygfpvisrkemqei pypffvikmpesnrskytfdsysgdtn1vidiwsvsdd1ghhdglvkr  
cidd1tpsvktn dydfeed  
dtnitq1vddttnqelihtsvtisyktf  
>tr|A5IR81|A5IR81\_STAA9  
mtiivrrppkngapvpvettlvkknadgvl tfdilenkytyevinaigrwivshvegendkkeyvitvidrksegdrq  
llectareipidklmidri  
yvnvtgsftveryfnivfagtgmlfevegkvksskfenggedtr1emfkkglehfgleyki tydkkkdrykfv1tpfan  
qkasyfisdevnanaikle  
edasdfatfirygnysgeetfehag1vmearsalaeiygdihaepfdgkvtdqetmdkelqsr1kks1kqs1sldflv  
1resypeadpqpdivqik  
stk1g1ndlvri1vqk1tirginnvivkqdv1gef nrearymkkvntaanyvsv1ndvn1snpskaaen1kskvasiaks  
1dlmsrtd1iedkqgkvs  
skvtvtsdgtivhfdiksnikdvktigtigdsvargshaktnftem1gkklkakttn1arggatmatvpigkeavensi  
yrqaeqirgd1i1lqgtd  
dw1hgywagvpigttdktktyfagfcsaievirknnpaskilvmtatrqcpmsgttirrktdknlgl1tledyvnaqi  
1acsel dvpvydayhtdyf  
kpynpafrkssmpdglhpnerghevimyeliknyyqfyg  
>tr|A5IR84|A5IR84\_STAA9  
mki tvndknevigfvntgg1rns1dvddnnpikfkeefepkrkfvftngeikynsnfekedvpinasqqsas1sdeeler  
gmvasmqmqvaqvnl tme  
1aqnam1tqql1telktnktstegd  
>tr|A5IR87|A5IR87\_STAA9  
mg1pnpknrkptasevewalyiakniaidvpgsgmgaqcw1pny1ldkywgf rtwgnadamaqksnyrgrdfkiirn  
tkdfvpqpgdwgvwtggwa  
ghvni1vvgpctkdywygdqnywttnatgsppyki khsyhdgpgggvkyfvrppyphekst papkpeddsddneknnkv  
piwkdvtti ky t issgevn  
ypeyiyhfivegnrr1lekpkgimrnaqtmssves1ynsrkkykqdvveyphfyvdrhniwaprravfevpnepdyividv  
cedysasknefi fneiham  
vvavdmmakeyip1sien1kvdds iwrsml ehvnwnmi dngvppkdkeyaleka1lni fknrek1lnsitkptvtksrik  
vmvdknadi anvrdsst  
anngsaskppqi itetspytfkqaldkqmarginpkksnawganatraqtssamnvkriwesntqcyqm1n1gkyqgvsv

Tsompanidou\_et\_al\_Supplemental\_FASTA\_File

sslnkilkkggtlnnggka  
faeackkhnineiyliahaflesgygtsnfangkgdvnyfygigaydnnpnyamt farnkgwtspakaimggasfvrkdy  
inkgqntlyrnrwnpknpa  
thqyataiewcqhqastiaklykqiglkgyfirdkyk  
>tr|A5IR89|A5IR89\_STAA9  
mifmegnfknvkkliyegeaytkvyagniqiwwkpsfvikplpknkypdsiedstakwtngvepnksyqvtienvrsg  
imrisqtnlgsseelgisgv  
nsgvaskninfsnpsgmlyvtisdvysgsptltie  
>tr|A5IR90|A5IR90\_STAA9  
mdigtivrtilivawinqflaikhispiqvdevfistvtgvisiwtwwknnfnthaskkgqqkiyevkagiqstggap  
kvngddnnavg  
>tr|A5IR91|A5IR91\_STAA9  
mpsvrtysqaisylkslegawnpdnafgcqcfdtanqwylylfnhrkkgvgaadiptwndftneatvyentvsfqalpg  
dvvifnrnygggyghvgiv  
isatldsitiieqnwlggaywsppevttrrthgydfpmwfi rpfyakettanklrsavkpvkqdkl skgkklmlvaghi  
gaysndpgavangenerdf  
nrkniiprvkkylesvgntvlyggnsnmqdl yqdtlyqrvgnkydygmywiksevkdaiiefhl dsaspqasgghvi  
isdrfpaddidka lssald  
ktvgkigrvtprgdlnanvsadlnlnyrlielgfitstkdl nyiknldsftkriaeaingrqidapsskpsadkitwn  
wkvfyfypnpekairvrkta  
glgtvveedswlytkddwvkfdqvikkdgywwi rkyqregsstnfy cavcritdkeqkiknekywgtiewa  
>tr|A5IR92|A5IR92\_STAA9  
mnkkl1tktliaasalvtvvgsgfhssnynginnvakaseitdse lwnvrda lkdaniidktdketikvyklngge  
seisgtanldnlsntnnt  
vspdsvnrvdi trvnpngntieandawkk lvdklkekhivkvgdkvtihskdpsdekvygkvgdqdsnvknrlispkdit  
hitier  
>tr|A5IRB1|A5IRB1\_STAA9  
mipygdftffli aliallpvii lglgkrsviyngvvtafmivlifssdkhnlfdqkylsvqlisfiyvwwqvllimfy  
yhskpknnsfskfvvmvl  
silplalvkv lqstwlghqihfheshkliefvgflgisvtfksvqlimeirdgsikeikvwk liqfissfftissgpid  
yrkrfvkddkkvptgneyr  
elvlkaihmlglflykyivayfintyaimplql dlhgfvnlwlymyayslylffdfagyslfaiafsylfgiktppnfd  
kpfkaknikdfwnrwhmtl  
sfwfrdcyimrslfymrskklksqfamsnvaflin flimgiwhgievyvivyglyhaalfigygyerwrkkhprwqn  
gfttal sivitfhfvtfgf  
lifsgkli  
>tr|A5IRB5|A5IRB5\_STAA9  
mehsvvvygadvicascvnaptskdiydlqp llkrkypnisfkytyiditkdndnltdhdlqfierieqdel fypl it  
mndeyvadgyiqtkqitrf  
idqklvne  
>tr|A5IRD6|A5IRD6\_STAA9  
mkaks l gkeekrimentennlvtstqgi ikeal hklgfdegmydlikeplrm lqvripvrmdgvtktftgyraqhdav  
gptkggvr fhpdvdeevn  
alsmwmtlkcgivnlpyggkggvi vcdprqmsi heverlsrgyvraisqfvgnkdipadvftnsqimawmmdeysald  
kfnspgfitgkpi vlggsh  
grdrstalgvviaieqaakrrnmqiegakvviqgfgnagsflakflydlgakivgisdaygalhdpngldidylldrrds  
fgvtvnlfeetisnkel fe  
ldcdilypaa isnqitednahdikasi vveaangpttpeatri ltergillvpdvl asaggtvsyfewvqnnqgyywe  
eevneklrekleaafdtiy  
elsqnkrkidmr laayiigikrtaeaaryrgwa  
>tr|A5IRI6|A5IRI6\_STAA9  
meflslvivv laaf ltpiivnrlnin flpvvvaeilmgivignsflniverdsilnilstlgfiflmlfsgleidfkafk  
kdkrarqqnddessipgh  
lnlaltvfafimiisil layvfkwlglvddvl lmviistislgvvvptlkemnimrttigqfillvavladvtmillt  
vygaininggstiwl igil  
vvftaisylgvqfkrmsflqklmdgttqigiravfaliillvalaegvgaenilgaflagvvvsllnpdeemvekl dsf  
gygffipiffimvgvdl ni  
pslikepklliiipilivafiisklipvmfirrwfdmktiasaflltstls lviaaakiserlnaisaetsgililsav  
itcvfvpii fklfpvpde  
fnrkievsligknqltipiaqnltsqlydvtlyyrkdlsdrrqlsdditmieiadyeqdvl erlg lfdrdivvcattndd  
inrkvaklakahqvervic  
rlesttdtelvdsgieifssylsnk illkglietpnm lnl snvetslyeiqmlnykyeniqlrnfpggdii fvriir  
nnesivphgdtqlrygdr l  
ivtgakeyvdelkqel efyf  
>tr|A5IRJ8|A5IRJ8\_STAA9  
mwiekfknknetkyryyeyekdpytdkwkrvsvlnkdtkqsqkeamfrleekikeklnkssselktltfhtlleewl  
eyhiktsgskvtlln nikt  
rvknikknsskdlllnkldtkymqm finklssiystnqlryqlghmkeaikyavkfydypnehlltgvk lpkkrktied i

Tsompanidou\_et\_al\_Supplemental\_FASTA\_File

ekdeakmynylelqqvigi  
rdfilnynslhyrtriliagalevqaltgmrigellaalqikdvdlnkktidingtIhrikcntgfykdttkttgskrni  
tinsrtakv1kkimlenkk  
mkqwkpsyidrgflfttskgnplqidkinklls1aaeslninkkvttthlrhthisllvemnislkaimkrvghtdekt  
ikvythvtekmdreldrkl  
ekliy  
>tr|A5IRK0|A5IRK0\_STAA9  
mnggenfmadknkkqeatrsnpinksfekpgasenlkslsekakkkd  
>tr|A5IRK3|A5IRK3\_STAA9  
mcfskrmkqsrekqgmtlaelgrkigkteatvqryesgniknlkndtiesiatalnvnpaylmgwveenddevqhraahl  
ege1tdewqrvldyadyi  
rskr  
>tr|A5IRK7|A5IRK7\_STAA9  
mismkaclylndkfveidnlekviksghrgtveiskekiksslftngsytfvgdkivaiasakiefiefid  
>tr|A5IRK8|A5IRK8\_STAA9  
meqqmniqeatkiatkn1vsmtrkdwkeshrtkilptndsflqciisnsdgnlirywqpsaddlmandwevinptrdqe  
llkqf  
>tr|A5IRL1|A5IRL1\_STAA9  
mpkiiipptpentyrgeekfvkkllyatptqihqlfgvcrstvynwlkyyrednlgvenlyidysatgtliniskleeyli  
rkhhkwy  
>tr|A5IRL3|A5IRL3\_STAA9  
mtlqqkilshfatydnfnssddvvefvgvskthakstlsrllkkkgkvemeswgkwrvieaqlhl1tvverkkeileeqfell  
ar1neqsddpreiedrik1  
mir1anqf  
>tr|A5IRL5|A5IRL5\_STAA9  
mkldhsnrahaklsasgkqwlncppsikasegiadkssvfaegtfahe1selyfslkyegltqfefnkafqnykrnqy  
yseelreyveeyvanveek  
ynea1srdndvialfetkldlgkyvpesfgtdvii1fsggvleiid1kygkgievsaidnpqlrlyglgayells1mydi  
htvrmti1qpridnfstee  
1pisrllqwgtdfvkplarl1ayngegefkgshcrfckikhsctr1raeymqnvpqkphllsdeeiaellyk1pdikkwa  
devehyaldqagndknyp  
gwk1vegrsrmm1tdtkat1lek1veagykpeditetkllsitklekligkafskitegfiekpqqkltlatesdkrpai  
kqsaeddfdk1  
>tr|A5IRL7|A5IRL7\_STAA9  
mkfmiidietysndiskcgaykyteaedfeili1aysidggaisaidmtkvdnepfhadyetfkialfdpavkkyafna  
nfertclakhfnkqmppee  
wictmvnsmrigl1pasldkvgelr1qnqkdkgakn1iryfsipckptkvnggrtrn1pehdlekwwqfidycirdveve  
mtiahkikdfpvtai1eqay  
wvfdqh1ndrgik1skslm1ganvldkqskeellnqakhitglenpnsptqllawlkddqgl1dipnlqkktvqeylkeat  
gkakkml1eir1qmsktsvk  
kynkhdmmcsdervrgl1fqfygagtgrwagrgvqlqn1tkhyisdtel1iardlikeqrfd1d111nvhpqd11sq1v  
rttftaeegnelavsd1fa  
earviawakeqwr1dvfnthgkiyeasasmfnpvesitkgdplrqkgkvelalgyqggagal1kamgal1emgieen  
elqgl1vdswrnanpni1vfnf  
wkacqeaaintvksrkthhthgl1rfymkkgflmielpsgralaypkasvgen1swgsqvvefmgld1nrkwskl1ktyggk1  
venivqatard11laisiar  
1easgfkivghvhdeviveiprgsn1g1keietimkpvdwakgl1n1nsdgftsp1fymkd  
>tr|A5IRL8|A5IRL8\_STAA9  
mqhqayinasvdiriptevesvnyndikekenlaeylfnnpge11kynvinikvld1eve  
>tr|A5IRM0|A5IRM0\_STAA9  
msiisnrkvdmmktqdnvkqpahytygdiei1dfieqvtaqyppqlafaignaikylsraplknghedlakakfyvdrvf  
d1we  
>tr|A5IRM2|A5IRM2\_STAA9  
mkiki1ekemnl1pel1iqawdnk1sgnkrfysndverncfvtfhvdsilcnvagyvsindkftiqeei  
>tr|A5IRM4|A5IRM4\_STAA9  
mtvt1sdeqykk1ctn1nn1ldk1hka1kerdeykkqrde1iediak1rerneelenmwrvtvknellgryefyrfr1nel  
qiesrankavainmgakin  
asa1lyrmdk1dgtnefyef1gqmeddtne  
>tr|A5IRM5|A5IRM5\_STAA9  
mnnreqieqsvi1sasacngndtegl1keiedvykkaqafdeilegl1namqdal1kediyl1deavgimtgqvykyeeeqe  
nd  
>tr|A5IRM7|A5IRM7\_STAA9  
mtqylvt1tkdstgrkhthitkaksnrftvveaeskeeakekyekqvkrdavikvgqlfenirecgk  
>tr|A5IRM8|A5IRM8\_STAA9  
mikk1knmdgfdi1fivg1sl1fgita111vvalpiytvasyqnkevhqgtitdkynkrqdkedkfyivldnkqviensd1  
1fk1k1k1f1dsadiqar1kvgd  
kvevktigryihf1n1ypv1yeakkvdkq  
>tr|A5IRN0|A5IRN0\_STAA9



Tsompanidou\_et\_al\_Supplemental\_FASTA\_File

mfsnstggvnmwivisvlaflllssishkmtiealeymsylfkqlvkngvegledyeneverirkrfks  
>tr|A5IRN1|A5IRN1\_STAA9  
mldkvtqietikydrdvsysyaasrlstywtnhnmawsdmqlaqtvrktedlteynkmskseqadikdvvggfvgyk  
egkrragqvmnrsmldi  
dyaadmdtilsmfydfayclysthkhreisprlrlviplkrvnadeyegaigrkvadivgmdyfdtttyqphrlmywps  
tsndaeffftyedlp1ldp  
dtilyvdwtdtlewptsskeesktkrldakqgdpeekpgivgafcraytieeaistfipdlyekhstnrytyhegsta  
gg1vlyennkfayshntd  
pvsqmlvnsfdlvrihlygaqdedaktptvnr1psykamqraqndevvkkqlindkmsdamqdfdeivnsddawsetl  
eitskgtfkasipniei1  
rndpn1kgkiafneftkqieclgkvpwntnfktrqwqgdss1rsyiekiydhshgktdaiisvamqayhpvrlyl  
nkiwdghkrlek1fikyl  
gvedtevrntttkka1tagiarvmepgckfdym1tlygpqvgksa1lkk1ggawfsd1svsvtgeayealqgvw1mem  
aelaatrkaeveaikhfis  
kqvdrfrvayghyiedfprqci figttknvdf1rdetgrrfwpmtnpervevnwsk1tkdeidqiwaekyyeegge  
1flnpeleeamrsiqskht  
eespytgiidey1ntpipsnwdd1tiferrrfyqgdvdm1ptgnvdyvernkvca1evfvecfgkdkgdsrgsmeirkis  
n1lrq1dnwsvydgksgk  
irfgkdygvqjayvrdes1ed1i  
>tr|A5IRN4|A5IRN4\_STAA9  
mgkasydikpgtfkyieseiylnenkeinrlrmeilnptkeltdnivygp1qkgepvrttelmatr1ltnkm1rnlee  
mveavesey1klpedhkkv  
ir1kywnkdkk1kieqigdachmhrntvttirknfvkaiayahagik  
>tr|A5IRN9|A5IRN9\_STAA9  
msmkakyfqmkrkskskgei1fygdivsdkwfesdvtatdfknk1delgdiseidvhinsggsvfeghaiynmlkmhpa  
kinyvdalaasiasviam  
sgdti1fmhksf1mi1hnswwmtvgnaeelrktad1lektdavnsay1dkakd1dqeh1kqm1daetw1taeeal1sfgli  
de1lganeitasiskeqyk  
rfenvped1kkdvdkitkiddvdtfelvetpkess1leekerekikrecei1kmtmny  
>tr|A5IRP0|A5IRP0\_STAA9  
mptlyelkqslgmigqqlknkndel1sqkatdpnidemedikqletekag1qqrfniverqvqdieekakvdkdkeayqs  
1sdnekmvkakaefyrhai  
1pnefekpsmeaqr11halptgndsggdk1l1pkt1skeivsepfaknq1rekar1tnikgleiprvsy1l1dddfitdve  
take1kakgdtvkfttnkf  
kvfaaisdvtv1hgsdvd1vnwvena1qsglaakerkda1lavspks1lehmsfyngsvkevegadmydaiinalad1hedy  
rdnatiymryadyvkiisv  
1sngttnffdt1paekvfgkpvvftdaavkpi1vgdfnyf1inydgttydtdkdvkkgeyl1fv1tawydqqr1dsafriak  
akentgs1ps  
>tr|A5IRP4|A5IRP4\_STAA9  
mni1ntikei1l1sdaelqtyinsriyyykvtenaetskpfvvitpiyd1psdfmsdkyl1seely1qidvessnqktidi  
tkriry1lyqqn1iqassq  
1dayfeetkryvmsrryqgipkniyyknqrie  
>tr|A5IRP5|A5IRP5\_STAA9  
maegqgsykvfkr1yvgvfnpeatkvkrmtwedekggtvd1nitglap1ldmfasnkrvwmkkqgtnevksdms1fn  
ipsed1ntvigrskdkngt  
swvgentrapyvtvigesed1tgqpyva1l1kgtf1dsiefktrgekaepeptk1tgdmnrkvvdvdtgtpqgivygy  
hegkegeaeffkkvfvgyt  
dsedhsedsass1ps  
>tr|A5IRP8|A5IRP8\_STAA9  
mnekvegml1el1dh1gvqegmkg1krq1gvvnsemkan1safdkseksmekyqarikg1ndr1kvqkkmysqvedelk  
qvnanyqkakssvkdeka  
y1kl1veankkek1aldkska1kssnte1kkaenqykrtnqrkdayqk1kq1rdaeqk1knsnqattaq1krasdavqk  
qsakhka1veqykqegnq  
qk1kvqnd1lksndkiessyaktntk1kqtekefnd1nntiknhsanvakaetavnkekaal1n1ersidkassmktf  
nkeqmi1aqshfgk1asqad  
vmskkfss1gdkmts1grtmtmgvstpit1gl1gaa1ktsadfeqgmsrvgai1aqassk1ksmsnqavd1gaktsksane  
vakgmee1aal1gfnakqtm  
eampgvisaaeasgaemattatvmasain1sf1kasdanhvad1larsandsaadiqymgdalkyagtpakal1gvsiedt  
saa1ev1sng1legsagat  
al1rasfir1anpskntakemk1gih1sdakgqfvmgel1rqfdnmkgmtreqklatvativgteasgfla1ieagp  
dk1insyks1knsngeskk  
aad1mkdn1kga1eq1ggafes1aievkdl1tpmi1ragaeg1tk1vdgft1lpgwvrkasv1gla1fgaa1gpav1agg1l  
irtvgsaakgyas1nrria  
enti1sntnskams1gl1qt1fl1gsttgktskfgk1lagammfn1kpinv1knsak1ail1pfl1kng1glaaks1fav  
ggarfagval1rfl1tgpiga  
t1tai1tiaykvftaydrwefrn1g1ng1getik1ffggki1iggavr1k1gefkn1yl1sigks1fkek1fskdmkdyks1sdd  
d1l1kvgnk1fkg1fmg1tmgt  
askkasd1tkv1lgk1gvsketeka1eky1vhyseens1rimekvr1nsgqis1edkakk1l1kietd1snn1iaeiekrnkkele

Tsompanidou\_et\_al\_Supplemental\_FASTA\_File

ktqelidkysafdeqekqn  
ilrttkekndlrikkeqelnqkikelkekslsdgqisenerkeieklenqrrditvkelkstekeqerilvrnqrnrnay  
sideaskaikeakarkar  
kkevdkyeddvaiaknnvnlsksekdkllaiadqrhkdevrkakskkdavdvvkkqkndidkemdlssgrvykntekw  
wnglkswwsnfredqkkks  
dkyakeqeetarrrnrenikkwfgnawdgvsksktgeafskmgrnanhfggemkkmwsigkipsklssswssakssvgyht  
kaianstgkwfgkawqsvk  
sttgsiynqtkqkysdasdkawahsksiwrngtskwfsnayksakgwltmanksrskwdnisstawsnaksvwkgtskwf  
snsykslkdwtdgmysrah  
drfdai:sssawsnaksvfngfrkwlsktydwirdigkdmgraaadlgnvankaigglnsmigginiskaitdknlikp  
iptlstgtlagkvatdns  
galtpqtfavlnrdrgsnagggvqevihradgtfhapqgrdvvpvlvgdsvinandtlklqrmgvlpkfhggtkkkkw  
meqvtenglkkagdfgska  
kntahnikkgaemveaagdkikdgaswlgdkigdvwdyvqhpqglvnkvmsglninfgganatvkiakgaysllkkkl  
vdkvkswffedfgggdgsy  
lfdhpiwqrfgsytgglfnnggrhygidfqmptgtniyavkggiadkvwtdyggngsiqiktganewnwymhlskqlarq  
gqrikaggligksgatgnf  
vrgahlhfqlmqgshpndtakpekwlkslksgsvrsgsgvnaasawagdirraakrmgvnvtsgdvgniisliqhes  
ggnagitqssalrdinvlq  
gnpakgllyipqtfhrhavrghnniysgydqlaffnnywrsqfnprggwspsgpryangglitkhqlaevgegdqk  
emvipltrrkraiqlteqv  
mriigmdgkpnntvndtstvekllkqivmlsdkgnkltdaligtvssqdnngsndairglekilskqsghrananny  
mggltn  
>tr|A5IRQ6|A5IRQ6\_STAA9  
mfgftrheqdwr|tr|leendktmfekfdriedslrtqeki ydk|drnfeelrrdkeedekneknaknirdikmwilgl  
igtillstfviallktifgi  
>tr|A5IRR4|A5IRR4\_STAA9  
mkfinsnnitdptlnlameeyvlknlpaeesyflfyinrpsii vgnqntieevnqtyidahnidvrrisgggavyhdt  
gnlnfsfitdddgnsfhnf  
qkftepivqalqslgvnaeltgrndiqvgqakisgnamvkvknrmfshgtlm|nsdldevqnalvnpakikskgiksvr  
krvaniqeflndpleieef  
kkii|lktifgeteveeyk|tddedeniek|sndkyrtwawnygrnpkyfereekfekgfvqikfdvkrkiehaki fgd  
ffgvgdvtdlenalvgclh  
dfehieealseydlyhyfgdirhelir|ms  
>tr|A5IRR6|A5IRR6\_STAA9  
mnkiskaltwfiisfiih|lilfimwgehqe ywlytgim|liagisyvfyqrdieskrlltsigvgiitailimlqllf  
slitsnlsysllikelart  
gnwkwqmlvtllfvipchelymrtvlqkelthfsipkwiailitaiyssslfiyldnwwivtfifvaqvilslsyeytr  
riattsvaivaiillllif  
na  
>tr|A5IRR8|A5IRR8\_STAA9  
mkwfk|lildvttfilia|llfvtykeneel|pdtkypia|vtdwnkkyskneiykrinqfaknenvaiykstsnynknv  
dkdiyvfnskattitpfn  
akynihylsddellkkdikgsyfvkdknfdvskfinflkeygvtaesykidhmmiavgvikqmnievplsallivyfiyy  
ifekninfkayai kylngf  
tlrkii fenfskkctywvtliisqillttsvlwilnytgnldl|filrlvl|lsc|filtisvinlwtflml|lnianmik  
gkghfktirfintvcksil  
lvliasvmientsv|kld|nkiketekywnv|ddytiiefapyhetkqslidnmlrseq|lvkaseaennailfkpkgdsvd  
ndnfspdegvilvnnqfw  
siyykqfqpdi|piknqknvevi|ipqkfhamrneinqayhswfefvqnknkenk|siqfinkdyrifsfdardsrhls  
fieapiivnvqasdlndf  
yyamisgggy|fknydalvknienyh|dgeisgitnykdsvmemyhenn|kl|tv|nfsqiiiiiiii|ldvkyyfeq  
hrkllvikklygyst|ran  
yqyllinnivvfigiltnvilhsqyimmifatilvvqillqicslyyhgrrfnevikef  
>tr|A5IRS7|A5IRS7\_STAA9  
msnqyqqystv|kkywhl|mrpht|tasvvpvlv|gtaaskiyfl|gsedhikisl|fiam|lla|ll|qaatnmfneydykgl  
ddhesvgiggai|vrngmsp  
elvr|raiafyi|laailgl|flaanssfw|lpvg|lvc|magvlytggp|fpi|swtpf|gel|fsgvfmgmfi|ivia|ffiq|tgni  
qsyviw|svpiv|itig|lin  
manni|rdv|kdkas|grkt|pil|lg|nas|l|t|f|mai|my|fi|ay|afiv|l|t|ii|k|pggs|l|fy|ll|a|ll|sf|pmp|vk|vir|rfk|kndtp  
ptmmpamaaagktntffgl  
lyalgiyisalfagi  
>tr|A5IRT9|A5IRT9\_STAA9  
makkfnyk|lpsmval|tlvgsavtahqv|qaaettq|dttnknv|l|dsnk|vkatteq|akaevknptqni|sgtqvyq|dpaivq|p  
ktannktgnaqvsqkv|dta  
qvngd|tran|qsatt|nntq|pvakst|sttap|ktnt|nvt|nagys|l|v|dded|dnseh|qin|peliksaakpa|letqykaa|apak  
teatpkvttfsasaqprsv  
aatpkts|l|pkyk|pqnss|indy|rkn|l|kap|kieedy|tsy|f|pkyay|rngv|rpegi|vvhd|tandr|stinge|isym|knn|yq

Tsompanidou\_et\_al\_Supplemental\_FASTA\_File

nafvhafvdgdriietapt  
dylswgvavggnprfinveivhthdyasfarsmnyadyaatqlqyyglkpdsaeydngntvwthyavskyggtdhadp  
hgylrshnysydqlydlin  
ekylikmgkvapwgqtftttptpskptpskpstgkltvaanngvaqikptnsglyttvydktgkatneqvktfavskt  
atlgngkfylvdynsgnk  
fgwvkegdvvyntakspvvnqsysiksgtklytvpwgtskqvagsvsgsgnqtfkaskqqqidksiylygsvngksgwv  
skaylvdaktpttpipk  
stptnnkltvsslngvaqinaknglfttvydktgkptkevqktfavtkeaslggnkfylvdynsptligwvkqgdvi  
ynnakspvnmqtytvkpg  
tklysvpwgtykqegavsgtgnqtfkatkqqidksiylyfgtvngksgwvskaylavpaapkkavaqptavkaytvtk  
pqtqtvsksiaqvknntg  
irasvyektakngakyadrftfyvtkerahgnetyvllnntshniplgwfnvkdlnvqnlgkevkttkyvtvnksnnglsm  
vpwgtknqvilggniaqg  
tfnatkqvsygdvlygtinnrtgwnakdlaptavkpttsaakdynytyvikngngyyyvtpsdtakyslkafneq  
pfavvkeqvingqtwyygk  
lsngklawikstdlakeklynqgmtlnqvaqiqaglykqpqvrpvgkwtndanfndvkhamdtkrlaqdpalkyqflr  
ldqpqnisisdkinqflkgk  
gvlenqgaafnkaaomyginevylisshalletngnqslakgadvvnkvvtnsntkyhvfgiaydndplregikyak  
qagwdtvskaivggafig  
nsyvkagqntlykmrwnpahpgthqyatdvdwanakiiikydykigevgkyfdipqyk  
>tr|A5IRU6|A5IRU6\_STAA9  
mnfpwdqllvkgnwmimtaqigapflvigliavityfklwkylykewftsvdhkkigimylivcavlmfvrngidallira  
qltvpdnkfleshyneif  
sthgvimiiimampfiglwniivvplqigardvafpvlinnsvwlffagmilfnlsfiiggspaagwtnyaplagefspg  
pgvnyyiaiqisglgla  
tginffvtiircktpmkfmqmpmftvtffittivilafpplvalalmttdridtafftvahggmpmlwanffvwg  
hpevyivilpafgiysei  
ptfarkr1fghqsmvtagiaf1sflvwvhfftmngalinsffsistmligiptgvklfnwlltlykgritfespm1  
fslafipnfl1ggvtgvm1  
amasadyqyhntyflvahfhytlvtgvvfac1aglifwypkmmgyk1netlnkwcffwfmigfnvcflppfilgldgmp  
rlytympsdgwfl1n1ist  
igallmaigfl1lvsvivshfkspreatgdndwglgrtlewttasaippkynfai1pdwndydtfvdmkehgrhylndh  
nykdihmpnntpvfgwigi  
fmtiggffli1fetvipal1c1fgi1fgtmiyrsfqi1dhgyhipaaevaetear1rearikereavshes  
>tr|A5IRU8|A5IRU8\_STAA9  
mnenkks1kl1snk1kmmass1kgsant1krn1pkviyr  
>tr|A5IRV7|A5IRV7\_STAA9  
mfnysglneecgvfgiwnhpeaaqlytmg1hs1qhrqgegagivvsdqnelkgerglgllteainddqmer1kgyqhaig  
hvryatsgnkgieniqpf1  
yhyfmsvgichngn1inaks1rqnlkqgai1fhsssdtevimh1irrskaptfeealkes1rkvkggftfailtkdaly  
gavdpnai1rplvvgkmdg  
tyilasetcajdv1gae1vqdi1hageyv1indkgitvksy1thttta1sameyiy1farpdstiagknvhavrkasgk1a  
qespnadm1v1gvpnss1s  
aasgyaeeig1pyemglvknqyvartfiqptqel1reqgvrvk1savkdivdgkni1lvddsivrgttirrivkmlkds  
nkvhvriaspemf1psfyg  
idvsttael1saskspee1kdyigadslay1svdgl1iesig1ldydapsyglcvesftgdypaglydyeanykah1shrqk  
qyisknkhff1dseg1n1v  
>tr|A5IRW3|A5IRW3\_STAA9  
m1kvsd1r1kyppngqrki1fdh1niti1dqkekv1ll1gpsgcgkst1lnv1sgivpn1iel1pmkydel1vdp1sgvi1fqdpd  
sqfcmkvyeel1afv1lenr  
qvpredmal1ina1nmvn1nvt1petyikd1sggm1kqk1aivetil1qskt1fl1deptam1dvqated1wtk1liel1wedq  
tvvivehkvkhiwnhvdv  
ilmdyngni1i1adecpei1l1qkyvh1l1seygvwh1prawefapsrvdfpttsh1l1qfkngr1i1rgkst1l1sfsd1leig1ge  
wititgangsgk1t1les1  
mq1likyqgdvyfenqr1tki1khaakhmy1vyqnpe1lqf1t1nsvyde1nih1fnh1skdqsddeti1q1l1k1l1dl1qnvdqhp  
yelsigkrr1svata1ss  
kadii1fl1deptfg1dshtf1q1ik1f1qkrin1gqsivm1vthd1dei1erypsr1rkis1dga1l1dcdg1dntv  
>tr|A5IRW5|A5IRW5\_STAA9  
mc1ss1s1q1ll1vrgfyacarrm1ypsft1q1ll1vrgfyacarc1myps1s1q1pl1vrgffacarrm1ypsft1q1ll1vrgffa  
carrm1ypsft1q1ti1irkp1  
ctg1s1l1l1kryd  
>tr|A5IRW7|A5IRW7\_STAA9  
ms1fl1rkhaei1fsy1ligivs1lftg1li1in1pl1kq1nggk1kvd1thvhnwef1naff1sei1k1vms1rfign1fpivs1aivi  
i1fgi1vm1light1l1rtik  
ydydisi1ff1vigim1yfi1t1l1mtqvyg1ffavi1fi1pft1ihigy1ivykdel1nqenvkn1hfmwi1vsygis1ylitq1ialy  
gridaneiesid1lsvnaf  
fi1mw1ll1gqmai1wnf1l1rra1pl1tkqe1lgeeep1s1rtskgn1vtnqtkih1k1q1ldktteyark1trrsvd1dkirakrd  
kfk1kkvndi1idi1qeddipd

Tsompanidou\_et\_al\_Supplemental\_FASTA\_File

wmrkpkwvkpmyvelfcgvviflftflefnnrnalfvsgdwklsqtqyviewtllillfiiayiattltfhlkgkfyf  
lqlfmgslffklltefin  
imihgllsvfittptllmllaiiisyslqlrerp  
>tr|A5IRX3|A5IRX3\_STAA9  
mdtveisrfltamtlavhii fatigvgmplmfai aefl girkndlqyiamakrwakaytitvavgvvtgtiiglqlslw  
ptfmemgghvia lplfmet  
fafffeaiflsiylytwdrfknkwthflisipviiggsfsaffitsvnsfmntpagfelkngkmvqvpi eamfnpsfiv  
rsfhvittagmtmafvias  
iaafkllnrqpkdtvyhkka lkm smivgffstllsm lagdlsakflhkfqpeklaayewhfdtsshaklllfgvldekt  
qqvkgaielpgllsfladn  
svkktkvqglndfpls hppmi vhyffdlmvtmgilcfvisgvvltlmfkk lrfsthkwmlygilltgpasm laiefgw  
fltemgrqpwi vrgymrva  
eaatqaggi tfvtl fgi lyii mytcayvli rmfknkpayedvnr lakkqggeiek  
>tr|A5IRY1|A5IRY1\_STAA9  
maqmtmqaindalktelkndqdv lifgedvgvnggvfrvteglqkefgedrvfdt plaesgigg lamglavegfrpvme  
vqflgfvfevfdaiaggia  
rtrfrsrggktapvtirspfgggvhtpel hadn legil aqspglkvvipsgpydakgllissirsndpvvylehmklyrs  
freevpeeytidigkanv  
kkegndisiitygamvqesmkaaeelekdgysvevidl rvtqpidvdtivasvektgravvvqeaqrqagvgaavvaels  
eraillsleapigrvaaadt  
iypftqaenwlpnkndiiekaketlef  
>tr|A5IRZ4|A5IRZ4\_STAA9  
mlgddvma lygfaagglieagirikqlmeqnltietksnpndlvtndkatedfifdtiletynhqvlgeeghghdidt  
skgtvwvdpidgtlnfvh  
qqenfaisigiyidgkpyagfydv madvlyhakvgegayrgsqplkp lndsnlrqsiiginpnwltkpilgeifkeivn  
dsrsaraygsaaleivsva  
tgnleaymtrlpqpdfagg lvi lyevngqasnllgeplti sgpn silvgnrglhqeisndylepyhdtliqlheqrfrk  
ksk  
>tr|A5IS13|A5IS13\_STAA9  
mkwsitqlrkyqgkpfefdqtvsfdnlkesldlidlspitiqqgtikstevvadihitgtyt mpcartlvpvkvpldvt  
tvevfdlegynqynddqqd  
vdehyhiikdgmvn lqdivediviiekpmrayseqsdqmltvngwevidedql delakqqe qdds esrqvdprlqklqq  
lydkeq  
>tr|A5IS19|A5IS19\_STAA9  
mriikyltilvisviltscqssssqestksgefrivpttval tmtldkl dlpivgkptsyktlpnrykdvpeigqpmep  
nvevvkklkpthvlsvsti  
kdemqpfykqlnmkgyfydfds lkgmqksitqlgdqfnrkaqake lndhlnsvkqkienkaakqkkhpkvli lmgvpgsy  
lvatdksyigdlvkiagge  
nvikvkdrgyissntenllninpdii lrlphgmpeevkkmfqkefkqndiwhfkavknnhvydleevpfgitanvdadk  
amtqlydlfykdkk  
>tr|A5IS44|A5IS44\_STAA9  
mgpqh refrkei lqtmqvgvqpqqreigspiptdnaswrgpniekldhqfqqtmqvgvgpnteageksayknvqvggapt  
>tr|A5IS46|A5IS46\_STAA9  
minfgliivp lltndadfvwtsssl iymilltsiilivyiktkdslq ltifilnialiilycapllfiyvf  
>tr|A5IS47|A5IS47\_STAA9  
mvfndweinvvysgehevvtneks lfvidefydvaiaiyldgklkvahvnygsdftidvankvfelninqpnvdeh  
>tr|A5IS58|A5IS58\_STAA9  
mrlqkaplvtsglvlgllgnllkdls ltnavcgifafl iwhllctmikyfnnvkeqln splvssvfttffmsgflg  
tlylntffsnitfinslit  
piwilclvgimthmii fsiky lkdflenvypswtvlfigiaia gltapvsgcffigq ltvigyfvatcivlpivfkr l k  
afplqtsikpntsticapf  
slvaaayviaf pkanafivii flilaqifyfyiiiqlpkllkep fspv fsaftplvisata lknslpvlmfpdiwkgll  
fievl latvivlrvfigyl  
hfflkkenqdkflrnasq  
>tr|A5IS74|A5IS74\_STAA9  
mkdnlqqistqindkseknnfstkpnviavtkyvtierakeayeagirhfg enrlegffqkkealpsdavihfignlqsr  
kvkdvindvdyfhaldr l s  
lakeinkraehkikcflqvnvsgeaskhgial edvdqfiddl kkydkieivglmtmap l tdeayirslfkqlrlkkeei  
qrlnleyapcde lsmgmsn  
dyliaveegatfvrigtklvgeee  
>tr|A5ISA5|A5ISA5\_STAA9  
migkiinerykivdkl ggggmstvy laedtilnikvaikai fipprekeetlkrferevhnssqlshqni vsmidvdeed  
dcyylvmeyie gptlseyi  
eshgp lsvdtainftnqil dgikhahdmrivhrdipqn ilidsnktlki fdfgiakal sets l tqtnhvlgtvqyfspe  
qakgeatdectdiysigiv  
lyemlvgeppfngetavsia ikhiqdsvpnvtt dvrkdipqslsnvilratekdkanrykti qemkddlssvlhenrane  
dveyldkmkti avplkked  
lakhisehksnqpkrettqvpi vngpahhqfqkpegtvyepkpkkkstrkivllslifsl l mialvsfvamamfgnkye

Tsompanidou\_et\_al\_Supplemental\_FASTA\_File

etpdvigksvkeaeqifnk  
nnlklgkirsrsysdkypeneiikttptntgervergdsdvviiskgpekvkmpnviglpkeaalqklkslglkdvtiekvy  
nngapkgyianqsvtante  
iaihdsniklyeslgikqvyvedfehksfskakkaaleekgfkveskeeyssddidegdvisqspkgksvdegstisfvvsk  
gkksdssdvktttesvdvp  
ytkndksqkvkyikdkdndgstekgsfditsdqridiplriekgktasyivkvdgktaeveksyddi  
>tr|A5ISB3|A5ISB3\_STAA9  
mrgetlklkkdkrreairqqidsnpfi tdhel s d l f q v s i q t i r l d r t y l n i p e l r k r i k l v a e k n y d q i s s i e e q e f i g  
d l i q v n p n v k a q s i l d i t s  
dsvfhktgiarghvlfaqanslcvalikqptvlthessiqfiekvklndtvraearvvnqtakhyyvevksyvkhtlvfk  
gnfkmfydkrg  
>tr|A5ISE4|A5ISE4\_STAA9  
mfkkl linkntinnyneel dssnipehiaaimdgngrwakkrkmprikghyegmqtikkitriasdigvlytlyafste  
nwsrpesevnyimnlpvnf  
lktflpeliekvkvvetigftdklpkstieainnakektannglklifainyggraelvhsiknmfdehqglnsdi  
detyinnhlmtdkdydpel  
lirtsgeqrnsflwqvysyefifnqklwpdfdedelikikiyqsrqrrfglsee  
>tr|A5ISF6|A5ISF6\_STAA9  
mkvievthpiqskgyitedvamafgffdgmhkghdkvfdilneiaearsllkavmtfdphpsvvl nprkrtyltp lsd  
ktekisqhdidycivvnfs  
srfanvsvedfvenyiiknnveviagfdftfgkfgkgnmtvlqeydafnttivskqeienekisttsirqdlingelqk  
andalgyiysikgtvvqge  
krgrtigfptaniqpsddyllprkgvyavsieigtenklyrgvanigvkptfhdnpkaevvievni dfedniygervtv  
nwhhflrpeikfdgidplv  
kqmnddksrakyllavdfgdevayni  
>tr|A5ISF9|A5ISF9\_STAA9  
mnsefiygrvtnlggkilslikkknkdi riip lggvgeiaknmyivevddemfmdaglmfpedemlgidivipdisyvl  
enkdklkgiflthghehai  
gavsvyleqldapvygskltialikenmkarnidkkvryyvtvnds imrfkvn isffntthsipds lgvcihtsygaiv  
ytgefkdqslhghyapdi  
krmaeigeegvfvli sdsteaekpgyntpenviehhmydafakvrgrlivscyasnfiriqqvlniasklnrkvsflgrs  
lessfniaarkmgyfdipkd  
llipitevdnypknevi iiatgmqgepvealsqmaqhkhhimnieegdsvflaitasanmeviantlnelvragehiip  
nnkkihasshgmeelkmm  
inimkpeyfi pvqgefkmqiahaklaaeagvapekiflvekgdvinyngkdmilnekvnsnilidgigigdvgnivlrd  
rhllaedgifiavvtldpk  
nrriaagpeiqsrgfyvresedllreaekvreiveaglqekriewseikqnmrdqiskllfestkrrpmiipvisei  
>tr|A5ISG0|A5ISG0\_STAA9  
maqakkkstakktaskkrtnsrkkkndnpi ryvia ilvvvlmvlgvfqlgiigr lidsffnylfgysryltyilvllat  
gfityskripktrrtagsi  
vlqiall fvsq l v f h f n s g i k a e r e p v l s y v y q s y q h s h f p n f g g v l g f y l l e l s v p l i s l f g v c i i t i l l c s s v i l l  
tnhqhrdvakvalenikaw  
fgsfnekmsernqekqlkreekar l keeqkarqneqppikdv s d f t e v p q e r d i p y g h t e n e s k s q c q p s r k k r v f d a e  
nssnni vnhqadqqeqlte  
qthnsvesentieeagevtnsvyvvpl t l l n q p a k q a t s k a e v q r k g q v l e n t l k d f g v n a k v t q i k i g p a v t q y e i q  
paqgvkvsivnlhndial  
alaakdvrieapipgrsavgievpnekis lvs lkev ldekfpsnklevg lgrdisgd pitvplnephllvagstgsgk  
svcingiitsillnakphe  
vklmlidpkmvelnyngiphllipvvt nphkaaqalekivaemerrydl f q h s s t r n i k g y n e l i r k q n q e l d e k q p e l  
pyivvivideladlmvagak  
evenaiqritqmaragihlivatqrpsvdvitgiiknripsria favssqtdsrtiigtggaekllgkgdmlyvngnds  
sqtriqqaf lsdqevqdv  
nyvveqqqanyvkemepdapvdksemksedalydeayl fvveqqkastsllqrqfrigynrasrlmddlernqvigpqg  
skprqvlidlnndev  
>tr|A5ISG7|A5ISG7\_STAA9  
mnipnqitvfrvvlipvfilfalvdfgfgnvsflggyeiriel l isgfifilas lsd fvdgy larkwnlvtnmgkfldpl  
adkllvasalivlvqlgt  
nsvvaiiia refavtgrl l l q i e q g f v s a a g q l g k i k t a v t m v a i t w l l l g d p l a t l i g l s l g q i l l y i g v i f t i l s g i  
eyfykgrdvfkqk  
>tr|A5ISH1|A5ISH1\_STAA9  
msinidpekfaelvvmsnpskfedaediakeslklyinayrlaerystiatncydtaevikelkktdlqlk  
>tr|A5ISI3|A5ISI3\_STAA9  
mwdkslvftffrrrrfgmalstfkrehiknlrnde yd l v i g g g i t g a g i a l d a s e r g m k v a l v e m q d f a q g t s s r s t k l  
vhgg l r y l k q f q i g v v a e t  
gkerai vyengphvttpewmllpmhkggtfgkfsts iglmydr lagvkkserkkmlskketlakeplvkkeglkgggy  
veyrtddarltievmkraa  
ekgaeinytksehftydknqqvngvkvikltnenytikakkvnaagpwwddvrs gdyarnkk l r l t k g v h v i d q s  
kfp l g q a v y f d t e k d g r m i

Tsompanidou\_et\_al\_Supplemental\_FASTA\_File

faipregkayvgtttdfydnikssplttqedrlylidainymfsvnvtddiestwagirpliyeegkdpseisrkdei  
wegksqlltiaggkltgyr  
hmaqdi vdlvskrlkknygltfspcntkglaisggdvvggsknfda fveqkvdvakgfgidedvarrlaskygsnvdeln  
iaqtsqyhdklpleiyye  
lvysiqqemvykpnfdlvrsgkmyfnikdvldykavidmadmdyspaqieayteeveqaikeaqhggnqpavke  
>tr|A5ISI8|A5ISI8\_STAA9  
maqqqihdaknklekavlvgvhaqddkqfnfestmeelsslsetcqllevlgqitqnrdrvrkyvvgkkieeiqafief  
kdidvvi tndelttagks  
lnealgvkiidrtqlileifa larskegklqvelaqldyllprlqghgkslsrlgggigtrgpgetklemdrrhirtrm  
neikhqlrtveehreryrn  
krnqnqvfqvalvgytnagksswfnv laneetyekdq lfatldpktrqiqindgfnliisdtvgfiqklptt liaafkst  
leeakgadllvhvvdssh  
eyrtqydtvndlikql dmshisqivi fnkkdlcdhasnrpasdlpnvfvs skndgdkllvktlfideikrqltyydetia  
tnnadrlyflkqhtlvte l  
kydeienvyrikgfkk  
>tr|A5ISK6|A5ISK6\_STAA9  
minrnekrevggnmksnks lamivvaiiivgv lafqmnhgtgpfkkgtthetvqdlngkdkvhvqrvvdgdt fianqngk  
eikvr ligvdt petvknpt  
pvqpf gkeasnyskktlnqdvyleydekek drygrtlayvwi skdrmykelvekglarekyfspngkyrnvfiea qnk  
akqklni wsk  
>tr|A5ISK8|A5ISK8\_STAA9  
mnemnaeq lvdnlmktssqlfkfhgevamqlf lndelklpsiveicverkr lsdvkvipqsyallyidkqdqaiaked  
lslskiakvyvqyddttim  
sifvydvndewi frldpni ripksniyfhsl nwdvdyikpeivlmydlmqhhqyhhsnykrvidalsyyqffilkfvv  
geqrikdaiqr tinn  
>tr|A5ISM0|A5ISM0\_STAA9  
mdtpkkq qfafnniqmmsksdvektlnkpkrvtfneygtkwytyyddynnfimisy mdkdvna lytnqniitsk skik  
yntpksvvrqr lgepetei  
vkgrvryeqnkeydvfhknhiyttvfydkhrrnvtav lqvsdamenrlkeqygapsks ladsfelqnfdlvnaerkqh  
qlstlkyskqns etarkhs  
kdmaknhyfdhtnlkgqspfdrlkkdgitfnsagen laygqvssiyahqglmsighrknilndtfkilvgvdfndekq  
pftwentyt g  
>tr|A5ISM6|A5ISM6\_STAA9  
mrkskfaidr gyfpmemasfynqinknyvy  
>tr|A5ISN8|A5ISN8\_STAA9  
mseiiqdl sledvlgdrfgryskyiiqeralpdvrdglkpvqrrily amyssgnthdknfrksaktvgdvigqyhphgdy  
svygamvr lsqdwklrhv l  
iemhgngsindndppaamryteaklsllaeellrdinketvsfipnyddttlepmvlpsrfpnllvngstgisagyatdi  
pphnl aeviqat lkyidnp  
ditvnqlmkyikgpdfptggiiqgidgikkayesgkriivrskveetl rngrkqliiteipyevnksslvkridelra  
dkkvdgivevr detdrtg l  
riaie lkkdvnsesi knylyknsdlqisynfnmvaisdgrpk lmgirqiidsylnhqievvantkfeldnaekrmhive  
glikal sildkvli riss  
knkr dakenlievfefteeqaeavmlqlyrlntndivalegehkelealikqlrhildnhdallnvikeelneikkkfk  
serls lieaeieeikidke  
vmvpseevils mtrhgyikrtsirsfnasgvediglkdgdsllkhqevntqdtvlvftnkgrylfipvhkladirwkelg  
qhvsqivpieedevvinvf  
nekdfntdafyvfatqngmikstvp lfktrfnkpliatkvkenddlisvmrfekdqlitvitnkgmsltyntsel sdt  
glraagvksinlkaedfvv  
mtegvsendtilmatqrgslkrisfki lqvakraqgitllkelkknphrivaahvvtgehsqytl ysk sneehglindi  
hkseytngsfivdtddfg  
evidmyis  
>tr|A5ISN9|A5ISN9\_STAA9  
mkdfds lipgw fkefvhvgtdliwsqyligllltagffftisskfvqlrmlpemf ralverpet ledgkkgispfqafai  
sagsrvgtgniagvataiv  
lgpggavfwmvviafigaasafieat laqvkyvhdkdggfrgppayitkgl nqkwlgivfailititfafvntvqsnt  
iaes lntqynispvitgii  
laivtaiii fggvrsiatlsslivpimaiiyigmvlvillfnldqivpmigtiiksafgieqvtggavgaavlqgikrgl  
fsneagmgsapnaaataav  
phpvkqgliqslgvffdtm lvtataimillysglkfgdnapqgvavtqsalnehlsaggifltiavtlfafssvvgny  
yggnsief lstrnvlfi  
frclvvvlvfv gavvtetvwn tadl fmg lmaivniisiiglsnvafalmkdyqkqkkegknpvf kpenleinlfgisaw  
gankykn sdk  
>tr|A5ISP1|A5ISP1\_STAA9  
mneneknirknflkftesrymkfvggndlvfslialvllgivi fifekvsyvfdpfiivfktiaapiivslilfy lfnpi  
vnmmeryrivrvagisiy  
lavvgviltivnllipiigsvdsvknspqyleklinsidkianntffssysqindwlnslpkkip smlseftd gfgs  
kiatfaetianigvvt

Tsompanidou\_et\_al\_Supplemental\_FASTA\_File

pfvlffmldkghhfkefstnimpkfrkdfhdllkmsvqvgysiqgqiivsficigillfigysviglkyslvlasiaav  
tsvvpylgptiaispaiivi  
aaitspwmllklavwtlvqfveghfispnimgkltkihlptiifillcagkllgivgvilgipgyailkvlvthlfqlf  
krrynrfygnvgeydike  
snkive  
>tr|A5ISP8|A5ISP8\_STAA9  
mepilemiktltginspsgdteeaiqfvekyakdlgyqttltnkgallitvpgkndevqrcitahvdtlgamveikedg  
rlaieligftynaiegey  
cqiktadagqiygticlhetsvhvyrnnheiprdqkhmeiridevtseedtkslgisvgdfvsfdprt vitssgfiks  
hlddkasvami lqllkklk  
eeqii lphttqfyisneeigyganasidskikeyialdmgalgdgqasdeytsicakdasgpyhkqlkshlvnlckin  
nipykvdiypygsdasaa  
lhagadi rhglfgagiesshamerthidsikatekllayayclspie  
>tr|A5ISR0|A5ISR0\_STAA9  
mgll diasirsi ergfnyyqsecvinlksfsetqheaevksgnkvyr cyidmeprkskcncphadgrrvickhmi all  
ftaspeaankhimmlneve  
edyqlrrnmwidslkemindmseeelrdaylnmliehgemaelfgldeeeemfedefy  
>tr|A5ISR1|A5ISR1\_STAA9  
mielkhvtfgyknkqmvldqinipdgenvgilgesgcgkstlasvlglfkpvkgeiylsnavltifqhp ltsfnpd  
wtietslkealyyrgltd  
ntaqdqlllqhlstfelnaqltklpsevsggqlqrfnmrsllvqprvl icdeitsnldviaeqvninilkaqtitln  
hfivishdlsvlqrlnvri  
ivlkdgmivddfaieel fnvdrhpytkelvqtfsy  
>tr|A5ISR7|A5ISR7\_STAA9  
maiirrqryeqlddlike lrrlganvyvsiengikslsiddrgfarqtvkndkhi nqlydinervimlitkqqpiasd l  
rmisslkiasdlerigdn  
assianir lrtkitddyvltrlktmgklamlmkldldqafkkkdtvli reierdediddlyshiinatylidndpfvaa  
qahlaarhlerigdhiini  
aesvyfyltgthyeq  
>tr|A5IST3|A5IST3\_STAA9  
mkyli lslvanllvfgvl saiglninilaammivlvipimigilffktnidktyiffniifidfy yyyiynvhlmtl pkf  
nnyikaemmeledidv lit  
skdfgfdeilfytllyllilivlylkkqvkhki  
>tr|A5IST7|A5IST7\_STAA9  
mtvryni shifgvlvgipvaf ltsifgmialdvsflidmsigivglmtylpiqkltsrky lneigltrkdyryir nqln  
hthqklrgilkyvni rsi  
kdf rqindi yqisrsiyttvrqrpasfykvegffyshidnaln lvd aytr lakmpkksineqqkleqtritldevkrtli  
adlkrlneddyerldieme  
lnklhqkhhqd  
>tr|A5ISU3|A5ISU3\_STAA9  
mcglrsitlgttnieqtkhfmvdi lglnyee llensirfgdadispgrlqfiqvpseql eeshfvigilrtptdsglee  
yaeilsnk dipfttvekl n  
gnkyfsl ednng hifsiysennyvgvl gmpsfesavnplhqvqglgpvilkvnhvditgqiltnifglevfaeyqpdfn  
adyhvqvfkvgtgglggei  
h lmpvetemtmpecgavdqvefetkdadffnqaksrldeveipyqt leqddiesiritensgl sfi ftlqk  
>tr|A5ISV9|A5ISV9\_STAA9  
mnaydaymkeiaqmqrgel tqngfts letseavseymnqv naddttfvvinstcgcaag larpaavavatqnehrptntv  
tvfagqdkeatatmrefiq  
qapsspsyal fkgqdlvyfmprefiegrdindiamdlkdafdenck  
>tr|A5ISW4|A5ISW4\_STAA9  
mqvgegpqh refrkei lqamrvgwaptqkltksq ltimckl gmdpnkeklysqflqtmqvgvgrnkfceni isvplp  
>tr|A5ISY0|A5ISY0\_STAA9  
mtenkgssqpkngnnggksn skknrvkrtiiki gfmiaffvlllgill fayyawkapafteakl qdpipakiydk  
ngelvktldngqrhehvn l  
kdvpksmkdavl atednr fyehgal dykr lfgaigknl tggfgsegastl tqqvkdaf l sqhksigrka qeayl syrle  
qeyskddi fqvylnkiyys  
dgvgtgikaaakyyfnkd lkdln laeeaylagl pqpvnnyinydhpkaaedr kntvlyl mhyhkritdkwedakkid lka  
nlvnrtp eerqnidtnqds  
eynsyvfvkse lmnkafkden lgnvlqsgiki ytnmdkdvqkt lqndvdngsfyknkdqvgatil dsktgg lva isg  
grdfkdvvnrnqatdpht  
gslkplf laygpaienmkwatnha iqdessyqvdgstfrnydtkshgtvsiyda l rqsfnipalkawqsvkqnagndapk  
kfaaklglnyegdigpsev  
lggsasefsptqlasafaaianggtynnahsiqkvvtrdgetieydhtshkamsdytaylor laemlkg t fkpysayghv  
sgvnmgaktgtgtygaety  
sqynlpdnaakdwi ngftpqytmsvwm gfskvkqygensfvghsqeypqflyenvmski ssrdgedfkrpssvsgsip  
sinvsgsqdnnttnrsthg  
gsdtsanssgtaqlnnntrsqqsrnsggl tgifn  
>tr|A5IT09|A5IT09\_STAA9

Tsompanidou\_et\_al\_Supplemental\_FASTA\_File

mlhdilrnkfgfenfkpggqeeiesimsqhtlglipgtsgkslcyqiptylsgkptliisplislmdqvmqlkingek  
rvtcihsgmdeiekkhnik  
c1lhrsrfiflspel1lqpsnfklismidfgmivldeahclsewydfrphyaligkvtkhfkeavv1altatapphlqdd  
ltemlaiqfnvikttnrnp  
nisfkhlnfhddedkiewl1pflqqsgptiivsskkmc1nlaqliydsgfltgihgdmnyqerhtvqqqflndipii  
vatsafmginkkdiirtii  
hfh1stspnsniyeigragrdgelsqais1fqpddkiylet1lfadmitteedvqnfeige1flapdkqdvltt1hsfysig  
alkqifkqsfkrkqlgffr  
migcykl1dqrrkyl1effgeyppaqdrccdndsntdivilnkkkvirsigfdek1qn1flr  
>tr|A5IT15|A5IT15\_STAA9  
mfkrik1lil1iatii1sgcsttnnesnnetksvpeemeaskyvgqdfqppaekdaiefakkhrkefekvgeqffkdnfglk  
vkatnvvgkddgvevyvhc  
edhgi1vfnas1plykda1hqgsmrsndngddmsmmvgtv1sgfeyraqkekydnlykflkenekkyqytgftkeaint  
qnvgyqneyfyityl1srnl  
keyrkyep1l1hkkdkefkegmqrarke1nytandvst1fstkknftkdntvddvielsnklkdkpmpqksqvtiql  
gkpsintkkpfyddinpie  
g  
>tr|A5IT29|A5IT29\_STAA9  
mamncqsesvvr1cvryaeqlsvfeeftvl1d1lgdisvdqisdgtlyytcekfkl1vl1qgnvl1gvqiitnndestcevy  
rkmf  
>tr|A5IT40|A5IT40\_STAA9  
mineqr1l1ntfle1lvqidsetgnesti1qipilkekfialgl1dvkedaakhpkl1gann1vctmnstieegevpklyltshm  
dtvvpainvkv1vkddgyi  
ysdgttilgaddkaglaam1lev1qvikeqqiphgqi1qfvtvgeesgligake1nse1ldadfgyaidasadvgttvga  
ptqmlisaki1igktahast  
pkegvsainiaaka1srnk1lgvdeittanigkfhggsatnivadevileaeashdperiktqvkhmtdvfettase1g  
gkaevtveqsyppgfk1ndn  
eavvki1aqesarn1gl1santi1sggsgdsi1ntfgipsvil1gvgyekihttnerpiksl1n1lasqvl1eikivarqsk  
>tr|A5IT41|A5IT41\_STAA9  
meahkmqnkv1riiivm1vsvvl1l1l1tsiipil  
>tr|A5IT45|A5IT45\_STAA9  
mak1syleairqaqdl1alqqnkdvfilgedvgkkgvfgttqgl1qqygedrvidt1laesnivgtaigaamvgkrpiae  
iqfadfilpatnqi1seaa  
kmryrsnndwqcp1tirapfgggvhggl1yhsqsiesifasspg1t1vipstpydakgl1l1ssiesndpvl1yfehkkayrf  
l1keevpeeytvp1lgkad  
kreged1tvfcygl1mvnyc1qaadi1aadginvevd1rtvyp1dketi1drakntgkv1l1vtedn1legsimsevsaiia  
ehc1fd1dtpimr1aapdv  
psmpfspv1leneimnpeki1nkmrelaef  
>tr|A5IT50|A5IT50\_STAA9  
mtnl1pmnk1l1idevne1svainksvmdtqleesml1ys1naggkri1rpv1l1l1l1ds1nte1yel1gvksaia1emihtysli  
hdd1pamnddyrrgk1tn  
hkvygewtai1agdal1tkafelis1sddr1tdevkikvl1qrl1siasghv1gmvggq1l1mqseggpidlet1lemi1hktktg  
all1tfavmsaad1anvdda  
tkeh1lesysyhl1gmmfqi1kdd1l1dcygeak1gkkvgsd1lenkstyvs1l1gkdgaedk1tyhrdaavde1tqi1deqfnt  
kh1leivd1lfysrdh  
>tr|A5IT75|A5IT75\_STAA9  
mtkii1aadvggttckl1g1ftpe1leql1hkwsih1tdtsdstgyt1l1kgyidsfvekvnenynfsnvl1gvig1vpgpvdf  
kgtvngavn1lywpekvnr  
ei1feqfvdcpvyvdndaniaal1gekhkgagegaddvait1gtgl1gggi1sgeiv1vhgngsgaeigh1fradfdqrfkn  
cgrsgci1etvasatgvvn1  
infyypk1l1tfrssi1le1likenkv1takavfdaakagdqfci1fitekvanyigyl1csi1svtsn1pkyiv1l1gggm1staggpili  
enik1teyh1n1tfapaqfet  
eivqak1l1gndagi1tgaag1liktyv1dkegvk  
>tr|A5IT78|A5IT78\_STAA9  
mtcivindie1lnkvgdvntkne1rkyi1l1hkmknfnkaekrkadt1wln1rqffateeykeanaia1l1v1snhevd1tfsiie  
qa1l1mdhkri1fvpkmdyl1nh  
qmtfkei1fn1kdi1dvdkngi1yyptskgettn1l1divvpgvgf1qddgyr1igygggydrfl1anyqtktis1l1ydfqitsf  
epesfdqpvk1liiyqsa  
>tr|A5IT83|A5IT83\_STAA9  
msqlidall1nfd1fmrysl1sigl1igfi1apligafivrr1sl1iadal1shvt1l1ggis1fgm1l1timpt1lv1finpmwfgilf  
aivgall1iek1l1rtsytayg  
eia1pi1imsagial1saifis1ladgfnqeivg1l1fgsisavn1sd1l1ttiiv1iaiv1l1fit1lfykel1fils1fdeeyskvig  
ihkw1qfl1fivivamvisa  
smrvvgi1l1vsal1it1piaismritksfkq1l1l1svfl1gel1svil1gl1v1lafymdispggviv1l1vill1mitmayqkrm  
kfkkgan1ineyk  
>tr|A5IT87|A5IT87\_STAA9  
mk1iad1mt1l1dhv1pfstaeswdnvg1l1igdg1dvevtgvl1tal1dct1levvneaiekgynti1shhpl1ifkgvts1lkangy  
gli1irkli1qh1din1liamht



Tsompanidou\_et\_al\_Supplemental\_FASTA\_File

nldvnpvgvnmmlakamglknisiinnqqdvvykvqtyipkdnvgpfdklsenglaqegnyeycffesegrgqfkpvge  
anptigqdkiedvdevkli  
efmidayksraeqlikqyhyetpvfdfieikqtslyglvmaevdnqmtledfaadiksklnipsvrvfgesnqkikr  
iaiggsgigyeyqavqqg  
advfvtgdikhhdaldakihgvnliidihyseyvmkeglktllmwnfniekinidveastintdpfqi  
>tr|A5IT90|A5IT90\_STAA9  
mridqsiinei kdktdi ldlvseyvklekrgrnyiglcphfdektpsftvstedkqichcfgckkgnvfqftqeikdisf  
veavkelgdrvnvavdja  
tqsnsvqiasddlqmiemheliqefyayaaltktvegeqaltylqdrgrftdalikergigfapdsdhfchdfllqkkgydi  
elayeagllsrneenfsyy  
drfrnrifpknaggrivgysgrtytgqepkylnspetpifqkrkllynldkarksirkildeivlllegfmdviksdtag  
lknvatmgtqlsdehitf  
irklltsnitlmfdgdfageatltkgqhlqqglnvfvilqpsgmdpdeyigkygndafthfvkndkksfahykvsilkd  
eiahdlsyerylkelshd  
islmkssllqkaindvapffnvspeqlaneiqfnqapanyyepedeygydeygyiepepigmaqfdnlrqaeraf  
lkhlmrdkdtflnyesvd  
kdnftnqhfkvyfevlhdfyaendqni sdavqyvnsnelretlislegynlndepyleneidvynvinekgqetiesln  
hklreatrigdvelqkyy  
qqivaknkerm  
>tr|A5ITB5|A5ITB5\_STAA9  
mivgvlwnsskvlstflflllyityrknkivyapislfliifsswylhysqqaiynyiniernsqfneraqqiviqiqrq  
gsdtykgrlslkneiyppf  
ltdkknfdlkkiesrncivkgqfkvnenkfvtklqsisvqsclesnrsliekhkqfimmriydsgikfpdrimalitg  
dvkeineqfkervkeigiy  
hllavsgshiaaivfllyqplkrlnlplfvikgitiivltlyaqytnyapsavraiimttlvllitkqikikgiqlafa  
fiimfilnplvvydigfqf  
sfisffimllfpflqqllsklqslfiitfiaqlasfivaipnfhqllqwgflsnliffvpyysilfplsilffitshfiv  
gltplnylvdlfnfhdwl  
ldlftrikqshfsvpkfnwifiiifiisvyyifwllakrkyilvtfwtiiltllitfptnshhkitmlnvqggsilye  
ggknqnvli dtggkviddt  
kqpsysiskyhiltnergineleylilthphndhigeveyiishikikhivynkgysntlmllsklshkyniklmd  
vrqvsfklgdssflffds  
fipnsrdkneysiitmi tyqnkkvllmgdasknesllkkynlpeidilkvghgsktssskefiemikpkislissgk  
nnmyhlpnievvkrigrir  
sriynsqngqvtidlddnlkvdsnsygnasgl  
>tr|A5ITC2|A5ITC2\_STAA9  
mltgkqkrylrs lahnidpifqigkgginenmikqidtdlenrelikvhvlqnnfddkkelaelseatrselqvigsm  
iviyreskenkeielp  
>tr|A5ITC4|A5ITC4\_STAA9  
msdilkcigcgalqsedknkpgfvpehnmfrddvicrrcfrlnkynevqdvgl esedflklsgladkkgivvnnvdf  
dfegsfina vkri vgnkki  
ilaankldllpkqinrrvkewlkr tarkygleaddvvlisaekgwgidllssianirendvyivgttnvgkstlink  
lieasvgekdvvttsrfpg  
ttldmidipldessfmydtpgi iqdhqmthlvsekelkiimpkkeikqrvyqlneaqtlffgglaridvsggkrplvcf  
fsndlnihrtktekandlw  
rnqldlltpgpnqfndlnekavrletgkekrdvmisglgfitigpgakvivrvpkndvvlrnsil  
>tr|A5ITC8|A5ITC8\_STAA9  
msqpvyhlc lalkckliivlgefeykyltgfililllegiftnsasaieysdlhhsksfdskrlsnakmsfinptqlenk  
ntndrllkhdllfhdmfvl  
vaskkdfkvefenealskkfinknidiyagsysyechgatnktqcsyggvtlsdnk  
>tr|A5ITD1|A5ITD1\_STAA9  
mlrclianrgeiavriiracreygietvavyakgdeqslvhvladqaicigeanaldsylvnidriisaaqitganaihpg  
ygflestkfaqtveeggi  
afigptkktmemmgdkitarqtvvhagvpvipgsngavnhvseienlakdigypvikaasgggkgirivkkaedleka  
fkeaksegkkyfddrvyv  
eafipvakhvevqvmgdgqnyvhlgerdcsvqrknqlieespcaalteerrqqicndavkvaraanyrsagtieflvt  
dtahyfiemnariquehtv  
temraerdlvaaqlyllehnhlpfsqsdiqfnghvhearinaenpekkfqptpgkvtahlppqfnvrvidsllhygyqvs  
pyydsllvakvivkshdras  
aidkllkvtdemvidgfsttadflyavl nyplyrdgdakdvdkflekhqivkgvel  
>tr|A5ITF8|A5ITF8\_STAA9  
mnneypysadevlhkaksylsadeyeyvlksyhiayeahkgqfrknglpyimhpiqvagiltemrldgptivagflhdvi  
edtpytfedvkemfneeva  
rivdgvtklkkvkysreeqqaenhrklfiaiakdvrvilvkladrlnhmrtlkamprekqirisretleiyaplahrlg  
intikwledtalryidnv  
qyfrivnlmkkkrseraeyietaidrirtemdrmniedgingrpkhisiyrkmmkqkqfdqifdllaivivnsindc  
yailglvhtlwkppmpgrfk  
dyiampkqnlyqslhttvgpngdp lei qirtfdmheiaehgvaahwaykegkvvsekdqtyqknlnwlkelaeadhtss

Tsompanidou\_et\_al\_Supplemental\_FASTA\_File

daqefmetlkydlqsdkvy  
aftpasdvielpygavpidfayaiahsevgnkmgakvngkivpidyilqtgdiveirtsksygsprdwlkivksssakg  
kiksffkkqdrssniekgr  
mmveveikeggfrvediitekniqvvnkynfaneddlfaavfggvtslqivnklterqrildkqralneaqevtkslp  
ikdniiatdsgyyveglenv  
liklskccnpiaggdivgyitkghgikvhrtdcpnikneterlinvewvkskdatqkyqvdlvtaydrngllnevlqav  
sstagnlikvsgrsdiidkn  
aiinisvmvknvndvyrvvekikqldvytvtrvwn  
>tr|A5ITH7|A5ITH7\_STAA9  
mvytmqlniknepvtkrnlitlaltstlglivtalagvivtkqafp11svaigsiftgivwgl11sgsyalirflsnafg  
rk  
>tr|A5ITH8|A5ITH8\_STAA9  
mr1kecglilgidl1dhiiigdnrfts1veagyfdend  
>tr|A5ITK5|A5ITK5\_STAA9  
mykeervfytcssf11ganfvkilevstiakdtqindkirakelrligqdgeqigvkskreaemaervd1dlvvvapn  
akppvarimdygkfkfeqq  
kkekemkkkqkiinvkeir1sptieehdfqtklkngrkfltkgdckkvsirfrgraitheigqrvlekyadeckdiatv  
eqpkmdgrqmfilapta  
ek  
>tr|A5ITL5|A5ITL5\_STAA9  
mktiq1hkttlilialil1fytfmgil1pimhdd1qwfsnyntdilkvfgas1ngryignifeiavhvs1rwl1syglis  
mgiiwimihitrckawtsy  
yllafslmlil1psaiyadtygwafgfyntatstlislfiyycinaiiykekqpsvtvlfyvlcffgqlfmenvtlfhc  
iililaflyeftanrtlny  
kllfsfmiaatigtiimfsnpyrki1fegseyqqvsnnqgifskaemists1pygvifsqiilsmiaaliy111rsd  
ryvhltilkrriimigfit  
1plyl1lfynqf11nkntdig1vgfvnvivcgyfafsifvgiylsindrktqitlys11iaicvsastlvivtpiepgnf  
livytihviilil1kefr  
kyksinvnfikgas1vlaviy1safiyvhyehkrvq1lkqkikhprqevytves1pfeyhmhpspinknyqewfnny  
eelpkmtkvky1pfgsdds  
>tr|A5ITL7|A5ITL7\_STAA9  
msqkvlvvddehsivt11kyn1etagyevvafdgdealekveseqpdliildvmlpkkgdivcktvrtkn1vpilm1  
takndefdrv1glelgadd  
ymtkpfsprevvarvka1lrrsqfveveeidditigsirirpdyfeykhnelleltpkefel1lylierqgrvitre  
hm1ntvwnyefagdsrivd  
vhish1rdklednpkkpql1ktvrg1gyk1erpkeq  
>tr|A5ITN5|A5ITN5\_STAA9  
maeqqtimer1fht1dekakt1nnengqsfieng1ameqvytnerg11eqst1qdrkafqfay1slmqeekiqanhqi  
tpdsig1ilgfl1verfmnn  
qee1hivdiasgagh1satvkevlpeiamhh1ievdp1srsvhl1anf1eipfdvypqdaimp1pleadivigdfpv  
gyypiderskefk1gfeeg  
hsyshy11ieqaina1kdagya1lvpsn1ftgehvkq1ekyiatetemqaf1n1ppt1fknekarksil1lqkkksget  
kpvev1lanipdfknpsqf  
qgfmet1nqwmtdncpkk  
>tr|A5ITP3|A5ITP3\_STAA9  
mt1nk1kdelqivshrg1psdfpentmvgvrevmg1nvam1eidvhl1tkdqhf1v1hdetidrtsdgkgriadyt1sq1k  
sfdgfsykdvafkgeript  
1dev1s1clkydkk11ielkspn1ypeieck11afleekkvdatqvviqsfdiecielnt1gsiyelgvl1skrnywyk  
kpnfsriaqiasyvnpny  
1varkfvdkahhhq1qvmpytvnl1ktgek1rqmgvdglitdnpklfik  
>tr|A5ITS7|A5ITS7\_STAA9  
myqtiiiggp1maavaaseqsssv11iekkkg1grkl1isgggrcnvtr1pyaei1knipngkf1lyspfsifdne  
siidffesrgvk1keedhg  
rmfpvsnkaqdvdt1vttierqhv1tikeeeavsrievntdqftvhtqnnsyeshs1viatggtsvpqtgstgdgykfa  
qdlghtitel1fptevpits  
aepfiks1nrlkg1s1kdvelsv1kkngkkri1shqmdm1fthfgisgpaal1rcsqfvykeqknqktqhismaidafpelnh  
eq1kqh1ts11sdt1pkii  
kns1hg1ieery11fm1eqagidenttshh1snqq1nd1vnmfkgfvf1kvngt1pidkafvtgggvs1keiqpktmmsk1  
vpg1f1cgevl1dihgytgg  
ynitsalvtghvag1yaghyshtsme  
>tr|A5ITS9|A5ITS9\_STAA9  
mksittdelkn1lfeskpvqivdvrtdeetamgyipnak1ipmdtipdn1nsfnkneiyyivcaggvrsakvveyleang  
idavnveggmhawgdegle  
iksi  
>tr|A5ITT1|A5ITT1\_STAA9  
mnikpsvww1vigma1nitgss1f1wp1ntiymkqelgks1tvag1vlminsfgmvign11ggs1fdkl1ggyktiligtft  
c1cstt11nffhgwpyav  
w1vmlgfgggmi1paiyamagavwpnggrqtfnaiylaq1nigvavgaamggfvaefsfnyiflan1imyvvfalvavtqf

Tsompanidou\_et\_al\_Supplemental\_FASTA\_File

nieinakvkypthlditgk  
knkarfislvlicamfaicwvayiqwestiasftqsinismaqysvltwingimilvaqplikpvlyllkgnlkkqmfvg  
iiifmlsffvtsfaenfti  
fvvgmiiltfgemfvwpavptianqlapdgkqggyqgfvnfaatvgkafgpfllggvlvdafnmrmmfigmmlllvfalil  
lmvfkenntqpkkida  
>tr|A5ITV9|A5ITV9\_STAA9  
mrvkfrdkdnrqvnlftfkndnei adgnhvlaiptfknqllftkhnrgiefpggkrergessaeavtrelyeetgakvkn  
ihyiaqytiethdqtdfvk  
dvyfieveslvskndyletagpvlncindielaqrsflldstilkcvervqslgfyqt  
>tr|A5ITW4|A5ITW4\_STAA9  
mkitykyrgdplntennknqnsvknserrgmkgcgglisfilliillsacsmmfnsndnstsnqssktqltqkden  
knedkpeeksetatdedlq  
steevpanentennqheideittkdqsddeintpnaedksqddlkdldkekqqssnhhqstqpktspstetnrqqs fan  
ckqlrqvypngvtadhpay  
rphldrkdnracepdkn  
>tr|A5ITW8|A5ITW8\_STAA9  
mekneytakynesqlldatysqavayllnkygavtdyykesytrflngeiksiskgytraseglychhisedkfqn  
lsdlrfisefkysynvqkk  
enlyycdliehlihaiitkesngqfgvaglcqmikptvidwyiseytpkpawmqatkaraylprilvekllikiddmle  
gieiydflesr  
>tr|A5ITX0|A5ITX0\_STAA9  
mckvlkiprstydsikrkdnkikddsveraainifnsnrkvfstriknhlndkglvtvsqkigr1  
>tr|A5ITX1|A5ITX1\_STAA9  
mvrlyengkprneiireydltp1t1gkwik  
>tr|A5ITY1|A5ITY1\_STAA9  
mimldiffikdvmaivvgvlmfi fnyvfglevlgdhsfwylpityatcyvymfiagsipvtltlaiyiiitlllavllfk  
gfnkwsgrtikd  
>tr|A5ITY5|A5ITY5\_STAA9  
mfkkkmlaatlsvgliaplaspiquesrantnienigdgaevikrtedvsskkwgtqnvqfdvkdckynkdalivkmqg  
finsrtsfsdvkgsgeyelt  
krmiwpfqyniglttkdpnsvlinylpknkiettdivgqtlgyniggnfqsapsiggnsgfnysktisytqksyvsevdka  
nksvkwgakanefvtpdg  
kksahdryl fvsqspngptgsareyfapdnqlpplvqsgfnpsfittlshekgssdtsefeisygrnldityatlfprtgi  
yaerkhnafvnrnfvvrye  
vnwktheikvkghn  
>tr|A5ITY6|A5ITY6\_STAA9  
makldlnsldehvkllinelkypethidvne  
>tr|A5ITZ2|A5ITZ2\_STAA9  
mrlyfiaaiiitllclinnnyvnaevdkkdllkksdlssklfnltsyytditwqldesnkistdqlnntiilknidis  
vltksslkvefnssdlanq  
fkgnidiyglyfgnkcvglteektsclyggvtihdgnqldEEKVIGVNVFKDGVQEGFVIKTKKAKVTVQELDTKVRF  
klenlykiynkdtgriqkq  
ciffhshnhqdqsfydlynvkgsvgaeffqfydnrtvsssnhyidvflykd  
>tr|A5IU06|A5IU06\_STAA9  
mkminklivpvtasallgacgasatdskentlisskagdvttvadtmkkigkdqianasftemlnkiladkyknkvndkk  
ideqiekmqkqygkdkfe  
kalqqqgl tadkyqn1rtaayhkelldskikisdseikedskkashilikvkskksdkeglldkeakqkaeeiqkevsk  
dpskfgeiakkesmdtgsa  
kkdgelgyv1kgqtdkdfeka1fkldgeevsevkssfyghii kadkptdfnsekqslkek1vdqkvqkiqny  
>tr|A5IU21|A5IU21\_STAA9  
mtnhivlyqpeipantgniartcagtnthlhlikplgfrtddkmlkragldywefvnityhdsieaffeatngey1l1tk  
fgkktysdfdfshndkdfy  
fifgkettglpdwvkekyqdtlripmsehirslnlsntaalliyealrqqdfpgln  
>tr|A5IU28|A5IU28\_STAA9  
mkvvglnrmrevetelqrrfsldfkfykkaseipesdladldilvgydggineaf1qrcpn1kwiawfatgvnt1pldy  
iadhgilltngkgvqakql  
sey1afilddykkmk1sydnqrqhiydskitgr1sgqvt1flgtgaiatrtaklakafnm1lig1sksgqnkdefdei  
ytieslest1pnadiiina  
1petqeti1h1kkkhfelmkdealfinigrsivkealliev1kskvirhtyldvfenep1kpnhelyelenvtitahit  
gndyeakyd1ldifknnlv  
nflnknglienevdakkgy  
>tr|A5IU45|A5IU45\_STAA9  
mtnykek1qqyaellvkvgnvqpkqpvfirssvetle1thliveayhcgasdrvrvysdpt1kr1kfenesvehfanh  
e1ksydvearmdyvkrkaa  
n1alisedpd1mdgidsq1qafqqqnara1fgymesvqknqfpwvaafpskawakrvype1sveeayikfidvfdv  
ridgndpvenwrqhian1s  
vyaqk1qqknyha1hyvsetgd1tvg1aknhiwedatsyvngaeafianipteevftapdrnrvdgyvtnk1pl1syngt  
iidqfk1mfkdgeiidfsa

Tsompanidou\_et\_al\_Supplemental\_FASTA\_File

ekgeavlkd lintdegsrrlgevalvpddspi snrnti fyntlfdenaachlaigsayafniqggtemtveekiasgln d  
snvhvdfmigssdl tiygi  
fedgske l vfengnwastf  
>tr|A5IU52|A5IU52\_STAA9  
mthkyistqmli iftal mianfyi ffekigflvl lllgcvlvyvgylyfhkirgllafwigalliaftllsnkytii  
lfvflllllvrylihkfkp  
kkvvatdevmtspsfikqkwfgeqrtpvyvykwedvqiqhgigdlhidl tkaanikenntivvrrilgkvqvilpvnyi  
nlhvaafygstyvneksyk  
vennihi eemmkpdnytvnivyvstfigdveviyr  
>tr|A5IU76|A5IU76\_STAA9  
mkrnfpklialslifs lsvtpianaesnsnikakdkkhvqvnvedksvptdvrnl aqkdy lsvvtsldkiynkekasyl  
gepfkiyknksdgnyyf  
pvlntegnidiyvtispkitkyssssskytinvspflskvl nqykddqitiltnskgyyvvtqnhkaklv lktprledkk  
lkktesiptgnnvtqlkqk  
asvtmpsqfksnnytyneqyinklenfki retqgnngwcagytsa llnatyntnkyhaeavmrf lhpnlqgqrfqftg  
ltpremiyfgqtqgrspql  
lnrmttynevdl tknknkiav lgsrvesrngmhaghama vgnak l dngqevii wnpwdngfmtqdaknnvipvsngd  
hyrwyssi ygy  
>tr|A5IU93|A5IU93\_STAA9  
mtfnihtitiylqyittkkkgaddmqqvi sdimtfrgshfelgvktgkwlqqtpl lknrekewkkrvprfdidvnytyqi  
fqtyapqiweelmg lqsi l  
kmptrqi ilnfghyrftdlkesgctvfqgkdfmvrnydyhpatydgryllyqptdsglaqigpvsrvtgrmdgmnesgl t  
mgynfmhrkkpangfvcym  
igrli lencrnvtea iqllkei phrssfysylmdkslnhaivevtp rsidvrydnictnhfeil thenrnytkeskerla  
rtisqtdnldmttafk l f  
nnpqyeiyskl fkswsgtihtsmyqpetl tayftl genappei idfkswldgqdl nithftgnidtdl tfank  
>tr|A5IUA5|A5IUA5\_STAA9  
mnp laqsl neqlqgsnataftm lsd lqgnmfypkgil sqsaeaksttynatigmatnkdgkmfass ldamfndltpdeif  
pyappqgieelrd l wqqkm  
lrdnpe l sidnms l pivtnal thgl slvgdl fvnqgdtil lpehnwgnyklvfnt rnganl qtypi fdkdghytt ds lve  
alqsynkdkvimi l nypnn  
ptgytphkevttivdaika l adkgtkvi avddayygl fyedvytqsl fta l sn l snail pvr l dgatkeffawgfrv  
gfmtfgtsdqttke v leak  
vkg l irsnissgplptqsavkhvl knnkqfdkeieqniqt l keryevtkevayadqy hshwqaydfnsgyfmaikvhvdv  
pe l rkh l iekysigvia l  
natdi r iafscvekediphvfdsiakaid l r  
>tr|A5IUA9|A5IUA9\_STAA9  
mknhtniini l l vlnsl thfl t l ntsffnnsasdfcfi igai ffligi fva iygmkratywln l l l l ft n i fy fl hfcv  
l l l l kyigfkl f i yegcv l  
l fi  
>tr|A5IUB9|A5IUB9\_STAA9  
mihv l dfndki idfl stddps l v raihkrnvndnsem l ellisseraekfrerhrvi i rdsnkqwrefi inwvqdtmdgy  
teieci asyladi ttakpy  
apgkfe kttseal kdv l sdtgwevseqteydg l r t t swtsyqtryev l kql cttykm v l dfyielssntvkgrvvlkk  
kns l fkgkeieygd l vgl  
trkidmseiktali avgpendkgr l e l vvt ddeaqsqfn l pmryiwgiyepqsddqnmnetr l sslakte l nkrksavm  
syeitstd l evtyphe i s  
igdtvrvkhrdfnpplyveaeviaeeyni isenstytfgqpkfkesel reefnkr l nlihqk l ndnisnintivkdvd  
geleyferki hksdtpen  
pvndmlwydtsnpdvavl rrywng rwi eatpndvekl ggitreka l fselnnifin l siqhas l l seatel l nsey l vdn  
dlkad l qas l davidvynq  
iknnlesmtpetatigr l vdtqal fl eyrkl l qdvtydvedvki a isdrfk l l qsytdkeykeale i i atkfg l tvned  
l qlvgepnvksaieaare  
stkeql rdyvkt sdyktdkgd giver l dtaeaert l kgeikdkvt l neyrng l ee qkytddq l s d l snpeikasieqa  
nqaqea l ksyidaqdn l k  
ekesqayadgki seeeqrai qdaqak l eakqnael karnaekkanaytdnk vkestdaqr r t l trygsqii qngkeik l  
rttkeefnatnr t l sn l n  
eivqnvtdgtti ryddngvaqa l nv gprgir l nadkidingnrein l liqnmrkdvkdtdivns l n l sregl dinvrig  
ikggnnr yvqi qndsie l  
ggivqr t wkgkrstddi ftr l kdgh l rfrnntaggs l ymshfgist yidgedgedgsgstiqwwdktysdsgmngitins  
yggvvaltsdnrvvlesy  
assnikskqapvylpntdkvpg l n rfaft l snadnayssdgyimfgsdenydygagir fskernkg l vqivngryatgg  
dtteagy gkfnmlkrrdg  
nryihiqstd l l svgsddagdri asnsiyrrtysaaan l hitsagti grstsarkykl sienqy ndrdeql ehskail n l  
pirtwfdkaeseilare l r  
edrkl sedtykl dryvgl iaeeven l glkefvtyddkgeiegiaydr l wihlipvikeqql rikkleesk nag  
>tr|A5IUC0|A5IUC0\_STAA9  
midtikvnnk tipwlyvergfeipsfnyv l ktenvdgrsgsiygr r lesysfdiplvvrndylshngikthddv l nelv

Tsompanidou\_et\_al\_Supplemental\_FASTA\_File

kffnyeeqvk1qfkskdw  
wnayfegpik1hkefaipvkftikvvt1tdpykysvtgnkntaisdqsvvnsqtdtplivearaikpssyfmitknded  
yfmvgddevtkevkdympp  
vyhsefrdfkgwtkmitedipsnd1ggkvggdfvisn1legeykatnfpdakgwgagtkrglpkamtdfqitykciveqk  
gkgagrtahiydsdgk11  
asi1gyenkyhdrki1ghi1vvt1lynqkgdpk1iydyqnkpimyn1drivvymr1rrvgnkfsiktwkfdhikdpdrkpidm  
dekewidggkfyqrpasii  
aiysakynkykwmemng1gsfnte1l1pkpgardvi1qkgd1vki1dmqaksvineepm1seksfgsnynvdsygyseli  
iqpenvfdt1tkwqdry1  
>tr|A5IUC1|A5IUC1\_STAA9  
mgerikg1sig1d1daan1nrsfaeikrnfkt1nsd1k1tgnnfkyteksthsyqrike1dgtitgykknvdd1akqyg  
kvsqeqgensaeak1rqe  
ynkqane1n1fleke1ekt1t1tefeefkkaqveaqrmaesgwgktskvfesmgpk1tkmgdglksigkglmigvtapvl1gia  
aasgkafaevdkgl1dtvtq  
atgatggel1k1k1qnsfkdvgnfpedaetvggvl1gevnr1l1gftgkelesatesf1kfshitsgdgvqavql1itramgda  
gieadeyqsv1dmvakaag  
asgisvdt1ladsitkygapmramgfemkesial1fsqweksgvnteiafsg1kka1snwgkagkdpreefkk1laeiertp  
di1asats1laieafgakagp  
d1adaikggrfsyqef1k1tiedsqgtvnqt1fkdsesgserfkvamnk1k1vgadvwasiesafapvmeelik1svavdw  
fss1sdgskrsivi1fggia  
aaigpvv1fg1gafistvgnavtvl1ap1lasiakadgl1s1f1stkvpilgtvftaltgpigiv1glv1aglavaf1tiaykks  
etfrnfvnga1nsvkqtfs  
nfi1qfi1qpfi1dsvknvfkqavsai1vdfakdiwsqingffnengisivqal1qnicfikai1fe1filnfvikpimfaiwqvm  
qfiw1pavkalivstwenik  
gvi1qgalni1il1gfikffss1ftgnwrgvwdgivi1ml1kgtvqliw1nli1q1lwfvgkilgvvryfgg1l1kgl1sigi1wgvikgi  
ftks1l1saiwnatks1ifgl  
ynsvksi1ftnmknw1sstwnniksntvgkahl1ftgvrskf1ts1wnatkdi1ftk1rnwmsniwnsikdntv1giagr1wdk  
vrni1fgnmrdg1k1si1igki  
kdhi1ggmvdai1kkg1lnk1iegl1nwvggk1gmdei1pr1htgteht1ttr1lvkngkiardt1fatvgdkgrngngp1ngfrnem  
iefp1ngkrv1tpntdt1tay  
l1pkgskvynqaqtysm1ngt1l1prfhfgttmwkdik1ssassafnwtkdqigkgtkw1gdkgvdv1dfmenpgk1l1nyile  
a1f1gidfns1l1tkmg1i1agdit  
kaawski1kksatdwi1ken1leamgggd1vgg1l1dpdkinihygrtaaytaatgrp1fhegvdfp1fv1yqevrt1pmggr1l1trmp  
fmsgg1ygn1yvk1it1sgvidm  
l1fah1knf1sk1sppsgtm1vkpgdvvg1tgnt1gf1stgph1lfemrrngr1hfdpepy1lnakkkgr1siggggatsgsgatya  
srvi1rqaqsi1lggryk1gkw  
ihdqmmrvakresnyqsnavnw1dinaqrgdpsrg1l1fqi1gstfranakrgytnynnpvhqgisamqyivrry1gwg1gfr  
agdyay1atggk1vfdgwyn1  
gedghpewi1ptdparkndamkml1hyaaaevrgrkasknkrpsq1snvngfddps1l1l1kmi1eqqqq1a1l1l1kiaqsn1dv  
i1adkdyqpi1ideyafdkkv  
nasi1ekr1erqestkvk1frk1ggia1iq  
>tr|A5IUC2|A5IUC2\_STAA9  
m1lknmdt1l1mmd1i1engkdanev1kmpfhyv1si1yqnknndi1seekaeal1idaf  
>tr|A5IUC5|A5IUC5\_STAA9  
mai1khasap1kayfni1tg1gfak1l1tkegae1kysdi1tktrgl1qkigvetggel1ktayadggpi1esgntd1ggekis1l1qmhaf  
pkei1rki1vfnedydedgvy  
eek1qgk1qnyvavw1frqerrdgt1frtv1l1pkvmftn1pkidgetaekdw1dfsseevegeal1fl1v1dnkksvrki1y1f1dsanm  
t1nhdg1d1gek1geea1fl1kki1l  
geeyt1gnv1tegneet1l  
>tr|A5IUD0|A5IUD0\_STAA9  
mvk1fkvvrg1fkdi1ehnhqkykvge1ypaegynnprve1l1tnqiknkydkvyivp1dkl1tkqelle1l1ces1l1qkkr1lvqwlk  
vkssty  
>tr|A5IUD3|A5IUD3\_STAA9  
msi1leki1fktrkdisym1d1dmied1sqayvkr1laidsciefvaravaqshfkv1legnri1qkndvyyk1lnikpntd1l1ss  
dsfwqqvi1y1kli1ydnev1l1i  
vvsdske1l1i1adsfyreeya1lyddi1fkdvtkdytyq1rtftm1qeviy1l1kynnnkvthfves1lfedygki1fgrmi1gaq1l1kn  
yqirgi1l1ksassaydekni  
ek1l1qaf1tnk1l1fnt1fnknq1lai1ap1liegf1dyee1l1snggknsnmp1f1sel1se1l1mrdaiknval1migippg1li1ygetad1leknt  
l1vfekf1cl1tp1l1kki1qne1l  
nak1l1itqsm1y1kdtr1ieivgnkkdp1l1qyaea1idk1lvssgsf1trnevrim1l1geepsdnpe1l1dey1l1vtknyekanengst1  
k1ggdedesg1d  
>tr|A5IUE2|A5IUE2\_STAA9  
mtnt1l1tidq1qe1l1l1qi1qk1fddrip1trn1l1ndtvasmi1iefaewnt1leffk1nwkkqpgkpl1dtq1l1dei1ady1l1afsl1ql1t1l  
t1ivdeed1leettevm1vdl1i  
enevt1l1pk1l1hsvy1fvhvmht1leq1fvk1gidsivqvl1imp1flyant1y1tytidq1l1idaykkk1mkrnherq1dgtadagkgyv  
>tr|A5IUE6|A5IUE6\_STAA9  
markariv1t1ndk1pyr1fsk1feme1lieshgitagmvskrikdgwe1l1heamdapegtr1l1seyrekktier1leqar1lerk1ler  
krkreae1l1rrkkph1l1fnvp

Tsompanidou\_et\_al\_Supplemental\_FASTA\_File

qkhsrdpywfdntynqmfkkwsea  
>tr|A5IUF6|A5IUF6\_STAA9  
msktyksylvavlcftvTaivlmpflyfttawsiafasiatfifykeyfyee  
>tr|A5IUG4|A5IUG4\_STAA9  
mnsfkdr1kqimserkisqselrrrtgigrnsisdylngkyeakqdkvfelakalnveawlmgfdisknrkienndits  
iyskltpprqsnv1kyatn  
qleeqnndsdlvdfnsyiqeksevdigyacasagigerlynepiskefvrgyvpahdialkvngdsmeplfkngqiifie  
kshtikdggqigvfiingda  
yvkkvyvednr1t1vs1nkkykdlyfydnesvr1vgkvi1  
>tr|A5IUG5|A5IUG5\_STAA9  
mkprkqdeki1sdqysyfepii1sdscdikfdenkrmgisifisheeicfirkeedyifkis1sevidyntvvtiwnqaf  
1t1ndnrkl1tvfvtvnspl  
tgfisi1ktymq1sknketi1snc1pindeqtkveifdvvg1nyegrrkelkkl1kkmknndfffflysd1kgnelke  
e1lyedkvyeisdyevipg  
vflqkepdpnydenaikvmsneysefhvgvpreyasr1vnhmdnivscnayinggykt1dyleekivtkesdyglrv  
hleykv  
>tr|A5IUG8|A5IUG8\_STAA9  
mki1tnckikretivyev1tsgnqpftyelpkdl1ssharkylefisksidgdkl1tkeds1  
>tr|A5IUJ7|A5IUJ7\_STAA9  
mns11idtsnqplsva1mqndev1aeittskqnhsvq1mpaisq1feqskiakqql1daiivaegpgsytg1rigvtvak  
t1aya1dvk1ygvss1ka1  
aatidhtdk11vpvfdarrqavytgi1fqwqngq1vtiledqymsieal1rafled1nqpfyigkdtik1qdelqgeviaq  
1pnasvmyq1idkptdvht  
ftpkyhk1aeaernw1nsqknn  
>tr|A5IUK0|A5IUK0\_STAA9  
msktqhevqn1dp1kmaes1e1eq1nekt1ndmrsgsev1vea11kenvdyl1fgypggavl1plydtfydgkikhil1arh  
eggavhaaegy1arvsgktg  
vvvvtsgpgatnvm1tgidahcds1p1vvftgqvatpgigkda1fquad1smtspitkqnyqvrvedipkivheafhva  
nsgrkgpvvi1dfpkdmgv1  
atnvd1cdein1pgyevvtepenkdi1dtf1s11keakkpv1lagagin1qsksnq11tqfvnkhqiptvt11glgavpye  
dt1f1gmggmhgsyasna  
1tecd11in1gsr1fddr1askpdafapnakivhvd1dpseinkvihvd1giiadckrf1ec1ndknvetiehsdvwk1hcq  
nnkqk1hpfk1geedqv1fck  
pqqt1eyigk1tng1eav1ttdvgqhqmwaaqfypfknhgqvw1tsgg1gtmgf1gipssigak1anpdk1tvvc1fvgdgg1fqm  
tnqema11peygl1dvkiv1  
inngt1gm1vkqwdk1ffnqrfshsvfngqp1dfmkmaeaygvk1gfl1dkpeq1eeq1daafayqgpv1lievrispteavtp  
mvp1sgksn1hemeg1  
>tr|A5IUK4|A5IUK4\_STAA9  
mtyniva1pgdg1gpei1ngs1s11lei1snkynfnyqiehh1efggasid1tfgepl1tekt1nackradai11lgaiggpkwt  
dpnr1pegg11k1rks1n1  
fanir1pttv1kgass1sp1keervegtd1vivrel1tsgiyf1geprhfn1healds1tytreeierivh1vafk1laasrrgk  
1tsvdken1vlassk1lwrkv  
vnevsq1lypevtvnh11vdacsmh1itn1pkqfdv1vncen1fgdi1sdeasv1pgs1gl1spsas1fsndgpr1lyepihgsap  
di1agknvan1pfgmi1s1lam  
c1res1nqpd1ade1eqhi1ynmiehgq1ttad1ggk1nttdi1feilsqk1nh  
>tr|A5IUK9|A5IUK9\_STAA9  
mdnq1linsi1iekyqf1skkqieav1t11leekntvpfiaryrkeqtg1devqikq1iddeyqymvnl1qkrkeeviknieqg  
11tee1kkdi1kqnk1lqrv  
ed1yrp1fkqkkk1tratearkg1lep1aiwmkarkhevsieekaqq1fineevqsvedaikgaqdi1aeqisdn1pkyrtki1  
kdmyh1ggv1ttskkknaed  
ekgi1femyyay1sepikrianhrv1avn1rgekekv1svk1fefdttsvedfiarqein1hnnvnr1syileaikds1lkr1livs  
ierei1had1tekaen1haid  
v1fsen1rn111qppm1kgkqi1gvdpaf1rtgck1lavinp1fgt1fiakgviyphppv1skeaaekdfv1qmvkaydvq1liaign  
gtasreteq1fvad1likkhq  
1pvqfi1ivne1agasvysaiearde1pdfqveersavsigrrv1qdp1selvki1dpksigv1ggyqhdvnqka1ena1tfv  
etavn1qvgvdvntass11  
qyvsg1ssq1iakni1ayreengaikh1nkel1skir1lgakt1feqsig1flrivdg1sep1dntsi1hpesykvtyq11ldk1lgfg  
gnd1gsda1kak1nsl1dm  
elaie1lqvgv1ptledi1ks1kapnr1dprdef1dtpi1ksdv1sied1kegm1ksgtvrnv1vdfgafv1digvkqdg1lvh1vsk  
1skk1fvkn1pmdiv1svgd1v  
dvwvys1dknk1dkvs1ltmi1dphe  
>tr|A5IUP5|A5IUP5\_STAA9  
mdkivi1kggnk1tgevk1vegaknav1pil1tas1lasdkpsk1vnvpa1sdvetinnv1tt1nadvtykkdenavvv1datk  
t1neeapye1vsvk1mrasi1  
vmgp11lar1ghaiva1pggca1gsrpieqhi1kgfeal1gaeih1lengniyanakdg1kgtsih1ldf1psvgatqni1maas1  
akgk1t1ienaakepe1vdi1  
anyin1emgg1ritgag1tditi1ngves1hgvehai1pdrieag1t1liagaitrgdi1fvrga1kehmas1vyk1leemg1veld  
yqedgi1rvraege1lpvdi1

Tsompanidou\_et\_al\_Supplemental\_FASTA\_File

ktlphpgfptdmqsmma11ltanghkvvttetvfенrfmhvaeefkrmaninvegrsaklegksqlqgaqvkatlraaa  
alilaglavadgktsvtelt  
hldrgyvd1hgk1kq1gadierind  
>tr|A5IUQ5|A5IUQ5\_STAA9  
msrfynifkqfiggyfyliiilgglylythhafilgliigtgsaintcificylakakrpdtmhistgmmwrylvaiia  
cmiwylnkahvsiigiiig  
lmisyvvviiirp1lkvsk  
>tr|A5IUS5|A5IUS5\_STAA9  
mkvgidaggtlikivqeqdnqrftkeltknidqvvec1nqqqiek1cltggnagviaeninipaqifvefdaasqglgi  
1lkeqghdladyifanvgt  
gts1hyfdgqsqrrvggigtgggmiqglgyllsqitdykq1tdmaqhgdrntid1kvrhiykdtteppipgd1taanfghv  
1h1dadftpsnklaavig  
vvgevvttma1tvarefktenivyigssfhnna1lrvvedyvt1rgckpyyvengafsgaigaly1gk  
>tr|A5IUT1|A5IUT1\_STAA9  
mrmidiiekkrdght1tteeinffidgyvkgdipyqasslamaiyfqdmndderaaltmamvnsdmi1dsikgvkvd  
khstggvgdttt1v1ap1v  
aavdvpvakmsgrglghtggtidk1eaidgfhveideatfvk1vnenkvavvgqsgn1tpadkk1yalrdvtgtvnsip1  
iassimskkiaagadaiv1  
dvktgsgafmkt1edaea1ahamvrignvgrntma1isdmnqplgraignale1qea1dt1kgqgpkd1telv1t1gsg  
mv1lankaet1leearall1  
eainsgaalekfkftknqggdetvidhper1pqaqyqieyakksgyvtelvsndigvasmm1gagr1tkeddidlavg  
iv1nkkigdkveeges11t  
ihsnrgdvdvkk1dssitiadhvspt1ihkiite  
>tr|A5IUU3|A5IUU3\_STAA9  
mdnvkai1fdmdgt1lhenngastytkdvinq1rekgykvflatgrshseihq1vpqdfavngi1ssngt1gevdgeiif  
khg1slaqvqqi1nlakrq  
qiyyevfpfegnrvs1kedetwmrdm1rsqdpingvshsewssrqdalagki1dwvtkfpegeyskiy1fssn1ekitafr  
delkqnhvq1qisvsnsr  
fnaetmayqtdkgtgikem1ahfghiheet1vigdsndramfefghy1tvamknarpeiqa1t1dvtaytneedgaaky1  
akhflad  
>tr|A5IUVO|A5IUVO\_STAA9  
mnlfrqqkfs1rkfnvgi1fsal1atvtfi1stnpttasaaeqnqpaqnpaqpapadantqpnanagaqanpaaqpanqggqa  
npaggaaqpagqgnqadpn  
naaqapgnqaapanqagqgnqatpnnnatpanqtqpanapaaaqpaapvaanaqtqdpnasntgegsintt1tfddpa  
istdenrqdptvtvtdkvn  
gys1inngki1gvnse1lrrsdmfdknpqnyqakgnvaa1grvnanndstdhgnfngitktv1vkpdseli1nfttmqtns  
kqgatn1vikdakkntela  
tvnvaktgtah1fkvptdad1rd1qfipdntavadasrittnkdgykyysfi1dnvg1fsgsh1yvknrd1apkatnkey  
tinte1gnngnfgas1kad  
qfkyevt1pggvtyvnds1ttf1pngnedstvl1knmtvnydq1tankvtfts1qgvttargthtkev1fpdks1kl1sykvnv  
anidtpkni1dfnek1tyrt  
asdvvinnaqpevt1tadpfsvavemnkda1qqqvnsqvdnshyttasiaeynk1kqqadtilnedanhvetanrasqad  
idglvtkl1qaalidnqaa1  
aeldtkaqekvtaaqskkv1tqdevaa1vtkinndknnaie1inkqitsqgvttedkngi1av1eqdvt1ptv1kppakqdi  
iqavttrkq1kksnas1q  
dekdvandkigkietkaikdidaattnaqvea1k1ka1indinqt1tpattakaaa1eefdevvqaqidqap1npdttneev  
aai1erinaakvsgvkaie  
at1taqdlervknee1fki1enidstqtkmdaykevrqaatarka1qnatvsnatdeeva1eanaavdaaqtegl1hdi1qvkv  
sqevadtka1kvl1dkina1  
qtqakvkpaadtevenayntrkqei1qnsnastteekeaa1yte1dakkqear1n1daantnsdvttakdngi1aa1inqvqaa  
ttkksdaka1eiaqkaserk  
taieamndstteeqqaakdkvdqavvtanadi1dnatantdvdnakt1tneatiaa1tpdanvkpaakqai1adkvqaqetai  
danngstteekeakq1qvq  
te1ktaadaa1daahsnveveaaknae1akiea1iqpatttkdnakqai1atkanerk1tai1aqtqdi1taee1iaanadv1nav  
tqans1ieansqndvdq1a  
k1ttgets1dqvtptv1nkkatarnei1tai1lnk1lqei1qatpdatdeekqaadaeantengkanqai1saattnaqvdeakan  
a1eaa1navtpkv1kkq1aak  
de1idq1lqatqtnv1nndqnatneekeaa1iqq1latavtdakn1nitaatddngvdtakdagknsi1qstqpatavksnaknev  
dqavttq1nqai1dnttgatt  
eeknaakdl1vl1kakekayqdi1naq1tndvtq1kdqavadi1qg1itad1ttikdvakdelat1kaneqkalia1aqtadat1teek  
eqanq1vdaq1l1tqgnqnie  
naq1siddvntakdnai1qai1dpiqastdvktnarae1l1temqnkite1lnnnettneekgndigpvraayeeg1lnninaat  
ttgdvttak1dtavqkvq1l  
hanpvkkp1pagkkel1dqaaadkktqieqtpnasq1e1ndakqevdte1nqaktnvdqsstneyv1navkegkakinavk1tf  
seykkdalakiedaynakv  
neadnsnast1sse1aeakq1lae1lq1tadqnv1nqatskddie1vqi1hnd1dnindyti1ptgkkesattd1yayadqkkni  
sad1tnatqdekq1aikqvd  
qnvq1taleni1ngvdngdvdda1ltqgkaa1diti1qvdatv1kpanqai1eakaedtkes1dhsdql1taeekte1alamikqit

Tsompanidou\_et\_al\_Supplemental\_FASTA\_File

dqakggitdatttaeveka  
kaggleafdniqidstekqkaieeletaIdqieagvvnvdadatteekeaftnaledilskatedisdqttnaeiavkns  
aleqlkaqrinpvvkknaI  
eairevvnkqieiiKnadadasakeiartdIlgryfdrfadklDktqtntevaelqnvtipaieaivpqndpdandtngt  
dnndatansnanatpentg  
qpnvsettdngkadaspttpnnsdaatgettvtsatddakdkpqaannssadastnsptmndvtskpevestngttdk  
pvtetdnatpaesttnns  
ttatnenaptgstatapttasteaassadskdnasvndskqnaevnnsaesqstngkvaqpksekakaekdgrdstng  
smvesttetIpsadi tepn  
vpsntskdkeestnqtdagqlksetnvasneadkspkskadtevsnpkstsasseakdkmtstnvsqkddtatadntdq  
ksvgpvannkakdmqndt  
qksvgsaannkatqndganaspatsvngshsmhqdmI nvtkpeenkanaksdqgkvnpkqqaktI pdtgmshnddIpy  
aelaIlgamafIirrfkk  
dqqtee

>tr|A5IUV5|A5IUV5\_STAA9  
mltvdqvkelvgeikdpiiDvpIketegivevsikeekehsvklamaqlggapqldIq mavvnalKengaktvgirfet  
Ipeekvnqfkpeenkpkt  
iegllsqnnpvefiaiasgkggvgkstvavnIavaIaregkkgvlvdadiygfsvpdmmgidekpgikgkevipverhgv  
kvismaffveenapviwrg  
pmIgkmltnfftevkwgdiEylilDlppgtgdvaldvhtmlpsскеiiVttphptaafvaaragamakhtdhsilgvien  
msyfesketgnkeyvfgkg  
ggtkIadeI ntqllgeIpleqpswnpkdfapsiyqsddrlgkiyssiaqkviaatnk

>tr|A5IUV6|A5IUV6\_STAA9  
mmakveltrrrrfivavmlisafvailnqtllntalpsimreIninestsqwlvtgfmIvngvmipltayImdriktrp  
lylaamgtfllgsivaala  
pnfgvlmlarviqamgagvlmpImqftlftI fskehrgfamglagIviqfapaigptvtgliidqaswrvpfiiivgial  
vafvfgIvsissynevkyt  
kldkrsvmystigfgmlIyafssagdlgftspivigaliismviiylfirrqfnitvllnlrvfknrtfalctissmii  
mmsmvgpalliplyvqnsI  
slsallsglvimpgaiingimsvftgkyfydygprplytfgtiltittimIcflhtdtsytyIivvyairmfsvsllmm  
pinttginsI rneei shgt  
aimnfgvmagsI gtaImvtImsfgaki flstspshIateikqqsiaigvdisfafvavIvmaayviaI firepkeies  
nrrkf

>tr|A5IUW9|A5IUW9\_STAA9  
mtkyffssflflgnwiqqiglnwfvlttyhnavylgivnfcrlvpiI llsvwagaiadkydkgrllritissflvta  
ilcvltySftaipisvii  
yatIrgil savetplrqailpdl sdi sttqavs fhsfi inicrsigpaiagvilavyhapttflaqaicyfiaallclp  
lhfkvtkipedatrympIk  
viidyfklhmegrqifitsllimatgfsyttllpvltnkvfpgkseifgiamtmaiggiiatIvlpkvlkyigmvnmmy  
lsslfgjallgvvfhniV  
imficiIligI fsqwarttnrvyfqnkvdyergkvlsii mdrgmipIgsllmsicadvfgivrtf simgisticitmv  
fyfinrklklkleeshgi  
S

>tr|A5IUX0|A5IUX0\_STAA9  
mnIifkegtlkfnkeeqetyI flqqhnsdwani fke mlIqgrdkvtqrlvtsmhrenlvkartqskkil srdlimI dist  
thileiqfpqakqtlyapi  
tgehafdridvegpfyiknditntitrvhphneilecili eapdlknaasdqfqqdlinsatnmtfaisyqalsmqhdsa  
plfniiensedsyI rseqa  
vieghplhgakI rkglnalqtflyssefnqpi klkivlihskl srtmsI skdydtvhqI fpdlikqleneftpnfnfn  
dyhimivhpwqlddvlhsd  
yqaevdkeI iieakhtI dyagI sfrtlvpkypamsphikI stnvhitgeirtI seqtthngplmtrilndilekdvifk  
syastiidevagihfyneq  
devdyqterseqIgtI frkniyqmipqevtpmipsslvatypfnnespivtlI kryqsaasI sdfessakswietyskaI  
IglvipIvtkygiaI leahl  
qnaiatfrkdglldtmyI rdfegI ridkaqI nemgystshfheksrI ltdsktsvf nkafystvqnhI gelilI tiskasn  
dsnl erhmwyivrdvl dni  
fdqlvlsthsnqvnenrineikdtmfapfi dykcvttmrI leadeahhytyikvnnplyrenn

>tr|A5IUY6|A5IUY6\_STAA9  
mrndletlkhiiDssnri tfftgagvsvasgvpdfrsmggI fdeI skdgl speyllsr dyI ledpegfinfchkrllfvd  
tkpniVhdwiakI lernqqs  
IgvitqnidglhsdagsqvdeI hgtI nrfycnachksytksdvidrtI khcdncggairpdivlygemI dqptiiraIn  
ki ehadtlvvl gsslvvqp  
aagI shfkgnI iinkdrtpydsdatI vihddmvsvvsI mte

>tr|A5IUZ2|A5IUZ2\_STAA9  
mskrlllfdfdetyfkhtneedI shI remekI lekI tnnevi tavI tgstfqsVmdkmdqvnmtfkplhifsdI sskm  
ftwngeyvesetykklvl  
sepI fediediI rhi saqnyvefipqrafegnethynfyfhstgnhnndsri leaI vryandqnytarfsrsnplagdp  
enaydi dftpsnagI yat



Tsompanidou\_et\_al\_Supplemental\_FASTA\_File

qf1mkkynipvksilgfgdsgndeaylsylehaylmsnsrdealkqkfrltkypyyqgitlhvkefvegkydy  
>tr|A5IV00|A5IV00\_STAA9  
mksiyilplayiviesplqignviltps1kviesghfhtdfs1ismfnkkel1silsts1kedalvifkddffepttv  
dqnyyfinklsqkadrtld  
iirinennfgvpeqlpgipgitsngwqvaeqltdhklrtingkvfmiregiglypid1ssniyedklynclyvtsnein  
1lfreaihrvsesmynn1  
ntsfvyl1stlem1ssrey1nfkktkski1pfisyskyqyhkcsey1rnisen1rtei1hngksifdlydnyedvyk11n  
wikliiieyisnivkknig  
tfddlekerkkiins1gi  
>tr|A5IV05|A5IV05\_STAA9  
mtirfdnvsytyqkgtpyqhqaihdvntefegqkyyaivgqtsqgkstliqinallkpttgvttvdditithktdkkyi  
rpvrkrigmvfqpesqlf  
edtveremifgpknfkm1ldeaknyahr1lmd1gfsrdvmsqspfqmssggmrkiaivsilampdiivvdeptagldpq  
skrqvmr11ks1qtdenka  
iilishdmnevaryadev1vmkegsivsqtspkel1fkdkkkladwhiglpeivqlqydfeqyqtr1kdialteeafvs1  
ykewqhek  
>tr|A5IV42|A5IV42\_STAA9  
mslenqlaelkydyvr1qgd1ekres1n1dtsalvrqlkdieneirnvraqmqd  
>tr|A5IV44|A5IV44\_STAA9  
mikk11qfs1gnkfai1mvlv1vgvyasak1kle11pnvqnpvisvtttmpgatpqstqdeisskidnqvrs1ayvk  
nvktqsiqnasi1vteyen  
ntdmkaeeqlkkeidkikfkdevgqpe1rrnsmdafpvlaysfsnkend1kkvtkv1neqlipklqtvdgvqnaqlngq  
tnreit1kfkqne1ekygl  
taddvenylktatrtt1gl1fqfgdkdsivvdgqyqs1vafkni1ni1pl1tagggqsqsqs1dnkqnsams1dvnqaspq  
nksapnnisgmptak1g  
d1aditvgdvrt1sktngkdavn1qitkaqdvntvqvakdvqrkid1tfdvdenkdfnvtkmdtakpveks1lytmvekas  
1gtivai1vil1fl1rni1rt  
taisi1sip1s1lmalialk1s1dvs1ni1tl1gal1tvaigrviddsivvveniyr1tdseeqlkgen1iisattevf1kpi  
msst1vtiiv1pl1v1fvs1g  
svgemfrpfal1af1s1las1lvs1tl1palaat1fkkgvkrnkqh1qeg1gvvsttyk1v1hws1nhkwivi1l1st1il  
vativfggpr1gts1fis1ag  
ddkfl1ait1tpkpgeteqav1nhakdveky1kqkhhvkti1qysvggss1pvdptg1stns1maimveydnd1tpn1fdveadkvi  
khvdg1fkhpgewkn1qd1gt  
gagnksvevt1vkgsmda1k1stvkdi1eqk1mqvkg1lanvks1d1sqtyd1qyei1kv1dq1kaaeng1isas1qlamh1nen1pek  
tv1tvkeng1ktvd1vk1kq1n  
kqtdwsed1k1nni1tl1k1kpt1ggt1k1gdi1at1vk1tt1ps1k1tq1eqg1dyatt1vs1ak1vtn1kd1vg1g1ttr1qv1ms1kinn1dk1pnnv  
kvn1ggas1dd1inn1amt1qla  
faml1aai1i1vy1li1v1l1v1tk1gg1lap1fti1l1fs1lp1ft1v1ig1vi1a1l1it1get1is1vps1lig1ml1ig1iv1v1tna1iv1lid1rv1inneq  
qgm1em1ke1al1ie1agg1tr1rp  
i1lmta1iat1ig1al1vp1l1fg1qd1ss1il1sk1g1la1at1vig1gl1is1st1l1t1lv1v1vp1vi1e1il1ft1l1kkr1ftkr  
>tr|A5IV55|A5IV55\_STAA9  
myvekrnp1ipvkeai1qri1vn1qq1ss1mpait1valeks1nh1lae1divat1ydi1pr1fdk1spy1dg1fairs1vds1qgas1gn1riefk  
vidh1gags1v1sd1kl1vg1dhe  
avrim1tga1qipng1adav1vmfeqt1ie1ldt1fti1rk1pfs1k1neni1s1l1kge1et1kt1gd1v1l1kk1g1q1vin1pgai1av1laty1gya1evk1v  
ik1qps1vavi1at1g1se1l1dvn  
dv1ledg1k1rns1ng1pmi1ra1laek1gl1ev1gi1ykt1qk1dd1d1sg1iq1vv1keame1k1h1div1itt1gg1v1sv1gd1fdyl1pei1yk1av1kaev1  
fn1kvam1rps1vt1vaf1adg  
kyl1fg1l1sg1nps1ac1ft1g1fel1fvk1pav1kh1mc1ga1lev1fp1qi1kat1l1med1ft1kan1pf1tr1fir1akat1l1ts1ag1at1v1vp1sg1fn1ks1ga  
vva1ihan1cm1vm1l1pg1gs1rg  
fkag1ht1vdi1il1tes1daae1e1e1l1l1  
>tr|A5IV59|A5IV59\_STAA9  
mlkinv1ky1ql1knt1lirin1idd1te1pk1iyav1rg1ps1g1ig1k1ttv1lnmi1ag1lrkadea1ie1vng1q1l1td1tt1k1nvn1k1iq1rr1igy  
l1fq1dy1ql1fpn1mt1vy1kni1tf  
maeps1k1hid1qli1qt1lni1nh1lmk1qyp1mt1sg1gea1qr1valara1l1stk1pd1l1l1dep1f1ss1ld1tt1k1des1it1vk1rif1new1qip  
i1ifv1ths1nyeae1qma1he1i1  
tig  
>tr|A5IV81|A5IV81\_STAA9  
mmkrk1pt1f1les1istmi1vm1v1vv1vt1gf1v1fd1ipi1qv1l1li1as1yat1wi1akrv1gl1twq1dle1kgiaer1ntampai1l1il1av1g  
i1iv1g1sw1mf1sg1tv1pt1li1yy1g  
ld1l1nps1y1fl1is1aff1is1av1ts1vat1gt1aw1gs1ast1agia1l1is1ign1ql1g1ipp1g1ma1agai1ag1av1fg1dk1ms1pl1s1dt1tn1la1al1vt  
kvn1ifk1hi1h1sm1mw1tt1tip1as  
i1ig1l1v1w1fi1ag1fq1k1gh1sndk1qi1qt1l1sela1qiy1qini1w1w1pl1ivi1vc1l1fk1mat1vp1am1viss1fsai1iv1gt1fn1hh1fkm  
td1gf1kat1f1sg1f1nds1mi1h1qs  
hi1ss1vks1l1le1gg1m1ms1mt1qil1vti1fc1gy1af1ag1ive1kag1cl1ev1l1tt1sk1gi1h1sv1g1s1lic1it1vic1cial1v1fa1ag1vas1ivi  
im1vg1vl1mk1dl1fey1qvs1rs  
v1sr1t1led1sst1mv1l1pl1ip1w1gt1sg1iy1yt1n1ql1h1vs1v1ge1ff1m1tv1pcyl1cai1iai1y1g1ft1g1ig1ikk1ss1nr1lt  
>tr|A5IV95|A5IV95\_STAA9  
mrqqi1tn1li1qi1dti1kynt1l1md1wni1q1thi1y1k1fn1qiv1t1ne1lnk1f1kg1fets1yi1nen1qvs1y1yei1it1l1nkr1pl1rq1vdy1gnk

iqylnfyhtelsnalfaik  
fah

>tr|A5IVB3|A5IVB3\_STAA9  
mrkiqakkglsieckgweqeavlrmlynnldpevaerpedlvvyggigkaarnweafeaiektlrelesdetmlvqsgkp  
vavfktheeaprvlisnsv  
lpewanwdhfneldkkglimyqmtagswiyyigsqgivqgtyetfaelgnqhfngdlagvtvltaglgmggaqplait  
mnhgvai cvdvdetrvdkr  
idtkydvktadldealklaeeakergeglsiglvgnavdihqai lekgfkidiitdqtsahdp lngyvpqgysveeakv  
lrekdpkkyvelsqasmak  
hvelmlefqkrgavafdygnni rqvafnngvknafdfpgfvpayirplfcegkpgprrfaalsgdpkdieradeemrklfp  
enekllrwl d laeekisyq  
glpsriawlygerakmgla lnr lvr dgeisapivigrdhldagsvaspnretesmkgdsdavgdwavlnalintaaggs  
wisfhggvgmgyslhag  
mvvvadgseraerrlerlvttddpgmgvarhvdagydiaiaqtakekghipmidkagdk

>tr|A5IVC9|A5IVC9\_STAA9  
mivtkemviiqk lfthtqtvtsefidhnnhmhdanyniifsdvvnrfnyshgls lkerenlayt lftleehettylselsl  
gdvftvtlyiydydykr l h  
lfltltkedgtlastnevmmginqhtrrsdafpesfstqiahyknqptitwpeqlghkiaiphkgalk

>tr|A5IVE0|A5IVE0\_STAA9  
malvkdikvknfgeglssetkvlkginfeveqgefvi lngasgsgkttlltilggllsqtsgtvlyndaplfdkqhrpsdl  
rledigfiqsshlvpylk  
vieqltlvgqeagmtkqqsstraiql lknigledr l nvyphqlsggekqrva imrafmnpkiiladeptasldadratk  
vvemirqqikeqqmigi mi  
thdr rlfeyadrvie ledgkitd

>tr|A5IVE5|A5IVE5\_STAA9  
mkn l k n s l f i s l i i g l s l s l f f s m l f a d g k y y p l n p q s t i g i l y n h f t e t t v m l i s i i l w l l i g v v f l g d f i f k y t d w  
sitkatimhfittyvgflp  
lamlagwfp ltvhyliiftiifiviyvliwiiqffknknyvdtineqlkqk

>tr|A5IVE8|A5IVE8\_STAA9  
meviamikqinvsnmqkfesqlmkaqsegythvpyaneimi yqsmldavqlypkshivdytvdgqykndchyfgqssin  
iadwaqnnnyypnliaiq  
qtldlihyysvetifdla l l l t l l k g d l s i d g h v v f d k a p i a t s a s i w e t i k t i e d f d m m s q f y l n k m a y i d h h p i p f r n  
lfiedseq l n s p d n w l y s t  
kfm l p k w l y k i a k q r a d n k q l q n f g l y t k q p n v l k d h i v f i g d h h q y i g n s k y l f t y f v k h n p m t a c y f v t d d r r g p h f i  
spksekadelinsarvviv  
endipet l q p n g t l i q l h q g t p i m q l f l d s k e p i k n i e t p f y r a k r y n r w l q f d y v i h s a d d i s h f y q t a f p s h q a n v l a  
ygnpkhgyl l q k r n e s t t q  
qgykksfkindkpv llyapig lvsaaqlplsdalfkayhvvvqgvdeailpeealvapkylsaqdlilmsdvvitdysn  
iifdamaidktvalytpnh  
sqyiesqgvnediwrhlskiwytdrql linnlisqaipvikypqiqhkeqplesisqlilskmtnsq

>tr|A5IVE9|A5IVE9\_STAA9  
mkr l v t g l l a l s l f l a a c g q d s d q k d s n e k d d k a k t e q q d k k t n d s s k d k k d n k d d s k d v n k d n k d n s a n d n q q q s n s  
natnndqngtntnnqssnnq  
kssyvapygqnaapvarqiypfngnktqalqqlpnfqtalnaanneankfgsnkvyndysieehngnykyvvsfkdpn  
angkysivtvdytgqamvt  
dpnyqq

>tr|A5IVF5|A5IVF5\_STAA9  
mrr l l y s f l f y m i i g l f s g f f y r e l t k a y d f t g t t q l s l v h t h t l i l g m f m l i l l p l e k l f k l s s y l f n w f f y v y n i g  
v i t i g m m v t k g f f q v t g k  
syspeafagfagightgm lag l l l l f f l l r q a i l k e p r d e s f k k

>tr|A5IVF6|A5IVF6\_STAA9  
mtkkrrydttefglahsmtakitlhqalyk

>tr|A5IVG8|A5IVG8\_STAA9  
mevmlnfnqfenqffngnpsdtfkdlgkqvfnfstpsfvtniyetdelyyleaelagvnkedisidfnntltiqat  
rsakykseq l i l d e r n f e s  
l m r q f d f e a v d k q h i t a s f e n g l l t i t l p k i k p s n e t t s t s i p i s

>tr|A5IVI3|A5IVI3\_STAA9  
mienkktvedtystgai vdsissvqm k q v m v q q t p g r y m l k a m m a g f l l s i v t v f m f i k t q f a n t h v d g l i n l m g a i a  
fslglilvvltnselltsn  
fmyftvgwykvsvkmtwil l y c f l g n i l g g f v l f f l m k f a h v m t p e m t q a l t a l v q k k t v d s t w l n i f t k g i f c n f f  
inigi fismqfkggltkaf  
fiacgvvvfvmgyehvvfnaglyagmvffnl davswlhv l knivfaflgnfvvggigifvglvdaf l ngkrnrleqq

>tr|A5IVI5|A5IVI5\_STAA9  
mtikvednkii f s r t i e a p i e k v f d a y t t k e l f e k w f h p k g a s t k v f r f n a v s g g d a f y a i k t p t m t s y t l a e y k t v k r p  
yli eyidsfatpqqakdtk  
mpsmk it l s f s k s n t t k t t v t s t s v f p t k e a a q q v i n m g v e q g m n q t l d q l d a l l k

>tr|A5IVI6|A5IVI6\_STAA9  
mkkklgm l l l v p a v t l s l a a c g n d d g k d k d g k v t i k t t v y p l q s f a e q i g g k h v k v s s i y p a g t d l h s y e p t q k d i l s a s

Tsompanidou\_et\_al\_Supplemental\_FASTA\_File

ksdlfmytgdnl dpvakkv  
astikdkdkrs ledkl dkaklltdqhehgeehheghdhekeehhhggdphwldpkinqtfakeikdelvkkdpkh  
kddyeknykkllndllkkid  
ndmkqvtkdkqnavfishesigy ladrygfvqkgiqnmaedpsqkeltkivkeirdsnakiylyednvankvtetirk  
etdakplkfynmeslnkeg  
qkkdnityqslmksni enigka lds gvkvkddkaeskhdkaisdgyfkdeqvkdrelsd yagewqsvypy lkdgtldevm  
ehkaendpkksakdlkayy  
dkgyktditnidikgneitftkdgkhtgkyeyngkktlkypkgnrgvr fmfklvdgndkd lpkfiqfsdhniapkkaeh  
fhifmgndndallkemdnw  
ptyypsklnkdqi keemlah  
>tr|A5IVI8|A5IVI8\_STAA9  
mtkklltlfivsmllitacgkkesattsskngkplvviygdykpyckeldekvmplrknyidnhkveyqfvnlaf l gk  
dsivgsrashavlmyapks  
fldfqqlfaaqdenkewl tke lldkhikqlhldketenkiikdyktdskswkaaekdkkiakdnhiktptafinge  
kvedpydyesyekllkdk  
k  
>tr|A5IVJ9|A5IVJ9\_STAA9  
mnlklnrkvismiknlltatlavgliaplanpfieiskaenki edigqgaeiikrtqditskr laitqniqdfvkd  
kynkdalvvkmqgfissrt  
tysdlkkyipyikrmiwpfynislktdksndlinylpknkidsadvsqklgynignfqsapsiggsgsfnysktisyn  
qknyvtevesqnskgykwg  
vkansfvtpngqvsaydqylfaqdptgpaardyfvpdnqlppliqsgfnpsfittlshergkgdksefeitygrnmdaty  
ayvtrhr lavdrkhdfkn  
rnvtvkyevnwkthevki ksitpk  
>tr|A5IVK6|A5IVK6\_STAA9  
mnytqqlkqkdseyvwhpftqmgvyskeeiiekgkgsylydtngnyldgyaslvwnvvhghnnylnkvikkqlnkia  
hstllgssnipsielaekl  
ieitpsnlrkvfysdtgsasveiaikmayqywnidrekyaknkfitlnhgyhgdtigavsvggikt fhkifkdlifen  
iqvespsfyr snydteie  
mtailtnieqilierndeiagfilepli qgatglfvhpkgflkeveklckkydvll icdevavgfgrtgkmfacnhedvq  
pdimclgkai tggylplaa  
tltsqkiyntflsdshgvntffhgtytgnqivctvalenirlyekrklshiettsstlekqlhal krhrnvgdvrgg  
lmfgvelvtdkdstplei  
ekverivrkckenglmirnlenvitfvpvl smsnkevktmvrifkkavhnildrkc  
>tr|A5IVL0|A5IVL0\_STAA9  
mavvrgfgvfrcsiyvvinysidkqgvqci lqyynk  
>tr|A5IVN9|A5IVN9\_STAA9  
mkkllcsliivvaliciaalsacgkeqtkyegdvsgkhvltcitykddkvlkqstintikyddl gmdkdeakklfaksesi  
fkdlkgvkykvdydkkai  
ehldidytevdmkklnkr lgvstkenkdisfeklekqlkhr glkekdkmddk  
>tr|A5IVQ8|A5IVQ8\_STAA9  
mnkxhvfi iigvilcicivasviylkvkydekekqkaiyykeqeritlylnhntkeptiktvhfts lkr gpmgdavie  
gyinenkeddfvaygspeh  
nyqfggsliksknlstllkpvhqtkspdeikkeleskndr  
>tr|A5IVR2|A5IVR2\_STAA9  
mmhskkltlgiclvllii livgyvmtktngrnaikdtfnqtlklyptknldfydkegfrdqefkkgdkgtwivnse  
mvi epkgkdm etrgm vlyi  
nrnrtrtkgyfyfise mtdsngprpkddekrypvkmehnki iptkplpndklrkeienfkffvqygdfkdindykdgdisy  
nnpvpsysakyqlknddyn  
vkqlrkryniptnkapkllikgdgd lkgssvgsknleftfvenkeeni yftdsvqytssedtsyesn  
>tr|A5IVR7|A5IVR7\_STAA9  
mmhskklmlgiclvllii livgyvmtkinsrsaikdtfnqtlklyptknledfydkegfrdqefekgdkgnwivdse  
mvielkdkkmesrsmvlyi  
nrnrtrtkgnfivrelwedskgyaqsdktpvkmehnri iptkpiaddklrkeienfkffvqygdfkdindykdgdisy  
nnpvpsysakyqlknddyn  
vkqlrkryniptnkapkllikgdgd lkgssvgsknleftfvenkeeni yfdsinfkpte  
>tr|A5IVT1|A5IVT1\_STAA9  
mkgvrsrhvfvri vqaiimkhlvycfk lndefnlnkykkykpcvtrvyddlntiyryisnnkiin  
>tr|A5IVT9|A5IVT9\_STAA9  
mkekrtnvrwmfalafffigviaymdranisyiakqmmddl gmtkppqgllasffslgyalmqvpsgmlaekfgprkmit  
ialvwsaftlltgmiknh  
gliylvrflfgvgeapmypsnavfnsfwfsknekgrassallagsyfgpvlapivtiaivnafnwqavfyifgavgilma  
vlwaijakdlseqhrmvne  
aekrfimenrdivatekssppwnnffkrfsfyai aiqyfvvqfiitlflwlp ty ltevfhnfkemisslpwllmffl  
ilsagai sdrvlg lgrskf  
vargviaiagfivfavisii favrtgnlyvsi fwls lglggigismgmswaaatdlgrnfsgtvsgwmnlwgnigalisp  
laglfvehlgwmtmfqlli  
vpaviavimwfyvkdqplivsdkaiek

Tsompanidou\_et\_al\_Supplemental\_FASTA\_File

>tr|A5IVV0|A5IVV0\_STAA9  
msnmnqtimdafhrhatkqfdpqqkvskefetesgrlspislglepwkfvviqdqalrdelkahswgaakqldtas  
hfvli farknvtssrpyvq  
hmlrdikkyeaqtipaveqkfdaqadfhisdndqalydwsskqtyialgnmmttaallgidscpmegfsltdvttilan  
kgildteqfglsvmafgy  
rqdppknktrqayedviewvgpke  
>tr|A5IVV7|A5IVV7\_STAA9  
mlrlsifiifiinttitygttegtwvnl1fkslslsmiivfmfyirfviেকkr  
>tr|A5IVV9|A5IVV9\_STAA9  
maksydyqsafdiigpvmmgpsssttagavkignsarailgdipknieihyesfaqthqghgtdvaivggamgystfdn  
rikssleiaaddgikidii  
eeegdsigghpncayikssrndgryieigisigggtikikgihinglevdlnhglpilvvdgnmtkaqvnhfndindm  
klckdefikidedkclvv  
iplnkaisestlntikekysdvnvsyin  
>tr|A5IVX5|A5IVX5\_STAA9  
mngffnsdfdsifrrmmqdmqgsnqvgnkkyingkevspeelaqltqqgsnqsaeqsaqafqaaarqqgqggngny  
leqigrnlteardglldp  
vigrdkeiqetaevlsrrtknnpilvgeagvgktaiveglqaivegnvpaaikdekiisvdissleagtqyrgafeeni  
qklijegvksqnavlffde  
ihqiigsgatgsdsgskglldilkpalsrgeisiigattqdeyrnnilkdaaltrrfnevlvnepsakdtveilkgirek  
fehhgvklpddvlkacvd  
lsiqyipqrlpdkaidvlditaahlsaqspavdkvetekriselendkrkavsaeeykkaddiqneikslqdklensng  
ehtavatvhdisdtigrllt  
gipvsqmdndierlknisnr1rskiigdqavemvsrairrnragfddgnrpigsflfvgtgvgkrelakqlaidlfg  
nkdalirlmseysdttav  
skmigttagyvgyddnsnt1tekvrnpysvilfdeiekanpqilt1llqvmddgnltdgqgnvinfkntiictsnagf  
gngndaeekdimhemkfff  
rpeflnrfngiveflhldkda1qdivn11ddvqvtldkkgitmdvsqdakdwlieegydeelgarplrriveqqvrcki  
tdyylhdtdvkhvdidved  
nelvvkkgk  
>tr|A5IVX8|A5IVX8\_STAA9  
makf1ykmgtfiakhkwsaviawivivaaailiplatnapkfdndikmtglesldtnkkiekhfnqdsekaqirrvvfkttk  
ddgivqpniaedikklted  
ikkddkhdikisdpyenkqiskdkttafaditydvsqts1kdgsrdnvksh1kd1rdnhnvqtelgtgtmtstevggmse  
lvgiivafvllitfgsvi  
aaglpiaisaliglasvgvis1ltyafdi pnv1tlavmiglavgidyalfilfryrqvmktetdyikgiglaigtagsa  
vfvagvtvviavcglslvg  
idflavmgfasaisvifavfsalt1lpalisi fhkrikvnlqsnfkdidtpwskfitgnalaavllg1ilvaaipv  
shmr1gipddgvkpadstg  
kkaydiisdkgfgegfnqgipmlinvkdkkddpqq1qqdlqsvykdikdkknvdivtppqmskdndyalmvvipkqgpnae  
stndlvhd1rdyhkdaqdk  
ygfkteisgqsvinidmskklneaip1fatvivv1affllmivfrsilip1kavlgfv1slmatlgfttlvmqdgfmkg1  
fgiettgpm1af1pvitig  
ilfg1amdyevflmsriheysktgndysikvlgkesgpvivaalimfsvffafvfqedvmiksmgmalafgv1fdaf  
vvrmm1ipal1tk1fgkgs  
ylpawlnriiprvdieghalekyktvesqeseakdskeydttkfvypqgatnvskhqdvhgqddahsiv1ddktmlayq  
evkqqsass1f1yda1idy  
qnkhl1nskqqvtnieq1nkniek1nq1lekn1rnks  
>tr|A5IVY8|A5IVY8\_STAA9  
mtmmdm1fkychkimkksksfsyafdl1pedqrkavwaiyavcrkiddsidvygdiqflnqikediqsiekypyehehhf  
qsdr1rimma1qhvvqhkn1  
afqsfn1id1tvykdqhf1tmfetdae1fgycygvagtvgel1tpil1sdhethqtydvarr1ges1qlinil1rdvgedfdn  
ervyfskqr1kqyevdiae  
vyqngvnnhyid1weyyaaiaekdfqdvmdqikvfsieaqpielaariyieildevrqanytlhervfvdkrkkak1fh  
e1nskyhri  
>tr|A5IVZ9|A5IVZ9\_STAA9  
mkildrinelanekvqpl1tvaekqeqhal1rqdylsmirgqv1ttfstikvvdpigqdvtpdkvydl1rqygyiqn  
>tr|A5IW03|A5IW03\_STAA9  
mrkdakenrqrie1eahk1fdeegvenismnriake1gigmgtlyrhfkdkd1lcyvviqrd1difithfkqikddyhsn  
yevmqvs1dy1l1qfkidnk  
allqcieagnnk1rfyqsafyqel1dfyyd1fksdddytkfktm1l1qsl1stsvfafqiehrhisieayrny1l1niyld  
evernd  
>tr|A5IW04|A5IW04\_STAA9  
mtkiv1itggngk1gyasaealkalgykvyigsrndvrgqqasqklgvhyvqldvtsdysvknaynmiaekegrldilin  
nagisgqfsapsk1pprv  
eevyqtnvfgivrmntfvp1lekseqpvvvvssglsgfmgvtnpetaeskvns1aycssksavtm1tl1qyakgl1pnmq  
inaadpgatntd1vgdfsn  
nshkhvsegikpiiq1latigadgptgtfingdgempw

Tsompanidou\_et\_al\_Supplemental\_FASTA\_File

>tr|A5IW20|A5IW20\_STAA9  
mnkmmkvisl fvailsvl iftdnanaennkpegvnsnli pvrqpdanyppvsdiarvkkldn lidgtdkdpdvikqlk  
ddnepnnavkaksdskivs  
dcrhllkhpnd lidgtdkdpvinq lknangtsnnsavnpsikandihtksnkqmakqqsihl dsksksvhkqqlkelpkt  
gvnnesntaimal figlil  
lvsvlvtrfiklnshq  
>tr|A5IW33|A5IW33\_STAA9  
maysilnlysiligykckinhkkeiqylhprktlqlplilkiiln laligiviivl thtefqlnagdsnvfl nwdirgl  
tsyifsflilvalvsklii  
ifitrqrts  
>tr|A5IW35|A5IW35\_STAA9  
mtkninemkafimniydeyrsylieelddcltiqknndtayydvleaindlsnds lcvlnhlyinegqeetfeqkflqrn  
khlknvdgfkalrflrprt  
agrhyiitlwenrqafyhwqnsaeykhthkhrgtskgadvkii nrels ynirieladm v  
>tr|A5IW41|A5IW41\_STAA9  
maiieylynfsrnkqnfnsaktavlsydlnltnfttrtafkniyftlniyll  
>tr|A5IW43|A5IW43\_STAA9  
mnqieea l tgliskdpaivnenankdsdtfstmr d l tagivsksyalnyllpkhvadahqrgdihfhdl dyhpfqpl tnc  
clidaknm l hngfeignan  
tspksiqtasaelvqiianvsss qyggctvdrvdell styarhneeqrniakqfvkeseidryvdqqvtdkindaies  
leyeintlytsngqtpfv t  
lgfglgt d h lsrk iqqa iln trikg l gkdrtta i f p k l v f s i k k g t n f s p q d p n y d i k q l a l k c s t k r m y p d i l n y d k l v  
eilgd f k a p m g c r s f l p s w  
kdaeghfenngrcnlgvvtlnlprmalesagnmtkfwefyeridvlhdallyrinrlkdavpnnapilyksgafnykllk  
etddvae l fknkratismg  
yiglyetatvfygpdwetsqeakftleilkemkryqtkwte lydiwfsiystpses l tdrfcrldqerfgdikditdkg  
yyqnsfhydvrkdvt p f e k  
ldfekdypyyasggfihyceypklqhn lka leavwdysydkvgylgnipidhcyecdygdgfeatekgfkcpncgndnp  
ktvdvkrctgy l g n p v q r  
pvikgrhkeicarvkhmkapke  
>tr|A5IW46|A5IW46\_STAA9  
mkhlk l n t s n s p f t e k q v t e i n n l l q t l t e s q q q w l s g f l l a n s n d t t s d n q q q l e t e v w q q s q i s e e q a t s t t y m l q n  
kephieanqrhvtvlygse  
sgnamrlaeifserlsdighqvvlmsmdeydttniaql ed l f i i t s t h g e g e p p d n a w d f f e l e d d n a p n l n h v r y s v l  
algdqteyffcqagkdvda  
llenlgaerickrvdcdiyeedaekwmadi inmidttsegiqsesvisesiksakekkyskl n p y q a e v l a n i n l n g t d  
snketrhiefl l d d f s e y  
epgdci valpndpelveklism l g w d p q s p v p i n d r g d t v p i v e a l t s h f e f t k l t l p l l k n a d i y f d n e e l s e r i q d e  
swareyvinrdfidlitdf  
ptielqpenmyqilrk l p p r e y s i s s f m a t p d e v h i t v g t v r y q a h g r e r k g v c s v h f a e r i k p g d i v p i y l k k n p n f k  
fpmkqdi p v i m i g p g t g i a  
pfraylqereelgmtgktwlffgdqhrssdflyeeei eewlengnltrvdlafsr dqehkeyvqhrimeeserfnewieq  
gaa i y i c g d e k m a k d v h q  
aikdvlvkerhisqeeael l l r q m k q q q r y q r d v y  
>tr|A5IW52|A5IW52\_STAA9  
milvm l s p l l i i f f i v l s i l e e r k r t k k k q l e k e k a n t l n q n t n d t e s s n q e p s l q q t k e q k d n k g  
>tr|A5IW74|A5IW74\_STAA9  
miklfdyfn d h s r k l y e s f k a s k l e e d l t i v l n d n g f l p d d v i s p y q f f a d n h n t e n m k p r f f n q v t v p a f w e i k g n n s  
atindmgr l r g k i f y q s g e  
rprivsrvevfddqqr v r f v d y s k n g i k f a q t v y d l n r k a i l k k y m t a e g k e v i y e n f v t s d v i l d w q g k s y f f p s k l a  
fv l f f i k q l e i t e h h f v i n  
sla l p f s v l y n l p s k g s d v l v w q e h c n g n v p g n m q l m c k g d m k r h c n i i p d k n e y e t m l n i a d a k v q s r i l q g g y l y n y  
rsnrnytkeiviltnsdq l  
rnikvlvetlpdfnfhiaaitemsdklmqldqyanvhlypsinidrvnelyqlcdiyldinegneilnaveqafdyelli  
lgyrqtahhakvtlshlf  
ehndeitmeskdq l i q m l e s l k d q q q f r d a l l a q k a h a h e i s r e q f e q v f k q a l e s  
>tr|A5IW87|A5IW87\_STAA9  
mvvvyvaggclwgveaffatipgiitheagrangrsakldgpydgyaecvklhfddrmltitdimnylfei idpysvnqq  
gndige kyrtgl yscvddh  
liearqfierrkdrdqiaavevlp l s n y i k s a e e h q q h l e k y p e d m h m c h i s k d l l n k y k  
>tr|A5IW91|A5IW91\_STAA9  
mkekfdlvkl l n i l k k n i k l l l i l p a i c l v v s t a l t f f v m p d k y t a s t q i l v n m k k s s s d l a f q n v q s s l q s v n t y t e i i  
ksprildkvsrefdgqyst  
aelnsflkvtnqtnsqiitvsvttgnksesdkivnriskvfahdmpkimsvdnvt ilssahdnavkvspivsvnlvisii  
vgivlailiiflkelldkr  
ikteedvesqlglpilgsiqkf  
>tr|A5IW96|A5IW96\_STAA9  
mkkirlelvylraicaiaiiithlltqiitl k h e n m e g g s l v l q f y i r n i v i f g t p c f i i l s q l l t t l n y q k v t y r y l t t r

Tsompanidou\_et\_al\_Supplemental\_FASTA\_File

vkiylipyilmglfysyse  
slltdssfnkqfienvllgwygyfivvimqffilsyifkinynlfnskillllsfilqqsfllyftntafhdvtlhy  
yplsentii fgwifyfflg  
aymgynyervlnflerylvimivlavatyvfvia langdywnvtsfsysltpynsimfivilgicthfktmlfntiqmis  
afsffiyllhpiildslfa  
ytnifedntmvflaisllfilglcigvgmilrefyifrffiigkqpyklninay  
>tr|A5IW97|A5IW97\_STAA9  
mmksqnkysirkfsvgassiliatllflsggqaqaekqvmngnsqedtvtasigdqqtrenanyqrengvdeqqhten  
ltnlhdktiseenhrkt  
ddlndqqlkddknslnnkniqrddtknnnanpsdvnqgleqaindgkqskvasqqqskevdsqdsnannnlpsqsltk  
eapslnksdqtsqreivne  
teiekvppqnnqandkitnhfnneqevkpqkdektlsvsdlnknqkspveptkdndknglnllkssavatlpnkgtk  
eltakakddqtnkvakqgg  
yknqdpivlvhgfngftddinpsvlahywggnkmnirqdleengykayeasisafgsnydravelyyyikggrvdygaah  
aakygherygktyegikd  
wkpgqkvhlvghsmggqtiqrleellrngnreeieyqkkhggeispflkgnndnmissittlgtphngthasdlagneal  
vrqivfdigkmfgnknsrv  
dfglaqwg lkqkpnesyidyvkrvkqsnlwkskdnfydlrtregatdlnrktslnpnivyktytgeathkalsndrqkad  
lnmffpfvitgnligkate  
kewrendglvsvissqhpfnqaytnatdkiqkgiwqvtptkhdwdhdfvgqdssdtvrtreelqdfwhhladdlvktek  
vtdtkqa  
>tr|A5IWA4|A5IWA4\_STAA9  
miyidknespvtpldektmtsii satpynlypdaayeqfkeayakfygl speqii agngsdeliqlmlimpegpaltln  
pdfmgyqayaaqvnreiaf  
vdagsdltdfletitkidevqpsffimsnphnpsgkqfdtafltaiadkmalngyfvideayldygtaydvelaphil  
rmrtlksafgiaglr1gvl  
istagtikhikiehpyp1nvtlniatyifrhreetrvtlmtqrqlaeqlkqifdthvadkmsvfpsnanfvltkgsaa  
hqlgqyvyeqgfkprfyde  
pvmkgyvrystatasqlkqleeivkwsakydlskttkhs  
>tr|A5IWA7|A5IWA7\_STAA9  
mlntv1kvkggrrvnseq1ialkesetaflkyfnkadyelvdsvvekldwkqlnhedlqqmgernfwqhehqiyalrn  
dftdq1lryysmyptaatk  
vaytgliirneaaqvglenyapslanvqqs1klfiqfiqq1rdnvhfvlghyq1ldalldks1qtpdilsmeern  
lsglvty1stehpivq1lk  
entqq1nv1ehyipndhpalvelkiwerwlhtqgykdi1hditaqprsytyglfiqchfaenesrvltggyykg1sieg  
fg1gl1l  
>tr|A5IWB8|A5IWB8\_STAA9  
mltkqsqdflek1rie1lfrgkteaeeve1leeledh1tmaeknedtssiintpiksmadqlspeisl1ttglykyitly  
fsfilaviiiprflldlgtf  
dvtiafllyjasivilgvvigm1l1rntlvrfgdqkityvinvtygivvflwmi1fggliikkypisffelsdkqsfig  
lv1lialivicilikqkiy  
aliv1vis1psliariaaifskpdtfn1svs1ililniafi1ytfnfrklk1ked  
>tr|A5IWC1|A5IWC1\_STAA9  
mentvkyrkfilpivvg1liwaltpfkpdavdptawymfaifvati1acitqmpigavs1igftimvlvgivdmktava  
gfgnnsiw1iamaffisrg  
fvktglrrria1hfvl1fgkkt1glaysivgvdl1lapatpsntaraggimfpi1ks1sesfgskpkdgsarkmgaf1vf  
tefgn1litaamfl1tamag  
nplagn1asstsnvhitwmnwflaa1vpg1vslivvpfi1ykiyptvketpnakswaenelatmgkia1aekfmigifv  
ial1lwi1vgsfihidat1l  
afialal1l1tgvl1twqdi1netgawnt1vwfsv1vlmadq1nkl1gfipw1sksiats1ggl1swpiv1vil1ilfyfyshy  
l1fasstahisamyaa1l1gv  
aiaagapp1fsa1ml1gffgn1lastthys1sgpapi1fssgyvtqkrw1tmn1il1gfvyfi1wig1l1gsl1wmkvigif  
>tr|A5IWC3|A5IWC3\_STAA9  
mtl1pk1gkpatra1nsggiyt1leavsqytk1slmemhgv1gpkais1leqal1fqh1lhfktevq1slp1k1l1tgdvsc1nhap  
krqgm1dfivataa1ldiel  
l1rs1lvttefi1swpghfdi1ygpq1liqel1snynqvas1nihsni1thgcl1gsmhgie1il1ktgkeih1fahffefenhk1kda  
k1skvtsy1ivva  
>tr|A5IWC4|A5IWC4\_STAA9  
mikyhmkegy1l1tvfkner1swlp1yiaiv1llhv1gfsf1lwiagkdhh1l1fgmgilayt1gl1rhafdadh1aaidntvr  
k1l1qqrkdps1gvgyfysig  
hssvfl1mavfl1gsvkwakde1lphfdiggtigt1vsgff1vl1igv1ln1il1is1lin1fak1rrehieeavdv1l1esr  
gfvsvrfvgpyfk1l1trswh  
vl1plg1l1fg1gfdtaseia1l1a1l1ssgasqqa1sfig1l1slpil1fasgms1l1dt1dgvmkyaynwaffn1pirkiyyniti  
ta1svmaa1lvigmi1ellqi  
l1adk1dl1hgafwafigsiefdy1lgyilva1flitw1lissliw1kfgriehk1wsk  
>tr|A5IWE0|A5IWE0\_STAA9  
mksvkl1seel1gsvkqti1fnnikr1nietikqents1fiked1dieki1qrvnenkkkyg1festtedk1qkkgsdn1infesk  
sdaqiveil1knqid1l1nng

Tsompanidou\_et\_al\_Supplemental\_FASTA\_File

iekqesrhettiefyrkelqerskllenqqlalesnkkiqklenqlekekhlrypfdtstntrqnvdakektyttnpvn  
inrdqeetketeigykdiss  
gsqsdestqgeeakkedvpanlndndsdiiekseetepkkgfwsrlfgs  
>tr|A5IWE1|A5IWE1\_STAA9  
mnyfrykqfnkdvitvavgyylryalsyrdiseilrergvnhstvyrvwqeyapilyqiwkkkkkkayykwridetyi  
kikgkwsylryaidaeght  
ldiwlrkqrdnhsayafikrlikqfgkpkvkitdqapstkvaikvikafklkpdchctskylnnlieqdhrhikvrktr  
yqsintakntlkgieciya  
lykknrrslqiygfspcheirdmlas  
>tr|A5IWE4|A5IWE4\_STAA9  
mqqnlfrrnggkikfktidlnlareaqrlihdqidqpkyskacaslddgfedafqyvtvqgnshnrkstknlnerlnqevr  
rrekiirifpnqtsanrli  
gavlmdlhdewiyssrkyinfdk  
>tr|A5IWE8|A5IWE8\_STAA9  
mkiygarvstglnlnlqedrlnthgceki fndhmsgskskrpgldkaiefarsgddivvwrldrlgrnmedlitlvnel  
nergvsfhsleenitmdks  
sstgqlfhlfaafaefernlilerssagriaarargrygrpekllkkdlnllktlydngtpiktiaeqwqvsrttiyr  
ylnkledkedekqgevsn  
>tr|A5IWF0|A5IWF0\_STAA9  
makllitsvsvfcfiflllvffkyilkryfnyslnykvwyltvlaglipfipikfsfikfnvnqaptveskshdlnhn  
inttkpiqefttdihkfnw  
dsidnicvwiwlvliisfkflkslllylkyllkqsllynenknkvdtlfnhqyknvirkaeti qspitfwygyki  
ilipssyfksvdkrlkyi  
ilheyahaknrtdlhlifnifsiimsynplvhivkrkiidneveadrflnninknefktyaesimsvlktpfsnkn  
ilshsfngkksllksrlin  
ikeadllkqsklilificiftffimiiqsqflmgqsltdynykkplqsdyqildesknfgsnsgsfvmysmkdkyyiyn  
ekesrkryspdstykiyla  
lfgldrhiisdksrmswnhkhylfeswnkeqdIntamqnsvnwyferisnqipknytaaqlkqlnygnenlgsykyym  
edslkisnleqvivfknmm  
eqnnhfskkaknqlsssllikknekyelygktgtgivingkyngwfvgyvitnhdkyyfathlsdgnpsgknaeliseki  
lkgmgvln dq  
>tr|A5IWF2|A5IWF2\_STAA9  
melndcinyllstsqnrvfkhfksllspynitpaeygvlnclinslnltpkaigntlnlepstisgildkmskklitrq  
tdnenrrtvlinstnkakd  
lwptlekkayqlnnhyfanltnetvfvkkillkinkttf  
>tr|A5IWF5|A5IWF5\_STAA9  
miqtvvaaavlyiatavdlvlliffaraktrkeyrdiyvgqylgsiililvsflafvlnyvpekwilgllglipiyl  
gikvaiyddcegekrakke  
lnekglsklvgtvaivtiascgadniglfvpyfvtsvtnlllflvfliliffvftaqknanipgigeivekfsrwim  
aiiyialglfiiendtiq  
tilgfif  
>tr|A5IWG2|A5IWG2\_STAA9  
mmttfnyhyqlilidelkgtlshvkdeefdgfvsevtasrifiagkgrsgfvansfamrlnqlgkqafvigesttpsi qkd  
dlfivisgsgstehrlila  
ekaksvdakvllttkl dsageiadt vvelpagtkhdatsgdqplgs lfeqssqifl dsvviglm tqldveettmqnnh  
anle  
>tr|A5IWG6|A5IWG6\_STAA9  
mssnigilglvgmgnlawniedkkysvsihsrdneindtiqkshyqkiypaynlkefvdslekprkillmikagsptd  
nmintllp1l1dddilidg  
gntnyqdtirrnkalaesgvnfigmgvsggevga l t g p s l m p g g q e a a y n k v s d i l d a i s a k a q d g a s c v t y i g p n g a g h  
yvkmvhngieyadmqliae  
syammkdllgmshteisqtfdwnagelesylieitgdifteldennep1vekil dtagqkgtgkwtsinal elgip1ti  
itesvfarfissikeervn  
askslnppqasfdgnkeeflekirka l y m s k i c s y a q g f a q m r k a s e d h e w n l k l g d l a m i w r e g c i i r a q f l q k i k d a y  
dnpelenllldpyfkniv  
tdyqea l r d v v a t g v k n g v p t p g f s a s v n y y d s y r s e d l p a n l i a q a r d y f g a h t y e r k d h e g v f h t q w d e e  
>tr|A6QD45|A6QD45\_STAAE  
mkeellmaelpqsrinernitsemresfldyamsvivaralpdrvdlkpvhrriylgln eqgmtpdksy kksarivgdv  
mgkyhphgdssiyeamvrn  
aqdfsyryplvdggngfgsmgdgaaamrytearmtkitlellrdinkdtidfidnydgnerepsvlparfpnllangas  
giavgmatnipphnlte li  
ngvls lsknpdisiaelmedi egpdfptag l i l g k s g i r r a y e t g r g s i q m r s r a v i e e r g g g r q r i v v t e i p f q v n k a r  
miekiealvrddkidgitd  
lrdetslrtgvrvvidvrkdanasvinnlykqtp1qtsfgvnmi alvngprk1inlkealvhylehqktvrrrtqynl  
rkakdrahileglrialdh  
ideiisti resdtkvameslqqrflsekqaqaildmrlrrl t g l e r d k i e a e y n e l l n y i s e l e a i l a d e e v l l q l v r  
delteirdrfgddrrteiq  
l g g f e n l e d e d l i p e e q i v i t l s h n n y i k r l p v s t y a q n r g g r g v q g m n t l e e d f v s q l v t l s t h d h v l f f t n k g r v y k

Tsompanidou\_et\_al\_Supplemental\_FASTA\_File

lkgyevpelsrqskgipvv  
naielendevistmiavkdulesednflvfatkrgvvkrsalsnfsrinrngkiaisfreddeliavr ltsqqediligts  
haslirfpestlrlgrta  
tgvgkitlregdevvgldvahansvdevlvvtengygkrtpvndyr lsnrggkgiktatiterngnvvcittvtgeedlm  
ivtnagvii rldvadisqn  
graaqgvrlir lggdqfvstvkvkedaedetnedeqststvsedgteqqreavvndetpgnaihtevidseededgri  
evrqdfmdrveediqqssd  
ee

>tr|A6QD51|A6QD51\_STAAE  
mtnytvdtlnlgefitesgevidnlrlryehvgyhgqplvvvchaltnghltygtddypgwwreiidggyipihdyqflt  
fdvigspfgsssplndphf  
pkkltrldivranerigialgydkiniligslggmqamellynqqfevdkaillaatsrtssysrafneiarqaihlgg  
keglsiarqlgflyrskk  
syderftpdevvayqqhgnkfkehfdlncyltllvdvldshnidrgrtdvthvfknletkvlmtgfiddllypddqvral  
gerfkyhrhffvpdnhghd  
gfllnfstwapnlyhf lnlkhfkrk

>tr|A6QD52|A6QD52\_STAAE  
mlifikevkiiavknmgvayvfskiqpkatitiatialvfvalalylvpglglifalfatipgivilwnksiqsfgisali  
tviittvlgnftvlsaiil  
vliasliigqllkertskerilyvttvamslisliafml lqtfgrippsasivkpfkqtlheaitmsgadanmtqileeg  
frgatvqlpgfiiitfli  
vlinlivtfpilrkfkiafpvkplfawqmsgillwiyiiviicllftgqpsvfqsillnfqlvls lvmiyiqglsvihff  
gkakglpnavtilllviigt  
iltptthivglgvidlslnlkrimknnsk

>tr|A6QD53|A6QD53\_STAAE  
mnrqstkkallipfvimiitavlmgvwfifnslialiasivlvmiivsiilfrqalmkmdsyvdgl saqisttnkai  
khlpgiivldendhiwv  
nqfmdthmeanvisesvnevfpnilkqldrvksveieynqyhfvrysendhclyffдитеqvqtnelyenskpiaitlf  
ldnydeitqnmndtqrsei  
nsmvtrvisrwateyniffkryssdqfvaylnqkiladleeskfdilsq lreksvgyraq ltsigvgegtenlidlge l  
sqsgldlalgrggdqvai k  
singnvrfyggktdpmekrtrvrarvishalkdilaegdkviimghkrpdl daigaaigvsrfammnleayivlnetdi  
dptlrrvmneidkkpelre  
rfitsddawdmmstktvvi dthkpelvldenvlnkanrkviddhrrgesfisnplliymepyasstaeltelleyq  
pteqr ltrlestvmyagi i  
vdrnftl rtsgrtfd aasy lrahgadt l tqhflkddvdyinrselirtvkvedngiaiahgsddkiyhpvtvaqaad  
ellslegieasyvvarred

nligisarslgsnvqltmealggghltnaatqlkgvtveeai aqlqqaiteqlrseda  
>tr|A6QD55|A6QD55\_STAAE  
mdrmyeqnqmpnhneaeqsvlgsi i idpelinttqevllpesfyrgahqhi framhlnednkeidvvtlmdqlstegt l  
neaggpqylaelstnvppt  
rnvqyytdivskhal krrliqtadsian dgyndeleldailsdaerrilelsssresdgfkdir dvl gqvyetaeeldqn  
sgtppgiptgyrdldqmta  
gfnrndlii laarpsvgktafalniaqkvathedmytv gisflemgadqlatrmicssgnvdsnr lrtgtmteedwsrft  
iavgklsrtkifiddtpgi  
rindl rskcrrlkqehgl dmividy lq liqgsgsrasdnrqqevseisrt lkalarelecpvialsq lsr gveqrqdkrp  
mmsdi resgsieqdadiva  
flyrddy nrggdeddddggfepqndengeieii akqrngptgtvklhfmkqynkftdidyahadmm

>tr|A6QD59|A6QD59\_STAAE  
mkslktvigmnnehiksvilal l v lmsvvl tymvwnfsp dianvdntdskksetkpl ttpmtakm dttitpfqiihskn  
dhpegtiatvsnvnltkp  
lknkevksvehvrrdhnlmpdl nsdfilfdftydlplstylgqvl nmakvpnhfnfnrlvidhdaddnivlyaiskdr  
hdyvkl ttttkndhfl da l  
aavkkdmqpytdi i tnkdtidrtthvfapskpek l ktyrmvfntisvekmnail fddstivrssksgvtty nntgvany  
ndknekyhkn l sedeass  
skmeetipgtfd f inghggfl nedfr lfstnnqsgeltyqrflngyptfnkegsnqi qvtwgekgvfdyrrsll rtdvvl  
nsednkslpklesvrssa  
nnsdinfevtniaigyemqndshnhievqinse l vprwyveydgewyvyndgrle

>tr|A6QD62|A6QD62\_STAAE  
mkalll ktsvwlvl l fsvmg l wqvsnaaeqhtpmkahavttidkattdkqqvpptkeaa hsgkeaatnvsasaqgtadd  
tnskvtsnapsnkpstvvs  
tkvnetrdvdtqqastqkpthtatfkl snaktas l sprmfaanapqttthkilhtndihgrlaeekgrvigmaklktvke  
qekpdlml dagdafqglpl  
snqskgeemakamnavgydamavgnhefdfydq l kkl egml dfpml stnvykdgkrafkpstivtkngirygi igvttp  
etktrpegi kgvefrdp  
lqsvt aemmriykdvdtfvvishlgidpstqetwrgdy l vkqlsqnpqlkkritvidghshtvlqngqi yndalaqtgt  
alanigkitfnyrngevsn  
ikpslinvkdvenvtpnkala eqinqadqt fraqtaevipnntidfkgerddvrtretnlgnai adameaygvknfskk



Tsompanidou\_et\_al\_Supplemental\_FASTA\_File

tdfavtngggi rasiakgk  
vtrydlisvlpfgntiaqidvkgdsvwtafehslgapttqkdgktvltanggllhisdsirvyydinkpsgkrinaiqil  
nketgkfenidlkrvyhvt  
mndftasggdgysmfggpreegislqvlasylktanlakydttepqrmllgkpavseqpakgqqgskgskgkdtqpig  
ddkvmppakppagkvvl  
lahrgtvssgtegsgrtiegatvssksqqlarmsvpkgsahekqlpktgtngqssspeamfvllagigliatvrrrkas  
>tr|A6QD64|A6QD64\_STAAE  
mkiniyksiynfgetntnflenleslnddnyellndkelvsdsnelkliskvyirkkdkklldwqlliknvyldteedn  
lfsesghhfdailflkedt  
tlqnnvyiipfggayhdinnli dydfgidfaeraiknedivnknvnffqqrllkeivnyrrnsvdyvrpsesyisvqghp  
qnpqifgkmtcgtislr  
vprkqfidi ksviikeinainlpkisefprivtlkdlnkievldtlllkklsnssttenisidirsflslsmill  
lddmldvniyinsfknntl  
etfdatdpevdyiteigdyllkydvnsvindvrievindlghsnmllktilhaevemedgkkyllqngkwgyfnreffdl  
lndhlnieieiryntltptg  
lvfkegeegyikeivgrlpeeylmllhkkfikpinknfivkngieladlyniknelftikrgintsllslyleqniai  
nal kypesynfeeliaip  
dnseni fndiqrstnfsivwilpissidnmpikdmvhtsnvinknfqltnlgsvllknklvewslylkdqrinpiiyet  
ptedrn  
>tr|A6QD69|A6QD69\_STAAE  
mekmnhyqiviiggtagvtvasrllrknqnlkekiaiidpadhhyyqplwtlvagavsslkssrkmdesvipeganwi  
kqavssfqpennsvl gdn  
tvvyydfllvapglnwssikglkenigkngvcsnyspdyvnetwnqisnfkqgnai fthpntpikcggapmkimylae  
dyfrkhkirsnaviyatp  
kdal fdvgykynkeleriveernitvnynynlveidgdkvatfehikaydrktisydmllhvtppmgpldvvkestlsdse  
gwwdvnpttlqhkysvfv  
algdasnvptsktgaarkqapivannllqvmnqmllthydgytscpi vtgynrlilaefdynkntketmpfnqakerr  
smyifkkdllpkmywgm  
kgli  
>tr|A6QD71|A6QD71\_STAAE  
matkkdvhdflnhvnsnavktrkmmgeyiydygvvigglydnrlvkatsaqqklqdnltvspypgskemilildft  
eatnldl fktikndlkk  
>tr|A6QD73|A6QD73\_STAAE  
mikiifrllylasppiigeakkpdntfkaniipnsweslvlsikyqlaptvliptpnaeiisaknnlkflifnksvin  
itffqckiyicelfyklrv  
v  
>tr|A6QD74|A6QD74\_STAAE  
mknlkvnfvnl yqsniekvtdnrhskganfhnddyeqilikvlesdiiifstplywysmsasllkfidrwteslrdtqid  
nfkeimsqkkylliliiggd  
nphtkaqplvnqfkli fefmni tnyrfligegnpfdilndsqfielelaninlalkkgdiyd  
>tr|A6QD82|A6QD82\_STAAE  
mmkrlnklvlgiiflvisitagcgigkeavkksfektlsympiknledlydkegyrddqfdkndkgtwiinsemviq  
pnedmvakgmvlmnrnt  
kttngyyyvdtkdedegkphdnekrypvkmvndkiiptkeikdekikkeienfkffvqygd fknlknykdgd isynpev  
psysakyqltnddynvkql  
rkrydiptskapllllkgsgnllkgssvgykdieftfvekkeeniyf sdsldykksgdv  
>tr|A6QD83|A6QD83\_STAAE  
mikrvnklvlgisllflvisitagcmgkeaeikksfektlsympiknledlydkegyrddqfdkndkgtwivnsqmaiq  
nkgealkikgmllkidrnt  
rsakgfyytneiktekyeva qdnqkypvkminnkfisteevkeenikkeienfkffaqs nfkdlmnykdgd isynpev  
psysaqyqltnddynvkql  
rkrydiptnkapllllkgtgnllkgssvgykdieftflenkeniyf tdsllhlepse dk  
>tr|A6QD84|A6QD84\_STAAE  
mmkrlnklvlgiiflvisitagcgigkeakikksfektlsympiknledlydkegyrddqfdkndkgtwiigsematq  
nkgealkvkgmvlymnrnt  
kttkgyyyvnaikndkgrpqenekrypvkmvndkiiptkeikdknikkeienfkffvqygnfkdl skykdgd isynpev  
psysakyqltnddynvkql  
rkrydiptnkapllllkgtgnllkgssvgykdieftfvekkeeniyf sdglifkpsedk  
>tr|A6QD86|A6QD86\_STAAE  
mqrdyli rvetesmsdfkrlnslmigfvikeahiydenmtqcns gdi fiinhrdlyrfqlqqdgiicyiqf qmkylad  
kfdvvhclyfhlt datttk  
nihqlrnimarlvsthirhnel sklteqqvlviqllmhmihyvprtyhsnqsilnddkvnqvcdyielhfhedlslselse  
yvgwshl skkfteslgv  
gfhflnttrihakldl tytdetidialqngfssaasfartfkfhfthqtpkqyrgdrpaitenqqsaqhd yhdrelil  
llndyieemnhfiediekmi  
nykeiafqptnhqlnqfnhiqvgylrnllntqyqsqlltchhd fqvnevlaydvipyimkkl napftydaeisni fydi  
dlcldflldhnfs ltmhld  
qydsrdyidafkifi hvalhvshrkdlkfnlyvttlhtsliemi dyfkal fpngglyihldqaterhllp lllkrlephid

Tsompanidou\_et\_al\_Supplemental\_FASTA\_File

hfvfdansndavdfnkmnd  
defktasqmi inktnylidlmhrhr1krpl1llnwnt1tgdtfitngeyfrggiieq11klsskvegigyr1nydlhvs  
hcknerdymnsiel fhqyn  
gkrpvyftallfnkltsni lysddtcivtgdtsnfqillydakhfnpyla1dnqmmnratemihlninal eegmykikhf  
tldkengalfnlwrkhhti  
hgmdkdsidyvnrmsfpklevydiditdt1alnikmitngihlievkrypss  
>tr|A6QD87|A6QD87\_STAAE  
mkdmnqgliet1kskegkmierrylhqhpelsfhedetakyaiefykdkdvevetnvpgrikvtidsgkpgktaira  
dfdalpitedtg1sfasqn  
kgvmhacghdahtaymlv1aetlaemkdsftgkvvvi hqpaeevppggaktmi engvldgvdhvlgv hvmstmtkgvvy  
rpgyvqtgraffklkvqgk  
gghgssphmandai vagsyfvtalqtvsrr1spfetgvvtigsfdgkqfnvikdvvei egdvrgltdatkatiekeik  
r1skgledmygtctleyn  
ddypal yndpefteyvakt1kean1dfgvemcepqpsedfayakerpsafiytgaavengeiyphhhpkfniseks11  
isaeavgtv1dy1kgdn  
>tr|A6QD89|A6QD89\_STAAE  
memsvtevi fsf1gg1g1flyglkimgdglqasagdr1rdilnkftsnvlgviagivvtiliqsssgttvitiglvtag  
fmt1kqai gvimganigt  
vtafiigidlgeyampi1algaflifffkrskinnigrilfgfgslffgl efmgdavkplasl d gfkqlm1dmstnpila  
vivgag1talvqssatig  
ilqefyqddl is1naaipv1l gdnigttilas1agsiaakraalvhvifnligviiftifl pvvihlis11qdlwhl  
kpamtiavshg1fnitnt1  
iq1pfvaglawivtklvpgkdiaddykqhl nkd1vyhapgvalqetqkelqnvqgivilsm fedireitkddkkl ikkle  
qkhqavetindsirnylv  
istkai tkadverlavmfdvnr silkvaelt eeyvaqlkrqhdediritedaqr gmdklfnhvaesfdkaidm1dvydkt  
kkdeiversresfniehk1  
rkghikr1nrgecttkgg1lyidmigvlerigyhsrnvsealvg1nddvptdeei attei  
>tr|A6QD93|A6QD93\_STAAE  
mskirsfti1s1liylammcytvvtypk1ptkvpihynlagdadnfadkwv111insafiviwliffiagryyerfakws  
hynhtpreiraik1flst1  
nleimsy si ftv1eiwqihhhqfn1lwf nmi fiii ig1t1vifc11ptihk mrdsq  
>tr|A6QD95|A6QD95\_STAAE  
mmt1qih tgg1n1kkkn1ysirk1lgvgiasvt1gt11isggvtpaanaaqhdeaqqnafyqvl nmpn1nadqrngfiqs1  
kddpsqsanvlgeaqk1nd  
sqapkadaqqnfnkdqqsafyei1nmpn1neaqrngfiqs1kddpsqstnvlgeakk1nesqapkadnnfnkeqqnafy  
ei1nmpn1neeqrngfiqs  
1kddpsqsan11seakk1nesqapkadnkfnkeqqnafyei1h1pn1neeqrngfiqs1kddpsqsan11aeakk1ndaq  
apkadnkfnkeqqnafyei  
1h1pn1teeqrngfiqs1kddpsvskei1aeakk1ndaqapkeednnkpgkednnkpgkednnkpgkednnkpgkedgnk  
pgkednkkpgkedgnkpgk  
ednkkpgkedgnkpgkedgnkpgkedngv hvkpgdvtndiakangttadkiaadnk1adknmikpgqelvvdkkqpan  
hadankaqalpetgeenpf  
igtvfgg1s1algaal1agrrel  
>tr|A6QD98|A6QD98\_STAAE  
m11kpkvqiviag1clai va1s1lmignt1vspgtvialfnfdsend1hdvvtgarasrtia11tgaalavsg11mq  
1trnpiasp1fgvnagav  
ffvifsi1t1fiqisfkmivviaf1gai vvtlvvalgmfrq1lfsphrvilagaaiam1ftaftqgilimnetd1qg11f  
w1sgsvs1rniwdipwip  
lv11il1iafsmahini1mtddiatg1gqniklikwmi1m1smlagisvavagsivfvglivpniskr11ppnyky1  
ipftalagailmiisdiva  
rii1kpl1elpigvvtavigai v1iyimkkgrqr1  
>tr|A6QDA2|A6QDA2\_STAAE  
mqnhtavntaqai11rd1vdal1fedia givsnseitkengq11liyeretqqikipvyfsalnmfryessqpitiegrv  
skqpl1taefwqtianmnc  
d1shewevarveeg1t1aatq1akq1sel1dashpvmseqfas1kdrpfhplakekrg1readyqvyqaelnqsfp1mv  
aavkkthmihgdtanidel  
en1tvp1ikeqatdm1ndqg1s1id dyv1fpvhpwqyqhilpnvfakeisek1lv11p1kfgdy1ssssmrs1lidigapynh  
vkvpfamqslgal1r1tptr  
ymkngaeq11rq1iekde alakyvmvcdetawwsymgqndi1fdq1gh1tvq1rkypev1akndtqq1vsmaalaan  
drtlyqmicgkdniskndv  
mt1fediaqvf1kvt1sfmgygalpelhgqni11sfedgrvqkcv1rdhdtvriykpwl1tahq1s1l pkyvredtpnt1i  
ned1etffayqtlavsvn  
lyaiidaiqdlfgvsehelms11kq1knevatiswvtt1dqlavrhilfdkqtwpfkq11p1lyqrdsggsgmpsg1tt  
vnp1mvt1yd  
>tr|A6QDB2|A6QDB2\_STAAE  
mitggagfigsh1vdd1qqdydyv1dnyrtgkreniks1adhdvfeldireydaveqimktyqfdyvi hlaalvsvaes  
vekp11sqeinvat1r11  
e1ikkynnhikrfi1fassaavygd1pd1pkdsqsl1p1spya1dkyygert1nycs1yniptavvkffnvfgprqdpk

Tsompanidou\_et\_al\_Supplemental\_FASTA\_File

sqysgviskmfdfsfehnkp  
ftffgdglqtrdfvyvydvqsvrimehkdaighgynigtgtftnllvyriigelygksvehefkearkgdikhsyad  
isnlkalgfvpkvtvetgl  
kdyfnfevdnieevtakevems  
>tr|A6QDB6|A6QDB6\_STAAE  
mksds1keniyygqlyqlirtmtplitiipiisrafgpsgvgivsfsfnivqyflmiasvgvqlyfnrviaksvndkrqls  
qqfwdifvsklflaltvfa  
mymvvitifidyyliifllggiyiigaaldiswfyagtekfkipslnivasgivilsvvifvkdqsdlslyvftiaivt  
vlnqlplfiylkryisfvs  
vnwihvwqlfrsslayllpngqlnlytsiscvvlglvgtyqqvgifsnafniltvaiimintfdlvmipritkmsiqqsh  
sltktlannmniqliltip  
mvfgliaimpsfylwffgeefastvplmtilailvliiplnmlisrqyllivnkirlynasitigavinlvciiilyfy  
giygaaiarlitefflliw  
rfiditkinvklnivstiqcviaavmmfivlgvvnhylpptmyatllliaigivvyllmmtmknqyvqilrhlrhkti  
>tr|A6QDB8|A6QDB8\_STAAE  
mkklatvgs1ivtstlvfssmpfqnahadttsmnvsnkqsqnvqnrhpyggvvpqgmtqaqytelekalpqlsagsnmqd  
ynmkydatqniadkynvi  
ittngvfkphavrdmnghalpltkdgnfyqtnvdangvnhggsemvqntghmsqqghmnqnthmnqqphmqghmqss  
nhqmmspanmhssnhqmn  
qsnkkvlpagesmtssiltasiaallvsglflafrrrstnk  
>tr|A6QDC1|A6QDC1\_STAAE  
mnveyskikkavp1llflfvfslvidnsfk1isvaiaddlnisvtvswqatlaglvigigavvyas1sdaisirtlfy  
gviliiigsiiigyifqhqf  
plllvgriiqtaglaaetlyviyvakylskedqktylg1stssys1slvig1sggfistylhwtmflialivvftlp  
flfk1lpkenntnkahldf  
vg1ilvatiattvmlfitfnwlymigaliaiivfalyiknaqrplvnksffqnkryasflfivfvmyaiqlgyiftfpf  
imeqiyhlqldtts1llvp  
gyivavivgalsgkigeylnskaiitailialslilpafavgnhisifvismiffagsfalmyapllneaiktidlnm  
tgvaigfynliinvavsvg  
iaiaaalidfkalinfpndalsshfgiiliilglmsivglvlfvslnrwtqsek  
>tr|A6QDC8|A6QDC8\_STAAE  
mrmsniafyvvsdvhgyifpdtftrsnyqpmg1llanhvieqdrdqyqsfkidngdflqgspfcnyliahsgssqplv  
dfynrmafdfgtlgnhefn  
yglpylkd1rrlnypvlcaniyendst1dngvkyfqvgdqtvgvig1ttqfiphweqpehiqsltfhsafeilqqylp  
emkrhad1ivvcyhggfek  
dlesgtptevltgenegyamleafskdidi fitghqhrqiaerfkqtaviqpgtrgttvgrv1stdeyen1svescell  
piddstftideddqlrk  
qledw1dyeitt1pydmtinhafearvaphpftnfmnyal1eksdadvactal1fdsasgfkqvvtmrdvinnyfpntfk  
vlavsgaklkeaiersaey  
fdvkndevsvsadfllepqpqhfnfydiyggsy1ihvgrpkkqrvsnmmiqghavdlkqytyicvnyravggggydmyid  
apvkd1qvegaql1idfl  
snn1mr1pqvvd1fkvek  
>tr|A6QDD0|A6QDD0\_STAAE  
ms1aipkl1sfda1tivgn1smsnaer1shfmstnpeir1wdil1qtnfkakal1kekyieydkikat1wnrrsmrvefnpn  
klshdev1wlkqni1syld  
dvsftr1d1afdfef1d1ndy1alsdksvkkt1fygrnvkpetkyfgvrnsdrfiriynknknvkimqmlk1iqhfygvwk  
1n  
>tr|A6QDD1|A6QDD1\_STAAE  
meie1krdmvdcwkdcfddl1h1kpn1kmieni1qeram1h1l1theeewgn1errtknkyrdk1kniasid1td1mkis1  
rgneng1kqk1dfw1n  
>tr|A6QDD2|A6QDD2\_STAAE  
m1iki1rggnmkrdf1fekwsf1n1il1fcafl1flv1lmfykdvd1iyifct1l1is1l1p1l1niikrykkktdn  
>tr|A6QDD3|A6QDD3\_STAAE  
mi1fdrhan1kyrygnrkfwckgfyvdtvgrnk1kvienyir1nql1qedi1vadei1smeey1dpft1geknkkrkkke  
>tr|A6QDD6|A6QDD6\_STAAE  
m1lmskkent1tt1fvyekpkst1sekfrg1rsnimfskangevkr1lvt1sekpggk1st1vsvn1vaityaqagykt1vid  
gdmrkptqny1fneqnnng  
1ss1li1grttm1seait1steien1d1l1tagpvpnp1seligserfkelvd1fnkrydi1iivd1tpvntvt1daqlyaraikd  
s1l1vid1sekndknevkkak  
al1mekagsn1lgv1lnktkvd1ksssyhyygde  
>tr|A6QDD8|A6QDD8\_STAAE  
mrgfmah1svkl1r1l1l1al1ids1lvt1fsvfvsy1ilepyfktysvkl1l1laa1slfishhisafifnmyhrawe1yasvse  
l1iivkavtts1v1tmvv  
t1vtgnrpf1r1ly1itwmmh1l1liggsr1fwriyrky1lggksfnkkpt1vvgagqagsm1l1rqm1ksdemk1lepv1lavdd  
dehkrnit1tegvkvggki  
adipelvrkyk1k1k1i1a1iptiger1ke1n1nichmdgve1l1kmpniedvmsge1levnq1kkveved1l1grdpvel1dmdm  
isnel1tnkt1lvtgaggsi  
gseicrqvcnfyperi1l1ghgensiyl1nre1l1nr1rfgknvd1vp1iadvqnrarmfeimetykpyavyhaaahkhvplm

Tsompanidou\_et\_al\_Supplemental\_FASTA\_File

ednpeeavrnni lgtknta  
eaaknaevkkfvmi stdkavnppnvmgaskriaemi iqs lndethrtnfvavrfgnvlgsrgsviplfksqieeggpvtv  
thpentryfmtipeasrlv  
lqagalaeggefvldmgepvki vdlarnliklsgkkeddiritytgirpgekmfeelmnkdevhpeqvfekiyrgkvqh  
mkcneveaiiqdivndfsk  
ekiinyangkkgdnyvr  
>tr|A6QDD9|A6QDD9\_STAAE  
mfddkllitggtsfgnavmkqfl dsnikeirifsrdekkqddirkkynnsklkfyigdvrdsvetamrdvdyvfha  
aalkqvpsceffpveavkt  
nigtenvlqsaihqnkvkviclstdkaaypinamgiskammekvfvaksrnirseqtlicgtrygnvmasrgsviplfi  
dkikagepltitdpmtrf  
lmsledavevvhafkhaetgdimvqkapsstvgdlatallelfadnaieiegtrhgekkatlltreeyaqedmgdy  
frvpadsrdlnysnyvetg  
nekitqsyeynsdnhiltveeikeklltleivrnelndykasmr  
>tr|A6QDE4|A6QDE4\_STAAE  
mkffv lcaismnifivistftkevl gfpiepyystmvgialittvfaiykiivtqeiprglilliaiclllylafyyfs  
pdkeeklaknnlffl twa  
vpaaisgiyikyinkatverffklvffifsvsfivlipkl tgeipsyinfglmnyqnasylsaftaglgifyfimgsv  
khkwiyvlf tii dipivfi  
pggrggail lilyglfafil itfkrigipiavksimyifalsissvliyflftkgsntrtfsylqggtnlegtsgrgpiy  
ekgiyfiqssllgygpf n  
yyklligniphniie lilsfgllgffii micilllvymirnydpntidllvmfaiaypitllmfssnylvvsefwvlf  
yfitkgrrhg  
>tr|A6QDE5|A6QDE5\_STAAE  
mdsvktiigtllialglqflaypiinqrvgneafgsiltiytiititsvvl gntlnnirlnmnyksnhyywkfasill  
isiliesialiivflyffn  
lniidiiflillni lmc lriylnvffrmtlkynqilyalialqflglliglflyl tqnwivcfitsel fatiytlvklrg  
ltigeygsednnvvkdyvm  
llstnslnnllyldrliillpiiggtavtisflstfigkmlatflypinvvlsyisvnesdnikkqylktnliaiaalc  
lvmiicypitiiivsllyn  
idsslyskfiilnigvlfnavsimiqt lntkhasitlqanymtlhtitfifitilmtiafngffwttlfsniikyvi  
lniiglkskfinkkdvd  
>tr|A6QDF4|A6QDF4\_STAAE  
mvnygsinlnrsykel flkati lntthl frsgkrmgkkantinrykyfhvhnhqkiqqsskktlwasliitllftvie  
fvgglvsnslal lsd sfhm  
lsdvlalgl smlaiyfaskkptarytfgyl rfeilaaf lnglalivisiwilyeavriiypqpiesgimfmiasigllv  
niiltvilvrs lkqedn  
iqsalwhfmgdl lnsigvivavvliyftgwriidpiisivisliilrggykitrnawli lmesvpqhltdtdqimadikni  
dgidlvhefhlwsittehy  
slsahvvl dkkyegddyqaidqvssllkekygiahstlqienlqlnpldepyfdklt  
>tr|A6QDF6|A6QDF6\_STAAE  
mikiqq lqhhfgshkvi hfnldi skgeivtfigksgcgkstllniiggfihpssgrviidneikqqpspdc lmlfqhhn  
llpwktindniriglqki  
sdeinaqlkldledrgkhfpeqlsggmqrvalcrahvhkpnvilmdeplgal daftryklqdqvlvqlkhktqstii l  
vthdideaiylsdrivilg  
egcnii sqyeitashprsrndshllkirneimetfalnhhqepeyy l  
>tr|A6QDG3|A6QDG3\_STAAE  
mgnlrfqqeyfriyknntestthrnaywvklaknveatkmyalstivqqhasirhffdvttddnl tmlheflpfieik  
qpsssanydleaffkqel  
styhfndsp lfkvlqfadaayi lldfhvsi fddsqidiflddlcnayrgntvinntqrhahinrddkdndqashial  
dsnyfrlennsdihidsyf  
pikhpfeqalyqtyliddmstidmaslavsvylanhimsqqhdvtlgihvpshlpndlhgnivpltl tidakdvcqrftt  
dfnkcvlqnmsqlqcakss  
lsetifhcyhmmssccndviedvhqihahtsladieifphqhgfkiiynsaaydl lsietlsdlvrniylqiteengn  
krttvdelnl mterdiqly  
ddinlslpeiddaqtvtvlfeqqveatpnhvavqfdgvfityqtl narandlahrlrnqygvpepndrvaviaeksiemi  
amigvlkaggayvpdpny  
psdrqeyilkdvtpkvityqalyengkqnihidlnkiawknidnlskcntledhayviytsgttgpnkgltiphrgiv  
rlvhqnhyvp lneetti l  
sgtiafdaatfeiygal nggklivakkeqllnpiaveqlinendvntmwltsslnfqiaserievlp lkylliggevl  
nakwvdl lnqkpkhpqiin  
gygptentttttynipnkvpnrpigi kpi l gthvyimqgerrcgvipgelctsgfglaagyl nqpel tadkfikdsni  
nqlmyrsgdivrllpdgni  
dylrkdqkqvki rgfrie lsevehaleriqqinkavvivqnhdqdyivayyeamhtlshnkiks qlrmtlpeymipvnf  
mhiqipitingkl dkkal  
pimdyvtd dayvapstdtehl l cqi fadi l hvnqvgihdnffelggshlkatlvvnrieastgkrlqigdllqkptvfel  
aqaiakvqeqnyevipeti  
vkddyvlssaqrmyllwksnhkdtvynvpflwr lsselnvaqlrqavqrliarheilrtqyivddevrqrivadvavd

Tsompanidou\_et\_al\_Supplemental\_FASTA\_File

feevnthftdeqeimrqfv  
apfnlekpsqirvryirspflhaylfidthhiindgmsniqlmndlnalyqhklllpklqykdysewmshrdmtkhrqyw  
lsqfkdevpils1pdyvr  
pniktngammsftmqmqrql1qkyvekqhqtfdmffmsvmtllsryarkddvsvgsarmskhgqteqmlgmfantl  
vyrgqpspdkmwtfqlgev  
kemsleayehqeypfeclvndldqshdasrnp1fdvmlvlqnnetnahfghsklthiqksvtakfdlsfiieedrddy  
tinieyntdlyhsetvrhm  
gnqcmimidyilkhqd1lqicdipngtee1lnwvnthvndrmlnvpgnksiisyfnevvsrqgnhvalvmndltmtyetl  
rnyvdaiahml1sngvng  
qrvalftersfemiaamatvkvgyasypididfpnkrqgailedakvtavmsygeiettlpviqlenakgfveskene  
qyddlhgnqlentamlne  
myaiytsgttgmpkgvaiqrn1lnlvhawstelq1gdnevflqhanivfdasvmeiyccl1nghtlvipdreervnpeq  
lqqlinkhrvtvasiplqm  
csmmedfyiek1itggatstasfvkyiekhcgtyfnaygpsestvitsywshhcgdlipetipigkplsniqvyimsdgl  
l1cg1gmpgelciagds1ai  
gyinrpe1madkwqnnpfgkgklyhsgdlarytsdggieflgridkqvkvngyrieldeienailairgisdcvvtvshf  
dthd1lnayyvgeqqveqd  
1kqylndq1pkymipkti1thidcmpl1tndkvdttr1pnpspiqqsnkvysepsneieqtfdvdfgev1kqndvgvdddf  
felggns1eam1vvshlkr  
fghhismqtlyqyktvrqi1vnymyqnqqs1valpdn1selqkivmsryn1gileds1shrp1gnt1ltgatgflgaylie  
vlqgyshriycfi1radnee  
iawyklmtn1ndyfeetveim1snievivgdfecmddv1penmdti1hagartdhfgdddefekvnnvqgtvdvirlaq  
qghar1iyvst1svgtyfd  
idtedvtfseadvykgq1ltspytrskfyse1kvleavnng1dgrivrvgn1tnpyngrwhmrniktrfsmvmd1lq1  
dcigvsmampvdfsfvdt  
tarqivalaqvntppqi1yhl1spnkmpvks11ecvrkeielvsdesfneilqkqdm1yetig1tsvdreqqlamidtt1t  
1kimnhisekwpti1tnw1  
yhwaqyikti1fnk  
>tr|A6QDG9|A6QDG9\_STAAE  
mnsi1eltdyysnnyap1klvi1skgkgvkwvwdtdgkqyidci1sgfsvanqghchptivkamteqask1si1srvl1ysdn  
1gkweekich1akkdkvlp  
1nsgteaveaai1kiarkwgvsevkgitdgqveii1amnnf1hgrt1lgs1sl1shndaykagfhp1l1qgtttvdfgdieqltqa  
ispntaai1iwepiqgeggy  
nippkgyiqavrq1cdkhq1l1iadeiqvg1grtgkwfameweqvvpdiyl1gkalggg1ypvsavl1andvmrv1tpgt  
hgstfggnplai1a1staa1  
dvlkdeqlverser1gsf1l1kallq1khpsikeirgrgl1figielntdaapfvdq1lqrgilckdthrti1rl1sppl1vid  
keehqivaafqdvfkn  
>tr|A6QDH0|A6QDH0\_STAAE  
mkkkl1tfkenmfigsm1fg1ffgagn1l1fpihl1gqaagsnvfian1glfl1taig1lpfl1giaig1sktsgl1feiasrvnk  
tyayiftialyl1vigpffa  
1pr1attsfeiaf1spfl1spkqit1lyl1fifsvffv1awffarkpsr1leyigk1lnpvfl1vllai1ll1fafi1hpl1ggisd  
apiskqyqshal1fngfldg  
ynt1dalas1afgi1ivatikk1gienptdiaketiksgtisi1immgi1yt1l1aimgt1sighfk1senggialaqitqy  
ylgnygivil1sl1vmvac1  
ktaig1litafsetfeh1l1fpmnylaiatvvsfis1flfanvg1l1tkiimysvpv1lmflyplai1aliv1tl1fssk1fhskliy  
qcti1fftmi1aalvdgl1kas  
pefisstsfsqt1l1nfsqky1lp1sdigmwv1v1sligfi1igfi1y1kikhrkipqa  
>tr|A6QDH1|A6QDH1\_STAAE  
minfnkta1vl1idl1qegil1kmdyapytaenvvqnank1idvfrknngfiafvrvnfydgkdvl1qpnamis1lpkegddys  
rfhh1l1dkrddd1fvidkrh  
fsafvgtd1ld1ql1rrrgid1tiv1l1ggvathigvdt1tardayq1lnynqffvt1dmmsaqnet1hqfpidnvp1lmgqtittnd  
flniln  
>tr|A6QDH4|A6QDH4\_STAAE  
mlrrat1tgfsvy1gqpl1deayikrmikqgyqmi1ftsvqipeeddetkyhyftk1l1n1lkheqvtyl1idanpsil1tpsfy  
dhl1rqydaqfmi1ridhsts  
ieaieaimaggl1kcc1lnasi1srellts1hqqlndft1l1sfchnyyprpdtg1svd1lvnkknelyqfnpkaqi1ygfivg  
sd1rgpl1hkg1lptieatr1h  
shpvvaak1l1qetgvsevl1vgds1liemrqakq1lidfckhrhft1l1cieevf1dttvtyl1fdmchkv1rpdnpenvirsetsrq  
icphsi1qpqftt1qrrigsv  
tvdn1nngryqgemqiv1rqt1sahdnv1vvaqi1iked1p1l1sciepn1dtdf1qktreckk  
>tr|A6QDH5|A6QDH5\_STAAE  
mmensttear1eatmh1demtveea1l1tmkedq1qvpl1avrkaipq1l1tkvikktiaqy1kkggr1liyigagtsgr1glv1da  
aecvptfntdphe1ig1ia  
ggghamt1mavegaed1hkk1laeed1knid1l1tskdv1vigiaasgktpy1viggl1tfantigattvs1iscnehaviseiaqypv  
evkvgpevl1tgstr1lksgt  
aqk1l1nmi1st1tmvgvgkydn1l1midvkatnqk1l1drsvri1qeicaitydeama1lyqvseh1dvkvatvmgm1cgiskee  
atr1l1nngdivkra1idr  
qp

Tsompanidou\_et\_al\_Supplemental\_FASTA\_File

>tr|A6QDH7|A6QDH7\_STAAE  
mmtnilyridkqlsdfcttekiadyilknphkiidmtvndladvtnvstasivrfsrkmthqgfqelkiaisrylpedi  
atnphlelienesvetlkn  
kmiarantnrmrfvatnimdaqidaidvlnkarti flfgfgassltigdlfqklsriglnvrllhethllvstfathddr  
dcmifvtngqshselqsia  
qvathysipiitissannpvaqiadyaliygrtdenemrmaatts lfaqlftvdilyyrfvalnyhaildcitqskmal  
dnyrkhl atidfk h  
>tr|A6QDI2|A6QDI2\_STAAE  
mki cekcfnteiveii andnskfdncdidn hlgvki fdttkdidklelirdylrpalelydisinlpdtfspkegkki  
eialkddwsi fnveeaqis  
cilnel fkd denldr rrvledlv gaki indkkytnkn livanndwdgfc eslkyknrfhnminlen laffldittnys  
eefrerfepl ysrivkfi  
tekse lmsppkgfatagrlnskwivlylstkeqvsieevkpkhndiiyigkvklqknvtkeklkianltnltsnaikag  
dggfrkyfvnyqtlkkih  
gitnpsdeqqidylpfqyladyirslkydgimyesilqdgtnfvffdqslfecvnyerkrvsdvkytltkls  
>tr|A6QDI4|A6QDI4\_STAAE  
mnc tfrlltsnkfdmmlclpihkcvnl fytvfyhsnlkiiilqgviiiitylesfkslyhkafykvfsvslspiflyav  
ikfffsakrknfyannsei  
seieqalhqkykylsqqsstqihkealki fkaqssntssknieqahfstyfenvlfhkfimikvilalpfilltlylq  
plvryiferivmaviviig  
vivsvftilyfspldaaysilgqnatkaqihqfnvlhhlnepyfiqlwdtikgvftfdlgttykgnevvtkavgeripit  
iivavlamvaliaaipig  
iisamkrnswlditlmialiglsipsfwqglfilafslkl dilppsympehpsililpvlvigtsiaasitr mtrssv  
levmrsdyvltayakglst  
tqvvikhilknaiipvtlvglvae lgg savteqvfningigryivqkqlipdipavmggvvyisivislanliidif  
yalidpklrseinerk  
>tr|A6QDI7|A6QDI7\_STAAE  
mvinlndkqtkskeglisvshplaakigkdvldqggnamdaviaiqlalnvvepfasgigggyll yyeqstgsitafd  
aretapehvd kqfyldds g  
eyksffdmthgktvavpaipklfdyihkryaklsledlinpaielaieghaanwatekysrqqharltk yhetaqvfth  
engywregdwivqpelgkt  
fqilreqgfnafykgdiakqlvnvvcacggtitledlakydiqikapisatfkdydiysmgpsssggitviqilkll ehv  
dlpsmgprsvdyllhliqa  
mhlaysdraqyladdnfhevqvslidddy lkarstlidsnkanidiehgvsdcishtdveenhtetthfcvidkegni  
asfttsigmiygsigitipg  
ygvllnttmvgfdvvdggineiapyrplsnmaptivmyhgkpi ltv gaggaisiasvaqtlinvlvfgmdiqqaidep  
riysshpnriewepqfsq  
tilaliahghamehkpdayigdvhglqvdp tteasggsddtregtmggevlvir kqplpyrqmysdsgfrlyfndvql  
plladqvrwmhdkyvwdes  
vvriifpevsahiedlrsyenagenyidiawlarkyayqvtlkddglyltddytsvkrntnayrydrdsitr  
>tr|A6QDI9|A6QDI9\_STAAE  
milnfissiiii lkkiteteenfqmakvlyitahpfnelvsnsmaagakafietyqqqhpdddevkhidlfetyipvidkdv  
ltgwgkmsngetltddeqm  
kvsr lsdileeflsadkyvftpmwnlsfppvvkayidaisiagktfkysaegpqltdkkvlhiqsr ggyytegpaad  
femgdryl rtimtflgvps  
yetiieghnaephkteeikatsinnaeklattf  
>tr|A6QDJ4|A6QDJ4\_STAAE  
mdlllllshlfnsvdqvrlkmrevykm tkkknikaigiysfiammfvii lyp llwtf gisl npgtnlygakmipdnatf  
knyafllfdssqyltwyk  
ntlivasanalfsvi vltayafsryrfvgrkyglitflilqmfplmamvaiyillntigll dslfgltlvyiggsip  
mnaflvkgyfdtipkelde  
sakidgaghmriflqimlplakpilavvalfnfmgp fmdfilpkillrspekftlavglfnfindkyannftvfaagaim  
iavpiaivflflqrylvsg  
l ttgatkg  
>tr|A6QDJ6|A6QDJ6\_STAAE  
miqnsqykkkecfsmkigvsvlyfdknfedmldyvsesgl dmi evgtggngpdkfckldellenedkrqafmksitdr g  
lqisgfschnnpi spdpie  
akeadetl rktir lanlldvppvntfsg iagsddtakkpnwpvtpwptayseydyqwnekli pywqdl aefakeqdvki  
aie lhagflvhtpytmkl  
reatneyiganldpshlwwqgidpiaairilgqanaihhfhakdtyinqenvmygltdmqpygnvatrawtfrtvgygh  
spywadiisqliingydy  
vlsiehedpimsveegfqkacqtlksvniydkpadmwwa  
>tr|A6QDK0|A6QDK0\_STAAE  
mtaykpyrhqlrrslfastifpvflviiiiglvsfyayiwiehrtihqhvdesslhhtekqiqtfitqhnnsfqeldl  
tnhhdvatatkrellklihq  
qpatlyyelsgpnqfittnyehln tknmyl fsthqlkfknstym lkiy mantprlseikkdnrqfalivdqydnyland  
drftigekeyrpqgfgfme  
svkl nhadhrliiykdiheniedgitllivmavvlvlvifgfi sadnmakrqtkdietiqkiyyaknrhlgtyp lkn

Tsompanidou\_et\_al\_Supplemental\_FASTA\_File

nseleeinnyiydlfesne  
qlihsiehterrlrdiqlkeierqfqpflfntmqtiqylitlspklaqtvvqqlsqmlryslrtnshtvelneelnyie  
qyvaiqnirfddmiklhi  
sseeahqtigkmmllqplienaikhgrdteslditirltlarqnlhvlvcdngigmssrlyvvrqslnndvfdtkhlg  
nhlnkamigygsarhi  
fskrnggtlicykiplsrgnvdv  
>tr|A6QDK7|A6QDK7\_STAAE  
mqeayivaygrsaaakaggal fherpddvaakvlqgvlkridgkfnkmiedvivgtafpegllqqniartialragls  
dtvpgqtvnrycssglqti  
aiaanqimagqgdi l vaggvelmsavpmggnptnptlqyddigasypmglaenvasqfdvsredqdayavrshqray  
daqrdgrfkdei ipiqvns  
veytnagpkvhtni fdqdefirpdtmealakl r tvfkadgtvtagtsaplsdgagfvvlmsgdkvkelgvtpiarfvvgf  
kavgvdpkimigipayaip  
evlslsnlsvedlielneafasqtiasikevgldisrtnvnggaialghplgatgamltarl n emgrprdsrygmvt  
mcigvgmgaaifeyvr  
>tr|A6QDK9|A6QDK9\_STAAE  
mhftlvfi l fggymtfeketv l ktl fpedvlsiakgltdgeveflqqvds lleskyreninqhwidatvpedyfdkg  
elnyfnnp llykdrpnakm  
psqlfqqfmsyllarfdislal lgvhqq lghntfyfggskeqiakyvpklqshelrtcfaltepehgsdvaggletvae  
rgdtwv ingekkwiggah  
vsdvpvfavnketgkphcfvvrpeqdgvdievidnkialrivpnalikltnkvdeadrlnqitsfkdiakilystrag  
vaymatggmagalratldy  
vterkqfgkpi skyql i qeklammgqlaamatcaqlanmqahgeydevatstakmmnalrlretvamgrgitggngil  
addydiarffsdaeaiyty  
egtheinalvigraltgdsafv  
>tr|A6QDL2|A6QDL2\_STAAE  
mkvgksmeglnhrrntekeettqtqsvapntgeegmssastqstktstidhnesidkqmeakahetaqntdlknearslfd  
natksigr lagndeslnln  
lkdm lsevfkphtkneadeifiagtakttpaicdi seewgkpw lfsrvfiaftvtfiglwvmaafnntnaipglifiga  
l tvplsg l fffyesnafkn  
isifeviimffiggyfslstmvlyrvfvfsdqferfgsl tffdaf lvg lveetgkaliivyfvnk l ktnkilnglliga  
aigagfavfesyagi l nfa  
l genvp lldivftrawtaigg hlvwsaivgaai viakeqhgfe fkdifdkrflifflsavvlhgiwdts l tvlgsdtlki  
filivivwilvfilmgagl  
kqvn l lqkefkeqqkqvde  
>tr|A6QDL7|A6QDL7\_STAAE  
mlmks l fekaqqfgksfm l pia l paag l l l giga l snpntvkaypildit l l qnift lmsaagsivfqnlpvi faigv  
aiglrsdkgtaglaal l g  
flimnatmng l l tigt l akdq laqngqgmvlgiqtvetgvfggiitgimtailhnykhkv l ppylgffggsrfvpivt  
afaaiflgvlmffiwpsiq  
agiyhvqgfvtktgaigtvfygfilrl l gplglhhi fylpfwqta l ggtlevkghlvqgtqni ffaqlgdpdvtkyysgv  
srfmsgrfittmfgl cgaal  
laiyhtakpehkkvvgg l mlsaaltsfltgiteplefsflfvapilyvihaffdglafmmadifnitigqtfsggidfl  
l fgv l qgnsktnylyvipi  
giovfclyyivfrflitkfnfktpgredkaaaqqveateraqtivaglggkdnieivdcatrlrvtlhqndkvdkv l le  
stgakgviqqgtgvqviyg  
phvtvikneiee l l g  
>tr|A6QDL9|A6QDL9\_STAAE  
mngdnqgilreivl nptihgkelesifgl srrqlgyriqinlwl e qegypklertsqgnfivsseimtlfkrdvseqqm  
l ngnnvifsietryylml  
mlfskenamslnhfsid l qvskntvihdinhvkeqlenhg l slkysrkhyeivgdefevrrffiklidqrlnhditkse  
vlkalnl t fedia yqkdk i  
kqveqflksrfidks l s l pyvlcvir rriqsghvmp l ninyqyl rdtkeyqateimqhepd l peakly l t l h l l st  
svqwt d l qesdsisl tma  
iaqmihhfeqitfiniedkek l sqql l l h l t pafyrikyn l tdrdelinplqgnyqsl fhmvkqscqsl t eyfgks l pdn  
eia y l t m l f g g s l r r q d e n  
fdgkikaiivctqgtsvsqmmlyelrnl fpeiifldais l r t feny t l dydivfspmfv l thkk l fitkval seneqrkl  
rkevmyinkesadidkei  
nklmalier t t t vnditelrdgledfianysistingsivtqnktldladliparhvkrmhvenideaiakasdv l va  
nhfidikiyihemqqv f d d s  
ymvimqniaiphaysekvhktamsml l l qepiym sdgtaihiivpiaavdkvth l r a l l q l r d v a q d n d a i k r i i q s r k  
nsdvneilknyskearen  
gwdsn  
>tr|A6QDM3|A6QDM3\_STAAE  
mkalvktreghgnle l l dkevatplddkvkikvhyagicgtdihtyeghykvnfpvtlghefsgeivevgadvkdfkvgd  
rvtsettfyvcneceyckg  
kdynlcnhrkgigtqvdfafnyviarees l hhipdevsyqsaamteplacahgvskiqvns g d v a v m g p p i g l l v a  
qvlkskgatvvvtgldndk

Tsompanidou\_et\_al\_Supplemental\_FASTA\_File

vrldkaealhmdivvnlqgtdlktyingitdgygadvvvecsgavpaarqgl dilrkkgfysqigifkdaeipfdmekvi  
qkeittvvgssrsqkpadwep  
slqlmadglvnaealvtkiydiskwdeayqhlksgegikvllkplldenegen  
>tr|A6QDM7|A6QDM7\_STAAE  
mtkktqaihidniywervqlyieghsegvdltsqqfvlrnl tetktleanemkidgntficrfnvailddgyylpmdkyl  
fvyhdqleyigqlnpniid  
qayaa neeqieeyne lttqngkvnyllaydakvfrkggvsqhtvyt itpeiasdvnefvfdieitlpqeksgviatsah  
wlhkqghkasfesrsflfk  
aifnitkllhikrsktilftsdsrpnlsngnfkyvyde llrqkvdfdydiktvfkenitdrkrwrkfrlpyllgkadyif  
vddfhp liytvrfrpsqei  
iqvwhavgafktvgfsrtgkkggpfidslnhrsyt kayvssetdipfyaeafgi reenvvptgvprtdvl fdeayatqik  
qemedelpiikgkvlifa  
ptfrngnghtahypffkldferlarycekhnavvl fkmhpfvknrl nisrehrqyfidvsdhrevndilfvtdllisdys  
sliyeyavfkkpmi fyaf  
ledyittrdfyepfesfvpgkivqsfdalmdaldnedyevkvvpfldkhfkyqdgrsserlvkd lfr  
>tr|A6QDM8|A6QDM8\_STAAE  
mikntikk liehsiyttfkllsklpnknliyfesfhgkqysdnpkalyeyltehsdaqliwgvkkyehifqqhnvpyvt  
kfsmkwflamprakawmin  
trtpdwlyksprttylqtwhgtp lkkigldisnvm lgtntqnyqdgfkkesqrwdylvspnpystsi fqnafhvsrdki  
letgyprndklshkrndte  
yingitktrlnipldkkvimyaptwrdeai regsyqfnvndiealrqa ldddyvillrmhyllvtridehddfvdvsd  
yedisdlylisdalvt dys  
svmfdfgv lkrpqi fyaydlkygdelrgfyndykelpgpi enqtalidalkqidetaneyieartvfyqkfcsl edg  
qasqricqtifk  
>tr|A6QDN9|A6QDN9\_STAAE  
msnkykeqaqdi ltaggvenivdatydtkcitihmqhtipstanevkqivdvtsvaendtqlviklngnvdevyqq lqr  
liknanveesentdninsq  
dtsytpqvkvtt pilvkapiagrri llkevrd sifrekvmgeglaikaheeskviapfnglismivptkhavgiqsedgv  
divihigvntvd legkgfk  
cfvkqndhveaggtllqfdqqyiqqqgynadvivvisnsadlgkveltmnei ittedvifkifkn  
>tr|A6QDP4|A6QDP4\_STAAE  
mynmsival liglp ligwffptvaskfggkpvhqii gatvgtlifailavtssgftgt nllfallsgagwfgqi  
itfkafelv gssrampvtt  
afqllgas lgvfalgnwpgighki igftalv viligarmtvwserkeasnaknlrravvlll igefgywlysaapqats  
idgltaflpqamgmvivav  
iygfmnmkaenpfrnkitw lqiisgffffafgal ty lisaqpnmglatgfilsqtsvlatltgiyflkqhkt skemvit  
iiglvli lvaasvtvfik  
>tr|A6QDQ0|A6QDQ0\_STAAE  
mfdnkeysytfvdaqghthyfyncypknanangsgqtyvnpatagdnndytasqsqqhinqygyqsnvgpdasyshsnn  
nqaynshdngkvny pngt  
snqnggsaskatasghakdaswltsrkqlqpygqyhggahygvdyampenspvys ltdgtvvqagwsnygggnqv tike  
ansnnyqwymhnnrltvs  
gdkvkagdqiaysgdtgnstaphvhfqrmsggignqyavdptsylqsr  
>tr|A6QDQ2|A6QDQ2\_STAAE  
mkpyiqllvfkqwlqy ilvttivia l v ligigyrvahdnfkipit iqdl dqt tasksfvnkikqsdvyt ikkvdedesy  
ieddvtkkeailsmqipkg  
fsqllkenrlketi qlygrddf iggiaveivssslyeqqipni iyeh ledmkqhqsidainksykhkhtpeskikfvsltk  
qaqhsisislifavilfv  
avqvvlhyrlnqqaalqr lsqyhl srfklystyvmthtillllvllavsl ylsqplslifylkslll iliyegivfilf  
hiqtishrlfmtfiyalam  
givyliifm  
>tr|A6QDQ3|A6QDQ3\_STAAE  
mktihlfriyhsflkkwyl i yllfilaa l l it ltti qhvteddnhfnigvvdkdqssetk l l insigkgsnl gknvsi  
kayddkqahtllkklhg  
yfvfdkqmtkafykqge l p i svytydqsmksvvl s q l tdsvyqrl m rsmggilafqdlap kashdsinvmt d l l itgl  
nrsgafnl epihl ydtgsy  
yaitgf lttvfi fals lftvlkmnqdtvlkar lkmfhfskerll i irtlitwfytm lwsivgvv wivfsipnifelynwp  
t laihlsyyvtflilwlll  
iellttgl lnsiskvilavilv lsgl t i p t i f l q h i a n g v f n i q p f a v v t n q l l e i l n n y i l e l h p s f y l s f i a l l i  
nlavlvwryrq  
>tr|A6QDQ4|A6QDQ4\_STAAE  
mksfap lssksisafnfv ldfkmligssaylmpifnvdf  
>tr|A6QDQ5|A6QDQ5\_STAAE  
mgskmskklkiipii vlll iggiawgvya ffantpknty l kseqqtakmykdyfndrfenevkfqekmkdnssl  
elsadasdeivkg l gipks  
vvnaskikmsyghdpkkeksminlepti adsalgkfq laadkdkhyfesplfkgkysvnnsd l l styskl tgedeetake  
ngitnqqlnlnt lfnnaq  
qqsdyskiaekyselivdk l d d d n f d k g k k e e i k v n g e k y k v r p v t l t l s r a d t k k i t l a v l e e a k k d k l k l m e e q q a



Tsompanidou\_et\_al\_Supplemental\_FASTA\_File

tkdfekdikkaiddvketk  
kdefakiqskiytekhktivkreititdkennkktikgtntleddklktrlrt  
>tr|A6QDQ6|A6QDQ6\_STAAE  
melkvddfvknikrpyltvlgvfvvavslffdaimffyaklydklpmyllvfmaftavilimmyiqeknenykvkryvv  
ryltlnvivgytllp11fvs  
iyvfgvvgfgfdvfnyclgiilm1f1swlg1flfyknefdsenpnpavnaiaiiik1fafggifyislivpvtqqeeifi  
glsifiniivdallvrsyf  
nyalyksikkdienegktm  
>tr|A6QDQ8|A6QDQ8\_STAAE  
mvimkktjlltmttltl1fsm1pnsaqaytndsktleakkahpnaqfknkdtgaytytydknntpn1nhqnsr1tndnh  
qhanqrdlnnnqyhsslsg  
qythindaidsh1ppqtspsn1tpaipnvednddel1nafskdnkglitgidldelydelqiaefndkaktadgkplal  
gngkiidqplitsknnlyt  
agqctwyvfdkrakdghtistfwdaknwagqassngfkvdrhptrgsilqtvn1p1fghvayveknidgsilisemwi  
geyivssrtisasevssyn  
yih  
>tr|A6QDR6|A6QDR6\_STAAE  
mkdvkridyfsyeeltl1ggsklp1vnfel1fdpsnfeekaaliekelvtendkltdagfkvatlvreyisaivnirind  
myfapfsyekdeyillsr1f  
knngfqiiriinkdiaawsvqsyp1l1mrqeksndwdfkqid1detlen1lnnesid1tigrvleieiy1nhqgdppqsl1nyiye  
qnd1l1f1rypl1kdkv1lvh  
igvintf1rel1fgfdtdenhinkae  
>tr|A6QDR8|A6QDR8\_STAAE  
mhdmtkdiel1tadydnekssi1qsv1dai1egqdf1ldvdt1tmd1davs1dvss1dedgais1tssv1vgp1qgsk1mg1yy1qnel1y  
dyasq1ldskmkei1id1tpfi  
edidkafkgit1nkl1eni1k1ngggh1rdty1gasgk1akgdakks1ds1dvs1de1il1ksdqef1kvid1qhykemk1kedk1l  
sksd1fekm1mt1qgascd1ymt  
vaeae1leeqkk1keea1ieiaa1lagmv1lscin1pvagava1igaysaysaanaat1gkniv1tgrk1lskeerimeg1slip1pg  
mgf1kgags1l1mk1lgfkgg  
ekfavktgl1qktm1qavs1rispk1mgm1kns1vl1nqsr1nfa1qnth1vgqm1sn1mrg1qath1tvqqs1rnw1gqqa1qnv1kriv1ng  
1dkei1ahp1fkq1lapag1mg  
gikfaet1t1rn1mgq1nikrav1tpqnh1vth1gpk1dsm1vr1seg1khs1sshem1nssky1ves1pny1tkve1fgehyar1lrpk1lkan  
iey1t1pt1gh1yrt1dhkg1ri  
kevy1dn1sl1kdg1drn1sha1rtv1gged1r1pdd1dgg1h1iarm1fgg1skdi1dn1lva1qsk1fin1rpf1fek1ghw1yn1lekew1qef1n  
sgke1vk1nik1me1vkys1gns1q  
rpti1fkve1ye1ngern1r1r1lnk  
>tr|A6QDS1|A6QDS1\_STAAE  
mef1l1l1iv1vag1lyy1i1y1lav1myseki1v1l1pii1yaiv1fvi1gity1ifi1gdsy1d1l1tn1fn1vily1mgs1fyaw1mai1rn1lwn  
rpl1l1kyk1nit1dss1sgivn  
ksey1ns1ves1lrin1ie1aky1kgi1s1livaiv1l1v1mt1lk1st1pqi1taet1rd1sis1ff1il1sl1fiii1favw1dl1fir1vr1kgafa  
fv1ir1p1l1f1scw1l1fil1nmi  
l1sr1l  
>tr|A6QDS3|A6QDS3\_STAAE  
mtfeek1l1semy1seianki1ssm1pvewek1vyamay1ddgg1gevf1y1y1y1tepgs1nel1yy1y1tsv1lnky1dis1esef1mdsv1yelyk  
qfqn1l1rn1l1fkeeg1hep1wts  
cefd1ft1reg1el1kvs1fdy1idw1inse1fgq1vgr1qny1kyrk1fgi1l1peteye1inkv1keieqy1vkeqeeaeq  
>tr|A6QDS5|A6QDS5\_STAAE  
mkys1li1lns1del1ny1tdi1pkeyni1svq1vfd1l1wmd1lyd1l1feel1rn1l1fkeeg1lep1wtscefd1ft1reg1el1kvs1fdy1idw1in  
se1fgq1vgr1qny1kyrk1fgi1l1peteye1inkv1keieqy1vkeqeeae1  
>tr|A6QDS6|A6QDS6\_STAAE  
mtfeek1l1semy1seianki1ssm1pvewek1vyamay1deec1gev1fny1teps1sdel1fy1y1tsv1ik1yn1l1kss1fmdsv1yel1hd  
qfeel1rev1fieeg1lep1wts  
cefd1ft1ked1l1kvs1fdy1idw1intef1dq1lgren1y1mykk1fgv1l1peteyemeev1keieqy1ikeqee  
>tr|A6QDT3|A6QDT3\_STAAE  
mtfeek1l1sqmy1ne1ane1sgm1pveweni1y1tiay1vtd1qg1gevi1fny1tkpgs1del1ny1tyi1pre1ynv1sekv1fyd1l1wtd1lyr  
l1fkk1l1ret1fkeeg1lep1wts  
sefd1ft1seg1l1kvs1fdy1idw1intef1dq1lgren1y1mykk1fgv1l1pemeyemeev1keieqy1ikeqdeae1  
>tr|A6QDT4|A6QDT4\_STAAE  
myne1ane1sgm1pvewek1vytiay1vde1gge1vv1fny1tkpgs1del1ny1sd1ip1kdc1nvs1kdi1fknsw1fkvy1rm1fde1l1ret1f  
k1ked1lep1wtscefd1f1rkg  
n1l1kvs1fdy1idw1i1kgf1g1ps1gken1y1mykk1fgi1l1p1d1meyemee1ravekyv1keq  
>tr|A6QDT7|A6QDT7\_STAAE  
mksed1v1vke1khi1kwdki1fyg1ddw1vnn1vet1irtk1dil1qs1vyl1kry1ll1rammag1fi1gi1itv1fv1lsvk1ath1ep1dl1pp1giv  
nmasait1fsfal1vl1l1l1ftn  
sell1tsn1fmy1tv1g1lyy1kv1ik1ptrv1l1ki1f1l1cfagn1il1gaail1fs1m1r1fs1nv1m1tp1dm1n1ql1savie1hkt1stg1fvs1ilmk  
aifan1ff1inis1lviam1qid  
dvlak1mf1vmm1fgvt1ifam1gyeh1vvyns1cl1fm1gg1li1yq1vdt1l1h1fipais1niaaaf1gny1igg1li1gl1fyay1lnd1hh1qfy

Tsompanidou\_et\_al\_Supplemental\_FASTA\_File

knn

```
>tr|A6QDU2|A6QDU2_STAAE
mvmddl1igt1f1flv1viftlftykapngmramgalanaaiatflveafnkyvggevfgekflleelgdaagglggvaaag
ltalaigvspvyaalviaaa
cggmdl1pgffagymigyvmkytekyvpdgvdligsivilaplarliavlltpvvnstlirigdiisstntnpiimgii
lggii tvvgtaplssmalt
allgltgvpmaigamaafssafmngtlfhr1klgdrkstiavsieplsquadivsanpipiyitnffggaiagliamsgl
indatgtatpiagflvmfg
fnhptt1v1ygvvmaivgalagy1gsivfkypivtkqdmnrgavda
>tr|A6QDU5|A6QDU5_STAAE
mnilfaitgiafalvaf1fsfdrkkidfkk1limifiqvliv1fmmnttigltl1talgsffegliniskaginfvfgd
iqnknqftff1nv11plvf
isv1l1g1fnyikvl1pfiikvygiainkitrmgrlesyfaistamfgqpevy1tikdiipr1sraklytiatsgmsavsma
mlgsymqmiepkfvvtavm
1n1fsal1iasvinpyksddtdveidn1tkstetkt1ngktgkpkkvaffqmigdsamdgfkiavvvavm1lafislmea
inimfgsvgl1nfkqligyv
fapiaf1mgipwseavpags1matk1itnefvam1dfknv1gdvsartqgiisvylvsfanfgtvgiivgsikgisdkqg
ekvasfamr111gst1asi
isgsiig1v1
>tr|A6QDU9|A6QDU9_STAAE
mkfenrvqryqhlftktdkrivnyirngysdafstinslahaitspatmtrfshkl1dyenfqdlkfn1qqemtetvie
nsp1iqrihkyhq1iqqt
gef1dnd1iqafidklqssrhl1fag1gssgl1satefyym1rmgl1kgnvttdsh1mkisas11shsdmfiamsngnts
elisaaevakshgayvva1
tnfegsk1tdcad1v11ttdqsrntdhqfintqiat1fl1divsyh1lentn1sqt1yqhtks1il1dnk
>tr|A6QDV2|A6QDV2_STAAE
m1rgqeerkys1rkys1gvsv1aatmfvvs1sheaqasektstnaaaqket1nqpgeqgnaitshqmqsgkq1ddmhken
gksqgtvteqkdt1qsskhq
stqnskt1rtqndnqvkdserqgskqshqnnatnnterqndqvqnthhaerngsqsttsqsndvdksqps1paqkvipn
hdkaaptsttppsndktap
kstk1aqdattdkhpngqdt1hpahqi1dakqddtv1rqseqkpqvgd1skhidgqnspekptdkntdnkq1likdalqapkt
rstnaaadakkvrplkan
qvqp1nkypvvfvhgf1gl1vgdnapa1ypnywggnkfkvi1eel1rkqgynvhqasvsafgsnydravel1yy1ikggrvdyg
aahaakygherygkytkgi
mpnwepgk1kvhl1vghsmggqt1r1meef1rngnkeeiayhkahggei1sp1ftgghnmvasi1t1latphngsqaadkfgn
teavrki1mfal1nrfmgnky
snid1gl1tqwgfkq1pnesy1idy1krvskskiwtssdnaayd1t1dgsak1n1nmtsmnpn1ityt1tytgvs1shtgpl1gyen
pd1gt1ff1matts1ri1ghd
areewrkn1dg1vvp1viss1l1hpsnqp1fvnvtndepatrrgiw1qv1kpi1iqgwd
>tr|A6QDV4|A6QDV4_STAAE
meenkt1key1rkf1legyk1yvenrynyqfssnpeafp1mrkddyki1sify1nqs1ffeep1civvisndsk1keiynfrni
diky1skhftsy1yds1kky
veeqs1l1dfnny1y1yts1yygky1igtv1l1qnn1d1ffnygk1r1andhynt1isksker1inkahdei1qp1fnh1d1nsmk
eivdd1tfsy1qie1qgl1qay
krely1paaat1fava1et1f1lik1kknki1khkdt1dstmytk1l1gelt1kegkvnyrtkkrve1iaysm1rni1nhsqagavak
gdcdf11nt1kdivdenek
i1reytks1inkte
>tr|A6QDV5|A6QDV5_STAAE
mglyeet1iqhdy1e1readv1pdn1dgw1lgd1l1likrg1sdrekagi1feelahnk1tygdi1adysn1fnnrk1fenyar
rhgf1isav1pl1reiveahny
gvrn1ly1elsey1q1seey1lea1ieqy1kky1gig1thygefs1it1fepl1rvfkl1hhid
>tr|A6QDV6|A6QDV6_STAAE
m1lcsfk1aildfks1lvs1ig1sfhh1shyvsn1imm1qkrss1l1rkf1frk1il1qmpkv1fli1el1sskrscit1mcf1skrmk1qsr
ekqgmt1lae1grk1ig1ktea
tvqryesgn1kn1kndt1ies1iata1nvn1pay1mgwveenddevq1hraah1egel1td1dewqrv1dyady1r1skrk
>tr|A6QDV7|A6QDV7_STAAE
mefiqst1l1fsnv1af1a1gl1s1aysi1fytrsqnk1fsfv1isd1nfyenn1fv1nfvvands1srth1leel1f1dknknv1t
pinv1lesdey1s1lgi1ynp
sy1lhapi1dkq1dkpevm1ianss1eflyk1felepaf1ikivsn1qrink1kky1k1istdsyeh1n
>tr|A6QDV8|A6QDV8_STAAE
mqa1lqtk1snigem1fni1qekenge1iaisarelyka1levkkrfsawae1n1khfkenrd1fts1v1t1st1vvn1gav1r1q1ledya1l
t1dvakhvam1msg1tek1gfd
freyfi1q1ekaw1nspem1m1qra1kian1ntinq1letkierdkpk1ivfadavattk1silvgelaki1kqngin1ig1qrr1fe
w1lrqng1f1ikrk1gv1dyn1mp
tqysmerel1fei1ketsi1thsdg1htsi1sktpkv1tgk1gqy1fvnk1fl1gek1q1tt
>tr|A6QDW1|A6QDW1_STAAE
mteekqepqekvs1l1k1k1inniaeknkrk1fyk1favygk1igsgk1tt1fatrdk1daf1vidineg1ttv1t1deg1sdve1ienyq1h
fv1yvv1n1f1pq1ilqem1reng
```

Tsompanidou\_et\_al\_Supplemental\_FASTA\_File

qeinvvvi etiqlrdmtlndvmknkskktfndwgevaerivsmrylglkqeeykfhfvitgheginkdkddegstin  
ptitieageqikkaitqsq  
dvlaramieefddngekkaryilnaepsntfetkirhspisitnkkfanpsitdvveairngn  
>tr|A6QDW2|A6QDW2\_STAAE  
mkitggaqftketngekfynsagfqageftvkvniefndrenryftivfendegkqykhqfvpkydfqekqliel  
vtrlgiklnlpsldfdtnd  
ligkfhchlvlkwkfnedegkyftdfsfi kpykkgddvvnkpi ptkdkqkaeenngaqqtsmsqqsnpfessgqfyddq  
dlaf  
>tr|A6QDW3|A6QDW3\_STAAE  
mqyitryqkndngtysvvtatgveleqshidllengypkaevevpdnkkl sieqrkki famcrdielhwegepvestrkll  
qteleimkgyeeislrdcs  
mkvareliliiafmfhhqipmsvetskllsedkallywatirncvicgkphadlahyeavgrgmnrnmnhydkhvla  
lcrehhneqhaigvksfdd  
kyhlhdswikvderlnkmlkgekke  
>tr|A6QDW4|A6QDW4\_STAAE  
mdpilgkgidkii egaskgpvetfsktwelvfghlyvdkiyqrevefekfkeqfkei ssvpennlqepqfsllgpa  
leaskfyisektnsmfak  
liassmddrknslthhsfveikqlspndailklknhevhpavkyravlnpkndgmnisdtlikdspdiesteisin  
nlvrlgvlnetfdmsyltk  
kgyinkfyapqflnhfnkii ekqrfvsglefvkrmksgnletisklsgiefevlklhyspwwidikkgsisl sayga  
fvktcin  
>tr|A6QDW5|A6QDW5\_STAAE  
matfrtikesgdfvtvhksfvfdsnlsakakgillyflsrpdnwqiytsevvkhmndgqksinsgvqelmdnkyvhriqk  
raengvfkgyfelyyekpt  
empfsenglsangfsengktenrkgrttnnstndlnnnntndgsilsgnptvysipykeiieylnkkagkhfkht  
aktkdfikarwnqdfried  
fkkvidiktaewlntdsdylrpetlfgskfegylnqkiqptgtdqlermkydesywd  
>tr|A6QDW7|A6QDW7\_STAAE  
meieikfnetfeapmgsprprfrntgrfvqtympatynhkayiqgmpklnleralkieldfyfplkswskkkksemv  
gqykvtkpdi dnlktvld  
acnghvwkddnqiteitsskryglepkiimrveevi  
>tr|A6QDW8|A6QDW8\_STAAE  
msvkingkpykftehene likngltpgmvakrvrggwallea lnapygmlaeykeivlsrimqreskereiarqrk  
evelrkrkphlfnvpqkhs  
rdpywfdvtynqmffkwsea  
>tr|A6QDW9|A6QDW9\_STAAE  
msiisnrkvdmmnetqdnvkqpahytygdieiidfieqvtaqyppqlafaignaikylsraplknghedmakakfyvdrvf  
dlwe  
>tr|A6QDX0|A6QDX0\_STAAE  
mtdnarkeylnqffgskrylyqdnervahihvngayyfhghivpdwqgvkktfdtaeelgiyikqhgleyeeqqltlf  
>tr|A6QDX1|A6QDX1\_STAAE  
mki kvkeml delikwarenpelsqkiffstgfsdgfvrfhpntnkcstssfipidipfidiekevtdktvfdklfe  
myemeggyetvlyantsi  
keclygrrlptkafyilndmtmtliwkdgelve  
>tr|A6QDX2|A6QDX2\_STAAE  
mmpkyrvwdeytgrihdvvgfdfi etevhyenyaeeal ihardfkdvemqstglkdknneiyagdivefedilemp  
ddevigtinravisidv  
ngiqlkdfmfegavsendyfeidi ksflyrdcevkgnifesshllleve  
>tr|A6QDX3|A6QDX3\_STAAE  
mnyetgvqlgvmdarlkkmrqrdeykkqrde ligidgklrernkelekkasawdrycksvekdlinefgkdgervkfgm  
elnnktfmeedtne  
>tr|A6QDX4|A6QDX4\_STAAE  
mtntltidqlqellqikefddriptlnlrdskiayvveffewfntletfknwkkkpgkpldvqldeladmlafgl sian  
qvgvsseeikeaiessfkd  
tefhkmfnfkdkefa qdavvstpqiifkefypdqqaivividiaynl ysidqlidaykkkmkrnherqdgtagkgyv  
>tr|A6QDX6|A6QDX6\_STAAE  
mikklnmdwfdifiagilrlfgvia lmvvispiytvasyqhkevhqgtitdkynkrqdkedkfyivldnkqviensd  
l fkkkfdsadiqarlkvgd  
kvkvtigyrihflnlypi lyevkkvdck  
>tr|A6QDX7|A6QDX7\_STAAE  
myskesivnmigt hkmkcnvladvipeydsnsiaqygiqatlpkpqgensskvedvvvrlerankryaqmlkevefinqs  
qqr lghvdfcflellkgy  
nrda iikkmpnsklnrnnflarrde laekiyllq  
>tr|A6QDX8|A6QDX8\_STAAE  
mlgli egksqrkayidagystkgksgeyl dkeastlfknrvsgryeklrqevaeqskwtrqkafeeyewlknvakndie  
iegvkkatadaflasl dgm  
nrm tlgnevlnankkieteikmllekki eqidkgdsgtedkikqlhdait evivne  
>tr|A6QDX9|A6QDX9\_STAAE

Tsompanidou\_et\_al\_Supplemental\_FASTA\_File

mnklkslytdkqieilktqtqkdwfmli nhgaktgktilnndlflrelmrvrkiadeegietpqiylagatlgtiqknv  
lieltknkygiefnfdkyns  
fm1fgvqvvtgshksvsgigairgmtsfgayineaslaheevfdeiksrcsgtgari1vdtndphpehllkdyientdp  
kagilshqfklddnfnlnd  
rykesikastpsgmfyerningmwsvsgdgvvyadfdlnentikadelddipikeyfagvdwgvehygsivligridgnf  
yfieeahqfkfidwvvi  
akdivsrygninfycdtarpeyitefrrhr1rainadksk1sgveevak1fkqnk11vlydnmdrfkqevfkyvwhptng  
epikefddv1ds1ryaiyt  
htkper1rrgk  
>tr|A6QDY0|A6QDY0\_STAAE  
mtlyk1iddieaggilpkhiealieshkddreremnlynrykthidyvpi fkrripieekedfetggnvrr1dvsvnnk1n  
nsfdseivdtrvgylhgvv  
vtydl denaeknek1kkfintfairnsyddedseigkmaaicgygarlayidngdvriknidpynvifvgdnileptys  
1ryfyekdddngtdyvyae  
fydntyyvfrgegidalqevgryeh1fdynplfgvppnkemigdaekvih1idaydltsmdasseisqtrlaylv1rgm  
gmseemi qetqksgafelf  
dkdmvky1tkdvndtmienh1drieknimrfaksvfnfnsdefngnvpi igmk1k1malenkcmterkmtam1ryqfkv  
il1sal1krkgy1n1ddd1s1n  
lifkfrn1pvnk1eesqvl1n1kgqvsert1rgsq1vddvdyeldemekes1efndk1pdidegdandksqnnqse  
>tr|A6QDY1|A6QDY1\_STAAE  
mtnpkitngndideyiegliskaekpieqlfanr1keikqiiadmfekyqnddvvtwtefnkynr1nkel1trigtm1td  
dyrvakmi qksqedayie  
kflms1ly1emasqtsmqfdvpskevikaieqiefir1mpt1qkhrdev1kkirmhitqgimsgegyskiakairddv  
gmskaqs1rvarteagram  
sqag1dsamvakdng1kmmkrwnatkdtrtrdrthrh1dgesveidqnfkssgcvgqapklfigvnsakenincrc1lly  
idene1ptvmrarkddgkn  
evipfmyrewekykrkggn  
>tr|A6QDY2|A6QDY2\_STAAE  
mks1flafss1idv1t1isksas1l1vtfttt1sfncns1issykd1mrsnfsiaspvstft1ilksisittfsl1fl1pl1ti  
shewdnf1ftivftcshys  
wqfifiniik  
>tr|A6QDY3|A6QDY3\_STAAE  
mnieevksffeekddkevkdylkg1k1tvsyddvkgf1dteegkrfiqpe1dryhskgleswkekn1led1ieqevrkrnp  
eqseeqkrisalegelekr  
daeakrek1rsnal1gkaqeln1pts1vdrl1gdsdedteqn1kal1ketfdkyvqkgveskfkssgrdvkesrnqdl1dspn  
vksieemakeinirk  
>tr|A6QDY4|A6QDY4\_STAAE  
matp1tytpgnv1lsdfkngvipaeqgt1imkdimansaimk1aknepmtaqkkkftylakvggaywvseteriqtskpey  
aqaeameakkigviip1ske  
flkwtakdffnevkl1iaefykafdqavi fgtkspyntstsgkpl1vegaeekgnvvt1dn1lyvd1salmatiedeeld  
pngv1t1trsf1rskmrna1d  
andrpl1fdangneimg1pl1sytgadvdkkks1al1mgdwdyarygilqgiyaisedat1tt1qasdasgqpvs1ferdm  
fal1ratmhiaym1v1kpeaf  
at1kpte  
>tr|A6QDY5|A6QDY5\_STAAE  
mtlyedvkl111kngvevksdeeei fkmevdgi1edvrditndf1mkgdgv1ypysikkyvad1leyyqrpevkkn1ksr  
smgtvsy1yndgvpdy1sg  
v1nrykrakf1hp1fks1r  
>tr|A6QDY6|A6QDY6\_STAAE  
mfnpydefphtis1gsikkvgeypi1qerfvsktikgfm1d1pttseq1k1fhqmsqeydrn1yvp1d1piakn1lfeyeg  
r1fs1vgds1vdqggqheik  
11r1k1qvpygks  
>tr|A6QDY7|A6QDY7\_STAAE  
mkl1nyydl1srchmakvkygadsmvvel1dkfdkkieewvkkgiakt1ttkiyntavalapvd1gf1leesid1fkyfdggl1ssv  
isvgadyai1yvegtgiya  
tggg1sratk1pws1fk1gddgewy1t1y1gqap1p1fwn1paidagrkt1feqyfs  
>tr|A6QDY8|A6QDY8\_STAAE  
mwsvs1pe1ln1qi1ykr1is1dpn1nk1lvddrvfdv1vqddavyp1y1v1vges1nvt1nessat1mretvg1vihvysqfatqyea  
k1il1sa1gyv1nr1pie1dn  
yefqfs1ridsqav1fp1dir1tkhgt1ir11fkyrhkkknegvy  
>tr|A6QDY9|A6QDY9\_STAAE  
maqkny1lavvrpaet1d1dpves111ad1qegg1hti1end1aeivrggktdyspnamsesfk1t1ignvpgdkgieavkhavq  
tggq1r1w1yernkradgk  
hhgm1fg1yv1pes1fems1fddes1kie1s1l1kvk1wnta1egaedn1pkew1feaagapt1veyek1fgekvgt1fenqkks1vvs1dsh  
tedhsm  
>tr|A6QDZ0|A6QDZ0\_STAAE  
mtefn1p1tt1k1indgekdye1veakvt1fa1drkaek1fsedsed1grkgamp1gf1nvi1fng11lesrnkail1qfwecatay1knp  
ptreq1lekaid1dfitened

Tsompanidou\_et\_al\_Supplemental\_FASTA\_File

t1p1lqgaldklnnsgffkresrsywmtlnkapnmaksedkemtkagiemmkenykeimgaepytitqk  
>tr|A6QDZ1|A6QDZ1\_STAAE  
mirdiekqryei repgsyarvqkarleekrrrelfkegtrkfleskkg  
>tr|A6QDZ2|A6QDZ2\_STAAE  
mdthfmakimani rdfgsnvrkaqr laktsvpnei etdvkadisrfqralqraksmaqrwrehsvklf mktdeykanler  
akaqverfkqhkvdlklsn  
telmakynatkatveawrkhhvkl dldanpakmavkgfkd lidlsrhsfdidssrwklgnkftkefnevegavkrsfgr  
igqimrkevngtsdiwgkl  
nns1kdyegekmdalatkirtfgtifaqqvkg lmi asiqalipviaglvpaimavlnavgvlgggvlglv gafsvaglgvv  
gfgamaisal kmvedgtla  
vtkevqnfrdasdqlkttwrdivkenqasi fnamsagirgvtsamsqlkpflsevsm lveanarkfedvkvkshsettkkaf  
ealnsiggafgdllnaag  
rfgdglini ftq lmp lfkfvssqglqnmsiafqnwansvagqnaikafidytttnl pkigqifgnvfagignlmi afaqns  
snifdwlvkltsqfrawse  
qvgqsqgfkdfisyvqengptimqlignivkalvafgtamapiasklldfvt nlagfiaklfeahpavaqiigvigilgg  
vfwalmapiaavssvl snv  
fsmtllnvvkri d ltritgvvskafgl ltgafts iswpilavvavigvfigilvy lwktnenfrktiteawngiktavs  
gaiqqvvdwltq lwgkiqs  
tlqsimpilqvl gqvfmqvl gvlvigiitnmni iqqglwtlitiafqaigtvisvavqiivglftaliqlltgdfsgawe  
tikttvtvnl dtiwqymqs  
vvesi igfltgvmnr t lsmfgtswsqiwst itnfvs siwstvtswfsrvawsvaekmgqal nfiitkgsewvsnwntvt  
sfaskvadgfkrrvsvngd  
gmsdal gkiksffsdf lnagaeligkvaegvanaahkvvsavgdai ssawdsvtsvfsg hgggsslgkglavsqakviat  
dfgsafnkelsstltdsi v  
npvstsidrhmts dvqhs l kennrpivnvtir negdldlik sriddmnaidgsfnll  
>tr|A6QDZ3|A6QDZ3\_STAAE  
miahdi evi rngsqyrvsdnpftynhlevveyntv gagyhrnysdiegidgrfhn yakeelk kvelki rykvpkia yash  
lksdvqal fagr fy lrela  
tpdnsikyehi l di pkdkqafe ldyvdgrql fvglvsevs fdtqtstg efs lsfette lpyfesvgystdlesnndpek w  
svpdr lptnegdkrrqmtf  
yntnsgevyngdvp l tqfnqfnvveiel aedvkandkdgftfytdkgnisvikevdlkagdkii fdgkhtyrgyl nids  
fnktleqpvlypgwnrfks  
nkvmkqitfrhkl yfr  
>tr|A6QDZ4|A6QDZ4\_STAAE  
mpillks lqgvghainvstkvskk l nedssld l t ienastfdaigaitkmw tithvegeddfneyvivildkstige ki  
rldikarqkel d dlnnsri  
yqeynesftgveffntv fkgtykyvl hpkvdaskfeglgkgdtrleifkkg leryhleyeydaktktfhlydel skfan  
yyikagvnadnvkiqedas  
kcyt f i kgygd f dgqqtfaeag l qiefthp laqligkreapplvdgrikkeds lkkamellikksvtasis ldfvalreh  
fpeanpkigdvrvvdsai  
gyndlv riveitthrdaynni tkqdvvl gdftrrnryn kavhdaanyvksvskstksdpskelkalnakvnas l sinnev  
kqnek inakvdkmntktvt  
tangtimydf tssqsi rniksigtigds vargshaktnftemlgkklakttnl arggatmatvpigkeavensiy r qae  
qirgdlii l qgtdddwlhg  
ywagvpi gtdktktfygafcsaievir knnpdskilvmtatrqcpmsgt tirrkdtdknklgl tledyvnaqilacse  
ldvpv fdayhtdyfkpynp  
afrkasmedgl hpnek ghevime likdyysfyd  
>tr|A6QDZ5|A6QDZ5\_STAAE  
mayglits l hsmtgrkivaqheynr l ldegmsk l ekmf iyhqeeiyahsakiky l ndsvedyl ty l ngrfsnmi l gh  
ngdginevkdaridntgyg  
hktlqdrlyhdyst l daf t k k vekavdehykeyrateyr fepkeqep efitd l spytnavmqs f wvdprtki iymtqarp  
gnhym l sr l kpngqfidr l  
l vknghgthnayryidgelwiysavl dsnknkfvr fqrtygeitygnemqdvmpni fndrytsai ynpvenlmi frre  
ykpterqlkns l n fvevrs  
addidkgidkvlyqmdipmeysdtqpmqgi tydagi lywytgdsntanpnyl qgfdiktke l l fkr ridiggvnnnfkg  
dfqeaegl dmyydl etgrk  
alligvti gpgnnrhhs iysigqrgvnqfl kniapqvsmt dsgrvkl p i qn pay l sdi tevghyyiyt qdtqna l d f p  
l pkafrdagwffdv l pghy  
ngalrqvl trnstgrnm l kfervidi fnkknngaw n fcpqnagywehipknitk l s d l k i v g l d f y i t t e s k r f t d f p k  
dfkgiagwi levksntpgn  
ttqvl r r n n f p s a h q f l v r n f g t g v g k w s l f e g k v v e  
>tr|A6QDZ6|A6QDZ6\_STAAE  
mivdnf skddn l ielqttsqynpi idtni s fyesdrgtgv l n favtknnrpl sissehvktsiv l ktddynvdr gayis d  
el tivdaingr l qyvipne  
flkhs gkvha gafftqngsnvvverqfsfni endlvsgfdgitk lvyiksiqdtieavgkdfnqlkqnmatdqtliakv  
ndsatkgiqqieikqneai  
qaitatqtsatqavtaevdkivekeqai fervneveqqingad l vkgnsttnwqsksl tddygkaiesyeqsidsvl sav  
ntsriihitnatdapektd

Tsompanidou\_et\_al\_Supplemental\_FASTA\_File

igtlekpgqdgvdgssfsdestytssksgvlvvyvvdnntaratwypddsndeytkykiygtwypfykndgnltkqfve  
etsnnaInqakqyvddkfg  
ttswqghkmtangqsivnlnnaqgdlyltagnyatrvpdlpgsvesyegylsvfvkddtnklfnftpynskkiytr  
sitngrleqqwtpnehks  
tvlfddggangvgttinlpepytnysillvsгыtppggviiegfgltaIpnaiqlskanvvdsgnggggiyecllsktssttI  
ridndvyfdlghtsgsgan  
ankvtitkimgw  
>tr|A6QDZ7|A6QDZ7\_STAAE  
mkitvndknevigfvntggIrnslvdddnnpikfkeefepkrkfvftngeikynsnfekedvpinasqqasdldeelr  
gmvasmqmqvaqvnvltme  
laqqnamltqqtelktnktntegdv  
>tr|A6QDZ8|A6QDZ8\_STAAE  
mfgftrheqdwrltrleendktmfekfdriedslraqekiydkldrnfelkrdkvedekneknaknirdikmwilgl  
igtifstiviallrvfgi  
>tr|A6QDZ9|A6QDZ9\_STAAE  
mgIpnpknrkptasevewalyiakniaidvpgsgmgaqcwldpnylldkywgfrtwgnadamaqksnyrgrdfkiirn  
tkdfvpqpgdwgvtggwa  
ghvniivgpctkdywygdqnywttnatgsppykikshyhdgpgggykyfvrppyhpekstpakpeddsddneknkkv  
piwkdvttikytissgevn  
ypeyiyhfivegnrrlekpgimi naqtmssveslynsrkkkykdveyphfyvdrhniwaprravfevpnepdyividv  
cedysasknefi fneiham  
vvavdmmakyeiplsienlkvdds iwrsml ehvwnm dngvppkdkyealekallnifknrekllnsitkptvtksrik  
vmvdknadianvrdsst  
anngsaskppqiitetspytfkqaldkqmarginpkksnawwanatraqtssamnvkriwesntqcyqmInlkyqgvs  
sslnkilkgkgtlnngka  
faeackkhineiyliahaflesgygtsnfangkdgvyfygigaydnnpnyamkfaknkgwtspakaimggasfvrkdy  
inkgqntlyri rwnpknpa  
thqyatai ewcqhqastiaklykqiglkgyifirdky  
>tr|A6QE00|A6QE00\_STAAE  
mykikdvetri kndgvdIgdigcrfytedentasi rigindkqgridlkahgltrlhlfmedgsifknepliiddvkg  
fi tykipkkvikhagyvrc  
klflekeekihvanfsfnivdsgiesavakeidvklvddaitrilkdnatdl skdfkeikdkvisyieknesrfkga  
kgdkgepggpgakgeagkk  
geqgagkngtvvs inpdtkmwqidgkdtidkaepell dkinianvegledklqevetikdttlndsktytdtkiaelvd  
sapesmntlrelaeaiqn  
sisesvlqqigskvstedfeefkqtlnlyapknhhnderyvlssqafkqqadslyqlksasqptvkiwtgteneyni  
yqkdpntlylikg  
>tr|A6QE01|A6QE01\_STAAE  
mifmegnfknvkkliyegeeytkvyagniqvkkpssfvikplpknkypdsieestakwtngvepnksyqvtienvrsg  
imrvsqtnlgssdlgisgv  
nsgvasknifsnpsgmlyvtisdvysgsptltie  
>tr|A6QE03|A6QE03\_STAAE  
mlmtknqaekwfdns lgkqfnpdgwygfqcydyanmffmlatgerlqglyaynipfdnkakiekygqiiknydsflpqkl  
divvfpskygggaghveiv  
esanlntftsfgqnwngkwtngvaqpgwgpvtrhvhydnpmfirlnfpnnlsvgnkakgiikqattkkeavikpk  
kimlvaghgndpgavgng  
tnerdfirkyitpniakylrhaghevalyggssqsqdmqdtaygvnvgnkdkdyglywvksqgydivleihldaagesas  
gghviissqfnadtidsi  
qdviknllgqirgvtprndlnvnvsaeininyrlselgfitknkdmwiknydlyskliagaihgpiggIvagnvkt  
sankknppvpagytldkn  
nvpkykeqgnytvavkgnnvrvgystnsritgvlpnnttitydgaycingyrwityiansgrryiatgevdkagnris  
sfkfsti  
>tr|A6QE08|A6QE08\_STAAE  
metlksnkarleylindmhrerndndvlmpssfedlwelyrglanvrpalpsdeylavqdamlsdlnrqhvtdlkdk  
pikgdni fvwggdittlki  
dai vnaansrflgcmqanhdcidni ihtkagvqvrldcaeiirqqgrnegvgkakitr gynlsakyi ihtvqpqirrlpv  
skmnqdl lakyl sclkla  
dqhslnhvafccistgvfafpqdeaeiavrtvesylketnstlkvvfnvftdkdlqlykeafnrdae  
>tr|A6QE12|A6QE12\_STAAE  
mqailnfi vdi lsqailvaliafiglivqkkpaatitsgtiktigflilsagadvvrslepfgkifqhafgvqgivp  
nneavslalkdfgttaal  
imvcgmivniliarftnlkyifltghhtfymaafilaiIvtshikgwltvivagalvlglimavlpallqptmrkitgndq  
valghfgsisyfaagavgg  
lfkgskssteekfpkglslflrestisisitmallyfiacIfagvsyvhesisdgqnfivfsligqvtfaagvfiiltgv  
rli laeivpafkgiseklv  
pnskpaldcpivfpyaqnavligffvsfitgvigmfllfvggvvilpgvvahfflgataavfgnarggikgaiagaaln  
gilitflpllpflgelg  
gaattfsdtdflavgivfgnavkymglfgailfiivgattillkgrqkeqq

Tsompanidou\_et\_al\_Supplemental\_FASTA\_File

>tr|A6QE18|A6QE18\_STAAE  
mckskillknifseesevkdleekynqdyealetfsfkeetyqsrlakktptksyfvctwtkdednynrpykieefady  
livaviddeingyflfpre  
llvekgi lasskyqgkmafrvypkwcnglnktagqtqkwqckyffey  
>tr|A6QE20|A6QE20\_STAAE  
mnivghhhi smytkdakrnkdfytnvlglr lveksvndnpsmyhlfygdevgtagtilsf feipnaghkqpgtetiyrf  
sllvpnqaalhyfekrlen  
ngikserlyy lgggevvfkdeddleii lvn dsfevphqwqh nayseipqayqilgigpvelrvrnaartveflenvlgy  
rkrdnksfdvltlapqgly  
sdfvvi eqqqrerpgrgyihhiavntpqmsdl daiykk lqqppqsngiidryffkslyyrhnsim yefateapgftid  
tpveqlgsq lnlpdfleae  
reqiesklhei  
>tr|A6QE27|A6QE27\_STAAE  
mtnyeqvndstqfsrrtflkmlgiggagvaigasgvgsmsfksmfntpedpekdayefygvqpgittptqkctnfval  
dlkskdrdaikamfkkwtv  
madrmmgdgtvgkpsnnp lmpvdtgesiglgaskltitfgisks lmkkig lsskipdafkdlphfpndqliddysdgi  
miqacsndsqs fhavhnl  
vrpfrdi vkrwaqsgf isakgketprnlmafkdgtinprknnqlkdyvfiddgwakhgtycvvriqihietwdrtale  
eqeatfgrkrhsgap l tgg  
kefdeidl kakkshgeyi idkdahtlakeantsil rrafnyvdgtddrtnfetgl lfi afqkatkqfid iqnnlgsnd  
k lneyi thr gasf l v lpg  
vskggy l get lfd  
>tr|A6QE28|A6QE28\_STAAE  
mvkhyltkfvam litaamvcsfgllksqaaeqsisdvysvitdaksalsnnsisndnkqkaieqvvsavkklsl ednse  
snavksdvrkledakandn  
qkdtlsgl tksliayee k laskdagskikllqqvdakdaamtkaikdknkaeleslnsl nqi wtsnetvirnydanqy  
gqieva l lqlriaihkspl  
dtakvshawttfksnidhvdkksntsandqyhvsq lndalekaikaiddnqlsdadaal thfietwpyvegqiqtkdgal  
ytkiedkipyyqsvldehn  
kahvkdglvdlnnqikevvghsysfvdmii flreglevllivmt lttmtrnvkdkkgtasviggaiaglv lsiilaitf  
vetlgnsgilresmeaglg  
ivavilmfivgvwmhkr snakrwndmiknmyana isngnlvllatiglisvlregvevii fymgimigelatkdfiigial  
aivilii fallfrfivkli  
pifyi frvlsififimgfkm l gvs iqklql l gamprhviegfptinwlgfypsyepliaqgayimvvailifkfk  
>tr|A6QE35|A6QE35\_STAAE  
mvnaltpkhlaekragfhe l ffdli fvyaiqkia hvilttqngsisad l fkyivms l flwlmwshqtfftnrfgqvtfk  
dvsfmmfnmfimvflsns l  
ydfektffpff lcvaimy l siglqyl l hirtgl dygdkr t c qafasvafvis fls fls l v l p qsihyipgflgvfiat  
glipfqy l v l spvnmmh l  
velfs l l t i i i fgevlvglassfsidhfsyiyi f qmilis l fgvwyi itenyinhk l t sigfr l syth l l inialgvi  
naaivfsnkn l ndlfein  
mmyisv l i fyig l w l i tpyfhneltnakyisys l gilvmsyivs l l fkgdhvmi isvsvatfcimliyfnqrlrnkhe  
>tr|A6QE51|A6QE51\_STAAE  
mlgmis l liestysqirlvalstrtklat l l kggadissikkpittht l hshistlaqlgin l kamqehvghsdykkn l  
eiythvtnqmakdmmnkfe  
rlgs  
>tr|A6QE61|A6QE61\_STAAE  
mlnad l kqqlkql l l emegnevfas l gsdkskelkd l l teitdmspr l s l seks l krtpsfsvnrpgeetgvtfagip  
lghefnslvlailqvsgra  
pkexsiidqikk legsfhfetfisl t c qkcpdvva l n l msvinpnithsmidgavfreesenimavpavflngeefgn  
grmtiqdilsklgstadas  
efenkepydv l ivggg pasgsaa iytarkglrtgivadriggqvndtagienfitvket t gsefssn laahidqydidam  
tgi ratdi ektdeai kv t l  
engavlesktvi iatgagwrkl n ipgeeql inkgvafcp hcdgpl fenkdvaviggngsgveaaidlagivnhvt l fefa  
selkadnvlqdr l rslsnv  
diktnakttevvgedhvtgiryedmntgeeh l l n l dgi f v q i g l l p n t s w l n d a v e l n e r g e i v i d r n n t n v p g i f a a g  
dvt dqknkqi i i smgagan  
aalnafdyiirn  
>tr|A6QE65|A6QE65\_STAAE  
mltkefaqrvel sekqvrkivqhleergyqlskteyrgreatdfkeediel fkd i adkvkqtnsyd l a f d e l e k e k d f l q  
vivkndkn l ptnqvag l  
ved l r l e i q k m r e e r h l l g q m m n q v h q q q e l k e l q n q l t s k i d s n s e l k a i q t s q e a i q e a q a s q a k a l a e s t n k v e k  
navtedkadskskvagvn  
tstdakt d tkaenagdgatnvdkedqisateaiekasveqskndnaaetsnkeatvdaeaqhdaeqqvaeahaeaskqa  
tsndsleakaendstasqs  
emsepkpqeekkgffar l fn l  
>tr|A6QE66|A6QE66\_STAAE  
mefkti qsvkdphyneal klydtk l n l s l t e d k r i i k r s l e n n k t e n d y v f i v g l e n d v v s l a t a h y e a t t n s a f l i y l

Tsompanidou\_et\_al\_Supplemental\_FASTA\_File

fakdlpnhdelmtqtllhqi  
ehelnllsnlvhsrsinflmmevpkepadltqdnqliiehrrqflyehqferqteidyihptndghtkkvdflfkknikl  
tkdiygtsvksnyi1kyvf  
angiareiyyalleemdlrkpf  
>tr|A6QE74|A6QE74\_STAAE  
mtkertrfssefklqmvrllykngklkneiirkydlkpsiiSNSIKqhqtgpfnhqdn1ksdekeliklrkevqhlkme  
dvlkqilkl  
>tr|A6QE75|A6QE75\_STAAE  
mqsqnsnlrtelki thkkqihflnymktnlnhfiysisnlrnaikdnalfhnyisqetktfqtslnpsiahs1khkai  
tmndqns1rtydvsvr1h  
lieqil  
>tr|A6QE79|A6QE79\_STAAE  
mkmkniakis1llgilatgvntttekpvhaekkpivisenskk1kaynqpsieykntvgyisfiqpsikfmniidgns  
nialigkdkqhyhtgvhr  
nlfiyvnedkrfegakysiggitsandkavdliaearvikedhtgeydydffpfkidkeams1keidfk1rkyli  
dnyg  
lygemstgkitvkkkygk  
ytfeldkklqedrmsdvinvtidrieikvika  
>tr|A6QE80|A6QE80\_STAAE  
mkmrtiaks1algl1ttgaitvttsvkaekiqstkvdkvptlkaerlaminitagansattqaantrqertpklekap  
ntneektsaskiekiSQPK  
qeeqktlnisatpapkqeqsqttesttpktkvtpstntppmqstksdtpqsptikqaqtdmtpkyed1rayytkps  
fefekqfgfmlkpwttvrf  
mnvipnrfiyki1alvgkdekkykdgpydni dvfi vlednkyqlkkysvggitktnskkvnkvelsitkkdnqgmisrdv  
seymitkeeis1keldfkl  
rkqliekhnlygnmgsgtivismknggkytfe1hkk1qehrmagnidnievnik  
>tr|A6QE82|A6QE82\_STAAE  
mkmtaiakas1algilatgtits1hqtvnasehkakyenvtkdiflrdyysgaskelkntvgyryskggkhyli1fdknr  
kfrvqi1fgkdi1erfkark  
npgldi1fvvkeaanrntvsvyggvtkknqdaydyinaprfaqirdegdgiatygrvhyiykeeis1keldfklrqyli  
qnfdykkf1pkdski1kvim  
kdgyytfel1nkk1qtnrmsdvidgrniekianir  
>tr|A6QE85|A6QE85\_STAAE  
mehmmkftviakafi1gil1ttsvmitenqsvnakgyekmnrlydtnk1hqyysgpsyel1tnvsgqsqgyysn11f  
nqqnqkf1qvfl1lgkdenky  
kekthgl1dvfapel1vd1dgri1svsgvtkknvksifes1rtpn11vkkiddkdgsid1efffiqeevs1keldfkirk  
1likkyklyegs1adkgri1v  
inmkdenkyeid1sdl1dfermadvinseqiknievnlk  
>tr|A6QE91|A6QE91\_STAAE  
mrenfk1rkmkvg1lsvvai1tmlyim1ngqaeasenqnal1sninvdnqekqnnvnqavqpqntnetskvanfvl1ndi  
kpgdts1qgtt1pnqfil1  
tidkdvssveds1dssfvmsdkdgnfkyd1ngrkivhnqei1evsssdpy1lgddeedeveetsteevgaeesteakaty  
t1pryekaye1jpeq1kek  
dghhqvfiepi1tegs1ikghtsvkgkval1sinnkfinfetnanggp1nkeeaksgsegiwmpiddkgyfnfdktrfdd  
1elkkndeis1l1tfapdded  
eal1ks1l1fktkvts1ledidkaetkydhtkvekvkvl1kdvked1hvdiei1ygslyhtekgk1il1dkegtkvikgk1tkfanav  
vkvdse1l1gegqefp1l1qvd  
ekgef1sfdvdhagfr1l1qnet1nftvvdpitge1l1sgnfvskni1di1yespeekadre1fdermentpayhkl1hgdkivgyd  
tngfpi1twfyp1l1gekkver  
kap1lek  
>tr|A6QE92|A6QE92\_STAAE  
midmkfkkv1vatamvgv1atgvvygnqadavysqng1vl1hddanfl1ehelsyidv1l1dknadqatkdnl1rsyfadkg  
1hsikdi1inakqdgfdvs  
kyehvk  
>tr|A6QE93|A6QE93\_STAAE  
mkykterreamgy1krfaly1svmili1fai1agcgknetkedskee1qkksfakt1dmpikn1led1ydegyrdsefkk  
gdkgmw1ty1tdfaks1nkp1g  
el1ddegm1v1n1drnrtakghyfvttfyrngk1pdeknykiemknnki1il1devkddk1kqk1ienfk1ffgqyan1kelrk  
yngdvs1inenvpsydvey  
kmsnkdei1vkel1rsryni1stekspil1kmhidg1lgssvgyrk1leidfskre1nsk1svief1syk1pakk  
>tr|A6QE94|A6QE94\_STAAE  
mrylkk1lawfisvi1ilgi1fi1igcdsssd1tgekakedskee1qkksfakt1dmpikn1led1ydegyrdsefkkgdkgmw  
t1y1tdfaks1nkp1gv1l1dneg  
mij1n1drnrtakgy1fvdt1ydnhensysknyrvemknnki1il1dkvedqk1kerienfk1ffgqyadfks1ksyngdv  
s1insnpsydakf1mnskd  
envkq1l1rsryni1ptekapi1kmhidg1lgssvgyk1leidfskeense1l1svvds1n1fqpakknkdde  
>tr|A6QE95|A6QE95\_STAAE  
mwsikri1gmytnvi1ilsvfi1igcdsssn1naenqredskee1qkksfakt1dmpikn1led1ydegyrdgefekgdkg1tw  
v1lysamvsqpkges1ksrg



Tsompanidou\_et\_al\_Supplemental\_FASTA\_File

mi1k1drnkrtakgsyirelkedknhdvqknekkypvklvnrivlikdvkdkk1kk  
>tr|A6QE96|A6QE96\_STAAE  
mmgy1kr1v1yivimvsvfiigcdkssdaekskedsketqikksfaktldmysiknlee1ydkegyrdgefekgdkgm  
wtiytdfaksnkqgelsne  
gm1y1drnr1takgyyfvrtfyrkdk1pdrknykvemknnki11ldkvedk1kqkienfkffsqyan1kelknysngd  
vsinenpvsydvkykmsnk  
denvkq1rsryniptdkspv1kmhidgn1kgssvgdrkleidfskrensh1svids1dyqpaktnkdde  
>tr|A6QE97|A6QE97\_STAAE  
mksikrig1cis11i1sifvtscdgdnkitgdsketqnqksfsk1dmpiknled1ydkegyrdgefkkgdkgmwtiyt  
dfakgnksdellddegmv1n  
1drnr1takgyyfvkkfyekdk1pdrknykvemknnki11ldkvedp1kkrienfkffgqyanfk1lenyngdvsinw  
npsydveykmsnkdenk  
q1rsryniptdkap1kmhidg1kgssvgykrleidfskegrdisvidy1sykpack  
>tr|A6QE99|A6QE99\_STAAE  
mkcfk1yifil1i1v1magcesnkitgdsketqikksfaktldvyptk1edfydkegyrdgefkkgdkgkwirsem  
telknenmvskgm1v1r1n  
nsrtctgeyfvrvkedsegkvysderkypvkmenkiit1kpiddekvvk1eiefkffvqygnfk1enykdgevtynp  
eapiysaqy1knsdynve  
q1rkrynit1kkap111kgsgn1kgssvgyknieftfvenkeenyiftdsinfnpsedk  
>tr|A6QEA0|A6QEA0\_STAAE  
mmgyikr1malymsvf11i1fivgcrnmkdeqkkee1qtnktdskeeqikksfektldmpiknlee1ydkegyrdgefkk  
dkgmwtiytdfaksnkqgg  
1snegmv1y1drnr1takghyfvktfynkgkfpdrknykvemknnki11ldkvedt1kkrienfkffgqyan1kelkny  
nngdvsinenpvsydakfk  
msnkdenkq1rsryniptdkapv1kmhidgn1kgssvgykkleidfskggksd1svids1nfqpakvdedde  
>tr|A6QEA3|A6QEA3\_STAAE  
m1srkyid1kai1qntestsaiskasyevenannng1skrdvinqfnd1kkmkf1psn1eyvdsytds1tgvttsaf1n  
kdtgkvt1gmtgn1qdea  
fk1kegefsrqnvt1a1etvkdgyad1kilyspasdqnyryantqefinkikskydidfitghs1ggrdav1lgmsngi  
pni1vynpapisits1n1pn  
spdgkr11elyknykgn1rfvaenda1ten1kkykhyvffgndkvfngkghemegf1teeqkaikke1kk1qgyaee  
nksfvknsnna1sk1asi  
e11ranmm1ttnggg1sssqqv1les1ta1tiaqsf1sq1iddein1q1kkmynekkkkf1gknwedaqkagkavged1svngv  
1na1degqvnessm1vrepe  
qm1sakerq1st1gssvsnyimrv1sineivdkdqv1asqigg11  
>tr|A6QEA6|A6QEA6\_STAAE  
m1fv11v1yvtgiaf11svfgsktegl1stkh1tyt1gisa1itia1f1s1g1y1aiqy1taalyg1  
>tr|A6QEB6|A6QEB6\_STAAE  
mvr1vnh1leaasngq1vidghd1tnysdkmmrd1kkdigm1fqhfn11nsatvfknvamp11skskteikqrvtem1e  
fvg1sdkkdqf1pde1sggq  
kqrvaiara1vtnpki11cdeatsa1dpattasi1t11knvntf1gitim1themrvikdicnr1vavmekgkvvetgtv  
kev1shp1ktti1agnfv1stv  
iqtepst11rr1nde1qvgdfkdyki1fveetqvtqpi1ind1iq1c1grevki1f1ssmsei1qgntvcymw1rfnmdqqfedt  
ainqyf1kekni1qfeevh  
>tr|A6QEC2|A6QEC2\_STAAE  
mtnndt1im1rhyvpqdysm1leafq1sesd1kfvt1peenitaamsdnerypivvmdgrqcva1fft1hr1gkgvapfsdnqd  
av1ffrsfsvdgr1yrnr1gig  
kvvmek1asf1tstfqd1nei1vtvntdnphama1yrqqgyqymgds1mfvgrpvh1maltik  
>tr|A6QEC6|A6QEC6\_STAAE  
mhnek1ikg1ydyreehdacg1gfyanmdnkrshdi1dkslem1r1rdhrgvggadgitgdgagim1teip1faffkqhvt  
fd1pgegeyav1g1ffsker  
i1lgsehev1fkkyfegeg1s1ilgyrnvpvkdaiakhvad1tmpvi1qqvfidi1rdiedvekr1flarkq1efystqcd1el  
yft1srkt1vykgw1r1sd  
q1kkvytd1sdd1yqsk1glvhsrfstntf1pswkrahpn1rmlhng1eintikgnvnmr1raqhk1liet1fgedqhk1vfqi  
vdedgsd1sai1vdna1lef1s  
1amepekaam11ipepw1lyneandanvrafeyfysy1mepwdgptm1sfcngdk1lga1ltdrng1rpgryt1tkdnf1v1fs  
sevgv1dv1pesnva1fkgq1  
npgk111vdfkqnkvi1ennd1kgai1age1pykawi1dnhkvd1dfeni1qyqdsqwkdet1fkl1qrqfaytkeeihkyiqe1  
vegk1kdp1gamgydapi1av  
1nerpes1fn1yfkq1lfaqvt1nppi1dayreki1vtse1s1ylgg1egn1lapdetv1driq1krpv1nesh1aa1idqehfk1ty  
1stv1yegd1leda1ealgre  
avnavk1ggaqi1v1lddsg1vdsngfamp11l1aishvq11likad1rmsts1vaksg1etrev1hvac11laygana1ivpy1a  
q1rtveq1t1tegl1ggtv1d  
nvktytdv1segi1kv1makmgi1stvqsyqgaqi1feaig1shd1vidryftgtqsk1sgisidq1daenkarqqsddny1as  
gstf1qwrq1ggq1h1hafn1pes  
i1f1l1qhackendyaq1f1kayseavnkrtdhi1rh1lefkactp1ididq1vepv1sdivkrfntgamsygs1saeahet1laqam  
nq1lgksns1ggedakry  
evqvdgsnkvsai1kqvasgrf1gvt1sdy1lqhakei1qikvaqg1akp1g1eggq1pgtkvypwiaktrg1stpgig1isppph1di

Tsompanidou\_et\_al\_Supplemental\_FASTA\_File

ysiedlaqlihdlnkankd  
adiavklvsktgvgtiastgvakafadkivisgydggtagspktsiqhagvpweiglaethqtlklnlrsrvkletdgl  
ltgkdvayacalgaefgf  
ataplvlvcimmrvchkdtcpvgvatqnkdlralyrgkahhvvnmfhiaqelreilaslgkrvedlvgrtdllqrs  
tlkanskaasidveklcp  
fdgpntkeiqqnhlehgfldtnlyevtkpyiaegrrytsftvneqrdrvgtgseiskqygeaglpentinvytng  
agqslaayapkglmihhtg  
dandyvgklsgggtvkapfeerqneiagnvsfygatsgkafingsagerfcirnsqvdvvvegigdghleymtgghv  
inlgdvgnfvggmsggi  
yvipsdveafvennqldtlfstkiqhkeekafikqmlleehvshtnstraihvlkhfdriedvvkvipkdyqlmmqkih  
hkslhndeamlaafydd  
sktidakhkpavvy  
>tr|A6QEC8|A6QEC8\_STAAE  
mkymavkredvkaivtaiggkenleaathcvtrlrllvldeskvdkdaalsnalvkgqfkadhqyqivigpgtvdevyq  
fidetgaqeaskdeakqaa  
aqkgnpvqrlikllgdfipilpaivtagllmginnlltmkgllfgpkaliemypqiadisniinviastafiflpaligw  
ssmrvfggspilgvlgl  
lmhpqlvsqydlakgniptwnlfgleikqlnyqqvlpvliaayvlakiekglkvvhsikmlvvgpvaallvtgflafi  
iigpvaligtgitsgvtf  
ifqhagwlggaiygllyaplvitgllhmfllavdqllmgsslggtylpivaisnicqgsaafgawfykrkmvkeegla  
ltsicisgmigvtepmfgv  
nlplkypfiaaistscvlgaivgmnnvlkgvvggpafisiquefwpylivtaiaivvpciltivmshfskqkakeiv  
ed  
>tr|A6QED5|A6QED5\_STAAE  
mkqpilnkleslngeeaishvpghknmtighlsqllsmtmdkteipglldlhpeevilesmkqvekhsdydayflvngt  
tsgilsviqsfsqkkgdil  
marnvhksvlhaldisqgeghfiethqspntnhynkvnlsrlnndghklavltypnyygetfnveevikslhqlnipvli  
deahgahfglqgfpdstln  
yqadyvvqsfhktlpalmtgsvlyihknapyretieylsyfqtsspsylimaslesaaefyktydstvffdkraqlic  
lekkgfemlqvddplkll  
kyegftghdiqnwfmanhiyleladdyqalailplwhhddtylfdslrkiedmilpkksvskvktqllttegnykpr  
feyvtwcdlkkakgkvlr  
hivpyppgipiiikgetitenmielvneyletgmivegiknnkilvede  
>tr|A6QED6|A6QED6\_STAAE  
mrmnkmsafitfegpegsqkttvinevyhrlvkdydvimtrepvgvptgeeirxivlegndmdirteamlfaasrrehlv  
lkvipalkegvvlcdryi  
dsslayqgyargigveevralnefainglypdltiylnsaevgreriiknsrdqnrldqedlkfhekviegyqei hne  
sqrfksvndqplenvved  
tyqtiikyleki  
>tr|A6QEF0|A6QEF0\_STAAE  
mkiinttripealgyshatvngmvytsgqiplnidghivsadvqaqtkqvlentkvvleeagsdlnsvakatifikdm  
ndfqkinevyggyfnehkp  
arscvevarlpkdvkveielvskikel  
>tr|A6QEF2|A6QEF2\_STAAE  
mfmrhaiilaagkgtrmkskkykvlhevagkpmvehvlesvkgsgvdqvvtivghgaesvkgghlgerslysfqeeqgt  
ahavqmakshledkegtti  
vvcgdtplitketletliahedanaqatvlsasiqqpygygrivrnasgrleriveekdatqaekdineissgifafnn  
ktlfekltqvkndnaqgey  
ylpdvlsliindggivevyrndveeimgvndrvmlsqakamqrrtnhyhmlngvtiidpdstyigpdtvigsdtviep  
gvringrteigedvviggy  
seinnstiengaciqqsvvndasvgantkvgpfaqlrpgaqlgadkvgnfveikkadlkdgakvshlsyigdavigert  
nigcgtitvnydgenkft  
ivgkdsfvgcnvnlvapvtigddvlvaagstittddvpndslavararqttkegyrk  
>tr|A6QEF8|A6QEF8\_STAAE  
mmahtitvlgnygidlplgiyflktqdkvyartldhpvieslqdeltfqsfdhvyeahnqfedvyidivaqlveaa  
nekdivyavpghprvaett  
tvkllalakdntdivkvlggksfiddvfeavnvdndgftlldatslqevtlrvrthtlitqvysamvaanlkitlmer  
ypddypvqivtgarsgdg  
nvtcplyelhdnafnnltsvfvpkiiiststylyhdfdfatevidtlvdedkgcpwdkvqthetlkrylleetfel fea  
idneddwhmieelgdillq  
vllhtsigkkeyidikevitslnakmirrhphifgdanaetidlleiwskakdaegkqprvkfekvfaehflnyekt  
kdksfdeaalqkwlekges  
nt  
>tr|A6QEG2|A6QEG2\_STAAE  
mlteediqnickelgaqltkdyqgkplvcvgilkgmsamfmsdlirikridthlsidfmdvssyhggttestgevgiikdlgss  
ienkdvlidietgttl  
ksitelqsrkvnslieivtlldkpnrrkadiakayvgkkipdefvvgylldyrelrynlpuyigtlkpevysn  
>tr|A6QEG6|A6QEG6\_STAAE

Tsompanidou\_et\_al\_Supplemental\_FASTA\_File

mtkktkimgilnvtppsldsggkfnvesainrvkami degadiidvggvstrpghemvsleemnrvlpvveaivgfdvk  
isvdtfrsevaeacklglv  
dmindqwaglydhrmfqivakydaeiilmhngngrdepvveemltsllaqahqakiagipsnkiwldpgigfaktrnee  
aevmarldelvataypvl  
atsrkrftkkmmgydttpverdevtaattaygimkgvravrvhvelnaklakgidflkenenarhnls  
>tr|A6QE19|A6QE19\_STAAE  
mhivakkvdkvklqipagkanpappvgpalgqagvnmfckefnartqdqagliipveisvyedsftfitktpapv  
llkkaagiekgsgepnktk  
vatvtnqvreianskmdlnaadeeaamriiegtarsmgivve  
>tr|A6QE1|A6QE1\_STAAE  
mirvldwfglannkenktiqlrrylhqypelsfeefqthdyivnqlsqlsdietetpigrngikatfkglggtptialrad  
fdaIpveelndvpykskn  
gcmhacghdghtailtvaeildekhlllegnvvlifqygeimpqgsqemidagclenvdriyghtlwsgyptgtihsr  
agaimaspdefsvtfkgrg  
ghgakphetidpivmaefilsaqkiisrtidpvkqavlsfgmiqagttsvipdqafckgtvrtfdsdiqnhvmdkmdk  
llqglaiandinydlnyik  
gylpvhnekayqvikeatndlhvrfnesdlmmigedfshylkvrpgaffltgcgneskgitaphhnpkfdidekslkya  
vavflkiiieleqvfktn  
>tr|A6QE9|A6QE9\_STAAE  
mvqysmsiltfgdvnmkpfiaiepgivgksslakhlsqldfyeekeiitenpflsdfyediskwsfqtemfflcnry  
kqfqdvtqlnqgvvsdyhi  
hknkifakntlssvefqkfskiydiiltdmimpnmiifldadldvlksriaknrnsfehqi edeyllkllkkyreyyesl  
qsnqsnvvlidttisidflk  
neqdyedilhiilpmigditne  
>tr|A6QEL2|A6QEL2\_STAAE  
mkgliiigsaqvnshtsalaryltehfkthdieaiefldaekplnqldfsgttsideikqnmkdllkekamaadflilgt  
pryhgsysgilknaldhln  
mdyfkmpvglignsggissepshlrivrsllgiavptqiathdsdfaknedgsyylndsefqlrarlfvdqivsvf  
nnspeyhlk  
>tr|A6QEL6|A6QEL6\_STAAE  
mnyilgtileskitgvekaqinrlklfkqhgiisskcvyvkwnpysytyakqhqiendvftmydyfqainykktkqvni  
qywekscrytlkfvnsnd  
vriydeeqfvmahfldkqyhllyvnyfdhkrkvrkrellydgrgflscsrilegqrivlenyytpngeivi qkyfddi  
kgkntltkvilnedghqqf  
fdtedelvyqfhlqcknndqiildrphe lgnviaglnqsipvivvlhsthlsagangiks fyktvfnnltrykaivvst  
ekqcqdisqyenkipvin  
ipvgyvanlkyqfdingkeknhiisiarlvenkqikhqievikqlvtkhpniqlniyghnglseyrqlvedyhlsehvk  
fhgfkthineeiakaelml  
stskmegfglailleslsvgtpvisydvdygpse liqdgfngylvpqgdinqmvekvdqllnntqklqqfsinsiesaqy  
nattistkwqniln  
>tr|A6QEL8|A6QEL8\_STAAE  
mfyikttnfdi yndssysinydqiivelriliydsqtsnekiykrdiql  
>tr|A6QEM1|A6QEM1\_STAAE  
mnvlepikqevidl lasfehkpvy l hvettngayan hfdqrvfnagtflrniqitythaqlkgnkepyriglkl sngg  
wvyvqglthfevnehdefl  
iagfnyegqlaaalqiserpfnl  
>tr|A6QEN3|A6QEN3\_STAAE  
malkkvltiagsdtsagagmqadlktfqeldtygmvaltaivtmdkdtwshdvtplpmdvfekqletalsigpdaiktgm  
lgtteeikrageveyeasna  
qyfvvdpmvckgedevlnpgnteami kyllpkatv vapnlfeagqlsglgklnsiedmkaatiifdkgaqhviikggk  
aldqkdsydl ydgqtfyq  
ltdmfqqsynhgagctfaaattaylangkspkeavisakafvasaikngwkmdfvgpvdhgaynr iehidvevte  
>tr|A6QEN5|A6QEN5\_STAAE  
mlnretliarieqelvqaeqahdhdfekhmyaihiltslyastsntphigeqqmnrri anhnqmpqsqitqpthqvtva  
eieamggkvnthshhknk  
sysqpsnqqrlatdddigngesifdf  
>tr|A6QEN7|A6QEN7\_STAAE  
mekknkqidrgdlkqnlskfvwaiaygscigwgafilpgdwiksgpiaasigivigallmiliavsygalverfpvsg  
gafafsflsfgrvsvffss  
wfltfgyvcvvalnatafslvkflldpvl nngklytiagwdvyitei iiatvlllvfmlvtirgasvsgslqyyfcvam  
vivvllmffgsffgnnfal  
enlqplaepskgwlvsvivsvvapwayvgfdnippqtaeefnfapnktfkli vsvllaaslyvvmilytgwlstshqsl  
ngqlwltgavtqtafgyig  
lgvlaiaimmgiftglnflmsssrllfsmgrsgimptmfsklshkyktpyvaiiflvgsliapwlgrtaltwivdmss  
tgvsiaiyfictlsaaklfs  
ynkqsntyapvyktfaiigsfvsfifla1llvpgspaaltapsyiallgwliiglifviryplknmdndelsrlilnr  
senevddmieepekektk  
>tr|A6QEN9|A6QEN9\_STAAE

Tsompanidou\_et\_al\_Supplemental\_FASTA\_File

mdinseeykqevlikdvmlaarillesgaegtrvedtmtriaklgysefsntvtntviqftlhsefprifritsrdt  
nlikisqankisrqitnne  
islaeaktqlekiyvakrdsslpfkgfaaamiamsflylqggrlidvltailagslgylvteildrklhaqfipefigsl  
vigiiavightliptgdla  
tiiiavmpivpgvliitnqidlfghmlmfttkslealvtafgigagvgsvlilv  
>tr|A6QEQ6|A6QEQ6\_STAAE  
mlcesrqiynpkyrvi rynnayfmvdlvstwityffpminwflpkkyakiseneferlnivepvknnvfwpvagssvlf  
giilrkygnffnvgfekql  
aitvffimligmlifyfylnkkltlki fntnvnknrvvliptfkqglivfayfflgsasiftltillttesqniifl  
twvii tmfffflvnmasign  
knvhilrine  
>tr|A6QEQ8|A6QEQ8\_STAAE  
metllceteninkpkyriikydeylmidlvsiwla lffpminwlipkkyvkisekdfetlnivktakinsfwpvagst  
vlfvgmlrryshlfivkye  
ysivilicciilgifflyi  
>tr|A6QEQ9|A6QEQ9\_STAAE  
mlhhntryfsvflylnqklklqiynenknksnkiiifptlkslclsivlyiylgggsfftiymlltievqniilfitlfv  
iflffflnmcsl ydnkvh  
vlfksngiekf  
>tr|A6QER1|A6QER1\_STAAE  
mlceskiinknqkyriikyndeylmvdii stwislffpfinwfpkeyvki sreefenlnivkpakknvfwpvagssal  
lgvalrkythllidiqdkk  
lviaicctfigilifyvrlikksslniyntknkrskifliptlknvcftlfgyilfggltmlfldall smsyqniivyf  
vwiavimgfflvnialiid  
knhvilknq  
>tr|A6QER2|A6QER2\_STAAE  
mkqfvnl gksdvevfpi algtnavgghnlypn ldeeqgkdvvrqainhginlldtayiygpersee lvgevvkeypreqi  
kiatkgshefdengevhqn  
nqpeylkqqvenslkr lqt dyidlyyihfpdnntpkdavaalqelkeqgkikaigvsnftldqlkeankdgyvdvqle  
ynllhreneavlgycvdhq  
itfipyfpl asgilagkydentkfsdhrtrrdfkpgvfeenvrvkalesiaaahqtsianivlafyltrpaidviipg  
akraeqvvenikaadivls  
ddeiqyidel fpied  
>tr|A6QES9|A6QES9\_STAAE  
miwvvcfdttfnlansivnsflrpklm lffnlnhqinsknyviranis  
>tr|A6QET0|A6QET0\_STAAE  
mllyfyigvlgvmlipiqtsvnrslytkspfytsfifsvgticliilni inpevftihfynnqsfnytwvvgllg  
vsfltg nllllpklgatlt  
viatvagqiimgviid tfglfgatihdfnlikaigvlllvigivimnqfnknllltdqy llfwlllgfifgffppiqt  
tinsalashthspafasl  
sftigsialliltai fnrslklktshlkfgklkpiyftggilgmavtaniilmphmgaa lttligmfgqilmgilidhf  
glfgspkiamtsrktigll  
ciltgii llrlf  
>tr|A6QEU5|A6QEU5\_STAAE  
mr ltmnylnsnffnttiqlniyiivivaacyiaihqyrhkpvl nyl dvilnyipvl thefghvlnk laggrakdlvivts  
prerqqt lqggfai tqsrh  
lagqw lttiggyfmpimlliglasshyqip sffiftyllifiyfliltsrkgs pivvitlisimlyfilkdeniveiq  
lvtmsyqyilgiirrssti  
>tr|A6QEV0|A6QEV0\_STAAE  
mrfti iiptcneati rql lsisieskehyrilcidggstdqtipmierlqrelkhisliqlqnasiatcinkglmdikmt  
dphdsdafmvikptsivlp  
gkl drltaafknndnidm vigraynyhgewklksadefikdnrivl teqpdll smmsfdgklfsakfaelqc detlan  
tynhailvkamqkatdihl  
vsqmi vgdndid thatsndedfnryiteimkirqvmemlllpeqrllysdmvdri lfnnslykymnehpavthttiqlv  
kdyimsmghsdyvsqnmfd  
iintvefigenwdreiyelwrqtliqvginrptykkfliqlkgrkfahrtksmlkr  
>tr|A6QEV7|A6QEV7\_STAAE  
mkflsyiigls mllitl fislidgakiqastieaifnynpsnqqqniineiriprniaavivgmalavsgaiiqgvt  
rngladpaliglnsgasfa  
lal tyavlpntsflimfagflgailggavlmigrsrrdgnpmriilagaavsamltalsqgialafrlnqvtvftwa  
ggvsgettwhlkwaip lig  
ialfiiltiskq ltilnlg eslakglgnvtmirgicliami lagiavaiaqqvafvglm vphiarfligt dyakilpl  
tallggilvlvadvia ry l  
geapvgaiisfigvpyflylvkkggrsi  
>tr|A6QEW1|A6QEW1\_STAAE  
memkimpkiilvshskeiasgtksllkqmagdvdiipigglpdgsigtsfdi iqevl tkleddalcfy digsemnvdma  
iemydgnhrvlkvdapive  
gsfiaavklsiggsiddalaeikqsf

Tsompanidou\_et\_al\_Supplemental\_FASTA\_File

>tr|A6QEW6|A6QEW6\_STAAE  
mahii rrvsikdvenfism laniydespymfytpgeydp svtsaskql eeyitsphkvi fvaesdeqlvgfafvnttpfq  
rikhvaki dlvkkllyqhr  
gigqall daimawc lnnqihrie anvp lnnqpa lelfksadfqiegv lkdkl fidgkyyddymmaki ln  
>tr|A6QEX1|A6QEX1\_STAAE  
malimtfnei ifknfrqnlshyai ylfslitsvlyfsvalkyahkl nmtesy piikegsqvg syflffiiia fllyan  
vlfikrrsyelalyqt lgl  
skfnii yilmleq lli fi itail gi iigi fgsk lllmivft lllgikekvpi ifslravfet lmligvay flt saqnf ilv  
fkqsisqmsknnqvketnh  
nk itfeevv lgi lgi vli ttgyyl snivqyydsigt lmf illstvigay lffkssvslvfkmvkkfrkgvisvndvmfs  
ssimyrikknafsl tvmai  
isaitvsv lcfaa isras lsseiky taphdvtikdqkanqlase lnnqkiphfnykevihtklykdn lfdvakepyn  
vtitsdkyipntd lkrqga  
dlfvaegsikdlvkhkhhgkai igtkkhhvnik lrdinkiyf mtdvd lggptfv lndkdyqe irkytkakhivsqfgfd  
lkhkda lalekaknkvd k  
sietrseai sissl tgi llfvts flgit flia vcciiy ikqidetedelenysil rklgftqkdmargl kfkimfnfgl  
plvialshayftslaymkl  
mgttnqipvfi vmglyi cmyavfavtaynshskrtirhsi  
>tr|A6QEY0|A6QEY0\_STAAE  
mkvkyidkrhwr r lidreytekvnnr fkgi iglvtmkkvr dplevtvvgqni ivaddnykw lqilpekkrysitvmfd  
nkg npleyyfdinikni tq  
kgnactvd lcl dvlalpsgeye lvdedd lmfaleseqitkkqfheaymia hqimael endfkgfqqkimycfnkinakaq  
knhqkpqnkt niekskqik  
pkqynqtknhqqkkn  
>tr|A6QEY5|A6QEY5\_STAAE  
mrtlnkdehnyikqianihet llsqvesnykctkl sialryemicsrlkhtndkiyiyenegqliafiwghfsneksm  
iellyvepqfrklgiatql  
kialek waktmnakrisntihknn lpmisl nkd lgyqvshvkmkydid  
>tr|A6QF07|A6QF07\_STAAE  
miitekrhelileelshkdf ltlqel idrtgcsastirrd lsklqqlgklqrvhggam lkenrmvean lteklatn ldek  
kmiakiaangindneclfi  
dagsstle likiyiqakdi i vvtng lthveal lkkgikt imlggqv kentlatigssameil rrycfdkafigmngl die l  
gl ttpdegealv kqtams l  
anqsfvlidhskfnkvyfarvp llestti itseka l nqes lkeyqqkyhfiggt l  
>tr|A6QF25|A6QF25\_STAAE  
mkisyqgdgai vvaiekevsk lted lltlrsylieqny pfi eivpsesdm mivydardmikhhniqspflymkalies  
ihlnikhdfnqqd lieipi  
vygskygpd lesllkhykik letfielhskaqyfvsmmgyspgfpyl tgl nkklyinh tskqkkfipagsv vlegkkcgi  
vttdtindwlvigytp lsl  
fnpkedfar lklgdnikfrpinene levga fkdvnhn  
>tr|A6QF28|A6QF28\_STAAE  
mgmeaykiehlnksyadkti fdn ldl si segekiglv g ingtgkst lllkviggid dftanvmhpnqyri ryssqkdln  
edmtvfdav lssdt tlr i  
ikqyeqavqayaddqsk lfkrmmdaqdamqdhdawdynaeikti lsklgihdttkyike lsggqkrrv lakt lieqpd  
lllldeptnh ldfesi swl  
inyvkqyphtvl fvthdryflnevstri e lnrklasy pgnyesyiemraerevt lqkqqkqralykeelawmragak  
arttkqqarinrfd lene  
vnqqykddkge lnlaysrlgkqvfe led lskaindkvl feh lte i iqgerigvvgp ngagktt llnilsgedqqfegkl  
ktgqtvkvayfkqtdetld  
rdirmidy lreenei akekdgtsvsitql llerflpsathgkkyk lsggeqkrly lllrvhqpnl llldeptnd l dte  
tlti ledy ihtfggtvitv  
shdryflnkvaqsywfihdgqmekiigt fedyesy ksk ldknkst l kqqsksst tvrkng lsykekleyeq lmkrieqa  
evrmeeidv lmi easadyg  
kikelneekeq lei qydl ditr wseleeikeqq  
>tr|A6QF34|A6QF34\_STAAE  
mlgptptci vcrnwr snfsm l gprqla lsv eignpi slcwgpavnycqysv vvskt  
>tr|A6QF40|A6QF40\_STAAE  
mektkt llnlrtrwvilmktmeekky nhie lnevtkrredgffsl ekdqealvay leevkdktiffdteier lrylvdn  
dfyfnvfdiyead lieit  
dyaksipfnfasymsaskffkdyal ktndksqyledynqhvaivaly langnkaqakqf isamveqryqpatptflnagr  
arrgelvscfllevddsln  
sinfidstakqlskigggvain lskl rargeaikgikgvakgv lpi aks leggsyadqlgrrpgagavy lni fhydvee  
fldtkkvnaded lrlstis  
tgli vpskffdlakegkdfymfaphtvkeeygt lddid lekyyddmvanpnvekkknarem llnliaqtqlqsgypylm  
fkdnanrvhpsniggi km  
snlctei fqlqetsi indygiedeikrdi scn lgs lni vvmesgkfrdsvhsgmdal tvvsdvani qnapgv rkansel  
hsvglgvmlnhgylaknki  
gyeseekdfani fmmmmnfysiersmeiakergikyqdfeksdyangkyfefyttqefepqfekvrelfdgmaiptsed

Tsompanidou\_et\_al\_Supplemental\_FASTA\_File

wkklqqdveqyglyhayr1  
aiaptqsisyvqnatssvmpivdqiertrygnaetfypmpflspqtmwyyksafntdqmkliidiatiqthidqgistil  
yvneistrelarlvvyah  
ykglslyytrnkllsveectscsi  
>tr|A6QF59|A6QF59\_STAAE  
mdnvtrykitesqsssqayyhlsfelseqqsyasehivrairkrqtilliyavtgagktemmfqgiqyariqgdniaivs  
prvdvvveiskrikdafln  
edidilhqgsrqgfeghfvcvthqlyrfkqhfdtifi devdafplsmdknlqqaalkssskvehatimtatppkqllse  
ipheniiklparfhkkslp  
vpkyryfklennkikqkmlrylqdqinnqrytlvffnietmiktfsvykqkitklyvhsvdvfrfekveqlrnghfdv  
iftttilergftmanldv  
vidahqytqeaaliqagrvgkrlcceptgkvlfhegvsmmniqakkeiqrmnklaalkrgwide  
>tr|A6QF66|A6QF66\_STAAE  
mvehypfkishdfepqgdqpaakeivegikagkrhqtllgatgtgkftmsnvikevgkptliiahnktlagqlysefk  
effpenrveyfvsyydyq  
peayvpstdafmekdasindeidqvrhsatsalferddviiiasvsciylgnpeeykdllvsvrvgmendrse11rk1v  
dvqytrndidfgrgtfrvr  
gdvveifpaskeelciveffgdeidrirevnyltgevlkerehfai fashfvtreeklkvaieriekeleyerlkelrd  
enkllaqrlqqrnyd1e  
mmremgfcsgienysvhl1lrplgstpytll dyfgddwlvmideshvtlpqvrngmyngdrarkqvlvdhgfrlpsaldnr  
plkfeefeektkqlyvysa  
tpgpyeihtdkmveqii rptgll dpkievrptenqidllseiqrternervlvttl1tkkmsedl1tymkeagikvny  
lhseiktlerieiiirdlrm  
gtydvivginllregidipevslvvlldadkegflrsnrsligtigraarndkgevimyadkmtsdsmkyaidetqrrrei  
qmkhnekhgipk1inkki  
hd1isatvendenndkaqtvipkmtkkerqktidniekemkqaakldfekatelrdmlfelkaeg  
>tr|A6QF70|A6QF70\_STAAE  
mrkflskthhhtnplwrvyrlvkfskvfnviiiefskfipsmvlkrihykqllninignqssiaykvmlidifypeliti  
gsnsvigynvtillthealv  
defrygpvtigsntliganatilpgitigdnvkvaagtvsdkdipdngfaygnpmyikmirr  
>tr|A6QF71|A6QF71\_STAAE  
maqknnnvi pmtfddafyrkmakqkfkqreykraaeyfekvlelspddmeiqidyaqclvqlgiakkaehl fydniinyr  
h1edsfyelsqlnievnep  
nkaf1fginyvisddqdyrdeldqmfvdvkyqseeqieleaqlfvvqilfqylfsqgrlkdaknyvlhqpqevqdhrrvr  
nllamcylylgeydrakal  
yeallqedstdiyalchytlllyntkeneqyqkyliklnkvvpmnddesfklgivilsy1kqyrasqqllyplykkgkfls  
iqmynalaynyyy1geede  
shyywklkqiskveighapwvienskevfdqhilpl1qsddshyrllygifflldq1ngkeivmtesiwqvlennnyek1  
yltylvqgl1lnkldfihr  
gll1lyhnel fvsendvmvawinqgeliiaekvd1tdvepyigafiylyfknqprnvtkkqittwlgitqy1nkmiel  
1si  
>tr|A6QF78|A6QF78\_STAAE  
msnqnydynknedgskkkmsttakvvsiatvllllgg1vfaifayvdhsnkakermlneqkqeqkekrqkenaekerkkk  
qeekeqnel dsqanqyq  
1pqqnqyqyppqqqaptkqrpakeendkaskdeskdskddkasqdkssddnqkktddnkqpaqpkppqqptpkpnnnq  
nnqsnqqakppapqqnsqs  
ttknqnnandk  
>tr|A6QF79|A6QF79\_STAAE  
mkfyrqcelgwgpnivklappnfyrc1lgwgpniekldfqflgamevgvgrnrkfceniisvpphsk  
>tr|A6QF86|A6QF86\_STAAE  
madrtnkeiktgrfiatasivfsilliihyfvsldnatakalln1tnqntsdkaidyilnsfrftgimiyilaylagfitf  
wnrhtyvwfmafayvsns  
1ftlin1sitiqaikaahgay1tlpiliviigsvalaiym1vvsirkstfnr  
>tr|A6QF91|A6QF91\_STAAE  
mqiiktkskks1s1sktikmatmvccemh1ttsfivs1stiadcvnrhidsneniktr1is1  
>tr|A6QF93|A6QF93\_STAAE  
mkkvmgillast1ilgacghhqsakkestshkkkendneelneelkefkskknmdikikgdtivsdkfeakikepfiin  
ekdekkyiafkmeitakk  
ddkd1npssishdyini tqddkntvnlrdgyllsdkkykdwtehnqdqikkgktaqamfiyelrgdgnin1nvhkysed  
ktvdsksfkfslk1tedfs  
hraetreevekkekefeeykkeqerekekekqkdddhs1g1dev  
>tr|A6QF94|A6QF94\_STAAE  
miniisaigsigt1imalfyfvsvsqlyqmki1sflpalgnqillereedq1nimnsateehhkhdyiklyn1gggaak  
kiaiev1lgkdkviqkkyv  
hilpskegym1pinknyeelertiennghad1nvrmtyyhnvsrkqvevilkgqidrfntynkeiydlqfi  
>tr|A6QF95|A6QF95\_STAAE  
mqirqihqhd1faqdq1irtafensehygnese1vdqir1sdydnt1el1vav1qnevvggh11sevy1dneaqreig1  
mlapvsvdihhqngigkr

Tsompanidou\_et\_al\_Supplemental\_FASTA\_File

liqalereailkgyfnfsvlgwptyyanlgyqrasmydiypydgipdeaflikeikvnslagktgtinytsafeiki  
>tr|A6QFA5|A6QFA5\_STAAE  
mslhfailfwlali flvaatfilvlmkktskeskkesylsftiilyifgfailytffigvl  
>tr|A6QFB4|A6QFB4\_STAAE  
mqsiknesfksvinsdtpvkvfeagwpcdramdlwidpiveqyndyqwytvnrdeledvvvnevngipsllvfkn  
dkiahlsanakspeqves  
flaetfk  
>tr|A6QFB8|A6QFB8\_STAAE  
mmmaiivnkviivegksdkkrvqqviaepvniicthgtmsidklldmieslydkqvfvladsddegdrirnwfkryl  
ses  
ehifidktycqvancpkgy  
lahvlskhgftckketp1lpninnerlvlvne  
>tr|A6QFC0|A6QFC0\_STAAE  
mielkevkeyrtknkevlavdhvnlsiragsiygvigfsgagkstlirmfnhleaptsgeviidgdhigqlsknglrak  
rqkvsmi fghfnllwsrtv  
lknimfpleiagvprrrakqkalelvelvlgkrekaypse1sggqkqrvgiaralandptvllcdeatsaldpqtdei  
ldlllki reqnltivlit  
hemhvirricdevavmesgkvi eggpvtqvfenpghtvtrfkvdldnddfetslteleplekdayivr1vfagsttep  
ivsslstaydikinilean  
ikntkngtvgflvlhipyissvdfgkfeke1ierqvkmvlrhg  
>tr|A6QFC6|A6QFC6\_STAAE  
mttdilniseeqldvyskahnepswmte1rkka1kltet1empkpdktklrkwdfdfs1kqhdvkgdvyqslsq1pesvre  
iidvdhsknlviqhnntia  
ytqvddnaskdgivegladalnmhsdlvqkyfmdavtvdehritalhtalvnggvfvyvpknvvvehpvqyvvlhdde  
nasfynhviivteesaevt  
yvenylsnasgegnqlniiseviagansnitygsvdymdkgftghiirrgiteadasinwalglmnegsqiidnttnlfg  
drstss1ksvvvtgeqki  
nltskivqyketdgy1khgvmkehassvfngigyikhggtksianqesrv1mlsehargdanpillideddvdqaghaa  
svgrvdpdqlylmsrgis  
grearlvihgfl1dpvvre1piedvkrqlrevierkvs  
>tr|A6QFD5|A6QFD5\_STAAE  
mrltiyhtndihsh1heyerikaymaehrpr1nhpslyvd1gdhvd1sapiteat1gkknval1neakcdvatignegm  
tisheahnlhydeakfivt  
csnvidesgh1pnivssyikdidgkvl1fvaatapftpfyralnwivtdplesikeeielqrgkfdv1vlshcgiffd  
etlcqelpeidvifgshth  
hyfehgeinngv1maaagkygny1gevn1tfeahkvvhtaki1plet1pevetsfeeegkt1msnsviqhpvvlkrsmn  
hiteaayllaqsvceytha  
qca1inag1lvkdivkdeydydihqm1phpinmvrvr1fgvklkei1aksnkqeymyehaag1gfrgni1fggy1lynlg  
yihstgry1ngeeiedk  
eyv1gtidmytfgryfpt1ke1pkey1mpel1rdifkek1ley  
>tr|A6QFE1|A6QFE1\_STAAE  
mvki1vsvrk1pdkfyq1sk1gdv1mwqks1vpmpkdqfvta1rdadacfit1seqida1laqspn1kvianmavgydn  
idvesatannvvvntn1pnv  
1tettaelgft1mlaiarri1veaekyveadawqswgpy11sgkdvfnstigiymgdigkafarr1qgfntnilyhnr  
sr  
hkdaeadfnatyvsfet1  
aesdfiictap1tkethhkfnaeafeqmkn1daifinigrqivdetalidalnkeilacgl1dvlanepidhthp1m  
grd  
n1litphigsasvttrdnm  
iq1cinnieavmtnqvph1tpvn  
>tr|A6QFE8|A6QFE8\_STAAE  
mgdkymehsvvvygadvicascvnaptskdiydl1qp11krkypnisfkytyiditkdn1ldhd1qfieri  
eqdelf  
ypl1itmndeyvadgyi1qtk  
q1trfidqk1lvne  
>tr|A6QFG9|A6QFG9\_STAAE  
mqvggaptqr1aesq1tivck1gwsdpdek1lapq1qtmqvggaptqklaksq1tivck1gwddeinfakis1flshsqk  
d  
ssri1siwky1tavfysn  
y1fvf1mfss1t111ndff1fiseickdtinaifi  
>tr|A6QFI3|A6QFI3\_STAAE  
miwmeea1kds1lgalemvidpelgidivn1glvykvnvddegvctvdmt1tsmgcpm1gpqi1dqvkt1laeipei  
qde  
vniwvsspwtkdmsryak  
ialgvs  
>tr|A6QFI4|A6QFI4\_STAAE  
mktkgftkykrmry1pgldgl1raiv1gii1yh1nkqwtggfl1gvd1ffvisgylits111keyddtgi1k1ksf  
wir  
r1kr11paviv11mvvgta  
t111ksdni1rvkhdiaa1fyvsnw1y1akdvnyfeqfsfmp1klh1wslaieeqfy1ffpvilvt111tik  
krykigfi  
fwgvs1is1glmmfiysin  
gdhsrvyfgtdtr1qt111gvilaf1wppfk1kndppkvvyvidsigs1sfiv1111ffi1indetnwi  
ydggyflisil  
t1fi1iasvvh1p1stwiakif  
snp1lvfi1grs1sly1whfavisfvhsyyvdgqipvyvyfidis1ti1faelsyrfi1etpfrkegika1  
nwrpsyipqf  
irmai1vt11ipf1m1ilvg

Tsompanidou\_et\_al\_Supplemental\_FASTA\_File

afnkygkdiigekansfdttiednylMRIapiDniHidglVsekkkessdvYnnikPlligdsVmdigesfkssvPKsr  
idgkvgrqlyqtLpLvkn  
ysykkssdqvvlelgtngdftvkqlddlnqfgkakiylvntrvprieaynvrlladaakrksnvtlidwykrsqghs  
eyfapdgvhleykglalk  
deilka1kkk  
>tr|A6QFI7|A6QFI7\_STAAE  
miriqdntirdgmqgsnvrksliikkevlkqinklninsvevgmcttiedefnihqfrdilspekelvvltrlnekeikk  
ivklkihnlvki1l1pisd  
lhikeklnfsnkyyiQkikdcldi1kkdkkgvdiCFedgtrtsrek1keymeiiskyqrvrtvtfadvGcstp1eygdif  
nyfvkkysniiFsahchnd  
lglatantlaailngakqietftlGigeragnapieeiitiltkkqiesteftlpdvYktsiniskildfqisenkpiig  
enifkhesghdqgTKkni  
nmyqylvpsdglknsqvvqfpisnisskikhkfkSivnteeidenisfyklvnkfspevapedtvdllqiikrrskd  
gnfk  
>tr|A6QFJ2|A6QFJ2\_STAAE  
maknksrlylgsfnkkdiFhfi1nsycdesfgglitaakiavkivntamiigfttklsppt1l1stk1ticinnaq  
knvtrcfmsfYlhfnyiyf  
ilses  
>tr|A6QFK9|A6QFK9\_STAAE  
mlvalneekervlatta1rktqyfcPvcgkqvilkrGlkvishfahkhlaeqkcfnetikhyksklilaqmiqqgckv  
eiEPflkeikqpdilinn  
kyvie1qyspipykqilqrteglkkmgykvsWllndvdychnkVkfnhfqsMfinpftRklhtfnlekkqimmfqqiqyl  
gghkyvaekrnakise1fn  
eapcdyhavyk1skfainqyikyrwqnsVlept1samyqlq1tdqevvhnygyifpeqiyiknhpiewqlqvd1wlkng  
ksklvndnlnyfk1kkfiv  
alesktaiieklinnylnicsdkgndvqilf  
>tr|A6QFL1|A6QFL1\_STAAE  
myknvlnmhflyindsymsimyqiynlynfrtg  
>tr|A6QFL9|A6QFL9\_STAAE  
msmntdekervqeelydqt1ldqylenddiqfrdefla1htyeqseyfedttdenrqkifqylspeevanffdqldidd  
deyellfdkMnatyashi  
eemsydnavdi1neltkpkvas11t1mnkddaneika1lhydedtaggimtteyls1kahtpvkeal1lvkaqapdaeti  
yviFvdddgklvgv1s1r  
d1ivaendayiedimnervisvNaddqedvaqvmrDydfmavpvidyqeh1lgiitidd1dvmdeasedysrlagvs  
didstnds1iktalkr1pw  
liiltflgmitatilgrfektlenval1aafipiisgmsgnsqtqslavsvrNittgeineqskfria1reagsgv1sgv  
vcst1lftiiva1yhp1l  
alivags1tcamtvgtfvgsmip1lmnk1nidpavasgpfittindiismliyfglatsfmayli  
>tr|A6QFM3|A6QFM3\_STAAE  
mkc1vlnrii1flc1nrrgn1mieklvtflnevVwskplvyg1litgvlft1rmrffqvrhfkemir1mfqgekspngiss  
fqaiams1agrvtgnivg  
vstai1fgpggavfwmwi1taflgassafiest1gqi1k1rvenneyrggpayyieygiggkfgkiygiifaivti1svgl1  
lpgvqsna1assmhna1hv  
pqw1mggi1vvilg1iifggvrsianvatavvpfmai1yilmaviiiciniqevpa1falifksafglqsafggivgami  
e1gvkr1glsneagggtgp  
haaaaaevshpskqglvqafsvyid1l1fvctata1i1isgtyntvdgtvnangtph1ikdgg1yvenatgkdysgtamy  
aqagidka1fhgsgyqfdpt  
fsgvgsyfi1af1ffaftti1syyitetnvay1trnqnqVssifiniarviilfatfygavktadvawafgdlvgvl  
mawlniia1wi1hkpvna  
1kdye1qkkr1ngynavyqdpnk1pnavfw1ktyper1kqarack  
>tr|A6QFM9|A6QFM9\_STAAE  
mva1linkrfidegktidvylfealnnqii1aipdwfsyqmamt1deetcfeailmq1l1vfkeeeeaes1asq1tdwie  
tykkekd  
>tr|A6QFN4|A6QFN4\_STAAE  
mmekneninve1l1tsdmhshflngdygsniyragyvNqvraqnhrvilldsggslagslaayyyaivapykrhpmik1  
mnrMhydasgvsPsefkgf  
1sfl1trsialarfpw1sanieynvtkepyfstpycikHfgdlkiaivgvtadglmeneysemeqdvsiekt1vaskrwir  
y1heveepdf1iviYhgg1  
nkisnstknkkassneak1mee1gvid1mitahqhtivgqdhetyyvqagqake1vh1sinfkkr1tttydvesidsk  
vid1neyeedqe1ld1tfy  
drkavaywsqe1sdkg1m1svng1qd1vcqthpfsq1l1hdai1h1afdnditcvhvpMngekg1sgqirnedlyhayyp  
dkpmdmt1sgqnikdi1ey  
sysh1dfvneq1s1ti1det1ctmwqgfnye1dmnqepqrvml1dqid1tk syrvtmtDycyrnyknylknaiihesyde  
tmst1iaek1rdpnyrisc  
sdnfivknr  
>tr|A6QFN6|A6QFN6\_STAAE  
mkyntnvkht1leafvtvnd1gieliinea1revrkrq1ielidda1vnkdeaa1fnqytaeykn1leaf1geih  
>tr|A6QFP0|A6QFP0\_STAAE



Tsompanidou\_et\_al\_Supplemental\_FASTA\_File

mdyqqqlmhlqntqkealgvmvsavsmfgriiimvikdmvqqlenidhlvviqelv  
>tr|A6QFP6|A6QFP6\_STAAE  
mkki fmmvhelvdkggmtssmfnsrskedydadipadivtfdykgydeiika lkkqgkmdrrtkmynvfeyfkqisnk  
hfksnkllkhiserlknt  
ieeeskgisryfdittgtyaiyrksksekvidffkdnkrierfsfidnkvhmketfnvdkvcyqvfydekgyypisr  
ninannagvgktyvlnkk  
efknnlalcvyyleklikskdsimicdpggsfpmfntnhknaqkygvihvnhenfddtgafkkseyiienanking  
vivlteaqrldilnqfdve  
niftisnfvkihnaphfktekivghisrmvptkridllievae lvvkkdnvkfhiygegsvkdkiakmiedknlernv  
flkgytttpqkcl edfklv  
vstsqqegqglsmieamiskrpvafdi kygpsdfiednkngyli enhnikmdadkilqlvndvlaaefgskareniie  
kystesilekwlnlfn  
>tr|A6QFP7|A6QFP7\_STAAE  
mnvggdmmlgmllirwmlatsflvhgtlkfvdldgtihflgslglpptaivlmsigevvgglaliigfltpyvnyfyic  
vmllgsiftlkltrgyvsgy  
efeihivmnlacissyswkkwlqfy  
>tr|A6QFP9|A6QFP9\_STAAE  
mkilkleilvfttnlsriivkedlqmknkaiyvivalflgglgihkfyadkfgqglfhllffwtgiptiisiihaifvi  
ftkkadkgyiifpkn  
>tr|A6QFQ0|A6QFQ0\_STAAE  
mirqarpedrfdiaklvymvddmelelvkhlpkdmvldai eksvdatyrtyqhilvyevenkvagciisysgenelk  
yekawell dlpekikqygt  
plpvkeakddeyyietiatfaayrgrgiatklltsll esnthvkwslncdinneaalklykkvgfisdgqielkymhyh  
livk  
>tr|A6QFQ7|A6QFQ7\_STAAE  
mnsscksrvfniisii msvmlilslgafannkakadshskqleinvksdkvpqkvkdl aqqqfagyakaldkqsnaktg  
kyelgeafkiykfngeedn  
syyypvikdgkiyvtl t l spknkddlnkskedmnysvki snfiakdl dqikdksnitvltdekgyfeedgkvr l vkat  
plpgnvkekesaktvsakl  
kqelkntvtptkveeneai qedqvqyentlnfkireqqfdnswcagfsmaallnatkntdynamhimrtlypevseqd  
l pncatfnpqmi eygksgg  
rdihyqegvpsyeqvdqltkdnvgimilaqsvqnpndphlghalavvgnakindqekliwynpwdtel siqdadssllh  
lsfnrdynwygsmigy  
>tr|A6QFR2|A6QFR2\_STAAE  
makkfnyklpsmvaltlvgsavtahqvqaaettqdqttnknvldnnkvkatteqakaevknptqnisgtqvyqdpai vqp  
ktannktgnaqvsqkvdt  
qvnqdransattnttqpvakststtapktntvntnagyslvddeddnseqinpeliksaakpaaletqyktaapkaa  
ttsapakkteatpkvttfs  
asaqprsvaatpktslpkykpqvnsindyirknnlkapkieedytsyfpkyayrngvgrpegivvhdtdandrstingei  
symknnyqnafvhafvdgd  
riietaptdy lswgvavgnprfinveivhthdyasfarsmnyadyaatqlqyyglkpsdaeydngntvwthyavsky l  
ggtddhadphgylrshnysy  
dqlydlinekylsngklawikvawgtqstttptpskptpskpstgkl tvaanngvaqikptnsglyttvydktgkatnevq  
ktfavsktatlgqkfy l v  
qdynsgnkfgwvkegdvvyntakspvnnqsysikpgtklytvpwgtskqvagsvsgsgnqtfkaskqqqidksiylygs  
vngksgwvskaylvdtakp  
tpttpkpstpttnkl tvsslngvaqinaknglfttvdydktgkptkevqktfavtkeaslggnkfy l vkdysptlig  
wvkqgdviynnakspvnm  
qytyvkpgtklysvpwgtykqagavsgtgnqtfkatkqqqidksiy l fgtvngksgwvskaylavpaapkkavaqpkta  
vkayvtkptqtqtvskia  
qvkpnntgirasvyektakngakyadrtfyvterahgnetyvllnntshniplgwfnvkdlnvqnl gkevkttkqyvtv  
ksnnglsmvpwgtnqvil  
tgnniagqtfnatkqsvgkdvlygtinnrtgwnakdl taptavkpttsaakdynytyvikngngyyyvtpnsdtaky  
slkafneqpfavvkeqvin  
gqtwygklsngklawikvawgtqstttptpskptpskpstgkl tvaanngvaqikptnsglyttvydktgkatnevq  
al kyqfl rldqpqn isidk  
inqflkgkgvlenqgaafnkaa qmyginevyl ishalletgngtsqlakgadvvnnkvvtnsntkyhvnfgiaaydndpl  
regikyakqagwdtvs kai  
vggakfignsvkagqntlykmrwnpahpgthqyatdvdwaninakiikgyydkigevgkyfdipqyk  
>tr|A6QFT0|A6QFT0\_STAAE  
mvkiaifasgsgsnfenivehvesgklenievtalytdhqnafcidrakkhdipvyinepkqfdskaayeqlvtllned  
kvewiilagymrligpdll  
asfegkilnihpsllpkkygidaigqayhsdttitgstvhvdsgmtgeieqrkcdirpddskeqleekvkkleyely  
psviakivk  
>tr|A6QFT3|A6QFT3\_STAAE  
mmvirmyeqwkvrvqsfvddvniitklflgiilfffiifvhnfdmlyitilmlvfl lmfngtqfkitaifitisigfall  
sslfmilyngshti l kfg  
fihitteslvrglhvs lrtiaisffgilia ltsqvvmifyslmqhlkvkskvayafmaairmiplmissliqlrrslkmr

Tsompanidou\_et\_al\_Supplemental\_FASTA\_File

yqmi daanyrglkrfkhl  
ipllsqnirkahqlsvameskgfrdgprrtyyynvpfsykdiifiivliaiitmayycsitlpitgiddvrlgrvg  
>tr|A6QFT4|A6QFT4\_STAAE  
mlkvsdlrlkypsgqrki fhdlnitiqdkekvlllgpsgcgkstllnvlsgivpnlielpmkydelivdplsgvifqdpd  
sqfcmpkvyee|afvlenr  
qlpredmdaliinalnmvnlvntpetyikdlsggmkkqlaivetilqqsktlfdeptamldvqatedlwtklielwedq  
tvvivehkvkhiwhvdrv  
ilmdyngni iadecpeiilqkyvhllseygvwhprawefapsrvdfpttnshllqfkgngriirgkstllsfsdleiglge  
witi tgangsgkttlllesi  
mqlikyggdvyfenqrltkikhaakhmylvynpelqfitnsvydeinihfhnlskdqsdde tiqlkllldlqnvdqhp  
yelsigkrrrlsvatalss  
kadiifldeptfgldshntfqliklfqkrinlgqsivmvthddeiierypsrrlkisdgalldcdgdtnv  
>tr|A6QFW3|A6QFW3\_STAAE  
malygfaqgliqeaqirikqlmeqnl tietksnpndlvtnvdkatedfiftiletynhqvlgeeghghdidtskgtvw  
ivdpidgtlnfvhqenfa  
isigiyidgkpyagfyvdmadvlyhakvgegayrgsqplkp lndsnlrqsiiginpnwltkpilgeifkeivndrsar  
aygsaaleivsvatgnlea  
ymtprlqpwwdfaggvlilyevngqasnllgepltisgpn silvgnrglhqeisndylephhdaliqlheqrfkrksk  
>tr|A6QFW9|A6QFW9\_STAAE  
mrsvsllkqikkllvanrgeiairifraaaeldistvaiysnedksslhrykadesylvgsdlgpaesylneriidvak  
qanvdaihpgygfllseneq  
farrcaeeqikfigphlehl dmfgdkvkarttaikadlpvipgtdgpiksyelakefaeeagfplmikatsggggkgmri  
vreeseledafhrakseae  
ksfgnseyvieryidnpkhi evqvigdehgnivhlferdcsvqrrhqkvvevapsvglstlrqricdaaiqlmenikyv  
nagtveflvsgdefffiiev  
nprvqvehtitemvtgidivktqilvaagadlfgeeinmpqqkditlgyaiqcritt edplndfmpdtgttiayrssgg  
fgvrl dagdgfqqaei spy  
ydsllvk l sthaisfkqaee kmvrs lremrirgvktnipflinvmknkktsgdyttkfi etpel fdiqpsldrgtktl  
eyignvtingfpnvekrpk  
pdyelasiptvssskiasfsgtkqlldevgpkgvaewkkqddvlltdttfrdahqsl latrvrtkminiasktadvfk  
dgfsl emwggatfdvaynf  
lkenpwerlerlrkaipnvlfqmllrasnavgyknydpnvi hkfvsakagidvfri fdslnwvdqmkvaneavqeagk  
isegticytgdi lnpersn  
iytleyyvklake leregfhilaikdmagllkpkaaeligelksavdlpihlthtdtsngnlltykqaidagvdiidta  
vasmsgltsqpsanslyya  
lmgfprhlrt diegmes lshywstvrtyysdfesdikspnteiyqhempggqysnlssqaks lglgerfdevkdmr rrvn  
flfgdivkvt psskvv gdm  
alymvqndldeqsvitdgykl d f pesvvsffkgeiqqpvngfnkd lqavilkqgeal tarpgeylepvdfekvrellee  
qqgpvteqdi isyvlpykv  
yeqyiqtrnqygnslldtptfffgm rnetveieidkgrliiketisepdengnr tiyyamngqarriyikdenvht  
nanv kpkadksnpshigaq  
mpgsvtevkvs vgetvkanqplliteamkmettiqapfdgvikqvtvnngdtiatgdllieiekatd  
>tr|A6QFX9|A6QFX9\_STAAE  
mfcyninneyrkdelqmksvgliteynpfhngqyhinqsklltnadvtiaimgnfvmrgepaiynkftrakmalstad  
lvielpatas lssgdhfae  
lavkvadymvdtiafgsenndikt l kqlahsineieqsesfsqkvkegksyprii sellehhealaspnnilgisylka  
iaknakninaisikrenaq  
hhdsl iqhhqfasgtsirts isiqddhwhhvvpkdiqhlyvtphitlnqifpylkyqiamtt dslkniyvttegfenrl  
ksniyeatdfhhfvkllkt  
krytythigrllmnl nikptdvtsnihavkvlamndrgrqylkh l ktafperqyitninksnahyftneikathiy na  
isgqqqtdfntpv iqgyr  
>tr|A6QFY2|A6QFY2\_STAAE  
mkvaiytrvstleqkekg hseeqerk l raysdindwkihkyvtdagysgakkdrpalqemlneidnfdl vlvykl drlt  
rsvkdll eilelfenknvl  
frsatevydtt samgrl fvtlv gamaewerttiqertamgrrasarkglaktvppfydrvndkfv pneykkvlrfavee  
akkgtslreitiklnnsky  
kaplgknwhrsignal tspvarghlvfgdi fventheaiiseeeyeeikl risektnstivkhnaifrskllcpncnqk  
ltnvkhktpknkev wysk  
lyfcsnckntknknacni degevlkqfy nylkqfdl tsykie nqpkieidvgidiek l rkerarcqt lfi egmmdkdeaf  
piisridkeiheyekrkdn  
dkgktnfyekiknfkysllngwelmedelktefikmaiknihfeyvkgikgrqns lkitgiefy  
>tr|A6QFY4|A6QFY4\_STAAE  
mdkke lakfignkiryrtklnltqdqlgek lntkkatisnyetgyrtpkqddlfeiahilnisiddlfp trnnkkn dit  
siyskltpprqknvlnyan  
eqld eqnkvt si deyesk lvsyiacgatgagigeelyddilheevffkedetpsnadfcilvngdsmepmlkqgyafi  
kkedsikdgtialvvl dgv  
slikrvdicedy inlvs lnpkyddikvasfsnikvmgkvvl  
>tr|A6QFY5|A6QFY5\_STAAE

Tsompanidou\_et\_al\_Supplemental\_FASTA\_File

mqa1qtfnfkelpvrtveienepfyvgkdiaeilyaradnairnhvdsedklthqfsasgqnrnmiiinesglyslifd  
askqskneki retarkfkr  
wvtsdvlpairkhgiyatdnvieqtlkdpdyiitvltteykkekeqnlllqqeigelkpkadyvdeilkstgtlattqiaa  
dygisaqklnkllhearlg  
rkvnkqvwlysehmgksytesdtpivrsdgretdvlqtrwtqkgrlkiheimtefyeanvta  
>tr|A6QFY6|A6QFY6\_STAAE  
maenikteqhytksdfsgyrneednfvangeitvtitlneyrklieikavkdeedyrgkyfaerkneklekeniklk  
nkiyelqneedneeceey  
eeyked  
>tr|A6QFY7|A6QFY7\_STAAE  
mykagdvcrkifnvdgdfqlrvkkraysveivldhegsidglvsvdendlytalidilkqsiyewientdeqdrli  
nlvmkw  
>tr|A6QFY8|A6QFY8\_STAAE  
manlyelseafkemsqdelcptllkdtlksikaemvkvdnivnrretlgidividkeikrlqnkkqkqnltdrlrd  
ylkemletqevdsyratn  
hiykrkngaskniideklipkdywlsqapklnskqliddlkagkdipgaekvtelvik  
>tr|A6QFY9|A6QFY9\_STAAE  
mseeqdlqelgieenedtqnysimvygksgtgkttlatrennafiidihedgtqvtrqgfvkrvnyiafrntiasi  
esivntarqrgklldvvi  
etaqlrditlthvmtthqvkariqdygetsklivnsirhllkvkdkgfhhvltgheglnsedkdengkiiinprisie  
vqpaihnlvtqfdiight  
fiedhtdengnathdyvsvpsnlyttkvrhnpqitinnpgiknasiskiidmaqngn  
>tr|A6QFZ8|A6QFZ8\_STAAE  
mgvmtmdnarkeylnqffgskrylyqdnervahihvngayyfghivpdwqgvkktfdtaeelgiyikqhgleeyeek  
qltlf  
>tr|A6QG03|A6QG03\_STAAE  
mtkkkyglklstvrkledelecdypnyhkqledlrseimtpwiptdtniggefvpnskskemavtnylcsirrgkilefk  
saierintssrkerefiq  
eyfnkktliavcydihisestahrikkivsklaeelgec  
>tr|A6QG05|A6QG05\_STAAE  
mtkvklnfnkpsnvfnrni feiltnydnftevhyggsgskshgviqkvvlkalqdwkypririlwrkvqstikdsifed  
vkdc1infgiwdmclwnkt  
dnkvelpngavflfkgldnpekiksikgisdivmeaseftlndytqlt1rlrerkhvnkqiflfnpvsklwvykyff  
ehgepmenvmirgssyrdn  
kfldemtrqnlellanrnpayykiyalgefatlklvfpkyekrlinkdelrh1psyfgldfgyvndpsafihskidvkk  
kklyieeyvkqgmIndei  
anvikqlyakeeitadsaeqksiaelrn1glkri1ptkkgkgsvvqglqflmqfeiiivdercftieefdytwqkdkd  
tgeytnepvdtynhcids1  
rysverfyrpvrkrtnvsskvdtikslgl  
>tr|A6QG06|A6QG06\_STAAE  
mlkvnefetdtdlrgninylnfdeanvvytydgesd1lnqnevskciehmdyqrprlklvsdyegtknlveltrr  
keeymadnrvahdyasyis  
dfingyflgnpiqyqddkdvleaeiafnd1ndveshnrs1gl1dsiygkayemirnqddetrlyksdamstfviydn  
iernsiagvrylrtkpidk  
tdedevftvdlftshgyryltsrtnglkltprengfeshsfermpitefsnnerkgydyekvitlidlydnaesdtany  
msd1ndam1likgn1ndp  
vevrkqkeanvlfleptyvadsegretegsvdgggiykqydvqgteaykdrlnsdihmftntpmkddnfsqtsgsgeamk  
y1fgleqrktkeglftk  
glrrrak1letilkntsr1dankdfntvryvyrn1pkslieelkayidsggkisqttlms1fsffqdpelvkkieede  
kesikkaqkgiykdprdin  
ddeqddtkdtdvdkke  
>tr|A6QG07|A6QG07\_STAAE  
mpnkntqeyweergkaieenelkrdtkaeerilnmikriekinafivkygdfagvtlqeaqkiidefdvkafqee  
akrlvenkdfsdraneelk  
kyntkmyvsreikiqiefliaataqtel smreyfestayrvfsdqagilgegvvakevidtivdtqfhgvvserl  
wtnteamkqeveeianvv  
igrhpnayvkdmrkhlnkfegtarqktaaiks1lytesarvhaqssidsmkeispegyymiakidnr1tkvckglng  
ifkvkdakigvnyfpmhin  
crsdcallpksmwpkkpskrkkyfggkvksgd  
>tr|A6QG09|A6QG09\_STAAE  
meqtqk1k1n1qhfasnnpqvfnpdnvmhkkdgt1lndfttpilqevmenskimqlgkyepmegtekkftfwadkp  
gaywgegqkietskatwv  
natmrafklgvlpvtkeflnytyqqfeemkpmiaefykkfdeagilnqgnnpfgksiaqsiektnkvikgdfdqdn  
id1eal1eddeleanafis  
ktqnrsl1rki1vdpetkeriydrnsdtldglpvvn1kssn1krgelitgdfdkliygipqlieykidetaqlstvknedg  
tpvn1feqdmvalratmhv  
alhiaddkafaklvpadkktdsvpgev  
>tr|A6QG12|A6QG12\_STAAE

Tsompanidou\_et\_al\_Supplemental\_FASTA\_File

mryedrvmvfqleqvatympktskkenaliditydaipcninpi srarkqlfegdvkndvsvlrikesishpvshvlvngiry  
kivdtriyrhetsyieev

n

>tr|A6QG13|A6QG13\_STAAE

mmnidgldallnqfhdmktniddvddilqenakeyvvraklkarevmnkgywtgnlsrniyrkktgdlytitsaays  
gflfegtrymeaepfmwpv  
yevirkstveelkalfe

>tr|A6QG14|A6QG14\_STAAE

mtpnlqlynkayetlqgygfpvisrkemqeiypypffvikmpesnrskytfdsysgdtnlvidiwsvsddlghhdglvkr  
ciddltpsvktnydyfeed  
dtniaqlvddttnqellhtsvtisyktf

>tr|A6QG15|A6QG15\_STAAE

manmknsndriilfrkagekvdatkmlflteyglshheadtdtedtdmgsyntggsvestmsgtakmfyggdfadeiedav  
vdrvlyeawevesripkn  
gdatkfkakyfqqfhnkfelkaeangideyeyeygvnrfqrgfatlpeavtkklkatgyrfhdttkadaltseidltaip  
qpkvdsssvtpgev

>tr|A6QG18|A6QG18\_STAAE

mteyikatieasvakfkrqidsavksvqrfrvadqtkdvelnaddkklqktikvakksldafsnkkvkakldasiqdl  
qqkvlesnfeldklnskev  
tpeiklqkqkltkdiaeaeaklselekkrvnidinadnskfnrvlkvskaslealnrsakaiidvngvanskikrtke  
elksipnktrsrldvdtgl

siptiyafkksldalpnkkttkvdvtnglkkayayii kvndnfqrqmglnanmfrvfgtvgsnmvgglltssfsilipv  
iasvvpvfallnaikvlt  
ggviallgavaiagagfvafgamaisaikmlsdgtlqassatneykkaaldgvsawtdiikqnqsai fttl angln tvkt  
amqslqppffsigrmeea

sqsvlkwagnsgvasrffnmmttgvsvfnkllsaaggfgdglvvnftqlaplqwsadwldr lqgsfsnwansaagens  
itrfiytktnlpiignif  
knvfvginlnnafsgsstgifsleqmtakfrewseqvgqsqgfkdfvsyiqtngplimqligniarglvafatamapi  
asavlravaitgwianlf

eahpataqlvgvii tlvgafrfliapilavmdflgplaarlvavtkfgwaktgtlvlskamtslkgpiklvtaifqllf  
gkiglinraitglvtvfgi  
lggpitiivigviaaliaifvllwnknegfrnfiinvwnaikt fmvvtwnvltvasvwnailkaittavsnvynfimii  
wnqivaylqglwngiaia

ttvwnllvtiittvfttimtivismiwtaiwftl stiwntiitiattiwnllvtvittvfttimtiamtiwnaiwftlqt  
wntivtvatkvwnaittti  
stalqaawfsisniwntiwsflsgilttiwnkvvsiftqvvtisdkmsqawnfivtkgmqvwstittstlinfvnrviqg  
fnvvnkvsggmtnavnki

ksfigdfvsagadmigrigiqmagqlvdaakvakkaldaaksalgihspsrefmdvgmysmlgfvkgidnhsskvi  
rnvsnvadkvvdafqptln  
apdissitgnlsnlggninaqvqthsietspnmktvkvefdvndaaltsivngrnkrnseyyl

>tr|A6QG19|A6QG19\_STAAE

mdieltkkdgvtviklsegyfivndividsmqintkyqdkenmngri lmgсныisrdiivpcfcvknrsdiaymrmlys  
ltdiepmlyreirrkeel  
nyrftqpi sddyvkl dknnpdyeyshdqqi yvngkqykvi fngvinpkqkgnkvsfelkfettel pygesigtslele  
enkkvglwsfdfnidwhag  
gdkrkytfenlsgtvyvhgsapndqfnmykkitiilgedtesfwmlthaeimkiegiklkagdrivydsfrvykngve  
istetniaqpkfkygankf  
efnqtvqkvqfdlkfyk

>tr|A6QG20|A6QG20\_STAAE

mtitikipkngapvpvettlvkkvnadgvlftdilenkytyevinaigrwivshvegendkkeyvitvidrksegdrq  
lvectareipidklmidri  
yvnvtgsftveryfnivfgqgtgm lfevegkvksskfenggedtrlemfkkglehfgleyki tydkkkdrykfv ltpfan  
qkasyfisdevnanaikle  
edasdfatfirgygnysgeetfehaglvmearsalaeiygdihaepfdgkvtdqetmdkelqsrllkkslkqslsldflv  
lresypeadpqpqdivqik

stklglndlvriqvktirginnvivkqdv tlfefnreqrymkkvntaanyvsglndvnlsnpskaaenlkskvasiaks  
tldlmsrtdliedkqqkvs  
skvttsdgtivhdfidksnikdvktigtigdsvargshaktnftemlgkklakctn larggatmatvpigkeavensi  
yrqaeqirgdliilqgtdd  
dwlhgywagvpigtdktdktfygafcsaievirknnpaskilvmtatrqcpmsgttirrkdt dknklgl tledyvnaqi  
lacseldvpydayhtdyf

>tr|A6QG21|A6QG21\_STAAE

kpynpafrkssmpdglhpnerghevimeyliknyyqfyg

>tr|A6QG21|A6QG21\_STAAE

msnkliitdlsrvfdryvdeneynfklisdm lsdfnfsleyhrnkegfahdgeqikyehlnvtssvsdflyl ngrfsm  
vlghngdgin evkdarvnd  
tgyghktlqdrlyhdystl dafatkve kavdehykeyrateyrfepkeqepelitd lspytnavmqs fvdprtki iymt  
qarpgnhym lsr lkpngqf  
idrllvknghghthnayryidgelwiysavl dsnknkfvr fqrtygeitygnemqdvmpni fndrytsai yn pvenlmi

Tsompanidou\_et\_al\_Supplemental\_FASTA\_File

frreykpterq|kns|nfv  
evrsaddidk|g|dkv|lyq|md|p|me|y|t|s|d|t|q|p|m|g|i|t|y|d|a|g|i|l|y|w|t|g|d|s|n|t|a|n|p|n|y|l|q|g|f|d|k|t|k|e|l|l|f|k|r|r|i|d|i|g|g|v|n|n|  
n|f|k|g|d|f|q|e|a|e|g|l|m|y|y|d|l|e|  
t|g|r|k|a|l|l|i|g|v|t|i|g|p|g|n|r|h|h|s|i|y|s|i|g|q|r|g|v|n|q|f|l|k|i|a|p|q|v|s|m|t|d|s|g|g|r|v|k|p|l|p|i|q|n|p|a|y|l|s|d|i|t|e|v|g|h|y|i|y|t|q|d|t|q|n|a|  
l|d|f|p|l|p|k|a|f|r|d|a|g|w|f|l|d|v|l|  
p|g|h|y|n|g|a|l|r|q|v|l|r|n|s|t|g|r|m|l|k|f|e|r|v|i|d|i|f|n|k|k|n|g|a|w|n|f|c|p|q|n|a|g|y|w|e|h|i|p|k|s|i|t|k|l|s|d|l|k|i|v|g|l|d|f|y|i|t|t|e|s|k|r|f|t|  
d|f|p|k|d|l|k|g|i|a|g|w|i|l|e|v|k|s|n|  
t|p|g|n|t|t|q|v|l|r|r|n|n|f|s|a|h|q|f|l|r|v|r|n|f|g|t|g|g|v|g|k|w|s|l|f|e|g|k|v|v|e|  
>tr|A6QG22|A6QG22\_STAAE  
m|i|v|d|n|f|s|k|d|d|n|i|e|l|q|t|t|s|q|y|n|p|i|d|t|n|i|s|f|y|e|s|d|r|g|t|g|v|l|n|f|a|v|t|k|n|r|p|l|s|i|s|s|h|v|k|t|s|i|v|l|k|t|d|d|y|n|v|r|d|g|a|y|i|s|d|  
e|l|t|i|v|d|i|n|g|r|l|q|y|v|i|p|n|e|  
f|l|k|h|s|g|k|v|h|a|g|a|f|f|t|q|n|g|s|n|n|v|v|e|r|q|f|s|f|i|e|n|d|l|v|s|g|f|d|i|t|k|l|v|y|i|k|s|i|q|d|t|i|e|a|v|g|k|d|f|n|l|k|q|n|m|a|d|t|q|t|i|a|k|v|  
n|d|s|a|t|k|g|i|q|q|i|e|i|k|q|e|a|i|  
q|a|i|t|a|t|q|s|a|t|q|a|v|t|a|e|f|d|i|k|i|v|e|k|e|q|i|f|e|r|v|n|e|v|e|q|q|i|n|g|a|d|l|v|k|g|n|s|t|t|n|w|q|k|s|k|l|t|d|d|y|g|k|i|e|s|s|e|q|s|i|d|s|v|l|s|t|v|  
n|t|s|r|i|i|h|i|t|s|a|t|d|a|p|s|f|k|d|  
i|g|t|v|d|t|p|k|e|g|v|d|d|g|s|i|p|v|a|p|n|t|l|g|k|s|g|v|l|v|y|v|v|d|s|t|a|r|a|t|w|y|p|d|d|s|n|d|e|y|t|k|y|i|s|g|t|w|y|p|f|y|k|n|d|g|d|l|t|k|q|f|v|e|  
e|t|s|n|n|a|l|n|q|a|k|q|y|v|d|d|k|f|g|  
t|t|s|w|q|q|h|k|l|t|e|p|n|g|q|i|s|q|v|n|l|n|n|a|q|d|l|g|y|l|t|a|g|n|y|a|t|r|v|p|d|l|p|s|g|v|e|s|y|e|g|y|l|s|v|f|v|k|d|d|t|n|k|l|f|n|f|t|p|y|n|s|k|i|y|t|r|  
s|i|t|n|g|r|l|e|q|q|w|t|v|p|n|e|h|k|s|  
t|v|l|f|d|g|g|a|n|g|v|g|t|i|n|l|t|e|p|y|t|n|y|i|l|l|v|s|g|t|y|p|g|g|v|i|e|g|f|g|l|t|a|l|p|n|i|q|l|s|k|a|n|v|v|d|s|d|g|n|g|g|i|y|e|c|l|l|s|k|t|s|s|t|l|  
r|i|d|n|d|v|y|f|d|l|g|k|t|s|g|s|g|a|n|  
a|n|k|v|t|i|t|k|i|m|g|w|k|  
>tr|A6QG23|A6QG23\_STAAE  
m|i|e|i|t|v|n|d|k|n|e|i|g|y|v|n|t|g|g|l|r|n|s|l|d|v|d|d|n|v|p|i|k|f|k|e|e|f|e|r|k|f|v|f|t|n|g|e|i|k|y|n|s|n|f|e|k|e|d|v|p|n|a|s|n|q|q|s|a|s|d|l|s|d|e|  
e|l|r|g|m|v|a|s|m|q|m|q|m|t|q|v|n|m|l|  
t|m|q|l|t|q|n|a|m|l|t|q|l|t|e|l|k|t|n|k|t|n|t|e|g|d|v|  
>tr|A6QG24|A6QG24\_STAAE  
m|f|g|f|t|k|r|h|e|q|d|w|r|l|t|r|l|e|e|n|d|k|t|m|f|e|k|f|d|r|i|e|d|s|l|r|t|q|e|i|y|d|k|l|d|r|n|f|e|l|r|r|d|k|v|e|d|e|k|n|k|e|k|n|a|k|i|r|i|d|i|k|m|i|l|g|l|  
i|g|t|i|f|s|t|i|v|i|a|l|l|r|t|i|f|g|i|  
>tr|A6QG25|A6QG25\_STAAE  
m|g|l|p|n|p|k|r|k|p|t|a|s|e|v|v|e|w|a|l|i|a|k|n|k|i|a|i|d|v|p|g|s|m|g|a|q|c|w|d|l|p|n|y|l|l|d|k|y|w|g|f|r|t|w|g|n|a|d|a|m|a|q|s|n|y|r|g|r|d|f|k|i|r|n|  
t|k|d|f|v|p|q|p|g|d|w|g|v|w|t|g|g|w|a|  
g|h|v|n|i|v|v|g|p|c|t|k|d|y|w|y|g|v|d|q|n|w|y|t|n|n|a|t|g|s|p|p|y|i|k|h|s|y|h|d|g|p|g|g|v|k|y|f|r|p|p|y|h|p|d|k|t|t|p|a|p|k|e|d|s|d|d|n|e|k|n|k|k|v|  
p|i|w|k|d|v|t|i|k|y|t|i|s|s|q|e|v|n|  
y|p|e|y|i|y|h|f|i|v|e|g|r|r|l|e|k|p|k|i|m|i|r|n|a|q|t|m|s|s|v|e|l|y|n|r|k|k|y|k|q|d|v|e|y|h|f|y|v|d|r|h|i|w|a|p|r|r|a|v|f|e|v|p|n|e|p|d|y|i|v|i|d|v|  
c|e|d|y|s|a|s|k|n|e|f|i|f|n|i|h|a|m|  
v|v|a|v|d|m|a|k|y|i|p|l|i|e|i|n|l|k|v|d|d|i|w|r|s|m|l|e|h|v|n|w|m|i|d|n|g|v|p|p|k|d|k|y|e|a|l|e|k|a|l|l|i|f|k|n|e|k|l|l|n|i|t|k|p|t|v|t|k|r|i|k|  
v|m|v|d|n|k|n|a|d|i|a|n|r|v|r|d|s|s|p|t|  
a|n|g|s|a|s|k|q|p|q|i|t|e|t|s|p|y|t|f|k|q|a|l|d|k|m|a|r|g|n|p|k|s|n|a|w|g|w|a|n|a|t|r|a|q|t|s|s|a|m|n|v|k|r|i|e|s|n|t|q|c|y|q|m|l|n|l|g|y|q|g|v|s|v|  
s|a|l|n|i|l|k|g|k|g|t|l|n|g|g|k|a|  
f|a|e|a|c|k|h|s|i|n|i|y|i|l|i|h|a|f|l|e|s|g|y|g|t|s|n|f|a|n|g|k|d|g|v|n|y|f|g|i|g|a|y|d|n|n|p|n|y|a|n|t|f|a|r|n|k|g|w|t|s|p|a|k|i|m|g|g|a|s|f|r|k|d|y|  
i|n|k|g|q|n|t|l|y|r|i|r|w|n|p|k|n|p|a|  
t|h|y|a|t|i|e|w|c|h|q|a|s|i|a|k|l|y|k|i|g|l|k|i|y|f|t|r|d|k|y|k|  
>tr|A6QG26|A6QG26\_STAAE  
m|y|i|k|d|v|e|r|i|k|n|d|g|v|d|l|g|i|g|c|r|f|y|t|e|d|e|n|t|a|s|i|r|i|g|i|n|d|k|q|g|r|i|d|l|k|h|a|g|l|t|p|r|l|h|l|f|m|e|d|g|s|i|f|k|n|e|p|i|i|d|d|v|v|k|g|  
f|l|t|y|i|p|k|k|v|i|h|a|g|y|v|r|c|  
k|l|f|l|e|k|e|e|i|h|v|a|n|f|s|f|i|v|d|s|g|i|e|s|a|v|a|k|i|d|v|k|l|v|d|d|i|t|r|i|l|k|d|n|a|t|d|l|l|s|k|d|f|k|e|i|d|k|d|v|i|s|i|e|k|n|e|r|f|k|g|v|  
k|g|d|k|g|e|p|g|q|g|a|k|g|e|t|g|k|k|  
g|e|q|g|a|p|g|k|n|g|t|v|v|i|n|p|d|t|k|m|w|q|i|d|g|k|d|t|i|k|a|e|i|l|d|i|n|i|a|n|v|e|n|g|l|e|n|l|q|e|v|e|i|k|d|t|t|l|n|d|s|k|t|y|t|d|s|i|a|e|l|v|d|  
s|a|p|e|m|n|t|l|r|e|l|a|e|i|q|n|n|  
s|i|s|e|v|l|q|q|i|g|s|k|v|s|t|e|d|f|e|k|f|k|q|t|l|n|d|l|y|a|p|k|h|h|d|e|r|y|v|l|s|s|q|a|f|t|k|q|q|a|d|n|l|y|q|l|k|s|a|s|q|p|t|v|i|w|t|g|t|e|n|e|y|i|  
y|q|k|d|p|n|t|l|y|i|l|k|g|  
>tr|A6QG27|A6QG27\_STAAE  
m|i|f|m|e|g|n|f|k|n|v|k|k|i|f|i|y|e|g|e|y|t|k|v|y|a|g|i|q|v|w|k|k|p|s|s|f|i|k|p|l|p|k|n|k|y|p|d|i|e|e|s|t|a|k|w|i|n|g|v|e|p|n|k|s|y|q|v|i|e|n|v|r|s|g|  
i|m|r|v|s|q|t|n|l|g|s|e|i|g|i|s|g|v|  
n|s|g|v|a|s|k|i|n|f|s|n|p|s|m|l|y|v|i|t|i|s|d|v|y|s|g|s|p|t|i|t|i|e|  
>tr|A6QG28|A6QG28\_STAAE  
m|d|i|n|w|k|l|r|f|k|n|k|a|v|l|t|g|l|v|g|a|l|l|i|f|i|k|i|t|d|l|f|g|f|d|l|s|t|q|l|n|q|a|s|i|i|g|i|l|t|l|t|g|i|g|i|v|t|d|p|t|s|k|g|v|a|d|s|i|a|q|t|y|q|a|  
p|r|d|s|s|k|e|e|q|q|v|t|w|k|t|s|q|d|t|  
s|l|t|p|e|l|s|t|k|a|p|k|e|y|d|t|s|q|p|f|d|t|s|n|i|g|f|d|v|n|e|y|h|g|g|d|n|a|s|i|d|  
>tr|A6QG29|A6QG29\_STAAE  
m|q|a|k|l|t|k|k|e|i|e|w|l|k|t|s|e|g|k|q|f|i|d|l|w|y|a|f|q|c|f|d|y|a|n|a|g|w|k|a|l|f|g|l|l|l|k|g|v|g|a|k|i|p|f|a|n|n|f|d|g|l|a|t|v|y|q|n|t|p|d|f|l|a|q|p|g|  
d|m|v|v|f|g|s|n|y|g|a|g|y|g|h|v|a|w|  
i|e|a|t|l|d|y|i|v|y|e|q|n|w|l|g|g|w|t|d|i|e|q|p|g|w|g|e|k|v|r|r|h|a|y|d|f|m|w|f|i|r|p|n|f|k|s|e|t|a|p|r|s|v|q|s|p|t|q|a|p|k|k|e|t|a|k|p|q|p|k|a|v|  
e|l|i|k|i|k|d|v|v|k|g|y|d|l|p|k|r|g|s|  
n|p|k|i|v|i|h|n|d|a|g|s|k|g|a|t|a|e|a|y|r|n|g|l|v|n|a|p|l|s|r|l|e|a|i|h|s|v|s|g|n|t|v|w|q|a|l|d|e|s|q|v|g|w|h|t|a|n|q|i|g|n|k|y|y|y|i|e|v|c|q|s|m|g|a|  
d|n|a|t|f|l|k|n|e|q|a|t|f|q|e|a|r|l|  
l|k|k|w|g|l|p|a|r|n|r|i|r|l|h|n|e|f|t|s|t|s|c|h|r|s|s|v|l|h|t|g|f|d|p|v|t|r|g|l|l|p|e|d|k|r|l|q|l|k|d|y|f|i|k|i|r|a|y|m|d|g|i|p|v|a|t|v|s|n|e|s|s|a|s|

Tsompanidou\_et\_al\_Supplemental\_FASTA\_File

ntvkvpasawkrnkygtyy  
meesarftngnqpi tvrkvgpfl scpvgyqfpggycdyevml qdghvwvgytwegqryyl pirtwngssppnqilgd1  
wgeis  
>tr|A6QG36|A6QG36\_STAAE  
mrmkrflti vqillviii fgykivqtyiedkqeranyeklqqkfqlmskhqehvrpqfeslekinkdivgwiklsgt  
slnypvlqgktnhdylnld  
ferehrrkgsifmdfrnelklnhntilyghhvgdntmfdvledylkqsfyekhkiefdnkygkyqlqvfsayktttkd  
nyirtdfenddqyqqflde  
tkrksvinsdvnvtvkdrimt1stcedaysettkrivvvakiikvs  
>tr|A6QG40|A6QG40\_STAAE  
mlisnewlkeyvtiddsvsnlaeritrtgievddlidytkdiknlvvgfvkskekhpdadklncqv digedepvqivcg  
apnvdagqyvivavvggrl  
pggikikrakl rgersegmicslqeigissnyipksfsgiyvfseaqvpgtdalqalylddqvmefdltpradal smi  
gtayevaalyntkmtkpet  
tsnel dlsandelvtienedkvpysarvvhdvti epspiwmqarlikagirpinnvdisnyvll eygqplhmfdqda  
igsqqivvrqanegekmtt  
lddtere lltsdivitngqtpialagvmggdfsevkeqtsniviegaidpvsirhtsrnlr sresssrfekgiatefv  
deavdracyllqtyangkv  
lkdrvssgelgafitpiditadkinrtigfdlsqndivtifnqlgfdteinddvitvlvpsrrkditikedlieevary  
gyddipstlpvfdkvtsgq  
ltdrkyktrmvkevlegagldqaityslvskedatafsmqqrqtidllmpmseahaslrqsl lphlieaasynvarknd  
vklfeignvffangege lp  
dqvey lsgiltgdyvvnqwgkktvdfylakgvdrvseklnlefsyrradidglhpgtraeillenkvvgfigelhipi  
laadndlkrtyvfe lnfda  
lmavsvgyinyqiprpfpgmsrdialevdqnipaadllstihahggnilkdtlvfdvyqgehlek gkksiairlnyldte  
etltdervskvqaeieaal  
ieggavir  
>tr|A6QG42|A6QG42\_STAAE  
mfyhncniti lvsnsdklsshil  
>tr|A6QG49|A6QG49\_STAAE  
mrkfii tsnfkyriqmlhcstcslvivqcvfvfkmfrlmimttletisl  
>tr|A6QG56|A6QG56\_STAAE  
mknknfigksilsiaaisltvstfageshaqtknveaakkydqyqtnfkqvnkkvvdqakavnffkrtrrtvathrkaqra  
vnlihfhqhsyekkk1qrqi  
dlv1kyntlk  
>tr|A6QG71|A6QG71\_STAAE  
mfsskyh1kfqsntifayatkyllnntthipsvsctfvkcvishplymlfsqpyvscvtktvyskyifftiniyhr  
sni1lktnfkniik  
>tr|A6QG73|A6QG73\_STAAE  
mrknersldnmslknael lykfansifsnen  
>tr|A6QG84|A6QG84\_STAAE  
mmddtkndqqesnedkdelelfttrntskrrqrkrskathfsnqnkddtsqqadfddeiy linkdfkkesndknnda  
sshandniddstnsien  
edyrynqeiddqnesnvisvdneqqsapkeqnsdsidetvtkkerkskvtqlkpltleekrklrrkrqkriqysviti  
lvllia vil iymfsp1ski  
ahvningnnhvstskinkvlgvkndsmytfskknaindeenpliksveihkqlpntlnv diteneiaalvkykgkylp  
llengkl1kgsndvkinda  
pvm dgfkgtkeddmikal semtpevrriyaevtyapsknkqsrielfttdglqvigdistiskmkyppqmsqslsrds  
g1k1ktrgyid1svgasfip  
yrgntssqsedsknvtkssqeenqakeelqsvlnkinkqsskn  
>tr|A6QG88|A6QG88\_STAAE  
mrvkdn1qqistqindkseknnfstkpnvia vtkyvtierakeayeagirhfgenrlegffqkkealpsdavihfigslq  
srkvkdvindvyfhaldr  
lslakeinkraehkicflqvnvsgeaskhgialevdvdfiddlkkydkieivglmtmapltddeayirslfkqlrlkke  
eiqrlnleyapcdelsmgm  
sndyliaveegatfvrigtklvgeee  
>tr|A6QG91|A6QG91\_STAAE  
mvfynffkvvinidiyqhfrqeeyelidqltdkcdqaeqhyapvlthfl dprgqyilevicgsyedlnvsfyggpnaerk  
raispnyyepkesdfels  
lmqidypekfvtkhqhilgtlmslgiereqvgdiivneriqfvltsrlesfimlelqrikgasvklytipvtdmiqsne  
nwknesatvsslrldvvik  
ylirksrtiakgggekkrvknhtivdsadfqlqandlisiqgfgrahitdlggktkkdkthityrtlfk  
>tr|A6QG94|A6QG94\_STAAE  
mnkmtklpvivknvrftkikiiqewy kfseaykcvivailnyvrndfk  
>tr|A6QG98|A6QG98\_STAAE  
metyefnitdkeqtgmrvdkl1pe1nndwsrnqiqdwikaglvvandkvksnykvkln dhivvtekevveadilpenln  
ldiyyedddvavvykpkgm  
vvhpspghytntl vnglmyqikn1sgingeirpgivhridmdtsgllmvakndiahrglveqlmdksvkrkyialvhgni

Tsompanidou\_et\_al\_Supplemental\_FASTA\_File

phdygtidapigrnkndrg  
smavvddgkeavthfnvlehfkdytvecqletgrthqirvhmkyigfplvgdpkygpkktldiggqalhafgfigfehvp  
tgeyerhaelpqdfedll  
dtirkra  
>tr|A6QGB5|A6QGB5\_STAAE  
maikk1vpashpiltkkaqavktfdds1kr11qdledtmyaqeaag1capqinqslqvaidmemegllqlvnpkiisqs  
netitdlegsitlpdvyge  
vtrskmi vvesydvngnkveltahedvarmilhiidqmgipfteradri1tdkeveyafind  
>tr|A6QGC1|A6QGC1\_STAAE  
mktgrivksisgyvqvdngerfntkprglfrkkkfspvvgdivefevqinegyihqvferenelkrppvsnidtlviv  
msavepnfstqlldrflvi  
ahsyqlnari1vtkkdktpiekqfeinelkiyenigyetefignddrkkiveawpagliv1sgqsgvgkstflnhyrp  
elnletndiskslnrgkht  
trhvelferngyiadtpgfsaldfdhidkdeikdyflelnrygetckfrncnhikepncnvkhqleigniaqfrydhy1  
qlfneisnrkvry  
>tr|A6QGD7|A6QGD7\_STAAE  
mafeg1ser1qatmqmrgkgk1teadikimmrevr1alleadvnfkvvkefiktvseralgsdvmqsltpgqqvikivq  
del1tqlmggentsinmsnk  
pptvmmvg1ggagkttagk1al1mrkkynkkpmlvaadiyrpaainqlqtvgkqidipvysegdqvkpqqivtnalkh  
akeeh1dfviidtagr1hi  
dealmlnelkevkdiaakpneimlvvdsmtgqdvavnaesfddqldvtgvt1tkldgdtrggaalsirsvtqkpikfvgmse  
kldg1el1fhpermasr1lg  
mgdv1s1iekaqqdvdeqakd1ekkmressft1ddf1eqldqvkn1gplddimkipgmnmkgldklnmsekiqidhik  
ai1qsmtpaernpdt1nv  
srkkriakgsgrslqevnr1mkqfndmkkmmkqftgggkgkkgrnqmnm1kgmnl1pf  
>tr|A6QGH8|A6QGH8\_STAAE  
mkeryyelidervfeqelengr1r1fi1pkpgfqtftvyttqfsg1dnqfkl1gqdfvtvpdgvahf1ehk1fekeed  
1ftafaednaqanaftsf  
rtsylfsatdniennikr11tmvetpyftketvdkekgiaeeikmyqeppgyk1mfdt1ramyqqhpirvdiagsvesi  
yditkddly1cyetfyhps  
nmv1fvvgdvdpcaicrivkghedarnkvnqpkierglvdepdvkeafvtesmkiqspr1ml1gfknkpl1qeaqqyvqr  
d1ems1ffeli1fgeetdfy  
qnl1negliddtfgyqfv1eptysfsivtsateepdk1kk111del1rdkkgnfqdaefel1kkqfigefiss1nspeyi  
anqytklyfegvsvfdm1d  
ivenit1dsinetssly1n1dqvdsr1leikk  
>tr|A6QGH9|A6QGH9\_STAAE  
mka1v1ggsgsigseivkq11tdgfevyvqyrtidnel1tskfnddkvrfiqad1sqtididktfgdiksl1dcliyasgq  
slygv1qdmkdhdidacyq  
1nv1ql1r1cryfvdv1rqsangriivissiwgetgasmetiysamsaq1gfvkalsqelal1tsvtvnaiapgvfagnm  
asewqedelqamitel1pqq  
r1v1psevah1tcay1lyhpnarsvtgtiqkvngawyi  
>tr|A6QGI2|A6QGI2\_STAAE  
mni1nqi1tvfrv1ipvf1il1falvdfgfgnvs1lggyeiriell1sgfifilas1sdfvdgylarkwn1vtnmgk1fdp1  
adk11vasal1myfvq1gl1t  
nsvvaiiiiarefavtgr11l1qieqgfvsaaq1gkiktavtmvaitw11lgdplat1ig1slgqillyigvift1lsg1  
eyfykgrdvfkqk  
>tr|A6QGI8|A6QGI8\_STAAE  
mkpql1swkvvggqgegiestgeif1atamnrkgylygyrhfssrikgghtnnkirvsttpvhaisdd1diliafdqetid  
vnhhemreds1iladakak  
pvkpegchaqliel1pftatakel1gta1mknmvaigatsal1m1ntntfeel1tmfsskkgdkvvevniqalnegyqlmq  
r1pei1ygdfelestdal1ph  
1ymigndaig1lgaiaagsqfmaaypitpasevmeymianiskvngaviqtedeiaavtmaiganyggvraftasagp1s  
1mmeaig1sgmtetpl1vi  
ntqrggpstg1lptkqegsd1mqmiygthgdi1pkivvaptdaedafyl1tmeafn1aeqqcpviv1sdl1ql1slgkqtvek1  
dynrieikrgei1qsdier  
eeddkgyfkryal1sdgvsprpipgvkggi1h1hitgvehneegkpsesasnrqqmekrmrkieq1liespvean1qheda  
di1lyigfistkgai1qegsn  
r1nqqgikvntiqi1rql1hpfptsvi1qdavnkakkvvvvehnyqq1asiikm1vnihdkienytkydgtp1l1pheieekg  
kiateikemv  
>tr|A6QJ2|A6QJ2\_STAAE  
mynkddv1nqadn1ank1kn1dtiktyqqieaqihqntiktmdm1kkhqkqavn1fnygkqnal1eqsehti1qsi1eaei  
nt1l1piveqf1qtsqyeaq1l  
1kmfvstmetr1ndh1nkakhsd  
>tr|A6QJ9|A6QJ9\_STAAE  
mwdks1vftffrrrfgmal1stfkrehikn1rnde1ydl1vi1ggi1tgagi1aldasergmkval1vemqdfaqtssr1stkl  
vhggl1ry1kqf1igvvaet  
gkerai1vyengphv1t1pewm1l1pmhkggtf1gkfstsig1gmydr1lagvkkserkkm1skket1akepl1vkkeg1kgggyy  
veyrtddar1tievmkraa

Tsompanidou\_et\_al\_Supplemental\_FASTA\_File

ekgaeiinytksehftydknqqvngkvi dkltnenytikakkvnaagpwwddvrsdyarnkkrlrtkgvhvvidqs  
kfp1gqavyfdtekdgrmi  
faipregkvyvgtttdfydnikssplttqedrdy lidainymfsvnvtdedi estwagirpliyeegkdpseisrkdei  
wegksqlltiaggkltgyr  
hmaqdivdlvskrlkkdygltfspcntkg laisggdvvggsknfda fveqkvdvakgfgidedvarrlaskygsnvdeln  
iaqtsqyhsklpleiyve  
lvysiqqemvykpnfdlvrrsgkmyfnikdvldykavidimadmldyspaqieayteeveqaikeaqhggnqpavke  
>tr|A6QGK4|A6QGK4\_STAAE  
maqqqihdtknklekavlvghaqqddkqfnfestmeelsslsetcqlvwwqitqnrdrvdrkyvvgkkieeiqafief  
kdidvvitndelttagks  
lnealgvkiidrtqlileifalrarskegklqvelaqldyl1prlqghgks1sr1gggigtrgpggetklemdrrhirtrm  
neikhqlrtveehreryrn  
krnqnqvfqvalvgytnagksswfnv laneetyekdqlfatldpktrqiqindgfnliisdtvgfiqklptt1iaafkst  
leeakgad1lvhvdsshp  
eyrtqydtvndlikqlmshisqivi fnkkdlcdhasnrpasd1pnvfvs skndgk1lvk1lfideikrqltyydetia  
tnnadrlyflkqhtlvte1  
kydeienvyrikgfkk  
>tr|A6QGK7|A6QGK7\_STAAE  
medfkmprtrftkddirkfaeeenvryrlrqftdilgtiknvevpvsqlekvldnemfdgssiegvrieesdmylhp  
ldtwifpwtaggkvar1  
icdvkytdgtpfegdpran1krv1kemedlgftdfnl gpepefflflk1dekgeptle1nddgyyfd1apt1gencrri  
vleledmgfdieashheva  
pggheidfkyadvtacdniqtflvvtiarkhn1hatfmpkplfgvngsgmhfvs1fkgkenaffdpntemgl eta  
yqftagvlknargftavcn  
plvnsykr1vpgyeapcyiawsgknrsp1rvpssrg1strievrsvdpaanpymalaaileagldgiknklkvpepvng  
niyemreereavgidlp  
stlytal kamrenevikkalgnhiynqfinsksiewdyrtqvsewerdqymkqy  
>tr|A6QGK8|A6QGK8\_STAAE  
mnn1t1etaek1ynyqkqleimied  
>tr|A6QGL1|A6QGL1\_STAAE  
mnkynfnydyahkivskkydysifikkvd  
>tr|A6QGL3|A6QGL3\_STAAE  
mlfslfvekeesqklylkelgedgeykyvakidsktsklchslngkifkvkdmipgvnappmhpwcrsttvphvgnwr  
kffkeregkyvegcfies  
galnksdeygikrnrhaqiyynsvrnrkdqieiskiakntninknliqrvyehifenkyll esgfkqfdpdfymaqsq  
rlregknikkmdim  
>tr|A6QGL9|A6QGL9\_STAAE  
mmnmpmakiivnvpksfenvrivfspikkgtkkhfapftsylftdkvkialnssslfgnvlssislivi ftnfkfvas  
selkka1mffsnnskvsav  
kvlslisci  
>tr|A6QGM0|A6QGM0\_STAAE  
mpffigeaktmrftfsnd1gtlftiilaigfiinlvafiiiflernrrtasstwawlfvlfv1pligfilylffgrtvs  
r1knknngn1tdfdglk  
qqiesfdkngygtndkqvkhhd1vrml1mdqdgfltennkvdhfidgndlydqlkdiknakeyihleyytfaldglgk  
rilhaleeklkqglevki1  
yddvgsknvkmanfdhfkslggeveaffasklpl1nfrmnrrnrkiividgqlgyvggnigdeylglgklywrth1  
riqgdavda1qlrfildwn  
sqahrpqfeydvkyfppkngplgnspiqiaasgpasdwhqieygtkmimsakksvylqspyfipdnsyinaikiaaksg  
vdvhlmi pckpdp1vywa  
tfsnasd1lssgvkiytyengfihs kmcliddeivsvgtanmdfrsfelnefvnafvydenlakdlrvayehditkskq1  
tkesyarnrplsvkfkesla  
k1vspil  
>tr|A6QGM3|A6QGM3\_STAAE  
mkflkdtsiaeissilylifpiagiffnevygpkwlyiisvivfslsy1ilvivnrlntlmfyilliihyfiicyfvfs  
vhpm1slfffysafavpft  
fknnvkkatn1filmtiictiityllynyfvammvyvvislimldnfkkmknreyqkeiaeknrhintliaeqerhr  
igqdlhdtlghvfas1slk  
selayklidadvekvkael1ainklsreslnkvreiidvklpsfieeidsirkvlkdadidftfenkelaqvsptkqs  
mlvmitreainnvikhana  
skvhgk1ktvnnhk111mi eddgk1dsdcevksisqrqh1ngtlavdstngtkiieistggia  
>tr|A6QGP4|A6QGP4\_STAAE  
mfnekq1lavd1ral1s1dtiekansghpg1pmgaapmay1wtrh1nfnppskdyfnrdrfvlsaghsa1lly1lhvs  
gs1eleelkqfrqwgsktp  
ghpeyrhtdgvevtgplggfamsvglalaedhlagkfnkegynvvdhytyvlasgd1megisheaasfaghnlsk1  
vvlydsndisldgelnkaf  
sentkarfeaygwnyl1vkdgndleeidkai ttaksqegptiievkttigfgspnkagtngvhgap1geverk1tfenyg  
ldpekrfnvseevyeifqn  
tmlkranedesqwnsllekyatype1aeefkla1sgk1pknykdelprfelghngasradsgtviqaisktvpsffggs



Tsompanidou\_et\_al\_Supplemental\_FASTA\_File

adlagnsnksnvndatdyss  
etpegknvwfgvrefamgaavngmaahggllhpygatffvfsdnlkpalrlssimglnarfifthdsiavgedgpthepie  
qlaglraipnmnvi rpadg  
netrvaveval esestpts lvltrqnlpvldvpedvveegvrkgaytvygseetpefl lllasgsevs laveaakdlekgg  
ksrvvvsmpnwnafeqqse  
eykesvipssvtkrvaiemasplgwhkyvgtagkviaidgfgasapgd lvvekygftkenilnqvmsl  
>tr|A6QGP5|A6QGP5\_STAAE  
mmnlvkfsrikkagetmatwlaifivaalilgliggfl larkymdy lknppineem lrmmmmqmgqkpsqkkinqmm  
tmnknmdqnmksakk  
>tr|A6QGP6|A6QGP6\_STAAE  
mlylifsival fmgativivirmkaqnyvnekkivlppffmatgalmyvvyfrltgsemleafivgl lfstliwtsr  
fevkgteiyemersiafpvi  
lislliiirtvmkifisneidpge lggmffllafcmivpwaamlykykk lkk tlin  
>tr|A6QGP9|A6QGP9\_STAAE  
myrttlahlf lfknyffsrnks lsvnttfssttassassffin vfailtkmkanamiiks itdwinkpylipqndh  
slakstdpkilpingimif  
stnediillkaapittaiaksktlpfkans lnsfnitlnl sflnvtssiiqqikklenrlfkki  
>tr|A6QGQ1|A6QGQ1\_STAAE  
mnsppenngkkyspvfiysaivvaivvllgaf lpeqfnyvtnnikmwitek lgyylil lttiivffci flifspigkl  
klgkpnkpefntiswfam  
lfsagmgiglvfygaaepmahfatp tadtptteaytea lrstffhwgf hawavygvvalalaysqfrkgepgllsrtlr  
pllgdkvegpigifidvls  
vfativgvavslmgalqingglhylfnvpntfvqaiiivvtilfiasawsgl skgiqylsnlniglgtilmvaaliv  
gptvlinmltsstgslln  
tflfnsfdtaalnpkrewmsswtlyywgwllswspfvgvfiarvskgrsirefigsvllvpavsvfwfsvfgvlgi et  
gkkhkeifdmtpetqlfgv  
fnhvpfgivls liallliasffitsadsatfv lgmqtffgs lnpssmvkvvwwgisqaliafvlllagggngaealnaiqs  
aaiisafpfsfvvilmvsv  
fykdanqerkflgl t ltpnkhr lqeyiksqqedyesdilekrqsrnigkkdn  
>tr|A6QGQ2|A6QGQ2\_STAAE  
mrvgvraprtqkl tksqltimck lmgpnkekl dsqflqtmqvgvgrnkfceni isvplpske  
>tr|A6QGS8|A6QGS8\_STAAE  
mrfvfdidgt lcf dgrlidqti idtl lqlqhdghel ifasarpirdllpvlpsvfqhqt ligangamisqqskisvikpi  
htdyhhi fki iqkyeldy  
iiddwnyaaql daenaifer l dphklascidvanidtpiki illnidpaqittil deldkyhqele mihhsneynidit  
aqninkytalqyifdadvk  
yiafgndhndivmlqhassgyi igpseaythailkl d kikhinnaqaickvlksyk  
>tr|A6QGU4|A6QGU4\_STAAE  
mvtrsvlkfggssvsdf tki kriaem l kervnqdeqlivvvsamgnttdql mtnvstl tkapqqela lllttgeqqts  
ylsmv lndigmnakamtgy  
qagiktighh lkski aqin pqtfeqafqendilvvagfqginehqel t lgrggsdt tavalavsnqipceiytdvdgvy  
atdprllpkakrldivsyel  
emmema l gavl etrsvelaknyniplyl gkt lsnvkgtwimsneeilekkavtgv aldkhmmhvtisyp lpdnqlltq  
lftel eegavnvdmi sqiv  
nldglqlsftikdsdfhgismilet lknqyealaykinehyvkisligsgmrdmsgvaskaf lliennipfyqtttsei  
sisyiddfngqqavekly  
dafni  
>tr|A6QGV1|A6QGV1\_STAAE  
mtvkynqngel tmdgis lktiaqnfgtptivydelq ireqmrryhrafdsgl kynisyaskaftci qmvklvaeedlql  
dvsege lytaleagfeps  
rihfhgnnktkheiryalennigyfvidsleeielidryandtvqvv lrvnpgveahthefiqtggedskfglsiqygl a  
kkaidkvqqskh lklkgvh  
chigsqiegteafietakiv l rwlkeqgiqvellnlgggfgikyvegdesfpiesgikditdaikseikvlgidapeigi  
epgrsiygeagvtlyevgt  
ikeipeinkyvsidggmsdhir talydakyqallvnrneeaddsvtiagklcesgdi iikdaklpssvkr gdy lailstg  
ayhysmasnynqm qkpsvf  
flkdgkarevikrql rqliindtk  
>tr|A6QGV7|A6QGV7\_STAAE  
mmtenksfkeshpl ddfis dkel snnttiqekeltieqqkvdtiskqinpldnegllafgsdlqkqmsqfshqmldevqs  
kdvgpigdt lsd lmsklks  
vnpe lntdkpsmlkri fsrakssineifsrmsvs aqvdr itiq lqkhqth ltrdie lldtlydknkqy fddls lhiia  
aaqkklqleneklpqlqqg  
aaqstnqmdiqqvadmqqfidr ldkriydlqlsrqialqtapqirmi qnvna laeki qssiltsiplwnqmaial tlm  
rqrnavaaqravtdtnd l  
l tanaem l kqnaie taten ergivldt l krtqrni etieetliiqhgreerqlaeke lqqleqdlkshlvnikgpnk  
qs  
>tr|A6QGV8|A6QGV8\_STAAE  
mkailgftrmsvrginkvkre l gfv lmalnirkiaa qravhykihikkadfyqinnrnqlfyia

Tsompanidou\_et\_al\_Supplemental\_FASTA\_File

>tr|A6QGV9|A6QGV9\_STAAE  
myknynmtqltlpietsvripqndtryvneivetisdsefdeficpnkkrigfkryayrndrysfrdfklyecddcss  
cs1rhqcmkpnsksnkkim  
knydneyfkaginqklsepetkksivkek1m  
>tr|A6QGW7|A6QGW7\_STAAE  
mtrkrklrnnwiivttmitfvtiflfc1iiff1kdtlhnselddaersssdinlhfshkpvkdisaldlnaslgnfqei  
iydehnnklfetsndntvr  
vepgyehryfdrvikkrigieyliikepittqdfkgs1lihslenydnivkslyiialafgviatiitatisyvfstq  
itkplvslsnkmieirrdg  
fqnk1qlntnyeeidn1antfnemmsqieesfnqqrqfvedashe1rtplqiighlnliqrwgkkdpavleeslnisie  
emnr1ik1veelle1l1tkgd  
vndisseaqtvhindeirsrihs1kq1hpdyaqfdd1tskn1eikmkphqfeqlflifidnaikydvknkkikvkr1kn  
kqk1ieitdhgigipeedq  
dfifdrfyrvdksrsrsqgng1g1siaqkiiq1nggsikikseinkgttfkiif  
>tr|A6QGX2|A6QGX2\_STAAE  
mddkqhtssdderaeiatsnqdetnsskrvh1krwqfisiligtilitavitvayifinqkisglnktdqan1kie  
nvyki1nsdyykkqdsdk1  
skaaidgmve1k1dpyseyltkeqtksfnegvsgdfvgigaemqkndqimvtspmkgsaeragirpkdvtkvngksi  
kgkaldevvkdvrgkente  
v11tvrgseekdvkikrekihvksveykkkgkvgitinkfndtsge1kdav1kahkdglkkiv1dl1rnp1gg11dea  
vkmanifidkgktvvk1ek  
gkdtea1qtsnda1keakmdisilvnegsasasevftga1kdynekavygsktfgkgvvqttrefkdgs11kytemkw1  
tpdghyihgk1gk1pdvtid  
tpkyqs1nvipntktfkvgdddkniktiki1g1s1algykvdnestqfdka1enqvka1fqqank1levtgef1nketnk1fte1  
1vekankhddv1dk1ini1  
k  
>tr|A6QGY0|A6QGY0\_STAAE  
meilriepspntmkvv1sytrek1sntykkveetqprfinq11sidgitsifhvmnflavdkapkadwevilpdika  
afsdankv1lesvnepqidn  
hfgeikaell1tfk1g1pyqik1tsadqel1req1p1q1tyvdhmtqaqtahdn1ivmrkw1d1gnrygni1qevmdgv1eevlat  
ypesq1p1v1kha1eenha  
tnnyh1fyrhvs1deyh1atdnwkr1r1m1nh1f1pk1pt1fedip11d1a1sdekvpvrrqai1v1lgmieskei1py1ykg1rdk  
spavrrtagdcis1d1g1ype  
alpemv111ddp1k1ivrwaamfi1fdegnaeq1palkahindnafev1k1qiemaisriengdealgsvwkqmanrti  
>tr|A6QGY8|A6QGY8\_STAAE  
mtntvt1qtahivs1gdieeakasikpfi1rrtpliksmys1qsitkgnv1k1lenmqftgsfkfrgasnkinh1tdeqk  
ekgi1aasagnhagv1ak  
ak11g1dati1vmpetapqakqatkg1y1g1akv1ilkgknfnetr1ymeelakengmtivhpyddkfvmagqgtig1e1l1ddi  
wnvntv1vpvggg1liagi  
ata1ksfnps1ih1igvqsenvh1gmaesfykrd1tehrvdstiadg1cdvkvpggeq1tyevvkh1vdefilvteeeiehamkd  
1mqrak1i1tegal1ptaa  
i1sgkinnkw1edknvvalvsggnvd1trvsgviehgl1niadtskgvvg  
>tr|A6QGZ5|A6QGZ5\_STAAE  
m1tqsemi1vfv1detinqgin1tamkypksfdm1drvi  
>tr|A6QH06|A6QH06\_STAAE  
mqmatyavvd1ettgnq1d1fd1di1qigitfvrrnqi1dtyhsmirtn1leippfiqal1tsieenm1qqapyfnqvaqei1yd  
k1kdc1fvahnvdf1nfi  
kka1fkdcni1qyrpkvidt1leifk1afptdksyq1selaehagitlanahradedaattak1milafekfek1p1d1tkq  
1y1yskq1kyd1ydi1ffem  
vrqydak1p1dksyekfeq1i1yrkqvdfk1k1pttnyngs1kslyskavdq1gl1tyrppq1ylaetil1dq1mhsekamieas1  
gsgks1ay1la1lmyniet  
gkhvm1stntk1l1qsq1lek1dipamnealnfkina1l1ksksdyis1gl1sq1ilkddtsnyevn1l1kmq1l1wi1tetpsg  
di1qe1n1l1kggqkmyfdqki  
etyvparhdvhyynfi1krnaqni1qigitnah1lihsdvensiyq1fddci1vdeahr1pdya1nqvtnel1syadi1kyq1gl  
igknene1k1kaidq1lekq  
r1lek1di1apidi1fg1kasmnei1helneq1lfstifti1ndsdyddi1hrfhnvftfetkdi1k1d1hai1dk1nkt1leif  
ngi1shktvks1rkq1ly1k  
dkfkn1eqs1kaghtsfis1kn1sqksti1r1lyvkdyavkd1tkqv1lekfs1l1ifisgt1kfnhsfeafkq1fnkdvhfn  
tfevnts1qsakntsvfip  
sdvasyqykn1deyvasivsyi1eyttitsskcl1v1fts1ykmhm1vqdm1nel1pefedyv1vtqqnqnykivqqfnnfd  
kai1l1gtst1ffeg1fd1fqan  
gikcvmiak1p1fmnkh1nakyw1mdseftstfkeyv1pdavtr1frq1gl1r1n1endrgi1ivs1fddr1l1nsnykn1ffe1qt1  
eny1rqkkgdi1qq1fgk1l1rq  
iqkkkk  
>tr|A6QH09|A6QH09\_STAAE  
mkig1itcypsmggsg1iate1lgik1aerghev1h1fitsnip1frirkp1nmi1fhqvevnqyavfqyppydi1t1stkieavi  
keyd1d1l1hmhyavphaic  
gilaremsgkdi1kimtt1hgtdi1tv1gydhs1lqgaik1fgieksdi1vtsvks1laqethei1ietnkei1piynfvre1nefp

Tsompanidou\_et\_al\_Supplemental\_FASTA\_File

tkhntalksqfgiapdek  
lihvsnrfrqvkridtietfakvrekipskllllgdgpeivpmrqltkelnveedvflfgkqdcvsefyqlsdvlvlllse  
kesfgltlleamktgvvpi  
gsnaggi kevikhgetgfvdvdcdsasdyairlledkvlynklqkmladiaerfgselitdqeyyyyqkmlnehnks  
kge  
>tr|A6QH10|A6QH10\_STAAE  
miytilemqykenvemksmvemqrevdeyigqfktgyfspianlarlteevgelareinhtygekkkkdseeantikael  
gdnlfvllclansgidmt  
esfnetmekfntrdknrferk  
>tr|A6QH12|A6QH12\_STAAE  
mtikafwqytlyqrswlmmlllicniilgmigyiywgeqlshtpwhfki fvpdsstailylvisisliliqkqnsiidala  
fvtlfkygiwavimniflfi  
ieggditi vnglvlfmshsimavqaiyfypfrkrmigisvamiwvflndyidyfhlqfpyydfitthvwqigvlscclsv  
fglllyielnkllkck  
>tr|A6QH19|A6QH19\_STAAE  
minvaklnmneikkveqrlekaikskdsvleqaslhlssggkrvrpafvilssqfgkdeqtseqtyqvavalelihma  
tlvhddvidksdkrrrgkl  
iskkwtdttailtgnflalgllehl mavkdnrvhqlisesivdvcrge l f q f d q f n s q q t i i n y l r r i n r k t a l l i q i s  
tevgaitssqsketvrklk  
mighyigmsfqi iddvldftstekk l g k p v g s d l n g h i t l p i l l e m r k n p d f k l k i e q l r r d s e r k e f e e c i q i i r k s d  
sideakavsskylskalnl  
isel pdghpksllsltkkmsrnt  
>tr|A6QH48|A6QH48\_STAAE  
mqknilksgislselglgcmslgt dlkkaeqiidcavengityfdtadmydkginesvvgkallkyqrrddifigtkvgn  
rltkdgsttwdpsksyike  
avkgs l k r l g i d h i d l y q l h g g t i d d p l d e t i s a f d e l k e g i i r a y g i s s i r p n v i d y y l k h s q i e t i i s q f n l i d n r p  
eslldaihndvkvlargp  
vskglltsnsvnl d n k f k d g i f d y s h d e l g e t i a s i k e i e s n l s a l t f s y l t s h d v l g s i i v g a s s v d q l k e n i e n y h t  
kvsldqikt ararvkdley  
tnhlv  
>tr|A6QH50|A6QH50\_STAAE  
mklvfygagnmaqai ftgi inssnl dandiy l t n k s n e q a l k a f a e k l g v n y s y d d a t l l k d a d y v f l g t k p h d f d a l a t  
rikphitkdncfisisimagi  
pidyikqqlecqnpvarimpntnaqvghsvtgisfsnndpkskdeindlvkafgsvievsedhlhqvtaigtsgpafly  
hvfeqyv kagtklglekeq  
veesipnliigt skmi etse l s m a q l k k k i p l k g v q n k p g l d t l s q y d l v s i f e d c l n a a v d r s i e l s n i e d q  
>tr|A6QH70|A6QH70\_STAAE  
mvkvt d y s n s k l g k v e i a p e v l s v i a s i a t s e v e g i t g h f a e l k e t n l e k v s r k n l s r d l k i e s k e d g i y i d v y c a l k h g  
vnisktankiqtsifnsis  
nmtaiepkqinihitqiviek  
>tr|A6QH93|A6QH93\_STAAE  
mtcivindijelnkvgdnvtkneirkyil h k m k n f n k a e k r k a d t w l r n q f f a t e e y k e a n a i a l v l s f n h e v d t f s i i e  
qalmdhkri fvpkmdylh  
qmtfkeifnlkdidvdnkgiyyptskgettnldlivpgvgf q d d g y r i g y g g g y d r f l a n y q t k t i s l l y d f q i t s f  
epesfdqpvdkliiyqaa  
>tr|A6QH98|A6QH98\_STAAE  
midallnfdmryslisgiligfiapligafivvrrlsliadalshvtl g g i s f g m f l l t i m p t l v f i n p m w f g i l f a i v  
galliek l r t s y t a y q e i a  
ipiimsajalsaisi adgnqei v g l l f g s i s a v n i s d l t t i v i a i i v v l f i t l f y k e l f i l s f d e e y s k v i g i p k  
wiqflfi v i v a m v i s a s m r  
vvgillvsal itl piaismritksfkqil l l s v f l g e l s v i l g l v l a f y m d i s p g g v i v l l v i l l m i t m a y q k m r m k f k  
kganineyk  
>tr|A6QHC0|A6QHC0\_STAAE  
mqryfidqnavsqrrffitkkedihhitnvmrydvgskiiltfndqtvylceiaditsdkievd l k e k q n i n t e l p v d v t  
icsglikadkyewllqkat  
elgassfiavsmersivklneakvakkierwqkiikeaaeqsyr lvipsiqfesnlklicdtidnydyiliayeeekdg  
el snfkqt l q q f n a q d k v l  
mifgpeggl seneis l f s n t s t v v g l g p r i l r a e t a p l y a l s a i s y e k e l m g  
>tr|A6QHC9|A6QHC9\_STAAE  
msdnivaiygdvpe l e k q s a e i i s q f l k s d r d d f n v k y n l y e t e i a p i v e e t l t l p f f s d k k a i l v k n a y i f t g e k a p  
kdmahndq l i e f i e k y d g  
enlivfeiyqnkl derkk l t k t l k k h a r l k k i e q m s e e e i k k w i q s k l n e n f k d i k r d a l d l f i e l t g i n f n i v s q e i e k  
l i l f l g d r p t i n k q d v n q i  
inrsleqnvl l t e y i q r k k e q a i h l v k d l i t m k e e p i k l l a l i t s n y r l f y q c k i l s q k g y s g q q i a k t i g v h p y r v k  
lalggvrhyql del l n i d  
acaetdyklkssymdkqlilelflsl  
>tr|A6QHD0|A6QHD0\_STAAE  
mlfvalsmivglwssskvlstflflllyityrknkivyapislflifisawylhysqqai fnyinyiernsqfneraq

Tsompanidou\_et\_al\_Supplemental\_FASTA\_File

viqirggsdtykgrlslk  
neiyppfltdkknfdlkkiesrncivkgqfkvndnkfvtklqsiVVqsclesnrsnliekhkqfimmriydsgikfpdr  
imalitgdvkeveqfker  
vkeigiylhavsgshiaavfliyqplkrlnlplfvikgitiivlalfaqytnyapsavraimttlvlvitkqikiks  
iqllafafiiimfilnplvv  
ydgfgfsfiisffimllfpflqqlsklqslfiitfiaqlasfivaipsfhqlqvwgflsnlifvpyysiilfpilsilff  
itshfiVgltplnyldvs  
fnfhdlldlfrirkqshfsvpkfnDwifivfiisvyyifwllakrkyilvtfwtiilTllitfptnshhkitmlnvqg  
gdsilyeggknqnlidtg  
gkviddtkqpsysiskyhlpTlnerginelEylilthphndhigeveyiishikikhiviynkgysntlmllsklshk  
yniklmdvrqvssfklgds  
sflffdsfipnsrdkneysiitmiTyqnkvllmgdasknneslllkkynlpeidilkvghhgsktssskefiemikpki  
slissgknmyhlpniev  
krlqrisriynsqngqvtidlddnlkvdssygnasgl  
>tr|A6QHE5|A6QHE5\_STAAE  
mgrnlklkkesdfetknhkrlllgsVflmatsaigpafTqtavftsqqffasfafailssiidigaqiniwriVvtg  
lrgqeisnkVvpglgtvis  
ilafgglafnignagaglglnaifglDvkwgaaitaifailifvsksgqkimdvsmilgivmilVvayvmfvsnpPy  
gdafvhtfapehpmklvlp  
iitlvggTVggyitfagahrildsgikgkqylpfvnqsaiagilttgimrtllflavlgvvvtgvtlssenppasvfeha  
igpigknifgivilfaams  
svigsaytsatflktlhkslnersnlivivfivistmiflfigkpisllliagaingwilpitlgailiaskkksivgdy  
khpnmfiifgivaVlvtiI  
tgifsfkeVlqlf  
>tr|A6QHF4|A6QHF4\_STAAE  
mteIltvtpkslshmetlidlgadafvigeqkfglrpgefnrqmteavalahkndkkvyaavnglfhnyhlDavedyin  
flheirvdriifgdPavvm  
yvkaqenpipLhwnaetlvtnhfqcnywgkrgasravlarelnldeiiikensveievqVqgmtcmfqsKrmllgnyy  
tfqdrqmkierrndeqsll  
lydeerqnnypvyedyngthimspndiclieelapffeagidsfkidgilqteeyinvvteqyrqaidlynedpeiyede  
kfmImdPieeiqpdhrpfd  
egflykqtvy  
>tr|A6QHG2|A6QHG2\_STAAE  
mriesgtsqcprlynvilagpqhrefrkeilqampvgdnefnfvkisflshslcmnlimysyf  
>tr|A6QHG7|A6QHG7\_STAAE  
madeskfdqfkgnvketvgnvtdnkelekegqqdkvigkakevvenaknkitaiklkk  
>tr|A6QHH1|A6QHH1\_STAAE  
mgflaaytpymkdVqnkkggthlyitgrmikll  
>tr|A6QHJ3|A6QHJ3\_STAAE  
mrfliyvglvllciylgyqgliwllDffqinsgflphfqfn  
>tr|A6QHK0|A6QHK0\_STAAE  
miyrnnfivfvlSffisillysshvllpfmfgpiiasiiCVkvfkldikwpflselgivilgvqigstftknvmdikn  
nwlSiivvsisilliaivm  
afvfkkiarintetaiIsvipgaltqmlVmaeqdkranllvsIltqtsriifvvvlvpfisyffhdgnmhangkltkvlp  
lsqvlNigqiviIaiifi  
vylimskikfptfqllaplivlvwnfstgltftldhwllnmaqliymirigvqiahllsdIkgrlaiaitiqnimliig  
alimvyiihffdnnpinel  
flgaapggvnqivlvalatgadvamitsyhifriffilfiIapginylkyrsnkred  
>tr|A6QHL8|A6QHL8\_STAAE  
mgrqafefglrpkdqfkvmqhfDlntnhlevlnrlytPligtqavglyhfmtqfvkeshnetlilshyifmnelkinlle  
frqqmdlleaigllkafvk  
hdegetqfvqliqppsahlffndpmlsilysevehrrfheIkkyfeyqqidlsefkqvtrqftdvfkvpstkididts  
dipinepyqgidlsnesfd  
femlrqmlgkhfisdvItkdakrlitqIatlyglTadgmkhvilnsitsgqqlsfeemrkqarsyylmehenqmpklqv  
kspatssagksseVnPKp  
qsdeWfelleqtspidmlaswseseptisqktmveelierekmsfgvinillqfvmIkedmklpkayileiasnwkkkgi  
kTakeaynyakkvnqpkne  
gssgnyqrgsygqrrnrisektpkwlenrdkpseedsakdnsVddqqleqdrqafldklskkweedsq  
>tr|A6QHM1|A6QHM1\_STAAE  
mpkvigltggiasgkstvsellsvfgfkVvdadkaareavkkgskglavrevfgdeaidengemnrRymgdIvfnhpek  
rlelnaiihpivrdimeee  
kqeylkqgyNvimdipllfeneIentvdevwvvytsesiqmdrlmqrnllsledakarvysqisidkksrMadhvidnlg  
dkleIkqnlerllEeegyI  
ekpnygeed  
>tr|A6QHM5|A6QHM5\_STAAE  
mmkfhhrllmllissiliiSfvtlgiIhasityvlsekheqalatdarsyiyIvqdneidkvkkivkqqnidllitkhdk  
kvfssgklkaipnsdsyiq  
krdvfiFnkkvngyhwiKgyNnditemhwtlWkyIilTclVvlIcIlyfasrsfkrTlirpiqevtyatqllangyyhir

Tsompanidou\_et\_al\_Supplemental\_FASTA\_File

vpesnvvetkalfvstndl  
arrlqklnneqkiqsnrlkttienipsailmidrngkivvankayyeqfnishnieqvyghyvnteieqlilesfkvek  
piyeqlvavinqvhakyfd  
iscvpiltrsqsllgqilvumhditnlkqlenlrrefvanvsheikt pitsikgfaetlidgakndaesldmflniilke  
snrieslvtldldshieg  
hteldtdymnlstdlrrriidnmtqanqknisihtdiekdvivkaqueskiaqvitrlltnainysyedgdinvrvyrddf  
rvifevqdfgigikledqq  
riferfyrvdkarsrdsggtglgsitkhiveahqgnievnsqvgkgstfkvilkyke  
>tr|A6QHN0|A6QHN0\_STAAE  
mknngqlkpgynlqiatnsqfvlsydlfqnpdtrtlipfltmiantfgylpeyivadagyseqnymaiiddfnktpplit  
ygmfikdktrkfksgifnt  
qnwkydelnneficpnkrigfkryayrndrygfkrdklyecddcssclrhqcmkpnksknkkimkynweyfkvqin  
qklsepetkniysqrkidv  
epafgfmkailgftmsvrginkvkrelgfvlmalnirkiaaqravhykihikkadfyqiinrnqlfyia  
>tr|A6QHN1|A6QHN1\_STAAE  
mykiytmqtltpietsvripqndisryvneivetipdsefdefrhrgatsyhpkmmlkiilyaytqsvfsgrriekll  
hdsirmmwlaqdgtpsykt  
inrfrvnpntdaliselfiqfhsqclqnidnnsifidgkveananrytfvwkksiqheshknensktlyrdlveek  
iipeikedgdsdltieeid  
ligshldkeiedlnhsiednacaqirkqtrkkiteikkfkkkfdyserknkyeeqksilkdrnsfsktdlimmql  
>tr|A6QH00|A6QH00\_STAAE  
miyldnaattkafeevldtylknvqsmynpnsphkaglqanqlqqaktqinaminsktnydvvtsgatesnnlalkg  
iayrkfdtakeiitsvleh  
psvlevvryleahegfkvkyvdvkkdgsinlehfkelmsdkvglvtcmvnnvtgqiqipqmakviknypkahfhvdav  
qafgkismdlndisisl  
ghkfnlkgqgvllvnhignveptvhggqeygvrgstvnlpndiamvkamkianenfealnafvteinnvdrqflnkyh  
gvyinsstsgspfvlnisf  
pgvkgevlvnafskydimisttsacsksrnklnvlaamglstdksiegsirlsfgatttkediarfkeifiiyeeikel  
lk  
>tr|A6QH05|A6QH05\_STAAE  
mhqhdfkvqtswqggrrnvnvqgdilsenisipaslgvgigtndemlvsaasscyiislaatlerekftdisieqqs  
igtaclnngkfsmskivhh  
pqiqipsdqiaglekrllpkilitiadnncmisnavrnndikiyipiqaq  
>tr|A6QH08|A6QH08\_STAAE  
mkkilfdvdgvflseercfdvsaltvyeilmdkcylglhshidwetldndiqdirnri fkdki lnklkslglnsnwdm  
lfivfshihidilkkishd  
eieafmyqdepvelklnqistnladcfnlneqlplqfldnvkvgknniyaa leefattelhvdatlfslkgalwtlaqe  
vyqewylgsklyedvekki  
arttftkgyiyqeiilrpvdevkvllndlkagfelgiatgrpytetvvpfenlgllpyfeadfiatasdvleaenmypyq  
arplgkpnpsyaalygn  
nrdkyesysnkqdnivnkddvfvvgdsldlisaqkigatfigtltglkgkdaageleahhadyvinhlge lrgvldnl  
>tr|A6QHR3|A6QHR3\_STAAE  
mtnqdnhqlnhriyhfkai khvifvifmifiaivaiaviamslfhhltktsdlsddalikkvrqipgdellhdh  
nknllzeynhsqnsliig  
pktsspnvikaltssedtlfykhdgilpkailramiqdifntdqssggstittqvlknqvltnektysrkanelrlairl  
ehliskdeiiytylnivpf  
grdynganisgiasasylfgippkdlsiaqsayligllqspyygtpyekdgtlksdkdlkysiqrqhyvlkrmliedqi  
tekeyndalkydikshlln  
rkkrr  
>tr|A6QHS0|A6QHS0\_STAAE  
msnklesyrseivslnhqildllskrgelaqkigeeklkqgtriydpqrekemlndlidsnkgpfnndtikqlfkeifka  
stdlqksenekhlyvsrk  
kpedtvtfdnggiigdgnksfvfgpcsvsfeqveavaknlhakgekfirggafkprtspydfqglgveglkilkqid  
kydlnvseivnndfeva  
deyldvfqigarnmqnfe lkeagrtkkipillkrglsatieefvyaeyiasqgnqniilcergirtyekatrntldisa  
vpilkqgthlpvmvdvths  
tgrkdimpltakaalavgadgmaevhpdpsvalsdagqmdldefqafydelkpladlynakkllk  
>tr|A6QHS5|A6QHS5\_STAAE  
mnlfnypkyvgdvaflqiepeveglvnykknvveitnegnvvgynifeiskditiiekghikltdelvnvfqkri seag  
fdyknadlspkfvvygve  
tkdkhpdadklsvlnvngndtlqivcgapnveagqkvvakvgavmpsgmvikdaelrgvassgmicsmkelnlpnape  
ekgimvlnsyeigqaffe  
>tr|A6QHU5|A6QHU5\_STAAE  
mhklartsfgivgmfvntcivakyviiwemfsmkknvndtvfgilqlletllgdinsifseieseykmsreeililltlw  
qkgsmtlkemdrfvevkpy  
krtrtynnlelewiyerpvdertviihfnekllqekvellnfisdaiasratamqnslnaiiav  
>tr|A6QHV2|A6QHV2\_STAAE  
msqfmdyaiqlanmvqgqgtgnppvgavvvkegrivgigahlrkgdkhaevqaldmaqqnaegatiyitilepcshfgstp

Tsompanidou\_et\_al\_Supplemental\_FASTA\_File

pcvnkiidckiakvvyatk  
dnlldthgdetlrahgievecvdderasqlyqdfkacakqlpqi tvkvsasldgkqandngqsqwitnkevkdvyklr  
hrhdavltgrrtvelddpq  
ytrriqdgknpi kvilsksgnihfnqiyqdestpiwiytenpnlttnqthieiiylkscdl ttilhnykrgvgtllve  
agptttseflqsnyidefi  
lyyapkligsgnyfyqtndvieipdanqfeivhse llnqnvkl tlrkk  
>tr|A6QHV3|A6QHV3\_STAAE  
mrvai igmgtagsv lrelvkhpkfnq ldidlyddkvnmgqgvpfqnds sellinmpskkmslnlddetefwkwykqtd  
fnfdepaylprfvfghymk  
sylsmftkkypnistnynkvqei ytnsnidetn ltyyicctnsgqswqaydyvfltcgtfayhdpy nlgkkggyiatpyp  
tyntldevne lddiaigt  
g lasldvrvyvaahpk lpi tmtsrsah lpsvrgtmidvtfkyltkdk lndikkhhf gnapldt lvs lflkecad ydidf  
kklvhr rtgnhi adlkydl  
arptemgi fqs mieh lken lniw nslsiedqh qfnqyskmiql nsnmpprtae l ielienks lilkkl edvkhdg  
klyyfsyknqesvdi ynv  
inatgaksh lnel dqqdqlirn lenrqivqahpmggi qipetnqv isprfgt ltnmia igqmtngv nklrngvkmiveq  
vahtvsqlyda lesneqq  
rsdnq  
>tr|A6QHW6|A6QHW6\_STAAE  
mm1ki illyaytqsvfsg rriekl lhd sirmmw laqnqtpsyktin rfrvnpntd alies lfiqfhsqcl kqnlidnnsif  
idgtkveananryt fvwkk  
siqnhesk lnenska l yrd lveeki ipeikedgdsd l tieeidl igsh l dkeied l nhsienedca qirkqtrkrkteik  
kfk kfd dyserknkyeeq  
ksil kdrnsfsktdhd atf mrmkedhmknq l kpgyn l qiatnsqfv l sydl fqnptdtrt lipfl tmiqntfgy l  
>tr|A6QHW8|A6QHW8\_STAAE  
mevktfyngntmpq iglgtfrvendencmesvkyaieqgyrsid takvygnee qvgag iraglestgiared l fitskly  
fedfgrenvaa yeas lsr  
lg lky l dly l vhwpgtneavm vdtwkgmed l yknnvnknigvsnfephe l eallaqvs ikpvinqveyhpy l tqhklkly  
laaqrivmesw splmnaq i  
lndetikdi aqelgkspa qvvl rwnvqhavvt ipksvtpnr isenfqi d f e l sdeqmtridgl nqdkrigpdpkkfeg  
>tr|A6QHx3|A6QHx3\_STAAE  
mgf ikrkrmp ieyfthqfee itylsddlqvka l mmtphhevnrivvy l rggkgqvgrvragr lmqfsdsqtlvigpyyrg  
nngsegkdefyrgd lndvt  
qlr l lhd kyphafihmvgfsrgglqgl l t f q d l p v t s y t i w g g v s d i d l m y e e r v d l r g m l r r m i g h p k k d r a a y e a r q  
aipn inensppi l i v h g g k  
dqqv gi h h a y l a d q l e l k g a t h e t f y q m a e g h v p r p p a m v e t l t y i k e f m n q v e s h s  
>tr|A6QHx8|A6QHx8\_STAAE  
mki tykyrgd l p l n t e n n k n q s v k n s e r r g m l k g c g g c l i s f i l l i i l l s a c s m m f s n n d n s t n n q s s k t q l t q k d e n  
knedkpeeksetatded l q  
steevpanentennqheide ittkdqsd d d i n t p n v a e d k s q d d l k d d l k e  
>tr|A6QHY1|A6QHY1\_STAAE  
mitfeniqqlekyt lmtmhglfnqlklgi isienaehl tftpymlet lsslgvkdsivd lihkgteledfaafnl s i e d t  
vtvc l q r t e e l l k q y k n v e  
fndkilinwriiqek  
>tr|A6QHY4|A6QHY4\_STAAE  
msnqn l f d e l e k k g y k l e d i f t k e e i k k y k a e d q l r a g k t q y v e t g k d t a t l y l s s a y t k t i a a l g a g a i s v i s a l t g g l  
vgagv g g f l g s i a a s n i d t  
skgiy i k l k t k k n a a g e y v l t g e k w g y q  
>tr|A6QHY5|A6QHY5\_STAAE  
mtrerrsf ssefk l q m v r l y k n g k p r n e i i r e y d f t p s t f v n g g y k m  
>tr|A6QHY7|A6QHY7\_STAAE  
mgfy nkedsnei i k g y e n n y d r g i n i p r a h s i y l y e y w s e a y k n y k e g y l t e s d g k l c p a i y e y f w e l d y s v k d k s i s  
fyipckeivdyfsl iqtee  
gvwktkfget icinsk l l e f d n e c l l i k k e s l l n f l n t k k l s i g w k i y l e k i s l r d r q e w y n v f y d d g k y n k k i i k n d m  
skirrnf  
>tr|A6QHZ7|A6QHZ7\_STAAE  
meffsryvisg irfcdfaldrvvaickyvfqvrfnfvvki iwisftdm l m h v f f v l i k y k m f t  
>tr|A6QHZ8|A6QHZ8\_STAAE  
mntkflgk t l v a s a l v l t t l g t g l h s s y l g l d t n k v v t a k a e e k m t d g q l w k k v k d s l h d s d i l s n e y e t i n v t y l l s  
ngysss vsapgn d d g h l t  
qsidfkglkqid ltkenvyddf nkk l dakntwnsl tek l k g l g l l n g n q k v s i y s s d s s s p v s g k v g e g v t s g g e n t l t k  
cfinkitid  
>tr|A6QHZ9|A6QHZ9\_STAAE  
maikmine lksck l k f s k q a l t f v p i i v t i l f i l f i n w y l n v n l w n g r q i s l f t a s f n a i t s l l i s i n v y q v i n f e e n i  
ghfnhilgkanrlnwnas  
miftytitaicillasin lwhshdmkit l m f i g v s l f f n v i i l l l l f i s i f i k d v m a i v v g v l m f i f n v y f g l e v l g d  
hswf y l p i t y a t r y v y m f i  
egsipvt l t l a i y i i t l l l a v l l f k g f n k w s g r t i k d

Tsompanidou\_et\_al\_Supplemental\_FASTA\_File

>tr|A6QI01|A6QI01\_STAAE  
mimaklvteniskrfknqdvkhhinitlennevygllgingagkttlmkiicgilqqdsgeikldnrpmtrendlhkvgsl  
ietpatynhlsaqdnlkiv  
clnesvdfseinsvslvnlvndkkkkvkdflgmkqrlgiamaalikpeilvldepsngldpygiqelrellklltegg  
tsiisshilseiqladh  
igihegelkyqqrnnkdenleeiffkitkgdyk  
>tr|A6QI12|A6QI12\_STAAE  
mkgenemtdviihsmhgnsrnhwyqwehnltegydvtlfnfespeaktvdqwieamtkqinvrkkdtyfvthglgsi  
talkyiemidqpiegffsi  
agfkedaenidldidlsnvtidydnikkkvdfnyglsskndkyvsyketqrlmnalegnlrivedggghfleedgftfta  
lqdrmqdymtr  
>tr|A6QI13|A6QI13\_STAAE  
mtksvaiigagitglssayflkqqdpnidvtifeasnrggkqsyrdgymielgpesylgrktimtelakdigleqdi  
vntttgqsyifaknklypi  
pgsimgiptdikpfvttklispigklragfdllkkptqmqgdsvgaffrarlgnevlenlieplmggiygtddkls  
lmstfnpnfkeeeafgsl  
kgmkdekkrllkqrqlypgapkgqfkqfkhglssfiealeqdvknkgvtiryntsvddiitsqkqykyvndqleevydg  
vlvttphqvflnwfgqdp  
fdyfktdmsttvtatvvlafdekdiendhgtgfviartsdtditactwtsskwpfttpegkvlirayvgkpgdttvddht  
dnelvsivrrdlsgmmtfk  
gdpeftivnrllpksmpqyhvghiqqirqiqahikqtyprrlvtgasfealglpdcitqskvaaeeviael  
>tr|A6QI21|A6QI21\_STAAE  
metkflssrllrsrsqflvltaylffkikcquinemtleyryflsslf  
>tr|A6QI25|A6QI25\_STAAE  
miiksleiygygqfvqrkiefnknfteifgeneagkstiqafigsilfgfptkkskeprleprlgnqyggklvlilddgl  
eieverikgsaqqdvkvyll  
pndavrddawllqkkllyiskktyqgifsfdvlgldihrlnekqlqdyllqagalgstefstsmrevinrkkdelykksq  
knpinqqieqlkqlesqi  
reeeakletyhrllvddrdkssrrlenlkhnlnglsmheekqkevalhdhsqewksleqqlniepitfpekgydryekar  
ahkqslerdiglrnerlag  
lkeeatqlepvkgsdidafislnqgeneiknefeltaiekdiankqrdkdelqsnigwsethdhdsseamksyvseqi  
knkqeqaayikqllerslee  
nkiednavhseldsveekivpeetfekkkkeysqqvielekenlysklkerfeieqqekqkrqklrrttfilltlvgigl  
tafsfisnmlfgiifavl  
tlvfvigiiimskskvedyseaitdeieeikaqlaildenyldfdldeqyri rdhwqqaalknkdi leekryiegrlnda  
kgrhdelqstvenvkdely  
lsskisndlivdsistmanikalqhisdlngqrqqlvqeldtfynhaeavtksqfvynklsflhdvqqwlksaedtne  
kwrinaentklvtneinh  
naqleennekitalfdfiingteedfyqhedyqytsnlrsfndltkylenqnysyelssslsekttaqleedhlilat  
qvdeyneqylemgaqvsdl  
saqinhmetdttlanlrheyhslknqln diakdwaslsylqslvdehikqikdkrlpqvineaveilkhltdgrytminy  
nedsitvkhvngglydpve  
lsqstkellyvalrislikvlrpyyppflivddafvhfdkkrtekmlnylrslsehyqvlyftcvkdni vpskevitlnk  
ieeggkr  
>tr|A6QI32|A6QI32\_STAAE  
mkfkkipenfdlslrdifqqlkvpkklhhlnmskditindkparlmdkvhtgddvfvtideksnyvpsyryaqikyed  
ddmaivmkpvgkthpnd  
kesntlmnhvitytidsdyvepihrldqetvllivaknplmkkildrmlenditriykanvkalplkpqtidmpigkd  
kfhsnkrrrvsptggrait  
iltskmi keavcqlaikldtgrthqirvhlaeighpvigdpdygdstlrqlelesykiefvhpltkvisvsldd  
>tr|A6QI42|A6QI42\_STAAE  
mcndtlellrikdenikyinqeidviikgkatvnavltykpsacyccgvknegqihkhgkrvsritllktqgyntyln  
lakqrfkclecngtftakt  
sivdescfsrcvtgkvieeatkvkteidtaedncispstvsrirtkaanslrikpfncilpehiamdefksvknvtgms  
fifidndthdvidilenrt  
trflrayferfdlnrqvkvttvtdmyepyvrlfrdlfpnaaiifdrfhivqhl nrelnkyrvqvmneyrnkkpdytif  
knnwkvllmdtskifsky  
rwnksfkaykrssdivefmlskddilrhsyevqglrkdrlrlnwpkfinrlnsvsksksvsgkwkavkyyrkhqrmrn  
tiyypafngai eginnki  
klirikrisfgyrnfnnfkarimmi fslykgekkkttkpnnglaa  
>tr|A6QI45|A6QI45\_STAAE  
mlqkgeqfpi fklengdgtvitndilkgkkaiiyfyprndtptctteacdfrndlemfndldvavygisgdskkkhqnf  
ekhglnfdllvdedfkllak  
etgyvqlkksfgkesmgivrtrtffiideqgkvl dviekvkvktqieelknilg  
>tr|A6QI61|A6QI61\_STAAE  
mifmegnfknvkkliyegeeytkvyagniqvwkkpssfvikplpknkypdsieestakwt ingvepnksyqv tienvrsg  
imrvsqtnlgsdligsgv  
nsgvaskninfsspsgmlyvtisdvysgsptltie

Tsompanidou\_et\_al\_Supplemental\_FASTA\_File

>tr|A6QI62|A6QI62\_STAAE  
mykikdvetriknkgvldigcrfytedentasi rigindkqgridlkahgltprlhlfmedgsifknepliiddvvgk  
fltykipkkvikhagyvrc  
klflekeeeekihvanfsfnivdsgiesavakeidvklvddaitrilkdnatdllskdfkekikdkdvisyieknesrfkga  
kgdkgepggqgakgeagkk  
geggapkgngtvvsinpdtkmwqidgktdikaepellkinianvegledklqevetikdttlndsktytdtkiaelvd  
sapesmtrlrelaeaiqnn  
sisesvlqqjgskvstedfeefkqtlnlyapknhhnderyvllssqafkqgadslyqlksasqptvkiwtgteneynyi  
yqkdpntlylikg  
>tr|A6QI66|A6QI66\_STAAE  
mvvdnfskddnlielqttsqynpiidtnisfyedrgrtgvl favtknnprrlssissehvktsivlktddynvdrgayisd  
elativdaingrlyyviipne  
flkhsqkvhaqaffttqngsnvverqfsfniendlvsgfdgitklvyiksqdtieavgkdfnqlkqnmadtqtliakv  
ndsatkgiqqieikqneai  
qaitatqtsatqvaefdkivekeqai fervneveqqingadlvkgnsttnwqskltddygkaiesseqsidsvlstv  
ntsriihitsatdapsfdk  
igtvdtpkedgvddgsdipvapntlgksgvlvyvvdstaratwypddsndeytkyikisgtwypfykknngdltkqfve  
etsnna lnqakqyvdkfg  
ttswqqhkltepngqsiquvlnnaaggdlyltagnyyatrvpdlpsgvesyegy lsvfvkddtnklfnftpynskkiytr  
sitngrleqqwtvpnehks  
tvlfddggangvgttinl tepytynsilvsgtyppggvi egfglta lpnaiqlskanvvsdngnggiyecllsktsstl  
ridndvyfdlgktsqsgan  
ankvtitkimgwk  
>tr|A6QI67|A6QI67\_STAAE  
mdnkli dlrsvfdyryvdeneynfk lisdmltdfnfsleyhrnkev fahngeqikyehlnvtssvsdflyl ngrfsm  
vlghngdgi nevkdarvnd  
tgydhktlqdrlyhdystldaftkkvekavdenykeyrateyrfepkeqepfitedl spytnavmqsfwdprtki iymt  
qarpgnhym lsr lkpngqf  
idrllvkngghgthnayryidge lwiysavl dsnkknkfvr fqrtygeitygnemqdvmpnifndrytsaiynpienlmi  
frreykaserqaknslnfi  
evrsaddidkgidkvl yqmdipmeytsdtqpmgitydagilywytgdsntanpnylqgfdiktke llfkrridiggvnn  
nfgkdfqeaegldmyydl e  
tgrkalligvtigpnnrhhs iysigqrgvnqflkni apqvsmt dsgrvklpi qnpaylsditevg hyiytqdtqna  
ldfplpkaf rdagwfl dv l  
pghyngalrqvltrnstgrnm l kfervidi fnkknngawnfcpqnagywehipksitklsdlkivgl dfyitteeskrft  
dfpkdfkgiagwi leiksn  
tpgnttqv lrrnnf psahqflvrnfgtggvgkws l fegkvve  
>tr|A6QI70|A6QI70\_STAAE  
mteyikatieasvakfkqidsavksvqkfkrvadqtkdvelnandkk lqktikvakksldafsnknvkakldasiqdl  
qqkilesnfeldklnska  
spevklqkqk ltkdiaeaeaklselekkrvnidvnadnskfnrvlkvska lealnrskakafidvngvanskikrtke  
elksipnktrsrlevdtgl  
siptiyafkksldalpnkttkvdvtnglkkayay i ikandfqrqmglnanmfrvfgtvgsnmvgglltssfsilipi  
iasvvpvfallnaikvlt  
ggv lalggavaiagagfvafgamaisaikm lndgtlqassatneykka ldgvsawtdi ikqnqsai fttlanglntvkt  
amqslqpffsgisrgmee a  
sqsvlkwagnsgvasrffnmmnttgvsvf nkllsaaggfgdglv nvtqlap l fqsadwldr l gqsfsnwansaagens  
itr fietytknlpiignif  
knvfvginl mna fsgsstgi fqsleqmtakfrewseqvgqsqgfkdfvsyiqtnqplimqligniarglva fatamapi  
asavlravaitgwianlf  
eahpataqlvgv iitlvgafrflipi ilavsnfmgggligriialvskfgllragltilkgafmllkgplkiisvifqll  
fgkiglrnaitglvtvfg  
ilggpiti vigviaaliai fvl lwnknegfrnfi inawnaikt fmv tvwnv lktvasvvnailkai ttavtnvynfimi  
vwnqivaylqglwngia i  
attvwnllvtiittvfttimtiwta iwtflstiwntiitiattiwnllvtvittvfttimtia mtiwnaiwtflqt  
lwn ti vtatkvwnaitta  
istalqaawsfi sniwntiwsflsgil ttiwnkvvsiftqv vstisdkmsqawnfivtkgmqvwstittstlinfvnrviq  
gfvnvnkvsqgmtnavnk  
iksfigdfvsagadmi rglirgigqmagqlvdaaknvakka ldaaksalgi hsprefmdvgmysmlgfvkgidnhsskv  
irvnsvadkvvdafqptl  
napdissitgnl snlgninaqvqhthsiet spnmktvkvefdvnda ltsivngrnakrnseyyl  
>tr|A6QI74|A6QI74\_STAAE  
mtpnlqlynkayetlqgygfpvisrkemqei pypffvikmpesnrskytfdsysgdtnlvidiwsvsddlghhdglvkr  
cidltpsvktn dydfed  
dtniaqlvddttngel lhtsitisyktf  
>tr|A6QI80|A6QI80\_STAAE  
mdi qeklk lklqffaesdngkskdnnddegdkdkdkt nseeiekr lqeeynkr lkeel srrmkqkekekqea vde  
akrlakmnkdqiaeyereq



Tsompanidou\_et\_al\_Supplemental\_FASTA\_File

mdkeleqlrsekqlnemrsearkmlseaevdssdevnllvvtdaeqtksnveafsnvkkavneavkvnarqsp1tggd  
sfhstknkpnlaeiaraq  
kriikn  
>tr|A6QI83|A6QI83\_STAAE  
mvrisikkkllrri1rlilvstmtkvklnfnkpsnvfnrniifeiltnydnftevhyggsgskshgviqkvvlkalqdwk  
yprri1wlrkvqstikds1  
fedvkdclinfgiwdmclwnktdnkvelpngavflfkgldnpekiksikgisdivmeeaseftlndytqlt1rl1rerkhv  
nkqiflfnpvskl1nwvyk  
yffehgepmenvmirqssyrndkfl1demtrqnlellanrnpayykiyalgefatl1dklvfpkyekrl1nkdelrh1psyf  
gldfgyvndpsafihskid  
vkkkklyiieeyvkqgm1ndeianvikqlgyakeeitadsaeqksiaelrn1gl1kri1ptkkgkgsvvqgl1qflmqfeii  
vdercftkieefdnwtqk  
dkdtgeytnepvdtynhcids1rysverfyrpvrkrtnvsskvdtkslgl  
>tr|A6QI90|A6QI90\_STAAE  
mtmtdnarkeylnqffgskrylyqdnervahihvngayyfghivpdwqgvkktfdtaeelgiyikqhgleyeeqkqlt  
1f  
>tr|A6QIA1|A6QIA1\_STAAE  
mqalqtksnigemfnieqengeiaisgre1hqa1evstrydkwfermteygfengidf1sqvekvhgqkrartyeqvnh  
ilt1dtakeiamiqrsepm  
krarqyfiqvekawnspemimqral1kianntinq1letkierdkpkivfadavattktsilvgelakiikqnginigqrr1  
fewlrqngfl1krkgvdy  
mptqysmerel1feiketsithsdgthsisktpkvtgkqgyfvnkflgek  
>tr|A6QIA2|A6QIA2\_STAAE  
mafksikeir1lnnr1skvemakldvsegtrmewesgrteprmgmvekiss1fnvskgyllgeieeiv1pefdseievp  
yfgkvsagnfeevaidnek  
1kvppfafngrpsecialkingdsmk1langsyiivhdyrkscdhk1nsndilvlrl1ggeytkrvrrtetk1h1dpa  
sysdefktnsyd1dsidei  
evigkviynyrid  
>tr|A6QIA4|A6QIA4\_STAAE  
mpvykddntgkwyfsi rykdvygnkrkmkrgferkkdaklaese1fiqnvkygysdnqpfeyiffnr1knen1sarsiek  
rtteynthikerfngnipg  
kitttqctafnyllndag1svgyarsvwagfkavinyakkhyk1lydpt1svtpiprtkqakfitreefdekveqitn  
dtsrqltk1l1fysgl1rige  
alalqwkdydkikgeidvknk1n1snreieyn1kkeskkgi1pvpk1irem1knmynesskrykyfdenyfi1fgglepir  
yvtysyhfksvfpn1kih  
1rhsyasy1innvgdmy1lme1mrhsnitetiqtys1lytdkkhqam1fid  
>tr|A6QIA5|A6QIA5\_STAAE  
mrnkpkiri1hndpweayndvkehqqlt1snieftttn1cnmrshcavgyt1qtvdpepl1dmdliyr1r1deipn1rtms  
itggepmfksks1rnvvkp  
1lkyahhrgiytqmnsn1t1pqdry1diaeyidvmhishnwg1tdefanvgfgamkkqpp1kak1k1yeqm1sart1se  
qgmfvsaetm1nqst1ph1  
rk1hqevvhdmkcsrheihmpypadfasq1nvl1taemkktihid1dfrdediwm1fgt1pvfpc1kddedqk1l1sr1rn  
aknvttrndpdgrsr1nvn  
vftgnv1vtdfgdetgtisniqkdk1tdvfdkw1ssd1aks1nchcsefsc1gpnv1vknmyypnmdfdknerhmkqpp  
iiqf  
>tr|A6QIA7|A6QIA7\_STAAE  
mgilt1nykek1lqyaell1vkvgmnvqpkqpvfirssvetle1th1liveeahcgasdvrvvysdpt1kr1kfenesvehf  
anheiksydvearmdyvkr  
gaan1al1sedp1mdg1dsq1lqafqqnarafkgymsvqknqfpwvvaafpskawakrvype1sveeayikfidvfv  
divridgndpvenwrqhia  
n1svyaqk1lqqknyhal1hyvsegtd1tvg1laknhiwedatsyngkeqafianipteevftapdrnrvdgyvtnk1p1sy  
ngtiidqk1l1mfkdgeiid  
fsagkgeav1kd1intdegrr1gevalvpddspisnrntifynt1fdenaach1aigsayafniqggtemtveekiasg  
1nds1nhvd1fmigssd1ti  
ygi1fedgske1lvfengnwastf  
>tr|A6QIA8|A6QIA8\_STAAE  
mtneekvl1airek1nivngq1ldpekyknaneeltdiydfvqsrer1spsevtaiadalqqlrhe  
>tr|A6QIB7|A6QIB7\_STAAE  
mterkcacnk1fs1lvrgpnkek1dsq1lqtmqvgvwaptkrnwipnfyrqck1gcpqhrefrkeilqakrvgvgrnk  
fyeni1svplpwcqla  
>tr|A6QIB8|A6QIB8\_STAAE  
mqhekmdern1tmkptkvi1kdasy1hsktsitfi1kdvvi1eednkiyyfdtsatfedqevkfefal1f1dsdmdn1khmd  
cdnpvteiyfi1epd1hfti  
idfnqell1ciyid1fdsg1r1hsmatesgis1rinvaksdftkfinelas1h  
>tr|A6QIC5|A6QIC5\_STAAE  
mqaiakndiktgtvvd1thehg1vki1drfpi1fipqal1neqieykii1kvknfaigk1lnintrsenrvappciyyerc  
ggcqlqhl1syeaq1lemkke  
qvin1l1fqrkahfdnski1ndvtg1mtdp1wryrnksq1pv1gkneqnevimgfyrq1rshdi1dmescl1qdsqhqevmnevksi

Tsompanidou\_et\_al\_Supplemental\_FASTA\_File

1kdlnvsyiqeq1kkg1mr  
hlvvrtyhtdemmiifvtngkkwpqknavekildafpnvtsikqnindshsnvimgrqsitlygkdtiidq1tdstfk  
isdqsfyqinseqteklyn  
kaieyaqltgnevldtycgigtiglymaplakhvygvevpsaiedaqqnatinqcnnttfvcgkaeevilqwkaagik  
pdvmdvpprkgcdefiq  
t11t1epkrivyiscnpatqqrda11laekyqleevtpvdmfpqtthvetvalfnlk  
>tr|A6QID1|A6QID1\_STAAE  
mkrt1v11itaifilaacgnhkddqagkdnqkhnnssnqvkeiatdknvqgdnyrt11pfkesqarg11qdnmansyngg  
dfedg11n1skevfptdky  
lyqdgqf1dkktinaylnpkytkreidkmskdkkkanenlglnpshegetdpekiaekspaylsnileqdfygggd  
kgknikgmtiglamnsvy  
ykkekdgstfksk1ddsevkqgkqmaseilsr1rendd1kdipihfaiykssedsitpgefitqataeksqtklnewh  
nineksallpsstaadye  
n1nnfkqfnd1qsyfnftqavgkvkfvdkkqrlvvd1pidyygqaetigitqyvteqankyfdkidnyeirikdgn  
qpralisktkddkeqpvh  
ysn  
>tr|A6QID5|A6QID5\_STAAE  
mqiek1rgaaldefda11tlenreecyqffdd1ctvneiqlsqr1qvakmikqgytyatieqesgastatisrvkrs1  
qwgndaytmi1drmnietn  
e  
>tr|A6QID7|A6QID7\_STAAE  
mkrnfpk1ia1s1ifs1svtpianaesnsnikakdkkhvqvnvedksvptdvrnlaqkdy1syvts1dkinynekasyt1  
gepfkiykfnkksdgnyyf  
pvlntegnidyivtispkitysssskytinvspflskvlnqykddqitiltnskgyyvvtqnhkaklv1ktr1ledkk  
1kktesi1ptgnvtq1kqk  
asvtmptsqfksnnytyneqyinklenfki1retqgnngwcagytmse11natyntnkyhaeavmrflhpn1qgqrfqftg  
1tpremiyfgqtqgrsq1  
1nrmttynevnd1tknngkiav1gsrvesrngmhaghamaavgnak1dngqevii1wnswdngfmtqdaknnvipvsngd  
hyrwyssi1ygy  
>tr|A6QIE1|A6QIE1\_STAAE  
myq1edds1m1hdlyqinmaesywndnihekmafv1dlyfrkmpfnsgyavfng1krvidfiehf1gfsesd1eylksigy  
kddf1s1y1kd1kftgs1rs  
mgege1l1c1f1gnep11rveap1liqaq1liet11lnivnfht1littkasr1rqiasndk1mefg1traqe1daalw1garaayig  
gfd1stsnvrag1l1fg1pvs  
gthahafv1q1tygdeyvafkkyarhkncv1lvd1t1fht1ksgvpnaikvake1gdkinfv1g1r1ldsgdiay1skearrm1d  
eag1ftetki1iasnd1deet  
its1l1kag1kav1dsw1gvgtk1l1tygdpa1lgavyk1vaienedgsysdrik1snaekvt1tpgkknvyri1nkktgkaegd  
yi1t1enenpydeq1k1l1fh  
pvhtykmk1f1ksfeaid1l1h1n1yeng1k1vyqmptedesreya1al1g1qsiwdenkr1fln1pqeypvd1skacwdnk1hk1rife  
vae1hvkemeedne  
>tr|A6QIE3|A6QIE3\_STAAE  
mq1y1lg1p1k1gt1fsyl1acr1q1yfseneat1fq1pksn1ffevikavadd1tsig1v1piensi1egt1in1vada1laqq1dv1fahgeir  
1din1falyng1td1sidik  
kvys1apa1isq1ttny1ihq1hf1dy1dv1dstiqs1l1tkiengvaai1apl1gsgeayg1ftpid1thiedyphn1vtr1flviknqqf  
dqnats1m1f1l1it1pm1hdkpg  
1lasv1ntfal1fn1lswiesr1l1ktq1lgmyr1ffvqadsaittdikkviailet1dfkvemigafn  
>tr|A6QIE7|A6QIE7\_STAAE  
mtmakty1fghknp1tda1issai1maefeq1rgnsgakayr1gdvs1aetqfal1d1fnvpape11tdd1dgqdv1ilvdhne  
fqssdtiasatikhvidh  
hri1anfeta1gpl1cyraepvgctatilykmfrergfeikpeiag1mlsai1sds1l1fksptctq1dvkaae1l1kdiakvdi  
qkyg1dm1kagasttdksv  
ef1l1nmdaks1ftmgdyv1triaqvnavd1dev1nrked1ekem1avs1aqekyd1flv1vvt1di1nsdskil1v1vgaekdkvge  
afnv1q1leddmaf1sgvvsr  
kkqi1vpqi1tealtk  
>tr|A6QIG0|A6QIG0\_STAAE  
mrhay1qncv1ycv1cy1tevdrgt1mki1ilknnsdfpiyeq1kq1qvkn1l1kghv1apgeh1psmrelak1dqvs1littkr  
ayed1lekdg1fv1tti1rgkgt  
fvkeqd1ssi1l1kekqff1tien1lvkelvneaqaiems1leelqdi1l1tfiyeess  
>tr|A6QIG9|A6QIG9\_STAAE  
mis1fl1pf1tryi1y1lnnie1l1qsl1hri1ngvvi1figsvyqvs1mlkhq1l1kmkri1hqcq1vihsiktmyrikkr1l1vitq1l1pm1  
kvit  
>tr|A6QIH0|A6QIH0\_STAAE  
m1lkr1g1l1f1l1tv1l1l1l1fsfss1itnevsasssfdk1gkyk1k1gd1asyfeptgpy1lmvnt1gvd1gkgnell1sphyvef1pikpgt  
t1tkeki1eyv1ewal1data  
ykefrv1vel1dpsaki1evtyydknkkkeetksf1p1tek1gfv1vpd1sehiknpgfn1l1tkvi1iekk  
>tr|A6QIH7|A6QIH7\_STAAE  
mid1tikvnnk1tipw1lyverg1feipsfnyv1l1ktenvdgrsgsiykgrr1lesysfdi1plvvrndyl1shngikthddv1nelv  
kffnyeeqvk1l1qfkskdwy

Tsompanidou\_et\_al\_Supplemental\_FASTA\_File

wmayfegpiklhkeftipvkftikvlt dpky sv tgnkntaisdqsvsvnsgtadtplivearaiksssyfmitknded  
yfmvgddevtkevkdympp  
vyhsefrdfkgwtkmitedipsndlggkvvgdfvisnlgegykatnfpdakgwgagtkrgl pkamtdfqitykciveqk  
gkgagrtahiydsdgl  
asigyenkyhdkighivvtlynqkgdpkkydyqnpimynldrivvymrlrrvgnkfsiktwkfdhikdprrkpidm  
dekewidggkfyqrpassi  
aiysaknygykwmemnglgsfntel pkpkgardviiqkgdlvkidmqaksvineepmlseksfgsnynvdsygseli  
iqpenvfdtvkwqdryl  
>tr|A6QIH8|A6QIH8\_STAAE  
mgerikgl sigldl daanlnrsfaeikrnfktlnsdllktgnnfkyteksthsyqrikel dgtitgykknvddlakqyg  
kvsqeggensaeaklrqe  
ynkqaneln flekelekttttefeefkkaqveaqrmaesgwgktskvfesmgpkltkmgdglksigkglmigvtapvlgia  
aasgkafaevdkgl dtvtq  
atgatgglklqnsfkdygnfpadaetvggvl gevntrl gftgkel esatesflkfshitgsdgvqavqlitramgda  
gieadeyqsvldmvakaag  
asgisvdtladsitkygapmramgfemkesialfsqweksgvnteiafsglkkaisnwgkagkdpreefkktlaeiertp  
diasatslaieafgakagp  
dlaaikggrfsyqeflktiedsqgtvnqtfdkesgserfkvamnkllvgadvwasiesafapvmeeliklsvavdw  
fsslsdgsksrsivifggia  
aagppvfgl gafistignavtvlapl lasivkagglisflstkvpilgtvftaltgpigivlgvlaglavafaiaykks  
etfrnfvngainsvkqtf  
nfiqfiqpfidsvknvfkqavsavdfakdiwsqingffnengisivqalqnicfikai fefilnfvikpimfaiwqvm  
qfiwpavkalivstwenik  
gviqgalniilgfikffsflftgnwrgvwdgivmilkgtvqliwnliqlwfvvgkilgvvryfgglkglisgiwgvikgi  
ftkslsaiwnatksifgfl  
ynsvksiftnmknwlsstwnniksntvgkahslftgvrskftslwnatk diftklnwmsniwnsikdntvagiagrlwdr  
vrnifgsmdglksisk  
kdhiggmvdavkrglnk liegl nwgvgkl gmdkipk lhtgtehttttrlvkngkiardt fatvgdkgrngngpgrnem  
iefpngkrvitpntdtay  
l pkgskvynqaqtysmlngt lprfslgtmwkdi ksgassafnwtkdki gkgtkwlgdkvgdvl dfmenpgkllnyileaf  
gidfns ltkmggiagditk  
aawskikkstadiwikenleamgggdvvggildpdki nyhygrtaaytaatgrp fhgvd fvfvyqevrtpmgrp ltrmpf  
msggygnyvkitsgvidml  
fahlnkfskspsgtmvkpgdvvg lgtngtfgstgphlfemrrngrhfdpepylrnakkkgrlsiggggatstsgatyas  
rvirqaqsilggrykgwi  
hdqmmrvakresnyqsnavnwdinaqrgdpsrglfqiigstfranakrgytnynnpvhqgisamqyivrrygggfkra  
gdyayatggkvfdgwynlg  
edghpewi i ptdparrndamki lhyaaevrgkkasknkrpsqlsdln gfdpsl lllkmi eqqqqia lllkiaqsndvi  
adkdyqpi ideyafdkknv  
asiekrrerqestkvkfrkggiaiq  
>tr|A6QII0|A6QII0\_STAAE  
mavkhasapkayinitglgfakltkegae lkysditktrglqkigvetggdlktayadggpiesgntdgegkislqmhaf  
pkeirkivfneeydedgrr  
ketgkqnyvavifrqerrdgtfrtvllpkvmftnpkidgetaekdwdfssevegealfplvdkksvrkyifdsanm  
tnhdgdgekgeeflkkil  
geeytgnvtegneetl  
>tr|A6QII4|A6QII4\_STAAE  
mvkmtiddllvkfkslekidhnsedeylkqllkmsyeriknqcgvfelenligqelil iraryayqdll ehfndnyrpe  
idfs lslmevsedeesv  
>tr|A6QIJ1|A6QIJ1\_STAAE  
mmtkderirfykskewqtrkrvlerdnyecqckrdgkl ttydkskrksldvdhilslehhpefahdlnnetlcikch  
nkkekrfikkenkwkdek  
>tr|A6QIJ2|A6QIJ2\_STAAE  
miki ekhdikkleeyiqhidnyrrelkmreyelleshepdnagagksnlpgnpiercaikkfsdnryntlrnivngvdr  
idesdedtlellrfrywdc  
pigcyewediahyfgtsktsilrrrnalidklakyigy  
>tr|A6QIJ3|A6QIJ3\_STAAE  
mwemikklnmdgfdi fivgils lfgitalllvvalpiytvasyqnkevhqgtitdkynkrqdkedkfyivl ddkqvien  
sdlsfkgkfdsadiqarl  
vgdkvkvtigyrihflnlypvlyevkkvdkk  
>tr|A6QIJ5|A6QIJ5\_STAAE  
mnnreqieqsvi sasayngndtegllkeiedvykkaqafdeilegmtnaiqhsvkegveldeavgimagqvvykyeeeqe  
neh  
>tr|A6QIJ7|A6QIJ7\_STAAE  
mrdymeieikfnetfeapmgsprprfstkgryahymptkytehkylnqmpklnlenalkielefyftppkswskkkk  
tqaiqqkvtkpdidnlmk  
tvldacnylwkdndqiaeitsskrygiepkiiirreei  
>tr|A6QIJ8|A6QIJ8\_STAAE

Tsompanidou\_et\_al\_Supplemental\_FASTA\_File

mtgwiklhrkllldspi fqnek lfkvfayclmkashkdhtqlvgrrvvelekgqvfvrkraseelrlkestvrdyiklle  
nltiivvksdnkfsvitvv  
nwaiyqsmeensdskndksttnqqmdnkwttnqqqintnknvkgndvkngekkkvtafdffqdnfgfitypnl  
dlnyylsdfendsdqivta  
slkiakdrnkvtwgyaksilntwl nanlksieqvrafekqqleskkqnykpfvkskektpkwltdstretktpevdenl  
ekdreafikrlnskwe  
>tr|A6QIJ9|A6QIJ9\_STAAE  
mlnrtilvgrl trdpe lrttqsgvnvasftlavnrftnaqgereadfiniivfkkqaenvnyl skgslagvdgrlqtr  
nyenkeqrvyvtevvads  
iqfl epknsndtqqdlyqqqvqqtrgqsqysnnkpvkdnpanangpielndddlpf  
>tr|A6QIK1|A6QIK1\_STAAE  
mtennklqti eqqlvqeknvsvnlkvrvlesqgnlelpndyspsnamkqawlqisqdnklmscndtskana lldmvtq  
glnpaknqcyfipygnkmq  
lqrsyhgvmmlkrdagadvvaqviykgdtfkqemgetgrikaikheqdfnidkeniigayctivfndgrdnyievmt  
ieqikqawmqssmikdeka  
lqnskthnnfkeemaktvinraakryintstdsni fkyaqeseqrqrkevl daevenanqeql dfeqpvl eeaqyte l  
endkpidvsdfeeikepat  
ekeseepf  
>tr|A6QIK2|A6QIK2\_STAAE  
mkinkltisnfagikevtfnfdgkdakiygnnatgkttatalqwl lfdkgl dgstksfnvpvl neknaenyeliptvfa  
efeidgkittfk keshpky  
tingktnrkeysrsrtkkqyindesikvkdykaridelidedvflitnpqafnlldwkkrrsl lfeiakpindedvikt  
nddfkelnni lgdheietk  
kkiltkikqinkdikdipirinqtqqnkqdvpefdndryaiikqeieqleneridiqngkeeinlrnqladkqselkri  
ednnsasnenkihaltne l  
hvengtvanl ktrlkqkqqi theenrrnql lenhkg lksdl eksknqkfeh lddnvcscgqql pteqvneareka lqk  
fnvkskeletiqtsinhi  
isegkkipiiek leddnnnlqikineaeersariqnkinklktthvdvtqtdeykavml eieinqrsnirktiqdkv  
sgiddkisel tqekseiev  
sr sieksnkh lddvise lrneedr ldekekyshdlyilkeftttkvkml teninnefdiaefkl fntlvngeleetcst  
tvngveydsglnnasrin v  
gldiintl skhfkvtapi fidnaesvte liktesqqiqlivneqdkklrmeti  
>tr|A6QIK4|A6QIK4\_STAAE  
myyktgdcqki invdgdfr lrvkkraysveivvl dhegnsidgilv sdendlytal dilkqsiyewienntdeqdklm  
nlvmkw  
>tr|A6QIK5|A6QIK5\_STAAE  
mtknymmmqeel rdllaekngel fevneinketefav llfstvgvsngdtssshcalgdivglan llnnendyhdia  
nviemyklkl lgladnke  
dendvlqng  
>tr|A6QIK6|A6QIK6\_STAAE  
mphilnvtvpipethvli tkdeydeligysl dpvwmmsdlkkklkiasdetikdr llfhprfeker aqgivhyphenfn  
rwrfnarkmnkfvdehfne  
iykerik  
>tr|A6QIK8|A6QIK8\_STAAE  
mqalqtksnigemfn iqekengeia isgre l hqalevktpykkwfermsdygfeenidyivtdi fvhnp lggrrnqtdha  
l ldtakeiamiqrsepgk  
rarqyfiqvekawnspeimqral kianntinqletkierdkpkivfadavattktsilv gelakiikqnginigqrrlf  
ewlrqngfl ikrkgvdyndm  
ptqysmere l feiketsi thsdghtsisktpkvtgkqqyfvnkflgekqts  
>tr|A6QIK9|A6QIK9\_STAAE  
mtdeakfvllqlysiy ldridegmskrsasyfgsdessfnaffl gfnfedydavle lkh rdfviasaedggflema lsr  
egiayseseskkdyktlmg  
lirdlkklii  
>tr|A6QIL1|A6QIL1\_STAAE  
mnkerni iaknirkfl ndsnmsqkklaelinikpst lsdyl nlr snpshgviqriadvfevgksdidttykddnditsi  
ynkltpprqenv lnyaneq  
leeqnsgkdnvvdinsykqektpvvnvcvsagvger lhdet lftemvkgpipthdlalkvngds mepmfkdgeiifvek  
thnikngqigifiieeay  
vkkvfveddr ltlvs l nkdyddlhfyrnesvr ligkvi l  
>tr|A6QIL4|A6QIL4\_STAAE  
mkrllglllvstlv lsacgn denqeeskkevkskekki ekenkskkdkekevatqqqpdnqtveqppsqqsvqqppq  
qipqnsvpqqnvqvqqnk  
qkvdlnnmpptdfstegmsegaqkqieel smqkdyhgl sqreyndrvsei inndn  
>tr|A6QIL5|A6QIL5\_STAAE  
mpilrrermktrcydgkkwqyefkhegkryrkkgrfrtkreansagldkl nelrsgfnidnyit leeyfenwiktykqpv  
kentyrhynalqhiqkhk  
igkme lskirrqvyqkfindyskehaketirktngairsaldda l ydglifknpaykvnykagkptksekekfi svteye  
ilkdhvrkktrrsslalfi

Tsompanidou\_et\_al\_Supplemental\_FASTA\_File

mictgcrvsgarnikiehinqvktifiderkntsprysiaksdmkhimdvistfaisydgyifkeggsiinlhainn  
alksacravnnipiitshal  
rthhcsyllakgvsihyiskrlghkniaittsvyshl1eekfneedkkttkilesm  
>tr|A6QIL9|A6QIL9\_STAAE  
mfknknvyinyittlkgvslmttfsekekiqlladivelqtenneidvcnyltdlfdkydikseilkvnehranivae  
igngsplalsghmdvnda  
gnqdnwsyppfqltekdgllygrgttdmkgglmalvvslielkeqnelphgtirllatageekeqegaklladkgylddv  
dgliaeptgsgiyahkg  
smsckvtatgkavhssvpfigdnaidtllfynlfkekyseikqddtkhelvdapmfksligkeiseedanyasgltavc  
siinggkqfnsvpdeasle  
fnvrpvpeyndndfiesffqniindvsnklsldipsnhrpvtSDKnsklittikdvassyveqdeifvsaivgatdassf  
lgnkdndvldai fgggnpl  
mahqideyiekdmylkyidifkeasiqylkek  
>tr|A6QIM3|A6QIM3\_STAAE  
mgymssiitrlnnsdfeklnqlcklyddlgyptnendlkrkkitnhddyfl1llikenkiigls gmckmmfyeknaey  
mri lafvi hsefrkkgygk  
rlladseefskrlnckaitlnsgnrnerlsahklysdngyvsntsgftkql  
>tr|A6QIM4|A6QIM4\_STAAE  
mfisla iwsinsmgkqci slnllsddtfavisvmttlgtailggiapsiygiftspidkkssfraisdweeqrnnvk  
dlmmlpftllsilivifi  
fqfaysklfntiaiiifiiilvmmfflillicykitvkicryfske  
>tr|A6QIM9|A6QIM9\_STAAE  
mtrlwaslltviiylsqflpllivkklpvfqysgieltkaviyiqvlvfliaattiilinlkiknptklelevkepky  
iipwallgfalvmiyqmvv  
sivltqiyggqvspntekliiarkipififfvsiigplleeyvfrkvi fgelfnaikgnrivafiiattvsslifala  
hndfkfipvyfgmgvifs1  
ayvwtkr lavp iihmlqngfvvifqllnpealkkateqanfiyhi fip  
>tr|A6QIN0|A6QIN0\_STAAE  
msremsyhwfkkml1stsililssslglathtveakdnlngekptnlhnhitspsvnsennnetgtphesnqtgneg  
tgsnsrdanpdsnnvkpds  
nnqnpstsdkpdnpnqpsnpkpdnpkpkpdnpkpdnpkpdnpkpdnpkpdnpkpdnpkpdnpkpdnpkpdnpkpdnpk  
pkpnpkpdnpkpdnpkpdnpk  
pdpdqpgdsnhsggsknggtwnpnasdgsnqqwqpnngnqgsqnptgndfvsqrflalangaykynpyilnqinklgkd  
ygevtde diyniirkqnfs  
gnaylnglqqsnryfrqyfnplkseryyrnldeqvlalitgeigsmpdlkkpedkpdskqrsfephekddftvkkqed  
nkksastayskswlaivcs  
mmvvsimlflfvkrnkknknesqrr  
>tr|A6QIN1|A6QIN1\_STAAE  
mg1fkdkkamtfdnameerrsiynlkdsisisddelesmiahavkhvpsffnsqstrivlllndnnnkfwdntkailke  
vmgenrdfep teqkidnflk  
hsygtilyedqdvvs glqeqmpnyydnfaiwstqtamhqfaiwatalatkgigas lqhynplvdemtsnefnipkswkl  
iaqmpfgdi reaagektfn  
pvedrfvikk  
>tr|A6QIN5|A6QIN5\_STAAE  
mellnsynfvlfvltqmi lmftipaiisgikyskldyffiiivistls1flfkmfdsasliiltsfiiimyfvkikwysil  
limtsqiilycanymyivi  
yayitkisd si fvi fpsffvvyvtisilfsyiinrvlkkistpylilnkgflivistillltslfffysqinsdeakvi  
rqysfi figitifl siltf  
visqfl1kemkykrnqeeietyyeyt1kieainnemrkfrhdyvnilttseyireddmpglr dyfnknivpmkdnlqmn  
aiklngienl kvreikgli  
takilraqemnipisieipdevssinlnmidlsrsigiildnaieasteiddpiirvafiesensvtfivmncaddipr  
ihelfqesfstkgegrlg  
lstlkeiadnadnvlldtiengffi qkveiinn  
>tr|A6QIP4|A6QIP4\_STAAE  
mllq1nhisksfdgediftdvdfevktgerigivgrngagkstmkiiagvenydsngvskiknlklgyltqqmtlnsn  
atvfeemskpfehikrmes  
likeetdwlskhandydsdytkthmsryeslnsqfeqlegyyeski ktvlyglfseedfnkpindfsggqktrls1laq  
mllnepd1111deptnhld  
lettkwledylryfkgaiviishdryfldkivtqi ydvalgdvkryvgnyee fiqrdlyyqkrmqeyesqqaeikrlet  
fveknitrastgmskrr  
kilekmeridkpmldaksaniqfgdrntgndvmhvknleigyqtaitkpsievskgdhiaaiigpngigkstliktian  
qqkalngditfganlqigy  
ydgkqaefkssktildyvwdqyp1mnekdirav1grflfvqddvkkiiindlsggekar11la11mlqrdnvlildeptnh  
ldidskemleqalqhfegt  
ilfvshdryfinglankvfdltidggkmylgdyqyyiekveeaealkahqeeqsvnvqahkksmeqssyhnqkeqrreqr  
klerqiseceneietlett  
ilqideqltqpevyynnqkane1aiqkdseqklehamskweelqk1  
>tr|A6QIP5|A6QIP5\_STAAE

Tsompanidou\_et\_al\_Supplemental\_FASTA\_File

mstnqtflifviaiilltsvbigvgrmysrqrllksmetlwqtispleafirpnshfdyeyklykekfeshslvddktws  
dlnmnaifhkmnynltaig  
>tr|A6QIP8|A6QIP8\_STAAE  
emklyaclrgmlsitnksllslfndnaefrknvtyhlaigktvyptfpdqitpvkrqnilflcpflpvisfavifinsq  
vgillflmsclfniiilsat  
lkrtyeddlksifyasnvlkqgytiskikhapqpevnfkqfrtarhltsvlaevndedigamviklvklifmldyvlfs  
iqksytthmnelkncfdyi  
aeldnhyalamyrrtlecytepqiddsndgivfsethpliadavandfslsqnilltgsnasgkstfmsiainiilas  
aiqtvtaskfvyqpgivft  
smanaddvlsqdsyfmaelksikriveipdnqkiycfideifkgtntteriaasesvlsflheksnfrviaathdielae  
llkqryenyhfnevienn  
ihfdykipgkantrnaieillkitsfpakiyerakdnvпки  
>tr|A6QIP8|A6QIP8\_STAAE  
mnklrrqlsmnllidtsnqplsvalmqndevlaeittdskqnhsvqlmpaisqlfeqskiakqqldaiivaegpgsytg  
lrigvtvaktlayaldvkl  
ygvsslkalaatidhtdkllvpvfdarrqavytgmfqwngqqlvtiledqymsiealrafledlnqpfiiygkdtvklqd  
elqgeviaqlpnasvmyql  
ldkpsdvhtftpkylhlaeaernwinqkn  
>tr|A6QIR7|A6QIR7\_STAAE  
mrdynfmsphakkvmr1savlfwipialvlliafnlnwlfweildnhlsivssviiillvavftlviapvyrykhcra  
fekhhlrvrngilfldekv  
ipyfriqnididvgpimrryr1atltlytaggqaeielidrearrlkrwlinnerhlennknee  
>tr|A6QIR8|A6QIR8\_STAAE  
msepklhpsifngiinaikqniivffifiifqldfdytnpesylwigivfvfflisyisqivgimntrywiednyfi  
ltagifnkrkelnikriq  
svdmtqgvvnqiiggvdliqiktspdgivlsviskqgeyleryidqlqtelktevaqkssaekndncnhdiegnvediae  
grldevqntdmslnqknkr  
ipiyqmfnkeslfmamtsgaigvtlaalvpiygavrelipwsklnheisqvwqivsisvliiillvliveyiigtiitmi  
rfygfsvmleneqkleyg  
lfnkkkvtpvtrkrlqavverqsyirr1fgytaihfiiitsdfenkkiedddndsgsvpilpfikrdkayqiiqnlvpdlsy  
qqvnegmplsgfhrhflip  
siiviamagigcyfwnqlllftiitiviiglfvikgylyvkhagfkmteeqitiqnfellkrniyyfkaahhiigfdtwq  
htllkrnnlnnfsfivakg  
vgaqslnlkyarsedanklkswylrgendeg1  
>tr|A6QIS6|A6QIS6\_STAAE  
minvtlkqiswipceiedqflnqeingvtidsraisknmlfipfkgenvdghrfvskalqdgagaafyqrgtpidenvs  
gpiiwvedtltalqq1aqa  
ylrhvnpkviavtgsngktttkdmiesvlhtefkvkktqgnynneig1pltileldndteisilemgmsgfheief1sn1  
aqpdiaavitnigeshmqd1  
gsregiakakseitig1kdngtfiydgdep1lkphvkevenakcisigvatdnalvcsvddrdttgisftinnkehylp  
ilgkhnmknatiaiavghe  
lgltyntiyqnlknvs1tgmrmeqhtlenditvindaynasptsraaidt1stltgriril1gdvlelgenskemhigv  
gnyleekhidvlytfgnea  
kyiydsgqqhvekaqhfnskddmievlindlkahdv1vkgsrgmkleevnal1s  
>tr|A6QIT1|A6QIT1\_STAAE  
mgysivrnnegvnamteqdnahhseqikt1ksrlnriegqvrainrmieedvycddvltqiratralsnsvaik1leq  
hmkscimnkvnqgagqeam  
eel1vtfql1kd  
>tr|A6QIT3|A6QIT3\_STAAE  
mqgsdvisaakkymesihqndytghdiahvyrvtalaksiaenegvndt1vie1ac1lhd1tvdek1vdankqyve1ksf1  
ss1s1stedqehilfiinn  
msyrngkndhvt1slegqivrdadr1daigaigvartfqfaghfgepmwtehms1dkindd1veq1lppsai1khffek1lk  
les1mhtdtakmiakerhd  
fmmmy1kqfftewnchd  
>tr|A6QIU0|A6QIU0\_STAAE  
mfficnflcnrfaiyyvf1lek1hkkttyttv1vm  
>tr|A6QIW0|A6QIW0\_STAAE  
mdtkiwdvreyned1qqypkineikdiv1ngglig1lptetvyglaanatdeeavakiyeakgrpsdnplivhihskgq1k  
dftyt1dprvek1mqafwp  
gpi1sfil1pl1k1gyl1crkvsgg1ssvavrmpshsvgrq1lqi1nep1laapsan1sgrpspttfnhv1yq1d1ngridg1vqae  
qseeglestv1dctsfpyk  
iarpgsitaami1e1lpnsiahadyndteqpi1apgmkykhyspntpl1tiitdieski1gndgkdwssia1fivpsnkva1fip  
seaqfi1ql1cqddndvk1qas  
hnlydv1hs1denenisaayiygfe1ndntea1imnrml1kaaghi1kgce1  
>tr|A6QIW7|A6QIW7\_STAAE  
mmevcpyleetfki1grswngli1ny1srcndcsahf1sdmkrd1k1titprals1kl1selaqwe1lvekqi1stspvqi1yv  
ltek1gka1aealhp1eawa  
qsyvd1tdq1rtak  
>tr|A6QIZ4|A6QIZ4\_STAAE

Tsompanidou\_et\_al\_Supplemental\_FASTA\_File

mdnvcakflmdgdtilhennqastytkdvinqlrekgykvflatgrshseihqlvpqdfavngiissngtigitgevdgeiif  
khglslaqvqqitnlakred  
qiyevfpfegnrsvlkedetwmrdmirsqdpingvshsewssrqdalagkidwvtfkpegeyskiylfssnlekitafr  
delkqnvhvqlqisvsnsr  
fnaetmayqtdkgtgikemiahfgihqetlvigdsndramfefghytmamknarpeiqa1tsdvtaytneedgaakyl  
aehflae  
>tr|A6QIZ5|A6QIZ5\_STAAE  
mliqldqigrmkqgktilkki swqiakgdkiwlyglngagkttllnlnayepatsgtvnlfgkmpgkvgysaetvrqhi  
gfvshsllkfqegervid  
vvvisgafksigvyqdiiddeirneahqllklvgmsakaqqyigylstgekqrvmiaramlgppqvllildepaagldfiare  
sllsildsldsypylami  
yvthfieeitanskil11kdggsiqqgavedilt senmsrffqknvavqrwnnrfsmamle  
>tr|A6QIZ8|A6QIZ8\_STAAE  
mllstrekemiallikyhgyitihdiaqq1avssrtihrelkgveayltsfsltlerankkg1riagtdsdlnl1kqsi  
aqhqtid1sveekviiy  
aliquakepvkqyslageigvsvqtlakmlddleldlnkyqlslsrkrgegiylvgteskkreflsq1mvnlnstsvsv  
ienhfvfhslnqihkdfvd  
lerifnverllmdylsalpyqltessylt1tvhiv1sisrikngeyvalnddiydvqntfehkvase1adklgqi ydvt  
fnqaeiafithlrgakrk  
n1ndtslnnrceenkikafvkvemisgmtfadldtlvdgl1hlnpainrlqanietynpltdmikfkypr1fenvrla  
1ndcwpd1ifpeseiafiv  
1hfggsiknqgnrfln1lvvcssgmgtsr11strleqvseieritqasvsd1ks1d1sqydg1istvn1didspyl1tn  
p11pdsdisyvaqflntks  
tfgethdkssnmidkddvhvetkdvdgntsfeneqtsyltsvfekhl1sdekseq11hmrsg1t11dsvkivstevkqwq  
tyiadylygcdvindptsf  
aell1egr1idnpgwi1spypvaiph1rdnmikhpmlitvleep1t1psiqndnqtikymismfisdndfmas1vsd1se  
fls1k1lesi d1t1fmenpge1  
et11rnk1f1erikkqfi  
>tr|A6QJ01|A6QJ01\_STAAE  
mnlfrqqkfs1rkfnvgi1fsaliatvtfistnpttasaaeqnqpaqnpaqpapadantqpnanagaqanptaqaapanqg  
qpavqpanqggqanpagga  
aqpntqpagqgnqadpnnaaqaqpgnqatpanqagqgnqatpnnnatpanqtqpanapaaaqaapvaanaqtqdpnas  
ntgegsintt1tfdpais  
tdenrqdptvtvtdkvnqys1nngkigfvnse1rrsdmfdknnpqnyqakgnvaalgrvnandstdhgnfngisktvnv  
kpdseli1inf1tmtqnskq  
gatn1vikdakkntelatvnnvaktgtah1fkvptdadr1dlqfipdntavadasrittnkdgykyysfidnvg1fsgsh1  
yvknd1lapkatnnkeyti  
nteigngnfgas1kadqfkyevt1pqgvtyvnns1ttt1fngnedstvlknmtvnydqankvtftsqqvttargthtk  
ev1fpdks1k1sykvnvan  
idtpkni d1fnek1tyrtasdvvinnaqpevt1tadpfsvavemnkda1qqqvnsqvdnshyttasiaeynk1kqqadtil  
nedanhvktanrasqadi  
glv1tk1qaalidnqaaiael1dtkaqekvtaaqskkvtqdevaalv1tkinndknaiaieinkq1ttaqgvtttekdnqia1v1  
eqdvi1tptvkppqakqdi1q  
avt1trkq1kksnas1qdekdvandkigkietkaik1daattnaqveaik1ka1indinq1t1pattakaaa1eefdevvq  
aq1dqap1n1pdt1neevae  
aierinaakvsgvkaieatt1taqdlervkneeiskienitdstqtkmdaynevkaatarkaqaatvsnatneevaeada  
avdaaqkqglhdi1qv1vksk  
qevadtkskv1dkinaiq1tqakvkpaadtevenayntrkqeiqnsnastteekqaaytel1dtkkqeartn1daantnsdv  
ttakdn1siaainqvqaatt  
kksdakaeiaqkaserktaieamndstteeqqaakdkvdqavvtanadidnaaanndvndakt1neatiaaitp1danvkp  
aakqaiadkvqaqetaidg  
nngstteekaaakqqvqtekt1tadaa1daahnaeveaakkaiaieaiqpatttkdnakeiaiatkanerktai1aqtq  
itaeiaaanadvnavtq  
ansnieaansqndvdqakttgensidqvtptvnnkatarneita1lnklqeiqatpdatdeekqaadaeantengkanq  
aisaattnaqvdeakanae  
aainavtpkvkkqaakdeidq1qatqtnvinndqnatteekeaa1qq1latavtdaknnitaatddngvdqakdagknsi  
qstqpatavksnakndvdq  
avttqnqaidnttgatteeaknd1v1kakekayqdi1naq1tndvtqikdqavadiqgitadttikdvakdelatkan  
eqkaliaq1tadatteekeq  
anqqvdaql1tqgnq1enaqsi1ddvntakdnaiqaidpiqastdvkt1nae1l1temqnkiteil1nnet1tneekgndig  
pvraayeeg1n1naattt  
gdvttakdtavqkvqqlhanpvkkpagkkel1dqaadkktqieqtpnasqqe1ndakqevdte1nqakt1nvdqsstneyv  
dnavkegkakinavktfse  
ykkdala1kiedaynakvneadnsnastsseiaekqklaelkqtadqvnqatskddievqihnd1dnindytiptgkke  
satt1dlyayadqkkn1isa  
d1natqdekqqaikqvdqnvqtales1nngvdngvd1dal1tqgkaaidaiqvdatvkpanqai1evkaedtkesidqsdq  
l1taeektea1lamikqitdq  
akqgitdatt1taevekakaqgleafdniqidstekqkaieel1etal1dqieagvvnadatteekeaf1tnaledilskate

Tsompanidou\_et\_al\_Supplemental\_FASTA\_File

disdqttnaeiatvknsal  
eqlkaqrinpevkknalea irevvnkqieei knadadasakei artdlgryfdrfadkl dktqtnaevael qnvtipaie  
aivpndpdandtnngidn  
ndatansnanatpentggpnvsettangkadaspttpnnsdaatgettatsatddandkppqannssvdastnsptmdnd  
vtskpevestnngttdkp  
tetdnatpaestnnstttatnenaptgstatapttasteaassadskdnasvndskqnaevnnsaesqstndkvaqpk  
senkakaekdgsdstnqsm  
vesttetlpsadi tepnvpnsntskdkeesttnqtdagql ksetnvasneadkspskadtevsnpkptsasseakekmtst  
nlsqkddtatadtndtqks  
vgsaannkatqndganaspatsvngsnanqdm l nvtntddhqaktksaqqgkvkakqqakt l pdtgms hdd l pyael  
algagmafli rrrftkkdq  
tee  
>tr|A6QJ06|A6QJ06\_STAAE  
mtkpk lketsapmcndtle l rikdenikyinqeidvi ikgkkatvnav l tykpsacyccgvknegqihkhgkrvsrit  
llktqgyntylnlakqrk  
clecngtftaktsivdescfsrcvtqkvieeatkvkteidtaedncispstvsrirtkaans l rikpfnc l pehiamde  
fksvknvtgmsfifidnd  
thdvidi lenrttrfl rayferfd l knrqvktvtidmyepyvr l frdlfpnaai ifdrfhivqhl nre l nkyrvqmne  
yrnkkgpdyti fknwkv l  
lmdtskti fskyrwnksfkaykrssdivefml skddil rhsyelvqgl rkd l r l cnwpkfinr l nsvskksvskgvkwkv  
kyyrkhqrm l nrtiypaf  
nngai eginnkik l ik  
>tr|A6QJ08|A6QJ08\_STAAE  
makvel ttrrrnfivavml isafvail nqt l l nta l psimrel ninestsqwlvtgfm l vngvmipltay l mdriktrpl  
ylaamgtfllgsivaal ap  
nfgvlmlarviamgagv l m l mqft l ft l fskehrgfamgl ag l viqfapaigptvtgl i idqaswrvpfiivgiai l  
afvfg l vsissynevkytk  
ldkrsvmystigfg l m l yafssagdl gftspivigalil smviiyl firrqfnitnal l n l rvfknrtfalctissmim  
msmvgpalliplyvqns l s  
l sal l sglvimpgaiingimsvftgkydygprpliytgftiltittim l cflhtdtsytylivvyairmfsvs l l mmp  
inttgins l rneeishgta  
imnfgvmags l gta l mvt l msfgakil stspsh l tateikqqsiaigvdisfafvav l vmaayvial firepkeiesn  
rrkf  
>tr|A6QJ12|A6QJ12\_STAAE  
ml dknql akykqdh l ceyekimsnnekealeekvas l d l dfiaklyndlyinkktiddvsavsevkydiks qmsddeikr  
leeg l qai keggfav l m  
aggqgtr l gykpkgsfeiegs l felqanql kt l nhqsghitqwyimtsdinheetlay feahsyfygdqeahffkqd  
nival seegklil nqqgri  
metpngnggvfks l dkagyleemsngvkiyl nni dnlvrv l dp l fagftvehdyditskti qpkpge svgr l vnvdc  
kdtv l eysel dpevanqfn  
nanigihafkl gfi l navnrel pyh l aikn l kql denfgvieqpt l kfel fyfdiftygtsfv l qvpreefsp l knke  
gkdsvatated l rrmgl i  
>tr|A6QJ15|A6QJ15\_STAAE  
mdsfsrkeivigr l kfi tms l igi l l flvpiveqdgqkqtt l pvaf l agvl kdv l ggvmplivtiit l sgiitlicst  
il kdk l kpdgl mna f nvr  
igw l il r l lavvfawmtfl rigskviysdetggl fss l l pt l vav l faal flpl l meyg l lem l gpi frpvmrplft l  
pgrstvdn l asfigdgtvg  
v l itsrqygegyysrreatvisttfsvvsitfaivvaetv hmqnqffafylsvivsc l vaavimpriwplnkipdeyake  
vpesarteal pegmalrh  
gfdtatevgi kagpvidffksg l ktvidmwfvl pvvmsigtiati anytpffvilgkpfvpfle l mqipeaaqasqi  
iigfadmf l psil liegvqn  
ditrfvigalsisq l iyl sevggvilgskipvsigkl fmi flirtiit l piisl mah l l l  
>tr|A6QJ24|A6QJ24\_STAAE  
mrmkedhmknqgl kpgyn l qiatnsqfv l sydl fqnptdtrt l ipfl tmiqntfgy l peyivadagygseqnymai iddf  
nktplitygmfikdktrkf  
ksdi fnt  
>tr|A6QJ25|A6QJ25\_STAAE  
mrhqc m k p n s k n k k i m k n y n w e y f k v q i n q k l s e p e t k k i y s r k i d v e p v f g f m k a i l g f t r m s v r g i n k v k r e l g f v  
l m a l n i r k i a a q r a v h y k i  
h i k k a d f y q i i n r n q l f y i a  
>tr|A6QJ30|A6QJ30\_STAAE  
m k m i g f e k p f k l e e g n l f k v y e q r k p t p e n d d i l v k v n s i s v n p v d t k q r q m e v t q a p r v l g f d a i g t v e a i g p d v t l f s  
p g d v v f y a g s p n r q g s n a t  
y q l v s e a i v a k a p h n i s a n e a v s l p l t g i t a y e t f f d t f k i s t n p a e n e g k s v l i i n g a g g v g s i a t q i a k r y g l t v i t t  
a s r q e t t e w c e k m g a d i v l  
n h k e d l v r q f k e i p l v d y i f c t y n t d l y n t m i e l i k p l g h i t t i v a f n e d q d l n a l k l k s i t f t h e f m f a r p i h r t p d m  
i k q h e y l e d i t k n i e s g h y  
q p t t t q v f e g l s p e n l y q a h q l l e k q s m i g l v i n i



Tsompanidou\_et\_al\_Supplemental\_FASTA\_File

>tr|A6QJ32|A6QJ32\_STAAE  
mgvksvkkifviiittlavaiiigsiimvvsqrqaqtfkiaqqqfvkkpiptlflhgfsgsansekfmvkaekrgvtk  
diiitayvskdgavtfgkgl  
rkdavnpivkie lennrggyldknaawfknvltkqseynfdkfnfvghsmgnltfaqymmtygndkslpqlnkqvniag  
tfngvlnmnedvneitvdk  
dgkpsrnmqpyqqlrvlkdikykggievlniygdldgthsdgrvsnskslkyllgnspskyreskyegepaqhsqhl  
enenvanelidflwkk  
>tr|A6QJ42|A6QJ42\_STAAE  
mllilelrfwnlefgfrnstfgiqnynewkiliiacImtwfcsdfylmncffv  
>tr|A6QJ49|A6QJ49\_STAAE  
mklsfvvatlalglstvgaalpsheasadsnngykemtvdgyhtvpytisvdgitalhrtyfifpenknvlyqeidsk  
vknelasqrgvttekinna  
qtatytltlndgnkkvvnllknddaknsidpstikqiiqvkk  
>tr|A6QJ50|A6QJ50\_STAAE  
mgdfmtvlyqhgltgtlimglktasinelqhgdlgiatltgsngevifldgkayhanehkefvelkgdeltpyatv  
tkfvadtsyetkdkssseav  
faiekekmlsenlfsavkislfgkkmhvrmpaqeppytrlidsarrqpeqtetyvkgsvvgfftpelfhgigsagfhvh  
fanddrnfgghvldfeved  
vkveiqnietfeqhfpdqkdfkanidykdiadeireae  
>tr|A6QJ53|A6QJ53\_STAAE  
mgykkyneyftnrddtltkintlyigqsfgtegrnvidrigkhekqlqeimtyqpenrktvliykipndniytinqyg  
keavsrkrilegsipnke  
yidlseislitffkpeynkqhvnneefnslsskiknlakendgiiylnfkdvnyqlisegntffsakpylhcvfnkdil  
nmdkvdienffksievkys  
k  
>tr|A6QJ56|A6QJ56\_STAAE  
mntikkiiyfdelsamdllqiekkgnlktkvqlmhdekgsasgeskvnmeffgkqsavkqifdsllgmsasasasaging  
nitgervaktientliyid  
fldtvefrkkktiidi segfkl niqqdtmyfatitpiasmfegskhldeeeIsfdvskmneairsikyfeligrne  
nrvfrfniesfknyriqd  
lkfmltlysvlveiskenlnydkefdlnqgakpsgigkfgkirseatkedkyqvvdvilagvk  
>tr|A6QJ84|A6QJ84\_STAAE  
mvkqmkakeirdlttseieeqiksskeelfnlrfqlatggleetarirtvrktiarlktvarereieqskanq  
>tr|A6QJA2|A6QJA2\_STAAE  
mikklqfslgnkfai flmvvlvlggyasaklklellpnvqnpvisvtttmpgatpqstqdeisskidnqvrs layvk  
nvktqsiqnasi tvveyen  
ntdmdkaeeqlkkeidkikfkdevgqpe lrrnsmdafpvlaysfsnkendlkvktvlneqlipklqtvdgvqnaqlngq  
tnreitlkfkqnelekygl  
taddienylktatrttplglfqfgdkdksivvdggyqsvdafkninipltlagggqqsqsqsdnkqnsamsdvnqasppq  
nskasapnnisgmptaklg  
dladitvgdvrtssktngkdavnliqitkaqdvqvakdvqrkidtfdvdenkdfnvtkmdtakpvekslytmvekas  
lgtivaiivillflnrirt  
taisiisiplslmalialklsdvslniltlgaItvaigrviddsivvveniyrrltdseeqlkgenliisattevfkipi  
msstlvtiivflplvfvsq  
svgemfrpfalafslasllvsitlvpalaatl fkkgvkrrnkqhgeg lgvvsttykklvhslnhkwiviilstlil  
vativfggprlgtfsisag  
ddkflaitytpkpgeteqavlnhakdvekylkqkhhvkti qsvggsspvdpdtgstnsmaimveydndtpnfdeadvki  
khadgfkhpgewkngdltg  
gagnksvevtvkgpsmdaikstvkdieqkmkqvkg lanvksdl sqtydqyeikvdqnkaaengisasqlamhlnenlpek  
tvttvkengktvdvkvkqn  
kqtdwsedklnnitlkkptggtiklgdiatlvktttspkl tqeaggdyattvsakvtnkdvggttrqvmskinnldkpnv  
kvniggasddinnamtqla  
famlaaivylilvitfkgglapftilfslpftvigviiallitgetisvpsligmlmigivvtnaivlidrvinneq  
qgmemkealieaggtirp  
ilmataiatigalvplfgdssiliskglaatvigglisstlltlvvvpiyeilftlkkrftr  
>tr|A6QJA4|A6QJA4\_STAAE  
mil kfdhi ihydqldrfsfpgdviklhsggyhhkygtfnklgyinenyielldvennekllkmaktieggvafatqivq  
ekyeggfknictlhtndiea  
vknklqseqvevvgpiqmerdthkdgkvkwqll yimnqdddeikppffiqweesdsmrkklqkyfqkqfsietvivksk  
nrsqtvsnwllkwfdmdive  
endhytdlilknddiyfriedgkvskyhsviikdaqatspysifirgaiyrfeplv  
>tr|A6QJC1|A6QJC1\_STAAE  
msmasismsdiycngtifenddeqliyltspfqrytsntwiykktptqerwldlerqhqlhtnqgsnyhafsfpeneq  
ldnhwmamfkdmnfe ligm  
elyaiesdalanlprnsdveiaivdeshidaylkvayqfslpfgkdyadaheemvrehyqkdvikrlvaylnnepigvvd  
viesenyieldgfgvleqf  
rhqgigstiqsligeyaisknhkpiilvadgedtakmyakqgyvyqsfcyqil kedign  
>tr|A6QJC4|A6QJC4\_STAAE

Tsompanidou\_et\_al\_Supplemental\_FASTA\_File

mylfinklyhnyfsayfmgisnggfqlkkrfkrittecydfveryittfykniillmenem  
>tr|A6QJC6|A6QJC6\_STAAE  
mvilqsflgelgdataalsigwhvsvvgqiyeklwsqdmleqfaveinngalvnravseaemgsprggrpsthavkadd  
gyilngvkytysmskalth  
iivaayieelesvgfflvdrnlpgveiadnwdvlmratshdliindvkvplkhlvetekskapngwilhipscylgia  
qaarnyavdfaiqhspsni  
egtiatlptvqqnlgkmetlllcarqflwstakgyqqykddsqirnpstaskvmvmnqglevidlamrivgakslemnrl  
lqryyrdmraglhnpmed  
aaytniaksi tdtf  
>tr|A6QJE8|A6QJE8\_STAAE  
mkvivasflivilaiivvayflsk  
>tr|A6QJG4|A6QJG4\_STAAE  
mnaikrfgsamivpvlmfaffgivilgfatlfknptimgsladqhtfwkfwsviesggwifhmevvfvvglpplsakk  
apghaalaalmgylmfntf  
inailtqwphtfganlekvenvpglksiagiatltdnillgiiisaiitwihnyyskrlepemvgvfqgltfvvtisff  
vmlplaaaitcviwptvqh  
igsmghfiiasgyigwlyhflevlptglhhfiyapiievpgvvvnhglkaewlqhlnefakstklkeqfpygfmllqg  
ngkvfgclgialamyattp  
kenrkvaallipatlavvvgitepleftflfiapylfvlvhavlaasmdtmyafgvvgnmggglldfistnwlpigke  
hwgtyvaqviiglifvaiy  
fflfrflilkfdiplpgrkkteevklfskqdyknkkgdsvdskrassgneyedkaayldglggenikdvtncctrlr  
ltvydeskvadteyftqq  
mahglvksqgsiqvvvgmtvpqvreafeqmvedqspedk  
>tr|A6QJH3|A6QJH3\_STAAE  
mkiiqleyflaivkynsftkaaqlhisqpsltatikmeadlydlftrstkdikitekgiqfyryaselvqqyrstme  
kmydlsvtseprikiqt  
stnqwianlirkhhsdypeqqrylyeihdkhsieqllnfnihlaitngkithedirsiplyeesyillapketfknq  
vdvenlplilpnknsqvrk  
hlddyfnrrnirpvnvvetdrfesavgfvlhlglyaiiprfyyqsfhtsnleykkirpnlgrkiyinyhkkrhseqvht  
fvqqcqdylygllea  
>tr|A6QJH7|A6QJH7\_STAAE  
mkdvkaiklmtlndvlsqingdmtlgigtgstmeillpqaalikergynitgvctsnkiaflakelgikiceindvdhi  
dlaidgadevdpslniikg  
gggalfrrekvidemasrfvvvvetkivqylgetfklpvevdkfnwyhilrkiesyadikverrvnedvafitdngnyil  
dcklpgkidpykfheylih  
ltgvfetgyfldmadqvivgtqegvki lek  
>tr|A6QJI4|A6QJI4\_STAAE  
mkvnasltikihtamftfkrvsiyankifhnkvytlhfyns  
>tr|A6QJJ4|A6QJJ4\_STAAE  
mkkmilinvtvvvllaigiagfyfwnkttsyvttdnakvngdqikiaspasgqikslnvkqgdldkqdkvaivtvqqg  
dgetkdmdlkmqkgtiak  
ldgmegsmvqagnpiayaynlldlyvtanidekdikdvevgkdvdvtidgqkasikgkvsigkataasfslmpssnsdg  
nytkvsqvipvkitlesep  
skqvvgmnaevkihkn  
>tr|A6QJL2|A6QJL2\_STAAE  
mietfkafvidkdesgkvtptfkqlsptdlpkgdvlivhysginykda latqdhnavksypmipgidlagtiveseap  
gfekgeqvivtsydlgvsh  
yggfseyarvksewiiklpdtlteesmygtagytaglaierlekvgmiedgpvlvrgasggvgtlavlmnelgykv  
iastgkqdvsdqlllelgak  
evidrlpveddhkkplastwqacvdpvggeginyvtrlnhsgsiavigmtagntytnsvfphilrgvnilgidsvfta  
mklrqrwrrlakdlmpen  
lhekqvifdelepeqlnkvikhenkgrividfgvd  
>tr|A6QJM4|A6QJM4\_STAAE  
malfkrkislpmqvvialvlgvvgllyggqenvanyikpfgdvflnlikmivpvvfcsalalsinvgesktvgrygwk  
tilyfeiittiaiglgiiif  
gnlfkpgaglptklpkgdiskyqstahaaeqstygnehfidtivhiiptnffea lnkgellpiiffavffglglaavgkk  
aepvkeflsgsleavfwm  
nkilklaplgvfaficttiitfgasalpllkvlvfvvfamvffvfailglvawmcvinimniirilkselllafstsss  
eavlpvmkkmenfgspke  
itsfvipigytfnldgsalyqsiaalfvaqmygmhltlseqivmltlimitskgmaavpgtsivvllttlgamglpaqgl  
aligiavdrildmvrvcv  
ignalstiviakwenvydkakgqeylksi  
>tr|A6QJM7|A6QJM7\_STAAE  
milnfnqfenqffngnpsdtfkdlgkqvfnfstpsfvtniyetdeleyleaelagvnkedisidfnntltiqatrsa  
kykseqlildernfeslmr  
qfdfeavdkqhitasfenglltitltpkikpsnettsstspis  
>tr|A6QJM9|A6QJM9\_STAAE  
mykiniirsdsyynnilkapindrdsiftkeilvpfkkkfevqhmpiynddkqtmsaiqfldafqispkdlrmsdqmsiq

Tsompanidou\_et\_al\_Supplemental\_FASTA\_File

ylnndfwsncekylkvaidd  
qfsnysiissqvsnyhftvllgdrqkplmylnknrggdgipgyimiyilvpststinsmksliahevnhmryqyidwdgg  
slieliiaeglaenyvesl  
ygakahigpwwtntn  
>tr|A6QJN7|A6QJN7\_STAAE  
mgkfglnffkptekfngnwsilesksrewekmyrerwshdkevrtthgvnctgscswkvfvkngvitwenqqttdypscgp  
dmpeyerprgcprgasfswy  
eysplrikypyirgklwdlwtealeenngnrvaawasivenedkakqykqargmgghvrsnwkdvteiaaqllytikky  
gpdriagftpiamsisy  
aagarfinllggemlsfydwyadlppaspqiwegeqtdvpessdwynasyiimwgsnvp|trtpdahfmtevrykgtkvis  
vapdaenvkfadnwlapn  
pgsdaaiaqamthvllqehyvnqpnernfnyakqytdmpfliml dedengyakgrflrasdlgqtteqgewkpvihdais  
dslvvpngtmqgrweegkk  
wnlkl etedgskl nptl smteggyletiqfpyfdsdgdgifnrpiptqrvtlangdkvriatidlmasqygvrfrdhk  
leskgyddaeskytpawqe  
aisgvkqsvviqvakefaqaaidtegrsmiimgaginhwfnstiyrsilnlvmlcgcqgvngggwahyvgqekcrpieg  
wstvafakdwggpprlqng  
tswfyfatdqwkyyeesnvdrlksp|laktee|khqhpadyv|laarlglw|psypqfnkns|lfaeakdegidsneailqr  
aidevkskqtqfaiedpdl  
kknhpkslfiwrsnlissakgqeyfmkhl|lgtksgl|latpnedekpeeitwreettgkldlvvs|ldfrmtatplysdiv  
lpaatwyekhd|sstdmhp  
yvhpfnpaidplwesrsdwdiyktlakafsemakdylpgtfdkvvtplshdtkqeistpygvvkdwskgeieavpgrtm  
pnfaiverdytkiydyvt  
lgpvlekgkvgahgvsfgvseqyeelksmlgtwsdtnddsranrprid|tarnvada|l|sissatngkl|sqksyed|leeq  
tgmp|kdisseraaekisf  
lnitsqpreviptavfpgsnkqrryspfttnier|vpfrt|tgrqsyvdhev|fqfges|lpykpt|lppmvfgnr|dkk  
ikggtalvlryl|tphgkw  
nihsmqdnkhl|tlfrggptvwi|snaedakhd|qdndw|levynrngvvtaravishrmpkgtmfmyhaqdkhiqtgse  
itdtrggshnaptrih|kpl  
tqlvggyaqisyhfnyygpignqrdlyvavrkmkevnwled  
>tr|A6QJP0|A6QJP0\_STAAE  
makqklvmignmagirtieelrandlyditvigkepypnynrim|snilqnkmtveetimpyewyeehgielitnd  
pvievdranqsvttangie  
vsydklifatgskafvipvgstlpsvigwrtiddteqmmniaktkkkaivigggl|glecargl|dqgmevtvl|hlaew  
lmemql|drkagnml|kadle  
kqgmkfemqantte|lgeddvegk|ladgreipad|lvvmavgi|rpytevakess|ldvnr|givvndvmqtsdsnv|yavgec  
aehngkvyglvaplyegqk  
vladh|ltnketngykgtstfts|lkvsgcd|lysagqivenaeikgieifnsvdnnykkl|f|kdgnvvgavlygdi|ddgsrf  
ynmmkkgstedyt|lvs|l  
tkggeeas|siadmaddeticgcnvgdkg|tivnaitengfttveevtaktkagnscgkckppiaqilqht|lgddfvaakp  
ag|cgct|l|trdq|vtqir  
akgl|ktskev|rhv|l|nfknkggcpkcrp|ainy|l|nmv|yphd|hederes|rfaneryhaniqndgtfsvipqmrggvtdadq|  
ir|lgevakkyhvp|lvkvtg  
sqrvglygvkkee|l|pniwed|l|gmrsasaygk|ktrsvkscvgkefc|rfgtqy|ttr|l|gir|l|ektfe|yid|tphk|fkm|gvs|gcp  
rscvesgvkdfgi|sveng  
fqiyigngg|tevekaef|l|ttvetedevik|l|cgal|mqyretgiyaertapw|l|rl|gfenvkev|l|dperqnelferim|d  
akkaveapweait|snaqa  
rri|fevekv  
>tr|A6QJP6|A6QJP6\_STAAE  
mkkkl|gm|l|l|vpavt|l|s|taacgn|ddgk|dkd|gkvt|ikt|t|v|p|l|qsfaeq|iggkh|kvk|vss|iy|pagt|d|hsy|ept|qk|d|l|sas  
ksd|l|fmy|tgd|n|dpv|akkv  
ast|ik|dk|dkk|l|s|ledk|ldk|ak|l|l|tdq|heh|geeh|eh|ghd|he|keeh|hh|hggy|dph|v|l|dpk|inq|tfake|ik|de|lvk|kdpk  
hkddyeknykkl|ndd|l|k|k|l|  
dndmkqvtkdkqgnavf|shesigyladcygfvqk|g|iqnmnaedpsqkel|tkivkeirdsnakyilyednvankvtetir  
ketdakplkfynmes|l|nke  
qqkkdnityqslmksni|enigka|l|dsgvkvkddkaeskhdka|s|dgyf|kdeq|vkdre|l|sdyagewqsvypyl|kdgt|l|dev  
mehkaendpkksakdlkay  
ydkgyktdi|tni|dik|gnei|tftkdgk|khtgkyeyngkkt|l|kypk|gnrgvr|fmfkl|vdgndkd|l|pkfi|qfsd|hhi|ap|k|k|ae  
hfhi|fmgnd|nda|l|kr|mdy  
wptyypsk|l|nkdp|ikeem|lahyfnrfahstq|ll|iae  
>tr|A6QJP8|A6QJP8\_STAAE  
mtkk|l|l|t|l|fivsm|l|l|l|tacgkkesattsskngkplvvvygdykcp|yckel|dek|vmpk|l|rknyidnhkveyqfvn|l|af|lgk  
dsivgsr|shav|l|myapks  
f|l|dfqk|q|l|faaq|denkew|l|tke|l|ldkhi|k|q|l|h|l|dketenkiikdyk|tkdskswkaekdkkiakdnhikt|t|pta|f|inge  
kvedpydyesyek|l|l|k|dki  
k  
>tr|A6QJP9|A6QJP9\_STAAE  
mga|l|kr|fvatv|l|l|l|l|vfi|sgcgn|dky|vkei|deavki|qnqk|qeql|akkng|ndrvdhferkdaniyv|ydkdki|l|laykpl|s

Tsompanidou\_et\_al\_Supplemental\_FASTA\_File

nddevhyaydfsdkrvsy  
kqdfdsrryyqqhdadyheenmtn  
>tr|A6QJQ4|A6QJQ4\_STAAE  
mtaypsimkdfesytqvqwltaflltngiviplsalviqryttrqvflvgisifflgtllggl sphfatllvariqa  
lgagimmp1mmttildvfq  
phergkymgifglviglapaigptlsgylveyfnwrslfhvvpiaavtfligfktikvgttikvpidfisvifsvlgf  
gglllygtssisekgfdnpi  
vlvsmiggvvlvalfvlrqyr1stpllnfavfknkqftvgiimvgtmvsmigsetilpifvqnl1hrsaldsgltllpg  
aivmafmsmtsgalyekfg  
prnlalvigmaivvittayfvvmdeqtstimlatvyairmvgia1glipvmthtmnqlkpemnahgssmtntvqqiagsig  
taaliti1shasknfsptm  
sdyngmknidmnnqikvdtm1hgyhagflfallitvvsffcsfm1qgkkkevdsrq  
>tr|A6QJR9|A6QJR9\_STAAE  
mdsqfletmqvgvgrnkfceni1svplpeplhnks1valyhfcpit1  
>tr|A6QJS8|A6QJS8\_STAAE  
malleaf1ififavi1ssvinrfrpqiaptafiqialgvvifiipi1qvdfqfnsevfmfaviapl1fvegthvsrtk1ley  
rkpi1lmsmalvfatvvgv  
gyfihwiwpalpmpaafai1aalcptdavavsaitrgk1lpkgsmtileges1lndaagi1sfkiavtalvtgtfslfqa  
veqfi1st1lgvligai1g  
fvvri1rid1tankglkdnt1tfiq1ltpfvvyflaeevhasgiaavviag1ihglerdr1liraqtelqmyhqi1wntf  
syalngfvfv1gfm1ptv  
vidifqtepdnfsflivitiliaiaiyacr1fvwyfwykdfyfpkniqsy1deehdshetppsr1vryafimtmcgihgti  
s1smalt1pfi1tkgqafe  
yrnd1lfi1asmvl1s1l1aqiv1pl1t1psaed1tfkgmtyqsakifivqkviqhfknescdkdntnyrpv1nqyyge1  
f1l1nsepdnqntkelkr1  
ediakvietst1er1idk1gkatyqdinnyrnigel1tetprt1asfgekfanffqm1wlk1kamkhyka1nkeskkqefens  
fkdvqkimrivnhni1lr1  
keeqnstnv1evs1vinhyydmsrs1kwraqrrkerqensnqi1pqamfhnk1lealy1qrh1l1delirknkinnivaaq  
ireninyneiv1slqskh  
>tr|A6QJT3|A6QJT3\_STAAE  
mdtskqfrgdnr1llg1v1g1vitfw1faqs1vn1lvpl1qstys1sdvgtiniavs1sal1fag1fivgagdvadkfgrvkit  
yvg1l1nvvg1s1li1itp1  
paf1li1gri1qg1saacimpst1ai1neyyigtrr1qra1s1yws1sigswgsgict1fgg1matyigwrs1fvvs1ill1t1la  
mylikhapetkaepikgmk  
aeakkfdvig1vl1lvvtm1sl1nvi1tqtshfg1lvsp1l1aliv1vfics1lvgfvyen1kikhpl1vdfs1fknrgysgatis  
n1f1l1ngvaggalivintyy  
qqq1gfnssqtgyis1ty1l1tv1smi1rvgeki1sqhgkpr1ll1gsgftvig1l1l1s1t1fl1pevwyi1ssivgy1l1fgtg  
lglyatp1st1dtavasapdd  
ksgvasgvymass1gnafgvavsgtvytv1aan1ln1n1ggftgmmfn1llaivaf1v1ll1vpknqtn1  
>tr|A6QJU0|A6QJU0\_STAAE  
mkin1ttgg1q1hgi1tdgd1d1f1g1ipya1eppvhdnr1fkhst1ktq1wsep1datei1qip1ppqpdnk1ledff1ssq1st1ftehe  
dc1yl1ni1wk1qhd1qtkkp1v  
iiyf1ygg1sfenghkaelyqpah1vqndi1iv1itcnyr1gal1y1dwsyfnkdfhsnng1sdqin1vikvwhqfiesfggd  
annit1mq1s1ags1msi1t1l  
lk1pdi1epy1fhkv1ll1sgal1rd1t1lesarnkaqh1fqmm1dy1ld1ddv1ts1stndi1lm1mak1kqsr1g1pskg1ld1iyapi  
ktdy1iqnny1pttkpi1facy  
tkdegdi1yt1seqk1l1spqr1fidime1ndi1pl1kyed1vtak1qqs1l1aithcy1fk1p1mk1q1fl1qq1ni1qdsnaq1l1wlaefawh  
dtssah1yrsayhi1ldmvfw  
fgn1qi1laahq1ypttah1kfl1srqm1qnd1anfaksg1mpw1pmyh1nerry1rtyq  
>tr|A6QJU1|A6QJU1\_STAAE  
msimr1lft1f1s1fiv1gm1vem1mvagimn1msqd1lvseavvg1vtmya1l1faic1gpil1vkl1tnrf1ssrp1llwt1l1ifi  
igngi1avapn1fsil1vvgr  
i1ssaaa1li1ivk1v1l1aitam1sapknrgkmi1glvy1tg1fsgan1vfgvpig1t1vig1d1vgwry1t1fl1iiv1si1v1g1fl1mmy1l  
pkdqe1igr1gpvn1hetpshe  
nhvtsk1il1rpaevak1yli1it1fl1v1iansvt1fvfin1pl1l1snghdms1fvsl1allvngi1agvig1t1l1ggi1fsdki1tskrw1lm  
isvsi1fiv1mm1l1mn1l1lpg  
sg1ll1ag1fi1wnimq1wstnpav1qsgvi1qhveg1dtsq1vmswn1mss1nagig1vggi1gg1vmth1sv1qait1ytsa1igal1gl  
ivvft1k1nnhyak1tfk1ss  
>tr|A6QJV5|A6QJV5\_STAAE  
msk1l1mig1tg1pva1iq1lanicy1lksdye1dmvgrast1sekskr1yqayk1kekq1fevki1qneahq1legk1feinr1lykdvkn  
vkgey1et1vm1actad1ayyd  
t1qq1s1let1qsvkhv1li1spt1fgs1qmi1veq1fmsk1fnk1dievi1sfsty1lgd1rivd1keapnh1v1ttg1vkkk1lymg1sthsn  
stmcq1risalaeq1k1iqle  
vvesp1haetr1nss1lyv1h1p1f1mnd1fs1kai1feg1tdvpvy1vyk1lfep1gpi1tmt1lirem1lmw1kemm1vil1qafrv1psvn1l1  
qfmvkeny1pvr1pet1deg1d  
iehfe1il1pdi1lqey1llyvryta1il1dp1fs1qpdenghy1df1savp1fk1vyk1neq1dv1vqi1prmp1sedyy1rtami1qhigk1mlg  
ikt1pmid1q1fl1trye1asc1qa  
ykdmh1qd1qh1l1ssq1fntn1l1feg1dka1lvtk1flein1rt1s

Tsompanidou\_et\_al\_Supplemental\_FASTA\_File

>tr|A6QJV9|A6QJV9\_STAAE  
mdnaseqqvdfvsdikeqfgridvlfnagvdnaadriheypidvydkimnvdmrgrfmltkmmlplmmnqggsivnts  
sfsgaadlyrsgynaakg  
avinftksiaieygrdsiranaiapgtietplvdkltgtseddagktfrenqkwmtplgrlgkpeevaklvvflasdds  
fitgetiridggvmaytwp  
gemlsddswkrtle  
>tr|A6QJW3|A6QJW3\_STAAE  
mskkkiliiltsimliilivagiykkydekekqkaiyykeqqaritlylkhtkeptiksvhftnsetspmgsavie  
gyinenkkdnftayatpeh  
nyqfggami eseklse l kpanqlkspddikke l nkkksh  
>tr|A6QJW5|A6QJW5\_STAAE  
mtvltdkvavvtgagsgieaiatlheegakvvlagrnekqlnvanqlsqdsvkvvptdvtneevdelikiaaqtfg  
gldivinsagqmlsskitd  
yqvdewsdmidnikgtlytaqaalptmleqssghliniasisgfevtsstiyatkaavhtitqglekelaktgvkvt  
sispqmvdtaitaaynptd  
rkklepqdiaeavlyaltqpkhvnvneitvrpv  
>tr|A6QJW8|A6QJW8\_STAAE  
mskehlfhifisdlnfyiikyflifqnsdkfvkyitnpiyleihvildl  
>tr|A6QJX0|A6QJX0\_STAAE  
mgldfsglpdlavleqmekeqiseviapehvrmhhdhqnklksdeki lldqmvshfkkfeddfknaaaggawvknatdel  
kdisndlekiqdikv  
>tr|A6QJX3|A6QJX3\_STAAE  
msqteyqiksgnikgnseetstvsni syeienannsglkqnkikdqikk l qeknkfpknlsylksytdpktgtttsafln  
kdtgkvtl gmtgtvnhkda  
ilkqtfgvpsyqgyidvsetlkdigadvnigl hsvtdkdkphykntqdfiknikkdydidiitghslggrdamilgmsndi  
khivvynpaplaikdvsgl  
yadqee l kkliekdyghivrvfvsdedeldagvrnhlyetagekivlkngeghamsgilmsrtqaiilaelnkvkgyqden  
nkalksvrkqtrhr l hkve  
t l ranwiqtggs l sssqqqllea l taltiaeglnqlvneesqhlkccitrwhinlettgkkrkkl emklvkn  
>tr|A6QJX4|A6QJX4\_STAAE  
mihskkltlgiclvlliliggcvimtktngrnaqikenfnktlsvyptknlddfydkegfrdqefdkrdkgtwiiysem  
viepkgnmesrgmvlyin  
rntrrttkgnfivteitedskgysrskekkypvkmenriiptkpi pddklk keienfkffvqygnfkdfkdykngdisyn  
pnvpsysakyqlnnddyn  
qq l rkryhiptkqapelklkgsgnlkgssvgskdleftfvenqeeniyfsdsveftpseddk  
>tr|A6QJX5|A6QJX5\_STAAE  
mmihskrlrlwlylvlavfigacgmkkeesskdqikenfnktlsvyptknledfydkegfrdqefekgdkgtwi i hsk  
mtietngknmesrglvlyv  
drntrrttkgefivrelwedkkgysrskekeypvkmehnkiiptkpiaddklrkeienfkffvqygd fkdindykdgdisy  
npvpsysakyqlsddyn  
vkqlrkrydiptkkapkl l ikgdgdlkgssighknleftfienkeenyftdsinfkpte  
>tr|A6QJX8|A6QJX8\_STAAE  
mffyfvgvflynslhkckgfsfhvllslteilkglatmdkelwierandslvkhfyeqqsdiereg fesk l tfgtagi  
rgkfglgegrlnkftiek l  
alglarylnaqt nsptivi hydih l stefa qianv l anhqitvylpdytktpelsfavrn l nttagimitashnpkd  
yngikvygsdgaqlstdas  
elasryieevgdplqidipiskqnts yikpfpsvtd dymkhiqnmi gyipksdlqv vfts l hgtsvpivpellqsl nfn  
qfnlveaqckpdpnfssvq  
sanpedhrafdqave l ankshad l listdpdadr l giaerdahghityfngnqigallnyriqqtsqlrhr l miqsivs  
sel tks l ary n nveykev l  
tgfkfi aqei rql ddhqnmifafeesygf l sepfvrdkdavqivpl iikyaselklygk l kdeleqiyqtvgrhedt l f  
sht l egfegkkkinaimtk  
frsnppqei qglkvkaiedy l tsevyh l dkdttsqinspksnvi rvl fdegfialrpsgtepki klyvs l kcpnfddvaq  
kinami fs  
>tr|A6QJX9|A6QJX9\_STAAE  
mkgskqil limgiislivlfi ft l fimaqyakhyeqsdsnaht l nssaiieqhtmsnlasl dyapvrnitssrdih  
piyfmtkd  
>tr|A6QJY2|A6QJY2\_STAAE  
mqmrdkkgpvnr vdf l snk l nkysirkftvgtasilgslmylgtqqeaaeanni enpttlkdnvqskevkieevtnk  
dtapqgveaksevtsnkdt  
iehepsvkaediskkedtpkevadvaevqpkssvthnaetpkvrkarsvdegsfditrdsknvestpitiqqkehfe gy  
gsvdiqkkptdlgvsevr  
fnvngnesnglialqlknkidfskdfnfkvr vannhqsnttgadwgwflfskgnaeey l tnggilgdkg l vnsggfkid t  
gyiytssmdktekqagqgy  
rgygafvkn dssgnsqmvgeni dsktnflnyadn stntsdgkfhgqr l ndvil tyvastgkmaeyagktwetsitdl g  
l sknqaynflitssqrwgl  
ngginangwmrtdlkgseftftpeapktite l ekkveeipfkkerkfnpd l apgtekv tregqkgektittpt l knpltg  
viiskgepkeetkdpine

Tsompanidou\_et\_al\_Supplemental\_FASTA\_File

l teygp eti apghrdefdpklptgk keevpgkpgi knpetgdvvrppvdsvtkygpvkgdsivekeeipfeker kfnpd l  
apgtekv tregqkgektit  
tptl knpl tgeiiskgeseeitkdpinelteygp etitpghrdefdpklptgekeevpgkpgi knpetgdvvrppvds  
tkygpvkgdsivekeeipf  
eker kfnpd lapgtekv tregqkgektit tptl knpl tgv iiskgep keeitkdpinelteygp etitpghrdefdpklp  
tgekeevpgkpgi knpetg  
dvvrppvdsvtkygpvkgdsivekeeipfker kfnpd lapgtekv tregqkgektit tptl knpl tgeiiskgeseei  
tkdpinelteygp etitpg  
hrdefdpklptgekeevpgkpgi knpetgdvvrppvdsvtkygpvkgdsivekeeipfker kfnpd lapgtekv tregq  
kgektit tptl knpl tgei  
iskgeseeitkdpinelteygp etitpghrdefdpklptgekeevpgkpgi knpetgdvvrppvdsvtkygpvkgdsiv  
ekeeipfeker kfnpd lap  
gtekv tregqkgektit tptl knpl tgeiiskgeseeitkdpinelteygp etitpghrdefdpklptgekeevpgkpg  
i knpetgdvvrppvdsvtk  
ygpvkgdsivekeeipfeker kfnpd lapgtekv tregqkgektit tptl knpl tgeiiskgeseeitkdpineltefg  
gek i p qghkdi fdpnl ptd  
qtekvp gkpgi knpdtgkvi eepvddvikhgpkgtgtpetktveipfetkrefnklp qgeervkqegqpgsktittpitv  
npl tgekvgeqpteeitk  
qpvdki vefggekpkdpkpenpekpsrpthpsgvnppngl skdrakpngpvhsmdkndkvkkskiakesvanqekkr  
aelpktglestqglifss  
igiaglmllarrkn  
>tr|A6QJY6|A6QJY6\_STAAE  
mpptp tpevpsepetptp tpevpsepetptp tpevpsepetptp tpevpsepetptp tpevpsepetptp tpevpsepetptp  
ptkkaqskksel petggee  
stngmlfgglf silglalrrnknhka  
>tr|A6QJY7|A6QJY7\_STAAE  
mksnlrygirkhklgaasvflgtmi vvgmgqekaaseqnttveesgssateskasetqttntnvtidetqsysats  
teqpsqstqv tteeapktv  
qapkvetsrvdlpsekvadkettgtqvdi aqpsnvseikprmkrstdvtaevaeevvetkatgtdvtnkveveegseiv  
ghkqdtvvnphnaervtl  
kykwkfgegi kagdydfdtl sdnvethgislrvkpeikstdgqvmateigerkvrytfkeyvqekkdltael slnlf  
idptvtqkgnqnvevklg  
ettvskifniqylggvrdnwgvtangridtlnkvdgk fshfaymkpnnqslssvtvtgqvtkgnkpgvnnptvkvykhig  
sddlaesyaklddvskef  
dvt dnmslfdtnggyslnfnldqsknyvikyegydsnasnlefqthlfgyyynytsnltwkn gvafysnaagdgk  
dklkepiiehstpielef  
seppvekhe lgtieesndskpidfeyhtavegaeghaegti eteedsihvdfeesthenskhadvveeedtnpgggq  
vttesnlvef dedstkgiv  
tgavsdhtti edtkeyttesnl ielvdelpeehgqaqgpiee itennhhi shsglgtenghnygvieeieenshvdiks  
elg  
>tr|A6QJY9|A6QJY9\_STAAE  
mknnlrygirkhklgaasvflgtmi vvgmgqdkaaseqktttveengnsatdnktsetqtatnvnhi eetqsynatv  
teqpsnatqvtteeapkv  
qapqtaqpanietvkeevvkeekp qvkettqsdnsgdqrqvd ltpk katqnqvaetqvevaqprtaseskprvtrsad  
vaeakeasnakvetgtdvt  
skvtveigsieghnntnkvephagqravlykylkfenglhqgdydfdtl snvnthgvstarkvpeikngsvvmatgevl  
eggkiryftndiedkvdv  
taeleinl fidp kvqtnqntitstlnee qtskel dvkykdgignyanlngsietfn kannrfshvafikpnnktt  
vtvtgtl mkg snqngnqpk  
vri feylgnnedi aksyvanttdtskfkevt snmsgnl nlnqngsyslnienldktyvvhydgeylngtdevdfrtqmv  
hpeqlykyyydrgytl twd  
nglvlysnkangngkngpi iqnnkfeykedtiketltgqydknlvtveeeydsstldid yhta idgggyvdgyietie  
etdssaididyhtavdsea  
ghvggyteseesn pidfeesthenskhadvveeedtnpgggqvtt esnlvef dedstkgivtgavsdhtti edtkey  
ttesnl ielvdelpeehgq  
aqgpiee itennhhi shsglgtenghnygvieeieenshvdikselg  
>tr|A6QJZ0|A6QJZ0\_STAAE  
mkgv srhvfvrivqai imkrlyvcfkldnd  
>tr|A6QJZ7|A6QJZ7\_STAAE  
mtsl ikinrlndfykgvrqglmi ipai igylcgnfqgllvatgtlahiyvfk gpsrskl r tviicn lafaicmmlgt  
l taktplvf gmtllivtvi  
pfyiftalki agpsstffivtfs lpinlpiapeeal yrgfailvggilatmmv litivfsknkaeeqai qndfkliskll  
htyndksaflqvaktavds  
fkaskllitstssndklsrrfqkllllhtsaqgiyellelnakqirp lpedliemdhiaaqlndseen vrywrkevt  
vteefqnlfnhlikidemv  
haneariayeadmrkplyskriyqnl tdsivfrntlrytaimmaiaifialmfdfekaywiplsahtillgtstihai er  
gmarglgti lglvlsvil  
lfsiptpvavilmgiaalftealvganyaia vffitiqvil mnglasqnltniafprvidvamgiviaiiglvlgqrt

Tsompanidou\_et\_al\_Supplemental\_FASTA\_File

asallpnmvaevvrkeatl  
fhy1fsengykddvyqkntamnlsvkl nmtqvynaangel fsktliqnyyplfaleeisfmlnramanedrltineq  
lmgeylai feniakhfel n  
teleikil pdlpqyniqsammniqhngfrerdknv  
>tr|A6QJZ8|A6QJZ8\_STAAE  
mkekrtnvrwmfalafffigviaymdranisyiakqmmddl gmtkppqfgll asffslgyalmqvpsgm laekfgprkmit  
ialvwvsaftiltgmiknh  
gliylvrflfgvgeapmypsnavfnsfwfsknekgrassallagsyfgpvlapivtiaivnafnwqavfyifgavgilma  
vlwaiiakdlpeqhrmvne  
aekrfimenrdivatekssppwndffkrfsfyaiaiqyfvvqfiitlflwlpityltevfhnfkemisslpwllmffl  
ilsagaisdrvlgmgrskf  
vargviaiagfivfavsii favrtgnlyvsifwls lglggigismgmswaaatd lgrnfsgtvsgwmnlwgnigalisp  
laglfvehlgwtmtfqlli  
vpaviavimwfyvkdqplivsdkaiek  
>tr|A6QK09|A6QK09\_STAAE  
micmsnleikqgenkfyigddenna laeityrfvdneinidhtgvsdelggqvgkklkavveharennlkiiascsf  
akhmlekedsyqdvylg  
>tr|A6QK15|A6QK15\_STAAE  
mstlklefkksisnkiiytlvvftflfllygflpigidkvs lsysqfffssytvatqlgfl lsfviayfinkeysnk  
nilfykligdnlftffyk  
vavllfec lvfii lsiitiisiiysdfshyllil lslvilqyilvvgtismvspnilislgisivywigsvilvainkn  
ifgivapfeasntmyrave  
kilnnestfmcpteiinivsvffvllfivntivllsrkrwlkigm  
>tr|A6QK16|A6QK16\_STAAE  
mkkwtnrlmtiagvvlivaaylfakphidnylhdkdkdeki eqydknvkeqaskdkkqakppkdkskvagyeipd  
adikepvypgpatpeqlnr  
gvsfaeenes lddqnisiaghtfidrpnypqftnlkaakkgsmyfvkvgnetrkykmtsirdvkptdvgldeqkgkdkql  
tlitcddynektgvwekrk  
ifvatevk  
>tr|A6QK23|A6QK23\_STAAE  
mannhsalrlkgiilaivgac lwl ggtvsdf l fkykninvdwyvtarlvvsgvfl l imykmmqpkrsifsvfqdrmlg  
klilfsilgm lvvqayma  
sintgnaaiatlqyiapvyiiwfvirgvaklt lfdv laiimtllgtfl l l tngsfslvvn pas lfwgilagvalafy  
tiypsdllnrfgsilvgw  
amlisgvamn l rhpiwhiditkwdisiilflifgiiggtalafyffids l qyisakett l fgtvepvvaviass l w l hva  
fkpfqivgii limi l il l l  
slkrqpet l de  
>tr|A6QK34|A6QK34\_STAAE  
meiieiymlrdgikehfilkkvrkkfkk l neinsdiqnmyaenqll etdkti idkv l stdvt nshdineyl fl kny  
ldktq  
>tr|A6QK38|A6QK38\_STAAE  
mnnvffnsdfdsifrrmmkdmqgsnqvgnkkyiingkevspe laqltqqgnhsaeqsaqafqaaarqqgqggngny  
leqigrnl tqeadglldp  
vigrdkeiqetaev l srtrknpilvgeagvgktaivegl aqavegnvpaaikdkeiisvdissleagtqyrgafeeni  
qkliegvkssqnavlffde  
ihqiigsgatgsdsgskgl sdi l kpa l srgeisiigattqdeyrn nilkdaaltrrfnev l vnepsakdtveilkgirek  
feehgvklpddvlkacvd  
lsiqyipqrl l pdkaidv l d itaah l saqspavdkvetekriselendkrkavsaeeykkaddiqneikslqdklensng  
ehtavatvhdisdtiqr l t  
gipvsqmdndier l knisnr l rskiigdqavemvsrairrnragfddgnrpigsflfvgtgvgtelakqlaidlfg  
nkda l ir l dmseysdtav  
skmigttagygyddnsnt l tekvrnpysvil fdeiekanpqil t l l l qvmdgdnltdgggnvinfknti i i ctsnagf  
gngndaeekdimhemkfff  
rpeflnrngiveflhl dkda l qdivn l l l d d vqvt l dkkgitmdvsqdakdw l i eegydeelgarplrriveqqvrcki  
tdyyl d htdvkhvdi d ved  
nelvvkkg  
>tr|A6QK41|A6QK41\_STAAE  
makf1ykmgtfiakhkwsaviawivivaailiplatnapkfdndikmtgles l dtnkkiekhfnqdsekaqirvvfkttk  
ddgivqpnitkdi kkt l d d  
ikkddkhi dki sdpnyenkqiskdkttafaditydvsqts l kdgsrdnvksh l kd l rdnhnvqtel t g t g m t s t e v g g n s e  
l v g i i a f v v l l i t f g s v i  
aaglp i i s a l i g l a s g v g i s l l t y a f d i p n v t l t l a v m i g l a v g i d y a l f i l f r y r q v m k t e t d y i k g i g l a i g t a g s a  
v v f a g v t v v i a v c g l s l v g  
i d f l a v m g f a s a i s v v f a v l s a l t l l p a l i s i f h k r i k v n k l q s k f k k d i d t p w s k f i t g n a l a a v l l g l i l v a a i p v  
s h m r l g i p d d g v k p a d s t g  
k k a y d i i s d k f g e g f n g q i p m l i n v k d k d d p q g l q d l q s v y k d i k d k k n v d i v t p p q m s k d n d y a l m v v i p k q g p n a e  
s t n d l v h d l r d y h k d a q d k  
y g f k t e i s g q s v i n i d m s k k l n e a i p l f a s v i v l a f f l l m i v f r s i l i p l k a v l g f v l s l m a t l g f t t l v m q d g f m k g l

Tsompanidou\_et\_al\_Supplemental\_FASTA\_File

fgjettgpm1af1pvitig  
ifglamdyevflmsriheysktgndysikvlgkesgpvivaalimfsvffafvfqedvmiksmgmalafgvlfdaf  
vvrmm1ipal1tklfgkgs  
ylpawlnriiprvdieghalekyktvesqeseakdskeydttkfvypqgatnvskhqdahgqddahsivl1ddktmalyq  
evkqqsasslflydalidy  
qnhqln1skqqatnieqlnknieklnq1leknlrnks  
>tr|A6QK42|A6QK42\_STAAE  
mleqq1fqtitvnqicdnalvhrttfykhfydkyd1ley1fnq1tkdyfardisdrlnhpfqtsmdtinnkedlreiaef  
qeadaefnkvlknvcikim  
hndiknnrdr1didsdipdn1fyiyds1iegfihwikdekidwpgedidni1fhr1linik  
>tr|A6QK46|A6QK46\_STAAE  
mrilitgtvaili1lg1vkti1qdyemndtsrqlsdnkdddkihl1nnfkn1hakefnpsdff  
>tr|A6QK58|A6QK58\_STAAE  
mainiieynrsykeeliefilsiqknefnikidrdqpdeniehn1nnggqfwlainnhqnvgtig1irl1dnmsal  
kkmfvdkgyrn1kigkkl1  
dkvimtcke1nidgi1y1gtidkfi1saqfyfysnngfreikrgd1pssfpl1dvdnrfy1rn1kd  
>tr|A6QK61|A6QK61\_STAAE  
m1gseqmmesksidprivrtkq11vdaf1kisrekk1sqitvkdi1tdiat1nratfyahftdked11dyt1svt1ikd1n  
dn1sisnvinekvl1rni1fi  
siasyikdaaksce1nseafcnkahqrinne1edi1faim1ensyep1hqr1diivnsas1laagis1gl1ahwfnts1qetadv  
fidrn1p1f1ih1hia1f  
>tr|A6QK62|A6QK62\_STAAE  
mrc1ntki1g1idv1setdepqgferthn1lninqss1gvvtyitn1klst1kqhi1iargkkr1dyr1synfy1t1ty1d1nve  
ikkidcey1ty1ampi1ai1r  
htmsfdnah1ffa1ql1rhp1v1  
>tr|A6QK65|A6QK65\_STAAE  
mkd1lvi1gatgk1gnavvkq11ledgwyvsa1trnk1nrk1sdighph1sivegd1sdnvs1qsamk1gkyg1ysi1qip1vkd  
dysee1rqgmki1e1e1ae1qe  
niqhi1vystag1gvnr1nrtgph1fevlakien1r1mesn1atvikps1fmdn1f1riakvederit1lpefin1p1nik1ft1missi  
diakiasy1fahpqs1fthq  
sieigsdevt1seaat1fsevtgkstviege1fsvgvaekq1wleekgyevdfelmaeinpr1s1s1sdw1kvq1ynk  
>tr|A6QK69|A6QK69\_STAAE  
mksitfeehy1viediqketmna1sadpk1gvp1mkvml1eglekk1tgftnadelshhderi1qf1mn1qdv1qi1qv1syng1spsn  
1vgqkaie1lcqkandq1lan  
yi1aqypnr1fv1gf1at1p1inepeaaareferc1nd1g1fkga1imgra1qd1gf1dqdkydi1fktaen1dvpi1yl1hpapvnsdi  
yqsy1ykg1nypev1ta1at1fac  
fgygwhi1dv1gihai1hl1vl1sgifdrypk1nmi1ghwgef1p1ff1er1mdeaf1teh1nhpvsy1f1knnfy1t1psgm1tkp1qf  
d1vkkevg1idri1lyaadyp  
yiepek1gv1f1de1gl1tdee1eki1sy1tngak11g1sp1nn  
>tr|A6QK70|A6QK70\_STAAE  
met1el1qg1ak1ryh1qv1gq1gp1v1ifip1gangt1gd1f1p1laeq1kd1hft1vavdr1rdy1gesel1tep1pds1asn1pds1dyrvkr  
daqdiae1aks1sdep1vy1  
lgsssgsi1vamh1v1kdy1pevvk1iafhepp1nt1f1p1dsty1wkd1knd1divh1qil1teglek1gmkt1fget1ni1apidak1mmsq  
padteegri1eqy1krt1mfws  
efeir1qy1thsdit1l1ddft1kysd1kit1l1ngt1dsrgs1fpq1dv1nfy1inket1gip1v1dip1ggh1gyi1qk1peg1fad1v1l1nmw1g  
>tr|A6QK72|A6QK72\_STAAE  
m1evkydm1rt1ghy1tpi1nephyl1vishadk1tatek1ak1r1l1i1kqk1ldislaesv1sspiasehv1ieq1t1lfqher1hl  
rpkisat1flaw1li1flm1fa  
lpigi1ayq1f1sdw1fq1ny1vsawiey1ltqt1l1nhdi1lqhil1fgdy1g1v1sl1gtys1lvwal1pvvil1s1stai1dqt1g1k1swm  
iwa1eps1ml1wig1lq1gndiv  
p1leg1fgc1naaa1isqaahq1cht1ctkt1qcms1isf1gsscsy1qigat1sifsvagksw1fmpyl1il1v1l1ggil1hnriw1lkkn  
dqql1sv1p1pydr1ql1hmp1ni  
rqm1l1qm1wq1ni1qm1fiv1qal1pifit1ic1livs1il1st1pil1nv1sqif1tpil1s1l1gissel1spgil1fsmirk1dgm1l1fn1lhqg  
al1lqgm1tat1q1l1l1v1ff1ss  
tftacs1vt1mt1ml1kh1lg1gsa1kl1ig1qm1vts1sl1vig1gi1vki1vml1ii  
>tr|A6QK76|A6QK76\_STAAE  
mmstv1qsdi1fk1tns1ass1iksavet1cnnv1skpdk1dest1tvsg1nna1hsv1idd1lmskn1qs1vaeair1tas1dni1kv1ge1afdq  
tdvm1igne1igkn  
>tr|A6QK77|A6QK77\_STAAE  
mneq1w1eh1pl1kdi1kei1spv1sggd1vneayrvet1dtd1ff1l1vqr1grkes1fyaae1iag1lneferag1itapr1viasge1vngd  
ay1lvm1ty1leegas1gsqr1q1  
gq1lvaq1l1hsqqe1egk1fg1fs1pyegg1dis1fdnhw1qddw1cti1fvdkr1ldh1kde1l1nrg1lwdandikvydkvrrqivae1e  
khqskps1l1hgd1lwgg1nym  
f1lq1dgr1pal1fdpap1lygd1ref1digi1ttv1fgg1ftsefy1daynkhyplakgasyr1efyr1ly1l1mvh1l1kfgemyr1dsvahs  
mdki1lq1d1tts  
>tr|A6QK81|A6QK81\_STAAE  
mta1l1fpy1iafens1kealaye1evf1gat1dvkr1levgee1qash1fgmt1keea1qeat1mae1fev1lgvkl1csds1fgradk1ing  
is1l1l1idy1dvn1ked1ad1kve



Tsompanidou\_et\_al\_Supplemental\_FASTA\_File

afyeqikdhssieielpfadqfwggkmgvftdkygvrwmlhgqdytaiqq  
>tr|A6QK82|A6QK82\_STAAE  
mtidrriksqvmrnafielhghqleeitvqqiadladvnrstfythydykdlllekledqqleeirdfihdeklnga  
vklstdnihqimtvliemi  
ekdiafyqlmfrmgkdsniheklydlmchlqryknendqingipfsyfmsyvsaglsfirhwvedpnridkvdlirhf  
ntivnggpatiikniq  
>tr|A6QK88|A6QK88\_STAAE  
mtnvlyghgtlgtlmagllegtatinelehgngiatltgsdgevi fldgkayhanehkefielkgdekvpysitnfk  
asktfplqqlsqddvfaqi  
knemlsenlfsavkiygtfkhmhvrmmpaqpppytrlidsarrqpeekrqdirgaivgfftpelfhgvgsagfhihfadd  
eraygghvldfevddvvve  
iqnfetfqghfpvnnetfvkakidyndvaeeri  
>tr|A6QK96|A6QK96\_STAAE  
myerklvmqksal fapekyniiseiekyshipdkkailyhntegedisvtyqq lieqsnkvgnv lashglskgdkvlimm  
prsiatyelyiaalklgva  
iipcsem lrtkdlqyri thgeinavialepftvefekikeydaltkfviagqkdgwisleaekenasnklemadttrddm  
ailsytsgttgnpkavthc  
hgwgfah lqmapkhwlcineddlwataapgwqkwvswpflsvlgsgatafvfngrfspetyellelkyqinvlcctpte  
yrmaklqn lndydlthlh  
savsageplnrevveqfkkyfnl tvrdgygqtestlligflkdtprigsmgkigpssvtvddegnsvpantkgniav  
pldlpal fkgyykeperta  
kaqtgkyyitgdlahvdddgyfwfegrrddi iissgytigpfevedaltnhpavkecavvakphdirgnivkafvilqdh  
tagdttl vke lqqfvknev  
apykypreiefvddlpktnsgk irrelrdaiekwqqkdsnq  
>tr|A6QK97|A6QK97\_STAAE  
mkidyeyrsyvieelddcltiqknndtayydvleaindlsndslcvlnhlyinegqeetfeqkflrrnkhlnvdfkalf  
rflrprtagrhyiitlwe  
nrqafyhwqnsaeykthkhrgtskgadvkii nrelysynirieladm  
>tr|A6QKA1|A6QKA1\_STAAE  
mtrsqnkqqleqakdivinsigqtm dlygtnrsvgnlygtnmfegsmtldemrhqlqmskpsmsagvkk lqefdivkqq  
ftrgsrkqhfiaekdffif  
frnfftkkfqr Reidinveavkdaqaiinsllessdlteaetqeaqkikaql dhthvyewleqlteaiesgeifkyfpi  
eqpsdsen  
>tr|A6QKA6|A6QKA6\_STAAE  
mnsdnmwl tvmgliiisivglliakkinpvvgmtiipclgamilgysvtdlv gffakgl dqvinnvimfifaiiffgim  
ndsgl fklplvkrli lmtrg  
nvvi vcamtaligtiaql dgagavtflsipa llyka lnmnyllil lla lsaaimmvpggpmarvaavlkaksvn  
elwyglipiqiigfilvml  
favy lgfkeqkr iikkaierne l pqtq didvhk lvevyerdqdrfpvkgrartkswikwntal t lavil smliniappe  
fafmigvs lalvinfksvd  
eqmer lrahapna lmmaav iiaagmflgv lnetgm lkaiatnlikvipaevgpylhiivgllgvpldl ltstdayyfav  
piveqttagqfgvpsvstay  
smvignii gtfvspfspalw laig laeanmgtyikyaffwiwgfai vmlviam lmgivti  
>tr|A6QKB0|A6QKB0\_STAAE  
mrgyngrycswntaiqc dyfnkvrqvkkd gksdr lsnnsni iyrvlek citlyncsrckralil sehsknifnik  
kav  
>tr|A6QKC1|A6QKC1\_STAAE  
mffkrsdknmkekivial ggnaiqtteataeaqqtaircamqnlkplfdsparivishngnpqigslliqqaksnsdttp  
amp ldtcgamsqmglyw  
eteinri ltemnsdrvtg tivtrvevdkddprfdnptkpi gpfytkeeveelqkeqpsvf kedagrgyrkvvasplpqs  
ilehqlirtladgknivia  
cgggipvikkentyegveavidkdfaseklat lieadt lmi ltnvvnfinfnepnqqqiddidvatlkkyaaqgk fve  
gsm lpkieaairfvesgen  
kkvii tnleqayealignkgthim  
>tr|A6QKC8|A6QKC8\_STAAE  
mkl l l i t i v i i v l i g a l g f a i y a a i n h s t s s n n q e q e n k s t h k k t e t e e n d q q d s a d k t d k n q n n g n v t n d n q p s s p  
snv p n n h s t v p s n t q p a q p  
kdsnsnknthgggsqsstnnqnnqqntppanksntntpskqtpqaqspkn  
>tr|A6QKD2|A6QKD2\_STAAE  
mtmknafklfkmdlkkvaktapwii lagla ilpsfyawfnlwamwdpygntghikvavvnedkgd tirgkknvngntmv  
ntlkknksfdwqfvsreka  
dheikmgkyfagi yipskftheitgtlrkqpqkadvefkvnqki navask l t d t g s s v v e k a n e q f n k t v t r a l l e e a n  
kag l t i e e n v p t i n k i k n a  
vysadka l p k i n d f a n k i v y l n n h q a d l d k y a n d f r k l g n y k g d i l d a q k k l n e v n g a i p q l n e k a k l i l a l n n y m p k i e  
ka l n f a a d d v p a q f p k i n q  
g l n i a s q g i d q a n g l n d a k g f v t q v r s r v g d y q d a i r r a q d l n r r n q q q i p q n s a a n n e t s n s a p a a n g v a s t p p s a p  
sgdtapnnnvtqntapnsn  
napvsttpqstsgkkgdgsfvdi tttqvstanentqni tdkdvksmeaal tgsllslnn ldtqakaaqkdsqalrnisy

Tsompanidou\_et\_al\_Supplemental\_FASTA\_File

gilasdkpsdfresldnkv  
sgleyttqynqqfidtlkeieknenvdlskeidkvkaannrineslrlnvqlsna1kngssgtaeatk1ldq1skldss1  
ssfrdyvkkdl1nsslvsis  
qrimdelnkgqta1snvqsk1ntidqvinsgqailkngktridr1qtv1psieqqyisavknaqanfskvksdvakaanf  
vrnd1pgleqr1tnatasv  
nkn1pt11ngydqavgl1nknqpakka1sd1adfsqnk1pdvekd1kkankifk1dkddavdk1id1tknd1kkqagi  
ianpinkktvdvfpvkdyg  
sgmtpfyta1svwga11mvs11tvdnkhks1esv1ttrqv1fgkagffim1gm1qalivsvgd11il1kagvesp1fv1  
it1fcs1ifnsiv1tvcv1  
1gnpgkaiaiv11v1lqiaggggtfpiqt1pqqfqnisp1pftyaid1retvgg1vpe1itk1i1il1t1fgigffvvg1  
i1kpvt1dp1mkrvsekvdq  
snvte  
>tr|A6QKD5|A6QKD5\_STAAE  
makyrqkpfqlyvk1scstmmatsi1ltni1pydaqaasekdteitkei1skqd11dkvdkairqieq1kq1sasseky  
kaq1neaktasqidei1kr  
ane1dskdnksshtemnggsdi1dsk1dq11kd1nevssnvdrqgqsgedd1namkndmsqtattkhgekddkndeamvnk  
g1ed1dh1nqqihkskdas  
kdt1sedpavst1dnnhevakt1pndgsg1hv1nk1f1sneenqshsr1tdk1qgsdkinhamiek1aksnastqhytyhk  
1nt1qs1dqriantq1pkn  
qksd1m1sevnk1t1kerik1sqrni1lee1artddkkyatq1silesi1fnkdeavki1kdirvdgktdqqiadqit1rhidq1s1  
ttsdd11ts1idqsdks1  
li1sqi1qt1k1gkaeadk1akdwtnkg1snrqivdq1kkhfastgdtssdd11kai1lnnakdkkqaiet1latrierqk1k  
1lad1it1k1ietdq1nki1fn1  
vksa1ngkadd11n1qkr1nqt1k1kdi1dyi1spivnrps11dr1n1kngk1ttd1n1k1lan1m1nqgsd11dsipdi1pt1k1pekt  
1t1gk1ng1l1sg11nadgn  
vs1lpkaget1ikehw1p1svivgamgv1miw1srrnk1knka  
>tr|A6QKD9|A6QKD9\_STAAE  
m1knkt1fkvtwnyi1sqt1tfmygskvs1fsngevt1finp1mpsg1pihew1m1kqfskyksaps1pil1rrgqhyk1hfd1fa  
tpagsvyfi1i1fynkngtk  
1steivksns1iti1qypdeayayki1m1mnaasts1i1frcl1t1emthqyd1leyksmrvtki1gddqygndminviaepsdt  
ypti1sndf1k1l1fghv1ve  
1rwmddni1egn1k1q1knd1l1sqdt1kain1is1ygsksnv1fvtyvaqh1gckvyr1tshedd11kgw1tehvp1gn1hel1kdt1nv  
evy1fkee1qd1kh1nyms1rlm  
npvr1fdy1ldvsk1nggevnet  
>tr|A6QKE0|A6QKE0\_STAAE  
mprk1frv1qi1ggdd1lep1fqhkk1gvs1wdy1fdig1l1fefds1gyvea1iea1iveaegr1fd1fiy1qap1yset1tn1l1qmi1sep1yn  
tyvdes1fws1veyeqdenvq  
kyv1vp1l1h1yrni1eernk1leav1sfsg1ygd1kv1spk1la1lvh1pn1fk1gd1vvy1qgn1sel1t1s1ge1fr1ke1fk1pi1asw1qnn1lv1ydkd  
kvi1qi1wpe1fdi1dgave1lqy  
tfr1li1qt1gad1galie1qiv1tddm1dsp1le1ipak1pfd1ay1svt1vkarg1ng1tvh1l1gpi1hkr1wsr1dm1gq1f1l1ggs1rfv1ds1qr  
qefi1yy1fh1pg1dm1kpp1l1nv1y  
fsgyr1taeg1fegy1mm1kr1mnap1f1l1ig1dpr1ve1ggs1fy1gs1seyeqgi1n1videt1lek1n1fk1shel1il1sg1l1sm1gs1fga1ly  
ga1l1npqai1ivgk1plvn1ig  
tiaehmr1l1rpeef1gta1ldv1lvs1neg1dts1qasi1qa1n1qk1fw1qt1fqkks1sqt1vfai1aym1qh1ddy1phaf1qe1ll1pv1l1tahq  
arv1mnr1sip1gr1hnd1ds1pti  
asw1fv1n1fy1ni1ledk1fgr1v1qhaek1qni  
>tr|A6QKE1|A6QKE1\_STAAE  
mkyfi1paw1ydd1qrww1qdt1tvpyy1qlnkte1fd1dmi1s1mgm1hlend1dyq1liv1nhap1n1rt1fl1hryd1lyet1kyss1vf1dei  
qgf1sh1hap1qain1yh1h1kwp  
ddve1fy1t1py1l1kcv1t1seq1ty1tni1y1fs1qeg1ysi1w1fee1fer1dq1l1rryi1f1ddrg1yl1sai1ry1f1dd1qge1asy1qey1l1ting1dcv  
1hed1l1kng1rv1tv1sk1ry1qh  
yq1t1eyn1n1ma1ql1iek1fqami1aq1iheddh1vas1dar1hnr1qian1hip1aks1l1sys1ff1knr1net1vs1deey1qs1iv1kna1h1iv  
dsv1ql1er1dl1ish1qey1qre  
ntmi1ri1tp1fetr1qsp1ni1ss1qlmet1fig1vw1idg1ms1dad1l1qmm1qr1lv1dy1ia1qed1y1r1l1ll1sr1hqnd1ip1mw1l1rec1its1vne  
ey1qak1qn1adv1n1vsal1mtpe  
dqddi1i1av1kti1haehd1v1veal1rt1l1r1vid1ms1kep1d1yl1qi1sai1sag1ip1qing1q1tdy1vs1dy1ngri1int1v1del1dda1l1nyy  
1fy1l1knw1ny1ay1ays1l1k1id  
ayaskni1ing1l1del1legendat  
>tr|A6QKE3|A6QKE3\_STAAE  
mskr1qka1f1hds1lanek1trvr1lyksgknwvks1gikei1em1fkim1gl1pfish1svsqdn1qs1isk1mtgy1gl1kttav1igga1ftv  
nm1hd1qq1afa1sdap1tse  
1nt1q1set1vg1n1q1nst1tieast1stad1stsvtk1nsssv1qts1nsdt1vs1sek1ekt1st1t1n1st1sn1qqek1t1st1se1st1sk1nt1t1ss  
sdt1ks1vast1ss1teq1p1ints  
tnq1stas1n1nts1q1st1p1ssv1n1kt1st1t1st1ap1vk1l1rt1fs1rlam1st1f1asa1tt1tav1tant1it1vnknd1l1kqym1t1sgnaty  
dq1st1g1iv1t1l1t1q1days1q1kga  
it1l1g1tri1ds1nks1fh1fsg1kvn1l1gnky1egh1ng1gd1ig1faf1spgv1get1g1ngaav1g1ig1l1sna1fg1fk1d1tyh1nt1sk1pnsaa  
kanad1ps1nvag1gga1fgafv  
ttdsy1gv1att1yt1ss1stad1naak1lv1nq1pt1n1t1fq1dfdi1nyng1dtk1vmt1vky1ag1qt1w1trni1sdwi1aks1gt1tn1fs1l1smt1ast1g

Tsompanidou\_et\_al\_Supplemental\_FASTA\_File

gatnlqqvqfgtfeytesa  
vtqvryvdvtgkdiipktysgnvdqvvtidnqqsaltakgynytsvdssyastyndtnktvkmtnagqsvtyyftdvk  
aptvtvgnqti evgktnmp  
ivltttdngtgvtnvtvgtlpsgl sydsatnsiigtptkigqstvtvvsdqannksttftinvvdtaptvtpigdq  
sevyspispikiatqdnsg  
navtntvtglpsgl fdstnntisgtpntigtstisivstdasgnktttftkyevtrnsmsdsvstsgstqqsqsvstsk  
adsqsaststsgsivvsts  
astskstsvslsdsvsasklstsesnsvsststslvnsqsvssmsdsaskstslsdsisnssstekseslststsd  
lrtstslsdslsmstsgsl  
sksgslstsisgssstaslsdstsnaietstslsesastdsisisnsiansqsastsksdsgstsislstsdsksmst  
seslsdststsgsvsgsl  
iaasqvststsdsmstseivdsistsgslsasdkmsvsssmstsqsgstseslsdqstsdskslsqstsqgs  
tstststasvrtseqst  
sgmsasqsdmsiststsdskstastasesisqaststsgsvststslstnsertstmsdtslstsesdi  
seststsdiseaisases  
tfislsestsdseqsasafleslsestsestsevsstsestslsdstseststslststsgststststststst  
eststfksestvstslsmst  
stslsdstststslsdstsdskststsmstsdstskstststststststststststststststststststst  
stsgstststststststststststststststststststststststststststststststststststst  
tslslsamnqsgvdsnqsasntststststststststststststststststststststststststststst  
lsgsesedsqststststststststststststststststststststststststststststststststst  
stsesastslsdstststststststststststststststststststststststststststststststst  
iaslsvststststststststststststststststststststststststststststststststststst  
tstedtststststststststststststststststststststststststststststststststststst  
tsdstaststststststststststststststststststststststststststststststststststst  
sdstststststststststststststststststststststststststststststststststststst  
smdsvststststststststststststststststststststststststststststststststststst  
lrsesvsesdlsdkststststststststststststststststststststststststststststststst  
tsdlsdkstststststststststststststststststststststststststststststststststst  
sestststststststststststststststststststststststststststststststststststst  
sdssststststststststststststststststststststststststststststststststststst  
qstststststststststststststststststststststststststststststststststststst  
dstststststststststststststststststststststststststststststststststststst  
seslsvstststststststststststststststststststststststststststststststststst  
stststststststststststststststststststststststststststststststststststst  
dmsmhhthststststststststststststststststststststststststststststststststst  
kkkdendqddsqa  
>tr|A6QKE7|A6QKE7\_STAAE  
milryatnlklakelygaskpkqedkgmielfehtfglqkelvkyvgiaeattaalysasfinknisrlaslstigils  
vaaykhfeagggkkaqha  
lnllglatlslltdfscnk  
>tr|A6QKF5|A6QKF5\_STAAE  
mqffnfllyfypfmsiywivgsiyfyftreirylnkkpdinvelegitflacynesetiedtlnvialkyekkeii  
iindgssdntaeliykike  
nndfifvdqenrgkanalnqgikqasydyvmcladativdqapyymienfkhdpklgavtgnprirnkssilgkikti  
eyasligcikrsqtagav  
ntisgvftlfkksavvdvgywdtdmitediavswklhlrgyrikyeplamcwmvlpetlgglwkqrvrwaagghevllrd  
ffstmktrfplylmfeg  
iisilwyyivllylgylfitanfldytfmtyfsifllssftmtfinviqftvalfidsryekknmaglifvswyptvyw  
inaavvlvafpkalrkk  
ggyatwsspdrngtqr  
>tr|A6QKG0|A6QKG0\_STAAE  
mtkykidfskglvpailqdnqtkqvlmlygmneafdkti edgvvcfysrskqrlwtkgetsghtqrvkdi hvdcndti  
lidvipngptchtgsqscf  
ntevpfsvtlaqtvdqsasnnksytkylltegiekitkkygeaefevvieaikgdkkafvsevadehyhlfvlmhal  
gvdfseieaelarrhkrn  
nfkgerqnieqw  
>tr|A6QKG5|A6QKG5\_STAAE  
miyidknespvtpldektmstsiisatpynlypdaayeqfkeayakfyglspeqii agngsdeliqlmlimpegpaltln  
pdffmyqayaaqvnreiaf  
vdagsdltdletitkidevqpsffimsnphnpsgkqfdtafltaiadmka lnygfvideayldygtaydvelaphil  
rmrtlskafgiaglrlgv  
istagtikhikiehpyplnvftlniatyifrhreetrqfltmqrqlaeqlkqifdthvadkmsvfpsnanfvltkgsaa  
qqlgqyvyeqgfkprfyde  
pvmkgyvrysiatasqlkqleeivkewsakydlskttkhs  
>tr|A6QKH4|A6QKH4\_STAAE  
mgnylvlsdfglsgavsamygvaytvssdi rvenlthdippydiwasyrlyqtvkywpgktvfsvvdpgvgdsrrs  
iaclytsghyiitpdngsl

Tsompanidou\_et\_al\_Supplemental\_FASTA\_File

shikhyegikkvieidevksrlphseeshtfhgrdvayngarlaankiaferlgqainvdsiealeirevtknedsvtg  
sidildirfgslwtgnipla  
flksleivhgnlvvtiyhqdkkvyqniikfarsfadvnvgeplvyvnslnigvavnqdsfsdlyhigtgndwtihlks  
apsi  
>tr|A6QKH9|A6QKH9\_STAAE  
mlskqsqdflekrlveflfrgkteaeeveelleedhlmtaeknnedtssiintpiksmadqlspeislttglykyitly  
fafilaviiiprflldlgtf  
dvtiafllyiasivilgvigmlilrntlvrfgdqkityvinvtygiivflwmilggliikkypisffelsdkqsfigv  
lvllialigtcilikqkiy  
alivlvislpsliariaaifskepdtfnlsvsiliilniafiityfvnfrklkcd  
>tr|A6QKI5|A6QKI5\_STAAE  
mikyhmkegyiltvfknerlswlpyiaivillhvigfsflwiagkdhilfgmgilaytlglrhafdadhiaaidntvr  
kllqqrkdpsgvgyfysig  
hssvflmavflgsvkwakdelphfdiggtigtlvsgfflvligvlnliilislilnfaklrrehieeaevdallesr  
glvsrfvgpyfkli trswh  
vlpfglfglfgdtaseiallaissgasqqaisfigilslpilfasgmslldtdlgvmmkyaynwaffnpirkiyyniti  
taisvmaalvigmiellqi  
ladklldlhgafwafigsiefdylgyilvalflitwlissliwkgfriegkwsr  
>tr|A6QKJ4|A6QKJ4\_STAAE  
mkfrelvkqsyedlknltvtwynvialtilvivlssfttpmigipaglpgsyylkrreekgk  
>tr|A6QKK3|A6QKK3\_STAAE  
mmllkayrikknadfgriykgghsvanrqfvvytcnkeidhfrlgisvskklgnavl rnkikrairenfkvhkshila  
kdiiviarqpakdmttlqi  
qnslehvkiakvfnkkik  
>tr|A6TXF5|A6TXF5\_STAA2  
msdvnntdnygagqiqlvlegleavrkrpomyigstserglhlvweivdnsidealagyankievviekdwnikvtdngr  
gipvdiqekmgrpavevil  
tvlhaggkfggggykvsgglhvgvssvnaalsqdevyvhrnetiyhqaykkgvpqfdlkevgttdktgtvirfkadegi  
ftettvynyetlqqrirel  
aflnkqitl rderdeenvredsyhyeggiksyvellnenkepihdepiyihqskddieveiaiqynsgyatnlltyan  
nihtyeggthedgkral  
rvlnsyglsskimkeekraltsgedtregmtaiisikhgdpqfegqtktklgnsevrqvvdklfsehferflyenpqvart  
vvekgimaararvaakkar  
evtrrksaldvaslpgkladcsskspeceiflvegdsaggstksgrdsrtqailplrgkilnvekarldriinnneirq  
mitafgtgiggfdlakar  
yhkivimtdadvdghairtlllffyrfmrplieagyvyiaqpplykltqgkqkyvyndreldklkse lnptpkwsiar  
ykglgemnadqlwettmnp  
ehralqvkledaieadtqfemlmgdvvenrrqfiednavyanldf  
>tr|A6TXG2|A6TXG2\_STAA2  
mtnytvdtnl ngkfit esgevidnlrlryehvgyhgqplvvvchal tgnhltygtddypgwwreiidggyipihdyqfl  
fdvigsfpgsssplndphf  
pkkltrldivranergiqalgydkiniligslggmqamellynqqfevdkaillaatsrtssysrafneiarqaihlgg  
kegl siarqlglfityrsk  
syderftpdevvayqhgqgnkfkehfdlncyltllvdldshnidrgrtdvthifknletkvlmtgfiddllypddqvral  
gerfkyhrhffvpdngvhd  
gfllnfstwapnlyhflnlkhfkrk  
>tr|A6TXH5|A6TXH5\_STAA2  
midnfmqvlklikekrtnnvkksdwdkgdlyktlvhdkl pkqlkvhikedkysvvgkvatgnyskvpwisiydenitke  
tkdgyylvy1fhpegegiy  
lslngqwsksidmfrdknaakqraltlsselnkyitsnefntgrfyfaenkdsydlkndypsgyshgsirfkyydne  
gftedml edlkkflelfn  
elaskvtktsydlvnsideiqedseieeirtaqkdktlkeveapkgiipkykkgvskttkndseieksnkenkltgkvg  
eklalnyfnelidnkided  
kkeqfrnilndnpgsqhghgydlvafdptntdkavekfieiktstsssieepffmslnemfamkeykqkylilrifnvsg  
kepofyfidpyanysefkd  
vddlidkvfnveaiqkvfgek  
>tr|A6TXJ5|A6TXJ5\_STAA2  
mnwikvaqisvtiisqaiimkeiqdevk  
>tr|A6TXJ7|A6TXJ7\_STAA2  
mqqltktrvgiyvrstempstegysidgqinqikeycdfhhfevkdiyadrgisgksmnrpelqrilkdakegyidcvm  
vyktnrlarntsdllkive  
dlhkqnveffslsermeintssgklmlqilasfsefernnivenvfmgqtrraqegyyqgnlplgydkipnskhelminq  
heanivkyifesyakghgy  
rkiana lnhkgvvtkkgpfsissityilanpfyigkiqfakykdwsekrkglndkpviaegkhspiiinqdlwdkvqmr  
kkqvsqkpqvhgkgtllt  
giihpcqgapmaasntntlkdgtkkri ryyscsnfrnkgskvcsansvradvi edyvmkqileivksdkviqrvtvthv  
nqenqvdgaa1hhdia ykq  
qqydevqiklnnliktiednpltsvirpsiqkyekqlniditnqinqlnqqnedkplfdakeiskllqhi fhdikhiiek

Tsompanidou\_et\_al\_Supplemental\_FASTA\_File

sr1kaly1svidridikk  
gnhkkqfyvt1klnneiikq1fnnkq1devh1stss1flpqtlylti  
>tr|A6TXK2|A6TXK2\_STAA2  
mly1ssimdiyngelvaykiddkqdr1vndtlnqidipegyl1hsdqgsvytsyayyq1ceekgi1rsmrkgtpadna  
piesfhss1ksetlyinnq  
lnssnhividivekyiknynnnq1qqk1gyl1spvkyrelia  
>tr|A6TXK3|A6TXK3\_STAA2  
mvpvvid1vdq1kgnysik1ilev1nipkstyrrwknktykndtvtqkviel1ceanhytygyrkitalinqcytspinh  
krvqrmmqkhh1ncrvrpk  
kttrigkpyyktnd1lgr  
>tr|A6TXK5|A6TXK5\_STAA2  
mdkdirktstrtviksvidinhkyl1tefl1pfveyitkvegskifi  
>tr|A6TXL1|A6TXL1\_STAA2  
mistsehsifknpakndglrvrtievsektssaqnsdtikkvvsqnnghv1piiaqf1ldntndvts1fqkedsvfyq1  
1stessntgirmikhyat1  
tttahi1nqsl1d1q1nvssikny11syhnetvsers1ladkamdtivqfiaen1gkfsqqtr1lanmiqnf1gils1kddyie  
vki1rnvfdkml1tdsqfed  
tknvidal1dnagk1vsdrdrkttkrnakddtgksts1vfyqikid1dyadv1gl1qsqgrdnviqkhsnpsqfkntn1leef  
mksentt1ivf  
>tr|A6TXL2|A6TXL2\_STAA2  
mekilyqtdefk1kpsgwyktippkdggtfeim1sgpiaftrfidpatrkekvf1sd1nnielvekasil1talq1ps  
li1eygftinekhird1gfv  
1qmrsttp1stiysgvml1ht1l1gp1is1dqpyfsneitnsts1icdnkyd1ipkgn1sew1qmykeevhgn1sle1dv  
1fgvss1vtaf1kyhnnve  
fsgti1fsftgqsstgkstaam1aasvagnptkgten1frswnatrna1egy1sgnygvpi1vde1saatfhdttg1llysf  
aegqgrqraningdvktpk  
n  
>tr|A6TXL7|A6TXL7\_STAA2  
mtknskytnevskeqfqienvnnkvkefy  
>tr|A6TXM1|A6TXM1\_STAA2  
mkqygekfi1defskaelek1akqgq1idvrteeeyalghingsil1hpvdeiesfnkeknktyyvicrsngnsanaskyla  
kqynvin1ldggykayeen  
dsydtqeeyksieikadrkqfnryrgfqcpgpivki1sqemknievgdqiekvtdpgfspdikswvkqtrht1vkl1dennn  
ginai1qkekakd1dinys  
akgtt1v1fsgel1dkavaa1i1angaraagkdv1t1fft1fwg1na1kkvqtvnkkqgiakmfd1ml1pqkn1rmp1skmm  
fg1gnmm1ryvmkkknvds  
lpt1in1qai1eqnik1iactmsmdvmgi1qkeel1rdeveyggvgtyigatenanh1lfi  
>tr|A6TXN3|A6TXN3\_STAA2  
mkr1nt1vl1yis1fl1i1is1ivagcgtgkeaeikksfekt1smypikn1ed1ydegyrddefdkndkgtwtis1semai1qk  
kgeal1nikgm1v1kl1nrnt  
sakgyfyyvnaik1kdengrpqdkqieypvkmidnk1i1ptk1dikdekik1e1nf1k1ffa1ygn1fkd1tky1kggdi1synpeap  
i1sakyq1tndd1ynvk1lr  
krydi1ptnk1apk1l1l1kgsgn1dgss1igykkieft1vekk1gentyftan1l1hf1kpsnde  
>tr|A6TXN9|A6TXN9\_STAA2  
mdgy1l1rcskn1di1yiegti1ynkvma1ir1fnegdvk1vntk  
>tr|A6TXP0|A6TXP0\_STAA2  
memsvtevi1fs1f1gg1gi1f1yg1k1imgd1gl1qasagdr1rdi1nk1fts1npv1lg1vi1agiv1vtili1q1ss1g1tt1vit1igl1vtag  
f1mt1k1qai1gv1imgan1gtt  
vtafi1igid1lgeyamp1il1alga1fl1fff1krskinn1gril1fgf1s1ff1gl1ef1mg1dav1k1pl1as1ldg1fk1ql1m1dm1ss1np1ila  
v1vg1ag1l1tal1vq1ss1atig  
i1l1qe1fy1qqd1is1lna1aip1v1l1gd1nig1tt1it1ail1as1l1ags1ia1akraal1vh1vif1n1lig1vi1ift1fl1pv1vih1lis1l1ld1vwh1  
k1pam1ti1av1sh1gt1fni1tnt1  
i1q1l1pf1vag1lawi1vtk1lvpg1kdi1addy1kpq1h1nk1dl1vy1hap1gval1qet1qkel1qnv1gqiv1l1sm1fed1ireit1kdd1k1lik1kle  
q1kh1qav1et1inds1irny1lv  
i1stk1ait1kad1ver1lav1mfd1vnrs1ilk1vae1lteey1vaql1krq1hd1edir1iteda1qr1gmd1kl1fn1hvae1sfd1kaid1ml1dvy1dkt  
kk1de1ivers1res1fnieh1kl  
rkgh1ikr1lnr1ge1ct1tkg1g1ly1id1mig1v1er1igy1hs1rnv1seal1vg1l1ndd1vpt1dee1iatte1i  
>tr|A6TXP1|A6TXP1\_STAA2  
my1sy1gn1yea1far1pk1pen1venksay1lig1sg1las1laa1acf1l1rd1g1qm1eg1ski1h1ile1lp1kag1s1ld1gen1mp1kgy1vv1rgg  
rem1enh1fec1lwd1l1fr1s1ips  
le1id1nas1vl1def1y1wn1ked1pnys1rcrv1iek1qg1qr1l1vd1gd1ft1l1k1tai1ke1ild1l1cl1t1need1dd1vit1dv1fs1dd1ff1ns1nf  
wi1ywk1tm1fa1fep1wh1samem  
rry1l1mr1fv1hh1igg1lad1fsa1l1kft1kyn1qyes1lv1pm1vey1k1sh1gv1qfey1dv1kved1ikvd1v1tts1qki1are1il1hrh1gkaesi  
k1l1tv1dd1l1vf1vt1ng1s1itess  
ty1gd1nd1tpap1pt1del1ggs1wt1lwn1lar1qs1pe1fg1np1dk1fc1qni1pk1ks1w1fvs1at1st1tn1kei1id1ties1ick1rd1pl1ag1kt1vtg  
gi1it1inds1aw1qms1ft1nrq  
qq1fk1dq1pene1stwi1yal1ysdv1ng1dy1kk1p1itec1sg1nei1cqew1lyh1lgv1std1kied1lakh1vs1nt1ip1v1ymp1y1itsy1fm1tra  
ig1dr1pl1v1vph1qs1qn1s1fig

Tsompanidou\_et\_al\_Supplemental\_FASTA\_File

nfaeterdvtvftteysvrtameavyqllnidrgipevinstfdlrvlmdavyelndhqdlreitkdskmqklalagflkk  
ikgtyietllkehkl1  
>tr|A6TXR2|A6TXR2\_STAA2  
mfynilgvliivmlstdaldcdiithlrtslinflpiqsllsalknpyc  
>tr|A6TXR4|A6TXR4\_STAA2  
mkk1q1kkwkcrendieavhnnkgyayqrkldaleevrkgyypikraidlvlsivllfltpimfifaiaividspgnpi  
ysqvrvgkmgkikiyklr  
smcknaekngaqwadkdddriatnvgkfirkrtridelpqlinvvgkemsfigrperpefvelfssevigfeqrc1vtpgl  
tglaqiaggdyd1tpqk1k  
ydmkyihkgs1mmelyisirtlmvvitgegsr  
>tr|A6TXR5|A6TXR5\_STAA2  
mkiicyitkadnggaqthliqlanhfcvhhdvviivgnhgpmieqldarvnviielhlvgpidfkqdilavkvlalq1fsk  
ikpdvihlhsskagtvgr  
akfiskskdrvvftahgaftegvkpkkflylviek1mscitsiicvsdfdkqlalkyrfnr1k1ttihngiadvpa  
vkq1ksqshnnigevgm  
lpnkqdlqinaptkhqfvmiarfaypklpqn1iaaieilk1hnsnhahftfigdgpt1ndcqqqvqaglendvtf1gnv  
inashllsqydtfiliskh  
eg1pisiieamatglpviashvggise1vadngicmmnnpetiakvleky1idsdyikmsnqsrkrylecfteekmike  
vedvyngkstq  
>tr|A6TXR7|A6TXR7\_STAA2  
mksds1keniyyqglyqlirtmtplitipiisrafgpsvgvsvsfnivqyflmiasvgvqlyfnrviaksvndkrqls  
qqfwdi1fvskl1flaltvfa  
mymvvitifidyyli1fl1qgiyiigaaldi1swfyagtekfkips1snivasgivilsvv1fvkdqsd1slyvftiaivt  
v1ng1pl1fiylkryisfvs  
vnwihvq1frss1ay1lpngq1nlytsiscv1glvgtyqqvgifsnafniltvaiimintfd1vmipritkmsiqqsh  
s1tk1lanmniq1l1tip  
mvfgliaimpsf1wffgeefastvplmt1lailvliiplnm1isrqy1llivnkirlynasitigavmnlv1clvliyfy  
giygaaiarlitefilliw  
rfvdi1tkinvk1nivstiqcviaavmmfiv1gvvnhylp1ptmyat111iaigivvy111mmtknqyvq1l1rh1rhkti  
>tr|A6TXR9|A6TXR9\_STAA2  
mkk1atvgs1ivtst1vfssmpfqnahadttsmvnpkqsqnvqnhrypyggvvpqgmtqaqytelekt1pqlsagsnmqd  
ymklydatqniadkynvi  
ittnvgvfkphavrdmnghalp1tkdgnfyqtnvdangvnhggsemvqntghmsqqdhmnqnthmnpqppiqqghmqss  
nhqmm1spkanmhssnhqmn  
qsnkv1paagesmtss1ltasiaa111vsg1flafrrrstnk  
>tr|A6TXS0|A6TXS0\_STAA2  
mevvyvtq1qpkf1tiy1tykeiqigkypsghalp1tekelcarfdvsrmt1rqai11aedgivestr1gkghfvi1pqt  
aqhasmdqfkhpldq11  
arvsmss1nyrvd1eseytnh1fanhpsaviameyyqkkdnhsqadafctf1p1nvidt1fkvntqneddmktfveqt  
iysnayqsd1kmsitkapr  
fknhshvfdgdthcwl1i1et1yaqtpypiminkwyipqeisel1l1tr1rsdy  
>tr|A6TXS1|A6TXS1\_STAA2  
mkstphikpmdveiaetv1lp1gdp1rakfiaety1ddveqfntvrnmf1gftgtykgkksvmgsgmgmpsigiysyeli  
htfgckk1i1rvsgcamqe  
nid1ydv1iaqgastdsnyvqqy1lpghfapiasyq1lekavetardkgrvhvgnv1ssdi1fyndattaserwmmrgil  
gvemesa1ymnaiyagve  
al1gvftvsdh1ihetsttpeereraftdmieia1slv  
>tr|A6TXS6|A6TXS6\_STAA2  
mpleiptkyds1l1kkvsl1ktsftfm1iiv1liiwsfiy1tgfnfgd1mgipqig1dfkqmippdfeylqqitt1pml1dir  
maivstvl1gsivsi1pial1  
casnivhqkwisipsr1f1nivrtip1l1laa1fvavfgigq1p1gilalfiltici1gk1llyes1letid1pgpmeamtav1g  
ankikwi1vfgvppa1issf  
msyvl1yafevni1rasav1glvgagg1glfydqt1gl1fqypktati1l1ft1vivv1vidyistkvrah1a  
>tr|A6TXT7|A6TXT7\_STAA2  
mrgfmah1svkl1r1l1l1al1ids1ivt1svfvsy1ilepyfktysvkl1l1laa1s1fishhisafi1fnmyhraweyasvse  
1i1livkavttsiv1tmvvv  
t1vtgnr1p1f1rly1litwmmh1l1iggsr1fwriyrky1lggksfnkkpt1lv1gagqagsm1l1rqm1ksdemk1epv1lavdd  
dehkrniti1tegvkvqgki  
adipelvrkyk1k1i1iaiptigqer1keinni1chmdgve1l1kmpni1edvmsge1levnq1kkveved1l1grdpve1dmdm  
isnel1tnk1lvtgaggsi  
geicrqvcnfyperi1l1ghgensiyl1nre1lnrfgknvdivpi1advqnrarmfeimetykpyavyhaaahkhvplm  
ednpeeavhnni1lgtknta  
eaaknaevkkfvmi1stdkavnppnvmgaskriaemi1qsl1ndethrtnfvavrfgnvl1gsrgsvi1pl1fksqieegg1pvtv  
thpentryf1mtipeasr1v  
l1qaga1aeggefv1ldmgepvki1vd1arn1lik1sgkkeddi1ritytgi1rpgekmfee1mnkdevhpeqv1fekiyrgkvqh  
mkcneveai1qdi1vndfsk  
eki1nyangkkgdnyvr  
>tr|A6TXU4|A6TXU4\_STAA2

Tsompanidou\_et\_al\_Supplemental\_FASTA\_File

mvkkvfimdsvktiigtllialglqflaypiinqrvgneafgsilrtiititsvvlngtlnnirlnmnyksnhyw  
kfvsillisiliesialii  
vflyffnltidiiflillnilmclriylnvffrmtlkynqilyialiqflglliglflyyliqnwivcfitselatiy  
tlvklrgltigeygsednn  
vvdymllstnslnnllyldrillpiiggtavtisflstfigkmlatflynvvlsvyisvnesdnikkqylktnl  
faiaalcvmiicypitli  
ivsllynidsslyskfiilgnigvlnavsimiqtlntkhasitlqanymtlhtitfifitilmtiafnglffwtlfs  
niikyvilniiglkskfin  
kkdvd

>tr|A6TXU5|A6TXU5\_STAA2

msekkililcgyfpeyvssatlpqlaedlianhinvdvmcwgpyeysnhkqvsktemhrgirirrlkysrfnnkskv  
riinffsflskfviniipkm  
lkydqilvysnppiipdvhrllkkysfvvydiapdnaiktgatrpqsmidklmryinrhvyknaenvivlgtemk  
nylnhqisknadnihvip  
nwydmrqlqdnriyndtfkayreydkillysgmngqlqmetlisflklndkqpqttilcghgkffadvktaiedhri  
envkmfefltgtdyadvlk  
iadvciaslikevglgvpsknygylaakplvlmdkqsdvqhveqydagiqidngdahaiynfinthsskelhemge  
rahqlfkdkytreintmky  
ynllk

>tr|A6TXU8|A6TXU8\_STAA2

mkltvvglyiglpstisimfakhgvdlvgdinqqtidklqsgqisieepglqevyeevllssgklkvsttpeasdvfiav  
ptpnddqyrscdislvmr  
aldsilpflekgtiinvestiapktmddfvpkvienlgtigediclvhpcpervlpgkileelvhnriiggvtkaciae  
gkyvyrtfvqgemietdar  
taemsklmentyrdivnialaneltkicnnlninvldviemankhprvnihqppgvvgghclavdpyfiakdpenakliq  
tgreinnsmpayvvdttkq  
iikalsgnkvtfvfgltykgdvddirespafdiyellnqepdievcaydphveldfvehdmshavkdasvlilsdhsefk  
nlsdshfdkmkhkvi fdk  
nvkssfedvsyynygni fnfidk

>tr|A6TXV9|A6TXV9\_STAA2

mmtlelikeql dphlvevdegtyyprtfiqqfvdgyfgeaalrknaevieavsqsclettgflwcqlafstylenatq  
phlnndlqqllsgeilga  
tglsnmpksfndleklnlehtyvdgqlvvsgrmpavsniedhyfgaiskhessedefvmfilranqdgiltvektfnlglv  
ngsatyqitlnqvvvpqsq  
iithdakqfaatirpqiayqipirlsikslelidafsqnqnginyleydveafkkryrqlreyyailddgnltsh  
lselislkkdigyllidvn  
qasvvnngsraytpspqvrklkegfffaaltptlrlhlgkleaelkg

>tr|A6TXW3|A6TXW3\_STAA2

mimgnlrfqqeyfrikntestthrnaywvklaknveatkmyalstivqqhasirhffdvttddnltmilheflpfie  
ikqvpssanydleaffkq  
elstyhfndspfkvklqfadaayilldfhvsifddsqidifliddlcnayrgntvintrqhahinrddkdnqdashi  
aldsnyfrlennsdihids  
yfpikhpfeqalyqtylidmtdsidmaslavsvlanhimsqqhdvtlgihvshlpndlhgnivplttidakdvcqrf  
ttdfnkcvlqnmqlqcak  
sslsletifhcyhhmsscndviedvhqihdahtsladieifphqhgfkiiynsaaydlisietlsdlvrniylqiteen  
gnkrttvdeInlmtediq  
lyddinlslpeiddaqtvtlfeqqveatpnhvavqfdgvfityqtl narandlahrlrnqygvepndrvaviaeksiem  
iamigvlgaggayvipd  
nypsdreqyilkdatpkvityqalyengkqinhidlnkiawknidnlskcntledhayviytsgttgnpkgtliphrq  
ivrlnhrnhvplneetti  
llsgtiafdaatfeiygallnggklivakkeqllnpiaveqlinendvntmwltsslnfqiaserievlpvlpkylligge  
vlnakwvdlngkpkhpqi  
ingygptentttttynipnkvpnrpigi kpi lgthvyimqgerrcgvipgelctsgfglaagyl nqpe ltadk fikds  
ninqlmyrsgdivrllpdg  
nidylrkdqvkirgfrielsevhaleriqqinkavvivqnhdqdyivayyeamhtlshnkiksqrmtlpeymipv  
nfmhieqipitingkl dkk  
alpimdyvtdayvapstdtehllcqifadilhvngvghdnffelggshkatlvvnri eastgkr lqigdllqkptvf  
elagaiakvqeqnyevipe  
aivkddyvlssaqrmyllwksnhkdtvynvpflwrllssglnvaqlqqavqhliarheilrtqyivddevrqrivadvv  
adfeevnthftdeqemr  
fvapfnlekpsqirvryi rslhayl fidthhi indgmsniqlmndlnalyqhklllpklqkydysewmshrdmtkhrq  
ywlsgfkdevpils lptdy  
vrpniktngammsftmqqmrqllqkyvekhtidfmffmsvmtllsryarkddvvvsvmsarmhkgteqmlgmfan  
tlvyrgqpspdkmwtfql  
evkemsleayehqeyfeclvndldqshdasrnlfdvmlvlqnnetnha hfgshklthiqksvtakfdlsfiieedr  
dytinieyntdlyhsetvr  
hmgncmimidyilkhqdltqicdipngtee ll nvnthvndrmlnvpgnksii syfnevvsrqghvalvmdlmtye  
tlrnyvdai ahml lsnvgv

Tsompanidou\_et\_al\_Supplemental\_FASTA\_File

ngqrvalftersfemiaamlatvkvgyasypididfpnkrqgaildakvtavmsygvieittlpviqlenakgfveske  
neqyddlhgnqlentamld  
nemyaiytsgttgmpkgvairqrnlnlvhawstelqldnevflqhanivfdasvmeiyccllngthlvipdreervnp  
eqllqqlinkhrvtvasipl  
qmcsimedfyiekliitggatstasfvkyiekhcgtyfnaygpsestvitsywshhcgdlipetipigkplsniqvyimsd  
gllcgtgmpgeiciagds1  
aigyinrpeImadkwqnnpfgkgklyhsgdlarytsdgqiefgridkqvkvngyrieldeienvilairgisdcvvtvs  
hfdthdilnayyvgeqqve  
qd1kqylndqlpkymipktiithidcmplttndkvdtrlnpnspiqqsnkysepsneieqtfvdvfgvllkqndvgvdd  
dffelggnsleamlvvshl  
krfghhismqtlyqyktvrqivnymyqnqqs1valpdnlse1qkivmsrynlgiledslshrp1ngtlltgatgflgayl  
iealqgyshriycfi radn  
eeiawyklmtnlndyfseetvemmlsnievivgdfecmddvvlpenmdti ihagartdhfgdddefekvnvqgtvdvir1  
aqghharliyvstisvgt  
fdidtedvtfseadvkqglltspytrskfyse1kvleavnngldgrivrvgnltspyngwrhmrniktrfsmvmd11  
qldcigvsmampvdfsfv  
dttarqivalaqvntpqi iyhv1spnkmpvks11ecvkrkeielvsdesfneilqkqdm yetig1tsvdreqqlamidtt  
1tlkimnhisekwptitnn  
wlyhwaqyikti fnk  
>tr|A6TXW8|A6TXW8\_STAA2  
mmi tvg1vggsgygaie1ir1lqthphvtiahiyshskvdep1k1t fph1qh1mqhfealtvdnndcdviffatpapvsk  
tcipp1vekghivdlsga  
friknreiyeyketaaaqddlnhaiysisewqsfdnngtklisnpgcfptat11alhp1isekivdlssiiidaktgv  
sgagrs1sqrvhfsemnen  
1sayaignhkhkpeieqyls1iagqdvsv1ftph1vpmtrgilstiyvkfsseyttes1hk1m1tsy1yanqpfv1rirdigt  
fpttkevlgsnycdigiyy  
dettqtal1sv1dn1vkgasgqaiqn1ni1ydfevttg1nqspvyp  
>tr|A6TXX1|A6TXX1\_STAA2  
minfnkta1v1id1lqegi1kmdyaphtaenvvqnank1idvfrknngfiafvrvnfydgkdvlqpnamis1ppkegddys  
rfhh1ldkrddd1v1dkrh  
fsafvgtd1dl1qlrrrgid1v1l1ggvath1gvdt1tardayq1nynqffvt1dmsaqnet1hqfp1dnv1f1mgqt1t1nd  
f1ni1n  
>tr|A6TXX9|A6TXX9\_STAA2  
mayqseyalenemmq1leq1gyervt1rdnkq1ldnfrt1lnerhadk1legn1tdkefqr1l1tm1dgks1fesari1rd  
k1p1rrdesei1y1s1f1dk  
kswcknk1fqvt1nqvsvedtykarydv1tiling1p1lvqvelkrrgid1neafnqvkrkrqnytg1fryiqmfi1sngvet  
ryfsnndse1l1kshmfyws  
dkqnnr1nt1qsfaesfmrpc1lakmi1srymi1inetdri1mamrpyqvyavealiqqatetg1nngyvwh1ttgsgk1t1sf  
kasq1lsqddi1k1kvi1fv  
drkd1dsqteee1fnk1fakgavdk1fnts1qlvrq1ndks1p1livtti1qk1makai1qgnah1leqyk1tnkv1fi1dechr1sqf  
gdmhr1vkqh1fkn1aqy1fgf  
tgtprfpens1sqdgrttadi1fgrcl1hty1lirdai1hdgn1v1gfsvdy1intfkn1ka1kaednsmveaidteev1ladkrvel  
vtrhi1innhdkytrnrqys  
s1ftvqsi1hali1kyyet1fkr1nkk1leq1l1tiagi1ftfk1neddr1d1gevp1yhs1rek1leimi1sdynkk1fetn1fst1dt1neyf  
nhisknvkk1gvk1dsk1idi1  
ivvmf1l1tgfdsk1v1nt1lyvdkn1myhd1liqaysr1trvekesk1pfgk1ivnyrd1lkket1dda1rvfsqtnd1td1ilm1rsy  
eeyk1kefmd1ayrel1kmi1vp  
tphmvd1dqee1lkr1fveayr1l1aki1ilr1kafdefeft1ideigm1deqenedy1kskylav1ydvk1rataek1nkvs1ilnd  
idfeiemmrnd1tin1vnyim  
ni1lrq1d1edkaeqrrn1eqi1rril1dhaddpt1rl1krd1lirefid1nv1ps1nkddd1dqeyvn1fesik1keaefk1gfager  
sideq1akt1s1ndy1qysgv  
vnph1l1kmi1gd1p1l1kekr1karkaies1fvaettekygv  
>tr|A6TXY6|A6TXY6\_STAA2  
mli1gg1l1gc1lvy1l1nid1l1gkmi1vaqd1n1lqei1ffhn1liyffsai1fgfl1t1gl1n1nig1l1insgm1lgffia1hgiysnq1  
ks1il1v1lapha1feila1l  
iastf1s1lgf1sy1lyqrmvkk1nkik1nkmfhnfvtti1tviv1ltiias1llevyvtin  
>tr|A6TXY9|A6TXY9\_STAA2  
mknn1kiarv1smtqkelankvgvtrqtis1liekgvhnps1slcknicsv1lnkn1ldeifgekpq  
>tr|A6TXZ1|A6TXZ1\_STAA2  
mii1i1tylesfks1lyhkafyk1fv1sv1slpiflyavik1fffsakrknfyannseiseiera1hqkykylsqqsstqihk  
ealk1fkaqssntssknie  
qahfstyfen1l1fhk1fimi1kvila1p1mfill1tiylq1plvryiferivmavivi1g1v1svftilyf1sp1ldaaysil1gqna  
tkaqihqfnv1lhh1n1epyf  
iq1wdt1ikg1ftfd1lgttyk1nevvtkavgeripitiivav1alivaliaipigi1samkrnswldit1lmia1lig1si  
psfwq1l1filaf1sk1ldi  
l1ppsympeh1p1s1l1p1vl1v1gts1iaas1trmtr1ssv1levm1rsdy1vtayak1gsttqv1vik1h1lknai1piv1tlv1g1l1va  
e1l1ggsav1teq1vfn1ing1g  
ryivqk1qlip1dipavm1ggv1yis1ivis1lan1liidi1fyalidp1klrseinerk



Tsompanidou\_et\_al\_Supplemental\_FASTA\_File

>tr|A6TXZ8|A6TXZ8\_STAA2  
maelklehikktydnntvkvdfnlhitdkefivfvgpsgcgksttirmvaglesitsgdfyidgermndvepknr diam  
vfqnyalyphmtvfenmaf  
glklrkvnkkeieqkvneaaeilglteylgrkpkalsggqrqrvalgrairvdakvflmdeplsnldaklrvqmrteilk  
lhrkrlntttiyvthdqtea  
lmasrivvldgdimgvgtpreiydapncifvaqfigspammnatvemdgkvgthhfklnhkkfeklkaagylde  
iilgiraediheepifiqt  
spetqfesevvse1lgseimvstfqqmeliskldsrtqvmtdkitlafdmnkchffdektgnriv  
>tr|A6TY04|A6TY04\_STAA2  
mkigvfsvlfydknfdemldyaesglmdievgtggngpdkfckldellenedkrqafmksitdrglqisgfschnnpis  
pdpieakeadetlrrktir  
anlldvpvntfsgisgdsdtakkpnwpvtpwptayseydyqwnekliipywqdlafakeqdvkiaielhagflvhvtpy  
tmlklreatneyiganldp  
shlwwgqidpaaairilqanaihhfhakdtyinqenvmygltdmppygnvatrawtfrtvgyghspyvwdiisqlii  
ngydyvlsiehdpimsve  
egfqkacqtlksvniydkpadmwwa  
>tr|A6TY07|A6TY07\_STAA2  
mfkvvicdderiireglkqipwgdyhfntiytakdvealsliqqhqpelvitdirmpkrngvdllndialldcnvii  
ssyddfeymkagiqhhvld  
y1lkpvdhaqllevilgrlvrtlleqqsqngrslaschdafqpllkveyddyvvnqivdqikqsyqtkvtvsdliqhidvs  
esyamrtfkdhvgitivy  
lnryrilqslqldrhykhyeiadkvfseykmfsyhfkyqlmsspsdyckqak  
>tr|A6TY10|A6TY10\_STAA2  
mletnknhatawqgfkngwrnrhvdvrefiqlnytliegndsf1agpteatsklweqvmqlskeererggmwmdmtkvas  
titshdagylkdletivg  
vqtekpfrsmqpfggi rmaaceaygyel deeteki ftdyrkthnqgvfdaysremlnckragvitglpdaygrgrii  
gdyrrvalygvdf1meekm  
hdfntmstemsedvir1ree1seqyra1kelkelgqkygfd1srpaenfkeavqwlylaylaa1keqngaams1grtstf  
ldiyaerd1kagvitesev  
qeiidhfimklrirkfartpdyne1fsgdptwvtesiggvgidgrplvtknsfrflhs1dn1gpapepn1tv1wsvr1pd  
nftkycakmsiktssiye  
nddimresygddygiaccvsamti gkqm qffgaranlakt1lyainggkdeksgaqvgnfeginsevleydevfkkfdq  
mmdwlagvyins1nvi hym  
hdkysyeriemalhdteivrtmatgiag1svaads1saikyaqvkpirneeglvvdfeiegdfpkygnnddrvddiavdl  
verfmtklrshktyrdseh  
tmsv1titsnvvygkktgntpdgrkagepfapganpmhgrdqgalss1ssvakipydcckdgisntfsivpks1gkepe  
dqnrn1tsm1dgyamqcgh  
h1ninvnretlidamehpeeyq1tirvsgyavnfikltreqqldvisrtfhesm  
>tr|A6TY12|A6TY12\_STAA2  
mkriskd1wavfk1lyqnkgrfsina1llq1limifissty1llfnmm1kvagqsq1tinwmeiishpasvillii1fil  
svaf1iyvefs1lvymvya  
gfdrii1tfks1fkna1fvnrk1ligvpviffviy1lm1pian1gl1ssv1tkniy1pk1fteelm1kttkgi1iygtfmi1a  
vf1lnfk1lft1pl1tilnr  
qs1fknmr1swq1tkrnkfr1vieivile1iigailt1iisgatylaicvdeegdkflvssilfv1ksalffyy1lftk1  
sl1sv1vl1kqenv1dgp  
gl1efkypkprksrff1ismv1avtcf1igynmy1lynntintnisi1ghrgfedkgvensips1kaaakanveyveltdi  
mtkdq1fvvshdn1kr1t  
gvnkn1sesnfkdvvg1kmrqngheak1vs1defietakqsnvkl1velkphgkepadytqrvidilkkhgvehqyrvms  
1dydvmtk1k1keapy1kcg  
yi1pl1qfghfkets1dffviedfsyspr1vnqah1lenkev1twt1ngeed1tkyl1qtnvdgi1tddpalad1qikeek1de  
tyfdrsi1rilfe  
>tr|A6TY13|A6TY13\_STAA2  
mttqmki1kty1vagi1kaa1ldttgik1asksettshtyqh1qalvdq1heliantd1nk1sy1n1dafqkr1dilaahy1ak  
sairtkn1dqmtk1kakqr1e  
siynsi1np1hsqnn  
>tr|A6TY17|A6TY17\_STAA2  
mtfeketv1kt1fpedv1siak1g1tdgevef1qqvds1leskyreninqhwi1datvpedy1fd1gelnyfnnp1lykdrp  
nakmps1ql1f1ffmsy1llar  
fd1s1lat1lgvhq1lghnt1fyggs1keqi1akyvpk1qshel1rtcfa1ltepehgsdvag1letvaerqgdtw1vingek1kwi  
ggahvsd1vip1favnk1ktg  
kphcfvvr1peqgdv1dievdnkia1rivpna1lik1tnvkvdeadr1qnitsfkdia1kilystragvaymatggmaga1ra  
t1dyvterk1qfgkpi1skyq  
li1qek1lammqgn1agam1tcaq1lanmqahgeydevatstakmmna1r1retvamgrgitggngil1addydiarffsdaea  
iytyegtheina1lvigra1  
tgdsafv  
>tr|A6TY20|A6TY20\_STAA2  
meg1nhrrnte1keettqt1qsvapntgeegmssastqstkt1sdihnesinkqmeakahetaqnad1ktears1fdnatk1si  
gr1lagndes1n1n1kdmf1s

Tsompanidou\_et\_al\_Supplemental\_FASTA\_File

evfkphtkneadeifiaagtakttpaicdi seewgkpwlfsvfiaftvtfiglwvmaafnntnaipglifigaltvpls  
glfffyefnafknisifev  
iimffigvfvfslstmvlyrfvfvfsdqferfgsltffdaflvglveetgkalliivyfvnkltknilnglligaaigagf  
avfesagylnfalgenvp  
lldivftrawtaigghlvwsaivgaaiviakeqhgfefkdidkrfliffllsavglhgiwdtsltvlgdsdtlki filivi  
wvllvfilmgaglkqvnll  
qkefkeqqkkvde  
>tr|A6TY21|A6TY21\_STAA2  
mhssgkdlnislplktsiapyetdvpvki gaaeslfktn dqgiekalvksyhpndttdielkdnikfqngqkltae  
kvksslensmkkdvlkys  
lpissitakgqkltiktnsaypelvselanpfmaiyytdaksdvnqtpvgtgpyqikdykqsrkislnsfkdywqgkpl  
dhitvtyqedgnrvrnle  
sqkddlitdvpvkvhdienqnkvskesgftrslmynhtnkmtksvrealdhiidrqqiadhyygyakpatspfn  
dkipyikepkltkqniega  
ktllakdgytkehplkiklitydgrpel skiaqvlqsdakkanieidiks vddiegylkdrsawdatmysfgtiprgdtg  
yffnqaykkdga inkgdyn  
nsnvddlinglnhtvdvkerhnisndiiklssrdvpnsyia yndqivaanskvknykvtpégiylidyrttier  
>tr|A6TY26|A6TY26\_STAA2  
matmyevrsvdivafinvtfealsssyttvvpqiasarqss  
>tr|A6TY62|A6TY62\_STAA2  
mieinnlskryrnkqifnhlmsfnsrnlvllgdngagkstllrmiagiekandgtinyfgekwnqrqi qnhi gyvpqd  
ialfehmtvaenikffksl  
cknpindttineylqqlnfdtsakvstlsggnkrkinilvgllgqprilildeptvgidlk srhdihqllnimkskli  
iltthhldevealaddikl  
igqdpfyqhvl edkqwaytyy  
>tr|A6TY66|A6TY66\_STAA2  
mvimkktilltm tlltlfsm spnsaqaytndsktleakrahpnaqfkvnkdtgaytytydknntpnnnhqnqsrtdnh  
qhanqrdfnngyhsslsg  
qythindaidshtppqtspnlpaipnvednddelnnafskdnkglitgidlde lydelqiaefndkaktadgkplal  
ngkii dqplitsknnlyt  
agqctwyvfdkrakdghtistfwgdaknwagqassngfkvdhrhptrgsilqtvn gpfghvayveknidgsil isemwi  
geyivssrtisasevssyn  
yih  
>tr|A6TY71|A6TY71\_STAA2  
mvknhnpknemqdm ltpldaeeaatklrl dmreipkssikpehfhlmyll eqhs pyfidael telrdsfqihydindh  
tpfdniksftkneklryll  
niknleevnrtrytflapdel ffrdg lpiaktrglqnvvdplpvseae fltrykalvicafnekqsfdalvegnlelh  
ktpfetkviaeatldllt  
afldeqyqkqeqdysqnyayvrkvghtvfkwaigm tllsvlliaflaflyfsvmkhneriekgyqafvkddy tqvln ty  
ddldgkkl dkealyiyaks  
yiqtnkqglekdkenlln nvtpnsnkdyll ywme lggghldeainiatyldnditklal inkln eiknngdl sdnkrs  
eetkkyndklqnl dkekq  
vkdekakseeekakakdek l kqgeenekkqkeqaqkdekrqeaerkk  
>tr|A6TY76|A6TY76\_STAA2  
mtlsgk isvkaetia hvvkeles isqkydeia qnfgkiaqlnyyssekaahsmengyssaatvisglk gplstl gggvmn  
saqkffeadehwg tefakl  
yynie g  
>tr|A6TYA9|A6TYA9\_STAA2  
mglyeetliqhdyievreadvlpdnldgvwlgdl ilikrglsdtekagilfeelahnklytgydiadyskfnnrkfenyar  
rhgftsavpireiveayny  
gvrnlyelseylqlseeyileaeieqykkiygigthygeysitfeplrvfkykei  
>tr|A6TYB0|A6TYB0\_STAA2  
mrt saeigklkqlrkennvnltdfatkigv nkstlsryengsrkipmediaeiana lkvtp eylllknrqten evqhra  
ahlegeltd dewqr vldya  
dyirskrk  
>tr|A6TYB1|A6TYB1\_STAA2  
myefnvkrmk aeriakgis isdmakklgmtpgtyskkenghirinvddlakvievl elpqdkcgiff tyrvsemsteqkq  
ts  
>tr|A6TYB2|A6TYB2\_STAA2  
mqdlkkih eia vkiiela ekekseeellttidllhlqnkntlsl tvdgk kii  
>tr|A6TYB3|A6TYB3\_STAA2  
mvir lktny nfsinvrnagkfeetpcefv dgskgvrlayenglvvtihvngnnidirsshllilvdenpltfdvdmntkn  
pk  
>tr|A6TYB4|A6TYB4\_STAA2  
mlnlkel reekgitryglakltelqnstirsietevknpgfltvkkicdalqv dianvkek  
>tr|A6TYB5|A6TYB5\_STAA2  
mqalqtk snigemfniqueengeia isgre lhaalevktryndwferminy gfeenidytaltqkrvtaqgnainyl dha  
ltdtakeiamiqrsepgk

Tsompanidou\_et\_al\_Supplemental\_FASTA\_File

rarqyfiqvekawnspeimqralkianntinqletkierdkpkivfadavattktsilvglakiiqnginigqrrlf  
ewlrrngflkrkgvdyndm  
ptqysmereifeiketsihsdghtsisktpkvtgkqqyfvnkflgekqtt  
>tr|A6TYB9|A6TYB9\_STAA2  
mtknykdmqtqeeikdl1sektaelyelakeikgeskfdillfssigvidgdylagsssvightfdlaylldstksykdiv  
nvlqmcksqkilgidddke  
d  
>tr|A6TYC7|A6TYC7\_STAA2  
mdafdkyy1fdhdgnkmfsvtphfdgrhlvvgiketkfngrrylddyelntlidneqmelghqtslfeyi  
>tr|A6TYC9|A6TYC9\_STAA2  
markarivtindkpyrfskfemelieshgитpgmvskrvkdgwelheamdapegmr1seyrekktierleqarlerkler  
qrkkaealrrkkph1fnvp  
qkhsrgryacylmendi fvkvvk  
>tr|A6TYD1|A6TYD1\_STAA2  
memmkikiekevn1peliqwawdnplsgnkrfysndverncfvtfhvdsilcnvtgyvsindkftvqeei  
>tr|A6TYD2|A6TYD2\_STAA2  
mkikvkkemrldelikwarenpelskgiflaksfsgfvrfrntntcsissfipidtpfiveveeitedtvfdr1fe  
vye1qegacmsalhtsisi  
nerlentffptkafy1ndgl1tmtliwkdgri1ve  
>tr|A6TYD3|A6TYD3\_STAA2  
mm1kfkawdkkkvmsi1deidfnsgyilistgyksfnevk1lqytgfkdvhgveiyegdivqdcysrevsfiefkegaf  
yitfsnvtellsenddiie  
ivgnifenem1levmr  
>tr|A6TYD4|A6TYD4\_STAA2  
mtft1sdeqykn1ctnsnk1ldk1hka1kdreeykkqryeligviak1rdcnkelekkasawdrycksverdl1nkfgnd  
dervkfgmelnnkifmedd  
tne  
>tr|A6TYD7|A6TYD7\_STAA2  
mtqylvttfkdstgrkhthitraksnqrftvveaeskeakekeyesqntpivvytnskvt1ferpseevlgslfekk  
>tr|A6TYD9|A6TYD9\_STAA2  
mmikk1knmdwfdifiagilr1fgvia1mlvvispiytvasyqhkevhqgtitdkynkrqdkedkfyiv1dnkqviensd  
11fkkkfadsadiqar1kvg  
dkvkvtigyrihf1n1lypi1yevkkvdkk  
>tr|A6TYE1|A6TYE1\_STAA2  
mmweivaigililit1lyviytdkievrekidelkhdikrnek1fenykenrpieyive1ydgvy1qeeytgafskmit  
1ttsnvfeaksydn1fla  
kidaef1sgrv1kykpn1evie  
>tr|A6TYE5|A6TYE5\_STAA2  
minem1npkqqevwncf1ndkpkv1iasgakragktyvf111flmhiatykdkg1nfiiggatqasirrn1ddmel1lg  
rel1ldksnavkifgnkvy  
vfdgqnsdawkkargftsagaf1negtalhnmfikevfsrscsykgarilidtnpenpmhpvkkyidksgqrlsngri1ni  
kafqft1fdnt1fdegyie  
siasptgmftdrdiygkwsaegvvykdfkekvhiteefkktkqirkyagvdwgyehygsimvvaedfdgnykie  
ehahrhkeiddwvaiakgv  
ikrhgdilfycdtarpehierfrrekikaryadkaviagiervis1fk1nki1fi1kekvs1fkeeynyvwkdnadepvk  
1nddt1dalryavytankp  
sgtgfn  
>tr|A6TYE6|A6TYE6\_STAA2  
mqfiqlisvqaqaliggnilypsqptqteifdaivrtnnkpetleemivryikqhleklpeisigqeyyeqrpdivek  
kpvdatgavdp1kpddrmi  
tnfhan1vdqkvsyivgkpi1afkhtddevvkridev1gnrfddk1hsv1tgasnkgiew1hpyldeegefklfrvpaeqg  
ipiwtdeheeleafirmy  
klenetkveywkvvtvnyvyvengslipdysnnlenskthfstgswgkipfipfkndleisdifmyktlidaynr1sd  
1sntfkdsneltyv1knyd  
dqelpfkr11ryygaikvsvdnggvdtiqevpvenskylde1yqkim1fgqavdfssdkfgsapsgvaleflytn1n1  
kadklarkakvaiqe1lwf  
vfehfdikgehndvdisfnynkvante1qvqtaqqsmg1vshetvlenhpfved1qaer1e1eqeqmeynkq1pn1ddgg  
adgaqqersnnkese  
>tr|A6TYE9|A6TYE9\_STAA2  
mpggvtktsnqiipev1apmmqaqlekk1rfasfaevdst1qgpgdt1tfpafvysgdaqvvaegekiptdiletkre  
akirkiakgtsitdeall1s  
gygdpqgeqvrqhg1lahankvndv1lea1mgak1tvnadi1tk1ng1qsaidkfned1epmv1fvnp1dagk1rgdastn  
ftrate1gddi1vkga1fge  
a1gaiivrtnk1eagta1lakkgavk1ilkrdff1levarastkttalysdkhyvaylydeskavkitkgs1lem  
>tr|A6TYF3|A6TYF3\_STAA2  
makvkygnwd1vkelenyerdmerwvkrgiakttakihnti1s1mpvdtgy1resvtdmfdkggftgvinigseyaiyv  
ygtgiystgaggsrakkip  
wsyk dangkwhttkgqhaqpfpwepaidagraffnkyfs

Tsompanidou\_et\_al\_Supplemental\_FASTA\_File

>tr|A6TYF7|A6TYF7\_STAA2  
mtsryigymndelmsmlpaewndwiigarqalidqrdialygaqynavaqagslkrfvqrnerehyiirgqedeyekm  
kqrelaknrkreiqkqgt  
rkflnslktshkkg  
>tr|A6TYG2|A6TYG2\_STAA2  
mvvdnfskddnlielqttsqynpvidtnisfyesdrgtgvlmfavtknnrplsissehvktsivlktddynvdrgayisd  
eltivdaingrlyqvipne  
ilkhsgkvhaqafftqngsnvverqfsfniendlvsgfdgitklvyiksiqdtieavgkdfnqlkqnmadtqtliakv  
ndsatkgiqqieikqneai  
qaitatqtsatqavtaefdkivekeqai fervneveqqingadlvkgnsttnwqkskltddygkaiesyeqsidsvl sav  
ntsriihitnatdapektd  
igtlekpggdvddgssfdestytsksvglvvyvvdnntaratwypddsndeytkykygtwypfykndgnltkqfve  
etsnna lnqakqyvddkfg  
ttswqghkmteangqsiqvnlnnaqgdlyltagnyatr vpdlpgsvesyegy lsvfvkddtnklfnftpynskkiytr  
sitngrleqqwtvpnehks  
tvlfddggangvgttinl tepyt nysil lvs gtypggvi egfgl talpnaiqlskanv vdsdgnnggyiecll sktsstl  
ridndvyfdl gkts gsgan  
ankvtitkimgw  
>tr|A6TYG3|A6TYG3\_STAA2  
mkitvndknevigfvntgg l rns lvd ddnvpik fkeefepkrfvftngeikynsnfekedv p n a s n q q s a s d l s d e e l r  
gmvasmqmmtqvm ltmq  
ltqqnamltqq ltelktnkntegdv  
>tr|A6TYG5|A6TYG5\_STAA2  
mfgftrhehewri r r l e e n d k t m l s t l n e i k l g q k t q e q v n i k l d k t l d a i q r e r q i d e k n k k e n d k n i r d m k m w i l g l  
igtifstiviall r t i f g i  
>tr|A6TYG6|A6TYG6\_STAA2  
mglpnpktrkptasev v e w a k s n i g k r i n i d n y r g s q c w d t p n f i f k r y w g f v t w g n a k d m a n y r y p k g f r f y r y s s g f v  
pepgdiavwhpgngigsdg  
htai v g p s n k s y f s v d q n w v n s n s w t g s p g s l v r h p y v s v t g f v r p p y s k d t s k p s s t d t s s a s k a n d s t i t g e a k k p  
qfkevktvkytaysnldk  
eehfidhivmgdersdiglyikesmhmrsvde l y t q r n k f i s d y e i p h l y d r e a t w l a r p t n f d d p r h p n w l v i e v c  
ggtdskrqfl l n q i q a l i  
rgvwl l s g i d k n l s e t t l k v d p n i w r s m k d l i n y d l i k q g i p d n a k y e q v k k m l e t y i k r d i l t r e n i k e v t t k t t i r i  
sdktsvdsastrgptpsde  
kpsivtetspftfqaaldrqmsrgnpkkshtwgwanatraqtssamnvkriwesntqcyqm l n l g k y q g i s v s a l n k i l k  
gkgtldgggkafaeackkn  
nineiyli ahaflesgygtsnfasgrygaynyfgigafndpdyamkfaknkgwtspakaimggasfvrkdyinkgqntl  
yri r w n p k n p a t h q y a t a i  
ewcqhqastiaklykqiglkgyifirdkyk  
>tr|A6TYG7|A6TYG7\_STAA2  
mykikdvetrikn d g v d l g d i g r f y t e d e n t a s i r i g i n d k q g r i d l k a h g l t p r l h l f m e d g s i f k n e p l i i d d v v k g  
fl t y n i p k k v i k h a g y v r c  
klflekeeeihvanfsnfvds g i e s a v a k e i d v k l v d d a i t r i l k d n a t d l l s k d f k e i d k d v i s y i e k n e s r f k g a  
kgdkgepggpgakgeagk  
geqgagkngtvvsinpdtkmwqidgkdt d i k a e p e l l d k i n i a n v e g l e d k l q e v e k i k d t t l n d s k y t d t k i a e l v d  
sapesmntlrelaeaiqnn  
sisesvlqqigskvstedfeefkqtlndlyapknhnderyv l s s q a f t k q q a d s l y q l k s a s q p t v k i w t g t e n e y n i  
yqkdpntlylkg  
>tr|A6TYG8|A6TYG8\_STAA2  
mifmegnfknvkkfiyegeeytkvyagniqwkkpssfvikplpknkypdsieestakwt ingvepnksyqv tienvrsg  
imrvsqtnlgsse l g i s g v  
nsgvasknifsnpsgtlyvtisdvysgsptltie  
>tr|A6TYG9|A6TYG9\_STAA2  
mdinwklrfknkavltglvga l l l f i k q i t d l f g l d l s t q l n q a s a i g a i l t l l t g i g v i t d p t s k g v s d s s i a q t y q a  
prdsseeqqvtwksqdt  
sltpelstkapkeydtsqpf d t s n e i g f d v n e y h h g g d n a s k i n  
>tr|A6TYH0|A6TYH0\_STAA2  
mqakl tkkefi ewlktsegkqfnad l w y g f q c f d y a n a a w k v l f g l l l k g l g a k d i p a n n f d g l a t v y q n t p d f l a q p g  
dmv v f g s n y g a g y g h v a w v  
ieasldyiyveqnlggwdg i e q p g w g e k v t r r q h a y d f p m w f i r p n f k s e t a p r s v s p t q a p k k e t a i p q p k a v  
elkiikdvkgydlpkrgg  
npgkivi hndagskgataeayrnglvnap l s r l e a g i a h s y v s g n t v w q a l d e s q v g w h t a n q i g n k y y y g i e v c q s m g a  
dnatflkneqatfqecarl  
lkkwglpanrntirlhneftstscphrsv l h t g f d p v t r g l l p e d k r l q l k d y f i k q i r a y m d g k i p v a t v s n e s s a s s  
ntvkpvasawkrnkgytyy  
meesarftngnqpi tvrkvgpflscpvgyqfpggycdyevmlqdg h v w v g y t w e g q r y y l p i r t w n g s a p p n q i l g d l  
wgeis  
>tr|A6TYH1|A6TYH1\_STAA2

Tsompanidou\_et\_al\_Supplemental\_FASTA\_File

mmcytcinylhls1ftgachwmvflaiesivfillpvvymtlafpynslrgafml  
>tr|A6TYH2|A6TYH2\_STAA2  
mylvtvgptgdiflvitryiylnniemlhl  
>tr|A6TYI6|A6TYI6\_STAA2  
meftysylfrmi shemkqkdaqk1eqfdi tneqghtlgylyahqqdgl tqndiakalqrtgptvsnllrnlerkkliyry  
vdaqdtrrkni glttsqik  
lveafstsi fdemeqtlvsq lseeeneqmkanl tkmlsslq  
>tr|A6TYI8|A6TYI8\_STAA2  
mykskllkyifseesevkd1teekynqdyea l tfsfkeetyqsrlakktptkagyfvtcwtkdennncqpsykeafady  
lmiividee lsgyflfpre  
llvek gillttfehkgkmafrvypkwcnq l nktagqtqkwqckyffey  
>tr|A6TYJ8|A6TYJ8\_STAA2  
mtpfityitrahvslhafsftemi qiyvmiiffiafcfispvmfyqlwafiapglh nnerqfiykysffsvllfcagvaf  
afyvgfp i i i qfalklsl  
lnispvigfkaylvelirwlftfgilfq l pilfiglakfgliditslkhyrkyiyfacfv lasi appdl tlnilltlpl  
illfefs m fivkftcrgkp  
pth  
>tr|A6TYL2|A6TYL2\_STAA2  
mcpilinkkscvknprvhltsmlilyryngrtrrhllastlqghfqtrfqnl lsatkdslykqgvfyfplycvyvsln  
yykilislskkrfvnys  
enfdlkvnlfvkl  
>tr|A6TYL4|A6TYL4\_STAA2  
mdqmsiisslfepltkietyeni atkiamiviyiivalivikilnkmieqgfkiqnkskksnkkrsktlislvqnvvky  
i v w f i v i t t i l s k f g i s v e  
g v i a s a g v v g l a v g f g a q t i v k d v i t g f f i i f e s q f d v g d y v k i n n g g t t v a e g t v k s i g l r s t r i n t i s g e l t i l p n s s  
m g e i t n y s i t n g t a i v k i p  
v s v d e n i d n v e k k l n k l f t s l r s k y y l f v s d p v v i g i d a f e d t r v i l r v s a e t i p g e g f s g a r i i r k e v q k m f l q e g i k t  
p q p i m t p f n h s e n g v  
>tr|A6TYM2|A6TYM2\_STAA2  
mfkkydsknsivlksilslgiyyggtfgiy pkadastq n s s s v d k q l q k v e e v p n n s e k a l v k k l y d r y s k d t i n g k s n  
k s r n w v y s e r p l n e n q v r i  
h l e g t y t v a d r v y t p k r n i t l n k e v v t l k e l d h i i r f a h i s y g l y m g e h l p k g n i v i n t k d g g k y t l e s h k e l q k d r e n v  
k i n t a d i k n v t f k l v k s v n  
d i e q v  
>tr|A6TYM9|A6TYM9\_STAA2  
mmkvritfiilailstivclflaamhptgpntvtfeqpylftlniilmvlvalpslvlaiydymssfrissailqflgais  
wfflslslstqftptfla  
sfitsiilfisaiitlaiggksvdkndsh  
>tr|A6TYP7|A6TYP7\_STAA2  
mnimltgatghl g h i t n q a i a n h i d h f h i g v r n v e k v p d d w r g k v s v r q l d y f n q e s m v e a f k g m d t v v f i p s i i h p s f  
k r i p e v e n l v y a a k q s g v a  
h i i f i g y y a d q h n n p f h m s p y f g y a s r l l s t s g i d y t y v r m a m y m d p l k p y l p e l m m h k l i y p a g d g r i n y i t r n d i a r  
g v i a i i k n p d t w g k r y l l s  
g y s y d m k e l a a i l s e a s g t e i k y e p v s l e t f a e m y d e p k g f g a l l a s m y h a g a r g l l d q e s n d f k q l v n d q p q t l q s f l q  
e n i  
>tr|A6TYQ3|A6TYQ3\_STAA2  
mk1ktlakatla l g l l t t g v i t s e g q a v h a k e k q e r v q h l y d i k d l y r y s s e s f e f s n i s g k v e n y n g s n v v r f n q e q  
n h q l f l l g k d k d y k k g l e  
g q n v f v k e l i d p n g r l s t v g g v t k k n n s s e t n t h l f v n k v y g n l d a s i d s f l i n k e e v s l k e l d f k i r k q l v e k y g l  
y k g t t k y g k i t i n l k d e k k  
e v i d l g d k l q f e r m g d v l n s k d i q n i a v t i n q i  
>tr|A6TYR2|A6TYR2\_STAA2  
mrylkr l s w y i s i l i l i v v i a g c g k g n e t k e g s k e e q i k s f a k t l d m y p i k n l e d l y d k e g y r d s e f k k s d k g t w t i y t  
d f a k s n k p g e l d d e g m v l n  
l d r n t r t a k g h y f v t t f y r n g l p d e k n y k i e m k n n k i i l l d e v k d d k l k q k i e n f k f f g q y a n l k e l r k y n n g d v s i n e  
n v p s y d v e y k m s n k d e i v k  
e l r s r y n i s t e k s p i l k m h i d g d l k g s s v g y r k l e i d f s k r e n s k l s v i e f l s y k p a k k  
>tr|A6TYR4|A6TYR4\_STAA2  
mgyskrfalyisvmlifaiagcgksdetkegskeeqiksfaktldmypi kn ledlydkegyrdgefkkgdkgtwviss  
vmvkqpkgeimksrgmylf  
l n r n t r t a k g y f i v d e t s n d t l k k t e d k e k r y p v k m v n k i v p i d p i n d k g v k k e i e n f k f f s q y g d f k e l k n y k n g e v s  
y n s e a p i s a k y q l k n n d y  
n v k q l r k r y d i s t e k a p k l l l k g t g d l k g s s i g h k d i e f t f v e n q e n i f f t d s l e f t s s e n y  
>tr|A6TYS4|A6TYS4\_STAA2  
mlfvilvlyvigiafi l l s v f g s k t e g l s t k h t l y t i g s a i i t i a i f i s i g y a i q y l t a a l y g l  
>tr|A6TYS6|A6TYS6\_STAA2  
msev ia a i n v l l l l t v t r v f q t k r a t k f c t r p i y l a p d q e d h  
>tr|A6TYT1|A6TYT1\_STAA2

Tsompanidou\_et\_al\_Supplemental\_FASTA\_File

midkkltspkmtvplflialivfigmfygvvtqnqewlknidmgsltwftdyfgepqrqyvnnlfnyymtfsaeigdvkgv  
vlisiivtiilfikqrhla  
vwfvtylvsgvimnklikdvtlrrprynhlavdtgfsfsgshnastllyfalmiisvaaktitkvlsalvmgilwls  
ilfcrlyfhahyfsdvgg  
tslaiwvalflmvpyfinhrrqrv  
>tr|A6TYT4|A6TYT4\_STAA2  
mkkgfihligmsdegasmitydligntplvllhysddkvkiyakleqwnpggsvkdrlgkylvekaiqegrvraggativ  
eatagntgiglaiaanh  
lkckifapygfseekinimialgadvsrtsqsegmhaqlaarsyaekygavymnqfesehnpdtyfhtlgpeltsalqq  
idyfvagigsggtftgtar  
ylkqhvhvcyavepegsvlnggpahadhtegigsekwpiflerrlvdgiftikdqdafrnvkslainegllvgsssgaal  
qgalnkaqlsegtivvvf  
pdgsdrymskqifnyeendye  
>tr|A6TYT6|A6TYT6\_STAA2  
mmiefrqvsksfhkkkqtidalkdvsftvnrndifgviygsgagkstlvrlnhleasngqvivdghditnysekgmre  
ikkdigmifqhnllnsat  
vfknavpmlilskkskteikqrvtlemlevglsdkkdqfpdelsggqkqvaiaralvtnpkilcdeatsaldpattas  
iltllknvngtfgitimm  
themrvikdicnravmekgqvvetgtvkevfshpkttiaqnfsvstviqtepstslirrlndeovggfkdykiveetqv  
tqiindliqicgrevkil  
fssmseiqgntvcymwlrfnidqqfddtainqyfkekniqueevh  
>tr|A6TYT7|A6TYT7\_STAA2  
mfgsdldsallqalyetlymvzialflgavigiplgvllvitrkqgiwpnivihqvlnplnilrslpfiilliaivpf  
tklvvgtsigttaaiavpl  
vyvapyiarlvensllevedgieaakamgasplqiiryflipealgsllaittaigligstamagavggggigdlal  
vygyqrfdtviiitvivl  
viiqvigtlnvlarfirrh  
>tr|A6TYU1|A6TYU1\_STAA2  
mikcvciveetadklllvqvrnrekyyfpggkieegesqvhallrevkeelnltlmdieyigtivgpaypqqdmletl  
ngfraltkidwenvtinne  
itdirwidkdndaliapavkvwietyggkhd  
>tr|A6TYU6|A6TYU6\_STAA2  
mhneklikglydyreehdacgigfyanmdnkrshdiidkslemllrrldhrgvggadgitgdgagimteipfaaffkqhvt  
fdipegeyavglffsker  
ilgseheavfkkyfegeglsilgyrnvpvnkdaiakhvadtmpviqqvfidiorgiedvekrllflarkqlfystqcdlel  
yftsllsrktivygwlrsl  
qikklytdlstdlygsklglvhsrfstntfpswkrahpnmlmhngeintikgnvnmraraqhklletlfgedqhkvfqi  
vedgdsaisvnaledfls  
lamepekaamllipepwyneandanvrafyefysylmepwdgptmifcngdklgaaltdrnglrpgrytitkdnfivfs  
sevgvvdvpesnavfkqgl  
npgklllvdfkqkvienndlkgaiaageipykawidnhkvdfdfeniqyqdsqwkdetlflkqrqfaytkeehkyiqel  
vegkdpigamgydapiav  
lnerpeslfnyfkqlfaqvtppidayrekivtseisylgggnllapdetvldriqlkrpvlneshlaaidqehfkly  
lstvyegdledalealgre  
avnavkqgaqilvlddsglvdsngfampmlaishvhqllikadlrmstslvaksetrevvhvacllayganaivpyla  
qrtveqltltelgggtvvd  
nvktytdvlsegvikvmakmgistvqsyqgaqifeaiglsdvidryftgtqsklsgisidqidaenkarqqsddnylas  
gstfqrqqqhahfnpes  
ifllqhackandyaqfkayseavnkrtdhirhllfkactpididqvepvsdivkrfntgamsygsisaeahetlaqam  
nqllgksnsgegedakry  
evqvqdsnkvsaiqvasgrfgvtsdylqhakeiqikvaqgakpgeggqlpgtkvypwiaktrgstpgiglisppphhdi  
ysiedlaqlihdlknankd  
adiavklvsktgvgti asgvakafadkivisgydggtagpksiqhagvpweiglaethqtlklndlrsrvkletdgkl  
ltgkdvayacalgaefgf  
ataplvvlgcimrvchkdtpvgvatqnkdllalyrgkahhvnfmhfiagealreilaslgkrvedlvgrtdllqrs  
tlkanskaasidveklcp  
fdgpntkeiqqhnlehgfldltnlyevtkpyiaegrrytsftvneqrdvgvitgseiskqygeaglpentinvytng  
agqslaayapkglmihhtg  
dandyvgkllsggtvivkapfeerqneiagnvsfygatggkafingsagerfcirnsqdvvvvegigdhgleymtgghv  
inlgdvgnfngqmgsggia  
yvipdveafvennqldtlfstkiqhkeekafikqmlvehvstnstraihvlkhfriedvvkvipkdyqlmmqkih  
hkslhndeamlaafydd  
sktidakhkpavvy  
>tr|A6TYV1|A6TYV1\_STAA2  
mqjylstlteldydklinsieesfdnpetswqarakvkhlrkspcynfeleviaknenndvvghvllieveinsddkty  
yglaiaslvhpealrgqkl  
grglvqaveerakaqeystvvvdhcfdyfeklgyqnaeahdiklesgdapllvkiyldnldaphgivkfphefy  
>tr|A6TYX6|A6TYX6\_STAA2

Tsompanidou\_et\_al\_Supplemental\_FASTA\_File

maslksiiqqkqtrsdlkqlrksqkvpavvygygtnsvsvkdevfikvi revgrngviegvgsktikvmvadyqfd  
plknqithidflainmsee  
rtvevpvqlvgeavgakeggvveqplfnlevtatpdnipeaievditeInindsItvadkvvtgdfkiendsaesvvtvv  
aptepteeteieamegeqq  
teepevvgeskedeekee  
>tr|A6TY5|A6TY5\_STAA2  
mhndlkevllteediqnickelgaqltkdyqgkplvcvgilkgsamfmsdlikridthlsidfmdvssyhggttestgeva  
iikdlgssienkdvliied  
iletgttlksitelksrkvnsleivtlldkpnrrkadiakvygkkipdefvvgylidyrelyrnlpuyigtlkpevysn  
>tr|A6TY8|A6TY8\_STAA2  
maqkpvdnitqiiggtpvkvlnrvddnaadvvkleynqpggsvkdrialamiekaeregkikpgdtiveptsgntgig  
lafvcaakgykavftmpet  
msqerrnllkaygaelvltpgseamkgaikkakeelkeehgyfepqqfenpanpevhelttgpellqqfegktidaflagv  
gtggtlsgvgkvlkkeypn  
ieivaipeaspvlsggepgphklqglgagfipgtlnteiydsiikvgnrtamemsrvakeegilagissgaaiyaaiaq  
kaeelgkgtvvtvlpnsg  
erylstplysfdd  
>tr|A6TY3|A6TY3\_STAA2  
mfectswntkglqqvkgkvmseemndqmlvrrqklqelydligdipfgskfdrsglssdlkeewdqyskeelvekeadsh  
vaiagrImtkrgkkgkagfa  
hvqdlagqiqiyvrkdqvgddefdlwknadlgdivgvegvmfknttgeIsvkakkftlltkslrlpdkfhglqdieqry  
rqryldlitnedstrtfi  
rskiiqemrnylnnkgflevetpmmhqiaggaaarpfvthhnaIdatlymriaiehlkrlivgglekvyegrfrneg  
vstrhnpeftmieIyeaya  
dyhdimdItesmvrhianevlgsakvqyngetidlesawtrlhivdavkeatgvdfyevksdeeakalakehgieikdm  
kyghilneffeqkveetli  
qptfiyghpteisplaknpedprftdrfelFivgrehanafteIndpidqkrfeaqIvekaqgndeahemdedyieal  
eygmpptgglgigidrlvm  
lltdspirdvllfpymrk  
>tr|A6TY9|A6TY9\_STAA2  
mlcencqlneaelkvkvtsknkteekmvcqtcaeghhpwnqaneqpeyqehqdnfeeafvvkqilqhlatkghinfqeva  
fkeekrcpschmtlkdiah  
vgkfgcancyatfkddiIdivrrvqggqfehvgktpshshkkialkrkieekneylkkliEIqdfEaaivrdeikaIka  
esevqhdda  
>tr|A6TZ00|A6TZ00\_STAA2  
mmthnihdnisqwmksneetpivmssriIarnlenhvhlmyatendgrvinevqdalpnfelmrldqmdqqskmkmv  
akhIispelikqpaavlv  
nddeslsvmineedhIriqamgtdtllqalynqassideldrslDisydeqlgylttcptnigtgmrasmhlhlpglSi  
mkrmtriaqtinrfgytir  
giygegsqvyghtyqvsnqIlgkseIeietItevnqiIhdekqirqkldtyngletqdrvfrsIgilqncrmitmee  
asyrlsevklgidlnyiel  
qnkfneImvaiqspflIdeedksvkekradiIrehik  
>tr|A6TZ05|A6TZ05\_STAA2  
mllkrmrddikmvfeqdpaarstlevittyaglHavwshIahklynqkyvaaraisqisrfftgieihpgakigkrI  
fidhmgvvetctigdn  
vtiyqgvtlgggtgkerghrpdigdnvIaagakvIgnikinsvniGanssvIqsvpsystvvgipghivkqdgvrvgk  
tdhrhlpdpiyeqikhle  
rqlekrngeiqddyI  
>tr|A6TZ29|A6TZ29\_STAA2  
mmsysigidygtasgrvflinttngqvsvkfvkpythgvieselnIkiphtyalqnsndyleimeegisyivreskidp  
vniVgigidftsstIiftD  
enlnpvhnlkqfknnphayvklwhhghaykeaklyqtaiennkwlghygynvssewmpkimevmnrapeimektayi  
meagdwiVnkltknvrsn  
cglgfkafeeetgfhydlfdkidpkIskviqdkvsapvvnigevvgklDDkmaqIglsketmvspfiidahasllgig  
sekdkemtvmgtstchlM  
InekqhqvpgisgsvkgaiIpeIfayeagqsavgdIfeyvakqapsyvdeaanrnmvfelmnekikhqmpgesglial  
dwhngnrsvlSdsnlTgci  
fgltlqtKhedyrayIeatafgtkmimqqyqdwHmevekvfacggipkknvmmDIyanvlnkklivmdseyapaigaa  
ilgavsggahnsIndavda  
mkepiIyeInpeaekvqryetIfkaykaIhdiHgykkanimkdiqslrveg  
>tr|A6TZ34|A6TZ34\_STAA2  
mvqysmsilTfgdvnmnpfiaiegpigvgksslakhlSqtldfyeekeiItenpflSdfyediskwsfqtemfflcnry  
kqfqdvtqlnggvvsdyhi  
hknkiIakntIspvefqkfskiydiIledmimpnmiifldadldvlksriaknrnsfehqiEdeylIklkkyreyyesI  
qsngsnvvlidttsidflk  
neqdyediIhiIpmigditne  
>tr|A6TZ39|A6TZ39\_STAA2  
mlnrenktaitrkgmvsnrlnkfsirkytvgtasilvgttlifglngqeakaaestnkelneattsasdnqssdkvdmqq

Tsompanidou\_et\_al\_Supplemental\_FASTA\_File

lnqedntkndngkemvssq  
gnettsngnksiekesvqsttgnkvevstaksdeqaspkstnedlntkqtisnqeglqpdllenksvvnvqptneenkvv  
daktesttlnvksdaiksn  
aetlvdnnsnnsnnennadiilpkstapkslntrmrmaaiqpnstdsknvndlitsnttltvvdadnsktivpaqdylslk  
sqitvddkvksgdyftiky  
sdvtvqyglmpediknigdikdpnnetiatakhdantlitytftdyvdrfnsvkmginsiymdadtipvdkkdvdfs  
vtignqittttaditypay  
keadnnsigsaftevtshvgnvedpgyynqvvyvnpmdkdllgaklkveayhpkypntnigqinqvntnikiyrvpegytl  
nkgydvntndlvdtdefk  
nkmtgygsnqsvnlfdgdi tsayvmmvntkfqytnsesptlvqmatlsstgnksvstgna l gftnnqsggagqevyikgny  
vwedtnkngvqelgekvgv  
nvtvtvfdnntntkvgeavtkedgsy lipnlpngdyrvefsnlpkgyevtpskqgnneeldsnglssvitvngkdnlsad  
lgiykpkyngdyvwedtn  
kngiqdqdekisgvtvtlkdengnvlktvttdadgkykftdlngnykvefttpegytpttvtsgsdi ekdsngl tttg  
vingadnmtl ds gyfkytpk  
ynl gnyvwedtnkdgkqdstekisgvtvtlknengevlqttktddkgyqftglengtykvefetpsgytptqvsgsd  
egidsngtsttgvikdkdn  
dtidsgyfkyptynlgdyvwedtnkngvqdkdekisgvtvtlkdendkvlktvttdengkyqftdlngtykvefetpsg  
ytpstvtsgndtekdsgl  
tttgvikdadnmtl ds gyfkytpkyslgdyvwydsnkdgkqdstekigdkvkvillnekgevigttkt dengkyrfdnls  
gkykvi fekptgl tqgtgn  
tteddkdadggevdtitdhddftldngyeeetsdsdsdsdsdsdsdsdsdsdsdsdsdsdsdsdsdsdsdsdsdsds  
sdsdsdsdsdsdsdsdsds  
sdsdsdsdsdsdsdsdsdsdsdsdsdsdsdsdsdsdsdsdsdsdsdsdsdsdsdsdsdsdsdsdsdsdsdsdsdsdsdsdsds  
sdsdsdsdagkhtpvkpm  
sttkdhnhkaka l petgnensgsnna l fgg l faa l g l l l fgrkkqnk  
>tr|A6TZ52|A6TZ52\_STAA2  
mnvileqlkthtqnkpn dialhiddetitysqlnaritsaveslqkyslnpvvainmkspvqsiiicylalhrlhkvpmmmm  
egkwqstihrqli ekygik  
dvigdtglmqnidspmfidstqlqhypnllhifgtsgttglpkayyrdedswlasfevnmmlknenaiaapglshsl  
tlyallfalssgrtfiggt  
tfhpeklnqchkissykvamflvptmikslllvynnehtiqsffssgdklhssifkkiknqandinlieffgtsetsfi  
synlnqqapvesvgvlfpn  
velkttndhngigticiksnmmfsgyvseqcinndewfvtdngyvkeqylyltgrqqdml iiggqniypahverlltq  
sssidaai igipnerfgq  
igvllysgdvtlthknvkqflkkkvkryeipsmihhvekmyytasgkiarekmmssmylrgel  
>tr|A6TZ64|A6TZ64\_STAA2  
mivkvlpktttrvhfamskvyfvidntlahiykfkhtdfnylnphvlci reytedkrkipslnr  
>tr|A6TZ78|A6TZ78\_STAA2  
mkqfvnlgksdvevfpi algnavghnlypn l deeqgkdvrqainhginll dtayiygpersee l vgevkeypreqi  
kiatkgshefdenqevhq  
nqpeylkqqvenslkr l qtdyidlyyihfpddntpkdavaalqelkeqgkikaigvsnftldqlkeankdgyvdvqle  
ynllhreneavlqycvdhl  
itfipyfpl asgilagkydentkfsdhrtrrd fipgvfeenvrvkaleslaahqtsianivlafyltrpaidviipg  
akraeqvienikaadivls  
ddeiqyidel fpied  
>tr|A6TZ88|A6TZ88\_STAA2  
mnvii derkenamtfnkvllswivil iittsiylfwqlgdindvfnqsilinrvlprllealltgmiltvaglifqtvln  
naladsftlglasgatfgs  
glalflglttlwipvftsitfslitlitv l vitsvlsqgyprililsglmigalfnsllyflillkprklntianylfgg  
fgdaeysnvsiaitfia  
lfgifiilnqlkllqlgelksqslglnvqlityialciasmitainvayvgiigfigmvipqlirkwqwkqslgrqlaln  
iviggqimvmadfigshil  
spvqipasiialigipvlfym l isqskrlh  
>tr|A6TZ91|A6TZ91\_STAA2  
mkklltasiia cvvmgvglvntsa eaasgnsidtvkqlikgdqslenvkigesikdv ltkyknpmysynedgtehyef  
htkkgmllvtt dgkknngk  
vthismmyndangptyqavknyvgkavthteyskvagnfyiekgkttqyfasapdkniklyridlek  
>tr|A6TZD9|A6TZD9\_STAA2  
mtfneiifknfrqnlshyaiylfslitsvlyfsvalkyahkl nmtesy piieksqvg syflffiiiafllyanvlfi  
krsyela lyqt l g l skfn  
iiyilmleqllifiitailgiigi fgsklllmivftllgikekvp iifslravfetlmligvayfltsaqnfilvfkqs  
isqmsknnqvkethnkkit  
feevvlgilgivil iitgyylsnivqyydsigilmfillstvigaylffkssvslvfkmvkkfrkgvisvndvmfsssim  
yrikknafsltvma isai  
tvsvlcfaaisraslssiekytaphdvtikdqkanqlase lnnqkiphfynykevihtklykdn lfdvkakepynvtit  
sdkiy pntdlkrgqadlfv  
aegsikdlvkhkhkhgkaiigtckkhvnikl rk dinki yf mtdvd lggptfv lndkdyqeirkytkakhivsqfgfdlkhk



Tsompanidou\_et\_al\_Supplemental\_FASTA\_File

kda1alekvknkvdksikt  
rseai555lgtgillfvtsflgitfliavcciiyikqidetedelenysilrklgftqkdmarglklfkimfnfglplvi  
alshayfts1aymklmgtt  
nqipvfivmglyicmyavfavtaynhskrtirhsi  
>tr|A6TZE2|A6TZE2\_STAA2  
msyiiivtiavvifslifdfingfhdta navata vstra ltpkta ilmaavmfigaltftgvagt itkdivdpfkleng  
lvvvlaa ilaa iwnlatw  
fygipssshaligsiagaaiasegsvglhyggftkiiivlivspiafcvglmysifkviknanltranrnfrffq  
iftaalqsfshgtndaqks  
mgii tla liva nqndgsvepq lwwkfacatamglgtaiggwkiiktvggnimkirpangaaadlssaltifvasslhfp  
lstthvsssilvggasnr  
akgvkwstaqrmiitwvitlpisallagllfyilnlff  
>tr|A6TZE9|A6TZE9\_STAA2  
mlqlflmkialndfendksvlfi flknhfyeemcvlsn  
>tr|A6TZF6|A6TZF6\_STAA2  
mheqdfri legqditlpe lgre lenitghti adstgeikrviah lnpfesdt dtfvatyr lnhqqdfidatftalks dra  
rlkevphvelisyisksk  
>tr|A6TZG5|A6TZG5\_STAA2  
mknnkdekirisiingflgsgkttllthyisel lkndekikiimnefgtfdidsnsisneievhs lingcvccd lkqelv  
yelkaialkgdvnhviea  
tgiahplellvacqdpqivnffekpiiygvldatrf lherhqtentvs lmedqlklsdmi inkidlitddslek idkql  
gmicasiptykttygkvs l  
eedl1tvkdreiss hhhhhhgiksmtytftgpidrqlfyqfimkl pesv lrlkgvsvfrnqpna iefqayagl pdygii  
gmqlplti viiget ldt nh  
ir nql dm lqft  
>tr|A6TZH4|A6TZH4\_STAA2  
mtvkn lflgfvavil tvcligllil atneda lakvhtintlna invstedtykkmdilnihtakasevnenve kqnhf  
khrvnanksnsfneqecqv  
iadryadkhindnyglerisktnhgynyvvsndnsts kqhvsi snqgiitk  
>tr|A6TZI0|A6TZI0\_STAA2  
metstii sl iifillia lltvfv gsefa lvkiratrieqladegnkpakivkkmianldyylsacqlgitvtslglglwlg  
eptfekllhpi fea inlpt  
al tttisfavsfiivtylhvvlgelapksia iqhtekla lvyarplfyfgnimkpliwlmngsarvii rmfgvnpdaqtd  
amseeeki iinnsyngge  
inqtelaymqni fsfderhakdimvp rtqmitlnepfnvde lletikehqftry pitddgdkdhikgfinvkeflteyas  
gktiki anyihel pmiset  
trisda lirmqrehvmsli ideyggtagil tmedileeivgeir defdddevndivkidnktfqvngrvll ddtteefg  
iefddseditigwqlsr  
ntnlqkddyvdttydrwvseidnhqiiwvilyn efnearptigqsdedekse  
>tr|A6TZI2|A6TZI2\_STAA2  
mki rvvipcfnegevi tqthqql teilsqdssvkgydym lfidgdst dttidemqhl atidrhvsfisfsrnf gkeam  
iagyqhstefdavimidcd  
lqhpp eyipkmvegfme gydqv iakrdrsgenfsrktlshlyy klvncfveevqfddgv gdf rllsqravksiasleeyn  
rfskglfewigyntkvty  
qnverqkgeskwsfklfn ygidglisfnskplrmmylglfifsisvlyi iylfinimisgvnipgyfstiaailllgg  
iq lisi gvvgeyigriyye  
vkarpkyiiqatnlssi endekdthkvysk  
>tr|A6TZI5|A6TZI5\_STAA2  
mnkllllvtfii rvgsgivmlmqgyekltggftlkg lvpvianntdspewykwffanivahtts lfdivvplgeiaiglg  
lifgvfayaasffgafvmi  
nyiladmi ftypqltffilllms hslkqis lkeiinyfrgrknrgekiddpltdrg  
>tr|A6TZI8|A6TZI8\_STAA2  
makipvlei fgptiqgegrvigrktmfvrtagcdyrscwcdsaftwdgsakgdiklmtaeeydelkriggdlfnhvtis  
ggnpalikgiqelvd lfdq  
kgifsaletqgskfqpwm tqiddlti spkppsstmpdlklk ldevitqcvpssl nlkvvv fddkdydfakmi hhryp dip  
fylqvgnpylsdsvdnhte  
klleryeq lvd lvmqsn dmnhvyvlpqlhtllwsnkkgv  
>tr|A6TZJ2|A6TZJ2\_STAA2  
mrieynyryyl teneykqyhiqlkgfikkyvatkladvgevi hfaqaqqrgryvslylsyeaakyfnhvmcths lakdd  
iyavays fekaesinstey  
hqt svskhhfsfveseem mtnikrvqqaivegetyqvnytar ltdniypistlyer l tqfsngnyta llqtdeiqva  
sispel ffqkgqfnv dnv  
iiskpmkgtmprgkteaedqyyktlqtsskdraenvmivd llrndigrisqsgsikvyklffieayktvfqmtsmvsgt  
lktntdl tqilts l fpcgs  
itgapk lntmkyi kqfessprgiycgaiglllpteddkmi fnipirtieykygqaiyvgagitidskpkdevnefyakt  
kil em l  
>tr|A6TZJ4|A6TZJ4\_STAA2  
mgpnmi ivyivllllilvyvnyrlvnrllsenriyvvr livtittvisfilvya lihelmpfvvramdlmyhq

Tsompanidou\_et\_al\_Supplemental\_FASTA\_File

>tr|A6TZK0|A6TZK0\_STAA2  
mikfknvtkrygkhvavnidsfnegeffvligpsgcgktttlkminrlhlseguyfkdkpisdcpvyemrwdigyv  
lqqlal fphmtikeniaqv  
pqmkkwkekdi dkrvdelldmvglepekyknrkpdelsggqrqrvgviraladppvilmdpefsaldpisreklqddli  
elqtkikkttiifvthdiqe  
amklgdki cllneghieqidtpgefknnpqsefvkqfmgshleddapcveenairldimkpiddevtsmsaypivydq  
pievlyqhl seservivmq  
edsvgyvidrkdifkylsqkkevaqhd  
>tr|A6TZK6|A6TZK6\_STAA2  
mifltywcvfhlayiigyikitfytkvhqknistrikqhfyrrllhfnvnyifilslincarliteysqyfyffvicwn  
i  
>tr|A6TZL2|A6TZL2\_STAA2  
mkyllkgnlllllllltiislfivgseisikdlhltesqrnilfssriprtm silia gsslalaglimqmmqnkfvs  
pttagtmewaklgilia ll  
ffptghillklvfavicsicgtflfvkiidfikvkdvifvpllgimmggivasfttfislrtnavqsignwlngnfaiit  
sgryeilylsipllaaly  
fanhftivgmkdfntnlglsyeklinialfitatitalvvvtvgtlpflglvipniisiyrgdhlknaiphtmmglaif  
vlfsvdivgri vvyypeini  
gltigvfgtii flillmkgrknyaqq  
>tr|A6TZL3|A6TZL3\_STAA2  
mrnnkkimllia vtlismlylfvgidfeifeyqfssrlrkfilililvgaaiatsvifqaitnrltpsimgldavy  
lfikvlpvflfgiqsvvvt  
nyvlnfilitimvlfalilfqgikighfsiyfilligvllgtffrsitgfiqlimdpeflaiqssmfanfnsnsl  
vtfsavllvillviti ll  
pyldvlllgraeainlgisyekltrillvivsvlvsvstalgvpitflgl ltvnlahelmktyehkyiliaticlswisl  
fsaqwvvenvfattensi  
lidliggsyfiy llvrrrnaq  
>tr|A6TZL6|A6TZL6\_STAA2  
mpkvyslidtetrchrhyfteedii aikfkccnkyypcykchnefekhaikrwsepsfnekailcgvckhel tneymmv  
ercpncqsrfnrckyh  
iyfei  
>tr|A6TZM5|A6TZM5\_STAA2  
mfeafiy nisviviagiylfhrlysenkrmvfskayvtvltivsl llsvypipyredylihlftvplllfgrftnmvyt  
lsatvivaiveivfnnsi  
mygvtliviaavtsaigpflkqndvsl llllnvvti ilfgvalvspiytlsevi ilipisliitlasaitfvdiwhffs  
lvnryenedkydyltg lgn  
vkefdrhlneisrkaekehqsi allididgfkdvndtyshksgdavlkqmsqllknyvnpqfki frnggeefsvvihny  
sldqsvklaeni rsgveys  
sfhlpnkevklsvsigvgyltdddpksqrkvfdaddmvhvaknqgrnkvmfnpinl  
>tr|A6TZM7|A6TZM7\_STAA2  
mtqniitvkkehi ienvisksrfia hkpqvnedekafiaa ikkehkdathncsaytigpemniqkanddgeptgtagv  
pml dilkkldvhnacvvvt  
ryfggikl gggg l raysgavrdviydvgrvel reavpcivt lnydqtkgfeyelasthfm lrnqytydkvsyyidvvs  
dyeafin flnqmtagnfdl  
teetpkqlpfdipte  
>tr|A6TZN2|A6TZN2\_STAA2  
mgflskil dgnnkeikqlgkladkvialeektailtdeei rnktkqfqteladidnvkkqndyldkilpeaya l vregsk  
rvfnmtpykvqimggiaih  
kgdiaemrtgegkltatmptylnalagrgvhvitvneylssvqseemaelynlglvtvgnlnsktteekreayaqdit  
ystnne l gfdylrdnmvny  
sedrvmrplhfaiidevdsilideartpl iisgeaekstsl ytanvfakmlkqdedykydektkavhlteggadkaerm  
fkvenlydvqnvdivshin  
talrahvtlqrdvdmvvdgevlivdqftgrtmpgrrfseglhqaieakegvqiqnesktmasitfqnyfrmynk lagmt  
gtakteeeefrninyntvt  
qiptnkpvrndksdli yisqkgfdavvedvvekhkagqpvl lgtvavetseyisnllkkrgirhdvlnaknhereaei  
vagagkgavtia tnmagr  
gtdiklgegveelgg lavigterhesriddqlrgsrgrgdkgdsrfylslqdelmirfgserlqkmsr lgllddstpi  
eskmvs ravesaqkrvegn  
nfdarkrileydevl rkqreiiynernsiideedssqvvdamlrstlqrsinyyintaddepeyqpfidyindiflqegd  
iteddikgkdaedifevvw  
akieaayqsqkdi leeqmneferm illrsidshwtdhidtdmlrqgihlrsyaqqnplrdyqneghel fdimmqnieed  
tckfilksvvqvedniere  
kttefgeakhvsaedgkekvpkpkpivkgdqvrnddcpcgsgkkfkncgk  
>tr|A6TZN7|A6TZN7\_STAA2  
mvehypfkihsdfepqgdqpaikeivdgikagkrhqtllgatgtgkftmsnvikevgkptliiahnktlagqlysefk  
effpenrveyfvsyydyq  
peaypstdtfiekdasindeidqlrsatsalferddviiiasvsciylgnpeeykdllvsvrvgmendrse llrk l v  
dvqytrndidfqrgrtfrvr

Tsompanidou\_et\_al\_Supplemental\_FASTA\_File

gdvvei fpaskeelci rveffgdeidri revnyltgevlkerehfai fphashfvtreeklkvaieriekeleerlkelrd  
enkll eaqrleqrtnydl  
mmremgfcsgienysvhltrplgstpytll dyfgddwlvmideshvtlpqvrngmyngdrarkqvlvdhgfrlpsaldnr  
plkfeefeektkqlvyvsa  
tpgpyei ehtdkmveqiri rptgll dpkievrptenqidll seiqtrvernervlvttl tkkmsedl ttmkeagikvny  
lhseiktlerieirdlrm  
gtydivginll regidipevslvvi ldadkegflrsnrsl iqtigraarndkgevimyadkmtsdsmkyaidetqrrrei  
qmkhnekhg itpki nkki  
hdli satvendenndkaqtvipkmtkkerqktidniekemkqaakldf ekate lrdml felkaeg  
>tr|A6TZP9|A6TZP9\_STAA2  
msnqnydynknedgskkkmsttakvvsiatvllllgglvfai fayvdhsnkakerml neqkqeqkekrqkenaekerkkk  
qgeekeqne ldsqanqyqq  
lpqqnqyqyvppqqqaptkqrpakeendkaskdeskd kddnasqdk sddnqkktddnkqpaqpkppqqptpkpnnnqq  
nqsnqqakppapqnsqs  
ttnkqnnandk  
>tr|A6TZR5|A6TZR5\_STAA2  
mqir qihghd faqvdl ir tafensehgygnese lvdqirl sdydnleivavl qnevvgghll sevyldnga qreigl  
vlapvsvdihhqnkgigkr  
liqal ereail kgynfivl gwptyyanlgyqrasmydi ppydgipdeaflike lkvns lagktgtinytsafe ki  
>tr|A6TZR6|A6TZR6\_STAA2  
mmkkkkehkhairkksigvaslvgtligfgll sskedasensvtqsdsasnesksndsss vsaapktddtnvsdtktss  
ntnngetsvaqnpaqqett  
qssstnatteetpvtgeat ttttnqantpattqssntnaeelvnqtsnettsndtntvssvns pqnstnaenvsttqdt  
teatpsnnesapqntdasn  
kdvvsqavnps tprmrafs laavaadapaagtdi tnql tdkvtidsgttvyphqagyvkl nygfsvpns pvkgdtfkit  
vpkel nngvtstakvppi  
magdqv langvi dsdgnviyftdyvdkenvtani tmpayidpenvtktgnvtl ttgigtntasktvli dyekyqqfhn  
lsikgtidqidktnntyrq  
tiyvnpsgdnvvl pal tgnlipntksnalidakntdikvyrvdnandl sesyynpsdfedvtnqvris fpananqykvf  
ptdddqittpyivvng hi  
dpastgd lalrstfygydsnf iwrmswdneva fngsgsgdgidkpvvpeqpdepgeiepipedsdsdpgsdsgsdns  
dsgsdsgsdstsdsgsda  
sdsdsasdsdsasdsdsasdsdsasdsdsasdsdsasdsdsasdsdsasdsdsasdsdsasdsdsasdsdsasdsds  
sdsdsdsdsdsdsdsdsds  
dsdsdsdsdsdsdsdsdsdsdsdsdsdsdsdsdsdsdsdsdsdsdsdsdsdsdsdsdsdsdsdsdsdsdsdsds  
dsdsdsdsdsdsdsdsdsdsdsdsdsdsdsdsdsdsdsdsdsdsdsdsdsdsdsdsdsdsdsdsdsdsdsdsds  
dsdsdsdsdsdsdsdsdsdsdsdsdsdsdsdsdsdsdsdsdsdsdsdsdsdsdsdsdsdsdsdsdsdsdsdsds  
sdsdsasdsdsdsgsdssdsdsdsdsdsdsdsdsdsdsdsdsdsdsdsdsdsdsdsdsdsdsdsdsdsdsdsds  
sedeantsliwgl laslgs  
lllfrkкенkdkk  
>tr|A6TZT4|A6TZT4\_STAA2  
melqqai anrrsvkkfkrdmhiddal lyqai ekaadapnhgmrepwrvvhvpkdr lgdmskdiskfafpnel dkqqchyd  
avtkl ggmllli lkt dprq  
rqndenyafgayaqnlml llyeagigt cwksplyiydpkvrktlgikkdevlagflyltdleedmpkaprkrnrnitly  
>tr|A6TZT5|A6TZT5\_STAA2  
mqai ksnfks iinsdtpv i vkfeagwcpdcramdlwidpiveqyndyqwytvnrde ledvvvenevmgipsllvfkg  
dkiah lhsanakspeqves  
flaetfk  
>tr|A6TZV1|A6TZV1\_STAA2  
makkapdvgekygfhdddsvi frsergl tenivre isnmk nepewml dfrlkslkl fykmpmpqwggdlse lnfddity  
yvkpseqaerswdevpeei  
krtfdkl gipeaeqky lagvsaqyesevvyhnmekeleekgi i fkdtdsalqeneel fkyfasvvpaadnkfaalnsav  
wsggsfiyvknikldtp l  
qayfrinsenmgqfertli i adegasvhyvegctapvyttss lhsavvei ivhkdahvrytti qn wannvynlvtkrtfv  
yengnmewvdgnl gskl tm  
kypncvll gegakgstl siafagkgvqdagakmi hkapntsstivsksis knggkviyrgivhfgrkakgarsniecdt  
lil dnestsdtipynefn  
dqisleheakvskvseeql fylmsrgisee eatemivmgfiepf tkelpmeyavemnrlik femegsig  
>tr|A6TZV8|A6TZV8\_STAA2  
msttdfgl kvrtell krnmtnkqlaemle issaylsdil rgrrdafeqqkriakileikeevks  
>tr|A6TZW0|A6TZW0\_STAA2  
mtpeqkeklnnivl tlyavkenksqthytkdtl tvtyageiehtyevdrekhlesmi ewaidqieqhfdl deee  
>tr|A6TZW9|A6TZW9\_STAA2  
mpkitsyitqddgttvisdvelgnketlll dngfdvevdvnnidpfqitgkqrrkifalvk diehtgqpm dymrhmf  
iefvrtygyderis lsn  
trtqasqi eatldwtfyndip l syktsnllkqdksflywstvnrcv icgkphadlahyeavgrgmnrnmnydkhvl  
alcrehneqhaigvksfd  
dkyqlhdswikvderlnkmlkgekke  
>tr|A6TZX1|A6TZX1\_STAA2

Tsompanidou\_et\_al\_Supplemental\_FASTA\_File

mekpymlytdlnspgqkyeelrnvikeisngchnywkssflfrsslstsemi ek lkpyl ds gklfvteivnnkqgwlt  
keqwdfinhni fi  
>tr|A6TZX3|A6TZX3\_STAA2  
mkplfsekineslkkyqpthvekglkercgseydlykfaptkkhpngeyeykdgckceiyeykrnkqrkinnifnqsnv  
npslrdatvknypqnekq  
vhakqtaieyvqgfstkepkslilqgsygtgkshlayaiakavkaghtvafmhipmlmdrikatynknavettdelvr  
lsdidllvlddmgventeh  
tlnklfsivdnrvgnniftnfsdke lnqnmnwqrinsrmkhnarkvrvigddfrerdaw  
>tr|A6TZX4|A6TZX4\_STAA2  
mvtkeflkiklscsdmyaqk lideaqgdenklyd lfiqklaerhtrpaivey  
>tr|A6TZX8|A6TZX8\_STAA2  
maritketktvsdgysredrettlnydyenqewiayssvpthitrmtklygddvevlerlesgtavlvraklpksaigfr  
klmseerrqelserakraf  
gh  
>tr|A6TZY0|A6TZY0\_STAA2  
mtdnarkeylnqffgskrylyqdnervahihvvnngtyyfhghivpgwksvktfdtaeeleiyikqhgleyeeqkeltlf  
>tr|A6TZY4|A6TZY4\_STAA2  
mntnlqvkllsenarmpernhktdagydi fsaetvlepqekaviktdvavsipegyvglltsrsgvssktylvietgki  
dagyhgnlginikndietl  
eiwddgnfsrnvagi dgkyapppsdki lfmngsyvinkgdklaqlvivpiwtpelkqveefesvsergakgfgssgv  
>tr|A6TZY5|A6TZY5\_STAA2  
miqylvttfkdstgrkhthitraksngsftvveaeskeeakekyeaqvkrdavikvgqlfenirecgk  
>tr|A6TZZ1|A6TZZ1\_STAA2  
mtkkkygklstvrkledelcdypnyhkqledlrseimtpwiptdntniggefvpnsntsktemavtnylcsirrgkilefk  
saierintssrkerefiq  
eyyfnkktliavcydihisestahrikkivsklaeelgey  
>tr|A6TZZ3|A6TZZ3\_STAA2  
myeildlnkkggynkfwhnknfyrvvkgsrgsksksttainliyrimkydwanilvvrfsntnkqstytdlkwatnq  
lgvahlfkfneslpeityk  
ptgqkilfrglddp lkitsitvdtgilcwawfeeayqietfakfstvvesirgsydspeffkqitvtfnpwserhwlkpt  
ffdeetklnntfrydtttyr  
vnewldkvdieredyliknprrarivcdgdwgaeglvdfnfkvedfdwfeefkrtqei thgmdfgfsqdpttvstvv  
dlknkklfiydehykkam  
tddikqmlikkglgdvdiaadygagdrviselkskgikgirka lkgantilpgiqfiqgfeviihpscehaieefntyt  
fdqndgkwl nkp idannh  
ida lryslkyhivrkkkniesktkvikslgl  
>tr|A6TZZ4|A6TZZ4\_STAA2  
mlkanefetdtdlrenrnylnfdeanvvytydgesdlnqinevskyiehhmdyqrprl kvlsdyeygktnlveltrr  
keeymadnrvahdyasyis  
dfingyflgnpiqcdddkdvl eaieafndlnveshnrs lgl dlsiygkayelmirnqddetrlyksdamstfviydn  
iernsiagvryl rtkpidk  
tdedevftvdlftshgvryltsrtnglkltprengfeshsfermpitefsnnerkgdyekvitlidlydnaesdtany  
msdln damllikgnlnldp  
vevrkqkeanvlfleptyenrdtgie tegsvdgyiykydvqgteaykdrlnsdihmftntpmkddnfsqtsgsam  
kyklfgleqrktkeglft  
kgllrrraklletilkntnsidankdfntvryvynrnlpkslieelkayidsggkisqttlmslfsffqdpel evkkieed  
ekesikkaqkgiykdprdi  
nddeqdddtkdtvdkke  
>tr|A6TZZ6|A6TZZ6\_STAA2  
msntdkylrdiarelkgrkelqkrnetviidanlsvrsavl ankekpyneplf  
>tr|A6TZZ8|A6TZZ8\_STAA2  
meqtqklklnlqhfasnvpqvfnpdvmhkkdgtlmnefttpilqevmenskimqlgkyepmegtekkftfwadkp  
gaywvgegqkietskatwv  
natmrafklgvlpvtkeflnytsqffeemkpmiaefykkfdeagilnqgnnpfgksiaqsiektnkvikgdfdqdn  
idlea lleddeleanafis  
ktqnrslrki vdpetkeriydrnsdtldglpvvnlkssnlkrgelitgdfdkliygipqlieykidetaqlstvknedg  
tpvnlf eqdmvalratmhv  
alhiaddkafaklvpadakpssnpgev  
>tr|A6TZZ9|A6TZZ9\_STAA2  
mpeiigivkvdftdlednrhvygmghvyprkgydptderikalasvenkrneqmiyivndkltkkelveiasvaglvde  
kqtkaeiintfesle  
>tr|A6U001|A6U001\_STAA2  
mryedrvifqleqvatinpkskntlitydaipcninpisrarkqlfgdvkndvsvlrikesisyvshvlvngiry  
kivdtriyrhetsyieev  
n  
>tr|A6U007|A6U007\_STAA2  
mteyikatieasvakfkrqid savksvqrfrvadqtkdvelnandkklqktikvakksldafsnknvkakldasiqdl  
qqkilesnfeldklnska

Tsompanidou\_et\_al\_Supplemental\_FASTA\_File

spevklqkqkltkdiaeaeeklselekkrisidvnadnskfnrvlkvskaslealnrskakaidvngvanskikrtke  
elksipnktrsrldvdtgl  
siptiyafkksldalpnkkttkvdvdtnglkkayayikandnfqrqmglnanmfrvfgtvgsnmvgglltssfsilipv  
iasvvpvfallnalkvlt  
ggvialggavajagagfvafgamaisaikmlsdgtlqassatneykkaaldgvsawtdiikqnqsaifttlanglntvkt  
amqslqpffsgisrgmee  
sqsvfkwaqnsqvasrffnmnttgvsvfknllsaaggfgdglvvnftqlaplqwsadwldrllgqsfswansaagens  
itrfeietyktnlpiignif  
knvfvginlmlnafsgsstgifsleqmtakfrewseqvgqsqgkdfvsiqtngplimqligniarglvafatamapi  
asavlravaitgwianlf  
eahpataqlvgviiitlvgafrrlipiilavsnfmggglligriialvskfgllragltilkgafmllkgplkiisvifqll  
fgkigllirnaigtltvtfq  
ilggpitiivigviaaliaifvllwnknegfrnfiinawnaiktfmtvwnvltvasvwnailkaittavtnvynfimi  
vwnqiaaylqglwngiia  
attvwnllvtiittvfttmtivmtiwtaiwftlstiwnitiatiwnllvtvittvfttmtiamtiwnaiwftlqt  
lwntjvtvatkvwnaittt  
istalqaawsfisniwntiwsflsgilttiwnkvvsiftqvvtisdkmsqawnfivtkgmqvwstittstlinfvnrviq  
gfvnvnkvsqgmtnavnk  
iksfigdfvsagadmriglirgigqmagqlvdaaknvakkaaldaaksalgihspsrefmdvgvysmlgfvkgidnhsskv  
irvnsvadkvvdafqptl  
napdissitgnlnlgninaqvqhtsietspnmktvkvefdvndaaltsivngrnakrnseyyl  
>tr|A6U008|A6U008\_STAA2  
mdieltkkdgvtviklseygfivndividsmqintkyqdkenmgrilmgnsnyisrdivvpcfckvknrsdiaymrmdlyr  
ltdiepmylreirrkeel  
nyrftqptsdddyvklkknfpdyeysrhdqqiyvngkqykvi fngvinpkqkdnkvsfelkfettel pygesigtslele  
enkkvglwsfdfnidwhag  
gdkrkytfenlsgktvyyhgsapndqfnmykkitiilgedtesfvwnlthaeimkiegiklkagdkivydsfrvykngve  
istetniaqpkfkygankf  
efnqtvqkvqfdlkfyk  
>tr|A6U010|A6U010\_STAA2  
mdnkliidlsvrfdyryvdeneynfklisdmldfnfsleyhrnkev fahngeqikyehlnvtssvsdflylgrfsm  
vlghngdginnevkdarvnd  
tgydhktlqdrlyhdystldaftkkvekavdehykeyqateyrfepkeqepetitlspytnavmqsfwdprtkiymt  
qarpghymllsrllkpnqgf  
idrllvknghgthnayryigne lwiysavldannnkfvrfkyrsgemtygnemqdvmpnvfndrytsaiynpienlmv  
frreyktseqqaknalnf  
evrsaddidkgidkvlqmdipmqytsgtqpmqgiaydagilywtgdsnpapnylqgfdiktke llfkrridiggvnn  
nfgkdfqeaegldmyydl  
tgrkalligvtigpgnnrhhsisigqrgvnqflkniapqvsmtdsgrvklpvpqnpaylsditevghyyiytqdtqna  
ldfplpkafrdagwffdv  
pghyngalrqvltrnstgrnmllkfervidifnkknngswfnpqqsagywehipksitklsdlkivglfdyitteesnft  
dfpkdfkjiagwilevksn  
tpgnttqvlrrnfnpsahqflvrnfgtggvgkwslfegkvve  
>tr|A6U016|A6U016\_STAA2  
mykikdvetriknvgvldgidgrfytedentasi rigindkqgridlkahgltrprllhlfmedgsifkneplimddvkg  
fitykipkkvikhagyvrc  
klflekeekihvanfsfnivdsgiesavakeidvklvddaitrilkdnatdllskdfkeidkdvisyieknesrfkga  
kgdkgepggqgagkeagkk  
geqgagkngtvvsinpdtkmwqidgkdtidkaepelldkinianveglenklqevetikdttlndsktytdskiaelvd  
sapesmntlrelaeaiqnn  
sisesvllqqigskvstedfegfkqslnslyadknhshtikqieglenalskksdinhshderyllssnaftkeeadklyq  
pigssqpslniwtgsetey  
nylyqkdpntlyllkg  
>tr|A6U026|A6U026\_STAA2  
mastkimfgsacafvdcgrlfi lhdlinlidyighdvggmrrc  
>tr|A6U037|A6U037\_STAA2  
mmttnyyvesikllnfinnidimnckkqilkrily  
>tr|A6U081|A6U081\_STAA2  
mdinkmtyavqsallqgavelsqhqklqnieieailsaalneseslyksileranievdqlnkayedkln tyasvegdnig  
ygqyisqqanqlitkaesy  
mkeyedeyismehilrsamididqttkhyinnkvevikeiikkvrghnhvtsqnpevnyealakygrdlveevrqgkmpv  
igrdeetirntirilsrktk  
nnpvligepvgktaiveglagrivkkdvpeslldktvfeldlsalvagakyrgefeerlkavlkevesdgriilfide  
ihmlvgagktgdagdm  
lkpmlarge lhcigattlneyreyiekdsalerrfqkvavsepdvdtisilrglkeryevyhgvrirdralvaaael sd  
ryitdrflpdkaidlvdqa  
cati rtemgsnpteldqvnrrvmqleieesal knesdnaskqrlelqee lanekekqaalqsrvesekekianlqekra  
qldesrqaledaqtannle

Tsompanidou\_et\_al\_Supplemental\_FASTA\_File

kaaelqygtipqlelelrelednfqdegedtdrmi revvtdeeigdivsqwtgipvsklveterekl1h1sdilhkrvv  
gqdkavdlvsdavvrarag  
ikdprnpigsf1flgptgvkte1aks1aas1fdsekhmiridmseymekhavsrligappgyighdeggqlteavrnl  
ysvilldevekahtdvfnv  
llqildegrrtdskgrsvdfkntiimsnigsqvl1envketgeitestekavmtlnayfkpeilnrmddivlfkpls  
iddmsmivdkiltqlnir1  
leqrisievsddakawlggeayepqygarplkrfvqrqietplarmmikegfpeggttikvlnsdnntfnvekihe  
>tr|A6U082|A6U082\_STAA2  
mnl1dwyyt1fvlaktlnyrlaseein1tipsihkqikneqhl1nkl1fetyknqiiltedghtflpiaqsfiqyesgik  
hiqlkktmfqsklnvvss  
yatfimpkflksffnehpfidvslhvkneniekdinnhtydigisrnqpk1revhsekvcegekivliapnkennh1te  
aslfeykiisdnhpeyws  
slknni1niygkaqflsindvhtsikliemnggisflpiyittsdynisvintkilqapisftyiyskkespeilvfik  
sfkkyianeg1  
>tr|A6U085|A6U085\_STAA2  
mnk1ilgiylyrifsrayf1pfl1iyfliqgysiiqleilmasygiaaf1fslykeckfkcicn1kdsnklvseifkii  
g11111yqnqylilvvaqi  
llg1sysmmagvdtaiikrni1nekyvqnksnsymfls11isgiigsylyginikwpiimtgifsil1tiiiirct1venr  
e1n1igetkqkikflpee  
kfwil1hysflralilgffigfipiniynd1kl1n1qf1sv1t1cy1vmgyl1ssryl1tkyl1nykfvseicliifliiytyqs  
fiavtismiflgissgltr  
pqtink1sssn1lrvm1nyaetlyfifniaf1liggylysigt1qyl1m1fms11t1fiy11t1fy1lrrdqhenqhr1  
>tr|A6U091|A6U091\_STAA2  
mlkkw1gmalitp1l1t1fi1wvfnsh1ti1y1n1il1fy1sv1li1f1is1f1il1l1vqeg1fdatsy1gfr1lkyqm1ss1k1k1k1s1s  
ddp1ff1np1qev1k1keh1y1fv1st  
wiip11111ini1y1f1im1t1iv1s1l1v  
>tr|A6U096|A6U096\_STAA2  
mtrkfrt1l1l1l1iatia1sgcanddgiysdkgqvfrkil1ssdl1ts1d1ts1it1de1sse1vtaqt1feg1lyt1gkgdkpvl1gv  
akafpek1skd1gk1tk1vkl1r  
sdakwsngdkvtaqdfvyawrktvdpktgsefayimgdiknasdi1stgk1pveq1lgika1ndet1qie1lekpvpyinq1l  
a1nt1fap1qnek1vak1kygkn  
ygt1aad1rav1yng1p1fk1vdd1wk1qedk1t1l1skn1qyy1wd1kkn1vkl1dkv1nyk1vik1d1q1agas1yd1tes1vdd1avit1ad1qv1nky1kdn  
kg1n1fv1l1ts1g1t1ff1vk1m1nek  
qypdfknkn1rlaiaqaidkkg1yvds1vknngs1psdt1takgiakapngkdyastmnspl1kynpkearahwdkake1gk  
nevt1fsm1nted1tp1dakis1a  
eyiks1qvekn1pgvt1kik1q1lpfk1qrvs1e1s1nn1feas1sgws1adyp1dp1may1et1mtt1gs1aqn1ntd1wgn1key1dq1l1kvar  
tk1al1qpn1eryen1l1kkaee  
mfl1gdap1vap1y1qkg1vah1tnp1qv1kgl1y1hk1fg1pnns1khvy1idks1idket1gk1kkk  
>tr|A6U0A0|A6U0A0\_STAA2  
mlk1l1l1kr1gl1mip1l1il1is1iv1v1s1lai1qpgdp1fsd1l1ngk1k1qea1naqrek1gl1nds1iphqy1r1wvnh1vihgd1ges  
ikykrp1vid1vieer1ipnti  
llgams1li1ty1i1s1fal1gits1grys1s1tdyt1vqi1fny1l1ma1ips1fi1ag1vfai1f1ifs1fel1qw1p1f1qgs1vdin1kegt1fey  
ymskiyht1fl1palt1gl1s  
tagy1qyl1r1ndi1ensk1kdy1vtars1kg1lsmnki1ynk1hil1rns1lipi1it1fl1gadiv1sil1ggavit1et1ifs1yng1ig1kl1fle  
sv1gq1dyp1l1m1mal1t1l1ff1sf  
lg1l1gn1l1sd1ty1g1fid1pr1rsn  
>tr|A6U0B1|A6U0B1\_STAA2  
mnqwdqf1tpykavde1kvk1lkgmrkqyevgeqaspiefvtgrv1kpiasi1dkankr1qip1fdr1reemy1diag1l1rmm1cq  
fved1dvvn1il1rqrkdfk  
vieerdy1rntkes1gys1yh1vie1y1piet1l1qqk1fil1ae1iq1irt1am1nf1wat1ieht1l1rykyd1gay1p1dei1qhr1l1era1aaa  
y1l1deem1se1k1dei1qea1qk  
yytqkr1skk1hend  
>tr|A6U0B9|A6U0B9\_STAA2  
msefktgkinkh1v1ysn1l1nrdvt1isiy1l1pesyn1qlv1kyn1vil1cfd1gld1fl1rfgri1qrtyes1likear1iddai1ivgf1hye  
dvdkrree1fhpqgsrsh1t  
iqsvgke1lpfid1stf1st1kvgnar1l1vgds1lagsia1l1ta1typt1ifsrvam1sphsddkvl1dkl1nqcankeq1ltiwhv  
ig1ldekdf1t1ptngkrad1f  
l1tpnre1laeq1kkyn1tyyy1defegghqwkdwkpl1sdil1lyfl1rkntddqhye  
>tr|A6U0D0|A6U0D0\_STAA2  
mkr1l1gl1t1asa1lv1gacgshd1gdk1kees1kkt1et1k1dkndk1k1k1k1et1kekae1akkenanqndnnnqvnnenntnvndqqt1n  
rpl1tkde1s1qrv1kngh1nvn  
gmvdad1gnt1wy1qaq1gag1dvi1gytkp1dgt1qct1vgg1cvtp1qq1qeq1ineanykemeky1gys1rekydai1qkeask1l1qqk1enge  
i1tae1eft1nry1i1elyd  
>tr|A6U0D5|A6U0D5\_STAA2  
mlqkfriaeksk1kl1n1l1khans1letr1nnp1ell1ravae1ll1keinr  
>tr|A6U0D9|A6U0D9\_STAA2  
mnt1r1seg1l1rigvp1qvss1kadass1yl1tekern1gae1ile1lik1sdys1yleinkvfya1ldre1lqyrannk1  
>tr|A6U0E1|A6U0E1\_STAA2

Tsompanidou\_et\_al\_Supplemental\_FASTA\_File

msdtyksy1lavlcftv1aivlmpflyfttawsiagfasiatfi fykeyfyee  
>tr|A6U0E3|A6U0E3\_STAA2  
mailedifeelk1lnkn1rvlntelstvdssivqekvkeampkeetaql etieevketstdl tkdyilsvgkeflkkad  
tsdkkefrnk1nelgadkl  
stikeehyekivdfmearina  
>tr|A6U0E5|A6U0E5\_STAA2  
mkakvlnktkvtgkvrasyahifepshmqegqeakysisliipksdtstikaieqai eaakeegkvskfggkvpan1kl  
plrdgdereddvnyqday  
finasskqapgiidqnkir1tdsgtivsgdyirasin1fpfntngnkgiavglnniqlvekgeplggasaaeddfdeltd  
ddedf1  
>tr|A6U0F0|A6U0F0\_STAA2  
mtdsgrkeylkhffgskrylyqdnervahihvngtyyfhghivpgwqgvkktfdtae eletyikqsdleyeeqqltlf  
>tr|A6U0F2|A6U0F2\_STAA2  
mkikvkkemr1delikwarenpelsqgkiffstgfsdgfvrfhpntnkctstssfipidipfivdiekevteetkfrlle  
veyieqevyksalykgis1  
nerfeddni fptkafyilnddid1erwgvgrrmlkfkawdkdkkvmssiideidfngyilistgyksfnevk1llytgf  
dvhgveiyegdivqdcysr  
evsfiefkegafyitfsnvtellsenddieivgnifenem1levmr  
>tr|A6U0G1|A6U0G1\_STAA2  
mlyh1lhqccitkndttpkitfyttvlhskndatfdttsknyvlfnisyikssklssltyaictp  
>tr|A6U0G6|A6U0G6\_STAA2  
mk1tkkqlkeyiedyksddilinyieteyfycr1rdelknsdlmiehtnkagasniiknplsieltktvtl1n1lks  
mg1taqrkkivqeeggfg  
dy  
>tr|A6U0G7|A6U0G7\_STAA2  
mtikvlnepspk1l1ttwyaevtqgkiktskyvrkecerhlrylengkwvfdeela hrpirfiekfckpskgskrqlvl  
qpwqhfiigs1fgwvhet  
klrrfkeali fmgrkngktttisgvanyavsqdgengaeih1lanvmkqarilfdeskamikaspkl dknfrtlrdeihy  
datiskimpqasdsdkldg  
1nthmgi fdeihfekdyklisviknsraarlqplliyittagyqldgplvd mveagrtdldqiedertfyylas1ddd  
dindssnikanplgvs  
n1demkeewekakrtpeagdfitkrfni fanndemsfidyptlqkneivsleelegrpctigydlsetedftaacatf  
aldngkvav1shswipkhk  
veysneki pyreweedg1ltvqdkpyidyqdvlnwi ikmnehyvvekitydranafkl nqelknygfeteetrqgalts  
palkdlkemfldgkii fnn  
nplmkwyinnvq1kl drngnw1pskqsryrkidgfaaf1ntytdimkvvsdsgegniefisikdimr  
>tr|A6U0G8|A6U0G8\_STAA2  
mnaviakenvtrikk1idnwidqstsklydfspwknrsfwgvinntletnetifsa itkl snsmas1plkmyedykvvn  
tevsd1l1tvspnns1ssfd  
finqietirnekgnayvl ierdiyhpksklf1lnpdvvenlienqsrelysihaatgnklivhnm dm1hfkhivasnmv  
qgispidv1knttdfnav  
rtfnltemqkpdsm1kygsnvgekrqqvledfkqyyeenggv1fqepgveieplpkkyvsedivasen1trervanvf  
qlpsvflnarsntnfakne  
elnrlylqht1lpivkqyeeefnrk1l1tktdrekryfkfnvksylradsatqaevyfkavrsgyytindi rewed1ppv  
eggdkplisgdlypidtp1  
elrks1kggdkvnves  
>tr|A6U0H1|A6U0H1\_STAA2  
msleeik1w1rdynfend1iegliqsakse1l1sgvpdydkddleyplfctairyiiardyesrgysndqsrskvfnek  
glqkmi1k1kkw  
>tr|A6U0H2|A6U0H2\_STAA2  
mefnefkdrayffqyvngpypdeekm1lyscfckiy npsmkdreilkatesksgl1ti mrsskieylpqtnh1vkidr  
glysk1fnikeiridtpd  
igyntvvlsek  
>tr|A6U0H3|A6U0H3\_STAA2  
msveikgipev1kk1esvygkqsmqaksdra1neaseffika1kkesfkdtagasieemtskpytkvgsqerav1iew  
vgpmnrkni ih1nehgytr  
dgkkytprgfgviakt1aanerkyreiikke1ar  
>tr|A6U0I3|A6U0I3\_STAA2  
menlylikd1galagrdrakeiqn1qrieqfalgl1ttefklhqaktiqhfaeqiyyngsrqaavnks1qsqinalvva  
prnnsaneivqarvnnge  
tfdt1keh1ddwetktqinkeetirelnktkqeildieyrfepdkqef1fvte1apltnavmqsfwfdnrtgivyntqar  
nngym1sr1rpngqfidss  
livggghgthngyryidde1wiysfi lngnnt1vrfkytpnveisygkygmqdvftghpekpyitpvinekenkilyr  
ierprsqwelensmyiei  
rs1ddvdkn1dkvlhki sipmr1tnetqpmqgvtfdekylywytgdsnpnnrnyltafd1etgeeayqvnadygg1dsf  
pgefaeaeg1qiyydkdsg  
kka1m1gvtvggdgrthri fmiqrgi1eilhsrgvpfimsdtggrvklpmpdpklkn1gm1tepglylytdhtvqi  
ddfp1prewrdagwflvkv

Tsompanidou\_et\_al\_Supplemental\_FASTA\_File

ppqtggdviqiltrnsyarnmmtfervlsgrtgdisdwnyvpknsgkwervpsfitekmsdinivgmsfylltddtkrftd  
fpterkgvagwnlyveasn  
tggfvhrlvrvsvtascei11knydsktssgpwtlhegriis  
>tr|A6U0I4|A6U0I4\_STAA2  
msnleksvainlentahyenisnlditftrtgesdssvllfnii knqp11seenikariairgkgvmvvpaleildpfk  
gilkfqlpndvikrdgsyq  
aqvsvae1gnsdvvvvertitfnvekslfskipsetklhyivefqe1ektimdrakamdeaikngedyasliekakekg1  
sdiqjakssside1kqlan  
srisdlenkaqaysrtfdeqkrymdekheafkqsvnsgglvtsgstsnwqkakitkddgkimqitgfdfnpeqrigdst  
qfiyvsqainyprgastng  
tvey1vvtstykrmtyrpngtnkvfvkrkevgswwsela1ndyntpfetvqnaqskantaesnaklytddkfnkrysv  
ifdgtangvgstlylnes1  
dqf111fygtfpggdftefgnpfgggkisl npsn1pdgdnggggyvefgl tksrts1tisndvyfdlgsqrgsganan  
rgtinkiigvrk  
>tr|A6U0I9|A6U0I9\_STAA2  
mqakl1tkkdfiewlktsegkqfnvd1wygfqcfdyanagkwvlfg111kg1gakdipfannfdglatvyqntpdf1aqqg  
dmvfvgsnygagyghvaw  
ieat1dyi1vyeqnw1gggwtgdieqpgwgwekvtrrqhaydfpmwfi rpnfkseitprsvqsptqapkketaipqpkav  
elkiikdvvkgyd1pkrgg  
npgkivihndagskgataeyrnglvnap1sr1eagiahsvsgntvwqal desqvgwhtanqlgnkyyygievcqsmga  
dnatf1kneqatfqcacarl  
1kkwglpanrntir1hneftstscphrsv1htgfdpvtrgl1pedkr1q1kdyfikqiraymdgkipvatvsnessass  
ntvkpvasawkrnkgytgy  
meesarftngnqpi tvrkvgpf1scpvgyqfpggydytevm1qdghvwvytwegqryylpirtwngsappnqilgd1  
wgeis  
>tr|A6U0J0|A6U0J0\_STAA2  
mqsasycftqvsp1hsri gyrygfkpdw11vm  
>tr|A6U0L6|A6U0L6\_STAA2  
mkgkflkvss1fvatl1ttat1vsspaana1sskamdnhpqqtqsskqtpkikkggn1kpleqrehanvilpnndrhqit  
dtnghyapvtyiqveapt  
gtfi asgvvvgkdt11tnkhvvdathgdphal kafpsainqdnypnggftaeqitkysgedlaivkfspneqnkhighv  
vkpatmsnaetqvnqnit  
vtgyppgdkpvatmweskgkityl kgeamqyd1sttgngsgspvfneknevigihwggvpnefngavfinenvrnflkqni  
edihfanddqpnnpdnpdn  
pnnpdnpnnpdnpnnpdnpnnpdnpnnpdnpnnpdngdnnsdnpdaa  
>tr|A6U0P0|A6U0P0\_STAA2  
mvkiaifasgsgsnfenivehvesgk1enievta1ytdhqnafcidrakkhdipvyinepkqfdskaayeqh1vt11nkd  
kvewi1lagymr1igpd11  
asfegk1ni1hps11pkkygidaigqayhsgdtitgstvhyvdcgmdtgeie1eqrqcdirpddskeqleekvkkleyely  
psviakivk  
>tr|A6U0P8|A6U0P8\_STAA2  
milqmdnfst1lfalk1ciqfsm1nshh1nqsn1vtkkv1sinfidly1nkleiyltysvhikmfnr  
>tr|A6U0Q2|A6U0Q2\_STAA2  
msk1ikgiaasdgvaiakay11vepd1tfdknekvtdevevakfnsaieaskveltkirnaevq1gadkaaifdah11  
v1ddpe1iqpiqdkiknen  
anaata1tdvt1qfvt1fesmdneymkeraadirdvskrv1shilgvelnpsmidessv1vgn1t1psdtaq1nkefvq  
gfatniggrtshsaimsrs  
1eipavgtksitqevkqgdm1ivdg1ngdvi vnptedeliayqdkrecyfadkkelqklrdadtvtvdgvhaelaanig  
tpnd1pgviengagigly  
rtefl1ymgrdqmpteeeqfeaykevl eamdgkrvvvrt1diggdkelsyl1n1peemnpflgyrair1claqqd1frpqlr  
allrasvygk1nimfpmva  
tinefreaka11leeken1kneghdi sddielgimveipataaladvfakevdfsigtnd1iqytlaadrmservsly  
qpynps11r1vkqvieash  
kegkw1gmcmagdataip111gl1defmsatsil karrqing1sknemtelanravdcatqeevie1vnnyvk  
>tr|A6U0S0|A6U0S0\_STAA2  
mkrfl1q1i1galvvgm1c1t1shwfskeqvhtnqkiyvynwgeyidpelikkfeketgiqvvyetf1dsneameakirng  
gthydvafpseytvqk1kr  
dh111pidhkvpn1kn1dsdymnmsfdkgnkys1pyffgtvgi1ynkeky pnesfswks1ynpkfknq111vdgare1  
igms1nk1gyn1ndrnshh  
1keaerd1tk1apqvrvgvgeitmm1qqnegni avwsgvaap1vqegdkynyvipkegsn1wfdnmvipktaqnkega  
ykmf11daknnkqntef  
vgyatpnkaarq11pkeikddhrfyptkkeqer1evyk1d1gpevlseynefn1nfkms1k  
>tr|A6U0S2|A6U0S2\_STAA2  
mnrkpelimawiansisiy11vmgl syfs1ksgnasqree1akq1sqnggnvs1dm1q1ttmgal1ai111istlygifat  
icikgrrk1si11fviai1  
vs1maln1iaiv1wv1vim11skkesketthkdddeiyh  
>tr|A6U0U0|A6U0U0\_STAA2  
mkqtfit1lgegltd1fefmtmieyhqridkiyfhspqaenkkssvai1mnp1ttg1nhfqafyiminai1kypypdsnkf



Tsompanidou\_et\_al\_Supplemental\_FASTA\_File

qmindcaekfdipilgidv  
qppqafhdlslyynyliisvlrlqkwipeiq  
>tr|A6U0V3|A6U0V3\_STAA2  
mkfmaenrltlktgtakdierlytrhgietlegfdgmfvttleqedfdevkiltvwkskqaftdwlksdvfkaahkhv  
rsknedesspiinnkvity  
digysymk  
>tr|A6U0W0|A6U0W0\_STAA2  
mtkkdvikllleqiatymelkgentfkisayrkaaqslelderpldeisdvteikgigkvaevindyrensesqylqqiq  
eevpeglipllkiqglgsk  
kiaklykelnivdkaslgvacengkvselsgfakkteqnilavkqlgakkdrypidqmrlnqeidiyidtlnyidqys  
sagsfrrfkemskldfii  
stdnpkavqqllninpkvkevavngtkvslelayddetigvdfrieprafyhtlqhftgskehnrirqlakardev  
seygieqadgtliqydsea  
kiyehfnvfiippamreddgsefdklsniitlddingdihmhttsdgaafsirdmveaniakgykfmvitdhsqslrvan  
glqverllrqneeikaldk  
eyseidiysgtemdilpdgslidydeilaqldyvigaihqsfnqseeqimerlanacrnpvyvrhiahptgriigrdgyk  
pnieqlmalaeetntvlei  
nanphrldlnaieivrkyppnvklntindahhtnhldfmygvataqkgfvtkdrvinalsreafkdfienniklk  
>tr|A6U0W9|A6U0W9\_STAA2  
mskwiivsdnhtesgvllyqiyemhpdadvylhlgdsefayddtelslfnrvkgncdfypefeneavakyndvkafythgh  
lyqvrtrdllaekglelg  
clfafyghthvakyeyingvhvinpgsisqsrsmeetyaeviiddqtlhgtinfknrhhethisttf  
>tr|A6U0X0|A6U0X0\_STAA2  
mkriivilenvivdnpiwlhvdylvksvllksiklrfqevrkfeilvkimnrhi  
>tr|A6U0X2|A6U0X2\_STAA2  
maivkrksnvltiikivtdivatvliirallnsrkdak  
>tr|A6U0Y4|A6U0Y4\_STAA2  
mteinniinslqslfesesykiisknsgvpyqtvdlnrgktkledarftrtiiklysyvslkeh  
>tr|A6U0Y7|A6U0Y7\_STAA2  
mknkimnklvllstalllgttstqlpktpisfsseakaynisenetninelikyypqphfslsgkwlwqkpnghatlg  
twwyshiqvfgseswgni  
nqlrnkyvdiqtkdeditvegywtydetftggvtpaatssdkpyrlflkysdkqqtiiigghefykgnkpvltlkeldfri  
rqtliknkklyngefnkgg  
ikitadgnnytidlskklkltdtnryvknpknaqievileksn  
>tr|A6U0Y8|A6U0Y8\_STAA2  
mknlnrnsfltlldfsrqevelltlstedlkrakyigtekpmknkniallfekdsttrtrcafevaahdqganvtylgpt  
gsqmgkettkdtarvlgg  
mgdgieyrgfsrvtvetlaensgvpvwnltdedhptqvladfltakevllkkyadinftyvgdgrnnvanalmqgaaim  
gmnhlvcpkelnptdel  
nrckniaaenggnliitddidqgvkgsdviytdvwwsmgepdevkerlellkpyqvnkemmdktgnpnvifehclpsfh  
nadtqiqqifekygi rem  
evtdevfeskavvfqeaenrmhtikavmvatlgef  
>tr|A6U0Z5|A6U0Z5\_STAA2  
mgklgyknilidfdtdivdfydaeewafhymanvfnhkatkddfltfkkinhqhweafqknltksevlservnyfkhh  
qmevdghradvlfnglae  
akvkyfdqtletivelshrhdlyivtngvtetqrrlnqtplhkyikkifiseetgyqkpnpeffnyvndigederqhs  
iivgdslltsdilgginagi  
atcwfntfrgfdhnpgiipdyeinswkqIndivr  
>tr|A6U106|A6U106\_STAA2  
mlfefeqgnhlatlkvigvgcggnnavnrmi dhgmnnvefiaintdgqaalnlskaeskiqigekltrglgaganpeigkk  
aaesreqiedaiqqadm  
fvtsgmgtgtgaapvakiakemgalvvgvtrpfsfegrkrqtqaaagveamkaavdtlivipndrlldivdkstpm  
meafkeadvlrggvqgis  
dliavsgenvldfadvktimsnqgsalmgigvssgenraveaakkaissplletsivgaqgvlnitggeslslfeaqea  
adivqdaadedvnmifgtv  
inpelqdeiivvtviatgfdkptshgrksgstgfgtsvntssnatskdesftsnsnaqatdsvershttkeddipsfi  
rnreerrsrtrr  
>tr|A6U111|A6U111\_STAA2  
mvfynffkvvinidiyqhfrqeeyelidqltdkcdqaeqhyapvlthfldprgqyilevicgsyedlnvsfyggpnaerk  
raispnyepkesdfelt  
lmeiypekfvtlkhqhilgtlmslgiereqvgdiivneriqfvltsrlesfimlelqrikgasvklytipvtdmiqsne  
nwknesatvsslrldvvik  
emirksrtiakqliekkrvknhtivdsadfqqlandlisiqgfgrahitdggktdkthityrtlfk  
>tr|A6U123|A6U123\_STAA2  
mmkdllpiialdfeskekvnqflldfdeslrvkvgmelfyqegpqlineikerghdvflldklhdipntvgkameglakln  
vdlvnvhaaggvkmmseai  
kglrkhnqhtkiavtqltsttedmlrheqniqtsieeavlnyaklanaagldgvvcsplesrmlteklgtsflkvtpgi  
rpkgasqddqhrittpeea

Tsompanidou\_et\_al\_Supplemental\_FASTA\_File

rqlgsthiVVGRPItGSDNPVesyhkikeswlv  
>tr|A6U126|A6U126\_STAA2  
mdipkittf1mfnnkaeeavklytslfedseiitmakygengpgdhtgvqhsiftlngqvmaidansgtelpmpaisl  
fvtvkdtiemerlfnglkd  
egailmpktnmpyrefawvqdkfgvsfqlalpe  
>tr|A6U127|A6U127\_STAA2  
maydglftkkmvslqflttgrvhkinqpdndtilmvvrqnrqnqlllsihpnfsrlqlttkkydnpfnppmfarvfrk  
hleggiiesikqigndrri  
eidiskdeigdtiyrtvileimgkhsnlilvdenrkiiegfkhltptnhyrtvmpgfnypptqhkinpyditgaev  
lkyidfnagniakqllnqf  
egfspnitneivsrrqfmsstlpeafdevmaetklpptpi fhknhetgkedfyfiklnqfnddtvtydslnldrlyd  
argerervkqhandlvrfv  
qqqlhkyqnlaklieeyeqsknkdeqlygelitaniyrikqgdkevtaInyytneevvipInptkspsanaqyykqy  
nrmktrereqlhgqigltkd  
nidystieqqlhhsvhdeideirdelaeqgfmkqrknqtkkkkaqiqlqhyvstdgddiyvgknnkqndyltnkkakkt  
htwlhtkdipgshvvi fnd  
apsdtti keaamlagyfskagnsgqipvdytliknvhkpsgakpgfvtydnqktlyatpdyeliqkmkq1  
>tr|A6U133|A6U133\_STAA2  
mfelkvgiikreandiisnstggkemqvnkviyillalfgsfghkfyagknmqgilhlifcwtgiphilaisavitv  
fkpadeqgnvt1  
>tr|A6U136|A6U136\_STAA2  
mienvrslafdtiqdilinegaysnlrinevlsenelnamdka1fteivgytvkrkytldfy1kpfvktkikawvrqllwm  
siyqyvyldkvpnhaiine  
aveiakerggyhngnvngilrtmmrsdlpdfneiadpkkrmaieysmpkwiidhwathygleetetilsflettsttv  
ranltrasliddiiek1qde  
gydvkdhd1pyclhiggqpihsrsfdgfvsiqdkssmfvahimvdrhdhvl dacsapggkachiaevlmpgqvda  
sdihdhkidlinfnik1r  
lnikafqhdatkpydktydkilvdapcsglgvmrhkpeikytqskqhieslvelqleilenvknnvkiggeiystcti  
eq1enenviytflknknf  
efepfqhpitgelvktlqimpqdfnsdgffitkikrkdn  
>tr|A6U156|A6U156\_STAA2  
mafeg1ser1qatmqkmrgkgk1teadikimmrevr1alfadvnfkvvkefiktvseralgsdvmqsltpgqqvikivq  
deltklmggentsinmsnk  
pptvmmvg1ggagkttagk1al1mrkkyknkpm1vaadiyrpaainqlqtvgkqidipvysegdqvkppqivtnalkh  
akeeh1dfviidtagr1hi  
deal mnelkevkeiakpneimlvvdsmtgqadvnvaesfddqldvtgvtltkldgdtrggaalsirsvtqkpikfvgmse  
kl dg1el fhpemasrilg  
mgdv1s1iekaqqdvdekakd1ekkmressft1ddf1eqldqvknlgplddimkipgmnmkmgldklnmseqidhik  
aiiqsmtpaernnpdt1nv  
srkkriakgsgrslqevnr1mkqfndmkkmmkqftgggkgkkgrnqmnm1kgmnlpf  
>tr|A6U161|A6U161\_STAA2  
mlkkwlnsnvkqffvitfsviltlilfsthiydivngtvfsgagdgfrqmpfqmylyeh1ssfsslydasfglggdy  
mkg1syys1splmwlnf1  
fikigetvgifnpttihfwptnqlimamiraiitfvvtfylfki1hfk1rstnmiatilygmstviyfnftwsfygnlly  
llp1silgleryfqarkig  
ifivaialt1fsnfysyqaiiigcylyrliftykydivsrtqkficvisatv1sv1ssvfglftgisaf1endrkn  
pnvdipfltp1dyhyfffs  
dgyfytisiltiva1l1sfklyrfyfyrlfaivtwilfigslsqyfdsafngfsfperrwyilalsssalcglfiqhlst  
lnmkyylirtipvsia1l  
yv1l1s1ph1al1ivgi1llmvlavilkfslwrykkltvailvlivmiqqivil dnnknmaikpyqqs1stlkqhdysny  
vnq1likkinqnatgpfnr1  
dymdyal1nspfiyhyngislyssi fngdilkydyktlqinmpidknstyr1lgnrqnl1slwnvdnirvnhddn1pyr  
fk1nsehkdnkvrwi1hskn  
tihypsahitnkvfsnkelksp1dkeqam1qg1vsntkdvnthfkankn1l1sdstik1nssawqsptkhl1lqvknngg  
1tvq1pksvsnqfkdl1yfe  
md1el1spdkahdvkvnetyqernk1tykyrrfvtpvtirikasdri1sl1pkgyrvn1kgygedyttlkdasnslea  
vkvs1tkqgyt1tknkss  
gyiv1ptaynqgmkatsgdqs1kvaqngvmtgikapknitkiqlsytppyyyl1titifgiicsiiftrwarqk  
>tr|A6U166|A6U166\_STAA2  
mnkqgskvrysi1rkvsigil1sigmflal1gmsnkayadeidkskdft1rgyeqnvfakselnanknttkdiknegavkt  
sdts1kl1dnksaisngnei  
nqdikisntpknssqgn1lvinnneptkeikianleaqnsnqkktknvtnnyfgyysf1reapktqiytvkkgdt1saial  
kykttvsn1qntnnianpn  
li1figqk1kvpmtpl1vepkp1ktvssnksnsnsst1nylkt1enrgwdfdg1sygwqcd1lvnywnhlyghg1kgygkad  
ipyannf1nseakiyhntpt  
fkaepgd1vvf1sgrf1gggyghtaiv1ngdydg1mkfqs1dqwnnggw1rkaevahkvvnyendmifirpfkka  
>tr|A6U168|A6U168\_STAA2  
mtladnlvivespakaktiekylgkkykviasmghvrd1prsqmgvdtednyepkyitirgkpvvkelkkhakkaknvf

Tsompanidou\_et\_al\_Supplemental\_FASTA\_File

lasdpdregeaiawhlski  
leledskenrvvneitkdavkesfknpreiemnlvdaqqarrildrvgynispvlwkkvkkgl sagrvqsvalrlvid  
reneirnfkpeeywtiege  
frykkskfnakflhyknkpfklktkkdvekitaaldgdqfeitnvtkkektrnpanpfttstlqqeaarklnfkarktmm  
vaqql yegidlkkqgtigl  
itymrtdstri sdtaeakqyitdkygesytskrkasgkqgdqdaheairpsstmrtppdmksfltkdqyrlykliwer  
fvasqmapaildvtvsl dit  
qgdikfranggtikfkgfml yvetkdds dsekenl pkleqqgdvttatqiepaqhytqpppry tearlvktleelkigr  
pstyaptidtiqkrnyvkl  
eskrfvptelgeivheqvkeyfpeidveftvnmelldkiaegditwrkvidgffssfkq dveraeemekieikdepa  
gedcevcgspmvikmgryg  
kfmacsfnpcrntkai vksigvkcpkndgdvverkskknrvfygcskypecdfiswdkpi grdcpcnqylvenkkgk  
ttqvicsncdykeaaqk  
>tr|A6U175|A6U175\_STAA2  
mgdkilm litffkkkieanykysirvlailpiimlks  
>tr|A6U1A3|A6U1A3\_STAA2  
msiaiiavgse lllggiantngqflskvfneigqnvlehkvigdnkkrlessvrhalekydtvil tgglgptkddltkht  
vaqivgkdlvidepslkyi  
esyfeeqqemtpnnkqgal viegstv lanhhgmapgmmvnfenkqi illpgppkemqpmvknellshfinhnriihsel  
lrfagigeskvetilidli  
dkqtnptiapl agshevyirltanadskeqaqsl iqpvkqeildrigeyygsddt lieqavikkihepfviydgitnga  
lyhr lkevd lndvlkgmin  
hnenfvdinkpieqq lkdavqfvnklfnvssai illeydgvvhigydnnefkteqfkmksk srnlknrsqnyvlirlln  
wlrtn  
>tr|A6U1B9|A6U1B9\_STAA2  
malstfkrehikknlnrdeydlvi iggitgagial dasergmkvalvemqdfaagtssrstklvhgglrylkqf qigvv  
aetgkerai vyengphvtt  
pewml pmhkggtfgkfstsiglmydr lagvkkserkkmlskketlakeplvkkeglkgggyyveyrtddarltiev mk  
raeekgaeiinytksehft  
ydknqqvngvkv idkltnenytikakkvnaagpwwdvrsgdyarnnkklrltkgvhvvidqskfplgqavyfdtekdg  
rmi faipregkayvgtdt  
fydnikssplttqedrly lidainymfsvnvt dediestwagirpliyeegkdpseisrkdeiwegksglltiaggklt  
gyrhmaqdi vdlvskrlkk  
nygl tfspcntkg laisggdvgsknfda fveqkv dvakgfgid edvarrlaskygsnvdel fniaqtsqyhdsklplei  
yvelvysiqgemvykpnf  
lvrrsgkmyfni kdvldykavidimadmldyspaqieayteeveqaikeaqhg nnpavke  
>tr|A6U1C0|A6U1C0\_STAA2  
mmtekqfkl tvqdn tnievknvftdvdskgi ihi fhgmaehmerydklaha lskhgfdvirhnrhrg hini destrghyd  
dmkrvigda fevaqtvrgn  
vdkpyi iighsmgsviar lfvetyppqyvdgl isgtgmyslwkg lptvkvlqlitkiygaekrvewvnqlvsnsfnkkir  
plrtqsdw issnpi evdnf  
ikdpysgfnvsnq llyqtaymlhtsq lknmkm ln hampillvsgydds lgydgk gilklaniyrkagiknvkvnlyhkh  
rhevl fekdhkiwedl fk  
wlnqfykk  
>tr|A6U1C8|A6U1C8\_STAA2  
mncydei fntikklienkeissyqinkytgis ygninamrrgerrienlslknakilyeyakkvl  
>tr|A6U1D3|A6U1D3\_STAA2  
mfkvnysil syypeyni avswqr lregktiknki  
>tr|A6U1D4|A6U1D4\_STAA2  
mltl iklkedeqviiyeyipeddi sngksvtnkkdaevdfs lseieneeyfml yrnksfsvvrdfiekqefpenyki  
awy  
>tr|A6U1D7|A6U1D7\_STAA2  
meqiklktftaetlellekninaflsseatnklv nitikeieertfpnneefnailt lsvnk  
>tr|A6U1E1|A6U1E1\_STAA2  
mkflkdtsiaeissilyl ifpiagiffnevygpkwlyi isvivfsl sylilvivnrlntlmfy illiihyfiicyfvfs  
vhpm lslfffysafavpft  
fknnvkkatn lfilmiictiityllynyfvammvyvvislim ldnfkkmknreyqkeiaeknrhintliaeqerhr  
igqdl hdtlghvfas lslk  
selaykl idtdevkvaellainklsreslnkvreiddvklpsfieeidsirkv lkdadidftfenkelaqvl sptkqs  
mlvmi treainnvikhana  
skvhgklktvnnhk lllmi eddgk gidscevksisqrqh lngtlavdstngtkiieistggia  
>tr|A6U1E5|A6U1E5\_STAA2  
msfyvvl iiiiavaligilvlnqrysnskidtevyarkqlikknka lsaenaelsqmlssnndvghhayknakrelrkil  
dsylengk lkyydiivtsn  
latkhpffeyarsfdfiivsdiglinvdvkswgektfyhfdvpdehdtemsn sniekvvghyisqqyhdqfnssrksiyt  
ftetvqpnrv iydfydydp  
yqlaannakal kdhieqnf nfkvqstgviyfsdgtvni iqgseerdkyvd tvstksl rriiseaie lskhplnkeqv dq  
itai fk

Tsompanidou\_et\_al\_Supplemental\_FASTA\_File

>tr|A6U1E9|A6U1E9\_STAA2  
mrrwqglveefkahlpvnentpkltnegntplihcenmskilgidlyvkyeganptgsfkdrgrmvmavtkakeqgkiv  
icastgntsasaayaara  
glkaiivvipegkia lglksqavmygaeivsiegnfdealeivkeiaksgieilvnsvnpfriegqktgsfeivqqldgea  
pdilaipvgnagnitaywk  
gfkeyheakgsq lpkmfqgaegaspi vqnkvknpetiatairignpaswdkatnal kesnglidsvtddeileayqlm  
ttkegvfsepasnasiagl  
iklhrqgklpqgkkvva l tgn glkdpdtaisl dnpikplqndkdsiidyikgal  
>tr|A6U1F4|A6U1F4\_STAA2  
msqqdkkl tgvfghpv sdrensmtagprgp lmqdiyfleqmsqfdreviper rmhaksgafgtftvtkditkytnaki  
fseigkqtemfarfstvag  
ergaadaerdi rgfalkfyteegnwdlvgnntpvfffrdpklfvs lnravkrdrptnrmrdannwdfwtglpealhqvti  
lmsdrqipkdl rhmhgfgs  
htysmyndsgervwvkhfrtqqgien l tdeaeaiiatdrdssqrdl feaiekgydkwtmyiqvmteeqaknhkdnf  
dltkvwyhdeyplievgef  
elnrnpdnyfmdveqaafaptni ipgl d fspdkmlqgr l f sygdaqryr lgvnhwqipvnpqkgvgienicpfsrdgqmr  
vvdnnqgggthypnnhgk  
fdsqpeykpfpptdgygyeynqrqddnyfeqpgklfr l qsedakeriftntanamegvtdvkr rhi rhcykadpeyg  
kgvakalgidinsidlete  
ndetyenfek  
>tr|A6U1G0|A6U1G0\_STAA2  
mfvki l tqnissdk l l iqt nvl gvemmfynkyknvsty i i i l vssaafaif l l sanvsahseqvyemtdhqikntink  
ayehkdpntngeqrdgkvf  
alin  
>tr|A6U1G1|A6U1G1\_STAA2  
msndlnierinelakkkkevg l t qeeakeqta l rkaylesfrkgfkqientkvidpegndvtpekikeiqqkrdnkn  
>tr|A6U1H0|A6U1H0\_STAA2  
mqvgdgpqqreigfpi stdnaswrgpnieaggksvynnvqvgvgrnkfceni isvplpske  
>tr|A6U1H5|A6U1H5\_STAA2  
mnkqnnysdds i qvleg l eavrkrpgmyigstdkr gl h l h l vyeiv d nsvdev l ngygneidvtinkdgsisiedngrgmp  
tgihksqkptvevif tvlh  
aggkfgqgykts g l hgv gasvvnal sew l evei hrdgsiyhqs fknngspssglvkkgkktktgtkvtfkpddtifka  
stsfndvlser l qesaf l  
lkn l k i t l n d l rsgkerqehyhyeegikefvsyvnegkevlhdvatfsgeangievdfafqyndqysesilsvnvr tk  
dggthevgfktamtrvnd  
yarrinelktkdnl d gndi reg l tavsvripeel l qfegqtksklgtsearsavdsvadklpfyleekgqlskslvk  
kaikaqareaarkareda  
rsgkknkrkdt l l sgl t paqsknteknelylvegdsaggsak l grdrkfqailplrgkvintekar ledifkneeinti  
ihtigagvgtdfkiedsny  
nrviimtdatd gahi qv l l l t f f f k y m k p l v q a g r v f i a l p p l y k l e k g k g k t r v e y a w t d e e l n k l q k e l g k g f t l q  
rykglgemnpeqlwettm  
petr l i r v q v e d e v r s s k r v t t l m g d k v q p r r e w i e k h v e f g m q e d q s i l d n s e v q v l e n d q f d e e e i  
>tr|A6U1I4|A6U1I4\_STAA2  
mkiknkqgdfyhtqievalfvfkeligmhlmkny  
>tr|A6U1I7|A6U1I7\_STAA2  
mttv l f v g l g l i g g s l a s n i k y h n p n t n i i a y d a d t s q l d k a s i g i i n e k c l n y s e a i k k a d v i i y a t p v a i t n k y l s e  
l i d m p t k p g v i v s d t g s t k  
amiqqhesnl l khn i h l v s g h p m a g s h k s g v l n a k k h l f e n a y y i l v y n e p r n e q a a n t l k e l l s p t l a k f i v t t a e e h d  
yvtsvshlphivasslvh  
vsqkngqehhlvnl aaggfrd i t r i a s s n a q m w k d i t l s n k t y i l e m i r q l k s q f d l e r l i e s n d s e k l l s f f a q a k s  
yrdalaakqlgg l n t a y d l  
yvdi p d e s g m i s k v t y i m s l h n i s i s n l r i l e v r e d i y g a l k i s f k n p t d r e r g m q a l s d f d c y i q  
>tr|A6U1J3|A6U1J3\_STAA2  
mmklkfcgftsikdvtaasqlpidaigfihyekskrhqtitqikk lasavpnhidkvcvmvnpdlttiehvlsntsinti  
qlhgtesidfiqeikkkys  
siki tkalaadeni qn i n k y k g f v d l f i d t p s v s y g g t g q t y d w t i l k h i k d i p y l i a g g i n s e n i q t v n q l k l s h q g  
ydlasgievngrkdiemt  
ainivkgdrdne  
>tr|A6U1K3|A6U1K3\_STAA2  
mhki fsknn l i f f v f a f i f v v i v l q f f v s s e n a t k v n l s q t f e p i s w l h l l g t d d y g r d l f t r i i g a r s t l f v t v l t l  
iaivvigvtlg l f a g y k k g  
wierlv l r f i d v g l s i p e f i i m i a l a s f f q p s l w n l v i s i t v i k w m n y t r l t r s i v n s e m n k p y i k m a q l f h v p t r t i l i  
rh l t p k i i p a i i v l m v v d f  
gk i i l y i s s l s f i g l g a q p p t p e w g a m l q q g r d f i s s h p i m l i a p a s v i a i t i l i f n l t g d a l r d r l l k q r g e y d e s h  
>tr|A6U1K6|A6U1K6\_STAA2  
msqglplredvpvsetwdlvd l f k d d q q y e s i d a l v k q a n q f h t y a t t l n s i e q i n t a l a e l e n i l i a l d r l s n y a e l  
r l s v d t s n i e a q v l s a k l s  
ttygkivsq l s f v e s e i l e l p e e i l q q l e e s c p y q h y i k q l i k q k p f q l s a s v e q v l a t l s p t l n s p y d l y g t t k m l d i t

Tsompanidou\_et\_al\_Supplemental\_FASTA\_File

fdsfehgdttypvdyatfe  
ndyednkdperrksfksfsgdirkyqhttaatynmqvqqekieadlrgfesvidyllhsqevtrdmfdrqidmimrdla  
pvmqkyakllqrihgldnm  
rfedlki svdpdyepeisiedsknyi fga lsvlgddytnmlreaydqrwidfaqnkgkdtgafcaspyfthsyvfi swtg  
kmaeafv lahelghaghft  
laqkhqpyleseasmyveapstmnemlmanylnfntsdnprfkrwvigsilsrtyyhnmvthlleaayqrevyhkvdqge  
slnaptlneimlnvykqff  
gdavdmtgae ltwmrqphyymglysytsagltigtvvsqkiknegqpavdawletlkkggsvspvelaniagvditte  
qplkstiqyisd lvdevk  
ltdeieqann  
>tr|A6U1M0|A6U1M0\_STAA2  
mtatwsvnkklf lqna itvknnp l mavvknnayhydlefavtqfihagidtfsttslreaiqirqlapdatifl mnavy  
efd lvrehqihmtlpslty  
ynhkn dl agihvhlefenllhrsgfdlneikevlkdhhnqnakmi isglwthfgyadefvsvdynversqwmeivea  
llseyqfdlihaqnsasf  
yregqillphhtharvgialygsrpysslnqhdivqsltvkahviqvrevqagdygcysfafevtknntklavvdigygd  
gilrtrakhealingkryp  
iralmshmfvevdgnvhaqdevilyndirideytfkgvganseqlsamhds lkkeyisndc  
>tr|A6U1M8|A6U1M8\_STAA2  
mnkntwvigftlfamffgagnlifppnlgl dsgqffwpailafvltgiglp llgvivgal dkegyigalnki spkfsilf  
liiyltigplfaiprtas  
tsfemiti pihsnsialfifti yfivvlyiclnpsklidrigsl ltp lllitilamiikgyldfsgnsagkgnealy  
hsnfssfaegftqgyltmd  
aiaaiafsmi vnavklgtgiktqnifkqtltagliaavalifiyislgyignhmpvsdmtldqlkskdrnigtyllttm  
asigfgsfkgyl lgiiva l  
aclttacg l iavseyfhrivpkvsykafvlvfilmfianqglnavismsipvlsivypvaitvlliliakfiptkr  
isqqipviivfilsifsvi  
sklgwlkinfieslp l rayslewfpvaiiatilgy lvgifvkqdpikyqge  
>tr|A6U1P0|A6U1P0\_STAA2  
mddkqhtsssd deraeiatsnq d qetnsskrvh lkrwqfisi l igttlitavitvvayifinqisglnktdqanlnkie  
nvykilnsdykkqdsdcl  
skaaidgmvkelkdpysel tkeqtksfnegvsgdfvgigaemqkndqimvtspmkgs paeragirpkdvitkvngksi  
kgkaldevvkdvrgkente  
vtltvqrgseekdvkikrek ihvksveykkkgvgvitinkf qndtsgelkdavlkahkdglkkivldlrnppglldea  
vkmanifidkgktvvklek  
gkdteaiqtsnds lkeakmdisi lvnegsasasevftgal kdynkakvygsktfgkgvvqttrefkdgsllkytemkw l  
tpdghyihgkigkpdvtid  
tpkyqslnviptktfkvgddd kniktikig l salgykvdnestqfdqalenqvkaqqanklevtgef nketnkftel  
lvekankhddvldk l inil  
k  
>tr|A6U1Q1|A6U1Q1\_STAA2  
msril tfseqnalakiddl mntycnqcpiktr l rklegkthahfcinecsigkeikql gnelq  
>tr|A6U1Q3|A6U1Q3\_STAA2  
mgpnteadeksaynnvqvgdgpqqreivfpi stdnaswggttk  
>tr|A6U1Q8|A6U1Q8\_STAA2  
mtntvtlqtahivslgdieeakasikpfi rrtpliksmylsqnitkgnyvlklenmqftgsfkfrgasnkinhlsdeqk  
akligidati vmpetapiakqnatkgygakvilkgknfnetrlymeelakengmtivhpyddkfvmagqgtigleilddi  
wnvntvi vpvggggl iagi  
atalksfnpsihi igvqaenvhgmaesfykra ltehredstiadgcdvkvpgektyevvkh l vdefilvseeiehamqd  
lmqra kii tegagal ptaa  
ilsgkidkkwlegknvvalvsggnvd ltrvsgviehgl niadtskgvvg  
>tr|A6U1Q9|A6U1Q9\_STAA2  
mlvavvkelkqgegrvactpenvrkltdaghkviveknagigsgfsndmyekegakivtheqaweadlvikvkephesey  
qyfkknqiiwgflhl assk  
eivekmqevgyta isgetiikngkael l apmsaiagqrsaimgayyseaqhggqgtlvtgvhenvdipgstyvi fgggva  
atnaanvalgnakviie  
lnddrikyledmyaekdvtkstpen laeqikkadvfistilipgakppklvtremvksmkkgsvlidiaidqggtiet  
irpttisdpvyeegviyh  
gvpnqpgavprtstmalaggnidyileicdkglea ikdnealstgvniyqgqvtnqglasshldykeilnvie  
>tr|A6U1R1|A6U1R1\_STAA2  
minkeql d llylkkveksrneal lhtinqvikkvylqqytcsfvghfsagk stlinllieq dilpsspvttsntaiv  
svsdnhdianlpnqtyak  
l snydevremnrqnvdesveinfqsakfengft l qdtpgvdsnvashqs iteqymytsnmi fytdynhvqselnfkfm  
khindvgipvvfiinqidk  
hqddel sfstfksrveksiadwgik lertfyvskfdhpenelvlssylisl dqhretiedytsrtveyiteaqldyiqs  
ei qevledlgi eeafeqa  
flnsqqhqa iseeaq llnnpdelmaf lknkrkni lenayimphnmrem lrsylesmsqdfnvggffnkkkkklqiqqqrl

Tsompanidou\_et\_al\_Supplemental\_FASTA\_File

ltatdalqehvnqqirgpm  
redmsfvtrfrinkkeasdkmvlngydvkpemiedlyqpqtsisntyvltfsdevvkaikkyveqqstpifkeienvqad  
elpteessddlkeyqrytel  
nelrqslltknyrhyyihlidesldkligrqettyqvattndtqdnrdnqqlnqntattnmsidiqkvldiisdvplfkrtk  
qdihetltridnklikigv  
fgtfsagksslinallgehilvsspnpttaatteisygdesyitlksqsqlldeinavveyqdisfstieefinwdlek1  
kshlnknqlafiqavekhy  
klyvnm1engekhainqqelkkwsaedeyatfvktvhialmhdwlkgkiivds1glhsnnqrhtneteqiltssdlilyv  
syfnhsftdndkafiehm  
dmnqlnenqafkmvinaadlaesqddleavetyvsdalrqlvhlqsdi favssrnalqaedkgidqlkqsiqqfvdesks  
ileqqmihqlqqmdrsyve  
mitefetnkadisrrgqr1tdykdqqr1qhqlidat1qhtdneveeqvyhlnar1klq1l1ddvksvfnsqmtqnsdfnee  
kkvstkvyl1dqihqr1fle  
qs1iterikkyfnk1tkq1api1vqqlad1hvivnpqfnfesanieqpl1hidfndm1nalpkq1tkrkil1npngqrdih  
esicqst1gl1qpqmg1lr  
qqlelyvqmaveaesqfesfeaniqtqind1lafdl1dt1l1nq1kdkhq1ktily  
>tr|A6U1R2|A6U1R2\_STAA2  
mkn1fnplqr1hfyaa1fiapl1it1tisgigylffpevenniykneffgdsdvkthqt1ndavhqveqqyegffvskvs  
1ldepynkrit1sdmagnq  
ryv1ldhnnqfvadqnakhtysnmrsihss1ftentiinylvel1tacwtifmilsgty1likkhlisnkskalrwqkwh  
amigv1iaipvf1v1vtg1  
pwsqfmgsk1agmmdtngd1ggela1nppksd1nel1p1watrknkqpassek1gssghh1gnaampqtk1dyqisidkvvvq  
aqkag1kkpfs1ivypsdkn  
gtfiv1sntsngvtg1dvspykeq1lyfdqysgk1gtikyddygiakwftwgipl1hegh1fgilnkiin1fvcit1lv  
aigmgfvswikrktntavk  
vphrvkkpasis1iic1liv1gl1mpl1fg1sl1ilvfielilyikdrakq  
>tr|A6U1S0|A6U1S0\_STAA2  
mtn1tkevfdn1leqe1dvfaknka1gsseakpy1deyhski1dyfkqvnditsnidfdn1nqypvvpmmfkerydymier  
kyhfmgyrqmktfk1telik  
mnasyqtr1knkqv  
>tr|A6U1S6|A6U1S6\_STAA2  
ms1tkvkasnmdks1lfeqarpi1leqi1qngfeayyv1ggsvr1dyvmgrni1hdid1ttsatpdeies1fsh1tipvgkehgt  
invvfndenyevttfraee  
dyvdhrrpsgtfvrd1yed1lqrrdftmna1amdtayk1lydyfdgqqdinnri1rtvgiaerfqedalrmirc1lrfqsq  
1sfdiametfeamrtqmad  
ikfls1eriviel1tkl1mrginveesfnh1ks1kafn1ympyfeq1dmnqinvtepidle1liaivsvkfdinys1kplk1s  
nrqvkdingyiqimnalps  
i1tkeq1kmfvdydydt1n1iknvmvaadv1kandi1qgheplivn1qtidet1hr1lpmhnrkdmmvnggv1mah1naksgpw  
1kdvl1rqieia1vtgkvsn  
eetei1kwvdnhvki  
>tr|A6U1U5|A6U1U5\_STAA2  
msvtn1niarevd1vtknv1cnnsrkmhy1r1ssyysnvkvay1rgf1fyksikfyyniscreq  
>tr|A6U1U9|A6U1U9\_STAA2  
msnnfkddfeknrqs1dt1nshq1dtedvekdqse1lehqdtienteqqfpprnaqrrkr1rd1atnhnkqvhn1esqtsedn  
vqneagt1ddrqvesshst  
esqepshqdstp1qheee1yynknafamdkshpepi1edndkhetikdaen1tehstvsdkskaeqsqppkpyfatganqant  
skdkhddvtvkqdkdeskd  
h1sgkkgaa1gagtagvagaag1amgvs1kakkhsndaqnsnsdksn1stedkasqdkskdhngkkgaa1gagtag1agg  
a1ksasaaskphasnas  
qnhdehdnhd1rdkerkk1gmmakv1lp1iaav1i1galai1fggma1nnhngtkenkiantnkn1nadeskdkdtskdaskd  
k1skst1dsdkskedqdkatk  
desdndqnnanqannq1annqnnq1qqanqnnq1qqqqq1rqqggqrhtvngqen1lyria1qyygsgspenveki1rrang1sgnn  
i1rngq1vip  
>tr|A6U1V9|A6U1V9\_STAA2  
mkkf1gsv1att1il1ggcs1mnesskdtntetk1svpeemeaskyvgqgf1qppaekdaie1fakkrke1fekvgeqffkdn  
fg1kvkatnvv1gkddgvev  
yv1hedhgivfnas1plykda1hqkgs1mrsndngddmsmmvgtv1sgfeyraqkekydn1ykffkenekkyqytgftkea  
ink1tqnvgyqneyfy1ityl  
srn1keyrky1yep1ihkndkefkegmqrarke1dytansntvat1fstndkknrkekin1nvid1sekiertkdpiknti  
ttq1gnk1ligtkkarfddk  
kvvsfgafede  
>tr|A6U1W0|A6U1W0\_STAA2  
mmsr1nsvvik1wl1ti1il1vttv1il1lsialit1fmqyyftqetenai1redarriss1veqshnkeeaikysqt1lienpgg  
1mi1nnkhrqstas1snik  
kq1mlnevvndh1fddv1fdkgs1vtrnvtikekgssqty1il1gyptkaqknshskysgvfiykdlksiedtnnaitiiti  
tavi1fl1tittv1aff1lssr  
itkpl1rr1rdqatr1vsegdysykpsvttkdeigq1sqafnqmsteieehvda1stsknirdslinsmvegvl1ginesrq  
i1lsnkmandimdnidedak

Tsompanidou\_et\_al\_Supplemental\_FASTA\_File

afllrqiedtfskqtemrdlemnarffvvttsyidkieqggksgvvvtvrdmtnehnldqmkkdfianvshehtrtpisl  
lqgytesivdgi vtepede  
keslavvldeskrlnrlnvne1lnvarmdaeglsvnkevqpiaalldkmkikyrrqaddlgl nmtfnyckkrvwsydmdrm  
dqvlnlidnasrytkpgd  
eiaitcdenesedilyikdtgtgiapehlqqvfdrfykvdhaartrgkqgtglglfickmieehggsidvkselgkgttf  
iikl pkpe  
>tr|A6U1X6|A6U1X6\_STAA2  
mnkgwwkeavayqvyprsfndshdgidlpgmidkldylkdldgldviwlspmfkspnddngydisdyqeimdefgtmed  
fdcllkgihdrgmkli1d1  
vvnhtsdehpwfiesksskdnprkrdwyiwqdpkpdgsepnnwesi fngstweydanteqyyfhlfskkqpdlnwgnpevr  
davfemmnwwfdkgidgfr  
vdaitthikktfeagdlpvpegktyapafdvdmnqpgiqtwlqemkdrs1skydimtvgeangvspddaddwvgeengkfn  
mifqfehlglnwsgdshfd  
vnsykvlnrwqkqknkgnal fienhdqprrvstwgdddkiywesatshaavyflqqgtpfiyqqgeigmtnypfesi  
etfndvavkndyqivkaqg  
gdvdallakykdenrdnsrtpmqwddt1nggftngepwpfvnl nyktinvaqqledehsvlqfykdliqlrksndvyvyg  
qfdlvdaensqv faytrt1  
nekqvlivgnltnheaelvtpfd1shgevk1fnydakvnlkqlrpyeacvie1n  
>tr|A6U1X8|A6U1X8\_STAA2  
mdkvii1glvtkqsilifiqtfilifgl nfsmkvlflsfyaivctn11tflervtk11lyrgwkrfpmqkltgdd  
>tr|A6U1Y6|A6U1Y6\_STAA2  
mktgeqisfhdkhnnvwyivkivskywcdsd  
>tr|A6U1Z9|A6U1Z9\_STAA2  
mnfkeikelieil dkst1teini edtkgkvtlkkeketeiitpqi sqmpveaaampmpqaqstdsnkteapkptsdnhkt  
inapmvgtfykspspdeea  
yvqvgdtvsnettvcileamklfnei qaeisgeiveilvedgqmveygqplfkvk  
>tr|A6U210|A6U210\_STAA2  
mm1taiyfsiftfyisqyslklktlyni eddynkiv111kegethes  
>tr|A6U212|A6U212\_STAA2  
mksykckgsflidsmagfliliglit111ipmmnqm qasinhklqsidaskvilttvskinkeelkkgvtigkydikqsdq  
qicaisknttsyqktciqy  
>tr|A6U213|A6U213\_STAA2  
mqirkgsaftmiemlvmm1lisif111tmtskgl snlrviddeaniisfite1nyiksqaianqgyinrvfyensdtikv  
iennkirflklkvvgkiinv  
akvdiiafdkkgnikfgsitidnnsiyriifhiekgriryek1  
>tr|A6U214|A6U214\_STAA2  
mfkflkktqaf1liem1lv11iis1111iipniakqtahiqstgcnaqvmvnsqieayaalkhnrnpssiedliadgfi  
keaqtkcksgetitisnge  
avan  
>tr|A6U256|A6U256\_STAA2  
mifsqnlfrcptptcivcrnwesnsvlgptpqlalpveflfeilcvgap11  
>tr|A6U272|A6U272\_STAA2  
maennqslvtkiatygsfiaiasfvilfisisflkfsfniefiatimnicrytlilgfilmslpdvvdknikkiifdafi  
iivfiff11  
>tr|A6U277|A6U277\_STAA2  
msikilqpglfstvdglgrigyehigfsgagamdqsfkvaqslinndgpaieytligptiqfntqntfvitggsinas1  
nnktismnsvilaekgd1  
kigaitkgvrgyltfghsinvpsiaesyathtrssiggfkgkrk1landvitvkinndfkenigktihlqdd1lpennih  
ilqppqfeafseearakiv  
nhpyliteqsdrgyrlegdsvapinqadiisevalgsqvvpndgqpi11lndkqtiggytkiatvckfdlplklaqmkp  
kdtiqfkwi sfqeavdknr  
eqmslfneilkshqktpi fdtss1rhtskk1stilkgd1  
>tr|A6U282|A6U282\_STAA2  
mtellvtpks1shmetlidgadafvigeqkfglr1pgefnrqqmteavalahkndkkvyaavnglfhnyhldavedyin  
flheirvdriifgd pavvm  
yvkaqenpip1hwnaetlvtnhfqcnywgkrasravlare1n1deinikensnveievqvqgmtcmfqskrml1gnyy  
tfqdrqmkierrndeql1  
lydeerqnnypvyedyngthimspndiclieelapffea gidsfkidgilqteeyinvvteqyrqaidlynedpei yede  
kfmli dpieei qpdhrpfd  
egflykqtvy  
>tr|A6U289|A6U289\_STAA2  
midqqtiiyqi qngkieealqalfgnieedptiieny inagivladaneiekaerffqkaltidpkngvvfy nlanvyyn  
qqryqeaiklyqgalqtei  
eqvdcnymigmafnglesfk1alpylmtaaeldkdkdaevqfyglvlcqlemfneaitqlkhvltidknhvdarynlg1  
alfmknedi deaithfkea  
vtidpkh11sqhal kftkmkeee  
>tr|A6U296|A6U296\_STAA2  
msteplasrmpknideiisqhlvgpkgi irrmvdtkk1tsmi fypppgigktsiakaisgstqykrq1navtntkkd

Tsompanidou\_et\_al\_Supplemental\_FASTA\_File

mglvveeamsgqvllld  
eihrldkakqdfllphlengkivligattsnpyhainpairsraqifelypIndedvrqaltraieddenglkytqpkid  
edamtyfstqsgdvrnal  
nalelavlsadndkdgyrhvtlqdakdc1qkgafvsdkdgmhdvmsafqksirgsdvnaalhyllarlieagdlptivr  
rllvisyediglaspnagg  
rtlaaiesaelglpearip1sqavie1c1spksnsamsaidsalsdirnghvgqipnh1kdghyqgakdlgrsigykyp  
hgyvngyvsqqylpdklkn  
kiyyepkttksseqqlkeiynn1lkqrp  
>tr|A6U2C0|A6U2C0\_STAA2  
mrrfvalsiltiiallvi1lfrvg1silrfliyvg1vl1lciylgyqglw1l1dffqinsgflphfqfn  
>tr|A6U2C8|A6U2C8\_STAA2  
mkikemtsemprer1lshgaks1sntellailintgrkgfssidisnellksasn1nelkkssindlikvkgiglqkai  
t1kaafelgermgrraenn  
rik1tqpsdvadymp1tmkd1tqehf1l1n1sknv1ketcvfkg1l1nssivhpreifsiavrenanai1avnhhpsgd  
v1tiv  
>tr|A6U2F5|A6U2F5\_STAA2  
mpkvig1tggiasgkstvsellsvfgfkvdadkaareavkkgsg1aqvrevfgdeaidengemnr1ymgd1vfnhpek  
r1elnai1hpi1vrdimeee  
kqey1kqgynv1mdip1lfenelent1devwvytsesiqmdr1mqrn1s1ledakarvysqisidkksrmadhvidnlg  
dk1e1kqn1er1leeegy1  
ekpnygeed  
>tr|A6U2F6|A6U2F6\_STAA2  
mpe1pevehvkrgepyvinqkiehvi1fsdkviegkaqgketiikgie1dtfkt1segytitnverrskyivfqldnkre  
qrtl1sh1gmaggffivde  
ledimipnyrkwhvifelsndkkl1ysdirrfgeirnavsasyps1fleiaepftneal1tyy1nr1hqqs1knkpk1q  
v1ldhkvi1agcgn1yacea  
1fragv1pdkkvkd1thqqqemvfyvrev1eegikhggt1s1dyrhadgktgemq1h1nvyk1pvckvcgsq1etk1ia  
trnshy1cpvcqk  
>tr|A6U2I1|A6U2I1\_STAA2  
md1n1tm1i1i1i1lfgfiaafidsvvggg1l1stpa1la1gl1ppsvalgtkn1lassfg1l1smikf1rsgkvd1fvvak1f  
gfv1lasacg1aiatmvps  
q1lkp1l1i1i1al1ssvfi1ft1l1kkdwgn1tr1ft1qft1fkka1i1faal1fi1ligfydgfvvggt1g1sm1fv1l1vfgdf1saagn  
akv1nfasn1gal1vl1fmv1  
gqvdyv1g1l1ma1smi1agsyt1gahfa1kqgvgykv1f1i1itail1l1knafdy1qqfv  
>tr|A6U2I3|A6U2I3\_STAA2  
minerev1f1i1yl1dnaattkafeev1dty1l1kvnq1sm1y1nps1phkag1qanq1l1qqakaq1inam1nsk1nydv1vftsgat  
esn1al1k1giayrk1fdt1k  
ei1tsv1ehpsv1evvry1leahegf1kvkyvdvkkdgs1n1ehfke1lvsdkvg1lvtcm1yvnnvtgq1ip1qpmakv1knyp  
kahf1hdavqaf1gk1smd1  
nnids1s1sghk1fng1kgggv1lvnhi1q1nveptv1hgggqeygvr1srgt1vnl1pndiamv1kamkianenfeal1nafvte1lnd  
vrqf1nkyhgvy1nsstsg  
spfv1n1s1fpgkge1v1nafsky1dimi1sttsac1sskrnk1nev1laamg1sdksiegs1r1l1sfgatttkediarfkeifi  
i1yee1kellk  
>tr|A6U2J1|A6U2J1\_STAA2  
mkk1ilfdvdg1fl1seercfdvsal1tve1l1mdkcy1gl1hshidwet1tdndi1qdirnr1fqdkil1nk1ks1gl1nsnwdm  
l1fivf1sih1lidi1lkk1shd  
eieaf1myqdepve1kl1qni1stn1adcfn1neq1lp1qf1dnkv1gknni1yaa1eefatte1hvsdat1lfs1lkgalwt1laqe  
vyqewy1gsklyedvekki  
art1fktgyiyqei1l1rpvdevkv1l1nd1kgagfel1giatgrpytet1vvpfen1gl1lpyfeadfiatasdv1eaenm1ypq  
ar1plgk1npfsy1iaalygn  
nr1dkyesy1inkqdn1vnkddv1fivgds1ad1l1saqkigat1figt1tg1kgkdaage1eahhadyvin1h1gelrgv1dn1  
>tr|A6U2J7|A6U2J7\_STAA2  
mnkhhpk1lrsfysi1rkst1gvasvivst1flitsq1hqaqaentntsdki1senqnnatttqqpkdtnqtqpatqpvi1ta  
knpaades1kdaikdpa1  
enkehdi1gpreqvnf1q1l1dknnetqyyhffs1ikdpadvyytkkkaevel1dintastwkk1fevyennqk1l1pvr1lvsyspvp  
edhay1irfpvsdgtqelki  
vsstq1iddgeetnydytk1lvfakpiyndps1lvsd1tndavvtndqsssdasnqtntntsnqntst1tnnannqpqattnms  
qpaqpk1ssanadqassqpa  
hetnsngntndktnessnqsdvnqyppades1qdaiknpai1dkehtadnwrpi1dfqmkn1dkgerqfyhyastvepatv  
iftktg1pviel1glktastv  
kkfevyegdkk1pvel1vsydsdkdyay1irfpvsngtrdvkivssi1eygenihedydyt1mvfaqp1itnnpddyvdeety  
lqk1l1apyhkakt1erqvy  
e1lek1qek1lpekykaeykkk1dqtrve1ladqksavtefenvtptndq1l1dl1qeahfv1feseensesvmdgfv1ehpfyt  
at1ngqkyv1mktkdds1yw  
kd1ivegkrvt1vskdpknnsr1l1fpy1ipdkavynai1kvvvvanigyegqyhvri1inqdintkddds1qnntsep1nvq  
tgqegkvad1tdvaens1ta  
tnpkdasdkadvi1epesdvk1dadnni1dkdvqhdvdh1sdmsdn1hfdkyd1lkemdtqi1akdtdrnvdnsvgmssnvdtd  
kdsnknkdkv1q1lahiadk



Tsompanidou\_et\_al\_Supplemental\_FASTA\_File

nnhtgkaakldvkvqnyntdkvtdkkttehlpdsdihtktdkvtkkekagtpskenlqsqskmlpktgettssqswgw  
yallgm1alfipkfrkesk  
>tr|A6U2L2|A6U2L2\_STAA2  
mmtklkyiipiiavaiviistisiiqfinrkrynpvkvlnvksyfmnvkgsyivyepfvhpetdkyrlvyqggittik  
ngqnihydfyadaytgevi  
niver  
>tr|A6U2M2|A6U2M2\_STAA2  
mnl1kknkysirkkykvgifstligtv111snpngaqa1ttdnnvqsdtngatpvnsgdtnvannrglansaqntpnqsat  
tnqstnqalvnhnngsian  
gatptsvqsstpsaqnnnhtdgnttatetvsnannkdvvsnttlvnpnktngsgghl1t1keiqedvrhssdkpelva  
iaeqasnrpkrsrraapa  
dpnatpadpaaaaagnggapvaitapytptdpnannagqnapnevl sfddngirpstnrsvpsvtvvdnlpgftlingg  
kvgvfshamvrtsmfsgd  
aknygaqgnvia1grikndtndhgd fngieks1tvnpnselife fntmttknyqgvtn1iiknadndtviaeksvaygp  
iwr1fkvpensh1kiqfv  
pkndaitdargiyqlrdgykydfvdsig1hsgshvyverrtmeptatnkeftvtts1knngnfgasfntddfvykvql  
pegveyvnns1tkdfpssn  
sgvdmndfnvtydaanrvitiktstggsgnspar1mpdkild1kyklrvnnvptprtvtfndt1tyktytdfinspaes  
htvstnpytidiimnkda1  
gaevdrriqqadytfasldifnd1krraqtildenrnnvplnkrvsqadids1tnqmghtlirsvdaenavnkvdqmed  
1vnqndeltdeekqaaiqv  
ieehkneiignigdqtddgvtrikdqgiqt1sgdtatpvvkpnakkairdkatkqreinatpdatedeida1nqlat  
detdaidnvtatnadve  
iaknnginti gavvpqythkqaardainqatatrqqinsnreatqeeknaalnel1tqatnhaleqinqattnadvdnak  
gdgl1ainpiapvtvkkqa  
ardavshdaqhiaeina nnpdatqeerqaa1dkvnaavtaantnilnntnadveqvktnaiqqiqaitpatkvktdakn  
aidksaetqhntifnnda  
t1eeqqaqq11dqavatakninaadtnqevaqaqdqgtqniiviqpatqvktarnavndkareaitninatpgatre  
ekqea1nrvt1knraltd  
igvtsttamvns1rdavngigavqphvttkqtatgv1nd1latakqeinqntnatteekqvalnqvde1atainning  
adnaevdqaq11gtkain  
aiqpni1vkkpaa1a1qinqhynak1aeinatpdatndeenaint1nqdrqqaiesikqantnaevdqaatvaennidavq  
vdvkkqaardkitaevak  
rieavkqtpnatdeekqaavnqinq1kdqainqinqnqndqvdt1tnqavnaidnveaevvikptaiadiekekavkekq  
qidns1dstdnekevasqa  
lakekekalaa1dqagtnsqvnqaatngvsai1iqpetkvkpaarekinqkanelrakinqdkeataeerqvaldkine  
fvnqamtdi1tnrntnqvd  
d1tsqa1dsialvapehivraaardavkqqyeakkqei1eqaehatdeekqvalnqlannek1alqinqavtndvkrve  
tngiat1kgvqphivi1kpe  
aqqaikataenqves1kdtphatvde1deanql1sdt1kqaqqeientnqdaavtdvrnqtikaieqikpkvrrkraald  
sieennknq1dairnt1dt  
tqderdva1dt1nkivnti1kndiaqnktnaevdrtetdgdndikvilpkvqvkaarsvgvkaeaqnalidqsd1stee  
erlaakh1veqalngaidq  
inhadktaqvnqds1daqni1skikpattvkatalqqiqniatnkin1likanneatdeeqniaiaaqvekelikakqqias  
avtnadvay11hdekneir  
eiepinrkasareq1t1fndkkqaeianiqatveernsil1aqlqniydaigqidqdrsnqavdktas1n1qtihld  
vhpikpdaekt1ind1lar  
vtalvqnyrkvsnrnkadal1kai1alk1qmdeektartnadvdav1krfnvalsdieavitekens11ridniaqqtya  
kfkaiatpeqlakvkv1id  
qyvadgnrmi1dedat1ndikqhtqfivdeilaik1paeatkvspkeiqpapkvctpikkeethesrkvekel1pntgsegm  
d1plkefalitgaal1arr  
rtknekes  
>tr|A6U2N2|A6U2N2\_STAA2  
mqfdnidsal1mal1kngeti1vvdndenrenegdlvavtewmndntin1fmakearglicapvskdiaqrld1vqmvdndsdi  
fgtqftvsidhvdtttgis  
ayert1takkl1dpsseakdfnrpgh1fplvaqdkgvlarngh1teavdlak1tgakpagviceimnddgtmakgqdlqn  
fkekhq1kmitidd1ieyr  
kk1epeie1fkakvkmpdfgtfdmygfkatytd1eeivv1tkgairqhenvr1hsac1tgdi1fhsqrcdcgaq1lessmkyi  
nehggmi1y1lpqegrig1  
1nk1raye1ieqgydtvtan1al1gfded1rdyhaaqil1kyfniehin11snpskfeg1kqygidiaerievivpetvh  
hdymvtkk1kmgh1i  
>tr|A6U2N5|A6U2N5\_STAA2  
mrvai1gmgtagsv1relvkhpkfnqldid1yddkvmggqvpfnqds1sell1nmpskkms1n1ddete1fwkwykqtd  
fnfdepay1prfvfghymk  
sylsmftkkypni1stnyknqveiytnsnidetn1tyyictt1nseqswqaydyv1l1tcgtfayhdpyn1kgkkgyiatpyp  
tynt1devne1ddia1igt  
g1as1dvrvyvaahpk1pi1tm1tsrsah1psvrgtmidvtfkyl1tkdk1ndikkhhfngap1dtiv1fl1kecaeydidf  
kk1lvhrrtgnhiad1kydl

Tsompanidou\_et\_al\_Supplemental\_FASTA\_File

arptemgi fqs mie h l k e n l n w i n s l s i e d q h q f n q k y s k m i q l n s n p m p r t a e l i e l i e n k s l i l k k d l e d v k h d g  
k l y y f s y k n g e s v d m y n v v  
i n a t g a k s h l n e l d q d d q l i k n l e n r q i v q a h p m g g i q i i p e t n q v i s p r f g t l t n m i a i g q m t n g v n k l r n g v k m i v e q  
v a h t v s q l y d a l e s n e q q q  
r s y n q  
>tr|A6U2N6|A6U2N6\_STAA2  
m t y k e l a t f l k v l s d s s r l e i l d l l s c g e l c a c d l l a h f q f s q p t l s y h l k a l v k t n l v t t r k i g n k h l y q l n h n i f e s v  
i n n l s k v h t s n q r c f c h n l  
k t g e c  
>tr|A6U2P5|A6U2P5\_STAA2  
m s r s k k y f y l s s l m i i l s f f f n t n n v f l s g f f n s f i k l i l f c s v i n s i v l i l s i i f a d r s i k s l k p d a d w i r i a s k s l p w  
i i l i v i l v h i f s i v r t f g f  
i  
>tr|A6U2P7|A6U2P7\_STAA2  
m i s i i l v m i g g g f g a i a r s a i t d y f n h k f t s k l p i a t l i v n l v g s f l i g l t i g l s i s i s w f p a f f v t g f l g g l t t f s t l a  
k e l t l m m t p k f d i n l f l n y  
s l l q f i i g f i a c y i g y h i  
>tr|A6U2P8|A6U2P8\_STAA2  
m i q n t f g y l p e y i v a d a g y d s e q n y m a i i d d f n k t p l i t y g m f i k d k t r k f k s d i f n t q n w k y d e l n d e f i c p n n k r i g f  
k r y a y r n d r y g f k r d f k l y  
e c d d c s a c s l r q q c m k p n s k n k k i m k n y n w e y f k a q i n q l s e p e t k k i y s q r k i d v e l v f g f m k a i l g f t r m s v r g i n  
n v k r e l g f v l m a l n i r k i a  
a q r a v h y k i h i k k a d f y q i i n r n q l f y i a  
>tr|A6U2P9|A6U2P9\_STAA2  
m e v k t f y n g n t m p q i g l g t f r v e n d e n c m e s v k y a i e q g y s i d t a k v y g n e e q v g a g i r a g l e s t g i a r e d l f i t s k l y  
f e d f g r e n v a a a y e a s l r  
l g l k y l d l y l v h w p g t n e a v m v d t w k g m e d l y k n n k a n i g v s n f e p e h l e a l l a q v s i k p v i n q v e y h p y l t q h k l k l y  
l a a q h i v m e s w s p l m n a q i  
l n d e t i k d i a q e l g k s p a q v v l r w n v q h g v v i i p k s v t p n r i s e n f q i d f e l s d e q m t r i d g l n q d k r i g p d p k t f e g  
>tr|A6U2Q8|A6U2Q8\_STAA2  
m k k f l k f k g m k i c l m l y l l i f l s s c g t n n k i v g r f e i q q h e t i g s i y f s a d y a h i r g i e k g t a k y f i d k v g s k r y l f i  
e y i p d n v l n c k p d f w k t l k  
y k k d k v t y y v y l i e n l d d e v f h l s a l q d m n r i p i d i a d d v a t m g s p h q n d r m t l k l n k n  
>tr|A6U2S7|A6U2S7\_STAA2  
m i r f d v n g s d h a n p p n n e r i p t p h i h i y t e e y n n g g i a i p l k d i e d l e l t d e i e s l d f f m k y t n i k h d n v i k e p r l l  
>tr|A6U2S9|A6U2S9\_STAA2  
m k k l s t v i i l i l e i v f h n m n y v n a q p d p k l d e l n k v s d y k n n k g t m g n v m l y t s p p v e g r g v i n s r q f l s h d l i f p i e  
y k s y n e v k t e l e n t e l a n n  
y k d k k v d i f g v p y f y t c i i p k s e p d i n q n f g g c c m y g g l t f n s s e n e r d k l i t v q v t i d n r q s l g f t i t t n k n m v t i q e l  
d y k a r h w l t k e k k l y e f d g  
s a f e s g y i k f t e k n n t s f w f d l f p k k e l v p f v p y k f l n i y g d n k v v d s k s i k m e v f l n t h  
>tr|A6U2T3|A6U2T3\_STAA2  
m l n v l l i l n l i a i c s v n n a y a n e e d p k i e s l c k k s s v d p i a l h n i n d d y i n n r f t t v k s i v s t t e k f l d f d l l f k s i n w  
l d g i s a e f k d l k v e f s s a  
i s k e f l g k t v d i y g v y k a h c h g e h q v d t a c t y g g v t p h e n n k l s e p k n i g v a y k d n v n v n t f i v t t d k k k v t a q e l d i  
k v r t k l n n a y k l y d r m t s d  
v q k g y i k f h s h e h k e s f y y d l f y i k n l p d q y l q i y n d n k t i d s s d y h i d v y l f t  
>tr|A6U2T8|A6U2T8\_STAA2  
m k k l y t s y g t y g f l h q i k i n n p t h q l f q f s a s d t s v i f e e t d g e t v l k s p s i y e v i k e i g e f s e h h f y c a i f i p s t e d h a  
y q l e k k l i s v d d n f r n f g g  
f k s y r l l r p a k g t t y k i y f g f a d r h a y e d f k q s d a f n d h f s k d a l s h f f g s s g q h s s y f e r y l y p i k e  
>tr|A6U2U3|A6U2U3\_STAA2  
m f l c k r q i d i n a r f g l p r i a f m s a v a t i m f l v s y e v m y f l s n t p l s d r h f l i f l l l v f m t y p l h k s i h l l f f l p y r k s f  
k v h k l t k r k w l i f y n t y v n  
q p v h k f y f c i n l i l p l i i l s a m f v y l t i s f p q y g h y f m f l l a l n f g i s i t d l l y l k i i i f s n y g q y i e e h s t g i n i l k k i  
k n p y h l  
>tr|A6U2W2|A6U2W2\_STAA2  
m k c l i r f i l v l g l l i s s a m v y i n p t a h a e q d q t w e k i k e r g e l r v g l s a d y a p m e f e h t v n g k t e y a g v d i d l a k k i a k d  
n n l k l k i v n m s f d s l l g a l  
k t g k i d i i s g m t s t p e r k k q v d f s d s y m m t k n i m l v k k d k v n e y k d i k d f n n k k v g a q k g t e q e k i a q t e i e n a s i t s l  
s r l p d v i l a l k s g k v e g a v  
v e k p v a e a y l k q n p k l g i s n v k f n e e k d t v i a v p k d s p k l l s q i n k t i k e v k d k g l i d k y m t n a a n a m n d d s g f i s k y g  
s f f l k g i k i t i l i s l i g v a  
l g s i l g a f v a m k l s k i k i i s w i a s i y i e i l r g t p m l v q v f i v f f g i t a a l g l d i s a l v c g t i a l v i n s s a y i a e i i r a g  
i n a v d k g g m e a a r s l g l n y  
r q t m k s v i m p q a i k n i l p a l g n e f v t l i k e s s i v s t i g v e i m f n a q v v q g i s f d p f t p l l v a a a l y f v l t f v l t r i m m  
i e g r l n a s d  
>tr|A6U2W7|A6U2W7\_STAA2

Tsompanidou\_et\_al\_Supplemental\_FASTA\_File

m1qkgeqfpi fklengdgtvitndtlkgkkaiiyfyptryntptctteacdfrndlemfndldvavygisgdskkkhqnfiekhglnfdllvdedfklak  
etgvyq1kksfgkesmgivrttffiideqgkvl dviekvkvktqieelkn1lg  
>tr|A6U2X4|A6U2X4\_STAA2  
m1dnii lyfkn1phtkryvter1kqswwsflivlaacliliiasetlfsfshltdvkevrwlfriialivfavlmftiyi  
syhhymndf1vtklfnisa  
atpvvimsilsfimlvi1tmisalvkpvnfetsyialfyfivmatifvglisvtfglir1l1tekinii fygvclci111  
piifipnphvfinhilml  
npmyyivngiaqsii fgissmenipyhfyfilflcliaavnflarytthaiynktskvtqtdnqqdvsndstdeadts  
>tr|A6U2Y4|A6U2Y4\_STAA2  
mtneekvlai reklnivnggl1dpekyknaneeltdiydfvqsrer1spsevtaiadalqglrhd  
>tr|A6U336|A6U336\_STAA2  
mklehitkkygsnv1ndidfdfgdsrivgligkngvgkttimkvmngniikfdgkviddnadnigfliehpkydnksg  
lyn1klfaqlgkqfdkay  
tdkiidafgmrpy1kkkvkkyismgmqkklaiavslmnpkflil1deptngmpdgsidvlttikslvnelmdrilissk  
ledielicdravflrdghf  
vqdvnmvegvastt1vtvdhkdfrteky1aehfq1qnvdkadghlminaqnyqvilkalseldiykyietrksslr  
dtyfninqrgdk  
>tr|A6U340|A6U340\_STAA2  
mkhltkifvvlaii1fiigyylqatnesqgik111aaimfmicafisrsndrrknsk  
>tr|A6U343|A6U343\_STAA2  
mimmvkktksnslkkvat1alan111vgaltdnsakaeskkddtd1klvshnvym1stvl ypnwr11t  
>tr|A6U354|A6U354\_STAA2  
makeiinnterfilvqidkegtervvyqdfgtsfttsemvnaqdfkseenakkiaetlnllyq1tnkkqrvkvvkeve  
rsd1spevtvntetv  
>tr|A6U364|A6U364\_STAA2  
msvkvtdkalerelekhfgikemvkvqdkaliagakviveiekkq1kpsedsgal1seigrtepewikgkrvtirwrg  
pferfrivh1ienghvekk  
sgkfvkpkamgginrai rggqnkyfet1kre1kk1  
>tr|A6U368|A6U368\_STAA2  
mtin1setfanaknefinavnngpqrqnel ygdminql feetklqakaeaervss1pksaqt1sanqrnffmdinksv  
gykeek11peetidrifed  
1ttnhplladlgiknaglr1kflksetsgvavwgkiygeikgq1daafseetaiqnkltafvv1pkd1ndfgpawierfv  
rvqieeafavaletaf1kg  
tgkdqpi glnrqvqkgvsvtdgaypekeeqgt1tfanpratvnel tqvfkyhstnekgsvvvkgvntmvvnpsdafevq  
aqythlnangvyvta1lpfn  
Inviestvqeagkv1tyvkglydgy1aggi nvqkfket1aldmdlytakfaygkakdnkvaavwk1dlkghkpa1edt  
eet1  
>tr|A6U369|A6U369\_STAA2  
mkveikgvi vnsedkwvyem1gmdstcpkdv1tq1efsdedvdi i insngnlvageseyth1rahkgkvnvritaiias  
aas1iamagdhie mspvar  
mmihnpssi aqgeakdl nhaet1ehvgqimaeyavragknkqeli emmaketwlnadeaieqgfadskmfendnmqiv  
asdtqv1skdvlnrvta1v  
sktpevnididai ankvi ekinmkekeseidvadsk1sangfsrflf  
>tr|A6U371|A6U371\_STAA2  
m1snkyvdeyin1wkqgkii1nkerid1fny1qthiysrddvyfdeqkiedcikfiekwyfpt1pfqrfiianiflidkn  
tdeafftefaifmgrgggk  
ngl1saisdf1stplhgvykeyhisivansedqaktsfdeirtvlmdnkrnktgktpkapyevskteiinratksvirynt  
sntktdggregcvifdei  
hyffgpevmvnrkgglgkkknrrtfyistdgfvregyidamkhkiasv1sgkvknsrlfafyck1ddpkevddrqtweka  
nplhkp1seyakt11sti  
eeeynd1pfnrsnkpefmrkm1pevd1ekviapweilatnreipn1dnqmciggl dfanirdfasvg11frknddyi  
w1ghsfvrqgf1ddvklep  
pikewekmgl1ti vdddvieieyivdwflkarekyglekviadnyrtdivrrafedagiklev1rnpkaihgl1lapridt  
mfakhnviygdnp1mrwft  
nnvavki kpdgnkeyikkdevrrktdgfmavhalyraddivdkdmska1dalmsidf  
>tr|A6U373|A6U373\_STAA2  
m1vntpgskkskaiki1ger1gsk1rdnfnkpcitppl1tilrqvmkwr1  
>tr|A6U381|A6U381\_STAA2  
mmnnreqieqsv1sasayngndtegl1keiedvykkarafdeildgmtnaiqhsvkegiel deavgimagqviykyeeeq  
gk  
>tr|A6U397|A6U397\_STAA2  
m1ldhdcvrh111eietnkkigep1teynfkdnvfgkydfetvmya11kleeakyvsvkfgwedghiygytinditwsg  
hef1dnirdnhtwkevkkv  
ankttsmsvt11sklafny1tqkfn1t  
>tr|A6U398|A6U398\_STAA2  
mqaqnkkyiyydeegnrrpvniqyndgydlmidqrfiemt1erhph1knnfyglidgkefkld  
>tr|A6U399|A6U399\_STAA2

Tsompanidou\_et\_al\_Supplemental\_FASTA\_File

mqa1ktsnigemfnigekegeiaisarelykalevkkrfswaeinlkhfkenrdftsvltstvvngavrqlledya1  
tldvakhvammstgtekqgd  
freyfiqvekawnspemimqralcianntinqletkierdkpkivfadavattktsilvgelakiikqnginigqrrlfe  
wlrqngflkrkgvdyndmp  
tqysmerelfeiketsithsdgthsisktpkvtgkqqyfvnkflgekqtt  
>tr|A6U3A0|A6U3A0\_STAA2  
mkllvtlkdgskkhvsvd1kkivfpgyegietvtkeeietffldptktyvfvgsqtlsvaeagqiltvefs  
>tr|A6U3A1|A6U3A1\_STAA2  
meqitltkeelkeiiakevrnaikgekpissgai fskvrinnddleeinklnfakdlslgrlrlklnhpiplkkyqhgf  
sihqkayvqvdvdhirklt  
lsifgvtlnsdlseseynlaakvyreiknylyiyekrvseltdffe  
>tr|A6U3A2|A6U3A2\_STAA2  
miynfdysllyermaeyrsqsslanaipisrtsinhklqgknlftqweikricelleipptkvgryyffeqnvqkpvqms  
>tr|A6U3A5|A6U3A5\_STAA2  
mdfkevdi nieewemveipfyteeeltyrlngl pitkseleeqesk  
>tr|A6U3A6|A6U3A6\_STAA2  
mstykeieh1hintggkeltqeqieeakafidsqefkdmireakeshqrvmeskidtrkl  
>tr|A6U3A8|A6U3A8\_STAA2  
msenkgemthniekrinklktsgnpgkfkldsdihyllkrfegeknhkgfypkfkqgeivfvdfginvnkefsnshfai  
vmnkndsntedivnvipls  
skenkky1kmnfdlkweyylrlflnlisqnnsailekfvdkkyqknntefitkdyfsefidsleienklnkidrninn  
ivsaikvkk1kgnsyaci  
nsfqpisrkfrkvlpqkiknpvidssdimllinrinnilqipdir  
>tr|A6U3A9|A6U3A9\_STAA2  
mkrtrcydggkqwefkyegkryrkkgfrtkreansagldklnelrsgfnidnyitleeyfenwiktykqpvvcentyrhy  
rnalqhiqkhkiqkme1sk  
inrqvyqkfindskehaketirktngairsalddalydglifknpaykvnykagkptksekekfisvteyeilkdhvrk  
krtrsslalfimictgrv  
sgarnikiehinqvktifiderktdtspryisiaksdmkhimdvistfaisydgyifkeagsiinlqainnalksacr  
nnipiitshalrhthcsyl  
lakgvsihyiskrlghkniaittsvyshlleekfneedkkttkilesm  
>tr|A6U3B3|A6U3B3\_STAA2  
mttfsekekiglladive1qtenneidvcnylkdldkydikseilkvnehranivaeigngsplalsghmdvvdagn  
qdnwtyppfq1tekagkly  
grgttdmkggmalvit1ie1keqnqlpqgtirllatageekeqegaklladkgylddvdliaeptgsgiyahkgs  
sckvtatgkavhssvpfig  
dnaidtllefynqfkekyse1kkhdtkheldvapmfksligkeiseedanyasgltavcsiiinggkqfnsvpdeaslefn  
vrpveyndfiesffqni  
indvdsnk1slidpsnhrpvtSDKnsklittikdvassyveqdeifvsalvgatdassflgdnkdndv1aifgpgnplma  
hqideyiekdmylkyidif  
keasiqylkek  
>tr|A6U3B7|A6U3B7\_STAA2  
mtr1waslltviiylsqflpllvkklpvfvygsieltkaviyiq1vlfliaattiilinkiknptklelevkepky  
iipwallgfalvmiyqmv  
sivltqiyggqvspntekliiarkipififfvsiigplleeyvfrkvi fgelfnaikgnrivafiiattvsslifala  
hndfkfipvyfgmgvifsl  
ayvwtkr1avpii1hm1qngfvvifqllnpealkkateqanfiyhi fip  
>tr|A6U3C5|A6U3C5\_STAA2  
mtewtreeryqriedvdtteyftklqqvdqskfrqqfhiqpetgllndpngl ifykgyyvshqwflgavhglkywyny  
tsddl infkpegpilnptd  
kydshgvysgsafeynghlymytgnhrdnhwqrhasqmiarlkedgsvekfpkpvisqqpegytshfrdpkvfkygeky  
yaiigaqndqqgrlllyn  
tediinwhy1geintelddfgymwecpdyfnldnqdvilicpqqiepkgnqfkniyqsgyilgkfdieklyehenfvel  
dngfdfyapqtf1dekgr  
vl1gwmglpeieyptdneghwactiprvlnvengqlkqrpypaleklrhketalgyankftrklhpyegkqyeliidi  
ldndatevyfelrtsktss  
tliaynkrenkitldrdsqllptnvegtrstildtp1kqlqifvdtssieifcndgervltsrifptedal giktste  
sgqvy1qftkyd1kdehk  
>tr|A6U3C8|A6U3C8\_STAA2  
mksflysvayfiskdviklnafllfincqimktrew  
>tr|A6U3C9|A6U3C9\_STAA2  
mihelgtvgmvpfp1ieaqkmat1qsgdelkidfdctqateaipnwaaengypitnyeqidnaswtit1qkv  
>tr|A6U3D2|A6U3D2\_STAA2  
mil1q1nhisksfdgediftdvdfevktgerigivgrngagkstlmkiiagvenydsngvskiknlklyltqqmtlnsn  
atvfeemskpfehikrmes  
likeetdw1skhandydsdykthmsryes1snqfeqlegyqyeskiktv1hglnfseedfnkpindefsggktr1slaq  
ml1nepd1111deptnhld  
lettkwledylryfkgavi1shdryfldkivtqi ydvalgdvkryvgnyee fiqrdlyyqkrmqeyesqqaeikrlet

Tsompanidou\_et\_al\_Supplemental\_FASTA\_File

fvekni trasts gma ksr  
kilekmeridkpmldaksaniqfgfdrntgndvmhvknleigyqtaitkpsievskgdhiaigp ngigk stliktian  
qka lngdi tfgan lqigy  
ydkqkaefksskti ldyvwdqyplmekdirav lgrflfvqddvkkind lsggekar lqlal lmlqrdnvlildeptnh  
ldidskem legalqhfegt  
ilfvshdryfinqlankvfdltidggkmylgdyqyyiekveeaeal kahqeeqsvnvqahkksmeqssyhnqkeqrreqr  
klerqiseceneietlett  
ilqideqltqpevynnpkane laiqkdseqklehamskweelqqk1  
>tr|A6U3E9|A6U3E9\_STAA2  
makesksanev speqinqwi kehqenktndaqdklvkhyqklies laykyskgqshhedlvqvgmvgligainrfdmsfe  
rkfeaflvptvigeikryl  
rdktwsvhvprrikeigprikksdel taelerspsiseianrlevseevleamemgqsynal svdhsieadkdgstvt  
lldimgqqddhydltkrm  
ilekilpilsdrereiqctfieglsqketgeriglsqmhsr lqartaikk lqeaahk  
>tr|A6U3F3|A6U3F3\_STAA2  
meylkpkklktsfynkkyeyhnwylksmfirkffvqnleiviiiikllsfisifyls lkn tynrrliflvsyciqp  
>tr|A6U3H1|A6U3H1\_STAA2  
mkrpekiqnvkllsslgvnikktsrldiintl pasnkvsheik  
>tr|A6U3K1|A6U3K1\_STAA2  
minkkgvikldtkiwdvreyne dlqqypkineikdivlngg ligitetvyglaanatdeeavakiyeakgrpsdnpliv  
hihskvqlkdftytl dprv  
eklmqafwpgpisfilp lkpgy lcrkvs gglssvavrmpshsvgrqllqineplaapsanl sgrpspttfnhvyqdl na  
ridgivaqeqseeglestv  
ldctsfpykiarpgsitaamiteilpnsiahad yndteqpiapgmkykhsyntpltiitdieski gndgkdwssiafiv  
psnkva fipsea qfiqlcq  
ddndvkqashnlydv lshs ldeneni saayiygfelndnteamnrm lkaaghiikgcel  
>tr|A6U3L8|A6U3L8\_STAA2  
msekqgil dyietnkysyieishriherpel gneeifasrtlidrlkehdfeteiaghatgfiatyds gldgpaigfl  
aeydalpglhacghniig  
tasvlgailgkqv idqiggkvvvl gcpaeeggensakasyvkagvidq idialmi hpgnetyktidtlavdvl dvkfyg  
ksahasenadealnal dam  
isyfngvaqlrqhikkdqrhv gvil dggaani ipdytharf ytramtrkel dil tekvnqi argaaiqtgc dyefgpiq  
ngvnefiktpkl ddfaky  
aeevgeavid ddfgygstdtgnvshvptihphikigsrnlvghthrfreaaasvhgdealikgakimalmg lelitnqd  
vyqdiieehah lkgngk  
>tr|A6U3M0|A6U3M0\_STAA2  
mnilryllgigfsvigvlhft rerqfrni ipkclpl rktavltvgifeilfgla llikrpsqcl kntinlfllavfpani  
ymavkklplgdqklptwql  
ylrlpmqfv lmglikk1  
>tr|A6U3N7|A6U3N7\_STAA2  
mllstrekemiallikyhsqyitihdiaqqlavssrtihrelkgveayltsfsl tlerankkg lriagadsdlndlkqsi  
aqhqtidlsveeqkviij  
aliquakepvkqys laeqsvqtlakmldd leldlnkyqlslsrkrgegiylv gteskkreflsqlmvnnlnstsvysv  
ienhfvfhslnqihkdfvd  
lerifnverllmdylsalpyqltessyltltvhivlsisrikngeyvalnddiyds vqntfehkvase l adklgqi ydvt  
fnqaeiafitihlrgakrk  
nln dtslnnrceenkikafvkvem isgmtfadltdlv dgltlhlnpainrlqanietynpltdmikfkyprlfenvr la  
lndcwpdlifpeseiafiv  
lhfggsiknqgnrflni lvcssmgtsrllstrleqv fseieritqasvsdlksldlsqydgi istvnldidspyltn  
pllpdsdisyvaqflntks  
tfqethdkssnmikddvhvetkdvdgnts feneqtsyltsvfekhl sdekseqllhmrsgltllsvkivstevkqwq  
tyiadylygcdvindptsf  
aell eqrlidnpgwi l spypvaiph lrdnmikhpmilitvleep ltlpsiqndnqtikymismfip dndfmaslvsdlse  
flslklesidtfmenpge l  
etllrnkflerikkqfi  
>tr|A6U3Q7|A6U3Q7\_STAA2  
myhcyiifaliqltpfsm tvipviqlilsvailcde lllhi  
>tr|A6U3R2|A6U3R2\_STAA2  
mtvdnnkakqaydnqtgvnekereerqkqeqnqepqfknk ltsfdevvekiagiaarevkgildmkggltdtftnafss  
gnnvtqgvsvevgekqaav  
dlkvi leygesapki frkvte l vkeqvkyitgldvvevnmqvddvmtqkewkqkheknennnnerqglq  
>tr|A6U3S0|A6U3S0\_STAA2  
mmqk liaqiekgpffeklsrniylrairdgfisampvilfssifllia yvpni fgfkwdkgmeailmkpnytmglvaf  
lvagttaksltdsfnrkle  
stnqin fistmlaamcgflfl asdpakdggflsafmgtkglltaflsafvtvivynfcvkrnitikmpkevppnisqvfk  
dlipfsaviiilyaldlvi  
rnsfksnvaegi lklfeplftaadwigvtiifgafal f wfv gihgpsivepaiaaityanieanfkl lqagehadkiit  
sgtqmfi vtfggtgatlvv

Tsompanidou\_et\_al\_Supplemental\_FASTA\_File

pfmlmwmmtkskrnkaigrasvvtffgvnepilfgaplvlnpvffipfvlapivnvwifklfvevlgmnsfsvnlpwttt  
gplgiimgtgfglwsfvla  
itlilvddiityppflkvdyseildeegrkesndlkekvaanfdukkadsilaasgvsddaakasniteqtnvlvlcag  
ggtsgllanaInkaaeeyh  
vpvkaaaggygahmdimkeyqlilapqvasnyedikqdttrlgiklaktqgaeyikltrdgqaaldfvqqqfen  
>tr|A6U3S6|A6U3S6\_STAA2  
mthrlnkgnftlnkherldeiaklvnkkgirtneiveglvnsdmtvrrdlielenkgiltkihgarsnstfykeis  
hkekhrqiaekryiarka  
asliedgdtlffgpgttvellaeevnhhtlitiitncipvykillekqtahfrvyliggemrhiteafvgemanamleklr  
fskmffssnavnkgavmts  
tldaytqqlalsnsiekyllidhtkvgkedftsfcqlneltavvmdyedekvetiktyievvd  
>tr|A6U3T8|A6U3T8\_STAA2  
mdtsikngieikiafvqktekyfinnkelekkfyefekdivnpgkyynlgykntqalvsnfrentpnntlsfwhendqwk  
plfkrkakndfsnkwekv  
hiiwflaykkvpkivildkiaimyvknhadmkskfleieinrillyndnilqecslsqkflkqtdfyiityagiellkk  
yglekitlsnilyefksng  
lhqknfdgnk  
>tr|A6U3U7|A6U3U7\_STAA2  
medknsvivfnvsfgyqsasftlkdvsnipkgqwtstivghngsgkstiaklmigiervksgeifynnqaitddnfek  
lrkdigivfnqpdnqfvgs  
ivkydvafglenhavphdemhrrvsealkqvdmleadyepnalsggqkqvaiasvialnpsviiideatsmlpdarq  
nlldlvrkvksehnitiis  
ithdlseameadhvimnkgtyvegtateifdhaeeltrigldlpfpikinqlghqtsfltyeglvdq  
>tr|A6U3V4|A6U3V4\_STAA2  
mniilmglpgagkgqtaseivkkfpiphistgdmfrkaikeetelgkeaksymdrgevpdevtvgivkeriseddakkg  
flldgfprtieqaealnii  
mseldrnidavinieppeelmnrltgrriescgttyhlvfnppkvegicdidggklyqreddnppetvanrlsvnikqs  
kpidfydqkgvlnidgs  
kdisdvtkdvidildhl  
>tr|A6U3Y6|A6U3Y6\_STAA2  
mekmhitngehdafvksphngdlqltkwaetkkltgwyarriavgrdgevqgvaqlfkkvpklpytlcyisrgfvvdy  
snkealnalldsakeiaka  
ekayaiki dpdvevdkgtdalqnlkalgfkhkgfkeglskdyiqprmtmitpidknddelnsferrnrskvralkrgt  
tversdreglktfaelmki  
tgerdgfltrdisyfeniydalahedgaeiflvklpkeniakvnqelnelhaeiakwqqkmetsekqakkaqnmindaq  
nkiaknedlkrdlealeke  
hpegiylsgallmfagsksylygassnefrdfpnhhmqytmmyarehgattydfggtdndpdkdsehyglwafkkvw  
gtylsekigefdyilnqpl  
yqlieqvkprltkakikisrk1krk  
>tr|A6U428|A6U428\_STAA2  
mekvyvagaipevgklqehfevemyegkglvdkdtlikgvknatalisllstnvdkdivdagdkliianygagfnni  
dieyareksidvnttpkas  
tnatadlitglvlavarrivegdqlsrttgfdgwaplffrgrevsgktigiiglgeigsavarrarafmdvlytgprnk  
eekereigakyvldtllk  
nadfitinaaynpkmhhlidteqfkmkstylinasrgpivheqalvqalkdneiegaalvdyefepditddlkslnnv  
vltphignatfeardmmsk  
ivanaaisavqgekpgfvvn  
>tr|A6U429|A6U429\_STAA2  
mkiaiiagiggltaaallqeqghtikvfeknesveigagigigdnvlkklgnhd1akgiknagqilstmtvlddkdr1  
l1ttvklksntlnvtlprqt  
lidikiysvkddviftnhevthidnetdkvtihfaeqeseafdlcigadgihskvrsvnadskvlyqgytcfrgliddi  
dlkhpdcakeywrkgrvg  
ivp1lnnqaywfitinskenhkyssfgkphlqayfnhypnevreildkqsetgillhniyd1kplksfvygrtillgda  
ahattpnmgqgagqamedal  
ivlvncfnaydfekalqrydkirvkhakvikrsrkigkiaqyrsrlfvavrnrmmkmpnalaagqtkflykskek  
>tr|A6U430|A6U430\_STAA2  
mknkfk1ristlllivi1vvfavllivnetklfkndvnysfdeavsmqqgkgivqtkeedgkfveanneiakamtishk  
dndmkymditekvpmsese  
vnqllkgkglengkvflaeakeyevnviylvshalvetgngkse1akgikdgkkryynffgigafdssavrsyksyae  
keqwtspdkaiiggakfir  
neyfennq1nlyqmrwnpenpaqhyasdi rwadkiaklmdksykqfgikkddirqtyyk  
>tr|A6U434|A6U434\_STAA2  
mvg1krsskskmslpkklflwvfgilvilavvyvaakifitgnkihnp1drnhselrddkvs1ndgdptialfgvd  
sdadrkkkgggersdsimi  
1sinpktkkteivsiprdtraeivgrgtteki ahayayggpnmavkslek1mnvpidhyatidmdglhnmidsiggvdv  
sndtftvdgvrftkqqqth  
vngdqalkfirskeegagdfgrqqrqqivleamankiaspsithfns1mnei qnnvktldltlgl1ntirsnykdand  
tinkhqlsgqggiqsdgly

Tsompanidou\_et\_al\_Supplemental\_FASTA\_File

yfipseqskaestkllkdnle  
>tr|A6U443|A6U443\_STAA2  
mmgyiilfflagpvilgvnlgvpi fnkqtpfrvqrsfvvgsmiylilatigyflllqgkl  
>tr|A6U453|A6U453\_STAA2  
matqdprrtkfktteyekqeqevpglqsempapdcgetsyqghqrlqgykmlvtggdsaignraaiayakegadvainyl  
pseeqdaevrqviesgq  
kavlipgdi rdeqfnydlveqayqqlggldnvtlvaghqqyhddihgftteaftetfetnvypfwvtvqakaleykpgas  
itttssvqgynpsilhdyl  
aaskaaiisltsfseelgpkgrvncvappgfwspqlqsggppskiptfgqktpgragqpvelcgtyvllaseessy  
ttgqvfgvsggvqid  
>tr|A6U472|A6U472\_STAA2  
mieinaittlclacilyllgtaiavnvnflkricipaviggilfailvaal dsfgmvkikldasfiqdffmlaffttig  
lgaslklfklggkvlllyf  
mfcaisvignivgvs lakvlnikpllgltagsm megghnaaaygktiqlgidsal taalaaatlglvfggligppv  
vkiylikrynlpqhsddtf  
kdysqvaynehlskfnatevffiqftivvfc mavgsyfshlftaqtginvpiyvgs lfvavivrnisesfnfnivdiki  
tnqigdvalgifslalms  
iqliieiyklaipliiivlvqvvmilfavli lfrglgkdydaavmvggfighglgatpnamanldvitkkygns pkaylv  
vpivgaf lidligviving  
fiqwfs  
>tr|A6U477|A6U477\_STAA2  
mirnrvmnsvvnkyllhnrsimfkndqverffykreienrkhhkqpstlnvkanleklslddmqvfrfnfrhqidkkil  
yihggfnvlqpspfhwrll  
dkitl stlyevvlpipyktp efhiddtfqaiqrvydqlvsevghqnvvmgdgsggalalsfvqslldnqqplpnklyli  
spildatlsnkdisdalie  
qdavlsqfgvneimkkwaglp ltdkrispingtieglppvymfgggremthpdmklfeqmm lqhhqyiefydydkmvhd  
fpiypirqshkaikqiaks  
idedvtqnn  
>tr|A6U497|A6U497\_STAA2  
mavfskekkrgcivvietfkafvidkdesgkvtp tfkqlsptdlpkgdvlikvhysginykda latqdhnavvksypmip  
gidlagt iveseapggfekg  
eqvivot sydlgvshyggfseyarvksewi iklpdtltleesmiygtagyt aglaierlekvgmnie dgplvrgasggvg  
tlavlm nelgykviasg  
kqdvsdqlllelgakevidr l pveddhkklp asstwqacvd pvggeginyvtrlnhsgsiavigmatntyt nsvfphil  
rgvnilgidsvftamklrq  
rvwrrlakdlkpenl heikqv itfde lpeqlnkvinhenkgrividfgvdk  
>tr|A6U4A3|A6U4A3\_STAA2  
mniknkllwiapiatmiilvifslafypaynpkpkdlpigil nedkgtti qdkvnigkkledkll dsdsnikkwkvd  
sekdlekd lkdqki fgvai  
idkdfskdamsktqkvmsdskkeemqqkvasgeippqv vqmqkqkmgnqqvevkqakktivsegsslqgsqiasavltg  
mgdninaqitkqsl etlts  
qnvkvnaadingltnpvkvdneklnkvkdhqaggnapflmfmpiwigsivtsillffafrtsnnivvqhriiasigqmif  
avvaafagsfvyiyfmggv  
qgfdfdhpnriai fvafailgfvglilgvmvwlgmksvpi ffil mffsmqlvtl pkqml pesyqkyvydwnpfthyatsv  
rellylnhhielnstmmmf  
igfmifgavsslvsairkhstkrtevps  
>tr|A6U4A8|A6U4A8\_STAA2  
mltifi llllycaqcktsvflgvfinffysllpfqkystiigilsmilki smfyi  
>tr|A6U4B8|A6U4B8\_STAA2  
mykiniirsdsvyknilkapindrdsiftkeilvpfkkkfevqhmpiynddkqtmsaiqfldafqispkdlrmsdqmsiq  
ylnndfwsncekylkvaid  
qfsnysissqvsnyhftvllgdsqkplmylnknrggdggipgyimiy lvpststinsmksliahevnhmryqyidwdgg  
slieliiaeglaenyvesl  
ygkahigpwtntnwsrdnvkikntiynhlhkhifesmpyl ygd dinklqgrpivglshaagyacgyhlvkyflqktni  
pievattlpaqkii nevtel  
fwhthtl  
>tr|A6U4C6|A6U4C6\_STAA2  
msvdkygvlyligagpnpnyl tkkaerli readvilydrlnvnlilqyanltteiidvgkkpyakhiqqekinecivea  
arrynkvvrlkggdpaifg  
rvqeevdtlnfniafeivpgvtsasaavatmqtgl tmravaksvtfstghfdseenevdvna l vnggtlaiymgvkr l  
gkii aqiqytdidypiai  
vfqascfnfvvkgrlsnivgklehyaieakpggicigevvyt envsttsnptqqfyvvsgrhdalmlcehlydegyg  
c llnpndtsngtyhssqyd  
yydafikqqenvtyistdradantv lch  
>tr|A6U4C8|A6U4C8\_STAA2  
makqklvmignmagirtieeil erandlydi tvigkeypnynrimlsnilqnkmtveetimpyewyeehgielitnd  
pvievdranqsvttangie  
vsydklifatgskafvipvgstlpsvigwrtiddteqmmniaktkkkaiviggllglecarglldqgmevtvlhlaew

Tsompanidou\_et\_al\_Supplemental\_FASTA\_File

lmemqldrkagnmlkadle  
kqgmkfemqantteilgeddvegvkladgreipadlvvmavgirpytevakessglvnrnivvndvmqtsdsnvayavgec  
aehngkvyglvaplyeqgk  
vladhlnketngykgsttfts1kvsgcdlysagqivenaeikgieifnsvdnnykklf1kdgnvvgavlygdidgdrf  
ynmmkkgestedytlvs11  
tkggeeas1siadmaddeticgcngvdkgtivnaitengfttvevtaktkagnscgkckpqiiaqilqhtlgddfvaakp  
ag1cgctdltrdqivtqir  
akglktskevrhvlfnknkggpcrpainyylnmvyphdheaderesrfaneryhaniqndgtfsvipqmrvgvtdadql  
ir1gevakkyhvp1vkvtg  
sqrvglygvkkee1pniwed1gmrsasaygkkrsvkscvgkefcfrfgtqytr1girlektfeyidtpfkfkmvgvsgp  
rscvesgvkdfgiisveng  
fqiyignggtevekaef1ttvetedevik1cgalmqyretgiyaertapwlrr1gfenvkev1ldperqnelferimd  
akkaveaepweaitsnaqa  
rkifevekv  
>tr|A6U4D5|A6U4D5\_STAA2  
mvkkine1lksidrnga1egigkpek1ksn1tgyysrrinhehr1vytvddnhikiasckyhy  
>tr|A6U4D6|A6U4D6\_STAA2  
mar1nitfspqafedykyfqnnkngeed  
>tr|A6U4F1|A6U4F1\_STAA2  
mkmnk1vkssvatsmal111sgtanaegkitpvsvkvdktlykttatadsdkfiskiltnfikdkksydkdtlv1k  
atgninsgfvkpnndydf  
sklywgakynvsissqnsdvvnvdyapknqneefqvqnt1gytfggdisisng1sgg1ngntafsetinykqesyrtt1  
srntnyknvgwgveahkim  
nngwpgygrdsfhptygne1flagrqsayagqnfiaqhqmp11srnsfnpeflsv1shrqdgakkskitvtyqremdly  
qirwngfywaganyknfkt  
rtfks1tyeidwenhkvk1ldtketennk  
>tr|A6U4G8|A6U4G8\_STAA2  
mskegmkgigt1ad1hidrhknktsedy1ealveivkykk1dilliagdisnhyqlthqfitq1tkqldipvkfvpgnh  
dlwevesmttqdiwnnyks  
msqclvgkpfivneewai1ghtgwydysfaaqrfsl1eh1qkgkhygatwqdkeriswgisdn1skiaaeqvkkdilevg  
nrrv1lvthvvthpdfivp  
mphrifdfynaf1gtsdfnp1yamfdipysimghvhfrksvmdgrcylcpc1gyprqwrse1yqeineti1qie1  
>tr|A6U4H0|A6U4H0\_STAA2  
mal1eaf1l1f1favi1ssvinnrfpqi1tafiqialgvvifi1piqvd1qfnsevf1mfaviap11fvegthvsr1tklley  
rkpi11msal1vfatvvgv  
gyfihwiwpa1mpaafai1aailc1ptdavavsaitrgk11pkgsmtileges11ndaagi1sfkiaavtalvtgtfsl1fqa  
veqfi1stilgvl1gaiig  
fvvvririd1ltankglkdn1nt1tfiq11tpfvvyflae1vhasgia1vviag1ihglerdr1iraqtel1qmnyhqiwn1tf  
syalngfvfv1lgfmiptv  
vidifqtepdnfs1fliviti1liaiaiyacr1fwvyfwykd1fyf1kniqsy1deehdshetppsrvryafim1tmcgihgti  
s1smal1tpfi1tkgqafe  
yrnd11fiasfmv1s1li1aqiv1pl1itpsaed1tkg1mtyqsaki1fivqkvi1qhfkneskkdknd1nyrpv1nqyyge1  
f11nsep1nqntkelkr1  
ediakvietst1ler1idk1gkatyqdi1nnyrnive1ltethrtas1fvekf1anffkmlw1r1kamkhyka1lnkeskkqefens  
fkdvqkimr1jvnhni1lr1  
keeqnstn1v1evs1vinhy1dmsrs1kwraqrrkerqensqi1pqamf1nhk1lea1ylqrh1ldelirknkinnivaag  
ireninyneiv1s1lqskh  
>tr|A6U4H4|A6U4H4\_STAA2  
mkia1agsgal1sgfgak1fqagydv1lidgytshveavkqhg1lnitingeafelnipmyh1ndqrdesiydv1vfl1fks  
mq1kevmed1mkphidneti  
vvctmng1kheevi1aqyvaqsivrgvttwtag1espghsh11lgsgpveigel1vdegkenvikvad11neaelngviskd  
lyqsiwkkicvngtana1s  
tv1ecnmas1nessyak1liyk1tqeivhvati1dnvh1nvdevfey1vd1nekv1gahypsmyqd1ivnnrkteidyinga  
vat1lgkqrhieapvnrfit  
d1ihtkesqrhaq  
>tr|A6U4I2|A6U4I2\_STAA2  
mnkdkq1hndkin1sq1vl1lg1sg1igsgw1fgaweassiagpvai1swvl1gfl1vigtiaynyieigt1mfpqsggmsnya  
qythgs11gfiaawanvvs  
1vti1pi1eavsavqym1sswpwhwakpmy1lmengsi1stygl1lavyl1iivif1s11nywsvk11tsfts1lisvfk1lgvpm1t  
i1m1ml1sgfdtsnyghsas  
tfmpygsapi1faattasgi1fsfnsfqi1inmgseiknpekniargia1s1sisavlyi1lqstf1tsmpqsm1lqhs1gwn  
ginfnspfad1ai1lginw  
1ai1llyieafv1spf1gtgvsfvavtgrv1rameknghipk1flgkmnekyhiprvai1fnai1ismimvt1lfrdwgt1laavis  
tat1vay1tgpttvia1rk  
mgptm1rpf1rak1ikvmap1sfv1as1aiywamwpttaev1lii1lgl1piyff1yeyrmnwrntkkqiggs1wiivyliv1  
s1lsf1igskefkg1lnmi1hy  
pfdfi1vii1vval1fy1igt1ssfesvyfratr1ntkmres1lnneskssh  
>tr|A6U4I3|A6U4I3\_STAA2



Tsompanidou\_et\_al\_Supplemental\_FASTA\_File

mkinttggqihgigtqgdldiflgiopyaepvhndrfkhstlktqwsepidateiqpippqpdnkledffssqsttfehe  
dclylniwkqhndqtkkpv  
iifyygsfenghgaelyqpahlvqndiivitcnrylgalgylwsyfnkdfhsnnglsdqinvikvwhqfiesfggd  
annitlmgqsagsmsiltl  
lkipdiepyfhkvvllsgalrldtksarnkaqyfqqmrdyldtdvtslstddilmmaklkqsrqpskgldliyapi  
ktdyiqndypttkpifacy  
tkdegdiytseqkklspqrfidimelndiplkyedvqtakqqsraithcyfkqpmkqflqhlniqdsnaqlwlaefawh  
dtssahyrsayhil dmvfw  
fgnlqilaahqypttahlkflsrqmndlanfaksgkmpwpmynherryrtyq  
>tr|A6U4I4|A6U4I4\_STAA2  
msimr1ftfilsifivgmvemmvagimnmsqd1hvseavvgqlvtmyaltfaicgpilvkltnrfssrpvllwtllifi  
igngiavapnfsilvvgr  
iissaaaaliivkvlaitamlsapknrgkmiglvytgfgsanvfgvpigtvigdlvgwrytflfliivsiivgflmmiy  
pkdqeigrpvnheapshe  
nhvtskilrpaevakylitflvlansvtfvfinplilsnghdmsfvslallvngiagvigtslggifsdkitskrwl  
isvsifivmmllmnlilpg  
sglllaglfiwnimqwtstpavqsqviqhvegtdtsqvmsswnmsslnagigvggiigglvmthsvsqaitytsaiigalgl  
ivvftlknhyaktfkss  
>tr|A6U4J1|A6U4J1\_STAA2  
mkaadfsvtannfilvvdaghtrisnikalri  
>tr|A6U4J8|A6U4J8\_STAA2  
mfkfilkrialmfp1vivvsfntfl1tyitnenpavtilhaqgtpnvtpeliaetnekygfndp1liqyknwllteamqfn  
fgtsyitgdpvaerigpaf  
mntlkltiissvmvmtsiilgvvsalkrgkftdairsvafflta1psywiasiliiyvsvklnilptsgltgpesyil  
pvivitiayagiyrnvr  
smveqlnedyvlylrasgksitlm1hvlrnaiqvavsi fcm sipmimglvvieyifawpglgqlslkailehdfpviq  
ayvlivavlfivfntladi  
inalnprlregar  
>tr|A6U4K3|A6U4K3\_STAA2  
mnevngqlhs1vepgeatlnkvygcm1mkqpitkscfplcgl  
>tr|A6U4L4|A6U4L4\_STAA2  
mskeh1hfii fsd1lnfyiinyflifqnsdkfvkiyitnlfilyleihvild1  
>tr|A6U4L9|A6U4L9\_STAA2  
mmihskkl1lgiclv1liiliggciimtkinsrnaqikdtfnqtlvnyptknlddfydkegfrdqefdkrdkgtwiinsg  
myiqlkggalksramvlyi  
nrnrtrtakgyflisettedkgyvhnkdkkypvmernriiptkpitdek1kkeienfkffvqygnfkdfkdykdgdisy  
nnpvpsysakyqlnndyn  
vq1rkrydistkrapelk1rgsgdlkgssvgskelefnfvnrkeenvyfsdginfkpteemneqn  
>tr|A6U4M2|A6U4M2\_STAA2  
msr1lnfdnqslkkgfikdshkgnypk1lvnnknekv1stiidelqkctefyfsvafitesglas1kaqll1d1snkg  
vkgk1ltsnylgfnspkmy  
ge1lklknvevrltdiagfhakgyifehkdyssmvgssn1tsnalkvnyehv1lstmkngdlvsvknefellwqkst  
plteqwinskykesfeyrs1  
ek1aeveqtqml1adkvkksveivpn1mqaealrslkairdtkdkaliisatgtgktilcaldvrevnpnkflfivhne  
gilnrakeefkkvlpiknd  
sdfgl1tgkhrvdakylfatiqtlrddnfnkqfdenefdyivfdeahrsaastyqrvfnyfkpkfmlgmtatpersdel  
sifelldyniayeir1qaa  
lesdilcpfhyfgvtdyvhhgikeddvtklryltsdervnyiiqktdyygysgeilqglifvsskkeaydladklsskgi  
ksvaltgddsvnyrqvie  
k1kegkinyiitvd1fnegidipevnqvm1rptessiiifiqqlgrglrksankeyvtvidfignyktny1lipialsgdq  
sqnkdneykfltnndsing  
vstifeevakkqiynsldavslnqnklil kayeevenrlghmp1lmdfiqqhsidpsvifskfsnyyef1lrykkidal  
lteneskn1vffsrqiap  
lkridslvlee1kneltydelknkm1nevkditeddidts1rildfsfynagi ekiygs1iecnermirlsdaftnal  
snqtfkifledlie1skyn  
nekyqkgknglilnykysredfskifnwnkngssvimgym1rsqempifitydkhedisdskyedeflsqdelkwftks  
nrt1kskevqkilshrakg  
ikmyifvqkkdddgiyfyy1gtagyiegeqkdkmpngsnvvtmd1aldkavrddiyryitn  
>tr|A6U4M4|A6U4M4\_STAA2  
miyhysiysmhfhth1lyntcekyc1gavffyfwgvflynslhkckgfsfhv1lslteilkglatmdkelwierands1  
vkhfyeqqsdieregfs  
kl1ftgtagirgkfglgegr1nkftiek1alglarylnaqtsp1tivyhidirhlstefaqianv1anhqitvylpdytk  
t1pelsfavrn1nttagim  
itashnpkdyngikvygsdgaqlstdaselasryieevgdp1qidipiskqnts1yikpfpksvtd1dymkhiqnmigyipk  
sd1qvfts1hgtsvpivp  
e1lks1nfnqfn1vdaqckpdpnfssvqsanpedhhafdqavelankshad1listdpdadrlgiaerdahghityfngn  
qigall1nyriqtsqlrh  
r1miqsisvsel1tks1arynnvkykevl1tgfkfi1aqe1rq1ddhqnm1fafeesygl1sepfvr1dkdavqivpl1ikyias

Tsompanidou\_et\_al\_Supplemental\_FASTA\_File

eIklygkTlkdeleqiyqt  
vgrhedtlfshtleglegkkesimthfrsnppqeiqglkvkaiedyltsevylhdkdttsqinssksnvirvlfdegf  
ialrpsgtepkiklyvslk  
cpdfddvaqkinamifs  
>tr|A6U4M8|A6U4M8\_STAA2  
mrddkqpvnrkrdflsnklnkysirkftvtgasiligsImylgtqqeaaennienpttlkdnvqskevkieevtnkdt  
apqgveaksevtsnkdtie  
heasvkaediskkedtpkevanvaevqpkssvthnaepkvrkarsvdegfsditrdsknvvestpitiqqkehfeqygs  
vdiqknptdlgvsevtrfn  
vgnesnglialqlknkidfskdfnfkvrannhqsnttgadwgwflfskgnaeeyltnnggilgdkglvnsggfkidtg  
iytssmdktekqaggggryg  
ygafvknkndssgnsmvgenidksktnflnyadnstsdkfghqrlnviltvystgkmraeyagktwetsitdlgls  
knqaynflitssqrwglng  
ginangwmrtdlkgseftftpeapktitelekveeipfkkerkfnpdlapgtekvrtregqkgektittptlknpltgei  
iskgeskeetkdpinel  
eygpetiapghrdefdpklptgekeevpgkpgiknpetgdvvrppvsvtkygpvkgdsivekeeipfekerkfnpdlap  
gtekvrtregqkgektittpt  
tlknpltgeiiskgeskeetkdpinelteygpetitpghrdefdpklptgekeevpgkpgiknpetgdvvrppvsvtk  
ygpvkgdsivekeeipfek  
erkfnpdlapgtekvrtregqkgektittptlknpltgeiiskgeskeetkdpineltefggekippqghkdfdpnlptd  
qtekvpgkpgiknpdtgkv  
ieepvddvikhgkptgtpetktveipfetkrefnplqpgervkqegqpgsktittpitvnlptgekvgeggqpteeitk  
qpvdki vefggekkpdkp  
penpekpsrpthpsgpvnppnglskdrakpnpvmsdkndkvkkskiakesvanqekkraelpktglestqkglifss  
igigaglmlarrkn  
>tr|A6U4N3|A6U4N3\_STAA2  
mknnlrygirkhklgaasvflgtmivvgmgqdkeaaaseqktttveengnsatdnktsetqtatnvnhieetqsynatv  
teqpsnatqvtteeapkv  
qapqtaqpanvetvkeekpavkettqpdnsgnqrqvdltpkvtqnqgtetqvevaqprtaseskprvtrsadvaeak  
easdvsevkgtvtskvtv  
esgsieapqgnkvephaggrvvlkyklkfadglkrqdyfdftlnsnvntygvstarkvpeikngsvvmatgeilngnir  
yftneiehkvevtanlei  
nlfidpktvqsngqkisklnegetktpvynpgvsnsytnvngsietfnkesnkfthiayikpmngnqsvntsvtg  
tltegsnlaggqptvkvy  
ylgkdelpqsvyantsdtnkfkdvtkemnglsvqdnsgyslnldkldktyvihtgeylqgsdqvnrftelygypera  
yksyyvyggyrltwdnglv  
lysnkadngkngqi idndfeykedtakgtmsggydakqiieteenqdnptldidyhtaidgegggyvdgyietieets  
saididyhtavdseaghvg  
gytesseesnpi dfeesthenskhhadvveyeedtnpgggqvtesnlvefdeestkgivtgavsdhtiedtkeyttes  
nlielvdelpheggqaggp  
ieeitennhhishsglgtenghnygvieeieenshvdikselgyeggqnsngsfeedteedkpkyeqgnivdidfs  
vpqihgqkngdgsfeedte  
kdkpkyeqgnivdidfsvpqihgfnkneieeedtnkdkpnyqfgghnsvdfeedtlpkvsgqnegqqtieedttpt  
pptpevpsepetpmpptpe  
vpsepetpmpptpevpsepetpmpptpevpsepetpmpptpevpsepetpmpptpevpsepetpmpptpevpsepetpmpptpe  
qkvvtpvieinekvkava  
ptkkaqskkkelpetggeestnkgmlfgglfsilglallrrnkknka  
>tr|A6U4P1|A6U4P1\_STAA2  
mlikrlwkyfdkerrsrndifltslikinrlnldfykgvrqglmiipaiigylcgnfqgllvatgtlahiyvfkgsr  
sklrvtiicnlafaiemm  
gtltaktplvfgmtllivtvipfyiftalkiagpsstffivtfslnpinlpiapealyrgfailvggilatmmvltivf  
sknkaeeqaiqndfklisk  
llhtyndkaaf1qvaktavdsfkasdkllitstssndklsrrfqkl1111htsaqqiyselelnakqirplpdeliemmd  
hiiqldnsdenvrywrke  
vtvteefqnlfnhilkidemvhaneariayeadmrkplyskriyqnltdsivfrntlrytaimmiaifialmfdfekay  
wiplsahtillgtstihai  
ergmarglgtlglvlsvillfsiptpvavilmgiaalftealvganyaiavvfitiqvilmgnglasqnltniafprv  
idvaigivaiiglvlgg  
rtasvllpnvmaevvrkeatlhlylfsenqykdnyqkntamnlsvklennmtqvynaangel fsdktliqnyypslfale  
eisfmlnramanedrltin  
eqlmgeylatfeniakhlelnteilekilpdlpqnyiqsamniqhngfrerdknv  
>tr|A6U4P3|A6U4P3\_STAA2  
meqitefisrfgyaafilillenvlpivpseiltfaglmsvkslshiltlfiiatiasfigllilyicrliseerl  
yrfidrhgkwiklskd1k  
randwfkkygvwavficrfipvlrvlitipagvnrnmvvtftvisligttiwnfglillgrtldsdsfgmlmtglhtysri  
myvviiaviyfairygk  
rkrvk  
>tr|A6U4Q1|A6U4Q1\_STAA2

Tsompanidou\_et\_al\_Supplemental\_FASTA\_File

msnleikqgenkfyigddennalaeityrfvdneini dhtgvsdelggqgvkklvkavveharenhkiiascsfakh  
mlekedsyqdvylg  
>tr|A6U4Q7|A6U4Q7\_STAA2  
mklefksisnkiitylglvflf1l1lgyflpigidkvknlsgyqfffssytvatefgfl1fsfviayfinkeysnkn1  
fykligdniftffykav  
lfiecliyiilgitiisiysdfshy111iilfs1vilqyilvvgtismvspnilislgisivywigsvilvainknifg  
ivapfeasntmyravekil  
nnestficpteiintvsffv11fivntiv111srkrwlkigm  
>tr|A6U4R5|A6U4R5\_STAA2  
m11vlsfkgvrylannhsalr1kgiilaivgac1wlggtvsdf1fkykninvdwyvtar1vsvgv11imykmmpkrs  
ifsvfqdrmlgk11fsi  
lgm1vvqyaymasintgnaaiat1lqyiapvyi1wfvirgvak1t1fdv1aiimt1lgtf111tngsfsnlvvnps1f  
wgilagvalafytiypsd1  
1nrfgsilivgwam1isgvam1rhpiwhiditkwdisi1l1f1figigtalafyffids1qyisakett1fgtvep1v  
aviass1w1h1vafkpfqiv  
giilimil1111s1krqpealde  
>tr|A6U4T0|A6U4T0\_STAA2  
msvii1n1l1f1a1fgya1yt1vkffkrskqgkcgctdinrdccgieqhtanhfpgk  
>tr|A6U4T2|A6U4T2\_STAA2  
m1nikngemnkaykikrmdianem1yr1safgl1tdai1tikqkcl1fkgpciievngqqls1rhcdacsiale  
>tr|A6U4U1|A6U4U1\_STAA2  
m1snk1anipdsyfkgtmgrkiehgp1p1inmavgipdgptpqqi1dhfqkaltipenqkygafhgkeafkqavd1fyqr  
qynvt1dkedevci1ygtk  
ng1lavptcvinpgdyv11pdpgytdylagv1ladgkvp1n1lepphylpdwstvsqii1dktkliyl1typnntgstat  
kevfdeaiakfkgtdtkiv  
hdfaygafgfdaknpsil1asengkdvaie1ys1skgynmsgfrvgfavgnkdmiqalkkyqthtnagmfgalqdaaiya1  
nhyddfleeqsnvfkt1rd  
rfeam1akad1p1fvhakggiyv1w1etppgydseqfeq1v1vqeksil1vapgkpf1gengnryvris1alddqk1deaair1t  
el1ay1ye  
>tr|A6U4U8|A6U4U8\_STAA2  
m1tvqkkckhsnwyitfneal1gtdyimitkparh1svivcfvak1  
>tr|A6U4W1|A6U4W1\_STAA2  
met1el1qgak1ryhqvqgpp1l1f1ipgangtgn1f1p1laeq1kdhtvavdrdygesel1tep1pdsasnpdsdyrvkr  
daqdiaelaks1sdepvy1  
l1gssgsivamh1k1dypevvkka1fheppintf1pdstywkdknddivhqi1teglekgmktfget1niapidakmmsq  
padteegrieqkr1tmfws  
efeirqythsd1t1ddftkysdkit1l1ngtdsrgsfpqdvnyinketgipivdipggh1gyiqkpegfadv11nmwg  
>tr|A6U4X4|A6U4X4\_STAA2  
mnqhl1gnpk1tvthvnevktginhi1vvdsvqygnqemimekdvtvemrdgeklyini1frpnkdgkfpvmsadtygkdn  
kpkitnmgalwpt1lgaip1  
ssftpeesdpdpgfwvpndyv1vkv1alrgsdkskgv1spwskreaedyeviewaakqpsngnigtngvsylavtqwwva  
s1npph1kamipweg1ndm1  
yrevafhgipd1tgfy1r1w1ggi1farwtdnp1iedmi1qaqqehp1fddfwkqrqv1sqiktp1l1tcaswstqglhrgs  
fegfkqaaseekw1lyvhgr  
kewesy1aren1erqks1ffdy1keenndwkd1tp1h1yevrd1qfykgefksasafp1pnteyt1ply1naenht1nhakis  
sayvaqydsedkrqdv1fk  
y1fdkdtel1vgnm1kl1wvsttdsddm1f1agik1ldrrgnev1f1pdfnhiengqvatgw1rvshrel1dqekstiaqpwh  
khetel1ksqdeivpveie  
l1psgt1fkqget1levvkgseivignstpgmktryeheetinngmhmiytggkydsq1lipivn  
>tr|A6U4Y5|A6U4Y5\_STAA2  
mirmr1kv1fhfiaa1fisfm1lwmtm1fd1isnqshlka111n1ldf1lipsdntpyileiich1lligsyivfv1l1fht  
skrlyy1cyip1ff1fia1  
ypf1v1fiaqrpi1qfsvtel1giwi1thiffms1malviprik  
>tr|A6U4Y8|A6U4Y8\_STAA2  
m1al1igivi1v1thtefq1nagdsnv1l1nwdirgl1tsy1fsfl1valvsklilifitrrqts  
>tr|A6U4Z9|A6U4Z9\_STAA2  
mnsdnm1w1vmgl1iii1sigv1l1iakkinp1vvgmti1p1clgamil1gysvtd1vgffakgl1dqvinv1m1f1ai1ffgim  
ndsg1fkp1vkr1l1lmtrg  
nv1v1camtal1ig1tiaql1dgagavt1l1sipa1l1plyka1nmky1l1l1l1l1saaimm1vpwggp1marvaav1kaks1v  
elwygl1ipi1qi1g1fil1m1  
fay1lgfkeqkrikkaierne1pqtqdidvhk1vevyerdqdr1f1pvkgrartkswikwvntal1t1avil1sm1mni1ppe  
f1fam1gvs1al1vin1fks1vd  
eqmer1rahapna1mmaav1iaagm1fgv1netgm1kaiatn1likvipaevgpy1hiivg1l1gvpl1d1l1t1stday1fav1  
piveqt1ag1q1fgvps1v1stay  
smvign1i1gt1fvsp1f1spa1lw1a1iglaeanm1gty1kyaffwiwg1fai1v1m1viam1mgivti  
>tr|A6U504|A6U504\_STAA2  
miimrgynerycswtntai1qcdyfnkvrqvkkd1gksdr1snn1nsni1yr1v1lek1cit1ynvcsrckral1il1sehskknif  
nikkav

Tsompanidou\_et\_al\_Supplemental\_FASTA\_File

>tr|A6U507|A6U507\_STAA2  
mtflksitqeiaivivifalfglmfylyhlpaleyllaalgvil11111ifigikyIsfvktisqqqqienletalyqlkne  
qieykndvesyfltwvhqm  
ktpitaaqll1lerdepnvvrnrqeviqidnytslalsylkllnetsdisvtkisinnirpiimkysiqfidqktkihy  
epchhev1tdvrwtslmie  
qlinna1kyargkdiwiefdeqsnglhvkdngigisead1pkifdkgysgyngqrqsnsngiglfivkqisthtnhpvs  
vskqnegttftiqfpde  
>tr|A6U511|A6U511\_STAA2  
mmkk1aviltlvgglyyafkkyqervnqapniey  
>tr|A6U513|A6U513\_STAA2  
mayis1nyhsptigmhqn1tvi1pedqsffnnditakplktlml1hgl1ssdettymrytsieryanehklavimpnv  
dhsayanmayghsydyi1levy  
dyvhqi1fplskkrddnfiaghsmggygtikfaltqgdkfakavplsavfeaqn1mdlewndfskeaiign1ssvkgtehd  
pyll1dkavaedkqipk11  
imcgkqdflyqdn1dfidy1srknvpyqfedgpgdhdyaywdqaikraitwmvnd  
>tr|A6U514|A6U514\_STAA2  
mkkridy1snkqnkysirrftvgttsvvgatilfgighqaqaseqsndttqssknasadseknmietspqlnttand  
tsdisantnsanvdsttkp  
mstqtsnttttepastnetppqtaiknqataakmqdqtvpqeansqvdnkttdansiatnselknsqtl1dlpqsspqi  
snaqgtskpsvrtravrsl  
avaepvnaadakgtvnvdktasnfklekttdpnqsgntfmaanftvtdkvksdyftaklpds1tgngdvdsnsn  
tmpiadikstngdvakat  
ydi1tktytfvftdyvnnkeningqfs1plftdrakapksgydaniniademfnkitynysspiagidkpngani1ssq  
igvdtasgqntykqtvfv  
npkqr1ngtwvyikgyqdkieessgkvsatdtklri1fevndtskl1sdsyyadpnds1kevt dqfnriyyehpnvasi  
kfgdi1tktyv1veghyd  
tgkn1ktqv1qenvdpvtnrdysi1fgwnnenvrygggsadgsavnpkdptpgppvdpepsdppeptpdpepsdppe  
pepsdpdpdsdsdsds  
dsdsdsdsdsesdsdsdsdsdsdsdsdsdsdsesdsdsesdsdsdsdsdsdsdsesdsdsdsdsdsdsdsesdsdsesds  
esdsdsdsdsdsdsdsds  
dsdsdsdsdsdsdsdsdsesdsdsdsdsdsdsdsdsdsdsdsdsdsdsdsdsdsdsdsdsdsdsdsdsdsdsdsdsdsds  
dsdsdsdsdsdsdsdsds  
dsdsdsdsdsdsrvtpnnneqkapsnpkgevnhsnkvsqhktda1petgdksentnat1fgamma11gs111frkrkqd  
hkeka  
>tr|A6U516|A6U516\_STAA2  
mffkrsdknmkekivial1gnaiqtkeataeaqqtairramqn1kpl1fdsparivishgngppqigs11iqqaksndttp  
amp1d1tcgamsqgmigywl  
eteinri1temnsdrvtg1ivtrvevdkddprfnnpkpi1gpfytkeeve1lqkeqpsvfkedagrgyrkvvaspl1pqs  
ilehql1irt1adgknivia  
cggg1pvikkentyegveavidkdfaseklat1ieadt1mi1tnvvnfinfnepnqqqiddidvat1kkyaaqgkfae  
gsm1pkieaairfvesgen  
kkvii1tn1eqayeal1gnkgthim  
>tr|A6U523|A6U523\_STAA2  
mkk11itiviiv1gal1gfaiyaainhstssnneqenks1thkkteteendqqddsadktdknqngnndtndnqpsp  
snvppnhstvpstqpaq  
kdsnskn1thgggsqsstnnqnnqqntppanksntntpskqtpqaqspkn  
>tr|A6U525|A6U525\_STAA2  
mki1vaitscpngiahtymaqek1eqvakemgvdikvetqggvgaenv1ttqdieadgviaadkqvdl1srfvgrline  
nvregihprg1hriinq  
dapiyqsetnyhskdrksgskiqmvyqhl1mgvsfmpfivvglliaial1lgettskglvipddsfwksienigs1  
afkfmvpi1lagyiasiad  
kpg1vp1gmiggaiaadgsfygsdagagf1ggivagf1lagyiakwikdikvpkamapimp11111piissvvvg1ififlig  
apisnif1es1ttw1ksmqg  
an1i1lamigamiaafdmggpvnkva1f1fgsaliaegnyavmgmvavavctppig1glatfvqykfnhseremgkasft  
mg1fgitegaipfaaqdp1  
ri1pani1gami1asviaa1ggvdrvahggpivav1ggidhvlwfi1favivgs1vtmtt1111krntpviavdapaqhtq  
1hdtdi1tqhdtevdndkt  
akhsh1nkpsvfdqqtmi1tdhdmsrneaidm1ihk1kicryvehtsh1knaileremesttaigmvnaiphaksdvk  
qpivavmkn1hg1vkwds1d  
gs1lpq1li1fiavpnsq1dth1k1lqr1ska1mdetrqslinanstteiy1n1lmki  
>tr|A6U534|A6U534\_STAA2  
m1knktfkvtwnyisq1ttfmygskvsfsngevtfinp1mpsg1pihew1mlkqfskyksaps1pil1rrgqhyk1hdfda  
tpagsvyfi1i1fynkngtk  
1steivksns1ti1qypdeayaykikmnaasts1ifrc1titemthqdd1eyksmrvtki1ddnqygndrinviaepsdt  
yptisndf1kl1fghv1ve  
rwmdd1ikenik1kdd1qsqdt1tain1isygsksnvfatyvaqhl1dckvyrtshedd1kew1tehvpgne1kdtv  
efyfkee1qdnh1nysr1m  
npvr1dyl1dvs1k1nggevet

Tsompanidou\_et\_al\_Supplemental\_FASTA\_File

>tr|A6U543|A6U543\_STAA2  
milryatnklakeyqaskplqedkgmiel fehtfglqkelvkyvgiaeattaalysasfinknisrlaslstigils  
vaaykhfeagggkkaqha  
ldllglatlslldtfscnkk  
>tr|A6U556|A6U556\_STAA2  
mdnhntsksiimsklsgidvtvkdvekymnrynevmmgkngekakelclslpiniivvftffvfil  
>tr|A6U566|A6U566\_STAA2  
mhkkyllfflllsvallyscskqnekaqnksvnpneyakhkskmdewetyhgqvyhvfyhplidpkvaftgdthqak  
gnndwmitvsefkkslne  
yknnyiyvnpdvydlsshvkakkiklpgkklpiisiddmnyssymrhgyadrldknkhvsettdkkghatysd  
dndivpilnkfvkehpdfs  
lugekgvvaltgyegvlgyrtneltskdytknkkaeevvrnkrdgwsfashsyghinfektslegikrdtkrwkdeve  
pivgktdmfvfphgaqdrh  
tqaydyldveafkfiagvgnnftdisatnvyqdrvaidglnlfevkyklkpfnpenvyskqdrqffkgnrdyee  
>tr|A6U583|A6U583\_STAA2  
mlmniaklenylqidssrynrsiealnnyatrfmltvpfenidvqnskpisinidalfnkivhdkrggfcyelntffka  
ylqqkgnpeimsatihtp  
gggrslngshaslvvsindvfvytdvgfgdlplhai pitssehtqpitdisgtfraifnedkdiyvqkfendhwhtky  
eae fkpqi edfnsnieyn  
qthpdsifvghllitmpqsfratmsenhltrngssekfdvtdknykhfleyfglnvtinriekq  
>tr|A6U591|A6U591\_STAA2  
mfsigsailhfviggiavalasiiadkvggklggiiatmpavflaiaialdhrgtqlvemsmlstgaivgilscilt  
vfltslyikhkgyrkgai f  
tvvcwfvislai fsi rh  
>tr|A6U5A1|A6U5A1\_STAA2  
mnenlekyiksllgllisillivlfffilvdedlfvflyclllplivnlsiygyfvvkrk  
>tr|A6U5A2|A6U5A2\_STAA2  
mkiiklfsiisflvlvfsanfsnayaneeqkssl enqkeklsknievsqmtkkesfleqlqknkedmqkfeqmqkke  
gfkki kledknsklylat  
eandknaygiannayknektkeivvsetiydynkkitkfi aekrsmtenkegkilinknyveykaekvdknrpvtyag  
fkwnkafacsmaglyaca  
hycgvwai vnpiaaggvceavcgtafaagcsvg  
>tr|A6U5A3|A6U5A3\_STAA2  
mqnqyftvqenykerfyqipkvfftsenyknltndmkiaailrdrlnlsiknswdedgniyfvsneklmeilnckke  
kltkikkglendglliqkr  
rglnkpnilylmkpi vterdiykiekeendvepygekevrksnvqkfenrtsrsskierpevrksntndtdfndidfndt  
enndmndlndikykeisn  
hsnhsnqfthnfddkemllqefpeqltnyllkydyrdleikavilkakksfnshedmymlediedeiltslkrkka  
ihdrgvkgqketiksmqay  
lmqtilteleethalymrrknmqynifnq  
>tr|A6U5B0|A6U5B0\_STAA2  
mdknlsslitifggtdlsyrkllpsifnlykkghfklviistgledisdeeyrskvkqillsrenfemvnlfldnify  
fgnvedktswnklkelsn  
didkkycl dgnrlfylanpqqfkiitqsisqsglsdtngfsrliiekpfgkdlksaedlnkhirqyfkeeeifridhyl  
gkempvqnieslrfngtife  
plwnkyisnvqitlsetlgiedrgqyydstgal kdmvqnalqiltliamekpesrnskdirlkkie llnnikflkgad  
vhkyfvrqgyingii netp  
imsyheekgvdsdsttetfvagkvlinnrrwegtpfyirtgkrlgkkateiviefkknntlryennedtdcnllvini  
epnakislyiyenksrnn  
rshnmkiy nsidknqvvdayslicdalignqtnfvhweelkqswefidyistewkksnvtipqykpgsfgpkesdqlk  
qdnfewwnl  
>tr|A6U5B2|A6U5B2\_STAA2  
mthiqldygtleffgeheleqqkdivkthkti hggtagndflgwvdlpvdydkeefsriveaskrikandsvlvvig  
iggsylgaraaiemltssf  
rtndypeivfvghlssytke lvdyladkdfsvnvisksgtttepavafrlfkqlveskygkeeakkri fattdkqkg  
alkqlatnegyetfvppd  
vggrysvltagllpiaaaginieammigaakarkelssdkleeniayqyatirnllyskgyttemlinyepsmqyfnew  
wkqlfgesegkdfkgyips  
sanyttldhslggyvqegrrflfetvkvnhpkhdlti eedsddl dgl nylagktidevntkafegtllahtdggvpniv  
vnipldeetfgyvvyffe  
lvcamsyqylgvnfpnqpgveaykqnmfallgkpgfedmkkdlearl  
>tr|A6U5B3|A6U5B3\_STAA2  
melqlaidllnkeaaelakkveeyvdiveigtpivineglpavqhl nenisnakvladlkimdaadyevsqavkfgadv  
vtilgvaedasikaaveea  
hknnkqllvdmia vqdl ekrake ldemgadyiavhtgydlqaeqqsplds lrvkksviknskvavaggikpdtikeivae  
epdlvivgggianaddpve  
aakqcrdaiegk  
>tr|A6U5B5|A6U5B5\_STAA2

Tsompanidou\_et\_al\_Supplemental\_FASTA\_File

myykgkefftskdla1cviggkwkipiifhllqdkvlrlselqkklphvnqrmliqrqlreleedqierhtysvvpkve  
ykltsigyklldkvvaice  
wgdlfkdeih  
>tr|A6U5B7|A6U5B7\_STAA2  
mleilvhittvisgciialfthwlrrnnk  
>tr|A6U5C0|A6U5C0\_STAA2  
mdytngkrkyiifgvlaitllivgiayylislnnakgqvkefeklvqhndynsiakklsnkeetlsendaknfvlfvks  
kenqeqyneqiqiksnid  
knkdnntvygsitdqygnlilitikkngktfffidk1efkpk1tsvyvkefnntgiykyqenakkviaesnqtte1gkff  
igkysiktdktiedsihg  
t1tgkidid1snrgnknkiyadedfnqswfkvk1nnds1leknsyk1liddkdvdynskktygkyynptelsvyaigkle  
gkefktnrinirryndkp  
qnlk1sfkesqirdyeskkskvkekaksyikeytkelnkaykkkdykyisdyvknsqlekq1kkqvkskskvkfkdvki  
nnvkrdknkiyielstnn  
gnvfqtkyt1dydnvsnef1vedshdn  
>tr|A6U5C3|A6U5C3\_STAA2  
mknkeky1tnfsearkkatqkyniikpfilgeqs1ssiskskia1stlyrnksykeqglkgl1yatradkgtrkiep  
kiideier1almknrsia  
t1hrkitnyckennfdipsykyiysvikampksvidfshqgekyynkydliqiressrpneiwqadht1ldifildqkg  
n1rnpw1tiimddysraia  
gyflsfdapnaqntalt1hqaiwnkndtnwpvcgipekfytdhgsdftsnhmeqvaidlkinlmskvgvprgrgkierf  
fqtvnqtf1leqlpgyinn  
dtpsniidfhfneek1ryfliedynqkehsaihttpisrwnshffpnmppsleql1111leipksrkvhdsdgihfqgfr  
ysntnlaayvgeyv1i1ryn  
pndmaeirvfyrdelfctaicpeiadysidikdqharsqrrkh1kqniaspsttelikeekncgyspqqettknvkk1kr  
yrnd  
>tr|A6U5C5|A6U5C5\_STAA2  
mtnkqveismaewdmni1wdkksvsaneivvei1qykevsdktirt1litrlykkeiikrykseniyfyssnikeddikm  
ktaktf1nklyggdmks1v  
1nfaknee1nnkeiee1rdi1ndisk  
>tr|A6U5C6|A6U5C6\_STAA2  
m1psyfksvdkrlkyi1lheyahaknrdt1h1iifnifsiimsyn1vhivkrkiidneveadr1vlnninknefkt  
yaesimds1v1ktpfsnkni  
1shsfngkks1lksr1inikead1kkqsk1lilificiftffimi1qsqf1mgqs1tdynykkp1qsdyqildesknfgsn  
sgsfvmysmkdkkyi1yne  
kesrkryspdstykiy1al1fg1drhi1sdksnrmswnhkhy1feswnkeqd1ntamqnsvnwyferisnqipknytaaql  
kq1nygnen1gsykywme  
ds1k1sn1eqv1vfk1nmmeqnnhfskkaknq1ss1l1kkneky1ygktgtg1vngkyngwfvgyvitnhdkyyfath  
1sdgnpsgknaeliseki1  
kgmgv1ndq  
>tr|A6U5C7|A6U5C7\_STAA2  
msi1yyky1kegvkmak1l1tsvvsfcfif111vffky1lkryfnys1nykvwyl1tvlaglipfipikfsfikfnvnq  
aptveskshd1nhninttk  
piqefttdihkfnwdsidn1ctv1v1v1i1s1fk1ks1ly1ky1kkqs1y1neneknkvdtilfnhqyki1  
>tr|A6U5C8|A6U5C8\_STAA2  
mkk1i1f1ia1al1vsacnsnsshake1nd1ekkynahigvya1ntksgkev1kfn1sdkrfayastskainsa1lleqvpyn  
k1nkkvhinkddivayspi  
1ekyv1gkdi1t1ke1ieasm1ysdntannki1keigg1kkvq1r1ke1gdkv1tnpvrye1elny1spksk1dtstpaafgk  
t1nk1i1ang1skknk1f1  
1d1mf1nkng1dt1ik1dgv1pk1dy1vad1ksgqaityas1rndvaf1vyp1kgq1sepi1v1v1ftn1kdn1sk1pnd1k1isetaksv1m  
kef  
>tr|A7WWM3|A7WWM3\_STAA1  
mgkpl1fkkgd1smnsi1fyty1kfn1ryfi1rrkfeivkr1sr1nvttk1l1f1k1l1f1ss1111f1st1m1lady1fsdy1id1fiey  
yfyasmfiy1v1f1ip1prt  
k1l1in1pmdkq1l1yr1ss1l1revdi1fn1iyasdv1kk1fvgyfn1l1ivg1mais1yhis1pfi1fn1kvfcaliy1fstisy1viqiif  
inikvistkk1fsyhycvf  
nfm1mgsiv1svig1fvvs1l1vn1l1ikp1f1v1fsty1vikskkt1fewysy1fdiknevi1inekv1mq1l1dyispht1fmr1nfv  
nis1fvi1tia1fia1ly1fn  
kig1f1wyrkediy1l1sstn1f1s1l1pisika1itti1q1khwi1snkeevn1lhk1pffiy1sysi1wff1lg1cliy1fsqmayn1qlanavi  
fi1i1l1nti1trds1fsag1tdf  
ftks1r1fd1sdrksig1lyr1msntdfk1iydsk1sl1ir1fig1fketil1ai1llai1fn1qdi1y1yi1ig1fei1i1intvi1ipn1sl  
l1psyl1sph1fn1hqhy1se1les  
feeqi1f1led1tv1fdk1vkn1f1l1ssy1f1l1fvgy1sq1rny1idimi1fii1f1nil1al1il1vs1l1fir1fsk1qkitks1wrkrd1y1  
>tr|A7WWM9|A7WWM9\_STAA1  
mi1il1vqevv1vegdi1ngq1f1ktegi1esggqakw1f1qd1vev1ingv1re1rrgk1lehq1dridipe1pedags1f1i1hqge  
q  
>tr|A7WWM8|A7WWM8\_STAA1  
mnkgv1tym1t1y1ldget1tiediks1f1lqq1skie1i1dda1ervkks1ravveri1eneetvygittg1f1fsdvridptqyn

Tsompanidou\_et\_al\_Supplemental\_FASTA\_File

elqvnli rshacglgepfs  
kevalvmmilrlntllkghsgatlelvrlqffineriipiipqqgslgasgdlaplshlalaaligegkvlrgeekdsd  
dvlrelnrqpnlqakegl  
alingtqamttagvisyieaedlgyqsewialthqslngiidayrhdvhsvrnfqeqinvaarmrdwlegstlttrqae  
irvqdaytlrcipqihgas  
fqvfnyvkqql efemnaandnplifeanetfvisggnfhgqpiafaldhklkgvselanvserrlerlvnpqlngdlpa  
flspepglqsgamimqyaa  
aslvsenktlahpasvdsitssangedhvsmsgttaarhgyqienarrvlaiecvialqaaelkgveglspktrrkyeef  
rsivpsithdrqfhkdiea  
vaqylkqsiyqtach  
>tr|A7WWP8|A7WWP8\_STAA1  
mnrqstkkallipfvimiiitavlmgvwvfifnslialiasivlvvmiivsiilfrqalmkmdsyvdgl saqisttnkai  
khlpigiiivldendhiewv  
nqfntnhmeanvisesvfnpnllkqldrvksveieynqyhfqvrysendhcllyffditeqvqtne lyenskipiatlf  
ldnydeitqnmndtqrsei  
nsmvtrvisrwateyniffkryssdqfvaylnqkiladleeskfdilsqpreksvgyraqtlt sigvgegtenlidlge  
sqsgldlalgrggdqvai  
singnvrfygktdpmekrtrvrarvishalkdilaegdkviimghkrpdldaigaaigvsrfammnleayivlnetdi  
dptlrrvmneidkkseire  
rfitssdawmmtskttvividthkpelvldenvlnkanrkvidhrrgesfisnplliymepyasstaelvtelleyq  
pteqrtrlestvmyagi  
vdtrnftl rtsrtfdasyrahgadtiltqhflkddvdtyinrselirtvkvedngiaiahgsddkiyhpvtvaqaad  
ellslegieasyvvarred  
nligisarslgsvnvqltmealggghltnaatqlkgvtveeai aqlqqaiteqlrseda  
>tr|A7WWQ9|A7WWQ9\_STAA1  
mkslktvigmnnkehiksvila1lvmsvvl tymvwnfspdianvdntskksetkpl ttpmtakmdttitpfqiihskn  
dhpegtiatvsnvkltkp  
lknkevksvehvrrdhnlimpd lssdftlfdftydlplstylgqvlm nakvpnhfnfnrlvidhdaddnivlyaiskdr  
hdyvkl ttttkndhfl da  
aavkkdmqpytdiitnkdtidrtthvfapskpekltktyrmvfntisvekmnail fddstivrssksgvttyntngvany  
ndknekyhyknlseas  
skmeetipgtfdfighggflnedfrlfstnqsge ltyqrf lngyptfnkegsnqi qvtwgekgvfdyrrsllrtddvl  
nsednktlpklesvrssla  
nnsdinfekvtniaigyemqndshnhievqinse lvrwvveydgewyvyndgrle  
>tr|A7WWS4|A7WWS4\_STAA1  
mgvsfnimcpnssisysdeksrvldvktksgkvrpwrekkiandvfyellhilefkaervkdcaileykqnretgerkl  
yrwvfcksr lcpmcnwrra  
mkhgtiqsqkvvaevikqkptvrwflfltl tvknvydgeelnks lsdmaqgfrmmqykkinknlvgfmrtevtinnkdn  
ynqhmhvlvcveptyfknt  
enyvngkqwiqfwkkamkl dydpnvkvqmi rpknyksdiqsaidetakypvkdtdfmddeeknl  
>tr|A7WWT1|A7WWT1\_STAA1  
mlceavgsadqnhktfktflfftrkkkqkn lpsatsakggfalvlv  
>tr|A7WWT4|A7WWT4\_STAA1  
mstfklpifilsvlsslpkarlsknkifivfrfssvtdkttqnkkdtrevsrifysaiapdc  
>tr|A7WWT5|A7WWT5\_STAA1  
mrmqsipalpvgdiksigfyckl gftlvhhdg favlmcnevrihlweasdegwrsrsndspvctgaesfiagtasc  
rievegide lyqhikplgi  
lhpnts lkdqwwderdfavidpnnl isffqiks  
>tr|A7WWT7|A7WWT7\_STAA1  
mri vngpiiimtreermkivheikeril dkygddvkaigvygslgrqtdgpysdiemmcvmsteeafshewttgewkvev  
nfdseeill dyasqvesdw  
plthgqffsilpiydsggylekvyqtaksveaqt fhdai caliveelfeyagkwrnirvqgpttflpsl tvqvamagaml  
iglhhricyttsasvltea  
vkqsd lpsgydhlcqfvmsgqlsdsek lleslenfwngiqewterhgyivdvskripf  
>tr|A7WWT9|A7WWT9\_STAA1  
mnyfrykqfnkdvltvavgylyrytlyrdisel rergvnhstvyrvwqeyapilyqiwk kkkkkkayykwridetyi  
kikgkwsylyraidaeght  
ldiwlrkqrdnhsayafikrlikqfgkpkvitdqapstkvamakvikaf  
>tr|A7WU1|A7WU1\_STAA1  
mytgslylslisllqhtfqpeekvc lfsygs gaveifsgsivkygdka ldkehl nmlsreq lsv eeyetffnrfdn  
qefdfere l tdpyskvy l  
ysiedhirtykiek  
>tr|A7WV8|A7WV8\_STAA1  
meqykehinslnkeeleklakmgqlidvrtkeeyelghingstlh pveeiksfnknsnktyihcksgnrstkacdy la  
kqgydvvn lkggykdyeak  
nfn sapliekdieikenrkqfdfrglqcpgpivniskeinistgeqievtvtdpgfnsdikswakqtgnl vnltean  
vinaiiqkekpkefeindt  
atgttivilfsgeldkavaami angakaagkdvti fftfwgl nal kkaqstrvkkkgi skmfdlmlpkdiphmp lskmnm

Tsompanidou\_et\_al\_Supplemental\_FASTA\_File

fglgnimmryvmnkknvds  
lyslidqaidqdikliactmsmdvmgiskeelrdevdyggvgtyighteqanhnlfi  
>tr|A7WWW4|A7WWW4\_STAA1  
mtfsl1vhynllltgynelt1svhynq1lilwilitnfinnkyrksthtf1sfpffs1  
>tr|A7WWX4|A7WWX4\_STAA1  
mkeinivslqmiktdt1sylnkrisnpedaeeimrsfignsdrehlilicmsknepthiqt1sig1sinqt1vihpreifk  
tail1snansimlghnhpsg  
dvl1tiv  
>tr|A7WWY0|A7WWY0\_STAA1  
mqqlk1tkrvgiyvrstemqstegysidgqinqikeycdfhhfevkd1yadrgisgksmnrpelqrilk1dakegyidcvm  
vyktnrlarntsd1lkive  
d1hkqnevffs1sermevtssgk1mlqil1asfsefernnivenvfmgqtrraqegyyqgn1plgydkipnskelminq  
heanivkyifesyakghgy  
rkiana1nhkgvvtkkgkpf1sityil1anpfyigkiqfakykdwsekrkgl1ndkpv1aegkhs1piinqd1wdkvqmr  
kkqvsqkppv1hgkgn1lt  
giih1cpqcgapmaasnt1nt1kdgtkkriryysc1nfrnk1gskvcsansvradviedyvmkqileivksdkviqrvvthv  
nqenqvdgaal1hd1diaykq  
qqydevq1k1nn1iktiednpd1t1svirpsiqkyekq1nditnqinq1knqnedkpl1dakeisk1l1qhi1fhdikiek  
sr1kaly1svidridikkd  
gnhkkqfyvt1k1l1neiikq1fnkq1devh1stss1fl1pqt1ly1ti  
>tr|A7WX01|A7WX01\_STAA1  
mimfv1cgfi1fp1tvtal1gqvl1fpeqangsl1vkqdgk1vigsk1ligq1wtepk1yfhgr1savnynmnanevkesggpasgg  
snygn1spe1kkrvqetik  
qegkk1ssdavtasg1dpdi1tdnakq1qv1kriakernidaskin1h1idenk1qaspmaddyv1n1kl1nit1dk1  
>tr|A7WX05|A7WX05\_STAA1  
m1meki1lyqtdefk1kpsgwykt1ppkkdg1tefeim1sgpia1ftdrfidpatrkekv1f1sd1nniel1vekas1l1talq1  
ps1iey1gft1nekhi1rd1g  
fv1qqmr1sttp1stiysgv1gm1ht1l1gp1is1ldqpy1fsneit1nstsi1icdnkyd1lipkgn1sew1lqmykeevhgn1s1el  
dvl1fgv1ssl1vtaf1kyhnn  
vefsg1t1fsftg1qsstgk1staam1aasvagn1ptkgten1lfrswat1rna1legyl1sgnygv1piv1del1saat1fhdt1tg1ly  
sfaegq1rqr1aningdvkt  
pkn  
>tr|A7WX11|A7WX11\_STAA1  
mq1qtmsn1sif1kn1lifain1es1eysetns1vmevt1fqkaig1ftqyn1fegek1k1kdd1kel1s1vgreeav1ifvnr1ne  
glyc1lnq1li1ewdn1nyqf  
amykeam1hny1l1fntiek1l1nddt1f1l1hqdg1lit1l1pehkykt1vavk1stf1gsrd1ft1frk1fpees1d1vnt1hqml1nkais1itg  
s1lanth1leqp1qkykahfkk  
ip1ietkn1ts  
>tr|A7WX13|A7WX13\_STAA1  
myksiy1nfgetnt1n1flen1les1l1ddnye1l1ndkel1v1sdsnelk1iskvy1irkkdkk1l1dwq1l1iknvy1ldteedn1lfse  
sg1hhf1dail1f1kedtt1lqn  
nvy1ipf1gqayh1dinn1li1dydfg1idfaera1knedivnknv1ffqqr1l1keivnyrrns1vdyvrpsesy1svqghp1qnpq  
ifgk1mtc1gts1s1lrvpnr  
kqf1idk1svi1keinai1n1lpk1isef1privt1kd1lnk1iev1dt1l1l1kk1s1nsst1tenis1idisr1fle1l1snm1l1l1ddm  
ldvni1y1nsf1knnt1letfd  
atdpe1vdy1teig1dyl1kydvn1sindvri1evidn1lghsnm1l1kt1il1haevemedgkky1l1qngkwgy1fnreffd1l1ndh  
l1nei1eir1ynt1l1tptgl1vfk  
egeeg1y1keivgr1l1peey1l1mhkkf1ikpinkn1fivkng1ielad1lynik1nel1ftikrg1ints1s1lys1leqni1iainalk  
ypesyn1feeli1eaip1dnse  
ni1fndiqr1stnfsi1vwi1lp1issidn1mpikdmvht1snvinkn1fq1l1tnl1gsv1l1knk1lvew1s1lyl1kdq1rinpi1iyet1pted  
rn  
>tr|A7WX19|A7WX19\_STAA1  
mkqyge1k1fidefskaefek1lakqg1lidvr1teeeyal1ghings1il1hpvdeies1fnkeknktyyvic1rsgnrsanaskyla  
kqgynv1indggykayeen  
dsydtq1eeyks1eikadrkqfn1yrgf1qcp1pivki1sqemknievgdqievkvt1dpgf1psdikswkqtrht1vkl1dennn  
ginai1iqkekak1ldinys  
akgtt1iv1l1fsgel1dkavaa1liangaraagkdv1t1fft1fwg1lnal1kkvqt1vnvkkqgiakmfd1ml1pqkn1rmp1l1skmm  
fglgnmm1ryvmkkknvds  
l1pt1l1inqaieqnik1liactmsmdvmgiqkeelrdevyggvgtyigatenanhnlfi  
>tr|A7WX24|A7WX24\_STAA1  
mkenf1wse1l1prpffi1lapmedvtdiv1frh1vsearpdv1ffteftntes1fchpegi1hsvrgr1l1tfsedehpmvahi1wgdk  
peqfrets1iq1lakmgfkgi  
d1lnmgcp1vanvakk1gkgs1gil1rpdvaaei1qat1kaggl1p1svktr1lgyyeidewkdw1khvfeq1dian1sihl1rtrkem  
skvdah1wel1ieaikn1rde  
iapnt1l1tingd1ipdrktgle1aekygidgvm1grgi1fhn1pfafekeprehtskel1ld1l1r1hl1s1l1fnkyekdeir1qfks  
l1rrffki1yvrg1irgase1l  
hq1l1mntq1siaeara1l1defeaqmdedvkie1  
>tr|A7WX35|A7WX35\_STAA1



Tsompanidou\_et\_al\_Supplemental\_FASTA\_File

mmkrlnklvlvgiiflflvisitagcgigkeavkksfektlsympiknledlydkegyrddqfdkndkgtwiinsemviq  
pnedmvakgmvlmnrnt  
kttngyyvvdvtkddegkphdnekrypvmvdkniiptkeikdknikkeienfkffvqygnfkdl skykdgd isynpev  
psysakyqvtnddynvkq1  
rkrydiptnkakplllkgtgnlkgssvgykdieftfvekkgeniyfsdshlepsedk  
>tr|A7WX40|A7WX40\_STAA1  
mmkrlnklvlvgisflflvisitagcgmgkeaeikksfektmsympiknledlydkegyrddqfdkndkgtwivnsqmaiq  
nkgepmkskgmvlmnrnt  
rttngyyvvnvikedgkghdnekrypvmvdkniiltkeikdenikieienfkffvqygnfkdlenykdgd isynpev  
psysakyqltnddynvkq1  
rkrydiptnkakplllkgtgnlkgssvgykdieftfvekkeeniyfsdglifkpsedk  
>tr|A7WX55|A7WX55\_STAA1  
mkippqrqlaiqynvrvtiiksieilleaegfiytkvsgstyvndylneahitnkwsemmllwssqrsqytvqlinkiet  
ddsylhiskgelgslmph  
iq1kkamsntashiedlsfgynngygyiklrdiivermskqginvgrenmitsgalhaiqllsigflgqdaaiisntps  
yihstnvfeqlnfrhidvp  
ynqineintiidrfinfknaikayieprfnptgrsltneqkknii tyserhni pieddifrdiffsdptpaiktydklg  
kvihiissfsktiapairig  
wivasekii eqladvrmqidygssil sqmvvyemlnknsydkhlvklryvlkdkrdfmnlilnlfkdiahwevpsgggyf  
wlvfkididikiylfye11  
skekilinpgyigskeksirlsfafesnenikhalykiytyvkv  
>tr|A7WX60|A7WX60\_STAA1  
mkkknisyirklgvgiasvtlgtllisggvtpaanaaqhdeaqnafyqvlmpnl nadqrngfiqslkddpsqsanvl g  
eaqkln dsqapkadaqnn  
fnkdqqsafyeilnmpnl neaqrngfiqslkddpsqstnvlgeakl nesqapkadnnfnkeqqnafyeilnmpnl neeq  
rngfiqslkddpsqsan11  
seakl nesqapkadnkfnkeqqnafyeilhlpl neeqrngfiqslkddpsvskeilaekln daqapkeednkpgk  
edgnkpgkedgnkpgkedn  
kkpgkedgnkpgkednknkpgkedgnkpgkedgnkpgkedgnkpgkedngvhvvpkgd tvndiakangttad  
kiaadnkl adknmi kpgqe  
lvvdkkqpanhadankaqalpetgeenpfigttvfgglslalgaallagrrel  
>tr|A7WX79|A7WX79\_STAA1  
mriivqpvieqlkaqshpvchyidlvgl ehhlqhitsslpsncqmyyamkansertildtisqyvegfevasqgeiakgl  
afkpanhiifggpgktdee  
lryavsegvqrihvesmhelqrlnailededktqhillrvnlagpfpnatlmagrptqfgisdevddvieaalvmpni  
hldgfhfhsisnlnsdnlh  
vdvvklyfkakswsekhrfplkhinlgggigvnyadltsqfewdnfvenfktliveqemedvtlnfecgrfivahigyy  
vtevl diikkvhgawyailr  
ggtqqfrl pvswhnhpfeiyrykdnpsfekvsisrqdtlvgqlctpkdvfarevqidaistgdvifkyagaygws  
shhdf1shp hpefiyltqt  
kede  
>tr|A7WX85|A7WX85\_STAA1  
mmfynilgvli1vm1stdaldcdiithlrtslinflpiqslsalknpyc  
>tr|A7WX97|A7WX97\_STAA1  
mtqtqpkfltiyntykeiqigkypsghalpteke1carfdvsrmtlrqaikllaedgivestrgkghfvipqtnaqhas  
smdqfkhp1dqillarvsm  
ssinyrvdleseytnhlfanhsavi ameryyqkdnhskqadafcftfip1nvidtfkvntqneddmktfveqtiysna  
yqsd1kmsitkaprknhs  
hvfddgthcwl1ietlyatpypiminkwyipqeisel1trirqsdy  
>tr|A7WXD1|A7WXD1\_STAA1  
mriaiekiigllknqsskesnvkihrlayitnskfdgnyidrwckirnshigeysyigfgsdfnnvevgrycsissdvk  
iglgkhpthffssspifys  
nnnpfnikqkfidfndqpsrttikndviganviimdgl tintgaviaagsvvtknvgayevvggpakvikkrfdnkti  
eklleskwwektpdklkgf  
sveylnk kdt  
>tr|A7WXE4|A7WXE4\_STAA1  
mc1nfrednvmkkimvifgtrpeaikmaplveidhngnfeanivitaqhrdml dsvl sifdiqadhdlnimqdqqt1ad  
ltana1akldsii neeqpd  
milvhgdtttt1vgs1aafy hqipvghveagl rthqkyspfeel nrvmvsniael nfaptviaaknll fenkderifi  
tgntv1dalsttvqndfvs  
tiinkhkgkvi11tahrrenigepm hqifkavrd1adeykdvvfiypmhrnpkvraiaekylsgrnrielielpdaief  
hnftnqsy1v1tdsggiqe  
eaptfgkpvlv1rnhterpegveagtsrvigt dydnivrvnkqlieddeayqrmsqannpygdgqasrriceaieyyfgl  
rsdkpdefvplrhk  
>tr|A7WXE6|A7WXE6\_STAA1  
mr1ilivig1iftalgiagav1pl1pttpf1lvavfcfarssdrfynwlinqkiykeyvenfy1hrgyt1qqkikilisl  
yivigfsiy mvdvlavrvg  
liimviiqtav1ftfvktl pksnhkiee

Tsompanidou\_et\_al\_Supplemental\_FASTA\_File

>tr|A7WYG5|A7WYG5\_STAA1  
msgavffviflkqatcntyfkvekiyhlgemdmkivalfpeavegqenqllntkkaiglkftleerghefiiladnged  
ldkhlpdmdvii sapfypa  
ymtreriekapnlklaitagvgsdhvdlaaasehnigvvevtgsntvsvaehavmdllillrnyeehgrqsvegewnlsq  
vgnhahelqhkktigifgfg  
rigqlvaerlapfnvtlqhydpinqdhlkskfvsfdelvsssdaitihapltpetdnlfkdvlslrmkkhsylvntarg  
kivnrdaivealasehlqg  
yagdvwypqpapadhprwrtmprnamtvhysgmtleaqkriedgvkdilerffnhepfqdkdiivasgriasksytak  
>tr|A7WXH1|A7WXH1\_STAA1  
mtkrqmgifiyagiiggllsgivklgwevmfprrtpernatnppqellqqlgfssefthqytytsnmlpwvsfivhfsf  
siviaiycilvkkyayla  
igqgavfgiaiwvlfhliimpimhtvpavwdqpyqehlseffghivwmmtielvrqhfvyrykln  
>tr|A7WVK0|A7WVK0\_STAA1  
mvlkttkiaslklfasyaiatyilmtsalnlfkgyvadtfyiaetlliiiltiliilteqtwkhhdllwrrivevll  
llmaltgntvftllmfvsir  
ryqrtsqihsyngwesfirkttrhriaigllilvymtltsivsqftfdttlatknqfnallhgpslaypfgtddfgrdl  
ftrvvvgtklftfsisiisv  
viavifgvllgtiagyfnhidnlimrildvvaipslllavaiiasfgasipnlialsignipsfartmrasvleikrm  
eyvdaaritgentwniwr  
yilpnaiapmivrflnigvvvlttsslsflglgvapdvaewgnilrtgsnylethsnlaivpgvcimfvvlafnfigda  
vrdaIdprih  
>tr|A7WVK7|A7WVK7\_STAA1  
mtkrpkriatiiiiflslftiiyiddiqkwnqytdkltnqhkqgghskwedffrgsritetfgyqhsfpdgkhygid  
falpkgtipikaptngkvtr  
ifnneiggkvlqiaedngeyhqwyhlkdynvkvgdrvkagdiiaysgntgkqttgahlhfqrmkggvgnayaedpkpfi  
eqlpdgerslydl  
>tr|A7WXL4|A7WXL4\_STAA1  
mmtikvgiigcggiangkhmps lqkvenvemiafcdvdiskaasaaeygtdnakvyddykallkddtidvihvctpnds  
hceitvaglhagkhvmcek  
pmakttaeaqkmi dtakstgkklitigyqnrfrpdsqflhqaargdldgdiyfgkahairrravptwgvflneeaqgggpl  
idigthal dltlwmmdnye  
pesvmsstfhklnkqhdaanaawgswnpdeftvedsafgfikmkgatiilesawainslevdeakcs lsgtkagadmkg  
lrihgedmgtlytkhvele  
nkgvdfyegnevdeaeekawidavvndtepvvkpeqamvvtkileaiyqsaksgkaiyfe  
>tr|A7WXM1|A7WXM1\_STAA1  
mtkwei fkyilgnpviwlcvsnvfyivrigidnwaplyvsehlfhskgdavntifyfeigalvasllwgyvsdllkg  
rraivaigcmfmitfvvlf  
ytnatsvmmvnislfa lgalifgpqlligvsltgfvpknaivsangmtgsfaylfgdsmakvglaaiadptrnglnifgy  
tlsgwtdvfivfyvalflg  
millingivafyeekkirslki  
>tr|A7WXM3|A7WXM3\_STAA1  
mtaykpyrhqlrrslfastifpvlviiiglvsfyayiwiehrthihqhvdesqsslhhtekqiqtfittqhnnsfqeldl  
tnhhdvatatkrellklhig  
qpatlyyelsgnqfittnyehlntknmylfsthqlkfnstymkiymantprlseikkdsrqfalivdqydnyland  
drftigekeyrpgqfgfme  
svklnhadhrliiykdiheniedgitllivmavvlvllvifgfisadnmakrqtkdietiiykiyynrhlgtypnlkn  
nseleeinnyidlfesne  
qlihsiehterrldiqlkeierqfphflntmqtiqylitlspklaqtvvqqlsqmlryslrtnshtvelneelnyie  
qyvaiqnirfddmiklhi  
sseeahrqtigkmm lqplienaikhgrdteslditirltlarqnlhvlvcdngigmssslqyvrqslnndvfdtkhlg  
nhlnkamigygsarhli  
fskrnggtlicykiplsrgnvdv  
>tr|A7WXM9|A7WXM9\_STAA1  
mkriskdiwavfklllyqnkgrfsinalllqlimifisstylillfnmmlkvagqsq ltnnwmeiishpasvilliiifil  
svafliyvefsllyvmvya  
gfdriitfksifknafvnrkligvpviffviylmlmpianlglssvltkniyipkflteelmkttkgiiygtfmia  
vfilnflkliftlpltilnr  
qslfknmr lswqitkrnkfrlvieivileliigailtliisgatylaicvdeegdkflvssilfvvlksalffyylftkl  
slisvlvlhlkqenvldqp  
glefkypkskrksrffiiismvlavtcfigynmyllyntintnisiighrgfedkgvensips lkaaakanveyveltdi  
mtkdkqfvvshdnllkr l t  
gvnknisesnfkdvvg lkmrqngheaklvsldefietakqsnvkl lvelkphgkepadytqrvidilkkhgvehqyrvms  
ldydvmtklkkeepylkcg  
yilplqfghfketsldffviedfsysprlvnqahlenkevtywtingeedlky lqtnvdgiitddpaladqikeekde  
tyfdrsirilfe  
>tr|A7WXN4|A7WXN4\_STAA1  
mqeayivaygrsaakakqgal fherpddvaakvlqgv l kridgkfnkmiedvivgtafpeglqgqniartialragls  
dtvpgqtvnrycssglqti

Tsompanidou\_et\_al\_Supplemental\_FASTA\_File

aiaanqimagqgdi l vaggvelmsavpmggnptnptlqyddigasypmgltaenasqfdvsredqdayavrshqray  
daqrdgrfkdeiipirvns  
veytnagpkvhtnifdqdefirpdtmealakl rtfvkadgtvtagsaplsdgagfvvlmsgdkvkelgvtpiarfvgy  
kavgvdpkimgipayaip  
evlslsnlsvdidlielneafasqtiasikevgl disrtvnnggaialghplgatgamltarllnemgrrpdsrygmvt  
mcigvgmgaaaifeyvr  
>tr|A7WXP2|A7WXP2\_STAA1  
mkfkrlatifsavlvlsccgsmhssgkdl nislplktsiapyetdvpvkigaaesl fktndqgkiekalvksyhpndt  
tldielkdnikfqngqklt  
aekvksslensmkksdlvkyslpissitakgqkltikt nsaypelvselanp fmaiyytdaksdvnqtpvgtgpyqikdy  
kqsrkislsnfkdywgqgp  
kl dhitvtyqedgnrnrnlesqkddl itdvpvnkvhdienqn l vskesgfrtsllmynhtnkkmtksvreal dhiid  
rqgiadhiyqgyakpatsp  
fndkipyikepltkqnieqaktllakdgytkehplkiklitydgrpelskiaqvlqsdakkanieidiksvddiegylk  
drsawdatmysfgtiprgd  
tgyffnqaykkdga inkgdynnsnvddl inqlnhtvdvkerhnisndiiklssrdvpnsyia yndqivaanskvknkvt  
pegiylidyr tier  
>tr|A7WXQ5|A7WXQ5\_STAA1  
msyftdfvrgfldlgatvilpvvifllglfrrqkigaaf rsgltigvafvgiflvidllvknlgpaaqamvknlgvslnv  
idvgwpatssiawassvaa  
fiip lgiivnvllvtkvtktmnvdiwnfwhtftaamvyavsgsiwqallaavifqviclkvadwtapmmseffdlpgv  
siatgstisyaggiylvk l  
lqkvpglnkladpetiqkrfgafgesifvgllilglgigvlagykpgdiinlgmsmaavmvlmprmvkilmeglmpvses  
artwlnkrfgereiyigld  
aavalghpavistalilv pitvllavilpgnqvlpfgdlatipfvafivgaagniihsvivgtimiaislyiatdvap  
iftmakgtvnmqpkgsse  
issidqgnivnylifklfslfn  
>tr|A7WXQ8|A7WXQ8\_STAA1  
mvesmltfmlgp l rqi tdfymehllvsnsiviagyfatgikkkkvvn  
>tr|A7WXR4|A7WXR4\_STAA1  
mktkqaihidniywervqlyieghsegvdltsqqfvlrnl tetktleanemkidgntficrfnvailddgyylpmdkyl  
fvyhdqleyigq lnpniid  
qayaa l neeqieeyne lttqngkvnyllaydakvfrkggvsqhtvytipeiasdvnefvfdieitlpqeksgviatsah  
wlhkqghkasfesrsflfk  
aifnltkllhikrsktilftsdsrpn lsgnfkyvyde l l rkvdfdydikt v fkanitdrkwrkfr lpyllgkadyif  
vddfhp liytvrfrpsqei  
iqvwhavgafktvgfstrtgkkggp fidslnhrsyt kayvssetdipfyaeafgi reenvvptgvprtdvl fdeayatqik  
qemedelpiikgkivilfa  
ptfrngnghtahypffkidferlarycekhnavvl fkmhpfvknrl nisrehrqyfidvsdhrevndilfvtdllisdys  
sliyeyavfkkpmyaf d  
ledyittrdfyepyesfvpgkivqsfdalmdal dtedyevekvvpfldkhfkyqdgrsserlvkd l fr  
>tr|A7WXT9|A7WXT9\_STAA1  
mqfklkeeeiisflelkypekefeygrllvgqhkrdldvyyfgdtflmctiisfktfeiketvelsydavnri v lkdgw  
lfrkmrietmqv lkygts  
klmltdfqkenynkyiqgqqrvi fenghfv  
>tr|A7WXU8|A7WXU8\_STAA1  
mskklkiiipiiivlll iggiawgvyaaffantpknty l kseqtakmykdyfndrfenevkf qekm kdnslslelsad  
asdeivkg l gipksvvnas  
kikmsyghdpkkeksminleptiadsal gkfqlaadkdkhyfespl fkgkysvnnsdl l styskl tgedetakengitn  
qqln l ntlfsnaqaqgsdy  
skiaekyselivdk l dddnfdkgkkeeikvngkeykvrpvt l t lsradtkkitlavleakkdkdlkl l meeegatkdyd  
kdikkaiddvketkkdefa  
kiqskiytehtivkreititdkennktki kgtntleddklkl dya l dfdqkytyaeakytikgvsskekdnkysdye  
fgkkteydeskik l dngek  
vdgtrqdkgkitvaldkysdeneftfennidsvknntqkst l nigikyaeepinfilksstklkadidfdsgakdfn  
slsskdreklekeiekngg  
kmfesilkkask  
>tr|A7WXX4|A7WXX4\_STAA1  
mnfeeklsqmyneianeisgmipveweqvftiayvtdqagevifnytkpgsdelnytyyipreynvsekvfydlwtdlyr  
l fkl l rna fkeedlepwt  
cefdftsegklkvsfdyidwintefdq l grenyymykfgvipemeyemevkeieqyikeqdeael  
>tr|A7WY05|A7WY05\_STAA1  
metlksnkarley l indmrrerndndvlmpssfedlwe l yrglanvrpalpsvdeylavqdam l sdlnhqhvtdlkd l k  
pikgdni fwwgdi t l ki  
dai vnaansrflgcmqanhdcidni ihtkagvqvr l dcaei i rqqgrnegvgkakktrgyn l pakyiihtvgpqi r r l pv  
skmnqdl lakyl sclkla  
dqhslnhvafccistgvfafpqdeaeiavrtvesylketnst l kvvfnvftdkdlqlykealnrdae  
>tr|A7WY07|A7WY07\_STAA1

Tsompanidou\_et\_al\_Supplemental\_FASTA\_File

mmqsskwnamsllmdektkqaevl rtaideadaivigigagmsasdgftyvgerftenfpdfiekryffdmqlqaslhpyg  
swqeywafesrfitlnyld  
qpvgqsyla1kslvegkqyhiittnadnafdaeydmthvfhiqgeyilqqcsqhchaqtyrnddlirkmvaqqdmliip  
wemiprcpkcdapmevnr  
kaevgmvedaeafhaqlqrynafleqhqdckvlyleigigyttppfvkhpqfmrtrknenaiymtmkkayripnsiqert  
ihlstedistlittalrnds  
ttqnnnigetevlnrtd  
>tr|A7WY13|A7WY13\_STAA1  
msldilsttrivkeqvndwteaitiasqpllqeqiieqgyvqamidsvnelgpyiviapeiaiaaharpnndvhqvgls1  
lklngqvafcdedhyasli  
fvlsaidnhshlsvlqnlatvlgdnqtvqqlltaknaqdiknilkeh  
>tr|A7WY14|A7WY14\_STAA1  
mlsyrqieilylliehqtfipintianqlgvsprtqiaydieqyaetyhyqvsrnkaagikvttahatl1nelehnlt  
nqihfskderlthialklf  
ettdpvstkqlaqdvnsrrtiaddikmiqaqldqyhkl1nyvhnkgfnvigeedhyrkayahfihqymkqaapfieadi  
fnsesialvrraiiktlns  
enyhlvqsaidgliyhiliaiqrlnenfsfdipineidkwrhtnqyaiaskmienlerscnvtfpeseiifitlhl1lsgk  
mtehtassitfeyhdlsqn  
iheliticvsqelgidmskdnk1htslithikpaihrikydmlqpnplrqevmrrypqiieavskhispieqdaairfnd  
eltiyitihfassiervath  
kqsmikvllcgsgigtsqllksklnhlypefhiwdaysiyqleesrllqdnidyvistvpceisavpvihvdpfinqq  
rqklnqiindsreqrvkm  
atdgksladllpehriineqplsieaiavavqhlindgivysnytaailkqfeqfgsymvisphialihagtdyvqng  
vgfaltyftegiifgskan  
dpvhlvltlatdhpnahlkalgqlsec1sndlyrqfdldgnifkikqhialtmtkev  
>tr|A7WY38|A7WY38\_STAA1  
mkilryigyllggivggiiggilgnfdglgienlftatynnvvisivatmiilveaivlmnqrralkykr1vdeevd  
idatdqyellanryvlns  
ilsviqtiiafvvllifvvgqaeanamlfflipffasai fntqftlfnrkfddrmpkiadknytekrleildegerhie1  
ialfktyainlsililai  
figsysiatginqsfsllliiaifiynafsyllkrrrfy  
>tr|A7WY39|A7WY39\_STAA1  
mtllnvdrvnkqykdsdfklqdasltistnetvlgikngsgkstlinilvgnrhkdngsiaffgeehaaddveykehi  
gvvfdldrvpnkltikdid  
kvfqslyttwnsqkffdlkyfelplqtikiktfsrgmrmkialtia1shdvkllil1deatagmdvsgreevmelledfva  
qgggllisshisedieqla  
dklvfmdgrmilteqkdi1laqygivttgdkdveipkhliiasr1skgkyqilvkdyaeienaep1khiddatkiimrg  
ev  
>tr|A7WY45|A7WY45\_STAA1  
mtqyp1wqqlntlkqatwvd1thtfdpeiprfsefekgevstlftvkdhgfyvqrwnivtqyghidapihfvenkryle  
did1kelvlp1iv1dfste  
vanndfivtrahieawekehgtiepgtfvalrtdwskrwpniekfenkdangqqhapgwgl1dalkylieerrveavghe  
tfdtdasvdvkvngdlvge  
ryilgqdkyqve11tnldq1ptrgaiiyaispkpkdapgfpvrafai1kpsnd  
>tr|A7WY71|A7WY71\_STAA1  
mttqsfi1fmni1ldgatqrhpfficqilaf1fpkfphin11fypilstfsni1hidh1hankkddn  
>tr|A7WY91|A7WY91\_STAA1  
mkn1ilsvqhl1amyagai1vpivgts1kftpeqiay1vtvdi1fmcgvat1lqankvtgtglpiv1lgtftavapmili  
gqtkgidvlygs1flsgil  
vii1apffsh1vkffppvvtgsvvtiigin1mpvamny1aggqgakdygdvkn1llglmtlii1lv1qrfttgfiksi1ai  
lig1vlgtigag1l1gmvd1  
nqvnhagw1gipvpfrfsgfsfdvtst1vffilaivs1iestgvyhal1seitgk1lerkdf1rkgytaeglaiv1lgsifns  
fpytaysqnvglvs1lsgak  
knnviygmvv11licgcipk1galani1p1v1l1ggami1amfgmvmaygvsilghid1fknqnn1li1avsvglgtgisavp  
qafkglgeqfaw1tqngiv  
lgaisai1lnfffngikyqteenvk  
>tr|A7WY94|A7WY94\_STAA1  
mvkdpikkakngtyyfran1gydskgk1k1qkyrs1gfttkkeareeysk1ll1mkpeel1senkdkmtfkhyifei1l1pwykt  
qvk1l1rtyen1l1pt1kkhfs  
yfdk1mavsdiepidvqnwq1kl1skkckssyvravqgl1fsvamdraiv1lgitt1npski1gnvkkqk1skiefwtkeefekv  
is1iykedyyqhf1f1s1lw  
fl1fmtgmri1geataiqwed1dfds1vlt1inkt1lyyknqsn1yrfvepktkasvrhiv1ldkct1tyl1sewke1vqqn1li1qtdf  
vmsyngiptqkht1syaie  
ryak1lagihri1rh1gh1rshas1l1ismgen1li1kdr1ghedi1ett1l1gtygh1ypns1nfevank1ngais1fkeakqnydt  
spknqftvdy1lnkemkv  
q  
>tr|A7WYA7|A7WYA7\_STAA1  
mtqkqkkl1hyswit1l1cvgvi1l1l1gt1l1navqatgl1vdetid1tsneyskygl1nqyql1dyyvd1nswgl1pwnwsdg1gq

Tsompanidou\_et\_al\_Supplemental\_FASTA\_File

svmyglyaitnfiwtisly  
lsnatgylvkeayaldfisqtsqaigenmqtiagitpngfsssgfyvgflllfilivgiyvaytglvkrettkviravln  
fvvffilsasfiayapdyi  
akindfskdvstaslnigtkivlpntdsqgkdsvdmirdsflsvqvkqpwllllygstdvealgeervesllstspdtnn  
gedrenvviieiedhdnty  
ltlptktisrlgtvfflrvfnigisifvfltgimifsqvlfiiifamflpisflsmllpsfdgmgrhaitklfnvimtrag  
itliitvafsistmlysls  
asspffmimflqivtfagiylfklgdmslftlqsndsqnmgqvfrprqmmnrqtrrfqrsmski frgkagstkqktmt  
tkqnqtnkanhtrqneritt  
pkketal snvkkqggigqr lgektahvldtknrlnvrkrqakqqiqatpthvkya lhgqkenvthnvtdfkqsmadtka  
qrkqqrnmqqeqkrkniaq  
krleldkakekrrkenpsspvqnnqhvkrqqtvtvplsqntkrenhqrp lkkeqkqktppkqfnqrkl nkrtdkrgqq  
t  
>tr|A7WYA8|A7WYA8\_STAA1  
maypikymednlvfnhdgevfayyelipynysflssdekiqvhdnfcqliaqnrldgkihalqlatessiratqeqskei  
tgrlkeiayekideqteal  
ismigdnqvdyrffigfkllylneqevsvknvgkeiqkafeeffhgvnhklmgdfvsmpmaeierfskmeqllsklsrrf  
qirklekddfyiiehlyg  
qtgvpddydyhlpkryedkkvlvkydil kptrclieenqrylrieqedtttyvayftinsivgel dfpnseifyyqqq  
qftfpvdt smnveivankk  
alstvrnkkelkdldshawesdnetstnvdalesvdelesnldqtkesmyklsyvrvsaknldelkqrcdevkdfyd  
dlsiklvrfpfgdm lglhne  
fipsskryindyiqvtsdf laglgfatqmigensgiyvgynldtgrniylqpslasqgikgsvtnal asafigs lggg  
ksfsnmlvyysvlfggqa  
tivdpkaergewketlpdiaheinivnltsendnkgll dpyvilklpkdseslaidiltfltgissrdsekfpvlrkair  
svtqskqrglllvidelrk  
edtpisnsiadhiesfvdydfahllfsdgsvtqsislekqlniiqvadlvlpdsnssfeeyttmellsvamlivistfal  
dfihdsrsifki vd ldeaw  
sflqvaqgkalsmrlvragramnagvyfvtqnaddlldekmmkniglkf afrstdlveikktleffgvdkedennqkr lr  
elengqclvsdiygrvgvm  
qfhpifeelhafdrppvrnevee  
>tr|A7WYA9|A7WYA9\_STAA1  
mivlflflrkredmkkirsytsiwsvekviyaindlqlpfpitftqmtwfvsvlsvvilfgslppslidgallky lgi  
pivltgfmqctfdgkky  
gflksityalrpkvtyagkqir lkketmnesitivrseqldgisd  
>tr|A7WYB2|A7WYB2\_STAA1  
mkgfmmftndqfkslliktlerkssnyeggneivskmki sevtldetddftykykkgwntlctylk irvpfddld  
ffeshkdliqtassiydk  
qgdnlvdtlvp lpenyevinfsqlkisdvvsqaiedaesfmsngeyqrafdrvhta fhgylieilkkyeitvprdenl  
sklysriqq liekeiqpte  
ladivkttirssngmisslnearnrshlahpntniigkreakliigisstvtdyisgyldk  
>tr|A7WYB6|A7WYB6\_STAA1  
menekiwikelkekr laygsqnlavashitryplsdietgkavptqqvkedllnalerfnpdnpl emlfdyvri rftp  
ndvaqiigevlrlnmdym l  
hedfgyysypehyrfgdivvlvshdvskgvll elkgkgcrqfenllaqhrs wydffqdcme hkgifkrld laindktgi  
lnipdlakkckqecisvf  
rsfknyrsge lvrdekpymgntlyigs lksevyfciekdyeqyvkdvp ledae vknrfeir lkn dratqamkdllah  
qqaektafeinryirfad  
kddtkrrsdwktnerewfigknrgalrlttqpepysfertlnwlhqvaptlkiasildv lngttiistmiqea k ltek  
hekli eqqlamedlit  
>tr|A7WYB7|A7WYB7\_STAA1  
mpllhdrgerikandkhlyvhfvlisllvvflvllp fhwralqsvnwqavqldtffylhtpyfwssil tal fvcglis  
wlyyhyridsik lehrqk  
larmilenhweaeetqsegffkd lpskktkqri rhfpkiyrmkdgli hihveitlgkyqdqllh lenkletglycelv  
ektlkdsyveyvll ydtig  
nrigiedvvaqdgvrklmesvywefds lphmlia ggtgsgksyfil tiesllhtnaklyildpknadladlgavmnnvy  
yrkedmlacinqfyedmid  
rsetmkqhpnyktgenyaylglsanflifdeyvamm dm lgre sttvihklkqivmlgrqagfflilacqrp dakyfsdgi  
rdnfnfrvalgrmsemgfg  
mmfgsdtqkqffl kpi kgrgyvdtgksviseftytp lvpkrydf lgeigkviqkkqsepvphevkg tgsdl l  
>tr|A7WYB9|A7WYB9\_STAA1  
mr laegiviekdqtfgtlkfsal rrevri qnedgtvseeikertydlk skgqgrmiqvsipasvplkefdyna evelinp  
vadtvatatfrgadvdwyv  
kaddlv lkgqtkphqkykkeasesek  
>tr|A7WYC4|A7WYC4\_STAA1  
mfistlqir nfrnyesei frfdnetnti igendsgktnal talrill ddsyyysk t lkesdffhgiqngwqghwi isa  
tfegiseeefdneicasis  
lnsesqtileelisnadkgvgsisl firpnkairkqlfdisteldshqfnefrnsirlsdyefyysksnl nfcineny d

Tsompanidou\_et\_al\_Supplemental\_FASTA\_File

klvgrlndniasnpeedde  
allgsridmsdi fkhisvvyvdalrdvlremknnrnpvkrimetieskissdnceslktiiqqlnetitsvpeirkigen  
inrqlnsiigsvsynl11  
sstmsddmgs lakflsmkpeqidldlglghlnmiylalkivefeacrsrellnimlieepeahihhhiqktlfeglnl  
qknytqilmthsvhlaev  
seisrmnvlksfngksivmpannl nsfakeklkknlnlinaveryldvkrngllfskgvilvegdaeeilipqivkkl  
fginldelgiglinvgsts  
feyiaslfddriqrkcaivtdldeqaipsehrlykstaqekgqarkek lsslfnennwvncfyanttfeieflvkn  
il tyvspiiddafkdkkti  
taykeei qseqylernlamlklanhvgkgwfaielgekidflikipkyilnaiafacqeivdlsiykkillhtidlyeet  
telsalsl ktsdtadln  
iaaislleyfgkdedvvylinqienytkilyaevsk  
>tr|A7WYC8|A7WYC8\_STAA1  
mkkvvnlimtkerrtfssefklqmvrlykngklkneiirkydlkpsii nsikqhqtgpfnhqdnlksdekeliklrke  
vqhlkmehdv lkqilkl  
>tr|A7WYD9|A7WYD9\_STAA1  
mkmaaiakas lalgi latgtitslhqtvnaseheakyenvtkdifldrduysgaskelknvtgyryskggkhylifdknr  
kftvrqi fgkdierfkark  
npgldi fvvkeaanrntv fsyggvtkknqdayydyinaprfaqkrdegdgiatygrvhyiykeeislkeldfklrqyli  
qnfldlykfpkdsikvim  
kdgyytfelnkklqtnrmsdvidgrniekeani r  
>tr|A7WYF1|A7WYF1\_STAA1  
mrenfk lrmkvglvsvaitmlyimtnqgaeasetnqvstnqeskavsqteqnsketkaaessknfvnl dpikpqaqkv  
tgttlphhiillnidgksa  
dsveggygdfi tandkgefeypln nrki vhnqei evssspdlgddeedeveesstekagaeestdakatyttpryek  
ayeipkeqlkekdgghqv  
iepit egsgii kghtsvkgkvalsinnkfinfeerakggi skedtkassdgvmpinekygfdfdkknfpdnl elkknd  
eisltfapddedealksli  
fktkvt sledidkaetkydhtkvekvklkdvkedi hvdeiyg lyhtekgk gildkqgtkeitgktkfanavkvysdl  
gdaq lfpdi qvdengkfsf  
daekagfrlnget lnfavvkpitgdllhgfvskyidvyespekkerefeeklentpayhklhgdkivgydvqgnpst  
wfyp lgekkverttpklek  
>tr|A7WYF3|A7WYF3\_STAA1  
mkyktrretmrylkr lswyisililivviagcgknetkegskeeqikksfaktldmypi knledlydkegyrdsefkk  
sdkgwtiytdfaksnkpg  
elddegmvl nldrnrtrtakghyfvttfyrngklpdeknykiemknki illdevkddklkqkienfkffgqyanlkelrk  
yngdvsinenvpsydvey  
kmsnkdeivkelrsrynistekspilkmhidgd lkgssvgyrkleidfskrensklsvieflysykpack  
>tr|A7WYF7|A7WYF7\_STAA1  
mnrnrtrttgyfsieeidsrks lderetekypvkminkiipteeikdek lkeienfkffvqygsfkgienyengdis  
ynseapiysakylknddy  
nvkelrkryniptekapkl lkgsgdlkgssvgykeiefi fienkkeniyfsdgl nlipd  
>tr|A7WYG0|A7WYG0\_STAA1  
mrdskrvlyisii vlsifiigcgkneikedakeeqikksfaktldmypi knledlydkegyrdgefkkgdkgmwtiyt  
dfaksnrpgvldnegmvl n  
ldrnrtrtakgyyfvdtiydnhensysknyrvemknki illdkvedqklkerienfkffgqyadfks lksynhgdvns  
nvpsydakfkmsnkdenk  
qlrsryniptdkapilkmhidgd lkgssvgykkleidfskeense lsvdslnfqpaknkde  
>tr|A7WYG7|A7WYG7\_STAA1  
mmeyikkialymvllliifiggcgmkeeqkkeantnkt dskeekikksfaktldmypi knleelydkegyrdgefekg  
dkgmwtiytdfaksnkpg  
lsnegmvl yldrnrtrtakgyyfvrtfyrkdklpdrknykvemknki illdkvedpn lkkrienfkffgqyanlkelkny  
sngdvsinenvpsydvyk  
msnkdenkqlrsryniptdkspvlkmhidgn lkgssvgyrkleidfskrensh lsvidsldyqpakvdeder  
>tr|A7WYG8|A7WYG8\_STAA1  
mkdkyki dpgi knnteetai ski syevenanlygadseditrqiey l kakkkfpsnleyvdsytdslngvttsaflnk  
dtgkvtl gmtgtniqgeaf  
kklkegefsrqvtnaletvkdgyad lki lypasdqnyryantqefinkikskydidfitghslggrdavvl gmsngip  
nivvynpapisinslnps  
pdgkrllelyknykgnitrfvaenda ltenl kkykhyvffgndkvfngkghemegflteeqkaikke lklqgyaen  
nksfvknsnnaisklasie  
llranmmttnggg lsssqkvleslta ltaqsfsq liddeinqikkmynekkkefgknwedaqkagkavged lsvngvl  
naldegqvnessmvrepeq  
misakerqlstigssvsnyimrvr lsineivdkdqv lasqiggll  
>tr|A7WYI2|A7WYI2\_STAA1  
mnrvi fvyial iitlvrrftpihpsfnliyi fvl yfipi ilcvigfkaekliatmviipnflgil yrlayvthilfm  
>tr|A7WYJ4|A7WYJ4\_STAA1  
mkr liglvivalvl laacgsnndkkvtigvasndtkawekvkelakkddidveikhfsdynlpnk alndgdidmnafqhf

Tsompanidou\_et\_al\_Supplemental\_FASTA\_File

afldqykkahkgtkisals  
ttvlaplgiysdkikdvkvdgkavvipndvsnqaralklleagliklkkdfglagtvkditsnphlkitavdaqqt  
aralsvdiavinngvatk  
agkdpkndpifleksnsdavkpyinivavndkdldnktyakivelyskskaqkaqedvkdgekpvnlskdeikaietsl  
ak  
>tr|A7WYLO|A7WYLO\_STAA1  
mavkredvkaivsaiggkenleaathcvtrlrllvldeskvdkdalsnnaivkgqfkadhqyqivigpgtvdevykqfid  
etgaaeaskdeakgaaakk  
gnpvqrlikllgdifipilpaivtagllmginnlltmkgifgpkaliemypqiadisniinviastafiflpaligwssm  
rvfggspilgivilglimh  
pqllvsqydlakgniptwnlfgleikqlynyggqvpvliaayvlakiekglnkvvhdsikmlvvgpvavllvtgflafiiig  
pvaligtgitsgvtfifg  
hagwlggaiygllyaplvitglhmfllavdfqlmgsslggtylpivaisnicqgsaafgawfvykrrkmvkeeglalts  
cisamlgvtepmfvgvnlp  
lkypfiaaistscvlgavgmnnvlgkvgvggpafisiqkefwpylivtaiaivvpciltivmshfskqakeived  
>tr|A7WYM6|A7WYM6\_STAA1  
mdeqqqltnayhsnkshaylfegddaqtmkqvainfaklilcqt dsqcetkfstynhpdfmyisttenaikkeqveqlv  
rhmqplpiestnkvyiied  
fekltvqgensilklfleppndtiaillstkpeqildtihsrcthvfykpidkekfinrlveqnmskpvaemistytqqi  
dnaialneefdllaarksv  
irwcellltnkpmaligiidllkqaknkqlslltiaavngffedihtkvnvedkqiysdlkndidqyaqklsfnqlilm  
fdqlteahkklngvnpnl  
vfeqivikgvs  
>tr|A7WYN5|A7WYN5\_STAA1  
maketfyittpiypsgnlhighaystvagdviarykrmqgydvryltgtdehgqkiqekaqkagkteieyldemiagik  
qlwakleisnddfirttee  
rhkhvveqvferllkqgdiylgeyegwysvpdetyytesqlvdpqyengkiiggkspdsghelvkreesyffniskytd  
rllfydqnpdfiqppsrk  
neminnfikpgladlavsrtfnwgvhpsnphvvywidalvnyisalgylddeslfnkywpadihlmakeivrfhs  
iwpillmalldlplpkkvf  
ahgwilmkdgkmskskgnvvdpnliidryglatryylmrelpfgsdgvtpeafvertnfdlandlgnlvnrtismvnk  
yfdgelpayqgpplheldee  
meamalletvksytesmeslqfsvalstvwkfi srtnkyidettpwvlakddsqkdmngvmahlveniryaavllrpfl  
hapkeifeqlninnpqfme  
fssl eqygvlt esimvtgqpkpifprldseaeiyikesmqppateeekeepskpqidikdfdkveikaatiidaehvk  
ksdkllkqvdldeqrqi  
vsgiakfytppdiigkkvavvtnlkpaklmgqksegmilsaedgvlvslpsaipngavik  
>tr|A7WYP2|A7WYP2\_STAA1  
mpksildiknsidchvgnrivlkangrkktkirsgilketypsvfiveldqdkhnfervsytytdvltenvqvsfeedn  
hhesiah  
>tr|A7WYP8|A7WYP8\_STAA1  
myyrgahymkvtdvrlrkiqtdgrmkalvsitldeafvihdlrviegnsqglfvampskrtpdgefrdiahpinsdmrqi  
qdavmkvydetdevvpdkn  
atsedseea  
>tr|A7WYQ0|A7WYQ0\_STAA1  
mrrhaiilaagkgtrmkskkykvlevagkpmvehvlesvkgsgvdqvvtivghaesvkgghlgerslysfekqlgtah  
avqmakshledkegttiiv  
cgdtplitketletliahedanaqatvlsasiqqpygygrivrnasgrleriveekdatqaekdineissgifafnnkt  
lfekltqvkndnaqgeyy  
pdvlsllndggivevyrtnvveimgvndrvmlsqakamqrrtnhyhmlngvtiidpdstfipgdvtigsdtviepgv  
ringrteigedvviggyse  
innstiengaciqqsvvndasvgantkvgpfaqlrpgaqlgadkvgnfveikkadlkdgakvshlsyigdavigertni  
gcgtitvnydgenkftiv  
gkdsfvgcnvnlvapvtigddvivaagstitddvpndslavararqttkegyrk  
>tr|A7WYR3|A7WYR3\_STAA1  
mknkvehienqytsqenkkkqrqkmmrvrrritvfvagvllaiivvlsillvvqkhrndidaqerkakeaqfqkqqnee  
ialkeklnnlnkdyeiki  
arddyylsnkgevirflpedkdsssskssk  
>tr|A7WYY9|A7WYY9\_STAA1  
mnpfiaiegpigvgksslaklsqldfyeekeiitenpflsdfyediskwsfqtemfflcnyrkqfqdvtqlnqgvvs  
dyhiknki fakntlspve  
fqkfskiydil tedmipnmiifldadldvlksriakrnrsfehqi edeyllklkkyreyyeslqsnsgnvvlidttsi  
dfllkneqdyedilhiilpm  
igditne  
>tr|A7WYZ8|A7WYZ8\_STAA1  
minrdnkkaikkgmismrlnkfsirktyvtgasilvgttlifglngqekaentstenakqddattdsnkevseten  
nsttendstnpikketntd  
sqpeakeesttsstqqqnnvtattetkpniekenvkpsdktatedtsvileekkapnytnndvttkpstseiqtktpt

Tsompanidou\_et\_al\_Supplemental\_FASTA\_File

tpqestniensqqptpsk  
vndqvtatnnpkepvnskeelknnpek1kelvrndnndtrstkpvataptsvapkrlnakmrfavaqpaavasnnvnd1  
itvtkqtikvvgdkdnvaa  
ahdgkdi eydteftidnkvkkgdtmtinydknvipsdltdkndpiditdpsgeviakgtfdkatkqitytftdyvdkyed  
ikarl1tlysidkqavpne  
ts1n1tfatagketsqnvsvdyqdpmvhgdsniqsiftkldenkqtieqqiyvnp1kktatntkvdiagsqvddygnik1  
gngsti idqnteikvykvn  
pnqqlpqs nri ydfs qyedvtsqfdnkksfsnnvatldfgdinsayi ikvvskytptsdgel diaagtsmrttdkygyyn  
yagysnfivtsndtgggdg  
tvkpeeklykigyvvedvdkdgvqgtdskekpmav1vt1typdgttksvrt danghyefgg1kdgetytkfetpagy  
lptkvn gtt dgekdsgss  
itvkingkddms1dtgfykepkyngdyv wedtnkdgiqdanepgikdvkvt1kdstgkvi gtttt dasgkykftd1dng  
nytvefetpagytpvknt  
taedkdsng1ttgvikdadnmt1dsgfyktpkys1gdyvwydsnkdgkqdstekgikdvkvt11nekgevigttkten  
gkyrfdn1dsgkykvi fek  
pag1tqtvtntteddkdadggevdtitdhddfil dngyfeedtsdsdsdsdsdsdsdsdsdsdsdsdsdsdsdsdsdsdsds  
sdsdsdsdsdsdsdsdsds  
dsdsdsdsdsdsdsdsdsdsdsdsdsdsdsdsdsdsdsdsdsdsdsdsdsdsdsdsdsdsdsdsdsdsdsdsdsdsdsds  
dsdsdsdsdsdagkhtpvk  
pmsttkdh hnkakalpetgsenns nat1fggl faalgs111fgrkkqnk  
>tr|A7WZ04|A7WZ04\_STAA1  
mepikegevid1lasfehkpvy1hvettn gayanhfdqrvfnagtflrniqvtythaqlkgnkepyrig1kl1snggwvy  
vqglthfevnehdefliag  
fnyegqlaaalqiserpfn1  
>tr|A7WZ18|A7WZ18\_STAA1  
mkfneiwi ney1alvnddnpihneivpgqlvsqmm1mams1etnqcqinyvkp ilineniefieqheheiiainddgeik  
ikis1stkk  
>tr|A7WZ33|A7WZ33\_STAA1  
mavpfnagkikvli ea1esgnyssiksdvydgmlydapdh1ks1vnr fve1nniteplavtiqtn1ppsrg1gssaavav  
afvrasydf1gks1tkee1  
iekanwaeqiahgkpsgidtqtivsgkpvwfqkghaet1kt1s1ldgymvvidtgvgkstrqavedvhk1cedpqymshvk  
higklv1rasdviehhfe  
aladi fnehad1kal tvshdkieqlmki gkengai ag1tgagrggsm111akd1ptaknivkavekagahtwien1g  
g  
>tr|A7WZ35|A7WZ35\_STAA1  
miksgkarahtnia1kiywgkkdealiipmnsisvt1ekfytetkvtfndqltqdqfw1ngekvsgeleki skymdiv  
rnr agidwyaieesdnfvp  
taagl assasayaalaaacnqald1qlsddk1sr1arigsgsasrsiyggfaewekgyndetsyavpl esnhfeddlami  
fvvinqhskkvpsrygms1  
trntsrfyqywl dhided1aeakaa1qdkdfkr1gevieeng1rmhatn1gstppfty1vqesydvma1vhecreagypc  
yftmdagpvnki1vekknk  
qqi idk11tqfdnngiidsdiatgieie  
>tr|A7WZ41|A7WZ41\_STAA1  
msidmy1drsrnqassvgn1sqtmsnydalekai tqfinddalkgkaytsakqffstvlip1stsmkt1sdltkqacd  
fvsrytsevdsis1kesel  
eedirs1sqitryen1tnn1kkhasdnqqaissnqqi iqt1gqqkheleek1rkl1refnqkspeifkeveefqkivqqg  
1tqaqnfwnfstnqfnips  
gkel dwakashekylkvamgiehkaeket1nkadfavikayakehp eddipksimkyindnkdsikrdig1ditst1le  
qgginaskfgvfintagv  
kqpagnsfvevkrtsgnvfi engskfakggkylgkgvagvgf1gmydd1andnktfgealshngmt1aagsvaafgva  
alvsnpvgwvvgi1tagi  
igstvdylyqnyfgikdkvdwaghki degidavnktaekavdsvgnai gdatksisnhinpmksw  
>tr|A7WZ49|A7WZ49\_STAA1  
mfkvrqatekdvvqirdvatkawfnty1niyaattvnh1leasynehhlkkr1qeqlflvveegndivgfanfiygeely  
1sahyvkpesqhtgygtal  
1neg1sr fedkfegvy1levdnkneeavayykeqgft1lrsyqpeygek1dla1mykaf  
>tr|A7WZ99|A7WZ99\_STAA1  
m1isieskehyri1cidggstdqtipmier1qrelkhisliqlnasiatcinkglmdikmtdphdsdafmvinptsiv1  
pgkl dr1taafknndnidm  
vigqraynyhgewk1ksadefikdnrivt1teqpd1lsmmsfdgk1fsakfaelqcdet1antynhailvkamqkatdih  
lvsqmi vgdndid thatsn  
dedfnryiieimki qrvmem111peqr1llysdmvdri1fnns1kyymnehpavthttiqlvkdyimsmqhsdyvsqnmf  
diintvefigenwdreiye  
1wrqt1iqvginrptykkf1liq1kgrkfahrtksmlkr  
>tr|A7WZB2|A7WZB2\_STAA1  
mkk1inkketfltdm1eg1liahep1dliantvikkakkehgvai vsggsghepahagfvaegm1daavcgevftspt  
pdki1eai kavtdgdv11  
vvknyagdvmmfemaqelaemeginvqtvivrddiavtnevqrrgvagtvfvhklagylaekgys1teiks rveallpei



Tsompanidou\_et\_al\_Supplemental\_FASTA\_File

ksigmaiepplvpttgkyg  
fdieddkmeigigihgekghreevkdidhivgtlldelykevtandvilmvngmggtplselnivtkyiqqnlaartvn  
vakwfvgydymtsldmqgfs  
itivpnkpeyleaflapttsgyfk  
>tr|A7WZC7|A7WZC7\_STAA1  
malimtfneiifknfrqnlshyaiylfslitsvlyfsvalkyahklmtesypiikegsqvgysflffiiiafllyan  
vlfikrrsyelalyqtlg  
skfniiyilmleqllifitailgiiigifgsklllmivftllgikekvpifslravfetlmligvayfltsaqnfilv  
fkqsisqmsknnqvketnh  
nkiteevvlgilgivilittgyylslnivqyydsigilmfillstvigaylffkssvslvfkmvkkfrkgvisvndvmfs  
ssimyrikknafsltvmai  
isaitvsvlcfaaaisraslsseikytaphdvtikdqkanqlaselnnqkiphfnykevihtklykdnlfdvakepyn  
vtitsdkyipntdlkrqga  
dlfvaegsikdlvkhkhgkaiigtkkhhvniklrdkinkiyfmdvdlggptfvlnkdqyeirkytkakhivsfgfd  
lkhkddalalekvknkvdk  
siktrseaississltgillfvtsflgitfliavcciiyikqidetedelenysilrklgftqkdmarglkfkimfnfgl  
plvialshayftslaymkl  
mgttnqipvfivmglycmavfavtaynhskrtirhsi  
>tr|A7WZC9|A7WZC9\_STAA1  
msyiiivtiavvifslifdfingfhdta navataustraltpktilmaavmfigaltftgvagtitkdivdpfkleng  
lvvllaailaaiwnlatw  
fygipsssshalignsiagaaiasegsvglhyqgftkiiivlivspiafcvgflmysifkviknanltranrnfrffq  
iftaalqsfshgtndaqks  
mgitlalianvqndgsvepqlwvkfacatamglgtaiggwkiiktvggnimkirpangaaadlssaltifvasslhfp  
lstthvsssilvgasnr  
akgvkwstaqrmiitwvitllisallagllfyilnlff  
>tr|A7WZD6|A7WZD6\_STAA1  
mlivdaltnnvnrtasdvraafgknggmvgsvaymfdhvatfgiegksvdeiletlmeqdvndviddngltivya  
epdqfavvqdalraagvee  
fkvae femlpqtdielseadqvtfeklidaledledvqnvfhndlk  
>tr|A7WZG0|A7WZG0\_STAA1  
mknkdekirisiingflgsgkttllthyiselkndekikiimnefgtfdidsnsisneievhslingcvccd lkqelv  
yelkaialkgdvnhvii ea  
tgiahplellvacqdpqivnffekpiiygvldatrflerhqtentvs lmeeqklksdmiinkidlitddslekidkql  
gmicasiptykttygkvs  
eel dltvkdreisshhhhhhgiksmytftgpidrqlfyqfimklpesvlrlkgyvsfrnqpnaiefqayayglpdygii  
gmqlpltiivigetldtnh  
irngldmlqft  
>tr|A7WZH1|A7WZH1\_STAA1  
mnkqifvlyfniflflgiglvipvlpyvldlglgtgsdlglvvaafalsqmiispfggtladklgkkl iicigllilfsv  
sefmfavghnfsvlmlsr  
iggmsagmvmpgvtgliadisshqkaknfgymsaiinsgfllpggiggfmaevshrmppyfagalgilafimsivlihd  
pkksttsqfqllepqltk  
inwkvfitpviltlvlsfglsafetlystadvnyspkdisiaitgggifgal fqiyyfdkfmkyfse ltfiaws lly  
svvvlillvfangywsiml  
isfvvfigfdmirpaityfnsniagerqgfagglnstftsmgnfigpliagal fdvhieapiy maigvs lagvvivliek  
qhraklkeqnm  
>tr|A7WZI2|A7WZI2\_STAA1  
mlneiqlnngypmpsvglgykisdedmtkvvnaaidagyrafdtayfydneas lgralkdngvdredlfittklwndy  
ggyektfe yfnksienlqt  
dyl dlfli hwpceadglfletykamee lyeqqkvkaigvcnfnvhhlek lmaqssikpmvnqievhyfnqqelqefcdr  
hdikvtawmplmrnrglld  
npvivkiaekyhktpaqvvlrwhlahnr iipksqtpkriqenidildfnleltevaeidaldrnarqgknpddvkigd  
k  
>tr|A7WZK0|A7WZK0\_STAA1  
miivyivllilvyvnyrlvnrllsenriyvrlivtittvisfilviali helmpfvramdlmyhq  
>tr|A7WZM1|A7WZM1\_STAA1  
miavnwntqedmtnmfwrqnisqmwvetefkvskdiaswktlseaeqdtfkka lagltgldthqaddgmp lvmllhttdlr  
kkavysfmanmeqihaksy  
shifftllpssetnyll dewleeph lkyksdkivanyhklwgkeasiydqymarvtsvfl etflffsgfyyplylaggg  
kmttsgeiirkilldesih  
gvftgl daqhlrne lsesekqkadqemykllndlylneesytkmlyddlgitedvlnykyngnkalsnlgfep yfeere  
fnpiiena ldttknhdff  
svkgdgyv lalnvealqddd fvfndk  
>tr|A7WZP1|A7WZP1\_STAA1  
mvtlllvavtmivsltipiviaiskrlnlvdkpnfrkvhtkpi svmggtvilfsfligiwighpieteikpliigaiim  
yvlglvddiydlkpyikla  
gqiaaalvvafygvtdfislpmgtti hfgflsipitviwivaitnainlidgl dglasgvsaignitigfiailqanif

Tsompanidou\_et\_al\_Supplemental\_FASTA\_File

itmicc1lgs1igflfyn  
fhpakiflgsdgalmigfiigflsllgfkniitlffpivilavpfidtlfamirrvkkgqhimqadkshlhhklla1g  
ythrqtvl1iysisilfs1  
ssiilyvspplgvvlmfvliifsieliveftglidnnyrpilnlisrksshked  
>tr|A7WZP5|A7WZP5\_STAA1  
mmfqqiqyarrqgdniavsprvdvvveiskrikdaflnedidilhqssqqfeghfvvctvhqlyrfkqhfdtifidev  
dafplsmdkslqqalksss  
kvehatiytmattppkqlseipheniklparfhkkslpvpykyrfklnnnkiqkmlryrlqdqinnqrytlvffniet  
miktfsvykqkiktlyvh  
sedvfrfekveqlrnghfdviftttilergftmanldvvvidahqytqealiqiagrvgklecragkvlffhegvsmm  
iqakkeiqrmnkla1krgw  
ide  
>tr|A7WZQ1|A7WZQ1\_STAA1  
mkk1lvtvssv1af1alnnaahaqqhgtqvktpvqhnvsnvqaqtqspttytvvagdslykia1ehh1tlnq1ysynp  
gvtp1lfpdvis1vpqnk  
vkqtkavkspvrkasqakkvvkqpvqqaskkvvkkqapqavaktvnavaykpaqvqksvptvpvahnyknsvanrgnlya  
ygnctyyafdrraq1grsi  
gslwgnannwnyaakvagfkvdktpevgai1qtaagpyghvgvvesvnpngtitvsemnyagf1vksrtilnpgkynyi  
h  
>tr|A7WZQ6|A7WZQ6\_STAA1  
mkepsivvkgarahan1kdi1dielpknk1ivmtglsgsgksslafdtiyaegqrryves1sayaqflgqmdkpdvdtieg  
1spaisidqkttsknprst  
vatvteiydyir1lyarvgkpycpnhnieiesqtvsqmvdrimleartkiq1lapviahrkgshekliedigkkgyvr1  
ridgeivdvndvpt1dknk  
nht1evvdr1lvkdgietr1ladsieta1elsegqltvdivdged1kfseshacpicgfsigeleprmf1fnspfgacpt  
cdglgqk1tvdv1vvpdk  
dkt1negai1epwiptssdfypt1lkrvcevykinmdkpfk1lterqrd1llysgdkeieftftqrggtrkr1tmvfegv  
vpnisrrfhespseytrem  
mskymtel1petchgkrl1sreal1svyvg1nigevveysisqa1nyyknid1seqdqai1anqilkei1sr1tfl1nvg1e  
yl1l1nrasgt1sggeaqri  
r1latqigsr1tgvl1y1ldepsig1lhrdndr1int1kemrd1ngt1livvehdddtmraady1vdigpgagehggqivssg  
tpqkvmkdkks1tgqylsg  
kkridvpeyrpasdrki1srgarsn1kgidvdi1psimtvvtgvs1sgkssl1vnevlyks1aqkinkskvkpglydki  
egidq1dki1ididqspigr  
tprsnpaty1tgvfddi1rdvfaqtneakirgyqkgrfs1fnvkgrceackgdgi1kiemh1l1pdv1vpcevcdgkrynret  
levtykgkniadi1emtve  
eatqffenipkirk1ql1vdv1lgyvt1lqqatt1sggeaqrvk1asel1hkrstgksiy1idel1ttgl1hvddisr1l1kv  
lnr1lvengdtvvi1ehnl  
viktadyi1id1gpegsggggtivatgtpediaqtksy1tgky1lke1vlerdkqntedk  
>tr|A7WZU2|A7WZU2\_STAA1  
meefgek1fthkaks1svkwekgl1tkpsner1keiak1gnisvhq1iygdfl1g1lesianeeik1fildtmcans1flan  
el1sss1svr1f1fsy1yergke  
nfen1lfrk1l1qhylq1le1dl1gnrd1les1tyfayqrtinaq1lvdy1yeds1kake1flkdeside1f1ttis1nkyfd1lleyi  
ddyrvkhd1leki1see  
>tr|A7WZU4|A7WZU4\_STAA1  
mmnkvsn1yrry1gl1tqnqmann1ki1svtayar1nker1git1pfdk1sekv1fikn1lieng1kidit1diffn  
>tr|A7WZU9|A7WZU9\_STAA1  
mnweikd1mcdi1evike1indva1ikhgw1fvedk1fvkne1letkqeh1nfsasylehri1qnehtve1l1qvylke1fgeli1qkf  
heiekassen1fgees1ddak  
k1kite  
>tr|A7WZV2|A7WZV2\_STAA1  
mneik1leydth1svv1hyes1dsrs1fks1fskpkwsk1ink1svpie1anykyargv1vaygdikngandhgei1kkhrndv1v  
vyrdv1v1dyde1ind1lkq1  
heaissal1snaw1fwhts1yshrteqar1r1lyip1lneris1addy1rkyskvlankighkvdegsy1qpsrc1falpvi1qkghif  
ikrvndcpi1idvdm1leqws  
ke1leqsnasp1nvigytr1rdsaywr1dia1fgv1seger1nst1lasitgy1llrry1vdpn1lvyl1vsawas1vckppin1qsevn1tf  
ks1lkkdskss  
>tr|A7WZV3|A7WZV3\_STAA1  
menvtndev1fem1dsrtg1v1nandwks1ql1rsattqal1kkttt1naei1ilcndes1kg1lvqyda1fekvt1klr1pywr1skg  
danywadi1tthv1ishid  
k1lynvqfsrd1id1tvi1ekayqnr1fhpiksmi1eskswdgikri1et1fidyl1gaed1hynrev1tkkwm1mgavari1yqpgik  
ydsmi1lyggq1vgkstav  
sk1lgghwynq1sikt1fkgdevy1k1lqgswi1ceie1safqkstiedik1gfisai1vdiyrasy1gkrterhpr1qcvfvt1tnn  
yef1kdqtgn1rrff1pittd  
knkatksp1fdd1tpvvvq1mfaeakvy1fdenptdka1ll1dkeasema1kvqeahse1kda1lvegiee1flerpi1psdyw1yrt  
leekrvsah1dvi1dqdyik1l  
ydgk1l1e1l1pnakpgay1vwr1dkvcsmei1wkvmmk1rddq1pqqh1l1rkidka1l1rntsycg1qsksr1hrf1gegig1ryqy1gfin1  
isyyqg1kskeqk

Tsompanidou\_et\_al\_Supplemental\_FASTA\_File

>tr|A7WZV5|A7WZV5\_STAA1  
mfehcpdnlkhiensemhlskirrkkmknqkqkseileyikahagtsfveievfeennfdykgdgaytsqghpnvfvf  
wigwnqeaafdviaelkkdr  
riemdicepivymvdgkglpivsskniktldhwlpvtftiskketecv  
>tr|A7WZV7|A7WZV7\_STAA1  
mndkekiynqlhdapiqiipapenlfveyieadevwpvvcmaalskahninfydsddvgcidkaatcsikkfnpetge  
feqfskmaqkeitq  
>tr|A7WZW2|A7WZW2\_STAA1  
mktesyfkeynqfvldqqkaiqeleqernalesskikidkstyqqlimdggddkadnlyqatdadedkklkalnkrletkks  
vskevkyqktie1lkhqse  
lsslyesekqsalgk1kkvdayneiideiedindryedehqqyasiysqeqlyddkearealngyfreniftsyngnd  
lpyehnk1f1kr  
>tr|A7WZW3|A7WZW3\_STAA1  
metkyelnntkkvanafglneadtlnlnavdlidknmqeisselqqseqskqkqygttlqnlakqnrriik  
>tr|A7WZW5|A7WZW5\_STAA1  
mspi ficksqvtmdkkqikdfvcdyhkrtisdvli ddeintdeffsigdensnewmaddnidhdhivknhlemivdqvand  
kefyifdsliqgrsfkdis  
nvlsecseqsvrlwyetl1dkivevie  
>tr|A7WZW8|A7WZW8\_STAA1  
msetakqarfvenyirtlnvtqsaikagysansahvtgcrllkkphikqyiqeqdkiidenvltake1lhvltnaavg  
detetkevvrgeykenp  
qsgkvqlynehvelievpi kpsdr1kardm1gkykh1ftdkhdngnvpifinigewgddeeldktvkdvsnanpht  
vivddipld  
>tr|A7WZX4|A7WZX4\_STAA1  
mkrldgipesmlipliarakeyeyekpiikdalskikfdglldiyknvtcddmsqigisirsviidsvtkrlikdnknl  
vinigcgltdtrfqrfnnek  
iswidldvpesieirktffketdsykmiaksmldyswiedvinykffnsksnilfifegv1myfdesvmtkl1htiikkf  
gdhnl1tfaiefcsktiann  
tkrhksvsk1ssqpvfkygynd1neldkvlpnkmkvineynyfdyhkkrgw1fgycryipy1kkr1nnkivimeykpak1  
ithn  
>tr|A7WZX5|A7WZX5\_STAA1  
msnkckswi1sftfnivheetslyaknspcyicqyknvr1hlig  
>tr|A7WZX8|A7WZX8\_STAA1  
mr111mkqsieqlqee1apn1ktrdlv11rymysykeinm1dsylfqlatnkeqitkkqfktklenirevpeipirqvnd  
ilegyknse1yvelinsil  
k  
>tr|A7WZY1|A7WZY1\_STAA1  
mkkvmgillastli1lgacghqdsakkesashkkkndneelnee1kefksknmdikikgdtivsdkfeakikepfiin  
ekdekkyiafkmeitakk  
ddkd1npssishdyinitqddkntvnlrdgy11sdkkykdwtehnqdqikkgktaqamfiyelrgdgnin1lvhkysed  
ktvdsksfkfsk1ktedfs  
hraetreevekkekefeeykkeqerekekekqkdddhs1dev  
>tr|A7WZZ5|A7WZZ5\_STAA1  
mngtvmkwfnaekgfgf1eredgsdvfvhfsaiaedyks1eegqkvefdivegdrgeqaanvkm  
>tr|A7X000|A7X000\_STAA1  
ms1hfai1fw1ali1flvaatfi1v1mkkgtgkeskkesylsftvilyifgfai1iyt1fifgv1  
>tr|A7X005|A7X005\_STAA1  
mdhhnqcnynvpqns1dwecfi1sksem1ldgvpnelintw1dkdi1tpfsirndeinfktkdiwdali1hnhwysn  
>tr|A7X035|A7X035\_STAA1  
makkapdvgykygfhdddsv1frsergl1tenivreisnmknepewm1dfr1ks1kl1fykmpmpqwggd1sel1nfddity  
yvkpseqaerswdevpee1  
krtfdk1gipeaqky1agvsaqyesevvyhmeke1eekgi1fktdsalqeneel1fkkyfasvvpaadnkfaalnsav  
wsggsfi1yvpknik1dtp1  
qayfrinsenmgqfert1li1adegasvhyvegctapvyttss1hsavvei1vhkdahvrytti1qnwannvyn1vtkrtfv  
yengmewvdgn1gsk1tm  
kypncv11gegakgst1siafagkgqvdaqakmi1hkapntsstivsksis1knggkviyrgivh1fgrkakgarsniecdt  
li1dnestsdt1pynefn  
dqis1eheaksvkvseeq1fy1msrgisee1eatemivmgfiepf1tkelpmeyavemnr1likfemegsig  
>tr|A7X046|A7X046\_STAA1  
mnnin1tqrq1d1liknkai1sk1lpveayakatntmnsyvmnaleiqstvnvnmnsirin1qsk1sdwasymhrvtknhp  
mfktn1fseki1defissn  
sfpedevrvksth1rnsfvdtvdvpv1gktvdsahpiddvntkkynsvfnes1nhi1fispakfikkvsvgsaigvtspv  
mvrti1dqyvny1fmffnvi  
at11tlyvianyl1dden  
>tr|A7X049|A7X049\_STAA1  
matsyh1mtklis1scssvfss1hssiaw1nksda1skfsstt  
>tr|A7X051|A7X051\_STAA1  
mteqt1feq1nknvndhteqqkrin1ssmvi1ctsr1vkkd

Tsompanidou\_et\_al\_Supplemental\_FASTA\_File

>tr|A7X053|A7X053\_STAA1  
mnelwkdvvgyegiyevsskgrvrthknkvtwsnryqkwrhwkqrylkdktpngrdvrvtlwkgkrkdfvlvhrlvafaf  
ipmiegkicinhdgnpkn  
nvenlewcnhlennrhafetglmhtnmavklnhnlgiyefismsragkflgrshsyisdikiksnhkdvtdihgnkykf  
ekli  
>tr|A7X054|A7X054\_STAA1  
mpiitsyitqddgtttvvisgvelgnketllldngfdvevdsvidpfaqitgkqrrkifalvkdieehtgqpmrdymrhmf  
iefvrtygyderislnc  
trtqasqiieatldwtfyndiplyktsnllkqdksflywstvnrcvicgkphadlahyeavgrgmnrnkmnydkhvl  
alcrehhneghaigvksfd  
dkyhldswikvderlnkmlkgekke  
>tr|A7X059|A7X059\_STAA1  
mitkeflktklecsdmyaqkolidetqgnenklydlfirklaerhtrpaivey  
>tr|A7X061|A7X061\_STAA1  
mskynakkveykgivfsvkveceyyqylesnmngtndhieiqpkfellpkldkqrkieyiafalylddklievidikg  
mptevaklkakifrhkyrn  
iklnwickapkytgktwitweelikarrerkremk  
>tr|A7X070|A7X070\_STAA1  
mnqlrillhdgssllhedelfneivfvldnfrnddyltiiekdygrelvlnkgyivginveeadd  
>tr|A7X071|A7X071\_STAA1  
minipkmkfpkyteikkyknktpeekakieddfikeindkdefyspmanmnehelramlrmmpslidtgddndd  
>tr|A7X073|A7X073\_STAA1  
mikqilrllflamyelgkyvtekyimttanddveapsdfaklsdqsdlmraevte  
>tr|A7X074|A7X074\_STAA1  
mqaeqlkgdvkvkereieilrsrlrhfeg  
>tr|A7X076|A7X076\_STAA1  
mslrkstqryleselsnyfydkdiarvrdevlnpwsqqdtniggdrvqsnsvteikairvndrllsqfarmksaiev  
vynhsttetqklmelyyfk  
kprtlnltgvaqeinvsksstaydmrkdilvrladelgiih  
>tr|A7X077|A7X077\_STAA1  
mnekqkrfadeyimngcngkkaaisagyskkaeslasrllrnvnvseyikerleqi qeerlmsitealalsasiargep  
qayskkydhlndevekev  
tytittptfeerqrsidhilkvygayidkkeitqknieinigeyddes  
>tr|A7X079|A7X079\_STAA1  
mtkvklnfnkpsnvfnrni feiltnydnftevhyggsgskshgviqkvvlkalqdwkypririlwlrkvqstikdslfed  
vkdcinfgiwdmclwnkt  
dnkvelpngavflfkgldnpekiksikgisdivmeeaseftlndytqltllrlerkhvnkqiflmfnpvslnwvykyff  
ehgepmenvmirqssyrdn  
kflidemtrqnlellanrnpayykiyalgefatlckmvfpkyekrlinkdelrhlpseyfgldfgyvndpsafihskidvkk  
kklyieeyvkggmnde  
anvikqlgyakeeitadsaeqksiaelnrlglkriiptkkgkgsvvqglqflmqfeivdercfktieefdnwtwqkdkd  
tgeytnepvdtynhcidsl  
rysverfyrpvrkrtnvsskvdtkslgl  
>tr|A7X082|A7X082\_STAA1  
mpnkntqeyweegrkaieenelkrdktaeeierilnmikriekinafivkygdvagvtlqeaqkiidefdvkafqee  
akrlvenkdfsdraneeik  
kyntkmyvsreqmkiqiefliayataqtelmsreyfestayrvfsdqagilgegvqakevidtividtdqfhgvvserl  
wnteamkqeevianvv  
igrhpnryvkdmrkhlkfkfegtarqktaaisllytesarvhaqssidsmkeispegyymiakidnrtrtkvckglng  
ifkvdakigvnyfpmhin  
crsdcallpksmwpkpkpkrktkyfggkvksgd  
>tr|A7X084|A7X084\_STAA1  
mdiqeklkklqffaesgdngkskdnnddegdkdkdktntseeeiekrleeynkrleelssrmkqkekekqavde  
akrlakmndqiaeyereq  
mekeleqlrsekqlnemrsearkmlseaevdssdevnllvtdtaeqtksnveafsnvkkavneavkvnarqspitggd  
sfnhstknkpqlaeiarq  
kriikn  
>tr|A7X085|A7X085\_STAA1  
meqtqklklnlqhfasnnpqvfnpdnvmmhekkdgtllndfttpilqevmenskimqlgkyepmegtekkftfwadkp  
gaywvgegqskhklhgl  
mll  
>tr|A7X086|A7X086\_STAA1  
mnqgnnpfgksiaqsiektknvikgdftqdniidleaalledleanafisktqnrsllrkivdpeteriydrnsdtld  
glpvnllkssnlkrgelit  
gdfdkliygipqlieykidetaqlstvknedgtpvnlfeqdmvalratmhvalhiaddkafaklvpadkktdsvpgev  
>tr|A7X087|A7X087\_STAA1  
mpeiigivkvdftdlednrhvykmghvyprkydptderikalasvenkrneqmiyivndkltkkelveiasvaglqvde  
kqtkaeiinafesle

Tsompanidou\_et\_al\_Supplemental\_FASTA\_File

>tr|A7X0A0|A7X0A0\_STAA1  
mdieltkkdgtviklseygfivndividsmqintkyqdkenmngriilmgsnyisrdivvpcfcvvnksdiaymrmdlys  
ltdiepmylreirreeel  
nyrftqpisddyvklkdnnpdyeysrhdqqnyvngkqykvi fngvinpkqkgnkvsfelkfettel pygesigtslele  
enkkvglwsfdfnidwhag  
gdkrkytfenlsgtvyvhgsapndqfnmykkitiilgedtesfvwnlthaeimkiegiklktgdrivydsfrvykngve  
istetniaqpkfkygankf  
efnqtqvkvqfdlkfyk  
>tr|A7X0A1|A7X0A1\_STAA1  
mtitikipkngapvpvettlvkkvnadgvlftdilenkytyevinaigrwivshvegendkkeyvitvidrksegdrq  
lvectareipidklmidri  
yvnvtgsftveryfnivfagtgmlfevegkvskskfenggedtrlemfkkglehfgleykitydkkkdrykfvltpfan  
qkasyfisdevnanaikle  
edasdfatfirygynsgeetfehaglvmearsalaeiygdihaepfdgkvtdqetmdkelqsrllkkslkqslsldflv  
lresypeadpqpdiqvik  
stklglndlvriqvktirginnvivkqdvltgefnreqrymkkvntaanyvsglndvnl snpskaeenlkskvasiaks  
tldlmsrtdliedkqgkvs  
skvtvtsdgtivhdfidksnikdvktigtigdsvargshakanftemlgnklkakttnlarggatmatvpigkeavensi  
yrqaeqirgdliilqgtd  
dwlhgywagvpigtkttdtktfygafcsaievirknptskilvmtatrqcpmsgttirrktdknklgltledivnaqi  
lacseldvpydayhtdyf  
kpynpafrkssmpdglhpnerghevimeyliknyyqfyg  
>tr|A7X0A2|A7X0A2\_STAA1  
mdnkli tdl sr vfdyryvdeneynfklisdm l tdfnfsleyhrnkev fahngeqikyeh l nvtssvsdf l ty l ngrfsm  
vlghngdgin evkdarvdn  
tgydhktlqdrlyhdystl daftkkvekavdenykeyrateyr fepkeqep efi tdl spytnavmqsfwvdrtki iymt  
qarpnhymlsr l kpnqgf  
idr l l vknghgthnayryidgelwiy sav l dsnkknkfvr fqrtygeitygnemqdvmpni fndrytsai ynpienlmi  
frreykaserqakns l nfi  
evrsaddi dkgi dkvlyqmdipmeytsdtqpmqgi tydagi lywytgdsntanpnylqgfdiktke l l fkrridiggvnn  
nfkgdfgeaegl dmyydl e  
tgrkalligvti gpnrrhhsyisigqrgvnqfl kniapqvsmt dsgrvklpi qnpayl sdi tevghyyiytqdtqna  
ldfplpkafrdagwffdv l  
pghyngalrqvl trnstgrnm l kfervidi fnkknngawnfcpqnagywehipksitk l sdlkivgl dfyitteesnft  
dfpkdfkgiagwi levksn  
tpgnttqvl rrrnfp sahqflvrnfgtggvgkws l fegkvve  
>tr|A7X0A5|A7X0A5\_STAA1  
mki tvndknevi gyvntgg l rns l dvddnvpik fkeefepkrkfvftngeikynsnfekedv pnasnqqsasdl sdeel r  
gmvasmqmqvqvvn l tme  
laqqnam l tqql telktnktstegdv  
>tr|A7X0A9|A7X0A9\_STAA1  
mg l pnpknrkptasev vewalyiaknia idvpgsgmgaqcw d l pny l l dkywgf rtwgnadamaqksnyrgrdfki i rn  
tkdfvpqpgdwgvwtggwa  
ghvni vvgpctkdywygv dqnwytnnatgsppyki khsyhdgpgggykyfvrppyhpdkttpapkpedsddnekknkv  
piwkdvtti ky t issgevn  
ypeyiyhfivegnrrlekpkgimi rnaqtmssves l ynsrkykqdv eyephfyvdrhniw aprravfevpnepdyividv  
cedysasknefi fneiham  
vvavdmmakyei pl sien l kvdds iwrsm l ehvwnmi dngvppkdkeyaleka l l nifknrekl l nsitkptvtsrik  
vmvdknadianvrdsst  
anngsaskpqi i tetspytkqal d kqmarginpkksnawganatraqtssamnvkriwesntqcyqm l n l gkyqgvsv  
salnkilkgkgt l nngka  
faeackkhni eiyl iahaflesgygtsnfangkdgvnyfygigaydnnpnyamt farnkgwtspakaimggasfvrkdy  
inkgqntlyri rwnpknpa  
thqyatai ewcqhqanti aklykqig l kgiyftrdkyk  
>tr|A7X0B3|A7X0B3\_STAA1  
mdinwkl r fknkav l tglvga l l l fikqit d l fg l d l stql nqasai igail t l l t g i g v i t d p t s k g v s d s s i a q t y q a  
prdskeeqqvtwkssqds  
sl tpe l sakapkeydtsqpftdasndvgfdvneyhggdnaskin  
>tr|A7X0B5|A7X0B5\_STAA1  
mqak l tkkefi ew l ktsegkqfnvd l wygfqcfdyanagkwvl fg l l l kglgakdipfannfdglatvyqntpdf laqpg  
dmv v fgsnygagyghvaw  
ieat l dyi i vyeqnlwggwtdrieqpgwgwekvtrrqhaydfpmwfi rpnfksetaprsiqsptqasketakppkav  
elki i kdvvkgyd l pkr gg  
npkgi vi hndagskgataeayrng l vnap l sr leagi ahsyvs gntvwqal desqvgwhtanql gnkyyygievcqsmga  
dnatflkneqatfqecarl  
lkkwglpanrnti r l hneftstscphrsv l htgfdpvtrgl l pedkqlqlkdyfikqirvydmgkipvatvsnessass  
ntv k pvasawkrnkgygtyy  
meesarftngnqpi tvrkigpflscpvayqfpggycdyevmlqdg hvvgytwegqryylpi rtwngsappnqilgd l

Tsompanidou\_et\_al\_Supplemental\_FASTA\_File

wgeis

>tr|A7X0B7|A7X0B7\_STAA1  
mteqiyliflflsfpflflfigrkthfycldkkngr  
>tr|A7X0B8|A7X0B8\_STAA1  
mtynintiakwfvnntssensydgnltlnkliyfadamnyaainkklvdeipvgfangpvyqsvyvdhryrtlesins  
ddaeiseetlkllrvkfa  
fgsytsqylseltheqtpwnkekckksfinpqlsfedltdeekfdlietynmygdmldnyvidrignnvfydintn  
lneddymelqqlnendsi  
fiekidgeivya  
>tr|A7X0C4|A7X0C4\_STAA1  
minigtgwdhyslyedlerqtdklktyaghfpvvelatyyaiqpernilkwiketpdtfefvkihqaltlhadykt  
fadtrqelfdqfknmllep  
htqkklamvlvqfppwfdcnaqnikiyilyvrqqqlqafpmcvefrhqswwsfafkeqtlafltehqi havvdepqvkds  
vplvnri tneiafvryhgr  
nhygwtkkdmsdqewrdvrylydyneqelidlaqkaqilaqkakkvyvifnnsghaannaktyqrllnieyeglapqq  
lklf  
>tr|A7X0E0|A7X0E0\_STAA1  
mklkpfllpilisgavfivflllpaswftglvnektvednrtsltdqvlkgtliqdklyesnyyipygsseigkddpfnp  
aialnkhankkafllgag  
gstdlinave lasydklkgkkltfiispqwfthgltnqnfarmsqtqinqmfqqnmstelkrayaqrllqfphvhn  
keylksyaknpketkdsyi  
sgfkenqlikieaiksifamdksplehvkpatkpdaswdemkqkaveigkadttsnkfgirdqywiliqueskrkvrndye  
fnvnspefqdlellvktmr  
aagadvqyvsipsngvwydhigdkerrqavykkihstvvnggkiydmdtkdyekyvisdavhigwkgwvymdeqiaxh  
mkgeppqevdkpkn  
>tr|A7X0H0|A7X0H0\_STAA1  
mtksekiieltnhygahnylplpivi seaegvwwkpegnkydm lsaysavnqghrhpkiiqalkdqadkvtlvsrafh  
sdnlgeyekicklagkdk  
alpmntgaeaveta lkaarwaydvkgepnkaeiafngnfhgrtmapvslsseayqrgygp lldgfrkvd fgdvda l  
kaainentaav lvepigge  
aginippegylkair elcdehnlfiadeiqag lgrsgklfatdwdnvkpdvylgkalgggvfpisvvladkevl dvft  
pgshgstfggnplacaasi  
aaldivvdedlpgsrlelgdyfkeqlkqidhpsikevrgrglfigvelnesarpycea lkeeglckethdvtirfapp l  
iitkeeldlalekirhvfq  
>tr|A7X0K9|A7X0K9\_STAA1  
mterilevndl hvsfdit agevqavrgvdfylnkget laivgesgsgksvttkai tklfqgdgrikkgeilflgedlak  
kpeneliklrgkdisimfi  
dpmtslnptmqi gkqvmep lkhknyskaqakkraleilnlvglpnaekrfkayphqfsggqrqri viatalacepkvli  
adepttal dvtmqagildl  
mkelqqkidtai ifithdlgvvani adrvavmyggqmv etgdvneif ydpkphpytwgl lssmpdlsttndtp llaipgap  
pdllhpkgdafarrsya  
ldidfkveppwfkvspthfvkswlldarapkelpe lvkqrmkmpnnyekplkvervsfnek  
>tr|A7X0L3|A7X0L3\_STAA1  
mnnvll evkdlets lkinnewlatvenisfel skgevlgivgesgcgsilsksiikllpekisklssgevidgkridt  
lnekqll dirdndiami fq  
epmtalnpvftiknqlvesikshkkskeannlakdl lkkvgiarqdeilnsyphqlsggmqrvmiamaiscspklli  
adepttal dvtiqagildl  
lkelqketqmaimmi thdlsvvae fcdkvlvmyagqivefggikeil hnpkphpytqkl l stipklkegqkrletiegivp  
sigafhvnkcrfanrcnk  
ldicnnqspkmhvcedvivrchlykneykei  
>tr|A7X0M7|A7X0M7\_STAA1  
mttppydi igkealydmi dyfyt lvekderlnh l fpgd faetsrkqkqfl tqflggpn iytee hghpmlrkrhmdftite  
ferdawl enmqtainraaf  
pqgvgydlferlrltanhmvns  
>tr|A7X0M8|A7X0M8\_STAA1  
matnheiefkqmitasiynklqekyfkdsvlfkqvnyyidtpdfklkehrsalrvkdnqyemlktpakvgll eynyi  
vdikpemnlisndnlpdd  
irqiiveqfgvkdttlsilgal ttyrqetkykgdllvdkseyfdtadyelefevkdynqglqkfqsl lnelnl ehqpl  
nkvrffkkketl snnin  
>tr|A7X0N4|A7X0N4\_STAA1  
mkfkyhisqqetvkaf larhdfs kktvsaikngalivndepvtrkqlmpndileihlpreipsvnlipyarklevlye  
dafiiivtkpnnqncpsr  
ehpheslieqvl yhcqehgeninphivtrldrnttgivi fakyghihhlfskvnllkiytclvygkthtsgieanirrs  
kdsiitrevasdgkyakts  
yevinqndkyslckvhlhtgrthqirvhfqhighpivgdslydgfhdkihgqvlqctqiyfvhpinknniyitidyqll  
klfnql  
>tr|A7X0P0|A7X0P0\_STAA1  
mlitgvlftlrmrffqvrhfkemirlmfqgekspngi ssfqaiamslagrvgtgnivgvstai figggpavfwmwitafl

Tsompanidou\_et\_al\_Supplemental\_FASTA\_File

gassafiestlgqifkrve  
nneyrggpayyieygiggkfgkiygiifaivtiisvgl11pgvqsnaissmhnaihvpqwlmgaivvvilgliifggvr  
sianvatavvpfmaiyyil  
maviiiciniqevpalfalifksafglqsafggivgamieigvkrglysneagqgtgphaaaaaevshpskqglvqafsv  
yidtlfvctataliilisg  
tynvtdgtvnangtphlikdggivyvenatgkdysgtamyaqagidkafhgsgyqfdptfsgvgsyfiafalfffafsttil  
syyytetnvayltrnqnn  
qvssifiniarvii1fatfygavktadvawafgd1gvglmawlniaiwilhkpavnalkdyeiqkkr1ngngynavyqpd  
pnklpnavfwlkyperlk  
qarakk  
>tr|A7X0Q2|A7X0Q2\_STAA1  
msifsqflkrsspqggivlyyivaiviaf11ln1pyvhkpgvevnpidtlfvavsgisvtglspisivdtystfgqliil  
vilniggigvmaigtmlwv  
vlgkhigirerqlimldnknmtmsgtvkliidivksifvievlgamllafyfyrdnpdlkyaimgqvfvsisattnggld  
itgkslipyahdyfvqai  
ifliilgsigfpvlllevkayiqnrvtnfrfslftkittstylflfivgvlail1fehnhafkglswhqslfyslfqsatt  
rsagltidvtllsdptni  
imgl1mfigsspsvvggirtttfaililflinfsnadtksikvynrevhimdiqrsfavftmatiltflgmliisate  
ngkl1tflqvffevmsafgt  
cgl1gvtsdisdiskv1mvm1mfigrvglisfiimiagrrepedkfhypkeriqig  
>tr|A7X0Q4|A7X0Q4\_STAA1  
mysqniyvirkgdmvirpafdddqrgngseiirfdktrinqpfkvqkiiersckfygntylgkkaetnritgisskppil  
ltp1fptyffpthsdrqne  
niwlnmhyiesikelknrkckvtfinnesiilhsyhs1whqynnsifyyvmvdqsrmsknpdqpidynkatlnvfea  
ltrysl1fedk  
>tr|A7X0R3|A7X0R3\_STAA1  
mkwfk1il1dvttf1ia1il1fvtykeneel1pdtkypiavt1dwnkkyskneykrinqfaknenvaiykstsnytnknv  
dkdiyvnkskattitpfn  
akynihyl1sddel1kkdikgsyfvkdknfdvskfinfl1keygvtaesykidhmmiavgvikqmnievpl1sallivyfiyy  
ifekninfkayai1kylngf  
tlrkiif1enfskkctywvtliisqil1ttsvlw1l1nytgnld1filr1vl1l1scl1f1iltisvin1wtfl1m1ln1n1anmik  
gkghfktirfintvcksil  
1vl1iasvmientsv1kd1nkiketekywnv1ddyti1efapyhetkqsl1idnm1rseq1lvk1vseannail1fkpkgdsvd  
ndn1fspdegnv1lvnngfw  
s1yykqfqpdi1pknqknvevi1ipqkfhamrneinqayhswfefvqnknknk1siqfinkndyri1fsdardsrh1s  
fi1eapi1ivnvqasdl1sndf  
yyami1sggy1fknydal1vkni1enyh1dge1sgitnykdsvmemehenn1kl1tv1nfsqii1ai1li1ii1il1fdvkyyfeq  
hrkl1lvik1lygst1ran  
yqyl1inni1vv1figi1ltnv1l1hsqyimmi1fatil1vvqil1lqics1lyyhgrfrfnevikel  
>tr|A7X0R4|A7X0R4\_STAA1  
mkfi1ai1l1gl1vs1tiafti1hhp1ldr1fnp1l1kte1syakvpkg1tqyvn1taysergek1ldyk1l1tfn1g1f1s1p1r1tyve  
ikhkgqyvisityvekedil  
pkevrqe  
>tr|A7X0T0|A7X0T0\_STAA1  
myqlqfin1vydttkl1th1leqtn1n1l1fignwsnhql1qsicirhgddtshnqyhil1fidtahqrikfssidneeityild  
yddtqhil1mq1tsskqgigt  
srpivyerlv  
>tr|A7X0V4|A7X0V4\_STAA1  
mkvavimgssdwkimgescn1ldyfeipyekqvvsahrtpkmmvqfasearerginiiiagaggaahl1pgmvas1ttlp  
vigvpietks1kgids1ls  
ivqmpggipvattaigaagaknagilaarm1siqnps1lvek1nqyess1liqkvedmqnelq  
>tr|A7X0W0|A7X0W0\_STAA1  
mkfavlvfpgsncdrdmfnaaiksgveaeyvdyretslsgfdgvlipggfsfgdyl1rsgamasvapii1sevkr1ategkp  
vl1gvcngfqi1lteig1lpg  
al1hndsh1fisrnee1ei1vnnqtaftn1yeqgekv1ypvahgeghyctdei1yq1lkannqi1ilkyvnnpngsyddiag  
ivnekgnvcgmmphpera1  
et1l1gtdsgvkl1feamvkswreqhv  
>tr|A7X0W8|A7X0W8\_STAA1  
mtpiaevhteisesnhqgildfakqqnv1dvvigpeqplidgladil1rangfkvfgpnkqaaqiegsk1fakkimkyni  
ptadykeverkkdal1tye  
nce1pvvkkdgl1aagkgvii1adtieaarsaie1imygdeeeegt1v1fet1f1egeefsl1mtfvngdl1avpfdci1aqdhkraf  
dhdegpntggmgaycpvph  
isddv1kl1tne1tiaqpiakam1negyqffgvlyigail1tkdgpkviefnarfgdpeaqv1l1srmesdl1mqhiid1degkr  
tefkwnesivgvm1askg  
ypdayekghkvsgfd1n1enyfvsg1lkkqgdt1vtsggrv1laigkgdnvqdaqrdayekvsqiqsdh1fyrhdi1anka1q  
lk  
>tr|A7X0X3|A7X0X3\_STAA1  
mplq1l1v1vrgfyacarrmcs1s1lq1l1v1vrgfyacarrmypsft1lq1l1v1vrgfyacarcmyps1s1lq1l1v1vrgffacarc

Tsompanidou\_et\_al\_Supplemental\_FASTA\_File

mypsftlqllvvrqffaca  
rrmypsftlqllvvrqffacarrmypsftlqtiirkplctgsslllkryd  
>tr|A7X0Y1|A7X0Y1\_STAA1  
mskllkgiaasdgvaiaakayllvepdlftfdknekvtdevevakfnasieaskveltkirnaevqlgadkaafidahl  
vlddpe liqpiqdkiknen  
anaataltdvttqfvti fesmdneymkeraadi rdvskrvlshilgvelpnpsmidesvvivgndltpsdaqlnkefvq  
gfatniggrtshsaimsrs  
leipai vgtksitqevkqgdi iivdg lngdvi vnptedeliayqdkrecyfadkkelqklrdadtvtvdg vhaelaanig  
tpndlp gviengaaggily  
rteflymgrdqmp teeeeq feaykeveamdgkrvvvrtldiggdke lsylnlpeemnpflgyrairlclaqqd ifrpqlr  
allrasvygklnimfpmva  
tinefreakailleekenlkneghdisddielgimveipataaladvfakevdfsigtndliqytlaadrm servsily  
qpynpsilrlvkqvieash  
kegkw tgmcmgemagdetai plllglg ldefsmsatsil karrqingl sknemtelanravdcatqeevie lvnnyvk  
>tr|A7X0Y7|A7X0Y7\_STAA1  
mgkeyv vlg rfggsivrelnalmdvmaidhdenrvneysdiathavvadttdeavmkslgir nfdhvivaigeniqs  
stl tliilke lgvkktak  
aqndyhakilnki gadtvvhperdmgrriahnvasasvldyleladehsivelkatek magqsiidldiraqyginia i  
krqkefiispnpi nleig  
dilimighdndlnrfekniatr  
>tr|A7X0Y9|A7X0Y9\_STAA1  
mrentq slyveaqteeqvr rylkdrnfniefitklegahl dyekensehfnveiak  
>tr|A7X104|A7X104\_STAA1  
mrntnkfl lipyllw mvi fiivpvv lliyfsfldinghfsftnyqqi fttkylkmfaysilyaalititl aisypaay  
itrskfqnillmimiiptw  
inlllkt yafigllshdgvinqffh lfnlpsfnllfttgaf lvvasyiyipfmilpifnsmkaipnllqassdl gaspf  
yfrkvim pltkegvmtgi  
qvtfips lslfmitrliagnkvinigtai eeqfltiqnygmgstiaiflivfmafiliitkssngrg  
>tr|A7X117|A7X117\_STAA1  
mtnkredvrniaiahvdhgkttlvde llkqsgifrenehvd ramdsndierergitilakntavdykgtrinildtpg  
hadfggeverimk mvdgvv  
lvvdayegtmpqtrfv lkkaleqn lkpvvvnkidkpsarpegvdevldlfi eleandeqlefpvvyasavngtas ldp  
ekqddnlqsl yetiidyvp  
apidnsdeplqf qvalldyndy vgrigigrvfrgkmrvgdvnslikldgtvknfrvtkifgyfglkrleieeaqagd lia  
vsgmedinvgetv tphdhq  
ealpv lrideptlemtfkvnns p fagregdfvtarqierlnqqletdvs lksntdspdtwvagrge l hlsilienmr  
regyelqvskp qviikeid  
gvmcepfervqcev pgenagavieslgarkgemvdm ttttdngl trl ifnvpargmigytt efmsmtrgygi inhtfeefr  
prikaqiggrrngal ismd  
qgsastyailg ledrgvnfmepgtevyegmi vgehnrendl tvnitkktkhqtnvrsatkdqtqt mnrpril tleaalqfi  
nddelvevtpesir l rkki  
lnknvrekeakrikqmmqene  
>tr|A7X189|A7X189\_STAA1  
mknk liaksltiaaigitttttiastadasegygprekkpvsinhniveyndgtfkyqsrpkfnstpk yikfkhdynile  
fndgtfeygarpgfnkpa  
ktdatikkeqk liqaqnlvrefekthtvsahrkaqkavn lvsfeykvkkmvlqeridnvlkqglvr  
>tr|A7X1B4|A7X1B4\_STAA1  
mmseikrleinyktdelfen frafgnkdl ymvnelngqmidassdspfygifvgdqlgarmallkkgdveei yfpdfed  
yillwklevlpkyqnr gya  
selidfaksfnmpikaigrndskdffllhghftdveaknieghdvl lwp  
>tr|A7X1C1|A7X1C1\_STAA1  
makqkikikknkigavllvg lfgllffilvl risyimitghsngqdlv mkanekylvkn aqqpergkiydrngkvl aedv  
eryk l vaviddkasansk  
prhvvd kketakl stvidmkpeeiekr l sqkka f qiefgrkgtnl tyqdklkiekmnlpgisllpeterfy pngnfash  
ligraqknpdtgelk galg  
veki fdsylsgskgs lryihdiwgyiapntkkeqkprgddvhl tidsniqv fveea l dgmveryqpkdl favvmdaktg  
eilaysqrptfnpetgkdf  
gkkwandlyqntyepgstfksyglaaai qegafdpdkkyksghrdimgsr isdwnrvwgweipmslgftysnt lmmhlq  
dlvgadmkswyerfgfgk  
stk gmf dgeapggigwsnelqqktssfgqsttvtvpqml qaqsaffndgnmlkpwfvnsvenpvskrqfykgqkqiagkp  
itkdt aekveqldlvvns  
kkshaanyridgyevegktgtaqvaapnggg yvkgpnpyfvsfmgd apkknkvi vyagmslaqkndqeyaelgvskafk  
pimentlky l nvgkskddt  
snaeyskvpdvegqdkqka idnvsakslepvtigsgtqikaqsikagnkvlphskvllltdgd ltmpdmsgwtkedviaf  
enltnikvnlksgsfvshq  
siskgqk l tekdkidvefssenvdsnstnnsdsnsddkkksdsktdkksd  
>tr|A7X1D9|A7X1D9\_STAA1  
myhnsnanfvngitlnvrdknelkpfyedvlglniinetltsiqyevgqnnhv itlvelqngreplmseagl fhaiklp



Tsompanidou\_et\_al\_Supplemental\_FASTA\_File

qisdlanllihlseydipv  
nggiqpaslsffedpegngfkfyvdkdeaqwtrqndlvkidi rplnvprlvshatkllwlgipddaiigalhikthls  
evkeyyldyfgleqsaymd  
dysiflasngyyqhlamndwvsatkrvenfdtyglavdfhynetthlnlqgpdgiyyrfnhieved  
>tr|A7X1E2|A7X1E2\_STAA1  
mlsfrmsvrginkvkreigfvlmalnrkiaaqravhykihikkadfyqiinrnqlftlpknlmsqpps  
>tr|A7X1G1|A7X1G1\_STAA1  
maydglftkkmvslqflttgrvhkinqpdndtilmvvrqnrqnhqllsihpnfsrlqlttkkydnpfnppmfarvfrk  
hleggiiesikqigndrri  
eidiskdeigdtiyrtilvleimgkhsnlilvdenrkieiegfkhltptnhyrtvmpgfnyeapptqhkpinpyditgaev  
lkyidfnagniakqllnqf  
egfspilitneivsrqfmsstlpeafdevmaetklpptpifhknhetgkedfyfiklnqfnddtvtydslnlldrifyd  
argerervkqrandlvrfv  
qqqlhkyqnklaklieeyesknkdteqlygelitaniyrikqgdkevta lnyytneevviplnptkspsanaqyyykqy  
nrmktrerehqhqqltkd  
nidystieqqllhishvhideirde laeqgfmkqrknqtkkkkaqiqlqhyvstgdgdiyvgnknqndyltnkkakkt  
htwhtkdipgshvvi fnd  
apsdtlikeaamlagyfskagnsqipvdtyliknvhkpsgakpgfvtydnqklyatpdyeliqkmkql  
>tr|A7X1I5|A7X1I5\_STAA1  
mhinllcsnrhlpqdiwaksnegkwggvdrgalillkhqiipffsvgdfdsvskeerqllteqlqikpvqaekadtdlal  
avdkavalgfdsitiygat  
ggrldhffgaiqlllkkayykhdvhievidqqnie lllpkgqhtvekdkssypyisfipmtddvelslagfkylnarqm ln  
igstltisneieslqakvt  
vhdgllilqirstdln  
>tr|A7X1I8|A7X1I8\_STAA1  
miskingklfadmi iqgaqnlsnadlvdslnvypvpdgdgtmnlmtsgreevennl sknigelgktfsgkllmgar  
ngsgvilsq lfrgfcknie  
seseinskl laesfqagvetaykavmkpvegtiltvakdaaqaai ekanntedcielmeiyivkaneslentpnllavlk  
evgvvdsggkgl lcvyegf  
lkal kgekveakvaki dkdefvhdehdfhg vintedi iygyctemmvrfgknkafdeqefrqdmsqfgdsllvindeei  
vkvvhvhteypgkvfnnygqq  
ygelikl kvenmreqhrevirkeqhtakpkmetvetaitiismgegiseifksmgathiisggqtmnpstedivkvieqs  
kckraailpnknilmase  
qaasivdaeavviptksipqgisal fcydvdatleenkaqmadsvnnvksgslyavrtdtkidgveikkdafmgliedki  
vssqsdqlttvtellneml  
aedseil tvi iggdaeqavtdnmi nwieeqypdvevevhggqpiyqyffsve  
>tr|A7X1J5|A7X1J5\_STAA1  
mkmtksalvtgasrgigrsialqlaeegynvavnyagskekaeavveikakgvdsfaiqanvadadevkamikevvsqf  
gsldvlvnnagitrndllm  
rmkeqewddvidtnlkgvfnciqkatpqmlrqrsgaiinlssvvgavgnpgqanyvatkagvigltksaarelarsgitv  
navapgfivsdmtdalsde  
lkeqmltqip larfgqtdiantvaf lasdkakyitgqti hvnggmym  
>tr|A7X1P7|A7X1P7\_STAA1  
mssnell lateylekekkipravlidai eaalitaykknysarnvrvelnmdqgtfkviarkdvveevfddrdevdlt  
alvknpayeigdiyeedvt  
pkdfgrvgaqaakqavmqr l rdaereil feefidkeediltgiidr vdhryvyvnl griea vl seaerspnekyipneri  
kvynkveqttkqpqi yvs  
rshpgllkr l feqevpei ydgtv ivksvareagdrski svfsenndidav gacvgakgarveavveelggek idivqwe  
dpkvfvkna l spsqvl evi  
vdetnqstvvvvpdyqlslaigkrqnarlaakltgwkidiksetdareagiypvveakvteedialedadttesteev  
ndvsvetnvekese  
>tr|A7X1R3|A7X1R3\_STAA1  
msemnavynvkqyilnl imqnkleygdqlpsnl siarelnvktddvyeaiqaliteqvikdnfeegtsvkslppffyp ln  
elisigqmiknagfecgte  
ylnfdeqpatml danl s veegyptiierl rtad gepvvy cl dkiakkel tcteyqmsngsil saikeqsnhnicyadt  
eieavnyepri sevl nasp  
heglillki thynel depi lyslnymknslvqfkitrki  
>tr|A7X1U1|A7X1U1\_STAA1  
mlfnyslydtlntflhipyengffimlyd  
>tr|A7X1U2|A7X1U2\_STAA1  
mnvy laeflgtaililfgggvcavn lkr saangadwiv itagwglavtmgvfavqqfsgahlnpavslalaldgsfdws  
lvpgyivaqmlgaivgati  
vwlmyp hwkate eagaklgvfstapaiknyfanfl seiigtma ltlgilfigvni adglnplivgalivaigls l gga  
tgyainpardlgpriahai  
lpiagkgsnwsyai vpi l gpiaggllgavvyavfykhtfnigcaiaivvviitlilgyilnksskkgdiesiy  
>tr|A7X1U7|A7X1U7\_STAA1  
mtekqfkl tvqdn tnievkvnftdvdskgi ihi fhgmaehmerydklahal skhgfdvirhnrghgini destrghydd  
mkrvigdafaevaqtvrgrnv

Tsompanidou\_et\_al\_Supplemental\_FASTA\_File

dkpyiighsmgsviarlfvetyppqvdglilsgtgmyslwkglptvkvqlitkiygaekrvewvnqlvsnsfnkkip  
lrtqsdwssnpiievdfni  
kdpysgfnvsnglllyqtaymlhtsqlnmkmlnhampillvsgyddslgdygkilklanirykagiknvkvnlyhkr  
hevlfekdhdkiwedlfkw  
lnqfykk  
>tr|A7X1W0|A7X1W0\_STAA1  
mnlqsyigklvkltltnkiligkvidfddkvdnfdgynsieidtritydisenkiktivlqk  
>tr|A7X1X2|A7X1X2\_STAA1  
mtsliiaedqnmrlrqamvqliklhgdfeladtdngldamklikeynpnvildiemgmtglevlaeirkkhlnikvii  
vttfkrpgyfeavvndvd  
aylkersieelvetinkvngekeysatlmstffvdknpltpkeqivlreignglsskeiseklfldgtvrnytsvii  
dklfadnrfdawkkanekg  
wi  
>tr|A7X1X8|A7X1X8\_STAA1  
mkvskfggssvsnatqikkvlnivnsdperkivivsapgkrhdndikttdllirlyekvinhllydhdkkreiiqryddiv  
kelqmdesilrtidvtleh  
yinglknepkrlldallscgedfnaqlialynnsqgiptkyispkeagifvtdvpqeaqildsayseikkldrydeklii  
pgffgvshegyivtfprgg  
sdtigaiissgvratiyenftdvsgiykanpniiikpelieeityremrelsyagfsvfhdeaqplykdripvvikntn  
rpdkgtfivhdreinakn  
visgiscdkdftvinikkylnmrqvgftrkilgvlednnisfdhmpsgidtisivmrskqiqnketkvlneirqkcdvde  
lsiehdlailmivgegmnk  
vigtankithalaeskinlkminqgaseismmfgihvddaekavlstyefcyhgvalknldcn  
>tr|A7X1Y1|A7X1Y1\_STAA1  
mrrwqglveefkahlpvnentpkltnegntplihcenmskilgidlyvkyeganptgsfkdrgmvmavtkakeqgkiv  
icastgntsasaaayaara  
glkaiivvipegkia lglksqavmygaeivsiegnfdealeivkeiakseielvnsvpnfriegqktgsfeivqqldgea  
pdilaipvgnagnitaywk  
gfkeyheakgsqplkpmfgfaegaspivqnkviknpetiatairignpaswdkatnalkesnglidsvtddleayqlm  
ttkegvfsepasnasiagl  
iklhrqgklpqgkqvailtgnglkdpdtaislldnpikplqndkdsiidyikgal  
>tr|A7X1Y7|A7X1Y7\_STAA1  
mtmsqqdkkltgvfghpvsdrensmtagprgplmqdiyfleqmsqfdrevipermrhakgsgafgtftvtkditkytna  
kifseigkqtemfarfstv  
agergaadaerdirgfaikfyteegnwdlvgnntpvfffrdpklfvslnravkrdprtnmrdaqnwdftglpealhqv  
tilmsdrqipkdlrhmhgf  
gshtysmyndsgervvwkfhfrtqqgienltdeeaeeiaatdrdssqrdlfeaiekgdypkwtmyiqvmteeqaknhkdn  
pfdltkvwyhdeypliev  
efelnrnpdnyfmdveqaafaptniipgldfspdkmlqgrlfsygdaqryrlgvnhwqipvnqpkvggienicpfsrdgq  
mrvvdnnqgggthyypnh  
gkfdsqpeykpfpptdgygyeynqrqddnyfeqqglfrlqsedakeriftntanamegvtddvkrhrrhcykadpe  
ykgvaka lgidinsidle  
tendetyenfek  
>tr|A7X1Z3|A7X1Z3\_STAA1  
mkkfiivtvafllsiiiapitefkipfihlqnevryidihinketisaenkltdtpkkqqfafnniqmmsksdvektlnk  
pkrvtfneygkwytyydd  
dynnfimisykdkvna lytnqniitskskikyntpskvrqr lgepeteivkgrvryeqnkeydvfhknhiyttvfyd  
khrnnvtavlqvsdamen  
rlkeqygapksladsfelqnfdlvnaerkqhqlstlkyskqns tarkhskdmaknyfdhtnlkgqspfdrlkkdgit  
fnsagenlaygqvssiyah  
qglmnsighrkni lndtfkilvgvdfndekqpfwtenygt  
>tr|A7X1Z7|A7X1Z7\_STAA1  
mfnekdlavdtlralsidti ekansghpplmpgaapmaytlwtrhlnfnpqskdyfnrdrfvsaghgsallysllhvs  
gsleleelkqfrqwgsktp  
ghpeyrhtdgvevtgplggfamsvglalaedhlagkfnkegynvvdhytyvlasdgd lmegisheaasfaghnlskl  
vvl ydsndisldgelnkaf  
sentkarfeaygwnylvkdgndleeidkai taksqegptiievkttigfgspnkagtngvhgaplgeverkltfenyg  
ldpekrfnvseevyefqn  
tmlkranedesqwnsllekyaetype laeefklaisgklpknykdelprfelghngasradsgtviqaisktvpsffggs  
adlagsnksnvndatdyss  
etpegknvwfgrvrefamgaavngmaahgglhpygatffvfsdylkpalrlssimglnatfifthdsiavgedgpthe pie  
qlaglraipnmnvi rpadg  
netrvaveval esestpts lvt rqnlpvl dvpedvveegvrkgaytvygsetpefl l l asgsevs laveaakdlekgg  
ksrvvsmpnwnafeqqse  
eykesvipssvtrvai emasplgwhkyvgtagkviaidgfgasapgd l vvekygftkenilnqvmsl  
>tr|A7X205|A7X205\_STAA1  
mnsppenngkkyvspviysaivvai vllgaf lpeqfnvtnnikmwitek l gwyylil ttiivffci flifspigkl  
klgkpnkpefntiswfam

Tsompanidou\_et\_al\_Supplemental\_FASTA\_File

lfsagmgiglvfygaaepmahfatpptadpkteayteairstffhwgfhawavygvvalalaysqfrkgepgllsrtlr  
pllgdkvegpigifidvls  
vfativgvavslmgalqinglhylnvnpntfvqaiiivvtilfiasawsglskigiylsnlniglgtilmvaaliv  
gptvlinmltsstgslin  
tflfnsfdtaalnppkrewmsswtlyywgwlnswspfvgvfiarvskgrsirefigsvllvpaivsfwfsvfgvlgiet  
gkhhkeifdmtpetqlfgv  
fnhvpfgivlslialliasffitsadsatfvlgmqtffgslnpssmvkvvwgisqaliafvllaggngaealnaiqs  
aaisafpfsfvvilmvsv  
fykdanqerkf1gl1t1tpnkhrlqeyiksqqedyesdilekrqsrniekkdn  
>tr|A7X220|A7X220\_STAA1  
mnqevknkifsilkitfatalfifvaitlyrelsginfkdtlvefskinrmslvllfigggaslvilsmydvilsralkm  
dislgkvlrvsyinaina  
ivgfggfigagvramvyknythdkklvhfislilism1tgslslsllivfhvfdaslildkitwvrwlyvvsfflp1f  
iismvrppdknrfvly  
ctlvscvewlaaavvlyfcgvidahvsfmsfiaifiaalsglvsfipggfgafdlvllgfk1gvpeekvllmllly  
rfayyfvpiiailissfe  
fgtsakkyiegskyfipakdvtsflmsyqkdiakips1slailvfftsmiffvnnltivyda1ydg1nhtyillaiht  
sac11111nvvgiykqsrr  
aifamisillitvatfftyasyilitwlaifvllivafrarr1krpvrnrnivamllfslfilyvnhifiagtlyal  
diytiemhtsvlryfwlt  
iliiiaiiigmiawlfdyqfskvrisskiedceeiinqyggnylshliysgdkqfftnektaf1myrykasslvlgdp1  
gdenafde1leafynyaey  
lgydvi1fyqvt1d1hmp1yhnfn1gnqffk1geeaiid1tqfstsgkkr1rgfrat1nkfdelnisfeiieppfstefinelqh  
vsdlw1dnrgemh1fsv1gqf  
neey1skapigvmrneeneviafcs1mptyfnda1svdl1rwl1peld1plmdg1ylhml1wskeqgytkfnmgmat1snv  
gq1hysylrer1lagrvfeh  
fng1yrfqgl1rry1kskynpnwepr1f1vyrkdns1wes1skvmrv1rhk  
>tr|A7X246|A7X246\_STAA1  
mrfvfdidgt1cfdgr1idqtiid1t1l1q1qhdghel1fasarpird1lpv1psvf1hqht1ligangamisqqskisvikpi  
htdyhhi1kiiqkyeldy  
iidddwnyaaq1daen1fer1dphk1ascidvanidtpiki1llnidpaqit1tildelnkyhqelemihhsneynidit  
aqninkytalqyifdadvk  
yiafgndhndi1fm1ghassgyi1g1pseaythai1k1ldkikhinntqaickv1ksyk  
>tr|A7X261|A7X261\_STAA1  
mtsstn1vka1iekni1kkgk1hndki1pvilaaisaisil1t1lgilit1l1letitfftripitefl1fst1wnptg1sdpkfg  
iwalii1gt1k1itviatifa  
vpvg1gaa1y1seyasdrarri1kpileilagi1ptiv1gffal1tyvtpv1rsfisgl1gefna1spgl1vvgimiv1plits1  
sedamasvpnki1regaygl  
gat1k1evatk1v1lpaatsgivasiv1laisraigetmiv1laagssptas1sl1tssiq1tmtgyiveiatgdatf1gsni1yys  
iyav1gft1f1ift1imn1ls  
qwi1skrfreey  
>tr|A7X263|A7X263\_STAA1  
mkyikaqin1q1k1sepetk1kiyshrkiyvepv1gfmkvi1lgftrmsvrginkvkrel1gfv1malnirkiaa1qravhykihi  
kkanfhqi1inrnq1fyia  
>tr|A7X2E5|A7X2E5\_STAA1  
mtenk1gssqpk1ngnnggksn1skknrvkrti1iki1gfmia1ffv1ll1gill1fayyawkapafteak1qdpipakiydk  
nge1lvkt1dngqr1hehvn1  
kdvpksmkdavl1atednr1feyhgal1dykr1lfgaigkn1tggf1gsegast1tqqv1kdaf1sqhksigrkaqeay1syrl1e  
qeyskddi1fqvyl1nkiy1cs  
dgv1tgi1kaaakyyfnkd1lkd1n1laeeay1lag1pqvpnnyniydhpkaaedr1kntvly1lmhyhkritdkwedakkid1ka  
n1lvnrt1peerqn1idtnqds  
eynsv1nfvk1selm1n1nkafkden1gnv1lqsgikiyt1nmdkdvqkt1qndvdngsfyknkdqvgat1l1dsktgg1v1aisg  
grdfkdv1vnrnqat1dphpt  
gss1kpf1laygpai1enmkwatnha1qdessyqvdgstfrnydtkshgtvs1yda1l1rqsfnipalkawqsvkqnagn1dapk  
kfaak1gl1nyegdi1gpsev  
l1ggsasefspt1qlasafaa1ianggty1nna1hsiqkv1trdgeti1eydhtshkamsdy1taymlaem1lkg1t1fkpygsayghv  
sgvnm1gaktgt1gtygaety  
sqyn1lpdnaak1dwi1ngft1pqtmsvwm1gfskvkqygensfvghsqqeypqflyenvmskissrdgedfkrpssvsgsip  
sinvs1gsgqdnt1t1nrst1hg  
gsdtsans1sgtaqsnn1ntrsqqsrnsgg1tgi1fn  
>tr|A7X2F2|A7X2F2\_STAA1  
mgmatyavvd1lettgn1q1dfddi1iqigitfv1rnqi1idtyhsmirtn1leippfiqal1tsieenm1lqqapyfnqvaqeyid  
k1kdc1fvahnvd1fdlnfi  
kka1fkdcn1qyrpkkvi1dt1eifkiafptdksyq1selaeahgitlanahradedaattak1milafekfek1pldt1lkq  
lyy1lskq1kyd1ydi1ffem  
vrqydak1pl1dksyekfeq1iyrkqvdfk1kpttnyngs1k1slyskavdq1gl1tyrppq1lylaet1ldq1lmhsekamieas1  
gsgks1lay1laalmy1niet  
gkhvmistntk1l1qsq1l1ekdipamnea1nfkina1lliksk1sdyis1gl1isq1ilkddtsnyevn1l1kmq1lliwit1etpsg

Tsompanidou\_et\_al\_Supplemental\_FASTA\_File

dique1n1kggqkmyfdqki  
etyvparhdvhyynfikrnaqniqidi tnhahlihsdvensiyqlfddcivdeahr1pdya1nqvtnelsyadiyqlgl  
igknenek11kaidqlekq  
rilekldiapidifglkasrneihe1neqlfstiftiindsdvydddihrfhnvftfetkdilkd1haiidklnktleif  
ngishktvks1rkq1lylk  
dkfknies1kaghtsfisikn1sqkstirlyvkdyavkdvltkqvlekfkslifisgt1kfnsfeafkqlfnkdvhfn  
tfevnts1qsakntsvfip  
sdvasyqyknidehyvasivsyiieyttitsskclv1ftsykmmhmvqdm1nelpefedyvvl1tqqnqnykivqqfnfd  
kai11gtstffegfdfqan  
gikcvmiak1p1mknkhnakyw1mdseftstfkeyv1pdavtrfrqglgr1irndrgiivsfdrlinsnyknffeq1  
enyrqkkqdiqqfgk11rq  
iqkkkk  
>tr|A7X2F8|A7X2F8\_STAA1  
mksmvemqrevdeyigqfktgyfsp1an1ar1teevglareinhtygekkkkdseeantikaelgdn1fv11clansmg  
idmtesfnetmekfntrdk  
nrferk  
>tr|A7X2G0|A7X2G0\_STAA1  
mtintfwqytlyqrswlmm1licni1gmiiygyiwygeqlshtpwhfkifvpsptaily1visisliliqkqnsiieala  
fv11fkygiwavimni1fi  
ieggd1itvng1v1mfshsimavqaiyfprfkrsimigisvamiwv1ndyidyfhlqfpyydfitthvwqigvlscclsv  
fg11lyie1nk11kck  
>tr|A7X2H4|A7X2H4\_STAA1  
mak1nmnneikkveqr1ekaikskdsv1eqas1h11ssggkrvrpafvilssqfgkdeqtseqtyqvavalelihm1lv  
hddvidksdkrrgk1tik  
kwdq1ttail1tgnf11a1g1eh1mavkdnrvhqlisesivdvcrgel1qf1qd1fns1qqt1iny1rrinrktal1iq1stev  
gait1sq1sk1etvrk1kmig  
hyigmsfqi1ddv1dft1stek1lgkpvgsd11nghit1p1ilemrknpdfk1kieq1rrdserkefeeci1q1irksid  
eakavssky1ska1n1ise  
1pdghpks111s1tkkmsrnt  
>tr|A7X2J0|A7X2J0\_STAA1  
msn1fkdd1feknrq1s1d1tnshq1dtedvekdq1se1ehq1dt1enteqq1fpprnaqrrkr1rd1atnhnkqv1hnesq1tsedn  
vqneagt1ddr1qvess1st  
esqepshq1dstp1qheee1ynknafamdkshpe1iedndkhetikdaen1teh1stvsdks1aeqsqqpkpyfatganqant  
skdkhddvtvkqdkdeskd  
hhs1gk1gaa1igagtagvagaagamgvskakkhsndaqnsnsdksn1stedkasqdkskdhngkkaaigagtaglagg  
aaksasaaskphasn1nas  
qnhdehdnhd1rdkerkk1g1makv11p1iaav1i1gala1fg1mal1nhnngtkenkiantkn1nadeskd1k1dtskdaskd  
kks1tds1dks1kedqdkatk  
des1dnd1qnanqannq1annq1qq1anq1nqq1qq1q1r1g1gg1qrhtvngqen1yria1q1y1y1g1sg1spenveki1rrang1sgn  
i1rngq1vip  
>tr|A7X2J6|A7X2J6\_STAA1  
mqqnkr1lit1ism1sa1afv11tfikf1pip1l1ppy1t1ldfsd1vps11latftfgpvagivvalvkn11ny1l1fsmgdpvgp1fan  
flagas111tayaiyknkr  
stks1itg1i1ativmtiv1s1ilnyfv11p1lygmifn1ladiann1kviivsg1ipfniikg1ivisivf1illyrr1anflk  
ri  
>tr|A7X2J9|A7X2J9\_STAA1  
mfkr1tk1l1iat111sgc1sttnnesn1netksvpeemeaskyvgqgfppaekdaie1fsk1hkdk1iakrgeqffmdnfg1k  
vkatnvvgs1gd1gevfv1hc  
ddh1divf1nas1ip1fdks1iesdss1r1sedk1gddm1st1vgtv1sg1feyra1q1ekyd1nyk1fl1kenekkyqytgftkeainkt  
qns1gyeneyfy1vanipt1  
qeyrky1yep1likkn1n1fk1g1mk1qark1gvgykaaievht11fsr1sn1fsk1dkk1ddv1d1se1stkk1h1nfentk1flq1  
ak1st1stnr1v1nysdnes1ir  
ieve  
>tr|A7X2K3|A7X2K3\_STAA1  
mr1n1m1sr1nsv1k1l1w1ti1iliv1ttv1l1l1sial1itfmqy1yftqetenairredarriss1veqshnkeeaikysqt1i  
enpgg1mi1innkhrq1stas  
1sn1kkqm1nevvnndh1fddv1fdk1gsvtrnvtikekgssq1ty1llgyptkaqknshskysgvfiyk1d1ksiedtnnait  
i1itiitav1f1t1ittv1faf  
f1lss1ritk1p1rr1rdqatr1v1segd1sykpsvttkdeig1q1sqafnq1msteiehvda1stsknirds1linsmvegv1gin  
esrqi1l1snkmand1mdni  
dedakaf111rq1ied1t1fks1qtemrd1emnarffvvttsyidkieggksgvvvtvrdmtnehn1dqmkkdfianvshe1r  
tpis1llqgytes1vdg1ivt  
epdeikes1lavv1deskr1nr1vne11nvarmdaeg1svnkevq1piaa11dkmkikyrqqadd1gl1nmtfnyckkrw1sy  
dmdrmdq1v1tn1idnas1ry  
tkpgde1ia1tcdenesedi1lyikdtgtgi1apeh1qqv1drfykvdaartrgkqgtg1gl1fickmiieehggsidvkselg  
kgttfi1k1pkpe  
>tr|A7X2K6|A7X2K6\_STAA1  
mtkeler1qkriansgytsrrkaet1isegkvkvngttvtelgtkvkpsdtievegikieledkiyilfhkptqvitsvs

Tsompanidou\_et\_al\_Supplemental\_FASTA\_File

ddrgrtvvtvdyfkdi eari  
ypvgrldydtsgllllndgeftnlmthpryqikkyvaklkgylmreevkaiekieleedgmtqpaevkvkkqdkdknt  
t1veititegrnrqvrmmf  
ehfghqvtklsrieygplnvvglnagegrvltphvekvmrhlaehgk  
>tr|A7X2L1|A7X2L1\_STAA1  
metiieeylrfiqiekglssntigayrrdlkkyqdytmehhishidfidrqliqecLghlidqgqsaksiarfistirsf  
hqfai rekyaaakdptvll d  
spkydkklpdvlnvdevlalletpdlnkingyrdrtmlellyatgmrvselihlelennvlimgfvrvfkgdkerivpl  
gdaviey1t1yietirpql  
lkkvtvevlf1nmhkgplsrqaiwkmikqngvkanikktltphtl rshsfathllengadlravqemlghsdisttqlyth  
vksqirkmynqfhp  
>tr|A7X2N2|A7X2N2\_STAA1  
mtqqigviglavmgknlawnieshgysvsfvnrsektdl mveeskgnihptysleefvnslekprkillmvqagkatd  
atidsllp1l1ddgdilidg  
gntnyqdtirrnkalaqsainfigmgvsgeigaltgplmpggqeeaynkvadildaiiakakdgascvtyigpngagh  
yvkmvhngieyadmqliae  
syammkellgmshediaqtkfdwnagelesylieitgdimkldenkealvekil dtagqkgtgkwtsinal elgip1ti  
itesvfarfissikeervn  
aske1ngpkasfdgdkkdflekirkalymskicsyaqgfaqmrkasednewnlklgd lamiwregciiraqflqkikday  
dnpnglqn1l1dpyfkniv  
teyqdalrdvvatgvqngvptpgfsssinyydsyraadlpanliqaqrdyfgahtyerkdkegvfhtqwiee  
>tr|A7X2N8|A7X2N8\_STAA1  
meitmpklgesvhegtieqwlsvvgdhid eyep1cevitdkvtaevpstisgtiteilveagqtvaidthickietadek  
tnetteeiqakvdehtqks  
tkkasatveqftakqngprnngfrspvfvklasehdidlsvvgsgfegrvtkkdimsvienggttaqsdkqvqtksts  
vdtssnqssednsenstip  
vngvrkai aqnmvsvteiphawmmievdatnlvnrnhyknsfknkegynltffaffvkavada1kayp1l nsswqgne  
iv1hkdnisiavadenkl  
yvpvikhadeksikgiareintl atkarnkqlttedmqggtftvntgtfgsvssmgi inhpqaailqvesivkkpvin  
dmiairsmvnlcisi dhri  
ldglqtgkfmhikqrieqylentniy  
>tr|A7X2T2|A7X2T2\_STAA1  
mklqwintfklhskkrqlskaqqid1l snlcnllkygftlyqsfqflnlqmtynkqlgttilseisngapcnqilslig  
ysdtivmqvylaerfgni  
dvleevnymkvnrkseqrllk1lqyplilvsifiamii1nltvipqfqlytsmniqlssfqk1sffitslptiivv  
mliivsm1aiimkliynn1  
nm1nk1nfvmk1pl1sgyfq1fktyfvtnelvlfykngitlqsvdvynhssdpfrqflgkyllysemgyglpqi lek  
lkc1kfpq1likfvlqgekrq  
klevelklysqilvkqiedkaikqtqflqpilflilglfiva1y1vim1pmfqqmqsik  
>tr|A7X2T6|A7X2T6\_STAA1  
maivdvvvi pvgtegpsvskyiadiqkk1qeykamgidfqltpmntliege1sdvlevvqihelpfdkgl srvcnir  
idrrrdsrkmndk1tsvq  
kh1ensgen1  
>tr|A7X2U0|A7X2U0\_STAA1  
msrkinnfydvqq1lksygfli yfknaedmyemiqqeisslyqyell skeeylkctliinqrrneqk  
>tr|A7X2U3|A7X2U3\_STAA1  
mtkneirkyil hkmknfnkaekrkadtwl rnqffateeykeanaialvlsfnhevdtfsiieqalmdhkri fvpkmdyl n  
hqmtfkeifnlkdidvdk  
giyyptskgett1n1d1ivpvgvfqddgyri gygggydrfl anyqtktis1lydfqitsfepesfdqpvdkliiyqsa  
>tr|A7X2V3|A7X2V3\_STAA1  
makhpfeqfnlesslidavkdlnfekpteiqnriiprilkrtnligqsqtgtgkshaf1lplmq1idseikeppaivvap  
tre1aqq1lydaanh1sqfk  
agvsvkvf1ggtdiekdrqrcnaqpqliigtprindlaktghlhvhlasy1videad1mid1gliedvdyiaarledna  
n1avfsatipqq1qpflnk  
ylshpeyvavdskkqkknief1liptkgaakvektlnlidi1npylciifcnsrdnandlars1neagikvgmihgglt  
prerkqmqkri rn1efqyv  
iasdlasrgidiegsvh1nfdvpndidffthrvgrtgrgnykgvaitlyspdeehnis1iedrgfvfntvdikdgelke  
vkahnqrqarmrkddh1tn  
qvkdkvrski knkvkpgykkkfkqevemkrqerqfskqqrqkrkqnkkq  
>tr|A7X2W6|A7X2W6\_STAA1  
msyqphyfgevrrkaqgesyspsqfkgaylktkdgrtfgytvenasyp1sicaeras1vsaisqgyrpgdfesitvtv  
dadkpspcgacrqv1ke1  
cddmpvymtnhkgdmvmm1vae1l pfgfsgkd1e  
>tr|A7X2X0|A7X2X0\_STAA1  
mpgi iqiddmngsqalignndehlkaieesfdvvi hargqevavkgtkienvekaesvlin1lkvid1gnnitikdveaa  
ikmahntiqh1ldlydee  
itkdafgk1t1raktmgqriyvnamknnd1vfgigpagtktflavvyaakqlrkgavkriv1trpaveages1gflpgd1  
kekvdpy1rp1ydg1y1tv1

Tsompanidou\_et\_al\_Supplemental\_FASTA\_File

gregterfiergiieiaplaymrgrtleadafvildeaqntthaqmkmftrlgfsgskmvvtgdqtqidlpgkvksglkea  
vsrlhvnkgisilklqdsd  
vvrhplvskiihehyegen  
>tr|A7X2X6|A7X2X6\_STAA1  
mstvfahltlgckvnhyeteaiwqlfkeanyervdfeanadvfintctvtntgdkksrqiiirairqnpdavicvtgcy  
qtssaeimeipgvdvvtg  
qdrhkllyidefrkerqpingvgnimknrkyeeldvpyftdrtraslkiqegcnnfctfciipwarglmrsrdpekve  
qatqlvnsgykeivltgih  
tgyygdldynlaqlldletingleririssieasqltdevidvlerstkvvrhlhiplqsgsdvllkrmrkytmdr  
fserltklhkalpdlavts  
divvgfpgeteaefqetydfivkhkfseihvfypsprigtpaaraddqideeiknervhklitlslnglkyvskfdqdv  
levipeegdttegtlvgya  
dnymkvqfegdesligqivkvtqanypnegqaikvdfatnksdrevlv  
>tr|A7X2Z1|A7X2Z1\_STAA1  
msdniyaiygdvpeivekqsaeiisqflksdrddfnvkynlyeteiapiveetltpffsdkkailvknayiftgekap  
kdmahnvdqiliefiekydg  
enlivfeiyqnklderklktlkkharlkkieqmseeikkwiqsklnenfkdikrdaldlfieltginfnivsgeiek  
lilflgdrptinkqdvngi  
inrsleqnvflleyigkrkkeqaihvkdlitmkeepikllalitsnyrlfyqckilsqkgysgqqiaktigvhpvrk  
lalqvrhyqldellnivd  
acaetdyklkssymdkqililelflsl  
>tr|A7X2Z3|A7X2Z3\_STAA1  
merikweeyfmaqshllalrstcqrsvgativkdnriaggynsvagevhcidegcliedghcirtihaemnalqca  
kqgvstegatiyvthfpc  
nctksiiqagikriyyaedyhneyatkllkqsgiefkkipfspeyvakyltk  
>tr|A7X2Z4|A7X2Z4\_STAA1  
myqfllrykdfllqwklyiisavvlmvligfiwfrqddytsrnfenkdtalkqstsenkskledvqvkdgdnsknkg  
pvyvdvkgavkhpnykmt  
skdrvvdlllkaqlldadvsrinlsekltqdkmifiphkgqknvepqienvsvhvkngntntkvnlnntasvselmsvp  
gvqgakanaveyrnqqa  
fqiiddlkkvkgfgsktfdklksyfti  
>tr|A7X312|A7X312\_STAA1  
mgrnlklkkesdfetknhkrlllgsvflmatsaigpafllqtavftsqqffasfafailssitidigaqiniwrlvvtg  
lrgqeisnkvvpglgtvis  
ilafgglafnignagaglglnaifglvdkwgaaitaifailifvsksgqkimdvsmilgivmilvvayvmfvsnp  
gdafvhtfapehpmklvlp  
iitlvgtvgyitfagahrilmsgikgkqylpfnqsaiagilttgimrtllflavlgvvvtgvtlssenppasvfeha  
igpigknifgivilfaams  
svigsaytsatflktlhkslnersnlivivfivistmiflfigkpisllliagaingwilpitlgailiaskkksivgdy  
khpnmfifgivaivlti  
tgifsfkevllqf  
>tr|A7X321|A7X321\_STAA1  
mktieekstpkvtmkkpellapagnlekliavhygadavflggqeyglrsnadnftmeeiaegvefanrygakiyvt  
niahdeniegllesylrn  
ektgatgiivadplietckevapkleihlsthqsslsnykaveyweegldrvtlaretgamemremkekvdieieafih  
gamciaysgrctlnhmta  
rdsnrgccqscrwdyellvddngeidvfynqgevtpfamspkdlkiesipqmmdigvdsllkiegrmksihyiatvvs  
vyrkvidayaadpndfkin  
pewlieldkcanrdtaffegtpgyeeqmfqqqskspdfcglvldynedtkiatiqrrnfnkpgqeieffgpeiet  
ftqvveaiydeegnsldaa  
rhpqlqvqikvdrpiypnmmrkeig  
>tr|A7X338|A7X338\_STAA1  
madeskfdqfkgvketvgnvtdnkelekegqqdkatgkakevvenaknkitaiddklk  
>tr|A7X339|A7X339\_STAA1  
mkistkgrygltlmislakkeggcislksiaeennlsllyleqlvgplrnaglirsvrgakgyqlrvpaeisagdi  
rlllegpittvesiesepa  
qkqlwirmdavrdvldnttlkylaeyvdtseidgyymfyi  
>tr|A7X348|A7X348\_STAA1  
mnneypysadevlhkaksylsadeyevlksyhiayeahkgqfrknglpyimhpiqvagilttemrldgptivagflhdvi  
edtpytfedvkemfneeva  
rivdgvtklkkvkyskeeqaenhrklfiaiakdvrvilvkladrlnhmrtlkamprekqirisretleiyaplahhlg  
intikwledtalryidnv  
qyfrivnlmkkkrseraeiyetaidrirtemdrnriegdingrpkhisyirkmmkqkqfdqifdlairvivnsindc  
yailglvhtlwkmpgrfk  
dyiampqnlyqslhttvpngdpleiqrtdmheiaehgvaahwaykegkkvsekdtqyqknlnwlkelaeadtss  
daqefmetlkydlqsdkvy  
aftpasdvieipygavpidfayahsevgnkmiagakvngkipidyilqtgdiveirtsksygsprdwllkivkssakg  
kiksffkkqdrssniekgr

Tsompanidou\_et\_al\_Supplemental\_FASTA\_File

mmveveikeqgfrvediItekniquvnekynfaneddlfaavfggvtslqivnkIterqriIdkqralneegevtsIpk  
ikdniiTdsGvyveglenv  
liklSkccnpiPgddivgyitkghgikvhrtdcpniketerlinvewvkskdatqkyqvdlvtaydrngllnevIqav  
sstagnlikvsgrsdidkn  
aiinisvmvknvndvyrvekikqIgdvytvtrvwn  
>tr|A7X351|A7X351\_STAA1  
mikpkykwkltkpaeyisdeltsklkltpivkkilesksiideqaiesisdtdvnhdalqlsdmtkaierikraiande  
kilvygdydadgvTsttiI  
vttlqllgaqvgwhipnrftegygpnelafRNAhdegitliitvDngiqghneikmvqdlgvdivtdhheigstIpeay  
aivhpmhpsfnypfqqlcg  
agvaykIaqalienvpdyfkaIvaigtiadIvsltdenrslvkqglkvIIndqcptsvkaIkeagyndnideetigfiig  
prInavgrIddasIaceI  
mtddeeeaaflaeqvehfnrerkdivatiteeamamaetkvkkgdlfllakenwhegvIgivaskivetfalptIilni  
dreqnhakgsarsidqvs  
feIIsahqeliakfgghmaagmtmdienieslaegInkwmkelsktsI dpvkpvdvlltenditiknirdmnrI rpfG  
tdfsrpi femddIsvssvk  
aigqqknhIkltlgesniaaI fwqngIlepelqdeqpinilgsvqinewngnqspqIliiqdiamneqqil dyrskrslp  
ftendenivvlihpksdkv  
naneyyygeei kqqtDkvvlrdIptsmedI snslqqlqfsqlyivIqhnhsiyfdgipnmdifkkykaIitkqetniqk  
egmllcqhIsvkpdtkf  
IkvfIdI kfvtdedgI rinqqpdksidsskvyql rqqrmDvekqll yqdfseikwIksqls  
>tr|A7X384|A7X384\_STAA1  
mnecafgtkdpvylnyhdhvwwqplydskalfkllalesqhagIswltIkkkeayeeafydfepkvaqmtaqdidrIm  
tfpniVhhrkkleaivnqa  
qgyIkieqaygsfSkflwsyvncpkdlqyehasdritvddnatqlskdlkqygfkflgpvtvfsfleaglydahlkdc  
pskpkhn  
>tr|A7X392|A7X392\_STAA1  
mqenI firfneiI llyI lisiicyfydfvqkshkirsI giylI giwvIqtisI sifiiqtrhipI gsisdvfytlswI  
isisI lInI kvl nI fsvff  
InI gI tI lI gmntfqpthytnkvqkiavvdeI lI vI hI glavI syvffaI afvnalI yimqyrnI kekrfdqkyfrigsva  
tlesivfystIsgwiIif  
siI lgtqwgvisvgerifidpkvilssiitvlygsyillrinkwlnsryliynyilfclnminIffathfvn  
>tr|A7X3A4|A7X3A4\_STAA1  
makdqtqindkirakeIrligqdeqigvkskreaIemaervdI dlvvapnakppvarimdygkfkfeqqkkekemkkk  
qkiinvkeirI sptieeh  
fqtklkngrkfltkgdckvsi rfrgraitheigqrvIkyadeckdiatveqpkmdgrqmI fmlaptaek  
>tr|A7X3A5|A7X3A5\_STAA1  
mskvqnesnnvkrglkdrhismaiggcigtglfvtsggaihdaI galigyaiigimvfflmtslgematyI pvsgs  
fstyatrfvdpsI gfaI gw  
nywfnwvtvaaditiaaqviqywtplqgipawawsaI flviI fslnsI svrvygeseywlaI kvitviviaigllti  
vgimgghvvgfeifnkgeg  
piI ggnI ggsI lsiI gvflI agfsfqteligitagesenperavpkaikqvfwriI lfyI laifvigmlipydssalmg  
gsdnvatspftI vfknaI g  
afaasfmanvI tsvI sagnsgmyastrmlysmskdlafaefgktnkngvpysllvtaiivviiI fvlqsltkgayeyi  
vaasgltgfiawvgiavsh  
yrfrrafdkqnydksklkytakI pfpgI fagflcivviiqgdvdfiktgdfnfsrflitymgipvflaffiyhklrykt  
kkipIeqvdI rQdvsmei  
kg  
>tr|A7X3C1|A7X3C1\_STAA1  
maelqrgI legviaaetkissiesqltyagydidlaenaqfeeviI llwnyrI pneeI ahI kgkI nqymI nprvyth  
feeyvtdhvhpmtaI rtsI  
syiahfdpdaenesdenryeramriqakvasI vtafarvrqdkelkpnpdI syaanflymI rgeI ptdieeafnkali  
I hadheI nasaftarcavs  
slsdmysgiI vaavgsI kgplhganeqvmtmlseigsienvdayI dekfanckvmgfghrvykdgdprakyI remsrqi  
tkdagreeI fmsvkmekr  
maeekgI lipnvdfysasvyhcmephdI ftpi favrsagwiahI leqykdnrImprakyigetnrkyiI pleerk  
>tr|A7X3D6|A7X3D6\_STAA1  
mlrsvyemtkiskiideI lnnqadaawittpI nvyvyftgyrsepherI fallikkdgkqvlfcpkmeveevkasptgei  
vgylDtenpfsI lypqtink  
lliesehlvarqkqlisgfnvnsfgdvdI tikqlrniksedeiskirkaaeladkcieigvsylkegvtereI vnhieq  
tikqygvnemsfdtmvI fg  
dhaasphgtpgdrrI ksneyvI fdI gviyehycsdmtrtikfgepskeaqeiynivleatsaiqaikpgiplkdidhia  
rniI sekgygeyfphrlgh  
glglqehyqdvssstnsI leagm vitiepgiyvpgvagvrieddiI lvtnegyevI lthyek  
>tr|A7X3D7|A7X3D7\_STAA1  
mkigipreiknnenrvglpsgvhaI vesghtvI vetnagsgsffedvdykeagaeI vaeqakvwdvdmvikvkeplese  
ytyfkeglvI lftyI lhlane  
ekI tqalI drkvisiayetvqlpdrsspI lspmsevagrmsaqvgaeflqklnggmgiI lggvpgvpkgkvtiiggqag

Tsompanidou\_et\_al\_Supplemental\_FASTA\_File

tnaakialglgadvtildv  
nprkrlqqlddlfggrrvhtimsnplnieelyvqsdlvigavlipgakaprvtedmikmqkngsviidiqidqggifettd  
kitthddptyikhgvvhya  
vanmpgavprtstlalnnaatlpyalmankgyreaafksnqplsnglntykghvtnkgvaeafemeyksveealq1  
>tr|A7X3E1|A7X3E1\_STAA1  
maeqqtimerlfhtldekaktlnnengqsfienglameqvytnergllleqstlqdrkafqfaylslmqeekiqanhqi  
tpdsigliglflverfmnn  
qeehivdiasgaghlSATVKEVlpeiavmhhlievdplsvsvhlanfleipfdvypqdaimplpleadivigdfpv  
gyypiderskefklgfeeg  
hsyshyllieqainalkdagaflvpsniftgehvqlekyiatetemqaflnlpptlfknekarksililqkkkset  
kpvevllanipdfknpsqf  
qgfmetlnqwmtdnrpkk  
>tr|A7X3E3|A7X3E3\_STAA1  
mteitfkggpihlkgqqinegdfapdfvtlndlnqvtladyagkkklisvpsidtgvcddqqrkfnseaskeegivlt  
isadlpfaqrwcasagld  
nvtltsdhrdlsfgenygvmeelrllaravfvlvdnkvykeivsegtdfpdfdaalaaykni  
>tr|A7X3G6|A7X3G6\_STAA1  
mkvevykgagkhnldyeetyntfdwkdeqafswsetgkmmayecidrhvdqrlgdkialnykdeyrkesytykdmq  
rlsnkaanvlsehaevdkg  
drvfi fmsrtpelyfallglvlgigaivgplfeafmekavadrleenseakvli tnka llprvpvdklplnkki vvvdedve  
dnyidfis lmetasdefdi  
ewlksddgli lhytsgstgqpgkvlvhqamlvhyisgkyvldlqeddvwyctadpgwvtgtsygi fapwlngatnciag  
grfspeqwysmi edfkvti  
wytapta lrm lmsagddivekydlss lrsilsvgeplnpevikwakkvyglvtldtwmtetgghmivnyptmdvklgsm  
gkplpgiqaai iddagne l  
ppnrmgnlaikkgwpsmmyriwnpekyksyfigdwyvsgdsaykdedgyfwfgrvddvimgtagervgpfevesklveh  
eavaeagi gkpdprgei  
ikafvalrkgyeptdelkeeir lfvkegl sahaapreiefkdklpktrsgkimrrvlkawelndagdlstme  
>tr|A7X3H0|A7X3H0\_STAA1  
matvsrvvngnqnvkaetknkvnevikrlnyrpnavarglaskttvtvgviipdisniyysqlarglediatmykyhsii  
snsdndpekekeifnnlls  
kqvvgiiflgtiteemkelinqssvpvvsngtkdahiasvni dftaakeitgeliekgaksfalvggehskkaqed  
vlegl tevl nkn glq l gdt  
lncsgaesyekevka fakmkgnlpdailcisdeeaigimhsamdagikvpeelqiisfntrlvemvrpqlssviqplyd  
igavgmrltkymndekie  
epnvvlphrieyrgttk  
>tr|A7X3I4|A7X3I4\_STAA1  
mkigdisihylnngntkmdggamfgvvpkplwskqyananernqinlpthpiliqtaqynliidagigngklsekqlrnfg  
vdeeshi iadlanynltpk  
didyvlmthmhdhaagldqaghai fenaihvvqqdewhefiapnirskstywdknkgdysnkli l fekhfepvpgikm  
qhsghsfghti itiesqg  
dkavhmgdi fpttahknplwvtayddypmqsi rekermipyfiqqqywf lfyhdenyfavkysddgenidayilretlvd  
nn  
>tr|A7X3I6|A7X3I6\_STAA1  
meqfyqlgwtldsaggasgeaymaeqdgqklflkrnsnpfiaalsaegivpklvwtkrietgevvtaqhwkngrelssne  
mkqtrvahllkkihnsrpl  
lsm lkrmemepitpeimlnkinas l srevlthhivrks ltyleehips ldsrfftvvhgdvnhnnwllsdrdel flvdwe  
gamiadpaidigm llynyv  
pqqqws ewl etygvqeslnlnkrmkwytv iqsiglvqwyeeqkrykdmntwlkflnevmsnmfi  
>tr|A7X3J4|A7X3J4\_STAA1  
mndlvnmfkgfvfkvngtlpidkafvtgggvs lkeiqpktmmsklvpglflcgevl dihgvtggynitsalvtghvagly  
aghyshtsme  
>tr|A7X3K4|A7X3K4\_STAA1  
mfvntcmvakyvii nwemfsmkkvndtvfgilqlletllgdinsifseieseykmsreeililltlwqkgsmtlkemdrf  
vevkpykrtrrtynn lvele  
wiykerpvddertviihfneklqqekvellnfishdaiasratamqnslnaiiav  
>tr|A7X3L5|A7X3L5\_STAA1  
mnkhkgsifgi iglvvi favvsflffsmi sdqiffkhvksdiki eklnvtlndaakkqinnytsqqvsnkndawrdas  
ateiksamsdgtfidnekq  
kyqfldl skyqgidknrikcm lvd rptllkhtddflkaakdkhvnevylishal letgavkselangveidgkkyynfyg  
vgal dkdpi ktgaeyakkh  
gwdtpekaisggadfi hkhflsstdqntlysmrwnpknpgehqyatdikwaesnati adfyknmktegkyfkyfvykdd  
skhlnk  
>tr|A7X3M7|A7X3M7\_STAA1  
mkkfkfkfddyserknkyeeqsilkdrnsfsktdhdafmrmkedhmknqglkpgynlqiatnsqffypmtyfkpqqil  
el  
>tr|A7X3M8|A7X3M8\_STAA1  
mqftnsdkfsiflsydlfqtptdtrtlipfltmiantfyg lpeyivadagydsenymai iddfnktp litygmfikdkt



Tsompanidou\_et\_al\_Supplemental\_FASTA\_File

rkfksdi fntqgnwkydeln  
deficpnnkrigfkryaynrndrygfkrdfklyecddcsacs1rqqcmkpnsksnkkimknyneweyfkaqinqklsepetk  
kiysqrkidvelvfgfmka  
ilgfrmsvrginnvkrelgfv1malnrkiaaqravhykihikkadfyqiinrnqlfyia  
>tr|A7X3N1|A7X3N1\_STAA1  
mmd1sspvvigliiavvia1iffvlflvalgskkkvkrqteekyeqqeqnikksheea1ekeriqnkktitkqqedynhm  
vstkdreida1klfsknhs  
eyvtdmr1giger1vkekri1pedmhimani1pkdgnnierish1vl1trtglyiidsq11kghvyngisggqfkd1p  
pmeqvfdt1d1dksrpqi  
vmdqnddkrs1svfnysdqieaikqlaed1qkelgakytptsilyfnpknegdvtisnynqnsavkvlvgaeqldeffnk  
fvfhgriqynved1qqmmd  
kiesfn  
>tr|A7X3N9|A7X3N9\_STAA1  
mk1talhfkysepfsqivtpkvt1thrdclfieliddkgnayfgecnafqtdwydhetiasvkhvieqwfednrnksf  
etyeaalk1vds1entppa  
ratiymalyqmfvh1psfsvaygatasg1snkqles1katkptrik1kwtppqimhqirvl1relldfhfq1vidanes1drq  
dftq1q11areqvlyieep  
fkdi1sm1devvdgtippialdekats11diinlielynvkvvvlkpfr1ggidkvqtaid1kshgkvkviggmyeyg1s  
ryftam1arkgdyppgdvtp  
agyyfdqdvvtksq1lkegr1efrpp1vdi1tqlqpy  
>tr|A7X3Q1|A7X3Q1\_STAA1  
mk1sldintdfevtt1td1pk1kivmen1mkinkseiarhmgyvrrtvdky1ngfeptkkrnrqs1idkyppiiek11s  
dsseqkfyk1i1wqy1kd  
khg1tcaystfray11khdefnryfmkgyqr1spkgktrfetkashqaqfdwkeginfktkdnmv1  
>tr|A7X3Q3|A7X3Q3\_STAA1  
msitekqrqqgae1hkk1wsiand1rgnmdasefrny1glifyr1f1sekaeqeyada1sgedityqeawadeeyred1k  
aelidqvgfyiepqd1fsa  
mireietqdfdieh1atairkvetst1geesendfig1fsdmd1sstr1gnnvkerta1iskvmvn1dd1pfvhsdmeid  
m1gdayef1igrfaatagk  
kagefytpqqvski1akivtdgkdk1rhvydptcgs111rvgketqvryfygqernntty1narmm11hdvryenfe  
irnddt1enpaf1gntfda  
via1nppysakwtadskfenderfsygyk1apkskadfafi1qhmvy1lddegtmavv1phgv1frgaaegvirrylieekn  
yleav1glpani1fygtsip  
tcilvfkkcrqqddnv1fidasndfekgknqnh1sdaqveriidtykrkatidkysysat1qeiadndyn1nipryvdtf  
eeeap1d1dqvqqd1knid  
keiaieieqeinay1kelgv1kde  
>tr|A7X3R7|A7X3R7\_STAA1  
mkmk1vkssvassia1111sntvdaaqhitpvsekkvddkitlykttatsdndk1nisiq1l1tnfikdkksydkdt1vlk  
aagn1nsygykkn1pkn1pdyn  
sqfywggkynsvs1sesndavnvd1yapknqneefqvqq1t1gysyggd1inisng1sgg1ngsksfsetinykqesyrtti  
drktnhks1igwgveahkim  
nngwgp1ygrdsy1dptygne1flggrqss1nagqn1flpthqmp11larnfnpefisv1shkqndtkkskikvtyqremdry  
tnqwnr1hwignnyknqnt  
vtftstyevdwqnhtvkl1igtdsketnpgv  
>tr|A7X3S9|A7X3S9\_STAA1  
mk1fafif1c1vks1s11fm1ngnpkpeq1nkaseftg1mdnmry1yddkhvsetniksqekflqhd11fkingskilkte  
fnks1s1dkyknknvd1fg  
tnyynqcyfs1dnme1ndgr1ieknyvwr1cra  
>tr|A7X3T3|A7X3T3\_STAA1  
mknsvm1nv11111n1iaicsvnnayaneedpkies1ckkssvd1pialh1n1nddyinnrfttvksivsttekl1dfd11  
fksinw1dgi1saefkd1kv  
efssaiskef1gktvdi1gyvykahchgehqvdtactyggvtphe1nk1sepknigvavykdnvntfivttddkkvt  
aqe1dikvrtk1nnaykly  
drmts1dvqkgy1kfshshsehkesfyyd1fyikgn1pdqyl1qiyndnktidssdyhidvylft  
>tr|A7X3W8|A7X3W8\_STAA1  
mdtkq1kqdi1dyaytigi1dsigfttadpfdelkqk1eayhangyasgfeesdia1rtepk1s1lptarsia1iavgy1pnk  
1kgapksvrgdr1rg1fara  
swgqdyhtimkr1dm1laafieskvpdveiksmvdtgvl1sdravaerag1gfvgrngfv1nplkg1twtylgem1vsipfe  
pddp11dscgdcti1cvdrc  
ptsalvgngq1nsqkci1sfl1tqtkgym1pdqyryki1gnrlygcdt1cqvc1pknrg1inte1qddi1ilepe1ilkpr1vp11rms  
nkefkq1tygh1agawrgkk  
piqrna11alahfnevdaipe1kkvattderp1mirataywaigq1lgeear1dfinanyd1qedaevqnemikg1dtrre  
>tr|A7X3Y4|A7X3Y4\_STAA1  
myqqs1fken1ihw1fdenqrem1pwrqttnpyyiw1sevm1qqtqvktv1idyhrf1verfptvev1sqasedev1kyweg1  
gyysrarnfhtai1kevydk  
yeg1vpkdpdqfka1kgvgpytqaavms1aynvp1latvdgnv1frw1sr1nddyrdik1qstrksyeqel1pyvtteagtf  
nqammelgalict1pknp1lc  
1fcpvqenceaf1dkgtfek1pvksknsvk1kieqsvf1irnnqgqy11lqkrsek11hgmwqf1p1mfeseharrkmtekih

Tsompanidou\_et\_al\_Supplemental\_FASTA\_File

diquvetpifelkhqfthl  
twkikvyaasgainietlpddmiwfnlsdrdqytfpvpmskiyqfing  
>tr|A7X328|A7X328\_STAA1  
mtnqdrpmskmseskyknrqvfpqdtnhhhtmfggtlmanideiaaitamkhagaqvvtastdsdvdfkpkiktgdilqy  
vamvsyagtssmevvvqir  
iddvfnnkhdlaalsyltfvalddegkpkhvpvpeddvkwyfdtapqrverrkarrieskqtieylaqaqhirid  
>tr|A7X422|A7X422\_STAA1  
mhkidltnnfqmrriilqlviafvilftykwalgvtavvdqniinlvvgfagfiillilhelihralflfkksk  
pmfnikkdrilftadacf  
nkwwfsiimlspilistglilikvfygsslifmfsmhtaycfidillvaltissfkyvqqdedsiylyhqkptq  
>tr|A7X455|A7X455\_STAA1  
mtyeetdyrnvprelndnnpmgrmikwapfatlpeqfetiqqyidqnkitrpvlstdqlaelnirhealqyaqp  
vevkfynngfvdsrvltiy  
ridainyeidgyvynqqqrqkisifdildivllp  
>tr|A7X466|A7X466\_STAA1  
mriinlvkydfysifksplylailvssliatqsilmansmdnpkhiivgsvfaakwllliiglmfvvktitrdfsq  
gtiqlymkvktrvgyiis  
ktisiilisilfalihyvilivvqassngknlafskyvdnlwfflilflffglflflitlasqktamifslgvflvlivp  
fikpfitfiprygekvlada  
fdyipfayltdkmissnfdsnwqwislgsiviffilnilyvakddi  
>tr|A7X483|A7X483\_STAA1  
mpagytldknnvpykktgyytvanvkgnnvrdgystnsritgvlpnatikydgaycingyrwityianngqrcyiatg  
evdkagnrissfgnfsal  
>tr|A7X485|A7X485\_STAA1  
mrcsdcnismllrymyrvkgkkinrisvrllghltgyivhsyihliit  
>tr|A7X487|A7X487\_STAA1  
mkyseararlrwyggryidfdgwygyqcadlavdyiywllleirmwgnakdainndfknmatvyentpsfvppiqgdvavf  
tkgiykqyghiglvfnggn  
tnqfilleqnydgnantpaklrdwnyygcthfirpkykseglmnkitnkvkppaqaqkavgsaskitvgskapynlkwskg  
ayfnakidglgatsatryg  
dnrtnyrfdvgqavyapgtliyvfeidgwcrywnhnewicye  
>tr|A7X491|A7X491\_STAA1  
mskmkktaftlllfiatlttspvngsekseeinekdllrkkselqgtaignlkqiyynekekaktenkeshdqflqhtil  
fkqfftdhswyndllvdfd  
skdivdkykgkvdlygaygyqcaggtpnktacmyggvtlhdnrlteekvpinlwlldgkqntvpletvktknknvtv  
qeldlqarrylqekynlyn  
sdvfdgkvqrglivfhtstevsnydlfgaggysntllriyrdnktinsenmhidilyts  
>tr|A7X494|A7X494\_STAA1  
mddiqkikkeiselvervddveilnetadhvlelreehkqhnelreshkelkdkqdkvndenleqtkilnrieeryqt  
qvdaqkneektlaqkwl  
vgaiwalvtivmiavitasitalp  
>tr|A7X495|A7X495\_STAA1  
malflyknlrrsfmmaneikkterfilvqidkegtervlyqdfvgsfttsdsasyaqdfkseenakkiaetlnllyqlt  
gnqngvkvkevvdrtldl  
sdksvdsetm  
>tr|A7X498|A7X498\_STAA1  
mihvldfndkiidflstddpslvraihkrvndnsemlellisseraekfrerhrviirdsnkqwrefiinwvqdtmdgy  
teieciasyladittakpy  
apgkfekkttsealtdvldstgwevseqteydgllrttswtsyqtryevlkqlcttykmaldfyielssntvkgrvvlkk  
knslfkgkeieygdllvgll  
trkidmseiktaiavgpendkgkrlelvvtddeaqsqfnlpryiwgiyepqsddqnmnetrlrslakteInkrksavm  
syeitstdlevtypheiis  
igdtvrkhrdfnplyveaeviaeeyniisenstytfgqpkfekeselreefnkrlniihqklndnisnintivkdvd  
geleyferkihksdtpen  
pvndmlwydtsnppvavlrrywngrwieatpndvekllggitrekalfseinniifinlsiqhasllseateInseylvdn  
dlkadlqaslavidvynq  
iknnlesmtpetatigrldvtqalfleyrkkldvytdvedvkiaisdrfkllqsqytdkeykealeiiaatkfgltvned  
lqlvgepnvksaieaare  
stkeqlrdyvktedytdkdgiverldtaeaerttlkgeikdkvtlneyrngleeqkytddqslsdlnnpeikasieqa  
nqeaqeaalksyidaqddlk  
ekesqayadgkiseeqraiqdaqakleakqnaelkarnaekkanaytdnkvestdaqrktltrygsqiiqngkeikl  
rttkeefnatnrtlniln  
eivqnvtdgttiryddngvaqalnvgrgpirlnadkidngreinnliqnmrdkvdktdivnslnsregldinvnrig  
ikggdnrryvqiandsiel  
ggivqrtwrgkrstddiftrlkdghlrfrrntaggslymshfgistydgedgedgssgtiqwwdktysdsgmngitins  
yggvvaltsdynriiids  
asanieareapiylspntknkpglnrfaftlfnadsayetdgyimfgsdenykygaglrfskrsnkglvqvvnngdyatgg  
dttiesgmgnfvlvkrddg

Tsompanidou\_et\_al\_Supplemental\_FASTA\_File

nsyvsiqsyd1lavgsdnagdrvasnsiykrtysapanlhitsagtigratsakkykisienqyineddqfshskeilk1  
pirtwfdkyeseimakele  
sgkkl1sddtfkl1srhtgliaeeveelgfnefvdyddngeiegiaydr1wvhlipiiknqqskiekleeline  
>tr|A7X4A0|A7X4A0\_STAA1  
mgerikgl1sigld1daanlnrsfaeikrnfktlnsd1kl1tgnnfkytekstsdysqqrikel1dgtiigykknvdd1akqyd  
kvsqeqgensaeakl1rqe  
ynkqanelnylerelqktsaeefekkaqveaqrmaesgwgktskifesmgl1tkmgdgl1sigkgmmigvtapvl1gia  
aasgkafaevdkgld1vtq  
atgatggel1kkl1qnsfkdvynfpadaetvvgvl1gevntr1gftgklesatesfl1kfshittgsegvqavql1tramgda  
gieadeyqsvldmvakaaq  
asgisvdt1ladsitkygapmramgfemkesial1fsqweksgvnteiafsgl1kka1snwgkagknpreefkkt1laieiekt  
diasats1laieafgakagp  
d1adaikggrfsyqefl1ktiedsqgtvnqtfkdsesgserfkvamnk1kl1vgadvwtsiesafapvmeel1kkl1siavdw  
fns1sdgskrsivifggia  
aaigp1vfvgl1gafistignavtv1lap1lagiakadgl1sfl1stkvpl1gtvftaltgpi1gvl1gvl1aglavaf1tiaykks  
etfrnfvngaiesvkqtf1s  
nfiqfiqpfidsvkni1fkqaisaivdfakdiwsqingffnengisivqal1qnicfikai1fe1fi1nfvikpimfaiwqvm  
qfiwpavkalivstwenik  
gviqgalni1lglikffs1ftgdwrgvwdai1vmil1kgvvq1liwnliq1lwfvgkil1gvvryfgg1l1kgliagiwdviksi  
fsks1saiwnatksifgfl  
fnsvksif1tnmknw1sntwssirtntigkaqsl1fsgvkskftn1wnatkeifsn1rnwmsniwnsikdntvgiasr1lwk  
vrgif1tnmrdgl1qsi1ski  
kshiggmvdaikkg1lnk1idgl1nwvggl1gmdk1pk1htgteht1ttr1lvkngkiardt1fatv1gdkg1rgngp1ngfrnem  
iefp1ngkrvit1pntdt1tay  
l1pkgskvyngaqtysm1ngt1prfs1gtmwkdiksgassafnwtkdq1gkgtkw1gdkgvd1ldfiehp1gk1l1nyileaf  
gidfns1tkgmgiagdi1tk  
aawskikksatdwi1ken1eamgggd1vgg1ldpdk1nyhygrtaaytaatgr1pfhegvdf1pfvyqevrtpm1ggr1l1trmpf  
msggygnyvki1tsgvidm1  
fah1knf1sksp1sgtmvkpgdvvg1ltgntgf1stgph1lfemrrngrhfdpepy1rnakkkgr1sigggdat1sgsgatyas  
rvirqaqsi1lggrykgkwi  
hdqmmrvakresnyqsnavnw1dinaqr1gdpsrg1l1fqi1gstfranakrgytnynnpvhqgisamqyivrrygwg1gfkra  
gdyay1atggk1vfdgwyn1g  
edghpewi1ptdparrndamki1lhyaaaevrgkkasknkrpsq1l1sd1ngfddps1l1l1kmi1eqqqq1a1l1l1kiaqsndvi  
adkdyqpi1ideyafdkkvn  
asi1ekrerqestkvkfrkggiaiq  
>tr|A7X4A1|A7X4A1\_STAA1  
mak1lkrni1q1vedpkaneik1lqty1l1tphfisfeivyeamd1l1iddienstmkpreiadr1l1mdmvkiydnqftvkdlk  
ermhapdgmna1l1reqvifi  
tqqqqteetrnfiqnmk  
>tr|A7X4A9|A7X4A9\_STAA1  
mvkfkvvrafkdi1ehnhkkykvge1ypaegynnprve1l1tnqiknkydkvyivp1dk1tkqelle1l1ces1qkkassmvk  
seivd1l1ngedndd  
>tr|A7X4B9|A7X4B9\_STAA1  
mmwitmtivfai1l1l1vcisinsdrareiqal1rymndy1l1devvktkgyngl1keyrie1lkrmnndikk  
>tr|A7X4C2|A7X4C2\_STAA1  
mtqy1lvt1fkdstgqp1heftavrdnq1ftvveaeskeeakekyeaqfkr1gavik1l1gq1l1fenirecgk  
>tr|A7X4C5|A7X4C5\_STAA1  
mnw1el1mrrtrkmtni1l1qvkl1senarmpernhktdagydi1fsaetv1lepqekaviktdvavsipegyvg1l1tsrgvs  
skth1l1vietgki1dagyhgn  
l1ginikndnet1lesedmsn1fgrspagi1dgkyar1l1pvt1dk1l1cmngsyvinkgd1klaq1l1vivpiwtpel1kqveefesvser  
gakgfgsgv  
>tr|A7X4C7|A7X4C7\_STAA1  
mn1reqieqsvi1sasayngndteg1l1kei1edvykkaqafdei1reainaqwveypedwasev1l1revreleyeeeqenen  
>tr|A7X4D0|A7X4D0\_STAA1  
mtdnarkey1l1nqffgskry1lyqdnervahi1hvngtyy1fghiv1pgwqgvkktfdtae1l1etyikqad1leyeeqkq1l1l1f  
>tr|A7X4D2|A7X4D2\_STAA1  
mrdymeieik1fnevfnapmgsprprfstkgryah1tymptkytehkky1l1nqmpk1l1n1enal1kie1l1fyftppkswskkkk  
tqai1gq1l1kvtkpdi1dnl1mk  
tv1l1dacnny1l1wkddnqiteit1sskrygiepkii1rieei  
>tr|A7X4D3|A7X4D3\_STAA1  
mdafdkyy1l1fdhdgnkmfsvtphfkdg1rhl1vvg1l1khtkfngr1rwy1l1ddye1l1kt1l1idneqme1l1ghqts1l1feyi  
>tr|A7X4D9|A7X4D9\_STAA1  
mkink1l1tj1snfagi1keekfnfdgkdaki1yggnatgktttatal1qwl1l1fdkg1ldgstksfn1pvp1l1nekneenyeliptvfa  
efe1dgi1t1t1fk1keshpk1y  
tingktnrkeysr1rtkkqy1indesikvkdykaridel1idedvfk1l1tnpqafn1l1dwkkrrs1l1l1fei1akpindedvikt  
nddfke1l1nni1l1gdheietp  
kkil1tdkik1qinkidk1pirinqtqqnkqdvpefdndryai1kqei1eq1l1eneridi1qngaeen1l1rnq1ladkqselkri  
ednnsasnenkiht1l1tne1

Tsompanidou\_et\_al\_Supplemental\_FASTA\_File

hvangtvanlkr1kqkqgiaheenrrnql1lenhkg1ksd1lekaenqkfeyl1ddnvcscgqql1aeqvneareka1qk  
fnaskeskeletiqvsinh1  
isegkkipiiek1vddn1qikineaeerseriqnkink1ktthvdvrtdeykavm1eineinqrsnirk1tiqdkv  
sgiddkisel1tqekseiev  
srsiekskh1ddvise1rneedr1ldekekysd1yil1keftttkvkml1teninnefdiaefk1fnt1vngleetcst  
tvngveydsg1ninasrin1v  
gldiint1skhfkv1tapi1fidnaesv1teliktesqqi1qlivneqdkk1rmeti  
>tr|A7X4E2|A7X4E2\_STAA1  
mykfgeiknkiisfngfefkvsamkkhdgis1qvkdmmnvp1ksfhvvd1selyiamdamrdvinewieentderdri  
n1vmrw  
>tr|A7X4E3|A7X4E3\_STAA1  
mtknykdm1tqdeirg1l1sektse1ydlakeikretefdi1lffsaigvgdgd1fiksssa1gnafn1ae1ldnatnfddvi  
naiqkrk1kqf1vidnke  
d  
>tr|A7X4E8|A7X4E8\_STAA1  
mqaqnkkvi1yyyydeegnrrpvni1qyndgyd1midprfiemt1erhph1kknfyg1lidgkefk1d  
>tr|A7X4F0|A7X4F0\_STAA1  
mqa1k1tksnigemfni1qekengeia1s1gre1lha1levstrydkwfermteygfengidfi1sqvekvhgqkrartyeqvn1  
i1l1tdtakeiamiqrsepm  
krarqyfi1qvekawnspe1m1qra1lkian1tinq1letkierdkpkivfadavattktsi1lvgelakiikqnginigrr1  
few1rqngf1ikrkgvdm  
mptqysmere1feiketsi1thsdg1htsi1sktpkv1tgkgqyfvnk1f1gekqts  
>tr|A7X4F6|A7X4F6\_STAA1  
mkprkqdek1l1sdqysy1fepi1s1dscdikfdgdkrrigsifi1sheeicfi1rkeedyifkisi1sdvdyntvvtiwnqas  
l1l1ndnrki1tfyfvtnsp1  
tgfisi1l1ktymq1srnketi1ipddn1l1inddeqtkvei1fdvvg1nyegr1rkelkk1likmktnda1fffl1ysd1kgnelk  
eell1yedkvyei1pdyevip  
gvf1l1qkepdnpydena1ikvmi1sneyse1fhvgyvpreyasr1vnyiedtvs1cnayinggkykt1dyleekivtkesdyg1r  
ihveykv  
>tr|A7X4G4|A7X4G4\_STAA1  
mttfsekeki1q1ladive1lqtennei1dvcny1kdl1fdkydikse1il1kvnهرانivae1igngs1pila1sghmdvvdagn  
qdnwt1yppf1q1tekagkly  
grgttdmkgg1malvit1li1elkeqng1lpqgtir1l1atagee1keqegak1ladkgy1l1ddvdg1li1a1eptgsgiyahkgs1m  
sckvtatgkavhssvpfig  
dnaid1t1l1efynqf1kekyse1lkkhdtkhe1ldvapmfks1ligkeiseedanyasg1tavcsi1inggkqfnsvpdeas1efn  
vrpvp1eydndfiesffqni  
indvdsn1k1s1dipsnhrpv1tsdksn1k1ittikdvassyveqdei1fvsa1lvgatdass1fgdnkdnvd1ai1fgpgn1lma  
hqideyy  
>tr|A7X4G6|A7X4G6\_STAA1  
mnkvhkp1yfy1ml1ffstti1gall1y1l1pftgkkipis1f1dal1fiassaftvtg1l1spvdigsqfn1l1geivill1liqigg1  
g1vtvt1l1t1v1f1nrkism  
knrf1imvtwn1depgg1vik1likh1laiys1vteligmic1l1c1sfipkfgigk1fl1s1l1ftsvsafnnagfal1fknn1lidy  
ssdpivi1it1isilii1fggi  
ghfvvid1finckmks1l1shsk1vl1t1tts1ilii1gaitff1l1eqfntmqhmg1l1vekignsffqsvt1trtagfnsidias1  
nksta1m1m1l1mfiggap1  
saaggiki1ttfavafi1v1l1nyirkennsvsvfnkeisdkhik1sivtinis1f1fisiit1filsii1n1pnislik1l1fevvs1a  
fgtv1g1sm1l1tteyhgitk  
iiii1fvml1cgkvg1l1t1l1rtfippkspknyrytkgqi1l  
>tr|A7X4H9|A7X4H9\_STAA1  
m1letivnqfetragt1l1ryytg1l1ehskvqpcck1lyndpfdmvyvmn1sk1l1fghvyikdckvrqsfelaspkhtegli  
rsieg1hyvgyel1hdgkh1s  
isdmmash1fedeyfmyg1l1qtyaesnnsdvfey1lengfdtdt1legiqssntdvianiemy1qlatginepapelveg1kl  
vtefvqdenatqedykale  
rk1nd1kasyys1sk  
>tr|A7X4I1|A7X4I1\_STAA1  
metgksdv1ldkiekinkkdsal1qei1pkgyei1ehhqcgvalyq1l1ipsk1kegepdkkvfitntipqiterfediesnevsf  
nm1fydnktpvni1avsae  
isdsr1q1l1k1vnkk1ldvtsststk1lvdy1invskrynpp1lvkvatr1lghvkgyfi1ypyqevmkdsnvk1l1fsndkgfqli  
dsfrskgt1l1qgyskkvfaq  
ikd1p1mvmvm1lyas1l1gsv1l1refg1l1qp1five1isg1ststgktft1l1v1ssv1wgt1sd1l1ttws1stqnsiesmas1f1ns1fpmf  
kddtrn1thpkfvtsttynf  
ssgesksrsn1l1t1l1nakkewrni1l1stgessian1madekagvsarvvt1l1qppypdnfdft1l1dks1frenygt1l1glafi  
kgyeskkdv1yknafesyqr  
yfnqksneimqr1l1grafal1l1qvtgev1ndidgfeh1dhfkiieqayds1mvknk1tidkpkq1l1leell1qyl1danrnnivgd  
gydsvnygdv1kavykhdf1  
ciknetvkn1l1ghemqti1tgwdkkgyl1ikdkkri1qkqvkhksqrh1l1g1yaikkeiieel1g1fd1fsishnpytesy  
>tr|A7X4I3|A7X4I3\_STAA1  
mneikleydthsvvhyes1dsrsfksf1skpewsk1vnk1svpieanykyargvavygdikdgandhgetikkhrndvvn

Tsompanidou\_et\_al\_Supplemental\_FASTA\_File

iyrdvivildydeindlkq1  
heaissv1ssvawywhtsfshtteqarirlyiplnerisaddykytkvlankighkvdegsyqpsrcfalpviqkghif  
ikrvndcpimvdmleqws  
kefeqsnaspnvigytrrdseywrelcfttgegrnnaalaslighllrchvndyivysfallwgqfackppmkeqeinat  
fqsilnkhyinn  
>tr|A7X4I4|A7X4I4\_STAA1  
mnreikdlfsdlkllkdsfedlkdsngwhfdepyepnhvlnkdeligegfsyherrihnnqmfdfhlyieqfdnie  
kfyekassenfgeesdd  
aknsikvae  
>tr|A7X4I8|A7X4I8\_STAA1  
mtilantrkfkeamflkgfnlsdlsretgvgisylsqiingkkipsplakkmaevlqvevnelfefevkea  
>tr|A7X4I9|A7X4I9\_STAA1  
mirnr1sellserglkirsrvakdvkiarssltsmaqndsemirydaidklcsylhispsfeffehnpinfdfdfdeepnyk  
indvfegfevtanithafs  
ienfdfeilvdvelndnrqklnfdldvsyketekitnsqhrfiftiknedeniglkkyvds1sag1kn11fkkinqklsgy  
vseiivkniddieelfpnk  
gekstt1hkeilqtdsr1ssdi fkey  
>tr|A7X4J6|A7X4J6\_STAA1  
msyhwfkkml1stsil1sssslglathtveakdn1ngekpttnlnhntspsvnsemnnetgtphesnqtgnegtgsn  
srdanpdsnnvkpdsnnqn  
pstdskpdpnnpnspnkpdpdpnkpdpdpdkpdpdpdkpdpdpdkpdpdpdkpdpdpdkpdpdpdkpdpdpdkpdpdpk  
pdpnkpnpnpspdpdpqgd  
snhsqgsknggtwnpnasdgsgnqgqwpngnqgnsqnpntgndfvsqrf1alangaykynpyilnqinklgkdygevtdd  
iyniirkqnfsgnaylng1  
qqqsnyfrfqyfnplkseryyrn1deqvlalitgeigsmpdlkkpedkpskqrsfephekddftvvkkqednkksasta  
yskswlaivcsmmvfsim  
1flfvkrnkknknesqrr  
>tr|A7X4J7|A7X4J7\_STAA1  
mg1fkdkkamtdfndameerrsiynlkdsisisddelesmiahavkhvpsfnsqstriv111ndnnkfwdntkailke  
vmgenrdfepteqkidnfk  
hsygt1lfyedqdvsglqeqmpnyydnfaiwstqtnamhqfaiwatalatkigigas1qhynplvdemtskefnipkskw1  
iaqmpfgdi reaagektfn  
pvedrfvikk  
>tr|A7X4K6|A7X4K6\_STAA1  
mrr1fsigealidfipnvtan1kdvqftfkqiggapcnvsctvqklgqqaymitqlgndafgdsiietissigvdvskv  
yrtneantalafvs1teag  
erdfsyrkpsadmlfepsfvndidvnendvvhfcsvd1vdspmrdaahyqlitktlnangtvvfdpnvr1plwdnaed1r  
qtihtflplahivkvsdee  
lefittgihdeneaiqs1ftgnvtvviytkgadgaavylknginhyhsgykvkpvdttgagdafigavisrilatdvlnlt  
qlfenegeeilafsnrvaa  
ivttkygains1pt1qeveqaf  
>tr|A7X4L3|A7X4L3\_STAA1  
mwmifsglivgg1lgfvmqrtrfcltggrfdmyvqknnkmfyalliaitiqsiglliltatdilqipahsfpilgtiigs  
fifgigivltggcatgtwy  
ragegligswialvlyavtaaitktgilkpvmkinqptvnstdmsqttgipfwglvtiltiitilvvrtnnkkvrva  
vpklkqrytgyrylfekr  
yhpfiiaaivigliallawpmsastgrndglgittpsanlvhflitgetkfidwgvlvlgifigsyiaargsrefkwr1p  
dkitirnsaiggi cmgfga  
svaggcsignglvetatmtwqgwialasmi vgvwtmshfifvrpmkkvqqqsakvkqqtqiv  
>tr|A7X4N5|A7X4N5\_STAA1  
mtvkttvstkdideaf1r1kddivketplqldhylsqkydckvylkred1qwrsfklrgaynaisv1sdeakskgitcas  
agnhaqqvaytak1n1na  
vifmpvt1plqkvqkffgnsnvev1tgdtfdhclaeal tytsehqmfnidpfnvhtisgggtlakem1eqsktdnv  
nfdylfaaigggglisgis  
tyfktyspttkiigvepssmyesvvvnqvvt1pnidkfdvgasvarvgditfeiakenyddvqvdegavcstild  
myskqai vaepagalsvsa  
lenykdhimgktvvcvisggndinrmkeieers1lyeemkhyfilnfpqrpgalrefvndvlgpqqdditkfeylkksq  
ntgtviigiq1kdhdliq  
1kqrnhfdpsniyinenkmls11i  
>tr|A7X4P7|A7X4P7\_STAA1  
msdkyyrsaymnd1navasnfkvfst1hpnktvmavvkanayglsvkvarhlmengatffavat1deaie1rmhgita  
kilvlgvlpakdidkaiqh  
rvaltvpskqwlkeaknisgeqekklwlhik1dtgmgrlgikdntyqevieiiqqyeqlvfegvfthfacadepgdm  
teqyqrfkdmvneaikpey  
ihcqsags1lmdcqfcna1rpgislygyypseyvqqkvkvh1kpsvqlianvvqtktlqagesvsygatytatdpttia  
1lpigyadgy1rimqgsfv  
nvnghqcevigrvcmdqti vkvdpdvkagdsvilidnhrespqsvevvaekqhtinyev1cn1sr1lpriyhdgdqrfvt  
ne11k

Tsompanidou\_et\_al\_Supplemental\_FASTA\_File

>tr|A7X4Q0|A7X4Q0\_STAA1  
mrdynfmsphakkvmr|savlwfipialvlliafnlnwlfweildnnisivssviiillvavftlviapvyrykhcrya  
fekhh|rvrngi|fldekv  
ipyfriqnidi|dvpgimrryr|lat|tlytaggqaeielidrsearr|krwl|nnerh|lennknee  
>tr|A7X4U1|A7X4U1\_STAA1  
mdy|ggyav|ih|lv|hvvc|iciaywa|lqs|irdqffkkg|yatql|qvc|mf|vail|lgtav|snf|ivd|llqystq|vkylik  
>tr|A7X4Z0|A7X4Z0\_STAA1  
mlcpk|l|fkk|m|k|krm|mi|k|krm|idi|iekk|rdg|ht|t|tee|in|ff|id|gyv|k|g|d|ip|dy|q|ass|l|ama|iy|f|q|d|m|n|d|d|e|ra|a|l|t|m|am|v|n|s|g|d|  
mid|l|s|d|i|k|g|v|k|v|d|k|h|s|t|g|g|  
vgd|t|t|t|l|v|l|ap|l|va|av|d|v|p|vak|ms|gr|g|l|ght|g|g|t|id|k|le|a|id|g|f|h|v|e|id|e|at|f|v|k|l|v|n|e|n|k|v|av|v|g|q|s|n|l|t|p|ad|k|k|y|a|  
l|rd|v|t|g|t|v|n|s|i|p|i|a|s|i|m|  
skk|ia|a|g|a|d|a|v|l|d|v|k|t|g|s|g|a|f|m|k|t|l|e|d|e|a|e|a|h|a|m|v|r|i|g|n|n|v|g|r|n|t|m|a|i|s|d|m|n|q|l|g|r|i|g|n|a|l|e|l|q|e|a|id|t|l|k|g|q|g|p|  
k|d|l|t|e|l|v|l|t|l|g|s|q|m|v|l|a|n|  
ka|e|t|l|e|a|r|a|l|l|e|i|a|i|n|s|g|a|e|k|f|k|i|f|i|k|n|q|g|g|d|e|t|v|i|h|p|e|r|l|p|q|a|y|q|i|e|y|k|a|k|s|g|y|v|t|e|l|v|s|n|d|i|g|v|a|s|m|m|l|g|a|g|  
r|l|t|k|e|d|d|i|d|l|a|v|g|i|v|l|n|k|k|  
i|g|d|k|v|e|e|g|e|s|l|l|t|i|h|s|r|q|d|v|d|d|v|v|k|l|d|s|s|i|t|i|a|h|v|s|p|t|i|h|k|i|e|t|e|  
>tr|A7X501|A7X501\_STAA1  
m|p|l|f|l|q|p|i|l|k|t|k|l|w|g|g|q|r|l|s|e|f|g|y|q|l|d|n|d|t|t|g|e|c|w|c|v|s|a|h|p|n|g|t|s|e|i|i|n|g|p|y|q|g|q|t|l|d|r|i|w|s|h|r|e|l|f|g|d|f|p|s|k|d|f|l|t|  
k|i|v|d|a|r|e|s|i|h|v|h|p|d|n|s|y|  
a|y|h|e|n|g|q|y|g|k|s|e|c|w|i|i|d|a|e|d|a|e|i|v|g|t|l|a|e|s|r|e|e|v|a|h|v|h|q|g|t|i|e|i|l|y|i|k|v|k|p|g|e|f|y|f|i|p|a|g|t|v|h|i|s|s|i|g|i|l|a|y|e|  
t|m|q|s|s|i|t|y|r|l|y|d|f|r|q|d|n|  
q|y|n|d|r|p|l|i|e|k|a|l|d|v|i|g|y|n|a|p|l|p|i|n|i|l|p|e|s|i|i|e|h|k|c|h|i|v|s|n|d|f|f|t|l|v|k|w|i|s|g|t|l|n|y|m|k|p|r|e|f|c|l|v|t|v|l|e|g|e|g|q|m|i|v|d|  
g|i|f|k|l|t|t|g|t|n|f|i|l|t|s|k|d|l|  
d|s|v|f|e|g|d|f|t|l|m|i|s|y|v|  
>tr|A7X502|A7X502\_STAA1  
m|i|l|v|i|g|a|n|g|g|v|g|s|l|l|v|q|l|a|k|e|n|v|p|f|t|a|g|v|r|q|s|d|q|l|n|a|l|k|s|q|m|k|i|l|v|d|v|e|n|s|i|e|t|l|t|e|t|f|k|p|f|d|k|i|f|s|v|g|s|g|n|t|  
g|a|d|k|i|i|v|d|l|g|a|v|k|s|m|i|a|  
s|k|e|a|i|k|h|y|m|v|s|t|y|d|r|r|q|a|f|d|d|s|g|l|k|p|y|i|a|k|h|y|a|d|d|l|r|r|s|g|l|n|y|i|l|h|p|g|a|l|t|n|a|a|g|s|g|i|e|a|a|q|y|f|d|g|k|e|i|p|r|  
e|d|v|a|t|v|l|k|e|i|v|t|s|h|f|h|n|h|q|  
e|f|q|i|s|g|e|q|d|i|k|d|a|l|t|q|f|e|i|e|k|d|  
>tr|A7X514|A7X514\_STAA1  
m|i|q|l|d|q|i|g|r|m|k|q|g|k|i|l|k|i|n|i|s|w|q|i|a|k|g|d|k|i|l|y|g|l|n|g|a|g|k|t|l|l|i|n|i|l|n|a|y|e|p|a|t|t|g|g|v|n|l|f|g|k|m|p|g|k|v|g|y|s|a|e|t|v|r|q|i|  
g|f|v|s|h|l|l|e|k|f|q|e|g|e|r|v|i|d|  
v|v|i|s|g|a|f|k|s|i|g|v|y|q|d|i|d|d|e|r|v|n|e|a|h|h|l|k|l|v|g|i|s|a|k|a|q|y|i|g|y|l|s|t|g|e|k|q|r|v|m|i|a|r|a|l|m|g|q|p|q|v|l|i|d|e|p|a|a|g|l|d|i|f|i|a|r|e|  
s|l|i|n|i|l|d|s|l|s|d|s|y|p|t|l|a|m|i|  
y|v|h|i|e|i|t|g|n|f|t|k|i|l|l|k|d|g|e|s|v|q|q|l|i|d|i|l|t|s|e|n|s|r|f|f|q|k|n|v|a|v|q|r|w|n|r|f|s|m|a|m|l|e|  
>tr|A7X515|A7X515\_STAA1  
m|c|g|i|v|g|y|i|g|y|d|n|a|k|e|l|l|k|g|l|e|k|l|e|r|g|y|d|s|a|g|i|a|v|v|n|d|n|t|t|v|f|k|e|g|r|i|a|e|l|r|k|v|a|d|s|s|d|f|g|p|v|g|i|g|h|r|w|a|h|g|v|p|  
n|h|e|n|s|h|p|h|q|s|s|n|g|r|f|t|l|v|h|  
n|g|v|i|e|n|y|e|e|l|k|g|e|y|l|g|g|v|s|i|s|e|t|d|e|v|i|v|q|l|v|e|y|f|s|n|q|l|s|t|e|e|a|f|t|k|v|s|l|h|g|s|y|a|l|g|l|l|d|a|e|d|k|d|i|y|v|a|k|n|k|s|p|l|  
l|l|g|v|g|e|g|f|n|v|i|a|s|d|a|l|a|m|l|  
q|y|t|s|e|y|k|i|h|d|h|i|v|i|v|k|k|d|e|v|i|k|d|a|d|g|n|v|v|e|r|d|s|y|i|a|e|i|d|a|s|d|a|e|k|g|v|y|h|y|m|l|k|i|h|e|q|p|a|m|r|r|i|i|q|e|y|q|d|a|e|g|n|l|  
k|i|d|q|d|i|i|n|d|v|k|e|a|r|i|y|v|i|  
a|a|g|t|s|y|h|a|g|l|v|g|k|e|f|l|e|k|w|a|g|v|p|t|e|h|v|a|s|e|f|v|y|n|p|l|l|s|e|k|p|l|f|v|i|s|q|s|e|t|a|d|r|a|v|l|e|t|n|k|l|g|h|k|s|l|t|i|t|n|v|a|g|s|  
t|l|s|r|e|a|d|h|t|l|l|h|a|g|p|i|e|i|a|  
v|a|s|t|k|a|y|t|a|q|i|a|v|l|s|i|l|s|q|i|v|a|k|h|g|r|e|a|d|i|l|l|r|e|l|a|k|v|t|t|a|i|e|i|v|d|d|a|p|i|m|e|q|i|a|t|d|f|l|e|t|r|n|a|f|f|i|g|r|i|d|i|n|v|s|  
l|e|g|a|k|l|k|e|i|s|i|y|i|q|a|e|g|f|a|  
g|g|e|l|k|h|g|t|i|a|i|e|d|g|t|p|v|v|a|l|a|t|q|e|n|v|l|s|i|r|g|n|v|k|e|v|v|a|r|g|h|p|i|c|i|s|m|e|g|l|e|k|e|g|d|t|y|v|i|p|h|v|h|e|l|l|t|p|l|v|s|v|a|l|q|l|  
i|s|y|y|a|a|h|r|d|l|d|v|d|k|p|r|n|l|  
a|k|s|v|t|v|e|  
>tr|A7X533|A7X533\_STAA1  
m|a|k|v|e|l|t|r|r|r|r|f|i|v|a|m|i|s|a|f|v|i|l|n|q|t|l|l|n|t|a|l|p|s|i|m|r|e|l|i|n|e|s|t|s|q|w|l|v|t|g|f|m|l|v|n|g|v|m|i|p|l|t|a|y|l|m|d|r|i|k|t|r|p|l|  
y|l|a|a|m|g|t|f|l|l|g|i|v|a|a|l|a|p|  
n|f|g|v|l|m|l|a|r|v|i|q|a|m|g|a|g|v|l|m|p|l|m|q|f|l|f|t|l|f|s|k|e|h|r|g|f|a|m|g|l|a|g|l|v|i|q|f|a|p|i|g|p|t|v|t|g|i|i|d|q|a|s|r|v|p|f|i|i|v|g|i|a|l|v|  
a|f|v|f|g|l|v|i|s|s|i|y|n|e|v|k|y|t|k|  
l|d|k|r|s|v|m|y|s|i|g|f|g|l|m|l|y|a|f|s|s|a|g|l|g|f|t|s|p|i|v|i|g|i|l|i|s|m|v|i|i|y|l|f|i|r|r|q|f|n|i|t|v|l|l|n|l|r|v|f|k|r|t|f|a|l|c|i|s|m|i|i|m|  
m|s|m|v|g|p|a|l|i|p|i|y|v|q|n|s|l|s|  
l|s|a|l|l|s|g|l|v|i|m|p|g|i|i|n|g|i|m|s|v|f|t|g|k|f|y|d|k|y|g|r|p|i|y|t|g|f|i|l|t|i|t|i|m|l|c|f|l|h|t|d|t|s|y|t|i|l|v|v|y|i|r|m|f|s|v|l|m|m|p|  
i|n|t|t|g|i|n|s|r|n|e|i|s|h|g|t|a|  
i|m|n|f|g|r|v|m|a|g|l|g|t|a|m|v|t|l|m|s|f|g|a|i|f|l|s|t|s|p|h|l|t|a|e|i|k|q|s|i|a|i|g|v|d|i|s|f|a|f|v|a|l|v|a|y|v|i|a|l|f|i|r|e|p|k|i|e|s|n|  
r|r|k|f|  
>tr|A7X540|A7X540\_STAA1  
m|l|d|k|n|q|l|a|k|y|q|d|h|l|c|e|y|e|i|m|s|n|n|e|k|e|a|l|e|e|k|v|a|s|l|d|l|d|i|a|k|l|y|n|d|l|y|i|n|k|k|i|d|d|v|s|a|v|s|e|v|k|y|d|i|k|s|q|m|s|d|d|i|k|r|  
l|e|e|q|l|q|i|k|e|g|q|f|a|v|i|m|  
a|g|g|q|g|t|r|l|g|y|k|p|k|g|s|f|i|e|g|v|s|l|f|e|l|q|a|n|q|l|k|t|l|h|q|s|g|h|i|q|w|i|m|t|s|i|n|h|e|e|t|l|a|y|f|e|h|s|y|f|g|y|d|q|e|i|h|f|f|k|q|d|  
n|i|v|a|l|s|e|e|g|k|i|l|n|q|g|g|i|  
m|e|t|p|n|g|n|g|v|f|k|s|l|d|k|a|g|i|l|e|m|s|n|n|g|v|k|y|i|f|l|n|i|d|n|v|l|v|k|l|d|p|l|f|a|g|f|t|v|h|d|y|i|t|s|k|i|q|p|k|g|e|s|v|g|r|l|v|n|v|d|c|  
k|d|t|v|l|e|y|s|e|l|d|p|e|v|a|n|q|f|n|

Tsompanidou\_et\_al\_Supplemental\_FASTA\_File

nanigihafklgfilnavnrelpyhlaiknlkqlndenfgvieqptlkfelgyfdiftygtsfvtlqvpreefspknke  
gkdsvatatedlrrmgli  
>tr|A7X547|A7X547\_STAA1  
mmttkiirryslitillivsifislcvgsvmihpidaikgiftqddfilneyriprtllgiiigsslaisgaiiqavirn  
plaspdvigiskgaslaav  
iiimifptaplflvpigsflgafavslflsfliskydvkgsklaliglaigaiactaivqflirnpleankalvwtgsl  
yghdmsniytilpwfliti  
piiillsyqldvlnlgdavatalglkvktikmllilavilagsaisvvggisflgliaphiarqlignktlhviimgl  
igailtfgdglargihpp  
ldipvgviiiaigapyflilrrmk  
>tr|A7X561|A7X561\_STAA1  
mkrlnkfilgllivvvgflfmyiqdgriteyqdyflqfewqpllislaalliliglilvlsifkpthrkpglykdfd  
dghvyvsrkavektafdtv  
akydqvrgpnvavklynknksyidiktddfvppnnvqvslteairsdiknveyftempvrklevnvrdqktsgrvl  
>tr|A7X563|A7X563\_STAA1  
mknktvslvfwslvictifvafgai fpkqlekltqnittfialhfswwy111vlvlfvcvylfstryanitlgeeged  
pefslpswfamlfsgmgi  
glvfwttaeppishafkltpihkagtqsaindamqfsffhwgihawavygivalvfayfsfhkgypglvsatltpllgeka  
mrgplggaidvlaviatvt  
gvaatlgfgalqineglhflfnvpsnftmqviliviati lftwsawsgidkgiktlsninmlafvvligl fivgptlyi  
lntftnglgnyanffsms  
lripsggqkfqlnwtifyawwiswapfvgifiarvskgrtiketilglvfpalvcfiffavfgasaiylqdnhiad  
iakaatetatfatlqhyp1  
gfvlsitllvimi ffvtsadsatyvlgm1ssrgdinpksfvkvswwiimalfaiimiytggtqaiqnlliaalpfsvv  
iamiwslkslseekprn  
snkvlikhrdpdileyrsskhidden  
>tr|A7X584|A7X584\_STAA1  
melrfwnlefgfrnstfgiqnynewkiliiac1mtwfcdfylmncffv  
>tr|A7X598|A7X598\_STAA1  
mlfyvglefvvlwryknalwrfqngvsinkpqqdl1tmtytfhtyisdyfysyk  
>tr|A7X5A2|A7X5A2\_STAA1  
mhtynrrcrkkimdtsikngieikiafvqktekyfinnkelekkfyefekdivnpgkyynlgykntqalvsnfrntpnnt  
lslfwhendqwkplfkrka  
kndfsnkwekevhiiwrflyakkvpkilvdkiiaimyvknhadmkskfleieinrillyndnilqec1sqkflkqtdfy  
iityagiellkkyglekit  
lsnilyefksnglhqqknfdgnk  
>tr|A7X5L3|A7X5L3\_STAA1  
mtkkvyfnhdggvdd1vs1fl1lqmenvqligvstigadcylepslsasvkiinrfsnediqvapsyergknpfpkewrm  
haffmdalpi1nepvkhva  
snvsdkeafedijqtlkrqsevt1lftgpltdlaka1qkdssivqyiek1vwmggtflpkgnveepehdgsaewnaywd  
peavkiivfdsdieidmval  
estnqvp1tdvrrwanerqytgidflgvsyaavpplthfitnstyflwdvlttayignkd1vhsiekkvdvisygpsq  
gktfeckdgrkinvinhd  
naffdyitalakkvn  
>tr|A7X5N2|A7X5N2\_STAA1  
milndvnpnd1fptekkgpsvlgiieyqvqgenefegafiatnerlimvdmngqfyrsisyneiekidydggtimfkf  
nignvpmhdiks1dnvemfv  
eyvkqhmiv  
>tr|A7X5N6|A7X5N6\_STAA1  
mtdnys1hiyskmkssvkeanlkiyw1qgtgvvsinlqqydvkrndvtvim1ndlyqidghddsvccvvevsaktflk  
fmnanymrgkilnevas  
tfrilikylyiskikqqsynandkii nymcvelms1ntydgshrhlvaeevhdy1tnnhhkkinrkdvinqvsitnkalsd  
mfkatpysnfiqylnhir1  
ehclidiltskkpiee1asshgfnhysrfih1fketygntpklikrksptshsinhsq1veidkniel1fdntnqssss  
mreidipfeptkrsqmyqp  
kniiykgsnfywmdyytikqiiqr1gvnlen1hiivtidtsnel sieqit1llqkivnynvvnvfrikheykelltster  
gkieklvatifnmtfesnr  
ckiaflind1nttaiqklkr1idnyigvfelyhlepkelnthydkeidh1idyfilplr1qieqvsiasckiicdvdlin  
enndlkekitmsdfnkvt1e  
llntnytkfrgl1mhmsi1seaskein1tr1sifi1iin1nqlrgiviyqndtmivtkfkhevqcvic1paallnensaa  
ir1sckgl1qqfshaktkqi  
v1sidkdnhtsengv1vndimqqhsywanfierniydhs1mvssnsivh1kyhlei  
>tr|A7X5S0|A7X5S0\_STAA1  
mfqk1sifatksflvwm1vaavigfifpqhvat1gkwvpy1lgivmlgm1gtitpndfkmvfkapraviigvclqfsimp  
t1afiiaksfhlppdiavg  
vilvgccpggtssnmsylakanavalsvittvst1lapfvtpaliylfanewlevsflsm1wsvvqvvlipialgivlq  
iinrkiaekastalpiisv  
vaislilavvvggskhqil1ttg1l1flvvl1hnv1gytigywlar1llk1drdqdkavsievgmqnsglavslaalhfnp1

Tsompanidou\_et\_al\_Supplemental\_FASTA\_File

aavpgavfsfihnitgpi  
akywskk1  
>tr|A7X5U6|A7X5U6\_STAA1  
mivevehqrqgvdliki dndetkiiftnygarvsvwkyhdnvlgnvveadefyhspfkfgasigrsgridnakfk1  
kgkeyqleknggehhlhg  
chgl dnlfdyeirneiaqikvifktvlksaddhfgdidvtithiydadhqwsieyevasedtlfspmnhvyfnlrd  
nnvvdnhrissnql dmyvl  
dernivtgdi ldlhev fednkiklsdi ftsqhaqlsqmtrfggl dhpftvgehkmvenhefmlevdt dmp hvvfftn  
qpde wds pfn iykphsgft  
letqflpndinlygekapsilkagevfnsktsfrieekvend  
>tr|A7X5V5|A7X5V5\_STAA1  
mfhcnlpfvnhiiyifnycyrnlqds lsshfisivihfgkwtlyfitskmktrykytsiwrli  
>tr|A7X5W4|A7X5W4\_STAA1  
mtdalqqkihielldl ddkfel telnaqkglyingpanql krgv hmayvqqkqaidnitiveqqledqhfledyd  
kfqne vthrnydktanfae  
lsdiprqfdnfl dqfyqikggyfiithintligdfhseah  
>tr|A7X5Y7|A7X5Y7\_STAA1  
mmklnlfinanetesidi hapkmndhvqsiinavndlkshtlvgyidkeihiinvsd vitfvinkvtaitsnqkfk  
lklrl yelekqlpghfiri  
skseivnkyyieklllepnglirmylkdahtysssrylksikerlsi  
>tr|A7X604|A7X604\_STAA1  
mitsfrhsedidkhiiktpldhtaswinvvepdreeienlmeqynipedfirdpldseessrieydedtgysliiidlpi  
vnstnrsvlsfvtpigii  
igngiivtvcaeneflenl pkrdinlkfhsrfaleilttiadhynrnlrl lnsriri ekelknnitnkqlfk lmevek  
slvyflaalkgndtiikk1  
frlpaikrfeedeell dliennqaiette lhrilesittsyasllsmdmtimktl t lftvll t lptlvfsffgmnv  
plpidhsyiswiivvgis  
lilvvivsi flwrkqkl  
>tr|A7X609|A7X609\_STAA1  
mtcqlkihhtl stipsrninnimvl fsltskl nitin getkdvsnii lnhgdi yninhgeniel mipvfyfyqqddd  
ffngyl drhl lqssnyks  
liadlistptsssimgknigqsiidtl lkeafiridheylpnial snpvfidcvnyihdnidahls lkdi amhc nisesy  
csnlfvrylsmnfkdyfts  
iklvnainlll stkhsttvselagfnshtnfanqfknylhfspkqfrslvskiteppqihfqqdnvsqftelidit  
aqlatnttdihiddfnpkd  
rsqrakvfvrfsnfnel fqi fneyy di fnehlpkpvfididieisqtynllnrcfekl fekniglaiaikstqqf  
etmkqlilt flqgnqdykt  
skklvkfm l vfcnsmtaeihlchl kknknkeikysvtvdgfl etystveqvydvmqr l kfhyyfidien sktathli  
tknqh yqt dth feqykkf  
ildsgisstqfvynn lsvsgfkytndgknpiql sdivyhli allrygggis yqll ddsnyis lnykygsp lplm hlykm  
frpfvnedieitnnyvl sr  
kdnnyhfl lfnkindrymsdvkqdfi fhnel pqsdlmi iktlnhehgsiqhllpis dqlvyiekeilde ldktnypkte l  
avgeetgrt felklnhdev  
kyicfkps  
>tr|A7X617|A7X617\_STAA1  
mnfnqfenqffngnpsdtkfdlgkvfnfstpsfvtniyetdelyyleaelagvnkedisidfnntltiqatrsaky  
kseqlildernfes lmrqf  
dfeavdkqhitasfenglltitl pkikpsnettsstsisipis  
>tr|A7X620|A7X620\_STAA1  
maytytlkdiieitgvtkrthlyydeigllvpdkndknyrvyqqdlekqlkililksfdfdiakikqyisydneqlrk1  
lseqiskldkkisdqlir  
rsvcefikgls lidtsilnktlqsqydeasikyghtkayqsfirrkdslsqdirhkl tti fnkfnhmslshy piqdc  
dlvfewka f mntiadfdde  
tlccia ktyeddrfkdyfnsydnqnlasyiseavnyflsnvnksdnf  
>tr|A7X626|A7X626\_STAA1  
mlnqflwifpylclvvfvaghiaryrydkfswtaksselierkrlmwgsllfhlgii pvffghvvgll ipkswmdavgv  
sehlyhigavyigsi fgii  
tligmfl l tarvttksirr lssasdi fvnfl lllivfmgcyatlvtniqhpdfnyrts lsiwfrql fmlkpdas lmsgv  
piafkmhil l gftimacwp  
ftrlvhwsvpltyinrryiy rknkv  
>tr|A7X644|A7X644\_STAA1  
marlnitfspqafedykyfqnnkkmvkkine l lksidrngal egigkpek lksnl tgyysrrinhehr lvytvddnhik  
iasckyhy  
>tr|A7X655|A7X655\_STAA1  
mskkqkl tmiitmlggffgl lnetllvta lpsimkdfesytqvql ttafl l tngiviplsalviqryttrqvflvgi  
siff lgtllgg l sphfat l  
lvariiqal gagimmp l mmttildvfqphergkymg ifglviglapaigpt lsgylveylnwrs lfhvvapiaavtflig  
fktiknvgttikvpidfis



Tsompanidou\_et\_al\_Supplemental\_FASTA\_File

vi fsvlgfggll ygtssisekgfdnpivlvsmiggvvlvalfvlrqyrilstp1lnfavfknkqftvgiimgvtmvsimg  
setilpifvqnlhralsd  
sg1tllpgaivmfmsmtsgalyekfgprklaivgmaivvittayfvvmedqtstimlatvyairmvgialglipvmtht  
mnglkpemnahgssmtntv  
qqiagsigtaal itilshasknfsptmsdyngmnki dmmnqikvdtm1hg yhagflfallitvvsffcsfmlqgkkkev d  
srq  
>tr|A7X685|A7X685\_STAA1  
mki gtiadlhidrhnktsedyleaiveivkykklidilliagdisnhyqlthqfitqmtkql dipvkfvpgnhdlweves  
mttqdiwnnyksmsqclvg  
kpfivneewaiightgwydysfaaqrfsleh1qkgkhygatwqdkeriswgisdqnl skiaaeqvkkdilevgnrrvilv  
thvvt hpdfivpmp hri fd  
fynafigtsdfnplyamfdipysimgvhfrksvmd dgrcylcpc lgyprqwr sediyqeinetiqiiei  
>tr|A7X690|A7X690\_STAA1  
mttkklyflsisiiilvaisaiyitlnsntktrltndsqqqidkii ehd1qkghipgasilivkngkvflnkgygyqdv  
dkkvkaspttkyeiasntk  
aftglailklaqegrln1nddvskhvphfkmnyngqnetitikql laqtsgpsditsedavtnknrln dvtraimgde  
lhhkpgeefeysnmydl1  
gliinqvntkqsytkyitnswl kplhmthtsfkqtnnkskhdaigyelqgstpvvskpefnlwdtpsaymmtstedlehwi  
kfqlnppdkykslvqqshk  
nlstige pnanayasgwftnndehlvfhsgtldnfssfilln pkqnygivlanlnseyvpklvehlntqivnhkryst  
vasilnqykdfnvtvlm  
ttlillafif sayrawqm rhgqilrrskriavls wtlclciaialilyalpylilgsnwsfvltwlpieiklalitt  
lialfstlivillflhtki  
tkt  
>tr|A7X692|A7X692\_STAA1  
mki aiagsgalgsfgaklfqagydv t lidgytshveavkqhgl nitingeafelnipmyh fndqrdesiydv vflfpks  
mq1kevmedmkphidneti  
vvctmnglkheeviagyvaqsqivrgvttwtaglespghshllgsgpveigelvdegkenvikvadllneaelngviskd  
lyqsiwkkicvngtanals  
tvlecnmaslnessyakcliyltqeivhvati dnvhlvndeafeylvdlnekv gahypsmyqdlivn nrkteidyinga  
vatlgkqrhieapvnrfit  
dlihtkesqrhaqd  
>tr|A7X694|A7X694\_STAA1  
mdtskqfrgdnrlllgivlgvitfwlfaqslnlvvplqstysdvgtiniavslsal fagl fivgagdvadkfgrvkit  
yvgliinnvgslliiitpl  
pafliigriiqglsaacimpstlai neyyigtrrqralsywsigswgsgictlfgglmatyigwrsifvvsilltlla  
mylikhapetkaepikgmk  
aeakkfdviglvilvvtm1slnviitqtshfglvsp1ilglivvficslv gfvyyenkikhplvdfsfknrgysgatis  
nfl1ngvaggalivintyy  
qqqlgnssqtgyislyliavlsmirvgekilshgpkprlllgsgftviglills1tflpevwyiissivgyllfgtg  
lgyatpstdtavasapdd  
ksgvasgvymasslgnafgvavsgtvvtv1aanlnlnlggftgmmfnallaivafvlvilllvpknqtnl  
>tr|A7X6A5|A7X6A5\_STAA1  
msntalgl tallvipiisyekeglihikdlivatlravvq1ilglfllhyifkindkwllilcvlviinaswntisra  
spvmhhvfwisflaifigt  
alplagtvatgaihtanevipigglm anngliainlayqnl drafvqdgtniesk1slaatk1askgairesirlaiv  
ptidsvktgylvsi pggmt  
gliiggvpp1qaikfql1vvfihttatimsaliaty1sygqffnarhq1varntdvkses  
>tr|A7X6A7|A7X6A7\_STAA1  
mlleikdlvykasdriidhis1kvdkgesiaigpsgsgkstfqkqicnlisptsgelyfkgkpyndydpeelrqrisy  
lmqqsdlfgetiednmi fp  
slarndkfdkrakqlikdvglghyqlssevenmsggerqriaiarqlmytpdillldestsaldvnnkekeniifklv  
eqdvaimw1thsdqsmrh  
fqkritivdgkiskveelnqhe  
>tr|A7X6C0|A7X6C0\_STAA1  
mtlltvkhltitdtwdqplvsdvnftltkgetlgvigsgsgksitcksiigl nperlgvtgeiifdgtsmlslsesqr  
kkyrgkdiamvqqgsraf  
dpsttvgkqmfetmkvhtsmstqeiektlieymdylslkdpkrilksypym1sggm1qrlmialalalkpkliiadeptt  
aldtitgydvleafidikk  
hfdcamifishdltvinkiadvvmkngqli eghtresvlhhpehvytkyllstkkkindhfkvmrgdvhd  
>tr|A7X6C1|A7X6C1\_STAA1  
miilkrllqdkgavialgiivlyvflglaaplvtfydpnhid tankfagisfqhllgtdhlg rdiltrliairpsllyv  
fvalfvsvligsilglfsg  
yfggfvdalimracdvmlafpsyvvtl alialfgmgaeniimafiltrwawfcrvirtsvmqytasdhvrfaktigmndm  
kiihkhimpltladaiis  
sssmcsmilqisgfsflglgvkaptawgmm1narkvmfthpemm faggiaviivmaf n1sdalqiaidprisskdk  
1rsvkkgvvqs  
>tr|A7X6D3|A7X6D3\_STAA1

Tsompanidou\_et\_al\_Supplemental\_FASTA\_File

mtskhqkqgsivnrflnsvekignklpdpvslfflmcvglaimtwvislfnvsvkhpgthqtiyikniishdgftmimnd  
tiknfsefpalgvlavmi  
gigvaektgyfdklmsvnrprflilptiiligilgstagdaatiilpplaamfikigyhiagltmayasavggfa  
anivvgmqdalvysftepa  
trivdsiktvmwfyiaasvvvllptiillvttkliiprlgkyddsImhddheeasshitdkeahalkwanisfivti  
illiiitaiphsflrnakt  
gsllddaplingvgliilvvflvpglvygilskeikntkdlgkmfgdavgsmgtfviviiffaaqllaylkwsnlgiaav  
kgakllehgngivliilgii  
vl samvnmliigsasakwgilgpi fvpmliligfhpafqtviyrvgsitnpi tpmmpylpllltyaqkydkrmlgalls  
slmpysialsvwtvfvii  
wfl ligipvgpggpi fvk  
>tr|A7X6D8|A7X6D8\_STAA1  
mskkkililtsimlilivsvasyfkmkydekekqksiykeqqaritlylkhtieptiksvhftkletsmpgsavie  
gyinenkeddfvayaspn  
nfqfvgdlikserlseilkpahqlkspddikkeInkk  
>tr|A7X6D9|A7X6D9\_STAA1  
mlvlfwiinyvrnyrlqknfihhilgvtlmnkxhvfiigvilcivasviylkvkydekekqkaiyykeqgeritly  
lnhtkeptiktvhftsI  
krpgmgdaviegyinenkeddfvaygspehnyqfggsliksknlstllkpvhqtkspdeikkeleskkndr  
>tr|A7X6E9|A7X6E9\_STAA1  
mgldfsglpllavleqmkekeqi sevi apehvrmhhdhqnklksdeki lldqmvshfknfeddfknaaqgawvknatdel  
kdisndlekiqdikv  
>tr|A7X6G3|A7X6G3\_STAA1  
msrllndfnqslkkgfidkdi shkgnypkllvnnknekvlstiidelqkctfyfsvafitesglaslkaqlldl snkg  
vkgkiltsnylgfnspkmy  
gellklknvevrldiagfhakgyifehkdyssmvi gssnltsnal kvnyehvllstmkngdlvdsvknefellwqkst  
plteqwinskykesfeyrsI  
eklaeveqtqmlladkvkksveivpnImqaealrslkairdtkdkali isatgtgktilcaldvrevnpnkflfivhne  
gilnrakeeffkvlpi knd  
sdfglltgkhrvdakyI fatiqtlsrddnfnkqfdenefdyivfdeahrsaastyqrvfnyfkpkfmlgmtatpersdel  
sifelfdyniayeirlqaa  
lesdilcpfhyfgvtdyvhqgikeddvtklryltsdervnyi i qkt d  
>tr|A7X6G6|A7X6G6\_STAA1  
mfffyfwgvflynslhkckgfsfhvllslteilkglatmdkelwierandslvkhfyeeqqsdi eqregfeskl tfgtagi  
rgkfglgegrlnkftiekI  
alglarylnaqtspitivihydirhlstefaqianvlanhqitvylpdykttpeIsfavrnInttagimitashnpkd  
yngikvygsdgaqlstdas  
elasryieevgdplqidi piskqnts yikpfpksvtdm kh iqnmigyipksdlqv vfts lhgtsvpivpellslnfn  
qfnlvdaqckpdpnfssvq  
sanpedhrafdqavelankshadllistdpdadrlgiaerdahghityfngnqigallnyriqqtsqlrhrImiqsivs  
seltkslarynnvkykevI  
tgfkfi aqei rql ddhqnmifa feesygfI sepfvrkdavqivpliikyaselklygkllkdeleqi yqtvgrhedtlf  
shtleglegkkkiesimth  
frsnppqei qglkvkaiedyltsevylhdkdttsqinssksnvi rvlfdegfialrpsgtepkiklyvsI kcpdfddvaq  
kinami fs  
>tr|A7X6H3|A7X6H3\_STAA1  
mrdkkqpvnrkrdvflsnklnkysirkftvgtasiligsImylgtqqeaaenienpttlkdnvqskevkieevtnkdt  
apqgveaksevtsnkdtie  
heasvkaediskkedtpievanvaevqpkssvthnaepkvrkarsvdegsfditrdsknvestpitiqqkehfe gygs  
vdiqknptdlgvsevrfn  
vgnesngliga lqlknkidfskdfnfkvr vannhqsnttgadwgglf skgnaeeyl tnggilgdkglvnsggfkidtg  
iytssmdktekqaggyrg  
ygafvkn dssgnsmvgeni dskstnflnyadn stntsdgkfhgqr lndvil tyvastgkmraeyagktwetsitdl gIs  
knqaynflitssqrwlng  
ginangwmrtdlkgseftftpeapktite lekkveeipfkkerkfnpdlapgtekv tregqkgektittptlknpl tgei  
iskgeskeetkdpinel t  
eygpetiapghrdefdpklptgekeevpgkpgikn petgdvvrppvdsvtkygpvkgdsivekeeipfeker kfnpdlap  
gtekv tregqkgektittpt  
tlknpl tgei iskgeskeetkdpinel teygpetiapghrdefdpklptgekeevpgkpgikn petgdvvrppvdsvtk  
ygpvkgdsivekeeipfkk  
erkfnpdlapgtekv tregqkgektittptlknpl tgei iskgeskeetkdpinel teygpetitpghrdefdpklptg  
ekeevpgkpgikn petgdv  
vrppvdsvtkygpvkgdsivekeeipfeker kfnpdlapgtekv tregqkgektittptlknpl tgei iskgeskeetk  
dpnel tefggekipqghk  
difdpnlptdqtekvpgkpgikn ptdgkvi eepvddvikhgpkgtgtpetktveipfetkrefnplqpgeervkqegqpg  
sktittptivnpl tgekv  
egqpteeitkqpvdki vefggepkdpkpenpekpsrpthpsgvnvnppngl skdrakpngpvhsmdkndkvkkskiak  
esvanqekkraelpktgle

Tsompanidou\_et\_al\_Supplemental\_FASTA\_File

stqkglifssiiagiaglmllarrkn  
>tr|A7X6H6|A7X6H6\_STAA1  
mmndlksksniklmkrvlttylelkyllkyfcltldnylvlayldvfkndegkyfmrdisyigidqsrivksvkelssk  
gylncrdphdsrnviiv  
svkqhnyiknllseininet  
>tr|A7X6K0|A7X6K0\_STAA1  
mkekrtnvrwmfalafffigviaymdranisyiakqmmddlgmtkppqfgllasffslgyalmqvpsgmlaekfgprkmit  
ialvwwsaftiltgmiknh  
gliylvrflfgvgeapmypsnavfnsfwfsknekgrassallagsyfgpvlapivtiaivnafnwqavfyifgavgilma  
vlwaiiakdlpeqhrmvne  
aekrfimenrdivatekssppwnnfkrfsfyaiaiqyfvvqfiitlflwlpityltevfhnfkemsisslpwllmffl  
ilsagaisdrvlgmgrskf  
vargviaiagfivfavsii favrtgnlyvsifwlsjlgggigismgmswaaatdlnrnfsgtvsgwmnlwgnigalispl  
laglfvehlgwtmtfglli  
vpaviavimwfyvkdqplivsddkaiek  
>tr|A7X6K9|A7X6K9\_STAA1  
mehifregkqgaptlilhgtaggedfllplgealnenyhllsirgqvsengmryfkrleggyvedeelfrgqellaf  
ikeaaeryefdiekavlvg  
fsgnsniainlmrseapfkkaallyaplypvevtstkldsvsllsmgkhdpiplaaseqvinlfktrgavveevvn  
gheitetgltagqilgk  
>tr|A7X6L8|A7X6L8\_STAA1  
myiifnfhllfnllkarflimtkimffgtrdyekemalnwgkknvevttskellssatvdqlkdydgvttmqfgklen  
dvypklesygikqiaqrta  
gfdmydlldakkhnivsnvpsyspetiaeysvsialqlvrrfpdierrvqthdftwqaeimskpvkntvaiigtgrig  
aatakiyagfgatitayda  
ypnkldfltykdsvkeaidadiislvpankesyhlfdkamfdhvkkgailvnaargavintpdliaavndgtllgaa  
idtyeneaayftndwtndk  
iddktlllelieherilvtphiaffsdeavqnlvegglnaalsvintgtcetrln  
>tr|A7X6Q3|A7X6Q3\_STAA1  
mqsldknfrhlsrqkllqqlvdqkqlsedqfdillnhplideevanslienviaqgalpvgllpniivddkayvvpmmve  
epsvvaasygaklvngtg  
gftvsserimigqivfdgvdteklsadikalekqihkiadeaysikarggyqriaidtfeqqllslkvfvtdkda  
mganmlntileaitafln  
espqsdilmsilshatasvvkvqgeidvkdlargertgeevakrmerasvlaqvdihraathnkgvmngihavvlatgn  
dtrgaeasahayasrdggy  
rgiatwrydqkrqligti evpmtlaivgggtkvlpiakaslellnvdsaqelghvvaavglagnfaacralvsegiqqg  
hmslqykslavvgakgde  
iaqvaealkqeprantqvaerilqeirqq  
>tr|A7X6R2|A7X6R2\_STAA1  
menycilgnpvnvgktslnfaltgsyeyignwsgvtvekkvgklkenvgqlidlpgytdlspiskdetvvttyllndsfsq  
iinivdasqlkrnvqltvq  
llelnqpiyiglnmidvatkrigiki dyhklmkkllktpi fpvpartgkgtkyllegeikhlegeyqphfkinygekieetik  
nmcqiiimtetshdkyqarf  
iaiqflinnmqianlnevvnkllsslrdaqvaeqvgavsvrremerirnhyietllqdvvtypdedkqyfssridkilth  
kyigmpiflaimwli fqt  
ftwigtpdsqldafiggtftdsvktimnylgvipflqdlitdgiagvgsvlvfpqivvllffisilledsgymariav  
lmdrimesfglsgksfipm  
igfgcnvpsimaarsienekerlttiliapfmscsarlpyalvfgiffkenqslvvlslvylgiimaflvstvltkti  
lkndnaifiveptyrvps  
iktllwrstwekakgfvrkagtfifggsvviwllsyvgphginvniqsflhmvgssffgmvlvqplgfgtwqagatlvpgfl  
akevivssmaiyssgdag  
lvnviqnfptlsayafmifillyipcvstvaairketysswkwtalavayplvtayvltfifyqvghlfv  
>tr|A7X6R4|A7X6R4\_STAA1  
makflykmgtfiakhksaviawivivaaailiplatnapkfdndikmtglesldtnkkiekhfnqdsekaqirvvfkttk  
ddgivqpnitedikktled  
ikkddkhdikisdpyenkqiskdkttafaditydvsqtslkdgsrdnvkshlkdlnrdnhvqtelgtgtgmstevggense  
lvgiivafvllitfgsvi  
aaglpiaisaliglasvgiislltyafdipnvtlavlmgilavgidyalfilfryrqvmktetdyikgiglaigtagsa  
vvfagvtvviavcglslvg  
idflavmgfasaisvifavfsaltllpalisifhkrikvnlqsnfkddidtpwskfitgnalaavllgllilvaaaipv  
shmrllgipddgvkpadstq  
kkaydiisdkggegfnqgipmlinvkdkkddpqlqdlqsvykdkdkknvdivtppqmskdndyalmvvipkqgpnae  
stndlvhdlrdyhkdaqdk  
ygfkteisgqsvinidmskllneaipfatvivvaffllmivfrsilipkavlgfvlsimatlgfttvmqdgfmkgll  
fgiettgpmalaflpvitig  
ilfglamdyevflmsriheysktgndysikvlgkesgpvivaalimfsvffafvfqedvmiksmgmalaavgvlfdaf  
vvrmmliपालtklfgkgs  
ylpawlnriiprvdieghalekyktvesqeseakdskeydttkfvypqgatnsvkhdvhgqddahsivliddktmalayq

Tsompanidou\_et\_al\_Supplemental\_FASTA\_File

evkqqasslflydalidy  
qnhqlnskqqvtnieqlnknienlqlleknlnks  
>tr|A7X6V3|A7X6V3\_STAA1  
mtki vlitggnglgyasaealkalgkyvigrndrvrgqqasqklgvhyvqldvtsdysvknaynmiaekegrldilin  
nagisqqfsapskltpdv  
eevyqtnvfgivrmmntfvpllekseqpvvnvssglsgfmvtnpetaeskvns laycssksavtm ltlqyakglpnmq  
inaadpgatntdlvgdfsn  
nskhvsegikpiiqlatigadgptgtfingdgempw  
>tr|A7X6W5|A7X6W5\_STAA1  
mneqwl ehlp lkdikeispvsggdvneayrvetdtdtffllvqrgrkesfyaaeiaglneferagitaprviasevngd  
vylvmtyleegasgsqrql  
gqlvaq lshqqeeegkfgfslpyeggd isfdnhwqddwrti fvdkrldhlkee llnrglwdandikvydkvrsqiveele  
khqskpsllhgd lwggny  
flkdgrpalfdpaplygdrefdigittvfggftsefydaynkhyplakgasyrlefyrllyllmvhllkfgemyrdsvahs  
mdrillgqts  
>tr|A7X6W6|A7X6W6\_STAA1  
mykli kpf lfkiepekahgl tidalktlqkfpvlfpvvd klf tyknptlsqt iqngtydnpiglaagfdkscevpkaleh  
l gfgalel ggitpkppgn  
ppqrmfrll eddal inrmgfn nigmnka lshlrknayqvpvginvgvnmktpyearyqdyikvidt fkhdvsfftniss  
pntenlqnfhdkdefsm l c  
qal ttfkkqh dvtvp iylkl tsdmdfdgl kallpa itetfdgiilan trqrdgltsankveegglsgrplfernlklik  
yayqqtngefliigtggvf  
stedaikmrrhgasliqiysslviepggltkkmnkiarylkdhhdvnsvdiiglda  
>tr|A7X6X5|A7X6X5\_STAA1  
mmnakihrarvteslnyvgsitidsdileavdilpnekvaivnnngarfetyviagergsgkiclngaasrlvevgdv  
viimtyaq lneeeiknhap  
kvavmnednviemihekentiv l  
>tr|A7X6Y3|A7X6Y3\_STAA1  
mhintvngrgmym skahql iqede hyfaks grikyypl vidhgygatlv diegktyid l lssassqnvghaprevteaik  
aqvdkfihypaymyhepl  
vrlakkl celapgd fekrvtf g l tgsdandgi ikfaraytgrpyi isftnayhgstf g l smsais lnmrkhygp l l n g f  
yhipdpkyrgmyeqpqn  
sveeyl apl kemfakyvpadevacivietiqgdggll epvpgyfealekicrehgilia vddiqggfgrtgwsvshfn  
ftpdlitfgkslaggpms  
aivgrkeimnc leapahl fttganpvscea alatiqmiedqsl lqasaekgeyvkrmdqvwskynsvgdvrgkgl sigi  
divsdkkltrdasaalki  
cnycfegvvii avagn lrfqplvi tyeq l dta lntieda lta leagn ldqydisggqw  
>tr|A7X6Z4|A7X6Z4\_STAA1  
mellkhl sgrqyidgewvestnkntrdi inpynqeviftvsegtkedaerailaarrafesgewsqetaekrgkkvraia  
dkiehearletldtg  
ktleesyadmdidhnvfmyfagl adkdggemidspipdteski vkepvgtqitpw nyp l lqaswkiapa latgcs lvm  
kpseitplttirvfe l mee  
vgfpgt in l ilgagsevdmvsmghevd lvsftggietgkhimknaannvtnialelggkpnii fddadfelavdqal  
ngyfhagqvcagsri l v  
qnsikdkfeqal idrvkkik l ngfdadtemgpvistehrnkiesymdvakaegatiavggrpdrrdlkdglffpeptvi  
tncdtsmrivqeevfgpvv  
tvegfeteqeiqlandsiyglagavfskdigkaqrvanlklgtvwindfhpyfaqapwggykqsgigrelgkegleey  
lvskhiltnnpqlvnwfs  
k  
>tr|A7X700|A7X700\_STAA1  
mnsdnmwl tvmgliiisivglliakkinpvgmtiipclgamil gysvtdlv gffakgl d qvinv vimfi faiiffgim  
ndsg l fkpvrkl il mtrg  
nvvivcama l i g t i a q l d g a g a v t f l l s i p a l l p l y k a l n m n k y l l i l l l l a l s a a i m n m v p w g g p m a r v a a v l k a k s v n  
elwyglipi q i g f i l v m l  
favy l g f k e q k r i k k a i e r n e l p q t q d i d v h k l v e y e r d q d r f p v k g r a r t k s w i k w v n t a l t l a v i l s m l i n i a p p e  
f a f m i g v s l a l v i n f k s v d  
eqmer l r a h a p n a l m m a a v i i a a g m f l g v l n e t g m l k a i a t n l i k v i p a e v g p y l h i i v g l l g v p l d l l t s t d a y y f a v l  
p i v e q t a g q f g v p s v s t a y  
s m v i g n i i g t f v s p f s p a l w l a i g l a e a n m g t y i k y a f f w i w g f a i v m l v i a m l m g i v t i  
>tr|A7X708|A7X708\_STAA1  
mkiliveddfv i a e s l a s e l k k w n y g v i v e q f d d i l s i f n q h q q l v l l d i n l p t l n g f h w c q e i r k t s n p i i f i s s r  
idnmdqimaiqm g g d d f i e  
kpfnls l t i a k i q a l l r r t y d l s v a n d s l t v k g c t l i l d e a k v v y q e q n i q l s l t e l q i l k l l f q n e d k y v s r t a l i e k c  
wesenfiddntlavnmtr l  
rkklntigvndfiitknvgykv  
>tr|A7X722|A7X722\_STAA1  
mrkfsryaftsmaavtl l st l s p a a l a i d s k n k p a n s d i k f e v t q k s d a v k a l k e l p k s e n v k n i y q d y a v t d v k t d k k g  
fthyt l q p s v d g v h a p d k e

Tsompanidou\_et\_al\_Supplemental\_FASTA\_File

vkvhadksqkvvlingtdtdakkvkptnkvtlskddaadkafkavkdkhkaknlkdkvikenkveidgdsnkyyvynveli  
vtpeishwkvkidaqtge  
ilekmnlvkeaaetgkkgvlgdtkdininsidggfslledlthqgklsafsfndqtgqatlitnedenfvkdeqragvda  
nyyakqtydykdtfgres  
ydnqgsplvs1thvnyyggqdnrannaawigdkmiygdgdgrtfts1sgandvvahe1thgvtqetanleykdqsgalnes  
fsdvfgyfvddedflmged  
vytpgkegdalrsmnspeqfgqpahmkdyvftekdnngvhtnsgipnkaaynviqaigkskseqiyyralteyltsnsnf  
kdckdalyqaakdlydeqt  
aeqvyawnevgve  
>tr|A7X729|A7X729\_STAA1  
mknafk1fkmdlkkvakt pavwii laglailpsfyawfn1wamwdpygntghikvavvnedkgd tirgkknvngntmvnt  
1kknksfdwqfvsrekadh  
eikmgkyfagiypskftheitgtlrkqpqkadvefkvnqkinavaskltdtgssvvvekaneqfnktvtralleanka  
gltieenvptinkiknavy  
sackalpkindfankivylnnhqadldkyandfrklgnykgdildaqqk1nevngaipqlnekaklilalnnypkieka  
lnfaaddvpaqfpkinggl  
niasqgidqangqlndakgfvtrsvrgdyqdairraqdlnrrnqqqipqnsaannetsnsspaangvastppsapsg  
dtapnnvtqntapnsna  
pvsttpqstsgkkgqsfaditttqvstanentqnitdkdvksmeaalts11s1sn1dtqakaaqkdsqalrnisygi  
lasdkpsdfresldnvksq  
leyttqynqqfidt1keieknenvd1skeidkvaannrines1rlvnqlsna1kngssgtaeatk1ldq1sk1dss1ss  
frdyvkkdlnss1vsisqr  
imde1nkgqta1snvqsk1ntidqvinsgqailkngktridr1qtvlpsieqqyisavknaqanfpkvksdvakaanfvr  
nd1pqler1tnatasvnk  
n1pt11ngydaqv1lnknqpakka1sd1adfsqnklpdvekd1kkankifk1dkddavdk1id1knd1kkqagia  
n1pinkktvdvfpvkdygsg  
mtpfyta1svwvga1lmvs11tvdnkhks1esv1ttrqv1fgkagffim1gm1qalivsvgd11il1kagvesp1fv1it  
ifcsi1ifnsivytcv1lg  
npgkai1v11v1qiagggtfpiqt1pffqni1spylpftyaid1retvgg1vpe1itk1i1l1f1g1g1ffv1gl1l  
kpvt1p1mkrvsekvdqsn  
vte  
>tr|A7X730|A7X730\_STAA1  
mpknkiliy1l1st1l1v1pt1vsptayadtpqkdt1tkt1shdskksnddetskd1t1skd1tkadnntsnqdnndkkfkt  
idd1st1sd1snni1dfiykn1  
pqt1niq1l1tknkyddnys1t1liq1n1fn1nsdi1sdyeqprngekstndsnknsdnsikndtdtqsskqdkadnqkapks  
nntk1p1st1snk1q1nspk1ptq  
pnqnsqpasddkanqksskdnqsm1sda1ds1ldqysedak1tqkdyasqskkdkneksntknpq1ptqde1khksk1p  
aqsf1nndv1nqk1d1trats1f  
etdps1snnd1sgq1fnv1dskd1trq1fvks1iakdahrigqdn1diyasvmiaqail1esdsgrsalakspnhn1fgikgafeg  
nsvp1nt1leadgnk1lysin  
agfrkypstkes1kdysd1ikngidgnrtiykptwksead1sykdatsh1sktyatdpnyakk1nsi1ikhyq1tqfdderm  
pd1dkyersi1kdyddsde  
fkpfrevsdsmpyphgqtwyynrmkqfgts1sgd1gdahnwnnraqyrdyqvsh1tpkrhaavvfeagqfgadqhyghv  
afvekn1sdgs1ivisesnv  
kg1gi1shrtinaaaae1syitgk  
>tr|A7X734|A7X734\_STAA1  
mtiy1nifgiw1assgveyaqayrak1l1rrtnqdtk1fv1ldfiqseniqt1tq1nig1fdqeviw1lyqyfsdisiapttyt  
l1ddi1er1lghe1sfrer1ng  
kivr1lyfngkssfv1t1cyl1neqkdv1draefvinsm1vrkdfysytrifseyyapadnkaklymrqfyndgsiayneyi  
gd1ss1yv1fedav1lynkte  
fiay1flqr1n1l1trddi1v1l1drasdigqav1lqhk1gskvgv1vihadhysnmmseqhilwnnyeyqfskakyidffitat  
diqnhm1vcrq1feg1yqgyr1p  
rvyt1ipgs1idal1syk1l1srkpyami1sas1rlanekhidw1lvkavivakrqvpel1tdiygegsekt1rkiid1thraqdy  
ir1llghv1kldeiyndyelf  
1sast1segf1gl1meav1gsg1gmig1lnvnygnptfirdgengylvpfd1tdeds1vddviak1lahaivmyfngp1qaphdis  
yevaqqf1mtqdi1ilkwet1  
vqev1hd  
>tr|A7X737|A7X737\_STAA1  
mmih1pl1qvgl1l1ft1l1fwkts1lgef1nm1knkt1fkvtwnyisq1ttfmygskvsfsngevtfinp1mpsg1pihew1mlkq  
fskyksaps1pilrrgqhy  
k1hfd1fdatpagsvyfi1i1fynkngtk1steivksnsitiq1pdeayaykikmmaasts1lifrcl1titemthqddleyk  
smrvtk1iddnqygn1drin1v  
iaepsd1typt1s1ndf1kl1fghvw1l1verw1dddikenikq1kdd1qsqdt1tain1lisygsksnvfatyvaqhl1dckvyr  
tshedd1kew1tehp1gn  
nelk1dtnvefyf1keeqdn1lnyms1r1mpvr1f1dy1ldvsk1nggevnet  
>tr|A7X745|A7X745\_STAA1  
mmrt1nhit1d1dai1el1ssgwny1nsk1lvtgkna1l1sds1l1rdikv1l1ssnakgdad1ilete1rav1namsqnegksvdal1kn  
st1ts1lkn1l1tk1l1keq1ldkt

Tsompanidou\_et\_al\_Supplemental\_FASTA\_File

th

>tr|A7X748|A7X748\_STAA1  
mvvvyvaggclwgveaffatipgiihteagrangrskldgpydgyaecvklhfddrmltitdimnylfeiidpysvnqq  
gndigekyrtglyscvddh  
liearqfierrkdrdqiaevlplsnyiksaeehqhlekypedmhmchiskdlnkyk  
>tr|A7X758|A7X758\_STAA1  
mkkirlelvylraicaiiithlltqitlkenmeggsvlqfyirnivifgtpcfiilsqllttlnyqkvtyryltr  
vkiilipyilmglfysyse  
slltdssfnkqfienvllgwygyfivvimqffilsyifkinynlfnski1111sfilqqsfllyftnntafhdvtlhy  
yplsentiifgwifyfflg  
aymgnyervlnflerylvimivlavatyvfvia langdywnvtsfsysltpynsimfivilgicthfktilfntiqmis  
afsffiyllhpiildsifa  
ytnifedntmvflaisllfilglcigvgmilrefyifrfiigkqpyklninay  
>tr|A7X762|A7X762\_STAA1  
mtkykidfskglvpailqdnqtkqvlmlgymnqeaafdktiedgvvcfysrskqrlwtkgetsghtqlvkdihvcdndti  
lidvipngptchtgsqscf  
ntevpfsvqtlagtvdsaqsnnesytkylltegiekitkkygeaefevvieaikgdkkafvsevadelylhflvmlhal  
gvdfseieaelarrhhkrn  
nfkgerqnieqw  
>tr|A7X775|A7X775\_STAA1  
mlvvgasgsgkstfancinglipfktkgnitgelyinnqdatvscldhrsnnvgtvlqdttdgqfigltaaedmafllenn  
cveqddmknvsywaekvg  
miehlnhrpqdlsggkqrvslggilhrtpilildeplanldpatghetlrl1nniheetkstmiivehrleeslddtf  
drvllfkdgkiianttpsd  
llkssklkeagireplyctalkyaevdvesidnlanlrdvcmsehvkfkvkkwidetsannndkyksep11elnevcvqy  
sdyssvlnnvqlnvyrre  
mlsivghngagkstlakai cgfliditgniqfcnrgfnqlsisersefvgyvmqnpnhmiseskmiydevalglrargmkes  
dikirvenvlikcglyafr  
nwpiaalsyggkkrvtiasvlnpeiiildeptagdfyhyneimsflielnrqgkiiimithdmllseysstrvvl  
kgqvvadtpvli1ndkki  
ceiaslrqtslfemaeyigisepqklvqlfinhdrkvrrq  
>tr|A7X779|A7X779\_STAA1  
mtnftfdgahsslefqikhlmvskvksfdqfdvavegdindfstlkatatiipssintkneardnhlksgdffgtdefd  
kitfetksvtenkvvgdlt  
ikgitneetfdvefnvsknmpdgsqvtgvivtginrenyginfnqaletggvmlgkdvkfeasaeftsise  
>tr|A7X783|A7X783\_STAA1  
mltkqsqdflekrlve1lfrgkteaeeve1leeledhlmaeknnedtssiiintpiksmadqlspeisl ttglykyitly  
fsfilaviiiprflldlgtf  
dvtiafllyiasivilgvvigmli1rntlvrfgdqkityvinvtygivvflwmi fggliikkypisffelsdkqsfig  
lvllialivicilikgkiy  
alivlvvislpsliariaaifskepdtfnlvsvsiliilniafiitytfvnfrklked  
>tr|A8YY04|A8YY04\_STAAT  
mkklytsygyflhqikinnpthqlfqsasdtsvi feetdgetvlkspsiyevikeigefsehfycaifipstedha  
yqlekkliisvddnfrnfgg  
fksyrllrpakgttykiyfgfadrhayedfkqsda fndhfskdalshyfgssgqhssyfyerylpyike  
>tr|A8YY11|A8YY11\_STAAT  
mrienlnpgdsvdhfflvhkatqgvtaaggkdymlhlqdksgieakfwtatkndmatikpeeivhvkvgdiinyrgnkq  
mkvnqirlattedqkteq  
fdgaplspaeiqeeishylldienanlqritrhl1kkyqerfytpaasshhnfasgl syhvltmlriaksicdiyp1  
lnksllysgii1hdigkvr  
elsgvpvatsytvegnllghisiasdevveaarelniegeeimllrhmilshhgkleygspk1pylkeaeilcyidnidar  
mnmfekaykktkdqgftdk  
ifglenrrfynpesld  
>tr|A8YY17|A8YY17\_STAAT  
mine1knknsgimnnyvvtkesk1  
>tr|A8YY30|A8YY30\_STAAT  
mkclirfilvlgllissamvyinptahaeqdtwekikergelrvgl sadyapmefhtvngkteyagvdidlakkiakd  
nn1klkivnmsfsl1ga1  
ktgkidi1isgmtstperkkqvd fsdsymmtknimlvkkdkvneykdikdfnnkkvgaqkgteqekiaqteienasits1  
sr1pdvilalksgkvegav  
vekpvaeay1kqnpklgisnvkfneekdtviavpkdspkllsqinktikevkdkg lidkymtnaanamnddsfgfiskyg  
sfflkgikiti1isligva  
lgsilgafvalmklskikiiswiasiyieilrgtpmlvqvfvffgitaalgldisalvcgtialvinssayiaeiirag  
inavdkgqmeaarslglny  
rqtmskvimpqaikni1palgnefvtlkessivstigvgeimfnaqvvggisfdpftplivaaalyfvltfv1trimm  
iegrlnasd  
>tr|A8YY31|A8YY31\_STAAT  
msnannadnkqffskilnsigagvvialvpna1lgev1kifksgneileltyqlviliqsfmafiigvlaahqfkfngag

Tsompanidou\_et\_al\_Supplemental\_FASTA\_File

aaivgtsamigsgavvysn  
nsfmikgigdiintslvviaciacliymvlqnlgsfeliiilpvlvpivsggigitlpyirkitqaignvihsftdlnp11  
msilisvafsl1mvtplsl  
vaiataislnglsgaanlgivaacvtflfgslrvnsigvnavlligaakmmipvylknliisipltingiitgiayvl  
qvkgtplsgfgytglvgp  
inafnrmsgdptmniillaalgyfvipfvsafivhelckkfipiysndiykfevpkq  
>tr|A8YY34|A8YY34\_STAAT  
mkvvglnrmrevetelqqrfsdlfdkfykkaseipesdladldilvgydgineafllrcpnlkwiawfatgvntlpdy  
iadhgil1tngkgvqakql  
seyilafilddykkmlsydnqrqhiydskitgrlsgqvtlflgtgaiatrtaklakafnmnliglksksgqkdefdei  
ytieslestlpnadiiina  
lpetqetihl1kkkhfelmkdealfinigrsivkeallievlskvirhayldvfenepkpnhelyeldnvtitahit  
gndyeakyd1ldifknnlv  
nflnknnglienevdakkgy  
>tr|A8YY52|A8YY52\_STAAT  
mniavamtneekvlaiereklnivnqgl1dpekyknaneeeeltdiydfvqsrerlspsevtaiadalqqlrhe  
>tr|A8YY53|A8YY53\_STAAT  
miasaigerhilprqtnatstilipnyvvispfysdfkq  
>tr|A8YY54|A8YY54\_STAAT  
maeaimeqr1kdrnihdikvhsrgtgswnlgepphegtqkilnkhnipfdgmisel featddfdyivamdqsnvdniksi  
nplnkqqlfk1lefsnme  
sdvdpdyttnnfegvydmvlsscdnldiyivkdanlkeg  
>tr|A8YY62|A8YY62\_STAAT  
mndqwykhligartiktgiaifltavfcma1dltpiyailtavvtieptakaslikgyrrlpatvigagfavlflylfgd  
qspftya1satftilfctk  
lk1qvgtnvav1tslamipghdayifnflsrtltaiglvtsglinfmvfpkygqveeklsktdalmyklfynrcqe  
lilsrlqsdksekeyknif  
nlnnqvetsisyqrde1syhkkkecdwk1lnq1tkraytr1fithlsniy1lpkntrvnfsgdekma1lkissikdif  
ydg5fkreddsvet1rsti  
kaleisgenqikshilyevlmiyr1ldsrya  
>tr|A8YY65|A8YY65\_STAAT  
mdgnnqidvcffvlnnyytmsiypriinsngdyat  
>tr|A8YY82|A8YY82\_STAAT  
mvnykek1dea1hl1tqqkgfeqtraew1m1dvfqwtrtdfvvhmddmpkamimkfd1alqrm1lgepiqyivgfasfyg  
rtfdvnsncl1prpeteev  
mlhflqqleddat1vdigtgsgv1ait1kcekpd1nviatdis1eamnmarnaekhsq1qfltgda1kplinegik1n  
glisnppyidekdmvtmsp  
tvtrfephqal1fadnhgyaiyes1ied1phvmekgspvveigynqgealksi1lnkfpdkkidiikdinghdrivsfkw  
>tr|A8YY94|A8YY94\_STAAT  
miakydiviy1nvl1lyinefrrin1dyilrkev1gnensrlyktng  
>tr|A8YY95|A8YY95\_STAAT  
make1cfegit1kafdeqyrsa1ndfd1nerqqiyss1pkevidda1ndadrianv1ndknevvgffv1hryyqhegyd  
ipenvvy1rs1sinekyqg  
fgygtk1mms1lpqyvqgvfpdfnh1ylvvdaendnawn1yeragfmhtatkeegpigkerlyy1ld1skhvss1klees  
rsevt1nvh1in1midgqkv  
gfialeqigermniaa1evdksyrfngigssa1rq1pty1rknydn1nvtim1lfgenn1fkpl1c1nsnfveieqtddyv  
vfeky1ny  
>tr|A8YYA2|A8YYA2\_STAAT  
mlcpk1fkkrmikrmidi1ekkrdght1ttee1nffiggyvkgd1pdyqass1ama1yf1qdmndderaaltmamvns1gd  
mid1sdikg1kvdkhstgg  
vgdtt1vl1ap1vaavdv1vakmsgrg1ghtggtidk1lea1dgfhveideatfvkl1vnenkvavvgqsgn1tpadk1lya  
1rdvtgtvns1pl1assim  
skkiaagada1v1dvktgsgafmkt1edae1ahamvr1gnnvgrntmai1sdmnqpl1graignale1lqea1dt1kgqgp  
kd1telv1t1lgsqmv1lan  
kaet1leara1l1eainsgaa1lekftfiknqggdetvidhper1pqaqy1qeykakksgyvte1vsndigvasmml1gag  
r1tkeddid1avgiv1lnkk  
igdkveeges1l1t1hsnrqdvddvkk1dssitiadhvspt1l1hkiite  
>tr|A8YYA8|A8YYA8\_STAAT  
mnd1kqfly1alvcgviag1gaf1hipqypsmt1privailgi1sam1tfkdkq1sas1kfsa1llinv1plcgtfvasn  
>tr|A8YYB3|A8YYB3\_STAAT  
matc1lvfddamfinkfsti1syshifdn1l1  
>tr|A8YYB8|A8YYB8\_STAAT  
mtfktrv1kktkqdnvgkqtmnanvykini1ld1vl  
>tr|A8YYC0|A8YYC0\_STAAT  
mliq1dq1grmkqgk1t1k1k1swq1akgdkwilyg1ngagktt1l1n1nayepatsgtvn1fgkmpgkvgysaetvrqhi  
gvfshs1lekfqegervid  
vvisgafks1gyyqdidde1rneahq1lk1lvgmfakaqy1y1stgeq1rvmiara1mgqpqvl1l1depaag1ldfiare  
s1l1s1lds1dsypt1lami

Tsompanidou\_et\_al\_Supplemental\_FASTA\_File

yvthfieeitanski111kdgqsiqqgavediltensenrffqknvavqrwnnrfsmamle  
>tr|A8YYC1|A8YYC1\_STAAT  
meenvmcgvgygydnake111kglekleyrgydsagiavvnddnttvfkekgriae1rkvadssdfgpgvightrw  
athgvpnhenshphqssng  
rftlvhngvienyee1kgeylqgvsfisetdtevivqlveyfsnqglsteeafktkvs11hgsyalg11daedkdtiyva  
knksp111gvgegfviias  
dalamlqvtseykeihdheivivkkdeviikdadgnvverdsyiaeidasdaekgyvahym1keiheqpavmrriqeyq  
daegn1kidqdiindvkea  
driyviaagtsyhaglvgkeflekwagvptevhvasefvynmp11seklpfvyisqsetadsrav1vetnklghkslti  
tnvagstlsreadht111h  
agepavastkaytaqiaavl1silsqivakehgreaid11relakvttaieaivddapimeqiatdflettrnaffigrt  
idynvs1legalk1keisyi  
qaegfagge1khgtialieegtpvvglatqekvn1sirgnvkevvargahpciismeglekegdyviphvhelltp1vs  
vvalq1isyaa1hrd1dv  
dkprnlaksvtve  
>tr|A8YYD0|A8YYD0\_STAAT  
mcndt1e11rikdenikyinqeidviikgkatvnav1tykpsacyccgvknegqihkhgkrvsrit11ktqgyntyln  
lakqrfk1ecngtftakt  
sivdescf1srcvtgkviieatkvkteidtaedncispstvsrirtkaans1rikpfnc1pehiamdefksvknvtgsms  
fifidndthdvidilenrt  
trflrayferfd1knrqvktvtidmyepyvrlfrdlfpnaaiifdrfhivqhl1nre1nkyrvqvmneyrnkkgpdytif  
knnwkv11mdtsk1fisky  
rwnksfkaykrssdivefmlskddilrshyelvqglrkd1rlcnwpkfinr1nsvskksvskgvkwkvkyrkhrmlrn  
tiyypafngaiegincki  
k1ik  
>tr|A8YYD1|A8YYD1\_STAAT  
myfknssl1nyipttfggepkkkhfpkmesassep  
>tr|A8YYD3|A8YYD3\_STAAT  
mmakvelttrrrnfivavml1safvailnqt11ntalpsimre1n1nestsqwlvtgfm1vngvmiptay1mdriktrp  
lylaamgtf11gsivaala  
pnfgvlmlarv1qamgagvlmp1mqft1ft1fskehrgfamglag1viqfapaigptatgliidqaswrvpfiilgiai  
lafvfg1vsissynevkvt  
kldkrsvmystigfg1mlyafssagdlgftspivigal1lsmviiylfirrfnitna11n1rvfknrtfalctissmi  
mmsmvgpall1p1yvqns1  
s1sal1sglvimpgaiingims1vftgkfydkygrprliytgftiltittim1cflhtdtsytylivvyairmfsvs11mm  
pinttgins1rneeshgt  
aimnfg1rvmag1lgtal1mvt1msfgak1flstspsh1tateikqqsiaigvdisfafvav1vmaayvialfirepkeies  
nrk1f  
>tr|A8YYE0|A8YYE0\_STAAT  
mgtvvl1y1fmlgvesikk1iheal1mndffiqfi  
>tr|A8YYE2|A8YYE2\_STAAT  
mmttk1irryslit11l1visif1slcvgsvmihpidaikgiftqddfilneyriprt11ggiigsslaisgaiiqavirn  
plaspdvigiskgaslaav  
i1imtftap1fvlpigsf1gafavslf1sfliskydvkgsklaliglaigaiactaivqfl1irnp1leankalvwtgsl  
yghdmsniyt1lpwfliti  
p1i111syqldv1n1lgdavatalg1kvktikm111ilavilagsaisvvggisf1gliaphiarq1ignkt1hviimsg1  
igai111tfgdglargihpp  
ldipvgv1ia1igapyf111lrrmk  
>tr|A8YYF4|A8YYF4\_STAAT  
mmqnkqilfnkipegmpqedt1k1eeidtpk1esdgvlvtlyisvdpymrgm1tkadsyvqpfeigkpi1vshvvakvid  
st1adykkgdvvvgm1pwr  
i1nhvqadq1tkvpttdvp1d1y1sv1gmpgqtayhgl1digqpkagdtvvvsaasgavgsvvgqiakikgcrvvgiagg  
dkkvny1tet1gfdagidy  
kkedfae1laqavpdgidvyfenvggtvgdevfkh1nrfarvpvcgais1synhpeadigp1riqgt1likkqvmrgflvse  
fanafkeaseq1atwvqeg  
kiqsqvtiedgfenaphafkn1ftgdnfgkqvikvte  
>tr|A8YYF7|A8YYF7\_STAAT  
mtmmqk1iaqiek1kpfek1srniyl1rairdgfisampvilfssif1liayvpni1fgfkwdkgmeailmkpnyntmg1v  
af1lvagttaks1tdsfnrk  
lestnqinfi1stm1aamcgf1flasdpakdggf1safmgtkg11taf1safvtvivynf1cvkrnitikmpkevppnisqv  
fkdlipfsavii1lyald1  
virnsfksnvaegi1kl1fep1ftaadgwigvti1fgafal1fwfvi1hgpsivepaiaaityanieanf1llqagehadki  
it1sgtqmfi1vtfggtgat1  
vvp1fm1mmtkskrnkaigrasvvptffgvnepi1fgap1vl1npvffip1fv1apivnwi1fk1fvevlgmnsfsvnl1pwt  
tpgp1gi1imgt1gfg1lwsfv  
la1t11vvdii1yyp1fkvydseil1deegrkesn1d1kekvaanf1dtkkadsilaasgvsddaakasniteqtnv1vlc  
agg1ts1g11ana1nkaee  
yhpvkaaaggygahmdimkeyq1i1lapqvasnyedikqdt1rlgik1aktqgaeyik1l1trdgqaaldfvqqqfen



Tsompanidou\_et\_al\_Supplemental\_FASTA\_File

>tr|A8YYG2|A8YYG2\_STAAT  
mskkqklmii tmlmgffgl netllvta lpsimkdfesytqvqwl ttafl lntngivi plsalviqryttrqvflvgi  
siff1gt1lgg1sphfat1  
lvari iqalgagimmlmmtti ldvfqphergkymgigflv iglapaigptlsgylveyfnwrs lfhvvapiaavtflig  
fktiknvgttikvpidfjs  
vifsvlgfggllygtssisekgfdnpivlvsmiggvvlvalfvlrqyr1stpllnfavfknkqftvgi iimgvtmvs mig  
setilpifvqnl1hrsald  
sgl1lpgai vmafmsmtsgalyekfgprnlalvgmai vvitayfvvmdeqtstimlatvyairmvgialglipvmtht  
mqglkpmnahgssmtntv  
qqiagsigtaal itilshasknfsptmsdyngmki dmmnqikvdtmlhgyhagflfallitvvsffcsfmlqgkkkev d  
srq  
>tr|A8YYG6|A8YYG6\_STAAT  
mltnrltsvnyvkkrl iqnigrilskevlygemq  
>tr|A8YYG9|A8YYG9\_STAAT  
mqppynik1fyrtlnliittdfyknkvsnhsrytntneti  
>tr|A8YYH0|A8YYH0\_STAAT  
mlknkil ttt1svs1laplanpl lenakaandtedigkgsdieiikrtedktsnkwgvtqniqdfvdkdkkynkdalilk  
mqgfissrttyynykktnh  
vkamrwpfqynig1ktdnkysv1iny1pknkiestnvsqt1gyniggnfqsaps1ggngsfnysksisytqqnyvseveq  
qnsksvlwgvkansfates  
gqksafdsdlfvgykphskdprdyfvpdse1pp1vqsgfnpsfiatvshekgssdtsefeytygrnmdvthaikrsthg  
nsyldghrvhnafvnrnyt  
vkyevnwkttheikvkggn  
>tr|A8YYH3|A8YYH3\_STAAT  
mrssnqdvhisgaetic efdkieqtvqr fynkgffhengqpdl nikiqkimepiqqikalqie ddkanlqhl tqecgv  
tegalnqgntyiknetvyt  
gai1lsaisgkr1dsfggrg irathfsfedinnkgdl nervtdal iascinahpyvkge1cvsd d1tyttgyfaaakig  
yhr1fdikpvntryggri  
fvddcid1nhyis1flestpkqvvyetv  
>tr|A8YYH8|A8YYH8\_STAAT  
mfqitfki1nwi rpykarmi1gfsmsflnai fialpiflaaki fnnvlshkpiymkdilnvviimv1lvigrfitayfks  
kshesiayemsaker1dig  
dklknvr1gyfnshhsne1ttivtt d1tflenfamkmvdvvngyilitvl1s1lvswqvs1lacigv1sffaiq1l  
erksrqnapayhnvqnlv  
ekvlevirgiqvks fakents1ksfnqavneskrintkiemqyipfn1h1s1lkvvsimiv1vac1lymnhsid1pt1  
imisifs1v1fidsvenis  
aahvlemidmtiddiek knape1dengkn1tikneniafqvnvfsyddkqviknvnfeiptqtstai igpsgsgkst1c  
h111rfydidgniridgv  
dikdmt1st1mskisavfqvylfndtienni1fgnpgatkeeiiraakqacchdfims1pegyqtm1nekgsn1sggek  
qrisiarailkdapii1ld  
eatasidpeneqliqtaine1skgktvitiakhletiknadqiiv1negeiiqkgshdelirkpgmyqdfiriksksgw  
k1  
>tr|A8YYI0|A8YYI0\_STAAT  
mavvrgfgvfrcsiyyvinysideqgvqci failq  
>tr|A8YYI2|A8YYI2\_STAAT  
mkl1tqthaeilkfiivggintlnyyvvy1l1l1k1l1hieymishitgflvafvisyylncyfvyrvkptwrkfishpitqi  
vnvs1qtv1lyvfvsw1n1  
paeiapfag1iitipitf1lskwilksdn  
>tr|A8YYI3|A8YYI3\_STAAT  
maykdegketkfavkgykd  
>tr|A8YYI8|A8YYI8\_STAAT  
mnrkilpvkpi sq1fpipvmgcegvsaamm1qynnqhipateimrhwphpnnphkgyvghh1fik1gnyhqti fpeay  
vpflqkynpnivdgtgks1  
ed1kgi1dqgqv1iyhtn1gskp1lrvfrfdnkpakqvsnihvt1ligyddyyyyyidplwshirrglv1paiipnrkq  
iiki rkekmeysfnspgrk  
ciyvqphsytienqqqnkht  
>tr|A8YYJ2|A8YYJ2\_STAAT  
mltyvqfhl1n1knrfynqig1mkgy1lfinlif  
>tr|A8YYK1|A8YYK1\_STAAT  
mkkikiyilvvfv1s1tv1sgcs1pg1gskstkndvkitalstsesqiishmlr1liehdthgkikptlvnn1gsstiqhn  
alingdanisgvryngtd1  
tgalkeapi knpkkami atqqgfkkkfdqtf fdsygfantya fmvtketakkyhletvsdlakhskd1rlgmdsswmnrk  
gdgyegfkkeygfdfgtvr  
pmqig1vyda1nsek1dva1lgystdgriaayd1kv1kddkqffppyaasavatne1l1rqhpe1kttink1tgkistsemq  
r1nye adgk gkepavvae  
flkkhhyfdkqkgghk  
>tr|A8YYK4|A8YYK4\_STAAT  
mggcpsvtmdacal1qkfdfcnnishfrhffaikqpier

Tsompanidou\_et\_al\_Supplemental\_FASTA\_File

>tr|A8YYL2|A8YYL2\_STAAT  
msnytvmkiknsaksdllkkikhsylkksfleivetlknndpykitqsfeklepkylerysrrinhqhrvvytvddrnkevli  
lsawshyd  
>tr|A8YYL6|A8YYL6\_STAAT  
mtflvmqfivniivvgfmltvivigliwikdkrqsqhsvlrnypllariryisekmgpelrqylfsgdnegkpfsrnd  
yknivlagkynsrmtsfgt  
tkdyqdgfyiqntmfpmqrneisvdnttllstfiykianerlfsreeyrvptkidpyylsddhaiklgehkhpfilkri  
vgqsgmsygalgnaital  
skglakagtwmntgegglsyhlkngndiifqigpglfgvrdkegnfseglfkevaqlsnvrafelklaagaktarghme  
aekvneeiakirnvepykt  
inspnryefihnaedlirfdvdlqqlgqkpvfkiivsvkseieltvrtmveldkypsfittidggeggtgatfelqdg  
glplftalpiivsgmlekyg  
irdkvklaasgklvtpdkiaialglgadvniargmmisvsgcimsqqchmntcpvgvattdakkekalivgekqyrvtny  
vtslheglfniaaavgvss  
pteitadhivyrkvdgelqtihdylklis  
>tr|A8YYL7|A8YYL7\_STAAT  
mihltkqntmealhfikqfydmffilnfv  
>tr|A8YYL9|A8YYL9\_STAAT  
mkgamawpflrlyiltlmffsanailnvfiplrghdlgatntvigivmgaymltamvfrpwagqiarvvpikvlriili  
inaialiiygftglegfyv  
arvmqgvctaffsmlqigiidalpeehrsegvslyslfstipnligplvavgiwnannislfaiviifialtttffgyr  
vtfaeqepdtsdkiekmpf  
navtvfaqffknkellnsgiiivasivfgavstfvplytvsllgfanagifltiqaiavvaarfylrkyipsdgmwhpky  
mvsvlsliviasfvvafgp  
qvgaiifysailigmtqamvyptltsylsfvlpkvgrnmllglfiacadlgislggalmpisdvlgfkwmlyicgmlv  
ivimimsflkkptprpass  
l  
>tr|A8YYM3|A8YYM3\_STAAT  
mfkfilkrialmfplmivvsfntfllyitnenpavtilhaqgtpnvtpeiliaetnekygfndpಲ್ಲಿiqyknwlleamqfn  
fgtsyitgdpv aerigpaf  
mntlklitissvmmitsiilgvvsalkrgkftdairsvaffltalpsywiasiliiyvsvklnilptsgltgpesyil  
pivitiayagiyrnrvr  
smveqlnedyvlylrasgvksitlmhlvrnalqvavsi fcm sipmimgglvvi eyifawpglgqlslkailehdfpviq  
ayvlivavlfivfntladi  
inalnprlregar  
>tr|A8YYM5|A8YYM5\_STAAT  
msklmigtgpvaiglanicylksdyeidmvrgrastsekskrlyqaykkakqfevkiqneahqhlekgfeinrlykdvkn  
vkgeyetvmactadayd  
tlqqlsletlqsvkhvliisptfgsqmiveqfmskfnkdievisfstylgdrivdkeapnhvlttgvkkllymgsthsn  
stmcqrisalaeqlkiqle  
vvesplhaetrnsslyvhpplfmndfslkai fegtdvpvyvyklfpegpittliremlmwkemmvilqafrvpsvnl  
qfmvkenypvrpetldegd  
iehfeilpdilqeyllyvrytailidpfsqpdenghydfdsavpfklyvykneqdvvqiprmpsedyyrtamiqhigkmlg  
iktpmidqfltryeasqa  
ykdmhqdqhlssqfntnlfegdkalvtkfleinrtls  
>tr|A8YYN7|A8YYN7\_STAAT  
msyikftfkffematyisqtlldielvsellvilpgfi  
>tr|A8YYN8|A8YYN8\_STAAT  
mihskkltlgiclvllilivgyvimtktngrnaikdtfnqtlklyptknlddfydkegfrdqefkkgdkgtwivnsem  
viepkkdmetrgmlyin  
rnrttkgyyfi semtddsngrpkddekrypvkmehnkiiptkplndklkkeienfkffvqygnfk dindykdgd isyn  
pnvpsysakyqlnnddynv  
qqlrkrydiptkqapkllkgdgdkgssvgsrsleftfvenkeeni yftdsvqytpsedtryesn  
>tr|A8YYP2|A8YYP2\_STAAT  
mlvvfftyqhhklfkkrkylynfywqnlin  
>tr|A8YYP5|A8YYP5\_STAAT  
mhfhthllnyntcekylgavfffyfwgvflynslhkckgfsfhvllslteilkglatmdkelwierandslvkhfyeqqs  
dieqregfesklftgtagi  
rgkfglgegrlnkftiekla glarylnaqt nsptivi hydihl stefa qianv lanhqitvylpdykttpe lsfav  
rnlnnttagim itashnpkd  
yngikvygsdgaqlstdaselasryieevgdp lqidipiskqnts yikpfkpsvtd dymkhiqnmi gyipksdlqvfts  
lhgtsvpivp ellqslnfn  
qfnlveaqckpdpnfssvqsanpedhrafdqavelankshadllistdpdadr lgiaerdahghityfngnqigallny  
riqqtsqlrhrlmiqsivs  
seltkslarynnveykevlgtgfki aeqi rql ddhqnmi fafeesygl sepfvrdkdavqivpliikyase lkygk t  
kdeleqiyqtvgrhedtlf  
shllegfegkkinaimtkfrsnppqeiqglkvkaiedyltsevylhdkdttsqinspksvirvlfdegfi alrpsgte  
pkiklyvs lkc pnfddvaq

Tsompanidou\_et\_al\_Supplemental\_FASTA\_File

kinamifs

>tr|A8YYP7|A8YYP7\_STAAT

mtvniivfsivfcismvilgiyvaitkdfllisfinqtaiadkhknqiayiftlcislsavflmssilsfeydfialafllf  
ltialllialfyvcfykit

kyp

>tr|A8YYP9|A8YYP9\_STAAT

mmndlksksniklmkrvlttyelrkylkkyfcltldnylvlayldvfkndegkyfmrdisyigidqsrivksvkdlskk  
gylncrdphdsrnviivv  
svkqhnyiknllseininet

>tr|A8YYQ2|A8YYQ2\_STAAT

mksnlrygirkhkllgaasvflgtmivvgmgqekeaaaseqnttveesgssateskasetqttntnvtidetqsysats  
teqpsqstqvttteeapktv  
qapkvetsrvdlpsekvadkettgtqvdiapqsnvseikprmkrstdvtaevaekveetkatgtdvtnkveveegseiv  
ghkqdtntvvnphnaervtl  
kykwkfgegi kagdyfdftlsdnvethgistlrkvpelikstgdqvmatgeiigerkvrytfkeyvqekkdltaelslnlf  
idptvtvqkgnqnvkvlg  
ettvskifniqylggvrdnwgvtangridtlnkvdkgfshfaymkpnnqslssvtvtgqvtkgnkpgvnnptvkvykhig  
sddl aesvyakl d d v s k f e  
dvt d n m s l d f d t n g g y s l n f n n l d q s k n y v i k y e g y d s n a s n l e f q t h l f g y n y y y t s n l t w k n g v a f y s n n a q g d g k  
dklkepiiehstpielef  
seppvekhehtgtieesndskpidfeyhtavegaeghaegti eteedsihvdfeesthenskhhadvveyeedtnpgggq  
vttesnlvefdeestkgiv  
tgavsdhtti edtkeyttesnl iel v d e l p e e h g q a q p i e e i t e n n h h i s h s g l g t e n g h g n y g v i e e i e e n s h v d i k s  
elgyeggqnsqnsfeedt  
eedkpkyeqgnivdidfsvpqi hgqnnqnsfeedtekd k p k y e q g g n i i d i d f d s v p h i g f n k h t e i i e e d t n k d k  
pnyqfgghnsvdfeedtlp  
qvsghnegqti eedttppi vpptp p t p e v p s e p e t p t p t p e v p s e p e t p t p t p e v p t e p g k p i p p a k e e p k k p s k p v  
eggkvvtpvieinekav  
vptkkaqskkse l p e t g g e e s t n g m l f g g l f s i l g l a l l r r n k k n h k a

>tr|A8YYQ3|A8YYQ3\_STAAT

mknllrygirkhkllgaasvflgtmivvgmgqdkeaaaseqnttveengnsatdnktsetqtatnvnhietqsynatv  
teqpsnatqvtteeapkv  
qapqtaqpanietvkeevvkeekp q v k e t t q s d n s g d r q v d l t p k k a t q n q v a e t q v e v a q p r t a s e s k p r v t r s a d  
vaeakeasnakvetgtdvt  
skvtveigsieghnntnkvephagqravlykylkfenglhqgdyfdftlsnnvnthgvstarkvpeikngsvvmatgevl  
eggkiryftndiedkvdv  
taeleinlfidpktvqtnqntitstln ee q t s k e l d v k y k d g i g n y a n l n g s i e t f n k a n n r f s h v a f i k p n n g k t t s  
vtvtgtlmgksnqngnqpk  
vri feylgnnediaksvyanttdtskfkevtsnmsgnl n l q n n g s y s l n i e n l d k t y v v h y d g e y l n g t d e v d f r t q m v g  
hpeqlykyyydrgytlwd  
nglvlysnkangngkngpi iqnnkfeykedtiketltgqydknlvtveeeydsstldidyhtaidgggyvdgyietie  
etdssaididyhtavdsea  
ghvggytesseesnpi d f e e s t h e n s k h h a d v v e y e e d t n p g g g q v t t e s n l v e f d e e s t k g i v t g a v s d h t t v e d t k e y  
ttesnl i e l v d e l p e e h g q  
aggpvee i t e n n h h i s h s g l g t e n g h g n y d v i e e i e e n s h v d i k s e l g y e g g q n s q n s f e e d t e e d k p k y e q g g n i v d i  
dfsvpqi hgqnnqnsfe  
edtekd k p k y e h g g n i i d i d f d s v p h i g f n k h t e i i e e d t n k d k p s y q f g g h n s v d f e e d t l p k v s g n e g q q t i e e d t  
tppi vpptp p t p e v p s e p e  
t p t p t p e v p s e p e t p t p t p e v p a e p g k p v p p a k e e p k k p s k p v e g g k v v t p v i e i n e k v k a v a p  
tkkpskkse l p e t g g e e s  
tnkgmlfgglfsilglallrrnkknhka

>tr|A8YYQ7|A8YYQ7\_STAAT

msnystgelaklcnvttrtiqyydrkgilkpqgftegkrrvyteqqrqtlelilililidlgalsdidmllkgegtlktln  
tlltmkqqeinqvqkqqa  
vlnkiknvqyyvneastspithlkdiehvmsksaemksirriwisagiigi q y s s i i s a i l m k n k w p f l i a l p f m i g y  
gigvtfyyqqkvaylcpnc  
qhifspslwavikakhtatrrfecpnchethycievpkahmsteqleishiqhnn

>tr|A8YYQ8|A8YYQ8\_STAAT

myvdrkpslyledl rhdfkns l s k f e n g d e a f d t l l g f v e l d h i y s s a l k e i s t k l s i l d d n f n h i y k h n p i h m e r r v k  
emrslieklnrkglqisae  
takehildia girvvcnylddiylieemllkqedvqlikrkdyiqhpkenyrslhivvsipvflaervevlpeiqirt  
igmdmwaslehkirykna  
etekyrdllkecateitevedklqqihseite

>tr|A8YYS8|A8YYS8\_STAAT

mvtalsdvntdnygagqivlegleavrkrpgmyigstserglhhlvweivdnsidealagyanqievviiekdnwikvt  
dnrgripvdiqekmgrpav  
eviltvlhaggkfgggqkvsgl h g v g s s v n a l s q d l e v y v h r n e t i y h q a y k k g v p q f d l k e v g t t d k t g t v i r f k a  
dgeiftettvynyelqqr

Tsompanidou\_et\_al\_Supplemental\_FASTA\_File

irelaflnkqiqitlrdereenvredsyhyeggiksyvellnenkepihdepiyihqskddieveiaiqynsgyatnll  
tyannihtyeggthedgfk  
raltrvlnsyglsskimkeekdrlsgedtregmtaiisikhgdpqfegqtktklgnsevrqvvdklfsehferflyenpq  
vartvvekgimaararvaa  
kkarevtrrksaldvaslpgkladcsskspeeceiflvegdsaggstksgrdsrtqailplrgkilnvekarldrilnn  
eirqmitafgtgiggdfd  
akaryhkivimtdadvdgahirtlllffyrfmrplieagyvyiaqpplykltqgkqkyvyndreldklkseInptpkw  
siarykglgemnadqlwet  
tmnpehrallqvkladaieadtqfemlmgdvvenrrqfiednavyanldf  
>tr|A8YYT3|A8YYT3\_STAAT  
mtthlsfrgqvqeciptllgyagvgisfgivassqnfsileivllclviyagaaqfimcalfiagtpisaivltvfivns  
rmfllsmlapnfktygfw  
nrvglgslvtdetfgvaitpylkgeaindrwmhglnitaylfwaiscvagalgeyisnpqtlgldfaitamfiFlaiag  
fesitksrlriyivliiav  
ivmmllslsmfmpsyilaiiaatisaalgvmmeg  
>tr|A8YYU3|A8YYU3\_STAAT  
mnnehiksvilallvlnsvvlytmvwnfspdianvdntdsksetkplttptakmdttitpfqiiskndhpegtiat  
vsnvnltkplknkevksv  
ehvrrdhnlimpdlnsdfilfdftydlplstylgqvlmnakvphfnfnrlvidhdaddnivlyaiskdrhdyvklttt  
tkndhflaalaavkkdmq  
ytdiitnkdtidrtthvfapskpekltktyrmvfntisvekmnailfdstivrssksgvttynntgvanyndknekyhy  
knlsedeassskmeetipg  
tfdfiinghggflnedfrlfstnnqsgeItyqrfngyptfnkegsnqiqtwtgekgvfyrrsllrtdvvlnsednkslp  
klesvrsslannsdinfek  
vtniaigyemqdnshnhievqinseIvprwyveydgewyvyndgrle  
>tr|A8YYU5|A8YYU5\_STAAT  
msrlirmsvlasgstgnatfvenekgsllvdvlgltgkkmeelfsqidrniqdlngilvthehidhikglgvlarkyqlpi  
yanektwqaiekkdsripm  
dqkfi fnpyetksiaagfdvesfnvshdaidpqtyfihfnnykkftilttdtgyvsdrmkgmirgsdafifeshhdvdmIrmc  
rypwwtkqriIgdmgghvsn  
edaahamtdivitgntkriylshlsqdnmklarmsvgqvlnehdidtekevllcddkaiptpiyti  
>tr|A8YYU6|A8YYU6\_STAAT  
miIywcmvtvnggnemkalllktsvlvlIsvmgIwqvsnaaeqhtpmkahavttidkattdkqvpptkeaahsgkea  
atnvsasaggtadtnskv  
tsnapsnkpstvvstkvnetrdvdtqqastqkpthatfklSnaktaslsprmfnaanapqttthkilhtndihgrlaeek  
grvigmaklktvkeqekpd  
ImldagdafqglplsnqskgeemakamnavgydamavgnhefdfydqllklegmldfpmIstnvykdgkrafkpstivt  
kngirygiIgvttpetktk  
trpegiIkgvefrdpIqsvtaemriykdvdtfvishlgidpsetwrgdylvkqlsqnqllkkritvidghshtvlqn  
gqiynndalaqtgtalani  
gkitfnyrngevsnikpslinvkdvenvtpnkalaeqinqadtqfraqtaeviiPnntidfkgerddvrtretnIlnaia  
dameaygvknfskktdfav  
tngggi rasiakgvtrydIsvlpfgntiaqidvkgsdvwtafehslgapttqkdgktvl tangglIhisdsirvyydi  
nkpsgkrinaiqilnketg  
kfenidIkrvyhvtmndftasggdgysmfggpreegislDqvlasyIktanlakydttepqrmllgkpavseqpakgqqg  
skgsksgkdtqpiIgdvkvm  
dpakpapkvvlllahrgtvssgtegsgrtiegatvssksqqlarmsvpkgsahekqlpktgtngssspeamfvllag  
igIiatvrrrkas  
>tr|A8YYV0|A8YYV0\_STAAT  
mliflsydfvracIprgmaraisIshilfpqasaltksvififirilteilIrgivkailskiadkrfvksssq  
>tr|A8YYV4|A8YYV4\_STAAT  
mlyiyktqnimshkiwllvlvstlipIipfykisnftfskdmnrnsdttssvshmlDgqqssvtdkIainvnqfetsn  
itymIliwvfgslIclfy  
mikafrqidviksslessylnerIkvcskmaqfykkhitisyssnidnmpvfglvksqivIptvvvetmndkeieyiil  
helshvkshdIifnqlyvv  
fkmiIwfnpalysktmndncekvcdnrnlkilnrhehIrygesilksilksqhinnvaaqyllgfnsnikervkyia  
lydsmpkpnrnkrivayiv  
csissft  
>tr|A8YYV5|A8YYV5\_STAAT  
miqcInlietsvllrilyvyrashetakealgdelraiahelktvkdnmvdsksrdsakamrvqvrllkkygyp  
pdIqkmaveqvveqaelma  
sqg  
>tr|A8YYV7|A8YYV7\_STAAT  
mmntikstihteaisfsdeqhryllkktwdekaactvityphldgvlslldlttvliInqlanserygavylvnlfsni  
rtpenIkhiknpydehtdi  
hImkaisesdtvIaygayakrpvviI driveqvmemI kphkkkvkklI nptvneimhplnparqkwilks  
>tr|A8YYV9|A8YYV9\_STAAT  
mnnwiivaqlsvtvineIidimkekqkggk

Tsompanidou\_et\_al\_Supplemental\_FASTA\_File

>tr|A8YYW4|A8YYW4\_STAAT  
mnkkskqqeklynfiiaksfqqpvgstftygelrkkynvvcstndqrevgrrfaywikytpglpfkivgtkngsllyqki  
ginpcnntpskkgdc  
>tr|A8YYW5|A8YYW5\_STAAT  
mirrrgtkngeggyliptheeiidkygnlvdylkfdvtveyedl111rs1sd1nehqkmdrvsfikkhlnsnfdy11dd  
tefrsinkiysnlnimthi  
nsqnnnfrnrfineeq1ks1laikkvdahmsydsnitskalaekntqkr1vtkidtlynqskkeneyvrlgekisytk  
lenhwkylynei qfynlnn  
qlisyvalqeyawaf1nel fylie1y1kafkgqkkt dyefgkklnefiqsyvii11idir1pvvrlyiirdivdtcege  
kdneykritlieesikkyry  
vkdqikrfknglees1lnat1sieqnm1kvkidykaycfprekthhnieynvs1ffkaldalkk  
>tr|A8YYW8|A8YYW8\_STAAT  
melk1lnk1dddq1d1ef1qdng1kgnvqgpmt1keplksyiqs  
>tr|A8YYX0|A8YYX0\_STAAT  
mpsrwkvktfks1stsk1lekk1qnfksynsfdieikrshylf1nivevyykdk  
>tr|A8YYX2|A8YYX2\_STAAT  
myylayg1tt1dncfkyyq1itqnehfcysqqeeresyqqkfqsming1kikigi qssnddaq  
>tr|A8YYX3|A8YYX3\_STAAT  
martyvikiyvikknkdd1king1rl1yefnikdekainisqifvnratl1eki qngeafthafrvnhntyyagql1s1s  
lnkngyinnnfeasrdiir  
nievs1dye  
>tr|A8YYX4|A8YYX4\_STAAT  
mkkventnsnmhkndnsyv1salsylsiffapvilplfwiladeptsehggkafinhimtwvsffigrlafifskevfd  
kpldhq1l1ifs1l1iiti  
ffliaililyilninrgiki1lkk  
>tr|A8YYX5|A8YYX5\_STAAT  
mklkasdfvednyngv1ifpen1s1tdnkk1lesliktilftgkryqytfki  
>tr|A8YYX6|A8YYX6\_STAAT  
mkrasysvetkykavemkaagfptkeimkelni rnrqtqkwnwrwyrngesyrfshvgkqytygyrkitalinqcytsp  
inhkrvqrvmqkhh1ncrv  
rpkkttrigkpyykt dn1lqrqfkascpmev1tt ditylpfghsmly1ssimdiyng eivaykiddkqdqrlvndtlnqi  
dipegc1l1hsdqgsvytsy  
ayyq1ceekgi1rsmsrkgtpadnapiesfhss1ksetfyinnq1nnsnhividivent1ktiiiefnkn  
>tr|A8YYX7|A8YYX7\_STAAT  
mihfnmstkvflynshywgqskikidnffnkidtlilkqgkkie1l1kqrkqg1l1qkmfv  
>tr|A8YYX9|A8YYX9\_STAAT  
mkikkyike1dkiyedfmmnda1tt1l1nd1qtiinqylsk  
>tr|A8YYY1|A8YYY1\_STAAT  
mnhdntiqsnwrtvascl asqnyisivkg1lvhftaiddeeil dkiyeefinddsittv1nnd1qtiinhylsk  
>tr|A8YYY2|A8YYY2\_STAAT  
mntikstihteafsddeqhry1l1kkiwddkpkactvitmy1h1ldgvl1s1d1ttv1l1nq1anseqygavylvnlfsnik  
tpen1khikeydehtdih  
1mkaisedtv1laygayakrpvvi drveqvmem1kphkkkvkkl1npvtnevmp1npkarqkw1k  
>tr|A8YYY3|A8YYY3\_STAAT  
meensmkinryitrgiseqls1d1q1l1wnmvkdrdnq1ntdy1h1fk1qeddnms1itheqeqpaykleyhytnyiknq  
nalpkkvyvireddvafy  
yvml1peey  
>tr|A8YYY6|A8YYY6\_STAAT  
mvptvvid1vdq1kvkysik1l1l1kv1nipkstyrrwknkthkndtvtqkvielckanhytygyrkitalinqcytspinh  
krvqrmqkhh1ncrvrpk  
kmtkigkpyykt dn1lqrqfkascpmev1tt ditylpfghsmly1ssimdiyng eivaykiddkqdqslvndtlnqidip  
egc1l1hsdqgsvytsyayy  
q1ceekgi1rsmsrkgtpadnapiesfhss1ksetfyinne1nshnhividivekyiknnnnnnnnriqqk1gylspvky  
relia  
>tr|A8YYY7|A8YYY7\_STAAT  
mski vvalggna1ggspeq1d1l1kstsks1vs1idkgyeivishgngpqvgsin1g1nyaaehkqgppfpfpecgamsq  
ayigyqmges1qnelhsmg  
idkqvvt1vtqvvasddsafnnpkpi g1fytk eqadkftkekyt fvedsgrgyrrvpsppisivel dsietlith  
gtlviaaggggipvikene  
vytgvdav1dkdksa1laah1qsdq1i1l1tavdhvyinygkenqrg1devsvdemkhh1sdgqfakgsm1pkveaalqf  
lekntkgsvl1tslag1gd  
aldgkigt1ikn  
>tr|A8YYY8|A8YYY8\_STAAT  
mkn1rnrnft1l1dftqkemef1l1n1sed1krakyagieqqkmkgkni a1l1fekdstrtrcafetaydqgahvtylgpt  
gsqmgkkestkdtarvlgg  
mydgieyrgfsqrved1akysgvpwng1tdedhptqvladfl1takev1kkpyneinfyvgdgrnnvanalmqgaaim  
gmtfh1vcpe1nptdel1  
nrcndiadknggei1itddidegvkgsdviytdvwwsmgepdevwekrik1lepyrvtkelmkktgnphti fehclpsfh

Tsompanidou\_et\_al\_Supplemental\_FASTA\_File

dtetiigkqi qekygltem  
evtnev feseqsvvf qeaenrahtikavmvatlge  
>tr|A8YYY9|A8YYY9\_STAAT  
myeeniyiknseyefdnnlkqlasylnipvsivrpykedltlyqykkgqvihstdqikfvyflvngcilhessnitgdn  
ylrlskdenifpmnfifne  
tpapeictaltdckiltltpkdllaylcrkhneifeslfkklnetiqfveyimalransakerierilqilclsigddn  
gefyelkqimtvqlisnls  
glnrkttgeiirelkieniyqdkrnwiikk  
>tr|A8YYZ1|A8YYZ1\_STAAT  
mvqgpiqvns eiglktvllkrpgkelenlvpdhlsgllfddipylkvaqeehdkfaqtlrdegievvyleklaesite  
pevrenfindilteskkti  
lgheteikeffsklsdqelvnkimagvrkeeiql etthlveymddrypfyldpmpnlyftrdpqasigrgmtinrmywra  
rrresifmtyilkhhrprfk  
dkdypwldrnspfneggdelvlskdvlaigisertsasaiek larnifkdantsfk kivaieipntrtfmhl dtvltm  
idydkftvhaaifkeennm  
niftieqndgkddikitrrsklretlaevlevekvdfiptgngdvidgareqwndgsntl cirpgvvvtydrnyvsnql  
rdkgikvieitgse lvrgr  
ggprcmsqplfredi  
>tr|A8YYZ3|A8YYZ3\_STAAT  
mfknillpydfendfsaipdylekvt dedsvvviyhvtendlaisvkyynkhkediirekekkltpflrelekrdiqyk  
idvdfghikdtilekitsg  
dinngedlvimsnhrvdlnikhvlgdvthkiakrsvpvliik  
>tr|A8YYZ5|A8YYZ5\_STAAT  
merfccvnqiniyiqmnp leakfktsalrswktdqadahklac lgp tlkqtgslpiheliffelrerarfhleieneqrnl  
kfqilellhqt fpglerlf  
ssrysiialniaeifthpvdvldidkdvlithifnstdkgmsmdkatkyaqlrviaquesypnvdrhsflveklrlliqq  
lkqsihhlkqlddamiqla  
qqldyfenihsipgigklstamiigeigdikrfksnkqlnafvgidikryqsghthcrdtinkrgnkkarkllfwvimni  
irgqhhydnhvdyyyklr  
kqpnepkhtaiiacinrlkthylvmnhklydyqmsph  
>tr|A8YYZ6|A8YYZ6\_STAAT  
mtktydvwqkggesddmardhqeawertikmldtsdiegktildvgnqggflrql ydttpfkkgvgidlarlsleka  
etlkgqrpltyy ltdkpqe  
tkhvfdtavstsvlyliedipqhakdlkevlpqggvyasfadltnnpsrqfmd dtinqygatpsqnhs lkhivdsfvda  
gfevavmkehvpdvidlth  
ysdfylspndylqtlyeesflikasvkegtek  
>tr|A8YZ00|A8YZ00\_STAAT  
msnyqqknavntvvvnqslsil dqekvllkdvdltv tkgafhciigesgsgkslltrtilgmksqlycyqgdididltq  
tdavfqdvqsnmfqnitla  
khfqyieanrthl tkqrikedvlqmmqllglrqgeql lerypfe lsggmaqrva fims lirrpnlyfldeptsaldqen  
ikkfmhyllraqeryqmti  
vfi thdinlvkdcathisimqqgliengeaasiltkpthnytkklitiahrrqpya  
>tr|A8YZ01|A8YZ01\_STAAT  
mlkierltkyidtlqifkeisc tindhllisgesgsgk stl akiiagldtdyqgelyl ngrlresytskewmkhiqyvp  
qyqrdtlnqrktvlatlle  
plknykvnkqrytssieavldqcnlphdilnhkvstlsggqfqrwiakalilepeilildeattnldvineea ilqml  
slkmtql iishdtyvlsq  
fegiqqlnkl n  
>tr|A8YZ03|A8YZ03\_STAAT  
mikk lffmilgsllilsacs nndekdkdtdndqkseshmkhndeskvp edmkstnegef kvgdktvitag hmpgmkgaeat  
vkgayktyayvvsykptng  
nekvnnhkwwvnee ikdapkgfsgkdtvkleashmsgmgatanidnvkktvvyvdykskdngkiiknhkwm tgnelk  
ar  
>tr|A8YZ04|A8YZ04\_STAAT  
mrnyrdisyilnergf nvhhltpskllsphteffsftydtplrig  
>tr|A8YZ05|A8YZ05\_STAAT  
mkypym lininlstikndkrfnatddrini  
>tr|A8YZ08|A8YZ08\_STAAT  
mkqygekfidefskaelek lakqq lidvrteeeyalghingsilhpvdeiesfnkeknktyyvicrsngnsanaskyla  
kqgyvni ldggykayeee  
nksydtqeeyksieikadrkqfnyr glqcpgpivkisiqemknievgdqievkvtdpgf psdikswvkqtrhtlvkl denn  
nginaiiqkekakldiny  
sakgttivl fsgeldkavaaliangaraagkdv tiffwgl nalkkvqtvnkkqgiakmfdlmlpkknirmp lskmn  
mfglgnmmr yvmkkknvd  
slptlinqai eqnikliactmsmdvmgiqkeelrdeveyggvgtyigatenanhn lfi  
>tr|A8YZ10|A8YZ10\_STAAT  
mstrglniwqemeignvshkvakraqipliifk  
>tr|A8YZ15|A8YZ15\_STAAT

Tsompanidou\_et\_al\_Supplemental\_FASTA\_File

mevverwqfsyrsresieefksqfcefiskqh  
>tr|A8YZ20|A8YZ20\_STAAT  
msqllndt1sawllies1spgevnftaedilsaehfknagakqaqlsfdeyfeiwnaerfiiseeksetgelifkfy rhc  
fryneinlkiqdi fddyse  
ihp ngthcygyt fntdkhgkvi vdsihipmimsalkeiekknanieekfndsvekf vqkvkeiladepinefklkmd  
kaydeyfsvlnskkdglfg  
hyvai eyvkdsdlppqefnsffisdi ekarkspnqtli dyiegevesqhie vdenkemfdkflhpsrlpdgrwpsqtefr  
ls1mqqlavnqitsgneri  
ssvngppgtgkttllkdi fahlvvergkelaklnnpkdafvktihetddkyvylkesiakykmvassnngavenisk  
dlpkieeiirnpekckfpk  
yeqnyanlahelkdfaeiaedligesawglfsgvfgkstinqv1shmlkqdandigfakllqnennrmsynelmsewqs  
hgrafleelrhvemlkees  
iraydvkyncesfskieqv insektsieeqvyhldnetlrdnkeiedlndrinyivkqietlneliksikesnkgfinkl  
kamfnseedesykdhnkek  
qqlltqqlelekckknkhedlvsklkekeklikqltkvqlqlde1nsq1qeleayrieskitipekdfwsdnyderqvt  
nlwtsdelqyrram1flra  
milhklllianttiyya indfkdrrklidanpdkvhnawnvmh1ifpvvsttfasfksmyggipkdfidylfideagga  
ipqaavgal yrskkvavg  
dpiqiepvvtleshlidnirknyhvpeylvskeasvqsvadnanqygfwksdatdsnqktwigiplwvhrcl kpmftia  
nqiyannkmv1psnitkv  
ktgwydvkgnavqkqvkehgekvvglladdwieaiekgknepssfvispfsavqqikrmlkqqlptridier tkinqw  
vdksigtvhtfqgkeaqv  
yfvigt dntqdgavnwscekpnllnvavtrakkefyvigdmqriqm kpfy etifkernvk  
>tr|A8YZ24|A8YZ24\_STAAT  
mksipekesdemikrvnk1vlgis11flvisitagcmgkeaeikksfekt1smypiknledlydkegyrddqfdkndkg  
twivnsqmai qnkgealki  
kgmllkldrntsrakgfyytneiktekyeva qdnqkypvkminnkfi steevkeeni kkeienfkffaqysnfkd1mny  
kdgdisynevpsysagyq  
ltnddy nvkqlrkrydiptnkapk1llkgtgn1kgssvgykkieftflenkneniyftds1hlepsedk  
>tr|A8YZ32|A8YZ32\_STAAT  
milnklqdtft1sy1ftiilwgsafpmikia1ndfsaes1safr1lilat iillpfviikk1ptpelrdipvifilgfcg  
fviyhtalnfgeal1sagi  
sgilvsttpifssalayi1fkehfskwnw1sslvafigisiisiskddyttinvlgvfiill asfseslyftfqkkyiek  
ygfi aftlytimasspfm1  
ifipei indihgatftsivsvlylai fptiipyvllayivksvgsdatmslyltpivsl1lsy1llde1ptt1aiiggi  
itllgvs1snffqnt  
>tr|A8YZ33|A8YZ33\_STAAT  
makykdiasdirdkii tgdwfygmkipshrq1aiqynvrvtiiksielleagfiytkvgs gtyvndylneahitnkws  
emmlwssqqrsgytvqlin  
kietd dsyihiskgelgis1mphiqlkkamsntashied1sfgynggyyik1rdiivermskqginvgrenvmitsgal  
haiql1sigflgqda1iis  
ntpsyihstnvfeqlnfrhdivpynqineidtiidrfinfknkaiyieprfnntgrsl1tneqkknii tyserhni piie  
ddifrdiffsdptpsikty  
dklgkvihissfskti apairigwivasekii eqladvrmqidygs silsqmvyem1knksydkhlvklryv1kdkrdf  
mln1lnn1fkdia hwevps  
ggyf wlvfkididikylye1lskekilinpgyi ygskeksirlsfafesnenikhal ykiytyvkkv  
>tr|A8YZ36|A8YZ36\_STAAT  
mmtlqih tggin1kkkn1ysirk1lgvgiasvt1gt11isggvt paanaaqhdeaqqnafyqvl nmpn1nadqrngfiqs1  
kddpsqsanvlgeaqk1nd  
sqapkadaqqnnfnkdqqsafyei1nmpn1neaqrngfiqs1kddpsqstnvlgeakk1nesqapkadnnfnkeqqnafy  
ei1nmpn1neeqrngfiqs  
1kddpsqsan11seakk1nesqapkadnkfnkeqqnafyei1h1pn1neeqrngfiqs1kddpsqsan11aeakk1ndaq  
apkadnkfnkeqqnafyei  
1h1pn1teeqrngfiqs1kddpsvskei1aeakk1ndaqapkeednnkpgkednnkpgkednnkpgkednnkpgkedgnk  
pgkednkpgkedgnkpgk  
edgnkpgkedgnghvvpkgdtvndi akangttadkia adnk1adknmi kpgqelvdkkqpanhadankaqa1petgee  
npfigttvfggl1s1alga  
llagrrrel  
>tr|A8YZ40|A8YZ40\_STAAT  
mlvvt1af11vlagcsgnsnkqssdnkdkettsikhamgtteikgkpkrvvtlyqgatdvavslgvkpv gaveswtqpkp  
feyiknd1kdtki vggqepa  
pnleeisk1kpd1ivaskvrnekvydq1skiaptvst dtvfkfdttk1mgka1lgekeaed1lkyddkvaafqkdaka  
kykdawp1kasvvnfradh  
triyaggyagei1nd1lgfkrnkdlqkqv dngkdi iq1tskesip1mnadhi fvksdpnakdaa1vkktesewtsskewk  
n1davknnqvsdd1dei tw  
nlaggykss1kliddlyek1niekqsk  
>tr|A8YZ47|A8YZ47\_STAAT  
mmqqls1khr1nngdsvygifnsipdp1mieviaasgydfvvidtehva indetlah1iraaeaahii pivrvtavidrd

Tsompanidou\_et\_al\_Supplemental\_FASTA\_File

ikvldmgargiivphvkd  
retvehivklsryppqglrslngrmarfgrtplldamemanehimviamiedvegvmaddiaqveglmdivegaadls  
qslgipwqtrddqvtsvhq  
hifevvnahgkhfcalpredediakwqaqgvqtfilgddrgkiyrhlsaslataskqkqgdeg  
>tr|A8YZ48|A8YZ48\_STAAT  
mriqvqvieqlkaqshpvchyidlvglehhlqhitsslpsncqmyyamkanserkildtisqyvegfevasqgeiakgl  
afkpanhii fggpgktdee  
lryavsegvgrihvesmhelqrlnailededktqhllrvnlagpfnatlmagrptqfgisedevddvieaalampki  
hldgfhfhsisnnlidsnlh  
vdvkvlyfkkakawsekhrrfpkxinlgggigvnyadltnqfewdnfverfktliveqemedvtlnfecgrfivahigyy  
vtevlidikkvhgawyaillr  
ggtqqrflpvswhnhpfdiurykdnpsfekvsi srqdtlvglctpkdvfarevqidaistgdvdivfkyagaygws  
shhdfllshppefiyltqt  
kede  
>tr|A8YZ51|A8YZ51\_STAAT  
meknveksfikiglyfqiayivlmaitlecfvicyglifglfyllsgsradylivtivisaisifviilsivpvivlas  
dlfkeriskgvilivlaii  
alvlcnfvsaillwfvsaissilgrkklvaaadtttiqsksgnanqashkdtckkeldsqdmehpevknpttknlegfnee  
ihkdeattkvvsdntepi  
eskdhvskkd  
>tr|A8YZ67|A8YZ67\_STAAT  
mliivliiwsfiyfgfnfgdlmigipqigdflkqmippdfeylqqittplmldtirmaivstvlgsivsipiallcasniv  
hqkwisipsrfilnivrti  
pdlllaaifvavfiggqipgilalfilticiigkllyesletidpgpmeamtavgankikwivfgvvpqaiissfmsyvl  
afevnirasavlglvagg  
iglyfdqtlglfgypktatiilftlvivvvidyistkvrahla  
>tr|A8YZ72|A8YZ72\_STAAT  
mfiiilkdisvflnnklkreykimlikirggnmkrdffekwsfilnllfcaflflvvlmfykdvdiviyifctllisll  
pllniikrigweinssmi  
yevilavid  
>tr|A8YZ76|A8YZ76\_STAAT  
midihhnlpniddgptnetemmdllkqattqgvteivtshlhprytpiekvksclnhiesleevqalnlfkygqe  
iritdqilndidrkvingi  
ndsrylliefpsnevphytdqlffeqlskgfvpiiahpernkaisqnlidilydlinkgalsqvttaslagisgkkirkla  
iqmiennlthfigsdahnt  
eirpflmkdlfndkklrdyyedmngfinsnaklvvddkkipkrmpqqdykqkrwfgl  
>tr|A8YZ78|A8YZ78\_STAAT  
mtlnivitgagkfgvgnlkadltsstdhhi fevhrqtkeeelesaalkadvvhlagvnrpehdkefslgnvsyldhvl  
iltrntkkpailsssiqa  
tqdnpygesklqgeqlreyaeeygntvyiywrpnlfgkwckpnynsviatfcykiarneeiqvndrnveltnyvdiv  
aekraiegtptiengvpt  
vpnvfkytlegeivdlykfkqsrldrtlplkldnlfekdlystysylpstdfsypllmnvddrgsftefiktpdrgqsv  
niskpgitkgnhwhhtkne  
kflvvsqkgvifrhvnddeieyyvsgdklevvdi pvgythnienlgdtmvtimwvnmfdpnqpdyflev  
>tr|A8YZ88|A8YZ88\_STAAT  
maenrlqlkqgsaetierfynrqgietiegfqmqmfvtklntedtdevkiltiwesedsfnwlnsdvfkeahknvrk  
sddgqqspilsnkvfkyd  
igyhyqk  
>tr|A8YZ92|A8YZ92\_STAAT  
mdkesvvaslarnkkiavetmagqryierilhtndekhihilpkpdvvlvdvsikeidenhlnat  
>tr|A8YZ96|A8YZ96\_STAAT  
mtrptnnkfilpiitfiiflgiwemviiighyqpvllpgpalvgksiwsfivtgeifqhlaislwrfvagfvallvaip  
lgflgrnrwlynaieplf  
qlirpispawapfvvlwfgigsipaiaiffiaaffpivfntikgvrdiepylkaaanlntgwslyrnifpgafkqi  
magihmavgtswiflvsg  
migaqsglgflivdarnmlnledvlaaiffiglgfiiidrfisyieqfilrrfge  
>tr|A8YZ98|A8YZ98\_STAAT  
mdmkivalfpeaveggenqlntkka lglktfleerghefiiladngedldkhlpdmdviisapfypaymtreriekapn  
lklaitagvgsdhvdlaaa  
sehni gvvvtgsvntvsahavmdllillrnyeehrqsvegewnlsqvgnahelqhktigifgfrigqlvaerlap  
fnvtlghydpinqqdhkls  
kfvsvdelvstsdaitihapltpetdnlfdkdvl srmkksylvntargkivnrdaivealasehlqgyagdvwypqpap  
adhpwrtpmnamtvhysg  
mtleaqkriedgvkdi lerffnhepfqdkdiivasgriasksytak  
>tr|A8YZA0|A8YZA0\_STAAT  
mkeglfmimgnlfqqeyfriyknntestthrnaywvklaknveatkmyalstivqqhasirhffdvttddnltmlhe  
flpfieikqvpssanydl  
eaffkqelstyhfnspflkvklfqfadaayilldfhvisiddsqidiflddlcnayrgntvintrqhahinrnddkdn



Tsompanidou\_et\_al\_Supplemental\_FASTA\_File

qdashialdsnyfrlenns  
dihidsyfpi khpfega lyqtyliddmts idmaslavsvylan himsqqhdvtlgihvpshlpndlhgnivplttidak  
dvcqrfttdfnkcvlqnm  
qlqcaksslsletifhcyhhmmsccndviedvhqihdahtsladieifphqhgfkiiynsaaydl1sietlsdlvrniyl  
qiteengnkrttvdelnm  
terdiqlyddinls1peiddaqtvv1feqqveatpnhvavqfdgvfityqtlnarandlahrlrnqygvepndrvavia  
eksiemi amigv1kagga  
yvpdpnypsdrqeyi1kdvtpkvvityqalyengkqinhi dlnkiawknidnlskcntledhayviytsgttgnpkgt  
liphrgrivrlvhqnhvvp1  
neetti1lsgtiafdaatfeiygallnggklivakkeq1lnpiaveq1inendvntmw1tss1fnqiaseriev1vp1ky  
1liggevl nakwvd1lnqk  
pkhpgiingygp tenttftttnipnkvpnr ipigkpi1gthvyimqgerrcgv gipge1ctsgfglaagyl nqpe1tad  
kfkidsniq1myrsgdiv  
r1lpdgnidy1yrkdkqvki riefsevehaleri qginkavvivqnhdqdyivayyeamht1shnkiks q1rmt1p  
eymipvnfmhieqipitin  
gk1dkkalpimdyvtd dayvapstdteh11cqifadi1hvnqvgihdnff elggsh1katlvvnri eastgkrlqigdl1  
qkptvfe1aqaiakvqeqn  
yevipetivkddy1lssaqrmy1lwksnhkdtvynvpflwr1sse1nvaqlrqavqrliarheilrtqyivddevrqr  
ivadva vdfvevnthtfde  
qeimrqfvapfnlekpsqirvryir splhay1fidthhi indgmsniq1mnd1nalyqhk111plklqykdysewmshrd  
mtkhrqyw1sqfkdevpi1  
slptdyvrpniktngammsftmqqmrq11qkyvekhqitdfmffmsvmt11sryarkddvsvgs vmsarmhkgteqm  
1gmfant1vyrgqpspdkm  
wtqflqevkems1eayehqeypfec1vnd1dqshdasrnlfdvm1vlqnnetnhahfghsk1thiqksvtakfd1sfi  
ieedrddyti nieyntdly  
hsetvrhmgncmimidiy1lkhdtd1qicdipngtee1lnwvnt hvndrmlnvpgnksii syfnevvsrqghvalvmd  
1tmtyet1rnvydaiahm1  
1sngvgngqrvalfters femiaam1atvkv gasyipididfpnkrqgailedakvtavmsy gveiet1l pviqlenakg  
fveskeneqydd1hgnqle  
ntam1dnemaiytsgttgm pkgvai rqrn1ln1vhawstelq1gdnevflqhanivfdasvmeiyc11nght1vipdr  
eervnpeqlqqlinkhrvt  
vasi1qmcsvmdefyiek1itggatstasfvkyiekhcgtyfnaygpsestvitsywshhcgdlipetipigkplsnig  
vyimsdgl1cigimgpelc  
iagds1aigy1nrpe1madkwqnpf gkgklyhsgdlarytsdqqie11gridkqvkvngyrieldeienailairgis d  
cvtvshfdthdi1nayyv  
geqqveqdlkqylndq1pkymi pkti thi dcmplttndkvdttr1pnpspiqqsnkvysepsneieqtfdvdfgev1kqn  
dvgvdddff elggns1eam  
1vvsh1krfghhismqtlyqyktvrqivnymyq nqslvalpdn1selqkivmsrynlgileds1shrp1gnt11tgatg  
flgayliev1qgyshriyc  
firadneeia wyk1mtn1ndyfseetveim1snievi vgd fecmddv1penmdti ihagartdhfgdddefekv nvggt  
vdvir1aqghhar1iyvst  
isvgtyfditd tedvtfseadvykgq11tspytrskfyse1kvleavngldgrivrvgn1tnpyng rwhmrniktrfsm  
vmd11q1dcigvsmamp  
vdfsfdttarqivalaqvntpqiiyhv1spnkmpvks11ecvkrkeielvsdesfneilqkq dmyetig1t svdreqq1  
amidtt1tkimnhisekw  
ptitnnwlyhwaqyiktifnk  
>tr|A8YZA5|A8YZA5\_STAAT  
mmikv givggsgygaie1ir1l1qthphvtiahiyshskvdeplk1t fphlqhimqhfeal tvdnndcdviffatpapvsk  
tcipp1vekghid1sga  
friknreiyeayketaaaqdd1nha isisewqsfdnngtk1isnpgcfptat11al hplisekivdlssi idaktgv  
sgagrs1sqrvhfsemnen  
1sayaighkhkpeieqy1s iagqdvsviftp1vpmt rgil1stiyvkl1sseyttes1hklm tssyanqpfvri ridigt  
fpttkevlgsnycdigi yv  
dettqtai1svidn1vk gasgqaiqn1ni lydfevttgl1nqspvyp  
>tr|A8YZB0|A8YZB0\_STAAT  
mmkdvkridyfsyeelti1ggsk1plvnfel1dpsnfeekaaliekelvtendk1tdagfkvat1vreyisaivnirin  
dmyfapfsyekdey11sr  
fknggfqiri inkdiawwsivqsyp11mrqeksndwdfkqid detlen1nnesid tigrvleieiy nhqgdppqslyniy  
eqnd11firyplkdkvlv  
higvintfi relfgfdtdenhinkae  
>tr|A8YZB2|A8YZB2\_STAAT  
mtkdieyltady nekssi qsvidaieggdf1dvdtmddavsdvss1dedgais1tssvvgp qgsk1mgyyyqnel ydia  
sqldskmkei idtpfiedi  
dkafkgitnkl eni1likngghgrdy gasgki akgdakksdsvysidei1ksdqefvkv idqhykemkkedk1sks  
dfekmmtqgascdymtva  
aeleeqkkkeeaieiaalagmvv1scinpvagavaigaysaysaanaatgknivtgrk1skeerimeg1slip1pgmgf  
1kgagks1mk1gfkgekf  
avktglqktmqqavsrispkmgmmknsvl1nqsrnfaqnthvgqm1snmrgqathtvqqs rnwigqqaqnvkrivngldk

Tsompanidou\_et\_al\_Supplemental\_FASTA\_File

ejahpfkqqlapagmggik  
faetttlrnmgnikravtpqnhvthgpkdsmvrsegkhsisschemnsskyvespnytkvefgehyarlrpkklkaniey  
ttptghiyrtdhkgrikev  
yvdlslkdgdrnshaqrtvggedrlddddggghliarmfggskdidnlvaqskfinrpfkekghwynlekewqeflnsgk  
evknikmekysgnsqrpt  
ifkveyeingernirriInk  
>tr|A8YZB8|A8YZB8\_STAAT  
mnfeeklsemynkianeinemi pvewekvyviayvddgggqvi fyytkprndelyyyssivedynvleeifddlwmelyr  
sfkklrni fkeeslepwt  
cefdftkedklkvsfdyidwknTEfdqI ggenyynyrkfgiipemeyemeevkqieqyikeqeeaeq  
>tr|A8YZC3|A8YZC3\_STAAT  
mtfeekisklyneianeissmipvewekvytmayiddgggeffnytkpgsddl nyytdipkeynisvqvfdlwmldyd  
lfeelrdlfkeeglepwt  
cefdftsegklkvsfdyidwintefdqI grenyymykkfgvl pemeyemeieidqyikeqdeaei  
>tr|A8YZC5|A8YZC5\_STAAT  
mqnhprftfDskkkvkdkii cnlksqI ayrypyimdk  
>tr|A8YZD0|A8YZD0\_STAAT  
mggnikfpapksennmrpeiitcfffvisflkl dihnlnknknvltlsln dntmillfykkdcnnvllll dndn  
>tr|A8YZD6|A8YZD6\_STAAT  
manlqkyieysrevqqarenqpival estii shgmpypqnvemattveqiirngaipatiaiidgkikiglesedlei  
latskdvakvsrrdlaevi  
amkcvgattvattmicaamagiqffvtggiggvvhkgahtmdisadleelsktnvtvicagaksildl pktmeyletkgv  
pvigyqtneI pafftreg  
vkltsvetperladihltkqqln leggivanpi pyehalskayieaiineavveaenqgikgkdatpflI gkivektn  
gkslaanikI vennaalga  
kiavavnkll  
>tr|A8YZE0|A8YZE0\_STAAT  
mkmfkknrngvskvyviaidiggqtiksavidkqlnmfdyqqistpdnkselitdkvyeivtgymkqyqliqpvigiss  
agvdeqkgeivyagptip  
nykgtnfkrllksI spyvkvkndvnaalI gelklh qyqaerifcmtIgtgiggayknnqghidngelhkanevgyll yrp  
tenttfeqraatsalkraem  
iaggftrsthvpvl feaaeggdiakqil newaedvaegiaaqiqvmydpglil igggi seqgdnlkyiepkvahylpkd  
yyapiqttskndaalyg  
clq  
>tr|A8YZE3|A8YZE3\_STAAT  
mhhtvlcihl nkgvalmngyhsnaqqpsawrrffvyslvgilcffi pftingntifvdhvhIairsi igplmpyvalimi  
litalpivr rtfmstIn  
lvi tI fkvagamigimvfkigpsilfkanygpflfekl mpls ilipvgaialslI lvgyllefvgyvempimrpifkt  
pgksavdavasfvgsyslg  
lIitnrvykqgmynkreati iatgfstvsatfmiivaktI glm phwnlyfwitlvitfvvtaitawlpis nesteyng  
qegeqevaiegsrlktaya  
eamkqnal tpslvknvwdnlkdglemtvgilpsil sigflglivanytpfidwlgylfypfiyifpiadqallakasais  
ivemflpsllvtkaamstk  
fvvgvsvsaiiffsalvpcilateikipvwklliiwfl rvalsllitipvallifg  
>tr|A8YZE4|A8YZE4\_STAAT  
mlrgqeerkysirkysigvsvlaatmfvsvsheaqasektstnaaaqketlnqpggegnaitshmqmsgkql ddmhken  
gksgtvtegkdtI qsskhq  
stqnsktirmqndnqvkdserqgskqshqnnatnnterqndqvqnthhaerngsqsttsqsndvdkSQSPiPaqkvipn  
hdkaaptsttpsndktap  
kstkaqdattdkhp nqqdthqahqi idakqddtvrqseqkpqvgdI skhidqnspekptdkntdnkql ikdalqapkt  
rsttnaaadakkvrplkan  
qvqplnkypvfvhgfIglvgdnapaly pnywggnkfkvieelrkqgynvhqasvsafgsnydravel yyyikggrvdyg  
aahaakygherygkykgi  
mpnwepgkvhI vghsmggqti rImeefl rngnkeeia yhkahggeisplftgghnmvasittlatphngsqaadkfgn  
teavrki mfaI nrfmgnyk  
snidlgI tqwgfkl pnesyidyikrvskskiwtSddnaaydl tI dgsaklnm tsmnpnityt tytgvsstgplgyen  
pdIgtffl mattsriighd  
areewrkn dgvpvisslhpsnqpfvntndepatrrgiwqvkipi iggdwhdfigvdfldfkrkgaelanfytgiindl  
I rveateskgtlkas  
>tr|A8YZG8|A8YZG8\_STAAT  
mkklttlllIastlliaacgnddskkddsktskddgvkaelkqatkaydytdeqlneflkgtekvkaiendmaqaka  
lypkvrmyersepvaeaf  
gdldpkidarladmkeekkeewsgyhkiekalyedkkiddvtkkdaqqllkdakeI hakadtI diipklmlqgsvdlln  
evatskitgeeeiyshtdI  
ydfkanvegaqkiydI fkpI lekdkkI sddiqmndkvnqll dkykdnggyesfekvskdrkafadavnaI gepI sk  
mavite  
>tr|A8YZH0|A8YZH0\_STAAT  
mkhlyl tkfvamI itaamvcsfgllksqaaeqqsi sdvysvitdaksal snnsi sdnkqkaieqvvsavkklsl ednses

Tsompanidou\_et\_al\_Supplemental\_FASTA\_File

navksdvrkledakandnq  
kdtlsqtktsliayeeklaskdagskikllqqvdakdaamtkaikdknkaeleslnnslnqiwtsnetvirnydanqyg  
qievallqlriaihkspld  
takvshawttfksnidhvdksntsandqyhvsqldndalekaikaidnqldsadaalthfietwpyvegqitkdgal  
tkiedkipyyqsvldehnk  
ahvkdglvdlnnqikevghsysfvdvmiiflreglevllivmtlttmtrnvkdkkgtasviggaiaglvlsiilaifv  
etlgnsgilresmeaglg  
vavilmfiogvwmhkrsnakrwndmikmyanaaisngnlvllatiglisvlregveviiifymgmigelatkdfiigiala  
iviliifallfrfivklip  
ifyifrvlsififimgfkmigvsiqklqllgamprhviegfptinwlgfypsyepliaqgayimvvailifkfk  
>tr|A8YZH7|A8YZH7\_STAAT  
mkgmflssfyatrktqtiyfivaiiaagyfavfnpmlssamagvmlitpitdnikhekdsrwmvystlpvkrtsy  
fafylilfgaslmiglvvt  
tvtqsvmigmisgmsfgiigaysiifpltkfgaensvnicasilllisfvfffiygmvsagasalefekistegw  
lvviayavigivitsvsi  
lsikifnkqel  
>tr|A8YZH9|A8YZH9\_STAAT  
mtrvvlaaayrtpigvfggafkdvpaydlgatliehiiketglnpseideviignvlqagqqnpariaamkglpetvp  
aftvnkvcsqglksiqlay  
qsvitgendivlagmenmsqpmvnnsrfgfkmghqsmvdsmydgltdvfnqyhmgitaenlveqygisreeqdtfa  
vnsqkavraqqngfde  
ivpvsipqrkgepvvtkdegvrenvsveklsrlrpafkkdgtvtagnasgindgaammvmsedkakeiniepavl  
fgshgvdpsimgiapvgav  
ekalkrskkelsdivfelneafaaqslavdrelklppekvvkggaialghpigasgarvltllhqlndevetglt  
ciggqaiavvsky  
>tr|A8YZI7|A8YZI7\_STAAT  
maskygindivemkkqhacgtnrfkiirmgadirikcencqrsimiprqtfdkklkiiieshddtqr  
>tr|A8YZJ0|A8YZJ0\_STAAT  
mfsfyictsllwsirlinlktkdqgiifithnkelyhapllftiiqtllhiifdinsfetfydifkntlhksehmfynsc  
evvrnefky  
>tr|A8YZJ6|A8YZJ6\_STAAT  
mk1kevnfkvvecknilinhkreiifvdfginvikefsi  
>tr|A8YZK2|A8YZK2\_STAAT  
mtiylvrhgesksnydnkhfrsyfcgqldvp1tdtgtsaddlcyfkekqikhvyvsdl1rtqqtfehi fpydiasttt  
p1lrerslgvfegeykdei  
sanpkydkyfnpnfkdfrrhsfsqapegesyedvyqrvehfmnhvnedtqkddivivahqvvirclmvyfnkvsraea  
vdlkvenckpyie  
>tr|A8YZK8|A8YZK8\_STAAT  
memnsvmhnd1kevllteediqnicelgaqltkdyqgkplvcvgilkgsamfmsdlikridthlsidfmdvssyhgge  
stgevqiikdlgssienkd  
vliiediletgtllksitel1qsrkvnsleivtlldkpnrrkadiakvygkipdefvgygldyrelryn1pyigt1k  
pevysn  
>tr|A8YZK9|A8YZK9\_STAAT  
mqkafrnvlviviigviiifglfsylnngnmpkqltynqftek1ekgd1ktleiqqqnvmvsgtkndedsstilyn  
nekelqkitdaakkqngvk  
ltikeekqsvfvsilstlipvviallfi fflsqaqggsggrmmnfgskakmydnkrrvrfsvdvagadeekqelie  
ivdflkdnkkfkemgsrip  
kgvllvgppgtgk1laravageagapffsisgsdfvmfvgvgsrvrdlfdnaknapciifideidavgrqrgagvg  
gghdereqtlnqllvemd  
fgenegiimiaatnrpdi1dpallrpgrfdrqivgrpdvkgreailvhaknpldetvdlkaisqrtpgfgadlenl  
lneasliavregkkidmr  
dieeatdrviagpakksrviskkernivahheaghtii gmv1deaevvhkvtivprgqaggyamm1pkqdrflmteqe1l  
dkicgllggrvsedinfne  
vstgasndferatqiarsmtqygmsk1gplqfghsngqvflgkdmqgepnysqiayeidkevqrivkeqyerckqil  
lehkeqliliaetllteet  
lvaeqiqslfyegklpei dydaakvkdedsefndgkfgksyeei rkeqledgqrdesedrkeekdiaedkheadksdek  
depahqqapniekpydpnh  
pdk  
>tr|A8YZL3|A8YZL3\_STAAT  
mkmqdtiflkgmrfygyhgal saeneigqifkvdvtlkvdlaeagrtndvidtvhygeveevksimegkavnll ehlae  
rianrinsqynrvmetkvr  
itkenppipghydgvgieivrenk  
>tr|A8YZM6|A8YZM6\_STAAT  
myvsgaf1ifnagtsimylrssiieemillkrmddikmvfeqdpaarstlevittyaglhavwshliahklynqky  
vaaraisqisrfftgieih  
pgakigkr1fidhgmvgvigetctigdnvtiyqgv1ggtgkergkrhpdigdnv1iaagakvlnikinsvni gansv  
vlqsvpsystvvgipghiv  
kqdgvrvgktfdhrh1pdpiyeqikhlerqlektrngeiqddyii

Tsompanidou\_et\_al\_Supplemental\_FASTA\_File

>tr|A8YZP1|A8YZP1\_STAAT  
midvnnfhykiglaspekirswsfgevkkpetinyrtlkpekdglfcerifgptkdweccsgkykrvrykgmvcdrcgv  
evtkskvrreemghielaa  
pvshiwfyfkgipsrmgllldmspraleeviyfasyvvvdpgptglekktllseaefrdydykypgqfvakmgaegikdll  
eedldeekllrdelesa  
tqqr1traikrlevvesfrnsgnkpswmi1dv1piippeirpmvqldggrfatsd1ndlyrrvinrnnr1kr1ldlgagg  
iivqnekrm1qeavdalid  
ngrrgrpvtgpgnrplks1shmlkgkqgrfrqn1lgkrvdysgrsviavgps1kmyqcg1pkemale1fkpfvmkelvqr  
eiatniknaks skiermdde  
vwdvleevi rehpv1lnrapt1hr1giqafept1vegrair1hplvttaynadfdgdqamavhvp1skeaqaearm1mlaa  
qni1npgkdgkpvvtpsqdm  
v1gnyy1t1erkdavntgai fnntnev1kayangfvh1htrigvhasffnptfteeqnkkilatsvgkiifneiipdsf  
ayineptqenlerktpry  
fidptt1gegg1keyfene1iepfnkf1gniaevfnrfsitdtsmml1drmkd1gfkfsskagitvgvadivv1pdqk  
q1ldehek1vdritkqfnr  
gliteeerynavveiwtdakdqigelmqs1dktnpi1fmsdsrgagnasftq1agmrg1maapsgkiielpitssfre  
gl1tvleyfisthgarkgla  
dtalktadsgyl1rr1vdvaqdvivreedcgtdrg1lvsdikegtemiepfieriegrysketi hhp etdei iirpdeli  
tpeiakkitdagieqmyir  
saftcnarhgvcekcycgknl atgekvevgeavgtiaaqsigepgtq1tmrtfhtggvagsditqgl1priqei fearnpgk  
qaviteiegvvedik1akd  
rqqeivvkganetr1s1lasgtsriiveigqpvqrgevl1tegsiepkny1svag1natesy1l1kevqkvymqgveiddkh  
vevmvrqml1rkvri1eagd  
tk1lpgs1vdi1hnftdanrea1fkhkrpatakpv1l1gitkas1etes1saas1fgettrv1tdaaikgkrdd1l1glkenv  
i1gk1l1pagtgmmrrysdvk  
yektakpvaevesqtevt  
>tr|A8YZP6|A8YZP6\_STAAT  
m1dwfqlannkenktiql1rrylhqype1sfeefqthdyivnql1s1scdi1etpigrngikatfkg1gtgptialradfda  
1pvee1ndvpyksknpgcm  
hacghdghta1l1tvaie1ldekh1legnv1l1fyqgee1mpggsqemidag1lenvdriygth1wsgyptgtihsraga  
imaspdfesvtfkgrrghg  
akphetidpivimaefi1s1saqi1srtidpvkqav1sfgmi1qagtt1dsvipdqafckgtvrtf1dsdi1qnhvmdkmdk1l1q  
glaiandinyd1nyikgy1  
pvhnekayqvi1keatnd1hvrfnesd1mmi1gedfshyl1kvrpgaff1tgcgneskgitaphhnpkfdideks1kyavav  
f1ki1e1eqvfktn  
>tr|A8YZQ0|A8YZQ0\_STAAT  
mkkimi1tgal1gqigte1lvkcreiygtdnv1atdi1repeadspvqngpfe1ldvtdrdrmfel1vrdfeads1mhmaalls  
ataeknp1lawd1nmgg1m  
naleaartyn1hfft1ps1gafgd1stpkvntpqvti1qqpt1mygvnkvagel1cqyyfkrfgvdtrsvrfpg1shvkep  
gggttdyaveiyfkavreg  
hytsf1dkgtym1mymddaieai1k1meaddak1etrngyn1samsfdpemvkeai1qeyypnft1dydvdp1rqqians  
wpds1dts1c1rgewgfdpk  
ydlasmtk1m1leaieqkdtvknnn  
>tr|A8YZQ7|A8YZQ7\_STAAT  
mik1iatdmdgt1l1naahe1sqpnidaikyaqeggitvviatgrafy1eaqapvadtd1t1vpyic1ngaevr1detfnvmst  
sh1nks1lvhk1tnv1kdag  
iyqvytsraiytedpqr1ldiyidiaeragqhanverikngi1qrridngt1kvvdnydaienipgelimkilafdgnle  
kidkaskilaespnlaiss  
ssrgniei1thsdaqgia1etiaer1giemkevmsigdn1nd1sm1ekvgypvamengae1evkki1akyvtdtnensgvk  
aimk1l1reqqv  
>tr|A8YZR1|A8YZR1\_STAAT  
minrdnkka1tkkgm1snr1nkfsi1rkytvgtasi1vgtt1ifgl1nqeakaaentstenakqddattsdnkevseten  
nsttenstnpi1kktntd  
sqpeakkestss1tqkqnnvtattetkpn1iekenvk1pstdktatedtsvileekkapnntndvttk1pstsepstsei  
qtkp1t1p1qestniensqpq  
ptpskvdnqvt1datnpkepvnskeel1knpekl1kelvrndsntdhstkpvataptsvapkrvnakmrfavaqpaavas  
nvnd1ikv1tkqtikvgdgk  
dnvaaahdgkdi1eydteft1dnkvkkgdtmt1nydknvi1psd1tdkndp1id1tdpsgevi1akgtdkatkqiytftdyv  
dkyediks1rl1t1syidkk  
tvpnets1n1t1fatagketsqnv1tvdyqdp1mvhgd1sn1qis1ftk1dedkq1tieqqiyvnp1kksatntk1vdi1agsvddy  
gnik1ngst1iidqnteik  
vykvn1sdq1lpqsnri1ydfsqyedvtsqfdnkks1fsnnvat1dfgd1insayi1kvvskyt1ptsdgel1diaagtsmr1ttdk  
ygyynyagysn1fi1vtsndt  
gggdgtvkpeek1ykigdyv1wedvdkdgvqgtdskekpmanv1vt1t1ypdg1tksvrt1danghyefgg1kdgety1tkfe  
t1ptgyl1ptkvng1ttdgekd  
sngssvtvkingkddms1ldtgfy1kepyn1gdyv1wedtnkdgi1qdanepgikdvkvt1kd1stgk1vigt1ttdasgkykft  
d1ldngny1tvefet1pagytp  
tvknttaddkdsng1l1tttgvikdadnmt1dsgfy1ktpkys1gdyv1wydsnkdgkqdstekgikdv1vt1l1qnekgevi1gtt

Tsompanidou\_et\_al\_Supplemental\_FASTA\_File

kt dengkyrfdnl dsgkyk  
 vifekpagltqvtnttedkdadggevdtitdhddftldngyfeedtsdsdsdsdsdsdsdsdsdsdsdsdsdsdsdsds  
 dsdsdsdsdsdsdsdsdsdsdsdsdsdsdsdsdsdsdsdsdsdsdsdsdsdsdsdsdsdsdsdsdsdsdsdsdsdsdsdsdsdsds  
 dsdsdsdsdsdsdsdsdsdsdsdsdsdsdsdsdsdsdsdsdsdsdsdsdsdsdsdsdsdsdsdsdsdsdsdsdsdsdsdsdsdsds  
 dsdsdagkhtpvkpmsttkdhhnkakalpetgsenngsnattlfgglfaalgslllfgrkkqnk  
 >tr|A8YZR8|A8YZR8\_STAAT  
 melqlaidllnkedaaelankvkdyvdiveigtpiinyegl pavkhmadnisnvkvladmkiidaadyevsqaikfgadv  
 itilgvaedasikaieea  
 hknnkqllvdmiavqdlekrakeidemgadyiavhtgydlqaegqsplerlrvksviknkvavaggikpdtikdivae  
 spdlvi vgggianaddpve  
 aakqcr aaiegk  
 >tr|A8YZS0|A8YZS0\_STAAT  
 mkfdnyi fdfdg tladtkkcgevatqsfkacgl tepsskeithymgipieesflkladrpldeaalaklidtfrhtyqs  
 iekdyiyefagiteaitsl  
 ynqgkklfvvsskksdvlernl saignhliteavgsdqvsaykpnpegihtivqrynlnsqqtvyigdstfdvemaqra  
 gmqsaavtwgahdarsllh  
 snpdfiindpseintvl  
 >tr|A8YZS1|A8YZS1\_STAAT  
 mdfnkenimvdakkakkktvatgignamewfdfgvayttayiganffspvenadirqmltfaalafiaflrpiggvfvf  
 giigdkygrkvvlstii  
 mafstlitglpsydqiglwapi1111larvlqgfstggeyagamtyvaesspdkrnslgsgleigtlsgyiaasimiyv  
 ltf fltdeqmasfgwripf  
 llglflglfglylrkleespvfendvatqperdnin flqii rfyykdi fvcfvavvffnvtnymvtaylptyleqviki  
 dattsvlitcvmaimipl  
 almfgkladki gekkvfligtggl tlf s i afml l hsqsfvvivi g ifil g ffl sty eatmpgsl p tmfyshir yrt lsv  
 tfnisv si fgg ttp l vatw  
 lvtktgdplapayy ltaivsigflvitflhlstagks l kgsypnv dneqdrayyaehpkealwvkerkn  
 >tr|A8YZT9|A8YZT9\_STAAT  
 miqvkapgkly ageyavtepgyksvli aldrfv tatieeddykg tihska lhhnpvtfsr dedsivis dphaakq lny  
 vvtai e i feqak s cdi am  
 khfhltidsnl ddsngkygl gssaavlsvikvl nefydml snlyiyklavianmklqsl sscgdiavsvy sgwlays  
 tfdhewvkhgiedttveev  
 liknwpglhieplqapenmevl igwtgspassphfvsevr lksdpsfygdfledshrcvekliahafktnnikgvqkmvr  
 qnr tii q rmdkeatvdiet  
 e l k y l c d i a e k y h g a s k t s g a g g d c g i t i i n k d v d k e k i y d e w t k h g i k p l k f n i y h g q  
 >tr|A8YZU1|A8YZU1\_STAAT  
 mkydliivigfgkagktlakyaastgqhavi eqspkmygg tcinigcipsk tlvdgl egksfeasynrkn dvvnaln  
 knyhl l ad d n n i d v l d f k a  
 qfksntevnlldqhddivdsitaphii i ntgatsvipnikgl dqakhvfdstgl l n i s y q p k h l v i v g g g y i a l e f a s m f  
 anl g s k v t v l e r g e s f m p r  
 edqdvaygjt d l e n k g i a l h t n v e t t e l s s d n h h t t v h t n v d n f e a d a v l l a i g r k p n t d l a l e n t d i e l g d r g e i k v n  
 a h l t t v p h i y a a g d k g g  
 l q f t y i s l d d y r i i k s a l y g n q s r t t d n r g s v p y t v f i d p p l s r v g l t s k e a a a q h y d y t e h q l l v s a i p r h k i n d p r g  
 l f k v v i n n e n n m i l g a t l y  
 g k q s e e l i n i i k l a i d q n i p y t v l r d n i y t h p t m a e s f n d l n f  
 >tr|A8YZU3|A8YZU3\_STAAT  
 mlnskfnvshliivtlvtikhf aqcvntyv  
 >tr|A8YZU4|A8YZU4\_STAAT  
 mcqylclksvelgvviviymiyclkvda l t v r l h n  
 >tr|A8YZU5|A8YZU5\_STAAT  
 mpmsidmyldr nrnqassvgnl s q t m n s n y d a l e k a i t q f i n d d a l k g k a y t s a k q f f s t v l i p l s t s m k t l s d l t k q a c  
 d n f v s r y t s e v d s i s l k e s  
 e l e e d i r s l s q q i t r y e n l n n l k k h a s d n q q a i s n q q i i r t l g q q k h e l e e k l r k l r e f n q s p e i f k e v e e f q k i v q  
 q g l t q a q n f w n f s t n q f n i  
 p s g k e l d w a k a s h e k y l k v a m g k i e h k a e k e t l n k a d f a v i k a y a k e h p e d d i p k s i l k y i n d n k d s i k r d i g l d i t s t l  
 l e q g g i n a s k f g v f i n t a g  
 g v k g p a g p n s f v e k r t s g n v f i e n g s k f a k g g k y l g k g v a g v f g i g m y d d l a n d d k t f g e a l s h n g m t l a a g s a g t a v  
 g a g l a t f v l g s n p v g w v i l  
 a g l a m s t v f a l g t d l i y q n n i f g l k d k v d w v g h k i d n s i d v v k k t t e k s m d s v g n a v s e a k n i i s n h i n p m k w a w  
 >tr|A8YZU6|A8YZU6\_STAAT  
 mlfnikvinknprykvvqyndeyl lidlvstwlvyffpf inwfipkryaklsekelenlvdkqnknni fwpvtgss flf  
 vvilrkyvhtfevql d n k i  
 l i s l c f i g f i g i a a f y i y l n k k l k l k i y d d n l d n e n r v i l p t f k d g s f i v f t y l l l g g c s i l f l i w l m t i k p q n l l v f i  
 m w i i t i f f f l i s m g s i s n  
 k k v y a k l k k q  
 >tr|A8YZU7|A8YZU7\_STAAT  
 meillcevrvvnknpryrii kykndylmidlvstwl v l f f p f i n w l i p k y v q i s r e d f d n l n i v k p v k n a l w p a i g s i

Tsompanidou\_et\_al\_Supplemental\_FASTA\_File

llfgtmfrdkyipdshle  
kncviiicsvlllslilvfviylnqkvklsiyndrsslngkimi fspfnlcfvlfsyffcggl simfldvlislsiqniiv  
fiawvmtmlfffinmssi  
idkkihviylrsyky  
>tr|A8YZW0|A8YZW0\_STAAT  
mtnedkrfeqlrferkfivipyliyavivlllnifysdlkitmtlfglffaynvvilfiafvkhykrtlllsliltvlsq  
aaffgiivyginhf  
>tr|A8YZW2|A8YZW2\_STAAT  
maiavllnrmfrmehnplfeyiyqqkedidacyfiipeedmssasdikaqfyrgtlqrfyqslhaekltpyvmsyddiis  
fckennisevvtagdimsy  
hleeydilhqrslnfeariavtlirgnhyfkasktmnqqgepynvfts fykkwrpylhrdvvyhdlskfedfviaspdd  
lvfddiafgssqieeqnk  
qhlfdqdiqnyesgrdylpevltsqslvalayglldiieifndllarydedeanyea firelifrefyyvltmqypetsy  
qafkpkyrqikwsqneadf  
nawcegqtgfpiidaaimeltqtgfmhnrmmvvsqfltkdlfidwtwgekffrkhlidydaasnihgqwsastgt dav  
pyfrmfnpirqserfdaka  
lyiktylpi fnqidakylhdtqrnesnlfeqqielgshyprqmvdhqekrtqvlafkald  
>tr|A8YZW4|A8YZW4\_STAAT  
mqsryariyflilfivslfetkifqfmtlnflayipfelsllrlfkpnkkyewplfiisfifvlllntfymvtdl  
ihlnqfqfnfyaglnl sew  
kyftylllgvflavyvmliiyfeiltltshrwlnrlivvvlmflngfgyigrflrlhsvyffneplhvlnhilesltk  
tamfvcfmvmmqaaillfg  
kgvrlnk  
>tr|A8YZX2|A8YZX2\_STAAT  
mseliinyngkvytedgkidngyihvkdqgivaige vddkaaidndttknkiqidakghvlpgfidihihggygdamdq  
sydglkylsenllsegts  
ylattmtqstdkidnaltniakyeaeqdvhnaaeivgihlegpfi senkvgaqhpqyvvrpfdkikhfquetanglikim  
tfapevegakealetykdd  
iifsiqhtvatyeeaveaveergakhvthlynaatpfqhrepgvfgaawln dalhthemivdgthshpasvaiayrmkgnr  
fyli tdamrakgmpegeyd  
lggqkvtsvqsqarlangalagsilkmnhglrnlsftgtdldhlwrvtslnqaialgidrksikvknkdadlvilddd  
mrvkstikqgkvhtfs  
>tr|A8YZX5|A8YZX5\_STAAT  
mki rvvipcfnegevitqthqqlteilsqdssvkgdydnmlfiddgstddtidemqhl atidrhvsfisfsrnfqkeam  
iagyqstefdavimidcd  
lqhppeyipkmvegfmeqydqviakrdrgenfsrktlshlyyklvncfveevqfddgvgdfrllsqravksiasleeyn  
rfskglfewigyntkvfty  
qnverqkgeskwsfkklnfygidglisfnskplrmmylglfifsisvlyiylfinimisgvnipgyfstiaailllgg  
iqlisigvveyigriyye  
vkarpyiiqatnlsslendekdthkvysk  
>tr|A8YZX6|A8YZX6\_STAAT  
mvlrsrsqiiigvssilltstilaiayilmwfnghmtltltlttiitscltllicsifinpli qkikqfniktkqfang  
nyasndktfnspkeiye ln  
qsfnkmaselitqmmqikseqekte liqnlahdltkplasiisyselrdgiitkdheikesydilikqanrlstl fdd  
mthiitlntgktyppeliq  
ldqllvsilqpyeqrikhenrtlevnfcneidafyqyrtp leriltnll dna l kfsnvgsridinisen edqdtidiais  
degigiipe lqerifertf  
rvensrntktgsgl glyiane laqqnnakisvssdidvgttmtvtl hkl dits  
>tr|A8YZX9|A8YZX9\_STAAT  
mntkyflaagavittla l gacgnsnsqdqgnkteqtktsedsnvktdkthltgtfsskngetvegkaeikngklmltny  
ksskqpdlyvyltkngdik  
ngkeiamvdydkekqtf dlknvdlskydevtiyckkahvifggaklk  
>tr|A8YZY0|A8YZY0\_STAAT  
mivylinijavvltgfnlyrhqmqlslsaml sitinafintfiidkynfitlctitmfiiwtlqfyidkklkpv y  
itdqkfiailt ivvsltq  
rvtdfsstqsiymsipflapai fiiggimlfistfnsl detaennkikk lmikgliiin isfivmmvlt pywyllylivy  
lifllflwqkvkykf  
>tr|A8YZY5|A8YZY5\_STAAT  
mitvrieynyryl teneykqyhiqlkgfikkyvatkladvgevihfaqaqqrqgryvslylsy eaakyfnhamcths la  
kddiyaaaysfekaesins  
tyehqtsyvskyhfsfesvmmtnikrvqqaivegetyqvnytarltdniyypistlyerltqfsngnyta llqtdei  
qvasspel ffqkgqfnv  
dnvii skpmkgtmprgkteaedqyyktlqtsskdraenvmivd ll rndigrisqsgsikvyklffieayktvfqmtsmv  
sgtlknntdl tqiltslfp  
cgsitgapklntmkyikql essprgiycgaiglllpteddkmi fnipirtieykygqaiyvgagitidskpkdevnefy  
aktkilem  
>tr|A8YZZ1|A8YZZ1\_STAAT  
mgmeaykiehlnksyadkti fdnldl si segekiglvgingtgkstllkviggiddftanvmhpnqyri ryssqkdln

Tsompanidou\_et\_al\_Supplemental\_FASTA\_File

edmtvfdavlssdtttlri  
ikqyeqavqayaddqsdklfrmmdaqdamdqhdawdynaeiktisklgihttkyikelsggqqkrvvlaktlieqpd  
llldeptnhldfeslswl  
inyvkqyphtvlfvthdryflnevstrieInrgklasypgnyesyiemraerevtlqkqqkqralykeelawmragak  
arttkqqarinrfdlene  
vnqykddkgeInlaysrlgkqvfeledlskaindkvliehlteiiqgerigvvgpngagkttllnilsgedqqfegkl  
ktgqtvkvayfkqtdetld  
rdirmidyIreeneiakekdgtsvsitqlllerflfpsathgkkvyklsggeqkrlyllrllvhqpnvllldeptndldte  
tltiledyihftfggtvitv  
shdryflnkvaqsywfihdgqmekiigtfdesyyskksldknkstlkqqskssttvrrknglsykekleyeqlmkrieqa  
evrmeeidvlmieasadyg  
kikelneekeqleiqydliditrwseleeikeqq  
>tr|A8Z001|A8Z001\_STAAT  
mnpkvkgiailisaigfsfmsvffrIagdlpvfqksIarnlvamfiplffiykyhqpmfgrlssqpllitrstlgligv  
llniyai dhmvlsdadsIm  
klnpfwtillslvflhekvrkyqitamiaiIgmllivkpefsssmipsIaglfsgifaasaytcvralstreapytivf  
yfsIsvivlipftaytye  
pmsqmilyllgaglaavvgqigtlaysfaakdisiftyasiiftailgfilfgespdfyatIgyvviigasyymfek  
arrdakiikk  
>tr|A8Z005|A8Z005\_STAAT  
mynaiyigsswrgpnteaggksannivqvggapt  
>tr|A8Z013|A8Z013\_STAAT  
mpyfiililililifqfsqmnfkigilydikdmrkdvlrsdk  
>tr|A8Z014|A8Z014\_STAAT  
mysnvqpfinsdltncfqsqyteiesllfnlldspvkytkhiggthhfkystepildilvgvenIhditsldekrInyvg  
fyrllhhkytkkvmmakfnn  
fheIkqyvrllhiqmntqtfesylaldylstnddiaIqfntkkhqilqhsItirqyemqkqyfeflckkyI  
>tr|A8Z026|A8Z026\_STAAT  
mmnncIscgakIyeniItynlfkknprlcdrckenwdnikldikarrcsrclkhlnqdeaycldeckflsahfnlmeqlyc  
qfydgImkemihqykflk  
dyyIcellahIjeipqtsydyivpipsspahdlSrtfnpveavlakagirfdkilkmsnrpkqshltkkerIadenpfii  
dteldIngkeillvddiyt  
tgltihragcklyaknirkfkvfafar  
>tr|A8Z032|A8Z032\_STAAT  
mgvhqyfkrlsdmerlirlpgkfkyfehnvaahsfkvtkiaqylatveeyhgrkinwkslyekalnhdfaevftgdiktp  
vkyasselkklfsqveem  
vetfieeepIqyrdvykqrIqegkddslegqilsvadkidllyetfgeiqkrnpeelffeiyemsletiiqfdhIasvq  
dfinniipemItenfiprt  
elrettmnilnkrkeene  
>tr|A8Z035|A8Z035\_STAAT  
mkepsivvkgarahanlkdidieIpknkIivmtglsgsgksslafdtiyaegqrryvesIsayarqflgqmdkpdvdtieg  
Ispaisidqkttsknprst  
vatvteiydyirilIyarvgykpcpnhieiesqtvqqmvdrimleartkiqllapviahrkgshekIiedigkkgyvrI  
ridgeivdvndvptldknk  
nhtIevvvdrlvvkdgietrIadsietaleIsegqltvdivdgedlkfshesacpicgfsigeleprmfSfnspfgacpt  
cdglgqkltvdvdlvvpdk  
dktInegaiepiwptssdfyptllkrvcevykinmdkpfkklterqrdillysgsdkeieftftqraggtrkrtmvfegv  
vpnisrrfhespseytrem  
mskymtelpcetchgkrIrealsvyvggInigevveysisqalnyyknidIsehdqaiianqilkeiisrltflnnvgle  
yltInrasgtIsggeaqri  
rlatqigsrltgvlvIdepsiglhrdndrlintlkemrdIgentIivvehdddtmraadyIvdigpgagehggqivssg  
tpqkvmkdkksltgqylsg  
kkrievepyrrpasdrkiSrgarsnIkgvdvdipIsimtvvtgvsrgsgksslnevlyksIaqinkskvkpglydki  
egidqldkiididqspigr  
tprsnpatytgvfddiIrdvfaqtneakirgyqkgrfsfnvkgrceackgdgiikiemhflpdvyvpcevcgdkrynret  
IevtykgkniadiIemtve  
eatqffenipkirkIqltIvdvglgyvtIggqattIsggeaqrvklaselhkrstgksiyildepttghvddisrlIkv  
Inrlvengdtvviiehnld  
viktadyidIgpegsggggtivatgtpediaqtksytkyIkevlrdkqntedk  
>tr|A8Z041|A8Z041\_STAAT  
mkmrIqqaIffnssqgpqhrefrkeilqamrvgvwaptqriskrnstgnaswvgvgniekIldsqflqtmvqvggaptqkltk  
sqItimckIagpqrswrk  
vsIq  
>tr|A8Z062|A8Z062\_STAAT  
mkskyepIfdkvelpngvelrnrflapIthissnddgtIsdvelpyiekrsqdvgitinaasnsvdvgkafpgqpsiah  
dsnieglkrIatamkknga  
kaIvqiIhggqaIpltpdgdvvapspisIksfgqkqehsaremtpeieeqaikdfgeatrraieagfdgveihganhy  
Iihqfvspyyrnrdvwan

Tsompanidou\_et\_al\_Supplemental\_FASTA\_File

qykfpvavieevlkakeaygnkdfivgyrlspeeaespgitmeiteelnkishmpidyihvsmdthattregkyagqe  
rlplihkwingrmpilig  
siftadealdavenvgvdlvaigre11ldyqfvekikdgredeiinyfdperednhltpnlwhqfnegfyp1prkdk  
>tr|A8Z064|A8Z064\_STAAT  
mtennnlvtstgqiikealhlklgfdegmydlikeplrm1qvripvrmdgvtktftgyraqhndavgptkkgvrfrhpdvd  
eeevkalsmwm1lkcgvn  
lpygggkkgivcdprqmsiheverlsrgyvraisqfvgpnkdipadvftnsqimawmmdeysaldfnspgfitgkpiv  
lggshgrdrstalgvviai  
eqaakrrnmqiegakvviqgfgnagsflakflydlgakivgisdaygalhdpngldidylldrrdsfgvtvnlfeetisn  
kelfeldcdilvpaaisnq  
itednahdikasisvveangpttpeatri1tergillvpdvlasaggvtvsyfewvqnnqgyywwseevdek1rek1lea  
fdtiyel1sqnrkidmrlaa  
yigikrtaeaaryrgwa  
>tr|A8Z068|A8Z068\_STAAT  
mltssfrnsneypeivfvgnh1sstytkelvdyladkdfsvnvisksgtttepavaf1fkqlveerygkeeaqkri fat  
tdkekga1kqlatnetyet  
fivpddvggrysv1tavgl1piatagini eammigaakareelssdkleeniaayqyatirni1yakgyttem1inyepsm  
qyfnewwkqlfgesegkdf  
kgiypssanytt1hslggyvqegrrf1fetvkvnhpkdyditi ekdsddl1glnylagktidevntkafegt1lahtdg  
gvnmvvnipq1deetfgy  
vvyffelacamsgyqlgvnfpnqpgveaykqnmfallgkpgfed1kkeleer1  
>tr|A8Z071|A8Z071\_STAAT  
msklkkeliewiisiavafvil1fivgkfi vtpytikgesmdpt1kdgervavnivgyktgg1ekgnvvf1hanknddyvk  
rvigvpgdkveykndtlyv  
ngkkqdepylnyn1khkqgdyitgtfqvkd1pnanpksnvipkgy1vl1gdnevskdsrafglidedqivgkvsfrfw  
fsefkhfnfpentkn  
>tr|A8Z081|A8Z081\_STAAT  
mnlwyyt1fvlakt1nyrlaseein1tipsihkqiknleqhl1nkl1fetyknqi1l1tedght1piaqsfieqyesgik  
hi1k1k1tmf1qsk1lnvvvss  
yatfimpkflksffnehpfidvs1hvkneniekdi1nhtydigi1srnqpk1revhsekvcegekiv1liapnkennh1lte  
as1fekyki1sdnhpeyws  
s1knni1niyekaqfl1sindvhtsik1liemnqgis1fl1plyittnsdynisvintkil1qapisftyiyskkespeilvfik  
sfkkyianeql  
>tr|A8Z084|A8Z084\_STAAT  
mlqchktplif1iv1wnn1lesksk1iktvnksml1vkkfginksqvl1tys  
>tr|A8Z089|A8Z089\_STAAT  
msqnkrvvi1tgmgal1spigndvkttwenal1kgvngidki1tridtepysvhl1agel1knfniedhidk1kearrm1drftqyai  
vaareavkdaq1dinenta  
drigvwi1gsgig1gmetfeiahkql1mdkgprrvspffvpm1lipmatgqvsid1gakgpngatvtacatgtnsigefkiv  
qrgdadami1tggteapith  
ma1agfsasra1stnddi1etacrpfqegr1dgvfvmgegagil1vies1esaqarganiyaeivgygtt1gdayhitapapege  
ggsramqaamddagi1epkd  
vqyl1nahgt1tpvgd1nevkaiknt1fgeaakh1kvnstksmtgh1l1gatggieaifsa1sikskvaptihavtpdped  
1di1vpneaqd1di1tyamsn  
s1gfgghnav1vfkkfea  
>tr|A8Z0A1|A8Z0A1\_STAAT  
met1fsgiqpsgiptignyiga1kqfvdvqndydcyfcivdqhai1mpqdr1kl1rkqtrqlaaiylasgidpdkat1fiq  
sevpahvqagwm1ltiasv  
gelermtqykdkakavegipag1l1typp1maadiv1yntnivpvgddqkqhiel1trnl1vdrfn1sryndvl1vkpeirmpk  
vggrvms1qdp1trkmsksd  
dnaknfis1l1depnvaakkisavtdsdgi1kfdrdnkpgitn1isiyag1tdmpikdieakeyeggygkfkgl1aeivk  
af1vefqekyesfynsd1k1  
ddi1dqgrdkahkvsfktvkkmekamgl1grkr  
>tr|A8Z0A5|A8Z0A5\_STAAT  
mage1rimenksredin1spvskieisffdpfssdcfk1sailsk1rieynqyirih1lnps1klv1tkcqaqsts1nfd  
ni1alaykaael1qgrvraer  
fih1mqnei1ipkrdi1itesmicdc1qmagid1levfkdd1qksk1tes1kid1hiaremeieqaps1vffsedvheeg1kv  
eglypyhiytyi1nelmgk  
pi1eknl1ppk1letyiqqq1lvtmee1l1tiyewpek1lnkelkk1laiqqkiek1kypdgdfwkskmpkiksk  
>tr|A8Z0B4|A8Z0B4\_STAAT  
mymilinkcf1rkss1iqkg1nqt1fivvir1nnfikks  
>tr|A8Z0D6|A8Z0D6\_STAAT  
mkwmatgyl1eddi1vkeiygsskewvsvevk1sqsl1dpst1fh1tdneagdrfymr1ndnrtsyfygkaiql1fknsknkq  
si1fkdwel1khni1tfihpq  
sekhh1rvvgg1qfsshksddewrefgl1nhfv1pevl1stdnngt1f1tytvkresftveal1nd1md1fn1sidivdeqi  
ggi1trnediykddwrql1vv  
eaiesin1neekiv1larr1likfdkdisipyi1lkqayskeknsyif1lesqdsiff1sqtpeql1kvnkil1st kavagtik  
rsqdededtknveaf1kdn



Tsompanidou\_et\_al\_Supplemental\_FASTA\_File

knliehrfvvdsilhdikpyitelhydtkpiklndhlyhlyteikaplkddsyislidnlhptpalggypkefamdfie  
qkefgtrglygapvgydi  
yddcefiवारिसम्लिककागतlfagcgivkdsdpdseiaetnlkftpmnalgvdmngks  
>tr|A8Z0D9|A8Z0D9\_STAAT  
mtnrqwetlreydeikyefyegiakvtinrpevrnaftpktvaemidafsrarddqnsvvivltgegdlafcsggdqkkr  
ghggyvgedqiprlnvldl  
qrliiriipkpviamvkgvavgggnvlnvvcldtiaadnaifgqtgpkvgsfdagygsylarivghkkareiwylcrqyn  
aqealdmglnvtvvpolekv  
edetvqwckeimkhsptalrf1kaamnadtglag1qqmagdatllyyttdeakegrdafkekrdpdfdqfpkfp  
>tr|A8Z0E3|A8Z0E3\_STAAT  
makkfnyklpsmvaltlvgavtahqvaaettqdqttnknvldsnkvkatteqakaevknptqnisgtqvyqdpaiivqp  
ktannktgnaqvsqkvdt  
qvnqgdranqsattnttqpvakststtapktntnvtnagyslvddeednsenqinpeliksaakpaaletqyктаapkaa  
ttsapakteatpkvtfts  
asaqprsvaatpktslpkykpvvnssindyirknlnkapkieedytsyfpkyayrngvrpegivvhdtandrstingei  
symknnyqnafvhafvdgd  
riietaptdy1swgvavgnprfinveivhthdyasfarsmnyadyaatqlqyyglkpdsaeydngntvwthyavskyl  
ggtldhadphgylrshnysy  
dqlydlinekyl1kmgkvapwgtqstttpttspkpttspkptstgkl1tvaanngvaqikptnsglyttvydktgkatnevq  
ktfavsktat1gnqkfy1v  
qdynsgnkfgwvkegdvvyntakspvvnqsysikpgtklytvpwgtksqvagsvsgsgnqtfkaskqqqidksiylygs  
vngksgwvskay1vdtakp  
tpttpkpstpttnkl1vss1ngvaqinakngl1fttvydktgkptkevqktfavtkeas1ggnkfy1vkdynspt1ig  
wvkqgdv1ynnakspvnm  
qytyvkpgtklysvpwgtykqagavsgtgnqtfkatkqqqidksiy1fgtvngksgwvskay1avpaapkkavaqpkta  
vkayvtkpkqt1tqtskia  
qvkpnntgirasvyektakngakyadrtfyvterahgnetyv11nntshniplgwf1vkd1nvqn1gkevkt1tqkytn  
ksnng1smvpwg1knqvi1  
tgnniagqtfnatkqvsvgkdvlygtinnrtgwnakdl1taptavkpttsaakdynytyvikngngyyyvtpnsdtaky  
s1kafneqpfavvkeqvin  
ggtwyygk1sngk1awikstd1ake1ikynq1gmt1nqvaq1qag1qykpvqrvpgkwt1danfndvkhamdtkr1aqdp  
alkyqf1r1rdqpqni1sidk  
inqf1kgk1v1enqgaafnkaa1qmyginevyl1shall1etng1tsqlakgad1vnnkvvt1nsntkyh1vfgiaay1dndp1  
regikyakqagw1d1vskai  
vggakf1gnsy1vkagqnt1lykmrwnpahpgthqyatdvdwaninaki1kgyydkigevgyfdipqyk  
>tr|A8Z0E4|A8Z0E4\_STAAT  
mwrnfmfskvnqkml1edcfyirkkvfveeqvpeeseideyeseih1igydnqpvatarirpinettvkiervavmk  
shrggmg1rmlmqaves1a  
kdegfyvatmnaqchaipfyes1nfk1mrgni1fleegiehiemt1k1ts1n  
>tr|A8Z0F0|A8Z0F0\_STAAT  
mykykg1r1pmnsi1i1eltdy1ssnnyap1kl1visk1gk1gvk1wdtdgk1yidci1sgfsvanqghchptivkamteqask1si  
isrv1ysdn1gkweek1ch  
lakkdkv1pl1nsgteaveaaikiarkwgsevk1g1tdgqveiiamnnf1hgr1t1gs1s1snhdaykagfhp1l1qgtttvdf  
gdi1eq1tqaispntaa1i1  
epiqgeggvni1ppkgyiqavrqlcdkhq1l1iadeiqvg1grtgkwfamewe1qvvpdiyl1gkalggg1ypvsavl1and  
vmrv1tpgthg1stfggnp1  
ajai1staal1dv1kdeq1lverser1gsf1l1ka1l1q1k1hpsikeirgr1lfigielntdaapfv1dqliqrgilckdthrti1  
r1spp1vi1dkeeihq1iva  
fqdv1fkn  
>tr|A8Z0G5|A8Z0G5\_STAAT  
mm1c1p1ihkcvn1fytfvyh1sn1l1ki1lqgvii1i1tylesfks1lyhkafykfv1sv1sl1piflyavikfffsakrknfy  
nseiseieqal1hgkykyl  
sqk1sstqihkeal1ki1fkaqssntssknieqahfstyfenv1fhk1fimikvilal1pmfill1tfylqplvryiferivmav  
ivi1gvi1svftilyf1sp1  
daays1l1gnatkaqihqfnv1hh1nepyfiq1lwdtikgvftfd1g1t1tykgnevvtkavgeripitiivav1al1mvalii  
aipigi1samkrnsw1ldit  
lmi1al1ig1sipsfwqg1l1filaf1sk1ldil1psymphep1sil1pvl1vigtsiaasitr1mr1ssv1levmrsdyv1taya  
kg1sttqv1vikhil1knaii  
piv1tlvg1l1vae1l1ggsavteqvfningigryivqkq1lipdipavmggvvyisivislanliidi1fyalidpk1rseine  
rk  
>tr|A8Z0G8|A8Z0G8\_STAAT  
mvin1lndkqt1ktskegl1svshp1laakigkdv1dqgnam1daviai1q1al1nv1lepfasg1gggyllye1qstgsita1fd  
aretapehvd1kqfy1ddsg  
eyks1fdmt1thgktvavpaipk1fdyihkryak1s1led1inpaie1laieghaanwatekysrqhar1tkyhetaqv1fth  
engywregdwi1vqpe1lgt  
fqil1reggfna1fykgdi1akq1lvnvkacggtit1led1akydi1qikapisatfkdydiysmgpsssggitviqil1k1lehv  
d1psmgprsvdy1lhh1liqa  
mh1laysdraqyl1addnfhev1pvqs1idddy1karst1idsnkanidi1ehgvvsdcis1htdveentetthfcvidkegni

Tsompanidou\_et\_al\_Supplemental\_FASTA\_File

asfttsigmigygsitipg  
ygvllnttmdgfdvvdggineiapykrplsnmptivmyhgkpiiltvgaggaisiiasvaqtlinvlvfgmdiqaidep  
riysshpnriewepqfsqs  
tilaliahghamehkpdayigdvhglqvdpptyeasggsddtregtvmggevlvirkqplpyrqmysdsgfrlyfndvql  
plladqvrwmhdkyvwdes  
vvriifpevsahiedlrsyenagenyidiawlarkyayqvtlkddglyltddytsvkrntnayrydrdsitr  
>tr|A8Z0G9|A8Z0G9\_STAAT  
mkahki fwl nlaaiiisivsgdmflamkweqihlkdglkkvlstypiknetlyeidghdnphyenndqdtwyiessy  
svvgsdellkedrmlkvd  
knthkitgeydtttndkknatdstyksypkvvnkivftkdvkdpalkqkiennqfliqsgdlt silnsndlkvthdpt  
tdyynlsgklsndnpnvkq  
lkrrynipknastkvelkgmsdlkgnnhqdklyfyfsspgkdqi iykesltynkiseh  
>tr|A8Z0H1|A8Z0H1\_STAAT  
mdatmtkrpkri latiiifslftiiyddiqkwnfytdkl tqnhkgqghskwedffrgsr itetfgkyqhspfdgkh  
ygidfalpkgtptikaptng  
kvtrifnne lggkv lqiaedngeyhqwylhldkynvkvgdrvkagdiiaysgntgiqttagahlhfqrmkggvgnayaedp  
kpfidq lpdgerslyd l  
>tr|A8Z0H2|A8Z0H2\_STAAT  
maelklehikktydnntvvkdfnlhitdkefivfvgsqgksttlrmvaglesitsgdfyidgermndvepknr diam  
vfqnyalyphmtvfenmaf  
glklrkvnkkeieqkvneaaeilglteylgrkpkalsggqrqrvalgrairvdakvflmdeplsnldaklrvqmrteilk  
lhkrlnnttiyvthdqtea  
lmasrivv lkdgdimqvgtpreiydapncifvaqfigspamm lnatvemdg lkvgt hfhklnhkkfeklkaagyl dke  
iilgiraediheepifiqt  
spetqfesevvselgseimvstfqqmeliskl dsrtqvmankitlafdmnkchffdektgnriv  
>tr|A8Z0H6|A8Z0H6\_STAAT  
mmtikvgi igcggi angkhm pslqkvenvemi afcdvdi skaasaaeygtdnakvyddykallkddtidvihvctpnds  
hceitvaglhagkhvmcek  
pmakttaeaqkmi dtakstgkklitigyqnrfradsqflhqaaraqrdlgdiyfgkahairrravptwgvfldeeaqgggpl  
idigthaldl tlvmmndnye  
pesvmgstfhklnkqhhaanawgswnpdeftvedsafgfikmkgatiilesawainslevdeakcs lsgtkagadmkgd  
lrihgedmgtlytkhvele  
nkgvdfyegnevdeaeekawidavvndtepvvkpeqamvvtkileaiyqsaksgkaiyfe  
>tr|A8Z0H9|A8Z0H9\_STAAT  
mkrvynlfnsevydnkkkpvtmvidttyfkgf  
>tr|A8Z0I8|A8Z0I8\_STAAT  
mknikmkl nikamrsvimkriskd iwavfk llyqnkgrfsinalllqlimifissty lllfnmmlkvaggsq l tinnt  
eivshpasvilliiifilsv  
afliyvefsl lvyvmyagfdrqitfksifknafvnrkligvpviffviylmlmpianlg lssvltkniyipkfltee  
l mkttkgii ygtfmiavf  
ilnflkliftlpltilnrqslfknmr lswqitkrnkfrlvieivileliigailtliisgatylaicvdeegdkflvssil  
fvvlksalffyy lftklsl  
isvlvlh lkdqenvldqgl efkyppkrksrffiiismvlavtcfi gynmyllynntintnisiighrgfedkgvensips  
lkaaakanveyveltdtimt  
kdkqfvvshdnnlkr l tgvnknisesnfkdivglk mqrngheakfvsldefietakqsnvkl lvelkphgkepadytqr v  
idilkkhgvehqyrvm l d  
ydvmtklk keapy l kcg yi iplqfghfkets l dffviedfsyspr lvnqah lenkev ytwtingeed ltkylqtnvdgii  
tddpaladqi keekkdety  
fdrsir ilfe  
>tr|A8Z0J1|A8Z0J1\_STAAT  
mcvrtr l vssssar l skaii iavivvyh l dvrg l f  
>tr|A8Z0J2|A8Z0J2\_STAAT  
mitmqeay i vaygrsaaakqgal fherpddvaakvlqgv l kridgkfnknmi edvivgtafpeg l qgqniartialra  
g l sdtvpqqtvnrycssgl  
qti aiaanqimaggdi l vaggvelmsavpmggneptnpt l qyddigasy pmltaenvasqfdvsredqdayavrshq  
raydaqrdgrfkdei ipiq  
vnsveytnagpkvhtni fdqdefi rpdttmealak lrtvfkadgtvtagtsap lsdgagfvvlmsgdkvkelgvtpiarf  
vgfkavgvdpkimgigpay  
a l pev l slsn l svedid l ielneafasqtiasikevg l di srtvnnggai alghplgatgam l tar l lnemgrpdsryg  
mvtmcigvgmgaai feyv  
r  
>tr|A8Z0J7|A8Z0J7\_STAAT  
meglnhrrntekeettqtqsvapntgeegmssastqstkt sdihnes idkqmeakahetaqntdlknears lfdnatksi  
grlagndes lnl n l kdm l s  
evfkphtkneadei fiagtakttpaicdi seewgkpw l fsrvfiaftvtfig l wmaai fntnaipgl ifigaltvpl s  
glfffy esnafknisi fev  
iimffiggyfsl l stmvl yrfvvsdqferfgs l tffdaf l vglveetgkaliivyfvnklktnkilng l ligaaigagf  
avfesagyl nfalgenvp

Tsompanidou\_et\_al\_Supplemental\_FASTA\_File

lldivftrawtaigghlwsaivgaaiviakeqhgfefkdfdkrfliffllsavvlhgiwdtsltvlgdsdtlkiifilivi  
wvllvfilmgaglkqvnll  
qkefkeqgkqvde  
>tr|A8Z0K2|A8Z0K2\_STAAT  
msvctptieriylnsknivvfllekskhdknkvk  
>tr|A8Z0K6|A8Z0K6\_STAAT  
myvknaskkhtqkymqkfqllyfkr1ksqki  
>tr|A8Z0L1|A8Z0L1\_STAAT  
mvkalvktreghgnlelldekatplddkvkikvhyagicgtdihtyeghykvnfpvtlghefsgeivevgadvkdfkvg  
drvtsettfyvcneceyck  
skdynlcnhrkgigtqvdgaftnyviareeslhipdevsyqsaamteplacayhgvskiqvnsgdvavvmgppigllv  
aqv1kskgatvvvtgldnd  
kvrldkaeahmdyvvn1qqtldktyingitdgygadvvvecsgavpaarqgldilrkkgfysqigifkdaeipfdmekv  
iqkeitvvgrsrqkpadwe  
pslqlmadglvnaealvtkiydiskwdeayqhlksgegikvllkplldenegen  
>tr|A8Z0L3|A8Z0L3\_STAAT  
mka1klygvedlryednekpviesandviikvratgicgsdtsrykkmgpyikgmpfghfsgvvdaisdvthvngdk  
vtgcpaipcyqceyclkge  
yarcek1fvigsyepgsfaeyvklpaqnv1kvpdnvdyieeamvepsavvahgfyksniqpgmtvavmgcgsigllaiqw  
arifgaahiiaididahkl  
diatslgahqtinskeenlekfienhyanqidlaiesgaktvigqiltlppkkggevvllgipyddieidrvhfekilrn  
eltvcgswnc1ssnfpkge  
wtatlhymktkdinvkpiishflplekqpetfdklnkkerfdkvmftiy  
>tr|A8Z0M7|A8Z0M7\_STAAT  
mlkyehiakqlnafihqsnfkpgdklpsvtqlkeryqvskstiikalgllqdgliyaqgsgiyvrniadanrinvfkt  
ngfskslgehrmtskvlf  
keiatppksvqdelqlnaddtvyylerlrfvdddvlciaysyhykeivkylnddiakgsifdylesnmklrigfsdiffn  
vdqltsseasllqlstgep  
clryhqtftytmgtkpfdsdivfhyrhaqfyipsk  
>tr|A8Z0M8|A8Z0M8\_STAAT  
msnkykeqaqdilavggvenivdatydtkcitihmqhtipstanevkqidvtsvaendtqlviklngnvdevyqqqr  
liknanveesentdninsq  
dtsytpqvkvttpllvkapiagrri1lkevrdsi frekmvgeglaikaheeskviapfnglismivptkhavgiqsedgv  
divihig1ntvdlegkgfk  
cfvkqndhveagqtl1qfdqqyiqqqgnadvivvisnsadlgkveltmneiittedvifkifkn  
>tr|A8Z0M9|A8Z0M9\_STAAT  
mtklpqnfmggalaanqfeggydkggkglsvivdmtsgahgkarqitesidpnhyypnhegidfyhrykedia1fkemg  
lklrtsiawtrifpngde  
dvpneeglafydrideliaggiepvvtlshfemphlakhyggfrnrevvdyfvhfarvvferykdkvtywmtfneinn  
qmdtsnpi1lwtngvalt  
endnpeevlyqvahhellasavrlgkeinpkkigtmi shvpiypyschpkdmmeaqianl rffffpdvqvrqgypsy  
akkmlarkgydvvgwqegdd  
silqqgtvdyigfSYMstavkhvdttvennivnglnhsvenphiatsdwgwaidpdglrytlvlydryqlplfive  
ngfgavdevvdghihdyr  
ieylkahitaaieavdqgdvdligytpwgiidivsf ttgemkkrygliyvdrndghgtmerlkkdsfywyqqviasngd  
kl  
>tr|A8Z0N0|A8Z0N0\_STAAT  
magpqhkefrkeilqvmqvggaptqrnskrnstgnaswgrteinfakisflfqsrdvkilrkk  
>tr|A8Z0N4|A8Z0N4\_STAAT  
msival1ig1gpligwffptvaskfggkpvhqii gatvgtlifailavvtssglptgtl1fallsgagwgfqqiitf  
kafelvgsrampvttafq  
llgas1wgvfalgnwpgighkiigftalvviligarmtwserkeasnaknlrravll1igefgywlysaapqatsidg  
ltaflpqamgmvivaviyg  
fmmkaenpfrnkitw1qisgffffafgaltylisaqpnmglatgfilsqtsvlatltgiyflkqhktkemvitiig  
lv1ilvaasvtfik  
>tr|A8Z0N8|A8Z0N8\_STAAT  
mkyfkkirhfaqltlpiktsvrpqndisrhvneivetipdskfdefrhhrgatsyhpkmmlkiilyaytqsvfsgrie  
kl1hdsirmm1aqdqtps  
yktinrfrvnpntdaliess1fiqfayfswiscisf  
>tr|A8Z0N9|A8Z0N9\_STAAT  
mtsvnntqssprsniiiaimlsaltyw1faqsfinigplvgqtyqtspavlnlsls1tsfatgimvaagdiadkigqlr  
mtymgliismfas111iis  
ditalligirilqglsaaillpstvgvlnnqfkgehlrraisylmistvggiglagviggliafnfgwqtnfiisiviaf  
iaill1kgtpkvsqshsr  
hpfdykgmsifavmigsft111tqgfeqgwfstfsiiclsifiittliffiierrehvpfidfsvlnrnpfigaf1nnfv  
lnsglgtvvffiyagthl  
glsaaqsglvtlpyaivavamirlgekatlrfggkml1iigplfpvigitiismtqllasqyviaviigfvicainglv  
atpgltiaifsmpekvg1

Tsompanidou\_et\_al\_Supplemental\_FASTA\_File

atg|lykmsgt|ggafgialsttvfsm|qlnyapsvaatvtfvsvlmlilgslsaymiipktvks  
>tr|A8Z0P0|A8Z0P0\_STAAT  
mctgftiqtlnnqvllgrtmdydpldgspavtprnyrwsrtggtgqtqyfgigtgdmegfiygdgvnehgvaistqy  
frgyssygsthkadamnit  
qneivtwilgyttsiedmkqqasqihvvavy|ndigevpplhyhvsdatghtvevsfkegevvikdnpigv|tnhpdlnw  
hysnlrqyinispypatan  
llegvtiep|gneagtfglpggftsterfvrmafkaniaqndkemd|lnafy|ldavnipigivrphtadnhytmyqt  
vin|ttrtlyikygsnel  
valkltd|l|nrkdm|tikpekhit|irk|l|ndnq  
>tr|A8Z0P1|A8Z0P1\_STAAT  
medvlymkkl|taaa|iatmgfatftmahqadaaettntqqahtqmstqsqdvsgtyy|tidsngdyhhtpdgnwnqamfdn  
keysytfvdaqghthyfyn  
cypknanangsgqtyvnpatagdnndytasqsqghinqygyqsnvgpdasyshsnnnqaynshdngngkvnypngtsnqn  
ggsaskatasghakdasw|  
tsrkqlqpygqyhggahygvdyampenspvys|tdgtvvqagwsnygggnqvtikeansnyqwymhnnr|l|tvsagdkv  
kagdq|aysgstgnstaph  
vhfqrmsgg|ignqyavdptsylqsr  
>tr|A8Z0P7|A8Z0P7\_STAAT  
miifil|it|ifa|y|y|iam|ias|lfk|seg|fs|i|gl|il|dv|vm|gt|l|if|y|f|ig|ar|f|vd|hd|l|sn|fl|m|fd|t|gs|y|i|f|my|fa|ik|l|w  
vkpkvny|li|akel|geske  
vieeqe|ld|qts|ki|rgi|y|ff|i|sv|vm|li|it|kl|rm|qpe|l|qada|ism|npv|fi|fv|gvi|i|li|w|l|v|l|di|yr|kk|ky|gi|fl|kt|iv  
plv|ttw|ii|ati|ils  
>tr|A8Z0Q0|A8Z0Q0\_STAAT  
mkkknwiyalivt|li|iii|aivsmi|ffv|qt|ky|gd|q|sek|gs|qs|vs|nkn|k|ih|iaiv|ned|qpt|tyng|kk|vel|gq|af|ik|rl|ane  
knykfetvtrnvaesglkn  
ggyqvmi|vipen|fsk|lam|q|ldak|t|ps|ki|sl|qy|kt|av|gq|keev|ak|ntek|vvs|nl|nd|fn|kn|l|vei|yl|ts|i|dn|l|hna|qknv  
gaimtrehgvnskfsnyll  
npindfpe|l|ftd|l|vns|isank|di|tkwf|qtyn|ks|ll|sans|dt|frv|nt|dyn|vst|lie|kqns|l|fde|ht|am|dkm|l|qdy|ksqk  
dsvel|dny|ina|l|kqmd|sqi  
dqqs|sm|qdt|gke|y|k|t|v|ken|ldk|l|rei|qs|qes|p|fs|kgmi|edyr|kq|l|tes|l|qde|l|ann|kd|l|qda|l|ns|ik|m|na|qfa|en|l  
ekq|l|hddi|v|kep|dt|dt|t|fi  
ynmskqdfi|aag|l|nede|ank|y|e|aiv|keak|ryk|neyn|l|kkp|laeh|in|l|tdy|dn|qva|qdt|ss|l|ind|gv|kv|q|rt|et|iks|nd|in  
q|l|t|vat|d|ph|fn|feg|di|kin  
gkkydi|kd|qsv|l|dts|nkey|kve|ngvak|l|kkda|ek|df|l|kdk|tm|h|q|l|l|fgq|an|rq|dep|nd|kk|ats|v|vd|t|l|nhn|l|dgr|l  
skda|l|sq|l|sals|rfd|ahy  
kmytd|tkg|red|kp|fdn|kr|li|dm|mv|dq|v|ind|mes|fk|ddk|vav|l|hq|ids|meens|dk|l|iddi|l|nnk|nt|tk|ned|isk|l|id|q|l  
envkkt|faeep|qep|ki|dkg  
kndef|ntm|ssn|l|dkei|sr|isek|stq|l|l|sdt|qes|ksi|adsv|sg|l|nq|vd|nnv|nk|l|hat|gra|l|gvr|and|l|nr|qma|knd|kdne  
l|fake|fk|kv|l|qns|kd|gdrq  
nqa|l|ka|fms|npv|qkkn|l|env|l|ann|gnt|dvi|spt|l|fv|l|my|l|l|smi|tayi|fysyer|akg|qm|fik|ddys|sknh|lwnn|vits  
gvig|ttg|l|veg|l|iv|gl|iam  
nkfhv|lagyr|akfi|l|mv|l|tm|mv|fv|l|inty|l|l|rqv|ksig|mf|l|miaa|l|gly|fvam|nnl|kaag|qgv|tnki|sp|l|syid|nm|ffn  
ylnaeh|pi|gl|vl|vl|tvlv  
iigfv|l|nm|fi|kh|fk|ker|li  
>tr|A8Z0Q3|A8Z0Q3\_STAAT  
mqyed|fk|l|iv|kyrg|vgnv|seh|vyn|l|vkk|h|svr|k|fkn|kp|l|sed|v|vkl|veag|qsast|ss|fl|qays|i|ig|id|dek|iken|l|re  
vsgq|pyv|vengyl|fv|fvid  
yyrhh|l|vd|qhaet|dmen|aygsteg|l|l|vga|idaa|l|vaeni|avta|edmgy|g|iv|fl|gs|l|rnd|verv|reil|dl|pdy|v|fpv|fgma  
vgep|addenga|akpr|l|pfd  
hvfhh|nky|had|ket|qyaq|mady|dqi|seyy|dqr|tngnr|ketws|qqiem|flgnkar|l|dm|leq|l|qksg|liqr  
>tr|A8Z0Q5|A8Z0Q5\_STAAT  
mltke|faqr|vel|sek|qvr|kiv|qh|leerg|yq|l|skteyrgreat|dfkeediel|fkdi|adkv|kqtnsy|dlaf|dele|eked|flq  
vivk|ndkn|l|p|tnq|nvaq|l  
ved|l|r|leiq|mreer|hl|l|gqmmn|qv|hqqqqe|l|kel|qnq|l|tsk|ids|nses|l|kai|qts|qea|iqea|qasqakalaestnkvek  
navted|kads|kdkv|agvn  
tstdakt|dtkaen|agdgtatkv|dkedqi|sate|aiekas|veqskndnaaetsnkeatvdaeaqhdaeqqvaeahaeaskqa  
tsnds|leakaend|stasqs  
emsep|kpq|eekkg|ffar|l|fn|l  
>tr|A8Z0R6|A8Z0R6\_STAAT  
mni|st|il|i|ifv|aleff|yimy|letiat|t|skkt|setfn|isvdk|l|kdkn|in|l|l|knqg|vyng|ligv|l|liyg|l|fiss|npkeic  
aailvy|iigvai|ygg|l|ssn  
isiffk|qgt|l|pv|la|l|ism|lw  
>tr|A8Z0S3|A8Z0S3\_STAAT  
mehttm|kmtai|akas|la|lgi|latgt|its|l|hqtvn|asehk|akyenv|tkdi|fd|l|rdyys|gaske|l|knvt|gyr|ysk|ggk|hyli  
fdknr|kftrv|qi|fgk|dier  
fkarkn|p|gl|di|fvv|ke|aen|rngtv|fsyggv|tkkn|qdayy|di|napr|fqikr|degdgiatygrv|hyiy|keeis|lkel|dfkl  
rqy|l|qn|fd|lyk|kfp|k|dsk  
ikvim|kdggyt|fel|nkk|l|qtnr|msd|vidgr|niek|eanir

Tsompanidou\_et\_al\_Supplemental\_FASTA\_File

>tr|A8Z0T4|A8Z0T4\_STAAT  
mkykterreamgy|krfalyisvmilifaiagcgknetkedskeeqikksfaitldmypiknedlydkegyrdsefkk  
gdkgmwtiytdfaksnkpg  
eldddegmvlndrnrtrtakghyfvttfyrngklpdeknykiemknnkiilldevkddklkqkienfkffgqyanlkelrk  
ynngdvsinenvpsydvey  
kmsnkdeivkelrsrynistekspilkmhidgd|kgssvgyrkleidfskrensklsvieflysykpack  
>tr|A8Z0T5|A8Z0T5\_STAAT  
mrylkklawfivsvilgifiigcdssstgekakedskeeqikksfaktldmypiknedlydkegyrdsefkkgdkgmw  
miytdfaksnkpgvldneg  
mjlndrnrtrtakgyyfvdtiydnhsysknyrvemknnkiilldkvedqklkerienfkffgqyadfs|ksynngdv  
sinsnpsydakfkmsnk  
envkqlrsryniptekapilkmhidgd|kgssvgykkleidfskeense|svvds|nfpakknkde  
>tr|A8Z0T7|A8Z0T7\_STAAT  
mksikriglcjllilsi|fvtscdgdnkitgdsketqikksfsktldmypiknedlydkegyrdgefkkgdkgmwtiyt  
dfakgnksdeldddegmvl  
lndrnrtrtakgyyfvkkfyekdklprknykvemknnkiilldkvedpn|kkrienfkffgqyanfk|lenynngdvsinw  
npsydveykmsnkdenk  
qlrsryniptdkapilkmhidgd|kgssvgyrkleidfskegrdisvidylsykpack  
>tr|A8Z0T8|A8Z0T8\_STAAT  
meylkr1allisvii|tifiimgcdsqsdtaenpkegskeaqikksfsktldmypiknedfygkegyrdgefkkddkgw  
lirseivkqpkgkvmktrg  
mqlyinrntetakgffv|keisenrvnkdkkekyevkmvgnkiipteqindekikkeienfkffvqygnfknfekynn  
gefsynpeapiysakyqlh  
nddynvrq|rkrydistketpk|llkggd|knssvgqndieftfverkgeniyfndsvefipsk  
>tr|A8Z0U2|A8Z0U2\_STAAT  
mmeyikkialymsv|llii|figgcnmkdeqkkeeqtnktdskeeqikksfaktldmypiknedlydkegyrdgefkk  
dkgtwt|l|tgfsksnkpgv  
l|dddegmvl|n|rnakkatgyyfvnkvyddi|sknhnekkyrvel|knnkiv|l|nvedkklkqkienfkffsqyadfk|kn  
yqdg|n|t|nenvpsy|eaqy  
kmnsdknvkkl|reiy|p|t|n|n|sp|nk|ly|dg|d|kg|ss|v|gy|k|k|e|y|k|f|s|k|d|k|g|q|e|t|l|r|d|y|l|n|f|g|p|s|e|g|e|n|v|e  
>tr|A8Z0U8|A8Z0U8\_STAAT  
mylql|t|v|g|t|mv|l|p|ff|in|v|n|k|r|k|t|t|c|p|s|p|m|d|k|m|q|i|s|a|l|s|k|l|s|h|f|r  
>tr|A8Z0U9|A8Z0U9\_STAAT  
msevnaainv|l|l|t|l|t|v|r|v|f|q|s|k|r|a|t|q|f|r|t|w|p|i|y|l|a|l|d|h|e|n|h  
>tr|A8Z0W2|A8Z0W2\_STAAT  
mskmikcvcl|veetadk|l|lvqvrnrekyyfpggk|eegesqvhallrevkeel|n|l|t|l|m|d|e|i|e|y|v|g|t|v|g|p|a|y|p|q|q|d|m|l  
te|ng|f|r|a|l|t|k|d|w|e|n|t|i  
nne|t|d|i|r|w|d|k|d|n|d|a|i|a|p|a|v|k|w|i|e|t|y|g|g|h|d|k  
>tr|A8Z0W5|A8Z0W5\_STAAT  
mflkyrn|l|f|t|k|p|f|n|i|l|g|l|f|c|i|a|f|i|g|i|l|f|t|f|n|e|n|f|y|n|k|p|i|g|i|i|d|v|k|h|v|s|t|p|t|k|d|a|q|n|r|d|i|k|y|k|n|q|l|k|v|k|i|l|n|g|q|f  
a|g|e|t|t|i|h|q|y|v|k|s|q|a|d|s|e  
a|f|r|t|h|e|k|v|l|h|i|s|n|k|p|s|d|a|y|i|e|k|k|r|d|t|l|t|v|i|t|g|l|l|t|v|l|l|v|g|r|k|v|g|l|q|s|i|l|s|i|l|n|s|i|a|i|i|a|i|y|i|h|i|q|h|s|n|i|n|l|f|l  
l|m|t|i|a|i|c|s|t|i|l|l|l|v|t|g|  
w|h|m|r|l|i|t|i|a|s|i|g|t|f|l|s|i|g|l|t|e|i|i|y|m|a|d|g|k|i|k|y|e|t|m|n|f|l|s|l|p|p|k|d|i|f|l|a|s|v|l|i|g|s|l|g|i|m|d|v|i|t|i|a|s|m|h|i|l|q|r  
t|p|h|i|m|r|r|w|a|l|a|g|r|n|i|g|g|d  
i|m|g|t|m|n|i|l|f|s|y|l|s|g|a|l|p|m|f|i|l|f|l|k|n|a|n|t|v|t|y|i|s|m|n|w|s|l|i|a|r|a|l|t|g|g|i|g|i|v|l|t|i|p|i|l|f|m|i|f|e|t|l|r|r|a|k|q  
>tr|A8Z0W7|A8Z0W7\_STAAT  
mhneklikglydyrehdacgifyanmdnkrshdiidkslem|lrr|ldhrggvgadgitgdgagimteipfaffkqhvt  
fdipgegeyavglffsker  
ilgsehevfkkyfegegl|silgyrnvpvnkdaiakhvadtmpviqqvfidi|rdiedvekr|flarkql|efystqcd|el  
yfts|srkt|ivykgw|l|rsd  
q|k|k|l|y|t|d|l|s|d|l|y|q|s|k|l|g|l|v|h|s|r|f|s|t|n|t|f|p|s|w|k|r|a|h|p|r|m|h|n|g|e|i|n|t|i|k|g|n|v|n|m|r|a|r|q|h|k|i|e|t|l|f|g|e|d|q|h|k|v|f|i  
v|d|e|g|s|d|s|i|v|d|n|a|l|e|f|l|s  
l|a|m|e|p|e|k|a|m|l|i|p|e|w|l|y|n|e|a|n|d|a|n|v|r|a|f|y|e|f|y|s|l|m|e|p|w|d|g|p|m|i|s|f|c|n|g|d|k|l|g|a|l|t|d|r|n|g|l|r|p|g|r|y|t|i|t|k|d|n|f|i|v|f|s  
s|e|v|g|v|d|v|p|e|s|n|v|a|f|k|g|q|l  
n|p|g|k|l|l|l|v|d|f|k|q|n|k|v|i|e|n|n|d|l|k|g|i|a|g|e|l|p|y|k|a|w|i|d|h|k|v|d|f|d|f|e|i|q|y|q|d|s|q|w|k|d|e|t|l|f|k|l|q|r|q|f|a|y|t|k|e|i|h|k|y|i|q|e|l  
v|e|g|k|k|d|p|i|g|a|m|g|y|d|i|a|v|  
l|n|e|r|p|e|s|l|f|n|y|f|k|q|l|f|a|q|v|t|n|p|i|d|a|y|r|e|i|v|t|s|e|l|s|y|l|g|g|e|g|n|l|a|p|d|e|t|v|l|d|r|i|q|l|k|r|p|v|l|n|e|s|h|l|a|i|d|q|h|f|k|l|y  
l|s|t|v|y|e|g|d|l|e|d|a|l|e|a|l|g|r|e  
a|v|n|a|v|k|q|g|a|q|i|l|v|l|d|d|s|g|l|v|d|s|n|g|f|a|m|p|l|l|i|a|s|h|v|h|q|l|i|k|a|d|l|r|m|s|t|l|v|a|k|s|e|t|r|e|v|h|h|v|a|c|l|l|a|y|g|a|i|v|p|y|l|a  
q|r|t|v|e|q|l|t|l|t|e|g|l|g|t|v|v|d  
n|v|k|t|y|t|d|v|l|s|e|g|v|i|k|m|a|m|g|i|s|t|v|q|s|y|q|g|a|q|i|f|e|i|g|l|s|h|d|v|i|d|r|y|f|t|g|t|q|s|k|l|s|g|i|s|i|d|i|a|e|n|k|a|r|q|s|d|d|n|y|l|a  
g|s|t|f|q|r|q|q|q|h|h|a|f|n|p|e|s  
i|f|l|q|h|a|c|k|e|n|d|y|a|q|f|k|a|y|s|e|a|v|n|k|r|t|d|h|i|r|h|l|e|f|k|a|c|t|p|i|d|i|d|q|v|e|p|v|s|d|i|v|k|r|f|n|t|g|a|m|s|y|g|i|s|a|e|h|e|t|l|a|q|a|m  
n|q|l|g|g|k|s|n|s|g|e|g|g|e|d|a|k|r|y  
e|v|q|v|d|g|s|n|k|v|s|i|k|q|v|a|s|r|f|g|v|t|s|d|y|l|q|h|a|k|i|q|i|k|v|a|q|g|a|k|p|g|e|g|g|q|l|p|g|t|k|v|p|w|i|a|k|r|g|s|t|p|g|i|g|i|s|p|p|h|h|i  
y|s|i|e|d|l|a|q|i|h|d|l|k|n|a|n|k|d  
a|i|a|v|k|l|v|s|k|t|g|v|g|i|a|s|g|v|a|k|a|f|a|d|k|i|v|i|s|g|y|d|g|g|t|g|a|s|p|k|t|i|q|h|a|g|v|p|w|i|g|l|a|e|h|t|l|k|l|n|d|l|r|s|r|v|k|l|e|t|d|g|k|l

Tsompanidou\_et\_al\_Supplemental\_FASTA\_File

ltgkdvayacalgaeeffgf  
ataplvvlgcimmrvchkdctcpvgvatqnkdrlalyrgkahhvvnmfhfiaqelreilaslgkkrvedlvgrtdllqrss  
tlkanskaasidvekl1cp  
fdgpntkeiqqnhnlehgfdltnlyevtkpyiaegrrytsftvneqrdvgvitgseiskqygeaglpentinvytng  
agqslaayapkglmihhtg  
dandyvgkglsggtvkvkapfeerqneiagnvsfygatsgkafingsagerfcirnsgvdvvvegigdhgleymtgghv  
inlgdvgknfgqgmssgia  
yvipsdveafvennqldt1sftkikhqeekafikqmlvehvshtnstraihvlkhfdriedvvvkvipkdyqlmmqkih  
hkslhdnedeamlaafydd  
sktidakhkpavvy  
>tr|A8Z0W9|A8Z0W9\_STAAT  
mavkredvkaivtaiaggkenleaathcvtrlr1vlkdeskvdkdalsnna1vkgqfkadhqyqivigpggtvdevyqfid  
etgaqeaskdeakqaaqk  
gnpvqrlikllgdfipilpaivtagllmginnlltmkg1fgpkaliemyppiadisniinviastafiflpaligwssm  
rvfggsplg1vlgli1mh  
pqlvsqydlakgniptwnlfgleikq1nyqqgvlpvliaayvlakiekgl1nkvvhdsikml1vvgpvallvtgflafiig  
pval1igtgitsgvtfifq  
hagwlggalygllyaplvitglhmf1lavdfqlmgss1ggtylpivaisnicqgsaafgawfvkyrrkmvkeeglalts  
cisgm1gvtepamfgvnlp  
1kypfiaaistscvlgaivgmnnv1gkvvggvpafisiqkefwpylivtaiaivvpciltivmshfskqkakeived  
>tr|A8Z0X6|A8Z0X6\_STAAT  
mnkmsafitfegpegsqkttvinevyhr1vkdydvimtrepvgvptgeeirkivlegndmdirteam1faasrreh1vlk  
vipalkegkvvlcdryids  
slayqgyargigveevralnefainglypdltiy1nvsaevreririknsrdqnr1dqed1kfhkviegyqei1hnesq  
rfksvnaadqplenvvedty  
qtiiky1leki  
>tr|A8Z0X9|A8Z0X9\_STAAT  
mpnviqvqfkgakleyytpndiqvdiwedvvveskrgieigivknp1mdiaeedvvlplkniiriaddkdidkfcner  
daenali1ckdivreggl  
mr1vnceytl1dkskvi1nftaddridfrklvki1aqh1ktrielrqigvrdeak11ggigpcgrs1ccstflgdfepvsi  
kmakdqnl1nptkisgac  
gr1mcc1kyendyyeevraq1pdigeaie1tpdgngkva1n1ldismqvk1egheqpleykleietmh  
>tr|A8Z0Y1|A8Z0Y1\_STAAT  
minqahsnsvii1neygl1dksetmhvsgfncv  
>tr|A8Z0Y5|A8Z0Y5\_STAAT  
maketfyt1tpiyypsgn1highaystvagdviarykrmqgydvry1tgtdehgqkiqekaqksgkteieyldemiagik  
qlwakleisnddfirttee  
rhkhvveqvfer11kqgd1y1geyegwysvpdetytesqlvdpqyengki1ggkspdsghel1vkeesyffniskytd  
r1lefydqnpdfiqppsrk  
neminnfikpg1adlavsrt1fnwgvhvp1nkhvvywida1vnyisa1gy1sddes1fnkywpadihlmakeivrfhs  
iiwpi1lmal1d1p1pkkvf  
ahgwi1mkdgkmskskgnvvd1pni1idrygl1datryy1mrel1pfgsdgvftpeafvertnfd1and1gn1vnr1tismvnk  
yfdge1payqgplhelde  
meama1etvksytesmes1qfsval1stvkwf1srtnkyid1ettpw1akddsqkdm1gnvmah1ven1ryaav11rpf1t  
hapkeifeq1ni1nnpqfme  
fss1leqygv1nes1imvtgqpkpi1fpr1dseae1ayikesmqppatkeek1eipsk1pqi1dikdfkveikaati1daehvk  
ksdk11ki1qvdl1dseqrqi  
vsgiakfyt1pddi1gkkvavvtn1kpak1mgqksegm1saekdgv1tl1vs1psaipngavik  
>tr|A8Z0Z4|A8Z0Z4\_STAAT  
mahtit1v1g1n1y1g1idd1p1l1gi1y1k1f1kt1q1dk1vy1art1dh1pv1es1l1q1de1lt1fs1fd1h1v1eah1n1q1fed1vy1id1iva1q1l1ve1aan  
ek1di1vy1av1p1gh1pr1va1ett1t  
vk1l1al1ak1d1nt1did1vk1v1lg1g1ks1fid1dv1feav1nvd1pnd1gft1l1dats1l1qevt1nvr1tht1lit1qvys1am1vaan1kit1l1mery  
pddyp1qv1it1gars1dg1adn  
vvtc1plye1ld1den1af1nn1tsv1fv1pki1t1sty1yh1df1d1fate1vid1t1l1vded1kg1cp1wd1kv1q1thet1lkry1l1eet1fel1fea1i  
d1ned1d1wh1mie1e1lg1di1l1qv  
11hts1ig1k1ke1gy1id1ike1v1ts1nak1mi1rrh1phi1fg1dana1et1idd1l1kei1wsk1ak1da1eg1k1q1pr1v1ife1kv1fa1eh1f1n1lye1k1tk  
dks1f1dea1al1k1qw1lek1gesn  
t  
>tr|A8Z0Z9|A8Z0Z9\_STAAT  
mlcetei1ink1npkyrv1kyd1dey1mvd1vir1tw1lv1yff1p1fin1w1fip1krc1akis1reey1ek1ntv1kpv1kn1kn1fwp1vvg1gt1ll  
gatsrkyih1llni1q1lekr1s  
vif1ic1fv1v1fl1ci1l1iff1v1lnr1kl1k1kv1fd1nk1kee1qki1ilv1pt1kn1av1lily1gy1ll1igg1ms1il1als1ml1t1len1qn1lit1fia  
wgm1gl1ml1ff1l1mni1t1liv1nk  
tvkvikr  
>tr|A8Z104|A8Z104\_STAAT  
mieigs1ay1ngg1sk1kyn1hil1ngenr  
>tr|A8Z105|A8Z105\_STAAT  
m1l1cdvr1vi1ykn1pky1kvi1qh1ngey1l1vd1lv1st1wf1vy1ff1p1fin1w1fip1kky1ai1isee1fen1nvv1kpn1knn1v1fws1vig1ss1v1

Tsompanidou\_et\_al\_Supplemental\_FASTA\_File

fgvtlrkyihvfdvqldkl  
vvmilcalalicvivfyfnlnrkklkvfdtnieknkrviliptfklgclvfygifyagsfsifslialmtiepqniif  
iywimtmffl1nmtsigt  
nekvrvimknn  
>tr|A8Z119|A8Z119\_STAAT  
mkksliafilifmlvlsccgmkdndkqgsndngsskspsyhrivsmpnteilyelglgkyivgvstvdypkdvkkgkk  
qfdalnlnkeellkakpdl  
ilahesqkatankvlsslekqgikvvyvkdasidetantfkgigklthhdkqaeqlveetkdnidkvidsipahhkkk  
vfiesskpeiytagkhtf  
fndmlekleaqnvsdingwnpvtkesiikknpdilisteaktrsdyndiikkrqgfnkinavkntrievngdevsrpg  
prideglkelrdaiyrk  
>tr|A8Z124|A8Z124\_STAAT  
mfhfkglpnrindkilteniedyfnhkglsphliddikekvidtiknsekkdqdyieykrkspaqiilmiqnlfalqm  
npviffiinfilisylydk  
qyvqfqaigtmslfyvlvfpmtivvylrvsqknylrsnkienimgtiaaisllilqafnitwgvipitnfhghqfff  
figiilviagifykrlefs  
gigllfcqktvdamihnpqsaqifslilwllvlyvlyftirlsrrl  
>tr|A8Z128|A8Z128\_STAAT  
mrrwfvllglvllsacgqkydkeidevtklekesiqdvkntkkyknversksyykiyndgeviimtympfkdsntkvs  
rvykinqtsdkyeedsnid  
aekfekdnkpveennmkk  
>tr|A8Z130|A8Z130\_STAAT  
mvnkdiakkvigktpigvklklakviiilcvaffifpviimflapdlngkddagctvsqgnvsangidkfnenakg  
gklegkgeikqiaeknk  
pvniamaiaesqwgkenatrqnnplsvmgsksihdstyptiedglagaknlydvyiskgltdpkkigpkyapvgas  
ndpnmnarwiptvekimk  
dlggseaktscsngkgsikfngklphwsnddpkgknytagqctwyaygmqrqmgkpvstywhdahkwndrakaegykv  
dknpepgalfjaeqgaggh  
dghyghvavvigsdggktfritemwegafkvnertlkmtdgysfihde  
>tr|A8Z131|A8Z131\_STAAT  
mkhksvylcfliilpiltsvsayavsnpvgepshavkpkiekydlshyrsiysekgdwnpfgqeeisrqinnvsdfff  
smtkilagvtdyaieulfq  
ldvindfadkigdfvgdiyqkllsnlaltlfiivcfnafiifsvqgnarealkraflimcligfgvgilanagnirgtn  
nigkdlnnimnstssidg  
nidyhensgmhnrnqlfdmtiyrtylvnnygtvdekeikakgkdrnidnklldyddksekelddivkdevekknkym  
tqgyvfqklaisvigfiit  
lfmsivflsisfaklifestfalflflvswivsfipgfeldsvsafaktlgyiilsacmtflfvivglciklansfie  
pdsqayflnsifiivilf  
vmykkraqiinfvsrgnisfspaigagvmnrqtqerfnkierheqaqkkakrenqrdepapplqndndlrrrqdkpmp  
finkdnqkngkrreqges  
mngndvksasvesnannyskqpqkasqqehqvretqrkdiqrspqvvnqplnnenhsinrkeqksvqtaytdvqkrqi  
qnatqngqsrqsgnrnqpi  
trnsqskdrleqkdinkhgk  
>tr|A8Z132|A8Z132\_STAAT  
mamneialfkgvrippyqkyidmfmasvlfafivlyriylfidyksenklldiltlfayfkphllylligtaiifvick  
liaqflirfktklaemie  
tqgfhnrtvikktteyipidykqteydyptmfykrkksfvihikkdgsrfqnyleletiepmfnselvekkihgyr  
lyefmpkykkrivmnge  
gesntifydtkiaithqitwdfvkapghlvtgittggktyflfyvirelfrhsevrlldpkvsdlsfmkrvigddkvad  
tkgqilkqlreannemeer  
frlmdssdykigndfrnfdmryfiifdevtaftstldkkelqemndyliniimkgrqagvfmfltaqrpdadvikgnv  
rdqglrvslgnlsndgyr  
mtfgqtdkefqtihdsdigryisilgqynepilfdaplmeqydfvedvkqilnke  
>tr|A8Z136|A8Z136\_STAAT  
mkiiskyiltrfsgkghfdipkeqrrvipkfnrrkmivicfysllailllllasfikatranndskeavnktnmiqk  
kyednantvqyspklllya  
dkfidtymniskdskelesrekelkyfpsydkpdekisderklnskefynikrkdktiiqiyvnydvnitekkevk  
vkkkksekdkdeyetkte  
ekqrkvngnilinipiksenkyvvveypyftpi pdsqlnqakmvednlkdnkrednppakafiedffnkyassksddma  
ylmdnpeglegtrevsqir  
eirlypkgddyvakveilmkdksplnlhytlditkkgkgyvknmtsigg  
>tr|A8Z137|A8Z137\_STAAT  
mtlknqctplnrgvertnksaveavdvqvtfhiapisaviedviglpitlfkkrnsgiyfyngyefsniklyssd  
desmgihlqltgtgcrefe  
hhlqqlnktwqdfdkclsvanftridiaidkytklvpllikkaekaecvsrfragsaingfnlsdgrskgatfyig  
skqsnlycrfyeknyeaf  
krhcdvediglwryeiwrmkayavncakvlsrtdniseivksilhnlnrfispkkgndknkrwplyrpalfikdte  
klnlttrptlksiednlw

Tsompanidou\_et\_al\_Supplemental\_FASTA\_File

lckqvattldtvtaesmaqseglltdtdfldkilahsqfndehtnrinhylealkqkklhskdkc  
>tr|A8Z153|A8Z153\_STAAT  
mlfvehlftyqflnralitsiivgvcgtvgsliivrglsimgdamshavlpqvalsflfgipmfvgalitgmiasifi  
gyitsssktkpdaaigisf  
taflasgiiiiislintttldlyhilfgnllaitnsafllttivigsivliliiifyrplmistfdptfstrmsglnttllhyf  
vmlllslvtvasiqtvgi  
lvvallitpastafliiskkllysmmiaslisvissivglyysiynipsgativlctfviyitlfftkftrkkrslt  
>tr|A8Z163|A8Z163\_STAAT  
mknllisiiiiiclltsimtpyaqatnsdvtpvqaanqygyaglsaayeptsavnvsqtgqlllyqynidtkwnpasmtklm  
tmylteleavnkgqlslddt  
vtmtnkeyimstlpelstnklypgqvwtiadllqitvsnsnaaalilakkvskntsdfvdlmnkakaigmknthfvnp  
tgaensrlrtfaptkykdq  
ertvttardyaihdlhviketpkildftkqlaptthavtyytfnfslegakmslpogtdglktgssdtanyhntittkrk  
frinqvimgagdyknlgge  
kqrmngnalmersfdqkyvkilskgeqringkkyvendlydvlpsdfskkdyklvvedgkvhadyprefinkdygpp  
tvevhqpiiikantvaksm  
weehplftiiggtclvagalivhmiinrlfrkrk  
>tr|A8Z185|A8Z185\_STAAT  
mfskklkdkfmvqleemvfnldraaiefgkmdfnthldlkaysdniktyeshgdelvqhvitdlnqtfittpieredilslc  
daiddvldaieetaamfem  
ysieydeymaefvndniqkavaemklavglldvdkksymrihsinikefetncdgilrqsikhifnsetdpitlikikdi  
yesmeeiadkqcqivannfe  
tiimkns  
>tr|A8Z189|A8Z189\_STAAT  
maekfkiiimtealslyiwgcniIntekletllgfykqykalseyidkkyklslnlavldlrmkhckdekvlmqsfllkta  
mde1d1srtkllvsirrl  
ekerlskvrsskderkiyiylnddi skfnal fedveqflni  
>tr|A8Z194|A8Z194\_STAAT  
mki edyrllitldetktrkaaeilyisqpavtqrkai enafgvdi firtkqlitttegtmii ehardmlkrerlffd  
kmqahigevngtisigcss  
ligqtllpevsllynaqfpnveiqvqvgsteqikanhrdyhvmi trgnkvmnlanthlfnddhyfi fpknrrddvtklpf  
iefqadpiyinqikewynd  
nleqdyhatitvdqvatickemlisvgvtilpeimmkniskeqfefekveidneplirstfmsydpsmlqlpqvdsfvnl  
masfveqpk  
>tr|A8Z195|A8Z195\_STAAT  
mvanaptakeplinklkgdkgiql danapta  
>tr|A8Z1B8|A8Z1B8\_STAAT  
mknkllvls1galcvsqiwesnrasavvsgeknpyvseslkltnknksrtveeykkslddliwsfpnl dnerfdnpeyk  
eamkkyqqrmaedealkk  
ffsekkikngntdndylglsheryesvntllkkqseeflkeiedikkdnpe1kdfneeeq1kcdlelnklenqilm1g  
ktfyqnyrddveslyskld  
limgykdeerankkavnkrmlenkkedletideffs didktrpnnipvledkqeeknhknmaqlksdteaaksdeskr  
skrskrs1ntqnhkpasqe  
vseqkaeydkraerkarflndnqikktpvvsleydfekqridnendkklvsaptkkptspttytettttqvpmpptve  
rqtqqqi iynapq lagln  
geshfttthqspttsnhthnnvfeetsal pgrksgslvgisqidssh1terekrvikrehvreaqklvdnykdthsy  
kdrinaqqkvntl seghqk  
rfnkqinkvyngk  
>tr|A8Z1C1|A8Z1C1\_STAAT  
mteyllsagici maisilligmaisnsvskgqykrffyfatclvl1tlvvvsslssanasqtdngvnrsgsedptvysa  
tstkk1hkepatlikaidg  
dtvklmykgqpmtrllvdtpetkhpkkgvekygpeasaftkkmvenakkievefdkgqrtdkygrglayiyadgkmvn  
ealvrqglakvayvykpnn  
theqllrkseaqakkeklniw sednadsgq  
>tr|A8Z1C9|A8Z1C9\_STAAT  
mlllaktlyimrhgqtlfnfkgliqgfgdsp1telgiaaqakarsyyetkginfdlyasstqerasdtlenvapnqsyqr  
fkg1kewhfgifegesvy1  
fdnlykped1fgdrivpfkgearqqveerivktlhdimsqtknna1vvshgtimgvflryclkldealkhnigncni1kf  
eydngt1kfvelidpn1  
>tr|A8Z1D2|A8Z1D2\_STAAT  
mmtkvqsfsvkycqkfqsriekitnqkflvgkfefyvfninne  
>tr|A8Z1E1|A8Z1E1\_STAAT  
mifsqnlfrprtptcivcrnwesnfsllgpipnlhc1  
>tr|A8Z1E2|A8Z1E2\_STAAT  
mlgpltriexllqahfrsvnycqynfvehrtliyvpacfhkpp1mci  
>tr|A8Z1F0|A8Z1F0\_STAAT  
mnik1frv1tvs1ffftflknn1ayadvgin1rnfytnyqpet1qgvssgnfstshqleyidgkytlysqfhneyeakr  
1kdhkvdi fgisysglcnt



Tsompanidou\_et\_al\_Supplemental\_FASTA\_File

kymyggitlanqnldkprnipinlvwngkqntistdevstqkkevtaqeidiklrkylqneyniygfnkttkkqgeygyqs  
kfnsqfngkkitfhlntet  
sftydlfytgtggaesflkiyndnktidaenfhldveisyekte  
>tr|A8Z1F2|A8Z1F2\_STAAT  
mrtndeitiiktsmkeqnmsslsearrvgvaksavsrylnltrefpInraedfakvlgikteyllgfaereestkqdti  
aahldgdfteeeleirky  
aelvrkahrng  
>tr|A8Z1F3|A8Z1F3\_STAAT  
mvlNlkr1raeriacgitqdemahkmgwktrtpyakrengivdiganeфикmakilgyetnndiffnnpvgkerkni1  
kgge1nv  
>tr|A8Z1F5|A8Z1F5\_STAAT  
mdvggkamkmyltyiclvs11ti111aisnmyvafsvygmmytygnltgeittcknk111kqk  
>tr|A8Z1F6|A8Z1F6\_STAAT  
mqkqviiikttvvgwynikdtqhn1m1nippkvfeqyfpdvskdvqvac1emd1skiteiknkkkvgs  
>tr|A8Z1G2|A8Z1G2\_STAAT  
mkefkeqfyq1snfddmdikgyanlyqkdigkdvsmieqglkq1sitetev11peqink11lgvlnmnevnsntwvg  
t1tkq1vssennfnigelp  
tarkevfkellvnce1pqs1revititddehvesips1tyikdklatngiels1ngsskyfdrreghiytevsdsvvhgs  
drt1dd11keifinecvay  
ett111dknssglidkgnqdl1slyngqikevsnts1ydgikqamkdipqtfrnrvsivmtehdhkl1kelaqmg1gg1  
agd1sn1fnvtnvvvtdda  
hdvfvqdfghaiyakyepimynkkkqa1kgyqfalnyvfdikiipe11rivnik  
>tr|A8Z1G3|A8Z1G3\_STAAT  
mvsdfesndkitevel1mhynpkvinskikamrsqieslyh1nmhv1tndndmlsvsvsyp1dk1vly1ieekdkleyym  
ktaqdr1n1fkniiknyse  
neqqdvmyml1ssgkvknegvier1kvdiykesrkrqerqnrqee1hriefnkh1eqvkke1s  
>tr|A8Z1G4|A8Z1G4\_STAAT  
mkpfeshnkq1k1lrrrgmevpssakrd1enenyni1ngykdl1f1eldvngn1lvpdkyqgthfkevfslyk1drkfr  
nv1ley11vfethiksris  
yyfsekyrephsly1fknyssdtsktdsivkmvatfssvmsnrknkplkhyinthngvplwilvny1t1gnvskmysn1d  
dd1r1evakdykrk1erdy  
ktrvqitpsdvs1lqqahmfrnvcaheerlydykidraksrani1fanynk1ydkeyvptmngsyvfd11is1cl1flnk1h  
dyik1mknmdk1isnyshs  
fytitiddlytkmnpdqtk1ldm1  
>tr|A8Z1G7|A8Z1G7\_STAAT  
mqqfkwin1lkgfamgtsdlvpvgvsggtia11lgiynqfiasisgifsrrfwsftflipi1igml1amgs1sn1fny11  
sqhhiptmffffggl1iigym  
pyllk1snyktsfttkhymviagia1livit1lmngdkhaget1t1st1s1iikyfiagmcassam1lpgisgsfm1lvf  
gyygtvmlaisevkl1nfa  
glp1llavgfgvlagfi1sski1qyfl1thk1mtfali1gfvvgs1favfpg1ptnivmwfvslvvfi1gfvsl1t1gri  
taene  
>tr|A8Z1H0|A8Z1H0\_STAAT  
msvrplhsrpflnknph1ntdv1vlyqyrqsisitnfyfqnii  
>tr|A8Z1H6|A8Z1H6\_STAAT  
m1ia1i1ilifisffffsgsetal1taanktkfktheadkgdkkakg1v1lekpsefitt1lignvan1l1pt1vtimalrw  
gisvgiasav1tvvii1is  
evipksvaatfpdkitr1lvy1i1nicv1vfrpit111nk1tds1nrs1skgqpqehqfskeefk1mla1aghegalneie  
tsr1legvinfen1kvkdvdy  
t1prinvtafasnatv1rs1n1k1y1etvmnkpytry1pvyegdidni1g1vfhsky1l1awsn1k1enq1t1nysakp1fvnehnkaewv  
1rkmt1srkh1aiv1defg  
gteaivshed1iee1lgme1iedemdkkekek1sqqqiqfqrknrvsi  
>tr|A8Z1H8|A8Z1H8\_STAAT  
mastkimfggacafvdcgr1f1hd1in1ldiy1ghdgvvgmrcc  
>tr|A8Z1K3|A8Z1K3\_STAAT  
mierkrkhfnkefaksn1s1nnekwkvcskskhffkks  
>tr|A8Z1L4|A8Z1L4\_STAAT  
myvmkkailsvsnktgivefakaltq1nyelystggtkr1ldeanvpvrsvsdl1thfpeimdgvrvt1hpavhggiladr  
nkpqhlne1seqhid1idm  
vvvn1lypfqqtvanp1dvtmdeaieni1dig1gptm1raaaknykhvttivhpadyqev1tr1rnds1desyrqslmikvfeh  
taeydeaiv1rffk1gdket1  
rygenpqqsayfv1rtsnakhtiagak1l1hgkq1synnikdadat1alvkkfdtpatvavkhmnp1cgv1g1gdtieqafqha  
yeadsqsi1fggiva1nrav  
tpe1laeq1hsif1levi1apkftdea1d1lkqkknvr1le1dmt1dsneeefsvsvsggy1vqdkdnyvvpkeemkvvteva  
ptdeqweam1lgkwvpsv  
ksnai1snnkqtv1g1gagqmnrvgaakialeraieindhvalvsdgffpmgdtvelaaqhgikai1qpsgsikdqsid  
mankhgiamvvtgtrhfk1h  
>tr|A8Z1M3|A8Z1M3\_STAAT  
msk1likgiaasdgvaia1kay1l1vepd1tfdknekvt1dvegevakfnsaieaskveltkirnaevq1lgadkaaifdah11

Tsompanidou\_et\_al\_Supplemental\_FASTA\_File

vlddpeliqpiqdkiknen  
anaataldvttqfvtifesmndneymkeraadirvskrvlshilgvelpnpsmidesvvivgndltpsdaqlnkefvq  
gfatniggrtshsaimsrs  
leipavgtksitqevkqgdmiivdglngdvvnptedeliayqdkreryfadkkelqklrdadtvtvdgvhaelaanig  
tpndlpvgviengaggigly  
rtfelymgrdqmpteeeeqfeaykeveamggkrvvvrtldiggdke lsylnlpeempflgyairlcllaqqdifrpqlr  
allrasvygklnimfpmva  
tinefreakailleekenlkneghdissdie l gimveipataaladvfakevdfsigtndliqytlaadrmservsly  
qpynpsilrlvkqvieash  
kegkwtgmcgemagdetaiplllglgldefsmatsil karrqingl sknemtelanravdcatqeevie l vnnyvk  
>tr|A8Z1N0|A8Z1N0\_STAAT  
mndmmnlvinqiviklhyrddwnefididsntillgltin  
>tr|A8Z1P3|A8Z1P3\_STAAT  
mliiryngfhngfifnfvvlgmferlnrhkyle  
>tr|A8Z1P9|A8Z1P9\_STAAT  
mkqikkllvanrgei airi fraaaeldistvaiysnedksslhrykadesylvgd l gpaesyl nieri idvakqanvda  
ihpgygf l senegfarrca  
eegtkfignhleh l dmfgdkvkarttaikadlpvipgt dgpiksyelakefaeeagfplmikatsggggkgm rivreese  
ledafhrakseae ksfngs  
evyieri yidnpkhi evqigdehgnivhlferdcsvqrrhqkvvevapsvglss l r qricdaaiqlmenikyvnagtve  
flvsgdefffi evnprvqv  
ehtitemvtgidivktqilvaagad l fgee inmpqqkdittlgyaiqcritt edplndfmpdtgttiayrssggfgvrld  
agdgfggaeispyydsllv  
klstha isfkqaekmvrslremri rgvkt niplinvmknkkftsgdyttkfi eetpel f niqps l drgktleyignv  
tingfnpvekrpkpdyela  
siptvsskiasfsgtkqldevgpkvaewkkqddvlltdttfrdahqsl l atrvrtkminiasktadvfdgfsle  
mwggatfdvaynflkenpw  
erlerl rkaipnvlfqmllrasnavgyknydpnvihkfvesakagidvfri f dslnwvdqmkvaneavqeagkisegti  
cytgdi lnpersniytley  
yvk l akel eregfhi laikdmagllkpaayel igelksavdlpihlhthdtsnglltykqidagvdi idtavasmg  
ltsqpsanslyalngfpr  
hlrt die gmes lshywstvrtyysdfesdikspntei yqhempggqysnl sqaks l glgerfdevkmyrrvnflfgdi  
vkvt psskvvgdmal ymvq  
nd l deqsvi tdgykl d f pesvvs f f kge igqpvn gfnkd l qavil kgqeal tarpgeylepvdfekvrelleeeqqgpvt  
eqdi isylypkvyeqyiq  
trngygnlsl l dtptfffgmrngetveieidkgrliiketisepdengnr tiyyamngqarriyikden vhtnanvkp  
kadksnpshigaqmpgsvt  
evkvs vgetvkanqpl l i teamkmettiqapfdgvikqvtvnngdtiatgdllieiekatd  
>tr|A8Z1Q7|A8Z1Q7\_STAAT  
mrviagkhkskalesmegrntrptmdkvkegifslydvsgigld l f agsgalgieal srgmdkvi fvdqnfkavkviks  
nlanldlea qsevyknnad  
ralka lskrdiqfdvif l dppynkg lidka l k l isefnllkengi ivcefsnheeidyqpfnmikryhygltdtlllekge  
>tr|A8Z1R3|A8Z1R3\_STAAT  
mriikyltilvisvvi l tscqssssqestksgefri vpttval tmtldkl d l pivgkptsykt l p nrykdvpeigqpmep  
nveavkk l kpthvlsvsti  
kdemqpfyk l nmkgyfydfds l kgmqksitq l gdqfnrkaqake l ndhl nsvkqkienkaakqkkhpkv l ilmgvpgsy  
l vatdksyigdlvkiagge  
nvikvkdrqyissnten l ninpdi l r l phgmpeevkkmfqekfkqndiwhfkavknnhv ydleevpfgitanvdadk  
amtqlydlfykdkk  
>tr|A8Z1R4|A8Z1R4\_STAAT  
miknkkkl l flcl l viliatayisfvgtik l sfnd l ftkfttgsneavdsi idl r l pri l i almvgam l avsgallqaa  
l qnplaeani igvssgali  
mralcm l fipqlyfy l pl l sfigg l ipfl i i l l hskfrfnavsmilvgvalfv l l ngvleil t qnplmkipqgl t mkiw  
sdvyilavsallgliltl l  
l spk l n l n l ddiqarsigfnidryrwl t g l l avflasatvaivgqlaflgiivphvvrklvggnyrvlipfstvigawl  
llvad l l grviqppleipa  
nailmi vggpmli y l i cqsqrnri  
>tr|A8Z1R7|A8Z1R7\_STAAT  
mkkkrinndi l grmiysss idkrn l yn l kyeye  
>tr|A8Z1S1|A8Z1S1\_STAAT  
mkgftqmanivfkl s d k d i t t l m s r i s f d t e n l p q g m k a r a k y q n t t v n i y q s g k v m f q g n h a e a v s e l l p q h s q l n t n  
k t k k k n m a n s f l e q t l m y d  
q f n c i g s d e a g s g d y f g p l t v c a a f v t k e h v p i k t l g v d d s k k l t d t k i v e l a e q l v t f i p h s l l t l h n e k y n i q q a k g  
w t q v k m k a a l h n e a i k n v l  
e k i d s s q l d y i v i d q f a k r e v y s h y a l s d i p l p k k t k f e t k g e s k l a i a v a s i s r y a f v t y m d q i s k n i n m t i p k g a g  
a k v d v i a a k i i k k y g l s r l  
d t i s k k h f k n r e a q k i l k p l

Tsompanidou\_et\_al\_Supplemental\_FASTA\_File

>tr|A8Z1T3|A8Z1T3\_STAAT  
mkeiviasnnggkndfkvipdyhvigselipdfdveetgstfeenailkseaakaanktviaddsglevfalngep  
giysarydgenksdeanie  
kllnklgnnttdrraqfvcvismsgpdmekvfkgtvsgeiadgkygengfgydpi fyvpkldkmaqkskeqkgqishrr  
nainllqaflegdknv  
>tr|A8Z1U0|A8Z1U0\_STAAT  
mknkliaksl1tlaaigittttastadasegygprekkpvsinhniveyndgtfkyqsrpkfnstpkyyikfkhdynile  
fndgtfeygarpqfnkpaa  
ktdatikkeqkligaqnlvrefekthtsahrkaqkavn1vsfeykvkkmvlqeridnvlkqglvk  
>tr|A8Z1U2|A8Z1U2\_STAAT  
mnkhinkkaaklledykkvqqrsketdrgclksvimlivlffliifgivacstvnfffq  
>tr|A8Z1Y1|A8Z1Y1\_STAAT  
mnqfkeiyntiekllndksisnyrinqtdtdvsyggiselrsgkrkvnnltletaeklynyqkqleimied  
>tr|A8Z1Y6|A8Z1Y6\_STAAT  
matfkrkknkkqdli1lrhealehylmkynfnnydyahkivskkydysifikkkvd  
>tr|A8Z1Z2|A8Z1Z2\_STAAT  
milimldsqliqdnvtakelesfkelveefesiekakknsnsdkd  
>tr|A8Z1Z7|A8Z1Z7\_STAAT  
mclvs1vvikaqkiap1slylcrkdaiivkq  
>tr|A8Z201|A8Z201\_STAAT  
miqisninksfnkrvc1knisfdieqgkcialigkngagkstlidilignvnansgeifdkdkllqsenrsimfqktmpf  
dq1kvieeinlyqsfyenp  
lpleeieitkfdssqlnqfvn1sggqqr1ldfv1sligqpql1ldeptstmdieireyfwsiienlkednrtilyts  
hyeevermsdkii1ieng  
eii1ndstshirtnqqsqit1sdeyirk1k1dkdd1viqknhngtikikiitsvndtilylqq1hin1ddieiqksivds  
yfnnkkqrgsnydtk1len  
ri  
>tr|A8Z203|A8Z203\_STAAT  
mkf1kdsiaeissivylifpiagiffnevygpkwlyiisvivfslsylvivnrlntlmfyilliihyfiicyfvfs  
vhpmlslfffyafavpft  
fknnvkkatn1filmiictiityllynnyfvammvyvvislim1dnfkkmkneyqkeiaeknrhintliaeqerhr  
igqdlhdt1ghvfas1sk  
selayklidadvkvkaellaink1sres1nkvreiiddvklpsfieeidsirkv1kdadidftfenkelaqvlspkqs  
mlvmitreainnvikhana  
skvhgk1ktvnnhk1l1mi1eddgk1dsdcevksisqrqhlngt1avdstngtkiieistggia  
>tr|A8Z221|A8Z221\_STAAT  
miysiteiearyaetdkmgv1yhgnyatwfevar1dyisk1gfsyadmekqgiispvtd1nvnykksifypekvvkktwv  
ekysr1rsvykyeifnekq  
elattgstelicikedtfkpir1dryfpdwheayskvqt1nnegktveimdgids1  
>tr|A8Z226|A8Z226\_STAAT  
mnhvpsik1driepsvnieihhhflyntrdly  
>tr|A8Z229|A8Z229\_STAAT  
mkkgl1npk1sv1hgrfvtkgicmvs1mlv1lhkwtvfiqhlml1sggesiie  
>tr|A8Z236|A8Z236\_STAAT  
mynyh1ledrdv1cidqksffasvsciekgl1dpletklavvadtkrqgsvilaatpk1kelgiktgsr1feiphrndiyi  
inpsmrkyl1nsvaiskia  
lryipped1hqysideffmdvtdsyhrfsstvhafcer1kreiyeetgiyctvgigsnml1skiamdveakhsqngiaew  
ryqdvptk1wp1qplrdfw  
ginrrteak1nkrqif1tgd1akypyk1k1kefgilgvdm1hangidqskvrekhhisnpsicksqil1mrdyh1fdeakv  
vmqeliedvasrvrarkkv  
artihfafgysdeggvhkqyt1kdptn1ekdiyvmmhfadk1cnkqalyrt1sis1sqfinederq1s1fedeyqrkrd  
e1aktidq1h1kygkgiv  
skavsfteagtkhgr1glmaghkm  
>tr|A8Z237|A8Z237\_STAAT  
mttv1fvgl1g1g1g1slasnkyhnpntni1aydadtsq1dkaksigi1nek1nyseaikkadviiyatpvaitnky1se  
1idmptkpgv1vsdtgstk  
amiqqhecn1lkhni1h1vsghpmagshksgv1nakkh1fenayy1lvynepneqaant1kellsp1lakfivttae1hd  
yvtsvsh1phivass1vh  
vsqkngqehh1vnk1laaggfrdi1triassnaqmwkdit1snkty1lemir1k1sqfqdler1liesndsek1l1sffaqs  
yrdalpak1q1g1ntayd1  
yvdipdesgm1skvtyi1sl1hnisisn1rilevrediygalkisfknptdrergma1sdfdcyiq  
>tr|A8Z241|A8Z241\_STAAT  
mktmt1l1triktet1l1lesdikelidil1spisigtdikyell1ssysereiqqeltyivrs1intmyphqpcyegamcvc  
gtggdksnsfn1sttvafv  
vasagvkv1khgnksitsnsgstd1l1nqmniqt1ttvddtpnq1nekdlvfigatesypimkymqpvrmigmkptil1nvg  
pl1npyh1tyqvmgvfdpt  
k1k1vaktik1d1grkraiv1hgangmdeat1sgdn1liye1tedgeikny1t1natdyg1k1hapnsdfkgspeen1ais1n  
i1ngkdqssrrdv1l1nag

Tsompanidou\_et\_al\_Supplemental\_FASTA\_File

1slyvaekvdtiaegielattlidngealekyhqmrge  
>tr|A8Z246|A8Z246\_STAAT  
mkftnl takefgaftdmpyshftqtvghyelklaegyethlvgiknnneviaac1ltavpvmkvfkyfysnrgpvidy  
enqelvhffffnel skyvkk  
hrclylhidylypyqylndgeitgnagnwffdkmsnl gfehtgfhkqfdpvlqiryhsvlldkdtaddiiknmdglr  
krntkkvkkngvkrflse  
eelpi frsmedtseskafadrddkfyynrlkykdrvlpvlayinfdeyikelneerdi lnkdlnkalkdi krpenkk  
ahnkrndlqqql daneqki  
eegkr1qeehgnelpisagffffinpfvvyaggt снаfrhfagsyavqweminya lnhgidrynfgyvsgkftedaeda  
gvvkfkkgyanaeiieyvgd  
fikpinkpvyaytal kkvkdri f  
>tr|A8Z251|A8Z251\_STAAT  
mmslidiqnl tikntsekslikigidlki fsqqinaligesgagksliakalleylpfdlsctydsyqfdgenvsrlsqyy  
ghtigysqnyaesfndht  
klgkqltaiyrkhykgskealskvdkalswnlqskdilnkysfqlsggqlervyiasvlmlepkliaadevasl dal  
ngnqvmdllqhvlehgg  
lfiithnlshvlkycqiyv1kegqiergninhfkyehlhpyterlikyrtqlkrdyd  
>tr|A8Z252|A8Z252\_STAAT  
mhkifsknnliffvfavifvvi1qffvssenatkvnlstqfepiswlhllgtddygrdlftriiigarstlfvtvltl  
iaivvigvtlg1fagykkq  
wierlv1rfidvgl sipefiimialasffqpslwnlvisitlikwmnytr1rsivnsemnkyikmaqlfhpvtrtili  
rhltpkiipaiivlmvvd f  
gkiilyisslsfiglgaqppptewgamlqqgrdfisshpimlia pasviaitilifnltgdalrdrllkqrgeydes h  
>tr|A8Z253|A8Z253\_STAAT  
mqmivvlfvistlftfilmk1spgnpvdkilhdvaqvsteqinatkdkg1ndsl1vqwwhmn1lhfnlgksfeskep  
vtqilfnyapitllisfst  
lvvslcisip1giaakrfhkwt dkvirvistlsislpaffigi1llfivtnl mndsvilsqfilpvitlslgm cayii  
rlvrsnllmlqsnivqas  
rlrgmneriyilhdllkptilpiipllgis1gsliggtvviendfdipgigylm dsiksrdypviqgcvlfigffvii  
ntiadlltllldpkqr1ql  
gnpkiktntplisessdrha  
>tr|A8Z260|A8Z260\_STAAT  
mlkkakfilmatillsgcsttnnesnketksvpeemdaskyvgqgfqppaekdaiefakkkhdkiakrgeqffmdnfglk  
vkatnavigsgdgvvfvhc  
ddhdvfnasipfdksiidssslrskdkgddmstlv gav1sgfeyraqekydklykffkdneekyqytgftkeainkt  
qnsyenyfyisaipynl  
aeyrdyfepllnksdsefskel snvkkqlkdksksvtttlfskkknytkksnsenvikmaeeikkdeipngielsikf  
sdnkintvknfnngestse  
ygvfdqe  
>tr|A8Z262|A8Z262\_STAAT  
mfkkakli1iatll1sgcsamneskkdtntetntetksvpeemeaskyvgqgfqppaekdaiefvkkhrkefekvgeqf  
fkdnfglkvkatnvvvgkdd  
gvevyvhcedhgi vfnaslp1ykdaihqkg smrsndngddmsmmvgtvlsgfeyraqekydnlykflkenekyqytgf  
tkeainktqnvgyqneyfy  
itylsrn1keyrkyep1ihkndkefkegmqrarke1nytantntvat1fstndernrkekinvidl sekiertk dmpi  
kntittqlgnkligt kkar  
fddkkvvsfgafede  
>tr|A8Z264|A8Z264\_STAAT  
mkkivkssvtsialll1sntvdaaqhitpvsekkvddkitlykttatsdsdkl kisiqltfnfikdksydkdtlilkaa  
gniysgytkpnpkdtissq  
fywgskynisinsdsndsvnvdyapknqneefvqvtvgysyggdini snlgsggngsksfsetinykqesyrtsl dk  
rtnfkkigwdveahkimn  
gwpgygrdsyhtygnemflgsrqsnlnagqnfleyhkmpvl srgnfnpefigvl srkqnaakskitvtyqremdrytn  
fwnqlhwignnykdenrat  
htsiyevdwenhtvklidtskeknpm s  
>tr|A8Z265|A8Z265\_STAAT  
mvkkrllaat1slgiitpiatsfheskadnnienigdgaevvkrtedtssdkwgtqniqfdfvkdkkynkdalilkmqg  
finskttyynyknthika  
mrwpfqynig1ktnpdnvdlinylpknkisdvnvsqtlgyniggnfnsgpstggngsfnysktisynqqnyiseverqns  
ksvqwgikansfitslgkm  
sghdpnlfvgykpsqnprdyfvpdne1pplvhsgfnpsfiatvshekgsgdtsefeitygrnmdvthatrrtthygnsy  
1egsr1hnafvnrnytvky  
evnwktheikvkghn  
>tr|A8Z269|A8Z269\_STAAT  
mqilvnkrneiisyaiiggfeegidienlpenfsqvfrpkafkysngeivfnedyseekddl hqqidseeqntvasddil  
rkmvasmqkqvvgstklsm  
qvnkqnal makqlvtlnkk1eevkgetena  
>tr|A8Z273|A8Z273\_STAAT

Tsompanidou\_et\_al\_Supplemental\_FASTA\_File

mdyhdhlsvmdfnelicenlldvdysfkeyyelnearyitftvyrthnsfvfdlllicenfiiyhgekytikqtapkve  
gdkvfi evtayhimyefqn  
hsvesnklddssetgktpaysldeylrygfanqktsvkmtykiigdfkrkvpideignkngleyckeavdlfgciipn  
dteigfyspetfyqrsekv  
iryqyntdvtstlelraikvfgkkytaeekknynpirttdikysngfikegtyrtetigskatinfdckynetv  
rftikksgggiyklildg  
kqikqiscfaksvqsetidliknidkgkhvlemi flgedpknriddissnkakpcmyvgtekstvl nliadnsgrnqyka  
ivdyvadsakqfgiryant  
qtnedietqdkll efakkqindtpkte ldvnyigyeki eprdsvffvhelmgyn telkvkldrshpfvnaidevsfsne  
ikdmvqi qqa lnrriiaqd  
nrynyqanrinhlytstlnspfetmdigsvli  
>tr|A8Z275|A8Z275\_STAAT  
mnekvegml elkl dhlgvqecmkg lkrqlgvvnsemkanlsafdkseksmekyqarikg lndrlkvqkkmysqvedelk  
qnanyqkaksvkdeka  
yklveankkek la ldskea lksnte lkaenqyrtrnqrkdayqklkql rdaeqklknsnqattaqlkrasdavqk  
qsakhkalveqyqegnqv  
qklkvqndlksndkiessyaktntklkqtekefndlnntiknhsanvakaetavnkekaalnnersidkassemktf  
nkeqmi aqshfglasqad  
vmskkfssigdkmts lgrtmtmgvstpitlg lgaalktsadfeqqmsrvgai aqasskd lksmsnqavdlgaktsksane  
vakmeelaalgfnakqtm  
eampgvisaaeasgaemattatvmasainsfgl kasdanhvadllarsandsaadiqymgdalkyagtpakalgvsiedt  
saaievl snglegsagat  
alrasfir lanpskntakemkklgihlsdakgqfvmgelirqfdnmkgmtreqklatvativgteaasgflalieagp  
dkinsysks lknsgesk  
aadlmkdnlkgaleqlggafes laievgkd ltpmiragaeg ltklvdg fthlp gwvrkasv glaf gaaigpavlaggl  
irtvgsaakgyas lnrria  
entilsntnskamkslg lqtflg sttgktskgfkg lagammfnl kpinvlknsak lailp fklknglg laaks l favs  
ggarfagval rfltg piga  
titaityaykvfktaydrvwfrnging lgetikffggkiiggavrklgefknylgsigksfkekfskdmkdgyks l sdd  
dlkvgvnkfkqfmqtmgt  
askkasdtvklgkgsketekalekyvhyseensrimekvr lnsqgisedkakkllkietd lsnliaeiekrnkkele  
ktqelidkysafdeqekqn  
iltrtkekndlrikkeqelnqike lkeka lsdgqisenerkeieklenqrrditvkel sktekeqerilvrmqrnray  
sideaskaikaekarkar  
kkevdkyeddvai knnvn lsksekdl laiadqrhkdevrkakskkdavdvvkqkndidkemdlssgrvykntekw  
wnglkswwsnfredqkks  
dkyakeqeetar nrennikwfgnawdgvsktgeafskmgrnanhfggemkkmwsigkipsk lssgwssakssvgyht  
kaianstgkwfgkawqsvk  
sttgsiynqtkqkysdasdkawahsksiwrgtsk wfsnayksakgw ldmanksrakwdnisstawsnaksvwkgtskwf  
snsyks lkdwtgdmysrah  
drfdai sssawsnaksvfngfrkw lsktydwirdigkdmgraaad lgnvankaiggl nsmigginkiskaitdknlikp  
iptl stgtlagkvatdns  
gal tqptfav lndrgsgnapgggvqevih radgtfhapqgrdvvp lvgvdsvinandt lklqrmgvlpkfhggtkkkdw  
ldqlkgnigkkagefgata  
kntahnikkgaeemveagdkidkgasw lgdkgdvwdyvqhpqklvknvmsgl ninfgganativkiakgays lkkkl  
vdkvkswfedfgggdgsy  
lfeypiwqrfgrytgg lfnnggrhygidfgmpsgtnvyavkggi adkvwt dyggnsiqiktganewnymh lskqlarq  
gqrikagqligksgatgnf  
vrgahlhfqlmqgshpgndtakdpekwlks lkgsgvrsgsvnkaasawagdirraakrmgvnvtsgdvgniisliqhes  
gnnagitqssa lrdinvlq  
gnpakgl lqyipqtrhyavrgnhniysgydql laffnnywrsqfnprggwspsgpryangglitkhqlaevgegdkq  
emvip ltrrkraiq lteq  
mriigm dgpnnitvndtstvek l lkqivmlsdkgn l tda liqt vssqdn lgsndairglekilskqsghrananny  
mggltn  
>tr|A8Z280|A8Z280\_STAAT  
mnilntikgill sdaelkthinsriyyykvtenaetskpfv vitpvydlpsdfmsdkylseeyliqidvessnqktidi  
tkriy llyqqnliqassq  
l dayfeetkryvmsrryqgipkniyyknqrie  
>tr|A8Z282|A8Z282\_STAAT  
mefnefkdrayffqyinkgpypdeeekmlyscfckiy npsmkdreilkatesksgl tiivrssktey l pqtntl vkids  
alysdk lfniveiridtpd  
igyntvvlsek  
>tr|A8Z284|A8Z284\_STAAT  
mrnfkndnel lgg nemptlyelkqslgmigqqlknkndel sqkatdpnidmedikql etekag lqrrfniverqvqdiee  
kekakvkdkeayqslsdn  
ekmvkakaefyrhailpnefekpsmeaqrl lhalptgndsggdkl l pkltskeivsepfaknqlrekar ltnikgleipr  
vstl ddddftdvetake  
lkagdtvkttnkfkvfaaisdtv ihgsdvd lvnwvena lqsg laakerkda lavspks gl ehmsfyngsvkevegadm

Tsompanidou\_et\_al\_Supplemental\_FASTA\_File

ydainadlhedyrdna  
tiymryadyvkijsvlsngttntffdtpaekvfgkpvvftdaavkpivgdfnyfginydgttydtdkdvkkgeylfvltaw  
ydgqrtdsafriakaken  
tgp1ps  
>tr|A8Z287|A8Z287\_STAAT  
mtikvlnepspkllttwyaeqvttgkiktksyvkkecerhlrylenggwvfdelahrpirfiekfckpskgskrqlvl  
qpwqhfiigs1fgwvhket  
klrrfkealifmgrkngktttisgvanyavsqdgengaeihllanvmkqarilfdeskamikaspkl dknfrtlrdeihy  
datiskimpqasdsdkldg  
lnthmgi fdeihfekdyklisviknsraarlqplliyittagyl dgp1vdmveagrtdldqii edertfyylasl dddd  
dindssnwikanpnlgvsi  
nldemkeewekakrtpaergdfitkrfni fanndemsfidyptlqknneivsleelegrpctigydlsetedftaacatf  
aldngkvav1shswipkhhk  
veysneki pyreweedg1ltvqdkpyidyqdvlnwiikmnehvvekitydranafkl nqelknygfeteetrqgal t1s  
pal kdlkemf1dgkii fnn  
nplmkwyinnvq1kl drngnw1pskqsryrkidgfaaf1ntytdimnkvvskdkegniefisikdimr  
>tr|A8Z288|A8Z288\_STAAT  
mkgg1ymk1tkkq1keyiedyksddilinlyietyefyrc1rde1knsdlmiehtnkagasnivknplsieltktvtq1  
nn1lksmg1taqrkkivq  
eeggfgdy  
>tr|A8Z290|A8Z290\_STAAT  
meh1aidfkphsyqkyaidkvidnekygl1dmg1gktvst1tafse1q1ldtkkmlviapkqvaktwvdevdkwnh1n  
h1kvs1v1gtpkernda1n  
teadiyvtntentkw1cdqykkewpfdmvide1stfkspsksqrfksikk1plinrfig1tgtpspns1qdlwaqvyli  
drgerlessfsryreryfke  
pthqvsehi fkwelrdgsekiykqiedic1smkakdy1dmpdrvdtkqtvlsekerkvyeeleknyileseeegtva  
qngas1sq11q1sngavy  
tdeedvr1ihdkk1dkleeiieesggp11fynfkhdkerilqrfkeatt1ddsnykerwnsgdik1liahpasaghl  
n1qqggh1ivwfg1tws1e  
lyqqanar1yrqqnhtti1hhimtdntidqrvykalqnkeltqeelmkaikariakhk  
>tr|A8Z295|A8Z295\_STAAT  
mikq1r11f1lamye1gkyvteqvyimmtanddveapsdyekiraevsw  
>tr|A8Z2A0|A8Z2A0\_STAAT  
mnt1tidq1qel1q1qkefddript1n1rdskiayvveffewfnt1etfknwkkkpgkpldvq1deladmlafg1sian  
qvgvsseeikeaiessfkn  
sefhnfnfkdkdefaqdavvstpqiifkefypdqlaiviaidiafnlysidq1idaykkkmkrnherqdgtagdkggyv  
>tr|A8Z2A1|A8Z2A1\_STAAT  
memmnreqieqsiisayngndteg1lkeiedvykkaqafdeileg1pnamqda1kedig1deavgimtgqvvykyee  
dqend  
>tr|A8Z2A2|A8Z2A2\_STAAT  
m1kgvttmtdsarker1nqffgskrylyqdnervahthvngtyyfghivpgwqsvkktfdtaeeleiyikqhgleyee  
qkq1t1f  
>tr|A8Z2A3|A8Z2A3\_STAAT  
matqkqvdyvms1qeq1e1edcekytdeqvkamshkevsvnienyktsirnee1yecmsfg1pnc  
>tr|A8Z2B1|A8Z2B1\_STAAT  
mykfgeiknkiisfngfefkvsamkkhdgisiqikdmnip1ksfhvvd1selyfatdamrdvinewieentdeqdr1i  
n1vmkw  
>tr|A8Z2B2|A8Z2B2\_STAAT  
mtkkykdmteevkd11seksge1yelakeikgeskfdi11fssigvidgylagsssvightfd1asl1dstksykdiv  
n1qmcksqkfhgidnke  
g  
>tr|A8Z2B3|A8Z2B3\_STAAT  
maenikteqhytksdfsgyrneednfanqelvtit1neyrk1ieikavkdkeedtyrgkyfaerknek1ekenik1k  
nkiyelqneedneedeene  
eevnd  
>tr|A8Z2B6|A8Z2B6\_STAAT  
misihr11tqyl dkeivts1dlh1ingevikvqehikdaeskt1hihpkdirvvs1dhvlyfdinvkgeknndspys  
>tr|A8Z2B7|A8Z2B7\_STAAT  
mneek1kmi111lediprdewnr1vnevnnqysyqadkvg1asdncqqiannykhygf  
>tr|A8Z2C0|A8Z2C0\_STAAT  
mglyeelcinnekiki eetdqlpnfqpgcymngkiyirrn1sevrkaevlyeq1ahhk1tygnildqtkwinrkfenyar  
rhgftsavplheiveahny  
gvrnlyelsey1q1sesy1leaieqykkiygigthygeysitfeplrvfkykei  
>tr|A8Z2C5|A8Z2C5\_STAAT  
mttv111sialitfmgyyftqetenairredarriss1veqshnkeeaikysqtlienpgg1miinnkhrqstas1snik  
kqmlnevvndhfdvfdk  
gksvtrnvtikekgssqy11gyptkaqknshskysgvfiykd1ksiedtnnaitiitiitavifltittvfafflssr  
itkplrr1rdqatrsvsegd

Tsompanidou\_et\_al\_Supplemental\_FASTA\_File

ysykpsvttkdeigqllsqafnqmsteieehvdalstsknirdslinsmveglnginesrqilnsnkmandimdnidedak  
afllrqiedtfkskqtemr  
dlEmnarffvvttsyidkieeggksgvvvtvrmdtnehlndqmkkdfianvsheIrtpisllqgytesivdgivtepedei  
keslaivldeskrlnrlnvn  
eIlnvarmdaeglsvnkevqpiaaIldkmmikyrqqaddlglnmtfnyckkrvwsydmrmdqvltnlidnasrytkpgd  
eiaitcdenesedilykd  
tgtgiapehlqqvfdrfykvdhaartrgkqgtglglfickmieehggsidvkselgkgttfiiklpkpe  
>tr|A8Z2C9|A8Z2C9\_STAAT  
mqqalinfyyqfhtkqhyflchdiledawkaennyskdavvsIlfatacyhyrrnllkgayksfnkskeiiqnakdrd  
alylnlndyqllieqqiak  
lnaakpfssvilpitpveriiKanyppydynqetatdpfivdhhmrrdrseviaakeeaiqlrkhrn  
>tr|A8Z2D1|A8Z2D1\_STAAT  
meerlnrvkqqlqgssykltpreatvrviIenekdhlsaedvylkvdkapeiglatvyrtlellaekvvdkinfgdg  
varfdlrkegakhfhhhlv  
cmecgrvdeidedllpevenrvenefnfkiIldhrltfhgvcetcqakgk  
>tr|A8Z2D5|A8Z2D5\_STAAT  
mkgghfivtggtsglglsivrkllenkvhvtllvrddvkatrifeqelgktinvipcdlnlksiqalqfedntsfdgfi  
ysaglgfyfksisdhsfsem  
ietyqlnlisfnvlytvIryltsnahivgissqaafstqanaahygaskagfyaImnalrlespnlhimtvnvgpidtp  
fhqkadpsmkymkgeim  
ldanqlaediiygiktkqlelnrpkmhhalKmyqiaprffercfpklfkna  
>tr|A8Z2D8|A8Z2D8\_STAAT  
mfnnvliindkynviikiyivmstlklleltskdefltdfdssin  
>tr|A8Z2E0|A8Z2E0\_STAAT  
mieligvkvldvikqiqqaiivyiedrllpefnlqelsdyvglspyhldqsfkmivglSpeayararkmtlaandvingat  
rlvdiakkyhyansndfan  
dfsdfhgvspiqastkkdelqierlyikIstterapyprleetddislvgyarfidtkylshpfvnpdfledllidgk  
ikelrryndvspfelvis  
cplengleifvgvpserypahlesrflpgkhcakfnlqgeidyatneawyyiesslqltlpyerndlyvevypldisfnd  
pftkiqlwipvkqspyded  
>tr|A8Z2E9|A8Z2E9\_STAAT  
meitmpklgesvhegtieqwlvsvgdhideyepIcevitdkvtaevpstisgtiteilveagqtvaiddtiickietadek  
tnetteeiqakvdehtqks  
tkkasatveqtstaknqprnngfrspvfkIasehdiIlsqvgsgfegrvtkkdimsvienggttaqsdkqvqtksts  
vdtssnqssednsenstip  
vngvrkaiagnmvsnteiphawmmievdatnlvnrnhyknsfknkegynlIffaffvkavadaIkaypllnsswqgne  
ivlhkdinisiavadenkl  
yvpvikhadeksikgiareintlatakarnkqltaedmqggtftvntgtfgsvssmgiinhpqaailqvesiikkpvvin  
dmiairnmvnlcisidhri  
ldglqtgkfmhikgrieqytIentniy  
>tr|A8Z2F4|A8Z2F4\_STAAT  
mftypkksvrhikiIreIIsneqietqdelvkrlnydylnvtqatvsrdikelqlikvpiPsgqyvyslpndrkfhpIekI  
grylmdsfvniDgtdnllv  
lktlpгнаqsigaildqinweevlgticgddtcliicrskeasdeiksrifnll  
>tr|A8Z2F5|A8Z2F5\_STAAT  
mtnlpmnkIidevnnelsvainksvmdtqlEesmlyslNaggkrirpvlllltldslnIteyelgmksaialemihtysli  
hddlpamdnddyrrgkltN  
hkvygewtaiIagdaIltkafelissddrltdevkikvlqrIsiasghvgmvggqmlmqsegqpidletlemihkktkg  
alltfavmsaadianvddt  
tkehlesysyhlgmfmqikddlldcygeaklgkkvgsdlennkstyvsllgkdgaedkItyhrdaavdelTqideqfnt  
khlleivdlfysrdh  
>tr|A8Z2F9|A8Z2F9\_STAAT  
mkkieawlskkglnkrtIivviafvlfiiIflllnsnsedsnititenaelrtgpnaaysviykvkghfkkgkv  
gkwievedtssnekgwiag  
whtnIdivadntkeknplqgktivldpghggsdqgassntkykslekdytlktakeIqrtekegatvkmtrtdtysvl  
enrdikgdaylsihndale  
ssnangmtvywyhdnqraladtldatiqkkgllsnrgsrqenyqvlrqtKvpavllelgyisnptdetmikdqIhrqile  
qaiVdglkiyfsa  
>tr|A8Z2G4|A8Z2G4\_STAAT  
mysaglnvfhlyfgliiyiasfpkdiiskitlnkkhlsk  
>tr|A8Z2H8|A8Z2H8\_STAAT  
maeqskqkqaneqqkaqnlfarwrqlqnsnsessndtnk  
>tr|A8Z2I1|A8Z2I1\_STAAT  
mvtsempreerllshgakslnIteIlaIIntgrkgfssidisnellksasnlnekssindlikvkgigIqkaiIkaa  
felgermgrraennrikI  
qpsdvadymiptmkdlTqehfvillnsknviketcvfkgtlNssivhpreifsiavrenanaiIavnhhpsgdvtpsq  
ediittmrIkecgliIgid  
lldhiiigdnrftsIveagyfdend

Tsompanidou\_et\_al\_Supplemental\_FASTA\_File

>tr|A8Z2I6|A8Z2I6\_STAAT  
mamiyrnnfivfvlssffisillysshvllpfmfgpiiiasicvkvfkldikwpflselgivilgvqigstftknvmdi  
knwlsiiivvsiilliai  
vmavfkkarintetai lsvipgaltqmlvmaeqdkranllvvs lqtstriifvvvlpfisyffhdgnmhangkltkv  
lplsqvlngqivilai  
fivylimskikfptfql laplivlivwnfstgltftldhwllnmaqliymirigvqiahllsdlkgrlaiaitiqnimli  
igalimvyihffdnnpin  
elflgaapggvngivlvalatgadvamitsyhi friffilfi iaginyflkyrsnkred  
>tr|A8Z2K7|A8Z2K7\_STAAT  
mriskvktiq l hkttlilialllytfgimllplmhddlqwfsnyntdilkvgfaslngryignifeiavhvs wlrwls  
yglismgiwmmhitrck  
awtsyylafslmlilpsaiyadtygwfagfynyatstlislfiyycinaiiykekqpsvtvlfyvllcfftqqlfmenv  
tlfhciililaflyeftan  
rtlnyklifsfmaitgtiimfsnpnyrkilfegseyqqvsnnqgifskaemistslpygvifsqiilsmiaaliyl  
llrsdryvhltilkrriim  
igfitlplyylyfyngflnkntdiglvgvnvivcgyfafsifvgiylsindrktqitlysliaicvsastlvivtpi  
epgnflivyti hviiilil  
lkefrkyksinvnfikgaslvaviylsafiyvhyehkrvqllkqqikdhprqevytveslpfehymhpspinknyqe  
wfnnyeelpkmtkvkiyif  
gsdds  
>tr|A8Z2M8|A8Z2M8\_STAAT  
maeqqtimerl fhtldekaktlnnengqsfi enlg lameqvytnergll eqstlqdrkafqfaylslmqeeki qanhqi  
tpdsiglilgflverfmnn  
qeelhivdiasgaghl satvkevlpeiavmhhlievdplsvsvhlanfleipfdvypqdaimplpleadivigdfpv  
gyppiderskefk l gfeeg  
hsyshyllieqainalkdagayflvpsniftgehvq l ekyiatetemaflnl pptlfknekarksililqkkkset  
kpvevllanipdfkipsqf  
qgfmtelnqwm dtnrpkk  
>tr|A8Z2N7|A8Z2N7\_STAAT  
melpyftinleftslicliifsisl vfkicin d r ilip lsnyssshlinnfglsvinpstpiclnfspvfnlltvgy  
itcn  
>tr|A8Z2P0|A8Z2P0\_STAAT  
myyhgpllltpgptvpda imrei qapmvghrskdfediaqqafqglkpi fgsqndvllitssgtsvleasmlnivped  
hfvvsvsgafgnrfkqiaq  
tyyknvhidydtvgeavdvkdfinflstlnvekvafsqycetsttvlhpihelgnainqfnsniyfvvdgvscigavdv  
dinkkdidvsvgsqkaim  
lppglafvayshrakehfkevttpkfyldlnkyi ssqadnstpftpnvslfrgvnayvetvkaegfnhviarhyairnal  
rsalkaldltilvndkdas  
ptvtafkpntndevki ikdelknrfkitiaggqghlkgqilrighmgkispfdilsvvsaleiiltehrkvnyigkgisk  
ymeveihei  
>tr|A8Z2P2|A8Z2P2\_STAAT  
mklimkkcqeameviqc l lgi ln l hkl f m t v p s i q l  
>tr|A8Z2P9|A8Z2P9\_STAAT  
mnkhhpk l r s f y s i r k s t l g v a s v i v s t l f l i t s q h a q a a e n t n t s d k i s e n q n n a t t t q p p k d t n q t q p a t q p a n t a  
knypadeslkdaikdpal  
enkehdigpreqvnfqlldknnetqyyhffsikdpadvyytkkkaevel d intastwkkfevyennqklpvr l v s y s p v p  
edhayirfpvsdgtqelki  
vsstqiddeetnydytklvfakpiyndpslvksdtdnavvtdndqsssvasnqtntntsnqntstinnannppqattnms  
qpaqkssn adqassqa  
hetnsngntndktnessnqsdvnqqyppadeslqdaiknpaidkehtadnrpidfqmknkgerqfyhyastvepatv  
iftktgpiielglktastw  
kkfevyegdkklpvelvsydsdkdyayirfpvsngtrevkivssieygenihedydtlmvfaqpitnnpddyvdeety  
lqklapyhkaktlerqvy  
eleklqeklpekykaeykkkl dqtrveladqvksavtefenvtptndqldlqeahfvvfeseensesvmdgfvehpfyt  
atlngqkyvmmktkddsyw  
kdlivegkrvtvskdpknnsrtlipyipdkavynai kvvvanigyegqyhvriinqdintkdddtsqnntsep l n v q  
tgqegkvadtvaenssta  
tnpkdasdkadviepesdvkdadnndkdvqhdvdh lsdmsdnhfdkydlkemdtqiaktdrnavdkdadnsvgmssn  
vtdkdsnkndkviqlnh  
iadknnhtgkaakldvkvqnyntdkvtdkktteh lpsdihktvdkvktkeagtpskenklsqskmlpktgettssqs  
wgl yal l g m l a l f i p k f r  
kesk  
>tr|A8Z2Q1|A8Z2Q1\_STAAT  
mkvevykgagghnlkdyeetyntfdwkdv eqafswsetgkmmayecidrhvdqglgdkia lnykdehrkesytkdmq  
rlsnkaanvlsehaevdkg  
drvfi fmsrtpelyfallgv l k i g a i v g p l f e a f m e k a v a d r l e n s e a k v l i t n k a l l p r v p v d k l p n l k k i v v v d e d v e  
dnyidfis lmetasdefdi  
ewlksddgli lhytsgstgqpkgv l h v q q a m l v h y i s g k y v l d l q e d d v y w c t a d p g w t g t s y g i f a p w l n g a t n c i a g



Tsompanidou\_et\_al\_Supplemental\_FASTA\_File

grfspeqwysmiedfkvti  
wytaptalrmmsagddivekydlsslrsilsvgeplnpevikwakkvyglvtltdtwmtetgghmivnyptmdvklgsm  
gkplpgiqaaiiddagne1  
ppnrmgnlai kkgwpsmmyriwknpekyksyfigdwvsgdsaykdedyfwfqgrvddvimgtagervgpfevesklveh  
eavaeagiigkpdprgei  
ikafvalrkgyeptdelkeeriifvkegl sahaapreiefkdkl pktrsgkimrrvlkawelnldagd1stme  
>tr|A8Z2Q2|A8Z2Q2\_STAAT  
mnhlkyqsedyihdkqfvi eegplthedlkal tfdahltafrdaedqykalleittlpegriyvarqdqlivgyvtfhy  
pdeierwstgklylielg  
aievsinfrqlqlaekliqlslstpefenyivitteyywhwdlkskl dvfdydklmqrlmatggleifatddpeitshp  
anc1marigknit1leqqa  
fddiymnrfff  
>tr|A8Z2Q5|A8Z2Q5\_STAAT  
mkkvyiklkyivryhlafvfissflnfskqkyvtvn  
>tr|A8Z2R7|A8Z2R7\_STAAT  
msmkrtlvllitai filaacgnhkddqagkdnqkhnssnqvkeiatdknvqgdnyrtl1p fkesqargllqdnmansyn  
ggdfedgllnl skevfptd  
kyl ydqgqfl dkk tinaylnpk ytkreidkms ekdkkdkkanenlglnpshegetdpeki aekspaylsnileqdfyggg  
dtkgknikgmtiglamns  
yykkekdgstfskkl dsvkqkqgmaseilsrlrenddlkdipihfaiyqssedsitpgefitqataeksqtklne  
whnineksallpsstaady  
denlnnnfkqfndnlqsyfsnftqavgvkfvdkkpqr1vvd1pidyygqaetigitqyvteqankyfdkidnyeirikd  
gnqpralisktkddkepva  
hiysn  
>tr|A8Z2T5|A8Z2T5\_STAAT  
mrvvavnfkwsfel ymlkvenramnrvhnniynfnhnekgrkktkiytqhrkyfkkm  
>tr|A8Z2T7|A8Z2T7\_STAAT  
mikrkpcfqkicvyleiycfgehqimeawfifvskinf  
>tr|A8Z2U1|A8Z2U1\_STAAT  
mqqvtsdimtfrgshfelgvktgkw1qqtpl1knrekewkkrvprfdidvnytyqifqtyapqiweelmg1qsilkmpr  
qiilnfgghyrftdlkesgc  
tvfqqkdfmvrnydyhpatydgryllyqptdsglaqigpvsrvtygrmdgmnesgl tmgynfmhrkkpangfvcymigrli  
lencrnvteaiql1keiph  
rssfsyilm dkslnhaivevtp rsidvrydnictnhfeil thenrnytkeskerlartisqtdnd1dm ttafk1fnnpqy  
eisky1fkswsgtihtsm  
qpetl tayftl genappeid fkswldgqdlni thftgnidtdl tfank  
>tr|A8Z2V6|A8Z2V6\_STAAT  
mvrnkinkfnqyvarfipyiatkipikkniapmikqksdae1lknevfrvrk  
>tr|A8Z2W0|A8Z2W0\_STAAT  
msnel daltsl vieenennnktvknkp1l sma1ppni iylflfifsfy  
>tr|A8Z2W1|A8Z2W1\_STAAT  
mkytsearar1rwyggryidfdgwygyqcadlavdyiyw1lei rmwgnakdai nndfknmatvyentpsfvppiqgdvavf  
tkgiykqyghiglvfnggn  
tnqflil1eqnydgnantpak1rwdnyygcthfirpk ykseg1mknitknkvppaqkavgsaskitvgs kapyn1kwskg  
ayfnakidg1gatsatryg  
dnrtnyrfdvqgavyapgtliyvfeiidgwc riywnhnewi wherlivkevf  
>tr|A8Z2W2|A8Z2W2\_STAAT  
minwki rmkqksfwvai1sai flfaqni akaigydiqvyteqltdglnailgflvltgvi qdpttkgigdshqaleyeep  
rky  
>tr|A8Z2W8|A8Z2W8\_STAAT  
midtikvnnk tipwlyvergfeipsfnyv1ktenvdgrsgsiygr1lesysfdiplvvrndylshngfkthddvlnel v  
kffnyeeqvk1qfkskdwy  
wnayfegpik1hkefai pvkftikvvltdpykysvtgykntaisdqsvvnsgtadtplivearaikpssyfmitknded  
yfmvgddevtkevkdympp  
vyhsefrdfkqwtkmi tedipsndlggkvvgdfvisnlgegykatnfsdakgwvgagtkrgl pkamtdfqitykciveqk  
gkgagrtaqhi ydsdgk1l  
as1gyenkyhdkighivvtlynqkgdpkkiydyqnpimynldrivvymr1rrvgnkfsiktwkfdhikpdrkpidm  
dekewidggkfyqrpasi  
aiysaknygykwmemnglgsfn teilpkpkgardviiqkgdlvki dmqaksvvi neepmlseksfgsn yfnvds gysel i  
iqpenvf dttvkwdryl  
>tr|A8Z2W9|A8Z2W9\_STAAT  
mgerikgl sigld1daan1nrsfaeikrnfktlnsd1k1tgnnfkyte kstsdysykrikel dgtitgykknvddlakqyd  
kvsqeqgensagaqklrqe  
ynkqanelny1lere1lqktsae feefkkaqveaqmaesgwgktskvfesmgpk1tkmgdglksigkgmmigtapvlgia  
aasgkafaevdkgldtvtq  
atgatgse1kklqnsfkdvynfpadaetvggv1gevntr1gftgkelenatesflkfshitgsdgqvavqlitramgda  
gieaseyqsv1dmvakaqa  
asgisvdt1ladsitkygapmramgfemkesialfsqweksgvnteiafsglkkaisnwgkagknpreefkktlaei ektp

Tsompanidou\_et\_al\_Supplemental\_FASTA\_File

diasatslaieafgakagp  
dladaikggrfsyqeflktiedsqgtvnqtfkdsesgserfkvamnk1klvgadvwasiesafapvmeeliklsvavdw  
fslsdgskrsivifggia  
aaigpvvfglgafistignavtvlapllagiakadglisflstkvpilgtvftaltgpigivlgvlaglavafaiyaykks  
etfrnfvndaiesvktqts  
nfiqfiqpfiidsvknvfkqavsaidvfakdiwsqingffnengisivqalqnicnfikvifefilnfvikpimfaiwqvm  
qfiwpavkalivstwenik  
gviqgtlniilglkiffsslftgdwrgvwdaiimilkgvvqliwnliqlwfvvgkilgvvryfgglkglitgiwdviksi  
fskslsaiwnatksifgfl  
fnsvksiftnmknwlsntwssirtntigkaqslfsgvkskftslwnatkdifsnlnrwmmaniwnsikdntvgiasrlwsk  
vrgiftnmrdglqsiiski  
kshiggmvdaikkglnklieglwnvvggk1gmdkipk1htgtehttttrlvkngkiardtfatvgdkgrngngpgrnei  
iefpngkrvitpntdttay  
lpgskvyngtqtysmlngt1prfslgtmwkdiksgassafnwtkdqigkgtkwlgdkvgdvlfdmenpgkllnyileaf  
gidfns1tkgmgiagdi tk  
aawskikksatdwi kenleamgggd1vggil dpdkinyhygrtaaytaatgrpffhegvdfpfvyqevrtpmgrp1trmpf  
msggygnyvki tsgvidml  
fah1knfksppsgtmvkpgdvvgltgntgfstgphlfemrrngrhfdpepylnakkkgrlsiggggatsgsgatyas  
rvirqaqslggrykgkwn  
hdqmmrvakresnyqsnavnwinaqrgdpsrglfqiigstfranakrgytnfnnpvhqgisamqyivrrygdgfkra  
gdyayatggkvdgwynlg  
edghpewi1ptdparndamkmlhyaaaevrgrkasknkrpsqlssvngfddps1llkmiqqqqqialllkiaqsndvi  
adkdyqpiideyafdkkvn  
asiekrrerqestkvkfrkggiaiq  
>tr|A8Z2X3|A8Z2X3\_STAAT  
midilykvhevisqdriirehvninnikfnkypnvktdvfpfividdiddipttytdgderaysyivqidvfvkfneky  
nariirnknisnriqkllws  
elkmgnvsngkpeyieefktyrstrvyegifyeee  
>tr|A8Z2X4|A8Z2X4\_STAAT  
msvkvigdkalere1enrfgtqam1kvqdraliagakviveevkkq1kpskdtgalinevsfskpewingkrtitvhwrg  
skdrykivh1ienghvqkg  
tgkfi1kpkamggvnrai1rqqnkyfet1kre1kk1  
>tr|A8Z2X9|A8Z2X9\_STAAT  
mkaeikgvi1vsnedkwvyem1gmdstcpkdv1tq1efsdedvdi1insngn1vagseyyth1rahkgkvnvritaiias  
aas1iamagdh1emspvar  
mmihnpssi1aggeakdlnhaet1ehvgq1maeayavragknkqel1vemmaretwlnadeaieqgfadskmfendnmqiv  
asntqvl1skdvlnrvtalv  
sktpevnididaiankviekinmkekeseidvadskvsangfsrflf  
>tr|A8Z2Y7|A8Z2Y7\_STAAT  
mik1knmdgfdi1fivgils1fgita1llvvalpiytvasyqnkevhqgtitdkynkrqdkedkfyiv1ddkqviensd1  
ffk1gk1f1sadiqar1kvgd  
kvkvktigyrihf1n1lyp1yevkkvdkk  
>tr|A8Z2Z1|A8Z2Z1\_STAAT  
mkines1kk1kekgykenedkai1fn1adgt1eiyidhdektiitefhd1kvfvsed1kdksmesvmyelagideedkend  
>tr|A8Z2Z3|A8Z2Z3\_STAAT  
mkvnyetg1f1gvmear1kkmrkqrdey1kqrdel1gdiak1rerneelenmwr1knel1fgryefyrfr1selqiesra  
nkevaiyrraein1svilc  
rmdk1dgtnefyef1gqmeddtne  
>tr|A8Z300|A8Z300\_STAAT  
mtagtqamnfeshr1ctikakqel1rigtwsil1pfdiehdanepvaf1l1qst1gykvlyvtdtkylkykfngithmmlv  
nyieqmqenikngsvhst  
lanrimeshf1lehaigm1kand1tr1leeih1ih1ssqnsnakyiksei1qvtgapvyfgl  
>tr|A8Z304|A8Z304\_STAAT  
myyktgdvcrki1indgfd1q1rvkkraysvemv1dhegnsidg1llvsdendlytal1dikqsvyewienntdeqdklm  
n1vmkw  
>tr|A8Z306|A8Z306\_STAAT  
mthrl1nkggnft1nkher1deiak1vnkkgtirtneivegl1nvsdmtvrrd1lielenkgiltkihgarsnstfkykeis  
hkekht1rqi1aekrfiakka  
as1iedgd1l1ffgpgttve1laeevnht1tiitnc1lpyki1lekqtahfrvyl1ggemrhiteafvgemanamleklr  
fskmffssnavnkgavmts  
t1deaytq1la1snsieky1lidhtkvgkedftsfc1q1nel1tavvmdyedeekvetiktyievvd  
>tr|A8Z307|A8Z307\_STAAT  
mfn1khd1et1khi1dssnr1fftgagvsvasgvpdfrsmgg1fdeiskdgl1spey1l1sr1yleddpegfinfchkr1l  
fvd1tmpn1vh1dwiak1lern  
qqslgvi1tqni1dgl1hsdagsqhvde1hgt1nrfycnvchksytskdv1dr1tkhcdncggairpdivlygem1dqptiir  
a1nki1ehad1lv1lgsslv  
vqpaag1ishfkgn1li1inkdrtpydsdat1vi1hddmvs1vks1l1mte  
>tr|A8Z310|A8Z310\_STAAT

Tsompanidou\_et\_al\_Supplemental\_FASTA\_File

mgekvn1wlaiefapwfi vdiqdkggsfyesy  
>tr|A8Z311|A8Z311\_STAAT  
mktkevvalmni sqdtlryyekvgvipvnrdenyriyndsdl nwiylvknlnragvsies liefcrlaqlpkneniqa  
qqkqilnkqleelnenlkt  
ihdvrldllykidnydnhiakinasdnyddnverlwerk  
>tr|A8Z313|A8Z313\_STAAT  
msmtyrikkwqklstitl magvitlnggefsvdkhqiavadtnvqtpdyeklrntwldvnygydkydenndpdkkkfd  
atekeatnllkemktesgr  
kylwsgaetletnsshmtrtyrnekieaamrnpkttlntdenkkkvkdalewlhknaygkepdkkvkel senftkttgk  
ntnl nwwdyeigt pksltn  
tlillndqfsneekkkftapikt fapdsdki lssvgkaelakgnlvdiskvkll ecieedkdmkksidsfnkvftyv  
qdsatgkerngfykdgsyi  
dhqdvpytgaygvvllegi sqmmpmi ketpfndktqndttl kswiddgfmpliykgemmdlsrgraisrenetshsasat  
vmskllrlsdamddstak  
ykkivkssvesdssykndyl nsysdi dkmksl mtdnsi skngltqq lkiyndmdrvtyhknkldf afgl smtsknvary  
esingenlkgwhtgagmsy  
lynsdvkhyhdnfwvtadmkr lsgtttdneilktdkkssktfvggtkvddqhasigmdfenqdktl takksyfilnd  
kivflgtgikstdssknvp  
tti enr kangy tlytdkqttnsdnqennsvfl estdtkknigyhfl nkpkitvkkesh t gkweinksqkdtqktdeyy  
evtqkhsnsdnkygyvlyp  
glskdvfktkkdevtvvkqedd fhvkdnesvwagvnysnstqtf di nntkvevkakgmfilkkddntyecs fynpest  
nsasdi eskismtgysitn  
kntstsnegvhfel tk  
>tr|A8Z314|A8Z314\_STAAT  
mnktnfgaylnksksrkiyki fdqn l krefsywfkrkl fksytrqsdvhelkvctqndgtieqiwideanqfgvsvtwkd  
nsi igfvmrplinydaikn  
ettlkyavpttdcyei fwggdnelnyhylyphqryaidlvi kenhktyknqgkvntdyfcfgkdiiapangtvekvvng  
vqdnsigstnesqflgnyi  
vikhaeneysliahlhqysiivnegqnvkygdi igkvgnsgnstephihfqvmndknieactsl kirfinnrelikgdvv  
cglqae  
>tr|A8Z315|A8Z315\_STAAT  
msmskrlll fdfdyfkhntneedlshl remekllekltnnevitavltgstfqs vmdkmdqvnmtfkplhifsd lss  
kmftwnngeyvesetykkk  
vlsepfll fediedilrhisaqynvefipqrafegnethynfyfhstgnhndsrilealvryandqnytarfsrsnplag  
dpenaydi dftpsnagkly  
atqflmrkynipvksi lfgdsgndeaylsylehaylmsnsrdea l kqkfrl tkypyyqgitlhvkefvegykydy  
>tr|A8Z319|A8Z319\_STAAT  
mrdvgli dvedcydi fgmwclvnggkl lsfygg l km lfyvglefvvlwrykkpqqdl dltvtytfttyiyr l vl  
>tr|A8Z323|A8Z323\_STAAT  
mrgdqrtqgeksrkeggki fgsgrapia isilvkdgsynhdiyndigeyl treqkl dltmkhqsivnlkslnvlpdkn  
ndwinqr dinyenylpmyd  
skdiensiyldqfngvnsardnwvtnfsnekalvnakllvdynseidrlidil dsrerinlvnkdetfiswtrgl tqkf  
skgnis inperivkfmhr  
pftkkwi vydknimemp sryynimentgqviyiqggmneksamitdilpnf qfigngkgfatykgkds lrlv dnisns  
fkkinlnseeivvyiyai  
lhkyyvnykysdlskgfpr ipilkdvygfveigrelvelhlnyekqlnwdgveiiynmnpnykvek  
>tr|A8Z352|A8Z352\_STAAT  
miltcyntfntsfaiiefkksksgidearsk  
>tr|A8Z358|A8Z358\_STAAT  
mqfyllillailylivsfisifkmevvftrilriimgvlllflvalttmsfpkenwvfvllllvgnvevtgfkmlkkdl  
kgvnilnlmslfi fviyfi  
ltivlf  
>tr|A8Z362|A8Z362\_STAAT  
mlsqeffnsfityrpylkl aepilekhniyggwlllrdiakhqptt lieishrraiekptarktlkaliendlitven  
sledkrqkfltltpkghe l  
yeivcldvqklqqavvakt nisqdmqetinvnqiheillreahnd  
>tr|A8Z365|A8Z365\_STAAT  
mfrfiyfgglvvystt fipkkdilqlngmecdinveplkiyyv vilksgiemifs  
>tr|A8Z374|A8Z374\_STAAT  
msqerysrqilfkqigeigqskinqkaliigmga l gthvaeglvragiakliivdrdyief snlqrqtlfteedalkmm  
pkvvaakkhlla lrsdvd i  
ddyiahvdyyfl ethgqdvdi idatdnfetrql indfaykyripwi yggvqvstyteaafipgktpcfnc lvpqlpaln  
l tcdtv gviqpavtmatsl  
qlrdamkv lteqpidtkitygd iwegshysfgf skmqr sdcttcgdvpsypylnkneqryatl cgrdrtvqyenasithdi  
lvqflkqhglnyrsnsymv  
mfefkghrivafkggrfl ihgmtrtsdathlml lfg  
>tr|A8Z377|A8Z377\_STAAT  
mklkrlfavviamllvlagcsnsndnneskkddadngkkqei qvaaaas l tdvtkklasefkkehknadikfnyggsgal

Tsompanidou\_et\_al\_Supplemental\_FASTA\_File

rkqiesgapvdvfmsantk  
dvda1kdknkahtykyakns1vl1gdkdsnytsvkd1kdndk1algevktvpagkyakqyl1dnn1fkeveskivyakd  
vkqvl1nyvekgnakqgfvy  
ktdlykqnkkidtvkivevelkkpityeagatsdsklakewmeflksdkakeilkeyhfaa  
>tr|A8Z384|A8Z384\_STAAT  
mkd1kiidv11knisqvvl1snkwtgl1filig1fvadwtiglaaivgsiiaytfarfinyseaeindglagfnpv1taia  
1t1flksgl1divitmiat  
11t1pvaaavrev1rpykvpml1tmpfvivtwfti11sgqvkfvdts1klmpqnienvfsnndrihfis1fegfsqvfi  
easviggvcil1giliar  
kat1lavias11sfiival1ggnyddinqgl1fgynfv1maialgytftainpyistflgv11tvvvqlgtt11lepfgl  
pal11pfiivtwi11fagi  
khdkvda  
>tr|A8Z395|A8Z395\_STAAT  
mtdnys1hiyksmkssvkean1kiiyw1qgtgvvsin1qqyd1krnyvtiim1ndlyqidgnddsccvvevsaktflk  
fmnanymrgkil1tnevas  
tfri1kyl1yskikqgsynandki1nymcvelms1ntydgshr1vaeevhdy1tnnhhkk1nrkdvinqsitnkalsd  
mfkatpysnfiqyl1nhir1  
ehcl1di1tskkpieeiasshgfnhysrfih1fketygntpk1irkrysptshsinhsq1veidkniel1fddtnqsss  
mreidipfeptkrsqmygp  
kniyikgsnfywmddytki1qir1gvnpen1hiivtidtsnel1sieqit111qkivnynvvnv1frikheykelltsaer  
gkiekl1vati1nmtfesnr  
ckiafl1nd1nttaiqkl1kr1idnyigvfel1yhl1epkel1ntrydkeidh1idyfil1prqieqvs1arskiicdv1in  
ennd1keki1tmsdinkvse  
11tnytkfrgl1mhmsi1sessa1n1tr1sifi1ini1nql1rgivi1yqndtmivtkfkhevqcvic1paal1nensda  
ir1sckgl1qqfshaktkqi  
v1s1dkdnhtsengv1vndimqqhsywanfierniydhs1mvssnsivh1kyhlei  
>tr|A8Z3A2|A8Z3A2\_STAAT  
mekvyvaga1pevg1kl1qehfevemyegkg1vdkdt1ikgvknatalis11stnvdkdvidagk1kii1anygagfnni  
di1eyareksidvtntpkas  
tnatad1tig1vlavarrivegdq1srttgfdgwap1ffrgrevsgktigi1gl1geigsavarrarafmdvlytgpnrk  
eekereigakyvd1dt11k  
nadfi1tinaayn1pkmh1id1teqfkmkstay1inasrgpivheqa1vqa1kdnei1egaal1dvyefepdi1tdd1ks1nv  
v1tphignat1feardmmsk  
ivanaa1savqgekpqfvvn  
>tr|A8Z3A6|A8Z3A6\_STAAT  
maerisski1rrlekseeqik1les1nevteaiaankdsilkaik1ikt1ddak1lda1ngairgrqvi1nkfavelnkdiy  
tg11snmasmv11gel1nv  
sd1sdf1nkvnkg1lvnanqaspnakt1rs11gv1kddd1mnr1s1ty1nm1lkgmsree  
>tr|A8Z3A8|A8Z3A8\_STAAT  
mdmkrevi1kl1qqfi1ierenadkrrqykkenee1d1s1tqfhi1el1idndkvnnk1flsem1nvskpaitksikk1lakd  
1vveshnefnkrevnys1t  
qkgkkl1syihdel1heksvkkyeev1kvfddemavi1e1flnrsieel1kkedglnd  
>tr|A8Z3B2|A8Z3B2\_STAAT  
minrrpsyteknpl1tiassegigvsm1lipvnci1itt1qqknakstnk1mk  
>tr|A8Z3B8|A8Z3B8\_STAAT  
mnqtimdafhfrhatkqf1dpqkkskedfetilesgr1spss1glepwkfvvi1qdqal1rdel1kahswgaakq1dtashfv  
1ifarknvt1rs1pyvqhm1  
rdikkyeaqt1paveqkfdafqadfh1sdndqalydws1kqtya1lgnmmttaal1gidscpmegfs1dvtvdilankgi  
1dteqfg1svmvafgyrqq  
epknktrqayed1viewvgpke  
>tr|A8Z3C5|A8Z3C5\_STAAT  
mktim1s1dkd1n1nr1thvpsvvy1pyviv1vmnaikmids1siss111syfrytgallqslf  
>tr|A8Z3D4|A8Z3D4\_STAAT  
mikiqaielyy1gksn1fsmr1liw1vakmh1fsmk  
>tr|A8Z3D5|A8Z3D5\_STAAT  
miknetayqmne11vi1rsyak  
>tr|A8Z3E0|A8Z3E0\_STAAT  
mm1vdik1hmkyfi1evvkqggmt1nasksl1yaqpt1skaikdienemgtp1fdrskrh1il1tdagqif1yekskeivalydy  
1psemer1ng1letghinmg  
msavnmk1ilini1gafhqypnvtyn1lienggktieqqi1indevdigvt1lpvdhhi1fdytt1dked1rlivsrehrla  
kyetvkl1ed1lagedfi1fn  
kdfy1ndki1ienaknvgfv1pntvaqisqwhvied1vtne1lgisil1ptsiseq1ngdvk11riedahvhwe1lgvvwkdkdq  
1shattkwiefl1kdr1g  
>tr|A8Z3E9|A8Z3E9\_STAAT  
mvkvs1vi1nili1flaifgalyt1lvkffkrskqgkcg1tcdinrdccgteqhtanhfpgk  
>tr|A8Z3G0|A8Z3G0\_STAAT  
mnkvkgdvkmtkikims1vrde1mpyikawaekhhvevdi1tkeal1tddnveg1vagydg1sl1sqqip1sehvykr1nelgi  
kqiaqrsagfdtyd1elan

Tsompanidou\_et\_al\_Supplemental\_FASTA\_File

kynfivsnvpsyspsnsiaefavnqainvvrhfnqitkvrehdfrweptilsksidlkvavigtgrigrvvadifangy  
qsdvvaydpfpnakiatyv  
dykdtieeavegadivtlhvpatkynhylfnaelfkfhkkgavfvncargslvdtka11da1dngvikgaaldtyeferk  
lfpsdqrgktlndpllesl  
idredviltphiafyteaavknlivda1dat1dv1qtdtr1rvn  
>tr|A8Z3G4|A8Z3G4\_STAAT  
mismkwlslrtvvtmsmacgalifnrrhqlkaktlnfnhkaltiiparneekrighllhsiiqqqvpvdvimmndgs  
tdearvarsyगतवदव  
ddtdgkwygkshacyqgvthactnriafvdadvtf1rkdavetlinqyqlqgekllsvqpyhitkrfyegfsaifn1mt  
vvgmnvfstl1ddgrtngha  
fgpvtltnkedyatggghksanrhiegfalgsaytsqslpvtvyegfpvafvfrmyqegfqs1qegwtkh1stgaggtkp  
k1mtaiv1w1fgsias1lg  
1c1slkyrqmsvrkma1y1syttqfiy1hrrvgqfsn11mvchp11fmfft1kifiqswkqthrygvvewkgrqysiske  
q  
>tr|A8Z3H7|A8Z3H7\_STAAT  
mslnkeqrritaeelqahfeast1svqmiaek1nvttedvekv1amtap1g1fshqlqrfih1vwdvrdvindnikngq  
tpepyty1kgekedywflr  
>tr|A8Z3I4|A8Z3I4\_STAAT  
mqhhkvaiigagaagimait1kdfgitdviilekgtvghsfkhwpkstrtitpsftsngfgmpdmnaismdtspaf1fn  
eehisgetyaeylqvvanh  
yel1nifentvvt1svddaytiattteiyhadyifvatgdynfpkkpfkygihyseiedfdnfnkgqyv1vggnesgfd  
aayqlakngsdialytstt  
g1ndpdadpsvr1spytrqr1gnvikqgariemnvhytvkdidfnngqyhisfdsgqsv1tphepilatgfdatknpi1vq  
qlfvttngdik1tthdest  
rypni1fm1gatvendnak1cyikfrarfavlah11tqreg1pakqdvienyqknqmy1ddysccevsctc  
>tr|A8Z3J1|A8Z3J1\_STAAT  
mpypiknyqietrdfsemnhtki1sgyl1nrkycryne  
>tr|A8Z3J5|A8Z3J5\_STAAT  
mpi1nvgl1wdnehvynhwgg1d1ndyrsty  
>tr|A8Z3J6|A8Z3J6\_STAAT  
mnqhl1gnpk1tvthvnev1kaginhivvds1vqygnqemimekdv1vemrdgeklyini1frpnkdgk1fvvmsadtygkdn  
kpk1tmga1wpt1gtipt  
ssftpeespdpg1fwv1pndyvvvkv1alrgsdkskgv1spwskreaedyev1ewaanqswsngnigtngvsyl1avtqwwva  
s1npph1kampi1weg1ndm  
yrevafhggi1pdtgfy1rftw1qgi1farwtdn1p1ied1i1qaqqeh1l1fddfwk1rqv1l1sqik1t1l1tcasw1stqg1l1hrgs  
fegfkqaaseek1w1yvhgr  
kewesy1aren1erqks1fdfy1keenndwkd1tph1yevrd1qfyk1gefksa1f1pnaey1t1y1naenht1nhakis  
sahvaqydsedk1qdv1sfd  
y1fdk1dte1lvgnm1kl1wv1stkdsddm1d1fagik1k1dr1rgnev1n1f1pdfn1hengqvatgw1rvshrel1dqekssiaqpwh  
k1hete1kl1sqde1vpveie  
11psgt1l1fkqget1levv1kgseiv1ignst1pgm1ktryeheetv1nk1gmh1iytg1gkydsq1liipivn  
>tr|A8Z3K2|A8Z3K2\_STAAT  
mh1ntv1ngr1gm1ysk1ahq1l1qedehy1fak1sgr1ikyyp1l1vidhgy1gat1l1v1dieg1ktyid1l1ssassq1nvgh1aprev1teaik  
aqvdk1fi1hyt1paymy1hep1  
vr1akk1l1cei1apgd1fekrv1tfg1l1tgsdand1gi1k1faray1t1grpyi1sft1nay1hg1stf1g1s1msa1s1n1mrk1hygp1l1ngf  
y1hip1fdk1yrg1myeq1p1an  
sveey1ap1k1emfak1yvp1adevac1iviet1iqgd1ggl1epv1pgy1fealek1icreh1giliav1ddi1qqg1f1rtgtw1ssv1shfn  
ftpd1l1t1fgk1slagg1mpms  
aivgr1keim1nc1leap1hl1ftgan1pvs1cea1alati1qmiedq1sl1qasaek1geyv1rkrmd1qvw1skynsv1gdv1rgk1sl1sigi  
divsd1k1k1k1tr1dasa1alki  
cnycfeh1gvv1i1avagn1l1rfqpp1l1vitye1q1dta1ntied1alta1eagn1dqydis1gqgw  
>tr|A8Z3K3|A8Z3K3\_STAAT  
m1dsi1hr1gmt1v1feq1dfksd1fiid1reat1lah  
>tr|A8Z3K7|A8Z3K7\_STAAT  
mi1qyk1cki1nhk1kdi1qyl1hpr1kt1ql1pl1ilki1iln1aligiviiv1l1thte1f1ql1nagds1nv1l1nwd1ir1gl1tsy1ifs1fl1ilv  
alvsk1l1ilif1itrr1qrts  
>tr|A8Z3K8|A8Z3K8\_STAAT  
mqksa1l1fapek1yni1iseieky1shipdkkail1yhntegedi1svtyqqlieqsnkvgnv1ashgl1skgd1kvl1impr1s1aty  
elyiaa1kl1gvai1ipc1sem  
l1rtkd1l1qyri1thgein1avia1lepft1vefek1ikeyda1tkfvi1agqkdgwis1leaekenasn1k1emad1ttr1ddma1ilsyts  
gt1gn1pkav1th1chgwg1fah  
l1qmapk1hw1lcined1l1vwata1apg1wqkw1wsp1fl1sv1lgsgata1fv1n1grf1spety1el1l1qkyq1inv1l1cct1pte1yrm1mak1  
qn1ndy1dl1th1hsav1sage  
p1lnrev1veq1fkky1fn1t1vrd1gyg1qtest1l1ig1fl1k1dtp1r1ig1smgk1gip1gssvt1v1ddeg1ns1vpant1kgni1av1pl1d1pa1  
fkgyy1kep1ertak1agt1gky  
yi1tgd1lahv1ddd1gy1fw1feg1rrddi1i1ssgy1tig1pfeveda1l1n1hpav1kecav1vak1phdir1gniv1kafv1il1qdht1ag1d1t1  
vke1l1qqf1vk1nev1apy1kypr  
eie1fv1dd1p1k1tnsg1k1rrve1l1rdaei1kwqqk1d1snq

Tsompanidou\_et\_al\_Supplemental\_FASTA\_File

>tr|A8Z3L7|A8Z3L7\_STAAT  
mtilrlnqfnhgkfiifivlhfqinekhkwfnv  
>tr|A8Z3N6|A8Z3N6\_STAAT  
mnmqndemfertvkvpldvnekpqaqawflslqhlfamfgatvlpvfltglpisaallasgigtlyyilitkaqipay  
lgssfafitpiitglsths  
lgdm1valfmsgvmyviigiliklsgtawlmkllppvvvgpvimviglslaptavnmyenpgdmkgynisflivamit  
llvtivvqgffkglflslip  
vlvgiivgyvvaifmgivkfdaimsakwidfphiylpfdyvpsfhlgvlvmpivfvvtvsehigqmvlnkivgrnff  
ekpgldksiigdgvmfma  
siiggppsttygenigvlatriysiyyiggaaviaivlafigkftalissiptvmggvsillfgiaasglrmlvesk  
vdfannrnlviasvilvvg  
ignlvfnlkeiginlqiegma laa lsgii ln l ilpkkkqnn  
>tr|A8Z3P1|A8Z3P1\_STAAT  
mmkdlpiialdfeskekvnfldlfdeslvkvgmelfyqegpqlineikerghdvflldklhdipntvgkameglakln  
vdlvnvhaagvkmseai  
kglrkhnqdtkiavtqltsttedmlrheqniqtsieeavlnyaklanaagldgvvcsplesrmlteklgtsflkvtpgi  
rpkgasqndqhrirtpeea  
rqlgsthiivgrpitqsdnpvesyhkikeswlv  
>tr|A8Z3P8|A8Z3P8\_STAAT  
mmkkillavtggiaaykaidltskltsqgyevrvmtnhaqkfvtplafqaisrnavytdtfeenpseiqlialgdwa  
daiivapatantiaklsvg  
iaddlvstllatetpkfiapamnvhmyenkrtqqninilkedgyhfipegsgflacgyvakgrmeepqlivsvidahfq  
nsrnlanssfqdkralvta  
gptievidpvrfsnrssgkmgyaiaea lnrngai vtlvagpttledpkdieihvqsaeemfeqvtsrfdeqdivvkaa  
avsdypvdvlehkmmkqd  
gdlsvsfkrtkdilkylghehtksqyligfaetedienyaqklrkknadviisnnavgdm sigfssddneltmhfknnek  
vnikkgkkvvlaaqilidel  
etrwq  
>tr|A8Z3R2|A8Z3R2\_STAAT  
makvnliespysllqlkgigpkkievlqqlnihtvedlvlylptriedntvidlnqaedqsnvtiegqvytapvvaaffgr  
nkskltvhlmvnniavkci  
ffnqpylkkie l nqti tvkgkwnrvkqeitgnrvffnsqgtqtqenadvqlepvyrikegikqkqirdqirqa lndvti  
hewltde l rekyk letldf  
tlnlthhpkskedllrarrtyafte l flfelrmqwl nrllekssdeaieidydidqksfidrlp fel teaqkssvneifr  
dlkapi rmhrllqgdvgsq  
ktvvaai cmyal ktagyqsal mppteila eqhaes lmal fgds mval l tgs vkgkkrkilleqlengt idcligthali  
qddvi fhnvglvitdeqhr  
fgvnqrqllrekgamtnvlfmtatpiprtlaisvfgemdvssikqlpkgrkpiittwakheqydkvlmqmtselkkgrqa  
yvicpliesseh ledvqnv  
valyeslqqyygvsrvglhglksadekdevmqkfsneinvlvsttvvegvnvpnatfmmiydadrfglstlhqlrgr  
vgrsdqqsycvliaspkte  
tgiermtimtqttdg fel serdl emrgpgdffgvkqsglpdf lvan lvegyrmlvardeaaeliqsgvffentyqhlrh  
fveenllhrsfd  
>tr|A8Z3R7|A8Z3R7\_STAAT  
mvectcnifelklidavvdwssngel sd lvnfageil snldkvpeflpkkh  
>tr|A8Z3S2|A8Z3S2\_STAAT  
mlkkwl nsnvkqffvitfivsiltilfsthidyivngtvfsgagdgfrqmpfqmylyeh lrsfsslydasfglggdy  
mkglyyyysl splmwl nfl  
fikigetvgifnpttihfwptnqlimamiraiitfvvtfylfki l hfkrsanmiatilygmstvviiyfnftwsfygnlly  
llplsilgleryfqarkig  
ifivaialt l fsnfysyqaiiigcylyrliftykydivsrtqklicvisatv lsvlssvfglftgisaf l endrkqn  
pndipfltp l dyhyfffs  
dgfyitisi l tivallsfklyrfyfyr l faivtwilfigslsqyfdsafngfsfperrwvylalsssalcglfiqhlst  
lnmkyylirtipvciaial  
yvl l spthplalivgiillivlavilkfslwrykkltvailvlivmiqqivil dnnknmaikpyqqs l stlkqhdyhsny  
vnqlikkinqnatgsfnri  
dymdya l nspfiyhngislyssifngdilkyydktlqinmpidknstyrllgnrqnl l slwnvndrirvnhddnlpyg  
fkiksehkdnkvrwihskn  
tihypsahitnkvfsnkelksp l dkeqam l qgivsnnikdvnthfkanknl l sdstik l nsaawqsptkhl l qvkqngg  
ltvqlpksvsnqfkdl yfe  
mdle l l spdkahdvkneyetqernk l tykyrrvvtptirikapdrirlslpkgyrvnlkgygedyttlkdasnslea  
kvsktkhgytitknkns  
gyivlptaynqgm katsgdqslkveqngvmtgikapknitkiqlsytpppyyllititifi g iicsiiftrwarqk  
>tr|A8Z3S7|A8Z3S7\_STAAT  
mfvyckecfimnkqgskvrysirkvsigil sisigmflal gmsnkayadeidkskdftrgyeqnvfakselnanknttk  
dkiknegavktsdtsklld  
nksaisngneinqdiki sntpknssqgnlvinne l tkeikianleaqnsnqkknkvtnnyfygysfreapktqiytv  
kkgdt l saialkykttvsn

Tsompanidou\_et\_al\_Supplemental\_FASTA\_File

iqntnnianpnli figgklkvpmtplvepkpktvssnksnsstlnylktenrgwdfdgsywgqcfdlvnyvwnhly  
ghglkgygakdipyannfn  
seakiyhntptfkaepgdllvvsgrfgygghyhtai vlngdydgklmkfqsldqnwnngwrkaevahkvvhnyendmifi  
rpfkka

>tr|A8Z3T0|A8Z3T0\_STAAT

mtladnlvivespakaktiekylgkkykvi asmghvrdlprsqmgvdtednyepkyitirgkpvvkelkkhakkaknvf  
lasdpdregeiaawhlski  
leledsknrvvfnejtkdavkesfknpreiemnlvdaqqarri ldrlvgnispvlwkkvkkgl sagrvqsvalrlvid  
reneirnfkpeeywtiege  
frykkskfnaflhyknkpfklktkkdvekitaaldgdqfeitnvtkkektrnpanpfttstlqqeaarklnfkarktmm  
vaqql yegidllkqgtigl  
itymrtdstri sdakveakqyitdkygesytskrkasgkqgdqdaheairpsstmrtppdmksfltkdqyrlykliwer  
fvasqmapaildvtvsl dit  
qgdikfranggtikfkgfml yvetkddsdenkenlplkleggdkvtatqiepaqhytqpppry tearlvktleelkigr  
pstyaptidtiqrnyvkl  
eskrfvyptelgeivheqvkeyfpeiidveftvmetlldkiaegditwrkvidgffssfkqdvraeeemekieikdepa  
gedceicgspmvikmgryg  
kfmacsfnpdcrrtkai vksigvkcpkndgdvverkskkrvfgygcskypecdfiswdkpi grdcpkcnqylvenkkgk  
ttqvicsncdykeaaqk

>tr|A8Z3U2|A8Z3U2\_STAAT

msylvtiiafiivfgvltvveyghmffakragimcpefaigmgpki fsfrknetlytirllpvgyvrmagdg leppv  
epgmnvkiklneeneithi  
ilddhkhfqqieaievkkcdfkddl fiegitaydnerhhfkiarksffvengslvqiaprdrqfahkkpwpkfltlfagp  
lfnfilalvlfignayyqg  
tptstveqvadkypaqqagllqkgdkivqigkykisefddvdka ldkvdknttvkferdgktsveltpkktekkltkvs  
setkyvlgfqpasehtlfk  
pivfgfksfligstyiftavvgmlasiftggfsfdmlngpvgiyhndsvvkagiisligyतालsvnlgimnlipipal  
dggrilfviyeaifrkpvn  
kkaettiaiaigaimvvimilvtwndirryfl

>tr|A8Z3U4|A8Z3U4\_STAAT

mteqqkfkvladqikisngl daeilnsge ltridvsnkrtwefhitlpqflahedyllfinaieqefkdianvtcrftv  
tngtnqdehaikyfgncid  
qta lspkvkgqlkqkklimgskvlkvmsndiernhfdkacngslikafnrcgfdidkii fetndndqeqnlasleahiq  
eedeqsarlateklekma  
ekakqddnesavdkcqigkpiqienikpiesiieefkvaiegvidinlkelksgrhiveikvtdytdslvlkmftrk  
nkddlehfkalsvgkwvra  
qgrieedtfirdlvmmsdieeikkatkdkkaekrvefhlhtamsqmdgipnigayvkqaadwghpaiavtdhnnvqaf  
pdahaaaekhgikmiygmie  
gm lvdvgvpiaykpqdvvlkdatyvvdvettglsnqydkie laavkvhngeiidkferfsnpherlsetiinlthitd  
dm lvdapeieevl tefkew  
vgdai fvahnasfdmgfidtgyerlgfgpstngvidtlel sr tinteygkhglnflakkygvel tqhhrai ydteatayi  
fikmvqqmkelgvlnhnei  
nkk lsnedaykrarpshvtlivqnqqglnl fki vsaslvkyfyrtprisrlldeyregllvgtacdege lftavmqkd  
qsqvekiakydyfiei qpp  
alyqdlidreli rdtetlhei yqrli hagdtagipviatgnahylfeh dgiarkiliasqpgnlnrstlpeahfrttde  
mlnefhflgeekaheivvk  
ntneladriervvpikde lytpmeganeeirelsyanarklygedlpqividrlekelksi igngfaviy l isqrlvkk  
sl ddgylvgsrgsvgssfv  
atmteitevnp lpphyicpnctseffndgsvsgfdlpdktcetcgaplikegq dipfetflgfk gdkvpdidlnfsge  
yqpnahnytkvlfgedkvf  
ragtig tvaektafgyvkgylndqgi hkrgaeidrlvkgctgvkr ttgqhpggiivvpdymdiydf tpiqypaddqnsaw  
mtthfd fhsihdnlkldi  
lghddptmi rmlqdlsgidpki tpvddkevmqifstpeslgvtedeilcktg tfgvpefgtgfv rqlmedtkpttfse l v  
qisglshgt dvlgnagel  
iktgidlssvigcrddimvy lmyag l epsmaf kimesvrkgkl teemietmkenev pdwyl dsc l kiky mfpkaha aa  
yvl mavri ayfkvhhp lly  
yasyfti rasdfdli tmikd ktsirntvkdmysrymdl gkkekdvl tvleimnemahrgyrmqpisleksqafefi iegd  
tlippfivspgl genvakr  
ivearddgpf lskedlnkkaglsqkii eylde lgs l p nlpdkaqlsifdm

>tr|A8Z3U6|A8Z3U6\_STAAT

mssnelllateylekekkiprav lidaieaalitaykknysarnvrvelnmdqgtfkviarkdvveevfddrdevdlst  
alvknpayeigdiyeedvt  
pkdfgrvgaqaakqavmqr l rdaereil feefidkeediltgii drvdhryvyvnl gri eavl seaerspnekyipneri  
kvyvknveqttkqpqi yvs  
rshpgllkr l feqevpei ydgtvivksvareagdrski svfsenndi davgacvgakgarveavveelggekidivqwe  
dpkvfvkna l spsqvlevi  
vdetnqstvvvvpdyqlsl aigkrqnarlaakltgwkidiksetdareagi ypvveakvteedval edadtteste ev  
ndvsvetnvekes

Tsompanidou\_et\_al\_Supplemental\_FASTA\_File

>tr|A8Z3U8|A8Z3U8\_STAAT  
msidqilnflglamragkvktgesviveikkgnlklvivandasntaklitdkcksykvprkfgnrnelgialgkge  
rvnvgitdpgfakkl1smi  
deyhke  
>tr|A8Z3V2|A8Z3V2\_STAAT  
mkvievthpiqskqyitedvamafgffdgmhkghdkvfdilneiaears1kkavmtfdphpsvvlnpkrkrtyltp1sd  
kiekisqhdidycivvnfs  
srfanvsvedfvenyiiknnvkeviagfdftfgkfgkgnmtvlqeydafnttivskqeienekesttsirqdlingelqk  
andalgyisikgtvvqge  
krgrt1gfptan1qpsddy1lprkgvyavsieigtenklyrgvanigvkptfhdnpkaevvievn1fdfedniygervtv  
nwhhflrpeikfdgidplv  
kqmnddksraky1lavdfgdevayni  
>tr|A8Z3V6|A8Z3V6\_STAAT  
mrqlaqakkkstakkktskkrtnsrkkkndnpiryviailvvvlmvlgvfqlgiigr1idsffnylfgysryltyilvl  
1atgfi1yskripktrrta  
gsivlqial1fvsqlvfhfnsgikaerepvlsvyqsyqshf1p1fgggvlgfy1le1svplis1fgvciit1ll1cssv  
1ll1tnhghrevakvaleni  
kawfgsfnekmsernqekqlkreekar1keeqkarqneqpqikdvsdftevpqerdipiyghtenesksqsqsrkkrvf  
daenssn1vnhhqadqge  
qlteqthnsvesent1eeagevtnvsyvpp1t1lnqakqkatskaevqrkgqvlent1kdfgvnakvtqikigpavtq  
yeiqpaqgvkvsivnlhn  
dialalaakdvrieapipgrsavgievpnekis1vs1kev1dekf1psnnk1levglgrdisgdpitvplneph1lvagst  
gsgksvcing1its1llna  
kphevklm1idpkmvelnvynghp1l1pvvt1nphkaaqa1ekivaemerryd1fqhsstrnikgynelirkqnqeldek  
qep1pyivv1vdeladlmm  
vagkevenaiqritqmaragih1ivatqrpsvdvitgiiknripsria1favssqtdsrtiigtgaek1lgkgdml1yvg  
ngdssqtri1qgaf1sdqev  
qdvvnyvveqqqanyvkemepdapvdksedsalydeay1fvveqqkasts1l1qrqfrigynrasr1mdd1lernqvig  
pqkgs1kprqvl1d1lndev  
>tr|A8Z3W7|A8Z3W7\_STAAT  
mkhdfdg1s1frvqsl1yrdadfdiqlvyk1in1k  
>tr|A8Z3Y6|A8Z3Y6\_STAAT  
mal1khyknsd1stv1ndakal1fd1lnkni1l1kgptgsgk1klaet1sevd1tpmhqvn1csvd1dtes1l1gftk1ik1naegq1q  
eiv1fdg1pvikamkegh1l  
yideinmakpet1pvl1ngv1ldyrrqitnpytgevikavpgfnviaa1negyvgt1pmneal1knrfv1vhvdyidgd1lkn  
vikeqs1l1qgd1k1ieq1ik  
fned1rtmsk1qgq1iseeas1ra1ld1cd1litvmpvera1krti1dk1edereqqai1ynave1nf  
>tr|A8Z3Z2|A8Z3Z2\_STAAT  
mtqilivedeqnlarflelelthenynvdteydgqgd1dka1shyyd1i1ld1mlpsing1eicr1kirqqst1pii1ita  
ksdtydkvag1dygaddy1  
vkpfdiee1lari1ra1lrrqp1kdi1dvngitidkna1kvtvngae1eltk1eyd1ly1laenkn1hvmqreq1l1nhvgy  
nsevetn1vvdvy1ryl1rnk  
1kpydrk1m1etvrg1gyvir  
>tr|A8Z3Z4|A8Z3Z4\_STAAT  
mt1n1ptr1krcg1gdvlyg1idnhf1q1l1y1isenhc1q1etk1tffey1l1rivnk1thdyailenkkic1sh  
>tr|A8Z438|A8Z438\_STAAT  
mg1krmk1ig1itcypsm1ggsg1iate1lg1klaerg1hev1fitsn1ip1f1r1k1p1nmi1fhqvevn1qyav1fypp1ydit1stki  
aev1keyd1ld1l1hmhyav1p  
hai1cg1ilaremsg1k1im1tt1l1hgt1ditv1lgydhs1l1gaik1fgieks1divtsv1skslaqethei1ietnkei1piyn1fvre  
nef1ptk1hntalks1qfgiap  
dek1vl1ihvsn1frqvkrid1ti1etfakvrek1psk1l1ll1gdg1pelvpmr1qtke1lnveedv1l1fgk1qdcvsefyq1sdl1vl  
1l1sekesf1gl1l1leamktg  
vvp1igs1naggi1kevikh1getgf1vvdvgd1cds1asdyair1ledkv1lynk1lqkml1adiaer1fgsel1tdqeyyy1qkml1ne  
hnkskge  
>tr|A8Z459|A8Z459\_STAAT  
mqkvesi1i1ggg1pcgl1saieqkrkgid1liiekgnv1vesiyn1phtq1tff1sssd1k1sigdvp1fiveeskpr1rnqal1vvy  
revvk1hhq1l1kvnafeev1t  
vkkmn1kft1tttkdvyecr1fl1tiatgyy1gqht1levegad1pkv1hyf1keahpyfdqdv1i1ggknsaidaa1lelekag  
anvtv1lyrgg1dysps1kpw  
il1pnftal1vnhek1idmefnanvtq1itedvt1yevngeskt1hndy1vfam1igyhp1dyefl1ksvg1iqintne1fgtap1mynke  
tyetn1enci1yag1viaagn  
dant1ifieng1kf1hgg1iaqsm1lakkq1tples  
>tr|A8Z478|A8Z478\_STAAT  
ml1taiyfs1iftfy1sqys1k1lkt1lyni1etd1nykiv1ll1kegk1thes  
>tr|A8Z480|A8Z480\_STAAT  
mk1sykckgs1fl1idsmag1fl1ig1lit1l1ipmmn1mqas1inhk1lqtidask1v1l1ttv1skinkeel1kkgvt1igkydik1qsdq  
qi1caisknttsy1qktci1qy  
>tr|A8Z481|A8Z481\_STAAT



Tsompanidou\_et\_al\_Supplemental\_FASTA\_File

mekqlqirkgsaftmiemlvmmllisifllltmtskglslrviddeanisfitefnyiksqaianqgyinvrfyensd  
tikviennnirflklkvgl  
iinvakvdiiafdkkgnikfgsitiynnsiyriifhiekgriryekl  
>tr|A8Z492|A8Z492\_STAAT  
mlkr1keksndeivqntinkrinfigviiifavlvrlrgylqiaaggshykqiikndenitvnesvprgrildrngkv  
vndnaskmaitytrgrkttq  
semldtaeklsklikmtdkkiterdkkdfwiqlhpkkakammtkeqamladgsikdqdydkqllskigksqldelsskd  
qvlai fremnagtvl dpqm  
iknedvsekeyaavsqqllsklpgvntsmwdrkyppygdtrgi fgdvstpaegipkeltehylskgysrndrvgksyley  
qyedvlgkckemkyttk  
sgkvtssvlnpgargqdllktididlqkevealldkqikkllrsqgakmdnammvvqnpkngdila lagkqinksgkmt  
dydigtftsqvavgs svkg  
gtllagyqnkai kvgetmvdelpfhfggltkrsyfnknghvtindkqalmhssnvymfktalklagdpyysgmalpsdis  
spaklrrglngvlgvkt  
gidl pnetrggiepltnnpgnyldlsigqydytptlqlsqyvstian gyriqphiglthiestnkdevgplkkkingtv  
lnkvntekeikqieqgfk  
mafndkdgtgyvsfkdtvvttagktgtaevfnggeprvnstyigyapidpkla fsivyt nqpvpppwltggdlgrdvin  
yyfkqlgkndknkdkk  
>tr|A8Z495|A8Z495\_STAAT  
msqlidallnfdmryslisgiligfiaplifivvrrlsliadalshvtlggisfgmfltimptlvfinpmwfgilf  
aivgalliekrlrtsytayg  
eiaipiiimsagialsaifisladgfnqevglfgsisavnisdlttiiviaiivlfitlfykelfilsfdeeyskvig  
ipkwiqflfivivamvisa  
smrvvgillvsalitlpiasmritksfkqlillsvflgelsvilglvlafymdispggvivllvillmitmayqkrm  
kfkkganineyk  
>tr|A8Z4B6|A8Z4B6\_STAAT  
mnnvqryfidqnadvqrffittkkedihhitvmrydvgskiiltfndqtvylceiaditsdkievdlkekqintelpv  
dvticsglikadkyewllq  
katelgassfiavsmersivklnakvakkierwqkiikeaaeqsyr lvipsiqfesnlklicdtidnydyiliayeea  
kdge lsnfkqtlqqfnaqd  
kv lmi fgpegl seneis lfsntstvglgprilraetaplyalsaisyekelm  
>tr|A8Z4C3|A8Z4C3\_STAAT  
mqvgvgpqrhfrkeilqamqvgvgrnkfceniisvlpya  
>tr|A8Z4C8|A8Z4C8\_STAAT  
mnilerikweeyfmaqshllalrstcqr lsvgatvkdnriiaggyngsvagevhcidedgcliedghcirtihaemna  
qcakqgvstegatiyvthf  
pclnctksiiqagikriyyaedyhneyatkllkqsgiefkkipfspeyvakyltk  
>tr|A8Z4D9|A8Z4D9\_STAAT  
mknrqirsieftvmsskiiiydtkllkelfikikqkfytmkimilvvvikm  
>tr|A8Z4E7|A8Z4E7\_STAAT  
mdvr fineqtimiyfenkiseetyrnvtamvrwrekeileiqdivpsyravliy fdeqaitssklienlelnkfnknv  
havngtnriikipvqyggv  
ygpdiievakhritvegiekhtskpyliymlgfmpgfpylggldeq lhtprnqprlkihagsvgiannqtglypsds  
pgwqiigrtp lkvfsser  
epmsmyeagewiqfyaideqkfiqierdisdgnfnvddwvvienv  
>tr|A8Z4F7|A8Z4F7\_STAAT  
msdptlfdysmikgtveailfqnndfytv lkvdtietnedfdtmptvvgflpnivegdvytfkgqvvdhprygkqlkae  
tfekempqtkeaiisylss  
dlfkvgkktaqniventlgnaindilldhsvlekvsgl skkqkqiaeqisanqesekimir lhdlgfpgklsmaiyyf  
ylgdtltildrnpyqliyd  
ikgigfnkadqlarnigiayndnerlkaalyltleecikqghtylpinvvidl tvdvl nyqdeeviepekl demlqyl n  
eekrliidneqvaipslyy  
seiksvqnl frikthtnklteieqsdlqmhigeiedanqvnyasqkealqtainskvmltggpgtgkttvikgively  
aeihglsldyddvnddyp  
vvl aaptgraskrlqestgleamtihrligwnqdtkpedileneinarliiidemsmvdtwlfhqflsavpldaqlifvg  
dedglpsvgpgqvfdlie  
skaiprvnltevyrqdgssielahrmlgqkiditqrfhdrsfincqanqiptvvekvvtsavnkgytmediqvlapm  
ykgnagikrlnqvlqdi ln  
pkkkdtreiefgdvvrkqdkvlqlvnrpdni fngdigvivgfwakenalnkdvlvdfegneitftkqdmmlthay  
ctsihksqgsefpivimpi  
vkqyfrmlqrpi lytgltraktslvllgdpeafdig lktngqarl tqlctllknyfnsedeemlentatndtgasqttid  
dqveapmssndseemsds  
tktdtnvlteatmfkidpminmgeitpydfier  
>tr|A8Z4G5|A8Z4G5\_STAAT  
mtqqqndkrtlknkhtyqneplnrkdfvvsf itgalvgsalglyfknkvyqkaddlkvkeqelsqkfeerktqleetva  
ytkervegflnkskneqaa  
lkaqqaai keeasannl sdsqeaqei qeakreaqeadksvavsnkeskaval kaqqaai keeasannl sdsqeaqei  
qeaqeaqetdksaavsn

Tsompanidou\_et\_al\_Supplemental\_FASTA\_File

eepkavalkaqqaai keeasannlsdi sqaevqeaqkaekdsdtltkdasaakvevskpesqaerlanaakqkqa  
kltpgskesqlteal faek  
pvakndlkeipqlvtkkndvetetvni dnkdtvkqkeakfengvitrkadektnttavdkksgkqskttpsnkrnas  
kastnktsgqkkqhkkss  
qgakkqssskstqknnqtsnkskttnakssnasktpnakvekakskiekrtfnd  
>tr|A8Z4G8|A8Z4G8\_STAAT  
mswfdklfgedndsnddlihrkkrrqesqni dndhdsllpqndiysrprgkfrfpmvayenenveqsadtisdekeq  
yhrdyrkqshdsrsqkrhr  
rrnqtteeqnysekrngnskiqqsi kykdhshyhtnkpptyvsaingiekethkpkthmynsntnhrakdstpdyhke  
sftksevpsaifgtmkpkk  
lengripvskpsekvesdkqkydyvaktqtsqnkql eqekqndsvvkqgtaskssdenvssttksmpnyskvdntikie  
niasqiveerirrererv  
lqkrrfkka lqqkreehkeeqda iqraidemyakqaeryvgdsslnddsldtdnstdasqlhtngienetvsndenka  
siqnedtndthvdespny  
eevslnqvsttkqlsddevtvsnvtsqhqsalqhnvevndkdelknqsrliadseedgatnkeeysgsqiddaefyelnd  
tevedttsniedtnrna  
semhvdapktqeyavtesqvnnidktvdneielaprkkddqtnlsvnslktndvndnhvvedssmneieknaeitenv  
qneaaeseqnveektienv  
npkkqtekvstlskrpfnvmtpsdkkrmmdrkkhskvnpelkpvqskqavsermpasqatpssrdsqesntnayktn  
nmtsnvnnqli ghaete  
ndyqnaqqyseqkpsvdstqteifeesqddnqleneqvdstsssvsevsditeeseetthpntsgqqdnddqkdlqs  
sfsnknedtanenrprtnq  
qdvatnqavqtskpmi rkgpniklpsvsll eepqviesdedwitdkkelndalfyfnvpaevqdvtegpsvtrfel sve  
kgvksritalqddikma  
aakdiri eapipgtsrvgievnpnqpttvnlrsiiespsfknaeskltvamgyrinnepllmdiaktphaliagatgsgk  
svcinsilmsllyknhpee  
lrlldpkmvelapynglphlvapvitdvkaatqslkwaveemerryklfahyhvrnitafnkapydermpkivivid  
eladlmmmapqeveqsar  
iaqkaracgihmlvatqrpvsvitglikaniptriafmvsssvdsrtildsggaerllgygdmlylgsgmknkpirvqgt  
fvsddeiddvdfikqgre  
pdylfeekellkktqtsqdel fddvcafmvneghistsliqrhfqigynraariidqleqlgyvssangskprdvvte  
adlnke  
>tr|A8Z4H0|A8Z4H0\_STAAT  
mrdklkerlshldvdfkfnreeetlriyrtdnknkgitiklnaivakyedkkekivdeivyyvdeaiaqmadktlesiss  
qimpviratsfdkktkqgv  
pfiydehtaetavyyavdlgksyrli desmledlklteqqiremslfnvrkl snsyttdevkgnifyfinsndgydasri  
lntaflineiaqcqgemlv  
avphqdvliiadi rnktydvmahtmefftkglvpitslsfgykqghlepi filgknnkqkrdpnvirqleanrrkfnk  
dk  
>tr|A8Z4H2|A8Z4H2\_STAAT  
mninkkvtlqriqtltelhgagpfeevknymtqqmapyvdefienrmggffgvkksknpnakrvmiaahmdeigfmitn  
itkngmiqftnlggvandi  
wqqrllviknrgdkii gvsnipkhfrtgsegapeikdltldigaqne devrergidigtivphtpftqlsehrysak  
awdnrygcvlaieilellk  
dielddlyvganvqeevglrgakasaemi dpdvafvdcspandvkgnqplsgelgkgtlirikdgtmilkpvrldyl  
klveahdiehqqymspggt  
dggeihkanigiptavigvcaryihstdsvfdir dyfaarsllseaicnldnnqietlqyk  
>tr|A8Z4H7|A8Z4H7\_STAAT  
mmhii fvthrkfynfyhyistenekngtfy  
>tr|A8Z4I0|A8Z4I0\_STAAT  
makgnlfkailgiggavaavl vtrkdsrdklkaeynkqkdpqsykdnakdkatqlgtianetikevktnpkeyanrlkn  
npkaffkeekskfteydnk  
tdesiekgkfddeggaapnnl rivteedlkkknalsdke  
>tr|A8Z4I3|A8Z4I3\_STAAT  
myqtiiiggpsglmaavaaseqsssvlliekkkgllgrklkisgggrcnvtnrlpyaeiiknipngkfl yspfsifdne  
siidffesrgvklkeedhg  
rmfpvsnkaqdvdtlvtierqhvtikeeeavsrie vntdqftvhtqnnsyeshslviatggtsvpqtgstgdgykfa  
qdlghtitel fptevpits  
aepfiksrlkgllskdvelsvlkkngkkihshqmdmlfthfgisgpaalrcsqfvykeqknqktqhismaidafpelnh  
eqlkqhitsllsdtppkii  
knslhglieryllfmleqagidenttshhlnqqllndlvnmfkgfvfkvngtlpidkafvtgggvsllkeiqpktmmskl  
vpglflcgevl dihytggtg  
ynitsalvtghvaglyaghysasme  
>tr|A8Z4I4|A8Z4I4\_STAAT  
mnlkknkysirkykvgifstligtvllsnpngaqaalttdnnvqsdtngatpvnsqdkdvannrglansaqt pnpqsat  
tnqatnqalvnhnngsinht  
gatptsvqsstpsaqqnnhtdgnttatetvsannndvvsntalnvptktnengsgghl tlkeiqedvrhssnkpelva  
iaepasnrpkrsraapa

Tsompanidou\_et\_al\_Supplemental\_FASTA\_File

dpnatpadpaaaavngnggapvaitapytpttdpnannagqnapnevlsfddngirpstrsvptvnnlpgftlingg  
kvgvfshamvrtsmfdsgd  
nknygaqgnvialgrihgtdtdndhgdngiekaItvnpnselifeftmttkngqgatnviiknadtdtiaektveggp  
tlrlfkvpdnvrnlkiqfv  
pkndaitdargiyqldgkykysfvdsiglshgshvferrrtmdptatnkeftvttslknngnsgasldtndfvyyvqvl  
pegveyvnsltkdfpsnn  
sgvdvndmntydaanrvitiktstgggtansparlmpdkildlryklrvnnvptprtvtfnetyktytqdfinsaaes  
htvstnpytidiimkdaI  
qaevdrriqqadytfasldifnglkrraqtildenrnnvplnkrvsqayidsItmqmhtlirsvdaenavnkvdqmed  
lvnqndeltdeekqaaiqv  
ieehkneiignigdqttdgdvtrikdqqigtlsgdttatpvvkpnakkairdkatkqreinatpdtvedeiqdaInqlat  
detdaidnvtnattnadve  
taknngintigavvpqvtthkkaardainqatatkrrqinsnreatqeeknaalnelqtatnhaleqinqattnadvdnak  
gdglnaipnpiapvtvkkqa  
ardavshdaqhiaeinanpdatqeerqaaikvnaavtaantnilnntnadveqvktnaiqqiqaitpatkvktdakn  
aidksaetqhntifnnda  
tleeqqaaqlldqavataqninaadtnqevaakdqgtqniiviqpatqvkttrnvndkareaitninattgatre  
ekqeaInrvntlknraltd  
igtvtstamvnsirddavnqigavqphvtkkqtatgvlndlatakkqeinqntnatteekqvalnqvddelatainning  
adtnaevdqaqqlgtkain  
aiqpniykkpaalaqinqhynaklaeinatpdatndeknaaintlnqdrqqaiesikqantnaevdqaatvaennidavq  
vdvkkqaardkitaevak  
rieavkqtpnatdeekqaavnqinqldqainqinqntndqvdtttmqavnaidnveaevvikpkaiadiekekavkekqq  
qidnsldstnekevasqa  
lakekekalaaiddaqntsqvnqaatngvsaikiiqpetkvkpaarekingkanelrakingdkeataeerqvaldkine  
fvnqamtditnrrtnqqvd  
dttsqaldisialvtpdhivraardavkqqyeakkreieqaehatdeekqvalnqlannekralqnidqaiandvkrve  
tngiatlkgvqphivikpe  
aqqaikasaenqvesikdtpatvdeIdaanqlisdtlkqaqqeientnqdaavtdvrnqtikaieqikpkvrrkraald  
sieennknqldaInrtldt  
tqderdvaIdtlnkivntikndiaqnktnaevdrtdgdndikvilpkvqvkaarqsvgvkaeaqnalidqsdIsteer  
erlaakhIveqalnqaidq  
inhadktaqvngdsinagniiskikpattvkatalqqiqniatnkinlikanneatdeeqniaiaqvekelikakqqias  
avtnadvayllhdekneir  
eiepvnrkasareqlttlnfdkkqaieaniqatveernsilaaqlnqiydtaigqidqdrsnqavdktaslnlqtihdld  
vhpikkpdaektindlar  
vtalvqnyrkvsnrnkadalakaitalklqmdeeltartnadvdavlkrfnvalsdieavitekensllridniaqqtya  
kfkaiatpeqlakvkvliid  
qyvadgnrmi dedatlnidkqhtqfivdeilaiklpaekvsvpkeiqpapkvctpikkeethesrkvekelpntgsegm  
dlplkefalitgaallarr  
rtknekes  
>tr|A8Z4I7|A8Z4I7\_STAAT  
mnikpsvwwlvigmalnitgssflwplntiymkqelgksltvaglvlninsfgmvignllggsldklggyktiligtft  
clcsttllnffhgwpyav  
wlvmlgfgggmiipajyamagavwpnggrqtfnaiylaqnigvavgaamggfvaefsfnyiflanlimyvvalvavtqf  
nieinakvkyphlditgk  
knkarfislvlicamfaicwvayiqwestiasftqsini smaqsylvwtngimilvaqplikpilyllkgnlkkqmfvg  
iiifmlsffvtsfaenfti  
fvvgmiiltfgefmvwpavptianqlapdgkqggyqgvnsaatvgkafgpfllggvlvdafnmrmfimgmlllvfalil  
lmvfkenntqpkkida  
>tr|A8Z4J4|A8Z4J4\_STAAT  
mqfdnidsalmalnkepiivvddenrenegdIvavtewmndntinmakearglicapvskdiaqrldlvqmvddnsdi  
fgtqftvsidhvdtttgis  
ayertltakkli dppsseakdfnrpghlfpIvaqdkgvlarnghteaavdlakltgakpagviceimnddgtmakgqdlqk  
fkekhlkmitiddlieyr  
kklepeiefkakvkmpdfgtfdmygfkatytddeeivvltkgairqhenvrIhsacItgdi fhsqr cdcgaql essmkyi  
nehggmi iylpqegrigil  
lnklrayelieqgydtvanlalgfdedlrdyhaaqilkyfniehinllsnpskfeglkqygidiaerievivpetvh  
nhdymetkkinmghli  
>tr|A8Z4J8|A8Z4J8\_STAAT  
mksfkwfngceseiiaylnkfywkyqiaiiignslniif  
>tr|A8Z4K8|A8Z4K8\_STAAT  
mhrqflssrcqnlffkfklllfevnqmgyvyifiggalgallrylisflntdggfpigtlianltgafvmgllaltiaf  
fsnhptlkkaittgflgal  
ttfstfqlelihmfdhqqfitlllyavtsyvfgillcyvgiklggdls  
>tr|A8Z4L4|A8Z4L4\_STAAT  
miygiikkdigiilrqlcerkgveieaeackdihmlvsippklgvssfvgyllkgksslmi fdrhanlkyrygnrkfwc  
kgfyvdtvgrnkkiyeniyi

Tsompanidou\_et\_al\_Supplemental\_FASTA\_File

rnqlqedi vadqismeyldpftgeknkrkkk  
>tr|A8Z4M4|A8Z4M4\_STAAT  
mekneyiakneysqlldatysqavayllskygavtdddykeksytrflngeiksiskgkytraseglychhisedkfqn  
lsdlrfiskfkysydvqkk  
enlycydlielhlilhaiitkeshgqfgvaglcqmikptvidwyigeypkpwamqatkaraylpgilvekllikiddmlk  
giei  
>tr|A8Z4M6|A8Z4M6\_STAAT  
mkqisigyeeiygdri fshflkehevknwktvnqiekehldkneyeaepplfffsgsl  
>tr|A8Z4N0|A8Z4N0\_STAAT  
mgcnvytiivkl nmlnlfkmfvnkynekeidflnkkylmiviiilililggiflkmkydekkyydeqkeritymkynvk  
gyknisfanfkenpmdgys  
isgyinnkklsftagirs vddf qfdtdi syt delgrkfnknpsvseikkeqtsnk  
>tr|A8Z4N1|A8Z4N1\_STAAT  
meegyrlkfi fignqnnknknfsnphnil fskkdiiltqdlceeflnlninkqdhaiellkkel spllfedslylk  
eefinek lefnisnlasry  
tanndvdtinnkii egisitnnfkytnisylkelkgyiendil dkmkskyakniylnfkki fsnleqsvnyyleeefe  
ekkkylseyelideinid  
pyifltehnecnikyiseneklelqtymskiekvllkyqtylketckeclyfpyllvqgeagigkshllahlskklrden  
hiyflfgfftknedpwh  
qilndlevtnsvdnflrsinkakettkrafiiidalnegegkrlwgnfyqsfinhikkysnialifsi rtpfedvilpk  
naiqdnni vvfqhegfske  
enynpivsfcdfyglelpklpi lnpefnplflklmceycvnkfkfedqtisvaelftnvltvnl nlskedkfdfdkni  
nvqvkvikglelmdsef  
nqlnyeesy tvvnni akeyvqksnrfl ealidenilikntgykgemii yfsyermgdyflseyllekyrnvdkrdlvkl  
qsdek vtryfqk eddlsyn  
rgline lfiklanefnie l fevfpqfknnynmiysfinslvwrkdgsiskhtkcyisdnvipydafrnnfldvllikmpq  
knhplniwalhklkqcnl  
gkrdf lwtqyis innkvfeiinw lfsnykk ldeetaekymi fltwifsatnnklrdlgtkslvkl fktfptkiigllkl  
fennndpyiverlyasvl  
atlr diceihieianiyeei fdkemvyphil mrdyarqtieyislskdisninlekirppyksnwykkeysnl niddy  
ikslknkl dshlhfsideki  
ksmtteygrgtgagdfgryvfyavrnwvkgfksdqdl snialmri femgydaklhgefmdwvnrndfnnsierisk  
kyqwiayyei laklvdkfp  
dvqysglwddyi rdi dptlllleidkeskilvpsplpshqsnewvntkvfdetklfleididnhryic lsskfnfekre  
keipfedrds cyflamgyf  
ynkedsnei ikgyennydr gini prahsiylyeywseayknykegy ltesdgklcpaiyeyfel dysvkdksisfyip  
ckeivdyfsl iqteegvkw  
tkfgeticinskll ef dnecll ikkesll nflntkk l sigwkiylekis lrdreqewynvfyddgkynkki ikndmskir  
rnf  
>tr|A8Z4P9|A8Z4P9\_STAAT  
mnl dakllvk insnktqksnyqnsitklisvykkftkynyii  
>tr|A8Z4Q0|A8Z4Q0\_STAAT  
amkklvkssvassiallll sntvdaaqhitpvsekkvddkitlykttatsdndkl nisqil tfnfikdksydkdtlvkl  
aagninsgykkpnpkdyny  
sqfywggkynsvssesndavnvdyapknqneefvqqtl gysyggdininsglsgglngsksfsetinykqesyrtti  
drktnhksigwgveahkim  
nngwpgygrdsy dptygnelfl ggrqssnagqnl pthqmp llargnfnpefivslshkqndtkk skikvtyqremdry  
tnqwnrlhwggnnyknqnt  
vtftstyevdwqhntvkl igtdsketnpgv  
>tr|A8Z4Q1|A8Z4Q1\_STAAT  
mfkkkmlaat lsvgliap laspiquesrantnienigdgaevikrtedvsskkwgtqnvqfdvkd kynkdalivkmqg  
finsrtsfsvdkgsyelt  
krmiwpfqynig lttkdpnsvliny lpknie ttdvgqtl gnyiggnfqsapsiggnsgfnysktisytqksyvsevdq  
nksvkwgvkanefvtpdg  
kksahdryl fvqspngptgsarey fapdnql pplvqsgfnpsfittl shekgsstsefeisygrnldityatl fprtgi  
yaerkhnafvnrnfvrre  
vnwktheikvkgghn  
>tr|A8Z4Q3|A8Z4Q3\_STAAT  
mtfdakllkkeyldwynqtlef snlnsnvvr idtpfkdnsl dnliiyalydqsrdmitl tddgytif lenngislnks  
kkrkkifehl saygikyn  
dktheifvqtnfnknfkskhnllqc lifvndmyll snpksqni ftedvankl dehniyygrdlpi igssgvvhndffis  
akknqkekfinaisnpnns  
miikskitdamqakk  
>tr|A8Z4Q4|A8Z4Q4\_STAAT  
mriiaqmqi yggieskiki alkmgktnl safteggfep lrrl  
>tr|A8Z4Q5|A8Z4Q5\_STAAT  
mtknykdmtdelrgll aeknaelfdlaseideetefdvll fsvngisngdftpsshcvignvvdianllkravyrdia  
dvikmr

Tsompanidou\_et\_al\_Supplemental\_FASTA\_File

>tr|A8Z4Q6|A8Z4Q6\_STAAT  
msdyksyllavlcftvlaivlmp1lyfttawsiagfasigtfiyykeyfyee  
>tr|A8Z4Q8|A8Z4Q8\_STAAT  
mhkr1ltqyldeivtsldlhlingeivkvqehmkaesktlhiykpdrvsvldhvlyfdinvkgekndspyps  
>tr|A8Z4R0|A8Z4R0\_STAAT  
mqalqtnsnigemfniqekengeiaisgrelhqa levktaykdwfprmlkygfeentdytai aqkrataqgnmthyidha  
ltdtakeiamiqrsepgk  
rarqyfigvekawnspeimqra lki antinqletkierdkpkivfadavattktsilvgelakiikqngvnigqrrlf  
ewlrqngflikrkgvdyndm  
ptqysmerel feiketsithsdgthsisktpkvtgkqqyfvnkflgekqts  
>tr|A8Z4R7|A8Z4R7\_STAAT  
mkitnckikretviyevltsgnqpfyelpkdlssharkylefisksidgkltkeds1  
>tr|A8Z4S0|A8Z4S0\_STAAT  
mikqlcknitictlalstftvlpatsfakinseikqvseknldgdtkmytrtattsdsknitqslqfnfltepyndke  
tvfikakgtigsglrlldp  
ngywnstl rwpgsysvsiqnvdnntnvtdfapknqdesrevkytygyktggdfs inrggl tgnitkesnysetisyqq  
psyrtdldqstshkgvgwk  
veahlinnmghdhtqltndsdnrksei fsltrngnlwakdnftpdkmpvtvsegnpeflavmshdkkdkgksqfvv  
hykrsmdefki dwnrhgfw  
gywsgehvdkkeeklsalyevdwkthnkvfvkvlndnekk  
>tr|A8Z4S1|A8Z4S1\_STAAT  
miselifanevagnvkvvdsanvqivifl hsc liisnppfqyyps1  
>tr|A8Z4S3|A8Z4S3\_STAAT  
mfknknyviniyttlkgvslmttfsekekiql ladivelqtenneidvcnyltdlfdkydikseilkvnehranivae  
igngsplalshgmdvda  
gnqdnwsyppfqltekdgklygrgttdmkgglmalvsvlielkeqnelphgtirllatageekeqegaklladkgylddv  
dsliaeptgsgiyahkg  
smsckvtatgkavhssvpfigdnaidtllefynlfkekyselkqqdtkheldvapmfksligkeiseedanyasgltavc  
siinggkqfnsvpdeasle  
fnvrpvpeyndnfiesffqni indvsnklsldipsnhrpvtSDKnsklittikdvassyveqdeifvsalvgatdassf  
lgdnkdndvdlai fgggnpl  
mahqideyiekdmylkyidifkeasiqylkek  
>tr|A8Z4S4|A8Z4S4\_STAAT  
mcllifeylshsnihryfyqlkirnkklpare  
>tr|A8Z4S9|A8Z4S9\_STAAT  
mfislaiwsinsmgkqcislnllsddtfavisvmttlgtailggiapsiygiftspidkkssfraisdweeqrnnvk  
dlmmllpftllsilivifi  
fqfaysklfntiaiiifiiilvvmff  
>tr|A8Z4T1|A8Z4T1\_STAAT  
mtddvndhiikhniemivdr latdkefyifdsliqgl syqdissaldcseqsvilwyetildkivgvik  
>tr|A8Z4T8|A8Z4T8\_STAAT  
mlekvkkl inlikkih lqrakwvltelsiikk  
>tr|A8Z4U2|A8Z4U2\_STAAT  
mellnsynfvlfvltqmilmftipaisgikyskldyffiiivistlsflfkmfdsasliiltsfiiimyfvkikwysil  
limtsqii lycanymyivi  
yayitkisdsvifvipsffvvyvtisilfsyiinrvlkkistpylilnkgflivistillltsflffysqinsdeakvi  
rqsfiifigitiflsiltf  
visqfllekemykrnqeeietyyeytlkieainnemrkfrhdyvnilttseyireddmpglr dyfnknivpmkdnlqmn  
aiklngienl kvreikgli  
takilraqemfpisieipdevssinlnmidlrsigiildnaieasteiddpiirvafiesensvtfivmncaddipr  
ihelfqesfstkgegrglg  
lstlkei adnadnvlldtiengffiqveiin  
>tr|A8Z4W1|A8Z4W1\_STAAT  
mtynivalpgdgigpeilngslslleisnkynfnyqiehhfeggasidtfgepltektlnackradailлгаiggpkwt  
dpnrpeqglklrkslnl  
fvnirpttvkgassl splkeervegtdlvivreltsgiyfgeprhfnhealdslytreeierivhvafklaasrrgk  
ltsvdkenvlassklwrkv  
vnevsqlypevtvnhllvdacsmh ltnpkqfdvivicenlfgdilsdeasvipgs lglspasfsndgprlyepihgsap  
diagknvanpfgmils lam  
clreslnqpaadeleghiysmiehgqtadlggklnnttdifeilsqklnh  
>tr|A8Z4X5|A8Z4X5\_STAAT  
mmrdynfmsphakkvmr l savl fwipialvlliafnlnwlfweildnhlsivssviiillvavftlviapvyrykhcry  
afekhh lrvrngilfldek  
vipyfriqnididvgpimrryr latltytaggqaeielidrsearrlkrwl innerhlennknee  
>tr|A8Z4Y4|A8Z4Y4\_STAAT  
mqnfkelgisdnvtqsl esmgfkeptpiqkdsipyalqgidilgqaqtgtgktgafgipliekvvgkqgvqslilaptre  
lamqvaeql refsrgqgvq  
vvtvfggmpierqikal kkgpqi vvgtpgrvidhlnrrtlktgdihlildeademnmngfidmrfimdkipavqrqtm

Tsompanidou\_et\_al\_Supplemental\_FASTA\_File

lfsatmpkaiqalvqqfmk  
spkiiktmmnemsdpqieefytivkelekfdtftnflvdhqpelaivfgrtkrrvdeltsaliskgykaeglhgditqak  
rlevlkkfkndqiniivat  
dvaargldisgvshvynfdipqdtesythrigrtragkegiavtfvnpiemdyirqiedangrkmsalrpphrkevlqa  
reddikekvenwmskeses  
rlkristellneyndvdvllaalqelveandevvqltfekplsrkgrngkpsgrnrnskrngnpkfdskskrskgyssk  
kkstkkfdrkekssggsrp  
mkgtrtfadhqk  
>tr|A8Z4Z3|A8Z4Z3\_STAAT  
mphhsttsrriivpahgssmtchqapttthqsma  
>tr|A8Z4Z5|A8Z4Z5\_STAAT  
mknvldwlggnlndnyglaiiilvlviriillpflmsnyknshmmrqkmkvakpevekiqekvkrartqeeqkmaanqel  
mqvykkydmnpiksmgcl  
pmliqlpiimglyfvldkqldvdlfkyphflwfdlgrpdiwitiiagvlyfiqayvssktmpdeqrqmgymmmvispimi  
iwislsasalglywsvsa  
afllvqthfaniiyekvakkevqpfiayerehnggsnkkgkntqvvskkkkk  
>tr|A8Z4Z6|A8Z4Z6\_STAAT  
mktfkavrfaqivnehgriieyelledgviinkeesgtgwllleivisnehyetfkeyqdneqllidirvitrpandpalfes  
tvksiknfttmsivfech  
iytlrqyaeslleqliddglsgeelkksfnrmmqskpklkdelee  
>tr|A8Z510|A8Z510\_STAAT  
mfqklsifatksflvmlvaavigfipqhvatlgkwpyllgivmlgmgltitpndfkmvfkapraviigvclqfsimp  
tlaifiaksfhlpdiavg  
vilvgccpggtssnvmstylakanvalsvsittvstllapfvtpaliylfanewlevsfvsmwsvvqvvlipialgivilq  
iinrkiaekastalpiisv  
vaislilaiivvggskhqilttglilflvvlhnlvlygtigywlarllklrdqdkavsievgmqnsglavslaalhfnpi  
aavpgavfsfihnitgpil  
akywskkl  
>tr|A8Z515|A8Z515\_STAAT  
mktssfiivcekevfligkqvkrmevhkksnawalp111fvalflvggiitgdftsmp1nvaititvival1mnrkesfa  
kkvevftkgaghsni1mm  
lifilagafsn1taekm1ggv1kstvn1gl1slipen1iivgl1fvi1cmfvs1smgtsvgtvaai1apvgygfaqatdvptal1ama  
tvvggamfgdnlsmisdt  
iaavrtqhtkmdkfrvnfkivlpgailt1iilyfltngislnhaknydynlikvpyilvlv1allgvnviivliggtl  
lagiiglidgsfgwmgll  
avskgismediamialliglvgiiqhnggiellqfvrskvkskrgaelgiaslsvadiatanntisiimsiplakn  
iadeydvdrksasilidif  
ggcfqgllpyspqv1saagvagi1plm1fpysiy1p1llgvclia1ilfn1fpl1knts1qemk1  
>tr|A8Z527|A8Z527\_STAAT  
miksigiyyi1fm1fgg1lnr1srivsnevts1iys1k  
>tr|A8Z530|A8Z530\_STAAT  
mylknkidesdth1sykmmmkacysyffi1fsyrimskkvynmvktnflkwecevr1rnvk  
>tr|A8Z533|A8Z533\_STAAT  
minereitmeq1pqvgf1mksfv1fwknyvnfkgrsrrseywmalwhl1ilm1pavcvliin1flffisiaadnet1ivms  
ilm1i1tsvy1tfvys1atf  
ipn1alcvrrfhd1sr1tm1fpmim1tvfsi1fyiv1qiidsydd1sdf1mpmg1n1llv1lyfvy1gl1tivmiv1flcfdsk  
pankygespkypstiknq  
vtsetpekactsetpktpeetdnq1  
>tr|A8Z535|A8Z535\_STAAT  
mielnaitt1clacily1lgkai1nhvn1flkricipapvigg1lifa1lvaal1dsfgmvkik1dasfiqdf1mlaffttig  
lgas1kl1fk1ggkv1llyf  
mfcai1sviqn1vgvs1akv1nikp1llgl1tagsmsmegghnaa1yagkti1qdl1gidsal1taal1aat1gl1vfgg1liggpv  
vkfl1kryn1kpqhsddt1f  
kdysq1vayneh1hskfnatevffiqftiv1vfc1mavgsy1fsh1ftaqtgin1vpiyvgs1fvavivrnisesfnfnivd1ki  
tnqig1dval1g1fls1alms  
iq1lieiyk1laip1liiiv1lvqvv1mil1fav1il1frgl1gkdydaav1mvgg1figh1lgatp1n1aman1dvitkkygns1pkay1v  
vpivga1flid1ligv1vimg  
fiqwf1s  
>tr|A8Z542|A8Z542\_STAAT  
mtttfi1isyi1laliivgvin1flirs1rkk1gkrqq1keq1fttr1qsn1qsk1fkas1ldk1tdq1stqrm1thee1lrvdn1qddhs  
qvs1ngyt1k1gsekd1qeaf1t  
nnkde1evaak1npese1eykvnek1ikkekn1fi1fgegvs1rgk1laa1llfgm1fia1ilnqt1llnval1pkintefnis1astgq1w  
lmtg1fml1vng1lipitay1l  
fnkysy1rk1flval1v1ftigs1licaism1nfp1immv1grvl1qaigagv1mplgs1ivi1itiyppekrgaamgtm1giamil1apa  
igpt1sgyi1vqny1hwnvm1f  
ygmfi1igi1jai1ligfv1wfk1lyqy1ttnpkadip1gii1fstig1fgal1lygf1seagn1kgws1veietm1faigi1ifi1ilfvire1l  
rmksp1ml1nlev1kft1ft1l  
tti1nmv1mls1lygg1mi1lpiyl1qn1rgfsa1ldsg1lll1pgs1img1llgp1fagk1lldtig1lkplai1fgiavmtyat1welt

Tsompanidou\_et\_al\_Supplemental\_FASTA\_File

klnmdtpytmimgiyvlrs  
 fgmafimmvmvtaainalprglashgnafIntmrqlagsigtailvtvmttqttqhlsafgeeldktnpvvqdhmhelas  
 yggqgegankvllqfvnkl  
 atvegindafivatifsiaalilclflqsnkkakataqkladadnsinhe  
 >tr|A8Z544|A8Z544\_STAAT  
 mkhfllfakihfjyrdmitkktptifirvlvkihkgvti  
 >tr|A8Z592|A8Z592\_STAAT  
 mlkammagflsivtvmfngiktqfasthvdglinlmgaiafslglilvvltnselltsnfmyftvgwykvsvskmtw  
 illycfignilggfvlffl  
 mkfahvmtpentqaltaqvkkvdstwltnftkgifcnffinigifismqfkggltkaffiacgvvvfvymgyehvvfn  
 aglyagmvffnldavswlh  
 vlknivfafignfvvggfvglvyafingkrnrleqq  
 >tr|A8Z598|A8Z598\_STAAT  
 mgalrfrvatvlll1vfigcgndkyvkeideavkiqnkqeqlakkgngdrvdhferkdaniyvdykdkiiilaykpls  
 ndevhyaydfsdkrvsvk  
 qdfdsriryqqhdadyheenmtn  
 >tr|A8Z5A1|A8Z5A1\_STAAT  
 mvkmfllnlnseqqhaldaakqafgpmleglvkysipitlvtfvlgliialftalmristskilrsisrvyvsiiirgtpmi  
 vqlfiifypipeigrlltn  
 dadnqwtlapvvaaiiglslnvgayaseiirggiisipkgqteaaysigmtygqtiqriilpqairvsipalngtflsli  
 kdstllgfilvaemfrkaq  
 evasttyeyltyivlvalmywvvcfiisiiqgiyesyiergyrs  
 >tr|A8Z5A7|A8Z5A7\_STAAT  
 mmtrsqnkqqleqakdivinsigqtmlygtnsvgnlygtmvfegsmtldemrhqlqmskpsmsagvkk1qefdivkq  
 qftrgsrkqhfiakdfffi  
 ffrnfftktkfreidinveavkdaqaiinsllessdlteaetqaekiksqldhthvyewleqlteaiesgeifkyfpi  
 peqpsden  
 >tr|A8Z5B0|A8Z5B0\_STAAT  
 maiieylynfsrnkqnlnsakitvlsydlnlntnfrmafknityl1tniyll  
 >tr|A8Z5B7|A8Z5B7\_STAAT  
 mklntsnspftekqvteinnllqt1tesqqqlsgfllansndttdsdsnqqletevqqsqiseeqatsttym1qnkep  
 hieanqrhvtvlygsesgn  
 amrlaeifserlsgdhgvvlmsmdeydttniaqlledlfii1ststhegeppdnawdffeflednapnlnhvrysvlalg  
 dqtyeffcqaqkdvdvll  
 n1gaerickrvdcidiyedaekwmadiiniidttsegiqsesvisesiksakekkysksnpyqaevlaninlmgtdsnk  
 etrhiefllddfeseyepg  
 dcivalpqnpelevklifm1lgwdpqspvpindhgdtpivealtshfektltlpl1knadiyfdneelseriqdeswa  
 reyvinrfdidlitdfpti  
 elqpenmyqilrklppreysissfmatpdevhitvgtvryqahgrerkgvsvhaerikpgdivpiylkknpnfkfpm  
 kqdiplvimigpgtgiafpr  
 aylqereelqmtgkwlffgdqhrssdflyeeieewlengnltrvdlafsrdaqehkeyvqhrimeeskrfnewieqga  
 iyicgdekcmakdvhaik  
 dvlvkerhisqeeael1lrqmkqqryqrdrv  
 >tr|A8Z5B9|A8Z5B9\_STAAT  
 mnrrninkknmi1kndewhtykvskywrsilltntnkv  
 >tr|A8Z5C3|A8Z5C3\_STAAT  
 mkiliveddfviaeslase1kkwnygvivveqfdilsifnqnqq1vllldinlptlmgfhwcqeirktsnvp1iifissr  
 idnmdqimaiqmgddfie  
 kpfnlsltiakiqallrrtydlsvandsltvkgct1ildeakvvyqeqniqlsltelqilkllfqnedkyvsrtaliekc  
 wesenfidnt1avnmlr  
 rkk1ntigvndfiitkknvgykv  
 >tr|A8Z5C9|A8Z5C9\_STAAT  
 mkkridylnskqnkysirrftvgttsvivgatilfgignhqaqaseqsndttqssknasadseknmi1etpqlnttand  
 tsdisantnsanvdsttkp  
 mstqtsnttttepastnetpptaiknqataakmqdqtpqeansqvndkttndansiatnse1knsqtl1dlpqsspqi  
 snaqgtskpsvrtravrs1  
 avaepvnaadakgtvndkvstasnk1ekttdfnpqsgntfmaanftvtdkvksgdyftaklpds1tgngdvdyssnn  
 tmpiadikstngdvakat  
 ydiltktytfvftdyvnnkeningqfs1plftdrakapksytydanianiademfnkitynysspiagidkpnani1ssq  
 igvdtasgqntykqtvfv  
 npkqrvtlgnwvyikgyqdkieessgkvsatdtklri1fevndisk1sdsyyadpndsn1kevtdqfknriyyehpnvasi  
 kfgditktyvvlveghydn  
 tgkn1ktqviqenvdpvtnrdisifgwnnenvvrygggsadgdsavnpkdpptgppvdpepspdpepspd1pdpsdsd  
 sdsdsdsdsdsdsesdsdsesdsdsdsdsdsdsdsdsdsdsdsdsdsdsdsdsdsdsdsdsdsdsdsdsdsdsdsds  
 sdsdsdsdsdsdsdsdsdsdsdsdsdsdsdsdsdsdsdsdsdsdsdsdsdsdsdsdsdsdsdsdsdsdsdsdsdsdsds  
 sdsdsdsdsdsdsdsdsdsdsdsdsdsdsdsdsdsdsdsdsdsdsdsdsdsdsdsdsdsdsdsdsdsdsdsdsdsdsds  
 sdsdsdsdsdsdsdsdsdsdsdsdsdsdsdsdsdsdsdsdsdsdsdsdsdsdsdsdsdsdsdsdsdsdsdsdsdsdsds

Tsompanidou\_et\_al\_Supplemental\_FASTA\_File

dsdsdsdsdsdsdsdsdsdsdsdsdsdsdsdsdsdsdsdsdsdsdsrvtpnneqkapsnpkgevnhsnkvsqhktdalpetgdksentna  
tlfgamallgslllfrkr  
kqdhkeka  
>tr|A8Z5D2|A8Z5D2\_STAAT  
mmnesgdnlksllglvlgsmiggafnmsdmggkagglaiiigwiitaigmislafvfnltnerpeldggiysy  
aqagfgdfvgfisaawywf  
saflgnvayatllmsavgnffpifkkgntlpsvivaslllwgvhflilkgvetaafinsivtvaklipillviicmiaf  
nfdtftktgffsmtseglp  
fswastmsqvkstmlvtvwwfigiegavifssraknkdvgsatviglisvliiyfltlvlaqgvilqnhisqldpsma  
qylativggwgstlvnigl  
iisvlgawlgwtllagelpfivakdglfpkwfakenkngapvnallitnilvqlflismlftqsayqafassailyp  
ymfsafyqvkytlehrqga  
ttkqwtigiasiyawliyaaginyllltmllyipallvytivqknnqtrlikdsyilfmiivlaviglikllmgtin  
vf  
>tr|A8Z5D7|A8Z5D7\_STAAT  
mnktskvcvaatlaigtligvtvensaptskqaqaaitpytyngyignnanfildknfinaikydnvkfngiklaktn  
tikvekydqtfkgvsakg  
neasqlqfvvknnsllkdiqkaygdllkengktkeadsgifyyqnakktlgiwfvvdhnrvevtvghtpyktsk  
>tr|A8Z5D8|A8Z5D8\_STAAT  
mealykkllitiviivligalfaiyaaiahstsssnqeqenksthkkteteendqqddsadktdknqngnvtndn  
qpsspsnvnphstvpst  
qpaqpkdsnsnknnthgggsqsstnqnqqntppanksntntpskqtpqaqspkn  
>tr|A8Z5D9|A8Z5D9\_STAAT  
mldrhlkllqffiknpskhiissneiakhvnvsnrtrndihvinsnfmddiivsiskgyqlntsqtletiterythiq  
sykeklllsmayqlmhnk  
sqtllqleqdyllsktvlnydvfriuqwcqkfnialtikkkgivvdgtdnditnaihlnqlssghvhvedlilnelpd  
shqrmishiiqetlqghsi  
ettdiqiqgllihlililkrkqslseltdlnhdsklisqscikqinerlgydlnekvinmfsffiyahfnklidigierif  
iqsyidrlielmqqrhivp  
fnedsilqqnlynhfskaylritqniylnnplvieikklypfvntlfeaidklaidtdiemsedeiafltihfqaaiier  
rtktqlnvviacyyglvgs  
nfltkinnlseeisvintiklenithyfdnvdllitthdipkqtlnilpkhlttikvaplfseddrhkirhvvkqkqn  
pvqahhhmdtvnflvvnte  
qksrhtvqifeeaqkilqahhaivegyiesalereksstyignfmaiphgdpekvqlshvlifrtkdvpwrqhdvklv  
fflaishkdkaftkqmmql  
ianldddsvnhlcslddhsllkqqlfeylqe  
>tr|A8Z5E2|A8Z5E2\_STAAT  
mknafklfkmdllkvaktapavwiilaglaillpsfyawfnlwamwdpygntghikvavvedkgdtrgkkvngntmvnt  
llknksfdwqfvsrekadh  
eikmgkyfagiyipskftheigtlrkqpqkadvefkvnqkinavaskltdtgssvvvekaneqfnktvtralleanka  
gltieenvptinkiknavy  
sadkalpkindfankivylnnhqadldkyandfrklngykgdildaqkllnevngaipqlnekaklilalnnypkieka  
lnfaaddvpaqfpknqgl  
niasqgidqangqlndakgfvtrsvrgdyqdairraqdlnrrnqqqipqnsaannetsnsapaagngvastppsapsq  
dtapnnnvtqntapnsna  
pvsttpqstsgkkdgsfvdiittqvstanentqnitdkdvksmeaaltsllslnltdqakaaqkdsqalnriysi  
lasdkpsdfreslndvksq  
leyttqynqqfidtlikeieknenvdlskeidkvkaannrineslrlvnqlsnaikngssgtaeatklldqlsklss  
frdyvkkdlnsslvsisqr  
imdeInkgqtaInsvsklntidqvinsgqailkngktridrllqtvlpseiqqyisavknaqanfskvsdvakaanfvr  
ndlpqleqrlnatasvkn  
nlpnllngydqavglInknqppakkaIsdladfsqnlpdvekdllkankifkklkdkdavdklidtlkndllkqagii  
npinkktvdvfpvkdysg  
mtpfytalsvwgalImvslldvdkhkslesvlttrqvflgkagffimlgmlqalivsvgdllilkgvespvlflit  
ifcsiifnsivycvsllg  
npgkaiavllvlqagggtfpittpqffqni spylpftyaidslretvggivreilitkliiltlfgigffvvglll  
kpvtDplmkrvsekvdsn  
vte  
>tr|A8Z5E5|A8Z5E5\_STAAT  
mlmakyrgkpfqlyvklscstmmatsiiltnilpydaqaasekdteitkeilskqdlldkvdkairqieqlkqlsasse  
hykaqlneaktasqidei  
kraneldskdnksshtemngqsdiIsklldqllkdlnvssnvdrqgqsgeddlnamkndmsqtattkhgekddkndeamv  
nkaledldhlnqqihkskd  
askdtsedpavsttdnnhevaktppndgshvlnkflsneenqshsnrltdklqgsdkinhamiekLaksnastqhyty  
hklntlqslDqriantqlp  
knqksdlmsevntkeriksqrniileeIartddkkyatqsiIesiFnkdeavkilkdirvdgktdqqiadqitrhidql  
slttSddltsldqsdk  
sllisqilqtKlgkaeadklakdwtnkglnsrqivdqllkHfastgdtssddilkaIlInnakdkkqaietilatrierqk



Tsompanidou\_et\_al\_Supplemental\_FASTA\_File

aklladlitkietdqnkif  
nlvksalngkaddl1nlqkrlnqtkkdidyilspivnrpsl1drlnkngktt1nkl1anl1mnqgsd11dsipdiptpkpe  
kt1t1gkngl1sgl1nad  
gnvslpkagetikehwlpisviviagamgv1miwlsrrnk1knka  
>tr|A8Z5E6|A8Z5E6\_STAAT  
mik1fdyfnhsrklyesfkaskleed1tiv1ndngflpddvispyqffadnhntenmkprffnqvtpafweikgnns  
atindmgr1rgkifyqsge  
rpriavrvefddqqrvrfdyyskngikfaqtvydlnrkailkkyntaegkeviyenfvtsdvi1dwqgksyffpskla  
falffikqleitehhfvin  
slalpfsvlyn1pskgsdvlvwqehcngnvpqnmqlmckgdmkrhcni1ipdkneyetm1niadakvsrilqggylyn  
rsnrntkeiviltnsdq1  
rnkiv1vet1pdfkfhiaaitemsdk1mq1dqyanvh1ypsinidrvnelyqlcdiyl1dinegneilnaveqafdyelli  
lgyrqtahhakvt1sehlf  
ehndei1meskdq1iqmles1kdqqqfrdallaqkahaheisreqfeqvfkqales  
>tr|A8Z5E7|A8Z5E7\_STAAT  
mtiyninfgigwassgveyaqayrak1lrrtnqdtkfvl1dfiqseniq1t1q1nigfkdqeviwlyqyfsdislapttyt  
l1ddiere1ghdisfrerng  
kivrl1yfnkssfvtycl1qneqkdivdraefvinsmlvrkdfysytrifseyyapadnkaklymrqfynqdsiayneyi  
dgdssiyv1fedavlynkte  
fiayflqr1n1trddiv1drasdiggavl1qhkgsdskvgvvi1hadhsynmmseqhilwnnyeyqfskakyidffitat  
diqnhmvrq1feqyqgyr  
rvyti1pvgsida1sypt1srkpyamisasrl1anekhidwlvkavivakrqvpel1tdi1ygegektr1rkiid1thraqdy  
ir1lghvkl1dei1yndyelf  
1sastsegf1t1meavgs1gmig1lnvnygnptfi1rdgengyl1vpfdtdedsvddviaklahai1vmyfngpqtphdis  
yevaqqf1mtqdi1lkwet1  
vgev1hd  
>tr|A8Z5F0|A8Z5F0\_STAAT  
mmprkfrv1q1gigdd1epi1fqhkkgs1w1dyfdig1fefds1gyveaieaiveaegrfd1fiy1qap1yset1tn1lq1mis1epy  
ntyvdes1fws1veyeqdenv  
qkyv1vqpl1hyrni1eernk1leavs1fsg1ygd1kvspk1al1vhp1nfkg1dvvy1qgnsel1t1sg1efg1kefk1pias1wqnn1vydk  
dkvi1qi1wpe1fd1dgave1q  
y1tfr1li1qt1gad1gal1ieq1vl1tdm1ldsp1leip1akp1fdayi1sv1tkarg1ng1tvh1l1gpi1hkr1wsr1l1dm1gq1f1l1ggs1rf1vds1q  
r1qefi1yy1fhp1gdm1kpp1lnv  
y1fsg1yr1taeg1feg1yym1krm1nap1f1l1ig1dpr1veg1sfy1igs1seyeq1gi1in1videt1lek1n1fk1shel1il1sg1l1sm1gs1fg1aly  
yga1q1np1qai1iv1gk1pl1vni  
gtiaehmr1l1rpe1ef1g1tal1dv1vs1neg1d1ts1qasi1qal1nq1k1fw1qt1fq1kks1l1sq1tv1fai1aym1qh1ddy1d1pha1f1qel1l1pv1l1tah  
qarvmnr1si1pgr1hnd1dspt  
iasw1fvn1fy1ni1i1led1kf1gr1v1qhaek1qni  
>tr|A8Z5F3|A8Z5F3\_STAAT  
mskrqkafhds1lanek1trvr1lyksgknwvks1gikei1emf1kim1gl1pf1ish1svsqdnq1s1skkmtgy1gl1kttav1iggaftv  
nm1hdq1qafa1asdap1tse  
l1ntq1set1vg1nq1st1tie1ast1stad1stsv1tkn1ss1vq1ts1ns1d1ts1vs1sek1se1kv1t1st1tn1st1sn1qqek1l1t1st1se1st1sk1nt1ts  
s1d1tk1sv1ast1st1sg1iv1v1st1s  
tnq1st1as1n1ts1q1st1tp1ss1vn1l1kt1st1t1st1st1ap1vk1l1rt1fs1rl1am1st1f1asa1tt1t1av1tant1it1vn1kdn1lk1qym1tt1sg1naty  
dq1st1gi1vt1l1t1q1days1q1kga  
i1tl1g1tr1ids1nks1fh1fsg1kvn1l1nky1egh1ng1gd1ig1faf1sp1gv1l1get1gl1nga1av1g1ig1l1sna1fg1fk1ld1ty1hnt1sk1pns1aa  
kanad1ps1nv1ag1gg1af1g1af1v  
t1td1sy1gv1att1yt1ss1tad1naak1lnv1q1pt1nnt1fq1dfd1iny1ng1d1tk1vmt1vky1ag1qt1wtr1nis1dwi1aks1gt1tn1fs1l1smt1ast1g  
gat1nl1qq1v1q1fg1t1fey1tesa  
vtq1vry1vd1vt1tg1kdi1ip1pkt1ys1gn1vd1qv1vti1dn1q1sa1l1tak1gyn1yts1vd1ss1y1ast1ynd1tn1kt1vk1mt1nag1qs1vt1yy1ft1dvk  
apt1vt1vg1nqt1iev1g1kt1mnp  
iv1l1tt1d1ng1t1gt1vt1nt1vt1gl1ps1gl1sy1ds1at1nsi1igt1pt1k1ig1q1st1vt1v1st1dq1ann1k1st1tt1ft1inv1vd1tt1apt1vt1pig1dq1s  
sev1ys1pi1spi1ki1at1qd1nsg  
nav1t1nt1vt1gl1ps1gl1t1fd1st1nnt1is1gt1pt1nigt1st1is1iv1st1das1gn1k1tt1t1t1fk1yev1tr1ns1ms1dsv1st1sg1st1qq1sq1sv1st1sk  
ad1sq1ast1st1sg1iv1v1st1s  
ast1sk1st1sv1l1sd1sv1s1ask1l1st1ses1nv1ss1st1st1l1vns1qv1sv1ss1ms1ds1ask1st1l1sds1is1nss1stek1ses1l1st1st1ds  
l1rt1st1l1sds1l1sm1st1sg1l  
sk1sq1l1st1s1ig1ss1st1sas1l1sd1st1sna1ist1st1l1ses1ast1sds1is1is1ns1ians1qs1ast1sk1sds1q1st1sis1l1st1sd1sk1sm1st  
ses1l1sd1st1st1sg1sv1sg1l1s  
iaas1qv1st1st1sd1sm1st1se1iv1ds1ist1sg1l1sas1d1sk1sm1sv1ss1m1st1sq1sg1st1ses1l1sds1q1st1sds1sk1l1sq1st1sq1sg  
t1st1st1st1sas1vrt1ses1q1st  
sg1ms1as1q1ds1ms1ist1fs1d1st1sds1ks1ast1ses1is1q1sa1ft1st1sg1sv1st1st1l1st1ns1ert1st1ms1d1st1l1st1ses1ds1i  
ses1t1st1sds1ise1ais1ases  
tf1is1l1sen1st1ds1es1qs1as1af1l1ses1l1se1st1se1st1ses1vs1st1se1st1l1sd1st1ses1g1st1st1l1sn1st1sg1st1s1ist1st1s1is  
est1st1fk1ses1v1st1l1sm1st  
st1l1sd1st1l1st1l1sd1st1sds1ks1ds1l1stm1st1sds1ist1sk1sds1ist1st1l1sg1st1ses1ed1st1ss1es1ks1d1st1ms1is1ms1q  
st1sg1st1st1st1l1sd1st1s  
ts1l1s1l1sas1mn1q1sg1v1ds1ns1as1qs1as1n1st1st1st1ses1ds1q1st1ss1y1ts1q1st1sq1se1st1st1st1l1sd1st1s1isk1st1sq1sg1sv1st1sas

Tsompanidou\_et\_al\_Supplemental\_FASTA\_File

lsgsesedsqsistsase  
stsesastslsdststnsngaststslnsasasesdlsstslsdstasmqssedsqststaslsdslststsnrmst  
iaslstsvstsegstses  
tsestdststslsdqstsrstasgsastststsdrrstaststsmrtstsdqsmslstststmsdstslsdsvds  
tsdstastsgmsvsi  
sdstststasevmsasidsqsmsevndsesvsesnsesdsksmgsvsvdsgslsvstslrksevssslscsq  
smsdsvstsdssslsvst  
lrssevseedsldskstsgstststsgslststslsgsevsestsldsismsdststsdslsgsislsgstsls  
tsdslsdskslsssqsmsg  
seststsvsdqssstnsqfdmsisasesdmsdssisgnststslstsdmsgsvsvststslsdsgstsv  
sdssstststslsdmsqs  
qststasgslstststmsastsssqtstsvstslstsdslsdstsisisgqstvesestsdstsisdeslstsd  
dstststsdstsgtstsi  
seslstsgstsvsdstmsesnsnsvmsqdkdstsisdesvstststslstsdststseslstsmgsgqsidst  
stmsgststsesnmhps  
dmsmhthtststsrslseattstsesqstlsatsevtkhngtpaqsekrldptgdsikqngllggvmtllvlglmkrk  
kkkdendqddsqa  
>tr|A8Z5F6|A8Z5F6\_STAAT  
mmrtnhdhltidaieilssgwnynskletgknaillsdslldrikvlssnakgdadiletelravinsmsqnegksvdalkn  
staslknltk1keqldkt  
th  
>tr|A8Z5F9|A8Z5F9\_STAAT  
mavvyvaggclwgveaffatipgiihteagrangrskldgpydgyaecvklhfddrmltitdimnylfeiidpysvnnq  
gndigqkyrtglyscvddh  
liearqfierrkdrdqiaevlplsnysaeqhqlkypedmhmchiskdlnkyk  
>tr|A8Z5G2|A8Z5G2\_STAAT  
mntnrrstsslivheqpkspisekfrgirsnimfanpdsavqsivitseapgagkstiaanlavayaqagyktlivdgm  
rkptqhyifnlpneglls  
lllnwstyqdsiisteiqdlvltsgpipnpse litsrafanlydtllmnyfviiidtpvntvtdaqlfskftgnvvy  
vvnennnrdevkkgkeli  
eatgakllgvlnrmpkdkasayyaygtdes  
>tr|A8Z5G9|A8Z5G9\_STAAT  
marpqhkefrkeilgtmqvggaptkklaesqltimcklagpqrhrswrvrlq  
>tr|A8Z5H0|A8Z5H0\_STAAT  
mmksqnkysirkfsvgassiliatllflsggqaqaekqvmngnsqedtvtasigdqqtrenanyqrengvdeqqhten  
ltnklhndktiseenhrkt  
ddlnkdqldkdkksslnknkniqrddtknnanpsdvngleqaingdkqskvasqqskeadnsqdsnannlpsqsrk  
eapslnklldqtsqreivne  
teiekvqqnqandkitnynfnneqevkpqkdektlsvsdlnknqkspveptkdndknglnllkssavatlpnkgtk  
elatakaddqtnkvakgg  
yknqdpivlvhgfngftddinpsvlahywggnkmnirqdleengykayeasifagsnydravelyyyikgrvdygaah  
aakygherygktyegiykd  
wkpqqkvhlvghsmggtirqllellrngnreeieyqkkhggeisp1fkgndnmissittlgtphngthasdlagneal  
vrqivfdigkmfgnknsrv  
dfglaqwg1kqkpnesyidyvkrvkqsnlwkskdngfydltregatdlnrktslpnivykytgeathkalsndrqkad  
lnmffpfvitgnligkate  
kewrendglsvissqhpfnqaytkatdkikqgiwqvtptkhdwdhdfvgqdsstvrtrtelqdfwhhladdlvktek  
ltdtkqa  
>tr|A8Z5H1|A8Z5H1\_STAAT  
mdnhhtskiiisklslngidvtvkdevkymnrynevmmkgkngkakelcsl1lpiniivvftffvfil  
>tr|A8Z5I1|A8Z5I1\_STAAT  
mpikmlngdfyievllahivla1lckviff1sfy  
>tr|A8Z5I9|A8Z5I9\_STAAT  
msqqd1ptlfysgksnsavpiisese1qtitaepwleiskglqlleglnfdrqqqlf1ldvfegnikinpetkeikrpf  
vshkanpaaikiikdgrlf  
vcylgd1kfstggifaatengdn1qdiied1staycidm1vfdskggfyftdfrgystnplggvyyvspdftrvtpii  
svangialstdekv1wvte  
ttanrlhria1eddgvtiqpfatipyftghegpdscidsddnlyvamygqgrvlvfnkrngypigqilipgrdeghml  
rsthpqfipgtngliicsn  
diemggsmlytvngfakghqs1fqf  
>tr|A8Z5J4|A8Z5J4\_STAAT  
mtktvfdv1dmglylvnydawkvekvlddyhkpfsntihwqfghvltifesa1avagkenidlniyrplfngngspd  
ewkdevpsierileglqt1  
perarn1tedd1aie1kqpivgcnnleellvlnaihiplhagkieemsr1lkn1k  
>tr|A8Z5J8|A8Z5J8\_STAAT  
mtvfkner1swlpyiaiv1llhvigfs1lwiagkdh1lfmgilayt1glrhafdadhiaaidntvrk1llqqrkdpsgv  
gfyfsighssv1lmaf1l  
gsvkwakdelphfqdiggtigt1vsgff1vl1gvl1n1ilisl1n1lfaklrreheeaevd1llesrg1vsr1fvgyf1k

Tsompanidou\_et\_al\_Supplemental\_FASTA\_File

litrshvlpplgflfglfgf  
dtaseiallalssgasqqaisfigilsplilfasgmslldtdlgvumkyaynwaffnpirkiyynititaisvmaalvig  
miellqiladklldhgafw  
afigsiefdylyilvalflitwlissliwkfgriehkwsr  
>tr|A8Z5J9|A8Z5J9\_STAAT  
mdkyilnrkirsqneviskrndlkmttesva  
>tr|A8Z5K3|A8Z5K3\_STAAT  
mtfnhivfknlrqnlkhyamylfslffsivlyfsfttlqftkgvnnddsmiikkgalvgsiflfiiviflmyanhlfv  
krtrrefalfqligltrqn  
ilkmlaleqmi vflitgvvgvlcgiagaqlllsivsklmslsinlsihfepmalvltifmliiayvlilfksalflkrrs  
ilsmmkdsiktattakvt  
taevisgvlgiamia lgyymatemfgtfkaltmamtspfiilfltvvgaylffrsvslifkflkkskngrvsitdvvft  
ssimyrmkknamsltiiai  
isavtvvlcfaalsksntdqtltsmapnefnvatqdaqfektlsqqqitfsknayetitvndvndqviltengsdsg  
rtnsilsannkltgnnaii  
tntkslpniinihlnkdllvkgtknetfrvtqedkgkvypnlfnspvievspekyqqktqnnvhtfygydikqtsqk  
ekaqaiaqfgdkvityde  
mkkevdatnglilfvtsflglafivaagciiyikqmdetedelsnfrilkrigfthtdmlkglllkitfnfglplliaiil  
havfaaiafmlmgnisfm  
pvivvivytlityitfaliafvhsnklikkti  
>tr|A8Z5K7|A8Z5K7\_STAAT  
mkiktfatfthrqldkqvnrfkndihvlei qihsnwlyisaivfyedk  
>tr|A8Z5L0|A8Z5L0\_STAAT  
mgyksts lfgecssniqrklifitarnissrffnfeikkstkvdyvfahvdlsdv  
>tr|A8Z5L4|A8Z5L4\_STAAT  
mklifliviavlvsacsnsshake lndlekkynahigvya lntksgkevknfsdkrfayastskainsailleqvpyn  
klnkkvhinkddivayspi  
lekyvgkditlkelieasmtysdntannkiikeiggikkvkqrkelgdkvtnpvryeielnyyspkskkdtstpaafgk  
tlnklian gklskknknl  
ldl mfnknngdtlikdgvpkdykvadksgqaityasrndvafvypkgqsepivlvi ftnkdnksdkpndkli setaksvm  
kef  
>tr|A8Z5L5|A8Z5L5\_STAAT  
makllimsvvsfcfiflllvffryilkryfnyslnykvwyltm laglipfipikfsfikfnvnnqaptveskshdlnhn  
inttkpiqefttdihkfnw  
dsidnictviwivlviilsfkflkallylkyllkqsllylneneknidtilfnhqyknivirkaeaiqs pitfwygyki  
ilipssyfksvidkrlyki  
ilheyahaknrtdlhlifnifsiimsynplvhivkrki ihdneveadrflnninknefktyaesimdsvlktpfsnkn  
ilshsfngkksllksrlin  
ikeadlkkqsklilifificiftffimi iqsqflmgqsltdynykkplqsdyqildesknfgsnsgsfvmysmkdkkyyiyn  
ekesrkryspd stykiyla  
lfgldrhiisdksnrmswnhkhylfeswnkeqd lntamqnsvnwyferisnqipknytaaqlkq lnygnenlgsykywym  
eds lkisnleqvivfknmm  
eqnnhfskkaknqlsssllikknekyelygktgtgivingkyngwfvgyvitnhdkyyfathlsdgnpsgknaeliseki  
lkmgv lndq  
>tr|A8Z5L7|A8Z5L7\_STAAT  
mkigy arvstglqnlnlqedr lntygceki fndhmsgskskrpgldkaiefarsgdtivvwrldr lgrnmedlitlvnel  
nergvsfhsleeni tmdks  
sstgqlfhlfaafaefernlilerssagriaarargrygrpeklnkqdl nllktlydngtpiktiaeqwqvsrttiyr  
ynkleakenknk  
>tr|A8Z5L8|A8Z5L8\_STAAT  
mnklekws lvfii ftflsslallyfkynfssvmpvlsilsiltilltsiitvsvndedt  
>tr|A8Z5L9|A8Z5L9\_STAAT  
mnyfrykqfnkdvi tvavgylyryalsyrdiseil rergvnhstvyrvwqeyapilyqiwk kkkhkayykwridetyi  
kikgkwsylyraidaeght  
ldiwlrkqrdnhsayafikrlikqfgkpkv itdqapstkvamkvikafklkpdchctskylnnlieqdhrikvrktr  
yqsintakntlkgieciya  
lykknrrslqiygfspcheisimlas  
>tr|A8Z5M0|A8Z5M0\_STAAT  
makmr ispelkkliekrycvkdtegm spakvyklvgenenlylkmtdsrykgttydverekdmm lwllegklpvpkvlhfe  
rhdgwsnllmseadgvlcs  
eeyedeqspeki ielyaecir lfh sidisdcpytnslsrlael dyllnndladvdcenweedtpfdprelydf lktek  
peeelvfshgd lgd snifv  
kdgkvs gfidlgrsgradkw ydiafcvrsi redigeeqyvel ffdllgikpdwekiky yilldel f  
>tr|A8Z5M1|A8Z5M1\_STAAT  
mitemkagh lkdikpsepfevigki ipryenenwftell yeapylksyqdeedeedeeadcle yidntdkiiylyyqd  
dkcvgkvklrknwnryayi  
ediavckdfrgqgisalinisiewakhknlhg lml etqdnnliackfyhncgfkigsvdtml yanfekavfwylrf  
>tr|A8Z5M2|A8Z5M2\_STAAT

Tsompanidou\_et\_al\_Supplemental\_FASTA\_File

mnyfrykqfnkdvltvavgylyryalsyrdiseilrergvnhstiyrvvqeyapilyqiwkkkkkkaykwriddy  
kikgkwsylyraidteght  
ldiwlrkqrdnhsayafikrlikqfgkpkvtdqapstkvamvkvikafklkpdchctskylnnlieqdrhikvrktr  
yqsintakntlkgieciya  
lykknrrslqiygfspsccheisimlas  
>tr|A8Z5M3|A8Z5M3\_STAAT  
mdnllrtefiklkrsymflisilgtcvapfmvvasfismrtkvptpnivfkqlfeevslyhmliigpplygviiaylfg  
reyiedtlknllipisre  
sflvskiillflwiqtlsviawlltllmllgmllhfqglsqslidsffftviggvllwilspiiilsiyfknyvptivlt  
iitlinlmtansehrgrlf  
pwaavgdlsrgtlnptypflslsliiivtsifsviilfsyfkktdis  
>tr|A8Z5M4|A8Z5M4\_STAAT  
mnnieinnltkqygsqiaavnlsitvesgqiylgrngagktttirmllglikptkgnikifekefesnkteilkng  
amvetpgfysnltakenlt  
inakillgikenaieevleivglasekvklfknylmgkqrlgiaraallhnpellildeptngldpigikeirklikdla  
qsrnitilsshilseieq  
lydkvgiihngvllleeimyedlkkknrqfisisvsdeekvacllletnfgiydykikengefkisyhidrqqeirllvln  
nidvfqmrviendletyfe  
dlvgggtig  
>tr|A8Z5M5|A8Z5M5\_STAAT  
mnyfrykqfnkdvltvavgylyryalsyrdiseilrergvnhstiyrvvqeyapilyqiwkkkkkkaykwriddy  
kikgkwsylyraidteght  
ldiwlrkqrdnhsayafikrlikqfgkpkvtdqapstkaamakiiikafklkpdchctskylnnlieqdrhikvrktr  
yqsintakntlkgieciya  
lykknrrslqiygfspsccheisimlas  
>tr|A8Z5M6|A8Z5M6\_STAAT  
meqytikfnqinhkltlrslnighlyayqfekialigngtgkttllnmiaqtkpesgtvetvgeiqyfeqlnmdven  
dfntldgslmsehipmht  
tdsmggekakylanvisnyspilleptnldkigkdylnilkyyygtliivshdralidqiadtiwdiqedgtir  
vfkgnytqyqnyeqeql  
qqrqyeyisekqrlsqaskakrnqaqmaqasskqknksiapdrlsaskqkgtvekaaqqakhiexmehleevekpq  
syhefnfpqnkidydhny  
pialqnltlvkgsqklltqvrfaqpygnialvgangvgkttlleaiyhqiegidcspkvqmayyrlayedmrdvsllq  
ylmdetdssesfsrailnn  
lgnealdrscnvlsggertklslavlfstkanmlildeptnflidktlealemfmkypgiilftshdtrfvkhvsdkk  
weltgqslhdit  
>tr|A8Z5M7|A8Z5M7\_STAAT  
mtrhneiikcaekyqlhiqpqtislnesglfdqavfgkdkhgvevvlrprpdykrkpekqtvdflqknvsfeipkw  
kvhakdliaypkltgkpaa  
tidpeiqnvyweiehkplpenfintlaetlvdlnhipeeninvqhiniktiqueikndfrrmknvketygvsdelwnrk  
qwlendeiwprhatmihgd  
lhpghimvndqanvtgldwteathsdpsmdfighhrvfddegleglityagkaggeiwprmkheiielnavfpmfiaef  
amesgesayetmalkeilm  
ke  
>tr|A8Z5M8|A8Z5M8\_STAAT  
miigyarvssidqnlqrldnktfgvekiftekqsgksvenrpvfqeaInfvrmgdrfvvesidrlnrydeiietvny  
lkekdvqlmitslpmnev  
ignp1ldkfmkdliaqilamvseqerneskrraqqgiqvakekgvykgrpllyspnakdpqkrviyhrvveleegkais  
kiakevniqrqvyrikhd  
kgl  
>tr|A8Z5M9|A8Z5M9\_STAAT  
mnlipfiiilifsc1wtaitnky1psetldkkqqdryderqrkmfieilaksfiwivycmlftlvkftglspisiegsw  
fsqypeiffiivalflmlf  
nyttnkkiyi  
>tr|A8Z5N0|A8Z5N0\_STAAT  
mknrireyrkqkgsqetlskelkvsrqtinaiennkydptltafklarlfddttvdelv  
>tr|B0BLD3|B0BLD3\_STAA1  
gksnnnfavaa  
>tr|B9ZUY0|B9ZUY0\_STAAE  
memmnaekhmqqmmqmlqncvidkyvshdeyeeliaidkhgnkmfikfypnteddtne  
>tr|D0K2F7|D0K2F7\_STAAD  
malkkvltiagsdtsagagmqadlktfqeldtygmvaltaivtmdkdtwshdvtplpmdvfekqleta1sigpdaiktgm  
lgteeikragevyeasna  
qyfvvdpmvckgedevlnpgnteamiky1l1pkatvvtpn1feagqlsglgklnsiedmkaatiiidkgaqhviikggk  
aldqksydllydggtfyq  
ltdmfqqsynhgagctfaattaylangkspkeavisakafvasaikngwkmdfvpgvdhgyaynriehidvevte  
>tr|D0K2G9|D0K2G9\_STAAD  
miqvkapgklyiageyavtepgyksvlialdrfvtatieeadqykgtihska1hnpvtfsrredsivisdphaakqly

Tsompanidou\_et\_al\_Supplemental\_FASTA\_File

vvtaiejefeqyaksdiam  
khfhltidsnlddsngkhyglgssaavlvsvikvlnefydmklnslyiyklavianmklqslsscgdiaavsvysgwlays  
tfdhewvkhgiedttveev  
liknwpghlieplqapenmevligwtgspassphfvsevr1ksdpsfygdfledshrcvekliahfktnnikgvqkmvr  
qnrtilqrmkdeatvdiet  
eklky1cdiaekyhgasktsaggdgcgitiinkdvdekiydewtkhgikplkfnihygg  
>tr|DOK2H1|DOK2H1\_STAAD  
mlefniavhv1af1tkhhsekfnsslaelctlnpvqlrrvttqlvd1kmidtirgkdggylansadvs1atlykhf  
v1ekehtr1ftgdegshc  
qiarniattmshyqqdeqniifnyektikdviediqlchedlcheni  
>tr|DOK2H5|DOK2H5\_STAAD  
midistwis1ffpfnwfpkryvkisreefenlnivkpkknvfwvasist1favtlrkyt111dtqldkklviaic  
cttfigilifyvr1ikkss  
lniyntknrskii1iptlknfcft1fgyvflifwtvifsyallsmsyqniivyfawitaiigfflvnia1iidknihi  
1kn  
>tr|DOK2H6|DOK2H6\_STAAD  
mvceviaiyknpyriikyndeylmyniinnwlv1fip11nw1tpkryikisqeel1ntf1kpkanna1fwpalgssv1f  
svtfrkymplfnvr1ekti  
viaiffvflg1ffynln1rr1alsvftmneksqkm11pnlkhfffiifaylyfggfsfftlyalitidvqniifi  
cwgavtmffffinivpigi  
kkahv11kkae  
>tr|DOK2I1|DOK2I1\_STAAD  
msekkgnfn1ikndpldghkgtnigsislndiapvfidvankeafidiggmharakvekgvkwitdkaavegdeakeyw  
1cwvterneqgpyyag1t  
acy11vnkairrgyksmphevnmmdksmkhhiidqigdenkailkdf1mnhdegmwl1ssdalhqafn  
>tr|DOK2I3|DOK2I3\_STAAD  
mdkkvsiqtqv1kqhnekef1t1egtwqqrqsnfiryveqiedatvntikvddsvklirkgdinmnlhfvegqtt  
ttfydisagriplevkt1r  
ihfvsgdgg1k1hyelyqdnekmg1syqeyinykeige  
>tr|DOK2I6|DOK2I6\_STAAD  
mkdndkqgsddngsskspyhrivs1mpsn1e1y1elg1gkyivgvstvdypkdvkegkqfda1n1nke11kakpdi  
1ahesqkatankv1sslek  
qgikvvyvkdq1s1detyntfkqigk1thhdkqaeq1veetkdn1dkvidsipahhkk1skvfievsskpeiytagkhtff  
ndm1ek1lea1qnvysdingw  
npvtkesi1kkn1pd11isteaktrsdymdi1kkr1gfnkinavkn1tr1evngdevsrpgprideglkelrdaiyrk  
>tr|DOK2J4|DOK2J4\_STAAD  
m1if1tkpnanpeiqs1clmnn1fykhffvyfsflisyn  
>tr|DOK2L1|DOK2L1\_STAAD  
mny1snffnttiq1n1y1i1vivaacyiaihqyrhkpvl1ny1ldv1lny1pvl1thefghv1fnk1laggrakdlv1v1tsprer  
qqt1qqgfai1tqsrh1agg  
w1tt1ggyl1mppi1m11ig1lasshyq1psffifty11ifiy1fl1tsrk1gspiv1t1isimly1fil1kdeniveiq1llvtm  
syqy1sv11gevlqsswt  
iak1tfq1rps1qwdgsal1k1shvpi1fiystiwi1fn1yavni1lkyth1in  
>tr|DOK2L3|DOK2L3\_STAAD  
mnsvni1knvtkeyr1yrtnkermkda1ipkhkn1tffa1ddis1kayegdvig1vgingsgk1t1sni1ggs1sptvgk  
vdrngevsvia1sag1sgq  
1tg1enie1fkm1cmg1fkrkeikamtpki1efselgef1yqpvkkyssgm1rak1gfs1nitvnpdi1lvideal1svgdq1tfa  
qkcl1dki1yefkeq1nktiff  
vshn1gqvrqfctkiawieggk1kdyge1ddv1pkyeaf1ndfkkkskaeqkefrnk1dearfvik  
>tr|DOK2L5|DOK2L5\_STAAD  
mnv1ikkfyh1lvvr1l1skmi1tpqv1dkphivfmm1t1pedikpi1kt1n1ssyqktv1t1tpkqapyl1sel1sddvdviemtn  
rt1vkqika1ksaqmi1id  
nyy1ll1ggynk1tsnqhi1vtw1hasgal1knfg1tdhqv1dvsdkamvqyrkvyqatdfy1vgceqmsqcfkqslgateeqm  
lyfg1lprinkyytaeratv  
kael1dkygi1tnk1lv1yvptyredk1adnraidkayfek1lpgyt1ink1hpsieds1diddvssid1tst1mlmsdi1isdy  
ss1pieas1ldipti1fyvy  
degtydkvrg1nqfyka1pdsykyvteed1imti1qekeh11spl1fdwhkyntdks1hq1l1teyidk1mvtk  
>tr|DOK2M2|DOK2M2\_STAAD  
mnr1hgqkvki1gygdnti1ink1dveipdgkvtsi1gpn1gcgk1st1lka1sr1lavkegevf1dgeni1htqstkei1akkia  
1lpqspevadgl1tvgel1vs  
ygrfphqkgfgr1taedk1eidwamevtgtdtfrh1rsind1sggqrqrviamalaqrtdi1fldepty1ldichq1leil  
el1vqk1nqeqgcti1vmvlh  
dinqairfsdh1iamkegdi1atgstedv1tqeilekvfnidv1l1rkd1pktgkpl1vtyd1l1crrays  
>tr|DOK2M4|DOK2M4\_STAAD  
missnknrrq1lialavfs1ll1fgctws1tsgeynipverffkt1liggdai1del1ll1dfr1lprmm1tilagaals1sga  
ivqsvtknpi1aepgilgin  
agggfaial1fiaigkinadnfvv1pl1s1il1ggittali1if1fsfnknegvtpasmv1igv1lqta1lyggsit1imskfdd  
kqsd1fiaawfagniwgdew

Tsompanidou\_et\_al\_Supplemental\_FASTA\_File

pfviaflpwvliiipyllfksntlniiehtgdniarglgvrslsrerlilffiaavlssaavavagsisfiglmphiakri  
vgprhqflpialvgac1  
lviadtigkivlqpggvpagivvaiigapyflylmyktnv  
>tr|DOK2M5|DOK2M5\_STAAD  
mkklinkketfltdmleglliahpe1dliantvivkkakkehgvaiivsgggsghepahagfvaegmldaavcgevftspt  
pdkileaikavtdgdgv11  
vvknyagdvmnfemagelaemeginvqtvi vrddiavtnevqrrgvagt vfvhklagylaekgysl teiksrveallpei  
ksigmaiepplvpttgkyg  
fdieddkmeigigihgekghreevkdidrivgt11deleykevtandvilmvngmggtplselnivtkyiqqnlartvn  
vakwfvgdymtsldmqgfs  
itivpnkpeyleaf1apttsqyfk  
>tr|DOK2M7|DOK2M7\_STAAD  
mpkiilvshskeiasgtsllkqmagdvdiipigglpdgsigtsfdiiqevl tkleddalcfydigssemnvdmiaemyd  
gnhrv1kvdapivegsfia  
avk1siggsiddalaeikqsfq1kftnekckpfsnet1  
>tr|DOK2N0|DOK2N0\_STAAD  
mnkdnkwtmitalfitvisv1lafh1kqhydqitnenhankdkiniknknvriyqnltnrvfppnskl diitpvdmsna  
klpvi fwmhgggyi agdkq  
yknpllakiaeqgyivvnvnyalapykyptpli qmnqatqfikenkmlpidfnqvi iggdsagaqlasqftaiqtndr  
lreamkfdqsfkpsqikga  
ilfggfymqtvretefpriqlfmksytgeedweksfkni sqmstvkqstknypptflsvgdsdpfesqniefskklqel  
nvpvdt1fydgthh1lhqy  
qfh1nkpesidnikkv11flsrntsssgiqteekp qmenpsnelplnpln  
>tr|DOK2N4|DOK2N4\_STAAD  
mqi1lveddnt1fqelkkeleqwdfnvagi edfgkvmdtfesfnpeivildvqlpkydgywcrkmrevsnvpilflssr  
dnpmdqvmse1gaddymq  
kpfytnvliaklqaiyrrvyeftaekrt1twqdavvd1skdsiqkgddtifl sktemiileilitkknqivsrdtiita  
lwddeafvsdnt1tvnvr  
l rkk1seismdsaietkvkgymahe  
>tr|DOK2N7|DOK2N7\_STAAD  
mtfneiifknfrqn1shyaiylfslitsvlyfsfvalkyahkl nmtesy piikegsqvgsyflffiiiafllyanv1fi  
krtsyelalyqt1gl1skfn  
iiyilmleqllifiiitailgiigiifgsk11lmivft1lgikekvpiifslravfet1mligvayfltsaqnfilvfkqs  
isqmsknnqvketnhnkit  
feevv1gilgivilittgyylslnivqyydsigilmfillstvigaylffkssvs1vfkmvkkfrkgvisvndvmfsssim  
nrikknafsltvmiaisai  
tvsvlcfaaisras1sseiky taphdvtikdqkanqlase1nnqkiphfynykevihtklykdn1fdvakepynvtit  
sdkiypntdlkrggad1fv  
aegsikdlvkhkhkgkaiigtckkhvnik1rkdkinkyfmdvd1ggptfv1ndkdyqeirkhtkakhivsqfgfdlkhk  
kdalalekvknkvdsikt  
rseai1ss1stgillfvtsflgitfliavcciiyikqidetedelenysilrk1gftqkdmarglkfkimfnfglplvi  
alshayftslaymklmgtt  
nqipvfi vmglyicmyavfavtaynhskrtirhsi  
>tr|DOK2P8|DOK2P8\_STAAD  
mkiedyr1l1it1detk1rkaaeilyisqpavtqr1kaienafgvdifirtkkqlitttegtmii ehardmlkrerlffd  
kmqahigevngtisigcss  
ligqt1lpevl1slynaqfpnveiqvqvgsteqikanhrdyhvmitrgnkvmnlanth1fnddhyfifpknrrddvktlpf  
iefqadpiyinqikwynd  
nleqdyhatitvdqvatckem1isvgvtilpeimmkniskeqfefekveidneplirstfmsydpsmlqlpqvdsfvn1  
masfveqpa  
>tr|DOK2P9|DOK2P9\_STAAD  
mdmfaa1lqiknyk1fvanmfl1gmgiavtvpvylv1fatkd1gmttnqyg11lasaa1sqftvnsiiaarfsdthhfnrki  
i1ilal1mga1gfsiyffv  
dtiwlfi1lyai1fggl1fapampqlyasaresinvssskdraqfantv1rsmfslgflfgpfigaqliglkgyag1fggti  
si1lft1v1qvffykdl1ni  
khpistqqhvekiapnmfkdk11lpfiafi1lhigqwmytmnmp1fvtdylkeneqhvgylas1caglevpfmiilgv1  
ssr1htrt1liygai1fggl  
fyfsigvfk1fymmlagqvflaiflav1lgigisyfqdilpdfpgyast1fsnamvigq1ggn1lggamshwvglevff  
vsaas1m1gmi1liff1tknq  
kitkedmist  
>tr|DOK2S2|DOK2S2\_STAAD  
maknkktnamrml drak1kyevhsfevpeeh1sgaevaeliqanvktvfk1vlentkhehfvpvset1dmkkaa1  
vgekk1qlmp1dn1knvtg  
yirggcspvgmkt1fptvvdksenyshisvsgglrtmqitiavedlititkgkigavihe  
>tr|DOK2S3|DOK2S3\_STAAD  
mmiitekrhelileeshkdf1tlqelidrtgcsastirrd1sklqqlgklqrvhggam1kenrmiean1teklatn1de  
kkmiakiaaangindnecl1f  
idagsst1elikiyakdiivvtng1thvea1lkkgikt1m1ggqv kentlatigssame1lrrycfdkafigmng1die

Tsompanidou\_et\_al\_Supplemental\_FASTA\_File

lglttpegealvkqtams  
lanqsfvlihdskfnkvyfarvp1lesttiitsekalinqeslkeyqqkyhfiggt1  
>tr|D0K2S5|D0K2S5\_STAAD  
mrvtel1tkdtiamd1mandkngvide1vnqldkagklsdvasfkeaihnrqssttgigegiaiphakvaavkspaiaf  
gkskegvdyqslmqpah1  
ffmiaapeggaqth1dalak1sgilmdenvrek1lhasspeevlaiideaddevtkeeeaeaeaqqvataeqsskqsne  
yvlavtactptgiahtymar  
dalkkqadkmgikikvetngssgiknh1teqdienatgiivaadvhvetdrfdgknvvevpvadgikrpeelinkaldts  
rkpfvardgqrkgnsnds  
ek1spgkafykh1mngvsnmlplvisggi1mai1vflfgansfnpkssseyna1faeq1lwnigsksafaliipilsgfiarsi  
adkpgfasglvggmlaisg  
gsfg1ggi1agflagyltggvkamtrk1pqa1leg1kpt1iypl1tv1tatg1lmiyvfnppasw1nh11ldg1ln1sgsni  
v1lg1v1gamma1dmggp1f  
nkaayvatgal1egnaapitaamiggmipplaiatam1lfrkftkeqrgsi1pnyvmgmsfitegaipfaaadplrvi  
psmm1gsg1ggai1lg1gs  
ritaphggi1vivgtgdgah1lqt1ia1lvg1t1vsaliygl1kpk1teteieasksmde  
>tr|D0K2S9|D0K2S9\_STAAD  
mki1rv1pc1fnegevi1tqthq1ltei1sqdssvkgydynml1fiddgst1dt1demqhl1atidrhvsfisfsrnf1gkeam  
iagyqhstefdavim1dcd  
lqhppey1pkmveg1fmedyqviakrd1rsgenfsrkt1shlyy1k1vnc1fveevq1fddgv1gdfr1l1sqravksiasleeyn  
rfsk1gl1few1gyntkvf1ty  
qnverqkgeskwsfkk1fn1ygidg1isfn1skpl1rmmiy1gl1f1f1sisv1lyi1yl1finim1isgvn1ipgyfstiaa1ll1gg  
iql1is1igv1vey1gri1yye  
vkvrpky1iqatn1l1ssi1endek1dthkvysk  
>tr|D0K2U1|D0K2U1\_STAAD  
mkkir1le1vyl1raii1caii1iah1l1tqit1khenmeggs1vl1qfy1rniv1fgt1pcfi1l1sq1l1tt1nyqkvtyryl1tr  
vkiyl1ipy1lmg1lfysye  
s1l1tdssfnkqfienv1l1gqwygyfi1v1vimqff1l1syi1f1kinyn1l1fnski1l1l1sfil1qqs1f1yyft1ntaf1hd1tv1lhy  
ypl1sentii1fgwi1fyff1lg  
aymgyn1yerv1nflery1lvimiv1lavaty1fvfialangdywnvts1fsys1ltpynsimfiv1lgicthfktm1l1fntiqmis  
afsffiy1l1hpi1l1ds1lfa  
ytnifedntmv1flais1l1fil1gl1cigvgm1l1refy1ifr1fi1gkpyk1lninay  
>tr|D0K2U4|D0K2U4\_STAAD  
mksk1l1snsgidvtvkdv1ekymnrynevmmgkng1ekakel1cl1s1l1piniiv1vft1ffv1f1l  
>tr|D0K2U6|D0K2U6\_STAAD  
mikkri1pc1l1dvkdgrv1vkgi1qfkg1l1rdi1gnpvd1laiyye1agadel1v1f1di1skteeghs1m1levieqtasr1l1fipl1tv1g  
ggi1qs1l1ddi1tq1l1nhg1adk  
vs1nssa1knpq1likqasdkfgrqc1ciaidsy1dperkahyccthg1gkmtnikvyd1wv1qqveq1lgagel1l1vtsmghdg  
mkqgfdiehlakikslvni  
piiasgggnaqh1fvel1nqtdvs1aglaasi1l1hdrettv1qsikevirqggi1avr  
>tr|D0K2V3|D0K2V3\_STAAD  
mgern1fwqhehqiyal1rndftd1q1l1ryysmyptaatk1vayt1gli1irneaa1vqvg1lenyaps1lanvqqs1kl1fiqfiqq  
l1rdnvhf1v1l1ghyq1l1dal  
l1dks1l1qtpdi1l1smieern1sg1lvty1l1stehpiv1qil1kentqq1l1nv1lehyipndhpa1l1velkiwerw1l1htqgykdi1h1di  
taqpprsy1ytgl1fiqchfa  
enesrv1l1tggyy1kgsie1gfg1l1gl1t1  
>tr|D0K2V7|D0K2V7\_STAAD  
mtepi1is1fkdfs1fqyhsqat1pt1qnin1vdi1ypgekv1lv1vgasg1kstf1ancing1lipfktkgnit1gelyinnqdatvsc  
l1hd1rsnv1vgt1v1l1qtd1gdqf  
ig1l1taaedma1fl1enn1cveqddm1kknvsy1waekvgmieh1nhrpqd1l1sggqk1qrvs1l1ggil1i1hrtpil1il1deplan1dpa  
tghet1l1r1l1nni1heetkst  
mi1ivehr1lees1l1ddt1fdrv1l1fkdgki1iant1psd1l1kssk1l1keagi1re1plycta1kyaevdvesidn1lan1l1rdvc1mseh  
vkfk1vkkwidetsanndk  
yksep1l1el1nev1cvqys1dysnsv1l1nnvq1l1nyvrrem1sivghngagk1st1lakaicg1f1dit1gni1qfcnr1gfn1ql1sisers  
efvg1ymqnp1nhmi1sekmi  
ydeva1gl1rargm1kesdiki1rvenv1kicr1lyaf1rnwpiaa1l1sygqkkrvtiasv1l1v1npei1il1deptagqdfyhynei  
msflie1l1nrqgk1ti1imith  
dmh1l1seyss1rtv1l1skgqv1vad1t1tpv1l1l1ndkkiceias1l1rqts1l1femaeyig1isepqk1lv1q1finh1drkvrrq  
>tr|D0K2V9|D0K2V9\_STAAD  
mgny1v1l1qsdf1gl1sdgavs1amygvaytvsndi1rven1l1thd1ippydi1wvasyr1lyqt1vkywpkg1tv1fvs1v1dpgv1gsdrrs  
iacl1tysghy1i1tpdngs1l  
shikhyegi1kkvie1devksr1l1phseesht1fhgrdv1yayngar1laankia1fer1lgqainv1dsiealei1reatk1neds1vtg  
sid1l1di1rfgs1l1wtnip1la  
flks1l1eivhg1nn1lvvtiy1hqdkkvyqni1k1fars1fad1v1nvgepl1vyvns1l1vnig1vavn1qds1fsd1lyhigt1gndwtih1l1sk  
apsi  
>tr|D0K2W5|D0K2W5\_STAAD  
mtkt1v1fdvi1dmgl1y1lvny1dawkvekv1l1ddyhep1fsntih1wqfghv1l1tifesa1lavagkenid1l1niyr1pl1fgng1spd  
ewkdevpsieki1leg1qt1

Tsompanidou\_et\_al\_Supplemental\_FASTA\_File

perarn1teddlaielkqpivgcnnleellvlnaihiplhagkieemsri1kn1k  
>tr|D0K2W7|D0K2W7\_STAAD  
mnieykkgifla1sayi1wgi1piywqfvdaigafeilafriifsaifmifilavgqqrnafqrdmnqllgkpiqllai  
vvagyvitlnwgtfiwavnghvlqtslgyyinplvsillaiflkerfnkfewlailfafigvlymtlkigefpivsiilalsfgtygllkkvvhida  
issitiectivtapagliyv  
iylwqqhqmsfglnmssfwllfsgaitaiplilfsagakriplsligfiqyvgtimfvlgifvfkepfsidqlitfifi  
wtgivilyslsqyiklkkhp  
vakt1  
>tr|D0K2X3|D0K2X3\_STAAD  
mtfnhivfkn1rqnlkhyamylfslffsivlyfsfttlqftkgvnnddsmiikkgalvgsiflfiiviflmyanhlfv  
krtrtrefalfgllg1trqn  
ilkmlaleqmi1vflitgvvgv1cgiagaqllsivsklmslslsinlsihfepmalvltifmliiayvllifqsalflkrrs  
ilsmmksiktattaktv  
taevlsgvlgiamialgyymatemfgtfkaltmamtspfiilfltvvgaylffrsvslifk1kkskngrvsitdvvt  
ssiiyrmkknamsltiia  
isavtvtv1cfaalsksntdqt1tmapnefnvatqdaqfetk1sqqqitfsknayetitvdnvdqvitlengsdsg  
rtnsilsannkvtnnain  
tntks1pniinihlnkd1vkgtknetfrvtqedkgrvyp1n1sfnsppvvevspekyqq1ktqnnvhtfygydikqtsqk  
ekaqaiaakqfgdkvityde  
mkkevdatngilifvtsflglaf1vaagciiyikqmdetedelsnfrilkrigfthtdmlkglllkitfnfglplliai1  
havfaaiafmlmgnisfm  
pvivvivyvlyitfalafvhsnklikkti  
>tr|D0K2X6|D0K2X6\_STAAD  
mnlskqikkyrerdgysqeylaeklyvsrqsiswendks1pdihn1lmmcelfnvt1ddlvkgtipfvpdikvqrs1n1  
wtvymli1fntlaai1mgpl  
vvywnwtwgitvai1lgifyasmkied1kkvhkmdnydrivafmngkdpsevqttkarntmtnalsiisaigilsliif  
1svymankf1  
>tr|D0K2X7|D0K2X7\_STAAD  
mkffvvggfav11syivsvt1pwkefggi1fatfpavflvsmf1tgmqygdkvavhvsrgavfgmtgv1vcilvtwmm1hmt  
hml1sisiivgf1swfisav  
cifeavefiaqkr1ekhswkagsnsk  
>tr|D0K2Y0|D0K2Y0\_STAAD  
mtvewlaeq1kehnie1tetqkqfqtyyr11vewnekml1tsitdehdvylkhfydsiapsfydfnqpisicdvgaga  
gfpsip1kimfpq1kvtiv  
dslnkriqf1nhlase1qlqdvsvfihdraetfgkgvyresydvtaravar1sv1selc1plikkggqfvalkskgeee  
leeakfaisv1ggvnteth  
tfk1pedagerqmfi1dkkrqtpkkyprkpgtpnktp1lek  
>tr|D0K2Y1|D0K2Y1\_STAAD  
m1tin1dniafmpcnp1svggpakgi1vveida1ggqmaktidkthiqmrm1ntgkpvavralraqadkvlyqqemkrvie  
deen1himqgmvdeliied  
nevgvrt1nigtely1skavi1ttgtflrgei1lgnmkysgpnhq1psit1sdn1relgfdivrftgtpprvnsktidy  
skte1qpgddv1grafsfet  
teyil1dq1pcw1tytnaethkviddn1h1samysgmikgtgprycpsiedkfvrfndkprhq1flepegrntnevyvqg1  
stslpehvqrqm1letipg1  
ekadmmragyaieydaivptq1lwpt1etkmikn1lytagqingtsgyeeaaqgglmaginaagkv1ntgeki1srsdayig  
v1idd1vtkgt1nepyr11t  
sraeyr111rhdnad1rl1tdmgyelgmiseeryarfnekrqqidaieikr1sdirikpnehtqaiieqhgg1srlkdgilai  
d11rrpemt1diileilee  
ehq1nadveeqveiqtkyegy1nks1qqvekvkrmeekkiped1dyskids1lateareklsevkplniaqasrisgvnpa  
disi1liyleqgk1qrvsd  
>tr|D0K2Y9|D0K2Y9\_STAAD  
mkiysqgdqai1vvaiekevsk1ted11t1rsy1ieqny1pfi1eivpsedmm1vydardmikhhniqsp1flymkalies  
ih1nikhdfnqgd1ieipi  
vygskygpdi1es1lkhyk1k1etfie1hsktqyfvsmmgyspgfpy1tglnkk1yinhtskqkkfipagsv1legkkcgi  
v1tdt1ndw1v1gytp1s1  
fnpkedfar1k1gdnikfrpinene1dvga1fkdvnhn  
>tr|D0K300|D0K300\_STAAD  
mahgrqqdelqdi1t1lgnqdn1tyndy1rpdv1esfdnkhqgrdy1vkfncpeft1scpitgqpdfatiy1syipnkvme  
sk1kl1yl1fs1frnhgd1fhe  
dcmni1mnn1ie1mdphy1evwgk1ftprggi1sidpy1tny1grpnskyekmaehr1mnhd1lypek1dnr  
>tr|D0K302|D0K302\_STAAD  
mynethni1v1krkrhni1c1fvck1cfiye1itfksn1tqk1fnsy1q1livi1flenv1skwkisndvnttysdfytfnpyk1  
1fsq1  
>tr|D0K304|D0K304\_STAAD  
mktmeekky1nhie1l1nevtkrredg1ffs1lekdqea1vay1eevkdkt1ilfdteier1ry1vdndfy1fnvfdiysead1ie  
itdyaks1sf1nfasymsas  
kffkdyal1k1tndksqy1ledynq1hvaiva1y1langnkaqakqfi1samveqryqpatpt1fnagrarrge1vsc1fl1evdds



Tsompanidou\_et\_al\_Supplemental\_FASTA\_File

lnsinfidstakqlskigg  
gvainlsklrargeaikgikgiakgvlpiaksleggfsyadqlgqrpqgagavylnifhydveefldtkkvnadedlrlst  
istgllivpskffdlakegk  
dfymfaphtvkeeygvtlddidlekyddmvanpnvekkkknaremlnliaqtqlqsgypylmfkdnanrvhpnnsnigqi  
kmsnlctefqlqetsiin  
dygiedeikrdiscnlgslnivnmesgkfrdsvhsgmdaltvsvdvaniqnapgvrkanselhsvglgvmnlhgyllakn  
kigyeseekdfaniffmm  
mnfysiersmeiakergikyqdfeksdyangkyfefyttqefepqfekvreldgmaiptsedwkkllqqdveqyglyhay  
rlaiaptqsisyvqnatss  
vmpivdqiertrygnaetfypmpflspqtmwyyksafntdqmklidliatiqthidqgistilyvnseistrelarlyvy  
ahykgllkslyytrnkllsv  
eectscsi  
>tr|DOK310|DOK310\_STAAD  
mpkvyslidtetrchrhyfteediiakfkccnkyppcykchnefekhaikrwsepsfnekailcgvckheltimeymmv  
ercpncqsrfnrckyhfh  
iyfei  
>tr|DOK316|DOK316\_STAAD  
mknqlidrltryttidtdsqdskstttptstekqwdllhlllekelqqllgllptldengylfatlesnidadvptvgflahvd  
tspdfnasnvkpgqieny  
gkpyklgntkrvldpkvfpeinslvghtlmvtdgtsllgaddkagiveimeaicylqehpeikhgtirigftpdeeigr  
phkfdvdrfnadfatmdg  
sqygelqyesfnaaeavitchgvnvhpgsaknamvnairlgeqfdsllpdsevpertegyegfyhlmnfegtvekatlqy  
iirdhdhkkqfelrkkri  
irddinahfenypkvdisdqyfnmaekilplphiidipkrvfakldipantepirggtdgsqslsfmgllptpniiftgcn  
fhgpyeyasidvmekavqv  
iigivediaenh  
>tr|DOK323|DOK323\_STAAD  
mlyavtgagktemmfqgiqyarrqgdniavsprdvvveiskrikdaflnedidilhqqssqqfeghfvvctvhqlyrf  
kqhfdtifi devdafplsm  
dksllqal kssskvehatismyatppkqllseipheniiklparfhkkslpvpykyfkl nnnkiqkml yrilqdqinnq  
rytlvffnietmiktfsv  
yqkiktlyvhsedvfrfekveqlrnghfdviftttilergftmanldvvidahqytqealiquagrvgklecragk  
vllffhegvsmmiqakkei  
qrmnkllal krgwide  
>tr|DOK328|DOK328\_STAAD  
mmaepnfdnqtkaqdiidknnal kaihngyktl qaevdmdatwdllqeeefdeemkedleqevinfkakvdeyelqlll  
dgpndannail ehhpgagg  
tesqdwanmlfrmyqrycekkqgfkvetvdylpgdeagiksvtllikghnaygyllkaekgvhrlvrispfdssgrhrt  
scdvi p d f n n d e i e i e i n p  
dditvdtfragaggqhinktesairithhpsgivi vnnqnersqiknreaamkmlsklyqlkleeqaremaeirgeqke  
igwgsqirsyvfhpsmvk  
dhrtneetgkvdavmdgdi gpfiesylrqtmshd  
>tr|DOK329|DOK329\_STAAD  
mkklltvtvssvllafllal nnaahaqqhgtqvktpvqhnysnvqaqtqspttytvvagdslykialehhltnqlysynp  
gvtp lifpgdvislvqnk  
vkqtkavkspvrkasqakkvkqpvqgaskkvvkvqapqavaktvnavkpaqvksvptvpvahnyksvanrgnlya  
ygnctyyafdrraqllrsi  
gslwgnannwnyaakvagfvkdtlevgai f q t a a g p y g h v g v e s v n p n g t i t v s e m n y a g f n v k s r t i l n p g k y n i  
h  
>tr|DOK339|DOK339\_STAAD  
mdfqflqtmqvgvwaptqriskrnstgnaswgvgpnteydksaydnvqvvgvqr  
>tr|DOK340|DOK340\_STAAD  
mdhnekekskse llvvtglsgagkslviqclenmgyfcvdnlppvllpkfvelmeqgnslrkvaiaaidlrgkel f n s l v  
avvdvkksesdviidvmfl  
easteklisryketrrahplmeqgkrslinainderekhsqirsianfvidttklspkelkerirryyedeefetftinv  
tsfgfkhgiqudadlvfdv  
rflpnpyyvvdllrpltgldkdvynyvmkwketeiffekltdlldfmipgykkegksqlviaigctggqhrsvalaerlgn  
ylnevfeynvyvhhrdahi  
esgekk  
>tr|DOK346|DOK346\_STAAD  
mgwgpnteagksaynnvqvggaptqkltesqltimcklagpqhrs  
>tr|DOK348|DOK348\_STAAD  
mavkvaingfgrigrlafrriqeveglevvavndltdddmllahllykdtmqgrftgevevvdggfrvngkevksfsepda  
sklpwkdlnidvlectgf  
ytdkdkaqahieagakkvlisapatgdllktivfntnhqeldgsetvsvsgascttnslapvakvlnddfglveglmttiha  
ytdqntqdaphrkgdkrr  
araaaeniipnstgaakaigkvi peidgkl dggaqrvpvatgsltel tvvlekqdvteqvneamknasnesfgytedei  
vssdvvgmtygsllfdatqt

Tsompanidou\_et\_al\_Supplemental\_FASTA\_File

```

rvmsvgdrqlvkvaawydnemsytaqlvrtlaylpelsk
>tr|D0K349|D0K349_STAAD
makkiivsdldlkgktvlvradfnvpdkgeitndnrivqalptiqyieqggkivilfshlgkvkeesdakltlrvpved
lskkldekvfvpetrgek
leaaidkldkegdvllventryedldgkkeskndpelgkywaslgdvvndafgtahrehasnvgisthletaagflmdke
ikfiggvvndphkpvvai
ggakvsdkinvinlvniadkiiigggmaytflkaqqkeigisllfeedkidfakdllekhgdkivilpvdtkvakefsnda
kitvvpdsipadqegmdi
gpntvklfadelegahtvwnpgmvgfefsnfaqgtigvckaiianlkdaitiigggdsaaaaislgfendfthisstggga
sleylegkelpgikaiinnk
>tr|D0K351|D0K351_STAAD
mtkkptaliiidgfandresegnavlankpnfdryynkypttqieasglvlgpegmgnsevghmnigrivyqslt
rinksiedgdfendvlnn
aiahvnshdsalhi fglldggvhshykhlfallelakkgvekvyvhafldgrdvqksalkyieeteakfnelgigqf
asvsgryyamdrkrwere
ekaynafrndaptyatakegveasynegltdfvvpfivenqndgvndgdavifynfrpdraaqalseifanrafegfkv
eqvkdlyatftkyndnid
aaiivfekvdlntigeiaqnnlntqlriaetkyphvtyfmsggrneefkgerrlidspkvatydlkpemsayevkda
leelnkgdldliinfanp
dmvghsgmltptikaeavdecldgevdki dmdgyaiitadhgnsdqltdddqpmthttnpvvpvvtkegvtlretg
rldlaptllldllnveqpe
dmtgeslikh
>tr|D0K354|D0K354_STAAD
mhtflivlliidcialitvvlqegkssglsgai sggaeqlfgkqkqrgvdflnlrliiilsilffvlmicisylgm
>tr|D0K358|D0K358_STAAD
matekel fifvtslsgcsykemsrvlifsls iclltqsaivdeteikevvkkcisqhtivaifivilddklfleflvfi
icnyttstfninv
>tr|D0K363|D0K363_STAAD
mal fyfvsvsqlyqmki sflpalgfngqillerekdqlnimnsateehhkdyiklynlgggaakkiaievllngdkviq
kkyvnilpskegympink
nyeeletienngyeadlnvrmttyhnsrkrqqevilkqqidrfntynkeiydlqfi
>tr|D0K365|D0K365_STAAD
mkkkekhairkksigvasvlvgtligfgllsskeadasensvtqsdsasnesksndsssvsaaapktdtdtnvdsdtktsnt
nngetsvaqpnaqgettsq
sstnatteetpvtgeattdtntqantpattqssntnaee lvnqtsnettsndtntvssvnsqpqnstnaenvsttqdtste
atpsnnesapqntdasnkd
vvsqavnstprmrarfs laavaadapaagdtitnqltdvkvtdsgettvyphqagyvklnygfsvpnsavkgdtfkitvp
kelnlnngvtstakvppima
gdqvlanqvidsdgnvityftdyvdnkenvtanitmpayidpenvtktnvltttgigtntasktvliidyekygqfhnls
ikgtidqiktntyrqti
yvnpsgdvvlpalnlnipntksnalidakntdikvyrvdnandllesyyvnpsdfedvtnqvrifpnanqykvfpt
dddqi ttpyivvvnghidp
astgdla lrstfygydsnfirwmswdneva fnngsgsgdgidkpvvpeqpedepei pipedsdsdpgsdsdsnsds
gdsdgsdstsdsdsasd
sdsasdsdsasdsdsasdsdsasdsdsasdsdsasdsdsasdsdsasdsdsasdsdsasdsdsasdsdsasdsdsdsdsd
sdsdsdsdsdsdsdsds
dsdsdsdsdsdsdsdsdsdsdsdsdsdsdsdsdsdsdsdsdsdsdsdsdsdsdsdsdsdsdsdsdsdsdsdsdsdsdsdsd
sdsdsdsdsdsdsdsdsdsdsdsdsdsdsdsdsdsdsdsdsdsdsdsdsdsdsdsdsdsdsdsdsdsdsdsdsdsdsdsd
sdsdsdgsdssssdsds
dstsdtsdndsdnsdsegsnvvppnspkngtnasnknkneakdskep l pdtgsedeantsliwllaslgsl llf
rrkkenkdkk
>tr|D0K366|D0K366_STAAD
mknkllvslgalcvsqiweshasavvsgeknpyvskaelkdknsksnsyenyrdsleslissl sfadyekyeepeye
kavkkygkfkmaeddal k
flneekiknadi srksndllgltherysyifdtkkknqeflkdieeiqlknsdlkdfnnteqhnadveinnlenkvlm
vgytfyntnkdeveelyse
ldlivgevdksdkkravnqrm lnrkkedlefiidkffkqiqerpesipaltseknhnqtmal klkadteaakndvskr
skrs lntqnnksttqeise
eqkaeyqrkseal kerfinrqksknesvvs liddedndndrqllvsapskktpttpttqtetttqvpmptverqtqqqiv
yktpkplag lngeshdftt
thqspttsnhtnvvvefeetsal pgrksgslvgisqidssh lterekrvikrehvreaqklvdnykdthsykdrlnaqq
kvntlseghqrfrnkqink
vynk
>tr|D0K368|D0K368_STAAD
mkrkvllvtmgvicatqlwhsnhanalvtesvetnfvvksdnknilqthteitteekfsiveksqlnklkal cndnyie
yd lhtnqtgikkgwlygys
eidsshftdrdrvi rrdhvkeaqslindykdtsyedlakatakvtlsqshqnylnkqidkvnnkiektekr

```

Tsompanidou\_et\_al\_Supplemental\_FASTA\_File

>tr|D0K375|D0K375\_STAAD  
mni11nainivittfvifnilitynkd1dd1cwl1pgiicgvilivsfiamitknwlseilffinivlvlyyiyipi  
fysfig  
>tr|D0K388|D0K388\_STAAD  
m1niqdvsh1skkeqkaynrffvesvengn1pv1pciemd1kemqet1sqskiggmpflksfkdipldennvpmv1laqi  
n1nd1peqqel1fpvnegi1  
qfwissedqmygmsen1kgnninsr1vyikepitd1sleniqvhlks1dadnedipfsgafsief1r1skqtitctdykyd  
edv1a1wnkvnp1falksm  
fggyde1mepvcntftakepfnq1ggypyfdqi1dprtdqe1kmydrv11qidstrddnssi1wgdl1gianilvkstd1e  
amk1fddymyswdcs  
>tr|D0K393|D0K393\_STAAD  
mkk1fg1i1v1tfavv1aacgn1ksgsd1kkitvgaspaphae1lekakp1lekkgyd1diktindytt1pnk11dkgei  
danyf1qhtpy1ntekkdkg  
yki1vsagdvhl1epmavyskkyks1ke1pkgatvyvsnp1aeqgr1fkffvdag1lik1kgvkiedakfsditenkkdikf  
n1kqsaefspki1yqnedad  
avi1insnfaieqk1npkkdsiavesakdnpyan1iavkeghqddkkikalievlqskdiqdfinekyngavipak  
>tr|D0K394|D0K394\_STAAD  
mwyekftnk1hgetkyryyeykdp1tnkwrsvv1nkn1gkqsqkeaq11nerieak1ndntptt1ks1tfhvacdewf  
qnyiktsgskrtt1ktk1s  
k1nt1kk1fvdedilinkit1syaqqvfde1dskgyvyqvnkdalsifknvfeytriyk1qd1eflkdit1nkriksyde  
vkakrnkyle1nei1qsiik  
dinmkaqkmhsgihkrfy1fvalmtefqa1ngmrigem1aiknevidfdnks1ningtihwhfdesggfgvkdttktess  
yrtig1srscei1kkai1  
enkkdskwndgy1nrfvftnhkgnpmqterfnki1rksakdvgiekeisshilrhshis11sqgvs1kaimdrvghsd  
hrtt1siyshvteqmdkdm  
mkk1eqvklg  
>tr|D0K395|D0K395\_STAAD  
mkk1fycf11i1fsi1m1fgginevtqnk1tfdi1fmfaifis1livfsivk1fknhh1dyksnksntnhknisnskttqfn  
tvqsdn1hirkn1ithd1et  
nntkkvkqvk1s1tnktnt1nk1dqvk1nenvqennq1d1vidvkdnnnyhyd1nandil1il1h1nknrevgkevknhfyl  
lenqin1vdeil1nk1in1dy  
1diks1nfdvs1f1y1kvpel1kei1reyk1k1sgnkpel1erikt1nidenai1kpqvyvptskgnki1igeteyi1lhfy1nspi  
is1lgsahkmakev1nidk  
ieyiyf1l1qqnqksnnsd1hrtani1ins1lv1y1y1kkt1nkdkdvirkytnyatylsvtqgihsaaflyseeni1dr1fiyf  
nyh1eyenm1fidnvsrr  
1fkn1fyediks1fedtdknfcdeice1l1faqiynnrnit1n1n1ptinyv1lekikkeneirmkydf  
>tr|D0K396|D0K396\_STAAD  
mqns1edfsni1knfrkaed1t1dt1sky1gvsdvysk1engkrf1pskni1fwy1v1fmdqsmhddiek1l1tifsenk  
ki1syeq1r1teydefvkkfr  
ekqkkhsski1qrkei1ktmnefnqyqiee1depyfd1kw1lnqseyk1fygidnks1lgfnev1sesdkm1seivns  
iqriyndenqk  
>tr|D0K3A0|D0K3A0\_STAAD  
mneqkeviki1dyss1lesvnnesteyihkikdgkkewtetv1nreqh1qai1ewt1qqiennfefeene  
>tr|D0K3A1|D0K3A1\_STAAD  
mnk1tkqeykni1enk1nydhmvngkkrt1nkink1l1qrehd1rdasi1kseypr1sdgeisev1dyrtykelviatetfvd  
fpinyedsnvcqfi1tkedi  
ed1ksaieemtsfien1lee1  
>tr|D0K3A2|D0K3A2\_STAAD  
mnwei1rilmgdigi1vkek1edvatahtfvderftkrs1ktkeevvnygl1tynehrihneqvte1mlty1kel1dgl1mnkf  
heiekassenfgeesdda  
k1kite  
>tr|D0K3A3|D0K3A3\_STAAD  
mneik1leydthsvv1hyes1dsrsfksf1skpkwsk1vnk1svpieanykyargvavygdikngandhgei1kkhrndnnv  
iyrdv1iv1dyde1nd1kq1  
hdaissv1snvawfwh1tsfsh1ttetprir1lyip1nerisaddyrykskvlankighkvdegsyqpsrcfalpviqkghif  
ikrvndcpi1idvdm1eqws  
keleqsnaspn1vigytrrdsaywre1sfgt1tegrnna1las1vg1llrcrvndyivysya1llwgqfackppmkeqeinat  
fqs1lnkhynn  
>tr|D0K3A5|D0K3A5\_STAAD  
mdkeq1kkyiydyvkeykeipi1yqled1fkelnhdyigrts1ithdkdenivfswgnkitmfalie1likseq1dlvyrgs  
fvmry1ldgrv1pn1plaic  
ypedgqqt1dvp1swvpmv1rinkeektk  
>tr|D0K3A6|D0K3A6\_STAAD  
mn1eti1v1nqfetragt1l1ryytg1l1eshkvqpcck1lyndpfdmayvmmsk1fghvyikdckvrqsfelaspkhtegli  
rsieg1hyvgye1hdgkhl1s  
isdmmash1fedeyfmygl1qtyaesnnsdvfey1engfdtdt1legiqsntdvianiemyqlatginepapelveg1rl  
vtefvqdenatqedykale  
ck1nn1kasyys1sk

Tsompanidou\_et\_al\_Supplemental\_FASTA\_File

>tr|D0K3A7|D0K3A7\_STAAD  
mqsiaeketyhlptehlqvfnvikntsnkyitktkilnqlgyeynssnerwlrrvinslvydygypigcsykpseryyyi  
itteqeklqamrsikkld  
gsmkryealkriev  
>tr|D0K3A8|D0K3A8\_STAAD  
mktesyfkeynqfvidqhkaieleqkcnaleskikidkstyqqlimgdqqddkadnlyqatdadedkklkalnkrletkks  
vskevkyqktie11khqse  
lsslyesekqsalgklkkvdayneiideiedindryedehqqyasiysqeqlyddkearealngyfreniftsyngnd  
lpyehnnklflkc  
>tr|D0K3A9|D0K3A9\_STAAD  
meikye1nntkkvanafglneedtn11navdldiknmqeisse1qqseqskqkqygtklqnlakqnriik  
>tr|D0K3B0|D0K3B0\_STAAD  
mk11kthkcllyrnngdnklseyq11tqfnpafinkkikmcefqiesmyhmsastttcdeimgvsvsypieklvikiet  
karlqnyknrsisnmv11k  
tvlnhytekeqkqvvykymrsngrykpysvierlqvelyqasikqrserqqrntaienskiarvnayhqssykvv  
>tr|D0K3B1|D0K3B1\_STAAD  
mkkqjrgfvcdyhkrtrsdv1iddintdeffsigdedsnawatddnvdyyiikhleiivgglatdkefyifhsligq  
rsykdiskvlecseqsvr1  
wyet11dkivevie  
>tr|D0K3B2|D0K3B2\_STAAD  
mse1takqarfvenyirtlnvtqsaikagysansahvtgcr11kkphikqyiqeqdkidenvltake11hvltnaavg  
detetkevsvkrgeykenp  
qsgkvqlvynehvelievpiqpsdr1kardm1gkyhklftdkhdngnvpifinigewdgdddkldktvkevsnanpnhp  
vivddipld  
>tr|D0K3B3|D0K3B3\_STAAD  
m1ntiitsifliff1pfffcigffii1ird1trnfnninvtyntftyetgktileryfiwerrkrkyfidliersei  
ihlagneivrgmyyvdas  
plkgnnkksflrkciqifek  
>tr|D0K3B4|D0K3B4\_STAAD  
mdlfdkisdvsneigegi1hdatdaikkeaekdakiamekar1falkhelkseiqsmisdekedienfss1deiesilkd  
qssklegafegktsdaiaf  
nlateqsk1md1tesyddckkscktydgwf  
>tr|D0K3B5|D0K3B5\_STAAD  
msiqnnditnhr1sekvytiksnqkyvniktnngmqtfkvqssridkvngfqamavspkdskgnidnetvyfvyagtdk  
yepadistdiylgtndiki  
etnpdkilnaaiyrds1keinpstvgnnkwl1emvnknakeadqfneaylwtqsvlnngnykhaygtghslggtiaqvm  
t1cnfdkktfsapngyn  
ilpndvken1d1skynqitdyahpndkigiatlgssilgteiladdselsklffnpi1sghgigtfe1fsggsvkikvdgk  
kadqmaremedk1hni1dka  
ikalekymentkkqakqieskyvnl1sgshefispdi1enyveelsksghydf1dealfedtigelkytkqr1sqfsek  
iidatkkfedrdkeiseiy  
hwfegv  
>tr|D0K3B6|D0K3B6\_STAAD  
mkhdekekfyneqkeritlylkyknfksveftsiesdpmggyaingyinnkd1sftastyadqnnqfeadysstsgf  
qemmpenpksvseikkeqs  
nkkdkkkdd  
>tr|D0K3B7|D0K3B7\_STAAD  
mydelknkpelrksithit1sitvlttiaviir1ftknppeswvalniagtisivyymgvfnskfky1kwla1skkfsy  
kmflvfia1iffafpfv11  
fvhn1seyifhtenv1vnyisrifi1imnftfilmhamsftmi1111mavlsrrikkkdsnt  
>tr|D0K3C2|D0K3C2\_STAAD  
maehsfdvnevikdfpildqkfngkr1lay1dstatsqtpmqv1nvl1edyykrynsnvhrghvt1gslatdgyenaretvr  
rfinakyfeei1ftrgtta  
sin1vahsygdanveegdeivvtemehhani1vpwqqlakrknat1k1fipmtadgel1niedikqtindktkivaiahisnv  
lgtindvktiaeiahqhg  
i1svdgaqaaphmk1dmqemnadfysfsgkmlgptgigv1fgkre11qkmpiefggmidfvskydatwad1ptkfea  
gtp1iaqaiglaeairyle  
rigfdaihkyeqeltiyayeqmsaiegieiygppkdragvitfn1qdvhphdvatavdtegvavraghhcaqplmkwln  
vsstarasfyiyntkedi  
qlinalkqtkeffsyef  
>tr|D0K3C5|D0K3C5\_STAAD  
mpvykdestnkwyfsi1rykdvygnnrkrmqrgfstkreksaeai1ndvnegysdsktfdyifhhylen1d1rpktkrr  
kqneyhkhfkakfghikmn  
kitqncqefrkyli1envastnsarti1wsgfkvvinyakkyfgl1rtdptisikpiprvkpkpkfmmreefeerikdieeq  
dyrelft1mfytgl1rigea  
malvwtodynkykkeis1nktmdi1snrti1yprpkt1dssedi1vlpk1fintm11terhqrekel1nkyf1dersyfi1fggmapkh  
yshvqkkf1gkafphyniha  
1rhsyasy1anngvdi1fv1qs1mrhaqit1etmgtysh1ytqkkhdai1aifdk

Tsompanidou\_et\_al\_Supplemental\_FASTA\_File

>tr|D0K3C6|D0K3C6\_STAAD  
mtnhntkligslyngqdfdyeiipvnrfindaqkrnsatnevliilnykptkrqlkeferakfyqkpkptsfvlkeyvkwk  
lqenvreyelqindlnvlm  
asdefefkekferlysgraesfdilplfissrnkqieywssdgeakkygfdkktvdfdlvesglrenlfmnnryknvld  
yilglevglssndkknytq  
twmmnqianllkendi tfrkevpykeiidanrikdktfdfvfnkddvtylevnffntsgskinsearfielnkelqny  
ediefiwvtdgiglkknqt  
sinkamksignlynlttdeflkel  
>tr|D0K3C7|D0K3C7\_STAAD  
mmseyklspivkwaggktqlldainalipndfaiyhepflgggatllsnqpknaiindlnyelmttyinvikhditplike  
lkdmikqhntnnakdfymt  
vreqeilnln dieiaarflynktgfnlyrvnsqgkfnvfpnkdmiknstvfsetnlrnlnkyfnenni iilnedfne  
alkkvkrk  
>tr|D0K3C8|D0K3C8\_STAAD  
mnlkevdi nieewemveipfyteeeltyrlnnnlptksefееeskkmstykeienlhintggkeltqeqieeaksfid  
sqgfkdmireakesrqrvm  
eskitertkm  
>tr|D0K3C9|D0K3C9\_STAAD  
mnsfkdr lkqimserkisqsel srrtgigrnsisdy lngkyeakqdkv felakalnveawlmgfdisknrkiennditt  
vynqltpprqnnvlyans  
qldeqnskgdnhvdi nsykdqkvevdngcv sagvgesl heeai fkyvkapvpphdla lkvngsmepmfkdgeiifve  
kthnikngqigifiiegea  
ylkkvfvednr ltlvslnkkyrdlhfyrnesvr lvgkvi l  
>tr|D0K3D0|D0K3D0\_STAAD  
miynfdysll yermaeyrysqs lanaipisrtsinhklqgnlftqweikricelleiptkvgr yffe qnvqktvqms  
>tr|D0K3D1|D0K3D1\_STAAD  
meqitltkeel kei iakevreaingkkpissgsi fnkvriddleeinkkl dfakhls lgrmrkl nhpiplkkyqhgf  
sihqkayvqvdhdirkl t  
lsifgv tlnsd lsesynlaakfyrdiknylyiyekrvsel tidffe  
>tr|D0K3D3|D0K3D3\_STAAD  
mdninl tqrqld liknqail sklpietyakvntmnd lrinqskl sdwasymhrvtknhpmfktnl fsekil defissn  
sfpedevrkvsth lrsfv  
dtvdvpvl gktvdsahpidvntekynsvfneslnhi fispakfikkvsvgsaigtvspvmvrtildqyvnyfmffnvi  
atlltlyvianlydensn  
dd  
>tr|D0K3D4|D0K3D4\_STAAD  
mqalqtksnigemfnieqengeia isgre lha levktpykkwfermsdygfeenidyvvtdivhnp lgrqngqidha  
ltdtakeiamiqrsepgk  
rarqyfiqvekawnspeimqral kianntinqletkierdkpkivfadavattktsilvgelakiikqnginigqrrlf  
ewlrqngflirkkgvdyndm  
ptqysmere l feiketsithsdghtsisktpkvtgkqqyfvnkflgekqts  
>tr|D0K3D5|D0K3D5\_STAAD  
meinvcgvkyki vqledvdnnp sclglciykdsliqlkrglsferkkqil ihellhammyesgyeehdeelnlnsivin  
qvisqndikatlnele  
>tr|D0K3D6|D0K3D6\_STAAD  
matnppkdgr rkgavknrsqvknpktgryvkrnsetgrfmdvksdskpfkgvrker  
>tr|D0K3D7|D0K3D7\_STAAD  
miknslqake lavi lsvskskagq iirelnkeledegyiairgrvpvqlarkkfyhd l sderimeelkkene  
>tr|D0K3D8|D0K3D8\_STAAD  
myyeigdvckvinvdgfdflavkkkdh silvnil dledkfidginitnendlytal dilnqsiyewieenaddydrli  
nlvmkw  
>tr|D0K3E0|D0K3E0\_STAAD  
manlyel sea fke lsnqdel dqtllkdt ldsiqae mnvkdni vnwrretl gdidvidkeikrlqn lkkqkqnl tdr lrd  
ylkemletqevdsyrtatn  
hifkrkngaskni ideklipkdyw lsqapklnskqliddlkagkdipgvelkvteslvik  
>tr|D0K3E1|D0K3E1\_STAAD  
mnksetvve inkamvaf rkevqplkdknnpffkskyvplenvvea ideaatphgl sytqwalndvdgrvgvatmlmhes  
geyieydpvfmaekntpq  
gagsl isylkryslsai fgitsdqddd gneasgknnnpkqqrtrtqwassetigil kkevisftkl igtdkeapqniveq  
kfdinnykl tekqaaeiaq  
kirnnaktitggkr  
>tr|D0K3E2|D0K3E2\_STAAD  
mlnrvv lvgrltkdpe lrstpngvnvgtft lavnrftnaggeread finvvvfkqaenvknyl skgs lagvdgrlqtr  
nyenkdgqrvfvtevvads  
vqflepknnnqqqknnnyqqqrqtqtgnnpfdnteedfsdlpf  
>tr|D0K3E3|D0K3E3\_STAAD  
mnkili rfainyikyqqkql rekeari ky legflkgky  
>tr|D0K3E4|D0K3E4\_STAAD

Tsompanidou\_et\_al\_Supplemental\_FASTA\_File

mkkcfiacpigtdddskvrnsdfl1qsiikpalesdfeiqrsdflisstnkitdeiiggltnselvividlsthnpnvfyel  
gyrhalerptiminkden  
ipfdvsayrtiyyseiyadvnakdq1ketiktftdndfnfenpvnkynnidneygvlnrhllidiksd1selkeflpsvt  
kqdpdipadsmvrmmelav  
qypdqferlme1qknsg  
>tr|D0K3E5|D0K3E5\_STAAD  
matfrtiksgdfvtvhksfvfdsnl1sakakgillyflsrpdnwqiytsevvkhmndgqksinsgvqelmdnkyvhriqk  
raengvfkgefylvyekpt  
empfsenglsangfsengktenrkgrttnnstndltnnnntnnegsilsgnptvssipykeiieylnkkagkhfkht  
aktkdfikarwngdfrled  
fkkvidiktaewlntdsdyl1rpetlfgnkfegylnqkiqptgtdqlermkydesywd  
>tr|D0K3E6|D0K3E6\_STAAD  
mkplfdekinkslkkyqpevi1rqncdkcghqydlykfengyeykdgeceieqrlayeeykrnkqkkl1dyifnqsnvp  
slrdatvnykppqnekqvg  
akqtaiyvqgfstkepkslilqgsygtgkshlayaiakavkaghtvafmhipmlmdrikatynknvettdelvrlls  
didllv1ddmgventehtl  
nk1fsivdnrvgnni1ftnfsdke1nqnmnwqirinsrmkhnarkvrvigddfrerdtw  
>tr|D0K3E7|D0K3E7\_STAAD  
mvtkeflktkl1ecsdmyaqkl1deaqgdenklydlfiqkl1terhtrpaivey  
>tr|D0K3E8|D0K3E8\_STAAD  
meieikfnetfeapmgsprprfrntgrfvqtypmstykhhkayiqkmpk1klehalkieldfyfp11kswskkkksemv  
gqykvtkpdi1n1iktvl1d  
acnghv  
>tr|D0K3E9|D0K3E9\_STAAD  
mqqqayinatidiri1pteveyqyfdvdkeket1adylynnpdeileydn1kirvnieve  
>tr|D0K3F0|D0K3F0\_STAAD  
msvkingkpykftehene1ikkngl1tpgmvakrvrggwkl1eal1hapygml1aeykeiv1srimgreskereiarqrk  
eaelrrkkph1fnvpqvh  
rdpywfdttynqm1kqwqea  
>tr|D0K3F1|D0K3F1\_STAAD  
mmnreqieqsvi1sasayngndtegl1keiedvykkaqafdeilegl1namqdal1kedi1deavgimtgqvvyeyeeeq  
end  
>tr|D0K3F2|D0K3F2\_STAAD  
mntl1qvr11setarmpernhktdagydi1fsaetv1lepqekaviktdvavsipegyvg11tsrsgvsskth1vietgki  
dagyhgn1ginikndnet1  
esedmsn1fgrspagidgkyar1pvtdki1cmngsyvinkgd1laql1vivpiwtpel1kqveefesvsergakgfgsgv  
>tr|D0K3F3|D0K3F3\_STAAD  
msdm1eif1igfgvyl1fyria1i1flskktihtniyem1mlati1fmistfaykhqkthilia1vmffmskl1kqvqgsye  
e  
>tr|D0K3F4|D0K3F4\_STAAD  
mtqyl1vttfkdstgl1phehitvardnqtftvveaenkeeakekyeaqvkrdaik1gl1fenirecgk  
>tr|D0K3F5|D0K3F5\_STAAD  
mikk1knmdwfdi1fiagil1rfgvial1lvvispiytvasyqnkevhqgtitdkynkrqdkedkfyiv1dnkqviensd1  
1fkkk1f1dsadiqar1kvgd  
kvevkti1gyri1h1n1lypv1yevkkvdkk  
>tr|D0K3F7|D0K3F7\_STAAD  
mmwitmtiv1fail11vcisinsdrareiqal1rymndy11devvktkgyngleeyrielkrmnndikk  
>tr|D0K3F8|D0K3F8\_STAAD  
mynrkei1remidnykwmkni1dskvydnestsiaqygyqsampkagttsnkv1kvinknka1rkydylinkiafidey  
eeyitnekdyhi1qm1kqr  
eshnrimsi1digrdnfysrvkdivni1ynl1qqktdtsytsdssdsykykytsd  
>tr|D0K3G1|D0K3G1\_STAAD  
magrpk11snsnknytkeeiekerqeaql1nkfskidtepph11deiakqeyl1ril1phmqelpisn1dkaqlaqcsfy  
sdfvka11leqes1m1led  
drgnqkvpafn1kekagi1rmqtant1gl1tidsr1rimvpeekenddpymkfasdd  
>tr|D0K3G2|D0K3G2\_STAAD  
midyvtqyakkvvsgei1asqkniqvckrh1sfi1enppigchwdnr1snkaiefvem1pdpktnepmp1mefqkfivgs1  
ygwr1rgqymftkayis1ma  
rkqgk11ivsgmsvne11fgqypkfnrqi1yvasstyqqaqti1fkmasqqvn1mrskskfi1rektdvrktdiedil1sssvf  
ap1snnpdavdgkdp1vai  
1delasmpddemys1rftkgmt1qknp1t11vstagdn1nsqmyqeykyikri1neevradnyfvyaemdsqeevqdetk  
wikamp11leskehrkti1g  
niksdi1qde1legtsyhk11iknfn1wqaqreds11diedweqattmpningkdvyigvd1sr1dd1tsvgfi1fpndk  
kvf1hshsfi1gl1rtn1leq  
akrdki1nydl1viergeadvtrsdsgmi1dykvidfimdfitthd1nvkavcydpwnaqs1fittiesma1dwp1lievgqsf  
ka1sqs1ikefrmwvadkri  
qhndt11ttsvnnav11rdgednvkinkmnrqkidpiisiitaftearmhefgenwaeiyeseefgf  
>tr|D0K3G4|D0K3G4\_STAAD

Tsompanidou\_et\_al\_Supplemental\_FASTA\_File

mmvqt1pgfqgk1reykdveaikhsdiftavmmiasdlarmpir1tvngqidysdrvin11ntrpnpmyngyifklvvf  
asalltshgyveitrdki  
kpmn1tfrktseielksdargrlyyfhqridskgniiernvkfedmldikfysldging1s11dt1srtesdngkdf1  
nnflrngthagglkmgv  
ldnkkarerareefhktfsgtkqagkvv1desmtdqlevdtevlklirensstreiagvfgiplhkfgietaansit  
dan1dy1st1kpyitcvca  
elnfkfndeyvnrdfkfdtteirvvdektqaeidkinidsgkmnideirqrdglapipggngsihrvdlnhvnie1vdey  
qmnksratdck1kggeene  
>tr|D0K3G6|D0K3G6\_STAAD  
mktkeklqseisdkrqid1kvkyatra1nnde1ekaekleqeitd1rsqiqekqeeldk1kekdgtseennpqtvelnea  
rtyrnqanindlgisiqnt  
kvtsqevrdfteyletrndiqggs1ktdsgfvvipeeivtdilk1kevefn1dkyvtvkrvtngsgkypvvrqsevaa1e  
kveeleenpelavkpfq1  
aydinthrgyfrisreaiedakvnlqel1wmartiaatrnkaiidvitkgstgstssgfekegk1evkkaks1ddik  
dain1nvkpnvehnvaivs  
qtmfak1dkm1k1gny1iqpdvkektqqr1lgakieilpdevlqgkgnnt1iign1kdaiv1fdrsqyqaswtmymhfg  
ec1miavrqcridyksa  
iviyyddsergegd1glea  
>tr|D0K3G8|D0K3G8\_STAAD  
mq1tae1k11kkhckidhnsedd11giyyswafheiasavtdepskyidwfkshp1faraipy1asyfenriay1drd  
1s1aphmv1stvhk1rgsf  
eq1lesendei  
>tr|D0K3H0|D0K3H0\_STAAD  
minvtki1rnai1anni1tdevnvfnytidhfhktdkpi1riy1lpfnpdyaddneisreyhyqidvwwsqdepneqa  
ekive11kv1n1f1qcyrep  
1yesdvmsfrhii1rakgsi1smk1een  
>tr|D0K3H4|D0K3H4\_STAAD  
mpnpi1gnm1vikvd1dgsgfnrgvtg1nrqmkmsrelsan1sqfsrydns1lekskikveg1skkqkvqaqitkelkdsyd  
k1sketgensaktqaaaak  
yneayak1nqyere1nqatqelkdmqreqka1ntamg1gtnfn1fgpk1qeignsmknvgrnmtmyvtapvvagfavaa  
kkgiefddsmrkvkatsga  
tgeefea1kkkaremgattkfsasdsaea1nyma1agwdsqmmeg1sgvmd1aasgeelgavsd1vtdg1tafg1kak  
dsghfad1vaqtsskantd  
vrg1geafkyvapvagalgytiedtsiaig1msnagikgekagta1rtmftn1ssp1ramgnemer1gisitdsngkmip  
mrk1ldq1rekfkh1skdq  
qassaati1fgkeamsgalai1nasdedyqk1tksidsstgaskrmadtmesglggk1rtlrsqleelaltiydriepalk  
iivsafs1kvvtwv1tklpts  
iq1lavvgf1faav1gplvfmf1gfisvmgnamtvl1gpl1invnkagsifa1l1rtkias1vkl1fpilgvsiss1tlpit1  
ivgalvgig1afyqaykrs  
etfrn1vnqaisgvana1fkaak1alqgffd1fkgdskgavt1eki1fppetvagi1qvntirttffkvvdaivgfakeig  
aq1asfwkengseitqalq  
niagfikatfefi1fnfi1k1pimfaiwqvmqfiwpavkalivstwenikgviqgaini1ilgiikvfss1ftgnwrgvwdgi  
vmi1kg1tvq1liwn1liqlwf  
vgki1gvvryfg1l1kgliagiwdvksifsk1saiwnatksifg1f1nsvksiftnmknw1sstwnniksntvdkaks  
1ftgvrskftn1wnatkdi  
ftk1rnwmsniwns1ikdntvagiagr1wdrvrni1fgsmrdg1k1si1gkikdhiggmvdavkrg1n1k1ieg1n1wvvgk1gmd  
kipk1htg1teht1ttr1v  
kngkiardt1fatvgdkgrngp1ngfrnemiefp1ngkrv1tpntdt1tay1pkgskvyngaqtysm1ngt1prfsigtmwkd  
iksgassafnwtk1dqigk  
tkw1gdkvgdvmdf1dnpgk1l1nyv1qafgvd1fss1tkgmgiagdi1tkaawskikksaikw1ledafaesgdggv1dmnk1  
rylygh1taayt1retgr1p1fh  
eg1dfdy1fepvp1stingraqvmp1fhnggygkwkivkga1eviyah1skykvktgqvrvgqvtv1gisngt1fstgph1h  
yemrwng1rhrd1lpw1l1rkn  
ngggk1stpggnga1narraika1aqni1lggrykaswi1nemrvasresnytanavnwdsnaragipsrgmfqmidpsfr  
ayaksgynn1lnpthqais  
amryi1vgkwv1prtgs1wraaf1kragyay1tg1gkvyn1glyh1geegypewi1iptdpsraneah1l1alaand1dnrsknr  
pnn1lpnps1s1nsdt1nyih1t  
1enk1davinc1vs1lvesnq1viadkdyepvink1yvfedevnnsidk1rerhestrvr1frggti1  
>tr|D0K3H5|D0K3H5\_STAAD  
mqdti1q1dnkt1ew1lvvqrgfeipsfnfvtekesvkg1rtgsiakary1ndiefel1pliirnev1apggqkthddileelv  
effdi1dn1kpkk1k1fksq  
wywfayfdg1p1k1lpknprgsvkftikv1ltdpykysvtgnknta1sdqsvsvnsgtadt1plivearaikpssyfmitknd  
edyf1mvgddev1tkevkdym  
ppvyhsefr1dfkgwtkmi1tedipsnd1ggkvvgdfvi1sn1lgegykatnfpdakg1wv1gagtkrg1lpkamtdf1qitykcive  
qkgkgag1rtaqh1ydsdgk  
1las1gyenkyh1drkighi1vvt1ynqkgdpk1kiydyqnpimyn1drivvym1l1rrvgnk1fsikt1w1kfdhikdpdrkpi  
dmdekewi1dggkfyqrpas  
iiaiyak1yngykwmemng1lgsfn1te1lpkpkgardvi1qkgd1vki1dmqaks1v1ineep1l1seks1fgsnyfnvds1gyse

```
liiqpenvfdttkwqdry
1
>tr|D0K3H6|D0K3H6_STAAD
mihvldfndkiidflstddpslvraihkrnvnndnsemlellisseraekfrerhrviirdsnkqwrefiinwvqdtmdgy
teieciasyladittakpy
apgkfekkitsealkdvlstgwevseqteydg|rttswtsyqtryevlkqlcttykmvldfyielsntvkgrvvlkk
knslfkgkeieygdvlg|
trkidmseiktaliavgpndkgrlelvvtddeaqsqfnlptryiwgiyepqsddqnmnetrlrslakteInkrksavm
syetstdlevtypheiiis
igdtvrvkhrdfnpplyveaeviaeeyniisenstytfgqpkfekeselreefnkrlniihqklnndnisnintivkdvvd
seleyferkihksdtppen
pvndmlwydtsnpdvav|rrywngrwieetpndveklggitreka|fse|nnifinlsiqhasllseate|lnsey|vdn
dlkadlqasldavidvynq
iknnlesmpetatiigr|vdtkt|fl|eyrkk|qdvtydvedvki|aisdrfk|llsqytdekykealei|atkfg|ltvned
|qlvgepnvksaieaare
stkeqlrdyvkt|sdyktdkdgiver|dtaeaertt|lkeikdkvt|lneyrng|leeqkqytd|ddq|sdl|snpeikasieqa
nqeaqea|ksyidaqdd|k
ekesqayadgki|seeeqrai|qdaqak|leakqnae|karnaekkanaytdnk|vestdaqrkt|ltrygsqi|iqngkeik|
rttkeefnaskrt|lsvla
ditvnamkgy|lrydengait|shtidkdgvki|sgdkvditanref|nvanninnkvgkndivns|ln|snegl|divnrig
ikgnanryvqvndfiel
ggivqrtwkgkrstddi|ftr|kdgh|lrf|nntaggs|lymshfg|istyid|gegedgg|ssgti|qwwdktysd|sgmngitins
yggvvaltsdynrii|idsy
asanie|sreapi|ylspntk|nkp|gnrfaft|lnsadsayetdgyim|fsgdenykygag|lrf|skrsnkg|lvqvvngdyatgg
dttiesgmgkfnivkrrdg
nsyvsiqsyd|llavgsdnagdrvasnsiykrtysapan|hitsagtigratsakkykisi|enqyinedd|qfshskeik|l
pirtwfdkyeseimakele
sgkkl|sddt|fk|l|srhtg|liaeevee|lgfnefv|yddngeiegiaydr|lvwh|lipiiknqqskiek|leeline
>tr|D0K3H8|D0K3H8_STAAD
maneiikkterfilvqidkegtervlyqdfvgsfttsdsasyaqdfkseenakki|aet|ln|lyq|l|tgnqns|vkvvkevvd
rtd|lssdks|vdseim
>tr|D0K3I1|D0K3I1_STAAD
mpsvrtysqaisylkslegkawnpdnafgcqcf|dtanqwy|ly|fnhr|lkgvgaadi|ptwndftneatvyentvs|fqalpg
dvvifnrnygggyghvgiv
isat|dsiti|leqnw|lggaywnp|pevttrrthgyd|fpmwfi|rfpyakettank|rsavtpvkqdk|l|skgk|im|lvagghi
gaysndpgavangenerdf
nrkni|iprvkky|lesvntv|lyggns|mqd|lyqdt|lygqrv|gnykdygmywiknev|kpdai|iefh|ldsaspqasgghvi
isdrfpaddi|k|alssald
ktvgki|rgvtprgd|ln|nansad|ln|nyr|lielg|fitstkd|lnyikn|l|dsftkriae|aingrqidapsskpsadkitwn
wkgvfypnpeka|rvrka
gl|tgtvveedsw|lytkddwv|kfdqvi|kkdgywwi|rfkyqregs|stnfy|cavcritdkeqkiknekywgtiewa
>tr|D0K3I3|D0K3I3_STAAD
mckevks|ml|di|ikt|l|lehqvlav|li|pevlkql|rewh|lgy|l|drkpnkd
>tr|D0K3I4|D0K3I4_STAAD
mteqmy|li|l|f|l|s|l|p|l|l|f|igrkthfyc|ldkkngr
>tr|D0K3J4|D0K3J4_STAAD
mylyddneesqvqfv|gfvgehsryd|lm|vhtnrhygkt|lv|lnmqtnkfgi|igtdd|lkeegyiahi|l|gvnaeegdeiteyl
nevi|h
>tr|D0K3J8|D0K3J8_STAAD
mttnyyvesik|kl|n|fimnidimnckqilkrily
>tr|D0K3K0|D0K3K0_STAAD
mtdiink|lqafadanpqs|iavrhttdel|tyqq|lmdessklahr|lqgskkpmi|l|fghmspymivgmigai|kagcgyvpvdt
sipedrikmi|inkvqpefv
fnttdesfes|legevftiediktsqdpvi|f|dsqik|dndtvtyt|iftsgstgepkgvqieyas|lvqftewmle|lnksgnkqq
wlnqapfsfd|lsvmaiypc
lasggt|ln|lvdknmi|nkpk|ln|nem|tatpiniw|stpsfmemc|ll|l|pt|lneeqygs|lnefffcgeil|phraaka|lsvrfp
satiyntygpteatvavts
iqitqeil|dqypt|l|pvgver|lgar|l|stddgelviegqsvs|lgy|l|kndqktaev|fnfddg|irtyhtgd|kakfengqwf|iq
gridfqik|l|ngyrmeleei
etqlrqsefvkeai|vvpvykndkvi|h|igai|vpttevt|dnaemtkniknd|l|ksr|lpeymi|prkfewmeq|l|l|tsngkidr
kkiaeving
>tr|D0K3K3|D0K3K3_STAAD
mk|l|kpfl|pi|l|isgavfi|v|f|l|l|paswftg|lvnektvednrts|ltdqvlkgtli|qdklyesnkyy|piygsse|lgkddpfnp
aialnkh|nankkaf|l|lgag
gstd|l|inave|lasqydk|l|kgk|l|tfi|ispqwf|tnhg|l|tnqnfdarmsqtqinqm|fqqnmst|l|krryaqr|l|l|qfphvhn
keylksy|aknpketkdsyi
ygfkenq|li|ki|e|ais|l|famdks|plehv|kpatkpdasw|demkqkave|igkad|ttsnkf|girdqywk|li|qeskrkvr|rdye
fnvnspe|fqd|le|l|l|vktmr
```



Tsompanidou\_et\_al\_Supplemental\_FASTA\_File

aagadvqyvsipsngvwydhigdkerrqavykkihstvdnggkiydmdtkdyekyvisdavhigwkgwvymdeqia kh  
mkgeppqevdkpkn  
>tr|D0K3K6|D0K3K6\_STAAD  
mknlvllgggygnmrimsrilttslpqdyvtlvdrmpfhgkpefyalaagtksdkdvrnkfpnhpqvntvygeindid  
ldaivsvgnskidydeli  
iglgcedkyhnpgaeeythsiqtlskardtfhsiselpegakvgivgaglsgielaselresrsdleiylydrgrpilr  
nfpeklskyvakwfaknnv  
tvvpnsninkvepgkiyncepkdidlvvwtagiqpvevvrnlpidinsngrvivnqyhqvptyrnyvvvgdcadlphap  
saqlaevggdqiadvlkkq  
wlneplpdkmpelkvqgfvgsldgkqgfayimdrvtvtrlasilksvglwlykyhng  
>tr|D0K3K8|D0K3K8\_STAAD  
mptvilteaaayevkdmkanempdgylikvngggctgltygmgaeepgendetvleyfglklvdkedapvlngttid  
fkqslmgggfqi dnpnaia  
scgcgisfrtakvagnpenc  
>tr|D0K3N1|D0K3N1\_STAAD  
msfhqveewfeifrqfgyllpgfilliyiraiipvfplalyiliniqaygpilgiliswlgisgtftvylickrlvnterm  
qrikqrtavqrlisfidrq  
glipfillcfpftptlnlfvaslshirpkyyfivlassklvstiilgylgkeittilthplrgilmvvlvfwivgk  
kleqhfmgskke  
>tr|D0K3P4|D0K3P4\_STAAD  
meilndsvksfeklylqldqgfpvivptdtnynlcslnndlcidkifeykkrsdkplslfidkpedwklygdnqntei  
vdklveifwsgplniilkn  
ktsynymlnnsdsiaigcvqnktrrfisyinspiaitsanisgtaddiliteneaikhmgenvrymlrsqnknyktss  
tiikvtdnkiellregdik  
feeikerlgtgiye  
>tr|D0K3P5|D0K3P5\_STAAD  
mnklilgiylyrifrsayfyllpfllyfliqgysiiqlleilmasygiaafllslykekcfcikcnlkdsnlkvseifkii  
glllllyqnqylilvvaqi  
llglsysmmagvdtaiikrnitnekyvqnksnsymflsllisgiigsylyginikwpiimtgifsiliiiiirctlvnr  
elnligetkgkikkflpee  
kfwilyysflralilgffigfipiniyndlklnnlqfivlctcyvmgylssryltkylnykvseicliifliiyytqs  
fiavtismi flgissgltr  
pqtinklssssnlrvmlnyaetlyfifniaflliggylysigtiqylmlfmslltfiylltlfyllrrdqhenqhri  
>tr|D0K3Q0|D0K3Q0\_STAAD  
msqnkrvvitgmgal spigndvkttwenalkgvngidkitridtepysvhlage lknfniedhidkkearrmdrftqyai  
vaareavkdaqldindnta  
drigvwigsgigmetfeiahkqlmdkgprrvspffvpm lipdmatgqvsidlgakgpngatvtacatgtnsigeafkiv  
qrgdadamitggteapith  
maivgfsasralstnddi etacrpfaqegrdgfvmgegagilvieslesaqarganiyaeivgygttgdayhitapapege  
ggsramqaamddagiepkd  
vqylnahgtstpvgdlnvkaikntfgeaakhkvsstksmtghllgatggieaifsaalsikdskvaptihavtpdped  
ldivpneaqldityamsn  
slgfgghnavlvfkkfea  
>tr|D0K3R4|D0K3R4\_STAAD  
melkiegqihkhgkrvsritllktqgyntylnlakqrfkclecngtftaktsivdescfisrcvtqkvieeatkvkteid  
taedncispstvsrirtka  
anslrikpfnclpehiamdefksvknvtgmsfifidndthdvidilenrttrflrayferfdlknrqvktvtidmyep  
yvr1frdlfpnaaiifdrf  
hivqhlrelnkyrvqmwneyrnkkgpnytifknnwkvllmdtskitifskyrwnksfkaykrssdivefmlskddilrrs  
yelvqglrkdrlrcnwpkf  
inrlnsvsksvskgvkwvvyyrkhqrm lntiyyafnngaieginnkiklikrisfgyrnfnnfkarimmi fslykg  
ekkkttkpnnqlaa  
>tr|D0K3R5|D0K3R5\_STAAD  
mcndtlellrikenikiyinqeidviikgkkatvnavltykpsacyccgvknrrtns  
>tr|D0K3T4|D0K3T4\_STAAD  
mvtqnkkilii tgsfngnhmqvtqsi vnqlndmnl dhlsviehd lfmehpiltsickkwyinsfkyfrnmykgfyysrp  
dkldkcfykyglnklnl  
likekpdlii ltfptpvm svlteqfninipvatvmtdyrlhknwitpystryvatketkqdfidvgidpstvkvtgipi  
dnkfetpinqkqlidnll  
dpdkqtilmsagafgvskgfdtmitdilaksanaqvmicgkskelkrsliakfksnenvlilgytkhnewmassqlmi  
tkpggiti tegfarcipmi  
flnpapggelenalyfeekgfgkiadtpeeaikivasltngneqltnmistmeqdkikyatqticrdlldlghssqqe  
iygkvp lyarffvk  
>tr|D0K3T5|D0K3T5\_STAAD  
mdastlfkkvkkrvlgsleqqiddittsrtaregsifvasvgytvdshkfcqnvadqgcklvvnkeqslpanvtqvv  
vpdtlrvasilahltlydyp  
shqlvtfgvtgtnktsiatmihliqrklqknsaylgtngfqinetkktganttpetvsltkkikeavdagaesmtlevs  
shglvlgrlrgvefdvaif

Tsompanidou\_et\_al\_Supplemental\_FASTA\_File

snltqdhldfhgtmeayghaksllfsqgedlskekyvvlnddsfseylrvtvpyevfsygideeaafmakniqeslqg  
vsfdfvtpfgtypvksygv  
gkfnisnimaamiavwskgtsletiikavenlepvegrlevldpslpidliidyahadgmnkliidavqpfvkqkliflv  
gmagerdltktpemgrvac  
radyviftpdnpanddpkmltaelagathqnyiefddraegikhaidiaepgdttvaskgrepyqimpghikvphrdd  
ligleaaaykkfgggvpdq  
>tr|DOK3T7|DOK3T7\_STAAD  
mnlkqevesrktfaiishpdagkttltekllfsgaireagtvkgkktgkfatsdwmkveqergisvtssvmqfdyddyk  
inildtpghedfsedtyrt  
lmavdsavmvidcakgiepqtllkfkvckmrgipiftfinkldrvgkepfelldeieetlnietypmnpigmgqsffgi  
idrksktieprdeenilh  
lnddfeleedhai tndsafeqaieelm lveeageafdnda lsgd ltpvffgsalanfgvqfnlnayvdfapmpnarqtk  
edvevspfddsfsfgfivki  
qanmdpkhrdriafmrsvsagafergmdvtlqrtnkkqkitrstsfmaddketvnhavagdiiglydtgnyqigdtlvggk  
qtysfqdlpqftpei fmkv  
saknvmkqkhfhkgieqlvqegaiqqyktlhtnqiilgavqqlqfevfehrmkneyndvvmepvgrkiarwienedqit  
dkmntsrslvkdryddl  
flfenefatrwfefkflleiklsl  
>tr|DOK3T9|DOK3T9\_STAAD  
mewtlvdigkkhvipksqyrkrreffhnedreenlnqhkdqnidnttskkadkqihkdsidkherfkns lsshleqrn  
rdvnenkaeesksnqdsks  
aynrhdhyltdvskkqns lsdvdqdekskyeqnseatlstkstdkvestemrklssdknkvgheeqhvl skpsehdk  
tridsessrtdsdssmqte  
kikkdssdgnkssnlksevisdksntvpkl sesddevnnqpl t lpeeqlkrqqsneqtktytygdseqndksnhend  
lshhtpsisddkdnvmren  
hivddnpdndintslskidddrk ldekihvedkhkqnadssetvgysqstasthrstekrnisindhk lngqktntkt  
sannqkkatsklnkgrat  
nnnysdilkkfwmmypkvlvimgiilivilnai fnnvnkndrmndndadaqytttmknanntvksvvtvenetskd  
sslpkdkasqdevgsgvvv  
kksgdtlyivtnahvvgdenkqitfsnksvvgkvlgdkkwsdlavvkatsdssvkeiaigdsnnl vlgepilvvgnp  
lgvdfkgtvtegiisglr  
nvpidfdkdnkydm lmkafqidasvnpngsggavvnregkligvvaakismpnvenmsfaipvnevqkivkdletkgkid  
ypdvgvkmkniaslnsfer  
qavklpgkvkngvvvdqvdnngladqsglkkgdvite ldgklleddlrfqrqiifshkddlksitakiyrdgkekeinikl  
k  
>tr|DOK3U7|DOK3U7\_STAAD  
mkwfkllildvttfiliaillfvytykeneeilpdkypiaavtdwnkkyskneykrinqfaknenvaiykstsnytnknv  
dkdiyvfnskattitpfn  
akynihylsdde lkkdikgsyfvkdknfdvskvinflkeygvtaesykidhmmiavgvikqmnievplsal llyvyfiyy  
ifekninfkayaikylngf  
tlrkii fenfskkctywvtliisqillttsvlwilnytgnldl filrlvl lsc lfil tisvinlwtflml llnlianmik  
gkqhfktrfintvcksil  
lvliasvmientsvikldlnkiketekywnvlddytiefapyhetkqslidnmlrseqlvkaseaennailfkpkgdsvd  
ndnfspdegnvlvnnqfw  
siyykqfqpdpipknqknnveviipqkfhamrneinqayhswfefvqnknkenklsiqfinkndyri fsfdardsrhls  
fieapiivnvqasdlnsdf  
yyamisggylfknydalvknienyhldeisgitnykdsvmemyhennlkl tvlnfsqiiiaiiiiilfdvkyfey  
hrkllviklygystlran  
yqylinnivvfmgiltnvilhsqyimmi fatilvvqillqicslyyhgrrfnevikef  
>tr|DOK3U9|DOK3U9\_STAAD  
mielkdltiqgnihlkklnlkfqcgsytligksgcgkstllntiaglektgkqyvyfngqleqfksnfyrdklgylf  
qnyglidnltnenldigl  
aykkskkekeqlkiryieqfglsnslkrkvhtlsggeqqrvalirmmlkdpivmladeptgalpdktgqmi iqslfdlv  
denkv l ilathdmainqc  
deiidleqyskvasm  
>tr|DOK3V0|DOK3V0\_STAAD  
mkiggviltrtyniigil sclisfiimalpmiwytasalwffpgaimillslvivficyiktqnqlhlllilvlniillf  
fslpllls  
>tr|DOK3V1|DOK3V1\_STAAD  
madkilklnndvlaeefgskareniiekystesilekwl nlfns  
>tr|DOK3V2|DOK3V2\_STAAD  
mklgmllirwmlatsflvhgtlkfvdldgtihflgslglpptiavlmsigevvgglaligfltpyvvnfyicvmlgsif  
tlkltrgyvsgyefeihi  
vmnlacissyswkkwlqfy  
>tr|DOK3V6|DOK3V6\_STAAD  
mirqarpedrfdiaklvymvddmelelvkhlpkdmvldaiekscvdatyrtfyqhilvyevenkvagciisysgene lk  
yekawell dlpeeikqygt  
plpvkeakddeyyietiatfaayrgrgiatklltsll esnthvkwslncdinneaalklykkvgfisdgqielykhmyhh

Tsompanidou\_et\_al\_Supplemental\_FASTA\_File

1ivk

>tr|D0K3W3|D0K3W3\_STAAD

mnssyksrvfniiisimvsmliislgafannkakadshskqleinvksdkvpqkvkdlaqqqfagyakaldkqsnaktg  
kyelgeafkiykfngeedn  
syyypvikdgki vytltlspknkddlnkskedmnysvki snfiakdl dqikdknsnitvltdekgyfeedgkvr lvk  
plpgnvkekesaktvsakl  
kqelkntvtptkveeneaiqedqvqyentlnkfki reqqfdnswcagfsmaallnatkntdtynahdimrtlypevseqd  
lpncstfnpnqmieygsqg  
rdihyqegvpsyeqvdqtkdnvgimilaqsvsqnpndphlghalavvgnakindqekliwynpwdtel siqdadsllh  
lsfnrdynwygsmigy

>tr|D0K3W4|D0K3W4\_STAAD

mklslnsnskylrapsirqfsnrnmnl ddcvnl tigqpdfmpdvkkayidainndktsyshnkgll etreaisqyfkn  
ryhfsydpeeii vtngase  
aidttlrsiiepgdei iipgpiyagi plievlggkpiyidttatqfk itpdal eshispktkavll nyptnptgvvlkr  
nevl ni vnlkky pifiis  
deiyaentfsgkhvsfaefedir dqlil iggl skshsatgirigfl lgpqylidkl tfmhayncicanvpaqiacitaln  
egleapky mneayverrny  
lvsel tk l gfeitaqpegafyifpsikhitdddfe fcvdllesthl aivpgssftefgkgfvrisayayemdv lkegmkr l  
aky lntk

>tr|D0K3X1|D0K3X1\_STAAD

mkfnkvklvihacvllfiisiali fhr lqtktshidpihketk lsdneky lvdnkekvapskl kevymskdkpykkid  
kylqsslfnngsvaiyengk  
lmskgygyqdfekgikntpntmfl igsaqkfstglllkqleehkinindpvskyl pwfkt skip lkd lmlhqsglyk  
yksskdyknl dqavkaiqk  
rgidpkyk khmyndgnyl vlakvieevtgksyaenytkigdp lklqhtafydeqpfkyl akgyaynstg lsf lrpni  
ldqyygagnl ymtpdmgk  
litqi qykl fspki tnp llhefgtkypdeyrygyakpt lnr l nggffgqdf tvyyndkyvvv lalnvkgnnevrikh  
iyndi lkqnkpyntkgv iv  
q

>tr|D0K3X8|D0K3X8\_STAAD

mvaki ldgkqiakdyrqgl dqveal kekgftplsvil vngd gasqsyvrskkkae kigmiseivhle etateeevln  
elnrlnndsvs gllvqvp  
lpkqvseqki leainpekdv dgfhpinigkly ideqtfvpctpl gimeilkhadid leaknavvigrshivgqpvsklll  
qknasvti lhrsksdmasy  
lkdadvi vsavgkpglvtkdvvkegavi idvgntpdengk lkgdvdydavkei agaitpvpggvgl titmvl nntllae  
kmrrgids

>tr|D0K3Y0|D0K3Y0\_STAAD

mnfnklkfgatigi igggql gkmmaqsaqkmgkykvvvl dpcsedpcryvahefi qakyddeka lnql gqkcdvityefen  
isaqqlkl lcekynipqgy  
qaiql lqdr lteket lksagtkvvpfi svkest didka ietlgypfivktrfggydgkqvl innekdl qegfklietse  
cvaekylnikkevs ltvtr  
gnnnqitffpl qenehrnqil fktivparidktaeakeqvnkii qsihfigtftveffidsnnqlyvnei aprphnsghy  
sieacdysqfdthi lavtg  
qslpnsie llkpavmmnl l gkdld l lenefnehpewhl hiygsgrkds rkmghmtvl tndvnqteq dmyakfegsn

>tr|D0K3Y4|D0K3Y4\_STAAD

mskfiepsveeik lekvyqdmgl sdqeyekvcdi lgrqpnftetgi fsvmsehcsykhskpfl kqfptsgehvl mgpge  
gagvvdigdnqavvfkves  
hnhpsai epyqgaatgvvggi rdivsigarpinllnsl rfgeldnkqnqrllkgvvgiggygncigipttageiefder  
ydgnp lvnamcvgvihdm  
iqkgtakgvgs viyvg lktgrdgi h gatfaseel teeseskrpsvqigdpfvgkkl meatleaitfdelvgiqdmgaag  
ltsessemaakggsglhlr  
leqvptrepgi spyemml setqerm llvvekgneqkfl d lfdkheldsavigevtdtnrfvl tyddevyadipveplade  
apvyilegeekdyntsknd  
ythidvkd tffkl lkhpti askhylydqydqvganti ikpqlasvvrvegtnkaiastidgearyvynnpyeggkmv  
aeayrnl iavgatplamt  
clnygspekkeiyqq lidstkgmaeacdi lktpvsgnsvlynetkgtsi fptpvvgmvglienvny lndfepqvgdkly  
ligdtkddf ggsqlekli y  
gkvnhefes ldl ssevekgesiktai regllshvqtvgkgl l litalksahygl glkssiditnaql fsktqgryvsv  
ksgktlnidnaieiglltd  
sdnfvttpyteisen vdikqiwegai aqclttqd

>tr|D0K3Y8|D0K3Y8\_STAAD

mkkai lsvsnktgives fakaltql nyelystggtkril deanvpvrsvsdl thfpeimdgrrvktlh pavhggil adrnkp  
qhl nel seqhid lidmvvv  
nlypfqqtvanp dvtmdea ienidiggptml raaaknykhvttivhpadyhev ltr l rndsl desyrqsl mikvfehtae  
ydeai vrffkgd ketlryg  
enpqqsayfvrt snakht iagakql hgkql synnikdadat lalvkkfdtpaavavkhmnp cvgigdtieqafqhayea  
dsqsi fggivalnrvavtpe  
laeq lhsi fl evi iapkf tdealdi lkqkknvrll e idmtidsneeefsvs ggy l vqdkdnyvvpkeemkvvte vapt d

Tsompanidou\_et\_al\_Supplemental\_FASTA\_File

eqweamllgwkvpsvksn  
aailsnkqtvgigagqmnrvgaakialeraieindhvalvsdgffpmgdtvelaaqhikakaiqpggsikdqdsidman  
khgiamvvtgtrhfkh  
>tr|DOK3Y9|DOK3Y9\_STAAD  
mnvllvigaggrehalayklnqsnlvkqefvipgneamtpiaevhteisesnhqgildfakqqnvdivvigpeqplidgla  
dilrangfkvfgpnkqaaq  
iegsklfakkimkyniptadykeverkkdaltyiencepvvvkkdglagkgviiadtiearsaieimygdeeeegt  
vfetflegeefs lmtfvng  
dlavpfdciaqdhkrafhdhdegpntggmgaycpvphisddvkltnetiaqpiakamlnegyqffgvlyigailtkdgp  
viefnarfgdpeaqvllsr  
mesdlmqhiidldegkrtefkwnesivgvmaskgypdayekghkvsgfdlnenyfvsglkkqgdtfvtsggrvilaig  
kgdnvqdaqrdayekvsqi  
qsdhlfyrhdiankaqlk  
>tr|DOK3Z5|DOK3Z5\_STAAD  
mkiatlnkgketkyfngyplieeediysqdhkegdiqivtdksqyvatayvgrqhkglgwvlytydkaqeintaffvkl  
fntalaerdyfni dgtna  
frlnaegdgvggltidnydghlliqwylkgyikfyailleavrkvfdyksiyekvrfdkseysggfvegdapefpivie  
enftfynvdl edglmtgif  
ldqkevrkklrgyakerhvl nlf sytgafsviaaseassttsvdlanrsrslteenfglnaidpksqiyvmdtfdyk  
yaarhghsydtividppsf  
arnkkrtfsvqkdydklingalnlssegtlllctnasvplnqfntikktleesgvdyeltevnglpkdfkthphykp  
skylkavfvnirh  
>tr|DOK401|DOK401\_STAAD  
miyafigitvllwllficyiiasidfgagffalshskltgdekkinhlsrylnpvwevtnvffvffvfgvfgffpesiky  
lgtvllipgsialimislr  
nsfyafenygqdtklawmimygvgllipaslstaltiteggyinvrnvidldwvqlllspfawsvflaiisvlyiss  
gfltyyakkandepaynl  
rqwhifl gppmiiclfvflslriqnsehfysavfdywmfaisflffalaslltffkkkklafvfvilqmmfaffgyg  
isklpyllypfvkitdayv  
npemgwllvivfilgllllpsllllrllfvfdkeyvegkks  
>tr|DOK409|DOK409\_STAAD  
mafefrllpdigegeihegeivkwfvkagdtieeddvlaevqndksvveipspvsgtveevmveegtavvgdvivkidapd  
aedmqfkgdhddsskeep  
akeeapaeqapvatqteevdenrtvkampsvrkyarekgvnikavsgsgkngritkedvdaylnggaptasnesaasats  
eevaetpaapaavslegdf  
petteki pamraiakamvnskhtaphvtl mdeidvqalwdhrkkfkeiaaeqgkltflpyvvalvsalkkypalnts  
fneeageivhkhynigia  
adtdrgllvpvkhadrksifqisdeinelavkardgkltademkgatctisnigsaggqwfptvinhpevailgigria  
qkpi vkdgeivaapvalsl  
lsfdhrqidgatgqnamhikrllnpe lllmeg  
>tr|DOK410|DOK410\_STAAD  
mvvgdfpietdtv igagpggyvaa iraaqlgqkvativeknglggvclnvgcipskallhashrfveaqhsenlgviaes  
vlnfqkvqefkssvvnkl  
tggveglllgnkvni vkgeayfvdnns lrvmdksaqtynfknaiiatgsrpieipnfkfgkrvidstgalnlqevpgkl  
vvvgggyigselgtafanf  
gsevtilegakdillggfekqmtqpvkkgmkekgeivteamaksaetdngvkvt yeakgeektieadyvlvtvgrpnt  
delgleelgvkfadrglle  
vdkqsrtsisniyaidivpglplahkasyeakvaaea idgqaaevdyigmpavcftelatelatvgyseaqakeeglaika  
skfpyaanralslddtng  
fvklitlkeddtligaqvvgtgasdi selglai eagmnaedialti hahptl gemtmeaaekaigypihm  
>tr|DOK418|DOK418\_STAAD  
mcndtlellrikdenikyinqeidviikgkatvnavltykpsacyccgvknegqihkhgkrvsritllktqgyntyln  
lakqrfkclecngtftakt  
sivdescfirs cvtqkvi eatkvkteidtaedncispstvsrirtkaanslrikpfnc lpehiamdefksvknvtgms  
fifidndthvidilenrt  
trflrayferfdlnrqqvktvtidmyepyvrlfrdlfpnaaiifdrfhivqhl nrelnkyrvqvmneyrnkkgpnytif  
knnwkvllmdtskifsky  
rwnksfkaykrssdivefmlskddilrrsyelvqglrkdllrlnwpkfinrlnsvskksvskgvkwkvkyrkhrmlrn  
tiyypafnngaiegincki  
klikrisfgyrnfnnfkarimmi fslykgekkkttkpnnglaa  
>tr|DOK419|DOK419\_STAAD  
mnrkpelimawiansisiy llvmgl syfslksgnasqreelakqlsqnggnvsldmlqtmtgalaiillistlygifat  
icikgrrkllsijl fviaki  
vs lmalnliavllwvimimliskkesketthkddeyiyh  
>tr|DOK430|DOK430\_STAAD  
msstyntckiksyflrwipsfhi lqsgqfivssqirllililsdaffdydgvylfgkknklwlgvatl mmtfvqlgga  
vktgsadgcgsswplchg  
alipeffpidtieelshravsal lmlvllvitawkhigyikeikplsiisvfl lllqaligaaaviwqndyv lalhf

Tsompanidou\_et\_al\_Supplemental\_FASTA\_File

gislisfssvflitliifs  
idqkyeadelyikkplrlltwlmaiicygvytgalvrhadaslayggwplpfhdlvphseqdwvqlthrimafivftii  
mityihavknypnnrtvhy  
gytaafilvilqvitgalsimtnvnliialfhaliftylfgmttyfimlmlrsvrsdkq  
>tr|D0K447|D0K447\_STAAD  
mrnvkqiatksiiiaisltiltyttmigsvladeikypsakfnqpeakdktelttsifdekikenkalellifnqenknv  
teeqqlvdekaqlisdmtg  
kiylqvklkgqidkeqlvfqndkneefpfvikdekddtivri lieqhmdkinmhvktlaekknldnkemvysihfkekkv  
qhddakevpskhqenq  
dqllkdidkksqsdtkerrtslftekgldn dipvqkdkvqqdsnkkienerpkasgtlkvenspntikkvennhkeqp  
khkdekskkkkkvvekek  
alpafnrddsknssq lssdikeldephkkqym lfaagivlatillisahlysrkrngqv  
>tr|D0K450|D0K450\_STAAD  
mrmkrfltivqillvviifgykivqtyiedkqeranyeklqqkfqmlmskhqehvrpqfeslekinkdivgwiklsgt  
slnypvlqgktnhdylnld  
ferehrrkgsifmdfrnelknlnhntilyghhvgdntmfdvledylkqsfyekhkiiiefdnkygkyqlqvfsayktttkd  
nyirtdfendqdyqqflde  
tkrksvinsdvnvtvdkimtlstcedaysettkrivvakiikvs  
>tr|D0K455|D0K455\_STAAD  
manivfklsdkdittlmsritfdtenlpqgmkarakyqnttvniyqsgkvmfqnhaetvske llpqhsq lntnktkkkn  
manssleqtlmydqfncig  
sdeagsgdyfgpltvcaafvtkehvpilktlgvddskk ldtkivelaeqlvafiphslltlhndkyniqqakgwtqvk  
kavlhneaiknvl ekidss  
qldyividqfakrevyshyalsdip lpkktkfetkgeskslaiavasii sryafitymdqiskyinmtipkgagakvdvi  
aakiikkygl srldtisk  
hfk nrekaqki lkp l  
>tr|D0K458|D0K458\_STAAD  
mtkkdvikll eqiatymelkgentfki sayrkaaqslelderpldeisdvte lkgigkvaevindyretgesqylqq lq  
eevpeglip llikqglgsk  
kiaklykelnivdkas lqvacengkvselsgfakkteqnil eavkqlgakkdrypidqmrrlnqeidiyidtl nyidqys  
sagsfrfkemskldfii  
stdnkvavqqlln ipnkiveavgn tkvsle layddetigvdfrieprafyhtlqhftgskeh niriqlakardev  
seygieqadgtliqydsea  
kiyehfnvnfippamredgsefdkdl sniitl ddingdihmhttsydgafsi rdmveaniakgykfmvitdhsqsl rvan  
glqverllrqneeikaldk  
eyseidiysgtemdi lpdgsldydeilaqldyvigaihqsfnqseeqimerlanacrnpvvrhiahptgriigrdgyk  
pnieqlmalaeentvlei  
nanphrldlnaeivrkyppnvl tintdahhtn hldfmnygvataqkgfvtkdrvinal srea fkd fienniklkk  
>tr|D0K459|D0K459\_STAAD  
mrqktldvlefekikslvanetisdglg lkvnmmpatnfetvfvqmeetdeiaqiynkhr lpslsgl skvsafihradi  
ggvlnvselnlkrliqvq  
nqfktfynglveedegvkypilddkmnqlpvltdl fhqinetcdtydlydnasyelqgirs kisstnqrirqnl drivks  
qanqkksdaivtrnren  
vipvkaeyrqdfngivhdqsasgq tlyiepssvemm nqisrl rhdeaiekeriltqltgyvaadkdallvaeqvmgqld  
fliakarysrsikgtkpi f  
keertvylpkayhpllnretvantiefmedietvii tgpntggktvtlktl gliivmaqsglliptldgsq lsvfkny  
cdigdeqsieqslstfssh  
mtniveilkhadkhs l v l f d e l g a g t d p s e g a a l a m s i l d h v r k i g s l v m a t t h y e l k a y s n r e g v m n a s v e f d v d t l  
sptykllmgvppgrsnafdi  
skklglslni inkaktmig tdekeinemieslernykrvetqrleldr l v k e a e q v h d d l s k y q q f q n y e k s l i e e a k e  
kanqkikaatkeaddiikd  
lrqlreqkgadvkehelidkkkrlddhyeaksikqnvqkqkydkivagdevkvl sygqkgevl eivndeeai vqmg i i k m  
klpiedlekkqkekvkptk  
mvrtrnqrqtiktel d l r g y r y e d a l i e l d q y l d q a v l s n y e q v y i i h g k g t g a l q k g v q q h l k k h k s v s d f r g g m p s e g g  
fgvtvatlk  
>tr|D0K462|D0K462\_STAAD  
medykqriknklnvvpmpgcy lmkdrndqviyvgkakk l r n r l s y f t g a h d a k t t r l v g e i r r f e f i v t s s e t e s l l l  
elnl ikqyqpry n i l l k d d  
ksypfik itkekyprllvtrtvkqgtgkyfgpypnaysaqetkklldriypyrkcdkmpdklclyyhigqclgpcvydvd  
lskyaqmtkei t d f l n g e d  
ktllksleerm l t a s e s l d f e r a k e y r d l i q h i q n l t n k q k i m s s d k t i r d v f g y c v d k g w m c i q v f f i r q g n m i k r d t t  
mip l q q t e e e e f y t f i g g f  
yslnqhilpk evhvrnldkemi qsvvdtkivqpargpkkdmvdl aahnakvsl n n k f e l i s r d e s r t i k a i e e l g t q m g  
iqtpirieafdnsniqgvd  
pvsamvtfvdgkpdkknrykyikt v k g p d d y k s m r e v r r r y s r v l n e g l p l p d l i i v d g g k g h m n g v i d v l q n e l g l d  
ipvaglqkndkhqtse lly  
gasaeivplkksnqafyl l h r i q d e v h r f a i t f h r q t r q t g l k s i l d d i d g i g n k r k t l l l r s f g s i k k m k e a t l e d f k  
nigipenvaknlheqlhk

Tsompanidou\_et\_al\_Supplemental\_FASTA\_File

>tr|D0K468|D0K468\_STAAD  
mskwiivsdnhtesgvlyqiyemhpdadvylhlgdsefayddtelslfnrvkgncdfypefeneavakyndvkafythgh  
lygvnrtrdllaekglelg  
clfvfyghthvakyeyingvhvinpgsisqsrsmeetyaeviiddqtlhgtinfknrhhethisttf  
>tr|D0K469|D0K469\_STAAD  
mivdnpiwlnehvdylvksvllksiklrfqevrkfeilvkimnrihi  
>tr|D0K470|D0K470\_STAAD  
mknfigksilsiaaisltvstfageshaqtknveaakkydqyqtnfkkqvnkkvvdqakavnlfkrtrtvathrkaqra  
vnlihfhqhsyekkk1qrqi  
dlv1kyntlk  
>tr|D0K476|D0K476\_STAAD  
mqvgvgpqqreigspiptdnaswrgpnieklhdhfqqtmqvgvgpnteageksayknvqvggapt  
>tr|D0K477|D0K477\_STAAD  
mnkhinkkatklledykvqqrkseetdrgclksvimlivlffliifgivacstvnfffq  
>tr|D0K483|D0K483\_STAAD  
mnnnitkkii1sttlll1l1l1gtaftqfpntpinssseakayyinqnetvneltkyysqkyltfsnstlwqkdngtihatll  
qfswyshi qvygpeswgni  
nqlrnksidifgikdgetidsfalsqetftggvtpaatsndkhyklnvtykdkaetftggfpvyegnkpvl1lkeldfri  
rqtlikskklynnsynkgg  
ikitgtdnnytidlskr1pstdanryvkkpqnakievileksn  
>tr|D0K489|D0K489\_STAAD  
mrlqkaplvtsglvlgllgnllkdls1tlnavcgifafliwihllctmikyfnvkeqlnsplvssvfttffmsgflg  
tlylntffsnitfinslit  
piwilclvgimthmii fsiky1kdfsleniypswtv1figiaia gltapvsgcfffq1tviygvatcivlpivfkr1k  
afplqtsikpntsticapf  
slvaaayviafpanafivii flilaqifyfyiiiqlpkllkefsvpfsaftfplvisatalkns1pvlmfpdiwkgll  
fievllatvivr1vfigyl  
hfflkkengdkflrnasq  
>tr|D0K490|D0K490\_STAAD  
mrnqiqkllsd1ss1hiskqtgvpqstihrmrkkers1dnms1knael1ykfansifsnen  
>tr|D0K494|D0K494\_STAAD  
mseikr1einyktdefenfracgnkdlymvnelngqmidassdspfyg1fvqdqlgarmal1kkgdveei1yfpdfedyi  
llwkle1v1pkyqnr1gyase  
lidfaksfnmpikaigrndskdff1hhgftdveaknieghdvl1wkp  
>tr|D0K499|D0K499\_STAAD  
makqkikikknkigavllvg1fgllffilvlr1sylim1tghsngqdlvmkanekylvknaqqpergkiydrngkvlaedv  
eryklvavidkkasansk  
prhvdkketakk1stvidmkpeeiekr1sqkka1fiefgrkgtn1tyqdk1kiekm1pgis1lpeterfypngnfash  
l1graqknpdtgelkga1g  
vekifdsylsgskgs1ryihdiwgyiapntkkeqkprgddvhl1tidsniqv1veea1dgmveryqpkdlfavvmdaktg  
eilaysqrptfnpetgkdf  
gkkwandlyqntyepgstfksyglaaaiqegafdpdkkyksghrdimgsr1sdwnrvwgweipms1gftysnt1mmhlq  
dlvgadmkswyer1fgfgk  
stkqmf1d1geapq1gwsnel1qaktssfgqsttvtvqm1lqaqsaffndgmlkpwfvnsvenpvskrqfykgqkq1agkp  
itkdaekvekqld1vvn1s  
kkshaanyridgyevegktgtaqvaapnggyvkgpnyfvsfmgdapkknkv1vyagms1aqkndqeaye1gvskafk  
piment1kyl1nv1gskddt  
snaeyskvpdvegqdkqka1dnvsaks1epvtigsgtqikaqsikagnkv1phskv1ll1tdgd1tmpdmsgwtkedviaf  
en1tnikin1kgsgf1shq  
s1skgqk1tekdk1d1efssenvdsnstnsdsnsddkkksdsktdkksd  
>tr|D0K4A2|D0K4A2\_STAAD  
mddktkndqgesnedkde1el1ftrnts1krrqrkrskathfsnqnkddtsqqad1deei1linkdfkkesndenngsas  
shandniddstsdniene  
dyrynqe1ddqnesngi1avneqpsapkeqnsdsndeetvtkkerkskvtq1kpl1tleekr1lrrkrqkriqysviti1  
v1li1avi1iy1mf1sp1skia  
hvningn1nhv1stskinkv1lgvkn1dsrmyt1fskknain1leedpl1ksveihkq1lpnt1nv1ditenei1alv1kykgkylp1  
leng1llkgsndv1kindap  
vmdg1fg1tkeddmika1semtpevr1ryiaevtyapsknkqsrie1fttdg1lqv1gdist1skmkyppqmsqs1sr1dssg  
k1ktrgy1d1svgasf1ipy  
rgntssqs1esdknvtkssqeenqakeelqsv1nkinkqsskn  
>tr|D0K4B0|D0K4B0\_STAAD  
mpftpnei1knkefsrvkng1leptevan1fleq1steier1kedkkq1lekvieerdtniksyqdv1hqsvsdali1qaqkagee  
tkqaaekqaeai1akaeaq  
anqmv1gdavekarr1lafqtedmkrqskvfrsrfm1veaq1d1llknedw1y1l1nyd1dae1vtleni1hh1hend1kpdev  
aanaqnasntpdnnqqs1n  
dsettkk  
>tr|D0K4B9|D0K4B9\_STAAD  
mqskry1vl1edgsfyegyr1gsdn1ltvgeiv1fntam1tgyqet1sdpsytgq1itftyp1ignyg1nrddfes1vpt1ngi

Tsompanidou\_et\_al\_Supplemental\_FASTA\_File

vvkeasahpsnfrqkktlh  
dvlelhqippiagvdtrsrtrkirqhgvlkagftdrkedidqlvkhllqqvelpkneveivstktpyvstgkdlsvvlvdf  
gkkqniivrelnvrgcnvtv  
vpytttaeeilamapdgvmlsngpgnpevvecaipmtqgilgkipffgiclgqqlfalsqgassfkmkfghrnganhpvkn  
letgkvdi tsqnhgyaidi  
ds1kstdlevthla1ndgtveg1khktlpafsvqyhpeanpgpsdsnyl1ddfvamtnfkekerhina  
>tr|DOK4C6|DOK4C6\_STAAD  
maydglftkkmvslqflttgrvhkinqpdndtilmvvrqnrqnhqll1sihpnfsrlqlttkkydnpfnppmfarvfrk  
hleggiiesikqigndrri  
eidiskdeigdtiyrvtvileimgkhsnli1vdenrkieiegfkhltpntnyyrtvmpgfnyeapptqhkinpyditgaev  
lkyidfnagniakqllnqf  
egfsp1itneivsrqqfmsstlpeafdevmaetklpptpi fhknhetgkedfyfiklnqfnddtvtyds1nd1ldrfdy  
argerervkqrandlvrfv  
qqqlhkyqnklaklieeyesknkdteqlygelitaniyrikqgdkevta1nyytneevvip1nptkspsanaqyyykqy  
nrmktrere1qhqiqltkd  
nidystieqqllh1svhdideirde1aeqgfmkqrknqtkkkkaqiqlqhyvstgdgdiyvgnknqndyltnkkakkt  
htw1htkdipgshvvi1nd  
apsdt1ikeaamlagyfskagnsqipvdtyliknvhkpsgakpgfvtydnqktlyatpdyeliqkmkq1  
>tr|DOK4D0|DOK4D0\_STAAD  
miakvi1dvasksvdykfdy1ipeqlesvi1qpgvrvi1vpfgprti1qgyvmevtaepdaql1dvsklkkie1vkdi1qpe1ts  
elialewmgsthv1kris  
m1evm1psa1kakykka1fkmkddie1psa1l1qkfdkhgyyyykdaqknndi1l1mk1l1kddiveekt1l1tqn1tkk1kra  
vrviegyhpdev1lak1lev  
ikqydl1yay1seeqhkti1f1tdiedmgfskss1dgl1kkgyvekydavverdpfkdrvfeqeskqql1tedqykayeai1ka  
kivs1qe1qet1f1lhgtv1gsg  
ktevyl1qtiedv1sqgkqamm1l1vpeia1l1tpqmv1l1rfkrr1fgddvav1l1hsg1l1ngery1dewqki1rddrarvsvgar1ssvfa  
pfkn1gl1i1ideeh1estyk  
qedypryhareiaqwrseyhhcpv1l1gsatpc1lesyaraekdvyl1l1s1pnr1v1nqqa1l1peidivdmree1l1segnrsmf1sk  
d1rea1ql1r1drqe1qv1f  
l1nrrgyasf1m1crdcgyvpqpcncdi1s1tyhkttd1l1kchycgyqetppnqpcncesehi1rqvgtgtqkvee1l1qqefed  
ari1rmdvdttsk1kgahek  
l1tefekngdi1l1gtqmi1akg1ldypni1l1vgv1nadtm1l1n1p1dfraser1tyq1l1tqvagragrhekagqvi1iqtyndh  
ysil1dvqkndyl1tfyrgem  
eyrk1gkypppyy1l1nfti1shkemkkvmeasqvhki1l1qhl1teka1l1vgpspaalarinnefrfqi1l1vkyksep1gl1qa  
iqf1ddyhek1fikek1la1  
kidi1dpqmm  
>tr|DOK4D4|DOK4D4\_STAAD  
mtki1fmgtpdfst1tv1em1iaehdvi1avvtqpd1rvp1vgrkrvmtpppvk1vamkyd1l1pvyqpek1sgsee1eq1l1q1dvd  
l1ivtaafgq1l1pes1la1lp  
kl1gainvhas1l1pk1yrggapi1hqai1idgeqetgitimymvkk1dagnii1sqaikieendnvgtmhd1k1sv1gae1l1ket  
l1psi1iegt1nesvpqdd1tqa  
tfasni1rrederi1swnkpg1rvfnqir1gl1spwpvayttmdd1n1kiydael1vetn1kinepgti1iettkai1ivatndnea  
vai1kdmq1lagkkr1laany  
l1sgaqnt1l1vgkkl1i  
>tr|DOK4D7|DOK4D7\_STAAD  
m1lea1fftdt1gqhrd1knedaggi1fynqtnqql1l1v1cdgm1gghkagevaskfvtdel1ksrfean1lieehqaenw1l1rnnik  
d1infq1lyhaqenaeyk1gm  
gttcvca1l1vfeksvvianv1gdsrayvinsrqieq1tsdhsfvnh1l1v1tgqit1peea1fthpqrni1tkvmgtdkrvspd1f  
ikr1l1nfydy1l1l1nsdgl1td  
yvkdneikr1l1vkegtiedhgdq1mq1al1dnhskdnvtf1laaiegd1kv  
>tr|DOK4D9|DOK4D9\_STAAD  
mktgrivks1sgvyqvdvngerfntkprgl1frkkk1fspvvgdivefevq1neginyihqvferknelkrppvsnid1l1viv  
msavepnfstq1l1drf1lvi  
ahsyqlnarv1l1vtkkdktpiekqfein1l1kiyenigyete1fignddrkkiveawpagl1v1l1sgqsgvgk1stf1l1nhyrp  
e1n1letndisks1l1nrgkht  
trhvel1ferqngyi1adtpgfsa1ldfdh1dkdeikdyfle1l1nrygetckfrncn1hikepncnvkhqleigniaqfrydhy1  
ql1fneisnrkvry  
>tr|DOK4E7|DOK4E7\_STAAD  
mvklai1dmmggdnapdiv1leavqkavedfkn1leim1fgdekkn1l1nheriefrhcsekiemedepvraikrkkdssmvkm  
aeavksgeadgcvsagntg  
a1msvg1l1fivgrikgvarpa1lvvt1l1ptidgkgfvf1l1dvganadakpeh1l1l1qyaql1gdiyaqki1rgidnpki1l1nigtep  
akgn1l1tkksfe1l1nqdh1s  
l1nfvgni1eakt1l1mdgtd1dvvt1dgytgnmv1l1kn1legtaksigkml1kdtimsstkn1lagail1kdd1laefakkmdysegg  
sv1l1gl1egt1v1kahgssna  
kafysai1rqaki1ageqni1vqtmketvgesne  
>tr|DOK4F0|DOK4F0\_STAAD  
mpihr1l1lyfpi1l1n1skkqveilet1l1n1l1isvsya  
>tr|DOK4F4|DOK4F4\_STAAD

Tsompanidou\_et\_al\_Supplemental\_FASTA\_File

msffkr1kdkfatnkeneevkslreeggqdkledthsegstqdvndlaenaevkkkprklseadfdddglisiedfeeie  
aqkmgakfkaglekstrqnf  
qeqlnnliaryrkvdedffeaileemlitadvfntvmtlteelrmeaqrriqdtedlrevivekiveiyhqeddseam  
niedgrlnvilmvgvngvg  
ktttigklayrykmegkkvmlaagdtfragaidqlkvwgervgvdvisqsegspaavmydainaaknkgvdilicdtag  
rlqktnlmqelekvkrvi  
nravpdapheallclldattgqnalSqarnfkevtntvgivltkldgtakggivlairnelhipvkyvglgeqlddlqpf  
pesyvyglfadmieqnde  
ttvendqivteekddnhgak  
>tr|D0K4G7|D0K4G7\_STAAD  
mkfstlseeftnytkkhfkhytqsieIynyrnkinheahivgvkndkneviaacllteariefkyfyshrgplfdyf  
daklvcyffkelSkfykn  
rgvfilvdpYlienlrdangriiknynnsvivkmlgkigyIhqgyttgysnksqirwisvldlkdkdenqllkemeyqtr  
rnikkteigvkedlsie  
etnrfyklfqmaeekhgfhfmedyfkrmqeiYkdkamIkiacinIneyqdklkiqllkienemmtvnralnenpnskkn  
ksklnglnmqIssinnris  
kteeliledgpvldlaaalIctddevyylssgsnpkynqymgayhlqwhmikyakshninrynfygitgvfsneaddfg  
vqfkkqgnahveeligdf  
ikpvrpilykfaIlykv  
>tr|D0K4G8|D0K4G8\_STAAD  
mnreenvlllryyafikldhndiikelqklkvsyitymdseypvllkeiyqfplllfykgniklinnmhhlavvgards  
tsytqqsleflIIndksky  
ltivsglaqadamahqialkynlptiavlafghqthypkstlalrnkieekglviseypphtpiakyrferpennriisgl  
skgvliIteakeqsgshiti  
dfaleqnrnvylpgsmfnpmtkgnllriqegakvvlndiIedyyi  
>tr|D0K4H3|D0K4H3\_STAAD  
mdtagirltpkeivsklneyivgqndakrkvaialrnryrrslldeeskqeiSpknIImigptgvkIteIarmakvvga  
pfikveatkftevgvgrd  
vesmvrldvdsvrlvkaqkslvqdeatakaneklvkllvpsmkkkasqtnpleslfggaipnfgqnnedeeepptee  
iktkrseikrqlleegklek  
ekvrikveqdpgalmlgttnqnmqemmqImpkkkverevavetarkiladsyadelidqesanqealelaeqmgiif  
ideidkvatnnhnsqgqvs  
rqgvqrldlpilegsviqtkygtvntehmlfigagafhvsKpsdlIpelqgrfpirvelsIsvedfvrlItepkIslIk  
qyeallqteevtnftdea  
itrIaeIayqvnqtdnigarrlhtilekmlledIsfeapsmpnavvdiItpqyvddkIksistnkdlIafil  
>tr|D0K4H8|D0K4H8\_STAAD  
maqiskykrvvlklSgealagekgfginpvIksvaeqvaevakmdceIavivgggnIwrgktgsdlgmDrgtadymgmI  
atvmnalalqdsleqlIcd  
trvltsiemkqaepyrriarIrhlekkrvvifaagignpyfstdttaalraaeveadvIlmgknnvdgvysadpkvndk  
avkyehlthiqmlqegIqv  
mdstassfcmDnnIpltvfsimeegnikravmgekigtIitk  
>tr|D0K4I1|D0K4I1\_STAAD  
mkvrtIaiialivflpilIkgglvlmi fanilalialkellnmnikfvsvpglisavgliiimlpqhagpwwvqiqlk  
slIamsfivIlytvIlsknr  
fsfmdaaafclmsvayvgigfmmfyetrsegIhyilyafIivwItdtgayIlgkmmgkhlwIpvIspnktiegfigglfcs  
Iivplamlyfvdfnmvwi  
llgvtIilslfgqlgdIvesgfkrhfgvkdsgrilpghgildrfdsfmfvIpllnIlliqs  
>tr|D0K4I4|D0K4I4\_STAAD  
mteqqkfkvladqikIsqIdaeIlnsgeltridvsnkrIrtewfhitlpqflahedyllfinaieqefkdianvtcrftv  
tngtnqdehaikyfgIcd  
qtaIspkvkgqlkqklImsgvIkvmsndiernhfdkacngsIkafrncgfdidkIifetndndqeqnlasleahiq  
eedeqsarlatekIekmka  
ekakqQdnnesavdkcqiGkpiqienIkpiesiieeefkvaiegviIfdinIkelksgrhiveikvtdytdslvlkmftrk  
nkddlehfkalsvgkwvra  
qgrieedtfirdIvmmsdieeIkkatkkdkaeekrvefhlhtamsqmdgipnigayvkaadwghpaiavtdhnvvqaf  
pdahaaaekhgIkmiygme  
gmIvddgvpiaykpqdvvlkdatyvfvvetgIlnqydkieIlaavkvhngeiidkferfsnpherIsetiinIthitd  
dmlvdapeieevItefkew  
vgdaiIvahnasfdmgfidtgyerIlgfgpstngvidtleIlsrtinteyghgInflakkygvelIqhhraydteatayi  
fikmvqqmkelgvlhnhei  
nklIlnedaykrarpshvtIivqnqqglknlfkivsaslvkyfyrtpriprslIdeyregllvgIacdegeIftavmqkd  
qsqvekiakyydfieIqpp  
alyqdlidreIrdtetIheiyqrIihagdtagipviatgnahylfehgdIarkiliasqpgnplnrstIpeahfrttde  
mlnefhflgeekaheivvk  
ntneladriervvpiKdeIlytprmeganeeireIlytnarklygedIppqividrlekelksIigngfaviylisqrIvkk  
slddgyIvgsrgsvsgslyv  
atmteitevnpIpphyIcpnctseffndgsvsgfdIpdktcetcgapIlikegqdiIpfetIlgfkgdkvpdidInfsge  
yqpnahnytkvlfgedkvf



Tsompanidou\_et\_al\_Supplemental\_FASTA\_File

ragtigtvaektafgvykgyIndqgi hkrgaeidr lvkgtgvrkrttgqhpoggiivvpdymdi ydftpiqypaddqnsaw  
mthfdhfsihdnlklidi  
lghdptmirmldlsgidpkipvddkevmpi fstpesl gvtedeil cktgtfgvpefgtgfvrqm ledtkpttfse l v  
qisglshgt dvlgnagel  
iktgicdlssvigcrddimvylmyag l epsmafkimesvrkgkg l teemietmkenev pdwyl dsc lkikymfpkahaaa  
yvlmavriayfkvhhlpy  
yasyfti rasfdli tmi kdktsi rntvkdmysrymdlgkkekdvl tvleimnemahrgyrmqpisleksqafefiiegd  
tlippfivppl genvakr  
ivearddgpflskedlnkkaglsqkiiey l delgs l p nlpdkaqlsifdm  
>tr|DOK4I9|DOK4I9\_STAAD  
mskqriyeyake lnkskei inelksmnievsnhmqaleddqikal dkkfkkeqkndnkqstqnnhqnsnnqknqkqqk  
dnknqgqnnknkgnknkn  
nrnkknknknkpnqpaapeipskvtyqegitvgefadk l nvessei ikkl fl l givaninqsl nqetieliaddygv  
eveevvinedlsiyfe  
ekddpeaierpavvtimghvdhgktt l ldsirhtkvtagaggitqhigayqi endgkkit fl dtpghaaftm rargaq  
vtditilvvaaddgvmpqt  
ieainhakeaevpiivavnkidkptsnpdrvmqel teygl ipedwggeti fvp lsa l sgdgidllemiglvaevqelka  
npknravgtvieaelksr  
gpsasllvqngt l vgdai vvgntygri ramvndlgqriktagpstpeitgindvpqagdrfvv fsdekqarrigesrh  
easivqqrqesknv l dnl  
feqmkgemkd l nvi ikgdvqgsvealaas l mkidvegvnvr i ihtavgain esdvt l anasngi i igfnvrpdsgakra  
aeaenvdmrlhrviyvie  
eiesamkg l dpfeeqvigqaevrqt fkvskvgti agcyvtegit r nagvri i rdgivyegeldt l krfkdakeva  
kgyecgitienyndlkegd  
vieafemveikr  
>tr|DOK4J5|DOK4J5\_STAAD  
mfml dag l mfpedem l gidivipdi syvlenkdkl kgi fl thghehaigavsvyleql dapvygsk l tialikenmkarn  
idkkvryytv nnds imrfk  
nvniffntthsi pds l gvcih t sygai vytgef kfdqsl hghyapdik rmaeigeegv fl isdsteaekp gyntpenv  
iehhmydafakvrgrlivs  
cyasnfi riqqvl niask l nrkvs fl grs lessfni arkmgyfdipkd l lipitevdnypknev i iatgmqgepveals  
qmaqkhkkmnieegdsfv  
laitasanmeviant l nelvragahi ipnkk i hasshgcmeel kmmimkpeyfi pvqqefkmqia hak l aaeagva  
pekifl vekgdvinyngkd  
milneknvsgni lidgigidvgniv l rdrl laedgifiavvt l dpknrriaagpei qsr gfvvresed l l reaeekv  
reiveagl qekriewseik  
qnmrdqisk l l festkr rmp i ipvisei  
>tr|DOK4J6|DOK4J6\_STAAD  
mvlgvfqlgiigr l idsfny l fgysryl tyilvl latgfityskriptrrtagsivl qiall fvsq l vfhfnsgikae  
repl syvyqsyqhshfqn  
fggv l gfyll elsvplisl fgvc i i t i l l lcssv l l ltnhqhrdvakvalenikawfgsfnekmsernqekql kreek  
r l keeqkarqneqqi kdv  
sdftevpqerdipi yghtenesksqcqpsrkrvfdaenssnivnhqadqqeq l teqthnsvesentieeagevt nvsy  
vvppl t l l nqpakqkatsk  
aevqrkgqvlent l kdfgvnakvtqikigpavtqyeiqpaqgvk skivnlhndialalaakdvrieapipgrsavgiev  
pnekislvs l kev l dekfp  
snk l evgl rdisgdpi tvpln emph l l vagstgsgksvcingi itsil l nakphevkl mlidpkmvelnvyngiph l l  
ipvvt nphkaaalekiva  
emerrydl f qhsstrnikgyne lirknqeldekqelpyivv idelad l mmvagevenai qritqmaragihliva  
tqrpsvdtitgi iknrips  
riafavssqtdsrtiigtggaek l l gkgdml yvngdssqtri qgaf l sdqevqdvnyvveqqqanyvkemepdapvdk  
semksedal ydeay l fvve  
qqkasts l l qrfri gynras l mdd l ernqvi gppqgskprqvlid l nndev  
>tr|DOK4K0|DOK4K0\_STAAD  
mka l v l gsgsigseivkql l tdgfevyvqyrtdinel tskfnddkvrfiqad l sqtididk tfgdiksl dcliyasgq  
slygv l qdmkdhdidacyq  
lnvlqlir l cryfvdl rqsangriivissiwgetgasmetiysamksaq l gfvka l sqela l tsvtnvai apgf vagnm  
asewqedelqamitelppq  
rlvlpsevahtcaylyhsnarsvtgti kvngawyi  
>tr|DOK4K9|DOK4K9\_STAAD  
mkpql swkvqqqqgegestgeifata mnrkgylygyrhfssrikghtnki rvsttpvhaisddl diliafdqetid  
vnhemreds i l l adakak  
pvkpegchaqliel pftatakel gta l mknmvaigatsal mnlntntfeelitnmfskkgdkvvevniqalnegyqlmq  
rlpeidgdfelest dalph  
lymigndaigl gai aagsqfmaaypi tpasevmeymi ani skvngaviqtedeiaavtmaiganyggvraftasagppl  
l mmeaig lsgmetplvi  
ntqrggpstglptkqeqsd l mqmiyghdipki v vapt daedafyl tmeafnl aeqqcpvivil sd l qlslgkqtvekl  
dynrieikrgeiqsdier

Tsompanidou\_et\_al\_Supplemental\_FASTA\_File

eeddkgfykryaltsngvsprpipgvkggihhtgvehneegkpsesasnrqqmekrmkieqlliespveanlqheda  
dilyigfistkgaiqegsn  
rlnqqgikvntiqirqlhpfptsviqdavnkakkvvvvehnyqqqlasiikmnvnihdkienytkydgtpflpheieekg  
kiiateikemv  
>tr|D0K4L6|D0K4L6\_STAAD  
mgkikelqtslankiaagevverpssvvelenaidagateisievesgvqsirvvdngsgieaedlglvfrhatsk  
ldqdedlfhirlgfrgea  
lasissvakvtlktctdnangneiyvengeilnhkpakakkgtdiveslfyntparlkyikslytelgkitdivnrmam  
shpdirialisdgktmlst  
ngsgrtnevmaeygmkvardlvhisgdsdyhiegvakpehsrsnkhyisifingryiknfmInkailegyhtlltig  
rfpicyniemdpi lvdvn  
vhptklevr1skeeqlyqlivskiqeafkdrilipknnldyvpkknkvlvsfeqqkiefeqrqntennqektfsseesns  
ksfmaenqndeivikedsy  
npfvtktsesli tddessygnntrekdedyfkqqeqlqemdqtfdsnedavqnyenkasddyvdndikgtskdpkr  
ripymeivgqvhgtyiaq  
nefgmymidqhaaqerikyeyfrdkigevtnevqdl lip1tfhfskdeqlvidqyknelqqvgimlehfgghdyivssyp  
vwfpkdeveeikdmieli  
leekkvdikklredvaimmsckksikanhylqkhemsdlidqlreaedpftcphgrpiiinfskyelek1fkrvm  
>tr|D0K4L7|D0K4L7\_STAAD  
mnni1pairnikdlekliktdykmcv1ldmhighiksime1lkqnhiectihidlikglshdefasefiiqqykpkgiv  
stkskvikkaks1nt1tif  
rvfiidsqalkrsidlikkvepdfvev1pgvaskaihiiketntqviagglintidevneavkngakyvttsydklw  
>tr|D0K4M8|D0K4M8\_STAAD  
mpkrtftkedi rkfaeeenvrylrlqftdilgtiknvepvvsqlekvldnemfdgssiegfvrieesmylhpdltdtw  
ifpwtaggkvarlicdvy  
ktdgtpfegdpranlkrvlkemedlgftdfnl gpepeffl fkldekgeptlelnddgyyfdlaptdlgencrrdivlele  
dmgfdieashhevapgqhe  
idfkyadavtacdnigtflvvtiarkhn1hatfmpkplfgvngsgmhfnvs1fkgkenaffdpntemgl tetayqyta  
gv1knargftavcnp1vns  
ykr1vpgyeapcyiawsgknrsplirvpssrg1strievrsvdpaanpymalaaileagldgikn1kvpepvnqniyem  
nreereavgidlpstlyt  
alkamrenevikkalgnhiynqfinsksiewdyirtqvsewerdqymkqy  
>tr|D0K4N5|D0K4N5\_STAAD  
matfkrknnkkqdlilrhealehy1mnkynfnydaykivsknti1qf1  
>tr|D0K4N8|D0K4N8\_STAAD  
mq1nnekqqrhi1ntneynnkknssflpsyitidsneiekvtkkefidfpvlfddegnfrkkqvidykkiigksyvngk  
ym1krn  
>tr|D0K4P7|D0K4P7\_STAAD  
mnisnenivtliaviaaiigiflqi fflplivtavlsillg1fvgfivylivsfynkrkn  
>tr|D0K4Q6|D0K4Q6\_STAAD  
mtnykvv1dmddt1l1nsdnvi seetany1taiqdegyyv1asgrptegmiptard1klpehshy1isyngsktinmtn  
eevevsksigkqdfdeivd  
ycrdrgffv1tyhdgvltydseheymnieaeltg1pmkrvddikayiqgdvpkvmgdyvanitearid1ngvfndnvda  
ttskpf1efmakdvskgn  
aikalchk1gysvdqviafgdsmndksmfevag1aiamgnasdelkqyadevt1dhnengiphal1k11  
>tr|D0K4Q7|D0K4Q7\_STAAD  
migqtn1fdv1kqderfivvqaleekng1lkrt1reypglnhkqmd1fth1kel1fseesfaenqsafsitvytn1d  
ytadqiyahvkrfrrkhdw  
tqtak  
>tr|D0K4Q9|D0K4Q9\_STAAD  
mqdiy1leqmsqfdrevipermmhakgsagfgtftvtkditkytnakifseigkqtemfarfstvagergaadaerding  
falkfyteegnwd1vgnt  
pvfffrdpk1fvs1nravkrdrptnrmrdannwdfwtglpealhqvt1lmsdrigpkdlrhmhfgshtysmyndsgerv  
wvkhfrtqqgien1tdee  
aei1atdrdssqrd1feiekgydpkwtmyiqvmteeqaknhkdnfpdltkvwyhdeyplievgefelnrnpdnyfmdv  
eqaafaptni1pg1dfspd  
km1qgr1fsygdqyr1gvnhwqipvnqpkvggienicpfsrdgqmrvvdnnqgggthyypnnhgkfdsqpeykkppfp  
tdgygyeynqrqddnyfe  
qpgklfr1qsedakeriftntanamegvtdvkrri rhcykadpeyggkvakalgidinsidletendetyenfek  
>tr|D0K4R4|D0K4R4\_STAAD  
mdtpkkqqa1fnni1qnmmsksdvekt1nkpkrvtfneygkwytyyddynn1fimisymkdkvna1ytnqni1tsk1k  
yntpksvvrq1gepetei  
vkgrvryeqnkeydvfhknh1yttvfydkhrrnntav1qvsdamen1keqygapsks1adsfelqnfd1vnaerkqh  
p1st1kyskqnssetarkhs  
kdmaknhyfdhtn1kgqspfd1kkdgitfnsagen1aygqvssiyahqglmsiighrkn1lndtfkilgvgvdfndekq  
pfwtenytg  
>tr|D0K4S0|D0K4S0\_STAAD  
mlylifsii1valfmg1t1vivi1rmkaqnyvpnekkiv1ppffmatgalmyvvyf1rltgsem1leafiig11fstvl1ltsr

Tsompanidou\_et\_al\_Supplemental\_FASTA\_File

fevkgteiy mkrskafpvi  
lisll iirtvmkifisneidpge lggmffllafcmivpwaamlykykk lkk tlin  
>tr|DOK4S1|DOK4S1\_STAAD  
mki ihtadwh l gki lngkql ledqayildmfvekmkeeepdiivi agdlydttypskdaimlleqaigklnlelripiim  
isgnhdgkerl ngyaswfe  
hnql firtdftsinspieingvnfytlpyatvsemkhyfeddtiethqqgitrcietiapeidedavnishltvqggk  
tsdserpl tigtvesvqg  
vfdifdyvmlghlhhpfsieddkikysgslqysfseagqakgyrrltindgiindvfiplkplrqlleisgeyndvine  
kvhvknkdnlylhfklknms  
hitdpmm slkqiypntlaltnetfnyneennaieisekddmsiemfykhitdke lsdiaqskkiknilenelrked  
>tr|DOK4S2|DOK4S2\_STAAD  
mkplhlklnnfgpflkeeidfskidnneflisgktgsgktmifdamtyalfgkasteqreendlrshfadgkqpmstvtf  
efqlnhriykvhrqgpyik  
egnttktnakfdvfmvdgkyeireskvisgtqfiiellgvnadqfrqlfilpqgefkrflisnsrekqgilrtlf dsek  
feaireilkeelkkekaqi  
enryqqidllwgeiesfdddki gllelatqqidklienipllqarskeilafvnesketaikeyeiekktlennilkd  
ninglnknkidfvqlkegg  
peideieaklkllditnllyienreki etkianskkdisktnkilnlcdkkrnidkekml eengdliesktsfidk  
trvlfndinkyqgsylnie  
clitegeqlgdelnnlikglekvedsignnesdyekie llnaitninneiniikenekakaeldkllgskqelenqine  
ettimknleikldhydksk  
sdlnkdesfiseiksavkigdqpcignei qdlghhidfdisiakrqneikeieanihaiksniavhnsaikfvnekisni  
niktqsdfslevlnkrll e  
nena lnnqrdlnkfieqmkeekdnltlqihnkqlrlnkneselklcrdlitefetlskynnitnfevdykkyvqdvnhq  
elskeiedklmq lsrkrlie  
eqnnlnhyenqletynndlelneqsiememsrlnltdndineiiawrgeqe leqkrdytkkryhefemeiarlesltk  
dke lldsklkdeyeqkke  
kmntlideysavhyqcqnninktqsivshinylnqelkdqqeifqlaeivsgknnknltenfvliyyldqiaaqanrl  
atmsdnryqlirreavshg  
lsgleidvfdl hsnksrhisslsggetfqsslalalglseivqqsggislesifidegfgtldqetletaldtllnlks  
tgrmvgiishvselknrip  
lvlevksdqyqsstrfkrn  
>tr|DOK4S4|DOK4S4\_STAAD  
mnssspenpekkyspvfiysaivvaiivvllgaf lpeqfnvtnnikmwitek lgyy lilttiivffciflifspigkl  
klgkpnkpefnti swfam  
lfsagmgiglvfygaaepmahfatppta dpkttteaytea lrstffhwgf hawavygvvalalaysqfrkgepgllsrtlr  
pllgdkvegpigifidvls  
vfativgvavslmgalqingglhylnvvpntfvqaiiivvt ilfiasawsgl skgiqylsnlniglgtilmvaaliv  
gptvli lnm ltsstgsl l n  
tflfnsfdtaalnpqkrewmsswtlyywgw lswspfvgvfiarvskgrsiref isgvllvpaisvfwfsvfgvlgiet  
gkhhkeifdmtpetqlfgv  
fnhvpfgivls liallliasffitsadsatfv lgmqtffgslnpssmvkvvwgisqalialfvlllagggngaealnaiqs  
aaiisafpfsfvvlmmvs  
fykdanqerkflgl t ltpnkhr lqeyiksqqedyesdilekrqsrniekkdn  
>tr|DOK4S5|DOK4S5\_STAAD  
msrkkivapnf nisfqchsf dgsgtemi fsqnl fr rptptctll  
>tr|DOK4T0|DOK4T0\_STAAD  
mamnkqnnysddsivqlegleavrkprgmyigstdkr glhhlvyeivdnsvdev lnygyneidvtinkdgsisiednrg  
mptgihksgkptveivftv  
lhaggkfgqgyktsgglhgvgasvvnal sewleveihrdgsiyhqsfknggspssglvkkgkktktgkvtfkpddtif  
kastsfnfdv lserlqesa  
fllknlkitlndlrsgkerqehyheegikefvsyvnegkev lhdvatfsgeangievdfafqyndqysesilsvnvr  
tkdggthevgfktamtrvf  
ndyarrine lktkdnl dndi regltavsvripeellqfegqtksklgtsearsavdsvvadklpfyleekgqlsksl  
vkkai kaqqareaarkare  
darsgkknkrkdtllsgkltpaqsknteknelylvegdsaggsaklgrdrkfqailplrgkvintekarledifkneein  
tiihtigagvgtdfkieds  
nynrvii mtdatdgdahiqvlll tfffkymkplvqagr vialpplyklekgkgtkrveyawtdeelnklqkelgkgt  
lqrykg l gemneq l wett  
mnpetrtilrvqvedevrskrvt limgdkvqprrewiekhvefgmqedqsil dnsevqlendqfdeei  
>tr|DOK4T4|DOK4T4\_STAAD  
mkfvggndlvfslialvllgivi fifekvsyvfdpfiivfktiaapiivslilfy lfnpivnm meryriprvagisiy l  
avvgvitlivnllipiigs  
qvds l vknspqyleklinsidkianntffssyysqindwlnslpkkip sm lseftd gfgskiatfaetianigvvivttp  
fv lffmlkdghhfkefstn  
impkfrkdfhdll ekmsvqvg syiqgqiivsf cigillfigysviglksylvlasiaavtsvvpylgptiaispav ia  
aitspwmllklavvvtlvq  
fveghfispnimgktlkihpltiifi lllcagkllgivgvilgipgyailkvlvthlfqlfkrryrnrfygnvgeydikes

Tsompanidou\_et\_al\_Supplemental\_FASTA\_File

nkive

>tr|D0K4U0|D0K4U0\_STAAD  
mttvlfvlglliggslnsniyhnptniiaydadtsqldkaksigiinekclnyseaikkadviiyatpvaitnkylse  
lidmptkpgvivsdtgstk  
amiqqhesnllkhnihlvsghpomagshksvglnakkhlfenayyilvyneprneqaantlkeltsptlakfivttae  
yvtsvvshlphivasslvh  
vsqkngqehhlnvklaggfrditiassnaqmwkditlsnktyilemirqlksqfqlerliesndsekllsffa  
yrdalpakqlgglntaydl  
yvdipdesgmiskvtyi1slhnsisnlrilevrediygalkisfknptdrermqalsdfdcyiq

>tr|D0K4V2|D0K4V2\_STAAD  
mrfvfdidgtlcfidgrlidqtiidtllqlqhdghelifasarpirdllpvlpsvfqhqligangamisqqskisvikpi  
htdyhhilkiikyeley  
iiddwnyaaqldaenaiferldphklascidvanidtpikiillnidpaqittildelnkyhqelemihhsneynidit  
aqinkytalqyifdadvk  
yiafgndhndifmlqhassgyiigpseaythailklkikyinnntqaickvlksyk

>tr|D0K4V6|D0K4V6\_STAAD  
mhkifsknnliffvfvafivvivlqffvssenatkvnlstqfepiswlhllgtddygrdlftriiigarstlfvtvltl  
iaivvigtglfagykkq  
wierlvlfidvglisepifimialasffqpslwnlvisitvikwmnhrtrlsivnsemnkpyikmaqlfhpvtrtili  
rhltpkiipaiivlmvvd  
gkiilyisslsfiglgaqpptpewgamlqqgrdfisshpimlipasviaitilifnltgdalrdrllkqrgeydes

>tr|D0K4W2|D0K4W2\_STAAD  
mettdnrrqslvdqqlvqkhlssrtvknkvfkliflactllglvvlialltqtlkgvshlnlqfftnfsstpsmagvk  
galigs1wlm1siip1si  
lgigtaiyleyaknnkftqfvkisisnlagvpsvfvgllygtlfgvgagiealkmgnsilaaaltmtllilpiivssq  
eairavpnsvreasyglga  
nkwtirrvvlpaa1pgl1tgfils1sralgetaplvligiptillatprsil1dqfsalpiqiftwakmpqeeqfnvasa  
gii1v11v11lmngvai1  
rnkfskkf

>tr|D0K4W3|D0K4W3\_STAAD  
mtsstnvaliekni1kkghndkiipvilaaaisailt1lgilit1lletitfftripiteflfsttwnptgspkfg  
iwaligt1kitviatifa  
vpvg1gaaiylseyasdrarriikpileilagiptivfgffaltfvtpvlrsf1sglgefna1spglvvgimivplits1  
sedamasvpnkiregaygl  
gatklevatkvvlpaat1sgivasivl1aisraigetmiv1laagssptas1st1ssiqtmtgyiveiatgd1atfgsniyys  
iyavgt1fift1imn1ls  
qwiskrfreey

>tr|D0K4W5|D0K4W5\_STAAD  
mgftrmsvrginkvkre1gfv1malnrkiaaqravhykihikkanfhqiinrnqlfyia

>tr|D0K4W6|D0K4W6\_STAAD  
mal1kd1vgs1ef1evvg1qgsty1lkgp1ngenvk1nqsem1ddde1evgees1ffiy1pnrsge1fatq1nmp1ditk1kyd  
fakv1ktdrdgar1dvglp  
sevl1pved1pkvks1wpqgdh1lvt1ridrenhmygr1asesvvenmftpvhddn1knevieakpyrv1rigsf1l1se  
sgyki1fvheserkaepr1g  
esvqvri1ghndkge1ngsf1p1aher1dddgqvi1fd1lveydge1pfdwksspea1kevfnmskgsfkraighlykqki  
inietgk1t1tkkgsr1d  
ske

>tr|D0K4X1|D0K4X1\_STAAD  
mnqrvar1aekgheivg1ientpkattpyqyqhiadvkdadvaidfsn1n1lfp1ldeefh1plvvattgekek1lnk  
lde1sqnmpvffsanmsy1g  
vhal1tki1laavp1l1ddfdie1teahh1kkvdaps1g1leklydviv1skenvtpvydrhelnekrqppdigih1s1rggti  
vgehev1fagtdeti1qith  
raqskdi1fangai1qaaer1v1nkp1ngfy1tfdn1

>tr|D0K4X3|D0K4X3\_STAAD  
mne1efvtk1hrrh1hqhpe1sl1hefettayika1f1ds1lnikydc1pletgviay1legngshtiayradid1alpileendvp  
yrsqsdhvmhacghdghtt  
al1m1fvqrckdmqdag1lpqnv1vifqpaee1tggganr1likagafdkypieavf1gihvnpfadegiavirdeeitasate  
yrff1tg1sshvadkeqah  
scgealqhv1l1tqisq1qqf1h1ng1lkrnivhighfkageaintvpsngylegtirtydidd1tivknqmhkiaesvkl1fn  
vecev1kfaegypt1inspk  
l1rtqiedal1kad1lnvydkptp1fl1gedfsfygqqlapayfv1figtrnedkgfv1tg1htsh1nfdekvl1invnfyen1l  
nnykev

>tr|D0K4X5|D0K4X5\_STAAD  
mtvkynqngel1tmdg1s1lktiaqsfgtptivydel1qireqmrryhrakfdsg1kynisyaskaftci1qmvklvaed1ql  
dvvsege1lyta1eagfeps  
rihfghnktkheiryalennigyfv1ids1leeielidryandtvqv1lrvnpgveahthefiqtggedskf1g1siqy1gla  
kkaidkvqqs1kh1klkgvh  
chigsqiegteafietakiv1l1r1lkeqgi1qve1l1n1gggfgikyvegdesf1piesgikditdaikseikvl1gidapeigi

Tsompanidou\_et\_al\_Supplemental\_FASTA\_File

epgrsivgeagvtlyevgt  
ikeipeinkyvsidggmsdhirtalzydakyqallvnrneeaddsvtiagklcesgdiikdaklpssvkrqgdylailstg  
ayhysmasnynqmkkpyvf  
flkdgkarevikrqsrlqliindtk  
>tr|D0K4Y2|D0K4Y2\_STAAD  
mtenksfkeshplddfisdkelsnttiqkekltieqqkqvdtiskqipldnegllafgsdlqkqmsqfshqmldevqsk  
dvgpigdtlsdmsklksv  
npnelntdkpsmlkriksrakssineifsrmsvsavqdritiqlqkhqthltrdielltdlydknkqyfdlslhiiaa  
qqkkqleneklpglqqga  
qqstnqmdiqqvadmqqfidrldkriydqlsrqialqtapqirmiqnvqalaekiqssiltsiplwknqmaialtlmr  
qrnavaaqravtdtndll  
tanaemlkqnaietatenergivldtlkrtqrnietietliiqqhgreerqlaekelqqleqdlkshlvnikgpnkq  
s  
>tr|D0K4Y8|D0K4Y8\_STAAD  
mpevkvpelaesitegtiaewlknvgdsvekgeaileletdkvnvevseeagvlseqlasegdtvevqaiiiegsg  
naskensndntpqqneetn  
nkkeettnsvdkaevnqanddnqqrinatpsarryarengvnlaevspktdvvrkedidkkqqapastqttqqapake  
ekkyngyptkpvi rekmsr  
rkktaakklllevsnntamlttfnevdmtnvme lrrkkekqfmdhdgkglgfmsfftkasvaalkkypevnaeidgddmi  
tkyydigvavstddglv  
pfvrddckknfaieaeianlavkarekklglldmvngsfritnggigfsmmstpiingnqaailgmhsiiitriaidqd  
tienrpmmyialsydhrii  
dgkeavgfktikelienpedlles  
>tr|D0K4Z2|D0K4Z2\_STAAD  
msqwkrisllivfalvfgiaffhesrlgkwidnevye fiyssesfittsimlgatkvgevwalncislllvaylmkrh  
kiealffaltmalsgilnp  
alknifdrerptllrliditgfsfpsghamgstayfgsgiyllnrlnqgnskigiliglcaamillisisrvylgvhyptd  
iagigggvfciiilstll  
rnklin  
>tr|D0K501|D0K501\_STAAD  
mtlsilvahdlgrvigfenqlpwhlpndlkhvkklstghtlvmgrktfesigkplnrrrvvltstdtsfnvegvdivhsi  
ediyqlpghvfi fggqtlf  
eemidkvddmyitvi egkfrgdtffppyt fedwevassvegkldekntiphtflhlirkk  
>tr|D0K504|D0K504\_STAAD  
meilriepspntmkvvl sytreklsntykkveetqprfinqlsidgitsifhvmnflavdkapkadwevilpdika  
afsdankvlesvnepqidn  
hfgeikael ltfkqipqikltsadqelreqlpqtyvdhmtqaqtahdnivfmrkwldlgnrygnieevmdgvleevlat  
ypesqlpvlvkhaleenha  
tnnyhfyrvhs ldeyhatdnwktlrm lnhfpkptfediplldlalsdekvpvrrqavillgmieskeilpylykg lrdk  
spavrrtagdcisdlgype  
alpemvllldpkiivrwaamfi fdegnaeqlpalkahindnafevklqiemaisriengdealgsvwkqmanrti  
>tr|D0K507|D0K507\_STAAD  
mterkcacnk lfsilvrgpnteadeksaynnvqvgdgpqqreivfpistdnaswggttk  
>tr|D0K509|D0K509\_STAAD  
mtl leqkeaaiaevnk lqqqa idhvnapdvhsveeiqqqeqayieqfnpeqftieqaksnaiksiedaiqhmidika  
rtdltdkekqeaialnql  
keqaiqaiqraqsiseiteqleqfkaqmkaanptakelakrkqea isrikdfsnekinsir nseigtadekqaamnqine  
ivletirdinnahtlqqve  
aalngiarisavqivisdrakqsstgnesnshltigygtanhpfnsstighkkkl deddidplhmrhfsnnfgnvik  
naigvvgisgllasfwffi  
akrrrkedeeeee leirdnnkdsiket lddtkhlp lll fakrrrkedeedvtveekds lnnge sldkvkhtpfflpkrkke  
deedvevtnentdekv lkd  
nehsp lll fakrrkdkeedvettsieskdedv lll akknqkdnqskdkksaskntskkvaakkkkkkssknkk  
>tr|D0K510|D0K510\_STAAD  
msevtaaknaate lnaqmgnleqaihdqntvkqgvnftdadkkrdaytnavsraet ilnktqgantskqdveaaiqnvt  
saknalngdqnvtnaknaa  
kna lnn ltsinnaqkrdl ttkidqattvagveavsntgtqlntamanlqngindkant lasenyhdadsdkktaytqavt  
naenilnksgsnldkaav  
enalsqvtanakgalngnhleqaksnanttinglqh lttaqkdklkqqvqqaqnvagvdtvkssant lngamgtlrnsiq  
dntatknqny ldaternk  
tnynnavdsangvinatsnnpmdana inqiatqvtstkna ldgthnl tqakqtatnaidgatn l nkaqkda lkaqvtsaq  
rvanvtsiqqtanelntam  
gqlqhgiddenatkqtqkyrdaeqskktaydqavaaaka ilnkqtgsnsdkaavdra lqqvtstkda lngdaklaeakaa  
arqnlgtlnhi tnaqrta l  
egqinqattvdgvntvktnant ldgamns lqga indkdat lrnqny l dadeskrnaytqavtaaegilnkqtggntskad  
vdnalnavtrakaalngae  
nlrnaktsatntingl pnl tq lqkdn lkhqveaqnvvgvngvkdkgnt lntamga l rtsiqndnttktsqny l dasdsn  
knyntavnnangvinatn

Tsompanidou\_et\_al\_Supplemental\_FASTA\_File

npnmdana indmanqvnttkaalngaqlaqaktnatntinnaqdlngkqkda lktqvnaqrvsdannvqhtatelnga  
mtal kaai adkertkasgn  
yv nadqekrqaydskvtnaeni ingtpnatltvndvnsaasqvnaakta lngdnnlrvakehanntidglaqlnnvqkak  
lkeqvqsattldgvqtkn  
ssqt lntamkg l rdsianeatikagqnytdaspnnrneydsavtaakai inqtsnptmepntitqatsqvttkehalnga  
qnl aqakttaknnlnn lts  
innaqkda ltrnidgattvagvnetakate lnnamhslqngi indetqtkqtqky l daepskksaydqavnaaka i l tka  
sgqnv dkaaveqal qnvns  
tkta l ngdak l neakaaakqt lgt l th i nnaqrna l dneitqatnvegvntvkakaqq l dgamgql etsi rdkdttlqsq  
nyqdaddakrtaysqavna  
aati l nktagntpkadveramqvtaqanta l ngi qn l erakqaanta i tnasd l ntkqkeal kaqvtsagrsvaangve  
htate l ntamta l kraiad  
kadtkasgnyvnadankrqaydekvtaaehivsgtptpt l tpsdvtnaatqvtnaktq l ngnhn l evakqnanta idgl t  
s l ngpqkak l keqvqgatt  
l pnvqtvrdnaqt l ntmkg l rdsianeatikagqnytdasqkqndynnavtaakai igqtspsmiaqei nqakdqvt  
akqqa l ngqen l rtaqtna  
kqh l ng l sd l tnaqkdaakrqie gathvnevtqaqnada l ntamtn l kngi qdqntikqgvnftdadeakrnaytnavt  
qaeqi l nkaqgpntakdgv  
eta l qnvqrakne l ngnqnvana kttakna l n n l ts i nnaqkaal ksqie gattvagvqvstmase l ntamsn l qrgin  
deaatkaaqkyteadrkq  
tayndavtaakt l l dktagsndnkveqal qrvntakta l ngdar l neakntakqq l atmsh l tnaqkan l teqiergt  
tvagvqgi qanagtl nqam  
nq l rqsias kdatkssedyqdanad l qnayndavt naegi i satnnpempndtinqkasqvnsaksa l ngdek l aaakqt  
aksdi gr l td l nnaqrtaa  
naevdqapn l aavtaaknkats l ntamgn l kha l aekdntkrsvnytdadqpkqqaydtavtqaeai t nangsna netqv  
qaa l nq l nqaknd l ngdnk  
vaqaketakra l asyn l nnaqstaatsqi dnattvadvtaaqntane l ntamgql qngi ndqntvkqqvntdadqgk  
daytnavtnaggil dkang  
qnm tkaqveaa l nqvttakna l ngdanvrqaksdakan lgt l th l nnaqkqdl tsqie gattvngvnsvktaqdl dgam  
qr l esai ank dqtkaseny  
idadptkktafdnai tqaesy l nkdhgtknkdkqaveqai qsvtstena l ngdan l qrakteatqaidn l tq l ntpqkta l  
kqvnaaqrsvsgvtd l kns  
ats l nnamdq l kqai gdhdti vaggnytnas pdkqgaytdaynaakni vngspnvi tnaadvtaatqrvnaets l ngdt  
n latakqqakda l r qmth l  
sdaqkqsi tgg i dsatqv tgvsvkdnatn l dnamnq l rnsi ankdevkasqpyvdadtdkqnayntavtsaeni i nats  
qpt l dpsavtqaanqvntn  
kta l ngaql nankqettan i nr l sh l nnaqkqdl n tqvtnapni stvnqvtkkaeq l dqamer l ingi qdkdqvkqsvn  
ftdadpekqtaynnavtaa  
eni i nqangtnangsqveaa l stvtttkqa l ngdrkvtdaknna nqt l st l dn l nnaqkgavtgn i nqahtvaevtqai q  
taqe l ntamgn l kns l ndk  
dt l gsqnfadadpekknayneai rnaeni l nkstgtnvpkdqveaamqvnttkaa l ngtqn l ekakqhanta idgl sh  
l tnaqkeal kql vqgstt  
aeaggneqkannvdaamdk l rqs i adnattkqnqnytdaspnkkdaynnavttaqgi idqtt nps l dptvinqaagqvst  
skna l ngnen l eaakqqat  
qs l g l dn l nnaqkqavtnq i nqahtvdeanq i kqnaql ntmamgn l kqai adkdatkatvntftdadqakqqayntavtn  
aeni i skanggnatqteve  
qai qqvnaakqa l ngnanvqhakdeata l innsnd l nqaqkda l kqqvqnattvagvnnvkqtaqe l nnamtql kqgi ad  
keqtkadgnfvnadsdkqn  
aynqavakaeal i sgtpdvvvtpse i taa l nkvtqat l vpvna i qqaatt l ndamtql kqgi ankaq i kgsenyhdadt  
dkqtaydnvntkaeel kq  
tt nptmdpnti qqa l tkvndtnqa l ngnqk l adakqdaktt lgt l dh l ndaqqqa l ttqveqapdiatvnnvkqnaqnl n  
namtn l nna l qdktet l ns  
i nftdadqakkddytnavshaegi l skangsnasqteveqamqrvneakqa l ngndnvqrakdaakqv i tnand l nqaqk  
dal kqqvdaaqtvanvnti  
kqtaqdl nqamtql kqgi adkdkqtkangfnvnadtdkqnaynnava haeqi i sgtpnanvdpqqvaqa l qqvnaqkqdl n  
gnhn l qvakdnanta idgl  
pn l nqpqkta l kdqvshae l vtgvna i kqnada l nnamgt l kqgi qansqvpqsvdftqadqdkqqaynnaanqaqqian  
gtptpv l apdtvtkavttm  
nqakda l ngdek l aqakqda l an l dt l rd l nqpqrda l rnq i nqaqa l atveqtkqnaqnvntamgn l kqgi ankdtvka  
senyhdadvdkqtaytnav  
sqaegi i nqtt npt l n pddi tra l tqvtdakns l ngeak l atekqnakdavsgmth l ndaqqqa l kqgi dqspei atv nq  
vkqtats l dqamdql sqai  
ndkdqi l adgny l nadpdkqnaykqavakaeal l nkqsgtnevqaqves i tnevnaakqa l ngndn l anakqqakqql an  
l th l ndaqqqs fesi tqa  
pl vtdvtti nqkagtl dhame l l rnsvadnqttl asedyhdataqrqndynkavtaanni i nqtsptmnpddvngattq  
vntkval dgden l aaakq  
qannr l dq l dh l nnaqkqql qsqi tqssdiaavngkhqtaes l ntamgn l inai adhqaveqrgnfinadtdkqtaynta  
vneaaami nkqtgqnanqt

Tsompanidou\_et\_al\_Supplemental\_FASTA\_File

eveqaitkvqttlgaIngdhnIqvaktnatqaidIIsIIndpqtakIdqvtaatlvtavhqiEqnantInqamhgIrs  
iqdnaatkanskyinedqp  
eqnydqavqaanniIneqtatIdnnaInqvaatvnttkaalhgdkvlqndkdhakqtvsqIahInnaqkhmedtIIdse  
ttrtavkqdlItevqaldqI  
mdalqqsIadkdatrassayvnaepnkkqaydeavqnaesiIagInnptInkgnvssatqavissknaIdgverIaqdkq  
tagnsInhIdqItpaqqa  
IenqInnattrdkvaeiIaqagaIneamkaIkesIdqpqtEasskfinEdqaqkdaytqavqhakdIInkttDptIaks  
iIdqatqavtdaknnIhgd  
qkIaqdkqrataetInnIsnIIntpqrqaIenqInnaatrgevaqkIteaqaInqameaInrsIqdqqqtesgskfinedkp  
qkdayqaavqnakdIngt  
gnptIdkaqveqIthafkqakdnIhgdkIaddkqhavtdInqIngnInnpqrqaIesqInnaatrgevaqkIaeakaIdq  
amqaInrsIqdqqqteags  
kfinEdkpkdayqaavqnakdIngtgnptIdksqveqIqtavttakdnIhgdkIardqqqavttvnaIpnInhaqqq  
tIdainaaptrtevaqhv  
qtateIdhametInkvdqvntdkaqpnysteaddkEavdqaIqaaqsItdptngsnankdaveqaItklqekvneIng  
nervaeaktqakqtIdqIt  
hInadqIatakqIdqatkIqpiaeIvdqatqInqsmdqIqqavnehanveqtiDytqadsdkqkaykqaiadaenvIkq  
nankqqvdqaInqInakq  
aIngdervaIaktngkhdIdqInaInnaqqdgfkgridqsndInqIqqIvdeakaInramdqIsqeitgnEgrtkgstny  
vnaDtqvkqvydeavdkak  
qaIdkssgnItaeqvIkIndavtaakkaIngeerInnrkaeaIqrIdqIthInnaqrqIaiqqInnaetInkasrainr  
atkIdnamgavqqyIdeqh  
IgvIssTnyInaddnIkanydnaIanaaheIdkvqgnaiakaeaeqIkqniIdaqnaIngdqInanakdkaafvnsIng  
InqqqgdIahkaInnadtV  
sdvtIdvnnqIdIndametIkhlvdneIpnaeqtvnyqnaddnaktnfddakrlantInsdntvndingaiqavndai  
hIngdqrIdakdkaiqs  
InqalankIkeieasnatdqdkIaknkaeeIansiInnkatsnqavsqvqtagnhaiEqvhaneIpkakIdankdvd  
kqvqalIdeIdrnpnItdk  
ekqaIkdrinqIqqghndInnaItkeeieqakaqIaqaIqdIdIvkakedakqvdvkqvqalIdeIdqnpnItdkekq  
aIkdrinqIqqghngInn  
amtkeeieqakaqIaqaIkeIdIvkakenakqdvdkqvqalIdeIdqnpnItdkekqalKdrinqIqqghndInnamt  
keeieqakaqIaqaIqdIk  
dIvkakedaknaIkanakrdqInsnpdItpEqkakaIkeIdeakraIqvenaqtiDqInrgInIglDdirnthvwe  
vdeqpavneiFeatpeqI  
vngelIvhrddiIteqdiIahInIdqIsaevIdtpstatisdsItakvevtIIdgskvIvnpvkvvekeIsvvkqqaI  
e  
>tr|DOK511|DOK511\_STAAD  
mnyrdkiqkfsIrkYtvgtfstviatlVfIgfntsqahaaetnqpasvkvkqqsneqtenresqvqnsqnsqnsqIs  
atheneqpnnsqanIvnqk  
vaqsstndeqpasqvnntkkdsataattqpdkeeskKhqnesqsankngdnraahvenheanvvtasdsdngnvqhd  
rneIqaffdanyhdyrfId  
renadsgtfnyvkgIfdkIntIlgSndpInnkdlqIaykeIeqavalirtmpqrqtsrrsnriqtrsvesraaeprsvs  
dyqnanssyyvenandgsg  
ypvgtynasskgapynIpttpwntIkasdskeiaImtakqtgdgyqvwIkfnkghaphqnmIfwfaIpadqvpvgrtdf  
vtvnsdgtnvqwsHgagag  
agankpIqqmwegvndpdrshdfkIrnrsqviyswptvhvysIedIrsasyfseagatpatkaIgrqnfeyIngqk  
aespgvpkvytfiggdas  
ytIsfktqgptvnlIyaaggraIeynqIfmysqIyvestqdhqqrIngnIrvvnrtYrigttkrvevsqgnvqtkkvle  
stnIniddfvddpIsvykt  
psnkvlGfyptnantnafrpggvqeIneyqIsqIftdqIqeaartrnpiRlmIgfDyPdgygnsetIvpvnIvtIpeiq  
hnikffknddtqniaekpf  
skqaghpfyvyagnqgnasvnIggsvtsIqplrinItsnenftdkdwqitgiprtIhienstnrtnnarernieIvgnI  
IpgdyfgtirfgrkeqIfe  
IrvkphTptIttaeqIrgtaIqkvpvniSgIpIdpsalvylvaptnqttnnggseadqipsytilatgtpdgvhntiti  
rpqdyvfvIppvgkqIrav  
vyynkvasnmsnavtiIpdDipptInnpvgInakyyrgdevnftmgvsdrhsgiknttittIpsgwtsnItksdnkngs  
Iaitgrvsmnqafnsditf  
kvsatdnvnttndsqsKhvsihvGkiSedahpivIlgntekvvvnptavsndekqsiItafmknqniRgyIlastdpvt  
vdnngnvtIhyrdgsstI  
datnvmtyepvKseyqtanaaktatvtiakgqsfniGdikqyftIInsgqaiPngtftnitsdrtiptaqevsqmnagtq  
lyhivasnayhkdtedfyi  
sIkIvdvkqpegdqrvyrtstydlttdeIsvkqafinanrdvitlaegdisvtntpanganvstitvInkgrItksfas  
nlanmflrwnfpqdytv  
twtnakianrptdggIswsddhksIlyrydatIgtqittdiltmIkattvpgInrniIgnekaqaeaggrpnYrttgy  
sqsnattDgqrqftInqgv  
iqIldiInpsngyggqpvtnsntrahnsstvnvnepaangagafIthvvssthnasdavykaqlyItpygpkyv  
ehInqntgnttdainiyfv  
psdlvnptIsvgnytNhqvfsgEftntitandnfgvsvtvpntsqiTgtvDnnhqvsatapnvtsatsktinIlatd

Tsompanidou\_et\_al\_Supplemental\_FASTA\_File

tsgntattsfnvtvklrd  
kyrvgtssstaanpvriani  
dgttstvtvpkhvipeiv  
ahshyvtvqqdfpagnss  
rtvphvfetargvlypgv  
sdmydakqyvkpvnnsw  
gltnqeikvnnvlnssvk  
lfkadntpInvtnithgsg  
qattegavfikggdfdfg  
hverfiqnpvhgatvawh  
yitfdpntntngitaawa  
rqppnqqagvqhlndvty  
nrddtgndanwaamkpn  
taqvvnakydviynghtf  
vtgivgtngitvaagfnp  
qamdiaytekvnggaehs  
tinvvrgqnnqwtiankp  
snvtaaeinnavqvankr  
atikngtamptnlaggst  
qqintakteaqqvinner  
tpqqvsdaltkvraaqtk  
idngdataqqisdekhrv  
naltnqakhdltadthal  
ladnsalrtaktkldeein  
iagltplapltaktqlq  
ndidqptsttgmtsasva  
qlqhsidttsttgmtqds  
inaynakltaarnkvqqi  
taslnaynqklqaarqkl  
einqvlnqnpvtvqni  
italntamtklkdsvadn  
tiksgqnytdatpankqay  
avndikqttqslntamgt  
kehalngeaklnaakqean  
talghlnnlnnvqrqnl  
aetiinqtanptmsvddv  
ratsavttknalngdek  
eqtlnsqnyqdatpskkt  
aytnavqaakdlnskn  
vagvhtvqsnantldqam  
tlrqsianndatkasedy  
ktylntltsitdaqknl  
sqissatrsvgdtvkqna  
eaaqrvtakdalngdak  
liaaqnaakqhlgtlth  
naynqaissaetiinkqtg  
pntaktaveqalnnvnsa  
gqlqhaiadkntlassky  
vnadstkqnayttkvtna  
keqvgqanrledvqsvqtn  
gqslnamkglrdsianet  
nlrnaqntakqnlntlsh  
tnn

>tr|DOK515|DOK515\_STAAD

m1vavvkelkqgegrvact  
qyfkknqi iwgfhllassk  
eivekmqevgvtaisgeti  
atnaanvalgnakviiie  
lnddrikyledmyaekdv  
irpttisdpvyeeegvivy  
gvpnqpgavprtsma laq  
>tr|DOK526|DOK526\_STAAD

mvcvfritytnslvfhy  
>tr|DOK537|DOK537\_STAAD

mksmvemqrevdeyigrf  
mlvavvkelkqgegrvact  
qyfkknqi iwgfhllassk  
eivekmqevgvtaisgeti  
atnaanvalgnakviiie  
lnddrikyledmyaekdv  
irpttisdpvyeeegvivy  
gvpnqpgavprtsma laq  
>tr|DOK526|DOK526\_STAAD  
mvcvfritytnslvfhy  
>tr|DOK537|DOK537\_STAAD  
mksmvemqrevdeyigrf



Tsompanidou\_et\_al\_Supplemental\_FASTA\_File

idmtesfnetmekfntrdk  
nrferk  
>tr|D0K547|D0K547\_STAAD  
mertflmikpdavqrnligevisrierkgklvvggklmqvpmehaethygehqqkpfyndlisfitsapvfamvvegeda  
vnvsrhigstnpseaspg  
sirgdgltvgrnihgsdslesaereinlwfneitsyasprdawlye  
>tr|D0K549|D0K549\_STAAD  
madnkankeqhrvfqniiskkydrlnniisfeqhkvwrkrvmkdmgvrkgtkaldvccgtgdwtialskavgptgevtgi  
dfsenmlevgkektasmen  
vklvhgdamelpfednsfdyvtigfglnrvpdylvalkemnrvlkpggmvcletsqtplpvfkqmyalyfkfvmpifgk  
lfakskeeyewlqqstfnf  
pgkeelkrmfefagfinvrvsftggvaamhlygekdntkdg  
>tr|D0K558|D0K558\_STAAD  
mlfnkvlrsriayqlnflnshqkdktpqstnltrenkk  
>tr|D0K563|D0K563\_STAAD  
mqqnkrilitismlsaitfvltfikfpipflppytltdfsdvsllatftfgpvagivvalvknllnylfsmgdpvpgfan  
flagasfllyayajyknkr  
stkslitgliativmtivlsilnyfvllplygmifnladiannlkviivsgiiipfniikgivisivfilllyrrlanflk  
ri  
>tr|D0K565|D0K565\_STAAD  
mrfykfhfaysythliytlhllvhlyinlqvhilalnkllf  
>tr|D0K567|D0K567\_STAAD  
mfkrikliiliatiilsgcsttnnesnnetksvpeemeaskyvgqgfqppaekdaiefakkhrkefekvgeqffkdnfglk  
vkatnvvgkddgvevyvhc  
edhgi vfnaslplykdaihkgmsrnsndngddmsmmvgtvlsgefeyraqkekydnlykflkenekkyqytgftkeainkt  
qnvgyqneyfyitylsrnl  
keyrkyypeli hkkdkefkegmqrarke lnytantdvstlfstkknftkdntvddviesnlkldkpnmpqksqvtiql  
gkpsintkkpfyddinpie  
g  
>tr|D0K569|D0K569\_STAAD  
mnkindrdl telssywyqdinkdndftvngkrfkqvdeyndngnknkkgasdlkiyelldekgkptgeqtmiyqgtsne  
ainpnpnlksldigddwlq  
naklmdnsnkstydylkgsdefadlyrdklnthanklskynftqkygvspnyknktivadggnsaggagakyqgakhpnk  
vvatdpamvpyaawqkfar  
prfdnmsfnstndlltwlqdpfikdmpgkrvni sdgvprldalidshvgykrklnrkdntydtvpliki ksvkdteikn  
gkkvktititlmdgrip  
invwtgdsjarsgrgtliklnlenlda lsklitgetsgmlaecviflnesfnisenenknfadrkqqlsegfkdkinlfq  
leemertliskinsleeva  
detiesisavkhllpdfaldal kerine lfk giksfi ekvydsidneileifknidhdfrdgvseemmkhlkvvkqnier  
iknqndiygrqiaersim  
kqgdatil dgnfqincsgenmvqglvipsnylgrkmkilkdhiddgikkiadyvqsiydeyaskivdvikylintipkir  
knlrhaiemlnvkkkefls  
lipnvtcnyiktlee lndtlgkwepflndlkavspilndhlddivknmplivqmlfepshyddmfilntqaharldqm  
aqqfeivcnglnenegqai  
qtmqqsaslrnsliqvkeqlav  
>tr|D0K576|D0K576\_STAAD  
mqqalinfyylfhtkqhyflchdiledawkaennyskdavvslilfatacyhyrrnllkgayksfnkskeiiqnakdrd  
alylnlndyqllieqqiak  
lnaakpfssvilpitpvferiikanyppydynqetatdpfivdhmrrdrseviaakeeaiqlrkhrrn  
>tr|D0K579|D0K579\_STAAD  
mdlnektidrtviyngkivdveihtvtl pnetstrelvyhgavavcaltpkkevvlvkqyrkpvekplleipagkled  
denrveaakreleetgyi  
akelthvvdmygspgfcdeqlsiyftdnleegtvlhdedefvevikvpienvksmlmkeiedaktialqhlllnynhs  
k  
>tr|D0K580|D0K580\_STAAD  
mqknilksgialselglgcmslgtdlkkaeqiidcavengityfdtadmydkginesvvgkallkyqrrddifigtkvgn  
rltkdgttwdpsksyike  
avkgs lkr lgidhidlyqlhggtiddpldetisafdelkqegii raygissirpnvidyylkhsqietimsqfnlidnpr  
eslldaihndvkvlargp  
vskgl ltsnsvnl dnkfkdgidfyshdelgetiasikeiesnl saltfsyltshdvlgsiivgassvdqlkenienyht  
kvsldqikt aravkdley  
tnhlv  
>tr|D0K583|D0K583\_STAAD  
maqai ftgiinssnl dandiyltnksneqalkafaeklgvnysyddatllkdadyvflgtkphdfdalatrikphitkdn  
cfisimagipidyikqqle  
cqnparimpntnaqvgshvtgisfsnfdpkskdeindlvkafgsvievsedhlhqvtaitgsgpaflyhvfeqyvkg  
tklglekeqveesirnl  
gtskmiersdlsmaqlrknitskggttqagldt lsqydlvsi fedclnaavdrsielsnvedq

Tsompanidou\_et\_al\_Supplemental\_FASTA\_File

>tr|D0K586|D0K586\_STAAD  
mtridyessksivlsfaffldyimklyftmpktiliieqmgv  
>tr|D0K590|D0K590\_STAAD  
meklnqvmlyvddvekakafwtetlefvvvsetplaedyvavevsptkdaetsltimakefiekhspevnlgtpsImfke  
knfdalysklnldlglgthd  
ivemdgrvfnfqdgggnyfavsd  
>tr|D0K591|D0K591\_STAAD  
msytsvlnfnkftfyliqiafsnmgsafttfvfpImilkltgsafqvgivsalsfipyailglpagalidrlnkktimkc  
adiirfvsylsipvlsffn  
mlsifqiyvvaissigilvfhsisevsiipsivkeedlasansiyatqnvseflgpiigglytymgysilifidsmtf  
llsffslilikietksifn  
qeklsqknflsdvkvgydyllsnstirvmavvvslnliispyiyivmfvkedmnqssqalglvlgisslgaligslsa  
sflklfnfgklyiviifl  
dtifrlmfpfstyifilipllgltymtqsilniaiitlrqkkcsenmlgrvnsvfktmvfafrpiglflggillenkggf  
yaltisavlfiplvlyilk  
nrfyqveey  
>tr|D0K595|D0K595\_STAAD  
mlklnpykigfrtiktagmtlgviiskllglndnyassailvvlcikhtkvhsIqaiisrlvscflvlflgsaifsllgq  
spivlgiivllfipltvvl  
kvqegvitscvillhvfnaksidahlivnetlllliglsiaftmnlmmpsldkqldeykckieqqiadiifskysyiceky  
edtiaiefevlllnikkak  
siafrdvknhfvrnensyyhyfdmreeqvellmrmkpliesichkdpllndvssllkeiglnvnsndytamrlnhlyetr  
lkdelplptthkalsra  
siiqilineleeylqiksqfgslkmhseva  
>tr|D0K599|D0K599\_STAAD  
maklsyleairqaqdlalqqnkdvfilgedvgkkggvfgttqglqqygedrvidtplaesnivgtaigaamvgkrpiae  
iqfadfilpatnqiiseaa  
kmryrsnndwqcpI tirapfgggvhggl yhsqsiesifasspgltivipstpydakgl llssiesndpvl yfehkkayrf  
lkeevpeeytvpIlgadv  
kregedltvfcyglmvnycIqaadi laadginvevdlrtvypI dketiidrakntgkvllvtednlegsimsesvaiia  
ehclfdldapimrIaapdv  
psmpfspvIeneimnpekiInkmrelaef  
>tr|D0K5A0|D0K5A0\_STAAD  
midykslgIseedlkviykwmdlgrkiderlwlInragkipfvvsgggqeatqigmayaIeegditapyrdlafvtymg  
Isaydtflsafgkddvns  
ggkqmpshfssraknIlsqsspvatqiphavgaalalkmdgkkkiatavtvegssnqgdhfgelnfagvhklpfvcviin  
nkyaisvpdsIqyaaekls  
draIgyghgeqvdgndplamykamkeardraisggstlieavtsrmtahssdddqyrteerealkkadcnekfkke  
llsagiiddawlaeieeah  
kdiinkatkaaedapypsveeayafvyeegsln  
>tr|D0K5A1|D0K5A1\_STAAD  
msekqydlvllgggtagyvaairasqlgkkvaiverqllggtclhkgcipI tksllksaevfqtvkqaamfgvdvkdanvn  
femlarkediinmqyggv  
khlmqhnhidiyngtrIlgtsifspqsgtisveyedgesllpnqfvliatgsspaelpflsfhdhkiI ssdilsIkt  
lpsigigggvIgmefas  
lmidlgdvtvieagerilpteskqasqlkksI sargvkyegikI sendinvnedgvtfeissdiI kvdkvllsigrk  
pntsdiglntkikIstsg  
hiltnefqtedkhiyaagdcigklqlahvgskegvavdhmfegnpipvnynmmpkciysqpeiasiglnieqakaegm  
kvksfkvpfkaigkavids  
hdanegysemvidqsteeivginmigqhvteI lineasllqfmngsalelglttahpsisevlmelglkaesraihv  
>tr|D0K5B0|D0K5B0\_STAAD  
mnfkeikelieilkdstIteiniedtkgkvtlkkeketeiitpqvsqmpveaaampmpqaqstdsnkteapkptsdnhkt  
inapmvgtfykspspdeea  
yvqvgdvtvsnettvciIeamklfneiqaesgeiveilvedgqmveygqplfkvk  
>tr|D0K5B3|D0K5B3\_STAAD  
mklvsivgatlllagcgsqnlapleekttdlrednyqlklidielnqqisdskskikglekdkenskktasntkiklm  
nvtstydkvakalksynd  
iekdvsknkgdknvqsklnqisndiqsahtsykdaidglsI sdddkktskniI dklnsdlInhafddikngyqnkdkkqltk  
gqqaI sklnInaks  
>tr|D0K5B7|D0K5B7\_STAAD  
mtsksspIifersregryaysIpkdsiktnsvesllddkfirknkaefpevaeI dIvrhytel snknfgvdngfyplgsc  
tmkynpkinekvaripgfs  
eshplqdedqvqgsleiIysI qeelkeitgmdevtlqpaagahgewtal mifkayhengeghrdevivpdsahgtnpas  
asfagfksvtvksnergev  
diddlkrvvnentaaimItnpntIgi feknimeireivhnaggllydganInaimdkvrpgdmgfdavhlnlhktftgp  
hgggpgsgpvgvkelas  
yIpkpmvikiIgdgkfyndidknsigrvkpfyngfiylraytyirtmgatglkevseavlnanyikarlsehfeipykq  
yckhefvIsgvrqkefgvr

Tsompanidou\_et\_al\_Supplemental\_FASTA\_File

tldmakr1ldfgvhpptiyfplnveegmmieptetesketldyfidtllisiaeeakndpdkvleaphttvdrldedataa  
rkpilkfenlkqek  
>tr|D0K5C3|D0K5C3\_STAAD  
mfkflkktqafthiemllvllisllliipniakktahiqstgcnqkvmsqieayalkhnrnpssiedliadgfi  
keaqtkcksgetitisge  
avan  
>tr|D0K5C8|D0K5C8\_STAAD  
mtkiilaadvgttcklgi ftpeleqlhkwsihtdtsdstgytllkgiydsfvekvnnynfnsvlvgvigvpgpvdfe  
kgtvngavnlywpekvvnr  
eifeqfvdcpvyvndaniaaalgekhkgagegaddvvaaitlgtglgggiisngeivvhngsgaeighfradfdqrfkcn  
cgrsgcietvasatgvvn  
vnfyypkltfrssi lelikenkv takavfdaakagdqfcifitekvanigylcsiisvtsnpkyivlgggmstagnpili  
enikteyhnl tfapaqfet  
eivqaklndagitgaagliktyvldkegvk  
>tr|D0K5G2|D0K5G2\_STAAD  
mtnkdesvekttestveetnikqniddsveqaeeskghlqdeaieetsdenvieeidpkdqkinelqqladeneekylrl  
yaefenykrriqkeneink  
tyqaqrvtldilpaidnieraalqiegddetfkslqkgvqmvheslinaikdngleviktegeafdpnihqavvqddnpdf  
esgeitqelqkgyklkdrv  
lrpsmvkvng  
>tr|D0K5G8|D0K5G8\_STAAD  
mlstffffilllyityrknkivyapislfliifsswylhysqqafinyinyiernsqfneraqviqirqgsdtykgrls  
kneiyppffltdkknfdlkk  
iesrncivkgqfkvnenkfvtklqsvvqsclesnrsnliekhkqfimnriydsigikfpdrimalitgdvkeineqfke  
rvkeigiyhlavsgshia  
aivfliyqplkrlnlplfvikgitiivltlyaqytnyapsavraimttvlitkqikikgiqlafafiimfilnplv  
vydigqfsfiisffimll  
fpflqqlsklqslfii tfiaqlasfivaipnfhlqvwgflsnl ifvpyysiilfp silffitshfivgltplnylvd  
sfnfhdwll dlftrikqsh  
fsvpkfndwifii fii svyyi fwllakrkyilvtfwtiiltllitfptnshhkitmlnvqggsilyeggknqnvlidt  
ggkviddtkqpsysiskyh  
ilptlnergineleyli lthphndhigeveyiishikikhiviynkgysntlmllsklshkyniklmdvrqvssfkldg  
ssflffdsfipnsrdkney  
siitmi tyqnkkvllmgdasknneslllkkynlpeidilkvghhgsktssskefiemikpkisliissgknmyhlpniev  
vkr lqrisriy nsqqngq  
vtidlddnlkvdsnsygnasgl  
>tr|D0K5H6|D0K5H6\_STAAD  
mkfavignpishslpvmhranfnslglddtyealnipedfhlikeiiskeidgfnitiphkeriipyldyvdeqain  
agavntvlikdgkwigynt  
dgiyvkg l hsvypdenayililgaggaskgiayelakfvkpkltvanrtmarfeswnlninqisladaekylaefdiv  
inttpagmagnesiinlk  
hlsptlmsdivyipyktpileeaerkgnhiyngldmfvyqgaesfkiwtndadinsmktavlqqlkge  
>tr|D0K5I5|D0K5I5\_STAAD  
mlrclianrgeiavriiracreygi etvavyakgdeqslvhvhladqaicigeana ldsylnidriisaaqitganaihpg  
ygf lsestkfaqtveeggi  
afigptkktmemmgdkitarqtvvhagvpvipgsngavnhvseienlakdigypvikaasgggkgirivkkaedleka  
fkeaksegkkyfddrvyv  
eafipvakhvevqvmgdgqnyvhlgerdcsvqrknqk lieespcaalteerrqqicndavkvaraanyrsagtieflvt  
dtahyfiemnarigvehv  
temraerd lvaaglyllehnl pfsqsdiqfnghv earinaenpekkfqptpgkvta lhlpggfvrvs llyhgyqvs  
pyyds l vakvivkshdras  
aidklkvtldemvidgfsttadfl yavlnyplyhdgdakdv dikflekhqivkgvel  
>tr|D0K5I7|D0K5I7\_STAAD  
msikilqpgl fstvqdlgrigye hifsgagamdqsfkvaqslinndgpaieytligptiqfntqntfvitggsinas  
nktismns vilaekgdil  
kigaitkgargyltfghsinvpsiaesyathtrssiggfkgkrl landvitvkinndfkenigtihlqddllpenniih  
ilqgpqfeafseearakiv  
nhpyliteqsdmgyrlegdsvapinqadiisepvalgsqvvpndgqpiillndkqtiggytkiatvckfdlplklaqmkp  
kdtiqfkwisfqaevdknr  
eqmslfneilkshqktpifdtsslrhtskl stilkgl  
>tr|D0K5J3|D0K5J3\_STAAD  
mddlnkky lidlhqhqnssievlrefaegnevpidr l tldlikqlirmnnvknileigtaigyssmqfasisddihvtt  
iernetmiqyaknlatyh  
fenqvriiegnaleqfenvndkvydmifidaakaqskkffeiytpllkhqglvitdnvlyhgfvsdigivrsvrnrqmvk  
kvqdynewlikqpgytnf  
lniddglaisikge  
>tr|D0K5J6|D0K5J6\_STAAD  
menfdktmkfdyeelptqdvrdlnnvyrtdergynavnqivgyllsgdpayiprqnearnqirhidrdvimeelvsyy

Tsompanidou\_et\_al\_Supplemental\_FASTA\_File

lkeqnk  
>tr|D0K5K6|D0K5K6\_STAAD  
msteplasrmpkndeisqqhlgvpgkiiirmvdtkkltsmifypggigktsiakaisgstqykfrqlnavtntkkd  
mqllvveakmssgqvilld  
eihrlkakqdfllphlengkivligattsnpyhainpairsraqifelyplndedvrqaltraieddenglktyqpkid  
edamtyfstqsqgdvrsa  
nalelavlsadndkdgyrhvtlqdakdc1qkgafvsdkdgmhydvm safqksirgsdvnaalhy larlieagd1ptivr  
rllvisyediglaspnagg  
rtlaaiesaelglpearip1sqavie1c1spksnsamsaidsalsdirnghvgqipnh1kdghyqgakdlgrsigykyp  
hgyvngyvsqqylpdklkn  
kiyyepkttskseqqlkeiynn1lkqrp  
>tr|D0K5N0|D0K5N0\_STAAD  
mtlfiigv1vpmvytmqlniknepvtkrn1lit1alstlgilvtalagvivtkqafpl1svaigsiftgivwcl1lsgs  
yalirflsnafgrk  
>tr|D0K5N1|D0K5N1\_STAAD  
mkikemtsemprer11shgaks1sntellailintgrkgfssididnellksasn1nelkssindlikvkgig1qkai  
t1kaafelgermrraenn  
rik1tqpsdvadymi1ptmkdl1tqehfvil1lnsknviketcvfkg1nssivhpreifsiavrenanai1avhnhpsgd  
v1psqedii1ttmr1kecg1  
ilgkdl1dhii1gdnrft1veagyfdend  
>tr|D0K5N3|D0K5N3\_STAAD  
mnyleslywihertkfgikpgvkrmewmlaqfnnpqnnikgihvggtngkgstvayl1rtalvengyevgtftspfi1etfn  
eris1ngvpisndaivel  
srikp1semmeretdlgvatefei1tammflyfgeihpvd1viveaglgikndstn1vftpl1siltsig1dhtdilggty  
ldi1ardkgai1kpnvpviy  
avkneda1kyvreraieqhakpie1dreivvvsqndef1tyrykdye1eti1lsm1geh1qknaal1aitalie1neqglie  
ldfnkmi1dgiesvrwtgri  
eqvhd1kpl1i1ldgahn1sesida1ldtikqyhd1kekvdil1fsaingkpinemvkh1sliahtfyate1fdfpka1rkeeivg  
siendei1qlvddyvef1kn  
yqgd1lvi1tgslyfisevks1ldfeal  
>tr|D0K5N7|D0K5N7\_STAAD  
midai1gpningsntcdeyni1likndkntmk1flyiivmfstsfnkk  
>tr|D0K5P0|D0K5P0\_STAAD  
mkpvvmtqtndmqsd1vsi1hkpfi1dikpl1nfdih1lnqrydw1l1fssknavkffykylkginvdni1avigs1ktaqyce  
s1girvd1fmpnd1fsqegf1  
ksfnq1tnqki1lpsse1larp1l1aa1skdnev1kidlytsvpnkqni1qdvkemiehq1idal1tfss1savryy1fnegfvp  
kfk1syfaige1qtartikty  
qqpv1tiaei1qtles1lieki1lesrg  
>tr|D0K5P7|D0K5P7\_STAAD  
mtatwek1kegneg1l1vtvpaekv1nkaldqafk1kvkqin1vpgfrk1gkvprsi1feqrf1gvealyqda1idil1pdaygeai  
det1dikpva1qpevs1vtqie  
kgkdfi1featv1tvepevk1lgdyk1leiekqete1sddel1qea1dhs1ghlaemv1kedgv1vengdtvni1dfsgsvd1geef  
egg1qaegy1dleig1sgsfip  
gfeeq1legmkv1deekdv1vvtfpeeyhae1lagkeat1fktk1vneik1fkevpe1l1tdeiane1l1daeantv1deyken1l1rkr1ae  
qkatda1envekee1aitkat  
dntti1dipeamv1ntel1drmvse1faqri1qqg1ld1qtyfqi1sgqdet1q1reqmk1ddae1qrvtkn1l1l1tai1aeaekie1atde  
di1dke1lekmsk1qfnis1ved  
iknt1lgntdi1kndvri1qkvid1l1rdnak1fvegtked  
>tr|D0K5Q8|D0K5Q8\_STAAD  
mstni1aingm1grirmv1ria1lqnkn1nvvainas1yppetia1h1inydt1thgkyn1lkvepieng1lqv1gdhkik1lvadrn1  
en1lpwke1ldi1dia1datgk  
fnhg1dkai1ahikag1kv1l1tgpsk1gghv1qmvvk1gvndn1q1dieafdi1fsnas1cttnc1igpvakv1lnnq1fgivng1lmttv  
hai1tndqkn1idnphk1dlrr  
arscnesi1iptst1gaaka1kevl1pelegk1lhgma1rvptknv1svd1lvvd1lekevtae1evnqaf1enag1legi1ievehqpl  
vsdfnt1npsai1idakst  
mvmsgn1kvkvi1awydnew1gysnr1vvdvaeq1gall1tsketvsas  
>tr|D0K5R6|D0K5R6\_STAAD  
mael1rg1legvia1aetk1ssi1iesq1ltyagy1didd1aenaq1feevi1fl1wnyr1lpnee1lah1kgk1lnqymt1nprvyth  
feey1tdh1vhpmta1l1rts1  
syiah1fdpda1enesden1ryeram1riqakvas1vtafar1vrqdke1lpknpe1lsyaan1flym1lrgel1ptdie1veafnkali  
l1hadhe1lnas1aftarcavs  
s1l1sdmysgi1vaavgs1lkgp1lhggane1qvmtm1seigsi1envday1dekfank1dkvm1gfg1hrvyk1dgdpraky1l1remsrq1  
tkdagree1lfemsvk1mekr  
maeekg1lipnv1dfysas1vyh1cmei1phd1l1ftpi1favsrsag1wiahi1leqykdn1rimr1prakyi1getnrkyi1pleerk  
>tr|D0K5S0|D0K5S0\_STAAD  
mcrai1ielmr1dleptk1itvdr1gkefa1lye1liehelncrvy1fsdp1gpcpg1rgsi1envng1l1rqyf1pkgtdf1kmitde1alih  
avn1rintr1prav1lyl1tse  
evi1qvyr

Tsompanidou\_et\_al\_Supplemental\_FASTA\_File

>tr|D0K5S1|D0K5S1\_STAAD  
msketterrkvdlntrlaiakylgdngstsdiaarl1nrnyvvvwrelkrytfndiydpiiahelaskaynhtekhkeesr  
klddrtkvyiekklacqws  
prqiaerieqdigiyisyptiyrymreglveyvkkdlrqggkkykstekrgkikvgnraimyrsrfrckrs  
>tr|D0K5S2|D0K5S2\_STAAD  
mtkrflilitfililsvaliacgkkydkeidevskieakkveelktpderkykrettnvyvyedgkvitltykfrkgsdtl  
vtrlyrknettgyeqdyd  
akkerymkehkpdykeenlke  
>tr|D0K5S3|D0K5S3\_STAAD  
mktklvlflivcvltigayflghqttkqqiveqksevqrldkdtlqheketnetlskrvqrqsktviadeekqiretahrf  
tteftlkkgesfkqkskv  
lkpmittqkydel fsdgrekfsifddvtvsnmhvyfeqfdpkdkykvfvqfderidteggqkevehrktsiqldlvrtnd  
kwlidnvqrfnlqkngrg  
>tr|D0K5S4|D0K5S4\_STAAD  
mvmkkekavqviqhtpivgkrlrlkwi fivlci sfflfpvillfvfspekeeeqtdgdvvceghvkdkgisvfnknakg  
gal dgkgktivkiaekhki  
ppnlfvaijasesewgkgmnatkqknp1simngnplkvynsvedgl nagaknlydlyikegl ttpdkigpkyapvgasnd  
psnmkrwiptvtsimkel  
sdcdsavckskggkdkfdgkpkwsdsdpkgknllytagqctwyaygirqkmgkpistywfhaqywndrakeegykvntk  
pavgal miaepggpavtg  
hvavvigvkdktftvtemnikgpyivsremkvepgisfihdke  
>tr|D0K5S5|D0K5S5\_STAAD  
mkrkslyllcflilplclvmgatayavanpvgqptnavnakiekykvdnkadgdidldryralfhkesdwnpfgkdevae  
tvnnvtntfffeinklivsi  
tdygi enlyql dvl ddfadkigqfv gdi yqkllsnivmtlfiiclnafiiysvkgnmaeal krgflifcligfgvgvla  
nasfiikgttnvgkgl nnv  
imnstaingnvdyvnensginkirnyqfdmtlykpylimnygtvneaikkdknkrindildikvkdktqgkrddrvk  
devtkhdnsamkqsrvfag  
lgiamftliiti svsviflais fakvifsafal flflflvswllsflplnlelsvfkalartlgyiilstcvslfvvig  
lsidiadavikpesqqayf  
lnviflmivlvlylkrreidfvtrgnlslspqtigeetikkgqdewnkrrkkqsedkqqkrenqrdkmpvfivnqdd  
nkpkrnqqqevshsttpn  
qnkrnqqqemhmsnsdgpntssrhd1qskqsqedqglqrevkrnteikrnpqqdmsnysnl srppkeisrtsqtpn  
elssntrevqssydkiel  
rriqnhqthqnhhsntngdqyrrsaqhnnkneaekrlkeqkdiskhgk  
>tr|D0K5S6|D0K5S6\_STAAD  
mkidfnengdfyflgkdvrrdfcyayrlasvdlgseimvlskqnl dlkplekvvln dlevkdatyvftgklefin  
>tr|D0K5S7|D0K5S7\_STAAD  
mnkeqieklllelaeeigmknvilia ldlalikedgtlrsdevekl i k i q r q i e k l  
>tr|D0K5S8|D0K5S8\_STAAD  
mamneial fkgvrippyfkhidfi fagvfafiflayril tlwqdyir qqa lnvvevyqyfkphflylvigtaivfliak  
lfsqfv lrfrekdl aemdie  
tqgfhnrtvikktteyldidykkteydyptlfykrkrksfmihvkkdgsrfqdhy leleqieipmfncelvekrhigrf  
lryefmp lkykkri vme g t  
eapettyydtkiyithqilwdfvkaphalitgvtgggktyflfymirel fkrnaevrll dpkvsdl sfmknvigtekvad  
ttgqifkqlreaneemerr  
frmmesesehyk lgsnfrnfdlppyfvifdevtaftstldkkelqemndyliniimkgrqagvfmfltaqrpdadvikgnv  
rdqglrvsmgnlsadgyr  
mtfgqtdkvfqpihesdigryisilgqynepilfdaplmeqydfvedvkqilnker  
>tr|D0K5S9|D0K5S9\_STAAD  
mkildflfkskftngvivvfttimlllylmiwla fhi lamsvvlai qdiaingkdafinvylgvlclgmylls fwmina  
llrisfdikglfmtiknnt  
llfnkkvvke  
>tr|D0K5T1|D0K5T1\_STAAD  
mtvlpilfyvvglpialvygyyyvqlmrtidehikkearyvknickrfnidtsyfklrlnghafnhcikkvk  
>tr|D0K5T3|D0K5T3\_STAAD  
mdkkaynlkrtfeqpi vmyeftnnarfsk giridwvatfvlelilail yfklgfh yivsv isglki iyftalpyymtky  
lvklkqdgkklvfflwdfi  
tyvfniqmrvhyaydeevkyhnnkklk  
>tr|D0K5T4|D0K5T4\_STAAD  
mdnlnfnmmvlgntptinplkd lvsrevgsaigiivlivgcmkwaggkyghmvllfvvggfmflvskgpetvfna lsglw  
klifgg  
>tr|D0K5T5|D0K5T5\_STAAD  
mrkiflniikhklls rfskkgkqfdvpeaerke lpkyrnhrkkivvifytvl i i l t v l l l a a f v r a s k a n n e s k q a v n k t  
eeiqkkyednaetvqynpn  
lklyadkyidtympkpggkeekerqkalenfypsdyksptentenverklnekeffnikrkdqti iqyivnydlkite  
kkevkvkkkkdkkdkdkke  
eyetkteektrteskka llnipvksennkyvvveyphfsivpnnqlkqaklvkdnlenekrednplkafvedffnkytk

Tsompanidou\_et\_al\_Supplemental\_FASTA\_File

skaddmaylmdnpegledt  
revskisdriypkndyviakaevlmdkdgspenlehytlevtkkdkgyvkkltttfgg  
>tr|DOK5T6|DOK5T6\_STAAD  
menqastplnrgvarakkcgleavvdwvqvtfqlpisifaimevdlklpravfkhrnsglyfynrgytfgni qifysdkd  
dsmgyhlqlsgsgcreleh  
yltncgetwqdfkrcavkkarfridiaiddtktylkiprlikkaehgeciskfrtassiagfklsdgqskgstfyigs  
kksdmycrfyeknyemayk  
lkkpvedfglwnryeiqmrtrnaencakil tetssisdivkgvl nnsmrftvtpkdgkdsdkrrwevyrewkhfingank  
itlsmkpslksiednidwl  
ckqvattldtvltaeamaqsegll edtdflnki lahssftdehtdrinhyleelkrkknls  
>tr|DOK5T7|DOK5T7\_STAAD  
mefytadnlapyartlklsegmlsyaarintgeklslmaiaaeiqkkfngdyvksslpsgrpriytdvcllcfslkeag  
hgrllqvdlkdcyigdid  
v  
>tr|DOK5T8|DOK5T8\_STAAD  
mawnpkfdlketfgdlyfmgvdekfkyedgektnekvyayklastgggeqltvkvpkevkieqmslcelvgveakqyvqs  
sgdfnsiqpsikaddikqi  
gtisvkkgapqg  
>tr|DOK5T9|DOK5T9\_STAAD  
miepvidvkatlgeefrylshvektsrfdeiylytiicvdigeqvki rlsneksfeplehvgfdnisikprvyqdmntg  
ychnlytsfsaddiyslndk  
en  
>tr|DOK5U3|DOK5U3\_STAAD  
mvaylnihtaydl nsslkiedavr lavsenvdalaitdtnvlygfpkydaciannikpifgmtiyvtnglntvetvvl  
aknndglkdlyqlsseikm  
nsmenvsfellqqfssdl i i fknvadehrdivqvfshedtyldhqsvlvqgikhwiqnvcyqtrqdad t isalaa ir  
dnakldlihdqedfgahfl  
tekeikql dinqeyltqvdivaqknaelkyhqslpqyqtpndesakylwrvlvtqlkklelnydvyl erlkyeykvi  
tnmgfedyflivsdlihya  
ktndvmvgpgrgssagslvsyllgittidpikfnllferflnpervtmpdididfedtrrerviyyvqekygelhvsgiv  
tfghllaravardvgrimg  
fdevtlnessliphkligt ldeayqidfkfvhrnrherwfsickleglprhtsthaagiiindhplyeyapltkq  
dtglltqwtmteaerigll  
kidflglrnlsihqiliqvkkd lginidiekpfdqkvfellsqgdttgifiqlesdgvrsvlkkklkpeh fedivavts  
lyrpgpmeeiptyitrrhd  
pskvqylhphlepi lkn tygviiyqeqimq iastfanfsygeadil rramskknravleserqhfiegakqngyhedisk  
qifdlilkfadygfpraha  
vsyskiayimsflkvhyppyfyanil snvigsekktaqmieeakkqgitilppnineshwfykpsqegiylsigtikvgv  
yqsvkvi vderyqngkfkf  
ffdfarripkrvkrkllea l ilvgafdafgktrstllqaidqvl dgdlnieqdgflfdiltpkqmyedkeelpdalisq  
yekeylgfyvsqhpvdkkf  
vakqylt i fkl snagnykpilvqfdkvkqir t kngqnmafvt lndgi etldgvi fpnqfkkyeellshndl fivsgkfdh  
rkqqrqliineiqtlatfe  
eqklafakqiiirnksgidmfeemikatkenandvlsfydetikqmttlgyinqkdsmfnnfiqsfnpsdirli  
>tr|DOK5U7|DOK5U7\_STAAD  
mklsfhgqstiy legnkkvividpfi snpkcdlnietvqvdyivl thghfdhfgdvvelakktgatvigs aemady lss  
yhgvnvhgmni ggkanfd  
fgsvkfvqafhsss fthengipvylgmpmgivfevegktiyhtgd tglfsdmsliakrhpvdcfvpigdnftmgiddas  
yainefikpkisvpihydt  
fplieqdpqfk davnvgdvqil kpgesvqf  
>tr|DOK5V6|DOK5V6\_STAAD  
mkydhllvrygel t l kgsnrkkfvnql rnnvnkslkgldgfvvkgkrdrmyielehdhadineityr lskifgiksispvl  
kvektieamsaaikfaqq  
feenstfki dvkradknfpm dtyelqrelggivl kqienvsvnvkrpdheirvevrl daiymyeevvp gsgglpvgtggk  
tllmlsggidspvagmevm  
rrgytieaihfhspptsdqakekvie l tri laervgpi klhipfte l qkvkvvhprytm t strmmmrvadklvhq  
igalaivngenlgqvasqt  
lshmyainnvtstpv l rp l l tydkee i i i kskeigt fetsiqpfedccti ftpknvtepnfekvvqyesvdf eeminr  
avenietleitsdyktike  
qtnqlindfl  
>tr|DOK5V7|DOK5V7\_STAAD  
mfiliyldnaattkafeevldtyl kvnqsmypnspkhag l qanqllqqakaqinaminsktnydvvtsgatesnlla  
lkgiayrkfdtakeiitsv  
lehpsvlevvryleahegfkvyvdvkkdgsinlehfkelvsdkvglvtcmynvntvgqi qpipqmakviknypkahfv  
davqafgkismdlnnidsi  
slsghkfnglkgggvllvnhiqnveptvhgggqeygvrsgtvnl pndiamvkamkianenfealnafvte l nndvrqfln  
kyhgvyinsstsgspfvln  
isfpgvkgevlvnafskydimisttsacsskrnk lnevlaamgl sdxsiegsirlsfgatttkediarfkeifiiyeei

Tsompanidou\_et\_al\_Supplemental\_FASTA\_File

ke11k

>tr|D0K5W3|D0K5W3\_STAAD

mhqhd fkvqtswqggrrnvnvqgdilsenisipaslgvgigtnpdemlvsasscyiislaatl erakftdisieqq  
igtac lnngkfsmskivhh  
phieipsdqiaqlerklpklitiadnncmisnavrnndikiypiiqak  
>tr|D0K5W6|D0K5W6\_STAAD  
mkkilfdvdgflseercfdvsaltvye1lmdkyy1glhshidwet1tdndiqdirnri fkdki1nk1ks1gl1nsnwdm  
lfivfsih1idi1kk1shd  
eieafmyqdepvelklqnistnladcfnlneqlplqfl dnvkvgknniyaa1eefatte1hvsdat1fslkga1wt1aqe  
vyqewylgsklyedvekki  
arttftktgyiyqei1lrpvdevkv1lnd1kgagfelgiatgrpytetvvpfen1gl1pyfeadfiatasdvl eanmypyq  
arplgkpnpsya1aalygn  
nrkyesyinkqdnivnkddvfivgds1ad1l1saqkigatfigt1tg1kgkdaage1eahhadyvinh1gelrgv1dn1

>tr|D0K5X2|D0K5X2\_STAAD

mnkhhpk1rsfysirkst1gvasvivst1flitsqhaqaqaentntsdkisenqnnatttqqpkdtnqtqpatqp vita  
knypaades1kdaikdpa1  
enkehdiqpreqvnfql1dknnetqyyhffsikdpadvuytkkkaeveldintastwkkfevyennqklpvr1vsyspvp  
edhayirfpvsdgtqelki  
vsstqiddgeetnydytk1vfakpiyndps1vksdtndavvtndqsssdasnqtnntnsnqntstttnannppqattnms  
ppaqpksanadqassqa  
hetnsngntndktnessnqsdvnqyppades1qdaiknpai1dkehtadnrpidf qmkndkgerqfyhyastvepatv  
iftktgpvie1glktastw  
kkfevyegdkk1pvelvsydsdkdyayirfpvsngtrdvkivssieygenihedydylmvfaqpitnnpddyvdeety n  
1qk11apyhkakt1erqvy  
eleklqek1pekykaeykk1dqtrveladqvsavtefenvtptndq1td1qeahfvvfeseensesvmdgfvehpfyt  
at1ngqkyvvmktkdds1y  
kd1ivegkrvtvskdpknnsrt1l1fpyipdkavynai1kvvvanigyegqyhvri1nqdintkdddsqntsep1nvq  
tgqegkvadtvaenssta  
tnpkdasdkadviepesdvvkdadnni1dkdvqhdvdh1sdmsdnhfdkyd1kemdtqiakdtdrvndsvgmssnv dtd  
kdsnknkdkviq1lahiadk  
nnhtgkaak1dvvkqnyntdkvtdkktteh1psdihtvdkvtktkeagtpskenk1sqskm1pktgettssqswg1  
ya1l1gm1a1f1pkfrkesk  
yltkysicmvnfvnnvkain1

>tr|D0K5Y1|D0K5Y1\_STAAD

mthyhfvgiksgmss1aqimhd1ghevqgsdienyvftevalrnkgiki1lpfdannikedmvi1qgnafassheeivra  
hq1kl1dvvsyndf1l1gqi1d  
qytsvavtgahgkts1tg1shvmngdkkts1f1igdgtgm1pesdyfafaceyrrhf1sykpdya1mtnidfdhpdyf  
kd1ndvfdafqemahnvkk  
giawgddeh1rkieadvpiyygfkdsddiyaqniqitdkgtafdvyvdgef ydhf1spqygdhtv1nalaviaisyle  
k1dvtnikealetfggvkr  
rfnettianqvi1ddyahpreisatietarkkyphkevavfqphtfsrtqaf1nefaes1skadvf1ceifgsiren  
tgaltiqd1idkiegas1i  
nedsinv1eqfdnavv1fmgagdiqk1qnay1dk1gmknaf

>tr|D0K5Y2|D0K5Y2\_STAAD

mswfdk1fgedndsndd1l1hrkkkrrqesqni1dndhds1lpqnn1diysrprgkfrfpmsvayenenveqsadtisdekeq  
yhrdyrkqshdsrsqkrhr  
rrnqtteeqnyseqrgnski1sqs1ikykdshyhtnkpgtyvsaingiekethsksthm1mysnntnhrakdstpdyhke  
sftsevpsai1fgtmkpkk  
lengripvskpsekvesdkqkydyvaktqtsqnkq1eqekqndsvvkqgtaskssdenvssttksm1pnyskvdntikie  
nyasqiveei1rrererkv  
1qkrrfkka1qqkreehkneeqda1qraidemyakqaeryvgdss1nddsd1tdnstdasq1htngienetvsndenka  
siqnedtndthvdespny  
eevs1nqvsttkq1sddevtvsnvtsqhqsal1qhnevndkdelknqsr1iadseedgatnkeeysgsqiddaefyelnd  
tevedttsniedntnrna  
semhvdapktqehavtesqvnndktvdneie1laphkkddqtn1lvns1ktndvndghvvedssmneiekhnaeitenv  
qneaeseqnveektienv  
npkkqtekvt1skrpfnvmtpsdkkrmmdrkkhskvnpel1kpvsqkqavseskpasqaapssrdsqesntnayktn  
nmtsnvennq1l1ghaete  
ndyqnaqqyseqkpsadstqtei1feesqddnq1eneqvdstsssvsevsdi1teeseetthpntsgqqdnddqkdlqp  
sfnsqnedtanenrprtnq  
qvatnqvahtskpmi1rkgpnik1psvs1leepqviesdedwitdkkkelnda1fyfnvpaevqdvtegpsvtrfel1sve  
kgvksritalqddikma1  
aakdiri1eapipgtsrvgievnpnqpttvn1rsi1iespsfknaesk1tvamgyrinnepl1mdiaktphaliagatgsgk  
svci1nsi1ms1lyknhpee  
1r1111idpkmvelapynq1ph1vapvitdvkaatqsl1kwaveemerryk1fahyhvrnita1fnkkapydermpkivivid  
elad1mmmapqeveqs1ar  
iaqkaracgih1m1vatqrpsvntitg1likaniptria1fmvsssvdsrti1dsggaer1l1gygdm1ly1lgsgmknpirvqgt  
fvdsdeiddvdfikqqre

Tsompanidou\_et\_al\_Supplemental\_FASTA\_File

pdylfeekellkktqtqsqdelfdvcafvmneghistlsiqrhfqigynraariidqleqlgyvssangskprdvvte  
adlnke

>tr|D0K5Y9|D0K5Y9\_STAAD

mrsvrykpwaedyldhpeivdmegqhagkmtewfdktqpihieigsgmgqfittlaaqnphinyismereksivykvldk  
vkemglnlkiicndaie  
neyfkdgevsriylfnsdpwpknrhakrrltyhtflalyqqilndegdlhfktdnrglfayslesmsqfgmyftkinlnl  
hqeddgsnilyteyckfsd  
kgsriyrmeakfhsqk

>tr|D0K5Z5|D0K5Z5\_STAAD

msekemvrgtflitisiilitkvlglvfiipfnyliggqenmapftyayapyniaiaavatagvplaaskyvakynaigay  
kvsqkfykssfvimsitgv  
lgflvlyflapyiseltlarnihdkngwsvdditwiiriismvvi fipvlatwrgifqgyksmgptavsevteqiarvif  
iligsylvlnvfdgsilla  
ngiatfaavgaiigiftlwywrkrkhnidrmvesdytdidvsygkmykeiiasipfvivlnyplfnlvdqfthnga  
lslvgipsqlqdiffnmln  
mstnkivmipstlsagfavslipyitktfaegrhemhhqirtsigvlmfitvpasigimalaaplftvfygcpivlgh  
dphhdgsrllfyyapvail  
isllsvtasmllqgdkqkltyvivilasvviklalnyplimlftpgailstsiiallfaigcnfyilkkyakfkfsyswih  
fakiflysfimmigvelvf  
flanlfleptklglyliiilgvtvgiliygtitikrladeflgeipeklrrrvrflr

>tr|D0K5Z7|D0K5Z7\_STAAD

mnllkknkysirkykvgifstligtvlllnpngaqaalttdnnvqsdtntqatpvnsqdtvannrglansaantpnqsat  
tnqstnqalvnhngsian  
gatpstsqsstpsaqqnnhtdgnttatetvsnannkdvsnnttlvnpktnengsgghltlkeiqedvrhssdkpelva  
iaeqasnrpkrrraapa  
dpatpadpaaaaagnggapvaitapytptdpnannagqnapnevlsvfdngirpstrsvpsvtvvdnlpgftlingg  
kvgvfshamvrtsmfdsqd  
aknyqaggnvialgrikgnndndhgdngieksltvnpnselifeftmttknyqgvtnliiknadndtviaeksvaygp  
iwrllfkvpenshlikqfv  
pkndaitdargiyqlrdgykydfvdsiglhsgshvyverrtmeptatnnkeftvttslkngnfgasfntddfvykvql  
pegveyvnsltkdfpssn  
sgvdmndfnvtydaanrvitiktstggsgnsparlmpdkildlkyklrvnnvptprtvtfndtlyktytqdfinspaes  
htvstnpytidiimnkda  
qaevdrriqqadytfasldifndlkrraqtildenrnnvplnkrvsqadidslnqmqhtlirsvdaenavnkvdqmed  
lnqndeltdeekqaaiqv  
ieehkneiignigqtdtdgvtrikdqqigtlsqdtatpvvkpnakkairdkatkqreinatpdatedeiqdalnqlat  
detdaidnvtatnadve  
iaknngintigavvpqvtthkqaardainqatatkrrqqinsreatqeeknaalnelqtatnhaieqinqattnadvdnak  
gdglainpiapvtvkkqa  
ardavshdaqhjaeinanpdatqeerqaaikvnaavtaantnilnantnadveqvktnaiqqiqaitpatkvktdakn  
aidksaetqhntifnnda  
tleeqaaqqlldqavatakqinaadtnqevaakdqgtqniivviqpatqvktarnavndkareaitninatpgatre  
ekqeaivrntlnralt  
igvtsttamvnsirddavnigavqphvttkqtatgvlnlatakkqeinqntnatteekqvalnqvdeqelatainning  
adtnaevdqaqqlgtkain  
aiqpniykkpaaiaqinqhynaklaeinatpdatndeknaaintlnqdrqqaiesikqantnaevdqaatvaennidavq  
vdvkkqaardkitaevak  
rieavkqtpnatdeekqaavnqinqldqainqinqnqndqvdttttnqavnaindveaevvikpkaiadiekaekqq  
qidnsldstdekevasqa  
lakekekalaaiddqaqtnsqvnqaatngvsaikiiqpetkvkpaarekinqkanelrakinqdkeataeerqvaldkine  
fvnqamtditnnrtngqv  
dttsqaldisialvapehivraardavkqqyeakkqei eqaehatdeekqvalnqlanneklalqinqavtndvkrve  
tngiatlkgvqphivikpe  
aqqaikataenqvesikdtpatvdeideanqlisdtlkqaqqeientnqdaavtdvrnqtikaieqikpkvirkraald  
sieennknqldairrntldt  
tqderdvaidtlnkivntikndiaqnknaevdrtetdgnndikvilpkvqvkaapaarsvgvkaeaqnalidqsdlstee  
erlaakhlveqalnqaidq  
inhadktaqvngdsidaqniiskikpattvkatalqqiqniatnkinlikanneatdeeqniaiaaqvekelikakqqias  
avtnadvayllhdekneir  
eiepvnrkasareqlttlfndkkqaieni qatveernsil aqlqniydtaigqidqdrsnaqvdktaslnlqtihdld  
vhpikpdaektinddlar  
vtalvqnyrkvsnrnkadal kaitalklqmdeeltartnadvdavlkrfnvalsdieavitekensllridniaqqtya  
kfkaiatpeqlakvkvlid  
qyvadgnrmedatlnidikqhtqfivdeilaiklpaeatkvspkeiqpapkvctpikkeethesrkvekelpntgsegm  
dlplkefalitgaallarr  
rtknekes

>tr|D0K607|D0K607\_STAAD

mnfegkligkdlkvaivsrfdnfitgrllegakdtli rhdvnednidvafvpgafeiplvakklassgnydaiitlgcv



Tsompanidou\_et\_al\_Supplemental\_FASTA\_File

irgatshydyvcnevakgv  
skvndqtnvpvifgilttesieqaveragtkagnkgaeaavsaiemanllksika  
>tr|D0K610|D0K610\_STAAD  
mdyaiqlanmvqgqgtgvnppvgavvvnegrivgigahlrkgdkhaevqaldmaqqnaegatiyitilepcshfgstppcvn  
kiidckiakvvyatkdnsl  
dthgdetlrahgievecvdderasqlyqdfkakahakqlpaitvksasldgkqandngqsqwitnkevkdvyklrhrhd  
avltgrrtvelddpqttr  
iqdgknpikvilsksgnihfnqqiyqdestpiwiytenpnltsnqthieiiylkscdltilhnllykrvgvtllveagpt  
ttseflqsnyidefiyya  
pkligsgnyqfyqtdvieipdanqfeivhseilnqnvkltrkk  
>tr|D0K612|D0K612\_STAAD  
mtykelatf1kvlsdssrleildl1scgelcacadl1ahfqfsqptlsyhlkalvktnlvttrkignihlyqlnhnifesv  
innlsvhtsnqrcfchnl  
ktgec  
>tr|D0K616|D0K616\_STAAD  
mwqlsqiykpsskqslssflftrlnyylid1frqqnqlkdvilcennsptlteqptyfnehdlrlqdifkllnhrerlwl  
klylegykqfeiaeims1s  
1stiklikmsvkrkccqhnfn  
>tr|D0K630|D0K630\_STAAD  
mpiesfthqfeeitylpddlqvkalmmtphevnrivvylrggkqvgrvragrlmqfsdsqtlvigpyyrgnngsegkd  
efyrgd1ndvtqllr1lhd  
kyphafihmvqfsgg1qglltfqdlpvtstyiwggvsdid1myeervdlrgmlrrmighpkkdraayearqaipninen  
sppilivhggkdqvgihh  
ayyladqle1kgathetfyqmaeghvprppamvetltyikefmkqvelhs  
>tr|D0K633|D0K633\_STAAD  
mklta1hfkysepfsqivtpkvtlthrdclfieliddkgnayfgecnafqtdwydhetiasvkhvieqwfednrnksf  
etyeaalklvdslentpaa  
ratiymalyqmfvh1psfsvaygatasglsnkqleslkatkptriklkwtpqimhqirvlrelldfhfq1vidanesldrq  
dftq1q1lareqvl1ieep  
fkdismldevvdgtippialdekats1ldiinlielynvkvvvlkpfrlggidkvqtaidtlkshgvkvvigmyeygls  
ryftamlarkgdypgdvtp  
agyfdqdvvtksqilkegrhefrpp1vditqlqpy  
>tr|D0K635|D0K635\_STAAD  
mkic1mlyl1if1sscgtnnkivgqrfeiqhnetigsiyfsadyahirgiekgtakfyfidkvgskrylfieyipdnvln  
ckpdfwktlkykkdkvtyy  
vylie1nddevfh1salqdmnripidiaddvatmgksphqndrmtlklknkn  
>tr|D0K639|D0K639\_STAAD  
mitfeniqqlkyt1mtmhglfnq1klgiisidnaehtlftpymmes1sslgvkdidi1ihkgteledfaafnlsiedt  
vtvclqrteellnqykne  
fndkilinwriie  
>tr|D0K652|D0K652\_STAAD  
mldiffikdvmaivvgvlmfi1fnvyfglevlgdhswfylvityatcyvymfiagsipvtl1laiyiii1llav1lfkgf  
nkwsgrtikd  
>tr|D0K654|D0K654\_STAAD  
mhdntiksisdkdyfdylqteskfiplenetiefyspivdyfgdsisvnisfsgdrykltdhgetlwnmeqlgidltsnkk  
qkkyq1lnnivqnyslvie  
nkhinfytnrin1sqaihdyvlaiseisylgilkkenikslfkdevmqyflsnrkiypnifepfkvegksklihsfeavf  
pgeateyvktikridkna  
knv1fdwndveihrnknfnsnarlniiteqqddiseavstm1sqynvev1fsfenkkqleekfsnv  
>tr|D0K655|D0K655\_STAAD  
mtvkvhylgigkfi1sigdlieietieetlyntiiry  
>tr|D0K658|D0K658\_STAAD  
mttfdakklkkeyldwynqilefsn1snsvkidtpfkdnslndlkiyalqdqsrmitltddytifglennngvsinkf  
kkrkki1fehl1saygikyn  
dktheifvqtnfknfnkskhn1lqclifvndmy1l1snpsqni1ftedvankldehniyygrdipiigssgvvhndffis  
akknqkekfinvisnpnns  
miikskitdamqakk  
>tr|D0K663|D0K663\_STAAD  
mkvefnssdlanqfkgkni1diyglyfngkcvglteektsclyggvtihdgnqldeekvigv1vfdkgvqqegfviktka  
kvtvqeldtkvrfl1enly  
kiynkdtg1n1qkgci1fshnhqdqsfyyd1ynvkgsvgaeffqfysdnrtvsssnhyd1vflykd  
>tr|D0K664|D0K664\_STAAD  
myggvtehdgnq1dknnstdnshn1likvyenerns1sfdiptnkknitaeidykvrny1lkhknlyefnsspyetgyi  
kfi1egsghs1fwydlmpesg  
kkfyptky1liyndnktvesksinvevh1tkk  
>tr|D0K665|D0K665\_STAAD  
m1ngnpkpeq1nkaseftgl1mdnmrylyddkhvsetniksqekflqhd1l1fkingskilktefnks1sdyknknvd1f  
gtnyynqcyfsl1dnme1nd

Tsompanidou\_et\_al\_Supplemental\_FASTA\_File

grlieknvyvwrcdra  
>tr|D0K671|D0K671\_STAAD  
mtksvaiigagitglssayflkqddpnidvtifeasnrpggkiqsyrdgymielgpesylgrktimtelakdigleqdi  
vtnttgqsyifaknklypi  
pggsimgiptdikpfvttklisplgklragldlikkpiqmqgdgisvgaffrarlgnevlentieplmggiygtdidkls  
lmstfnpnfkekeefgsli  
kgmkdeknrlkqrqlypgapkqgfkqfkhglssfiealeqdvknkgvtiryntsvddiitsqkqykivysnqqedvfdg  
vlvttphqvflnwfgqpa  
fdyftmdsttvatvvlafdekdientydgtgfviartsdtditactwtsskwpfttpegkvli rayvgkpgdttvddht  
dnelvsivrddlsqmmtfk  
gdpeftivnrpkssmpqyhvghiqqirqiqahikqtyprrlvtgvsfeavglpdcitqgkvaeeviael  
>tr|D0K676|D0K676\_STAAD  
mhnqattlfnkrlhalrkeknyynkfi fngfhmvflillgafifgygewlkhiptninfaliaavivaaltsifpmrpl  
leadkifllpfekhmsqfm  
rhailysyfariliqliiivvmfplfyninqhnavafyicfgfsalifpyvglrlrwqwyqsglktwqvnlisfiifalty  
ylllapkwyivfvmvalpv  
lieflvkkypgflypwekmi aiehrhmnyykfvnmftdvkhlkesavrrsyldillpvpgkskfnsnamylflfirsf  
igrdafiifrlviiavl  
lmwlsyplvtgvgislfvyiillqmaqfysqqayglwpqvwvppeekvikgyeqflyrlmfvictvfavtfiikhmtlf  
yvllifyivglitirsiik  
klkyqetllrd  
>tr|D0K679|D0K679\_STAAD  
mkasrilfgigvgvavfvalqgrddksvknntidrtaptgskselqrefetikqsfnidilnygvqiknesaefgssig  
geikslngfksdinpie  
rlqshienlqnrgeidigneisk  
>tr|D0K686|D0K686\_STAAD  
mnaifiii fmi vvgai iggitnvaiarm lfhpfkpyyifkfrvpftpglipkrreeiatkigqvieehlltetlineklk  
seqsqqaiesmiqqqlqkl  
tkdqlsikqitsqididleqvlqtngnqyiesqlnnyytkhqntiasllpnqlvtfldqhvdnatdllcdrarnylssa  
kgtqdinmdltdffhekgl  
ligmlqmfmtkesiadriqqelirltshpkartivtslitneyqtfkdkplnell dasqfneiaenlsvyvttyasnan  
kpvvtlmpqfvdylegqls  
sklanliieklsihlstimkkvdrlrglieeqintfdldyiekliieiankelklimsngfilggiigffqglvaifv  
>tr|D0K696|D0K696\_STAAD  
mgiirltdkqlkqdiidyaytigidsigfttadpfdelkqkleayhangyasgfeesdialrtepkls lptarsiaiaiv  
gypnkllgapsvrgdrgrg  
lfaraswgqdyhtimrkrldmlaafieskvpdveiksmvdtgvl sdravaeraglgfvgrngfvinpkltwtylgemlv  
sipfepddplldscgdcti  
cvdrpcpsalvngqqlnsqkcisflqtqkgympdqyrykignrlygcdtcqqvcpknrginteqddiilepeilkprlv  
llrmsnkefkqtyghlaga  
wrgkkpiqrnaialalahfnevdaipelkkvattderpmirataywaigqilgeardfinanydgedaevqnemikgldt  
rre  
>tr|D0K6A0|D0K6A0\_STAAD  
mcndt1ellrikdenikyinqeidviikgkatvnavltykpsacyccgvknegqihkhgrvsritllktqgyntyln  
lakqrfkclecngtftakt  
sivdescfisrcvtqkvieeatkvkteidtaedncispstvsrirtkaanslrikpfnclpehiamdefksvknvtgsms  
fifidndthdvidilenrt  
trflrayferfdlknrqvktvtidmyepyvrlfrdlfpnaaiifdrfhivqhl nrelnkyrvqvmneyrnkkgnpytif  
knnwkvllmdtsktilfsky  
rwnksfkaykrssdivefmlskddilrrsyelvqglrkdrlrcnwpkfinrlnsvsksvskgvkwkvkyrkhqrm lrn  
tiyypafnngaieginnki  
klirikrisfgyrnfnnfkarimmi fslykgekerqqspimdwppnnknskscnlk  
>tr|D0K6A1|D0K6A1\_STAAD  
msveiesieheleesiaslrqagiritpqrqailrylisshtptadeiyqalspdfpnisvatiynn lrvfkdigivke  
ltygdsssrfdfnthnyh  
iiceqcgkivdfqypqlneierlaqhmtfdvthrmeiygvckecqdk  
>tr|D0K6B8|D0K6B8\_STAAD  
mteftpfddgsnqlnyrkfvilrfhgvskrkickmyrfayfrilevcemakkndyrftykdykflkqygvsn tfickmyh  
isiedleffevmnr  
>tr|D0K6C2|D0K6C2\_STAAD  
mkiiskyiltrfsgkhfdipkeqrrvipkfnrrkmivicfysllaillllllasfikatranndskeavnktnmiqk  
kyednantvqyspklllya  
dkfidtymniskdskelesreke llkyfpsydkpdekisderklnskefynikrkdktiiqyivnydvnitekkevk  
vkkkksekdkdeyetkte  
ekqrkvngqnilinipiksenkyvvveypyftpi pdsqlnkakmvednlkdnkrednppakafiedffnkyassksddma  
ylmdnpeglegtrevsqir  
eirlypkgddyvakveilmkdksplenehytlditkkgdyvknmtnsigg  
>tr|D0K6C5|D0K6C5\_STAAD

Tsompanidou\_et\_al\_Supplemental\_FASTA\_File

mnlkapyaglrdnlllktktgevwyyrvrsesistanydakeeskkrmryflsesikgyqdfhfemydhdlrlnkfkeis  
kdfdeafnvaeyysketi  
dvlqeqlmi thnsfvmgkireladdavtlkeilkstlsdtaerivsnfgfdvnl ddkildkyktferdladsflgigg  
erltene layiirkpfisn  
athdvqeessrraitdiynavidptrlsvlevendnekfytttvvddfpldmeythlfekaqmpfpvechvkakiinn  
ekvkkkfrdrakinhkqqak  
ekqdtgdsasedvqdnlfvlnqmerevtgsgvfiewvmfviksddyrdckrkakrImkrIketqiyavnpladqlqlyf  
qclhgndlfinkywlqrrt  
atgiaenlfgvsqslgtktgfyigrdkfirsvsreeavassrdiilfslllaakgikgavsdspvhlitgqtgkgsfl  
akllwiytsffkgqmlywd  
pksefaewfdrvteskemqekypfinhIktfkyvtlnyedstnygcldpivfldgieanemlksvfdeiksfenyhhie  
taiyqaisdtveerengkk  
vgslnvieklqnnedehvknagdllfektqnnilkIvdsdgnpalniqekatilqvkgldmpkaddtssystsekngi  
tlmlligkfllekfgsrrdv  
qttifidegwafsasrgqkkgvkrirkrtgrsennsvfitqsvkdaddggngfghfafdekderedilkslgleyske  
spenmemlkdIkkggcifs  
dfygrvgkmvvhcpfeemteafrtqedsasskaeekfam  
>tr|DOK6C6|DOK6C6\_STAAD  
mamneialfkgvrippygkyidmfasvIafiflvryiylfidyksvnkklidiltlfayfkphllylligtaiifvick  
liaqflirfktkdlaemie  
tqgfhhtvikktteyipi dykqteydyptmfykrkksfvihikkdgsrfqdnyleletiepmfnselvekkihgyr  
IryefmpIkykkrivmnge  
gesntifydtkiaithqitwdfvkaphglvtgitgggktyflfyvirelfrhsevrlldpkvsdlsfmkrvigddkvad  
tkgqilqIreannemeer  
frImndssdykigndfnfdmryfii fdevtaftstldkkelqemndyliniimkgrqagvfmfltaqrpdadvikgnv  
rdqIglrvslgnlsndgyr  
mtfgqtdkefqtihdsdigryisilgqynepilfdapImeqydfvedvkqilnke  
>tr|DOK6C7|DOK6C7\_STAAD  
mkhksvyllcfliIpiIltsvsayavsnpvgepshavkpkiekydIshyrsiysekgdwnpfgqeeisrqinnvsdfff  
smtkiIagvtdyaIenlfq  
ldvindfadkigdfvgdiyqkllsnlaItIfiivcfnafiiIsvqgnareaIkraflimcligfgvgilanagniiirgtn  
nigkdlnniimnstssidg  
nidyi hensgmnhirnglfdmtiyrtylvmnygtvdekeikakgkdridnilklI dydkksekelddivkdevekknnkym  
tgyvfqklaisvigfiit  
lfmsivflsisfakliIstfalflflflvswivsfipgfeIsvfsafaktIgyiilsacmtflfvivglcikIansfie  
pdsqayflnsifiivlf  
vmykkraqiifvsvrgnisfpsaigagvmnrtqerfnkIrheqaqkkakrenqrdepapplqndndlrrrqdkpmpI  
finkdnqkngnkrreqqes  
mngndvksasvesnannyskqpqkasqqehqvretqrkdiqrspqvvnqplnnenhsinrkeqksvqtayntdvqkrqi  
qnatqnqsrqsgnrnqpi  
trnsqskdrIkeqkdiinkhgk  
>tr|DOK6D1|DOK6D1\_STAAD  
mkkrkrkeldyktrIaiakylndglniiqiskilgrddavlyrevnkrsvdgvynpllaeedaiksrsisdeqvakrrr  
IndetkayieekIslkwsp  
rqiasqiekdtghyisyptiyryirnglvkvdvkrdmrqagkkykssenrgkl dvgsrvikyrlkky  
>tr|DOK6D2|DOK6D2\_STAAD  
mltiierktryIasrlntrksnvvcnei inimpIpk sitmdrgkefalfkqiedelnsciyfsdlgcpyqrgsiena  
ngllrqyypkgtdfanitq  
ksIdeavkqinarprmi fdyksseemIkyhvstqncepiIIndcvrhepvn  
>tr|DOK6E1|DOK6E1\_STAAD  
mthkyistqmliiftalmianfyiIffekigflvlIlgcvlvvygylfhkIrgllafwigalliaftllsnkytii  
lfvflIliIvrylihkfkp  
kkvvatdevmtspsfikqkwfgeqrtpvyvykwedvqihgigdIhidItkaanikenntivvrhilgkvqvilpvyni  
nlhvaafygstyvneksyk  
vennnihieemmkpdnytvniyvstfigdveviyr  
>tr|DOK6E5|DOK6E5\_STAAD  
mkptkvilrdasyIhsktsitfilkdvvieednkiiyf dtsatfedqevkfefal fdsdmdnlkhm dydnpvteiyfiep  
dlhftiidfnqellciyid  
fdsglrhsmatesgislriniaksdftkfinelasly  
>tr|DOK6E7|DOK6E7\_STAAD  
mrqwtaihlakIarkasravgkrgrtdIpgqiarkvtdvlrklaeqvddivfisgtngktttsnlightlkanniqiihn  
neganmaagitsafimqst  
pktkiavieidegsiprvIkevtpsmmvftnffrdqmdrfgeidimvnniaetisnkgiklllnaddpfvsrIki asdti  
vyygmkaahahefeqstme  
srycpncgrllqydyihynqighyhcqcgfkreqakyei ssfdvapflylnindekydmkiagdfnaynalaaytvIrel  
glnqetikngfetytsdng  
rmqyfkkerkeaminIaknIpagmnasIsvgeqIegekyvisIIndnaadgrdtswiydadfekI skqqieaiivtgtrae  
elqlrlklaevevpiiver

Tsompanidou\_et\_al\_Supplemental\_FASTA\_File

diykataktmdykgftvaiipnytslapmleqlnrsfeggqs  
>tr|D0K6F1|D0K6F1\_STAAD  
mterriihidmdyffaqvemrdnpk1kgkpvi vggkassrgvstasyearkygvhsampmsqahklcpngyfvtsnfga  
yretsaqimsifrsytdkv  
epmsldeaylditelvrpdlpaskiaqyirkdileqthltasagvsynkflaklasgmnpdgltvldyqnvhdilmtd  
igdfpgvgkaskkvmhdng  
ifngrdlyektefelir1fgkrgrglynkargidhsevksrsvrksvgttertfatdvnddeeilrkvwelsgktaerlnk  
lqksaktvtvkikyqfet  
lsqms1rdsvsseediyniay1lynd1kdpdvpir1igvtvgn1eqstyknmtiydfi  
>tr|D0K6G0|D0K6G0\_STAAD  
mad1ssrvnelhd1lnqsyeyvednpsvpdseydk1lhelikeehpeyktvdsptvrvggeaqasfkknvhdtpm1  
slgnafned1rkfdqri  
eq1gnveymcelkidglavslkyvdgyfvqgltrgdgttediten1ktihaip1kmkep1nvevrgeaymprsrflrln  
eekendeq1fanprnaa  
gs1rq1dsk1takrklsvfiysvndftdfnarsqsealdeldklgfttnknrarvnnidgvleyiekwtsqreslpydid  
givikvnd1dqddemgftq  
ksprwajaykfpaeevvtkl1dielsigrtgvvtptailpevkvagttvsras1hned1hdrdirigdsvvvkkagdi  
pevvsiperpedavtyh  
mptpcscghe1vriegevalrcinpkcqaqlveg1ihfvsrqamnidglgtki1qqlyqselikdvadifyl1teed1lp  
ldrmgqkkvdn1laaiqa  
kdns1en1lfg1g1rh1gvkasqvlaekyetidr11tvteaelveihdigdkvaqsvvtylenediralik1kdkhvm  
iykgiktsdieghpefsgk  
tiviltg1hqmtrneaskwlasqgakvtssvtkntdvviagedagskl1tkaqslgieiwteqqfvdkqnelns  
>tr|D0K6G4|D0K6G4\_STAAD  
mierysreemsniwtdqnrweaveilaceawselghipkadvqkirqnakvveraqeieqetrhdvvafrqvset  
lgeerkwvhygl1stdvvd  
talsfvikqandiiekdlerrfidvlaekaknykyl1mmgrthgvhaepttfgvkmalwytemqrnlqrfrkqvreeievk  
msgavgtfanippeiesy  
ckh1gigtapvstqt1qdrhrhayyat1aliatslekfaveirnlqktetreveeafakgqkssamphkrnpigsenit  
gisrvirgyittayenvp1  
wherdishssaerim1pdvtialdya1nrftnivdr1tvfednmrnnidktfgl1fsqr11al1inkgmvreeaydkvqp  
kamswetktpfrelieq  
esitsv1tkeeldecfdpkhh1nqvdtiferagla  
>tr|D0K6G9|D0K6G9\_STAAD  
msklqdvivqemkvkkri1dsaeime1kqfiknyvqshsfikslvlgisggqdstlvglvqmsvnelreegidctfiav  
klpygvqkdadevdqalrf  
iepdeivtvnikpavdqsvslkeagiv1tdfkgnekarearmkvqfsiasnrqg1vvgtdhsaenitgfytkygdgaad  
iapifgl1nkrqgrq1lay1  
gapkelyektptad1eddkpqlpdeda1gvtyeaidny1legkpvtpreekvienhyirnakhrelaytrytwpk  
>tr|D0K6H0|D0K6H0\_STAAD  
m1hndlyqi1nmaesywndni1hekmafvdl1yfrkmpfnsgyavfnglkrvidfiehfgfsesdleylksigykddf1sylvk  
dlkftgs1rsmgegelc1fg  
nep1lrveapliqa1ietil1nivnfht1ittkasr1rqiasndkl1mefgtrraeidaalwgaraayiggfdstsnvr  
agklfg1pvsqgthahafvq  
tygdeyvafkkyarhkncvflvdtfht1ksgvpnaikvake1gdkinfvgir1dsgdiaylskearrm1deagftetki  
iasnd1deetits1kaqga  
kvdswgvgtk1itgydqa1lgavyklvaieneegsysdriks1naekvttpgkknvyri1inkktgkaegyit1enenp  
ydeqp1kl1fhpvhtyk1mf  
iksfeaid1hhniyengklvyqmp1tedesreyl1agql1siwdenkrfl1npqeypvd1skacwdnkhkri1fevaehvkeme  
edne  
>tr|D0K6J0|D0K6J0\_STAAD  
mnaie1snvnyssdqfn1kni1sfkvpqgfvgtgfigrnagagktti1r1imdlyqpqtgvirvleedmalnpielknsigfv  
ysenyfnerwttkq1lekmi  
apfyrkwdhqvfefylekfd1lpinksiktfstgmkmk1slavafshhaelyifdeptsgldplarnellei1qqeliden  
kti1fmsthi1sd1lekiady  
ih1lsdgevi1ngskeq1l1qryqvsgated1ddelas1liyeekrtgfigl1tehaqvfeilghkvnittpsien1mv  
ylekrkpk1yheni1klmeeg  
f  
>tr|D0K6J7|D0K6J7\_STAAD  
mmvkk1tkns1kkvat1alan11lvga1tdnsakaeskddtd1kl1vshnvym1stvl1ypnwr111  
>tr|D0K6J8|D0K6J8\_STAAD  
mkl1kdnd1mskykmdai1sdies11nmdeikqesrmviatknsgsmiympcvd1n1skigivkivsi1pensmkd1pt  
tqaim1ltd1ntgeh1sti  
eany1tk1rtga1sgiatkyl1srensnsigi1gtggmayeq1tgn1evrkisnvflynkskdakvfkskileelph1sv  
eimdntkelveksdi1ncq  
trsvepvfnaenvkagth1ngigsftpemreidyni1lksnkvv1ddfagvkaeagefieannkgvfkfedasgd1kdlv  
tses1irr1nsekei1tvfksv  
gtayfd1lavvigvynki1inn

Tsompanidou\_et\_al\_Supplemental\_FASTA\_File

>tr|D0K6J9|D0K6J9\_STAAD  
mtntkksifyfjilsillaaligsvlpfsdytnnligqsivtmslliylvkdgkynnlqinlknihigfiigiylm  
avlnllsgaetiltinsf  
iivisliltlnlmalfeevvcrgiifneflknntplkagllssai falahflnithnpdflgvftqvvytffl gmi faai  
yytknlltai llhfil dl  
tsgfye lkpvkvasdsmttvtndmfvtl islpc lligyylkkkssk  
>tr|D0K6K0|D0K6K0\_STAAD  
mlmtknqaekwfdnslgkqfnldgwygfqcydyanmffmlatgerlqglyaynipfdnktkiekygqiiknydsflpqkl  
divvfpskygggaghveiv  
esantftsfgqnwngkgwtngvaqpgwgpvtrhvhydnpmfirlnfpslsvgdkakgiikqvttk keavikpk  
kimlvsgghynds gavgng  
tnerdfirkyitpnakiylrhaghevalyggssqsqdmqdtaygvnvgnkkdyglywvksqgydivleihl daagesas  
gghviissqfnadtidsi  
qdviknllgqirgvtpndllnvnsaeininyrlselgfitnkkdmdwiknydlyskliagaihgpiggvvas kvkt  
pvkneknppvpagytldsn  
gvpykkeqgnytvavkgnnvregystnsritgilpnnttikydgaycingyrwityiansgqrryiatgevdkagnrms  
sfkfsfl  
>tr|D0K6K1|D0K6K1\_STAAD  
meakvityrivlilalvngflankgispipvdeesvssiiltvia lyttykdnptsqegrwanqklkkykaeskyrkatg  
qapvkeviaptnmndtndl  
g  
>tr|D0K6K2|D0K6K2\_STAAD  
mfgftkrheqdwrltrleendktmfekfdriedslrtqeki ydkldrnfelrrdkeedekneknaknirdikmilgl  
igtilstfviai lktifgi  
>tr|D0K6K4|D0K6K4\_STAAD  
mqilvnkrneiisyaiiggfeegidienlpenfsqvfrpkafkysngeivfneyseekddfyyqqgdseehstvasdyil  
rkmvasmqkqvvgstklsm  
qvnkqnal makqlvafnkkleevkgeaena  
>tr|D0K6K5|D0K6K5\_STAAD  
msnleksvni lentahyenisl ditfrtgesdssvllfnisknqp lllseenikariairgkgvmv vappleildsfk  
gilkfqipndvirkdgsyq  
aqsvaelngsdvvvertitfnvekslfskipsetklhyivef qelektimdrvkamdeaikngedyasliekakekgl  
sdiqjakssside lqghan  
sritdenkaqsysrtfdeqkrymdekheafkqsvnsgglvtsgstsnwqkakitkddgkimqitgdfnneqrigdst  
qfiyvsqainyprgvstng  
tveylvvtsdykrmtyrpngtnkvfvkrkeagswsewelaindyntpfetvqnaqt kanmaesnaklyaddkfnkrysv  
ifdgtangvgstlynesl  
dqfllif ygtfpggdftefgnpfggkislspanlpdndgngggfyefgltkssrtsltisndvyfdlgsqrgsganan  
rgtinkiigvrk  
>tr|D0K6K6|D0K6K6\_STAAD  
menlylikdlgalagrdrakeiqnlqrieqfalglttefklhqaktiqhfaeqiyyngrsaavnksiqsqinalvva  
prnnsaneivqarvnvng  
tfdtlikehlddwetkqnkeetirelnkakqqil dieyrfepdkqefl fvte lapltnavmqs ffdnrtgivy mtqar  
nngytlsr lrpngqfidss  
livggghgthngyryidde lwiysfilngnntlvrfkytpnveisygkygmqdvftghpekpyitpvinekenkilyr  
ierprsqwelensmyiei  
rslddvdknidkvlhkisipmr ltnetqpmqgvtfdekylywytgdsnpnnryltafdletgeeayqvnadyggtdsf  
pgefaeaeglqiyydkdsg  
kka mlgtvvggdgrnthri fmiqqrgileilhsrgvpfimsdtggrvklpmpdkltnl gmltepglylytdhtvqi  
ddfplprewr dagwfl evk  
ppqtggdviqil trnsyarnmmtfervlsgrtgdisdwnyvpknsgkwervpsfitkmsdinivgmsfyltddtkrftd  
fpterkgvagwnlyveasn  
tggfvhrlvnsvtascei llknydsktssgpwllhegriis  
>tr|D0K6K8|D0K6K8\_STAAD  
mdyhdhlsvmdfnelicenlldvdygsfkeyyelnearyitftvyrthnsfvfdllicenfi iyhgekytikqtapkle  
gdkvfi evtayhimyefqn  
hsvesnk ldddsetgkmpaysldeylrygf anqktsvkmyki igdfkrkipidelgnknngleyckeavdlfgci ypn  
dteigfyspetfyqrsekv  
iryqyntdvtvsatvstlel rtaikvfgkkytaeekknynpirtt dikysngfikegtyrtetigskatinfdckygnetv  
rftikkgsqggiyklildg  
kqikqis cfaksvqsetidliknidkgkhvlemiflgedpknr idissnkakpcmyvgtektstvlnliadnsgrnqyka  
ivdyvadsakqfgi ryant  
qtnedietqdkll efakkqindtpkte ldvnyigyeki eprdsvffvhelmgyntelkvvkl drshpfvnaidevsfsne  
ikdmvqi qqa lnr rvi aq  
nrynyqanrinhlytstlnspfetmdigsvli  
>tr|D0K6L0|D0K6L0\_STAAD  
mnekvegmtlekl dhlgvqegmkglkrqlgvvnsemkanlsafdkseksmekyqarikglndklkvqkkmysqvedelk  
qvnanyqkakssvkdeka

Tsompanidou\_et\_al\_Supplemental\_FASTA\_File

ylklveankkeklaidskealkssntelkkaenqkrtnqrkqdayqklkqlrdaeqklknsnqattaqlkrasdavqk  
qsvkhkelveqykqeggnqv  
qklkvqndnlsksndklessyaktntklkqtekefndlnntikhnsanvakaetavnkekaaInnlersidkassmktf  
nkeqmiagshfgklasgad  
vmskkfssigdkmstlgrtmtmgvstpitlglgaalktsadfeqqmsrvgaiagasskdksmsnqavdlgaktsksane  
vakgmeeaaalfnakqtm  
eampgvisaaeasgaemattatvmasainsfglksandanhvadllarsandsaadiqymgdalkyagtpakalgvsiedt  
saaievlnsnglegsagt  
alrasfirlanpskstakemkklgihlsdakgefvgmgelirqfqdnmkgmtreqklatvativgteasgflalieagp  
dkinsyskslksnsgeskk  
aadlmkdnlkgaleqlggafeslaievgkdltpmiragaegltkldvgfthlpgwvrkasvglaiifgasigpavlaggl  
iravgsaakgyaslnrria  
entilsntnskamslgltlflgtttgktskgfkglagamlnlkipinvlntanlaipfkllgkgiglasksvfafs  
ggarglgialrfitgpiga  
titaityaykvfktaydhvewfrkginglgetikffggkiiggavrklgefknylgsigrsfkekfskdmkdgykslstd  
dllkvgvnkfkqfmqtmgt  
askkasdtvkvlgkgsketekalekyvhyseennrimekvrlnsgqitedkakkllkietdlnnliaeiokrkkelle  
ktqelidkysafdeqekqn  
ilrttkekdnlrikkeqelnqkikelkealsdgqisenerkeienlenqrrditvkelstekeqerilvrmqrrnray  
sideaskaikaekarkar  
kkevdkyeddvaiaknnvnlkssekdkllaiadqrhkdevrkakskkdavdvvkkqnkdidkemdssgrvykntekw  
wnglkswwsnfredqkks  
dkyakeqeatarrnrenikkwfgnawdgvtktgeafskmgrnanhfggemkkmwsgikgipsklssgwnsakssvgyht  
kaianstgkwfgkawqsvk  
sttgsinyntkqkysdasdkawahsksiwrgtskwfsnayksakgwltmanksrskwdnisstawsnaksvwkgtskwf  
ssykslkswtgdmysrah  
drfdaiyssawsnaksvfngfrkwlskytdwirdigkdmgraaadlgnvankaigglnsmigginiskaitdknlkpk  
iptlstgtlagkqvadns  
gsltqptfavlnrdrgsnagggvqevihradgtfhapqgrdvvpilvgdsvinandtlklqrmgvlpkfhggtkkkkw  
meqvtenlgkkagdfgska  
kntahnikkgaemveaagdkikdgaswlgdkigdvwdyvqhpqklvnkvmsglninfgganatvkiakgaysllkkkl  
vdkvkswfedfgggdgsy  
lfdhpiwqrfgsytgglfnnggrhygidfqmptgtniyavkggiadkvwtdyggngsiqiktganewnwymhlskqlarq  
gqrikagqligksgatgnf  
vrgahlhfqlmrgshpndtavidpmkwlskkgggkvvgsgyenakraillraqsilggryrsdyittqmlrvakresny  
qadvinnwdsnaragtpsk  
gmfqmiepsfrafakpghgninyntdeaismkyivakygwgffkragyayangglitkhqiaevgegdkpemvipltr  
rkramqlteqvmriigmdg  
kqnnitvnnststvekllkqivmltdkgnkltdaligtvssqdnllsssdairdlekvlskqsghrvnannymgglt  
>tr|D0K6L1|D0K6L1\_STAAD  
meqygtltevrdqpylklllelnedndeeseqkqseqkvitgtdlrlkifgs  
>tr|D0K6L2|D0K6L2\_STAAD  
mikfeikdrktgktesytkedvtmgeaekcyeylelvnqenkkeapnatkmrqkerqllvdlfkdegltedvlnkmstk  
tytkalqdi freingedee  
tsetepeemgktekqsq  
>tr|D0K6L3|D0K6L3\_STAAD  
mktklkykgddvbaseqgegkvsvtlnlnladttypkgytqvsweengesskvdvpqfktnpilvsgvsftpetksit  
vntddnvepniapstatnk  
tlkytsehpefvtdertgaihgvaegtsivtatstdgsdksgqitvtvtng  
>tr|D0K6L4|D0K6L4\_STAAD  
maegqgsykvfkrlyvgvfnpeatkvvkrmtwedekggtvdlnitglapdlvdmfasnkrvwmkkqgtnevksdmsifn  
ipsedlntvigrtkdngt  
swgentrapyyvtvigesedlgtgqpyvavallkgtfslsiefktrgekaeapeptkltgdmnrkvdvdgtpqgivygy  
hegkegeaeffkqvfygt  
dsgehsdds1gs1ps  
>tr|D0K6L5|D0K6L5\_STAAD  
mnilntvkgillsdalqtyinsriyyykvtenaetskpfvvitpvydlpsdfmsdkylseeyliqidvessnhqktidi  
tkrirylyqqnliqassq  
ldayfeetkryvmsrryqgipkniyyknqrie  
>tr|D0K6L6|D0K6L6\_STAAD  
msveikgipevllklesvygkqamqaksdra1neaseffikalkefesfkdtgasieemtskpytkvgsqeravliew  
vgpmnrkhiihlnehgytr  
dgkkytprgfgviaktlaaserkyreiikke1tr  
>tr|D0K6L7|D0K6L7\_STAAD  
mefnefkdrayffqyinkgypgeekmlyscfckiynpmskdreilkatesksgltiivrsskteylpqtnhlvkids  
alysdklfnieeiridtpd  
igyntvvlsek  
>tr|D0K6L9|D0K6L9\_STAAD

Tsompanidou\_et\_al\_Supplemental\_FASTA\_File

mptlyelkqslgmigqqlknkndelsqkatdpnidmedikqletekaglqqrfrniverqvqdieekakvkdteayqs  
lndnekmvkakaefyrhai  
lnefekpsmeaqrllhalptgndsggdkllpktlskeivsepfaknqlrekarltnikgleiprvsytlddddfitdve  
takeklkgdtkfatnkf  
kvfaaisdvtihgsdvelvnwvena lqsglaakerkda lavspksglehmsfyngsvkevegadmydainaladlhedy  
rdnatymryadyvkiisv  
lsgttnffdtpaekvfgkpvvftdaavkpivgdfnyfginydgtytdkdvkkgeylfvltawydqqrtdsafriak  
akentgplps  
>tr|D0K6M0|D0K6M0\_STAAD  
msmkakyfqmkrkskskgeifiygdivsdkwfesdvtatdfknklde lgdiseidvhinssggsvfeghaiynmlkmhpa  
kinyvdalaasiasviam  
sgdai fmhknsflmi hnswwmtvgnaeelrktadll ektdavsnsayldkakldqehlkqml daetwltaeaal sfgli  
deilganeaiaasiskeqyk  
rfenvpedlkkdvdkitkidvdtse lvetpkessmleekekrekikreceilkmtmny  
>tr|D0K6M1|D0K6M1\_STAAD  
mnviakenivtrikkklidnwidqstsklydfspwknksfwgvinntletnetifsaitkl snsmaslp lkmyedykvvn  
tevsdll tvspnsl sssf  
finqietirnekgnayvlierdiyhpksklfl lnpdvvemlienqsrelyysihaatgnklivhnm dmlhfkhivasnmv  
qgispidvlnknttdfdnav  
rtfnltemqkpdsm lkygsnvgekrqqvledfkqyyeenggil fpepgveieplpkkyvsedivasenltrervanvf  
qlpsvflnarsntnfakne  
elnrfylqhtll pivkqyeeefnrkl ltktdreknyrfkfnvksyl radsatqaevyfkavrsgyytindi rewedlppv  
eggdkplisgdlypidtp l  
elrkslkgdknvnes  
>tr|D0K6M2|D0K6M2\_STAAD  
mtikvlnepspkl lttwyaeqvsqgkiktskyvkkecerhl rylenggwvfdeela hrpirfiekfckpskgskrqlvl  
qpwqhfiigs lfgwvket  
klrrfreali fmgkngktttisgvanygvsqdgengaeihll anvmkqaril fdeskamikaspilsrefrpl rdeihy  
dktiskimpqasdsdkldg  
l nthmgi fdeihfkdykl isviknsraarl qplliyittagyql dgp lvdmvemgrdil dgvi edertfyylasl dddd  
dindssnwikapnlgsi  
dleemkeewkkakrt paergdfitkrfni fanndemsfidyptl qknnetvsleelegrpctigydl setedftaacatf  
aldngkvav lshswipkhh  
veysneki pyreweedgll tiqdkpyvdyqdvlnwi ikmnehyvvekitydranafkl nqelknygfeteetrqgal tls  
palkdlkemfdgkii fnn  
nplmkwyinnvql kl drngnw lpskqsryrki dgfaaf lntytdimkvvsdsgegniefisikdimr  
>tr|D0K6M3|D0K6M3\_STAAD  
mkltkkqlkeyiedykssddilinlyietyefyrc lrdelkksdlmiehtnkagasnivknplsieltktvtqlnllks  
mg ltaaqrkki vqeggfg  
dy  
>tr|D0K6M4|D0K6M4\_STAAD  
mtkhnniykhgrksygydwfyhskawkr lreialdrdnyl cqmc lredivtdanivhhiyvdedfnkal dldnlmsvcy  
schknhandndksnlkki  
rvlki  
>tr|D0K6M5|D0K6M5\_STAAD  
mikiekhdi kkleeyiqhidnyrrel kmqeyelleshepdnagasksnlpgnpiercaikkfsdnryntlrnivngvdr l  
idesdedtlellrfrywdc  
pigcyewediahyfgtsktsil rrrnalidklakyigyv  
>tr|D0K6M6|D0K6M6\_STAAD  
mwiattivfai lllisisinsdrareiqal rymndyl ldevvktkgwngledyriemkrmnndikk  
>tr|D0K6M7|D0K6M7\_STAAD  
mtevkiktisgdiyssidgpiedm ftrvidcavvagvetftrqkawiradnieai icigeasddveapskykhraevse  
>tr|D0K6M8|D0K6M8\_STAAD  
mtqylvttfkdstgrkhthi traksnrftvvdaeskeeakekeyeaqvkrdavikvgqlfenirecgk  
>tr|D0K6M9|D0K6M9\_STAAD  
mntltingqlqell qikefddriptrnlndtiasmiiefaewntleffknwkkqpgkpldtqldeiadylafslqltl  
tivneedleettevmvdlf  
enevtlplhsvyfvhvmhtlteqfvkgidnsivqvl impflyantyysidqlidaykkkmkrnherqdgtagagkyv  
>tr|D0K6N0|D0K6N0\_STAAD  
msnksnseiikrvletsksdiniwvdlsefdsegeeeilfdidenieefeiflntal ihiverlklriafatareaqend  
>tr|D0K6N1|D0K6N1\_STAAD  
mnnreqieqsvi sasayngndtegll keiedvykkaqafdeilegmtnaiqhsvkegie ldeavgimagqvvykyeeeqe  
neq  
>tr|D0K6N2|D0K6N2\_STAAD  
mpswgqvkktydtaeel etyikqhgleyeeqqltlf  
>tr|D0K6N3|D0K6N3\_STAAD  
msivkingkpykftehene l ikngltpgmvakrvrggwalqea lhapygmlaeykeivlskimereskereiarqrrk  
eaelrrkks hlf nvpqkhs

Tsompanidou\_et\_al\_Supplemental\_FASTA\_File

rdpywfditynqmfkkwqea  
>tr|D0K6N4|D0K6N4\_STAAD  
mqqqayinatidiripteveyqhfddvdekdaiaerlddnpyellkysitirhayieve  
>tr|D0K6N5|D0K6N5\_STAAD  
mmgfslrdevkvteihrstihsyeegtrntpiervhqladvyrarpsdifqgaydrleygvdkdprnrlldikldldcav  
iisklnhqqeihlehkn  
ihsiktkfnv  
>tr|D0K6N6|D0K6N6\_STAAD  
mtaeelyydtkwrfenhfktdmkeqlikhghdyikwlenkvnelegnvkelegeleeltcedwey  
>tr|D0K6N7|D0K6N7\_STAAD  
mkevnhlrtfveyqgkghagkdadesetsesfkdcgikltekdlvddidnvpkdvikaliffdietetqvtwtdrgvhfyf  
kkpenfkganaisalgfpi  
eykhihgntksvtvkrngvlrqidnegirenlhevfhlrnrkiknllgmgesdgrndalykhkmaiyaikdvkkilnfine  
fifadklpseejstiadq  
avdtkemtfdtiaksvnqyvrnyvnlffrdddegkfindenmlrkihqflqkdsrnveevyqlllmspiitlged  
esfeihfnngylhegrfy  
mdsktftpyhidvnyndpdaeavevvdnylnhlnnnedykklilevlahtliinkefkrmlakffifvgdggngkgtllt  
iirailnrnkncsglsigdm  
aderyfvvmqgklnlgddiedepinnkqmkalknistcdfvstrqlfqgatevemtllsiftsnhilkswekgesykr  
vmwlpitytkpakkekfnfiq  
kltqqdalewikliveayerlyanekftvsevvekfndqyheennfllylqdfkerkdfinmkpkqiyeaewaend  
lhpqskkqvkdtekkyl  
vvgrrringstgrvyielneevke  
>tr|D0K6N8|D0K6N8\_STAAD  
mnsvivkdedllfydievfkhnafvfkdknevglfhndfngiaeliknilvgynnhfyddkilnmlngytpyik  
kinderiingqkhayinkll  
prtldvfqqidvskpslkrvegnagkmilessvdftidraltpkelqaidycrydvdttieiykrknsyfmpkwsln  
rlgnpnadkwntttisavn  
lthkplpkwssirlhkdvkqkhekniemlnlvpekvqelwlnqskgavtiedfdniefgfgglhgvhkkknnvknvkl  
ldvtsmyspilinglet  
atkyadiqlerkkvkhkdktdlsdalklvlnsvygnlnqysllydpnkqksvcfygqialfdlckrlsksceiinintd  
gvafitdsdeykdvwkawe  
kdfnlteedefthfiqkdvnyvai epsgkvktkgdvnyhednwfkantariidiaitdyllfkdkpkqtlienldn  
pilyqyilqasrkfagtf  
qhdkeyqrinripakkesvtlvkrrldggvtfkpnqpnmwvfnndlenldiedfknnidlnhyleiiddkltkgwnaw  
ss  
>tr|D0K6N9|D0K6N9\_STAAD  
mtnnteirkslpleevyngatltfldeqqqilqvlhskifdkdtkkriddaeqaeraeknaqeyfgvafddlnka  
vgqehdiyvydrfcslew  
evveklndmegeifqttieevkddgrgiri rfykdgktyeskmmsydeslgqwfvpnpkqntqyskfadkfvsiee  
adeivgkeimvekvafgk  
hayadikkpkwsk  
>tr|D0K6P0|D0K6P0\_STAAD  
mnelikhhdnfvvtqgsvfeeydelssaqnlaehvktvevneenikeakdlmaqmnkrvksiedtrkqvkklllepy  
nsfesqvktiksvindnavs  
hirngereelveqeredkkqaiieifdkri rhydfekvlgfsdfllkqhlksysmtkvekdldvdwlekskrdleviyqsg  
dvddliieyqntqdlsmaf  
divnkrkerkkqieqvkkqkvvhvfvvndkdarltkllleqnnieftheik  
>tr|D0K6P1|D0K6P1\_STAAD  
mtleqqllmafedlesftykdvarelqikqpyartllsrllktkgkvqflskgtwqvvhsgieytkdrkrvtlqeqfell  
arlneesddpedieerikl  
mirlaklf  
>tr|D0K6P2|D0K6P2\_STAAD  
mnyeiasgskgnavaindvmvdcgiafkrmknylydikyllithisdhvkpstlkrikkefphitvisnyevaqqyev  
diiinagypmdigdytfea  
fecihdvtygyvwrfeagneiyatdtsslehakkkqydyllflesnyditklemvrgtktktygydpyasglrhstkdck  
tfyymyrrnrdseliehlk  
serfy  
>tr|D0K6P3|D0K6P3\_STAAD  
mkphkfkrmalidliervqstayqvdyniirvwhysddylgriasinmhnvdddalltkyekakkvlagealide  
>tr|D0K6P4|D0K6P4\_STAAD  
myyeigeehvkpi kvdvgfkffvhairvngvaikvndidrrevynivvtdesglqiamdninaaiyewiehtdeqeri  
nmimkw  
>tr|D0K6P5|D0K6P5\_STAAD  
msdyksyllavlcftvllailmpflyfttawsiagfasiatfiyykeyfyee  
>tr|D0K6P6|D0K6P6\_STAAD  
mphilnvtvpipehvliitkeeydeligysldpvnmsdlkkklkiasdetikdrllfhprfekelraqgivyhpydenfn  
rwrfnarkmnkfvdehne



Tsompanidou\_et\_al\_Supplemental\_FASTA\_File

iykervk  
>tr|D0K6P8|D0K6P8\_STAAD  
mdlekiadhtisllpraldrhklhnewqevgddviafakdsvardyfsiyssvllglqeeeksrkdllgl  
>tr|D0K6P9|D0K6P9\_STAAD  
mklrrlfnkkhenlidvwhgnqwlkvkesklkkykvvsdregkkylik  
>tr|D0K6Q0|D0K6Q0\_STAAD  
meqitlkeelkeiiakevnaikgekpissgai fnkvrinnddleinkkl dftkdl slgrlrklnhpiplkkyqhgf  
sihqkayvqvdhdirkl  
lsifgvtlnsdlseseynlaakiyrdikdylyiyekrvseltidffe  
>tr|D0K6Q1|D0K6Q1\_STAAD  
myefnvkrmaeriakgisismakklgmtpgtyskkenghirinvddlakvievl elpqdkcgiffyivsemsteqk  
ts  
>tr|D0K6Q3|D0K6Q3\_STAAD  
mglyeetliqhdyievreadvlpdnldgvwlgdlilikrglsdrekagilfeelahnklytgdiayskfnnrkfenyar  
rhgfisavplreiveayny  
gvrnlyelseylqlseeyileaeieyqkkygigthygeysitfeplrivyrykei  
>tr|D0K6Q4|D0K6Q4\_STAAD  
mrkiiglllvstlaltacgekekpkkeenkshtqkhkdsppkkqektkkvedknppsnsvqnnatnqsqtqnpnsna  
vnlsqweqnranelksnpn  
snyqnwtaedqaqaearatksgmandtgesveemrrseqankemgle  
>tr|D0K6Q5|D0K6Q5\_STAAD  
mniqklkdyiegyktqashydfldgeiqnalplikfenylsfilfdvdkdvfdapklvivdnyqnpeekiivreedyk  
nikrllmesekrkrfdifl  
kyyyenltskqvfkiepirliysgsnl tiegqyeaendykkwsnenkksldnyhdkvspyshldyeglisnfdspkyns  
dfeyqmaqaeeckykrklfl  
paaatlsvaletllmaicdkekvl nskdssdtmmnylgqrllsegkinyrmhkridityslrnsvshsnpgevskadcq  
iilscikvlidehysk  
>tr|D0K6Q6|D0K6Q6\_STAAD  
mgnyvtrdefnsmrefkdemramrtdmnylnsirtmnnmnslrseIntninnlrietqnsisklpsnsdvkmlle  
nnkelereakqrntiisw  
tigiiglgftiakfgwi  
>tr|D0K6Q7|D0K6Q7\_STAAD  
mqilrfenkrsniytvktqngnifthslykdtptykirkvlkileekidnqen  
>tr|D0K6Q8|D0K6Q8\_STAAD  
mernstkksskdkil kavnnfeevcnsngkfkfylddwlytksii fknnettlnqkyfkvyprgtivyaklgvnigsefs  
gnhfcvvlknkdnkrneli  
tivpltskdtkfsklqeniil  
>tr|D0K6Q9|D0K6Q9\_STAAD  
mksdhktlqfdldrikemhaksakvknlnpeiekeldeiennymqlakiieryerflgkqayaipsqvttiskkriikln  
dydptghisfneetlkie  
dfmkanils  
>tr|D0K6R0|D0K6R0\_STAAD  
mktrcydgkkwqyefkhegkryrkkgfrtkreansagldkl nelrngfnidngitleeyfenwiktykepvvkentyrhy  
knaqhigqhkigkmeisk  
inkqvyqkf indyskehaketirktngairsaldda lydglifknpaykvnykagkptksekekfisvteyemlkehvk  
krtrsslalfimictgcrv  
sgarnikiehinqvntifiderktdtspryisiaksdmhimdvissfaisydgyifkesgfiitlqainna lksacr  
nnipitshalrhthcsyl  
lakgvsihyiskrlghkniaittsvyshlleekfneedkktirilem  
>tr|D0K6R2|D0K6R2\_STAAD  
mikqlyknitictslaitaltvfpatsyak in seikavseknldgdtkmytrtattsdsqknitqslqfnfltepyndke  
tvfikakgtigsglriidp  
ngywnstlrwpgsysvsiqnvdnntnvt dfapknqdesrevkytygyktggdfs inrglgtgnitkesnysetisyqq  
psyrllldqstshkgvgwk  
veahlinnmghdhtqrlltndsdnrtkseifsltrngnlwakdnftpkdkmpvtvsegnpeflavmshdkkdkgksqfvv  
hykrsmdefkidwnrhgfw  
gywsgenhvdkkeeklsalyevdwkthdvkfvkvlndnekk  
>tr|D0K6R3|D0K6R3\_STAAD  
mknkkrvliasslscaillsaattqansahkdsdqknkehvdksqqkdkrnvtnkdknstvpddigkngkitkrtetv  
ydektnilqnlqfdfidp  
tydknvlvkkqgsihsnlfeshkeeknsnwlykypseyhvdqvkrrkteildqlpknkistakvdstfsyssgkfd  
stkgigrtssnsysktisy  
nqqnydtiasgknwnhvhwsviandlkyggevknrndellfyrntriatvenpelsfaskyrpalvrsgfnpefltyl  
sneksnektqfevtytrnq  
dilknrpgihyappileknkdgqrlivtyevdwknktvkvvdkysddnkpykeg  
>tr|D0K6R6|D0K6R6\_STAAD  
mvkqlkfsedarqamlrgvdqlanavkvtigpkgrnvldkeftaplitndgvtiakeieledpyenmgaklvqevankt  
neiagdgtttatvlaqami

Tsompanidou\_et\_al\_Supplemental\_FASTA\_File

qeglknvtsganpvglrqgdkavkvavealhensqkvenkneiaqvgaisaadeeigryiseamekvngdgvitieesn  
glnlelevvegmqfdrqgy  
spymvtdskmvaelerpyilvtdkkissfqdilplleqvvsnrpiliivadevegdaItnivlnrmrgtftavavkpag  
fgdrrkamledlailtgaq  
vitddlgldkdasidmlgtaskvevtdkntttvvdgdgdensidarvsqksqieetesdfdreklqerlaklaggvavi  
kvgaaasetelkerklried  
alnstraaveegivagggtalvnvyqkvseieagdi etgvnivlkal tapvrqiaenag legsviverlknaepgvgn  
tatnewnmleagivdptk  
vtrsalqhaasvaamfltteavvasipeknndqpnmggmpgmm  
>tr|DOK6S2|DOK6S2\_STAAD  
msclilrifilikegvismaqdiistigdlvkwiidtvnkftkk  
>tr|DOK6S5|DOK6S5\_STAAD  
metinnlamatfqvlvftvakfisfvkfnlradyfiivgiiiptmflyfygsravliptfssiiifffklkyyaivtil  
vtmiimylsnfatvgflft  
lrkytt dpailplyilsfssvsllaty lvriskkkfkksylslnktymiisfvlfatfaffyiystntssngdslipy  
alvfigliifisvvlims  
lftlkemkykrnqeeietyyeytlkieainnemrkfrhdyvnilttseyireddmiglrayfnknivpmkdnlqmnaik  
l ngienl kvreikglittk  
lraqemnipisieipdevssinlnmidlsrsigiildnaieasteiddpiirvafiesensvtfivmncaddiprihe  
lfqesfstkgegrglst  
lkeiadnadnvlldtiiengffiqkveiinn  
>tr|DOK6T2|DOK6T2\_STAAD  
mwmifsglivggllgfvmqrtrfcltggfrdmyvqknkmfyalliaitiqsiglliltatdilqipahsfpilgtiigs  
fifgigivlaggcatgtwy  
ragegligswialvlyavtaaitktgilkpvmkinqptvnvsdmsqttgipfwglvviltiitilvvrtnnkkvrva  
vpklkqrytgi ryylfekr  
yhpfaaivigliallawpmsastgrndglgittpsanlvhflitgetkfidwgvlvlgifigsyiaargsrefkwrp  
dkitirnsaiggicmgfga  
svaggcsinglvetatmtwqgwialasmivgvwtmshfivrpmkkvqqqsakvkqqtqiv  
>tr|DOK6T4|DOK6T4\_STAAD  
mllqlnhisksfdgediftdvdfevktgerigivgrngagkstmkiiagvenydsngvskiknlklyltqqmtlnsn  
atvfeemskpfehikrnes  
likeetdwl skhandydsdytkthmsryeslnsqfeqlegyqyeskiktvlhglnfseedfnkpindfsggqktrls laq  
mlnepdl1111deptnhld  
lettkwledylryfkgaviiishdryfldkivtqi ydvalgdvkryvgnyee fiqrdlyyqkrmqeyesqqaeikrlet  
fveknitrastsgmaksrr  
kilekmeridkpmldaksaniqfgfdrntgndvmhvknleigyqta itkpi sievskgdhiaaigpngigkstliktian  
qqkalingdiftganlqigy  
ydkqkaefksskti ldyvwdqyplmekdirav lgrflfvqddvkkii ndlsggekarlqlalmlqrndvllildeptnh  
ldidskemlegalqhfegt  
ilfvshdryfinglankvfdltidsgkmylgdyqyyiekveeaealkahqeeqsvnvqahkksmeqssyhnqkeqrreqr  
klerqiseceneietlett  
ilqideqltqpevynnpqkanelaiqkdseqklehamskweelqqk1  
>tr|DOK6T5|DOK6T5\_STAAD  
mstnqtflifviaiilltsvigivgrymsrqrlksmetlwqtispleafirpnshfdyeyklykekfeshslvddktws  
dlnmnaifhkmylnltaig  
emklyaclrgmlsitnksllslfndnaefrknvtyhla ligktvyptfpdqitpvkrqnilflcpflpvisfavifinsq  
vgillflmsclfnii lsat  
lkrtyeddlksifyasvnlkqgytiskikhapqpevnfkqfrtarhltsvlaevndedigamviklvkli fml dyvl fhs  
iqksytthmnelkncfdyi  
aeldnhyalamyrrtlecytepqiddtndgivf selthpliadavandfslsqnilltgsnasgkstmksiainiilas  
aiqtvtaskfvyqpgivft  
smanaddvlsqdsyfmaelksikriveipdnkiycfideifkgtntteriaasesvlsflheksnfrviaathdielae  
llkqryenyhfnevienn  
ihfdykikpgkantrnaie llkitsfpakiyerakdnvsng  
>tr|DOK6T7|DOK6T7\_STAAD  
mtkedvpqvfdlerrsfndsswtidafyheieqnnfakyfvlefeqqi igylglwividqaqittvaiddnyrgyglgqm  
llkyginyashtcdvmsle  
vrvnnkvaqhvyenlgfyggkrknyygegedamvmvvnld  
>tr|DOK6T9|DOK6T9\_STAAD  
mnqfamflveqlksgdli llngdlgagkttltqfigkavgrrtinsptfniiksyrqgnklhmdcyrledsdedlgf  
deffedqaitviewsqfik  
dllpathlsinistisentrqiel faqgehyeqikea i ihefaah  
>tr|DOK6U3|DOK6U3\_STAAD  
mttvyydqdvktdalqgkkiavvygysqghahaqnlkdngydvvigirpgrsfdkakedgfdvpvaeavkqadvimvl  
pdei qgdvykneiepnlek  
hna lafahgfnihfgvii qppadvdvlvapakgpghlvrrt fvegsavpslfgiqqdasqgarnialsyakgigatragvi  
ettfkeetetdlfgeqavl

Tsompanidou\_et\_al\_Supplemental\_FASTA\_File

cggvskliqsgfetlveagyqpelayfevlhemkllivdlmyeggmenvrysisntaefgdvysgprvritpdvkenmkavl  
tdiqngnfsnrifiednkng  
fkefyklreeqghqiekvgre1remmpfiksksiek  
>tr|D0K6V3|D0K6V3\_STAAD  
mqskedfiemrvpasaeyvs1rlt1sgvfragatyddiedakiavseavtnavkhaykennvngiiniyfeiledkik  
ivisdkgdsfdyettkski  
gpydkdenidflregglglflies1mdevtvkyesgvtismtkyikkeqvrnngerveis  
>tr|D0K6W0|D0K6W0\_STAAD  
mmrdynfmsphakkvmr1sav1fwipialvlliafnlnw1fweildnnisivssvii1llvavftlviapvyrykhcry  
afekhh1rvrngilfldek  
vipyfriqnididvgpimrryr1at1tlytaggqaeielidrsearr1krw1nnerhlennknee  
>tr|D0K6X1|D0K6X1\_STAAD  
minvt1kqi qswipceiedqflnqeingvtidsraisknmlfipfkgenvdghrfvskalqdgagaafyqrgtpidenvs  
gpiiwedtl1talqqlaqa  
ylrhvnpkviavtgsngktttkdmiesv1htefkvkktqgnynneig1pltileldndteisilemgmsgfheief1sn1  
aqpdiaivtigneshmqd1  
gsregiakakseitig1kdngtfiydgdep1lkphvkevenakcisigvatdna1vcsvddrdttgisftinnkehylp  
1lgkhnmknatiaiavghe  
1g1tyntiyqn1knvs1tgmrmeqht1enditvindaynasptsmaaidt1gt1tgrri1ilgdvlelgenskemhigv  
gnyleekhidvlytfgnea  
kyiydsqqhvekaqhfnskddmi ev1tsd1kahdrv1vkgsrgmkleevvnalis  
>tr|D0K6X7|D0K6X7\_STAAD  
miellsialkhsni1lnsifigafiln11faftiifmerrsansiwaw1lv1vflp1lfgfily1llgrqirrdqifkidk  
edkkg1elivdeqlaalkn  
enfsnsnyqi vfkemiqm1lynnaaf1ttnd1kiytdgqekfdd1iqdirnatdyihfqqy1iqndelgrtilnelgk  
kaeggveki1lyddmgsrg  
1rkkgl1rpf1rnkggheaaffpsklp1in1rmnrrnrhki vvidgqi gyvggf1vngdeylgkskkfgywrtdth1rivgdav  
nalq1rf1ldwnsqatrhd  
isyddryfpdvns1ggt1gvq1assgpdeewe1kygy1kmissakksiyiqs1pyfipdqaf1dsikiaalggvdvnmip  
nkpdp1fvfwat1knaas1  
ldagvkvfhydngf1hskt1viddeiasvgtanmdhrsft1nfevnafiy1nqqiak1kqafidd1avsseltkaryakr  
s1wikfkegisq11spi1  
>tr|D0K6Z2|D0K6Z2\_STAAD  
mgigrvtqvmgpvidvrfehnev1kinnalvidvpkeegtiq1t1evalq1gddvrtiamdstdg1vrgmdvkd1tgei  
svpvgdet1grvfnv1get  
id1keeisds1vrrdp1hrqapafde1stevqiletgikvvd1lapyikggkig1lfggagvgktvliqelinniaqehggi  
svfagvgertregndlyfe  
msdsgvikktamvfgmnepppgarmrvalsg1tmaeyfrdeqqdv1lfi d1nif1rftqagsevsal1grmpsavgyqpt1  
atemgq1qeritsttkgs1v  
tsiqavfvpaddytdpapatafah1dattn1erk1temgiypavdplastsra1epsivgqehyevardvqst1qkyrel  
qd1ia1lqmdel1sdedkqt  
verarrmqff1sqnfhvaeqftgqkgsyvpvkt1vanfkd1ldgkydhipedafr1lvg1smddviakakdmgvev  
>tr|D0K700|D0K700\_STAAD  
mkkimti1fgtrpeaikmap1vka1eqekm1epivv1taqhrem1dsv1stfeikpyd1nimksqgt1seitsksitqle  
qviq1lekpdmv1vhgd1tmt  
tfagg1aafynqvp1ghveag1rsyd1kyspfpeevnrq1vgv1ad1hfaptknaash1lsegkysesvvtgntaidamk  
ytvdnyksn1mdkyhdkk  
filmtahrren1igkpmeni1fkairr1ideytd1alvypmhknpkvrevaqki1lgshdrieli ep1dvvd1fhn1fakksyfi  
1tdsggi1qeeaps1fnkpvl  
v1rsv1terpegveagt1kvi1gtnkqnvyqaakelidder1lyhq1mseas1npygdg1faserivnhikyyl1n1itekpsdf  
>tr|D0K702|D0K702\_STAAD  
msyitkqdkviaeaiere1fqrqnsnieli1asenfvseavmeaagsv1tnkyaegypgrryyggcefvdvtesiaidra1ka  
1fgaehv1nvp1hsgsqanm  
avylval1emgd1v1gm1n1shgh1lthgapvn1fsgk1fyn1fveygvd1kderinydevrk1falehkpk1livagasaysrtid  
fkkfkei1adevna1k1mvd1m  
ahiag1vaag1l1hnp1veyadfv1ttt1hkt1lrg1prggm1l1ckeeyk1kdi1dkti1fpgi1qgg1plehviaakava1fgealennf  
ktyqqv1vknakv1laeal1i  
negf1riv1sggtd1nh1lavdvkgsig1l1tgkeaeet1dsv1gitcnkntip1fdqekp1fv1tsgir1l1gtpaattrgf1dekafeev  
aki1s1l1knsk1deek1lq1  
akervak1taey1plyq  
>tr|D0K703|D0K703\_STAAD  
mkd1tm1l1de1kdms1ffnkgd1c1ligcst1sevige1kigtv1gsmevaet1fna1ldv1vsket1gvt1fafqgcehinra1itiek  
sqyn1pl1tmeev1svvp1dvha  
ggs1latya1fqh1mkdp1ivveh1itvpcgid1igq1l1igmhik1hvcvp1rtsvk1qvqgaiv1tiatsrpkk1iggerak1yk  
>tr|D0K711|D0K711\_STAAD  
mrdytkqy1ingewves1nsnet1ev1n1pateev1gkvakgnkad1vdkaveaaddv1y1efrh1svkerqal1ldkivkeyenr  
kddivqait1delgap1s1s  
ervhyqmg1lnhfvaarda1dnye1feerrgdd1lvvkeai1gvsg1litpwn1fptnqts1kl1aaafaagspv1lkpseet1pfaa

Tsompanidou\_et\_al\_Supplemental\_FASTA\_File

vilaeifdkvgyvpkgvfnl  
vngdgagvgnplsehpkvrmmsftgsgptgskimekaakdfkkvslleggksyivlddvdikeaakattgkvvnntgqv  
ctagtrvlvpnkikdafla  
elkeqfsqrvvgnpredgtqvgpiiskqfdqvnyinkgieeaelfyggpgkpeglekgyfarptifinvdnqmtiaq  
eeifgpvmsvityndldea  
iqiandtkyglagyvigkdketlhkvarsieagtveineagrkdplfpggykqsglgrewgdygieeflevksiagyfk  
>tr|D0K727|D0K727\_STAAD  
maelpqsrinernitsemresfldyamsvivaralpdivrdglkpvhrriylglneggmtpdksykkसारिवगद्वमग्यह  
hgdssiyeamvrmaqdfsy  
ryp|vdgggnfgsmgdgaaamrytearmktitelldrinkdtidfidnydgnerepsvlparfpnllangasgiavgm  
atnippnlteilingvls  
sknpdisiaelmediiegpdfptaglllgksgirrayetgrgsiqmrsravieergggrqrivvteipfqvnkarmiekia  
elvrddkidditldrdets  
lrtgvrvidvrkdanasilnnykqtplqtsfgvnmialvngprkllnkealvhylehqktvrrrtqynlrkakdr  
ahileglrialdhideiis  
tiresdtdkvameslqqrfklsekqaqaildmrlrrltglerdkieaeynellnyiseletiladeevllqlvrdeltei  
rdfrgddrrteiqlggged  
lededlipeequivitlshnnyikr|pvstyraqnrggrgvqgmtleedfvsq|vtlsthdhv|fftnkgrvyklkgyev  
pelsrqskgipvnaiele  
ndevistmiavkdlesednflvfatkrvvrksalsnfsrinrngkiaisfreddeliavrltsgqediligtshaslr  
fpestlrlp|grtatgvkgi  
tlregdevvgldvahansvdevlvvtengygkrtpvndyr|snrggkigiktatiterngnvvcittvtgeedlmivtnag  
virlldvadisqngraaqg  
vrlirlgddqfvstvkvkedaedetnedeqststvsedgteqqreavvndetpgnaihtevidseendedgrievrqdf  
mdrveediqqssdedee  
>tr|D0K735|D0K735\_STAAD  
mnrqstkkallipfvimiitaivlmgvwfifnslialiasivlvvmiivsiilfrqalmkmdsyvdgl|saqisttnkai  
khlpigiiivldendhiew  
nqfntnhmeanvisesvnevfpnlkqldrvksveieynqyhfvrysendhcl|yffditeqvqtnelyenskipiatlf  
ldnydeitqnmndtqrsei  
nsmvtrvisrwateyniffkryssdqfvaylnqkiladleeskfdilsq|lreksvgyraq|t|sigvgegtenlidsgel  
sqsgldlalgrggdqaik  
singnvr|fyggktdpmekrtrvarvishalkdilaegdkvii|mgkhrpd|daigaaigvsrfammnleayivlnetdi  
dptlrrvmneidkkpelre  
rfitsddawdmmtskttvividthkpelv|denvlnkanrkviddhrrgesfisnplliymepyasstaeltelleyq  
pteqr|trlestvmyagi  
vdrnftl|rtgsrtfdaasy|rahgadtiltqhflkddvdtyinrselirtvkvedngiaiaahgsddkiyhpvtvaqaad  
ellslegieasyvvarred  
nligisarslgsvvnq|tmealggggh|t|naatq|kgvtveeia|aq|lqqaiteq|srseda  
>tr|D0K742|D0K742\_STAAD  
mnwkl|tktl|f|fvfi|lvni|v|sviyvknvrshinevesnnevnfq|eeikv|pasilnksvkgik|leqitgrskdf|ska  
kgdsd|ttsdggk|lnani  
sqsvkvsdnn|kdlkdyvnlkrvfk|gseyq|seinsgsvkyeqtydnf|ilnnskamlfniednkaasyk|qsmddikpt  
dgadkkhqvigvrkaieal  
yynryl|kkgdevinar|gyysvvn|etnvq|l|qp|nweikv|khdgk|dktntyyveat|nnnpi|inh  
>tr|D0K744|D0K744\_STAAD  
mkall|l|ktsv|w|l|v|l|fsv|mg|lwqvsnaaeqytpi|kahv|vt|tdkatt|dkq|vt|pt|keaa|hf|geea|at|nvs|asa|q|gt|ade  
innkvtsn|afsn|kpstavs  
tkvneth|dvdtq|qastq|kptqsat|ft|snaktas|s|prmf|aan|vp|qt|t|thki|l|htndi|hgr|laeek|grv|igmak|l|ktike  
qekpdlm|dagdaf|qglpl  
snqskgeemakamnavgydamavgnhef|dfgyd|q|l|k|legm|l|dfpm|l|stnv|ykd|gkraf|k|pstiv|tkngi|rygi|g|v|t|p  
etk|k|tr|peg|ikg|vefrdp  
lqsvtaem|riy|kdvd|tfv|ish|lgi|dpst|qetw|rgdy|lvkq|lsqn|p|l|kkrit|vidgh|shtv|l|qngqi|y|n|ndal|a|q|t|g|t  
alanig|kvt|fnyr|ngevsn  
ikpslinv|kdv|env|tpnka|laeqin|qad|q|fra|qtae|vi|ip|nntid|fkger|ddv|rt|ret|n|lgnai|adame|ayg|vkn|fsk|k  
tdfav|tngg|g|riasi|akgk  
vtryd|lisv|l|pfgnt|iaq|idv|kgsd|v|wta|fehsl|gap|ttq|kdg|ktv|l|tang|g|l|h|sds|irv|vyd|mnk|p|sgk|r|ina|i|q|l  
nketg|k|fenid|lkr|vyhvt  
mndftas|ggd|gysm|fgg|preegi|s|ldqv|lasy|l|ktani|akyd|ttep|qrm|l|lgk|pav|seq|pak|gq|q|gsk|gses|gkdv|qp|ig  
ddkam|pak|qpat|gkvvl|l  
pthrgt|vssg|tegs|rt|legat|vssk|sgnq|lvrms|vpkgsa|hekq|l|pkt|gt|nq|sss|paam|fv|lvag|ig|liat|vrrr|kas  
>tr|D0K745|D0K745\_STAAD  
mntnks|lcpw|vmr|wfn|swan|pseds|ifpc|isn|vmt|vdc|glil|asir|wps|fsft|csis|lslif|sgaf|ssgts|mms|ilvy|gp  
krfsysa|mac|f|qy|fs|fsfp  
takmvi|fms|fgpp|ncyq|lssyp|qvin|lft|l|fli|ipi|ffav|fdi|lft|fmpnf  
>tr|D0K748|D0K748\_STAAD  
mewddei|nfgki|sflsh|ship|drktg|le|laeky|gidg|vmi|gsgif|hnp|fafe|kepre|htske|ll|dl|l|rlh|sl|fnky|ekd  
eirqfks|lrrff|kiy|vrgi

Tsompanidou\_et\_al\_Supplemental\_FASTA\_File

ralanfdir

>tr|D0K754|D0K754\_STAAD

medvtdivfrhvvsearpdvffteftntesfchpegihsvrgrltsedehpmvahiwgdkpeqfretsiaqlakmgfkg  
idlnmgcpvanvakkkgks  
gliirpdvaeiigatkagglpvsvktrlggyeidewkdwlkhvfeqidianlsihlrtrkemskvadahweliaiknlrd  
eiapntlltingdipdrkt  
glelaekygidgvmigrigifhnpfafekprehtskelldlrlhlslnfnkyekdeirqfkslrrffkiyvrgirgase  
rhqlmntqisiaearalde  
feaqmdedvkie

>tr|D0K757|D0K757\_STAAD

mlislvipvfallviggiiwviiegivhiskknkaidnflnqvnkvsetykfataflflilatagisqfylyyivsafllf  
wlviltfagiagiiflmpyg  
lcfllplykqkkkkqtfkkymvyttiglsiclgslvlvhttkiymdeggvryyygsfvmkqaggyaylalavlstlliva  
kkatknkeietvdntnit  
er

>tr|D0K758|D0K758\_STAAD

msqllndtlisawllieslspgevnftaedilsaehfkngakqaqlqsfdeyfeiwnserfiiseeksetgelikfyfyrhc  
fryneinlkiqdidysd  
ihnpngthcygytntdkhgvivdsihpimmsalkeieknknanieekfndsvekffqkvkeiladepinefklkmd  
kaydefsvlnskkdglfg  
hyvaiyvkdsdlpqpfnffisdi ekarkspnqtldiyiegvessqrievidenkemfdkflhpsrlpdgrwpsqtefr  
lslmqqlavnqitsgneri  
ssvngppgtgkttllkdi fahlvvergkelaklnpkdafvktihetddkyvylkesiakykmvassnngavenisk  
dlpkieeiirnpekckfpk  
yeqnyanlahelkdfaeiaedligesawglfsgvfgkstinqvlshmlkqdandigfakllqnennrmsynelmsewqs  
hgrafleelrhvemlkees  
iraydvkncesfskieqvinseksieeqvyhldnetlrdnkeiedlndrinyivkqietlneliksikesnkgfinkl  
kamfnseedesykdhnek  
qqlltqqlelekckknkhedlvsklkekelikqltkvqlqldelnsqleleayrieskitipekdfwsdnyderqvt  
nlwtsdelqyrramflra  
mihlkllljannttiyyaindfkdrklidanpdkvhnawnvmhli fvvsttfasfksmyggipkdfidylfideagqa  
ipqaavgalyrskkvavg  
dpiqiepvvtleshlidnrknyhvpeylvskeasvqsvadnanqygfwksdatdsnqktwigiplwvhrclkmftia  
nqiyannkmvlpnltkvg  
ktgwydvkgnavqkqfvkehgekvvglladdwieaiekgknepssfvspfsavqqikrmlkqqlptridierkinqw  
vdksigtvhtfqgkeaqkv  
yfvigtndtqdgavnwscekpnllnvavtrakkefyvigdmqriqmkyetifkernvk

>tr|D0K760|D0K760\_STAAD

mkkciktflfslilvmmggwyhsahasdskspenwmskl deskhlteimpgshdsgsftltdpvksvaktqgkdy  
tqmksgrvffdirgrasad  
nmisvhgmvylhhehgkflldakyylsaypnetivmsmkdydsdkvtktfeeifreyyynnpqyqnl fytgsnanpt  
lketkgkivlfnrmggyti  
ksgygadtsqiwadnatfetkinngslnlkvqdeykdydkveavknlakaktdsnkdnvyvnlsvasggsafnst  
ynyashinpeiaktikeng  
kartgwli vdyagypwpyddivseidsnk

>tr|D0K761|D0K761\_STAAD

mmkrlnklvlgiifflvisitagcgigkeavkksfektlsympiknledlydkegyrddqfdkndkgtwiinsemvq  
pnnedmvakgmvl ymnrnt  
ktngyyyvdvtkdedegkphdnekrypvmvdkniiptkeikdknikkeienfkffvqygnfdl skykdgdisynpev  
psakyqvtnddynvkql  
rkrydipntkaplllkgtnlgssvgykdieftfvekkgeniyfsdslhlepegk

>tr|D0K762|D0K762\_STAAD

mikrvnkvlvgsflflisifagcgtgkeaeikksfektlsympiknledlydkegyrddqfdkndkgtwivrssmsiq  
sngkdmnikgmvl ymnrnt  
rtngyyyvdviredkghrdnekrypvmvdkniiptkeikdekikkeienfkffvqygdfdl skykdgdisynpev  
psakyqltnddynvkql  
rkrynipntkaplllkgtnlgssigykkieftfvekkgeniyfsdglhfnpsedk

>tr|D0K763|D0K763\_STAAD

mkrlnl vlyisflilisi vtagcgtgkeaeikksfektlsympiknledlydkegyrddqfdkndkgtwtissemaiqk  
kgealnkgmvlklqcvt  
ktkislnfkfs

>tr|D0K764|D0K764\_STAAD

mqlcigphsvnerkeyghyeidtilskrpslacvltierktrylyacrldsrcksdvcdaveimrdlspktitvdrk  
efsnylleseincryvys  
dpgcpgqrgsienvngllrqyfpkgtdfknisddalykaverintrpravlnyltseeviqvyr

>tr|D0K765|D0K765\_STAAD

mtkkrkrrpvdlttrlaiakylydgvpiadiarlldrdsvilnelkrytfddiydpvlaqeyasvtynhseeheksr  
kldekskvyieerlacqws

Tsompanidou\_et\_al\_Supplemental\_FASTA\_File

prqiaeriekdigvyisyptiyyireglvkyvkkdlrqqgkknfkstekrgkikvgdraimyrptfrk  
>tr|D0K766|D0K766\_STAAD  
mtkrflilitlilvisialiacgkkydkeieevtsleakdrndssdpefnkyerkksniyvvedgkvitltyapfkgssel  
strmyiknettgnkyedin  
gkpkkfmkenkpdfkeenlke  
>tr|D0K767|D0K767\_STAAD  
mklkiigfvivtiltvsayfigtqttkqqvqeknhvselkqtlqqekdtnealnqrvkrqsktviaeekqiretaqtf  
tletftlkkgssfkqkpkp  
lkpfvtekyynvlfsdnrekfsifddvtvsdihvyfdqydpkhdnykvfvqfneridteggqevenrktsvqldmvrtn  
kwlindvqrfnlqkngrg  
>tr|D0K768|D0K768\_STAAD  
mynkktvvevmkqtpigikfrllkigllfcvlfvlfpvilmfvfsspeedkqtdgdmsscvggdvdkgiavfeqnakgg  
alegkqvivkiakkkhki  
enlfmaiiasesgwkggenatrqnplsvmgtsihdstystiedgleagaknlydvyikeglttpekigpkyapvgasn  
dpnmmnkqwiptvksmmkk  
lsdgdgavckstggkdkfngklpkwsnsdagkgnlytagqctwyaygirqkmgkpistywfhaqfwnrakdegykvn  
kpavgalmaeppgaggapp  
vtghvavvidvkdntftvtemnikgpyivsremkvesgisfihde  
>tr|D0K769|D0K769\_STAAD  
mkrkslyllcfllpfflitgatadavanpvgkptnavdakiemykvddkadgdidleryriwfqkdedwnpfgkdevae  
tvnnvtntfffeidklivsi  
tdyavenlyqldvlnfdadvqgfvvgdiyqkllsnivmtlfiviclnafivsvkgnmhealkrvflifcligfgvgvla  
nasfvikgttnvgkglennv  
imnstssingdiyvnennginkirnyfdmalykpylimnygtvnedkikngknridnildvkvkdeketekevdkid  
kevksyntamkqthvfgg  
lgiamftliitiaalsiiflisisfakvifsafalilflflafswlisfipgfeisvfkalartlgyiilsacmtflfvvig  
fsidianafvkpesqqayf  
lnviflmiilfvlykkrseiidfvtrgnlslspqklgadvmrkgqdefnkrrqkraedkknkrknqldnpeppmindn  
kpnrrnqsdpivsmhske  
ikrrnqqeemhgapnvgvasyvsrsgvdpkgytkskqiaqddgmhrdikkkdkirnpqtesfnptylsqppkelsrshq  
sfnkdiqssydkiekrri  
qtgedkpyqprsheneptfkrnsqtkvhvdrlnkqkdinkhgk  
>tr|D0K770|D0K770\_STAAD  
mnkeqveqllselakeigmknviliaaldlaikedktrrsdeveqlikvqrqieki  
>tr|D0K771|D0K771\_STAAD  
mtmneialfkgvriqpyfyidfi fagvfafiflayri lmlwqgyisqqkalnvvevyqfphflylaigtlvifiak  
lssqllirfrekdlameie  
tqgfhnrtvikktteyldidykkteydyptlfykrnrktfvihvkkdgsrfqddylelesiepmfncelvekrhigry  
lryefmplkykkrivmegt  
eapettyydtkiyithqilwdfvkaphalitgvtgggktyflfymirelfkrdaevrlldpkvsdlsfmknvigaekvad  
tkgqifkqlreaneemehr  
frmmesekyqqlgsnfrnfdlppyfvifdevtaftstldkkelqemndyliniimkgrqagvfmfltaqrpdadvikgnv  
rdqglrvsmgnlsadgyr  
mtfgqtdkafqpihesdigrgyisilgqynepilfdaplmeydfvadvkqilnk  
>tr|D0K772|D0K772\_STAAD  
mrsykdimyvsediyqyfskvtkeearnasekwnisearsqsgtlaclenisknindysqeelgkmiysiskaqreifk  
ll  
>tr|D0K773|D0K773\_STAAD  
mllfalknsilvlliasiiigisniiisfifykskfrlligtillftniiwsnandfsesilelsennfqryliiifl  
mislfvialnnnllthyf  
nyfnhkkdynnpvkrficyitlpplfftikwvlnngylriiefllknl  
>tr|D0K774|D0K774\_STAAD  
melkapyagiknnllltskgevwayyri rsesistanydkkeaskkrmyflesikgyqdfhfemyehdlldlnkfkeis  
qdfddsafdvanyyaqeti  
dvleqelqmitrnsfvmgkvlrelsdaisikeilkstlsdtaermisnfgfnvsldekvl sryevfereladsflsieg  
erltene layivrkpifsn  
athdvqeessrravtdvcnvidptnmrvlktnenetfyttivvddfpldmefthiyekaqnmpfpvechvkakien  
dkvkkkfrdrakinhkagar  
ekqsagdnasediqdnlfvleqmekevtgsgvfmewscsfviksdldkckrkakrlikrketniyavnpladqlqlyy  
qilhgnplfinkywvqrtt  
atgiaenlfgvsqslgtktgfyigriddkfrsvsreeavassrdiilfslllaakgisgavsdspvhlitgqtgkgsfl  
akllwiytsffkgqmlywd  
pksefadwfnkitesedmqrkypfvnhlktfkyvtldyknpnsnygcldpivfldgieanemlksvfdeiksfenehrve  
taiyraitetveerekggq  
vgsldvikklqndedehvsqagdllfektqnnilklvfsdgsnpalniqekatilqvqglmpkagddpsgystgekngi  
tllmlligkflqkfgsrrqi  
qtlfidegwafsasrggkqvakgikrmgrsennsvfitqsvkdadedggngfghfafdekderedilkslgleyske  
spenmemldklkkgqcifs

Tsompanidou\_et\_al\_Supplemental\_FASTA\_File

dfygrvgkmvvhcpfeemteafktqedsassiaaekfai  
>tr|D0K775|D0K775\_STAAD  
mdkkayn1krtfeqpivmeyftgsyrwskgirldwvgtlfvielelillylkagfntltglipgltiyftvlpymtkq  
lvklkqdgkkliffldwfm  
myvfnqmrvhyaydeevkyhdkkiiklk  
>tr|D0K776|D0K776\_STAAD  
mehlfnlmlvlgdapsinplgqwwnkevgaigiivlvigcvkwatgkyghmlvlfvvgglmfliiskgpetvfnsvsgiw  
klifgs  
>tr|D0K777|D0K777\_STAAD  
milsr1skkgkrfdvpeeerka1pkyrnrhrkkiviifytilvlltilliasfiraskanneskeavnktqeiqkkyedna  
etvqynpn1klyadkyida  
ymtipkdgkakeerqkaladfypsdyktptentenverklnekeffnikrkdqtiiqyivsydlkitekkevkvkkkkd  
kkdkdkkdeyektteeker  
tetkka1lnipvksennkvvieyphfstipsnqlkkatlvkds1enkretnpelktfveeffdkycksksdmaylmd  
npeg1edtrevsksid1ri  
ypkgddyvvaevlmdkdgsp1enlehyt1ditkkdgkyvkk1tttigg  
>tr|D0K778|D0K778\_STAAD  
menqastpltnrgvakpekcg1eavvdwvqvtfvqpsiftimedvklpravfkhrnsglyyyrnrgytfgniqifysdkd  
egmgfhlq1sgsgcrefeh  
ylinrnetwqdfkrcavkkarfridiaiddtktylkiprlikkaergeciskfrsassisgfk1sdgqskgstfyigs  
kksdiycrfyeknyemayk  
lktpvdfglwnryeiqmrrsnaencamiltetssisdivkgvlnnsmrfvtepkdvsdrksrwpvyqewsrfikgdk  
islsmkps1ksiednidwl  
ckqvatt1dtv1taeamaqseg1ledtdf1nki1ahssfndehtdrinhyleelkrkkn1rqdis  
>tr|D0K779|D0K779\_STAAD  
mefytadnlapyart1kl1segmlsyiasrintgeals1mliakeiqekfngdyvksr1psgrpriytdvc11cfs1keag  
hgr11qid1kdciyigdvds  
>tr|D0K780|D0K780\_STAAD  
mawspkfd1ketfgdlyfmgvdekykyedgektdqklyayk1astgqgeqvtvkvpkevkl1dimsvcelvgveakqyvqs  
sgdfhsiqpsikaedirqi  
gt1svkkgaqqs  
>tr|D0K781|D0K781\_STAAD  
miepvididatmgkefry1shvekisrfdeaylytivcvdigeqvki1r1snekhfdalervdfdn1tikprvyqdmntg  
ycn1ytsfsaddiys1dkk  
v  
>tr|D0K782|D0K782\_STAAD  
maeftpyfydfkr1dyrnfvilrfhgvskrhickmykiayfcil1dvcnkaknndyqftykydvflkrygvsntfickmyh  
idkl1leffevmnr  
>tr|D0K783|D0K783\_STAAD  
midnk1iptkdi1kdek1kkeienfkffaqygnfkdl1tkykggdi1synpeapiysakyq1tnddynvkq1rkrydiptnka  
pk111kgsgn1dgssigyk  
kieftfvekkgentyftan1hfkpsnde  
>tr|D0K784|D0K784\_STAAD  
mlgisfl1visitacgmgkeaeikksfektmsypiknledlydkegyrddqfdkndkgtwivnsqmai1qnkgepmks  
kgmvlymnrntr1tngyyy  
vnikgedkgkhqdnkrypvkmdnki1l1tkeikdenikieienfkffvqygnfkdl1enykdgdi1synpevpsysakyq  
1tnddynvkq1rkrydipt  
nkapk111kgtgn1kgssvykdi1eftfvekkeeni1yfsdgl1fkpsedk  
>tr|D0K786|D0K786\_STAAD  
mpdfkr1ng1mgfvikgeahiydenmtqcnsdgi1fi1nhrdlyrfql1qdggi1cyiqf1qmkyl1adkfddahclyfhl1t  
datttknihq1rnimar1v  
sthirhnel1sk1teqql1viq11mhmi1hyvprtyhsnqsi1n1ddkvnqvcyiel1hfhed1s1sel1seyvgwsesh1skkf  
tes1gvqf1qh1n1ttr1eh  
ak1dl1tytdeti1dial1qngfssaasfartfkhfthqtpkqyrgdrpaitenqqsahnyhdrel1111ndyieemnhfi  
ediekmykeiafkptnq  
lnqfnhi1qvgyl1rn11ntqyqsq11tchhdfqvnev1aydvmpyimkkl1napftydaeisni1fydid1cl1df11dhfnfs  
1tmh1ngydsr1yidafkv  
fihhval1hvshrkdl1kfn1yvtt1hts1iemidyfka1fpngglyih1ldqaterh1p11kr1lephinhfvfdansndavd  
fnkmnddefktasqmi1nk  
tny1id1mhrhnl1krp1i11lnwnt1tgdtfi1tngyefrggi1ieq11k1stkvegigyw1nydl1hvshcrnerdymnsie  
1fhqyngkrpvyfta11fn  
k1tsn1lysddtc1vtgtdsnfqi1lydakhfnpyal1dnqmmratemih1lna1ledgmykikhft1dkengal1fn1w  
rkhh1tihgmdkds1dyvnr  
msfpk1levydid1td1al1nikmitngih1lievkrypss  
>tr|D0K789|D0K789\_STAAD  
msvtevisf1lggl1g1f1ygl1kimgdgl1qasagdr1rdi1lnkftsnpv1gviagivvtiliqsssgttvitiglvtagfm  
t1kqaigvimganigtvtv

Tsompanidou\_et\_al\_Supplemental\_FASTA\_File

afiiigidlgeyampilalgaflifffkrskinnigrilfgfgslffglefmgdavkplaslbgfkqlmldmssnpilavi  
vagalvalvqssatigil  
qefyqdlislnaaipvlldgnigtitailaslagsiaakraalvhvifnligviiftiflrvvihlisllqdvwhlqp  
amtiaavshgfnitntliq  
lpfvaglawiavtklvpgkdiaddykqhlndlvvhagvalqetqkelqnvqgqivlsmfedireitkddkklkkleqk  
hqavetindsirnylvris  
tkaitkadverlavmfdvnrslkvaelteeyvaqlkrqhdediritedaqrqgmdklfnhvaesfdkaidmldvydktkk  
deiversresfniehlrk  
ghikrlnrgecttkgglliyidmigvlerigyhsrvsealvglnddvptdeeattei  
>tr|DOK794|DOK794\_STAAD  
mtlltvnpfdnvglsalvaavpiilflcltvfkmkgiyaaatlvtlivalvfelparvsagaitegvvagifpigy  
ivlmavwlykvsiktgqfs  
iiqdsiasisedqriqllligfcmfllegaagfgvpiaicavlliqlgfepkaamclliangaagafgaiglpvsiid  
tfnlsgvttldvarysal  
tlpilnfiipfvlvfiiddmkgikeilpviltvsgtytgllliti fhgpeladiipslatmvvlfavcrkfkpknifrl  
easehkiqrtpkeivfaw  
spfviltavflvwsapffkklfqpqgaleslviklpipntvsdlspkgialrldligatgtailtviitilitklkws  
agallveaikelwlpilti  
sailajavmttyggltvaigqgiakagai fplfspvlgwigvfmtgsvvnnntlfapiqatvaqqistsgsllvaantag  
gvaaklispqsiataav  
kkvgeesallkmtlkysii fva ficvwtfiltilif  
>tr|DOK796|DOK796\_STAAD  
mtekinkkdnyhli faliflavsvvsmmigssfiplqrvlmyfinpndsmdqftlevlrlpritlailagaalgmsglm  
lqnvlnpiaspdiigitg  
gvs savvfi affshltihllplfavlggavammillvfqtkgqirptiliiigismqtlfialvqgllittkqlsaaka  
ytwlvgslygatfkdtiil  
gmvilavvpillflvipkmsilddpvaiglglvhvrnkliqllitstilvsmailsvgnigfvgliaphiaktivrgsya  
kklmsamigaisiviadl  
igrtilflpkevpagvfi aafgapffiylll tvkkl  
>tr|DOK798|DOK798\_STAAD  
mnkvikmlvvtlafllvlagcsgnsnkqssdnkdkettsikhamgtteikgkpkrvvtlyqgatdvavslgvkpvgaves  
wtqkpkfeyikndlkdtki  
vgqepapnleeisklkpdlivaskvrnekvydqlskiaptvstdtvfkfkdttklmgkalgekeaedllkkyddkvaaf  
qkdakakykdawplkasvv  
nfradhtriyaggyageilndlgfkrnkdlqkqvndgkdi iqltskesiplmnadhi fvkssdpnakdaalvkktesewt  
sskewknl davknnqvssd  
ldeitwnlaggyksskliddlyeklniekqsk  
>tr|DOK7A0|DOK7A0\_STAAD  
mlylnrsdieqaggnhsqvyvdaltealtahandfvqplkpylrdpenghiadriiampshiggehaisgikwigskh  
dnpskrnmerasgvii lnd  
petnypiavmeasli ssmrtaavsviaakhlakkgfdltiigcgligdkqlqsmleqfdhikrvfydqfseacarfvd  
rwqqqrpeinfiatenake  
avsngevvitctvtdqpyieydwlqkgafisnismdvhkev f ikadkvvddwsqcnrekktinqlvlegkfskealha  
elggltvgdipgredddei  
illnpgmaiedissayfiyqqaqqnigtllnly  
>tr|DOK7A4|DOK7A4\_STAAD  
mivvqtlfihiyqi qfvitrryri vntilnrktrvmhqlvssliyenivvykasyqdgvghtieghdseyrftaekt  
hsfdri ritspiervgde  
adtttdytqllreavftfpkndekleqfive llqtelkdtqsmqyresnppatpetfndyefyameghqyhsyksrlgf  
tldnllkfgpdpvnpvklq  
wlaiddkdvettvsrvvvnemlrqqvgdktyehfvqqieasgkhvndvemipvhwpqfehviqvdlaeerlngtvllwg  
esde lyhpqqsirtmspid  
ttkyylkvpisintstkrvlaphtienaaqitdwlkqiqqdmylkdelktvflgevlqgsyln tq lspykqtqvya l  
gviwreniyhmlideedai  
pfna lyasdkdglpfiekwikyqgseawtkqflavairpmihmlyyhgiafeshaqnmmlihengwptrialkdfhdgvr  
fkrehlseaashltlkpmp  
eahkkvnsnsfietdderlvrdflhdafffiniaeilfi ekqygideqrqvwvkdii eayqea fpe lnyqhfdlfep  
tiqvekl ttrllsdse l r  
ihhvtnplgvvggindattiset  
>tr|DOK7A5|DOK7A5\_STAAD  
mqqlslkhrlnngdsvygfn sipdplmieviaasgydfvvidtehva indetlahliraaeahiipivrvtavidrdi  
ikvldmgargiivphvkd r  
etvehivkl sryylqglrs lnggrmarfgrt plldamemanehimviamiedvegvmaddiaqvegl dmivegaadlsq  
slgipwqtrddqv tshvqh  
ifevvnahgkhfcalpredediakwqaqgvqtflgddrgkiyrhlsas latskqkgddg  
>tr|DOK7B7|DOK7B7\_STAAD  
mkl1atvgfl1vtstlvfssmpfqnahadttsmnvpnkqsqnvqnrpyggvvpqgmtqaqytelektlpqlsagsnmqd  
ynmkl ydatqni adkynvi



Tsompanidou\_et\_al\_Supplemental\_FASTA\_File

ittnvgvfkphavrdmnghalpltkdgnfyqtnvdangvnhggsemvqkntghmsqqdhmnqnthmqqppiqqghmqss  
nhqmmspanmhssnhqmn  
qsnkkvlpagesmtssiltasiaallvsglflafrrrstnk  
>tr|D0K7C1|D0K7C1\_STAAD  
mkfekydhtllkpestrtqidqideakayhfkscvnpthvkyaerladsevlctvigfplgasttatkafededa  
iqngadeidmvinigalkd  
grfddvqqdieavvkaakghtvkviievllhdheivkasetkvagadvktstgffaggataedvklmkdtvgadvev  
kasggvrnledfnkmveag  
atrigasagvqimqgleadsdy  
>tr|D0K7C8|D0K7C8\_STAAD  
msniafyvsvdhgyifptdftsrnqyqpmglllanhvieqdrdqyqsfkidngdflqgspfcnyliahsgssqplvdf  
ynqmafdfgtlgnhefnyg  
lpylkdtlrrlnypvlcaniyendstltdngvqyfvgdqtvgviglttqfiphweqpehiqsltfhsafetlqqhlpem  
krhadiiivvcyhgffekdl  
engtptevltgenegyamleafskdidi fitghqhrqiaerfkqtaviqpgrtvtvgkvvlstdeyenvsvescellpv  
iddstftideddqhlrkql  
edwldyeittlpydmtinhafearvaphpftnfmnyalleksdadvactalldsangfkqvvtmrdvinnypfpntfkvl  
avsgaklkeaiersaeyfd  
vqndevsvsadflgpkpqhfnydiyggsytihvgrpkqrvsnmmiqghavdlkqytyicvnyravgggqydmfidap  
vkdiquvegaqllidflsn  
nnlmripqvvdfkvek  
>tr|D0K7E2|D0K7E2\_STAAD  
mnsakliidhtllkpestrtqidqideakayhfkscvnpthvkyaerladsevlctvigfplgasttatkafededa  
iqngadeidmvinigalkd  
grfddvqqdieavvkaakghtvkviievllhdheivkasetkvagadvktstgffaggataedvklmkdtvgadvev  
kasggvrnledfnkmveag  
atrigasagvqimqgleadsdy  
>tr|D0K7E9|D0K7E9\_STAAD  
mnilvigangvgvslvqqalakenvpftagvrqsdlalaksqgmkaillvdvendsietltetfkipdkvifsvgsgnt  
gadktiivdl dgavksmia  
skeanikhcvmstydsrrqafddsgdlkpytiakhyaddy lrrsglnytilhpgaltnaagsgkieaaqyfdgkgeipr  
edvatv1keivtsnhfnh  
efqisgeqdikdaltqfeiekd  
>tr|D0K7F2|D0K7F2\_STAAD  
mkitcflllylyeekeaplc1l1tnqhlkmlnhny  
>tr|D0K7F3|D0K7F3\_STAAD  
mftyfksafknakpqlitliyaliafaviavvllanfqlakyaqtiaiyqfgqkppvdaylkviavlliaavvslfv  
lvqifigitnvmkramshe  
kvkftdlfiakkgnylksvliglvsiamiivsl1tsllyklfspvsemimnsqvssyadsthligiaittqsiiiv  
llikaiitwlllipjfnfm  
tsfvestndkvkthlangfkamngqktffkffigillnliiilfktpvgylisfntqslsqsvaeniirvytvmtil  
fvvihaiilmgivyqylkr  
gqkitkdkvktadkdkkvvtepkntkvengkvttsvetktekaqds1ndnttktmtsdkpednqpk  
>tr|D0K7F4|D0K7F4\_STAAD  
mspkdttrfetkpdhqaqfdwkesinfktdknqriplyigvlllyysrfiimhne  
>tr|D0K7F8|D0K7F8\_STAAD  
mcgivygydnakellkglekleyrgydsagiavvndnttvfkekgriae1rkvadssfdgpgvightrwathgvp  
nhenshpqssngrftlvh  
ngvieneelkgelylqgsfisetdtevivqlveyfsnqglsteaftkvvsllhgsyalglldaedkdtiyvaknkspl  
llgvgegnviasdallam  
qvtseykelhdheivivkkdeviikdadgnvverdsyaeidasdaekgyvahym1keiheqpavmrriiqeyqdaegn1  
kidqdiindvkeadriyvi  
aagtsyhaglvgkeflekwagvptevhvasefvynmp11seklpfvyisqsgetadsravlvetnklghksl1titnvags  
t1sreadhtlllhagpeia  
vastkaytaqiaavlslsqivakehgreaidllrelakvttaieaivddapimeqiatdflettrnaffigrtidynvs  
legalklkeisyiaegfa  
gge1khgtialiedgtpvvalatqenvnl1sirgnvkevvargahpciismeglekegdyviphvhe1ltp1svsva1q1  
isyaa1hrd1dvdkprnl  
aksvtve  
>tr|D0K7G1|D0K7G1\_STAAD  
mselfsndniflnvnsqneaiekagkalvdsgavtdaiyamkdreqvstfmgnglaiphgtdeaktviahsgl1l  
qipegvdwdgevvkvvvvgi  
agkdgehl1lksiaitfseeenvdriqvaksaeikqvfeeda  
>tr|D0K7G2|D0K7G2\_STAAD  
mkavhfgagnigrfgiyiltdnnkvtfadvneeinalahdhqydviladeskttrvnnvdainsmqpsealkqail  
eadiittavgnv1piak  
sfapflkektnhv1vacenaimatdtlkkavlditgplgnnihfansavdriplqknenildvmvepfyewvvekdaw  
ygpe1nhikyvddltpyie

Tsompanidou\_et\_al\_Supplemental\_FASTA\_File

rklltvntghaylayagkfagkatvldavkdssi eaglr rrvlaetsqyitnefdfteaeqagyvekiidr fnsylsdev  
trvgrgtlrkigpkdriik  
p1tylynkd1ertg1lntaa1llkyddtadqetveknyikehglkaf1seyakvddgladeiieayns1s  
>tr|D0K7G3|D0K7G3\_STAAD  
mnlfrqqkfsirkfnvgifsaliatvtfistnpttasaaeqnqpaqnpaqp adantqpnanagaqanpaaqpanqggqa  
npaggaaqpagqgnqadpn  
naaqagpgnqaapanqagqgnnqatpnnnatpanqtqpanapaaaqpaapvaanaqtqdpnasntgegsinttltfddpa  
istdenrqdptvtvtdkvn  
gysl1nngkigfvnselrrsdmfdknpqnyqakgnvaalgrvnandstdhgnfnngitktvnpkpdseliinf ttmqtns  
kqgatnlvikdakkntela  
tvnvaktgtahlfkvptdadrldlqfipdntavadasrittnkdgykyysfidnvg1fsgshlyvknrdlapkatnkey  
tinteignngnfgaslkad  
qfkyevtlpqgvyvnds1ttt f pgnedstvlknmtvnydq tankvtftsqqvttargthtkevlfpdks1kl sykvnv  
anidtpknidfnekltyrt  
asdvinnnaqpevtltadpfsvavemnkda1qqqvnsqvdnshyttasiaeynk1kqqadtilnedanhvetanrasqad  
idglvtklqaalidnqaa  
aeldtkaqekvtaaqqskkvtdavaalvtkinndknnaiaieinkqttsqqvttedkngiavleqdvitptv kpkqakqdi  
iqavttrkqqikknsalq  
dekdvandkigkietkaididaattnaqveaiktkaindingttpattakaaaleefdevvqaqidqaplnpdttn eev  
aeierinaakvsgvkaie  
atttaqdlervkneeifkieni tdstqt kmdaykevrqaatar kaqnatvsnatdeevaanaavdaaqteglhdiqvvk  
sqqevadtkakvldkinai  
qtqakvkpaadtevenayntrkqeiqnsnastteekeaa ytel dakkqear tnl daantnsdvttakdngiaainqvqaa  
ttkksdakaieiaqkaserk  
taieamndstteeqqaakdkvdqavvtanadidnatantdvdnaktneatiaaitpdanvkpaakqaiadkvqaqetai  
danngstteekeakqgvq  
tektaadaaidaahsnveveaknaeiaeiaiqpatttkdnakqaiatkanerktaiaqtqditaeiaaanadvnav  
tqansnieaansqndvdqa  
kttgetsidqvtptvknkatarneitailnklqeiqatpdatdeekqaadaeantengkanqaisaattnaqvdeakan  
aeaainavtpkvkkqaak  
deidqlqatqtnvinndqnatneekeaa iqqlatavtdaknnitaatddngvdtakdagknsiqstqpatavksnaknev  
dqavttqnqaidnttgatt  
eeknaakdlvlkakekayqdi1naqttnvdvtqikdqavadiqqitadttikdvakdelat kaneqkali aqtadat teek  
eqanqqvdaq1tqgnqnie  
naqsiddvntakdnaiqaidpiqastdvktnarael1temqnkiteilnnettneekgndigpvraayeeglnninaat  
ttgdvttakdtavqkvqal  
hanpvkkpagkkel dqaaadkktqieqtpnasqqeindakqevdte1nqaktvndqsstneyvnavkegkakinavktf  
seykkdalakiedaynakv  
neadnsnastsseiaekqklaelkqtadqnvqatskddievqihndldnindytiptgkkesattdlyayadqkknni  
sadtnatqdekqqaikqv d  
qnvqta1en1nngvndgdvddal1tqgkaa idtiqvdatvkpanqai eakaedtkesidhsdqltaektealamikqit  
dqakqg1tdatttaeveka  
kaqgleafdniqidstekqkaiee1eta1dqieagvndadatteekeaf tnaledilskatedis dqttnaeiatvkns  
aleqlkaqrinpvvkkna1  
eai revvnkqie iiknadadasakei artd1gryfdrfadkl dktqtntevaelqnvtipaieaivpqn dpdandtnngt  
dnndatansnanatpentg  
qpnvsettdngkadaspttpnnsdaatgettvtsatddakdkp qannnsspdastnsptmndvtskpevestnngttdk  
pvtetdnatpaesttnns  
ttatnenaptgstatapttasteaassadskdnasvndskqnaevnnsaesqstngkvaqpk senkakaekdgrdstnq  
smvesttetlpsaditepn  
vpsntskdkeestnqtdagqlksetnvasneadksp skadtevsnkpstsasseakdkmtstnvsqkddtatadntdq  
ksvgpvannkadmqtndt  
qksvgsaannkatqndganaspatsvngshsmhqdmlnvtkpeenkanaksdqggkvnkpkqakt1pdtgmshndd1py  
aelal gagmaflirrrftkk  
dqqtee  
>tr|D0K7G5|D0K7G5\_STAAD  
ml eskwglrfjaf11a1fff1svnnvfgni fntgn1gqksskti qdvpveilyntkd1h1tkapetvntisgpqskiik  
ienped1rvvid1snakag  
kyqekyqvkg1addihysvkpk1anitlenkvtkkmtvqp dvsqsdidplykitkqevspqtvkvtggeeqlndiaylka  
tfktnkkingdtkdvaevt  
afdck1nk1nvs1qpnnevnlqvkv epfskkvkvnvkqkgs1addkelssidledkeieifgsrdd1qni sevdaevldg  
isestektvkinlpehvtk  
aqpsetkayinvk  
>tr|D0K7G7|D0K7G7\_STAAD  
mtktkaidi igapstfgqrklgvd1gptair yag1sr1kql1dvydkgdikvpavniekf hseqkg1rnydei idvng  
k1nkevsasiennrf1v1  
ggdhsiavgsvsaiskhynn1giwydahgd1nipeespsgnihgmp1riltgegpkel1elnsvikpenivligmrd1  
dkgerqfikdhniktftms

Tsompanidou\_et\_al\_Supplemental\_FASTA\_File

didklgikevientieylksrnavdgvhlsldvda|dpletpgtgrvlggl|syreshfalellhqshlissmdlvevnp|  
idsnnhtaeqavslvgtff  
getll  
>tr|D0K7I1|D0K7I1\_STAAD  
mvy|lewakadrnigyrvinaiikeriypeqtfisqkgs|lieiqyhmhvtievvrksaleryeftgditylnkgets|ii  
t|legll|dvlnhd|fdipise  
r|reelihsrds|lvetykqms|hrqtlisqsfkfsr|lpqdinffsw|lqhvkdsdktd|ltyse|lvpeghpth|l|tktklp  
l|tmeevrayapefekeip|l  
q|immi|ekdhv|vctamd|gndqfiidei|ipeyynqi|rvflks|lg|ksedyrail|vhpwqydhtigkyfeawi|akkil|iptpf  
t|l|skatl|sfrtms|lidkp  
y|hvk|lpvda|qatsav|rtvstvt|tdvgpk|sya|lqnm|nqy|pgfkvame|pfgayanv|dkdrar|qlacii|rqkeid|gkgat  
v|vsas|lvnkn|pidqkvim|d  
sylew|lnqg|itkes|ittfi|eryaqal|ippliafi|qnygia|leahmqnt|vvnl|gphfdi|qflvr|dlggs|ridlet|lqhrvs  
diki|tnds|liads|idavia  
k|fqhavi|qnqmae|lihhfn|qydcveet|lfniv|qqv|vahain|ptl|phanel|kdil|fgptit|vka|llnmrmen|kvkqyl|ni  
eldn|pikkev  
>tr|D0K7I2|D0K7I2\_STAAD  
m|tkyff|sssf|llfl|gnwig|qigln|wfv|l|t|tyhnavyl|givn|fcr|lvpi|ll|svwagaid|dkydkgr|llrit|issf|l|vta  
i|lcv|l|tysfta|ipisvii|l  
y|at|lrgi|lsavet|l|rqail|pdl|s|dkistt|qavs|fhsy|i|nicrs|igrai|agvil|avyhaptt|flaqa|icyfia|all|clp  
l|hfkv|tkip|edatrym|plk  
v|i|dyfk|lhme|grqif|its|llimat|gfsy|t|l|lpvl|tnkv|fpgk|seif|giamt|maigg|iat|l|vpkvl|kyig|mvnmyy  
l|ss|llfg|iallgv|fhniv  
i|mfic|itl|ig|lfsq|wartt|nrvy|fqnnv|kdyerg|kvls|i|immdr|gmip|l|gsl|lmsic|advf|givr|tfsim|gistic|itmv  
fyfinr|kl|klees|nhgi  
s  
>tr|D0K7I5|D0K7I5\_STAAD  
m|annhn|qngq|dstqqv|in|flkv|fkwri|vgfla|fl|liai|l|fl|t|lgfw|ktvlii|vl|cl|igvg|igym|kdrk|qdfm|n|l|nrws  
>tr|D0K7I7|D0K7I7\_STAAD  
m|knksv|slvfw|svl|victi|fvafgai|fpkql|ekl|tqn|ittfi|alh|fswy|ll|vl|vl|il|fvcv|yl|fsry|anit|l|geeged  
p|efsl|p|swfam|l|fsagm|gi  
g|lvfw|ttaepi|shaf|kl|t|p|h|kag|tqsa|indam|qfsff|hwgi|hawavy|giva|lvfay|fsfh|kgyp|glvsat|l|tp|ll|geka  
m|rgpl|ggai|dv|lavi|atvt  
g|vaat|lgfgal|qine|ghfl|fnvps|nftm|qvil|ivi|at|il|ftws|awsg|idkg|ikt|l|snim|llafv|vl|ig|l|fivg|ptlyi  
l|ntftn|gn|nyian|ffsms  
l|rips|ggqk|fqw|lqnwti|fyawwi|swap|fvgi|fiarv|skgrtike|fil|glv|fvpal|vcfiffav|fgasa|iy|lqdnhiad  
i|akaat|etat|fat|l|ghyp|l  
g|fv|l|s|lit|l|l|vimi|ffvts|adsaty|vlgm|l|ssrg|din|pksfv|kvs|wgi|imal|fai|imiyt|gg|tqai|qn|ll|iaa|lp|fsvv  
i|amiw|sl|ks|l|seek|prn  
s|nkvl|ikhr|dpd|ileyr|ssk|hiden  
>tr|D0K7J2|D0K7J2\_STAAD  
m|tm|mqk|liaqie|kgk|pffek|l|srniy|lraird|gfi|sampv|il|fss|i|f|liay|vpni|fgfk|wdkg|meail|mkpyn|ytm|glv  
a|flv|agtt|aks|l|tds|fnrk  
l|estn|qin|fistm|laam|cgfl|fl|aspak|dggfl|safmg|tkg|ll|tafl|safv|tviv|ynf|cvk|rnit|ikmp|kevpp|nisqv  
f|kd|lip|fsavi|i|lyald|l  
v|irns|fksn|vaegi|kl|fep|l|ftaad|wigvt|iifgafal|fwfvg|ihg|psive|paiaa|ityanie|anf|kl|lqage|hadki  
i|ts|gtq|mfiv|tfg|gtgat|l  
v|vpf|mfm|mwt|kskrnka|igrasv|vptff|gvnepil|fgap|lv|l|npv|ffip|fv|l|spivn|wi|fkl|fve|l|gmns|fsvn|l|pwt  
t|pp|lgi|imgt|gfl|wsfv  
l|ait|l|ivv|dii|ypp|flkvy|dseil|deee|grkesn|sd|l|kekvaan|fdt|kkadsila|asgvs|ddaakasni|teqtnv|lv|l|c  
a|gggt|sg|llana|lnkaee  
y|hvpv|kaaaggy|gahmdim|keyq|lii|lapqvasnyed|ikq|dtr|lgik|laktqgaeyik|l|trdg|qaal|dfv|qqq|fen  
>tr|D0K7L1|D0K7L1\_STAAD  
m|kqnv|efnqavik|fnkrnk|inkss|ndeyiknfrnk|fgkfl|sqsf|l|nsn|nvik|qeiki|kdey|yyyd|qentkky|likf|cq  
d|liehi|kehrnq|indchft  
n|lnkda|ekt|nss|il|ts|l|fl|tannip|n|l|ssn|fskaveyy|fakn|eiygdgy|ekyl|deyfrn|vl|geksyl|il|iddf|sgt  
g|ksis|dfi|daikky|il|tlk  
i|ei|ifci|hiteda|ekkim|dtsikngie|ikiafv|qkteky|finnke|lekkfyefek|divnpgkyyn|lgykntqalvsnfr  
n|tpnnt|l|slfwhend|qwkp  
l|fkrk|akndf|snkwek|kvhi|irwflay|kkvpkilvd|kii|aimyvknhadm|ksk|fleieinrillyndnilqec|lsqk|fli  
k|qtdfyi|ityagi|ellkky  
g|leki|t|l|snilyef|ksng|lhqqkn|fdgnk  
>tr|D0K7L3|D0K7L3\_STAAD  
m|kenl|rkak|lens|lenr|lkhysky|ll|iideigyl|pigseaa|kiffqin|rfkv  
>tr|D0K7L5|D0K7L5\_STAAD  
m|kvnrsnmi|tyksnqysasaeyc|gktvevqvyd|qkqhv  
>tr|D0K7M9|D0K7M9\_STAAD  
m|kvrpsv|kpic|ckv|krkgkvm|vicen|pkhk|qrqg

Tsompanidou\_et\_al\_Supplemental\_FASTA\_File

>tr|D0K7N2|D0K7N2\_STAAD  
miqtlvnffrtkevrnkifftlamlvi fki gtyipapgvnpaa f dnpqgsqgate l lntfgggalkrfsifamgivpyit  
asivmqllqmdivpkfsew  
akqgevgrrkl n nvtrylaislafiqsigmafqfnnylkgaliinqsimy l lialv l tagtafl i w l g d q i t q f g v g n g  
isiii fagi l st l pas l i q  
fgqtafv g qe d t s l a w l k v l g l l v s l i l l t v g a i y v l e a v r k i p i q y a k k q t a q r l g s q a t y l p l k v n s a g v i p v i f a m a  
ffllprt l t l f y p d k e w a q  
n i a n a a n p s s n v g m v v y i v l i i l f t y f y s f v q v n p e k m a d n l k k q g s y v p g i r p g e q t k k y i t k v l y r l t f v g s i f l a v i  
s i l p i l a t k f m g l p q s i q i  
g g t s l l i v i g v a i e t m k s l e a q v s q k e y k g f g g r  
>tr|D0K7N6|D0K7N6\_STAAD  
m i s k i d k n k v r l k r h a r v r t n l s g t a e k p r l n v y r s n k h i y a q i i d d n k g v t l a q a s s k d s d i a t t a t k v e l a t k v g e a i  
a k k a a d k g i k e i v f d r g g y  
l y h g r v k a l a e a a r e s g l e f  
>tr|D0K7Q0|D0K7Q0\_STAAD  
m e a r d i l k r p v i t e k s s e a m a e d k y t f d v d t r v n k t q v k m a v e e i f n v k v a s v n i m n y k p k k k r m g r y q g y t n k r r k a i v  
t l k e g s i d l f n  
>tr|D0K7Q6|D0K7Q6\_STAAD  
m k s l i l a e k p s v a r d i a d a l q i n q k r n g y f e n n q y i v t w a l g h l v t n a t p e q y d k n l k e w r l e d l p i i p k y m k t v v i g k t  
s k q f k t v k a l i l d n k v k d i  
i i a t d a g r e g e l v a r l i l d k v g n k k p i r r l w i s s v t k k a i q q g f k n l k d g r q y n d l y y a a l a r s e a d w i v g i n a t r a l t t  
k y d v q l s l g r v q t p t i q l v  
n t r q q e i n q f k p q q y f t l s l t v k g f d f q l e s n q r y t n k e t l e q m v n n l k n v d g k i k s v a t k h k s y p q s l y n l t d l q q d m  
y r r y k i g p k e t l n t l q s l y  
e r h k v v t y p r t d s n y l t t d m v d t m k e r i q a t m a t t y k d q a r p l m s k t f s s k m s i f n n q k v s d h h a i p t e v r p v m s d l s n  
r e l k l y d m i v e r f l e a l m p  
p h e y d a i t v t l e v a g h t f v l k e n v t t v l g f k s i r q g e s i t e m q p p f s e g d e v k i s k t n i r e h e t t p e y f n e g s l l k a m e  
n p q n f i q l k d k k y a q t l k q  
t g g i t v a t r a d i i d k l f n m n a i e s r d g k i k v t s k g k q i l e l a p e e l t s p l l t a q w e e k l l l i e r g k y q a k t f i n e m k d f  
t k d v v n g i k n s d r k y k h d n  
l t t e c p t c g k f m i k v k t k n g q m l v c q d p s c k t k n v r k t n a r c p n c k k l t l f g k g k e a v y r c v c g h s e t q a h m d q r m  
k s k s s g k v s r k e m k k y m n k  
n e g l d n n p f k d a l k n l n l  
>tr|D0K7Q9|D0K7Q9\_STAAD  
m y g a y l i n e y h q d f k s i a n f k v l k r m i n v m m c y c v l f l e p r i s  
>tr|D0K7S4|D0K7S4\_STAAD  
m f m a e n r l q l q k g s a e e t i e r f y n r q g i e t i e g f q q m f v t k t l n t e d t d e v k i l t i w e s e d n f n n w l n s d v f k e a h k n v r  
l k s d d g q q s p i l s n k v f k  
y d i g y h y q k  
>tr|D0K7S7|D0K7S7\_STAAD  
m n g k k a n t i n r y k y f h h v n h q i q q s s k k t l w a s l i i t l l f t v i e f v g g l v s n s l a l l s d s f h m l s d v l a l g l s m l a i y f  
a s k k p t a r y t f g y l r f e i l  
v a f l n g l a l i v i s i w i l y e a i v r i i y p q p i e s g i m f m i a s i g l l v n i i l t i i l v r s l k q e d n i n i q s a l w h f m g d l l n s i  
g v i a v v l i y f t g w r i i d p  
i i s i v i s l i i l r g g y k i t r n a w l i l m e s v p q h l d t d q i m a d i k n i d g i l d v h e f h l w s i t t e h y s l s a h v v l d k k y e g d d  
y q a i d q v s l l k e k y g i a h  
s t l q i e n l q l n p l d e p y f d k l t  
>tr|D0K7S8|D0K7S8\_STAAD  
m i f s q n l f r c p t p t c i v c r n w e s n f s l l g p t p q l a l p v e f l f e i l c v g a h t p t c i a c r i s f r n s l c w g p  
>tr|D0K7T0|D0K7T0\_STAAD  
m i k i q q l q h h f g s h k v i h n f n l d i s k g e i v t f i g k s g c g k s t l l n v i g g f i h p s s g r v i i d n e i k q q p s p d c l m l f q h h n  
l l p w k t i n d n i r i g f g q k i  
s d e e i n a q l k l v d l e d r g k h f p e q l s g g m k q r v a l c r a h v h k p n v i l m d e p l g a l d a f t r y k l q d q l v q l k h k t q s t i i l  
v t h d i d e a i y l s d r i v l l g  
e g c n i i s q y e i t a s h p r s r n d s h l l k i r n e i m e t f a l n h h q v e p e y l  
>tr|D0K7T2|D0K7T2\_STAAD  
m t r p t n n k f i l p i i t f i i f l g i w e m v i i g h y q p v l l p g p a l v g s i w t f i v t g e i f q h l a i s l w r f v a g f v a l l v a i p  
l g f l l g r n r w l y n a i e p l f  
q l i r p i s p i a w a p f v l w f g i g s l p a i a i i f i a a f f p i v f n t i k g v r d i e p q y l k i a a n l n l t g w s l y r n i l f p g a f k q i  
m a g i h m a v g t s w i f l v s g e  
m i g a q s g l g f l i v d a r n m l n l e d v l a a i f f i g l f g f i i d r f i s y i e q f i l r r f g e  
>tr|D0K7T4|D0K7T4\_STAAD  
m g k g p n s i r v s f k d n w a i a h m t g v l s k v e s f y l n d k r n e s m l h y t r t e k i k q m y k e i d v n e m e s l v g a k f v k l f t d i d l n  
d d e v i s i f v f d k s i e  
>tr|D0K7T6|D0K7T6\_STAAD  
m k e g l f m i m g n l r f q q e y f r i y k n n t e s t t h r n a y w v k l a k n v e a t k m m y a l s t i v q q h a s i r h f f d v t t d d n l t m i l h e  
f l p f i e i k q v p s s a n y d l  
e a f f k q e l s t y h f n d s p l f k v k l f q f a d a a y i l l d f h v s i f d d s q i d i f l d d l c n a y r g n t v i n n t r q h a h i n r n d d k d n

Tsompanidou\_et\_al\_Supplemental\_FASTA\_File

qdashialdsnyfrlenns  
dihidsyfpi khpfega lyqtyliddmts idmaslavsvylan himsqqhdvtl gihvpshlpndlhgnivpl tltidak  
dvcqrfttdf nkcvlq nms  
qlqcakssls leti fhcyhhmmsccndviedvhqihdahtsladieifphqhgfkiiynsaaydl llsietl sdlvrniyl  
qiteengnkrttvdelnlm  
terdiql yddinls lpeiddaqtvv tlf eqqveatpnhvavqfdgvfityqtlnarandlahrlnrqygvepndrvavia  
eksiemi amigv lkagga  
yvpidpnypsdrqeyi lkd atpkvvi tyqalyengkqinhi dlnkiawknidn lskcntledhayviyts gttgnpkgt  
liphr givr lvrhnyvp l  
neetti lsgtiafdaat feiyga l nggk livakkeq llnpiaveq linendvntmw l tss lfnqiaseriev lvp lky  
lliggevl nakwvd llnqk  
pkhpqi ingyptenttftttynipnkvpnr ipigkpi l gthvyimqgerrcgv gipge lctsgfg laagyl nqpe l tad  
kfikdsni nqlmyrsgdiv  
rllpdgnidy l yrkdkqy kirgfriel sevehal eri qginkavvivqnhdqdy ivayyeamht lshnkiks q l rmt l p  
eymipvnfmhieq ipitin  
gkl dkkal pimdyvdt dayvapstdteh l l cqi fadi l hvnqv gi hdnff elgg hsl katlvvnrieastgkrl qigdl l  
qkptvfe laqai akvqeqn  
yevi peai vkddy l lssaqrmy l l wksnhkdtvynvpfl wr l ssg l nvaql qqavq hliarheilrtqyivv ddevrqr  
ivadvvadfeevnthftde  
qeimrqfvapfnlekpsqi rvryir spl hayl fidthhi indgmsni qlmndlnalyqhkl lllplklqykdysewmshrd  
mtkhrqywl s qfkdevpi l  
slptdyvrpniktngammsftm nqmrq l l qkyvekhqitdfmffm svvmt l l sryarkddvvvgs vmsarmhkgteqm  
l gmfant l vyrgqpspdkm  
wtqfl qevkems leayehqey pfecl vnd l dqshdas rnl fdvmlvl qnnetnhahfghskl thi qksvtakfd l sfi  
ieedrddy tinieyntdly  
hsetvrhmgncmimidy l l khqdt l qic dipngtee l l nwnthvndrml nvp gnksi i syfnevvsrqghvalv mnd  
l tmtyet l rnyvdai ahml  
l sngvgngqrval fters femiaam latvkv gasy ipididfpnkrqgailedakvtavmsy gveiettl pviqlenakg  
fveskeneqydd l hgnqle  
ntam l dnemai yts gttgmpkgvai rqrnl l n l vhawstel qlgdnevfl qhanivfdasvmei ycc l l nght l vipdr  
eervnpeql qqlinkhrvt  
vasipl qmcsimedfyiek litggatstasfvkyiekhcgtyfnaygpsestvitsywshhcgdl ipetipigkpl sniq  
vyimsdgl l c gimgpelc  
iagds laigy nrpel madkwqnpf gkgklyhsgdl arytsdggiefl gridkqvkvngyriel deienvil airgis d  
cvvtvshfdthdi l nayyv  
geqqveqdl kqylndq l pkymi pkti thi dcmpl ttnkdvdtr l pnp spiqqs nkvysepsneieqt fvdvfgevl kqn  
dvgvdddff elggns leam  
lvvshlkrfghhismqtlyqyktvrqivny myqnqslvalp dnl selqkivmsrynlgiledslshrpl gnt l l t gatg  
flgay liea l qgyshriyc  
fi radnee iawyl mtn l ndyfseetvemml snievi vgd fecmddv l penmdti ihagartdhfgdddefekv nvggt  
vdvir laqghharli yvst  
isvgtyfdi dtedvtfseadvykgq l l t spytrskfyse l kvleavngldgrivrvgn l t spyng rwhmrniktrfsm  
vmd l l ql dci gvsmaemp  
vdfsfdttarqivalaqvntpqi iyhv l spnkmpvks l l ecvkrkeielvsdesfneilqkdmyetig l tsvdreqql  
amidtt l t l kimnhisekw  
ptitnnwlyhwaqyiktifnk  
>tr|DOK7U1|DOK7U1\_STAAD  
mikvgivggsgygaie l r l l qthphvtiahiyshskvdeplkl t fphl qhimqhfeal tvdnn dcdviffatpapvskt  
c jpl l vekgihvid l sgaf  
riknreiyeayyketaaaqdd l nhaiysi sewqsfdnngtkl isnp gcfptat l l al hplisekivdlssi i idaktgvs  
gagrslsqrvhfsemnen l  
sayaignhkhkpeieqyls i iagqdvsvi ftph l vpmtrgil stiyvkfsseyttes l hkl mtsyyanqpfvri rdigt f  
pttkevl gsnycdigi yvd  
ettqtai l vsvi dnlvkgasgqaiqn l ni lydfevttg l nqspvyp  
>tr|DOK7U6|DOK7U6\_STAAD  
mmpqntiakkkqarh l mkvyapvyskhy lasn  
>tr|DOK7V2|DOK7V2\_STAAD  
mayqseyalenemmnqleq l gyervtirdnkq l l dnfrtilnerhadk legnpltdkefqr l l tmidgksifesarilrd  
klplrrdeseiyls f l dk  
kswcknkfqvtnqvsvedtykarydvtiling l plvqvelkrrgidineafnqvkrkqnytg l fryiqmfii sngvet  
ryfsnndsel l kshmfyws  
dkqnnrint l qsaesfmrpcqlakmi srymi inetdril mamrpyqvyavealiqqatetgngyvwhttgsgkt l t s f  
kasqil sqddi kkviflv  
drkd l dsqteefnkfakgavdktfnts q l vrq l ndks l plivtti qkmakai qgnah l l eqyktnkvvfi idechrsqf  
gdmhr l vkqhfknaqyfgf  
tgtprfpenssqdgrttadi fgrcl hty l i r daihdgnv l gfsvdyintfknka l kaednsmveaidteew l adkrvel  
vtrhiinnhdkytrnrqys  
siftvqsihaliky yetfkr l nkkleqpltiagi ftfkpneddrdgevpyhsrekleimi sdynkkfetnfsttdttneyf

Tsompanidou\_et\_al\_Supplemental\_FASTA\_File

nhisknkvkkgvkdskidi1  
ivvnmfltgfdskvlnltlyvdkn1myhdliqaysrtrnvekeskpfkivnyrvlkketdda1rvfsqtndtdtilmsy  
eeykkefmdayrelkmivp  
tphmvddiqdeee1krfveayr1lakiilr1kafdefeftideigmdeqenedykskylavydqvrataeknkvsilnd  
idfeiemmrndtinvnym  
nilrqid1edkaeqrrnqeirrilhdhaddpt1rlkrdlirefidnvvps1nkdddidqeyvnfesikkeaeefkgfager  
sideqalktisndyqysgv  
vnphh1kkmigdlplkekrkarkaiesfvaettekygv  
>tr|D0K7V8|D0K7V8\_STAAD  
mvyyl1nid1gkmivaqd1nlqeiffhnliyffsai fgfl1gl1nigm1linsgm1gffiahgiysnqlksillvlaph  
aifeilalliastfslgl1  
slylqrmvkknkiknkmfhnfvttitviviltiias1levyvtin  
>tr|D0K7W0|D0K7W0\_STAAD  
msn1levns1nvqfnydettvqavknvsfelrkkhilgivgesgsgksitaksilgl1pdypdht1tgeiifngqs1nn1  
stsalqqirgkdisimifq  
plss1npr1tigkqitevlfqhkrvskseaksmtinilekvgikhatrqfdayphelsggmrqrvmiamalilkpqilia  
depttaldestqngl1qlm  
kslyeytetsiifi1thd1gavyqfcddivmkgdsvvesgtvesifkspqhtytkr1idaipdihqtrppr1nndillk  
fdrvsvdytspgs1yragv  
ndin1airkget1givesgsgkst1aktvvg1kevsegfiwynelplslfkdelks1rqiemi1qdpfasinprfkv  
idvikrpli1hgkvkdndd  
iiktvs1lekvg1dqsflyryphelsggqrqrvs1aralavepkvivcdeavsaldvsiqkdiel1kqlqldfgityl  
fi1thdmgvineicdrvavm  
kngeivelntedi1khpqsdyaqlisevaviak  
>tr|D0K7W3|D0K7W3\_STAAD  
mkk1isiaiiv1alv1sgcgvptksevaqksskvevkgerptihf1gqasyendmnivkdqlenagfnvkmi1qpdysy  
rtqrqagnydi1qiddwmtv  
fgdpnyamta1fsstgsns1lkdkhvdq1lnkastqneadvkqtykqiedevvfdkgymaplygskkn1vydnkvldkns  
vg1pnsraliwqqfdynns  
rerdrtrplv1tqqdgeipt1dpi1rsiapsvyl1nmmytr1111dendh1ttkgs1srdyavnkdnkafyfl1rddyfa  
kvngqarntgervsaedv  
kfs1drardkksvpnnntymhkhindikilkdeditdqlrkekdkddksiydklikaynvks1ttddgkvnnkdgiyqiv  
kittdqsmprevnyl1thss  
agilskkfvnqvnqeypkgygdsstipansdgkna1yasgayimtqknayqatfqrnpgfnetekgsygsppiknit1kf  
ngdpnna1selrnhsidm1  
advnqkhfd1iksdkn1si1rkngrksvflm1nikkgi1fkthpn1rqavvnaidqdqfikfyrgdkfkiaspitplvdtg  
neqrqdlekevainq  
>tr|D0K7W4|D0K7W4\_STAAD  
mvin1ndeqtkskegl1svshplaakigkdv1dqggnamdaviaiqla1nvvepfasgigggy1lyyeqstgsita1fd  
aretapehvd1kqfy1ddsg  
eyksffdm1tthgktvavpaipk1fdyihkryak1s1led1inpaielaieghaanwatekysrqqhar1tkyhetaqvfth  
engywregdwivqpelgkt  
fqil1reggfna1fykgdiakq1vnvkcacggti1led1anydiqikapisatfkdydiysmgpsssggitviqil1k1lehv  
d1psmgprsvdy1lh1liqa  
mhlaysdraqyl1addnfhevvpqs1iddylkarst1linskanidiehgvsdcishtdveenhtetthfcvidkegni  
asfttsigm1ygggitipg  
ygv11nt1mdgfdvvdgg1nei1apykrp1snmaptivmhgkpi1ltvgaggaisiiasvaqt1inv1lvfgmdiqqaidp  
riysshpnriewepqfsqy  
tilal1iarghamekpdai1gdvhgl1qvd1ntrdasggaddtregtvi1ggdvl1sirkqpl1spkiydn1dthrvy1fndmq1  
plyaeqvrwmhdkyvwdes  
virii1fpevsvhied1rsyei1agknyidiaw1arkkgyqvt1kdds1y1tdetyhsvkantnayyrydrdsitr  
>tr|D0K7X2|D0K7X2\_STAAD  
mtikvgi1g1cggi1angkmpsl1qkvenvemi1afcdvdi1skaasaaeaygtdnakvyddyka1lkddtidv1ihvctpn1dsh  
ceitvag1hagkhvmcekp  
makttaeqkmi1takstgkkl1tigyqnrfrpdsqfl1hqaargd1lgdidfgkahairravptwgvfl1neaagggpli  
digthald1tlwmmdnyep  
esvmgstf1hk1lnkqhdaanawgswnpdef1tvedsafg1fkmkgati1ilesawains1evdeakcs1sgtkagadmkgd1  
rihgdmgt1ytkhvelen  
kgvdfyegnevdeaeekawi1davvndtepvvkpeqamvvtki1eaiyqsaksgkaiyfe  
>tr|D0K7X5|D0K7X5\_STAAD  
mtsfiyki1lyvvkinaytydim1edimil1silliffcirlvslkisinhsq1lkadgaveygvknskflaithvliyvla  
gveafinkdtfsfangig1  
vilifayim1fmvikt1ggiwt1kl1fil1pnhi1ksglykitkhpnyflni1peligv1ll1thatyttillvpyayflyv  
rikqeek1mni  
>tr|D0K7X9|D0K7X9\_STAAD  
mkskiyi1ll1fl1ifl1sscantrhsedknv1tvyspyqs1n1rpi1nefekqehvkieikhgstqv1l1sn1hnedfserg  
dvfmggv1setidhpedfv  
pyqdtsvtqq1ledyrnsnkyvtsf1l1mptvivvnsd1lqgdiki1rgyqd1l1qpi1lkgkiaysnpnttttgyqhmraiyismh

Tsompanidou\_et\_al\_Supplemental\_FASTA\_File

hrvsdvhqfqnhamqjskt  
skviadvakgkyyaglsyeqdartwknkgypvsivypiegtmInvdgialvknahphpkrkklvqyltsrsvqqrIvaef  
daksirkdvseqsdqsien  
lknipIipksklpdiphhkfllemi  
>tr|D0K7Y2|D0K7Y2\_STAAD  
mkriskdiwavfkIlyqnkgrfsinaIllqlimifisstyIillfnmmlkvagqsqItnnwmeiishpasvilliiifil  
svafliyvefsllymvyva  
gfdriiitfksifknafvnrkligvpviffviylmlmpianIglssvltkniyipkflteelmkttkgiiygtfmi  
vfIlnfkliftIpltilnr  
qslfknmrIswqitkrnkfrIvieivileIigailtIisgatyIaicvdeegdkflvssilfvvlksalffyyIftkl  
slisvlvIhIkqenvIdqp  
glefkyppkrksrffiiismvlavtcfIlgynmyIlynntintnisiighrgfedkgvensipsIkaaakanveyvel  
mtkdkqfvshdnIkrIt  
gvnknisesnfkdvvgIkmrqngheakIvsIdefietakqsnvkIvleIkphgkepadytqrvidIlkkgvehqyrvms  
IldydvmtklkkeapyIkcg  
yIipIqfghfketsIldffviedfsysprIvnqahIenkevYtwtingeedItkyIqtnvdgiItddpaladqikeekde  
tyfdrsiirilfe  
>tr|D0K7Y4|D0K7Y4\_STAAD  
mkkqiislgaIavassIftwdnkadaIvtkdyskesrvnekskkgatvsdyyywkiidsIleaqtgaidIlledykygdpI  
ykeakdrImtrvlgedqyl  
IkkkideyelykkwykssnkntnmltfhkynIynIltmneyndifnslkdavyqfnkevkeiehknvdlkqfdkdgedkat  
keydIvseidtlvvtyya  
dkdygehakeIakIdIlgdtdnphkitnerikkemiddlnsiiddffmetkqnrpnstkydptkhnfkeksenkpnf  
dkIveetkkavkeadeswk  
nktvkkyeetvtskspvkeekkvveepqIpkvgngqevkttagkaeettqpvaqplvkipqetiygetvkgpeyptmenkt  
IqgeivqgpdlImeqnrp  
slsdytqpttpnpiIleglegssskIeIkpgqtestIkgiqgesdiEvkqatetteasqygrpqfnktpkyvkyrda  
gtgiIreYndgtfgyearpr  
fnkpsenaynvttngdgtvsygarptqkpsenaynvttthangqvsygarptqkpsktnaynvttthangqvsygar  
tqkpsktnaynvttthang  
qvsygarptykpsenaynvttthangqvsygarptqkpsenaynvttthadgtatygrvtk  
>tr|D0K7Z2|D0K7Z2\_STAAD  
mtvdiIgrIydnkdntdaIriIvdrvwprgiIskrtanIdywIkdiapsteIrqwfqhdpkIIfgafkekyekeIrdqdaqd  
afekIkdivnqnhvllly  
aakdtkhngavvlqqlIlt  
>tr|D0K7Z8|D0K7Z8\_STAAD  
mkrkiImdcdpghddaIalIagaidspIeIlavttvagnqsvdknttnaInvlDimgrqdiavakgadrplIkpaafas  
eIhgsgIdgpkIpsstpr  
qavampasdviInkvmstDtpvtivatgpltnvatalIrepriaehiesitImgggtfgnwtptaefniwvdaeaakrvf  
esgitInvfgIdvthqvl  
dnhvierfesInnpvaqfvveIIfkfkkykthfnmdgpihdactilyIIfqpeIftmvpvniDiehqspltygtmavdl  
nhvtgkpanayfatavdve  
evwnIidhkIrtye  
>tr|D0K802|D0K802\_STAAD  
msryfpivItfdvtvistttlatfdcspfelqslrfyvinhls  
>tr|D0K808|D0K808\_STAAD  
mtktkqaihidniywervqlyieghsegvdltsqqfvlrnltetkIleanemkidgntficrfnvailddgyylpmdkyI  
fyhdqleyigqInpniid  
qayaaIneeqieyneIlttngkvnyIlaydakvfrkggvsqhtvYtitpeiasdvnefvdieitIppqeksgviatsah  
wIhkqghkasfesrflfk  
aifnItklIhikrsktilftsdsrpnIsgnfkyvydeIlrqkvdfdydiktvfkanitdrkwrkfrIlyllgkadyif  
vddfhpIlytvrfrpsqei  
iqvwhavgaftkvgsrtgkkggpfidsInhrsytKayvssetdipfyaeafgiIreenvvptgvprtdvlfdeayatqik  
qemedelpiikgkviIifa  
ptfrngnghtahypffkIdferIarycekhnvvlfkmpfvknrInisrehrqyfidvsdhrevndilfvtyllisdys  
sliyeyavfkkpmiIyafdl  
ledyittrdfyepyesfvpgkivqsfdalmdaldtedyevkvvpflDkhfkyqdgrrserlvkdIfr  
>tr|D0K809|D0K809\_STAAD  
mikntIkkliehsiyttfkIlsklpnkniyfesfhgkqysdnpkalyeyItehsdaqIiwgvkkgyehifqqhnpvyvt  
kfsmkwflampakawmin  
trtpdwlyksprttlyIqtwhgtpIkkigIdIsvkmlgtntqnyqdgfkkesqrwdylvsnpystsiIqhafhvsrdki  
IetgyprndkIshkrndte  
yIngiktrInipIdkkvimyaptwrdeaiIregsyqfnvndiealrqaIdddyvillrmhyIvtridehddfvdvds  
yedisdlyIIsdalvtDys  
svmfdfgvIkrpqiIyaydlkygdeIrgfydykkelppivenqtaIIdalkqIdetaneyieartvfyqkfcslEdg  
qasqricqtiIk  
>tr|D0K813|D0K813\_STAAD  
mkfsvivptynseyiteIlnslakqdfpktefevvvddcstdqtIqivekyrnkInIkvsqlEtngggpgkprnvalk

Tsompanidou\_et\_al\_Supplemental\_FASTA\_File

qaegefvlfvdsddyinke  
tlkdaaafidehhsdvllikmkgvngrgvpqsmfketapevtllnsriiytsptkiyrta1lkndiyfpeelksaedq  
lftmkaylnanrisvlsdk  
ayyyatkregehmsayvspedfyevmrliaveilnadleeahkdqilaeflnrhfsfsrtngfslkvkleeqqwinal  
gdfiqavpervdalvmskl  
rpllhayarakdidnyrtveesyrggqyyrfdivdgklniqfnegepyfegidiakpkvkmatafkfdnhkivteltnefm  
igeghydvr1klhsrnkkh  
tmyvplsvnankqyrfnimledikaylpkekiwdflevqigtevfevrvgnqrnkyaytaetsalihlnndfyr1tpyf  
tkdfnnislyftaitltds  
ismklkgknkiiltglrdrgyvfeegmasvvlkddmimgmlsqtsevevllskdikkrdfknivklntahmtyslk  
>tr|DOK814|DOK814\_STAAD  
minkndivadividykaadifrsvgidfccggqvsieaslekknvdlnellqrlnndveqnttpgslnpkflnvssliq  
yiqaaayheplreefknlt  
yvtklskvhgpnhyvelketydtfksgmlehmkeddvdfpklikeyqgevvndintviddlvsdhiatgqllvkmsd  
ltsyeppeieacgtwrlyf  
qr1kalevlthevhlenhv1fkkvs  
>tr|DOK815|DOK815\_STAAD  
m1llervg1i1layvlmni pyfkn1mnr rrtwkarwqlciifslfalmsnltgividhqhslsgsvyfrldddvs1ant  
rvltigvaglvggpfgvlf  
vgvisg1frvymggadaqyvlissifigiiagyfglqaqrnkrypsiaksamigivmemiqmlsiltfshdkayavdlis  
li1alpmiivnsvgtai fms  
iist1kqeeqmkaqthdv1qlmqt1pyfkegl nresaqqiamiikn1mkvsavaitskneilshvgagsdhhiptne  
ilts1skdv1ksgk1kev  
tkeegcshpncplraaivi plemhgsivgt1kmyftnpnd1tfverqlaeglanifssqielgeaetqsk1lkdaeiks  
lqaqvsphfffnsintisa  
lvrinsekare11le1syffran1qgskqhtit1dke1sqvray1s1eqarypgrfnininvedkyrdv1vppfliqilv  
enaikhaftnrkqgndiv  
sviketathvriivqdngqgiskdkm1l1getsvesesgtgsalen1n1r1kgl1fgksaalqfestssgttfcwv1pyer  
qeee  
>tr|DOK816|DOK816\_STAAD  
mkaliiddeplarne1ty1lneiggfeeinaenvketleallinqydiifldvn1mdengielgakiqkmkeppaiifa  
tahdqyavqafelnatdyi  
1kpfqgkrieqavnkvratkaddnnasaiandmsanfdqslpveiddkihmlkqgniigigthngittihhtnkyett  
ep1nryekr1nptyfiri  
rsy1intkhikevqwfnytmviltngvkmqvgrsfmkdfkasig1l  
>tr|DOK819|DOK819\_STAAD  
m1kyeh1akqlnafihqsnfkpgdk1pnvtq1keryqvskestiikalgl1eqdgl1yqaqgsgiyvrniadanrinvfkt  
ngfks1gehrmtskv1vf  
kematppksvqdelq1naddtvyyler1rfvdddvlciaysyvhkeivkylnddiakgsifdylesnmklrigfsdiffn  
vdk1tsseas1lq1stgep  
c1ryhqtftytm1gkpfdsdivfhyrhaqfyipsk  
>tr|DOK820|DOK820\_STAAD  
msnkykeqaqdi1tavggvenivdatydtk1itihmqt1pstanekqivdvtsvaendaqlvik1ngnvdevyqqlqr  
liknanveesentdninsq  
dtsytpqvkvttpi1vkapiagrri1lkevrd1sifrekvmgeglaikaheeskviapfnglismivptkhavgiqsedgv  
divihigvntvd1legkgfk  
cfvkqndhveagq1l1qfdqy1qqqgynadvivvisnsad1gkveltmneiittedvifkifkn  
>tr|DOK821|DOK821\_STAAD  
mtk1pqnfmwggalaanqfeggyekggkglsv1dvmtsgahgkarqitesid1nhyypnhegidfyhrykedialfkemg  
1kcl1rtsiawtrifpngde  
dvpneeglafydri1fdeli1aqqiepvvt1shfemp1hlakhyggfrnrevvdyfvhfarvvferykdkvtywmtfneinn  
qmdtsnpi1flwtngval1t  
endnpeevlyqvahhel1asav1r1gke1n1pkfki1gtmi1shvpi1ypyschpkdmmeaqian1r1ffffpdvqvr1gyypsy  
akkmlarkgydv1gwqegdd  
sil1qqgtvdy1igf1syymstavkhvd1ttvenni1vnggl1nhsvenphiatsdwgwaidpdgl1ryt1nvlydryq1pl1five  
ngfgavdevvdghi1hdyr  
iey1kahi1taa1eavdqgdv1ligytpwgi1divsfttgemkkrygliyvdrnddghgtmer1lkdsfywyqqviasngd  
k1  
>tr|DOK826|DOK826\_STAAD  
mkkvsi1kdvareagsvttvsh1nhndsrf1sattiknvhavser1gyapnkhakqlrgskiq1tigvilps1tnpffsa1  
mqs1ihdhkpsdv1l1cflts  
tatdlydnikh1lidrgidgl1iaqy1sspdal1nny1kkhhvpyvvl1dqndhqgytdf1vrtneyqgytdf1vrtneyqggq1  
aaqh1ielghnhmi1vapy  
dmm1anmstrv1agfvdt1ranq1lepqi1vhtel1skrggl1tivddimvqsatai1fainde1aigilrg1liehgisipkdis1  
igyddi1dyaayv1sp1l1ttv  
aqpi1tdigkts1l1l1qr1qh1l1dksidmi1elptt1kirattgyh1sn  
>tr|DOK828|DOK828\_STAAD  
mqfkl1keeei1s1fle1lkyepe1feygr1lv1gqhkrd1dvyyfgdt1f1mcti1s1fkt1feiketvel1sydavnriv1kdgw



Tsompanidou\_et\_al\_Supplemental\_FASTA\_File

lfrkmrietmqkvlykgyts  
klmvtdfqkenynkyigqkqrvi fenghfv  
>tr|DOK834|DOK834\_STAAD  
mktihlfriyhsfllkkwyllylflilaallitlttiqhvteddnhfngivvdkdqssetkllinsigkgsnlgknvsi  
kayddkqahtllkkhklgg  
yfvfdkgmtkafykqgelpisvytydqqsmsvvlsqltdsvyqrlmrsmggilafqdlapakashsdsinvmtdllitgl  
nrsgafnlepihlydtgsy  
yaitgflatvfi falslftvlkmnqdtvlkarlkmfhfskerlliralitwfytmlwsivgvvwwivfsipntfelynwp  
tlaihlsyyvtflilwlll  
iellttglinsiskvilaivilvlsgltpiqtiflqhiangvfniqpfavvtnqllleilnnyilelhpshfysfiaallii  
nlavlvwryrq  
>tr|DOK835|DOK835\_STAAD  
mskklkiiipiivlllgiagwgyaffantpkntykseqqtakmykdyfndrfenevkfqekmdnsflsslalsad  
asdeivkglgipksvvnas  
kikmsyghdpkkeksminleptiadsalqkfqlaadkdkhyfesplfkgkysvnnsdllstyskltgedeetakengitn  
qqlnlntlfsnaqqgsdy  
skiaekyselivdkldddndfdkgkkeeikvngedykvrpvtltsradtkkitlavleakkdkdklkkimeegatkdyd  
kdikkaiddvketkkdefa  
kiqskiytehtivkreititdkennktkigtntleddklklalyaldfdqdkytaaekytkgvsskekdnkysdye  
fgkkteydeskikldnqek  
vdgtrqdkgkivaaldkysdeneftfennidsvknntqkstlnigikyaeepinfilksstklkadidfdsgakdfn  
slsskdreklekeiekngg  
kmfesillkkgi  
>tr|DOK836|DOK836\_STAAD  
mkktiltmttltlfsmspsnaqaytndsktleakrahpnaqfkvnkdtgaytytydknntpnnnhqnqsrtnndnhqha  
nrdfnnnqyhsslsgyt  
hindaidshppqtspsnpltpaipnvednddelnnafskdnkglitgidldelydelqiaefndkaktadgkplalngg  
kiidqplitsknnlytagg  
ctwyvfdkrakdghtistfwgdaknwaggassngfkvdhrprrgsilqtvngpfghvayvekvnidgsilisemnwige  
ivssrtisasevssynih  
>tr|DOK845|DOK845\_STAAD  
mkdvkridyfsyeeltluggsklplvnfelldpsnfeeakvaliekevtendkltdagfkvatlvreyisaivnirind  
myfapfsyekdeyillsr  
knngfqiiriinkdiawwsivqsypllmrqeksndwdfkqiddeilenlnnesidtigrvleieiyhqqdpqqslyniye  
qndllliryplkdkvlnvh  
igvintfirelfgfdtdenhinkae  
>tr|DOK848|DOK848\_STAAD  
mipvewekvytmayiddgggeffnytkpgsddllyytdipkeynisvqvfdllwmdlydlfeelrdlfkeedlepwtsc  
efdftrregklkvsfdyidw  
intefdqlgrenyymykkfgvipemeyemeevkqieqyikeqee  
>tr|DOK860|DOK860\_STAAD  
mgehqnkvlnrtvkaavltvsdtrdfvtdkggqcvrqlqaddvevsdahytkvdekvaaittqvkkwleedidviittg  
gtgiaqrvtieavkpllt  
keiefgelfrylsyvedvtrallsravagtvnklifsigstgavklaaleklikpelnhliheltk  
>tr|DOK869|DOK869\_STAAD  
mkklllplliimllvlaacgnqgeknnkaetksykmdgktvdipkdpkriavvptyagglkklganivavnqqvdqskv  
lkdkfkgytkigdgdevk  
akekpliiyvstkdikiqykvaptvvvdynkhkyleqqemlgkivgkedkvkawkkdwettakdgkeikkaigqdat  
vsldfdefdkklytygdhwg  
rggevlqafglkmqpeqqkltakagwaevkqeeiekyagydivstsegkptpgyestnmwknkatkeghivkvdagty  
wyndpytldfmrkdllkek  
ikaak  
>tr|DOK870|DOK870\_STAAD  
mndmdnsflitteiqrkwiekfvirdtfkakaeyndqhsqfpykniewlikegygkltlpkayggegati edmvilqsf  
lgeidgatalisgwhvsvv  
qqiyeqkllwsqdmleqfaveinngalvnravseaemgsprtrgrrpsthavkaddgyilngvkytsmskalthiivaayi  
eelesvgfflvdrnlpgve  
iadnwdvlmratshdliindvkvpklhlvetekskapngwilhipscylgiaqaarnyavdfaiqhspsnsiegat  
ptvqqnlgkmetlllcarq  
flwstakgyqqykdssqirnpstaskvmvmnqglevidlamrivgakslemnrplqryyrdmraglhnpmedaaytnia  
ksitdtf  
>tr|DOK871|DOK871\_STAAD  
mllknisqvvlisnkwtglfiliglvadwtiglaaivgsiiaytfarfinyseavndglagfnpvltaialtiflks  
gldivitmiatlltlpva  
avrevlrykvpmllmpfvitwftillsgqvkfvdtslklmpqni etvnfsnndrihfislfegfsqvfi easvigv  
ciligiliasrkaallavi  
asllsfiivalignyddinqglfgynfvmaialgytftainpyistflgvlltvvvqlgtttllepfglpaaltlphi  
ivtwillfagikhdkvda

Tsompanidou\_et\_al\_Supplemental\_FASTA\_File

>tr|D0K881|D0K881\_STAAD  
mskfkvkr1tahilmkvinadm1kysfh1t1tqvk1ln1lvkydndsnsasidr1lkmkeiqskmallqmlsylnnhqw  
1lkgdrdqrdqrkltisink  
mhidkieymnne1sdyierfygqytdfscdyvsy1lssqelfrn1kcylnmcq1tleelyvlgiln1hkqqltvkelqg  
efhhpifavspilkc1ilk  
glvkkercel derrivtikrekfskvtmliqacynylekgiqvkl1nk  
>tr|D0K884|D0K884\_STAAD  
mmkrkptflesistmivmviwvtgfvffdiqvl1iiasayatwiakrvgl1twqdlekgiaer1ntampailiilavg  
iivgswmfsgtvpaliyyg  
ld1lnpsyflisaffisavtsvatgtawgsastagialisignqlgippgmaagaiagavfgdkm1sldttnlaalvt  
kvnikhishmmwttipas  
iig1lvwfiagfqfkg1hndkqiqt1l1selaqiyqiniwv1pliviivc1l1fkmatvpamvissfsaiivgtfnhhfkm  
tdgfk1atfsgfndsmihqs  
hissvks1leqggmsmtqilvtifcgyafagivekagcle1v1l1ttiskgihs1vgslicitviccialvfaagvasivi  
imvgv1mkdl1fekyqvsrs  
v1srt1edsstm1v1plipwgtsgiy1tnq1lvsvgeffmw1tpcyl1caii1aiy1gftgig1kks1nsr1t  
>tr|D0K889|D0K889\_STAAD  
mkia1igagig1l1taa1l1qeqg1tikvfeknesvkeigagig1g1dnv1l1k1gnhd1akgiknagq1l1stmtv1ddkdr1  
1ttvkl1ksnt1nvt1lprqt  
1idi1ksyvkd1dvi1fnh1vthidnetdkvtihfaeqeseaf1dcigadgihs1kvrqsvnadskvlyqgytcf1rgl1iddi  
d1khpdcakey1wgrkgrvg  
ivp1lnnqaywfi1t1nskennhkyssfgkph1qayfnhypnev1reil1dkqsetg1ll1hniyd1kpl1ksfvyg1rt1llgda  
ahatt1pnmgg1gagqamkda  
iv1vncfnaydfekal1qrydki1rvkhtakvikrsrkig1kiaqyrs1rfvavrnr1mkmpna1laagqtkf1lykskek  
>tr|D0K891|D0K891\_STAAD  
mmklv1l1aitffav1s1s1lvfnmmfrdrttmkvivnasflivilaivvayf1l1sk  
>tr|D0K893|D0K893\_STAAD  
mqeh1lvvt1dgkdy1vepgtn1lefiks1qdtfvpsicynesmgpiqtcdtctveidgkierscstvidrpmtvntvndv  
kdaqkealdri1lekhl1yc  
tvcdynngdcei1hntmdawg1qhqt1yeykekyekdygpfyrydpnqci1l1cgrcveacqdievnetiridwdrehprviw  
dndvpinesscvscgqcat  
vpcnammevnmegnagymtdtepgs1laamid1tkkaepgygpl1faisdseaemrkerikk1tkvtctycvgvcsfevwtk  
dreil1kvqps1hdspankia  
tcvkgk1fswgh1nsdqr1tkp1vrkng1efheveudea1nviadnftsikekygpda1s1fisskatneesy1lmqklarqv  
igt1nvdncsryc1qapatk  
gl1frtvghg1gds1gsied1lekaamsv1igtntaeahpviasrmkraql1fgqki1hvfdi1rkhemaeradr1fyqpkpgtd1a  
w1savtkyi1dh1d1hdkaf  
idewvdd1fdeyyks1etftmafaeeatgipese1likfaecakaesvvi1cwamgitq1qdi1gdsstaisn1ll1vtgnyrr  
pgtgayp1rg1hnnv1qgcsd  
mgsmpdk1tgyqs1eaddi1rakfekeygvk1n1pkagkdnhem1legihd1gevh1s1lygedtgivdsn1infvqaafek1df  
mvvqdef1tft1atyadv1l  
pasps1lekdg1tftnterri1qrlyqa1lep1gds1kpdwki1fqai1anr1gfdwny1khpseimdevar1t1plyagvsydr1legf  
ns1lqwpvq1pdgt1depily1l  
egfn1fdngk1k1fp1sfdny1fkqdeiydi1hvnngr1l1ehfhegnmty1qtpmikykvprafveis1pelaedrgi1hegaevk  
l1setgeav1lqvhvtdrvk  
gkeiy1ip1nndameng1d1gain1l1t1nsdv1dqytd1tps1ykrts1cr1levit1krgksp1n1pnn1frv1nkk1rh1pqysv1qvqkkwe  
rsdyv1fpgn1qvdk  
>tr|D0K896|D0K896\_STAAD  
mkaerqn1i1itai1qqnk1mtale1akycnvs1krtil1rdidd1lenqgvkiyahy1gknggyqi1qqaqskia1n1setq1sa  
l1fl1v1nesq1syst1lpykse  
inaik1qc1sl1pqr1l1rk1l1krmdfy1k1fddt1qhmt1l1pml1fsdili1ycternv1lvdhrvdd1nikaenvi1fig1ll1ckhgh  
whaviy1dia1gktae1eie  
niidi1sysfg1kti1qtrdi1sidny1hqf1l1npids  
>tr|D0K8A1|D0K8A1\_STAAD  
m1kqil1pratk1sil1favaffi1inyig1mekpdily1vg1rti1at1afilic1l1t1fti1nsperkik1lgtt1lpialii1gii  
fgai1fl1tvq1igvit1gliig  
viatfiwe1liekn1kggrss  
>tr|D0K8B1|D0K8B1\_STAAD  
m1fl1cts1il1ftc1fpi1knts1fsq1tmk1kev1fmc1ftc1l1ssnhygywnwhi1rdvaeas  
>tr|D0K8B9|D0K8B9\_STAAD  
mykqgepn1wtgr1dsetdpk1kfrhfqtvtfed1sk1lekssmpsgvgilgyavdkgvaln1kgrigakegpdaikqafag1l  
pd1nq1cet1ldygnvy1hdh  
ee1id1tqkefam1laaksianhrqt1fl1ggghdiayaqylatrkv1yttqsigvinidahfdtraeqqstsgtsfrqileed  
entdy1vl1giaqggntq1sl  
fdyakek1ki1dyvfade1l1shvsptikdmierfv1hehdv1imfticmdvidsafapgv1sapav1glyphtv1lelakri1psd  
kvssvs1iaem1ptydadnr  
tak1van1lvhh1flk  
>tr|D0K8C2|D0K8C2\_STAAD

Tsompanidou\_et\_al\_Supplemental\_FASTA\_File

misihai stgki qd lpysskrpirsaldk tki sqttw l sstgftgdeqaykdhg gphkavcgf skhnyalyqdd lpt lpt  
hamfgen ltf dyl desdvy  
fgnqyr lgealievsei repcwkiqakynipdlvkr mstsgktgyfrvlkqgyvspndqlyliqeapiehr lsvqq lnd  
lyndrqndmlryal nnp  
flspt rrdklqkmy nrtlk  
>tr|D0K8D7|D0K8D7\_STAAD  
mtttfi isyiilaliivgv inlflirsrkkgrqqkeqqfttrqsnqskfkasdldktt dqtqrmtheelrvdnqddhs  
qvs lngytkgsekdeaft  
nnngeeavaaknpeseeykvn ekikkeknfifgegvsrgkilaallfgmfia ilnqtllnvalpkintefnisastgqw  
lmtgfm lvn gilpitayl  
fnkysyrklflvalv lftigslicaismnfpimmvgrvlqagigavlmp lgsivii tiy pekraamgtmgiamilapa  
igpt lsgyivqnyhwnvmf  
ygmfi igiia lvgfvwfklyqy ttnpkadipgii fstigfgallygfseagnkgwgsveietmfaigiifiilfvirel  
rmkspm lnlv l kftftl  
tti inmvmlsl yggm illpiylqn lrgfsaldsgllllpgslimgllgp fagkll dtiglkplai fgiavmtyatw elt  
klnmdtpymti mgiv lrs  
fgmafimpmvtaaina lpg rlashgnaf lntmrqlagsigtailvtvmttqtqhl safgeeldktnpvvdh mrelas  
qyggqegamkvllqfvnkl  
atvegindafivatifsia ilclflqsnkkakataqkleassnnhe  
>tr|D0K8E1|D0K8E1\_STAAD  
meykqhpfkvftisvnyfegivfcekiygv lrfisfytfyk l  
>tr|D0K8F9|D0K8F9\_STAAD  
minyaiyfn nininsimalndnnyqfehvnerneyres  
>tr|D0K8G3|D0K8G3\_STAAD  
mitsfrhsedidkhi ktp l dhtaswinvvepdreeienlmeqynipedfirdpldseessrieydedtgysliiidlpi  
vnstnrsvlsvftiplgii  
igngiivtvcaeneflen lpkrdinlkfhsrfaleilttiadhynrnlrl llnksriri ekelknnitnkqlfk lmevek  
slvyflaalkgndtiikk l  
frlpaikrfeedeel ledliiennqaiette l hqrilesittsyasllsndmntimktl t lftvll t lptlvfsffgmnv  
plpidhshyiswiivvgis  
lilvvivsi flwrkqkl  
>tr|D0K8G4|D0K8G4\_STAAD  
mnykqsaedi lnaiggeen ldamahcatr lrlv lndeslvneea lnm dmvkgtfstggqyqi i igsgtvnkvfselek l  
tgkeasttsevkagsaknm  
nplqrfvkm lsdifvpi ipaivagglimg lnniltakdlffsgks lidvysqfaglaeminvfanapftllpiligfsaa  
krfggnpflgavlgmi lvh  
pslmsaydfpkaveagkaipyw dvfg lhinqvyggqvlpm lvaayilasiekglrkviptv ldnlltp llsifitaf l t  
fsfvgpitrqlgyw lsdgl  
twlyefggaigg l ifgllyapivitgmhhsfiavettliadatktggsfifpiatmsnvaqggaaiaaaffiikqnkklkg  
vasaagisalgit epamf  
gvnlk lrypfigaivgsgigsaya affkvkaialgtag lpgfis inpvhagwlhyfvgmtisfiiaitvtlilskrkank  
evve  
>tr|D0K8G6|D0K8G6\_STAAD  
mtcqlkihht l stipsrninimvlfs ltskl nitin getkdvsn yiilinhgdi yninhgeni elmipvfyfyqqddd  
ffngyl drhl lqssnyiks  
liadlistptss lmgknigqs i idtllkeafiridheylpnialsnpvfidcvnyihdnidah lslkdiamhcnisesy  
csnlfvrylsmn fkd yfts  
iklvnainlll stkhsittvselagfnsh tnfanqfknylhfspkqf rslvskiteppqihfqqdnvsqftel istidlt  
aqlatnttdihiddfnpkd  
rsqrakvfv rfsnfelqfifneyy dinfeh lpkpvvfididieisqtnynllnrcfek l fekniglaiaikstqqf  
etmkqliltflqgnqdykt  
skklvkfm l vfcnsmtae eihlchl kknknkeikysvtvdgfl etystveqvydvmqr l kfhyfyfi diensktathli  
tknqh yhqtdth feyqkkf  
ildsgisstqfvynn lsvsgfkytndgknpiqlsdivyh liallrygggis yqll d dhsnyislynkygsp lplmhlykm  
frpfvnedieiannyv lsr  
kdnyyhfl lfnkindrymsdvkqdfi fhnelpqds lmiikt lnehgsiqhllpisdq lvyiekeilde ldktnypkte l  
avqeetgrt felk lnhdev  
kyicfkps  
>tr|D0K8G8|D0K8G8\_STAAD  
mqqfanavfi l hkinlkrht l itlnvkvclktihck l dckhikhfnysel f  
>tr|D0K8H3|D0K8H3\_STAAD  
milnfnqfenqnfngnpsdtfkdlgkqvfn yfstpsfvtniyetdelyyleaelagvnkedisidfnntltiqatrsa  
kykseq lildernfes lmr  
qfdfeavdkqhittsfenglltitl pkikpsnettsstsisipis  
>tr|D0K8I0|D0K8I0\_STAAD  
mlnqflwvifpylclvvfiaghiaryrydkfswtaksselierkrlmwgsllfhlgii p vffghvvgllipkswmdavgv  
sehlyhigavyigsi fgi i  
tligmfl l tarvttksirr lssasdi fvnlllllvfmgcyatlvtniqhpdfnyrts lsiwfrqlfmlkpdas lmsgv

Tsompanidou\_et\_al\_Supplemental\_FASTA\_File

piafkmhillgftimacwp  
ftrlvhvsvpltyinrryiykrnkv  
>tr|D0K8I5|D0K8I5\_STAAD  
mttkenidtlrkpgaqalslslflilfscldfffgldyerfpnylkittieliivisllqwirfidfekesarkykk  
iyarflviinvlttitvvf  
alcnlyfaavqnhydlnfywlmgtisiiisyllviggmftllklpkvtkrwggkthfgllltalssfiyiekieiey  
ilipnvveskfiiivsmv  
iagafvafqfimqysrfyifeInteddd  
>tr|D0K8I6|D0K8I6\_STAAD  
mefllliivvaglyyiyiltavmysekivvlpiiyailfviigityifigdsydqltnfnvilymgslyawmairnlwn  
rplllkyknitdsssgivn  
kseynsveslrinieiakykgiislivaivlvtlmtlkstpitaetrdlsisffilslfiiiiifavwdlfirvrkgafa  
fvvirpilfscwifilnmi  
lsrll  
>tr|D0K8I9|D0K8I9\_STAAD  
mipvewekvytmayiddgggeffnytkpgsddlnoytdipkeynisvqvfdlwmldydlfeelrdlfkeedlepwtsc  
efdftsegklkvsldydw  
intefdqlgrenyymkkfgvipemeyemeeikeieqyikeqdeael  
>tr|D0K8J0|D0K8J0\_STAAD  
mtfeeklsqmyneiankiissmipvewekvyamayvnersgevfynyteprsdelfyysvlnkynisrsefmdsvyelyk  
qfdklrdlfkeeglepwtsc  
cefdftdrgklsvsfdyidwansefgqmgrehyymkkfgiwpekeyainvkk  
>tr|D0K8K0|D0K8K0\_STAAD  
mdlmgltlflvlviftlftykapngmramgalanaaiatflveafnkyvggevfngkflleelgdaaglggvaaglt  
alaigvspvialviaaacg  
gmdllpgffagymigyvmkytekyvpdgvdlgsivilaplarliavlltpvvnstlirigdiisstntnpiimgiilg  
giitvvgtaplssmalta  
lgltgvpmaigamaafssafmngtlfhrklkgdrkstiavsieplsqadivsanpipiyitnffggaiagliamsplin  
datgtatpiagflvmfgfn  
hpmtivi ygvvmaivgalagylgsivfkypivtkqdmnrgavda  
>tr|D0K8L5|D0K8L5\_STAAD  
mtpelqddigtvgvvefvspevkvddeivsieasktvidvqtpsgtTierntkaeeptilnsekpeenwlfkladdvd  
keaflalpea  
>tr|D0K8M3|D0K8M3\_STAAD  
mlsyrqieilylliheqtfipintianqlgvsprtqiayieqyaetyhyqvsrnkaagikvttahatllelehnl  
nqihfskderlthialklf  
ettdpvstklqagdvnsrrtiaddikmiqaqldqyhlklnyvhnkgfnvigeedhyrkayahfihqymkqaapfi  
eadifnsesialvrraiiktlns  
enyhlvqsaidgliyihliaiqrlnenfsfdipineidkwrhtnqyaiaskmienlerscnvtfpeseiifitlhl  
lsgskmtehtassitfeyhdlsqn  
ihelitcvsqelgidmskdnklhtslithikpaihrikydmlqpnplrqevmrrypqieavskhispieqdaair  
fnedelytithfassiervath  
kqsmikvvlcgsgigtstlksklnhlypefhiwdaysiyqleesrllqdnidyvistvpceistvpvihvdpfin  
qqs rqlnqiindsregrvmkm  
atdgksladllpehriineqplisiesaiavavqplindgivyvnytaailkqfeqfgsymvisphialihagtdy  
vqngvgfaltyftegiifgskan  
dpvhlvitlatdhpnahlkalglsecldndlyrqdflgdni flikqhialtmkvev  
>tr|D0K8N1|D0K8N1\_STAAD  
maslknkhfmiglsltfivalfsflaaklpildkvgaltiailiailyrhfrgypeqyssgitfsskyllrfaiilyglk  
lnifdiigqgskllaidvg  
vvifsivmmifvnklhgdknialllgvgtgvcgaaiaavapifksrekdtaisigialigtifsliytaiyaismt  
tnvygawsgvsleiahvv  
laggfgsdalkiallgklgrvfllipltivlilimrfrsnessskgrisipyfligfvimalvntyvtipsvllnilnt  
isticllmamvalgnvaf  
kdlknralkpmtiitsiclsslafivvhwlys  
>tr|D0K8N2|D0K8N2\_STAAD  
mssasfnsilalfcrifkykfgmvnkviklscvigikdinqsrhynaywrgpnkeadeksaynnvqvgdgpqhreigs  
vistdnaswrgpnkfkicq  
vilicyyydnlnqymkne  
>tr|D0K8N6|D0K8N6\_STAAD  
mkhyltkfvamliitamvcsfgllksqaeeqsisdvysvitdaksalsnnsisndnkqkaieqvvsavkklsl  
lednsegnavksdvrkledakandnq  
kdtlsqltklsliayeeklaskdagskikllqqvdakdaamtkaikdknaeleslnnslnqiwtsnetvirnydanqy  
qievallqlriaihkspld  
takvshawttfksnidhvdksdtsandqyhvsqlndalekaikaiddnqlsdadaalthfieiwpyvegqitkdgal  
ytkiedkipyyqsvldehkn  
shvkdglvdiinnqikevghsysfvdvmiiflreglevllivmtlmttrkvkdnkgtasviggaiaglvlsiilaifv  
etlgnsgilresmeagligi

Tsompanidou\_et\_al\_Supplemental\_FASTA\_File

vavilmfivgvwmhkrnsnakrwndmiknmyanaisngnlvllatiglisvlregveviiifymgmigelatkdfiigiala  
ivilivfavlfrfivrliip  
ifyifrvlsififimgfkmIgvsiqklqllgamprhviegfptinwlgfypsyepliaqaayimvvailifkfk  
>tr|DOK8N7|DOK8N7\_STAAD  
mtpfityitrahvslhafsftemiqiymiiiffiafcfisvpmfyqlwafiapglhnerqfiykysffsvllfcagvaf  
tfyvgfpriiqfalklslt  
lnispvigfkaylvelirwlftfgilfqlpilfiglakfgliditslkhyrkyiyfacfvlasiaappdltlnilltllp  
illfefsmafivkftcrqk  
pth  
>tr|DOK8P5|DOK8P5\_STAAD  
mtrvvlaaayrtpigvfggafkdvpaydlgatliehiiketglnpseideviignvlqagqqnpariaamkglpetvp  
aftvnkvcsqglksiqlay  
qsivtgendivlaggenmsqspmIvnnsrfgfkmghqsmvdsmydgltdvfnqyhmgi taenIveqygisreeqdtfa  
vnsqhkavraqqngfdse  
ivpsipqrkgepiIvtkdegvrenvsveklslrIrpafkkdgtvtagnasgindgaamIvmsedkakeInieplavldg  
fgshgvdpsimgiapvgav  
ekalrskkelsdidvfeInefaaqsIavdreIkIppekvvnkggaialghpigasgarvltllhqIIndevetgltsl  
ciggqaiIaavvsky  
>tr|DOK8Q1|DOK8Q1\_STAAD  
mseIksedqriktkdeqikqidiIkdikpnpyqprktfdenhIIndIadsikqygilqpivlrktvqgyyivvgerrfra  
skiaglkysaiikdltd  
dmmeIavienIqredIaieeaesyqrImtdIkitqqevakrIksrpyianmIrlIhlpkkiadmvdgrItsahgrtl  
IaikdeqgmIrlakrvvke  
kwsvryIenhvneIknvssksetdkvdiItpkfkIqqrqIreqygtkvdIisiksvgkIsfefsqqdfvriIeqInrr  
ygk  
>tr|DOK8Q2|DOK8Q2\_STAAD  
mdqvmSiissIfepltkietyeniatiIamiviyaIivalivikiInkmiEqgfkiqnkskksnkkrsktlIslvqnvvky  
IvwfivittIlskfgIse  
gviasagvvgIavgfgaqtivkdviIigffiiIesqfdvgdyvkinnggttvaegtvsigIrstintisgeltilpnss  
mgeitnysitngtaivkip  
vsvdenidnvekkInkIftsIrskyylfvsdpvvigIdafedtrvIlrvsaetipgegfsgariIrvinevqkmflqegikt  
ppimtpfnhsengv  
>tr|DOK8R3|DOK8R3\_STAAD  
msavvlIacgndtpkdetkstesntnqdtnttkdvialkdvktspedavkkaetykgqklkgIsfensngewaykvttq  
ksgeesevlvadknkkvin  
kktekedtvnendnfkysdaIdykkaIkegqkefdgdIkewslkddgklvynidIkkgnkkqevtdakngkvlkseqd  
h  
>tr|DOK8R7|DOK8R7\_STAAD  
mkvritfiilalIstivclflaamhptgpntvtfeqpylftlniImvlvalpslvIaiydymfrissailqflgaisw  
fflslslstqftptlas  
fitsiIlfisaiItIaiggksvdkndsh  
>tr|DOK8S2|DOK8S2\_STAAD  
msdyvynIvkkhsvrkfnkplIedvvkklveagqsastssflqaysiIgiddekIkenIrevsgqpyvvengylfvfv  
Idyrrhhlvdqhaetdmen  
aygstegllvgaidaalvaeniavtaedmgygivflgslrndvervreildIpdvypvfgmavgepaddengaakphlp  
fdhvfhhnkyhadketqya  
qmadydqtiseyydqrtngrketwsqqiemflgnkarIdmleqlqksgliqr  
>tr|DOK8S3|DOK8S3\_STAAD  
mnafltliniivIvifivIlhmmarkhisfakrvftalIgigivgvllhlvygthsnvitstsdwfnivgqyvalIqmi  
vmpIifisivaaftkiqig  
ekfakigslififlIgtvtiaaivgvvyaIvfgldastinIгнаeqahgseiakqakdltahtIppqilellpknpfldf  
tggratstiavvifasfig  
faylrvarqpdhgellkraidaiyslvmavtflvrltpygvIaimantIstsdfgaiwtIlgkfliasyaalitmyiih  
liIsllgispriyvkktl  
evlifaftrsrsagalplnvqtqtrrlvpegiIanaftfglsiqngcagiypamIaimvapvanveidIqfivtIav  
viIssfgvagvggatfas  
ilvIstInIvpalagvlisveplIdmgrtaInvndsmIagtgtakltkhwdkdtfesndnaaltsh  
>tr|DOK8S8|DOK8S8\_STAAD  
mknIIsIsvqhlIamyagaiIvpiivgtsIkftpeqiayIvtvdiIcmgvatflqankvtgtglpivlgctftavapmili  
gqtkgidvlygslfIsgil  
viiIapffshlvkffppvvtIgvsvvtiIginImpvamnyIaggqakdygdvknillglmtliiIlvlqrfttgfiksiIai  
IiglvIgtigagllgmvdI  
nqvnhadwlgipvpfrfsgfsfdvtstlvffivaivsIiestgyvhalseitgkklerkdfrkgytaeglaivlgsifns  
fpytaysqnvglvsIsgak  
knnviygmvlIlicgcipklgalaniIplvlggamiIamfgmvmaygvsilghidfkqnllIiavsvglgtgisavp  
qafkgIgeqfawltqngiv  
IgaIsaiIlIffngikykqteenvk  
>tr|DOK8U4|DOK8U4\_STAAD

Tsompanidou\_et\_al\_Supplemental\_FASTA\_File

mkltalakatlaalgitgvtfaeskavhaveldetqrkyinmlhqqyseeffestnisvksedygsvlnfnqrnk  
tfkvflilgddknkykekth  
gldvfavpelidikggiysvggitkknvrsvfgfvsnpqlqvkvdakhgfsineffiqkeevslkeldfkirkmivek  
yrlykgasdkgrivimkd  
ekkyvidlseksfdrmfvdmskqiknievln  
>tr|D0K8U6|D0K8U6\_STAAD  
msitekqrqqaelhkkllwsianlrgnmdasefrnyilgliyrfylsekaeqeyadalsgedityqeawadeeyredlk  
aelidqvgyfiepqdlfsa  
mireietqdfdiehlatairkvetstlgeesendfiglfsdmdlssstrlgnvkertaliskvmvnlddlpfvhsdmeid  
mlgdayefligrfaatagk  
kagefytpqqvskilakivtdgkdklrhvydptcgs1llrvgketqvryfgqernnttynlarmmllhdvryenfd  
irnddtlenpafingntfda  
vianppysakwtadskfenderfsgyglapkskadfafiqhmvhylddegtmavvlphgilfrgaagvirrylieekn  
yleaviglpanifygtsip  
tcilvfkcrqddnvlfidasndfekgnqnhlsdaqveridtykrketidkysysatlqeiadndynlnipryvdtf  
eeeapidldqvqqdlknid  
keiaiegeinaylkelglvldkde  
>tr|D0K8V1|D0K8V1\_STAAD  
mkyktrretmrylkrllswyisililivviagcgknetkegskeeqikksfaktldmypi knledlydkegyrdsefkk  
sdkgwtiytdfaksnkp  
eldddegmvlndrnrtrtakghyfvttfyrngklpdeknykiemknkiilldevkddklkqkienfkffgqyanlkelrk  
ynngdvsinenvpsydvey  
kmsnkdeivkelrsrynistekspilkmhidgd1kgssvgyrkleidfskrensklsvieflysykpack  
>tr|D0K8V3|D0K8V3\_STAAD  
mmgyskrfalyisvmlifaiagcgksdetkevskeeqikksfaktldmypi knledlydkegyrdgefkkgdkgtwvis  
svmvkqpkgeimksrgmyl  
flnrnrtrtakgyfivdetsndtlkktedkekrypvkmvnnkivpidpindkgvkkeienfkffsqqydfkelknykgev  
synseapiysakyqlknnd  
ynvkqlrkrydistekapkl1lkgtd1kgssighkdi eftfvenqeeni ftdsleftsseney  
>tr|D0K8V4|D0K8V4\_STAAD  
mcvvyrtsvlijllasgcsgvfdtpedsketqikksfaktldmypi knledlydkegyrdgefkkgdkgtwvrsemi iq  
kgksltsrgmilymnrnr  
tttgyfsieeidsrkslderetekkyvkminnkiipteeikdek1kkeienfkffvqygsfkgienyengdisynseap  
iysakyklknndynvkelr  
kryniptekapkl1lkgsgd1kgssvgykeiefifienkeniyfsdglnlipsd  
>tr|D0K8V5|D0K8V5\_STAAD  
mrdskrvvlyisimvlsifigcgkneikedakeeqikksfaktldmypi knledlydkegyrdgefkkgdkgmwtiyt  
dfaksnrpgvldnegmvl  
ldrnrtrtakgyfivdtydnhsysknyrvemknkiilldkvedqklkerienfkffgqyadfkslksynhgdvns  
npsydakfkmsnkdenk  
qlrsryniptdkapilkmhidgd1kgssvgykkleidfskeense1sivdslnfqpaknkdde  
>tr|D0K8V6|D0K8V6\_STAAD  
mgyskrfalyisilivmavagcgksdetkedskeeqikksfaktldmypi knledlydkegyrdgefkkgdkgtwvly  
aivsqpkgeslksrgmil  
ldrnkrtakgsyirelkedknhdvqnekkypvklvnnrivlkdvdkk1kneiesfelqsqygnfnhfrneitnis  
ynpnapsyaeykmmkndr  
niqq1kkrfnlktsktpkl1lkgsgdikgssvgykeieifrsrseeafimlta1ssfvtk  
>tr|D0K8V7|D0K8V7\_STAAD  
mmgy1kr1vlyivimvsvfiigcdkssdaenpkegskaeqikksfsktldmypi knledlydkegyrdgefkkgdkg  
wtistdfaksnkqgemnse  
gmvlhfnrnrtrtatgyytvrttydevdklarekkyrvefknknkivllkvedenlkqkienfkffgqyadfkdlnkykng  
rissnenvpyeaeykrnn  
sdgnvkk1rekypttkqspilklhidgdikgssvgykqieytfsekeddetfmsdf1nfgpshsk  
>tr|D0K8W5|D0K8W5\_STAAD  
mlsfqllfslfvialiaialisgllflapvmpmryiklhlyilvmpilfavigffihgqhvlgpfkidrlswllagfvma  
lgfiigkfsmryllgdhhy  
rhyfp1ftaitstfaslawmsedlr1malcwgmtllcltllmavnrfwkvpresaklssmtflcgwafvgaivtiyatg  
ewrvpqhivhptwslltnv  
llv1lavmipaaqfpfhrwliesvtaptpvsaimhagivnaggviltrfapifdngfalsllilssisvllgsgislvq  
dykrqlvgstmsqmgfm1v  
qcalgyysaaiihlihgifkatlflqsgsivkrfnipkqasakdaygwi vmgrv1aiivaf1fwmsdrsayevlsali  
lawsllvswnqmvafskgr  
mar1vgmiliaivtfiyvithnyfydvlnqitthattptsvsiisvvilifgsl1siwarhryskgfavlyvwlvnlg  
earskaieshpnlykky1  
>tr|D0K8X3|D0K8X3\_STAAD  
mrhgrnqa1eafise1vkddihhydiafleseqdletvmtliqsgvdhfkivpl1ifsamhyldipnivhemkry  
pdikevseplgthplmrr  
lieqricdalagdeqqvgvmvahgningnftkaheelqicaqhlqinkptyartlygeisfthdesiskryqklivvp

Tsompanidou\_et\_al\_Supplemental\_FASTA\_File

lflydgrlvnkvkqgmndm  
vintdihftpsinfdpi lkqiindrleslmipmki  
>tr|D0K8X5|D0K8X5\_STAAD  
mkqvmvqqtpgrymlkammagflsivtvfmfgiktqfanthvdglinlmgaiafslglilvvtlnselltsnfmyftvg  
wyykvsvvkkmtwillycf  
lgnilggfvlfmkmfahvmtpentqal talvqkktvdstwl niftkgifcnffinigifismqfkggltkaffiacgvv  
vfvymgyehvvfnaglyag  
mvffnldavswlhvlnivfafngfvvggi fvglvayafngkrnrleqq  
>tr|D0K8X6|D0K8X6\_STAAD  
mveryikvliyifftllssisvtskcvpnkvirfilrtaigysifayglhyfsnlkknk  
>tr|D0K8X8|D0K8X8\_STAAD  
mkkklgmllvpavt1s1aacgnddgkdkggkvtiktvtvplqsfaeqiggkhkvsvsiypagtdlhsyeptqkdilsas  
ksdlfmytgdnl dpvakkv  
astikdkdkkrsledklldaklltdqhehgeehheghdhekeehhhggypdphwldpkinqtfakeikdelvkkdpkh  
kddyeknykklnddlkkid  
ndmkqvtkdkqnavfishesigy ladrygfvqgqi qnmnaedpsqkeltkivkeirdsnakyilyednvankvtetirk  
etdakplkfynmeslnkeq  
qkkdnityqslmksni enigka ldsgvkvkddkaeskhdkaidsgyfkdeqvkdrelsd yagewqsvpylkdgtldevm  
ehkaendpkksakdlkayy  
dkgyktditnidikneitftkdgkktgkyeyngkktl kypkgnrgvr fmfklvdgndkdlpkfiqfsdhniapkaeh  
fhifmgndndal lkemdnw  
ptyypsklnkdqikeemlah  
>tr|D0K903|D0K903\_STAAD  
mfnl linimtsal sgc1vaffahwlrtrnnkkgdk  
>tr|D0K904|D0K904\_STAAD  
mkl tqthaeilkfiivggintlnyyvvyllllkl l hieymishitgflvafvisyylncyfvyrvkptwrkfisfpitqi  
vnvs1qtvll yvfvswlnl  
paeiapfaglvitipitfvlskwilkdsn  
>tr|D0K915|D0K915\_STAAD  
mskifvtgatgligiklvqr lkeeghevagfttsengqqklaainvkayigdil kadtidqal adfkpeiinqitdlkn  
vdmaantkvrjegsknlid  
aakkhdvkkvraqsiafmyepgeglaneetsldfnstgdrkvtvdgvvgleetarmdeyvvlrfgwlygpgtwygkdg  
inyqfmdgqvtl sdgvtstf  
vhlddavetsiqaih fengiynvaddapvkgs efaewykeqlgvepnid iqpaqpfervgsnekfkaaggtli ykwtkdg  
mnpik  
>tr|D0K918|D0K918\_STAAD  
megnl1qq1fnyyvtnfgyldw lffkhllmsvygv lfaaligiplgillarytklsgfvitiani iqtvpviamla ilml  
vm1gsetvvltvflyal l  
piikntytgiasvdanikdagkgmgmtrnqvlrmielpsvsviiggirialvvaigvvavgsfigaptlgdivirgtna  
tdgttfilagaipiaiaia  
vidvllrflekrl dpttrhrknqsnhrpqsinn  
>tr|D0K922|D0K922\_STAAD  
mtrnnqwlml1vvflgsvmgntltlefryrlgsrkc  
>tr|D0K924|D0K924\_STAAD  
mnkdkqlhndkinlsqvl1lg1sglsgwlf gaweassiagpaaiiswlgflvigtiaynyieigtmfpqsggmsnya  
qythgsllgfaawanvvs  
lvtiipieavsavqymsswpwhwakpmrylmengsistygllavylivifsl1nywsvklltsfts1isvflkgvpm1t  
iimlmsgfdtsnyghsas  
tfmpygsapifaattasgifsfnstqtiinmgseiknpekniargiaislisavlyiilqstf1tsmpqsm1qhsgwn  
ginfnspfadlail1ginw  
laillyieafvspfgtgvsvfvtgrvlrameknghipkflgkmnekyhiprvaiifnaiismimvtlfrdwgtlaavis  
tatlvayltgpttvialrk  
mgptmtrpfrakilkvmaplsfvlaslaiywamwpttaeviliilglpiyffeyermnrntkkqiggs1wiivylivl  
s1lsfigskefkglnmiyh  
pfdfiivvvalifyyigtstssfesvyfratrntkmreslnneskssh  
>tr|D0K934|D0K934\_STAAD  
msntnkhyieeeyateqsrffkrdigfilyiflvnilpiiivlftfglvavftqqapwgfsfpismnisyllaviisla  
ifrrmhedafvpmirtqi  
astkykwhilisftlsvvlfl1llyfdifa1nvdaftvfdiyp1irdygsislivmlwltiilntlicqlifrhiliqel  
sr1ip1kitivlsvilet1  
yyppyintwwefipalilassatylylksnrnfmvsyfyqlavilvlhifm  
>tr|D0K935|D0K935\_STAAD  
mkgamawpflrlyiltlmffsanailnvfip1rghd1gatntvigivmgaymltamvfrpwagqiiarvgpikvlriili  
inaialiiygftglegyf  
arvmggvcta1ffsmlqlgida1peehrsegvslys1fstipnligplvavgiwnannislfaiviifialtttffgyr  
vtfaeqepdtsdkiekmpf  
navtvfaqffknkel1nsgiiivasivfgavstfvplytvs1gfanagifltiqaiavvaarfylrkyipsdgmwhpky  
mvsval11viasfvvafgp

Tsompanidou\_et\_al\_Supplemental\_FASTA\_File

qvgaiifygsailigmtqamvyptltsylsfvlpkvgrnmllglfiacadlgislggalmpisdvlgfkwmylicgmlv  
ivimimsflkkptprpass  
l

>tr|D0K937|D0K937\_STAAD  
mtlltvkhlittdtwdqplvsdvnftltkgetlgvigsgsgksitcksiiglnperlgvtgeiifdgtsmlslsesql  
kkyrgkdiamvmqggsraf  
dpsttvqkqmfetmrvhtsmstqeiektlieymdylslkdpkriksypymlsggmqlrmlialalalkpkliiadeptt  
aldtitqydvleafidikk  
hfdcamifishdltvinkiadrvvvmkngqliehgtresvlhphvytkyllstkkkindhfkvmrgdvhd

>tr|D0K940|D0K940\_STAAD  
mrkltkmsamllasglltgcgngkleekkenkqlyttvkdigdmnphvyggsmsaesmiyepivrntkdgikp1lak  
kwdvsedgktytflrddv  
kfhdgttfdadavkknidavqqnklhswlki stlidnvkvdkytvelnlkeayqpalaelamprpyvfvspkdfkngt  
tkdgvkkfdgtgpfklgeh  
kkdetadfnkndqywegesklkvqakvmpagetaflsmkgetnfaftddrgtdslkdkslkqldtgdyyvkrspmn  
tkmlvvnsqkknnavsdt  
vrqai ghmvnrkiakeildgqekpatqlfaknvtidnfdmptkydlkkaeslldeagwkkkgsdsvrqkdgknlmam  
yydkgssskeqaeyleae  
fkkmgiklningetsdkiaerrtsgdylmfnqtgwlllydpqstiaafkakngyesatsgienkdkkiysiddafkiqng  
kersdayknilkqiddegi  
fipishgsmtvvpakdlekvstqsqyelpfnemqyk

>tr|D0K941|D0K941\_STAAD  
mvgrastsekskrlyqaykkeqfevkiqneahqhllegkfeinrlykdvknvkegetvmactadayd1qq1slet1  
qsvkhvilisptfgsqmiv  
eqfmskfsqdiervisfstylgdtrivdkeapnhvlttgvkkllymgsthsnstmcqrisalaeqlkiqllevvesplhaet  
rnsslyvhpp1fmdfslk  
aifegtdvpyvyk1fpegpimtli remrlmwkemmailqafrvpsvnl1qfmvkenypvrpet1degdiehfeilpdi  
lqeyllvyvrytailidpfs  
qpdenghyfdfsavpfkvykneqdvvqiprmpsedyyrtamiqhigkmlgiktpmidqfltryeascqaykdmhqdq1  
ssqfntnlfegdkalvtkf  
leinrtls

>tr|D0K944|D0K944\_STAAD  
mni rhirnatavieyggkri lidpmlsdkgsfdpfpnsprqdqknlvelpmaiediindidlvilthlhidhfdpkai e  
vlpkdikiyaqneedasev  
erygftnsvfndvthigeieliktdaqhghgeilkmtghvhgmilkhseptlylaadtvwfegvekal ktyqpdvvl  
ngganqffeggplvmdehd  
vlkvant1plaqivvvhmeavnwhlsrkelnefinsndlgnrvvvpndge11tfek

>tr|D0K948|D0K948\_STAAD  
mnkxhvfvii gvilcicivasviylkvkydekekqkaiyykeqeritlylqhntkeptiksvhftslkrpmpgdavie  
gyinenkknftayatpeh  
nyqfggami eser1sel1kpahqlkspdeikeeldkkegh  
>tr|D0K954|D0K954\_STAAD  
mihskk1tlgiclv1liilivgyimtktngrnaikdtfnqtlklyptknlddfkdkegfrdqefkkgdkgtwivnsem  
viepkkgkdmtrgmlyin  
rntrttkgyyfi semtdsngprkdekrypvmehnkiiptkplndklrkeienfkffvqygdfkdindykdgd1syn  
pnpvsysakyqlknndyn  
kqlrkryniptnkapk11kkgdglkgssvgsknleftfvenkeeni yftdsvytssedtsyesn

>tr|D0K957|D0K957\_STAAD  
mktkyqinsdnksnseatsaissyieianannndlnasiqtqieilksqnsfpknlsylksytdpktgtttsaf1n  
kdtgkvtl gmtgtvnhkda  
ilkqtfgvpsyqgyidasetlkdigadvniglshvtdkdphykntqdfiknikkdydidiitghslggrdamilgmsndi  
khivvynpaplaikdvsgl  
yadqee1kkliekydghivrvsdedeldagvrnhlyetagekivlkngeghamsgilmsrtqai ilaelnkvkgyqden  
nkalksvrkqtrhr1hkve  
t1rvnw1qt1ggs1sssq1lealtaltiaeglnqlvneesqhlkmyhamahkfgdnwkaqevgneigekltseevi  
delrkggayeskletdprk  
kiddk1kklndvykncngyiakikqsieaivsndqmlasqidgmm

>tr|D0K959|D0K959\_STAAD  
mihskr1klc1c1liilsvfigacgmkkeesskdkqikenfnk1sllyptknl edfydkegfrdqefekgdkgwivdsem  
vie1kdkkmesrsmvlyin  
rntrttkgnfivrelwedsqyaqskdtkypvmehnr1iptkpiaddklrkeienfkffvqygdfkdindykdgd1syn  
pnpvsysakyqlknndyn  
kqlrkryniptnkapk11kkgdglkgssigsknleftfvenkeeni yfsdsinfkpte

>tr|D0K960|D0K960\_STAAD  
mmhskklmlgiclv1liilivgyimtkinsrsaikdtfnqtlklyptknl edfydkegfrdqefdkrdkgtwi insg  
mniqlkggalksremilyi  
rntrttkgyfivgeitkdkkythdkdkypvmehniiptkpi kdek1kkeienfkffvqygnfkdfkykngdisy  
pnpvsysakyh1snddyn



Tsompanidou\_et\_al\_Supplemental\_FASTA\_File

iqqlrkrydiptkkape111kgdgd1kgssigskdleftfvqnkreniyftdsveftpsedtsyesn  
>tr|D0K961|D0K961\_STAAD  
mmihsrklr1wlylv1lavfigacgmkkeesskdkqikenfnk1slyltnkledfydkegfrdeefekgdkgtwi i hsk  
mtietngknmesrglvlyv  
drnrtrttkgefivrelwedkkgyrsrkekeypvkmehnkiiptkpiaddklrkeiedfkffvqygdfkdindykdgdisy  
npnvpsysakyqlsnnodyn  
vkqlrkrydiptkkap111kgdgd1kgssighknlefi fienkeeniyftdsinfkpte  
>tr|D0K962|D0K962\_STAAD  
msr11ndfnqslkkgfikdshkgnytpk11vnnknekv1stiidelqkcetfyfsvafitesglaslkaq11d1snkg  
vkgkiltsnylgfnspkmy  
ge11klknvevrltdiagfhakgyifehkdyssmvi gssn1tsnal kvnyehnv11stmknngd1vdsvknefellwqkst  
plteqwinsykesfeyrs1  
eklaeveqtqml1adkvkksveivpnlmqaealrs1kairdtkdkali isatgtgktilcaldvrevnpnkflfivhne  
gilnrakeefkklvpiknd  
sdfg11tgkhrvdakylfatiqt1srddnfnkqfdenefdyivfdeahrsaastyqrvfnfypkpfm1gmtatpersdel  
sifelldyniayeir1qaa  
lesdilcpfhfygvtdivhggikeddvtklryltsdervnyiiqktdyygysgeilqglifvsskkeaydladklsskgi  
ksvaltgddsvnyrqivie  
k1kegkinyyiitvdlfnegidipevnqvm1rptessii fiqqlgrglrksankeyvtvidfignyknylipialsgdq  
sqnkdnkfkfltnndsing  
vstinfeevakkqiynsl davslnqnk1ilkayeevenrlghmp11mdfiqqhsidpsvifskfsnyyef11rykkidal  
lteneskn1vffsrqiapg  
1kridslvlee11kneltydelknkm1nevkiditeddidts1ril d fsfynagi ekiygs piecnermir1sdaftnal  
snqtfkifledlie1skyn  
nekyqkgknglilinkysredfski fnwnkngspvimgymirsqempifitydkhedisdskyedefl sqdelkwftks  
nrt1kskevqk1lshrakg  
ikmyifvqkkdddgiyfyylgtagi egsekqdkmpngsnvvtmd1aldkavrddi yryitn  
>tr|D0K964|D0K964\_STAAD  
m1sekiiapttlitffir1tlqfkii1ivilskitklyinqy  
>tr|D0K965|D0K965\_STAAD  
mhfhth1lyntcekyclgavffyfwgvfl yns1hkckgfsfhv11slteilkglatmdkelwierandslvkhfyeqq  
dieqregfesk1tfgtagi  
rgkfglgegrlnkftiek1alglarylnaqt nsptivi hydih1stefa qianv1lanhqitvylpdykttpelsfav  
rn1nttagim itashnpkd  
yng1kvygsdgaqlstdaselasryieevgdp1qidipiskqntsyikpfpksvtd dymkhiqnmi gyipksdlqvvfts  
1hgtsvpivpel1kslnfn  
qfn1vdaqckpdpnfssvqsanpedhrafdqavelankshad11stdpdadr1giaerdahghityfngnqigall1ny  
riqqt1sqrhr1miqsivs  
sel1tks1arynnvkykevlgtgfkfiaeirql d d h q n m i f a f e e s y g f l s e p f v r d k d a v q i v p l i i k y a s e l k l y g k t l  
kdeleqiyqtvrghedtlf  
sh1leglegkkkiesimthfrsnppqeiqglkvkaiedyltsevyl d k d t t s q i n s s k s n v i r v l f d e g f i a l r p s g t e  
pkiklyvs1kcpdfddvaq  
kinamifs  
>tr|D0K968|D0K968\_STAAD  
mlylev1knrnfty1lignflrrscfv1fslqi i w f t v e l t n q s s l k l s m m v m s q t l p f i i f g i f g g a y s d k h n k k k i l y  
1sdlils1liiiiip1lait  
sn1ny1l1tistaiti1ncytdpafra1lpeiideeh1atsnalids1lrgsni1l paligvivilvgnvgvfficsi1  
1flgfi1fnal1kytnnm1  
drhskedfsetwef1kgskeipfiii iqfacilintglwrvalplf isni1kegvgyglatsclgias11ms1img11s  
ekr1ifkfsigvlwgi1  
siinvfpsvailyigatlvlggsieg1trsvaiqikmpnh1mgkvfsisstsnyaa dt1s  
>tr|D0K969|D0K969\_STAAD  
mrdkkgpvnrkrdv1snk1nkysirkftvgtasiligs1mylgtqqeaaeanni enptt1kdnvqskevkieevtnkdt  
apqgveaksevtsnkdtie  
heasvkaediskkedtpkevanvaevqpkssvthnaeapkvrkarsvdegsfditrdsknvestpitiqgkeh fegygs  
vdiqknptdlgvsevtrfn  
vgn esngl1galqlknkidfskdfnkvrvannhqsnttgadwgwflf skgnaeeyl tnggilgdkg1vns g g f k i d t g y  
iytssmdktekqagqgyrg  
ygafvkn d s s g n s q m v g e n i d k s k t n f l n y a d n s t n t s d g k f h g q r l n d v i l t y v a s t g k m r a e y a g k t w e t s i t d l g l s  
knqaynflitssqrwg1nq  
ginangwmrtd1kgseftftpeapktite1ekkv e i p f k k e r k f n p d l a p g t e k v t r e g q k g e k t i t t p t l k n p l t g e i  
iskgeskeetkdpine1t  
eygpeti apghrdefdpk1ptgekeevpgkpgiknpetgdvvrppvdsvtkygpvkgdsivekeei p f e k e r k f n p d l a p  
gtekv t r e g q k g e k t i t t p  
t1knp1tgei1skgeskeetkdpine1teygpeta pghrdefdpk1ptgekeevpgkpgiknpetgdvvrppvdsvtk  
ygpvkgdsivekeei p f e k  
erkfnpd1apgtekv t r e g q k g e k t i t t p t l k n p l t g e i i s k g e s k e e i t k d p v n e l t e f g g e k i p q g h k d i f d p n l p t d  
qtekvpgkpgiknpdtgkv

Tsompanidou\_et\_al\_Supplemental\_FASTA\_File

ieepvddvikhgpkgtptetkveipfetkrefnpklqpgervkqegqpgsktittpitvnp1tgekvgqpteeitk  
qpvdki vefgggekpkdpk  
penpekpsrpthpsgpvnppngl skdrakngpvhsmdkndkvkskiakesvanqekkraelpktgl estqkglifss  
igiaglmllarrkn  
>tr|D0K972|D0K972\_STAAD  
mlpildkptiqyiveearagiediiivtgrhkraiedhfsqkel emvlkekgsellekvqstelani fyvrqkeqk  
glghaissarqfignepfa  
vllgddivesevpavkqli dvyeetghsvigvqevpeadthrygi idpltkngrqyevkkfvekpaqgtapsnlaimgry  
vltpeifdylktqkegagn  
eiqltdaiermnndnqvaydfegerydvgek lgvfkttieyalkddsmreeltrfikalgl  
>tr|D0K973|D0K973\_STAAD  
mivvgmqekeaaseqnnttveesgssateskasetqttntvntidetqsysatsteqpskstqvtteeapttvqapk  
vetemksqedlpsekvadk  
ettgtqvdi aqpsnvseikprmkrsadv tavsekevaeekatgt dvtnkvevtessleg hnkdsnivnphnaqrvtlky  
kwkfggikagdyfdftls  
dnvethgistlrkvpeiksstedkvmangqvinertiryftdyinnkkdltaelnlnlfidptvtkqgsqkvevtlqq  
nkvskefdikyl dgvkdrn  
gvtvngridtlnkeegkfshfayvkpnnqsltsvtvtgqvtsyqqsannptvkvykhigsdelaesvyakl ddtksfed  
vteknlsytsnggytlnl  
gdldnskdvyikyegydnakdl nfrthlsgyhkyypyypyypvql twnngvafysnnakgdgkdkpndpii ekse  
pidldikseppvekhe lgt  
tiesndskpidfeyhtavegaeghaegiieteedsihvdfeesthenskhqadvveyeedtnpgggqvtttesnlvefde  
estkgivtgavs dhtted  
tkeyttesnl ielvdelp eehgqaqgpi eeitennhhi shsglgtenghnygvideieenshvdikselgyeggqnsn  
qsfeedteedkpk yeqgn  
ivdidfsvpqi hgqnnqnsfeedteedkpk yeqgnii didfsvpqi hgfnkneiieedtnkdkpnyqfgghnsvd  
feedtlpkvsgqnegqqt i  
eedtppptp ptpsep ptpptp ptpsep ptpk ptpsep ptpv ptpsep ptpk ptpsep ptpk ptpsep ptpk  
gkvvtpvieinek vkavap  
tkqkqskkse lpetggeestnk gmlfgglfsilglvllrrnkknka  
>tr|D0K974|D0K974\_STAAD  
myalvycfk ldefefnlknkykkykpvisrdsrvlhaiym  
>tr|D0K982|D0K982\_STAAD  
mpftmkgypek wkefevikrqkaieianam lkegylekdvpiaakkakdwyralskeika leenfvqfhtatmekae  
vdseyatt dneehiqeqsn  
qdksyfdsesignqsggv rrep lmdgahpkvvesfkdv  
>tr|D0K983|D0K983\_STAAD  
miipaiigylcgnfqfgllvatgtlahiyvfk gpsrskl rvtviicn lafaicmmlgtltaktplvf gmtllivtvi pfyi  
ftalki agpsstffivtfs  
lpinlpiapeealyrgfailvggilatmmv litivf sknkaeeqai qndfkliskllhtyndka aflqvaktavdsfkas  
dkllitstssndkl srrfq  
kllllhtsaqqiyse llelnakqirp lpdeliemmdhiaql dnsdenvrywrkev tvteefqnlfnhilkidemvhane  
ariayeadmrkplyskriy  
qnltdsivfrntlrytaimmi aifialmfdfekaywiplsahtillgtstihai ergmarglgt ilcvlsvillfsi  
ptpvavilmgiaalf teal  
vganyaia vvfitiqvil mnglasqnl tiniafprvidvaigiviai igl fvlqqtasvllpnvmaevvrkeatl fhyll  
fsenykdnvyqkntamnl  
svkl nntqvynaangel fsdktli qnyypsl faleeisfml nramanedrltineql mgeylatfeniakhlelntele  
ikilpdlpqnyiqsamn  
iqhngfrerdknv  
>tr|D0K984|D0K984\_STAAD  
mkekrtnvrwmfalafffigviaym drani syiakqmmddl gmtkppqfgll asffslgyalmqvpsgml aekfgprkmit  
ialvwwsaftiltgmiknh  
gliylvrflfgvgeapmypsnavfnsfwfsknekgrassallagsyfgpvlapivtiavvnafnwqavfyifgavgilma  
vlwaiiakdlpeqhrmvne  
aekrfimenrdivatekssppwnnffkrfsfyai aiqyfvvqfiitlflwlp tyltevf hvnfkemsisslpwllmffl  
ilsagaisdrvlg lgrskf  
vargviaiagfivfavsii favrtgnlyvsifwls lglggigismgmswaaatdlgrnfs gtvsgwmnlwgnigalisp  
laglfvehlgwtmtfqlli  
vpaviavimwfyvkpdpqplivsd dkaiek  
>tr|D0K989|D0K989\_STAAD  
mrilkesiivafavgvvvgagfatgqei qfftshgaysisgiivtgllitl ggmvmvmtghh lksrnhdsinyflyp  
siargfdiiltmfm lslai  
imtaggastihqsfnlpywlsalilvafilat lflkfdrlia vlgvtpfliaivimiavyyfttshldftaanndaqih  
kqkslspgwwfdainyasl  
qiaaafsflsvmgskvkyrdstlygg liggliitflmminlglisqfdkikhvd lptlklatqmspsigiimsvimilv  
iyntvvg lmyafasrfsvp  
fsrryfi i i i i t m a v i t y i s t f i g f i s l i g k v f p i m g l f g f t l l i p v l y k g l i k r i t g k s h i d

Tsompanidou\_et\_al\_Supplemental\_FASTA\_File

>tr|D0K998|D0K998\_STAAD  
mklNnyslkvknkqldvncdlnfylogqinhivgkngvgksllakdfllnnsnipsksisqnvtlissssnipnditkdfll  
sl1kskfennrqtfdkiy  
nilnieaipsnvlknlsdgqkqk1k1lsf1ledhdliildevtnaldkktvneiyeflnfdiqshqtktiinithnlsd  
lsalpgkyfikdlqieey  
qskeevindyinl  
>tr|D0K9A5|D0K9A5\_STAAD  
mvlvimt1flkyapygkqglqalsgaacatflppaf1syaiggvfdikflqdigdlags1sgiavgilctlnlgvapvfa  
vivglvlhdfkllpafiaa  
ycvaflikwiekkvpegldlivvilfapaiafglasiiptgvlatlkqigsavtavgdnnpyalavilglvipvtgmtpl  
ssmvltsllglgtgvmaig  
altctgssfvnlilfrklnigggpskafavciepltdidliaqypvqlygtnaligvvnacivtfsglvigvkgmatpiag  
aivlfgfnnavtsivtiat  
viivsvlayiigtlinkfnlminfkmppsknhikesv  
>tr|D0K9A7|D0K9A7\_STAAD  
mkrqqsqwsstgfilasagsaiglgamwkfpymagiyyggaf1amfliftifvglpllimeftvgkmgrtyttqiyskl  
tgkkwlniigwngnlavfi  
lfgfysviggwiviyyiqv1wqlvifqrinhlqemnfavispw1tvlgqgiffatmiivmlgvekglekaskvmmpl  
lfvfl1iivks1tdga1  
egvki1qprvseitadgilfalgsfftlslgttgmitasyaskdmtikssaisivmni fvsvglai fpalhsfg  
yepqegpgllfkvlpmvfs  
qmhlgtl1fy1gflvl1f1faaltssis1le1nvsnf1tkndntkrkkvavigsilvfiisipat1sfgilkdvrfagatfd  
nmdfivsnv1mplgalgtt  
lvigqlldkk1l1qyfgkdrfr1fngwy1ikyampvvi1lvfivqlfs  
>tr|D0K9A9|D0K9A9\_STAAD  
mkktklihggh1tddytgavt1piyqtstylqddigdlrqgyeysrtanptrssvesviaaalengkhgfafssgvaais  
avvm1ldkgdhi1lnsdvy  
ggyraltkvfrf1gievdfvdtthtdsivqairpttkmlfietspn1lrvtdikksaeiakehglisvvdntf1mtpyy  
qnp1ldgidiv1hsatky1  
gghsdv1v1g1vatsddk1aer1afisnstggilgpqdsy1lvrgikt1gl1rmkqinrsvieiikmlqahpavqqvf1hpsi  
esh1nhdvhmaqadghtgv  
iafevntesakq1likatsyyt1aes1gaves1isvpa1mthasipadirakegitdglvrisvgiedted1vdd1kqa1  
dt1  
>tr|D0K9B2|D0K9B2\_STAAD  
mkr1ig1vivalv1laacgsnndkkvtigvasndtkawekvkelakkddidveikhffdyn1pnka1ndgdidmna1fqhf  
afldqy1k1kahkgtkisals  
ttv1aplgiysdk1kdvk1kvdgkavvipndvsnqaralk1leaaglik1kkdf1lagtvkditsnphk1kitavdaq1t  
ara1sdvdiavinn1gvatk  
agkdpkndpi1fleksnsdavkpyinivavndkd1dnktyakivelyskskaqka1qedvkdgekpvn1skdeikaiets1  
ak  
>tr|D0K9B5|D0K9B5\_STAAD  
mikcvclveetadk1lvqvrnrekycfpggkieegesqvhallrevkeelnl1t1tmdei1eyigtivgp1ayppqdm1tel  
ngfral1tkidwen1vtinne  
itdirwidkndali1apavkw1ietyggkhdk  
>tr|D0K9B6|D0K9B6\_STAAD  
mtnndtim1rhypq1dysml1eafq1sesd1kfvtpeenitaamsdnery1livvmdgrqcva1fft1hrkgkvap1fsdnq1d  
avffrsfsvdgr1yrnr1gig  
kvvmek1asfi1tstfq1dineiv1tvntdnphama1lyrqgyqymgds1mfi1grpvhimal1tik  
>tr|D0K9B8|D0K9B8\_STAAD  
mkyrn1lftkpfni1lg1fcia1figail1ftf1n1enfynk1pigqi1dvkhs1stptk1daqnrdi1kyknq1lkvki1ngq1fag  
ett1inhqy1vksqad1seaf  
rthekv1l1hisn1kpsday1iekkrd1t1vii1tg1fl1lv1lvgrkvg1lqsil1sl1nsia1iliaiy1hih1qhsn1l1fl1m  
tiamic1stil1t1lv1tgwh  
mrt1iti1ast1igt1fl1sig1lteli1ymtdgk1gik1yet1mn1fl1sl1ppkdi1fl1asv1lig1slgaimdvaitiasgm1heil1q1rtp  
hismrrwalagr1nigq1dim  
gtmtni1l1fsy1lsga1lpmf1l1fl1knantv1tyt1ismnws1leiaraltggigiv1ltipit1lfmeifet1lrakq  
>tr|D0K9C0|D0K9C0\_STAAD  
mhnek1ikg1lydyreehdacg1gfyanmdnkrshdi1dks1lem1lrr1ldhrgvggadgitgdgagim1teip1affk1qh1vtd  
fdipgegeyav1glffsker  
ilgseheav1fkkyfegeg1silgyrnvpvnkdaiakhvad1tmpvi1qqvfidi1rgiedvekr1flarkq1lefystqcd1el  
yfts1srktiv1ykgw1lrsd  
qikklytd1sdd1yqsk1glvhsrfstntf1pswkrahpnrm1mhngeintikgnvnmr1raqhk1liet1fgedqhk1vfqi  
vdedgsd1saivdn1alef1s  
lamepekaam1lipepw1lyneandanvrafyefysy1mepwdgptm1sfcngdk1galtdrng1lrpgryt1tkdnfiv1fs  
sevgv1dvpesnvafkq1gl  
npgk1l1l1vdfkq1nkvienn1dkgai1age1pykawi1dnhkvd1dfeni1yq1qdsqwk1det1flk1lqrq1faytkee1ihkyi1qel  
vegk1kdpigamgydapi1av  
lnerpes1lfny1fkq1lfaqv1tnppi1dayreki1vtse1lsy1lggegn1lapdet1vdri1qlkrpv1lnesh1laaidqeh1fk1ty

Tsompanidou\_et\_al\_Supplemental\_FASTA\_File

lstvyegeledalealgre  
avnavkqgaqilvlddsglvdsngfampmlaishvhqllikadlrmstslvaksetrevhhvacllayganaivpyla  
qrtveqltltteglqgtvvd  
nvktytdvlsegvikmakmgi stvqsyqgaqifeaigls hdivdryftgtqsklsgisidqidaenkarqqsddnylas  
gstfqrqqgqhafnpes  
ifllqhackendyaqfkayseavnknrt dhirhllfkactpididqvepvsdivkrfntgamsygsisaeahetlaqam  
nqlggksnsgeggedakry  
evqvdgsnkvsai kvasgrfgvtsdylqhakeiqikvaqgakpgeggqlpgtkvypwiaktrgstpgiglisppphdi  
ysiedlaqlihdlnankd  
adiavklvsktgvgtiasgvakafadkivisgydggtagpksiqhagvpweiglaethqtlkln dlrsrvkletdgkl  
ltgkdvayacalgaeefgf  
ataplvvlgcimmrvchkdtdcpvgvatqnkd lralyrgkahvvnfmhfi aqelreilaslgkkrvedlvgrtdllqrs  
tlkanskaasidveklcp  
fdgpnkaiqqhnl ehgfdltnlyevtkpyiaegrrytsftvneqrdvgvitgseiskqygeaglpentinvytng  
agqslaayapkglmihhtg  
dandyvgkglsggtvirkapfeerqnei agnvsfygatggkafingsagerfcirns gvdvvvegigdhgleymtgghv  
inlgdvgnfvggmsggia  
yvipdveafvenqldt lsfkikhqeeafikqml eehvshtnstraihvlkhfdriedvvkvipkdyqlmmqkih  
hkslhdnedeaml aafydd  
sktidakhkpavvy  
>tr|D0K9C1|D0K9C1\_STAAD  
mgefkgfmkydky lge lslvdr lkhkayqrrftkedasiqgarcmdcgt pfcqtgqqygre tigcpignyipewndlv  
yhqdfktayerl setnfp  
dftgrvc papcesacv mkinresiaikgiertiidea fengwvapkvsrrrdekvaivgsgpagltaaeelnllgyqvt  
iyeraesggllmygipnm  
klkdvrrrik lmeegitfingvevgvidkat leseydaiilctgaqkgrdlplegrmgdihfamdylteqtqlln  
geiddititakdknviig  
agdtgadcvatal rencksi vqfnkytklpeaitftenaswplampvfkm dyahqeyeakfgkepraygvqtmrydvddk  
ghirglytqi leggengmv  
mkegperfwpadlvll sigfegteptvpnafniktdrnriv addtnyqtnnekvfaagdarrgqslvvwaikegrgvaka  
vdqylaskvcv  
>tr|D0K9C6|D0K9C6\_STAAD  
mnyqalrymrpgsfedvvgqehv tklrnaiskekqshayifsgprgtgktsiakmfakainclnstdgepcnechick  
gitqgtnsdvieidaasn  
gvdeirnrldkvkyapseskykvyiidev hmlttgafnal lkleppahafilattephkipptiisraqrfdfkais  
ldqiverlkfvadaqqiec  
edealafiakaseggmrda lsimdqaiafgdgtl tldalnv tgsvhdealdhl fddivqgdvqasfkkyhqfitegkev  
nrindmiyfvrtdimnkt  
sekdt eyralmnl eldmlyqmidl indtlvsirfsvnqnvhfevllvklaeqikgppqvia nvaepaqi asspntdvllq  
rmeql eqelktlkaggvsv  
apaqksskkpargi qksknafsmqqiakvldkankadikllkdhwqev idhaknndkkslvsllqnsepvaasedhvlvk  
feeeihceivnk ddekrss  
iesvvcnivknvkvgvpsdqwrvt eylnqrknegddmpkqqaqtdiaqkaldl fgeetvhvidee  
>tr|D0K9D6|D0K9D6\_STAAD  
mdshfvvi vkcsdgslytgyakdv narvekhnrqqgakytkvrrpvhlvyqemyetk seal kreyeiktytrqkklrl ik  
er  
>tr|D0K9D8|D0K9D8\_STAAD  
mlrylllsmylfyikkrrchffivniilsvsmqndnl pfk itacvykiv  
>tr|D0K9E0|D0K9E0\_STAAD  
mlidthvhlndeqydd lsevit rareagvdrmfvvgfnkstieramkl ideydflygiigwhpvda idftee hlewies  
laqhpkvigigemgldyhw  
dkspadvqkevfrkqialakr lklpiih nreatqdcidil lehaeevggimhsfsgspei adivtnkl nfyislggpv  
tfknakqpkvakhvsmer  
llvetdapy l sphpyrgkrneparvt lvaeqiaelkg l syeevceqttknaeklfnlns  
>tr|D0K9E8|D0K9E8\_STAAD  
mrrhaiilaagkgtrmkskkykvlhevagkpmvehvlesvkgsgvdqvvtivghgaesvkg hlgerslysfqeeqlgtah  
avqmaksh ledkegttiv  
cgdtp litketletli ahhedanaqatv l sasiqqpygygrivrnasgrleriveekdatqaekdineissgifafnkt  
lfekl tqvkn dnaqgeyy l  
pdvlsli lndggivevyrtndveeimgvndrvmlsqaekamqrtrnhyhmlngvti idpdstfigp dvtigsdtviepgv  
ringrteigedvvigqyse  
innstiengaciqqsvvndasvgantkvgpfaqlrpgaqlgadkvgnfveikkaldkdgakvshlsyigdavigertni  
gcgtitvnydgenkftiv  
gkdsfvgnvnlvapvtigddv lvaagst itddvpndslavara rqttkegy rk  
>tr|D0K9F2|D0K9F2\_STAAD  
mti lttlikednhfqdl nqvfqgantlv tgl spsakvtmiaekyaqsnqql l l itnnlyqadkletd llqfidaeelyky  
pvqdimteefstqspqlms  
erirtlta laqgkglfivplnglkkwltpvemwqn hqmt lrvgedidvdqflnklvnmgykresvshigefslrggi

Tsompanidou\_et\_al\_Supplemental\_FASTA\_File

di fplige pirielfdtei  
dsir d f dvet q rsk dnie ev d itt as dy i i te e vir h l kee l kt ay ent rpk id ksv r nd l kety es fkl fest yfd hqi  
l rrl vaf mye ip sti i ey f  
qkdai i av def nr i ketees l tves ds f i sni es g ng f i gq s f i ky d d fet l i eg y p vt y f s l fatt mp i k l n h i i k f s  
ckpvqqfyggydimrsefq  
ryvnqnyhivv lvetetkvermqam l semhipsitk l hrs mss g qavi i egs l seg fel pdmg l v v i t e r e l f k s k q k k q  
rkr tkais nae k i k sy q d l  
nvgdyi vvh hgvgryl gvet l ev g q t h r dy i k l qy k g t d q l f v p v d q m d q v q y v a s e d k t p k l n k l g g s e w k k t k a k v  
qqsvediaee l i d l y k e r e  
maegyqyg edtaeqttfel d f p y e l t p d q a k s i d e i k d d m q k s r p m d r l l c g d v g y g k t e v a v r a a f k a v m e g k q v a f l v  
pttilaq qhyet l i e r m q d  
fpveiq l m s r f r t p k e i k q t k e g l k t g f v d i v v g t h k l l s k d i q y k d l g l l i v d e e q r f g v r h k e r i k t l k h n v d v l t l t  
atpipr t l h m s m l g v r d l s  
vietppenr f p v q t y l e q n m s f i k e a l e r e l s r d g q v f y l n k v q s i y e k r e q l q m l m p d a n i a v a h g q m t e r d l e e t m  
l s f i n n e y d i l v t t t i e t  
gvdv p n a n t l i i e d a d r f g l s q l y q l r g r v g r s s r i g y a y f l h p a n k v l t e t a e d r l q a i k e f t e l g s g f k i a m r d l n i r  
g a g n l l g k q q h g f i d t v g f  
d l y s q m l e e a v n e k r g i k e p e s e v p e v e d l n l d a y l p t e y i a n e q a k i e i y k k l r k t e t f d q i i d i k d e l i d r f n d y p v  
e v a r l l d i v e i k v h a l h s g  
i t l i k d k g k i i d i h l s v k a t e n i d g e v l f k a t q p l g r t m k v g v q n n a m t i t l t k n q w l d s l k f l v k c i e e s m r i s d e a  
>tr|D0K9F3|D0K9F3\_STAAD  
mkhkeafngvvv l t a a l i v i k i l s a v y r i p y q n i l g d t g l y a y q q v y p i v a l g m i l s m n a i p s a i t q n i g k y s d e a y a k  
a v a y i q l v g i l l f i a i f v f  
a n n i a h m m g d s h l t p m i q a a s l s f i f i g m l g v l r g y y q s a n n m t v p a i s q v i e q v i r v g i i v t i v i f v d r g w t i y e a g t  
a i a l a s t i g f l g s s i y l v a  
h r p f k f k m v n t a k i v w k q f a l s v l i f a i s q l i v i l w q v i d s v t i i k s l q a i r v p f d v a i t e k g v y d r g a s f i q m g l i v t  
t t f s f a l i p l l s d a i k m n n  
q v l m n r y a n a s l k i t i l i s t a a g i g l i n l p l m n g v f f k t n d l t l t l s v y m i t v i c v s l i m m d m a l l q a q h a v r p i f v g m  
t a g l v i k f i l n i i l i r l s g  
i i g a s i s t v v s l i i f g t i i h i a v t r k y h l h a m r r f f i n v l g m v f m s i v v q c v l n i v t t h g r f t g l i e l l c a a v l g i a l  
f f y i f r f n v l t y k e l t y l p  
f g s k l y q i k k g r r  
>tr|D0K9G5|D0K9G5\_STAAD  
m i q a y l g l s n i g d r e s q l n d a i k i l n e y d g i s v s n i s p i y e t a p v g y t e q p n f l n l c v e i q t t l t v l q l l e c c l k t e e c  
l h r i r k e r w g p r t l d v d i l  
l y g e e m i d l p k l s v p h p r m n e r a f v l i p l n d i a a n v v e p r s k l k v k d l v f v d d s v k r y k  
>tr|D0K9G8|D0K9G8\_STAAD  
m s k r e p k k r k e a s d c h k s r k v l s e d g s q l t f r  
>tr|D0K9G9|D0K9G9\_STAAD  
m k n i l y h q l y e k l k k q i e g q f k e g d k f y s k r q l s k h l s i s q t t v e h a y q l l l d e g y i y s r p r s g y f v s e i e s l t i l n n q  
p i p s l f d d d s y k p k a s d e a  
y d y a f n l d e i d t k h f p i e l f r k y s k d l y d t n h l n q l r r g h f q g e l h l r f q l a f y l f t n r g v i c d p n q i i g s s t e q l v n q  
l v d l l y t s t f i i e k p s y p p  
i k n i l d k k q v e y e q i e v e d n g i n v d e v i k s q k n i v y i t p s h q f p t g y v m d l k k r t q l i q w a q e k e e r f i e d d y d s e f r y  
f g k p i p a i q g l y s r g e k v i  
y i s t f s k s i f p s c r v a y m v l p y s i m k k y h s q n h i e g n t v p v h m q n l i a t f i s s g g f e r h l n k m r r i y r r k l t y i l k r l k p  
y k e q l d i q g a e t g m h f t i t  
v k n g l t l q e c l d r a n k v k l k l q v y n f d d d q y k k t p k f i l g f g i d d a l k p h v d a l i k s l i i k  
>tr|D0K9H4|D0K9H4\_STAAD  
m l c e n c q l n e a e l k v k v t s k n k t e e k m v c q t c a e g h p w n q a n e q p e y q e h q d n f e e a f v v k q i l q h l a t k h g i n f q e v a  
f k e e k r c p s c h m t l k d i a h  
v g k f g c a n c y a t f k d d i i d i v r r v q g g q f e h g g k t p h s s h k k i a l k r k i e e k n e y l k k l i e i q d f e e a a i v r d e i k a l k a  
e s e v q h d d a  
>tr|D0K9H8|D0K9H8\_STAAD  
m n i v k l m v i i i y l i i g s a l g i i i p e i a n d l g l q n s i f l k n h y v d g i i g s i f m f l i f g v f i r r v t n a i k g l e h f i m r r s a  
v e i l f a t i g l i i g l l i s v m  
v s f i l e s i g n s i f n h f i p v i i t i l l c y f g f q f g l k k r d e m l m f l p e n i a r s m s q h t k s a t p k i i d t s a i d g r i l e v i r c  
g f i d g n i l i p q g v i n e l q i  
v a d s n d s v k r e g k r g l d i l n e l y d l d y p t k v i h p t k t h s d i d t m l l k l a k y h a s i i t t d f n l n k v c h v h g i k a l n v n d  
l s e a i k p n v h q g d q l h i l l  
t k m g k e p g g a v g y l d d g t m v v d n a k n l i g s h v n l e v s l l q t s s g r i v f a k k i e d t v s l  
>tr|D0K9I5|D0K9I5\_STAAD  
m k y d l t t q d s t i k r n n s i n d k d f e k l v m d l q p l i i r r i k t f g f n h y d l e d l y q e i l i r m y r s v q t f d f s g e a p f t n y v q c  
l i t s v k y d y l r k y l a t n k r  
m d n l i n e y r v t y p c a i k r f d v e n n y l n k l a i k e l i c q f k y l s a f e k d v m y l m c e q y k p r e i a q l m h v k e k v i y n a i q r c k  
n k i k r y f k m i  
>tr|D0K9J4|D0K9J4\_STAAD  
m a g q v v q y g r h r k r r n y a r i s e v l e l p n l i e i q t k s y e w f l r e g l i e m f r d i s p i e d f t g n l s l e f v d y r l g e p k y d l e e

Tsompanidou\_et\_al\_Supplemental\_FASTA\_File

sknrdatyaaplrvkvrl  
iketgevkegevfmgdfplmtdtgvfvingaervivsqlvrspsvyfnekidkngrenydatiipnrgawleyetdakdv  
vyvrldrtrklplvtvlla  
lgfssdqeivdlgdneylrntlekdgteqalleiyerlrpgepvtvenaksllsyrffdpkrydlasvgyrktk  
lhkhrlfnqklaepivnt  
etgeivveegtvlrrkideimdvlesnansevfehlgsvidepveiqsikvyvpnddegrtttvgignafpdsevk  
adiasmsyffnllsgigy  
tddidhlgrrlsvgeilnqfriglrmervvrermsiqdtesitpqqlinirpviasikeffgssqlsqfmdqanpl  
aeltkrllsalpggltr  
eraqmevrdivhyshygrmcpietpegpniglinssyarvnefgfietpyrkvdldthaitdqidyltadeedsyvvaq  
ansklengrfmddevvcr  
frgnntvmakemdymdvspkqvsaatacipflenddsnralmganmqrqavplmpeapfvgtgmehvaardsgait  
akhrgrvehvesneilvrr  
lveengveheglrdryplakfkrsnsgtcynqrpiavgdvveyneiladgpsmelgemalgrnvvvgfwtwdgynyeda  
vimserlvkddvytsihie  
eyesearltkigpeeitrdipnvsesalknlddrgivyigaevkdgdilvgkvtpkgvteltaerllhaifgekarevr  
dtslrvphgaggivldvkv  
fnreegddtlspgvnlvrviyivqrkihvdkmcrhngkngviskiivpeedmpylpdgrpidimlplgvpsrmnigqv  
lehlmgmaakngihvasp  
vfdgandddvswstieagmardgktvlydgrtgepfdnrivsgvmymklahmvddklharstgpyslvtqqplggkaqf  
ggqrfgemewaleaygaa  
ytlqeiltyksddtvgrvktyeaivkgenisrpsvpsfrvlmkelqslgldvkvmdedqneiemtdvdddvdvvehkvd  
qqndapetqkevtd  
>tr|D0K9K1|D0K9K1\_STAAD  
mldwfqlannkenktiqlrrylhqypeisfeefqthdyivnqlsqsclietpigrngikatfkgigtgptialradfda  
lpveelndvpyksknpgcm  
hacghdghtailltvaeildekhlllegnvvlifqygeempggsqemidagclenvdriygthlwsgyptgtihsraga  
imaspdefsvtikgrgggh  
akphetidpivimaefllsaqkiiisrtidpvkqavlsgfmiqagttadvipdqafckgtvrtfdsdiqnhvmdkmdkllq  
glaiandinydlnyikgy  
pvhnekayqvi keatndlhvrfnesdlmmigedfshykvprpaffltgcnegskgitaphhnkfdidekslkyavav  
flkieleqvfktn  
>tr|D0K9K3|D0K9K3\_STAAD  
msqdvnel skqptpkaednaaffpspyslqytapktfdgvehkgaykdgkwkvlmiaaeryvllengkmfstgnhpv  
emllplhhlemeagfdvdva  
tlsgypvklelwamptedeavistynklkekllkqpkkladviknelgpdsdylsvfipgghaavvgisesedvqqtldwa  
lndrfivtlchgpaaals  
agl nrekspl egysvcvfpdsldeganieigy lprlkwlvadlltkqglkvvnddmtgrtlkdrkl lltgdsplasnelg  
klavnemlnaiqnk  
>tr|D0K9L3|D0K9L3\_STAAD  
mnkkkatnrkgmi pnrlnkfsirkysvgtasilvgttlifglsgheakaaehtngelnqsknettapsenktekvdsr  
qlkdnrtqatatadqpkvts  
dsatvketssnmqspqatasqsttqtsnvtndkssttysnetdksnltqaknvsttpktttikqralnrmavntvaap  
qgtnvndkvhftnidiai  
dkghvnttgntefwatssdvllkanytidsvkegdtftfkygqyfrpgsvr lpsqtqnl ynaqgniiakgiydskt  
tttyftnyvdqytnvsgs  
feqvafakrenattdktaykmevtlgndtyskdvi vdygnqkqqllsstnyinnedl srnmtvyvnpkktytketfvt  
nltykfnpdaknfkiyev  
tdnqfvdstfptdsklkdvttgqfdviysndnktatvdllngqsssdqyiiiqqvaypdnsstdngkidytletqngkss  
wsnsysnvngsstangdqk  
kynlgdyvvedtnkdgkqdanekgikgyvil kdsngkel drtttdengkyqftgl sngtysvefstpagytpptanagt  
ddavdsdgl tttgvikdad  
nmtldsgfyktpkyslgdyvwydsndkgkqdstekgikgvkvtlqnekgevi gttetdengkyrfdnl ds gkykvi fekp  
agltqtgtntteddkdadg  
gevdvti dhddftl dngyeeetsdsdsdsdsdsdsdsdsdsdsdsdsdsdsdsdsdsdsdsdsdsdsdsdsdsdsdsds  
dsdsdsdsdsdsdsdsdsdsdsdsdsdsdsdsdsdsdsdsdsdsdsdsdsdsdsdsdsdsdsdsdsdsdsdsdsdsdsds  
dsdsdsdsdsdsdsdsdsdsdsdsdsdsdsdsdsdsdsdsdsdsdsdsdsdsdsdsdsdsdsdsdsdsdsdsdsdsdsds  
dsdsdsdsdsdsdsdsdsdsdsdsdsdsdsdsdsdsdsdsdsdsdsdsdsdsdsdsdsdsdsdsdsdsdsdsdsdsdsds  
dsdsdsdsdsdsdsdsdsdsdsdsdsdsdsdsdsdsdagkhtptkpmstvkdqhktakalpetgsennnsngt lfggl faalgslllf  
grrkkqnk  
>tr|D0K9L4|D0K9L4\_STAAD  
mlnrenktaitrkgmvsnrlnkfsirkytvgtasilvgttlifglngqeakaaestnkelneattsasdnqssdkvdmqq  
lnqedntkndngkemvssq  
gnettsngnksiekesvqsttgknkevstaksdeqaspkstnedlnkqtisnqeglqpdllenksvvnvqptneenk  
daktestl nvksdaiksn  
aetlvdnnsnennadiilpkstapkslntrmrmaaiqpnsdsknvndlitsnttltvvdadnsktivpaqdyllsk  
sqitvdkvksgydyftiky  
sdtvqvygl npediknigdikdpnnetiatakhdtannlitytftdyvdrfnsvkmginsiydadtivdkkdvfps

Tsompanidou\_et\_al\_Supplemental\_FASTA\_File

vtignqitttttaditypay  
keadnnsigsaftevtshvgnvedpgyynqvvyvnpmdkd1kgak1kveayhpkypntnigqinqvntnikiyrvpegyt1  
nkydvntnd1vdvtdefk  
nkmtygnsqsvnlfdgdi tsayvmmvntkfqytnsesptlvqmat1sstgnksvstgna1gftnnqsggagqevyikgny  
vwedtnkngvqelgekvgg  
nvtvtvfdnntntkvgeavtkedgsylipn1pngdyrvefsn1pkgyevtpskqgnnee1dsng1ssvitvngknn1sad  
1giykpknlgdyvwedtn  
kngiqdqdekgsigtvt1kdengv1ktvttdadgkykftd1dngnykvefttpegytpttvtsgsdi ekdsng1tttg  
vingadnmt1dsgfyktpk  
yn1gnyvwedtnkdgkqdstekgisgtvt1knegev1qttktkdkgkyqftglengtykvefetpsgytptqvgsgtd  
egidsngtsttgvikdkdn  
dtidsgyfkyptyn1gdyvwedtnkngvqdkdekgsigtvt1kdendkv1ktvttdengkyqftd1nngtykvefetpsg  
ytptsvtsgndtekdsng1  
tttgvikdadnmt1dsgfyktpkys1gdyvwydsnkdgkqdstekgikdvkvi11nekgevigttkt dengkyrfdn1ds  
gkykvi fekptgl1qtgtgn  
tteddkdadggevdtitdhddft1dngyeeetsdsdsdsdsdsdsdsdsdsdsdsdsdsdsdsdsdsdsdsdsdsdsds  
dsdsdsdsdsdsdsdsdsdsdsdsdsdsdsdsdsdsdsdsdsdsdsdsdsdsdsdsdsdsdsdsdsdsdsdsdsdsdsdsdsds  
dsdsdsdsdsdsdsdsdsdsdsdsdsdsdsdsdsdsdsdsdsdsdsdsdsdsdsdsdsdsdsdsdsdsdsdsdsdsdsdsdsds  
dsdsdsdsdsdsdsdsdsdsdsdsdsdsdsdsdsdsdsdsdsdagkhtpvkpmsttkghnkakalpetgnensgsnnat1fgg1  
faalgs111fgrrkkqnk  
>tr|DOK9L5|DOK9L5\_STAAD  
minrdnkkaikkgm1snr1nkfsirktyvtgasi1vgt11fig1nqeakaaentstenakqddattsdnkevseten  
nsttendstnpikketntd  
sqpeakeesttsstqqqnnvtattetkpniekenvkpstktatedtsvileekkapnytnndvttkpstseiqtktpt  
tpqestniensqpqtpsk  
vndqvtatnpkepvnvskeelknpek1kelvrndnndrstkpvataptsvapkr1nakmrfavaqpaavasnnvd1  
itvtkqtikvgdgkdnvaa  
ahdgkdi eydteftidnkvkkgdtmtinydknvi psd1tdkndpiditdpsgeviakgtfdkatkqitytftdyvdkyed  
ikarl1tlysyidkqavpne  
ts1n1tfatagketsqnvsdyqdpmvhgsniqsi ftk1denkqtieqqiyvnp1kktatntkvdiagsvddygnik1  
ngsti1dqnteikvykvn  
pnqq1pqsnr1ydfsqyedvtsqfdnkksfsnnvat1fdgdi nsay1ikvvsyktptsdgel1diaqgtsmrttdkygyyn  
yagysnfi vtsndtgggdg  
tvkpeeklykigdyvwedvkdgvqgtdskekpmav1vt1typdgttksvrtdanghyefgg1kdgetytkvetpapy  
1ptkvngttdekdsngss  
vtvkingkddms1dtgyfkyepkn1gdyvwedtnkdgi qdanepgikdvkvt1kdstgkvi gttttasgkykftd1dng  
nytvfefetpagytpvtknt  
taedkdsng1tttgvikdadnmt1dsgfyktpkys1gdyvwydsnkdgkqdstekgikdvkvt11nekgevigttkt den  
gkyrfdn1dsgkykvi fek  
pag1tqtvtntteddkdadggevdtitdhddft1dngyfeedtsdsdsdsdsdsdsdsdsdsdsdsdsdsdsdsdsdsdsdsdsdsdsds  
dsdsdsdsdsdsdsdsdsdsdsdsdsdsdsdsdsdsdsdsdsdsdsdsdsdsdsdsdsdsdsdsdsdsdsdsdsdsdsdsdsds  
dsdsdsdsdsdsdsdsdsdsdsdsdsdsdsdsdsdsdsdsdsdagkhtpvk  
pmsttkdhhnkakalpetgsenngsnnat1fgg1faalgs111fgrrkkqnk  
>tr|DOK9M2|DOK9M2\_STAAD  
melqlaid11nkedaaelankvkdyvdiveigtpti1y neg1pavkhmagnisnvkvladmkimdaadyevsqaikfgadv  
itilgvaedasi kaaieea  
hknnkq11vdm1avqdl ekrake1demgadyi avhtgyd1qaegqspl es1rtvksviknskvavaggikpdtikdivae  
spd1vi vggianaddpve  
aakqcraa1egk  
>tr|DOK9M4|DOK9M4\_STAAD  
mkfdnyi fdfdg1ladtkkcevatsafkacgl1tepsskeithymgipieesflkladrpl1deaalak1tdtfrhtyqs  
iekdyiyefagiteaits1  
ynqgkkl1fvsskksdvlern1saig1nh1iteavgdqvsaykpnpegihtivqryn1nsqqtvyigdstfdvemaqha  
gvpsaavtwgahdars11h  
snpdfi indpseintv1  
>tr|DOK9M9|DOK9M9\_STAAD  
mfkkl1fgql1rigrkalm1pvai1paagi1lafgnamhneql1vei apwlkndi1vmi1ssvmeaagqvfdn1p11favgta  
1glaggdvaa1aalvgyl  
imnatmgkv1hitiddi1fsyakake1sqaakepaha1vlgipt1qtgvfggiimgalaawcyknfynit1ppfl1gffag  
krfvpi vtsvva1atgv11  
sfawppi qdgl1ns1snf11nkn1t1ttfi1fgi1iers1lipfgl1hhi1fysp1fwefgsytnhage1vrgdqriwmaqlkdgv  
pftagaf1tgky1fmmfg1  
paaafai yknarperkkvvggl1msag1taf1tgit epl1efsf1fvapvlygi hv11lagtsf1vmh11gvkigmtfsggf  
idy1lyg11nwdrshallv  
ipvgi vya1vyf11dfai rkfk1ktpgredeetei rnssvak1pfdv1damggkenikh1dacitr1rvevvdkskvdv  
agikal gasgv1levgnmq

Tsompanidou\_et\_al\_Supplemental\_FASTA\_File

aifgpksdqikhdmakimsgeitkpsettvteemsdepvhvealgtttdiyapgvqgiiplsevpdqvfagkmmgdgigfi  
pekgeivapfdgtvktifp  
tkhaiglesesgvevlihgidtvklngegveslindekvtqgqplmkvnlaylkahapsivtpmiitnlenkelvied  
vqdadpgklimtvc  
>tr|D0K9N2|D0K9N2\_STAAD  
mhkvqliiklllqlgiiivityigteiqkifhlpagsivglflfylllqfkivpltwvedganflkktmvfffipsvvg  
imdvasaitlnyilffavi  
iigtciavalssgyiaekmsvkhkhrkgvdaye  
>tr|D0K9N4|D0K9N4\_STAAD  
mqsfllgddtp|gelvdwinqdsnfprevkshseilsyfrtnpcpesisvpvikralsvfnqftnvq  
>tr|D0K9N7|D0K9N7\_STAAD  
mtigidkinfyvpyyvdmaklaearqvdpnkfligigqtemavspvnqdivsmganaakdiitdedkkkigmvivates  
avdaakaaavqihnlgiq  
pfarcfemkeacyaatpaiqlakdylatrpnekvliatdtaryglnsqgeptqgagavamviahnsilalnedavayt  
edvydfwrptghkyp1vdg  
alskdayirsfqqswneyakrqgksladfaslcfhvpftkmgkalesiidnadettqerlrsgyedavdynryvgni  
gsllyslisllnrdlqag  
etiglfsgsgsvgefysatlvegykdhldqaahkallnrtesvdayetffkrfddvefdeeqdavhedrhifylsni  
ennvreyhrpe  
>tr|D0K9P1|D0K9P1\_STAAD  
menycilgnpvgktslnfaltgsyeyignwsgvtvekkvgklkenvgqlidlpgytdlspiskdetvtdy1lndsfsq  
iinivdasqlkrnvqltvq  
llnqpiyiglnmidvatkrigikidyhklmkk1ktpifpvartgkgtkyl1geikh1gegyqphfkinygekieetik  
nmcqiiimtetsdkygarf  
iaiqfllnmqianelnsevvnlsslrdqvaeqvgavsvrremerrnhietllqdvvtppedkqyfssridkilth  
kyigmpiflaimwli1fqt  
ftwigtp1sdqldafiggtftdsvktimnylgvipflqdlitdgiagvgsvlvfvppqivvlfffisllledsgymariav  
lmdrimesfglsgksfipm  
iigfgcnvpsimaarsienekerltiliapfmscsarlpvya1fvgi1ffkenqslv1slyvlgiimaf1vst1tkti  
lkndnaifive1ptyrvps  
ikt1wrstwekakgfvrkagififggsvviwllsyvgphginvninqsf1hmvgsffgm1vqpl1gfgtwqagat1vpgf1  
akevi1vssmai1yssgdag  
lvnviqngftplsayafmi1llyipcvstvaa1rketyswkwtalavayplvtayv1t1fifyqvg1h1fv  
>tr|D0K9P5|D0K9P5\_STAAD  
mvvefknepgydfsvqenvdmfka1kdveke1gqdiplvingeki1fkddkiks1npatdsqvia1naskatkqdvadafk  
aaneaykswtwsandrae  
1m1rvsai1rrrkaeiaaimvyeagkpwdeavgdaaegidfi1eyarsmmd1aagkpvl1dregehnyfyksigtgvtip  
pwnfpfaimagt1lapvva  
gntv1lkpaedtpy1ayk1mei1leag1pkgvvnfvpgdpkeigdy1vdhkdthfv1tftgsratgtriyersavvqegqn  
f1krviaemggkdaivvde  
nidtdmaaeai1vtsafgfgsgkcsacsraivhkdvdevleksi1k1tke1t1gntvdntymgpvinkkqfdkiknyieig  
keegkfeqgggtdsksygf  
vepti1sg1kskdrimqeeifgpvvgfvkvndfdeaie1vandtdygl1tgavitnrehwikavnefdvgnly1nrgctsa  
vvyghpfggfkmsgtakt  
gspdy1l1hf1eqkvvsemf  
>tr|D0K9Q0|D0K9Q0\_STAAD  
mtkikimsvrredmpyikawaekhhvevditkealtddnvegvgdygl1s1sqipl1sehvykr1nelgikqiaqrsagf  
dydle1lankyn1ivsnv  
syspnsiaefavnqainvrhfnq1qtkvrehdfrwepti1lksik1dkvavigtgrigrvadi1fangyqsdvvaydpf  
pnakiat1yvdykdtieav  
egadi1v1hvp1atky1nhy1fnae1fk1fkkgavfvncargslvdtka1l1dal1ngvikgaal1dtyeferk1l1psdqrgkt  
pndp1les1idredv1ltp  
hiafyteaavkn1ivda1dat1dv1qtgdtr1rvn  
>tr|D0K9Q6|D0K9Q6\_STAAD  
mkkyik1taffcsmyw1ivq1lnian1lgtripdkyfrqkyi1fksfn1fekhgkfwk1wfyvrkwkhkildghq1lnqniydqr  
h1mtintdeiekmi1ietkr  
aelihwisilpvii1fnkgsr1vkyini1fyamianvpii1vqryn1rpr1tq1l1ril1krrgerhd  
>tr|D0K9Q7|D0K9Q7\_STAAD  
mkkiv1tati1ataglati1afaghd1a1aeqnnngynsndaqsysy1ty1t1daqgn1fhy1twtgnwnpsq1tqnntyyynnynt  
ysynnasynny1nhsyqgn  
nyt1nnsqtat1nny1tggsasyst1snnvht1ttaap1ssngrsi1ngyasgn1lytsgqcty1y1v1drv1ggk1gstwgnas  
nwanaa1assgy1tvn1ntpkv  
gaimqt1tggy1ghvay1veg1vnsngsvrv1semny1ghgagv1tsrti1sanqagsyn1fih  
>tr|D0K9R1|D0K9R1\_STAAD  
mtsik1t1tpkdfi1frv1sgva1g1vag1vpna1l1geffky1fmdy1hpi1fkt1l1gvv1vai1qftv1pal1gal1vamkfd1spla  
iavvasaayvgsgaaqfkn  
gawmi1tg1gd1int1mita1ia1v1f1ill1qhrvgsma1l1vfptv1vgg1sgaig1v1l1pytk1mitta1ignmvngftel1qpiv  
msilismv1fs1lii1s1plst



Tsompanidou\_et\_al\_Supplemental\_FASTA\_File

vaiafaigitglaagsasigisateavliigtskvnrlgvplsvffggvkmmpnmvkypilmplilttaivsglvsv  
gihgtkesagfgfigmvgp  
inafkmevdsawlsvllivvaffvvpvtawladiiyrkvfrlytndifkfm  
>tr|D0K9R4|D0K9R4\_STAAD  
mlfrqmqiacllanvrhssivclnniccivdmrclnkkgidvsetdeppqgferthnilninqsslgvvtyitnklks  
tlkqhiiargkkridyr  
synfyttydnveikkidceytyampaiilirhtmsfdnahffaqlrhpv  
>tr|D0K9R8|D0K9R8\_STAAD  
mslnkeqrritaeelqahfeestlsvqmiaeklnvttedvekvlamtaplgifshqlqrfihlvwdvrdvindnikngq  
tpepytylkgekedywflr  
>tr|D0K9S4|D0K9S4\_STAAD  
mrtghytpiphephylvishadklatekaklrlliiikqkldislaesvsspiasehvieqltlfqherrhlrpkisat  
flawlliflmfalpigaiy  
qfsdwfnqnyvsawieyltqttl1nhdilqhilfgdygvlslgtyslwalpvvilislstaiidqtlkswmiwaieps  
mlwlgqgndivpllegfg  
cnaaaaisqaahqchtctktqcmslisfgsscsyqigatlsifsvagkswlmpylilvllggilhnriwlkndqqlsvp  
lpydrqlhmpnirqmlqm  
wqniqmfiqvqalpifitilivsilsltpilnvlsqiftpilslgisselsgilfsmirkdgmllfnlhqgallqgmt  
atqllllvffsstftacs  
tmtmllkhlggsalkligkqmvtslslvigviiivkivmlii  
>tr|D0K9S9|D0K9S9\_STAAD  
mneqwlhlpkdikeyspsvggdvneayrvetdtdtffllvqgrkesfyaaeiaglnreferagitaprviasevngd  
aylvmtyleegasgsqrql  
gqlvaqlhsqqeegkfgfslpyeggdisfdnhwqddwrtilfvdkrldhlkeellnrglwdandikvydkvrsqiveele  
khqskpsllhgdllwggny  
flkdgrpalfdpaplygdrefdigittvfggtsefydaynkhyplakgasyrlefyrllyllmvhllkfgemyrdsvahs  
mdrllqgts  
>tr|D0K9T2|D0K9T2\_STAAD  
minaepiiskmknqkinydkvlkkligqwereairpkillhscapcstytlef1tqyadiaiyfansnihpkneylrra  
kvqeafvedfnrktganvk  
yieapyephkfvkmvkdke1adekegg1rctacfemrldivakaavehgydyfgsaitlspkknqline1gmdvqkiyd  
vnylpsdfkktkgyersie  
mcndynifrgcycgcvfaamqggi dfktnkeakafleqypd  
>tr|D0K9T7|D0K9T7\_STAAD  
mtkifkisfllllvvivssyygesfvladnnpivnsengsdnnfesgtiernqnelvevgdystpltervfgkdqrtvvn  
nilqrpkyqtvl1nmtfsn  
nrvykgtgmgkdivltaahnvyskddkgwakkidvyagvngqtytigkafshkffvsktwinnaptkediaiiklnsn  
lgnktgyltlnthiskgen  
ieisgfpgdksdnrqqykgkgllesfdenemytvdtfsgqsgsairdsknniigvhaygrynhnsgvrindlklidyinyw  
igkyrshpynkkvkviksk  
yiywnieitkkgdnkllikkdkaytaklyynipngykyyslydeknrwmgyfnsndikvvk  
>tr|D0K9T9|D0K9T9\_STAAD  
mtklittvkemqhvkaakrsgttigfiptmgaldghlmtvresvstnditvsvfvnplqfgpnedfdtyprqidkd  
elvsevgadivfhpavedi  
ypgelgidvkvgp1advlegakrpgfdgvvtvvnklfnivmpdyayfgkkaqq1aiveqmvkdfnhaveiigidivre  
adglakssrnvylteqerq  
eavhlskslllaqalyqddgerqskviidrvteyleshisgrieevavysypqlveqheitgrifislavkfskarlidni  
igae  
>tr|D0K9U9|D0K9U9\_STAAD  
miqykckinhkkeiqylhprktlqlplilkiilnla1igiviivlthtefqlnagdsnvfl1nwdirgltsyifsfllilv  
alvsklilifitrrqrts  
>tr|D0K9V2|D0K9V2\_STAAD  
msfyeyiqtfkddktp1gelaiwikeddsfpkqek1tenilsyfhqmsnidhefleivkrs1slydq1ks  
>tr|D0K9V5|D0K9V5\_STAAD  
mtrsqnkqq1eqakdivinsigqtm1ygtnrsvgnlygtmvfegsmt1demrhqlqmskpsmsagvkl1qefdivkqq  
ftrgsrkqhfiaekdffif  
frnfftkkf1qreidinveavkdaqaiinpl1lessd1teaqeaqkikaql1dthvyeyewleql1teaiesgeifkyfpi  
eqpsden  
>tr|D0K9W0|D0K9W0\_STAAD  
mgyfvns1imkd1sdndmr1kyeyynrekdt  
>tr|D0K9W4|D0K9W4\_STAAD  
mnrninkknmi1kndewhtykvskywrs1llintnvk  
>tr|D0K9X0|D0K9X0\_STAAD  
mlsvkkatkfavanliivstvfssvtpaiaqsdkskdesfavgn1knpknviflvgdmgpsfntayryyknshakem  
tptafdsylkgtnrtynd  
pkqni1tdsaaggsfssghktyngaigvdsnkqkvktvlerakekgk1stglvstaeltdatpaayaahvtsrddkneiak  
qfykdkingkhkvdv1l1gg  
gakyfgksngn1dkkfkkgdydlatnskd1sksdkdv1glfadknmp1aidaskdeps1admqqsa1sk1ernkkgff1

Tsompanidou\_et\_al\_Supplemental\_FASTA\_File

mvegasidksahsnditgv  
msemegfeka fddai qyakkhkd tlvatadhstggltigkdkgyewnpqpi ksmkhsgsymtekmakgedpekvinegy  
gfefs qddmkkvkkenkk l  
qkllkkeksadvektka lqhai qkpvndksytgwtsdghtgedvntyaygprsesfsgnientesakiifdfk  
>tr|D0K9X1|D0K9X1\_STAAD  
mkk lavi ltlvgg lyyafkkyqervnqapniey  
>tr|D0K9X7|D0K9X7\_STAAD  
mnesgdnk lskssl iglvigsmiggafnimsdmggkagglaii igwi itaigmis lafvfn ltnerpeldggiysyaq  
agfgdfvgfisaawywfsa  
flgnvayat l lmsavgnffpi fkggnt lpsii vas lllwgvhfl ilkgvetaafinsivtvaklipillviicmiafnf  
dtfktgffgmtsegv l pfs  
wastmsqvks tmlvtvwvfigiegavifssraknkdvgsatviglisvliiyfl ltvlaagvilqnhisql dspsmav  
lativggwgst lvniglii  
svlgawlgwt l l age l pfi vakdg l fpkwfakenkngapvnal l itnilvql flism lftqsayqfaflassailypym  
fsafyqvkytlehrqqatt  
kqwtigii asiayaiwliyaaginy l l ltm llyipal lvsivqknnqtrlikdsyilfmi iivlaviglik l lmg tinvf  
>tr|D0K9Y3|D0K9Y3\_STAAD  
mnktskvcaat lalgt l igvtvensaptskqaqaaitpytyngyignnsfil dknfinaikydnvkfngiklakt  
tikvekydqtfkgsakg  
neasqlqfvvknnislkdiqkaygd l l kengktheadsgifyyqnakkt lgiwfvvdhnrvevtvghtpyktsk  
>tr|D0K9Y4|D0K9Y4\_STAAD  
mkk l l i t i v i i v l i g a l g f a i y a a i n h s t s s n n q e q e n k s t h k k t e t e e n d q q d s a d k t d k n q n g n n d t n d n q p s s p  
snvhn hst vpsntqpaq  
kdsnsnk n thgggsqsstnnqnnqqntppanksntntpskqtpqaqspk  
>tr|D0K9Y5|D0K9Y5\_STAAD  
ml drh l k l l q f f i k n p s k h i s s e i a e h v n v s n r t v r n d i h v i n s f m d d i i v s i k s k y q l n t s q y t l e t i t e r y t h i q  
sykek l l l s m a y q l l m h n k  
sqt l q q l e g d y l l s k t v l n d y f v r i q q w c k f n i v l t i k k k q g i v d g t d n d i t n a i i h l n q l s s g h v h e d l i l n e l p d  
shqrmishiiqet l q q h s i  
ettdiqiqg l l i h l i l i i k r k q s l s e l d t l n h d a k l i s q s c i k q i n e r l g y d l n e k v i n m f s f f i a y h f n k l d i g i e r i f  
iqsyidrlielmqqrihvp  
fnedsilqqnl yn h f s k a y l r i t q n i y l n n p l v i e i k k l y p f v f n t l f e a i d k l a i d t d i e m s e d e i a f l t i h f q a a i e r  
rtktqlnvviacyyglgvs  
n f l e t k i n n l s e e l s v i n t i k l e s i t h y f d n v d l l i t n h d i p k q t l n i l p k h l t t i k v a p l f s e d d r h k i r h v v k q k q n  
pvqahhmdtvnflvvnte  
qksrhtvqi f e e a q i l q a h h a i v e g y i e s a l e r e k s s t y i g n f m a i p h g d p e k v l q s h v l i f r t k d v f p w r q h d v k l v  
fflaishkdkaftkqmmql  
ianl d d s v n h l c s l d d h s l k q q l f e y l q e  
>tr|D0K9Z0|D0K9Z0\_STAAD  
msrktal l v l d m q e g i a s s v p r i k n i i k a n q r a i e a a r q h r i p v i f i r l v l d k h f n d v s s n k v f s t i k a q g y a i t e a d a  
striled l a p l e d e p i i s k  
rrfsaftgsylevylrandinh l v l t g v s t s g a v l s t a l e s v d k d y i t v l e d a v g d r s d d k h d f i e q i l s r s c d i e s v  
eswkssl  
>tr|D0K9Z2|D0K9Z2\_STAAD  
mik l f d y f n d h s r k l y e s f k a s k l e e d l t i v l n d n g f l p d d v i s p y q f f a d n h n t e n m k p r f f n q v t v p a f w e i k g n n s  
atindmgr l r g k i f y q s g e  
r p r i v s r v e w f d d q r v r f v d y s k n g i k f a q t v y d l n r k a i l k k y m t a e g k e v i y e n f v t s d v i l d w q g k s y f f p s k l a  
fv l f f i k q l e i t e h h f v i n  
s l a l p f s v l y n l p s k g s d v l v w q e h c n g n v p g n m q l m c k g d m k r h c n i i p d k n e y e t m l n i a d a k v s r i l q g g y l y n y  
rsnrnytkeiv l tnsdq l  
rnkv l v e t l p d f n f h i a a i t e m s d k l m q l d q a n v h l y p s i n i d r v n e l y q l c d i y l d r v n e l y q l c d i y l d i n e g n e i  
lnaveqafdyellilgyrq  
t a h h a k v t l s e h l f e h n d e i t m e s k d q l i q m l e s l k d q q q f r d a l l a q k a h a h e i s r e q f e q v f k q a l e s  
>tr|D0K9Z6|D0K9Z6\_STAAD  
mprkfrvlqigddlepifqhkkgvswdyfdig l f e f d s g y v e a i e a i v e a e g r f d f i y i q a p y s e t l t n l l q m i s e p y n  
tyvdesfwsveyeqdenvg  
kyvvqplhyrnieernnk leavsfsgygdkvspklalvhpnfkgdvvyqgnsel t l s g e f g k e f k p i a s w q n n l v y d k d  
kviqiwpefd idgave l q y  
t f r l i q t g a d g a l i e q i i l t d d m l d s p l e i p a k p f d a y i s v t v k a r g n g t v h l g p i h k r w s r l d m g q f l l g g s r f v d s q r  
qefiyyfhpqdmkpplnvy  
fsgyrtaegfegyymmkrnapfl l igdprveggsfyisseyeqgiinvidetlek l n f k s h e l i l s g l s m g s f g a l y y  
gaqlnpqaiivgkplvni g  
tiaehmr l l r p e e f g t a l d v l v s n e g d t s q a s i k a l n q k f w q t f q k k s l s q t v f a i a y m q h d d y d p h a f q e l l p v l t a h q  
arvmhshipgrhndspti  
aswfvnfyniiledkfrgvqhaekqni  
>tr|D0K9Z7|D0K9Z7\_STAAD  
miritpfetrqspnissqlmetfigwidgmsdad l qmmqr l v d y i a q e d y r l i l l s r h q n d i p m w l r e c i t s v n e e y  
qakqnadvnvsalmtpedq

Tsompanidou\_et\_al\_Supplemental\_FASTA\_File

ddiavktihaehdvvealrtlrvidmskepdllylqisaisagipqingqtdyvdyngriintvdelddalnyylyf  
ylknwnyayayslkli day  
askniinqldeli legendat  
>tr|DOK9Z8|DOK9Z8\_STAAD  
mkyfipawyddqrwwqdtvpyyqlnktefddmislmgmhlendldyqlivlnhapnlrtflhrydlyetkyssvfdei  
qgfs hhapqainyhhlkwp  
ddvefvytpyllkcvtseqtytni yfsqegysi wfeeferdq lqrryifddrgylsairyfddqgeasyqqyltingdcv  
lhedlkngrvtvskryqhh  
yqteynnmaqli eekfqamiaqqiheddhvivasdarhnrqianhipakllsysff  
>tr|DOK9Z9|DOK9Z9\_STAAD  
mlkllqqyeykiiykrml ytcfilfiyilgtnisivs yndmqv khesffkiaismggdvntlniftlglgpwltsmiil  
mlisyrrndkymkqtslek  
hykeriltlilsviqsyfyihyevskervhqdnilytililvtgtmllvwladknsrygiagppivmvsii ksmmhqkm  
eyidashivialliilvii  
tlfillfiellevripyidlmnvsatnmksylswkvpagsitlmsisafvflksgihfils mfnksisddmpmltfds  
pvgisvylviqmllgyfls  
rflintkqkskdflksgnyfsgvkpgk dterylnyqarrvcwfgsalvtviigi plyftlfvphlsteiyfsvqlivlvy  
isiniaetir tylyfdkyk  
pflnqyw  
>tr|DOKA00|DOKA00\_STAAD  
mskrqkafhds lanektrvrlyksgknwvks gikeiemfkimglpfishslvsqdnqsis kmtgyglkttaviggaf tv  
nmldhdqqafaasdapltse  
lntqsetvgnqnsttieaststadstsvtknsssvqtsnsdtvsseksekvststntstsnqqekltstsestssknttss  
sdtksvastsssteqpi nts  
tnqstasntsqs ttpssvnl nktsttststapvklrtfslamstf asaatttavantitvkn dnlkqymttsgnaty  
dqstgivtl tqdaysqkga  
itlgt ridsnksfhfsgkvnlg nkyeghgnggdgigfafspgv lgetglngaavgigglsnafgfkldtyhntskpnsaa  
kanadpsnvagggafgafv  
ttdsygvattytssstadnaaklnvqptnntfqdfdi nyingdtkvmtvkyagqtwrnis dwiaksgttnfslsmtastg  
gatnlqqvqfgtfeytesa  
vtqvr ydvttgkdiippktysgnvdqvvtidnqqsal takgynytsvdssyastyndtnktvkmtnagqs vtyyftdvk  
aptvtvgnqti evgktnmp  
vvltttdngtgvtnvtvgtlpsgl sydsatnsiigtptkigqstvtv vstdqannksttftinvvdtaptvtpigdq s  
sevyspispikiatqdng  
navtntvtglpsgl tfdstnttisgtptnigtstisivstdasgnktttftkyevtrnsmsdsvstsgstqqsqsvstsk  
adsqsaststsgsivvsts  
astskstsvslsdsvsaskslstsesnsvssststslvnsqsvsssmgs vskstslsdsisnnsstekseslststsd s  
lrtstslsds lsmstsgsl  
sksqslstsisgssstas lsdstsnai ststslsesastsd sisinsiansqsastsksd sqstsislstsdsksmst  
ses lsdststsgsvsgsl  
iaasqsvststsdsmstseivdsistsgslsas dsksmvsssmstsqsgstses lsd sqstsd sdsks lslstsqgs  
tstststasvrtse qst  
sgmsasqsdmsiststsdstsdksastassesisqaststsgststslstnsertstsvsdstslstsesdsi  
seststsd siseaisases  
tsislse nstsd sesqsaflses lsestsestsesvssstsests lsdstsesgststslsnstsgsasiststsis  
eststfkse svstslsmst  
stslsnstslstslsdstsdsksdslstsmstsd sistskdsiststslsgstsesesd stssesksd stsmismsg  
stsgstststslsdst s  
tslslasasmnqsgvdnsasqsasntststsesdsqststytsqstsqsestststslsdstsis kstsqsgststsas  
lsgsesedsqstst sase  
stsesastslsdststsnsgaststslnsasasesdssstslsdstasmqssedsqstsas lsdslststsnrmst  
iasl stsvstse gstses  
tse dststslsd sqstsrstasgsastststsd srstasaststsmrtstsd sqmsl stststsmstsdstslsdsvds  
tsdstastsgmsvsi sl  
sdstststasevmsasidsqsmsevndse svsesnesdsksmgstvsvdsgslsvstslrkse svsesslsgsq  
smdsvstsdssslsvst s  
lrsesvsesd lsdskstsgstststsgslststslsgsesvsests lsd sismdststsd sds lsgsislsgstsls  
tsdslsdskslsss qsmg  
seststsvsdqssstsnqfdmsi sasesdsmstsdssni gsnststslstsdsmgsvsvststslsd sigstsv  
sdssstststslsdmsqs  
qststasglststsmstastsssqtstsvstslstsd sisdstsis isgsqstvesestsdstsis dseslstsd s  
dstststsdstsgststsi  
seslstsggstsvsdstsm sedstsvmsqdksdstsis dsesvstststslstsdststses lstsmgsgsqsidst  
stsmggtstsesnsmhps  
dsmsmhthststsr lseattstsesqstlsatsev tkhngtpaqsekr lpdtdgsikqngllggvmtllvlg lmlkrk  
kkkdendqddsqa  
>tr|DOKA03|DOKA03\_STAAD  
msek lqv kqefngvtrqyl nfrtdsiddl kfkkefkpvmhlkgdafnqq lqslinkypqi qknmks

Tsompanidou\_et\_al\_Supplemental\_FASTA\_File

>tr|D0KA09|D0KA09\_STAAD  
midihnhilvdiiddgpkkieksiallkqakdegvtsivatphhlhprydntfqqvlvklaelrthpevqaldiklfpqqe  
iritdsilkglngsiqgi  
nrskylliefptgevphytkqlffeisrgyipiiahpernrsiaknpeilyelvangalsqltssslvggfgkniqkls  
lqfiecnlahfvasdahsc  
dqrpf1mqel fhnhk1kkysndieal1rnassvindnfvyldrptkpgkvksflkwf  
>tr|D0KA12|D0KA12\_STAAD  
mygliqtahal fy1fqfpfghgtfrlyv111v1awsnphsithqhlqlavityshfpyqkfsrhkqstqrayttl r kqi  
>tr|D0KA13|D0KA13\_STAAD  
mgrdkmiyledektvldfhknl tggklvvylytdqlnaqnlpldsyd1kvkryngvykvwykn1rksntnpyqkfn  
lekr1kmskeeleleeeq  
rrshifevkn1ikdyv1snhfdmfwl t fdpkkydgevsdelayd1mrkw1hkmrnthkrksdepfnyiaiperhksqgi  
hwhmltgyiepn1idsgkt  
frnqkvyncmdwkhgftnvqkmrsksvssymtkyitkd1lyspvrkhkrkywvskglalpevyagnysevadvlplyde  
ng1nphthsndvcdiwlfk  
v  
>tr|D0KA14|D0KA14\_STAAD  
msysivrsvksgtnttgiqkhvqrennyenedihsktylnydlvnankqfnnlidekieqnytgrkirtdaikh  
idg1itsdndffdnqtped  
tkqffeyakefleqeygkdn1lyatvhmdektphmhygvvpi tddgr1sakevvgnkka1tafqdrfehvkqrgydlr  
gqsrqvtnakheqisqykq  
kteyhkqeyeresqtdh1kqkndk1mqeyqks1nt1kkpinvpyeqetekvgglfskeiqetgnvvisqkdfnefqkqi  
kaaqdisedyeyiksgra1  
ddkdeirekdd11nkaverienaddfnqlyenakplkenieialk11k11kelervlgrntfaervnk1tedepk1n  
glagn1dkkmpe1yseq  
qqeqgknqkrdrgmh1  
>tr|D0KA15|D0KA15\_STAAD  
myknnhanhsnh1enhd1dnfsktgysnsr1dahtvcisdpk1sfdamtivgn1nrDNAqalskfmsvepqir1lwdilqt  
kfkakalqekvyieydkvk  
adswdrnmriiefnpnk1trdemiwlkqni isymeddgftr1d1afdfedd1sdyamsdkavkkti fygrngkpetkyf  
gvrdsnrfir1ynkqkerk  
dnadaevmseh1wrveielkrdmvdywncfsd1h1lqpdwktiqrtadraivfml1sdeeewgklhrnsrtkyknlike  
ispvd1td1mkst1kanek  
qlqkqidfwqhefkfwk  
>tr|D0KA17|D0KA17\_STAAD  
mvsvrkhfsnvypniefheadesh1dfptkrstyfyak1khns1kqgy piei f qhdn1tkivsimepdtwlqfrfrnyg  
fk1  
>tr|D0KA18|D0KA18\_STAAD  
mlninki ydfi1hgsiekykfknskatd1lekanfkatqprnwrsaria vtpnkat1idglgliaseealvqyghkfshw  
tpnpynylskekan1advn  
tykv1nrtkdnvkqintfvl dvdediey nelvqslasahinegae1pnlyvktprgwhlyfv1dtpfyakgiekkaikva  
ekvhsslahaiskylpvdn  
qcvstgyfr1lptkdnvqlftnqycsksymvrwskeysekh1nqnvlyksiangqeltpewvdy1lkeadvtsfgygvgr  
nna mfsvalyyyskni dm k  
vaesniyafnqr1nqplshkeverviksaysgryggamrehven1leaftdgqiaysnsgvsingfwkhkkerkdrvrsh  
fderkadlerylneh1nkq  
kvfvkgsmsaiak1lgmarsslyavfekhinkgtiiky tikngrysetfi alksvyies1femvksiknkkesyitairh  
lvssernthslmvqng1l  
neient1tyidrh1tqyiegnieilyerfis  
>tr|D0KA19|D0KA19\_STAAD  
mnenillelcsklkgirkgkkytqqevadiiginiw tvnrienkkleevklktilrildlyeitlyefiednkdivnray  
nk  
>tr|D0KA20|D0KA20\_STAAD  
makigyarvstisqsl etqin1lkaegciki fsekvsgkktnrsk1declky1reddvlvvtkidrlgrttkqlinlasw  
lqehnie1kildgnfnms  
plgkmi ftvm sgfae1etd1nrert1leg1neakargrkgrpgvtdvknyvmylynntelsgneiarktgvsrstvyri  
krdfn  
>tr|D0KA21|D0KA21\_STAAD  
myi1ylkkgfidiskegkmakigyarvstkdqnlgsvvk1ekv  
>tr|D0KA22|D0KA22\_STAAD  
mikkeircfsnfatepefp1fnkefghlerdtivgrrhgsai1t1vervskmi1t1rplgrkatdiena1hsmfsalps h  
ifksitfdcgkefsnwkti  
cnchdisi ffadpgtspqrg1nehsgil rrrsgldkeldfnlvt dnhii svaqkinhrprks1gyrtplevfmsfi eddk  
lssl1  
>tr|D0KA23|D0KA23\_STAAD  
mintekvns1plftgelvkninrgsl nipflsiviflirvkveny  
>tr|D0KA24|D0KA24\_STAAD  
meginniklierisfgyrnfnfkctcimmi fslyqvekednqa

Tsompanidou\_et\_al\_Supplemental\_FASTA\_File

>tr|D0KA25|D0KA25\_STAAD  
mskyqlinikdnnlefsekywlhllqgvwrpekistkplkitfnknifpiyickeinedsrrilnntdntniieiiii  
nhkkii fnvlnklslgvtp  
kitfik  
>tr|D0KA26|D0KA26\_STAAD  
makkicnistivfvlaigllslvflsffnvnvaeasqkelpnqkntkvnidkkdipsavkklaedqylsrvaaldkls  
geknsstlgeafkiykfn  
qksdgnnyfvpvlnkegkvvyvvtispkiandkntssnsdytinvspflskilnqyenqkftiltntkgyfvvtednkikh  
vlktpysgeknskntmesp  
knidlnkfkqtasvtpkpiiqfenpkygvraqvvnqlknfki retqgngwcagytmsallnatyntdrynaeavmrylhp  
nlqgddfqtgltpqemmk  
ygksqgrdtqylnrmpsynevdklttnkgiai lgsrvestdgi haghamaavgnael eggqevimiwnpwrgrfmtqda  
esnii pvsngdhyqwsssi  
ygy  
>tr|D0KA27|D0KA27\_STAAD  
mfsalpsihfksitfdcgkefsnwkticnchdisiffadpgtspqrglnehngilrrsgldkeldfnlvtndhiisvaq  
kinhrprkslgyrtplevf  
msfi eddklssli  
>tr|D0KA28|D0KA28\_STAAD  
mi amagfl dnkvvgqqkrgfl ddi dtsavkytenykp maksstmr vdtlikrrlsqmal dkdtsikaisdkvlqeflek  
nny  
>tr|D0KA29|D0KA29\_STAAD  
msviti gnfgggvgttvstllsyigserydkrillvdfdpqgnatqimkrtypeaidekqtfidalktgeledsiinls  
tklsl lpadsslanlsdi  
akt di ikkryil ktvidqikknyndyifidvpptinsdftnnavyasdyiamvfqtqqsayesslsfvnflrdkkesn  
lpfeligaipvlikknqni  
deyilei skktfsnal fknqifqrerikkfgaegirdkdvhdkrvlhmleaiykelierielieg  
>tr|D0KA30|D0KA30\_STAAD  
msqsl rftklykf l fedptfktlpakakllyaliserqslskanakqhgiqsqfidnegr lfsiytnqelmtkl nmskpt  
viklkkqliefglledvr l  
gnnqpnrl ypkkpydnyfyaydvdefyr lphal fenpkyqslaesiiayaiylsryeysiyknhfsdengavyccfsnd  
nmanil dvstrkverikke  
livsslminkrasfgksnrlyislpkasddkevkkcrtsytyfsytyssdidsndmndtydnndeivehinds pqt nhss  
hpnqhntedtfndqqveq  
emllqhl pdyvqlnlkhfsnteirciksvlnkakasy nhhapvdervtyeactyaigeal rrikllsrqknenicdleay  
mmqtfrvfvvehv lndqqk  
lddtktkthdisqfepkna fqsma krmfldv  
>tr|D0KA31|D0KA31\_STAAD  
mnekeigiaf lnhftqveaylea lgvpenhiadikpiviqnyperfl fddl gdvtnvi ipfskvisgnlfgnigyk  
>tr|D0KA32|D0KA32\_STAAD  
mkwsl eqnfhgnapnlkpkiqgc l gflks l gwenwnqsyqtl digelyfslll ddkghvitymheggnggrhri ftgk  
vcgaeyvraarl tqfrlnk  
qkl ayknwylsnklkil fkvncfklfvsiylfmf  
>tr|D0KA33|D0KA33\_STAAD  
mnyfrykqfnkgvitvavgyylryalsyrdiseil rergvnhstvyrvwqeyapivvyqiwkkkkkayykwridetyi  
kikgkwnylyraidaeght  
ldiwl rkkrdhqsayafikrlikqfgkpqiitdqapstkvamtkivkvfkl n pnchctskylnnlieqdhrhikvrktr  
yqslntakntlkgieciyg  
lykknrrslqi ygfspcyeshmlas  
>tr|D0KA34|D0KA34\_STAAD  
mtfignvvilvpv lva isengnssgedndfnrygcmlky  
>tr|D0KA35|D0KA35\_STAAD  
myknlnnihqshylaliyi illiipryailpfsnkl ninydi inewyffvittilmiyaikifkvklqkdwlniknki  
gvfltgivgfflilllnvi  
lilii nqgrpvk svnqaienisflsqffaplliviigpileellfrvyilevlknkikllpailisissftvihmhs l t  
edwktlipyfsigivtvfi  
ylkknhfyyilshvlnnlvaqiaiwflq  
>tr|D0KA36|D0KA36\_STAAD  
mnikqfdilyidlnptrgrekhnrpc lvin nqmsidgtnfvwlpittrglryptdiqlkttkglvsgvidtvqiral d  
lkargynykdelqdnlnkd  
ilkaiktylkptl  
>tr|D0KA37|D0KA37\_STAAD  
mflifinystsyvftlvttfvmnkr gliimakslkdlnktservfkngnskaislskktirlanfdigdtvevqkmngg  
lfitkkkesiedriknffq  
sggkytelevdweervgrei  
>tr|D0KA38|D0KA38\_STAAD  
mnyikyihsvdgttl ykvknenvnssaniiichglaehldrydeisnylqeknfniirfdqrghrgsggkrtfysvnei  
vedldavinftkehykgni

Tsompanidou\_et\_al\_Supplemental\_FASTA\_File

ylighsmggygsvlystknpgkingliisgavtrynqktfgdidtdrnkyinyeigegvcsdtfelekyrldaitek  
vsglyiytlegvklven  
aqyfdniliihgkddglvhysdsldfyknisskkelhiydgjqheifnerkknkeifseianwinndlt  
>tr|D0KA39|D0KA39\_STAAD  
mkkttiyfvyfiisalqfgmlkklgieynsleiavyalpmmiilsifvysialnpyqkrksspiihvksleyvvpvlvl  
cdiliiilellytgnfrpvl  
vaqlfltflligfseefffrkyiiehiltkyksllalitssilfgllhmantfggltiennaasqmsatgvglllygliyi  
ftkkiwmlvllhmnvdfal  
fssvinqsylvavpafivdiiliftvikiimyilksiksknkfl  
>tr|D1GLX1|D1GLX1\_STAA0  
mkniyksltvsaivatvslsalpqslaitesqptkqqqtvlfdrshgqtagaadwvsdgaafsdyadsiqkqgydvkaid  
ghsniteaslksskifvip  
eanipfkeseqaaivnyvkqggvsvfisdhynadrnlndrisseamngyrrgayedmskgmnaeeksstamqgvkssdw  
stnfgvrfrynalgdlns  
nivsskesfgitegvksvsmhagstlaitnpekakgi vytpeqlpakskwshavdqgiyngggaegyvaivskvgkga  
afigdsslvedsspkyvre  
dngekkktydgfkeqngkl nni tawmskdndgkslkasgltdtktkll dferperstesekepwsqppsgykywdpt  
tfkagsygsekqadpqpnt  
pddhtppnqtekvsfdipqnvsvnepfevtihkgfeanqtlenlrvgiykeggrqigqfsskdndynppgystlptvka  
dengnatikvnaakvlesme  
gskirklgdktlittdfk  
>tr|D1GLX3|D1GLX3\_STAA0  
metikqevresivkqifagykdvnernevkkrmvisdayvytksnhienvakhlenfvkyikenagpswylkfi fnk  
deeknnimfilknedyfde  
knsvgkslvadknqksknylegliaknsginfdtvgedfki rhqmtadsilfnikegsnrndinsyfliityridkesq  
laaikqwl pnpetsaimv  
ddltplldkviveredyhideelevelkndgelefidvehafgisidedndmieser  
>tr|D1GLX5|D1GLX5\_STAA0  
mlti pekenrgskeqevaimidaladkqkka lealskksqeeinhivhqmslaavdqhmvlaklaheetgrgiyedkaik  
nlyaseyiwnsikdntvg  
iigedkegltyvaepigvigtpttntptsttikamiaiktgnpii fahpsaqesskraaevvleaamkagapkdi  
qwfepvsieatkqlmnhkg  
ialvlatggsgmvksaystgkpalvgpgnvpsyiektahikravndi igsktfngmicaseqvvidkeiykdvtnef  
kahqayfvkkdelqrlena  
imneqktsikpdvgsaveiaelagipvpentklliaeisgvgsdyp lsreklspvalvkaqstkqafqicedtlhfg  
glghtavih tedetlqkdf  
glrmkacrvlvntpsavggidmyne lipsltl gcsygrnsishnvsatdlniktiakrrntqifkvpaqiyfeena  
imsltmdkiekvimivcdp  
gmvefgytktvnvlrqrteqpqiki fsevepnpstntvykglemmvdfqpdtiaalggsamdaakamwmffehpetsf  
fgakqkfldigkrtykigm  
penatficipttsgtgsevtpfavitdsetnvkyp ladfaltpdvaiidp qfvmsvpksvtadtgmdvlthamesyvs  
asdytrglslqai kltfey  
lkssvekgdksrekmhnastlagmafanaflgiahsiahkiggeygi phgranaillphii rnakdpqkhalfpkyef  
fradtdyadiakflglkgn  
ttealveslakavyelgqsvgiemnlksqgvseeelnesidrmaelafedqcttanpkealiseikdi iqtsydykq  
>tr|D1GLX6|D1GLX6\_STAA0  
mestlel tkikevlnknlkiliilplllfiisavtffvlspkyqantqilvnqtkgdnpqfmaqevqsniqlvntykei  
vksprildevskdlnkys  
psklssmlti tngentqliniqvksghkqdseki ansfakvtskqipkimsvdnvsilskadgtavkvapktvvnligpl  
flglvvaliyiffkvi fdk  
rikdeedvekelglpvlgsiqkfn  
>tr|D1GLX8|D1GLX8\_STAA0  
midihhnlpniddgptnetemldllrqattqgvteivtshhlhprytpiekvksclnhiesleevqalnlfyygqe  
iritdqilndidrkvitgi  
ndsrylliefpsnevphytdqlffe lqskgfvpii ahpernkaisqnl dil ydlinkgal sqvttaslagisgkkirkla  
iqmiennlthfigsdahnt  
eirpflmkdlfndkklrdyyedmgfisi naklvvddkkipkrmpqqdykqrwfgl  
>tr|D1GLX9|D1GLX9\_STAA0  
mahlsvklrllilalidslivtfsvfyvsiylepyfktysvkl lilaaislfishhisafifmyhraweyasvselili  
vkavttsivi tmfvitvt  
gnrpfrrlylitwmmhli liggslfwriyrkylggksfnkkptlvvgagqagsmlirqm lksdemklepvlavdddehk  
nrititegvkvqgki adip  
elvrkyikkkiiiaiptiggerlkeinni chmdgvelkmpniedvmsgelevnqlkkvevedllgrdpvelmdmisne  
ltnktilvtgaggsigsei  
crqvcnfyperiillghgensiylinrelrnrfgknvdivpiiadvqnrarmfeimemykpyavyhaaahkhvplmednp  
eeavrnnilgtkntaeaaak  
naevkkfvmi stdkavnppnvmgaskriaemi iqsln dethrtnfvavrfgnvlgsrgsviplfksqieeggpvvtvthe  
mtryfntipeasrlvlqag

Tsompanidou\_et\_al\_Supplemental\_FASTA\_File

alaeggevfvlmgepvkivdlarnliklsgkkeddiritftgirpgekmyeelmnkdeihpeqvfekiyrgkvqhmkn  
eveaiiqdivndfskekii  
nyangkkgdnyvr  
>tr|D1GLY0|D1GLY0\_STAA0  
mfddkllitggtsfgnavmkwflsdnikeirifsrdekkqddirkkynnsklkyfigdvrdsvetamrdvdyvfa  
aalqvpseffpveavkt  
nigtenvlqsaihqnkvkviclstdkaaypinamgiskammekvfvaksnrirseqtlicgtrygnvmasrgsviplfi  
dkikagepltitdpmtrf  
lmsledavelvvhafkhaetgdimvqkapsstvgdlatallelfeadnaieiegtrhgekkatlltreeyaqedmgdy  
frvpadsrdlnysnyvetg  
nekitqsyeynsdnthiltveeikeklltleivrnelndykasmr  
>tr|D1GLY4|D1GLY4\_STAA0  
mnkiynvtsyviailmfpcmlmgdkplflapisygvglfifsfnnpnfkfskivydvlgflrlvfipamivffqdsti  
dnlplggdyfnqaviyisv  
efiigsflililsklfkhevsvrsnftlsgssiyivfvlvcgifvafpevrknisfliiktdamgrgteatsglvlf  
vmlfqlalallfliayas  
ykkkykenpkiiyvilplaigilnislivgerrisyqlytmvavltvsvllfshkrriniiisvgifvlaamtlykelyv  
fnyssysealnstsvsnlk  
ivdtlqsyfyggsniaasidylnyngsfkqylfdntravfgfnffvdkkqlitsqlfnqliygskqltghlissagyi  
iyfgplffylnlianiffa  
flseyiirkshslevifigtyimrlitsifshptplitlismilvvyviaaipgiiikkftkkvgie  
>tr|D1GLY7|D1GLY7\_STAA0  
msekkiilicqfyfpeyvssatlpqlaedlianhinvdvmcgpweysnhkqvsktemhrgirirrlkysrfnkskvg  
riinffsflskfviniipkm  
lkydqilvysnppilplipdvhrllkkysfvvydiapdnaitgatrpqsmidklmryinkhvyknaenvivlgtemk  
nyllnhqisknphihvip  
nwydmrqlqdnriyndtfkayreqydkillysgnmqqlqmetlisflklnkdpqqltilcghgkffadvktaiedhri  
envkmfefltgtdyadvlk  
iadvciaslikevgglgvpsknygylaakplvlmdkqsdvqhveqydagiqidngdahaiynfinthsskelhemge  
rahqlfkdkytreintmky  
ynllk  
>tr|D1GLZ0|D1GLZ0\_STAA0  
mkltvvglygiglptsimfakhgvdlvgvdinqqtdklqsgqisieepglqevyeevlssgklkvsttpeasdvfiav  
ptpnddqyrscdislvmr  
aldsilpflekntiinvestiapktmddfvpkvienlgftigediylvhcpervlpgkileelvhnriiggvtkaciea  
gkrvyrtfvqgemietdar  
taemsklmentyrdvnialaneltkicnnlninvldviemankhprvnihqppgvvgghclavdpyfiiakdpenakliq  
tgreinnsmpsyvvdttkq  
iikalsgnkvtfvfgltykgdvddirespafdiyelinqepdievcaydphveldfvehdmshavkdaslvllisdhsefk  
nlsdshfdkmkhkvi fdk  
nvkssfedvsyynygni fnfidk  
>tr|D1GLZ1|D1GLZ1\_STAA0  
mkkimvifgtrpeaikmaplvkeidhngnfeanivitaqhrdmlsvlsifdiqadhdlnimqdqqlagitanaalakld  
siineeqpdmi lvhgdttt  
tfvgslaafyhgipvghveagl rthqkyspfpeelnrvmsniaelnfaptviaaknllfenkdkesifitgntvidals  
ttvqnefvstii khkgkk  
villtahrrenigepmhi fkavrdladeykdvfiypmhrnpkvraiaekylsgrnrielielpdalefhnfqnqsyv  
ltdsggiqeeaptfgkpv  
vlnrhterpegveagtsrvigtodydnivrnkqlieddeayqrmsqannpygdgqasrriaceaieyyfglrsdkpdefvp  
lrrk  
>tr|D1GLZ2|D1GLZ2\_STAA0  
mfmaenrlqlkgsaetierfynrqgietiegfqqifvktlntkdtdevkiltiwesedsfnwlnsdvfkeahknvr  
lksdddqqspil snkvfk  
ydiygyhyk  
>tr|D1GLZ4|D1GLZ4\_STAA0  
mavnvrnyaenyglfingefvkgssdetievtndpatgetlshitrakdkdvdhavkvaqefeswsltskseraqmlrd  
igdklmaqdkiamietln  
ngkpi rettaidipfaarfhyfasvietegtvndidkdtmsivrhepigvgavvawnfpmllaawkiapaaagnti  
viqpsstplsllevakif  
qevlpgvvniltgkgsesgnainhdgvdklsftgstdvgyqvaaeahlvpatlelggksaniilddanldlavegi  
qlgilfnqgevcagsrll  
vhekiydqivprlqefsnikvgdpqdeatqmsqtgkdqldkiqsyidaakesdaqilagghrltengldkgffffeptl  
javpdnhhkl aqeeifgpv  
l tvikvkddeaidiandseylaggvfsqnitralniakavrtgriwintynqvpegapfggykksigigretykgalsn  
yqqvkniiyidsnalkgly  
>tr|D1GLZ9|D1GLZ9\_STAA0  
mkr1siiviigifiitgcdwqraskepsnnaqhqqvikigylpithsanlmmtkllsqhnhpkyklelvkfnnwpdlmd  
alnsgridgastlielamk

Tsompanidou\_et\_al\_Supplemental\_FASTA\_File

skqkgsnikavalghhegnvimgqkghlnefnngddyhfgiphrysthyllleaalreqlkikpghfsyhemspaempa  
alsehritgysvaepfgal  
gek1gkgt1khgddvipdayccvlvlrge1ldqhkavaqafaqdykksfgkmdrksvdimthhfkqsrdrvltqsaaw  
tsygdltikpsgyqeittl  
vkqhh1fnppayddfvepslykeasrs  
>tr|D1GM00|D1GM00\_STAA0  
mtr1tinkii1piitfiiflgiwemviiighyqpv1lpgpalvgksiwtfivtgeifqhlaislwrfvagfvallvaip  
lgfllgrnrwlynaieplf  
qlirpispawapfvvlwfgigs1paiaii1fiaaffpivfntikgvr diepqylkiaan1nltgwslyrn1lfp gafkqi  
magihmavgtswiflvsg  
migaqsglgflivdarnm1nledvlaaiffig1fgfiidrfisyieqfilrrfge  
>tr|D1GM01|D1GM01\_STAA0  
mmt1etlikeql dph1vevdegtyyprtfiqq1fvdgyfgeat1rknaevieavsqsc1ttgfc1wcqlafstylenatq  
ph1nndlqqq1l1sgeilga  
tg1snpmksfnd1ek1n1ehtyv dqq1lvvsgrmpavsn1qedhyfgaiskhessefvmfilranqdg1tlvekt n1lgv  
ngsatyqit1nqvavpqsq  
i1thdakqfaatirpqiayqipig1siksle1idafснаqnginqyleydvvegfkkyrqlreeyya1l d d g n 1 t s h  
1nelis1kkdigy1l1dvn  
qasvvnnggsraytpspqvrk1kegfffaaltpt1rh1lgkleaelkg  
>tr|D1GM02|D1GM02\_STAA0  
mntidhtkqqfns1lvsyrkeyvgkgnps1rvsfkdnwai ahmtgvlskvesfy1ndkrnesm1hyrtekikqmyke  
idvnemesvvgakfvklft  
did1nddevisifvfdksie  
>tr|D1GM08|D1GM08\_STAA0  
mkfivikiggst1sdmhs1innikh1rsnniyp1ivhgggpfinea1snqqiephfvng1rvtdkatmtitkhtliadv  
ntalvaqfnqqqcsaiglc  
gl1daqlfeikrfdqqgyvgvptt1nids1sylctkfvp1insigfnnhdgefyninadt1layfiaasleapiyv1snia  
gv1indvvipq1pladinq  
yiehgdiyggmi1pkv1daknaikngc1kviiasgnkpn1ieaiyndfvgtt1lkssv  
>tr|D1GM13|D1GM13\_STAA0  
minfdkta1vl1id1qqgi1kmdyaphtaenvvqnank1ieaf1rkngfiafvr1vfydgkdalqpnamis1ppkegddys  
hfhy1ldkrdd1fvdkrq  
fsafvgt1dl1qlrrrgid1tiv1ggvathvgvdt1tardayq1nydqyfvtdmmsaqnet1hqfpidnvfplmgqt1tnd  
1n1n  
>tr|D1GM15|D1GM15\_STAA0  
mrkkl1fgql1r1gkalm1pvai1paag1llaigtamqgealqhy1l pfiqnggvqtvak1mtgaggi1fdn1pmi1fal gva  
iglaggdgvaai1aafvgyi  
imnktmgdf1qvt1pkn1gd1pasgyas1lgipt1qtgvfggi1igalaawcynkfyn1n1psylgffagkrfv1immatts  
fi1afpma1liwpt1qtg1n  
afstg1ldsntgvav1lfgf1krl1ipfg1lhi1fhapfwf1egswknaagei1ihgdqri1fieqiregah1tagkfmqgef  
pvm1fg1paa1laiyhtak  
penkkv1vag1mgsaal1tsf1tgiteplefs1l1fvap1lffihav1dgl1sfl1tly1l1d1h1lgyt1fsggf1dyf1l1gil1pnk  
tqww1vipvg1lvayiyf  
vfr1livk1kyktpgre1dkqsqaatasate1pyav1eamggkanikh1ldacitr1rvevndkskvdvpg1kdl1gasgve  
vgnm1qai1fgpsdq1khe  
mqqimngqvvenpt1meddkdetvvaedksatse1shivhap1tgevtp1sevpdqvfsekmmgdgiaikpsqgevrp  
fngkvqmi1fptkhaig1lvs  
dsg1e1l1hi1g1dtv1k1ngegft1hveegqevkqgd1l1nfd1dy1rn1haksditpi1vtqgnit1n1dfkqgehg1nisfg  
dq1feak  
>tr|D1GM16|D1GM16\_STAA0  
mtgfsvy1gqpl1deay1krmikqgyqmi1ftsvqipeeddetkyhyftk1l1n1lkheqvtly1idanps1l1tps1fyeh1rqy  
daqfmi1ridh1stsieaiea  
imaqg1kcc1nas1isrel1ts1hqqlndft1l1sfchnyyprpdtg1svd1vnkkneliyqfnpkaqiygfivgsg1rgp  
1hkg1ptieatr1hshpvva  
ak1l1qetgvse1lvgs1ieir1qakq1ldfckhrhft1cieevfdttvty1l1fdmchkvrpdnpenvirsetsrqicphsi  
qpqfttqrrig1lvtvdn1n  
ngryqgemqivrqt1sahds1vnvvaqiiked1p1l1sciepn1d1fd1qk1treckk  
>tr|D1GM21|D1GM21\_STAA0  
mayqseya1lenemng1leq1gyervt1rdnkq1l1dnfrt1l1nerhadk1legn1l1tdkefqr1l1tmidgks1fesari1rd  
k1p1l1rrddesei1ysf1ldt  
kswcknk1fqvt1nqvsvedtykarydv1tiling1p1lvqvelkrrgidineafnqvkyrkqnytgl1fryiqmfii1sngvet  
ryfsnndse1l1kshmfyws  
dkqnnrint1qsfaesfmrpcq1lakmi1srymi1inetdri1mamrpyqvyavealiqqatetgnggyvwh1t1tgsgkt1tsf  
kasq1l1sqdd1kkvif1lv  
drkd1dsqteef1n1kfakgavdk1fntsq1lvrq1ndks1p1livt1tiqkmakai1qgnah1leqyktnkvvfiidechrsqf  
gdmhr1lvkqh1fknagy1fgf  
tgtprfpenssqdgrttadi1fgrc1lhty1lirdaihdgn1lgfsvdyint1fknka1kaednsmveaidteevwl1adkrvel  
vtrhi1innhdkytrnrqys



Tsompanidou\_et\_al\_Supplemental\_FASTA\_File

siftvqsihalikyeyfkrlnkkleqpltvagiftfkpneddrdgevpyhsrekleimisdynkkfetnfstdttneyf  
nisknkvkkgvkdskidil  
ivvmf1tgfdskvln1lyvdkn1myhd1iqaysrtnrvekeskpfgkivnyrd1kktdda1rvfsqtnddtilmrsy  
eeykkefidayrelkmi  
tphmvdidiqeeekrfveayr1lakiilr1kafdefeftideigmdeqenedyksylavydqvrataeknkvsilnd  
idfeiemrntdinvnyim  
nilrqidledkaeqrrnqeqirrilhdhaddpt1r1krd1irefidnvps1nkdddideqyvnfesikkeaeefkgfager  
sideqalktisndygysgv  
vnphh1kkmgd1pl1kekrkarkaiesfvaettekgyv  
>tr|D1GM23|D1GM23\_STAA0  
msn1levns1nvqfnydettvqavknvsfelrkkhilgivgesgsgksitaksilg1lpdypdht1tgeiifngqsltn1  
stsa1qqirgkdisimifq  
plssl1nr1rtigkqitevlfqhkrvskseaksmtidilekvgikhatrqfdayphelsggmrqrvmiama1ilkpqilia  
deptaldastgnqllq1m  
kslyeytetsiifi1thd1gavyqfcddivmkgdsvvesgtvesifkspqhtytkr1idaipdihqtrppr1nndi1lk  
fdrvsdytspsgslyrav  
ndin1dirkget1givgesgsgkst1aktvvg1kevsegfiwynelpl1sfkdelks1rqiemi1fqdpfasinprfkv  
idvikrpl1ihgkvkdndd  
iiktivs1lekvg1dqsflyryphelsggqrqrvsialavepkvivcdeavsaldvsiqkdiellkqlqldfgityl  
fi1thdmgvineicdrvam  
kngeivelntedi1khpqsdyaqlisevaviak  
>tr|D1GM24|D1GM24\_STAA0  
mpl1flyavikfffsakrknfyannseiseieqalhqkykylsqqsstqihkealki1ktqssntnsknieqahfstyfe  
nvl1fhkfi1ikvilalpmf  
ill1tiylqplvryiferivmaviviigvsvfsilyfsp1daaysilgnatkaqihqfnvlhh1nepyfiqlwdtikg  
vftfd1gttykgn1dvvtka  
vgerip1ti1vav1alivaliaipigi1samkrnswldit1mia1lig1sipsfwqg1l1filafslk1ldilppsympeh  
pis1ilpvl1vigtsiaasi  
trm1trssv1evmrsdyv1tayakg1sttqvvikhilknaiipiv1vg1l1vae1l1ggsavteqvfn1ingigryivqkqli  
pdipavm1ggvvyisivis1  
an1iidi1fyalidpk1rseinerk  
>tr|D1GM27|D1GM27\_STAA0  
mvin1lndkqtkskegl1svshplaakigkdv1dqgnam1daviaiqla1nvvepfasgigggy1lyyeqstgsita1fd  
aretapahvd1kqfy1ddsg  
eyks1ffdm1tthgktvavpaipk1fdyihkryak1s1led1inpaielaieghsanwatekysrqqhar1tkyhetaqvfth  
engywregdwi1vqpelgkt  
fqil1reggfna1fykgdiakql1vnv1kacggtit1led1anydi1qikapisatfkdydiysmgpsssggitviqil1k1lehv  
d1qsmgprsvdy1lhh1liqa  
mh1laysdraqyl1addnfhev1pvqs1iddyl1karsk1lidsnkanidiehgvsdcis1htdveentetthfcvidkegni  
as1fttsigmi1ygggitisg  
ygv1l1nttmdg1fdvvtgg1nei1apykr1l1smaptivm1hhgkpi1ltvgappaisi1iasvaqt1inv1lvfgm1diqqaidp  
ri1ysshpn1riewepqfsqs  
ti1lali1arghamehk1pdayigdvhgl1hdv1ntrdasg1addtregtvm1ggevl1sirkqpl1pyrqmysnvyrvyfndvq1  
pl1ladqvrwm1hdkywvdes  
vvri1ifsevsahied1rsyenagenyidi1twlarkkgyqvt1kddg1ly1tddytsvkrntn1ayrydrdsitr  
>tr|D1GM29|D1GM29\_STAA0  
mtkrpkri1lati1iif1s1l1fti1yiddi1qkwfnqytdk1ltqn1hkqgghsk1led1ffrgsr1itetfgkyqhs1pfdgkhygid  
fal1pkgt1pikaptngkvt1r  
if1nne1ggkv1lqiaedng1eyhqwy1h1dkynv1kvgdrvkagdi1iaysgntgkq1ttgah1hfqrmk1ggvgnayaedpkpfi  
dq1lpdgers1ydl  
>tr|D1GM31|D1GM31\_STAA0  
msk1ilkyit1lavvm1l1ivtacgpn1rskedi1dka1l1nkdn1skdkpnq1tmvvdg1dkqmafykkitd1qytkkngikvkl1vnig  
qndq1lenis1dapagk1gpd  
if1flahdntgsay1lqgl1aaeik1skdelkgfnkqal1kamnydnkqal1paivetta1fynkkl1vknapt1leeveanaak  
l1tdskkkqygm1fdaknfy  
fnyp1fl1fgnddy1fkkngseydihq1lg1nshkhv1knaer1lqwydkgy1lpaathdvm1ig1lfkegkv1gqfv1tgpwn1ney  
qet1fgkd1lgvt1l1ptdggk  
pmkp1fl1gvr1gwy1seyskhkywakd1m1lyitskdt1lqkytdemseit1grvdv1kssnpn1l1kvfekqarhaepmpn1ipemrq  
vvep1mgnas1ifi1sngknpk  
qa1ldeatndi1tqnik1l1hpsqndkkgd  
>tr|D1GM34|D1GM34\_STAA0  
mmt1ikvgi1igcgg1angkhm1ps1lqkvenvemi1afcdvdi1skaacaae1aygtdnakvyddyka1llkddtid1vihvctpnds  
hce1itvag1lhagkhvmcek  
pmakt1tae1aqkmi1dtakstgk1l1tigyqnr1frpdsq1flyksaqrgd1lgdiyfgkahairr1ravptwg1vfl1deeaqgggpl  
id1igtha1ld1tlwmm1ndnye  
pesvm1gst1fhk1lnkqhdaanawgswnpde1ftveds1afgfi1kmkngati1ilesawain1levneakcs1sgtkagadm1kdg  
l1ri1hgedmgt1lytkhvele  
nkgvd1fyegnev1dkaeeekawidavvnd1tep1vkvpeqam1vvtkileai1yqsaksgkviyfe

Tsompanidou\_et\_al\_Supplemental\_FASTA\_File

>tr|D1GM35|D1GM35\_STAA0  
mtklkvgvigvggiagdrhipal1klkdavslvavq dintvqmidvakrfniphavetpselkfldavvictpnkfhad  
lsiealn hgvhvlcekpma  
mteecdrmieaankncklltvayhyrhtdvaitakkaiesgvvgkplvarvqamrrrkvpvgwvftnkalgggslidy  
gchlldslwllgkdmvph  
evlgktyngl1skqpnqindwgtfdhtkfdvddhvtsymtfanrasmqfecswsanikedkvhvs1sgedgginlfpfeiy  
epfrgtifesanvehned  
iagerqarnfvnalcgieeivvkpeearnvnalieaiyrslndnksiq1  
>tr|D1GM42|D1GM42\_STAA0  
mletnknhatawggfkngrwrnhvdvrefiq1nytl yegndsflagpteatsklweqvmqlskeererggmwmdmtkvas  
titshdagylkdletivg  
iqtepkfkrsmqpfggi rmakaaceaygyeldeetekiftdyrkthnqgvfdaysrem1ncrkagvitglpdaygrgrii  
gdyrrvalygvdf1meekm  
hdfntmstemsedvir1reelseqyra1kelkelgqkygfd1srpaenfkeavqwlylaylaa1keqngaams1grtstf  
1diyaerd1kagvitesev  
qeiidhfimkl1rvkfartpdyne1fsgdptwvtesiggvgidgrplvtknsfrflhs1dn1gpapepnl1tv1wsvr1pd  
nfktycakmsiktssiye  
nddimresygddyg1accvsamtigkqmqqfgaranlakt1lyainggkdeksaqvgpnfeginsev1eydevfkkfdq  
mmdwlagvy1nsl1nvi hym  
hdkysyeriemalhdteivrtmatgiaglsvaads1saikyaqvkpirneegl1vdf1eiegdfpkygnnddrvddiavd1  
verf1mtkl1rshktyrdseh  
tmsvl1titsnvvygkktgntpdgrkagepfapganpmhgrdqkga1ss1ssvakipydcckdgisntfsivpks1gkepe  
dqnrn1t1sm1dgyamqcg  
h1n1n1vfnret1idamehpeeypl1tirvsgyavnfik1ltreqq1dvisrtfhesm  
>tr|D1GM44|D1GM44\_STAA0  
mrqvgqwl1kedafvssyadkecdal1kmgfgyhrmgyy11layeyesfqifidpe  
>tr|D1GM45|D1GM45\_STAA0  
mkriskd1wavfk1lyqnkgrfsina111qlimi f1sstyl111fnmm1kvagqsq1tinwmeivshpasvillii1fil  
svaf1iyvefsl1vymvya  
gfdriq1itfks1fkna1fvnrk1ligvpviffviyl1ml1mipian1gl1ssv1tkniy1pkfl1teelm1kttkgi1iygtf1mia  
v1iln1fk1l1ft1pl1tilnr  
vsl1fknmr1swq1tkrnkfr1lvieivile1liigail1liisgatylaicvdeegdkflvssilfvvlksslffyy1ftkl  
sl1sv1vl1hlkqenv1dqg  
glefkyppkprkrsrff1ismv1avtcf1gynmy1lynntintnisi1ghrgfedkgvensips1kaaakanveyvel1dti  
mtkd1kqfvvshdn1lkr1t  
gvnkn1sesnfkdvvgl1kmrqngheak1vs1defietakqsnvkl1velkphgkepadytqrvidil1kkhgvehqyrvms  
1dydvmtk1k1keapy1kcg  
yi1p1qfghfkets1ldffviedfsyspr1vnqahsenkev1twt1ngeed1tkyl1qtnvdgi1tddpaladqikeekde  
tyfdrsi1rilfe  
>tr|D1GM56|D1GM56\_STAA0  
mkkvli1anrgei1avri1racrd1lgiqtvaiysegdka1lhtqiadeaycvgpt1skdsyl1nipn1lsiatstgdcgvhpg  
ygf1aenadfael1ceacq1  
kfi1gpsyqs1qkmg1kdkaemikanvpvpgsdg1mkdvseakkiakkigypvii1kataggggk1irvardeke1etg  
fr1mteqeaqtaf1gngg1ym  
ekfi1enfrhie1iq1vgdnygnvih1lgerdcti1qrrmqk1veeapsp1l1ddetrremgnaavraakavnyenagtiefiyd  
1ndnkfyfmemntri1qveh  
pvtemvtgid1vkl1ql1qvamgdv1pykqedik1tghaiefr1naenpyknfmpspgkieqylapgg1ygvriesacytnt  
i1ppyds1mvak1i1heptr  
deaimagi1ralsefv1lgidttipfhi1k11nndi1frsgkfn1tnf1eqnsimndeg  
>tr|D1GM62|D1GM62\_STAA0  
mtetwnf1intgskdpyynmamdeal1nfvsrgeidpvirfytwnpat1sigyfqr1lqkeididk1vkekgf1lvr1rtggr  
gv1hdke1tysv1vpeshp  
nmpstvt1eayrv1sqg1legfkn1lgfdtyfavpktpeerqk1kqprssvcfdapswe1lvvegrkiagsaqtrqkgv1lq  
hgsi1lqdi1del1fdmf1iy  
kner1kl1k1mkeafvekavaindisdehit1ismeeafekgfkkg1niefkpl1el1teaqlaeveel1tekyrsdewmfrk  
>tr|D1GM64|D1GM64\_STAA0  
mtsksspl1ifersregryays1pkdikt1nsves1l1ddkfi1rknaefpevaeld1vrhytel1snknfgvdngfyp1gsc  
tmkynpk1nekvar1ipgfs  
eshp1lqdedqvqgs1lei1y1lqeel1kei1tgmdevt1lqpaagahgewtal1mifkayhengeghrdevivpdsahgtnpas  
asfagfksvtvksnergev  
didd1krvvnentaa1im1tnpnt1lgi1feknime1reivhnaggl1lydgan1naimdkvrpgdmgfdavh1nlhktftgp  
hggggpgsgpvgv1kelas  
yl1pkpmv1kdgdkfkydndiknsigrvkpfygnfgiyl1raytyirtmgatgl1kevseav1nanyikar1skhfeipykq  
yckhefv1sgvrqkefgvr  
t1dmakr1l1dfgvhpptiyfpl1nveegmmi1eptetesket1dyfidt1l1isiaeeakndpdkv1leaphttv1dr1deataa  
rkp1lkfen1kqek  
>tr|D1GM65|D1GM65\_STAA0  
mshryipl1tekdkqem1qtigaksigelfgdvpsdi11nrd1niae1geaett11rr1nr1riasknitkethsfl1gagvyd

Tsompanidou\_et\_al\_Supplemental\_FASTA\_File

hyapsvvdamisrsefyta  
ytpyqpei sqgelqai fefqtlice l tmdvanssmydgmstsfacilafsqtkknkivvskglhyqalqvlhtyakt  
kefevveidldgtvtdlkk  
leaavddetaavavqypnfygsiedlekihsfiedkka lfivyanplalglltppgsfgadivvgdtqpfqipa qfggph  
cgyfattkklmrkvpgrlv  
gqtqddegnrgfvltlgareqhirrdkatsnicnqalnalassiamsal gkqgiydiavqniehanyakqffikkqfev  
ldgtsfnefvvfkdkpiqq  
vneelvky niiggfdlgvvsddfnhmliavtelrtkdeidtfvekage lnd  
>tr|D1GM66|D1GM66\_STAA0  
mssdlkqtplyqnyvdr gakevefggwampvqfssikeehnavryeig lfdvshmgievtgkdasqfvqyllsndtdnl  
ttskalytalcneeggiid  
dlviykladdnyllvnaantekdfnwilkhkekfdveqvnsnygqlaiqgpkardlinqlvdedvtemkmfefkqgv  
klfganvilsqsgytdged  
feicynidttekiwdg l leynvmcpglgardt l rleag l plhgqdltesitpyeggiafvskplidadfigksvlkdqke  
ngaprtrvglellekgiar  
tgyevmdl dgniigevtsgtqspssgksialamikrdefemgrel lvqvrkrqlkakivkknqidk  
>tr|D1GM68|D1GM68\_STAA0  
mlvammfisitllivpd l rlsktfliesrd l ttvdfeffsrd l ddfkgvdrndieir qhriilhkgeemiey k l innk  
iikvvndrgnitminnvta  
ftaniyyksiikititvkvgtvntvqtktiyv  
>tr|D1GM70|D1GM70\_STAA0  
miemlvmm l isiflll tmtskgl sn l rviddeaniisfite l nyiksqaianqgyinrvfyensdtikviennkirflk  
lkvgkiinvakvdiafdk  
kgninkfgsitiynnsiyriifhiekgriryek l  
>tr|D1GM72|D1GM72\_STAA0  
mklqcintfklhskkrqlskaqqid l lsn l cnllkygftlyqsqf l nlqmtynkqlgttilseisngapcnqilslig  
ysdtivmqvylaerfgni  
dvleetvny m kvnrkseqr l lkk l qyp l ilvsifiami i l n l tvipqfqlytsmniqlssfqk l sffits l ptiivv  
mliivsm l ai m k li ynn l  
nm l n k i n f v m k l p l i s y f q l f k t y f v t n e l v l f y k n g i t l q s i v d v y i n h s s d p f r q f l g k y l l t y s e m g y g l p q i l e k  
l k c f k p q l i k f v l q g e k r g  
k l e v e l k l y s q i l v k q i e d k a i k q t q f l q p i l f l i l g l f i v a i y l v i m l p m f q m m s i k  
>tr|D1GM81|D1GM81\_STAA0  
mlkr l keksndeivqntinkrinfi fgvivfi favlv l r l g y l q i a g g s h y k q i i k n d e n i t v n e s v p r g r i l d r n g k v l  
vdnaskmaitytrgrkttq  
sem l d t a e k l s k l i k m d t k k i t e r d k k d f w i q l h p k k a k a m m t k e q a m l a d g s i k q d q y d k q l l s k i g k s q l d e l s s k d l  
q v l a i f r e m n a g t v l d p q m  
i k n e d v s e k e y a a v s q q l s k l p g v n t s m d w d r k y p y g d t l r g i f g d v s t p a e g i p k e l t e h y l s k g y s r n d r v g k s y l e y  
q y e d v l r g k k k e m k y t t d k  
s g k v t s s e v l n p g a r g q d l k l t i d i d l q k e v e a l l d k q i k k l r s q g a k d m d n a m m v v q n p k n g d i l a l a g k q i n k s g k m t  
d y d i g t f t s q f a v g s s v k g  
g t l l a g y q n k a i k v g e t m v d e p l h f q g g l t k r s y f n k n g h v t i n d k q a l m h s s n v y m f k t a l k l a g d p y s g m a l p s d i s  
s p a q k l r r g l n q v g l g v k t  
g i d l p n e t r g q i e p l t n n p g n y l d l s i g q y d t y t p l q l s q y v s t i a n d g y r i q p h i g l t i h e s t n k d e v g p l k k k i n g t v  
l n k v n n t e k e i k q i q e g f k  
m a f n d k d g t g y v s f k d t v v p t a g t g t a e v f q n g e p r v n s t y i g y a p i d d p k l a f s i v y t n q p v p p p w l t g g d l g r d v i n  
y y f k q l g k d d k n k d k d k  
>tr|D1GM87|D1GM87\_STAA0  
makhpfeqfnless lidavkd l n f e k p t e i q n r i i p r i l k r t n l i g s q t g t g k s h a f l l p l m q l i d s e i k e p q a i v v a p  
t r e l a a q l y d a a n h l s q f k  
a g v s v k v f i g g t d i e k d r q r c n a q p q l i g t p t r i n d l a k t g h l h v h l a s y l v i d e a d l m i d l g l i e d v d y a a r l e d n a  
n i a v f s a t i p q q l q p f l n k  
y l s h p e y v a v d s k k q n k k n i e f y l i p t k g a a k v e k t l n l i d i l n p y l c i i f c n s r d n a n d l a r s l n e a g i k v g m i h g g l t  
p r e r k q q m k r i r n l e f q y v  
i a s d l a s r g i d i e g v s h v i n f d v p n d i d f f t h r v g r t g r g n y k g v a i t l y s p d e e h n i s l i e d r g f v f n t v d i k d g e l k e  
v k a h n q r q a r m r k d d h l t n  
q v k n k v r s k i k n k v k p g y k k k f k q e v e k m k r q e r k q f s k q n r q r k r k n k g  
>tr|D1GM93|D1GM93\_STAA0  
mnltrat l rpd l ail tmsgfl earprvgyyysgsksgkffnek l r q f e v k d y m s q p v v l r e n t t v y d a i c t i f l e d v s t l  
f i n e d n d f v g v c s r k d l l  
r a s m i g a d i h k v p i s v n m t r m p n v t y l k e s e l v i y a a d r m i e k e i d s i p i v r k k d n q y e v i g r i s k t t i a k l l v a l y k e  
>tr|D1GM95|D1GM95\_STAA0  
mrqkgi i ikavdygesdk i i t i l n e h g a k v p l m a r r a k k v k t g l q a q t q l f v y g l f i y n q w r g m g t l n s v d v i s q h y k l q  
m d l y v s s y a a l a e t i e r s  
m d e g d i a p y n y q l l q f v l e k i e s g t s a q l m s v v v m l k c m k r f g f t a s f n r c a v s g n d t q a d l i g y s f k f d g a i s r q e a s k  
d v h a v i l s n k t l y l l d v l q  
k l p i d k m n s l n i h q e i d e m s d i i l m l y r e y a g m f f k s q k l i n q l k r l e q  
>tr|D1GM96|D1GM96\_STAA0

Tsompanidou\_et\_al\_Supplemental\_FASTA\_File

mtehksgfvsiiigrpnvgkfstfvnrivghkiaimsdkaqtrnrkiqgvmttrddaqiifidtpgihkpkhklgdymmkvak  
ntlseidaimfmvnaneei  
grgdeyieimlknvktpvflvlnkidlvhpdelmpkieeyqsymdfteivpisa leglnvdhfidvltktylpegpkyydpd  
dqisdhpegfvvgeiirek  
ilhltseeiphaigvndrmvkenedrvhieatiyverdsqkgivigkggkklkevgrarrdiemllgskvylelvkv  
qrdwrnkvnfirqigyved  
qd

>tr|D1GMA0|D1GMA0\_STAA0

mpgiiqiddmnsqalignndehlkaieesfdvvi hargqevavkgtkienvekaesvlinllkvidlgnnitikdveaa  
ikmahntiqhlldlydee  
itkdafgkti raktmgqriyvnamknndlvfgigpagtgktflavvyaakqlrkvavkrivltrpaveageslgflpgdl  
kekvdpylrplydglytv  
greqterfiergiieiaplaymrgrtledafvildeaqntthaqmkmltrlgfgskmvvtgdqtqidlpkgvksglkea  
vsrlhvkgsilkldqsd  
vvrhplvskiihyegen

>tr|D1GMA9|D1GMA9\_STAA0

mskiiigidlgttncsvtlvegdepkviqnpegsrttspvafkngetzvgevakraqaitnptvqsikrhmgtdykvdie  
gksytpqeisamilnlnkn  
taesylgekvdkavitvpayfndaerqatkdagkiagleveriineptaaalayglkdtdkdeklvfdlgggtfdvsil  
elgdgvfevlstagnklg  
gddfdqviidylvaeffkngvdl sqdkmalqr lkdaaekakkdlsqvsqtqislpfisagengplhle vnltrskfeel  
sdsli rrtmeptraqamkda  
gltnsdi devilvggsiripavqeavkkeigkepnkgvnpdevvamgaaigggvitgdvkdvll dvtpslslgieilggr  
mntliernttiptsksqi  
stavdnqpsvdvhlqgerpmaadnktlgrfqldippaergkqievtfdidkngivnvtakdlgnkeqritiqssss  
lsdeeidrmvkdaevnaea  
dkkrreevdlr readslvfvektltdlgenigeedkksaekkdalktalegqdi edikskkeelekviqelsakvyeq  
aaqqqqagqanagqnd  
tvedae fkevkd dkk

>tr|D1GMB2|D1GMB2\_STAA0

myvgggtptalsinqlerllkairdtftitgeytfanpdeltkekqvllkeygvkrismgvqtfkpellsvlgrthnte  
diytsvlnaknagiksisl  
dlmyhlpkqtiedfeqsl dlalmdiqhi ssyglilepktqfynmyrkglklpnedlgadmyqllmskieqspfhqyei  
snfal dghesehnkvwyfn  
eeyyfgagasgyvdgvrytninpnvnyhikainkeskailvsnkpsltermeeemflglrlnegvsssr fkkkfdqsies  
vfgqtinnlkekelivekn  
dvia ltnrgkvignevfeaf lind

>tr|D1GMB6|D1GMB6\_STAA0

mlfvalsmivglwssskvlstflflllyityrknkivyapislfliif sawylhysqqai fnyinyiernsqfneraq  
viqirggsdtykgrlskl  
neiyppffltdkknfdlkkiesrncivkgqfkvndnkfvtklqsivvqsclesnrsnliekhkqfimnriydsigkfpdr  
imtli tgdvkeveqfkaar  
vkeigiyhllavsgshiaaivfliyqplkrlnlp lfvikgitiivlal faqytnyapsavraimttlvlvitkqikiks  
iqllafafiimfilnplvv  
ydgfgqfsfiisffimllfpflqqslkslf iitfiaqlasfivaipsfhqlqwgflsnlifvpyysiilfp silff  
itshfi vgltplnyldvl  
fnfhdlwldl ftrikqshfsvpkfn dwifivfiisvyyifwllakrkyilvtfwtiiltllitfptnshhkitmlnvqg  
gdsilyeggknqnvlidtg  
gkviddtkqpsysiskyh lptlnergineleylilthphndhigeveyiishikikhiviynkgysntlmllsklshk  
yniklmdvrqvssfkldgs  
sflffdsfipnsrdkneysiitmi tyqnkkvlmgdasknneslllkkynlpeidilkvghhgsktssskefiemikpki  
slissgknmyhlpnievv  
kr lqrisriynsqngqv tidldn lkvds ssygnasgl

>tr|D1GMC2|D1GMC2\_STAA0

mkkivlyggqfnpihtahmi vasevfhelqpdefyflpsfmsplkkhhd fidvqhr ltmiaqiidelgfgdicddeikrg  
ggsytydtikafkeqhkds  
elyfvigt dqnqlekwyqiey l kemvtfvvnr dksnqvenamia iqiprvdisstmir qrvsegksiqvlvpskven  
yikgeglyeh

>tr|D1GMC5|D1GMC5\_STAA0

msdilkcigcgalqsedknkpgfvpehnmfrddvicrrcfrlkn ynevqdvgl esedflkl lsgladkkgivvvvdvf  
dfegsfinavkrivgnkki  
ilaankldllpkqinkrrvkewlkr tarkygleaddvvlisaekgwiddllssiani renevdyvtvgttnvgkstlink  
lieasvgekdvvttsrfpg  
ttldmidipldetsfmydtpgi iqdhqmthlvsekelkiimpkkeikqrvyqlneaqtlffgg laridvsggkrplvcf  
fsndlnihrtktekandlw  
rnqlgdlltpgnpqndlnevka vrletgkekrdvmisglgfitigpgakvivrvpknvdvvlrnsil

>tr|D1GMC8|D1GMC8\_STAA0

mgefevkyltgfililllegiftnsasaieysdlhhkskfdskrlsnakmsfinptqlenkntrndrllkhdllfhdmfvn

Tsompanidou\_et\_al\_Supplemental\_FASTA\_File

ddwkkdfkvefenealskk  
finkdidi fagnygychggatnktqcsyggvtlsdnkyddyknipcnlwidghqteieltavtkkkkivtiqeleqv  
rnylnekyklyeqggdivk  
gyvkyynddeqnveydfynl ngeygrevlkmyadnktinsdklhldiylfks  
>tr|D1GMD2|D1GMD2\_STAA0  
mtinkvtvl gagtmgaa laalfvnaglkvklldivvdkndpnliakksydkitdkkrp11fdlnlshltygnfdddln  
ddadlyieavkedieikha  
vwqlvlqhakedal fatntsgipinaiaqafnekdqerffglhffnpprimklveliptshtkesiildvknfaqnvlgk  
gviivndvpgfvanrvgtq  
tmndimyraeqhklsvdvda l t g q a i g r p k t g t y a l s d l v g l d i a v s v i k g m q q v p e e t p y f h d v k i v n t l y e n g a l g r  
k t k q g f y k k d k e t k a r l v y  
dvekdqyvpvsqpqlpilinefnkdlvhnldvifnaqdeagflwetlrnnfyysainvpkatddfrdidralvwgfnwk  
gpqqlwdamgyervktrme  
delgd1pqwisdldggfykqdetieyatpvshfvkdelwdkgdaklsvthndq111klqsknnvitdefnda1vdaid11  
enehytsmviyadgnnfsv  
gan1flmkkahedglvddvvaqsdklhysfnrlkyslkpvtavqgralgggcelvlyspivvaasetyig1veavg1  
lpsggglaemadri1rtsh  
kfdkqasmtkvltniafakvstnafearrygylrtdt1ifntaqrvevalkrakyeaetnyipnprhqiya1gedfka  
liqqqldaqrhghfisdhd  
yhi1niati1sggd1prntfnqryiqslekigfid1lksksyeriahmlktgkplrn  
>tr|D1GMD4|D1GMD4\_STAA0  
mnfdwiktrsd f d d d k p a v i d h a k q t s w t y q q l n a r a d n m a h y l t s q g v k k g d v i g i f a p n d i a i l d 1 1 f a c f k t g a v f l  
p1nwr1npkeiaaivedaq  
lkl1fyakhlssltdidqn1lhmdidvaqydeivnpdyhqpfaqtpvepqdlaaliytsgttgs pkgvmfsvyesfvhng  
anleltykfnstnyitvst  
pmfhvlgfndtvlpvlmsggtlilqryfngeelndmiaqyhptfiimiptmyystlrasnfnpenfkamdyiiqggsqpl  
psiqaa1kqygininingy  
lteapl1vntpenskrkpmsigkavmfvdarilddngeevptgeigelaikaknvtpgywnkpaetakafhgrylltgd  
lakmdddgdifiidrckel  
iitggenvlpsevenalaeaplvdrcvvvgydhpkygesiaaai1redephyaeildqhmsr1lagykvrmyvpvthm  
plnstgkpk1airqmmnd  
kvsqt1  
>tr|D1GMD9|D1GMD9\_STAA0  
mtvdigriydnkndtdairilvdrvwprgiskrtanldywlkdiapstelrqwfqhdpklygafkekyekelrdnetqke  
afek1kainqhhl1ly  
sakdtkhngavvlqq1nt  
>tr|D1GME0|D1GME0\_STAA0  
mkl1nqryvkvfalyfasivtani1vkn1liktliqtlagytvfavglkyltkrknk  
>tr|D1GME1|D1GME1\_STAA0  
m1teqekdi1kqtpvl1kekgtetsifypkmfkahep11nmfnqtnqkrmgqssalaqavmaaavnidn1svikpvimp  
vaykhcalqvaehypivg  
enllkai1qdv1teendpviqawakaygviadvfiqiekeiydqm1wigf1kpfkitnikqesediksftvetdaydfsq  
vpgqyitvdvssdklpyra  
krhysivsgdknh11fgvkrdrvttehegevstilhdeikegdminlaapvggfv1enttepql1flgsgigvtp1vamyea  
asakg1dtqmvqaeneqh  
lpfkdnfn1sianhyd1naklyth1kgeqgyigaeelkaflankpeiyicggtkflqsmiealks1nydmrvhyetfipr1  
svvv  
>tr|D1GME9|D1GME9\_STAA0  
mka1vktreghgn1elldkevatp1ddkvkikvhyagicgtdihtyeghykvnpvt1ghefsgeivevgadvkdfkvgd  
rvtsettfyvcnecgyces  
kdynlcnhrkgigtqvdgaftnyviarees1lhipdevsyqsaamteplacahhgvskiqvns1gdvavvmgsgpig11va  
qvlkskgatvvvtg1dndk  
vrldkaeal1hmdyvvn1lqqtd1lkytingitdgygadvvvecsgavpaarqg1d1l1rkkgfysqigifkdaeitfdmekvi  
qkei1tvvgsrsqkpadwep  
slq1madglvnaealvtkiydi1skwdeayqhlksgegikal1kpl1denegen  
>tr|D1GMF1|D1GMF1\_STAA0  
mka1klygved1ryednekpviesandv1vkvratgicgsdtsrykkmgpyiqgmpfghfsgvvdaisdvthvngdk  
vtgcpaipcyqcey1kge  
yarcek1fvigsyepgsfaeyvklpaqnv1kvpdnvdyieamvepsavvahgfyksniqpgmtvavm1gcsig11aiqw  
ar1fgaahiaididahl  
diats1gahqt1nskeen1lekfienhyanqidiaiessgaktigqil1tpkkggevv11gipyddieidrvhfekilrn  
el1tvcgswnc1ssnfp1gke  
wtat1hymk1tkdinvkpi1shf1plek1gpetfdk1vknkerfdkvmftiy  
>tr|D1GMF2|D1GMF2\_STAA0  
miyagi1aggi1grmgnv1pkqf1didnkpilihtiekfilvsefn1iatpaqwishtqdil1kkynitdqrkvvag  
gtdrnetimni1dhi1rntq  
gt1nddv1vthdavrpf1tqriikenievaakygavdtvieaid1tivmskdkqnihsipvrnemyqgqtpqsfnik11qd  
syrals1saqkeil1sdacki

Tsompanidou\_et\_al\_Supplemental\_FASTA\_File

ivesghavklvrgelynikvttpydlkvanaiiqgdiadd  
>tr|D1GMF4|D1GMF4\_STAA0  
mtktkqaihidniywervqlyieghsegvdltsqgfvlnltetkleanemkidgntflcrfnvailddgyylpmdkyl  
fvyhdqleyigqlnpnid  
qayaaaneeqieeynelettqngkanyvlaneakvfrkggvsqhtvytipeiasdvnefvdiditlpqeksgviatsah  
wlhkqghkasfesrsflk  
aifnltkllhikrsktilftsdsrpnlsngfkvydelrqqvdfdydiktvfkanitdrkwrkfrlpyllgkadyif  
vddfhpliytrfrpsqei  
iqwhavgafktvgfsrtgkkggpfidslnhrsyt kayvssetdipfyaeafgi reenvvptgvprrtdvlfdeayatqik  
qemenelplikgkklfa  
ptfrngghgtahypffkidferlarycekhnvvlfkmpfvknrlnisrehrqyfidvsdyrevndilfftdllisdys  
sliyeyavfkkpmi fyaf  
leyyittrdfyepyesfvpgkivqsfdalmdaldnedyevkvvpfldkhfkyqdgrsserlvkdfr  
>tr|D1GMF5|D1GMF5\_STAA0  
miktikkliehsiyttfkllsklpknliyfesfhgkqysdnpkalyeyltehsdaqliwgkkyehifqqhnpvyt  
kfsmkwflamprakawmin  
trtpdwlyksprttylqtwhgtpkkigldisnkvmlgtntqnyqdgfkkesqrwdylvspnpystsi fqhahfvsrdki  
letgyprndklshkrndte  
yingiktrlnipldkkvimyaptwrdeai regsyqfnvndiealrqaldddyvillrmhylvtridehddfkdvsd  
yedisdlylisdalvt dys  
svmfdfgvlkrpqi fyaydlkygdelrgfymdykkelppivqntalidalkqidetaneyieartvfyqkfcsl edg  
hasqricqti fk  
>tr|D1GMF9|D1GMF9\_STAA0  
mmkfsvivptynsekyitellns lakqdfpktefevvvddcstdqtlqivekyrnklnlkvsqletnsgggkprnval  
kqaegefvlfvdsddyink  
etlkdaaafidehhsdvllikmkgvngrgvppsmfketapevtllnsriiytlsptkiyrta llkndiyfpeelksaed  
qlftmkaylnanrisvlsd  
kayyyatkreghmssayvspedfyevmrliaveilnadleahkdqilaeflnrhfsfsrtngfsfvkledqppwina  
lgdfiqavpervdalvmsk  
lrpllyharakdinyrtveesyrgqyyrfdivdgklniqfnegepyfegidiakpkvkmatafkfdnhkivtel tnef  
migeqhydvrlklnsrnk  
htmyvplsvnankqyrfnimledikaylpkekiwvflvqigtevfvrngvrnkyaytaetsalihlnndfyr ltpy  
ftkdfnnislyftaitld  
sismkllgkknkiiltglrdryvfeegmasvvlkddmvmgm lsqtsenevqillskdikkrdfknivklntahityplnk  
>tr|D1GMG2|D1GMG2\_STAA0  
mkaliiddeplarneltyllneiggfeeinaenvketleallinqydiifldvnlmdengielgakiqkmeppaiifa  
tahdqyavqafelnatdyi  
lkpfgqkrieqavnkvratakdgnsanaianmsanfdqslpveiddkihm lkqnniigigthngittihthkyett  
eplnryekrln payfiri h  
rsyintkhikevqqwfnytyvmviltngvkmqvg rsfmkdfkasigll  
>tr|D1GMG5|D1GMG5\_STAA0  
msmqssykrlykvl ltilvivf silvvgwyifkneaprptki vqqgghtlvtkgelisgqaiyekygltdygsylngs  
ylgpdytaeahhlyligr  
kyyaqdiyhkqlhklhaelavvkdvmkeirinrysekedqlvltpgqvyg lky lqdykkefvnnpkqvglnenmikq  
fqnddymvagnkvehlsqf  
ffwgawlsst drpgktfsytnnwpvdagntlpsagilwtaisvtllia glafiiyiqkryefdmkptyeserelpkie  
vdskitdsqrkvgyllvvv  
mllflvqillge llahyyvenffgieiqr lfpfniaktwhvqlvi fvwattwlaagiyivpkvl gkepkkgvldilf  
waliiivmgs mi g ewghil  
gwidshwllfghf gweyielgkfwqilfi vgmvlwv i lcr gflpairnkvanhdkrhlltllfvgaiaiplf ylaslf  
impnshvtfadywrwwivh  
lwvegi feafavligflmvnmkltti ettira lyfqlilllgtgivgmghyywqgdhsiwla l gscfsalevvp lcll  
iweaythyrlykksdiafp  
ykgtfiflastglwnaigagalglintpavnyfehgtqwaahahgsmagvygmfsiaialyvfknitkkefwtpkvek  
wikiscwalnvglagm vfi  
tlmpvgyiqlkdalehgywhsr ltsfyeqplvkaimwgrmpwdiiftvgv iilvvi firgyrh lkpkyrv  
>tr|D1GMG6|D1GMG6\_STAA0  
mlkyehiakqlnafihqsnfkpgdklpsvtqlkeryqvskstiikalglleqdgliyqaaggsgiyvrniadanrinvft  
ngfskslgehrmtskvlvf  
keiatppksvqdelqlnaddtvyylerlrfvdddvlci eysyvhkeivkylnndiakgsifdylesnmklrigfsdi ffn  
vdq ltsseasllqlsagep  
clryhqt fytmtgkpfdsdivfhyrhaqfyipskk  
>tr|D1GMG7|D1GMG7\_STAA0  
mgnykdyaqdi ltaggvenivnvsydtvrmtihmhhaipstan evtqidgvasvdenetqlvivfneevkyvyqqllq l  
lmdakhqedtnhdavdtq  
eteqkaqakvttplvkapiagrri llkevrdsifrekmgvgleikaheeskviapfnglvsmivptkhavgiqsedgv  
divihigvntvdlegk gfe  
cfvkqndrveagqtl lqfdqqyiqqqgynadvivvisnsadlgkveltmneiittedvifkifkn

Tsompanidou\_et\_al\_Supplemental\_FASTA\_File

>tr|D1GMG8|D1GMG8\_STAA0  
mtklpqnfmggalaanqfeggydkggkglsvldvmtsgahgkarqitesidpnhyypnhegidfyhrykediafkemg  
lklrtsiawtrifpngde  
dvpneeglafydrideliaggiepvvtlshfempnlhlakhyggfrnrevvnyfvhfarvvferykdkvtywmtfneinn  
qmdtsnpiflwtngvalt  
endnpeevlyqvahellasaalavr1gkeinpkkigtmi shvpiypyschpkdmmeaqianlrffffpdvqvrqgyypsy  
akkmlarkgydfgwqegdd  
silqqgtvdyigfsyymstavkhvdttvennivnglnhsvenphiatsdwgwaidpdglrytlnvlydryqlplfive  
ngfgavdevvdghihddyr  
ieylkahitaaieavdqgdvdligytpwgiidivsfittgemkkrygliyvdrndgrgtmerlkksdfwyqqviasngd  
kl  
>tr|D1GMH5|D1GMH5\_STAA0  
mnntqssprsniiiaimlsaltywlfqsfinigplvgqtyqtspavlnlsisltsfatgimvaagdiadkigqlrmt  
mgliismfasllliisdit  
alliigrilqglsaailpstvlgvlnnqfkgehlrraisylmistvggiglagviggliafnfgwqtnfiisigiafia  
lllkgtpkvsqshshrpf  
dykmsifavmigsftllltqgfeqgwfstfsficlsifiittlifiierrhevpfidfsvlnrnpfigaflnnfvlns  
glgvtvffiyaqthlgls  
aaqsglvtlpyaivavamirlgekatlrfggkmlniigplfpvigitiismtslqpsqyiaavvigfvicainglvatp  
gltiaifsmpekvglatg  
lykmsgtlqgafgialsttvfsmqlnyapsvaatvtfivsvlmlilglsaymiilkvks  
>tr|D1GMH8|D1GMH8\_STAA0  
mieinnlskryrnkqifnhlmsfesnr1tvllgdngagkstllrmiagiekandgtinyfgekwnqrqiqnhigyvpqd  
ialfehmtvaenikffksl  
cknpindttineylqqlnfddtsakvstlsggnkrkinilvgllgqprilildeptvgidlksrhdiqllnimkskli  
iltthhldevealaddikl  
igqdpfyqhvlledkqwaytyy  
>tr|D1GMI2|D1GMI2\_STAA0  
mkktil1tm1t1l1fsm1p1saqaytndsktleakkahpnaqfknkdtgaytytydksnapnnnhqnqsrtdnhqha  
nqrdlnnnqyhsslsgqyt  
hindaidsh1ppqtspsn1ltpaipnvednddelnnafskdnkglitgidldelydelqiaefndkaktadgkplalng  
kiidqplitsknnlytagq  
ctwyvfdkrakdghtistfwgdaknwagqassngfkvdhrp1trgsilqtvnpgfghvayvekvnidgsilisemwigey  
ivssrtisaseissynih  
>tr|D1GMI7|D1GMI7\_STAA0  
mvknhdpknemqdm1tp1daeeaatklr1ldmreipkssikpehflmyl1leqhsphyfidael1telrdsfqihydindh  
tpfdniksftkneklryl1  
nikn1eevnrtrytfv1lapdel1fftrdglpiaktrglqnrvdp1pvseaf1trykalvicafnekqsfdalvegnlelh  
kgtpfetkviaeatld1lt  
af1deqyqkqeqdysqnyayvrkvghtvfkwaigm1t1svlliaflaflyfsvmkhneriekgyqafvkedytqv1nty  
dd1dgkkldeka1yiyaks  
yiqtnkqglekdkken1lnnvtpsnkdy1lywme1gqgh1deainiatyldnditk1alink1neiknngd1sndkrs  
eetkkyndklqdi1dkek1  
vkdekakseeekakakdek1kqgeenekkqkeqaqkdekrqeaerkk  
>tr|D1GMI8|D1GMI8\_STAA0  
mhkliikynkqlkm1n1rdgktytisederadit1ks1lgevih1eqnngt1wqanhts1inkvlvrkgd1ddit1qlytea  
dyasfaypsiqdtmt1gsn  
ayddmviqslmna1i1kdfqsiqetqyvri1vhdkntdv1nyel1qeqltnkayigdh1yvegiw1levqadgl1nvl1sntv  
assl1rl1tqemphaqaddy  
ntyhrs1p1i1h1reptdd1kierpp1qi1knntvi1wrs1i1p1l1v1ial1tv1v1l1vr1p1igi1y1ilm1igm1st1v1t1v1fg1t1y1f  
sekkkynkdv1ekrekdyka  
y1dnkske1nka1kaqrfs1nyhyptvae1kdivetkapriyektshhhd1flhyklgisnveksfk1dyqeeefnqrrde  
1fddakelyefytdveqap  
l1ndlnhgpiayigarh1leel1ekm1liq1stfhsyhd1ef1fv1tredevet1kwarw1lphmt1rgqni1rgfvynqrtrd  
qiltsiysmikertqavre  
rsrsneqi1ftpg1lvf1v1tdms1li1dhv1leyvnd1seygis1lifvedvies1pehvdti1diksrtegelitkekelv  
q1kftpenidndkeyiar  
r1an1ihveh1knaipds1t1f1emynvkevdq1dvvn1rwrq1netyktmavp1lgvrgkdd1ils1nl1hekahgphglvagtt  
gsgksei1qsyi1slainf  
hphevafl1idykggman1fkdlv1lvg1t1n1dgdeamra1tsikael1rkrqrlfgeh1dvn1hin1qyhklfkegvatep  
mph1fiisdefaekseqp  
dfmkelvstarigrslgih1lilatqkpsgvddqiwsnskfkla1kvqdrqdsne1lkt1pdaadit1pgray1lqvgnnei  
yelfqsawsgatydiegdk  
1evedktiymindyq1lqainkd1sg1edeetkenqte1eavidhiesit1tr1eieevkrpw1lpp1penvyqed1vetdf  
rk1wsddakevel1t1glkd  
vpeeqyggpmv1qlk1kaghia1igspgygrtt1flh1i1fdvarh1hrpdqahmy1fdfgtng1mpvtd1iphvadyftvdqe  
dkia1kai1rki1hdi1serkr  
1lsqervvnieqynketgnsipnv1liidnydtvkesp1fmeeyeemmskv1treg1algyi1ilsgsrssaiksaiftnik

Tsompanidou\_et\_al\_Supplemental\_FASTA\_File

trvalylfenneltniigs  
ykkgykdvkgraaiddnftqfqi aqpfelaegqtyneriknevaqmkefyvgdypkhipmmpdkvfmedi reaydleki  
iheehklplgldefdelv  
sldltsssiivtaikptemekmndvimsslsvysknqfvilvdaednmsqysedvtsyysapsdlsnirlgfkqeiearkn  
geksieeckivfinnikrf  
nqltgmteideirvlfnegqkvniiasglsydtigafdrskmmvrtinqalishkiseqefirvkdrfgepelkvgem  
yyinnqeyqkiklmeg  
>tr|D1GMJ0|D1GMJ0\_STAA0  
msnkgeirrqiankerekaskeaqldlkedlrrlkdaskldtagedfnkgqssynkveistsdwkgertrksdskkdd  
vdsekkveqdfddakkai  
kkdiqdeeeeikgvegeistinaaidalkskl  
>tr|D1GMJ1|D1GMJ1\_STAA0  
mgykvdmsvehnmqksidssl saintkvstlssinnl integfecqtassvknysktfhlqsikkietinkdfksdiak  
sirfkqsevdnnsailde  
deikkykkiddaldkdvfksskdangaisdvsdlttakkiktenlankmgdfnkdidqtverl tttfdannsidgktdnl  
itelsgvnsyvknmkpnra  
risstsgkiegaiarhktsee lvrwqtymetlsenlyktpgl skaasdiitqagreyyaikavngnsalrgykeyl ktrd  
inklinkmnknqlkrmslv  
lntdrgnikiknavkmasefarnnpfkkgnlvnwmskvqgyqsvsaqilkkgldknfkytfgdakkffdtadmkaavt  
efkntfvpqni retffkke  
nltsktalknmskfwnedikggikefkldfankni igklglkllkggkalkplgfitaitdnigkksweklv gmgvd  
saigasaaagaavgtaipl  
pvvgtvagalagaavgialdykipyl dksatelakdginsginkvksfgkvtsgfktvfg  
>tr|D1GMJ6|D1GMJ6\_STAA0  
menqkqnglkiatwfvil tvvtp lfgigsivcsinykkydaekgskllkia iivtiivfvlnllaylglr  
>tr|D1GMJ7|D1GMJ7\_STAA0  
mtfeeklsqmyneianeisgmipievewekvty mayiddeggevfyytepgsnelyyysvlnkydisesefmdsayelyk  
qfqnlrni fkkegyepwts  
cefdftkegelkvsfdyidwintefdq lgrqnyy mykkfgvipemeyemeevkeieqyikeqdeaeq  
>tr|D1GMJ8|D1GMJ8\_STAA0  
mtfeeklsemyneiankissmipvewekvty mayiddgggevfnytkinsdelnyytdipkeynisvqvfdllwmdlyd  
lfknlrnl fkeeghep wts  
cefdftregklkvsfdyidwinsefgqigrqnyykyrkfgilpeteyeinkvkeieqyikeqeeaei  
>tr|D1GMJ9|D1GMJ9\_STAA0  
mtfeeklnemyneianeisgmipievewekvty ayvndrggevi fnytkpgsdelnyytnisrdynvseeifddlwmnlyy  
lfknlrnl fkteehewp wts  
cefdftredgklnvsfdyidwintefdq lgre nyymy kkgvipemeyemeeiekeieqyiksqs  
>tr|D1GMK0|D1GMK0\_STAA0  
mekikkinkiflsfevipfammi llaf l pviagi nnr lqygrdfgdrvsfycyisimvayaitilleiifyfillknyq  
yqnnielanrvkvtkvl s  
ilympglyaipfyfrflhvrsfrenkksqpayhweffikpnrkpielkdfdiknr  
>tr|D1GMK1|D1GMK1\_STAA0  
mkrliiglmifsmisinygcnqnenkyksqinkvmkiqqethkemvksnevnpefnkdkvntyvfndgklliiisykl  
fkdkdqmfyatyefkndki  
fykrdipktyvkehqsdykdi kvk  
>tr|D1GMK4|D1GMK4\_STAA0  
mtfeekqsemynkianeisgmipievewekvty ayvndrggevfnytkpgsdelnyytnisrdynvseeifddlwmnlyy  
lfknlrnl fkteghep wts  
cefdftsegklnvsfgyvdwiklslgplarenyymy kkgvipemeyemeevkqieqyikeqeeaei  
>tr|D1GMK5|D1GMK5\_STAA0  
mtfeeklsqmyneianeisgmipievewekvty aylddeggevfnytkpgsdelnyytdisrdyniseki fddlwmnlyy  
lfmnlrdl fkedlepwtsc  
efdftsegdlnvsfdyidiklgfgpsgkgyymy kkgvlpemeyemeeiravekyvkeqe  
>tr|D1GMK9|D1GMK9\_STAA0  
mkkqviiisgmlfslffgagnlifppmlghtagqnmwigmlgfaltgillpfitvivvafydegvesvgnrihpwfgfif  
avviymsigafygi praan  
vayeigrhilpvhnqwtliifaaffaivywislnpskivdnlglklltpllllmvallsiavifnpsvlsapkdkyit  
hpfisgsl egyftmdlva  
lafsvvivngykfgltdrmkilkyvcfsgliaaillgmiyfalayvgastapgnfkdgtdiltynslrvfgsfgnlvfg  
mtvilac lttcigl vnaca  
tftkhhvpkfsyki falvfsi igflfttlglemilkiavplltliypvsialvlisfanmfstfrfswayrlatvitlii  
silqilnsfnllhgvilkw  
fmmpladidlawlvpfmlfaiigfiidvfirrpqatt  
>tr|D1GML0|D1GML0\_STAA0  
mnkiskyiaiaslvavtvsapqttntstafakssaevqqtqqasipasqkanlgnqnimavawyqnsaeakalylggyns  
aktqldeikknkgkhkla  
ialdl detvldnspyyqyasihnkpfpegwhewvqaakakpvygakeflkyadkkgvdiyyisdrdkekd lkatqknlkq  
qgipqakkshillkgkddk



Tsompanidou\_et\_al\_Supplemental\_FASTA\_File

skesrrqivqkdhklvmlfgdnllfdtdpkeataesrealiekhkddfgkkyiifpnpmysweatiynnykasdkakd  
klrknaiqqfdpktgeik  
>tr|D1GML3|D1GML3\_STAA0  
mdlilgtlflflvlviftlftykapngmramgalanaaiatflveafnkyvggevfikfleelgdaagglggvaaaglt  
alaigvspvyaalviaaacg  
gmdllpgffagymigyvmkytekyvpdgvdligsivilaplarliavlltpvvnstlirigdiisstntnpiimgiilg  
giitvvgtaplssmalta  
lgltgvpmaigamaafssafmngtlfhrllkldrkstiavsieplsqadivsanpipiyitnffggaiagliamsplin  
datgtatpiagflvmfgfn  
hpmtiviyygvmaivgalagylgsivfkkyivtkqdmnrgavda  
>tr|D1GML4|D1GML4\_STAA0  
msdsekdiikrikdnfpiisqrelaeaiglsrpsvaniisglikkeyvmgkayvlnedypivcigaanvdrkfyvhkdlva  
etsnptstrsiggvarti  
aenlgrlgetvafllsasgdsawemikrllstpfmnl dhvqqfenastgsyataliskegdmtygladmevfdyitpeflik  
rshllkkakciivdlnlgk  
ealnflcayttkhqiklvittvsspkmknmpdshaidwiitnkdetetylnlkiestddlkaakrwndlgvknvvt  
gvkeliyrsgeeeiiksvm  
psnskvdtgagdsfcaavvyswlngmstediliagmvnakktietkytvrqnl dqqqlyhdmedykngkftkvy  
>tr|D1GML6|D1GML6\_STAA0  
mnilfaitgiafalvfalvflfsydrknidfkktlimifiqlvivi fmmnttigltitlta lgsffeglinvskagin fvfgd  
iqnkgftfflnvllplvf  
isvligifnyikvlpfiikyvgiainkitrmgrlesyfaistamfgqpevytltikdiipklsraklytiatsgmsavsma  
mlgsymqmiepkfvvtavm  
lnifsaliasvinpyksddtdveignltkstetktlngktgkpkkvaffqmigdsamdgfkiavvvavmllafislmea  
inimfgsvgl nfkqligyv  
fapiaflmgjpwseavpagslmatk l itnefvamldfknvlgdvsartqgiisvylvsfanfgtvgiivgsikgisdkqg  
ekvasfamrlllgstlasi  
isgsiiglv  
>tr|D1GMN2|D1GMN2\_STAA0  
mmkklkaseirgkyldffvekghmvepsaplvpiddtllwingsvatlkyfdgretpkkprivnsqkairtndienvg  
ftarhhtffemlgnfsigd  
yfkqeaiefawefltsdkwmgmepdklyvtihpedmeayniwhkdigleesriiriegnfwdigegpsgpntefydrge  
aygqddpaeemyppgener  
ylevwnlvfsefnhkhdsytplnknidtgmglermasvsqnrvtnyetdlfmpimneiekvsgkqylvneeqdvafkv  
iadhirtiafaidsalpa  
negrqyvlrrllravrfstlginepfmyklvdivadimepyppnvkekadfikrvikseeerfhetledglailneli  
kkakattneingkdafkly  
dtygfpielteeiavqaglkvdmddfesemqqrdrarqarqnsqsmqvqsevlknitsastfvgydtataqttlthliy  
ngeevsveagetvyfmlt  
etpfyaissggvadgtivyndnfeia vsevtkapngqnlhkgvvqfgqvnvgatvsaevnqndrrdiqkhsathllhaa  
lksvlgdhvnqagslvead  
rlrfdfshfgpmtndeidqverlvneeiwkgidvniqemdiasakemgama l fgekygdvrvvnmappsielcggihvr  
ntseigl fki vsesgtgag  
vrirealtgkaaflyledi qekfntmksqlkvsddqvdkltqlqdeekallkql eardkeitslkmgniedqveeing  
ykvlvtevdvpnakairst  
mddfksklqdti i ilasnvdksmvatvpksltnnvkagdl ikqmapivggkgggrpdmaaggggtqpenisksl sfikd  
yiknl  
>tr|D1GMQ2|D1GMQ2\_STAA0  
mpavtyehiktckqsgarlgivhtphgsfetpmpvgtkatvktmspe l rqi eakiilgntyhlwlpqgndiikhagg  
lhkfmnwdgpiltdsggfq  
vflsnl rki teegvefrhhtngsklflspeksmqiqndlgsdimmafdecppmpaeydyvkksierttrwakrcldahq  
rpedqal fgi igggedl  
reqsakdlveldfpgyai gglsvgepkpvmymvehte qfmpkdkprylmgvgspdali ecsi rgmdmfdcvlptriarn  
gtcmtsqqrlvknakfad  
dlrpldenncytcqnsrayirhlikaetfgirltthnlhflklmedirqairedrlldfkeeffeqygl nvenpk  
nf  
>tr|D1GMQ3|D1GMQ3\_STAA0  
mnieefdydlpesliaqtp lkdrdhsrllvmdretgemkhlfkdiieyfrpgdtlvln dtrvmparlfglkeetgakve  
mlmltqi egndwevllkpa  
krikvgnklnfgngkiaecikemdqgrimrlyhyegilqerldelgemplpyikerlddpdryqtvyakesgsaaapt  
aglhftdel lieiknkgvn  
iafvtlhvglgtfrpvsdvdndhemhseyyqmtqetadllndtkskghriisvgttstrtletirrdhdkfvetsgctn  
ifiyppgdfkaidgqitnf  
hlpkstlvm lvsafssrenvlnayktavnleyrffsfgdamlii  
>tr|D1GMQ5|D1GMQ5\_STAA0  
myayvkgklthlypthvvvetagvgyeiqtpnsyrfqkhl dhevlihtslivredaql lhgfsseeekdmflslikvtgi  
gpkasalailatstpnvkr  
aienendtyl tkfpgigkktarqivldlkgkvki teedsdsl lqvdatstvqdqfvqeamlaaleal gyskrelakvektl

Tsompanidou\_et\_al\_Supplemental\_FASTA\_File

nknkydsvdeavkaglqlv  
vs  
>tr|D1GMR0|D1GMR0\_STAA0  
mfaiietggkqikeveeggeifiekldvnegdtftfdkvlfvggdsvkvvgaptvegatvtatvknkqgrgkkitvftykrnk  
nskrkkghrqpytkltidk  
ina  
>tr|D1GMR1|D1GMR1\_STAA0  
mrtlyyfligillfyidtaigllipmhigkfelvfvphltfmyilmvvyrgfgvslllsiflgvmtdivfsgsiygyvlf  
gyilflalidrffkiifykd  
hsmllfiiilastlllevyvaliygmigfiqfdiiahfvvfrllptlimnfvllimlypliikflkknkq  
>tr|D1GMR3|D1GMR3\_STAA0  
mrlifsmikniiaviaiiviyaialkyapflkeqdwvnpvhdndqmnqvtpqntdaqhvvyvsgekyslkendliknvp1s  
qiknvfkmidkqefmavsg  
mnrmayndqyiggrgdefilykfgdesmrvyntefemqqdlnelgqnlqlksenayq  
>tr|D1GMR8|D1GMR8\_STAA0  
msnlingkipnqaiqt1kivkd1fgssivgyvlfgsavngglrinsdvdvlvvvnhslpq1trkk1terlmtisgkignt  
dsvrplevtvinrsevvpw  
qyppkrefiygewlrgfengqi qepsydpdlaivlaqarknsislfgpdsssilvsvpltdirraikdslpeliegikg  
derviltlarmwqvtvtg  
eitskdvaewaip1lpkehvt1ldiarkgyrgecdkweglyskvkalvkymknsietsln  
>tr|D1GMS0|D1GMS0\_STAA0  
mnasskrkiisqseiskkiavmneemqgfwannswdirkcphpsaie1sknpalrnrwvrfervkn1wlrte1kyfyfyh  
1nngiwnaktvwi1rkgtvi  
nkm1df1dlkypsi1sitevpidkamteyrtyl1tkrgvritttnykitanektpvkansyyvt1nkqfme1fyenfyfdg  
eewdkdvdrrn1plpddk  
vnptqeytinfkgfrntyfkqlvkryck1rlnmdsfsyv1diaqklkeffn1dikfkvhqrvhql1trveieay1seln  
mmgikpstitgrisileg1  
fst1hrlewdvpsk1liypedypki1prakprfidefvleq1nsh1dk1peyatmtmivqecgmriselct1kkgc1le  
dkdgdyl1kyqwk1mkkkeh  
ivpiskevvl1ikvredkvseefpdsey1fprkdgsp1kqktfrge1nklaye1qni1vdklgeiyrfhahaf1rhsvgtrmi  
nngvpqhi1vqk1fghespe  
m1sryahi1fde1l1kneftk1fqek1vt1nngdv1n1dddse1vddve1lqwfkk1naqv1pngycr1lpviaggc1phanac1dc  
thfctskqf1lpqheeqler  
tee1l1tiakdkwqrqietnsrvker1leqi1gs1tg  
>tr|D1GMS2|D1GMS2\_STAA0  
mvv1l1syscsci1fsf1yqfisi1eetsfdy1hrrskcdycnss1kwyelmpii1sfl1llkgrcncrkris1lthf1getfal  
ipivfikiydf1tyvnat1fi  
ttyv1l1iftmtdits1ml1dcr1lii1ycivs1slsmi1ypvafii1sm1tthifys1lfrayigygdv1llisa1slff1plqft  
iyv1l1ftfviag1lvalitm  
ifkpi1k1l1plvpfi1fisffins1lyndihqf1l1ggvyf  
>tr|D1GMS6|D1GMS6\_STAA0  
m1evenmamiyrnnfivfv1sffisil1lysshv1lpf1mfgpiiasii1cvkvfk1dikwpf1l1selgiv1l1gvqigstftk  
nvm1diknnw1si1vvs1s  
i1lliaivmaf1vkkiarintetai1svipga1l1tqm1vmaeqdkran1l1vvs1l1tqtsrii1fvv1l1vpfi1syffhdgnmhan  
gk1tkv1pl1sqv1nigqiv  
i1laiaifivyl1mskikfptfql1lap1liv1vwnfstg1l1tft1dhw1l1nmaqliymirigvqiah1l1sd1kgr1aiaiti  
qni1mliigalimvyi1ihff  
dnp1pine1flgaapggvni1v1valatgadvamitsyhi1friffil1fi1agpinyf1lkyrsnkred  
>tr|D1GMT7|D1GMT7\_STAA0  
m1skfdeqi1ivvprei1fnnekntfngf1lnknkpegqni1fda1sqyevk1rgdmeedpsykq1lisycl1lenehgei1lvyer  
l1sgggear1lhqgssigvgg  
h1mndvp1gaes1nev1lrvaqre1leevgl1seqdsqnmeiyg1finddn1evgkv1higv1vfk1itv1stndveaketd1lrikw  
vekni1esyddfetwsa1i  
l1qd1  
>tr|D1GMU0|D1GMU0\_STAA0  
m1lganfvki1levstiakdqtqindki1rake1l1rligq1dgeqigvkskrea1emaervd1l1vvvapnakppvarimdygkf  
kfeqqkkekemkkkqki1in  
vkei1rlsptieehdfqtk1lkngrk1fltkgdckkvs1rfrgrai1thkeigqrv1lekyadeckdiatveqkpkmdgrqm1fim  
l1aptaek  
>tr|D1GMU1|D1GMU1\_STAA0  
m1skvqnesn1vkr1glkdrh1smiaiggcigtgl1fv1tsggaih1daga1lgaligyai1igimvff1l1mts1lgematyl1pvsgs  
f1styatr1fv1dps1lgfal1gw  
nywfn1wvvtvaadi1tiaaqviqywtpl1qgipawawsa1fl1vi1fs1lns1svrvygeseyw1al1ikvvtv1vfi1aig1l1ti  
vgim1gghv1vgfei1fnkge1g  
p1ilgg1n1l1ggs1l1sil1gvf1liag1fs1fgte1ligi1tagesenperavpkaikqv1fwr1l1l1fyi1lai1fvig1m1lipydssa1l1mg  
gsd1ni1atspft1l1vfk1nag1f  
afaas1f1mnavi1l1tsv1lsagnsgmyastr1m1lysm1skdk1l1afeafgk1tnkngvp1yms1l1lvtai1ivvi1fv1l1qsl1tkgayeyi  
vaasgl1tgfiawvgiavsh

Tsompanidou\_et\_al\_Supplemental\_FASTA\_File

yrfrfafdkqnydksklkytaklfpgplfagflcivviigqdvdfiktgdfnfsrflitymgipvflaffiyhklrykt  
kkipleqvdlrqdvsmdel  
kg  
>tr|D1GMV0|D1GMV0\_STAA0  
mktiqhkttliliaiillfytfmgillplmhddlqwfsnynntdilkvgfaslngryignifeiiavhsvlrlwlsyglis  
mgiwmimhitrckawtsy  
yllafslmlilpsaiyadygwfgafynyatstlislfiyyicinaiiykekqpsvtvlfyvlcffgqlfmenvtlfhc  
iililaflyeftanrtlly  
kllfsfmiatigtiiimfsnpnyrkilfegseyqqvsnnqgifskaemistslpygvifsqiiilsmiaaliiylllrsd  
ryvhltilkrriimigfit  
lplyllfynqflnkntdiglvgvnviwvgyfafsifvgiylsindrktqitlyslliaicvsastlvivtpiepgnf  
liyvtihviiifillkefr  
kyksinvnfikgaslvaviylsafiyvhyehkrvqllkqkikhprqevytveslpfehymhhpspinknyqewfnny  
eelpkmtkvkypfgsdds  
>tr|D1GMV1|D1GMV1\_STAA0  
mllissiliiisfvltgiihasityvlsekheqalatdarsyylvqdneidkvkivkqqnidllitkhdkkfssgkl  
kaipnsdsyiqkrdfifn  
kkvngyhwwikgynnditemhwtlwkyliltclvvlilyfasrsfkrtilrpiqevtyatqllangyyhirvpesnvve  
tkalfvstndlarrlqkln  
nekiqsnrkttienipsailmidrngkivvankayyeqfnishnieqvyghyvnteieqlilesfkvekiyeqlev  
ainqvhakyfdiscvpllt  
rsqkslqgilvvhmditnlkqlenlrrefvanvshektpitsikgfaetlidgakndaesldmflniilkesnrieslv  
tdlldlshieghteldtdy  
mnlSDLtrriidnmmtganqknisihtdiekdviwkaqueskiaqvintlltnainysyedgdinvrvyrdfrvifevqd  
fgigikledqqriferfyr  
vdkarsrdsggtglglsitkhiveahqgnievnsqvgkgstfkvilkdyke  
>tr|D1GMV6|D1GMV6\_STAA0  
mnqyhsnaqqpsawrfvyslvgilcffipftingntifvdhvhlairsiigplmpyvalimiligtalpivrtrfmts  
itnlvitlflkvagamigim  
yvfkfgpsilfkahygpflfeklmpslsilipvgaialsllvgyllefvgyvymepimrpifktpgksaidavasfvgsy  
slgllitnrvykqgmynr  
eatiiatgfstvsatfmiiaktlglmpwhnlyfwitlvitfvvtaitawlppitnesteynggegeqevaiegsrlkt  
ayaeamkqnaltpslvknv  
wdnlkdglemtvgilpsilsigflglivanytpfidwlygifypfiyifpiadqavlakasaisivemflpsllvtkaam  
stkfvvgvsvsaiiffsa  
lvpcilateikipvwklliiwflrvalsllitipvallifg  
>tr|D1GMV9|D1GMV9\_STAA0  
meenktlkeylrfkfllegkyvvenrynyqfssnpeafpfrkddykisifylnqsffeepcivvisndsklkeiyfnrni  
dikylskhftsyiydskky  
veeqsglldfnnyiyysyiygkyigtvilqnnldlffnygkrlanthyntliskskelinkahdei qpfnhlnlnsmk  
kivdditfsyqieqglqay  
krelylpaaatfavaietfliklkkvnkikhkdttdstmytkllgeltkegkvnyrtkkrveiaysmrniinhsqagavak  
gdcdfllntlkdivdener  
ilteysksinkte  
>tr|D1GMW2|D1GMW2\_STAA0  
mnlvqirirnlcnsgmtfaelertlgfsgngqirrewektkgpidkvqkiadhfdvsdyllgrekdeysgedksedilimh  
ratenmteaqrqaklitle  
amfddwddltk  
>tr|D1GMW6|D1GMW6\_STAA0  
mntlykttllitnavvtwkvwkiekhrkpvisralsdylnnksltipkdaenstesarrllkfaeqtisk  
>tr|D1GMW8|D1GMW8\_STAA0  
mlhsldctyavsilhysmvncgickyrnihvlqrmfqrkklilvgasnsikhlrknscsi  
>tr|D1GMW9|D1GMW9\_STAA0  
myyeigeiirknihvngfdkflfilkgmgisiqvkdmmnvpikhayvvdendldmasdlfnqaidewieentdeqdrli  
nlvmkw  
>tr|D1GMX0|D1GMX0\_STAA0  
mvgvsmrdternilnifktlfdeytlsnqralleiernhhgylsinflhyhdsyktnnklvqiheinpdsheiriknlie  
vlrghrkikkga  
>tr|D1GMX1|D1GMX1\_STAA0  
mkinkltisnfacikeekfnfdgkdakiygnnatgktttatalqwlldfkgldgstksfnvpplnekneenyeliptvfa  
efeidgkittfkkeshpky  
tingktnrkeysrsrtkkqyindesikvkdykaridelidedvflitnpqafnlldwkkrrsllfeiakpindedvikt  
nddfkelnnilgdheietk  
kkiltkikqinkdikdipirinqtqqnkdvpfdndrhtiikqeiqleneridiqngaeenlrnqladkqselkri  
eannsassenkihaltne  
hvengtvanlkrllkqkqqi theenrrnql lenhkgllksdleakankqfeylddnvcscgqqlpaeqvsevrekalkq  
fnankskeletalitqtsinhi  
isegkkipiieklednnnlqikineaeersariqnkinklktthvdvtqtdeykavmleineinqrsnrkti qdkv

Tsompanidou\_et\_al\_Supplemental\_FASTA\_File

sgiddkiselqtgekseiev  
sisiexsnkhlddviselrneedrlldekeyshdlyilkeftttkvkmlteninnefdiaefklfntlvngeleetcst  
tvngveydsgltnnasrinv  
gldiintlshfkvtapifidnaesvteliktesqqiqlivneqdkklrmeti  
>tr|D1GMX2|D1GMX2\_STAA0  
mtne111knnkmgdnlsvrktleaaggdlqfpanyspenamksamlqlqelkgskkdgykpalifatstsi analmdmvv  
qglnpaknggyfimygdkv  
qfqrshygtmavtkrvagaeinaevi fegdevkyktnkngkivelehtqsfgnrntqniigayatvfvkdesrnyteimt  
feeieawkqsqmvynvgvf  
kedgthrrfpqgemakktvinrackkilnstddasllsnqikeseqrqrkevl daevenanqeqldfepvfeeaytel  
endkpidvsdfeeikepat  
ekeseepf  
>tr|D1GMX3|D1GMX3\_STAA0  
mtagtqramdfeshrlctikakqelrigtwsilpfdiehdanepvafllqstlgyklyvtdtkylkykfngithmmllev  
nyieqmgenikngsvhsa  
lanrimeshfslahaigmkandltrleeihlihssqnsnakykseiqkvtgapvyvggl  
>tr|D1GMX5|D1GMX5\_STAA0  
mtgwisidrsiqnhwlfkekrtfskfeawiyllmeanhskakvpignqivtvergqrlltsiltdlfnwsrfkvktfld  
llesdgmlevkttskytli  
tivnydfyqseggrnqhndikptskqhqsniptskqhqtntnndnkdnnekvnnekkkttafdfqdnngfgfitsy  
nlddlnyldsfendsdei  
vtaslkiaakdrnkvtwgyaksilntwlnanlksieqvrafekqql eskkqnykpfvkqskektpkwltdstretktpevd  
enlekdraefikrlnskwe  
>tr|D1GMX8|D1GMX8\_STAA0  
markarivtindkpyrfskfemeli eshgitagmvskrvkdgwelheamdapegtrlseyrekk tierleqarlerkler  
krkreaelrrkkphiv  
>tr|D1GMY0|D1GMY0\_STAA0  
mtmtynarkeylnqffgskrylyqdnervahihvngtyyfhghivpgwqgvkktfdtaeeleiyikqhgleyeeqkqlt  
lf  
>tr|D1GMY3|D1GMY3\_STAA0  
mtftl sdeqyknlctnsnklldklhkaikdreeykkqryeligviaklrdcnkelekkasawdrycksvekdlinkfgnd  
dervkfgmelnnkifmedd  
tne  
>tr|D1GMY5|D1GMY5\_STAA0  
mtntltidqlqellqi qkefddriptlnlgdskiayvveffewfntletfknwkkkpgkpldvql deladmlafglsian  
qvgvsseeikeaiesffkd  
tefhkmfnfkde faggavstpqii fkefypdqlaiviaidiaynlytidqlidaykkkmkrnherqdgtagdaggyv  
>tr|D1GMY6|D1GMY6\_STAA0  
mtqylvttfkdstgrkhthitraksnqrfi vveaeskeakekeya qvkrdaviklgqysicfgqf  
>tr|D1GMY8|D1GMY8\_STAA0  
minipkmkfpkkyteii kkyknktpeekakieddfikeindkdsefyspmanmnehelramlrmmpsli dtgdgndd  
>tr|D1GMY9|D1GMY9\_STAA0  
mikkilrli flamyelgkyvteqvyimmtanddveepsdfakfsdqsdlmraevse  
>tr|D1GMZ1|D1GMZ1\_STAA0  
mmwfiaaiillvillfgvmlqaeqlkgdvkvkerei elrsrlrhfed  
>tr|D1GMZ2|D1GMZ2\_STAA0  
mtkkkygklstvrklede lcdypnyhkqledlrseimtpwiptdtniggefvpnsntsktemavtnylcsirrgkilefk  
saierintssrkerefiq  
eyyfnkktli vvcydihi sestahrikkkivsklaeelggilkltvk  
>tr|D1GMZ3|D1GMZ3\_STAA0  
mikltpkqekfvlg liegksqrkayidagystkgksdnyidsrafel sknsavldryeelrqaeeqskwtrrqafeeye  
wlknvakndieiegvkkat  
adaflasl dgmnrmtl gnevlnkkiyeikmlekkidqmdksennsqaeavakaliklagvnd  
>tr|D1GMZ4|D1GMZ4\_STAA0  
minemlnpkqqevwncfindkpkvli asgakra gkyvfllflmhiatykdkglnfiiggatqasirrnilld melilg  
reltdksnavkifgnkvy  
vfdgqnsdawkkargftsagaf lnegtaln hmfikevfsrscsykgarilidtnpenpmhpvkkydidksgqrlnsgrlni  
kafqftlfdntfldeeyie  
siasptgmftdrdi ygkwvsae gvykdfkekvh yiteefkktqikrkyagvdwgyehygsimvvaedfdgnkyvie  
ehahrhkeiddwvaiakgv  
ikrhgdil fycdtarpehiferfrrekikaryadkaviagiervisrlfklnki fiiekvslfkeeiynyvwkdnadepvk  
lnddtldalryavytankp  
sgtgfn  
>tr|D1GMZ6|D1GMZ6\_STAA0  
mtevl tvpnnkkl tikonndideyidsli skaekpieqlfanrlkeikqii admfekyqsddvyvtwtefnkynrlnke  
l trigtml tddyrqiakmi  
qksqedayiekfmslylyetvsqtsmqfdvpskeviksaieqpiefir l mptlqkhrdevlkkirmhitqgimsgegys  
kiakairddvgmskaqslr

Tsompanidou\_et\_al\_Supplemental\_FASTA\_File

varteagramsqagldsamvakdnglkmkkrwhatkdtrtrdthrhldgesveidqnfkssgcvgqapklfigvnsaken  
incrcckllyyideneiptv  
mrankddgknevipfmyrewekykrkggn  
>tr|D1GMZ7|D1GMZ7\_STAA0  
mdfkikvndtgeaiekleriksllyeeiieIQnekvvvntvkneadlmdvksiseenaknndftlf  
>tr|D1GN00|D1GN00\_STAA0  
mykvierfedaqdngheyqvqgdiyprdglevseerftelsttnrrnliaklveddtteqseasadeqkslsdmkvael  
kelakkreikgysdmkkde  
likalegvk  
>tr|D1GN02|D1GN02\_STAA0  
mfnpfdefphtieigevevagtfpkeyerfksnetikgfmtdptssetlkfhqmskdfdrnlytphyhipitnktlfnykd  
ktyevvgpevdqggqhein  
ltrlrvrsigkg  
>tr|D1GN04|D1GN04\_STAA0  
mwvsverylfnkvynklksnpiiqkqldgrvfdcvqkdavypyivvgetnvtnketttsmvedvgitlhvysqarnrdea  
sqiiqflgfvlnneieidy  
ysfiksriddtqevitdidqytkhgiirlvfkyrhntlqrsvtngag  
>tr|D1GN06|D1GN06\_STAA0  
mtettfnpitsltinneevkakatfmfdktakkfsteqednkgrkqktsqgftnvynallerdtvaivdfwecataylgks  
apkredieaeimeieren  
dtlnllqgalvdmnsgffkqksrlfwtqmnqapslakedekegakagiemmnnykeimtvapy  
>tr|D1GN08|D1GN08\_STAA0  
meknflaritariisdfkrnmrtaqrmaktdipdeiktevtanirdyqreltraksmaqrwrehkvnidadaskvkqvisf  
vkvelsnirrkveidgda  
sglkrnvatskamlagwrkhtvklfdtdtgmtkmqvaltagkraldqyqstmdgiasnirtfgti faqqvkglmiasiq  
lipviaglvpaivnav  
gvlggvgvlgafsvagvgavfgamaitalkmvdgtlavtkevqnrfdasdqlkttwqgivkenqasifnamsagir  
gvtsamsqkpfsevsml  
veanarefedwvkhsetakkafealnsiggai fgdllnaagrfgdgvniftqlmpfkfvsqglqnmsiafqnwansva  
gqnaikafidytttnl pki  
gqifsnvfagignlmiafaqnssni fdwlvkltsqfrawseqvgqsqgkdfisyvqengptimqlignivkalvafgta  
mapiasklldfi tnlagfi  
aklfethpavagii gvigilggvfwalmapiaavssvlnvfvsmllnvvkri dldlritgvvska fgl l tgafts iswp  
ilavvavigvfigi lvy l w  
ktnenfrkti teawngiktavsgai qgvvgwltelwgkiqstlqpimpilqvl gqifmqvlgvlvigii tnmnii qglw  
tlitjiafqaigtvisvavq  
iivglftaliql l tgd fsgawetiktti tnl ditiwqmqsvwesii gfl tgv mnr t l smfgtswsqiwst itnfvssiw  
ntvtswfsrvassvae kmg  
qalnfiitkgsewvsniwntvtsfaskvadgfkrrvsvngdgmknaldkiksffsdf lnagaeligkvaegvanaahkvv  
savgdai ssawds vtsfv s  
ghggsglkglavsqakvmatsfgkftselgstltdgfnds l tpsvdghmtndvqshmkennrpivnvtvrnegdlnm  
ikshiddmdakdgsfnlm  
>tr|D1GN10|D1GN10\_STAA0  
mpvllkslqgvghaihvntklneklnedstldidmi enastfdaigaitkmwtitnikgeddlnyvivml d kstignki  
klsikarqkelldlnnsri  
yqeynesftgveffntvfkgttsykyvlhtkvdaskfeglgkgdtrleifkkg leryhleyeyeaktktfhlydel skvag  
yyiksgvnadnvkiqedas  
kcytyirgygdfdgqqtft eaglqfefthplaqligkreapplidgrikkedvllksmelvikksvtasisldfvaqpeh  
fpeanprigdvvrvaepti  
gyndlvriveitthrdaynniikqdvvlgdftmrdryrkaiheatnyvknvkttsdpakylrelnakvnaslsinnel v  
kqnekinakvdkmstktvt  
tangtimydfstqssirniksigtigdsvargshaktnftemlgkklakttnlakggatmatvtdtnnvensiyraqe  
irgdliilqgtdddwlhgy  
wagvpigtdktdktfygafcsaievirknnpdskilvmtatkqcpmrgttirrktdknklgl tledyvnaqilacsel  
dvpvfdayhtdyfkpynpa  
frkasmedglhpnekghvimyelikdyysfyd  
>tr|D1GN11|D1GN11\_STAA0  
mayglitsl hsm tgrkivaqhey nrldegmsklek mfiyhqeeiyahsakqikyln dsvedyltylngrf snmilgh  
ngdgin evkdaridntgyg  
hktlqdrlyhdystldaftkkvekavdehykeyrateyrfepkeqepetitl spytnavmqsfwidprtki iymtqarp  
gnhym lsr l kpngqfidrl  
lvknngghgthnayryidgelwiysavldsnknkfvr fqr tgeitygnemqdvmpnifndrytsaiynpienlmifre  
ykas erqaknslnfi evrs  
addidkgidkvl yqmdipmeytsdtqpmqgitydagi lywytgdsntanpnylqgfdiktke llfkrridiggvnnnfkg  
dfqeaegldmyydl etgrk  
alligvtigpgnrrhhsyisigqrgvnqflkniapqvsmt dsgrvklpiqnpaylsditevg hyyiytqdtqnaldfp  
lpkafrdagwffdvlpghy  
ngalrqvltrnstgrnmlkfervidi fnkknngawnfcpqnagywehipknitklsdlkivgl dfyitteeskrftdfpk

Tsompanidou\_et\_al\_Supplemental\_FASTA\_File

dfkgjagwilevksntpgn  
ttqvlrrnnfhsahqflvrnfgtggvgkwslfegkvve  
>tr|D1GN12|D1GN12\_STAA0  
mvvdnfskddnlielqttsqynpvidtnisfyedrgrtgvlrfavtknnpplsissehvktsivlktddynvdrgayisd  
eltivdaingrlgyvipne  
flkhsqkvhaqafftqngsnvvverqfsfniendlvsgfdgitklvyiksqdtieavgkdfnqlkqnmadtqtliakv  
ndsatkgiqqieikqneai  
qaitatqtsatqavtaevdkivekeqai fervneveqqingadlvkgnsttnwqskltddygkaiesseqsidsvlsav  
ntsriihitnatdapektd  
igtlekpgqdgvdgssfdestytskskvlvvyvddstaratwypddsndeytkyisgtwypfykknngdltkqfve  
etsnnaInqakqyvddkfg  
ttswqqhkltehngsqiknlynakgnlealgagnyyvtsvpdlpgsvesyegylsvfvkddtnklfnftpynskkiytr  
sitngrleqqwtvpnehks  
tvlfddggangvgttinlpepytnysillvsgtyppgviiegfltalpnaiqlskanvvsdngnggiyecllsktssttl  
ridndvyfdlgtksqsgan  
ankvtitkimgw  
>tr|D1GN13|D1GN13\_STAA0  
mkvtvndkneviyyvntgglnrsldvddnnpikfkeefepkrkfvtngelikynsnfekedvnpassqqsesdlsdeelr  
gmvasmqmqvtqvnilame  
lkqqnamltqqltelkagkntegdv  
>tr|D1GN14|D1GN14\_STAA0  
mekikmiyptfkdi ktfyvwgcykndqikwyvdmgvidkeeyalitgekypetkdeksqv  
>tr|D1GN16|D1GN16\_STAA0  
mglnpktrkptasevveaksnigrinidnyrgsqcwtdpnfifkrywgfvtwgnakdmanyrypkgfrfyryssgfv  
pepgdiavwhpgngigsdg  
htaiivgpsnksyfyvsdqndrqnwvnsnswtgsprlvrhpyvsvtgfvrrppyskdtkspssttssaskandstiteakkp  
qfkevktvkytaysnvlkd  
eehfidhivmgdersdigglyikesmhmrsvdeiytrnkfisdyeiphlyvdreatwlarptnfddprhpnwlvievc  
ggqtdskrqfllnqi qali  
rgvwlsgidknlsettlkvdpnirwsmkdlinydlkqgipdnakeyqvkkmletyikrdiltrenikevttkktiri  
sdktsvdsastrgptpsde  
kpsivtetspftfqaaldrqmsrgnpkkshtwganatraqtssamnvkriwesntqcyqmInlgyqgisvsalnkiIk  
gkgtldgggkafaeackkn  
nineiyliahaflesgygtsnfasgrygaynyfgigafndpdyamt fakngwtspakaimggasfvrkdyinkgqntl  
yri rwnpknpathqyatai  
ewcqhqastiaklykqiglkgyftrdkyk  
>tr|D1GN17|D1GN17\_STAA0  
mykikdvetriknvgdldigcrfytedentasi rigindkqgridlkahgltrhlfmedgsifknepliiddvvgk  
fltykipkkvikhagyvrc  
klflekeeeekihvanfsfnivdsgiesavakeidvklvddaitrilkdnatdlldskdfkekiddvisyieknesrfkga  
kgdkgepggpgakgdtgk  
geqgagkngtvsinpdtkmwqidgkdtikaepellkinianveglenlqevetikdttlndsktytdskiaelvd  
sapesmntlrelaeaiqn  
sisesvlqqigskvstedferfkqtlnslyadknhshtikqieglenalsrksdinhnderyvllsqaftkqqadnlyq  
lkgasqptvkiwtgtene  
nyiyqkdpntlylikg  
>tr|D1GN18|D1GN18\_STAA0  
meanlkgvkklykgyveyskvfagntkvwskppsfviklplknkypdsiedstakwtngvepnksyqvtienvrsgimr  
isqtnlgsselgisgvnsq  
vaskninfsnpsgtlyvtisdvysgsptltie  
>tr|D1GN19|D1GN19\_STAA0  
mdinwk1rfknkavltglvga111fikqvtdlfgldlstqlnqasaiigailtlltgigvitdptskgvsdssiaqtyqa  
prdsnkeeqvwtwkssqds  
sltpelstkapkeydtsqpftdasndvgfdvneyhhggdnaskin  
>tr|D1GN20|D1GN20\_STAA0  
mqakl tkkefielktsegkqfnvdlwygfcfdyanagkvlfgl111kglgakdipannfdglatvyqntpdfiakpg  
dmvffgsnygagyghvaw  
ieatldyiyveqnlgggwdrieqpggwewkvtrrqhaydfpmwfirmfkssetaprsiqsptqasketakppkav  
elkiikdvvggydlpkrgg  
npkgivihndagskgataeayrnglvnaplsrleagiahsvyngntvwqaldesqvgwhtanqlgnkyyygievcqsmga  
dnatflkneqatfqecarl  
lkkwglpanrntirlhneftstscphrsvlhtgfdpvtrgllpedkqlqlkdyfikqirvyumdkipvatvsnass  
ntvkpvasawkrnkgytyy  
meesarftngnqpi tvrkigpflscpvayqfpggycdyevmlqdghevvygtwegqryy1pirtwngsappnqilgd1  
wgeis  
>tr|D1GN21|D1GN21\_STAA0  
mteikdkvitekdafe1pytiikahqptkgaivyihgg1mfkgandlspqyidiltehydliqlsyrllpevsldciid  
diftsfdaiqsqysncpif

Tsompanidou\_et\_al\_Supplemental\_FASTA\_File

tfgrrsgaylsllliardrdidgvidfygysgintepfkmsansyakiqsvnetvlaqltsptpii qdqiqrfllygya  
rgtgewinminiadytdsk  
ynispne1ktlppvfi ahcngdydvpvkesehihnhvphstfervnknehdfrrpndeaitiyrkvvdflnaitta  
>tr|D1GN23|D1GN23\_STAA0  
mvklsvldyalidegkdaqkalqdsvtlakladrlgfkriwftehnvpafacsspellmmhtlaqtnhirvsgggvmlp  
hyrpykiaehfrmmaaly  
nridlgignpghtmvmkqaldginptydsydesislrdyltikdkpsahlgvqphidhfpemwllssetsakiaael  
giglsvgtfllpdinaiha  
akdnidiykkyfqastikmdakvmasvfviadnaevaa1qhaldwllgk1qfaefehfsvdtaqkyk1ndrdkemi  
qahqariagtqeavkaql  
ddfiafdevlvaplipgieqrckt1k1laeyl  
>tr|D1GN26|D1GN26\_STAA0  
mqsskwnamsllmddktkqaevlrtaideadaivigigagsasdgftvygerftenfpdfiekyrffdm1qaslhypgs  
wqeywafesrfitlnyldq  
pvqsy1alkslvedkqyhiittnadnafdaaeydmthvfhiqgeyilqqcsqhchaqtyrddlirkmvvaqqdm1ipw  
emiprcpkcdapmevnrk  
aevgmvedaefhaqlqrynafleqhkdkvlyleigigyttpqfvkhpqrmtrknenalymtmkkayripnsiqerti  
hl1tedistlittalrndst  
tqnnnigetkdvlnrtd  
>tr|D1GN31|D1GN31\_STAA0  
msldilsttrii vkeqvndwteaitiasqpllqeqieqgyvqamidsvnelgpyiviapeiaiaaharpnndvhqvgls1  
1klnqhva fcdedhyasli  
fvlsaidnhsh1svlqnlatvlgdnqtvqqlltatnaqdiknilkeh  
>tr|D1GN32|D1GN32\_STAA0  
mlsyrqieilylliehqtfipintianqlgvsprtqiayieqyaetyhyqvsrnkaagikvttahatl1nelehnlt  
nqihfskderlthialklf  
ettdpvstkqlagdvnsrrtiaddikmiqaqldqyh1k1nyvhnkgnfiigeedhyrkayahfihqymkqaapfieadi  
fnsesialvrraiiktlns  
enyhlvqsaidg1iyhiliaiqrlnenfsfdipineidkwrhtnqyaiaskmienlerscnvtfpeseiifitl1llgsk  
mtehtassitfeyhd1sqn  
ihel1tcvsqelgidmskdnk1htslithikpaihrikydm1qpn1rqevmrrypqieavskhispieqdaairfnd  
el1tyitihfassiervath  
kqsmikvvl1cgsgigtsqllksk1nh1ypefhiwdaysiyqleesr1l1qdnidyvistvpceisavpvihvdpfinqqs  
rqklnqiindsregrvmkm  
atdgkslad1lpehriinkqplsiesaiavavqplindgivsynytaa1lkqfeqfgsymvisphialihagtdyvqng  
vgfaltyftegiifgskan  
dpvhlvitlatdhpnah1kalgq1sec1sndlyrqdfldgni1fkikqhialtmtkea  
>tr|D1GN35|D1GN35\_STAA0  
mckskil1kni1fseesevkd1teekynqdyea1tfsfkeetyqsrlakktptksyfvtcwtkdednynrpykieefady  
1ivavidde1ngy1fpre  
1lvekgi1asskyqgkmafrvypkwcnq1nktagqtqkw  
>tr|D1GN46|D1GN46\_STAA0  
msfvitvivyvssfwmtpfityitrahvslhafsftemiqiyvmiiffiafcfispvmfyqlwafiapglhnerqfi  
ykysffsv11fcagvafaf  
yvgfpmi1qfalk1sl1tnispvigfkaylieli1rwlftfg11fqlpilfmg1akfglidtts1khyrkyiyfacfvas  
i1appd1t1n1l1t1p1l  
1fefs1mfivkftcrqkppth  
>tr|D1GN48|D1GN48\_STAA0  
maft1saiqqahqftgvd1fkl1fkafkdmgmtynivniqdgatyvhqseddivtssvksnhpvaqksnktivqdv1tr  
hqgqtdfetfcdemaeg  
iykwhidiqagtctyid1qdqavise1ipq  
>tr|D1GN49|D1GN49\_STAA0  
mrrn1kelrardg1nqtq1akqagvsrqtisliernnfmpsv1taikiarifnetvetvfieeedea  
>tr|D1GN50|D1GN50\_STAA0  
mkilryigy111gg1vggi1ggi1gnfdgfgien1tfatynnvvisivati1i1lveaiv1mnqrralkyq1vdkev  
idatdqyell1anryv1ngs  
ilsilqtviaf1v111fvvghaaana1ff1lipffasafntqft1fnrrfdripkiadknytekrleildegerhie1  
ialfktyain1sililaiv  
viglysit1tgingsfs111iaifiynafsy11krrrfy  
>tr|D1GN53|D1GN53\_STAA0  
mvna1tpkh1aekragfhe1ffd1ifvyaiqkiahv1ltqngsisad1ffkyivms1flw1mwshqtfftnrfgqvtfk  
dvsfmmf1m1f1m1v1s1n1s1  
ypdfektffpff1cvaimy1sig1qy11h1rtg1dygdkrctqafasvafvis1fs1s1s1v1lpqsihyipgflgvfiat  
gl1pfqky1v1spvnmh1  
verfs11t1i1ifgevlvglassfsidhfsyiy1fqfmilis1fgvywiitenyinhk1tsigfr1syth11inialgvi  
naaivfsn1nk1nd1fein  
mmyisv1l1fyig1w1tpyfhne1tnakyisys1gilvmsyivs11fkghdhv1m1isvsvatfcim1iyfknqr1rnkhe  
>tr|D1GN74|D1GN74\_STAA0

Tsompanidou\_et\_al\_Supplemental\_FASTA\_File

mslrdealemhkrnggklevkpnkvtnkeelslayspgvaepckdiyedkrkvydytikngtvavitdgtavlgngnig  
peasipvmegkavlfskfa  
gingvpialnntdteeiiktvtkllepnygginledisaprcfeieerlkketnipvfhdqhgtaivttagllnalrvvn  
kdiakikvvlngagaagia  
ivkllayagvrnmvmcdsrgaifegrsygmnpkdvvakwtknkdiegsleevkdadvfigvsvanaalsqdmvksmadn  
piifamanpnpeiipddak  
aagarvvtgrsdypnqinnvlafpgifrgaleveathineemkkaaveaiadlidsseInedycipgpfdkrvapsvar  
nvakaamesgvari evdpq  
dvydtkmkltdlq  
>tr|D1GN76|D1GN76\_STAA0  
mistlneimkciendntiirhrvrpdpdaygsqglkyiiaqqkfpqkqvfvavgeasslsfigeldnidktyqdalvi  
vcetanapridderystgr  
klikeidhhpavdqygdinlvntnasstseiidydlisfhndeaivnkdiasvlylgivgdtrflfntsehtmeiagkli  
ghidihnalnkmmekdpk  
mlpfqgyvlqhfelmddgfcqvkitedvleqfqiqpneasqfvniadiakgliwvfvavdegneircrlrskgqliindi  
aqdfgggghpnasgvsvds  
wdefeqlatalrtkl  
>tr|D1GN83|D1GN83\_STAA0  
msklilainagsssikfqlirmpeeeivtkglveriglkdsiftievngekvktvqdikdhveavdimldafkahniind  
indidgtghrvvhggekfp  
esvaitdevekeieelse laplhpanlmgirafkllpniphvaifdtafhqtmpekaylslpyhykdygirkylgfh  
gtshkfvsqraaemldkpi  
edlriischingasiaaidggksidtsmgftplagvtmtrsgnidpalipfimektgktaeqvleilnkesgllglsg  
tssdlrdlseeaesgkars  
qmaldfaskihkyigsyaarmhgvdvifvtagigensveirakvleglefmgvywdpknenllrgkegfinyphspvk  
vvviptdeesmiardvmtf  
gglk  
>tr|D1GN86|D1GN86\_STAA0  
mdlntmiiiiifgfiaafidsvvggglistpallaiglppsvalgtknlassfgslstikfirsgkvdlyvvaklf  
gfvflasacgayiatmyps  
qilkplicialssvfi ftllkkdwgntrtftqftfkkaiafaal filigfydgfvvgggtgsfmfvllvfgfdflsaagn  
akvlnfasnigalvlfmvl  
gqvdyviglimaismiagsyagahfaikqgvgyvkvlfiiitaililknafdyiqqfv  
>tr|D1GN88|D1GN88\_STAA0  
minerevfiliyldnaattkafeevldtylkvnqsmypnspkagllqanqllqqaktqinaminsktnydvvtsgat  
esnllalkgiayrkfdtak  
eiiitsvlehpsvlevvryleahegfkvyvdvkkdgsinlehfkelmsdkvglvtcmvnnvtgqi qpipmakviknyp  
kahfhvdavqafgkismdl  
nnidsislsghkfnglkgqgvllvnhinqnveptvhgggqeygvrsgtvnlpndiamvkamkianenfealnafvteInnd  
vrqflnkyhgvyinsstsg  
spfvlnisfpgvkgevlvnafskydimisttsacsskrnlnevlaamglsdksiegsirlsfgatttkediarfkeifi  
iyyeeikellk  
>tr|D1GN92|D1GN92\_STAA0  
mtlnklkdelqivshrglpsdfpentmvgvrevmglvnamleidvhltkdqhfvihdetidrtsdgkgriadytIsqIk  
sfdfgsykdavfkeript  
ldevlsclkydkkllielkspnltypeieckllafleekkvdatqvviqsfdiecielntlgsiyelglvlskrywyk  
kpnfsriaqiasvnpny  
lvtrkfvdkahhqlqvmptvnlktgek lrmgvdglitdnpklfik  
>tr|D1GNA2|D1GNA2\_STAA0  
mnkhhpklrfsysirkstlgvasvivstlflitsqhqaqaentntsdki senqnnatttqppkdtntqpatqpanta  
knypadeslkdaikdpa  
enkehdiqpreqvnfqlldknetqyyhffsikdpadvyytkkkaeveldintastwkkfevyennqklpvr lvsyspvp  
edhayirfpvsdgtqelki  
vsstqiddgeetnydytklvfakpiyndpslvksdtdavvtdndqsssvasnqtntntsnqntstinnannppqattnms  
qpaqksstnadqassqa  
hetnsngntndktnessnqsdvnqyppadeslqdaiknpaidkehtadnrpidfqmknkgerqfyhyastvepatv  
iftktgpiielglktastw  
kkfevyegdklpvelvsydsdkdyairfpvsngtrevkiessi eygenihedydylmvfaqpitnnpddyvdeety  
lqkllapyhkaktlerqvy  
eleklqeklpekykaeykkldqtrveladqvsavtefenvtptndqltdlqeahfvvfeseensesvmdgfvvehpyt  
atlngqkyvmmktkndsyw  
kdlivegkrvtvskdpknnsrtlifpyipdkavynai kvvvanigyegqyhvriinqdintkdddtsqntsepInvq  
tgqegkvadtvaenssta  
tnpkdasdkadviepesdvkdadnndkdvqhdvdhlsdmsdnhfdkydlkemdtqiaktdtrnvdkdadnsvgmssn  
vtdkdsnknkdkviqlnh  
iadknnhtgkaakldvkvqynntdkvtdkkttehlpdsihktvdkvtkkekagtpskenklsqskmlpktgettssqs  
wgliallglalfipkfr  
kesk



Tsompanidou\_et\_al\_Supplemental\_FASTA\_File

>tr|D1GNA3|D1GNA3\_STAA0  
mthlsdl dianqstl qpi kdiaasvgisedalepygghyakidinkitprenkgkvltamsptpagegkstvtvlglad  
afhel nknvmval repalg  
ptfgikggatgggyaqvl pmedinlhfnngdfhaittanna lsafidnhihqgnelgidqrriewkrvldmndralrhvvnv  
glggptngvpredgfnitv  
aseimailclsriskdlkdkisritigytrdrkpvtvadlkvegalamilkdaikpnlvqsiegtpalvhggpfaniahg  
cnsilatetardladi vvt  
eagfgsd lgaekfmdikv reagfdpaavvvvati ral kmhggvakdn lkeenveavkagivnlerhvnnikkfgvepvva  
inafi htdaeveyvkswa  
kennvri altevkkggkggvd lanevlev idqpn s fkp lyelel pleqkiekivteiygskvtfsskaqkqlkqfken  
gwdnypvc maktqysfsdd  
qtll gaps gfeiti releaktgagfiva l tga imt m p g l p k k p a a l n m d v t d d g h a i g l f

>tr|D1GNA6|D1GNA6\_STAA0  
mqqhssktayvysdkllqyrfhdqhpfnqmr l k l t t e l l l n a n l l s p e q i v q p r i a t d d e l m l i h k y d y v e a i k h a s h g i  
i sedeakkyg l n d e n g q f  
k h m h r h s a t i v g g a l t l a d l i m s g k v l n g c h l g g g l h h a q p g r a s g f c i y n d i a i t a q y l a k e y n q r v l i i d t d a h h g d g  
t q w s f y a d n h v t t y s i h e t  
g k f l f p g s g h y t e r g e d i g y g h t v n v p l e p y t e d a s f l e c f k l t v e p v v k s f k p d i i l s v n g v d i h y r d p l t h l n c t l h s  
l y e i p y f v k y l a d s y t n g k  
v i m f g g g y n i w r v v p r a w s h v f l s l i d q p i q s g y l p l e w i n k w k h y s s e l l p k r w e d r l n d y t y v p r t k e i s e k n k k l a  
l h i a s w y e s t r q

>tr|D1GNA8|D1GNA8\_STAA0  
msnklesyrseivslnhqildllskrgelaqkigeeklkqgtriydpqrekem l n d l i d s n k g p f n d t i k q l f k e i f k a  
stdlqksenekhlvysrk l  
k p e d t i v t f d n g g i i g d g n k s f v f g p c s v e s f e q v e a v a k n i h a k g e k f i r g g a f k p r t s p y d f q g l g v e g l k i l k q i k d  
k y d l n v v s e i v n p n d f e v a  
d e y l d v f q i g a r n m q n f e l l k e a g r t k k p i l l k r g l s a t i e e f v y a a e y i a s q g n q n i l c e r g i r t y e k a t r n t l d i s a  
v p i l k q g t h l p v m v d v t h s  
t g r k d i m l p t a k a a l a v g a d g v m a e v h p d p s v a l s d a g q q m d l d e f q a f y d e l k p l a d l y n a k k l k

>tr|D1GNB1|D1GNB1\_STAA0  
mthyhfvgikgsgmsslaiqimhd l ghevqgsdi enyvftevalrnkgikilpfdannikedmvviqgnafassheeivra  
hqlkl dvvsyndflgqi id  
q y t s v a v t g a h g k t s t t g l l s h v m n g d k k t s f l i g d g t g m g l p e s d y f a f e a c e y r r h f l s y k p d y a i m t n i d f d h p d y f  
k d i n d v f d a f g e m a h n v k k  
g i i a w g d d e h l r k i e a d v p i y y y g f k d s d d i y a q n i q i m d k g t a f d v y v d g e f y d h f l s p q y g d h t v l n a l a v i a i s y l e  
k l d v t n i k e a l e t f g g v k r  
r f n e t t i a n q v i v d d y a h p r e i s a t i e t a r k k y p h k e v v a v f q p h t f s r t q a f l n e f a e s l s k a d r v f l c e i f g s i r e n  
t g a l t i q d l i d k i e g a s l i  
n e d s i n v l e q f d n a v i l f m g a g d i q k l q n a y l d k l g m k n a f

>tr|D1GNB2|D1GNB2\_STAA0  
mswfdkl fgedndsnddlihrkkkrrqesqni dndhdsllpqnndiysrprgkfrfpm svayenenveqsadtisdekeq  
yhrdyrkqshdrsrsqkrhr  
r r r n q t t e e q n y s e q r g n s k i s q q s i k y k d h s h y t n k p g t y v s a i n g i e k e t h k p k t h m y s n n t n h r a k d s t p d y h k e  
s f k t s e v p s a i f g t m k p k k  
l e n g r i p v s k p s e k v e s d k q y d k y a k t q t s q n k q l e q e k q n d s v v k q g t a s s d e n v s s t t k s m p n y s k v d n t i k i e  
n i y a s q i v e e i r r e r e r k v  
l q k r r f k k a l q k k r e e h k n e e q d a i q r a i d e m y a k q a e r y v g d s s l n d d s d l t d n s t d a s q l h t n g i e n e t v s n d e n k q a  
s i q n e d t n d t h v d e s p y n v  
e e v s l n q v s t t k q l s d d e v t v s n v t s q h q s a l q h n v e n d k d e l k n q s r l i a d s e e d g a t n k e e y s g s q i d d a e f y e l n d  
t e v d e d t t s n i e d n t n r n a  
s e m h v d a p k t q e y a v t e s q v n n i d k t v d n e i e l a p r h k k d d q t n l s v n s l k t n d v n d n h v e d s s m n e i e k n n a e i t e n v  
q n e a a e s e q n v e e k t i e n v  
n p k k q t e k v s t l s k r p f n v m t p s d k k r m m d r k k h s k v n v p e l k p v q s k q a v s e r m p a s q a t p s s r s d s q e s n t n a y k t n  
n m t s n n v e n n q l i g h a e t e  
n d y q n a q y s e q k p s v d t q t e i f e e s q d d n q l e n e q v d q s t s s s v s e v s d i t e e s e t t h p n n t s g q q d n d d q q k d l q s  
s f s n k n e d t a n e n r p r t n q  
q d v a t n q a v q t s k p m i r k g p n i k l p s v s l l e e p q v i e s d e d w i t d k k k e l n d a l f y f n v p a e v q d v t e g p s v t r f e l s v e  
k g v k v s r i t a l q d d i k m a l  
a a k d i r i e a p i p g t t r v g i e v p n q n p t t v n l r s i i e s p s f k n a e s k l t v a m g y r i n n e p l l m d i a k t p h a l i a g a t g s g k  
s v c i n s i l m s l l y k n h p e e  
l r l l l i d p k m v e l a p y n g l p h l v a p v i t d v k a a t q s l k w a v e e m e r r y k l f a h y h v r n i t a f n k k a p y d e r m p k i v i v i d  
e l a d l m m m a p q e v e q s i a r  
i a q k a r a c g i h m l v a t q r p s v n v i t g l i k a n i p t r i a f m v s s s v d s r t i l d s g g a e r l l g y g d m l y l g s g m n k p i r v q g t  
f v s d d e i d d v v d f i k q q r e  
p d y l f e e k e l l k k t q t q s q d e l f d d v c a f m v n e g h i s t s l i q r h f q i g y n r a a r i i d q l e q l g y v s s a n g s k p r d v y v t e  
a d l n k e

>tr|D1GNB9|D1GNB9\_STAA0  
mrvrykpwaedy lkdhpelvdmdgqhagkmtewfdktqpihi eigsgmgqfi tklaaqnphinyismeceksivykvldk

Tsompanidou\_et\_al\_Supplemental\_FASTA\_File

vkemgltnlkiicndaie1  
neyfkdgevsrlylnfspdwpknrhakrrltyhtflalyqqilndegdlhfktdnrglfayslesmsqfgmyftkinlnl  
hqedgnsilteyekkfsd  
kgsriyrmeakfhsqk  
>tr|D1GNC7|D1GNC7\_STAA0  
mnl1kknkysirkykvgifstligtvll1snpngaqaaltdnnvqsdtntqatpvnsqdkdvannrglansaqntpnqsat  
tnqatnqalvnhnngsivn  
qatptsvqsstpsaqnnhtdgnttatetvsnanndvvsntalnvptktnengsgghltlkeiqedvrhssnkpelva  
iaepasnrpkrrsrraapa  
dpnatpadpaaaavngggapvaitapytptdpnannagqnapnevlsfddngirpstrsvptvnnvnlpgftlingg  
kvgvfshamvrtsmfdsgd  
nknygaqgnvialgrihgtdndhgdngiekaaltvnpnselifeftmttkngqgatnviiknadntdiaektveggp  
tlrlfkvpdnvrnlkiqfv  
pkndaitdargiyqlkdgykyysfvdsiglhsgshvfverrtmdptatnkeftvttslknngnsgasldtndfvyqvql  
pegveyvnnsltkdfpsnn  
sgvdvndmntydaanrvitikstgggtansparltpdkildlryklrvnnvptprtvtfnetltyktytqdfinsaaes  
htvstnpytidiimkda1  
qaevdrriqqadytfasldifnglkrraqtildenrnnvplnkrvsqayidsltnqmghtlirsvdaenavnkvdqmed  
lvnqndeltdeekqaaigp  
iehkneiignigdttddgvtrikdqqigtlsgdttatpvvknakkairdkatkqreiiinatpdvtedeiqdalnqlat  
detdaidnvtnattnadve  
taknngintigavvpqvtthkkaardainqatatkrqqinsnreatqeeknaalnelqtatnhaleqinqattnadvdnak  
gdglainpiapvtvkkqa  
ardavshdaqhiaeinanpdatqeerqaaidkvnaavtaantnilnantnadveqvktnaiqqiqaitpatkvktdakn  
aidksaetqhntifnnda  
tleeqaaqllldqavatakninaadtnqevaakdqgtqniiviqpatqvkttrnvndkareaitninattgatre  
ekqainrvntlknraltd  
igvtsttamvnsirddavnqigavqphvttkqtatgvlndlatakkeinqntnatteekqvalnqvddelatainning  
adtnaevdqaqqlgtkain  
aiqpniykkpaa1aqinqhynaklaeinatpdatndeknaaintlnqdrqqaiiesikqantnaevdqaatvaennidavq  
vdvkkqaardkitaevak  
rieavkqtpnatdeekqaavnqinqldqainqinqnqndqvdttnqavnaindveaevvikpkaiadiiekavkekqq  
qidnsldstnekevasqa  
lakekeka1aaidqaqtnsqvnqaatngvsaikiiqpetkvkpaarekingkanelrakingdkeataerqvaldkine  
fvnqamtditnrrtnqqvd  
dttsgaldsialvtpdhivraardavkqqyeakkreieqaehatdeekqvalnqlannekralqnidqaiannvkrve  
tngiatlkgvqphivikpe  
aqqaikasaenqvesikdtpatvde1deanqlisdtl1kqaqqeientnqdaavtdvrnqtikaieqikpkvrrkraald  
sieennknqlairntldt  
tqderdvaiddlknivntikndiaqnknaevdrtetdgdndikvilpkvqvkaapaarsvgvkaeaqnalidqsd1stee  
erlaakh1veqalngaidq  
inhadktaqvnqdsinagniiskikpattvkatalqqiqniatnkinlikanneatdeeqniaiaqvekelikakqqias  
avtnadvayllhdekneir  
eiepvnrkasareq1t1fndkkqaieaniqatveernsilalq1qniydaigqidqdrsnqvdktaslnlqtihdld  
vhpikpdaektindlar  
vtalvqnyrkvsnrnkada1kaitalklqmdeeltartnadvdav1krfnvalsdieavitekensllridniaqqtya  
kfkaiatpeglakvkv1id  
qyvadgnrmi1dedat1ndikqhtqfivdeilaik1paeatkvspkeiqpapkvctpikeethesrkvekelpntgsegm  
d1pkfalitgaallarr  
rtknekes  
>tr|D1GND3|D1GND3\_STAA0  
mkkvndtvfgilqlletllgdinsifseieseykmsreeilill1tlwqksmtlkemdrfvevpykrtrtynnlvelew  
iykerpvdertviihfne  
klqqekvel1nfisdaiasratamqnslnaiiav  
>tr|D1GND8|D1GND8\_STAA0  
mnfegkligkdlkvai1vvsrfndfitgrllegakdtlirhdvnednidvafvpgafeiplvakklassgnydavitlgcv  
irgatshydyvcnevakgv  
skvndqtnvpvifgilttesieqaveragtkagnkgaava1saiemanllksika  
>tr|D1GNE0|D1GNE0\_STAA0  
mftgiveeigvksvqirgsvrtieieahkitadmhigdsisvngacltvidfnqtsftvqvikgtenktyladvkrqse  
vnlramsgngrfgghfv1  
ghvdelgtvskinetanakiitiqcsqhin1q1vkqgsitvdgvs1tvfdkhdnsfdihlipetrrstilsskk1gykvh  
letdv1fkyvenilnkdkd  
q1svdk1rafgf  
>tr|D1GNE2|D1GNE2\_STAA0  
mrvaigmgtagvsv1relvkhpkfnqldidlyddkvnmgqgvpfqndssellinmpskkmslnl1ddetefwkwykqtd  
fnfdepaylprfvghymk  
sylsmftkypnistnynkvqei1ytnsnidetn1tyyicttnsgqswqaydyvfltcgtfayhdpyn1kgkkgyiatpyp

Tsompanidou\_et\_al\_Supplemental\_FASTA\_File

tyntldevnelddiaigt  
glasldvrvyaahhpklpitmtsrshlpsvrgtmidvtfkyltkdklndikkhhfgnapldtlvslflkecadydif  
kklvhrtrtgnhiadlkydl  
arptemgifsmeihlkenlnwiwnslsiedqhfnqkyskmiqlnsnmpprtaelielienslilkkdledvkhg  
klyyfsykngevdinyv  
inatgakshlneldqdnqlirnlenrqivqahpmggiqipetnqv sprfgltlnmiaigqmtngvnlrngvkmiveq  
vahtvsqlydalesneqq  
rsdnq  
>tr|D1GNE8|D1GNE8\_STAA0  
mekddtlaeikpmlnfdeqiaklkqmniffniidtekaneilrknyffklayfrknfekknnggyfiefaylsdlatidm  
klrytmhlhltldiehsly  
lvklitennqedgykiideflcidksysnsnfdtnsrtpveemetkiknkneifkhmnkrqqlpeklnkyqqppawvc  
iefmqllgqfvsflnfykk  
yndeelrvaniimplvknirnsahnqpiianlnydsrlpqylfekgnnigisrnmfgiknfidtfatlelnhqvcnai  
iqaryhdldqlqkrykrne  
syynnalaikrffialdkiidfnrpkv  
>tr|D1GNF2|D1GNF2\_STAA0  
mklkslavlsmsavvlacgndtpkdetkstesntnqdtnttkdvialkdvktspedavkkaetykgqklkgisfensn  
gewaykvtqqksgeesevl  
vadknkkvinkktekedtmendnfkysdaidykkaikegqkefdgdikewslkddgklvynidlkkgkqevtdak  
ngkvlkseqdh  
>tr|D1GNF8|D1GNF8\_STAA0  
mlkvctsrkqinmkndiekeyvneiimllrtiptsklvqipmqlfidkailnvvqndalliekatharnhlrlwslqgh  
rdipn  
>tr|D1GNG4|D1GNG4\_STAA0  
mefkti qsvkdphynealklydtklnslstedkriikrslennktendyvfviglendvvslatahyeattnsafliy  
fakdlpnhdeltqtllhqi  
ehelnllsnlvhsrsinflmvepkepadltqdnqli ehrrqflyehqferqteidyihptndghtkkvdflkknikl  
tkdiygtsvksnyilkyvf  
angiareiialleedlrkpf  
>tr|D1GNG7|D1GNG7\_STAA0  
mknllsvqhlamyagai lvpivgtslkftpeqiaylvtvdi fmcgvatflqankvtgtglpivlgctftavapmili  
gqtkgidvlygslflsgil  
viiapffshlvkffppvvtgsvvtiiginlmpvamnylagggakdygdvknillglmtliiilllqrfttgfiksi  
liglvtigtigagllgmvd  
nqvnhagwlgipvprfsgfsfdvtstlvffivavsliestgvyhalseitgkklerkdfrkgytaeglaivlgsifns  
fpytaysqnvglvslgak  
knnviygmvvlllicgcpklgalaniiplvlggami amfgvmaygvsilghidfkqnlliiavsvglgtgisavp  
qafkg lgeqfawltqngiv  
lgaisaiilnffngikyqteenvq  
>tr|D1GNH1|D1GNH1\_STAA0  
mktayprvpfli vkatdgdveainqivkhyrgytskrslrrmtdeygnshmidetlrgmetkliskilsfeik  
>tr|D1GNH3|D1GNH3\_STAA0  
mrkkedkydfraqv laikearmkr gltreqvgtmieidpryltnienkqhpstqvlydlvslhvsid efflptdnlik  
strrlqvekymsftdkel  
slmealakginearnieg  
>tr|D1GNH4|D1GNH4\_STAA0  
mkiinigvlahvdagkttltesllynsgaitelgsvdkgtrtrtdntllerrqgitiqtgitsfqwentkvniidtpghmd  
flaevyrslvldgailli  
sakdgvaqatri lfhalkmgipti ffinkidqngidlstvyqdikeklsaeivikqkvelypnmcvntf teseqwdtvi  
egnddllekymsgksleal  
eleqeesirfgncslfplyhgsaksnigidnlievitnkfyssthrgpselcgnvfkieytkkrqlayirlysgvlhlr  
dsvrvsekeki kvtemyts  
ingelckidraysgeivilqneflklnsvlgdtkllpqrkkienphpllqttvepskpeqremll dalleisdsdp lly  
yvdsttheiilsflgkvqm  
evisallqekyhveielkeptviymerplknaeytihi evppnpfwasiglsvsp lplgsgmqyessvslgylnqsfqna  
vmegirygceqglygnvt  
dckicfkyglyspvstpadfrm ltpivleaqfrkagtel lepylsfkvyapqeylsrayndapkycanivntqlknev  
iigeiparciqdyrndlt  
fftnglsvclaelkgyqvttegepvcqtrrlnsridkvrymfknt  
>tr|D1GNH6|D1GNH6\_STAA0  
mklkitvicsvvsflfffllflviffadtdsgennkdssipqggvtvspevlahrpliekygkeygiedyvsyila  
qvesggtaedvmqsseslg  
lppnslsteesikqgvkyfse lltsaeqqgvdidsviqsyngggflnyvrshgkkytyela eqfskeksggqkady  
npi  
iaipvnggwrynygnqfyv  
qlvsqyltdtspetfddetvqvimdea lkyegfpvfggaspttsfdcsqliqvydkagislprvaqdqydatqei  
sme  
eaqagdli ffhstynagty  
vthvaiylegnrfyhagdpigygd lssrywqdhligarrvihn

Tsompanidou\_et\_al\_Supplemental\_FASTA\_File

>tr|D1GNH8|D1GNH8\_STAA0  
maypikymednlvfnhdgevfayyelipynysflssdekiqvhdnfcqliaqnrdgkihalqlatessiratqeqskei  
tgrlkeiayeki deqtea1  
ismigdnqvdyrffigfkllylneqevsvknvgkeiqkafaefhgvnhklrgdfvsmpmaeierfskmeqllsklsrrf  
qirklekddfygiehlyg  
qtgvpfdydyhlpkryedkkvlvkkydi1kptrclieenqrylrieqedtttyvayftinsivgeldfpnseifyyqqq  
qftfpvdtsmnveivankk  
alstvrnkkelkdldshawesdnetstnvvdalesvdelesndqtkesmyklsyvrvsaknlde1kqrcdevkdfyd  
d1siklvprfgdm1glhne  
fipsskryindyiqvtsdf1ag1gfgatqmigensgiyvgyn1dtgrniylqpslasqgikgsvtnalasafigs1ggg  
ksfsnm1vyysv1fggqa  
t1vdpkaergewket1pdiaheiniv1tSENDKGL1DPYV1K1PKDSESLAID1LTF1TG1SSRDSEKFPV1RKAIR  
svtqskqrg111vide1rkd  
edtpisnsiadhisfdydfah11fsdgsvtqsislekq1niiqvad1v1pdsns1sfeeyttmellsvam1ivistfal  
dfihsd1rsifk1vd1deaw  
sflqvap1smr1vragramnagvyfvtqnadd11dek1mkn1g1k1faf1rst1d1ve1kkt1effgvd1kedennqkrlrele  
ngc1vsdiygrvgvmqfh  
p1fee1lhafd1trppvrnevee  
>tr|D1GNH9|D1GNH9\_STAA0  
mkk1rsytsiwsvekiya1nd1qlpfpitftqmtwfvsv1fvv1lfgslppl1slidgallkylgipiv1tgfmcqktfd  
gkkpygflksiityalrpk  
vtyagqir1kktmnesitiv1rseq1dgisd  
>tr|D1GNI0|D1GNI0\_STAA0  
mtk1kr1atkedei1vdki1p1snee1kdrakqyd11tpkrfatrynkml1flptsfkwngseypiqynycinpfccnfgke  
qhkfkdvkgkpsrykmtgs  
skdkghkgm1ycndnpi1grgvsqncvtvplsnwsvveikr1ie1nsiqdvepdyqfhkegcseeestpfnepkqfykrk  
srgksqryqckackkftnv  
1pkreettyhqqknti1p1mfakmvgrvs1srtcdi1gigvgtyyhk1ewlyrrc1efleryetqplqtckfnemw1nt  
dkmhy11nvr1kkgqgskk  
ytgfe1d1nmq1ty1vvsae1v1sryvfrsdvaydwni1smd1ed1ned1trkfked1ntfsrkndr1dwsyypqepsandsenrn  
ay1helgki1tnrs1rfdv1gl  
nvdapytttahywl1kqmvnadewrmi1sddd1s1rna1fyrvf1tkel1r1sdah1ficv1nk1tk1srkqcl1kefgqakae1ld  
wgdir1gfk1tkf1rt1lashy  
1tel1tshqf1heea1skdgeryrkyadnpi1khp1atkdkgfysvdc1rd1s1alepnei1akm11nvndh1stnsfiqq1rry  
iss1ler1p1ttargdkksy1  
yanfnpkyaqfai1t1rtyynfcrp1fksadkkv1tpaq1rgitdkqfdwkdi1yfk  
>tr|D1GNI1|D1GNI1\_STAA0  
mkvs1iaamdknrv1gkendi1pwripkdweyvkn1tkghpi1lgrkn1esigra1pdrni1l1trdkgftfngceivhsi  
edvfe1lcknee1e1fi1fgge  
qiyn1ffpyvekmy1tki1hhe1fegdtffpevnyee1wnevf1aqkig1kndknpynny1fhvyerkn1ls  
>tr|D1GNI2|D1GNI2\_STAA0  
myfffai1ctkv1qntwv1dsfyfrykqnyiv1vk1fekeekvpeya1llk1ef1kendfsdm1avyansvklytdtkti  
reyfgiey1ssn1gdv1lfqf  
sq1larfi1pte1vsekknedqkeamcfs1sqdsedprkky1cfsvr1rnp1kngel1gkrs1pfdnktr1yrps1yer1gsd  
tn1sfrysmnp1ddeetdeg  
i1akwtkn1kie  
>tr|D1GNI4|D1GNI4\_STAA0  
m1tmd1inti1rn1rnnhdks1inhi1aqe1evnwrtakkyadd1l1p1kakhksgmmy1vek1wgdiva1w1sedtk1pkkk1r  
rtae1amt1nal1kad1gfkgsy  
rtvcvfi1qdwkathya1e1sedngfer1ehppaea1q1dfgtmev1chegafkdvkt1v1l1t1p1fsnagfav1l1paenqec1le  
gmkel1frqagg1prki1rid  
nmst1avtkvksktdpav1tdgfl1qfath1g1fetqvcnprsgnekgsvenkvgyvryn1ffsatpimkdfssfnkv1laqqla  
qdreri1hyekya1i1nd1wl  
eekad1l1t1pdkey1pvfke1ieikankyne1k1dkeri1hipri1rnhsviyg1l1r1f1dsyq1l1st1dge1iaeg1prpymkkra  
idwqai1ldwrrk1pramhy  
srywky1perik1fl1shsdwkeqnr1nh1le1llvthdm1gidtnfyelid1tadqsd1aydidwqhyda1fl1spskevvd  
>tr|D1GNI7|D1GNI7\_STAA0  
mnfgqnl1ynwfl1dnaqslv1l1ai1vvig1fl1gfkrefskligflia1liavgl1v1fnaagvkdv1l1n1fnri1ga  
>tr|D1GNI8|D1GNI8\_STAA0  
ms1l1tke1k1kgf1qcc1iefqay1iqntgkyts1i1iegkrqagdti1tydyfkyvrfynny1trvtvygeh1tpfq1llrvks  
yiyreky1ker1titi  
>tr|D1GNJ0|D1GNJ0\_STAA0  
mp1l1hdrgeri1kandkh1lvhfvl1s1l1vvf1v1v1l1p1fhwrt1qsvnwqavq1ldtff1yq1l1htpyfwss1l1tal1fvcglis  
wlyyhyrids1ikq1lehrk  
1armi1lenhweaeetq1segffkd1pskktkqri1rhfpkiyrmkdgl1ihihveit1gkyqdq1ll1henk1letglycelv  
ekt1kdsyvey1l1ydtig  
nr1giedvvaqdg1rvk1mesvywefds1lphm1iaggtgsgksy1fil1ties1l1htnak1lyi1ldpknad1ad1gavmnnvy  
yrkedm1lacin1qfyedmid

Tsompanidou\_et\_al\_Supplemental\_FASTA\_File

rsetmkqhpnyktgenyaylglisanflifdeyvammmlgresttvihklkqivmlgrqagfflilacqrpdkyfsdgi  
rdnfnfrvalgrmsemgfg  
mmfgsdtqkqfflkpkikgrgyvdtgksvisefytplvpkrydfllgeigkviqkkqsepvphevkgtgsdl1  
>tr|D1GNJ1|D1GNJ1\_STAA0  
mntnplilkeipkdeaisfirqyhyskilprlckyfllgifseekllgvvelgwgtpqlqtirklfpdsslqtttdyleigk  
mcf1pemnqtnyfgsqals  
alikwlkehtdchflytladgiegkcyvyqasnffycgyfksvyrdkqswekihprsarlleenarfeqvekkhwl  
qafceykgiekingrmfry  
lypltkakkl1ghtlyrrhyypkekn1rfekriayqkyeaisqptfdkqariyntqlf  
>tr|D1GNJ4|D1GNJ4\_STAA0  
mtnifevivndlnleqkdvedednlyvnacpgsgktrvltrkiayqaikhgslkriiaitytnraaeikerlsllsi  
dddiniwvgtihqfclfi  
iypfkmlsrsvskgftiiddytqrayvsqinmlnlnlktylelnkidls1shdfkinevqytqvsemyhtmlenkeidf  
dmillvaykiltvnsnvar  
niasniraiyvdefqdtrelqynviakllqnpqiismfvqdidqaiygsldgiaksveelem1tshtfqsktlhgcyrs  
nqrlvdfysnfqscpyeie  
srgnknkndrgfisydckvktedlpniikniiekeiesgihekdicvlapqhyp1fslgeylkkel1pynfdainispikv  
nnhs1ffklaillyftesge  
kvrnrk1iandi1iilknefgievkdyfidl1lqlinsvkrmysgddngvdlykfvtkhi1fvlnideknypsifkhy1  
ffinevedriknns1sssv  
ssfkkmfksrdgitl1tahkvkgneydtviain1lngkiphwei1fvsvdkgissark1lyvicsrakn1fl1fsevygf  
tskgd1lyptq1ldkiefd  
yni  
>tr|D1GNJ8|D1GNJ8\_STAA0  
mskninqansk1ntsnkklkqaysksdsknmkviymphw1efysiaihsdvtsnkkrykysysrgtvvyvklgsnigsef  
sgnhfcvildnkdnkgket  
vtivplsskgnknylklnesvln1tatd1kkqiidi1sskvqalaqkyreidik1stedkkl1sn1nqkanelyrvigvys  
khkgkdyvnisaittik  
rriskindsdptgti1iseddmneiekqlkikffsn  
>tr|D1GNK1|D1GNK1\_STAA0  
mvsigvvggddvvggled1selcvdfr1rvfhpnyfkqr  
>tr|D1GNK7|D1GNK7\_STAA0  
mkittiakts1algl1ttgvi1tttqaanattpsstkeapqstppstkieapqskpnattppstkeapqqtanattpp  
stkvtppstntppqpmqst  
ksdtpqspttkqvpteinpkfkd1rayytkps1efkneigi1kkwt1rfm1vvpdyfiy1kialvgkddkkygegvrn  
vdvfvvleennynlekysv  
ggi1tknskkvdhkagvritkednkgti1shdvsefkitkeqis1keldfk1rkqlieknlygnvsgskivikmknngky  
tfe1hkk1qenrmadvig  
tnidnievnik  
>tr|D1GNL2|D1GNL2\_STAA0  
mkl1ttiakat1algi1ttgvftaesqtghakvel1detqrkyyim1lhqyyseesfeptn1svksedygsn1lnfkqrnk  
afkvf1l1gddknkykekth  
g1dvfapelid1kggiysvggitkknvrsvfgvsnps1qvkkvdakngfsin1lffiqkeevs1keldfkirk1liek  
yrl1ykgtsdkgrivimkd  
ekkeid1sekl1sfermfdvmsdkqiknievln  
>tr|D1GNL4|D1GNL4\_STAA0  
mhqsiss1srfgl1cvmnpipisikvkfppptskfstsqhnqm1  
>tr|D1GNL8|D1GNL8\_STAA0  
mrgnfl1rkmkvgl1svait1myim1ngqaeasenqnal1sin1vndqekqnnvnqavqpqntn1etskvpanfvk1ndi  
kpgdtsiqgt1l1pnqf1l1  
tidkkdvssvedsdssfvmsdkdgnfkyd1ngrkivhnqei1evsssdpyl1gddeedeveetsteevgaeesteekaty  
t1pryekaye1pkeq1kek  
dghhqvfi1epitegs1ikghtsvkgkval1sin1kfin1fetnanggp1nkeeksg1seg1wmp1iddkgyfn1fdk1krfdd  
1elkknde1s1tfapdded  
ea1ks1l1fktkvts1ledidkaetkydhtkvekvkvl1kdvked1hvdei1ygs1yhtekgk1il1dkegtk1vikgk1tkfanav  
vkvdse1gegqefpdl1qv  
ekgefs1fdvdhagfr1lqnet1nftvvd1pitge1l1sgnfvskni1diyes1peekadre1fderment1payhk1lhgd1kivgyd  
tngfpi1twfyp1gekkver  
kap1lek  
>tr|D1GNM0|D1GNM0\_STAA0  
mkykterreamgy1krfaly1svm1lifa1agcgknetkeds1keeq1kks1fakt1diyp1kn1led1ydkegyrd1gefkk  
ddkgtw1l1rsemki1qlkge  
n1lesrgav1ein1rnr1takghy1ivrevvedsdgm1thn1tkryp1vkmenn1kmi1pkid1dek1vke1ieefn1ffvqygn1fke  
1enyk1edevs1ynpevp1iys  
akyq1kns1dynveq1lrkryni1ptk1kap1l1l1kgsgn1l1kgss1vgyknie1ftfi1enkeeni1yftdsi1yfn1psedk  
>tr|D1GNM1|D1GNM1\_STAA0  
meyik1kia1lymsv1l1i1figgcgn1kdeq1kkee1qtnk1tds1keeq1kks1fakt1dmy1pik1n1led1ydkegyrd1gefkk1gd  
kgtw1til1tgfsks1nkp1gv1

Tsompanidou\_et\_al\_Supplemental\_FASTA\_File

ddegmvlylnrnakkatgyyfvnkvyddisknhnekkryvelknnkivllndvedkklkqkienfkffsqyadfdklnky  
qdgnittnenvpsyeayk  
mnsdknvkklreiypittnspnlklyidgdikgssvgykkieykfskdkgqettlrdylnfgpsegenve  
>tr|D1GNM2|D1GNM2\_STAA0  
msrkykidlkainqntestsaiskasyevenannnglskrdvinqfndlkkmkkfpsnleyvdsytdsltgvttsaflnk  
dtgkvtlqmtgtnlqdeaf  
kklkegefsrqvntaletvkdgyadlki lypasdqnyryantqefinkikskydidfitghslggrdavvlmgmsngip  
nivvynpapisitslnpns  
pdgkrlllyknykgnitrfaenda ltenlkkkykhyvffgndkvfngkghemegflteeeqkaikkekkkqgyaen  
nksfvknsnaisklasie  
llranmmtngggllsssqqkvleslta ltaiaqsfsq liddeinqikkmynekkkkf gknwedaqkagkavgedlsvngvl  
naldegqvnessmvrepeq  
misakerqlstigssvsnyimrvr l sineivdkdqv lasqiggll  
>tr|D1GNM4|D1GNM4\_STAA0  
mtliepdmtrmpdisttvetlnliskmeaqkenirtviapekhkykdienglkgeekv lieqmaqhceafkanfkga  
qgdwvksamseidsikddl  
kkins  
>tr|D1GNM8|D1GNM8\_STAA0  
mlsfqllfslfvialialisglflflapvmpmryiklhlyilvmpvl favigffgihgqhvlgpfkidrlswllagfvma  
lgfiikfsmryllgdhhy  
rhyfplftaitsfaslawmsedlr lmalcwgitllcltllmavnrfwkvpresaklssmtflcgwla fvgavitiyiatg  
ewrvpqhivhptwslltnv  
llvlavmipaaqfpfhrwliesvtaptpvsaimhagivnaggviltrfapifdngfalsllllilssisvllgsgislvqv  
dykrqlvgstmsqmgfmlv  
qcalgvysaaiihllhgi fkatlflqsgsivkrfnipkqasakdaygwimgrvlaiivaf lfwssdrs ayevlsali  
lgwsl lsvwnqmvafskgr  
marlvgmil iaivtfiyvithnyfyavlnqitthattptsvsiisv vilifgsl lsiwvarhryskafavlyvwlvnlg  
earskaieshpnylkky l  
>tr|D1GNN4|D1GNN4\_STAA0  
mmkrqqsqwksstgfi lasagsaiglgamwkpymagi ygggaf lamflifti fvglp llimeftvgkmgrtyttqiysk  
ltgkkwlni igwngnlavf  
ilfgfysviggwivi yiqv lwlvlviqrinh lqemnfeavisnpl tvlgggi fifatmiivmlgvekglekaskvmmp  
llfvfliviviksltdga  
legvkfilqprvseitadgil falgqsfft lslgttgmitasyaskdmtikssaisivvmnifvsvlag laifpalhsf  
gyepqegp glfkvlpmvf  
sqmhlgtl fylgflvl flfaaltssisllelnvsnftkndntkrkkvavigsilvfii sipatlsfgilkdvrfagatif  
dnmdfivsnv lmpgalgt  
tlvvgqll dkkllqyfgkdrfr l fsgwyylikyampvviilvfivqlfs  
>tr|D1GNN7|D1GNN7\_STAA0  
mmiefrqsktfnkkkqkida lkdvsftvnrndi fgvigysgagkstlvr lvnhleasngqvivdghditnysdkmmrd  
ikkdiqmi fghfnllnsat  
vfknvamp liskkskteikqvtem l efvgl sdkkdqfpdelsggqqrvaia ralvtnpkillcdeatsal dpattas  
iltllknvngtfgitimmi  
themrvikdicnrvavmekgvvetgtvkevfshpkttiaqnfvstviqtepstslirr lndeqv gdfkdykifveetqv  
tqpiindliqicgrevkil  
fssmseiqgntvcymw l rfnmdqqfedtainqy fkekn iqfeevh  
>tr|D1GNP2|D1GNP2\_STAA0  
mndfskyfilitsgnicytynlendylkfn dvynkhhkiihhllkynisynde yqlllikmwqlsqiykpskqsls  
sflftrlnfy lidlfrqqn  
qlkdvilcennsptlteqptyfnehd lrlqdi fkl l nqrer lwlkly legykqfeiaeims lslstiklikmsvkrkcqh  
nfn  
>tr|D1GNQ1|D1GNQ1\_STAA0  
mevktfyngntmpqig lgtfrvendencmesvkyai eqgyrsid takvygnee qvgagiraglestgiared lfit skly  
fedfgrenvaaay easl sr  
lglyldlylvhwpgtneavmvd twkgmedlyknnvkni gvsnfepheal laqvsikpvinqveyhpyl tqhklkly  
laaqrivmesw splmnaqi  
lndetikdiaqelgkspaqvvlrwnvqhavvtipksvtpnrisenfqidfel sdeqmtridglnqdkrigpdpknlkar  
lksln  
>tr|D1GNQ2|D1GNQ2\_STAA0  
mdlsspivig l iavvialiffvl flvalgskkkvkrqteekyeqqeqnikksheea lekeriqnkktitkqqedynhmv  
stkdreidalklfsknhse  
yvtdmrligirerlvkekri rpedmhimaniflpkdgfnnierishlv ltrtglyiidsqllkghvyngisggqfkd lpp  
meqvfdtldl dksrpqtiv  
mdqndkrs lsfvnysdqieaikqlaed lqkelgakytptsilyfn lknegdv tisinynqnsavkvlvgaeqldeffnkf  
vfhgriqynvedlqqmmdk  
iesfn  
>tr|D1GNR1|D1GNR1\_STAA0  
mkkflkfkgmki cmllylliflsscstnki vqqrfei qqhnetigsiyfsadyahirgiekgtakyfidkvgs krylfi

Tsompanidou\_et\_al\_Supplemental\_FASTA\_File

eyipdnvlnckpdfwktlk  
ykkdkvtyyvylienlddevfhlsalqdmnripidiadvatmgksphqndrmtlklnkn  
>tr|D1GNR2|D1GNR2\_STAA0  
mntennknqnsvknserrgmkgcgglisfilliillsacsmmfnsndstnqssktqltqkdenkedkpeekset  
atdedlqsteevpanente  
nngheideittkdqsdiddintpnaedksqddlkddlkekqssnhqstqpktsptetntqqsfanckqlrqvypngv  
tadhpayrphldrkdkra  
cepdky  
>tr|D1GNR3|D1GNR3\_STAA0  
msnqfkseeerrqweqfqaqnnqnnqyqgqkkskkgwfwgcgglvlfiliigisactagitgnlggnssketnkt  
hki getvkngdlevtvnsv  
etmksvgpslaptnakgfvvadvtiknkgkealtidssmfklksgdktfeadntgmsanqsdngsiensfflqrinpd  
staqgkivfdvsenianak  
dkklevislfsvkkifdlsdaktskakkdkqdeavavassnsdnvsyeasattpattssadtdsedseksskdedkq  
nasksdksvekseesneet  
apvepmpshskpttseappsqnihnedsmydaste  
>tr|D1GNS6|D1GNS6\_STAA0  
msitekqrqqaelhkkllwsianlrgnmdasefrnyilglifyrflsekaeqeyadalsgedityqeawadeeyredlk  
aelidqvgyfiepqdlfsa  
mi reietqdfdiehlatairkvetstlgeesendfiglfsdmdlssstrlgnnvkertaliskvmvnlddlpfvhsdmeid  
mlgdayefligrfaatagk  
kagefytpqqvskilakivtdgkdlrhvydptcgsllrvgketqvyryfgqernnttynlarmmllhdvryenfd  
irnddtlenpafngtfd  
vianppysakwtadskfenderfsgyglapkskadfafi qhmvylddegtmavvlphgvlfrgaaegvirryliekn  
yleaviglpanifygtsip  
tcilvfkkcrqddnvlfidasndfekgnqnhlsdaqveriidtykrketidkysysatlqeiadndynlnipryvdtf  
eeeapidldqvqqdlknid  
keiaei qeinaylke lgvlkde  
>tr|D1GNT0|D1GNT0\_STAA0  
mnkniviksmaaliltsvtginaavveetqianaeknvtqvkdtnifpyngvvsfkdatgfvigkntiitnkhvskdy  
kvgdri tahpngdknggmi  
ykiksidsygdedisvmnieeqavergpkgfnfnenvqafnfakdakvddkikvigyp lpaqnsfkqfestgtikrikd  
nilnfdai epngsgspvl  
nsnnevigvvyggigkigseyngavyftpqikdfiqkhi eq  
>tr|D1GNT6|D1GNT6\_STAA0  
maklvteniskrfkngdvlkhinitlennevylngingagkttlmkiicgilqqdsgeikldnrpmt rndlhkvgs lie  
tpatynhlsa qdnlkivcl  
nesvdfseinsvlslnlnvdkkkkvkd fslgmkqrlgiama lkkpeilvldepsngldpygiqelrel lkl lteqgts  
iisshilsei qvladhi g  
iihegelkyqqrnnkdenleeiffkitkgdyk  
>tr|D1GNT8|D1GNT8\_STAA0  
mgenvlicl cgsvnsinishyielkskfdevnviastngrkfingeilkqfcdnyydefedpflnhvdi ankhdki iil  
patsntinkiangicdnll  
ltichtafeklsifpnmnlrmwenpvtqnnirllkdygvsipyanisesyelasktfkknvapepykvl efi  
>tr|D1GNU1|D1GNU1\_STAA0  
mekvldldvqvkannsndsagderitshslctpgcaktgfsn fcc  
>tr|D1GNU4|D1GNU4\_STAA0  
mfkkmlaatlsvglia plaspiquesrantnienigdaevikrtedvsskkgvtqn vqfdvkd kkyndalivkmqg  
finsrtsfsvdkgsyelt  
krmiwpfqyniglttkdpnvslnylnpkni ettdvgqtlgyniggnfqsapsi agngsfnysktisytqksyvsevdka  
nksvkwgvykanefvtpdg  
kksahdryl fvqspngptgsarey fapdnqlpplvqsgfnpsfittlshekgssdtsefeisygrnldityatlfprtgi  
yaerkhnafvnrnfvrye  
vnwktheikvkgghn  
>tr|D1GNU5|D1GNU5\_STAA0  
makldlnsl ddehvkllinelkypethidvnelktivasrinerqeisfklgiky lltikrniekdrfsisii fkdty  
htlvridinggthdnpdgt  
iapkshihiyndkydkdrfayeinlkdfpdinlynvym sfleynnidle  
>tr|D1GNV2|D1GNV2\_STAA0  
mrnqattlnfrlhalrkeknyynkfi fnghfmvfl lllgafifgygewlkhiptninfsliaaviva ltsifpmp rll  
leadkifllpfekhmsqfm  
rhailysyfariliqliiivimfplfyin qhnvafyicfgvsalifpyvgrlrlrwqwyqsglktwqvn lsfitfalty  
ylllapkwyiafvmvalpv  
lieflvkkypgflypwekmi aiehrhmnnykfvmnftdvkhlkesavr rsyldillpvpkgskfnsnamylflfirsf  
igrdafi iifrlviiavl  
lmwlsyplvtai igclfyi illqmaqfysqqayglwpqvwvppeekvikgyeqflyrlmfvictvfavt fiikhmtlf  
yvllifyivglitirsiik  
klkyqetllrd

Tsompanidou\_et\_al\_Supplemental\_FASTA\_File

>tr|D1GNV3|D1GNV3\_STAA0  
mtvkveq1tgggkrpvikdinfelnkgeivglig1ngagksttikhmlg11tpmegslsisdininddieayrrklsyi  
pespviee1tleehiemt  
amaydi drdetmnramp11ktfrlene1kvfshfskgmkqkvmiicafivnpelyiidepf1gldplgiqsmld1mvek  
knegrtvlmsthilataer  
ycdrfiildegevvafgd1lea1rqqtg1hnqt1ddiyihvtqggdvha  
>tr|D1GNV9|D1GNV9\_STAA0  
miiksleiygygqfvqrkiefnknfteifgeneagkstiqa fihsilfgfptkkskeprlepr1gnqyggklvl1iddgl  
eieverikgsaqqdvkvy1  
pngavrddaw1qkk1nyi1skktyqgifsfdv1glqdihrn1nek1qdy11qaga1gstefstsmrevinrkkde1ykksg  
knp1inqqieq1kqlesqi  
reeeak1etyhr1vddrdkssrr1en1khn1nq1skmheekqkevalhdhsqewks1eqq1niepitfpekgydryekar  
ahkqslerdig1rner1aq  
1keeatq1lepvkqsdifis1nqgeneiknkefel1taiekdiankqrdkdelqsnigwsethdvdsseamksyvseqi  
knkqeqaayikq1erslee  
nkiednavhse1dsveekivpeetfekkkkeysqqvieleken1ysk1kerfeieqqekqkrqk11rttfill1tlvgig1  
tafsf1snm1fgiifav1  
tl1fvigi1mskskevdyseaitdeieeikaqla1ldenyd1dfd1deqyri1rdhwqa1knkd1leekrqyiegr1nda  
kgrhde1qstvenvkdely  
1skisnd1ivdsistmanika1dqhis1nqqrqqlvqel1dfynhaeavtksqfvynk1sl1fhdvqqw1ksaedtne  
kwrinaentk1vtne1nh1  
naqleennekita1fdfinvgteedfyqhedyqtytsn1srfdn1tkylenqnysyelsss1sekttaq1leedh1lat  
qvdeyneqy1emqavsd1  
saq1nhmetdt1lan1rheyhs1knq1ndiakdwas1sylqslvdehikqikdkr1ppvineavei1khl1tdgrytminy  
nedsitvkhvngq1ydpve  
1sqstke1lyval1ris1likv1rpyypfp1ivddafvhfdkkrtekmlny1rs1sehyqvlyftcvkdnivpskevit1nk  
ieeggkr  
>tr|D1GNW2|D1GNW2\_STAA0  
mna1fii1fmivvgai1ggi1tnvia1rm1fhpfkpyyi1kfrvpftpg1ipkrreeiatkigqvieeh11tet1linek1k  
seqsqaiesmi1qq1kq1  
tkdq1sikq1tsq1did1leq1vtngnqyiesq1nnyytkhqntias11pnq1vtf1nqhvdnatd11cdrarnylssa  
kgtqdi1ndm1dtffnekqk  
1igml1qmf1mtkesi1adriqqel1irtshpkartivts1itneyqtfkdkplne11dasqfneiaen1svyvttyaskqan  
kpvt1mpqfvdy1legq1s  
sk1an1li1iek1sih1stimmkvd1rg1ieeqintfd1dyiek1iieianke1klims1gfilggi1gffqglvaifv  
>tr|D1GNW4|D1GNW4\_STAA0  
mnkvi1vddhy1vrqgl1rf11stieniev1qdfadget1fley1kehehpdiv11d1vmpgmngieiteyikahypdikv1  
v1tsyvdehvi1sainkga  
dgyemkdvepqq1ietirrvmngekmih1kaqdvfetvsqkphytnk1skreiev1remvkgktnkeiaet1fvsektik  
thvshifsk1qvsdrtaq  
iyamenk1i  
>tr|D1GNX6|D1GNX6\_STAA0  
mqkkviaa1igtsaisavaatqanaatthtvkpgesvwaisnkygisiak1ks1nn1tsn1ifpnqvlkvsgssnstsns  
srpstnsgggsyytvqagd  
s1s1iaskygttyqnimr1ng1n1nffiyppgqk1kvsqtassnaasnsrps1nsgggsyytvqagds1s1iaskygtty  
qkims1ng1n1nffiyppgqk  
1kvtgnastnsgsatt1nrgyntpvfshqn1lytwgqctyhvf1nrraeigkgistywnannwdnaaaadgytidnrptvg  
siaqtdvggyghvmfverv  
nndgsi1lvsemnysaapg1ltyrtvaayqvnyryih  
>tr|D1GNX8|D1GNX8\_STAA0  
mikcvclveetadki11vqvrnrekyyfpggkieegesqvhallrevkeel1n1t1tmdeiyyvg1ivgpayppqdm1tel  
ngfra1tkidwenvt1inne  
itdirwi1dkdnda1iapavkwietyggkhdk  
>tr|D1GNY6|D1GNY6\_STAA0  
mskeidwrksvvyqiypksfndttgnigdingi1qk1dyik11gvdyiwltpvyespmndngydisny1einedfgtmd  
dfek1likvahqk1dkvm1d  
ivinh1tstehewfkearkskdnpyrddyffr1ssedgpptnwykfggnawkydsetdeyy1h1fdvsqad1nwdnpevrq  
s1yri1vnhwi1dfgvdgfrf  
dv1n1iskgef1kdsdk1gkefytdgprvhef1he1n1rqtfgntdm1tigemssttiencikytqperqelnsvf1nfhh1k  
vdyvdgekwtnak1dfhk1  
kei1mqwqrgiydgggwna1f1wcnhdqprvvsrfgddtseemriqsakmlaia1hmlqgtpyiyqgeeigmt1dphftsia  
qyrdvestinayh1q1l1segh  
aeadv1ai1lgqksrdnsrtpmqwsddvnagftagkpwi1disenyhqvnvrqalqnkesifytyqk1liq1lrhthdiitygd  
ivprfmdhdh1fvyerhyk  
nqqw1vianfsasavd1peg1laregcvviqtgtvenntisgfgaivietna  
>tr|D1GNY9|D1GNY9\_STAA0  
mnyqalrymyr1pqs1fedvvgqehvkt1rnaiskekqshayi1fsgprgtgktsiakvfakainc1nstdgepcnechick  
gi1tqgtsndvieidaasn



Tsompanidou\_et\_al\_Supplemental\_FASTA\_File

gvdei nrirdkvkyapseskykvyiidevhlmttgafnaliktleppahafilattephkipptiisraqrfdfkais  
ldqiverl kf vadaqqiec  
edealafiakaseggmrda ls imdqai a fgdgt l t l qda l nvtgsvhdealdh l fddivqgdvqasfkkyhqfitegkev  
nrlindmiyfvrtdimnkt  
sekdteyralmnlldmlyqm id l indt lvsirfsvnqnv hfev l l v k l aeqikgppqvia nvaepaqi asspntdvl l q  
rmeql e qe l k t l k a g g v s v  
apvqksskkpargi qksknafsmqqiakv l dkankadik l l k d h w q e v i d h a k n n d k k s l v s l l q n s e p v a a s e d h v l v k  
feeeihceivnk ddekrss  
iesvvcni vnk n v k v v g v p s d q w r v r t e y l q n r k n e g d d m p k q a a q t d i a q k a k d l f g e e t v h v i d e e  
>tr|D1GNZ6|D1GNZ6\_STAA0  
mpnvigvqfqkagkleytpndiqvdi edwvveskrgieigivknp lmdiaeedvvlplkniiriaddkdidkfcncr  
daenalilckdivreggl d  
mrlvnceytl dkskvi f n f t a d d r i d f r k l v k i l a q h l k t r i e l r q i g v r d e a k l l g g i g s c g r s l c c s t f l g d f e p v s i  
kmakdn l s l n p t k i s g a c  
grlmcc l k y e n d y y e e v r a q l p d i g e a i e t p d g n g k v v a l n i l d i s m q v k l e g h e q p l e y k l e e i e t m h  
>tr|D1GNZ7|D1GNZ7\_STAA0  
mdrnei fekimrlemv n q l s k e t s e l k a l a v e l v e n v a l q l e n d n l k k v l g n d e p t t i d t a n s k p a k a v k k p l s k d n  
l a i l y g e g f h i c k g e l f g k  
hrhgedclfclev l s d  
>tr|D1GNZ8|D1GNZ8\_STAA0  
mlkenerfdqlikedfsiiqnddvfsfstda l l l g h f t k p r t k d i v l d l c s g n g v i p l l l f a k h p r h i e g v e i q k t l v d m  
arrtfqfndvdeyltmh m  
dlknvtkvfkpsqytlvtcnp pyfkenqqhqhqkeahkiarheimctledcmiaarhllkeggrlnmvhraerlmdvlfe  
mrkvn iepkvvfiyskv g  
ksaqtivvegrk g g n g g l e i m p p f y i y n e d g n y s e e m k e v y y g  
>tr|D1GP10|D1GP10\_STAA0  
mrrhaiilaagkgrmkskkykvlhevagkpmvehvlesvkgsgvdqvvtivghgaesvkghlgerslysfqeeqlgtah  
avqmakshledkegttivv  
cgdtpl itketletliahhedanaqatv l s a s i q p p y g r i v r n a s g r l e r i v e e k d a t q a e k d i n e i s s g i f a f n n k t  
l f e k l t q v k n d n a g g e y l  
pdv l s l i l n d g g i v e y r t n d v e e i m g v n d r v m l s q a e k a m q r r t n h y h m l n g v t i i d p d s t y i g p d v t i g s d t v i e p g v  
ringrteigedvvi g q y s e  
innstiengaci q s v v n d a s v g a n t k v g p f a q l r p g a q l g a d v k v g n f v e i k k a d l k d g a k v s h l s y i g d a v i g e r t n i  
gcgtitvnydgenkftiv  
gkdsfv g c n v n l v a p v t i g d d v l v a a g s t i t d d v p n d s l a v a r a r q t t k e g y r k  
>tr|D1GP14|D1GP14\_STAA0  
mti l t t l i k e d n h f q d l n q v f g q a n t l v t g l s p s a k v t m i a e k y a q s n q q l l l i t n n l y q a d k l e t d l l q f i d a e e l y k y  
pvqdimteefstqspqlms  
erirtlta laqgkglfivplnglkkwltpvemwqnhqmt l r v g e d i d v d q f l n k l v n m g y k r e s v v s h i g e f s l r g g i i  
difpligepirielfdtei  
dsirfdvetqrskdnveevdittasdyiiteevishlkeelktayentrpkidksvrndlketyesfk l f e s t y f d h q i  
l r r l v a f m y e t p s t i i e y f  
qkdaiiavdefnrketees l t v e s d s f i s n i e s g n g f i g s f i k y d d f e t l i e g y p v t y f s l f a t t m p i k l n h i i k f s  
ckpvqqfygqydimrsefq  
ryvnqnyhi v l v e t e t k v e r m q a m l s e m h i p s i t k l h r s m s s g q a v i e g s l s e g f e l p d m g l v v i t e r e l f k s k q k k q  
rkrtkaisnaekiksyqdl  
nvgdyivvhhgvgrylgvetlevgqthrdyiklqykgtdqlfvvpdqmdqvqkyvasedktpklnklggsewkktkakv  
qqsvediaeelidlykere  
maegyqygedtaeqttfeldfpyeltpdqaks ideikddmqksr p m d r l l c g d v g y g k t e v a v r a a f k a v m e g k q v a f l v  
pttllaqqhyetliermqd  
fpveiq l m s r f r t p k e i k q t k e g l k t g f v d i v g t h k l l s k d i q y k d l g l l i v d e e q r f g v r h k e r i k t l k h n v d v l t l t  
atp i p r t l h m s m l g v r d l s  
vietppenrfpvqtyvleqnmsfikealere l s r d g q v l y l n k v q s i y e k r e q l q m l m p d a n i a v a h g q m t e r d l e e t m  
lsfinneydilvttti et  
gvdvpnantliiedadrfg l s q l y q l r g r v g r s s r i g y a y f l h p a n k v l t e t a e d r l q a i k e f t e l g s g f k i a m r d l n i r  
gagnllgkqqhgfidtvgf  
dlysqmleeavnekrigikepesevpevevdlnldaylpteyianeqakieiykklrktetfdqi idikdelidrfndypv  
evarlldiveikvhalhsg  
itlikdkgkiidihlsvkatenidgevlfkatqplgrtmkvgvqnnamtitltkqnqwlslkflvkcieesmrisdea  
>tr|D1GP16|D1GP16\_STAA0  
mahtitivglngygidlplgiy k f l k t q d k v y a r t l d h p v i e s l q d e l t f s f d h v y e a h n q f e d v y i d i v a q l v e a a n  
ekdivyavpghprvaett  
vkllalakndtidvkvlggksfidvfeavnvd p n d g f t l l d a t s l q e v t l n v r t h t l i t q v y s a m v a a n l k i t l m e r y  
p d d y p v q i v t g a r s d g a d n  
vvtcplyel dhdenafnnltsvfvpkiitstylyhdfdfatevidtlvdedkgcpwdkvqthetlkrylleetfel feai  
dneddwhmieelgdillqv  
llhtsigkkeyidikevitslnakmirrhphifgdanaetid l k e i w s k a k d a e g k q p r v k f e k v f a e h f l n l y e k t k  
dksfdeaal k q w l e k g e s n

Tsompanidou\_et\_al\_Supplemental\_FASTA\_File

t

>tr|D1GP17|D1GP17\_STAA0  
mrldkylkvsrlikrrtlakevsdqgritingnvakagsdvkaedvltirfgqklvtvkvtalnehaskdnakgmyeiie  
errleea  
>tr|D1GP25|D1GP25\_STAA0  
mtktkimgilnvtppsldggkfnnvesainrvkamidegadiidvggvstrpghemvsleemnrvlpvveaivgfdvk  
isvdtfrsevaeacklglv  
dmindqwaglydhrmfqivakyaeeiilmhngngrdepvveemltsllaqahqakiagipsnkiwldpgigfaktrnee  
aevmarldelvataypvll  
atsrkrftkemmgdydttperdevtaattaygimkgvravrvhvelnaklakgidflkekenenarhnls  
>tr|D1GP30|D1GP30\_STAA0  
mskiigsdrvkrmaemqkggvimdvvnaeqariaeeagavavmalervpsdiraaggvarmanpkiveevmnavsipvm  
akarighitearvleamgv  
dyidesevltpadeeyhlrkdqftvpfvcgcrnlgeaarigegaamlrtkgepgtgniveavrhmrvnsevsrltvmn  
ddeimtfaidigapyeilk  
qikdngrlpvvnfaagvatpdaalmmelgadgfvfgsifiksedpekfakaivqatthyqdyeligrlaselgtamkg  
ldinqlsleermqergw  
>tr|D1GP32|D1GP32\_STAA0  
mlnqriidiyrfvekkispsnlaeelffmsklmkiknkaihkkktlqrd  
>tr|D1GP36|D1GP36\_STAA0  
mthnihdnisqwmksneetpivmssrirlarnlenhvhlmyatendgfrvinevqdalpnfelmrldqmdqqskmkmva  
khlispelikqpaavlvn  
ddeslsvmineedhiriqamgtdttlqalynqassideldrsldisydeqlgylttcptnigtgmasvmlhlpglsim  
krltriaqtinrfgytirg  
iygegsqvygthyqvsngltlgkseleietltevvnqiiheekqirqltdynqletqdrvfrrlgilqncrmitmea  
syr1sevklgidllyielq  
nfkfnelmvaiqspflgeeddksvkekradilrehik  
>tr|D1GP41|D1GP41\_STAA0  
mlkrmrddikmvfeqdpaairstlevittyaglhavwshliahklynqkkyvaaraisqisrfftgieihpgakigkrifi  
dhgmgvvigetctigdnvt  
iyqgvtlgggtgkerghrpdigdnvliagakvlnikinsvniqanssvlqsvpsystvvgipghivkqdgvrvgktf  
dhrh1tdpiyeqikhlerq  
lektrngeiqddyii  
>tr|D1GP42|D1GP42\_STAA0  
mitlyntltrqkevfkpipegkvkmyvcgptvynyihignarpainydvrryfyqgynveyvsnftdvddklikrsqe  
lnqsvpeiaekyiaafhed  
vgalnvrkatsnprvmdhmdidiqfikdldvqgyayesggdyvfrtrkfegyglshqsiddlkvgaridagehkedald  
ftlwkkakpgei swdspfg  
egrpgwhiecsvmafhelgptidihaggsdlqfpheneiaqseahnhapfanywmhngfinignekmskslgnfilvhd  
iikevdpdvlrffmivshy  
rspinyntelivesarsglerirnsyqlieraqiatnienqytyidqidailnrfetvmnddfntanaitawyd1aklan  
kylenttstevdkfkav  
yqifsdvlgvplksknadelleyvekleerneckndfaradeirdmlksqniiledtpqgvrfkrq  
>tr|D1GP44|D1GP44\_STAA0  
medtvivgrhavreaitghpinkiliegikkqqineilknakdqkiivqtpvksklfdlanaphqgvaaliapyeyad  
fdqflkqqkekeglltvli  
ldgledphnlgsilrtadatgvdgviipkrsvtlqtvakastgaiehpvirvtnlaktidelkdngfwvagteanna  
tdyrnleadmslaivigse  
ggmsr1vsdkcdfyikiipmvghvnslnasvaaslmmyevfrkrhdvgei  
>tr|D1GP50|D1GP50\_STAA0  
mcndtlellrikdenikyinqeidviikgkkatvnavltykpsacyccgvknegqihkhgkrvsritllktqgyntyln  
lakqrfkclecngtftakt  
sivdescfisrcvtqkvieeatkvkteidtaedncispstvsrirtkaanslrikpfnc1pehiamdefksvknvtgms  
fifidndthdividilenrt  
trflrayferfdlknrqvktvtidmyepyvrlfrdlfpnaaiifdrfhivqhlrelnkyrvqvmneyrnkkpdytif  
knnwkvllmdtskifsky  
rwnksfkaykrssdivefmlskddilrshyelvqglrkdrlcnwpkfinrlnsvsksvskgvkavkyyrkhqrm1rn  
tiyypafnngaieginnki  
klirikrisfgyrnfnfkakrimmifskygekrqpmpimdwppnnksksilkivl  
>tr|D1GP51|D1GP51\_STAA0  
msveiesieheleesiaslrqagvritpqrqailrylisshtptadeiyqalspdfpnisvatiynn1rvfdigivke  
ltygdsssrfdfnthnhyh  
iiceqcgkivdfgypqlneierlaqhmtdfdvthhrmeiygvckecqdk  
>tr|D1GP69|D1GP69\_STAA0  
mtnykek1qqyael1kvkgmnavqkqvfi rsvvetlethliveayhcgasdvrvvysdptlkr1kfenesvehfanh  
eiksydvearmdyvkrgaa  
n1alisedp1mdgidsq1qafqqnara1fkgymesvqknqfpwvvaafpskawakrvypelsveayikfidvfdiv  
ridgndpvenwrqhianls

Tsompanidou\_et\_al\_Supplemental\_FASTA\_File

vyaqklqqknyhalhyvsegtdltvglaknhwedatsyvngkeqafianipteevftapdrnrvdgyvtnklplsyngt  
iidqfklmfkdgeiidfsa  
gkgeavlkdlintdegsrrlgevalvpddspisnrntifyntlfdenaachlaigsayafniqggtemtveekiasglnd  
snvhvdfmigssdltiygi  
fedgskeivfengnwastf  
>tr|D1GP73|D1GP73\_STAA0  
mskkdhssskylnsvkeageeskkknksnpkidvdrtyiepqfqskkpkddqvfflsrlnkpakykkdsnflsyliyr  
igkddasglaaqmyhfv  
amfpmllflltllpffnikqsqitnmlsnapaetstliksvigditqnssgllsiglilaiwsasngmtaimnsfnvay  
dvedsrngivlklsvvft  
vvmgvfvvalaplglsvishflfgplgfdeqkwifnlirivlpiiiifivlysvapnvkklksvlpgevftsi  
iwlagsfgfwyisnfgny  
sktygsiagiilllwllyitsfiiivgaeinaiihqrsvikgktpaeaalehddnnknhyentryeydedsnathqerty  
hydehpsdtypeddknikd  
kivdklkkd  
>tr|D1GP83|D1GP83\_STAA0  
mlsknlleaIndqmhheyfaahaymamaaycdkesyegfanffiqakeerfhgqkiynyindrgahaefravsapkidf  
ssiletfkdslsqeqevtr  
rfynlseiarqdkdyatisflnwfldeqveeesmfethinyltrigddsnalylyekelgartfdee  
>tr|D1GP84|D1GP84\_STAA0  
miqdafvaldfetangkrtisvsgvmkvidsqitktfhtlvnpqdyfsqqnikihgiqpedvenaptfdyvfpymmqi  
adlpvvaahnaafdmnvlhq  
siqniqlptpnlyfcsyqlakrtvdsyryglkhmmefyqldfhghhdaIndakacamitfrllknyenlyvtvniygkn  
lkdkg  
>tr|D1GP87|D1GP87\_STAA0  
mqaiakndiktgtvvdltthehgvvkidrfpifipqalineqieykiikvknfaigkllnintrsenrvappciyyerc  
ggcqlqhlseyaqlemkke  
qvinlfqrkahfdnskindtvgmtdpwyrnksqipvgkneqnevimgfyrqrshdiidmescliqdsqhqvemnevksi  
lkdlnvsyqeqllkglmr  
hlvvtgyhtdemmiifvtngkkwpqknavekildafpnvtsikqnindshsnvimgrqsitlygkdtiidqldstfk  
isdqsfyqinseqteklly  
kaieyaqltgnevlltlycigigtiglymaplakhvygvevpsaiedaqqnatinqcnhttfvcgkaeevilqwaqgik  
pdvvmvdprrkgcdetfiq  
tlltlepkriyiscnpatqqrda11laekyqleevtpvdmfqtthvetvalfnlk  
>tr|D1GP89|D1GP89\_STAA0  
miadldaieg1fisievklll1l1fivhvngkninfinalaliilrqtv  
>tr|D1GP93|D1GP93\_STAA0  
mltmgtalsqqvdanwqtyimiavyflilivigfygykatgnlseymlggrsigpyital sagasdmmsgwmimglpqsv  
ystgl samwitigtlay  
inyfvvaprlrvytelagda itlpdffknrlndknnvlkiisgliivvfftllythsgfvsqgklfesafgl dyhfglilv  
afivifytffggylavsit  
dffqgyimliamvmpivammnIngwgtfhdvaamkpinlnlfkglisfigiis1fswglgyfgqphiirfmsikshkm1  
pkarrlgiswavgllgav  
avgltgiafvpayhikledpetlfivmsqvlfhp1vggfllaaillaaimstissqllvtsssltedfyklirgeekakth  
qkefvmigr1sv1vvaiva  
iaiawnpndtiln1vgnawagfgasfsp1vl1falywkg1tragavsgmvsgalvvivwiiwikplahineifglyeiiipg  
fivsvivtyvsvskl1tkkpg  
afvetdlnkvrdivrek  
>tr|D1GP97|D1GP97\_STAA0  
mydikkwrhifkldpakhisddd1daicmsqtdaimiggtddvtednvihlmsrvrryplplvleisniesvmpgdfdyf  
vptvlnstdvvhngtll  
alktyghsidfeevifegyavcnadskvakhtkantdlttedleayaqmvnhmyrlpvmiyeysgiygdvskvqavseh1  
tetqlfygggisseqqate  
maiadtiivgdiiykdikka1ktvkikessk  
>tr|D1GPA6|D1GPA6\_STAA0  
mqlyylgpkgtfsylacrqyfseneatfqpsnffevikavaddtsigvvpensi egtinivadalaqqdvfahgeir  
ldinfalyngtdsisdik  
kvysiapaisqtnyihqhfdydydstiqsltkiengvaaiaplgsgeaygftpidthiedyphnvtrflviknqqqf  
dqnatslmflitpmdhdkpg  
llasvln1falfnln1swiesrplntqlgmyrffvqadsaittdikkviailetldfkvemigafn  
>tr|D1GPB6|D1GPB6\_STAA0  
mkkffffigllvfvfftaatiifwsydknkygkqydktdkddafdnvsinldstelrikrgnqfrvkydgdndilniv  
dktlkisdkksktrgyaid  
mnpfhenkktl1empdkmikrln1ssgagsvr1sdvldentsiqsingevviksnldaldsktnsstyisksnikns  
nikvvigt1qidksqikqs  
iflndhgdiiefknmpskvdakastkqgdirfkydskpedtilklnpgtgdsvvknkftngkvgsdnvlefytidgnik  
ve  
>tr|D1GPB7|D1GPB7\_STAA0

Tsompanidou\_et\_al\_Supplemental\_FASTA\_File

mnkitylneletaIdalprhIrdqkmyeryfyeeIngvdegeilkkIkdppdvaetkarsvidyaeskptfenisr  
avaaslsIglisivilip  
vsivglfvlaflisllllfcpiillasaIsrgivdsisnvffaisysglglvfiivifkileyirIilkyllwyikt  
kgsvrk  
>tr|D1GPD3|D1GPD3\_STAA0  
nvktpakneknsppagytIdknnvpykktgnytvanvkgnnvrdgystnsritgvlpnnatikydgaycingyrwity  
iansgqrryatgevdkg  
nrissfgnfsav  
>tr|D1GPD4|D1GPD4\_STAA0  
mlkrsllfltvllllfsfssitnevsasssfdkgkykkgdasyfeptgpylmvntvgvdgkgnellspryvefpikpgt  
tltkekiyyvewaldata  
ykefrvvelDpsakievtyydknkkeetksfpitekgefvpdlsehiknpgfnlitkvviekk  
>tr|D1GPD7|D1GPD7\_STAA0  
mkktaftlllfiatltsplvngsekseeinekdIrkkselqgtalgnlkqiyynekaktenkeshdqflqhtilfkg  
fftdhsyndllvdfsd  
ivdkykgkkvdlygaygyqcaggtpnktacmyggvtIhdnrlteekkvpinIwldgkqntvpletvktknknvtvqel  
dlqarrylqekynlynsdv  
fdgkvqrgIivfhtstepsnydlfgaqqysntllriyrdnktinsenmhidilyts  
>tr|D1GPE4|D1GPE4\_STAA0  
midvnnfhymkiIglaspekirswsfgevkkpetinyrtlkpekdgIfcerifgptkdwecscgkykrvrykgmvdrcgv  
evtkskvrermghielaa  
pvshiwfykgipsrmglldmspraleeviyfasyvvvdpgptglekktllseaeFrddydkypqgfvakmgaegikdl  
eedldeekllrdelesa  
tgqrltraikrlevvesfrnsgnkpswmiIvIpiipeirpmvqldggrfatsdIndlyrrvinrnnrlkrllldlgap  
IivqnekrmIqeavalid  
nrrrgrpvtgpgnrplksIshmlkgkqgrfrqnlIgrvdysgrsvIavgpsIkmqyqglpkemalelfkpfvmkelvqr  
eIatniknaks skiermdde  
vwdvleeiIrehpvllnraptIhrIgiqafeptIvegrairIhplvttaynadfdgdqmvhvpIskeaqaearmlmlaa  
qnlIpkdgkpvvtpsqdm  
vlgnyytlterkdavntgaiFnntnevlkayangfvhlhtrigvhassfnntfteeqnkkiIatsvgkiifneIipdsf  
ayineptqenlerktpnry  
fidpttIgeggIkeyfeneIiepfnkklgniaevfnrfsitdtsmmlIrmkdIlgkfsskagitvgvadivvlpdq  
qIdeheklvdritkqfnr  
gliteeerynavveIwtdakdqIqgelmqslDktnpiFmmsdsgargnasnftqIagmrgImaapsGkiieIpitssfre  
gltvIeyfisthgarkgla  
dtalktadsgyltrrlvdvaqdvIreedcgtdrgllvsdikegtemiepfieriegrysketirhpetdeiiirpdeli  
tpeiakkItDagieqmyir  
saftcnarhgvcekcygknlatgekvevgeavgtiaaqsigeptqItrmfhtggvagsdiIqglpriqeiFearnpkg  
qaviteiegvedikIakd  
rqqeivvkganetrSylasgtsriiveigqpvqrgevltegsiepknyIsvaglnatesyIkeVqkvymqgveiddkh  
vevmvrqmlrkvriieag  
tkllpgslvdihnftdanreaFkhrkrpatakpvllgitkasIetesflsaasfgettrvltdaaikgkrddllglkenv  
iigklIpagtgmmrrysdvk  
yektakpvaevesqtevt  
>tr|D1GPE6|D1GPE6\_STAA0  
mptinqIvrkprqskIkkdsPalngkfnskkkftdInspqkrvctrvgtmtpkknpsalrkyarvrIsnieinayi  
pgIghnlqehsvvlvrgr  
vrdIpgvryhivrgaldtsGvdgrrqgrslygtkkpkn  
>tr|D1GPF0|D1GPF0\_STAA0  
mIldwfqlannkenktiqlrrylhqypeIsfeefqthdyivnqlsqIscdietpigrngikatfkgIgtgptialradfda  
Ipveelndvpyksknpgcm  
hacghdghtailIvtvaeIdekhlllegnvvlIfyqgeeitpggsqemidagclenvdriygtIhwsgyptgtIhsraga  
imaspedfsvtfkgrgghg  
akphetidpivimaefIlsaqkiisrtidpvkqavlSfgmiqagttDsvipdqafckgtvrtfDsdIqnhvmdkmdkllq  
glaiandinydlnyikgyI  
pvhnekayqviKeatndIhvrfnesdlmmigedfshyIkvrrpaffltgcgneskgitaphhnpkfdideksIkyavav  
flkiieleqvfktn  
>tr|D1GPF3|D1GPF3\_STAA0  
mmsysigiDygtasgrvflinttngqvvsKfvkpythgviesselngIkiptyalqnsndyleimeegisyivreskidp  
dnivgigidftsstiiIftd  
enI npvhnIkgfknnphayvklwkhghaykeaklyqtaiennkwIghygynvssewmpkimevmnrapeimektayi  
meagdwivnkItnknvrsn  
cglgfkafweeetgfhydIldkidpkIskviqdkvsapvvnigeavglldkmaqIglsketmvsPfiidahaslIlgig  
sekdkentmvmgtstchl  
InekqhqvpgisgsvkgaiipeIfayeagqsavgdIfeyvakqapksyvdeaanrnmvtfelmekikhqmpgesglial  
dwhngnrsvIsdnltgci  
fgltIqtKhedyrayIeatafgtkmimqyqDwhmevkvfacgIpkknvmmDIyanvlnkklivmdseyapaigaa  
ilgavsggahnsindavda

Tsomanidou\_et\_al\_Supplemental\_FASTA\_File

mkepilyeinpeaekvqryetlflkaykahlhdihgykkanimkdiqslrveg  
>tr|D1GPF5|D1GPF5\_STAA0  
msqavkverretlkqkpnstqlfgkyftdymlsydydadkgwhdtkivpygpieispaaqgvhyggsvfeglkaykrdg  
evalfrpeenfkrlnnsila  
rlemqpvdeaelleglkqlvdi erdwipegegqsl yirp fvfategalvgvashqy lliil spsgayygetl kptkiy  
vedeyvravrggvfakva  
gnyaasllaqtnanklgydqvlwldgveqkyieevgsmniffvengkvi tpe lngsilpgitrksiielaknlyeveer  
rvsidel fesydkgeltev  
fgsgtaavispgtlyredreivinnetgeitqklydyvtgiqngtledkngwrvvvpyk  
>tr|D1GPG2|D1GPG2\_STAA0  
mnnkkatnrkgmipnrlnkfsirkysvgtasilvgttlifglsgheakaaehtngelnqsknettapsenkttkkvsr  
q1kdntqtatadqpkvtns  
dsatvketssnmqspqnatangsttktsnvttn dkssttysnetdksnl tqakdvsttpktttikprtlnrmavntvaap  
qggtvndkvhfnsdiai  
dkghvnttgktefwa tssdvlk lkanytidsvkegdtftfkygqyfrpgsvr lpsqtqnl ynaqgni iakgiydsttn  
t t y t f t n y d q y t n v r g s  
feqvafakrknattdktaykmevtlgndtyseeiivdygnkkaqplisstnyinnedl s r n m t a y v n p k n t y t k q t f v t  
n l t g y k f n p n a k n f k i y e v  
tdqnqfvdsf t p d t s k l k d v t d q f d v i y s n d n k t a t v d l m k g q t s s n k y i i q q v a y p d n s s t d n g k i d y t l d t d k t k y s  
w s n s y n v n g s t a n g d q k  
kynlgdywWedtnkdgkqdanekgikgvyvikdngkel drtttdengkyqftglsngtysvefstpagytppttanvg  
ddaydsdgl t t t g v i k d a d  
nmtldsgfyktpkyslgdyvwydsnkdgkqdstekgikgkvvtl qnekgevigttetdengkyrfdnl ds gkykvi fekp  
agltqtgtntteddkdadg  
gevdtvtdhddftldngyeeetsdsdsdsdsdsdsdsdsdsdsdsdsdsdsdsdsdsdsdsdsdsdsdsdsdsdsdsdsdsdsdsdsds  
dsdsdsdsdsdsdsdsdsdsdsdsdsdsdsdsdsdsdsdsdsdsdsdsdsdsdsdsdsdsdsdsdsdsdsdsdsdsdsdsdsdsdsdsdsds  
dsdsdsdsdsdsdsdsdsdsdsdsdsdsdsdsdsdsdsdsdsdsdsdsdsdsdsdsdsdsdsdsdsdsdsdsdsdsdsdsdsdsdsdsdsdsds  
dsdsdsdsdsdsdsdsdsdsdsdsdsdsdsdsdsdsdsdsdsdsdsdsdsdsdsdsdsdsdsdsdsdsdsdsdsdsdsdsdsdsdsdsdsdsds  
mstvkdqhktakalpetgs  
ennnsngt1fgglfaalgs111fgrkkqk  
>tr|D1GPG3|D1GPG3\_STAA0  
mlnrenktairkgmvsnrlnkfsirkytvgtasilvgttlifglngqeka aestnkelneattsasdnqssdkvdmqq  
l n q e d n t k n d n q k e m v s s q  
gnettsngnkleikesvqsttgnkvevstaksdeqaspkstnedlntkqtisnqealqpdl qenksvvnvqptneenk  
daktestl nvksdaiksn  
detlvdnnsnennadiilpkstapkrlntrmriaavqpssteaknvdn l i t s n t t l t v v d a d k n n k i v p a q d y l s l k  
sqitvddk vksgdyftiky  
sdtvqvyglnpediknigdkdpngetiatakhd tannlitytftdyvdrfnsvqmginysiy m d a d t i p v s k n d v e f n  
v t i g n t t t k t t a n i q p p d y  
vvneknsigsaf tetvshvg nkenpgyykqtiyvnp s e n l t n a k l k v q a y h s s y p n n i g q i n k d v t d i k i y q v p k g y t l  
nkgydvntkeltvtnqyl  
qkitygdnsavifgnadsayvmvntkfqytnsesptlvqmatl s s t g n k s v s t g n a l g f t n n q s g g a g q e v y k i g n y  
vwedtnkgvqelgekgvg  
nvtvtvfdnntntkvgeavtkedgsylipnlpngdyrvefslnpkgyevtpskqgnneeldsnglssvitvngkdnlsad  
lgiykpkynglywWedtn  
kngiqdqdekisgvtvtdk dengv l k t v t t d a d g k y k f t d l d n g n y k v e f t t p e g y t p t t v t s g s d i e k d s n g l t t t g  
vingadnmtldsgfyktpk  
ynlgnyywedtnkdgkqdstekgisgvtvtdknengev l q t t k t d k d g k y k f t g l e n g t y k v e f e t p s g y t p t q v g s g t d  
egidsngtsttgvikdkdn  
dtidsgyfkyptynlgdywWedtnkngvqdkdekisgvtvtdkendkv l k t v t t d e n g k y q f t d l n g t y k v e f e t p s g  
y t p t s v t s g n d t e k d s n g l  
t t t g v i k d a d n m t l d s g f y k t p k y s l g d y v w y d s n k d g k q d s t e k g i k d v k v t l l e k g e v i g t t k t d e n g k y c f d n l d s  
gkykvi fekpagl tqtgt  
t teddkdadggevdtvtdhddftldngyeeetsdsdsdsdsdsdsdsdsdsdsdsdsdsdsdsdsdsdsdsdsdsdsdsdsdsdsdsdsdsdsdsdsds  
dsdsdsdsdsdsdsdsdsdsdsdsdsdsdsdsdsdsdsdsdsdsdsdsdsdsdsdsdsdsdsdsdsdsdsdsdsdsdsdsdsdsdsdsdsdsdsds  
dsdsdsdsdsdsdsdsdsdsdsdsdsdsdsdsdsdsdsdsdsdsdsdsdsdsdsdsdsdsdsdsdsdsdsdsdsdsdsdsdsdsdsdsdsdsdsdsds  
dsdsdsdsdsdsdsdsdsdsdsdsdsdsdsdsdsdsdsdsdsdsdsdsdsdsdsdsdsdsdsdsdsdsdsdsdsdsdsdsdsdsdsdsdsdsdsdsdsdsdsds  
dsdsdsdsdsdsdsdsdsdsdsdsdsdsdsdsdsdsdsdsdsdsdsdsdsdsdsdsdsdsdsdsdsdsdsdsdsdsdsdsdsdsdsdsdsdsdsdsdsdsdsds  
dsdsdsdsdsdsdsdsdsdsdsdsdsdsdsdsdsdsdsdsdsdsdsdsdsdsdsdsdsdsdsdsdsdsdsdsdsdsdsdsdsdsdsdsdsdsdsdsdsdsdsds  
gs111fgrkkqk  
>tr|D1GPG4|D1GPG4\_STAA0  
minrdnkkaiktkgmvsnrlnkfsirkytvgtasilvgttlifglngqeka aestst enakqddattsdnkevveten  
nstennstnpikketntd  
sqpeakkestssstqkqnnvtattetkpqniekenvpstk tatedtsvileekkapnntndvttkptstseiqtkpt  
tpqestniensqpqptpsk  
vndqvtdatnpkepvnvskeelknpeklkelvrndsntd hstkp vataptsvapkrvnakmrfavaqpaavasnnvndl  
ikvtkqti kvgdgkdvaa  
ahdgkdieydeftidnkvvkkgtmtinydknvipsdltdkndpiditdpsgeviakgtfdkatkqitytftdyvdkyed  
iksrltlysyidkktvpne  
tslnl t f a t a g k e t s q n v t v d y q d p m v h g d s n i q s i f t k l d e d k q t i e q q i y v n p l k k s a t n t k v d i a g s q v d d y g n i k l

Tsompanidou\_et\_al\_Supplemental\_FASTA\_File

gngstiidqnteikvykvn  
sdqqlpqsnriydfsqyedvtsqfdnkksfsnnvatldfgdinsayiikvvskytptsdgel diaagtsmrttdkygyyn  
yagysnfi vtsndtgggdg  
tvkpeeklykigydwedvdkdgvqgtdskekpmavltvtltpydgttksvrt danghyefggldkgetytkfetptgy  
lptkvn gtt dgekdsgss  
vtvkingkddmsldtgfykepkyngdyvwedtnkdgiqdanepgikdvkvtlkdstgkvi gtttt dasgkykftldng  
nytvefetspagytpvknt  
taddkdsngl tttgvikdadnmtldsgfyktpkyslgdyvwydsnkdgkqdstekgikdvtvtlqnekgevigttkten  
gkyrfdnldsgkykvi fek  
pagltqtvtntteddkdadggevdtitdhddftldngyfeedtsdsdsdsdsdsdsdsdsdsdsdsdsdsdsdsdsdsds  
sdsdsdsdsdsdsdsdsds  
sdsdsdsdsdsdsdsdsdsdsdsdsdsdsdsdsdsdsdsdsdsdsdsdsdsdsdsdsdsdsdsdsdsdsdsdsdsdsds  
sdsdsdagkhtpvkpmst  
tkdhhkakalpetgsennsnatlfgglfaa lgsllfgrkkqnk  
>tr|D1GPH0|D1GPH0\_STAA0  
mkvlnl gskkqasfyvace lykema fnqhcklglatggtmtdlyeqlvkllnknqlnvdnvstfnldeyvgl tashpqsy  
hyymddmlfkqpyfnrkn  
ihipngdaddmnaeaskyndvleqqgqrdiqilgigenghigfnepgtpfsvthivdltestikansryfkneddvkq  
aismglanilqakriilla  
fgekkraai thllnqeisvdvpatllhkhpneviyldeacpknvaki hvdemd  
>tr|D1GPH1|D1GPH1\_STAA0  
melqlaidllnkedaaelankvkdvdiveigtpiiyneglpavkhmadnisnvkvladmkimdaadyevsqaikfgadv  
itilgvaedasikaaieea  
hknnkqllvdmia vqdl ekrake ldemgadyiavhtgydlqaegqspleslrvksviknskavaggikpdtikdivae  
spdlvivgggianaddpve  
aaklcraaiegk  
>tr|D1GPH5|D1GPH5\_STAA0  
mnvileqlkthtqnkpn dialhiddetitysqlnaritsaveslqkyslnpvvainmkspvqsiiicylalhr lhkvpmmm  
egkwqstihrqli ekygik  
dvigdtglmqnidspmfidstqlqhypnllhifgtsgttglpkayyrdedswlasfevnmmlknenaiaapglshsl  
tlyallfalssgrnfiggt  
tfhpekllnqchkissykvamflvptmikslllvynnehtiqsffssgdklhssifkkiknqandinlieffgtsetsfi  
synlnqqapvesvgvlfpn  
velkttndhngigticiksnmmfsgyvseqcinn dewfvtn dngyvkeqylyltgrqqdml iiggqniypahverlltq  
sssidaai igipnerfgq  
igvllysgdvtlthknvkqflkkkvkryeipsmihhvekmyytasgkiarekmmmylrgel  
>tr|D1GPH6|D1GPH6\_STAA0  
mnqavivaakrtafgkyggtlkhl epeql lkp l fqh fkekyevi skiddvvlgnvvgnggniarka lleaglkdsipgv  
tidrqcsglesvqyacrm  
iqagagkvyiaggestsrapwkikrphsvyetalpefyerasfapemsdpsmiqgaenvakmydvsrelqdefayrshq  
ltaenvkn gnisqeilpit  
vkgeifntdesl kshipkdnfgrfkpvikggtvtaanscmkndgavllimekdmayelgfehgl l fkdgv tvgvdsnfp  
gigpvpaisnllkrnqlti  
eni evieineefsavvacqaalni sntqlniwgga lasghpygasgaqlvtr l fymfdketmiasmgigggl gnaalft  
rf  
>tr|D1GPH7|D1GPH7\_STAA0  
mqhyll dsnrlnvsfskdsvaayyqcf nqpyrkevpplmcaslwpkfdl fkyanse liltksainqtqkievdtiyvg  
hledi eqtrnri trytma  
l t l tkndqhvi tvqt fikamk  
>tr|D1GPJ4|D1GPJ4\_STAA0  
mktydli vigfgkagktl akyaastgqh vavieqspkmyggtcinigcipsktlvhdglegksfeasynrkn dvvna lnd  
knyhll addnnidvldfka  
qfksntevnll dqhddivdsitaphi iintgatsvipnikgl dqakhvfdstglln isyqpkhlvivgggyialefasmf  
anlgskvtvl ergesfmp  
edqdvvaygidlenk gialhtnvette lssdnhttvhtnvdnfeadavllaigrkpntd lalentdielgdrgeikvn  
ahlqttvphiyaagdvkkg  
lqftyislddyriksalygnqsrtdnrgsvpytvfidpplsrvgltskeaaaqhydytehql lvsai prhkinndprg  
l fkvvinnenmilgatly  
gkqseeliniki laidqni pytvlrdniythptmaesfndlnf  
>tr|D1GPJ7|D1GPJ7\_STAA0  
mlfnikvinknprykvvyndeyllidlvstwlvyffpf inwfipkryaklsekelenlnvdkqnknni fwpvtgssflf  
vvilrkyvhtfevqldnki  
lislcf igfigiaafyijlnkkllkiyddnldnenrvilvptfkdg sfivftylllgcsilfliwltikpnllvfi  
mwiiitiffllismgsin  
kkvyakfkkq  
>tr|D1GPJ9|D1GPJ9\_STAA0  
mlcetei inknpkyrvikyddeylmvdvir twlvvyffsfinrfipkrcakisreeyekln tvkpvknknfwpvvggtill  
gatsrkyihllniqlekr

Tsompanidou\_et\_al\_Supplemental\_FASTA\_File

vificfvvflcili fvfllnrklklkvfdnkkeeqiilvptlknavlilygylliggmsilalsmlltlenqnlitfia  
wmgmlmflflmnlitlvnk  
tvkvikr  
>tr|D1GPK2|D1GPK2\_STAA0  
metllceakvinknpkyriikydyseylmidlasnwivffffpfinwlipktyvkitkndyeklnivkpvknksigwtifag  
ivllggtvrntyldfdq  
eelivwsscfigfleiffycylnkiltlniynesknnelklrllpsfknicftifyyftgfmgyafyflvfenvqnl  
ilyvswlfmtmfmfmnmh  
siidkkvhiffksnk  
>tr|D1GPK7|D1GPK7\_STAA0  
mllceskiinknpkyriikyndeylmvdii stwislffpfinwfipkeyvki sreefenlnivkpakknvfwpvagssa  
lgyalrkythlidiqldkk  
lviaicctffigilifyvrlikksslniyntknkrskifliptlknvcftlfgylfggltmlfldallsmsyqniivyf  
wviavimgfflvnialiid  
knhvilknq  
>tr|D1GPL1|D1GPL1\_STAA0  
mtnayvd1klveekvfkdpihryihvedqlidwliktkefqrllrirqlgtlylsfhtaehsrfgshlgvyeivrrlide  
sfighdawnkdrplalca  
allhd1ghgpfshsfeki fntdheaytqaiitgdtevnalrkvapefprevaevinkthhnlvismissqidadrmdy  
lqrdyftgvsygafmer  
llrlmrpskdevlikesgmhavenfimsryqmywqi yfhvsvrggevl nnc1krakqlynegyefklhphdfipffet  
vtieqyveldeavvtyyle  
kwtkeddailsdlasrfinrdlfkyipfdgsiitiselqelfeagginpdyfvseafsd1pydydrpgsnrkpihl1rq  
ygtireisnqslvihsitg  
inrqdyklyyppremvakikdktireaienline  
>tr|D1GPL3|D1GPL3\_STAA0  
mraavvtkdhkvsiedkklralkpgealvqteycgvchtdlhvknadfgdvtgvtlghegigkvieaedveslkigdrv  
siawmfescgrceycttgr  
etlcrsvknagytdvgameaeqvvtadyavkvpekldpaaassitcagvttkavkvsnvkpgqwlgvfgigg1gn1alq  
yaknvmgaki vafdiindk  
lafake1gadai inskdvdpaevmk1tdnkg1datvvtsvaktpfinqavdvkagarvvavglpvdkmndipr1vldg  
ievvgslvgtrqdlreafe  
faenkvtpkvqlrkleeindi feemengtigrmvikf  
>tr|D1GPM2|D1GPM2\_STAA0  
mndsnqglqanpqtihylsqeitrvtqenam1kayiqeqneksksae  
>tr|D1GPN4|D1GPN4\_STAA0  
mtin1setfanaknefinavnngepqrqnel ygdminqlfeetklqakaeaervsslpsaqs1sanqrsffmdinkv  
nykeekllpeetidrifed  
ltnhplladlgiknaglr1kflksetsgvavwgkiygeikgqldaafseetaiqnkltafvvlpkd1ndfgpawierfv  
rvqieeafavaletaf1kg  
tgkdqpiq1nrqvqkgvsvtegaypekeeqgtl1fanpratvnelmqvfkyhstnekgksvavkgnvtmvnpsdafevq  
aqyth1nangvyvta1pfn  
lnviestvqeagkvltyvkglydgy1agginvqkfketa1ddmdlytakqfaygakdnkvaavwk1dlkghkpa1egt  
eet1  
>tr|D1GPN5|D1GPN5\_STAA0  
mkveikgvi vnsedkwvyem1gmdstcpkdv1tq1efsdedvdii insngnlvageseyth1rahkgkvnvritaiias  
aasliamagdhie mspvar  
mmihnpssiaggeakdl1naaet1ehvgqimaeyavragknqel vemmaretwlnadeaieggfadskmfendnmqiv  
asntqvlskdvl1rvta1v  
sktpevnididaiankvi ekimkekeseidvadsksvsangfsr1f  
>tr|D1GPN8|D1GPN8\_STAA0  
meiivden1vlkeker1qvlykdipsnk1kvvdg1liqaarlrvml dymwedikekgdyd1ftqsekappyererpvak1  
fnardaaykikiq1sd11  
peekedtetspsddy1  
>tr|D1GPN9|D1GPN9\_STAA0  
mvtpgsksksvikt1geragar1rdnfknpcitppl1til1rqvmkwr1  
>tr|D1GPP1|D1GPP1\_STAA0  
mikiekhdi kkleeyiqhidnyrrelkmreyel1eshepdnagasksn1pgnpiercaikkfsdnrynt1rnivngvdr1  
idesdedtle11rfrywdc  
pigcyewediahyfgtsktsilrrrna1idklakyigyv  
>tr|D1GPP6|D1GPP6\_STAA0  
mnnt1tidqlqellqikqefddript1nlgdskiayvveffewfntletfknwkkkpgkpldvq1deladmlafglsian  
qvgvsseeikeaiessfkd  
tefhkmfnfkdefagavvstpqiifkefypdqlaiviaidiaynlytidqlidaykkkmkrnherqdgtadagkgyv  
>tr|D1GPP7|D1GPP7\_STAA0  
mtrptree11syfkkgyvervnsitgeesaihyfrtkafyyreenkkl senidklekrnkelenmwrt1knel1fgryefy  
rfr1selqiesrankevai  
yrraein1svilcrmdk1dgtnefyef1dqmedndne

Tsompanidou\_et\_al\_Supplemental\_FASTA\_File

>tr|D1GPP8|D1GPP8\_STAA0  
mnrekieqsviasayngndtegl1kevedvykkaqafdeidnliyevfemmncfkfsfinenkelildsesniffslk  
dcankldlvkfhwvsrs  
cienmspertqvflqtgfelyigkhltkkdyemytcfnglnsdgaysyarrllnipegiaq  
>tr|D1GPP9|D1GPP9\_STAA0  
mnyetgflgvmdar1kkmrkqrdeykkqryeligviaklrdcnkelekkasawdrycksvekdlinkfgnddervkfgm  
elnkifmeddtne  
>tr|D1GPQ0|D1GPQ0\_STAA0  
mmpkyrvwdkytgrihdvvgfdfietyevhyenyaeealihardfkdvemqstgldkknneiyagdivefedeilemp  
ddesvigtinravisidvv  
ngiqldkdfmfegavsendyfeyidiksflrydcevkgnifesshllleve  
>tr|D1GPQ1|D1GPQ1\_STAA0  
mtynarkeylnqffgskrylyqdnervahihvvnngtyyfhghivpgwqgvkktfdtaeeleiyikqhgleyeeqkqltlf  
>tr|D1GPR1|D1GPR1\_STAA0  
mvgismrdternilnifktlfdeytlsnqralleiernhhgylsinflhydsyktnnklvqiheinpdsheriknlie  
vlrghrkikkgga  
>tr|D1GPR2|D1GPR2\_STAA0  
myykiyeiknkiiisfngfefkvsvmkrhdgisiqikdmnvp1ksfhvidlselyiatdamrdvinewienntdeqdkli  
nlvmrw  
>tr|D1GPR3|D1GPR3\_STAA0  
mtenikteqhytksdfsgyrneednfanqelvtvitlneyrklieikavkdeedyrgkyfaerkneklekeniklk  
nkiyelqneedneedeedk  
edendvlqnw  
>tr|D1GPR4|D1GPR4\_STAA0  
msniyksyllavlcftvlaivlmp1lyfttawsiagfasiatfiykeyfyee  
>tr|D1GPR7|D1GPR7\_STAA0  
mlqkfriaeknk1k1k1khasyclersnpellravaelkkvn  
>tr|D1GPR9|D1GPR9\_STAA0  
mqalqtqsnigemfniqekengeiaisarelykalevkkrfasawaeinlkhfkenrdftsvltstvvngavrqlledya1  
tldvakhvammstgtekfgd  
freyfiqvekawspemimqralcianntinqletkierdkpkivfadavattktsilvgelakiikqnginigqrrlfe  
wlrqngflikrkgvdymp  
tqysmerelfeiketsithsdghtsisktpkvtgkqqyfvnkflgekqts  
>tr|D1GPS0|D1GPS0\_STAA0  
mtneakfvllqlysiylriddegmskrsasyfgsdessfnaffldfnfedydavlelkhdrfviasaedggflemalsr  
egiayseseskkdyktlmd  
lirdlkklii  
>tr|D1GPS1|D1GPS1\_STAA0  
mniqeatklamekgisirrenqdvylptnlqryqclvvsrhykkkrqtaagrwpqsaddliaddwil dy  
>tr|D1GPS6|D1GPS6\_STAA0  
mkitnckikretviyevltsngpftyelpkd1ssharkylefiskldgdkltkeds1  
>tr|D1GPS7|D1GPS7\_STAA0  
mrmkrllgl1lvst1vl1sacgndenqeeskkevkskekkekenkskkdekevatqqqpdnqtveqqpsqeqsvqqp  
qqq1pqnsvppqnvqvqqn  
kkqkvdlnmpptdfstegmseqaqkieelismqkdyhgl1sqreyndrvseiinn dn  
>tr|D1GPS8|D1GPS8\_STAA0  
mktcrydgkkwqyefkhegkryrkkgfrtkreansagldklnelrsgfnidnyitleeyfenwiktykqpvvkenkyrhy  
rnalqhiqkhkigkme1sk  
inrqvykfindyskehaketirktngairsalddalydglifknpaykvnykagkptksekekfisvteyeilkdhvrk  
krtrsslalfimictgcrv  
sgarnikiehinqvntifiderkntsprysiaksdmkhimdvistfaisydgyifkeggsiinlhainnalksacr v  
nnipiitshalrhthcsyl  
lakgvsihyiskrlghkniaittsvyshlleekfneedkkttkilesm  
>tr|D1GPT7|D1GPT7\_STAA0  
msetakqarfvneryrtlnvtqsaikagynansahvtacrllkkphikqyiqeqdkiidenvltake1lhvltnaavg  
detetkevkvkrgeykenp  
qsgkvqlvynehvelievpi kpsdr1kardm1gkykh1ftdkhdngnvpifinigewdggdegldkavkdvsndnpnht  
vivddipledyesirfl  
>tr|D1GPU0|D1GPU0\_STAA0  
mlkpi gnrvieekkeqeqttksgivltdsakeksnegvivavgtgrllndgtrvtpvkegdrvvfqqyagtevkrdnet  
yllneedilavie  
>tr|D1GPU4|D1GPU4\_STAA0  
mkvqiylpivfgdssknetqitqwfeknmnaevdvvvlpemwnngydlehlnekadnnlgqsf1khl1aekykvdiva  
gsvsnirnnqifntafsvn  
ksgqlineydkvhlvpm1rehefltagyvaepfqlsdgtyvtqlicydlrfpellryparsgafiafyvaqwpmsrlqh  
whsllkaraienmfvig t  
nstgfdgnteyaghsivinpngdlvge1nesadiltvdln1neveqqrenipvfksikldlyk  
>tr|D1GPU7|D1GPU7\_STAA0



Tsompanidou\_et\_al\_Supplemental\_FASTA\_File

mntlfnlffdfitgilknigniaaystcdfimdevevpkeltqlhe  
>tr|D1GPU8|D1GPU8\_STAA0  
me1lnrynfvlflvtqmilmftipaisgikyskldyffiiivistlsflfkmfdsasliiltsfiiimyfvkikwysil  
limtsqiiilycanymyivi  
yayitkisdsvifvifpsffvvyvtisilfsyiinrvlkkistpylilnkgflivistillltsflffysqinsdeakvi  
rqysfifigitiflsiltf  
visqfllekmykrnqeeietyyeytlkieainnemrkfrhdyvnilttseyireddmpglrdyfnknivpmkdnlqmn  
aiklنگienlkyreikgli  
takilraqemnipisieiipdevssinlnmidlsrsigiildnaieasteiddpiirvafiesensvtfivmncaddipr  
ihelfqesfstkgegrglg  
lstlkeiadhadvlldtiengffiqkveiinn  
>tr|D1GPV0|D1GPV0\_STAA0  
mrrlfsigealidfipnvtanlkdvqfttkqiggapcnvactvqklgqqaymitqlgndafgdsiietissigvdvskv  
yrneantalafvslteag  
erdfsfykpsadmifepsfvndidvndvvhfcsvdlvdsmpmdahyqlitktlnangtvvfdpnvrplplwdnaedlr  
qtihtflplahivkvsdee  
lefittgihdeneaiqslftgnvtvviytkgadgaavylknginhyhsgykvkpvdttgagdafigavisrilatdvlnlt  
qlfenegeeilafsnrvaa  
ivttkygainslptlqeveqsf  
>tr|D1GPV1|D1GPV1\_STAA0  
mtewtreeryqriedvteyftklkqvvdqskfrqqfhiqpetglindpnglifykgyyvshqwfplgavhglkywyny  
tsddlinfkaegpilnptd  
kydshgvysgsafeynghlymytgnhrdnhwqrhasqmiarlkedgsvekfpkpvisqqpegytshfrdpkvfkydeky  
yaisaqndqqgrlllyn  
tediinwhyigeintelddfgymwecpdyfnvdnqdvilicpqgiepkgdqfkniyqsgyilgkfdieklyehenfvel  
dngfdfyapqtfldekgrr  
vligwmg1peiyeptdnegwahcltiprvlnvengqlkqrpypaleklrhketalgyankftrklhpyegkqyeliidi  
ldndatevyfelrtsktss  
tliaynkrenkitldrdsqllptnvegttrstildtp1kqlqifvdtssieifcndgervltsrifptedalgitste  
sgqvy1qftkydlkdehk  
>tr|D1GPV3|D1GPV3\_STAA0  
mn1ndtiffmflctllvw1mtpgls1fygg1vqsknalntvmqsmiaivlvtfwitvgtisfgngnlwfgnweytf1nh  
vgfatgedisphipfal1m  
lfqmmfctiaisilsgsiaekmkfipy11fvviwta1vyspvahvwggswinklgvldfaggtvvhitsgvsglv1aim  
igkgnkhsestphnliit1  
iggi1fwigwygfnvgsaftfdniamlaftntvisasagaigw1ileyifkktts1lg11galaglvvitpaagyvty1  
satimaliggi1ccyiviny  
ikvk1kyhdaldafgihgvvggi1gav1tavfqsakkanpdiengfiytdihiilvqilcvtavvifsvimtfiiakvik1  
itpls1vteqetnig1dkiv  
hgehayfege1nrfnkhiry  
>tr|D1GPV6|D1GPV6\_STAA0  
mrtnehnfhn1eeei1khvay1rl1srgedese1dnhktr1lnrce1nwnsyelykeigsgstidrdpvmqk11tdvekn1  
ydav1vvd1dr1srgngtd  
ndrilysmkvset1ivvespyqvl1dannesdeei1lfkqffarfefkqinkrmregkkl1aqsrgqwnsvtptygyivnkt  
tkk11tpseeeakvvimikd  
fffegkstsdiawe1nkrkikprratewrsssi1an1lqnevvygnivynksvgnkkpsksktrvttpyrr1peeewrrvy  
nahqplyskeefdr1kqyf  
ecnvkshkgsevrtya1tg1cktpdgktmrvtqgkkgtddd1yl1fpkknkhgdssiykgisynvvyet1kevilqvkdy1  
dsvldqnenkd1veelkee  
1mkkede1eti1qaknri1vqgf1ig1lydeqdsielkvekekeidekekeieaikmkidnaktvnnsikktkier11sdvq  
saesekeinrfykt1likei  
ivdrtdeneakikvnf1  
>tr|D1GPV7|D1GPV7\_STAA0  
msdkskrtfnrwtssed1lkk1yeknit1ndiadffpkrtnkqvrakydymfktkkkhvkpskrwseeeeqilkdnydi  
ewpe1mk11prsrtsikk  
kl1fq1dl1hrptrkiteeveerielakthatsdivk1tn1snksvydv1nkynvkavnknqwiatdvdi1edeid1svtft  
1nknigrggi1iden  
>tr|D1GPV8|D1GPV8\_STAA0  
msktskvkfskvvkdk1knihinvtqeqiht1ngiki  
>tr|D1GPV9|D1GPV9\_STAA0  
mplqcr1s1p1pts1nk1yvqqfsggrftgkkl1skagkenrediminverqms1pvnidwdyeytkdhyiyndieayvt  
rvnvd1dnt1kt1ndsiea  
sg1vfdndkkvvprfnrvyiepsnprvel1tftqtgwngifdkedeyndflegcqrctryrsgscsilkkalengkiqueeis  
1degt1myscswkkekki  
>tr|D1GPW0|D1GPW0\_STAA0  
mnsdkfkreqir1laid1ies1al1nsdnyikevihtyeg1hgtktin1qvtfkddmrgididkgrplgeddfankvtsei  
ersrngmkqkplnrstni1  
snkqvananf1srqiken1tkngdkhaftm

Tsompanidou\_et\_al\_Supplemental\_FASTA\_File

>tr|D1GPW1|D1GPW1\_STAA0  
mfqqikkqgqividvtvkqyqkvigrefknnkgvellvevvdqknentrttklikvpimnvrpfpkptnekkkpyapyfd  
vkkfhetfghpvaevppqi  
skeraaqradylveelveflwssvagneheteklvdelihsihkaknkcfkggefpsseillnqtdalndinyinygsiv  
etgvnpkpiifeiqkanma  
klgedgkpiidpvtkkimkpagweanhkpepliekelnrqieaakrkrgy  
>tr|D1GPW2|D1GPW2\_STAA0  
meknk1kkiiegifiayeyekrthgldeisvrildrki fyaikqlnelkgiknmcfkayhkaklrdlylkihnqqiykq  
>tr|D1GPW3|D1GPW3\_STAA0  
mnetkyl1fgsptcmpcknlkgilpvmnfefeykdvfenpelaahmvmstptmvkfvngekvatkvqgqeimkfvdeeq  
nk  
>tr|D1GPW4|D1GPW4\_STAA0  
mil1qptnntinialtgkmrsgkdtvakqlikafeddsdtrvrmfgfgdalkeyaqelfpnkftdggkprhlyqwfqgt  
mrtgdediwrmaadnir  
sksfsslfnainvidl1rqpneyqfckdnfiivkvecddavr1qrmeaindefditd1thetegyidtfeadytittt  
htnedecmervkalkefi1  
kk  
>tr|D1GPW5|D1GPW5\_STAA0  
mtreikaratnwdkdnisialtywkqnvkqmteefkpskd1svwkt1sadeqetyvkalsgltgldttqgtegmp1laf  
hypeeiwrgvfafmsmmen  
ihhksyshi fts1lerkdthyy1kewvpanylnkktklittnyk11kpnptdreiyvamassiflesflffsgfyyp1  
ylagggkmvhsgeiirkii  
ldeti hsgtgaaqvi fekskeeqedi rkelmel fdqlyfneveyaaslydklg1tedviriyiqngnralmnlgwet  
vfnpepfnpi vengl rtdt  
tnhdffsvkgdgyt1alnqvp1rdkdfdfnnvisyel snkflq  
>tr|D1GPW6|D1GPW6\_STAA0  
mskwiekneimrrdelgqlslskdkeaielylehiskstkqfsnqiar1rylveedyyidvfkdyseet1le1ldyays  
fgfefqs fmaaskfydtya  
1ktrdksqwl edfeqhni vsvlylaggdvd1akryikaht1qtvqtatpty1nagrkhrgelascylftmddt1nsinfi  
rsqvsqaskiaggvavn1t  
rlrgrgat1kgvknvgkqipvak1iegevsyadq1gqragagaay1nifhsdviellntkkvnadedtrlat1sigliv  
ps1ffdlakedkdl ymfep  
ysiqeefgkdvi1ddinindwydkfvenenvikhkinarem1n1iaqiqlsgypyimykdnankhahnelgeikmsn1  
cvtgdte11tekygvkakt  
lyesqed1kvvidnrtnknydinnkgtdivnaipmqltakqaeiyeittkqgfkikstewhkyyrkindsiekvq1nqlev  
gdk11vqsgngsygd fhdsp  
klaf1mgli agdgtfgrdgsvk1ylyhekqylketieelvayiidkyrnkneflhhsan1hpkfvenkelqkltissvel  
yki1srfgfnretkl rfpn  
11knatkntitay1sglyqmdacvntnekykamsielttiseelardi qmql1n1lgvyssiyqsereis11pdgnggmke  
ykvqntykisiqdrssrd1  
fmkeval kpkdihkami fn1tlrpnsrkpkhdftaeiteikyigkedvydttqedyhs1ifngivtgncteifqymhvsd  
ikdyneqdelgqdi cn1a  
s1nmvksieekeieesirtgmraltfvannsrieh1ptvhkanknrravg1gvmsfhsacaknkirygsees1d1lnvyc  
mmdyys1desmkiavern  
dkfygfdqtdyakddkefgeyfyknrrvtknvepitpkikeifkgyiptkedwqrlarevdknglynsyr1siapyrt  
qsisyitncssaltpvvdv  
vekrkygnsetypppy1spetmwfyspta fdi p qehi invaavaqkwidqgvstilfnseietnklarlyayahrgl  
kslyytrnk1isiaectsc  
av  
>tr|D1GPW7|D1GPW7\_STAA0  
mghkktindmfdkqfgivfdmqqddiikdn1rkrnrhqdlqaatqtl yflysmk11dqsnseyevitptstttktvdrytd  
gnvg11erdeepgvngqvs  
dyldglaekrdidq11dkmnenrrkfiedikri1mseafedy1rnei  
>tr|D1GPW8|D1GPW8\_STAA0  
mnsavdkrenisvpsk1slayysrtrqterfmekvl eqiqidvhrikdepleinnsyvlitptydfgevpapvetflene  
tnqnn1iavmssgnrnwgt  
nfaiagdtiskrfnveligkyelagnmvdvnlvdyikgrvm  
>tr|D1GPW9|D1GPW9\_STAA0  
mna1eaayknatfdyledndtydntqdfneaihttedflen1dynfydkk  
>tr|D1GPX0|D1GPX0\_STAA0  
mpvytneg1rfdneqea1dwfktt1ntetpigel yek1havkewegefd1qatg1ndkevhiq1dpsshgkvfrvqy  
nsygnneplefet1kelid  
nmiksvnvasiiafdkvieileaikegnekysdrvtssen1v1tvqaernmydgavviaitdentkeqyqdsipsdeeg  
ridielvekavesifmkqm  
sgkfnggeevtdgyklqf11nyahenekevevki  
>tr|D1GPX1|D1GPX1\_STAA0  
medmklydyadqyn1in fmeendysfeemkdtlesiqesaegkvinigkviqyqddikviserkkal delkkaarni  
dn1kqyglvqmsr1dmkkv

Tsompanidou\_et\_al\_Supplemental\_FASTA\_File

asptltvsi rnskv mnikdesklpqeyitekvekkvdkvafkkyynslpteeqea idyaeievkqnilik  
>tr|D1GPX2|D1GPX2\_STAA0  
maallltlnllvvlifvtayynqlksifysknitgissmfwylvsfstlflslnlvltgnaewiyilgqfinagvaliiv  
iclnfkrmekpiaifsl  
yillaalvifshlslevsqtvatvsivlayidqihfircktseganpllylffaiglsllvtifsltgvsihiiitevan  
icllltcfvlakvyskirn  
ki  
>tr|D1GPX3|D1GPX3\_STAA0  
mkr1cltiigsiffgaifflltfgffeifmli rtnlvetaisqkeviyqsiigysvlttlllnskvakqtlee hgg  
>tr|D1GPX4|D1GPX4\_STAA0  
mdkeqlvr1kykknshmtavqtnnnkviqlvpnpafevmynhiqenakvftgngtilyr  
>tr|D1GPX5|D1GPX5\_STAA0  
mknlel fyeaveklmteykndypinekwnlsrvhineykskvtldfttkcelpsivmtngivsklmkkninfntyyld  
ikkqleernnemdhigedk  
rrrtngidvfikkf1kgn  
>tr|D1GPX6|D1GPX6\_STAA0  
mikvlel fsgvgsfsislntlgieheivgfsetrktatqlfcklhnkkesenlgdvrnvsakldvdllvfgspcqsfr  
agkqggg1kgsdtrsalmw  
eavri meeckpkwivwenvpdaisrknmpnfqnymdel dslnyntyykvlnahelgsaqkrkr1fsisirkdidngkfef  
ldltrephletylenndq  
pdianehihshli1lgkdendykikngtkkgylyanngdgidlayvt skarrgrvqvkcactimrgktlgtindgv1rfys  
preywr1qempde1ykhve  
acnfkfstaydvvgvinq1h1ktvf1slkka fnw  
>tr|D1GPX7|D1GPX7\_STAA0  
mnynpfqt fkseqtnefnehveksvpfykeihkivkiiggffveddtnvydigsstgnllkgmsnilkrnanyigidn  
siymnqvamndadndniki  
l sedvqdfkftnasyitsil t1qfiniedreki1knvyqglnkkgafilvekvngefvqsheimnqiyhdfkleng1tye  
evikksqsirgv1kpltle  
qnkrml e eagfkdi dtwfkwnnfvgi iavk  
>tr|D1GPX8|D1GPX8\_STAA0  
mfdnpedfdwsr1hwradwnged1gfpdrnvvghythydl nlyidtenleilqawfgdeede1  
>tr|D1GPX9|D1GPX9\_STAA0  
mekviylaghi1neamvdyrekqhnqveaiegvkpysphqdk sindksnaiqeglaeril kndftameksdiyvl dvlne  
glgtise1gii igmkkqaq  
ktidr1sv1seeikhdeygdkteaydliqdeiskqeki1nkpvlcycsdi rqqhgkpytdpdraefstnqfvymvleat  
ngegf1twdqvlhrld1fg  
sgliv  
>tr|D1GPY0|D1GPY0\_STAA0  
meil t qei ydi syygtpl yqdqkiyi lngdl fadrkel iriyiessigiyilggnnqkaikkertygesnlsswpys  
>tr|D1GPY1|D1GPY1\_STAA0  
mkvkynrp1n1qdiidq1kimqaigk idtise1iediewlkkedvgtydqkyhalsvdygy1rmenkelkeqiefleses  
ded  
>tr|D1GPY2|D1GPY2\_STAA0  
mlpn1nkqgikefvvetnqmgr1lar1pehywnqsnkllaetikldnitvddidieevvqypdveknvyticihdf1r  
yaliesstgditfeqldfk  
kk  
>tr|D1GPY3|D1GPY3\_STAA0  
mnkekdsyvvelisfkiyiskadnniedivytenntsltkrewdkettsklifelissrisseqiitdmtqeiadldeqi  
kelkgendkdvtepk  
>tr|D1GPY4|D1GPY4\_STAA0  
msklykvaynqlyiakankthdvdfkftkdeneythmiintyidgtehtkdivitrepl ddfldlegineilktnnikik  
rleekvie  
>tr|D1GPY5|D1GPY5\_STAA0  
msyeqmkyekylkhreqiatmlttfydkaeealqsgegmeealefigiksdemlqki  
>tr|D1GPY6|D1GPY6\_STAA0  
mntttnnkkk1itvssiviaislliiiliavikpfsdeskyivnswetdteeyitfdkdgevd sentdgdtkygyeie  
rygktdeyflvvnmedepe  
atfnvkfsddhktmyl ttedkqviter  
>tr|D1GPY7|D1GPY7\_STAA0  
mqelyei1qei kntsktskenil rkhkdne1ltetlklf1ddli vtgisskkiakpinpmtinnid1mk1feylrsnns  
gkdkdiayakgminnarkv  
fgtdvadmvkgi iikdypigiskvtinkvfkggfi fkdvrkgskfegklkpnvqyaqstkldgvrsvvlvndkgvqifg  
rsgktidd1keiealfnky  
yeqtntpmmfdgellai detesipndel fritskilrvkgdksdikfvmdnmp1eefyegsksk1kfkerrdn1lafyeq  
1kvidpkvidivpihygn  
dmaeiqsvqkkledsgfegsm1deidayeakrts1lkfktfhtvd1rc1rveehvrgnkvgnivvdykgyelgvsgsf  
sdrkl1fweqkdliegki  
veisyfeesknkdgges1rfpvfkmvrndkdevs1n

Tsompanidou\_et\_al\_Supplemental\_FASTA\_File

>tr|D1GPY8|D1GPY8\_STAA0  
mkvlnidkhneilalkeeiemiedygvnmnieelqylkrmskechtymncvitiinnlqlrdecnntgkskelkyeek  
lelfkeylpqydeyknqle  
evlaa  
>tr|D1GPY9|D1GPY9\_STAA0  
mrgvnlrlekdlenlqkelkvcskeiskadkqvsgilhdietrnmnayqgyylskeqlkvlearrcwkdrreyleaf  
aelggeeklkalrrkrekr  
vkrylkgngwknfskealailsav  
>tr|D1GPZ1|D1GPZ1\_STAA0  
mtlslsksgiavtavatgislspiassnishaateatsttqnnsaagqmskvgehdqfnlnknitydvdengiatltd  
knngkteqlpsakdkdgk  
dvtlvyyeendklfvhaqekssergwkkcaagiaggattgattvlgagasavlttplamslcf1  
>tr|D1GPZ9|D1GPZ9\_STAA0  
mlipiqtsvnsrslslytkspfytsfifsvgticliilniiinpevftihfynnqsfnytwvvgllgvsfltgnllllp  
klgatltviatvagqim  
viidftglfgatihdfnlkaigvllivgivismqfnknllltdqyillfwlllgfifgffppiqtinsalashths  
pafaslvstfigsialli  
taifnrslklktshlkfgklkpiyftggilgmavtaniilmphmgaalettigmfqilmgilidhfglfgspkiamts  
rktigllciltgillrlf  
>tr|D1GQ01|D1GQ01\_STAA0  
mskinhitivlsftkv dangkqtefkrrfaninpdasndqiktfsklerltgetysnielikslsi  
>tr|D1GQ08|D1GQ08\_STAA0  
miqtithimiissliifgialiicflrlkigpttadrvtfdttsavmsivgvlsvlmgvtvsfldsimliaiisfvssv  
sisrfigghvfngnkrn  
1  
>tr|D1GQ09|D1GQ09\_STAA0  
meitkeifsliaavmlllgsfialisaigivkfqdvflrshaatksstlsvlltligvliyfvntgffsvrlllslvfi  
nltspvgmhlvaraayrng  
aymyrkndahthasilssneqNSTEALqlraekreehrkkwyqd  
>tr|D1GQ15|D1GQ15\_STAA0  
mnylnsnffnttiqlniyivivaacyiaihqyrhkpvlnyldvilnyipvlthefghvlnklaggrakdlvivtsprer  
qqtqqgfaitqsrhlag  
wlrttiggymppimlliglasshyqipsffiftyllifiyfliltsrkgs pivvitlisimlyfilkeniveiqllvtm  
syqyilgvllgevlqsswt  
iakltfqrpsqwdgsalkeishvpifiystiwiifnlyavnillkythlin  
>tr|D1GQ22|D1GQ22\_STAA0  
mknlisiilcltlimtpyaqatnsdvtpvqaanqygyaglsaaeyptsavnvsqtgqlllyqynidtkwnpasmtklm  
tmyltleavnkgqlslddt  
vtmtkeyimstlpeIsntklypgqvwtiadllqitvsnsnaaalilakkvskntsdvdlmnnkakaigmknthfvnp  
tgaensrlrtfaptkykdq  
ertvtardyailldhviketpkildftkqlaptthavtytfnfslegakmslpogtdlktgssdtanyhntittkrk  
frinqvimgagdyknlgge  
kqrnmgnalmersfdqykyvkiiskgeqringkkyvendlydvlpsdfskkdyklvvedgkvhadyprefinkdygpp  
tvevhqpiiikantvackm  
weehplftiiggtclvaglalivhmiinrlfrkrk  
>tr|D1GQ31|D1GQ31\_STAA0  
mkvndmkarllnleetfkkheseleldraigdgdhgvnmvrgfsslkdklddssmqslfkstgmalmsnvggasgplyg  
fsfvkmsavtkddmdnqdf  
itliqafaeavesrgvtlnektmydvvaraaklngetltfndlqqladntkdmvatkgraayfgeeskyidpgaqs  
mvyilnaligdedna  
>tr|D1GQ34|D1GQ34\_STAA0  
mmmneaikigfayvgivvgagfstgqevmqfftkyglwaylgviisgfilafigrvakigtafeatnhestlqyvffe  
kfskvfdyiliffifgiav  
tmiagagatfeesyntptwlgalimtlaiyitllldfnkivralgivitpflivlvliagvylfkghvs laevnqvpea  
siwkgi wfgtiygglafsv  
gfstivaiggdtekrvtsgagamyggiytlallalinalqseyptiknasiptlannihpliatvlsvimlavmynt  
ilglmysfaarftepskn  
yhifiiimmvagyllsfvgfaelinklytimgyvglfivvaviikyfrknadkhhia  
>tr|D1GQ42|D1GQ42\_STAA0  
myfsfvalkyahklnmtesypikegsqvglyffiiiafllyanvlfikrrsyelalyqtlglskfniiyilmleqll  
ifiitailgiiigifgskl  
llmivftllgikekvpifslravfetlmligvayfltsaqnfilvfkqsisqmsknnqvketnhnkitfeevlglilgi  
vlittgyylslnivqyds  
igtlmfllstvigaylffkssvslvfkmvkkfrkgvisvndvmfsssimyriknafsltvmaiaisaitvsvlcfaaais  
raslsseikytaphdvtik  
dqkkanqlaselnqkiphfynykevihklykdnldvkakepynvtitsdkyipntdlkrqqadlfvaegsikdlvk  
kkhgkaiigtckhhvnikl  
rkdinkiyfmdvdllgptfvlndkdyqei rkytkakhivsqfgfdlkhkkdalaalekaknkvdksietrseaiissisl

Tsompanidou\_et\_al\_Supplemental\_FASTA\_File

tgillfvtsflgitfliav  
cciiyikqidetedelensilrklgftqkdmarglrfkimfnfglplvialshayftslaymklmgttmqipvfivmg  
yicmyavfavtaynhskrt  
irhsi  
>tr|D1GQ47|D1GQ47\_STAA0  
makschliltneyattrcqdgivlwpidgeielqkfrkskiieddiyiinhldvfsiknnkktimlylssywfaelgf  
tffnyhytaklikssynlk  
c111k1tyrylndqplndadirklqdiikiakeasmdkkiaqnqyryayygd1rdeleyiyqvnqr1tlksvadklfv  
sksn1ssqfh11mgmgfkk  
yidtlkigksieil1ttdstisnisehlgfssstyskmfksymditpneyrnlskynkclmlkpeplvgkmvqevkei  
lneyehyknhtdvihide  
dkfetpk1fqtviqintytemklvfllegifktllnknsqvffimpsilkskntmseeekftiiktiiesdlkiafninn  
iettyfveeafmsvfrqis  
pnelshnnyevhfvd1s1meirtiyrmilklhnm1nvklglnitclfekpsvfks1vsqikr1kfdsliidnan1ss  
pymgesdel11kni1hfk  
nlkqvinedieqekli1nvenhk1lnkerd1snsapliykt1salyhnfdgfglnifdnhqafnamhlydkngfkt  
lg1ilekfiyevskpkyen  
syysifdienyyc1viydwrviesetimsnfedsqvyinfknnv1ndkyliviet1densgnihliskelrkyewnp  
11skidnylkaieiekeh  
fsdns1ninvtfnalyyiikigk  
>tr|D1GQ59|D1GQ59\_STAA0  
miyceter11rdwhedd11pfqkmnanydvrkyfplsyrse1dmrtmdavikdygig1favedkeshqwigfigln  
yipetsdypfkelplyeig  
wr11pefwgkglategakat1klaehqi ydvysftaeankasqrvmekigmtvydhfelplnskyh11krqvryyinlr  
k  
>tr|D1GQ61|D1GQ61\_STAA0  
mthi1idgdacpvvdsi1d1ttetg1fvti1rsfshfsnqlypphvstlyvddgpdavdykivq1stkddivvtqdygla  
s11vdkv1ivmhngkiyn  
skniqg11dkrymnaq1rkqggrhkgpppftkqdqkvfeqs11kvihrike1d  
>tr|D1GQ62|D1GQ62\_STAA0  
mdkkkvikfminv1piv1vpliverkrikqhpdvqkvtdatskvasktsaa1sntasdvkeyvgdkkqdfenkrelkkfa  
rehdpayiekkgeklakqn  
rkdadmki1qkniekrhkeeqkarekneiqrikdmkksqyeekag1tpnk1dektekkgdklaeknrkeiakmkk1  
qkniekrhkeeqkrqead  
kariks1fkkykdyvaknasqqnkenntea  
>tr|D1GQ67|D1GQ67\_STAA0  
mknnkdekirisi1ngflsgktt11thyise11kndekiki1imnefgtfdidsnsisneievhs1ingcvccd1kqelv  
yelkaia1kgdvnhi1ea  
tgiahple11vacqdpqivnffekpiiyg1datrflerhqtentvs1medq1k1sdmi1inkid1itdds1lekidkq1  
gmicasiptykttygkvs1  
eel1d1tvkdreiss1hhhhhgiksmtytftgpidrh1fyqfimklpesv1rlkgyvsfrdqpnaiyefqayg1pdygi  
gmqlpl1tjivi1get1dtnh  
irnq1dmlqft  
>tr|D1GQ68|D1GQ68\_STAA0  
meqiminhyvhfsr1vqgfwranewkmtake1nyfine1vergittmdhadygdyqces1fgnal1dspelnkiqivt  
kcg1ilpskqfdftnghry  
d1sskhi1vksveqs1in1nvdy1ds11ihrsp1mdpeqvada1tklvkqgk1ksfgvsfnhsqyq11nqyimker1hi  
sinqle1sphyvds1qdg1  
mdsmyqnhvqimawsp1fagki1fdkedikaqrimkvvqsi1adkygvsdtavmiaw1vki1phrimpilgtsq1kridqae  
glq1n1ddqswfdiytai1  
gqdi1p  
>tr|D1GQ70|D1GQ70\_STAA0  
mseekhvveheqkkek1tkkqykp1fwivmsfi1liv111papss1pimakav1ailafavimvwteavsy1pvsat1iig  
1mi111g1fspvqnl1gek1g  
npksgsai1agsd11gtnhals1lafsgfatsava1vaaal1flaamqetn1hkr1al11v1sivgnktrnivigaiivsi1v  
1affvpsataragavvpi1  
1gmiaafkvsksk1las11iitsvqavs1iwnigik1taaaq1nivainfinhq1lgfdvswgew1flyaapwsivmsvally1fim  
ikvmppeinti1eggk1dik  
eel1hk1g1pvsprewr1livism1111fwstekv1hpid1sasiti1al1gvm1mpkigvmtwk1hvenkipwgtiiv1fgvgis1  
gnv11ktgaaq1w1sdq1tfg  
v1gl1kh1piat1ial1it1f1n1ih1lgfasats1ssa1lipvfis1tst1hl1gdqsigfv1liqqfv1isfg111pvsapqnm1  
aygtgtftvkdf1kagip1  
t1ivgy1ilvi1v1fsmt1ykw1lg11  
>tr|D1GQ76|D1GQ76\_STAA0  
mgkgmtvkn1fl1fgvavi1tvcl1g111latneda1akvhtint1nainvstedtykkkmd1lnihtakasevnen1vkk  
qn1hf1khrvn1nanksns1fneq  
ecqvi1adry1adkh1indnyg1lerisktnhgynyvys1ndn1stskqhs1isnqgi1itk  
>tr|D1GQ81|D1GQ81\_STAA0

Tsompanidou\_et\_al\_Supplemental\_FASTA\_File

mniveneicirtlidddfpmlkwltdervlefydgrdkkytleslkkhytepwedevfrviiieynnpigygqiykmyd  
elytdyhyptkdeivygmd  
qfgepnywskgigttryiklifeflkkernanavildphknpirairayqksgfriedlpehelhegkcedcylmeyry  
ddnatnvkamkyliehyfd  
nfkvsdieiigsgydsvalvneyifktkfstnkkkgyakekaiynflntnletnvkipnieysyisdelsilgykeik  
gtfltpetystmseeeqnl  
lkrdiasflrqmghl dytdisectidnkqnvleeyillretiyndltdiekdyiesfmerlnattvfegkkclchndfsc  
nhllldgnnrlltgiidfgd  
sgiiideycdfiyll edseeigtngedilrmygnidiekakeyqdiveeyypietivygiknikqefiengrkeiykrt  
ykd  
>tr|D1GQ82|D1GQ82\_STAA0  
mvktlysilhrsl dtefmeevliddnmvfdidnlkgflndtssfgfiakennkiigfaycytllrpdgktmfylhsigm  
l pnyqdkgygskllsfike  
yskeigcsemflitdkgnprachvyeklggkndykdeivyvydyekgd  
>tr|D1GQ85|D1GQ85\_STAA0  
mnkskkslekrllvtlaitiiall fvgctmeignikeinemsdnevkkltpsdvealsdsevaeynkrmdkihdkeldd  
pseeekltqeeensielk  
nqeeqerakykqiedelkpaimdsmygegkinkdyyskpeihaydengktiveienkcneynqadlmlnfdkidikvdf  
dqwltslrwddvpknydev  
rmkttiywhhkkgedeyeattksvedienantdpkvikiekin  
>tr|D1GQ86|D1GQ86\_STAA0  
mkiaylndlhidswikfnnnehknrkkieefintifsksekecleaeilviagdishhnsiskltievfskyfnkvyvvl  
gnhdyylisktqmrryan  
slnrriielndmladnervvllhsavnkvtidykglriagctmtskpnteeisfyngfmdsryipnkvdlnsmdmksy  
edikefkdplfshypllm  
tyskhllhdgsngsflckvdehiapinffghvhergdydigssfytnaigykelsnetialkvini  
>tr|D1GQ87|D1GQ87\_STAA0  
mylielsnseeernevlgvdskkiakeisetvtnegyeleyrkidhfksledfyknhtyikhlitinvknykktiev  
vtvntkrvhisefkyplym  
dflgtkgelefliigyttidyintnieilleraipkvkhkskkyiskhilqylkqilnenfiqene  
>tr|D1GQ88|D1GQ88\_STAA0  
mkkvikfiskimneeslfykfslfiviagvlvlsvalndiidlirflfnyehlvmvspivalaimfysqakypldktik  
ysdyakkrm  
>tr|D1GQ89|D1GQ89\_STAA0  
mlleiflsviityeftgslmriierikykevkyrkrdtylvlaalsvitasiiifvfnwlyldtylkivfavtviylf  
ityvssfiigtldqatesl  
kdkrmklqeeyikalenydnlqtrykalenvfnrlgevvaedekgn  
>tr|D1GQ90|D1GQ90\_STAA0  
mqnikyltekqvaiinvkaiqelspeqvgkvpevlnatiegvkqsfggvlyetierkaafiyrniaqkhaffnankr  
taftsmviflklnkifnc  
tqdeavqftlkvvedktllediadwikrhck  
>tr|D1GQ91|D1GQ91\_STAA0  
mvttrklrragnssvsvpteviaalgvtngdnlkfniednkvtiekevnedeeffklldefteynqalrklvdi  
>tr|D1GQ92|D1GQ92\_STAA0  
mkskgiwmknrtlickwki rkivgikkglrevckwllqen  
>tr|D1GQ93|D1GQ93\_STAA0  
miyfgdlhfghsnileyeketrkywnsveemnegliklwnetitkddivynigdffnmkpkdvkrilkqlynkkmil  
iagnhdhrkmklfeqegi  
tvkyadmikrdgvryylshyptligrknl ynihghihsdmetgyhinvydftgiaisfdeliefiekilrk  
>tr|D1GQ94|D1GQ94\_STAA0  
mekinygketlklieggfvvqese lrrcqedhievyntidlnfkrrlftsarskvsfdkcaarlekyvtsklqyeeeqq  
kplktlmlnkikelndkefy  
nktnskkgkvisngyslifsayydnkpkieicylnagntlidfeplsknsvl nnegnihinsnytnkfsetigkllgy  
isdyltdlnireeelkei  
nskfisnpykfpkesedk  
>tr|D1GQ95|D1GQ95\_STAA0  
msnrltkinyvftkengyisfskvrqifkhgefepsytll eedrtleailyfeqyeddskeislirkiydldqipiel  
adseenevrplieskceki  
vgeivg  
>tr|D1GQ96|D1GQ96\_STAA0  
mtrkvfvvpdi hgeydkllrlmdkil dkrtnddliiflgyidrgkqsrvinyifnlksnddniitllgnhdmafwesm  
rsietldiygvewfaryci  
etleayqidtkplksfeednqmfyteyfkfveevkalkkteyrkfdilmcnsklyhregkyifhthsggihykdvrkqt  
vnelwlsrdfaerndgyih  
vcghtptitgtveehndvllcdvgavyrdielplielevgnde  
>tr|D1GQ97|D1GQ97\_STAA0  
maeltnggvsllkmvsmllwkrmkfefhqhgyindltdledasrriaqilkyndvkevtdkdefeeyfatgvky  
>tr|D1GQ98|D1GQ98\_STAA0

Tsompanidou\_et\_al\_Supplemental\_FASTA\_File

msnafniefdyktfaevirqvtkitgetelqqlidylnstysdeki svlvhegeyhgvm  
>tr|D1GQ99|D1GQ99\_STAA0  
mkttefekelkeinlyveenviypyssgrkeqlyitnedenevygvsktdvfkfstnyidfdldsidkknlltea11  
sysktpieerkeekkyli  
lgclpkykgylnlstrptnkhnrgeiffgcknsntyqieftqseidqfsyliqnlittgnlikvevqahnkaltkgyedn  
e  
>tr|D1GQA0|D1GQA0\_STAA0  
mkiiedhkfiidyakl ddtvinqivdeilk yngdnvldyrchetngrkfiigferehtyeelkaleieremqkrealni  
laslgnrrll  
>tr|D1GQA1|D1GQA1\_STAA0  
mknliklvmfvta1alvkkavesllvyleandeveipvdfvkt dhlhlnki  
>tr|D1GQA3|D1GQA3\_STAA0  
mqqpidi liml tkeylrll ekrkevqpnlsysyervskariqraalm lretmldvengr1k  
>tr|D1GQA4|D1GQA4\_STAA0  
meidkilsnldasvdfismtkpymnteeiiklnkavvqinkvikiyedrl eevkcnnq  
>tr|D1GQA5|D1GQA5\_STAA0  
mksayqiqelenkvfkpeytyep1isniegetidhifyaalsvntelglpaiilvtsk kkvityc1gvdeymkeecd11  
didamqraylseedfihkf  
irdeirfegsftkek1pfidqea1keyedfkhnkykeveekyqkeleykrylelkekyenn  
>tr|D1GQA6|D1GQA6\_STAA0  
mlkqml1kpcpfcngeari r ysfkka1iecsnskck1qpstflymdtdrvsklvkwantrkyegen  
>tr|D1GQA7|D1GQA7\_STAA0  
mkvne1nqnkqfdmndv fgevsnlkvnpfeiyllnknenirkdyrfavgskvlsqsilnelec  
>tr|D1GQA8|D1GQA8\_STAA0  
maaykka1divdsflteelenssnyktsck1lkn1vedeeltdiqkfel1telkn1ilrvetrllvnsswrsyv  
>tr|D1GQA9|D1GQA9\_STAA0  
meikldvnmtdk1itkgi rfhretnldneackkikeltd1fvsvifelnivkaht1hepn1sgkeireqidkflksvei  
etkgfeee  
>tr|D1GQB0|D1GQB0\_STAA0  
mknykqmwmsl r ng1smqi rdyekadn1sg1ddya1tel dawcgimqqmegleeqleqyireskngn  
>tr|D1GQB1|D1GQB1\_STAA0  
mnkqel1ynvsnk1ermhmlvtwk1skrskqmnnetieaail1geitq11tflsdielketnir1ewlqtyfseydkyypk  
tke  
>tr|D1GQB2|D1GQB2\_STAA0  
mrcwkm1gi1rg1tdtfsmsewnvvdnngkyhkkyfyk tearffyd11pfyhkr1ervr  
>tr|D1GQB3|D1GQB3\_STAA0  
mskpnfinqal1k1sdkgmdis edklvfhlkdgs1eiyidhdeet1kvethdmkvytsdelkdktmkdvinqitkhn  
>tr|D1GQB4|D1GQB4\_STAA0  
mdk1lgrriq1enevdq1qekhek1lkeakefkfkaevldk1ievyknsd1ysnedvmmfiedriteleenke  
>tr|D1GQB5|D1GQB5\_STAA0  
mkvgeh1ytykakctkvi dgdt1dividfgfntygkrrvr11gvdtpersqtnykeatqftrscvenkdiyiqshksdsf  
grylakvwfenerclnee1  
kksq11kenskwnkee  
>tr|D1GQB6|D1GQB6\_STAA0  
mlpmkvwdeekrmwfvqs1hiedewi randgsiygekkvlvrnfk1lyptaqt dknqppiyqgdvkvdnhplqt kdid  
n1nikvgmding1yvveyi  
eeemafvigd1kpravikhaevvgniyetph1leges  
>tr|D1GQB7|D1GQB7\_STAA0  
mayenie1vvaaitgd1ymtrtkddgamdtnnrriatndvmraaaewfisngktvahfgghgt1awvpakegltpqevka  
hidq1ke  
>tr|D1GQB8|D1GQB8\_STAA0  
mvk1krkiemn1yel1nwawdn1kdkryesikg1dtvyfdqygivqlyesvssedvfiieteeiteet11pkilalyd  
gt1peilinerienid1nk  
edtvylmeddtn1tlvwkkge1vk  
>tr|D1GQB9|D1GQB9\_STAA0  
mqkvvtkkem1pel1ewgfnntkkvesktfisetrlgtmerssvqfstdghgvridegvtkd difivetevisentvi  
pv11qvytnftetntyse1  
yentsikev1ddev1svkthlvkedgehiliwknkiige  
>tr|D1GQC0|D1GQC0\_STAA0  
miy1ddqtm1l heevftskakakyfhdc1psykryfknk  
>tr|D1GQC1|D1GQC1\_STAA0  
msikdd1reyahskg1nkynevkqki vgeikeeiagcekevtvswgnygfdppsvs1venvmeeid1pydiendydf1r  
ltikikel yed  
>tr|D1GQC2|D1GQC2\_STAA0  
meimdvi1mhdeakqaihem1ekenkyevgsknymriqs1efaws1ledekqk1ks11satkinn  
>tr|D1GQC3|D1GQC3\_STAA0  
mgyyptkqel1q1fqsenqkelkqhs1lkempiqfargtsqqygmdaefremremeerykntgeekfyh1ssrmksvas  
1dde1yeefcdknks1ynw

Tsompanidou\_et\_al\_Supplemental\_FASTA\_File

fpk1kqaidqqdffkvpktkverlpvelaqfirldyqdttesreifnqii fklleedktyfiktgtfsskfqyhna  
cteplemgeyfqvinnfam  
evgagmsvdivareyi edveenpti yngmplrteyr tfvdfdtnevig tapywhpvllknhlkrmsdeqmrrdyltylsq  
eeklnyeykhvnlqkei  
sklienidlegqysidimkngedfyiidmalmsdsal tefintegfvk  
>tr|D1GQC4|D1GQC4\_STAA0  
medfkl emlgfgsafnsveyngtsgyfesddsii yidcgvstvfneilrrkl dlsktinliiththtdhigs vgtfveysy  
falgnkl difcakeiessl  
itill asgvtnemfnihshhntldidei in itfyevnhvdtlkafavvleetendrqliysgdinnyddl kemfismi y  
knvssiyldfsl nnspsvhe  
nsl enleqivel fensniylmhl dntieeyewnlrkhysdkkvk vak  
>tr|D1GQC5|D1GQC5\_STAA0  
mkvklkgeytpnl dpleyilsnrgikeedyekyispteelqpdwkkledieegvkslkskiddnakigilid adqdgla  
sgsimy kfltkqlqf dker  
iivipplnks hginier vlehgmtsgdil itpsassdfeqheelynk gintlvidhhl apknkds kaiiinqlsdefe  
nkaltgsamtyl fcvayce  
llgtdl tvnlkdlaaiglvadranfahdl gayymrdglrkenidsl mlkmi inkssnleqgvdl nakdigf nvaptina  
vfrmgtqdel tqvihgmce  
fdyti hnrkkmdl hiseeayl ramavkrrqkkgenevldkikerikegskh kilivnstgivenngl ngliamklar  
eygrpvlmvrkri geyfkgs  
grinnspidlnkmltdtg lftckghana fgvfhsdalevlkaieselidvnl sdi eyadfqwt nlnsni ihtla  
nnkdmwcn gideplirln  
ilvrkenikligktgntlkinvngidcvkffl keeqkneivtapdimyfdl ictasvns frgmntpqlmieeysisdakd  
hvenylcedelpf  
>tr|D1GQC6|D1GQC6\_STAA0  
mfdkdkfkssltnh diekvlayynaegte gkng eiiaetichnktgshklyyypetqlfhcytgcsfdvftliekr lk  
megkahsfidcittlgki l  
eininltskvkgiqskvkihdwdwlnkiqkkekvqpqlkihneril tyfdeiypkawyqagis letmekyqikfypemf  
qtviphhdhegnligirsr  
nwdkefvkkakyipty indtgy nhplgyalyglyqnkeai iqrkkamivegeksc lfsdtygednfvvaicgsnmskyq  
aelllnlgieeviaidke  
ymqvdtpefdeymkkvkkigkl fapyiqtyhltdt nsvlnykdspl datkseleemkvdkhil tlkqirned  
>tr|D1GQC7|D1GQC7\_STAA0  
mnl fptkaicsalac lmkepellesnsikldr sdyikgetkfyqvifaai ynlyqdglttitpanideflshydnlyei  
ynendgidflysieetlan  
tdsyhryasri rkfsl lrdvvdkgfsl egvyevsdnreeneafqmr fekmsvddiidhyerivndfaskfkigy etdggf  
agengidl fhsfknaaqy  
vttcgklqnsifrgnl gasm lrsaantfksrtslgeatdlainrwnweteqwedkgkaekvlyitt emeqdelepti  
wayisgvkeeri rdfdln  
eevgiveqsikdl necqtfyieyvpkfdpttinti ikkya lqydvyvffdyihlnfqimmdias ktrgmttredmilgi  
faaglaelakeyfnh lsts  
tqvsgeiqhskkl dqnvl rgaknmadkftkacimtrptkeddkviekl flagikkkpnmiwhiyknrhskfkgl ylyid  
fdtmrmedl fmdndell  
nvperelkveealp f  
>tr|D1GQC8|D1GQC8\_STAA0  
marlvkcphckeednkdgmikgrry wheecleehlieieenkteedi ikerdkqerkelidfilelfdiekptglilkq  
iknlheeygyrykaialtl  
dyffniqn hstenargigivpyvdeasdfyknlkriekqhkeieetetkvvtikk tkenrrkhktinmlei  
>tr|D1GQC9|D1GQC9\_STAA0  
msldifsp tlvvpkglegktillygsnsvgk tlnatklskpfylgfekgl naisgipfnyitkwsdfkkl nqftgkdk  
dkarelydtiifdtvdias  
mycqkyvanahgakdiasnggfglwsnykeefwle idkl tscgytvvfightsvdkntdqii pagdsrsmgivrldvdi  
tvv yiksnvgdedgnvvlst  
gyvreteeffarsrfdlmpnkiepftaenlekavikgiereeqggttvsydefventksee ldfgelkekl telgktyl  
kadrleeftqamedtfgvd  
kvvadlkerqveavsilidelnenl  
>tr|D1GQD0|D1GQD0\_STAA0  
maetkkqfenkvsvtgtlkslevtdlvtakkvpmkiatlrietgkgethtakmmavkhferdgvktenksysaietmqke  
yvsiedisenkagedaeat  
vvvnvngmsinmyknkaekvvetnqiearfvnrvkdvena qfgaeflqt yliskgqrvikneeetdevtfkaatidyr g  
qahpfef tandeygvaewi  
edevelgqslilqgliinkfiveqversssagigkai vdrreverkl lvegi pipiededdpkyiteeeikeankkyedk  
kteveastngtkktevkk g  
vatskpkaakptieidddd lpf  
>tr|D1GQD1|D1GQD1\_STAA0  
mkfi vvkprgdaksgdsdktvidydl nkindketfirsqgvdvvmveqigdyfwfneprgdfyteqdelvkiplkaqrn  
lpnilineny lahgnvvt  
anavtcdgdnlyglddqdyaiiinafms tghaivehgddaei vdrvfdgllnvsqtdydnydypeieeleipdkvegtg



Tsompanidou\_et\_al\_Supplemental\_FASTA\_File

vefeytdeeyngsneyyka  
prsgsdedfnavspeeleeaqkylsnl  
>tr|D1GQD2|D1GQD2\_STAA0  
mdlktsyvsqtdfgsmgrvldlvmflrktafsdlsrmiqelihspsyistvndsindelidgydeevivdgeqe  
vldteptveeaepstiene  
fdteisskiskyaevigydkiaangevstitnvpdtyikkfkelngifqtydyfdvftpat  
>tr|D1GQD3|D1GQD3\_STAA0  
msdhekikynkerlmanysrvtrdkpfgklterdwtkiedeamesifqlmkkhikvyqmsdpertsvieydlnvda  
kvysnkeyktdlglyh  
>tr|D1GQD4|D1GQD4\_STAA0  
mnyynqffkdeflstiseenranfrslfrskqlleqlnkdlynftdneiqillfsintaqrntlvtylnqarrycdyai  
ktgkksnlnlyntfmysq  
ldnylakhklkyfsknnfdislknvanecdyalyalfeglngntyseisnlkiqdvkkaknkpkpnntyeielrsinsd  
qsistrtdvsatlikale  
raymqedyylngestsrtshrvidgdvfrnvattkyddakvdkqyvyrkmnlkeitdgeissvltmmnsgiiyyls  
emadqnnqvsiedmkyvvd  
ryqlsvhayspmytykalakkkhdallnynvtfkel  
>tr|D1GQD5|D1GQD5\_STAA0  
mnkedvlinivselrngkddtaiekiaatmennykipkglytsftrsrdldrnfddttdlrilitlyimeafkvlgreemle  
dyipkgeqgeakqydfly  
nkadevtlpyeftptlpvndvystkmsvkelgafmngiinyndiqreakleirtgeiiktppinernvremvnhllnd  
slkestiylnaapttssvg  
deliydnstytlivtedtridvldgfhrlavqralrenpmiefenvvsnfttseaikwqaqhskatawsknrisemq  
lenraskvvkaiknsdhef  
slyiytgsrlkndkslitfnlnniiddmytlnsrkeevilaeklskilsrvnelkqysntlksqyyvyafiklfkekyn  
ndvdeylhlldkleeylkn  
ndfnftlqntkekivkeetyksvlelcket  
>tr|D1GQD6|D1GQD6\_STAA0  
mna lskvelnqkvthfnmkltelienysnevginserterkiayrddvaqffkyfncnnesaadvvymiftrnnivkysyl  
leekksastinrkmcalk  
efikylyssygnidiniinqslsklkttnsyealsleayalinwikdnenrkaldkyyc11aldtgvraea1nkltk  
sfvikedevivkgvdkgkk  
aytkvisrefydnmhd1kfdq1n1tdni1fnfsgknrtmdl1nrakks1gwenrni1t1f1s1f1k1g1av1y1a1y1e1c1k1d1r1v1a1m1  
vgshsnmettqryiadnee  
afkgavsnfatgvkdvdfnnfekdq1iev1ks1lpeai1qlvkte1nk1k  
>tr|D1GQD7|D1GQD7\_STAA0  
mkkyyikknsvsnfkrsdtnqmkwepfqrftklydlnkhniffklrksltqvmfkeceiiyqlpantcvrdfksglmka  
aevrksyttyllttseamr  
lyenyhterahkderhlysgfdgkkmsekefiikygsqyelie  
>tr|D1GQD8|D1GQD8\_STAA0  
mkk1yyidf1etennffnviyyr1ekhnnk1r1sk1eraffspfkadflkynfdvsier1i1k1ikef1steekaiky1i1kkh  
eylkskyfiknd1skftnl  
ny1fsyeymkdkaath1k1l1sygvkyinydfsqyqlnimkeink1k1k1di1ykykic1k1te1tengq1k1sty1ti1  
>tr|D1GQE1|D1GQE1\_STAA0  
mndeiknfsnmddk1i1knmkk1tkgvsdarpilqhiyyndntivatdshr1l1q1inkkhnktnvlynaktgengesfqy  
petsriipesenanki1i1  
nhdeidl1ia1ilkaykgik1dr1t1li1dknqey1lmnysdfnfnnel1eh1n1ny1k1kn1n1sdpvhkitfnvsy1ln  
afeylkddvktqdl1nsy1  
iy1l1kenypinimdkansfn1yvicpirp  
>tr|D1GQE2|D1GQE2\_STAA0  
mki1fk1nfe1l1k1k1y1n1s1l1ase1l1ee1ke1agew1ene1yyhk1d1ked1fa1q1y1ev1td1g1wy1ssi1di1nan1fng1ap1d1fd1y1id1y1eg1a  
ed1t1q1n1wd1vs1ny1l1ss1ne  
v1t1ts1y1gw  
>tr|D1GQE3|D1GQE3\_STAA0  
mkn1t1ikenqpaiy1itn1l1gkyte1gkhvgqwl1nvp1at1qd1q1fn1q1al1kn1ig1vd1g1v1y1e1y1f1t1d1w1en1igg1is1q1cs1ni1erv1nd1m  
aki1qi1a1ine1k1ly1n1ff1gad1q  
ei1ty1fn1dd1ky1k1v1me1i1ndy1ake1qade1l1t1de1i1en1ies1m1ri1fa1qd1q1ynt1c1iv1nf1any1l1de1l1dy1in1f1ka1iek1id1q1ni1ny  
fd1fek1f1gh1k1li1el1n1ans1d  
vi1vg1ty1ev1g1k1l1nd1ti1i1vt1f  
>tr|D1GQE4|D1GQE4\_STAA0  
m1n1ien1l1n1rn1iv1k1ine1k1vr1nev1sey1fk1g1fee1ite1ied1qq1fy1nr1iled1t1if1l1sv1n1l1s1f1sd1v1q1y1ys1n1nd1ic1dd1fd1i1yr  
l1k1y1ly1y1fd1nv1k1dy1q1ef1in  
dy1v1tn1f1ene1ini1ikk1nd1ny1li1ay1vp1de1ew  
>tr|D1GQE5|D1GQE5\_STAA0  
md1il1t1leg1te1iy1ins1lg1qd1k1li1yr1tel1k1ne1ke1aa1kie1ky1l1ns1ny1l1d1h1sk1iv1dh1ny1nd1fky1ly1iv1tm1fng1fnt1lig1fk  
f1ss1vt1i  
>tr|D1GQE6|D1GQE6\_STAA0  
mki1iel1fd1kv1g1qa1et1inn1lty1q1ia1qng1v1s1id1l1k1gy1vi1adi1ey1nd1gy1cd1l1ti1y1dsen1d1hs1y1ya1ev1t1dd1v1ena1ikk1ys

Tsompanidou\_et\_al\_Supplemental\_FASTA\_File

nledhkiitlmdngscnd  
fkkiisinfesvetieelaksyfnwrtstkkysiydrllsigskrydefilychklgy  
>tr|D1GQE7|D1GQE7\_STAA0  
mftlfvaiigfigigyllgnkeiqkslfpegeefker  
>tr|D1GQE8|D1GQE8\_STAA0  
melyttekgtklyystdydlggynhftgqnkargyylevrrnarefgafedltqptgaarmllievtrkskkqetnaasm  
alekveeiagyyln  
>tr|D1GQE9|D1GQE9\_STAA0  
mnekkynelktnikkifdnteiakgiknmidafsenqatqkdvlfvtmkeftkeyqassvlqfyhylgnikrdevnm  
inflclcrqkev  
>tr|D1GQF0|D1GQF0\_STAA0  
misdeidvgyfaggyskvrdfvtvpakisqqsdvksltypptkpsntsikkgkiiivillfdlhnviiiciffllqng  
iykti  
>tr|D1GQF1|D1GQF1\_STAA0  
mkgaitakamleklsnglvivknaalklctslmdtefomvltctvif  
>tr|D1GQF2|D1GQF2\_STAA0  
meekhllteeeirnrreifkngkvviprgvitylknkmsvstkgkilyayigiilcyhnayhtyrkhhmhlslndv  
mniqgsklvrkeftksqff  
ekeyyithqnylplwylsktkskdnkevi fanhkttdlrdellekvnyenrykicieptlhiygkvvkkgryqik  
qplniepvdymfdlkti  
ekvlgtgelsgalfyiaylkgitgnnntdkdkfktvsqiavglditeitarkfhkeirdnfgekyklnqvtkkyngg  
lisivylnlsrei  
>tr|D1GQF3|D1GQF3\_STAA0  
mekefkefrerlvvskqlfyndssmfagygfsfegeinpeitvhpqyrnfsiagnvqplvegeaytvrkesyderkid  
tytfievesdgisgkane  
eflrviltndqaeaiidefgysdelvkdi lndkvdivtevgiksataalsikekltemskyskavielaplgasikavvs  
adhysveklthienni  
dltsaggfgfkrideyglkkgisidspqri ragalyvieqmalgdtklsidkfeenlcdileidevddetfslindpn  
vydngyislkkyrreeel  
ivehlrrirdsftsytnelediikmnedrlgftfneqqkeairkavsnvfilgdglagsgktslktaidiiglpvac  
alsgkaanvlsqnglkakt  
ihrtlrfdpvnfgflhneenplsekvvildeasmvdklflldlikavesgsqlmivgdsgqlpsisrgavfdnlldttef  
ehvtltevhrqakesgtlg  
vankiregtqfngytdyglvtygdndkdfyfgqdraaikdnllhtvkrylsnkdmnpndiqvitglkekgelesvvnlnk  
elqelfnpkivqntltgk  
vyefrkgdrviqqnkytartlgysdfqdvangfallenktefevfngtfgeiecasvgmlikfegveelvyeht  
qktneigiidlgaischr  
sqsgfktlvgalvsfmdmllsrqflytmtrtinqcflfaetsavhysiktdkgktrkcfisefleh  
>tr|D1GQF4|D1GQF4\_STAA0  
miitkenlhnyvdslygsteeleemkigdsyeisttinkikrtaldewlflrfdsvnthihkeysnpqnkelwdfnkks  
cdyalkygedrnnaikenf  
nddqaaevstvtfmneqvkttsaqslsgesgikttekiadyivfskfnnakeeeqhedikkeimrlerikkkkrkeaeq  
krieaklelknptpynhtk  
klsvppshmnlltslshidstinehsagthvnytrvdrqmeqgkfnedmeafwerfsskpsniphytkepykelays  
tmkqyidejylesrpfsp  
drakqisylktemrtaletlrkvihiqptssidetipmdswrnlslrntdyialllgyydatkkydnkpstsfwalfrt  
feqilnntlwtneekvlie  
filetgitdqkqisyeleketgsiisqsqisklinkhipnklltyyekqledwiwtyrrkglyktckhcnevklavdnry  
fskdtkgyglkakcktce  
kkk  
>tr|D1GQF5|D1GQF5\_STAA0  
mtklakkdlinelqeksrvrgleitkkdaatlfsafedtmieaihaadevgysfstnfgtfkivevpeksgvsrlggee  
kswtspahktvrflnksv  
kdklkaetsk  
>tr|D1GQF6|D1GQF6\_STAA0  
maqitnsisfknaiidlennqie lnkdteqqyslsevfsrfdqkyslvtikenselgfeq  
>tr|D1GQF7|D1GQF7\_STAA0  
mslnitrgdnetlaqyhfrlyknkeemgl sniqiadllnseygtnydeskfrkeyqayinvwkdmieekhkaspngive  
elryernekkeki rfsdq  
krefnnilrkmarlehldyketveqlepvnlniqpthagvkeamvvisdmhigmqinsqfnvynkdvakqrleklnk  
tydkvgkenittlhiaslg  
dqinglihsttrinneeenvieqiitvseylkqfvkvflldginvkfynvvgnhsrvvankkdsigtsesferlittildt  
sfekytnyhsesdtegfiv  
inisgnivilahgdldrgansitklsqllgiqihyiftghvhhfvkehgltvqygvgsfcgldqyaisgrfsgrpsqll  
vtfnetdieetntvyld  
>tr|D1GQF8|D1GQF8\_STAA0  
mirllgilkawaiqvsnstffllndnfstprcrflfsifyidfqliaeliqpswydgfskalrmcplkhivlkvavsra  
atshlitferlvtisilkn

Tsompanidou\_et\_al\_Supplemental\_FASTA\_File

seqitslvei  
>tr|D1GQF9|D1GQF9\_STAA0  
mairkkaekkltcmcnrrnltldlNyypIndnnpafpnyypickdcdadm1kdeengyksfiqllrvldypfryeafeq  
vnfdyvrymnkasirrnas  
fidsdalvssksetteenimkltpdelrqcklywgegdyteddyiylisryesycktydvdspfeniitqicqlelei  
rkkrtkgsqstkeetnli  
nlmksagispnqekesktndketfgvwwkrwendkpvpepleefkdvdgiekyvqnnflspmrrsllddnfhdqyqehi  
dkygistee11gvede  
>tr|D1GQG0|D1GQG0\_STAA0  
mskfvnsnspykntid1fklrrnkrntksrseqtmeniaewisfyrenphrfvldfmninlrpfqcvllwamihhqymf  
lasrglgktflsavycltr  
cilypgtkiitaptksqginvlekiene11splihreiesintgnqkpmiafhngswirvvasndnarghran111vde  
fvkvdedlidtvfkkmlts  
qrepaf1hkakynympreentqmylssawmkshwaydsmsftkqmlkkksedd1ksfvchipyytgvmeklyshkqmk  
eaqaegfnkmkfamemeav  
wwgetesaffnfntidfnrkl1sqafypkev1vqadinnpikepkekr11lavdvarmggnsndasvflir11pkgkqqye  
rg1nymedmegidftqgai  
rirqlyddfcdyivld1knvgagildn1rip1tdidrgveyep1nvsndd1lastckypeaprvihvinatnermema  
n1ladnfmrgkfr11iree  
qaeel1frqdkk1kyln1npstqa11kypyrqtel1sevmn1eqvnmngafklvtsgarkdryssvsygnqfatiler  
elarhtrnidfkrfgsvrk  
pkni  
>tr|D1GQG1|D1GQG1\_STAA0  
medkkapvnedflnyiknyadvrnip1srrkmas1fhtsktaidvseqelntw1rkpdkfyvniel1skdlyyksgeyr  
s11nyfidmarfyyvidp1  
fssdskmskekvvkd1skis1qlnkmlkhe1akiyktcvledi1ffgyeiedknyfm1k1dpkyck1vgisdgmytyaf  
n1syfdgn1d11ktfpeef  
qraylersidkqad1nwfipdfktsvfvkineddpt1ppfstmfep11d1ndykk1kkagakinnyml11hqkvpmdna  
nkdyqadnfaisaeamdyf  
selvnen1pdeigsi1vspmevnpik1drddktdkv1eatrdvynasgvssfi1fndknstgg1tysvrkdel1fvinfyrq  
verw1nrki1rygnivaknq  
wr1s11nvtgmsedyt1leqltksgtfgfsvrgriaa1hg1dyht1sqsl1elenni1d1dtn1iplasshtgg1ntaveqt  
kgkiedsggrptketkd1s  
dsgqanrdssnsetks1leggdtnne  
>tr|D1GQG2|D1GQG2\_STAA0  
mnkssns1pmstq11eeytseegdi1rftkvk1w1mhtg1n1ngsvfnkdvvekaipt1antpimasvsynfdgekdfegh  
etdiei1tedgeik1instv  
pfgvipetnnakfetr1lgddmverey1tcegi1wnkwddavei1qskggvtgqsmei1spnytgyfdgenmi1fetfsfyga  
c11gddvt1pamknstveik  
yaaktde1ikek1qvfnni1vyankggnevppkddttv1fdeqethvnaqgd1sttgnvegepkananeastkeeks1etdgg  
egqereekaseet1idsp1  
saeqvtvqvenvedid1thkevkedidn1peavdmi1tvagveysaediaak1telasvksq1aeyqskfeal1qkevhae  
kvek1fsthkds1siesie  
k1kaqadgit1pelet1ifaeigrqnsakpkaetkatnfsqiaipvnktsnns1ledivaswk  
>tr|D1GQG3|D1GQG3\_STAA0  
mak1n1drvkg1hyvetikadkeyeng1vgkg11edgeir1ykaaetaenc1fvstpel1daakanghgsid1fvnpkgs  
imrahq1levgdtftveqk1  
hgtgfvagda11vtggkfakgegafvveyvttigadrppaysirkvk  
>tr|D1GQG4|D1GQG4\_STAA0  
mpkfsne1kevaiqaahgatttqfsnk1sdavrkkmieelgsdt1dystyrkkhd1fefieetvapivnertaeifgq  
faeykni1afgdqnkffied  
ik1fpvati1stgngvkrqr1dsqel1vvpmtigagvyee1vrflagrtdwar1tarlaesfvndiaqrigdalyksvds  
vgstykanvsgsngelktk  
v1e1adhveaangqavivgtkaa1rk1kpedss1qkgaknevygfgv1dgvvecial1pqfhkagtdefgl1kndvifv1ps  
sdek1vkvvqdghyiaree  
ggsegyrtd1qms1ldvitrvgvavvtaarygave1s  
>tr|D1GQG5|D1GQG5\_STAA0  
maikkttt1tekstqkttkptekkttrtakpkrkevdl1sqsv1vinmtqgs1tyvakkgtgyle1sey1dsdy1tveelki  
mkssargm1fdkgw1fvdde  
dvvefl1gikkmda111pdel1d1fel1padel1rer1ks1spsvketvhl1amkkkyedgel1anahviraieesvni1dnns  
i1ni  
>tr|D1GQG6|D1GQG6\_STAA0  
mteft1iydkf1sk1tdfs1ar1dkdv1esdl1qer1ital1sdfaql1peektevd1stktftng1sveeqniat1lmviny  
1dky11sednmri11n1skd  
ykqysqaal1kel1katkseyqsdvdak1nsysfrqkfrkkkkdeq  
>tr|D1GQG7|D1GQG7\_STAA0  
mnsksyt1fy1telknrvk11pl1ceekndyidkylen1i1e1kg1pkaypevfdsqsawyvrv1ss1ftfyedfsiae1h  
svdgvqrvrri1s1lvn1i

Tsompanidou\_et\_al\_Supplemental\_FASTA\_File

dkevgr  
>tr|D1GQG8|D1GQG8\_STAA0  
mdyferykni nmpygt d lsshvinaskdsal r tflsspt l sdiyvd siptqsvvs nysgdffert fl fepds dlakvgn y  
iehr gytyl tmksndd di y  
pnlhak l cnedfkl plkit kkkvstgrggytyvdq letkdipivdvkgysiadna ilpltegrviiymkyskeylekik  
l nyefel fndsyktt diqt  
d niinhggyi vl saqvvetnat  
>tr|D1GQG9|D1GQG9\_STAA0  
mqlryktsgrgdilqkfkivmandeh l l r llyynpidengnyieftdas l p nitemdeekkdqivnd l irtsqksddiie  
mkkvtvi fvfygksrpkynn  
htlvdreii fmi lshndfsfadrieeicdr l dt lfvnkhiggigrtnigisfpveapkeylafeqkyt itdkrm  
>tr|D1GQH0|D1GQH0\_STAA0  
meellen l fddqsiqdkvi l n l piespfge l kplsihdymqr l ssi svi l nky l laeygkyqeetgqtdneiftmlk  
d l nekys l fyfl remfd l  
l hhyi i i tryvkfydyqdkn p qsrkdi densddt pl sekefteailekciqfvfsl dddqfelyrkyilqlhgqsep  
raflnplqrneerskask  
l kkkdstpt l stmvts cavymgvdysdimkwnalqlqhsfqr is l fiqnnatt l fatvtsevd l vnwseni tdnckedm  
t l dtfrqnvsgv  
>tr|D1GQH1|D1GQH1\_STAA0  
mplyiqdtadavlerksdkfviatgttqtvt l kqkveetvkggignaaqftiksnkeleitmedal fnfqwlaatqgvk  
vvndklvvrtevaeveeg  
gkvtsvnsk l age l vvidtygknvkgkftagsat is d l ssqvgknvtivteeevqgekvs iradrfaekyr l qlftyayd  
q dteaiakdvfl t f dnvsp  
ssefd l klkagdp l spelql katanpktkeigswmi vdhkedagatnsgaviagrraedtashlg  
>tr|D1GQH2|D1GQH2\_STAA0  
mkin d nndknvegnavvd l kkv l emaksyde i eryt l sngedie fyphfsrtkikeiieeykgy l isedkddmkfmdmvs  
kddvs l vl fwyflavkkft  
hfgesmkrikkvks l apyyna l letgileeicndafayeel skvtemfakeaa invtanefvnkyedeie v arekfanty  
l nksed  
>tr|D1GQH3|D1GQH3\_STAA0  
mpqfsnlqsl nnyvl rai tevmrnevavrqewi ammeknvgytyqpwsyer rhkqgg l adprniqivsekvaadsaa i  
vmen l tkggwdhyygd l i  
ntmiesadgfagnsal gmpkrpyteeavdfmtkgigrntil dal tsg l arrgininik  
>tr|D1GQH4|D1GQH4\_STAA0  
maieknl rera k l pti t demwekvhpvykel l sey l gsvd l srdtkkqytsa l kqfgwfvadsl nknplfk l kkrda l  
rymny l redrkmssgin l  
kksavsafcqwieny i addyedengdl v fet frnfmtgl p pvvknqvydkkkvt feeyqemmka l rsdedy l gmaw l ata  
fnvgarrsei i qfkts l fd  
hewnaegnflmshnvr gkgrgedgki l qfmindea l kymklwvekrgyedeyi f tvgnenth r qmskswadyfche t l sh  
ilgrrvnphi f kascvty l  
levkkvdi khvsk l vahhesvettqi y d l rdseeerns i fs  
>tr|D1GQH5|D1GQH5\_STAA0  
masdfnigil stle idsssrkk ind t l knieaninsikad l evsdtkksenna i ksannvirninsngnlkkl nvel dv  
n l tksrqniqral st l skd  
fknkkidvevnakankns igqvkn s i skgasqpleikespsrstrsrdikeqqslmtglansykn l d d l tra l ntstfeg  
l rktvkeiknadsl ksyq  
vt l ervnqegkklgsrfdytpsang l k l nktqltdqtdkarkeenaaink l lenevskydr l l nkgkidikqhqt l lqt  
l rqi tnekskanqfnrtdf  
nrvakaadeakeygyqndml rkk l a l t sqierienmaat idkqqtal nknql nslgnnrtpfgkeaa fhmni qdkvr  
qisae aeratr tql s fvdq  
freamtkspvwm gatt l ffgaingakem l dviteidgkmit lakvtgd dnal qqt fidannaasqfgqt l gsv l dvyaef  
arqgvkgnel sqfsnaali  
aanvgei dakqasey l tmsaqwettgnqamrqvds l nevsnykattvekl aqqqakagstaksmgl t f detngi igalt  
aktkqsgdeignf mkat l p  
k l ysgkgksti eg l gismk dengqlksa i s l l eevsqtkn l ekdqkaaving l ggtyhyqrmqv l l d d l sktdglykqi  
kessessagsal qenakym  
esi eakvnqaktafeqfalavget faksgm l dgi rmvtql l tgl thgite l gttapi fgmvggaas l msknvrsgfegar  
ssvanyitevnlakvnna  
agqvvg l qkvqtgtasql qfnkgeydkaasqakaaeqatyqfskaqkdvsasami asg ainkttvattastvatraat l  
avng l klafrg l laatgv  
l a i t gvsfv l ekvgsfnaasqaaeqyqkqeqtkqai asmsngeins l issydk l qqkmnsgsafntaeakeykevtsq  
l ani f p d l vtgenrygkem  
agnkevmkqk i e l i k g e m e l e r q k n a i k q k e e q d a y i k e q d s l a k k n r g q k w y q l g q t p e l k l q e q a r p t t v s d n s n i k  
i n a t i q k v k s q a q a e k a l e  
qvdqlaqsqtknrqnevgh l qkvrqal qdyi tktgqanqatraav l taqqqftnqiatmkk l gttgqqvmntisnsvak  
taksgkaaqatfksfets l  
vksssfksmasyeasvkkfknaanqsakiaa l kdverdyskvakgimqaakaanmsksqmkd l kks l q q n i q a e t g f r a  
svskagkv t i d q s k k i k q n

Tsompanidou\_et\_al\_Supplemental\_FASTA\_File

taetrrnssaklqnadasdqaseenkeladsmragiessqllgkamgelqsqgtlstetlieltekygdeilavagdqea  
lsnfimqkqneetdnykn  
lktklensssykavagadsalsnylmenygidtknyksltevkakitdlyngsaeeqakvvdaiakayhidlsnygs  
nekkealenglmkilgskw  
kkyigsvakdmkslgvdagevgadgfdskmfnpgaligannfnvsnlsnisvnfnslngafneakneaagvsrgldda  
asglkdvgsagsagsglg  
ktakgadkasdsldgtnkelektkekaeeagvtvkqlykqftvttyvadklsmaldkinnklekqklltekyatwssyr  
nslkaenklldektakikk  
qiesmkeqiaqgkviyeglvgkdiinvpyeytannliddgetgrisrytgnstqakvwnffkskglshavagimgnere  
srfkpgaqeqgggtgiglvq  
lsfgrannlrnyaarrgkswkdln tqldfiwkelnttevnalrglksatsvigaansfqrlyeragvvaqgernaaakky  
yrqfkgtnsgsfllsggv  
agtngkpltsdrnayl drqfgryngggvvhgrditsatingspikaarsgvtfkgwtgggntlsifdgkntytyhmhk  
nparvvkggrvkagqivgn  
vgttydrllggfstgphlhvqanlgktpsgtfmtnfngahravdpvkygytrvsggslngsltsghsamsgsisaama  
edlneaeqerlnkieqain  
ahnkaeemkqkvdelrktlmdkql eevqtakeksenlyniqkshveeydhwrtlqearsakleyelnkiefekgrntkew  
rnknkqlqasrql evnfd  
skiqyinkalkknankifgkntvnrdefetmkrdaqnirdlkagiqtasgeiatsmidqildeyedrvgkvsakiekmg  
kqkekldladnkqalksss  
lsrqakdskslasyinfyikqlerqlktgknelqqkvkeqikemkvayddatlaahqyiteaaevdterqlqlnarr  
lrdagneksadykagfis  
qeyqidlyrknqeakfkgylkekealeqnkseldmyeiysvptqaqkikealietknairdnnglydlkydman svi  
nqidyiskglevatkayd  
deykayeminkklkliddeqtqesfnkdvrdrteamdkirdeiaqrsdds lanqkklklireqlkqeedytmfink  
nrddrrkalqdelndkneq  
iqeqkedlnkafqldigdt rrfnaiqueslmegqidkyksliadltkynvndmkeigrstsegildglaasfkgllsslske  
lqkqeknnlnpvpskllkp  
tkvdeatiaaikvnglsppttilqgl dikpvnlpkdvkpsktvtnnkttakalvni enfngtkaeadklannlatamrk  
qgv

>tr|D1GQH6|D1GQH6\_STAA0  
mpdifsmeytelrnaphfi fngyhtrdfnvknvqvdnglasdtfladrtpiekrfsektyllgyteepkfkvrllfd  
ehkftlnnimtlrrmidta  
gfkefrfdneesa lnivyamitgasnlthnvindgyvdl efqtnsprryseimideydfsrsgsdr litefkse lnsi  
vqleetfsheikqyartn  
yanieeffedknkdsipdgwki isgnksgivlnkdkslsltnvklrkrfypinnrnyyirfhngggkfrihedtykitdg  
lvhefkyrrnllghsgtfd  
ldsssdgigegwtqkgdngaftinkvsefqaitdggiltspisiqmqkyvviaddlnknstikvgkntvtnttslltkm  
kfigslsdhditisaatpt  
dkamls hirvfavtddeyaefdtltdqqinknyphtdahdyfel dfltdtagkinyidmwel sdvnkkklgkgtkiediiy  
tpykkylaflnkykanftr  
mkvellndnfakvsgdptinfrplrdkttillqkfnlllqslsfgddmkyqwadlqpyyhqvl sikeetakllpdlinfv  
klnskidlnslanskit  
vynfgdkpvyptftfestngsdi lvrnldtnqqtii sdnlagetitmigaseqiyssrpayfykdahddn firngign  
dlefagnfklitkyqfvll

>tr|D1GQH7|D1GQH7\_STAA0  
mtlnnhfaytfeerpptklwlckpdgtrieriadfsklggtfkftnvtlhfdlplqvfsedtkqiernkvvdvlknkyl  
idyryngyrdi fviddikk  
sandsdfitlnl dsrase lnkkaaneie llgstipqmmnkilsiyaplwk lghvdgki invkre ltsnttvnalidnic  
slfdavaiynninrtisfy  
hkdnvgtnrglrvrensylksfedqfvskdivrlypfgqsgltiqsvnpagssyiedfsyfmspfkrdnrrnlqhsdy  
msdelchalldyqefyask  
kdqagel skqysa lkehsqedfrlnqlsatlqrl nerve lvpkseyidlgtkvknfk itvpkssyylimirndgsftr  
ikfnkqydipsgewlyik  
lktgkfnat kfeql eyp lei sanan lrvvytrssegdyeedtkkieekynlekyktlvkdqekvvasierrlkafe  
dqrasvirsmnaknflsek  
lykere lyvfesvneehtdaqelyddavkqmkkqkkirtitvdlnvfisldhkddwdklnvgdkvifqnkifntki  
kayitemqldfqtqvk it  
isdi fdykdldmiaeklaqttstssqvdfhkqqi reqtgritdmtr liegewdankkrvmagnetvdigshgvkviskd  
npnefvimvgviamtrdn  
getfktgtipeginaemligkmi vgetl tfenesgtvkfdkdglyvnsknfhlvsndgeenyfdkl kremsenakqqtdr  
mleeykkevsqtiseatdv  
rnivdnaadilqaa fadg vitdvekr l isetlaql ekenrefedkinlalnhpyiteedtielnnsiveyssmyetlvis  
inesvsdkmitp qeseein  
qni in freeikdi ls lveei iertknaqlqatleakdyttrvrddikdelndlnksfkslnstvedslkdnifdaaele  
aiktvvlvtkseyqdi tr  
yssmsvntdlksesksdltkayktldssfnfdvki demtmrvadetekanykkkydtlqknlsdymkydncileisk  
kyskdeadkvlgdftaiat

Tsompanidou\_et\_al\_Supplemental\_FASTA\_File

elkndfqvdknwaeftkqttlesfkdgivteaekarlvqldmldresmdieeryksllanqytdtniknrlaasrspy  
sahaslrqtieqitdggv  
desektlanksIntynttltayskaiqeaNtIsqiissdvaskkveefngvittissdvtikkqrdgsvityyysgvp  
tIsndpakswttndlkdlh  
ikdmyldtksgyayftksgtsyswkp1tdqvivsslkqaknaqdtadnkrrvftqppipydqgdmwtqgsqgdiyv  
tsrttgsfvssdwvkasky  
tddtvakqaakdlenykvkmtkdfkd1ndgvstfktevikdfkdgivteaektrlvqldildresqdieerynsifnsq  
yadtqvktisinarstynn  
s1tn1rntiqtiiedgevtsssekttanq1ttynna1tgystaiqea1ssmskviaaqeatsqvnqfnevinnintnid  
iqkqvdaigietfyysgvpt  
1tnipasdwkttnkrea1gdly1dtatgivyrf1kkgtsptyywsaisdq1itda1nraktaqdtadgkrrvfvntpv  
ppydtgdmwtqgargdiy  
cqtprkagaisindwvkaskytdtvsavqqlneykrtn1ldiad1krktsdfektvvnafddrvisisessaikgq  
1al1nhekdr1arqyen1i  
gnsn1vgaektk1sttysnmntk1sd1sttinsai1vdkn1vdaesksvtsklelyktsvneyqlafdnalnsiireiass  
qakdr1dewkrtefstdsd  
giervagakfdskwtdtwrstvnpaiskvqss1ndtnkisn1ktggvnl1qsyreetkavidpsitstkkasfdk1wa  
tplykpdyfrtylqpnrey  
t1syeyq1dnfngakt1tgrsfgm1lydytdtkv1snfsvet1petvdpk1vgkkfkaktfttpps1fkn1nflayagy  
ylandgsriypsvt1sn1k  
1etgn1vsdwtpapedtst1ldyntr1ssaetfi1eknkdk1sqiatktdvd11skvatyetqysvssgnyqvp1qey  
ngs1ftdnytyevvaknns  
1ssnnvata1fvskgsnngye1velndmsktganpkfv1dskgrpsistfspqsatqdisviytkylgsastinttks1i  
eqtassielqvkk1taete  
ynn11nsdf1ssgwegwinvdpqysivdkntfgit1pdaitknknkyntvkmtynkntnypsvfsn1f1svgkgqevaige  
h11t1tcyay1psskgk1t  
gn1yiefagyyekdk1snpmiarheilpkdfeynk1wfrmtastai1pstnsegkkiny1rac1rydgknqsvnnsa1fyya  
1pqlergskptews1sr1d  
vfsteqlaak1alnpesvd1iarnidfntdsmkiynsngt1nisgdt1tisnnssnevi1n1pkgft1kkdgvvk1kng1  
dtsdysvqayepqfsswnn  
ikatdpaakskyn1rihepgmngyyt1ntgvynfavqhkq1levnntknarvnrytylnkrylkiqmsassqgk1sly  
i1fktktgd1t1hqeivss  
ts1vypdi1tid1qak1gyppnn1pdf1felqagiaygensid1gff1r1rmamtdtpnaev  
>tr|D1GQH8|D1GQH8\_STAA0  
mei1ktyds1in1engdytdryv1lavpytsidedgki1sgdysfgstfhtvvpca1li1denthnq1les1rlki1dgvyk  
1vapdgyk1f1iednese  
dre1releem1ak1lkskkr1snne  
>tr|D1GQH9|D1GQH9\_STAA0  
mnend1ni1q1r1lq1aqnek1stvvgnqany1a1e1vtnem11sq1qnnde1qeaqg  
>tr|D1GQI0|D1GQI0\_STAA0  
msyfn1vyt1k1d1k1q1n1p1n1p1v1r1v1q1y1ds1av1fk1e1y1dn1gr1k1d1k1d1ger1ft1vs1ve1heat1get1h1s1gi1aky1d1ge1q1fv1yd  
1rkadmkn1g1ty1rar1f1asy  
kdrnr1vss1mfryevyedy1etvgdase1tm1qel1f1q1eve1ev1gr1vt1qr1q1ge1ya1ed1rg1dy1ana1ag1dyan1rag1ds1q1im1nw1py  
vkt1aernk1ly1pn1peng1d1t  
vyvidenk1vfry1dgi1dal1dwea1sgy1dts1vi1q1di1ynt1ked1kt1vvak1red1n1s1tig1arn11tg1d1fek1pm1n1ky1ts1pt1f  
t1ft1qn1ks1d1ss1mt1lap1td1ky  
v1st1s1avy1fd1le1ke1alenn1fft1s1fn1kv1l1sg1at1k1fk1vg1da1y1sep1vt1vk1ass1ny1qr1v1l1t1ast1q1d1k1tn1k1n111q1tt  
s1a1a1ie1kes1f1kae1ign1rat  
tw1tps1yl1dv1k1tk1lddy1g1tr1ik1gle1vem1nt1nv1k1ks1v1ye1ad1ks1k1neek1l1sk1i1qd1ans1ts1iv1sk1kv1dk1g1qv1ks1min1q1tae  
rik1ikas1nid1fd1g1vv1v1fkn  
rnnk1id1pna1fv1ring1gel1tak1gy1rr1vwr1d1g1karn1rv1qv1v1q1ld1g1ml1ris1dp1kg1d1vd1st1kdr1dry1did1vng1kr1v1yst1v  
rs1ly1ss1dg1v1st1yrd1g1sgk  
afn1ke1g1kv1v1ss1gt1ie1ff1she1ys1rs1rg1t1lys1ag1ga1ig1l1qa1ann1ai1h1da1aat1lyn1rs1rq1an1v1i1r1phen1vr1kg1ind1fk1fg  
is1ad1nt1gr1lv1yg1des1kr1lg  
vg1l1rf1sk1ss1kn1kv1t1gid1st1gr1ass1dvr1le1ige1vr1ank1il1srd1g1ket1vy1fn1ag1sgn1t1qs1at1rag1g1ikt1nat1nf1y1vgv  
rg1el1rv1tn1tr1gan1fg1kg1ig  
ymp1vr1ask1fns1v1ss1r1ky1k1tn1kd1le1ins1ldv1ln1std1ik1qyn1lks1d1nd1gid1kv1ky1gv1iled1sh1dal1ke1g1da1id1vy1t1mts1i  
1wd1v1vk1q1g1ke1ie1q1l1k1k  
>tr|D1GQI1|D1GQI1\_STAA0  
mvi1tir1k1nel1rel1fk1n1l1q1ni1at1ig1fd1v1i1ists1i1g1m1k1s1iew1ink1nt1sel1kn1s1if1y1yn1ise1v1v1di1q1im1gw111v  
sc1f1111s1vf1irt1p1ne1fr1l  
mi1lg1gl1v1sg1lv1y1faf1gi1lav1dn1as1ly1aty1ynn1ling1w1v1q1i1i1ag1m1ga1ig1iw1k1tk1v  
>tr|D1GQI2|D1GQI2\_STAA0  
menes1ie1v1q1l1sg1iked1vt1k1qed1hd1k1tker1q1dk1ld1tk1ie1kt1dr1mq1y1q1dm1nek1fl1q1l1sin1na1qm1lem1tk1n1vek1nter  
tad1imer1m1ved1d1ket1kasi  
dkk1fae1v1ddd1id1l1kse1iht1k1ins1iet1ts1ised1ges1ris1g1kt1wg1til1ial1fal1met1mik1v1vap11lap1lit1k  
>tr|D1GQI3|D1GQI3\_STAA0  
mik1ld1k1gs1lv1rg1vl1g1laf1vn1vale1l1sgh1n1pi1p1ide1g1aint1fit1laf1l1gatt1il1gy1y1kn1fv1nt1qea1hia1qan1ln1alk1qqk

Tsompanidou\_et\_al\_Supplemental\_FASTA\_File

kyaqntggvisaamadeds  
lpnkhlqdti  
>tr|D1GQI4|D1GQI4\_STAA0  
mrrnlinnyrflfdpgetsieikqgdftpitvklstetikddgkdakvilintdnkvfetsvpaknriiefainknlp  
kgryfleivynqmkfpsrd  
yktiiingsaslgslikeiniiseddvknrfiseakkeksadidqlvseklnkyvtenqedlkgqsisiashefdkngln  
itfsdetsiqipkgqgrn  
gengrdglngrdgqsttitergtsdnrngvfirtykvdehigikqdlisetfvsdgrdgsngqdgkqgkngndgqdgshv  
nvdhveydeddntvihftd  
gksaiikkgiqgergedglnngdgisvsiknietdnsgnkvnftdgnsvtipkgerglgdgkdtngksftysdftqeql  
eslkgkdngdgkqgadgks  
itieetttnngqdkvrfdsdgttviipkgqngqdgkqgeagkngengtgdqdgksvtvtsergkddegngsikftfyhei  
dgektqvitsfsirdgkdg  
kdgksfsfsdlteedfkkildygiknnyfnsksetdflisnppldknkiwidtgvd  
>tr|D1GQI5|D1GQI5\_STAA0  
mnaipkiydeeknewveltkpiaeevrmednfmknkgqikllklypygkyykeqdvveytyymfynskvsqkvvdeay  
gtlkgsvqvyvdsipekre  
ltyndlkqeysfrafekailgfnvlyqdefgstavvhskdvselelynvigsynftvsyifndnpielnqfvhkay  
>tr|D1GQI6|D1GQI6\_STAA0  
mktqkqvaerlrayvngtvdspyrvtwthydddftmepgcidvdrsphaqcmdlvvdyclwisdnqfrirengakqaid  
nlpkqwkiiirneratvpk  
qgwivntstyyghiwlvdkgatqmtmpvieqwnslanlkpkrrldyyygcthfivppissnnaivraaknvlpspkpm  
kvllvaghgkaysndpgt  
vnteldicerdfvrqkivpnvakylrqaevnvqlyggstmnqdmqdyqtkygvnlgdtkrygmywaarqgfdqivefhds  
agsqasgghviiidnvyqd  
kiderlhkvidkyvgtirgidkrdnllnanvsadlnqnyrlvelgfitnktvnrnierhledftkemaevgnvignnl  
gsqdikpstkkgskskpsk  
kkpkpqqiawksgtfypntlikvrrnwglngeevprkfwlngekdwvvihsvikdtknklwwakmtyppnkeikyfyca  
lgkitdkeakikkekekyg  
kikwk  
>tr|D1GQI7|D1GQI7\_STAA0  
mkkyriviegerdfteeeellqfsnenifdivtvlraneegrtivikstkdfniaqfkei  
>tr|D1GQI8|D1GQI8\_STAA0  
mdfysdlkmndeylekkfgnveiykvtvcnfeytfdgtyrniycsfylsinsiyvnqeedfaykipfkdviveldetl  
gnkpiritygdtkrstfny  
isigtikdskeiinvierrdtqnhihnieevlvdnrpqlhplndrfeveingkygaldgllldnnpnykpnideld  
elnkekdllritisksksk  
yfetaimkrfdnfefednkysikvtsdmeylehrddienifflikwknkeiylegkiykylieyrefvshtenrik  
rilnysygdsfdvlnddn  
rahiyypldhqtkffafrdsfdqepymcsctkkaikhklnvkeclppvikaylndentdiineiqfdnicfrcn  
ktpnrriyssndskfrkyh  
gwyidqvqiendldndiygkeaenireeygvakigegwisetmmfrivedifegyecerhcrpnflegleidiyipek  
lgefeyngiqhykpvewhgg  
eeslkkqardkhkqqlcdqndvliiikydeqlskdlilskipveylvedksk  
>tr|D1GQI9|D1GQI9\_STAA0  
mkkskvlattlagallftgvgathnahaadyvndsivrnyaknaigskyteagsvsigghggvtdkdngvkdngdyt  
vifsgedngvgaakvykd  
grieaqtprdannvltidapnntqstdntqaatnntttattdnnvstqenntqstqstqtneaqtttkalpetggqsng  
lvtiiasvllaagsllafr  
rtsnsk  
>tr|D1GQK3|D1GQK3\_STAA0  
mgqtlfdkvwnrhvlygklgepqllyidhlhevtspqafeglrlqnrklrrpdltfatlhdhvptidifnikdei ank  
qittlrknaidfgvhiidm  
gsdeggivhmvqpetgltpgktivcgdshtathgafgaiafgigtsevehvfatqtlwqtkpknlkidingtltptgvya  
kdiilhliktygvdfgtgy  
aleftgetiknlsmgrrmticnmaieggakygiipdditfeyvkgpfnadnfaksvdkwrelysdadifdrviel dvs  
tlepqvtwgtnpemgvnfs  
epfpeindiindgraydymglepgqkaedidlygvflgsctnarlsdliashivkgnkvhpnitaiivpgsrtvkkeak  
lgltdtifknagfewrepgc  
smclgmnpdqvpegvhcastsnrnfegrqggarthlvspamaaaaaihgkfvdrkvvv  
>tr|D1GQK4|D1GQK4\_STAA0  
maai kpi ttykgkivplfndnidtdqipkvhlkrisksfgpafadewrylpdgsdnpdfnknkpykgasilitgdnf  
gcgssrehaawal kdygfh  
iiaagsfsdi fymnctknamlpivleksarehlaqyveievdlnqtvsspdkrfhfeidetwnklvngl ddi aitlqy  
esliekyeks  
>tr|D1GQK5|D1GQK5\_STAA0  
mtvktvstkdideafrlrkdivketplqldhylsqkydckvylkredlqwvrsfklrgaynaisvlsdeakskgitcas  
agnhaqgvaytakllnla

Tsompanidou\_et\_al\_Supplemental\_FASTA\_File

vi fmpvttplqkvngvkffgnsnvevvtgdtfdhclaeal tytsehqmfnfdpfnvhtisgqgtlakemleqaksdvn  
nfdylfaaigggglisgis  
tyfktyspttkiigvepsgassmyesvvvnqvvtl pnikfdvdgasvarvgditfeiakenyddvqvdegavcstild  
myskqai vaepagalsvsa  
lenykdhikgktvvcvisggndinrmkeieersllyeemkhyfilnfpqrrgalrefvndvlgpqdditkfeyllkssq  
ntgtviiigiqlkdhddliq  
lkqrvnhfdpsniyinenkmlslli  
>tr|D1GQK8|D1GQK8\_STAA0  
makesksaneispeqinqwikehqenktndaqdklvkhyqklieslaykyskgqshhedlvqvgmvgligainrfdmsfe  
rkfeaflvptvigeikryl  
rdktwsvhvprrikeigprikksvdel taelerspsiseiadrlevseevleamemgqsynalsvdhsieadkdgstvt  
lldimgqddhydltkrm  
ilekilpilsdrereiqctfiegl sqetgeriglsqmhsr lqrrtaikk lqeaahq  
>tr|D1GQL6|D1GQL6\_STAA0  
mii fillialttvfvgsefalvkiratrieqladegnkpakivkkmianldyylsacqlgitvtslglglwgeptfekll  
hpi feainlptaltttisf  
avsfiivtylhvvl gelapksiaiqhteklalvyarplfyfgnimkpliwlmngsarvii rmfgvnpdaqtdamseeieik  
iinnsynggeinqtelay  
mqnifsfderhakdimvprtqmitlnepfnvdelletikehqftrypitddgdkdhikgfinvkeflteyasgktikian  
yihelpmissettrisdali  
rmqrehvhmsliideyggtagiltmedileeivgeirdefdddevndivkidnktfqvngrvll ddtteefgiefddsed  
idtigglwlsrntnlqkdd  
yvdttydrwvseidnhqiiwvlnyefnearptigqsdedekse  
>tr|D1GQM0|D1GQM0\_STAA0  
mthllivddeqdivdicqyfefeyegkvtttts gkeaisllsndidimvl dimmpevngydivkemkrqkl dipfiylta  
ktqehdtiyaltlgaddyv  
kkpfsprelvlrinnltrikkyhhqpveqlsfdel tinlskvvtvnghevpmrikefellwylasreneviskselle  
kvwgydyyedantvnhih  
rireklekesfttyittvwglgykfersr  
>tr|D1GQM5|D1GQM5\_STAA0  
mlqqiypstthpyqfelndfnfsaahhipceeaqicqnvhgtyfvnl tivgkl ddtgflvnfshlkkmi hkgfdhq  
lnnlpafknkipsteivae  
tiyqivkenlaslehqpkciqvfvretptsyvfrpkeqv  
>tr|D1GQN4|D1GQN4\_STAA0  
meaykiehlnksyadkti fdnldl sisegekiglvgingtgkstllkviggiddftanvmhpnqyri ryssqkdlned  
mtvfdavlsdtttlriik  
qyeqavqayaddqskl fkrmmadaqdamdqhdawdynaeiktisklgi hdttkyikelsggqkrvvlakt lieqpdll  
lldeptnhldfes iswlin  
yvkqyphvtvlfvthdryflnevstriel nrgklasypgnyesyiemraerevtlqkqqkqralykeelawmragakar  
ttkqqarinrfdl enevn  
qqykddkge lnlaysrlgkqvfeledlska indkvlfeh lteiiqkgerigvvgpngagkttllnilsgedqqfegklkt  
gqtvkvayfkqtdetl ddr  
irmidylreeneiakekdgtsvsitql lerflfpsathgkkyklsggeqkrlyllrllvhqpnvllldeptndldtetl  
tiledyihftfggtvtivsh  
dryflnkvaqsywfi hdgqmekiigt fedyesyksldknkstlkqqkssttvrrknglsykekleyeqlmkrieqae  
rmeeidvlmieasadygki  
kelneekeqleiqydl ditrwsleeikeqq  
>tr|D1GQN6|D1GQN6\_STAA0  
mikfknvtkrygkhvavdnisf nnegeffvl igpsgcgktttlkminrl ihlseg yiyfkdkpisdypvyemrwdigyv  
lqqialfphmtikeniaqv  
pqmkkwkekdikrvdellemvglepekyknrkpdelsggqrqrvgviral aadppvil mdepfsaldpisreklqddli  
elqtikiktii fvthdiqe  
amklgdki cllneghieq idtpegfknnpqsefvkqfmgshleddapcveenaiirdldimkpidvtsmsaypivydq  
pievlyql seservimq  
edsvgqyvidrkdi fkylsqkkevaqhd  
>tr|D1GQN8|D1GQN8\_STAA0  
mkeqlnql sayqpgl spralkekygiegdlyk lasnenlygpspkvkeaisahlde lyyypetgsptlkaaiskhlndvq  
srilfgagldevilmisra  
vltpgdti vtseatfgqyyhnaivesanviqvp lkdggfdlegil kevneds lwlcnpnnp tgyfnhes ldsflsqv  
pphvpvi ideayfefvtae  
dypdtlalqqkydnafllrtfskayglaglrvgyv vasehaiekwniirppfnvtriseyaavaaledqqylkevthkns  
vererfyqlpqseyflpsq  
tnfi fvktkrvnel yea lnvgcitrpfptgvr itigfkeqndkml evlsnfkye  
>tr|D1GQP0|D1GQP0\_STAA0  
menkythgvlfyhehsgl kninqigevtta lssickhlsiq lsenegdi ikycqeiktknyakdvdl filggdgtvne  
lingvmthdlql pigilpg  
gtfndftktlni apnhkqaseqmi saqvgytdvikinnqyalnfvglglivqnaenvqdgskdifgklsyigstvtlln  
ptqfnysl sidktyset



Tsompanidou\_et\_al\_Supplemental\_FASTA\_File

tmi1tangpfiggsrip1td1spqdge1ntfi1fneqsfsi1ndi1fkkrdsmnwneitqgiehipgkks1ttdpamkvdi  
dgeis1etpidi1evipnai  
q11tvnd1  
>tr|D1GQP1|D1GQP1\_STAA0  
mtqqnshgnqigdi1pqtgffghprglgv1ffvefwerfsyymrallifymfavtdnglgidkttamsimsvygsliym  
tsipggwi1adritgtrgat  
llgavfii1ghic1slpfa1lig1lftsmffii1igsg1mkpnisnivgrlypendrrmdagfvifymsvnmgallspiilqh  
fvnvknfhggf1iaavgma  
lg1vwyv1fnrkn1gsvgmkptn1tpaekkkyl1iigsv1laiv1iivigaltns1sfnlvsntv1vlgialpiiyft1  
i1rskdvt1dtersrvkafi  
plfilgmfvwai1qeggsnv1niygiehshdmk1n1fgwktnfgeaifqsinp1filllapiis1llwqklgkqps1pvkfa  
igt1lagasy1iligivgya  
sgssnfsvnwv1lsyi1cvi1gel1c1sptgnsaavk1apkafnaqmm1siwyltnasaqaing1lvk1ieplgqtnyfi1flg  
v1ai1vttiv1lafsp1iik  
amkgir  
>tr|D1GQQ1|D1GQQ1\_STAA0  
msmpkvys1id1tetr1crhyf1teedi1aik1fkccnkyypcykchne1fekhaikrwseps1fnekailcgvckhel1tineym  
mvercpnc1qsr1fnnrckyh  
yhiyfei  
>tr|D1GQR5|D1GQR5\_STAA0  
mnc1lscgak1yeni1tiyn1l1fkkpnr1cdrckenwdnik1ldikarrcsrclkh1lnqdeayc1dckflsahfn1meqlycq  
fqydg1mkemihqyk1fld  
yyl1cellah1ieip1qtsydyivpipsspahd1srtfnpveav1kakgirfdk1ilkm1srpkqsh1tkker1adenpf1id  
tel1d1ngkei1llvddiytt  
gl1tihrsgck1yaknirkfvf1afar  
>tr|D1GQR6|D1GQR6\_STAA0  
mirfei1hgdn1l1tidai1rnyieekig1kleryfndv1pnavahvkvk1tysnsatkievti1plknvt1raerndd1yagid1  
innk1lerqvrk1ykt1rinrk  
srdr1gdqev1fvael1qemqetqv1dndayddneie1i1rsk1efs1k1pmd1seeav1qmn1l1ghd1ffv1tdret1d1gtsiv1yrrkd  
gkyg1liqt1seq  
>tr|D1GQR7|D1GQR7\_STAA0  
mgf1l1skil1dgnn1keik1ql1gk1ladkvia1leek1tail1tdee1rnk1tkqf1qtel1adiv1nkk1qndy1ldk1il1peaya1lvregsk  
rvfn1mtpyk1vqi1mggia1h  
kgdiaem1rt1gegkt1tatmpty1nal1agrgvh1vitvney1l1ssvq1seema1elyn1flg1ltvg1ln1n1skt1teek1reayaq1dit  
ystn1nel1gfdy1l1rdnmvny  
sedrv1mrpl1hfai1idevds1il1ideart1pl1isgeaek1sts1lytqanv1fakm1kqdedy1kydek1tkavh1lteqgadkaerm  
fkven1lydvq1ndv1shin  
tal1rahvt1l1qr1dvdm1vvdge1vl1vdqft1grt1mpgrr1f1seg1lhqai1eakeg1vqi1qnesk1tmasit1fqny1frmy1nkl1agmt  
gtake1teee1frni1ynmtvt  
qi1ptnk1pvqr1ndksd1li1yisqkg1fdavved1vvekhkag1qpvl1lgtvavet1seyis1n1l1kkr1gir1hdv1lnakn1hereaei  
vagag1kgavt1iatn1magr  
gt1dik1legvee1lg1lavig1terhes1riddq1l1rgsr1grqgdk1gdsr1fy1sl1qdel1mir1fgser1l1qkms1rl1g1dd1stpi  
esk1mvs1raves1aqkrvegn  
nfdark1riley1dev1l1rk1reii1ynernsi1ideed1ssqv1dam1rst1l1rsiny1intadde1pey1qpf1idy1indif1l1qegd  
i1tedd1kgk1daedi1fevvw  
aki1eaay1qsqk1dileeqm1nefermi1l1rsid1shwt1dhid1tmdq1lrqgih1l1rsyaq1qnp1l1rdyq1neshe1ldimm1qnieed  
tck1fil1ksv1vqved1niere  
ktte1fgea1khsa1edg1kek1vkpk1ivkgd1qvgr1ndd1cpc1gsg1kfk1nch1gk  
>tr|D1GQR8|D1GQR8\_STAA0  
mel1seik1rni1dkyn1qdl1tq1irg1sl1denket1ni1qeyeem1maep1n1fwdn1qtkaqdi1idk1nna1l1kaivngy1kt1l1qae1vdd1md  
atwd1l1qee1fdeem1ked1le  
gev1in1fkak1vdeye1l1q1l1ldgph1dannai1le1l1hpgag1gtes1qdwan1l1frmy1qryce1kkg1fkvet1vdy1lp1gdeag1iks1vt  
l1likgh1naygy1l1kaek1gvh  
rl1vr1spfd1ssgr1rhts1fascd1vipdfn1ndeieie1inpdd1itvdt1frasgag1gqhink1tesair1ith1hpsg1ivvnn1qner  
sq1knreaam1kml1ksk1lyq  
l1klee1qare1maei1rge1qkei1gwg1sqi1rsyv1fhpys1mvd1hrt1neet1gkvd1avmd1gdig1pfiesy1l1rqt1mshd  
>tr|D1GQS3|D1GQS3\_STAA0  
mk1eps1ivv1kgarahn1k1didi1elpkn1livmt1gl1sgsg1kssl1afdt1iyaeg1qrryves1saya1rqfl1gqmd1kpdvdt1ieg  
l1spais1idq1ttsk1nprst  
vatv1tei1ydyi1r1lyar1vgk1pypc1pnh1nieies1qt1vq1mvd1rime1eart1kiq1l1lapvia1hrk1gshe1k1iedig1kkg1yvr1  
ridge1ivd1vnd1vpt1ldknk  
nht1iev1vdr1lvk1dgi1etr1lads1ieta1le1l1seg1l1tv1d1vidged1l1kfsesh1acpic1gfs1ig1elepr1mfs1fnsp1fgac1pt  
cdg1lgqk1l1tv1dv1lv1vpdk  
dk1t1negai1epwi1ptss1dfy1pt1l1krv1cevy1kin1mdk1pfk1l1terqrdi1l1lygs1gdkei1eft1ftq1rqq1gtr1kr1tmv1fegv  
vpni1srr1fh1es1pse1ytrem  
msk1ymtel1pc1etch1gkr1l1sreal1svy1vgg1ln1ige1vveys1isqal1nyy1knid1l1seqd1qai1anq1ilkei1isr1l1tfl1n1vgle  
yl1t1lnras1gt1sg1geaqri  
rlat1qigs1rl1tg1v1yl1deps1igl1hqrd1ndr1l1int1l1kemrd1l1gnt1l1ivve1hdd1tmraady1l1vdig1pgage1hgg1qiv1ssg

Tsompanidou\_et\_al\_Supplemental\_FASTA\_File

tpqkvmkdkksltgqylsg  
kkrievepyrrpasdrkisirgarsnnlkgvdvdiplsimtvvtgvsgsgksslvnevlykslaqkinkskvkpglydki  
egidqldkiididqspigr  
tprsnpatyvtgfvddirdvfaqtneakirgyqkgrfsfnvkgrceackgdgiikiemhflpdvypcevcdgkrynret  
levtykgkniadilemtve  
eatqffenipkikrklqtlvdvlglyvtlgqqattlsggeaqrklaselhkrstgksiyildepttghvddisrllkv  
lnrlvengdtvviiehnld  
viktadyiidlgpegsgggtivatgtpediaqtkssytgkylkevlterdkqntedk  
>tr|D1GQS9|D1GQS9\_STAA0  
mdnnekekskcellvvtglsvgvkslviqcledmgyfcvndlppvllpkfvelmeqgnpslrkvaiaidlrgkelfnslv  
avvdvkksesdviidvmfl  
easteklisryketrrahplmeqgkrslnainderekhsqirsianfvidttklspkelkerirryedeefetftinv  
tsfgfkhgiqudadlvfdv  
rflnppyvvdrlrpltgldkdvynyvmkwketeiffekldlldfmipgykkegksqlviaigctggqhrsvalaerlgn  
ylnevfeynyvvhhrdahi  
esgekk  
>tr|D1GQT3|D1GQT3\_STAA0  
mkqylitggtgmvgsqlvneikkdsdshilitrhdqisndkkisyvnwaksgwehkvpqnidvvinlagatlnkrwtpey  
kqtlmlsrigtstqalayelf  
ksrnkapkalfnasatgyppdlfmsytevyktlpfdflsdivyqwerfaqqfeqlgtrvvigrfgiilsneggalqtmk  
lpyeyyiggklsqgqwwys  
wihindliqailflinnesasgpfnltapiperqnlfgytaramhkphetwapslamrllilgqmvstvltdtqkvlpnki  
qalqfqqfksnlkmaledl  
ike  
>tr|D1GQU7|D1GQU7\_STAA0  
msepqklhpsifngiinaikqniVVffifiifqlkdfdytnpesylwigivfvfflisyisqivgimntrywiednyfi  
lTtgifnkkrkelnikriq  
svdmtqgvnqiiggvdliqktpsdgivilsvikkqgeyleryidqlqtelktevaqkssaekndncnhdiegnvediae  
grldevqntdmslnqknkr  
ipiyqmfnkeslfmamtsgaigvtlaalvpiygavrelipwsklnheisqwwqivsisvliiillvlivayiigtiitmi  
rfygfsvmleneqlkiey  
lfnkkkvtvptkrlqavverqsyirrfgytaihfiitsdfenkkiedddndsgsvpilpfikrdkayqiiqnlvpdlisy  
qqvnegmplsgfhrhflip  
siiviamagigcyfwnqlllftiitiviiglfvikgylyvkhagfkmteeqitiqnfellkniyyfkaahiigfdtwq  
htllkrnnlnnfsfivakg  
vgaqslnkyarsedanklkswylrgendeg1  
>tr|D1GQV2|D1GQV2\_STAA0  
msnteslnigkkrsltiyigyspgvgtfemlsnaiefqsndikigyiephqrdeatnaeqlpkittnftkhgshh  
fqyldvdriieesptivli  
deLahtnisrdrehkrymdieeilnhgidvhtlniqhieslssqielmtgvhvkervpdyfimsadvlevvdispeqli  
krlkagkvykkdrldvafs  
nfftyahlselrtlrlrtvadlmsdkekvrhnhktslkphiavaisgsiyneavikeafhiaqkehakftaiyidvfekn  
rkykdsqkqvhhqhlmlaks  
lgakvkvyvsqtvalgl dewcknqdvtkliigqhirnkwrdfntplidhlisfehsykieivpikqipvelkmnksyr  
pkgkrfaidmlkmi liqi  
cvmmgliwiyqldkhesstiiilmifligiillsiwtrsfiiigflaaiinvfvfnyffteprytfeyrfdypitfivsilT  
siltsallkqikfqsitk  
kqlyrtdllfqfndisikqytvenllinagyqinqllqssitiyvinqskviktiplqnhidnttqqheqalswvikner  
qagattdtfpginkwliqi  
gtspikgilaidyqssqvinpydasilesmlnelslavenvtllkqtresmlqaerqlthsNFLrsishdirtpItting  
nldilvshskdmsieekeq  
llvhsfquesqlyllvtnilsltklqssnvqiklqpylvselveidmilerrhllkkrivsssvnlqfihidsklilqa  
lfnlienavkhtstdtkin  
lsiryasyeqiefavidegpgisleeqkifepfytgsknyfkdnqkesmglylyvqtilhkhqsnlqykpnqphgsif  
yfniytdfnegdv  
>tr|D1GQV6|D1GQV6\_STAA0  
mtkenicivfggksaehevsiltaqvnlnaidkdkyhvdiitndgdwrkqnnitaeikstdehlhengealeisqllk  
esssgppydavfp1lhgn  
gedgtiqglfevlDpvyvngvlSaassmdklvmkqlfehrglpqlyisflrseykyehnilklvndklnypvfvkpa  
nlgssvgiskcneaelke  
gikeafqfdrklvi eggvnaieavlgndypeatwpgevvkdva fydykskykdgvqlqipadl dedvqltlnmal  
eafkatdcsglvradffvt  
ednqiynetnampgftafsmypklwenmglsypelitklielakerhqdkqknkykid  
>tr|D1GQW1|D1GQW1\_STAA0  
miellsialkhsniilnsifigafilnllfaftiifmerrsansiwawllvlvflplfgfilylllgrqirdqifkidk  
edkkglelivdeglaalkn  
enfsnsnyqivkfkemiqmllynaaf1ttndlkiytdgqekfddliqdirnatdyihfyyiiqndelgrtilnelgk  
kaeqgvevki lyddmgsrg

Tsompanidou\_et\_al\_Supplemental\_FASTA\_File

l r k k g l r p f r n k g g h a e a f f p s k l p l i n l r m n r n r h r k i v v i d g q i g y v g g f n v g d e y l g s k k f g y w r d t h l r i v g d a v  
n a l q l r f i l d w n s q a t r d h  
i s y d d r y f p d v n s g g t i g v q i a s s g p d e e w e q i k y g y l k m i s s a k s i y i q s p y f i p d q a f l d s i k i a a l g g v d v n i m i p  
n k p d h p f v f w a t l k n a a s l  
l d a g v k v f h y d n g f l h s k t l v i d d e i a s v g t a n m d h r s f t l n f e v n a f i y d q q i a k k l k q a f i d d l a v s s e l t k a r y a k r  
s l w i k f k e g i s q l l s p i l  
>tr|D1GQX2|D1GQX2\_STAA0  
m d k i v i k g g n k l t g e v k v e g a k n a v l p i l t a s l l a s d k p s k l v n v p a l s d v e t i n n v l t t l n a d v t y k k d e n a v v v d a t k  
t l n e e a p y e y v s k m r a s i l  
v m g p l l a r l g h a i v a l p g g c a i g s r p i e q h i k g f e a l g a e i h l e n g n i y a n a k d g l k g t s i h l d f p s v g a t q n i m a a s l  
a k g k t l i e n a a k e p e i v d l  
a n y i n e m g g r i t g a g t d t i t i n g v e s l h g v e h a i p d r i e a g t l l i a g a i t r g d i f v r d a i k e h m a s l v y k l e e m g v e l d  
y q e d g i r v r a e g e l q p v d i  
k t l p h p g f p t d m s q m m a l l t a n g h k v v t e t v f e n r f m h v a e f k r m n a n i n v e g r s a k l e g k s q l q g a q v k a t d l r a a a  
a l i l a g l v a d g k t s v t e l t  
h l d r g y v d l h g k l k q l g a d i e r i n d  
>tr|D1GQX6|D1GQX6\_STAA0  
m a s l k e i d t r i k s t k k m k q i t k a m m v s s s k l r r a e k n t k q f t p y m d k m q d a i t a v a g a s s n t n h p m l r p r k i t r s g y l v  
i t s d k g l a g a y s a n v l k k l  
i t d i e a k h q d s s e y s i v v l g q g v d f l k n r g y d i e y s q v d v p d q p s f k s v q a l a n h a i d l y s e e e i d e l n i y y s h y v s v l  
e n k p t s r q v l p l s q e d s s k  
g h g h l s s y e f e p d k e s i l s v i l p q y v e s l i y g t i l d a k a s e h a t r m t a m k n a t d n a t e l i d d l s l e y n r a r q a e i t q q i t  
e i v g g s a a l e  
>tr|D1GQY3|D1GQY3\_STAA0  
m k k i m t i f g t r p e a i k m v p l v k a l e q e k m l e p i v v v t a q h r e m l d s v l s t f e i k p k y d l n i m k s g q t l s e i t s k s i t q l e  
q v i l e k p d m v l v h g d t m t  
t f a g g l a a f y n q v p i g h v e a g l r s y d k y s p f e e v n r q l v g v l a d l h f a p t k n a a s h l l s e g k y s e s v v v t g n t a i d a m k  
y t v d d n y k s n i m d k y h d k k  
f i l m t a h r r e n i g k p m e n i f k a v r r l i d e y t d l a l v y p m h k n p k v r e v a q k i l g s h d r i e l i e p l d v d f h n f a k k s y f i  
l t d s g g i q e e a p s f n k p v l  
v l r s v t e r p e g v e a g t l k v i g t n k q n v y q a a k e l i d d e r l y h q m s e a s n p y g d g f a s e r i v n h i k y y l n l i t e k p s d f  
>tr|D1GQY4|D1GQY4\_STAA0  
m s k v h v f d h p l i q h k l s y i r d v n t g t k e f r e l v d e v g m l m a y e v t r d l e l q d v d i e t p v t k m t a k r l a g k k l a i v p i l r a  
g l g m t d g i l s l v p a a r v g h  
i g l y r d p e t l k a v e y f a k l p q d i t e r q i i v v d p m l a t g a s a i e a i t s l k k r g a k n i r f m c l i a a p e g v e k m h e a h p d v d i  
y i a a l d e k l n d k a y i t p g l  
g d a g d r l f g t k  
>tr|D1GQY9|D1GQY9\_STAA0  
m n y k e l d e a i h l t q q k g f e q t r a e w l m l d v f q w t r t d f v v h m h d d m p k a m i k f d l a l q r m l l g e p i q y i v g f a s f y g r  
t f d v n s n c l i p r p e t e e v m  
l h f l q q l e d d a t i v d i g t g s g v l a i t l k c e k p d l n v i a t d i s l e a m m a r n n a e k h q s q i q f l t g d a l k p l i n e g i k l n g  
l i s n p p y i d e k d m v t m s p t  
v t r f e p h q a l f a d n h g y a i y e s i i e d l p h v m e k g s p v v f e i g y n q g e a l k s i i l n k f p d k k i d i i k d i n g h d r i v s f k w  
>tr|D1GR08|D1GR08\_STAA0  
m r m i d i e i k k r d g h t l t t e e i n f f i g g y v k g d i p d y q a s s l a m a i y f q d m n d d e r a a l t m a m v n s g d m i d l s d i k g v k v d  
k h s t g g v g d t t t l v l a p l v  
a a v d v p v a k m s g r l g h t g g t i d k l e a i d g f h v e i d e a t f v k l v n e n k v a v v g q s g n l t p a d k k l y a l r d v t g t v n s i p l  
i a s s i m s k k i a a g a d a i v l  
d v k t g s g a f m k t s e d a e a l a h a m v r i g n n v g r n t m a i i s d m n q l g r a i g n a l e l q e a i d t l k g q g p k d l t e l v l t l g s q  
m v v l a n k a e t l e a r a l l i  
e a i n s g a a l e k f k t f i k n g g d e t v i d h p e r l p q a q y i e y k a k k s g y v t e l v s n d i g v a s m m l g a g r l t k e d d i d l a v g  
i v l n k k i g d k v e e g e s l l t  
i h s n r q d v d d v v k k l d s s i t i a d h v s p t l i h k i t e  
>tr|D1GR17|D1GR17\_STAA0  
m s e q y s e i n t d t l e r v t e i f k a l g d y n r i r i m e l l s v s e a s v g h i s h q l n l s q s n v s h q l k l l k s v h l v k a k r q g q s m i y  
s l d d i h v a t m l k q a i h h a n  
h p k e s g l  
>tr|D1GR18|D1GR18\_STAA0  
m s h s h h h h d m h s h v t t n k k v l f i s f l i i g l y m f i e i i g g l l a n s l a l l s d g i h m f s d t f s l g v a l v a f i y a e k n a t t t  
k t f g y k r f e v l a a l f n g v t  
l f v i s i l i v f e a i k r f f v p e v q s k e m l i i s i i g l i v n i v v a f f m f k g g d t s h n l n m r g a f l h v i g d l l g s v g a i t a a i l  
i w a f g w t i a d p i a s i l v s v  
i i l k s a w g i t k s s i n i l m e g t p s d v d i d e v i t t i k k d s r i q s v h d c h v w t i s n d m n a l s c h v v v d h t l t m k e c e l l l e n i  
e h d l l h l n i h h m t i q l e t p  
n h k h d e s i c s g t h s h s h n h h a h h h a h v h  
>tr|D1GR24|D1GR24\_STAA0  
m c g i v g y i g y d n a k e l l k g l e k l e y r g y d s a g i a v v n d d n t t v f k e k g r i a e l r k v a d s s d f d g p v g i g h t r w a t h g v p  
n h e n s h p h q s s n g r f t l v h

Tsompanidou\_et\_al\_Supplemental\_FASTA\_File

ngvi enyeel kgeyl ggvsv fise tdevivql veyf snqgl stee aftkvvs llhgsyal glldaedkdtiyvaknkspl  
llgvgegf nvi asdal ml  
qvtseykeihdheivivkkdevi ikdadgnvverdsyia eidasdaekgyvahym lkeiheqpavmrriiqeyqdaegn l  
kidqdi indvkeadriyvi  
aagtsyhaglvgkeflek wavgp tevhvasefvynmp llseklfvv isqsgetadsravlv etnklghks ltitnvags  
t l s readht l l l hagepia  
vastkaytaqiavlsi lsqivakehgre adid llrelakvtt aieaivddtpimeqiatdf lettrnaffigrtidynvs  
lega lklkeisyiqae gfa  
gge l k hgtialieegtpvvg latqekvn l sirgnvkevvar gahpciismeglekegdtyviphvhe l l t plvsvalql  
isyaa l hrd l d vdkprnl  
aksvtve  
>tr |D1GR25|D1GR25\_STAA0  
msqteekkgigrrfqafgs flssmimpnigafiawgfiaaifidngwlpnkdlatlagpmityliplliafsggrliydl  
rggiiaatatmgvivalpd  
tpml l gamimgplvgwlmkktdql iqprtpqgfem lfnnsagilg f imtiagfkilapl m k f imhilsvavealvhahl  
lplvsilvepakivflnna  
inhgvftplgadqaakaggsilytiesnpgpglgillaymifgkg takatsy gagi ihflggiheiyfpyvlmrpllfia  
vilggmtgvatyqatgfgf  
kspaspgsfivyc l n aprgef lhm l lgvflaa lvsfvvaalimkftrepkqdleataqmentkgkksvasklvssdkn  
vnteenasgnvsetssdd  
dpealldnyntedvdahnynni nhvi facdagmgssamgasm l rnkfk k agi ndi tvntainqlpkdaqlvitqkkltd  
raikqtprnaihisv d n fln  
spryeel l n n l k k d d q a  
>tr |D1GR29|D1GR29\_STAA0  
mnlfrqqkfsirkfnvgifsal iatvtfistnpttasaaeqnqpaqnpaqp adantqpnanagaqanptaqpaapanqg  
qpavqpanqggqanpaga  
aqpntqpagqgnqadpnnaaqaqpgnqatpanqagqgnnqatpnnnatpanqtqpanapaaaqpaapvaanaqtqdpnas  
ntgegsintt l t f d d p a i s  
tdenrqdptvtvtdkvn gys l i n n g k i g f v n s e l r r s d m f d k n n p q n y q a k g n v a a l g r v n a n d s t d h g n f n g i s k t v n v  
kpdseliinf t t m q t n s k q  
gatnlvikdakkntelatv n v a k t g t a h l f k v p t d a d r l d l q f i p d n t a v a d a s r i t t n k d g y k y s f i d n v g l f s g s h l  
yvk n r d l a p k a t n n k e y t i  
nteig n n g n f g a s l k a d q f k y e v t l p q g v t y v n n s l t t t f p n g n e d s t v l k n m t v n y d q n a n k v t f t s q g v t t a r g t h t k  
evlfpdks l k l s y k v n v a n  
idtpk n i d f n e k l t y r t a s d v v i n n a q p e v t l t a d p f s v a v e m n k d a l q q v n s q v d n s h y t t a s i a e y n k l k q q a d t i l  
nedanhvktanrasqadi d  
glvtklqaalidnqaaiael d t k a q e k v t a a q s k k v t q d e v a a l v t k i n n d k n n a i a e i n k q t t a q g v t t e k d n g i a v l  
eqdvi t p t v k p q a k q d i i q  
avttrkqikksnas l q d e k d v a n d k i g k i e t k a i k d i d a a t t n a q v e a i k t k a i n d i n q t t p a t t a k a a a l e e f d e v v q  
aqidqap l n p d t t n e e v a e  
a i e r i n a a k v s g v k a i e a t t t a q d l e r v k n e e i s k i e n i t d s t q t k m d a y n e v k q a a t a r k a q n a t v s n a t n e e v a e a d a  
avdaaqkqgl h d i q v v k s k  
qevadtkskvl d k i n a i q t q a k v k p a a d t e v e n a y n t r k q e i q n s n a s t t e e k q a a y t e l d t k k q e a r t n l d a a n t n s d v  
ttakdn siaa i n q v q a a t t  
kksdaka e i a q k a s e r k t a i e a m n d s t t e e q q a a k d k v d q a v v t a n a d i d n a a a n n d v d n a k t t n e a t i a a i t p d a n v k p  
a a k q a i a d k v q a q e t a i d g  
nngstteekaaakq v q t e k t t a d a a i d a a h t n a e v e a a k k a a i a k i e a i q p a t t t k d n a k e a i a t k a n e r k t a i a q t q d  
i t a e e i a a a n a d v d n a v t q  
ansnieaansqndvdqakttgensidqvtptv n k k a t a r n e i t a i l n n k l q e i q a t p d a t d e e k q a a d a e a n t e n g k a n q  
aisaattnaqvdeakanae  
aainavtpkvkkqaakdeidqlqatqtnvinndqnatteekeaa i qqlatavtdaknnitaatddngvdqakdagknsi  
qstqpatavksnakndvdq  
avttqnqaidnttgattee k n a a k d l v l k a k e k a y q d i l n a q t t n d v t q i k d q a v a d i q g i t a d t t i k d v a k d e l a t k a n  
eqkaliaqtadatteekeq  
anqqvdaqltqgnqnienaqsiddvntakdnaiqaidpiqastdvktnaraelltemqnkiteilnnettneekgndig  
pvraayeeg l n n i n a a t t t  
gdvttakdtavqkvqqlhanpvkkpagkkel d q a a a d k k t q i e q t p n a s q q e i n d a k q e v d t e l n q a k t n v d q s s t n e y v  
dnavkegkakinavktfse  
ykkdala k i e d a y n a k v n e a d n s n a s t s s e i a e a k q k l a e l k q t a d q n v n q a t s k d d i e v q i h n d l d n i n d y t i p t g k k e  
satt d l y a y a d q k n n i s a  
dtnatqdekqqaikqvdqnvqtalesinngvdngdvddal t q g k a a i d a i q v d a t v k p k a n q a i e v k a e d t k e s i d q s d q  
l t a e e k t e a l a m i k i t d q  
akqg i t d a t t t a e v e k a k a g g l e a f d n i q i d s t e k q k a i e e l e t a l d q i e a g v n n a d a t t e e k e a f t n a l e d i l s k a t e  
d i s d q t t n a e i a t v k n s a l  
eq l k a q r i n p e v k k n a l e a i r e v v n k q i e i i k n a d a d a s a k e i a r t d l g r y f d r f a d k l d k t q t n a e v a e l q n v t i p a i e  
a i v p q n d p d a n d t n n g i d n  
ndatansnatpentgqpnvsettangkadaspttpnnsdaatgettatsatddandkppannssvdastnsptmdnd  
vtskpevestnngttdkpv

Tsompanidou\_et\_al\_Supplemental\_FASTA\_File

tetdnatpaesttntnnstttatnenaptgstatapttasteaassadskdnasvndskqnaevnnsaesqstndkvaqpk  
senkakaekdgsdstnqsm  
vesttetlpsaditepnvpsntskdkeesttnqtdagqksetnvasneadkspskadtevsnpkptsasseakekmtst  
nvsqkddtatadntdqks  
vgsaannkatqndganaspatsvngsnanqdmnvtntddhqaktksaqqgkvnkakqqaktlpdtgmshnddlpyael  
alagmalfirrrftkkdqq  
tee

>tr|D1GR36|D1GR36\_STAA0  
mnmkkkekhairkksigvasvlvgtligfgllsskeadasensvtqsdsasnesksndsssvsaapktddtnvsdtkts  
ntnngetsvaqnpaqqett  
qssstnatteetpvtgeattttntqantpattqssntnaeelvnqtsnettsndtntvssvnsqpnstnaenvsttqds  
teatpsnnesapqstdasn  
kdvvnqavntsaprmrafslaavaadapaagtditnqltnvtvgidsgttvyphqagyvklnygfsvpnsavkgdtfkit  
vpkelnlngvtstakvppi  
magdqvlavgvidsdgnviyftdyvntkddvkatlmpayinpenvkktgnvtlatgigsttanktvlvdyekygfyn  
lsikgtidqidkntnyrq  
tiyvnpsgdnviapvlgnlknptdsnalidqqntsikvykdnaadlsesyfvnpenfedvtnsvnitfpnpnykvef  
ntpddqittpyivvvnghi  
dpnsgdlaalrstlygynsniwrsmswdnevafrngsgsgdgidkpvvpeqpdepgeiepipedsdsdpgsdsgsdns  
dsgsdsgsdstsdsgsda  
sdsdsasdsdsasdsdsasdsdsasdsdsdndsdsdsdsdsdsdsdsdsdsdsdsdsdsdsdsdsdsdsdsdsd  
sdsdsdsdsdsdsdsdsds  
dsdsdsdsdsdsdsdsdsdsdsdsdsdsdsdsdsdsdsdsdsdsdsdsdsdsdsdsdsdsdsdsdsdsdsd  
dsdsdsdsdsdsdsdsdsd  
sdsdsdsdsdsdsdsesdsdsdsdsdsdsdsdsdsasdsdsgsdsssdssdsesdsnsdsesgsnnnvppnspk  
ngtnasnkeakdskep1p  
dtgsedeantsliwgl1lasigs111frkkenkdkk

>tr|D1GR42|D1GR42\_STAA0  
msewhinnqstkpfligqaekqlsivkplpngsfqilteinlengnisnidhsllvsvdpkaleisifdav

>tr|D1GR44|D1GR44\_STAA0  
mnyikrtiil1ilfvvvspinspktiadnkyseiqqdkfqlpggdiivtkgpvmwgffghcsiaiddktilqiegpgdkp  
ttqsfesfkynyasgkndw  
mkvyrcsyppgagkkaeawvknyentnhrylvtnlnskkftyctkiyqaykfgvseksvksyglhiispyaikdnfid  
pyklrlvkay

>tr|D1GR48|D1GR48\_STAA0  
maktlyimrhgqtlfnfkgliqgfgdsp1telgiaaqakarsyyetkginfdlyasstqerasdtlenvapnqsyqrfkg  
lkewhfgifegesvylfdn  
lykpedlfgdrivpfggearqqveerivktlhdimsqtknna1vshgtimgvflryclkldealkhnigncnilkfeyd  
ngtfkfvelidpnl

>tr|D1GR49|D1GR49\_STAA0  
mvtaiihgfilaig1ilplgaqnvfiFnqanqkyryvlpaiitaglsds11111avvgvsiiims1pvlqaiiyivgl  
iflmyawtiwhdkpstgd  
etqimspmkqvsfalsvl1nphaildtigvigssaalygsnkiافتiacisvswlwffl1ailgkmvgsidktgkllt  
iinkissiiiiivalmilq  
k1iq11f

>tr|D1GR55|D1GR55\_STAA0  
mikfyqkncttckkaakfldeygvsyepidivqhtptinefktiantgveinklfnthgakyrel1knklqt1sdde  
kle11ssdgm1vkrplavm  
gdkitlgfkedqyketwla

>tr|D1GR57|D1GR57\_STAA0  
m1niqdvsh1skkeqkaynrfvesvengn1pvlpciemd1kemqet1nqskiggmpflksfkdipldennvpmvllaqi  
n1dd1peqqel1fpvkegi1  
qfwissedqmygmsen1kgnninsr1vyikepitd1sleniqah1ks1dadnenipfsgafsief1r1skqtitctdykyd  
edv1alwnkvnpfsalksm  
fggyde1mepvcntftakepfng1ggypyfdqidprtdqe1kmydrv11qidstrdgns1iwgd1gianilvkstd1e  
amkfddymyswdcs

>tr|D1GR63|D1GR63\_STAA0  
mwfekfknknketkyryykykdp1tnkwrrsvv1nknkgqsqkaqr11nerieak1ndktptt1ks1tfhaasdewf  
qnyiktsgskrttik1s  
k1nt1kkfvedilinkit1syaqqvfdemskgyvyqvnkdalsifknvfeytriyklqdlflkdit1nkriksyde  
vkakrnkyle1neiqsiik  
dinmkaqkmhsgihkrfylfvalmtefqa1ngmrigem1aiqneditdfdnks1ningtihwfhdsggfgvkdttkts  
yrtig1ssrsce1lkkail  
enkkdskwndgy1nrfvftnhkgnpmqterfnkilreaakdvgidkevsshilrhshis11sqqgvs1kaimdrvghsd  
hrtt1siyshvteqmdkdm  
mnl1eqvklg

>tr|D1GR64|D1GR64\_STAA0  
mkk1isi11ini11ilgvsnnasaqgdigidn1rnfytkkdfvd1kdvkndtpianqlqfsnesyd1iseskdfnkfsnf

Tsompanidou\_et\_al\_Supplemental\_FASTA\_File

kgkklvdfgisyngqcntk  
yiyggvatneyldksrniipiniwingnhtistnkvtstnkkltvtaqidvklrkylqeeyniyghngtkkgeeyghksk  
fysgfniqkvtfhlnndt  
fsydlfytdgdlpksflkiyednktvesekfhlvdvdisyketi  
>tr|D1GR65|D1GR65\_STAA0  
mpiwrcnikkgaikmki friltvs lffftfliknlayadvginl rnfyanepelqgvssgnfstshqleyidgky  
tlysqfhneyeakrldhk  
vdfgisysglcntkymyggitlanqndkprnipinlwngkqntistdkvstqkkevtaqeidiklrkylqneyniy  
fnktkkgeygyqskfnsq  
fnkgkitfhlnepsfitydlyfytgtgqaesflkiyndnktidaenfhldevisyekte  
>tr|D1GR67|D1GR67\_STAA0  
mliinnnlslimgkhrvtasklstvtgisrtsihglyhertenpdtktvmklceyfnitpneffgiiekegvk  
>tr|D1GR68|D1GR68\_STAA0  
mprtklqdfplkentvtepkqvvnplfakpna lagifgisysvnrilkewekdhkgiddlyyslsssmivisiprfee  
ymkarhkkwm  
>tr|D1GR69|D1GR69\_STAA0  
mkmyltyiclvslltillaisnmyvafsvyawlitlgcnltgglene  
>tr|D1GR72|D1GR72\_STAA0  
mneikleydthvsvvhyesldsrfsksfskpkwsklinklsvpieanykyargvavygdikngandhgeiikkhrndvvnv  
vyrdvivildydeindlkql  
heaisalsnvawfwhtsfshhteqarirlyiplnerisaddykytkvlankighkvdegsyqpsrcfalpviqkghif  
ikrvndcpiidvdmleqws  
kefeqsngspnikgytrrdsaywr diafgvsegernstlasitgyllrryvdplvyglvsawasvckpainqsevnntf  
ksilkdkss  
>tr|D1GR74|D1GR74\_STAA0  
mnknqkkselleyikahagtsfveiervfeennfdykgd gaytsqghpvnvfwgwnqea fdviaelkkdghiemdicep  
ivymvdgkgldlpivrskn  
iktdhwlpvtftiskketecv  
>tr|D1GR77|D1GR77\_STAA0  
mqsiaeketyhlptehlqvfnvikntsnkyitktkilnqlgyeynssnerwlrrvinslvhyhygypigcsykpseryyyi  
itteqekqgamrsikkld  
gsmkryealkrikv  
>tr|D1GR79|D1GR79\_STAA0  
metkyelnntkkvanafglneedtnllinavldidknmqeisselqqveqskqkqygttlqnlakqnriik  
>tr|D1GR83|D1GR83\_STAA0  
misnisi fakddkmqvsdkfnqivakmdylknkrnlvhsksiaedekkfletyiki ekynesniylkddkvnkrklng  
nnfd femvkdifeireelv  
dleiedlsinniessyifestffadvlddvnfakkqn lqkkrnskslesenvykdkkkllntdiktkfdmvtl  
>tr|D1GR84|D1GR84\_STAA0  
mikkidkilevnylnridkdntdndgiilkannvnlpnedneayveiiftmrsvesnsweneknkkrilddendqni  
igklrvnykiicdfstere  
ekmr dalleiiepyfrkevetllsnmklpnfilpyrfwenedn  
>tr|D1GR95|D1GR95\_STAA0  
mwnknrltqm lsiieyipi qagmagsttpklvasvsnsnglgtivagyfntqqledeidyvrqltsnsfgvvnfvpsqqsy  
tssqienmnawl kpyrral  
hleppvki teeqqfkchidtiikkqvpvccftfgipseqiisrlkaanvkligtatsvdeaianekagmdaivaqgsea  
gghrgsf lkpknqlpmvgt  
islvpqi vdvs ipviaaggimdgrgvlasi vlgagvqmgtafltsqdsnasellrdai insketdtvitkafsgklar  
ginnr fieemsqyegdi p  
ypiqnel tssirkaaanigdkelihmwsgqsprlatthpantimsniinqinqimqyk  
>tr|D1GR98|D1GR98\_STAA0  
mrlyhtndihshlheyerikaymaehrprlnhpslyvdlgdhvdl sapiteatlgkknvallneakcdvatignnegm  
tishalnhlydeakfivt  
csnvidesghlpnnivssyikdidgvkil fvaatapftpfyralnwivtdplesikeeielqrgkfdvllivlshcgiffd  
etlcqelpeidvifgshth  
hyfehgeinngvlmaaagkygnylgevnltfeahkvvhtakii pletlpevetsfeeegktlmsnsviqhpvvlkrsmn  
hiteaayllaqsvceytha  
qcaiinagllvkdivkdevtey dihqmlphpinmvrvr lfgvklkei iaksnkqeymyehvqglgfrgni fgyi lnylg  
yihstgryylngeeieddk  
eyvlgtidmytfgryfptlkel pkeylmpelfrdifkekll ey  
>tr|D1GRA0|D1GRA0\_STAA0  
mikvdqhyfelienyrecfnee qfiarysdi ldkydivgdygdqlrlkgfykdsnkkaemskrfsni qdyifeycnfg  
cpyfv l rhlskqevkklie  
evhpsdvidddnk lqdvkikptiqdteh  
>tr|D1GRB8|D1GRB8\_STAA0  
mthlletfemsidhqedglvvismpvtdkvkqpfy lhg gasialgetacs lgsanlidttkfiplglemnanhihsakd  
grvtataei ihrgksthv  
dikikndkeq l itvmrgtvaiks l k

Tsompanidou\_et\_al\_Supplemental\_FASTA\_File

>tr|D1GRC3|D1GRC3\_STAA0  
miesnmlvltlvipvitailvfigkrpiikryvalggtlltvaaiinlanvvkhgpirvelgswkapysivfvldifs  
alliitsiitaivilysy  
qtignereryyyyfsvlflmigiigafttgdi fnlfvffevflmssyflvlgstkiqlqetikyvlvnnvsssffvmgv  
ailysvvtlnladisnk  
anlsahdsglvnivfilfivfatkagvfpmfvwlpsayyappiiaffgalltkvgvyaiartlsffsdnvsfshyv  
ilflalltiifgcvgavay  
anikkiilynvmiavgvilvgvammtesgmigaiyytlhdmlvklalflligimikitgtadlrqfgglikrypvlgwsf  
fiaalslagippfsgfygk  
ffivqstfergfyfsgvivilsslvlysviriflqgffgqpkgydlnnkvdvkiytiaivavvitvlyglsadylypm  
vkagaetfynpstyvkav  
ggk

>tr|D1GRD9|D1GRD9\_STAA0  
mltvdqkelvgeikdpii dvpketegivevsikeekehsvklamaqlggepqldlq mavvnalkengaktvgirfet  
lpeekvnqfkpkeenpkpt  
iegllsqnnpvefiaiasgkgvgkstvavnalavalaregkkgvlvdadiygfsvpdmngidekpgikgkevipverhgv  
kvismaffveenapviwrg  
pmlgkmltnfftevkwdieyilidlpptgdvaldvhtmlps skeiivttphptaafvaaragamakhtdhsilgvien  
msyfesketgnkeyvfgk  
ggtkladeIntqlgeleqpswnpkdfapsiyqsdrrlgiyssiaqkviaatnk

>tr|D1GRE0|D1GRE0\_STAA0  
mmakveltrrrrnfiavmli safvailnqtllntalpsimrelninestsqwlvtgfmvngvmpiltaylmdriktrp  
lylaamgtfligsivaala  
pnfgvlmlarviqamgagvlmpmqtflftlfskehrgfamglaglvifqfapaigptvtgliidqaswrvpfiiivgiai  
lafvfglvsissynevkyt  
klkrsvmystigfglmlyafssagdlgftspivigalilsmviylfirrqfnitnallnrvfknrtfalctissmii  
mmsmvgpalliplyvqns  
slsalsglvimpgaiingimsvftgkyfydkgprplytghtiltittimlclhdtstytilivvyairmfsvsllmm  
pinttginslrneeshgt  
aimnfgvrvmagslgtal mvtlmsfgakiflstspshtateikqqsiaigvdisfafvavl vmaayvialfirepkeies  
nrrkf

>tr|D1GRF0|D1GRF0\_STAA0  
mrglktfsilglival lvaacngtdnsskkesstkdtisvkdengtvkvpkdakrivvleysfadalaaldvkvpgiad  
dgkkkriikpvrekigdyt  
svgtrkqpnleeskikpdl iiadssrhkginke lnkiaptlslksfdgdykqninsfktiakalnkekegekr laehdk  
linkydeikfdrnqkvlp  
avvakagllahpnysyvgqflnelgfkna lsdvvtkglskylkgpylqldteh ladinpermiimtdhakkdsaeffklq  
edatwkklnavknrvdiv  
drdvwarsrglisseemakevelskkeqk

>tr|D1GRF1|D1GRF1\_STAA0  
mahvni niskikynakvlqtvfqsknmqftpvikciagdrtiveslkalginhvaesrldniisiadqdltytllrtpak  
keisdmi ekvdmsiqtel  
tihqinevaevlgkhhkil mvdwkdgregvlytdvldyikeihlknihfvglafnfmcfksdapsdddifminrfvsa  
vereigyrlkiisggnssm  
lpqlllyndlgkine lrigetlfrgvdttttnqaiamlyqdaitleaeileikprvntqthesflqaidigyl dtkvdnis  
pmdqhini lgassdhml d  
l ngqghyvgdhisfsl nyealshsmymknlhkvyiddskidtl lqnfdvkspamvny

>tr|D1GRF3|D1GRF3\_STAA0  
mwagaidkydkgrllritissflvtailcvltsyftaipisviiyat lrgilsavetplrqailpdlsdkisttqav  
sfhsflinicsigpaia g  
vilavyhapttflaqaicyfiavllclplhfkvtkipedasrymplkviidyfklhmegrqifitsllimatgfsyttll  
pvltnkvfpgkseifgiam  
tmcaiggiaitlvlpkvlkyigmvnmmylssflfgiallgvvfhnivimficitliglfsqwarttnrvyfqnkvdyer  
gkvl siimdrgmip lgs  
lmsicadvfgivrtf simgisticitmvfyfinrklklkleeshgis

>tr|D1GRF7|D1GRF7\_STAA0  
myiqdgri teyqdyflqfewfp llislaalliligilv fsifkpthrkpglykdfddghvyvsrkavektafdtvaky  
dqvrqpnvvaklynkknks  
yidikt dffvpnnvqvs lteairsdikknveyftempvrklevnvrdqktsgrvl

>tr|D1GRF8|D1GRF8\_STAA0  
mknksvslfwvslvicti fvafgai fpkql ekltqnittfialhfswylllvilv fvcvylf sryanitlgeged  
pefslpswfamilfsagmgi  
glvfwttaepishafkltpihkagtqsa indamqfsffhwgihawavygivalvfayfshkgypplvsat ltpllgeka  
mrgplggaidvlaviatvt  
gvaatlgfgalqineglhflfnvpsnftmqviliviati lftwsawsgidkgiktlninmllafvvliglfivgptlyi  
lntftnglgnyanfms  
lriptggkfqwlqwti fyawwisiwapfvgi fiarvskgrtikefilglvfpalvcfiffavfgasaiylqdnhiad  
iakaatetatfatlqhyp l

Tsompanidou\_et\_al\_Supplemental\_FASTA\_File

gfvlslitllvimi ffvtsadsatyvlgm lsssgdinpksfvkvswwgiimalfaiimi ytggtqaiqnlliaalpfsvv  
iamiwslkslseekprn  
snkvlikhrdpdileyrsskhidden  
>tr|D1GRG1|D1GRG1\_STAA0  
mkkifvittllavaiiigsiimvvsqrqaqt fkiqqqfvkkipitlflhgf ggsansekfmvkqaekrgvtkdi ita  
yvskdgavtfkgklrkdav  
npivkielenrqqyl dknawfknvltk lqseyndkfnfvghsmgnltfaqymmygndkslpq lnkqvniavtfngv  
lnmnedvneitvdkdggkps  
rmngpyqqlrvlkd iykgkievlniygd lkdgthsdgrvsns sskslkyllgnspksyreskyegepaqhsq lhenenv  
anelidflwkk  
>tr|D1GRG6|D1GRG6\_STAA0  
miltltnpsvdisypltalk lddvnr vqevsktaggklnvtrv laqvgepv lasgfiggelgqfiakk lhdhikhaf  
ynikgetrnciailheggq  
teileggpeidnqeagfikhfeqllekveavaisgslpkg lnqdyaaqiercqngv pvil dcs gat lqt vlenpykp  
tvikpnise lyqlnqp l d  
esleslkqavsqplfegiewiivslgaqdafakhnhtfyrvniptisvlnpvgs gdstvagitsailnhendhdllkkan  
tlgm lnageaqtgyvnl n  
yddlfnqievlev  
>tr|D1GRH1|D1GRH1\_STAA0  
mcfdinnldikklnfrkvknaihslsgdkyqfl edgktinntyflavydnainifedl fspdsinlvhvvyvysepyk  
ktnvik kfts ltidelyyf  
keykkekddnilceefsykcsikdi kykkllkai snqdfkg lvpnin qndnyseyi inntknliyhlyddrglwlafnn  
nedarysekyndlisefd  
nedi  
>tr|D1GRH5|D1GRH5\_STAA0  
mtyrikkwqklstittlmagvitlnggefsvdkhqiavadtnvqtpdyeklrntwldvnygydkyden n p d m k k k f d a t  
ekeatnllkemktesgrky  
lwsgaetletnsshmtrtyrniekiaeamrnpkttlntdenkkkvkdalewlhknaygkepdkkvekelsenftkttgknt  
nl n w w d y e i g t p k s l n t l  
illndqfsneekkkftapi ktfapdsdki lssvgkaelakgnlvdisvklleciieedk d m m k k s i d s f n k v f t y v q d  
satgkerngfykdgsyidh  
qdvpytgaygvvlllegi sqmmpmiketpfn d k t q n d t t l k s w i d d g f m p l i y k g e m m d l s r g r a i s r e n e t s h s a s a t v m  
ksllr lsdamddstkakyk  
kivkssvesdssykqndylnsysdi d k m k s l m t d n s i s k n g l t q q l k i y n d m d r v t y h n k d l d f a g l s m t s k n v a r y e s  
ingenlkgwhtgagmsyly  
nsdvkhyhndfwvadmkrlsgtttldneilktd d k k s s k t f v g g t k v d d q h a s i g m d f e n q d k t l t a k k s y f i l n d k i  
vflgtgikstdssknpvtt  
ienrkangytlytdkqttnsdnqennsvfl estdtkknigyhflnkpkitvkkesh t g k w e i n k s q k d t q k t d e y y e v  
tqkhsnsdnkygyvlypgl  
skdvfkttkkdevtvvkqedd fhvkdnesvwagvnysnstqtdf inntkvevkakgmfilkkkddntyecs fynpestns  
asdi eski smtgysitkn  
tstsnesgvhfeltk  
>tr|D1GRH6|D1GRH6\_STAA0  
mctqndgtieqiwideanqfgvsvtwkdnsi igfvmrplinydaiknett lkyavpttdcyeifwggdnelynyhylyph  
qryaidlvikenhktyknq  
gkvntdyfcfgkdiiapangtvekvvngvqdnsigstnesqflngyivikhaeneysliahlhqsyiivnegqnvkygdi  
igkvgnsngstephihfq  
mndknieactsl kirfinnrelikgdvvcglqae  
>tr|D1GRI1|D1GRI1\_STAA0  
mnnsfnlveligtkiitmedfykmeeefflksklplylysfnyvdeytmklldrgrisi lntktnkdcifdiskyihe  
nii f r r d i f e l n d i r d d d l  
kykingnievylsgelekivkhlfen k f d v e y g f y i l f i k p i f e i v f s s n y v k e e f n t k i e s s e y r e l d s f n e i l m k y  
leneinfkevkkylidelf  
kklnvqllihkkieslissyd k k i s d d c s m y s k v f e q y k k n v l d k v y y s e v y k y s d n l i k v f s e d v n i m g y k k y n e y  
ftnrddttlkitnlyigqs  
fgtegnrvidrigkheklqeimtyqpenrktvliyfykiqpndiyitnqygkeavsr lkrileqsipnkeyidlseisl  
itffkpeynkqhvn eefns  
lssskiknlakendgi i y l n f k d v n y q l i s e g n t f f s a k p y l h c v f n k d i l n m d k v d i e n f f k s i e v k y s k  
>tr|D1GRI8|D1GRI8\_STAA0  
mknk liigrylpinsfvhldpraklmfvflfiiliffchsp ltylwv falilfimrlakiqlwflig ltpiff flift  
lmhifl tkgyv l v e w h g  
itietngileglyislr ligivmiatiml stspid l t d a f e r l l a p l k m f k l p v h q l s m i m s i a l r f i p t l m d e l d k i i  
laqksrgseissgniatr i  
ksfvpllvplf isafqraeelavamevrgydanvkrt syrqlkwqlrdtis l t m i i p i a i i l f v l k y s g v  
>tr|D1GRJ0|D1GRJ0\_STAA0  
medknsvivfknsfyqqs dasftlk d v s f n i p k g w t s i v g h n g s g k s t i a k l m i g i e k v k s g e i f y n n q a i t d d n f e k  
l r k d i g i v f q n p d n q f v g s  
ivkydvafgl enhavpydemhrrvseal k q v d m l e r a d y e p n a l s g g q k r v a i a s v l a l n p s v i i l d e a t s m l d p d a r q



Tsompanidou\_et\_al\_Supplemental\_FASTA\_File

n1ldlvrkvksehnitiis  
ithdlseameadhvi vnmkgvtvykegtateifdnaeeltrigldl pfpikinqlghqtsfltyeglvdq1  
>tr|D1GRJ8|D1GRJ8\_STAA0  
miqtlvnffrtkevrnkiff tlamlvi fkiqtiyapagvnpaafdnpqgsqgate11ntfggga1krfsifamgivpyit  
asivmql1qmdivpkfsew  
akggevgrrk1nnvtrylaislafiqsiglafqfnny1kgaliinqsimyllialv1tagtafliwlgdqitqfgvgng  
isiiifagilstlpasliq  
fggtafvqgedtslawlkvlgl1vs1i11tvgaiyvleavrkipiqyakkqtaqr1gsqaty1plkvnsagvipvifama  
ff11prt11fypdkewa  
nianaanpssnvgmvvyiv1i1lftyfyafvqvnpekmadn1kkqgsyvpgirpgeqtkeyitkvlyr11tfvgsiflavi  
silpilatkfmg1pqsiqi  
ggt11ivigvaietmks1leaqsqkeykgfgr  
>tr|D1GRL4|D1GRL4\_STAA0  
mthiq1nfsk1teffgehelkqqeivksihktihegtgagsdf1gwvd1pvdydkeefsriveaskrikensdvlvvi  
iggsylgaraaiem1tssf  
rnsneypeivfvgnh1sstytkelvdy1adkdfsvnvisksgtttepavafr1fkq1veerygkeeaqkri fattdkekg  
a1kq1atnegyetfivpdd  
vggrysv1tavgl1piatagini eammigaakareelssdkleeniayqyati rni1yakgyttem1inyepsmqyfnew  
wkq1fgesegkdfkgiyps  
sanymtd1h1lgqyvqegrrf1fetvkvnhpkyditi ekdsdd1dgl1n1lagkti devntkafeqt11ahtdggvpmv  
vni pqldeetfgyvvyffe  
lacamsgyq1gvnpfnqpgveayqnmfal1gkpgfed1kkeleer1  
>tr|D1GRL7|D1GRL7\_STAA0  
mkkeilewiisiavafv11fivgkfi vtpytikgesmdpt1kdgervavnivgyktgg1ekgnvvvf hanknddyvkrvi  
gvpdkveykndt1yvnkg  
kqdepy1nyn1khkqgdyitgtfqvkd1pnanpksnvipkgy1vlgdnevskdsrafgl1idedqivgkvsfrfwfse  
fkhnfnpentkn  
>tr|D1GRL8|D1GRL8\_STAA0  
mt1hay1lragtgkstkml1teikqkmkadplgdpi1liaptqstfq1eqafvndpelngs1rtevlhfer1shrifqevg  
syseqk1skaatemmiyni  
vqeqqkyl1klyqsqakygfsek1teqi qdfkkyavtpehlehi adknmqtrtkn1ledialiyrefeqriqnefitge  
ds1qyfidcmpksew1kra  
diyidgfhnfstieyli1kgl1kiyaksvti11ttdgnhdqfs1frkpsevlrhi eeianel nisierqyfnqlyrfnnqd  
1kh1eqefdalqinrvacq  
ghinilesatmreeineiarriivdir dkq1ryqdiai1lyrdesyay1fdisil1p1ynipynidtkrsmthhpvmemirs1  
1evi qsnwqvnpm1rl1kt  
dvl1tasy1ksay1vd1lenfv1l ergiygkrw1dde1fnvehf skmkrakah1tederntfeqvvl1kkdvidki1hfekq  
msqaetvkd1fatafyseme  
yfel1pnq1l mterde1d1ngnhekaeeidqi wngliqi1dd1vl1vfgdepmsmer1levfdigleq1efvmipqt1dqvsi  
gtmd1akvdnkqhvy1vgm  
ndgtmpqpvtass11tdeekkyfeqqanvelsptsdi1qmdeafvcyvamtrakgdvtfsys1mgssgddkeisp1nqi  
qs1fnq1lei1tnipqyhev1  
pls1mqhakqtki11fealrawlydeivadsw1dayqvirdsdh1nqgl1dylmsal1tdnetvkl1get1skdlygkeina  
svsrfegyqcpfkhyash  
gl1k1nertkyel1qnf1d1gdi1fhsv1kyiseringdfkq1d1lkkirql1tnealee1l1pkvqfn11nssayry1srrigai  
vett1sal1kyggtysk1fmp  
khfets1frkpr1ndeli1aqt11tttqgipinirgqidridtytkndtsfvni1dykssegsat1d1tkvyymqmqmmt  
mdiv1qnqr1gl1tdivkp  
gg1ly1fhvheprik1fkswsdidedk1eqd1ikkfk1sg1vnadqtv1daldir1lep1kftsdivpvg1nkdgs1skrgsqv  
adeatiyk1fiqhnkenfie  
tasnimdg1tevap1kykqk1pcafc1syqs1vchvdgm1dskryrtv1detinpieaiqnin1defgqeg  
>tr|D1GRM5|D1GRM5\_STAA0  
mnktkgftkykkmryipgl1dgl1raiav1giii1ylnkqwl1tggf1lgvdtffvisgylits111keyddtgi1k1ksfwir  
r1kr11paviv11mvvgta  
t111ksd1i1rvkhdi1aa1fyvsnw1yia1kdvnyfeqfs1fmp1kh1lws1aieeqfyi1ffp1ilvt111tikkykigfi  
fwgvs1i1s1gl1mmfiysin  
gdhsrvyfg1dtr1qt111gvi1af1wppfk1kndppkvvkyvidsig1s1fiv1l111ffi1ndetnwiydggfylisil  
t1fi1asv1h1pstwiakif  
snp1lvfi1gkrsys1ylwhfavisfvhsy1yvdgqipvyvyfidis1ti1faelsyrfi1etpfrkegika1nwrpsyipqf  
irmaivvt11ipfm1ilvg  
afnkygkdi1gekansfd1tiedny1mriapidniqidgl1vsekkkessdvynn1kpl1igdsvmvdigesfkssvpksr  
idgkvgrqlyqt1plvkan  
ysqykkssdqv1le1gtngdftvkq1dd11nqfgkakiy1vntrvpriyeavn11ladaakrksnvt1idwykrsqghs  
eyfapdgvh1eykgv1alk  
de1kalkkk  
>tr|D1GRN1|D1GRN1\_STAA0  
mkiktefkg1n1pyeyaagadv1sdsingn1piks1pfevie1pegtkylaws1idydai1pvcgfawihwsvanvsvsgnsi  
sikad1srtkgdyvqgkns

Tsompanidou\_et\_al\_Supplemental\_FASTA\_File

ftsgllaedfseienhyvgtpdpdqdhqyelvtvyaaldhslnlkngfyneflkevnqhkidqtsinligrki  
>tr|D1GRN4|D1GRN4\_STAA0  
mnvgtikgfgayapekiidnayfeqfldtsdewiskmtgikerhwaddqdtsdlayeaslkaiadagiqpedidmiivat  
atgdmfpftvanmlqerlg  
tgkvasmdqlaacsgfmysmitakqyvqsgdyhnilvvgadklskitdldrstavlfgdgagaviigevsdgrgiisye  
mgsdgtggkhlyldkdtgk  
lkmngrevfkfavrimgdastrvvekanltsddidlfiphqanirimesarerlgiskdkmsvsvnkyngntsaasiplsi  
dqe1kngkikdddai1vg  
fggg1twgamtikwgk  
>tr|D1GRR2|D1GRR2\_STAA0  
mieklvtflnevvsckplvygllitgvlftlrmrffqvrhfkemirlmfqgekspngissfqaiamslagrvgtgnivgv  
staifigggpavfwmwita  
flgassafiestlgqifkrvenneyrggpayyieygiggkfgkiygiifaivtiisvgl1llpgvqsnaissmhnaihvp  
qwlmggi1vvv1gl1ifgg  
vrsianvatavvpfmai1yilmaviiiciniqevpalfalifksafglqsafggivgamieigvkrglysneagqgtgph  
aaaaevshpskqglvqaf  
svyidtlfvctatali1lisgtyntdgtvnangtphlikdggivyentatgkdysgtamyaqagidkafhgsgyqfdptf  
sgvgsyfi1af1fffaf1t1  
i1sy1y1tetnvayl1rnqnnqvssifiniarvi1l1fatfydavktadvawafgd1gvg1maw1ni1aiwilhkpavnal  
kdyeiqkkr1lgnynavyq  
pdpnk1pnavfw1ktyper1kqarakk  
>tr|D1GRR7|D1GRR7\_STAA0  
mdastl1fkkvkvkrv1gsl1eqqiddittdsrtaregsifvasvgytvdshkfcqnvadqgck1vvvneqslpanvtqvv  
vptl1rvasilahtlydyp  
shq1vtfgvtgtnktsiatmih1iqrklqknsaylgtngfqinetkktganttpetvs1tkkikeavdagaesmt1evs  
shglv1gr1rgvefdvai1f  
sn1tqdh1ldfhtmeayghaks1lfsq1ged1skekyv1lnnds1fsey1rtvtpyevfsygid1eaaqfmakniqes1qg  
vsfd1vtp1fg1typ1ksp1yv  
gkfn1sn1maami1avwskgts1leti1kaven1epvegr1lev1dps1pid1i1dyah1tadgmkn1lidavqp1fvkqk1l1flv  
gmagerd1tktpemgrvac  
radyvi1ftpdp1anddpkml1tael1agathqnyie1ddraegikha1diaepgd1tv1askgrepyq1impghikvphrdd  
l1gleaayk1kfgggpv1d  
>tr|D1GRR8|D1GRR8\_STAA0  
minkrfiddegktidvyl1fealnnqii1aipdwfwsyqmamt1deetcfeailmq1lfv1keeeeaesiasq1tdwietykk  
ekd  
>tr|D1GRR9|D1GRR9\_STAA0  
mnlkqevesrktfai1shpdagkt1tek1lyfsgai1reag1tvkgkktgk1fatsdwmkveqergisvtssvmqfdyddyk  
in1ldtpghed1fsedtyrt  
l1mavdsavm1idcakgiepqt1kl1fkvckmrgipi1ftfink1drv1gkepfel1deieet1nietypmnwpigmgqsffgi  
idrksk1tiepfrdeen1lh  
l1nddf1e1eedhai1tnds1dfeqaiee1ml1veeageaf1dnda1lsgd1tpvffgsa1lanf1gvqnf1nayvdfapmpnarqtk  
ed1ev1sp1fdds1fsgfi1fki  
qanmdpkhrdria1fmr1vsvgafergm1dvt1qrtnkkqk1itrsts1fmaddketvnhavagdi1glydtgnyqigdt1vggk  
qtys1fqd1lpq1tpei1fmkv  
saknvmkqkh1fhkgieq1lvqegai1qyykt1lhtnqi1ilgav1gqlq1fevf1ehrmkney1ndv1vmepvgrkiarwienedqit  
dkmntsrs1ilvkdrydd1lv  
f1fenefatrw1feek1fpeik1lys1l  
>tr|D1GRS1|D1GRS1\_STAA0  
mewt1vdi1gk1khvipksqyrrkrreffhnedreen1nqh1qdkqni1dnttsk1kadqihkdsidkherfkns1ssh1leqrn  
rdvnenkaeesksnqdsks  
aynr1dhyl1tddv1skkqns1dsvd1qdteksky1yeq1nseat1stk1stdkvestemrkl1ssdknkv1gheeqhv1l1skpsehdke  
tr1idsess1rtds1dssmqte  
k1kkd1ssdg1nk1ssn1lksevi1sksntvpk1sesd1devnnqk1pl1t1pee1qk1krqqs1neqtktytygd1seqndks1nhend  
l1shhips1sddk1dnvmren  
hivddnp1dndi1tps1l1skt1dddrk1ldek1ihvedk1hkqnads1setvgy1qsq1stas1hrst1ekrn1isindhk1lngqktntkt  
sannqk1katsk1lnkgrat  
nnnysdi1lkk1fwmmywpk1lvi1lmgii1ilivi1lnai1fnnvnkndrmndndadaqy1ttmknantvksvvtvenetskd  
ss1lpkdkas1qdev1gsgvv1y  
kksgdt1lyiv1tnah1vvgdkenqk1itfsnks1svvgk1lgkdkwsd1lavvk1atss1dssvkeia1igdsnn1vl1gepil1vvgnp  
lgvdfkgtv1tegi1sg1lnr  
nvp1idfkd1nk1ydm1mkaf1idasvnp1gns1ggav1vnregk1ligv1vaaki1smpnvenms1faip1nevqkivkd1letk1gid  
ypdv1gvk1mknias1lnsfer  
qavk1lp1gk1vkn1gvvd1qv1dng1ladq1sg1lkk1gdvite1ldgk1l1edd1l1rfrqi1fshkdd1ksitakiyrdgkekeinik1  
k  
>tr|D1GRS8|D1GRS8\_STAA0  
mwgeh1qeywy1lytgim1liagi1syvfy1qrdieskr1l1tsig1vgi1itailim1ql1l1fsl1itsn1l1sys1slikelartgvnw  
wqmlvt1l1fvip1chelymr  
tv1lqkel1thfs1ipkw1vail1taic1sss1lfiy1ldnwwiv1tf1fvaq1vils1syey1trriattsva1qivai1ll1l1fna

Tsompanidou\_et\_al\_Supplemental\_FASTA\_File

>tr|D1GRT1|D1GRT1\_STAA0  
mie1kdltiqkgnthi1kkl1nkfqcgksyaligksgcgkst11ntiaglektgkqyvyfngqleqfksnfyrdklgylf  
qnyglidn1tvnenldigl  
aykkiskkekeqiki ryieqfglsns1krkvht1sggeqqrvalirmm1kdpivmladeptgalpktgqmi1qslfglv  
denkv1ilathdmainqc  
deid1eqyrkvasm  
>tr|D1GRT4|D1GRT4\_STAA0  
mmklgm11irwm1atsflvhgt1kfvd1dgtihf1gslglpptiavlmsigevvgglaliigfltpyvnyfyicvmlgsi  
ft1kl1trgyvsgyefeiih  
ivmnlac1ssyswkkwlqfy  
>tr|D1GRT9|D1GRT9\_STAA0  
msnqyqqystvkkywh1mrpht1tasvvpvlvgtaskaify1g1sedhikis1fiam1lac1liqaatnmfneydykkg1  
ddhesvg1ggaivrngmsp  
elvr1raiafyilaailglflaanssfw1lpvg1vcmavglytggpfpiswtpfge1fsgvfmgmfiiviaaffiqtgni  
qsyviw1svpiviti1glin  
mannirdrvkdkasgrkt1pil1gknas1tfmaimyfiayafiv1t1iikpggs1fy1lla1l1sfmpvkvirrfkndtp  
ptmvpamaagktntffgl  
lya1giyisa1fagi  
>tr|D1GRU5|D1GRU5\_STAA0  
mnsscksrvfni1siimvsm1i1slgafannkakadshskqleinvksdkvpqkvkd1aqqqfagyakaldkqsnaktg  
kye1geafkiykfngeedn  
syyypvikdgi1vyt1t1spknkdd1nkskedmnysvki1snfiakd1dqikdksnitv1tdekgyfeedgkvr1vkat  
p1pgnvkekasaktvsak1  
kqe1kntvtptkveeneai1qedqvqyent1knfki1reqqfndswcagfsmaallnatkntdtynahdimrt1ypevseqd  
1pncatf1pnqmiey1gksqg  
rdihyqegvpsyeqvdq1tkdnvgimi1aqsvsqnpndph1ghalavvgnakindqekliwynpwdtelsiqdadss1lh  
1sfnr1dynwygsmigy  
>tr|D1GRV5|D1GRV5\_STAA0  
mkn1gpk1sl1aligi1f1il1ceffygip1flgatf1l1sf1gwq1p1l1fnally1l1ilti1ll1vnrqna1rpi1aip1fgiv1gs1fla  
i1p1fl1gi1li1hwi1l1ff1mi1  
fv1lv1stptyipknarvitytqykdghre  
>tr|D1GRW1|D1GRW1\_STAA0  
ms1lenq1lae1kydyvr1lqgdi1ekres1n1dtsa1vrq1kdi1ene1rnvr1aqmqd  
>tr|D1GRW3|D1GRW3\_STAA0  
mi1kkl1l1qfs1lgnk1fai1fmv1lv1l1ggvy1sak1kle1lpnv1qnpvis1vt1t1mpgat1p1qst1qde1sski1dnqvr1slayvk  
nvktqsi1qnas1ivtveyen  
ntdmk1aeeq1k1keidk1kfkdevgqpe1rrnsmdafp1l1ays1fsnkend1kkv1tkv1neq1ipk1qtvd1gvqnaq1ngq  
tnre1t1kfkqne1lekyg1  
taddveny1lktatrt1p1gl1fqfgdkdks1ivvd1gqy1svdafk1n1ip1t1lagg1q1sqs1sdnk1qnsams1dvn1qas1p1q  
n1skasapn1n1sgmptak1g  
d1adi1tv1gdv1rts1sktngk1davn1qi1tkaq1dant1v1qak1dv1qrk1idt1fv1den1kdf1nv1tk1mdt1ak1p1veks1ly1tm1vekas  
1gt1vai1i1v1l1fl1r1n1rt  
tai1si1s1ip1sl1mal1ialk1l1sdvs1n1ilt1gal1tva1igr1vidds1ivv1veni1yr1rd1seeq1kgen1i1is1atte1vf1kpi  
ms1st1vt1i1v1f1p1lv1fv1sg  
sv1gem1fr1p1fal1a1afs1l1as1l1vs1it1vp1alaat1f1kkg1v1krrn1kqh1qeg1lgv1st1ty1k1kvl1hws1nhk1wivi1il1st1il  
vat1iv1fgg1pr1l1gts1fis1ag  
ddk1fla1ity1tpk1p1geteq1avl1nhak1dveky1kqk1khv1kti1qys1vgg1ssp1vd1pt1gst1ns1maim1vey1dnd1tp1nfd1vead1kvi  
khad1g1fk1hp1gewk1nq1d1gt  
gag1nks1ve1tv1k1g1psmda1k1st1vk1dieq1k1mk1qv1kgl1anv1ksd1s1q1tyd1qye1ikvd1qn1kaa1eng1isas1qlam1h1nen1pek  
tv1tt1vk1eng1kt1vd1vk1vk1qn  
kq1tdw1sed1k1lnni1t1k1k1pt1g1gt1ik1l1gdi1at1lv1k1tt1t1ps1k1t1qe1gg1dy1att1vs1ak1vt1nk1d1vg1g1t1tr1q1v1ms1k1inn1ld1k1p1nnv  
kv1n1igg1as1dd1inn1amt1qla  
fam1laa1i1i1vy1l1il1vi1tf1k1g1gl1ap1ft1il1fs1lp1ft1vig1via1l1it1get1is1vps1lig1ml1ig1iv1v1tna1iv1lid1rv1inneq  
qgm1em1ke1al1ieag1g1tr1ip  
i1l1mta1iat1iga1lv1p1l1fg1d1ss1il1sk1g1la1at1vig1gl1is1st1l1t1lv1vv1p1vi1ye1il1ft1l1kkr1f1tkr  
>tr|D1GRW4|D1GRW4\_STAA0  
mek1mhi1tnqeh1daf1vk1shp1ngd1l1ql1tkwa1et1k1l1tgwy1arri1av1gr1d1gev1q1gvaq1l1fk1kv1pk1pyt1l1cy1srg1fv1vdy  
sn1ke1aln1l1dsake1i1aka  
ekaya1ki1dp1dve1vd1kg1tda1l1qn1ka1lg1fk1hk1g1f1keg1l1sk1dy1i1qpr1mt1mit1pid1knd1del1ns1ferr1nr1skvr1al1krgt  
t1vers1dreg1l1kt1fae1lmki  
tger1dg1f1l1tr1di1sy1feni1yda1l1hed1g1dae1fl1vk1l1dp1keni1akv1nqel1ne1l1hae1iakw1qq1k1mkt1sek1qak1kaq1nm1indaq  
nki1ak1ned1k1rd1lea1leke  
hpegi1yl1sga1l1mf1ags1ksy1ly1gass1ne1fr1d1fl1pn1h1mq1y1tm1ky1areh1gatt1ydf1gg1tdnd1pd1kd1sehy1glwaf1k1kw  
gt1yl1sek1ige1fdy1v1lnq1l  
yq1lieq1vk1pr1tk1ak1i1srk1l1krk  
>tr|D1GRW9|D1GRW9\_STAA0  
mp1kev1fg1dd1fv1l1pkne1l1t1fdemari1ak1vya1el1gvk1kir1it1g1gepl1mrr1d1dv1liak1lnq1id1gied1ig1l1ttng1l1l1k1kh  
gq1kly1dag1l1rrin1vs1ldai

Tsompanidou\_et\_al\_Supplemental\_FASTA\_File

ddtlfqsinrnrikattileqidyatsiglnvkvvviqkginddqiipmleyfkdkhieirfiecmdvgnngwdfskv  
vtdemltmieqhfepdv  
epkyfgevakyryrhkdnvqfqlitsvsqsfctctrarlssdgkfygclfatvdgfnvkafirsgvtdeelkeqfkalw  
qirddrysdertagtvanr  
qrkkinmnyigg  
>tr|D1GRX9|D1GRX9\_STAA0  
mpdltpfwisirvavistiivtvlgifiskwlyrrkgswwklllesllilpivlpptvlgfilliifsprgpigqffanvl  
hlpvftltgaviasvivs  
fplmyqhtvqgfrgiddtkmintartmgasetkiflklilplakrsilagimmsfaraigeftatlmvagyipnktntlpl  
eiyflveqgrenewlwvl  
vlvafsivvistinllnkdkykev  
>tr|D1GRY0|D1GRY0\_STAA0  
mklkrflavviamllvlagcsnsndnneskkddadngkkqeiqvaaasltadvtkklasefkkehknadikfnysggsgal  
rkqiesgapvdvfmstantk  
dvdaikdknkahtykyaknsllvigdkdsnytsvkdldkndklaalgevktvpagkyakqylndnnlfkeveskivyakd  
vkqvlnyvekgnakqgfvy  
ktdlykqnkkidtvkivevelkkipityeagatsdsklakewmeflksdkakeilkeyhfaa  
>tr|D1GRY3|D1GRY3\_STAA0  
mttkqlvytalmtaiailglvpviplpfssvpivlqnigiflagvilgrkygtlsvivflllvvaglpllsggrggigv  
fagsagflllypvvafmi  
gairdrfineinfwilfvglivfgviaaldvigtlimgmiiinipftkaisislalpgdilkaivasligtallnhsqfrq  
imgik  
>tr|D1GRY7|D1GRY7\_STAA0  
mkiidvllknisqvvliisnkwgtlfiliglfvadwtiglaavgsiiaytfarfinyseaeindglagfnpltaialti  
fldksgldivitmiatllt  
lpvaaavrevlrpykvpmltmpfvivtwftillsgqvkfvdtslklmpqnienvnfsndrihfislfegfsqvfi eas  
viggvciligiliasrkat  
llaviasllsfiivalggnyddinglfgynfvlmaialgytftainpyistflgvlltvvvqlgtttllepfglpa  
tlpfiivtwillfagikh  
kvda  
>tr|D1GRY9|D1GRY9\_STAA0  
mipgeiitksteveinnhhpetvievntgdprpiqvghfhfyeanaaldfere mayghldipagaavrfevgdkkevq  
lveyagrki fgfrgmvg  
pidesrvyrptdendeyagvfgdngaenvnkkggkrs  
>tr|D1GRZ3|D1GRZ3\_STAA0  
manpikigiggpvagaktqlikvvrllskemsigvitndiytkedekilvnsgvlpesriigvetggcphtairedasm  
nfaaidellerhddielif  
iesggdnlaatfspelvdfsiyiidvaqgekiprkgggmiksdffvinktdlapyvgasleqmaedtkvfrgkrpftft  
nlktdegldevidwierdt  
llkgl  
>tr|D1GS01|D1GS01\_STAA0  
mkiaivgsgngavtaavdmvskghdvklycrnqsisfkqnaiekggfdfnegderfvkftdisddmeyvlkdaeivqvi  
ipssyieyyadvmaehvtd  
nqliffnmaaamgsirfmnvledrhietkplaeantltygtrvdfeneavdlslnvrriiffstydrscIndcydkvssi  
ydhlvkeesliktnlengn  
pevhpgptllnvgridyagefalykegitkhtvrllhaielerlnlgrrlgfelestakesrierylerdkedepnlrlf  
ntspvfsqipgnhvesry  
ltediayglvlwsslgrvidvptpnidaviviastilerdffeeiglveigldkldlekyllk  
>tr|D1GS03|D1GS03\_STAA0  
mklvtattltagigtaivgqahadaaenytnynnyntttqmtttttttssishsgnlytagqctwyvydkvgge  
igstwgnannwaaaaggag  
ftvnhtpskgailqssegpfgvhayvesvnsdgsvtisemnysggpfsvsrtisaseagnynyih  
>tr|D1GS05|D1GS05\_STAA0  
mkiaijagiggltaaallqeqghtikvfeknesveigagigigdnvlkklgnhdlakgiknagqilstmtvlddkdr  
lrvklksntlnvtlprqt  
lidikiysyvkddaitfnhevthidnetdkvtihfaeqeseafdlcigadgihskvrqsvnadskvlyqgytcfrgliddi  
dlkhpdcakeywgkrgrvg  
ivpllnnqaywfitinskennhkyssfgkphlqayfnhypnevreildkqsetgillhniydllkplksfvygrtillgda  
ahattpnmgqgagamed  
ivlncfnaydfekalqrydkirvkhakvikrsrkigkiaqyrsrlfvavrnrmmkmpnalaagqtkflykskek  
>tr|D1GS07|D1GS07\_STAA0  
mlktsavisntllviglvcflmmklvlaitffavslsislvfnmmfrdrttmkvivasflivilaivvayfllsk  
>tr|D1GS12|D1GS12\_STAA0  
mkaerqnlitaiqqnkmtalelakycnvsrtilrdiddlenqgvkiyahygnnggyqiqaqskialnlsetqlsa  
lflvlnesqsystlpykse  
inaikqclslpqrllrkllkrmdfyikfddtqhmtlplmfsdiliycternvmlvdhrvddnikaenvifigllckhgh  
whaviydiaqdktaeleie  
niidisysfgktiqrdisidnyhqflnpsid

Tsompanidou\_et\_al\_Supplemental\_FASTA\_File

>tr|D1GS23|D1GS23\_STAA0  
mnaikrfgsamivpvlmfaffgivilgfatlfknptimgsladqhtfwkfwsviesggwvifthmevvfvvglpplsakk  
apghaa laalmgylmfntf  
inailtqwphftganlekgvenvpglksiagiatldtnilggiiisaiitwihnryyskrlepemvgvfqgltfvvtisff  
vmlplaaaitcviwptvqh  
igsmghfiiasgyigvwllyhfervliptglhhfiyapievgpvvnhglkaewlqhlnefakstkpkeqfpygfmllqg  
ngkvfgcglgialamyattp  
kenrkkvaallipatlavvvgitepleftflfiapylfvlahvlaasmdtmyafgvvgnmggglldfistnwlpigke  
hwgtyvaqviiiglifvaiy  
fflfrflilkfdiplpgrkkteeevklfskqdyknkkgsdsvskrassgneyedkaayldgllggenikdvtnccttrlr  
ltvydeskvadteyftthq  
mahglvkskgsiqvvvgmtvpqvreafeqmvedqssedk  
>tr|D1GS26|D1GS26\_STAA0  
mevhkksnawalfp111fvalflvgviiitgdftsmpInvaititvivalmnrkesfakkvevftkgaghsnivlmmliif  
ilagafsntaekmggvkst  
vnlgslipenliivglfvicmfvsismgtsvgtvaaiapvgygfaqatdvpatalamatvvggamfgdnlsmisdttiaa  
vrtqhtkmdkfrvnfkiv  
lpgailtiiiilyflnngislnhaknydynlikvpyilvlviallgvnviivliggtllagiiglidgsfgwmglldavs  
kgiismediamialliggl  
vgiiqhnggiewllqfvrskvkskrgaeigiaslsvadiatanntisiimgsplakniadeydvsrksasildifggc  
fgglpyspqvisagvag  
ispmlfpysiypllgvcgliaifnfpklkntsquemkh  
>tr|D1GS34|D1GS34\_STAA0  
mykqgepnltwgrldsetdpkkfrhfqtvtfedlsklekssmpsgvgilgyavdkgvalnkgrigakegpdaiqafagl  
pdlnqcetlvdygnvyhdh  
eeldtqkefamlaaksianhrqtflggghdiayaqylatrkvpytqsigvinidahfdtraeqqstsgtsfrqileed  
entdyvlvgiaqggntqsl  
fdyakekkidyvfadelshvsptikdmierfvhehdvimfticmdvidsafapgvsapavlglyphtvlelakriipsd  
kvssvsiaemntydadnr  
taklvnlvhhffk  
>tr|D1GS39|D1GS39\_STAA0  
mykqlekliitlnndlnlvnrrrfqqrtdikseqlellrilfnydrlsqydltmkisreqsivsrwikklvlkgyitsqq  
sedlrckeliltqartli  
sqinnarceliearcqclsevelnlnqlldklnqrrisl  
>tr|D1GS40|D1GS40\_STAA0  
makkfnkylpsmvaltlvgsavtahqvqaaettqdqttknvldsnkvkatteqakaevknptqnisgtqvyqdpai  
vqp  
ktannktgnaqvsqkvda  
qvgdtrnqqsattntqpvakststtapktntvtnagyslvddeddnseqinpeliksaakpaaletqykaapkaa  
ttsapakteatpkvttfs  
asaqprsvaatpktslpkykpqvnsindyirknnlkapkieedytsyfkyayrngvgrpegivvhdtdandrstingei  
symknnyqnafvhafvdgd  
riietaptdylswgvavgnprfinveivhthdyasfarsmnyadyaatqlqyyglkpdsaeydngntvwthyavskyl  
gtdhadphgylrshnysy  
dqlydlinekylimgkvapwgtqstttptpskptpskpstgklvtaanngvaqikptnsglyttvydktgkatnevq  
ktfavsktatlgngkfyly  
qdynsgnkfgwvkegdvvyntakspvvnqsysikpgtklytvpwgtksqvagsvsgsgnqtfkaskqqqidksiylygs  
vngksgwvskaylvdtakp  
tptptpkpstpttnkltvsslngvaqinaknnglfttvdydktgkptkevqktfavtkeaslggnkfylykdynsptlig  
wvkqgdviynnakspvnm  
qytkvkgptklysvpwgtykqeaavsgtgnqtfkatkqqqidksiylyfvtvngksgwvskaylavpaapkkavaqpkta  
vkayvttkpqtqtvskaia  
qvkpnntgirasvyektakngakyadrtfyvterahgnetyvllnntshniplgwfnvkdlnvqnlgkevkttkqyvtvn  
ksnnglsmvpwgttnqvil  
tgnniaqgtfnatkqvsvgkdvlygtinnrtgwvnakdlaptavkpttsaakdynytyvikngngyyyvtpnsdtaky  
slkafneqpfavvkeqvin  
ggtwyygklngklawikstdlakeklynqgtmtnqvaqiqaglykypqvrvpgkwtndanfndvkhmdtkrlaqdp  
alkyqflrldqpqnisd  
inqflkgkgvlenqgaafnkaaomyginevylisalltngntsqlakgadvvnnkvvtnsntkyhvfgiayyndndpl  
regikyakqagwdtvskaia  
vggakfignsyvkagqntlykmrwnpahpgthqyatdvdwanakiiigydykigevgkyfdipqyk  
>tr|D1GS44|D1GS44\_STAA0  
mkfnkvklvihacvllfiisiali fhr lqtktksidpihketklsdnekyldvrnkekavpsklkevynskdpkykkid  
kylqsslfnngsvaiyengk  
lkmkgygyqdfekgikntpntmfligsaqkfstglllkqleehkinindpvskylpwfktskipiplkdlmlhqsglnk  
yksskdyknlldqavkaiqk  
rgidpkkykkhmyndgnylvlakvieevtgksyaenytykigdplklqhtafydeqpfkylakgyaynstglsflrpni  
ldqyygagnlymptdmgk  
litqiqqyklfspkitnpllhfgtkkypdeyrygyakptlnrlnggffgqvftvyndkyvvvialnvkgnnevrikh

Tsompanidou\_et\_al\_Supplemental\_FASTA\_File

iyndilkqnkpyntkgviv

q

>tr|D1GS45|D1GS45\_STAA0

mkhtvgfiasivltllavyvtlytsltfqakltiifgfafvqagllmfmhltgkdgrlqtfkvifalvitlcfvvgtywvmqgghssh

>tr|D1GS47|D1GS47\_STAA0

mnpwdqllvkgnwmi tmaqigapflvigliavityfklwkylykewftsvdhkkigimylcavl mfvrggidallira qltvpdnkflesnhyeif sthgvimiifmampfiglwnivvplqigardvafpvl nnsfwlffagmilfnlsfiiggspaagwt nyaplagefspg pgvnyy liaiqisglgla tginffvtl rcktpmkfmqmpmftvttfittlivilafppl tvalalmttdridtafft vahggmpmlwanffvwg hpevyivilpafgiyseii ptfarkrlfghqsmvawatagiaflsflvwvhfftmngalinsffsistmligiptgvklfnwlltlykgritfespl fsltfipnflggvtgvm amasadyqyhntyflvahfhytltvgvfac laglifwypkmmgyklnetlnkwcfwffmigfvncflpqfilgldgmpr rlytympsdgwflnlist iga lmaigflflvsviyshfkspreatgdndwglgrtlewttasaippkynfaitpdwndydtfvdmkehgrhlydnh nykdihmpnntpvfgwi g fmtiggffli fetvipaliclfgi fgtmiyrsfqidhgyhipaaevaetearlrearikereavshes

>tr|D1GS56|D1GS56\_STAA0

mskfi epsveeiklekvyqdmgl sdqeyekvcdilgrqpnftetgifs vmsehcsykshkpfllkqfptsghvlmgpge gagvvdigdnqavvfkves hnhpsaiepyqgaatgvvggi rdivsigarpinlnslrfgelndkqnqrllkgvkgiggygncigipttageiefder ydgnplvnamcvginhdmi qkgtakgvgnsviyvglktgrdgihgatfaseelteeseskrpsvqidpfgvkk lmeatleaitfdelvgiqdmgaag ltssemaakgsglhr leqvptrepgi spyemmlsetqermllvvekgt eqkfldlfdkheldsavigevtdtnrfvlytdevyadipveplade apvyilegeekdyntsknd ythidvkdttffklkhptiaskhylydqyqqvgantiikpglqasvrvvegtnkaiastidgearyvynnpyeggkmv aeayrnliavgatplamt d c lnygspekkeiyqq lidstkgmaeacdi lktpvsgnsvlynetkgtsi fptpvvmvglienvnylndfepqvgdkly ligdtkddfsgsleklly gkvnhefesldlssevekgesiktai regllshvqvtvgkgl ltitlaklsahyglgkssiditnaqlfsetqgryvsv ksgktlnidnaieiglltd sdnfkvttpyteisenvsdikqiwegai aqc lttqd

>tr|D1GS78|D1GS78\_STAA0

mkfghtiavvl assvllagcttdkkeikaylkqvdkikddeepiktvgkkiaeldekklktedvnskdtavrgkavkd lknaddr lkefekeedaik kseqdfkkakshvndi dndvkrkavkqlddv lkekyk lshdyakaykkavnsektlfkyl nqndatqqgvnekskaieqn ykk lkevsdkytkvlnkv g kekqdvdfk

>tr|D1GS88|D1GS88\_STAA0

mkrflql iigalvsm lclt lshwfskeqvhtnqkiyvynwgeyidpelikkfeketgiqvvyetf dsneameaki r ng gthydvafpseytvqklr dhlllpidhnkvpni knl dsdymnmsfdrgnkyslpyffgtvgily nkekypnesfswkslynpkfknqillvdgare i igmslnklgynlndrnshh lkaerdltklapqvrvgvdeitmm lqqnegni avvwsgvaapl vqegdkynyvipkegsnlwfdnmvipktaqnkega ykfmnflldaknnkqntef vgyatpnkaarql lpk eikddhrfyptkkeqerlevykd l gpevlseynefnl fkm slk

>tr|D1GSA3|D1GSA3\_STAA0

mgvpilptisttcivisailiaigwrliwkreinkhknvmlaaavfaltffliyasrtifigntafggpasikkytifi l ffinlatigglglvqii tafkdkynvhrkfgppasviwfctaitgvavyllyvlypggettslikatfgh

>tr|D1GSB1|D1GSB1\_STAA0

mksvgliteynpfhngqyhinqskltnadvtiaimgnfvmrgepaiynkftrakmalstadlvielpataslssgdh faelavkvadhmsvdtiaf gsenndikt l kqlahsineieqsesfsqkvkegkyspriisellehhealaspnnilgisylkaiaknaknainaisikre naqhhdslqh hqfasgts irtsii sqdhhwhhvvpkdiqhlyvtphitlnqifpylkyqiamttdslkniyvtvegfenrlksniyeatdfhhfvkl lktkrytythiqrlmnl lnikptdvt snihavkvlamndrgrqylkh lktafperqyitninksnahyftneikathiy naisgqqqtdfntpviiqq yr

>tr|D1GSC0|D1GSC0\_STAA0

mivevehqrqgdvlikidndetkiiftnygarvsvkyhdnivilgnvveadefyhspfkfgasigrsgridnakfkl kgkeyqleknghehlhgg chglndklfdyeirneiaqikvifktv lksaddhfpgdidvtithiydadhqwsieyeasedtlfsptnhvyfnlnrd nnvvdnhrissnql dmyvl dernivtgdi ld lhev fednkikl sdi ftsqhaqlsqmtrfggl dhpftvgehkmvenhefmlevdtdmhpvffftfn

Tsompanidou\_et\_al\_Supplemental\_FASTA\_File

qpdedwspfnikyphsgft  
letqflpndinlygekapsilkagevfnsksfrieekvend  
>tr|D1GSC7|D1GSC7\_STAA0  
msdfqreqrknehveiamagsdamhsdfdkmrfvhhsipsinvndidltsqtpdltmaypvyinamtggsewtkninel  
avvaretglamavgsthaa  
lnprmaetftiarkmnpemifsnvgadvpekaleaveleaqalqihvnsqpelvmpegnrefvtwldniasivsr  
svpvikevgfgmskelmh  
dlqqigvkyvdvsgkggtfnvdiennrankdmdylsswgqstveslletayqseisvfasgglrtpldvikslalgak  
atgmsrpflnqvenngiah  
tvayvesfiehmsimtmldakniddltqkqivfspeilswieqrnlnihrg  
>tr|D1GSC8|D1GSC8\_STAA0  
mtlkiiryqttyepfkvvddikeipkdativwydfdepneqenewfahfnfdlevddaingmprakyksykydyqylvfh  
simgsnyspialnifiqdn  
vlvtyhhtleslnkvvykymntldaeldcadvivildmvdkyfnfvyaledsvyhfedrhdvdrfnkmvmdsvfklr  
sdlikvkrvlfpmqelidt  
mkqngdliidnkhslyiqhiddhlikqrniirtaqemtneirenfesysfrmsimqvltlsvvispftfiagiymn  
fvnmpalhhygyyiclav  
mfviavvliiffrkkwf  
>tr|D1GSE0|D1GSE0\_STAA0  
gq1kpgynlqiatnsqfvlsydlfnqptdtrtlipfltmiantfgylpeyivadacydseqnymaiiddfnktpilityvm  
fikdktrkfkdsifntqnv  
kydelndeficpnnkrigfkryayhndrygfkrdfklyecneliyikyiskklisik  
>tr|D1GSE5|D1GSE5\_STAA0  
mmklnlfinanetesidihapkmndnvqsiiavndldkshtligyidkeihiinvsvitfvinkvntaitnsqkfk  
lklrlyelekqlpqhfiri  
skseivnkyyieklllepnglirmylkdahtytsrrylksikerlsi  
>tr|D1GSE8|D1GSE8\_STAA0  
mlvntfnpfdnlllssliaaipivlflcltvfkmkgiyaaaitlvvtlliaipffklpvgiasangavvegffqgiipigy  
ivmmavllkyitvesgqfl  
tiqdsitnisqdqriqvlligfafnaflegaagfgvpiaicallltqlgfnplkaamcllvanaasgafgaigipvgvve  
tlklpgdvsvlgvsgsatl  
tlaifnfiipflifiidgfrgketlpailvsitytltqglltvfsgpeladiipp11tm1alavfskkfqpkiyrv  
nkdeejepakahsakavlh  
awspfiylvivmiwsapffknflpnga1sslvfknlpgtisevthkplvltlniigqgtgtailltiitilmskkvn  
fkdagrlfgvtfkelwlpv  
lticfilaiskittyggl1saamgqgiakagnvfpvlsipilgwigvfmtgsvvnns1fapiqasvaqqigtsgsllsan  
tvggvaaklispqsiat  
aavkqvgkesellkmtlkysvc11ificiwtfils11  
>tr|D1GSF4|D1GSF4\_STAA0  
mkdvtiiggpgslyasfyaglrdmsvr1idvqselggkmriypekiidwiggiaapkpcheilkdtikqglyfkpevhln  
ervvdirrkaerhfevete  
ageiytskaviiagaginpqldvkgveryqltnlhyvvsyrrfkdkdv1isgggntaldwahdiakiaksvtvyr  
kedvsgheamktlmdlnv  
klcpktriky1vgnddethisev1ehvesgdrhtvkfddviishgfdrcnt11setssklmdhddcrvkfgntttsip  
giyacgdivyhdakshlia  
safsdganaanlaktiyqpdanaegyvsshhevfkentivnkhlly  
>tr|D1GSG4|D1GSG4\_STAA0  
malfkrkis1pmqvvialvlgvvg11lygqenvanyikpfgdvflnlikmivpvvfcs1alsisnvgesktvgrygwk  
tilyfeiittiaig1iif  
gnlfkpgagldptklpkgdiskyqstahaaeqstygndhfidtivhiiptnffea1nkge11piiffavffglglaavgk  
aepvkeflsgsleavfwm  
nkilk1aplgvfaficttiitfgasalp11klvlv1vvf1amvffvfailglvawmcginimniirilksellafstsns  
eavlpvmkkmenfgspke  
itsfvipigytnldgsalyqsiia1fvaqmygmh1t1seqiv1m1t1mitskgmaavpgtsiv11t1gamglpaqgl  
aliigvdri1dmvrtcvn  
ign1stiviakwenvydkakgqeylksi  
>tr|D1GSH1|D1GSH1\_STAA0  
milnyqndmevvataadgveayqvmeykpdv11md1smppgesgliatskiadsfpetkil11tmfddeeylfhvlrng  
akgy11knapdeq111air  
tvykgetyvdm1tts1vnefvsn1qdtanttdpfk11skreleil1pliakgygnkeiaek1fsvsktveahkthimtk  
lg1kskpelveyal1kk11  
ef  
>tr|D1GSJ2|D1GSJ2\_STAA0  
miq11nnihksfndvevikgid1sveqgevvt1igrsgsgktt11rminaleiptegtvvngktytskdkksqievrkqs  
gmvfqsyn1fphktalenv  
meg11tvkk11kkdeargks1e1lekvg1thvkdrphal1sggqqrvaiaralampkvm1fdeptsaldpelvndvlkv  
ikd1anegmtmvi1vthemr  
fakevsnnivfihegmigeqqapeemfnrpkteelrrflnvinee

Tsompanidou\_et\_al\_Supplemental\_FASTA\_File

>tr|D1GSJ5|D1GSJ5\_STAA0  
mskkqklmtiitmlmgffgl1netllvta1psimkdfesytqvqwl1tfa11tngiviplsalviqryttrqvflvgi  
siff1gt11sg1sphfat1  
lvari1qalgagimmlmmtti1dvfqpbergkymg1fg1v1glapaigpt1sgylveyfnwrs1fhvvpiaavtflig  
fktiknvgttikvpidfjs  
vifsv1gfgg1lygtssisekgfdnpi1v1vsmiggv1valfv1rqyr1stpl1nfavfknkqftvgi1imgvtmvsig  
setilpi1fvqn1lhrsald  
sg111lpgaivmafmsmts1galyekfgprn1alvgmaivvittayfvvmdeqtstimlatvyairmvgialglipvmtht  
mq1k1pemnahgssmtntv  
qqiagsigtaal1itilshasknfsptmsdyngmki1dmmnqikvdtm1hgyhagfl1fallitvvsffcsfmlqgkkkev  
srq  
>tr|D1GSJ6|D1GSJ6\_STAA0  
mpk1ilcrhgqsewnakn1ftgwedvn1seqgineatragekvrenniadvfts11tral1dtthyilteskqqwipvy  
kswr1nerhygg1lqglnkd  
darkefgeeqvhi1wrrsydvkppaeteeqreayladrrynh1dkrmpyses1kdt1vrvipfwdhisqyl1dgqtv1v  
sahgs1raliky1edvsd  
eni1nyeiktgap1vyel1tdd1levidkyy1  
>tr|D1GSK4|D1GSK4\_STAA0  
mkf1qeqid1l1qqkgl1yrs1ksvgy1drqy1evenkrctnytsndyl1glqgiafdkddferfmrkysyh1snsr1isgsst  
aye1ietmlagw1lgsact  
i1nsgydan1al1fni1fktntcvv1fsd1qenhasi1idgik1sglekviykh1ldiadlekr1lekypnqnipki1isds1vstn  
gdvvd1gq1vs1khkynat  
l1ildvsh1fgienysnyqgvdi1tss1skacgaygv1lssndvkdml1nhgrpliysss1piynlyfikrnieklinad  
dr1rtk1n1s1skyfnq1lka  
l1nvyn1ssnsp1k1fie1ddieaenihqt1l1kh1hvf1tsyl1ryptv1tkpml1ris1syfhte1qdidr1feil1hqed  
>tr|D1GSK9|D1GSK9\_STAA0  
mm1knkk1l1f1c1l1vi1tiatayis1fv1tg1tik1sfnd1ftk1ftts1neavdsi1d1rl1prilial1mvgam1lavsgal1qa  
al1qn1plaeani1igvssga1  
im1ralcm1f1ipq1lyf1lp1l1s1figg1lip1flii1ll1hsk1frnavsmil1vgval1fv1l1ngv1leil1tqn1l1mkipqg1l1tmki  
wsdvy1lavsa1l1gl1ilt1  
l1l1spk1n1l1n1ddi1qars1gfnidryrwl1tg1l1lav1flasa1tvaiv1gq1laf1l1giiv1phvvrk1lv1ggnyrv1lip1fstv1igaw  
l1l1vad1l1grv1iqpp1leip  
ana1l1mi1vggpm1li1y1lic1qsqrnri  
>tr|D1GSL5|D1GSL5\_STAA0  
mk1gftqmaniv1fk1l1sdkdi1t1lmsris1fdten1lpqgmkarakyqnttvni1yqsgkv1mfqgnhaeavse1l1pqhsq1lntn  
ktk1kkn1mans1fleq1lmyd  
qfnc1igsdeags1gdyf1gp1l1tva1cafvtkehvpil1kt1lgvddsk1l1tdtkivelaeq1lvtfiphs1l1tl1hnekyniqqakg  
wtqvk1mkaal1hneaiknv1  
kk1idssq1ldyiv1dqfakrevyshya1sdi1pl1pkktkfetkgesks1laiavasii1sryafvtymdqiskninmtipkgag  
akvdviaa1kikkyg1sr1  
dt1skkh1fknrekaqk1l1kp1  
>tr|D1GSL6|D1GSL6\_STAA0  
mtq1fknknvns1indq1l1ftivgednpehi1ryvah1vddkikelgykaag1dtsrkail1tavnimhekv1leer1rkqqi  
hk1l1qqreq  
>tr|D1GSM1|D1GSM1\_STAA0  
medy1kqrik1kn1nvvp1mepgcy1l1mkdrndqvi1yvgkakk1l1rn1l1rsyftgahdak1ttr1l1vgeirr1fefiv1tssetes1l1l  
e1l1n1liky1qpry1n1l1kdd  
ksy1p1fiki1tkekypr1l1vtr1tvkqgtgkyf1gpy1pnaysaqetk1l1ldriypyrkcdkmpdk1l1c1yyhigqcl1gpcvydvd  
l1s1kyaqmtkei1tdf1l1nged  
kt1ilks1leerml1tases1l1dferakeyrd1liqhiqn1l1tnkqkimssdk1tir1dvfgysvdkgwmc1iqvffir1qgnmikrdtt  
mi1pl1qqteeeefyt1figgf  
ys1lnqhi1lpkev1hvprn1ldkemi1qsvvdtkiv1qpargpk1dmvd1laahnakvs1l1n1kfelis1rdesrtikaieel1gtqmg  
iq1tp1rieaf1dnsni1qgvd  
pvsam1y1fvdgk1pdkkn1rykyik1tvk1gpddyks1mrevvrr1rysr1v1neg1pl1pd1liiv1dggkghmngvidv1lqnel1gld  
ipv1ag1l1qkndkhqtse1l1y  
gasaeiv1pl1kkn1sqafy1l1lhri1qdevhr1fai1t1fhrqtr1qktg1lksil1ddidgignkrkt1l1l1rsf1gsikk1mkeat1edfk  
ni1gipenvakn1heq1lhk  
>tr|D1GSM9|D1GSM9\_STAA0  
mkkn1tkti1astviaag1l1tqtndakaffsyewkgleiakn1ladqakkdderidk1l1mkesdkn1l1tpykaetvndly1liv  
kk1l1sqgdvkkavvri1kdgg  
prdy1y1tfd1l1trp1leenrkn1kvkng1eidsitwy  
>tr|D1GSP0|D1GSP0\_STAA0  
mnnn1tkki1il1st1l1l1l1gtastqfpnt1p1nssseakahyinqnetvnel1tkyysqyl1tfsnst1wqkdngtihat1l  
qfswy1shiqvyg1peswgn1  
nq1l1rnksvd1f1gikd1qetids1fal1s1qetftggv1tpaatsndkhyk1l1nvtykdk1aetftggf1pvyegnpv1l1tl1kel1dfri  
rq1t1lik1skk1lynnsynkgg  
iki1tgadnnyti1d1skr1p1stdanryvkkpqnakievileksn  
>tr|D1GSP2|D1GSP2\_STAA0



Tsompanidou\_et\_al\_Supplemental\_FASTA\_File

mknlnrnsflltlldfsqrveflltllsedlkrakyigtekpmllknkiaallfekdstrtrcafevaahdqganvtylgpt  
gsqmgkkttkdtrvlgg  
mydgieryrgfsqrtvetlaeysgvvwnltdedhptqvladfltakevllkkyadinftyvgdgrnnvanaImqgaaim  
gmnhlvcpkelnptdel  
nrcknijaenggnlittddidqgvkgsdviytdvwwsmgepdevwkerlellkpyqvnkeimdktgpnvifehclpsfh  
nadtkgqqifekygi rem  
evtdevleskasvffgeaenrmhtikavmvalgef  
>tr|D1GSP3|D1GSP3\_STAA0  
mmakivvalggnaIlgkspqeqlvknaksIvgIitkgheivishngnpqvsinIglNyaaehnqgpafpfaecgams  
qayigyqlqesIqnelhsi  
gmdkqvvtIvtqvevdendpafnnpkpiGIlfynkeaeaiqqekgfIvedagrgyrvvpsppisiiellesiktlik  
ndtlviaaggggipvireg  
hdgfkgidavidkdktsaIlganiqcdqIiIltaidyvyinfntenqqplkttnvdelkryidenqfakgsmIpkieaai  
sfiennpkgsvlitsInel  
daalegkvgtvik  
>tr|D1GSR4|D1GSR4\_STAA0  
maIkdIlfsgffviddeeevvpdkqqvneapakeqsqqttkqnaIksvpqksasrytttseernnrmsnysknnsrnvv  
tmnnapnnsqesskmcI  
feprvfdtqdiadelknrratlvnIqridkvsakriidflsgtvyaiggdiqrvgtidiflctpdnvevagsitdhiem  
ehsf  
>tr|D1GSR8|D1GSR8\_STAA0  
mdyketllmpktdfpmrgglpnkepqi qekwdaedqyhkaIeknkgnetfilhdgppyangnlhmghalnkiIkdIvry  
ktmqgyfapyvpgwdthgl  
pieqaltkkgvdrkkmstaefrekckefaleqielqkkdfrIlgvrdfndpyitlkpeyeeaqirifgemadkglIykg  
kkpvywspssesslaeaei  
eyhdkrsasiyvafdvkddkgvvdadakfiIwtttpwtipsnvaitvhpelkygqynvngkyiiaeaIldavaeaIldw  
kasiklekeytgkeIeyvv  
aqhpfIdresIvingdhvtttagtgcvtapghgeddyivgqkyelpvispidkdvfteeqqfegmfydkankavtdI  
ItekgallkIdfiIthsyph  
dwrtkkpviIratpwwfasiIsvrqdiIdai entnfkvnwgktriy nmvrdrgevwisrqrwgvplpvfyaegeiimt  
ketvnhvadI faehgsniw  
fereakdlIpegfthpgspngftketdimdvwfdsgsshrgvIetrpelIspadmyIegsdqyrgwfnsittsvatrg  
vspykflIshgffmdgegk  
kmsksIgnvIvpdqvvkqkgadiarlwsstydIadvrisdeI lqtsdvyrkirntIrfmIgnIndfnpdtIsipeseI  
IevdryllnrIreftasti  
nnyenfdylniyqevqnfInveI snfyI dygkdiIyieqrdshirrmqvtlyqiIvdmtkllapilvhtaeevwshtph  
vkeevhladmIpkvvevdq  
aIldkwrtfmnlrddvnrI letarnekvigksIleakvtiasndkfnasefltsfdaIhqI fivsqvkvvdIlddqtaye  
hgdiviehadgekercwn  
ysedIlgavdeIthIcprcqqvksIv  
>tr|D1GSS7|D1GSS7\_STAA0  
mqskryIvIedgsfyegyrIgsdnIvtgeivfntamtgyqetIsdpsytgqiItftyplignyginrddfesIvptIngi  
vkeasahpsnfrqqktIh  
dvIelhqIpgiagvdrsiItrkirqhgvlkagftdrkedIdqlvkhIqqvelpkneveivstktpyvstgkdIsvvlvdf  
gkkqniIvrelnvrvcnvtv  
vpytttaeeI lamapdgvmI sngpgnpevvecaipmiqgiIlgkipffgiIghqI fal sqgassfkmkfghrganhpvkn  
IetgkvdiI tsqnhgyaIdi  
dsI kstdIevthIaI ndgtvegIkhktI pafsvqyhpeanpgpsdsnyI fddfvamtnfkekerhina  
>tr|D1GSS8|D1GSS8\_STAA0  
mpkrndiktiIvigspiiIigqaaefdyagtqaclalkeegyrvIlnsnpatimtdkei adkvyieplthdfiariirk  
eqpdallptIggqtgInma  
iqIhesgvlqdnvqIlgteI tsIqqaedremfrI mndI nvpvpesdivntveqafkIkeqvgypIivrpaftmggtgg  
gichndeeIheivsnghy  
spatqclleksiagfkeieyevmrkndnaiIvvcnmenidpvgihtgdsivvapsqtI sdveyqmIrdvsIkviralgie  
ggcnvqIal dphsfdyii  
evnprvsrssaIaskatgypiaklaakiavglItdemInpitgtsyaafeptI dyviskiprfpfdkfeKgerelgtqmk  
atgevmaigrtyeesI lka  
irsIeygvhhIglpngefdI dyikerishqdderIffigeairrgttleeihmtqidyffIhkfqnii diehqIkehq  
gdleyIkyakdygfsdkti  
ahrfnmteeevyqIrmendiIkpvykmvdtcaaeI fesspyyygytetenesivtdkekiIvlsgspiriIggvefdyatv  
hawaiiIqkagyeaiIvnnn  
petvstdfsI sdklyfepIteedvniInlekpkgvvvqfggqtainI adklakhgvkiIlgtslenInraedrkefeall  
rkInvpqqgktatspeea  
IanaaeIgyvvvrpsvIlggrameivdndkeIenytmqavkaspehpvlvdryIlgkeievdaicdgetviIpgimehi  
eragvhsdsiavppqtI  
tedelatIedytikI lakgInI igIiniqfviahdgvyvIevnprsrvtvpflskitdipmaqlamraii gekItdmgyqe  
gvppyaegvfvkapvsvfn  
klknvdiIlgpemkstgevmgkdtIlekaI fkgIlgsgvevkdhgvtI mvsdkdkeevvkl aqrI nevgykiIatsgta

Tsomanidou\_et\_al\_Supplemental\_FASTA\_File

nklaeydipaevvgkigge  
ndlltrinqgdvqivintmtkgkeverdgfqi rrttvengipcltsldtanaltnviesmtftmrqm  
>tr|D1GST1|D1GST1\_STAA0  
mndktsndlygkikhcnefinhsndsnlssshdvdessstkqkhiknkttidhnddlfkvhkdilrkqeqi  
>tr|D1GSU1|D1GSU1\_STAA0  
mtkii fmgtpdfsttvlemli aehdviavvtqprpvrkrvmtpppvkkmkydlpvyqpekls gseeleqllqldvd  
livtaafgqllpesllalp  
nlgainvhasllpkyrggapihqaiidgegetgitimymvkkldagnii sqqaikieendnvgtmhdksvlgadllket  
lpsii egtnesvpqddtqa  
tfasnirrederiswnkpgqrqvfngirglspwpvayttmddtnlkiydaelvetnkinepgtiettkkaiivatndnea  
vaikdmqlagkkrmlaany  
lsgaqltvgkkl  
>tr|D1GSV1|D1GSV1\_STAA0  
mall eafli fi favi issvinnrfpqi ptafiqialgvvifi ipiqvdfqfnsevfmfaviapl fvegthvsrtklley  
rkpillsmalvfatvvgv  
gyfihwiwपाल्पमाफाiaailcptdavavsaitrgkllpkgsmtilegesllndaagiisfkiavtalvtgtfslfqa  
veqfiistilgvligaiig  
fvvvriridltankglkdntltfiqlltpfvvyflaeevhasgiaavviaglihglerdrli raqtelqmyhqiwntf  
syalngfvfvlgfmiptv  
vidifqtepdnfsflivitiliaiaiyacr fvwvyfwykd fypkniqsyldeehdshetppsvryafimtmcgihgti  
slsmaltl pfiitkgqafe  
yrndllfi asfmvlislilaqivlpl itpsaedttfkgmtyqsakifivqkviqhfkneskkdkndtnyrpvlnqyygel  
lfllnsepndqntkelkr  
ediakvietstlerlidkgkatyqdi nnyrnivel tethrtasfvekf anffkmlwlr lkamkhykalneskkqefens  
fkdvqkimrivnhniilr  
keeqnstnvlsvlinhyydmrs lkwraqrrkerqensnqipqamfhnk lealylqrhlldelirknkinnivaag  
ireninyneivls lqskh  
>tr|D1GSV4|D1GSV4\_STAA0  
mski fvtgatgligiklvqr lkeevhevagfttsengqqklaavnkayigdil kadtidqal adfkpeiiinqitdlkn  
vdmaantkvriegsknlid  
aakkhdvkkv iaqsi afmyepgeglaneets ldfnstgdrkvtvdgvvgleetarmdeyvvlrfgwlygpgtwygdgm  
inyqfmdgqvtlsdgvtstf  
vhlddavetsiqaih fengi yn vaddapvk gsefaewykeqlgvepni di qpaqpfervgsnekfkaagggtli yqtwdg  
mpik  
>tr|D1GSW2|D1GSW2\_STAA0  
mnkdkqlhndkinlsqvl lglgsligsgwlfgaweassiagpaaiiswlgflvigtiaynyieigtmfpqsggmsnya  
qythgsllgfiaawanwvs  
lvtiipieavsavqymsswpwhwakpmrylmengsistygllavylivifsl lnywsvkl ltsftsli svfklgvpmlt  
iimlmlsgfdtsnyghsas  
tfmpygsapi faattasgi ifsnfsqti inmgseiknpekniargia islsavlyiilqstf itsmppqsm lqhsgwn  
ginfnspfadlaillginw  
laillyieafvspvgtgvsfvavtgrvlrameknghipkflgkmnekyhiprvaiifnaiismimvtlfrdwgtlaavis  
tatlvayltgpttvia lrk  
mgptmtrpfrakilkvmaplsfv laslaiywamwpttaeviliilglpiyffeyermnrntkkqiggs lwiivylivl  
silsfigskefkglnmi hy  
pfdfi viiivali fyyigtstssfesvyfratr intkmreslnneskssh  
>tr|D1GSW3|D1GSW3\_STAA0  
mkinttgqihg itqdgldifl gipyaeppvhdnrfkhstlktqwsepidateiqpippqpdnkledffssqsttftthe  
dclylni wkhqhdqtkkp v  
iiyfgygsfenghgtael yqpahlvqndiiv itcnyrlgalgyl dwsyfnkdfhsnnglsdqin vikwvhqfiesfggd  
annitlmqqsagsmsilt  
lkipdiepyfhkvvl lsgalrldtlesarnkaqh fqmml dyldtdvtslstndilm maklkqsr gpskgldiyapi  
ktdiyqnnypttkpi facy  
tkdegdiyitseqkkl spqrfidime lndiplkyedvqtakqslait hcyfkqpmkqflqqlni qdsnaqlwlaefawh  
dtssahyrsayhil dmfvw  
fgnlqilaahqypttah lklf lsrqm qndlan faksgkmpwpm yhnerryrtyq  
>tr|D1GSX0|D1GSX0\_STAA0  
mkk lcsli vvalvciaalsacgkeqt kyegdvsgkhv ltsitykddkvlkqstintikyddl gmdkdeakkl fakesei  
fkdlkgvkykvdydkkai  
ehldidytevdikklnkr lgvstkenkdisfeklekqlkhr glkekdkmddk  
>tr|D1GSX6|D1GSX6\_STAA0  
miilkrllqdkgavialgi ivlyvflglaaplvtfydphid iankfagmsfqhllgtdhlgrdil trliyai rpsllyv  
fvalfvsvligsilgflsg  
yfqqfvdalimracdvm lafpsyvvtalialfgmgaeniimafil trwawfcrvirtsvm qytasdhvrfaktigmndm  
kiihkhi mpltladi aiis  
sssmcsmilqisgfsflglgvkaptawgmm lnearkv mft hpemm fapgiaiivi mafnflsdal qiaidprisskdk  
lrsvkkgvvqp  
>tr|D1GSX8|D1GSX8\_STAA0

Tsompanidou\_et\_al\_Supplemental\_FASTA\_File

mrkltkmsamllasgliltgcggnkgleekkenkqlyttvkdigdmnphvyggsmsaesmiyepivrntkdgikpllak  
kwdvsedgktytflrddv  
kfhgtpfdadavkknidavqenkkhswlki stlidnvkvdkytvelnlkeayqpalaelamprpyvfvspkdfkngt  
tkdgvkfdgtgpfklgeh  
kkdesadfnkndqygeksklnkvqakvmpagetaflsmkkgetnfaftddrgrtdsldkdslkqldktdgyqvkrsqpmn  
tkmlvvnsgkkdnavsdt  
vrqai ghmvnrckiakeil dggekpatql faknvtidnfdmptrkydlkkaeslldeagwkkgkdsdvrqkdgknl emam  
ydkgssskeqeaeylqae  
fkkmgiklningetsdkiaerrtsgdylmfngtwgll ydpqstiaafkakngyesatsgienkdkiy nsiddafkiqng  
kersdayknilkqiddegi  
fipishgsmtv vapkdl ekvsftqsqye lpfnemqyk  
>tr|D1GSY3|D1GSY3\_STAA0  
mavdiaeavsetvdkiksngdnakayvndnaseqqvdfvsdikeqfgridvlfnnagvdnaadriheypidvydkimnv  
dmrgtflmtkmmllpmmnq  
ggsivntssfsqqaadlyrsgynaakgavinftksiaieygrdsiranaiapgtietplvdkltgtseddagktfrenqk  
wmtplgrlgkpeevaklvv  
flasddssfitgetiridggvmaytwpgeml sddswkrtle  
>tr|D1GSY7|D1GSY7\_STAA0  
mnkkhvfiiigvilcivicivasviylkvkydekekqkaiyykeqparitlylkhtkeptiksvhftnsetspmgsavie  
gyinenkdnftayatpeh  
nyqfggami eseklse l kpanqlkspddikke l nkkksh  
>tr|D1GSY8|D1GSY8\_STAA0  
mtvltdkvavvtgagsgigeaiatl heegakvvl agrnkeklnvanqlsqdsvkvvptdvt nkeevdelikiaaqtfg  
gldivinsagqmlsskitd  
yqvdewsmidvnikgtlytaqaalptmleqssghliniasisgfevtsstiy satkaavhtitqglekelaktgvkvt  
sispgmvdtaitaaynptd  
rkklepqdiaeavlyltqpkhvnvneitvrpv  
>tr|D1GSZ1|D1GSZ1\_STAA0  
mmihskkltlgiclvlliiilivgyvimtktngrnaqikdtfnqtlklyptknl ddfydkegfrdqefkkgdkgtwivnse  
mvi epkgkdm etrgm vlyi  
nrnrtrtkgyyfi semtddsngrpkdde kryptvmehnkiiptkplpndklkkeienfkffvqygnfk dindykdgdisy  
nnpvpsysakyqlnndyn  
vqqlrkrydiptkqapkllkgdgd lkgssvgsrsleftfvenkeeni yftdsvqytpsedtryesn  
>tr|D1GSZ2|D1GSZ2\_STAA0  
mkkeesskdkqikenfktlslyptknl edfydkegfrdqefekgdkgtwi i hskmtietngknmesrglvlyvdrnrtrt  
tkgefivrelwedkkgysr  
skekeypvkmehnkiiptkpiaddklrkeienfkffvqygd fkdindykdgdisy nnpvpsysakyqls nddynvkqlrk  
rydiptkkapkllikgdgd  
lkgssighknleftfienkeeni yftdsinfkpte  
>tr|D1GSZ3|D1GSZ3\_STAA0  
msrllndfnqslhkgfidkhi shkgnypkllvnnknekvlstiidelqkcetfyfsvafitesglaslkaqll dlnkg  
vkgkilt snylgfnspkmy  
gellklknvevrltdiagfhakgyifehkdyssmvi gssnltsnal kvnyehnvllstmkngdlvsvksefdllwqkst  
plteqwinskykesfeyrs l  
eklaeveqtqml lagkvkksveivpnlmqaealrslkairdkakdka liisatgtgktil caldvrevnnpnkflfivhne  
gilnrakeefkkvlpiknd  
sdfglltgkhrvdakylfatiqtlsrddnfkqfdenefdyivfdeahrsaastyqrvfnfypkpkfmlgmtatpersdel  
sifel fdyniayeirlqaa  
lesdilcpfhfygtdyvhqgikeddvtklryltsdervnyi i qktdyygysgeilqgli fvsskkeaydladklsskgi  
ksvaltgddsvnyrqvie  
k lkegkinyiitvdlfnegidipevnqvm l rptessii fiqq lgrglrkssnkeyvtvidfignyktny lipialsgdq  
sqnk dnykkfltnndsing  
vstinfeevakkqiynsl davslnqnk lilkayeevenrlghmp l lmdfiqqhsidpsvifskfsnyyeflvrykkidtl  
ltenesknlvffsrqiap  
lkridslvlellkneltydelknkm l nevkdi teddidtsl rildfsfynagi ekiygs pi ierner mir l sdaftnal  
snqtfnmfl edlielskyn  
nekyqkgknglilynkysredfski fnwnkngssvim gymiksqempifitydkhedisdstkyedeflsqdelkwftks  
nrtleskevqk lshrakg  
ikmyi fvqkkdddgiyfy lgtagi egsekqdkmpngsnvvtmdlal dkavrddi yryltn  
>tr|D1GSZ5|D1GSZ5\_STAA0  
mkelwierandslvkhfyeqqsdi eqregfeskl tfgtagirgkfglgegrlnkftiek lalglarylnaqt nsptivi  
hydirylstefa qianvl  
anhqitvylpdykttpels favrn lnttagimitashnpkdyngikvygsdgaqlstdaselasryieevgdplqidip  
iskqnts yikpfpksvtd  
ymkhiqnmigiypksdlqvvfts lhgtsvpivpe llqsl nfnqfnlveaqckpdpnfssvqsanpedhrafdqavelank  
shadllistdpdadr lgia  
erdahghityfngnqiall nryriqqtsqlrhr lmiqsisvsse ltkslarynnveykevltgfkfi aqeirql ddhqnm  
ifafeesygf lsepfvrk

Tsompanidou\_et\_al\_Supplemental\_FASTA\_File

davqivplii kyaselklygkltkdeleqi yqtvgrhedtlfshstlegfegkkinaimtkfrsnppqei qglkvkaied  
yltseyvhl dkdtttsqins  
pk snvirvlfdegfi alrpsgstepkiklyvs lkcpnfddvaakinamifs  
>tr|D1GSZ7|D1GSZ7\_STAA0  
mtvnivfsivfcismvilgiyvaitkdftlisfinqtai adkhknqiayiftlcislsavflmssilsfeydfialaflf  
lsialllialfyvcfykit  
kyp  
>tr|D1GT03|D1GT03\_STAA0  
mi vvgmgqekeaaaseqnnttveesgssateskasetqtttnvntidetqsysatsteqpsqstqvtteeapktvqapk  
vetsrvdlpsekvadkett  
gtqvdi aqpsnvseikprmk rstdvtavae keveetkatgtdvtnkveveegseivghkqdtvvnphnaervtlkykw  
kfgegi kagdydfdtlsdn  
vethgjstlrkvp eikstdgqvm atgeiigerkvryt fkeyvqekkdltael slnlfidp tvtqkgnqnvevklgett v  
skifniqylggvrdnwgvt  
angridtlnkvdgk fshfaymkpnnqsl ssvtvtgqvtkgnkpgvnnptvkvykhigsddlaesvyakl dddvskfedvtd  
nmsldfdtnggyslnfnnl  
dqsknyvikyegy ydsnasnlefqthl fgyynyytsnl twkngvafysnnaqgdgkdlkepiiehstpielefksepp  
vekhe lgtieesndskpi  
dfeyhtavegaeghaegti eteedsihvdfeesthenskhhadvveyeedtnpgggqvtt esnlvefdedstkgivtgav  
sdh tti edtkeytt esnl  
elvdelp eehggaqgpi eei tennhhi shsglgtenghnygvieeieenshvdikselgyeggqnsqnqsfedteedk  
pkyeqggnivdidfsvpq  
ihgqnnqnsfeedtekdkpkyeqggnididfsvphihgfnkhteieedtnkdkpnyqfgghnsvdfeedt lpqvsg  
hneqqatieedttppi vpp  
tpptpevpsep etptp tpevpsep etptp tpevpsep etptp tpevpsep etptp tpevpsep etptp tpevpsep etptp  
kaqskksel petggestn  
ngmlfgglfsilglalrrnkknhka  
>tr|D1GT04|D1GT04\_STAA0  
myglvyffkldefefnlkskykkykpvisrcsralyaiym  
>tr|D1GT05|D1GT05\_STAA0  
mi vvgmgqdkeaaaseqktttveengnsatdnktsetqttatvnhieetqsynatvteqpsnatqvtteeapkavqapq  
taqpanietvkeevvkeea  
kpgvkettqsqdnsgdqrqvdltpk katqnqvaetqvevaqprtaseskprvtrsadvaeakeasnakvetgtdvtskvt  
veigsieghnntnkvepha  
ggravlkyklkfenglhggdydfdtlsnnv nthgvstarkvpeikngsvvmatgevl eggkiryftndiedkvdvtael  
einlfidpktvqtngnqt  
tstln eeqtskel dvkykd gignyanl ngsietfnkannr fshvafikpnngkttsvtvtgtlmkgsnqngnqpkvri f  
eylgnnediaksvyanttd  
tskfkevt snmsgnl nlnqngsyslnienldktyvvhydgey lngtdevdfrtqmvg hpeqlykyyydrgytltwdnglv  
lysnkangngkngpi iqnn  
kfeykedtiketl tggdyknlvttveeeydsstldidyhtaidgggyv dgyietieetdssaididyhtavdseaghvg  
gytesseesnpi dfeesth  
enskhhadvveyeedtnpgggqvtt esnlvefdeestkgivtgavsdh tti vedtkeytt esnl  
elvdelp eehggaqgpi  
veei tennhhi shsglgt  
nghgnydvieeieenshvdikselgyeggqnsqnqsfedteedkpkyeqggnivdidfsvpqihgqknqnsfeedte  
kdkpk yehggnididfsv  
vphihgfnkhteieedtnkdkpsyqfgghnsvdfeedt lpkvsgqnegqqtieedttppi vpp tpevpsep etptp  
p tpevpsep etptp tpevpsep etptp tpevpsep etptp tpevpsep etptp tpevpsep etptp tpevpsep etptp  
psep etptp tpevpsep etptp tpevpsep etptp tpevpsep etptp tpevpsep etptp tpevpsep etptp  
mlfgglfsilglalrrnk  
knhka  
>tr|D1GT11|D1GT11\_STAA0  
mpftmkgypekwkefevikrqaieianam lkegylekdvvpiaakkakdwyralskeekaleenfvqfhtatmekte  
vdseyatt dneehiqeqsn  
qdk syfdsesignqsggvrrqrep lmdgphpkvvesfkdv  
>tr|D1GT12|D1GT12\_STAA0  
mm lgtltaktplvfgmtllivtvpfyiftalki agpsstffivtfs lpinlpiapeeal yrgfailvggilatmmv lit  
ivf sknkaeeqai qndfk l  
iskllhtyndksaf lqvaktavdsfkasdkllitstssndklsrrfqkllllhtsaqgiysellelnakqirplpdelie  
mmdhii aqldnseenvryw  
rkevtveefqnlfnhilkidemvhaneariayeadmrkplyskriyqnl tldsivfrntlrytaimmi aifialmfdfe  
kaywiplsahtillgtsti  
haiergmarglgtjlgvlvsvillfsiptpvavilmgiaalftealvganyaiavvfitiqvil mnglasqnl tiniaf  
prvidvamgiviaiiglvf  
lgqrtasalpnvmaevvrkeatl fhy lfsenqykddvyqkntamnlsvklnnmtqvynaangel fsdktliqnyyplf  
aleeisfmlnramanedrl  
tineqlmgeylai feniakhfelnte leikilpdlpqnyiqsammniqhngfrerdknv  
>tr|D1GT22|D1GT22\_STAA0

Tsompanidou\_et\_al\_Supplemental\_FASTA\_File

minhellgi hvtamtddaernykfftevlgrmlvkkvtvnqddiytyhtffaddvgsagtdmtffdfpnitkgqagtns  
itrpsfrvpnddaltyeq  
rfdefgvkhegiqelfgkkvlpfeevdgqvyqlisdelnegvapgvpwkngvpvvdkaigyglpieikvsyfddfknil  
tvygmttiahednvallev  
gegngggqvilikddkgsaarqgygevhvsfrvkdhdaiawatkykevginnsgivnrfyfealyarvghilieistd  
gpgfmedepyetlgegls  
ppflenkreyiesevrpfntrqhg  
>tr|D1GT26|D1GT26\_STAA0  
msnmnqtimdahfrhatkqfdpqqkvskefetesgrlspsslglepwkfvviqdqalrdelkahswgaakqldtas  
hfvli farknvtrsrpyvq  
hmlrdikkyaqtipaveqksdafqadfhisdndqalydwsskqtyialgnmmttaallgidscpmegfsltdvttilan  
kgildteqfglsvmvafgy  
rqeppknktrqayedviewgpke  
>tr|D1GT27|D1GT27\_STAA0  
mienvrslafdtiqdilinegaysnlrinevlsenelnamdkalfteivgytvkrkytldfylvkpfvktkikawvrqllwm  
siyqvyldkvpnhaine  
aveiakerggyhngnvngilrtmmrsdlpdfnei adpkkrmaieysmpkwiidhwathygleetetilsflettsttv  
ranltraslddiiekldqe  
gydvekdhdlycylhiggqpiihrsrskdgvfsiqdkssmfvahimnvdrrhdhvl dacsapggkachiaevlmpegqvda  
pdihdhkidlinfnikklr  
ltnikafqhdatkpydktydkilvdapcsglgvmrhkpeikytqskqhieslvelqlleilenvknnvkiggeiystcti  
eqlenenviytflknnknf  
efepfqhpitgelvktlqimpqdfnsdgffitikirkdn  
>tr|D1GT30|D1GT30\_STAA0  
migkiinerykivdklgggmstvy laedtilnikvaikai fipprekeetlkrferevhnssqlshqnivsmidvdeed  
dcyylvmeyiegtlseyi  
esrgplsvdtaifntnqilgdikahdmrivrhdikpqnildsnktlki fdfgiakalsetsltqtnhvlgtvqyfspe  
qakgeatdectdiysigiv  
lyemlvgeppfngetavsiaikhidsvpnvttvdvrkdipqslsnvilratekdkanrykti qemkddlssvlhenrane  
dvyeldkmtiavplkked  
lakhi sehsnqpkrettqvpi vngpahhqqfqkpegtvyepkpkkkstrkivlls lifsllmialvsfvamamfgnkye  
etpdvigksvkeaeqifnk  
nnlklgkisrsysdkypeneiiktptntgervergdsdvviskgekvkmpnviglpkeaalqklkslgldvctiekyv  
nnqapkgyanqsvtante  
iaihdsniklyeslgikqvyvedfehksfskakkaleekgfkveskeesddidegdvisqspkgksvdegstisfvvsk  
gkksdssdvktttesvdvp  
ytgkndksqkvkvyikdkdndgstekgsfditsdqridiplriekgtasyivkvdgktvaekevsyddv  
>tr|D1GT36|D1GT36\_STAA0  
miskingklfadmi iqgaqnl snadlvdslnvypvpdgdgtmnlmtmsgreevennl sknigelgktfsgkllmgar  
gnsgvilsglfrgfcknie  
seseinskl laesfqagvetaykavmkpvegtiltvakdaaqaai ekanntedcielmeiyivkaneslentpnllavlk  
evgvvdsggkglcvyegf  
lkal kgekveakvakidkdefvhdehdfhg vintedi iygyctemmvrfgknkka fdeqefrqdmsqfgdsllv indeei  
vkvhvhteypgkvfnyyqq  
ygeliklkvenmreghrevirkeqhtakpmetvetaitismgegiseifksmgathiisggqtmnpstedivkvieqs  
kckraailpnnknilmase  
qaasivdaeai viptksipqgisalfqyvdatleenkaqmadsvnnvksgslyavrdtkidgveikkdafmgliedki  
vssqsqdlttvtellneml  
aedseil tvii gqdaeqavtdnminwieeqypdvevevheggqpiyqyffsve  
>tr|D1GT44|D1GT44\_STAA0  
mvyllksidaigfksfadqtnvqfdkgvtaivgpnsgksnitdaikwlvgeqsaks lrgskmediifsgaehrkaqnyae  
vqlrldnhskklsvdenev  
ivtrrl yrgeseyyinnrarlkdiadlfl dsglgkeaysiisqgrvdeilnakpidrrqiieesagvlkykkrkaesl  
nkldqtednltrvedilyd  
legrvepl keeaaiakeyktlshqmksdivvtvh didqytndnrql dqrln dlqqqqankeadqrlsqqi qykgkrh  
qlnddveslnyqlvkatea  
fekytqqlnvl eerknqsetnaryeeeqenl mellenisneiseaqdtykslkskqkelnavireleeqlyvsdeahde  
kleekneyytlmseqsdv  
nndirflkhtieeneakksrldsr lvevfeqlkdiqqqikttkkeyqqtnkelsavdkeikniekdlt dtkkaqneyeek  
lyqayrytekmktridsla  
tgeeytyffngvkhil kaknkelkgiygavaei idvpskl tqaietal gaslqhvidsekdgrqai qfl kernlgrat  
flplnviqsrvatdiksi  
akeangfisiaseavkvapeyqni ignllgntiivdh lkyanelarai kyrtrivtlegdivnpggsmtgggarksksil  
sqkdel ttmrhqledylrq  
tesfeqqfelkiksdqslselyfeksqkhntlkeqvhhfemel drlttqetqikndheefefekndgytsdksrqtlsek  
etylesikaslrledeie  
rytklskegkesvtktqtlhqkqsdlavvkeriktqqqtidrl nnqnnqtkhq lkdvkeki affnsdevmgeqafqnik  
dqingqqetrtrlsdeldk

Tsompanidou\_et\_al\_Supplemental\_FASTA\_File

lkqgrielneqidaqeaklvchqdi laienhyqdikaesklvdl ihhaidh lndeyqltverakseysdesidalrk  
kvklmkmsidelgpvnlna  
ieqfeelnerytflseqrtdlrkaketleqi isemdqevterfketfhaiqghftavfkqlfgggdaeqlteadyltag  
idivvqppgkklqhlsls  
ggeraltaiallfailkvsapfvildeveaaldeanviriyakylne lsdetqfivithrkgtmefadrlygvtmqesgv  
tklsvsnlntiddvlkeep  
>tr|D1GT45|D1GT45\_STAA0  
msffkr1kdkfatnkeneevkslteeqgqdkledthsegstqdanlaenaevkkkprklseadfdddglisiedfeeie  
aqkmgakfkagleksrqnf  
qeqlnliaryrkvdedffea leemlitadvfgntvmtlteelrmeaqrriqdtedlrevivekiveiyhqeddnseam  
nledgrlnvilmvgvngvg  
ktttikglayrfkmeqkkvmlaagdtfragaidqlkvwgervgvdvisqsegspaavmydainaaknkgvdilicdtag  
rlqkntnlmqelekvkrvi  
nrapvdapheallclattgqnal sqarnfkevtntvgivl tkldgtakggivl airnelhipvkyvglgeqlddlqpfn  
pesyvyglfadmieqnee  
ttvendqivteekddnhgsk  
>tr|D1GT50|D1GT50\_STAA0  
mkidy1t1fpemfdgvl nhsimkraqennklqintvnrdayainkhnqvddy pygggqgmvlkpepvfnamedldvteqt  
rvilmcpqgepfshqkave  
lskadhi vfighyegyderi rthlv tdeismgdyvltggelpamtmdaivr lipgvl gneqshqddsfsdgll efpqy  
trprefkg1tvpdvllsgn  
hanidawrheqklirtynk rpdliekyp1tnadkqilerykig1kkg  
>tr|D1GT56|D1GT56\_STAA0  
msvfidkntkvmvggigtstalfhtkqmdygtkivagvtpgkqgvvegvvpvntveeaknetgatvsviyvpapfaad  
sileaadaldmviceiteh  
ipvl dmkvkrylqgrktrlvgnpcpgvitadeckigimpyihekghvgvsrsgtlyeavhqlteegigqttavgig  
gdpvngtnfidv1kafned  
detkavvmigeiggtaeeaaewikanmtkpvvgfiggqtappgkrmghagaiisggkgtaeekiktlnscgvktaatps  
eigstlieaakeagiyesl  
ltnk  
>tr|D1GT58|D1GT58\_STAA0  
mkfstlseeftnytkkhfkhytqsie lnyrnkinheahivgvkndkneviaac1l tearifkfykyfyshrgplldyf  
daklvcyffkel skfykn  
rgvfildvpylienlrdangri iknynnsvivkmlgkigy1hgqyttgysnksqirwisvldlkdkdenqllkemeyqtr  
rnikkteiegvkvedlsie  
etrnrfyklfqmaeekhgfhfmedyfkrmqei ykdkam1kiacin1neyqdklkiqllki enemmtvnralnenpnskkn  
ksklnglnmq1ssinnris  
kteeliefedgpvldlaaal fictddevyylssgsnpkynqymgayhlqwhmiyakshnirynfygitgvfsneaddfg  
vqfkkqgnahveeligdf  
ikpvrpilyk fakliykv  
>tr|D1GT59|D1GT59\_STAA0  
mik1f11klywahfstkqihqflmaypnvikeegrkkdsylcewvnrreenvhllrkyafikldhndiikelqklkvsyi  
tymdseypvllkeiyqfpl  
llfykgniklinnmhhlavvgardstsytqqsleflsndkskyltivsglaqgadamaqhialkynlptiavlafghqt  
hypkstlalrnkieekglv  
iseypphtpiakyrferpnriisgl skgvliteakeqsgshitidfa1eqnrnvylpgsmfnpmtkgnllriqegakvv  
lnandifedyyi  
>tr|D1GT62|D1GT62\_STAA0  
mnhigdaf1ntlkvernsehtlksyqddliqfnqfleqhlelntfeyrdarnylslysnh1krtsvsrkistl rtfy  
eywmtldenii nfpvqlvh  
pkkeky1pqffyeemealfktveedtskn1rdrvilellyatgirvselvnikkqdidfyangvtvlgkgskerfvpfg  
aycrqsienylehfkpiqs  
cnhdflivnmkgeaitergvryv1ndivkrtagvsei hphklrhtfathllnqgad1rtvqsllghvn1sttgythvsn  
qqlrkvyl nahprakkene  
t  
>tr|D1GT70|D1GT70\_STAA0  
mfkkl1inkntinnynee1dssnipehiaaimdgngrwakkrmprikghyegmtikkitrvasdigvky1tlyafste  
nwsrpesevnyimnlpvnf  
letflpeliekvkvvetigftdklpkstieainnakektanntg1klifainyggraelvhsiknmfde1hqgglnsdii  
detyinnh1mtkdypdpe1  
lirtsgeqrisnflwqvsyefi fnqklwpdfdedelikikiyqsrqrrfglsee  
>tr|D1GT73|D1GT73\_STAA0  
mkqskvfiptrmdvpseaeaqsrl1lksqliqstsgiy sylplatr vlnnitavrqemeridsveilmpalqqaelw  
eesgrwgaygpe1mr1qdr  
hgrqfalgptheelvtsvrnelksyqlpmtlfqi qskfrdekrprfgllrgrefimkdaysfhadeasldqtyqdmq  
aysrifervginarpvad  
sgaigshthefma1saigedti vysesdyaaniekaevvyepnhkhttvp1leki etpnvktaqeladflgrpvdeiv  
ktmifkvdgeyimvlvrgh

Tsompanidou\_et\_al\_Supplemental\_FASTA\_File

heindiklksyfgtdnie latqdeivnlvganpgslgpvidkeikiyadnfvqdlinlvvganedgyhlinvvgrdfnv  
deygdrfjilegeklsdgs  
gvahfaegi evgvfkigt kysesmatflnqgkaqslimgcygigisrtl saiveqnhddngivwpksvtpdfdlhlis  
inpkddqreladalyaef  
ntkfdvlyddrgeragvkfnadliglplrivvgkrasegivevkerltgdseevhiddlmtvitnkydnlk  
>tr|D1GT74|D1GT74\_STAA0  
mamteqqkfkvladqikisnqldaeilnsgeltridvsnkrtwefhitlpqflahedyllfinaieqefkdianvtrcf  
vtngtnqdehaikyfghe  
idqta l spkvkgqlkqklimgskvlkvmsndiernhfdkacngslikafrncgfdidkiifetndndqeqlasleah  
iqeedeqsarlateklekm  
ktekakqddnnesavdkcqigkpiqienikpiesiieefkvaiegvidinlkelksgrhiveikvtdytdslvlkmft  
rknkddlehfkalsvgkwv  
raqgrieedtfirdlvmmsdieeikkatkdkkaekrveflhtamsqmdgipnigayvkaadwghpaiavtdhnvvq  
afpdahaaaekhgikmiygv  
meqmlvddgpia ykpqqdv l kdatyvfdvettglnsqydkie laavkvhngeiidkferfsnpherlsetiinlthi  
tddmlvdapeieevl tefk  
ewvgdaifvahnasfdmgfidtgyerlgfgpstngvidtlel srtinteygkhl n flakkygveltqhhraydteata  
yiflkmvqqmkelgvlnhn  
einkkl snedaykrarpshvtlivqnqglnklnfkivsaslvykyfyrtpriprslldeyregllvgtacdegel ftavmq  
kdqsvekiakyydfieiq  
ppalyqdli dreli rdtetl heiyrli hagdtagipviatgnahylfeh dgiarki liasqpgnplnrstlpeahfrtt  
demlnefhl geekaheiv  
vkntneladriervvpikde l ytpmeganeeirelsyanarklygedlpqividrlekelksiigngfaviyilsqrlv  
kkslddgy lvgsrgsvgs  
fvatmteitevnlpphyicpncktseffndgsvgs gfdlpdktcetcgaplikegqdipfetflgfk gdkvpdidlnfs  
geyqpnahnytkvl fgedk  
vfragti gtvaektafygvkgy lndqgi hkrgaeidrlvkgctgvkrttgqhp ggiivvpdymdiydf tpiqypaddqns  
awmtthfdfs ihdnlkl  
dilghddptmi rmlqd lsgidpktipvddkevmqifstpeslgvtedeilcktgtfgvpefgtgfvrmledtkpttse  
lvqisglshgtvwl nnaq  
elikgticd lssvigrcddimvylmyaglepsmaf kimesvrkkgglteemietmkenevdpwyl dsc l kikymfpkaha  
aayvlmavri ayfkvhhp l  
yyyasyfti rasdfdli tmi kdktsi rntvkdmysrymdlgkkekdvltvleimnemahrgyrmqpi sleksqafefiie  
gdtlippi fsvpgl genva  
krivearddgpflskedlnkkagl sakiieylde l gslpnlpdkaqlsifdm  
>tr|D1GT79|D1GT79\_STAA0  
mskqriyeyakelnkskeiide l ksmnievsnhmqaleddqikaldkkfkeqkndnkqstqnnhqnsnnqnknqgqqk  
dnknqgqnknkgknknkn  
nrnnknknknknkpqnqpaapkeipskvtyqegitvgefadknvesseikk l flgivaninqsl nqetieliaddygv  
eveeevvi needlsiyfed  
ekddpeaierpavvtimghvdhgkttll dsirhtkvtageaggitqhi gayqiendgkkitfldtpghaafttmargaq  
vtditilvvaaddgvmpnt  
ieainhakeaevpiivavnkidkptsnpdrvmqel teyglipedwggetivp l salsgdgiddllemig l vaevqelka  
nknrvagtvieal dksr  
gpsasllvqngt l nvgdai vvgntygri ramvndlgqriktagpstpveitgindmpqagdrfvv fsdekqarrigesrh  
easi iqqrqesknvsl dn l  
feqmkggmkdl nviikgdvqgsvealaas l mkidvegvnvr i ihtavgain esdvtlanasngi igfvvrpdsgakra  
aeaenvdmlhrviyvnie  
eiesamkgll dpefeeqvigaevrqt fkvskvgtiagcyvtegit r nagnvriirdg ivqyegeldtlkrfkddakeva  
kyecgiti enyndlkegd  
vleafemveikr  
>tr|D1GT84|D1GT84\_STAA0  
msqekkvfktewagrslti etgqlakqangavlvrygd tvl stataskeprdgdfpltvnyekmyaagkipggfkk  
egrpgddatl tarlidrpi  
rplfpkgykhdvqimnvl sadpdcspqmaamigssmal svdipfqgpi agvngyidgkyiinptveekevsrldlev  
aghkda inmvagaseite  
qemleai ffgheei qrlvdfqqqiv dhi qpvkqefipaerdealvervks l teekgl ketvlt fdkqarden l dn l keei  
vnfideedpenellikev  
yailnelvkeevrrliadek i rpdgrkpdeirpl dsevgilprthgsgl ftrgqtqalsvltl galgdyqlidgl gpee  
krfmhhynfpn fsvgetgp  
vrapgrreighgalgeralky iipdtadfpytirivsel esngssasicgstlalmdagvpikapvagi amglv tre  
dsytiltdi gmedal gdm  
dfkvagtkegit ai qmdikidgl treieealeqarrgrleimnhmlqtidqprtelsayapkvvtmtikpdki rdvign  
ggkkin e i detgvl die  
qdgtifigavdqaminrareieeitreaevgqtyqatvkriekyga fvg l fpgkdallhisqisknriekvedvlkigd  
tievkiteidkqgrvnash  
ralee  
>tr|D1GT86|D1GT86\_STAA0

Tsompanidou\_et\_al\_Supplemental\_FASTA\_File

maqakkkstakkkttskrrtnsrkkkndnpi ryvia ilvvvlmvlgvfqlgiigr lidsffnylfgysryltyilvllat  
gfityskripktrrrtagsi  
vlqiall fvsq l vfhfnsgikaerep vlsyvyqsyqhshf pnf gggvlgfy l l e l svplislfgvciitilllcssvill  
tnhqhrevakvalenikaw  
fgsfnekmserngekqlkreekar l keeqkarqneqpqikdv dsft evp qerdipiyghtenesksqsqpsrkkrvfdae  
nssnnivnhhqadqqeqlt  
eqthnsvesentieeagevt nvsyvpp l t l l nq pakqkatskaevqrkgqvlent l kdfgvnakvtqikigpavtqyei  
qpaggvkvskivnlhndia  
lalaakdvrieapipgrsavgievpneki slvs l kevldekfpsnklevglgrdisgdpitvplnephllvagstgsg  
ksvcingiitsillnakph  
evklmlidpkmvelnvynghpllipvvt nphkaaqalekivaemerrydlf qhsstrnikgynelirkqnqeldekqpe  
lpyivvivedladlmmvag  
kevenaiqritqmaraagihlivatqrpsvdvitgiiknipsria favssqtdsr tiigtggaekllgkgdmlvygngd  
ssqtriqqaf lsdqevqdv  
vnyvveqqqanyvkemepdapvdksemksedalydeay lfvveqqkastsllqrqfrigynrasrlmddlernqvigp qk  
gskprqv lidlnndev  
>tr|D1GTA2|D1GTA2\_STAA0  
mneeqrkassvdvlaerdkkaekdyskyfehvyppnlkeakkrkqevrynrdfqidekyrgmgner tfliktygcqmn  
ahdteviagi lealgyqat  
tdintadvilintcairenaenkvlseignlkh lkkerpdiligvcgmsqeesvvnki lksyqnvdmifgthnihhlpe  
ileeayl skamvvevwske  
gdvienl pkvregnikawvni mygcdkfcctycivpft rgkersrrpedi idevrelaregykeitllgqnvnsygdldq  
ieydlgdllqaiskiaipr  
vrfttshp wdfthmidvisegnivphi hlpvqsgnavl kimgrkytresyldlvkrikdripnvaltt diivgypne  
seeqfeet l tlydevgfeh  
aytyl ysqr dgt paakmkdnvplnvkker lqr l nkkvghysqiamskyegqtvtvlcegssk kddqvl agytdknklvnf  
kapkemigklvevrideak  
qysl ngsfikevepemi q  
>tr|D1GTB0|D1GTB0\_STAA0  
miryakkedlnailaiyndai inttavtyepqti dervawfetkqrkhepi fvfeengsvlgfatfgsfrpwpaylyti  
ehsiyv dasargkgiasql  
lhhliveakakgyralvagidasnka siqlhqkfafkhagtltnvgfknrwl d lafye l d l qd  
>tr|D1GTB4|D1GTB4\_STAA0  
meaikvqlshsvkvaisiy lalifitftsylviilytsmtghdvshfv ldsqshhgs l tqkhlslpeisfk  
>tr|D1GTC1|D1GTC1\_STAA0  
mndyvqallm lltvvlyyafakrlqqkypnpfln paliaslgiifvllifgis yngymk ggs winhilnatvvclayply  
knrekikdnvsiifasvl  
gym l nfm l vfl t l kafgyskdv i vt l l prsitaavgievshelggtdtmtvlfiittg ligsilgsmllrfgrfessiak  
gltygnashafgtakalem  
diesgafssigmiltavissv lipvlil lfy  
>tr|D1GTC2|D1GTC2\_STAA0  
mityigteiqki fh l plagsivglflfy lllqfkivpltwvedganfl l ktmvfffipsvvgimdvaseit lnyilffav  
iigtci valssgyiaekm  
svkhkhrkgvdaye  
>tr|D1GTD2|D1GTD2\_STAA0  
menycilgnp nvgkts lfnal tgsyeyignwsgvtvekkvgklkenvgqlid lpgtyd l spiskdetvvt dyllndsfsg  
iinivdasqlkrnmqltvq  
l l e l nqpiyig l nmi dvatkr giki dyhklmkklktpi fpv vartgkgtkyl lgeikh lgegyqphfkinygekieetik  
nmcqiimtets hdkygarf  
iaiqfl l n n m q i a n e l n s e v v n k l s s l r d q v a e q v g a v s v r e m e r i r n h y i e t l l q d v v t y p d e d k y f s s r i d k i l t h  
kyigmpiflaimw l i f q t t  
ftwigtp lsdql dafiggtftdsvktimnylgvipflqdlitdgi iagvgsvlvfpqivvlfffis l l e d s g y m a r i a v  
lmdrimesfg lsgksfipm  
iigfgcnvpsimaarsieneker l t t i l i a p f m s c s a r l p v y a l f v g i f f k e n q s l v v l s l y v l g i i m a f l v s t v l t k t i  
l k n d n a i f i v e l p t y r v p s  
ikt l w r s t w e k a k g f v r k a g t f i f g g s v v i w l l s y v g p h g i n v n i n q s f l h m v g s f f g m l v q p l g f g t w a g a t l v p g f l  
akevivssmaityssgdag  
l n v n i q n f t p l s a y a f m i f i l l y i p c v s t v a a i r k e t y s w k w t a l a v a y p l v t a y v l t f i f y q v g h l f v  
>tr|D1GTD4|D1GTD4\_STAA0  
mgtfiakykwsaviawivivaa ilip latnapkfdndi kmtgl es l d t n k k i e k h f n q d s e k a q i r v v f k t t k d d g i v q p  
s i t k d i k k t l d d i k k d d k h  
i d k i s d p y e n k q i n k d k t t a f a d i t y d v s q t s l k d g s r d n v k s h l k d l r d n h n v q t e l t g t g m t s t e v g g n s e l v g i i v a  
fvvllitfgsviaaglpii  
saliglasvgvis l l t y a f d i p n v t l t l a v m i g l a v g i d y a l f i l f r y r q v m k t e t d y i k g i g l a i g t a g s a v v f a g v t  
vviavcglslvgidflavm  
gfasaisvfvavsal l l palisi fhkrikvnlqskfkdidtpwskfitgnalaavllgliilvaaaipvshmr lgi  
pddgvkpadstqkkaydii  
sdfggegfnqgipmlinvkdkkddpqlqdd l qsvykdi kdkknvdi vtpqmskdndyalmvvipkqgpnaestndlvh



Tsompanidou\_et\_al\_Supplemental\_FASTA\_File

d1rdyhkdaqdkygfktei  
sgqsvinidmskklneaip1fasvivv1aff1lmivfrsilip1kavl1gfv1slmat1gftt1vmqdgfmkg1fgiettg  
pmlaf1pvtig1lfglam  
dyevflmsriheeysktgndysikv1kesgpvivaaalimfsvffafvfqedvmiksmgmalafgv1fdafvvrmmli  
palk1fgkgsyw1pawln  
riiprvdieghalekyktvesqeseakdskeydttkfvypqgatnvskhqadahgqddahsiv1ddktmal1yqevkqssa  
sslflydalidyqnkhqln  
skqqatnieqlnknieklnq1lekn1rnks  
>tr|D1GTD5|D1GTD5\_STAA0  
mketdlrviktka1sss1lq1leqq1fqtitvnqicdnalvhrttfykhfydkydlley1fnq1tkdyfardisdr1nh  
pfqtsmdtinnked1reia  
efqeadaefnkvlknvcikimhndiknrrdrididsdipdn1ifyiys1iegfihwikdekidwppedidni1fhkvini  
kik  
>tr|D1GTD8|D1GTD8\_STAA0  
mrilitgtvaili1lg1vkti1qdyemtndtsrqlsdnkdddki1h1nnfkn1hakeftpsdff  
>tr|D1GTE1|D1GTE1\_STAA0  
mtkikimsvrdedmpyikawaekhhvevditkealtdnvegvagydg1slsqqip1sehvykr1nelgikqiaqrsagf  
dtydl1elankyn1ivsnvp  
syspnsiaefavnqainvvrhfnq1qtkvrehdfrwept1lksikdlkvavigtgrigrvvadi1fangyqsdvvyaydpf  
pnakiatyvdykdtieeav  
egadiv1lhvpatkynhy1fnael1fkhfkdkavfvncargslvdtka1l1dalngvikgaal1dtyeferkl1fpsdqrgkt  
1nd1l1les1idredv1ltp  
hi1fyteaaven1ivdal1dat1dv1qtgdtr1rvn  
>tr|D1GTE5|D1GTE5\_STAA0  
mkw1sri1tvi1v1tmsmacgali1fnrrhq1kakt1fnfnhkal1ti1iparneekri1gh1l1hsii1qqqv1pvdv1vmndgstde  
tacvarsygatvvdv1dda  
dgkwygkshacyqgvthactnri1afvdadv1fl1rkdaveal1nqy1lqgekg1l1svqpyhi1tkrfyegfsai1fn1mtvvg  
mnv1fst1ddgrtnq1hafgp  
vt1tnkedyatgghksanrhi1iegfal1gsaytsqs1pvtvyegfp1fvaf1rmyqegfqs1qegwtkh1stgaggtkpkim  
aai1v1wl1fgsias1l1gl1cl  
slkyrqmsvgkml1tvyl1syttqfiy1l1hrrvgqfsn1l1mvchp1l1fmfft1kifi1qswkqm1hrygvvewkgrqysis1keq  
>tr|D1GTE6|D1GTE6\_STAA0  
mtkhi1iv1ggg1l1ggi1saa1rma1qsgysvs1yeqnnh1ggkvr1hesdd1fgfd1l1gpsi1l1tmpy1fek1feyskkqmsdyvt  
ikr1l1phqwr1s1ffpdgt1tid  
lyeg1ketgqhnai1l1skqdiee1l1qny1l1nytrrid1ritekgyfnygl1dt1l1sqiik1fhgp1l1nalinydyvhtmqqa1dkris  
npy1l1rqm1lgyfi1kyvg1sss  
ydapav1sml1f1hmqqeggl1wyveggi1hh1anal1ek1lareegvt1ihtgtrv1dniktyercvtgvr1dtg1efvkadyi1ism  
evi1ptyky1l1h1dtqr1lnk  
l1erefepassgyvm1h1gvacqypq1lahhn1ffft1enay1l1nyqqv1fhekvl1pddpti1yl1vntnkt1dhtqapvgyeni1kv1lph  
ipy1iqdqp1ft1tedyak1frd  
ki1ldk1lekmg1l1td1l1rkhi1yedvwt1pedi1eknyrsnrgai1ygvvadkkknkg1k1fpkesqyfen1lyfv1ggs1vnp1ggg1mpm  
vt1sgqqvadki1nareakn  
rk  
>tr|D1GTE8|D1GTE8\_STAA0  
mkkiv1tati1ataglati1afaghd1aqa1e1qn1ng1nsnda1qs1syty1t1daqgn1yhtwt1gnwn1psq1l1tqnnt1y1y1nnynt  
ysynn1asyn1ny1nhsyqyn  
nytnnsqtatnny1tg1sg1syst1tsn1nv1hvt1tta1p1ssn1gr1si1ngy1asgn1lyt1sg1qcty1y1v1drv1gg1k1g1str1gnas  
nwasaa1ssgyt1vn1ntpka  
gai1mq1tt1qgy1ghvay1vegvnsngsvr1vsem1nygh1gagv1tsrti1sanq1agsyn1fih  
>tr|D1GTF1|D1GTF1\_STAA0  
mtsik1t1tpkdfi1frv1l1sgva1g1ivag1vpna1l1gei1fky1fmdy1hpi1fkt1l1gvv1vai1qftv1pal1gal1vamk1fd1spla  
iavvasaay1vg1sgaa1qfkn  
gawmi1tg1gd1l1ntmi1taai1avl1f1l1li1qhrv1gsmal1iv1fptv1vvg1sga1g1il1il1pytk1mitta1ign1mvng1ftel1qpiv  
msi1lism1v1f1s1l1i1ispl1st  
vai1afa1g1itg1laags1asig1isateav1l1ig1tskvr1l1gvpl1sv1ff1gg1vkmm1ipnm1vkypil1mlpil1ttaiv1sgl1vsa1lv  
gihgtkesag1fg1fig1mv1gp  
ina1fk1fmev1dsaw1sv1l1iv1vaff1vp1fv1taw1ladi1yrk1vfr1lytndi1fk1fmg  
>tr|D1GTF2|D1GTF2\_STAA0  
mlg1seqm1teski1d1priv1rtkq1l1vdaf1lki1srek1l1sqi1tvkdi1tdiat1l1nat1fyah1ftd1ked1l1dyt1l1svt1l1kd1n  
dn1l1sis1nvinekv1l1rni1fi  
siasy1ik1daaks1cel1nseafcnkahqrinne1ledi1faim1lensy1ep1hqr1di1ivns1gs1flaag1isgl1al1h1wfnts1qetadv  
fidrn1l1p1f1l1hh1iahf  
>tr|D1GTF6|D1GTF6\_STAA0  
mkdi1l1vigat1gkqgn1avvkq1l1ledg1wyv1sa1l1trnk1nrk1l1sdigh1ph1l1sivegd1l1sds1v1l1qsam1kgkyg1lysi1qipivkd  
dv1see1l1rqgm1kie1ieaeqe  
niqhi1vystag1gvnr1nrtg1phfev1l1akien1l1mesn1inat1vikps1ff1mdn1fl1riak1veder1tl1pefin1pnik1ftmissi  
di1akiasy1vfeh1l1qs1fthq  
sie1igs1dev1t1seati1f1sevt1gk1stvie1gef1vsg1vaek1qwl1eek1gyev1dfel1maei1n1ptr1l1s1sdw1l1kvq1d1ynk

Tsompanidou\_et\_al\_Supplemental\_FASTA\_File

>tr|D1GTF8|D1GTF8\_STAA0  
mrkdakenrqrreeiahklfdeegvenismriakelgigmgtlyrhfkdkSDLcyvviqrdldifithfkqikddyhsn  
yevmqvsldyllqfkidhk  
allqcieagnnkrlrfyqsafyqelfyfyydlfksdddiytkfktmdl1qalstrvdfdfqiehrnisieayrnyllniyld  
evernd  
>tr|D1GTF9|D1GTF9\_STAA0  
mtkivlitggngklyasaealkalgykvyigsrndvrgqqasqklgvhyvqldvtsdysvknaynmiaekegrldilin  
nagisgqfstpskltpdv  
eevyqtnvfgivrmmntfvp1lekseqpvvvnvssglsgfmgvtnpetaeskvns1aycssksavtm1tlqyakglpnmq  
inaadpgatntdlvgdfsn  
nskhvsegikp1iq1atidadgptgtfingngempw  
>tr|D1GTG4|D1GTG4\_STAA0  
mqhhkvaiigagaagimaitlkdfgitdviilekgtvghsfkhwpkstrtitpsftsngfgmpdmnaismdtspaftfn  
eehisgetyaeylqvvanh  
yelni fentvvtnisvddaytiatttetyhadyifvatgdynfpkkpfkygihyseiedfdnfnkgqyvvggnesgfd  
aayqlakngsdialytstt  
glnpdadpsvr1spytrqr1gnvikqgariemnvhytvkdidfndgqyhisfdsgqsv1tphepivatgfdatknpiVq  
qlfattnqdik1tthdest  
rypni fmi gatvendnak1cyiykfrarfavlah11tqreglpakqevienyqknqmy1ddysccevsctc  
>tr|D1GTG8|D1GTG8\_STAA0  
mki gyarvstgln1n1qedr1naygceki fsdhisgsksrpgldkvi efarsgd tivvwrldrlgrnmedlitlvne1  
nergvsfhs1leenitmdks  
sstgq11fh1faafaefern11erssagriaarargrygrpeklnqkdln11ktlydngtpiktieaqwqvsrttiyr  
ylnk1eekedekqgevsn  
>tr|D1GTH0|D1GTH0\_STAA0  
mak11imsivsfcfi1111ffryil kryfnym1nykvwylt1laglipfipikfslfkfnvnqaptveskshdlnhn  
inttkpiqefatdihkfnw  
dsidn1ctviw1v1i1s1fkflka1ly1ky1kkqs1ylneneknidtilfnhqyknvirkaeti qspitfwygyi  
ilipssyfksv1dkr1kyi  
ilheyahaknrtd1h1i1fni1fsi1msyn1lvhi1vrki1hdneveadr1v1nn1kn1efktyaes1msdsv1nvpffnkn  
ilshsfngkks11krr1in  
ikean1kkqsk11i1f1c1f1t11mvi1qsq11mgqs1tdyn1kpl1hndyq11dski1fgs1ngs1fvmys1mkkdkyyi1yn  
ekesrkryspnstykyi1la  
mfg1drhi1ndens1rmswnhkhypfdawnkeqd1ntamqnsvnwyferisdqipknytatq1kq1nygnkn1gsyky1sym  
eds1k1sn1leqv1v1fknmm  
eqnnhfskkaknq11ss11ik1knekye1ygktgtg1vngkyngwfvgyvitnhdkyyfath1sdgkpsgknaeliseki  
1kemgv1ngq  
>tr|D1GTH1|D1GTH1\_STAA0  
mkk1i1fliv1al1vsacnsnsshake1nd1ekkynahigvya1dtksgkevknfsdkrfayastskainsa1lleqvpyn  
k1nkkvh1nkddivayspi  
1ekyvgkdi1tkplieasmtysdntannki1keiggikkvkqr1ke1gdkvtnpvryeie1nyyspkskdtstpaafgk  
t1nk1iangk1skenk1kfl  
1d1m1nnksgdt1ikdgvpkdykvadksgqaityasrndvafvypkgqsepiv1viftnkdnksdkpndk1isetaksvm  
kef  
>tr|D1GTH4|D1GTH4\_STAA0  
mvmkkdiakkvigktpigvkl1akvii1cvvaf1t1fpv1vmf1lapdsnkdkddagctvsngnvsangidkfnenakg  
gk1legkgeik1kaeknkV  
pvni1fmai1asesqwgkgenatrqnnp1svmgks1hdstyptiedgl1nagaknlydvyiskgl1dtpkkigpyapvgas  
ndpnmnarw1ptvek1mk  
d1ggseaktscsngkgs1ikfngk1phwsnddpkgk1lytagqctwyaygm1rqm1gkpvstywhdahkwndrakaegykv  
dknpep1gal1fiaeqgaggh  
dghyghvavv1gvsdggktfritemwegafkvnert1kmtdgysfihde  
>tr|D1GTH6|D1GTH6\_STAA0  
mamneial1fkgvri1pyqkyid1fmfagv1afi1lv1yriy1il1f1dyksv1nk1ldil1t1fayfkph1ly1lligtai1fvick  
li1aqf1li1rfk1kd1laemie  
tqgf1hnr1t1v1kk1ttey1ipi1dyk1tey1dypt1mfy1kr1gkks1fvi1h1kkdgs1rfqdny1le1eti1ep1mf1nsel1vekkh1gry  
1ryef1mp1ky1kk1r1iv1m1nge  
qesnti1fydtki1ai1thq1twd1fvkaphg1vtg1itgggkty1fl1fyvire1l1frh1sevr1ldpkvsd1s1fmkrvigddkvad  
tkgq1k1q1reannemeer  
fr1mndssdyki1gnd1frn1fdm1rpyfi1fdevtaftst1ldkkelqemndy1lini1mkgrqagv1fm1ltaqrpdadvikgnv  
rdq1gl1rvs1gn1s1ndgyr  
mtfgqtdkefqt1hdsdi1grgyi1sil1gqynepi1ldap1meqydfvedvkqilnke  
>tr|D1GTH9|D1GTH9\_STAA0  
msg1fnffv1lgad1rps1ggvgdwi1snevtgig1lv1lvvgivkwasgkyghmvi1fvvgg1fl1vskgpeqvfnaiagvw  
kmi1fgg  
>tr|D1GTI5|D1GTI5\_STAA0  
mnnni1pai1rni1kd1lek1ikt1dyk1mcv1ldm1high1iksime1llkqnhiecfihid1lik1g1shdefasefi1qqy1kpgiv  
stkskvikkaks1nt1tif

Tsompanidou\_et\_al\_Supplemental\_FASTA\_File

rvfiidsqalkrsidlikkvepdfvvelpgvaskaihhiiketntqviagglintidevneavkngakyvttsydklw  
>tr|D1GTI7|D1GTI7\_STAA0  
mekyilsidqgttssraifnqkgeiagvaqrefkqyfpqsgwehdaneiwtsvlavmtevinendvradqiagigitn  
qrettvwdkhtgrpiya  
iwwqsrtqscselkqggyeqtfrdktgllldpyfagtkvkwilndvegarekaengdlfngtidtwlvklskaahi  
tdynasrtlmfnihdlew  
ddellelltvpknmlepvassevygkti dyhfygqevpiagvagdqqaalfgqacfergdvkntygtggfmlmntgdka  
vksesgllttiaygidgkv  
nyalegsifvsgsaiqlrdglrminsapqsesyatrvdstegvyvvpafvlgtpywdseargaifgltrgtekehfir  
atleslcyqtrdvmeamsk  
dsgidvqslrvdggavknnfimqfqadivntsverpei qetta lgaaf laglavgfweskdidiaknwkleekfdpkmddeg  
ereklyrgwkkaveatqvf  
kte  
>tr|D1GTK2|D1GTK2\_STAA0  
mlfslfvekeesqltylkelgedgeykyvakidsktsklchslngkifkvkdmipgvnappmhpwcrsttvphvgnwr  
kffkeregkyqvegcfies  
galnksdeygikrnrhaqiyynsvrnrkqieiskiakntninkdliqrvyehifenkyll esgfkdqfdpdfymaqsq  
rlregknikkmdim  
>tr|D1GTK9|D1GTK9\_STAA0  
mriedayrkdvii tllnneeyegfvtdyenefesetgnlvvdiqtdfavysfdeteiksirllk  
>tr|D1GTL2|D1GTL2\_STAA0  
misfendylegahekvllrvldtnlvqasgygfdqftaqaeikikdtidcpnatirflvggtqtnqvvin smlesyegvi  
sadtghvavheggaieysg  
hkvitipskegkvsasdvetyetfksdfkkdhmvfpgmvyishpteygtlyskseleelckvckqyqlplfmdgarlgy  
glmsdqsdmtikdiakycd  
vfyiggtkigalceai vftkknepkqfttrikhgallakgrlgtiqflelftdnlfnisrhaimankmkgdfknkg  
yrlfydsptnqqffilsne  
kiaeleqkvkfavwekyddqhrvrfatswatteenlnkllleli  
>tr|D1GTL8|D1GTL8\_STAA0  
mtsliaedqnm lrqamvqliklhgdfeiladtdngldamk lieeynpnvvildiempgmtglevlaeirkkhlnikvii  
vttfkrpgyfekavndvd  
aylkersieelvktnknvnggekeysatlmtsffvdknpltpkeqivlreinglsskeiseklfldgtvrnytsvii  
dklfadnrfdawkkaneqg  
wi  
>tr|D1GTM6|D1GTM6\_STAA0  
msnvl eltipastanlgvgfdisgmaldkflhlsvketsgkweyifhddaskqlptdetnfiyhvaqqvaskysvdln  
lcie mrsdiplarglssa  
salvgaiyianyfgdiqlskhevqlateieghpdnvaptiyygliagyndvsketsvahidipdvdivvtiptye lkt  
easrralpqklthseavks  
saisntmicalahnye lagl mqqdgfhpyrqh liaefdevktiasqhnayatvisgagptilifsrkensgelvrs  
nsqvvschselvdinisgv  
kerivyq  
>tr|D1GTN3|D1GTN3\_STAA0  
mkifdyediqlipnkci vesrsecdttiqfgpkkfk lppvpanmqtvmneklakwfaendfyimhrfdeearipfikhm  
qnsqglfasivsgvkaefd  
fieklaqeklipeyitidiahghsdsvinmikhikthipdsfviagvgtpegvrelenagadatkvigipgrvcitkik  
tgfgtgwqlaalnicska  
arkpliadggrthgdiaksirfgasmvmigs lfaaheespetvel dgkqykeyfgsasefqkgehk nvegkkmfv ehk  
gslmdtlkemqqdlqssis  
yagkdllkslrvdyvivrsifngdrd  
>tr|D1GTN5|D1GTN5\_STAA0  
mreltkrqseiynyikqvvtkgyppsvreigeavgl assstvhghlsrl eekgyirrdptkpraieivsdqtdninme  
etihvpvigkvtagvpita  
venieeyfplpehlstshnsdifi lnvvgdsmieagildgdkvivrsqtiaengdiivamteedeatvkrfykeknryrl  
qpenstmepiyl dnvavig  
kviglyrem  
>tr|D1GTP5|D1GTP5\_STAA0  
maanfkeqskkhfdlngqsytyydlkaveeqgitkvsnlpysirvll esllrqeddfvitddhikalsqfgkdgnegevp  
fkpsrvilqdfgtgvavvd  
laslrkamddvggdi tkinpevpvd lvi dhsvqvsdyanpealer nmkleferyeryqflnwatkafdynavppatgi  
vhqvnley lasvvhvrdvd  
gektafpdtlvgt dshttm ingivlgwgvvggieaeagmlgqpsyfpipevigvrlvns lppgatatd lalrvtqelrkk  
gvvgkfveffgpgvqhlp  
adrati anmapeygatcgffpvddes lkymltgrsdehialvkeylkqnhmffdvekedpnytdvie ldlstveas lsg  
pkrpqdlifl sdmkssfen  
svtapagnqghgl dksefddkkae infkdgskatmktgdiaiaa itsctnts npyvmlgaglvakkavekg lkvpeyv kts  
lapgskvvtgylrdaglpq  
ylddlgnlvgygcttcignsgplpeiekaiadedllvtsvlsgnrnfegrihplvkanylaspqlvvayalagtvdid

Tsompanidou\_et\_al\_Supplemental\_FASTA\_File

lqnepigkngdgedvylkd  
iwpstkevsdtdsvstpelefieeynnvynnelwneidvtdqplydfdpnstyiqnpsffqglскеpgtivrplnglrvm  
gkfgdsvtttdhispaigaig  
kdtpagkylqdhqvpi refnsygsrrgnhevrvrgtfanirirknqlapgteggfttywptnevmpifdaamkykedgtgl  
vvlagndygmgsrdwaak  
gtnllyvktviaqsyerihrsnlvmmgvlpfefkkesadsldgteeisvni denvqphdyvkvttakkqdgdlvefda  
mvrfdslvemdyyrhggi l  
qmvlnkrlaq  
>tr|D1GTQ0|D1GTQ0\_STAA0  
mseiqdlsledvlgdrfgryskyiiqeralpdvrdglkpvqrrilyamyssgnthdknfrksaktvgdvigqyphgdf  
svyeamvrlsqdwklrhv l  
iemhgnngsidndppaamryteaklsllaellrdinketvsfipnyddttlepmvlpsrfpnllvngstgisagyatdi  
pphnlaeviqatlkylidnp  
ditvnqlmkyikgpdfptggi iqgidgikkayesgkgrivrskveetl rngrkqliiteipyevnksslvkridelra  
dkkvdgivevrde dtrtg l  
riaie lkkdvnsesiknylyknsdlqisynfnmvaisdgrpklmgirqiidsylnhqievvanrtkfel dnaekrmhive  
glikalsildkvielihss  
knkrdakenlievyefteeqaeai vmlqlyrlntndivalegehkelealikqlrhildnhdallnvikeelneikkkfk  
serls lieaeieeikidke  
vmvpseevil smtrhgyikrtsirsfnasgvediglkdgdsllkhqevntqdtvlvftnkgrylfipvhkladirwkelg  
qhvsqivpieedevvinvf  
nekdfntdafyvfatqngmikstvp lfktrfnkpliatkvkenddlisvmrfekdq litvitnkgs ltyntsel sdt  
glraagvksinlkaedfvv  
mtegvsendtilmatqrgslkrisfki lqvakraqgitllkelkknphrivaahvvtgehsqytl ysk sneehglindi  
hkseqytngsfi vtdddfg  
evidmyis  
>tr|D1GTQ5|D1GTQ5\_STAA0  
mnintayfaggc fwcmtkpfdfdgiekvtsgymgghienptyeqvksqtsghletveiqydvalfsynkll eiffsv id  
pldtggqyqdrpqqyqta i  
fytnhdhkel aetyieqlkntinadkaiatki l pasqfykaedyhd fykknperyaeeqkirqeyknkq  
>tr|D1GTQ6|D1GTQ6\_STAA0  
mketndneyrrqsehrtsapkrkkkkkirk lpiillivillialvvyivhsynsgveyakkhakdvkvhqfngpvknd  
gkisi l vlgadkaagggqs r  
tdsimvvqydfin kkmkmmsvmrdiyadi pygkghkinsaya lggpellrktldkn lginpeyyavvdf tgfekmidelm  
pegvpinvekdmsknigvs  
lkkgnhr l ngkel lgyarfrhdpegdfgrvrrqqvmqt lkkemvnfrtvvklpkvagilrgyvntnipdsgifqtgl sf  
girgekdvks l tvpiknsy  
edvntntdgsalqinrntnkqaikdf l ded  
>tr|D1GTR1|D1GTR1\_STAA0  
mdifykkikanvtpelaqlhskkii l estnqqqtkgrysvvi fdiygt l tldndvlsvst l kesyqiterpyhylt tki  
nedyhniqdeqlks l pfi s  
gyvgtc sfdlvrh efpklqsiql edhkqh dvrlymveqvvyvf dhykde lyiiatnqfsnstksdl enrviksiedl tkiq  
pfmptqdfdfktkeiqsni  
seerfiemi qy fkeki tegdmf qvvp sriykyahasqlnqlsfqlyqn lkrqnp spymyylnidqpyivgsspes fvs  
vkdqivtt npiagtiqrge  
ttqidnenmkql lndpkecsehrmlvd lgrndihrvskigtskitklmviekyehvmhivsevtgkinqn l spmtvian l  
lptgtvsgapklraieri y  
eqyphkr gvyggvgyincnhd f alairtm m ideqyinveagcvvydsipekelnetklkaks l levsp  
>tr|D1GTR2|D1GTR2\_STAA0  
milvvdnydsftyn l vdi vaqhtdvi vqypdddnl nqsvdavi ispgpghplddqqlmkiist yqhkpilgic l gaqa l  
tcyyggevikgdkvmhgkv  
dtl kvishhqh l lyqdi peqfsimryhs l isnpdnfpeelkitgrtkdc iqs fehkvrphygiqyhpesfatdygvkiit  
nfinlvkeg  
>tr|D1GTR6|D1GTR6\_STAA0  
mnkqi qteadel gffgeyggqyvpelmpaiielkkaykeakadpefqreleyylseyvgratpltyaasytes lggaki  
ylkredlnhtgahkinna l  
gqallakrmgkkklvaetgagqhgvasatvaal f dmelvfvmg sedikrqqlnvfrmel l gakkvavedgggt l sdavnk  
alqyvwshvddthyl l gsa  
l gdpdfptivrdfqsvigkei ksqi l kkegrlpdai vaciggg s naigt fypfikddvaly gveaagggdtdkhalaig  
kgspgv l hgtkmyli qded  
gqvqlahs isag l dypgi gephsyyhdigrvt fenasdtqamnal inftkhegi ipaiesahalsyver l aptmskedi i  
vvtisgrgd kdmeterqym  
vergl and  
>tr|D1GTS5|D1GTS5\_STAA0  
myklikpflfkiepekahgltidal ktlqkfpvlfpvvdkl ftyknpt l sqtiqgnty dnpiglaagfdkscevpkaleh  
l gfgale l ggi t p k p q p g n  
pprmfr l led dal inrmgfnni gmka l sh l rknayqvpvgi nvgnkmtpyearyqdyikvidt fkhdsfftniss  
pnten l qnfhdkdefsm l c

Tsompanidou\_et\_al\_Supplemental\_FASTA\_File

qal t t f k k q h d v t v p i y l k l t s d m d f d g l k a l l p a i t e t f d g i l a n t t r q r d g l t s a n k v e e g g l s g r p l f e r n l k l i k  
y a y q q t n g e f l i i g t g g v f  
s t e d a i k m m r h g a s l i q i y s s l v i e g p g l t k k m n k g i t r y l k d h h f d n v s d i i g l d a  
>tr|D1GTS8|D1GTS8\_STAA0  
m t a l f p y i a f e n s k e a l a y e e v f g a t d v k r l e v g e e q a s h f g m t k e d a q e a t m h a e f e v l g v k v l c s d s f g r a d k i n n g  
i s l l i d y d v n n k e d a d k v e  
a f y e q i k d h s s i e i e l p f a d q f w g g k m g i f t d k y g v r w m l h g q d y t a i q q  
>tr|D1GTT0|D1GTT0\_STAA0  
m n q h l l g n p k l t v t h v n e v k a g i n h i v v d s v q y g n q e m i e k d v t v e m r d g e k l y i n i f r p n k d g k f p v v m s a d t y g k d n  
k p k i t n m g a l w p t l g a i p t  
s s f t p e e s p d p g f w v p n d y v v v k v a l r g s d k s k g v l s p w s k r e a e d y e v i e w a a n q s w s n g n i g t n g v s y l a v t q w w v a  
s l n p p h l k a m i p w e g l n d m  
y r e v a f h g g i t d t g f y r f w t q g i f a r w t d n p n i e d l i a q a q e h p l f d d f w k q r q v p l s i k t p l l t c a s w s t q g l h n r g s  
f e g f k h a a s e e k w l y v h g r  
k e w e s y y a r e n l e r q k s f f d f y l k e e n d w k d t p h v i e v r d q f y k g e f k s a s a f p l p n t e y t p l y l n a e n t l n h a k i s  
s a h v a q y d s e d k r q d v s f k  
y t f d k d t e l v g m n l k l w v s t t d s d d m d l f a g i k k l d r r g n e v n f p d f n h i e n g q v a t g w l r v s h r e l d q e k s t i a q p w h  
k h e t e l k l s q d e i v p v e i e  
l l p s g t l f k q g e t l e v v v k g s e i v i g n s t p g m k t r y e h e e t v n k g m h m i y t g s k y d s q l i i p i v n  
>tr|D1GTT7|D1GTT7\_STAA0  
m g s f f n k i a r k e d p a i y q n k d g h l k r t l r v r d f l a l g v g t i v s t s i f t l p g i v a a e h t g p a v a l s f l l a a i v a g l v a f t y  
a e m a a a m p f a g s a y s w v n v  
l f g e f f g w v a g w a l l a e y f i a v a f v a s g f s a n l r g l v k p i g i e l p a a l s n p f g t n g g f i d i i a a i v i l l t a l l l s r g m s e  
a a r m e n i l v i l k v l a i i l f  
v i v g l t a i n v s n y v p f i p e h k v t a t g d f g g w q g i y a g v s m i f s a y i g f d s i a a n s a e a l d p q k t m p r g i l g s l s i a i v l f  
i a v a l v l v g m f h y s q a n n  
a e p v g w a l r q s g h g v v a a i v q a i s v i g m f t a l i g m m l a g s r l l y s f g r d g l l p s w l s h l n d k h l p n r a l v i l t i i g v l i g  
s m f p f a f l a q l i s a g t l v a  
f m f v s l a m y r l r k r e g k d l p i p a f k l p l y p v l p a v t f v l v l l v f w g l g f e a k l y t l i w f i v g i i l y l s y g l r h s k k n d v a  
e y h p p k  
>tr|D1GTU0|D1GTU0\_STAA0  
m n k e q l e k m k n g k g f i a a l d q s g g s t p k a l k e y g v n e d q y s n e d e m f q l v h d m r t r v v t s p s f s p d k i l g a i l f e q t m d r  
e v e g k y t a d y l a d k g v v p f  
l k v d k g l a e e q n g v l m k p i d n l d s l l d r a n e r h i f g t k m r s n i e l n e g g i k d v v e q q f e v a k q i a k g l v p i e p e v n  
i n a k d k a e i e k v l k a e l k k  
g l d s l n a d q l v m l k l t i p t e a n l y k d l a e h p n v r i v l s g g y s r e k a n e l l k d n a e l i a s f s r a l a s d l r a g q s k e e f d  
k a l g d a v e s i y d a s v n k n  
>tr|D1GTU6|D1GTU6\_STAA0  
m e l l k h l s q r q y i d g e w v e s a n k n t r d i i n p y n q e v i f t v s e g t k e d a e r a i l a a r r a f e s g e w s q e t a e t r g k k v r a i a  
d k i e h r e a l a r l e t l d t g  
k t l e e s y a d m d d i h n v f m y f a g l a d k d g g e m i d s p i p d t e s k i v k e p v g v t q i t p w n y p l l q a s w k i a p a l a t g c s l v m  
k p s e i t p l t t i r v f e l m e e  
v g f p k g t i n l i l g a g e v g d v m s g h k e i d l v s f t g g i e t g k h i m k n a a n n v t n i a l e l g g k n p n i i f d d a d f e l a v d q a l  
n g y f h a g q v c s a g s r i l v  
q n s i k d k f e q a l i d r v k k i k l n g n f d a d t e m g p v i s t e h r n k i e s y m d v a k a e g a t i a v g g k r p d r d d l k d g l f f e p t v i  
t n c d t s m r i v q e e v f g p v v  
t v e g f e t e q e a i q l a n d s i y g l a g a v f s k d i g k a q r v a n k l k l g t v w i n d f h p y f a q a p w g g y k q s g i g r e l g k e g l e e y  
l v s k h i l t n t n p q l v n w f s  
k  
>tr|D1GTU9|D1GTU9\_STAA0  
m t l l d i k q g q g y i a k i e s n s f v d g e g v r c s v y v s g c p f n c v g c y n k a s q k f r y g e k y t d k i l a e i l d d c d h d y i s g l s l l  
g g e p f c n l d i t l n l v k a f r  
a r f g n t k t i w w t g f l y e y l a n d c t e r r e l l s y i d v l v d g l f i q h l f k p d l p y k g s l n q r i i d v q q s l s h a r m i e y i v s  
>tr|D1GTV1|D1GTV1\_STAA0  
m n s d n m w l t v m g l i i i s i v g l i a k k i n p v v g m t i i p c l g a m i l g y s v t d l v g f f a k g l d q v i n v i m f i f a i i f f g i m  
n d s g l f k p l v k r l i l m t r g  
n v i i v c a m t a l i g t i a q l d g a g a v t f l l s i p a l l p l y k a l n m n k y l l i l l l l a l s a a i m n m v p w g g p m a r v a a v l k a k s v n  
e l w f g l i p i q i i g f i l v m l  
f a v y l g f k e q k r i k k a i e r n e l p q t q d i d v h k l v e y e r d q d v r f p v k g r a r t k p w i k w n t a l t l a v i l a m l i n i a p p e  
f a f m i g v s l a l v i n f k s v d  
e q m e r l r a h a p n a l m m a a v i i a a g m f l g v l n e t g m l k a i a t n l i k v i p a e v g p y l h i i v g l l g v p l d l l t s t d a y y f a v l  
p i v e q t a g q f g v p s v s t a y  
s m v i g n i i g t f v s p f s p a l w l a i g l a e a n m g t y i k y a f f w i w g f a i v m l v i a m l m g i v t i  
>tr|D1GTV3|D1GTV3\_STAA0  
m k l n t s n s p f t e k q v t e i n n l l q t l t e s q q w l s g f l l a n s n d t t s d s n q q l e t e v w q q s q i s e e q e t s t t y m l q n k e p  
h i e a n q r h v t l y g s e s g n  
a m r l a e i f s e r l s d i g h q v v l m s m d e y d t t n i a q l e d l f i i t s t h g e g e p p d n a w d f f e l e d d n a p n l n h v r y s v l a l g  
d q t y e f f c q a g k d v d a l l e

Tsompanidou\_et\_al\_Supplemental\_FASTA\_File

n1gaerickrvdcidiyeedaekwmadiiniidttsegiqsesvisesiksakekkysksnpyqaevlgninlngthdsnk  
etrhiefl1ddfsesyepg  
dcivalpqpndpelveklism1gwdpqpvpindhgdtpiaeaaltshfeftkl1lpl1knadiyfdneelseriqdeswa  
heyvinrdfidlitdfpti  
elqpenmyqilrklppreysissfmatpdevhitvgtvryqahgrerkgvcsvhfaerikpgdivpiylkknpnfkfpm  
kqdi pvimigpgtgiapfr  
aylqereelgmtgktwlffgdqhrssdflyeeieewlengnltrvdlafsrdaqehkeyvqhrimeeserfnewieqgaa  
iyicgdekcmakdvhqaik  
dvlvkerhisqeeaeitlrqmkqrqryqrdvy  
>tr|D1GTV6|D1GTV6\_STAA0  
m1levkhvkkvygkgl1nattalnqmn1svgagefvaimgesgsgkst1ln1iasfdgltegdiivdgahl1nmknkska1  
yrqqmvgfvfgdfl1lptm  
tnkenimmp1ilagakrkdieqrvhqltvqlhlegflnkypseisggqkqriaiara1vtkpti1ladeptgal1dsktsk  
alml1fqi1hql1egtilm  
thsnidasyaervi1fikdgrlyheiyrgeesqlvfqqr1tdslalvngsvni  
>tr|D1GTV8|D1GTV8\_STAA0  
mk1liveddfviaes1aselkkwnygvivveqfdd1lsifnqhqpqlv1ldinlpt1ngfhwqceirktsnvp1iifissr  
idnmdqimaiqmgddfie  
kpfnl1s1tiakiqal1rrtydlsvands1tvkgct1ildeakvvyqeqs1ql1st1elqilkl1fqnedkysrta1iekc  
wesenfidnt1avn1mtr1  
ckk1ntigvndfi1tkknvgykv  
>tr|D1GTW0|D1GTW0\_STAA0  
m1svkkatkfavan1iivstvfssvtpaiaqsdksksdesfavgn1tknpknv1flvgdgmgpsfntayryy1kndphakem  
tptafdsylkgtnr1tysnd  
pkqni1tdsaaggtafssghktyngaigvdsnkqkvktv1erakekgkstglvstaeltdatpaayaahvtsrddknei1ak  
qfykdkingkhkvdv1l1gg  
gakyfgksngn1dkkfkkgdyd1atnskel1sksdkdv1gl1fadknmp1aidaskdeps1admqqsa1sk1ernkkgff1  
mvegasidksahsnd1tgv  
msemegefekafddai1qyakkhkdt1lvatadhstgg1tigkdkgyewnpqpi1ksmkhsasymtekmakgedpekvi1negy  
gfefsqqdmkkvkkenkkl  
kr1l1kkeksadvekqtkal1qhai1qkpvn1dksy1tgwtsdg1htgedvntya1ygp1rsesfsgn1ientesaki1fid1fk  
>tr|D1GTW3|D1GTW3\_STAA0  
mkwsni1fekridyl1snkqnkys1rrftvgttsv1vgat1lfg1gnh1qaqaseqsnd1ttqsskn1nasadsekn1tietpql  
nttandt1sdisant1sanv  
dstaktm1stqtsnt1ttt1epastnetp1qptaik1dqataakm1qdq1tvpqeansqvdnkt1tdanniatn1selknpqt1dl1pq  
sspqt1snaag1tkspsvrt  
ravrs1lavaepvnaad1akgtvndkvtasdfk1lektafd1pnqsgntf1maanfkvtgqvksgdyftak1pdsvtgngdvd  
ysnsntmp1iadik1stngd  
vvakatydi1tktyt1fvftdyvndkeningq1fsl1pl1ftdrakapks1gytdaniniademfdnk1itynysspiagidk1png  
anissqi1igvdtasgqnty  
kqtvfvn1pkqrv1l1gntwvyikgyqdkieessgkvsatdtk1lri1fevndtsk1sdsy1adpnds1l1kevtgefkdki1syky  
dnvasin1fgdinktyv1v1n  
eghydntgkn1ktqvi1nenidpatgkdys1fgwnnenvvrygggsad1gdsavnpvdptgppvdpepepeptpdpepspe  
pepeptpdpepspe1pdpds  
dsdsds1gsdsds1gsdsds1gsdsds1gsdsds1gsdsds1gsdsds1gsdsds1gsdsds1gsdsds1gsdsds1gsdsds1gsdsds1gsdsds  
dsdsds1gsdsds1gsdsds1gsdsds1gsdsds1gsdsds1gsdsds1gsdsds1gsdsds1gsdsds1gsdsds1gsdsds1gsdsds  
sesdsds1gsdsds1gsdsds1gsdsds1gsdsds1gsdsds1gsdsds1gsdsds1gsdsds1gsdsds1gsdsds1gsdsds1gsdsds  
dsdsds1gsdsds1gsdsds1gsdsds1gsdsds1gsdsds1gsdsds1gsdsds1gsdsds1gsdsds1gsdsds1gsdsds1gsdsds  
dsdsds1gsdsds1gsdsds1gsdsds1gsdsds1gsdsds1gsdsds1gsdsds1gsdsds1gsdsds1gsdsds1gsdsds1gsdsds  
neqkapsn1pkgevn1hsnka  
skqhqt1dal1petgdk1sentnat1fdamva1l1gs1l1l1frkrk1qdhkeka  
>tr|D1GTW5|D1GTW5\_STAA0  
mkekiv1ial1gnai1qtkeataeaqqtai1rramqn1kpl1fdsparivishgngpqig1g1li1qqaksnsd1t1tpamp1dtcga  
msqgm1gyw1letein1rlt  
emnsdr1tvgtiv1trvevd1kddprfdn1ptkpi1gpfytkeeveel1qkeqpgsvf1kedagrgyrkvvasp1l1pqsilehql1irt  
1adgkniv1iacggg1pvi  
kkentyegveav1dkdfasek1lat1leadt1ml1tnvenvfinfnepnqqq1iddivat1l1kkyaaqgkfaegsm1pkiea  
airfvesgenk1kvi1itnle  
qayeal1gnkgth1hm  
>tr|D1GTW6|D1GTW6\_STAA0  
mnesgdnk1skss1lig1lvigsm1ggafn1msdm1ggkagglaii1igwi1taigmis1lafvfqn1tnerpel1dgg1iysyaq  
agfgdfvgf1sawgyw1fsa  
flgnvayat1l1msavgn1ffpi1fkgn1t1psiivas1l1lwgvh1fl1lkgvetaafinsiv1tvaklip1llvii1cmiafnf  
dtfktg1ffgmt1segv1l1pfs  
wastmsqv1kstml1vtwv1figiegavi1fssraknkkdvgsatvig1lisv1liiyf1l1tvlaqgvil1qnhisql1dpsmaqv  
lasivggwg1stlvn1ig1li  
svlgaw1l1gw1t1lage1lpfivakdgl1pkrfakenkngapvna1l1itn1lvql1fl1ism1ftqsayqfaf1lassailypym  
fsafyqvkyt1lehrqatt

Tsompanidou\_et\_al\_Supplemental\_FASTA\_File

kqwtigiasiyaiwliyaaginyllltmllyipallvysivqknnqtrlikdsyilfmiiivlaviglikllmgtinvf  
>tr|D1GTX0|D1GTX0\_STAA0  
mrkfsryafstmatvtllssltpaalasdtnhkpatdinfaitqksdavkalkepksevnkhyqdysvtdvktddkkg  
fthytlqpsvdgvhpadke  
vkvhadksqkvvlingtdakvkpntkvtlksdeaadkafnavkidknkknqlddvikenkveidgdsnkyyinieli  
tvtpeshwkvkidadtga  
vvektnlvkeaaatgtgkvgldtkdininsinggfslledlthqgklsaynfndqtgqatlitnedenfvkddqragvda  
nyyakqtydykntfgres  
ydnhgspivslthvnhyggqdnrannaawigdkmiygdgdgrtftnlsgandvvahehthgvtqetanleykdqsgalnes  
fsdvfgyfvddedflmged  
vytpgkegdalrsmnspeqfgqpsmhkdyvytekdnggvhtnsgipnkaaynviqaignkseqiyyraleyltsnsnf  
kdckdalyqaakdlydeqt  
aeqvyeanvegvge  
>tr|D1GTX2|D1GTX2\_STAA0  
mkkflitvviilligalgfaiyaainhstssnhneqdnkathqkkdtevhqkdentntnenqnnngvtngnqsstp  
stvqnngstapantqpsnp  
nqsnqnqsnqggssqpsntnqnkhqantpapnksnantnesskqaspsqpqsskn  
>tr|D1GTX3|D1GTX3\_STAA0  
mldrhlkllqffiknpskhisneiaehvnvsnrvtvrndihvinsnfmdidiivsiksksyqlntsqtletiterythiq  
sykeklllsmayqlmhnk  
sqtllqlegdylskvtlndyfvriqqwcqkfniakikkkqgviyvdgtdnditnaihlnqlssghvhvedlilnelpd  
shqrmishiqetlqqhsi  
ettdiqiqgllihlililkrkqslseltdlnhdaklisqscikqinerlgydlnekvinmfsffiyahfnklidigierif  
iqsyidrlielmqqrhivp  
fnedsilqqnlynhfskaylritqniylnnplvieikklypfvntlfeaidklaidtdiemsedeiafltihfqaaiier  
rtktqlnvviacyyglgvs  
nflletkinnlseeisvintiklenithyfdnvdllitthdipkqtlqmlpkhlstikvaplfseddrhkiihvvkqkqn  
pvqahhhmdtvnflvnte  
qkprhtvqifeeaqkllqahhaivegyiesalereksstyignfmaiphgdpekvlqshvlifrtkdvfpwrqhdvklv  
fflaisqkdaftkqmmql  
ianldddsvnhlcsldnhsllkqqlfeylqe  
>tr|D1GTX4|D1GTX4\_STAA0  
mkiavaitscpngiahtymaqekleqvakemgvdikvetqggvgaenvlittqdieadgviaaadkqvdlrsrfvgrkline  
nvregihnprgligriinq  
dapiyqsetnyhskdrksgsksgiqmvyqhlmgvsvfmpfivvglliaialtlggettskglvipddsfwksienigsl  
afkfmvpi lagyiavsiad  
kpglvpgmiggaiadgsfygsdagagflggivagflagiyakwikdikvpkamapimpiiiiipiissvvvglififlig  
apisni fealttwlksmqg  
aniiiilamiigamiafdmgppvkvafifgsaliaegnyavmgmvavavctppiglglatfvqkykfnhseremgkasft  
mglfgitegaipfaagdp  
riipanmigamiasviaaigvgdrvahggpivavlggidhilwfi favivgslvtmitvlllkrtrtpviavdapahtq  
lhdtditqhdtevdnvdnt  
akhshlnkpsvhfdqqtiiadhnmsrneaidtlihqkvcryehtshlknaileremesttaigmvaiphaksdvk  
qpiavmknngvkwesld  
gslpqlifliavpnnsqgdthlkiqlrllskalmndetrqslinanstteiyllmki  
>tr|D1GTX5|D1GTX5\_STAA0  
malflqpvfkdriwggalkafnydipnettgecwaisahpnpntiingpykdmtdqlwsqhrelfdndsrdspllt  
kvl dandkllsvqvhpdddy  
alkhegelgktecwylldaapgaeiigyvhahnkqtltdmidnefdslfkripvksgdfyyvpagtvhaigsgililet  
qssdttiryidydrddqn  
gqlrdlhleqskdvieignhepnttpitthidthvtqfvdnqyfavykwidhgdllkfnkphayclvtiidgtgtlavnd  
khydiqkgssfiltteded  
ihfvgnisavshpg  
>tr|D1GTX7|D1GTX7\_STAA0  
mpknkiliy11sttlv1ptlvsptayadtpqkdtakttskkskstdetskdttskdidkadnntsngdndkkvkt  
iddstsdnsniidfiykn1  
pqtninglltknkyddnysl1tliqn1fn1nsdisdyeqprngekstndsnknsdnsikndtdtqsskqdkadnqkaps  
nntkpstsnkqpspkptq  
pnqsnspasddkvngkssskdnqsmdsaldisildqysedakktqkdyasqskkdkneksntknq1ptqdelkhkskq  
aqsfndvnqkdratslf  
etdpsisnndsgqfnvvdskdtrqfvksiakdahrigqndiyasvmiaqail esdsgrsalakspnhnlfgikgafeg  
nsvpfntleadgnqlysin  
agfrkypstkeslkdysdlikngidgnrtiykptwkseadsykdatshlkskyatdpnyakklnsiikhyqltqfdderm  
pdldkyersikdyddssde  
fkpfrevsdnmpyphgqctwyvynrmkqfgtsisgldahnwnnraqyrdyqvshtpkrhaavvfeagqfgadqhyghv  
afvekvnsdgsivisesnv  
kg1giishrtinaaaee1syitgk  
>tr|D1GTX9|D1GTX9\_STAA0

Tsompanidou\_et\_al\_Supplemental\_FASTA\_File

makyrgkpfqlyvklscstmmatsiiltnlpydaqavsekdeiskellskqdlldkvdkanrqieqlkqlsaskahy  
kaqlneaktasqideiikr  
aneldskdnkgsqiemngqsdisklldqllkdlnvsskvdrgqqsgedlnamkndmsqtattkhgekddkndeamvnk  
aledldhlsqqihksedsa  
vsttdnnhevaktppndgshvvlnkflsneenqshsnrltdklqgsdkinhamieklaksnastqhytyhklntlqsl  
qriantqlpknqksdlmse  
vnkteriksqrniieelartddkkhatqrilesifnkdeadkilkdirvdgktdqqiadqitrhidqlslttsddllt  
slidqsqdkslisqilqt  
klgkaeadklakdwtnkglsnrqivdqllkxhfastgdtssddilkailnnakdkkqaietilatrierqaklladlitk  
ietdqnkifnlvksalngk  
addllnlqkrlnqtckdidyvlspivnrpslldrlnkngkttlnklnanlmnqgsnllsdiptpkpektltlgkng  
llsgllnadgnvslpkage  
tikehwlpisvimgamvlniwlrrnklnka  
>tr|D1GTY0|D1GTY0\_STAA0  
miklfdyfnghsrklyesfkaskleedltivlndngflpddvispyqffadnhntenmkprffnqvtpafweikgnns  
atindmgrlrgkifyqsge  
rprivsrvevfdqqrvrfdvyskngikfaqtvydlnrkailkkymtaegkeviyenfvtsdvlwdqgksyffpskla  
fvlfkqleitehhfvin  
slalpfsvlynlpnsgsdvlnvqeqcdgnvpgnmqlmckgdmkrhcniipdkneyetlniadakvksrilqggylny  
rsnrtytkeiviltnsdql  
rnkvlvetlpdfkfhiaaitemsdklmqldqyanvhlypsiniidrvnelyqlcdiylidinegneilnaveqafdyelli  
lgyrtahhakvtlshlf  
ehndeiimeskdqliqmleslkdqqqfrdallaqkaheisreqfeqvfkqafes  
>tr|D1GTY2|D1GTY2\_STAA0  
mkhklldvtinelrlksirkivkrintwsdevksysddvlkqktlefkeriasgvdtldtllpeayavareaswrvlgmp  
kevqligaivlhegniaem  
qtgegkltatmplylnalsgkgytittndylakrdfeemqplyewlgltaslgfvidvyeyqkgekrniyehdiyt  
tngrlgfdyldnladsae  
gkflpqlnygiidevdsiildaaqtplvisgaprlqsnlfhivkefvdtliedvhfkmkktkewllnqgieaaqsyfn  
vedlyseqamvlvrnina  
lraqylfesnvdyfyngdivlidritgrmlpgtklqaglhqaiakegmevstdksvmatitfqnlfklfesfsgmtat  
gklgeseffdllyskivvqv  
ptdkaiqrdepdkvfrsvdekniamihdivehetgrpvllitrtaeaaeyfskvffqmdipnlliaqnvakeaqmia  
eagqigsmtvatsmagrgt  
diklgegvealgglaviihehmensrvdrqlrgsrgrqgdpgssciyislddylvkrwsdsnlaennqlysldaqrlsq  
slfnrkvkqivvkaqrise  
egvkaremanefeksisiqrdlveernrvleiddaenrdfkvlakdvfemfvneekvltksrvveyiyqnlisfqfnkd  
vacvnfkdkqavvtfllq  
fekqitlnrknmqsaayynifvqkvflkaidsawlqevdyllqllkanvnqrqngqrnaifeyhrvaldsfevmttrnikr  
mvknicqsmifdkegmpv  
ihfp  
>tr|D1GTY5|D1GTY5\_STAA0  
mkyfipawyddqrwwqdtvpyyqlqnktefdmislmgmhlendldyrlivlnhapnlrtflhrydlyetkywsvfdei  
qgshhapqainyhhkwp  
ddvefvytpyllkcvtsqytniyfsqegysiwfeferdqllrryifddrgylsairyfddqgeasyqeyltingdcv  
lhedlngrvtvskryqhh  
yqteynnmaqliieekfqamiahqiheddhvivasdarhnrqianhipakslsysffknrnetvsdeeqsivknahliv  
dsvqlerdlisqkygre  
ntmiritpfetrqspnissqlmetfigvwidgmsdvdllqmmqrlvdyiaqednyrlilltrhqndipmwlrecitsvne  
eyqakqnadvnvsalmtpe  
dqddiiaavktihaehdvvealrtlrvidmskepdllyqisaisagipqingqtdyvsdydngrintvdelldalny  
lfylknwnyayayslkli  
ayaskniinqldeliendat  
>tr|D1GTZ2|D1GTZ2\_STAA0  
mhtfdaqltarenyklligsiiprpiavtllnqdasvnaapfsffnivnnhppmiaiavqraggkrkdalniergd  
fvvhitdednvqdinetaa  
playgdselsrtelsltsttiktpgikdakmrfecklsqmillgdvldgadliigeivtyhidddsiyegnfinphalq  
avsrlagndyaklggifti  
drpek  
>tr|D1GTZ7|D1GTZ7\_STAA0  
mkekfdlvkllnllknkllllilpaiclvvsaalffvmpdkytastqilvnmksssdlafqnvqsslqsvntyteii  
ksprildkvsrefdgqylt  
aelnsflkvtnqtnsqiitvsvttgnksesdkivnriskvfahdmpkimsvndvtilssahdnvkvspivsvnlvisii  
vgivlailiifkelldkr  
ikteedvesqlgplilgsiqf  
>tr|D1GTZ9|D1GTZ9\_STAA0  
msiywivgsiyfyftreirylnkkpdivdelegitflacynesetiedtlnvlnalkyekkeiiiindgssdntael  
iykikenndfivdlqenr



Tsompanidou\_et\_al\_Supplemental\_FASTA\_File

gkana1nqqgikqasydyvmcldaddtivdqapyymi enfkhdpklgavtgnprirnkssilgkiqtieyasligcikersq  
t1agavntisgvft1fkks  
avvdvgywdtdmitediavswk1h1rgyrikyep1amcwm1vpel1gg1wkqrvrwaagghev11rdffstmktrfply  
ilmfeqiisilwvyiv1ly  
lgy1fitanfldytfmtyfsif11ssftmtfinviqftvalfidsryekknmaglifvswyptvywiinaav1vafpk  
alkrkkgyatwsspdrgn  
tqr  
>tr|D1GU00|D1GU00\_STAA0  
mvkprqreyptlkssl1iiretaliaiscvfwiyclv11vyigtifeihdesintirvalnienteildifetmgifai  
iifvfftisiliqkwqkgr  
es  
>tr|D1GU03|D1GU03\_STAA0  
mmksqnkysirkfsvgassiliat11f1sggqaqaaekqvmngnsqedtvtasigdqqtrenanyqrengvdeqqhten  
l1tkn1hndktiiseenhrkt  
dd1nkdq1kddkks1nkn1qrdttkn1nanprdvng1eqaindgkqskvasqqqskeadnsqd1nann1psqsrk  
vps1nksdqtsqreivne  
teiekvppqqknqandkitdhnfnneqevkpqkdekt1svsd1knnqkspveptkdndkng1n11kssavat1pnkgtk  
el1takakgdqtnkvakqgq  
yknqdpiv1vhgfnqftdd1npsv1ahywggnkmn1rqd1eengykayeas1safgsnydravelyyyikgrvdygaah  
aakygherygktyegiykd  
wkpgqkv11vghsmggq1r1qlee11rngsreeieyqkkggeis1p1fkgndnmissitt1gtphngthasdlagnea1  
vrqivfdigkmfngknsrv  
dfgl1aqwg1kqkpnesyidyvrkqsn1wkskdngfyd1tregatd1nrkts1n1pnivykytgeathka1nsdrqkad  
1nmffpfvitgn1ligkate  
kewrendgl1svsissqhpfnqaytnatdk1qkgiwqvtptkhdwdhvd1fvqgdssdtvrtree1qdfwhh1add1vktek  
vtdtkqa  
>tr|D1GU05|D1GU05\_STAA0  
mikkriipclvdkgdrvvkqigfkg1rdignpvd1amyneagadelv1f1diskteeghs1m1levieqtas1rfip1ltvg  
gg1qs1ddi1tq11nhgadm  
vs1nssal1knpq1kqasdkfgrqci1ciaidsyydperkahyccthgk11tnikvydvwqqveq1gagel1vtsmghdg  
mkqgfdiehlakikslvni  
pi1asgggnahfvel1fdqtdvsag1aas11hdrettvqsikeairqggiavr  
>tr|D1GU08|D1GU08\_STAA0  
miyqkqrntaetq1n1siddqspshintgvgl1nhm1t1ftfhsg1s1nieaaggdidvddhhvtedigivigq11lemi  
kdkkhfvrygtmy1smdet  
larvvvd1sgrpy1sfnat1skekvgtfdtelveeffravvinar1tthid1irggnthheiea1fkafsralgialtat  
ddgrvpsskgvie  
>tr|D1GU10|D1GU10\_STAA0  
mlnaqqf1nqfs1leap1deslypi1rdicqevkvhgdkalkmyn1tfdhtktdhleisheqikaafdt1dektkqalqqs  
yerikaygesikqmnqgle  
esvecyey1yhp1lesvgiyvpggkasypstvlmtat1aqvagveni1vvtpqpngvsqev1aacyitqvnqvfvvggaqs  
iaal1tygtet1pkvdkivg  
pgnqfvayakyl1fgqvg1dq1agpteial1iddtdad1daivdvfaqaehdelartyvisedaqvlkdl1esriakalpn  
vdrydivsksianghy1ih  
asn1fdeachvmnt1apehasiqtvpnpqyiekvkyvgal1fighyspevigdyvagpshv1ptnr1tarftng1svndf1tr  
ntvih1skdtfdqiadsaq  
hiahveal1nhqqs1il1rqs  
>tr|D1GU14|D1GU14\_STAA0  
minter1n1mipsssh1id1lynicshp1qaniytpkg1hnsk1dtqrwiekwqhwwqyqfyfv1vkkidcsvigicgye  
yrq1kqetv1n1fyk1hps  
fegqgyaceait1tnfvnyidqetvkvirtnkcnqrsin1aer1n1fkrddtmd1inqqdivfyk  
>tr|D1GU19|D1GU19\_STAA0  
met1nsin1ipkrkedshkgydgi11liggsan1lggaim1aaracv1fsgsl1tvathptnhsal1hsr1cpeamvidindtk  
m1tkmiemtds1ligpg1g  
vdfkg1nna1t1f11qniqphq1n1ivdgda1t1f1sk1kpq1lptcrvi1ftph1kewer1sgipieeqtyernreavdr1gatv  
v1kkhg1te1ffkdedf1kt  
igspamatggmgdt1agmits1fvqgfdn1keavmsatyth1sfigen1lakdmyvppsr1lineipyamkqles  
>tr|D1GU20|D1GU20\_STAA0  
mtlyldget1tieyiks1flqqskie1iddalervkksravverieneetvygittgfg1fsdvridptqynelqmn1i  
rshacg1gepfskevalvm  
mi1r1nt11kghsgat1elvrq1qffineri1ipi1pqqgs1gasgd1aplsh1alal1igegkv1yrgeekdsddv1re1n  
rqp1n1lqakegl1alingtq  
amtaggvi1syiead1gyqsew1aalthqs1ngi1idayrhdvhavrnfqeqinvaarmrdw1egst1ttrqae1rvqday  
t1rcipqihgasfvfnyv  
kqql1efemnaandnpl1ifeanatfv1sggnfhgqpi1afaldh1kl1gvselanvserr1er1vnpq1ngd1paf1spepg  
1qsgamimqyaaas1vsen  
kt1ahpasvdsi1tssanqedhvs1mgttaarhgyqi1enarrv1aiecvial1qaae1kgveg1spktrrkydefrsivpsi  
tydrqf1hkdieavaqylkq

Tsompanidou\_et\_al\_Supplemental\_FASTA\_File

siyqttach

>tr|D1GU22|D1GU22\_STAA0

mtthlsfrgqvqeciptllgyagvgisfgivassqnfsileiillclviyagaaqfimcalfiagtpisaivltvfvivns  
rmfllsmlapnfktygfw  
nrvglgsvtdetfgvaitpylkgeaindrwmhglnitaylfwvipcvagalgeyisnpqalgldfaitamfi flai aq  
fesitksrlriyivliiav  
ivmmlslsmfmpsy la iiaatisaalgvmmmer

>tr|D1GU24|D1GU24\_STAA0

mtnytvdtnlgefittgsgevidnrlryehvgyhgqplvvvchal tgnhlygtddypgwwreiidggyvpihdyqfl t  
fdvigspfssssp lndphf  
pkkltlrdivranergiqalgydkiniligsglmgqamellynrqfevdkaillaatsrtssysrafneiarqaihlgg  
kegl siarqlglfityrsk  
syderftpdevvayqqhgqnfkerfdlncyltlldvldshnidrgrtdvthvfknletkvl tmgfiddllypddqvral  
gerfkyhrhffvdpdvghd  
gfllnfstwapnlyhf lnkhfkrk

>tr|D1GU25|D1GU25\_STAA0

mfskiqpkatmiatitlvfalaly lvp glglifal fatipgivlnk siqsf gisal itviittvl gntfvlsaiilvl  
iasliigqllkertskeri  
lyvttvamslisliafmlqtfgrippsasivkpfkqt lheatmsgadanmtqileegfrqatvqlpgfiiiiitflivl  
inlivtfpilrkfkia tpv  
fkplfawqmsgillwiyiiviicllftgqpsvfqsillnfqlvls lvmiyiqglsvihffgkakglpnavtilllvigt il  
tptthivglgvidlslnl  
krimknnsk

>tr|D1GU31|D1GU31\_STAA0

mkwlkqlqslhtklvivyvlliiigmqiiglyftnnlekelldnfnkknitqyakqleisiekvydekgsvnaqkdinqll  
seyanrqeigeirfidkdq  
iiaattkqsnsrlinqkandssvqkalslgqsndhlikdygggkdrvwvynipkvdkkvigniyieskindvynqlnn  
inqfiivgtaisllitvil  
gffia rtitkpi tdmrntv emskgnytrvk iygn deigela lafnl skrvqeaqantesekrrldsvithmsdgiia  
tdrrgririvndmal km l g  
makediigymlsvsl edefkleeiqenndsflldlnee gliarvnfstivqetgfvtygiavlhdvteqqqvererr  
efvanvshe lrtpltsmns  
yiealeegawkdeela pqlsv treetermir l vndllqlskmdnesdqinkeiidfnmfinkiinrhemstkdttfird  
ipkktiftefdpdkmtqv f  
dnvitanamkysrgdkrvefhvkqnplynrmtirikdngigipinkvdki d rfyrvdkartrkmggtglglaiskeivea  
hngriwansvegqtsifi  
tlpcevi edgdwde

>tr|D1GU32|D1GU32\_STAA0

mnnkehiksvilallv lmsvvltymvwnfspdianvdntdsksetkpl ttpmtakmdttitpfqiihskndhpegtiat  
vsnvnltkplknkevksv  
ehvrrdhnlmpdlssdftlfdftydlplstylgqvlmnakvpnhfnfnrlvidhdaddnivlyaiskdrhdyvkl ttt  
tkndhfl dalatvkkdmqf  
ytdiitnkdtidrtthvfapskpek l ktyrmvntisvekmnil fddstivrssksgvttynttgvan yndknekyhy  
knlse deassskmeetipg  
tfd f inghggflnedfr lfstnnqsgeltyqrflngyptfnkeganqivtwgekgvfyrrsllrtddvlnsednkslp  
klesvrsslannsdinfek  
vtniaigyemqndpnhhievqinse l vprwyveydgewyvyndgrle

>tr|D1GU33|D1GU33\_STAA0

mnnkltktlfi fvlfnivlsviyvknvrshinevesnnevnfqeeikvpassilnksvkgiql eqitgrskdfsska  
kgdsdl ttdsggkllnani  
sqsvkvsdnnlkd l kdyvnrkrfkgseyqlseissgsvkyeqtydnfpilnnskamlfnfniednkatsyqsmmddikpt  
dgadkkhqvigrkaieal  
yynrylkkgdevinarlgysvvnnetnvql l qpnweikvkhgdktntyyveatnnspekiih

>tr|D1GU37|D1GU37\_STAA0

mkgniqclrlkgslldfvletvdfvngskndcelvnfnkyegkvvsrystkfesnpklrkeqlistvkvvryvifdfe  
kilwgigkvl l kfiilrqc  
ll

>tr|D1GU38|D1GU38\_STAA0

mkhinhfsestlaylekdhehafyvyclidprndecfyvgkggnrifkhhkdaqraqll yedifreenkdnlkfnrinei  
csndlnvlgyii sygltes  
eafsaenvlinfnlnknktltnminghskaylvedlenefgydsinlenintnelilavkirdaflldkdeskeypin  
eskrdrnllksrtlgswii  
gkdkihkiyiyigintgannavvsayevsfeqaesietnngmryafiglserdatlkklnlykka l pdlrfgsgsatay  
inngtmkvd

>tr|D1GU40|D1GU40\_STAA0

metrdklmsltqsdktqqlmdkssnqddi qllqqqfsqqldqynalladekakldqyvevhqgleslkeeiesepitl  
nidklpdikatmleraknd  
ehsdkiekl fdrleqalngtnrlytqlsligtrthrittknfnlqglpkavqhtilpskfkkvytvd fksfepsvaaymt

Tsompanidou\_et\_al\_Supplemental\_FASTA\_File

qdskljd1lnqkdglyda1  
lselglsdelrvfvkrafisflfggnfknkpfklnqyvsevqwdavsqftkvielkkhveksnsmppysiehdmsaf  
qgssimaiyvqtvasyifk  
h1llkvykaqcdqktfkiiivpihdaimiecedeeiaqnvqqlmkdtanqlfngefahvtveeiggdhe  
>tr|D1GU41|D1GU41\_STAA0  
mnndrgqslhipsstpkenniyvatlhsviqtdfsgeikhqfityeivnnqivyanrniptkpsanqlsihdwlkrhsn  
ysvghdtyepyidrkhlih  
igqysgnyyvqdasldafggvls  
>tr|D1GU42|D1GU42\_STAA0  
mnhilqmlskllsvakeaidrqgliaailtipvnnndeieetaqgetvynelidqlrlnipktdtyqpnisyfgikkpn  
dtvlmemmikvfhikrfns  
elffkvnqwkngdelqgliskmiqvlldvykpslstlknvvdglqkstdveelveneryigcgenmfdlntfqvkn  
sidi fpktrlnlslstndv  
itdkippyfkqymqlanoddldqyflfqhtavlltadtkyrrglliyggakngksvyielvksffyskdivskplnele  
grfdkeslidkslmashei  
gqsriqekivndfkkllsvesmhdrkgktqvevilldklifstnailnfpehakalerriniipceyyvekadtslid  
klqsekkeiflylmyvyqq  
ivkadielylensrvteithdwlfnfyefvssrsvsnanqkacinllrklieiksgsrikvselnkvineeikvssqvinq  
liqanfdtqtklngydyw  
idlgwkeankkeihdisekdniislknenitddealdeenldfdwedfdde  
>tr|D1GU45|D1GU45\_STAA0  
mtlskqlktyiterfklnyqetwaretvdaedvlekyiknsplenkilntftyndelheisiypflcyldkelvai  
gyldnfdldfiflndthqv  
ideryllqkgge  
>tr|D1GU46|D1GU46\_STAA0  
mqinryitrgisehlsldlqilwnmvkerdnqpdtdylhifrlqedenilsitheqeqpaykleyhytnyeknqnalpk  
kvyviredvdlsyyvmll  
peey  
>tr|D1GU47|D1GU47\_STAA0  
mktiestleteaifsdqghryllkktwdsekqkitiitmypnnytglridlittqlimkvsemdafgsinfnlysnit  
tpinlkhlenaydnhtdiq  
imkavkesdevilawgayakkpvvesrvnevlemlkphkkkvrlnmpatneimhplnparqkwtkla  
>tr|D1GU50|D1GU50\_STAA0  
mnkqvrntteivrakqksqktrekvdkaiskfsiegkainfnsiakeanvskswlykehdirqrieslrerqitanvvs  
kpkksrseeiliktlkrr  
vmelekenkklqnqiklygdlynke  
>tr|D1GU54|D1GU54\_STAA0  
mdrafrilitiynrllqnksvknqsltleldtsprtirqdiddirnflyeskswistpkeitydyksesykleqdksknh  
fmyniltalylttpklshy  
fyqylklliiikhshnrhtllkylerfeidknqtgistsslvqamnenkylqnqklllpmsyyqmhafhlvyrmnde  
iyiddinqmnlfsfeksvd  
thekavqyti tfeiskdvskmhryyqihviekydahylivtfkmtrieaiqlcfmyrsniriispdlkeqvde111  
lqttylkqqvqk  
>tr|D1GU55|D1GU55\_STAA0  
mgimsniiktigkgigkgvgaaaysvatvgaaigaiwettgdrgrlmdalsdssnqdlmeiyeiqkkddgdydtyiaak  
sllqergfrynhetnkwek  
>tr|D1GU56|D1GU56\_STAA0  
meftyetkslndfenektla lnkkytfsketgvlkedeileksnshere1lkvfkdnaqittyhfkshksnyliimge  
tkapniiglvtvifnkppfk  
qmgkia1gwlialtsggsilaigavfgiltsvarrtlvikgplgkeisqiienelgepieikk  
>tr|D1GU57|D1GU57\_STAA0  
mkkifaslglvillvailgvavvfaygsykdlelkkeeakledkknkkidknkttenenqdqinnqtitapnekaqygnn1  
gvqekstkdndpngvlrfd  
tngdgfistsevtpeaqlvddegklqpssdrmvewtknknndntydydesykkqqemykkaargevpepetik  
>tr|D1GU58|D1GU58\_STAA0  
mlqqisrsrirknklqakqkeneesnsqttsetsnnenqsnqsqknsqdaqatteentndeqqvtrdnmfdyaaavnevg  
dadllkfqepeyngsewti  
nannksgagantivvkddgtvqiwngpktsmnhetkie1  
>tr|D1GU59|D1GU59\_STAA0  
mnqdsiqsdwqtvaklasqnyisivkglvhhftniddeildktyddfmndsittvlndfdqdiinrylsk  
>tr|D1GU60|D1GU60\_STAA0  
mkkyiislvl1tsfllsactinierdeenseknkqkenthtdsntssnesdtskqssqentinqteqnqpannnsssq  
npqiiteneaiqkvkdefp  
strtgndyridttrtdnnvyaikftsqaegympqaaviidkrtgefidiyidrsdedkerhvqhakestlykgpydafr  
kdfshkine  
>tr|D1GU61|D1GU61\_STAA0  
mnyfrykqfnkdviltvavgyylryalsyrdiseilrergvnhstvyrvvqeyapilyriwkkkkkayykwridetyi  
kikgkwsylyraidaeght

Tsompanidou\_et\_al\_Supplemental\_FASTA\_File

ldiwlrkqrdnhsayafikrlikqfgkpkvkitdqapstkvamakvikafklkpdchctskylnnlieqdhrikvrktr  
yqsintakntlkgieciya  
lykknrrslqiygfspcheisimlas  
>tr|D1GU62|D1GU62\_STAA0  
mtkkydlivigtgsagsitaackcnkagwnvamvddrpfpggtcalrgcdpkvlhgaaelidwnkrmvkngvpsevsinwk  
dlmnfkrfttdvpekkee  
alnkggidtyhgnasfvsedklevnkevllegshfliasingakptlpikgeehltsydefleldehpqrivfvgggyisfe  
fahiaaragsevhihrgg  
rplenfidi1vdillekskeigiqvhlqhsvesiekeqgkfhvyarkkeditrfeadivihgagrvaldmnlekgnier  
kkhgvhvneylqsvsnpnv  
yaagdaatdglpltpvasadshvasnllkgnskkieypvipsavftvpkmasvgmseeeknsgnrnikvkqknisdwf  
tykrtnedfaafkvlided  
sdqvvgahlisneadelinhfatairfgistkelkqmi fayptaasdiahm1  
>tr|D1GU63|D1GU63\_STAA0  
memkiselakacdvketvryyerkgliagpprnesgyriyseetadrvrfikrmkeldfs1keihllfgvvdqgerck  
dmyaftvqktkeierkvqd  
llriqrlllelekecpdekaiytcpiietlmggpdk  
>tr|D1GU64|D1GU64\_STAA0  
mkkrisftaimtvlligltacgaesdtaneskvqdiqgnpvslnepkptliyformatwpcsciyneeifkeihqlnndvq  
litvsldpntdtkesfakf  
kqdyggdwphv1kigvel  
>tr|D1GU65|D1GU65\_STAA0  
msfsflfilitagmvaafnpgciallpsyisyliggetkdhsfryaifkglglggamtgfltifvlaglligglgsaltg  
ifpils1vmgilia1lglg  
mlfgkhlpikigsfqvkpgkwsiyfygiayavtslgctlpafmlvvsas1ndnsvtaviikfiisylmgmivvtaitmvs  
lisrqlvqkflhnymsiq  
kiaavviflsvlymayywyfgsggictf  
>tr|D1GU66|D1GU66\_STAA0  
mylnqrikfflervrmmndenrskgnrvgvaffgillvp11vp11ccagp11valgstgigalfagatgnwwltgifa  
alaimialilskllknky  
nspegngtknktdcctppesvdrkhetr  
>tr|D1GU67|D1GU67\_STAA0  
mtqnsyki pigmtctgceehvtealeqagakdvsadfrreai fel sddqiekakqni saagyqpgeeesqpsensvdf  
nrdgdyd1liigsgaafs  
aai kanengakvamvergtvggtcvnigcvpsktmlrageinglaqnpftglqtstgaadlaqlteqkdglvsqmrqek  
yidlieeygfdlirgeasf  
iddkti qvngqni tsksfliatgas pavpeipgmnevdy1tstsalelkevpqrlavigsgyiaaelgqmfnlgtvtl  
mqrser1fktydpei sea i  
desl teqgl n1itgvtyqkveqngksts iyievnqqeqv ieadqvlvatgrkptet1nlesagvktgkkgevl tneylq  
tsnnriyaagdv1lpgqfv  
yvaayeggivanna1glakrki d1rfvpgvtftnpsiatv glteqqakekgydvktsvlpldavpra1vnhetgtvyklv  
vnaqtqkligahivsenag  
dviyaatlavqfgltied1tdsfapyltmaeglkl aaltfdkdvsklscag  
>tr|D1GU68|D1GU68\_STAA0  
mknisefsaqldqtdqgeavsmewlfrp11kmlaegdpvpvediaaetgkpvveevkqvlqt1psveldeqgrvvgygl t  
lfptphrfevdgkqlyawc  
aldt1mfpaligrtvhi aspchgtgksvr1tvepdrvsvsepstavsvitpdemasvrsafcndvhffsspsaaqdwln  
qhpessvlpedafelgrh  
lgaryeesgptngscni  
>tr|D1GU69|D1GU69\_STAA0  
ml1gkclggmamdshlnhi1sywqgpplegaktiiskygypqeatsrliwynsgpwrktivykdpvphnfptphldflk  
qti dykvpvhl ydaiaafd  
gsyldrttgeasakcheeamnflsln11ndivtgrkrdvqgakafyaqtaeqftkyhitspyteglfpmqyntadlgvt  
yfk  
>tr|D1GU70|D1GU70\_STAA0  
mnyfrykqfnkdv1tvavgyylryalsyrdiselrergvnhstvyrvwqeyapilyqiwkkkkkkayykwridetyi  
kikgkwsylraidaeght  
ldiwlrkqrdnhsayafikrlikqfgkpkvkitdqapstkvamakvikafklkpdchctskylnnlieqdhrikvrktr  
yqsintakntlkgieciyt  
lykknrrslqiygfspcheisimlas  
>tr|D1GU71|D1GU71\_STAA0  
mgkiyyenfneavimlicvalwaligilftygnl1ftdtdwsitkqtvvhfilmi1lffplailagwfhlnfeniisfii  
ifivvyitmwfgtyqrnk  
i1heannklgh  
>tr|D1GU73|D1GU73\_STAA0  
mkfte1tvtefdnfvqnpleshyfqvkenivtrendgfevllgikddnnkviaas1fskiptmgsyvyysnrgpvmdf  
sd1glvdyylkeldkylqq  
hqcl yvkl dpywlyhlydkdivpfegreknda1vn1fkshgyehgftteydtssqvrwmgvlnlegktpet1kktfdsq

Tsomanidou\_et\_al\_Supplemental\_FASTA\_File

rkrninkainygvkvrflerdefnlfldlyreteeragfvsktddyfynfidtygdkvlvplayidldeyvklqqlndkenrrdqmmakenksdkqm  
kkaealdkqidhdqhelln  
aselsktgdgpi ln lasgyfanayevnyfsggssekynqfmgpymhwmfminycfdngydrynfyglsgdftensedygv  
yrfkrqfngvqieeligdify  
kpihkvkywfttldklrkkllk  
>tr|D1GU75|D1GU75\_STAA0  
mglldiasirsiergfnnyqsecvinlksfsetqheaevksgnkvyracyidmehprksicncphadgrrvickhmiall  
ftaspeaankhimmneve  
edyqlrrnmwidslkemindmseeelrdaylnmliehgemaelfgldeeeemfedefy  
>tr|D1GU76|D1GU76\_STAA0  
mieikhvtfgynkkqmvldinipdgenvgilgesgckstlaslvlglfkpvkgeiylsnavlpifqhpitsfnpd  
wtietslkealyyrcldt  
ntaqdqlllqhlstfelqalltklpsevsggqlqrfnmrsllaqprvlicdeitsnlaviaeqnvinilkaqtitln  
hfivishdlsvlqrlnvri  
ivlkdgmivddfaieelfnvdrhpytkelvaqfsy  
>tr|D1GU78|D1GU78\_STAA0  
mhllgtddygrdlftriiigarstlfvtvltliaivvigvtlglfagykkwierlvlrfidvglisipefiimialasff  
qpslwnlvisitlikwmny  
trlrsivnsemnkpyikmaqfhhvptrtilirhltpkiipaiivlmvdfgkiilyisslsfiglgaqpptpewgamlq  
qgrdfisshpimliapasv  
iaitilifnltgdalrdrllkqrgeydes  
>tr|D1GU89|D1GU89\_STAA0  
mlqvtvslrfgrklfedvnikftegncygligangagkstflkilsgeldsqtghvslgknerlavlkqdhayeder  
vldvvikgherlyevmkek  
deiympdfsdedgi raaelegefaemngwnaeadaanlsglgidptlhdkkmaelennqikvllaqslfgepdvlll  
deptngldipaiswledfl  
infndtviwvshdrhflnnvcthiadldfgkikvyvgnfydwyqssqlaqkmaqknkkekemkelqdfiarfsanask  
skqatsrkkqlekielddi  
qpsrrypfvkftperegndllivqnlsktidgekvl dnisftmnpndkailigdseiaktllkilagemepdegisyk  
wgvttslsyfpkdnseffe  
gvnmnlvdwlrqyapedtetflrgflgrmlfsgeevkkkasvlsgekevrcmlskmllssanvllldeptnhldlesi  
tavndglskfskgsiiftsy  
dfefintianrvidlnkqggvskeipyeeylqeigvlk  
>tr|D1GU90|D1GU90\_STAA0  
mvtrsvlkfggssvsdfthkriaemlkervnqdeqlivvvsamgnttdqlmtnvstltpkapqqelaallttgeqqts  
ylsmvldigmnakamtgy  
qagiktighhlskisaqinptfeqafqendilvvagfqginehqelttlgrggsdttavalaavsnqipceiytdvdgvy  
atdprllpkakrldivsye  
emmemaalgagvletrsvlaknyniplylgtlsvnkgtwiisneeilekkavtgvaldkhmmhvtisypdpdnqlltq  
lftellegavnvdmsqiv  
nldglqlsftikdsdfhqismiletlnqyealaykinehyvkisligsgmrdmsgvaskaflltiennipfyqtttsei  
sisyviddfngqqavekly  
dafni  
>tr|D1GUB0|D1GUB0\_STAA0  
mpevkvpelaesitegtiaewlknvgdsvekgeaileletdkvnvevseeagvlseqlasegdtvevgqaiiaigksg  
naskensndntpqqneetn  
nkkeettnsvdkaevnqandenqqrinatpsarryarengvnlaevspktnvvrkedidkkqqapastqttqqasake  
ekkyngyptkpvirekmsr  
rkktaakkllaisntamlttfnevdmtnvme lkrkkeqfmdhdgkklgmsfftkasvaalkkypevnaeidgddmi  
tkqyydigvavstddgllv  
pfvrddckknfaeieaianlavkarekklglldmvngsftitnggifsmmstpiingnqaailgmhsiiitriaidqd  
tienrpmmyialsydhri  
dgkeavgflktikelienpedllles  
>tr|D1GUB5|D1GUB5\_STAA0  
msqwkrisllivftlvfgiaaffhesrlgkwidnevfyvssesfittsimlgatkvgewamlcislllvaylmlkrh  
kiealffaltnalstglnp  
alknifdrerptllrliditgfsfsgghamgstayfgsgiyllnrlnqgnsgilglcaamillisisrvylgvhyptd  
iagiiggfciilstlll  
rnklin  
>tr|D1GUB6|D1GUB6\_STAA0  
mtkiaftgggtvghsvnlsliptalsqgyealyigskngieremiesqlpeikyypissgkllryislenakdvfkvlk  
gildarkvlkkekpdlf  
kggfsvpvviaakslniptiiesdltpglankialkfakkiyttfeetlnylpkekadfigatiredlknghangyq  
ltgfnenkvllvmggsly  
skllnsiirenldallqqyqvihtgkglkdaqvkksgyiqyefvkedltdllaitdtvisragsnaiyeflltripmll  
vplglqdsrgdqidnanhf  
adkgyakaiddeqltaqillqelnemeqertrininmksyeqsytkaelfdkmikdaIn

Tsompanidou\_et\_al\_Supplemental\_FASTA\_File

>tr|D1GUB9|D1GUB9\_STAA0  
mknysfyqfvmtvrgrhddkgrlaeeifddlafpkhdddfnilsdyiethgdftlpmsvfdldyeeytewlkfyynf  
>tr|D1GUC2|D1GUC2\_STAA0  
mtkeyatlaggcfwcmvkpftsypgirsrvsgysgghvndptyeqvctnqtghveavqitfdpevtsfenildiyfktfd  
ptddqgqffdrgeyqpvifyhdehqkkaefkkqqlneqgikfkpviptikpyknfypaedyhqdykknvhyyyqrgsgrkafieshwgnqna  
>tr|D1GUC3|D1GUC3\_STAA0  
mtkqiivtdstdlskeyleannihviplsltiegasyvdqvditseeфинhiendedvktsqpaigefisayeelgkdg  
feisihlssglsotyntayqasqmvdanvtvidsksisfglygiqhlvelvkegvstseivkklnhlreniklfvviqqlnqlikggrisktkglig  
nlmkikipigtlddgrlelvhnartqnsiqylkkeiaefigdeiksivahanvieyvdklkkvfneafhvnydinvtppvisahtgqgaiglvvlk  
k  
>tr|D1GUC5|D1GUC5\_STAA0  
mlnsfdaayhslceevleigntrndrntgtiskfghqlrfdlskgfplltkkvsfklvatellwfikgdtniqyllky  
nnniwnewafenyiksdeykgpmdtdfghraisdpefneqykeqmkqfkqriledtdfakqfgdlnvygkqwrwdvdkdgnhfdqlktvieqikhnpd  
srrhivsaawnpteidtmalppchtmfqqfyvqdgklsqlyqrsadiflgvpfniasyallthliakecglevgefvtfgdahiyshidaiqtqlare  
sfnpptlkinsdksifdinayedleivdyeshpaikapiav  
>tr|D1GUC7|D1GUC7\_STAA0  
meilrieptpsntmkvvllysytreklnsntykkveetqprfinqllsidgitsifhvmnflavdkapkadwevilpdika  
afsdankvlesvneqpidnfhgeikaelitfkkipyqikltsadqelreqlpqtyvdhmtqaqtahdnfvmrkwldlnrygniqevmdgvleevlat  
ypesqlpvlvkhalenhatnyhfyrhvsldeyhatdnwktlrmlnhfpkptfediplldlalsdekvpvrrqaiवलगमिेकेिलप्यल्यकलरदक  
spavrrtagdcisdlgyealpemvlllddpkivrwraamfildegnaeqlpalkahindnafevklqiemaisriengdealgsvwkqmanrti  
>tr|D1GUD2|D1GUD2\_STAA0  
mnyrdkiqkfsirktyvgtfstviatlvflgfntsqahaetnqpasvkvkqqsneqtenresqvqnsqnsqngqsls  
atheneqpnisqanlvdqkvaqsstndeqpasqnvntkkdsataattqpdkeqskhkqnesqsankngndnraahvenheanvvtasdsdngnvqhd  
rneiqaffdanyhdyrfidrenadsgtfnvykqifdkintlgsndpinnkdlqlaykeleqavalirtmpqrqtsrrsnriqtrsvesraaeprsvs  
dyqnanssyyvenandgsgypvgtyinasskgapynlpttpwntlkasdskeialmtakqtgdgyqvwikfnkghaphqnmifwafalpadqvpvgrtdf  
vtvnsdgtnvqwsghagagankplqqmwegvndphrshdfkinnrsgqviydwptvhiysledlsrasdyfseagatpatkafgrqnfeyingqkpa  
spgvpkvytfigggdasytisfktqgptvnllyaaaggraleynglfmysqlyvestqdhqqrlnqlrqvnrtyrigttkrvevsqgnvqtkkvest  
nlnidfvddplsyvktps nkvlgfysnnantnafrrpggaqqlneyqlsqiftdqklqeaartrnpirnimgfdypdaygnsetlvpnltvlpei qhn  
ikffknndtqniaekpfskqaghpvfyvyagnqgnasvnlggsvtsiqplrinltsnenftdkdwqitgiprtlhienstnrpnarernielvgnllp  
gdyfgtirfgrkeqlfeirkphtptitttaeqlrgtalqkvpnisgipldpsalvylvapntnqttnggseadqipsgytilatgtpdgvhntitirp  
qdyivfippvgkqiravvyinkvasnmsnavtilpddipptinnpvginakyrgdevnftmgvsdrhsgiknttittlpngwtsnltkadknngsls  
itgrvsmnqafnsditfkvsatdnvnttndsqs khvsihvki sedahpivlgn tekvvvnptavsndekqsii tafmnknqnrigy lastdpvtvd  
nngnvtlhyrdgsstlda tnmtyepvvpkpeyqtvaaktatvtiakgqsfsigdikqyftl sngqipsgtftnitsdrtipaqevsqmnagtqly  
hitatnayhkdsedfyisl kiidvkqpegdqrvyrtstydlttdeiskvkqafinanrdvitlaegdisvtntpanganvstitvinkgrltskfasnl  
anmnflrwvnpqdyvtwt naki anrptdggls wsdhksli yrydatlgtqittndil tmlkattvpgl rnnitgneksqaeaggrpnfrttgysq  
snattdgqrqftlngqviq vldiinpsngyggqpvtnsntrahsnstvvvnepaangagaftidhvksnsthnasdavykaqlyltpygpkqyveh  
lnqntgnttdainiyfvps dlvnptisvgnytqhvfsgtftntitandnfgvqsvtvpntsqitgtv dnnhqhsatapnvtsatnktinllatdts  
gntattsfnvtvklrdky rvgtsstaanpvriani snnatvsqadqtti insltftetvpnr syarasaneitsktvsnvsrtgnnanvtvtvyqdg  
ttstvtvpkhvipeivah shytvqqgdfpangssasdyfkl sngsdi adati twvsgqapnkdntrigeditvtahilidgettpitktatykvvrt  
vpkhvfetargvlypgvsd mydakqyvkpvnnswna qhmnfqfvgtygpnkdvvgistrli rvtydnrqteditliskvkpdpri dansvtykagl  
tnqei kvnnvlnssvklf

Tsompanidou\_et\_al\_Supplemental\_FASTA\_File

kadntpInvtni thsgsfsvvvtvsdalpnggikakssi smnnytyttqdehgqvvtvtrnesvdsndsatvtvtpqlqa  
ttegavfikggdgdffghv  
erfiqnpghatvawhdsptdwkntvgnthktavvtlpnggqtrnvevpvkypvanakapsrdvkgqnl tngtdamnyi  
tfdpntntngitaawanrq  
qpnnqqagvqhl nvdvtypgisaakrvpvtvnyqfefpqttyttvtvggtlasgtqasgyahmqnatglptdgyftkwnr  
dtgtndanwsamnkpnva  
kvvnakdyvinyghtfatslpakfvvkdvqakptvtetaagaiti apganqtvnthagnvttiyadklvikrngnvttf  
trrntspwvkeasaatva  
giagtngiti vaagtfnpadti qvvatqgsgetvsdeqrsddftv vapqpnqattkiwqnghiditpnnpsghlinptqa  
mdiyatekvnggaehskti  
nvvrqgnqwtiankpdvvtl daqtgkvtfnantikpnssititpkagtghsvssnpstl tapaahvntteivkdygsn  
vtaaeinnavqvankrtat  
ikngtampntlaggstttipvtvtyndgsteevqesiftkadkrelitaknhl ddpvstegkkpgtitqynnammhaqqq  
intakteaqqvinneratp  
qqvsdal tkvraaqtkidqakallqnkednsq lvtsknlqssvnpvsttagmtqqsidynakkreaeteitaaqrvid  
ngdataqqisdekhvrdna  
ltaInqakhdl tadthaleqavqql nrtgtttgkkpasitaynnsiralqsd ltsaknsanai iqkpirtvqevqsaltn  
vnrvrnerltqainqlvpla  
dnasal ktaktkldeeinksvttldgmtqssi qayenakragqtestnaqnvinnngdatdqqiaaektkveekynslkqai a  
gltpdlaplqtaktqlnd  
idqptsttgmtsasiaafneklsaartki qeivdrvlashpdvati rqnvtanaaksa ldqarngl tvdkaplenaknql  
qhsidqtsttgmtqdsin  
aynakl taarnkiqqinql agsptveqintntstanqaksdl dharqaltpdkaplqtaktql eqsinqptdttgmtta  
slnaynqklqaarqkltei  
nqvlngnptvqni ndkvteanqakdq lntarqgl tldrqpalttlhgasnlnqaqqnftqqinaaqnhaaletiksnit  
alntamtklkdsvadnti  
ksdqnytdatpankqaydnavaakgvi gettntmdvntvnqkaasvsktdal dgqqnl qrakteatnait hasdl nq  
aqkna lttqqvnsaqnvqav  
ndikqtts lntamtklrgvanhnqvvsdnyvnadtnkkndynnaynhandi ingnaqhpvi tpsdvnnal snvtske  
halngeaklnaakqeanta  
lghlnlnnaqrql lqsqingahqi davntikqnatlnsamgnl rqavadkdqvkrtedyadadtakqnaynsavssae  
tiinqttntmsvddvra  
tsavtsnkna lnyeklaqsktdaaraidal phlnnaqkadvkskinaasni agvntvkqqgtdlntamgnl qga indeq  
ttlnsqnyqdatpskktay  
tnavqaakdi lnsngqkktkdqvteamnqvnsaknldgtrll dqakqtakqql nmthl ttaqktnltnqinsgttva  
gvqtvqsnantldqamntl  
rqsiankdatkasedyvdandkqtaynnavaaaeti inansnpempstittqaeqvnskta lngdenlaaakqnakt  
ylntltsitdaqknnl isq  
itsatrvsgvdtvkqnaqhl dqamas lqnginnesqvssekyrdadtnkqqeydnaitaakailnkstgtpntaqnavea  
alqrvnnakdalngdakli  
aaqnaakqhlgtlthi ttaqrndltnqisqatnlagvesvkqnansldgamgnlqtaindksgtlasqnl dadeqkrna  
ynqavsaaeti lnkqtgpn  
taktaveqalnnvnnakhalngtqnlnnakqaaitaingasdl nqkqkdalkaqangaqrvsnaqdvqhnate lntamgt  
lkhaidaktntlasskyvn  
adstkqayttkvtnaehi isgtptvttptsevtaaanqvnsakqelngderlreakqnantaidaltqlntppkaklke  
qvgqanrledvqtvqtnqg  
alnnamkgl rdsianettvktstqnytdaspnnqstynsavsnakgi inqtnptmdtsaitqattqvnnakngl ngaenl  
rnaqntakqnlntlshltn  
nqksaisqidraghvsevatknaate lntqmgnl eqaih dqntlvkqsvkftdadkakrdaytnavsraeailnktqga  
ntskqdveaai qnvssakn  
alngdqvntnaknaaknalnntsinnaqkrdl ttkidqattvagveavsntstqlntamanlqngindkntlasenyh  
dadsdkktaytqavtnaen  
ilnksgsnldktavenal sqvanakgalngnhnleqaksnanttingl qhl ttaqkdklkqqvqqaqnvagvdtvkssa  
ntl ngamgtl rnsiqdnta  
tkngqnyl daternktnynnavdsangvinatsnpnmdana inqiatqvtstkna ldgthnl tqakqtatnaidgatnl n  
kaqkdal kaqvtsaqrvan  
vtsiqqtane lntamgql qhgiddentkqtqkyrdaeqskktaydqavaaakailnkqtgsnsdkaavdra lqqvtsk  
dalngdaklaeakaaakq  
lgtlnhitaqrtdlegqinqattvdgvntvktnantldgamns lqgsindkdatl rnqnyl dadeskrnaytqavtaae  
gilnkqtggntskadvna  
lnavtrakaa lngadnl raktsatntidglpnltqlqkdnlkhqveqaqnvagvngvkdkgnt lntamgalrtsiqndn  
ttktsqnyl dasdsnkny  
ntavnnangvinatnnpnmdana ingmanqvnttkaalngaqlaqaktatntinnahdl nqkqkdalktqvnaqrvs  
dannvghtate lnsamta l  
kaai adkertkasgnyvadqekrqaydskvtnaeni isgtpnatl tvndvnsaasqvnaakta lngdnnlrvakehann  
tidglaqlnnaqkaklkeq  
vqsattldgvvtvknsq lntamkgl rdsianeatikagqnytdaspnnrneydsavtaakai inqtsnptmepntitq  
vtsqvttkeqalngarnla

Tsompanidou\_et\_al\_Supplemental\_FASTA\_File

qakttaknnlnnltsinnaqkda1trsidgattvagnqetakate1nnamhs1qngindetqtkqtqky1daepskksa  
ydvavnaakailtkasgqn  
vdkaaveqalqnvstktalngdak1neakaaakqtlgtlthinnaqrta1dneitqatnvegvntvkakaqq1dgamgq  
letsirdkdt1lqsqnyqd  
addakrtaysqavnaaati1nktaggntpkadveramqavtqanta1ngiqn1drakqaantaaitnasd1ntkqkealka  
qytsagrsvsaangvehtat  
e1ntamta1kraiadkaetkasgnyvnadankrqaydekvtaaeivsgtptpt1tpadvtnaatqvtnaktq1ngnhn1  
evakqnanta1dglts1ng  
pqkak1keqvggatt1pnvqtvrdnaqt1ntamkg1rdsianeatikagqnytdasqnkqtdynsavtaakaiigqttsp  
smnaqeiinqakdqvtakqg  
a1ngqen1rtaqtnakqhlng1sd1tdaqkdavkrqiegathvnevtqaqnnada1ntamtn1kngiqdqntikqgvnft  
dadeakrnavtnavtqaeq  
i1nkaqgpntskdgveta1envqrakne1ngnqvnakttakna1nlnltsinnaqkealksqiegattvagnqvstta  
se1ntamsn1qngindeaa  
tkaaqkytdadrektayndavtaakt1ldktagssndnkaaveqalqrvntakta1ngder1neakntakqqvatmsh1t  
daqkan1tsqiesgttvag  
vqgiqanagt1dqamq1rqsiaskdatsedyqdanad1qnayndavtneaegii satnnpempd1inqkasqvnsak  
sa1ngdek1aaakqtaksd  
igr1td1nnaqrtaanaevdqapn1aavtaaknkats1ntamgn1khalaekdntkrsvnytdadqpkqqaydtavtqae  
aitnangsnanetqvqaa1  
nq1nqaknd1ngdnkvaqakesakra1asysn1nnaqstaatsqi dnattvagtvaqantane1ntamgq1qngindqnt  
vkqgvnftdadqgkdayt  
navtqaqgi1dkahgqnm1tkaqveaa1nqvttakna1ngdanvrqaksdakan1gtlth1nnaqkqdltsqiegattvng  
vngvktkaqdl1dgamqrlq  
sa1ankdqtkasenyi1dadptkktafdnaitqaesy1nkdhgankdkqaveqaiqsvtstena1ngdan1qrakteaiqa  
idn1th1ntppkta1kqqv  
naaqrvsgvtd1knsats1nnamdq1kqaiadhdtivasgnytnaspdkqgaytdaynaaknivngspnivitnaadvtaa  
tqrvnnaetg1ngdtn1at  
akqqakda1rqmth1sdaqkqsitgqidsatqvtgvsvkdnatn1dnamq1rnsiankddvkaspvydadrdkqnay  
ntavtneaeni1natsqpt1  
dpsavtqaanqvstnktalngaqn1ankqettaninq1sh1nnaqkqdlntqvtnapnistvnqvktkaeq1dqamer1  
ingiqdkdqvkqsvnftda  
dpekqtaynnavtaaeini1ngangtnanqsqveaa1stvttkqalngdrkvtdaknnanqtlst1dn1nnaqkgavtgn  
inqahtvaevtqaiqtage  
1ntamgn1kns1ndkdt1lgsqnfadadpekknayneavhnaeni1nkstgtnvpkdqveaamnqvnatkaa1ngtqn1e  
kakqhanta1dglsh1tna  
qkeal1kq1vqqs1tvaeeagqneqkannvdaamdk1rqsia dnattkqngnytdasqnkdaynnavttaqgiidqtspt  
ldptvinqaagqvsttkna  
1ngnen1leaakqqasqslgs1dn1nnaqkqvtvdq1ngahtvdeanqikqnaqn1ntamgn1kqaiadkdatkatvntfd  
adqakqqayntavtneaeni  
iskanggnatqaeveqai1kqvnaakqalngnanvqhakdeata1inssnd1nqaqkda1kqqvqnatvagnvkvqtaq  
e1nnamtq1kqgiadkeqt  
kadgnfvnadpdkqnaynqavakaeali1satpdivvtpseitaalnkvtqaknd1ngntn1atakqnvqhaidq1pn1nq  
aqrdeyskqitqat1vpnv  
naiqqaatt1ndamtq1kqgiankaqikgsenyhdadt1kqtaydnvtaae11kqttntptmpntiqqa1tkvndtnq  
a1ngnqk1adkqakdt1  
gt1dh1ndaqkqal1ttqveqapdiatvnnvkqnaqn1nnamtn1nna1qdktet1nsinftdadqakdaytnavshaeg  
i1lskangsnasqteveqam  
qrvneakqalngndnvqrakdaakqv1tnand1nqaqkda1kqqvdaaqtvanvntikqtaqd1nqamtq1kqgiadkq  
tkangnfvnadt1kqnayn  
navahaeqii1sgtpnanvdpqqvqaa1qqvnaqkgd1ngnhn1qvakdnanta1dq1pn1nppkta1kdqvshae1vtg  
vnaikqnada1nnamgt1k  
qqiqansqvpqsvdftqadqkqaynnaanaqqaqiangi1ptpv1tpdvtvqavttmnqakda1ngdek1aqakqea1an  
1dt1rd1nqpqrda1rnqi  
nqaqal1atveqtkqnaqnvntamsn1kqgi ankdtvkasenyhdadadkqtaytnavsqaegii1nqttntpt1npdeitra  
1tqvtdakng1ngeak1at  
ekqnakdavs1gmth1ndaqkqal1kqgidqspeiatvnnvkqtats1dqamdq1sqaindkaqtladgny1nadpdkqnay  
kqavakaeal1nkqsgtne  
vqaqvesi1tnevnaakqalngndn1anakqqakqqlan1th1ndaqkqs1fesqitqap1vtdvttinqkaqtl1dhame11  
rnsvadnqtt1asedyhda  
taqrqndynqavtaanni1nqtsptmnpddvngattqvntkvaldgden1aaakqqannr1dq1dh1nnaqkqql1sq  
itqssdiaavnghkqtaes  
1ntamgn1ina1adhqaveqrgnfinadt1kqtayntavneaaamin1kqtgqnanqteveqaitkvqtt1qalngdhn1q  
vaktnatqaidal1ts1ndp  
qkta1kdqvtaatl1vtavhqi eqnant1nqamhg1rqsia dnataatkanskyinedqpeqqnydqavqaanni1neqtat1  
dnainqaa1ttvntkkaal  
hgdvk1qndkdhakqtvsvq1lah1nnaqkhmedt1idsettrtavkqdl1teaqa1dq1mda1qqsiadkdatrassayvna  
epnkkqsydeavqnaesi



Tsompanidou\_et\_al\_Supplemental\_FASTA\_File

aglnnptinkgnvssatqavisskna1dgver1aqdkqtagnslnhldq1tpaqqqa1enqinnattrgevaqklteaqa  
lnqamealrnslqddqqte  
agskfinedkppqkdayqaavqnakd1inqtnnpt1dkaqveq1tqavnqakdn1hgdqkladdkqhavtd1nq1ng1nnp  
qrqalesqinnaatrgeva  
qklaeakaldqamqalrnslqddqqtesgskfinedkppqkdayqaavqnakd1inqtgnpt1dksqveq1tqavttakdn  
1hgdqklardqqqavttvn  
alpn1nhaqqqaltdainaaptrtevaqhvqtate1dhamet1knkvdqvntdkaqpnysteaddkkeavdqalqaaesi  
tdptngsnankdavidqvl  
klqekene1ngnervaeaktqakqtidq1th1nadqiatkqnidqatk1qpiav1vdqatq1nqsmdq1qqavnehav  
eqtvdytqadsdkqnaykq  
aiaaenv1kqnankqqvdqalqni1nakqalngdervalaktngkhdidq1nalnaqqdgfkgriqsdn1nq1qqiv  
deakalnrmdq1sqe1td  
negrtkgstnyvndtqvkvvydetvdkakqaldkstgqnl1takqvik1ndavtaakka1ngeer1nrrkaealqr1dq1  
th1nnaqrqla1qqinnae  
t1nkasrainratk1dnamgavqyideqhlqvisstnyinaddn1kanydnaianaahe1dkvqgnaiakaeaeq1kqn  
iidaqnalngdq1lanakd  
kanafvns1ng1nqqqqd1ahkainnadtvsdvtdivnqid1ndamet1kh1vdneipnaeqtvnyqnaddnaktnfdd  
akrlant11nsdntvndi  
ngaiqavndaihn1ngdqr1qdakdka1qsinqalank1keiasnatdqdk1iaknkaeelansiinninkatsnqavs  
qvqtagnhaieqvthaneip  
kaki1dankdvdkqvqalideidrn1n1tdkekqal1kdrinqi1lqqghnginnamtkeeieqakaqlaqa1qdik1lvkak  
edakqdvdkqvqalideid  
qnpn1tdkekqal1kdrinqi1lqqghndinna1tkeeeqakaqlaqa1qdik1lvkakedaknaika1lanakrdqinsp  
d1tpeqkaka1keideak  
ralqvenaqtidq1nrg1n1g1ddi1rnthvvevdeqpavneifeatpeqilvngelivhrddiiteqdilahin1idq1  
saevidtpstatids1ta  
kvevt1ldgskv1vnpvkveke1svvkqqaiesienaaqqkineinnsvt1tleqkeaaiaevnk1kqqa1dhvnnap  
dvhsveeiqqgeqahieqf  
npeqftieqaksnaiksiedaiqhmideikartd1tdkekqaeiak1nq1keqaiqaiqraqsideiseq1eqfkaqmka  
anptake1akrkqaeisri  
kdfsnekinsirnseigtadekqaamnqineiv1letirdinnaht1qqveaalnngiarisavqivtsdrakqsstgne  
snsh1tiqygtanhpfns  
tighkkk1dedddi1dplhmrhfsnnfgnviknaigvvgisg1lasfwwiakrrrkedeeeee1eirdnkdsiket1ddt  
kh1p1lfakrrrkedeedv  
tveekds1nnges1dkvkhtpff1pkrrrkedeedvevtentdekvlkdnehspl1fakrrkdkeedvettsieskde  
dvp1llakkknqkdnqskd  
kksaskntskkvaakkkkkkkakknk  
>tr|D1GUD3|D1GUD3\_STAA0  
mkkqdisvktvvaigigaavfvlgrfvviptgfpntnietsyaf1al1sai1fgpfag1mtglighaikdf1t1t1gsawws  
wvicsg1ig1c1y1gwig1kl  
n1ssgrfsrksmiyfntgq1ianiicwaliapt1diliynepankv1tqgvisav1ni1svgiigt1llkayassq1kkg  
slrke  
>tr|D1GUD6|D1GUD6\_STAA0  
mkt1sfd1ivt1fkmkmi1vktnemkgmimmsqqd1pt1fysgksnsavpiiseselqtitaepwleiskkg1q1eg1nfd  
rqqq1f1ldvfegni1fkvn  
petkeikrpfvshkanpaaiki1hkdgr1ficy1gdfkstggi1faatengdniqdiied1steyciddmvf1dskggfyftd  
frgystn1l1gvyv1tpdf  
ktvtpi1qni1svangial1stdekvlwvtettan1rhria1eddgvti1qpf1gatipyyftghegpdsc1cid1sddn1yvamy  
qgrv1lvfnkrqy1p1gq1l  
ipsrdeghm1rsthpq1fipgt1nq1liicsndi1emdggsm1lytvng1fakghksyqf1q  
>tr|D1GUD8|D1GUD8\_STAA0  
mhi1vtgfapfdnq1d1npsweavtq1leni1gtht1dk1kl1pts1fkkvdti1inkt1asnhyd1v1aigqaggrnaitperv  
ainiddaripnddfq1pid  
qaihl1dgapayf1sn1pvkamtq1si1nqg1lpgal1snsagt1fvcnhv1yh1lgy1ldkhyph1r1fgfihvpyipeqvvgk1pdt  
psmplekivag1taaieai  
snded1h1al1gttq  
>tr|D1GUD9|D1GUD9\_STAA0  
mtktvfd1v1dmgl1gy1lvnyd1twkvekv1ddyhkpfsntihwqfghv1tifesa1avagkenid1niyrpl1fgngsspd  
ewkdevpsi1eti1les1qt1  
perarn1tedd1aie1kqpi1vgcn1lee1lv1naihip1hagkieemsri1knfk  
>tr|D1GUE0|D1GUE0\_STAA0  
mnknv1kfmv1im1lni1tp1fnkneafaardi1sstnvt1d1tvspski1edggkttvkm1fddkngki1qngdtikvawpts  
gtvki1egysk1tvs1tvkge  
qvgqavi1tpdgati1fndkvek1sdvsgfaefevqgrn1tqtntsddkvatitsgnkstnvtvhk1seag1tssvfyyktgd  
m1pedtthvrw1fl1n1nek  
ryvskdi1tikdq1ggqq1ld1st1n1nvtg1thsnyysgpna1tdfeka1fpgskitvdntkntidvtipqgy1s1nfsin  
ytki1tneqqkefvnnsqa  
wyqehgkeevngkafnhtvhni1nanagi1egtvkge1kv1kqdkdtkapi1anvkfk1skkdgs1vkd1nqkeieiktdangi

Tsompanidou\_et\_al\_Supplemental\_FASTA\_File

anikalpsgdyilkeieap  
apytfdkdkeypftmkdtdnngyfttienakeiektkdvsaqkvwegtqkvkptiyfklykqddnqnttpvdkaeikkle  
dgttkvtwsnlpendkngk  
tikylvkevnagkdttepegytkkedglvvtntekpiettsisgekvwddkdnqdgkrpekvsvnllangekvktdlvts  
etnwkiefknlpkkydegkk  
ieyvtedhvkdyttdingttitnkytpgetsatvtnkwdnnnqdgkrpteikvelyqdgkatgkattlnesnnwthtw  
tgldekagqqvkytveel  
tkvngytthvdndmgnlvtntkytpekpnkpiypekpkdktpptkpdhsnkvkptppdkpskvdkddqpkdnktpenp  
lkelpktgmkiitswitwv  
figilglylilrkrfns  
>tr|D1GUE5|D1GUE5\_STAA0  
mniakledylqieprynqpsiealnnyatrfmltvpfenidvqngkpi svdidalfnkivhdkrggfcyeIntffkayl  
qqkgfnpe lmsatihtpgg  
grsqngshaslvvsnvfvvtdvgfgdlplnaipitlpddtqqitdisgtfraifnsedkdi fyvqkyennhwhtkyea  
efkareieefdqnieynqt  
hpdsvfvkhllitmpqsfgratmsenhltltkdgtpeklaitkdnykqfltkyfglnvtisrlensdn  
>tr|D1GUE7|D1GUE7\_STAA0  
mtilsvqhvsktygkktfqaalkdinfdiqkgefvaimgpsgsgkttllnvlssidqissgsviangqelnklnqalak  
fhkeslgfifqdsilptl  
tvkenimlp1svqkmskatmeenykaittalgiydlgnkypselsggqqrtaaraafvhhkpiiifadeptgaldsksan  
dllqrleemnksfdttivm  
vthdpvaasfaervimlkdgqihqtlyqegrskqafyedivhlqsvlggvsndi  
>tr|D1GUE8|D1GUE8\_STAA0  
mtfnhivlknlrqnlkhyamylsffsivlyfsfttlqftkgvnnddsmaiikkgalvgsiflfiiviflmyanhlfv  
krtrrefalfqilgltrqn  
ilkmlaleqmivfiitgvvgvlcgiagaqllsivsklmslslsihfepmalvtilmliiayililfqsslflkrrs  
ilsmmkdsvktvttakvt  
vievisgvlgiamia lgyymatemfgtfkalmtamtspfiilfltvvgaylffrsvslifktlkkskngrvsitdvvft  
ssimyrmkknamsltiia  
isavtvvlcfaalsksntdqtltsmapndfnvasqdaqfeskl sqqhitfsknyyetitv dnvkdqv itlengsdg  
rtnsilsantklgnnai  
ntkslpnvinihlndlvkgtknetfrvtqedkdkvypnlfnfspvievspekyqqlktqnnvhtfygydikqtsqk  
kkaqaiakqfgdkiiyydd  
mkkevdatngilifvtsflglaf1vaagciiyikqmdetedelsnfrilkrigfthtdmlkglllkitfnfglplliai  
havfaaiafmlmgnsf  
pviiiviytliyivfaliafvhsnklikkti  
>tr|D1GUG4|D1GUG4\_STAA0  
mnyfrykqfnkdvityavgylyryt1syrdiseilrergvnhstvyrvwqeyapilyqiwkkkkkkayykwridetyi  
kikgkwsylyraidaeght  
ldiwlrkqrdnhsayafikrlikqfgkpkqv itdqapstkvamakvikafklkpdchctskylnnlieqdhrikvrktr  
yqsintakntlkgieciya  
lykknrrshqiygfspcheisimlas  
>tr|D1GUG5|D1GUG5\_STAA0  
mfslykkfkglfysvlfwlcilssffsvlnemvlnslpdi anhfnttpgitnwvntaymltfsigtavygklsdyinikk  
lliiigjlsclgsliafig  
hnhffilifgrlvqvggsaafpslimvvvarnitrrkkqgkafgfigsivalgeglgpsiiggiahyihwsyllilpmi  
vtipflikvmvpgkstknt  
ldivgivilmsisicfmlfttnynwftlilftiffvifikhisrvsnpfnpklgknipfmlglfsgglifsvagfism  
vpyymmktiyhvnvatigns  
vifpgtmsvifgyfgglvdrkgs1fvfilgslsisisfltiaffvefsmwlttfmfifvmgglstktviskivsssl  
seeevaagsml1nftsf1s  
egtgiaivggllslqlinrk1vlefinyssgvysnilvama1iilc1l1tiivfkrsekqfe  
>tr|D1GUH3|D1GUH3\_STAA0  
mkkiki vplilivvvvgfgiyfyaskdkeinntidai edknfkqvykdssyisksdngemterpikiynslgvkdini  
qdrkikkvsknkkrvdaq  
kiktnygnidrnvqfnfvkedgmwklwdhsviipgmqkdqsihieklksergkil drnvelantgtayeigivpkvns  
kkdyka1ake1sisedyik  
qqmdgkwvqddt1vplktvkkmdeylsdfakkfhlttnetesrnyp1ekatshllgyvgpinseelkqkeykygkddavi  
gkkgleklydkklqhedgy  
rvti vddsntiahtliekkkkdgkdiqltidakvqksiynmkndygsgtaih1pqtgella1vstpsydvpfmygmsn  
eynk1tedkkep1lnkfq  
ittspgstqkiltamiglnnktl1ddktsyki dgkgwqkdkswggynvtryevvngnidlkqaiessdniffarvalelgs  
kkfekgmkk1gvgedipsd  
ypfy naqi snkn1dneil1ladsgyqgeilinpqvilsiy salenngninaphllkdtknkvwkniiskeninlltdgm  
qqvvnkthkediyrnyan1  
igksgtaelkmgqgetgrqigwfi sydkdnpmmmainvkdvdqkgmasynakisgkvyde1yengnkkydide  
>tr|D1GUH4|D1GUH4\_STAA0  
mshkiwllvlvstlip1ipfykisnftfskdmnrsvdttssvshml1dgqqssvtdk1ainvqfetsnitymilliww

Tsompanidou\_et\_al\_Supplemental\_FASTA\_File

fgsllclfymikafrqidv  
iksslessylnerlkvcqskmqfykhhitisyssnidnmpmfvglvksqivlptvvvetmndkeieyiilhelshvkshd  
lifnqlyvfvkmi fwnpa  
lyisktmmdndcekvcdnrnlkilnrhehrygesilkcsilksqhinnvaaqyllgfnsnikervkyialydsmpkpnr  
nkriyayivcsislligap  
llsahvqqdkyentvsykklnqlapyfkgfdgsfvlynereqaysiyepeskqryspnstykiylalmafqnllslnh  
teqqwdkhqypfkewngdq  
nlssmkysvnwyenlnkhlrqdevksyldlieygneeisgnyenywnesslkisaieqvnllknmkqhnmhfdnkaiek  
vensmtlkqkdykyvgkt  
gtgihvnhkeangwfvgyvetkdntyyfathlkgednangekaqqiserilkemeli  
>tr|D1GUH5|D1GUH5\_STAA0  
menilnindnekrvlreiynhhnirsrtqisknleinkatissilnklykslvnevgegdstksggrkpi11kvnhlygy  
fisldltyssvevmnyfd  
gnvikhesydlpdekvnfksliikkhidiekldtyngllgsvsvihgvvdneqhvtylpfhetegisiakkikeitnvp  
vvveneanlsalyernfnh  
nlsynnlialsihkgigagliinnqlyrgangeageigtlvskvsdnveifhkiedifsqeallhnl snqlnekmtlsk  
liqfyneknppvveemeqf  
inklavlihnltqfnpnaiyincplfnempeileaiknqfkqysrneiqikltsnvkfatllggtlaiiqvlqindiy  
ldika  
>tr|D1GUH8|D1GUH8\_STAA0  
mtydkkminrinriqqqlngvkvmmeeekdckdiitqlsasksiqrlmgiiisenliecvktaenessqelineavn  
llvksk  
>tr|D1GUI0|D1GUI0\_STAA0  
mkkspipki fgddkmiatil tatavyvatgidylvilillfsqvkkqkvkhiwigqyigtaivigasllvaqgvnlipq  
qwwigllglplylvgkiw  
ikgeededessilslfssgkfnqlfltmifivlassaddfsiyipyfttismseifivtivflimvgvlcyvsyrlasfd  
fisetiekerywivpivfi  
glgiylfengtfnalisfl  
>tr|D1GUI1|D1GUI1\_STAA0  
mddsstk1tedkqyrvvegfsancagkfeknvkelsgvhdakvnfgaskidvfgsatvedlekagafenlkvapekarr  
rvepvtedknvyrvegfs  
cancagkfeknvklagvqdnakvnfgaskidvynasveelekagafenlkvipek lanpsiqavkedtkapkeekipfy  
kkhstllfatlliafgyls  
hfvngednlvtsm1fvssiviggys1fkvgfnlirfdfdmktlmtvavigaaiigewaeasivvilfaisaalerfsmd  
rarqsirslmdiapkealv  
rrngqemihvddiavgdimivkpgeki amdgiingvsavnqaaitgesvpvaktvdevfagtlneegllevkityv  
edttiskihlveeaqger  
apaqafvdkfakyytpimviaalvavvpp1ffggswdtwvyqglavlvvgcpcalvittpisivsaignaakkgvlikg  
gvyleelgaikaiafdktg  
tltkgvpvvtfdkvlnqveekelfsitalayrsqhp1asaimkkaeqdnitysdvrkdfitsitgrgiqgnidgttyy  
igspr1fkelnvdsfslgf  
ennvki1qnqgktami gtdqtilgviavadevretsknvilklhqlgikqtimltgdnqgtaeaigahvgvsdiqsell  
pqdkldyikkmaehgnva  
mgdgvndapalaastvgiamggagtdtaietadialmgddlslpfaavr1srktlniikanitfaigikiialllvipg  
wltlwai1sdmgatilva  
lnslr1mrvkdk  
>tr|D1GUI2|D1GUI2\_STAA0  
mtkdmcevti hedkvnrakd1akqnpmdvakvfka1sddtrvkiayv1slegelcvcdvani esstatashh1r1lk  
n1giakyrkegklvyysld  
dehvkqlvekaf1hqrevasig  
>tr|D1GUI4|D1GUI4\_STAA0  
mneemgfwannswd1rkcp1hsaie1sknpal1nrwvrfervknlw1rte1kyfyf1h1nngiwnaktvirkgtvink  
m1df1d1kypsitsitevp  
idkamteyrt1tkrgvri1ttntykitanqektpvkansyyvtn1kqfme1fyenfyfdgeewdkdvdrn1p1pddkvn  
ptqeyt1nfkgfrntyfk  
qlvkryck1r1nmdsfsyvsdiaq1keffn1dikfkvhqrvhql1trveieay1selnmmgikpstitgrisi1eg1fs  
t1hr1ewddvpsk1liye  
dypki1prakpr1fidefv1eq1nsh1dk1peyatmtmi1vqecgmri1selct1kkgc1ledkdgyd1kyyqwk1mkehiv  
piskevvl1ikvredkvse  
efpdsey1fprkdgsp1kqktfrge1nk1layeqnivdk1geiyrfhahafrhsvgtrminngvpqhivqkflghespemt  
sryahifdet1kneftkfq  
ek1vtngdv1n1dddsevdv1elqwfkk1naqvlpngycr1pviaggcphanac1dcthfctskqf1pqheeq1erte  
ell1tiakdkqwrqietns  
rvker1eqi1gsltg  
>tr|D1GUI5|D1GUI5\_STAA0  
msrkr1dvkvqmvked1lwy1krrieepkdaadimr1dfignadrehfilic1n1sknepthietvsigtinfavihprei  
fktailsnatgmi1ghnhp  
sgdiltiv

Tsompanidou\_et\_al\_Supplemental\_FASTA\_File

>tr|D1GUI6|D1GUI6\_STAA0  
mnqtwkevygylmhqphidvikgiafssnkknseldelysiymndsitsivhpdliesielihne  
>tr|D1GUI7|D1GUI7\_STAA0  
mksiksvleteaifsqdkmhryllkktwdidkevltiitmyphydgvinvdlttqlivnkvaekdeyggvnfinlfsnid  
tpinlkhienshdkhtdih  
imkavkeadsvllawgsyggkplvenrvnevldmlkphskkisiltnpqtneimhplnpyarkawtikplketk  
>tr|D1GUI8|D1GUI8\_STAA0  
mkryitrsianylnpamlggqlwklvaqreneqfkeleeidyfhiqfnmhnsqlyikhkqerpeyvkihkanyskainin  
kvyiireddvdlsyyvml  
peey  
>tr|D1GUI9|D1GUI9\_STAA0  
madnilpdqyirlgpltnkilhtytyysdtlherhiypfilyyqqliaigyidetndmdflylhntvmp1ldqrh1lek  
enynne  
>tr|D1GUJ2|D1GUJ2\_STAA0  
mntvalaheiederfeylestpldtvkeckqegrqisntyteeyklindilekvikptsivaygeyedyihlkkfaqrr  
isns1111rcn  
>tr|D1GUJ3|D1GUJ3\_STAA0  
mtnii fsepywltedsweyevppkgkndqqksirlsspilinkflpksgveklvisngqnerietsdiltsqklps  
limygf sinekyiklsna  
lqlmrqslplsslytgvgvlnldkgvvisldepylskeitqsqadeiicetqyd1qpkgtfedwwqmyldevkgn11le1  
avvfgisslvtafltkkhe  
vefagti fsftgnsstgkstaaalgvsitgnptkgsntlfrswngtrnalegy1snnygvpi v1delssatfkdttg1ly  
siaegqgrqrsnihgevks  
lknwgtsvistaehsifnnsarndglnvrtieiseafttnadnadtikkatsanyghimplvaeyllnreqevikwfqne  
hlrfktgleketsntgirm  
fkryatittsari lerviatpvdlnavrlylinyhldsvsersladkaievivqfvaqnrkgfsddtr1stlienymis  
leddhiqvkmi asvfknl  
kehnfqdtnnvidalrdkdyiqsdanrkttkrsvkdkgekpkktivfyhlkldksyapifglsekskfnip1sfisehqhp  
ilrdmiskarewdkngdid  
f  
>tr|D1GUJ4|D1GUJ4\_STAA0  
mmkekefyt1kravtsiafnlpvgtmfmyhdlnvravn1csteiqqdvgrwfahfvkytpnlpfivvgkkgss1lylka  
pnpmhqnnwkgggn  
>tr|D1GUJ5|D1GUJ5\_STAA0  
miptieei idkygslvdc1kfdisgevyed1111rs1sd1nehqkmhrvsfiqkhfnpnfdy11ddsefrsmkiyrnln  
tmtyinsqnefk1kpfid  
eeqlks11aikvdehl sydpsitskala dinktqkr1vtkpn1lynrskkeneyvr1ggkisytkmekhweylhnei qy  
yn1tnqlisyvalekeyaw  
af1nel fylielylkafkgqkktghefeeglnafiqsyvi111idir1ptvrlyiirrivdecekesdnqkrik1ieesi  
kkyryvkeqierfgnalke  
e1s1at1sieqnm1leakidyyknyyyprkktkhnnieynvsmffkavds1kk  
>tr|D1GUJ9|D1GUJ9\_STAA0  
mitidskinkqiakn1slegmyvtreqq1qil hainnekeitnelirki afk  
>tr|D1GUK3|D1GUK3\_STAA0  
mrnvya fnid1kqrnrviavvmigafvgvlnqtlmttilpeimkdfvssstqvwl1ttifmlvngimipitaflierft1  
rs1ffnatcflmigsficm  
lginfpm111grsiga1gagilmp1tqt11f1mfppekrgm1gm1glvigfapaigptaagwfvnifdwrylflv11i  
gm1dfvfgylslpnitel  
kpn1dk1svil1stvsfggl1ygfstagn1gwhpmvnit1iaavil1tvf1frq1k1lesp11efrvfkyndfsvamiliv  
1mfml1fign1tilpiymqt  
mmkwsplesg111pgg1img11spvtgk1fdkiggrilsimg11timigal1maqfsqnttqlyviisfsvtm1gnami  
mtpmttqalnalprqyah  
gtamnt1rqvsaaigtg1lvt1mtgl1gtss1sgsqg1ihg1ditfyvvaliafigt1iaffirkh  
>tr|D1GUK5|D1GUK5\_STAA0  
meknqrkkrdsaeynq111ttmed11leggedistkkm1sdiakisgvgvgtlyrhfeskt11cqaimdkkvdqmfieied  
ilaentqwpvrk1invilt  
ky1dl1keanft11nfi ekssshsssvinipffer1kn1liqqfenvhsiad1dfk1n1m1nafssdfyf1vkhnqk1tkq  
qf1dk11d1y1r  
>tr|D1GUK8|D1GUK8\_STAA0  
mf11fvylpny1nfit1finiv1i1ffsig1il1tthi1idk1ksnk  
>tr|D1GUL1|D1GUL1\_STAA0  
msq11ndt1saw1lies1spgevnftaed1lsaenfkgakqaqlsfdeyfeiwnderfiiseekseigei1fkfyrhc  
frynein1kiqdi1fddysd  
ihnpngthcygytfn1dkhgqvivdsihipmimsalkeiekknani eekfndsvekf1vqkvkeiladepinefk1kkmd  
ia1ydeyfsv1n1skkdgl1fa  
hyvaieyvkd1sd1p1qpefn1ffisdi ekarkspnqt1idyiegveeskrievdenkemfdk1l1hpsr1pdgrwpsqtefr  
1s1mq1lavnq1it1sgneri  
ssvngppgtgktt11kdi1fah1vvergkelak1lnpkdafvktk1thetddkyv11kesiakykmv1vassnngavenisk

Tsompanidou\_et\_al\_Supplemental\_FASTA\_File

d1pkieeiirnpekckfpk  
yeqnyanlahelkdfaeiaedl igesawgl fsgvfgkstinqvlshmlkqdandigfakllqnennrmsynelmsewqs  
hgrafleelrhvemlkees  
iraydvkncesyksvehelnskkmnvkeklnhleiqiscdnkeiedlddrinyntkqlletlneliksirdsnkgfvnkl  
kaifnseederykkhnaek  
qqllgqqielekckkiknedlvsklkekeklikqltkvqlqlde lnsqlqeleayrieskitipekdfwsdnyderqvt  
nlwtsdelqyrramflra  
milhklll jannttiyyaindfksrrklidanpdkvhnawnvmhli fpvvsttfasfksmyggiprdfidylfideagga  
ipqaavgal frskkvavg  
dpiqiepvvtleshlidnirknynvpeylvskeasvqsvadnanqygfwksdatdsnqktwigiplwvhrclkmftia  
nqiaynnkmvlp snitnvg  
ktgwydvkgnsvqkqfvkehgekvlellandwfeaikegknepssfvispfsavqkqvkrilkqqlp tridierkinqw  
vdksigtvhtfqgkeaqkv  
yfvigt dntqdgavnwscekpnllnvavtrakkefyvigdmqriqskpfyetikernvk  
>tr|D1GUL4|D1GUL4\_STAA0  
mmkrlnklvlginllflvisitagcmgkeaeikksfektlsympiknledlydkegycddqfdkndkgtwivrssmsiq  
pngkdmvkgmvl ymnrns  
rtngyyvvdvierqdkghrdnekkypvmvdkniptkdikdenikkeienfkffaagygsfdl skykdgd isynpev  
psysakyql tnddynvkql  
rkrydiptnkakplllkgtgnlkgssvgykdieftfvekkgeniyf sdsllhlep sedk  
>tr|D1GUL6|D1GUL6\_STAA0  
mnqqleialkskedmieirrylhqhpe lsfhedetakyiaefykgkdvevetnvgprgikvtids gkpgk t lairadfd  
alpit edtg lsfasqngv  
mhacghdahtaymlvlaetlaemkdsftgkvvvi hqpaeevppggakami engvldgdvhlvgvhvmtmetgnvyypg  
yvtggraffklkvqgkgh  
gssphmandai vagsyfvta lqtvsrrl spfetgvvtigsfdgkqfnvikdvveiegdvrgl tdatkatiekeikrls  
kglealygtctleynddy  
palyndpefteyvaktlkeadl efgveicepqpssedfayakerpsafiytgaavedgeiyphhhpkfkiseksllisa  
eavgtvldylkgdn  
>tr|D1GUL9|D1GUL9\_STAA0  
myssygnyeafarppkpenvenksayligsglaslaacflirdgqmegskihileelpkaggsldgenmplkgyvrrg  
remenhfec lwdlfrsips  
leidhasv ldefywl nkedpnysrcrviekqqr lvtgdgftl tktaikeildlcltneedl ddkitdvfsdfffnsnf  
wiywktmfafepwhsamem  
rrylmr fvh higg l adfsal kftkynqyeslv lpmvey l kshgvqfeydvkvdikvdvttsqkiareilidrngnaesi  
kl t indlvfvtngsites  
tygdndtpapptdelggswtlwknlarqspefgnpdkfcqnipkkswfv satsttnkdi idtiesickrdplagktvtg  
giitindsawqisftinrq  
qqfk dqpkneistwiyaly sdvngdyikkp itecsgneicqewlyhlgvptdkiedlakhasntipvmpyitsyf mtra  
igdrplvvp hqsqnlafig  
nfaeterdtvftteysvrtameavyqllnidrgipevinstfdlrvlmdavye lndhqdlreitkdskmqklalagflkk  
ikgtyiesllkehkl  
>tr|D1GUM2|D1GUM2\_STAA0  
mkkknisi rklvgiasvtlgtllisggvt paanaaqhdeaqqnafyqvl nmpnl nadqrngfiqslkddpsqsanvl g  
eaqklnds qapkadaqqnk  
fnkdqqsafyeilnmpnl neeqrngfiqslkddpsqsanllaeakkl nesqapkadnkfnkeqqnafyeilhlplnee q  
rngfiqslkddpsqsanll  
aeakklndaqapkadnkfnkeqqnafyeilhlplteeqrngfiqslkddpsvskeilaekklndaqapkeednnkpgk  
ednnkpgkedgnkpgkedn  
kkpgkedgnkpgkedgnkpgkedgnkpgkedngvhvvpkgd tvndiakangttadkiaadnkladknmikpgqelvvdk  
kqpanhadankaqalpetg  
eenpfigttvfgglslalgaallagrrel  
>tr|D1GUN1|D1GUN1\_STAA0  
myhpevwlidgkskkl t tykeaiarilqhmaqsadnqtavqqhmaqimsdidnsihrtarylqsn tidyaedryivseqs  
lylghpfhptpksasgfse  
adlekyapechtsfqlyhylvahqdvlltryvegkedqvekvlyqladidiseipkdfillpihpyqinvlr qhpqymys  
eqglidlgvsgdsvypts  
svrtvfska lniylklpihvkitnfirtndleqiertidaa qviasvkdevetphfklmfeegyral l pnp l gqtvepem  
dlltnsamivregipnyha  
dkdihvlasl fetmpdsptsklsqvieqsglapeawlecyldr tllpilklfsntgisleahvqntlielkdgipevcyv  
rdlegiclsrtiatekqlv  
pnvvaasspvvyahdeawhr lkyvvvnhlghlvstigkatrnevvlwklvahr lmtwkkeyannavfidcvedlyqtpt  
iaakanlmsklndcganpi  
ythipnpi chnkevsycesnns  
>tr|D1GUN2|D1GUN2\_STAA0  
mnqtilnrvktrvmyqlvssliyenivvykasyqdgvgyftie gndseyrftaekthsfdriritspiervvgdeadttt  
dytqllrevvftfpkndek  
leqfive l lqtelkdtqsmqyresnppatpetfndyefyameghqyhsyksrlgftl sdnlkfgpdfvpnvklqlw laid

Tsompanidou\_et\_al\_Supplemental\_FASTA\_File

kdkvettvsrnvvvnm1r  
qqvgdktyehfvqqieaskhvnvemi pvhpwqfehviqvdlaerlngtv1wlgesdelyhpqqsirtmspidttkyy  
1kvpisintstkrvlaph  
tienaagitdwlkqiqqdytlkdelktaflgevlgqsyIntqlspykqtqvygalgviwreniyhmlideedaipfnal  
yasdkdgvpfienwikyqg  
seawtkqflavairpmihmlyyhgiafeshaqnmlihengwptrialkdfhdgvrfrkrehlseaashltlkpmpeahkk  
vnsnsfietdderlvrdfl  
hdafffiniaeiilfielkygideklqwkwvkgiieayqeaapelnyqhfdlfeptiqvekltrrllsdselrihhvt  
nplgvvgitdattiset  
>tr|D1GUN5|D1GUN5\_STAA0  
mnhiheh1klvpvdkid1hetfep1r1lektkssieaddfirhpi1vtamqhgrymvidgvhryts1kalgckkvpvqeih  
etqysistwqhkvpfvqvw  
et1qqehr1pwtterqepfi1tmchgdtteqlytkdlgeahfqvwekvvasysgccsveriaagtypclsqdvlmkyq  
p1sykeieavvhkgetvpa  
gvtrfni1tgrcln1lqvplal1kqdddveqlrnwkqfladkf1anmrcytekvy1veq  
>tr|D1GUN8|D1GUN8\_STAA0  
mekvli1tgagfigsh1vdd1qqdydvyl1dnyrtgkreniksl1adhdvfeldireydaveqimktyqfdyvi1hlaalvs  
vaesvekp11sqeinvvat  
1k11letikkynshikrfi1fassaavygd1pdlpksdqsl1lplspya1dkyygertt1nycsl1nyiptavvkffn1vfgpr  
qdpksqysgviskmfdfsfe  
hnpkftffgdgl1qtrdfvyvydvvsvr1imehkдавghgynigtgtf1n1levyri1gelygksvehdfkarkgdikh  
syadisn1kal1gfvpktyv  
etg1kdyfnfevdnieevtakevems  
>tr|D1GUP0|D1GUP0\_STAA0  
mki1yci1tkadnggaqth1liq1anhfcvhdv1v1vgnhgpmieql1darvnvii1eh1vgpidfkqdi1lavkvl1aq1fsk  
ikpdvih1hsskagtvgri  
akf1skskdtrvvftahgwaftegvkpkkf1yl1vieklmsritdsi1cvsd1fdkql1alkyrfnr1kl1ttihngiadvpa  
vkq11ksqshnn1gevgm  
1pnkqdl1qi1ndstkhqfvmi1arfaypk1pqn1iaaie1kl1hnsnhahft1figdgpt1ndcqqqv1vqag1lendvt1f1gnv  
inash11sqydtf1liskh  
eglpisii1eamatg1pviashvggise1vtdngicivnnqpetiakv1eky1lidsdyikmsnqsrkry1ecfteekmike  
vedv1ngk1stq  
>tr|D1GUP4|D1GUP4\_STAA0  
mkk1latvgs1ivtst1vfssmpfqnahad1ttsmnvsnkqsqnvqnrhpyggvvpqgmtqaqyte1ekal1pql1sagsnmqd  
ynmk1ydatqni1adkynvi  
i1ttnvgvfkphavrdmng1halpvtkdgnfyqtnvdangvnhggsemvqnk1tghmnqnthmnqqphmqgghmqssnhqmnq  
snkkv1paagesmtss1it  
asiaa111vsg1fl1afrqrstnk  
>tr|D1GUP5|D1GUP5\_STAA0  
mtqtqpkf1tiyntykeiqigkypsg1hal1pteke1carfdvsrmt1rqaik1laedgivestrgkghfvipqtnaqhas  
smdqfkhp1ldqi11drvsm  
ssinyrvd1eseytnh1fanhpsavi1ameryyqkkn1hskqadaf1cftfipl1nvidtfkvntqneddmktfveqtiysna  
yqsd1kmsi1tkaphfknhs  
hvf1gdthcw1li1et1yaqtpypiminkwyipqeise1tl1trir1qdsy  
>tr|D1GUP7|D1GUP7\_STAA0  
mnveyskikkavpi11fl1fvfsl1vidnsfkl1isvaiadd1nisvttvswqat1lag1lvigigavvyas1sdaisirt1fiy  
gv11i1igs1igy1fghqf  
a111lvgr1iqtag1aaet1lyiyvaky1skedqkty1gl1stssys1sl1vig1lsggfistyl1hwtmflialivvft1p  
f1fk11l1pkenntnkah1ldf  
vg11ilvatiattvm1lfi1tnfnwiymigaliaiivfalyiknakrplvnksffqnkryasfl1fivfvm1yaiqlgyift1p  
imeqiyh1ql1dtt111vp  
gyivavivga1sgkigeylnskqai1itailialsl1lpafavgnhisifvismiffagsfalmyap11neaiktid1nm  
tgvaigfyn1iinvasvg  
iaiaa11idfkal1nfp1gnda1sshfgi1i1ilg1msivgl1vl1fvilnrwtqsek  
>tr|D1GUQ0|D1GUQ0\_STAA0  
msgkelqkni1gffsafaivmgtvigsgvffki1snvtevtgtagma1fwf1l1ggi1iticag1ltaaelaaaipetggl1tky  
ieytygdfwg1f1sgwaqsf  
iyfpanva1sivfatq1in1l1h1sigs1lipiaiasalsiv1in1flgskaggilqsvt1viklipiivivifg1fqs1gdi  
tfs1ipttgnsgngff1tai  
gsg1latmfaydgwi1hvgnvage1knpkrd1plaisvgigcimavyl1inat1f1l1t1piellagn1naasdt1skil1fgen  
gk1i1itig1ilisvygting  
ytmtgmrvpyamaerk11pfsh1fak1l1tks1gapwfgai1q1liai1immsmgafdtitnmlifviw1fycmsfvavi1l1rk  
repnmerpykvp1yp1ip1  
ia1ilagsfv1int1lftqf1il1ai1igilitalgipvy1y1kkkqkaa  
>tr|D1GUQ7|D1GUQ7\_STAA0  
mfq1lavcpm1gleavvareiqelgyetnvengri1ffegdasavkan1wl1rtadriki1vgrfnatt1fdel1feqtka1lpw  
esi1idkegnfpvqgrsvks  
t1hsvpdcqaitkkaiver1rraynekgw1nesgakypvevailkdnv11t1dtsgsg1nrrgyr1laqgeapiket1laas

Tsompanidou\_et\_al\_Supplemental\_FASTA\_File

lirlanwkgdtp lidpfcg  
sgtiaieacliaqniapgnrefvseqwnimpaniyddyrdeadkmadydkeievyasdidpemveiakrnaeevgl sdi  
ikfsvkdvntltidteepv  
alignppygerigdreveemyryigklmkqhpflstyiltsnefeylvdrkatkrklfngyiectyyqywgkkterk  
tien  
>tr|D1GUQ9|D1GUQ9\_STAA0  
mvktvyvtgyksfelni fkddapevhylkqfikkkieqlldeglewvliqqmgie lwtavvie lqertydskfavitp  
fgghtekwnehngskyani  
ikhadyvdsi fhtsyqgpfqfkqadqfmleysdqtlliydeeqeaspkffkqmlvdfmdktnytcdivtfdeltafindl  
qwsedqsf  
>tr|D1GUR1|D1GUR1\_STAA0  
mnyprgkpyrknsaidggkkaafsnieygggrmslekdihsntfylksdiavihkkptpvqivvnvnyprskavinea  
yfrtpsttdyngvyggyyi  
dfeaketknktsfplnnihdhqvehmknayqqgivflmirfktldevy llypskfefwkrykdniksitvdeirkng  
hhipyqyqprldylkavdk  
lildesedrv  
>tr|D1GUR2|D1GUR2\_STAA0  
mtenkgssqpkngnnggksnkskkrnrvtiikiigfmiaffvlllgillfayyawkapafteaklqdpipakiydk  
ngelvktldngqrhehvn l  
kdvpsmkdavlatednrfehgaldykr lfgaigknl tggfgsegastl tqqvkdaf l sqhksigrkaqeay l syrle  
qeyskddi fqvyl nkiyys  
dgvvtgikaaakyyfnkd lkdln laeeaylagl pqpvnny niydhpkaaedrkn tvlyl mhyhkritdkwedakkid lka  
nlvnrtppeerqnidtnqds  
eynsyvfvkse lmnkafkden lgnvlqsgikiytnmdkdvqkt lqndvdngsfyknkdqqvgatil dsktgg lva isg  
grdfkdvvnrnqatdpht  
gslkpflyagpa ienmkwatnhviqdessyqvdgstfrnydtkshgtvsiyda l rqsfnipalkawqsvkqnagndapk  
kfaaklg lnyegdigpsev  
lggsasefsptqlasafaaianggtynnahsiqkvvtrdgetieydhtshkamsdytaymltemlkg t f kpygsayghv  
sgvnmgaktgtgtygaety  
sqynlpdnaakdwi ngftpytmsvwm gfskvkqygensfvghsqeypqflyenvmskissrdgedfkrpssvsgsip  
sinvsgsqdntnrsthg  
gsdtsanssgtaqsnnntrsqqsrnsggl tgifn  
>tr|D1GUR8|D1GUR8\_STAA0  
mskysqdv lq llyknkpnysggsiaeslnisrtavkkvidqlklegckidsvnhkghllqqlpdiwyggiidqytkssa  
lfd fsevydsidstqlaak  
kslvgnqssffil sdeqtkg rgrfnrhwssskgqglwmsvvlrpnvafsmiskfnl fialgirdaiqhfsqdevkvkwpn  
diyidngkvcgfltemvan  
ndgiea iicgiginltqqlenfdesirhratsiq lhdknkldryqfleillqeiekrynqfltlpfseireeytaasniw  
nrtllftendkqfkqga id  
ldydglyivrdeageshr l isadidf  
>tr|D1GUS4|D1GUS4\_STAA0  
msetfnqikesfiel l fgyrfsriavw lnyikvneaklanihfvdtkinhhetleiaevgshasaiqftkrnikl mn  
tneifdyianhncafdqi  
hfanvskregr ldd livaqltespsyqtylhdlnsmaidrkhallidyl llnid lslqmnekqr fyqltqilntlklvn  
khnqfedladdn  
>tr|D1GUT9|D1GUT9\_STAA0  
mkhl lvihtggtis msqdsnkvvtn dinpismhqdvinqyaqidel n pfnvpsphmtiqhvkqlkdiileavtnkydyg  
fvithgt dtleetaflld l  
ilgieqpvvigtamr ssneigsdglynyisairvasdekarhkgvmvfvndeih tarvktkhtsntntfqsphngplgv  
l tkdrvqfhhmpyrqqa le  
nvndkl nvp l v kaymgmpgdi fsfysregidgmviealgggnipp saleviqq lvslnipivlvsrsfngivsp tyaydg  
ggyqlaqqgfifsnl ngp  
kar lkl lvalsn l dkaeiksyfel  
>tr|D1GUU6|D1GUU6\_STAA0  
mlkkakfilmatil lsgcsttnnesk etksvpeemdaskyvgqgfqppaekdaiefakkkhkdkiakrgeqffmdnfglk  
vkatnvi gsgdgv evfvhc  
ddhdvfnasipfdksiidss l rskdkgddmstlv gavlsgfeyraqekeydklykffkdneekyqytgftkeaint  
qnsyenyfyisai pyn l  
aeyrdyfel l nksdsefskel snvkkqlkdkskvsvt t l fskkknyteksnsenvikmaeeikkdkeipngielsikf  
sdnkintvknfn gestse  
ygvfdqe  
>tr|D1GUV1|D1GUV1\_STAA0  
meneskkdtktetksvpeemeaskyvgqgfqppaeknaiefakkkhrkefekvgeqffkdnfglkvkatnvvgkddgvevy  
vhcedhgi vfnas lplykd  
aihqkgs mrsndngddmsmmvgtvlsgfeyraqekeydnlykffkenekkyqytgftkeaintqnvgykneyfyityss  
r lkeyrkyyep lirkndk  
efkegmerarkevn yaantdavat lfstkknftkdntvddviesdklyn lknkpdkstitiqigkptintkkafyddnr  
pieygvhskde

Tsompanidou\_et\_al\_Supplemental\_FASTA\_File

>tr|D1GUW3|D1GUW3\_STAA0  
mkgqhfivtggtslglsivrkllenkvhvtllvrdvdkatrifeqelgktinvipcdlndlksiqalqfedntsfdgfi  
ysaglgyfksisdhsfsem  
ietyqlnlisfnvlytvlrpyltsnahivgissqaafstqanaahygaskagfyalmaalrlespnlhimtvnvvgpidtp  
fhqkadpsmkyakkmgem  
ldanqlaediyygiktkqlleinrpkwmyhalmyqiaprffercfplfkna  
>tr|D1GUW4|D1GUW4\_STAA0  
mklvfygagnmagajftgiinssndandiylnksneqalkafaeklgvnysyddatllkdadyvflgkphdfdalat  
rikphitkdnctfisiimagi  
pidyikqqlcqnpvarimpntnaqvghsvtgisfsnfdpkskdeindlvkafgsvievsedhlhqvtaitgsgpafly  
hvfegyvkagtklglekeq  
veesirnlitgtskmiersdlsmaqlrkknitskggttqagldtllsqydlvsifedcnaavdhsielnsiedq  
>tr|D1GUW6|D1GUW6\_STAA0  
mstknkhipclitifgatgdlshrklfpsi fhlyqqdnldehiaiigigrditnddfrnqvksisikhvkdtnkidafm  
ehvfyrhrhdvsneesyqel  
ldfsneldsqfelkgnrlylamapqffgvisdyllkssgltdtkgfrlviekpfgsdllksaealnqirksfkeeeiyr  
idhyllgkdmvqnivlrf  
namfeplwnnkyisniqvtssielgvedrggyessgalkdmvqnhmlqmvallameapislnsedi raekvkvllkslrh  
fqsedvkknfvrqqygey  
idgkqvkyardedraddstptfvsqkltidnfrwagvpfyirtgkrmskrtiqvvvefkevpmnlyytdkllsdnll  
viniqpnegvslhlnakkn  
tqgi etepvqlsysmsaqdkmntvdayenllfdclkgdatnfthweelkstwkvfdaiqdewnmvdpefpnyesgtngpl  
esd1llardgnhwwddiq  
>tr|D1GUW7|D1GUW7\_STAA0  
mdvikqiqqaiivyiedrllpefnlqelsdyvglspyhldqsfkmivgl speayararkmtlaandvingatrldiakky  
hyansndfandfsdfhgvs  
piqastkkdelqigerlyiklstterapyprleeddislvgyarfidtkylshpfnvpdfledllidgkikelrrynd  
vspfelfviscplenglei  
fvgpserypahlesrflpgkhcakfnlqgeidyatneawyyiesslqltlpyerndlyvevypldisfndpftkiqlwi  
pvkqspyded  
>tr|D1GUX5|D1GUX5\_STAA0  
meitmpklgesvhegtieqwlsvvgdhideyeplicevitdkvtaevpstisgtiteilveagqtvvidtiickietadek  
tnetteeiqakvdehtqks  
tkkasatveqtstakqngprngrfspvfkasehdidllsqvvgsgfegrvtkkdimsvienggttaqsdkqvqtksts  
vdtssnqssednsenstip  
vngvrkaiagnmvsvteiphawmmievdatnlvntnrnhyknsfknkegynl tffaffvkavadaalkaypllnsswqgne  
ivlhkdnisiavadenkl  
yvpvikhadeksikgiareintlatakarnkqltaedmqggtftvntgtfgsvssmgiinhpqaailqvesivkkpvvin  
dmiairnmvnlcisi dhri  
ldglqtgkfmhikqrieqytlentniy  
>tr|D1GUY6|D1GUY6\_STAA0  
mqrmnyfrykqfdkdvitvavgyllryalsyrdiselrregiyvhstiyrvwqeyapilyqiwkknkqayykwhide  
tyikikgqwnlyraidad  
ghtldislrkkrdnhsaytfikrlikqfgkpqmiitnqapstkvamskvikdfkltpnchcnskylnnlieqdhrikvr  
kisyqsintakntikgiec  
iyglykknrrflqiygfspcrvisimlas  
>tr|D1GUY7|D1GUY7\_STAA0  
msyentcdvicvhedkvnnalsfledksskllnilekicdekkllkiilslikedelcvcdislilkmvastshhlrl  
yknevl dfykdgkmayyfi  
kddgireffsknhgef  
>tr|D1GUY8|D1GUY8\_STAA0  
msklvgtvaivtiascgadniglfvpyfvltsvtnlllflvfliliffvftaqklanipgigeivekfsrwimaiiyi  
alglfiiendtiqtilgf  
if  
>tr|D1GUY9|D1GUY9\_STAA0  
miqtvvtaailiyiatafdllvilliffaraktkkeyrdiyigqylgsiililvslflafvlnyvsekwilgllglipiy  
gikvaiyvivkekrellkn  
>tr|D1GUZ0|D1GUZ0\_STAA0  
mfyylpksgnevfimpnfekynlsqvokterfyqlpkylfedayfkksaeakimyaallkdrfelisqnewvdrnniyf  
ifsnkhlcelygeqkii  
kllkkelvfnlltqervglnkpnrllyllkpnnydieasltkelpsqfqnnefgssrtvnlsgqelpnsqsndtelntny  
ienedndtydmndiisntl  
innhhsnhtnhqktefnndaalkfqvleelpqqldylyskfeireiriiksvllkgkksfntshdtyyrl edvefeivsv  
lkrfkamllqknetveamq  
gylmqsi kaeleethalymrrknmkqynifnq  
>tr|D1GUZ1|D1GUZ1\_STAA0  
mktikmvadelnvtkqti vnnaknl nisfkkenginyindndclkiiekittktertqnkesikkerfnentaefekhiy  
nnsngfeslktkvneleq



Tsompanidou\_et\_al\_Supplemental\_FASTA\_File

ieifetrakndekyienltkqldqqnsnvtlnklllenqqilalesnkkiqklenqleerqlnysfdtatndrqsinq  
eatfteeyqnsnqqkkkiq  
pieaelnhkgitkakkddssnedvlkrddkseeiesgpedrevetpkkgfwsrlfgs  
>tr|D1GUZ3|D1GUZ3\_STAA0  
misfftkttddmmskkrwta1vvlavslfvvtmdmtilimalpelvrelpsgtqqlwivdiyslavlafgiip1safadk  
wgrkka11tgfalglvs1  
aiffaesae1vairf11giagalimptt1smirvifenpkeratalavwsiassigavfgpiiggalleqfswhsafli  
nvpfaiiavvag1f11pes  
k1skekshswdipst11siagmig1vwsikefskegladiipwvvlaitmivivfkrnlsssdpmldvrlfkkrfsa  
gtiaafmtmfamasv111a  
sqwlqvveel1spfkagly11pmaigmvfapiapglaarfgpkiv1p1sgigiaaigmfimyffghp1sysimalalilvg  
agmas1avasalim1etpt  
skagnaaaveesmyd1gnvfgvav1gslssmlyrvf1dissfsskgivgd1ahvaeesvvgavevakatgikqlaneavt  
sfndafvatalvggimi  
isivvy11ipks1d1tkqk  
>tr|D1GV00|D1GV00\_STAA0  
mkkkdtceifcydeekvnriqgd1qtvd1sgvsqilka1adenrakityal1cqdeel1cvcdianilgvtianashh1rt1  
ykqgvvnfrkegk1alys1  
gdehirqimmi1al1ahkkekvvnv  
>tr|D1GV01|D1GV01\_STAA0  
mseqkvk1meeemnyrvqgftcancagkfeknvkkipgvqakvnfgaskidvygnasveelekagafen1kvspekla  
nqt1qrvkddtkahkeekt  
pfykkhst11fat11iafgy1shfvngedn1vtsm1fvgsiviggys1fkvgfqn1irfd1dmt1mtvavigaaiigew  
aeasi1vvl1faisealerf  
smdrarqsi1rs1mdiapkealvmrngqeimihvddiavgdiiivkpgeki1amdgi1ingvsavnqaaitgesvpvaktvd  
devfagt1neeg11evkit  
kyvedttiski1ih1veeaqgerapaqafvdkfakyytpi1mvial1vavvpp1ffggswdtwvyqglav1vvgcpca1vi  
stpisivsa1ignaakkgv1  
ikggvyleel1gaika1afdkgt1tkgvpvvt1dfev1ndqveeke1fsi1itale1yrsqhp1lasaimkkaeqdnipysnvq  
veeftsitgrgikg1vngt  
tyyigspk1fkel1nvsdfs1gfennvki1qnqgktami1gtektil1gviavadevretsknviqk1hql1gikqtim1tgd  
nqgtana1gthvgvsdiq  
elmpqdk1dyi1kkmqseydnvami1gdgvndapalaastvgi1amggagtdtai1etadia1mgdd1sk1pfavr1srkt1ni  
ikanitfa1igiki1ial1lv  
ipgw1t1w1ai1s1dmgat11valns1r1l1mrvkdk  
>tr|D1GV02|D1GV02\_STAA0  
mnyfrykqfnkdv1tvavgy1rya1syrdise1l1rergvnhstvyrvwqeyapilyqi1wkkkkkaykwhidetyi  
kikgkwsy1yraidaeght  
1diw1r1kqrdnhsayafikr1likqfgkpqkvi1tdqapstkvamakvikafk1kpdchctsky1ln1lieqdh1rhikvrktr  
yqsintaknt1kgieciyt  
lykknrrs1qiygfspehisim1as  
>tr|D1GV03|D1GV03\_STAA0  
mgmkiselakacdvnetvryyerkg1iagpprnesgyriyseetadr1rfikrmkel1dfs1keih11fgvvdq1dgerck  
dmyaftvqktke1erkvqg  
11riqr11eel1kekcpdekamytcp1iet1mggpdk  
>tr|D1GV04|D1GV04\_STAA0  
mkkrisftaimtv11lig1t1acgaesdtaneskvqdi1qgnpvs1pnekpt1iyfmatwpcsci1ynee1fkemhql1npndvq  
litvs1dpntdtkes1akf  
kdyggdwphv1kngkei1adtygvkq1leeiv1vnsenevfyrsvrps1fdd1kealtqigev1  
>tr|D1GV07|D1GV07\_STAA0  
mtqnsykipiqg1mtctgceehvtea1eqagakdvsadfr1rgeaifelsddqiekakqni1saagyqpgeeesqpsensvdf  
nrdgdyd11i1igsgaafs  
aaikanengakvam1vergtvgg1tcvni1gcvp1sktm1rageing1aqnnpftg1qtstgaad1aq1teqkdglvsqmrqek  
yid1liey1gfd1irgeasf  
iddkti1qvnqni1tsksf1iatgaspavpeipgmnevdy1t1tsale1l1kevpqrlav1igsgyiaael1gqm1fhn1g1tevt1  
mqrser1f1ktydpeisei  
des1teqgl1n1itg1vtyqkveqngksts1yie1vngqeqvieadqvl1vatgrk1pntet1n1lesagvktgkkgevt1neylq  
tsnnriyaagdv1l1gpqfv  
yvaayeggi1vanna1glakrki1d1rfvpgvtftnpsi1atvg1teqqakekgydvktsv1p1davpra1vn1hettgvyk1v  
vnaqtqk1ligahivsenag  
dviyaat1lavqfg1tied1tdsfapy1tmaeg1k1laalt1fdkdvsk1sccac  
>tr|D1GV09|D1GV09\_STAA0  
mna1qksvs1rkv1vis1sfl1t1ismv1nfnfkeaqnkn1niadkniet1nekeiekel1dyiygkiiv1dkdgtakdvn  
1enaksrygyvpegf1k1k  
ndienkkk1nssi1spravggnyknsndcfysev1nsyge1l1tgni1aavfddvkakniksaakk1larigikgn1lagiaatm  
vskdvqct1kygwf  
>tr|D1GV10|D1GV10\_STAA0  
mqyntt1rsitenqdnkt1kdm1tks1gkqrpwrekkidnvsyadile1ilkikkaynvkqcg1nvef1kptdegy1k1l1hktwfc

Tsompanidou\_et\_al\_Supplemental\_FASTA\_File

ksklcpvcnwrramknsyg  
aqkvi eevikekpkarwflftlstknaidgdtleqslkhltkafdrfsrykkvkqnlvgfmrstevtnkndgsynqhmh  
vllcvenayfrkkenyitq  
eewvnlwqkalqvdyrpvanikaikpnqkgdkdi esaiketskysvksdfltdndeknqeivsdlekglyrkrmlsygg  
llkqkhkilnlddaedgnl  
intsdedkitdeekahsitaiwnfekqnyylrh  
>tr|D2EBB2|D2EBB2\_STAA0  
mdftgvitsiidliktciafg  
>tr|D2N343|D2N343\_STAA5  
msekeiwekvleiaqeklsavsystflkdtelytikdgeaivlssipfnanwl nqqyaeiiqailfdvvyevkphfitt  
eelansnnetatskettk  
pstettednhvlgreqfnahntfdtfvigpgrnfphaaslavaeapakaynplfiyggvglgkthlmhaighhvl dnpd  
akviytssekftnefiksi  
rdnegeafreyrnidvlliddiqfiqnkvqtqeeffytfnelhqnnkqivissdrppkeiaqledr lrsrfewglivdi  
tpdyetrmalqkkiee  
kl dippeal nyianqisnirelegaltrllaysqllgkpittel taealkdiiqapkskkitiqdiqkivgqyyvrie  
dfsakr tksiyaprqiam  
ylsreltdfslpkigeefggrdhttvihaheki skdlkedpifkqevenlekeirnv  
>tr|D2N346|D2N346\_STAA5  
mklntlqlenyryndevtlkchpdvniligenaaggktnllesiytlalakshrtsndkelirfnadyakiege lsyrhgt  
mpltmfittkkgkqvkvnhl  
eqsr l tqyighlnvvl fapedlnivkgsppirrrfidmelgqisavyln d laaqyqrilkqknyllkqlqgkddl tml e  
vlnqqfaeyamkvtdkrah  
fiqel eslakpihagitndketlslnylpslkfdyaqnearleeimsilsdmqreker gis l fgphrddisfdvngmd  
aqtygsqgqrrtaalsikl  
aeielmnievgeypil llddvlse l ddsrqthllstiqhkvtfvtttsidgidheimnaklyrinqgeiik  
>tr|D2N347|D2N347\_STAA5  
mvtalsdvntdnygagqivql egleavrkrp gmyigstserglhhlvweivd nsideal agyanqievviekdnwikt  
dngrgipvdiqekmgrpav  
eviltvlhaggkfggggykvsgglhvgvssvvnalsqdl evyvhrnetiyhqaykkgvpqfdlkevgttdktgtvirfka  
gdiftettvnyetlqdr  
irelaflnkgi qitlrderdeenvredsyhyeggiksyvellnenkepihdepiyihqskddieveiaiqynsgyatnll  
tyannihtyeggthedgfk  
raltrvlnsyglsskimkeekdr lsgedtre gmtaiisikhgdpqfegqtktklgnsevrqvvdklfsehferflyenpq  
vartvvek gimaararvaa  
kkarevtrrksal dvaslpgkladcsskspeeceiflvegdsaggstksgrdsrtqailplrgkilnvekarldrilnnn  
eirqmitafgtgiggdfl  
akaryhki vimtdadvdgahirtlll tffyrfmrplieagyvyiaa pplykl tqgkqkyvyndrel dklkse l nptpkw  
siarykg l gemnadqlwet  
tmnpehral lqvkle daieadt femlmgdvvenrrqfiednavyanl df  
>tr|D2N348|D2N348\_STAA5  
maelpqsrinernitsemresfldyamsvivaralpdvrdglkpvhrriylg lneqgmtpdksy kksarivgdvmgkyhp  
hgdlsiyeamvrma qdfsy  
ryplvdgqngfsgmdgdgaaamrytearmktilellrdinktidfidnydgnerepsvlparfpnllangasgiavgm  
atnippnhtelingvls l  
sknpdisiaelmedi egp dftag l ilgksgirrayetgrgsiqmrsravieergggrqrivvteipfqvnkarmiekia  
elvr dkkidgitdlrdets  
l r tgvrvvidvrkdanasvilnnlykqtplqtsfgvnmialvng rpklinlkealvhylehqktvrrrtqynlrkakdr  
ahileg l rialdhideiis  
tiresdtkvameslqqrflsekqaqaildmrlrrltglerdkieaeynellnyiseleailadeevllqlvr deltei  
rdrfgdrrrteiq lggfed  
lededlipee qivitlshnnyikr l p vstyraqnrggrgvqgmntleedfvsq lvtlsthdhv l f ftnkgrvyklkgyev  
pelsrqskgipvvnaiele  
ndevistmjavkdlesednflvfatkr gv vkr salnfsrinrngkiaisfredde liavr l tsgqedilig tshas l ir  
fpestl rplgrtatgvkgi  
tlregdevvg l dvahansvdevlvvtengykrtpvndyr lsnrggkgiktatiterngnvvcittvtgeedlmivtnvg  
viirldvadisqngraaqq  
vr lirlgddqfvstvkvkedaddetnedeqststvsedgteqqreavvndetpgnaihtevidseendedgrievrqdf  
mdrveediqqssdedee  
>tr|D2N350|D2N350\_STAA5  
mtlyldgetl tiediksf lqqskieiddalervkksravvegieneetvygittgfg l fsdvridptqynelqvnli  
rshacglgepfskevalvm  
milrlntllkghsgatlelvrq l qffineriipiipqgslgasgdlap lshlalaligegkvlhrgeekdsddv l reln  
rqplnlqakeglalingtq  
amtaggvisyieaedlgyqsewialthqslngiidayrhdvhavrnfqeqinvaarmrdwlegstl ttrqaeirvqday  
tlrcipqihgasfvfnvy  
kqql efemnaandnplifeanetfvissgnfhgqpi afaldhklglvselanvserrler l vnpqlngdlpaf l spepg  
lqsgamimqyaaas lvsen

Tsompanidou\_et\_al\_Supplemental\_FASTA\_File

ktlahpasvdsitssanqedhvsmttaarhgyqi enarrvlaiecvialqaaelkgveglspktrrkydefrsivpsi  
thdrqfhkdieavaqylkq  
siyqttach  
>tr|D2N352|D2N352\_STAA5  
mtthlsfrgqvqeciptllgyagvgisfgivassqnfsileivllclviyagaaqfimcalfiagtpisaivltvfivns  
rmfllsmlapnfktygfw  
nrvglgslvtdetfgvaitpylkgeaisdrwmhgl nitaylfwaiscvagal fgeyisnpqalgldfaitamfi flai aq  
fesitksrlriyivlijav  
ivmmllskfmpsyailiaatisaalgvmmer  
>tr|D2N353|D2N353\_STAA5  
mithmnilililicgivtlliriipfimi skvqlpdvvrwlsfipitlftalvidsiiqqtpghegytlnipyiialip  
tvilsitrsltitiisgi  
vimaalrfff  
>tr|D2N354|D2N354\_STAA5  
mtnytvdtlnlgkfitesgevidnrlryehvgyhgqplvvvchal tgnhltygtddypgwwreiidggyipihdyqflt  
fdvigspfgssspndphf  
pkkltlrdivranergiqalgydkiniligsggmqamellynqqfevdkaillaatsrtssysrafneiarqtihlgg  
keglsiarqlglfityrsk  
syderftpdevvayqqhgknkferfdlncyltlldvldshnidrgrtdvthvfknletkvlmtgfiddllypddqvral  
gerfkyhrhffvpdnhgh  
gfllnfstwapnlyhf1n1khfkrk  
>tr|D2N355|D2N355\_STAA5  
mfskiqpkatimatialvivalalylvpglglifal fatipgivlnksiqsfgisalitviittvl gntfvlsailvl  
ivsvliigqllkertskeri  
lyvttvamslisliafmllqtfgrippsasivkpfkqtlheaitmsgadanmtqileegfrqatvqlpgfiiiitflivl  
inlivtfpilirfkfiatpv  
fkplfawqmsgillwiyiiviicllftgqpsvfqsillnfqlvls1vmyiqglsvihffgkagklnavtillliigtill  
tptthivglgvidls1n1  
krimknnsk  
>tr|D2N358|D2N358\_STAA5  
mdrmyeqnqmpnhneaeqsvlgsi idpelinttqevllpesfyrgahqhi framhlnednkeidvvtlmdqlsmegt  
neagppqylaelstnvppt  
rnvqyytdivskhal krrliqtadsian dgynde leldailsdaerrilelsssresd gfkdir dvl gqvetaeeldqn  
sgqtpgiptgyrdldqmta  
gfnrdliiilaarpsvgktafalniaqkvathedmytv gislemgadqlatrmicssgnvdsnr lrtgtmteedwsrft  
iavgklsrtkifiddtpgi  
rindlrskrrlkqehgl dmividyqliqgsgsrasdnrqqevseisrtlkalarelecpvialsq1srgveqrqdkrp  
mmsdi resgsieqdadiva  
flyrddyynrggdeddddggefepqndengeieiiiakqrngptgtvklhfmkqynkftdidiyahadmm  
>tr|D2N360|D2N360\_STAA5  
mqmarkvvvvddekpiadi lefnl kkegydvycaydgdavdliyeepdivlldimlpgrdgmecrevrkkyempiim  
ltakdseidkvlglelgad  
dyvtkpfstrelriarvlnrrhysqpaqdtgntneitikdivipdaysikkrgedielthrefelfhylskhmgqvm  
trehllqtvwgydyfgdvr  
tvdvtirrlreki eddpshpeyivtrrgvgyflqqhe  
>tr|D2N362|D2N362\_STAA5  
mnkheiksvilal1v1msvvltymvwnfspdianvdntdsksetkplttptakmdttitpfqiihskndhpegtiat  
vsnvnltkplknkevksv  
ehvrrdhnlmipdlssdf1fdftyd1plsty1gqvlmnakvpnhfnfnrlvidhdaddnivlyaiskdrhdyvklttt  
tkndhfl dalai vkdmq  
ytdiitnkdtidrtthvfapskpek1ktyrmvfntisvekmnail fddstivrssksqvttynntgvanyndknekyhy  
knlse deasskmeetipg  
tfd f inghggflnedfr1fstnnqsgeltyqrflngyptfnkeganqivtwgekgvfdyrrsllrtdvvlnsednkslp  
klesvrsslannsdinfek  
vtniaigyemqndpnhhievqinse1vprwyveydgewyvndgrle  
>tr|D2N363|D2N363\_STAA5  
mnwkltktlfifvfilvni1v1sviyvknvrshinevesnnevnfqeeikvpasilnksvkgiqleqitgrskdfsska  
kgdsdltsdggkllnani  
sqsvkvsdnn1kd1kdyvnrkrfkgseyqlseissgsvkyeqtydnfpi1nnskamlfnfniednkatsyqsmmddikpt  
dgadkkhqvigvrkaieal  
yynrylkkgdevinar1gyysvnetnvq1lqpnweikvkhgdktntyveatnnnpkiinh  
>tr|D2N364|D2N364\_STAA5  
msv1asgstgnatfvenekgs1lvdvgltgkkmeelfsqidrnikd1ngilvthehidhikglglarkyqlpiyanekt  
wqaiekkdsripmdqkfi f  
npyetksia gfdvesfnvshda idpqfyi fhnykkftilttdgyvsdrmkgmirgsdafi fesnhdvdmlrmcrypwkt  
kqrilgdmghvsnedagha  
mtdvigtntkriy1sh1sqdnmklarmsvgqvlnehdidtekevllcddtdkaiptpiyti  
>tr|D2N365|D2N365\_STAA5

Tsompanidou\_et\_al\_Supplemental\_FASTA\_File

mka111ktsvwl11fsamglwqvssaaeqhtpmkahavtvdkattdkqvtptkeaaahqsgeeaatnvsasvqgtad  
dtnnkvtstnapsnkpststav  
sttvnetrdvdtqastqkptsatftl snaktaslsprmf aanapqtthki lhtndihgrlaeekgrvigmaklktvk  
eqekpdlmldagdafqglp  
lsnqskgeemakamnavgydamavgnhefdgydqllklegmldfpmlstnvykdgkrafkfstivtkkgirygiigvtt  
petktktrpegikgvefrd  
plqsvtaemmriykdvdftfvvishlgidpstqetwrgdylvkqlsqnpqlkkritvidghshtvlqngqiynddalaqtg  
talanigkitfnyrngevs  
nikpslinvkdiventpka laeqinqadqtfraqtaevii pntidfkgerddvrtretnlgnaiadameaygvknfsk  
ktdfavtngggi rasiakg  
kvtrydlisvlpfgntiaqidvkgdsdwtafehslgapttqkdgkvtltanggllhisdsirvyymnkpsgkrinaiqi  
lnketgkfenidlkryvhv  
tmndftasggdysmfggpreegisl dqv lasylktanlakydttkppqrmllgkpavseqpakgqqgskgsksgkdaqpi  
gkdvmdpakpapskvvl  
lptnrgtvssgredsralegtavssksgkqlasmsapkgstheqllpktgtdqssspaamfvlvvgigliatvrrrkas  
>tr|D2N366|D2N366\_STAA5  
msfgppncyqlssypqvinlftlfp liipiffavfdifltfmpvf  
>tr|D2N368|D2N368\_STAA5  
mkgniqcprlikgsll dfvletvdvfngskndcelvnfnkykegkvvsrystkfesnpklrkkqlistvkvvryvifdfe  
ki lwgigkvllkfiilrqc  
ll  
>tr|D2N369|D2N369\_STAA5  
mkhinqfsestlaqlekdaqhvfyvyclmdprndecfyvgkkgknri fkhkqdaqkklvlyedifieenkdnlkfnrinei  
csndlnvlygiisyltes  
eafsaenvlinflnltnkttltnminghskaylvedlenefgydsinlenintnelilavkirdafllkdeskeypin  
eskrdrnnlksrtlgswii  
gkdkihkiyigintgannavvsayevsfeqaesietnngmryafiglsersdatlkklnlykka lpd lrfgsgsatay  
inngtmkvd  
>tr|D2N370|D2N370\_STAA5  
mpsddivkkllyskedi rlelgltp hkfknkmetiaklfkidmki fhnykgqdknnytfngvake likvllksvdyypvd  
inskkfkqngkskkemien  
idnssymkyiyqlmksineiqykrliadihmkdvyqntkawlnngesinkkeqelyqymtilplhkrvelqnevkside  
tifqflakehrnnqieenn  
eleaytkaikegrnpkndyelnhll ykknqpldsliediwdyeete ytel dwliadm lkrsg radnsfieslekknklr  
knihkdsiksisklidhel  
vknnrkwdvae fyknqgfwnnstlrrssqnfgi lykknr lhtmnqsn iikkikiieaniesankqpsyl dfflqakfdl  
erlese lmkysinpk yfnk  
insdyvryaiedvhnai ikidryisndkvklnysnvqmvvrneiteqgsyfvtaqlntlskveesgysfdnfmvgpfved  
fkkaiknrrfsgskd  
>tr|D2N372|D2N372\_STAA5  
mnndrgqslhipsstpi kenniyvatl hsviqtdfsgeikhqftyevn nqivyanrniptkpsanqlsihdwlkrhsn  
ysashenyepyidqkhli l  
lgqyngnyyvqdasldafggvls  
>tr|D2N373|D2N373\_STAA5  
mnhilqmlskllsvakeaidrqglia iltipvnnndeieetaqgetvnelidqlrlnipktdtyqpnisyf gikknpn  
dtvlmemmikvf hikrfns  
elfi fkvngwqkingdelqgliskmiqvlvdykpslstlknvvdglqkstdveelveneryigcgenmfdlntfqvkn  
sidi fpktrlnlslstndv  
itdkippyfkqymqlanyddd lqyflfqhtavlltadt kyrrgliyggakngksvyielvksffyskdivskplnele  
grfdkeslidkslmashei  
gqsriqekivndfkl lsvesmhvdrkgktqvevil dklifstnailnfppehakalerriniipceyyvekadt lid  
klqsekkeiflylmyvyqq  
ivkadi eyelensrvteithdwl nfygefvsrsvsnanqkacinllrklieiksgsrikvselnkvinee ikvssqvikq  
liqanfdtqt klyngydyw  
idlgwkeankkeihdisekdni isldknenitddealdeenldfdwedfdde  
>tr|D2N374|D2N374\_STAA5  
mkriwtligrtl tmnneqieafvevlvpiieerinkgn  
>tr|D2N375|D2N375\_STAA5  
mkgkialysrvstseqsehgysih eqevlikevvknfpgydyetytdsgisgkniegrpamkrllqdvkdnkiemvls w  
kl nrisrsmrdvfni ihef  
kehdvgyksisenidtsnasgevlvtmfgligsierqt lsnvkl smnakarsgeaitgrvlgyklslnpl tqkndlvid  
eneanivrei fdlylnh nk  
glkai ttvlnqkgyrtinqkpfsvgyvki lnnpykygyvrfnnhqwavqrrsgksdkndvilvkgkhea iiseevfdk  
vhekl asksfkpgrpiggd  
fylrglikpecgnnmvcr rtyytkkskertikryyicslfnrsgssachsnsinaevvervinvhlnrilsqpd iikq  
iasnvieelkqkhsnqtei  
kydidslekqkalktqgerll el flddqmdsem l kakqsqmnqql evldqqikeaqqanqsqdeipnfdklkgrlilmi  
trfsvylrkatpeaknqlm

Tsompanidou\_et\_al\_Supplemental\_FASTA\_File

kmldsiettdkqvklvrykideslipqslkkdwgsffmpkfqfeiyygqndyfidqittftt  
>tr|D2N376|D2N376\_STAA5  
mnryitrgiannlpnlqhqlwqlvsereqeqtkdntsvdyfhiqfnkhrnqlyikhkqerpeyakihkanyskainin  
kvyiireddvdlsyyvmll  
peey  
>tr|D2N377|D2N377\_STAA5  
metikstlkteaifsddkqhryllkktwnsekqsitiitmyphydgiInidlttqlimkvsemdafgsinfvnlvsnit  
tpinlkhlenaydkhtdiq  
imkavkesdevi lawgayakkpgvearvnevlemlkphkkkvkrImnpetneimhplnskarqkwilkv  
>tr|D2N378|D2N378\_STAA5  
mnyfrykqfnkdvltvavgylyrytlysyrdiseilrergvnhstvyrvvqeyapilyqiwkkkkkkayykwridetyi  
kikgkwsylraidaeght  
ldiwlrkqrdnhsayafikrlikqfgkpkvkitdqapstkvamakvikafklkpdchctskylnnlieqdhrhikvrktr  
yqsintakntlkגיעיציא  
lykknrrslqicgfspscheisimlas  
>tr|D2N382|D2N382\_STAA5  
mkkikivplilivvvvgfgyfyaskdeinntidaiedknfkqvykdssyisksdngemterpikiynslgvkdini  
qdrkikkvsknkkrvdaq  
kiktynynidrnvqfnfvkedgmwklwdhsviipgmqkdqsihienlksergkildrnvelantgtayeigivpkvns  
kkdykaiakeIsisedyik  
qqmdqnwvqddtfvplktvkkmdelyrdfakkfhlttnetesrnyplgkatshllgyvgpinseelkqkeykygkddavi  
gkkglleklydkklqhedgy  
rvtivddnsntiahtliekkkdgkdiqltidakvqsiy nmkndygshtaihpqtgellaalvstpsydvpfmygmsn  
eeynkltedkkepllnkfq  
ittspgstqkiltamiglnnktlddktsykidgkgwqkdkswggynvtryevvngnidlkqaiessdniffarvalelgs  
kkfekgmkklgvedipsd  
ypfynaqisnknldneilladsgyqgeilinpqvilsiyalenngninaphllkdtknkvwkniiskeninlltdgm  
qqvvnkthkediyrnyanl  
igksytaelkmgqgetgrqigwfi sydkdnpmmmainvkdvdqkgmasynakisgkvydeleyengnkkydide  
>tr|D2N383|D2N383\_STAA5  
mnyfrykqfnkdvltvavgylyryalsyrdmsei l rergvnhhlvtv  
>tr|D2N384|D2N384\_STAA5  
mkfqvspyflitqnaegllklyeel f gaktlyiqrikdrpidkklnidendlnkidqcvlqfgdikimiaddteglpitq  
gnnislcltfdqveetkhv  
yqqliekqsevlkftfspefytegygyvrpygislhlftrkn  
>tr|D2N385|D2N385\_STAA5  
mkksvrlynmieycnenrnfklnldmsefnisrstalrdikeiealgvplysnpgknggytiignrdqtkiaisdeelka  
lvftlssisnvnlpfqt  
yqeilkklynnsnkkelinqyndlfqyfnedkyqfksyklfneiirliienksfetcysqnyikeqykgigimyknhqwy  
fvvaniesklvnllniski  
kellyemgetqecnditmqnfqqfmvknetaidilirsnmglnilkgylwsdymienideetylfkskvnakdidfiakl  
ivtggvkvvetpnslnka  
vkveltkiinmy  
>tr|D2N386|D2N386\_STAA5  
mnknitalkstenttymqytvhiddqiinnikectkkfki l pmedkiplspllqpeyagevqdfistyeqfmifgkvil  
dsqgikiqfeselsisqr  
giqehcylnertnidvdkewylckfsnqileedknqlynalqklmndsknkqafqevfkvhidiylynkekseykyqv  
ssyfnlvkenpkitykkrh  
lqekqgvkgttftnkllklnkmygdvakyqpfynsnpeyergqfgeriyisqrsnyefnrlyqyqidmlskildkhlpl  
ksdnykhiptiekailsq  
dshsfyeyfedimkeiismensslkeklltdftyqsqcrwysesekllqllesfmhkvlesnyyegnklyrmlshaiet  
ineadedkvhfnyfkdyfl  
tdggvknweqisekifengkvindi qeynkiqfnanrnqklfnlylyhcfesnlvkarvngnrgyilyfvdkyki  
kmpfldqllinylnqeigg  
esinyntqlfekerydrsstieklvatskfyekddsdlfkqlfndvensidrlgiyllnnginsdenaryyrsflke  
lsrikskltpfsliskss  
greghypddaiddkderknkeetyhafddksdisklnkinvsidnllsvkiksnyldispntkkq  
>tr|D2N387|D2N387\_STAA5  
myqanirdl itklpqsnktehflmkfnsqdkvqqlqrqisqqldqyne llanekakldqyvevhnllepkkieises  
inldtdklpdikatmlaka  
kndehfdkieqlfdrldqslngtnrlytqlsligtrthritkrfnvqglpklvqqmilpsqfkkvytidfksfepsvaa  
ymtqdeqli dyl nheegly  
dallrdlslskekrsvkrafigsflfggryssskfkinqevseinwlqvmskfkkiefkeqvekyktmptpygiehdm  
safqgssimaiyvqtvasy  
ifkhillavykagcekkftkiivpihdaimiecdnkgi aqnaqlmkdtanqlfngefahvtvealggidne  
>tr|D2N388|D2N388\_STAA5  
mnndrgkslqipqstllkegsiyvatlshvyeknfsgdikhqfyevelnqethyvnrnirtvksmshqlsiadwikrhn  
yvnhiyndpyidrkhvl

Tsompanidou\_et\_al\_Supplemental\_FASTA\_File

vgqyngnyyiqdvapldfeggvl  
>tr|D2N389|D2N389\_STAA5  
mnhilemlikllkvgeaidrkgliailtssigndemddseqavmvynelidklqlnlpkdvdyrpnisyfygiqkkpnd  
tilvemmicifhikrfdse  
lfvfkdkgwqkvsedelqgliskmiqvlldvykpslstlknvvdgiqkstdieklvehrqyigcgrnmfnlktfkvvndd  
leifpktrldleldindti  
tdkipnfnkqymlelanydhdlqyf1fqhmavlltadtclrrglf1ygtakngksvyiklvksffysndivsktlnelgg  
rfdkesligkrimasdevg  
kanideatvndfkkllsvepihadrkgrtqvevtldlklifntnavlnfpsshakalerriavipceyyvekadpdiek  
lqdekkeiflylmyvykqi  
vkndieylqndrvteishdwlnfgyefvssksaniahqkacinllrkliekpgsrikvsrlnvirdeikvssqvindl  
vqanfvqsrlnngykywv  
dlgwketdkkddmisdknenvtddeflyeddlnlgwedfdde  
>tr|D2N390|D2N390\_STAA5  
mkgkiaalsrvstseqsehgysihseqvlikevknfpgydyetytdsgisgkniegrpamkrllqdvkdnkiemvls  
klnrisrsmrdvfniihef  
kehdvgyksisenidtsnasgevlvtmfgligsierqtlnsvklsmnakarsgeaitgrvlgyklslnplttqkndlvid  
eneahivrei fdlylnhnk  
glkaiittilnqkgyrtinqkpfsvfgvki lnnpvykgyvrfnnhqnwavqrrsgksdkndvilvkgkheaiisedvfdq  
vheklasksfkpgripigg  
fylrglikpecgnnmvcrtyytkkkskertikryyicslnfrsgssachsnaiaevvervinvhlnrilsqpnvikq  
iassvieelkqkhsqktei  
kydidslekqkakvktqgerl1el1ddemsemkakqsemnqqlevldqqikeakqanqsqddipnfdklkarlilmi  
trfsvylrkatpeaknqlm  
kmlidsieittdkqvk1vrykideslipqslkdkwgsffipkfnfvinvtkknrienlsllplf  
>tr|D2N391|D2N391\_STAA5  
mtlskqlktyiterfklnyqetwacetidavaedvlpekyiknsp1ehkilntftyndelheisiypflcyldkelvai  
gylndfdldfi1ndthqv  
iideryllqkggg  
>tr|D2N392|D2N392\_STAA5  
mninryitrginesipldlqilwnmvkerdnqphtdylhifrlqedenilsitheqeqpaykleyhyinyvknqntlpk  
kvyvirendvdvfyvml  
peey  
>tr|D2N393|D2N393\_STAA5  
mmntikstihtheaifsddeqhryllkktwdekkactvitmyphldgvlslldl1ttvli1nqlanseqygavylvnlfsni  
kttentlkhikepydkhdti  
hlmkaisedavilaygayakrpvverveqvmemlkphkkkvkkl1npatnegsvak  
>tr|D2N395|D2N395\_STAA5  
msydkreqfnfikqlfndssirtivngcdsdregsni fyssyymtgaknkeikrlwinslevdeirkgfnnlqdnkkd1l  
lyyeaktrqisdwlvgmng  
sr1ft1l1qqkgfnds1sigrvqsstvyliyrqkeieqfvstpfyeiegsftakngmykgkakiksetlklqlml  
>tr|D2N396|D2N396\_STAA5  
mkdetnntgirmfkryaaittsakilshvlatdidiakirdyfidyhghtvsersladkaievitqfvaqnrkfsddta  
lknmienhglialkddyie  
vkijasvfkdmlienhfqdvnnvna1kdkgfiesdrdrittkrtvkdngkqslvfyh1kl1dpeyasifgltkdaepi  
kaein1dnkkml1eswkkqk  
llif1m  
>tr|D2N397|D2N397\_STAA5  
midklakgajdaetfrkqsqsllqskptlsineqqiqrsfenviqqhftlsmlyryideihisknkslvgiyfknepln  
ivnqatqssia  
>tr|D2N398|D2N398\_STAA5  
mddralasaligivggglawimegfsghgfiysl1cagliigllffemipesielggwvillggiaiglvlfqsihllmd  
kitiitnshqkdfvrsgv  
llisaiahnfpvgnip1fv  
>tr|D2N399|D2N399\_STAA5  
mkniqqaheshshdshdhgkmpii syfiglvlaig1fl1sdanlliqn1lfsiatitagyhviilegigetvent  
klkgkftpnshilmglaai  
gasligsfwegtllilifsgahfledyaegkskreitkll1emnp1takl1l1pdgntkivdvselkvgdqlqvlngdqvpi  
dgiilsgttsidessinge  
sipkekskgdevfgstingtftmevtkenkdtvskilqlvsqndnqtkaa11qkfepkyvnivliaiplvml1ap  
flfdwtwsqsvyrglv1lv  
aaspcalaaatvsvtlsttsnlakkgvlskgs1y1sq1adidaiafdktgt1tng1pkvtnyy1fthsvneeniidiival  
ekeshplanail1ekfevk  
nkidi1evtnq1gk1tgdyngknyrigkptsfesaseeytqfnhdwasegktvvyvaeneevigialmdipnehaketi  
nyfkk1gih1t1itgdsem  
tgkavgeqlgidevianvmpedksriieeqkekgvtamvgdgvndapa1vnadv1gamgggtdvavevsdlvlmqn1s  
klvqshkissnmgrv1rq  
iifsmavvaflvvis1lg1tdit1svivhegstlvvilng1r1l1rsk

Tsompanidou\_et\_al\_Supplemental\_FASTA\_File

>tr|D2N3A0|D2N3A0\_STAA5  
mnllyqpytvpatntnr|tfdlrskeayhgghiegtinipydknfninqigwylndqeinligdyhlvskathtlqligy  
ddvagyqlpqskvqtrsih  
seditgneshildvrndnewnngl|sqavhvhpgklltdtdlpfskndviyvhcqsgrssiaigilehkgyhniinvneg  
ykdi|hs  
>tr|D2N3A1|D2N3A1\_STAA5  
mffkqfydkh|sqasy|l|gcqktgeami|d|pird|l|ssy|rvadeeg|l|titha|eth|had|fasg|ird|vaik|lnani|y|vsg  
esddt|l|gykn|mpn|hty|fvq  
hnddiyvgnik|kv|l|htp|ght|pesi|sf|l|tdegaga|qvpmg|l|fsgd|f|v|gd|igrp|d|lekav|k|vegs|seigak|qm|f|ksi  
esikd|l|pdy|iqi|wp|ghgag  
spcgk|l|ga|ipt|st|l|gyek|qtn|waf|sen|neat|fidk|l|isd|qap|p|ph|h|hk  
>tr|D2N3A2|D2N3A2\_STAA5  
msqyktkh|ind|ftk|ke|lee|l|gskd|ql|idvr|qpe|efel|ghik|na|ll|hsven|iet|fk|qsk|nk|tyy|y|cksg|nr|sr|kas|q|fla  
grgydvvn|l|dgg|y|taye|eq  
hhnd|l|skv|ked|reik|dnr|ktfn|sn|l|qcp|gpi|vni|skeik|nia|igdq|iev|vvt|dhgf|l|ndik|svk|qtg|ht|l|vr|l|nd|fg  
neihai|q|keen|knie|vth  
tksgt|t|iv|l|fsg|eld|kava|ami|iangaka|agr|dv|t|fct|fwg|l|na|l|k|k|iqs|qri|kk|k|giak|l|fd|fm|l|n|sp|in|mp|isk|mn  
mfg|l|gn|l|m|ry|vm|k|k|k|nv|d  
tlps|l|id|qave|ggv|k|li|act|ms|md|vm|git|keel|rd|dv|ey|ggv|g|ay|ig|y|te|qan|h|l|fi  
>tr|D2N3A3|D2N3A3\_STAA5  
meynk|mi|nr|ih|ri|q|q|l|ng|vik|m|e|e|ek|n|ck|n|vis|ql|s|ask|ssi|qr|l|mg|i|i|sen|l|vec|vm|se|ensed|sqal|ineave  
l|l|isk|k  
>tr|D2N3A4|D2N3A4\_STAA5  
mlv|ig|il|gg|fis|gl|vg|igg|ai|vi|ypa|l|l|l|pp|l|fg|l|pt|ys|ay|ias|gl|t|ss|qv|ff|st|l|sgs|l|nay|kn|kn|fs|rt|l|l|nm|g|sg  
mv|igs|m|l|gai|lan|l|inv|qf  
vntvy|ii|ial|l|al|l|mf|ik|vtp|st|shik|fnr|l|l|l|it|ig|gi|gl|v|sg|iv|gagg|afi|ip|v|l|l|vi|fk|l|pm|nm|vvt|ns|iv|ia|f  
issig|af|mi|k|l|l|qgy|ipin  
saip|l|il|gs|il|ftp|l|gm|k|mg|q|kip|dy|iq|kti|ic|il|iv|ia|i|k|l|if  
>tr|D2N3A5|D2N3A5\_STAA5  
mvqn|l|ww|gag|yn|iv|avp|laagi|l|af|ig|l|il|spa|igail|ms|l|stv|iv|aina|ft|l|k|k  
>tr|D2N3A6|D2N3A6\_STAA5  
mik|k|l|ff|mi|l|gs|l|l|l|sacs|n|ndek|dk|dt|nd|qksesh|mk|h|ndesk|vped|mt|st|ne|gef|kv|gd|kvt|itag|h|mp|gm|k|gaeat  
vkgay|k|tyay|vvs|y|k|ptng  
nek|vsn|h|kw|v|vnee|ik|dap|kd|g|f|sk|g|dt|v|k|leash|msg|m|kgatan|id|nv|k|kt|t|vy|v|v|dy|sk|dng|ki|k|nh|k|w|mt|g|nel|k  
ar  
>tr|D2N3A7|D2N3A7\_STAA5  
mek|f|kek|v|nd|lea|ikt|try|te|f|vek|f|k|k|rd|wak|nen|l|kneak|l|aqe|ie|ie|f|s|l|cek|np|l|sk|nk|se|kr|fv|atis|f|ddg  
re|wp|di|q|k|ft|nd|q|ky|y|eq  
r|l|net|nn|l|fl|kv|rys|df|l|feh|gn|k|k|it|k|t|kye|isk|l|l|scl|ve|il|ty|s|dd|fn|y|ts|v|lar|l|ve|vs|l|l|mg|d|re|k|le|ka|ie|l  
iy|l|km|de|f|dyn|ne|ys|y|v|ye  
l|sk|l|ire|il|ks|kh|k|k|i|l|en|h|l|nk|i|i|iv|le|ka|ik|nn|fed|k|ny|l|hrv|f|ce|el|sqyr|k|fd|l|iss|err|sel|kke|ig|ksye|le  
aey|qq|gr|nn|ks|l|l|v|kan|fl  
ekame|k|yme|igere|ks|nk|mi|l|vk|w|tye|ey|ens|nem|l|ir|ip|ie|fp|kee|id|k|i|ieg|f|iss|dv|qis|l|dk|ia|ys|nd|l|ip|kit  
vi|ed|l|vd|k|l|ske|fp|l|q|g|li  
skg|l|l|nd|g|k|kv|v|ett|te|ed|n|kt|in|f|ns|ny|mh|l|nin|ve|l|l|l|ka|if|dk|l|ise|fe|isted|fm|qk|fn|k|well|dn|kn|vp|fi|ehg  
is|rf|lek|dy|l|sal|h|il|vpq  
fest|vr|r|mf|skag|yst|ts|irk|gnt|qq|ev|tf|nef|l|l|rd|dv|k|st|l|gnd|vh|k|li|q|iv|me|q|sg|l|nr|ne|ia|h|gl|ie|l|sn|inyt  
kc|il|vi|yl|fl|il|tr|ys|iek  
nd  
>tr|D2N3A8|D2N3A8\_STAA5  
mk|lee|l|l|l|it|qq|l|ie|ys|kn|k|l|legs|r|l|fd|ider|m|der|kip|kil|t|nsd|kyh|v|ve|ia|ny|dn|l|i|id|ne|ving|nel|iqv|gq  
ci|df|ds|nv|msyl|rn|l|iv|nn  
ky|ed|ff|k|il|tn|ikk|sk|qqi|scv|py|li|eng|nn|ih|rink|i|isy|et|il|s|fs|if|dr|ise|fd|fen|rn|fs|ry|f|nd|se|vil|d|td|dr  
yy|h|mm|ni|q|ds|ni|l|q|f|q|ai|y  
l|l|v|l|ma|ff|rq|cv|nr|k|mr|is  
>tr|D2N3A9|D2N3A9\_STAA5  
mkp|l|l|p|ksi|t|mdr|g|ke|fa|l|fe|q|iede|l|ncsi|y|fsd|l|g|c|py|q|rgs|ienang|l|l|rqyyp|kg|td|fanit|qks|l|deav|k|qinar  
pr|mi|fdy|ks|seem|l|ky|h|vs  
tq|nce|pi|l|nd|cvr|he|pvn  
>tr|D2N3B0|D2N3B0\_STAA5  
mkk|r|k|k|r|ke|l|dyk|tr|l|ai|aky|l|ndg|l|ni|i|qi|skil|gr|ddav|ly|rev|nk|rs|vd|gv|ynp|l|la|eeda|iks|rs|is|deq|vak|rrr  
l|ndet|kay|ieek|l|s|l|kw|sp  
rq|ias|q|iek|dt|gyy|isypt|iy|y|irng|l|vk|vd|v|k|rd|mr|qag|k|k|ny|ks|se|k|rg|k|l|dv|gs|rv|iky|rl|k|y  
>tr|D2N3B2|D2N3B2\_STAA5  
mk|q|ki|i|mf|t|l|vtvi|l|fcav|l|igy|q|ip|k|q|v|k|m|q|n|q|ied|l|qee|qri|l|rd|k|nge|l|nk|l|vkr|q|skt|vis|deek|qi|rev|ss|nf  
v|k|qm|fem|k|k|d|ss|f|ks|kap|q  
ikp|l|vt|k|dy|y|dt|l|f|k|dsk|dky|d|ly|ddi|t|v|nd|i|h|vy|f|d|ty|dp|k|k|dsy|kv|fv|q|f|der|iet|dg|dd|kie|hr|q|tsa|q|l|d|l|vr|tae  
gwr|id|n|l|kr|fn|l|kp|l|gr

Tsompanidou\_et\_al\_Supplemental\_FASTA\_File

>tr|D2N3B3|D2N3B3\_STAA5  
mvnkdiakkvigktpigvklakviiilcvvaffi fpvii mfl lapdlnkgkddagctvsggnvsangidkfnenakg  
gklegkgeikieaknkv  
pvni fmaii asesqwgkgenatrqnnplsvmgsksihdstyptiedgl nagaknlydvyiskgl dtpkkigpkyapvgas  
ndpnmnarwiptvekimk  
dlggseaktscsngkgsikfngklphwsnddpgkgnlytagqctwyaygmrkkmgkpvstywhdahkwndrakaegykv  
dknpeppgal fiaeaggagh  
dghyghvavvigvsdggktfritemnwega fkv nertl kmtdgysfihdke  
>tr|D2N3B4|D2N3B4\_STAA5  
mkhksvyl lcfli lpi llltsvsayavsnpvgepshavkpkiekydlshyrsiysekgdwnpfgqeeisrqinnvsdfff  
smtkilagvtdyaienlfq  
ldvindfadkigdfvgdiyqkllsnla ltlfiivcfnafii fsvqgnarealkraflimcligfgvgilanagnii rgt  
nigkdl nniimnstssidg  
nidyi hensgmhnrnglfdmtiyrtylvmygtvdekeikakgkdrnidnkl dydkksekelddivkdevekkknkym  
tgyvfqklaisvigfiit  
lfmsivflsisfaklifstfal flfl flvswivsfipgfelsv fsafaktlgyiilsacmtflfvivglciklansfie  
pdsqayflnsifiivilf  
vmykkraqi infvsrgnisf spsaigagvmnrtqerfnki rheqaqnkkakrenqrdepapplqndndl rrrqqdkpmp  
finkdnqkngnrreqqes  
mngndvksasveksvesnannyskqpqkasqqehqvretqrkdiqrsqvvnp lnnenhsinrkeqksvqtaydt  
dvqkrqiqnatqngqsrqs  
gnrnqpi trnsqskdr lkeqkdinkhgk  
>tr|D2N3B5|D2N3B5\_STAA5  
mfidyksvkkldiwtlfayfkphllylligtaiifvickliaqllirfktkdlaemietqgfhnrtvikkttteyipidy  
kqteydyptmfykrgrkkt  
fvihikkdgsrfqdnyletietiepmfnse lvekkhigrylryefmplkykkrivmngesntifydtkiaithqitwd  
fvkaphglvtgigtggkty  
flfyvirelfrhsevrll dpkvsdl sfmkrvigddkvadtkgqil kqlreannemeerflmndssdykigndfrnfdm  
rpyfiifdevtaftstldk  
kelqemndylini imkgrqagvfmfltaqrpdadvikgnvrdqlglrvslgnlsndgyrmtfgqtdkeftihdsdigrg  
yisilgqynepilfdapl m  
eqydfvedvkqilnke  
>tr|D2N3B6|D2N3B6\_STAA5  
mamneial fkgvriqpyqkyidmfasv lafi flvyri  
>tr|D2N3B8|D2N3B8\_STAA5  
mdkkaynlkrtfeqpi vmyeftdkfrinkgfrldfwatflivwiflflfwy llqpvimsigglmfyftvapyitkyi  
vklkqdgkklfff lwdfvi  
fvfnvqlrkvkl sydeevyhdkkitfk  
>tr|D2N3C1|D2N3C1\_STAA5  
mnktwqdfdkclsvnanftridia iddyktyl kvp llikkaekaecvsrfragsaingfnlsdgrskgatfyigskqsn  
lycrfyeknyeqafkrhcd  
vedig lwnryei qmrkayavncakvl srtdniseivksil hnnlrfisppkdgndknrkrwplyrpwal fikdteklnt  
trptlksiednl dwlckqv  
attldtvltaesmaqseglltdtdfl dki lahsqfndehtnrinhylealkqkhl skdkc  
>tr|D2N3C2|D2N3C2\_STAA5  
mpitl fkkrnsgiyfynrgyefsniklyyssddesmgihlqltgtgcrefehlls  
>tr|D2N3C4|D2N3C4\_STAA5  
mkpvl dikktl gq lfnl gvdedykyengertdktvyayklasqqeqe qitvktpnkvel dylqecel vepdvkmyvqmsg  
dfgtiayswnaedikvvgv  
nsal kqk  
>tr|D2N3C5|D2N3C5\_STAA5  
mteftpfddgsnqlnyl kfvil rfhgvsrkrickmynfayfrilevcemakkndyr fpykdykflkqygvsn t fckmyh  
isiedleffevmnr  
>tr|D2N3C6|D2N3C6\_STAA5  
miqt fiketenklaysel elsvi fdyinngdnni fkstnl sknl lsklkgiawdl fhirtsedqial rntnskevflhs  
iftadkgl snvinnysir  
mlaheeklyvyrdnni fkl skdkatk iqellekdrnsrisnvreakyniqenidiyekyinemi  
>tr|D2N3C7|D2N3C7\_STAA5  
mikkislqniatyrnyvei kpkkinfiygsngsgkttisnligrfnksddcvietkksnssilvynkkfveknfsqsd  
glkgiftlgensinlqdnl  
nelrrkiqvneeniyekektirgf eeieertni ikdkiwhqkeiskdfpeafvgyknnkqkflnqcikvyeenileks  
eeiltnslek lkenynisf  
sddiklyevfnvndteki leiektnliekviggndsligqfiqslknsdvwkqgl dyl dysnhtcpcfnqsisekleqe  
ikdyfneeyeqdlkkikei  
kqvysscfekiesnmlfi l rksipy lntkl lskfevlekqyevnqkqlkek lnrpsqklkikslvpkienineiissln  
esietnnni irnkereqk  
fkn lwi yivnmkqdl keyvfnkngfkai anirraqi slknenkktnkeigeietnitsveptvknineilnkdfkg  
flqensnakgtylivred



Tsompanidou\_et\_al\_Supplemental\_FASTA\_File

gsnanetmsegeynfiftlyfylyvgshestsltsnkiviiddpisslidsnvlfivstlvknlindcrnnkngiqqifn  
lthnyfhkeiftlgsrer  
fspnevmygiirkkdniyfntyenpiessyqlmwkelnseemspitsfntmrrileyfniiggmdyekcinkfdgid  
kilckslisgindgshfis  
ddfvitfdeasmrnykrvfk1vfeklghiqhfemmsknkik  
>tr|D2N3C8|D2N3C8\_STAA5  
mrhdiyegvlfyimgkikpnyaelgrqyncdprtvtkkyeagkenelerlkkrrqqnkaskldpfkeiinkkln  
>tr|D2N3C9|D2N3C9\_STAA5  
maifkyiekkgyegkytilreycknkqnetkkatirvetnpgiaaqvdwkedvmhdkfgrtyqfniflyvlhyskmky  
itltdwrkqdtlfeclka  
feytegvpkewfdnmrtvdrsrtyqkkvfnllyqfskdanfepiacrpyrpqtkgsveslakfveqr1rpydyefy  
davelielvddlchelnhl  
eisqyteqrpdivfnyeekehlnffnakl1dtyienecirivskepminfrkgkysvptkyigeevqivfnstdelliy  
ydgelirrhnlserkfny  
vedmseilksdvfkhddeikeltyiensl1lydei  
>tr|D2N3D0|D2N3D0\_STAA5  
midl tekeieyqselkfkra vnsarfpkiky1hdfdfmfqpsinqeiltlksmhfledsinicflngsgvgkthlaisl  
gieackqniktrfytfkel  
idl1tvdsdskgiinkt1kqlsrie11ideigytpitkeqadlfyqlmslryewkstittnipfsswgesfsnkivsa  
iidr1vhhskvfkitgesy  
r1kdykteks1nirqs  
>tr|D2N3D1|D2N3D1\_STAA5  
msnlh1sniqlifddmrkdyyiidsfkfkyknenylvfirrfkgkifkrinkfakvqltfykestmkns1vveannngli  
vndynmlnffgiesssf  
kg1fpfyes1neaipnevnl1nsskeknl1skelykddikemdkiyctgvtr1segrkrsernekakr1rpalyeffdd  
hsitfnfshpewkeksdeq  
ikkdavnrl  
>tr|D2N3D2|D2N3D2\_STAA5  
mgtfnhqdn1sdeekelik1rkevqyikmendi1kqaalimrrk  
>tr|D2N3D3|D2N3D3\_STAA5  
met1vsdl1tykvvgtwqyic1fid1fnreivgysagkvrnqi  
>tr|D2N3D4|D2N3D4\_STAA5  
mnrn1l1t111l1gytyl1fnfltteys1apriytl1nfis1s1l1lakaksk1lnkhthf1devql1lekrystimyiln  
ialvvsfis1l1tgfiylre  
eypqfilyssv1l1vmsfyyik1fyedknniymnrkivdfnsevecql1q1ddgekni1l1kq1dnfyksti1l1fiteim  
l1mfysi1ssnyqtvsml1  
aivifissl1l1tknvytrn  
>tr|D2N3D5|D2N3D5\_STAA5  
mplsqthsvvqraikt1nkhvyyikntfdyyn1sngpleginnkiklikrtsfgygnyh1nrn1l1cl1klyalkskev  
kqclva  
>tr|D2N3D7|D2N3D7\_STAA5  
m1l1rhvintyvgsei1fkss1pkvqnsdemaqqfeqqfg1srrsmrlagafemigs1l1l1ftsifgk1gkkl1vvgtimini  
vmgtaiynhykaghgykga  
qaaskfff1nv1s1l1ev1s1trnk  
>tr|D2N3D8|D2N3D8\_STAA5  
mrniyafnid1kqnrnriavvmigafvgv1nqtlmttilpeimkdfvssstaqwl1ttifmlvngimipitaflierft1  
rs1ffnatcfl1migsf1cm  
lg1nfpml1lvgrs1qalgagilmp1tqt1l1fimfppekrgmamgmfg1vigfapaigptaagwfvnifdwryl1fliv1l1  
gmidfvgyl1s1l1pnte1s  
kpn1dk1s1i1stvsfgg1l1fgfstagn1gshpmvyit1iaaivil1tvfif1rql1klespl1efrvkyndfsvamiliv  
l1mfml1fign1t1l1piymqt  
mmkwsplesg1l1l1pgg1img1l1spvtgk1fdkiggrilsimg1l1timigal1maqfsqnttqlyviisfsvtm1gnami  
mtpmttqalnalprqyah  
gtamnntirqvsaaigtg1lvt1mtglgkts1sgsqg1l1hg1ditfyvvaliafigt1iaffirkq  
>tr|D2N3D9|D2N3D9\_STAA5  
mknaimekvyin1fegleqy1ngdntrynm1s1dvl1ny1kqyv1tipfkndvqngmkvsaevkdi  
>tr|D2N3E0|D2N3E0\_STAA5  
mnffnvyfeykgftvn1vsstihthggks1kgshvs1lipidgvdyvtgagfgd1pfsvpivqkdispvihdmngdf  
hamyvny1fyvrkmgkdn  
dnnwdhtmkrn  
>tr|D2N3E1|D2N3E1\_STAA5  
meknqrkkrdaeynqqi1l1ttmed1leqgedisakkmsdiakisgvgvgtlyrhfeskt1l1cqaimdkkvdqmfieied  
vlaentqwpvrdrkinvilt  
ky1dl1keanf1t1l1fiekssshssvinipffer1kn1l1iqqfenvnsiad1dfk1n1m1nafssdfyf1vkhqk1tkq  
qf1dk1l1d1f1k  
>tr|D2N3E2|D2N3E2\_STAA5  
mvstgsy1l1selpcivayknndivg1l1tykvydeyie1is1dsfvenkgigsh1l1nyae1iasdmskrs1svittneni  
kalyfyqknkyritdvifd

Tsompanidou\_et\_al\_Supplemental\_FASTA\_File

avtearki kpsipemgengieirdeivlrkcl  
>tr|D2N3E3|D2N3E3\_STAA5  
mkenfwselprpffilapmedvtdivfrhvvsearpdvffteftntesfchpegihsvrgrltsedeqpmvahiwgdk  
peqfretsiaqlakmgfkgi  
dlmngcpvanakkkgksglilrpdvaeaiiqatkagglpvsvktrlgyyeidewkdwlkhvfeqidianlsihlrtrkem  
skvdahwelieaiknlrde  
iapntlltingdipdrktglelaekygidgvmigrigifhnpfafekprehtske1ld1lr1h1s1fnkyekdeirqfs  
lrrffkiyvrgirgase1r  
hq1mntqsiaraal1defeaqmdedakie1  
>tr|D2N3E4|D2N3E4\_STAA5  
matekdvnd1flnhvnsnavktrkmmgeyivydygvglydnrl1vkatsarhqlqdn1lispypgakemilipdit  
eatn1tn1feciknd1kk  
>tr|D2N3E6|D2N3E6\_STAA5  
mitclfgssrkdgsaiaven1kn1nvnfvnlyqsniekvtdnrhskganfhnddyeqil1kvlesdiiifstplywys  
msas1klfidrwtes1rdt  
qidnfkeimsqkylil1iggnphtkaqplvnqfklifefmnitnyrfligegnkpdyv1ndsqqikelaninlalkkg  
diy  
>tr|D2N3E7|D2N3E7\_STAA5  
mnl1n1ksflvtsetkn1tkase1lnysqstvsthielkqldvklfyrkkygmelteeglayvyakvildsnseyer  
eikglynkkvnisinmqes  
qylryynkisewlaehpyvnlkfsahsnfyikeeianfksdislitdekiinsn1taipiteerlifvtnkdmkdfkl  
ndiqnht1lvtekgcsyre  
qleki1lykysfstkqmief1gies1kkh1knsdgial1pefivadelnks1fqididvdipnlettliinpekkqvl  
sfkvdf1  
>tr|D2N3E8|D2N3E8\_STAA5  
mlis1vipvfallviggiiwaiiegivhiskknkaidnffnqvnkvsetykfattflil1atagisqfylyyivsaflf  
wlviftfgiagiiflmpyg  
lcf1plykqkkkqtffkymvyttig1sic1g1slvlvhttkiydeggyvryyysfvmkqaggyaylalav1st1liva  
kkatknkeietvdntit  
er  
>tr|D2N3E9|D2N3E9\_STAA5  
mkqsvnfksktn1laanlytpeqfdeskkypaitvchpgggvkeqtagmyaeklaefgyvtvvydashqgesegspryle  
dpfartedvrasvdy1tt1  
dfvndndrigalgvcaggytvsaarerrickalatvsmvdigalfrkgpgdvvsiddqlafmtqvadqrtaeangadygi  
tgyvpeiddsmpenstmv  
qghdyyltargqhknapk111rsfsevltfapftyide1ltqpflaiagteadtieysvdavekaagdnnelykiedas  
hvdlydipeyvnpv1pkle  
sfyket1  
>tr|D2N3F0|D2N3F0\_STAA5  
mnvgdlrvvktrasikkafmt11fekdfdtisikeitefaqigrktfylhyidkyd1ldqivsek1ieleqiseakkslg  
iqegtqlwfeffennrtff  
mki1fninnasnykkk11hfieeefkkkvptrvatekgldydlyinfisngiig1ldiy1nssenteeqekitlqvsr11s  
lydli  
>tr|D2N3F1|D2N3F1\_STAA5  
mqnrndfiel1draqikegmrvldigcatgevtqliakrvgevevgvdvnes1lkianennqynnvsyqysdiyqlp  
etmghfdaivgrrv1mlylp  
daekclqilksilkpegi1cfqesdainagvgada1shqsaiqwivetvkqeggnihigqnl1n1hngmhvdyfae  
aviqtsmdndlaw1vdvml  
prmkahgviindfsldefkl1n1eheamnnqcafirdmafgiigka  
>tr|D2N3F2|D2N3F2\_STAA5  
mkkfnnw1lnaisgsqtdknettee1kgakfiilyaysmlv1lalvisnifihilepk1sittqiiiv1liliesliglrf  
lkaydvkrqkdkenkknsk  
dfvklkai1lailfts1al1tagtvadiygitd1gntrsd1ivwsiggiifglvcytmedkr  
>tr|D2N3F3|D2N3F3\_STAA5  
mkkcikt1fls1ilvmsgwyhsahasds1skspenwmsk1ddgkh1teinipgshdsgsft1kdpvksvaktqdkdy1  
tqmksgrffdi1rgrasad  
nmisvhgmvylhhe1gkfl1ddakyy1saypnetivmskkdydsdskvtktfeeifreyyynnpqyqnl1fytgspanpt  
1ketkgkiv1fnrmggyti  
ksgygadtsqi1wadnatfetkinngs1n1qvqdeykdydkkveavkn1lakaktdsnkdnvyvnl1svasggsafnst  
nyasninpeiaktikang  
kartgw1ivdyagyppwgyddivseidsnk  
>tr|D2N3F4|D2N3F4\_STAA5  
mkr1neivicis1fl1ti1figgcgigkeavkksfekt1smypiknled1ydkgyrddqfdkkdkgtwtissemankk  
gealnikgmvlkinrntsr  
akgfyyvnaikkdengrpqdnqieypvmvdnki1ptkdikdeki1esfkffaagygnfkdl1knykdgd1synpevps  
ysvkyql1nddynvkqlrk  
ryniptnkase111kgsn1dgssvgykkieftfvekkgentyytan1hfkpsedk  
>tr|D2N3F5|D2N3F5\_STAA5

Tsompanidou\_et\_al\_Supplemental\_FASTA\_File

mqrlylrvetesmpdfkrlnlmgfvikgeahydenmtqcvsgdifinhrdlyrfqlqqdgiicyihfqmkylad  
kfddvhclyfhltatdttk  
nihqlrnmrlvsthirhnelkslteqqlviallmhmihyvprtyhsnqsilnddkvnqvcdyielhfhedlslselse  
yvgwshslskkfaeslgv  
gfqhflntrihakldltytdeitdialqngfssaasfartfkhfthqtpkqyrgdrpaitenqqsaqhnyhdrelil  
lndyieemnhfiediekv  
nykeifqptnhqlnqfnhiqvgylnlntqyqsqlltchhdhfvnevlaydvmpyimkklnapftydaeisnifydi  
dlcldflldnfsltmhld  
hydsrdyidafkifihhvalhvshrkdikfnlyvttlhtsliemidyfkalpngglyihldqaterhlp1lkrlephid  
hfvfdansndavdfnkmd  
defktasqmiinktnyldlmrhh1krplillnwntltgdtfitngeyfrggiieqllk1sskvegigywlnydlhvs  
hcrnerdymnsielfhqyn  
gkrpvyftallfnk1tsnilyddtcivtgdtsnfqillydakhfnpylaldnqmmratemihlninaledgmykikhf  
tldkengalfnlwrkhhti  
hgmdkdsidyvrmsfpklevydidvtdtialnikmitngihlievkrypss  
>tr|D2N3F6|D2N3F6\_STAA5  
mnqqlietlkskegkmierrylhghpelsfhedetakyaefykgkdvevetnvgprgikvtidsqgkpgktlairadfd  
alpitedtglfsasqkgy  
mhacghdahtaymlvlaetlaemkdsftgkvvvihqpaeevppggakamiengvldgvdhvlgvhvmsttmktgnvyvrg  
yvtgraffk1kvqgkgh  
gssphmandaiavasyfvta1qtvsrrlspfetgvvtigsfdgkqfnvikdvveiegdvrgltdatkatiekiekrls  
kglealygvttctleynddy  
palynpdefteyvtktlead1efgveicepqpssedfayakerpsafiytgaavedgeiyphhhpkfniseksllisa  
eavgtvvl1dy1kgdn  
>tr|D2N3F7|D2N3F7\_STAA5  
mnetyrgnkli1lgivlgvitfwlfaqs1vnvvpnlqsfadmgtisiavsltal1fsgmfvvgaggladkigrvkmtni  
gll1siigsal1iitn1pa  
l1ilgri1qgvsaacimpst1aimktyyegaerqral1sywsigswggsgics1fggavattmgrwif1fisiivav1sm1  
likgtpetksevtnthkfd  
vaglivlvml1sl1nvvitkgaalgys1wffgliaivivaffi1l1vekkvdnplidfk1fenkpytgatisn1l1ngv  
agtlivantfvqqglgyta  
1qagy1sity1imv1l1mirveg1l1qkmgskrpm1l1gtfivvigial1sl1vfl1pgifyviscvvgyl1c1fg1gl1giyatps  
tdta1snap1dkvgvasgi  
ykmas1lggafgva1sgavyagavaats1htgamial1wvnl1mgimafia1l1faipnddkrvkdek  
>tr|D2N3F9|D2N3F9\_STAA5  
myssygnyeafarppkpenvenksay1igsglas1aaacfl1rdgqmegskih1leelpkaggs1dgenmp1kgyvvrgg  
remenhfec1wd1frs1ips  
1eidhasv1defywl1nkedpnysrcrviekqqr1vtdgdft1tktaikei1dl1cl1tneed1ddvkitdvfsddffnsf  
wiywktmfafepwhsamem  
rryl1mrfvhhigg1adfsa1kftkynqyes1vl1pmvey1kshgvqfeydvkvedikvdvttsqkiareil1drngnaesi  
k1tind1lvfvtngs1tess  
tygdndtpapptdel1ggswt1wkn1arqspefgnpdkfcqni1pkkswfv1satsttnkdi1dtiesickrdplagktvtg  
gi1tindsawq1sft1nrq  
qqfkdpkne1stwiya1lysdvngny1kkp1tecsgneicqewlyh1gvptdkied1akhasntipvmpyitsyf1mtra  
igdrpl1vphqsqnl1afig  
nfaeterdtvftteysvrtameavyq1lnidrgipevinstfd1rvlmdavye1ndhqdl1reitkdskmqkl1alagflkk  
ikgtyies1l1kehkl1  
>tr|D2N3G0|D2N3G0\_STAA5  
mskirsfti1sl1iy1lamcytvvtysk1ptkvp1ihyn1agyadnfadkw1l1l1nsafiviwl1ffiagryyerfakws  
hynhtpreiraik1fl1st1  
nleimsy1siftv1eiwq1qhhhqfn1l1wfnmi1fii1igl1tv1fcl1ptihkmrdsq  
>tr|D2N3G1|D2N3G1\_STAA5  
mt1l1tvp1fdnvg1sa1vaavpi1l1cl1tv1fkmkgi1yaalt1lvvt1lival1fvfel1parvsagaitegvvagifpigy  
iv1mavwlykvs1ktgqfs  
iiqdsiasisedqriq1l1igfcfnaf1legaagfgvpiaicav1l1iq1lgfel1kaam1cliangaagafgaig1lpvs1id  
tfn1sggvtt1dvarysa1  
t1pi1nfi1ipfv1lvf1vdgmkgikei1lpviltvsgtytg1q1l1l1ti1fhgpeladi1pslatmv1lafvcrkfkpkni1fr1  
easehki1krtpkeiv1faw  
spfviltav1l1vwsapffk1lfqpggales1vik1lipntvsd1l1spkgial1rd1ligatgtail1tviitilitk1kwkn  
agallveaikew1lpil1ti  
sailaiakvmtgyg1l1tvaigqgiakagai1fp1fspv1lgwigvfmtgsv1nnt1fapiqatvaqq1stsgs1l1vaantag  
gvaak1ispqsi1a1ataav  
kkvgeesa1l1kmt1kys1i1fvaficvwt1fil1t1if  
>tr|D2N3G2|D2N3G2\_STAA5  
mkkkn1ysi1rkl1gv1gasvt1gt1l1sggvtpaanaaqhdeaqna1fyqv1nmpn1nadqrngfi1qs1kddpsqsan1lg  
eaqk1ndsqa1pkadaq1qnn  
fnkdqqsafyei1nmpn1neeqrngfi1qs1kddpsqs1tnv1geakk1nesqa1pkadnnfnkeqqnafyei1nmpn1neeq  
rngfi1qs1kddpsqsan1l1

Tsompanidou\_et\_al\_Supplemental\_FASTA\_File

aeakklnesgapkadnkfnkeqqnafyeihlplneeqrngfiqslkddpsqsanllaekklndaqapkadnkfnkeq  
gnafyeihlplneeqrngfiqslkddpsqsanllaekklndaqapkeednnkpgkedgnkpgkednkkpgkedgnkpgkednkkpgkedgnkpgke  
dgnkpgkedngihvvpkg  
dtvndiakangttadkiaadnkldknmikpggqelvvdkkqpanhadankaqaalpetgeenpfigttvfgglsalgaal  
lagrrrel  
>tr|D2N3G3|D2N3G3\_STAA5  
mkyinnhdkirdfijieaymfrfkkkvkpevdmtikefilltylfhqgentlpfkki vsdlcykqsdlvqhiklvkhsyi  
skvrskiderntyisisee  
qrekiavertlfdqiiqfnladqsesqmi pkdskeflnlmmytmyfknikkhltsfveftilaiitsqnknivllkd  
lietihhkypqtvrlnnl  
kkqgylkerstederki lhmndaqqdhaeqllaavnqlladknhlhlvfe  
>tr|D2N3G4|D2N3G4\_STAA5  
mteknkkdnyhli faliflavsvvsmmvgsfipqrvmlyfinpndsidqftlevlrlpritlailagaalgmsglm  
lqnvlnkpiaspdiigitg  
gaslsavvfi affshltihlplfavlggiamvillvfqtkghirpttliigismqtfialvqgllittkqlsaaka  
ytwlvglygatfkdtfi l  
gmvivavipllflvipkmsisiddpvaiglglvhqrmlqliqitstilvsmailsvgnigfvgliaphiaktivrgsya  
kklmsamigaisiviadl  
igrtflpkvmpagvfiaafgapffiyllltvkk l  
>tr|D2N3G5|D2N3G5\_STAA5  
mllkpkvqivaglc laivails lmigntlvspgtvialfnfdsendlhdvvtgarasrtiaalltgaalavsgllmq  
ltnpiaspplfgvnagav  
ffvifstfiqisfkmivviaflgai vvtlvvalgmfrqtlfsphrvilagaaiam lftaftqgilimnetdlqgllf  
wlsqsvslrniwdipwip  
lvllililifafmaahinilmtdiatglgniklikwmiimlismlagisvavagsiafvglivpniskrllppnykyl  
ipftalagailmiisdiva  
riikplelpigvvtavigaivliylmkkgrqr l  
>tr|D2N3G6|D2N3G6\_STAA5  
mnkvikmlvvtlafllvlagcsgnsnkqssdsdkdtkettsikhamtteikgkpkrvvtlyqgatdvavslgvkpv gaves  
wtqkpkfeyikndlkdtki  
vgqepapnleeiskl kpdlivaskvrnekvydq lskiaptvstdtvfkfdttklmgkalgekeaedllkkyddkvaaf  
qkdakakykdawplkasvv  
nfradhtriyaggyageilndlgfkrndlkqkv dngkdi iq ltskesiplm nadhifvksdpnakdaalvkktegewt  
sskewknl davknnqvssd  
ldeitwnlaggyksslkliddlyeklniekqsk  
>tr|D2N3G9|D2N3G9\_STAA5  
mqnhtavntaqtii lrdlvdall fedia givsnseitkengqtiliykretqqikipvyfsalnmfryessqpitiegra  
skqpltaae f wqki vkmnr  
dlsrevarveeglttaatqltkqlsel d l ashpfvmseqfasl kdrpfhplakekrglreadyqvyqaelnqsfp lmv  
aavkktmh ihgdtanidel  
enltapikegatdm lndqgl sidyvlfpvhpwqyqhilpnvfakeiseklvllplkfgdylssssmrs lidigapynh  
vkvpfamqslgalrltpr  
ymkngeqaeqllrq liekde alakyvmvcdetawwsymgqndi fkdqlghl tvqlrkypevlakndtqq lvsmaalaan  
drtlyqmicgkdniskndv  
mtl fediaqvflkv t lsfmqygalpelhgqnil lsfedgrvqkcvlrdhdtvriykpwl tahqslslpkyv v redtpntli  
nedletffayfgtlavsvn  
lyaiidai qdlfgvsehelmsllkqil knevat iswvtt dqlavrhilfdkqtwpfkqillpllyqrdsgggsmpsgl t t  
vnpmpvtyd  
>tr|D2N3H0|D2N3H0\_STAA5  
minqsiwrnsfri lwlsgfiaia gltvlp lpiymaslnlsvveiq lwsgiaiaapavttmiaspiwgklgdkisrkw  
mvlral lglavclflmalc  
ttp lqfv lvrllqglfggvvdassafasaeapaedrgkvlglqssvs ggh  
>tr|D2N3H1|D2N3H1\_STAA5  
msiavitfivcifgalklietthmrksqtpninkgirrsfqc l lctqqtcrfiivgvlanfamygmltal splassvnht  
aiddrsvigflqsafwtas  
ilsaplwgrfndksyvkvyifatiacgsailqglatnieflmasrilqgl tysal i qsvmfvvvnachqq lkgtfvgt  
tnsm l vvgqiigs lsgaai  
tsytt pattfivmgivfavsslfl icst itnqindhtl mklwelkqsak  
>tr|D2N3H2|D2N3H2\_STAA5  
mqnkelighaayaaierilneyfreenlyqvppqnhqwsiq lsel et l tgefrywsamghmyhpevw lidgskskitty  
keaiarilqhmagsadnqt  
avqqhmaqivsdidnsihrtarylqsn tidyvedryivseqslylg hpfhptpkasgfseadl ekya pechtsfq lhy l  
avhqdv l ltryvegkedqv  
ekvlygladi di seipkdfi l l pthpyqinvlr qhpqymqyseqgl ikdlgvsgdsvyptssvrtvfska lniylklpih  
vki t nfi r tndleqierti  
daaqvi asvkdevetphfk l mfeegyral l pnp l gqtvepemd l l tnsamivregipnyhadkdi hvl as l fetmpdspt  
sklsqvieqsglapeawle

Tsompanidou\_et\_al\_Supplemental\_FASTA\_File

cyl drtllpilk lfsntgis leahvqns lie lkdgipdv cvfvr dlegic lsr tiatekqlvpnvvaasspvvyahdeawh  
r1kyvvvnhlghlvstig  
katrnevvlwklvahr lmtwkkeyannavfvdcvedlyqtptiaakanlmsklndcganpiythipnpichnkevscyces  
nns  
>tr|D2N3H3|D2N3H3\_STAA5  
mykasyqdgvg hftieghdseyrftaekthsfdri ritspiervvgdeadt tidytqllrevvftfpkndekleqfive l  
lqtelkdtqsmqyresnpp  
atpetfndyefyameghqyhsykr l gft lsdnlkfgp d fvpnvklqwlaidkdkvettvsrnvvkemlrqqvgdkty  
ehfvqqieasgkhvndvei  
ipvhpwqfehviqvdlaer lngtv lwlgesdelyhpqq sirtmspidttky lkvpsitntstkrv laphtiena aqi  
tdwlkqiqqdtylkdelk  
taflgevl gqsy lntq lspykqtqvygalgviwreniyhmlideedaipfnalyasdkdgvpfienwikqygseawtkqf  
lavairpmlhmlyyhgiaf  
eshagnmml ihengwptria lkd fhdgvr fkrehl seaash ltlkpmpeahkkvnsnsfietdderlvrdflhdafffin  
iaei l fiekqy gideqrq  
wqvwkgi eayqea fpe l nnyqhfd l feptiqvekl ttr l lsdse l rihhvtnplgv ggitdattiset  
>tr|D2N3H5|D2N3H5\_STAA5  
mrivqpvieqlkaqshpvchyidlvglehhlqhitts lpsncqmyyamkansertildtisqyvegfevasqgeiakgl  
afkpanhii fggpgktdee  
lryavsegvqrihvesmhelqr lnailededktqhillrvnlagfpnatlhmagrptqfgisedevddvieaalampni  
hldgfhfhsisnlnsdnlh  
vdvkllyfkkakswsekhrfplkhinlgggigvnyad ltsqfewdnfvekfktliveqemedvt l n fecgrfivahigyy  
vtevl dikkvhgawya ilr  
ggtqqr l p vswqhnhpfdi yrykdnpsfekvsisrqdt lvgqlctpkdvfarevqieaistgdv ivfkyagaygws i  
shhdf l shphpefiyltqt  
kede  
>tr|D2N3H7|D2N3H7\_STAA5  
msmtdli igkiaiwigivvqicynvvivsmttfiffintegaspeiavli alviilil ltpiltvinlenkmevkgtl  
fivyaivafcmfnylssi l  
wvvcgfl iwtkyskggstgknenekeveiestenqfeskdktke  
>tr|D2N3H8|D2N3H8\_STAA5  
mtpfeils l nksdantmtgtiesiitnieiiddititvik  
>tr|D2N3H9|D2N3H9\_STAA5  
masdlfkerisngvilivlaia l v lcnfvsa ilwfvsa isilgrkklvstsdtttiqsksgnanqashkdtckkel dsq  
dmmehpefknpttknleg l  
neeihkdeattkvsdntepfeskdhvskkd  
>tr|D2N3I1|D2N3I1\_STAA5  
mekvlitggagfigshlvdf l sqdyvyvl dnyrtgkreniksladdhvfeldi rey daveqimktyqfdyvihlaalvs  
vaesvekp l sqe invvat  
lrlletikkynshikrfi fassaavygd l pd l pksd  
>tr|D2N3I2|D2N3I2\_STAA5  
mfsdehnkpftffgdglqtrdfvyvydvvqsvr l imehkдавghgynigtgtftnllevyri igelygksvehdfkear  
kgdikhsyadislkalgf  
vpkytvetglkdyfnfevdnieevtakevems  
>tr|D2N3I3|D2N3I3\_STAA5  
mcknaekngaqwadkdddritnvgk fir ktridel pql invvkgemsfigrperpefvel fse i igfeqrclvtpglt  
gl aqi qgyd ltpqqklky  
dmkyihkgs lmmelyisirt lmvvitgegsr  
>tr|D2N3I4|D2N3I4\_STAA5  
mkiicyitkadnggaqthliqlanhfcihhdvyvivgnhgpmieql darvnvii eh lvgpidfkq dilavkvl aqlfsk  
ikpdivihlsskagtvgr i  
akfiskskdrvvftahgwaftegvkpakkflylviek lmsritdsiicvsdfdkqlalkyrfnr lklttihngiadvpa  
vkqtlksqshnigevvgm  
l p nkd l q indstkhqfvmiarfaypklpqn liaaieilklhnsnhahftfigdgpt lndcqqqvqaglendvtflgnv  
inash l l sqydtfiliskh  
eglpisiiamatglpviashvggise lvt dngicivnnqpetiakvleky lidsdyikmsnqsrkrylecfteekmike  
vedvyngkstq  
>tr|D2N3I6|D2N3I6\_STAA5  
mksdslkeniyyqglyqlirtmtpl itipiisrafgpsgv givsvsfnivqyflmiasvgvqlyfnrviaksvndkrqls  
qqfwdi fvsklflal tvfa  
iymvvitifidddy l vfl l l qgiyiigaaldi swfyagtekfkips lsnivasvivilsvvifvkdqsd l slyvftiaivt  
vlnglplfiylkryisfvs  
vnwihvwqlfrsslay l l p n g q l n l y t s i s c v l g l v g t y q q v g i f s n a f n i l t v a i i m i n t f d l v m i p r i t k m s i q q s h  
s l t k t l a n n m n i q l i l t i p  
myfgliaimpsfylwffgeefastvplmtilailvl iiplnmlisrqyllivnkirlynasitigavmnlvlclvliyfy  
giygaaiarlitefflliw  
rfiditkikvklnivstiqcviaavmmfivlgvvnhy l p p t m y a t l l l i a i g i v v y l l l m m t m k n q y v w q i l r h l r h k t i  
>tr|D2N3I8|D2N3I8\_STAA5

Tsompanidou\_et\_al\_Supplemental\_FASTA\_File

mkklatvgslivtstlvfssmpfqnahadttsmnvsnkqsqnvqnrhpyggvvpqgmtqaqytelekalpqlsagsnmqd  
ymklydatqniadkynvi  
ittnvgvfkphavrdrmgahlp1tkdgnfyqtnvdangvnhggsemvqnkgtghmsqqghmnqnthmnqqphmlqghmqss  
nhqmmspkanmhssnhqmn  
qsnkkvlpagesmtssiltasiaa11lvsglflafrrrstnk  
>tr|D2N3I9|D2N3I9\_STAA5  
mtqtqpkfltiyntykeiqigkypsgahalpteke1carfdvsrmtlrqaikllaedgivestrgkghfvipqtnaqhas  
smdqfkhp1dqillarvsm  
ssinyrvd1eseytnh1fanhpsaviameyyqkkdnpskqadafcftfiplnvidt1fkvntqneddmktfveqtiysna  
yqsd1kmsitkaphfknh  
hvfddgthcwl1iet1yaqtpypiminkwyipqeisel1trirqsdy  
>tr|D2N3J1|D2N3J1\_STAA5  
mnveyskikkavp11f1fvfslvidnsfk1svaiadd1nsvttvswqatlaglvigigavvyas1sdaisirt1fiy  
gv11iigsiiigyifqhgf  
a11lvgr11iqtaglaaet1yviyvaky1skedqktylg1stssys1slvig1sggfistylhwtmflialivvft1p  
f1fk11pkentnkah1df  
vg1ilvatiattvml1fitfnwlymigaliaiivfalyiknaqrplvnksffqnkryasfl1fivfvmyaiqlgyiftfpf  
imeqiyhl1qldtts11lv  
gyivavivgal1sgkige1n1skqaiitailialsl1lpafavgnhisifvismiffagsfalmyap11neaiktid1nm  
tgvai1gfn11invavsv  
iaiaaa11idfka1nfp1gnda1sshfgi11ilglmsivgl1v1fvilnrwtqsek  
>tr|D2N3J6|D2N3J6\_STAA5  
msqiefknvskvypnghvg1knin1niekgefavivgl1sgagkst11rsvnr1hditsgeifiqgksitkahgkallemr  
rnigmi1fqhfn1vkrssv1  
rnv1sgrvgyhptwkmv1gl1fpkedkikamdalervn1dkynqrsdel1sggqqrisiaral1cqesei1ladepvas1d  
p1ttkqvmdd1rkinqel  
it1iln1hfvd1akeygt1rig1rdgevvdygpaseatddv1fskiygrtikedek1gvn  
>tr|D2N3J8|D2N3J8\_STAA5  
mkk1yks11tvsai1atvs1salpqs1aithesqptkqqqt1v1fdrshgqtagaadwvsdgaf1sdyads1qkqgydvkaid  
ghsniteas1ksski1fvip  
eanip1fkeseqaa1vnyv1kqgnv1v1f1sdhynadrn1nrids1seamngyrrgayedmsk1gmnaeeks1stamqgvkssdw1  
stnfgvr1fryna1lgd1nts  
nivsskes1fgitegvksvsmhagst1aitnpekakgi1vytpeq1pakskwshavdqgi1yngggkaegyva1skvgkga  
af1gdss1vedsspkv1re  
dng1kkktydg1fkeqdn1gk11n1nitawmskdndgk11kasg11tdtkk11dferper1stepeke1pwsqppsgykywdpk  
kfkagsy1gsekgaypp1tt  
pddhtppnq1tekvs1fdipqnvsvnep1fevtih1kefeanq1ten1rvgiy1keggrq1igqfssk1dndynppgyst1ptvka  
dengnat1ikvnakv1lesme  
gsk1r1k1gdk1t1ittdfk  
>tr|D2N3J9|D2N3J9\_STAA5  
msn1afyvsvdhgy1f1p1tdf1tsrnqyqpmg11lanhvieqdr1r1qy1dqs1fki1dng1d1lqgsp1fcny1liahsgsgq1v1df  
ynrma1fd1fgt1gnhefn1gy  
1py1kdt1r1r1nyp1vc1aniyendst1tdngv1y1fqvgdq1tv1g1v1gttq1f1phweq1pehiq1sl1tfhsafet1lqql1pem  
krhad1i1vvcy1hgg1fek1d1  
esg1tpe1v1tgenegy1am1eafsk1didi1fitghqhrq1iaer1fkdtavi1qpgtr1g1ttv1gkv11stdeyenvsv1escell1pv  
idd1pt1ft1idedd1qh1rkq1l  
edw1dye1itt1pydmt1inhafearv1aphp1ftn1fmny1alleksgadvacta1l1fdsas1gfkqv1tmrdv1innyp1fpnt1fkv1  
avsgak1keaiersaey1fd  
vknde1svs1ad1f1epk1p1fnydi1yggvsy1tihvgr1pkqrv1snmmi1qghavd1kq1ty1ticvny1rav1ggg1qy1dmy1dap  
v1kdi1qvega1q1l1idf1sn  
nn1mr1ipq1v1dfk1vek  
>tr|D2N3K0|D2N3K0\_STAA5  
met1kqevres1ivk1gi1agy1kdyvnernev1kkrm1visdayvy1tksn1hienq1vakh1lenfv1ky1ikenag1pswky1lkfi1fnk  
deeknn1im1filknedy1fde  
knvs1vgk1slvad1knpk1skny1lev1maknr1d1nfg1tveed1feighq1mtads1il1fnikegsnr1dinsy1fliity1ridkesq  
1aai1kq1w1pn1petsa1imv  
dd1te1li1ekv1iveredy1hidee1lev1kndge1le1idveha1fgisidegndm1ieser  
>tr|D2N3K1|D2N3K1\_STAA5  
mf1igkn1leyvr1k1nal1srkel1sekinv1seqai1wqyetknmm1pei1skiyd1mtsifnvk1ssy1fiseq1pee1llinsvd1khsia  
fraknyk1vst1k1lnkqyy1q  
amy1sn1tsy1lfs1vki1pdni1slinn1nd1l1ngn1les1nkkes1iketakv1vrak1ilqdesne1all1fm1lekag1iviyek  
r1inds1days1fwskdq1tpf  
i1ilg1tnkgv1avrrn1fd1lahe1lgh1vl1hrhi1qfd1l1speey1ktieheadi1fase1fl1peea1fk1kdf1dqmkkksn1pdy1lav1  
kekwy1vs1qai1amray1lg  
1msst1qyry1fwas1nkkg1y1skep1ddvi1emsr1pvk1mns1l1kly1fdrn1l1tpqk1l1ny1lkvdet1flnh1lagin1k1lfkdy  
vnenreyn1itn1lyk  
>tr|D2N3K4|D2N3K4\_STAA5  
mskkent1ttt11fvyek1pkstisek1frg1rsnim1f1skangevkr11lv1tsek1pgagk1st1vsvn1vaityaq1agykt1lvidgdm

Tsompanidou\_et\_al\_Supplemental\_FASTA\_File

rkptqnyi fneqnnnglss  
liigrttmseaitsteienldlltagpvppnpseeligserfkelvdlnfkrydiiivdtpvntvtdaqlyaraikdsll  
vidsekndknevkakala  
ekagsnilgvinlkakvdksssyhygyde  
>tr|D2N3K5|D2N3K5\_STAA5  
midihhilpniddgptnetemmdllrqattqgvteii vtshlhprytpiekvksclnhiesleevqalnlfyygqe  
iritdqilndidrkvitgi  
ndsrylliefpsnevphytdqffeflqskgfvpiiahpernkaisqnlidilydlinkgalsqvttaslagvsgkkirkla  
iqmiennlthfigsdahnt  
eirpflmkdlfndkklrdyyedmgfisiaklvvddkkipkrmpqqdykqrwfgl  
>tr|D2N3K6|D2N3K6\_STAA5  
mahlsvklrllilalidslivtfsvsvsyyilepyfktysvklililaaislfishhisafifnmyhraweyasvselili  
vkavttsivitmvtvvt  
gnrpfrrlylitwmmhliliggrlfrwiryrylggksfnkkptlvvgagqagsmlirqmlksdemklepvlavdddehk  
nrititegvkvqgeiadip  
elvrkykikkiiiaiptiggerlkeinnichmdgveilkmpniedvmsgelevnqlkkvevedllgrdpvelmdmisne  
ltnktilvtgaggsigsei  
crqvcnfyperiillghgensiylinrelnrfgknvdivpiadvqnrarmfeimemykpyavyhaaahkhvplmednp  
eeavrnnilgtkntaeaaak  
eavkkfvmistdkavnppvmgaskriaemi iqslnidethrtnfvavrfgnvlgsrgsviplfksqieeggpvvtvthe  
mtryfmtipeasrlvlqag  
alaeggefvldmgepvkivdlarnliklsgkkeddiritytgirpgekmfeelmnkdevhpeqvfekiyrgkvqhmkcn  
eveaiiqdivndfskekii  
nyangkkgdnyvr  
>tr|D2N3K8|D2N3K8\_STAA5  
mnivitgagkfgvgnlkadltsttdhhi fevhrqtkeeelesa llkadfvvhlagvnrpehdkefslgnvsyldhvl dil  
trntkkpailsssiqatq  
dnlygesklqqeqllrqyaeeygntvyiywrpnlfgkwckpnynsviatfcykiarneeiqvnnrnel tlnyvddivae  
ikraiegnptiengvptvp  
nvfkvtlgeivdllykfkqsrlnrtlpklndlfekdlstylyslpstdfsypllmnvddrgsftefiktpdrqgvsvni  
skpgitkgnhwhhtknekf  
lvvsgkgvirfrhvnndeiieyyvsgdklevvdi pvgythnienlgdtmvtimwvnmfdpnqpdyflfv  
>tr|D2N3L0|D2N3L0\_STAA5  
mriaiekiigllknqsskesnkihrlayitnskfdgnyidrwckirnshigeysyigfgsdfnnvevgrycsissdvk  
iglghphtffssspifys  
nnpfnikqkfidfndqpscttiendwiganviimdgl tintgaviaagsvvtknvgayevvggpakvikkrfdnkti  
eklleskwekt pdklkgf  
sveylnkkdt  
>tr|D2N3L1|D2N3L1\_STAA5  
mriilnivssnivqdprvlkqietikgvtndyki vgmnsqatnkr lenldcnyrllgskvdpknisklikrirfaigvi  
reikaykpdvihandfdvl  
lmvylsnykkanivydaheiyaknafinkvpliskfvesiekhivkhrvnaftvshaakeyyqskgykkeanvitnapi  
lndsrefkeienfksivyq  
gqivmdrgyeefiiasafkqnapsfiirgfgphekvikelisynpenirldkpvekelvdklaesnvgvltkpv sin  
feytvsnkifecihaglpv  
ilspvkehilynekykfgivlkevtpleiekavrklrdnhdlnhlnrqnaikaskilnwqieserlvelykf  
>tr|D2N3L2|D2N3L2\_STAA5  
mkffvvlcaismniflvistftkevlgfpipevyystmvgialittvfaiykiivtqeiprglilliaiclllylafyyfs  
pdkeeklaknnilffltwa  
vpaaisgiyikyinkvtverffklvffifsvsfiivilipkl tgeipsyinfglmnyqnasylsaftaglg iyfimgsv  
khkwiyvlti idipivfi  
pggrggaillylglfafil itfkrigipiavksimyifalsissvliyflftkgsntrtfsylqggtnl legtsgrgpiy  
ekgiyfiqqspllgygpf  
yykligniphniieilifsgllgffiimicilslykmi rnydpntidllvmfaiyipitllmfssnylvvsefwfvl f  
yfitkgrrhg  
>tr|D2N3L3|D2N3L3\_STAA5  
makkvfimsvktiigtllialglqflaypiinqrvgneafgsil tiytiititsvvlgn tlnnirlinmnyksnhyw  
kfasillisiliesialii  
vflyffnl niidiflillnilmclriylnvffrmtlkynqilyialiqflglliglflyyltqnwivcfitsel fatiy  
tlvklrgltigeygsednn  
vkdymllstnslnnllyldrlllpiiggtavtisflstfigkmlatflypinnvlsyisvnesdnikkqylktnl  
faiaalclvmiicypitii  
ivsllynidsslyskfiilgnigvlnfnavsimiqtln tkhasitlqanymtlhtitfifitilmtmafngffwttlfs  
niikyvilniiglskfid  
kkdvd  
>tr|D2N3L4|D2N3L4\_STAA5  
mydiapdnaitkgatrpgsmidklmryinrhvyknaenvivl gtemknylvnhqiskn pdnihvipnwydmrqlqdnhiy  
ndtfktyreqydkillysg

Tsompanidou\_et\_al\_Supplemental\_FASTA\_File

nmgqlqmetlisflklnkdqptlticghgkfkadvktaiedhrienvkmfelftgtdyadvlkiadvciaslikegv  
glgvpksnyglaakklplv  
limdkqsdvqhvegydaqidngdahaiynfintsskelhemgerahqlfkdkytreintmkyynllk  
>tr|D2N3L6|D2N3L6\_STAA5  
mrknilitgvhgyignalkdklieqghqvdqinvrnqlwkstsfkgydvlhtaalvhnnspqarlsdymqvmlltkql  
aqkakaedvkqfifmstma  
vygkeggvqksdqidqtqpmnptanygiskfaeqalqelisdsfkvaivrppmiygahcpgnfqrlmqlskrliipni  
nqrstlyikhltafidql  
islevtgvyhpqdsfyfdtssvmyeirrqshrktvlinmpsmlnkyfnklsvfrklfgnltsyntlyennalevipgkm  
slviadimdetttkdka  
>tr|D2N3L7|D2N3L7\_STAA5  
mkltvvglyiglpstsimfakhgvdlgvdinqqtidklqsgqisieepglqevyeevlssgklkvsttpeasdvfiav  
ptpnnddqyrscdislvmr  
aldsilpflekntiivestiapktmddfvpkienlgtftigediyvhcpervlpgkilelvhnnriiggvtkaciea  
gkrvyrtfvqgemieadar  
taemsklmentyrdmnislaneltkicnnlninvldviemankhprvnihqppggvgghclavdpyfiakdpenakliq  
tgreinnsmpayvdttkq  
iikalsgnkvtfvgltykgdvddirespafdiyeellnqepdievcaydphveldfvehdmshavkdaslvliisdhsefk  
nlsdshfdkmkhkvi fdk  
nvkssfedvsyynynignifnidk  
>tr|D2N3L8|D2N3L8\_STAA5  
mkkimvifgtrpeaikmaplveidhngnfeanivitaqhrdmlsvlsifdihadhdlnimqdqqtlagltanalakld  
siineeqpdmilvhgdttt  
tfvgslaafyhqipvghveagl rthqkyspfpeelnrvmsniaelnfaptviaaenllfenkderifitgntvidals  
ttvqndfvstii khkgkk  
villtahrrenigepmhqifkavrdladeykdvvfiypmhrnpkvraiaekylsgrnrielielpdaiefhnftnqsyv  
ltdsggiqeeaptfgkpv  
vlrnhterpegveagtsrvigtodydnivrnkqlieddkayqrmsqannpygdgqasrriaceaieyyfglrsdkpdefvp  
lrrk  
>tr|D2N3M1|D2N3M1\_STAA5  
mavnvradyaenyglfingefvkgssdetievtntpatgetlshitrakdkdvhavevageafeswstskseraqmlrd  
igdklmaqkdkiamietln  
ngkpi rettaidipfaarhfhyfasvieteegtvndikdmtmsivrhepigvgavvawnfpmllaawkiapaaagnti  
viqpsstplsllevakif  
qevlpggvvniitgkgsesgnainhdgvdklsftgstdvgyqvaeeaaakhlvpatlelggksaniilddanldlavegi  
qlgllfnqgevcasgrll  
vhekiydqlvprlqeaafsnikvgnpqdeatqmgstgkdqldkiqsyidaakesdaqilagghrltengldkgfffep  
lavpndhhlakeeifgpv  
ltvikvkddeaidiandseyglaggvfsqnitralniakavrtgriwintynqvpegapfggykksigigretykga  
sn  
yqqvkniiyidtsnalkgly  
>tr|D2N3M2|D2N3M2\_STAA5  
mtkiiavgwflianhltafityanlrcgyykrfvyelw  
>tr|D2N3M3|D2N3M3\_STAA5  
mngkkantinrykyfhhdhkiqqsskktlwasliitllftviefvgglvsnsiallsdsfhlmsdvlalglmlaiyf  
askkptarytfgylrfeil  
aafnglalivisiwilyeavriiypqpiesgimfmasigllvniiltvilvrslkqedniniqsalwhfmgdllnsi  
gvivavvliyftgwriidp  
iisivisliilrggykitrnawliimesvpqhltdqimadiknidgildvheflwsittehyslsahvvldkkyegdd  
yqaidqvssllkeygiah  
stlqienlqlnpldepyfdklt  
>tr|D2N3M4|D2N3M4\_STAA5  
mdkesvvaslarnkkiavetmtgqryierilhtndekhihilpkpkdvldvntikdidenliddat  
>tr|D2N3M6|D2N3M6\_STAA5  
mikiqqlqhhfgshkvihnfnldiskgeivtfigksgcgkstllniiggfiqpsgrviidneikqqpspdcmlfqh  
hnlpwktindnirigfqaki  
sdeei naqlklvdlgrgkhfpeqlsggmqrvalcrahvhkpnvilmdeplgaldaftryklqdqvlqkhkktstiil  
vthdideaivlsdrivllg  
egcniiisqyeitashprsrdshllkirndimetfalnhhqepeyy  
>tr|D2N3M7|D2N3M7\_STAA5  
mkrlsiiviigifitgcdwqrtskepsknaqqvikigylpithsanlmmtkkllsqhnhpkyklelvkfnnwpdlmd  
alnsgridgastlielamk  
skqkgsnikavalghhegnvimgqkgmhlnefnngddyhfgiphrysthylllealreqlkikpghsyhemspaempa  
alsehritgysvaepfgal  
geklgkgktlkhgddvipdayccvlvlgelldqhkavaqafvqdykksfgkmndrkqsvdimthhfkqsrdvltqsaaw  
tsygdltikpsgyqeittl  
vkqhhlnppayddfvepslykeasrs  
>tr|D2N3M9|D2N3M9\_STAA5  
mmtletlikeqldphlvevdegtyyprtfiqqlfvdgyfgeatlrknaeviekvsqsclettgfcflwcqlafstylenatq



Tsompanidou\_et\_al\_Supplemental\_FASTA\_File

phlnndlqqgllsgeilga  
tglsnmpkspfndleklnlhtyvdgqlvvsgrmpavsniqedhyfgaiskhessefvmfilranqdgitlvektnflgv  
ngsatyqitlnqvvvpsq  
iithdakqfaatirpqiayqipiglsikslelidafснаqnginqyleydvvegfkkrqrqreyyailddgnltsh  
lnelislkkdigylllvdn  
qasvvnnggsraytpyspqrk1kegffffaaltptlrlhlgkleaelkg  
>tr|D2N3N0|D2N3N0\_STAA5  
msfkdnwaiahmtgvlskvesfylndkrnesmlhytrtekikqmykeidvnemeslvgakfvklftdidlnddevisifv  
fdksie  
>tr|D2N3N2|D2N3N2\_STAA5  
mkr1sttlkvr1isnflqliittafipfia1y1tdmlsqsigiy1vg1lv1kfp1siisgylieifpk1llvliyqatm  
vim1vfmvgvfgshqlwgii  
gfcvaya1ft1vwglqfpvmdtlimdaitedvehyiykisywmtnlsvaigallgg1mygysm1llfliaaciflivlfi  
lyiwlpgdrnqvkqsddkr  
hasryqk1qi1nifrsy1vlkdrnym1lisgfsiimmgefsissyiair1kdqfetisigsyditgakmlaillmintv  
vvi1l1tysiskvvlkidfk  
kalitg1liyivgysgltylnqfg1lvfmi1atvgei1yspivseqrk1ipk1krgtysavna1gihfsetlarlgiv  
1gaf1tt1qm1ymfiv1t  
igasm1vagvfggkqvntn  
>tr|D2N3N3|D2N3N3\_STAA5  
mkeglfmimgnlrfqqeyfryknntestthrnaywvklaknvevtkmyalstivqqhasirhffdvttddn1tmilhe  
flpfi1eikqvpssanydl  
eaffkqelstyhfn1d1sp1fkfkl1qfadaay1ll1dfhvs1fdds1qidi1fdd1lcnayrgntvintrqahlnrddkdn  
qdalhia1dsnyfr1lenns  
dihidsylpikhpfeqalyqtyliddmts1dlas1lavsvlyanyimsqqhdvt1gihvpsh1pnd1hgnivp1t1tfdak  
dvcqrfttdfnksvlqms  
qlqcakss1s1leti1fhcyhqmmscndviedvhqihdahtsladie1fphqhgfk1iynsaaydl1siet1sdlvqniyl  
qiteengnkrttvde1nlm  
tesdi1qlyddin1slpe1ddaqtvv1t1feqqveatpnhvavqfdgvfi1tyqt1narand1aqr1rnqygvepndrvavia  
eksiemi1amigv1kagga  
yvp1dpnypsdrqeyi1kdatpkvvi1tyqv1fnnddciphel1dtivweevdn1skcnt1edhayviytsgttgnpkgt  
1iphrgiv1rv1vhqnhyvp1  
nekt1t1llsgtiafdaatfeiyga1l1nggk1livakteq1l1npialeq1linendvntmw1tss1fnqiaseriev1vp1ky  
1l1igge1v1nakwvd1lnqr  
pkhpqi1ingygp1tent1t1t1tynipnkvpnr1p1igkpi1lgthvyimqgerrcgv1gipge1ctsgfg1aagyl1nqpe1tad  
kfikdsni1nq1myrsgdiv  
r1l1pdgnidy1lyrkdkqvki1rgfrie1sevehaleri1qginkavvivqnhdqdyivayyeamht1shnkiksq1rmt1p  
eymipvnfmhieqipi1tin  
gk1dkkalpimdyv1td1dayvap1std1teh1l1cqifadi1lhv1nqv1gihdn1ff1el1gghs1kat1lvn1rie1ast1gkrl1qig1d1l  
qkptv1fe1laqai1akv1qeqn  
yevi1peaivkddy1v1ssaqkrm1ylwksnhkdtvynip1flwr1sse1lnvaq1lrqavq1liarhei1rtqyiv1ddevrqr  
ivad1vad1fkev1nth1ftde  
qeimrqfvap1fn1lekpsqi1rvryi1rsp1hay1fid1thi1indgmsni1qlmnd1nalyqhk1ll1plk1qykdysewmshrd  
mtkhrqy1w1sqfkdevpi1  
s1lptdyvr1pni1kttngammsftm1nqmrq1llqkyvekhqi1tdf1mffmsv1vmt1l1sryarkdd1vvvgs1vmsarmhkgteqm  
1gmfant1lvyr1gqps1ldkm  
wtqf1lqevkems1layehqey1pfe1lvnd1dqshdasrnp1fdvm1vl1qnnetnhahfghsk1lthi1qksvtakfd1sfi  
ieedcddy1tini1eyntd1ly  
hsetvrhmg1nqcmimidi1ylkhqdt1qi1cdipngtee1l1nwvnt1hvndrml1nvpgnks1iisyfnevvsrqgnhvalvmnd  
1tmtyet1lnryvdaiahm1  
1sngvgkgqrvalitersfemiaam1atvkv1gasyipidid1fpkkrqgail1edakvtavmsygieiet1lpviqlenakc  
fveskeneqy1dd1lhgd1le  
ntam1dnemyai1ytsgttgm1pkgvairqrn1ln1vyawst1el1q1gdnev1flqhaniv1fdasvmei1ycc1l1nght1vipdr  
eervnpa1qlqhl1inkhrvt  
vasi1plqmcsvmedfyieki1tggatstasfvkyie1kqcgtyfnaygpsestvi1tsywshqcgd1lipetipigkpl1sniq  
vyimsd1g1l1cgigmpge1c  
iagds1laigy1nrpe1madkwqnn1pfgkgklyhsgd1larytsd1gqie1flgridkqvkvngyrieldeienailairgisd  
cvvtvsh1fdthdi1lnayyv  
geqqmeq1dlkyl1ndh1lpkymi1pkti1thi1dci1pl1ttndkvd1ttr1pnpspiqqsnkvysepsneieqt1fdv1fgev1liqn  
dvgvddd1ffe1lggns1leam  
lvvsh1krfgh1ismqtlyqyktvrqi1vny1mhq1nqqs1valpdn1selqkivmsryn1gileds1shrp1lgn1t1l1tgatg  
flgay1liea1lqgyshri1yc  
fi1radnee1awyk1lmtn1lndy1fseetvemm1snieiv1vgdfecmddv1lpenmdti1hagartdhfgdddefekv1nvqgt  
vdvir1laqghhar1liy1vst  
isvgytyfdi1dtedvt1fseadvykgq1l1tspytrskfyse1lkv1eav1nng1ldgrivrvgn1tspyng1rwhmrniktrfsm  
vmnd1l1q1dcigis1laemp  
vdfsvd1ttarqi1vala1qntpqi1iyhv1spnkmpvks1l1ecvkrkeie1lvsdesfne1lqkqdm1yetig1l1tsvdreqq1  
amidtk1t1k1imdhisekw

Tsompanidou\_et\_al\_Supplemental\_FASTA\_File

ptitnnwlyhwaqyiktifnk  
>tr|D2N3N5|D2N3N5\_STAA5  
mtkrqmgifiyagiiggllsgivklgwevmfpprtpernatnppqellqqlgfssefthqytytfsnmelpwvsfivhfsf  
siviaiicyilvkkyayla  
igggavfgiaiwvlfhliimpimhtvpavwdqpfqehlseffghivwmmtielvrqhfvyrykln  
>tr|D2N3N6|D2N3N6\_STAA5  
mkfivikiggstlsdmhtsiinnikhlsrnniypivhgggpfindaalsnqqiephfvnglrvtdkatmtitkhtliadv  
ntalvaqfnqqcsaiglc  
gldaq1feikrfdqygyvvpptlnidslsylctkfvpiinsigfnnhdgefyninadtlayfiaasleapiyvlsnia  
gylindvvipq|plvdihq  
yiehgdiyggmikvldaknaiengcpkviiasgnkpnieaiyndfvgttilkssv  
>tr|D2N3N7|D2N3N7\_STAA5  
mavlfdeqamsntlthenvtidvqlglnaaataygcdlsydyvrinasyr  
>tr|D2N3N8|D2N3N8\_STAA5  
mkhqettsqynfsiikhgdistpqgftaggmhiglrnkdfgwiyssslassaavytlnqfkaaplivedt1qkskg  
klqalvvnсананstctggq  
giddaqqtqtwvaqqlqipsehvastgvigeylpmdkiktgethindanfttpgafneailltdtctkhiavslnidg  
ktitiggssaksgmihpnm  
atmlafittdasiesntlhqlksstdhtfnmitvdgdtdndmvlvmanqqvehqilsqdhppwetfvdafnfvctfla  
kaiardgeatklisvnvs  
gaksisdarkigktivssnlvksaifgedanfgriitaigysgceidpntcmfn  
>tr|D2N3N9|D2N3N9\_STAA5  
mmikvgivggsgygaieilrllqthphvtiahiyshskvdeplkltfphlqhmqhfealtvdndcdviffatpapvsk  
tcippivekghividlsga  
friknreiyeayketaasqddlnhaiysisewqsfdnngtklinspgcfptatllalhp1isekiidlssiidaktgv  
sgagrs1sqrvhfsemnen  
lsayaigshkhkpeieqylsiaiagqdvsviftphlvpmtrgilstiyvklssseytteslhlk1mtsyyanqpfvrirdigt  
fpttkevlgsnycdigiyy  
dettqtailsvidnlvkgasgqaiqnlnilydfevttglkqspvyp  
>tr|D2N3P0|D2N3P0\_STAA5  
mnsieltdyssnnyaplklviskgkgkvwdtdgkqyidc1sgfsvanqghchptivkamteqaskl1s1srvl1ysdn  
lgkweekichlakkdkvlp  
l1ngsteaveaai1arkwgsevkgitdgqveiamnnfnhgrtlgslslsnhdaykagfhp1l1qgtttvdfgdieqltqa  
ispntaa1ilepiggeggv  
n1ppkgyiqavrqlcdkhq1l1iadeiqvlg1rtgkwfameweqvvpdiyilgkalggglypvsavlannvmltpgt  
hgstfggnplai1staa1  
dvl1dneqlierserlgs1llkellqlkhsikeirgrglfigielntdaapfveqlikrgilckdthrtiir1spplvid  
keinqivaafqdvfkn  
>tr|D2N3P1|D2N3P1\_STAA5  
manktgyidihhhiipefyl1dalkeagidkagglkinnwqpensikmmdrlgievgitsisdpvveplepskrkaiarei  
n1l1qkqi1keypnrfgafa  
t1lp1pdvdsai1eevkyaldn1ql1dgvgl1snyevfl1gdpqfep1mkv1lderatvvfihp1stppdyvprpkymvdfmae  
ftfnttraaan1l1sgtmd  
rypnikfilahaggl1pyl1twr1necyk1l1kqtadesqfv1l1akdpeayvsdfyyd1al1stqsatf1raleettledhilf  
gsd1ahyapen1dqsminti  
khq1d1knetienikynsa1kl1fprfqk  
>tr|D2N3P2|D2N3P2\_STAA5  
mtnkki1dprvkrtnqylinaivkl1ndkdinkisiqnitdsad1l1tratf1lyrdkqdf1fnrivt1nvidd1idyvkdgh1  
iasgl1nesdiknaftr1f  
ey1ymnyeffsvml1sdrgl1sqfrpk1esvvqkeiyipl1fhalvki1dgektskfpqhyfl1nyitsahigvictw1nddmny  
spkymaellyk1l1legifs  
vvrsef  
>tr|D2N3P4|D2N3P4\_STAA5  
mdyaphtaenvvqnank1idvfrknngfivfvrvnfydgkdvl1qpnamis1ppkegddysrfh1ldkryddfidkrhf  
safvgt1d1l1q1rrrgidt  
iv1l1ggvath1gvdttardayq1lnynqffvtdmmsaqnet1hqfpidnvfpl1mgqtittndf1n1ln  
>tr|D2N3P5|D2N3P5\_STAA5  
mkqrigay1idai1hragvdkifgvpgdfn1af1lddi1snpnvdwvgtne1nasyaadgyar1nglaalvt1tfgvgel1sa  
vngiagsyaeripviaitg  
aptraveqagkyvhsl1gegtfddyrkmfahitvaaggyitpenatteipr1lntaiaerrpvhl1lpidvaiseieiptp  
fevtaakdt1dastyiel1a  
sk1lhqakqpi1itgheinsfhl1hqeledfvnqtqipvaql1slgk1gafneenp1yymgiydgkiaedkir1dyv1d1n1l1ni  
gak1l1tdsatagfsyqfnid  
dvvm1nhhnikiddvtnde1s1ps1l1kq1sni1sytnnat1fpayhr1r1tspdy1tvgtepl1kq1q1tyf1kmmq1n1fl1kpndv1iad  
qgts1ffgayd1al1yknntf  
igqpl1wgs1gyt1pat1l1gsq1ladkdrn1l1l1igdgs1ql1tvqa1stmi1rqhikpvl1fv1indgyt1ver1ihgmyep1ynei  
hmwdykal1pavfggenvei  
hdvesskd1qdtfna1nghp1dvmhfvevkmsvedapkl1idiakafsqqnk

Tsompanidou\_et\_al\_Supplemental\_FASTA\_File

>tr|D2N3P6|D2N3P6\_STAA5  
msmkgdliddfkiqnlgertindaakhnnnektgaspyegirtcl  
>tr|D2N3P8|D2N3P8\_STAA5  
mtgfsvylgqpldeayikrmikqgyqmi ftsvqi peeddetkyhyftkl1n1lkheqvtylidanpsiltpsfyehlrqy  
daqfmiridhstsjeaiea  
imagglkcclnasiisrelltslhqqlndftllsfchnyyprpdtglsvdlvnkkneliyqfnpkaqiygfivgsvlrgp  
lhkg1ptieatrshshpva  
akllqetgvsevlvgdsliemrqakqlidfckhrhftlci eevfdttvtylfdmchkvrpdnpenvirsetsrqicphsi  
qpqfttqrrigsvtvdnl  
ngryqgemqivrqtlsahdnvnvvaqiikedlp1lsci epndtfdqktreck  
>tr|D2N3P9|D2N3P9\_STAA5  
mensttear neatmhl demtveea litmnedqqvplavrkaipqltkvikktiaaqykkgrliyigagtsgrlgvldaa  
ecvptfntdpheigiia  
gqhamtmavegaedhkklaeedlknidltskdvigiaasgktpyvigltfantigattvsiscnehaviseiaqypve  
kvvgpevlgtstrlkshta  
qkllnmi stitmvvgkvydnlmidvkatnqklidrsvriiqeicaitydeamalyqvseydvkvatvmgmcgiskeea  
trr1lnngdivkrairdrq  
p  
>tr|D2N3Q0|D2N3Q0\_STAA5  
mteqq1aer1iaavggmdnidsvmncmtrvrikvldenkvddqelrhidgvmgviheriqvvvgpgtvnkvanhmael  
sgvklgdqiphnhndsekm  
dyksyaadkakankeahkakqkngklnkvksianifiplipafigagliggiaavlnlmvagyisgawitqlitvfnv  
ikdgm1aylai ftginaak  
efgatp1ggviggtlltgiagknilmnvftgeplppgggiigvifavwil sivekrlhkivpnaidiivtptialli  
vglltifi fmp1agfvds  
lsvvngiisigvfgfiigasflplvm1glhhi ftpihieminqsatyllpiaamagagvgaalalwvrckrnttl  
rntlkgalpvgligep1  
iygv1plgrpfltaciggiggaviggighigakaigpsgvs1lplisdmylgyiagllaayaggfvctylfgttkam  
rqtd11gd  
>tr|D2N3Q2|D2N3Q2\_STAA5  
melneminfvkennkimvtlslt1ftsvi fpe1kswyskiintenkyrifdraiimigtvlpmyfl1lgflnykiyik1le  
rphsefinti wfs1igisy  
glilfiaistyrnylai vnrflqlykmcendyihsyrfvvnkestlikdcfkvgndlyepgsnykiinlnqtiygyek  
vesfyqnkndkifhiitln  
rkn1irswlfinnwsii1crftmpivftlfi fslsyfdngiyafipivi yiftfvfqsii fnk1iytenkqlrtqyiqk1  
nsgiev  
>tr|D2N3Q3|D2N3Q3\_STAA5  
mayqseyalenemmqleqlgyervtirndkq1ldnfrtilnerhadklegnpltdkefqr1l1tmidgksifesarilrd  
klpl1rrdeseiylsfltd  
kswcknkfqvtnqvsvedtykarydvtilinglplvqvelkrrgidineafnqvkrkqnytg1fryiqmfiisngvet  
ryfsnndsel1kshmfyws  
dkqnnrintlqsfaesfmrpcqlakmi srymiinetdril mamrpyqvyaavealiqqatetgnngyvwhttgsgktltsf  
kasqilsqqddikkviflv  
grkd1dsqteefnkfakgavdkfntsq1lvrq1ndks1plivtti qkmakaiqgnah1leqyktknkvfiidechrsqf  
gdmhr1vkqhfknagyfgf  
tgtprfpenssqdgrttadifgrclhtylirdaihgdgnl gfsvdyintfknalkaednsmveaidteevwladkrvel  
vtrhiinnhdkytrnrqys  
siftvqsihalikyyetfkr1nkk1eqpltvagiftfkpneddrdgevpyhsrek1eimi sdynkkfetnfsttdtneyf  
nhisknvkkgvkdskidil  
ivvnmfltgfdskv1ntlyvdkn1myhdliqaysrtrnrvekeskpfkivnyrd1kktddalrvfsqtndtdtilmsy  
eeykkefmdayrelkmi v  
tphmvddiqdeek1rfveayr1lakii1r1kafdefeftideigmdeqenedykskylavydqvrataeknkvsilnd  
idfeiemrntdinvnyim  
n1lrqidledkaeqrrnqe qirri1dhaddpt1r1krd1irefidnvvps1nkddd1dqeyvnfesikkeae fkgfager  
sideqal1kti1sdyqysgv  
vnphh1kkmgd1pl1kekrkarkaiesfvaettekygv  
>tr|D2N3Q4|D2N3Q4\_STAA5  
mdnrnminrvfsqk1lhqia1knksdvvdeaydfyiqgpkninvikmkslyny1kksyrneyfykntm1nk111grhsv  
ntt1al sempigksiadfi  
11ngkgvvyekte1dk1dr1dnq1indyevfnvyvvi tndkh1nkvm arykdttvgilv1tsrnt1sevqpkenns11  
nskamyf1rkeerkrvia  
qnhmdvptyndfteydv1fdvfkeipmtk1hnmi selkkrngmkeykdeflaapteikf1lyfakmtkkdknklyhflk  
dandpphft  
>tr|D2N3Q5|D2N3Q5\_STAA5  
msn1levns1nvqfnyeettvqavknvsfelrkkh1lgivgesgsgksitaksilg1lpdypdht1tgeiifngqsltn1  
stsalqqirgkdisimifq  
p1ss1npr1ti gkqitevl fqhkrvskseaksmtidilekv gikhatrqfdayphelsggmqrvmiamalilkpqilia  
depttal dastqnq11qlm

Tsompanidou\_et\_al\_Supplemental\_FASTA\_File

kslyeytetsiifithdlgavyqfcddivmkgdsvvesgtvesifkspqhtytkrldaidpdihqtrpprplndillk  
fdrsvdykspsgslyrav  
ndinlarkgetlgivgesgskstlaktvvglkevsegfiwyneplslfkdelkalrreiqmifqdpfasinprfkv  
idvikrpliighkvkdndd  
iiktvsllkvglqdsflyryphelsggqrqrvsialavepkvivdeavsaldvsiqkdiellkqlqldfgityl  
fithdmgvineicdrvavm  
kngeivelnntediikhpgsdyakqlisevaviak  
>tr|D2N3Q6|D2N3Q6\_STAA5  
mpiflyavikfffsakrknfyannseiseieqalhkykylsqksstqihkealkifkaqsntnsknieqahfstyfe  
nvlfhkfimikvilalpmf  
illtiylqplvryiferivmaviviigvsvftilyfspldaaysilgnatkaqihqfnvlhhlnepyfiqlwdtikg  
vftfdlgttykgnevtka  
vgeripitiivavlalivaliaaipigiisamkrnswlditlmialiglsipsfwqglfilafslklldilppsympeh  
pislilpvlvigtsiaasi  
trmtrssvlevmrsdyvltayakglsttkvvikhilknaiipivtlvgllvaeilggsavteqvfnigigryivqkqli  
pdipavmggvvyisivil  
anliidifyalidpklrseinerk  
>tr|D2N3Q7|D2N3Q7\_STAA5  
mvklttkiaslklfasyaiatyilviltalnlfkgyvadtfyiaetllivltiiliiiltteqtwkhhdwrrivevll  
llmtltnvftlmlfvsir  
ryqrtsqihsyngwesfirkttrhriaiigllilvymltlsivsqftfdttlatknqfnallhgpslaypfgtddfgrdl  
ftrvvvgtkltsfisiisv  
viavvfgvllgtiagyfnhidnlmriildvvaipslllavaiiasfgasipnlialsignipsfartmrasvleikrm  
eyvdaaritgentwniwr  
yilpnaiapmivrfslnigvvvlttsslsflglgvapdvaewgnlirtgsnylethsnlaivpgicimfvvlafnfigda  
vrda1dprih  
>tr|D2N3Q8|D2N3Q8\_STAA5  
mkkisiaiivlavlsvsgcpiptksevaqksskvevgerptihflgqasyendmnivkdqlenagfnvkmniqpdysy  
rtqrqagnydiqidwmtv  
fgdpnyamta1fsstgsnslkdkhvdqllnkastqneadvkqkykqiedevvfdkgymplygskknlyvdkvldkns  
vglpnsraliwqqfdynns  
rerdrplvmtqqdgeiptldpirsiapsvysinmmytrlllldendhlttkgslsrdyavnkdnkafyflrrddyft  
kvvngqarntgervsaedv  
kfsldrardkksvpnnntymhkhindikilkdedidqlrkekdkddksiydklikaynvksltdgqkvnnkdgiyqiv  
kittdqsmprevnylthss  
agilskkfvnqvnqeypkgygdsstipansdgkna1yasgayimtknayqatfqrnpgfnetekgsygpakiknitlkf  
ngdpnna1selrnhsidml  
advnqkhfdlikdknlsiirkngrksvflmlnikkgifkthpnlrqavvnaidqqdfikfyrgdkfkiaspitplvdtg  
neqrqdlekekaing  
>tr|D2N3Q9|D2N3Q9\_STAA5  
mvnlndkqtkskeglisvshplaakigkdvldqgnamdavaiqltlnvvepfasgiggggylllyeqstgsitafd  
aretapahvdkqfyllddsg  
eyksffdmthgktvavpaipklfdyihkhyaklsledlinpaielaiegshanwatekysrqqharlkyhetaqvft  
engywregdwiiqpe1gkt  
fqilreqgfnafykgdiakqlvnnvkecggtitledlanydiqikapisatfkdydiysmgpsssggitviqilkll  
d1psmgprsvdyllhliqa  
mhlaysdrayladdnfhelvpqsliddylkarstlidsnkanidiehgvsdcishtdveentetthfcvidkegni  
asfttsigmiygsgitipg  
ygvllnttmdgfdvaggineiapyrplsnmptivmhgkllitvgappaisiasvaqtlinvlvfgmdiqqaidep  
riysshpnriewepqfsqs  
tilalialarghamehkpdaiygdvghlhvdlntrdasggaddtregtvmggevlsirkqpllspeiyndthrvyfvndvq  
pllaeqvrwmhdkyvdsv  
vvriifsevsahiedlrsyenagenyidiawvarkkgyqvtlkddglyltddytsvkrntnayrydrdsitr  
>tr|D2N3R0|D2N3R0\_STAA5  
mkahkiwlnlaaiiisivvsggmflamkweqihlkdglkkvlnotypiknetlyeidghdnpyykndqdtwyiessy  
svvgsdel1kedrml1kv  
kntkigtgydtndrknatdstyksypkvvnkivftkdvkdpalkqkiennqfliqngd1tsilnsndlkvthdpt  
tdyyn1sgk1sndpvnkq  
lkrrynipknastkvelkgmsdlkgnnhqdqklyfyfsspgkdqiiykesltynkiseh  
>tr|D2N3R1|D2N3R1\_STAA5  
makvlyitahpfnelvsnsmaagkafietyqqhpdevkhidlfetyipvidkdvltgwgkmsnetltddelmkvsrm  
sdileeflsadkyvfvtpm  
wnlsfppvkvayidaisiagktfkysaegpglltdkkvlihsrggytepaadfemgdrylrtimtlgvpstyeti  
ieghnaephkteekatsi  
nnaeklattf  
>tr|D2N3R2|D2N3R2\_STAA5  
mtkrpkriatiii1sl1ftiiyiddiqkwnqytdkltqnhkqgghskwedffrgsrivetfgkyqhsfpdgkhygid  
falpkgtipikaptngkvtr

Tsompanidou\_et\_al\_Supplemental\_FASTA\_File

ifnne1ggkv1qiaedngeyhqwy1h1dkynikvgdrvkagdiiaysgntgkqttgah1hfqrmkggvgnayaedpkpfi  
dq1pdgerslyd1  
>tr|D2N3R3|D2N3R3\_STAA5  
maeklehiikktydnntvkvdfn1hitdkefivfvgpsgcgkstt1rmvaglesitsgdfyidgermndvepknr diam  
vfqnyalyphmtvfeniaf  
glk1rkvnkkeeieqkvneaaeilglteylgrkpkalsggqrqrvalgrairvdakvflmdeplsnldak1rvqmrteilk  
1hkr1ntttiyvthdqtea  
1tmasrivv1kdgdimgvgtpreiydapncifvaqfigspamm1natvemdglkvgthhfk1hnkkfek1kaagylde  
i1lgi raediheepifiqt  
spetqfesevvvse1lgseimvstfqgmelisk1dsrtqvmankit1lafdmnkchffdektgnriv  
>tr|D2N3R4|D2N3R4\_STAA5  
mskilkcit1avvm11ivtacgpnrskedidka1nkdnskdkpnq1tmvvdgdkqmafykkitdqytkktgikvklvni  
qndq1enis1dapagkqpd  
iff1ahdntgsay1qglaaeik1skde1kgfnkqal kamnydnkqal1paivetta1fynkklvknaptleeveanaak  
1tdskkkqygm1fdaknfy  
fnyp1fgnddy1fkkngseydihq1g1nshkhvknauer1qkwydkgy1pkaathdvmig1fkegkvqgvftgpnwiny  
qetfgkd1gvtt1ptdggk  
pmkp1f1gvrqwy1seyskhkywakd1mlyitskdt1qkytdemseitgrvdkssnplkvfekqarhaempn1pemr  
vwepmgnasi1f1sngknk  
qa1deatnditqnik1l1hpsqndkkgd  
>tr|D2N3R7|D2N3R7\_STAA5  
mmtikvgi1g1cggi1angkhmps1qkvenvemtafcdvdi1skaasaaeygtdnakvyddyka11kddtidvihvctpnds  
hceitvag1hagkhvmcek  
pmakttaeaqkmi1dtakstgkkt1tigyqnrfrpdsqflyksaqrgd1gdiyfghahairravptwgv1f1deeaqgggpl  
idigtha1d1t1wmmdnye  
pesvmgstf1hk1nkqhdanaanawgswnpdef1tvedsafg1f1kmkgati1lesawains1evdeakcs1sgtkagadmkg  
1rihgedmgt1lytkhvele  
nkgvdfyegnevdeaeekawidavvndtepvvkpeqamvvtkileaiyqsaksgkaiyfe  
>tr|D2N3R9|D2N3R9\_STAA5  
mki1gvfsv1fydknfedm1dyvaesg1dmi1evgtggngpdkfck1del1enedkrqafmksitdrg1q1sgfschnpis  
pdptqakeadet1rktir1  
an11dvpvntfsg1agsddtakkpnwpvtpwptaysei1dyqwnekli1pywqdl1aefakeqdvkiaielhagflvhtpy  
tm1kl1reatneyigan1dp  
sh1wwqgidp1aair1lgqana1hhfhakdtyingenvmyg1tdmqpygnvatrawtfrtvgyghspyvwaadi1sq1i  
ngdyv1s1ehedpimsve  
egf1qacq1t1ksvni1ydkpadmwwa  
>tr|D2N3S2|D2N3S2\_STAA5  
mfkvvicdderi1reg1kqi1p1wgdyhfntiytakdgveals1iqhqpelvitdirmp1rknvgd11ndiah1dcnvi1  
ssyddfeymkagi1qhhv1d  
y11kpvdhaq1levl1gr1vrt1leqqsqngrs1apchdafq11kveyddyvvnq1vdqikqsyqtkvtis1d1qhidvs  
esyamrtf1kdhvgit1vdy  
1nryrilqs1q11drhykhyei1advkfseymf1syhfky1qm1spsdyckqak  
>tr|D2N3S3|D2N3S3\_STAA5  
mtaykpyrhq1rrs1fastifpvflvii1g1vsfyaiyi1wiehrtihqhvdesqssihhtekq1qtfitqhnnsfqeld1  
tnhhdv1tatkrel1k1ihq  
qpat1yye1sgpnqfi1tnnyeh1ntknmy1fsthq1kfknstym1kiyantpr1seikkdsrqfal1vdqydnyland  
drftige1kyrpgq1fgf1mne  
svk1nhadhr1i1ykdi1heniedgit11ivmav1v11vifg1fisadnmakrqt1kdi1eti1qkiyyaknrh1gtyt1kn  
nselee1nny1yd1fesne  
q1ihsiehterr1rdi1q1keierqf1qph1f1ntmqti1qylit1spk1aqt1vvq1lsq1m1rys1rtnsht1velnee1nyie  
qyva1qni1rfddm1kl1hie  
ssee1hqt1gkmm1qpl1ena1khgrdtes1ditir1t1larqnl1h1v1cdng1igm1ssr1qyvrqs1nndv1fdtkh1gl  
nh1hnkami1qygshar1hi  
fskrnqgt1icyki1p1srgnv1dv  
>tr|D2N3S4|D2N3S4\_STAA5  
mkskiyi111f1if1sacanthrsesdkn1vtvspyqsn1irp11ndfekqehvkie1khgstqvl1sn1hnedfserg  
dvfmggv1set1dhpedfv  
pyqdt1svtq1ledyr1snkyvtsf11mptv1ivvnsd1qgdiki1rgyqdl1qpi1kgki1aysnpnttttgyqhmraiysmh  
hrvsdv1hqf1qdamq1skt  
skvi1edvakgky1yag1syeqd1artwknkgypvs1ivypiegtm1nv1dgi1al1vknahp1pkrkkl1vqyl1tsrsvqqr1vae  
daks1irkdv1seqsdq1sien  
1knip1ipksk1pdi1phhk1f1emi1q  
>tr|D2N3S5|D2N3S5\_STAA5  
m1etnkn1hatawq1g1fkngrw1rhvdvrefiq1ny1t1yegnds1f1agpteatsk1lweqvmq1skeererggmwdm1dkvas  
t1tshdagyl1dkd1letivg  
vqtekp1fkrsmq1pfggi1rmakaaceayge1deetekiftdyrk1thnqgv1fdaysrem1ncrkagvitgl1pdaygrgri  
gdyrrva1lygvdf1meekm  
hdfntm1stemsedvir1ree1seqyra1kel1kel1gqkygfd1srpaenf1keavqwy1laylaa1ikeqngaams1grtstf

Tsompanidou\_et\_al\_Supplemental\_FASTA\_File

ldiyaerdlkagvitesev  
qeiidhfimklrirkfartpdynelfsgdptwvtesiggvgidgrplvtknsfrflhsldnlgpapepnlvltwsvrldpd  
tfktycakmsiktssiye  
nddimresygddygiaccvsamtigkqmqqffgaranlaktllyainggkdeksgaqvgpnfeginsevleydevfkkfdq  
mmdwlagvyinslnvihym  
hdkysyeriemalhdteivrtmatgiaglsvaadslsaikyaqvkiprneeqlvvdfeiegdfpkygnnddrvddiavdl  
verfmtklrshktyrdseh  
tmsvltitsnvvygkktgntpdgrkagepfapganpmhgrdqkga1ss1ssvakipydcckdgisntfsivpkslgkepe  
dqnrnltsmldgyamqcg  
hlninvfnretlidamehpeeyq1tirvsgyavnfikltreqqldvisrtfhesm  
>tr|D2N3S7|D2N3S7\_STAA5  
mrqyqqlkvdfassyadkecdal1kvgfyhrmgy  
>tr|D2N3S8|D2N3S8\_STAA5  
mkriskdwavfk1lyqnkgrfsinal1lqlimifisstylil1fnmmlkvagqsq1tindwmeivshpasvilliiifil  
svafliyvefs1lyvmvya  
gfdrqii1tfsikfnafvnrk1igvpvffviylmlmpian1glssv1tkniyipkflteelmkttkgiiygtfmia  
vfilnflk1ift1pltilnr  
qslfknmr1swq1tkrnkfr1vieivileliigailtliisgatylaicvdeegdkflvssilfv1kss1ffyy1ftkl  
slisvlv1h1kqenv1dgp  
glefkyppkprksrffiismv1avtcfvgynmy1lynntintnisiighrgfedkgvensips1kaaakanveyveltdi  
mtkdqfvvshdnn1kr1t  
gvnknisesnfkdiv1g1kmrqnrheak1vs1defietakqsnvkl1velkphgkepadytqrvidil1kkgvehqyrvms  
1dydvmtkl1kkeapy1kcg  
y1iplqfghfkett1dffviedfsyspr1vnqah1enkev1twt1ngeed1tkyl1qtnvdgi1tddpaladqikeekde  
tyfdrsi1r1lfe  
>tr|D2N3T0|D2N3T0\_STAA5  
mkkqi1s1galavass1ftwdnkadaivtkdysgksqvnagskngkqiadgyywgii1en1enqfyni1fh1ldqhkyaeke  
yk1d1vdk1k1trv1leedqy1  
1erkk1eyei1yke1lykkyk1kenpntqvkmafdkyd1gd1tmeeynd1sk1l1tkal1dnfk1levk1kiesenpd1rpyse  
ertaygk1ds1vdqaysv1  
fayvtdaqhktea1n1rakid1il1gdekdp1rvtnqrtekemik1desi1ddffietk1nrpqhitrydgtkhdyhkhkd  
gfdal1vketreavskades  
wktktv1kkygetetkypv1veek1kveepqspkvsekv1dvetvgtteeap1piaqplv1k1pqigtqgeivk1gpd1ytm  
kt1ggvi1vqgp1d1fptmeq1n  
rps1sdny1tqpsv1lps1itgestp1tnpi1k1giegnssk1eik1p1q1test1k1gi1q1gessdi1evk1p1q1at1et1teashyp1arpq  
fnk1tpky1vkyrdag1tgi1re  
yndgt1fgyear1prfnk1psetn1aynv1tthangqvsygar1ptq1nk1psetn1aynv1ttnq1dgtvsygar1ptq1nk1psk1tnaynv1t  
thangqvsygar1ptyk1kps  
etn1aynv1tthangqvsygar1ptq1nk1psk1tnaynv1tthangqvsygar1ptyk1kps1etn1aynv1tthadgt1aty1gpr1v1tk  
>tr|D2N3T1|D2N3T1\_STAA5  
mqeay1ivaygr1saaak1qga1fherpdd1vaak1v1lqgv1k1ridgk1fnk1miedv1ivg1taf1peg1lqgq1ni1art1ial1rtg1s  
dtv1pgq1tvn1ryc1ssg1lq1ti  
a1aanq1imagg1d1vagg1ve1msav1pmggn1eptn1pt1lqy1ddi1gas1y1pmg1lta1en1vas1q1fdvs1red1q1day1avr1sh1qray  
daq1ldgr1fk1dei1ipi1q1vns  
vey1tnag1pk1vht1ni1fdq1defi1rpd1ttie1alak1rtv1fkadgt1vtag1tsap1sdg1ag1fv1lmsg1dkv1kelg1vtpi1arf1vgy  
kav1gvd1pk1img1ipaya1ip  
ev1sl1sn1lsv1edid1li1e1neaf1asq1tias1ikev1g1dis1rtv1ngg1aial1ghp1lgat1gam1tar1l1nem1grp1ds1rygm1vt  
mc1ig1vgm1gaa1i1fey1vr  
>tr|D2N3T2|D2N3T2\_STAA5  
mtink1vtv1lgag1tmaq1laa1fvnag1lvk1l1di1vvd1knd1pn1iak1syd1kitd1kkr1p1l1fd1n1l1ash1tygn1fddd1lvn  
ddad1ly1eav1ked1iki1kha  
vwq1qlq1haked1alfat1ntsg1ipina1iakaf1nk1kdqer1ffg1lhffn1pprim1k1lvel1ipt1sht1kesi1il1dvkn1faqn1v1lgk  
gv1iv1vnd1vp1g1fvan1rvgt1q  
tmnd1imy1raeqh1k1siv1dvdal1tgqa1igrp1ktg1tya1sdl1vg1ldi1avsv1ikgm1qqv1peet1py1fhdv1kiv1nt1yengal1gr  
ktk1q1gf1yk1kdk1etkar1lv1y  
dve1kd1y1vp1vs1qp1lpi1nefn1kd1lvh1ndvi1fnaq1deag1l1flwet1l1rnn1fy1sain1vpkat1dd1fr1did1ra1lvw1gfn1wk1  
gp1fq1ld1dam1gyerv1k1trme  
de1lg1d1lpq1wis1dl1gg1fyk1qdet1eyat1pi1shfv1kde1lwd1kgdak1sv1th1dd1q1l1l1k1qsk1n1vit1def1nda1lvda1id1l1  
ene1hy1tsm1vi1yad1gn1fsv1  
gan1lf1m1kka1hed1gl1vdd1v1vaq1sidk1lhys1fnr1lkys1kpv1vtav1qgr1al1ggg1cel1v1lysp1ivva1asety1ig1lveag1vg1  
1psgg1g1laem1adri1rtsh  
kfd1dk1qas1mtk1v1ltni1afak1vstna1fearry1gy1lrd1tdti1fnta1qrve1val1krak1yea1etny1ipn1prh1qyial1ged1fka  
li1gg1q1da1qr1hgh1fis1dhd  
yh1ial1ni1ati1lag1gd1l1prnt1fin1q1ryi1qs1lek1ig1fid1l1ksk1syer1iahm1ktg1kpl1rn  
>tr|D2N3T4|D2N3T4\_STAA5  
mnfdw1ik1trsd1fddd1kpav1idhak1qts1wty1qq1narad1mahy1lts1qgv1k1gdv1igif1apnd1ia1ild1l1fac1fkt1gav1fl  
p1lnwr1lnpke1iaa1ivedaq  
1k1l1fyae1kh1ss1ltd1id1qn1l1hmd1idva1qyde1ivnpdy1hqpf1qat1pvep1qd1laa1iyts1g1ttg1spk1gvm1fsyes1fvhng

Tsompanidou\_et\_al\_Supplemental\_FASTA\_File

anlelytkfnstiytivst  
pmfhvlgfndtvlpvlmsggtlilqryfngeelndmiaqyhptfiimiptmyystlrasnfnpenfkamdyiiqggsqpl  
psiqaaqkqygininiingy  
lteaplvlvntpenskrkpmsigkavmfvdarildngeevptgeigelakaknvtpgywnkpaetakafhgrylltgd  
lakmddgdifiidrckel  
iitggenvlpsevenalaehplvdrcvvvgydhpkysesiaaaailredephydkildqhmsrslagykvprmyvpvthm  
plnstqkpkklairqmmnd  
kvsqt1  
>tr|D2N3T5|D2N3T5\_STAA5  
mkqitwhdlqhiikgdviglipalavanlpaevlraqlaqhdtyhtpndltfilandihslgvapdlldfiermikrvi  
msiltassktaqamknndi  
eayflpqgiathyrqsnqllpgvltkigIntavdpryggkvnttrtddlvsivtidetylhytfpsvdvallrgtya  
dqgnniyltqesy1secyh  
valnakanhgkviqvkd1vdeyqlnpnevviqgnlvdyvyvtedeknrqviqshylpalsgeeridgipepalpfnsr  
klilrraaqfltygdtsi  
gyginne1snllheecvehdvqplldvgifggfvgsrehfgmynadvrmphdrawdfiyngvsvaylsfaevdqygnv  
nvsyfndr1ngcggfidit  
qsvnkiifsgt1fvagshvschnqrlnietegqnqkfvsdvshidfnaqysqsleqevyfvtdravfeltnqglklieiap  
gldlhkdi1nqmafkipia  
dh1klidtsiykekwwgelkqsihkv  
>tr|D2N3T7|D2N3T7\_STAA5  
megl1nhrnteneettqtqsvapntgeegmssastqstkttsdihnesidkqmeakahetaqntdlknearslfdnatksi  
grlagndes1n1n1kdmfs  
evfkphtkneadeifiagtakttpaicdi seewgkpwlfsvfiaftvtfiglwvmaafnntnaipglifigaltvpls  
glffffyesnafknisifev  
iimffigvfvsl1stmvlyrfvfvfsdqferfasl1ffdaflvglveetkaliivyfvnklktnkilnglligaaigagf  
avfesagyl1nfa1genvp  
lldivftrawtaigghlvwsaivgaaivivkeqhgfefkdi fdkrflifflsavglhgiwdts1tilgsdtlki filivi  
vwi1vfilmgaglkqvn11  
qkefkeqqkkvde  
>tr|D2N3T8|D2N3T8\_STAA5  
mkfkr1at1fsav1vlsgcgsmhssgkdl1nis1pl1ktsiapyetdvpvkigaaes1fktndqgkiekv1vksyhpndt  
tldielkdnikfngqklt  
aekvksslensmkkd1lvkys1pissitakgkltiktssaypelvselanp1fmai1ytdaksdvnqtpvgtgpyqikdy  
kqsrkis1snfkdywqgkp  
kl1dhitvtyqedgnr1vrn1lesqkdd1itdvpvnkvqdiennqnlkvskesgfrts1lmyhntknkmtksvreal1dhiid  
rqiadhiyqgyakpat1sp  
fndk1pyikep1l1tkqnieakt1lakdgytkehplkiklitydgrpel1skiaqvl1qsakkaheidiks1vddiesylk  
dr1sawdatmysfgt1prgd  
tgyffnqaykkdga1inkgdynnnvdd1inq1nhtvdvkerhn1s1ndi1k1ssrdvpsnyia1yndqivaanskvknkyvt  
pegiy1l1dyrtt1er  
>tr|D2N3T9|D2N3T9\_STAA5  
mtvdigriydnkdntdair1lvdrvwprgiskrtan1dywlkdiapstel1rqwfqhdpklygafkekyekel1rdnetqke  
11kn  
>tr|D2N3U1|D2N3U1\_STAA5  
m1teqekdi1kq1tvp1l1kekgteitsiyf1kpmfka1pel1nmfnqtnqkrmgqssalaqavmaaavnidn1svikpvimp  
vaykhca1qvaehypivg  
en1l1kai1qdv1gleendpviqawakaygviadvfiqiekeiydqmmwigf1kpfkitnikqesediksftvetdaydfsqy  
vpgqyitvdvssdk1lpyra  
krhysivsgdknh1l1f1gvkrdv1ttehege1vst1l1hdeikegdmin1laapvggfv1lenttepql1flgsgigv1plvamyed  
asakg1dtqmvqvaeneq1h  
1p1fkdnfnsianhyd1naklyth1kgeqgyigaeel1kaf1lankpei1yicggtk1flqsmieal1ks1nydmdrvhyetfipr1  
svav  
>tr|D2N3U4|D2N3U4\_STAA5  
mks1fekaqqfgksfm1pia1lpaag1l1lgigga1snpntikaypildit1l1qni1ft1msaagsivfqnl1pvi1faigvai  
g1srsdkgtag1laa1l1gf1  
imnatmng1l1ti1gt1akdq1aqngqgmvl1gi1qtvetgvfggi1tgimtail1hnykhkv1l1ppy1lgffggsrfvpivtaf  
aa1f1gv1myfi1wpsiqag  
iyhvggfv1tk1tga1gt1fvygfi1r1l1gp1gl1hhi1f1p1fwqta1l1ggt1evkgh1vqgtqni1ffa1l1gdpdvtkyysgvsr  
fmsgrfi1tmmf1gl1cgaala  
iyhtakpehkkvvgg1ml1saal1ts1f1tgi1tep1efs1flvapi1lyvi1haffdg1lafmmsdi1fni1tigqtfsggf1df1l1f  
gv1lqgnsktny1lyvi1pigi  
vwl1c1lyyiv1fr1f1itk1fn1fkt1p1gredkaaaqqveateraqtivag1l1ggednieivd1ccatr1rvt1lhqndkvdkv1l1est  
gakgvi1qqgtgvqvi1y1gph  
vtvikneiee1l1gd  
>tr|D2N3U5|D2N3U5\_STAA5  
mkrki1mdcdpghddai1al1lagaidsp1leilavttvagnqsvdknttna1nvl1dimgrqdi1avakgadr1likpaafas  
eihgesg1dgp1k1p1stpsr

Tsompanidou\_et\_al\_Supplemental\_FASTA\_File

qavampasdviiinkvmtsdtptvatgpltnvatalirepriaehiesitlmgggftgnwtptaefniwvdaeaakrvf  
esgitinvfgldvthqvla  
dehvierfesinnpvaqfvvelqffkkykthfnmdggpihdactilyllqpeiftmvvpnidiehqsplytgtmavdl  
nhvtgkpanayfatavdve  
evwnlidhklrtye  
>tr|D2N3U6|D2N3U6\_STAA5  
mngdnqqilreivlnptihgkelesifglrrqlgyriqkinlwleqegyplertsqgnfivsseimtlfkrdvseqqm  
lgnnvi fsietrryylml  
mlfskenamslnhfsidlqvsntvindhivkeqledhglslkysrkhgyeivgdefevrrffiklidqrlnhditkse  
vlkalinltfediyqkdk  
kqveqflksrfidkslsslpypcvirrriqsghvlnlninyqylrdtkeyqateimtqhepdlpeaklyltlhlst  
svqwtldgesdnisnlta  
idqmihhfeqitfiniedkeksqqlllhltfayrikynltdrdelinplqnyqsflhmvkqscqsleyfgkslpdn  
eiyaylmlfgslrrqeen  
fdgkikaiivctqgtsvsqmmlyelrnlfpelldaislrtfenytdydivfspmfvltkklfitkvalsenqrkl  
rkdvmyinkesadidkei  
nkmalierttvnditelrdgledfianysistingsivtqnktldladliparhvkhrihvenideaiakasdviva  
nhfidikiyhemqafdds  
ymvimqniaiphaysekhvhtamsmlilqepiymdgtaihiivpiaavdkvthlrallqlrdvaqndaikriiqsrk  
nsdvneilknsnkearen  
gwsn  
>tr|D2N3U7|D2N3U7\_STAA5  
mggqlvhkenimlnlsatdkesvlsqmsdvlfqngfvkstfkdauidrekefatglphtlcsvaiphtdvehinhrtigv  
avlekevpfiemgtldqqt  
evkivfmlamdklldqklmqifqseekleqilrtkdetilatindyleyn  
>tr|D2N3V2|D2N3V2\_STAA5  
mkalklygvedlryednekpviestndvivkvratgicgsdtsrykkmgpyiqgmpfghfsgvvdaisdvthvngdk  
vtgcpaipcyqceyclkge  
yarceklfvigsyepgsfaeyvklpaqnvkvpndvdyieamvepsavvahgyfksniqpgmtvavmgcgsigllaiqw  
arifgaahiaididahl  
diatslgahqtinskeenlekfiennyandlaiesgaktigqiltlppkkggevvllgipyddieidrvhfekilrn  
el tvcgswnc lssnfpge  
wtatlhymktkdinvkpiishflplekqpetfdklvnkkerfdkvmftiy  
>tr|D2N3V4|D2N3V4\_STAA5  
minqvyqlvaprqfdvtynnvdiygnhvivrplylsicaadqrytgrrdenvlrkklpmslvheavgevvfdskgvfek  
gtkvvmvntptekhdivia  
enylpssyfrssgydgfmqdyvvhmadrivlpndidlstisyte lvsvsyhaiqrferksiplktsfgiwdgnlyit  
aillrklypeakiyvfgkt  
dyklshfsfvddiftvnqipddlkidhafecvggkgsqvalqqivehispegsiallgvselpevntrlvlekgtlig  
ssrsgskdfeqvvdlyrky  
pdiveklalkgheinvctmqdivqafemdlstswgktvlkwti  
>tr|D2N3V5|D2N3V5\_STAA5  
mkttkqaihidniywervqlyieghsegvdltsqqfvlrnl tetkleanemkidgntfkcrfnvailddgyylpmdkyl  
fvyhdqleyigqlnpniid  
qayaa lnee qieeyne lttqngkanyv laneakvfrkggvsqhtvytipeiasdvnefvfdieitlpqeksgviatsah  
wlhkqghkasfesrsflk  
aifnitklhikrsktilftsdsrpnlsnfykyvdelrkvdfdydiktvfkanitdrkwrkfrlpyllgkadyif  
vddfhp liytvrfrpsgei  
iqvwhavgaftvgfstrteqkkgpfidslnhrsyt kayvssetdipfyaeafgi reenvvptgvprtdvlfdeayatqik  
qemedelpiikgkvi lfa  
ptfrngnghtahypffkidferlaryceknavvl fkmhpfvknrl nisrehrqyfidvsdyrevndilfvtdllisdys  
sliyeyavfkkpmi fyafd  
ledyittrdfyepyesfvpgkivqsfdalmdaldnedyevkvvpfldkhfkyqmgrsserlvkd lfr  
>tr|D2N3V6|D2N3V6\_STAA5  
mclhiyelndwidfyflqndnsvtgwdinqcsmlyevilavvd  
>tr|D2N3V7|D2N3V7\_STAA5  
mikttikkliehsiyttfkllsklpnknliyfesfhgkqysdnpkalyeyltehsdaqliwgkkygyehifqqhnvpyvt  
kfsmkwflamprakawmin  
trtpdwlyksprttylqtwhgtplkkigldisnvm lgtntqnyqdgfkkesqrwdylvspnsystsifqhafvsrnki  
letgyprndkshkrndte  
yingiktrlnipldkkvimyaptwrdeairegsyqfnvfdiealrqa ldddyvillrmhylvtridehddfkdvsd  
yedisdlylisdalvtdys  
svmfdfgv lkrpqi fyaydlkygdelrgfyndykelppivenqtalidalkqieetaneyieartvfyqkfcsl edg  
hvsqricqti f  
>tr|D2N3W1|D2N3W1\_STAA5  
mmkfsvi vptynsekyitelns lakqdfpktefevvvddcstdqtlqivekyrnklnlkvsqletnsggpgkprnval  
kqaegfvl fvdssdyink  
etlkdaaafidehhsdvl likmkgvngrgvppsmfketapevtllnsriiytlsptkiyrta lldndiyfpeelksaed



Tsompanidou\_et\_al\_Supplemental\_FASTA\_File

qlftmkaylnanrisvlsd  
kayyyatkregehmsayvspedfyevmrliaveilnadleeahkdqilaeflnrhfsfsrtngfslkvkvedqpqwina  
lgdfiqavpvrvalvmsk  
lrpllhayarakdidnyrtveesyrggqyrfdivdgklniqfnegepyfegidiakpkvkmatafkfdnhkivteltnef  
mieggydvr1k1hsrnkk  
htmyvplsvnankqyrfnimledikaylpkekiwvflvqigtevfevrvgnrnkyaytaetsalihlnndfyr1tpy  
ftkdfnnislyftaitltd  
sismk1kgknki1lgtldrgyvfeegmasv1kddmvmgm1sqtseveqillskdikkrdfknivk1ntahmtysl1k  
>tr|D2N3W2|D2N3W2\_STAA5  
minkndivadvvtidykaadifrsvgidfccggqvsieaaslekknvdlnellqr1neveqtntpgslnpkflnvssliq  
yiqaaayheplreefkn1tp  
yvtk1skvhgpnhyplvelketydtfkngm1ehmqeddvdfpk1ikyeqgevddintvidd1vsdhiatgq1lvkmsd  
1tssyeppeieacgtwr1vy  
qr1kalev1thevh1lenhv1fkkvs  
>tr|D2N3W3|D2N3W3\_STAA5  
m1s1tm111lervg1i1layvlmniyfknlmnrtrtwkarwqlciifslfalmsnltgividhqhs1sgsvyfr1dddv  
slantrv1tigvaglvggp  
fvg1fvgvisg1frvmggadaqvy1issifigi1agyfg1qaqrrkrypsiaksamigivmemiqm1siltfshdkaya  
vd1s1l1alpmiivnsvgt  
aifmsi1ist1kqeeqmkavqthdv1qlm1nqt1pyfkegl1nresaqqiamiik1nmkvsavaitskneilshvgagsdhh  
iptneilts1skdv1ksgk  
1kevhtkeeigcshpncpl1raaivi1plemhgsivgt1kmyftnpnd1tfverqlaeglani1fssqielgeaetqsk11kd  
aeiksl1qaqvsphfffsi  
ntisalvrinsekare11lelsyffran1qgskqhtit1dke1sqvray1s1eqarypgrfninivedkyrdv1vppf1  
iq1lvenaikhaftnrkqg  
ndidvsviketathvri1vqdnqggi1skdkm11getsvesesgtgsalen1n1r1kg1fgksaalqfestssgttfwcv  
1pyerqeee  
>tr|D2N3W4|D2N3W4\_STAA5  
mkaliiddeplarne1ty11neiggfeeinaenvketleallinqydi1fldvn1mdengielgakiqkmkeppaiifa  
tahdqyavqafelnatdyi  
1kpfqgkrieqavnkvratkakddnsastiandmsanfdqslpveiddkihmlkqgniigigthngittih1ttnhkyett  
ep1nryekr1npayfirih  
rsyi1ntkhi1kevqqwfnytyvmv1l1ngvkmqvg1rsmkdfkasig11  
>tr|D2N3W7|D2N3W7\_STAA5  
msmqssykr1kvk11ti1vivfsi11vggwyi1fkneaprptkivdqgght1vtkge1isgqaiyekygltdygsylngs  
ylgpdytaealhhyligmr  
kyyaqdiyhkqlh1khve1avvkdkvmkeir1nrysekedq1v1tpgqvyg1ky1qdyykkefvnnpkqvg1nenmikq  
f1qnddymvagnki1eh1sqf  
ffwgaw1sstdrpgktfsyt1nwpvdvdagnt1psagi1wtaisvt1liag1afiiyiqkryefdmkptyeserelpkie  
vdski1tdsgrkvgy1lvv  
m11f1vqi11ge1lahyyvenkffgieiqr1f1pfnivktwhvq1v1fwvattwlaagiyivpkv1gnepkkqgv1vdilf  
walii1v1vmgsmigewsh1l  
gwidshw1fghfgweyie1lgkfwqil1fivgm1v1wvii1l1crg1f1pairnkqvnhdkrh11t11fvgaiaip1f1ylas1f  
impnshvtfadywrwwi1h  
1wvegi1feafav1ig1flm1vnmk11tti1ettiralyf1q1l111gtg1v1gmghyywqgdhsiw1al1gscfsa1evvp1c11  
iweaythyr1lykksdiaf1p  
ykgtf1f1astg1wnaigaga1gf1intpavnyfehgtqwaahahgsmagvygmfsiaia1y1vfk1nitk1kef1wtpkvek  
w1kiscwa1nvglagmv1fv  
t1ipvgiyi1kdg1ledgyw1hsr1tsfyeqpl1vka1mwgrmpwdi1ftvgvii1lv1firgyr1h1kpk1yrv  
>tr|D2N3W9|D2N3W9\_STAA5  
msnkykdqaqdi1tavggven1vdvsydtvrmtihmhhaipstanevtqidgvasvdenetq1vivfneevkyvyqq1q1  
1mddakhqedtnhdavdtq  
eteqkaqakvt1tpi1lvkapiagrri11kev1rdsi1frekmvgegl1aikahkefkviapfsgkvsmivptkhavgiqsedgv  
divi1higvntvd1legkgfk  
cfvkqndrveaggt11qfdqqyiqeqgynsdv1vvi1snssdfnkvel1tmnei1ttedv1fki1fkn  
>tr|D2N3X0|D2N3X0\_STAA5  
mtk1lpqsfmwgga1aanqfeggydkggkg1sv1dvmtsgahgkarqitesidpnhyypnhegidfyhrykedia1fkemg  
1k1r1rtsiawtrifp1ngde  
dvpneeglafydri1fdeli1aqqiepvvt1shfemp1hlakhyggfrnrevvdyf1vhfarvvferykdkvtywmtfneinn  
qmdtsnpi1f1wt1nsgval1t  
endnpeev1yqvahel1lasalavr1lgkei1npkfkigtmi1shvpiypyschpkdmmeaqianr1rfff1pdvqvr1gyypsy  
akkmlarkgydv1gwqegdd  
s1lqqgtvdy1igfsyymstavkh1dvnttvenni1vngg1nhsvenphiatsdwgwa1dpdg1ryt1nv1ydryq1pl1five  
ngfgavdevvdghihddyr  
iey1kahi1taaieavdqgdv1ligytpwgi1divsfttgemkkrygl1iyvdrnddghgtmer1kkdsfywyqqv1iasngd  
k1  
>tr|D2N3X1|D2N3X1\_STAA5  
mag1qhreigta1stdnaswrgpnteaseksaynnvqvgggpnteeageksaynnvqvgagqk

Tsompanidou\_et\_al\_Supplemental\_FASTA\_File

>tr|D2N3X2|D2N3X2\_STAA5  
mskeaghtflaklgktrlprggkaatdwliqqgafsqdkhvlvacnmcttsiylahtygchiqgvdkkalekaqeni  
saaglesyiqvqqanavkl  
pfdnqfdivlneamltmpliaikekalkreyrvlpggillthdivivneshathvkslsaainvvnspqtklgwldl  
yhqagfnhvhyhtgpmslm  
tpkgliydegivgtikiinna1kknrmpfckmftmtrlrkdmnyitfvakkeh  
>tr|D2N3X3|D2N3X3\_STAA5  
mtknvvilgstnvdqfltvaryaqpgetlhveeaqkafgggkanqaiatarmqadttfkitgtdgvadfiledfkaah  
idtsyiiktteektgqafi  
tvnaegqntiyvygganmtmtpedvinakdaiinadvvaqleipipaiisafeiakahgvttvlnpapakalpnells1  
idiivpneteael1sgikv  
tneqsmkdnanyflslgikvtliltlgkqgyfatknqsqhieaykvnaidttaagdtfigafvsrlnksqdnladaidfg  
nkassltvqkhgaqasip1  
leevnqv  
>tr|D2N3X4|D2N3X4\_STAA5  
mkkstav1nehiskaiatighfdlltindagmpipndhrridlavtknlprfidvlatvleemeiqkiylaeiekehntq  
lqqikqlisseieiiifiph  
eemksnlahplnkgnirtgettpysnialesnvtf  
>tr|D2N3X5|D2N3X5\_STAA5  
msivalliglpigwffptvaskfggkpvhqiigatvgtlifaiilavtssgfpdgnllfallsgagwfgqiitf  
kafelvgsrampvttafq  
llgaslwgvfalgnwpgighriigftalvviligarntvserkeasnaknlrravlllgefgywlysaapqatsidg  
ltaflpqamgmvivaviyq  
fmmkaenpfrnkitwlqisgffafgaltylisaqpnmglatgfilsqtsvlatltgiyflkqhkskemvitiig  
lvilvaasvtvfik  
>tr|D2N3X6|D2N3X6\_STAA5  
mkkvsikdvareagvsvtvshlnhndsrfsattiknvhavseclyapnkhakqlrgskiqtigvilpsltnpffsa1  
mqsihdhkpsdvd1cflts  
tatdlydnikhlidrgidgliiaqyisspdalnnylkhhvpyvvlqndhqgytdfvrtneyqggqlaaqhl1elghnn  
mmivapydmmanmstrvtg  
fvdtlranqlpepqihte1skrggltivddimvsataifaindelaignlrgliehgisipkdisligyddidyaayv  
sp1ttvaqpitdigkts1  
t111qr1qh1dksidmie1ptt1kirattgyh1sn  
>tr|D2N3X9|D2N3X9\_STAA5  
mnnqtqssprsniiiaim1saltyw1faqsfinigplvgqyqtspavln1sis1tsfatgimvaagdiadkigqlrmt  
mgliismfas111iisdit  
alliiigrilqg1saa11lpstvgvlnnqfkgdhlrraisylm1stvggiglagvigglia1tnfgwqtnfiisiviafia1  
111kgtpkvsqhsrhphf  
dykgmsifavmigsft111tqgfeqgwfstfsfics111iittlif111errhevpidfsvlnrnpfigaf1nnfvlns  
glgvtvffiyagthlg1s  
aaqsg1vt1pyaivavamir1gekat1rfggk1m1iigplfpvigit1ismts1qpsqy1iavvigfvica1ignglvatp  
gl1tia1fsm1nekvg1latg  
lykmsgt1ggafgial1stvfsm1qlnyapsvaatitfivsv1milg1s1saymi1p1ktvks  
>tr|D2N3Y0|D2N3Y0\_STAA5  
mctgftiqt1nnqv1lgrtmdydyp1dgspavtprnyrwrtsrtgttqgtygfigtgdmeqfyigdgvneghvaistqy  
frgyssygsihkadannit  
qneivtwilgyttsiedmkqqasqihvvavy1ndigevpplhyhvsdatghsvevsfkegevvikdnpigv1tnhpd1dw  
hysnlrqyini1sypapan  
1legvtieplgneagtfg1pggftsterfvrmafmkaniaqndkemd1mnafy1ldavnipigivrphdadnhytmyqt  
vin1ttrtlykygsnei  
valkl1tdd1lnrkdm1tikpekhitirk1lndq  
>tr|D2N3Y2|D2N3Y2\_STAA5  
mieinn1skryrnkqifnh1tmsf1dsnr1tv1l1gdngagk1st1l1rmiagi1ekandgtinyfgekwnqrqiqnhi1gyvpqd  
ialfehmtvaenik1ffks1  
cknsindttiney1lq1nfn1dtsakvst1sggnkrkinilvg1l1gqpril1l1deptvgid1ksrhdi1h1llnimkskli  
il1tth1l1deval1d1dik1  
igqdpfyqhv1ledkqwaytyy  
>tr|D2N3Y3|D2N3Y3\_STAA5  
mkpyiq1lvvfkw1lqy11lvttivta1vl1igmgyrvahdnfk1ipitiq1ld1qttasksfvnik1qsdyvtik1kvdedesy  
ieddvtkkeai1smq1pkg  
fsq1l1kenr1ketiq1lygrddfiggiaveivss1lyeqq1pniiyeh1edmkqhsidainksy1hkhtpeskik1fvsltk  
qaqhsisis1lifavil1fvs  
avqvvl1hyr1nqqaalqr1sqyh1srfl1ystyvmtht1ll1ll1lavsl1ysqpl1s1l1fy1ks1ll1liyeigiv1filf  
hiqtishr1f1mtfiya1lam  
givy1t1fm  
>tr|D2N3Y4|D2N3Y4\_STAA5  
mktih1lfriyhs1fl1kkwy1liiy1l1filaa1l1it1l1tiqhvteddn1hf1nigvvd1kdssetk1l1l1nsigkgsn1l1gknvsi  
kayddkqaht1l1khh1l1qg

Tsompanidou\_et\_al\_Supplemental\_FASTA\_File

yfvfdkgmtkafykqgelpi svtydqsmksvvlsqltdsvyqrlmrsmggilafqdlapakshdsinvmtddlittgl  
nrsgafnlepihlydtgsy  
yaitgflatvfi falslftvlklnqdtvlkarlkmfhfskerllii rali twfytm lwstvgvwwiif sipntfelynwp  
tlaihlsyyvtflilwlll  
ielittgl lnsiskvilaivilvls gltiptiflqhiangvfniqp favvtqnllleilnnyilel hpsfyls fia llll  
nlavlvrwryrq

>tr|D2N3Y5|D2N3Y5\_STAA5

mskk1kiiipiivvlll iggiawgvyaaffantpknty l kseqqtakmykdyfndrfenevkfqekmkdnslssl elsad  
asdeivkglgipksvvnas  
kikmsyghdpkkeksminleptiadsal gkfqlaadkdkhyfespl fkgkysvnnsdlstyskltgedeetakengitn  
qqlnlntlfsnaqaqgsdy  
skiaekyselivdkl dddnfdkgkkeeikvngedykvrpvtl t lsradtkkitlavleakdkdklkk l mee qgatkdfe  
kdikkaiddvketkkdefi  
kiqskiytekhktivkreititdkennk tikgtntleddklkl dya l dfdqkytyaeakytikgvsskekdnyndkye  
fgkkteydeski kldnqek  
vdgtrqrdkgkitvaldkysdeneftfennidsdvknntqkstlnigikyaeepinfilksstklkadidfdsgakdfn  
slsskdreklekeiekngg  
kmfesilkkask

>tr|D2N3Y6|D2N3Y6\_STAA5

mkktiltmttllfmspsnaqaytndsktleakkahpnaqfkvnkdtgaytytydknnapnnnhqnqsr ttdnhqha  
nqrdlnnqyhsslsgqyt  
hindaidshppqtspsnpltpaipnvednddelnnafskdnkg litgidldelydelqiaefndkaktadgkplalngg  
kiidqplitsknnlytagg  
ctwyvfdkrakdghtistfwgdaknwagqassngfkvdhrprrgsilqtvnppfghvayvekvnidgsilise mwi gey  
ivssrtisasevssnyih

>tr|D2N3Y8|D2N3Y8\_STAA5

mkkknwiyalivtliiiiavsmi ffvqtkygdqsekgsqsvsnknknhiaivnedqpttyngkkvelgqafikr lane  
knykfetvtrnvaesglkn  
ggyqvmivipenfsklamqldaktpskislqyktavgqkeevakntekvsvnlndfnknlveiy ltsiidnlhnaqknv  
gaimtrehgvnskfsnyll  
npindfpe l ftdtlvnsisankyitkwfqtynksllsands tfrvntdynvstliekqns l fdehtamd kmlqdyksqk  
dsvelndnyinalkqmdsqi  
dqqssmqdtgkeeykqtvkenldklrei qsqespfsgmiedyrkqlteslqdelannkd l qdalnsikmnaqfaen l  
ekqlhddivkepdtdttfi  
ynmskqdfiaaglnedeankeyeai vkeakrykneynlkkplae h in l tdydnqvaqdtssl indgvkvqrtetiksndin  
qltvatdphfnfegdikin  
gkkydikdqs vql dtsnkeykvevngvaklkkdaekdf l kdktmhlqllfgqanrqdepndkkttsvvdvtlnhnldgr l  
skdalsqqlsalsrfdahy  
kmytdtkgredkpfndkrli dmmvdqvindmesfkddkvavlhqidsmeensdkliddilnnknttknkedisklidql  
envkktfaeepgepkidkg  
kndefntmssnldeksrisekstql l sdtqesk tiadsvsgqlnql dnnvnlhatgralgvrandlnrqmakndkdne  
lfakefkvlqnskdgdrq  
nqalkafmsnpvqknlvnlannngtdvisptl fvl l myllsmitayifysyerakgqmnfikddyssknhlwnnvits  
gvivttglveglivgliam  
nkfhvlagyrakfil mvi l tmmvflinty l l r qvksigmflmiaalglyfvamn l kaagqgvtnkisp l syidnmffn  
ylnaehpiglalviltvl  
igfvlnmfikhfkkerli

>tr|D2N3Y9|D2N3Y9\_STAA5

m l mnsvia l tfl tassngglnidvqheekrinndlnqydt l fnkdskevndaiakqkkerqqqikndmfqnqashst  
rlnetkkvlfsksnlekt  
esdkspyi qnkqekki fpyi l msvgafl t l gfvifsihkgrrtknesarksni

>tr|D2N3Z1|D2N3Z1\_STAA5

mvknhnpknemqdm l t p l daeeaa ktl r l dmreipkssikpehflmyll eqhspyfidael tel rdsfqihydindh  
tpfdniksftkneklryll  
niknl eevnrtrytflapdel f ftrdglpiaktrglqnvvdplpvseae fl trykalvicafnekqsfdalvegnlelh  
kgtpfetkviaatldllt  
af l deqyqkqeqdysqnyayvrkvghtvfkwaigm t t lsvlliaflaflyfsvmkhneriekgyqafvkedytqv lnty  
ddldgkkl dkealyiyaks  
yiqtnkqglekdkken l l n nvt pnsnkdy llywme l gqgh l deainiaty l d dnditklalink l neiknngd l sndkrs  
eetkkyndkl qdi l dkeqk  
vkdekakseeekakakdek l kqgeenekkqkeqaqkdkekrqeaerkk

>tr|D2N3Z2|D2N3Z2\_STAA5

m h k l i i k y n k q l k m l n l r d g k t y t i s e d e r a d i t l k s l g e v i h l e q n n g t w q a n h t s i n k v l v r k g d l d d i t l q l y t e a  
d y a s f a y p s i q d t m t i g p n  
a y d d m v i q s l m n a i i k d f q s i q e s q y v r i v h d k n t d v y i n e l q e q l t n k a y i g d h i y v e g i w l e v q a d g l n v l s q n t v  
a s s l i r l t q e m p h a q a d d y  
n t y h r s p r i i h r e p t d d i k i e r p p q p i q k n n t v i w r s i i p p l v m i a l t v v i f l v r p i g i y i l m m i g m s t v t i v f g i t t y f  
s e k k k y n k d v e k r e k d y k a

Tsompanidou\_et\_al\_Supplemental\_FASTA\_File

ylndkskeinkaiqafrfslnhyptvaeikdivetkapriyektshhdflyhklgianveksfkldyqeeefnqrrde  
lfddakelyefytdveqap  
lindlnhgpiayigarhlileelekmliaqlstfhsyhdleflfvtredevetlkwarwlphtmlrgqningfvynqrtrd  
qiltsiysmikeriqavre  
rsrsneqii ftpqlvfvitdmsliidhvileyvndlseygisli fvedvieslpehvditiidiksrtegelitkekelv  
qlkftpenidndvkeyiar  
rlanlihvehlknai pdsitflemynvkevdlvvnwrwrqetyktmavplgvrgkddilslnlhekahgphglvagtt  
gsgkseiiqsyilslainf  
hphevafllidykgggmanl fkdvlhlvgtitnldgdeamraltsikaelrkrqrlfgehvdnhinqyhlk fkegvatep  
mphlfjisdefaelksepp  
dfmkelvstarigrslgihlilatqkpsgvddqiwsnskfklal kvqdrqdsneilkt pdaaditlpgraylqvgnnei  
yelfqsawsgatydiegdk  
levedktiymindyggqlqainkdls g ledeetkenqteleavidhiesittrleieevkrpwlpplpenvyqedlv etdf  
rk1wsddakeveltlgkld  
vpeeqyggpmvlgkkaghialigspgygrttflhniifdvarhhrpdqahmylfdfgtnglmpvtdiphvadyftvdqe  
dkiakairkihdiiserkr  
llsqervvnieqynketgnsipnvfliidnydtvkespfmeeyeemskvtreglalgvvivilsgsrssaiksai ftnik  
trvalylfenneltniigs  
ykkgykdvkgraa inddnftqfqi aqpfelaegqtyneriknevaqmkefyvgdypkhipmmpdkvlmediqetydleki  
iheehklplgl dfedvelv  
sldltlpsil tartpndleivnrvldgmsklkesvttilvdadenmsdkasivnsyassedlqlikqgfiveikkrln  
serskesvkivfinnlkaf  
isitglnekdiryilsegpkvnytiissmyndilgtfdresklarqii nqavivtrlydqeflqakitnrepllkpyem  
yyfnknehikiklig  
>tr|D2N3Z3|D2N3Z3\_STAA5  
mgeikvetsstigkiesi snagsnvsfdnvsdsleytnispftgfaasstlttaisnyhsii tqdteamktavndfrdk  
dadiagqidgnnllgagl  
>tr|D2N3Z4|D2N3Z4\_STAA5  
mkslqgdkkrlqdavnsaqtii edfnsekkydgieieknqwsqtrnksddnrtnlntsidkykekfdkalnqmkkdle  
nleskiegvetdisniaae  
iqnidsqll  
>tr|D2N3Z5|D2N3Z5\_STAA5  
mgnkikmsevnfnaslqksllsstntktlknninklkdsefkgktasni nsynqsfhietisriekikeefekklkd  
aiedfqnsvdndhnailde  
daiekykgevkksieqiesiktrmstiggvhdlttaktisgkdvkekgetfnkqitdtldnfnfqslhflddsellsm  
itpvstmaskvknmpsnrs  
tisgnagyikseyklhsennqfre lkelekyesaiygnkyrktvksmieiknalivayiagdgnifkgnellaknqlg  
klgnkklklinatmqtnve  
niegkrlvkaakfi ldknnkmkfsek l kagfkmtrnysdtefkqlekvagryngksamkr gakaawesmsqkqlreflkn  
pknlnknicldevkdfllgkn  
klgkflksmryagkl lgp l gavaavannvneksgqkkivgsivdlgaiggsaatgtaigagigppfgaaigaaigtmgv  
istdiki vggksltdlakd  
klntvssirsngfgkllsnvf  
>tr|D2N3Z6|D2N3Z6\_STAA5  
mnntkenidtlrkpgaqalslasl fmi l fsc l tffygldyerfpnylkittieliiiiisllqwirfidfekesaqyk  
kiyarflvvinl ttitav  
fatcnlyyfvavqnhydlnfywlmgtisiiisylllviggmftllklpkvtrwggkthfgllltafsafiyierie  
yilvsnveskfvimvsii  
iiactqfvafqfimgysrfyife lntadd  
>tr|D2N3Z7|D2N3Z7\_STAA5  
mel dalvmpnlakmefsinpeywkdemsrksffidkriyvtgpivftrevvgldemkfvtyislnseiddipelnikfi  
psiallptishkcfdef  
envymkikefavennitl snspfyhvmvdyfggqvyeihaeinl dedele  
>tr|D2N3Z8|D2N3Z8\_STAA5  
mnel systimfrnviskeyldid l knlnevthflnevkyhdlnengpliltinqlmknekvni tyssinnisslhdsf  
efqsylyidqmlhnqlrp l  
nyeedikkgledierfakenqlqrispyyfilndvngfkwidikvkmey  
>tr|D2N3Z9|D2N3Z9\_STAA5  
mefllilivvaglyyiyiltavmysekivvlpiiyai vfvvivityifigdsydqltnfnvilymgslyfawmafrnlwn  
rplllkyknitdsssgivn  
kseynsveslrinieiakykgiislivaivl tvlmtlkstpqitaetrdlsisffilslfiiiiifavwdliirvrkgfta  
fvvirp ilfscwllfilnmi  
lsrll  
>tr|D2N400|D2N400\_STAA5  
mtfeeklsqmyneianeingmpvdwekvyamayiddgggevfyytepgnrnelyyysvlnkydisese fmdseyelyk  
qfqklnrifkeeghepwts  
cefdftregklkvsfdyidwinsefgqigrqnykyrkfgilpeteyeinkvkeieqyvkeqeeaei  
>tr|D2N401|D2N401\_STAA5

Tsompanidou\_et\_al\_Supplemental\_FASTA\_File

mnfeeklsqkyneiankissmipvewekvyamayinerngevfynytepsdsel fyysvlnkyniprsefmdsvyelyk  
qfdnlrelfieeglepwtscfdftregkl nvsfdyidwtkl efgqiakenyymykkfgvmpemkyeinkvkevekcikeqee  
>tr|D2N402|D2N402\_STAA5  
mttkenidilrkpgaqalslslflilfsc l t f f f g l d y e s f p n y l k i t t i e l i i i v i s l l q w i r f i d f e k e s a q k y k k  
iyvrflviinvlttittvvf  
alcnlyyfaavqnhydlnfywlmgtisiiisylllviggmftllklpkvtkrwwgkthfglllta l s s f i y i e k i e y  
ilipnvveskfiiivsm lv  
iagafvafqfimqysrfyife l n t e d d d  
>tr|D2N404|D2N404\_STAA5  
mtfeeklsemeyneianeisgmipveweqvftiayvtdqagevifnytklvmm  
>tr|D2N405|D2N405\_STAA5  
mfdelretfkkeglepwtscfdftregkl nvsfdyidwiklgfgpsgkenyymykkfgvlpeteyeinkvkevekyvke  
qe  
>tr|D2N406|D2N406\_STAA5  
mkri l v v f l m l a i v l a g c s n k g e k y q k d i d k v y k e q n q m n k i a s k v q n t i k t d i k q e d s n t h v y k d g k v i v i g i q l y k d r  
ekmyyfayeikdgkaeinr  
eidpikymkdhkadyedenvevekd  
>tr|D2N407|D2N407\_STAA5  
meksikimtiigivvqglatvflfmv laasgvmttdvsttvngevdpvdaetaaiftvlflflfifigiisiilgaig  
mfkasknkkm s g i l l i g a  
visgnitfalwlvsgiklltnkpkdeisdls  
>tr|D2N409|D2N409\_STAA5  
mwigm l g f a i t g i l l p f i t v i v v a f y d e g v e s v g n r i h p w f g f i f a v v i y m s i g a f y g i p r a a n v a y e i g t r h i l p v h n q  
wtliifaai f f a i v y w i s l  
npski v d h l g k l l t p l l l m v a l l s i a v i f n p e s a l s a p k d k y i t h p f i a g s l e g y f t m d l v a a l a f s v v i v n g y k f k g l  
tdrmkilkyvcfsgliaai  
llgm iyfa layvgastapgnfkdgtdiltynslrvfgsfgnivfgmtvilac l t t c i g l v n a c a t f t k k h v p k f s y k i f a  
l i f s i i g f l f t t l g l e m i l  
kia v p l l t l i y p v s i a l v l i s f a n m f s t f r f s w a y r l a t v i t l i i s i l q i l n s f n l l h g v i l k w f m m l p l a d i d l a w l v p  
fillaiigfiidvuirrp k  
qattk  
>tr|D2N410|D2N410\_STAA5  
mnki skyiaias l s v a t v s a p q t t n s t a f a k s s a e v q q t q q a s m p a s q k a n l g n q n i m a v a w y q n s a e a k a l y l q g y n s  
aktql d k e i k k n k g k h k l a  
ialdl detvl dnspyqgyasi h n k p f e g w h e w v q a a k a k p v y g a k e f l k y a d k k g v d i y y i s d r d k e k d l k a t q k n l k q  
qgipqakkshillkgkddk  
skesrrqivgkdhklvmlfgdnll d f t d p k e a t a e s r e a l i e k h k d d f g k y i i f p n p m y g s w e a t i y n n y k a s d k a k d  
klrknaikqfdpktgevk  
>tr|D2N413|D2N413\_STAA5  
mdlligt l f l f l v l v i f t l f t y k a p n g m r a m g a l a n a a i a t f l v e a f n k y v g e v f g i k f l e e l g d a a g g l g g v a a a g l t  
alaigvspvya l v i a a a c g  
gmdllpgffagymigyvmkytekyvpdgvdligsivilaplarliavlltpvvnstlirigdiisstntnpiimgiilg  
giitvvgtaplssmalta l  
lgltgvpmaigamaafssafmngtlfhr l k l g d r k s t i a v s i e p l s q a d i v s a n p i p i y i t n f f g g a i a g l i a m s g l i n  
datgtatpiagflvmf g f n  
hpttivyglvmaivgalagylgsivfkky pivtkqdm inrgavda  
>tr|D2N416|D2N416\_STAA5  
mnilfaitgiafalfvaf l f s f d r k n i d f k k t l i m i f i q v l i v l f m m n t t i g l t i l t a l g s f f e g l i n v s k a g i n f v f g d  
iqnkngftfflnvllplvf  
isvligilnyikvlpfiikyvgiainkitrmgrlesyfaistamfgqpevy l t i k d i i p k l s r a k l y t i a t s g m s a v s m a  
mlgsymqmiepkfvvtavm  
lnifsaliiasvinpyksddtdveidnltkstetktlngktgkpkkvaffqmigdsamdgfkiavvvavmllafislmea  
inimfgsvgl n f k q l i g y v  
fapiaflmgipwseavpagslmatklitnefvamldfknvlgdvsartqgiisvylvsfanfgtvgiivgsikgisdkqg  
ekvasfamrlllgstlasi  
isgsiiglv l  
>tr|D2N417|D2N417\_STAA5  
mkevgfgtlnwvaviy l l a m l l i g v y f t k r a s q s t n s f f t a s g r l p s w v v g f s i y a t t l s a i t f m s t p e k a f l t d w s y i  
agniaivaiipliyfyvp  
ffkklkvt sayeylearf g p s i r v i g s l l f v v y h l g r v a i v i y l p t l a i t s v s d m n p y i v a s l v g l l c i l y t f l g g f e g v  
vwsdfiqgvi l l g g a l v i i  
ilgvmnikggfgtvfadaiehkklisadnwklntaaaapiiflgnifnlyqytasqdvvqryqasds l k e t n k s l w t n  
gilal isap l f y g m g t m l y  
sfyaheavlpkgfntssvpyfiltemppfvaglliaaifaaqstissl nsisacisidikqrffgkgserhevnfar  
lviiagi fgfgmslylia  
snsndlwlflfvgtlfgvplagvfavgi ftkrtntfgvicglilgii fayvyngvgkgnsfpfystisftvafvfayil  
sfivppkhkkitgtl t i f e

Tsompanidou\_et\_al\_Supplemental\_FASTA\_File

kdkpstyisktatk  
>tr|D2N418|D2N418\_STAA5  
mnkd1kglyaa11vpfdengqvneqglkqiaqnaietee1dglyvngssgenf11nteqqkqvfvakeavgdkvk1iaq  
vgsldlneaie1gkyate1  
gydalsavtpfyypftfeeirdyfdiieatqnmiiyaipdltgvnisiefselfnhekivgvkytapnff11lerirk  
afpdkliisgfdemlvqat  
isgvdgaigstynvngrrarkifdlarqqiqeayqlqhsndiievtlsmgiyptlkeilrhrgidaglpkrpfpkpfne  
ahrqtdqliakyd1  
>tr|D2N419|D2N419\_STAA5  
myyiaidiggtqiksavidkqlnmfdyqqiptpdnkse1itdkvyeivtgymkqyhliqpvigissagvvdeqkgeivya  
gptipnykgtnfkr11ks1  
spyvkvkndvnaa11ge1klhgyqaerifcmt1gtgiggayknnqghidnge1hkanevgy11yrptenttfeqraatsa  
1kkrmidggftrsthvp1  
feaaegddiakqilnewaedvaegiaaqiqvmydpg11ligggiseqgdnl1kyiepkvahy1pkdyvyapiqttsknd  
aalygc1q  
>tr|D2N420|D2N420\_STAA5  
mkfenrvqryqhlftktdkrivnyirngysdafstinslahaigtspatmtrfshkl1dyenfqdlkfn1qqemtetvie  
nspiiqr1hkyhqqi1qqt  
gefinndi1qtfidklqssrhilfag1gssgl1satefyirmi1rgmlkgnvttdsh1mkisas11shsdmfiamsngnts  
elisaaevakshgayvva1  
tnfegsk1tdcad1v11ttqsrntdhqfintqiat1flidivsyh11lentn1sqtyqhtksi11dnk  
>tr|D2N421|D2N421\_STAA5  
m1phg1ivscqalpdeplhssf1mskma1aayeggavgirantkedilaiketvdlpvigivkrdydhsdvfitatskev  
deliesqcevia1dat1qq  
rpket1delvsyir1thapnveimadiatveeaknaar1gfdyigt1l1hgytsytqgq11lyqndfqf1kdv1qsvdakvia  
egnvi1tpdmykrvmd1gvh  
csvvggaitrpkaitkrfvqmed  
>tr|D2N422|D2N422\_STAA5  
mnqyhsnaqqpsawrffvyslvgl1cffi1pftingnti1fdvhv1lairsi1gpl1mpyvalimiligtal1pivrrt1fmts  
itn1vit1fkvagai1gim  
yvfki1gpsi1fkanygp1f1fek1mmp1silipvgaia1s11lvgyg11efvgvymepimrpi1fktpgksavdavasfvgsy  
s1g11itnrvykqgmynkr  
eat1iatgfstvsatfmi1vakt1gl1mphwn1lyfgit1vitfvvtaitaw1ppitnesteyngqegeqevaiegr1kt  
ayaeamkqnal1tps1lvknv  
wdn1kdgl1emtvgl1psi1sigf1glivanytpfidw1lgyifypfiyifpiadqavlakasa1sivemf1ps11lvtkaa  
stkfvvgvsvsai1ffsa  
1vpcilateik1pvk1i1i1w1l1rva1s11itipva11ifg  
>tr|D2N423|D2N423\_STAA5  
m1rgqeerkys1rkysigvsv1aatmfivssheaqasektptsnaaaqket1nqpgeqgnavtshqmqsgkq1ddmhke  
ngksgtvtegd1t1qsskh  
qstqns1ktsrtqndnqvkdserqgskqshpnnatnkterqndqvqnthhaernesqsttsqsndvdksqpsvpaqkvi1p  
nhdkaaptst1t1psndkta  
pkstkaqdas1dkhpnqddthqpahqi1dakqddnhvqseqkpqv1gdl1skhidgqnspekptdkntdnkq1k1kda1qapk  
trsttnaaadakk1r1lka  
nqvqp1nkyppvfvhg1gl1vgdnapa1ypnywggknfkvie1l1rkqgynvhqasvsafgsnydrave1yyyikggrvdy  
gaahaakygherygktyk  
imprnwepgk1kv1lvghsmggqt1r1meef1l1rngnkee1ayahqahgeis1p1ftgghnmvasi1ttlatphngsqaadkfg  
nteavrki1mfalnr1fmgnk  
ysnid1gl1tqw1gfkq1pnesyidyikrvskski1wtsddnaayd1t1ldgsak1n1nmtsmnpni1tyttytgvs1shtgpl1gye  
npd1gtff1mdttsri1gh  
dareewrkn1dgvvpv1ss1hpsnqpfv1vntnepatrrgiwqvkp1l1qgd  
>tr|D2N424|D2N424\_STAA5  
mwfekfknknnetkyryyeykdp1ytdk1wkrvsv1lnkntkqsqkeamf1ledkikek1lnnqss1ilkt1tfht11dewf  
eyhtktsgf1kv1t1dn1kt  
riknikknssq1n11nkidtkymqt1fine1sniysenqvkrq1ghmkeaikyavkfy1nypnehilnsvt1pkksktied1  
ekeeakmynylemeqvi1qi  
rdfi1lndnmqyraril1vagavevqaltgmrigella1qvkdvdl1knktidingti1hriknagfghkdt1tktagsr1rki  
ainsrianv1kkim1lenkk  
mqqwepsyvdr1gfi1fttcqgnpmqgsr1nkr1ssaes1ninkkv1t1t1rhthis11laemnis1kaimkrvghtdekt1  
ikvythvtekm1dre1leq1  
ek1ly  
>tr|D2N425|D2N425\_STAA5  
mtqf1ga111tgvl1gyipykyl1tmig1vseknkvintp11l1fsietcl1wfy1sfi1f1nnvd1kn1nliq111tg1kani1  
f1fi1fv1tvfv1fn1lvk1f  
i1w1l1ini1trk1f1m1k1dc1s111dkr1k1l1fn1ngk1pv1f1v1ik1dfen1rieegel1k1tynsags1df111everq1dfkvs1dasnd  
elyikht1vd1kq1q1k1ld1  
yl1mney  
>tr|D2N426|D2N426\_STAA5

Tsompanidou\_et\_al\_Supplemental\_FASTA\_File

mvdknkkqettrsnplnksfeksgaseklkstlsekakkkd  
>tr|D2N428|D2N428\_STAA5  
mglyeetliqhdyieireadvlpdnldgvwlgdlilikrglsdrekagilfeelahnklytygdiadyskfnnrkfenyar  
rhgfisavplreiveayny  
gvrnlyelseylqlseeyileaeieyqkkygigthygeysitfeplrvmkykei  
>tr|D2N435|D2N435\_STAA5  
mnrtrseglrigvqpvsksadassyltekernlgaielelikkvitat  
>tr|D2N436|D2N436\_STAA5  
mpkiiipptpentyrgeekfvkkllyakpteihqlfgvcrstvywnlkyrednlgvenlyidysatgtliniskleeyli  
rkhkkwy  
>tr|D2N439|D2N439\_STAA5  
mklhdsnrhakilasgkqwlncppsikasegiadkssvfaeegtfahelelyfslkyegltqfefnkafqnykrnqy  
yseelreyveeyvanveek  
ynea1srddvialfetklldlgyvpesfgtdvii fsggvleiidlkygkievsaidnpqlrlyglgayellsliydi  
htvrmtiiqpridnfstee  
lpisrllqwgtdfvkplarlangegefkagshcrfckikhsctraymqnvpqkpphllsdeeiaellykldpdkkwa  
devehyaldaqendknyp  
gwk1vegrsrmmidtkavrdr1veagykpeditetkllsitnlekligkafskiaegfiekpqqkltlatesdkrpai  
kqsaeddfdkl  
>tr|D2N441|D2N441\_STAA5  
mkfmidietysndiskcgaykyteaedfeiliaysidggpisaidmtkvdnepfhadyetfkialfdpavkkyafna  
nfertclakhfnkqmppee  
wictmvnsmriglpasldkvgevlrlqnqkdkagknliryfsipckptkvnggrtrnlpehdlekwaqfidycirdveve  
maiankikdfpvtaieqy  
wvfdqhindrgiklskslmlganvldkqskeellkqakhitglenpnsptqllawlkdeqglidipnlqkktvqdykkest  
gkakkmlerlqmsktsvk  
kynkmhdmcsdervrglffqfygagtgrwagrgvqlqnltkhyisdteleiardlikeqrfddldlllnvhpqdl1sq1v  
rttftaeegnelavsdfsa  
iearviawyakeqwrldvfnthgkiyeasasmfnvpvesitkgdplrqkgkvelalgyqggagalkamgalemgieen  
elqglvdswrnanpnivnf  
wkacqeaaintvksrktththglrfymkkgf1mielpsgralaypkasvgenwsgsvvefmgldlnrkwsklkyggk1  
venivqatar1laisiar  
leasgfki vghvhdeviveiprgsnglkeietimkpvdwakglnlnsdgftspfymkd  
>tr|D2N443|D2N443\_STAA5  
msiisnrkvdmetqdnvkqpahytygdieiidfieqvtaqyppqlafaignaikylsraplknghedlakakfyvdrvf  
dlwe  
>tr|D2N444|D2N444\_STAA5  
mtdsarkelylsrffgskrylyqdnervahihvndtyyfhghivpgwqgvkktfdtaeetyikqhdleyeeqkqltlf  
>tr|D2N446|D2N446\_STAA5  
mki kvkkemrldelikawdnpglatgrnfyptkdsidykcfsl ydgrnciikgfvsaddtfevefeediteetkvdrl  
ielfeiqegdynstlyent  
sikeclygrcvptkafylnddmtmtliwkdgelve  
>tr|D2N447|D2N447\_STAA5  
mqtykvs1cikflaskcdykikkhyfvqsineeeaknmal1trkklpftasievekveve  
>tr|D2N448|D2N448\_STAA5  
mmpkyrvwdtetkkmcvaldlhnsesysytkeneygkviketekmadvelmqsiginlwgrelyegdilkvvstk  
lwgiertktyiyldatgvv  
trnaigtii gdh11rvfaeevremptieylgnkfenpelleve  
>tr|D2N449|D2N449\_STAA5  
mnyetgfqlgvmdar1kkmrqrdeykkqrde1ivdiaklernerelenmwrvtvknellgryefyrfrlnelqiesrank  
avainmgakinasa1lyrm  
dkldgtnefyeflgmeddtne  
>tr|D2N450|D2N450\_STAA5  
mnnreqieqsvi sasayngndtegl1keiedvykkaqafdeileglpnamqdalkeidiyldeaigimvsqviyeyeeeqe  
nd  
>tr|D2N451|D2N451\_STAA5  
mnt1tidqlqellqikefddriptrnlndtvasmiiefvwintleffknkkqpgkpldtqldeiadylafslqltl  
tivdeedleettevmvdl  
enevtlplhsvyfvhvmhtlteqfvkgidnsivqvlimpflyantyysidqlidaykkkmkrnherqdgtagkgyv  
>tr|D2N453|D2N453\_STAA5  
mikk1knmdwfdifiagi1rlfgvia1mlvvispiytvasyqnkevhqgtitdkynkrqdkedkfyivldnkqviensd1  
1fkkkfsadiqar1kvgd  
kvevktigyrihf1nlypvlyevkkvdq  
>tr|D2N455|D2N455\_STAA5  
mwivisivilaif11v11ssishkmtiealeymsylfkqlvkngvegledyeneverirkrfks  
>tr|D2N456|D2N456\_STAA5  
mldkvtqietikydrdvsysyaasrlsthwtnhnmawsdmqlaqtvrktedlteynkmskseqadikdvvggfvgy1k  
egkrragqvmnrsm1tldi

Tsompanidou\_et\_al\_Supplemental\_FASTA\_File

dyaaqdmtdilsmfydfayclysthkhreisprlrlvlpkrvnadeyegaigrkvadivgmdyfdtttyqphrlmywps  
tsndaeffftypdlp1ldp  
dkilneyvdwtdtlewptssreesktrladkqgdpeekpgivgafcraytieeaietfipdlyekhstnrytyhegsta  
gglvlyennkfaysyhntd  
pvsqmlvnsfdlvrihlygaqedakttdtpvnrpsykamqraqndevvkkqlindkmsdamqdfdeivnsddawsetl  
eitskgtfkasipnieiil  
rndpnlkgkiafneftkqieclgkvpwntnfktrqwqgdgdsrslyiekiydhhsqtkkdaiisvamqnayhpvrlyl  
nkiswdghkrlek1fikyl  
gvedtevrntttkkaltagiarmepgckfdym1tlygpqvgksa11kk1ggawfsdsvsvtgeakeyalqgvw1mem  
aelaatrkaeveaikhfis  
kqvdrfrvayghyiedfprqci figttnkvdf1rdetgrrfwpmtnpervevnwsk1tkeeidqiwaekhyeeggee  
1fnpeleemrsiqnkh  
eespytgiideylntpipsnwed1tiferrrfyqgdvdm1ptgnvdyvernkvcalevvecfgkdkgdsrgsmeirkis  
nilrqlndwsvydgnksk  
irfgkdygvqiayvrdes1ed1m  
>tr|D2N459|D2N459\_STAA5  
maidfkphsyqkyaidkvidnekygl1dmglgktvst1tafse1q11dtkkmlviapkqvaktwvdevdkwnh1nh1k  
vs1vlgtpernda1ntea  
diyvtntkentkw1cdqykkepfdmvvidelstfkspsqrfksikk1plnrfigl1tgtpspns1qdlwaqvy1idrg  
erlessfsryreryfkpht  
qvsehi fkwelrdgseekiykqiedic1smkakdy1dmpdrvdtkqtvtv1sekerkvyeeleknyileeseegtvaqng  
as1sqk11q1sngavytdn  
gdvreihdkk1ekleeieesqgqpi11fynfkhdkerilqrfeattledsnykerwnsgdik1liahasaghg1nlq  
qgghi1vwfg1tws1elyq  
qanar1yrqgqnh1ti1hhimtdntidqrvykalqnkeltqeelmkaikariakhk  
>tr|D2N460|D2N460\_STAA5  
mgkasydikpgt fkyieseiylnqenkeinrlrmeilnptkel dtnivygplqkgepvrte1matr11tnkmlrnlee  
mveavesey1k1pedhkkv  
ir1kywnkdkk1kieqigdachmhrntvttirknfvkaiayahagik  
>tr|D2N461|D2N461\_STAA5  
mtkhnniykhgrksygydwfyhskawkk1reialdrdny1cqmc1redivtdanivhhiyvdedfnka1d1dn1msvcy  
schnkihandndksnikri  
rv1ki  
>tr|D2N463|D2N463\_STAA5  
mtikvlnepsk11ttwyaevtqgkiktskyvrkecdrl1rylenggwvfdelahrpirfiekfckpskgskrq1vl  
qpwqhfiigs1fgwvhket  
kl1rrfkealifmgrkngkttt1sgvanyavsqdgengaeih1lanvmkqarilfdeskamikaspk1dknfrt1rdeihy  
datiskimpqasdsdk1dg  
1nthmgi fdeihfkydk1isviknsraarlqpl1iyittagyl1dgp1vdmveagrtd1dq1iedertfyylas1dddd  
d1ndssnwikanpn1gvs1  
n1demkeewekakrtpaergdfitkrfni fanndemsfidypt1qknneis1lee1egrpctigydl1setedftaacatf  
al1dngkvav1thswipkhk  
veysneki1pyreewid11tvqdkpyidyqdvfdwi1ikmna1hypvekvtydranafk1nqel1knygfeteetrqgal1ts  
pa1kd1kemf1dgki1ifn  
np1mkwyinnvq1k1drngnw1pskqsryrkidgfaaf1ntytdimnkvsdsgeg1iefisikdimr  
>tr|D2N465|D2N465\_STAA5  
msmkakyf1mkrkskskge1fiygd1vsdkwfesdv1tatdfknk1del1gdiseidv1hinssggs1vfeghaiyn1mkmpa  
k1niyvda1aasiasviam  
sgdti1fmhknsf1mi1hns1wmtvgnaeelrktad11ektdavsnsay1dkak1dqeh1kqml1daetw1taeeal1sfg1i  
de1lganeias1skeqyk  
rfenvped1kkdvdk1tkiddvdtse1vetpkess1leekekrekikreceil1kmtmsy  
>tr|D2N466|D2N466\_STAA5  
mpt1yelkqslgm1gq1knkndel1sqkatdpn1dmedik1q1etekag1qqr1niverqvqdieekakvkd1tgeayqs  
1ndhek1mvkakaefyrhai  
1pn1fekpsmeaq11ha1lptgndsggk11pkt1skeivsepfakn1rekar1tnikgleiprvsy1l1ddd1fitdve  
take1k1kgd1tvkfttnkf  
kvfaa1sdtv1hgsdvd1vnwvna1qsglaakerkda1avspks1glehmsfyngsvkevegadmyda1inalad1lhedy  
rdnat1ymryadyvki1isv  
1sngt1nff1dtpaek1vfgkp1vftdaavkpi1vgdfnyf1ginydg1tytdk1dvkkgeyl1fv1tawydqqr1ldsafriak  
akentgs1ps  
>tr|D2N468|D2N468\_STAA5  
mefnefkdrayffqyvngpypdeekm1lyscfckiy1npsmkdreil1katesksg1tiiv1rsskteyl1pqt1nh1vkidr  
gsysdk1fniee1ridtpd  
1gyntv1lsek  
>tr|D2N469|D2N469\_STAA5  
msveikgipev1k1lesvygkqamqaksdra1neaseffikalkkefesfkd1tgasiem1tkskpytkvgsqerav1iew  
vgpmnrkni1ih1nehgytr  
dgkkytprgfgviakt1aaserkyrei1kkg1ar



Tsompanidou\_et\_al\_Supplemental\_FASTA\_File

>tr|D2N470|D2N470\_STAA5  
mniIntvkgi11sdae1kthinsriyykvtenaetskpfvvitpvyd1psdfmsdkylseeyliqidvessnhqktidi  
tkriry11yqqn1iqassq  
1dayfeetkryvmsriryqgipkniyyknqrie  
>tr|D2N471|D2N471\_STAA5  
maegggsykvfkr1yvgvfnppeatkvvkrmtwedekggtvd1nitglapdlvdmfasnkrvwmkkqgtnevksdmsifn  
ipsedIntvigrtkdkgnt  
swvgentrapyvtvigesed1tgqpyva11kgtfs1dsiefktrgekaeapeptk1tgdmnrkvdvdgtpqgivygy  
hegkegeaeffkkvfvygt  
dsedhsedsags1ps  
>tr|D2N472|D2N472\_STAA5  
mkt11kvykgddvbaseqgegkvsvt1snleadttypkgtyqvaweengkesskvdvpqfktnpilvsgvsftpetksim  
vntddnvepniapstatnk  
t1kytsehpefvtdertgaihgvaegtsvitatstdgsdksgqitvtvtng  
>tr|D2N475|D2N475\_STAA5  
mnekvegml1elk1dh1gvqegmkg1krq1gvvnsemkan1safdkseksmekyqarikg1ndr1kvqkkmysqvedelk  
qvnanyqkakssvkdeka  
y1k1veankkek1s1dkskeal1ksnte1kkaenqyrtnqrkqdayqk1kq1rdaeqk1knsnqattaq1krasdavqk  
qsakhkalveqykqegnqy  
qk1kvqndn1skndk1essyaktntk1kqtekefnd1nntikhnsanvakaetavnkekaal1n1ersidkassmktf  
nkeqmi1aqshfgk1asqad  
vmskkfssigdkmts1grtmtmgvstpit1gl1gaa1ktsadfeqqmsrvgai1aqassk1ksmsnqavdl1gaktksane  
vakgmeelaal1gfnakqtm  
eampgvisaaeasgaemattatvmasain1sfg1kasdanhvad11arsandsaadi1qymgdal1kyagtpqkh  
>tr|D2N476|D2N476\_STAA5  
mkk1gih1sdakgqfvgmge1irfqdnmkgmtreqk1atvativgteasgfla1ieagpdkinsysks1knsngeskk  
aad1mkdn1kga1eq1gga  
fes1aievgkd1tpmi1ragaeg1tk1vdgft1h1pgwvrkasvgl1aifgasigpavlagg11iravgsaakgyas1nrria  
ent11sntnskamks1gl1q  
t1fl1gsttgktskgfkg1agam1fn1kpinv1knsak1a1lpfk11kng1gl1aaks1favsggarfagval1kfl1tgpiga  
t1tai1t1aykvftaydrv  
ewfrnging1getik1ffgk1iggavr1k1gefkn1y1sigks1fekfskdmkdgyks1sddd11kvgvnk1kqf1mqtmgt  
askkasdtvkv1gkgvske  
teka1ekyvhyseen1rimekvr1nsgqi1tedkakk11kiead1sn1iaeiekrnkke1ektqelidkysafdeqekqn  
i1trtkeknd1rikkeqel  
nqkikel1keka1sdgqisenerkeiek1enqrrdi1tvkel1skekeqeril1vrmqrnrnaysideaskaikaekarkar  
kkevdkqyeddv1ai1knnv  
n1sksekdk11ai1adqrhkdevrkakskkdavdvkqkndidkemdl1ssgrvykntekwwng1kswwsn1fredqkkks  
dkyakeqeetar1nrenik  
kwfgnawdgvk1sktgeafskmgrnan1hfggemkkmwsg1kigipsk1ssswssakssvyhtkai1anstgkwfgkawqsvk  
sttgs1ynqtk1kqysdasd  
kawahsksi1wrgtskwfsnaysakgw1tdmanksrskwdni1stawsnaksvkgt1skwfgnsyks1kgwtgdmysrah  
drfda1ssawsnaksvfn  
gfrkw1sktydwi1rdigkdmgraaad1gknvanka1igg1nsmigginkiskaitdkn1likpipt1stgt1agkgvatdns  
gal1tqptfav1ndrgsgna  
pgggvqev1hradgt1fhapqgrdvvp1vgvdsvinandt1k1qrmgv1pkfhggtkkkdw1dq1kgnigkkagefgata  
kntahnikkgaemveaag  
dk1kdgasw1gdk1gdvwdyvqhpqk1vnkvmsg1n1nfgganatvkiakgays11kkk1vdvksw1fedfggggdgsy  
1fdhpiwqr1fsgy1tggl1nf  
nggrhygi1dfqmp1tgn1yavkggi1adkvwtdygggnsi1qiktganewnwymh1skq1vrqgqrikagq1ligksgatgnf  
vrgah1hfq1mqgshp1gnd  
takdpekwl1ks1kgsgvrsgsvnkaasawagdi1rraakrmgvnvtsgdvgni1sliqhesggnagitqsss1rdinv1q  
gnpakg11qy1pqtfr1hya  
vrg1hni1ysgyd11affn1rywrsqfn1prggw1spgpr1yangg1itkhq1aevgegdqemvip1trrkrai1q1teqv  
mri1igmdgkqnni1tvnndt  
stveki1vetncyakdkgnk1tda1liqt1vssqdn11sssdai1rgleki1skqsghranannymgg1tn  
>tr|D2N477|D2N477\_STAA5  
mqsfvki1idgykeevi1tdfnq1i1fl1daraespntndnsvt1ingvdgil1pgais1fapfsl1v1rfgygdgidvid1n1feh1w  
rsvfn1rrhpyy1vitsqmpg  
vkvavntanvtsn1kdgss1teievs1nvykgysesv1nwd1sefl1fdsnwm1fengip1dft1pkythtsnqfti1wngstdti  
nprfkhd1k1il1in1nasgg  
fel1vnyttgdi1fkykns1dkntdfv1ldgvyayrdi1nrvgid1tnrgi1it1lapgknefkikg1dv1sdikt1tkf1pfiyr  
>tr|D2N478|D2N478\_STAA5  
mdyhdh1svmdfne1licen11dvdygs1fkeyye1n1earyit1ftvyr1tthns1fvfd11licenf1iyhgekytik1qtap1kve  
gdkvfi1evtayhi1myefqn  
hsvsnk1ddd1ssetgk1tpeys1dey1rygfanqktsv1kmyki1igdfkrk1ipide1gnkng1leyckeavdl1fgci1ypn  
dteic1fyspetfyqr1sekv  
i1ryqyntdtvsatv1stle1rtaikv1fgkkytaeekknypik1tt1d1nysndfikegtyrtetig1skatin1fdck1ygn1etv

Tsompanidou\_et\_al\_Supplemental\_FASTA\_File

rftikkgsqggiyklildg  
kqikqiscfaksvqsetidliknidkgkhvlemi flgedpknridissnkakpcmyvgtekstvl nliadnsgrnqyka  
ivdyvadsakqfgyryant  
qtne dietqdkll efakkqindtpkte ldvnyigyeki eprds vffv helmgyntel kvvkl drshpfvnaidevsfsne  
ikdmvqi qqa l nrrvi agd  
nrynyqanrin hlytst l nspfetmdigs vli  
>tr|D2N480|D2N480\_STAA5  
menlylikdl galagrdrakeiqnlqrieqfal glt ttefkl hqkaktiqhfaeqiyyngsrqsavnsk l qsqins l v la  
prnsaneivqarvvnge  
tfdtlkeh l d dwetktqinkeetire l nkakqqi l dieyrfepdkqef l fv telap l tnavmqs f wfdnrtgivy m tqar  
nngym l sr l rpngqfidss  
li vggghgthngryidde l wiysfi l ng nnt l vrfkytpnvei sygkygm qdvftghpekpyitpvinekenkilyr  
ierprsqwelensmyiei  
sr l d d v d k n i d k v l h k i s i p m r l t n e t q p m q g v t f d e k y l w y t g d s n p n n r n y l t a f d l e t g e e a y q v n a d y g g t l d s f  
p g e f a e a e g l q i y y d k d s g  
k k a l m l g v t v g g d g n r t h r i f m i g q r g i l e i l h s r g v p f i m s d t g g r v k p l p m r p d k l k n l g m l t e p g l y y l y t d h t v q i  
d d f p l p r e w r d a g w f l e v k  
p p q t g g d v i q i l t r n s y a r n m m t f e r v l s g r t g d i s d w n y v p k n s g k w e r v p s f i t k m s d i n i v g m s f y l t t d d t k r f t d  
f p t e r k g v a g w n l y e a s n  
t g g f v h r l v r n s v t a s a e i l l k n y d s k t s s g p w t l h e g r i i s  
>tr|D2N481|D2N481\_STAA5  
msnleksvain l entahyenis n l d i t f r t g e s e s s v l l f n i t k n n q p l l l s e e n i k a r i a i r g k g v m v v a p l e i l d p f k  
g i l k f q l p n d v i k r d g s y q  
a q v s v a e l g n s d v v v e r t i t f n v e k s l f s k i p s e t k l h y i v e f q e l e k t i m d r a k a m d e a i k n g e d y a s l i e k a k e g l  
s d i q i a k s s i d e l k q l a n  
s r i s d l e n k a q a y s r t f d e q k r y m d e k h e a f k q s v n s g g l v t s g s t s n w q k a k i t k d d g k i m q i t g f d f n n e p e q r i g d s t  
q f i y s q a i n y p r d v s t n g  
t v e y l v v t s d y k r m t y r p n g t n k v f v k r k e a g s w s e s e l a i n d y n t p f e t v q s a q s k a n m a e s n a k l y a d d k f n k r y s v  
i f d g t a n g v g s t l y l n e s l  
d q f i l l i f y g t f p g g d f t e f g s p f g g g k i s l n p s n l p d g d n g g g v y e f g l t k s s r t s l t i s n d v y f d l g s r r g s g a n a n  
r g t i n k i i g v r k  
>tr|D2N482|D2N482\_STAA5  
mqi l v n k r n e i i s y a i i g g f e e g i d i e n l p e n f s q v f r p k a f k y s n g e i v f n e d y s e e k d d l h q q i d s e e q n t v a s d d i l  
r k m v a s m q k q v v g s t k l s m  
q v n k q n a l m a k q i v a f n k k l e e v k g e t e n a  
>tr|D2N483|D2N483\_STAA5  
m l k l i s p t f e d i k t w y q l k e y t k e d i a w y v d m e v i d k e e y a i t g e k y p e n i e s  
>tr|D2N484|D2N484\_STAA5  
m f g f t k r h e q d w r l t r l e e n d k t m f e k f d r i e d s l r a q e k i y d k l d r n f e e l k r d k e e d e k n k e k n a k n i r d i k m w i l g l  
i g t i l s t f v i a l l k t i f g i  
>tr|D2N486|D2N486\_STAA5  
m l m t k n q a e k w f d n s l g k q f n p d g w y g f q c y d a n m f f m l a t g e r l q g l y a y n i p f d n k a k i e k y g q i i k n y d s f l p q k l  
d i v v f p s k y g g g a g h v e i v  
e s a n l n t f t s f g q n w n g k w t n g v a q p g w g p e t v t r h v h y d n p m y f i r l n f p n n l s v g d k a k n v i k q a t a k k q a v i k p k  
k i m l v a g h y n d p g a v n g  
t n e r d f i r k y i t p n i a k y l r h a g h e v a l y g g s s q s q d m y q d t a y g v n v g n k k d y g l y w v k s q g y d i v l e i h l d a a g e s s  
g g h v i i s s q f n a d i d k s i  
q d v i k n n l g q i r g v t p r n d l l n v n v s a e i n i n y r l s e l g f i t n k n d m d w i k k n y d l y s k l i a g a i h g k p i g g v v a s e v k a  
p v k n e k n p p p a g y t l d k n  
n v p y k k e a g n y t v a n v k g n n v r d g y s t n s r i t g v l p n n a t i k y d g t y c i n g y r w i t y i a n s g q r r y i a t g e v d k a g n r i s  
s f g k f s t i  
>tr|D2N487|D2N487\_STAA5  
m a t k s f t t d y k f n n k a a e k l v n a m n k s e d a q f n r s n v f a q r l k t m e d l q n f k n k v k v i l  
>tr|D2N488|D2N488\_STAA5  
m e w q p n n t y v i a q n l i t k y q e i t g n s i v g d e m k v h k l m y y i q k t s i a l t g n a i i d e q f e g w v h g p v l p s l r g l f d y f v e d  
n t s r n k v n d t e e f i i e n a i  
y q y g k y a t w a l r e k s h e e i s w l n s r k g l s a n e r g y r n l a i e d i k e d a n k i r l y d y s y d m y i d e f e d l d e e e f i s a h  
>tr|D2N490|D2N490\_STAA5  
m d f l d f k r k g a e l a n f y t g i i n d l l r v e a t e g k g t q l k a s  
>tr|D2N492|D2N492\_STAA5  
m y r y k p l l q s i h l p n g i k i s n r f v l s p m t v n a s t k e g y i t k a d l a y a a r r s n s a g m q v t g a a y i e p y g q l f e y g f n i d h d  
a c i p g l t n m a s t m k q h g s l  
a i i q l a h a g r f s n q a i l n f g k v y g p s p m t l h s p i e h d v i a m s h e k i n s i i q q y r d a t l r a i k a g f d g v e i s i a q r l l i q t  
f f s t f s n k r t d h y g a d t l r  
n r a r l c l e v m r a v q e v i d k e a p d n f i l g f r a t p e e t r g s d l g y t i d e f n q l i d w v m d v s n i q y l a i a s w g r h i y q n t s r t  
p g e h f g r p v n q i v y e h l a g  
r i p l i a s g g i n s p e s a l d a l q h a d m v g m s s p f v t e p d f v h k l a e q r p q d i d l e f s m e d l e n l a i p r a a f k d i v k m m d y g e  
g l k k h t r d a l r q l e q n y h d

Tsompanidou\_et\_al\_Supplemental\_FASTA\_File

tsskdnfs  
>tr|D2N493|D2N493\_STAA5  
mvk1svldyalidegkdaqkalqdsvtlakladr1gfkriwftehnpafacsspellmmhtlaqtnh1rvsggvm1p  
hyrpykiaehfrmmaalyp  
nrldlginnpgttmvkqaldginptydsydesislrdyltikdkpsahlgvqphidhfpemwllsssatsakitael  
gig1svgtf11pdinaiha  
akdnidiykkhfqastikmdakvmasfvivadneaevaalqhaldwllgklqfaefehfsvdtaqkyk1ndrdkemi  
qahqari1agtqeqvkaq1  
ddf1atfevdevlvapl1ipgieqrcktlk1laey1  
>tr|D2N495|D2N495\_STAA5  
met1ksnkarley1indmrrerndndvlmpssfed1welyrglanvrpalpsvdeylavqdam1sd1nrqhvtd1kd1k  
pikgdn1fvwgdditt1ki  
dai1vnaansr1fgcmqanhdcidni1htkagvqvr1dcaei1rqqrnegvgkakitr gyn1pakyi1htvgpqi1rr1pv  
skmnqdl1lakcy1scl1ka  
dqhs1nhvafccistgvfafpqdeaaeiavrtvesylketnst1kvvfnvftdkdl1qlykeafkrdae  
>tr|D2N496|D2N496\_STAA5  
mmqsskwnams11mddk1kqaevl1rtaideadaivigigagmsasdgftyvgerftenfpdfiekyrffdm1qas1hpyg  
swqeywafesrfit1ny1d  
qpvgqsy1al1ks1megkhyhi1ttnadnafdaeydmthvfhi  
>tr|D2N497|D2N497\_STAA5  
mvvaqqdm1ipwemi1prcpkcdapmevnkrkaevgmvedsafhaql1rynaf1eqhqddkv1yleigigyttppfvkphf  
qrmtrknenalymtmnkka  
yri1psiqertih1tedist1litaal1rndsttknnnigetev1nrtd  
>tr|D2N498|D2N498\_STAA5  
myli1epirngeyi1tdgaialamqvyvnhif1dedi1lfpyycdpkveigrfntaievnqdyidkhsi1qvrrdtgggav  
yvdkgavn1mcc1leqdt1si  
ygd1qr1fyqpaika1lht1gatdviqsgnd1l1ngkkvsgaamt11nnriyggys111dvnyeamdev1kpnrkkiaskg  
iks1vrvr1vgh1realdeky  
rdi1tieefkd1mvtqi1lgiddikeakrye1sdadweaiqe1arkkyknwdwny1gkspsyeynrser1ssgtvdi1tisveq  
nri1adcri1fgdffgggdi1k  
dveqal1qg1kmtred1thq1kq1divvyfgnvtves1vemil1s  
>tr|D2N499|D2N499\_STAA5  
mnkv1vtgg1tg1fvgmri1sr1leqgyevqtti1rd1skadkvik1mqdngipter1mfvead1sqdehweamkdkcyv1  
svaspv1ffg1ktd1daevmak  
paiegi1qri1raeahagvkrvmtanfgav1gfsnkdksit1neshwt1nedep1lsvyeksk1laekaawdfvenent1ve  
fati1npvai1fgps1dahvs  
gsf1h1len11ngsmkrvpqi1p1nvvdvr1dvael1hilamkneqangkrfiatadgqin11leiaklikekrpeiaqkvstkk  
1sdfi1s1lgak1fnhqakeg  
k111dmrnr1vsn1erakt11gwepiatqeeai1laidsmakfhi1  
>tr|D2N4A0|D2N4A0\_STAA5  
mqai1nfivdi1sqpai1valiafi1glivqkkpaatitsgtik1tilg1f1ilsagadvvrs1lepfgkifqhafgvqg1ivp  
nneai1vs1al1kdfgt1taal1  
imvcgmivn1liarfn1kyif1l1tg1h1t1fy1maaf1ai1l1tvshikgw1l1tivigal1vl1glimav1pal1l1qptmrkitgndq  
va1lghf1gs1isyfaagav1gq  
l1fk1g1ks1k1steei1k1fpkg1l1sfl1rest1sis1it1mallyfiac1l1fagvsyvhesis1dgqnfiv1fs1liqgvtfaagvfi1l1tg1v  
r1li1aei1vpafkg1isekl1v  
pnskp1aldcp1iv1fpyaqnav1ligffvs1fitg1vig1m1fil1fl1fggv1vil1pgvvahff1lgataav1fgnarggikgavagaal1n  
gilit1f1p1l1fl1p1l1ge1lg  
gaatt1fs1dtd1flav1g1ivfn1avkym1gl1fgail1fii1vgatai1l1kgrqk1p1q  
>tr|D2N4A3|D2N4A3\_STAA5  
m1syrqie1ily1l1heqt1fipintianq1l1gvsprt1iydiayieqyaetyhyqvsr1nkaagikvttant1tilnelehn1l1t  
nqih1fskder1l1thia1kl1f  
ett1dpv1stk1qlag1dvnsr1rti1addikmi1qaq1ldqyh1kl1nyvhnkgfni1geedhyrkayahfihqymkqaapfi1ead1  
fnsesial1vrrai1ikt1lns  
enyh1lvqsaid1gliyh1iliaiqr1nenfs1fdipineidkwrhtnqyai1askmien1erscnvt1fpesei1fit1hl1l1gsk  
mteht1assit1feyhd1lsqn  
ihel1itcv1sqel1gidmskdnk1l1hts1lithikpaihrikydm1lqpnp1rqevmrrypqi1eavskhispieqdaairf1ned  
el1tyit1ihfassiervath  
kqsmikv1v1l1cgsg1ig1tsq1l1ksk1lnh1ypefhi1wdaysiy1qleesr1l1qdnidyvistvpceisavpvihvdpfinqqs  
rqk1lnqi1indareqrv1mkm  
atdgks1lad1l1pehri1inkp1lsiesaitvavqpl1indgivnsnytaailkqfeqfgsymvisphialihagtdyvqng  
vgfal1tyf1tegi1ifgskan  
dpvh1l1vit1latdhp1nah1kal1gq1sec1snd1yrqdf1ldg1nifkikqhialtmtke1v  
>tr|D2N4A4|D2N4A4\_STAA5  
meftysyl1frmi1shemkqkadqk1leqfdi1tneqght1glyyahqqdgl1tqndiakal1qrtgptvsn1l1rnlerkkliyry  
vdaqd1trrkni1gl1tts1gik  
l1veaftsi1fdemeqt1lvsq1l1seeeneq1mkan1l1mkm1ss1lq  
>tr|D2N4A5|D2N4A5\_STAA5

Tsompanidou\_et\_al\_Supplemental\_FASTA\_File

mkdeqlyyfekspvfkammhfslpmmigtllsviyglniyyfigfledshmisaisltlpvfailmglnlfgvgagtyi  
srllgakdyskskfvsfs  
iyggialgliviivalpfsdqiaailgargetlaltsnylkmvflsapfvilffileqfaraigapmismigmlasvgn  
iildpili fgfdlnvvgaa  
lgtaisnvaalffivyfkmnsdvsvniklakpnkemlseifkigipafmsilmgftglvlnlflahygnfaiasygi  
sfrlvqfpeliimglcegv  
vpliaynfmsnkgmkdvikavimsigvfvvcmiavftighmvglfttdqaivematfilkvtmtslll ngigflftg  
mlqatgggrgatimailgg  
vviipvlfimnalfgltgviwslliaeslcalaamlivyllrdrlvtvdtselieg  
>tr|D2N4A7|D2N4A7\_STAA5  
mnilkpakhikplpenqidtykr1rlqvflgifiygygyllrknfslampalqeqgftkaelgfalsavsiaygfskf  
fmgtsvdrsnarilvlgl  
vltaivnlmgfvpfftsigimfvllflngwfqgmwppsgrvlvhwfsvsergsktalwnvahnvgggimapiaawgi  
tttafinfgylkgfegvfi  
ypallalialiaisyvliirdtpqsqglppieiykndfatsdkktletelttkeilfkyvlnnkwwaiafanifvyfvyrg  
vldwapvylseekhfdlka  
sgwayflyewagipgtllcgyisdklfgrrgpagfffmjgvtvfvliywlnppgnawldnvsliagfliygpvmligl  
qaldyvpkkaagtaagltg  
lfgylfgavmanivlgavvdkgfwdvgflltaisvfamlsfiltwnkvqgetvhh  
>tr|D2N4A8|D2N4A8\_STAA5  
mnivghhhi smytkdakrnkdfytnvlglrlveksvndnpsmyhlfygdevgtagtilsfefipnaghkqpgtetiyrf  
sllvnpqaalhyfekrlen  
ngikserlylrrregvfkdeddleilvndsfevphqwqhnaipseipqayqilgigpvelrvrnaartveflenvlgy  
rkrdnksfdvltlapqgly  
sdfvvi eqqqrerpgrgyihhiavntpkmsdl daiykkllqqpqsnsgiidryffkslyyrhnsimye fateapgftid  
tpeqlgsqllnlpdfleae  
reqiesklhei  
>tr|D2N4A9|D2N4A9\_STAA5  
maklemdkntp1efglyslgdhllnfpkgekvsyegrineieaskladeagidvfavgeshqehfttqahtvvlgaiaq  
atkhi kvsssstiisatdp  
vrvfedfatldlishgraeivagrasrtgfdlfgydldkydel feeklglllelnkteritwsgkyrpe lnmkifprp  
idntlpiwravggppasai  
kagkgvpmmitl ggpamnfgksidayrqvateagfdaspslpvstaslyftaettqdamrefyphlntgmsfirvgv  
ypkqqfanspdyrealmgv  
spqqiieki lyqhelyghqrmaqldfggvpfenvmknieligndiipaikkhlsk  
>tr|D2N4B0|D2N4B0\_STAA5  
mnivllsgstvgsktriamddl knelevineghqielmdlrelelefsvgknyldttgdvykl ttslmqadvifigfpif  
qasipgalknfvdl1pvna  
frdkvlg1vatagsskhylipe mlkpi lsymkahtmqtyvfieekdfsnqqivnddvvr1kalaqstmrtakvqqqv  
eeennqydf  
>tr|D2N4B1|D2N4B1\_STAA5  
maslknkhfmigls1tfivalfsflaaklpildkvgaltiailiailyrhfrgypeqyssgitfsskyllrfaiilyglk  
lnifdiiggssrllaidvg  
vvi fsivmm1fvnkllhgdknia1llgvgtgvcgaaiaavapifksrekdtaisigialigtifsliytaiyaifsm  
tnvygawsgvslheiahvv  
lagfggsdalkiallgklgrvfl lip1tivlilimrfssessskgrisipyfligfvimalvntyvtipsallnilnt  
vsticllmamvalglnvaf  
kdlnra1kplmtiitsic1sslafivvhwlys  
>tr|D2N4B2|D2N4B2\_STAA5  
mssasfnsilalfcrikfykfgmnnkvviklscvigikginqsnhynaywrgpnkeadeksaynnvqvgvrgptkrnwi  
rnfyrccklagpqhrefrk  
eilqamqvgeeqqi  
>tr|D2N4B3|D2N4B3\_STAA5  
mfgmkvneqitlki levhdtealfnlvnrsrns1rewlpwvdateqssdtrafikrgllqfadngngfcgiwyggtlvgv  
ig1heinhmrktslgyyl  
dkqyeghgmtqavealikyfcdeidlnrieisvavneksqaipe rlgftregmlrdnellngiysssiyisllksefn  
eg  
>tr|D2N4B4|D2N4B4\_STAA5  
mkk1ttlllastlliaacgnddskkddskaskkddgvkaelkqatkaydkytdeqlneflkgtekfvnaienndmaqaka  
lypkvrmyersevaeaf  
gdldpkidarladmkeekkekwsgykhieka lyedkkiddvtkkdaqllkdake lhakadtlditpk1mlqgsvdlln  
evatskitgeeeiyshtdl  
ydfkanvegaqkiyd1fkpi lekdkklsddiqmndkvnklldkykdnnggyesfekvskdrkafadavna1geplsk  
mavite  
>tr|D2N4B5|D2N4B5\_STAA5  
mtnyeqvndstqfsrrtflkmlgiggagvaigasgvgsmsfksmfntpedpekdayefygvqpgittptqktckfval  
dlkskdrdaikamfkktv  
madrmmgdgtvgkasnplmppvdtgesiglgaskl tiftgiskslmkkig1sskipdafkd1phfpndqllddysdgd

Tsompanidou\_et\_al\_Supplemental\_FASTA\_File

miqacsndsqsvsfhavhn1  
vrpfrdivkvrwaqsgfisaqgketprnlmafkdgtinprknq1kdyvfiddgwakhgtycvvrriqihietwdrtale  
eqeatfgrkrhsgapltagg  
kefdeidlakdshgeyidkdahtlakeantsilrrafnyvdgtdrdtgnfetgllfiafqkatqqfidiqnnlgsnd  
k1neyithrgsasflvlpq  
vskggylgetlfd  
>tr|D2N4B6|D2N4B6\_STAA5  
mkhy1tkiivmlitaamvcnfgllksqaeeqqsisdvysvitdaksalsnsisndnkqkaieqvvsavkklsllednseg  
navksdvrkledakanddq  
kdtlsq1tksliayeek1askdagskik1lqqvdakdaamtkaikdknkaeleslnnslnqiwtsnetvirnydanqyg  
qievallqlriaihkspld  
ttkvshawttfksnidhvdksqgsandqyhvsq1nde1ekaikaidnnq1sdadtalthfieiwpyvegqiqtkdgaly  
tkiedkipyyqsvldehkn  
ahvkdglvg1nnqikevghsysfvdvmiiflreglevllivmtl1tmtrnvkdnkgtasviggaiaglvlsiilaitfv  
etlgnsgmlresmeaglg1  
vavilmfiogvwmhkrnkrwnamiknmyana1sngnlvllatiglisvlregveviifymgmigelatkdffviala  
iviliifallfrfivrlip  
ifyifrvl1snfifimgfkm1gvs1qklq1lgamprhviegfptinwlgfypsyepliaqaay1ivvailifkfk  
>tr|D2N4B8|D2N4B8\_STAA5  
maft1seiqqahqqftgvdfpklfkafkdmgmtynivniqdgatyvhqseddivtssvksnhpvapssnqsivqdv1tr  
hqqgqtdfetfcdemaag  
iykwhidiqagtctyidlkeqaiiselipq  
>tr|D2N4B9|D2N4B9\_STAA5  
mnrnlkelrardgl1nqtq1aklagvsrqtisliernnfmpsvltaikiarifnekvetifiieeda  
>tr|D2N4C0|D2N4C0\_STAA5  
mkilryigy1llgg1vggiiggilgnfdglgien1tfatynnvvisivati1ilveavlmnqrralkykr1vdeevd  
idatdqyellanryv1ngs  
ilsiiqtijallv1l1fvvgqaeangilfflipffvsgifntqft1fnrrfddrmpkiadknytekrleildegerh1el  
ialfktyain1sililaii  
figsysiatginqsfs1ll1iaifiynafsy1lkrrrfy  
>tr|D2N4C1|D2N4C1\_STAA5  
mtt1lnvdrvnkqykdsdfklqdas1tiatnetvlg1kngsgkstlinilvgnrhkdngsilffgeehamddveykehi  
gvvfd1rvpnk1tikdid  
kvfqs1ytswnsqkffdl1kyfelplqtik1tfsrgmrmkialtia1shdvk1l1ldeatagmdvsgreevmelledfva  
qgggil1sshisedieqla  
dk1vfmkdgrmi1teqkdi1laqyivtteekdveipkh1iasr1skgkyqilvkdyeeienaep1khiddatkiimrg  
ev  
>tr|D2N4C2|D2N4C2\_STAA5  
mkgmfl1ssfyatr1kqtyiyfivaiiaagyfavfnp1mssamagvmlitpitdnikhekdsrwmmyvst1pvkrsdyiksy  
fafy1ilfgas1miglvvt  
t1vtqsvm1gimsg1msfgiigaysiifpl1tkfgaensnvimifasi1ll1fsfvfffiygmvs gasalefekistggw  
lvvivyav1givit1svsy1  
lsiki1fnkqel  
>tr|D2N4C3|D2N4C3\_STAA5  
mvnal1tpkh1aekragfhe1lffdl1fvyaiqkiahviltiqngsisad1lffkyivms1flw1lmwshq1tfftr1fgqvtfk  
dvs1fmmf1nmf1mvf1sns1  
ypdfekt1ffp1flcvaimy1lsig1qy1l1higt1ldygdkrtcqafatvafvis1fs1s1sl1vlpqs1hyipg1flgvfiat  
gl1pfqky1vl1spvnmh1  
verfs1l1t1i1ifgevl1g1lassfsidhfsyiy1fqfmi1lis1fgvywi1itenyinhk1lssig1fr1syth1linialgvi  
naav1fsnnk1nd1fein  
mmyisv1li1fyig1lw1itpyfhne1tnakyisys1gilvmsyivs1l1fkghdhvmi1svsvatfcim1liyfnqr1rnkhk  
>tr|D2N4C4|D2N4C4\_STAA5  
mtrvvl1aayrtp1gvfggafkdvpay1gat1iehiiketg1npseinevi1gnvlqagqgnpariaamk1g1petvp  
aftvnkvcgsg1ksiq1lay  
qsivtgendiv1lagmenmsqpm1vnnsrfg1kmghqsmvds1mvyd1tdvfnqyhmg1itaen1veqyg1sreeqdtfa  
vnsqkavraqqng1efds  
ivpvs1pqrkgepi1vvtkdegvrenvsvek1sr1rpafkkdgtvtagnasg1ndgaamm1vmsedkake1nieplav1dg  
fgshgvdpa1imgiapvgav  
ekal1rskke1sdi1dvfelneafaaqslavdre1kl1psekvnvk1ggaialghp1igasgarv1vt1l1hq1ndevetg1ts1  
c1gggqai1aavvsky  
>tr|D2N4C5|D2N4C5\_STAA5  
mthyp1lwq1nt1lkqatwvd1thtfdpei1prfsefekge1vst1ftvkdhgfyvqrwnivtqyg1thidapihfvenkry1e  
did1ke1vl1pliv1ldfste  
vannnd1fivtra1ieawekehgtiepgt1fval1rtdwskrwpnietfenkdangq1happg1wdalky1lieerrveavghe  
tfdtdasvdv1vkn1gd1lve  
ryil1gqkyqve1l1tn1dq1lptrgai1yaispkpkdapg1fpvrafai1kpsnd  
>tr|D2N4C6|D2N4C6\_STAA5  
mttiktsn1lgfpr1lgrkrewkkaiesywakki1skeel1dq1td1lhken1ll1qkyyh1dsipvgd1fslydh1ildts1l1fni

Tsompanidou\_et\_al\_Supplemental\_FASTA\_File

iperfqgrtidddllfdia  
rgnkdhvasalikwfnntnyhiyvpewdnvepkvsrnvlldrfkyaqslnvnahpvivgpitfvklskgghqtfeekvktl  
lplykevfeslidagaeyi  
qvdepilvtddsesyentreydyfekagvakkliqyterahlkflsslpvvgglgldfvhdngynlkqieagdfdks  
ktlyagiidgrnvwasdie  
akkalikdllahtnelviqpssslhvpvslddetldssvgeglsfatekldeida lrrlfnqndsvkydklkaryerfq  
nqsfknl dydfesvrtsrq  
spfaqrieqqkrlnlplptttigsfpqsrevrkyradwknkritdeayetflkneiarwikiqedigldvlvhgefer  
ndmveffgek lqgflvtkf  
gwwqsygsravkppiiygdkwtapl tvdetvyaqsltdkpvkgmtgpvti lnwsfervd lprkvvdqialaineevl  
aleaagikviqvdepalre  
glplrseyheqylkdavlsfklatssvrdeqihthmcysqfgqiihaihdldadvisietsrshgdlikdfedinydlg  
iglgvydihspriptkeei  
ttainrslqgidrslfwvnpdcglktrkeeevkdaltvlnavkakarqe  
>tr|D2N4C7|D2N4C7\_STAA5  
msqfltlqkdnvlvadgaigtilysegl dtcpeaynlshpdkverihrsyieagadvitntyanfeklkrfgledkvk  
aihqaavriakkaankdty  
ilgtvggfrgikqedisltqilyhteiqidtlieegvdallfetyydlleltnvisrtrkkydipiiaqltasntnyln  
ggaineglkqlvqcganiv  
glnchhghphmqesfthielpehaylscypnasll diensefkysdnaqyfgvaqnliregvr liggccgttpehikfi  
kesigtlkpvndkkvipip  
tkalnpsqnkvrs ltskvqerptvii eldtpkhl dtnrffeniakldkanvdavtladnslatvrisniaaaslikqy  
ynieplvhitcrdrnligl  
qshllglsligvneilaigtgpskvghlpgatnv ydvnskgl telalrfnqgintgdal kkrthfniagafnpvrkld  
gavkrlekkiesgmsyfit  
qpvysekiieiyhatkhlnkpf figimpiasyknaflhnevpgikmsdeilqqfeavkddkaktrelslklskldit  
vheyfnglyiitpfqnv  
slelaaysksitahkeail  
>tr|D2N4C8|D2N4C8\_STAA5  
mtlsketevi fdwrrgveyhsanpplydsstfhqtslggdvkydyarsgnpnrelleeklarleqqkfafafasgiaais  
avlltfksgdhvilpddvy  
ggtfrlteqilnrnfieftvttdtkleqiegaiqsntkliyietsnpcfkitdikavskiaekhkllvavdntf mtp lg  
qsp111gadivihsatkfl  
sghsdlia gavitnea isea lyliqngtgm lsaqdswtlakh lktfpirfkqsvenaqkivsfl ikqdeisevyypgl  
taahleqaknggavigrl  
adeskaqqfvda ltlplvsvs lggveti lshpatmshat lpeevr qergitfglfrlsvgledpdeliadikyalkeafn  
esiph tier  
>tr|D2N4C9|D2N4C9\_STAA5  
mkdtqlaqitltddstg ia npihlstaykhpklgqstgfdytrtknptrstfetcfakleh giasfatssgmsaiqlc  
nlfkphdeilvsfdlyggt  
frlfefyeqy dikfkyvdf tdyeqveke itdktvalfiepi snqmi aidvkpyyqlckakgllsiidntfltpylstp  
laegadivlshatkyiggh  
ndvlagvvtvkdeslaqglfd fhnmtgat lspidsy111rglktlhl rieraqsnarklaekcqs lqaidevlysgqtgm  
lslrlnkaysvakll enld  
icifaeslggtetlvtfpytqthvdmpdaekdkrgideylirlslgvenyedierdiiqaldkaqigeiv  
>tr|D2N4D0|D2N4D0\_STAA5  
msksedqritktkdeqikkidisdikpnpyqprktfdenh lndladsikqygilqpivlrktvqgyyivvgerrfraski  
aglkysaiikdltdedmm  
elavienlqredlnaieeaesyqrlmtdlkitqqevakrlsksrpyianmlrllhlpkkiadmvdgrltsahgrtllai  
kdeqqlrlnkrvvkekws  
vrylenhvnelknvssksetdkvdi tkpkfikqerqlreyygakvd isikksvgkisfefesqddfvr iieqlnrkygk  
>tr|D2N4D3|D2N4D3\_STAA5  
maltagivglpnvgkstlfnaitkagalaanypfatidpnvgivevpdarllkleemvqpkktlpttfeftdiagivkga  
skgeg lgnkflshirevda  
icqvvr afddnvthvagr vpidiev inmelv ladlesvekr lprieklarqkdkaemevrilttikealengkpar  
sidfneedqkwvnaqllt  
skkmlyianvgedeigdddndkvkaireyaaqedsevivisakieeiatl ddedkemfledlgieepgl drlirttyel  
lglstyftagvqevrawtf  
kqgmtapqcagiihtdfergfi raevtsyddyvqyggesgakeagrql egkeyfmqgdgdivhfrfv  
>tr|D2N4D4|D2N4D4\_STAA5  
mnlnidwskdfqefqei lnsghpewlycakanlvlep aynggekqffstqdiinaskiipff  
>tr|D2N4D8|D2N4D8\_STAA5  
mpkgnivintknggkyl eshkelqkdrenvkintadiknvtfklvksvndieqv  
>tr|D2N4D9|D2N4D9\_STAA5  
mktlktitylaltiigayaa lfi lktidshg itdqfnlvkeddsyvktte vstrmddqlrsysqsafnkegketqliy  
tatfdvkphrylki thkgh  
hvetfevekeevpkka ldklsr  
>tr|D2N4E0|D2N4E0\_STAA5

Tsompanidou\_et\_al\_Supplemental\_FASTA\_File

mk1kslav1smsav1tacgndtpkdetkstesntnqndanttkdvialkdvktspedavkkaeetykgqklkgisfensn  
gewaykvtqqksgeesev1  
vadknkkvinkktekedtvnendnfkysdaidykkaikegqkefdgdikewslkddgklvynid1kkgnkkqevtvdak  
ngkv1kseqdq  
>tr|D2N4E2|D2N4E2\_STAA5  
mfgfigmlivggliwaagaimgkdipggilgniiagiigswlpggt1lghwgpelgsiyilpaligsiiialvtlilra  
mrk  
>tr|D2N4E3|D2N4E3\_STAA5  
mtiylvrhgesksnydnkhfrsyfcgqldvpltetgtksaddlcdyfkekqikhvyvsd1lrtqqtfehifpydiasttt  
p1lrerslgvfegeykdei  
sanpkyekyfndpnfkdfrrhsfsqkapegesyedvyqrvehfmnhvnedtqkddivivahqvvirclmvyfnnvsreea  
vd1kvenckpyiie  
>tr|D2N4E4|D2N4E4\_STAA5  
mkvritfiilailstivclflaamhptgpntvtfeqpylftlniimvlvalpslvlaiydymfrissailqflgaisw  
ff1slilsltqftpftlas  
fitsiilfisaiitlaiggkafdkndsh  
>tr|D2N4E6|D2N4E6\_STAA5  
mldvhfiypeklqnaceyfnlptqkegfevtihalrpenlkhkiyhdmdkteqkflletlisngnpvtiinshevn1kltn  
hlgfviqinedtffvn1f  
lsyinsevlidsaygefetldtkdhm1ndeifrvrqhtr1ndvtmeqal1lktndelkaicrqygikgfsnknkqnlvk1  
imtaffnnnhiieqvfsna  
slfefsiltgilesddnyr1nne1itfenih1mnpgtflithfyyyydfeydclilpndvrkhienyvniqigdgdkkai  
nkfideqtikhsladfena  
ielsmmddeahfdilynedddfedfgttdslrsdaitqliseikkglidkkdilprilgsvnlygilstnhllyltqr  
fydatfskeelqysldtla  
gte1yyieddfvfhpv1fdvveseasgidisdegyvvasve1iyydrhhy1ksdqaikeftsylrkqinmkndiekek  
yvneiim1l1rtiptsklvq  
pimqlfidnai1nnvqndal1iekatharnh1rlwslqghrdipn  
>tr|D2N4E9|D2N4E9\_STAA5  
mrnwi1fkyetif1kvq1l1tykqiaikkfgrvqlqyedf  
>tr|D2N4F0|D2N4F0\_STAA5  
msdhiyn1vkkhhsvrkfkknkplsedvvkklveagqsastssflqaysiigiddekiken1revsgqpyvvengylfvfv  
idyrrh1vdqhaetdmen  
aygsteg1lvga1daalvaeniavtaedmgygivf1gslrndvarvreil1dpdyvfp1fgmavgepaedengaakpr1p  
fdhvfh1nkyhadketqya  
qmadydqtiseyydqrtngrketwsqqiemflgnkar1dmleqlqksgliqr  
>tr|D2N4F1|D2N4F1\_STAA5  
mnafl1t1iniiv1vifiv1hmmarkhisfakrvftal1gigivfgv1l1hlaygthsniitstsdwfnivgqgyvallqmi  
vmp1ifisivaaf1tkiqig  
ekfakigslifif1igtvtiaaivgvvya1vfgldastin1gnaeqargseiakqakd1taht1pqqile1l1pknp1ldf  
tgqratstiaav1fasfig  
fay1rvarkqpdhge1lkraidaiysl1vmaivtfl1r1ltpygv1aimant1stsdfgaiwt1gkfliasyaalitmyi1h  
li1sl1gisp1ryvkk1t1  
evlifaf1srssaga1pl1nvqtqtr1l1vpegi1anfaatf1g1sigqngcagiypam1aimvapvanveid1lqfivt1iav  
vi1ssfgv1agv1ggatfas  
ilv1st1n1pva1agv1isvep1idm1grta1nvndsm1agtgtak1tkhwdkdtfesndnaal1tsh  
>tr|D2N4F2|D2N4F2\_STAA5  
m1tkefaqrvel1sekqvrkivq1leergyq1skteyrgreatdfkeediel1fkdiadkvkqtnsyd1afdelekekdf1q  
v1vkn1ddkn1lptnqnvag1  
ved1r1lei1qkmreerh1l1gqmmnqv1hq1qqel1kel1qnq1l1tkidsnses1kai1qt1qea1qeaqasqakv1aestnkven  
navtedkadskdskvagv1  
tstdakt1dtk1aenagdg1atkv1kedqisate1ietasveqskndka1aetsnkeatvdaeaqhd1aeqqv1aeahaeaskqv  
tsnds1seakaendstasq1  
emaepk1p1qeekkg1ffar1fn1  
>tr|D2N4F4|D2N4F4\_STAA5  
maditv1vndtge1lynv1nqk1ksegy1lese1ti1sksk1h1nd1hdse1s1lists1g1tfsdkm1k1l1tgedge1hav1sry1n1  
apde1lekyq1l1l1ddkm1v  
vgvr1dh1sshqev1lennsayeev1d1thfaeaskgpka  
>tr|D2N4F5|D2N4F5\_STAA5  
mellgqkvkedg1v1ideki1kv1d1gf1nhq1idak1mnevgrt1fyeq1fdk1gitk1iltieasgiapaimaal1hfdvpc1fak  
kakp1st1tdgy1yets1hsf  
tknkt1st1v1yskef1seedt1v1iidd1flangdas1glydiaq1qanakt1agigivveksf1qng1hr1leag1ltvss1ckva  
s1legnkvt1vgee  
>tr|D2N4F8|D2N4F8\_STAA5  
memakeqel1ilv1ldfgs1qynq1l1trri1remgvysel1hdhe1siee1kk1mnpk1gi1lsggpns1vyeegsftidpeiyngi  
pv1lgicygm1q1l1tk1l1ggk  
vaner1eygkai1naksdel1fag1paeqt1vwmsh1sd1k1vie1iepeg1fevi1adsp1st1dya1aedkkrriy1gvq1fhpevr1hte  
ygn1d1l1nnf1vrr1vceckgq

Tsompanidou\_et\_al\_Supplemental\_FASTA\_File

wtmenfieieiekiqrvgdrrvlcamsggvdssvavllhkaigdqtlcivfdhgllrkgegdvmveqfgegfnmniir  
vnaakdrfmnk1kgvsdpeq  
krkiignefvyvfddeask1kgvdf1aagtltytdviesgktaqtikshhvvglpedmefeliepintlfdkdevrklgi  
elgipehlvwrqpfpgpgl  
girvlgeitedkleivresdailrqvireeglereiwqyftvlpnisqsvgmgydyrtvgtviravtsidgmtsfari  
dwevlqkissrivnevdhv  
nrvvyditskppstiewe  
>tr|D2N4F9|D2N4F9\_STAA5  
mikykkkdgstaymfvaylgtdpihgkqrtrrgfktreakiaeaklqtevsqngflnndittfkevyelwleqqn  
tvrestygrvltlfdtai  
ehfqdvpikkitvpycqkvinkwnkkysdikairiytsnvfkyavs1kiivdnfpahtkaprkeaqdastkyysdel  
kqfltfveddplyyairt  
laftgfrgelmaltwkdldftkqtisinktcarganyk1iqepktskshrtisiddktasvlkswrthqrveslkygh  
ntsdkhghvfttvdnkp1  
yphcnkalldiceknsfkrikvhgfrhthcsllfeaglsiqevqdr1ghgdiktmdiyahvtekqrdaqvadkfakiy  
f  
>tr|D2N4G3|D2N4G3\_STAA5  
mkl1n1lyitltslltillaisntyvafstyal1itygfnltgglene  
>tr|D2N4G4|D2N4G4\_STAA5  
mnneqkeviqdiyntlavayntsmeyihncvdgkkewtenvnreehlqaiiewalqqiennfdndteveel  
>tr|D2N4G5|D2N4G5\_STAA5  
mnweikslfsdlk1lksdfed1kdnhgwyfdklyphephvlnkteaikeglisyherihnnqmf1l1hlytkqfdsiiq  
kfhelekassfadqsqdna  
>tr|D2N4G6|D2N4G6\_STAA5  
maikkkdriigvkeleipgelk1vpnwv1wraewnekqqnygkvpysingyrasttnkktwcdfesvsieyevdeqysgi  
gfv1sdggnfvc1didnai  
dekgqinse1akmmr1tycekspsgtg1hcfkkgk1pdrkkkrtd1dielydsarfmtvtgctigqndicdnqevnt  
1vdeyfenlpvndvree  
sntnmqlsdedi1inimmskqkdkid1lqgtyesyfesseavqs1lhy1afytgknkqmeriflnyn1tdkweskr  
gnttwgq1eldkaiknqkt  
iytksi1defnvi1pgskdvkq1lnq1gheertkmeenwieegkrkrp1tispikcayilneh1tfilfddeentklamy  
qfdegiytqnttiikrvis  
ylepkhnsnkadeviyh1tnmvdikektnspylipvkngvfnrktkqlesftpdylfttkistkynpvnvrpn1ngwdf  
hwlyeiacadkeivt1lwe  
vindsnngnytrkkai1ffvgdgngkgtfqelis1n1vgynvas1kvnfdhefk1svlegkavigddvpvginiedss  
nfksvvtgds1v1vknkq  
pyrtefrctviqstngmpkftdktgetnr11ivpfnadfndsnenvdikeky1kdnhvleyvlykainlefdrftipqv  
skm1eiykqndsvydfk  
ieefdqwniqkvpkkvvyryrafceengymgmsdrftfyrrefekylgkewntdakcryssideleeivgyinrt1mpfg  
qqhrsnyken1kiv  
>tr|D2N4G7|D2N4G7\_STAA5  
mnrnrnkqijleyikndstsfveienvfeeqgfykngaytsghnkni1fwmgnneeafnivad1krdgliemqicpp  
myy1idgkg1rlpivknkn  
ikidhw1pvtfs1vn  
>tr|D2N4G8|D2N4G8\_STAA5  
m1dhtnesvkrvfkyrdkqel1nkyhelldkyf1hni1sfyeedkneriyglvvhtknk1gdedyerv  
>tr|D2N4G9|D2N4G9\_STAA5  
mkefkeqfgyq1snfddm1dkgyanlyqkdigkdvsmieqglkq1sitetev1lpeqink1lglv1nmnevnsntwvg  
11tkq1vssennfnigelp  
tarkevfkellvnr1pqt1rdviti1tdehvesipalsyikdklatngiels1ngsskyfdrreghiytevadvvhgs  
drt1dd11keifinecvsy  
ett111dknasgl1dkdnq1s1ynqgikevsntsmydgikqamk1pqtfrkrvsvmntehtdklike1aqmg1gt1  
agd1tk1fnvshvvtda  
qdi1vgdfghaiyakyepimynkkqa1kgvyqfalnyvfdikivp1l1rivkvk  
>tr|D2N4H0|D2N4H0\_STAA5  
mvsdfesndkitevel1mhynpkvinskikamrsqieslyh1nmnhvitndndm1svsyp1dk1vlyiieekdkfeyym  
ktaqdr1n1fkdiiknyse  
neqqdvmrym1ssgkvknegvier1kvdiykesrkrqerqreel1hriefnkhleqvkkels  
>tr|D2N4H1|D2N4H1\_STAA5  
mtnike1teipkie1hch1dgsvsyey1ksqskkqkiqidmknvtvgehcer1dyylksfde1l1kvmqteesliesv1dv  
vkqaeqdgikyieiryap  
1htqkn1kilev1lavckgae1aesqcdvitr1ivcgmkhysnfenie1lkhv1knkd1qqyivgmd1aggeednsigky  
seaieyaknnfnitihag  
ecgciknyvdsvelgakrighgva11kseqeikefskrv1leicpksnvqtkaik1led1die1lkqynvpyl1ntdnr  
tvgtt1likeyr11lenn1  
ismdeikrinkeai1gytfdksei1l1mkki1  
>tr|D2N4H2|D2N4H2\_STAA5  
mklkkcimttalaigvaassigvyegsakastdkqitaneyydklake1kd11ne1nvnvlatss1dppykrnvqmygf



Tsompanidou\_et\_al\_Supplemental\_FASTA\_File

kakmvvksknyskmsiake  
eleniyreidealanyy  
>tr|D2N4H3|D2N4H3\_STAA5  
mkkkvliiltgalcasqIwnsdnasaivtgeanvyksssIvnggyvssseqakryldsIddliiynsvnrhagyeepeyk  
evdykyqkkflaeidavnk  
frqeqkkvdnrynrydrnnylygltyeryinvynsIkanredfdkevkkiedkhedImrfyeikqeqvnqemnkIenqilm  
igqafiktnrkavldmynr  
ldmvgtteqergnmIptnermrkikiedIetiideffndigekrpdnialtndehknkemitkIksdteaakkdvskr  
skrsIdkqkhsIseevse  
eqkvkynkemeeikekflakskIrnvasIddeddnghkqIiistptnkpiapptytetttqvpmpvlerqtqqqiyy  
napkplaglngeshdftit  
hqspttsnthnnvvefeetsalprksgslvgisqidsshIterekrvikrehvreaqIvdnykdthsyndrvkaqqk  
vntIgeahknyfnkqinkv  
yngk  
>tr|D2N4H4|D2N4H4\_STAA5  
mhnnnefnkkIkdfigsdrmvIvkgyvneykIttvlralnnsdytkgtihtrsighnkIqivdnriipknitqntifkIs  
nIltlevnIyerntiyhgdf  
aiyyvpesaliIetdtpriinhinnpvqkifiittndwsfntlelekivdetiIydlkqedpkqeyilyknkhgkIpy  
>tr|D2N4H5|D2N4H5\_STAA5  
mskninqanskItnsnkkIkqaysksdknmkviymphwIefysitihsdvtsnkkrykysysrgtvvyvklgsnigsef  
sgnhfcvildnkdnkgket  
vtivplsskgknnyIklnesvInIatdIkkqIidisskvqalaqkyrdidikIstedkklIsnInqkanelyrvigvys  
khkgkdyvnisaittisk  
rriksindsdptgtiIiseddmneiekqIkikffsn  
>tr|D2N4H6|D2N4H6\_STAA5  
mtkertrfssefkIqmvrlykngkIkneiIrkylkpsifnsikqhqtgsfnhqdnIksdekelikIrkqvhlkmeh  
dvIkqileli  
>tr|D2N4H7|D2N4H7\_STAA5  
mvpeekgsitIskaaiIfatakfkpfhnriknnpqktnpfkIhenkkt  
>tr|D2N4H8|D2N4H8\_STAA5  
mniisiliiIvafeffyImletiattscktsetfnisvdkIkdkninvIknqgvynIglvllvyglffssnpkelc  
aailvyiigvaiyggIssn  
isiffkqgtIplalIismIw  
>tr|D2N4H9|D2N4H9\_STAA5  
mniiltgatghIgtihtqaianhidhfhigvrnvekvpedwrgkvsvrqIdyfnqesmvkafkgidtvvfipsiIhpsf  
kripevenIvyaakqsgva  
hiifigyadqhnnpfhmspyfyasrlIatsgidytyvrnamymdpIkpyIpeImkmhkiIypagdrinyitrndiar  
gviaaiIknptdwgkryIIs  
gysydmkelaaIIsasgteikyepvsIetfaemydepkgfgaIIsmydagargIIdqesndfqqlvneqpqtIqsflq  
eni  
>tr|D2N4I0|D2N4I0\_STAA5  
mkfkaiakasalglmatgviItnisqsvqaktevqqseselkhyynkpvlerknvtgykytekgkdyidvIvndqysqi  
slvgsdkdkfkdgdnid  
vfiIregdsrqatnysiggvtsksnsyqidyintpileikkgnedvIkdllyiskedisIkeldyrlreraikqhgIysn  
glkqgqitiImkdgkshti  
dlsqklekermgdsidgtkidrilveik  
>tr|D2N4I1|D2N4I1\_STAA5  
mkmksiakvsIvlgIatgvntvteqpvhakenkhvqsqnsknIkayytqpsveyknvtgyiisIqpkpgtkflnmiegn  
tvnnIalvgkdkkehYhtgv  
hrnIdifvnedkrfegakysiggitkasdkvvdqvaearvikedhtgeyaydfpfkIckeamtIkevdfkIrkhlidh  
yglygemssgtvtvqmky  
gkytielDkkIqedrmadivkvididrievkvkka  
>tr|D2N4I2|D2N4I2\_STAA5  
mkiriakasalglvtgasivttqsanaevasalkagqlakisvpsaittttqavnaeqnrtanteqasksntenvs  
tspstkteqtpksniqkat  
qqtpsvtttspnvpqpspqtptkpttpssnvetqqpspttkqaqkeinpKfkgIrsyytkpsIefknelgiIkkwt  
tirfmniIvpyfiykialv  
gkddkkygegvrhvdvfiIveqnkygvdKysvggitkanrkvdynarikitkedkkgtishdvseykitkeeisIkel  
dfklrkqIieqhnlygnig  
sgtIvikmnggkytfeIhkkIqhrmadvidgtnidrievnlkss  
>tr|D2N4I3|D2N4I3\_STAA5  
mrmtqiakasalglIltgasivttqsakaevtpsIkselmsiIsvpsavttttqgvnaevasalkteqaiksniqkv  
tshstnaqpqstqstpkpt  
tppsavetppqpspttkqaqkeinpkykdlrtyytkpsIefekqfgfmlkpwtvrfmniIvdpwfiykialvgkddkky  
kdgpydniIvfiIlednky  
qIkkyvggitktnskkvdhkaelsitkdeegkisrdvseykitkeeisIkeldfklrkqIieqhnlygnigsgtIvik  
tknggkytfeIhkkIqehr  
madvidgtsidrievnlts

Tsompanidou\_et\_al\_Supplemental\_FASTA\_File

>tr|D2N4I5|D2N4I5\_STAA5  
mkmtaiakasalsilatqvntsttaqtnaseheskyenvtkdiflrdyysraskelknvtgyryskggkhylifdkhq  
kftrigifgkdielkark  
npgldi fvvkeanenrgtvsvyggvtkknkgaydylsaprffvikkevqavsvhvkryyiykeeis1keldfklrqyli  
qdfdlykkfpkaskikvtm  
kdggyytfeInkk1qtnrmsdvidgrniekieanir  
>tr|D2N4I6|D2N4I6\_STAA5  
mk1ktlakat1algl1ttgvitseggavkaaekqervqhlydikdlhryysapsfeysn1sgkvenyngsnvvrfnqkdq  
nhq1f1l1gkdkeqykeglq  
gqnvfvvqelidpngr1stvggvtksnktsetktqlvvnkvdggnldasidsfliqkeeis1keldfkirkqlvenygl  
ykgtskygkiiinlkdekr  
evidl1sd1lefermgdvl1nskdirgiavtinqi  
>tr|D2N4I7|D2N4I7\_STAA5  
mk1taiakat1algi1ttgvmtaesqtnakvkl1detqrkyinm1kdyysqesyestn1svksedygsvnlfnqrnk  
nfkvfl1gddrnkykelth  
grdvfavpelidtkggiyvtvggikknvrsvfygvshpglqvkkvdpkdgfsikelffiqkeevs1keldfkirkmlvek  
yrlykgtadkgrivimkd  
ekkehd1sekl1sfdmfdm1dskqiknievn1  
>tr|D2N4I8|D2N4I8\_STAA5  
mk1talakvt1algi1ttgt1tteahshakqihksvnxhdkeal1hryysgnfkemkninalkhgknl1rfkyrgmktqv  
1lpgdeyrkyqrrhtgl  
vffvqerrdkhd1syvtvggvtkntksgfvstpr1nvtkekgedafvrgypydikkeeis1keldfklrkhl1ekyglyk  
tiskhgsvkimkdgfsyn  
1n1rck1lafkymgevidskqikdievn1k  
>tr|D2N4I9|D2N4I9\_STAA5  
msitekqrqqaelhkk1lwsian1lrgnmdasefrnyilg1l1fyrf1sekaeqeyadal1sgedit1yqeawadeeyred1k  
aelidqvgfyiepqdl1fsa  
mireietqdfdieh1atairkvetst1geesendfig1fsdmd1sstr1gnnkertaliskvmvnl1dd1pfvhsdmeid  
m1gdayef1igrfaatagk  
kagefytpqqvskilakivtdgkdk1rhvydptcgs1l1rvgketqvryfygqernnttyn1armm1l1hdvryenfd  
irnddt1enpaf1ghtfda  
viannppysakwtadskfenderfsygyk1apkskadfafi1qhmvy1l1ddegmavv1phgv1l1frgaaegvirryliekn  
yleav1glpani1fygtsip  
tcilvfkkrqddnvl1fidasndfekgknqnl1sdaqverid1tykrketidkysysat1qeiadndyn1nipryvdtf  
eeeapid1dqvqqd1knid  
keiaeveqeinay1kelglv1kde  
>tr|D2N4J0|D2N4J0\_STAA5  
msntqkknvpe1l1rfpgfegeweek1gefagkvtqknvdkkyiet1l1tsnaelgi1sqkdyfdkeisnidnikkyvveen  
dfvynprmsnyapfgpvr  
nk1gkkgvmsplytvfkiqnid1nfiiefyksskwyrfmalngdsgaradrfsikdrftmemp1hipcmdeqikigqffs  
k1drqie1leek1el1qqq  
kkgymqkifsqel1rfkdengkdypeweettikeiaqintgkdktdkaidngsydfyvrspivykintfsygeailtvgd  
gvgvgkvfhyvngkfyhq  
rvykisdfknnygl1l1fyfysqnf1ketkysaktsvdsvrkdmi1nkvprpiyieqkkigqfikrvdnktkiqkqvie  
1l1kqrkks1l1qkmfi  
>tr|D2N4J1|D2N4J1\_STAA5  
mk1kniakas1algi1ttgm1tttaqpvkast1evrsqatqdl1kgyysgtgfnfqnvsgyrendkm1l1fsgsq1nvis1l  
gsdkerfknsdysgl1dvfv  
vregsgrqadnsiggiktnknnykdfvnnvg1leitkptghntatrqvetysinkeeis1keldfklrkhlidkhdlyk  
tepkdskirvtmknngdyt  
fel1nkk1qthrmgdvidgrniekievn1  
>tr|D2N4J2|D2N4J2\_STAA5  
mrenfk1rkmkvgl1svvai1tmlyim1ngqaeaseanekpstnqeskvvsqteqnsketktvesnknfvkl1dtikpgaakv  
tgtt1pnhyv1l1tvdgksa  
dsvenggl1gfveandkgefeypl1nrkivhnqei1evssspdl1gedeedeeveeastdkagaeesteakatyttpryen  
aykvpkq1ldkknghhqv1  
iepi1tegsgikghtsvkgkval1sinnkfinfetnanggpneeaksgsegiwmpiddkgyfnfdftkrfdd1elkkdn  
eis1tfapddedeal1ksli  
fktkvts1ledi1kaetkydhtkvnkvv1kdvked1lvdei1ygs1lyhtekgkgl1dkegtkvikgktkfanavkvdsel  
gesq1f1pd1qvdekgefsf  
vdvhagfr1lqnet1nftvdpitgk1l1sekvsknid1yqspekadrefdermentpayhkl1hgdkivgydtngfpit  
wfyp1gekkverkap1lek  
>tr|D2N4J4|D2N4J4\_STAA5  
mkykterreamgl1krftly1sil1ilivviagcgkneikedsketqikksfakt1dmpiknled1ydekyrdgefkk  
gdkgtwt1l1tsfsksnkpq  
eiddegm1ly1nrntkakatgyfvnkiyddi1sknqnekkyrvel1knki1l1dnvedek1kqkienfkffsqyadfdk1k  
nyqdg1t1tnenvpsyeae  
yk1nnsdenvkkl1rdiypit1tkkapi1k1hidgidk1gssvgykkyeykfskvkdqett1rdy1n1fgpsdeds

Tsompanidou\_et\_al\_Supplemental\_FASTA\_File

>tr|D2N4J5|D2N4J5\_STAA5  
mvagcgkgnetskedskeeqikksfaktldmypi knledlydkegyrdgefkkgdkgwtwlltsfaksnkpgeiddegmv  
flnrntkkatgyymnkah  
defnekdqkkyhvelknnkivlldnvedpnlknkienfkffsqyadfrdlknykngnisstdnvpsydaeykmsntdkn  
vkk1revypitkkspvlk  
lhidgdi kgssvgyknieynfskvkdqetavrdvfnfgpsdgd  
>tr|D2N4J6|D2N4J6\_STAA5  
meylkriglyisifiliaviagcgkdnikedsketqikksfaktldmypi knledlydkegyrdgefekgdkgtwviss  
amvkqpkgkimrsgmylf  
lnrnrtrtakgyfi vdvtskdtlkktedkekrypvkmvnkii pigpindegikkeienfkffsqygd fkg lknyqngdys  
ynseapsysakfqlsnddy  
nvkqlrkmydiqt kkapklllkgtdlkgssighkdi eftfvenqeenvfftdsleftpsedy  
>tr|D2N4J7|D2N4J7\_STAA5  
mnnfrqcalcigt svlllvs gcsvfdapegskeiqikksfaktldmypi knledlydkegyrdgefkkgdkgtwvrs  
emi iqpkgs ltsrgmtly  
mnrnrtrtttg yfsieeidsrkslderetekypvkmknkiipteeikdek lkeienfkffvqygsfkgienyengdis  
ynseapiysakyklnddy  
nvkelrkryniptekapaklllkgsgdlkgssvgykeiefiflenkkeniyfsdglnlipsd  
>tr|D2N4J8|D2N4J8\_STAA5  
mvl si fi igcdrsdi tenqredskeeqikksfaktldmypi knledlydkegyrdgef  
>tr|D2N4J9|D2N4J9\_STAA5  
mflsldrnrtrtakgyyfvrtfyrkdklpyrknykvemknkii lldkvedkklkqkienfkffsqyanlkelknysngdv  
sinenvpsydvkykmsnd  
envkqlrsryniptdkspvlkmhidgnlkgssvgrkleidfskrenshlsvidsldyqpaktnkdde  
>tr|D2N4K0|D2N4K0\_STAA5  
milsifvtscdgdnkigt sketqikksfaktldmypi knledlydkegyrdgefkkgdkgtwvirsemkiqlkgenlef  
rgvvl einrnrtrtakgnyi  
vrevvedsdgmthhntkmypvkmennknhsikttr  
>tr|D2N4K1|D2N4K1\_STAA5  
menykdgevtynpeapiysaqyqlknsdynveqlrkryniptqkapklllkgsgnlkgssvgyknieftfvenkgeniyf  
tdsvyfnpsedkyny  
>tr|D2N4K2|D2N4K2\_STAA5  
mkdeqkkeeqtntkdskeeqikksfaktldmypi knledlydkegyrdgefkkgdkgmwtiytdfaksnkadel snegmv  
lyldrnrtrtakghyfvktf  
yekdkfpdrkkykvemknkii lldkvedpkllkrienfkffgqyanlkelknynngdvsinenvpsydakfkmsnkden  
vkqlrsryniptdkapvlk  
mhidgnlkgssvgykkleidfskgeksdlsvidslnfqpakvdeder  
>tr|D2N4K3|D2N4K3\_STAA5  
mkdkyki dpgpi kynteettaiskisyeienaklygiksrtigrqidqlkeakfpsnleyvdsytdsltgvttsaflnk  
dtgkvtlqmtgtnlqdeaf  
kkkegefsrqvntaletvkdgyadlki lypasdqnyryantqefinkikskydidfitghslggrdavvl gmsngip  
nivvynpapisitslnpns  
pdgkrllelyknykgnitrfvaendaltenlkykhyvffgndkvfknkgghemegflteeqkaikke lklqgyaen  
nksfvknsnnaisklasie  
llranmmttnggg lsssqkvleslta ltaqsfsq liddeinqikkmynekkkkf gknwedaqkagkavgedlsvngvl  
naldegvnessmvrepeq  
misakerqlstigssvsnyimrvkl sineivdkdqlasqiggll  
>tr|D2N4K4|D2N4K4\_STAA5  
mmfnqiinnkneleesyesekkriene lqnlnelhrtrkenersydvfqlkhemnysedaqrk mtrnieaye qeinei i  
rkqewkleeykedlksye  
kqldklsd  
>tr|D2N4K5|D2N4K5\_STAA5  
mtliepdmnlrmpdisttvetlnliskmeaqkenirtvi apekhkykdi engl kgeekv lieqmaqhceafkanfk gaa  
qgdwvksamseidsikddl  
kkins  
>tr|D2N4K7|D2N4K7\_STAA5  
makipvtvlgylgsgkttlnhnlqnregrii avivndmsevnikdldvadgglsrtdek lvelsngcicctlrddll  
keverlvkkggidqivies  
tgiseppvpaqtfsyidde lgidltaicrl dtmvtvvdanrfvhdinsedllmrdqsvdetdersiadllidqvefcdv  
liinkidli seeelaklek  
mlsalqptakiikttnsevdlkev lntqrfdfekasesagwikel esgghashtpeteeygissfvykrrlpfhakrfnd  
wlesmpnvvrvskgi vwl  
qynhvacllsqagsscihpvtywvasmseaaqtqilaerqdvaaewdpeygd rhtqfviigtlddegaitkel dactlvn  
aqeidadwqqfedpyqwqi  
rpar  
>tr|D2N4K8|D2N4K8\_STAA5  
mlsfqllfslfvialialisgllflapvmpmryiklhlyilvmpvl favigffgihgqhvlgpfkidrlswllagfvma  
lgfiiqkfsmryllgdhhy

Tsompanidou\_et\_al\_Supplemental\_FASTA\_File

rhyfplftaitsfaslawmsedrlmalcwgmtllcltllmvrnfkwkpresaklssmtflcgwafvgaivtiyatg  
ewrvpqhiahtwslltnv  
llvlavmipaaqfpfhrwli esvtaptvsaimhagivnaggviltrfapifdngfalslllilssisvllgsgislvqv  
dykrqlvgstmsqmgfmlv  
qcalgvysaaiihlilhgi fkatlflqsgsivkrfnipkqasakdaygwiwgrvlaiivafllwmsdrrsayevlsali  
lawsllvswnqmvafskgr  
marlvgmilisi vtfiyithnyfydvlnitthattptisviisvvilifgslsiwvarhrysktfavlyvwlvnlg  
earskaieshpnlylky1  
>tr|D2N4K9|D2N4K9\_STAA5  
mttqlninsvienakrvitp lpsisifaarnpwegleadtfedvakwlr dvr dvi f p n k a l i e s a v a r g e l d e s v f n q l  
vtdmllehynipqhyinl  
yidnikt1kdvpasymhnsndvvdlllekskrmdasyhhydvrpmsdaiideqgeplseqvnrqmikwtklyidqfl  
sswtmpkreysfyhawhl  
aqhdhsftkagrqlpndpemtiesv lthfsidqedyqayveghlla lpgwagmlyyrsqqhhfeqylldylairl  
vveqllvgdefksvtkdce  
srsewfkqtvaswcyysdmpsdvllqhdvneiqtfihfaatmnknvfknlwliawemtyesqlkqkikaghesvagald  
aiqvnvsendnanqshsvs  
lndtqavdennselnqvctstkaqiafcidvrsepfrrhieaagpfetigiagffglpiqkdavdeqfkhdslpvmvppa  
yrikefadrydmvyrqqq  
qtmssmfytfk1mknvmpslllpe lsgpflslstivntimprksraslqkikqkwlkkpetkltidrefdrtsdlpvgf  
tegeqidfalqalklmdlt  
eafapfvvlaghashshnnpahaslecgacggassgnakllami cnrpnvrqglkqagvvpettvfaaehhtstdtl  
awvyvptlssialdayes  
lndampmihanrerldklptigrvnhpveeaqrfasdwsevrpewglaknasfiigrqltkgidlegrtflhnydwr  
kdedgtllntiisgalva  
qwinlqyyastvaphfygsgnkatqvtvsgvgmqnasdlmyglswqsvmaadrmyhsprllvvvqapdyvvarlla  
nnehfarkvsnhwlrmsv  
neegrfskwi  
>tr|D2N4L1|D2N4L1\_STAA5  
mlsiismchkhftdnikiikfllcilqikhcieiticyfqqfstiyiytegvgrinrvifvyialitlvrfftpi  
hpsfsnliywi fvl y f i p i  
ilcvigfkaekliatmviipnflgifyrlyayvihtlfm  
>tr|D2N4L2|D2N4L2\_STAA5  
midkk laspkmtvplfialivfigmfysvvtngewlnkidmgs ltwftdyfgepqrqyvnnlnfnyymtfsaeigdvkgv  
vlisiivtiilfikqrhla  
vwfvtylvsgvimnklikdvtl rprpynhlavdtgfsfpgshsnastllyfal m i i i s v a a k t i t k v l s a l v m g m l w l s  
ilfcrlyfhahyfsdvigg  
tslaiiwvalflmvyppyfihrrqrv  
>tr|D2N4L3|D2N4L3\_STAA5  
mriktpspsy lkgtnghail l h s f t g t n r d v k h l a e l n a q g f s c y a p n y p g h l l l k d f m t y n v d d w e e v e k a y q f l  
vnegyesiatgvs lgglm  
tlk laqhyp lkhia vmsapkeksddgli ehlvysqrmsnilndqqassaqlaa iddyegeitkfqhfiddimtnlnvi  
kmpanilfggkdapsyets  
ahfiyehlgsvdke l n g l k d s h h l m t h g e r d i l e e h v i r f f n a l t  
>tr|D2N4L4|D2N4L4\_STAA5  
mmkrqqsqwkssstgfilasagsaiglgamwkpymagi ygggaf lamfliftifvglpllimeftvgkmgrtyttqiysk  
l t g k k w l n i i g w n g l a v f  
ilfgfysviggwiviyigqvlwqlvifqrinh l q e m n f e a v i s n p w l t v l g q g i f i f a t m i i v m l g v e k g l e k a s k v m m p  
llfvfliiiviks l t l d g a  
legvkfilqprvseitadgilfalqgsfftlslgttgmitasyaskdmtikssaisivvmnifsvlaglaifpalhsf  
gyepqegpgllfkvlpmvf  
sqmhlgtllylglvlflfaaltssisllelnvsnftkndntkrkkvavigsilvfiisipatlsgilkdvrfgagtif  
dnmdfivsnlmp l g a l g t  
tlvvgqlldkkllqqsfgkdrfrl fsgwyylikyampvviilvfivqlfs  
>tr|D2N4L5|D2N4L5\_STAA5  
mitydliqntplvll ehysdekviyakleqwnpggsvkdr l g k y l v e m a i q e g r v r a g q t i v e a t a g n t g i g l a i a a n r  
hhlkckifapygfseekin  
imialgadvsrtsqsegmhgaqlaarsyaekygavymnqfesehnpdyfhtl g p e l t s a l q q i d y f v a g i g s g g t f t g t  
arylqhhvqcyavepegs  
ilnggvahahdtegitgsekwpiflerslvdgi ftikdqdafrnvks lakhegl l v g s s s g a l q g a l n l k a q l s e g t i v v  
vfpdgsdrymskeifnyee  
ndye  
>tr|D2N4L6|D2N4L6\_STAA5  
mnkktkl ihggh t t d d y t g a v t t p i y q t s t y l q d d i g d l r q g y e s r t a n p t r s s v e s v i a t l e n g k h g f a f s s g v a a i s  
avvmlldkgdhiilnsdv  
ggtyraltkvfrfgevdvdtthtdsivqairpttkmlfietsnp l l r v t d i k k s a e i a k e h g l i s v d n t f m t p y y  
qnpdlgidivlhsatky1  
gghsdvvalvatsddklaerlafisnstggilgpqdsyllvrgikt l g l r m e q i n r s v i e i i k m l q e h p a v q q v f h p s i

Tsompanidou\_et\_al\_Supplemental\_FASTA\_File

eshlnhdvhmaqadghtgv  
iafevkdtesakqlikatsyytlaeslgaveslisvpalmthasipadirakegitdglvrsvgieditedlvdldkqal  
dtl  
>tr|D2N4L7|D2N4L7\_STAA5  
mmiefrqvsksfhkkkqtidaikdvsftvnrndifgvigysgagkstlvrlnhleaasngqvivdghditnysdkmrd  
ikkdigmifghfnllnsat  
vfknavmplilskkskteiqrvtemlefvglsdkkdqfpdelsggqkqvaiaralvtnpkilcdeatsaldpattas  
iltllknvngtfgitimli  
themrvikdicnravmekqgvvetgtvkevfshpkttiaqnfvstviqtepstslirrlndeqvdfkdykifveetqv  
tqpiindliqicgrevkil  
fssmseiqgntvcymwlrfnmdqqfddkainqyfknekniqfeevh  
>tr|D2N4L8|D2N4L8\_STAA5  
mfgsdltsaqllqalyetlymvsialflgavigiplgvlvitrkqgiwvniqhvlvnlplnilrslpfiilliaivpf  
tkllvvgtsigttaavpl  
vyvapyiarlvensllevedgieaakamgasplqiiryflipealglvlaittaiigligstamagavggggigdlal  
vygyqrfdttviiitvivl  
vvivqvigtlgnilarfirrh  
>tr|D2N4L9|D2N4L9\_STAA5  
mkrliqlvivalvlacgggnndkkvtigvasndtkawekvkelakddidveikhfsdynlpnkaldgdidmnafqhf  
afldqykkahkgtnisals  
ttvlaplgysdikdvkvdgkavvipndvsnqaralklleaglikkkdfglagtvkditsnphkkitavdaqqt  
aralsdvdiavinngvatk  
agkdpkndpifleksdsdavkpyinivavndkdldnktyakivelysheaqkalqedvkdgekpvnlskdeikaietsl  
ak  
>tr|D2N4M0|D2N4M0\_STAA5  
mqkkviaaiigtsaisavaatqanaatthtvkpgesvwaisnkygisiaklkslnnltsnlifpnqvlkvsgssnstsns  
srpstnsgggsyytvqagd  
slsliaskygttyqnimrlngrlnnffiyppgqklvsgtasssnsasnsrpsntnsgggsyytvqagdsllsliaskygtty  
qnimrlngrlnnffiyppgqk  
lvtgnastnsgsttttrngyntpvfnhqnltywqctyhvfnrraeigkgistywannwnadnaaaadgytidnrptvg  
siaqtdvgyyghvmfverv  
nndgsilvsemnysaapgiltyrtpayqvnyryih  
>tr|D2N4M2|D2N4M2\_STAA5  
mikcvc1veetadkllvqvrnrekyyfpggkieegesqvhallrevkeeinltlmtdeieyigtivgpaypqqdm1tel  
ngfrsltkidwenvtinne  
itdirwidkdndaliapavkwietyggkhdh  
>tr|D2N4M3|D2N4M3\_STAA5  
mtnndtimlrhyvpqdysmlleafqlsesdlkfvtpeenitaamsdnerypivvmdgrqcvaftlhrkgkvapfsdnqd  
avffrsfsvdqyrnkig  
kvvmeklapfiistfqdineivltvntdnphamalyrqggyqymgdsfmvgrpvhimaltik  
>tr|D2N4M4|D2N4M4\_STAA5  
mnavfilal111flmiifggkkgfisytlflnfailiisivliifgvpiyvvtfffciiigacnlfvlnsynvktqaaf  
istivttillitliylsvy  
fghlqgfstegqdetvyvsmnigidmvqfmvftiilaviaavidltitisspiyelhqvnptltqyelqsgmrvgreil  
atsantiylaffggqlalf  
iwffk1kysfghiinskifaqefisiilggiavaisipitawitaflikrpsrqrkndesin  
>tr|D2N4M5|D2N4M5\_STAA5  
mkyrn1ftkpfniilglfciafigailftfnnenfynkpigqiidvkhvsstptkdaqnnrdtkyknqlkvkilngqfag  
etttinhqyvksqadseaf  
rthekvllhisnkpsdayiekkrdtltviitglfl1tvllvgrkvglqsilslilnsiailiaiyihqhsnlnfl1m  
tiamicstiltllvtgwh  
mrtlitvastiiigtflsiglteliymtdgkgyketmfnslppkdi1flavsligslgaimdvaitiasgmheilqrtp  
hismrrwalagrniqdim  
gtmtnil1fsylsgalpmfliflknantvtytismnwsleiaraltggigivltipitilfmeifetlrrakq  
>tr|D2N4M6|D2N4M6\_STAA5  
meikqlryfievakrehisetalelniaqsaisrqtllleqelnsvl1fkkqgrnimltsegkllfnealriehldstie  
qfqsghl1tknksiyigyde  
sdvshml1pliqtfh1qndthvipn1lehdtiinsvlnnidigfteltpeirkhkqlhmlplfeehyhlyapsddpitm  
athppliqfehshiyclap  
faesvkkqlrkitksdvytisslplaqyl1rqkegyiissqnihlpekswidikldhtelkrticaitkepytksdigi  
lltliqq1mtktstfh  
>tr|D2N4M7|D2N4M7\_STAA5  
mhneklikglydyreehdacgigfyanmdnkrshdiidkslem1rrldhrgvggadgitgdgagimteipaffkqhvt  
fdipegeyavglffsker  
vlgseheavfkkyfegeglsilgyrnvpvnkdaiakhvadtmvpiqqvfidiirdiedvekr1flarkqlefystqcdlel  
yfts1srktivykgwlr  
qikklytd1sddlyqskglvhsrfstntfpswkrahpnrm1mhngeintikgnvnmraraqhkl1etlfgedqhkvfqi  
vdedgsdsaidvna1efls

Tsompanidou\_et\_al\_Supplemental\_FASTA\_File

lamepekaamllipepwlneandanvrafyefysylmepwdgptmifscngdklgaaltdrnglrpgrytitkdnfivfs  
sevgvvdvpesnvafkqgl  
npgklllvdfkqnkviennlkgaiageipykawidnhkvdfdfeniqyqdsqwkdetlflkqrqfaytkeeihkyiqel  
vegkkdpigamgydapiav  
lnerpeslfnyfkqlfaqvtnppidayrekivtseisylgggnllapdetvlnriqlkrpvl neshlaainqehfkly  
lstvyegdledalealgre  
avdavkqgaqilvlddsglvdgngfampmlaishvhqllikadlrmstslvaksetrevhhvacllayganaivpyla  
qrtveqltltteglggtvvd  
nvktytdvlsegvikvmakmgi stvqsyqgaqifeaigls hdivdryftgtqsklsgisidqidaenkarqqsddnylas  
gstfqwrqqgqhhafnpes  
ifllqhackendyaqfkayseavnknrt dhirllefkactpididqvepvsdivkrfntgamsygsisaeahetlaqam  
nqlggksnsggedakry  
evqvdgsnkvsai kvasgrfgvtsdylqhakeiqikvaqgakpgeggqlpgtkvypwiaktrgstpgiglispphdi  
ysiedlaqlihdlknankd  
adiavklvsktgvtiasgvakafadkivisgydggtgaspktsiqhagvpweiglaethqtlkln dlrsrvkletdgl  
ltgkdvayacalgaefgf  
ataplvvlgcimmrvchkdtpvgvatqnkdlralyrgkahvvnfmhfi aqelreilaslgkrvedlvgrtdllqrs  
tlkanskaasidveklcp  
fdgpntkeiqqnhlehgf dlnlyevtkpyiaegrrytsftvneqrdvgvitgseiskqygevglpentinvytng  
agqslaayapkglmihhtg  
dandyvgkglsggtvikapfeerqnei agnvsfygatggkafingsagerfcirns gvdvvvegigdhgleymtgghv  
inlgdvgnfgqgmssgia  
yvipdveafvennqldt lsfkikhqeeakafikqml eehvshtnstraihvlkhfdriedvvkvipkdyqlmmqkih  
hkslhndedeamlaafydd  
sktidakhkpavvy  
>tr|D2N4M9|D2N4M9\_STAA5  
mavkredvkaivtaiggkenleaathcvtrlr l vlkdeskvdkda lsnalvkgqfkadhqyqivigpgtvdevykqfid  
etgaqeaskdeakkaaagk  
gnpvqrlikllgdi fipilpaivtagllmginnlltmkglfgpkaliemyppiadisniinviastafiflpaligwssm  
rvfggspilglvlgli lmh  
pqlvsqydlakgniptwnlfgleikq lnyqqqvlpvliaayvlakiekgl nkvvhdsikmlvvgpval lvtgflafiig  
pval l i g t g i t s g v t f i f q  
hagwlggaiygllyaplvitglh h m f l a v d f q l m g s s l g g t y l w p i v a i s n i c q g s a a f g a w f v y k r r k m v k e e g l a l t s  
gisgmlgtepamfgvnlp  
lkyfiaaistscvlgaivgmnnvl gkvvggvpafisiqkefwpylivtaiaivpciltivmshfskqkakeived  
>tr|D2N4N0|D2N4N0\_STAA5  
mskeidwrksvvyqiypksfndttgngigdingiiekldyikllgvdyiwltpvyespmndngydisdyleinedfgtmd  
dfeklikgahqkd lkvmld  
ivinhtstehewfkearks kdnpyrdyffr ssedgpptnwhskfggnawkydsetdeyylh l f d v s q a d l n w d n p e v r q  
slyri v n h w i d f g v d g f r f  
dvinliskgefkdskigkefytdgprvhelhelnrqtygntdmmtvgemssttiencikytqperqelnsvfnfhhlk  
vdyvdgekwt nakldfhkl  
keilmqwrqgiydggnai fwc n h d q p r v s r f g d d t s e e m r i q s a k m l a i a l h m l q g t p y i y q g e e i g m t d p h f t s i a  
qyrdvesinayhql l segh  
aeadv la i l g g k s r d n s r t p m q w s d d v n a g f t a g k p w i d i p e n y h q v n r q a l k d k d s i f y t y q k l i q l r h t h d i i t y g d  
ivprfmdhdhlfvyerhyk  
nqqlvianfsasavdlpeg lasegrvviqtgtventtisgfgaivietna  
>tr|D2N4N1|D2N4N1\_STAA5  
makqkkfmkiealkedilngqi qygeqipsehdlvqlyqssretvrka l d l l a l d g m i q k i h g k g s l v i y q e v t e f p f s  
elvsfkemqemgvaylte  
vvvnevveahevpevqda lninssesli h i v r t r r l n q h v k i v d e d y f l k s i v s d i g n d v a s d s i y d l e k v l n l n i s y s  
sksitfepfdeqayqlfgd  
vs l a y s a t v r s i v y l e n t m p f q y n i s k h l a n e f k f n d f s r r r i k  
>tr|D2N4N3|D2N4N3\_STAA5  
mnyqalrmyrpsfedvvgqehvktlrnaiskekqshayifsgprgtgktsiakvfakainclnstdgepcnechick  
gitqgtnsdvieidaasn  
gvdeirni rd kvkyapseskykvyiidevhmlttgafnal l k t l e e p p a h a i f i l a t t e p h k i p t t i s r a q r f d f k a i s  
ldqiverlkfvadaqqiec  
edealafiakaseggmrda l s i m d q a i a f g d g t l t l q d a l n v t g s v h d e a l d h l f d d i v q g d v q a s f k k y h q f i t e g k e v  
nr l i n d m i y f v r d t i m n k t  
sekdteyralmleldmlyqm id l i n d t l v s i r f s v n q n v h f e v l l v k l a e q i k g p q v i a s v a e p a q i a s s p n t d v l l q  
rmeql eqelktlkaqgvsv  
aptqksskkpargiqksknafsmqqiakvldkankadikllkdhwqevidhaknndkkslvsllqnsepvaasedhvlvk  
feeeihceivnkdekrss  
iesvvcnivknkvvgvpsdqwrvrteylqnrknegddmpkqqaqqt diaqk k d l f g e e t v h v i d e e  
>tr|D2N4N6|D2N4N6\_STAA5  
mkqpilnkleslnqeeaislhvpgkhnm t i g h l s q l s m t m d k t e i p g l d d l h h p e e v i l e s m k q v e k h s d y d a y f l v n g t  
tsgilsviqsfsqkkgdi l

Tsompanidou\_et\_al\_Supplemental\_FASTA\_File

marnvhksv1haldisqgeghfiethqsp1tnhynkvn1sr1nndghklav1typnyygetfnveeviks1hq1nipvli  
deahgahfglqgfpdstld  
yqadyvvqsfhkt1pal1mgsvlyihknapyreni1ey1syftsspsylimas1esaaqfyktydstvffdkraqliec  
lekkgfem1qvddp1k1li  
kyegftghdiqnfwmnahiyle1addyqala1lp1whhddty1fds11rkiedmilpkksvskvkqtq11ttegnykpr  
feyvtwcd1kkakgkvlar  
hivpyppgipii1fkgetitenmie1vney1etgmivegiknnkilvede  
>tr|D2N4N9|D2N4N9\_STAA5  
mdeqqq1tnayhsnk1shay1fegddaqtmkqvainfak1ilcqt1dsq1c1etkvstynhpdfmyisttenaikkeqveqlv  
rhmq1piestnkvyiied  
fek1tvqgens1lk1fleppdntia1il1stkpeqildtihsrqhvfykpidkekfinr1veqdm1skpvaemistytqi  
dna1al1neefd11al1rksv  
irwcel11tnksmaligi1d11kqaknk1q1s1tiaavngffedi1htkv1vedkqiysd1kndidqyaqk1sfng1ilm  
fdq1teahkk1nqvnpt1  
vfeqivikgvs  
>tr|D2N4P0|D2N4P0\_STAA5  
mpnviqvfqkagkleytpndiqvdiiddwvveskrgieigivknp1mdiaeedv1lp1kni1riaddkdidkfcner  
daena1il1ckdivreg1ld  
mr1vnceyt1dkskvi1fnftaddr1dfrk1lvkilaqhlktrielrqigvrdeak1l1ggigpcgrs1ccst1fgdfepvsi  
kma1dqnl1s1nptk1sgac  
gr1mcc1kyendyyeevraq1pdi1geai1etpdngkvva1n1ldi1smqvk1legheqpleykleetm  
>tr|D2N4P2|D2N4P2\_STAA5  
m1kenerfdq1ikedfsi1iqnddvfsfstda1l1gyftkprtkdiv1d1l1csgngvip1l1fakhprhieqveiqkt1vdm  
ar1rtfq1ndvdey1tmh1m  
d1knvtkvf1kpsqyt1vtc1npp1y1fkenq1qh1q1keahk1iarheimct1ledcmiaarh1l1keggr1nmvhradr1mdv1fe  
mrkvn1epk1kvfiyskvg  
ksaqt1vvegrk1ggnqgle1imppfy1inedgnyseemkevy1yg  
>tr|D2N4P4|D2N4P4\_STAA5  
mav1yl1vgtp1ign1adi1tyravdi1krvdm1acedtrvtsk1cnhydipt1ksyheh1nkdqtafi1ieq1el1g1dvalv  
sdag1pl1sdp1gyel1vva  
rdan1kvetvp1gnag1tal1masg1psyvyt1fg1fl1prke1eksav1eqrm1henst1liyesphrvtdt1ktiakidatr  
qvs1gre1l1tkk1feqiv1td  
vtq1qal1iqg1dvp1k1gefvi1liegakanne1swfdd1sinehvdhyi1qtsq1mkpkqaikkvaerq1ktnevyniyhq  
n  
>tr|D2N4P5|D2N4P5\_STAA5  
maketfy1t1pi1yppsgn1lhighaystvagdv1arykrmqgydvry1tgtdehgqki1qekaqkagkteiey1ldemiagik  
q1wak1eisnddf1rtte  
rhkhvveqvfer1l1kqgdi1y1geyegwysvpdetyytesq1lvd1pyengki1iggkspdsghqvelvkeesyffniskytd  
r1lef1ydqnpdfiqppsrk  
neminnf1kpg1ad1lavs1rts1fnwg1vhvpsnpkhvvyvwi1dalvnyisa1lgy1sddes1fnkywpadihlmakeivrfhs  
i1wpi1l1mal1d1p1pkkvf  
ahgwi1mkdgkmskskgnvvd1pni1idryg1datryy1l1mrel1pfgsdgvt1peafvert1nfd1land1gn1lvnrtismink  
yfdge1payqgp1helde  
meama1etvksytesmes1qfsval1stvkwf1srt1nkyid1ettpw1lakdds1qkdm1lgnvmah1lveniryaav1l1rpfl1t  
hapke1feq1ni1nnpqfme  
fss1leqyg1v1tepimvtgqpkpi1fpr1dseae1ayikesmqppateeekeei1pskpqi1dikdfkveikaati1daehvk  
ksdk1l1ki1qv1d1seqrqi  
vsgiakfytpddi1igkkvaivt1n1kpak1mgqksegm1lsaekdgvt1lvs1psaipngavik  
>tr|D2N4Q0|D2N4Q0\_STAA5  
miyetapak1inf1tdt1l1fkrndgyheiem1ttvd1lndr1l1tfhkrkdrkivveiehnyvpsnhknlayraaq1fieqyq1  
kqgv1tisidkeipvsag1a  
ggsadaaat1rg1lnr1fnigas1leel1al1gskigtdipfciy1nktal1ctgrgekief1nkppsaw1ilakpn1lgisspdi  
fk1in1dkrydvhtk1mcy  
alenrnyq1l1cqs1snr1epi1svskhpqi1dk1knm1ksgadga1msgsgptvyglarkesqakniynavngcnevylv  
r1lg  
>tr|D2N4Q4|D2N4Q4\_STAA5  
mrrhai1ilaagk1gtrmk1skkykv1hevagk1pmvehv1lesvkgsgvdqvvtivghgaesvkgh1gers1ysf1qeeq1gtah  
avq1maksh1ledkegtt1iv  
cgdt1pl1itket1let1iahhedanaqatv1sasiq1hpygygrivrnasgr1eriveekdatqaekdineissgi1fafnkt  
l1fek1l1tqvkndnaqgeyy1l  
pdv1s1li1ndggiveyrtndvee1imgvndrv1msaekamqrrtnhyhm1ngvti1idpdst1figpdvtigsdtviepgv  
ringrteigedv1vigqyse  
innstiengaci1qqs1vndasvgantkv1gpfaql1rpgaql1gadkv1gnfveikkad1kdgavsh1syig1davigertni  
gcgt1itvnydgenk1fktiv  
gkdsf1vgcnv1lvapvtvgdgvl1vaagst1tdvpnds1lavararqt1tkegyrk  
>tr|D2N4Q8|D2N4Q8\_STAA5  
mti1l1t1l1kednhf1qgl1nqvfgqant1vtg1l1spsakvtmiaeknaqsnq1l1l1itn1lyqadk1letd1l1qfidaeelyky  
pvqdimteefstqspq1lms

Tsompanidou\_et\_al\_Supplemental\_FASTA\_File

erirtlta laqgkglfi vplnglkkwlt pvmwqhmqmtlrvgedi dvdqflnklvnmgykresvshigefslrggi  
difplige piriel fdtei  
dsirdfdvetqrskndieevdittasdyiiteevishlkeelktayentrpkidksvrndlketyesfklfestyfdhqi  
lrrlvafmyetpstiidyf  
qkdaiiavdefnriketeesltvesdsfisi esngngfigqsfi kyddfetliegyptvyfsl fattmpiklnhiikfs  
ckpvqqfyggydimrsefq  
ryvnqnyhi vlvvetetkvermqam lsemhipsitklhrsmssgqaviiegs lsegfel pdmglvvitere lfkskqkq  
rkrtkai snaekiksygd l  
nvgdyivvhhgvgrylgvetlevgqthr dyiklqykgt dqlfv pvdqmdqvkyvasedktpklnklggsewkktkakv  
qqsvediaeelidlykere  
maegyqygedtaeqttfel d fpyeltpdqaks ideikddmqksr pmdrllcgdvgygktevavraafkavmegkqvaflv  
pttilaqghyetliermqd  
fpveiq lmsrfrtpkeikqtkeglktgfvdvvgthkl lskdiqykdgl llivdeeqrfgv rhkerikt lkhndvltlt  
atpiprtlhmsmlgvrd l  
vietppenrfpvqtyvleqnmsfikealere lsr dgqvfylynkvqsiyekreq lqmlmpdaniavahgq mterdleem  
lsfinneydilvttti et  
gvdvpnantliiedadrfg l sqlyqlrgrvgrssrigyayflhpankvltetaedr lqaikeftelgsgfkiamrdlnir  
gagnllgkqghgf idtvgf  
dlysqmleeavnekr gikepesevpevevdln ldaylpteyiane qakieiykklrktetfdqi idikdelidrfndypv  
evarlldiveikvhalhsg  
itlikdkgkiidih lsvkatenidgev l fkatqplgrtmkvgvqnnamtitl tkqnqwlslklvkcieesmrisdea  
>tr|D2N4Q9|D2N4Q9\_STAA5  
mkhkeafngvvv ltaalivikil savyripyqnil gdtglyayqqvypivalgmilsmnaipsaitq nigkysdeayak  
avayiq lvgml lfiavfv  
annihmmgdsh ltpmiqaas lsfifigmlgv lrgyyqsanmtvpaisqvieqvrv giiivt ivi fvdrgwtiyeagt  
iailastigflgssiylva  
hrpfkfk m vntakivwkqfal svlifaisqliv ilwqvidsvtiikslqairvpfdvaitekgyvdr gasfiqmg lvt  
ttfsfalip l lsdai kmn  
qvlmnr yanaskitilistaagiglin l plmngvffktn d l t l t lsvy mitvicvslimmdmallqaqhavrpi fvgm  
taglvikfilniilr lsg  
iigasistvvsliifgti ihavtrkyhlhamrrffin v l gmvfmsivvqc v l nvtthgritgliellcaavlgial  
ffyi frfnvlyteltylp  
fgsklyqikkgr  
>tr|D2N4R0|D2N4R0\_STAA5  
mahtitivglngygid d l plgiy kflktqdkvyart l dhpvies lqdel t fqsfdhvyethdq fedvyndivaqlveaan  
ekdivyavpghprvaett  
vkllal akdntdivkvlggksfidvfeavnvd pndgft l l dats l qeet l nvrtht l itqvysamvaan l kitl mery  
addyvpqivtgarsgdan  
vvtcplyel d hdenafn l tsvfvpkittptylyhdfdfatevidt l vdedkgcpwdkvqthet l krylleetfel feai  
dneddwhmieelgdil lqv  
llhtsigkkegyidikevits l nakmirrhphi fgdanaetid l keiwskakdaegkqprvkfekvfaehfl nlyektk  
ksfdeaalqwl ekgesn  
t  
>tr|D2N4R4|D2N4R4\_STAA5  
mq lnsngwhvddhivvavstgid smcllyql l ndykdsyrkl tclhvnhgvr sasieearfleaycerhhid l hikk l d l  
shsl drnnsiqnearikry  
ewfdemmnv leadv l l tah l d d q l e t i y r i f n g k s t r n k l g f d e l s k r k g y q i y r p l l a v s k k e i k q f q e r y h i p y f e  
desnkdnkyvrndi rnrri  
paidennq l kvsh l l k l qwhdeqydi l qysakqfi qefv kfdeqskylevsrqsfn l pns l kmvvl d c l l skyyel fn  
isaktyeewfkqfsskkaq  
fsin l tdkwi iqiyagk l iimaknngdyfrvqtiekpgnyi fnkyrleihsn l pkclfp l tvrtrqsgdt fkl ngrdgy  
kkvnr l fidckvqqvrdq  
mpiv l dkq q r i i a v g d l y q q q t i k w i i s k n g d e  
>tr|D2N4R5|D2N4R5\_STAA5  
mhnd l kev l l teed iq n i c k e l g e q l t k d y q g k p l v c v g i l k g s a m f m s d l i k r i d t h l s i d f m d v s s y h g g t e s t g e v q  
i i k d l g s s i e n k d v l i e d  
i l e t g t l k s i t e l l q s r k v n s l e i v t l l d k p n r r k a d i e a k y v g k k i p d e f v v g y g l d y r e l y r n l p y i g t l k p e v y s n  
>tr|D2N4R7|D2N4R7\_STAA5  
mthdyivka l afdgei rayaal ttetv qeaqtrhyt wptasaamgrtmtatammgam l kgdqk l tv tvd g q g p i g r i a d  
anakgevr ayvdhpqthf p  
lneqgkl d v r r a v g t n g s i m v v k d v g m k d y f s g a s p i v s g e l g e d f t y y a t s e q t p s s v g l g v l n p d n t i k a a g g f i i  
q v m p g a k d e t i s k l e k a i s  
amtpvsk l i e g g l t p e g l l n e i l g e d h v q i l e k m p v q f e c n c s h e k f l n a i k g l g e a e i q n m i k e d h g a e a v c h f c g n k y  
kytee l n v l l e s l a  
>tr|D2N4R9|D2N4R9\_STAA5  
mtk t k i m g i l n v t p d s f s d g g k f n n v e s a v t r v k a m m d e g a d i i d v g g v s t r p g h e m i t v e e l n r v l p v v e a i v g f d v k  
i s v d t f r s e v a e a c l k l g v  
diindqwaglydhrmfqvvak y daeiv l m h n g n g n r d e p v v e e m l t s l l a q a h q a k i a g i p s n k i w l d p g i g f a k t r n e e



Tsompanidou\_et\_al\_Supplemental\_FASTA\_File

aeimar1delvateypv11  
atsrkrftkemmgdydtpverdevtaattaygimkgvravrnhvelnaklakgidflkenenarhn1s  
>tr|D2N4S0|D2N4S0\_STAA5  
mqdtiflkgmrfygygha1saeneigqifkvdvtlkvdlaeagrtdnvidtvhygevfeevksimegkavn1lehlaeri  
anrinsqyn1vmetkvrit  
kenppipghydgvgieivrenk  
>tr|D2N4S2|D2N4S2\_STAA5  
mseemndqm1vrrqklqelydlgidpfgskfdrsglssdlkeewdqyskeelvekeadshvaiagr1mtrkgkgkagfah  
vqdlagqiqiyvrkdqvgd  
defdlwknadlgdivgvegvmfktntgelsvkakkft1l1tks1rplpdkfhglqdieqyrqryldlitnedstrtfinr  
skiiqemrnylnnkglflev  
etpmmhqiaggaaarpfvthhna1datlymriaie1h1kr1livgg1ekvyegrvfrnegvstrhnpeftmielyeayad  
yhdimd1tesmvrhiane  
1gsakvqyngetidlesawtr1hivdavkeatgvdfyevksdeeakalakehgieikdtmkyghilneffeqkveetliq  
ptfiyghpteisplaknp  
edprftdrfel1vgrehanafte1ndpidqgrfeaq1vekaqgndeahemdedyiealeygmptgg1gigidrlvm1  
1tdsp1rdv11fpymrqk  
>tr|D2N4S3|D2N4S3\_STAA5  
mkntlyhqlyek1kkqieggfkegdkfyskrqlskh1sisqttvehayq111deg1ysrprsgyfvseies1tilnnq  
p1ps1fdddsynpkasdes  
ydyafn1deidtkhfpie1frkyskdlydtnh1nq1rrghfqqel1hrfqlafylf1tnrgvicdpnqi1igssteqlvq  
1vd1lytstfi1iekpsypp  
ikn1ldkkqveyeqievednginvdeviksqnivyitpshqfptgyvmd1kkrtqliwagekeerfiieddydefry  
fgkpi1aiggl1ysrgekvi  
y1stfsks1f1psc1rvaymv1pys1mkkyhsqn1hiegntvpv1mqn1iatf1ssggferh1nkmrriyrk1tyilkr1kp  
ykeq1ldi1qgaetgmhftit  
ikng1tlqec1drankvkl1k1qvynfdddqdykktpkf1l1gfgg1ddd1kphvdaliks1iik  
>tr|D2N4S6|D2N4S6\_STAA5  
mhiligi1gii1ff1alaf1fssdrkni1rwkyvgi1laiq1lifaf1l1kttmgikviggisngfny111kaadgvnfvfgg  
iqy1dpkqppff1sv1lpi  
vf1sai1g1lqytk1lpi1inv1gfl1skingm1rlesynavaaa1lgqsev1sikkq1lpyipkqrlyt1tasamstv  
as1igayft1liepkyvvt  
vv1n1fggf1ias1inpykvneedd1k1lveeteerqqsffem1gey1ldgfkvavivgam1ligyiaia11ngivssifs  
tvsgg1s1wdfq1t1igfvf  
apfa1f1vgvpwq1davqagsv1matk11snefvamqal1gk1sd1sehakgvtsv1lvsfanfssigi1sgaiks1ndkkgdt  
varfg1k1l1fgat1lvsf1s  
aa1agff1i  
>tr|D2N4S9|D2N4S9\_STAA5  
mthn1hdn1sqwmksneetpivmssr1rlarn1lenhvhplmyatendgfrv1nevqdalpnfelmr1dqmdqqs1kmmva  
kh1ispel1kqpaav1vn  
ddes1svm1needh1riqamgt1t1qalynqassid1eldrs1ldisydeq1gyl1ttcptnigtgmrasvm1hlpg1sim  
krm1riaqt1inrfgytirg  
iygegsqvygh1tyqvsnq1tlgkse1e1iet1tevvnqi1heekqir1qk1dtynq1letqdrvf1rslgil1qncrmitmea  
syr1sevkl1gid1nyielq  
n1kfne1mva1qsp1f1l1deedksv1kekrad1lrehik  
>tr|D2N4T2|D2N4T2\_STAA5  
mnivk1mviii1y1iigsalgi1iipeiand1gl1qns1flknyvdgi1igsifm1lifgvfirrvtnaikglehfimrrsa  
ve1lfat1g1i1g1l1svm  
vsf1ilesign1sifnhfipvii1t1lcyfgf1qfg1lkkrdem1mflpeniarsmsqhtksatpk1iidtsaiidgrilevirc  
gf1dgn1l1p1qgvine1lqi  
vadsn1svk1regkrg1ldi1ne1ydl1dyptk1vihptkthsdid1tm1l1klakqyhani1tt1dfn1kvchvhgikalnvnd  
l1seai1kpnvh1qgd1l1h1l  
tkmg1kep1g1avgy1ld1dgtmv1vdnakn1ligshvn1levs1l1qtssgriv1fakkied1tvs1  
>tr|D2N4T3|D2N4T3\_STAA5  
msdri1rvryaps1tgy1l1hignarta1fny1yakhyngdfvir1iedtdkkrn1edgetsqfdn1kwl1gl1dwdesvdkdngy  
gpyrqserqhi1yqpl1idq1  
1aedkayk1cymteee1leaerea1qargempryggqah1teeqrqq1feaegrqps1rfrvpqnqtys1fddmvkgnis1fds  
ng1gdwv1v1kkdgi1ptynf  
ava1ddhyme1s1dvi1rgddhis1ntpkqimi1yefgwep1r1fghms1livneerkk1skrdgqil1qfieqyrd1gyl1pealf  
nf1iall1gwspegeee1fsk  
eef1iki1fdekr1l1skspaffdkqk1lawvnnqymkqkdtetvfq1al1ph1likan1l1pevpseed1swgrk1lia1lyqkemsya  
ge1ivp1semff1kempa1lge  
eeqqv1ngeqvpe1mth1l1fsk1lea1lepfeaae1kktikevqketgikgkq1fmpirvavt1gqmhgpe1l1pntievl1gkekv  
1nr1lkqyk  
>tr|D2N4T5|D2N4T5\_STAA5  
mitlynt1l1trqkev1kpi1epgkvmyvcgptvyny1ihignarpainydv1vrry1feyqgynev1vsnft1dvddk1likrsqe  
1nqsvpeiaekyiaafhed  
vga1lnvrkatsnprvmdhmd1di1qf1k1ld1vdqgyayesggdv1fr1trk1fegygl1shqsidd1kvgaridagehkedald

Tsompanidou\_et\_al\_Supplemental\_FASTA\_File

ftlwkkakpgeiswdsfpfg  
egrpgwhiecsvmafhelgatidihaggsdlqfpheneiaqseahnhapfanywmhngfinidnekmskslgnfilvhd  
iikevdpdvlrffmivshy  
rspinynelelvesarsglerirnsyqlieeraqiatnienqqtyidqidailnrfetvmnddfntanaitawydaklan  
kyvlenttstevdkfkav  
yqifsdvlgvplksknadelldedvekleernearknkdfaradeirdmlksqniiledtpqgvrfkrq  
>tr|D2N4T6|D2N4T6\_STAA5  
mdnqqdnhikllnpltlaymgdavlqyvrtiyivlklkskpnklhqmskkyvsaksqaqtleylmeqewftdeemdilkr  
grnakshtkakntdvqtyr  
kssaieavigfilyekreerleaallneiitivner  
>tr|D2N4T9|D2N4T9\_STAA5  
mkydlttqdstikrnnaindkdfeklvmdlqplliirciktfgfnhydledlyqeilirmyrsvqtfdfsgkqpfntnyvqc  
litsvkydylrkylatnkr  
mdnlineyrvtypcakrydvennylnklaikelirqfkylsafekdvmylmceqykpreiaqlmhvkekviynaiqrck  
nkikryfkmi  
>tr|D2N4U4|D2N4U4\_STAA5  
msaiieakkqlvdeiaevlnsnsvstivdyrgltvaevtdlrsqreagveykvykntmvrreaekagiegldelftgpt  
aiatssedavaaakvisgf  
akdhealeiksgvmegnviataevktvgsipshdglvsmllsvlqapvrnfayavkaigeqkeenae  
>tr|D2N4U6|D2N4U6\_STAA5  
mshyydedpsvisneqriyqqlkhhkidlitdngvfskdkvdysdvlvktflkthppgskriadvvcgygpiplmiak  
vspphsitmldvnhralal  
veknkklngidnvivkesdalsavedksfdfiltnppi ragketvhri feqalhrldsnge lfvviqkkqgmpsakkrmn  
elfgnvevvnkdkgyyilr  
sika  
>tr|D2N4U9|D2N4U9\_STAA5  
mskekvarfnkqhfvvglketlkal kkdqvtsliiaedvevylmtrvlsqinqknipvsffkskhalgkyvginvnativ  
alik  
>tr|D2N4V4|D2N4V4\_STAA5  
mldwfglannkenktiqlrrylhqype lsfefqthdyivnqlnqlscdietpigrngikatfkgigtgptialradfda  
lpveelndvpyksknpgcm  
hacghdghtailltvaeil dekhllngnvvlifqygeeimpggsqemidagclenvdriygtlhwsgyptgtihsraga  
imaspdefsvtikgrgghg  
akphetidpivimaefilsaqkiisrtidpvkqavlsfgmiqagttsvipdqafckgtvrtfdskiqehvmhkmdklq  
glaiandieydlnyikgy  
pvhnekayqvi keatndlhrvfnesdlmmigedfshylkvrpgaffltgcnegskgitaphhnpkfdidekslkyavav  
flkiiieleqvfktn  
>tr|D2N4V5|D2N4V5\_STAA5  
mvqslhefleeninylkenglyneidtiegangpeikingksyinlssnylglatnedlksaakaaidthgvagavrt  
ingtldlhdeleetlakfk  
gteaaiayqsgfncnmaaisavmnkndailsdelnhasiidgcr lskakiirvnhsdmdl rakakeavesgqynkmyi  
tdgvfsmgdgvaklpeive  
iaefgl llyvdahgsgvmgkagatvkhfglqdkidfqigtlskaigvvggyvagtkelidwlkaqsrpflfsts lapg  
dtkaitavkklmastelh  
dklwdnaqylknglslgydtgesetpitpviigdekttefksr l kdegvyvksivfptvprgtgrvrnmptahtkdm  
ldeai vayekvgkemnli  
>tr|D2N4V6|D2N4V6\_STAA5  
msqdvnel skqptpdkaednaffpspyslsqytapitdfdgvehkgayidgkwvlmiaaeryvllengkmfstgnhpv  
emllplhhlmeagfdvdva  
tlsgypaklelwamptedeavistynklkek l kqpkkladviknelgpdsdylsvfipgghaavvgisesedvqqtldwa  
lendrfivtlchgpaa lls  
aglnrekspl egysvcvfpsldeganieigy l pgrlkwlvadlltkqglkvvnddmtgrtlkdrkl l l tgdsp lasnelg  
klavnemlnaiqnk  
>tr|D2N4V7|D2N4V7\_STAA5  
mmsysigidygtasgrvflintngqvsvkfvkpythgvieselnglkiphtyalqnsndyleimeegisyivreskidp  
vni vgi gidftsstii ftd  
enlnpvhn l kqfknnphayvklwkhghaykeaklyqtaiennnkwlghygynvssewmpkimevmnrapeimektayi  
meagdwi vnk l t nknvrsn  
cglgfka fweeetgfhyd l fdkidpklskvi qdkvsapvvni geavgl ddkmaqklgl skdtmvspfiidahasllgig  
sekdkemtvmgmtstchl m  
lnekqhvpvgisgsvkgaipe l fayeagqsavgd l feyvakqapksyvdeanrnm tvfel mnekikhqipgesglial  
dwhngnrsv l sdsnl tgc i  
fgl t l qtkhedyrayleatafgtkmimqqyqdwhmevekvfacggipkknvmmidiyanvlnkk l i vmdseyapaigaa  
ilgavsggahnsindavda  
mkepi l yeinpeaekvqryet l fkayka l hdi hgykkanimkdiqsl rveg  
>tr|D2N4V8|D2N4V8\_STAA5  
mkkimigtalggigtelvvkcreiygtdnvl atdi repevdspvqngpfeildvtdrdrmfelvrdfeads l mhmaa l l s  
ataeknpi lawdl nmgglm

Tsompanidou\_et\_al\_Supplemental\_FASTA\_File

na leaartynlhffftpsigafgdstpknvtpqvtiqqptmygvnkvagellcqyyfkrfgvdtrsvrfpqlishvkep  
gggttdyaveiyfkavreg  
hytsfidkgtymdmymddaieaiklmeaddakletrngynlsamsfdpemvkeaiqeypnftldydvdpirqgians  
wpdsidtsrgewgfdpk  
ydlasmtklmleaieqkdtvknnn  
>tr|D2N4W0|D2N4W0\_STAA5  
mewilfdkdgltiefdrswekigvrfvqsllletfpvhnkeaalrqlgvikesidpksvmgsgslqqiiqafndvtgqdt  
dwskstsqklvderipein  
wvegvkealidlakagyqlgivtsdtkkveqflahtnatslfdliisteadanekpnkvlspifeqynvdpqkvaivg  
dtandmktasnanlgmaig  
vltgiatkeelheadiilnsaadilealn  
>tr|D2N4W1|D2N4W1\_STAA5  
mnnygipqnaaitiagtvgvgkstltqaladklmfktsfenvehnpyldkfysdferwsfhlqiyflaerfkeqkrmfey  
ggfvqdrsiyedvdfak  
mheegtmskedfktysdlfnamvmtpyfppkdvmiylecnydevidriiergreimeintdpeywkklfkryddwvnsfn  
acpvvrinineydi hkdpd  
slnmpidkiariiqtyrqvdtr  
>tr|D2N4W2|D2N4W2\_STAA5  
mnpkpfiaiegpigvgksslakhlstldfyeekeiitenpflsdfyediskwsfqtemfflcnrykqfqdvtqlnqgvvs  
dyihknkifakntlssie  
fqkfskiydiltedmimpnmiifldadldvlksriakrnrsfehqi edeyllklkkyreyyeslqsnsgnvvlidttsi  
df1kneqdyedilhiilpm  
igditne  
>tr|D2N4W3|D2N4W3\_STAA5  
mtndiyfmlaieeakkaarlgevpigavitkgdeviarahnretlqqptahaehiaieraakvlgsrlegctlyvtl  
epcvmcagtiivmsrprvv  
ygaddpkggcsgslmnlqqsnfnhrai vdkgvlkeacstllttffknrankkstn  
>tr|D2N4W4|D2N4W4\_STAA5  
mikliatdmgtllnaaheisqpnidaikyaqeqgittvviatgrafyeeaqapvadtdltvpyiclngaevrdetfnvmst  
shlnkslvhkitnvlkdag  
iyyqvysraiytedpgrldiyidiaeragqhanverikngiqrridngtlkvvdnydaiknipgelimkilafdgnle  
kidkaskilaespnlaiss  
ssrgnieithsdaqgialetiaerlgiemkdvmaigdnlnvsmlekvgyppvamengaeevkkiakyvtdtnensgvk  
aimkllreqqv  
>tr|D2N4W5|D2N4W5\_STAA5  
mkgliiigsaqvnshtsalaryltehfkthdieaeifdlaekplnqldfsgttpaideikqnmkdllkekamaadflilgt  
pnyhgsysgilknaldhln  
mdyfkmpvgllignsggivaep1shlrvivrsllgia vptqiathdsdfaknedgsyylndsefqlrarlfvdqivsfa  
hnspeh1k  
>tr|D2N4W6|D2N4W6\_STAA5  
mnnkktatnrkgmipnrlnkfsirkysvgtasilvgttlifglsgheakaaehtnge1nqsknettvtenttekvdsr  
qqnnieqsttsnqpkvnes  
dntsvkettepqtstqstkqnnatankdnleaqnistqakdvsatpkktttikprtlnrmavntvaapqqgtvndk  
vhfsnidiaidkghvnstt  
gktefwatssdv1klkanytidssvkegdtftfkyggyfrpgsvr1psqtqnllynaqgniaakgiydstnttttytftny  
vdqytnvsgsfeqvafakr  
enattdktaykmevtlgn dayseeiivdygnkkaqplisstnyinnedlsrnmtyvynqpkntytketfvstltgykfnp  
daknfkiyevtdqngfvds  
f1pdtsk1kevtngfnitysndnktatvdllngqtssnkqyiiiqqvaypdntstdngkidytletqngksswsnsysvsn  
gsstangdqkkynlgdyvw  
edtnkdgkqdanekgikgyvvi1kdsngkeldrtttdengkyqftglngtyvstfepagytpttanagtdavdsdg1  
tttgvikdadnmtldsgfy  
ktpkyslgdyvwydsnkdgkqdstekgikgvkvtlqnekgevigttetdengkyrfdnldsgkykvi fekpagltqtvtn  
tteddkdadggevdtitd  
hddft1dngyfeetsdsdsdsdsdsdsdsdsdsdsdagkhtpvkpsatkdhhnaka1petgsengsnn  
at1fgglfaalgs111fgr  
rkkqnk  
>tr|D2N4W7|D2N4W7\_STAA5  
mlnrenktamtrkgmvsnrlnkfsirkytvgtasilvgttlifgigsqeakaaevtnkemkedatsvndqvskkvdtdgq  
lnndgntskvdteqlkden  
inkvanqkevtrvensvakeknnnsqpsengk1qtsdvkkteanntl1ddqvttvnsqqlntdnttsnatmssapinvs  
kddlkinneevrnvgeksd  
nadrngsdvimpkstapkrlntrmrmaaiqststdsknvndlitsnttl1tvvdadnsktivpaqdy1slksqitvddkv  
ksgdyftikysdtvqvygl  
npediknigdikdpngetiatakhtannliytftdyvdrfnsvkmginysvymdadtivdkkdvpsvtignqttt  
ttaditypaykeadnnsig  
saftetvshagnaedpgyynqvvyvnpmdk1kgan1kveayhkypanigqinqvntnikiyrvpegytlnkygdvnan  
dlvdvtdefknkmtgtnq

Tsompanidou\_et\_al\_Supplemental\_FASTA\_File

svnidfgditsayvmmvntkfqytntsesptlvqmatlsstgnktvstgna1gftnnqsggagqevyki gnyvwedtnkng  
vqelgekvgvntvtvfdn  
ntntkvgavtkedgsy1ipn1pngdyrvefsn1pqgyevtpskqgnne1dsngvssvitvngkdn1sad1giykpkyn  
1gdyvwedtnkngiqdqd  
kgisgvtvt1kdekgnv1ktvttadagkykftd1dngnykvefttpegytptvtvsgsdi ekdsng1tttgvingadnmt  
1dsgfyktpkyn1gnyvve  
dtnkdgkqdstekgisgvtvt1knengev1qtktkdkgkyqftglengtykvefetpsgytptqvsgtdegidsngts  
ttgvikdkdndtidsgfyk  
ptyn1gdyvwedtnkngvqdkdekgisgvtvt1kdendkv1ktvtt dengkyqftd1nngtykvefetpsgytptsvtsg  
ndtekdsng1tttgvikda  
dnmt1dsgfyktpkys1gdyvwydsnkdgkqdstekgikgvkvt1qnekgevigttetdengkyrfdn1dsgkykvi fek  
pag1tqtgtntteddkdad  
ggevdvt1tdhddft1dngyfeetsdsdsdsdsdsdsdsdsdsdsdsdsdsdsdsdsdsdsdsdsdsdsdsdsdsdsds  
dsdsdsdsdsdsdsdsdsdsdsdsdsdsdsdsdsdsdsdsdsdsdsdsdsdsdsdsdsdsdsdsdsdsdsdsdsdsds  
sdsdsdsdsdsdsdsdsdsdsdsdsdsdsdsdsdsdsdsdsdsdsdsdsdsdsdsdsdsdsdsdsdsdsdsdsdsdsds  
sdsdsdsdsdsdsdsdsdsdsdsdsdsdsdsdsdsdsdsdsdsdsdsdsdsdsdsdsdsdsdsdsdsdsdsdsdsdsds  
dsdsdsdsdsdsdsdsdsdsdsdsdsdsdsdsdsdsdsdtgkhipvkpmsatkdhdnkakalpetgsennngsnat1fgglfaalgs111  
fgrkkqk  
>tr|D2N4W8|D2N4W8\_STAA5  
mnyilgtileskitgvekaqinr1klfkqhgisskcvyvkwnpysytyakqhqiend1ftmydyfqakainykktkqvni  
qywekscrytlkfvnsnd  
vriydeeqfimyahf1dkqyhq1nyvnyfdqrrkikrelydgrglscsri1gegqrivlenyytpngeivi qkyfddi  
kgktt1tkv1nedghqf  
fdtedelvyqf1hq1cknndqi1ldrphe1gnviag1nqsipviv1hsth1sgtgndiksfyktvfnn1trykaivvst  
ekqcqdisgyienkipvin  
ipvgyyan1kyqfdsnqkdknhiisiar1venkqikhqievikqlvtkhpniq1niyghgng1leyrqlvedyh1sehvk  
fhgfkthineeiakaelm1  
stskmegfg1ajles1sgtpvisydvygpse1iqdgfngylvppgdinqmvekvdq11nnsqmmqqsinsiesaqy  
nattisikwqni1n  
>tr|D2N4W9|D2N4W9\_STAA5  
msynh1t1terarijev1rgenys1rsiark1krsvstisreisrnn1nqsyqaetaqknyetkrk1cgrptrftpelgni  
ikyylkchwspeqivgr1  
qngicfktiyrwinsnminfelisc1rqkgkrqkpketrgrkfnigrpisqrpkvkkrrntfghweadtivssrgskgci  
atfaerksryyycv1mpdr  
ssnmetainn1ikh1lpgkavktitvdrgekfcyqni enqfninvyfadpysawqrgtntng11reffpkkt1lakv  
nqeqlnya1dsinyrprkc  
1nwkfpyev1cde11h1n  
>tr|D2N4X0|D2N4X0\_STAA5  
mnyfvgns1gvn1tgiekaiinr1n1fkemgrpaqcvf1swrylyrnaqnyitssdyinmydffqeaty1ernepfdw1  
sywtdechytlkhvenshd  
friydqerf1myahfqdpkyri1dyvnhfdsqrrkvkrdfydvrgr1scsri1vdkqqt1ceffynpegdtklekyfsyk  
dgkpevqki1vyvankqyf  
fnnete1gaffikq1yqhd1ffsdrnvytapi1n1tpesipvvav1hsthiknida1dsspfnvykamfen1sryrai  
ivsteqqk1dvekrinhti  
pvini1pvgysetidtpvqtd1dqrsvk1isvaryspekqlhqqielirrv1svyvpkielhmgyfgseskklne1iqygle  
nhvylrgf1sn1dqeyda  
yls1itsnmegf1al1les1ahgvpvisydikygpge1itsdfngylitkndeda1fdkvkyvidhpevqqr1skgs1ak  
aqyskas1ikqwdqfvr1  
i  
>tr|D2N4X2|D2N4X2\_STAA5  
mtderhvlvi1fphpddetfssagtlasyiqqipvtyacl1lqmgmrgn1gnppfatres1ptirereleeackvigtd1  
rkmg1rdktvefepyeid  
gmiks1iddtnps1iisfypgyavhpheatadavirtvermpkeerpr1t1vafsnatealgepdinqnditdfkelki  
kafeahasqtgpf1kq1as  
peidgkqhsf1tvepywtyhfs  
>tr|D2N4X3|D2N4X3\_STAA5  
mepikeqev1d1lasfehkpvy1hvetngayanhdqrvfnagtflrniqvtythaqlkgnkepyrig1kl1snggwvy  
vqglthfeinehdef1iag  
fnyegq1aaalqiserpfn1  
>tr|D2N4X4|D2N4X4\_STAA5  
mkv1n1gskkqasfyvace1ykemafnqhck1glatggtmtd1yeqlvkl1nknq1nvdnvstfn1deyvgl1tashpqsy  
hyymddm1fkqypyfnrkn  
ih1pngdadd1naeastyndv1eqqqr1dqi1lgigenghigfnepgtpfsvthivd1testikansryfeneddvpkq  
aismglan1lqakrii1la  
fgekkraai1th1nqe1svdpat1lhkhpneiy1ddeacpknvaki1hdemd  
>tr|D2N4X6|D2N4X6\_STAA5  
makfsdyq1i1delkmt1shveadefstfaski1haehifvagkgrsgfvansfamr1nq1lgkqahvvgesttpaiksnd  
vfviisgsgsteh1r1lad

Tsompanidou\_et\_al\_Supplemental\_FASTA\_File

kaksvgadivlittnkdsaignlagtnivlpagtkydeqgsaqplgslfefasqflfidsvvmglmtemnvteqtmqqnha  
nle  
>tr|D2N4X7|D2N4X7\_STAA5  
mkfdnyi fdfdgtladtkkcevatsafkacgltepsskeithymgipieesflkladrpldeaalaklidtfrhtyqs  
iekdyiyefagiteaitsl  
ynqgkklfvvsskksdvlernlsaiglnhliteavgsdqvsaykpnpegihativqrynlnskqtvyigdstfdvemaqha  
gvpsaavtwgahdarsllh  
snpdfiindpseintvl  
>tr|D2N4X8|D2N4X8\_STAA5  
mdfnkeninmvdakkaktvvatgignamewfdgvyayttayiganffspvesadirqmltfaalafllrpiggvfvf  
giigdkygrkvvltstii  
mafstltigllpsydqiglwapi111larvlqgfstggyagamyvaesspdkrrnslgsgleigtlsgyiaasimial  
ltffltdeqmasfgwrifp  
llglflglfgylylrrkiespvendvatqperdninflqiirfyykdfvcfvavffnvtnymvtaylptyleqvikl  
datttsvliitcvmaimipl  
almfgkladkigekkvfligtggl1fsiafml1hsqsfvvivigifilgfflstyeatmpgslptmfyshiryrtlsv  
tfnisvsi fggtp1vatw  
lvaktgdplapayltaivsigflvitflhlstagslkgsypndneqdrayyaehpkealwwvkerkd  
>tr|D2N4X9|D2N4X9\_STAA5  
mnvileq1kthtqnkpdialhiddetitysqlnaritcaveslkyslnpvvainmkspvqsiicylalhr1hkvpmmm  
egkwqstihrq1iekgyik  
dvi edtg1mqsidspmfidstqlqhypnllhigftsgttglpkayyrdedswltsfevne1mlknaivapgp1shsl  
tlyal1falssgrtfigqt  
tfhpek1lnqcrklssykvamflvptmiks1llvynnehtiqsffssgdklhssifkkiknqandinlieffgtsetsfi  
synlnqqapvesvgv1fnp  
veltknhdhngigticiksnmmfsgyvseqcinn dewfvtdngyvkeqyl1tgrqhdml1iggqniypanveh1ltq  
sssidaeaiigipnkrfgq  
igvllysgdvt1thknvkqflkkkvkryeipsmihhvekmyytasgkiarekmm1rge1  
>tr|D2N4Y0|D2N4Y0\_STAA5  
mnqavivatkrtafkgkyggtlkhlepeqllkplfqhfketypeviskidvvlgnvvgnggniarks1leaglkdsipgv  
tidrqcgsglesvqyacrm  
iqagagkvyiagvestsrapwki krphsvyetalpefyerasfapemsdpsmiqgaenvakmydvsrelqdefayrshq  
ltaenvknqnisqeilpit  
vkggi fntdeslkshipkdnfgrfkpvikggtvtaanscmkndgav1llimekdkayelgfnhg1lfdkgvtvgvdsnlp  
gigppaisn1lkrnq1ti  
enievieineafsaqviacqqa1n1sntq1niwgga1asghpygasgaqlvtr1lfymfdketmiasmgigg1gnaalft  
rf  
>tr|D2N4Y1|D2N4Y1\_STAA5  
mqhyll1dsnqr1nvsfskdsvaayyqcfnpqyrkevpp1mcas1wskfd1fkkyanseliliksainqtqkievdtiyvg  
h1ediecrqirnitrytma  
l1tkndqhvitvtqtfikamk  
>tr|D2N4Y2|D2N4Y2\_STAA5  
mkfneiwi ney1alvnddnpihnei vpgqlvsqmm1mams1leadqcqinyvkp1lineniefieqheqeiiainddgeik  
ikis1stkk  
>tr|D2N4Y6|D2N4Y6\_STAA5  
mynret1iarieqlvqaeqaqhdhdfekhmyaihiltslyastsntshigeqqmnhrianhnmphsqitqsthqvtaa  
eieamgkvnthshahh1nk  
sysqpsnqqqr1atdddigngesifdf  
>tr|D2N4Y7|D2N4Y7\_STAA5  
mklfiilgalnammavgtgafgahglqgkisdhy1svwekattyqmyhglall1igvisgttsinvnwagw1ifagiiff  
sgslyilvltqikvl1gait  
piggv1fiigwim1iatfkfag  
>tr|D2N4Z2|D2N4Z2\_STAA5  
mad1lnv1kdk1sgknvki1lpegederv1taatqlatdyvtpivlgdetkvqslaqln1ldisnielinpatselkae  
lvqs1fverrkgateeqaq  
e1lnnvnyfgtm1vyagkadglvsgaahstgdtvrpalqiiktkpgvsrtsgiffmikgdeqyifgdcainpeldsqgla  
e1avesaksalsfgmdpkv  
am1sfstkg1saksddvtkvqevak1laqqkaeek1eaiidgefqfdaaivpgvaekkapgak1qgdanvfvp1leagni  
gyki1vqr1lgydavgpvlq  
glnspvnd1srgcsiedvyn1siitaaqalq  
>tr|D2N4Z5|D2N4Z5\_STAA5  
miksgkarahtnia1kiywgkkdealiipmnsisvt1lekfytetkvtfndqltqdqfwngekvsgkeleki1skymdiv  
rnr1ragidwyaiesdnfvp  
taag1assasayaalaaacnqald1qls1dkd1sr1arigsgsasrsiyggfaewekgyndetsyavp1lesnhfeddlami  
fivinqhskkvp1srygms1  
trntsrfyqyw1dhided1aeakaa1qdkdfkr1gevieeng1rmhatn1gstppfty1vqesydvma1vhecreagypc  
yftmdagp1nvki1lvekknk  
qqi1dk11l1tqfdnnqi1dsdiatgieie

Tsompanidou\_et\_al\_Supplemental\_FASTA\_File

>tr|D2N4Z8|D2N4Z8\_STAA5  
mktydli vigfgkagktl akyaastgqh vavieqsskmyggctin igcipsk tlvdhglegksfeasynrkndvvnaln  
knyhll addnnidvldfka  
qfksntevnll dqhgdivdsitaphii intgatsvipnikgl dqakhvfdstglln isyqpkhlvivgggyialefasmf  
anlgskvtvl ergesfmp  
edqdvvahaitd lenkgial htnvette lssddhhttvhtnvgnf eadavllaigrkpntd lalentdielgdrgeikvn  
aqlqttvphiyaagdvkkg  
lqftyisl ddyriksalygnqsr ttdnrgsvpytvfi dpplsrvgltskeavaqhydytehql lvsaiprhkinndprg  
l fkvvinnenmi l gatly  
gkqsee l in i k l a i d q n i p y t v l r d n i y t h p t m a e s f n d l f n f  
>tr|D2N4Z9|D2N4Z9\_STAA5  
mnl efn i avh v l a f l t k h h s e k f n s s l a e l t c l n p v q l r r v t t q l v d l k m i d t i r g k d g g y l a n d r s a d v s l a t l y k h f  
v l e k e h t r l f t g d e g s h c  
q i a r n i a t t m s h y q g d e q n i i n f y k e k t i k d v i e d i q k e d l c h e n i  
>tr|D2N500|D2N500\_STAA5  
m s i d m y l d r s r n q a s s v g n l s q t m s n y d a l e k a i t q f i n d d a l k g k a y t s a k q f f s t v l i p l s t s m k t l s d l t k q a c d n  
f v s r y t s e v d s i s l k e s e l  
e e d i r s l s q i t r y e n l n n l k k h a s d n q q a i s s n q q i q t l g q q k h e l e e k l r k l r e f n q s p e i f k e v e e f q k i v q q g  
l t q a q n f w n f s t n q f n p m  
g k e l d w a k a s h e k y l k v a m g k i e h k a e k e t l n k a d f a v i k a y a k e h p e d d i p k s i m k y i n d n k d s i k r d i g l d i t s t l l e  
q g g i n a s k f g v f i n t a g g v  
k g p a g p n s f v e v k r t s g n v f i e n g s k f a k g g k y l g k g v a g v g f i g m y d d m a n d d k t v g e a l s h n a l t t g i g t g a g i a t s  
a t i v a l a s n p v g w a a l g g l  
a v g i i f s n l t d l a y q n n f l g i k d k t d w v g h k i d d g i d a v k k s t e k a v d s f e n a v g e a t k g i s s h i n p m k w s  
>tr|D2N501|D2N501\_STAA5  
m l c e t e i i n k n p k y r v i k y d d e y l m v d v i s t w l v y f f p f i n w f i p k r c a k i s r e e y e k l n t v k p v k n k t f w p v v g g t i l l  
g y t s r k y i h l l n i g l e k i l  
v i i c f v v f l c i l i f f v l n r k l k l k v f d n k i e d k k i l v p t l k n a v l i l y s y l l i g g m s i l a l s m l l t l e n q n l i t f i a  
w g i g l m l f f l m n i t l i v n k  
k a k v i k r  
>tr|D2N502|D2N502\_STAA5  
m l c e s k v i n k n p k y r v i k y g d e y l m v d l v s t w l t l f l p m i n w l i p k k y v k i s k k e f d d l n i v k p v k n k a f w p v a g s t i l f  
g y t f r k y i p s l n i g l e k n m  
v i v i c c a i f l g v l i l f l f l n r k l r l e i y n n s s k g k i i l f p s l k n f c f t i f y y f l f g g l s i m a l s m l l t l n p q n i i g f i g  
w  
>tr|D2N503|D2N503\_STAA5  
m l l c e s k i i n k n p k y r i i k y n d e y l m i d i s t w i s l f f p f i n w f i p k r y v k i s r e e f e n l s i v k p a k k n v f w p v a g i s t l  
f a v t l r k y t h l l d t q l d k k  
l v i a i c c i t f i g i l i f y v r l i k k s s l n i y n t k n k r s k i i l i p t l k n f c f t l f g y v f l i f w t v v f s y a l l s m s y q n i i v y f  
a w i t a i m g f f l v n i a l i i d  
k n i h v i l k n  
>tr|D2N504|D2N504\_STAA5  
m l c e s k v i n k n p k y r i i k y e s e y l m i d l a s n r i v f f f p f i n w l i p k y i k i t k n d y e k l n i v k p v k n k s i g w t i f a g i v l  
l g g t v r r n t y l f d f q l e e l  
i w s s c f i g l g i i f f y c y l n k k l t l n i y n e s k n e l k l r l l p s f k n i c f t i f y y l f t g f m s y g a f y l l v f e n v q n l i y  
v s w l f m t m l f m f m m h s i i  
d k k v h i f l k s n k  
>tr|D2N505|D2N505\_STAA5  
m l c e s k q i y k n p k y r v i r y n n q y f m v d l v s t w i t y f f p m i n w f l p k k y a k i s e n e f e r l n i v e p v k n n v f w p v a g s s v l f  
g i l r k y g n f f n v q f e k q l  
a i t v f f i m l i g m l i f y f y l n k k l t l k i f n t n v n k n r v l i p t f k q g l l l v f a y i f l g s a s i f t l t i l l t t e s  
>tr|D2N506|D2N506\_STAA5  
m l l c d v r v i y k n p k y k v i q h n g e y l l v d l v s t w f v y f f p f i n w f i p k k y a i s e e f e n l n v v k p n k n n v f w s v i g s s v l  
f g v t l r k y v h v f d v q l d k l  
v m i l c a l a l i c v i v y f n l n r k l k l k v f d t n i e k n r v i l i p t f k l g c f l v f g y i f a g s f s i f s l i a l m t i e p q n i i f  
i y w i m m t m l f f l l n m t s i g  
n e k v r v i m k n n  
>tr|D2N507|D2N507\_STAA5  
m l c e t e n i n k n p k y r i i k y k d e y l m i d l i s t w l a l f f p m i n w l i p k k y v k i s e k d f e t l n i v k t t k i n s f w p v a g s t v l f  
g v m l r r y s h l f i v k y e y s i  
v i l i c c i i l g i f l l f l y l n q k l k l q i y n e n k n i s k n i i i f p t l k s l c l s i v l y i y l g g s f f t i y m l l t i e v q n i i l f i  
t l f v i f l f f l f l n m c s l y d  
n k v h v l f k s n g i e k f  
>tr|D2N508|D2N508\_STAA5  
m i d l v s t w l t l f l p m i n w f i p k k y v k i s r e e f e n l n i v k p v k n k v f w l v a g s t i l f g v t f r k y i p s l n i q l e k n m v i v i c  
c a i f l g v l i l f l f l n r k l r  
l e i y n n s s k g k i i l f p s l k n f c f t i f y y f l f g g l s i m a l s m l l t l n p q n i i g f i g l v m t a g f f l l n m s s i d k k i y v l  
s k t n t v e k

Tsompanidou\_et\_al\_Supplemental\_FASTA\_File

>tr|D2N509|D2N509\_STAA5  
myylkltrwknldglagftagsisailvywtngknefgikdkndwighklldagidaveksaektvdgvenvmvklqkvfli  
i  
>tr|D2N510|D2N510\_STAA5  
mllceskiinknpyriikyndeylmvdiiistwislffpfinwfipkryvkiskedfenlnivkpakknvfwpvagisal  
favt1rkyth1ldtqldkk  
lviaicctfigilifyvrlikksslniynpknerskiiliptlknfcftlfgyilfggltmlflldallsmsHQniivyf  
twiavimgfflvniaiid  
kniyvilkng  
>tr|D2N511|D2N511\_STAA5  
mkqfvnlgksdvevfpialgtnavghnlypnldeeqgkdvvrqainhginfldtayiygpersee1vgevkeypreqi  
kiatkshefdenqevhq  
nqpeylkqqvenslkr1qtdyidlyyihfpddntpkdqaavalqelkeqgkikaigvsnftldqlkeankdgyvdvqle  
ynllhreneavlgycvdhg  
itfipyfplasgilagkydentkfsdhrtrrdkpgvfeenvrvnalekiaaahqtsianivlafyltrpaidviipg  
akraeqvienikaadivls  
kdeiyyidelfped  
>tr|D2N512|D2N512\_STAA5  
mitvlfggsrpngntagltkfalqglidywidvtqhrfkpirdrvhieesitdyeddyqeildkvlasditiifaspvywy  
sisaplkafiehwsetlqd  
krypnfkaqmaekdfrevlvggdcpkikakpaitqmksldflgatlngyigtankpgdimkdnyalaratewnqllq  
>tr|D2N513|D2N513\_STAA5  
mfkvrqatekdvvqirdvatkawfntylniyaattvnhlleasynehh1kkr1qeqlflvveegndivgfanfiygeely  
lsahyvkpesqhtgygta1  
lneglrsfedkfegvylevdkneeavayykeggftilrsyepemygekldlalmykaf  
>tr|D2N515|D2N515\_STAA5  
msekkgfnfnii knp1dghkgtnigsislndiapvfivankeafidiggmharakvekgvkwitdkaavegdeakeyw  
lcwvterneqgpyyaglt  
acyllvnkairrgyksmphevnmmdksmkhhiidqigdenkvilkdf1mnhdegmwkhssdalhqafn  
>tr|D2N516|D2N516\_STAA5  
mraavvtkdhkvsiedkklralkpgealvqteycgvchtdlhvknadfgdvtgvtlghegigkvieaedveslkigrv  
siawmfescgrceycttgr  
etlcrsvknagytdvgamaeqvvtadyavkvpek1dpaaassitcagvttkavkvsnvkpgqwlvgvfgigg1gn1alq  
yaknvmgaktivafdiindk  
lafake1gadviinskdvdvpaevmkltdnkgldatvvtvaktpfnqavdvkagarvvavglpvdkmndipr1vldg  
ievvgslvgtrqdlreafe  
faaenkvtpkvqlrkleendi feemengtigrmvikf  
>tr|D2N517|D2N517\_STAA5  
mdkkvsitykqvlkqhnekekfefttegtwqqrqsnfiryveqiedatvnvtikvddsvklirkgdinmnlhfvegqat  
ttfydisagriplevktlr  
ilhfvsgdggk1kihyelyqdnekmgisyqeyinykeige  
>tr|D2N518|D2N518\_STAA5  
mniidqvkqtlveeiaasinagladeipdikevpkdtkngdyatniamvltkiakrnpreiaqaivndldtekhvkq  
idiaggf1nfyldnqylt  
aiipeaiekgdqfghvneskgqnilleyvsanptgd1higharnaavgdalaniltaagynvtreyyindagnqitnlar  
sietrffea1gdnsysmpe  
dgyngkdiieigk1laekhpeikdyseearlkefrklgveyemak1kndlaefnthfdnwfssetslyekgeilevlakmk  
elgytyeadgatwlrtdf  
kdkdrrv1ikndgtytyf1pdiayhfdkvkrngndilid1fgadhgyinrlkasletfgvdsnr1eiqimqmvr1mengk  
evkmskrtgnait1reimd  
evgvdaryfltmrspdshfdfdmelakeqsqdnpyyaqyaharicsilkakeqgievaaandfttitnekaie1lkk  
vadfeptiesaaehrsahr  
itnyiqldashfhkfynekvltddivtkahvami eavritlknalamvgvsapesm  
>tr|D2N519|D2N519\_STAA5  
mlgtde1yk1lyrhmgpqnwwpadndiemmlgailvqnrwrnaeia1nqikehthfnphilelpietlqslirpsgyf  
ksks1tik11twlarhhf  
nyqeinerykaelrkel11tkgigsetadv11vyiferiefipdsytrkiynklgyentksydq1kkvit1pnhftnqda  
nefhalldvfgkhyfrdkd  
iknydf1epyfkk  
>tr|D2N520|D2N520\_STAA5  
mkksliafili1fm1v1sgcgmkdndkqsddngsskspyhrivs1mpsn1eilyel1glgyivgvstvddypkdvkkgkk  
qfdalnlnee11kakpd1  
ilahesqkatankv1sslekqgikvvyvkdagsidetyntfkqigklthhdkqaeqlveetkdnidkvidsipahhkksk  
vfievsskpeihtagkhtf  
fndmlek1eaqnvysdingwnpvtkesiiknpdilisteaktrsdymdiikkrggfnkinavkntrievngdevsrpg  
prideglkelrdaiyrk  
>tr|D2N523|D2N523\_STAA5  
md1ftrkdgtsihystlgegypivlihtv1dnysvfnklaaelaksfvv1id1rghgysdkprhieikdfsddivel1k

Tsompanidou\_et\_al\_Supplemental\_FASTA\_File

lylieevafvchemggiig  
adisvrypeftsslmvnpstsiegepeerlfrkyahiiirnwdekqdkflnrkkyrprkmnrfllkhvvdtnestkee  
iqavkevfknadisqtyrn  
vvvptkiiagefgerttrleakevadliqnadfevyqessafpfveeqerfvedtaafinkhhdkehv  
>tr|D2N524|D2N524\_STAA5  
mkklltasiiaacsvvmgvlantsaeaasnsidtvkqlikgdqslenvkigesikdvltkyknpmysynengtehyyef  
htkkgmllvttgdgkknngk  
vthismmyndangptyqavknyvgkavthteyskvagnfygiekgkttqfasapkdkniklyridlek  
>tr|D2N525|D2N525\_STAA5  
mrindkii leniedyfnhkglsphliddikekvitdiknsekkdqyieykrkspaqiilmiqrnlfalqmpviffiln  
filisylydkqyvqfqaait  
gmsl fyc lvi fpm t i v v y l r v s q n y l r s n k i e m i m g t i a i s l l l i l q a f n i t w g v i p i t n f g h q f f f f i g i i l v i a  
g i f y k r l e f s g i g l l f c q k  
t l d a m i h n p q s a g t f s l i i w i l l v v l v i y f t i r l s s r t r l  
>tr|D2N526|D2N526\_STAA5  
mnkv tin p q i q l t y q i e g k g d p i i l h g l d g n l a g f e d l q h q l a s s y k v l t y d l r g h g k s s k s e s y d l n d h v e d l k i l m e  
k l n i h e a h i l g h d l g g v v a  
k l f t d k y a y r v k s l t t i a s k k d d l i h s f t q l l i q y q d d i a g f n k s e a y i l l f s k l f r n q e k t m k w y q k r i y s i k s e d d s  
a v a i r s l i l h k d e p m y l k k  
r t c v p t l l i n g e h d p l i k d k n h f k l e s h f l n v t k k i f e h s g h a p h i e e p e a f l s y y l n f l k s v s  
>tr|D2N528|D2N528\_STAA5  
mfipiqtsvnrslytkspfytsfifsvgticlivlnifinpdvflhffsnqtfnytwfvvgllgvgyltgnlllp  
klgatltviatvagqimq  
viidtfglfgatihdfnlkaigvllivgiitmniqinkcnilltnqkhlifwlllgtf g f f p p i q t t i n s l l a s h t h s  
p a f a s l v s f t i g s i t l l i l  
t a i f n r s l k l k t s h l k f g k l k p i y f t g g i l g m a f v t a n i i l m p h m g a a l t l i g m f g q i l m g i l i d h f g l f g s p k i a m t s  
r k t i g l l c i l t g i i l l r l f  
>tr|D2N530|D2N530\_STAA5  
msktnhitivlsftkltdngkqtefkrrfaninpevsndqiktfsklerltgetynnieviksesi  
>tr|D2N531|D2N531\_STAA5  
mnkvevikcnddinkmydal karsdrdy l f f k l a i h s g m k i t e l l t i t v e d t k r l i e k g t l s e l c k s h y h s l i k i r l p e t  
l s n e l l h y i e n k s l s n e d v  
l f g s l r t n q v l s r q q a y r i i h q a a i k a g i e n v g l t t l r k t f a y h a y q k g i p i p v i q k y l g h q s a i e t l n f i g l e n e c e h s  
i y i s l q l  
>tr|D2N532|D2N532\_STAA5  
mslvyliaailvimamiftskrramakyagyialtapviasiyflqvpvikqhy l s v s i p w m t s l d i n l d l r l d g l s  
l m f s l i i s l i g i a v f f y a t  
q y l s s r k d n l p r f y l y l t l f m f s m l g i v l a d n t i l m y v f w e l t s v s s f l l i s y w y n n g d s q f g a m q s f m i t v f g g l a l l v  
g f i m l y i m t g t n n i t e i l g  
q a d h i k n h a l f i p m i i m f l l g a f t k s a q f p f h i w l p r a m a a p t p v s a y l h s a t m v k a g i f l l l r f t p l l g l s n m y i y i v t  
f v g l i t m l f g s i t a l k q w d  
l k g i l a y s t i s q l g m i m a m v g i g g y a q h q q d a i a s i y v f v l f a a l f h l m n h a i f k a l f m g v g i l d h e a g s r d i r i l s g  
m r q l f p k m n l v m t i a a l s m  
a g i p l n g f l s k e m f l d a l t q t g q l s q f s l i s m i i v c m g v i a s i f t f t y a l y m v k e v f w t k y d s k v f t k k n i h e p w l f s  
l p s l i l m v l v p v i f f v p n i  
f g k g i i v p a l r g v s g g n h q i d p l v p h v s q w h g f n i p l l l t i i i l l g s v l a i k v d w k k v f t g k i r q i s v s k y e m v y r q f  
e k f a t k r f k r v m q d r l n q y  
i i m t l g i f m v i g y g y i r i g l p k v h q l h v s e f g p l e v i l a i v t v i g l s l i f i r q r l t m v i l n g v i g f v v t l f f i a m k a p  
d l a l t q l v v e t i t t i l f i v  
s f s r l p n v p r s k v n k k r e i k i s v s l m m a l i v v s l i f i a q q a d g l a s i n f y l r a d k l t g g k n i v n a i l g d f r a l d t l f e  
g l v l i i t g l g i y t l l n y q d  
r r g q d e r e  
>tr|D2N534|D2N534\_STAA5  
mnlllllvigflvfigtymilsinlirivigisiythagnliimsmgtygsnkseplitggngl f v d p l l q a i v l t a i v i  
g f g m t a f l l v l y r t y k v t  
k e d e i e g l r g e d d a k  
>tr|D2N535|D2N535\_STAA5  
mlsnllilpmllpflcalilvflknndriskyllylgtmtittiislmlliyvrhrpitldfggwtapfgiqflgdsll  
i m v t t a s f v i t l i m a y g f g  
r g e h k a n r y h l p s f i l f l s v g v i g s f l t s d l n l y v m f e i m l l a s f v l i t l g s v e q l r a a i y v v l n i i g s w l f l l g i g  
l l y k t v g t l n f s h i a m r l n  
d m g d n r t v t m i s l i f l v a f s a k a a l v l f m w l p k a y a v l n t e l a a l f a a l m t k v g a y a l i r f f t l l f d q h n d l i h p l l a t m  
a a i t m v i g a i g v i a y k d i k  
k i a a y q v i i s i g f i i l g l g t n t f a g i n g a i f y l v n d i v k t l l f f i i g s l v y i t g y r q y q y l n g l a k k e p f f g v a f i i m i  
f a i g g v p p f s g f p g k v l i f  
q g a l n g n y i g l t l m i t s l i a m y s l f r i l f y m y f g d k d g e e v h f k r i p q y r k g i l s i l v v v v i a i g i a a p v l l k i t n d a  
t e l n t n d q l y q k l v n p h l k  
g e e



Tsompanidou\_et\_al\_Supplemental\_FASTA\_File

>tr|D2N537|D2N537\_STAA5  
miqtithimiissliifgialiiclfrikgpttadvvtfdttsavvmsivgvlsvlmgvtvsfldsimliaiisfvssv  
sirsfiggyvfngnkrn  
|  
>tr|D2N538|D2N538\_STAA5  
meitkeifsliaavmlllgsfialisaigivkfqdvflrshaatksstlsvlltligvliyfvntgffsvrlllslvfi  
nltspvgmhlvaraayrng  
aymyrknddthasillssneqNSTEALqlrakkreehrkkwyqnd  
>tr|D2N545|D2N545\_STAA5  
mtveersntakvdi lgvdfndntmlqmvniktffanqstnnlfivtanpeivnyatthqaylelinqasyivadgtgvv  
kashr1kqplahripgie1  
mdec1kiahvnhkvfllgatnevveaaqyalqqrypnisfahhhgyidledetvkvriel fkpdyifvngmgfpkqewi  
mthenqfestvmmgvgs1  
evfagakkrapyifrklniewiyralidwkrigr1ksipifmykiakakrkkak  
>tr|D2N548|D2N548\_STAA5  
mitpqvidkphivfmmtfpedikpiikalnssyqktvlttpkqapylselddvdviemtrtlvkqikalksaqmiii  
dnyy1llggynktsnqhiv  
qtwahasgalksfgltdhqvdvsdkamvqyrkvyqatdfylvgceqmsqcfkqslgateeqmlyfglprinkyttadtrat  
vkaelkdkygitnk1alay  
ptyredkdnraidkayfek1pgytlinklhpsehiddvssidstlmlmsdiiisdysllpieaslldiptifyv  
ydegtydkvrglnqfykai  
pdsykvytvedlmtiqekehllsp1fkdwkhyntdkslhqlteyidkmvtk  
>tr|D2N549|D2N549\_STAA5  
mtdphdsdtfmvinptsivlpgklrdltaafknndnidmviqraynyhgewklksadefikdnrivtltteqpdllsmms  
fdgklfsakfaelqcdvt1  
antynheilvkamqkatdihlvsqmivgdndidthatsnnefdkryiteimkirqrvmemlllpeqrlllysdmvdri1fn  
nslkyyrnehpavthtti  
lvkdyimsmqhsdyvsqnmfdiintvefngenwdreiyelwrqtlivqginrptykrfliqlkgrkfahrtksmlkr  
>tr|D2N553|D2N553\_STAA5  
mfl1liniiglivflgiavlfsrdrkniqwqsigilvvlnlflawffiyfdwgqkavrgaangiawvvsahagtgfafas  
lnakmmdmavaalfpi11  
ivplfdilmyfnl1pk1igigwllakvtrqpkfesffgiemflgntealavsseq1krmemrvltiammsmssvsga  
ivgayvqmvpgelvltaip  
lnivnaiivsc1lnpvsveekediys1knneverqppffsflgdsvlaagklvliiaafvisfvaladlfdrfn1itgl  
iggw1gikgsfglnqilgv  
fmyppfall1glpydeawlvaqqmakkiivtnefvvmgeiskdiasytpphravittflisfanfstigmigt1kgivdkk  
tsdfvskyvpmml1sgilv  
s1ltaafvg1faw  
>tr|D2N554|D2N554\_STAA5  
mnktvkd1ilvvlgsfi faagvnafii sgnlgeggvtglaiilyafhispa1tnflvnavliaigykflskrsmlytil  
vt1l1sif1s1teswqvet  
gnsivnai fggvsvgligivii laggttagttilariatyklvdstpyallffdmivvais1tvipldkvlvtvislyig  
tkvmeyvieglntkkanti  
istnpek1akaideqigr1t1lnghgytreetdvlyvvisktqvskakrlikqidkdaflvihdvrdivyngflade  
>tr|D2N558|D2N558\_STAA5  
mmkkl1inkketfldmiegm1iahpeleavsvivkkakkeggvaivsggsghepahagfvaegml daavcgevftsp  
tpdkileaikavtdgdv1  
lvvknayagdmnfemaqelaemeginvetvivrddiavtneaqrrgvagtvfvhklagylaekghs1teiksveallpe  
iks1gmaiepp1vpttgky  
gfdieddkmeigigihgekghreevkdivhivgt1ldelykevtanev1vmvngmggtp1selnivtkyiqnlaartv  
nvakwfvgydymts1dmqgf  
sitivpnkpeyleaf1apttsqyfk  
>tr|D2N559|D2N559\_STAA5  
mkvndmkvr1lnleefkkehese1tel draigdgdhgvnmvrgfss1kdkl1ddssmqslfkstgmalmsnvggasgplyg  
fsfvkmsavtkddmdnqdf  
ik1iqafaeavesrgkvt1nektmydvvaraak1knget1tfn1lqq1adntkdmvatkgraayfgeeskyidpqaqs  
mvyilnaligdedna  
>tr|D2N560|D2N560\_STAA5  
mvqks1lkqmagdvdi ipigglpdgsigtsfdi iqeal tk1dddalcfy digsssemnvdm1aiemyegnhrv1kvdapive  
gsfiaavk1siggsiddal  
aeikqsf  
>tr|D2N563|D2N563\_STAA5  
mnkdnkwtmital fiavisv1lafhlkqhydqttnehanckkiniknknvriyqnltyrvf1pnskl1diitpvdmsna  
k1pvi fwmhgggyi agdkq  
yknpl1akiaeqgyivvnvnyalapykyptpli qmnqatqfikenkmn1pidfnqv1vggdsagaqlasqftaiqttnq  
1rnamkfdqsfkpsqikga  
ilfggfynmqtvretfpriql fmkysytgeedweksfkni sqmstv1kqstknypptflsvgdsdpfesqniefskklqel  
kvpvdt1fydgthh1lhqy

Tsompanidou\_et\_al\_Supplemental\_FASTA\_File

qfhlnkpesvdnikkvllflsrntsssgiqteekpqienpsnelplnpln  
>tr|D2N564|D2N564\_STAA5  
mtrsalpfnkrvmvtgriqrvlfknyldrhtfknvrillkdvfvsgvsidhlwlyetnkyyalamelihqrvkfsa  
nvvpkykinrnnnlfvqdy  
gikrkgrliteeynqnnqyqdkiyekipdidfrledfysken  
>tr|D2N565|D2N565\_STAA5  
mahiiirrvsikdvenfismlakiydespymfytpgeydpvsvtsaskqlleeyitsphkvi fvaerdeqlvgfafvnttpfq  
rikhvakidlgvkklyqhr  
gigqalldaimawcInnqihreanvpInnqpaletfksadfqi egvlkdklfidgkyyddymmakiIn  
>tr|D2N566|D2N566\_STAA5  
mkpkvllaggtgyigkylseviendael faiskypdnkktddvemtwiqc di fhyeqvvaamnqidiavffidptknsak  
itqssardltiaadnfrgr  
aaainqvkkviyipsrydnetierlgaygttvettnlvfkrslvnvelqvskyddvrstmkvvl pkgwtlknvvnhfa  
wmytkgtfvktekshdqf  
kiyiknkvrplavfkivetadgiitlilsgslvkkytvnqgklefrlikesavvyihlydyiprlfwpiyyfiqapmqk  
mmihgfevdcrikdfqsr  
ksgenmkytk  
>tr|D2N567|D2N567\_STAA5  
mqillveddntlfqelkkelqwdfnvagi edfgkvmtdfesfnpeivildvqlpkydgywcrkmrevsnvpilflssr  
dnpmdqvmsmelgaddy  
kpfytnvliaklqaiyrrvyeftaeekrtltwqdavvdl skdsiqkgeqtifl sktemiileilitkknqivsrdtiita  
lwddeafvsdntltvvnvr  
lrrklseigmdsaietkvgkgymahe  
>tr|D2N568|D2N568\_STAA5  
mlgisli dydfpidslfyivsl nls ltlifliltffkevklyrhfekdkeieeikhkdl aetpqrhtvdylyrqilahk  
dkvvdqqlq1kmheqtite  
fvhdiktptamklliddeenqerkqallfews rinsltdtqlyitrlesqrkdmffdyvslkrmvideiqltrhisqvk  
gigfdidfkvdnhvytdik  
wcrmiirqil snalkysenyndistelidqhvaliikdrgrgiskdmpri fer gftstanrnettssgmglylvsvk  
dqlgigqlqvtstigkgtv  
klifplqneivermsevtnl sf  
>tr|D2N569|D2N569\_STAA5  
mtilevkqltkiygnkmaqevlrdinmsveegefiaimgpsgsgkttllnvlssidyisqgsitlkghkleklsnkals  
dirkhdigfi fqeynllht  
ltvkenimlpltvqkl dktmdryekvaealnldisdkypselsggqrqrtsaarafitlpsiifadeptgaldskst  
qdllkrmlkmmeeikttii  
mvthdpvaasyanrvvmldggqifte lyqgdddktffkeiirvqsvlgginyef  
>tr|D2N570|D2N570\_STAA5  
msfneiifknfrqnlshyaiylfslitsvllffsfvalkythsinitetypii kegsqvg syflffiiiafllyanvlfl  
krrsselalyqtlgl skfn  
iiyilmfeqlli fsitailgitigifgskillmivftllgikekvpiifsfravfetllligvayfltaaqnlilvlkqs  
iselskhngpkqmnhhkit  
feevilgilgii lligyysl rivhydaigvlmfilfatvigaylffkssvslvfkiikrfkkgvisvndvmfsssim  
yriqknafsltvmaissai  
tlsvlcfaa isratlsseikytsphdvtikdqkanqlaselnnqkiphfnykevihtklykddlfdikakepynvtit  
sdkiypntdlkrgqadlfv  
aegaidlvkhkhkgkavigtkkhvdiklrkdinkiyfmdvdlggptfvln dqdyqeirkytkpkhivsqfgfdlkhk  
kdmalekatnkvdksiet  
rseaisslsgillfvtsflgisfliavcciiyqidetedelenysilrklgftqkdmakglkfki afnfglplvi  
alshayftslaymklmgtt  
nqipifivmglyicmyaifaitaynhskrtirhsi  
>tr|D2N575|D2N575\_STAA5  
maksc l hiltneyattrcqdgivl fwpidgeielqkfrkskiieddiyiinhldv fsiknnkktimlylssdwfaelgf  
tffnyhytaklikssynlk  
c1llk1tyryldnqplndadirkldiiki iakeasmkkaaqnyryayygd l rdeleyiyqvnqr ltlksvadklfv  
sksnlssqfhlmgmgfkk  
yidtlkigksieilltdstisnisehlgfssstyskmfksymditpneyrnlskfnksimlnpeplvggmaqevkdvi  
lnyidhyknhltdvhide  
dkfeipklfqtviqintytemklvflegl fktllnksqvffimpsilskntmseeekftiiktiiesdlkiafnind  
iettyyveefmnrqls  
pneinhnnyevhfvdls lmeirtiyrmilklnimlnvklgl nitclfdkpsvfkslvsqikr lkfdslidnanlss  
pymgesdelllkni lhfk  
nlkqvine ldiagekliflnvenhkllnkerdlnsapliyktlsalyhnfdgfglnifdnhqtfnamhlydkngfkt  
lglllekfiyvs kpkyen  
syysifdienyyclviydrviesetimsnfedsqvyinfknnvln dky livietldensgnihliske lrdkyewnps  
llskidnylkpaieikahn  
fsnnslninvtfnalyiikigk  
>tr|D2N576|D2N576\_STAA5

Tsompanidou\_et\_al\_Supplemental\_FASTA\_File

mntekletllgfykqykalseyidkkyklslnlavldltmkycdekvlmqsfllktamdelldsrkllvsirrlieke  
rlskvrsskderkiyiyln  
dddiskfnalfedveqflni  
>tr|D2N577|D2N577\_STAA5  
mgrkwnnikkkaqkdkntsriyakfgkeiyvaaksgepnpsnqarlvlraktysvpnhiekaiekakgagdenfd  
hlryegfgpsgsmlivdal  
tnnvnrtasdvraafgknggnmgvsgsvaymfdhvatfgiegksvddiletlmeqdvdvndvfdngltivyaepdqfav  
vqdalraagveefkvaefe  
mlpqtieleadqvtfeklidaledledvqnvfhvndl  
>tr|D2N579|D2N579\_STAA5  
mkvkyidkrhwrriidreytekvnnrfrkgiiglvtmkkvrpllevtvvgqniivaddnykwqlilpekkrysitvmfd  
nkgnpleyfydiniknitq  
kgnartvdldvdlalpsgeyelvdeddImfaleseqitkkqfheaymiahqimaelendfkgfqqkimycfnkinakaq  
kihqqpnktnfekskqik  
pkqynqtknhqqkkn  
>tr|D2N580|D2N580\_STAA5  
mkiedyrllitldetktrkaaeilyisqavtqrllkaienafgvdifirtkkqlitttegtmiehardmlkrerlffd  
kmqahigevngtisigcss  
ligqtlpevlslynaqfpnveiqvqvgsteqikanhrdyhvmiitrgnkvmnlanthlfnddhyfifpknrrddvtklpf  
iefqadpiyinqikqwynd  
nleqdyhatitvdqvattkemlisvgvtilpeimmkniskeqfefekveidneplirstfmsydpsmlqlpqvdsfvnl  
mtsfeepka  
>tr|D2N581|D2N581\_STAA5  
mdmfaallqiknyklfvanmflgmgiavtvpvlvfatkdlgmttnqyglilasaaissqftvnsiiarfsdthhfrki  
iialallmgalgfsiyffv  
dtiwlfiillyaifqglfapampqlyasaresinvssskdraqfantvlrsmfslgflfgpfigaqliglkgyaglfggti  
siilftlvqvfkykdlni  
khpjstqhv ekiapnmfkdktl1lpfiafilhigqwmymtmnplfvtdylkeneqhvgylaslcaglevpfmiilgv  
ssrlqtrtlliygaifgg  
fyfsgvfknyfymmlagqvflaiflavllgigisyfqdildpfpgyastlfsnamvigqggllggamshwvgenvff  
vssasimlgmliifftknq  
kitkedvist  
>tr|D2N582|D2N582\_STAA5  
mtiilwlliaafmlafvglikpiipsvlvlwigfliyqfgfhnqhlswfvysmalltililcadflankyfvnrfggs  
kfgyaaligvvgcfvlp  
pfgiipflvfiveiqgysferavkvsigsivafлтssiaqaiimfimiwffidallin  
>tr|D2N584|D2N584\_STAA5  
micsrlehtndkiyiyenegqliafiwghfsneksmvnieillyepqfrklgiatqlkialekwahtmnakrisstihks  
nlpmislnkdlyqvshvk  
mykdid  
>tr|D2N585|D2N585\_STAA5  
mkkliisimsvmllagcgkseekatlekdidlekenkelkdkkekllqqekekldkqkdlekevkdlkpskddkkded  
knkdkdkdeasqdkqskd  
qtkssdkdnhkkptstdkdqkandkhqs  
>tr|D2N586|D2N586\_STAA5  
mheqdfrilegqditlpeigkelenitgrtitdstgeikrviahlpnfesdttdfvatyrlnhqdfidatftalksdr  
rlekvphvelisyisks  
>tr|D2N587|D2N587\_STAA5  
miyceterliirdwheddllpfqkmnanydvrkyfplsyrseidmrtmdsvikdygiglfavedkeshqwigfigln  
yipetsdypfkelplyeig  
wrllpefwgkglategakatlklaeqhqiadvysftaeankasqrvmekigmtvydhfelplnlskyhllkrqvryyinlr  
k  
>tr|D2N588|D2N588\_STAA5  
mkriavycgaskghdpsyvqkaydlgkyfaeqgyelvfagsigimgaiqdgvl dhggkaigvmpkmldeheitsqrkte  
lilvdsmerknkmaelad  
afvmapggagsleeffemyswaqigihekpaiyningffnplqtmidhmieegfidpkyralaplcdtkesliesilnf  
kplgtrsyd  
>tr|D2N589|D2N589\_STAA5  
mthiiddgacpvvdfiidlttetgfvttiirsfshfsnqlypphvstlyvddgpdavdykivqlstkddivitqdygla  
sllvdkvlivmhngkiyn  
skniqlldkrymnaqirkqggrhkgpppftkqdkvfeqsllrvihrikeid  
>tr|D2N590|D2N590\_STAA5  
mdkkkvikfminvlpivliverkrikqhpdvqkvtdatskvasktsaaissantasdvkeyvgdkkqdfenkrelkkfa  
rehdpayiekkgek lakqn  
rkdadmknkllqkniekrhkeeqkarekneiqrikdmknsqkyeekagltpnkldektekkgdklaeknrkeiakmkkll  
qkniekrhkeeqkrqgead  
kariksfkkykdyvaksasqqnkenntea  
>tr|D2N591|D2N591\_STAA5

Tsompanidou\_et\_al\_Supplemental\_FASTA\_File

mfiielikgiilgivegltefapvsstghmilvddmwksseflgsqsaftfkiviqlgsvfaaawvfrerfleilhighk  
hkhvegdnqrrsrkprl  
nllhvlvgmpagilglfddfielhsvptvmiglvfgaiymiadkysvkvknpqtdvqinyfqafvigisqavamw  
pgfsrsgstistgvlmkl  
hkaasdfmavpimlaasglslkhyqdiadiapfiylgflaavtvgliaktflhlinkiklipfaiyriilvifi  
ailyfvgfjgkgi  
>tr|D2N592|D2N592\_STAA5  
mkklttilfkykifpvlmflvstglgilvitqniliadflakiihqfqlwivlfillgvlrratvqflnqwlgtla  
fkvkhmlrqrviykngghp  
igeqmtiteninglapfyksylpqvfksmmvpliiiamffihintalimlitapfiplyiifglktrdeskdqmyl  
nqfsqrflniakglvtlk  
fnrteqtekhiyddstqfrltmrilrsafisglmlefismgliglvaleatlslvvfhnidfktaaiailapefynai  
kdlgqafhtgkqsegasdv  
vfeleqpnneflkyeenqnpfiqltdisfryddsdrvlndlnleifkgdqialvgpsgagkstlthliagvyqpt  
igtistnkrdlngilsqg  
pyifsasikenitmfkdiennntveevldevglldkvqsftqgintiigeggemlsggqmrriecrllvmkpdlvifdep  
atglidqtehmiquvlfqh  
fkdttmiviahrdntirhlqrrlyienrliaddrnisvntengddl  
>tr|D2N593|D2N593\_STAA5  
mkttrlkfqvdkdllaivvgvsgslvalamfflsgymvtqsalgaplyalmilvvtvklfgflraitryverlishkatf  
tmlrdirvqffgklvnvip  
nvyrklsssdlsrmisrvealqniylrvyppvvgltalvtvivlafisighallimvsmfltlivpwlsskkartl  
kkhaaneqarflnhfydyk  
agmdelrrfnqinhyrdnlmaklnhfdklqlkeqrfltiydfilniamlsifgslvlgliqinagqlniymtsivlmv  
tlfeqavpmtnvayykad  
tdqalhdinevisvpstngnrltdkydatniyevkdasfkywnqptyvlsdinfvnrgekkaivgpsgsgkstllqim  
aglyqldsgsirfenmdmf  
eidkdkfeslnvllqsqqlfdgtirqlftdekdeavqaifkqldlehalerqidldghtlsgeiqrlaiarmllkd  
tastwildepttaldkqns  
lkvmdlieahaetlivathdltilsrfetivmingkivekgyqqlanqgalwnmiqyna  
>tr|D2N595|D2N595\_STAA5  
mknkdekirisiingflsgsktllthyiselkdekikiimnefgtfdidsnsisneievhslingcvccdtkqelv  
yelkaialkgdvnhviea  
tgiahplellvacqdpqivnffekpiygvldatrflerhqtentvsmedqklksdmiiinkidlvtdslekidkql  
siicasiptykttyqgvs  
eelldpgkdreisshhhhhgiksmytftgpidrqlfyqfimklpesvlrlkgyvsfrdqpnaiyefqayglpdygii  
gmqlpltiivigetldtnh  
irnlqldmlqft  
>tr|D2N596|D2N596\_STAA5  
meqiminhyvhfsrlvqgfwranewnmtakeinyfineilvergittmdhadiygdyqceslfgnaldlspelrnkiqivt  
kcgilpskqfdftnghry  
dlsskhivksveqslinlvdyldsllhrpsplmdpeqvadaltklvkqgklsfgvsnfnhsyqqlnqyimkerlhi  
sinqlelspyhvdsldqg  
mdsmynhvqimawspffaggkfdkedikaqrimkviqsiadkygvsdtavmiawlkiphrimpilgtsqlkridqae  
glqlnlddqswwfdiytai  
gqdi  
>tr|D2N598|D2N598\_STAA5  
mseekhveheqqkkektkkqykpfwivmsftilivilllpapsslpmakavlaialafavimwvteavsyvpsatliig  
lmilllgfsvpqlgekgl  
npksgsavlagdllgtnhalslafsgfatsavalvaaalflaaamqetnlhkrallvlsivgnktrnivigaiivsiv  
laffvpsataragavvpi  
lqmiaafkvsksklasllitsvqavsiwnigiktaaaqnvainfinhqlgfdvswgewflyaapwsivmsialyfim  
ikvmppeintiieggkdlk  
eelhklgppsarewrlivismlllfwstekvlhpidsasitiaigvmlmpkigvmtwkhvenkipwgtiivfgvgisl  
gnvllktgaaqwlsdqtfq  
vlgklhlpiaatitlfnilihlgfasatslssalipvfisltstlhlgdqsigfvliqqfvisfgflpvsapqnm  
aygtgtftvkdfkagip  
tivgyilvivfsmykwlgll  
>tr|D2N599|D2N599\_STAA5  
maiavllnrmfrmhnlfeiyqqkediacyfiipeedmssasdlkaqfyrgtlqrfyqslhaekltpyvmsyddiis  
fkennisevviagdimsy  
hleeydilhqrslnfeariavtliirgnhyfkasktmnqqgepykvftsfykkwrpylhrhdvyhydlskfedfviaspdd  
lvfddiafgssqieqk  
qhfldqdiqnyesgrdylpevltsqslvalayglldiieifndllarydedeanyeafirelifrefyyvltmqypetsy  
qafkpyrqikwsqneadf  
nawceggtgfpiidaimeitqgtfmhnrmmvvsqfltkdlfidwtwgekffrkhli dydaasnihgqwsastgtdav  
pyfrmfnpirqserfdpka  
lyiktylpifnqidakylhdthrneseifkqgiegrhypkqivdhqekrsqvlafkald

Tsompanidou\_et\_al\_Supplemental\_FASTA\_File

>tr|D2N5A0|D2N5A0\_STAA5  
mqsryariyflilfivslfеткиfqfmtlnlflayipfelslllrlfkpnkkyewplfiiysfivlllntfymvtdl  
ihlnqfqfnfyaglnlgew  
kyftylllgvflavyvmliiyfeiltltshrwlnrlivfvlmflngfgiyigrflrlhsvyffneplhvlnhilesltk  
tamfvcfmvmaqaiifg  
kgvrlnk  
>tr|D2N5A1|D2N5A1\_STAA5  
mk1qksnhtillvlekgedivecitnfaddqdlftsvsgigacddvilkffnlttkqyeekहितेपलेत्सllgnisrl  
dnghfah1hatfgtqsyet  
fsghlakaiivsataeiiltvtdldiqrsfndavglnlldpq  
>tr|D2N5A2|D2N5A2\_STAA5  
mnkqifvlyfni flifliglvpvlpvylkd1gltgsd1gllvaafalsqmiispfggtladklgkcliicigilifsv  
sefmfavghnfsvlmlsr  
igmsagmvmppgvgtliadvspshqkaknfgymsaiinsgfilpggiggfmaevshmpfyfagalgilafimsvvlihd  
pkksttsqfkllepqltk  
inwkvfitpailtlvafgl safetlylytsykvnyspkdisiaitgggigalfqiyffdkfmykfseltfiawslly  
svivlvllviadgywtimv  
isfvvfigfdmirpai tnyfsniagdrqgfaglnstftsmgnfigpliagalfdvheapiymaigvslagvvivliek  
qhraklkqqd1  
>tr|D2N5A3|D2N5A3\_STAA5  
mtvkn1flgfvaillvcligllilatnedalakvhtintlnainvstedtykkkmdilnihtakasevnenkkqnhf  
khrvnanksnsfneqecq  
iadryadkhindnyglerisktnhgynyvysndnstskqhsisnqgiitk  
>tr|D2N5A4|D2N5A4\_STAA5  
maknkktnamrml drakikyevhsfevpeehlsgqevaeriqanvktvftl vlenakhehfvfvipvsetldmkkaaam  
vgekk1q1mpldn1knvtg  
yirggcspvgmkt1fptvvdksenyshisvsgglrtmqitiavedlititkgkigavihe  
>tr|D2N5A5|D2N5A5\_STAA5  
miitekrhelillelshkdf1tlqelidrtgcsastirrd1sklqq1gklqrvhggam1kenrmvean1teklatn1dek  
kmiakiaangi ndnec1fi  
dagsst1elikiyiqakdiivvtnglthveal1kkgiktimlggqv kentlatigssamvilrrycfdkafigmngldiel  
gl1tpdeqea1vkqtams1  
anqsfvli dhsknkvyfarvp1lesttiitseka1nkes1keyqkhyfiggt1  
>tr|D2N5A6|D2N5A6\_STAA5  
miytvtfnpsidyviftndfkidglnratatykfaggkginvsrvlktldvestal g faggfpgkfiadtlnnsaiqsnf  
ievdedtrinvk1ktgget  
einapghitsaqfeql1qqiknttsedivivagsvpssipsdayaiaqitaqtgaklvvdaekelaesvlsyhp1fik  
pnkdelevmfnttvnsded  
vikygr11vdkgagsvivslggdgaiyidkeisikavnppqkvvntvsgdstvagmvagiasgl1tiekafqqavacgta  
tafdedlatrdaiekiksq  
vtisvldge  
>tr|D2N5A7|D2N5A7\_STAA5  
mrvtel1tkdtiamd1mandkngvide1vnq1dkagk1tdvasfkeaihnrseqsttgigegiaiphakvaavkspai af  
gkskegvdyqs1dmqpah1  
ffmiaapeggaqth1dalak1sgilmdenvrek1lhasspeevlaiidhaddeatkeeeaeaeaaqvaaveanqdtngsn  
epyv1avtacctgiahtym  
arda1kkqadkmgikikvetngssgiknh1teqdiknatgiivaadvhvetdrfdgknvvevpvadgikrpeelinkald  
tsrkpfvardgqrkgnsnd  
sqek1spgkafykhlmngvsnmlplvisggilmaivflfgansfdpkssyna faeqlwnigsksafaliipilsgfiar  
siadkpgfasglvgmlai  
sggsgf1ggi1agflagyltqgvkvitrlpqa1leglkptliyp1lvtatgllmiyvfnppaswlnh1llldglnn1sgs  
niv1lg1vigammaidmng  
pfnkaayvfatgalieгнаapi taamiggmipplaiatamli frkftkeqrgsiipnyvmgmsfitegaipfaaadplr  
vipsmm1gsgiggaialgl  
gsritaphggi1vivgt dgah1lqt1ialvvgtlvsaliyglkplkteteieasksmde  
>tr|D2N5A8|D2N5A8\_STAA5  
mseliinyngkvytedgkidngyihvkdqgivaige vddkaeidndttknkiqvidakghhvpgfidihihggygdamd g  
sydglky1sen1l1segts  
ylattmtqstdkidtaiiniakyeveqdvhnaaeivgihlegpfi senkvgaqhpqyvvrpfidkikhfquetanglikim  
tfapevegakealetykdd  
iifsi ghtvatyeaveavergakhvthlynaatpfqhrepvfgaawln dalhtemivdgthshpasvaiayrmkgn er  
fylitdamrakgmpegeyd  
lggqkv1vqsqqar1angalagsilkmnhglnrlisftgtdl drlwrvtslnqaialgidrksikvknkdadlvilddd  
mnvkstikqgvhtfs  
>tr|D2N5B1|D2N5B1\_STAA5  
mki rvvipcfnegevi1tqthqqlteilsqdssvkgydynmlfiddgsttdt1deiqhlatidrhvsfisfsrnfgkeam  
1agyqhs1tefdavimi dcd  
1qhppeyi pkmvegf megydqviakrdrsgenfsrkt1shlyyklvncfveevqfddgvgdfr1l1sqravksiasleeyn

Tsompanidou\_et\_al\_Supplemental\_FASTA\_File

rfskglfewigyntkvfty  
qvarqkgeskwsfkk1fnygidglisfnskplrmmylglfifsisvlyiylfinimisgvnipgyfstiaaillgg  
iq1isigvveyigriyye  
vkarpyiiqatnlssiendekdthkvysk  
>tr|D2N5B4|D2N5B4\_STAA5  
mnl111vtfii rvsgivmlmqgyekltggftlkg1vpvianntdspewykfffanivahttslfdiivplgeiaiglg  
lifgvfayaasffgafvmi  
nyiladmiftypqltffl111mshs11kqis1keiinyfrgrknrgekiddpltdrg  
>tr|D2N5B5|D2N5B5\_STAA5  
mntkyflavgavasvli1gacgnsnsdqgnkteqtktsedsnvktdkthl1gtfssknsetvegkaeikngklmltny  
ksskqpdlyvyltkngdik  
ngkeiamvdydkekqtdf1knvd1skydevtiyckkahvifggaklk  
>tr|D2N5B6|D2N5B6\_STAA5  
mivylinaiivv1itgfnlyrhqmqls1sam11sitinafintfiidkynfitlctitmfiiwtlqfyidkklkpv  
itdqkfiailtivvstq  
rvtdfsstqsiymsipflapafiiggim1fistfns1desaennnkiklmikgliiinifivmmv1tpywylylivy  
lif11f1fwqkvkyf  
>tr|D2N5B7|D2N5B7\_STAA5  
makipvlei fgptiqgegrvigrktmfvrtagcdyrcswcdsaftwdgsakgdik1mtaeeiydelkriggdlfnhvtis  
gnpalikgigeldlfdq  
kg1fsaletqgskfqpwmtdl1tisppkpsstmpdlkl1deviaqcvpss1n1kvvfvddkdydfakmihhrypdip  
fylqvgnpylsdsvdnhte  
k1leryeq1vd1vmqsnidnhvyv1pq1ht11wsnkkgv  
>tr|D2N5C0|D2N5C0\_STAA5  
milvidnndsftyn1idyiktqtk1tvqvvgidn11iedvinmkpkaivispgggnpddypilnevleqfyqrvpilgvc  
lfgqci vsyfggnihgyh  
pvhgh1tq1rhtnegifqglpqnfnvmryhs1iadgatfpcn1kitakndeaiimavehitfpvfgvqyhpesilseygy  
rqvel1skvgdycenri  
>tr|D2N5C1|D2N5C1\_STAA5  
mrienyryylteneykqyhiqlkgfikkyvatkladvgevihfqaqqrqgryvslylsyeaakyfnhvmcshslakdd  
iyavaysfekaesinstey  
hqtisyvskhhfsfvesseymmtnikrvqqaivegetyqvnytar1tdniyypistlyer1tqfsngnyta11qtdeiqva  
sispel1ffkqgqfnnvdnv  
iiskpmkg1mprgkteaedqyykt1qtsskdraenvmivd11rndigrisqsgsikvyklffieayktvfqmtsmvsgt  
1ktntd1tqi1ts1fpcgs  
itgapk1ntmkyikqlessprgiycgaig111pteddkmifnirpirtieykygqaiyvgagitidskpkdevnefyakt  
kilem1  
>tr|D2N5C2|D2N5C2\_STAA5  
mq1fetmki dnghipr1tyhtnrikcsser1nfkfdhawrne1ndvttkyhsgqyr1kiv1haesefetivsp1pekss  
ftakfqv1pkavnptfinn  
ktterkh1ahnhetd1111tsedgkv1efdignvvi eedgkwytpsykddflkgcmrdylidskl1vekdfnkneliyky  
hneir1flins1revadv  
hlcl  
>tr|D2N5C3|D2N5C3\_STAA5  
miiyyiv11111vyvnyr1vnr11senriyvvr1iatittvisfiivyalire1mpfvvramd1myhq  
>tr|D2N5C7|D2N5C7\_STAA5  
meaykieh1nksyadkiifdn1d1sisegekiglvgingtgkst11kviggiddftanvmhpnqyririyssqkd1ned  
mtvfdav1ssdt11riik  
gyeqavqayaddqsdk1fkrmmaqdamdqhdawdynaeikt1sklgihdttkyikelsggqqkrvvlakalieqpd11  
11deptnh1dfes1swlin  
yvkqyphtv1fvthdryflnevstriel1nrgklasypgnyesyiemraerevt1qkqqkqralykeelawmragakar  
ttkqgarinrfd1lenev  
qqykddkge1n1aysr1gkqvfeled1skaindkvlfeh1teiiqgerigvvgpngagktt11n1sgedqqfegklkt  
gqtvkvayfkqtdet1drd  
irmidy1reeseiakekdgtvsitq11er1f1psathgkkyk1sggeqkrly11r11vhqpnv111deptnd1dtet1  
tiledyih1tfggtvitvsh  
dryfl1nkvaqsywfi hdgqmekiigt fedyesyks1dknkst1kqqskst1vrkkn1sykekleyeq1mkrieqae  
rmeeidv1mieasadygki  
kelneekerlei qydidit rwsleeikeq  
>tr|D2N5C8|D2N5C8\_STAA5  
mmqgt1shyfyetfrpgqeeiiskv1dhrnv1gv1ptgggksicyqvp111ggttivisplis1mkdqvdq1kamgiq  
aaf1nss1tqkeqgrieka  
1sngeiq1lyvaperfenryfl1n1qrikih1vafdeahciskwghdfrpsynviskvft1pqdf1ia1tatatvevq  
qdirek1niaqtdqiktst  
krrn1ifkvnptyqrqkfv1dyikthdedagiycstrkqveelqea1esqkidsviyhagl1snkereeaqndf1fdrvk  
vvvatnafgmgidksnrvf  
vihynmpgd1esyqagragrdg1kseci11fserdin1heyf1tvsqaddydkmgek1tkmiqytkkkcleativ  
hyfepnekleeceqscncv

Tsompanidou\_et\_al\_Supplemental\_FASTA\_File

qqdksynmtqeakmiisciarmkqquesysviiqvlrgestdyikykygdqisthglmkgyttseishlidelrfkqflne  
ndeilmcdtsikkllsnev  
evfttpfkqkatekvfintvegdrvlfsqlvevrkklskltiapvsifsdytleefakrkpaskqadminidgvgsykl  
khycpafletiqnykakv  
>tr|D2N5C9|D2N5C9\_STAA5  
mikfknvtkrygkhvavdnisfninegeffvligpsgcgktttlkminrlhlseggiyfkdkpisdypvyemrwdigyv  
lqqialfphmtikeniaqv  
pgmkkwkedidkrvdelldmvglepekyknrkpdelsggqrqrvgviralaadppvilmdpfsaldpisreklqddli  
elqtikiikttiifvthdiqe  
amklgdkiellneghieqidtpegfknnpqsefvkqfmgshleddapcveenpiirdldimkpiddevtsmsaypivyddq  
qievlyqhl seservivmq  
edivggyvierkdkfkylsqkkevaqhd  
>tr|D2N5D0|D2N5D0\_STAA5  
mtnffdi lserkqglfstmiehiqisfia lliataiavplgilltkktiseivmniaailqtips lallglmpiflgig  
rvpaiialvvyallpplrnl  
tytgikevdpslieakgigmkpfrrl tkvelpiampvimagvrtamvliigtatlaaligagglgdllilgidrnas  
illgaipaallaiifdlil  
rfmaklsykkllmtlgivmiiilaiaipmfaqkgdkitlagklgsepsitnmykilieetkntvevkdmgmktafll  
nalksddidgyleftgtvl  
geltkep1kskeekkvdydqakslekkyqmtmlkpmkynntyalavkrdfakqhni rtigdlnkvkdqlkpgftlefndr  
pdgykavqkaynlndnir  
tmepklryqa inkgninlidaystdae lqydmvvlkddkhvfppyqgaplfkesflkkhpeikkplnklenkisdedmq  
mmykvtkvknedytvakd  
ylkekglk  
>tr|D2N5D1|D2N5D1\_STAA5  
mkeqlnq1sayqpg1spralkekygiegdlyklasnenlygpspkvkeaisahlde lyyypetgsptlkaaiskhlndvq  
srilfgag1devi1misra  
v1tpgd1vtseatfgqyyhnaivesanviqvp1kdgdf1legilkevneds1vwlcnpnntgtyfnhes1dsflsqv  
pshvp1lidayfefvtae  
dypdt1alqqkydnaf1l rtfskayglag1rvgyvasehai ekwni1rppfnvtriseyaavaaledqqylkevthkns  
vererfyqlpqsehfiqsg  
tnfi fvktkrvnelyeal1nvgcitrpfptgvritigfkeqndkml evl snfkye  
>tr|D2N5D2|D2N5D2\_STAA5  
mtrksiaidmdevladtlgeiidavnfradlgikmealngqklkhvipehdglitevl repgfrrhlkvmpyaqevvkl  
tehydvyiataamdvpstf  
sdkyewl1effpfl dpqhfvcgrknivkadylidnprql eiftgtpimftavhninddrfervnswkdveqyfl dnie  
k  
>tr|D2N5D3|D2N5D3\_STAA5  
menkythgvlfyhehsglkninqigevttalssickhlsiqlsenegdiikycqeikakdyakdvdlfilggdgtvne  
lingvmtyd1qlpigi1pg  
gtfnftkt1niapnhkqaseqmisavqgtydvikinnqyalnfvg1glivqnaenvqdgskdifgklsyigstvtlln  
ptqfnyqlsiddktyset  
tmi1sangpfiggsrip1tdlspqde1ntfifneqsfsilndifkkrds mnwneitqgiehipgkksittdpamkvdi  
dgeis1etpidievipnai  
q11tvnd1  
>tr|D2N5D6|D2N5D6\_STAA5  
mnpkvkgiiaailisaigfsmvffr1lagdlpvfqs1arn1vamfiplffiykyhqpmfgklssqpl111trstlg1igv  
l1niya1dhmv1sdads1m  
k1n1p1fw1t1l1s1v1fl1hek1rky1q1tami1ailgm1livk1pef1ss1mips1lag1fsg1faasaytcvralstrea1pyt1vf  
yfs1fsv1v1lip1ftay1ye  
pmsqtqi1ly1lgag1laav1gq1gvt1ays1faa1kdis1ifty1asi1ftailg1ilfges1pdfyat1gyvvi1gasyym1fek  
arrdakv1k  
>tr|D2N5E1|D2N5E1\_STAA5  
mrnnnkim1liav1tflism1ylfvgidfeifeyqfssr1rkfil1ilvgaa1atsv1vfqaitnr1l1tpsimg1davy  
1fikv1pvf1fgiqsvvt  
nvyl1nfil1t1imv1fal1lfqg1fkihf1siy1filligv1lgtffrs1itgfiql1mdpes1flaiqssmfanfnasnl  
vtfsav1lvi1lvi1tifi1l  
py1dv1l1lgrae1in1gis1yek1ltri1lvivsv1svst1alvgpit1flg1l1tn1lahel1mktyehkyiliatic1swis1  
fsaqwivenvfeattensi  
lid1iggsyfiy1l1vrrrnaq  
>tr|D2N5E3|D2N5E3\_STAA5  
mkk1tv1ylvavmf1laacgnnsdkeqsksetkgskdvtkiennyk1mrgekkdgsdakkvketvevpkn1knavv1dyga  
ldvmkemg1sdkvka1pkq  
eggk1spn1flesfkddky1tvgn1kevnfdkiaatkpevi1f1sgrtanqkn1defkkaapkakivvygadekn1lissmq  
ntenigkiydkedkake1n  
kd1dnkiasmkdktkkfnksvmy1lvnege1stygpkgrfgglvydt1lgnavdkkvsnsnhgqnsneyinkenpdvil  
amdrqgavsgkstakqal1n  
npv1knvka1kedkvyn1dpk1wyfaagsttttikqidelekvvk

Tsompanidou\_et\_al\_Supplemental\_FASTA\_File

>tr|D2N5E4|D2N5E4\_STAA5  
minkdiyqalqqlipnekiqvdeplkrytytktggnadfyitptkneevqavvkyayqneipvtylgnsgniiiireggi  
givisllsldhievsddai  
tagsgaaidvsrvarद्याlgtlefacgipgsiggavymnagayggevkdciद्याlcvneqgslkfttkeleldyrnsi  
iqkeh1vvleaaf1lapgk  
mtei qakmdd1terreskqpleypscgsvfqrppghfagk1iqdsnlqghriggvevstkhagfmvndngtatdyenli  
hyvqktvkekfgielnrev  
riigehpkas  
>tr|D2N5E5|D2N5E5\_STAA5  
mysnvqpfinsdltncfqsqyteies11fn11dspvkytkhiggthhfkystepildilvgvenlhditsldekr1nyvg  
fyr1hhkynkkvmmakfnn  
fhe1kqqvr1hi1qmntqtfesylaldr11stndeialqfntkkhqi1qhsftirqyemqkqyfeflckky1  
>tr|D2N5E8|D2N5E8\_STAA5  
mkvlvamdefhgi1ssyqanryveeavasqietadvvqvp1fngreh11dsvflwqsgqkyripvhdadmnevegvygqt  
dtgmtviagn1f1kgkkpi  
vertsyglgemi khalndakhvvis1ggidsfdagagmlqalgaqfyddegrrvdmrqqagvikyirrmmsnlhpkme  
tariqvmsdfssrlygkqs  
eimqtydahq1nhnqaaidnliwyfse1fkse1kiaigpverggaggiaav1kglyqaeiltshalvdq1thlen1ve  
qad1iifgegl1nendq1le  
tt1riaelchkhqkvaiaicataekfd1fesqgvmtamfntfidmpesytdfkmglqirhytvqslk11kthfnvdv  
>tr|D2N5E9|D2N5E9\_STAA5  
mknqlidr1tryttid1tqsdpksttptstekqwd11h1lekelqq1gl1ptd1dengylfatlesnidvdvptvgflahvd  
tspdfnasvnpqiienyd  
gkpyk1gntkrv1dpkvfpe1nslvght1mvtgdts11gaddkagiveimeaicylqkheikhgtirigftpdeeigr  
phkfdvdrfnadfaytmdg  
sqyge1qyesfnaaeavitchgvnhpgsaknamvnair1geqfds11pdsevpertegyegfyhlmnfegtvekat1qy  
iirdhdkkqfelrkkri1e  
irddinahfenypkvdi1sdqyfnmaekil1phi1dipkrvfak1dipantepirggtdgsq1sfmg1ptpni1ftgcn  
fhgpyeyas1dvmeakavq  
iig1vediaenn  
>tr|D2N5F1|D2N5F1\_STAA5  
mpdsiti1idenkvidv1iagri11lesgaetyrvedtmnriahsyglhntysfvsstai1fs1ndrtstr1iriqerttd  
lekialtns1srkisnkel  
tideaksefi1h1qhas1qysf1tnffaaaiacgff1fmfgvasdcwiaviaggsafl1tfsfvqryiqikffsefvaaav  
visiaatftk1giatnqdi  
itiasvmp1vpgil1tnaird11age1lagmsrgveaal1tafaigagvaiv11ii  
>tr|D2N5F2|D2N5F2\_STAA5  
mfeafiy1nsvivagiylfhr1qysenkrmvfskayvtv1mtivs111svy1pipyredy1ih1lftvp111flgrftnmvyt  
1satvivaiveivvfnnsi  
mygv11iviaavtsaigp1fkqndv1s11i1nvvti1i1fgvalvspiyt1sevi1lipisliitlasaitfvdiwhffs  
1vnryenedkydyltg1gn  
vkefdrh1nei1srkaekehqsi111idi1dgfkdvndtyshksgdav1kqmsq11knyvpnqfki1frnggeefsvvirny  
1dqsvk1aeni1rsgveks  
sfh1pnkevik1svsigvgyl1tdddpksqrkvfdaddmvhvaknqgrnkvmfnp1in1  
>tr|D2N5F5|D2N5F5\_STAA5  
mkiavmtdstys1sqd1idkyniqiap1svtfdgknftesneiaieefynkmassqtipttsqpaigewitkyem1rdq  
gytdiivic1ssgisgsyq  
ssyqagemveg1nvha1f1dsk1laami1egcyv1rai1emveegyepqqi1idd1tnmrehtgay1ivdd1kn1qksgritgaqa  
wvgt11kmp1k1kfedgki  
ipeekvrtkkraiq1tlekkv1divkdfevt1fv1ngdh1ledgqalykk1qedcpsayqvaysefgpvvaah1gsggl1  
gyvgrki1rt  
>tr|D2N5F6|D2N5F6\_STAA5  
mdnvtryki1tessqsssqayh1sfel1seqqsyasehivrai1rmrqt11lyavtgagktemmfqgiqyarrqgdniav1s  
prvdvve1skrikdafi1n  
edid1lhqssqfeghf1vctvhq1lyrfkqhfdti1fidevda1p1smdks1lqqa1kssskiehatiymtatppkq11se  
ipheni1k1par1fhkks1p  
vpkyryfk1nnnk1iqkml1yri1lqdqinnqryt1vffn1ietmikt1fsvykqkitk1tyvhsedv1rfekveq1rngqfdv  
iftt1ilergftman1dv  
vidahqytqea1liq1agr1vgrk1ecptgkv1ffhegvs1mni1qakkei1qk1mnk1al1krgwide  
>tr|D2N5F7|D2N5F7\_STAA5  
mnc1scgae1yekiti1yn1fkkpnr1cdrckenwdnik1dikarrcsr1kyl1nqneayc1dckf1sahfn1meqlycq  
fqydgimkemi1hqy1kfskd  
yy1cellah1jeipqtsydyiv1pipsspahd1srtfnpveav1kakgil1fdki1kmsnrpkqsh1tkker1adenpfiid  
me1d1ngkei11vddiytt  
gl1t1hragck1yakni1rkfvf1afar  
>tr|D2N5F9|D2N5F9\_STAA5  
mgf1ski1dgnnkei1kq1gk1ladkvia1leektail1tdeeirnk1tkqf1qteladi1nvkkqndy1dkil1peaya1vregsk  
rvfnmtpykvqim1ggiaih



Tsompanidou\_et\_al\_Supplemental\_FASTA\_File

kgdiaemrtgegkltatmptylnalagrgvhvitvneylssvqseemaelynflglvtvglnlnsktteekreayaqdit  
ystnnekgfdylrdnmvny  
sedrvmrplhfaiidevdsilideartpliisgeakstslytqanvfakmlkqdedykydektkavhlteqgadkaerm  
fkvenlydvqnvdivshin  
talrahvtlgrdvymvvdgevlidvqftgrtmpgrrfsegllhqaieakegqvqi qnesktmasitfqnyfrmynklagmt  
gtakteeeefrniynmtvt  
qiptnkpvrndksdliysisqkgkfdavvedvvekhkagqpvllgtvavetseyisnllkkrgrihdvl naknhereaei  
vagagkgavtiatnmagr  
gtdiklgegveelgglavigterhesriddqlrgsrgrqgdkgdsrfylslqdelmirfgserlqkmsrllglddstpi  
eskmvsravesaqkrvegn  
nfdarkrileydevl rkqreiiynernsiideedssqvvdamlrstlqrsinyintaddepeyqpfidyindiflqegd  
iteddikgkdaedifevww  
akieaayqsqkdi leeqmnefermillsidshwtdhidtdmqlrqgihlrsyaqqnplrdyqneghel fdimmqnieed  
tckfilksvvqvvedniere  
kttdfgeakhvsaedgkekvpkpkpvkgdqvrnddcpcgsgkkfkncchgk  
>tr|D2N5G1|D2N5G1\_STAA5  
mkksltvtvssvflaflalnaahaqqhgqtqktpvqhnyvsnvqaqtqspttytvvagdslykialehhltnqlsynp  
gvtplifpgdvislvpqnk  
vkqtktvksprkasqakvvkqvqqaskkvvkvqapqktvaktvvnvaykpaqvqksvptvpvahnyknsvanrgnlya  
ygnctyyafdrraqlgrsi  
gslwgnannwnyaakvagfkvdktpevgai fqaagpyghvgvvesvnpngtitvsemnyagfsvksrtilnpgkynyi  
h  
>tr|D2N5G4|D2N5G4\_STAA5  
mvehypfkihsdfepqgdqpaikveigekagrhtllgatgtgkftmsnvikevgkptliiahnktlagqlysefk  
effpenrveyfvsvydyyyq  
peayvpstdtfiekdasindeidqlrhsatsalferddviiiasvsciylgnpeeykdllvsvrvgmendrse llrkllv  
dvqytrndidfqrgrtfrvr  
gdvvei fpaskee l cirveffgdeidri revnyltgevlkerehfai fphashfvtreeklkvaieriekeleerlkelrd  
enkll eaqrleqrtnydl e  
mmremgfcsgienysvhltrplgstpytll dyfgddwlvmideshvtlpqvrngmyngdrarkqvlvdhgfrlpsalndr  
plkfeefeektkqlvyvsa  
tpgpyei ehtdkmveqii rptgll dpkievrptenqidll seiqrvernervlvtlltkkmsedl ttmkeagikvny  
lhseiktlerieii rd lrm  
gtydiviginllregidipevslvvil dadkegflrsnrsl iqtigraarndkgevimyadkmtsdmskyaidetqrrrei  
qmkhnekhgipkktinkki  
hdlisatvendenndkaqtvipkmtkkerqkti dni ekemkqaakldf ekate lrdml felkaeg  
>tr|D2N5G5|D2N5G5\_STAA5  
mkepsivvkgarahanlkdidielpknlivmtglsgsgksslafdtiyaegqrryveslsayarqflgqmdkpdvdtieg  
lspaisidqkttsknprst  
vatvteiydyirll yarvgkpycpnhnieiesqtvqqmvdrimleartkiqllapviahrkgshekliedigkkgyvrll  
ridgeivdvndvptldknk  
nhtjevvdrlvvdgietrladsietalelseglvtvdvidgedlkfshesacpicgfsigeleprmf sfnsfgacpt  
cdglgqkl tvdvlvvpdk  
dktlnegaiepwiptssdfyptllkrvcevykinmdkpfkklterqrdillysggdkeieftftqrggtrkrmtvfevg  
vpnisrrfhespseytrem  
mskymtelpcetchgkrlsreal svyvgglnigevveysisqalnyykninlseqdqai anqilkeiisrlaflnnvgle  
yltnrasgtlsggeagri  
rlatqigsrltgvlvldepsiglhqrdndrlintlkemrdlgnl ivvehddtmraadyldigpgagehggqivssg  
tpqkvmkdkksltgqylsg  
kkrievepyrrpasdrkisirgarsnllkgvdvdiplsimtvvtgvsgsgksslnevlykslaqkinkskvkpglydki  
egidqldkii didqspigr  
tprsnpatygtgfddirdvfaqtneakirgyqkgrfsfnvkggrrceackgdgii kiemhflpdvypcevcdgkrynret  
levtykgkniadi lemte  
eatqffenipkinrklqtlvdvlglyvtl gqqattlsggeaqrklaselhkrstgksiyildepttghvddisrllkv  
lnrlvengdtvviiehnld  
viktadyiidl gpegsggggtivatgtpediaqtksytky lkevl erdkqntedn  
>tr|D2N5G9|D2N5G9\_STAA5  
maqknnnvj pmtfdafyrkmanqfkqreykraeayfekvlelspddleiqidyaqlvqlgiakkaehlfydniinyr  
hledsfyelsqlnievnep  
nkafllfginyvsvsddqdyrdeldqmfdvkyqseeqieleaqlfvvqilfqylfsqgrlkdaknyvlhqpqevqdhrrvr  
nllamcylylgeydtakal  
yeallqedstdiyalchytlllyntkeneqyqylykllnkvvpmnddesfklgvlsvlykqyrasqlllyplykkgkfls  
iqmynalaynyyylgeede  
shywdkllkqiskveighapwwienskevfqhilpllsddshyrlygifflldqngkeivmtesiwqvlennnyekl  
yltylvqgltnklldfihr  
glltlyhnel fviendlmvawinqgeliiaekvdldvepyigafiylyfknqprnvtkkqittwlgitqyknkmi efl  
lsi  
>tr|D2N5H0|D2N5H0\_STAA5

Tsompanidou\_et\_al\_Supplemental\_FASTA\_File

mteidfdiaigagpagmtaavyasranlktvmergi pggqmanteevenfpgfemitgpdlstkmfehakkfgavyqy  
gdiksvedkgeykvinfng  
kel takaviiatgaeykkgvpgqe lgggrvsvycavcdgaffknkr lfviggdsaveegt fltkfadkvtivhrrdel  
raqrilqdrafkndkdfi  
wshtlksinekdgkvgsvtlstkdgseetheadgvfiyigmkpl tapfkdlgitndvgyietkddmttsvpgifaagdv  
rdkglrqivtatgdgsiaa  
qsaeyiehlndga  
>tr|D2N5H1|D2N5H1\_STAA5  
mkmr1qqaffnssqppqreigfpi stgnaswggaptqki skrnstsnaswvgpnteadeksaydinvqvgagqr  
>tr|D2N5H6|D2N5H6\_STAA5  
mkgiellnnpflnkgiaftneerkqlgleglpanvrtleqqaeqcyeqfkakqtdfekrflmai fnrnr tlfykltse  
hlvefmpiiydpviaqsie  
qynerfsrpqdavflsvdrdqdieqelnvangerdir livvt daegilgigdwgvdgvdiaigklivytaaaginpsqvl  
pvsldvgtneqllnddly  
lgnrhkrvddetyyafvdkfvsavrkeypnallhwedfgrghaknildkyedt lptfnddiqgtgivt lagvlgalnisk  
vnytnqtflyvggtagmg  
itnilkdelikqgvseekanqhfymdkqgl fddmddlteaqqvfaknrnefsktvnwnk lkevienikptvligtstq  
tgafte davkemlkhterp  
mifp1snptklaeatqdl lkwtnkalaigtgipyndieyngvnysigqanna lmypglglg liaskakkvnqqilsaas  
halggmvnpdeppgaav lpp  
vekihqcسرائيکاکاواصیدقگناetididkaieaeiwypeyky  
>tr|D2N5H7|D2N5H7\_STAA5  
mkqyli tgggmvgsqlvneikkdsshitil trhdqisndkki syvnwaksgwehkvppkidvvinlagatlnkrwtp ey  
kqtlmlsr iqtqalyelf  
ksrnkapkv lfnasatgyppdl fmsytevykt lpfdf lsdivyqwerfaqqfeql gtrvvigrfgi ilsneggalqtmk  
lpyeyyiggklsgqqwys  
wihndliqail flinnesasgpfnl tapi perqnl fgyt laramhkphetwaps lamr l ilggmstvv ldtqkvlpnki  
qalgf qfkysnlkmaledl  
isk  
>tr|D2N5H8|D2N5H8\_STAA5  
msnqnydynknedgskkkmsttakvvsiatvllllgg l vfaifayvdhsnkakerml neqnqeqkekrqkenaekerkkk  
qeekeqnel dsqanqyq  
lppqqnyqy vppqqqaptkqrpakeendkaskdeskd kddkasqdk sddnqkktddnkqpaqpkppqqptpkpnnnqq  
nnqsnqqakppapqqnsqs  
ttknqnnandk  
>tr|D2N5I1|D2N5I1\_STAA5  
makkivsdldlkgktvlvradfnvplkdgeitdnrivqalptiqyiegggkivlfshlgkvkeesdkakltlrpvaed  
lskkl dkevfvpetrgek  
leaaidk lkegdvllventryedldgkkeskndpdlgkywaslgdvfvndafgtahrehasnvgisthletaagflmdke  
ikfiggvndphkpvaail  
ggakvsdkinviknlvniadkiiiggmaytflkaqgkeigisll eedkidfakdllekhgdki vlpvdtkvakefsnda  
kitvpsdsipadqegmdl  
gpntvklfadelegahtvwnvgpmgvfefsnaqgtigvckai anlkda itii gggdsaaaaislgfendfthistggga  
sleylegkelpgikai nnk  
>tr|D2N5I2|D2N5I2\_STAA5  
mrtpi iagnwkmktvqeakdfvna lptlpdskevesvicapaiql dal ttavkegkaqgleigaqntyfedngaftget  
spvaladlgvkvvighse  
rrel fhetdeeinkkahi fkhgmtpi icvgetdeeresgkandvveqvkavag lseeqlksvviayepiwaigtgks  
stsedanemcafvrqtiad  
lsskevseatriqyggsvkpnnikeymaqtdidgalvggaslkvedfvqllegak  
>tr|D2N5I4|D2N5I4\_STAA5  
mpiitdyarev ldsrgnptvevev ltesgafgralvpsgastgeheavelrdgdksrylgkgv tkavenvnei iapeii  
egefsvl dqvsi dkmmial  
dgtpnkgkl ganail gvsiavaraadllgqplykylggfngkqlvpmmni vnggshsdapiafqefmilpvgattfke  
slrwgteifhn lksilskr  
gletavgdeggfapkfegtedavetii qai eaagykpgeevflgfdcasseyfyengvydyskfegkhgaktataeqvdy l  
eqlvdkypii ti edgmden  
dwdgwkl terigdrvqlvgddl fvtnteilakgi engignsilikvnqigtltetfdaiemaqkagy tavvshrsgete  
dttiadiavatnaggiktg  
slsrtdriakynqllriedel fetakydgiksfnldk  
>tr|D2N5I7|D2N5I7\_STAA5  
mqiklpkpf ffeegkravlllhgftgnssdvrlgrflqkkytsyapqyeghaappeeilqsspfvwfkda ldgydylv  
eggydeivvag lsggdfa  
lklslnrdrvkgivtmcapmggktegaiyegfleyarnfkkyegkdqetidnemhhfkptetlkel seal dtikdqvdevf  
dpi lviqaendnmi dpqsa  
nyiyehvdsdekdi kwysqsg hvitidkekeqvfd diyqfl esldwse  
>tr|D2N5I8|D2N5I8\_STAA5  
mnlkqsieei nqpeyepmsvsdfqdalglssadsfrdlikvlveleqsgliertktdryqk khsskghsklikgtlsqn

Tsompanidou\_et\_al\_Supplemental\_FASTA\_File

kkgfaf1rpedkdmedi fi  
pptkinraldgdvtiveihqskgehkgkiegevksiekhsvtqvvtysqarhfgfvipddkrimqdi fipkgqslgavd  
ghkvlvqitkyadgsdpe  
ghisailghkndpgvdi lsiyqhgieiefpdevlqaeatpdnieidseikgrhdlrde ltitidgadaklddaisvkk  
langntqltvsiadvsyyv  
tegsaldkeaydratsvylvdrvipmiphrlsngicslnphvdr ltlscrmeidasgrvvkheifdsvihsdyrmydav  
nqittekdp tiregyneit  
pml d laqdlnrliqmrkrgeidfdi seakvlvnedgiptdvqlrqrgegerliesfmlianetvaehfskl dvpfiyr  
vheqpsdr l r q f f d f i t n  
fgimikgtgedihpttlqkvqeevegrpeqmvi stmm l rsmqqahyddvnlghfgl saeyythftspirrypdltvhrli  
rkyli eksmdnkevkrwed  
klpelaehtskrerraieaerdtde l kkaeymiq higdefegivssvanfgmfie l pntiegmvhianmtddyrfeerq  
maligerqakvfrigdtvk  
mkvthvdvderlidfqivgmp l pkndrsqrpargkti qaktrgks l dksksddkghkkkgqrkgknerkndksngskhk  
pfykdksvkkarrkkk  
>tr|D2N5J0|D2N5J0\_STAA5  
myky1rkisvatiasfv lvgpvystvesgkanaetakavdkemkqrekignalleidnskedfkdpvstek lkgqvr dy  
kngvaergkati takagak  
airatvknigekawdk l vakienttgk lvmfhyqsinkfcdiltgfegnlaegiatg ltnnfgfnkfayivarafiai  
v l  
>tr|D2N5J1|D2N5J1\_STAA5  
mkkvmgillast l ilgacghhqsakkestshkkkndneelnee lkefkskknmdikikgd tivsd kfeakikepfi in  
ekdekkyiafkmeitakk  
ddkdl npsishdyini tqddkntvnlrdgyl lsdkkykdwtehnqdqikkgktaqamfiyelrgdgninfnvhkysed  
ktvdsksfkfsk lktedfs  
hraetreevekkekefeeykkeqerekekekqkdddhs ldev  
>tr|D2N5J2|D2N5J2\_STAA5  
mini saigsigtfimalfyfvsvsqlyqmki sflpalgnqillereggqlnimnsatdehhhkdyiklynlggaak  
kiaiev l gndkviqkkyv  
nilpskegym lpinknyeelerti enngyead l nvrmyyhnvsrkqqevilkqgidrfnynkeiydlqfi  
>tr|D2N5J3|D2N5J3\_STAA5  
mqir qihqhdfaqvdq l i rtafensehgygnese lvdqir lsdtydnlelvav lqnevvhg l lsevy l dneaqreigl  
vlapvsvdihhqnkgigkr  
liqalereailkgynfi sv l gwpkyyan lgyqrasmydi ppyydgipdeaflike lkvkslagktgtinytsafeki  
>tr|D2N5J4|D2N5J4\_STAA5  
mmkkqekhairkksigvasvlvgt l igfg l lsskeadasensmtqtentnesksndpssvnaapkt dntnvsdsnttt  
ntnsdetnvaqnpaqgett  
qsastnatteetpvtgvtttatnqantpattqssntnaeesvntstnettsndntvssvnsqpnstnaenvsttqds  
tevtspnnesapqstdasn  
kdvvngtvntsasrmrafs laaadapavgt di tnqltnvtvgidsgttvyphqagyvklngy fsvpnsavqgd t fki tvp  
kel n l ngvtstakvppima  
gdqvl angvidsdgnviyftdyvdtkndvkat l tvpayidpenvtktgnvt l ttgignttanktv l vdyekygkfy n l s  
ikgtidqidkntntyrqti  
yvnpsgdnviapvlgn l kpntdsnalidqqntsikvykvdaad l sesyfvnpenfedvtvsvnitfpnpnqykvfnt  
pddqittpyivvnghidp  
nsgd l alrstlygynsni iwrmswdneva fngsgsgdgidkpvvpeqpdepgeiepipedsdsdpgsdsgsdsgsds  
nsdsgsdsgsdstsdsgsd  
sasdsdqrairfse  
>tr|D2N5J5|D2N5J5\_STAA5  
mnl nhs l n l i a r  
>tr|D2N5J6|D2N5J6\_STAA5  
msdsdsasdsdsdsdsdsdsdsdsdsdsdsdsdsdsdsdsdsdsdsdsdsdsdsdsdsdsdsdsdsdsdsdsdsds  
dsesdsdsdsdsdsdsds  
sdsdsdsdsdsdsdsdsdsdsdsdsdsdsdsdsdsdsdsdsdsdsdsdsdsdsdsdsdsdsdsdsdsdsdsdsds  
dsasdsdsdsdsdtgs  
dndsdsesdsnsdsesgsnnvppnspkngtnasnkneakdskep l pdtgsedeantsliwgl l las l g l l l l frkken  
kdkk  
>tr|D2N5J7|D2N5J7\_STAA5  
mknk l l v l s l galcvsqi wesnrasavvsgeknpyvses l k l ndnksks l s l ekykes l r simctkeinkndgydepeyk  
eal dtyrkk l fael d a l nk  
fldeerkiasyikkmevpsni l g l thgrytaiynaikenkfeknvenieskh l d l k r f e d k d y e a r v k l n e l e n k v  
l m l g g a f p d k v d a r e s l y n  
k l d m i v g l d n d e i e e r h p q n e r l l k e r v e d l e t i i d e f f n d i g e n r p e n i a p l t n e h k n k e m i t k l k s d t e a a k s d e s k  
r s k r s k r s l n t q n h k s k i n  
evtaeqkaeyerkaeerkekflaknkdpvvs l i deednenendkqlvvsaptnkptt l ptytettttqvpmp t v e r q t q  
qqi vykapkplag l n g e s h  
dfttthqspttsnhthnlhieetsal pgrktgslvg l sqidssh l t e r e k r v i k r e h v r e a q k l v d n y k d t h s y k d r l  
naqqkvnt l s a g h q k r f n k

Tsompanidou\_et\_al\_Supplemental\_FASTA\_File

qinkvyngk  
>tr|D2N5J8|D2N5J8\_STAA5  
mkkkllvlmtstlfatqimnsnhakasvtesvdknfasedklnkiadpsaaskivdknfavpesklgnivpeykeinnr  
vnttnnpaskqvdkqivv  
kgpevnrfitqknvnhhfittqthykkvitsykstvhnhvdhatssihhhftikpteaprythpsqsqsliinhhfavp  
gyghkvvtppgqasirihh  
fcavpqiinsfkvippsyghnshrmhvpsfqntttathqnakvnktykyfytykvvkgvkkhfsfskshgckivkpalni  
knvnygyavpsnsphvvp  
efkgilpaprv  
>tr|D2N5J9|D2N5J9\_STAA5  
mkrkv1vl1tmgv1catq1wqtnnaka1vhesgvndtkqftevtseekvitvehayinifksnsnsnlmefniltiggksg  
amvgyseidssshftdrkr  
airrdhvkeaqslindykdtqsyedlakatakvtlsqshqnylnkqidkvnkiektekr  
>tr|D2N5K1|D2N5K1\_STAA5  
mlivkvs111vallqf1dhvmyyqfrikkvnsikikci  
>tr|D2N5K3|D2N5K3\_STAA5  
mnelkqkytiakfyklyiersnnetetvanffgdaknarenyfcdryqdf1tncqilinqkyltgev1ddniynis  
ilnktfiefeqnfg  
>tr|D2N5K4|D2N5K4\_STAA5  
mnyikrti1111fvvvspinspktiadnkysaiqqdkfqlpggdiivtkgpmwgfghcsiaiddktilqiepggdkp  
ttqsfesfkynyasgkndw  
mkvyrcsyppgagkkaewvknyentnhrylvt1lnskkftyctkiyqaykfgvseksvksyglhiispyaikdnfid  
pyklr1vktv  
>tr|D2N5K9|D2N5K9\_STAA5  
mvtaiihgfilaig1ilplgaqnvfi fnqganqkyryvlpaiitag1sds1111avvgvsiiims1pvlqaiiyvig1  
if1mymawtiwhdkpstdg  
eaqimspmkqvsfalsvs1lnphaildtigvigssaalysgsnki aftiacisvsw1wff11ailgkivgsidktgk11t  
iinkissiiiiivalmilq  
k1iq1if  
>tr|D2N5L1|D2N5L1\_STAA5  
maihyetkatnvggrkghvytdraididivppaqadgkatnpeqlfaagyascfngafd1ilkqnkvrdahpevt1tvr  
ledpdsespk1svsdat  
iknvisqeeaekeylqmahefcypyskatqgninvd1ivnvvd  
>tr|D2N5L2|D2N5L2\_STAA5  
mthvevvatiapqlyieetliqkinhridaidvle1ridqienvtvdqvaemitklkvmqdsfk11vtyrtrlqgygqf  
tndsyln1isdlaningid  
midiewqadidiekhriithlqqynkeviishhnfestppldelqfiffkmqkfnpeyvklavmphnkndvln11qsm  
tfsdtmdckvvgi1smk1g  
lisrtaqgvfggaltygc1gepgagqgidvtd1kaqv1y  
>tr|D2N5L3|D2N5L3\_STAA5  
melqqaianrrsvkkfkrdmhidda1lyqai ekaadapnhgmrepwrvvhvpkdr1gdmskdiskfafpneldkqqchyd  
avtk1ggm1111ktdprq  
rqndenyfafgayaqnlm11lyevgigtcwksplyiydpkvrktlgikkdevlagfly1tdleedmpkaprknrnlitly  
>tr|D2N5L6|D2N5L6\_STAA5  
maypnelkyskehewkvvegnvatigiteyaqselgdivfvelpetddeinegdtfgsvsvktvselyapisgkvvevn  
eeledspfvnespyekaw  
mvkvevsdesq1eal1saekyaemige  
>tr|D2N5L8|D2N5L8\_STAA5  
m1niqdvsh1skkeqkaynrfvesvengn1pilpciemd1kemqet1nqskiggmp1ksfkdipldennvpmv11aqi  
n1dd1peqqe1fpvnegi1  
qfwiessedqmygmsen1kgnninsr1vyikepisd1slkdiqah1kslnadnedipfsgafsief1r1skqtitctdykd  
edv1alwnkvnsfalksm  
fggydelmepvcntftakepfnq1ggypyfdqidprtn dq1kmydrv11qidstrdgns1iwgd1gianilvkstdle  
amkfdmymyswdcs  
>tr|D2N5L9|D2N5L9\_STAA5  
mai1nkvi1vegskdkkrvqqviaepvni1cthtgmsidkfdmieslydkqvfv1adsddegdri1rnfkry1sesehi  
fidktycqvancpkqy1ah  
v1skhgftckketp1lpninner1vlvne  
>tr|D2N5M0|D2N5M0\_STAA5  
mns1dikdvttfyeedkh1ifgytptcgtckvserm1dianeilq1p11kid1nfypqfckdmqimstpi111mnkdke  
vkriyafqsvtd11en1k  
>tr|D2N5M2|D2N5M2\_STAA5  
mgksfsei1nemi1tmpniqwpewtaivetlymtvvstiftfilgl1lgv11flsagksigar1fysivsfi1vnl1frai  
pfi1i1111ipfts11lgt  
isgptgalpaliigaapfyar1veiafkeidkgvieaawsmgantwtvirkv11peampalvsgitvtaialvgstavag  
vigagglgnlay1tgftrn  
qndvilvstvfi1iivfi1qfigdw1tnk1dkr  
>tr|D2N5M3|D2N5M3\_STAA5

Tsompanidou\_et\_al\_Supplemental\_FASTA\_File

mkk1fglilvlvtfavvllaacngsksgsdckkivtvgaspaphaeilekakpllekkgyeldiktindyttpnkllkgei  
danyfqhtpylntekkdkg  
yki vsagnvhlep mavyskkykslkelpkgatvyvsnpaeqgrflkffvdaglikikkgvkiedakfsditenkkdikf  
nnkqsae flpk i y q n e d a d  
aviinsnfaieqklnpkkdsiavesakdnpyanliavkeghqddkkikalievlskdiqdfinekyngavipak  
>tr|D2N5M5|D2N5M5\_STAA5  
mqqfkwinilkgfamgtsdlvpgvsggtiallgiynqfiasisgifsrrfwsftflipiigmlamgslsnlfnyll  
sqhhiptmffffggligiv  
pyllkisyktsfttkhymmviagiailivitlmngdkhagetltlstgliikyfiagmcassamllpgisgsmllvf  
gyygtvmlaisefvkl nfa  
glp illavfgvlagfiisskiiqyflthhklmtfaliigfvvgs1favfpglptnivmwfvslvvfiigfivsltlgri  
taene  
>tr|D2N5M8|D2N5M8\_STAA5  
maehsfdvnevikdfpildqkvngkrlayldstatsqtpvqvlvledyykrynsnvhrghvtlgs latdgyenaretvr  
rfinakyfeeii ftrgtta  
sinlvahsygdanveegdeivvtemehhanivpwqqlakrknatlkfipmtadgelnie dikqtindktkivaiahisnv  
lgtindvktiaeahqhga  
iisvdgaqaaphmklmdqemnadfysfsgkmlgptgigvlfgkrellqkmpiefggmidfvskydatwadlptkfea  
gtpliaqaiglaeairyle  
rigfdaihkyeqeltiyayeqmstiegieiygppkdragvitfnlqdvhphdvatavdtegvavraghhcaqplmkwln  
vsstarasfyiyntkedi  
qlinalkqtkeffsyef  
>tr|D2N5N1|D2N5N1\_STAA5  
myfvlaiftiisasvlgysiqacasshninayyalsrslplfl laifslvihsaiflitisiamilvqfl daivgyksn  
dvfkygplatsvvnliil  
ivflf  
>tr|D2N5N2|D2N5N2\_STAA5  
miiaililifisffffsgsetaltaanktkfktheadkgdkkagivkllekpsfittilignnvanillptlvtimalrw  
gisvgiasavltvviilis  
evipksvaatfpdkitrlyvpiinivfrpitlllnklt dsinrc lskgppqehqfskeefktmlaiaghegalneie  
tsrlegvinfenlkvkdv  
tprinvtafasnatyeyetvmnkpytrypyegdidniigvfhskyllawsnkkedqitnysakplfvnehnkaewv  
l r k m t i s r k h l a i v l d e f g  
gteaivshedlieellgmeiedemdkkekeklsqqqifqqrknrvsi  
>tr|D2N5N3|D2N5N3\_STAA5  
mwknrltqm lsiefpiiqagmagsttpklvasvsns gglgtigagyfntqqledeidyvrqltsnsfgvvnfvpsqsy  
tsnqienmnawl kpyrral  
hleepvkiiteeqfkchidtiikkqvpvccftfgipnesiikrlkeanikligtatsvdeai anekagmdaivaqgsea  
gghrgsflkpknglpmvgt  
islvpqjvdvvsipviaaggimdgrgvlasivlgaegvqmgtafltsqdsnasellrdaiinsketdtvitkafsgklar  
ginnrfieemsqyegdipd  
ypiqnel tssirkaaanigdkelthmwsqsprlatthpantimsniinqinqimqyk  
>tr|D2N5N4|D2N5N4\_STAA5  
minigtgwgdhyslyedlerqtdklktyaghfpvvel datyyai qpernilkwiketpdtfefvkihaqltlhadykt  
fadtrqelfdqfknml ep l  
htqkklamv1vqfppwfdcaqnikiyilyvrqq1qsfpmcvefrhqs wfsdafkeqtl sfltehqi ihavvdepqvkds  
vplvnritneiafvryhgr  
nygwtkkdm sdqewrdvrylydyneqelidlaqkaqilaqkakkvyvifnns gghaannaktyqrllnieyglapqq  
lk1f  
>tr|D2N5N6|D2N5N6\_STAA5  
mr1tiyhtndihshlheyerikaymaehrprlnhpslyvdlgdhvdl sapiteatlgkknvallneakcdvatignnigm  
tishaelnhlydeakfivt  
csnvidesghlpninvssyikdidgvkil fvaatapftpfyraldwivtdpldsikeeielqrgkfdvllivlshcgiffd  
etlcqelpeidvifgshth  
hyfehgeinngvlmaaagygnylgevnltfeahkvvhtakiipletlpevksfeeegktlmsnpviqhpvvlkrsmn  
hiteaayllaqsveytha  
qcaiinagllvkdivkdevtey dihqmlphpinmvrvr1sgvklkei i aksnkqeymyehaagglgfrgni fgyi1ynlg  
yihstgryl ngeeedk  
eyvlgtidmytfgryp1lkel pkeylmpelr di fkek1ley  
>tr|D2N5P2|D2N5P2\_STAA5  
mkiivsrkipdkfyqq1sklgdvvmwqkslvmpk dqfvta1rdadacfitlseqidaeilaqspnlkvianmavgydn  
idvesatannvvvntnprv  
l t e t t a e l g f t l m l a t a r r i v e a e k y v e a d a w q s w g p y l l s g k d v f n s t i g i y g m d i g k a f a r r l q g f n t k i l y h n r s r  
hkdaeadfnatyvsfetl  
aesdfiictapl tkethhkfn aeafeqmkn dai finigrqivdeta lidal dnkeilacgl dvl anepidhthplmgrd  
nli1tphigsasvttrdm  
iq1cinnieavmtnqvphptvn  
>tr|D2N5P4|D2N5P4\_STAA5

Tsompanidou\_et\_al\_Supplemental\_FASTA\_File

mtdiinklqafadanpqsiavrhttdeltyqqldmessklahrllqgskkpmilfghmspymivgmigaikagcgyvpvdt  
sipedrikmiinkvqpefv  
fnttdel feslagevftiediktsqdpvi fdsqikdndtvtyiftsgstgepkqvqieyaslvqftewmlelnksgneqq  
wlnqapfsfdlsvmaitypc  
lasggtlnlvdknminkpkllnemltatpinivwstpsfmemclllptlneeqygslnefffcgeilphraakalvsrfrp  
satiyntygpteatvavts  
iqitqeil dqyptlpvgverpgarlsttdege lvi egqsvslyl kndqktaevfnfddgirtyhtgdkakfengqwf iq  
gridfqiklngyrmeleei  
etqlrqsefvkeai vvpvykndkvihligai vpttevt dnaemtknikndlksrlpeymi prkfewmeqlpltsngkidr  
kkiaeving  
>tr|D2N5P7|D2N5P7\_STAA5  
mkllkpfllpilisgavfivflllparwftglvtektvednrtsltdqvlkgtliqdklyesnkyypiygsse l gkddpfnp  
aialnkhnan kkafl l g ag  
gstdlinave lasydklk gkkl t f i i spqwftnhgltnqnfarmsqtqinqmfqqkmstelkrryaqrllqfphvhn  
keylksyaknpketkdsyi  
sgfkenqlikieaiks lfamdksplehvkpatkpdaswdemkqkaveigkadttsnkfgirdqywkliqueskrkvr r dye  
fnvnspefqdlellvktmr  
aagadvqyvsipsngvwydhigdkerrqavykkihstvv dnggkiydmtdkdyekyvisdavhigwkgwvymdeqia kh  
mkgepqpevd kpkn  
>tr|D2N5P9|D2N5P9\_STAA5  
mehsvvvygadvi cascvnaptskdiydlqpllkrkypnisfkytyiditkdndnltdhdlqfierieqdel fypl it  
mndeyvadgyiqtkqitr f  
idqklvng  
>tr|D2N5Q3|D2N5Q3\_STAA5  
maqdrkkvlvlgagyagltvtklqkaisteaeitlinkneyheawatl heasagtl nyedvlypvesvlkdkvnfvq  
aevtkidrdakkietnggi  
ydfdilvvalgvsetfגיעmkdhafqienvitarelsrhi edkfanyaaskekddndlsilvvggagftgveflge l td  
ri pelcskygvdqnkvk it  
cveaapkm l p m f see l vnhavsyl edrgvefk i atpivacnek gfvvevdgekqqlnagtsvwaagvr gsklmees f egv  
krgrivtkqdltingy d n i  
fvigdcsafipageerplpttaqiamqqgesvaknikrilngestee feyvdr gtvcs l gshdgv gmvfgkpiagkkaaf  
mkkvidtravfkiggigla  
fkkgkf  
>tr|D2N5Q4|D2N5Q4\_STAA5  
mnfkl nnt l sneintli igipehlnqlerisfnhiditeslerlkhqhiigskvgkiyttafdvqdqtyrlitv glgnlk  
trsyqdm lkiwghlfqyik  
sehiedtyllm dsfiskydq lsdv l macgiqseratyef dhyksskka l f ktn l n lises l ieldfihegisigqs inla  
rdfs nmpnv ltpqtfaed  
ivnhfkntkvkvevkdydtlvsegfgllqavgkgs khkprlv tityngkdkdeapialvgkgitydsggysiktngmat  
mkfdm cgaanvvgiieaas  
rlqlpvnivgvlacaenmineasmkpddvftalsgetvevmntdaegr l vladavyyanqyqpsvimdfatltgaaival  
gddkaafesnskvi lndi  
lqisskvdemvfelpitaterasikh sdiadlvnhtngqgka l faasfvthfsgqtphihfdiagpattnkasyngpkgp  
tgfm i p t i v q w l k q q  
>tr|D2N5Q5|D2N5Q5\_STAA5  
minavviavil mivlclcrlnvvisl fisa l vgg l isgmsiekvinvfgnivdgaevalsyallggfaalisysgitdy  
lvgk i i n a i h a e n s r w s r v  
kvkvtiia l l a m s i m s q n l i p v h i a f i p i v i p p l l s l f n d l k i d r r l i g l i g f g l c f p y v l l p y g f g q i f q q i i q s g f  
akanhpiefnmiwkamlip  
smgyivgl l i g l y v y r k p r e y e t r k i s d s d n v t e l k p y i l i v t i v a i l a t f l v q t y t d s m i f a l a g v l v f f i s r a y n w y  
eldakfvegikimayigvv  
iltangfagvmatgdidelvktltsitgdnklfsiimmyviglivtlgigssfatipiasl fipfgasigldtmalia  
ligtasa l g d s g s p a s d s t  
lgptagl nvdgqh d h i r d t c v p n f l f y n i p l m i f g t i a a m v l  
>tr|D2N5Q6|D2N5Q6\_STAA5  
mthlletfemsidhqedglvvi smpvtdkvkqpfgy l hggasialgetacs lgsanlidttkfiplglemnanhihsakd  
grvtataeiihgksthvw  
diki kndkeqlitvmrgtvaikplk  
>tr|D2N5Q7|D2N5Q7\_STAA5  
mhwtiiggigqgtaiakllssgl ttdrltiidphetf cqr fnsytnriempylrspivhhvhppqfhlkqfakqh qytn  
afygyqrpel t m f m d h i a  
haskyql edclvqglvqtl dkqedkwyikledgqi ittdcvviaigstnipmpdilkdkqnvnhifekehdqvvydkt  
dhivgsgitaahlalklln  
hdddkihlwlnkdi ei h d f d a d p g w l g p k n m s s f l s t k s m p e r n a i v q r e r h k g s m p h e l y l r l k k h i k n g r i n v h k t p  
itqisggvintendsvpyq  
qimvatgfeqdfmsqplikqliqnydapi necnypviseklewi p n l y v a g c f a d l e l g p f g r n v m g g r k a a e r i e q a f l  
klqqysa  
>tr|D2N5R1|D2N5R1\_STAA5

Tsompanidou\_et\_al\_Supplemental\_FASTA\_File

miesnmlvltlvipvitailvfigkrpiikryvalggtl1t1vaaiinlanvvkhgpirvelgswkapysivfvldifs  
alliitsiiitaivilysy  
qtigiereryyyfsvlflmigiigafttgdfnlfvffevflmssyfl1vigstkiqlqetikyvlvnnvsssffvmgv  
ailysvvgtnladisnk1  
anlsahdsglvnivfilfifvfatkgavfpmfwlpsayyappipiaffa11tkvgvyaiart1s1ffsdnvsfshyv  
ilfla11tiifgcvgavay  
anikkii1ynvmiavgvilvgvammtesgmigaiyytlhdmlvklalfl1ligimikitgiadlrqfgglikrypvlgwsf  
fiaalslagipp1sgfygk  
ffivqstfergfylsgviv11ss1vv1ysviriflqgffgqpkgydlnnkvdvlylttiaivavvitvlygl1sadylypm  
vkagaetfynpstyvkv1  
ggk  
>tr|D2N5R4|D2N5R4\_STAA5  
ms11hiavilplifaliipilyrffkrihlgwfvlpvivi1iymltlikttmsgntvmktlnwmpfhgmndlyldglg  
11fs11isgigs1v1ysi  
gylskseq1gnfycy111fmgam1gv1sdnviily1fwe1tsfss11isfwrerqasiygaqks1iitvfgg1s11gg  
i11laiptqsfsiqymiqh  
aseiqnspffifamilimigaftksaqfpfyiwlpdameaptvpsay1hsatmvkaglyliarmtpifaasqgwiwtvt1  
vglit1fwas1natkqdd1  
kglafstvsq1gmimam1gigaisyhyqgddskiyaaftaaifhlinhatfkga1fmitgavdhstgtrdvkklgg11  
tvm1p1sftitvitalsmag  
vppfngflskes1lettftasqan1fsvdt1gylfpiigivgsvftfvysikfimhiffgqykeq1pkkahevsilm11  
spailat1vivfg1fpgil  
tnsiiepatssinhtviddvef1hm1fhg1tpaf1st1viyilgillivtfsywvkl1qrqpgk1tfnwynrsanvipnys  
ekmtnsyvtdysrnn1vii  
fgalil1tfvtvsvvpfn1fkdvspirifevcivil11saaf1ilfaksr1fsiim1savgyavsv1fiffkapd1alt  
qfvvesistal1f11cfyh1  
pn1nrynekr1sfq1tnaliaggvg1sviiig1iaygnrhfesiskfyqehvyd1ahgknmvn1v1vdfrgmdt1fessv1  
giag1avytmik1rkk1rqt  
qgnevknhe  
>tr|D2N5R5|D2N5R5\_STAA5  
mk1lyrfshktgsvgtiveengddv1vkveqvi1khpqkgd1hnptetegvffherkalshfekrytkrsq1rdfnvdv1r  
yeds1qqaitd1etk1kah  
qtkhaems1as1ar1kedys1qykenfk  
>tr|D2N5R8|D2N5R8\_STAA5  
mkskyep1fdkvv1pngvelrnrflap1thiss1nddgt1sdiel1pyiekrsqdvgitinaas1nsvsdvgkafpgqpsiah  
dsdieglkr1latamknga  
ka1vqi1hhggaqalpel1pdgdv1vapspis1ksfgqkqehsaremtneeieqaikdfgeatraieagfdgveihganhy  
1ihqfvsp1yynkrndvwan  
qykfpvavieev1kakeaygnkdfivgyr1speeaespgitmeiteelvnkishmpidiyihvsmmdthattregkyagqe  
r1plihkwingrmp1igig  
siftadeal1davenvgd1vaigre111dyqfvekikdgredeiinyfdperednh1tpn1whqfnegfyp1prkdk  
>tr|D2N5R9|D2N5R9\_STAA5  
mtksek1iel1tnhygahny1plpivi1seaegv1vkdpegnkymdm1saysavnqghrhpk1iqa1kdqadkv1tvsrafh  
sdn1gewyekick1lagkdk  
alpmtgaeaveta1kaarrraydvk1iepnkaeiafngnfhg1rtmapvs1sseae1yqrgygp11dgfrkvnfgdvda1  
kaainentaav1vepigge  
aginippegy1kai1relcdeh1v1fiadeiqag1grsgk1fatdwd1v1kpdv1yilgka1gggvfpi1sv1ladkev1dvft  
pgshgstfggn1lacaasi  
aal1dvi1dd1lpg1r1le1geyfkeq1kqidhpsikevrgrg1figvelnesarpycea1keeg11ckethd1t1r1fapp1  
iitkeeld1aleki1rhvfq  
>tr|D2N5S1|D2N5S1\_STAA5  
mtnssks1ftk1fmaasavftmgf1svptagae1qtnqi1ankpqi1qwh1tn1tnerft1tiahrgasgyapeht1fqaydkshne  
1kasyieid1qrtdkgh1v  
amhdetvnr1tng1hgkvedyt1delkq1ldagswfnk1kypkyarasyknakvpt1de1lerygpnanyyietkspdvypgm  
eeq11as1kkhh11nnk1  
knghvmiqsfsdes1kki1hrqkxhvp1vk1vdkge1qqfndqr1keirsyaig1gpdytd1teqnth1h1kd1gfi1v1hpyt  
vnekadm1r1nkygvdgvf  
tnfadkykev1k  
>tr|D2N5S2|D2N5S2\_STAA5  
msnkawggr1fevq1eewvddfnas1tfdqt1idqdi1egsiah1atmladqgi1sqqdseqi1qglksiqhdyhdqdi1qfsa  
s1ledih1niehelikrigd  
aggk1htgrs1rndqv1atdmh1lytkkqv1dialiks1qsviv1diasn1vdtimp1gyth1lraqpis1fahhimtyfwm1lqr  
dqgrfeds1kridin1plga  
aalsgt1tpid1rhettal1nfgs1lyens1davsdrdy1i1et1hni1s1tmv1h1srfaeei1fwstdeakfit1s1dafstgs  
simpqkkn1pmaeli1rgkv  
grttgh1msm1mt1kg1playnkdm1qedkeg1fdavht1kgs1ri1fegmi1qmt1inker1nqt1vkedfsnatelady1vt  
knip1frta1heivgki1vlec  
iqqghy11dvp1st1yqqh1ssidadi1ydy1qpenc1krrqsyg1stgqssv1kqql1dvakq11sq

Tsompanidou\_et\_al\_Supplemental\_FASTA\_File

>tr|D2N5S3|D2N5S3\_STAA5  
mkeivlaysgldtsvavqwlidkgydvaccldvgegkdldivykaldmgavechiidatkefsdeyvsvaikgnlm  
yenayplvsalsrpliakk  
lveiaektnsvgiahgctgkngdqvrfevaikalnpslkafapvrewawsreeeidaikhnipvsinhdspysidqnlw  
granecgiledpyavpped  
afdlnaleetpdtadeiiltfdkgipvqidgktyelddliltlnalagkhgigrhdhvenrlvgiksreiyeapaaevi  
lkahkaletitltdkdvahf  
kpiiekqfaeqlynglwfspldtslklfidstqqyvsgdvriklfkgnainvgrkspytlydeklatytkedafnqdaav  
gfidiyglptqvnamlhgg  
ysneq  
>tr|D2N5S4|D2N5S4\_STAA5  
mthiqldfsktleffgehelkqqeivksihktihegtgagsdfllgwvdlpvdydkeefsriveaskrikensdvlvvig  
iggsylgaraaiemltssf  
rnsneypei vfvghlsvstytke lvdyladkdfsvnvisksgtttepavafrl fkqlveerygkeeaqkri fattdkekg  
alkqlatnegyettfivpdd  
vggrysvltavglpiataginieammigaakareelssdkleeniayqyatirniyakgyttemlinyepsmqyfnew  
wkqlfgesegkdfkgiyps  
sanyttldhslgqyvqegrrflfetvkvnhpkyditi ekdsddl dgl nylagktidevntkafegtllahtdggvpmv  
vni pqldeetfgyvvyffe  
lacamsgyqlgvnpfnqpgveaykqnmfallgkpgfedlkeledrl  
>tr|D2N5S6|D2N5S6\_STAA5  
mkkvvkylisililaiiivlvqtfvighvipnndmsptlnkgdrvivnkikvtfnqlnngdiityrrngndiytsriiak  
pgqsmafrqgqlyrddrpv  
dasyaknrkikdfslnrfkelgdgdi pppnfvvlnhdhnnqhd srqfglidkkdiignislryppfskwtiqfks  
>tr|D2N5S8|D2N5S8\_STAA5  
mtlhaylgragtgkstkmlteikqkmkadplgdpiiliaptqstfql eqafvndpelngslrtevlhferlshrifqevg  
syneqkl skaamemmiyni  
vqeqqkylklyqsqakyygfsek lteiqdfkkyavtpehlesfiadknmqrtrtknkledialiyrefeqriqnefitge  
dalqyfidcmpksewlkra  
diyidgfhnfstieyliikglikyaksvtiilttdgnhdqfslfrkpsevlrhiieianelnisierqyfnqlyrfnnqd  
lkhleqefdalqinrvacq  
ghinilesatmreeineiarriivdirdkqlryqdiailyrdesyayl fdsilplynipynidtkrsmthhpvmemirs  
ieviqsnwqvnpmrlrlkt  
dvltsylksaylvdllenfvlergiygkrwlddelniehfskmgkrahkl tederntfeqvklkkdvidkilhfekq  
msqaetvkdafafyesme  
yfelpnqlmterdel dlnghnekaeeidqiwnqliqilddlvlvfgdepmsmerfle vfdigleql efvmipqtl dqvsi  
gtmdlakvdnkqhvyivgm  
ndgtmpqpvtassli tdeekkyfeqqanvelsptsdilqmdeafvcyamtrakgdvtfsyslm gssgddkeispflnqi  
qslfnqlei tni pgyhevn  
pls lmqhakqtkitlfealrawldeivadswldayqvirdsdhlnqgl dylmsaltfdnetvklgetlskdlygkeina  
svsrfeqyqcpfkhyash  
gklnertkyelqnfldgdi fhsvlkyiseringdfkqldlkkirqltnealeeilpkvqfnllnssayrylsrrigai  
vettlsalkyqgtyskmp  
khfetsfrkprtndeliaaqtltttqgipinirgqidridtytkndtsfvniidykssegsatldl tkvyymqmqmmt  
mdivlqnkqrlgltdivkp  
ggll yfhvheprikfkswadidedkleqdl ikkfk lsglvnadqtvidaldirlepftsdivpvglnkdgs lskrgsqv  
adeatiykfiqhnenfie  
tasnimdghte vap lkykqlpcafcsvchvdgmiskryrtvdetinpieaiqniniddefggeq  
>tr|D2N5S9|D2N5S9\_STAA5  
mtipekpqgviwtdaqwsiyatgqdvlvaaaagsgktavlveri iqkilrdcidvdrl lvtftnl saremkhrvdqri  
qeasiadpanahlknqrik  
ihqaqistlhfckl liqqhydvlnidpnfrtsseanenillleqtidevieqhydil dpafielteqlssdrsddqfrmi  
ikqlyffsvanpdptnwld  
qlvtpyeeeagqaqliqlldl skvfitaaydalnkaydlfsmmdgvdkh laviederrl mgrvleggfidisyltghef  
garl pntakikeanemmv  
dale daklqykykslidkvksdyfsreaddlkadmql aprvklarivkdvmsenrkkksknildfsdyehfalqil  
tnedgspseiaesyrqhfq  
eilvdeyqdt nrvqekilsciktgdehngnl fmvgdvksiykfrqadpslfi ekyqrftkdgdgtgrridlsqnfrsrk  
evlsttnyi fkhmmdeqvg  
evkydeaaqlyygapydesdhpvn lkv lveadqehsdltgse qeahfiveqvkdilehqkvydmktgsyrsatykdivil  
ersfgqarnlqqafknedi  
pfhvnsregyfeqtevr lvsflraidnplqdiy lvglmrsviyqfkedelaqirils pnddyfyqsivnyindeaada  
lvdklkmflsdiqsyqqys  
kdhpyqldikfyndhyviqyfs gliggrrranlyglfnkaiefenssfrglyqfirfideli ergkdfgeenvvgpnd  
nvvrmmtihsskglefpfv  
iysglskdfnrldkqpvinqqfglgmdyfdvdkemafpslasvayravaekelvseemrlvyvaltrakeqlyligrv  
kndksllleqlsige  
avnerltsppnphliysilskhqsasipddlkfekdiaqiedssrpnvnisiyfedvstetildndeysvnlqletmqn



Tsompanidou\_et\_al\_Supplemental\_FASTA\_File

gnevdkaqikhqldyqypy  
vndtkkpskqsvselkrqyeteesgtsyervrqrigrfstyerpkflseqgkrkaneigtlmhtvmqhlpfkkeriseve  
lhgyidgldikhieeadak  
kdi rmd eim tfin sel ysi iaeaeqvyrel pfvvna lvdql pggdedvsii qgmidl ifvkdgvhyfvdyktdafnrrr  
gmtdeeigtqlknkykiqm  
kyyqntlqtilnkevkglyffkfgt1q1  
>tr|D2N5T0|D2N5T0\_STAA5  
mkf1sfkyndktsygvkvkredavwd1tqvfadfaegd fhpkt11sglqqnhtldf qeqvrkavvaaedsgkaedykisf  
ndief1ppvtpnnvi afg  
rnykdhanelnhevekl yvftkaassltgdnatipnhkditdql dyegelg ivigksgekipkala ldyvygyti indit  
drkaqseqdqaf1sksltg  
gcpmgpyivtkdelplpenvni vtkvnnei r qdgntgemilkideli eeskyvalhpgdiiatgtpagvgagmqppkfl  
qpgdevkvtidnigt1tty  
iak  
>tr|D2N5T2|D2N5T2\_STAA5  
msekr rdnkgri lktgesqrkdgrylykyidsfgepqfvyswklvatdrvpagkrdcislreki aelqkdihgidvvgk  
kmt1cqlyakqnaqrpkvr  
kntetgrkylm d1kkdklgvrsidsikpsdakewairmsengyayqtinnykrs1kasfyiaiqddcvrkn pfdq1ka  
v1dddtpkvtv1teegeek  
1lafakadktsknydeil1l1ktglrisefggl1pdl dfenrlvni dhq11rdeigyietpktsgerqvp mveea  
yqafkrv1anrkndkrvei  
dgydf1f1nrknypkvasdyngmmkg1vkkykn ynedklphitphs1rhtfctnyanagmnpka1qyimghaniamt1n  
yyahatf dsamaemkr1nk  
ekqqr1va  
>tr|D2N5T3|D2N5T3\_STAA5  
mkqtdipi weryt1tieeaskyfrigenklrrlaenknanwlimngnriqirkqfekiidtldai  
>tr|D2N5T4|D2N5T4\_STAA5  
mkpssfqtti enqfdyickramederknymly1sriakrevsfsdvgyd1vsqfattdnystdfqift1ng1svgvend1  
l1sealrelpdkkrei111f  
yfmdmsdseiad11kl1nrstvyhrtsglalikkfmeefee  
>tr|D2N5T5|D2N5T5\_STAA5  
mrkkedkydfrafglaik ear1krgl treqvgalieidpryltnienkgqhsiqvlyd1vs11hvsvdeff1pannlvk  
strrlqiekymdsftdke1  
slmeslasginearnied  
>tr|D2N5T6|D2N5T6\_STAA5  
mkiinigvlahvdagktt1tes1lynsgaitelgsvdkgtrtrtdnt1lerqrgitiqtgitsfqwentkvniidtpghmd  
flaevyrs1svldgail1i  
sakdgvqaqtri1fhalrkmgipti ffinkidqngid1stvyqdikek1saeivikqkvel ypnmcvtntfeseqwdtvi  
egndd1lekymsgks1lea1  
eleqeesirfqncs1fp1lyhgsaksnigidn1ievitnkfyssthrgpse1cgnvfkieytkkrqrlayirlysgvlh1r  
dsvrvsekeki kvtemyts  
ingelckidraysgeivi1qnef1k1nsv1gdtk11pqrk kienph11qttvepskpeqrem11dalleisdsdp11ry  
yvdstthei1s1flgkvqm  
evisal1qekyhvei1lkeptviymerp1knaeytihi evppnpfwasig1svsp11p1gsgmqyessvs1gy1nqsfqna  
vmegirygceqglygwvnt  
dckicfkyglyysp vstpadfrmlapiv1eqv1kkagtel1lepy1sfkiyapqey1srayndapkycanivdtq1knev  
i1sgeiparciqeyrsd1t  
fftngsvcl1telkgyhvtgpevcqprprnsridkvrymfknit  
>tr|D2N5T7|D2N5T7\_STAA5  
mrked1mmkfrknqnkekqipekkprvykvnphkkvialw11lg1sfsfai fkhftaidtht1hetti ekeyvdthh  
venfvenfakvyysweqsd  
ksidnrmes1kgy1tdelqalnvdtvrkdipvsssvrgfqiwtveptgdnefnvtysvdq1litegentktvhsayivsvy  
vdgsgnmv1vknptitn1p  
kkssykpkaiesegtvsd1ttneinef1ttffklyptatase1syyvndgilkpigkeyifqel vnpihnrkdnqvtvs1  
tveyidqtkatqvsqfd1  
v1ekngsnwkiie  
>tr|D2N5T8|D2N5T8\_STAA5  
mk1kt1viggsg1flmvfs111fvailfsdeqds gisnihyggvvnsvaevlahkpmvekyakeygeevynillaiiqve  
sggtaedvmqsses1gl1pp  
ns1steesikqgvkyfse1lasser1svd1esviqsnygggflgyvanrgnkytfe1aqsfskeysggekv sy pnpiai  
pingwrynygnmfyvq1v  
tqylvttefd ddtvqaimdea1kyegwryvyggaspttsfdcs gltqwtygkagin1prtaqqqydvtqhip1seaqagd  
lvffhstynagsyithvgi  
ylgnrmfhagdpigyad1tspywqqlvgagrikq  
>tr|D2N5T9|D2N5T9\_STAA5  
mkpsivnr1ksnwt1kr1gkvamtvaft1viaif1lam1gtvvqaag1vddtvnvaney sryplenyqldfyvdnswgw1  
pwnwsdgi1gkvmygl ya1  
tnfiwtis1yvsnatgylvqeays1dfisatadsigknmqt1agvsangfstegfyvgf111111v1lgvyvaytglikre

Tsompanidou\_et\_al\_Supplemental\_FASTA\_File

ttkaihaimnfvlvfilsa  
sfaiyapdyikkindsdisnaslslgtkivmphsdsqgkdsvdliirdslfsiqvqppwlllqynssdiesigidrves  
llstspdsnngedrekiva  
eeiedrsntnlitiktinrlgtvfflflvfnigisifvfl1tgimifsqvlfiiyamflpvsvfilsmpsfdgmskraik  
lfntiltragitliittaf  
sistmlyt1sagypffliaf1qivtfagiyyfklgd1msmfs1qsndsqsvsgrvmrkprmlmhahmhr1qrklgrsmtt1  
gagsaivtgkkgqsgsgss  
artqadhsrpdgkekst1gkrigqtiqtvadtkdrmvdtasglkeqvkd1ptnaryavyqgkskvkenvrd1tssisqtk  
adrasgrkeqqeqrria  
krrsemeqvkkqpassvherpttrqeqyhdeqtskqsniqtsykesqqakqerpavksdfsspverqgntvqektvq  
kpatsttadrtssrpk  
erpstvqrvp1qntsrppiktatikvkkp  
>tr|D2N5U0|D2N5U0\_STAA5  
maypikiyenn1vwnkdgecyayyelvpynysflspeqkiqvhsfrqliaqnrkgihalqistessirsaqersknev  
tgklkavaydkidqtdal  
ismigenqvnyrffigfkl11ndqefsmks1tveakna1sdfvydvnhklmgdfvsmsndeilrfqkmek1lenkisrrf  
kirr1dkddfgyliehlyg  
qtgtayeeyeh1skkk1enet1kiyyd1ikptrclveekqrylkiqqedetvyvayftinsivgeldfpsseifyyqq  
qftfpidtsmveivanrk  
alstvrnkke1kd1dnhawqsdnetssnvaealesvneletn1dskesmyk1syvrvsand1delkrrcnevkdlyd  
d1svklvrpfgdm1glhee  
flpaskrymndyiqvtsdf1ag1gfgatqm1genegiyvgys1dtgrny1kpalasqgvkgsvtnalasafvgs1ggg  
ksfann1ivvyavlygaqa  
vivdpkaergwrket1peisheiniv1tsdekng1ldpyvimknpkdses1aidil1tfltgissrdgerfpilrkair  
avtnevrg1mkvieelrv  
entp1stsiadhiesftdydfah11fsngyveqsislekq1niiqvad1vlpdketsfeeyttmellsvamlivistfal  
dfihtdrsi1kivd1deaw  
sflqvagkt1smk1vragrannagvyfvtqntdd11dek1knn1glkfafrst1neikkt1affgvdpedennqkr1r  
d1engqcl1sdlygrvgvi  
qfhpvfeel1hafdrppvrkev  
>tr|D2N5U1|D2N5U1\_STAA5  
mkkirsytsiwsvekv1ysindfr1pfpitftqmtwfvvs1favm1gn1pp1smiegaf1kyfgipvaftwfmstktfd  
gkkpygf1ksviaya1rpk  
1tyagkkvt1grnqpqea1tavrsefygisn  
>tr|D2N5U2|D2N5U2\_STAA5  
mddmqvyian1gkynege1vgawftfpidfeevkekig1ndeyeyaihdyelpftvdeytsigelnr1wemvselpeel  
qsel1allthfssieel1se  
hqedi1ihsdcddmydvaryyieetgalgevpas1qnyidyqaygrd1d1sgtfistnhgifeivy  
>tr|D2N5U3|D2N5U3\_STAA5  
mnfgqn1ynwfl1snaqs1v11aiivigly1gfkrefskligfliiaiiavglvfnaagvkdllelfnriiga  
>tr|D2N5U4|D2N5U4\_STAA5  
megf11neqtwl1qhlkekr1aygl1sqnr1avatgitrqyl1sdi1etgkvkpsed1qqslwealerfnpdaplem1fdyvri  
rfpttdvqqvvenil1ql  
syf1hedygfsysehya1gdi1fv1cshe1dkgv1ve1kgrgcrqfesyl1laqrsweyeffmdvlvaggvmkr1d1a1nd  
ktgil1nip1tekcqqec  
isvfrs1fksyrsgel1vrkeekcemgnt1yigs1qsevyfc1yekdyeqykndipiedaevknrfair1knerayyavrd  
11vydnpehtafki1nryi  
rfvdkddskprsdwk1neewawfignrer1k1ttkpepysfqrt1nw1shqvapt1kvaik1deinqtqvvdildhak  
1tdrhkqil1kqqsveqdv  
ittkk  
>tr|D2N5U5|D2N5U5\_STAA5  
mkqrgkri1rpsgd1vfhftias11pvf11vvg1f1hvk1tiqqinwqdfn1sqadkidipyliisfsvailic11lavf1k  
rvrydtvkq1yhrqklakm  
ilenkwyeseqvktegffkdsagrtkeki1tyfpkmyr1kngliqirveit1gkyqdq11hlekklesglyceltdkelk  
dsyveyt1lydtiasrisi  
deveakdgk1r1mknvweydk1phm1iaggtgggktyf1l1t1lea11htdsklyi1ldpknad1ad1gsvmanvyyrked  
11scietfyeemmkrseem  
kqmkn1yktgknyay1gl1pahf1ifdeyva1fmem1gtkentavmkn1kqivm1lgrqagff1ilacqrpdky1lgd1irdqf  
nfrva1lgrmsemgygm1fg  
sdvqkdf11kri1kgrgyvdvgtsvise1fytp1vpkgydf1lee1k1s1nsrqstqatceavagvd  
>tr|D2N5U6|D2N5U6\_STAA5  
mmr1angiv1dkdt1fge1kfsa1rrevri1nedgsvsdeikertyd1k1skgqgrmi1qvsipavp1kefdynarvelin  
piadtvatatyqgadvdwy  
ikaddiv1tkdsss1fkaqqakkeptqdk  
>tr|D2N5U7|D2N5U7\_STAA5  
mv1paeagekhfgfeervk1vnpri1taegykitrgftny11haddmike  
>tr|D2N5U8|D2N5U8\_STAA5  
mknyndy1fkaqin1k1sepktk1iysqrki1dvepvfgf1mkail1g1ftrmsvrginkv1krel1gfv1malnir1kiaaqravh

yqihlkkadfyqiinrnq1  
fyia  
>tr|D2N5U9|D2N5U9\_STAA5  
mpkiVVVGavaggatcasqirrlDkesdiiifekdrdmsfancaIpyvigevedrkyalaytpekfydrkqitvktyhe  
viainderqvtvlnrkt  
eqfeesydkliIspgasansIgfesditftlnrledtdaidqfikanqvdKvlVvgagyvslevlenlyerglhptlihr  
sdkinklmdadmngpilde  
ldkreipyrIneedtingneitfksgkvehydmiiegvgthpnskfinessnikidrkGfipvndkfetvnpniyaigdi  
atshyrhvdIpasvplawg  
ahraasivaeqiagnDtiefkGflgnniVkfDytfasvgvkpneIkgfdykmvevtqgahanyypgnspIhIrvyydts  
nhqilraaavgkegadrI  
dvlsmammnqItdelItefevayappshpkdlinmiGyak  
>tr|D2N5V2|D2N5V2\_STAA5  
mktkgftkykkmrympglDglraIavIgiIyhlNkqWlTggflGvdtffvisgylitsIllkeyddtgiIkIksfwir  
rIkrIlpavivIImvvgta  
tIllksdniIrvkhdiIaIfyvsnwwyiakdvnyfeqfsfmpIkhIwslaeeqfyiffpvilvtIltikkrykigfi  
fwgvsmlsIglmmfiysin  
gdhsrvyfgtdtrIqtIlgvilafIwppfkIknDppkvvkyvidsigIsIsvIvIIfIIndetnwiYdggyfIIsI  
tIIfIiasvvhpsIwIakif  
snpvlvfigkrSylwhfavisfvhsyyvdGqIpyvyfidisIItIIfaelSyrfiEtPfrkegikaInwrpsyipqf  
irmaivvtIlipfmlIlg  
afnkygkdiIgekansfdttiednyImriapidnihidglvsekkkessdvynnikpIlgdsvmvdigesfkssvpksr  
idgkvgrqlyqtIplvkan  
ysqykkssdqvvleIgtngdftvkqIddIlnqfgkakiylvntrvprieAnvrIldaakrksnvtIIdwykrsqghs  
eyfapdgvhIeykgvIak  
deIkaIkkk  
>tr|D2N5V3|D2N5V3\_STAA5  
mdinkmtYavqsaIqqaveIsqqhklqnieieaIlsaalneseslyksileranievdqInkayedkIntyasvegdniq  
ygqyIsqqanqIItkaesy  
mkeyedeyismehIrsamdiDqttkhyInkvevikeiIkkvrggnhvtsqnpevnyealakygrdlveevrqqkmdpv  
igrdeeiRntirIsrkt  
nnpvlIgepgvgktaiveglqarivkkdvpeSlldktvfeIdIsalvagakyrgefeerIkavIkevkesdgriIfide  
ihmlvgagktDgamDagnm  
IkpmlargeIhcigattIneyreyiekdsalerrfqkvavsepDvedtisiIrgIkeryevyhgvrIqdralvaaaIsd  
ryItdrflpdkaidIvdqa  
catirtemgsnptelDqvnrrvmqleieesaIknesdnaskqrIqelqeeIanekekqaalqsrvesekekiakIqkra  
qIdenrqaleDaqtnnle  
kaaeIqygtIpqIlekelrelednfqdeqgedtdrmi revvtdeeiGdivsqwtgIpsklveterelIhIlsdiIhkrvv  
gqdkavdlvsdavvrag  
ikDpnrpigsflIlgptgvkteIaksIaasIldsekhmiridmseyekhavsrlIgapgyIghdeggqIteavrrnp  
ysvIIdvevekahtdvfnv  
IlgIldegrItdskgrsvdfkntiImtsnigsqvlIenvketgeitestekavmtsInayfkpeilnrmddivIfkpls  
iddmsmiVdkilTqInrI  
IeqrisievsddakawIggayepqygarplkrfvqrqietplarmmikegpeggttikvInsdnntfnvekihe  
>tr|D2N5V4|D2N5V4\_STAA5  
mnlDwytfvIaktInyrlaseeInItipsihkqiknleqhlNvkIfetyknqIiltedghtflpiaqsfiEqyesgik  
hiqIkktmfqsIlnvvss  
yIatfimpkflksffnehpfidvsIhvkneniekDinnhtydigisrnqpkIrevhsekvceGkivIiapnkennIlte  
asIfekykiIsdnhpeyws  
sIknniIniyekaqlsIndvhtsikIiemnqgisflpiyitknsynisvintkilqapisftyiyskknpeilafik  
sfkkyianeql  
>tr|D2N5V5|D2N5V5\_STAA5  
mkinTEfkgnnIpyeyaagadvdsingnpiKsfpevtelpegtkylawslidydaIpcgfwahwsvanvsvsgnsi  
sIkadIlsrtkgdyvqgkns  
ftsgIIddfseIenhyvgtpppdkdhqyeItvyaIdhsInIknGfylneflkevnqhkidqtsinIgrki  
>tr|D2N5V6|D2N5V6\_STAA5  
mkIksfItvtIalgmIattgatvvsnevsaaekdkIpatqkakemqnvpytiavdgimafnqsyInIpkdsqIsyldIgn  
kvkaIlydergvtpekirn  
aksavytItwkdgskkevdIkkdsytanIldsnst  
>tr|D2N5V7|D2N5V7\_STAA5  
mkhIvtffwaIImqmvnfvlnslvggdsInvnpiImavIftiftaifaavikppkdssq  
>tr|D2N5V9|D2N5V9\_STAA5  
msqnkrvvtgmgaIspigndvkttwenaIkgvngidkitridtePysvhlageIknfniedhidkKearrmDrftqyai  
vaareavkdaqlDinenta  
drigvwiGsgIggmetfeiAhkqIldkgprrvspffvpmIipmatgqvsidIgakpngatvtacatgtnsigeafkiv  
qrGadamitggteapIth  
maIagfsasraIsnddiIetacrpfqegrDgvmgegagilviesIlsaqarganiyaeivgygttgdayhitapapege  
ggsramqaamddagiEpkd

Tsompanidou\_et\_al\_Supplemental\_FASTA\_File

vqylnahgtstpvgdlnvkaikntfgeaakhlkvsstksmtghllgatggieaifsaalsikdskvaptihavtpdpecd  
ldivpneaqnlidityamsn  
slgfgghnavlvfkkfea  
>tr|D2N5W0|D2N5W0\_STAA5  
mlkkwlgmalitpmltftiivfnshtiiitylnilfyvsliifisiflillvqegifdatsygfrrlkyqmssskkkksis  
ddpffnqpgevkkhehyfvs  
wiiplllinilyfimtivilslilv  
>tr|D2N5W1|D2N5W1\_STAA5  
mgkyifkrfiymllsifiiititfflmlkmpgspfnadaklnaeqkeilnekyglnpdatqylhylknvvtgdfgnsfqy  
hnqpvdlikprllpsfem  
gltamfigmilglilgvaatkqnswwdytttvisvivasvpsfvlavllqyvfavklrwpfvagwegfstavlpslals  
aavlatvaryiraemiev  
ssdyillaragntmrvlfghalrnalipiitiivpmlasiltgtltienifgvpglgdqfvrsttndfsvimaitll  
fstlfivsiifvdiylgyvi  
dpriqvqgkk  
>tr|D2N5W2|D2N5W2\_STAA5  
maenknlisindhnaamthtsdaiassdfiireldlnqepemqresknfwqdawaqlkrnklaavvmigliiivifaf  
igpvinikhdyaeqnvqhrn  
lpakiplldkvpflpfdgkdadgkdaykaanakenywfgtqldgrdlwtrtwkgaqislfivvaamldifigvvygais  
gffggrvdtimqrilevia  
sipnliivlilfvli fepsiwtiilamsitgwlgmsrvvrgefllklnqefvmasktlgaskfklifkhillpntlgaivvt  
smftvpsaiffaflsfig  
igvpapqtslgslnvndgramliiyphelfipamilsllilffylfsdglrdafdpkmrk  
>tr|D2N5W4|D2N5W4\_STAA5  
mkndevllsiknlkqyfnagknevraienisfeiykgetlglvgesgcksttgksiiklnditsgeilyegididqkir  
krkdllkfnkkiqmi fqdp  
yaslnprlkvmdivaegidihhlatdkrdkrkrvydletvlglskehanryphesggqrqrigiaralavepefiade  
pisdaldvsiaqavvnllk  
lqrekgitflfiahdlsmvkyisdriavmhfgkiveigpaddiyqplhdytksllsaipqdpesersrkrfsyiddea  
nnhrlrqlheirpnhfvfst  
edeaarlrknllviqd  
>tr|D2N5W5|D2N5W5\_STAA5  
mtrklkalililvatialsgcanddgiysdkgqvfrkllssdltsldtslitdeissevtaqtfe glytlgkgdkpvlgv  
akafpekskdgkllkvklr  
sdakwsngdkvtaqdfvyawrktvdpktgsefayimgdiknasdistgkpkveqlgikalddetlqidlekpvpyinqll  
alntfapqnekvakkygkn  
ygtadravynpffkvdwkdqektllsknqyywdkkkvklkdvnykvikdlqagaslydtesvddavitadqvnkykdn  
kglnfvlttgtffvkmnek  
qypdfknknlrlaiagaidkkgvydsvknngsipsdtltakgiakapngkdyastmnsplkynpkearahwdkakke lkg  
nel fsmntedtpdakisa  
eyiksveknlpqvtlkkqllpqrvslelsnnfeaslsgwsadydpmayletmttgsaqntdwgnkeydqllkvar  
tklalqpneryenlkkaee  
mflgdapvapiyqkgvahlnpqvkgliyhkfgpnnsllkhvyidksidketgkkkk  
>tr|D2N5W6|D2N5W6\_STAA5  
mikyflkri fymaislviiittitfflmlkmpgspfnadaklspdqkyilnekyglnp pipi qylnymknvftgdfgysfqy  
hnqpvdlikprllpslem  
gitamiigvliglilgvasaakntwidycatlisvlavsvpsfvlavllqfvfavklrwpfvagwegistvilpsfals  
aiviatvtryiraellv  
ksdyillaragvnpkrlythalnaliplvtvlvpmmasiltgtltientfgvpglgdqfvrstiatndfpvimattil  
fssffivsiifvdmlyiii  
dpriqvqgrnngd  
>tr|D2N5W7|D2N5W7\_STAA5  
mvidenkkqltstdfefkkdkinqeflnvknknfwqdgwsqllrknklaavigmigliimiilfalpapavsqhnstevqntd  
rnlpkipllkvdylpfn  
gkdvngkdykevgskdyllfgtdqlgrdlwsrtwegarislfivvaaildfigvlfvlgaisgyggkldtimqriiei  
iasipnliivlilfvli fep  
siwtiilamsvtgwismrvvrgefllklnlefvqasktlgvsnlrlifkhillpntlgaiivtsmftvpsaiffafls  
igigvpapqtslgslnvndg  
ksmliiyphelfipatilsllilffylfsdglrdafdpkmrk  
>tr|D2N5W8|D2N5W8\_STAA5  
mmkkvlevknlevsfevedgivnavrgidycihegeilaivgesgsksvatkaitklfqgengkitngnvkffgedlve  
knekelakirgkdiami fq  
dpmtslnptmqigkqimeplmi hkkmrkdakgkaveildlvigiknaelrfkdyphqfsggqrqrivigma lacepklli  
adepttal dvtmqsqiidl  
mkilqkktntaifiithd lgvvaniadivsvmycgei ietgkveelfyypkphpytwgllasmtlesnsksklliaipgtp  
nllkppigdafarrsaya  
lnvdfkyeapwfgllspthfvksllsdrapkvi ppetvkrkfel synferplkvegvsfneq  
>tr|D2N5W9|D2N5W9\_STAA5

Tsompanidou\_et\_al\_Supplemental\_FASTA\_File

mnnv1veiknltkifnknkneikaiddvsininkgealgivgesgckstfgksirlllevpeetiffegkdinkits  
rrdslnlnkriqmi fgdpy  
aslnprlkvmdivgegidihklaenkaernekiyklllelvgnkehanryphefsggrqrigiaralsvepdliiade  
isaldvsiqagiiniikk1  
qkernttllfiahdlsmvkyvsdriavmhkgkiveiasserlyqnp1hnytkslisaipqppqyerervreykdsfdn  
nseyklreiekdhfvtst  
nkaellrqrkl  
>tr|D2N5X0|D2N5X0\_STAA5  
meisklkylllnfifvli1sgcskegiysdkgqvfrkviqdmstldttlitdavsgdisnqvfeqlftldkndkakra1  
akelpkksnggklttfklr  
kdakwsngdpvtaydfvyawrk1vdpktgseyayimsdienadsinsgk1pveklgikalskyeleiklkrpipyne11  
alsnfypqnekvakkygek  
yglkpqnavyngpfdvtwraedki1lsknnfywdkknvklkvnykilkdqagas1fetgsyddt1ladqvkyens  
salqkritisgnffikfnqk  
kveefknqdlrmaialaidkkyveavkndgsiysntftakgvak1sngddy1ssinsplkydkkaalkhwkakke1ni  
knftfsmntedtpdskisa  
eyikaqieknlpgvkmkirq1p1fkqr1seefkmtyetst1tgaadypdptty1stmtkdnppnntdwsnkkyddy1gein  
gellgevskrdrnmkedee  
111ndvplapiyqkgeah1tnpkvkg1qyhvvgpddt1kyvyidk  
>tr|D2N5X3|D2N5X3\_STAA5  
mriervddttvklfitysdieargfsred1wtnrkrgeeffwsmmdeineedfvvegplwiqvahafekgvevtiskskn  
edmmmsdddtdqfdeqv  
qe1laqt1legedqlee1feqrtkekeagkskrqkssarkntrtiivkfn1ledvinyayhsnpittefed1lymvdstyy  
yavhfdshvdqevindsys  
q1lefayptdrtevy1ndyakiimshnvtavrryfpette  
>tr|D2N5X4|D2N5X4\_STAA5  
mlvalneekervlatta1rktqyfcpcvgkqvilkrglkvi shfahkhlaeqkcfnnesikhyksk1ilaqmiqqgckv  
eiepflkeikqipdi1inn  
kyvie1qyspisykqi1qrteglkkmgykvs11ndvdychnkvkfnhfqsmfinpitrlhtfnlekkqimmfqqiqyi  
gghkyvaekrnvkmsel1n  
eapcdyhavyk1skfainqiyikyrwqns1lept1samyqlq1tdqevvhnygyifpeqiyienhpiewqlqvd1wlkng  
esilvsdn1nyfk1kkfiv  
alesktaiiek1linny1nissdrgndvqilf  
>tr|D2N5X5|D2N5X5\_STAA5  
msqqlsreeqerkypeytwldtti1fkdeafeaafkevene1gkeeqfkghigdsaelynaleledt1gk1lekvyvya  
h1kqddttdnkytgmser  
ahq1iikfssaws1lvepeliqidedkiqsfvnsydk1qkfafd1k1linekrphildaetek11teaqda1stpsnvygmf  
snad1vfedaidkdgnahp  
1tqgtfikylesddrk1resafnrnykaygahnnt1gat1agevkknvnfnarthnyktareka1snhipenvydn1vkt  
vhky1p1lhrytelrke11  
g1dd1kmyd1ytp1ikdikfempyeeakewm1ka1epmgeey1nvvkeg1nrrwvdyenkgrsggyssgahltnpfil  
1nwsnt1sdly1lvhefgh  
sahsyfsrkfqsnsdyt1fvaevastcneal1sdymdkh1ddek1111nqelerfrat1frqtmfaefehkihaiee  
sge1tptmrneeyak1nk  
lyfgdsvetdediskewsriphfymnyvyqyatgysaaqslshqil1tegpavdryineflkkgssnypieilknagvd  
mttpepieqacevfeqk1n  
afek1mka  
>tr|D2N5X6|D2N5X6\_STAA5  
mage1rimenksredin1spvskieiyffdpfssdcfk1sailsk1rieynqyirih1nps1kvl1tkcqaqstsnfd  
ni1alaykaaelqgrvraer  
fih1mqnei1ipkrdi1tesmicdc1qmagid1levfkdd1qksk1tes1kid1hiaremeieqaps1vffsedvhdeg1kv  
eglypyhiytyi1nelmgk  
p1eknlppk1etyiqqq1vtmee11tiyewpek11nkelkk1aiqqkiek1kypdgdfwkskmpkisk  
>tr|D2N5X9|D2N5X9\_STAA5  
mrlyineikikddi1lycyteds1kg1sevgqm1vdsnyafayt1ddgkayay1ifvqetwtm1yenmtkii1indele1  
tefhqeltyi1dnikgnn  
ygkefvatveetfdie  
>tr|D2N5Y2|D2N5Y2\_STAA5  
mkfkyhisqqetvktflarndfskktvsaiknngalivndepvtvrkq1mpndileih1preipsvn1liparklevlye  
dafii1v1tkpnnqnc1psr  
ehphes1ieqv1yhcvhgeninphivtr1drnttgivi1fakyghihh1fskvn1kkiytc1lyvgkthtsgii1eanirrs  
kdsi1trevasdgyakts  
yevinqndkys1ckvh1htgrthqirvhfqh1ghpivgds1ydgfhgkihqqv1qctqiyfvhpinknniyitidykq11  
k1fnq1  
>tr|D2N5Y4|D2N5Y4\_STAA5  
mef1slv1vv1laaftpi1ivnr1nin1pvvvaie1imgivigns1fniverdsil1nilst1gfif1mf1sgleidfkafk  
kdkrarqgqnddessipgh  
1n1al1tvfafi1isi1layvfkwl1glvddv11mvi1istis1gvvvt1kemnimrttigqf11lavlad1vtmillt

Tsompanidou\_et\_al\_Supplemental\_FASTA\_File

vygaingqggstiwligil  
vftaisylgvgqkrmsflqklmdgttqigiravfaliillvalaegvgaenilgafilagvvvsllnpdeemvekldsf  
ygffipiffimvgvdlni  
pslikepklliiipilivafiisklipvmfirrwfdmktiasaflltstlslviaaakiserlnaisaetsgililsav  
itcvfvpii fkklfvpde  
fnrkievsligknqltipiaqnltsqlydvtlyyrkdlsdrrqlsdditmieiadyeqdvlerlgldfrdivvcatnddd  
inrkvaklahqvervic  
rldstddtelvdsgieifssylsnki11kglietpnm1n11snvetslyeiqmlnykyeniqlrnfpfggdiifvriir  
nnesivphgdtqlrygdr1  
ivtgakeyvdelkqelefyf  
>tr|D2N5Y5|D2N5Y5\_STAA5  
m1n1enktyvimgiankrsiafgvakvldqlgaklvftyrrkersrkelek11eqlnqpeaylyqidvqsdeevingfeqi  
gkdvgnidgvyhsiafanm  
edlrgfsetsregflaqdissysltivaheakk1mpeggisvattylggefavqynvmgvakasleanvky1aldlg  
pdnirvnaisagpirtlsa  
kgvggfntilkeieerap1krnvdqvevgktaay11sd1ssgtgenihvdsgfhaik  
>tr|D2N5Y7|D2N5Y7\_STAA5  
mieklvtflnevvwskplvygllitgvlftlrmrffqvrhfkemirlmfqgekspngissfqaiamslagrvgtgnivgv  
staifigggavfwmwita  
flgassafiestlqqifkrvenneyrggpayyieygiggkfgkiygiifaivtiisvgl11pgvqsnaiaasmhnaihvp  
qwlmggiovvilg1iifgg  
vrsianvatavvpfmai1yilmaviiiciniqevpalfalifksafglqsafggivgamieigvkrglysneagqgtgph  
aaaaaevshpskqglvqaf  
svyidtlfvctatali1lisgtyntdgtvnangtphlikdggivyvenatgkdysgtamyaqagidkafhgsgyqfdptf  
sgvgsyfiafalfffafnt  
ilsyyitetrnvayl1rnqnqsvsvfiniarviilfatfygavktadvawafgd1gvg1mawl1ni1aiwilhkpavnal  
kdyetqkkr1gsgynavyq  
pdtkk1pnai1fwlkyper1kqarakk  
>tr|D2N5Y8|D2N5Y8\_STAA5  
mlefkagkinkhvlysdi1nrdvtlsiy1pesynqlvkynvilcfdgl1df1rfgriqrtyeslikeariddaiivgfhye  
dvdkrreefhpqgsrsh1t  
iqsvgkei1pfidstf1kvgnar11vgdslagsiallta1typtifsvam1sphsdekvl1dk1nqcankeq1tiwhv  
ig1nekdf1lptngkradf  
1tpnrelaeqikkyntiyyydefegghqwkdwkpl1sd1llyf1skntddqlye  
>tr|D2N5Z1|D2N5Z1\_STAA5  
mitkgdagnqitknklvnakinpvvkti1fvpnffnkkipitkfvdasai1k1cienardviatamdvtvgkkl1  
>tr|D2N5Z3|D2N5Z3\_STAA5  
mdast1fkkvkvr1v1gs1leqqiddittsrtaregsifvasvgytvdshkfcqsvadqgck1vvvnkeq1panvtqvv  
vpdt1rvasilaht1fdyp  
shq1vtfgvtgngktsiatmih1iqrk1qknsay1gtngfqinetkktganttpetvs1tkkikeavdagaesmt1levs  
shglv1gr1rgvefdvai1f  
sn1tqdh1dfhgtmeayghaks11fsq1ged1skekyiv1nnddsfsey1rtvtpyevfsygiddeaqfmakniqes1qg  
vsfdvtpfgt1ypvkspyv  
gkfnisnimaami1avwskgts1etiikaven1epvegr1ev1dps1pid1i1dyah1adgmkn1idavqp1fvkqkl1f1v  
gmagerd1tktpemgrvac  
radyv1ftpdnpanddpkml1taelakgathqnyie1fddraegikha1diaepgd1tv1askgrepyq1impghikvphrdd  
1ig1leaaykk1fgggpvqg  
>tr|D2N5Z4|D2N5Z4\_STAA5  
mvnkr1idegk1divyl1fealndqii1aipdwfwsyqmama1deetcfeailmq1fvfkeeeeaesiasq1tdwietykk  
ekd  
>tr|D2N5Z5|D2N5Z5\_STAA5  
mnlkqevesrktfai1shpdagktt1tek1lyfsga1reagtvk1gkktgk1fatsdwmkveqergisvtssvmqf1dyddyk  
in1ldt1pghed1fsedtyrt  
1mavdsavm1idcakg1epqt1kl1fvckmrgip1ftfink1drv1gkepfel1deiedt1nietypmnwp1imgqs1ffgi  
idrkskt1epfrdeen1lh  
1nddfel1eedhai1tndsafeqaieel1m1veeageaf1dnda11sgd1tpvffgsa1anfgvqnf1nayvdfapmpnarqtk  
eeievsp1fdds1fsgf1fki  
qanmdpk1hrdri1afmr1vsga1fergmdvt1qrtnkkqk1itrsts1faddketvn1havagdi1glydtgnyq1igdt1vggk  
qtysfqd1l1pqtpei1fmkv  
saknvmkqkh1fhkgieq1vqegai1qyykt1lhtnqi1ilgavq1lqfevfehrmkney1ndv1mepvgrkiarwienedqit  
dkm1tsrs1lvkdrydd1lv  
f1fenefatr1wfeek1fpeik1lys11  
>tr|D2N5Z7|D2N5Z7\_STAA5  
mdigk1khvi1pksqyrrkr1reffhnedreen1nqhgdqkni1dnttsk1kadkqihkdsidkherfkns1ssh1eqrnrdvne  
nkaeesksnqgksaynk1d  
hyltddvskkqns1dsvdq1tekskyeqnteat1stnstdkvestdmrkl1ssdknkv1gheeqhvl1skpsehaketridf  
essrtdsds1mqteki1kkd  
ssdgnkssn1ksevi1sksns1vpi1sesddevnnqkpl1t1peeql1krqqs1neqtktytygd1seqndksn1hend1shht

Tsompanidou\_et\_al\_Supplemental\_FASTA\_File

psisddkdnvlredhivdd  
npdndintqslskidddrkldekihvedkhhqnadssetvgysqssashrssekrniaindndklngqkpnktsanns  
qkkatsklngkgratnnys  
dilkkfwmmypklvilmgiiilivilnainfnvnkndrmndndadaqkytttmknantvksvvtvenetskdsslpk  
dkasqdevgsgvvkykygd  
tlyivtnahvvgdenkqitfsnksvvgkvlgdkwslavvkatsdssvkeiaigdsnnlvgepilvvgpnlgvdf  
kgtvtegiisglrnrnpid  
fdkdnkydmkafqidasvnpngsggavvnrregkligvvaakismpnvenmsfaipvnevqkivkdletkgkidypdv  
vkmknianlnsferqavkl  
pgkvkngvvvdqvdnngladqsglkkgdviteidgkllreddlrfraqiifshkddlksitakiyrdgkekeinikl  
>tr|D2N5Z9|D2N5Z9\_STAA5  
mekneninveilttsdmhshflngdygsniyragyvqvraqnhrvilldsggslagslaayyyaivapykrhpmiklm  
nrmhydasgvspsfkgf  
sfltrsiarfpwlsanieynvtkepyfstpycikfhgdlkiaivgvtaglmeneysemeqdvsiektlvaskwiry  
iheveepdfliiviyhgln  
kisnstknkassneaklmeeigvidlmitahqhqtivgqdhetyyvqagqdakelvhlsinfkkrtttydvesidskv  
idlneyeedqellldltyd  
rkavaywsqeisdkglmlsvnglqdlvcqthpfsqllhdaihlaafdnditcvhvpnmgekglngqirnedlyhayppd  
kpmdmisggnikdileys  
yshldfvneqlsltiidetlctmwqgfnyeidmnlpgqrvmldqidltsyrvtmtdycyrnyknylnkaiihesydet  
mstliaeklrpnyliscs  
dnfvvknr  
>tr|D2N600|D2N600\_STAA5  
mysqniyvirkgdmvripafdddqrhgseiirfdktrinqpfkvqkiiersckfygntylgkkaetnritgisskppil  
ltpfptyffpthsdrqne  
niwlnmhyiesikelknrkckvtfinnesiilhsyhsllwhqynnsifyyymvdqsrmsknpdqpidynkatlnvfea  
ltryslfedk  
>tr|D2N602|D2N602\_STAA5  
mkfissnnitdptlnlameeyvlknlpaeesyflfyinrpsiiivgknqntieevnqtyidahnidvrrisgggavyhdt  
gnlnfsfitdddgnsfhfnf  
qkftepivqalqslgvnaeltgrndiqvgqakisgnamvkvknrmfshgtlmlnsdldevqnalvnpakikskgiksvr  
krvaniqueflnapleieef  
kkiilkti fgeteveeyklttedwenieklsndkyrtwewnygrnpkynfereekfekgfvqikfdvkrkiehaki fgd  
ffgvgdvtdlenalvgclh  
dfehieealseydlyhyfgdidrhelirllms  
>tr|D2N606|D2N606\_STAA5  
mkwfkliildvtifiliaillfvytykeneeilpdkypiaavtdwnkkyskneiykrinqfaknenvaiykstsnytnknv  
dkdiyvnkakatsitpf  
akynihylsddeilkdkgsyfvkdknfdvskfinflkeygvtaesfkidhmmiavgvikqmnivvplssllyvyfiyy  
ifekninfkayaikylngf  
tlrkii fenfskkctywwtliisqillttsvlwilnytgnldlflrlvllsclfiltisvinlwtflmlnlnianmik  
gkqhfktrfintvcksil  
lvliasvmientsvikldlnkiketekywnvlddytiefapyhetkqslidnmlrseqlvkaseaennailfkpkgdsvd  
ndnfspdegnivilvnnqfw  
siyhkqfqpdpiknqknnveviipqkfhamrneinqayhswfefvqnknkenklsiqfinkndyri fsfdardsrhls  
fieapiivnvqasdlndf  
yyamisggylfknydalvkniekyhldeisgitnykdsvmemyhennlklvtlnfsqiiiaailviilfdvkyfey  
hrkllviklygystlan  
yryllinnivvifigiltnvilshyimmalfatilvvqillqicslyyhgrrfnevikef  
>tr|D2N608|D2N608\_STAA5  
mielkdltiqgnthilnklnl kfqcgsyaligsgcgkstllntiaglektgkqyvyfngqleqfksnfyrdklgylf  
qnyglidnltvyenldig  
aykkskkekeqlkiryieqfglsnslkrkvhtlsggeqrvalirmmlkdpivmladeptgalpetgqmi iqslfdlv  
denkvli lathdmainq  
deiidleqyrkvasl  
>tr|D2N609|D2N609\_STAA5  
malpmiwaasalwffpgaimillslvivficyiktqnqlhllllvlniillffslpllls  
>tr|D2N612|D2N612\_STAA5  
mnrnivklvfmliivvavagcgqkdteektdmttikdelgtekikknpkrvvvleysfadylaaldmkpvgiaddgstk  
nitksvrdkigtysesvgs  
ppnmeviskpkpdliaadvrhhkikselkiaptimlvsgtdynanieafktvakavgekegekrlekhdki laei  
rkkieqstlksafafgisr  
agmfinnedt fmgqflikmgipevtkdktahvgerkggpyiylneelaninpkvmilatngktdknrtkfidpavwks  
lkavkdnkvydvdrnkwlq  
srgiasesmaedleki aekak  
>tr|D2N613|D2N613\_STAA5  
mrqfikirivktlvgvvikfirnkls gksshptdnkhk  
>tr|D2N614|D2N614\_STAA5

Tsompanidou\_et\_al\_Supplemental\_FASTA\_File

mkvknaiyvvalflgglgihkfyadkfgqglfhllffwtgipitisiiahifviftkkadrddyiiifpkn  
>tr|D2N615|D2N615\_STAA5  
mirqarpedrfdiaklvymvddmlelvkhlpkdmvldaieksidatyrtfyqhvlyveienkvagciisysgeneik  
yekaweqldlpeeikqygt  
plpvkeakddeyyietiatfaayrgrgiatklltsllesnthvkwslncdinneaalklykkvgfisdgqielykhmyhh  
livk  
>tr|D2N617|D2N617\_STAA5  
mrlnnrtsyfygaiqlfknnsknkqsi fkdweklkhnitfihpqsekhlrvvggfqfsshksddewrefglnhfvlp  
evlistdnngtfltytvkr  
esftvealndlmdlfnntsdiyvedeqigeitruediykgdwrqlvveaiesinneekivlarrlikfdkdisipyilkq  
ayskeknsyifllesqdsi  
ffsqtpelikvnnki lstkavagtikrsqnededtknveafldknkniehrfvvdsilhdikpyitelhydtkpkilk  
ndhlyhlyteikaplkdds  
yislidhlhptpalggypkfamdfieqkefgtrglygapvgyidiyddcefivairsmlikkaqatl fagcgivkdsdp  
dselaetnlkftpmnalg  
vdmngks  
>tr|D2N618|D2N618\_STAA5  
mgnhkaalkqvftfaselaygvrevvispgsrstplalafeahpniktwhpdersaaffavgligserpvailcts  
gtaaanypaiaesqisri  
plivltsdrphelrsvgapqainqvmfnnyvsyefdmpiaddsketidaiyyqmiasqylygphkgpihfnlpfrdp  
tpdlnatelltsemkilph  
yqksidasairhilnkkgliivgdmqhveveqiltystiydlpiladplshlrkfdhpnvictydllfrsgldlkvdfv  
irvgkpviskklngwlkkt  
dafqilvqndkidvfpiapdisyaisandffrslmgdttvrvnwlekwsllekkgrqei enyleqatdesafvge  
lik  
ktfeedalfisnsmirdi  
dnlllnknidiyanrgangidgivstal gmavhkrvtlligdlsfyhdmgllmskl nni qmnivllnndgggifsylpq  
kesatvyferlfgtptgld  
feytaklyqfdkrfnsvsefknatllsetstiyelitnrednfkqhqiylqklsemihdtl  
>tr|D2N619|D2N619\_STAA5  
mthynnyeanvetnqvllvhgflsdsrtyhnhidkytdichvitidlpghgedqssmdetwnfdyittlldrilkykd  
qsimlgysmgrrvalyya  
inghipisnlllestspgi keeanqlerrlvddarakvldiagielfvndweklplfqsqglpveiqhqirqqr  
lsqsp  
qkmakalrdygtgqmpnlw  
prlkeikvptlilageydekfvqiakkmanlipnskcklisatgthivedsdefdtmilglfleeqnd  
>tr|D2N622|D2N622\_STAA5  
mnsscksrvfniisimvsmllslgafannkakadshskqleinvksdkvpqkvkdl aqqqfagyakaldkqs  
naktg  
kyelgeafkiykfngedn  
syyypvikdgi vyltllspknkddl nkskedmnysvkisnfiakldqikdknsnitvltdekgyfeedgkvr  
lvkat  
plannikekesaktvspql  
kqelkttvtptkveeneaiqedqvqyentlnkfkireqqfdnswcagfsmalnatkntdynamdimrtlypev  
seqd  
lpcatfnpqmi eygksqg  
rdihyqegvpsynqvdltkdnvgimilaqsvsqnpndphlghalavvgnakindqekli ywnpwtel  
siqdadsllh  
lsfnrdynwygsmigy  
>tr|D2N623|D2N623\_STAA5  
mkgkflkvsslfvatlttatlvsspaana lsskamdnhpqqtqtdkqtpkiqkgnl kpleqreranvil  
pnndrhqit  
dttnghyapvtyiqveapt  
gtfi asgvvgkdtlltnkhvvdathgdphalkafpsainqdnypnggftaeqitkysgegdlaivk  
fspneqkhigev  
vkpatmsnaetqvnqnit  
vtgypgdkpvatmweskigitylkgeamqydlstggngsgspvfneknevighwggvnpqfngav  
finenvrnlkqni  
edihfanddqpnnpdnpnn  
pdnpdnpnnpdnpnnpdnpnnpdnpnnpdnpnnpdngdnnsdnpdaa  
>tr|D2N624|D2N624\_STAA5  
mklslnsnsky lrapsi rqfsnrmmnl ddcvnl tigqpdfmpdvkkayinainndktsyshnkg  
lletreaisqyfkn  
ryhfsydpeeivtngase  
aidttlrsiiepgdeiipgiyagi plievlggkpiyidttatqfkitpdal eshispktkavll  
nyptnptgvvlkr  
nevlnivnlkky pifiis  
deiyaentfsgkhvsfaefedir dqliligglskshsatgirigflgpqylidkltfmhayncican  
vpaqiacitaln  
egleapky mneayverrny  
lvseltklgfeitaqpegafyifpsikhitdddfe fcvdllesthlai vpgssftefgkgfvris  
yayemdv lkegmkr l  
akylntk  
>tr|D2N625|D2N625\_STAA5  
mts lkerdyffd naraililvvfghmlqpytsgdkylsalyviysfhmptflf isgyfaknidkpy  
ylekiskrlivp  
ymiffaffsiyyfltgksd  
elqldpfnpvfalwflitlfffhvilvivrrfnpykvlsvsiisigagfsdnidsylsisrtivff  
pifylgyiftkhh  
taifknkklipvsii tfl  
ffiiyvihipnadwllgsspytslenegqsvfspfkr lilygiiliamtaflnmstkkklyty  
igsrtlyvyllhglii  
givrgefwpfdnpislmt  
ylylisisviivylstnfvckwtnpiinlqrpsqfkds



Tsompanidou\_et\_al\_Supplemental\_FASTA\_File

>tr|D2N627|D2N627\_STAA5  
makkfnyklpsmvaltlvgsavtahqvqaaettqdqttknvldsnkvkatteqakaevknptqnisgtqvyqdpai vqp  
kaanktgnaqvngkvdttg  
vngdtratqsttsnnakpvtkttnttapktnnnvtsagyslvddeednsenqinpeliksaakpaaletqykaaapkatp  
vapaktevtpkvttfsas  
aqprsaaaapktslpkykpqvnssindyirknnlkapkieedytsyfpkyayrngvgrpegivvhdtandrstingeisy  
mknyqnafvhafvdgdri  
ietaptdy1swgvavgnpfrinveivhthdyasfarsmnyadyaatqlqyyglkpdsaeydngntvthyavsky1gg  
tdhadphgylrshnysydq  
lydlinekylikmgkvapwgtqstttptpskpstgkltvaanngvaqikptnsglyttvydktgkatnevqktfavskt  
atlgngkfy1vqdynsgnk  
fgwvkegdvvyntakspvnnqtysikpgtklytvpwgtksqiagsvsgsgnqtfkaskqqqidksiylygsvngksgwv  
skay1vdtaktptptpkp  
stptnnk1tvsslngvaqinaknglfttvydktgkptkevqktfavtkeas1ggkfy1vkdynspt1igwvkqgdvi  
ynnakspvnmqtytvkpg  
tklysvpwgtykqeaavsgtgnqtfkatkqqqidksiylygtvngksgwiskaylavpaapkkavaqptavkayavtk  
pqtqtvsakiaqvkpntg  
irasvyektakngakyadrtfyvtkerahgnetyvllnntshniplgwfsvkd1nvqnlgkevkttkyvtvnksnnglsm  
vpwgtknqviltdghiaqg  
tfnaakqvsvkgdvlygtinnrtgwnakd1taptavkpntsaakdynytyvikngngyyyvtpsndtakyslkafneg  
pfsvvkeqvingqtwyygk  
1sngk1awikstdlake1ikynqgmt1nqvaq1qag1qykpqvrvpgkwtndanfndvkhamdtkrlaqdpalkyqflr  
ldppqnisidkinqflkgk  
gv1enqgaafnkaaomyginevylisshalletgngtsqlakgadvvnnkvvtnsntkyhvfgiaydndplregikyak  
qagwdtvskaivggkfyg  
nsyvkagqntlykmrwnpahpgthqyatdvdwanakii kgyydkigevgkyfdipqyk  
>tr|D2N628|D2N628\_STAA5  
mftkvidpemledcfyirkkvfveeqvpeeseidqyesesihligyngqpvatari pinettvkiervavikshrgq  
gmglmlmqaveslakdegf  
yvatmnaqchaipfyes1nfkmrgnifleegiehiemtktltsln  
>tr|D2N630|D2N630\_STAA5  
mnkflkyf1i11alvlivpivfat11fktsqdafessqdsknanrqsn1rdnkvnpeeqpisilflgiddndgrkkgq  
daehrsdami1ttfnqsk  
hqirm1siprdtisyipkvgyydkithahayggpiaamdsveatmnpvdyvrvnmkafveavnelggiyydvpyd1ne  
pntddtgkikikkgyqkln  
gdealavatrhhdsdlkrqqrqmeliki1fqkaqevdsidk1dnviqivgknakhn1tseikalakmy1tndveikta  
q1kgkddmlngiyyhpsv  
dsiqkylan11rkd1e1spindknfd1dqrvinhygs1ip1tp1dss11rkeqndttdkdkssntddsnnnsvnnqqqp  
atdqnl1nqnsgtqqtppa  
snnqngvvn  
>tr|D2N631|D2N631\_STAA5  
mkfnkvklvihacv11fi1sig1vfhr1qtktnsiepihketk1sdnaky1vdrnkkgkgepsk1kevynskdpkykkid  
kylqns1fngsvavyngk  
1kmskgygydfekgikntpntmfl1gsaqkfstg111kqleehkinindsvskyipwfktskpip1kd1mlhqsglyk  
yksskdyknl1dqavrai qk  
rgidpkkykkhmyndgnylv1akvieevtgksyaenytkigdp1klqhsafydeksfrkyfakgysynstg1sflkpnv  
1eqyygagniymp1tdmgk  
1itqiqqy1f1spk1t1n11hefgtkypdeyrygfyvkpt1nr1nggffgqvftvyyndkyvvv1alnvkgnnevrikh  
iyndi1kqnkpyntkgviv  
q  
>tr|D2N636|D2N636\_STAA5  
mnenkks1k1snk1kmmass1kgsani1mrn1pkviih  
>tr|D2N637|D2N637\_STAA5  
mnk11qsls1agvsat1vtpn1nadattnttpqikgandivikkgqdyn11ngisafdkedgd1tdkikvdgqidtsksg  
kyqikyhvtdsdgaikist  
ryievk  
>tr|D2N638|D2N638\_STAA5  
mvaki1dgkqiakdyrqg1qnqvealkekgtfplsvilvngdgasqsyrskkkaekigmiseivhleetateev1n  
elnr1nndsvsg1lvqvp  
1pkqvseqkileainpdkdvdfhpini gklyideqtfvpctplgimeilkhadidlegknnavvigrshivgqpvsk111  
qknasvti1hsrskdmasy  
1kdadvivsavgkpg1vtkdvvkegaviidvgntpdengk1kgdvdydavkeiagaitpvpggvgpl1titmv1nnt11ae  
kmrrgids  
>tr|D2N639|D2N639\_STAA5  
mkvavimgsssdwkimqescnm1dyfeipyekqvvsahrtpkmmvqfasearergidii1agaggaah1pgmvas1ttlp  
vigvpietks1kgids1s  
ivqmpggipvattai gaagaknagilatrm1siqnps1vek1nqyessliqkvedmqnelq  
>tr|D2N640|D2N640\_STAA5

Tsompanidou\_et\_al\_Supplemental\_FASTA\_File

mnfnklkfgatigiggqglgkmmaqsaqkmgkykvvvl dpaedcpcryvahefiqakydekaInqlgqkcdvityefen  
isaqqlkl1ceknipqgy  
qaiql1qdr1teketlksagtkvvpfsvkestdidkaietlgypfivktrfggydgkqvlinnekdlqegfklietse  
cvaekylnikkevs1tvtr  
gnnnqityfplqenehrnqilfktivparidktaeakeqvnkiiqsihfigtftveffidsnnqlyvneiaprphnsgy  
sieacdysqfdthilavtg  
qslpnsiel1kpavmmn1lgkd1d11enefnehpewh1hiygkserkdsrkmghmtvl1tndvnqteqdmakfegsn  
>tr|D2N641|D2N641\_STAA5  
mt11yegkakrifstnqenelrveykdevtagngakkdtmagkgrl1nnqitsiifkylqengieshfiq1seteq1vkp  
vkiiplevvvrniagsit  
krlgfengevfreplveffyknda1ndpl1itddhvk11niatdkdietlktkaleinqv1kq1mdamnlk1vdfkiefgk  
tetgq11ladeispdtrci  
wdkatnanfdkdvyrrntgs1ietyqif1nk1led1k  
>tr|D2N644|D2N644\_STAA5  
mskfiepsveeik1ekvyqdmgl1sdqeyekvcdilgrqpnftetgifsvmsehcsykhskpflkqfptsgehv1mgpge  
gagvvdigdnqavvfkves  
hnhpsaiepyqgaatgvvggi1rdivsigarpin1lnslrfgel1dnkqnr11kgvkviggygncigipttageiefder  
ydnpl1namcvginhdm  
iqkgtakgvgnsviyv1ktrgdihgatfaseelteeseskrpsvqigdpfvgk1meat1eaitfdelvgiqdmgaag  
1tsssemaakgsg1h1r  
1eqvptrepgispyemmlsetqerm11vvekgteqkfl1d1fdkhe1dsavigevtdnrfv1tyedevyadipveplade  
apvyilegeeknyntsknd  
ythidvkd1ffk11khptiaskhylydqydaqvganti1kpg1qasvrvvegtnkaiastidgearyvynnpyeggkmmv  
aeayrni1avgatplamt  
c1nygspekkeiyqqladstkgmaeacdi1ktpvsgnsv1ynetkgtsiftpivgmvg1ienvdy1ndfqpqvgdkly  
vigtdkddfsgs1lek1iy  
gkvnhefesid1ssevkkgesiktairqgv1shvqtvvgkgl1itlak1sahyglg1ks1iditnaq1fsetqgryvsv  
ksgkt1nidnaieig11td  
sdnfvttpyteisenvsdik1qiwegaiaqc1ttqd  
>tr|D2N645|D2N645\_STAA5  
mfnysg1neecgvfiwnhpeaaq1tymgl1hs1qhrqgegagivvsdqnelkgergl11teaikddqmer1kgyqhaig  
hvyatsgnkgieniqpf1  
yhyfmsvgichngn1inaks1rqnlekqgai1fhsssdtevimh1irrskaptfeealke1rkikggftfailtkdaly  
gavdpnair1rvvgkmdg  
tyilasetcaidv1gaefvqdi1hageyv1ndkgitvksythttta1sameyiyfarpdstiagknvhavrkasgkmla  
qespvkadm1v1gvpnss1s  
aasgyaeig1pyemglvknqyvartfiqptqel1regvrvk1savkdivdgkni11vddsivrgttirrivkmlkdsga  
nkvhvri1aspefmf1psfyg  
idvsttaelis1askspeeikdyigads1ay1svdgliesig1ldydapysglcvesftgdypaglydyeanykah1shrqk  
qyisknkhff1dsegn1nv  
>tr|D2N646|D2N646\_STAA5  
mskayeqsgvni1hageavermsshvkrtrmkevigglggfgatfd1sq1nmtapvl1vsgtdgvgtkl1klaidyghkhsi  
gidavamcvndi1ltgaep  
lyf1dyiatnkvvpeieqivkgs1dacvetntal1iggetaemgemyhegeydvagfavgavekddyvdgsevkegqvvi  
glassgih1sngys1vrk1i  
nesgid1asnfdnrpfidv1fleptklyvkpvl1alkkevsikamnhitgggyfenipral1pagaarid1ttsfptpkifdw  
1qqqgnietnemyin1fmg  
igy1tvivdekdv1sralki1laeqnveayqighivknestaiel1gv  
>tr|D2N647|D2N647\_STAA5  
mvkiaifasgsgsnfenivehvesgk1eni1evtal1ytdhqnafci1drakkhdipvyinepkqf1dskaayeql1vt11ned  
kvewi1lagymr1igpd11  
dsfegki1ni1hps11pkkygidaigqayhsgdtitgstvhyvdsgmdtgeie1eqrqcd1rpddskeqleekvkk1leyely  
psviakivk  
>tr|D2N648|D2N648\_STAA5  
mkkailsvsnktgivefakaltq1nye1ystggtkril1deanvpvrsvsd1thfpeimdg1rvkt1hpavhggiladrnkp  
qhl1ne1seqhid1idm1vvv  
nlypfqqtvanp1dvtmdeaienidiggptm1raaknykhvttivhpadyhev1tr1rnds1desyrqslmikvfehtae  
ydeai1vrffkgdket1ryg  
enpqqsayfv1rtsnakhti1agakqlhgkq1synnikdadat1alvkkfdtpaavavkhmnp1cgvig1gdtieqafqhayea  
dsqsi1fggiva1nravtpe  
laeq1hsif1levi1iapkftdea1ni1lkqkknvr11leidmtidsnee1efsvs1ggy1vqdkdnyvvpkeemkvvt1evapt  
eqweam11lgwkvvpsvksn  
ai11snkq1tvig1gagqmnr1vgaakialeraie1indhval1vsdgff1pmgdtvela1aqhgikai1iqpggsik1dqdsidman  
khgiamvvtg1trh1fk  
>tr|D2N649|D2N649\_STAA5  
mnv1vigaggrehalayk1lnqsn1vkqvfvipg1neamtpiaevhteisesdhqgil1dfakq1nvdwv1vipeqplidgla  
di1rangf1kvf1gpnkqaaq  
iegskl1fakkimekyniptadykeverkkdaly1encefpv1vkkdgl1aagkgv1iad1tieaarsaieimygdeee1g1tv

Tsompanidou\_et\_al\_Supplemental\_FASTA\_File

vfetflegeefs lmtfvns  
elavpfdciaqdhkrafhddegntggmgaycpvphisddvklklnetiaqpiakamlnegyqffgvlyigailtkdgpk  
viefnarfgdpeaqvllsr  
mesdlmqhiidlddgrtefkwknesivgvmaskgypdayekghkvsqgfdlnenyfvsglkkqgdftvtsggrvilaig  
kgdndvqdaqrdayekvsqi  
qsdhlfyrydiankaqlk  
>tr|D2N650|D2N650\_STAA5  
myeqwkvrsfvddvniitklflgiilfffiifvhnfdmfyitilmvlflmfngtqfkitaitisigfallsslfm  
ilyngshtilkfgfihit  
teslvrglhvs lrtiaisffgiliaaltsqvvmifyslmqhlkvkskvayafmaairmipmissliqlrrslkmryqmid  
aanyrglkrfkhliiplls  
qnirkahqlsvameskgfrdgprrtyyynvpfsykdvifiivliaiitlayycsitlpitgiddvrlgrvg  
>tr|D2N651|D2N651\_STAA5  
mlkvsdlrlkypsgqrki fdlhlnitidqkekvlllgpsgcgkstllnvlsgivpnlielpmkydelivdplsgvifqdpd  
sqfcmkvyee lafvlenr  
qvpredmdaliinalnmvnlvntpetyikdlsggmkkqlaivetilqqsktfldeptamldvqatedlwtklieledwq  
tvvivehkvkhiwhvdrv  
ilmdyngni adecpeiilqkyvhlseygvwhprawefapsrvdfpttshllqfkngriirgkstllsfsdleiglge  
wititgangsgkttlesl  
mqlikyqgdvyfenrlltkikaakhmylvynpelqfitnsydeinifhnlskdqsdde tiqlkllldenvkdqhp  
yelsiqkrrlsvatalss  
kadiifldeptfgldshntfqliklfqkrinlgqsivmvtthdeieriypsrrlkisdgalldcdgdtnv  
>tr|D2N654|D2N654\_STAA5  
msflrkhaeiifsyligivslftgliilinlplikqlnggkvdthvhnweflnaffseikvmsrfignfpivsaivi  
iifgilvmlightllrtik  
ydydisifflvigimfyitlilmtqvygffavifiipftihigyivykdelnqenvknhymwiivsygisylitqialy  
gridaneiesidilsvnaf  
fiimwllgqmaiwnflrralpltkqelgeeepe lsrtckgnvtntqtkihlkqlqdktteyarktrrsvldkirakrd  
kfkkkvndiidiqeddipd  
wmrkpkwvkmypvelfcgvviflftlefnnrnalfvsgdwklsqtqyviewtllillfiiayiattlthflkgkfyf  
lqlfmg silffklltefin  
imihglllsvfitptlllmlllaiiisyslqlrerp  
>tr|D2N655|D2N655\_STAA5  
mkiatlnkgketkyfngypliceediysqdhkegdi fqivtdksqyvatayvgrqhkglgwvlytdkaqevntaffvk  
fntalaerdyfndrtna  
frlfnaegdgiggltidnydghlliqwyskgykfyai leavrkvfdyksiye kvrfdseysggfvegdapefpivie  
enftfynvdl edglmtgif  
ldqkevrkklrdqyakerhvl nlfytgafsviaaseasstsvdlanrsrslteenfglnaidpksqyiyvmdtfdyk  
yatrghgsydtividpsf  
arnkkrtfsvqkdydklitgalnlssegtlllctnasvplkqfkntiktleesgvdyeltevnglpkdfkthphykp  
skylkavfvnirh  
>tr|D2N656|D2N656\_STAA5  
mgfknnltsnltnkignsvfkienvdggampptiqelrerreraeavkrkslmsstmsvvpipglfdgvdllkmlkdi  
edvknkiygl dhkqvnsldg  
dvkerimsaa iqgsqfigkrissaf lkivirdvakrtaakqtkwfpvvgqavsasisyfmnkigkdhiqkcenvikn  
m  
>tr|D2N659|D2N659\_STAA5  
mseii vytqndcppctfvknylnerqidfeerninnqyrnemidfdafstpfllngnpmyhvdleinkvlniqd  
>tr|D2N661|D2N661\_STAA5  
miyafigitvllwllfcyiii asidfgagffal hskltgdekkinhlisrylnpvwevtnvffvffvfgvfgffpesiky  
lgtvllipgsialimislr  
nsfyafenygqdtklawmfmygvsgllipaslstaltiteggyinrvnvidldwvqlllspfawsvflaiisvlyiss  
gfltyyakkandepaynl  
rqwhifl gppmi icl fvfsl riqnseh fysavfdywwlfaislffalaslltffkklhglafvfvilqmmfaffgyg  
isklpyll ypfvk itdayv  
npemgwtlvivfilgllllpslillrlfvfdkeyvegks  
>tr|D2N663|D2N663\_STAA5  
mkqlhpnevgyalggigeigkntyaveykdeivi idagikfpddnllgidyvipdytylvqnqdkivglfithghedhi  
ggvpflkqlnipiyggpl  
alglirnklee hllrtaklneinedsvikshftisfylvlthsipetygvivdtpgkvvhtgdfkfdftpvkpania  
kmaq lgeegvllc llsdstn  
slvpdftl serevgqvndkifrnckgriifafasniyrvqqaveaaiknnrkivtfgsrsmennikigmelgyikappet  
fiepnkintvpkhe lllc  
tgsqgepmaalsriangthkqikiipedtvvfssspipgnrtsinrtinslykagadvihskisnihtsghgsqgdqqlm  
lrlkpkylpiphgeyrm  
kahgetgvecgveednvfi fdigdvla lthdsarkagripsgnvlvdgsgigdigvvir drkllseeglvi vvvsidfn  
tnkllsgpdii srgfyymr  
esgqliydaqrki ktdviskl nqnkdiqwhqikssietlqpylfektarkpmlpvimkvneqkeskn

Tsompanidou\_et\_al\_Supplemental\_FASTA\_File

>tr|D2N665|D2N665\_STAA5  
mltmkdiirdghptlrqkaaelelpttkeeketliamreflvnsqdeeiakryglrsgvglaapqiniskrmiavlipdd  
gsgksydymlvnpki vshs  
vqea ylp tgegc lsvddnvagl vhrhnr itikakdiegndiqlrlkgy paivfqheidh lngvmfydhidkdhplqphtd  
avev  
>tr|D2N669|D2N669\_STAA5  
mafefr lpdigegi hegeivkwfvkagdtieeddvlaevqndksvveipspvsgtveevmveegtvavvgdvivkidapd  
aedmqfkg hdddssskeep  
akeepaeqapvatqteevdenrtvkampsvrkyarekgvnikavsgsgkngritkedvday lnggaptasnesaasn  
eevaetpaapaavslegdf  
petteki pamrraiakamvnskhtaphvtl mdeidvqalwdhrkkfkeiaaeqgkltflpyvvkalvsa lkkypalnts  
fneeageivhkhywnigia  
adtdrgllvpvkhadrksifqisdeinelavkardgkltademkgatctisnigsaggqwftpvinhpevailgigria  
qkpi vkdgeivaapvlas  
l sfdhrqidgatgqnamnhkrllnnpelll meg  
>tr|D2N671|D2N671\_STAA5  
meyeypidlwsneemisivnfhnvekyyesgvt agdfmdaykrfkeivpakaekqifntfekssgynsykavqdvkn  
hseeqrvtakk  
>tr|D2N673|D2N673\_STAA5  
mepllslksvksyddlnl ddi didiesgyfytllgpsgcgkttilkliagfeypdsgeviyqkpnignlppnkrkvnt  
vfqdyal fphlvnydniaf  
gllkllskteidqkvtea lklvklsgyekrninemsggqqrvaia raivnepeilll deslsaldlklrtemqyelre  
lqsr lgitfi fvthdgee  
lalsdf lfv lkdgkiqqfgtptdiydepvnr fvadfigesnivegrmvr dyvvnnyggdfecvdmgipenkkvevvi rpe  
dislikaeegl fkatvdsm  
lfrgvhyei ccidnkgyewviqttkkaevgsevglyfdpeaihimvpeteeefdkriesyeevdha  
>tr|D2N676|D2N676\_STAA5  
mkrflql iigalvvgmlcltlshwfskeqvhtnqkiyvynwgeyidselikkfeketgiqvvyetf dsneameaki rng  
gthydvafpseytvqklkr  
dhlllpidhkvpniknl dsdymnmsfdkgnkyslpyffgtvgilynkekypnesfswkslynpkfkni llvdgarei  
igmslnklgynlndrnshh  
lkeardl tk lapqvr gvgeitmm lqqnegni avvwsgvaapl vqegdkynyvipkegsnlwfdnmvipktaqnkega  
ykfmnflleaknnkqntef  
vgyatpnkaarqllpkvkd dhrfyptk keqerlevykdl gpevlseynefnl fkm slk  
>tr|D2N677|D2N677\_STAA5  
mtgeqftqikrpvsrltekvlgwlcwvml lvtvitmfialvsfsnntsi anlentlnnafiqqllagndynttqfviw  
l ngi waiivyfivcllis  
flal ism niri lsgflflisaivtiplvllivtliipilffiiamm l fir kdkvemvapqyyeeyngpiydyrepvyerp  
qpkddydvpykekel dks  
ntvydqeqerdkydqfpraveseynhderteepsvl srqakykqksteelgi eddgyyaep evdpkelkaqqkre kve  
ikakkkekrkaynqr mker  
rknqpsavsqrrm nfeerrqiyndi seernssevkd kkeqe  
>tr|D2N678|D2N678\_STAA5  
mnrkpelimawiansisiiyllvmgl syfslksngnasqreelakqlsqnggkvsldmlqtmtgalaiillistlygifat  
icikgrrklsjilfviai i  
vs lmalnliai v lwiivmimliskkesketthkddeyiyh  
>tr|D2N681|D2N681\_STAA5  
malygfaqgl iqeagirikqlmeqnltietksnpndlvtnvdkatedfifdtiletynhqvlgeeghghdidtskgtw  
vdpidgtlnfvhqgenfa  
isigi yidgkpyagfyvdmadvlyhakvgegayrgsqplkp lndsnlrqsiiginpnlwtkpilgeifkeivndrsar  
aygsaa leivsvatgnlea  
ymtprlqp wdfagg lvi lyevngqasnllgepl t isgpn silvgnrglhqeisndylephrdaliqlheqrfkrksk  
>tr|D2N688|D2N688\_STAA5  
mkqikkllvanrgeiairifraaaeldistvaiysnedksslhrykadesylvgsdl gpaesyl nieri idvakqanvda  
ihpgygf l seneqfarrca  
eegtkfigphlehl dmfgdkvkarttaikadlpvipgt dgpiksyelakefaeeagfplmikatsggggkgm rivreese  
ledafhrakseaksfgns  
evyier yidnphievqv igdehgnivhlferdcsvrrhqkvvevapsvglssdlr qricdaaiqlmenikyvnagtve  
flvsgdefffi evnprvqv  
ehtitemvtgidivktqilvaagadlfgee inmpqqkdittlgyaiqcritt edplndfmpdtgttiayrsggfgvrl d  
agdgf qgaeispyydsllv  
klstha isfkqaekmvrslremri rgvkt niplinvmknkkftsgdyttkfieetpel fdiqpsl drgtkleyignv  
tingfpnvekrpkpdyela  
s iptvsss kiasfsgtkqlldevgpk gvaewkkqddvlltdttfrdahqsl latrvrtkdm ini asktadvfdkgfsl e  
mwggatfdvaynflkenpw  
erlerl rtaipnvlfqmll rasnavgykny pdnivhkf vqesakagidvfri fdslnwvdqmkvaneavqeagki segti  
cytgdi lnpersniytley  
yvklakel eregfhi laikdmagllkpkaa yeligelkaavdlpihlhthdtsnglltykqaidagvdi idtavasmg

Tsompanidou\_et\_al\_Supplemental\_FASTA\_File

ltsqpsanslyyalngfpr  
hlrtdiegmeslshywstrtyysdfesdikspnteiyqhempggqysnlssqakslglerfdevkdmrrvnflfgdi  
vkvtppskskvvgdmalymvq  
ndldeqsvitdgyklfdpesvvsffkgeigqpvngfnkdlqavilkqgealtarpgeylepvdfekvrelleeeqqgpvt  
eqdiisyvlypkvyegyiq  
trngygnlslldtptfffgmrngetveieidkgrliikletisepdengnrtyyamngqarriyikdenvhtnanvkv  
kadksnpshigaqmpgsvt  
evkvsvgetvkanqplliteamkmettiqspfdgmikqvtvnngdtiatgdllieiekasd  
>tr|D2N692|D2N692\_STAA5  
mkkliirvvgvflvgfllylfsprlkfdvlenpnkgnkvrnseqvnksnhaenpkpkevgtwvgkdikvltskfgq  
adrvyprfdgyknyvfkdk  
nsyivstkreievsvyatgekvnvslkigqhsaeifnhtsinpepsfkvdgkkyefelsdedlktqtlkygnyiaqv  
ysdqskkvlsvrfltkem  
ladiepyrlnsnstsehnkrpveqnpnqlislyevtnemrklkgklpkinsdlahiasnlyeatsngsdsvefteda  
lrgqldknhvtykttaanv  
gyafndvptlihswwnsdihrsrllnskydemggdvmdrdislyflek  
>tr|D2N694|D2N694\_STAA5  
mkklnrnlnavlvgagfvssllmitknkvitkqtipdffkgnapyifahrggmtlrpeqtqlafdyakqlgvdgftd  
vrltkqqilivfhdatvdr  
ttngsgkvsahlaelkkldagyhfkdingltpyrghahtailtfdelkqypdmyinvdlkdapesyegsiapqimfdt  
iaenqafdrvltvsfykeq  
ivrfnkiaggsvaigasqqevteaflykhlggryyqlaqtqmpthfkginltsrfikwlnmniipgyygvnsinl  
mndlyqkgahtivtdrpd  
aqqfqtinkq  
>tr|D2N696|D2N696\_STAA5  
mkqtfiltlgegltdlfefmtmieynhridkiyfhspqaenkkssvaiimnpttgnhfqafyiminaikyypdsnkf  
qmndcaekfdipilgidv  
qppqafhdlslynylsvlrlqkwipeiq  
>tr|D2N697|D2N697\_STAA5  
mrviagkhkskalesmegrntrptmdkvkegifslydvsgigldlfagsgalgiealsrgmdkvi fvdqnfkavkviks  
nlanlnleaqsevyknnad  
ralkaliskrdiqfdvifldppynglidkalklisefnllkengiivcefsnheeidyqpfmikryhygltdtlllek  
e  
>tr|D2N699|D2N699\_STAA5  
mksvgliteynpfhngqyhinqskltnadvtiaimgnfvmrgepaiynkftrakmalstadlvielpataslssgdh  
faelavkvadymsvdtiaf  
gsenndiktllqalahsineieqsesssqkvkegksypriisellehealaspnnilgisylkaiakhakninaisikre  
naqhhdslqhhyasgts  
irtsiiqqdhhwhhvpkdiqhlvtphtlnqifpylkyqiamtteslknityvttegfenrlksnneatdfhhfvks  
lktkrythyigrllmnil  
lnikptdvtrnihavkvlamndrgrqylkhlktafperqyitninksnahyftneikathiyaisgqqqtdfntpviiq  
yc  
>tr|D2N6A0|D2N6A0\_STAA5  
mkwsitqlrkyqgkpfefdqtvsfdnlkesldlidlspitiqqqltikstevvadihitgtytmpcartlvpvkpldvt  
ttevfdlegynqyndgqdd  
vdehyhiindgmvnldivediviiekpmrayseqsdqmltvngwevidedqldelakqqeqddsesrqvdprlqklqq  
lydkeq  
>tr|D2N6A2|D2N6A2\_STAA5  
mnkqqkefksfysirksslvasvaistllllmsngeakaaetggnteaqpkteavaspttttekapeakpvanavs  
vankevvtpttetkevkp  
keakeekpaakadnntypilnqelreaiknpaikdkhsapnsrpidfemkkkdgtqqfyhyassvkparviftdskepi  
elglqsgqfwrkfevyegd  
kklpiklvsydtvkdyayirfsvsngtkavkivssthfnkeekydytlfefaqpinyksadkfkteedykaekllapykk  
aktlerqvyelnkiqdklp  
eklkaeykkkleetkkaideqvksaitefqnvqptnekmtldlqtkyvvyesvennesmmdt fvkhpiktgm lngkymv  
mettnddywkdfmveqqr  
rtiskdakknttrtiifpyvegklydaivkvhvtidydgqyhrivdkeaftkanadksnkkeqqdnsakkettptps  
kptppvekesqkdsqkd  
dnkqsasvekendassesakdktpatkpakaevesssttpkvsttqnvakpttassettkdvvqtsagsseakdsapl  
qkanikntndgdtqsqnnk  
ntqenkaksllpqtgeesnkdmtpmlalla lssivafvlprkrkn  
>tr|D2N6A3|D2N6A3\_STAA5  
mtkhylnskyqseqrssamkkitmgtsiilgslvyigadsqqvnaateatnatnngstqvsqatsqipinfqvqkdsse  
kshmdymqhpgkvikqnn  
kyyfqavlnnasfwkeykfyannqelattvnddkkadtrtinavavepykslttkvhivvpqinyhrytthlefeka  
iptladaakpnnvkpvqk  
pgqktpteqtkpvqkvekvkpvavtapskaentqtkkvstetkqsdqtsartvktqtatqeqnkvtqpvkdvatak  
sesnnqavsdnksqqtnkv

Tsompanidou\_et\_al\_Supplemental\_FASTA\_File

tkqnevkhkqgpskdsakepkgtlsvdnfistvafatlaallgslslllfrkesk  
>tr|D2N6A4|D2N6A4\_STAA5  
mknllkvfntmlaliliiiatfnsanaadsgtlneyvykyntndtsiandyfnkpakyikkngklyvqitvnhshwitg  
msieghekiiskntakde  
rtsefevsklngkidgkidvyidekvngkpfkydhynitykfnngptdvaganapgkddknsasgsdkgsdgattgqses  
nssnkdkvenpqtagnatpa  
yiyaipvaslalliatlfrkkskgnveq  
>tr|D2N6A5|D2N6A5\_STAA5  
mrnvkqiatksiiiaislgltyttmigsvladeinypsakfnqpeakdkteltssifdekikenkalellifnqenknv  
teeqqlvdekaqlisdmtg  
kiylqvkllkgqidkeqlvfqndkneefpfvikdekdytivriliehmdkinmhvktltekklndnkemvysihfkekkv  
qhndakevpskhqngennq  
dqllkddiddkdsqksdikerrtslftekglndipvqkdkvqqdsdkkienerpkasgtlkvenspptvkkvennhkeqp  
khkdekskkkekvvveke  
alpafnrddsknssqllssdikeldephkkqymlfaagivlatillisahlysrkrngqv  
>tr|D2N6A7|D2N6A7\_STAA5  
mmiknkkllflclliviliatayisfvtgtiklsfndlftkfttgsneavdsiidrlprilialmvgamlavsgallqa  
alqnpiaeaniigvssgal  
imralcmfipqlyfyllp1l1sfigglipflilil1hskfrfnavsmilvgvalfvllngvleiltqnp1mkippqgltmki  
wsdvyilavsallgliltl  
llspklnllnlddvqarsignidryrwltgllavflasatvaivgqlaf1giivphvvrklvggnrvlipfstvigaw  
lllvadllgrvipp1eip  
anailmivggpmlilylicsqsrnri  
>tr|D2N6A8|D2N6A8\_STAA5  
mrmkrfl1tivqillvviliiifgykivqtyiedkqeranyeklqqkfqmlmskhqahvrpqfeslekinkdivgwiklsgt  
slnypvlqgktnhdylnld  
ferehrrkgsifmdfrnelklnhntilyghhvgdntmfdvledylkqsfyekhkiefdnkygkyqlqvfsayktttkd  
nyirtdfendqdyqqflde  
tkrksminsdrvntvdkkimt1stcedaysettkrivvvakiikvs  
>tr|D2N6A9|D2N6A9\_STAA5  
mkfmaenrltikgtakdieryfyrhgiellegfdgmfvttleqedfdevkiltvwkskqaftdw1ksdvfkaahkhv  
rsknedesspiinnkvity  
digysymk  
>tr|D2N6B0|D2N6B0\_STAA5  
meqitsaqnrrikqankllkkkrerdkglaliegvlhieayqrgivitqlfaieparldqqiiaayaqevfeinmkvaes  
lsgtvtppqgfaiiekpqy  
diskaqqvllidrvqdpnglgtlirtadaagmdavimekgttppyqdkvlrasqgsvfhlpvmtqldlftitqfngpvvg  
talnavaykevtsdsfa  
lll1gnegegvnpe1lahttnliipiygkaeslnvaiagsill1yhlkg  
>tr|D2N6B1|D2N6B1\_STAA5  
mseqtmse1kqqa1vdieneanderalqevkvylgkkgsvsglmlkmdlpneekpafgqkvnelrqtique1lderqqm  
lvkeklnkqlaetidvsl  
pgrhieigskhplrtieiedlflglgyeivngyeveqdhynfemlnlpkshpardmqdsfyitdeillrhtspvqar  
tmesrhgqgvkiiicpgkv  
yrrdsddathshqftqieg1vvdknvkmsdlkgtlellakk1fgadreir1rpsyfpftepsvevdvscfckkgkgnvc  
khtgwieilgagmvhpnv1  
emagfdsseysgfafgmgpdriam1kygiedirhfytdvrfldqfkavedrgdm  
>tr|D2N6B2|D2N6B2\_STAA5  
mlisnewlkeyvtiddsvsnlaeritrtgievddlidytkdiknlvgfvkskekhpdadklnvcqvdigedepqvivcg  
apnvdagqyvivakvggr1  
pggikikraklrgersegmics1qeigissnyipksfesgiyvfsesqvpqgdalqalylddqvmefldtpnradalsmi  
gtayevaalyntkmtkpet  
tsnel1sandelvtienedkapyysarvvhdtiepspiwmqarlikagirpinnvdisnyvll1eygqplhmfddqda  
igsqqivvrqanegekmtt  
lddtere1ltsdivitngqtpialagvmggdfsevkehtsniviegaidpvsirhtsr1n1rse1ssrfekgiatefv  
deavdracyllqtyangkv  
lkdrvssgelsafitpiditadkinrtigfdlsqndivtifnqlgfdteinddivitqvpsrrkditikedlievari  
gyddipst1pvfektsgq  
ltdrkyktrmvkevelegaldqaityslvske1datafamqqrqtidllmpmseahaslrqsl1phlieaasynvarknd  
vklfeignvffangege1p  
dqvey1sgil1tgdyvvnqwgqkktvdfylakgvvdrvsekl1n1efsyrradidglhpgrtae1llenkvvgfigel1hpt  
laadnd1krtyvfe1nfda  
lmavsvgyinyqpi1prfpgmsrdialevnqnipaad1l1stihahggnil1kdt1vfdvyqgeh1ekgkksiair1n1yldte  
et1tdervskvqaeiea1  
ieggavir  
>tr|D2N6B3|D2N6B3\_STAA5  
mkgftqmanivfk1s1dkdi1t1lmsrisfdten1pqgmkarakyqnttvniyqsgkvmfqqnhaevs1qell1pqhsq1ntn  
k1kkkntdnss1eqt1lmyd

Tsompanidou\_et\_al\_Supplemental\_FASTA\_File

qfncigsdeagsgdyfgplvtvcaafvtkehvpilktlgvddskltdtkivelaeqlvtfiphslltlhnekyniqqakg  
wtqvkmkavlhneai knvl  
ekidssqldyividqfakrevyshyalsdiplpkktkfetkgeskslaiavasiasryafvtymdqiskninmtipkgag  
akvdviaaakiikygl sr1  
dsiskkhfknrekaqkilkp1  
>tr|D2N6B5|D2N6B5\_STAA5  
miidfiiii fvyfvi vgfrrgfwlsmihlsativslwiasqfyksiverlivfipykttafnttfafhfnhlqhrfea  
ivaf1mit1fckfilylii  
vtfdkiiayqnihi fsramgmivgvfmitiivlhftlyllaalpnealqhq1kisivshslifhipylsaftin1  
>tr|D2N6B6|D2N6B6\_STAA5  
mtkkdvik11eqiatymelkgentfkisayrkaaqslelderpldeisdvte1kgigkgvaevindyretgesqylqq1q  
eevpeglip11kiqg1gsk  
kiaklykelnivdkas1qvacengkvselsgfakkteqnilavkqlgakkdrypidqmrr1nqeidiyidtlnyidqys  
sagsfrfrfkemskldfii  
stdnkvavqq11n1pnkvkevavgnkvslelayddetigvdfriepsafyht1qhftgskehni rirqlakardev  
seygieqadgt1iqyde  
kiyehfnvnfippamreddgsefdk1snit1ddingdihmhttsdgafsi rdmveaniakgykfmvitdhsqslrvan  
glqver11rqneeika1dk  
eyseidiysgtemdi1pdgs1dyddeilaq1dyvigaihsfnqseeqimerlanacrnpvvrhiahptgriigrdgyk  
pnieqlmalaeetntvlei  
nanphr1d1sadvrkypnvk1tintdahhtnh1dfmhygvataqkgfvtkdrvinalsreafkdfiennik1kk  
>tr|D2N6B7|D2N6B7\_STAA5  
mrqkt1dv1efekikslvanetisd1gl1ekvnqmpatnfetvfvqmeetdeiaqiynkhr1ps1sg1skvsafihradi  
ggv1nvsel1nikr1iqvq  
nqkftfynq1veedegvkypilddkmnq1pvt1d1fqinetcdtydlydnasyelqgirsksstnqrirqn1drivks  
qanqk11sdai1vtvrn  
vipvkaeyrqdfngi1vhdqsasgq1yiepsvsvemnnqisr1rhdeaiekeril1tq1tgyvaadkdallvaeqvmgq1d  
fliakarysrsikgktpif  
keertvylpkayhpl1nretvvantiefmedietvii1tgntggktvt1kt1gliivmaqsg11ipt1dgsq1svfkny  
cdigdeqsi eqs1stfssh  
mtnivei1kradkhs1v1fde1lagtdpsegaalamsi1dhvrkigs1vmatthypelkaysynregvmnasvefdvt1  
sptyk11mgvpgrsnafdi  
skk1g1s1niinkaktmigtdkeinebies1ernykrvetqr1e1dr1vkeaeqvhd1skqyqqfnyeks1iedake  
kanqkikaatkeaddi1kd  
1rq1reqkgadvkehe1idkkkr1ddhyeaksikqnvqkqkydkivagdevkv1sygqkgevl1eivndeeai1vqmg1ikm  
klpiedlekkqkekvkptk  
mvrqrnrqtiktel1drgyreda1ie1dqy1dqav1snyeqvyi1hgkgtga1qkgvqqh1kkhksvsdfrvmpsegg  
fgvtvat1k  
>tr|D2N6B9|D2N6B9\_STAA5  
medykqriknk1nvpmepgcy1mkdrndqviyvqkakk1rn1rsyftgahdaktr1vgeirrfefivtssetes111  
e1n1likyqpry1n11kdd  
ksypfiki1tkekypr11vtrtvkqgtgkyfgpypnaysaqetkk11driypyrkcdkmpdk1c1yyhigq1gpcvydvd  
1skyaqmtkei1df1nged  
kti1ks1leerm1tases1dferakeyrd1iqhiqn1tnkqkimssdk1irdvfgysvdkgwmc1qvffir1qgnmikrdtt  
mip1qqteeeefy1tfiggf  
ys1nqhilpkevhvprn1dkemiqsvvdtkivqpargpkkemvd1aahnakvs1nnkfelisrdesrtikaieelgtqmg  
iqtpir1ieafdnsni1ggvd  
pvsamvtf1dgkpdkknrykyik1tvkpgddyksmrevrrrrysrv1neg1p1pd1iivdggkghmngvidvlqnelg1d  
ipvag1qkndkhqtsel1y  
gasaeiv1p1kknsqafy11hriqdevhrfai1t1fhrqtrqktg1ksil1ddidgigskrkt111rsfgsikk1mkeat1edfk  
nigipenvakn1heq1hk  
>tr|D2N6C3|D2N6C3\_STAA5  
mnkpigvidsgvgg1tvakeimrq1pnetiyy1gdigrpcyprpgeqvkytveiark1mefdikm1viacntatava1  
eylqkt1sipvigviep1ga  
rtaimttrnqnv1v1gtegtikseayrthikrinphvevhgvacpgfvplveqmryndptitsivihq1tkrwrnskad1  
v1lgcthyp11ykpiydyf  
ggkktvissg1etarevsal1tfsnehasytephdrffatgdtthitniikew1n1svnverisvnd  
>tr|D2N6C4|D2N6C4\_STAA5  
mkeiviasnngk1ndfkvi1fpyhvigi1selipdfveetgstfeenailkseeaakal1nktviaddsg1evfal1ngep  
giysaryagenksdeanie  
k11nk1gnttdrra1qfvcvi1smsgpdmetkvfkgtvsgei1adgkygengfydipi1fyvpk1dr1tmaql1skeqkgqi1shrr  
nain11eay1agdqnv  
>tr|D2N6C5|D2N6C5\_STAA5  
mskwivvsdnhtesgi1yqi1yehpdadmy1h1gdsefeyddtel1s1frrvkgncdfypefeneavakcndvkafy1thgh  
lyqvn1r1rh11laeqare1g  
cvfayfghthvakyeyingvhvinpgsisqsrssmeesyaevl1iddq1lqgtvnfknrqhetis1httf  
>tr|D2N6C6|D2N6C6\_STAA5  
mkri1v1fgkvi1vdcpiw1nhvdy1vksv11ksik1kf1qevrkfeilvkimnrihi

Tsompanidou\_et\_al\_Supplemental\_FASTA\_File

>tr|D2N6C8|D2N6C8\_STAA5  
mkknitkviiastviatgllthsndakaffsyewkgleiakkladqakqeeridklmkeadknqkpykgetvndlyliv  
kklsggdvkkavvrikdgg  
prdytfdltrpleenrknkvkngheidsiywdq  
>tr|D2N6C9|D2N6C9\_STAA5  
mlkrylyfstilfammgrqtlsvihvavliinvykttk  
>tr|D2N6D1|D2N6D1\_STAA5  
mknkliakslitiasigittttlastadasegygprekkpisinniveyndgtykyqsrpkfnttpkyikfrhdynive  
yndgtfeygarpqfnkpaa  
kteatikkeqkliqaqnlvrefekthtvsahrkaqkavnlsfeynvkkmilqeridqvlkqglvr  
>tr|D2N6D4|D2N6D4\_STAA5  
mvfkdwainvvygkhevvtenslfvidedyvaiainyldnkllkvshvnygseftidasnkvllelmihnpniden  
>tr|D2N6D5|D2N6D5\_STAA5  
mktriyvsvttlllgsilmpvanaadsdiniktgttdigsnttvktgdltvydkengmhkkvfysfidknhnkkliv  
irtkgtiagqrvyseea  
nksglawpsafkvqlqldsnevaqisdyprnsidtkkeymstltygfngnvtgddsgkiggliganvsightlkyvqpdf  
ktilesptdkkvgwkvifn  
nmvqnqwgpydrdswnpvynqlfmktrngsmkaadnfldpnkassllssgfspdfatvitmdrkaskqqtndviyerv  
rddyqlhwtstnwkgntk  
dkwtdrsserykidwekeemtn  
>tr|D2N6D6|D2N6D6\_STAA5  
mteineiinaiqslfesqsgyiksknsgvpyqtvdlnrgktkiedarfrtiiklysyytslkers  
>tr|D2N6D7|D2N6D7\_STAA5  
mrkrimkklifmttlllgttatqtpnspInvstdakayhigqdetninelikyqtppltsnrwlyqyddgniyvefk  
rysawahirlwgaeswgnv  
nqlrdryvdfgllkdedtsqllwvyrdfggvtpaaspsdkpyslrvqykdklqtiigahkmyqgnkpiiltkeidfra  
retliknkilyhenrnkgk  
lkiiggndftidlskrllhsdlanvyvknppqkitvevlid  
>tr|D2N6D8|D2N6D8\_STAA5  
mknlltkkiilsialtmigtatsqsphspisimsseakaynisetnvneltkytqrhltsfnkwlwqkdngtihatll  
qlswfshiqvfgpeswgni  
nqlrnkyvdi Falkdyetwrtymlaqetftggvtpaakpsdkyyklnvtykdkagtfigeyqfytgkpvltlkevdfri  
rqtliknklyngdyngkh  
ikitggsnnytidlskrllkstdanryvknppqtahieillekps  
>tr|D2N6D9|D2N6D9\_STAA5  
mkknitnkiivlstailllgttstqppkapisfsseakaynisenetninelikyqtphlsfsgkwlwqnpngtihatlq  
twwythiqvfgpeswgni  
nqlrdkyvdi fgtkdedtiegywtydetftggvtpaatssdkpyklflkykdkqqtmiiggleyqgnkpvitlkeldfvr  
rqtliknklyngefnkgg  
iritggghytidlskllkltdtnryvknprhaeievileksh  
>tr|D2N6E1|D2N6E1\_STAA5  
mmakivvalggna l gkspqeqlvknntakslvgllitkgheivishnggpqvg sinlglnyaaehngqpsfpfaecgams  
qayigyqlqeslqnelhs  
gmdkqvvtlvtqevdendpafnnpkpi glfynkeaeqikdkgfifvedagrgyrrvpsppisiielesiktlik  
ndtlviaaggggipvireq  
hdgfkgidavidkdktsallganiqcdqliiltaidyvyinfntenqpplkttnvdelkryidenqfakgsmllpkieaai  
sfienpkgsvlitslne  
daalegkvgtvik  
>tr|D2N6E2|D2N6E2\_STAA5  
mentnnesekkrflkmpgafmllflltvvaviatwvipagaysklsyepssqelkivnphnqvkkvpgtqqeldkmgv  
kikieqfks gainkpv sip  
dtyerlkqhpapeqitssmvegtieavdimvfilvlggligvvasgsfesgllaalkkktghefmlivfvsilmiigg  
tlcgieeeeavafypilvpi  
fi algydsivsvgaiflassvgstfstinpfsvviasnaagttftdglywrigacivgai fvisylywyckkikkdpkas  
syedkdafeqqswvlkdd  
dsahftllrkkii ltlvlpfpimvvgvmtqgwwfpvmasafliftiimfiagt gkcglgkgtvdafvngasslvgs  
iiglarginlvlnegmisd  
tilhfsslvqhmsgplfiivllfiffclgfvpssslavlsmpi fapladvgiprfvivtvyqfgqyamllflaptgl  
vmatlqmlnmryshwfrfv  
wpvvaflvifggvllitqvlia  
>tr|D2N6E4|D2N6E4\_STAA5  
mrllqkaplvtsglvlgllgllgnllkdlsltnavcgifaflwihllctmlkyfnnveqllnsplvssvfttffmsgflg  
tlylntffsnitfinllit  
piwilclvgimthmii fsiky l kdfs l vnvypswtlvfigiaia gltapvsgyffigq l tviygfvatcivlpivfkrllk  
afplqtsikpntsticapf  
slvaaayviafpanafivflllaqi fyfyi i iqlpkllkepfspvfsaftfplvisatal knslpvlmfpviwkgll  
fiemllatvivilrvfigyl  
hffllkenqdkflrnasq



Tsompanidou\_et\_al\_Supplemental\_FASTA\_File

>tr|D2N6E5|D2N6E5\_STAA5  
mrnqiqkllsdslsslhiskqtgvpqstihmrknrsldnmslknaellykfangifsnen  
>tr|D2N6E8|D2N6E8\_STAA5  
mgynilidfdtdvfydaeewafyymanfhnkatkddfltfkkinhqweafqqnkltksevlserfvnyfkhqme  
vdghradvlfnglaeakv  
kyfdqtletivelskrhnlyivtngvtetqkrrlnqtplhkyikkifiseetgyqkpnpeffnyvndigederqhsiiv  
gdslltsdilgginagiatc  
wfnfrgfdhnpqiipdyeinswkqldiv  
>tr|D2N6F0|D2N6F0\_STAA5  
mdckvvslnekdqfipkikssdpvikglfqydaaqqtsfekrmskenngreaalanviyreymdsklsseqelnihlan  
gskvviaggqaglfggply  
tfhkifsiitlskeltdthkqqvvpvfwagedhdfdevnhtfiyenenhgslhkvkyhtmempettvsryypdkaelkqt  
lktmfihmketvhtqglle  
icdriidqydswdmfkalhetfkaygvlfidaqfeplrkmeapmfkiklkkhqlldafraqkrtqngqkiamiqtd  
tnvhlflhdenmrqlvsyd  
gkhfklnktdktytkeeinienaenqelnsnnvtrplmeewlntvafiggpseikywaekdvfelldvempivmprl  
ritylndriekllskynip  
lekvlvdgveggerskfi reqasdqfi ekvegmieqqrlnqdllnevgngqnninlvknkneihiqydyllkryllnie  
rendismkqfreigetlhp  
mglqeriwnplqilndfgidvfkpstypplsytdhiiikp  
>tr|D2N6F3|D2N6F3\_STAA5  
mavekvyqpydeqvynsipkqqpqtpekktsrkvvvtkfkelyitlitviamlsiymlslkmdaydtrgkiadld  
ykidkqssensalqseikk  
nssyeriyekakkqgmslendnvkvrsngeakn  
>tr|D2N6F4|D2N6F4\_STAA5  
makqkikikknkigavlvgllfgllffilvlrisyimitghsngqdlvkanekylvknaqqpergkiydrngkvladv  
eryklvaviddkasansk  
prhvvdkketakklstvidmkpeeiekrlsqkkaqfiefgrkgtnltyqdklkiekmnlpgisllpeterfypngnfash  
ligraqknpdtgelkgalg  
veki fdsylsgskgslyrihdiwgyiapntkkekqpkrgddvhltdisniqvveealdgmveryqpkdlfavvmdaktg  
eilaysqrptfnepetgkdf  
gkkwandlyqntyepgstfksyglaaaiqegafdpdkkyksghrdimgsrisdwnrvwgweipmslgftysntlmmhlq  
dlvgadmkswyerfgfgk  
stkgmfdgeapggigwsnelqaktssfgqstvtvpqmlqaqsaffndgnmlkpwfvnsvenpvskrqlykgqkqiagkp  
itketaekvekqldlvvns  
kkshaanyridgyevegktgtaqaapngggyvkgppnyfvsfmgdapkknpkvivyagmslaqkndqeayelgvskafk  
pimentlkylnvgkskddt  
snaeyskvpdvegqdkkaidnvsakslepvtigsgtqikaqsikagnkvlphskvllltdgdltmpnmtgwtkedviaf  
enltnikvnlksgsfvshq  
siskgqkltekdkidvefssenvdsnstnnsdsnsddkkksdsktdkdsd  
>tr|D2N6F7|D2N6F7\_STAA5  
mddktkndqgesnedkdelelfttrntskrrqrkrskathfsnqnkddtsqqaefdeeiylinkdfkkeeskdenndsas  
shandniddstsdniene  
dyrynqeidgqnesngiavdneqqsapkeqnsdsndeetvtkkerkskvtklpltleekrklrrkrqkriqysviti  
vlljavi liymfsp lskia  
hvningnnhvstskinkvlgvkndsrmtyfssknaindleedpliksveihkqlpntlnvditeneialvkykgkylpl  
lengklkgsndvkindap  
vmdgfkgtkedmikalsemtpevrryaevtyapsknkqsrielfttdglqvigdistiskmkyppqmsqslsrds  
k1ktrgyidlsvgasfipy  
rgntssqsesdknvtkssqeenakeelqsvlnkinkqsskn  
>tr|D2N6F8|D2N6F8\_STAA5  
meehyvvsidigssvktivgekfhnginivigtgqytsgikngliddfdiarqaikdtikkasiasgvdikevflklpi  
igtevydesneidfyedte  
ingshiekvlegirekndvqetevinvfpirfivdkenevdpkeliarhslkveagviaiqksilinmikcveacgvdv  
ldvysdaynygsiltatek  
elgacvidigedvtqvafyergelvdadsiemagrtdiddiaqglntsyetaekvkhyghafydsasdqdif tveqvds  
detvqytqkdl sdfiearv  
eeiffefvfdvldgltkvnggfivtggsanllgvkellsdmvsekvrihtpsqmgirkpefssaistissiafde lld  
yvtinyhdneeteedvidv  
kdkdnesklggfdwfkrrktnkddthenevestdeeiyqsednhqehkqnhehvqdkdkeeskfklmkslfe  
>tr|D2N6G0|D2N6G0\_STAA5  
mndnfkkqphhliyee llqqgitlgittrgdgl sdypknafmmaryidrrpynitqhqlqlaeeiafdrknwvfpiqthe  
nkvacitkddigtidnlt  
delhgidamytfdsnvlltmcyadcvpvyfystkhhfiaalahagwrgtyteivkevllkhvnfdlkdllhvvigpstssye  
inddikskfetlpidsgny  
ietrgrdrhgidlkkanaallnyygvpeniyttayatsehlelffsyrlkqgtgrmlafiqgq  
>tr|D2N6G1|D2N6G1\_STAA5  
mrvkdnllqqistqindksknkffnktrdcykyicynras

Tsompanidou\_et\_al\_Supplemental\_FASTA\_File

>tr|D2N6G2|D2N6G2\_STAA5  
megffqkkealpsdavihfigsqsrkvkdvindvdyfhaldrslakeinkraehkikcflqvnvsgeaskhgialedv  
dqfidlkkkydkieivglm  
tmapltdeayirs1fkqlr1kkeeiqrlnleyapcde1smgmsndyliaveegatfvrigtklvgeee  
>tr|D2N6G5|D2N6G5\_STAA5  
mvfynffkvvinidiyqhfrrreeyelidqltdkcdqaeqhyapvlthflprgqyilevicgsyedlnvsfyggpnaerk  
raispnyyepkesdfdl  
lmeidyepfvtlkhqhlgtlmslgiereqvdiivneriqfvltsrlesfimlelqrikgasvklytipvtdmiqsne  
nwkiestatvss1r1dvvik  
emirksrtiakqliekkrvkvnhitivdsadfqlqandlisiqgfgrahitd1ggkttkdkthityrt1fk  
>tr|D2N6G7|D2N6G7\_STAA5  
mdyket11mpktdfpmrgglpnkepqi qekwdaedqyhka lekknqnetfilhdgppyangnlhmghalnkilkdfivry  
ktmqgfyapyvpgwdthgl  
pieqaltkkgvdrkkmstaefrekckefaleqielqkkdfrlrvrgdfndpyitlkpeyeeaqirifgemadkgllykg  
kkpvywspssess1aeaei  
eyhdkrsasiyvafdvkddkgvvdadakfiwtttptipsnvaitvhpelkygqynvngkyiiaealsdavaealdwd  
kasiklekeytgkeleyvv  
aqhpf1dres1vingyhvttdagtgcvhtapghgeddyivgqkyelpvispidkgyfteeggqfegmfydkankavtd1  
1tekga11k1dfi1thsyph  
dwrtkkpvi1fratpqwfasi1skvrhdi1dai1entnfkvnwgktri1ymvdrdgewis1rqrwgvplpvfyaengei1mt  
ketvnhvad1faehgsniw  
fereakdl1pegfthpgspngtftketdimdvwfdsgsshrvgletrpelsfpadmylegsdqyrgwfnsittsvatrg  
vspykf11shgfvmdgeqk  
kmsks1gnv1vpdqvvkqkgadiarlwsstdyladvrisdeilkqtsdvyrki1rnt1rfm1gn1ndfnpdtdsipse1  
1evdry11nr1reftasti  
nyenyf1ny1qevqf1nve1snfy1dygkdi1lyieqrdshir1rsmqtv1lyqilvdm1k1lapilvhtaeevwshtph  
vkeesvhladm1kvvevdq  
all1dkwrtf1m1rddvnr1a1etarnek1vigks1leakvtiasndkfnase1f1tsfdal1hq1fivs1qvkvvd1k1ddqataye  
hgdiviehadgekercwn  
ysed1gavde1th1cprcqqvks1v  
>tr|D2N6G8|D2N6G8\_STAA5  
myhnsnanfvngit1nvrkne1kpfyedilglniinet1tsiqyevgqnnhvit1velqngrep1mseagl1fhaik1p  
qisdlan11ih1seydipv  
nggiqpas1s1ffedpegng1kfyvdkdeaqwrqnd1vkidir1nvr1vshatk11w1gipddai1galhiktih1s  
evkdy11dyf1g1eqsaymd  
dysif1asngyyqhlamndwvsatkrvenfdtyglai1vdfhypetth1n1qgpdgi1yrrfnhieved  
>tr|D2N6H4|D2N6H4\_STAA5  
mmk11kngkv1qngelqqadilidgkvikqia1a1epsngvdi1dakghfvspgfvdvvh1repggeyketietgkaa  
arggfttvc1pmpntrpvpd  
svehfealqk11iddnaqvr1lpyas1ttrq1gkelvdfpa1vkegafaftddgvgvqtasmm1yegmieakvnkaivahc  
edns1iyggamhegkrske  
1gipgipnicesvqiardv1laeaagchyhvchvstkesvr1irdakragihvtaevtph111teddipgnnaiykmnp  
1rstedreal1eg1ldgt  
idciatdhaphardekaqpmekapfgivgsetaf1lythfvkngdwt1qq1vdcltikpcetfn1eygtlkengyad1t  
iid1dseqeikgedf1ska  
dntpfi1gykvynp11tmvegevkfegdk  
>tr|D2N6H5|D2N6H5\_STAA5  
mqskry1v1edgsfyegyr1gsdn1tvgeivfntamtgyqetis1dpsytgqi1tftyp1ignyginrddfes1vpt1ngi  
v1keasahpsnfrqkt1h  
dv1elh1qipgiagvdr1s1trki1rqhgv1kagftdrkedid1qlvkh1qqvelpkneveivstktpyvstgkdlsv1vdf  
gkkqni1vre1nvr1gcnvtv  
vpytttaee1lamapdgvm1sngpgnpedvecaipmiqgilgkipffgic1ghq1fal1sqgassfkmkfg1rganhpvkn  
1etgkvdi1tsqnhgyaidi  
ds1kstd1evth1a1ndgtveg1khkt1pafsvqyhpeanpgpsdsny1fddfvamtnfkekerhina  
>tr|D2N6H6|D2N6H6\_STAA5  
mpkrndikti1vigsgpi1igqaaefdyagtqac1a1keegyrvilvnsnpatimtdkei1adkvyiepl1thdfiari1rk  
eqpdal1pt1ggqtg1nma  
iq1hesgv1qdnvq11gte1tsiqqaedremfr1mnd1nvpvpesdivntveqafk1keqvgypliv1rpaftmggtgg  
gichndeel1heivsn1ghy  
spatqc11leks1agfke1eyevmrkndnaivvcnmenidpvgihtgdsivvapsq1sdveyqm1rdvs1kviralgie  
ggcnvq1a1dphsfdy1i  
evnprvsr1ssalaskatgypiaklaakiavgl1tdem1n1pitgtsyaafept1dyviskiprfpfdk1fekgerelgtqmk  
atgevmaigrtyees11ka  
irs1eygvhh1gl1pngesfd1dyikerishqdder1ffigeairrgt1leeihnmtqidyff1hkfqn1idiehq1kehq  
gdley1kyakdygfsdkti  
ahr1fnmteeevyq1rmendi1kpyk1mvd1tcaefes1stpyygytetenesivtdkeki1vl1gsgpir1ggvefdyatv  
havwai1qkagy1eai1vnnn  
petvstdfs1sdklyfep1teedv1mni1n1lekpgkvvvqfggq1tain1adk1lakhg1vkil1gts1en1nraedrkefeal1

Tsompanidou\_et\_al\_Supplemental\_FASTA\_File

rkinvpqpgqktatspeea  
lanaaeigyvvvrpsyvlggrameivdndkelenymtqavkaspehpvlvdryltgkeievdaicdgetviipgimehi  
eragvhsdsiavyppqt1  
tedeatledytiklakglniigliniqfviahdgvvlevnprssrtvpflskitdipmaqlamraigekltmgyqe  
gvqpyaegvfvkapvvsfn  
klknvdi1lgpemkstgevimgkdt1leka1fkg1tgsgvevkdhgtv1mtvsdkdkeevvklagr1nevgykilatsgta  
nklaeydipaevvgkigge  
nd11triqngdvqivintmtkgeverdgfqi1rrttvengipcl1ts1dtana1tnviesmtftmrqm  
>tr|D2N6H7|D2N6H7\_STAA5  
mmkd1pia1dfeskekvnqf1d1dfes1fvkvgmelfyqegpql1neikerghdvf1d1kl1hdipntvgkameglak1n  
vd1vnhhaagvkmsea1  
kg1rkhnghtki1avtql1sttedm1rheqniqtsieeav1nyaklangag1dgvvcsplesrml1teklgasf1kvtpgi  
rpkgasqddqhr1ttpeea  
rqlgsthivvgrpitqsdnpvesyhkikesw1v  
>tr|D2N6I0|D2N6I0\_STAA5  
mdipki1ttf1mfnnqaeavklyts1fedsei1tmakyaengpgdpqvtqhsif1t1ngqvfm1aidansgtel1pmpais1  
fvtvkd1tiemer1fng1kd  
egailmpktnmpyrefawvqdkfgvsfqla1pe  
>tr|D2N6I1|D2N6I1\_STAA5  
mrs1krsivf1nnvssfn1qi1fvilkmsetkm1mct  
>tr|D2N6I2|D2N6I2\_STAA5  
maydgl1ftkkmes1qf1ttgrvhkinqpdnd11mvvrqnrqnhq111sihpnfsrfq11ttkkydnpfnppmfarvfrk  
h1eggiiesikqigndrri  
eid1kskdeigdtiyrvti1eimgkhsn1ilvdenrki1iegfkh1tpntnhyrtvmpgfn1yeapptqhkmnpdyitgaev  
1kyidfnagn1akq11nqf  
egfsp11tneivnrrqfmtsst1peafdevmaetk1p1tpi1fhknhetgkedfyfik1nqfnddtvtyds1nd11drfyd  
argerervkqrand1vrfv  
qqq1hkyqnk1lak1ieeyeqsknk1dteq1ygelitaniyrikqgdkevtal1nyytneevvip1nptkspsanaqyykqy  
nrmktrere1qhqi1tkd  
nidyf1stieq1l1h1svh1dei1ree1aeqgfmkqrknqtkkkkaqi1q1qhyvstdgddiyvgknnkqndy1tnkkakkt  
htw1htkdipgshv1fnd  
apsdt1tikeaam1agyfskagnsgq1pvdyt1iknvhkpsgakpgfvtydnqkt1yatpdyehiqkmkqs  
>tr|D2N6I5|D2N6I5\_STAA5  
mkk11lavtggiaayka1d1tsk1tqsgyevrvm1tnhaqkfvtplafqaisrnavytdt1fieenpsei1qhia1lgdwada  
i1vapatantiak1svgia  
dd1vtst1latetqkfi1apamnvhmyenkrtqqn1nt1kedgyhfiepgsgflacgyvakgrmeep1qivsvidahfqs  
nr1anssfqdkralvtagp  
t1ev1dpvrfvsnrsgkmgyaiaea1rnrgaivt1vagptt1ledpkdievihvqsaeemfeqvtsrfdeqdivvkaaav  
sdytpvdv1ehk1mkkqdg1d  
1svsfkrtkdi1ky1geh1ktsqy1igfaetedienyaqq1rkknadvi1snnvgdmsigfssddne1tmhfknnekvn  
ikk1gkvv1aaq11delet  
rwq  
>tr|D2N6I6|D2N6I6\_STAA5  
miakvi1dvasksvdykfdy1i1peq1lesvi1qpgvrvi1vpfgprt1iqgyvmevtaepdaq1dvsk1k1k1ievkdi1qpe1ts  
el1a1sewmgst1hvikris  
m1levm1psa1kakyk1kafk1mdd1evpsa11qkfdkhgyyyk1daqknndi1q11mk11kediveekt1ltqn1tkk1kra  
vrvi1egyhpdev1lak1lekv  
ikqyd1yay1seeqhk1t1f1tdiedmgf1skss1dgl1ikkgyvekydavverdpfkdrvfeqeskq11tedqfkaye1ika  
k1vsqeqetf11hgvtgsg  
ktevyl1qtiedv1sqgkqam1lvpeia1ltpqmvl1rfkrrf1gddvav1hsg1sngerydewqki1nrgarvsvgarssvfa  
pfkn1gl1i1ideehestyk  
qedypryhareiaqwrseyhhcpv1lgsatp1lesyaraekgyv1h1s1pnrvnqqa1peidivdmree1segnrsmf1sk  
d1rea1q1r1drqevv1f  
1nrrgyasf1m1crdcgyvpqcpncdi1s1tyhkttd11kchycgyqetppnqcpncesehi1rqvgtgtqkvee11qqefed  
ari1irmdvdttskkgahk  
11tefekng1d11gtqmi1akg1dypni1t1vgv1nadtm1n1lpdfrasertyq11tqvagrgrhekagqvi1iqtypndh  
ys1ildvqkndy1t1fyrgem  
eyrkl1gkyppyy11inf1t1shkemkkvmeasqhv1hki11qh1l1teka1v1lgpspaalarinnefrfqilvkyksep11lqa  
iqf1ddyhekfi1kek1a1  
kidi1dpqmmm  
>tr|D2N6I7|D2N6I7\_STAA5  
mkk1t1gc1111im11lvagcsf1ggnhk11ssk1seeskqetvkkeseekdpkvahykk1rkk  
>tr|D2N6I8|D2N6I8\_STAA5  
mns1tgm1qgwk1dyks11mnqvk1ladynftkeskgasmedvdkffknkkgvkrkev1ttdy1g1kqvnywyvdks1gk1ggs1dtp  
vfyae1l1tkykdgk1liyas  
vepgsys1snknavn1dkvee1dd1smf1sn1kdpkvpvysvaqmei1ssvpvtsvsfvtkggnhk1dtnpekeqvdmpq1lay  
1tvsq1lyhdkehpdphi1  
g1valpy1nasr1dfgnahysv1nn1skemkek1asrs1d1nk

Tsompanidou\_et\_al\_Supplemental\_FASTA\_File

>tr|D2N6I9|D2N6I9\_STAA5  
mqvkvviyilalflgsfghkfyagknmqgilhlicwtgiphilaisavinvfkpadeqgnvtl  
>tr|D2N6J1|D2N6J1\_STAA5  
mtkiiimgtpdfsttvlemliehdvavvtqpdrpvgrkrvmtpppvkkmkydlpvyqpeklsgeeeleqllqldvd  
livtaafgqlpesllaalp  
klgainvhasllpkryggapihqaiidgeqetgitimymvkkldagniiisqqaikieendvgtmhdkslsvlgadllket  
lpsiegtnesvpqddtqa  
tfasniirrederiswnkpgqrqvfngirglspwpvayttmddinlkiydaelvetnkinepgtiidttkkaiivatndnea  
vaikdmqlagkkrmlaany  
lsgaqtlvgkkl  
>tr|D2N6J2|D2N6J2\_STAA5  
mienvrslafdtiqdilineaysnlrinevlseneinamdkalfteivgytvkrkytldfyllkpfvktkikawvrqllwm  
siyqyvyldkvpnhaine  
aveiakerggyhngvngvngirlrtmmsrdlpdfneiadpkkrmaieysmpkwiidhwathyglegtetilqsfllettsttv  
ranltrasladdiiekldede  
gydvekdhdldpyclhiggqpiihsrfsfdgfvsiqdkssmfvahimnvdrhdhvlacsapggkachiaevlmpgqvda  
sdihdhkidlinfnikklr  
ltnikafkhdatkpydktydkilvdapcsglgvmrhkpeikytqskqhieslvdllqleilenvknnvktggevystcti  
eqlenenviytflknnknf  
efepfghpitgelvktlqimpqdfnsdgffitikrkdn  
>tr|D2N6J5|D2N6J5\_STAA5  
migkiinerykivdklgggmstvylaedtilnikvaikaiifipprekeetlkrferevhnssqlshqnivsmidvdeed  
dcyylvmeyieqptlseyi  
eshgplsvdtainftnqildgikhahdmrivhrdikpqnildsnktlkiidfgiakalsetsltqtnhvlgtvqyfspe  
qakgeatdecdtiysigiv  
lyemlvgeppfnggetavngiaikhiqdsvpnvttvdvrkdipqslsnvilratekdkanrykti qemkddlssvlhenrane  
dvyeldkmtiavplkked  
lakhisehksnqpkrettqvpi vngpahhqqfqkpegvteyptkkkstrkivllslifslmlialvsfvamamfgnkye  
etpdvigktvkeaeqifnk  
nnlklgkirsysdkypeneiiktptntgervergdsdvvi skgpekvmknvignlpkeaalqklkslgldiaiekvy  
nngapkgyanqsvtante  
iaihdsniklyeslgikvyvedfehksfskakkai eekgfkveskeesyddidegdvisqspkgksvdegstisfvvsk  
gkksdssdvktttesvdvp  
ytgkndksqkvkvyikdkdndgstekgsfditsdqridiplriekgktasyivkvdgktvaekevsyddi  
>tr|D2N6J6|D2N6J6\_STAA5  
mktgrivksisgyqvvdnngerfntkprglfrkkkfspvvgdivefdvqninegyihqvykrknelkrppvsnidtlviv  
msavepnfstqlldrflvi  
ahsyqlnarvlttkkdktpiekqlleineilkiyenigyete fignddrkkiveawpaglivlsgqsgvgkstflnhyrp  
elnletndiskslnrgkht  
trhvelferqngyiadtpgfsaldfdhidkdeikdyflelnrygetckfrncnhikepncnvkhqleigniaqfrydhyll  
qlfneisnrkvry  
>tr|D2N6K0|D2N6K0\_STAA5  
mtleisndygidisneviasvvggkavecygivgmasrqvrdgiaeilghenyakgikvtengvvidmyiivsygv  
kisevannvqstvkyllek  
slnsvnsiniyvqgvrvnntgkka  
>tr|D2N6K1|D2N6K1\_STAA5  
miskingklfadmiiqgaqnl snadlvdslnvypvpdgdgtmnlmttsgreevenl sknigelgktfsgllmgar  
gnsqvilsqlfrgfccknie  
seseinlkl laesfqagvetaykavmkpvegtiltvakdaaqaavekanntedcielmeiyivkaneslentpnllavlk  
evgvdsqgkglcvyegf  
lkal kgeveakvakidkdefvhdehdfhg vintedi iygyctemmvrfgknkka fdeqefrqdmsqfgdsllvindeei  
vkvhvhteypgkvfnygqg  
ygelikl kvenmreqhrevi rkeqhtakpkmetvetaitiismgegiseifksmgathiisggqtmnpstedivkvieqs  
kckraailpnnknilmase  
qaasivdaevviptksipqgisalfqydvdattenkaqmadsvnnvksqsltyavrtdkidgveikkdafmgliedki  
vssqsdqllttvtellneml  
aedseil tvi igqdaeqavtdnminwиеeqypdvevevheggqpiyqyffsve  
>tr|D2N6K2|D2N6K2\_STAA5  
makvnliespysllqlkgigpkkievlqqlnihtvedlvlylptriedntvidlnqaedqsnvtiegqvytapvvaaffgr  
nkskltvhlmvnniavkci  
ffnqpylkkkielelntitvkgkwnrvkqeitgnrvffssqgtqtqenadvqlepvyrikegikqkqirdqirqa lndvti  
hewltdglrekykletldf  
tlnlthhpkскеglrarrtyafteflfelrmqwl nrllekssdeaieidyldqvksfidrlpfe lteaqs svneifr  
dlkapi rmhrllqgdvgsq  
ktvvaai cmyalktagyqsalmvpteilaeqhaeslia lfgdsmnval l tgsvkgkkrkilleqlengt idcligthali  
qddvifhnvglvitdeqhr  
fgvnqrqllrekgamntvlfmtatpirtlaisvfgemdsvsikqlpkgrkpiittwakheqydkvlmqmtselkkgrqa  
yvicpliesseh ledvqnv

Tsompanidou\_et\_al\_Supplemental\_FASTA\_File

valyeslqqnygvsrvgl1hgklsadekdevmqkfsnheidvlvsttvvegvnvpnatfmmiydadrfglstlhq1rgr  
vgrsdqqsyvliaspkte  
tgiertimtqttdgfe1serd1emrgpgdffgvkqsglpdf1van1vedyrm1evardeaaeliqsgvffentyqhlrh  
fveen11hrsf  
>tr|D2N6K5|D2N6K5\_STAA5  
msktaiifpggaqkvmaqd1ynnndqateiltsaant1dfdiletmftdeegklgetentqpa11thssa11aalkn1  
npdftmg1s1geysslvaa  
dvl1sfedavki1vrkrqqlmaafpsgvgsmaav1gl1dfdkvdeicks1syddk1iepanincpgqivvsghkalide1ve  
kgks1gakrvmt1avsgpf  
hss1mkvieedfssyinqfewrdakfpvqvnaqgetdkevixnmvqklyspvqfinstew1idqgvdhfieigpgkv  
1sglikinrdvkltsiq  
1edvkgwnend  
>tr|D2N6K6|D2N6K6\_STAA5  
mtksalvtgasrgigrsialqlaeeagnvavnyagskeaeavveikakgvdsfaiqanvadadevkamikevvsqfgs  
1dvl1vnnagitrdn11mrm  
keqewddv1dtn1kgvfnciqkatpqlrqrsgai1n1ssvvgavgn1gqanyvatkagvig1tksaarelasrgitvna  
vapgfivsdmt1d1sdelk  
eqm1tqi1plarf1gqtd1iantvaf1lasdkakyitgqti1hvnggmym  
>tr|D2N6K7|D2N6K7\_STAA5  
msfssgvplisyqfidyyvf1s1fssgvplisyqfid  
>tr|D2N6L0|D2N6L0\_STAA5  
mvy1ksidaigfksfadqtnvqfdkgvtaivgpnsgsksnitdaikw1geqsaks1rgskmediifsgaehrkaqnyae  
vq1r1dnhskk1svdenev  
ivtrr1yrsgeseyy1nndrar1kdiad1f1dsg1gkeaysi1sqgrvde1lnakpidrrqi1eesagv1kykkraes1  
nk1dqtedn1trvedilyd  
1egrvep1keeaaiakeykt1shqmkhsdi1vvtvhd1dqytn1dnr1q1dqr1nd1gqqan1keadkqrl1sqqi1qykgqrh  
q1dndves1nyq1vkatea  
fekytgq1nv1eerknqsetnaryeeeqen1i1ellenisneiseaqdtyks1kskqkelnavireleeqlyvsdeahde  
k1eeikneyt1mseqsdv  
nndir1flkhtieeneakksr1dsr1vevfeq1kdi1qgqik1ttkkeyqqt1nke1savdkeikniekd1tdtkkaqneyeek  
1yqayrytekmktrids1a  
1qeeeytyffngvkh11kaknke1kgihgavaei1dvpsk1tqaieta1gas1qhvidsekdgrqai1q1kern1grat  
f1p1nvi1qsr1v1atd1ksi  
akeangfisiaseavkvapeyqni1gn11gnti1ivdh1khanelaraikyrriv1t1legdivnpggsmtgggarksksi1  
sqkdel1tmrhq1ledyl1rq  
tesfeqqfkelkiksdq1se1yfeksqkhnt1keqvhhfemel1dr1ttqetqikndheefefekndgytsdksrqt1sek  
ethlesikas1kr1edeie  
rytk1skegkesvtktqqt1hqkqsd1avvkeriktqqtidr1n1nqsqqtkhq1ndvkeia1ffnsdevmgeqafqnik  
dqingqqetr1rsdelk  
1kqgri1neqid1aqeat1qvchqdi1aienhyqdikaeskdvl1ihhaidh1ndeyq1t1verakseytsdesida1rk  
kvk1mkmside1gpvn1na  
ieqfeel1neryt1f1segrtd1rkaket1eqi1sem1dqe1vterfketfhai1qghftavfkq1fgggdae1q1teady1tag  
1di1vvqppgk1qh1s11s  
ggeral1taia11fai1kvrsapfvi1ldeveaa1deanvi1ryakyl1nel1sdetqfivi1thrkg1tme1fadr1lygv1tmqesgv  
tk1svsn1nt1iddv1keeq  
>tr|D2N6L1|D2N6L1\_STAA5  
msffkr1kdkfatnkeneevks1teeqqdk1edthsegstqdvnd1aenaevkkkprk1sead1dddglisiedfeeie  
aqkmgakfkag1eksrqnf  
qeqln1niaryrkvdedf1ealeem1itadv1g1fntvmt1tee1rmeaqrn1iqdted1revivekiveiyhqedd1nseam  
n1ledgr1nvi1mvgvngvg  
kttt1gk1ayrykmegkkvm1aagdt1fraga1dq1kvwger1vgvdvis1qsegsd1paavmyda1naaknkgvd1ilic1dtag  
r1qnkt1n1mqe1ekvkrvi  
nravpdaphea11c1dattgqna1sqarnfkevtntvgiv1tk1dgtakggiv1airnelhipvkyvg1geq1dd1qpfn  
pesyvng1fadmieqnee1  
ttvendqivteekddnhgsk  
>tr|D2N6L3|D2N6L3\_STAA5  
mafeg1ser1qatmqk1mrgkgk1teadik1immrevr1a1leadvn1fkvvkefikt1vsera1gsdvmqs1tpgqqvikivq  
del1tk1mggentsinmsnk  
pptvmmvg1lgagk1tttagk1a11mrkkynkkpmlvaadiyrpaainq1qtvgkqidipvysegdqvkppqivtna1kh  
akeeh1dfvi1dtagr1hi  
dea1mne1kevkdiakpneim1lvdsmtgq1davnaes1fddq1dvtgvt1tk1dgdtrggaals1rsvtqk1pik1fvgmse  
k1dgle1f1hpermasr1lg  
mgdv1s1iekaqqdv1dqekakd1lekkmressft1ddf1eq1dqvkn1gpl1ddimk1ipgmnmkmg1dk1nmsek1qidhik  
a1iqsmt1paernnpd1lnv  
srkkriakgsgsr1gevn1rmkg1fndmkkmmkqftgggk1gkkgkrn1qm1qnm1kgm1lpf  
>tr|D2N6L5|D2N6L5\_STAA5  
mrvevgqivnthgi1kgeikvksnsdftdvr1fqpgqv1tvvhnn1d1eytvkshr1vhkg1hml1tfeginn1indie1hkgss  
iyqerdhediv1denefyy

Tsompanidou\_et\_al\_Supplemental\_FASTA\_File

sdiigctvfdqetpigrvini fetgandvwi ksgkeylipyiadvvkevdvenkkiiitpmegll d  
>tr|D2N6L8|D2N6L8\_STAA5  
mlkkwl nsvnkqffvitfiviltlilfsthiydyivngtvfsgagdgfrqmpfqmylyehlssfsslydasfgl ggdy  
mkglsyyysl splmwl nfl  
fikigetvgi fnpttihfwptnql imamirai itfvvtfylfki lhfkrstnmiatilygmstvv iyfnftwsfygnlly  
llplsilgleryfqarkig  
ifivaial tlfsnfyfsyyqai igcylyrliftykydivsrtqkfcvisatvlsvlssvfglftgisaf lndrkqn  
pnvdipfltp ldyhyfffs  
dgfyitisi lltival lsfklyrfyfyr lfaivtwil figslsqyfdsafngfsfperrwvylal sssalcg lfiqhlst  
lnmkyyli rtipvcia ll  
yvllspt hplalivgi llmvlavil kfs l wrykkl tvailvlivmiqqivil dnnknmaikpyqqsistlkqhdyhsny  
vnqlikkinqnatgpf nri  
dym sdya l nspfiyhngislyssi fngdilkydktlqinmpidknstyrllgnrqnl lslwnvdri rvnhddnlpyg  
fki nsehkdnkvrwi hskn  
tihypsahitnkvf snkelksp l dkeqam l qgivsntkdv nthfkanknl lsdstik lnsaawqsptkhl lqvknngg  
l tvqlpksvsnqykdlyle  
mdlell spdkahdvkneytqernkl tykyrrfvtpvtirikssdrirlslpkgkyrvnlkgygedyttlkdasnslea  
vkvsktkqgyti tknkss  
gyivlptaynqgm katsgdqslkveqvngimtgikapknitkiqlsytppyyllititifi giciisiftrwarqk  
>tr|D2N6M0|D2N6M0\_STAA5  
mtltikevtqlinavntieelenhecf lderkgvqnai arrrka lekeqalkekyvemtyfene ilkehpnaiicgidev  
grgplagpvvacati lnsn  
hnylg l ddskkvpvtrkl rlelneal knevtafaygiataeeidefn iykatqiamqraidglsvqpthllidamtl dnalp  
qvslikgdarsvsiaaasi  
makvfrddy mtqlsknypeygfeknagyg tkqhllaiddigimkehrksfepiksl l  
>tr|D2N6M2|D2N6M2\_STAA5  
msvfidkntkvmvqgi tgstalfhtkqml dygtki vagvtpgkqgvvesvpvfntveeaknetgatvsviyvpapfaad  
sileaadad ldmviciteh  
ipvl dmvkvkryl qgrktr lvgpncpgvitadeckigimpygi hkkghvgvsrsrgl tyeavhql teegigqttavgi g  
gdpvngtnfidv lkafned  
detkavvmigeiggtaeeeaewi kanmtkpvvgf iggtappgkrmgagai isggkgtaeekikt l nscgvktaatps  
eigst l ieaakeagiyes l  
l tvnk  
>tr|D2N6M3|D2N6M3\_STAA5  
mnkqqs kvrysi rkvsigtflngdydgklmkfqs l dqnwnnggw rkaevahkvvhnyendmi firplkka  
>tr|D2N6M4|D2N6M4\_STAA5  
mkfst l seeel tnytkkhfkhytqsie l ynrnkinheahivgvkndkneviaac ll teari fkykyfyshrgpl l dyf  
daklvcyffkel skfiykn  
rgvf ilvdpylien l rdangri iknynnsvivkmlgkigy l hqgyttgysnksqirwivl d  
>tr|D2N6M5|D2N6M5\_STAA5  
mdfcigl kdkdenql l kemeyqtrrniktieigvkved l sieetr fyklfqmaeekhgfhf mned yfkrmqei ykdka  
klkiacid l neyqdklkiq  
llkienemtvnr alnenpnskknsk l nqlnmql ssnr riskteeliledgpvl d laaal fctddevyyl ssgsnpk  
yn  
>tr|D2N6M6|D2N6M6\_STAA5  
mgayhlqwhmi kyakshni nrynfygitgvfsneaddfgvqqfkkgfnahveeligdfikvrvpilykfakli ykv  
>tr|D2N6M7|D2N6M7\_STAA5  
mir l flkllywahfstkqihqfl maypnvikeggrkkdsylcewv nreenvhllrkyafik l dhndiikelqklkvsyi  
tymdteypvllkeiyqfp l  
llfykgnik l innmhh lavvgardstsytqqslefl l sndksky l tivsglaqqadamahqialkynlptiavlafghqt  
hypkst l alrnkieekglv  
iseypphtpiakyrfernri isgl skgv l iteakeqsgshiti dfa l eqnrnvylpgsmfnpmtkgnll riqegakvv  
lnandifedyyi  
>tr|D2N6M8|D2N6M8\_STAA5  
mtladnlvivespakaktieky l gkkykvi asmghvrd l prsqmgv dtednyepkyitirgkpvvkelk khakkaknvf  
lasdpdregeai awhlski  
leledsk enrvvfneitkdavkes fknpreiemnlvdaqqarri l drlv gynispvlwkkvkkgl sagrvqsval r l vid  
renei rnfkpeeywtiege  
frykkskfnakfl hyknkpfkl ktkkdveki taa l dgdqfei tnvtkke ktrnpanpfttst l qqaark l nfkarktmm  
vaqql yegid l kkggtig l  
itym rtdst r isdtakaeakqyitnkygesytskrkasgkqgdqdaheairpsstmrt pddmksfltkdqrlykliwer  
fvasqmapail dtvsl d i t  
qgdikfranggtik fkgfmtlyvetkdds dsekenl pkl eqgdkv tatqiepaqhytqpppry tearlvktleelkigr  
pstyaptidti qkrnyvkl  
eskrfvptelgeivheqvkeyfpei idveftvnm etll dki aegdi twrkvidgffssfkq dveraeemeki eikdepa  
gedcevcgspmvikmgryg  
kfmacs nfpdc rntkai vksigvkcpk cndgdvverkskknrvfygcsky pcedfi swdkpi grdcpkcnqyl venkkgk  
ttqvicsncykeaaqk

Tsompanidou\_et\_al\_Supplemental\_FASTA\_File

>tr|D2N6N0|D2N6N0\_STAA5  
mnhieafnltkvernfshtlksyqddliqfnqfleqehlqlntfeyrdarnylslysnhlkrtsvsrkistlrtyf  
eywmtldeninpqvqlvh  
pkkeylppqffyeemealfktveedaskslrdrvilellyatgirvselvnikkqdidfyangvtlvgkskerfvpfg  
aycrqsienylehfkpiqs  
cnhdfliivnmkgeaitergvryvlnnivkrtagvsei hphklrhtfathllnqgadlrvqsllghvnlsttgkythvsn  
qqlrkvylnahprakkene  
t  
>tr|D2N6P1|D2N6P1\_STAA5  
mkqskvfiptmrdvpseaeaqshrlllkaglikqstsgiyssylplatrvlnnitavrqemeridsveilmpalqqaew  
eesgrwgaygpelmlrldqr  
hgrqfalgptheelvtisvrnelksyqlpmtlfqi qskfrdekrprfgllrgrefimkdaysfhadeasldqtyqdmq  
aysrifervginarpvad  
sgaiggshthefmal saigedti vskesdyaaniekaevvyepnhkhtvtvqpleki etpnvktaqeladflgrpvdeiv  
ktmifkvdgeyimvlvrgh  
heindiklksyfgtdnie latqdeivnlvganpgslgpvidkeikiyadnfvqdlnnlvvganedgyhlinvvngrdfnv  
deygdfri legeklsdgs  
gvahfaegievqvfk lgtkysesmatfldnqgkaqplimgcygigisrtlsaiveqnhddngivwpksvtpfdlhlis  
inpkddqreladalyaef  
ntkfdvlyddrqreragvkfndadliglplrivvgkrasegivevkerltdgseevhiddlmtvitnkydnlk  
>tr|D2N6P2|D2N6P2\_STAA5  
mamteqqkfkvl adqikisnqldaei lnsge ltridvsnkrtwefhitlpqflahedyllfinaieqefkdianvtcrf  
tvtngtngdehaikyfgch  
idqtalspkvkgqlkqkklimgskvlkvmsndiernhfdkacngslikafnrcgfdidkiifetndndqeqnlasleah  
iqeedeqsarlateklekm  
kaekakqgdnnesavdkcqigkpiqienikpiesieeykvaiegvidinlkelksgrhiveikvtdytdslvlkmft  
rknkddlehfkalsvgkwv  
raqgrieedtfirdlvmmmsdieeikkatkdkkaekrvefhlhtamsqmdgipnigayvkaadwghpaiavtdhnvvq  
afpdahaaekhgikmiyg  
megmlvddgvpiaykpqdvvlkdatyvvdvettglsnqydkie laavkvhngeiidkferfsnpherlsetiinlthi  
tdmldapeieevl tefk  
ewvgdai fvahnasfdmgfidtgyerlgfgpstngvidtlel srtinteygkhglnflakkygvel tqhhrai ydteata  
yifimvqqmkelgvlnhn  
einkklsnedaykrarpshvtlivnqqglnklnfkivsaslvkyfyrtpriprslldeyregllvgtacdege lftavmq  
kdqsqvekiakyydfieiq  
ppalyqdlidreli rdtetlhei yqrlihagdtagipviatgnahylfeh dgiarkiliasqpgnlnrstlpeahfrtt  
demlnefhflgeekaeiv  
vkntheladriervvpikde lytprmeganeei relsyanklygedlpqividrlekelksiingfaviyllisqrlv  
kkslddgylvgsrgsvgss  
fvatmteitevnp lpphyicpncktseffndgsvsgfdlpdktcetcgaplikegqdipfetlfgfkgdkvpdidlnfs  
geyqpnahnytkvlfgedk  
vfragtig tvaektafygyvkgylndqgi hkrgaeidr lvgctgvkr ttgqhpggiivvpdymdi ydftpiqypaddqns  
awmtthfdhfsihdnvkl  
dilghddptmirmlqdlsgidpkipvddkqvmqifstpeslgvtedeilcktg tfgvpefgtgfvrqmledtkpttfse  
lvqisgls hgtvdwlnaq  
eliktgicdlssvig rddimvylmyag lpsmaf kimesvrkgkglteemietmkenev pdwyldsc lkikymfpkaha  
aayvlmavriayfkvhhl  
yyyasyftirasfdl itmikdkt sirntvkdmysrymdl gkkekdvl tvleimnemahrgyrmqpisleksqafefie  
gdtlippi fsvpglgenva  
krivearddgpflskedlnkkaglsqkieyldelgslpnlpdkaqlsifdm  
>tr|D2N6P4|D2N6P4\_STAA5  
mssnel llateylekekkiprav lidaieaalitaykknysarnvrvelnmdqgtfkviarkdvveevfddrdevd l st  
alvknpayeigdiyeedvt  
pkdfgrvgaqaakqavmqr l rdaereil feefidkeediltgi idrvdhryvyvnl gri eavl seaerspnekyipneri  
kvyvnkveqttkqpqi yvs  
rshpgllkr l feqevpei ydgtvivksvareagdrski svfsenndi davgacv gakarveavveelggekidivqwe  
dpkvfvkna l spsqvlevi  
vdetnqstv vvpdyqlsl aigkrqnar laakltgwkidiksetdareagiypvveakvteedval edvdttesteev  
tdsvetnvekes  
>tr|D2N6P8|D2N6P8\_STAA5  
mqitie lkdkevtrmssmraervgeqmkel mdi innkvkdrvgf ititdvvl tndlsqakvfl tvl gndkeventfka  
ldkakgfikselgsrmlr  
impe lmyeydqsieygnkiermiqd l hkqdr  
>tr|D2N6P9|D2N6P9\_STAA5  
myngil pvykergl tshdvvfk l rki l ktkki ghtgt l dpevag l pvcignatr vsvdyvmdmgkaye atvsigrsttte  
dqmgdt lemkgvhsadfn  
ddidr l l ieqfipm yssvkvngklyeyarnnetverpkrvnikdigri seldfkenechfkirvicgkgyi  
rtlatdigvkl gfpahmsk

Tsompanidou\_et\_al\_Supplemental\_FASTA\_File

ltriesggfvlkdsltleqikelheqdslnkflpleyglkglpsikikdshikkrlngqkfnknefdnkikdqivfid  
ddsekvlaiymvhptkese  
ikpkkvfn  
>tr|D2N6Q3|D2N6Q3\_STAA5  
mslikknkndiriiplggvgaiaknmyivevddemfmldaglmfpedemlgidivipdisyvenkdklkgiflthgheh  
aigavsvyleqldapvygs  
kltia likenmkarnidkkvryytvnnds imrfknvnisffntthsipds lgvcihtsygaivygtgefkdqslhghyap  
dikrmaeigeegvflisd  
steaekpgyntpenviehmydafakvrgrlivscyasnfiqiqvlniasklnrkvsflgrslessfniarkmgyfdip  
kdllipitevdnypknevi  
iatgmqgepvealsqmaqhkhhimnieegdsvflaitasanmeviiantlnelvragehiipnkkhiasshgcmelk  
mmnimkpeyfi pvqgef  
mqiahaklaaeagvapekiflvekgdvinyngkdmilnekvnsngnilidgigigdvgnivlrdrhllaedgifiavvtld  
pknrriaagpeiqsrgrfvy  
vresedllreaeekvreiveaglqekriewseikqnmrdqiskllfestkrpmpii pvisei  
>tr|D2N6Q4|D2N6Q4\_STAA5  
maqakkkstakkkttskkrtnsrkkkndnpiryviailvvvlmvlgvfqlgiigr lidsffnylfgysryltyilvllat  
gfityskripktrrtagsi  
vlqiall fvsqvlvfhfnsngikaerepvl syvyqsyqshfnpfgggvlgfyll els vplislfgvciitilllcssvill  
tnhghrdvakvalenikaw  
fgsfnekmsernqekqlkreekar lkeeqkarqneqqikdvsdftevpqerdipiyghtenesksqsqsprkkrvfae  
nssnnivnhhqadqqeqli  
eqthnsvesentieeagevtvsvvppltl nqpakqatskaevqrkgqvlentlkdfgvnakvtqikigpavtqyei  
qpaggvkvskivnlhndia  
lalaakdvrieapipgrsavgievpneki slvslkevldekfpsnklevglgrdisgdpitvplnephllvagstgsg  
ksvcingiiitsillnakph  
evklmlidpkmvelnyngiphllipvvtphkaaalekivaemerrydlfqsstrnikgynelirkqnqeldekqpe  
lpyivvivedladlmmvag  
kevenaiqritqmaraagihlivatqrpsvdvitgiiknipsria favssqtdsrtiigtggaekllgkgdmlvyngnd  
ssqtriqqaf lsdqevqdv  
vnyvveqqqanyvkemepdapvdksemkseda l ydeayl fvveqqkastsllqrqfrigynrasrlmddlernqvigpqq  
gskprqvlidlnndev  
>tr|D2N6Q5|D2N6Q5\_STAA5  
msemnavynvkqyilnlkqnkleygdlpsnl siarelnvktddvyeaiqaliteqvikdnfeegtsvkslppffypln  
elisiqqmiknagfecgte  
ylnfdeqpatml danllsveegysvtierl rtadagepvvycldkiakkelcteyqmsngsil saikeqsnhnicyadt  
eieavnyepri sevl nasp  
heglillki thyneldepilyslnymknslvqfkitrki  
>tr|D2N6Q6|D2N6Q6\_STAA5  
msrqsqpnihikvspttkfktttivfkfmapleydtitgrsllskllvratkkwptdksfnhnladlygayvnstiskfk  
dqhvittfsl eivneryln  
geslfnqgl dl lqeiwnplienkafndnfvnqektllakkieamvdnkaqysflklldhmfeneaykylstggleqiph  
itaetlyhtyqsmindq  
svyvvgnvepesveqkirekfa lkpfdkhqfghsthlhdeevdyiveyddvdqaklnmgyrftqygqsgyaa fvvfnm  
mfggdpsvlfnevrekqs  
laysihsqidgkngylfv lsgvssdkyetakntiisefekikagdfteeklelakkvii shryesedrpksvieimhnqi  
lleqqsketfikdikvsv  
redivsvaekafldtiyvltkggdk  
>tr|D2N6Q7|D2N6Q7\_STAA5  
mkeryyelidervfeqelenglr lfiipkpgfqtftvtyttqfsgl dnqfkpigdqfvtvpdgvahflehklfekeeed  
lftafaednaqanaftsf  
rtsylfsatdniennikrlltmvetpyftketvdkekgiiaeeikmyqeqpryklmfntlramyqqhp irvdiagsvesi  
yditkddlylcyetfyhps  
nmvlfvvgdvdpeticrivkqhedar nkvnqpkidrglvdepedvkeafvtesmkisprlmlgfkknplqeaqqyvqr  
dl emslffeli fgeetdfy  
qnllnegliddtfgyqfvleptysfsivtsateepdklkkllldelcdkknfqdaefellkkqfigefisslnspeyi  
anqytklyfegvsvfdmld  
ivenitlds inetsslylnldqqvdsrleikk  
>tr|D2N6Q8|D2N6Q8\_STAA5  
mkalvlgsgsigseivkqlltdgfevyvqyrtdineltskfnddkvhfiqadlsqtididktfgdiksldcliyasgq  
slygvlgdmkdhdidacyq  
lnvlqlirlcryfvdlrqsdngrivissiwgetgasmetiystmksaqlgfvkalsqelaltsvtvnaiapgvagnm  
asewqedelqamitelppq  
rlvlpsevahcaylyhpnarsvtgtiqkvngawyi  
>tr|D2N6R2|D2N6R2\_STAA5  
msiaiaavgse lllgqiantngqflskvfneiqnvl ehkvigdnkrl essvrhalekydtviltgglgptkddltkht  
vaqivgkdlvidepslkyi  
esyfeeqqqemtpnnkqqa lviestv lanhhgmapgmvnfenkqiillpgppkemqpmvknellshfinhnriihsel



Tsompanidou\_et\_al\_Supplemental\_FASTA\_File

lrfagigeskvetvliidl  
dkqtnptiaplagshevyir1tanadskeqaqsliqpvkqeildrigeyygsddt1ieqavikkinepfviydgitnga  
lyhr1kevd1ndvlkgmin  
hnenfvdinkpieqq1kdavqfvnk1fnvssai1leydgvvhigydn1efkteqfkmsksrnl1knrsqnyalir1ln  
wlrtn  
>tr|D2N6R9|D2N6R9\_STAA5  
msynhl1terarievlrgenyslrsiark1krsvstisreisrnnlnqsyqaetaqknyetrklcgrprftpelgni  
ikyylkchwspepivgr1l  
qnqicfktiyrwinsminfelisc1rqkgkrqpketrkgfnigrpisqrpkvkkrentfghweadtivssrgskgci  
atfaerksryyyvc1mpdr  
ssnsmetainnikh1pkgvaktitvdrgekfcyqniengfninvyfadvpysawqrgtnteng1lreffpkktldakv  
nqeqlnyalidsinyrprkc  
lnwkfpvev1cde1lhl1n  
>tr|D2N6S1|D2N6S1\_STAA5  
mneeqrkassvd1aerdkkaekdyskyfehvyqppn1keakkrkqevrynrdfqidekyrgmgnerftliktygcqm  
ahdteviagi1ealgyqat  
tdintadvilintcairenaenkvfseign1kh1kkerpdiligvcgmsqeesvvnkilksyqnvdmifgthnihlpe  
ileeaylskamvvevwske  
gdvien1pkvregnikawvnimygcdkfcctycivpftrgkrsrrpediidevrelaregykeitllgqnvnsygdldq  
leydlgd1lqaiskiaipr  
vrfttshpwwfdthmidvisegnivphihlpvqsgnav1kimgrkytresyldlvkrikdripnvalttidiivgypne  
seeqfeet1tlydevgfeh  
aytyllysqrdgtpaakmkdnvpldvkker1qr1nkkvghysqiamskyegqvtv1cegsskkddqvlagytdknk1vnf  
kapkemigklvevrideak  
qyslngsfvkqvepemiq  
>tr|D2N6S2|D2N6S2\_STAA5  
mynkddvlkqadnank1knldtiktyqqieaqihqntiktmdmlkxhqkqavnfnqyqkqna1eqsehtiqaieai  
nt1piveqfqasqyeaq1  
lkmfvstmetr1ndhnikakhsd  
>tr|D2N6S3|D2N6S3\_STAA5  
mksrk1aitallisinvv1ssiiip1gpvkaapvqhfvnvl1savivgpygl1aqalissilrv1fgtgtafapfgsmig  
v11asmfyiyrkhi1fmaav  
gevlgtgvigsl1icip1ayfl1glqdf1kplmitfivssaigsi1syf1lit1lkkrgil1qrfik  
>tr|D2N6S4|D2N6S4\_STAA5  
msnvtppmmqy1kikseyqdc1l1ffr1l1gdfyemfyedakeasrv1eit1l1tkrdakkenpipmcgvpyhsadsyid1l1vnn  
gykvaiceqmedpkqtkgm  
vrrevvri1vtpgtvmeqggvddkqny1l1sfvnmqpeial1sydcvstgelkvthfndeatl1neittinpevvindnis  
dh1krqinmvtetitvret  
l1steiysvnqtehl1myqatq1l1ldyihhtqkrd1shiedvvqyaaidymkmdfyakrn1eltesir1lkskkg1l1w1md  
etktpmgarr1kqwidrpl  
iskeqiear1divdefsa1fierdt1rty1nqvydier1vgrvsygnv1nard1l1q1khsiseipnikal1nsmnqdt1lvq  
vnq1ep1dd1l1di1leqslv  
eppisvkdgg1fkvgf1mq1dey1easkngktw1aelqakerqrtgiksl1k1sfnk1vfygfieitran1qnfepsefgy  
mrkqtl1snaerfi1delke  
kedi1l1gaedkaie1eyq1lvq1reev1kkyter1qqqaki1sel1dc1qsfaeiaqkynytrpsfsenk1tel1vesrhpv  
ervm1dyndyvpnn1r1dne  
tfiy1l1itgpnmsgksty1mrqva1i1simaqmgayvpckeav1pifdqif1trigaadd1vsgkstf1mvem1leaqa1ltyate  
ds1i1fde1igr1gtsty1dgl  
alaqami1eyvaetshakt1f1sthyhel1tt1dqa1ps1knvhvaaneykge1l1f1hk1vkd1gav1dds1ygi1qvak1ad1pek1v  
israqv1l1se1feasagkks  
sisn1l1km1venep1e1ngens1l1sve1ttdt1l1sqk1dfeqasfd1l1fendqese1el1qikn1l1nsmtpieal1vkl1sel1qnl1k  
>tr|D2N6S5|D2N6S5\_STAA5  
mgkikel1qts1lanki1aagev1verpssv1kellenaidagat1e1sieve1sgvqsi1rvv1dng1sgieaed1gl1vf1hrhatsk  
ldqded1l1f1h1rt1l1g1frgea  
lasissvakvt1l1ktctdnangneiyvenge1l1nhk1pakakkgtdi1l1ves1fyntpar1kyikslytelgkitdivnrmam  
shpdi1rial1isdgktm1l1st  
ngsgrtnevmae1ygm1kvard1l1vhisg1dtsdyhi1egfvakpehsrsnkhyisifingryiknfm1nkailegyht1l1tig  
rfpic1yini1emdpi1l1vdvn  
vhptk1levr1l1skeeq1lyq1livski1qea1fkdril1ipknn1dyvpkknkv1l1hsfeqqkiefeqrqntennqektfsseesns  
kpfmaenqnde1ivikedsy  
npfvtktses1l1addressy1nntrekdedy1fkkqqe1l1qemdqt1f1dsnddtsv1qnyenkasddyvdndikgtskdpkr  
ripyme1ivgqvhgtyi1iaq  
nefgmymidqhaaqerikyeyfrdki1gevtnevqdl1l1p1t1fhfskdeq1l1vidqyknel1qqvgim1lehfgghdyivssyp  
vwf1pkdevee1i1kdmie1l1  
leekkvdi1kkl1redvai1mmsckksikanhy1l1qkhem1sd1l1dq1l1reaedp1ftcphgrpi1i1nfskyelekl1fkrvm  
>tr|D2N6S8|D2N6S8\_STAA5  
meky1l1sidqgtts1ra1l1fnqkgei1agvaqrefkqyfpqsgwvehdaneiwtsvlavmtevinendvradqiagigitn  
qrettvvd1khtgrpiya

Tsompanidou\_et\_al\_Supplemental\_FASTA\_File

ivwqsrtqscisclkggyeqtfrdkgtllldpyfagtkvkwilndvegarekaengdlldfgtidtwlvwklsgkaahi  
tdysnasrtdmfnihdlew  
dellelltvpknmlpevkassevygktdyhfygqevpiagvagdqqaalfgqacfergdvknntygtggfmlmntgdka  
vksesgllttiaygidgkv  
nyalegsifvsgsaiqwlrdglrminsapqsesyatrvdstegvyvvpafvlgtpywdseargai fgltrgtekehfir  
atleslcyqtrdvmeamsk  
dsgidvqslrvdggavknfifmqfadi vntsverpei qetta lgaaylaglavgfweskd diaknwkleekfdpkmd eg  
ereklyrgwkkaveatqvf  
kte  
>tr|D2N6T0|D2N6T0\_STAA5  
mteqkfltvqdntnievkvntdvdskgi ihfhgmaehmerydklahalskdgfdvirhnrghginidestrghydd  
mkrvigdafevaqtvrngv  
dkpyiighsmgsvarlfvetypqyvdglilsgtgmyplwkg lptvkvqlitkiygaekrvewvnqlvsnsfnkkirp  
lrtqsdwisinptevdnfi  
kdpysgfnvsngllyqtayym lhtsq lknkvlnhampillvsgyddplgdygk gilk laniyrkagiknvkvnlyhhr  
hevlfekdhkiwedlfkw  
lnqfykk  
>tr|D2N6T1|D2N6T1\_STAA5  
mnkikpfi vvi vgp tasgk tel sielak ringei isgdsmqvykhm nigtakvtpeemdgiphhlidilnpddtfsayef  
krlaedli tdi tnrkvpi  
iaggtglyiqsli nyel edetvtpaq lsvvkqk lsa leh ldnqqlhdyla qfdavs aenihpnnrqr vlraieyylk tk  
kllsnrk kvq qftenydtl  
llgiemsrktlysrinkrvdimldhg lfvqq lveqgyescsqm aigykelipvingqmiyedavndlkqhsrqykr  
qmtwfk nkmshw ldkenm  
slqmm ldeittqik  
>tr|D2N6T2|D2N6T2\_STAA5  
mianeni qdka lenfkanqtevtvfflngfqmkgvieeydkyvvs lnsqgkqhli ykhaistytveteaqestese  
>tr|D2N6T3|D2N6T3\_STAA5  
metiydfvvetnkgvtykl daykgdvm livntasecgfts qfeg lqslyekykdqgfvilg fpcnqfggqepgsgeaaq  
ncklnygvtfpmhqk idvk  
gehqlpl fryltaaqhgffnk kikwnftkflvdregnvkrfapqkkpvqiereiekll  
>tr|D2N6T4|D2N6T4\_STAA5  
maqqqihdtknk lekav lvgvhaqddkqfnfestmeelssl setcql evlgqitqnrdrvdrkyvvgk kieei qafief  
kdidvvi tndelttag sks  
lnealgvki idrtqlileifa lrarskegklqvelaqldyl lprlqghgks lsr lgggigtrgpgetklemdrrhirtrm  
neikhqlrtveehreryn  
krnqnqvfqvalvgytnagksswfnv laneetyekdq lfat ldpktrqiqindgfnliisdtvgfiqklptt liaafkst  
leeakgadllvhvdsshp  
eyrtqydtvndlikql dmshisqivi fnkkdlcdhasnrpasd lpnvfvs skndgdkllvktlfideikrqltyydeiaia  
tnnadrlyflkqhtlvte l  
kydeienvyrikgfkk  
>tr|D2N6T5|D2N6T5\_STAA5  
mkdiskivadvestlapyfkeieetayinqekvl nafhvkatesdlqgstgygyddfgrdhleeiyaqafkaedaivrp  
qisgthaitialqslkh  
gdeliyitgspdytll evigvngngies lmehgvsyk dialkegkidiesvldgisertkviaiqrskgydqrpsiplde  
ieqvitr lknvhpnilifv  
dncygefverrepieccadliagsliknpggglakiggyiagrkdliercgyrltapgigkeagaslnallemyqgffla  
phvvsqslkgalfts lfl e  
kmmnttpkyekrtdliqtvkfktkeqmisfcqsiqhaspinahfspepsympgyeddvimaagt fiqgssielsadgp  
irppyeyvqggltyehvk  
iavtravkqlkeggli  
>tr|D2N6T6|D2N6T6\_STAA5  
misndairrmavfmsvskltdl tprqiryethelikpertegqkr lfs lndlerlleiks llekgfnikgikqi y  
dsqehl tdeqei rkkmi v  
datqkpi getlpinrgd lsrfik  
>tr|D2N6T8|D2N6T8\_STAA5  
mncydei yntikk lienkeissyqinkdtgisygninamrrgerrienlslknakilyeyakkvl  
>tr|D2N6T9|D2N6T9\_STAA5  
mnei etiseiekll tntpsysknsgvprqtvt dlkvgn tkidakfktiiklyeyqklsennsec  
>tr|D2N6U1|D2N6U1\_STAA5  
mfkvnysil syypdiy lhnslavgsfei igesyhkneikfitqrrkissfddeidnlvlinmfl dglkcefeqtnqsik  
nykkkfvnnfyfenieykm  
fDSLkevnffi ektykyvlhigldkker lkktekel lns  
>tr|D2N6U2|D2N6U2\_STAA5  
maifkyieekgyegkytil reycknkiqnetkkitffednini cflndrvvgkthltis lgi eackqniktrfytfkeli  
dl ltvtdskei nktlkql  
sriellideicysaitkeqad lfyqlms lkyemkstiittnitfsswgesfsnkivsaaidrlvhhskvfkitgesyr  
lkdyktekslnirqs

Tsompanidou\_et\_al\_Supplemental\_FASTA\_File

>tr|D2N6U3|D2N6U3\_STAA5  
mrhdiyegvlfyitkgikpnayaelgrqyncdpitvkkyyeagkenelerlkkrrqqn  
>tr|D2N6U4|D2N6U4\_STAA5  
mfkrrknnkkqdli1lrqea1ehylmknkyyyreahgiverkynfssyiek  
>tr|D2N6U5|D2N6U5\_STAA5  
miimrk1keddqivyeyipqdkiekkggeitvnl1dskvidyklskvenekgilvyrdsfhailln1fidenkfpneyiy  
awy  
>tr|D2N6U6|D2N6U6\_STAA5  
mipgvnappmhpwcrsttvpvhvgs wrdkffkeregkyqveddttkdelqqakvlgkkiyitdqaikdvryvdipthtkee  
nqfiqeqhka11kdakenn  
dsnevay11kdgkvtkvygdqdsvsfapgekete11fnskpnsivmlnhhpgqssfs1tdlyl1fifnnsikt1tivtnkg  
qtkyl1tktkyckstcid  
ikkynknnnikfnhkdidmilkrlynsniiykv  
>tr|D2N6U7|D2N6U7\_STAA5  
myfaqldgeitnkqsqe11dkeykkaie1enknkeqk1ek  
>tr|D2N6U9|D2N6U9\_STAA5  
meqik1ktftaet1e1lesnief1gseeaan1klvnitikeieertfnpneefnailt1svnk  
>tr|D2N6V0|D2N6V0\_STAA5  
mqftfsnd1gt1fti1aigfiin1v1afii1flernrrtasstwaw1fv1fv1pligfily1ffgrtvsark1nkngn  
v1tdfdg11kqqiesfdkg  
nygtdnkqvqkhhd1vrml1mdqdgfltenkikhfidgnlydqvl1qdiknakeyihleyytfaldglgqrilka1eek  
1kqgl1evki1yddvgskkv  
kmanfdhfk1s1ggeveaffask1p11nfrmnrrnrhrki1vidgq1gyvggnigdeyl1glgk1gywrwth1riqgdavda  
1qlr1fil1dwnsqahrp1qfe  
ydekyf1pkknks1fgnapiq1aasgpasdwhqieygytkmimsakksvyl1qspyfipdnsyinaik1aaksgvdvhl1mpc  
kpdhpl1vywatfsnasd11  
ssgvki1tyengfi1hskmcl1ddeivsvgtanmdfrsfel1nfevna1fyden1akd1raayahditksq1teesyanrp  
1tvkfkes1ak1vspil  
>tr|D2N6V1|D2N6V1\_STAA5  
mnisnentvt1iavi1aii1gifi1q1ffk1plivtav1sill1g1fv1g1fiv1y1l1v1sfynkrkh  
>tr|D2N6V3|D2N6V3\_STAA5  
msfyv11i1i1valigi1i1lnqrysnskidtevyark1liknk1alsae1n1rsqm1ssnndvghhayknakrelrki1  
dsyleng1k1kydi1vtsn  
latkhp1ffeyars1fdfi1vsdig1invdvks1wgekt1fyhfdvpdehd1temsns1niekv1ghyis1qqyh1dqfn1srksiyt  
ftetv1qpnrv1ydfydydp  
yqlaannak1kdhi1eqnfn1kvqst1gvi1yfsdgtvni1qgseerdky1vdtv1stk1s1l1rri1seai1elskhp1nkeqvdr  
1taifk  
>tr|D2N6V5|D2N6V5\_STAA5  
mkvsk1fgg1ssvs1natq1kkv1nivns1dperki1v1vsap1gkrhd1ndikt1td1l1r1lyek1vinh1ldyh1dkkrei1qryddiv  
kelqmdes1l1rtid1vt1eh  
yinq1knepkr11dal1scged1fnaq1lia1ynnsq1g1ptkyi1speagi1fvtdvp1qeaq1ildsayse1kk1l1rdydek1ii  
pgff1gvs1hegy1vtf1prgg  
sdi1tgai1ssg1rati1yen1ftdv1s1gi1yan1pni1ikdp1elie1ityrem1elsyag1fs1vh1dea1qp1lykdrip1vvikntn  
rpqdkgt1fiv1hdre1in1akn  
visg1iscd1kdf1tvin1kky1l1mnrq1vgf1trki1lgv1ledn1is1fdh1mpsg1id1tis1ivm1rsk1qi1qk1etkv1neir1qk1cdvde  
1siehd1lai1miv1geg1mnk  
vig1tanki1thalaes1kin1l1kmin1qgase1ismm1f1gh1vddaekav1styef1cyh1gval1kn1cnkn  
>tr|D2N6V7|D2N6V7\_STAA5  
mrrwqg1veefkah1pvnent1pk1t1negnt1plihcen1skil1gid1lyvk1egan1ptgs1fkdr1gm1mav1tkake1kgk1iv  
ic1astg1nts1asa1ayaara  
glkai1vvi1peg1kia1glk1sqav1mygae1vsi1egn1fdeale1ivkei1aksge1el1vns1vp1frieg1qktgs1feiv1qq1ldgea  
pd1ilai1pvg1nagni1taywk  
gfkey1heak1gsq1lpkm1fg1faegas1pivqn1kvikn1peti1atai1rign1pas1wekat1nal1kesng1lids1vtdde1ileay1qm  
ttkeg1vf1sepas1nasia1gl  
ik1lhr1gk1lpqg1kkv1vai1tgng1kdp1dta1s1l1dn1pik1lpndk1dsi1idy1kga1  
>tr|D2N6V9|D2N6V9\_STAA5  
mtnyk1vvv1dmd1t1l1nsdn1viseet1any1tai1qdegy1yvv1lasgr1pteg1miptard1kl1pehhsy1iis1yngsk1tin1mtn  
eeve1vsk1sig1kqdf1deivd  
ycrdrg1ffv1tyhd1gqi1yde1se1heim1ieae1tg1p1mkr1vdd1kay1iqgd1vpk1vmg1vdy1vanitear1id1ngv1fnd1vda  
ttsk1pff1efmak1dvs1kgn  
aika1chk1l1gys1vdq1via1fgd1smndk1smfev1ag1lai1amgn1asde1lkqyade1it1ldhneng1iphal1kk1l1  
>tr|D2N6W1|D2N6W1\_STAA5  
mednkm1nrs1lnsrh1ism1jia1igga1igt1gl1fvat1gni1sqag1pggailay1lvig1vml1yfl1mas1igelat1fyp1vsg1sfss1yst  
rfid1ss1l1gft1mgw1lywa1lw  
slvts1vdv1ivas1nly1fwdt1fk1ffh1pitws1l1f1iti1l1l1l1ni1fsvks1fget1efw1sl1ikv1lti1iv1fvi1fg1lmi1fgil1gg  
hay1gfeny1tkg1qap1fv1ggi  
sgf1lgv1l1vag1sv1ggt1evav1tages1ddp1kks1mpkaik1qv1fwr1l1l1fyv1lsi1avigai1ipytd1ps1l1rass1isq1spft  
iv1fdrv1gia1faas1v1navi

Tsompanidou\_et\_al\_Supplemental\_FASTA\_File

ltsllsaansgyvttgrmlyslssdkkapkflsklnkttklplralllttyavvviviiyanfnnavfnlleigsmiiv  
vwgssiwsqirrlrqaiikkq  
gqdpnkvlpykapfypigpiiviatllflfllfggsveyilkdqwlnafknflpliialiyfihkiihktkfvkletinlk  
phdygnqk  
>tr|D2N6W2|D2N6W2\_STAA5  
msqqdkkltgvfghpvsdrensmtagprgp1lmqdiyfleqmsqfdrevipermrhakgsagfgtftvtditkytnaki  
fseigkqtemfarfstvag  
ergaadaerdi rgfalkfyteegnwdlvgnntpvfffrdpklfvslnravkrdrptnrmrdagnwdfwtglpealhqvti  
lmsdrqipkdlrhmhgfgs  
htysmyndsgervvkwfhfrtqqgienltdeeaeeiatdrdssqrdlfeaiekgydkwtmyiqvmteeqaknhkdnf  
dltkvwyhdeyp lievgef  
elnrnpdnyfmdveqaafaptniipglfdspdkmlqgrlfsygdaqryrlgvnhwqipvnpkgvgienicpfsrdgqmr  
vvdnnqgggthyypnnhgk  
fdsqpeykpfpfdpygyeynqrqddnyfeqpgklfrlqsedakeriftntanamegvtddvkrhrhrcykadteyg  
kgvakalgidinsidlete  
ndetyenfek  
>tr|D2N6W6|D2N6W6\_STAA5  
mdtpkkqfafnniqmmsksdvektlnkpkrvtfneygkwytyydgdynnfimvsyikdkvnalytnqniitskskik  
yntpksvvrqr1gepetei  
vkgrvryeqnnkeydvfhknhiyttvfydkhrrnntavlqvsdamenr1keqygapsksladsfelqnfdlvnaerkqh  
qlstlkyskqnssetarkhs  
kdmaknhfydhtnlkgqspdr1kkdgitfnsagenlaygqvssiyahqglmsisghrknlnlndtfkilgvgvdfndekq  
pftwentytg  
>tr|D2N6W8|D2N6W8\_STAA5  
mmfynkyknvstyiii flvssaafai flsanisahseqvyemtdhqikntinkayehkdptndseqr dgkvfal in  
>tr|D2N6X0|D2N6X0\_STAA5  
mfnekqqlavdtlral sidti ekansghpglp mgaapmaytlwtrhlnfnpqskdyfnrdrfvlsaghsallysllhvs  
gsleleelkqfrqwgsktp  
ghpeyrhtdgvevtgplggfamsvglalaedhlagkfnkegynvvdhytyvlasdgd1megisheaasfaghnl skl  
vvlydsndisldgelnkaf  
sentkarfeaygwnyl1vkdgndleeidkaiittaksqegptiievkttigfgspnkagtngvhgaplgederkltfenyg  
ldpekrfnvseevyeifqn  
tmlkranedesqwns1lekyaetype laeefkla isgklpknykdelprfelghngasradsgtviqaisktvpsffggs  
adlagsnksnvndatdyss  
etpegknvwfgvrefamgaavngmaahgglhpygatffvdsylkpalrlssimglnatfifthdsiavgedgpthe pie  
qlag1raipnmnvi rpadg  
netrvaweval esestpts1v1trqn1pvl dvpedvveegvrkgaytyvgseetpefl11asgsevs1aveaakdlekgg  
ksvrsvsmpnwnafeqqse  
eykesiipssvtrkrai emasp1gwhkyvgtagkviaidgfgasapgd1vvekygftkenilnqvm1  
>tr|D2N6X1|D2N6X1\_STAA5  
matwlaifi vaalilg1iggf11arkymmdylkknppineem1rmmmqmgqkpsqkkinqmmtmnknmdqnmksakk  
>tr|D2N6X2|D2N6X2\_STAA5  
mlylifsii val fmgktivivirmkaqnypvnekkivlppffmatgalmyvvyfrltgsemleafiigllfstvliwtsr  
fevkgteiy mkrskafpvi  
lisllvirts mki fisneidpge1ggmff11afcmi vpwraamlykykk1kktlin  
>tr|D2N6X3|D2N6X3\_STAA5  
mki ihtadwh1gk1lngk1ledqayil dtfvekmkeepdiivi agdlydttypskdaiml1leqaigkl nlelripiim  
isgnhdgkerl ngyaswfe  
nq1firtdfts inspieingvnfytlpyatvsemkhyfeddtiethqqgitrcietiapeidegavnishltvqqgk  
tsdserpl tigtvesvqg  
vfdi fdyvm1gh1hhpfsieddkikysgsl1qysfseagqakgyrrvtindgi indvfiplkplrqlleisgeyndvine  
kvhvknkdny1hfk1knms  
hitdpms1kqiypnt1al tnetfsyneennaieigekddmsiemfynhitdke1sdiqskkiknilene1rked  
>tr|D2N6X4|D2N6X4\_STAA5  
mkplh1k1nnfgpfl1keedfskidnne1flisgktgsgktmi fdamtyal fgkasteqreend1rshfadgkqpmstvtf  
efq1nnriykvhrqgpfik  
egnttktnakfdvfemvdgkyeireskvisgtqfiieilgvnadqfrqlfilpqgefkrflisnsrekqgilrtlfnek  
feaireil keevkkekag1  
enryqqid1lwgeiesfdddki g1levatqqidkvienip1lqarskeilafvnesketaikeyeiekk1lennilkd  
ninqlninkidfvqlkeqg  
peiee1eak1k1l1qdi1n1nyienreki etkianskkdi setnki1n1lvcdrnidkekkmleengd1ieskisfidk  
trv1fndinkyggsylnie  
r1rtegeqlgde1nn1ikglekvedsignnesdyekie1lnnaitninneinvikenekakaeldk1l1gskqelenqine  
ekt1lkn1eik1drydksk  
1d1ndkesfiseiksavkigdqcpcgnei qd1ghhidf1siakrqneikeieanihtmsniavh1nseikfvneki sni  
niktqsd1slevlnkr1le  
nena1nnqre1nkfi eqmkeekdn1t1qihnkqlr1lnknese1klcrd1itefet1skynnitnfevdykkyiqdvnqhq  
ehskeiedk1liq1sqrk1i

Tsompanidou\_et\_al\_Supplemental\_FASTA\_File

eqnlnhyenql etynndlelneqsiememsrlnltdnndideiawrgeqaeleqkrdytkkryhefemeiarlesl tk  
nkelldsklkdeyelkkq  
kmtlidesavhyqcqnniktqsivshinylnqelkdqgefqlaeivsgknnknltenfvliyyldqiaaqanlr  
atmsdnryqlirreavshg  
lsgleidvfdlshnksrhisslsggetfqsslalalglseivqqqsggislesifidegfgtldqetleta ldtlln lks  
tgrmvgiishvselknrip  
lvlevksdqyqsstrfkrn  
>tr|D2N6X5|D2N6X5\_STAA5  
mlkefkefalkgnvldlaiavvmgaafnkiisslveniimpligkifgsvdfakewsfwgikyglfiqsvidfiiiafal  
fvfvkiantlmkkeeeeee  
avveenvvllteirdllrek  
>tr|D2N6X7|D2N6X7\_STAA5  
mqvgagpnteadeksaynnvqvgdgrqqresgfpistdnaswrgpntetggksvynnvqvgvgrnkfyeniisvplpsk  
e  
>tr|D2N6X8|D2N6X8\_STAA5  
maanfkeqskkhfdlngqsytyydlkaveeqgitkvklpysirvlllesllrqeddfvitddhikal sqfgkdgnegevp  
fkpsrvilqdfgtgvpavvd  
laslrkamddvggdi tkinpevpvdlvi dhsqvdsyanpealer nmklefernyeryqflnwatkafdynavppatgi  
vhqvnleylasvvhvrdvd  
gektafpdtlvgtshhttingigvlwgvggieaeagmlgqpsyfpipevigvrlvns lpggatatlalrvtqelrkk  
gvvgkfveffgpgvqhlpl  
adrationmapeygatcgffpvddeslkymkl tgrsdehialvkeylkqnhmffdvekedpnytdviel dlstveas lsg  
pkrpqdlifl sdmkssfen  
svtapagnqghglkdfefdkkaeinfkdgskatmktgdiaaait sctnts npyvmlgaglvakkavekg lkvpeyv kts  
lapgskvvtgylrdaglpq  
ylde lgnlvgygcttcignsgplpeiekaiadedllvtsvlsgnrnfegrihplvkanylaspqlvvayalagtvdid  
lqnepigkngdgedvylkd  
iwpsikevsdtdsvvtpe lfi eeynnvynne lweidvtdqplydfpnstyiqnpsffqgl skepgt ivplng lrv  
gkfgdsvtt dhi spagaig  
kdtpagkylqdhqvpi refnsygsrrgnhev mvrgrt fanir i knqlapgteggfttywptnevmpifdaamkykedgtgl  
vvlagndygmgsrdwaak  
gtnlvgkvtviaqsyerihrsnlvmmgvlp l efkkesads lgl dgteei svni denvqphdyvkvtakkqgd lvefda  
mvrfdslvemdyyrhggil  
qmvlnklag  
>tr|D2N6Y0|D2N6Y0\_STAA5  
mqieltdaavtwfknelelpennkvlvffvryggefq l kqgfspaftvepkedvdi gyeqhyddlnvvvaekdlwyfedd  
hiivnvvdhedeisyskk  
>tr|D2N6Y2|D2N6Y2\_STAA5  
mamnkqnnysddsivlegleavrkrpgmyigstdkrglhllyveivdsvdevlngygneidvtinkdgsistednrg  
mptgihksgkptveviftv  
lhagkfggggkts gglhgvgasvvnal sewleveihrdgniyhqsfknggspssglvkkgkktktgtkvtfkpdtdif  
kastsfnfdv lserlqesa  
flknkkitlndlrsgkerqehyheegi kefvsyvnegkevlhdvatfsgeangi evdvafqyndqysesilsvnnvr  
tkdggthevgfktamtrvf  
ndyarrine lktkdnl dndi regltavsvripeellqfegqtksklgtsearsavdsvvadklpfyleekgqlsksl  
vkkai kaqqareaarkare  
darsgkknkrkdtllsgkltpaqskntdknelylvegdsaggsaklgrdrkfqailplrgkvintekarledifkneein  
tiihtigagvgtdfkieds  
nynrvii mtdatdgahiqvlll tfffkymkplvqagr vfi al pplyklekgkgtkrveyawtdeelnklqkelgkgt  
lqrykglgemnpeqlwett  
mnpdtrt lrvqvedevrskrvtlmgdkvqprrewiekhvefgmqedqsilndnevqvlendqfdeeei  
>tr|D2N6Y3|D2N6Y3\_STAA5  
mseiqdlsledvlgdrfgryskyiiqeralpdvrdglkpvqrrilyamyssgnthdknfrksaktvgdvigqyhphgdf  
svyeamvr lsqdwklrhv  
iemhgngsindppaamryteaksl laeelrdinketvsfipnyddttlepmvlpsrfpnllvngstgisagyatdi  
pphnl aeviqat lkyidnp  
ditvnqlmkyikgpdfptggiiqgidgikkayesgkgrivrskveetl rngrkqliiteipyevnksslvkridelra  
dkkvdgivevr detdrtgl  
riaie lkkdvnsesiknylyknsdlqisynfnmvaisdgrpk lmgirqiidsylnhqievvanrtkfel dnaekrmhive  
glikal sildkvie l irss  
knkrdakenlievyefteeqaeavmlqlyrlntdivalegehkelealikqlrhildnhdallnvikeelneikkkfk  
serlslieaeieeikidke  
vmvpseevils mtrhgyikrtsirsfnasgvediglkdgdsllkhqevntqdtvlvftnkgrylfipvhkladi rkelg  
qhvsqivpieede viinvf  
nekdfntdafyvfatqngmi kktstvp lfktrfnkpliatkvkenddlisvmrfekdq litiitnk gmsl tyntsel sdt  
glraagvksinlkaedfv  
mtegsendtilmatrgslkrisfkilqvakraqgitllkelknphrivaahvvtgehsqytl ysk sneehglindi  
hkseytngsfivdtddfg

Tsompanidou\_et\_al\_Supplemental\_FASTA\_File

evdmyis

>tr|D2N6Y5|D2N6Y5\_STAA5

mgeyivtktlinnvvtctndqeviligkgigfnkkegmvlndqntiekiykleseqqkahykslveiaddnvlqviid  
slnfisntamnvdsqllv  
sltdhiifaykr1kqnqvsnpvmfmetmqlysdaihiakqvidqlnaalvdhfpedeigfialhiasntedlsmhemtli  
nnvikkgidiiesdlvtvtv  
dkeslqyqrfirhvqflirr1rrkeyihaqddfvsimknhypicyntaykiltmiqkqfdvniseseiyltlhihhfee  
rinqs

>tr|D2N6Y7|D2N6Y7\_STAA5

mnqevknkifsilkitfatalfivvitlyrelsginfkdtlvefskinrmslvllfigggaslvilsmydvilsralkm  
dislgkvlrvsyiinalna  
ivgfggfigagvramvyknythdkklvhfislilismltglsllsllivfhvfdaslilnkltwvrvlyavslflplf  
iysmvrppdknrryvgly  
ctlvscvewlaavvlyfcgvivdvhsfmsfiaifiaalsglvsfipggfgafd1vvl1lgfktlgvpeekvllmllly  
rfayyfvpiialilssfe  
fgtsakkyiegskyfipakdvtsflmsyqkdiiakipslslailvfftsmiffvnnltivydalydgnhltyyllaiht  
sac11111nvvgiykqsrr  
aiiyamisiiliivatlftyasyilitwlviiifallivafrarrlkrpirmrnlvamllfsifilyinhifiagtfyal  
dvytiemhtsvlkyfwit  
iliiiaivgaiawlfdyqfsvkrissnieeceeiidqyggnylshliysgdqkfftneknaf1myrykasslvvlgdpi  
gdenafdelleafynyaey  
lgydvi fyqvt dqhmplyhnfgnqffklgeeaidl tqfstsgkkrgrfratlnkfdelnisfeiveppfstefinelqh  
vsdlwldnrqemhfsvgqf  
neeylskapi gvmrnenneviafcs1mptyfndaisvdlirwlpe1d1plmdglylhmllwskeqgytkfnmgmat1snv  
gq1hysylrer1agrveh  
fnglyrfqglrrykskynpweprflvyrkdnslwes1skvmrvirk

>tr|D2N6Z0|D2N6Z0\_STAA5

mmpivnvk11egrsdeqlkn1vsevt davekttganrqaihvvieemkpnhygvagvrksdq

>tr|D2N6Z1|D2N6Z1\_STAA5

mynyh1ledrdv1cidqksffasvsciekgl1dpletklavvadtkrqgsvv1aatpk1kelgiktgsr1feiphrndiyi  
inpsmrkyl1nsvaiskia  
lryipped1hqysideffmdvtdsyhrfsstvhafcer1kreiyeetgiyctvgigsnm1lskiamdveakhnqngiaew  
ryqdvp1klwpiqplrdfw  
ginrrteaklnkrqif1tgidlakypykfl1kkefgilgvdm1hangidqskvrekhhisnpsicksqilmrdyhfdeakv  
vmqeliedvasrvrarkkv  
artihfafgysdeggv1hkqyt1kdptn1ekdiykvmhfadklcnkqalyrt1sis1sqfinederqsl1fedeyqrkrd  
eclaktidq1hlkygkqiv  
skavs1fteagtkhgr1glmaghkm

>tr|D2N6Z2|D2N6Z2\_STAA5

mttv1fvgl1gigs1asnikyhnptni1aydadtsq1dkaksigi1nekc1nyseaikkadviiyatpvaitnky1se  
1ihmstkp1gvi1vds1tgst  
amiqqhecs1lkhni1lvsg1hpmagshksgv1nakkhl1fenayy1lvynepneqaant1kell1spt1akfivttae1hd  
yvtsvsh1phivass1vh  
vsqknsqehh1vnl1aaggfrdi1triassnaqmwkdi1tsnkty1lemir1qlksqf1dler1liesndsekl1viffcrs

>tr|D2N6Z3|D2N6Z3\_STAA5

mepilemikt1tginspsgdteeai1qfvekyakd1gyqtt1tnkga1litvpgkndevqrcitahvdt1gamveikedg  
r1laie1l1ggftynaiegey  
cqikt1dagqiy1gtic1hetsvhvyrnnheiprdqkhmeiri1devttseedtks1gisvgdfvs1fdprt1vitssg1fiksr  
h1ddkasvami1k1l1kk1k  
eeqii1l1pht1tqfyis1nneeigyganasi1dskikeyia1ldmga1ldgqasdey1tsicakdasgpyhkq1ksh1vnl1ckin  
nipykvdi1pyygs1dasaa  
lhagadi1rhgl1fgagiesshamerthidsikatek1lyayc1spie

>tr|D2N6Z4|D2N6Z4\_STAA5

mdvfykkikanvtpevlaqlhskki1lestnqqqtkgrysivi1fdiygt1t1dndv1svst1kesyqiterpyh1l1tcki  
nedyhni1qdeq1kpl1pfis  
gyvg1tcs1fd1vrh1efpk1qsi1qledhkqhdvr1ymveqvyv1fdhykde1lyiatnqfsnstks1denrvnksied1tkiq  
pfmptq1dfdfktkeiqsni  
seerfiemi1qy1fkeki1tegd1mfqvvs1riykyahhanq1lnq1sfqlyqnl1krqnpspymy1lnidkpyivgsspes1fvs  
vkdqiv1ttnpi1agti1qrge  
ttqidnenmkq1l1ndpkecsehrm1vd1grndi1hrvskigt1skitk1lmviekyehvmhivsevtgein1qnl1spmtvian1  
l1ptgtvsgap1kraieriy  
eqyphkr1gvysggvgyi1ncnhn1ldfa1airtmmi1deqyi1veagcgvvydsi1pekelnetk1kaks1levsp

>tr|D2N6Z5|D2N6Z5\_STAA5

mi1vvdnyds1ftyn1vdi1vaqhtdiv1qypdd1nvl1nqsvdavi1spgpg1h1ddqqlmki1issyqdkpilgic1lgaqa1  
tcyyggevi1kgnkvmhgk  
dtfniktens1lyegvpeqfs1imryhs1isnpdnfpeelkitgrtedci1qsfehkerphygi1qyhpesfatdygvkilm  
n1finsvk1ggr

>tr|D2N6Z6|D2N6Z6\_STAA5

Tsompanidou\_et\_al\_Supplemental\_FASTA\_File

mslltriktesilhesdikelieilispstgtdikyellnsysereiqqqeltyivrslintmyphqpcyegsmcvcgtg  
gdxnsfnisttvafvvas  
agvkvikhgnrsitsnsgstdlnqmrsttsvddtpkqldeknlvfigatesypimkymqvrkmigkptilnlvgpli  
npyhlsyqmgvfdptkik  
lvaktikdlgrkraivlhgangmdeatlsdnliyeltdedgeiknytlnatdyglkyapnsdfkglpeenlaislniln  
gkdqssrrdvvlagnls  
yvaekvdtiaegielastlidngvalkkyhqmrge  
>tr|D2N6Z7|D2N6Z7\_STAA5  
mtileeiveykqslnggyqdklslksvniqnkksfintieqepklviiieikskstpvndlperdlsqqisdyeqyg  
anavsiltdekyfggsfer  
lqeltkttlpvlckdfiidplqidvakqagasmillivnilsdqqlrelyeyatsqslevlvevhdreeldraykinpk  
ligvnnrdlkrfvtkveht  
niilenkqpnhyysesgihdtsdvrkilhsgidglligealmrcdnlseflpqlkmqkvs  
>tr|D2N6Z8|D2N6Z8\_STAA5  
mmk1kfcgftsikdvtaanqlpidaigfihyeksrhqtiaqikklasavpehidtvcvmvnpdlttiehvlstnptinti  
qlhgtetvdlkigkkkyp  
rikiikalpadehiinqninnykaffdlfiidtpsvsyggtgqtydwtilkhikdipyliaagginsenirtvnqklshlg  
ydlasgievdgrkdiekmt  
aivnivkgerene  
>tr|D2N6Z9|D2N6Z9\_STAA5  
mnkqiqtvedelgffgeyggqyvpelmpaiielkraykkakedpefqreleyylseyvgretplyaaesyteslggaki  
ylkredlnhtgahkinna  
gqallakrmgkkklvaetgagqhgvasatvaalfdme1vfvfmgseidkrqqlnvfrme1lgakvvavedgqgtlsdavnk  
alqyvwshvddthyl1gsa  
lgpdpfptivrdvfqsvigkeiksqi1kkegrlpdaivacigggsnaigtfypfikddvalygveaagqgedtdkhalaig  
kg1pgvlhgtkmyliqdeg  
gqvqlahsisagldypgigpehsyyhdigrvtfenasdtqamnalinfthkegiipaiesahalsyverlaptskedi  
vvtisgrgdkdmetirqym  
aergland  
>tr|D2N700|D2N700\_STAA5  
mtklfipyimgndlienakilsengadiieigvpfsdpvadgpvimeagqqaikqgitidfi feqlekhgnqikcqvvl  
mtyyniichygeqafferc  
rdsgvygliipdlpyelsqr1kqqfshydvkiislvamttdderikdivshaegfiytvtmnattgqngafhpelkrkie  
sikeianvpvvgfirtp  
qhvadikavadgivi gseivkrfkantreeiieylsikaln  
>tr|D2N701|D2N701\_STAA5  
mkfnt1takefgaftdsmpyshftqtvgheylklaegyethlvigiknnneviaac1ltavpvmkvfkyfysnrgpvidy  
enqelvhffffne1skyvkk  
hrclylhidylypyqylnhdgeitgnagnwffdkmsnlgfehtgfhkqfdpvlqiryhsvldlkdktaddiiknmdglr  
krntkkvkkngkvrylse  
eelpi frsmedtseskafadrddkfyynrlkykdrvlp1layinfdeyikelneerdi1nkdlnkalkdiekrpenkk  
ahnkrndlqqqldaneqgi  
eegkr1qeehgne1pisagffffinpfevvyaggt снаfrhfagsyavqweminyalnhgidrynfygvsqkftedaeda  
gvvkfkkgynaeiieyvgd  
fikpinkpvyaaytal1kkvkdrif  
>tr|D2N703|D2N703\_STAA5  
mkfvfdidgt1cfngksidpsiidsl1qlqhaghelifasarpirdl1pvlpevfqhqtligangamisqqskisvikpi  
qaytyhhi1riiqkyeldy  
iiddwnyaakldaeniferldphklascinvanidtpikiillnidpaqittildelnkyhqelemihhsneynidit  
aqninkytalqyifdadvk  
yiafgndhndivmlqhasgyiigpseaythailkldkikhidntqaickvlksyk  
>tr|D2N704|D2N704\_STAA5  
mia1lftas1eaankhimm1neveedyqlrrnmwids1kemindmsee1rdaylnmliehgmaelfgldeeeemfede  
fy  
>tr|D2N706|D2N706\_STAA5  
mslidiqnl1tikntcek1kigidlki fsqqinaligesgagksliakalleylpfdl1rctydsyqfdgenvsrlsqyyg  
htigyisqnyaesfndhtk  
lgkqltaiyrkhyksskeea1skidka1swvn1qskdi1nkysfqlsggqlerlyiasvmllepklia1depvas1da1n  
gnqvm1l1qhiv1lehqgt1  
fiithnlshvlkycqyiyvlkegqiierngnihfkyehlpyterlikyrtqlkrdyd  
>tr|D2N707|D2N707\_STAA5  
mhkifsknnl1ffvfgafivmiv1qffvssenatkvn1sqtfeπισwlh1l1gtddygrdl1ftriiigarst1fvvtl1  
iaivvigvt1glfagykkq  
wier1v1rfidvgl1sipefiimialasffqps1wn1visitvikwmnytr1trsivnsemnkpyikmaqlf1hvp1tr1li  
rh1tpkiipaiiv1mvvdf  
gkiilyiss1sfig1gaqptpegam1qqgrdfisshpim1iapasviaitilifn1tgda1rdr1l1kqrgeydesh  
>tr|D2N708|D2N708\_STAA5  
mfiksmlyr1iqmiv1fvist1t1f1mk1spgnpvdki1h1dvaqvsteqinatkek1gl1nds1lvqwwhwmnh1l1hf

Tsompanidou\_et\_al\_Supplemental\_FASTA\_File

nlgksfeskepvtqilfn  
apitllisfstlvslcisiplgiaakrfhkwtDKvirvistlsislpaffigiillfivtnlmnidsvilsqfilpvl  
t1slgmcayiiirlvrsnll  
mllqsnivqasrlrgmncyilhdllkptilpiipllgislgsliggtvviendlfdipgigyllmsiksrdypviqgc  
vlfiffvviintiadllt  
llldpkqr1q1gnpkntntplisessdrha  
>tr|D2N710|D2N710\_STAA5  
msqglplredvpvsetwdltdlfdkddqyyesidalvqqanqfhhtyattlnsieqintalaelenilialdr1snayael  
r1svdtsnieaqvlsakls  
ttygkivsr1sfveseilelpeeilqqleescpyqhyikqlikqkpfqlsasveqvatlsptlnspydlygttkmlidit  
fdfsfehdgtttypvdyatfe  
ndyednkdpfrrksfksfsdgi rkyqhttaatynmqvqqekiead1rgfesvidyllhsqevtrdmfdrqidmimrdla  
pvmqkyakllqrihgldnm  
rfed1kisvdpyepei1siedsknyi fga1svlgddytnmlreaydqrwidfaqnkgkdtgafcaspyfthsyvfi swtg  
kmaefv1ahe1ghaght  
laqkhqpy1eseasmyfveapstmnem1many1fntsdnprfkrwvigsilsrtyyhnmvth1leaayqrevyhkvdqge  
slnapt1neim1nvykqff  
gdavdmtegae1twmrqphyymglysytsag1tigttvvsqkiknegqpavdawlet1kkggsvspvelaniagvditte  
qplkstiqy1sd1vdevek  
1tdeieqann  
>tr|D2N711|D2N711\_STAA5  
mykiymtql1pietsvripqndisryvneivetipese1fdefrhrgatsyhpkmmlkiilyaytqsvfsgrriek11  
hdsirmmwlaqntpsykt  
inrfrvnpntdaliel1fiqfhsqclqknliddnsifidgkveasanrytfvkk1siqnhelklnenskalyrd1veek  
iileikedgds1tteeid  
1vgsh1dkeied1nhsienentqrginkvkelgfv1malnirkiaaqravhykihikkadfyqi1nrnqlfyia  
>tr|D2N712|D2N712\_STAA5  
mai1rqryqe1ddlike1rr1ganvyvsiengikslsiddrgfarqtvkndkhinqlnyninervimlitkqppiasd1  
rmm1ss1kiasd1lerigdn  
aasian1rlrtkitddyv1tr1ktmgklam1mlkd1dqafkkkdtv1lirei1ereded1dlyshii1naty1idndpfvaa  
qahlaarh1erigdh1ini  
aesvyfy1tgthyeq  
>tr|D2N713|D2N713\_STAA5  
maqt1aqtqk1sqsh1fdvsqshhktppddt1nshsviystqnl1dwygenhalqn1n1diyenqitai1igpsgcgkstyik  
t1nrmv1elvptvktagi1  
yrdqdi1fdqkysqe1l1rtnv1gmvfqqpnpfksiyd1nytygpk1hgiknkkv1deiveks1rgaaiwde1kdr1lhtnays  
1sggqq1rvci1arcl1aiep  
ev11md1eptsald1p1st1rvee1lvqe1lkeny1ti1mvth1mqqaarvsdktaff1ngyvneyddtdki1fsnpsnkktedyi  
sgrfg  
>tr|D2N714|D2N714\_STAA5  
mettdn1nrs1ldvqql1vqkh1ssrtvknkvfklif1lact11glv1lia11tqt1likgvsh1nlqff1tnfs1stpsmagvk  
gal1gs1lw1mlsi1p1lsi1  
1gigtai1yleeyaknnk1ftqfvk1s1sn1lagvpsv1vfg11gyt1fv1ggagie1alkmgn1sila1aa1tmt11il1pi1iv1ssq  
eai1ravpts1v1reasy1lga  
nkwti1rrv1lpaa1lpgi1ltgf1ils1sra1lgetap1vl1igipt11latpr1sildqfsal1piq1ftwakmpqeefqnvasa  
gi1v1llv1il1lmngv1ai1l  
rnkfskkf  
>tr|D2N716|D2N716\_STAA5  
mkkwq1fvgt1talgat11lgacggnggsgnsd1kgeakgdgsstvapivek1nekwaqdhsdakisagqagt1gagf1qkfi  
agdi1dfadas1rp1kdeekq  
k1qnkni1kyke1fki1aqdgvt1vavnk1endfvde1dkqql1kai1ysgkakt1wkdvnskw1pdkkinavspn1sshgty1dffenev  
m1kedikaek1nad1tna1ivs  
svtkn1kegi1gyf1gyn1fyvq1nkdk1lkevki1dengkate1ptkkt1iqd1nsya1srpl1fiyv1neka1kdn1km1sef1ikfv1led  
kgkaee1eagy1vaapektyk  
sq1dd1lka1fidkn1qks1ddkks1ddk1serqki1irrn1fkcv1khdf1dges1lfrv1qs1liyr1dad1fdi1qlvyk1lin1k  
>tr|D2N717|D2N717\_STAA5  
mkyika1qinq1k1sep1etkk1iyshr1kiyvep1vfg1fmk1vilg1ftrms1vrg1inkv1krelgfv1malnirkiaaqravhyqi1h1  
kkadfyqi1nrnqlfyia  
>tr|D2N718|D2N718\_STAA5  
mal1dkdi1vgs1ief1evvg1lqgsty11kgp1ngenvk1nqsem1ddde1l1evge1ysffiy1pn1rsgel1fatq1nmpdi1tkdkyd  
fakv1lkt1dr1dgar1idvg1lp  
rev1lvped1lpk1vks1lwp1qpgdh11lvt1lridren1hmygr1lases1vven1mft1pv1hddn1lkne1vieak1pyrv1lrig1sfl1se  
sgyki1fvheser1kaep1rg  
esvqvr1i1ghndk1gelngs1fl1p1laher1ddd1gqvi1fd11veyd1gel1pfdk1sspea1ikev1fnmsk1gsfkraigh1lyk1qki  
ini1etgki1t1tkgws1rid  
ske  
>tr|D2N719|D2N719\_STAA5  
mlqvt1dvs1lrf1gdr1kl1fedv1nik1ftegnc1ygl1igangagk1st1fl1ki1lsgel1dsqt1ghvs1lgkner1lav1lkqdhy1ayer



Tsompanidou\_et\_al\_Supplemental\_FASTA\_File

vldvvikgherlyevmkek  
deymkpdfsdedgiraeelegefaemngwnaeadaanllsrgldptlhdkkmaelennqkikvllaqslfgepdvlll  
deptngldipaiswledfl  
infndtviwvshdrhflnnvcthiadldfgkikvyvgnfydwyqssqlaqkmaqeqnkkeekmkelqdfiarfsanask  
skqatsrkkqlekielddi  
qpssrrypfvkftpereigndllivqnlsktidgekvlndvsftmnpndkailiddseiakttllkilagemepdegsk  
wgvttlsyfpkdnseffe  
gvnmnlvdwlrqyapedeqtetflrgflgrmlfsgeevkkkasvlsgekevrcmlskmmlssanvllldeptnhldlesi  
tavndgllksfkgsiiftsy  
dfefintianrvidlnkqggvskeipyeeylqeigvllk  
>tr|D2N720|D2N720\_STAA5  
mvtvsvlkfggssvsdfkikriaemlkervnqdeqlivvvsamgnttdqldmtvstltkapqkqelaallttgeqqtv  
ylsmvlnDIGVnakamtgy  
qagiktighhllkskiaqinpqtfefaqfendi lvvagfqginehqelttlgrggsdttavala vnsqipceiytdvdgvy  
atdprllpkakrldivsy  
emmemaalgagvletrsvlaknyniplylgtlsnvkgtwimsneeilekkavtgvaldkhmmhl tisyp lsdnqlltq  
lftel eegavnvdmsqiv  
nldgllq lsf tikdsdfhqismiletlnqyealaykinehyvkisligsgmrdmsgvaskaflltiennipfyqtttsei  
sisyviddfngqqavekly  
dafni  
>tr|D2N722|D2N722\_STAA5  
mthlfegygvalttptnknvnleaalkahvnflennakaiivngttaesptlttdekelilktvidlvdkrvpviagt  
tndteksiqssi qakalga  
daimlitypynktnqrglvkhfeaiadavklpvvlynvpsrtnmtiepetveilsqhsivalkdatndfeyleevkri  
dtnsfalysgnddnvvey  
qrgggvisvianvipkefal fdaqsgldiqdqfkipigtllsalsvdin pipikaltsylgfgnyelrlplvsledtd  
tkvlreaydtfkagene  
>tr|D2N723|D2N723\_STAA5  
mkil ligygamnqrvarlaeekgheivgvientskattpyqqyqhiadvkdadvaidfsnplllfp lldeafhlpllvat  
tgekekllnkldelsknmp  
vffsanmsygvhaltkilaavp lldfdielteahnkkvdapsgtleklydvivslkenvtpvydrhelnekrqpqi  
gihsi rggtivgehevlf  
gtdeti qithraqskdifangai qaaerlvnkpngfytdfnl  
>tr|D2N725|D2N725\_STAA5  
mnel efvtkhrrhlhqphe lshfettayikafldslnikydcpl etgvvaylegngshtiayradidalpileendvp  
yrsqsdhvmhacghdght  
alm lfvqrckdmqdagqlpqnvvfi fqpaeetgganrl ikagafd kypieavf gihvnpfadegiavirdeeitasate  
yrf fltg lsshvadkeqgh  
scgealqhvltqisqiqfhlnglkrnivhighfkageaintvpsngylegtirtydiddltivknqm qkiaesvkl lfn  
vdceikfaegypptinspk  
lrtqiedalikadlnvydkptpflfgedfsfygqqlapayfvfigtrnedkgfv tglhtshlnfdekmlinvanfyenll  
nnykev  
>tr|D2N726|D2N726\_STAA5  
mtatwsvnkkliflqnaivtknnqplmavvknnayhydlefavtqfihagidtfsttslreaiqirqlapdatifl mnavy  
efdlvrehqihmtlpslty  
yynhkndlsgihvhlefenllhrsgfkdlneikev lkdhhnqnakmi isglwthfgyadefdvsvdynamversqwmeives  
llsegyqfdlihaqnsasf  
yregqillphtharvgialygsrpysslnqhai vqsltvkanviqvrevqagdygcysfafevtknntklavvdigygd  
gilrtrakhealingkryp  
iralmmshmfvevdgnvhaqdevilyndirideytfkgvganseqlsamnhdsllkeyisndc  
>tr|D2N727|D2N727\_STAA5  
mtvkynqngel tmdgis lktiaqsfgtptivydelqireqmrryhrafkds glkynisyaskaftclqmvklvaeedlql  
dvvsege lytaleagfeps  
rihfhgnnktkheiryalennigyfvidsleeielidryandtvqvv lrvnpgveahthefiqtggedskfglsiqygl  
ikainkvqskhllklkgvh  
chigsqiegteafietakivlrlwkeqqiqvellnlgggfgikyvegdesfpiesgikditdaikseikvlgidapeigi  
epgrsivgeagvtlyevgt  
ikeipeinkyvsidggmsdhirtal ydakyqallvnrneeaddsvtiagklcesgdiiikdaklpssvkr gdy lailstg  
ayhysmasnynqm qkpsvf  
flkdgkarevikrqlrqliindtk  
>tr|D2N728|D2N728\_STAA5  
mhvpkyfqvddfkeiekf iqsnsfgmi vtvdaqgkpiathvplvldkkgddyisghlaktnpqcntlkdnqnv livyqga  
hsyvssawyekenvptwny  
qavhlygessilseeetidllksllvkyerhredpvlwdni sentkmqakg ivgfkvkihkieaaykmsqrnekdynni  
iekledesnassvavaevm  
knihpys  
>tr|D2N729|D2N729\_STAA5  
mkyli lslvanllvfgvl saiglnini laammivlvvpimisgilffktnldktyiffniifidfyuyiyvhlmtl pkf

Tsompanidou\_et\_al\_Supplemental\_FASTA\_File

nnyikaemmelehidvliit  
skdfgfdeilfytllyl1111iilylkkqvktks  
>tr|D2N730|D2N730\_STAA5  
mkqgtvkwfnaekgfgfi evegendvfvhfsainqdgysleegqavefevvegdrpqaanvvk1  
>tr|D2N732|D2N732\_STAA5  
mrh1hlqvfgrvqvgfryftqriamnyivgtvqnvddyveiyaqgndadierfiqgvi egaspasnvtshqleel1n  
qklsdfrsi  
>tr|D2N734|D2N734\_STAA5  
mtenksfkeshplddfisdke1snttiqkek1tieqqkqvdtiskqip1dneg1lafgsdlqkqmsqfshqmldevqsk  
dvgpigdt1sd1msklksv  
npne1ntdkpsmlkri1fsrakssineifsrmsvsaqvdritiqlqkhqth1trdie1ldtlydknkqyfd1slhiiaa  
qqk1q1enek1pq1qqqa  
qqstnqmdiqqfadmqqfidr1dkryd1qlsrqialqtapqirmiqnvqalaekiqssiltsiplwknqmaialt1mr  
qrnavaaqravtdtnd11  
tanaem1kqna1etatenergivg1dt1krtqsn1ietieet1liqqhgreesqlaekelqqleqdlksh1vnikgpnkq  
s  
>tr|D2N735|D2N735\_STAA5  
mnkntwvigft1famffgagn1ifppn1gl1dsgqffwpailafv1tgig1pl1lgviva1dkegyiga1nkispkfsilf  
lii1y1tig1plfaiprtas  
tsfem1tipi1hsns1ialfifti1yfiv1vlyic1npsklidrigs11tp111itilamiikgyl1dfsgnsagkgnealy  
hsnfssfaegftqgyltmd  
aiaaiafsm1vnavk1tg1tktnqi1fkqt1tag1iaava1lfiyis1lgyignhmpvsdmt1dq1kskdrnigty11ttm  
astgfgsfgy11giiva1  
ac1ttacg1ivavseyfhrivpkvsykafvlvfilmsfianqg1navismsipv1sivypvaitv111iliakfiptkr  
itqqipv1i1if1sifsvi  
sk1gw1kinfies1pl1rays1ewfpvaiiatilgy1lvgifvkqdpikyqqe  
>tr|D2N736|D2N736\_STAA5  
msdrfikfndeq1dakqvm1qd1ar111kneqtqvkiqkfl1yynpvqnilitswfwshrpshiemag1ktdvmlaaygy  
hmm1dvqivnevvdktfk1h  
pkfyqqlfk1ledmrv1nsikverpstak1id1r1dtrisytesqikvyrtktqytd11f1ylehaf1sqdff1dipsihs  
d1dd1lvnmf1yl1pnffqn  
qnsednmy1aqri1myqvdd1kedm1neyyy1pkt1ynt1aspafed1krtdasqvdgqddtsedddnqsekadskads  
eskgg1yleme1hegqns  
t1gndear1egdatddmtdm1tkkgksndt1nre1gdav1gqsqafq1dgvnknveikwqipeiepqyv1leyqelkqdvqy  
eikd1liqi1kkti1ereqrd  
arf1n1tkgr1qkd1inwf1iddqy1fykkq1d1sksfdatft11idasasmhdkmaetkkgv1lfhet1ka1nikhe1l1sf  
seda1f1dsdehaqpn1ie1  
inydystfekd1prima1leqddnrdgvairvaser1mrrnqh1rf1livfsd1gepsafnysqdg1idtyeavemsrkf1gi  
evfnv1f1sqdp1tedveqt  
ihniygqya1fvegvah1pgh1sp11kk111ks1  
>tr|D2N739|D2N739\_STAA5  
mcg1rsit1gttnieqt1khfmvdi1gl1nyee1lensir1fgdadisp1gtr1lqfiqvpseql1eeshfv1gig1rtptdsg1lee  
yae1l1sskd1pft1tvkel1n  
gnkyfs1lednng1h1fsiysnennygv1lgmpsfesavn1lhqvq1lgpvi1kvnhditgqil1tnif1glevfaeyqpf1dn  
adyhvqvf1kigtg1lggei  
h1mpvetem1tpeygavdqvefetkdadffnqaksr1deveipyqt1leqddiesir1itensg1sfi1ft1qk  
>tr|D2N740|D2N740\_STAA5  
mpevkvpelaes1tegtiaew1knvgdsvekgeaile1etdkvnvevvseagv1seq1asegdtvevgqaiav1igegsg  
naskensndntpqndett  
nnk1keett1nksadkaevnqtnddnqrvnatpsarryarengvn1aevspk1ndvvrkedidkkq1qapastq1ttq1qapak  
eek1kynqyptkpv1rekms  
rrkk1taakk11levsn1ntam1ttfnevdm1tnvme1rkrkkeqf1mkdh1dg1tk1g1fmsff1tkasvaal1kkyevnae1idg1ddm  
itkqy1y1digvav1std1dg11  
vpfvr1dcdkknfaeieaeian1avkarekk1gl1ddmvngsftitngg1ifgsmm1stpiingnqaailgmhs1it1rpiaidq  
dtienr1pmyia1sydhri  
idg1keav1gf1ktike1lienped111es  
>tr|D2N742|D2N742\_STAA5  
m1tkr1kl1rnwi1vttmi1tfvti1f1fcl1i1iff1kdt1h1nse1l1ddaer1sssd1inn1f1hskpvkdisal1d1nas1lgnf1qe1i  
iydeh1nkl1fetsnd1tvr  
vepgyehry1fdrvik1krykgidyl1ikepittqdfk1gys11ihs1lenydnivkslyiialafgviatiitatisyvf1stq  
itkplvs1snkmi1eirrdg  
fqnk1ql1ntnyeeidn1lantfnemmsqieesfnqqrqfvedashe1rtp1lqi1qgh1n1liqrwgk1dpavlees1nisie  
emnr1iik1vee11el1tkgd  
vndissea1qtvhinde1irsrihs1kq1lhpdyhfdtd1tskn1leikmkphqfeq1flifidnaikydvknkkikvkr1kn  
kqki1e1tdhg1igipeedq  
df1fdrfyr1vdk1srsrsqggng1gl1siaqki1q1nggsik1k1kseinkgt1tfkiif  
>tr|D2N745|D2N745\_STAA5  
mtkiaftgggtvghsvn1sl1ipta1sqgyealy1igskngierem1esqlpeikyyp1ssgk1lrryis1lenakdvfk1k

Tsompanidou\_et\_al\_Supplemental\_FASTA\_File

gildarkvllkkekpdllfs  
kggfvsppvviaakslniptiihesdltpglankialkfakkiyttfeetlnylpkekadfigatiredlknghangyq  
ltgfnenkkvllvmggs1g  
skklnsiirenldallqqyqvihltgkglkdaqvkksgyiqyefvkddltdllaitdtvisragsnaiyefltlripml1  
vplgldqsrqgdqidnanhf  
adkgyaktideeq1taqillqe1nkmeqertriiinnmksyeqsytkea1fdkmikda1n  
>tr|D2N746|D2N746\_STAA5  
mir1gkmsdldqiln1veeake1mkehneqwdqyp1lehfeediakdylvleennkiygfivvdqdaewyddidwp  
vnregafvihrltgskeyk  
gaate1fnyvidvkvargteviltdtfa1nkpaqgl1fakfgfhkveq1meyppydkgpefyayykn1ke  
>tr|D2N747|D2N747\_STAA5  
mddkqhtssdderaeiatsnqddqntsskrvh1krwqfisiligtilitavitvayifinqisglnktdqan1kie  
nvykilnsdykkqnsdk1  
skaaidgmvkelkdpseyel1tkeqtkfnegvsqdfvgigaemqkknqimvtspmkgsaeragirpkdvtkvngksi  
kgka1devvkdvrgkente  
vt1tvqrgseekdvkikrekihvsveykkkgkvgitinkfndtsgelkdav1kahkdglkkivld1rnnpgg11dea  
vkmanifidkgktvvk1ek  
gkdeaiqtsnda1keakmdisilvnegsasasevftga1kdynekavygsktfgkgvvqttrefkdgs11kytemkw1  
tpdghyihgkiki1kpdvtid  
tpkyqslnvipntktfkvgdddkniktikig1salykvdnestqfdqalenqvka1fqqank1evtgefknketnkftel  
1vekankhddv1dk1ini1  
k  
>tr|D2N749|D2N749\_STAA5  
mfkkl1fgkgkevqkdi1yap1tgeyvki1edipdpvfaqkmmgegfginptegevvspiagrvidnvfptkhaigl1kadng  
le1lvhig1dtvq1dgeg1f  
ev1vssgdevnvqdp1vrfn1eyinnaksvi1piitntdqatsiniydenavikgetkvidvtm1n  
>tr|D2N752|D2N752\_STAA5  
mtkqi1vtdstsd1skeyleannihvip1sl1tiegasyvqvditsee1finhiendedv1ktsqpaigefisayeelgkdg  
sei1sih1ssg1sgtfnta  
yqasqmvdanvtv1dsksis1fglyqih1vle1vkegvstseivk1nh1renik1fvvigq1nq1ikggrisktkglig  
n1mkikpig1tdg1r1el1v  
hnartqns1siqyl1kkae1figdheiksvgahanvieyvd1k1kvfneafhvnnydinvt1tpvisah1tggaig1lv1k  
k  
>tr|D2N753|D2N753\_STAA5  
mt1silvah1qrvigfenq1pwh1pnd1khvkk1stght1vmgrktfesigk1p1nrrnv1tsdtsfnvedvdv1hsi  
ediyq1pghvfi1fggq1lf  
eem1dkvddmy1tvi1egkfrgdtffpyt1fedwevassvegk1dekntipht1fl1irkk  
>tr|D2N754|D2N754\_STAA5  
m1nsfdaayhs1ceev1elgnt1rndrtntgt1skfghq1rfd1skgfp11ttkkvsfkl1vate1llwfikgdt1niqy11ky  
nnniwnewafeny1ksdey  
kgpdmtdfghra1sdpefneqykeqmkqfkqri1eddt1fakqfgd1gnvygkqwrwdvkdgnhfdq1ktvieqikhnpd  
srrhiv1sawnp1teid1tma1l  
ppchtmf1qfyvqdgk1scq1lyrsadi1flgvpfniasya11thliakecglevgefvtfgdahiy1snhidaiqtq1lare  
sfnp1t1k1nsdks1fdin  
yed1eivdyeshpaikapiav  
>tr|D2N755|D2N755\_STAA5  
mnaydaymkeiaq1mrgel1tqngfts1etseavseymnqv1naddtt1fvinstcgaag1arpaavavatqnehrptntv  
tvfagq1dkeata1mrefiq  
qvpsspsya1l1fkgrd1vyfmprefiegrdi1ndiamd1kda1fdenck  
>tr|D2N756|D2N756\_STAA5  
mei1ri1eptpspntmkv1sy1trek1sntykkveenqprfinq11sidgitsi1fhvmn1flavdkapkadwevil1pdika  
vfsgesqvm1etgkdpq1idn  
hfgeika1el1tfkgi1pyqik1tsadqel1req1pqt1yvdm1tqaqtehdn1vfmrkwd1lgnrygnieevmdgv1leev1vt  
ypesq1lpv1vkha1leenha  
tnnyhfyrhvs1deyh1atdnw1ktr1rm1nhf1pkptfedip11dl1alsdekvp1rrraiv1l1gmieskei1lpy1lykg1rdk  
spavrr1tagdc1sdl1gype  
alpemv111ddp1qki1vrwraamfi1fdegnaeq1palkahindnafevkl1qiemaisriengdqa1lgs1vwkqmt1nrti  
>tr|D2N758|D2N758\_STAA5  
mynei1glvtfiatfv1lmv1myrffgkqgliawvaigtiani1qviktveifgisat1gnvmfasiy1latdi1ndiygrk  
vakravw1l1gfsst1imiiv  
mq1sl1hfipapedma1qkaha1fdvvpria1lgsivayii1gqhidvfi1slikkvfssdk1tffiraygst1f1ssi1dta1lf  
vaia1figs1lpgt1vvfeifi  
ttyv1k1astvinvp1fgyi1aksfyrkgkik1dk1dqy  
>tr|D2N759|D2N759\_STAA5  
makin1fdaatkg1npgi1stcavvikedeq1hfty1thelgemdn1htaewaaciya1lkharel1nvsna1llytdsk1liadsvnag  
yvknak1fkpyfdq1lei1feq  
dfd111fvkwipre1qnkeanqhaqqa1lyk1likknk  
>tr|D2N760|D2N760\_STAA5

Tsompanidou\_et\_al\_Supplemental\_FASTA\_File

mnyrdkiqkfsi rkytvgtfstviatlvlflgln tsqaqaaetnpasalkkqkqngdtqtenrehevqnsqngqslsapi  
eneqpnntqtnhvdasavq  
ssttehdqpvsnegakkdtaaatptqsakaaskheqsesraankkendneathvesheanvvtasdsdsgnvqhdrne  
lqaffdanyhdyrfidren  
adsgtfnvykgifdkintlgsndpinnkdlqlaykeleqavalirtmpqrqqtssrssiqrtsiesraaeprsvsdyq  
nanssyvenandgsgypv  
gtyinasskgapynlpttpwntlkasakefalitakqtgdgyqwwikfnkghaphenmi fwfalpdgqtpvgrtefv  
nadgtnvqwsngagagank  
plpqrweygvndphrshdfkinnrsgqviyewptvniksldlarasydlnagatpatkafgrqifdyingqkpaessg  
vpkvytfigggdasytisf  
ktggptidklyyaagara leynqlfmysqlyvestqdqqqrlngrlqvvnrtyrigttkrvevsqgnvqtkkvl estnln  
iddfvddplsyvktpsnk  
lgyfptnantnafrgggvnp lndyqlsq lfsdqnfqeaartknpir lmgfdypdafngnetlvpnltvlpei qhnikf  
fknddgqniaekpaskqag  
hpvfyvyagnqgnasvnl ggsvtsiqplrinltsnenftdkdwqitgiprtlhienstnrpnarernielvgnllpgdy  
fgtirfgrkeqlfeirvkv  
htpritttaeelrgtalqkvpvtvdipldpsalvlylviptsqtkdggseadqipsytkiatgtpdgvhsttirpedy  
vvfippvghqirali fyynn  
vvasnmsnavtilpddipptinnpvglnakyyrgdevsftmgvsdrhsglksttittlpsgwtsnltsdkknsgla isg  
rvsmnqaynsditfkvsat  
dnvnttndsqs khvtvhvgkisdda hpi vlnsekvvvvnptaltgdekqrittafmknqnirgylassnpvtvdnhg  
nvtlqyrdgsstl datnv  
mtyepvkvpeyqtanapktatvtiakqgsfnigdikqyftl sngqai psstftnitsdrtipta qevsqmnagtqlyhit  
atnayhkdtedfyitlki  
dvkqpegdqrvmstyditteiskvkqafinanrdaisfaegdisvntpnsgsvstivninkgrltskfts nlanm  
nflrwnfpqdytvtwtna  
kianrptdgg lswsddhksliyrydatlgtqittndiltllkattvpgl rnniagnekaqaeaggrpnkttgysqsnp  
tsdgqrqftlngqviqimd  
iinpsngfggqpvtnsvranhsnstvsvnesaangagaftidhvknsthnaadavykaqlylspygpkqyvehlnq  
ntgnttdainiyfvpsdlv  
nptvsvgnytnhqvfsgtftntitandnfgvqsvtvpntsqtgtv dnnhqhvsatapnvt satnktinlvatdts gnt  
attsfnvtikplrdkyrvg  
tsstaanpvriani snnatvsqadqta inslftsnaprnyatasaseitsktvsnvsrtgnnaqvttvtyqdgts  
tvtvpkhvipeivahshy  
tvqqdfptngasadyfkl sngsaipdatitwvsgqapknnttigqdinvtahilidgett pitktatykvsvvpk  
hvfetnrgavfpgisdyd  
akqyvkpvndswtqnaqrnmfqt nsygpskdvvgistrdirvtydnhqtqiikilakvkpdprridgnsvtykaglnq  
qikinnvlssssikl fkd  
ntpl tinn tygsgntavvtvsdalpngvikarssitmnvtyttqdehgraidvtrnesvdsnds atvttvtpqlatte  
gavfikggdgd fdfghverf  
iqnpph gatvawhds ptdwkn tvgnthktavvtlpsggtrnevvpkvypvanakapsrdvkgqnlngtdainyitfd  
pntntngi taawanrqpn  
nqqagvqhlnvdvtypgi saakrvpvtvnvyqfefpqtstttvggtlasgtqasgyahiqnanglptdgftykwnrdtt  
gtndanwaamkn pnaakvi  
nakydviynghtfatsllakfvvkdvpakptvtetaagaiti appanqvtv nthagnvttiyadklvikr ngvttftrh  
nntspwvkeasaatvagiv  
gtngitvaagt fnaadti qvvatqgsgeti sdeqlsddftv vapqpnqattkiwqnghidimpnpsghlinptqamdi  
aytekvnggae hsktl nav  
rgqnnqwtiankpdvvtl dahtgkvtfnantikpnisaititpkagtghs assnpstltapathvntteivkdygsnvtp  
aeinnavqvan kr tati kn  
gtampnlaggstttipvtvtyndssteevqesiftkadkre litdknhl ddpvstgdgkpgtitqynnai hnaqqqina  
akteaqvinneratpqqv  
sdal tkvraaqtkidqakallqnkednsq lvt sknlqssvnqvpsttgmtqqsidynakkrdaese itaaqrvidngd  
ataqqisdekr rvdnal ta  
lnqakhdl tadthaleqavqqlnrtgittgkkipasitaynsiralqsd ltsaknsanai iqkpirsvqevqaltvnr  
vnerltqainqlvpladns  
alrtaktkldeeinksvtt dgm tqssi qayenakragqtestnaqvninngdatdqqiaaektkveekynslkqaidgl t  
pdlaplqtaktqlqndidq  
pntttgmtsasvatfnekl saartkiqei drvlashp dvatir qnvtaanaaksa ldqarngl tvdkaplenaknqlqhs  
idtqtsttgmtqdsinayn  
akltaarnkvqqinqvlag sptvdqintntsaanqaksdl dharqaltpdkaplqnaktqleqsinqptdttgmttasln  
aynqklqaarqklteinqv  
l ngnptvqkindkvteangakdq lntarqgl ldrqpalstlh gaslnqaqqnftqqinaaqnhaaletiksnitaln  
namtklkesvadnnsiksg  
qnytdatqankqaydnavaakgvi getnnp tmdvntvnqkassvkstqdal dgqqnlqrakteatnaithasdl nqaqk  
nal tqqvnsaqnvqavndi  
kqttqslntamtgl krgvanhnqvvsdnyvnadtnkkndynnaynhandi ingnaqhpv itpsdvnnal svntnkehal  
ngeaklnaakqeantalg

Tsompanidou\_et\_al\_Supplemental\_FASTA\_File

lnnlannaqrqnlqsqingahqietvntikqnatnlnsamgnlrqavadkdvkrteyadadtakqnaynsavssaeti  
nqtnptmsvndvnsatsa  
vttknalnqdeklaqsktdaasaidalpllnnaqkadvkskinvasniagvntvkqggdlnntamgnlqgaindeqttl  
nsqnyqdatpskktaytna  
vqaakdi lnksngqkktkdqvtevmnqvdsaktnldgtrlldqakqtakqqlnmthltpaqktnltnqinsgttvagvh  
tvqsnantldqamntlrs  
iankdatkasedyvandanndkqtaynnavaaaeti inansnpempstittqkadqvnsakta lngdenlaakqnaktyln  
sltsitdaqknnlisqits  
atrsvgdtvkvqnaqhlldqamanlqsginnesqvkssekyrdadtnkqqeydnaitaakailnkqhgpnataqnaaveaalq  
rvntaknalngdakliaaq  
naaqhlgltlthittaqhndlnnqisqatnlagvesvkqsansldgamgnlqtaindksqtlasqnlfdadeqkrnaynq  
avsnaetlnkqtgpnak  
taveqalnnvnsakhalngtqnl nnaqqaaitaingssdl nqhakealkaqangaqrvsnaqdvqrnate lntamgtlkx  
aidktttlasskyvnads  
tkqnayttkvtnaehi isgtptvttpevtaaanqvnsakqelngderlreakqnantaidaltqlnltpqkalkkeqvg  
qanrledvqvtqngqaln  
namkglrdsianettkagqnytdaspnnqstynsavsnakgi inqtnptmdasaitqaatqvnnaknglngaenlrna  
qntakqnlntlshltnnqk  
saissqidraghvsevtaaknaate lntqmgnleqaihdqntvkvsvkftdadaakrdaytnavsraetlnktqgantp  
kqdvvasiqnvssaknaln  
gdqnvtnaknaaknalnlnltsinnaqkrdlttkiddqattvagveavsntgtqlntamaklqngindkantlasenyhdad  
sdkktaytqavtnaeniln  
knsqnl dkaavenalsqvtnakgalngnlnleqaksnanttinglqhlttaqkdklkqqvqqaqnvagvdtvkssantl  
ngamgtlrnsiqdnaatkn  
gqnyldatesnktynnavdsansvinatsnpnmdanainqiatqvtstkna ldgthnl tqakqtatnaidgaanlnkaq  
kdal kaqvt saqrvanvts  
iqqtane lntamgqlqhgiddenatkqtqkyrdaeqskktydqavaaakailnkqtgssndkaavdra lqqvtstkda l  
ngdaklaeakaaakqnlst  
lnhitaqrtalegqinqattvdgvntvktnantldgamns lqgsindkdat lnrqnyldadeskrnaytqavtaaeqil  
nkqtggnntskadvnalna  
vtraktalngaenlrnakttatntinglphltqlqkdnlkqveqaqnvagvngvkdkgnt lntamgalrtsiqndnttk  
tsqnyldasdsnknynta  
vnnangvinatnnpnidanaingmanqvnttkaalngaqlaqaktnatntinnahdl nqkqkda lkaqvnaqrvsdan  
nvqhtate lngamta lkaa  
iadkertkasgnyvadqekrqaydskvtnaeni ingtpnat ltvndvnsatsqvnaakta lngdnnlrvakehanntid  
glaqllnnaqkalkkeqvqs  
attldgvqvtknssqtlntvmkglrdsianeatikagqnytdas lnrneydsavtaakaiinqtsnptmeantitqats  
qvtkeqalngaqlaqak  
ttaknnlnnltsinnaqkda ltrsidgattvagvnetakate lnnamhs lqngindetqtkqtqkyldaepskksaydq  
avnaakailtkasgqnvdk  
aaveqalqnvstktalngdaklneakaaakqtlgtlthinnaqrta lneitqatnvegvntvkakaqql dgamgqlet  
sirdkdtlqsqnyqdadd  
akrtaysqavnaaatilnktsggntpkadveramqvtvqantalingiqlerakqaanta itnasdlntkqkealkaqvt  
sagrsvangvehtvte l  
tamta lkraiadkadtkasgnyvadankrqaydekvtaeenivsgtptptltpsdvtnaatqvtnaktqlngnlnle  
kqnanta idglts lngpqq  
aklkeqvgqattl pnvqtvrdnaqt lntamkglrdsianeatikagqnytdaspnnrseydsavtaakai igqtsptmn  
aqeinqakdqvtakqgaln  
gqenlrtaqtnakqhlngl sdltdaqkdavkrqie gathvnevtqaqnada lntamtnlknqidqntikqgvnftdad  
eakrnaytnavtqaeqiln  
kaqgpntakdgveta lqnvqraknd lngnqvanakttaknalnlnltsinnaqkealksqidsattvagvqvsttase l  
ntamsnlqngindeaatka  
aqkytdadsdkqtayndavtaakt lldktagtndnkaaveqalqrvntakta lngdar lneakntakqqlatmshltdaq  
kgnlteqjergttvagvqg  
iqanagtlldqamnlrqsivskdatkasedyhdantdlqnaynhavseaqi isasnpempdtnqkasqvnsansal  
ngdeklaeakqtaksdigr  
lsdlinnaqqsataevdhapnl aavtaaknkats lntamgnlkhal aekdntrsvnytdadqpkqqaydtavtqaegit  
nangsnanetqvqaalnql  
nqaknd lngdnkvaakeaakhalasysnl nnaqstaatsqidnattvagvttaqntane lntamgqlqngindqntvkq  
qvnftdadqgkdaytnav  
tnaqqil dkanqnmkaqveaalnqvttaknalngdanvrqaksdakanlgtlthlnnaqkqdltsqiegvttvngvng  
vktkaqldgamqrlesai  
ankdqtkasenyidaptnktafdnaitqaesylnkdhgankdkqaveqai qsvtstena lngdanl qrakteatqaidn  
lthlntppkta lkkqvnna  
qrvsgvtdlksats lnsamdqlkqaiadhdtivaggytnaspdkqgaytdaynaaknivngspn vitnaadvtaatqr  
vnaetglngdtnlatakq  
qakdalrqmthlnaqqkqstgqidsatqvtgvqsvkdnatln dnamnqlrnsiankdevkasqpyvdgtdkqnaynta  
vtsaeni inatsqptldps

Tsompanidou\_et\_al\_Supplemental\_FASTA\_File

avtqaanqvntnktalngaqlnankkqestaniqlshlnnaqkqdlntqvtnapnistvnqvktkaeqldqamerling  
iqdkdqvkqsvnftdadpe  
kqtaynnavtaeeniinqangtnenqsqveaalstvtttkqalngdrkvtadaknnanqtlstldnlnnaqkgavtgninq  
ahtvaevtqaiqtageInt  
amgnlnkslnkdttlgsqnfadadpekknayneavrnaeniInkstgtnvpkdqveaamqvnttkaalngsqnlekak  
qhantaidglshtnaqkd  
alkqlvqqsttvaeeaggneqkannvdaamdklrqsiadnatkqnqnytdaspnkkdaynnavttaqgiidqtsptldp  
tvinqaagqvsttknalng  
nenleaakqatqslgsldnlnnaqkqavtnqingahtvdeanqikqnaqnlntamgnlkqaiadkdatkatvnftdadq  
akqqayntavtneaenis  
anggnatqteveqaiqqvntakqalngnanvqhakdeatalinnsndlnqaqkdaalkqqvqnattvagvnnvkqtaqeln  
namtqlkqgiadkeqtkad  
gnfvnadpdkqnaykqavakaealisgtpdvvtptseitaalnkvtqakndlngntnlatakqnvqhaidqldpnlngaqr  
deyskqitqatlvpnvai  
qqaattlndamtqlkqgiankaqikgsenyhdadtktaydnvtaeellkqttntmpntiqaaltkvndtnqaln  
gnqkladakqaaktnlgtl  
dhlnaqqkqalttveqapdiatvnnvkqnaqnlnamtnlnalqdktetlnsinftdadkakkdaytnavaqaegils  
kangsnasqteveqamqr  
naakqalngndnvrakdaakqvintandlnqaqkdaalkqqvdvdaqvavntnkqtaqdlngamtqlkqgvadkdqtk  
ngfnvadtekqnaynnav  
ahaqeiisgtpnanvdpqqaqalqqvtdaknglngnhnlqvakdnantaidqldpnlngpqtalldqvthaelvtgvna  
ikqnadalnnamgtlkqgi  
qansvppqsvdfqadqdkqaynnaanaqqiangtptpvltpdvtqavttmnqakdalngdeklaqakqdaalanldt  
lrdlnqpprdalrnqinqa  
qalatveqtkqnaqvntamsnlkqgiankdtkasenyhdadadkqtaytnavsqaegiiqttntptlnpdditrvtq  
vtdaknglngaeklatekq  
nakdavnamtlnaqqkqalngqidspeiatvtqvktatsldqamqnlsgaindktqtladgnylnadpdkqnaykqa  
vakaeallnkqsgtnevqa  
qvesitnevnaakqalngndlnanakqqakqalanlthlnaqqkqsfesqitqaplvtdvttinqakaaldhameilrns  
iadnqatlasedyhdaaaq  
rqndynqavtaanniinqttsptmpddvnrattqvntkvaldgdenlaaakqqannrldqldhlnnaqkqqlqsqitq  
ssdiaavnghkqtaesInt  
amgnlinaiadhgaveqrgnfinadtdkqtayttavneaeaminkqtgqnanqteveqaitkvqttlqalngdhnlvak  
tnatqaidaltsIndpqt  
alkdqvtaatlvtavhqi eqnantlnqamhglresiqdnaatkanskyinedqpeqqnydqavqaanniineqtatldnn  
vinqaattvnttkaalhg  
vklqndkdhakqavsqalahlnnaqkhmedtlidsettrtavnhdlteaqaldqldmalqssiadkdatrassayvnaepn  
kkqaydeavqnaesiag  
nnptinkgnvtsatqavtssknaIdgverlaqdkqtagnslnhldqldtpaqqqalenginnattrdkvaeiaaqaalne  
amkalkesikdqpqteass  
kfinedaqkdaytqavqhakdlinkttptlvksvidqatqavndaknlhgdklaqdkqrattetlnlnsnlntpprq  
alenginnaatrgevaqll  
teaqlnqamealrnsiqdqqqteagskfinedkpkdayqaavqhakdlinqtsnptldkaqveqltqavnqakdnlhg  
dqkladdkqhavtdlnqln  
glnnpqrqalesqinnaatrdevaqklaeakalnqamealrnsiqdqqqtesgskfinedkpkdayqaavqhakdlinq  
tgnptldksqveqltqava  
takdnlhgdklvrdqqgavttvnaIpnlnhaqqqaltdainaaptrtevaqhvqtateIldhametlnkvdqvntdkaq  
pnyteastdkkdavdqaIq  
aaqsiidptngsnankyaveqaltklqgkeneIngnervaeaktqakqtidqIthlnadqiatkqnidqatkIqpiael  
vdqatqInqsmdqIqqavn  
ehanveqtvdytqadIdkqnaykqaiaeaenvlkqnankqqvdqalqnilnakqalngdervalaktngkhdidqInaln  
naqqdgfkgridqsndlnq  
iqqivdeakalnramnqlsgeitgnegrtkgstnyvndtqvkrvydeavdkakealnkatgqnltaeevikIndavtaa  
kqalngeerlnnrksealq  
rldqIthlnnaqrqlaiqqinnaetlnkasrainravqlddamgavqqyidehhdvisstnyinaddnlkanydnaitn  
aaheIdkvqgsaiakaeae  
qlkqhiidaqkalngdqnlatakdkanafvdtlnglnqqqqdIahqainnadtvtgianiindqidlnnametlnkhIvdn  
eiptaeqtvnyqnaddvak  
snfddakrlanalnsdntnvnndingaiqavkdviqnlngqrIqeaekdkaIQvnkvIadkIkeieasnatdqdkIak  
nkaeelansiinninkats  
nqdvsvqtagnqaiEqvhaneipkaki dankdvdkqvqalideidrnpltdkekqalldrinqilqqghnginnamtk  
eeiehakaqlaqaIqdiKd  
lvkakenakqdvdkqvqalideidrnpltdkekqalldrinqilqqghnginnamtkeeieqakaqlaqaIqdiKdIvk  
akedaknaikalaneKrdq  
insnpdltpqkakaIkeideakraIeni enaqtkdqInkgInIglldirnthvvevdaqpavneifdatpeqilvnge  
IivhrddiIteqdiIhahin  
IidqItaeiidtpstatisdsIstakvevtIldgskvsvpvkvvekelvtvkqqaiesienaaqqkineinnhatItp  
qkeaaiaevnklkqqaieq

Tsompanidou\_et\_al\_Supplemental\_FASTA\_File

innaadvhtveevqhgeqahieqfnpdqftidqaksnaiksisdaiqhmidenaskdltdekekqeaisklnqlkdqsiq  
aiqraqsideiaqgleqfka  
aq1kaanpfakelenrkkksaisikdistdeinrirnstigtaeerqaamnrineivletirdinnahtpqqveaalng  
iarilavqivtsdhskpss  
nsdgqsnslhvgygtvnhpynsttighkkklqddeidplhmrfhgdgrignviknalgvvgisgllasfwwfiakrrrk  
edeeeeeieirdnskdkkkk  
svegtkhlp1lfakrrrkedeedaiveekdslnndesldkvkhtpfflpkrrrkedeedvevtentdekvlqdneshpi  
liakrrrdkeedvettssi  
dskdedvpvllakkknqkdnqskgkksaskkpskvaakkkkkkkskknk  
>tr|D2N761|D2N761\_STAA5  
mekpsreefegnnklligivlsvitfwlfaqslnvvpiledsfntdigtvniavsitalfsgmfvvgaggladkygrik  
ltnigiilnigsl1iis  
nipllliigrliqglstacimpatlsiiksyigkdrqralyswsgswgsgvcsffggavatllgwrwifilsivisl  
ialvlikgtpetksksisl  
nkfdikglvllvimllslnilitkgse1gvtsllfitliaiaigsfslfivlekratnplidfk1fknkaytgatasnfl  
lmgvagt1ivantfvqrgl  
gysslqagslsitylvmvlimirvgekllqtlgckkpm1igtgvlivgeclislftlpeilyvicciigylffglglgiy  
atpstdtaianap1ekvgv  
aagiykmasalggafgvalsgavyaivsnmtniytgamialwlnagmgilsviilllvpkqndtql  
>tr|D2N763|D2N763\_STAA5  
mtntvtlqtahivslgdieeakasikpfiirrtpliksmylsqsitkgvflklenmqftgsfkfrgasnkinhltdedk  
ekgiaasagnhaqgvalt  
akllgdativmpetapqakqqatkgygakvilkgknfnetrlymeelakekgmtivhpyddkfmagqgtigleilddi  
wnvntvi1vpvgggliagi  
atalksfnpshiiigvqsenvhgmaesfykrdltehrvdstiadgcvkvpgeqteyevvkh1vdefilvteeeiehamkd  
lmqrakiitegagalptaa  
ilsgkinnkwl1edknvvalvsggnvd1trvsgviehgl1niadtskgvvg  
>tr|D2N764|D2N764\_STAA5  
mlvavvke1kqgegrvactpenvrkltdaghkviveknagigsgfsndmyekegakivtheqaweadlvikvkephesey  
qyfkknqi1wgf1hlassk  
eivekmqevgvtaisgetiikngkaellapmsaiagqrsaimgayyseaqhgqgtlvtgvhenvdipgstyvi1fgggva  
atnaanvalgnakviiie  
lnddriky1qdmyaekdvttvkstpenlaeqikkadvfistilipgakppklvtremvksmkkgsvlidiaidqggtiet  
irpttisdpvyeeegvihy  
gvpnqpgavprtsma1aqgnidyileicdkgleqaikdnealstgvniyqgqvtnqglatshldykeilnvie  
>tr|D2N765|D2N765\_STAA5  
mpnkil1vdgmal1frhfyats1hkqfmynsqgvptngi1qgfvrhif1taiheirpthvavcwdmgqstfrndmfdgykqn  
rsappeel1ipqfdyvkeis  
eqfgfvni1gvknyeaddivgtlaqqystdndvyiitgdkd1lqcindnvevwl1ikkgniyryt1hrfneeyalepqq1  
idikafmgdtadgyagvkg  
igeaktaik1iqyqsvenvvenidalsagqrnkindndelyl1skrlaeihtqvpidsealfekmsfattlnhilsicne  
helhvsqkyisshf  
>tr|D2N766|D2N766\_STAA5  
minkeq1d1lyk1kkeveksrneal1htinqvikkvyl1qytcsvfghfsagkstlin1lieqdilpsspvpptsntaiv  
svsdnhdian1pnqtyak  
lsnydevremnrqnvdesveinfqsakfengft1qdtpgvdsnvashqs1teqymytsnmi1fytdynhvqsel1nfkfm  
khindvgipvvfi1inqidk  
hqddelsfstfksrveksiadwgik1ertfyvskfdhpenel1v1ssylis1dqhretiedytsrtveyiteaq1dyiqs  
eiqevled1geieae1feqa  
flnsqhqhai1seeaq1lnnpdelmaf1knkrkn1lenayimphnmrem1rsylesmsqdfnvggffnkklklq1qqqr1  
l1atdalqehvnq1rqpm  
redmsfvtrfinkkeasdkv1nqhydvkpe1ieglyqpqtsisntyv1tfsdevvkaikkyveqqstpi1fkei1envqad  
el1ptesdd1keyqrytel  
nelrqs1ttknyrhyyih1des1dk1igrqettyqlatdnardnrndnq1lnqntattnmsidiqal1diisdvpl1fkrtk  
qdihet1tridnk1likigv  
fgtfsagkss1inal1gehilvsspnpttaatteisyrdesyit1ksqsq1l1deinavveyqdmssystemeefinds1lek1  
ksh1nknq1lafi1qavekhy  
klyvnm1engekhainqge1kkwsaedeyatfvktvhialmhdw1kgki1ivds1glhsnnqrhtneteqil1tssdlilyv  
syfnhsftdndkafi1ehmk  
dmnq1nenqafk1mvin1aad1aesqdd1eavetyvsdal1rqvn1qsdi1favssrnal1qaedkgidq1kqsiqqfvdvesks  
i1leqqmihq1lqmdrsyve  
mvtefetnkadi1trrqqr1tvykdkqr1qhqlidat1qhtdneveeqvyh1nar1klq1l1ddvksvfnsqmtqnsdfnee  
kkvstrvy1dqihqr1fle  
qs1iterikkyf1nk1teqi1apivqqlad1hvivnpqfnfesani1eqp1l1hidfndm1nal1pkql1tkrki1lnpngqrdih  
esi1cst1gl1qpqmg1lr  
eqle1lyvkq1maveaesqfes1feani1qtqind1laf1d1dt1l1nq1kdkhq1l1ktily  
>tr|D2N767|D2N767\_STAA5  
mkntfnplqr1hfyaaifiap1l1it1tisgigyl1ffpevenniykneffgdsdvkthqt1ndavhqverqyegffvskvs

Tsompanidou\_et\_al\_Supplemental\_FASTA\_File

ildepynkritlsdmagnq  
ryvfl dhnnqfvadqnakhtysnvvrshsslftentiinylveltacwtifmilsgiyllikkhlisnkskalhwqkwh  
amigiiaipvfv1vltgl  
pwsghmgskiammdtngdlggela inppksdl nelpwatrknkqpassekgsghhgksampqtkldyqisidkveq  
aqksqgikkpfsivypsdkh  
gtfivsntsnsgvtgl dvspykeqtl yfdqysgkklgtikyddygiakwftwgiplheghlfgilnkiinlfcia1lv  
aigmgfvswikrtkntavk  
vprvkkpasisliiclivlglmplfglsilvfielilyikdrakl  
>tr|D2N769|D2N769\_STAA5  
mfqllavcpmgleavvareiqelgyetnvengriffegdasai vkanlwlrtdrikivvgrfnattfdelfeqtkalp  
esiidkegnfpvqgrsvks  
tlhsvpdcaitkkaiverlrraynekgl nesgakypvevailkdnvlltidtsgsl nrrgyrlaqgeapiketlaas  
lirlanwkgdtp lidpfcg  
sgtiaieacliaqniappgnrefvseqwnimpanyddyrddeadkmadydkeikvyasdidpemveiakrnaeevgl sdi  
ikfsvkdvntlidteepv  
alignppygerigdreveemyryigklmkqhpflstyiltsnefeylvnrkatkrklfngyiectyyqywgkkterk  
tien  
>tr|D2N774|D2N774\_STAA5  
mllinrgvfdlndfir1kvfssynnihdkiilylrkfldl1d1tdnlfekkl nqir  
>tr|D2N775|D2N775\_STAA5  
mnyngkpyrknsaidggktaafsni eygggrmslekdi eh snafylksdiavi hkkptpvqivvnvnyprskavinea  
yfrtpsttdyngvyqgyyi  
dfeaketknktsfplnnihdhqvehmknayqqkivflmirfktldevy1lpyskfeifwkryqdniksitvdeirkng  
yhipyqyqprldylkavdk  
lil desedrv  
>tr|D2N776|D2N776\_STAA5  
mtenkgsqpkngnnggksnksknrvkrtiiki igfmi affv1llgillfayyawkapafteakl qdpipakiydk  
ngelvktldnggrhehvn1  
kdvpksmkdavlatednrfehgaldykr1fgaigkn1tgfgsegast1tqqvkdaf1sqhksigrkaqeylsyrle  
qeyskddi fqvyl nkiyys  
dgvvtgikaaakyyfnkd1kdln1aeeaylaglpqvpnnyniydhpkaaedrktvlylmyhkhritdkqweeakkid1ka  
lnvrtaeerqnidtnqds  
eysnyvfvkse1mnkafkdenlgnv1qsgikiytmdkdvqkt1qndvdngsfyknkdqvgatil dsktgg1va isg  
grdfkdvvnrnqatdphpt  
gss1kpf1aygpai enmkwatnha iqdessyqvdgstfrnydvkshgtvsiydal rqsfnipalkawqsvkqnagndapk  
kfaaklg1nyegeigpsev  
lggsasefsptqlasafaa ianggtynnahsi qkvvtrdgetieydhtshkamsdytaymlaem1kgtfkpygsayghv  
sgvnmgaktgtgtygaety  
sqynlpdnaakdvwi ngftpqytmvwmgfskvkqygensfvghsqqeyppflyenvmskissrdgedfkrpssvsgsip  
sinvsgsqdnnttnrsahg  
gsdtsanssgtaqsnnntrsqqsrnsggl tgi fn  
>tr|D2N777|D2N777\_STAA5  
mtnikvfdn1eqeidvfaknkt1gsseakpyldeyhskii dyfkqvnditgnidfdn1nqypvvpnmfkerydymier  
kyhfmgyrqmktfktelik  
mnasyqtr1knkqv  
>tr|D2N781|D2N781\_STAA5  
mgmatyavvd1ettgnqldfddi iqigitfvrrnnhiidtyhsmirtnleippfiqal tsi eenmlqqapyfnqvaeeyd  
k1kdcifvahnvdfdl nfi  
kkafkncniqyrpkkvidt1eifkiafptdkyqlselaeahgitlanahradedaattaklmilafekfeklpldtlkq  
lyylskqlkydlydi ffem  
vrqydakpldkseykfeqi yrkqvdfkkpttnyngslkslyskavdq1gltyrpqqlylaetil dq1mhsekamieas1  
gsgkslay1laalmyniet  
gkhvmi stntk11qsq1lek dipamnealnfkina1likksdyis1glisqil kddtsnyevnilkmqlliwi tetpsg  
diqelnlkggqkmyfdqki  
etyvparhdvhyynfikrnaqniqigitnahlihsdvnsiyql fddcivdeahr1pdya1nqvtnel syadikyqlgl  
igknenek11kaidqlekq  
rilekldiapidifglkasmneihelneqlfstifti indsdvyddihrfhnvftfetkdilkd1haiidklnktleif  
ngishktvks1rkq1lylk  
dkfknieqslkaghtsfisiknlsqkstirlyvkdyavkdvltkqvlekfkslifisgt1kfnsfeafkqlfnkdvhfn  
tfevnts1qsakntsvfivp  
sdvasyqkni deyvasiyiieyttitssk1vlftsykmmhmvdmlnelpefedyvvl tqqnqnykivqqfnfd  
kail1gtstffegfdfqan  
gikcvmiak1p1fminkhakywlmdseftstfkeyvlpdavtrfrqglgrlirndrgiivs fddrlinsnyknffeql  
enyraqkgdiqqfg1lrq  
iqkkkk  
>tr|D2N783|D2N783\_STAA5  
mdks1feqarpi1eqiqdngfeayyvgsvrdivmgnihdidittsatpdeiesifsh tipvgkehgtinvv fndenye  
vttfraedyvdhrrpsgv



Tsompanidou\_et\_al\_Supplemental\_FASTA\_File

tfvrldlyedlqrrdfmtmaiandtayklydyfdgqqdinnriirtvgiaaerfqedalrmirclrfqsqslsfeiatetfe  
amrtqmadikflsierivi  
eltklmrginveesfnh1ks1kafnympyfehldmnqinvtepidlelliaivsvkfdinyslklplklsnrqvkdingyi  
qimnalpsitkeq1kfmfv  
ydydtnliknvmvaadv1kandiqqheplivn1qtidet1hhlpmhnrkdmmvnggv1mahlnaksgpw1kdv1rqieia  
1vtgkvsneete1lkwvnn  
hvk1

>tr|D2N784|D2N784\_STAA5  
mgsggiatelgiklaerghevfiitsnipfrikplnmi fhqvevnqyavfqyppydit1stkiaevikeydl1lhm  
hyavphaicg1laremsgk  
dikimtt1hgtdivlgydhs1ggaikfgieksdivtsvsks1aqethei1etnkei1piynfvrenefptkhtalksq  
fgiapdekvl1hvsnfrqv  
kridti1etfakvrkipsk1l1l1gdgpe1vpmrqt1kel1nveedv1flgkqdcvsefyq1sdlv1l1sekesfg1t1le  
amktgvvpigsnaggikey  
ikhgetgfvvdv1gdcdsasdyair1ledkvlynk1qknmladiaerfgsel1tdqeyyyyqkmlnehnkskge

>tr|D2N786|D2N786\_STAA5  
mssiftmi1yfv1lmv1plwaqhkvsnyekysqvrstsgktgrevale1lhangiydvevvkgegfltdhydpkkkvvs  
1spanydrpsvagtaiaah  
evghai1qdhgqywf1rfraalvpvan1gss1symi1mlgfil1taigsafgsta1wigag1mslav1fsivt1pvefdass  
ramkqita1nivnekeykh  
arkv1saaamtyvaatavavael1vriiliarsdd

>tr|D2N787|D2N787\_STAA5  
mtintfwqyt1yqrswlmm1licni1lgm1ygyiwygeq1shtpwqfki1fvpsptail1flvisis1lirkqnsi1dala  
fvt1lfkygiwavimn1lfi  
ieggdivtng1vlmfs1shimavqai1yfyprfkrsmig1svamtwv1lndyidyf1h1qfpyydf1tthvwqigv1scc1sv  
fg1l1lyie1nk1l1kck

>tr|D2N788|D2N788\_STAA5  
mset1nqikesfi1y1l1fryr1fksri1avwv1nyikvneak1anihfvdtkinhhet1eiaevgshasai1qftkhnk1lmn  
tne1fdyianhncafdi1qi  
qfanvskreqr1dd1livaq1tespnyqy1lhd1nsm1sidrhkhal1lidy1l1hnd1s1qmnekqr1fyq1tqilnt1klvn  
khnqfed1ladd

>tr|D2N789|D2N789\_STAA5  
mediykl1iddin1qk1en1l1dsrvneai1ttndda1l1filget1ynfg1lmpqg1levfrv1lyhkypdesel1lyfi1eg1lmsen  
qtdeale1y1syvepspek1  
m1ead1yq1im1mevai1dk1l1gga1le1epndpi1ihfalaem1lydgqy1ratseyet1vetgeyq1vngvnl1f1srmadcs1q  
sgnysdair1lydeinedem  
tsedy1kka1sydkndit1qeaikimtt1l1skdpdy1qgy1ly1qs1yeneknypdai1etgkeg1r1sqfykelmyttgcle  
iehgdanegv1l1kqalev  
dnayqep1l1l1sd1yrneedyeai1e1l1tyvdeed1dpt1fmwh1lafaygqeerdkeaqhffelayptmktnidfmsdyf  
y1lietgqkeqait1lnq1l  
el1epsnenwhde1sr1qs

>tr|D2N790|D2N790\_STAA5  
mvneqi1disgpl1kge1ievp1gdksmthraim1las1laegv1stiyk1l1gedcrrtmd1f1r1l1gveikeddek1vvtspgyq  
sfntphqv1ytgns1gtttr  
l1lag1l1sg1giesv1sgdvs1igrpmdrv1rpl1ksmnaniegi1ednytp1liikpsvikginykmevasaqvksailfas1  
fskepti1kel1dvsrnh1te  
tmfrhfn1pieaeg1s1itttpeair1yikpadfhvpgdi1ssaaffivaal1itpgsdvtihvnginptrsgiidivekmgn  
iq1fnqt1gaep1tasi1riq  
ytpm1lqpi1tiege1lvpkaidel1pvial1ctqavgt1stikdae1l1kvketnridttadm1n1l1g1felqptndg1liihpsef  
ktnatvds1tdhri1gmm1la  
vas1l1ssepvki1kqfdavnvs1fpgf1pk1k11enag

>tr|D2N791|D2N791\_STAA5  
mkl1q1t1yps1nny1pi1yvehgaiky1igty1nqfdqs1f1l1ideyvny1fankfddi1syknvhkvi1pagek1tktfeqyqet1  
eyi1lshhvt1rntai1i1avgg  
gatgdfagfvaat1l1rgvhfi1qvpttil1ahdssv1ggkv1gins1kqgknl1igafyrptaviy1d1df1kt1lpfeqil1sgyaev  
ykhall1ngesat1qdieqhf  
kdreil1qs1ngmdkyiakgi1etk1divvadekeggvrk1fln1lght1fghaveyyyk1phghavmvgi1yqfivant1fdsk  
hdinh1yiq1li1q1lgypl1dm  
itd1l1dfet1lyqym1s1dkkndk1qgvqm1v1l1rqfgdi1vvqhv1dq1t1l1qhaceq1lkyfk

>tr|D2N792|D2N792\_STAA5  
mryl1tsgesh1ppq1tvive1gvan1leikved1inkemfkrqgy1gr1rmqiekdtveivsgvrngyt1l1gspit1mvvtndd  
fthwrk1imgaapi1sdeere  
nmkrti1tkprp1ghad1vggm1kynhrd1l1rnv1lerssaretaarvagalckv1lleq1ldie1ysrvveiggikdkdfydsset  
fkan1ldrndvr1viddg1aq  
amrdki1deakndgds1iggyv1qvven1mpvgv1gsy1vhydrk1ldgriaqgvvsina1fkgvs1fgeg1fkae1kpgseiqdeily  
nte1lgyyrgsn1l1gg1legg  
m1sngmp1i1vngmkpi1ptlykpl1nsvdint1kedfkatiersdscavpaasivcehvva1fevakal1leefqsnhieq1lkqq  
i1ierrq1lnief

Tsompanidou\_et\_al\_Supplemental\_FASTA\_File

>tr|D2N795|D2N795\_STAA5  
madnkankeqvhrvfqniskkydrlnniisfeqhkvwrkrvmkdmgvrkgtkaldvccgtgdwtialskaveptgevtgi  
dfsenmlevgkektasmen  
vklvhgdamelpfednsfdyvtigfglnrvpdylvalkemnrvlkpggmvvclsetsqtplpvfkqmyalyfkfvmpifgk  
lfakskeeyewlqqstfnf  
pgkee1krmfeeagfinvrsvrftggvaamh1gykekdntkdg  
>tr|D2N798|D2N798\_STAA5  
mtkivtfmgsgftalanv1aenghdv1mwgknqdavde1ntchtnkky1kyak1dvni1atsdmtkaiqfadiylmalp  
tkamrevasqindk1tskk  
tfihvakgiengtfrkrvsemiedsispeynagigv1sgpshaeevvvkqpttvaasskdkrisk1tqdlfmdy1rvytn  
ddlvgvelggalkni1ava  
sgivagigygdnaaa1mtrglaeisr1gek1gadpmtfl1g1ggigdlivtctsthsrnft1gyk1gqgesmdqalsemn  
mvvegiyttksvyhlakek  
nvdmpitnalrv1fenisvkecvkd1merdkkse  
>tr|D2N7A0|D2N7A0\_STAA5  
mteefnesmindi1kegdkvtgevqqvedkqvvhingggkfnngi1p1sq1sthhidspsevvekegdeveayvtkvefdeen  
etgay1lsrrq1leteksys  
ylqek1dnnei1eakvtevvkglvvdvqgrgfvpas1istdfiedfsvfdgq1irikve1dpennrv1lsrkaveqee  
ndakkdql1qslnegdvd  
gkvar1tqfgafid1ggvd1vhvselshhvqtpeevvsigqdvkviksidrderis1sikdt1ptpfenikgqfre  
ndvi1egvv1lanfgafve  
iapgvqglvhiseiahkhigtgpeve1epgqqvvnk1lgideenervs1sikat1pnedvvesdpsttkay1eseednpt  
igdm1gdk1kn1k1  
>tr|D2N7A1|D2N7A1\_STAA5  
mqr1thiqnecadnd1ln1kgdfysmmnesc1fifgks  
>tr|D2N7A2|D2N7A2\_STAA5  
mkainia1dgpaaagksti1akrvase1smiyvdtgamyra1tyky1k1nk1tedfak1vdq1ttd11tykadkgqcvi1dne  
dvtfd1rnndvtqhvsvya  
skepvrsvfavkkqkelaakgi1vmdgrdig1tvvl1pdad1kvymiasveeraerrykdnq1rgiesnfed1krdieardqy  
dmnre1splrkaddavt1d  
ttgksieevtde1lamvskik  
>tr|D2N7A3|D2N7A3\_STAA5  
mkh1l1vih1tggt1smsqdgsknvvtndin1p1slhqdvinqyaqide1n1pfnvpsphmtiqhvkq1kdi1leavtnkyydg  
fvi1thgtdt1leetaf1ld1  
ilg1ieqp1v1tgamr1ssne1igsdgl1yny1sairvasdekarhkgvmv1fnde1htar1nvtk1htsntntf1qspnhgplgv  
l1tkdr1vqf1h1hmpyrqqa1le  
nvnek1nvp1vkaymg1lpgdi1fsfysregidgmvieal1gqgn1ppsalegiqqlvs1nipiv1vsrsfngiv1sptyaydg  
ggyq1laqqgf1fsng1ngp  
kar1k1l1val1snn1dkaei1ksyfe1  
>tr|D2N7A4|D2N7A4\_STAA5  
mqkvesi1igg1pgc1lsaie1qkrkgid1li1ekgnvvesi1ynp1thqtff1sssd1ksigdv1pfive1eskpr1rnqalvyy  
revvkh1h1kvnafeev1t  
vkkmn1kfti1tttkdy1yecrf1tiatgyy1qhnt1levegad1pkvf1hyfkeahpyfdqdv1i1ggknsaidaa1lelekag  
anvtv1lyrg1gdysps1kpw  
ilpnftal1vnhek1d1mefnanvtq1itedtvtyevngesktihndy1vfam1gyh1pdyeflksigiq1intnefg1tapmynke  
tyetn1enci1agviaagn  
danti1fieng1kf1hgg1iaqsm1lakkqtp1les  
>tr|D2N7A5|D2N7A5\_STAA5  
m1fnkvl1sqi1ltyq1nfn1shqkdktpqstn1trknk  
>tr|D2N7A6|D2N7A6\_STAA5  
msnnfk1ddfeknrq1sidt1nshq1dhtedvekdq1selehqdtienteqq1fp1rnaqr1rrkr1rdlat1nhnkq1hhd1esqas1ddn  
ahneagt1l1ddrq1vessahs  
svnqep1shq1dstp1qheey1ynknafam1dkshpepi1edndk1hetik1daen1tehstvs1nkskaeqs1qqpkpyftt1ganqse  
tsknehd1nds1vkq1dqdes  
dhhs1gk1kgaai1gag1tag1vagamadskak1khsnda1qnksnsg1kannstedkasq1dkskd1hngk1kgaai1gag1tag1agaaa  
sk1sasa1askp1has1n1nasqn  
hdehd1h1drdker1kkg1makv1lp1iaav1i1galai1fgg1mal1nhnng1tkenkiantn1knnadesk1dkd1tskdask1dks  
k1std1s1dks1kdd1q1kat1kde  
sdndq1n1nanq1annq1a1nnq1nq1qq1anq1nq1qq1qq1r1qgg1qrhtvng1qenlyria1i1qyy1gsg1spenveki1rrang1sgn1ir  
ngq1q1vip  
>tr|D2N7A7|D2N7A7\_STAA5  
m1hdi1l1rnk1fg1fen1fkpg1qaei1iesimsq1htl1gil1ptg1sgks1cyqi1pty1sgkpt1liispl1isl1mddqvm1qlkingek  
rvtc1ihsg1mde1iekkh1nik  
c1r1hsr1f1fl1spe1fl1qpsn1fk1ismid1fgmiv1ldeahc1sewgyd1fr1phya1ligkv1tkhfkeavv1al1tatap1hl1qdd  
l1tem1ai1qfnv1ikt1mnrp  
nis1fkh1lnf1hdded1kiew1lp1fl1qsg1pti1iyv1ssk1kmc1ln1aql1iyd1sgfl1tgiy1hgd1mny1qerhtv1qqq1fl1ndip1i  
vatsa1fmg1gink1kdi1rti1i  
hf1hl1st1sps1nyi1qeigr1agr1d1elsqais1lfq1pdd1kyi1let1lfadmi1teed1vqn1feige1flap1dkqdv1l1t1l1hsf1ysig

Tsompanidou\_et\_al\_Supplemental\_FASTA\_File

alkqifkqsfkrkqlgffr  
migyckldqcrkyl1effgeyppaqdrccndsnitdivilnkkkvirsigfdeklqnlf1r  
>tr|D2N7B0|D2N7B0\_STAA5  
mqqnkr1itism1saiafvltfikfppf1ppy1tldfsdvs1latftfgpvagiivalvkn1lnylfsmgdpvpgfan  
flagasf1ltayaiyknkr  
stkslitgliistivmtiv1silnyfv1lplygmifnladivn1kviivsgiiipfniikgivisivfillyr1lanflk  
ri  
>tr|D2N7B1|D2N7B1\_STAA5  
menesketksvpeemeaskyvggqfppaekdaiefakkkdkfakrgeqffmdnfg1kvkatnvigsgdgvefvhcd  
dhdivfnasipfdksids  
dss1rskdkgddmst1vgtv1sgfeyrahkeelnd1tevlkeykskykytgytenaimktqnsgrneyyyltaipytd  
eykkyfqp1ikeddksfrd  
gmknskkq1kdkrsryivt1fstkdnftkdntidemidfsevlkkkniprd1nvs1qisnkyintkrpnyskkdviev  
gvfnhektntnd  
>tr|D2N7B2|D2N7B2\_STAA5  
medktnketksvpeemeaskyvggqfqp1saekdaiefakkkhrkefekvgeqffkdnfg1kvkatnvvgkddgvevyvhce  
dhg1vfnas1plykdaihq  
kgmsr1ndngddmsmmvgtv1sgfeyraqekeydn1ykffkenekkyqytgftneainktqnvgyqneyfyity1srnk  
eyrkyep1ihkndkefke  
gmqrarke1nytantdavst1fstkknftkdntvddvie1snkikdepnmpqksqvtiqlgkpsintkkpfyddinpieg  
>tr|D2N7B3|D2N7B3\_STAA5  
menesskdt1ietksvpeemeaskyvggqfppaekdaiefakkkdkkiakrgeqffmdnfg1kvkttnvvgsgdgvevy  
vhcddhdivfnasipfdks  
iiesdss1rsedksgdmsmmvgtv1sgfeyraqekeydn1ykffkdneekyqytgftkeainktqnvgykneyfyityss  
rs1keyrkye1lirkndk  
efkegmerarkevnyaadtdavt1fstkknftkdntvddvie1sd1ynfknkpekstitiqigkptintkkafyddnh  
piegyvrkde  
>tr|D2N7B4|D2N7B4\_STAA5  
mta1psyddmfi1ntqahar1dqmaqfevvcng1nenegqaiqtmdqsas1irsni1qvkeqleklavy  
>tr|D2N7B6|D2N7B6\_STAA5  
mewqpnntyviaqnl1tkyqeitgnsivgdemkvhk1myyiqktsialtgnaiideqfegvvhgvp1ps1rg1fdyfv  
ntsrnk1vndteefiienai  
yqygkyatwa1rekshee1sw1nsrkg1sanergyrn1ql1r1skkmqtk  
>tr|D2N7B8|D2N7B8\_STAA5  
mqak1tkkefiel1ktsegkqfnid1wygfcfdyanagwq1fgyn1kgvgakdipsannfnglatvyqntpdf1aqqg  
dmv1vfgsnygagyghvaw  
ieat1dyi1vyeqnl1ggwdtgieqpgwgwekvtrrqhaydfpmwfi1rpnfkseisprsvqsptqapkketakppkav  
elki1kdvvkgyd1pkrgg  
npgkivi1hndagskgataeayrn1vnap1sr1eag1ahsyvsgntvwqal1desqvgwhtanqvgnkyygyievcqsmga  
dnat1fkneqatfgecar1  
1kkwgl1panrnt1r1hnef1stscphrsv1htgfdpitr1g1l1pedkr1qlkdyfik1raymdgkipvatvsnessass  
ntvkpvasawkrnkgytyy  
meesarftngnqpi1tvrkvqpf1scpvgyqfpggycdyevml1qghv1wvgy1wegqryy1pirtwngsappnqil1gd1  
wgeis  
>tr|D2N7B9|D2N7B9\_STAA5  
mdinwk1rfknkav1tg1igal1l1fikqitd1fgfd1snq1nqasaiigail1t1tgigvitdptskgvdassiaqtyqa  
prds1skeeqvtw1ktsqda  
s1tpe1stkapkeydtsqpftdasndvgfdvneyhyggdnaskid  
>tr|D2N7C0|D2N7C0\_STAA5  
mfgftkrheqdw1r1tr1eendktmfekfdrieds1raqekiydk1drnfeelkrdeedeknkeknaknirdikmwilg1  
igt1l1stfvial1ktvfgi  
>tr|D2N7C1|D2N7C1\_STAA5  
mlk1l1sptfediktwyq1keytkediawyvdmevidkeyai1tgekypen1vs  
>tr|D2N7C2|D2N7C2\_STAA5  
mqkqvvs1tk1l1mqvknqnal1makqivafnk1leeikgetena  
>tr|D2N7C3|D2N7C3\_STAA5  
mfgftkrheqdw1r1tr1eendktmfekfdrieds1raqekiydk1drnfeelkrdeedeknkeknaknirdikmwilg1  
igt1l1stfvial1v1lkkv  
l1  
>tr|D2N7C5|D2N7C5\_STAA5  
mqi1vnkrnei1syav1ggfeegidies1penfsqvfrpkvfkydsdkii1fnedyteekddshqqidneenstgasddi1  
rk1mvasmqkvvs1tk1l1m  
qvnkqnal1makqivafnk1leeikgetena  
>tr|D2N7D1|D2N7D1\_STAA5  
mkk1gih1sdakqfvgmgeli1rqfdnmkgmtreqklatvativgteasgfla1ieagpdkinsysks1knsngeskk  
aad1mkdn1kga1eq1gga  
fes1aievgkd1tpmi1raega1tk1vdg1fth1pgwvrkasvg1a1fgaa1gpav1agg1l1irtvgsaakgyas1nrria  
enti1sntnskamks1gl1q

Tsompanidou\_et\_al\_Supplemental\_FASTA\_File

tlfngsttgktskgfkglagammfnlkpinvlnksaklailpflkllknglglakslfavsggarfagvalkfltgpigatitaitiaykvfktaydrv  
ewfrnginglgetikffgkiiiggavrklgefknlylsigksfkekfskdmkdgykslsdddllkvgvnkfkgfmqtmgt  
askkasdtvkvlgkgvske  
tekalokyvhyseenrimekvrlnsgqitedkakkllkieadlsnlniaieikrnkkelktqelidkysafdeqekqn  
iltrtkekndlrikkeqel  
nqkikelkekalldgqisenerkeieklenqrrditvkelsteketeqerilvrnqrnrnaysideaskaikaekarkar  
kkevdkqyeddvjiaiknnv  
nlsksekdkllaiadqrhkdevrkakskkdavvdvkkqnkdidkemdlsgrvykntekwnglkswwsnfredqkks  
dkyakeqeetarrrnenik  
kwfgnawdgvkstgeafskmgrnanhfggemkkmwsgikgipsklssswssakssvyhtkaianstgkwfgkawqsvk  
sttgsiynqtkkysdasd  
kawahsksiwrgtskwfsnayksakgwltmanksrskwdnissstawsnaksvwkgtskwfgnsykslkgwtgmysrah  
drfdaiyssawsnaksvfn  
gfrkwlsktydwi rdigkdmgraaadlgknvankaigglnsmigginkiskaitdknlikpiptlstgtlagkgvatdns  
gal tqptfavlnrdrgsgna  
pgggvqevihradgtfhapqgrdvvpvlvgdsvinandtlklqrmgvlpkfhggtkkkdwdlqkgnigkkagefgata  
kntahnikkgaemveaag  
dkikdgaswlgdkigdvwdyvqhpqglvkvmsglninfgganatvkiakgaysllkkklvdvkswffedfggggdgsy  
lfdhpiwqrfgsytgglnf  
nggrhygidfmpgtgtniyavkggiadkvwtidyggngsiqiktganewnwymhlskqlvrqqrikagqligksgatgnf  
vrgahlhfqlmqgshpgnd  
takdpekwlkslkgsgvrsgvgnkaasawagdirraakrmgvnvtsgdvgnisliqhesggngitqssslrdinvlq  
gnpakgllyqipqtfrrhya  
vrghnniysgydqllafnrrywsqfnprggwspgprryanglitkhqlaevgegdqemviplrrkraiqlteqv  
mriigmdgkqnnitvndt  
stveki vetncyakdkgnkltadaliqtvsqdnnlsssdairglekilskqsghranannymgglt  
>tr|D2N7E4|D2N7E4\_STAA5  
mtikvlnepsklttwyaevtqgkiktskyvrkecdrlrylenggwvdee lahrpirfiekfckpsksgskrqvl  
qpwqhfiigs lfgwvhet  
klrrfkeali fmgkrngktttisgvanyavsqdgengaeihllanvmkqarilfdeskamikaspkl dknfrtlrdeihy  
datiskimpqasdsdkldg  
lnthmgi fdeihfkdyklisviknsraarlqp11iyittagyl dgp1vdmveagrtdldqiedertfyylasldddd  
dindssnwikanpnlgvsi  
nldemkeewekakrtpaergdfitkrfni fanndemsfidyptlqkneivsleelegrpctigydlsetedftaacatf  
aldngkvav1thswipkhk  
veysneki pyreweedgl1tvqdkpyidyqdvfdwi ikmna hypvekvtydranafkl nqelknygfeteetrqgal t1s  
palkdlkemf1dgki ifnn  
nplmkwyinnvq1kl drngnw1pskqsryrkidgfaaf1ntytdimnkvvdsdsgegniefisikdimr  
>tr|D2N7E7|D2N7E7\_STAA5  
mgntiydikpgtfkyieseiylnenkeikrlrleilnptkeqdsni vygplqkgepvrttelmatrlltnkmlrnlee  
mveavesey1klpedhkkv  
ir1kywnkekk1kmeqighechmhrntvttirknfvkavsvcryqitlckcakglqicsnmivserciklsksytt  
>tr|D2N7G8|D2N7G8\_STAA5  
mk1dhsnrahaklsasgkqwlncppsikasegiadkssvfaegtfahe1selyfslkyegltqfefnkafqnykrnqy  
ysee1reyveeyvanveek  
ynea1srdddvia1fetkl1d1gkyvpesfgtdvii fsggvleiid1kygkievsaidnpqlrlyglgayellsllydi  
htvrmti iqpridnfstee  
1pisr11qwgtdfvkplarl ayngegefkgashcrfckikhscrtraeymqnvpqkpph1sdeeiaellyklpdikkwa  
devekya1eqakendktyp  
gwk1vtgrsrarvi1tdtkavrdr1veagykpeditetk11sitnlekligkka fskiaegfiekpqqk1t1atesdkrpa1  
kqsaeddfdk1  
>tr|D2N7H7|D2N7H7\_STAA5  
mttsvadkpylki kslialkgtnqkevakaigmsrslsikinringrdfttseakk1adhlnkvvdfff  
>tr|D2N7H8|D2N7H8\_STAA5  
mgigeg1kk1rknknmtmeqlatdlnkypd1mkltkgkiskwenekepr1stakilaeyfnvkindlysesnttykdd  
nditslynk1tpprqenv1  
nyaneq1eeqnkvtsidgykesk1vsyi acgatgagigee1yddi1heevffkedetpsnadfcilvngdsmepmlkqgt  
yafikked1kdgtiallv  
ldgvs1ikrvdicedyin1vs1npyddikvasfsnikvmgkv1  
>tr|D2N7H9|D2N7H9\_STAA5  
mki1tnckikketivyev1tsgnqpftye1pkd1sshnarkylef1sqkidgk1tkeds1  
>tr|D2N7I0|D2N7I0\_STAA5  
mt1lnknnetkyryykykdpdytdkwkrsvvlnkntkqsqeamfr1eekikeklnkssselkt1tfhall dewleyh  
iktsgsk1ttlnnikirir  
nikryssen11nk1dtkymqifink1sdiysqnqvtrqlgdmkgaikyavkfynypney11tnvkipkrktiediekd  
eskmynylemnqvlqi rdh  
ilndnk1hkrnriliasilevqaltgmrigelqalqekdid1lnktinitgtihrikyeegfgykdttkttisskrsisin

Tsompanidou\_et\_al\_Supplemental\_FASTA\_File

srtveifkkiilenkmlkr  
wnssyvdrfgfi fttkkgnplcnnqitgvlkkttkalnmmkvtthtfrhthitllvemnvslkaimkrvghvdekttiri  
ythvtekmdreltqkleni  
ps  
>tr|D2N7I1|D2N7I1\_STAA5  
mkindrdl telssywyqni dikkefvngkrfrkqvdsynddknsn l ngaadikiye l ddkskptgqqtiiyqgtsne  
ainpnnplkssgfgddwlq  
naklmmndnestdylkqtdqlsnqykkledadr l snsdflkkyrmessnfknktivadggenseggagakyqgakhpek  
vvatdpamvpyaawqkfar  
prfdnmsfnstndlltwlqdpfikdmpgkrvni sdgvpr l dalidshvgykrkl n rkdntydtvpl ikiksvkdteikn  
gkkvkkttinitlmdgrip  
inwvtgdsiarsgrgtliklnlen l dal sklitgetsgmlaecviflnesfnisenenknfadrkkqlsegfkdkinlfq  
leemertliskinsleeva  
detiesisavkhllpdfaldal kerinel fkgiksfi ekvydsidneileifknidhdfkdgvseemkh l kvvkqniqq  
iknqndiygrqi adirsim  
kqqdatil d gnyqinyscenmvqg l a lpsny l grkmkil kdhiddgikki adyvqgiydeyaskivdvikylintipkir  
kn l rhaiem l nvkkkefls  
lipnvtcnyiktkleel dnt l gkwepfl nd l kavspil dnh l ddi vknmkplivqmi fepshyddmfisrkaltpvfssv  
l  
>tr|D2N7I2|D2N7I2\_STAA5  
mkkfigsvl attlilggcstmenesskdtntetksvpeemeaskyvgqgfppaekdaiefakhrkefekvgeqffkdn  
fgl kvkatnvvgkddgvev  
yvhcedhgivfnas l plykda i hqkgs mrsndngddmsmmvgtvlsgfeyraqekydnl ykffkenekkyqytgftkea  
inktqnvykneyfyi tys  
srs l keyrkyypeli rkdkefkegmerarke v nyaant davat lfstkknftkdntvddviesdklyn l knkpkdsti  
tiqigkptintkkafyddn  
rpiygvhske  
>tr|D2N7I3|D2N7I3\_STAA5  
mtvli l llsialitfmqyyftqetenairredarriss l veqshnkeeaikysqtlienpgg l mi innkhrqssas l snik  
kqmlnevvnndhfddvfdk  
gksvtrnvtikekgssqyil l gyptkaqknshskysgvfiykd l ksiedtnnaitiitiitavi fltittvfafflssr  
itkplrr l rdqatrvsegd  
ysykpsvttkdeigqlsqafnqksteiehvda l stsknirdslinsmveglginesrqil snkmandimnidedak  
afllrqiedtfkskqtemr  
dl emnarffvvttsyidkieggksgvvvtvr dmtnehn l dqmkdfianvshe l rtpis l lqgytesivdgivtepei  
keslaiv l deskr l nrlvn  
e l nvarmdaeglsvnekipiaa l dkmki kyrqqadd l gl nmtfnyc kkrwvsydmrmdqvltn lidnasrytkpgd  
eiaitcdenesedilyikd  
tgtgiapehlqqvdrfykvdaartrgkqgtglglfickmieehggsidvkselgkgttffiiklpke  
>tr|D2N7I4|D2N7I4\_STAA5  
msneliivddedri rrl kmyleresfeiheasngqeayel amenyaci l ldlmlpemdgiqvatklrehkqtpiimlt  
akgeetnrveg fegaddy  
ivkpfsprevvlrvkallrrtqsttveqsephardviefkhleidndahr vladnqevnltpkeyelliylaktpnkvfd  
reql l kevwhyefygd l rt  
vdthvkr l rek l nrvsseaahmiqtvwgvgykfevksndepak  
>tr|D2N7I8|D2N7I8\_STAA5  
mqqalinfyyqfhtkqhyflchdi ledawkaennyskdavvs l ilfatacyhyrrn l kgayksfnkskei iqnakdrd  
alyln l ndyqllieqqiak  
lntakpfssvilpitpdferi ikanyppydynhetatdpfivdhmrrdrseviaakeeaiqlrkhrrn  
>tr|D2N7J1|D2N7J1\_STAA5  
mdlnektidrtviyngkivdveihtvt l p ngetstrelvyhgavavcaltpkkevvlvkqyrkpvekplleipagkled  
dedrveaakreleetgyi  
akelthvvdmypspgfcdeqlsiyftdnleegtvlhdedefvevikvpienvksmlmkeiedaktialqhlllnynhs  
k  
>tr|D2N7J2|D2N7J2\_STAA5  
mqknilksgialselglgcm slgtdl kkaeqi idfavengityfdtadmydkginesvvgkvllkyqrrddivigtvgn  
rltkdgsttwdpsksyike  
avkgs l kr l gidhidlyqlhggtiddpldetisafdelkqegii raygissirpnvidyylkhsqietimsqfnlidnrrp  
es l l daihnndvkv l argp  
vskgl l tsnsvnl dnfkdg i fdyshdelgetiasikeiesnl saltfsyltshdvlgsiivgassvdqlkenienyht  
kvs l dqikt ararvkdley  
tnh l v  
>tr|D2N7J3|D2N7J3\_STAA5  
mncqsesvvr l cvryaeqlsvfeeftvl dilgd isvdqisdstlyytcekfllvlqgnvlgvqv itnndestcevkryk  
mf  
>tr|D2N7J4|D2N7J4\_STAA5  
mkgqhfivtggtsglgfsivrk l lenkvht l lvr dvdkatrifeqelgktinvipcd l nd l ksiqalqfednt l fdgfi  
ysag l gyfksis dhsfsem

Tsompanidou\_et\_al\_Supplemental\_FASTA\_File

ietyq1nlisfnvlytv1rpyltsnahivgissqaafstqanaahygaskagfyalma1rlespnlhimtvnvgpidtp  
fhqkadpsmkyakkmgkim  
ldanqlaedi1ygi1ktkqmeinrpkwmhhal1kmyqiaprffercfpl1fknka  
>tr|D2N7J6|D2N7J6\_STAA5  
mevtffgtsag1ptkerntqai1n1epysnsiwl1fdvgegtqhqil1hhaik1gkvthifithmghdhi1fglpg11ssrs  
fqggeqkpl11vgpkgika  
yvemsml1esh1nypityieiddh1tyhhdgftveah11nhgipsygyrvmappettgtinveal1knig1leppkyqevk  
shdtfehnggvyskdfgr  
eskqgpi1vai1fgdtkpcsnervisrdadvmvheatyidgekl1annyhshiedv1alikeanvkrtlith1snrynted  
ineiyqt1iqnedtpnfnf  
vkdfdsfkv  
>tr|D2N7J9|D2N7J9\_STAA5  
mnkqwwkeavayqvyp1rsfnds1nhdgi1gd1pgmi1dk1dy1kd1gi1dvi1w1spmfkspnddngydisdyqeimdefgtmed  
fdr11kgvhdrgmk11ld1  
vvnhtsdeh1wfi1esksskdn1pkrdwyiwqdpkpdgsepnnwesi1fngstweydanteqyyf11f1skkqpd11nwg1npevr  
davfemmnwwfdkgi1dgfr  
vdai1thi1kkt1feag11pvpegktyapa1fdvdmnqpgi1qtw11qemkdrs11skydim1tvgeangv1spddaddwvgeengkfn  
mi1fqfeh11glwnsgdshfd  
vnsy1ksv11nrwqk11lenkgwna11fi1enhdqprrvstwgddd1kywesatshaavy11qqgtpfi1yqqgeigmt1nypfesi  
et1fndvavkndy1qivkaqg  
gdvd11lakykden1rdns1rtpmqwdd11nggftngep1wfpvnpnyktinvaq11ledesv11qfykd11i1q11rksndv1vyg  
qfd11vdaens1qv1faytr11  
nekq11vi1gn11tnhea11tvpfd11shgevk11fnydvkvn11kq11rpyeacvie1n  
>tr|D2N7K1|D2N7K1\_STAA5  
mek11nqvm11yvddveka11kafwtet11efvvvset11laedyvave11vsptkdaets11timakefi1ekyspevn11gtps11mfke  
knfd11alysk11nd11gl11tghd  
ivemngqr11vfn11fdg11qg11nyfavsd  
>tr|D2N7K3|D2N7K3\_STAA5  
mineqr111ntf11el1vqidsetgnest11qipil1kekfia11gl1dvkedaak11pk11gann11vctmkstie11egevpk11yltsh1m  
dtvvpainvk11pivkddgyi  
ysdg11tti11gaddkag11laam11lev11qvikeqqi11phgqi11qfvi11tvgees11ligake11nse11ldadfgya11idasadv11g11ttv11vga  
ptqm11lisaki11igktahast  
pkegvsaini11aaka11srmk11lgqvde11ttanig11kfhggsatni11vadevileae11arshdperiktqvk11hmt11dvfettase11lg  
gkavvtveq11syppg11fk11ind  
etv11vki11agesas11n11gsanti11sggsdgsi11intfgi11psvil11gvgyeki11htnermpiks11n11lasqv11lei11kivarqsk  
>tr|D2N7K4|D2N7K4\_STAA5  
m11vissq11vksfi11syvvi11ntkvih11leahkmqkv11rii11ivm11vs11v11a1111tsi11p11  
>tr|D2N7K5|D2N7K5\_STAA5  
m11k11npyki11gfrt11ktavgmt11gvi11isk11lg11dnyassai11lv11cikhtkvhs11lqai11sr11vscf11vl11flgsai11f11lgq  
spiv11gi11iv111fip11tvv11  
kvqegv11tscv1111hvf11naksidv11hivnet111111g11siaftm11mmps11dkq11deykckieqqi11adi11fskysyiceky  
ed11tiaie11feal111nikkak  
siafrdv11kn11hfvnensy11hyfdmreeqve111mrmp11liesichkdp111ndvas111keig11nvnsndytamr11h11nyetr  
11k11ve11p11ptthka11nsra  
si11iqi11ne11leey11qi11ksqf11g11kmhseva  
>tr|D2N7K7|D2N7K7\_STAA5  
mei11tmpk11gesv11hegtieq11w11svgd11hideyep11cevitdkvtaevp11stisgtitei11veagqt11vaidti11ickietadek  
t11nettee11qakvdehtqks  
tkkas11tveqt11stskq11nqprn11ngrf11spv11fklasehdid11sqvvg11sgfegrvtk11kd11msvieng11g11ttaqsd11kqv11qtqsts  
vd11tssnq11ssegn11senstip  
vngvrkai11aqnmvns11vteiphawmmi11evdatn11vnr11rnyknk11fknkegyn11tffaffv11kavada11kayp111nsswqgne  
iv11hkdi11nisi11avadenk11  
yvpvikhadeks11ig11iareint11latkarnk11q11ttedmqg11g11ftvntgt11fgsvssmgi11nhpqaai11lqvesivk11kpvvin  
dmia11irn11mvn11lcisi11dhri  
ldg11lqtgk11fmh11kqrieqyt11lentniy  
>tr|D2N7K8|D2N7K8\_STAA5  
mak11lsy11lea11rqaq11d11alqknkdv11filgedvgkkgg11vfg11gttqgl11qqkygedrvidt11plaesni11vgtaigaam11vgkrpiae  
iqfad11filpatnqi11iseaa  
kmryrsnndwqcp11ti11rapfgggv11hgg11lyhsqsiesi11fasspg11t11vipstpydak11111ssiesndpv11lyfehkkayrf  
11keevpeey11tvp11lgkadv  
kreged11tvfcy11gm11vnc11laadi11laadginvevd11rtvyp11ldketi11drakhtgkv111vtedn11legs11msevsaiia  
ehc11fd11dapi11m11laapdv  
psmpf11spv11lene11imn11peki11nkmre11laef  
>tr|D2N7K9|D2N7K9\_STAA5  
mi11dyks11gl11seed11kvi11ykwmd11grki11der11w111nragki11p11fvsgqg11qeatqi11gmayaleegdi11tapyyrd11lafvtymg  
i11saydt11fl11safgk11ddvns  
ggkqmpshf11ssrskni111sqssp11vatqi11phavgaal11kmdgk11k11at11atvgegssnqgd11fhegl11nfagv11hkl11p11fvcvii11n  
nkyaisvpds11lqyaaek11s

Tsompanidou\_et\_al\_Supplemental\_FASTA\_File

dra1gygi hgeqv dndplamykamkeareraisgggstlieavtsrmtahssddddqyrkteerea1kkadcnekfkke  
llsagiiddawlaeieaeh  
kdiinkatkaaedapypsveeayafvyeegsln  
>tr|D2N7L0|D2N7L0\_STAA5  
msekqydlvvlgggtagyvaairasqlgkkvaiverqlggctlhkgciptksllksaevlqtvkqaamfgvdvkdvnvn  
fenmlarkediiinqmyqgv  
khlmqhnhidiyngtgrilgtsifspqsgtisveyedgesdllpnqfvliatgsspaelpflsfhdhki1ssddilslkt  
lpssigiiggvgimefas  
lmidlgvdtvi eagerilptesqasqllkkslsargvkfyegikl sendinvnedgvtfeissdiikvdkvllsigrk  
pntsdiglnntkiklstsg  
hiltnefqtedkhiyaagdcigklqlahvgskegvavdhmfegnpipvnynmmpkciysqpeiasiglnieqakaegm  
kvksfkvpfkaigkavids  
hdaneysemvidqsteeivginmigphvtelineasllqfmngsalelglttahpsisevlmelglkaesraihv  
>tr|D2N7L3|D2N7L3\_STAA5  
mtnlpmnkli devnne1svainksvmdtqleesmlysl naggkri rpvl1111t1ds1ntkhe1gmksaialemihtysli  
hddlpamdnddyrrgk1tn  
hkvygewartilagdal1tkafelisddr1tdevkikvlqrlsiasghv gmvggqmlmqsegppinletlemihkktg  
alltfavmsaadianvdda  
tkehlesysyhl gmmfqi kdd1ldcygdeaklgkkvgsdlennkstyvsllgkdgaedk1tyhrdaavdelmqideqfnt  
kh1leivdlfysrdh  
>tr|D2N7L5|D2N7L5\_STAA5  
msdylsvsaltkyikyfdqdp1qsvlikgel snfkkhssghlyfnvkdkesvisammfkgasklnfepkegdevlle  
arvsvferrgnyqi yvnm  
qldgignlyqkleal kkk1teegcfdnankksipkfpkkiavltastgaa ir di hstinsrfplaeqiqistlvqgekak  
ddiiekieyadslgvdtii  
vgrgggsiedlwnfneeavraiyncktpiisavghetdvtlsdfaadi raatptqaaviatpdqyellqqiqyyqftlt  
rfikkhleqqrkvhelss  
yykfkqpt1lydqjqrrddlekr1kqqiqatfeqqhr1ml1qqryn1kal1ssvnqeqqnn1ql1tnqlvk1l1nskils  
yknd1knkven1nn1sptn  
tm1rgyai vnk kdevitstkd1tendq1t1tmkdglvdakvtkvrcnd  
>tr|D2N7L8|D2N7L8\_STAA5  
mkkvlianrgeiavri1racrd1giqtvaiysegdka1htqiadeaycvgpt1skdsyl1nipnilsiatstgcdgvhpg  
ygflaenadfaelceacq1  
kfigpsyqs1qkmgikdvakaemikanvpvpgsdglmkdvseakkiakkigypviikataggggkgirvardekeletg  
frmteqeaqtafngg1ym  
ekfienfrhieiqivgdsygnvihlgerdcti qrrmqk1veeapspilddetrremgnaavraakavnyenagtiefiyd  
lndnkfyfmemntriqveh  
pvtmvtgid1vk1qlqvamgdv1pykqedik1tghaiefrinaenpyknfmpspgkieqylapgggygvriesacytnyt  
ipyyds1mvakliiheptr  
deaimagira1sefvvlgidttipfhi k1l1nnei frsgkftntfleqnsimndeg  
>tr|D2N7L9|D2N7L9\_STAA5  
mnfkeikelie1ldkst1teiniedtkgkv1lkkeketei1tpqisqmpveaaampmpqvqstdnnkteapkptsdnhkt  
inapmvgtfykspspdeea  
yvqvgdtvsnettvcileamk1fnei qaeisgeiveilvedgqmveygqplfkvk  
>tr|D2N7M2|D2N7M2\_STAA5  
mkk1svi gat111tgcsqnlapleekttd1rednhqlk1diqel nqqisdskskikglekdkenskktasntkik1m  
nvtstydkvakal1synd  
iekdvsknkgdknvqsk1nqisndiqsahtsykdaidg1slsdddkt sknidk1nsd1nhafddikngyqnkdkkq1tk  
gqa1sk1n1naks  
>tr|D2N7M6|D2N7M6\_STAA5  
mtskssp1ifersregryays1pisdikt nsves1l1ddk firknkaefpevaeld1vrhytel snknfgvdngfyp1gsc  
tmkynpkinekvaripgfs  
eshplqdedqvqgs1ei1ys1qee1kei1tgmdevt1qpaagahgewtal1mfkayhengeghrdevivpdsahgtnpas  
asfagfksvtvksnergev  
didd1krvvnentaa1m1tnpt1gi feknimeireivhnaggl1yydgan1naimdkvrpgdmgfdavh1nlhktftgp  
hggggpgsgpvgvvelas  
y1pkpmvikdgdkfydndiknsigrvkpfygnfgiyl raytyirtmgatglkevseavlnanyikar1seyfeipykq  
yckhefv1sgvrqkefgvr  
t1dmakr1ldfgvhpptiyfplnveegmmieptetesket1dyfidt1isiaeeakndpdkvleaphttvdr1deataa  
rkp1lkfen1kqek  
>tr|D2N7M7|D2N7M7\_STAA5  
mshryipltekdkqem1qtigaksigelfgdvpsdillnrd1niaeseaett1lrr1nriasknitkethsflgagvyd  
hyapsvvdamisrsefyta  
ytpyqpeisqgelqai1fefqtlice1tdmdvanssmydgm1tsfaeacilafsqtkknkivvskglhyqalqvlhtyakt  
kefevveid1dgtvtd1kk  
leaavddetaavavqypnfygsiedlekihsfiedkka1fivyanplalgl1tppgsfgadivvgdtqpfgipaqqfggph  
cgyfattkklmrkvpg1v  
gqtqddegnrgfv1tlqareqhirrdkatsnicnqalnalassiamsal gkqgiydiavqniehanyakqfikkgevev

Tsompanidou\_et\_al\_Supplemental\_FASTA\_File

ldgtsfnfvvkfdkpiqq  
vneelvkyniiggfdlgvvsddfnhmliavtelrtkdeidtfvekageInd  
>tr|D2N7N0|D2N7N0\_STAA5  
mvisitllivpdlrisktfliesrelttvdfeffsrdiledfkgvdrndieirqqriilhkgeemieyklinnkiikvv  
ndrgnitlinnvtaftani  
yyksiikititvkvgtnlqtktiyv  
>tr|D2N7N2|D2N7N2\_STAA5  
mqirkqsafmlemlvmmllisifllltmtskglslrviddeaniislitelnyiksqaianqgyinrvfyensdtikv  
ienkirf1k1kvgiinv  
akvdiafdkkgninkfgsitidnnsiyriifhiekgriryekl  
>tr|D2N7N4|D2N7N4\_STAA5  
mklqwintfklhskkrqlskvqqidllsnlcnllkygftlyqsqf1nlqmtkyknq1ggttilseisngapcnqilsig  
ysdtivmqvylaerfgni  
dvleetvnymkvnrkseqrlktlqyplilvsifiamiiilnlvtvpqfqlytsmniqlssfqktsffitslptiivv  
mliivsm1aiimkliynkl  
nm1nkinfvmlplisgyfqlfkyfvtne1vlfyknqitlqsivdvynhssdpfrqflgkyllysemgyglpqilek  
lkcfkpqlikfvlqgekrq  
klevelklysqilvkqiedkaikqtqflqpilflilglfivaiylvimlpmfqqmsik  
>tr|D2N7N5|D2N7N5\_STAA5  
mkilfgeiinkaiemkasdvfipvknevsikfrindnleqyeqignsiyqkllvymkfqagldvstqqvaqsgrisyhf  
nkiyflristlpls1gqes  
cvirivpqqffqqkstyknfdkhlmmkkqgl1lfsqptgsgkstlmyqmvsyanka1n1nvisiedpvmqipgqvqin  
vndkaginyvnsfkailrc  
dpdviligeirdkdvakcviaslsghlvltt1hatdckgailr1lemgisvqeliqatnliinqrlvttikqqrqlvce  
ilsqqqlryffshhslps  
sfknledk1ddmtkagvicettmdkyi  
>tr|D2N7N9|D2N7N9\_STAA5  
msrkinnfydvqqllksygfliyfknppdmyemiqqeisslyqyellskyeelkctliinqrreqk  
>tr|D2N7P0|D2N7P0\_STAA5  
mnidkqfwktiyywirylnfdivsrekddqeiwlahkrkkqvvi1kqhikstqeirfdkakvlehkdeianfisfepqif  
efyyftesefseeqlnevs  
pirikfnvirhtkdlikhmpniflarlisedndkktymfykrkv1tdnfldkymqkfspatytiifvnlw1cmilyln  
nfsdvk1ldvvg1vhfnvv  
hgewyriivtsmflhfsfehilmnmsl1figkiveaigswrmltvyfiag1fgnfvs1sfntttisvgasgaifgligs  
ifammyvsktfnkmlgq1  
lialvilvgvslfmsnininvahiggfiggl1itligyyykvnrnvfwilligmlvifialqiriftikedniynklikdd  
mtsgnydnaqni1vkqtink  
nyaddqtyylsgmimatinsksegmtewerg1rmfpksg1lnfelaians1nddeka1kyvrka1nadpkntdyinlek  
el1ksnesknk  
>tr|D2N7P1|D2N7P1\_STAA5  
mtkneirkyi1hkmktfnkaekrkadtwl1nqffateeykeanaialv1sfnhevdtfsiieqalmdhkri1fvpkmdyl1n  
hqmtfkeifn1kdi1dvdkk  
giyyptskgettn1d1ivpvgvfgdngyriygggydrflanyqtktis1lydfqitsfepesfdqpvdkliiyqsa  
>tr|D2N7P3|D2N7P3\_STAA5  
mlkr1leksndeivqntinkrin1figvivi1fav1v1rl1gylqiaqgshykqiikndenitvnesvprgril1drngkv1  
vdnaskmaitytrgrkttq  
sem1dtaek1sk1ikmdtkkiterdkkdfwi1lhpkkakammtkeqam1adgsikqdydkq1l1skigksq1delsskd1  
qvlai1fremnagt1ldpqm  
iknedvsekeyaavsqq1sk1lpgvntsmdwdrkypygd1lrgifgdvstpaegipkeltehy1skgysrndrvgksyley  
qyed1lrgkkkemkyttk  
sgkvtssv1npgargqd1k1tidid1lqkevea1ldkqikk1rsqgakmdnammvvqnpkngdilalagkqinksgkmt  
dydig1tfsqfavgssvkq  
gt1lagyqnkai1kvgetm1vdep1hfagg1tkrsyfnknghvs1ndkqal1mhssnvymfktalk1lagdpyysgmalpsdis  
spaqk1rrg1nqvg1lgvkt  
gid1pnetkqgiep1tnnpny1d1sigqydyt1pl1l1sqyvstiandgyriqphigl1tihestnkddv1plkkkingtv  
1nkvntekei1kqieqgfk  
mafndkdgtgyvs1fkdtv1vptagktgtaev1fnggeprvnstyigyapiddpk1afsivyt1nqpvpppw1tggd1lgrdvin  
yyfkq1l1gkdnknkdkdk  
>tr|D2N7P9|D2N7P9\_STAA5  
makhpfeqfn1less1idavkd1nfekpteiqnri1prilkrtn1l1gqsqtgtgkshaf1l1plmq1lidseikepqai1vvp  
tre1laq1lydaanh1sqfk  
advsvkv1figgt1diekd1rcnaqpp1ligtp1rind1aitgh1lvh1lasy1lvidead1mid1gl1iedvdyaar1ledna  
n1avfsat1ipq1lqp1lnk  
y1shpeyvav1dskkqknknieff1liptkgaakvekt1n1idil1npy1lciifcnsrdnand1ars1neagikv1gmihgg1t  
prer1kqmqm1kri1rn1lefqyv  
iasd1lasrgidieg1vsh1v1fdvpnd1dff1thrv1gtr1grnykgvait1lyspdeehnis1liedrg1fv1ntvdik1dgelke  
vkahnqrqarmrkdhd1tn  
qvknkvrski1knkvkpgy1kkkfkqevemkrqerqk1fskqqrqkrkqknkq



Tsompanidou\_et\_al\_Supplemental\_FASTA\_File

>tr|D2N7Q0|D2N7Q0\_STAA5  
mkiadlmtl1dyhvpfrtaeswdnvglligdedvevtgvlta1dctlevvneaiekgyntiishhplifkgvtslkangy  
gsiirkliqhdiinliamht  
nldvnpghvnmmlakamglnknsiinnqqdvvykvqtypkdnvgpfdklsenglaqegnyeycffesegrqgfkpvge  
anptigqidkiesvdevki  
efmidacqksraeqlikqyhyetpvfdfieikqtslyglgvmaevdnqmtledfaadfksklnipsvrvfgesnqkikr  
iaiggsgigyeyqavqqg  
advfvtgdikhhdaldakiggnlidiinhyseymkeglktllmnwfnTekinidveastintdpfqi  
>tr|D2N7Q1|D2N7Q1\_STAA5  
mislnnr1ttvsrflkqgtiadigsdhaylpiyaiqnhlcdcgiageviqgpfqaavknvaanqlvdridvrlgdglsvi  
hpedvidniticmggpli  
akilkgqdklsqhrli1qsniqtenlqrtlqqlnyeideimeekghiyeivvaeystqlielssdelkfgpkllnn  
kneyfikkwqrelealyhi  
kskInteghhqrlaqindeiaviervl  
>tr|D2N7Q3|D2N7Q3\_STAA5  
mridqsiineiKdkti1dlvseyvklekrgrnyig1cpfhdektpsftvstedkqichcfckkgnvfqftqeikdisf  
veavkelgdrvnvavdiea  
tqsnsvqiasddlqmiemheliqefyya1tkTvegeqalTylqergftdalikergigfapdsShfchdf1qkkgydi  
elayeag1srneenfsyy  
drfrnr1mfp1knaqgrivgysgrtytgqepkylnspetpiFqkrk1lynldkarksirk1deiv1legfmdviksdtag  
1knvvatmgtq1sdehitf  
irk1tsni1lmfdgdfagseat1ktgqh1lqqg1nvfv1qlpsgmpdeyigkygndaftafvknkksfahykvsi1kd  
eiarn1syery1ke1shd  
is1mkssi1qqka1ndvapffnvspeqlaneiqfnqapvnypedeYgyiepepigmaqfdn1srqekaeraflkh1mr  
dkdtf1nyyesvdkdnftn  
qhfkyvfev1hdfyaendqni1sdavqyvnse1ret1is1leqy1ndepyeneidYvvn1engqeties1nhk1rea  
trigdv1elqkyylqqi1vak  
nkerm  
>tr|D2N7Q7|D2N7Q7\_STAA5  
mrqkgiikavdygesdkii1TinehgakvplmarrakkvktglqaqtqlfvYglfiynqwrngmt1nsvdvisqhyklq  
mdlyvssys1laetiers  
mdegdiapynyq1lqfv1ekiesgtsaq1msv1vm1kcmkrfgftasfnrcavsgndtqad1igysfkfdgaisrqaefk  
dvhavi1snktly1ldv1q  
klpidkmns1nihqei1demsdi1lmlyreyagmffksqk1inq1kr1eq  
>tr|D2N7R3|D2N7R3\_STAA5  
mktstivmvvacfft1rkiekqresfekyelFklqqkid  
>tr|D2N7R9|D2N7R9\_STAA5  
mqryfidqnadvsqrffi1tkkedihhitnmrydvgski1lTfndqtvylcevaditsdkiavd1kekqnintel1pvdvt  
icsg1likadkyew1lqkat  
elgassfiavsmersivk1neakvakkierwqkiikeaaeqsyr1vipsiqfesn1klicdtidnydyiliayeeekdg  
el1snfkqt1qqfkaqdkv1  
mifgpeggl1seneis1fsntstvvg1gpri1raeta1ya1saisyeke1mg  
>tr|D2N7S3|D2N7S3\_STAA5  
mtnkdesvektstestveetnvkqn1ddsveqaeeskgh1qdeaieetsdenvieeidpkdqkine1qqladeneekylr1  
yaefenykrriqkeneink  
tyqaqrvt1di1paidniera1qiegdde1fks1qkgvqmves1ina1kdng1leviktegeafdpnihqavvqddnPDF  
ksgeitqe1qkgyk1kdrv  
1rpsmvkvng  
>tr|D2N7S4|D2N7S4\_STAA5  
mitdrq1si1naivedyvd1fgqpvgskt1ierh1nvspati1nemqled1nyiekthsssgrspsq1gfryyvnr1le  
qtshqktnk1rr1nq1lve  
ngydvsal1tyfade1snisqytt1lvhpnhkqdi1innv1h1ranpn1vimv1v1fssghvehvh1asdm1pfsndk1ntis  
nfvtnk1tefnqnlqddiv  
sfvqseqeei1fink1lntmnnhisnqsnsiyggkvklidalnesnvssi1qpilqyiesnriaellqdis1pninvk1gd  
eids1sdisivtsqyhfd  
et1kgqi1avigptamhyqnviq1lnriw  
>tr|D2N7S5|D2N7S5\_STAA5  
mtvqsayih1pfcvri1cty1cdfnkyfi1nqpvdey1dalitemstakyrn1ktmyvgggtptalsidq1er1lkairdtf  
titgeysfeanpdel1tkek  
vq1lekygnr1smgvtfkpe1lsv1grthntedi1ytsv1naknagi1sis1dl1myh1pkqtiedfeqs1dlaldmdiq  
hissygl1ilepktqfynmy  
rkg1l1klpned1gadmyq1lmskieqspfhqyeisnfa1leghesehnkvywfneeyy1fgagasgyvdgvrytn1pvnh  
yikainkeskai1vsnkps  
1termeeem1gl1r1negvssrrfkkkfdqsiesvfgqtinn1kekklivekndaia1ltnrgkvignevfeaf1ind  
>tr|D2N7S9|D2N7S9\_STAA5  
myiayrknki1vyapis1fl1i1fsswy1hysqgai1fnyiniernp1qf9nervqviq1qrqgsdtykgr1slkneiypff1t  
dkknfd1kki1esrncivkg  
qfkvidnkfv1tk1qsivvqsc1lesnrsn1iekhkqf1imnriy1dsgikf1pdrimalitgdvkeineqfkerveigiyh1

Tsompanidou\_et\_al\_Supplemental\_FASTA\_File

lavsgshiaaivfliyqpl  
krlnlplfvikgitiivlaalfaqytnyapsavraimttlvlitkqikikgiqllafvfiimfilnplvvydigfqfsf  
iisffimllfpflqqlskl  
qslfiitfiaqlasfivaipnfhqqlwvgnlnlifvpyysiilfpilsilffitshfivglmplnylvdlsfnfhdwllld  
lftrikqshfsvpkfnldwi  
fiiifiisvyyifwllakrkyilvtfwtiililtllitfptnshhkitmlnvqggsilyeggknqnvlidtggkvindtkq  
psysiskyhilptlnergi  
neleylilthphndhigeleyiishikikhiviynkgysntlmllsklshkynvklmdvrqvssfklgdssflffdsfi  
pnsrdkneysiitmityqn  
kkvllmgdasknneslllkkynlpeidilkvghhgsktssskefiemikpkisliissgknmyhlpnievvkrlqrisr  
iynsqngqvtjlddnlk  
vdsnsygnasgl  
>tr|D2N7T0|D2N7T0\_STAA5  
merikweeyfmaqshllalrstcqrsvgativkdnriiaggyngsvagevhcidedgcliedghcirtihaemnalqca  
kqgvstedatitythfpc  
nctksiiqagikriyyaedyhnheyatkllkqsgiefkkipfspeyvakyltkq  
>tr|D2N7T1|D2N7T1\_STAA5  
myqfllrykdflltqwklyiisavvlmvligfifwrqddytsrdfenkdtaalkqstsensslskledvqvkdgddsknkq  
pvyvdikgavkhpnyvkm  
skdrvvdlllkaqllddavsqinlsekltqkmi fiphkgqknvepqfgansvhvkngntntkvnlnntasvselmsvp  
gvqqakanaveyrnqqa  
fqiiddllkkvkgfgsktfdklksyftt  
>tr|D2N7T2|D2N7T2\_STAA5  
msqyaemslvydqltgdqpyekwfeivknhckdesnildigcgtgsltvqlea lgnvtgmdlsvdm ltvaaqksvvnwl  
egdmtsfdlqqqfdiitif  
cdslnylqdetavietfinvyhhladsgvfi fdvhtvykmmtlfnqsyiddkgdiflawdavqgd lplsvyhdmtffir  
hedetysrfdeshfartfd  
ektylswltqvgfkhvetftdfnidehnedaerlffiakk  
>tr|D2N7T5|D2N7T5\_STAA5  
mkkivlyggqfnpihtahmivasevfhelqpedfyflpsfmsplkkhhdfidvqhr ltm iqmiidelgfgdicddeikrg  
ggsytydtikt fkeqhkds  
elyfvigtqynqlkwyqiey l kemvtfvvnrknsqnvengmiaiqiprvdisstmirqrvsegksiqvlvpksven  
yikgeglyeh  
>tr|D2N7T7|D2N7T7\_STAA5  
mkfavignpishslspvmhranfnslglddsyeanlipiedfhlkeiiske l d gfnitiphkeriipyldhvdeqain  
agavntvlikdkgwigynt  
dgigyvkg l hsvypdlenayililgaggaskgiayelakfvkpkltvanrtlarfeswnlninqisladaekylaefdiv  
inttpagmagnesiinlk  
hlspntlmsdivyipyktpileeaerkgnhiyngldmfvyqgaesfkiwtknkdadinsmktavlqqkge  
>tr|D2N7T8|D2N7T8\_STAA5  
msdilkcigcgas l qsedknkpgfvphe nmfrddvicrrcfr l knynevqdvgl esedflkl lsgladkkgivvnvvdvf  
dfegsfinavkrivgnkki  
ilaankldllpkqinkrrkewlkrarkygl eadddvlisaekgwidd l ssianirenevdyivgttnvgkstlink  
lieasvgekdvvttsrfpg  
ttldmidipldetsfmydtpgi iqdhqmthlvsekelkiimpkkeikqrvyqlneaqtlffgg laridvsggkrplvcf  
fsndlnihrtktekandlw  
rnqlgdlltpgnpqnfd l nevka vrletgkekrdvmisglgfitigpgakvivrvpknvdvvlrnsil  
>tr|D2N7U0|D2N7U0\_STAA5  
migiigameeevti l knkl tq l seivahvkfytgilkdrevvitqsgigkvnaaisttllinkfkpdiintgsagald  
es l nvgdvlisddvkyhda  
datafgyeygqvpmpvafqsskpliekvsqvqqqq l takvg l ivsgdsfsgsieqrqkikka f pnamavemeataiaq  
tcyqfnvpfvvravsdla  
ngeaemsfeaflekaavsssqtvealvsq l  
>tr|D2N7U2|D2N7U2\_STAA5  
mgefevkyltgfilillegiftnsasaieysdlhhkskl dskrl ynakvsfanptdenkktndrllkhdllfhdmfvn  
ddwkdkfkevfeana l skk  
finkdidi fagnygygchggeanktqcsyggvtfsdnkyddyknipcnlwidghqteiel tavkttkkkivtiqeldvq l  
rnylnekylyeqggdivk  
gyvkyhndeknveydfyn l ngeyghv l kmyadnktinsdklhlidiylfks  
>tr|D2N7U3|D2N7U3\_STAA5  
mgyrtlksi fhehneskmeyskrfnslasfntnini ipmengkknvdveyp l fmvtknl skkqelisinsrkidra l  
nslpyaareqyfnldllide  
lqstneienvfstkqeiahalnqaseflkfrglvdqykeielnkkikvdnvrdiraiydklvsneineqdkldgel frk  
nfvghdgstnkyihvg l q  
petkiveyigem l tflkyfdapqpfkimashylfeyihpfydgngvrgrfiakllsdydnytal tfsyvinrnkskyy  
kafmtashlncgd l tefi  
dtmle l liagqeril delipkmdatek l tlyl tshyqidyefly l lsmdk l fgnkrnr l tidlenilgvgrvkinnti  
kkfgnylvkiksrtiyei

Tsomanidou\_et\_al\_Supplemental\_FASTA\_File

sdeflnsiik  
>tr|D2N7U4|D2N7U4\_STAA5  
mgrn1klkhresdfetknhkr1llgsvflmatsaigpaf1tqtavftsqflasfafai1lsiidiigaqiniwri1vvt  
glrgqeisnkvvpglgtvi  
siliafgglafnigniagaglglnaifglvdkwgaaitaifailifvsksgqkimdvvsmilgivmilvvayvmfvsnp  
ygdafvhtfapehpmklvl  
piitlvvggtvgyitfagahri1dsgikgkqylpfvnqsaiagil1ttgimrt1lflavlgvvvtgvt1ssenppasvfeh  
aigpigknifgivilfaam  
ssvigsaytsatflktl1hkslnersnlivivfivistmiflfigkps1liiagaingwilpitlgailiaskkksivgd  
ykhpnwmfifgivilvti  
ltgifsfkevlq1f  
>tr|D2N7U5|D2N7U5\_STAA5  
mridlncdlgeafgnysfggdhqiip1itsanvacgfhagdenvmnetvklakahnvavgahpglpdlkgfgrnidisn  
eiynlmiyqlgalggfcr  
ihqvkinhvkphgal1yqmgakdreiasviaqavydfpslv1vg1ansyliseaknvg1itasevfadrrieddglvsr  
kesdavitdtdealkqv1k  
mvkenkvisknnkevt1qadticvhgdgehallfvskireilmkegidiqs1  
>tr|D2N7U6|D2N7U6\_STAA5  
mlrclianrgeiavri1racreygietvavyakgdeqs1hvh1adqaicigeanaldsylvnidriisaaitganaihp  
ygl1sestkfaqtveeggi  
afigptkktmemmgdki1tarqtvvhagvpvipgsngavnhvseiek1akdigypvikaasggggkgirivkkaed1eka  
fkeaksegkkyfdddrvvy  
eafipvakhvevqvmgdgdnyvh1gerdcsvqrknqk1ieespcaalteerrqqicndavkvaraanyrsagtieflvt  
dnahyfiemnariquehtv  
temraerd1vaaqyl1lehn1lpfsqsdiqfnghv1earinaenpekkfqptpgkvta1h1pqqfnvrvs1lyhgyqvs  
pyds1vakv1vkshdras  
aidklkat1demvidgfsttadfl1yav1nyp1lyrdgdakdvdk1f1ekhqv1kgve1  
>tr|D2N7U7|D2N7U7\_STAA5  
mniekieqi1k1vkendvkkfkfknfedei1eidftdsnh1aahsnqsnqsmnnd1taskvndnsdvstndyhdikspmv  
gtff1qdske1tepi1kvq  
dkvknkgdi1gyveamkv1nevttdvageiteivadhgtvneydqa1vrk  
>tr|D2N7U8|D2N7U8\_STAA5  
msiki1lqpg1fstvqd1arkgyeh1g1fsgagamdqfsfkvaqsl1nndgpaieytl1gptiqfntqntfvitggsvas1  
nnk1ismnsv1laekgdil  
kigaitkgargyl1tfghs1invppiaesyathtrssiggfkgkrl1landvitvkinndfkenigktih1lqdd1lpenniih  
il1qgpqfeafseearakiv  
nhsyliteqsdrmgyr1legdsvapinqadi1sepvalgsvqvpndgqpi1llndkqtiggytkiatvckfd1pk1aqmkp  
qdtiqfkwi1sfqavdknr  
eqms1fnei1kshqkapi1fdtss1lrhtskk1latilkgd1  
>tr|D2N7U9|D2N7U9\_STAA5  
mdvr1fneq1t1mi1yfenkiseetyrntamvrwi1rekeileiqdivpsyravli1yfdeqaitsskliense1nkfneknv  
havngtnri1kipvkygg  
ygpdi1eevakhri1tveqviekhtskpyli1ym1g1fmpgfpyl1gg1deq1htprnrqpr1k1ihagsvgiannqtglypsds  
pgwqi1grtp1kvfsser  
epmsmyeagewi1qfyaideqefiqierdi1sddnfnvddwv1k1knv  
>tr|D2N7V3|D2N7V3\_STAA5  
mte1l1vtpks1shmet1lid1gadafvigeqkfg1rl1pgefnrqmqteava1lahkndkkvyaavng1lfhnyh1davedy1n  
fl1heirvdri1fgdpavvm  
yvkaqenpi1l1hwnaet1vtnhfqcnywgkrgasrav1lare1n1dei1inikensveievqvqgmtcmfqs1krm1l1gnyy  
tfqdrqmkierrndeqs1l  
lydeerqnnypvyedyngthimspndic1ieelapffeagidsfkidgil1qteeyinvvteqyrqaid1lynedpei1yede  
kfm1mdpi1eeiqpdyrpf  
egf1ykqtv1y  
>tr|D2N7V8|D2N7V8\_STAA5  
mmkklkasei1rqky1dffvekghmvepsap1vpiddt1lwinsgvat1kkyfdgretpkkprivnsqkairtndienvg  
ftarhhtffem1gnfsig  
yfkqeaiefawef1tsekwmgmepdk1lyvtihpedmeayniwhkdigleesri1riegn1fwdigegpsgpnteifydrge  
aygqddpaeemypggener  
ylewn1lvfsefnhkhdsytp1pnkni1dtgm1lermasvsqnrvtnyetd1fmpimnei1ekvsgkqyl1vneqdvafkv  
iadh1rtiafa1sdgalpa  
negr1yv1rr1l1ravrsqt1ginepfmyk1vdivadimepyypnvkekadfikrvikseerfhet1edglailneli  
kkakattneingkdafkly  
dtygfpi1eltee1avqag1kvdmtt1fesemqqdrdrarqarqnsqsmqvqsevl1knitsastfvgydtataqtt1thliy  
ngeevsqveagetvyfmlt  
etp1fyavsggqvadtgi1vyndnfei1avsevtkapngqnl1hkgvvqfgqvnvgatvsaevnqndrrdi1qknhsath1l1haa  
lksvl1gdhvnqags1lead  
r1rfd1shfgpmtnde1dqver1vnee1iwkgidvni1qemdiasakemgama1fgekygdvrvvnm1apfsielcggihvr  
ntseig1l1fkivsesgtgag

Tsompanidou\_et\_al\_Supplemental\_FASTA\_File

vrriealtgkaaflyledi qekfntmksqlkvksddqvvdktlqlqdeekalkqlqrdkeitslkmgniedqveeing  
ykvlvtevdvnpnakairst  
mddfksklqdtiilasnvdskvsmvatvpksltnnvkagdlikqmapivggkgggrpdmaqqgggtqpeniskslsfikd  
yiknl  
>tr|D2N7V9|D2N7V9\_STAA5  
msdptlfdysmikgtveailfqnsdnfytvlvkvdietnedfdtmptvvgflpnivegdvvtfkgqvvdhprygkqlkae  
tfekempqtkeaiisylss  
dlfkgvgkktaqniventlgdnaindiiddhsvlekvsglskkkqkqiaeqisanqesekimirihdlgfgpklsmaiyyqf  
ylgdtltildrnpyqliyd  
ikgigfnkadqlarnigiayndnerlkaallytleecikqghtylpinvvidltdvlnyqdeeviepekl demlqyln  
eekrliidneqvaipslyy  
seiksvqnlfrikthtnklteieqsdlqmhigeiedanqvnyasqkealqtainskvmlltggpgtgkttvikgively  
aeihglsldyddvnddyp  
vvlaaptgraskrleamtihrliqwnqdtkpedileneinarliiidemsmvdtwlfhqflsavpldaqlifvg  
dedqlpsvpggqvfkdlie  
skaiprvnltevyrqdgssielahrmklgqkiditqrfhdrsfincqanqiptvvekvvtsavnkgytmdiqvlapm  
ykgnagikrlnqvlqdi ln  
pkkkdtreiefgdvvrkqdkvlqlvnrpdnifngdigvivgfwakenalnkdvlvdfegneitftkqdmmlthay  
ctsihksqgsefpivimpi  
vkqyfrmlqrpi lytqltraktslvllgdpeafdiglktngqarlqlctllknyfnsededmlentatndtvasqttid  
dqveapmssndseevtsds  
tktdtnvlteatmfkidpminmgeitpydfier  
>tr|D2N7W0|D2N7W0\_STAA5  
midqqtiiyqi qngkieealqalfgnieedptiienyinatigvladaneiekaerffqkaltidpkngvfyfnlanvyyn  
qqryqeaiklyqqa lqtei  
eqvdcnyimigmafnglesfkla lpylmtaaeldkdkdevqfyglvlcqlmfneaitqlkhvltidknhvdarynlg  
alfmknediaeithfkea  
vtidpkhllsqhalktftkmkeee  
>tr|D2N7W3|D2N7W3\_STAA5  
maikysalnlvpi regedertaindmvkl aqhldelsyerywiaehhnapnlvssata lliqhtlehtkhirvgsggiml  
pnhaplivaeqfgtmatlf  
pnrvdlglgrapgtmmtasalarrdqhdgvykfpeevsllqqyfgpahqqayvraysavgnvplyilgsstdsahlaar  
kglypyvfaghfapqmqkea  
iei yktlfepsdvldepyvivclntivaenddeaqyl assmaqvmvsitrgrlqpvpqpthelqniltpreytmamerqk  
isligsentvqqkiqdfme  
tygeveimeaisyidkdmqldsyrrfknvinqlnekntl  
>tr|D2N7W4|D2N7W4\_STAA5  
msfmdkakdavekfknsdneqvenvkdkineytgsnneekkenedkek  
>tr|D2N7W7|D2N7W7\_STAA5  
msteplasrmrpknideiisqqhlgvprgiirrmvdtkkltsmifygppgigktsiakaisgstqykfrqlnavtntkkd  
mqlvveakmsgqvi lllid  
eihrlkakqdfllphlengkilvligattsnpyhainpairsraqifelyplndedvrqaltraiedeenglktyqpkid  
edamtyfstqsggdvrsal  
naletavl sadndkdgyrhvltldakdc lqkgafvsdkdgmhdvmsafqksirgsdvnaalhy larlieagd lptivr  
rllvisyediglaspnagg  
rtlaaiesaelglpearip lsqavie lclspksnsamsaidsal sdirnghvgqipnhlkdghyqgakdlgrsigykyp  
hgyvngyvsqy lpdklkn  
kiyyepkttskseqqlkeiy nllkqrp  
>tr|D2N7W8|D2N7W8\_STAA5  
mkhqfsrne laiqggldllkqqtvvilgvvgvgsfaealartnighi ilidkddvditvnqr lhal tttvgqskvs l  
meeriklinpdckvtp lhm  
fyteetyeei fdnydidyvdasdtimykvhl mkecl drgikvissmgaanktdprftis disktytdpmaki irqklk  
klgirkgipvvfsdespiv  
iredvkddivgdknainrkgqmpssnafvpsvvglicasyvndv lkdipvrrikdkgq  
>tr|D2N7W9|D2N7W9\_STAA5  
mskrttycglvteaf lqgeit lkgwvnnrrdlgg lfvdlrdregivqvfnpafseealkiaetvrseyvvevqgtv tk  
rdpetvnpkiktqgvevqv  
tnikvinksetppfsineenvnvdenirkyryldlrrqelaqtfkmrhqitrsirqyl ddegffdi etpvltkstpega  
rdylvpsrvhdgefyalpq  
spqlfkql lmi sgfdkyyqivkcf rdedl radrqpeftqvdi emsfvdqedvmqmgemlkkvvkevkgveindafrmt  
ykeamrrygsdkpdrfem  
elidvsq lgrdmfdkvfkdtvendgeikaivakgaaeqytrkdmdal tefvniygakglawkvvvedgl tgpigrffete  
nvetllt l tgaeagdlvmf  
vadkpnvvaqslgalrvklake lglidetklnflvvtwdp lleydedakryvaahpftspkeadiaklgtapeeaeana  
ydivlngyelgggsirihd  
gelqekmfevlgftkeaqeqfgflldafkygapphggialglrdlvmlltnrtnlrdtiafpktasatclltnapevs  
dkql eelslrih  
>tr|D2N7X5|D2N7X5\_STAA5

Tsompanidou\_et\_al\_Supplemental\_FASTA\_File

mikpkykwkltkpaeyisdeltsklkltpivkkilesksiidetaiesiisdtdvnhdalqlsdmtkaidrikraiande  
kilvygdydadgvtsttil  
vttlqllgaqvgwhipnrftegygpnelafnahdegitliitvdngiqghneikmvqdlgvdivtdhheigsilpeay  
aivhpmhpsfnypfqqlcg  
agvayklaqalienvpdyfkaivaigtiadlvsltdenrslvkqglkvlnqdcptsvkallkeagyndnideetigfiig  
prlnavgrlddaslace11  
mtddeeeaaflaeqvehfnrerkrdivatiteamamaetkvkngdlflllakenwhegvlgivaskivetfalptlilni  
dreqnhakgsarsidqsvm  
feilsahqeliakfgghhmaagmtmdienieslaeglnkwmkelsktsldpvkpvdl1tenditiknirdmnr1rpfq  
tdfsrpi femd1svssvk  
aigqqknh1kl1lgesniaalfwqnghepelqdeqpinilgsvqinewngnqspqiiiqdiamneqqildyrskrkslp  
ftendenivvlihpksdkv  
naneyyygeekqqtdkvvlrdlpmsmed1sns1qq1qfsqlyivlqhnhsiyfdgipnmdifkkykalitkqetniqk  
egml1cehlsvkpdtkfm  
1kvf1d1kfvtdedg1irinqqpdkrsidsskvyqlrqrmdevkq1lyqdfseikwiksq1s  
>tr|D2N7X6|D2N7X6\_STAA5  
mkkssriiaf111v11fagmaatyksviknvn1g1d1qggfevlyqvdp1nkgdkidkka1qstaqt1enrvn1lgvse  
pk1qveepnr1rv1agvt  
dqnearki1ssqan1tirdaedkv1sgsdi1kqgsakqefkqetnqptvtfvkdknkfkvteeiskkrdnvmv1wldf  
kkgdsykkeaqkknkpfis  
aasvdqpinsdsvei1sggfkqgegkkakqiaellnags1pvd1keiysnsvgaqfgqda1dktvfasfigvaliy1fml  
gfyrlpg1vaiialt1yiy  
1t1vafn1figv1t1pglaa1v1lgvmavdani1myerikdel1rigrtikqafskankss1t1ifdsn1ttviaaav1ff  
fgessvkgfatm111g1lm  
ifvtavf1srfl1s1lvssni1fknqyw1fgvkknkrhdinegvdvhd1ktsfekwnfvklakpligvsilivvvglvily  
ifk1n1g1idfssgtrvdfq  
skqaitqqkveqvvdsg1kadq1qingkdnkvatvqfkdd1traqdnk1sdnikskfgdtpqintvspiigqelaknam  
laliyasig1i1yvs1rfe  
wrmg1ssv1a11hdvfi1vai1f1s1frievd1tfiaav1tivgysind1t1vtfdrvren1qkvkvittteqiddivnr1s1r  
qtmtr1sintv1t1v1v1v1v1a  
1l1ffgapt1fnft1a1fig1isgvfss1fiav1pwgimkk1r1kkspkh1lvvykekksndek1lv  
>tr|D2N7X9|D2N7X9\_STAA5  
mnieefdyd1pes1iaqtp1kdrdhsr11vmdretgemkh1hfkdi1eyfrpgdt1v1ndtrvmpar1fg1keetgakve  
m1m1tqi1egndwev11kpa  
krikvgnk1nfgngk1iaecikemdqggrimr1hyegilqer1delgemplpyiker1ddpdryqtv1yakesgsaaapt  
ag1hftdel1teiknkgvn  
iafv1lhv1lgtfrpvsvdvdndhemhseyyqmtqetad11ndtkskghri1svgttstr1let1irrdhdkfvetsgwn  
ifiy1pgfd1kaidgq1tnf  
h1pkst1vm1vsafsnrenv1nayktavn1eyrffsfgdam1ii  
>tr|D2N7Y0|D2N7Y0\_STAA5  
mnermvdqsmhseetdfels1rpr1r1qyigqnsiks1nlevfikaak1rhepldhv11fgppglgktt1sn1ianemevn  
irtvsgps1erpgd1laail  
sg1lqpgdv1fide1hr1ssvveev1ypamedff1di1igkgdears1rid1ppft1vgattrags1tgplrd1rfgvhl1r1  
eynesd1kei1i1rtaev1  
gtgideesajelakrsrgtprvanr11krvrd1fqvnedeqiyi1ettkhalg11qvdaqh1g1dyidhkmmnci1kqynggp  
vg1da1avt1geer1tied  
vyepf1iqkgf1ertprgrkatp1layehfaksneere  
>tr|D2N7Y1|D2N7Y1\_STAA5  
myayvkgk1thlypthvvetagvgyeiqtpnsyrfqkh1dhev1ihts1livreda11lygfsseeekdmf1s1likvtgi  
gpk1s1a1il1at1stpnevkr  
a1enendty1tkfpg1gkktarqiv1d1kgkvki1teeds1s11qvdat1stvqdqfvqeam1aleal1gyskrelakvekt1  
nknkyds1vdeavkag1qlv  
vs  
>tr|D2N7Y3|D2N7Y3\_STAA5  
mfvdqvkis1kagdgngi1tayrrekyvpfggpaggdggkgasvvfevdeg1rt11dfryqrhfkaskgengqssnmhgk  
naed1v1kvppgti1knvd  
tdev1ad1vedgqravvakggrrgrnsrfatprnpapdfsekgepgeel1dvs1elk1ladvg1vgfsvgkst11sivs  
kakpkigayhfttikpn1g  
vvstpdqrsfvmad1pg1iegasdgvg1ghqf1rhvertkvi1vhmi1dmsgsegrepiedykvinqelaayeqr1ledrpqi  
vvankmd1pesqdn11fk  
ee1gedvpp1pvt1trdnidq11y1aiadk1eeykdvdftveeesvginrvlykhttpsqdkftisrdddgayvvs1gnai  
ermfkmtdfnsdpavrrfa  
rqm1rsmgidda1rergckngdivr1lggefefve  
>tr|D2N7Y7|D2N7Y7\_STAA5  
mrt1lyf1lig11fyidtaig1lipmhigkfelvfvphtf1fmyilm1mvvrsfgvs111sif1lgvmtdivyfgsiygyv1f  
gyl1fla1idrffk1fykd  
hsm1fi1i1ast11levy1aliygm1lgi1qfdi1hf1vvr11pt1lm1fv11im1lypliik1flkktndidmkr1rqw  
>tr|D2N7Y8|D2N7Y8\_STAA5

Tsompanidou\_et\_al\_Supplemental\_FASTA\_File

mlkffknnklivvlcaivfialiglsirsqsqspeqyigdsvsfgrvsvypvnfvagtigdffkkgdskeaknkisq  
lesknqqleaneeklke1  
d1kdiskfdpisttvlarmpdqwmntividkgsksqitsnmavmtskgfvgrvtkvnkfssqvdlstntragklsvniq  
hgsknifglidrydekns  
lvisdinnrdniskgdkvvtsgladqlpsnlyigevtkvqndqyglakevrvtgadltdlshvyvakrdpkipddesr  
dk  
>tr|D2N7Z1|D2N7Z1\_STAA5  
mkikemtsemprerlshgakslnstellaailntgrkgfssidisnellksasnlnelkssindliqvkiglgkai  
t1kaafelgermgrraenn  
rikitqpsdvadymiptmkdlqtqehfvlllnsknviketcvfkgtlssivhpreifsiavrenanaiavhnhpsgd  
vtpsgeiiittmr1kecgl  
ilgidldhiiigdnrfts1veagyfnd  
>tr|D2N7Z2|D2N7Z2\_STAA5  
mvvllsyicscifsflyqfisieetsfdylhrrskdcycnsslkwyelmpiisflllkgrcrnchkrislthffgetfal  
ipivfikydftvynat1fi  
ttyvfl1iftmtditslmlcdrliiycivslslsiypvafiiismtthifyflfrayigygdvllisalslffplqft  
iyvii1ftfviag1valit1  
ifkpikllplvpfi1fifffins1fyndihqflggvyf  
>tr|D2N7Z3|D2N7Z3\_STAA5  
mnyleslywihertkfgikpgvkrmewmlaqfnnpqnnikgihvggtngkgstvaylrtalvengyevgtftspfi  
eris1ngvpisndaivel  
srikpvsemmeretdlgvatefeii1tammflygeihpvdviveaglgikndstnvtfpilsiltsigldhtdilggy  
ldiardkgaiikpnpvpiy  
avkneda1kyvreraieqhakpieldreivvvsqndkftyrykdyeleti1slmlgehqkqnaalaitalielneqglie  
ldfnkmidgiesvrwtgri  
eqvhdkplii1ldgahnseidalidtikqyhdkkevdlfsaingkpinemvky1slihtfyatefdfpkalrkeevg  
sienddiqlvddyvefikn  
yqgd1v1tgslyfisevsk1dfeal  
>tr|D2N7Z4|D2N7Z4\_STAA5  
memkpydpreveagryeewvknqyfkpsedksketytivi1ppnvtgk1h1ghawdtt1qdi1trmkrmqgydtly1pg  
mdhagiatqakveak1neq  
gitrydlgrekflqawdkeeyasfiraqwak1gl1gldysrerft1deg1skavkkvfd1ynkgi1yrgeri1nwdpk  
artalsdi1evihedvggaf  
yhfkyppyadgegfi1eiatrpetm1gdtai1vnpnderykdvigktvil1pivgre1piladeyvid1dfgsgamkvtpahd  
pndfeigqrh1q1eni1vmd  
engkmndkagkyegm1drfdcrkq1ved1keqd1viki1edhvhsvghsersgavvepy1stqwfvrm1dakrs1dnqkt  
dr1dfypqrfehtfnq1wme  
nir1dwtisr1q1wghq1pawyhketgeiyvgeeaptdienwq1dedv1dtwfssa1wpfst1gwpd1esedfkryyptnv  
1vtgydi1ffwvarmi1fqg  
leftdrppfndv1l1hg1vraedgrkmsks1ngvdpmdvi1deygads1ryfl1atgsspghd1rystekvesvwnfinkiw  
ngarfs1m1nigedfkved1  
d1sgn1sladkwi1tr1netiatvtd1sdkyefgevgralynfi1wddfc1dwyiemskipmngndeeqkvtrsv1sytd  
n1mrm1h1pmpfvtekiwq  
s1phqgeti1v1kaswpevres1vfeeskqtmq1lvei1k1svrqs1rvevnt1plskeipili1qakdkei1ett1sqnkdylikf  
cnpst1n1istdveipekam  
tsvviagkv1pl1eg1idmdkeis1r1eke1ak1qse1drvd1k1snenfvskapekvineekrkkqdyqekydgvkarie  
q1ka  
>tr|D2N7Z5|D2N7Z5\_STAA5  
mnecafgtkdpvyl1dyhdhv1wgq1lydska1fk1la1lesqha1glsw1tilkkkeayeeafydfepkvaqmtaqdi1dr1m  
tfpni1vh1rkk1leaivnqa  
qgy1kieqafgs1fsk1f1wsy1vngkpkd1qyehasdri1vddtatq1skd1kqyg1fk1l1gpvtv1fs1leaaglydah1kdc  
pskprhn  
>tr|D2N7Z6|D2N7Z6\_STAA5  
mfgpi1jas1icvk1vfk1ldi1kwp1l1sel1giv1l1gvq1gst1ftknv1mdik1dnw1siiv1vs1isillia1vmaf1fkkiari  
ntetai1lsv1pgaltq1mlv  
maeqdkran1l1vvs1tgts1rii1fvv1l1vpfi1syffhdgn1mhvngk1tkv1l1psq1v1nigq1ivilaiaifivyl1mskikf  
ptfql1lap1liv1ivwnfst  
gl1tft1dhw1l1nmaq1liymi1rigvqia1h1l1sd1l1kgr1lai1aitiqn1mi1igal1imvyvihffdn1pinel1flgaapggvn  
qiv1valat1gad1vami1tsy  
hifri1ffil1fi1ap1giny1flkyrsnkred  
>tr|D2N7Z7|D2N7Z7\_STAA5  
midai1gpn1ngskt1cdeys1ri1likndktntmk1fl1yi1vmf1stsfnkk  
>tr|D2N7Z8|D2N7Z8\_STAA5  
mrytkseeamkvaet1mpggvns1pvr1afksv1dtpai1fmdhgk1gskiydi1d1gneyi1dyv1l1swgpl1ilghrdp1qvi1sh1hea  
idkgts1fgast1len1k1laq  
lvidrvps1iekvr1mvs1sgteat1dt1l1r1argyt1grnk1ivk1fegcy1ghsds1l1ikagsv1at1gl1pds1pgv1pegiaknti  
t1pynd1dal1ki1afekfgd  
diagvivepvagn1m1gvppie1gf1qgl1rdi1tseyga1l1ifdevmt1g1frv1gyh1caqgh1fgv1tpd1t1c1lgkv1iggg1lpvgaf

Tsompanidou\_et\_al\_Supplemental\_FASTA\_File

ggkkeimdhiaaplgniyqa  
gtlsgnplamtsgyetlslqtpetyeyfnmlgdiledglkrvfakhnvpitvnragsmigylfnegpvtnfeqanksdlk  
lfaemyremakegvlpps  
qfegtflstahtkediectiqafdalsrivk  
>tr|D2N7Z9|D2N7Z9\_STAA5  
mkfdrhrrlrsatmrdmvrenhvrkedliypifvvekddvkkeikslpgvyqislnlleselkeaydlgiraimffgvp  
nskddigtgayihdgviqq  
atriakkmyddl1ivadtc1ceytdhghcgviddhthdvdndkslp1lvktaisqveagadiiapsnmmdgfvaeirrgl  
deagynipimsygvkyas  
sffgpfrrdaadsapsfgdrktyqmdpanrlea1relesdlkegcdmmivkpa1syldivrdvknhtnvpvaynvsgeys  
mtkaaaqngwi deer vme  
qmvsmkragtmiityfakdicryldk  
>tr|D2N800|D2N800\_STAA5  
mkpvvmtqtndmqsd1vsiihkpfidikp1nfdih1lnqrydwlifssknvkkffky1kginvdniavigsaktaqyce  
slgirvdfmpndfsqegfl  
ksfnqtnqki1lpsse1arp1lsaalskdnevvkidlytsvpnkqniqdvkemiehqaidaltfssssavryyfnegfvp  
kfksyfaigeqtartiksy  
qqpvtaeigtlesliekilesrg  
>tr|D2N801|D2N801\_STAA5  
mrklvgsrrsklaltqsqqfidklkavepnleieikeivtkgdrivdkqlskvggkglfvkeiqhel feknidmaihs1  
kdvpvipegltlgcipdr  
elpfdayisktht1sq1pegsiigtss1rrgaqilskypnleikwirgnidtrlek1qtedydai1laag1rrmgwsd  
divtsylrdrt1lpaiggg  
algiecrsddel1s1lsvkhndevakcvtaertflaemdgsqvp1agyatisdqkeieftglimtpdgkerfeytmng  
tdpvelgktvsnk1keqga  
yeiikr1neqh  
>tr|D2N802|D2N802\_STAA5  
mqenl1firfnei1lly1l1siicyfydfvqkshkirs1giy1llgiwvwlqtis1sifiiqtrhiplgsisdvfytlswli  
isis1l1n1likv1nfsvff  
1n1lig1t1l1gmntfqpthytnkvqkiavvdell1vhiglav1syvffalafvnallyimqyrn1kekrfdqkyfrigsva  
tlesivfyst1sgwi1lif  
si1lgtqwgvisvgerifidpkvilssiit1lygsy1llrinkwlnsryliyni1lfc1nmin1lffathfvn  
>tr|D2N803|D2N803\_STAA5  
mhfiaisinhrta1valreqvafrrda1ria1hedlyetksilenvil1stc1nrtevyavvdqihtrgyyiqrflarafgfe  
vddikamsevkvgdeaveh  
1lrvts1g1dsiv1getq1lgqirdaff1aqstgtt1g1fnh1fkqaitfakrahnetdiadnavsvsyaavelakkvfgk  
lkskqai1igagemse1s1l  
1n1l1gs1git1di1tvvnrtienam1laakhqvkyde1ss1pn1lesadivis1sts1saqsyi1tnemieriaenrkqds1vlid  
iavprdi1epgisaitn1fn  
ydvd1lkg1vdan1rerq1laa1tiseqipaeihahnewvsm1lgvvpviralrekama1qaetm1sdrk1lpg1sererki  
iskhtks1inqm1kdpikq  
ake1ssdkksnek1el1fqn1fdieaecp1heqamqqkeskvkeisarri1fsfe  
>tr|D2N805|D2N805\_STAA5  
mfkfnede1n1kcs1fcgk1dqdvk1lvagsgvy1c1necielcseiveelaqntseaitel1tpk1eimdh1neyvigqek  
akks1lavavynhykri1qq1  
gpkeddv1elqksnial1igptgsgk1t1laqt1lakt1nvpfaiadats1teagyvgddven1llr1liqaadfdidkaekgii  
yvdeidkiarksentsitr  
dvsgegvqqa1lki1legttasvppqgrkhp1nqemiqidtt1n1l1filggafdgieevikr1lgek1vigfssneadkydeq  
all1aq1rped1lqaygl1pe  
figrvpivan1let1ldvtalkn1l1tqpknalvkqytkm1elddvd1lefteealsaisekaiertkgarglrsiiees1idi  
mfdvpsnenvtkv1taqt  
ineetepe1lydaegn1inns1ktsa  
>tr|D2N807|D2N807\_STAA5  
msdi1iqf1pnssk1lykdi1kraeqdqnyd1lmyeyivqyerqfelteeiamm1kcrml1yetgs1fel1reetiv1l1ktgiqqyd  
al1miyyvks1lig1lgyfea  
vevihqi1idevkdhktrmal1hp1kefaksk1iedekr1tqsl1tdfdt1smreqth1l1klidnghf1qf1qetv1ly1ilksnt  
ysyn1l1slmiey1lrfanct  
qel1ti1kygm1dvtfvpan1kg1leht1l1kekvipnvm1et1ndgalhiaeeahh1mnhs1imiypidiet1fetnkw1inaye  
cyfkn1mlg1l1kcelqs1daf  
nfiqq1d1nnns  
>tr|D2N809|D2N809\_STAA5  
mprvkgtvt1rarrk1tik1lakgyfgskht1lykvakqvmksgqya1frdr1rkrdr1k1wit1rinaaarqhemsysr1lm  
ng1kkagid1nrkm1seja  
isdekafaq1lvtkakda1k  
>tr|D2N812|D2N812\_STAA5  
mskvqnesn1vvkrg1kdrh1smia1iggcigtgl1fvtsggaihdagalgaligyai1gmmvff1lmts1lgematy1lpvsgs  
fstyatrfvdps1l1gfal1gw  
nywfnwvtvaadit1aaqviqywtp1lqgipawawsa1flvi1fs1nslsvrvygeseyw1al1kvvtv1v1fiaig1l1ti

Tsompanidou\_et\_al\_Supplemental\_FASTA\_File

vgimgghvvgfei fnkgeg  
pilggnlggsllsilgvfliagfsfqgteligitagesenperavpkai kvfwrillfyilafvigm lipydssalmg  
gndvatspftlvfknagf  
afaasfnaviltsvlsagnsgmyastrml ysmkdklafetfgktnkngvpymsslvtaiivvii fvvqsvtegayqyi  
vaasgltgfiawvgiavsh  
yrfrrafdkqnydksklkytakwfpfgpi faailcivviigqdvdfiktgdfnfsrflitymgipvflaffiyhklrykt  
kkipleqvdlrqdvsmdei  
kg

>tr|D2N813|D2N813\_STAA5  
meqiniqfpdgnkkafdkgtttedi aqsi spglrkkavagkfngqlvd ltepletdgsieivtpgseealevlrhstahl  
mahai krlygnvkfgvgpv  
ieggfyydfidqni sddfeqiektmkqivnenmkierkvvsrdeake lfsndeykle lidai pedenvtlysqgdftd  
lcrghvhpstakikefkl  
stagaywrgdsnnkmlqriygtaffdkkel kah lqml eerkerdhrkigkele lftnsq lvgaglp lwl pngatirreie  
ryivdkevsimgydhvytpv  
lanvdlyktsghwdhyqedmfppmq ldetesml rpmncphhmmiyankphsyrelpiriaelgtmhryeasgavsglqr  
vrgmtlndshifvrpdqik  
eefkrvvnmi idvykdfg fedysfr lsyrdpedkekyf dddd mwnkaenmlkeaadel glsyee aigeaafygpkldvqv  
ktamgkeetlstaql dfl  
perfdlyigqdehhrpvi hrgvvstmerfvaf lteetkgafptwlapkqvqi ipvnid lhydyarqlqdelksqgvr  
vsiddrnekmyki reaqm  
qki pyqivvgdkevennqvnrqygsdqdetvekdefiwnlvdeir lkkhr

>tr|D2N815|D2N815\_STAA5  
mgrqafefgl rpkdqf kvmqhfd lntnhlevlnrlyt pligtqavglyhfmtqfvkeshnet lishyifmnelkinlle  
frqqmdlleaigllkafvk  
hdegetqfvyqli qppsah lffndpmlsiflysevehrrfelkkyfeyqqid lsefkqvtrqftdvfkvpstkididts  
dipinepygqid lsnesfd  
femlrqmlgkhfisiqdivtkdakrl itq latlygl tadgmkhvilnsit sqq lsfemrkqarsyyliehenqmpklqv  
kspatssstaksteanpmp  
qs dewfel leqtspidmlaswseseptisqktmveel ierekmsfgvinillqfvm lkedmklpkayileiasnwkkkgi  
k takeaynyakkvnqpkne  
gssgnyqkrqsyggqrnrri skektpkwlenrdkpseqdsakdsvddqql eqdrqafldkl skkweedsq

>tr|D2N817|D2N817\_STAA5  
mstniaingmgrigrmvl rialqnknlnvva inasyppetiah linydtthgkynlkvepienglqvgdhkiklvadrnp  
enlpwkel didiaidatgk  
fnhgdkai ahikagakkvl l tgp skgghvqm vvkgvnddq l dieafdi fsnascttncigpvakvl n nqfgivnglmttv  
hai tndqknidnphkd lrr  
arscnesi iptstgaakal kevlpelegklhgma lrvptknvslvd l vvdlekevt aeevnqafenagle giievehqpl  
vs vdfntnphsai idakst  
mvmsenkvkvi awydn ewgysnr vvdvaeqigall tsketvsas

>tr|D2N819|D2N819\_STAA5  
mpelpevehvkrgeipyvinqiehvifsdkvie gkaqgketi ikgiel dtfkt lsegyt itnverrskyivfqldnkre  
qrtl ishlgmaggffivde  
ledimipnyrkhw hvi fel sndkkl iysdi rrfgei rnv asvasyps fieiaepftneal tyyl nr ihqqs nknkpikq  
vil dhkvi agcgniyacea  
l fragvlpdkkvkd l thqqqemvfyyvrev leegikhggt sisdyrhadgktgemql hlnvykqpvckvcgsqietkia  
trnshycpvcqk

>tr|D2N820|D2N820\_STAA5  
mnklvlidgns lsfrafyal pl lsnkagihtnavygfam l lekil keekpnhfl vafdagkttfrhekyseykggrqktp  
pel seqfpyirqlldayhi  
kryel dnyeaddi igt l skeadkagfqt iitgdrdl tq latdnvtiyytkkgvtdvdhytpdfiaekyngltpnqi idm  
kg lmgdtsdnipgvagvge  
ktaikllnqfdtvegyeh ldeisgkkl keklqnskedalmskelatinvds pievkle dtl mthqdeqqekiel fkkle  
fkql ladidqsasgedaie  
ktfeietsfdnvdfts leeaaih fel dggnyl rnnilkfslftgek hivinaddinnyaelvsw lenpntkkvvydakkt  
yvashrlgidignisfdim  
lasyii dpsrti sdvqsvsl ygqsfvkddvs iygk gkfkvp peddvl npyvafit daiy fakpnmdkql eeynqvella  
dlelplaki lsemee igiy  
tdvhdleemekeiqekldvli rni hdaagedfnis pkqlgvvl fetlqlpvikk tktgystavdvleqlqgehpi idyi  
leyrq lsklqstyveglqk  
visddqri htrfnqt laqtgr lssvdpn lqni pvr leegrki rkafkpts kds vil sadysqielrvlahitqdesmkea  
fingddi htatamkvfge  
adqvds l mrrqakavnfgi vygisdygl sqsl git rkkakvf iddyl asfpgvkqymsdivkdakalgyvetllhrrryi  
pditsrnf nrgfaertam  
ntpiqgsaadi iklamvkfaqmkettyqak lllqvhdeli fevpksevdsfsefvee imenal qldvpl kvdssygatw  
ydak

>tr|D2N821|D2N821\_STAA5  
mktiqlhktt liliai llfytfmgil lplmhdd lqwfsnyntdil kvgfas l ngryigni feiavhsvl rwl syglis



Tsompanidou\_et\_al\_Supplemental\_FASTA\_File

mgiiwimhitrckawtsy  
yllafslmlilpsaiyadtywgfagfynyatstlislfiyyicinaiiyekekqpsvtvlfyvlsffgqlfmenvtlfhc  
iililaflyeftanrtlny  
kllfsfmiatigtiimfsnpnyrkilfegseyqqvsnnqgifskaemisttlypgvifsqviilsmiatliiylllrsd  
ryvhltilkrriimigfit  
lplyllyfynqfllnkntdiglvgfaniivcgyfafsifvgiylsinrktqitlyslliaicvsastlvivtpiepgnf  
liyvtihviiililkefr  
kyksinvnfikgaslvlamylsafiyyvhehekrvqllkqqikdhprqevytveslpfehymhhpspinknyqewfnny  
eelpkmtkvkyipfgsdds  
>tr|D2N822|D2N822\_STAA5  
mllissiliiisfvltgiihasityvlsekheqalatdarsyiyvqdneidkvkeivkqqnidllitkndkkvfssgkl  
kpiipnsdsyikrdvfi  
kkvngyhvwikgynnditemhwtlwkyililtclvvlliclyfasrsfkrtilrpiqevtyatqllangyyhirvpesnvve  
tkalfvstndlarlqkln  
neqkmsnrllkttienipsailmidrngkivvankayyeqfnithnieqigyhyvnteieqlilesfkvekipieylev  
ainqvhakyfdiscvpi  
rsqkslqgilvmmhdi  
tdlldlshieghteldtdy  
mnlsltrriidnmmtganknisihthdiekdvivkaqueskiaqvitnlltnainysyedgdinvrvyrdfrvifevqd  
fgigikledqgri  
vdkarsrdsggtglglsitkhiveahqgnievnsqvgkstfkvikdyke  
>tr|D2N823|D2N823\_STAA5  
msqkvlvddesivtllkynletagyevvafgdgealekveneqpdlilldvmlpkkgidvcktvrtnknlvpilm  
takndefdrvlglgadd  
ymtkpfsprevvarvkailrrsqfvkeveeidditigsirirpdyfevykhnelleltpkefelllylierqgrvitre  
hmlntvwnyefagdsrivd  
vhishlrdklednpkppqliktvrglgyklerpke  
>tr|D2N824|D2N824\_STAA5  
mtaekitqgteglnvpnepiipfiigdigpdiwkaasrvidaavekayngekriewkevlagqkafdttgewlpqetld  
tikeyliavkgplttipigg  
girslnvalrqeldlftclrpvrwfkvpspvkrpqdvdmvifrentediyagiefkegttevekvidflqnemgatnir  
fpetsgigikpvskegter  
lvraaiqyaidnrrksvtlvhkgnimkftegsfkqwygdlaletfgdqvftwqqydeivekegrdaanvaqekaekgki  
iikdsiadi  
ehdvvatmningdyisda  
adkitdsiedtiaskvvt  
dfarlmdgaeevstafadeliknlk  
>tr|D2N827|D2N827\_STAA5  
mrktkivctigpaseseemieklinagmvarlnfshgsheehkgridtirkvakrldkivailldtkgeirthnmkdg  
iielegnevivsmneveg  
tpekfsvtyenlindvqgsyilddglie  
fgikenvd  
mldsmqnrnpratrael  
anaiydgtdavmlsgetaaglypeeavktrniavsaeaaqykllsdrtklvetslvnaigisvahtalnlnvkaiva  
atesgstartiskyrphsd  
iiaavtpseetarqcsi  
angqgigrsvvgttlvae  
tykdlegkdl  
kifegyanvl  
>tr|D2N832|D2N832\_STAA5  
mvaylnihtaydlnsslkiedavr  
akdnnglkdlyqlssek  
nalehvsfelli  
teneiqql  
tnmgfedyflivsdlihya  
ktndvmvgpgrgssagslv  
tfghllaravardvgrimg  
fdevtlineisslipk  
kidflglrnlsihqi  
lyrpgpmeeiptyitrhd  
pskvqylhphlepi  
qifdlikfadygfpraha  
ysyskiayimsflkvhy  
yqsvkvi  
ffdfarripkrvkrkllealilvgafdafgktrstllqaidqvl  
Pagina 849

Tsompanidou\_et\_al\_Supplemental\_FASTA\_File

yekeylgfyvsqhpvdkkf  
vakqylti fkl snagnkplvqfdkvkqir tknqgnmafvt lndgietldgvi fpnqfkkyeellshndl fivsgkfdl  
rkqgrqliineiqtlatfe  
eqklafakqii rnskqidmfeemikatkenandvlsfydetikqmttlgyinqkdsmfnnfiqsfnpsdirli  
>tr|D2N833|D2N833\_STAA5  
mistmneimkci edndtii hrhvrpdpdaygsq lglkyi iqkfpqkqv favgeasslsfigeldnidktyqdalvi  
vcdtanapridderystgr  
klikidhhpavdqygdinlvntnasstsei ydl ishfndeaivnk diasvlylgivgdtgrfl fntsehtmeiagkli  
ghdidhnallnkmekdpk  
mlpfqgyvlqhfe lmdgdfcqvki tedvlkqfqi qneasqfvntiadikglkiwvfavdegseircrl rskgqliindi  
aqdfggghpnasgsvns  
wdefeqlakal rtkln  
>tr|D2N834|D2N834\_STAA5  
mtkheqildyieslsigskisvrkiakflnvsegstayraikdadkmgmvatidrvgtvriekrnrneiehltfneivnii  
dgqvlgnkgitkmvskfa  
igamelkdi lkyigpktllivgnredvqiealkrgtailitggfkpsnkvidfanehd lplvsssydtflvaniinkalf  
nqkirkdilivqdimtpld  
dlsvlfdtmkiadykrmanqtghtrfpvvnesyklvgivtsremintkdddeidkvmt rnpiyvnamstvascahmmiwe  
gielipvssnkkvtvgvin  
rqdv lksmqllgrppmgetindqiakyitmnqdgitvevsp llinhygtvskaafvsii eeti qyemrkfkkgvnmien  
lnivyiktvpieshitvrf  
gil dvgrnfakievn mhsqndkvasalvicqm fdev  
>tr|D2N837|D2N837\_STAA5  
mtkiskii delnngqadaawittp lnvyyftgyrsepherl fallikkdgkqvl fcpkmeveevkaspftgeivgyldte  
npfsl ypqtkllieseh  
ltvarqkqlisgfnvnsfgdvdltikql rniksedeinkirkaaeladkcieigvsylkegvterevvnhieqtikygv  
nemsfdtmvlfgdhaasph  
gtpgdr rlsksneyv lfdlgviyehycsdmtrtikfgepsqeaqeiynivleatsaiqaikpgpilkdidhiarniisek  
gygeyfp hrlghglqeh  
eyqdvssstnsnlleagmvi tiepgiyvpgvavrieddilvtnegyevlthyek  
>tr|D2N838|D2N838\_STAA5  
mki gipreiknnenrvgl spsgvalvesghtvlvetnagsgsffedvdykeagaeiva eqakvwdvdmvikvkepl ese  
ypyfkeglv lftyhlane  
ekltqal idrkvisiayetvql pdrs lpl spmsevagrmsaqvgaeflqklnggm gillggvpgvpkgkvtiiggqag  
tnaakialglgadvtildv  
npkrlqql ddfggrvhtimsnplnie lyvkqsd lavigavlipgakapr lvtedmikqmknsvi idiaidqggifettd  
kitthdnptyikhgvvhy  
vanmpgavprtstla lnnat lpyalm lankgyrea fksnqplslglntykghvtnkgvaeafemeyksveealql  
>tr|D2N839|D2N839\_STAA5  
mityknil iavdgsheaewafnravgvakrndakltivnvidsrtysseyvydaqftekshfaeellngykevatnagv  
kdvetrl efgspksiipkk  
laheinadlimsgtsgl naverfivgsvsesivrhapcdvlvrtee lpadfqpqvattql rekisklniddh  
>tr|D2N840|D2N840\_STAA5  
msklilainagssslkfqli rmpееelvtkg lveriglkdsiftievdgekvktvqdikhveavdimldafk khniind  
indidgtghrvvhggekfp  
esaaitdevekeieel selap lhnpanlmgirafkllpniphvai fdtafhqt mpekaylslpyhykydygirkygfh  
gtshkfvsqraeamldkpi  
edlriischinggasiaa idggksidtsmgftplagvtmgt rsgnidpalipfimektgktaeqvleilnkesgllglsg  
tssdlrdl seaesgkars  
qmal dvfaskihkyi gsyarmhgvdvifvftagigensvei rakvlegl efmgywdpkkn enlqrgek gfinyphspvk  
vvviptdeesmiardvmt y  
gglk  
>tr|D2N841|D2N841\_STAA5  
maeqqtimerl fhtldekakt lnnengqsfi enlglameqvytnergll eqstlqdr rkafqfaylslmqeeki qanhqi  
tpdsigllilgl lverfmnn  
qee lhi vdi asgagh l satvkevlpei avmhh lievdplsvsvhlanfleipfdvypqdaimplpleadivigdfpv  
gyypidersrd fklgfeeg  
hsyshyllieqainalkd agyaf l vpsniftgehvkqlekyiatetemqaf lnlpptl fkn ekarsililqkkksget  
kpvevl lanipdfknpsqf  
qgfmetelnqwm dtnrpkk  
>tr|D2N842|D2N842\_STAA5  
mteitfkggpihlkgqli negdfapdfvtl dndlnqvt ladyagkkklisvpsidtgvc dqqrkfnseaskeegivlt  
isadlpfaqrwc asagld  
nvitl sdhrdl sfgenygvvmeel rllaravfvldadnk vvykeivsegtdf pfd daalaaykni  
>tr|D2N844|D2N844\_STAA5  
mkydhllvrygel t lkg snrkkfvnql rnnvnks lkgldgfvvkgkrdrmyieledhadineityr lskifgiksispv l  
kvektleamsataikfaqq  
feenstfki dvkradkny pmdtyelqrelggav lkhfdni svnvkrpdheirvevrl daiymyeevvqgagglpvgtggk

Tsompanidou\_et\_al\_Supplemental\_FASTA\_File

tllmlsggidspvagmevm  
rrgvtieaihfhspptsdqakekvieltrilaervgpihlhivpftelqkqvnkvvhprytmstrmmrvadklvhq  
igayavngenlqqvasqt  
lshmyainnvtstpvlrpllytdekeiikskeigtftsipfedcctiftpknpvtepnfdkvvqyesvdfdeeminr  
avenietleitsdyktike  
qqtnqlindf1  
>tr|D2N845|D2N845\_STAA5  
minerevfiliyldnaattkafeevldtylknvqsmypnpsphkag1qadqllqqakvqindmvtntmydvvftsgat  
esnnialkgvayrkfdtar  
eitsvlehpsvlevvryleeregfkvkvvdvtdkgsinlehfkelmsdkvglvtcmyvnnvtgqiipqmadviknyp  
kahfhvdavqafgkismdf  
nnvdsislshkfnlkgqgvllvnhinqveptvhgggqeygvrsgtvnlpndiamvkamkianenlealnafvte1nd  
vrqflnkyhgvyinsstsg  
spfvlnvsfpgkgevlvnafskydimisttsacsskrnk1nevltamglsdkaiegsirlsfgamttkeditkfketft  
iieeikelk  
>tr|D2N846|D2N846\_STAA5  
mlyiilaiivii1iavgvlfylrsnrqriiekaierkneietlpdfqnlq1sk1nlkgetkkydamkkdinvestnky  
lapveekihnaealldkfs  
fnasqseiddanelmsyeqsyqqledvneialyknddelydkckvdyremkrdvlanhqfgeaslleteiekfep  
rleqyevlkadgnyvqahn  
hiaalneqmkqlrsymeeipeli retqkelpgqfdlkygcrdlkvegyl dhvkvdstlqslktele sfveplisrlele  
eandk1anindkl ddm1  
iehevkanndveetkdiitdn1fkakdmnylqteieyvrenyyinesdaqsvrqfeneiqslisvyddilkemsksvr  
yseqdn1qyledhvtvin  
dkqeklnhliqlredeaeaedn1rvqskkeevyrllasn1tsvperfiimkneidhevrdrvneqfserpihvkq1kd  
kvskiiviqmntfedeandv  
1vnavyaekliqygnryrkdygnvdkslneaerlfnknykraieiaeqalesvepgvtkhieevikq  
>tr|D2N849|D2N849\_STAA5  
mtlnklkdelqivshrglpsdfpentmvgyrevmglvnamleidvhltkdqhfvihdetidrtsdgkgriadyt1sq1k  
sfdfgsykdva1kgeript  
ldev1slcl1kfdk11ielkspnlypgieck1lafleekkvdatqvviqsfdiecielnt1gsiyelgv1cskrkywyk  
kpnfsriaqiasyvnpny  
1vtrkfvdeahhhq1qv1pytvnk1ktgek1rhmgvdglitddpk1fik  
>tr|D2N850|D2N850\_STAA5  
mhqhd1kvqtswqggrrnvgvdkgd1senisipas1ggvgigtndem1vsaasscyiislaatl1erakftdisieqq  
igtac1nngkfsmski1vh  
phiqip1sdqiaqlekr1pk1itiadnncmi1navrnndikiy1i1qak  
>tr|D2N852|D2N852\_STAA5  
mkqfnv1vadpiskdgikalldhkqfkvdiqtgl1seealikiipsyhalivrsqttvteniinaadslkviaragvgvnd  
inidaat1kgilvinapdg  
ntisatehslam1lsmarnipqahqsltnkewrnafkgte1yhkt1g1v1gagr1glvakraqsfgmkilafdp1tde  
kaks1sitkatvdeiaqhs  
dfvt1h1tp1k1g1inadffakakps1qiinvarggiidekalikaldegqisraaidvfehepatdsp1vahdkii1v  
tph1gastveaqekvaisv  
sneiieilidgtvthavnakmd1sniddtvksfin1sqtvgelaiqlmynapssikityggd1asidss1l1trtiithi  
lkddl1gpevni1inalm1ln  
qqqvt1niennkaetgfsny1levelsndsvkvgasvftgfgprivrinnfsvd1kpnqyqivsyhndtpgmvgktgal  
1gkyniniasmt1grteag  
gdalmi1svdqpvsnniide1kqvgeynqifttel1vqs  
>tr|D2N853|D2N853\_STAA5  
mkkilfdvdgv1seercfdvsal1tve1lmdkcy1glhshidwet1tdndiqdirnrifqkdki1nk1ks1gl1nsnwdm  
1fivfsh1idi1k1shd  
eieafmyqdepvelk1qni1stnladrfn1neql1plq1fdnkvkgknniyaa1eefattel1hvsdan1fslkgalwt1aqe  
vyqewylgsklyeevekki  
arttftktgyiyqei1l1rpvdevkv1lnd1kgagfelgiatgrpytetvvpfen1gl1pyfeadfiatasdv1eaenm1ypq  
arplgkpn1pfsyiaalygn  
krdkyvsyinkqdn1vknkddv1vgd1ad1l1saqkigatfigt1t1gl1kgkdaageleahhadyvinhl1gelrgv1dn1  
>tr|D2N854|D2N854\_STAA5  
mykffqnlgrslm1lpvai1paaai1agignt1nalhaapki1amffttvgttileql1gil1faigvaigmakndgavalaa  
algyfl1vtv1l1spm1lap1  
1gm1kase1nsafekmnn1gnv1fgiv1ig1iaayaynk1fsetel1pl1alsffsgkr1vpimtaf1yctfl1v1ill1flwpl1lysw  
1vk1fgesiv1gl1sfgafiy  
gvann1l1ipt1gh1hal1nsv1fwfdt1g1ind1ig1kf1qsgkdaik1git1gryqag1ff1imm1fg1paaal1amyhtak1tt1qkk1qvyg  
wfl1assva1ff1vgv1tepie  
fafmfvapi1lyv1hal1tg1sl1fiaat1fhwt1ag1fs1sag1l1dyv1sl1inpvs1nhp1m1ll1vqgv1ff1ilyy1v1frv1vi1qv1f  
n1nt1igr1genel1vd1ptv1k  
dn1ap1gendi1k1skyh1hai1qi1leg1gg1qen1v1nt1ncat1rl1r1el1k1dtsi1id1qq1k1nagav1gvt1vngk1hst1qv1vg1th  
vqqvadeiekh1

Tsompanidou\_et\_al\_Supplemental\_FASTA\_File

>tr|D2N857|D2N857\_STAA5  
mtnvliledlkwrgliyqqtdeggiedl1nkeqvtlycgadptadslhighl1pfltlrrfqehghrpivligggmgid  
psgkseervlqteeqvdkn  
iegiskqmhniefegtdhgavlvnrdwlgqis1isflrdygkhvgnymlgkdsiqsrlehgisyteftytilqaidfg  
hlnre1ncki qvgsdqwg  
nitsgielmrmygqtdaygltiplvtksdgkfkgsesgavwldaektspyefyqfwinqsdedvikflkyftflgee  
idrleqskneaphlreaqk  
tlaeevtkfihgeda1ndairisqal fsgd1ks1sake1kdgfkdvqvvtlsndttivevlietgispskrqaredvnn  
gaiyingerqqdvnyalap  
edkidgeftiirrgkkkyfvmvnyq  
>tr|D2N859|D2N859\_STAA5  
mnkhhpk1rsfysirkstlgvasvivstlflitsqhaqaqaentntsdkisenqnnatttqppkdnqtqpatqptnta  
ktpaadeslkdaiknpav  
enkehdigpreqvnfqlldknnetqyyhffsikdpadvuytkkkaevel dintastwkkfevyennqklpvr1vsyspvp  
edhayirfpvsdgtqelki  
vsstqidggaetnydytklvfakpiyndpslvksdtdavasndqsssdasnqntntntsnqntstttnasdaqppattms  
qpakpvssanadqassqa  
hetnsngntndktnassnqsnqyppadeslqdaiknpaidkehtadnrpidfqmknkgerqfyhyastvepatv  
iftktgpiielglktastw  
kkfevyegdkk1pvelvsydsdkdyayirfpvsngarevkivssieygenfhedydtlmvfaqpi tnpddyvdeety  
1qk11apyhkaktlerqvy  
elek1qdk1pekykaeykkk1dqtrveladqvsavtefenvtptndq1td1qeahfvfeseensesvmdgfvehpfyt  
at1ngqkyvmmktdkdsyw  
kdlivegkrvtvskdpknnsrtlifpyvsdkaiynai kvvvanigyegqyhvrivnqdiktkdddtsqntsep1nvq  
tgqenksatdtaenssta  
tnpkdasdkadviepesdvkvtdsnidkdahhdvdh1sdmsdnh1dkyd1kemdtqiakdtdkgvdkdadnsvgmssn  
vdekdinknegkviqlah  
ntdknnhtgkaak1dgvrqynnidkvtdkkttehsndihktvdktkkkesgtpskenk1sqskm1pktgettssqt  
wwg1yal1gm1alfipkfr  
kep  
>tr|D2N861|D2N861\_STAA5  
mkvevykgagkh1kdyeetyntfdwkdveqafswsetgkmmayeci drhvdqglgdkia1nykdehrkesytkdmq  
r1snkaanv1sehaevdkg  
drvfi fmsrtpelyfallgv1kigai vgp1feafmekavadr1enseakv1itnkallprvpvdk1pn1kkivvdedve  
dnyidfis1metasdefdi  
ewlksddgli1hytsgstgqpgvlhvqqam1vhyisgkyv1dlqeddvwyctadpgwvtgtsygifapw1ngatnciag  
grfspeqwysmi edfkvti  
wytapta1rm1msagddivekyd1ss1rsi1svgep1npevikwakkvygl tv1dtwmtetgghmi vnyptmdvklgsm  
gkplpgiqaaiiddagne1  
ppnrmgn1aikkgwpsmmyriwknpekyksyfigdwvsgdsaykdedyfwfqgrvddv imtagervgpfevesklveh  
eavaeagi1gkpdprgei  
ikafva1rkgyeptdelkeeir1fvkegl sahaapreiefkdk1pktrsgkimrrv1kawelndagd1stme  
>tr|D2N862|D2N862\_STAA5  
mnh1ktyqsedyihdkqfvi egl1thed1kaltfdvh1tafrdsedqyealleitt1pegriyvarqdqlivgyvtfhy  
pdeierwstgn1pylielg  
aievsinfrqlqlaekliqls1stpefedyivitteyywhwd1knsk1dvfdydk1mqr1matggleifatddpeitshp  
anc1marigkni1leqqa  
fddiry mnrfff  
>tr|D2N863|D2N863\_STAA5  
mqh1sktayvysdk11qyrfhdpfnqmr1k1ttell1ntn11speqivqpriatddelmlihkydyveaikhashgi  
isedeakkyglndeengqf  
khhmthsativggalt1ad1imsgkv1ngchl1gggl1haaqgrasgfcyndiaitaqylakeynqrv1iidtdahhgdg  
tqwsfyadnhvttysihet  
gkfl1fpgsghytergedigyghtvnp1lepytedasflecfn1tvepvvksfkpdi1svngvdihyrdplth1nct1hs  
lyeipyfvky1adtytngk  
vimfgggyniwrvpvrawshvfls1idqpiqsgylplewinkwkhysellpkrwedrlndytyvprtkeiseknkla  
1hiaswyestrq  
>tr|D2N865|D2N865\_STAA5  
mkkvyik1kyivryh1afvfigfs1nfskqkyvtvn  
>tr|D2N866|D2N866\_STAA5  
msnk1esyrsivs1nhqi1dl1skrge1aqkigeek1kqgtriydpqrekem1nd1idsnkgpfdntikqlfkeifka  
std1qksenekhlyvsk1  
kpeditivfdnggi1gdgnksfvfgpcsvesfeqveavakn1hakgekfirggafkprtspydfqglgveglkilkqid  
kyd1nvvseivnpndfeva  
deyl1dvfqi garnmqnfe11keagrtkkpi11krg1satieefvyaeyiasqgnqni11cergirtyekatrnt1disa  
vpi1kqgth1pvmvdvths  
tgrkdim1ptakaa1avgdgvmaevhpdpsva1sdagqmd1defqafyde1kpl1sd1ynakk1k  
>tr|D2N867|D2N867\_STAA5

Tsompanidou\_et\_al\_Supplemental\_FASTA\_File

mtqqqnnkrtlnknkhtyqneplnrkdfvvsfitgalvgsalglyfknkvyqkaddlkvkeqeelsqkfeerktqleetva  
ftkervegflnksknegaa  
lkaqqaaikeasannlsdtsqeaqeiqeaqreaqaetdksaevsnkeskavalkaqqaaikeasannlsdtsqeaqai  
qeaqrevqtekdsdtstkd  
asaakvevskpesqaerlanaakqkqakltpgskesqltealfaekpvakndlkeipqlvtkknvsekgnntdnkdtvkq  
keakfengvitrkadektt  
dntdvdkksgkqskttpsnkrnaskastnktssqkkqhnkkasqgakkqssssnstqknnqtsnkskttnakssnask  
ksnakvekakskiekrtfn  
d

>tr|D2N869|D2N869\_STAA5

mthyhfvgiksgmsslaiqimhdlghevqgsdienyvftevalrnkgikilpfdannikedmviqgnafassheeivra  
hq1kl dvvsyndf1gqiid  
qytsvavtgahgktsstgllshvmngdkktsfligdgmgplpesdyfafeaceyrrhf1sykpdyaaimnidfdhpdyf  
kdindvdfafgemahnvkk  
giaawgddehlrkieadvpiyygfkesddiyaqniqitdkgtafdvyvdgefvdhflspqygdhtvlnalaviaisyle  
kl dvtnikealetfggvkr  
rfnettianqvi vdyahpreisatietarkkyphkevavfqphtfsrtqaflnefaeslskadrvflceifgsiren  
tgaltiqdli dkiegasli  
nedsinal eqfdnavil fmgagdiqklqnayldklgmknaf

>tr|D2N870|D2N870\_STAA5

mswfdklfgedndsndlihrkkkrrqesqni dndhdsllpqndiysrprgkfrfpmsvayenenveqsadtisdekeq  
yrrdyrkqshdsrlqkrhr  
rrrnqtteeqnyseqrngskisqqsikykdshyhtnkpgtyvsaingiekethsksthniysnntnhrakdstpdyhke  
sftksevp saifgtmkpkk  
lengripvsksskesvesdkkydyaetqtsqnkql eqekqndsvvkqgtaskssdenvssttkstpnyskvdntikie  
nyasqiveeirrererkv  
lqkrffkka lqqkreehkneeqdai qraidemyakqaeryvgdsslnddsldtndstvasqhhtngieneavsndenkqa  
siqnedtndahvdespyny  
eevslnqvsttkqlsddevtvsdvtsqrqsalqhnevndqdglnqsrli adseedgatnkeeysgsqiddaefyelnd  
tevedttsnsqdntrna  
semhvdvpktqehavtesqvnndktvdndielaprhhkdnqtnlsvnslktndvndghvvedstmneiekhsaevtenv  
qneaeseqngeektiena  
npkkqtekvstlskrpfnvmtpsdkkrmmdrkkhskvnpelkpiqskqavsesktasqatpssstsdqsentnayktn  
nmtsnnvendqlighgete  
ndyqnaqqysdqkpsvdstqteifeesqddnqleneqvdl tsssvsevsditeeseetthlnntsgqqdnddqkdlqp  
sfsnqnedtanenrprtnq  
pdvatnqavqtskpmirkgniklpsvslleppqvi epdedwitdkkkelndalfyfnvpaevqdvtegpsvtrfel sve  
kgvksritalqddikmal  
aakdiri eapipgtsrvgievnpnqpttnlrsiiespsfknaeskl tvamgyrinnepl lmdiaktphaliagatgsgk  
svcinsilmsllyknhpee  
lrllidpkmvelapynglphlvapvitdvkaatqslkwaveemerryklfahyhvrnitafnkapydermpkivivid  
eladlmmmapqeveqsar  
iaqkaracgihmlvatqrpsvntitglikaniptriafmvsssvdsrtildsggaerllgygdmlylgsgmnkpirvqgt  
fvsddeiddvdfikqgre  
pdylfeekellkktqtqsqdel fddvcafvmneghistliqrhfqigynraariidqleqlgyvssangskprdvvyvte  
adlnke

>tr|D2N877|D2N877\_STAA5

mrvkykpwaedyldhpe lvdmgqhagkmtewfdktqpihieigsgmgqfittlaaqnphinyismereksivykvl dk  
vkemgltnlkiicndaiel  
neyfkngesvriylfnspwpknrhakrrltyhtflalyqqilndegdlhfktdnrglfayslesmsqfgmyftkinlnl  
hqeddgsnilteyekkfsd  
kgsriyrmeakfhsqk

>tr|D2N880|D2N880\_STAA5

mwkekvqqyedqiindlkgllai esvrddakasedapvgpgprkaldymyeiahrdgftthdv dhiagri eagkndvlg  
ilchdvvpagdwdsnpf  
epvvtedvii argtlddkgptiaaayaikiledmndwkkrihmiigtdeesdwkctdryfkteemptlgfapdaefpci  
hgekgttfdlvqnkl ted  
qdepdye l i t f k s g e r y n m v p d h a e a r v l v k e n m t d v i q d f e y f l e q n h l q g d s t v d s g i l v l t v e g k a v h g m d p s i g v n  
aglyllkflaslndnnak  
afvafsnrylfn sdfgekmgmkfhtdvmgdvttnigvitydenaglfginlrypegfefekamdrfaneiqqygfevkl  
gkvqpphyvdkn dpfvqkl  
vtayrnqndmtepytigggyarnldkgvafgamfssedlmhqkneyitkkqlfnatsiyleaiyslcv ee

>tr|D2N882|D2N882\_STAA5

mridkfl anmgvgt rnevkl l kkg l v n v n e q v i k s p k t h i e p e n d k i s v r g e l i e y v e n v y i m l n k p k g y i s a t e d h h s  
ktvidlip eyqhl n i f p v g  
rlkdktegl l i t n d g d f n h e l m s p n k h v s k k y e v i s a n p i t e e d i q a f k e g v t l s d g k v k p a i l t y i d n q t s h v t i e g  
kyhqvkrmfhsiqnevlhl  
rrikiadlel dsnl dsgeyrll tendfdklnyk

Tsompanidou\_et\_al\_Supplemental\_FASTA\_File

>tr|D2N883|D2N883\_STAA5  
mseskemvrgtflitisiilitkvlglfiipfnyliggqenmapftyayapyniaiatagvplaaskyvakynaigay  
kvsqkfykssfiymsitgv  
lgflvlyflapyiseltlarnvhdkngwsydditwiiriismvvi fipvlatwrgifqgyksmgptavsevteqiarvif  
iligsylvlnvfdgsilla  
ngiatfaavgaiigiftlwywrkrkhnidrmvesdytdidvpygkmykeiiaysipfvivlnyplfnlvdqfthnga  
lslvgvpsqlqdi ffnmln  
mstnki vmipts l sagfavslipyitktfaegr lhemhqirtsigvlmfitvpasigimalaqplftvfgydpivlgh  
dphhdgsrllfyapvail  
isllsvtasmlqgdkqkltvyvilasvviklalnypliml fhtpgavl stsi allfaigcnfyilkkyakfkfsyswih  
fakiflysfimm l gveavf  
fianlfleptklgyliiilgvvtvgil iygtitikr l adeflgeipeklrrrvrflr  
>tr|D2N884|D2N884\_STAA5  
mygti i iggpgslmaavaaseqssnvl liekkglgrkl isgggrcnvtnr l pyaei iknipgngkfl yspfsifdne  
siidffesrgvklkeedhg  
rmfpvsnkaqdvdvtlvttienqhvvtveeeavsrie vntdqftvhtqnnsyeshslviatggtsvpqgtstgdgykfa  
qdlghtitel ftevpits  
aepfiksnrlkglslkdvelsvlkkngkkri shqmdml fthfgi sgpaal rcsqfvykeqknqktqhismaidt fpe lnh  
eqlkqhitsl l sdtppkii  
knslhglieeryllfmleqagidenttshhl snqqlndlvnmfkgfvfkvngtlpidkafvtgggvs lkeiqpktmmskl  
vpglflcgevl dihgvtg  
ynitsalvtghvaglyaghysasme  
>tr|D2N885|D2N885\_STAA5  
mnlkknkysirkykvgifstligtvlll snpngaqa l ttdhmvqggsnqa l pgnspntnadtnrdivngsqntpnahat  
dntstnqaltnhqnvgnan  
qvapapiqpstssasnnhsdanstatepaantnnl asnnnt l nvpnntdnndsarhl t lkeiqedvrhssdkpelvai  
aeasnrpkrsrraapad  
pnatpadptagnsapvaitapftptdpnannigqnapnev l t fddnnirpstnrsvptvtvvdnlpgytl inggkvgv  
fshamvrtsmfdsgdakny  
qaqgnvialgrikgndtndhggfngi ekt l tvnpnselife fntmttknyqgmtnl i iknadndt vigekvvaygpiwr l  
lkvpensh lkiqfvpknd  
aitdargiyqlrdgykydfvdsig l hsgshvyverrtmeptatnkeftvttslknngnfgasfntddfvykiqlpegv  
eyvnns ltkdfpsgnsqvd  
indmnvtydaanri i tikstgggtgnsparlmpdkil dlkyklrvnnvptprtvtfndil tyktytdqdfinspaeshtvs  
tnpytidiimnkda l qaev  
drriqqadyt fas l di fnelkrraqtil denrnnvplnkrvsqadids l vnqmght l irsvdaenavnrvkddmed l vnq  
ndel tdeekqaa i qvieh  
kneiignidqtdtdgvtrikdqgiqt lsgdtatpvvknakqairdkaakqrei inntpdatqdeiqdalnql ttdetd  
aidnvt n atnadvetakn  
ngintigavapqvthkqaarda inqatatkrrqqi nsreatqee knaalnel t qatnhal eqinqattnddvdtakgdgl  
nainpiapvtvkvqaarda  
vshdaqhjaei nanpdatqeerqaa i ekvnaavaaantnl nantnadveqvktnaiqgiqai epatkvktdaknaidq  
saetqhnai fnnndatlee  
qqaqqll dqavatakninaadtnqevaqaqdqgtqni vviqpatqvkt d arnavndkareaitninatpgatreekqe  
ainrvnt l knralndigvt  
sttamvnsi rddavnqigavqphvttkqtatgvl tdlatakkeinqntnatdeekqvalnqvddqlatainninqadtn  
aevdqaaqlgtkainaiq  
nivkkptal ainqhynaklaei natpdatddeknai ntl nqdrqaaiesikqantnaevdqaatvaennidavqvdv  
kkqaardki taevakria  
vkqtpnatdeekqaavnqinqlkdqafnqinqnqndqvdattnqainaidnveakvvikpkai adiekavkekqqqidn  
sl dstdnekeval l lake  
kekalaa idqaqtnsqvnqaatngvsaiki iqpetkvkpaareki nqkanelraqinqdkeataerqaal dkindlvak  
amt n i tndrt nqvndstn  
qalddialvtpdhivratardavkqqyeakkheieqaehatdeekqvalnqlannekralqnidqai annvkrvesngi  
at lkgvephi vvkpeaqea  
ikasadnqvesi kdtphattdel deanqqi ndtlkqqqqdidnttqdaavndvrnqtikaieqikpkvrrkraalndide  
snnqldai rnt l dttqde  
rnvaiaalnkivnaikndiaqnktnaevdqteadgnnikvilpkvqvkaarqsvsakaeaqnalidqsd l steer l a  
akhlveqal nqaidqinha  
dktaqvnqnsidaqniiskipattvkatalqqiqniatnkinlikanneatdeeqnaaivqvekelikakqqiasavtn  
advayllhdgknei reiep  
vinkkat areql t t l fndkkl aieanvqatveernsil aqlqniydaigqidqdrsnaqvdktas l n l qti hdl dvhpi  
kkpdaekt i ndlarvth l  
vqnyrkvsdrnkadal kaitalk l qmdeeltartnadvdav l krfnvalgdieavitekens l l ridniaqqtyakfka  
iatpeglakvkalidqyva  
dgi rmi dedat l ndikqhtqfivdeilaik l paeatkv l pkvgqpapkl tsi kkvdkqevrkvvkel pntgseemdlpl  
kelal itgaallarrnkn  
ekes

Tsompanidou\_et\_al\_Supplemental\_FASTA\_File

>tr|D2N886|D2N886\_STAA5  
mksittdektkllskpvqivdvtdeetamgyipnaklipmdtipdnldvfnketyyivcaggvrsakvvdyleang  
idavnveggmhawgdegle  
iksi  
>tr|D2N887|D2N887\_STAA5  
mlnynhnqiekkwqdywdenktfktndnlgqkkfyaldmfypysgaglhvghpegyattdiisrykrmqgynvlhpmgwd  
afglpaeqyaldtgnpre  
ftkknigtfrqikeifgsydwdevnttdpeyykwtqwi fiqlynkglayvdevavnwcpalgtvlsneevidgvserg  
ghpvyrkpmkqvwlikey  
adqlladlddwpeslkdqmnrwiwrsegakvsfdvnaegkvevfttrpdtiygasflvlspehalvdsittdeykdk  
vkayqteaskksdlertdl  
akdksgvftgayainplsgekvqiwiadvlstygtgaimavpahddrdeyefakkfdlpiievi eggnev eaaytgegkh  
insgeidgleneaaitkai  
qllleqkgagekkvnyklrdwlf srqrywgepipvihwedgtmttvpeeelp111petdeikpsgtgesplanidsfvnv  
dektgmkgrrretntmpqwa  
gscwyylyridpknemladpekikhwlpvdlyiggvehavlh1lyarfwhkvlydlgivptkepfqklfnqgmilgegn  
ekmskskgnvinpddivqs  
hgadt1rl1yemfmgpldaaiawsekgldgsrrflrdvwr1mvnedgtlsskivttnksldkvynqtvkkvtedfetlgf  
ntaisqlmvfinecykvdhe  
vykpyiegfvkmlapiaphigeelwsklgheesityqpwpptydeallvdeveivvqvnkglrakikiakdtskeemqei  
alsndnvkasiegkdimkv  
iavpqlvnivak  
>tr|D2N888|D2N888\_STAA5  
malnitgssflwplntiymkqelgksltvaglvlmnsfgmvignllggsldfklggyktiligtftclcsttllnffhg  
wpwyavwlvmlgfgggmi  
paiyamagavwpnggrqtfnaiylaqnigvavgaamgfvae fsfnyiflanlimyvvalvavtqfnieinakvkypth  
lditgkknkarfislvlic  
amfaicwvayiqwestiasftqsini smaqysvltwingimilvaqplikpilyllkgnlkkqmfvgiifmlsffvtsf  
aenftifvvgmiiltfgem  
fvwpavptianqlapdgkqggyqgvnsaatvgkafgpfllggvldafnmrmfimgmvllvfalllmvfkenntqpkk  
ida  
>tr|D2N889|D2N889\_STAA5  
mgnhfqyafenkryhtwnyhlnkfgqkikvaldggfdcpnrtdgtvahggctfcsaagsgdfagnradsiaqvkeike  
kmhekwhegkyia yfqaft  
nthapvevlekefepvlekepgvgvlsigtrpdc1pddvveyladlnqrtylwvelglqtihqstsdlinrahdmqtyydg  
vaklrkhninvcthingl  
pgedydmmatakevaqmdvqgikihl1h1lkgtpmvkqydkgl1tfmtqeeytnlvvdqlevippemivhritgdgp id  
imvgpmwsvnkwevlngid  
aelarrnsyqglrykskvkq  
>tr|D2N890|D2N890\_STAA5  
mklertl pfsktilkqh1tpesivvdatcngndt1flaeqvpeghvygfdiqdla1entrdkvkdfnyvslidgheni  
ehindahkghidaaifnl  
gylpkgdksivtkpdttiqaikal1slmstegiivlvihghsegqlekqalldylsnldqkhaqvlqyqflnqrnhapf  
icatiekis  
>tr|D2N893|D2N893\_STAA5  
mlisfvynmndnntinrn1hsefaiimllkinekgav  
>tr|D2N895|D2N895\_STAA5  
mnfegkligkelkvaivvsrnfndfigr1legakdtlirhdvnednidvayvpgafeiplvakklassgnydavitlgcv  
irgatshydyvcnevagv  
skvndqtnvpvifgiltesieqaveragtkagnkgaeeavsaiemanllksi  
>tr|D2N896|D2N896\_STAA5  
mqfdnidsalmalngetiivvddenrenegd1vavtewmndntinmakearglicapvskdiaqrldlvqmvddnsdi  
fgtqftvsidhvdtttgis  
ayert1takklidpsseakdfnrpghlfp1vaqdkgvlarnghteaavdlakltgakpagviceimnddgtmakgqdlqk  
fkekhlkmitiddlieyr  
kklepeiefkakvkmpdfgtfdmygfkatytd eeivvltkgairqhenvr1hsac1tgdi fhsqr cdcgaql essmkyi  
nehggmi iylpqegrigil  
lnklrayelieqgydtvan1algdedlrdyhaaqilkyfniehinllsnpskfegliqygidiaerievivpetvh  
nhdymetkklmghli  
>tr|D2N898|D2N898\_STAA5  
msqfmdyaiqlanmvqgqgvnppvgavvkegrivgigahlrkgdkhaevqaldmaqqnaegatiyitlepcshfgstp  
pcvnkiidckiakvvyatk  
dnsldthgdetlrdhgievecvdderasqlyqdfkakakqlpqi tvkvsasldgkqandngqsqwitnkevkdvyklr  
hrhdavltgrrtvelddpq  
ytrriqdgknpi kvilsksgnihfnqiyqdestpiwiytenpn1ttnqthieiiylkscdltilhnykrgvgtllve  
agptttseflqsnyidefi  
lyyapkliggsnyqfyqtdndvieipdanqfeivhse1lnqnvkl1lrkk  
>tr|D2N899|D2N899\_STAA5

Tsompanidou\_et\_al\_Supplemental\_FASTA\_File

mrvaigmgtagsvslrelvkhpkfnqldidlyddkvmngqgvpfndssellinmpskmslnlddetefwkwykqqt  
fnfdepaylprfvfghymk  
sylsmftkkyprnistnynkveiytnsnidetnlytyicttnseqswqaydyvfltcgtfayhdpylnkgkgyiatpyp  
tyntldevnelddiaigt  
glasldvrvyaahhpklpitmtsranslpsvrgtmidvtfkyltkdklndikkhhfgnapldtlvslflkecaeydidf  
eklvhrrtgnhiadlkydl  
arltemgifsiehlkenlnwiwnslsiedqhfnqkyskmiqlnsnmpprtaelielienkslilkdledvkhdg  
klyyfsyknqesvdiykvv  
inatgakshlneldqddqliknlenrqivqahpmggiqipetnqvissprfgltlnmiaigqmtngvnlrngvkmiveq  
vahtvsqlydalesneqeq  
rsdnq  
>tr|D2N8A0|D2N8A0\_STAA5  
mmttlatfiflvtlflvfwqpkglidigftalagafiavitgvvsfsdvfevtgivwnatltfsvvilislildkigffew  
saihmlhaskgsglkmfvy  
iillgavvaaffandgaaliltplivlamvknigfskraifpfiasgfiadttslplivsnlvniisadyfnisfsqyls  
rmiipnlfslasllvlwl  
yfrkaijksfdanhikkpidaindlklfkiswivlvillfgyliseftkipvsiftgiafi flilarksnavnkqvik  
gapwnivlfsigmyivifg  
lrnagitlilakileyisnyglfstilgmgfisafssimnmptvlidaiaigqsnvhgmlkegliyanvigsdlgpki  
tpigslatllwlhvlhtqkd  
vkiwgyfktgiiitipvlfftliglyltlilf  
>tr|D2N8A1|D2N8A1\_STAA5  
mnkhkksifgiiglvvifavvsflffsmisdqiffkhvksdikielnlvtlndaakkqinnytsqqvsnkkndawrdas  
ateiksamsdgtfidnekq  
kyqfldlskyqgidknrikrmldrptllkhtddfllkaakdkhvnevylishalletgavkselangveidgkkyynfyg  
vgaldkdpiktgaeyakkh  
gwdtpekaisggadfi hkhflsstdqntlysmrwnpknpgehqyatdikwaesnatiadfyknmktegkyfkyfvykdd  
skhlkk  
>tr|D2N8A3|D2N8A3\_STAA5  
mndfskyfilisgnicytynlendylkfnvynkhhkiihllkynisyndeyyqlllikmwqlsqiykpsnsqsls  
sflfmrlnfy lidlfrqqk  
rln diilcenhsplteqptyfneydlrlqdvcalikhrrerqwlmlylegykqyeiadimslststiklikasvkrkcqr  
fln  
>tr|D2N8A4|D2N8A4\_STAA5  
mtaienstlihfqegiqlevdepfslvskkcheslalkhfientndh  
>tr|D2N8A5|D2N8A5\_STAA5  
mnkasfdkvvkqqlwflnkkekqaldqr lssitdkdnvnfnkpitfantylrenvfrskesksysifvtlvmmfayval  
lgflfglitslsgvqffv  
npkvdlsttvviltiigailmlvsylikittsyftkkllehkfngh  
>tr|D2N8A6|D2N8A6\_STAA5  
mqkfkdlfyddlsvargnyfltlisafilitiilligfvvsdthilygvfivligivllrlfkinllsfkkltsmqviyii  
ggalliygldylhfhhdv  
ptneqeldrelqhmplmysivtiaipaiveeivfrgmii rvvfrkhlfliglvvsslvfaslhesdtwigylpylysgvi  
fgliy ltktrlevvilihf  
innlsslililwg  
>tr|D2N8A7|D2N8A7\_STAA5  
mfsrnnnifvddlsvtkdnyliavlkmlviflvinygtdvsydeyvglfii llgvllkilninllsfkklkfthmlyi  
ifgfllmygl dylydtfap  
ptlneilideesepayhiallstaiippiteeicrgliirilfrnflflgfvstvfvtlihesdtligylpyfygsl  
ifgytlktrlevvilih  
finnllam  
>tr|D2N8A9|D2N8A9\_STAA5  
msiifadrsikslkpdadwiriaskslpwilivilvhifsivhtfgfi  
>tr|D2N8B0|D2N8B0\_STAA5  
mqyvyifiggalgallrylisflntdggfpigtlianltgafvmglltal tieffsnhptlkkaittgflgal ttfstfq  
lelihmfdyqqfittlly  
vtsyvfgi llcyvgiklgggls  
>tr|D2N8B1|D2N8B1\_STAA5  
misiilvmiggglgaiarsavtdyfnhiftsklpiatlivnlvgsfligltiglsisiswfpaffvtgflgglttfstla  
keltlmmtpkfdiklflny  
sllqfiigfiacyigyhi  
>tr|D2N8B2|D2N8B2\_STAA5  
mevktfyngntmpqiglgtrvendencmesvkyaieggysidtakvygneeqvagiraglestgiaredl fitskly  
fedfgrenvaayearlsr  
lglyldlylvhwpgtneaimvdtwkgmedlyknnkvknigvsnfephelellaqvsikpvinqveyhpyltqhkllky  
laaqhimeswsp llnaqi  
lndetikdiaqelgkspaqvvlrwnvqhgvvtipksvtpnrisenfrifdfe lsdeqmtriddlnqdkrigpdpktfeg  
>tr|D2N8B3|D2N8B3\_STAA5



Tsompanidou\_et\_al\_Supplemental\_FASTA\_File

mdlsspvviglijiaavialiffvflvalgskkkvkrqteekyeqqenikkshaeaekeriqnkktitkqqedynhmi  
stkdreida1klfsknhse  
yvtdmr1igirerlvkekirpedmhimaniflpkdgnnierishlvltrtglyiidsqllkghvyngisggqfkd1pp  
meqvfdtldlksrpgtiv  
mdqnddkrs1sfvnysdqieaikqlaedlqkhlgakytptsilyfnpknegdvtisynqnsavkvlvgaeqldeffnkf  
vfhgriqynvedlqqmmdk  
iesfn  
>tr|D2N8B5|D2N8B5\_STAA5  
msvdytettkdkllkkptshfq1sttqlynkilnnegv1telgavnastgkytgrspkdkffvsepsyrndidwgei  
nqpideetflklyhkvldy  
ldkkde1yvfkgyagsdkdtmlkltvinelawhnlfaknmfirpeskeeatkikpnftivsaphfkadpevdgtksetfv  
iisfkhkviliggteyage  
mkkgifsvmnyllpmqdimsmhcsanvgekgdvalffglsgtgkttlsadphrkligddehgwnkngvfnieggcyakai  
nlskekepqifdaikygai  
lentvvsedgsvdfednrytentraaypinhidnivpskaahpntiifltadafgvippisklnkdqamyhflsgftsk  
lagtergvtepepsfstcf  
gapffplhptvyadllgelidldhdvdy1vntgwtggkygvgrrislhytrqmvnqaisgklknakytkdstfglsipve  
iedvpkti1npinawsdke  
kykaqaedliqrfeknfekfgekvehiaekgsfnk  
>tr|D2N8B6|D2N8B6\_STAA5  
mdfikrkrmpiesfthqfeeitylsddlqvkalmmtphevkriyvylrggkgqvgrvragr1mqfsdsqtlvigpyyrg  
nngsegkdefyrgd1ndvt  
qllr1lhdkypqafihmvgsfrrglqgl1tfqdlpvssyi1wggvsdidlmyeervdlrgmlrrmighpkkdraayearq  
aipninenpp1livhggk  
dqqvghi1hayyladqle1kgaahetfyqmaeghvprppamvetltyikefmnqvelhr  
>tr|D2N8B9|D2N8B9\_STAA5  
mkl1tavhfykysepfskivtpkvtlthrdclfieiidkgnayfgecnafqtdwydfetidsvkealqqwfidiknksf  
esyaa1el1sp1edtpaa  
ratvvmalyqm1fhtlpsfsvaygatvsgl1snkq1aal1ketkparik1kwtppiidqikslre1nfqfqlvidanes1trq  
dmtq1q1lahenilyeep  
fkeismidevvaektppialdekats1saiinlielynvkvvvlkpfrl1ggidkvqtaidtlkshgvkvvigmyeygls  
ryftam1arkgdyppgdvtp  
agyyfeqdvvahsgilkegr1efrpp1vdi1tq1qpy  
>tr|D2N8C0|D2N8C0\_STAA5  
mdfwlykqaqqnghhia1tdggesy1qny1ceas1lakr1ktyqqsrvglyidnsiqsi1lihacwlanieiamintr1  
tpnemtnqmr1sidvq1ifc  
t1ple1rgfqivs1ddiefagtdi1tmd1mdnt1gi1qy1dtsnetvvpkg1spsn1lntsfn1ddiasim1fts1g1t1gp1q1kav  
pqtfrnhyasaigckes1g  
fdrdt1n1svl1piyh1sg1svl1ravie1gftv1r1vd1k1fnaeq1l1tmiknerithis1vpqt1n1w1mqg1l1hepyd1q1kil  
l1ggak1s1at1mi1etalq1yn1  
pi1yn1sf1gm1tet1cs1q1fl1tat1pem1her1pdt1vg1mps1an1vd1k1ik1pn1ke1gh1gel1mik1gan1vm1ng1ly1pt1d1td1f1eng1yf1nt  
gd1ae1id1hagy1v1mi1ydr1rk  
d1i1is1g1gen1i1py1q1iet1vak1q1f1pg1i1s1dav1cv1gh1p1dd1tw1g1qv1k1ly1fv1ses1di1sev1q1i1ay1l1sqh1aky1kv1pky1fek1v1d1l  
py1t1st1g1k1l1qr1nk1l1nrg  
>tr|D2N8C1|D2N8C1\_STAA5  
mkkf1k1fk1gm1k1c1m1ly1l1i1f1l1ssc1g1tn1k1iv1g1qr1fei1q1qh1net1igs1iy1fs1ady1ah1rg1iek1gt1v1ky1fv1dk1vg1sk1ry1l1fi  
ey1ip1dn1v1nck1p1df1wkt1k  
ykkdkvtyyyvyl1ien1dde1fh1s1al1qdm1nhr1pidi1add1vat1mdk1sph1qndr1mt1k1lnk1n  
>tr|D2N8C2|D2N8C2\_STAA5  
mntennknqnsaknserrgm1kgcggclisfilli1llsacsmmfsnndnstsnessktq1tcsvsrgfeki1fk  
>tr|D2N8C3|D2N8C3\_STAA5  
mrqenvk1t1idrg1kefak1feliera1lncsvyfsdp1gpcpyqrgsieqvn1l1rqyfpk1dtdfvnvsdidveia1vl1qin1qr  
prmkqnyktseymr1leyn  
>tr|D2N8C4|D2N8C4\_STAA5  
mstivehttserv1vgkifayrn1vl1rskivnkqyregr1l1qiv1sis  
>tr|D2N8C5|D2N8C5\_STAA5  
makkntqrkrrvpvd1dtr1aiaky1ddg1tilqianilgrhnhviyyelnhrsqkdgtydpvkahkmaketkkmpekk  
gemra1n1paikkyieqk1s  
l1kwsprq1ssemendigyv1sf1stiyry1ntg1qvr1v1nk1ik1dm1rrg1g1k1y1kt1teerg1k1iv1g1qh1rt1iss1rs1n1rs1skt  
>tr|D2N8C6|D2N8C6\_STAA5  
m1k1rf1l1i1t1f1i1l1s1val1iacgkkydkeidevskieekienwkdsdfrkykrdttniyvyedgkvitltykfkksdi1l  
ttdlyrknettgkyeedn  
vnkerymkehepydykeen1ke  
>tr|D2N8C7|D2N8C7\_STAA5  
mktklv1flivcv1tigayflghq1ttkq1iveqksev1r1q1kdt1lqheketnet1nkrv1qr1qsktviadeekqiretahrf  
t1e1ft1l1kkges1fkqkskv  
l1kp1mi1t1q1ky1y1de1l1fsd1g1rek1fsi1dd1vt1vs1nm1h1vy1feq1fd1pk1k1dy1kv1fv1q1f1der1id1teg1q1eve1hr1k1tsi1q1ld1l1v1rt1nd  
kw1id1n1v1qr1fn1l1q1knrg

Tsompanidou\_et\_al\_Supplemental\_FASTA\_File

>tr|D2N8C8|D2N8C8\_STAA5  
mvnkkevavkqvihqtpigvklrllkwi fia lciafflfpvillfvfspekeeeqtdgdvvceggghvedkgiavfnknakg  
galdgkgktivkiaekhki  
ppnlfmaiiasesewgkgmnatkqknp lsimngnplkvynsvedgl nagaknlydlyikegl ttpdkigpkyapvgasnd  
psnmnrwiptvtsimkel  
sdkdsavckskggkdkifdgkpkwsdsdpqgnlytagqctwyaygirqkmgkpistywfhaqywndrakeegykvntk  
pavgalmaiepggpavtg  
hvavvigvkdktftvtemnikgpyivsremkvepgisfihdke  
>tr|D2N8C9|D2N8C9\_STAA5  
mkykglyllcflilplclvvgatayavsnvpgqptnavnakiekykvdnkadgdidldryralfhkesdwnpfgkdevae  
tvnnvtntfffeinklivsi  
tdygienlyqlvldvdfadkigqfvqdiyqkllsnivmtlfiiiclnafiiysvkgnmaeaalkrgflifcligfgvgvla  
nasfiikgttnvvgklnnv  
imnstsaingnvdytnensginkirnyfdmtlykpylimnygtvnedaikkdknrididikvkdkseskrnkeve  
eikkhnyamkqsrvfag  
lgiamftliititsvsviflaisfakvifsafalfllflvfwllsflplnlelsvfkalartlgyiilstcvslfvvig  
lsidiadavikpesqqayf  
lnviflmi vlvlykkrreidfvtrgnlslspqtigeetikkgqdewnkrrkkqedkqkrenqrdkmpvfivnqdd  
nnkprnqqqevshsttpn  
qnikrrnqqeemhssndgsntssrhd lqskqsqedqglqrevkrnteikrnpqqdmsnysnl srppkeisrtsqtpn  
elssntrevqssydkdiek  
rriqnhqthqnqhsntnsdqyrrsaqhnnkneaekrlkeqkdiskhgk  
>tr|D2N8D0|D2N8D0\_STAA5  
myhyrydfklyeqmamltwqgivelyrnlmyqtgdkvfityenki iayealsklmcelndfdevfrknp lidakryll dv  
keglrrciehlnregitke  
saplmhqe lksmyeeiimr lvagr dyqiqesdi l  
>tr|D2N8D1|D2N8D1\_STAA5  
mamneialfkgvriqpyfkhidfi fagvfafiflayriltlwqdyirqqkalnvveyqyfkphflylvigtaivfliak  
lfsqfv lrfrekdl aemie  
tqgfhnrtvikkteyldidykkteydyptlfykrkrksfmihvkkdgsrfqdhy leleqiepmfncel vekrhigrf  
lyefmp lkykkri vmegt  
eapettydtkiyithqilwdfvkaphalitgvtgggktyflfymirel fkrnaevrll dpkvsdl sfmknvigtekvad  
tigqifkqlreaseemerr  
frmmseseqy lgsnfrnfdlppyfvi fdevtaftstldkke lqemndylini imkgrqagvfmfltaqrpdadvikgnv  
rdqlglrvsmgnlsadgyr  
mtfgqtdkvfqpihesdigryisilgqynepilfdap lmeqydfvedvkqilnke  
>tr|D2N8D2|D2N8D2\_STAA5  
mkildflfkskftngvivvfttimlllylmiw lafhi lamsvvlamqdiaingkdafinvylgvlclgmyllsfwmina  
llrisfdikglfmtiknnt  
llfnkkvvke  
>tr|D2N8D3|D2N8D3\_STAA5  
mmyyil isfiivllvsakl fkkryryaelreleahkaemakihewhksleskqrsekidiilealerheyr sdq  
>tr|D2N8D5|D2N8D5\_STAA5  
mdlkapyagiknnlltkngevwayyrisestanydakeaskkrmkyflesikgyqdfhfemyehdlldlrnkfkeis  
kdfddttfdvanyyaqeti  
dvleqelqmi thnsfvmgvlkrelsdav sikemvks lsdtaermisnlgfnvsl ddkvlsryesfereladnflsieg  
erltene layivr kpfisn  
athdvqeesarravtdvcnvv idptqmr vlkvtnenetfyttvvvddfp ldmeythifekaqnmpfpvechikakiven  
dkvkkkfdrakinhkaqsr  
ekqatgdnaseei qdnlfvleqmekevtgsgvfmewsc lfviksddlrdckrkakr lvr lketeyavnp ladqlqlyy  
qvlhgndlfin kywvqr tt  
atgiaenlfgvsqslgtktgyigridkfirsvsreeavassrdi ilfsl llaakgikgavsd sphvlitgqtgkgsfl  
akllwlytsffkgqm iywd  
pksefadwfnki teseemrrkyp lfvshletfkyvtldynksnfnfgcl dpivflngieanem lksvfdeiks fenyhhie  
taihqaisdtiderenget  
vgs lsviek lqnhddeavrnagd llyqktqnni klvfgngenpalnieekitilqvkgl dipkaddpstystseqngi  
tllmlligkflqkfgsrrqi  
qttifi degwafsasrqqk kvakgikrmgrsennsvlfitqsvkd kadeggnfgchfafdekderedilksldleyske  
spenmem lkd lkkggcifs  
dfygrvgkmavhpcfeemteaf rtqedsasskaekfai  
>tr|D2N8D6|D2N8D6\_STAA5  
mdkkaynlkrtfeqpi vmyeftnnarf skgiri dwatfvalelilailyfk lgfhyitsl isgmki iyftalpyymtky  
lvklkqdgkklvfflwdfi  
tyvfniqmrnihyaydeevkyhnkklklk  
>tr|D2N8D7|D2N8D7\_STAA5  
mdnlfnfmmv lgn tptinplkd lvsrevgsaigivlvvgcmkwaggkyghmvllfvvggfmflvskgpetvfna lsglw  
klifgg  
>tr|D2N8D8|D2N8D8\_STAA5

Tsompanidou\_et\_al\_Supplemental\_FASTA\_File

mrkiflniikhkllsrsfsgkkgkqfdvpeaerkepkpkyrnhrkkiivvifytvlililvlllaafvraskanneskqavnnt  
eikkkyednaetvqynpn  
lklyadyidtymtipkdgkeekerqkalenfypsdyktptentenverklnekeffnikrkdqtiiqyivnydlkite  
kkekivkkkkdkdkdkke  
eyetkteektrteskkaalnipvksennkyvvveyphfsivpnnqlkqaklvkdnlenekrednplkafvedffnkytk  
nkaddmaylmdnpegledt  
revskisd1riypkkndyviakaevlmdkkgsp1enlehytlevtkkdgkyvkkltttffg  
>tr|D2N8D9|D2N8D9\_STAA5  
mninyetleerikhfekhissehraldrllidyftrhsytkqietifsslyiiklidsrdlvdglnlkalqeelkdnel  
tmfltsclgqgl syddls  
sitqlcalkaeniafnktlve  
>tr|D2N8E0|D2N8E0\_STAA5  
mifeqqartwqsffklclerrgsfsridiaidrrkpyfsvgalgnkvkkgelvtlrlrtsnkteglktsdgsnqgktyig  
skissvli1riyeknyeqah  
kygtlpedygpwnrieiccrkkqanvlapylaetsemqdv1svl1ngtvrfiskpksndtdkrwp1ykpwe1fiknas  
kik1slvpsmktiednmew  
lksqvattlqtvl yaedyahqmgyl1dsdfledilqtad1edehlerir1ftetlkhhnkqavnkieygmkptktylr  
>tr|D2N8E1|D2N8E1\_STAA5  
maiqpkiditgtl1gkdllyl1gkdekkvyernqmtgkneptgevylyhiattvgdavidispeaydfel fealelvnats  
syygrsqdstyvemrsvy  
sceamkplglkpewkrftskalgnhsskeetkteeaeksttk  
>tr|D2N8E2|D2N8E2\_STAA5  
mikpmidveknigttefyi1shqkksktekgyfiyr1asftlgrqlivsipfeksfefgdcvklvnpvqtrakkernsd  
ysqvyvyvaedielighi  
evikfdnk  
>tr|D2N8E3|D2N8E3\_STAA5  
mpeeksesetdkdlqsteevpanentennqheideittdqsddeintpnvaedksqdd1kdd1kdd1kekqqpsdhhqs  
tqpktsptetnkqgsfan  
ckqlrqvypngvtadhpayrphldrkdkracepdky  
>tr|D2N8E4|D2N8E4\_STAA5  
msnqfkseeerrqweqfqa1fnqqnqqhqqyggkkskkgwfwg1vlfiliigisactagvtgnlgnssketnkt  
hki1getvkn1gdl1evtnsv  
etmksvgps1aptnakgi1fvvadvtiknkgkealtidssmfklksgdktfeadntgmsanqndngsiensfflqrinpd  
staggkivfdvsenianak  
dkk1eviss1fsvkkitfd1sdaktskakkdkqdeavavassnsdnvsyeasattpattssadtdsedseksskdedq  
nasksdksveksesneet  
apvepmrqskpttseappsqni1hnedsmydaste  
>tr|D2N8E5|D2N8E5\_STAA5  
mkfkaivait1sl1l1tacganqhkenssksn1dntkktqtdnttqsnrekqmtpqeaedivrndykargvneyqtl1nfk  
tn1ersneheyveh1vrd  
avgtplkrcaivnrhngtini1fdmsekdeefea1fkkrs1kynpgmsdaetdnesedi1qhhdidnka1qndtpnqk  
vddkndknadnkeekhdnr  
en1saetk1vk  
>tr|D2N8E6|D2N8E6\_STAA5  
mitfeniq1lekyt1mtmhgl1fnq1kl1gi1sidnaeht1ftpymmet1ss1gvkrdi1in1ihkgteledfaafn1siedt  
vtvc1qrtee1lnqykve  
fndk1linwrimqek  
>tr|D2N8E7|D2N8E7\_STAA5  
mekneytakynaysq1ldvtysqavay1lnkygavtd1dykeksytrf1ngeiksis1kgytraseglychhisedkfqn  
1sdl1rfise1fkysynqk  
en1vycd1ieh1l1hai1tkesngqfgvag1cmikptvidwyige1ynpkpawmqatkaray1prilvekl1likiddm1k  
gieiydf1esr  
>tr|D2N8E8|D2N8E8\_STAA5  
mkviekvhyed1lepki1vqli1qs1vkdkmdq1fitsehfaididkv1fq1nlkvkyikmesntsgylsgrtiyinn1si  
n1trfaiare1lgrylykik  
dn1nds1kn1hemi1yesdvnqfsvd1lmpkkqiealvynfyevnn1n1ssgl1sekern1ln1istklevskaag1rly  
nl1gih1  
>tr|D2N8F0|D2N8F0\_STAA5  
msnqnl1fde1lekkgyk1ledi1ftkeeikkykaedq1ragktqyvetgkdat1yl1ssaytktiaal1gagaisvisal1tgg1  
vgagvgg1flgsiaasn1dt  
skgiy1kl1tkknaaweyv1igekwgyq  
>tr|D2N8F1|D2N8F1\_STAA5  
mckv1k1lr1styys1krkdnk1tkdds1nieravini1fnsnrkvfgtr1rienn1ndkgl1tvsrrkigrimikhnlsvyt  
kakyknhqketnekrikn1  
yy  
>tr|D2N8F2|D2N8F2\_STAA5  
mtrerrsf1sefk1qmvr1yengkprnei1reyd1tpsal1gkwikqhqntgtfn1hdn1sdeekelik1rkevqhlkmen  
dil1kqaal1imgqk

Tsompanidou\_et\_al\_Supplemental\_FASTA\_File

>tr|D2N8F3|D2N8F3\_STAA5  
mkkkyiliiivvviigllvvacvikhkkdhyietqekridlyfkynlnhyssmkv  
>tr|D2N8F4|D2N8F4\_STAA5  
mkkkyilkvvvviiigllvvacvthkhrkdyyietqekridlyfkynlnnyssmkvtsfkknpmggyfikgfvnnknyk  
fdavifsdtnkqfkgdlgy  
kedkigel frekdakdrlnvdeiekehldksdyvaepplfffsgrle  
>tr|D2N8F5|D2N8F5\_STAA5  
mkkryvfvvvvailligllivayahnkqikahyiktqekridlyfkhnlnnyknmkvtdfhktpmggyfivgyinddkkyk  
fqasidsgsnnqykdigy  
hedk1gk1fkekdpyk1svdeiekehldkseyaepplfffsgrle  
>tr|D2N8F6|D2N8F6\_STAA5  
mtykmmkwk1stittlmagvitl ngefrnvdkhqiavadtnvqtpdyeklkkwldvnygydqydenndmkkkfdak  
ekeakkllledmkttdtrty  
lwsakdl dksadmtktyrniekiaeamrhknts1ktdenklkitdaikwlhnhvygkdpdkkvtdl ttnrkekdskk  
nsl nwwdyeigtpraltn  
tlllmdmltkdemknyskpistyapssdkilssvgesedakgnlvdiskvkllesvieedetmmknsidsfnkvftyv  
qdsatgkarnfykdgysy  
dhqdvpytgaygvvlllegisqmpmikespfkhtqdkatlsnwiddegfmplykgemmdl srgraisrenetshtasatv  
mksllr1sdtmddstakdy  
kqivktsvnsdssynagylnsysdi dkmklmddstiskndltqqlkiyndmrvtyhknldfagf1smtsknvarye  
sinnen1kgwhtgamsyl  
ynds vkhyrdnfwatadmtclpgtttlndmpstntkndksfvvggklnnkyasigmdfenqdktl takksyfilndkivf  
igtgikstdssknpvtsve  
nrkavgyklfkgdieittsdvnaqethsvflesndtkknigyhfl dkpkitvkkeshgkwseinksqktdddkkdeyyev  
tqhtntsdskeyayvlypgl  
skdfksknnnsvikqdedfhvikdndgvfagvnysdstksfdingtive1kekgmfvikkdnntyecsfnptstns  
tsnkesk1svtgyt1nqs  
vsnfkesdihfel tk  
>tr|D2N8F7|D2N8F7\_STAA5  
mnkklmivfiiiililvgiflkikydekkydkqkeritiymkhnvkgyknisftnfknsmdgysisgyinndkkl sf  
tagirsiddf qfdtdisy  
delgrkl1knpxsvseikkeqnts nk  
>tr|D2N8F8|D2N8F8\_STAA5  
merkkiiifiisliiallistgylinnkdkdhyieiqekridlyfkynlnnyhsmkvtsfkktpmggyivdgyvnhnknyd  
fkvlisatdnhqfedsigy  
ddktfgklfkekdhkne1kstdiikkehl dkseyeaepplfffsgrle  
>tr|D2N8F9|D2N8F9\_STAA5  
mkytdkiyhkvsdfsysk1kkdntykilgqdykiekrddtqngl rayvfapvikgkvdtsslligyagtdpfsln dirt  
dlq1pihhntnlnkinhy  
kn  
>tr|D2N8G0|D2N8G0\_STAA5  
mlytkpligdrtpakfapsqmdesdaftesvkkkypdseihpighslgaf1aqynlikhnl dngttfaapnlyhsftgdf  
kkeidngvydskirnihf  
ddpivnsglkm1fygg1kmsffsglrlsyi  
>tr|D2N8G2|D2N8G2\_STAA5  
mrhdiyegvlfyimkgikpnyaelgrqncdprt vkkyyeagkenelerlkkrqnkaskl dpfkeiinkkielgctam  
aifkyiekkgyegkytilr  
eycknkqnetkkatirvetnpgiaaqvdwkedmvmhdkfgrtyqfniflyvlhyskmkyitltwdrkqdtlfeclkdaf  
eytegvpkewfdmrtvv  
drsrtqykkvvnfnlfyqfskdanfepiacrpyrpqtkgsveslakfveqrlrpydyefydavelielvddlchelnhle  
isqvteqrpidvfnyeeke  
hlnffnakll dtyienecirivskepminfrkgkysvptkyigeevqifnstdelliydgelirrhnlserkfniv  
edmseilksdvfkhkddke  
iltyienslllydei  
>tr|D2N8G3|D2N8G3\_STAA5  
mkrllglllastlvlvacgn denkeeskkevkskekkekenkskkdkekevatqqqpdnqtveqpsqeqsvqqppq  
qlpqnsvpqnaqvqqnk  
qkvdlnnmpptdfstegmsegaqkqieel tmqkdyhgl sqreyndrvsei inndn  
>tr|D2N8G5|D2N8G5\_STAA5  
mtksvaiigagitglssayflkqdpnidvtifeasnppggkiqsyrdgymielgpsylgrktimtelakdigleqdi  
vtnktgqsyifaknklypi  
pggsimgiptdikpfvttklisp1gklragldllkkptqmrddgdivgaffrarlgnevlenlieplmggiygtidikls  
lmstfnpfkeeeafgsli  
kgmkdekknkr1kqrqlypgapkgqfkqfkhglssfiealeqdvknkgvtiryntsvddiitsqkqykvivsnqqedvfdg  
vlvttphqvflnwfgqdpaf  
fdyfktdmsttvatvvlafdekdientydgtgfviartsdtditactwtsskwpfttpegkvlirayvgkpgdttvddht  
ddklsvivrrdl sqmmtfk  
gdpeftivnr1pksmpqyhvghiqqirqiqahikqtyprlrvtgasfeavglpdcitqgkvaaeeviael

Tsompanidou\_et\_al\_Supplemental\_FASTA\_File

>tr|D2N8G6|D2N8G6\_STAA5  
mtkkmgllvmaygtpykesdiepyytdi rhgkrpseeelqdlkdryefigglsp lagttddqadalvsaln kayadvefk  
lylgkhispfiedaveqm  
hkdgiteaitvvlaphyssfsvgsydkradeeaakygiqlthvkhykqpkfiewtnkvnetlaqipeehkdtvlvvs  
ahslpkgliiekndpypqe  
lehtallikeqsniehitigwqsegntgtpwlgpdvqdltrdlyekhkyknfiytpvgfvcehlevlyndyeckvvcdd  
iganyyrpkmpnthplfig  
aivdeiksf  
>tr|D2N8G7|D2N8G7\_STAA5  
mvhnknntilkmikeetthtpvwfmrqagsqpeyrklkekyslfdithqpelcayvthlpv dnyhtdaailykdimp  
lkpigvdeiksgigpvih  
npiktiqdvекlsqidperdvpyvldtikllteeklnvp ligftgapftlasymieggpsknyntkammyrdeatwfa  
mnhlvdsvkyvtaqveag  
aeliqifdswvgalnvedyrryikphmirliisevkekhdvpvilfgvgashlinewndlpidvlgldwrtsinqaqqlgv  
tktlqgnldpsillapwnv  
ieerlkpildqgmengkhi fnlghgvfpevqpetlrkvsefvhtytqr  
>tr|D2N8G9|D2N8G9\_STAA5  
mrnqattlfnkr lhalrkeknyfnkfi nghfmvflililgafifgygewlkhiptninfaliaavivaltsifpmrp11  
leadkifllpfekhmssqfm  
rhailysyfariliqliiivmfp lfyinqhnvtfyicfgvsalifpyvglrlrwqwyqsglktwqvn lisfiifalty  
ylllapkwyialvmvalpv  
lieflvkkykpgflypwekmieiehrhmnyykfvnmftdvkhlkesavrrsyldillpvpkgnkfnsnamyllfirsf  
irgrdafniifrlviiav1  
lmwvlsyplvtaiigclfyvii1lqmaqfysqqayglwpqvwpvpeekvikgyeqflyrlmfvictvfavtfiikhmtlf  
yvvlifyivgl1tirsiiik  
klkygetl1rd  
>tr|D2N8H1|D2N8H1\_STAA5  
msetifgkiltgeipsfkvyeddyvyafl disqvtkghtllipkkasani fetdeetmkhigaa1pkvanaikrafnpdg  
lniiqngefadqsvfhih  
fhlipryendi dgfykwethedi ldnakqgiaeqiqaqf  
>tr|D2N8H2|D2N8H2\_STAA5  
mkasrilfgigvgvaagfvvalqgrddksvknntidrtaptgskselqrefetikqsfn dilnygvqiknesaefgssig  
geiksl1gnfksdinpnie  
rlqshienlqnrge digneisk  
>tr|D2N8H5|D2N8H5\_STAA5  
mkminklivpvtasallgacgasatds kentlisskagdv tvadt mkkigkdqianasftemlnkiladkyknkvndkk  
ideqiekmaqkyggkdkfte  
ka1qqggl tadkykenl rtaayhkel1sdkiki sdseikedskashilikvkskksdkegl ddkeakqkaeeiqevsk  
dpskfgeiakkesmdtgsa  
kkdge1gyv1kgqt dkdfeka1fk1kdgevsdvkss fgyhi ikadkptdfnsekqslkek1vdqkvqknpk11tdaykd  
llkeydvdfkdrdiks vve  
dkilnpek1kqggagggqsgmsq  
>tr|D2N8H8|D2N8H8\_STAA5  
mvkfihcsdlhl dspfkskshispki fedvqksayesfkni vdi alqqdvdfvii agdl fdsenrt lraeiflkqqfer1  
qneqifiyvchgnhdp1ss  
kissnwpdsvsvfsnkvetyeaitksgetiyihgfsyenrasyenki deypssqqgkigihigvlhgtyssv nerytef  
iledlnsklyhywalghih  
erqq1sdmpvinysgniqgrhfneqqegkc1liegdh1klktkfyptqyirfeeatietdkt skqglyeviqnfkeqvre  
egkafyr1tlvinsetlis  
pqdl1qveemtdyeenenqfyvidelki qyaqndesplvnfesaellvdqtvfdkamsdlylnpraskfl ddygtfdht  
alvnraeeilkamrgeqn  
dn  
>tr|D2N8I0|D2N8I0\_STAA5  
mna1fiiifmivvgaiiggitnviairm1 fhpfkpyyifkfrvpftpglipkrreeiatkigqvieehlltetlineklk  
skqsqqaiesmiqqqlqk1  
tkdq1sikqitsqidid1eqv1qtngnqyasqlnnyytkhqntias11pnqlvtfl dqhvdnatdl1cdrarnylssa  
kgtqdindm1dtffnekkgk  
ligm1qmfmtkesiadriqqelirltshpkaravtslitneyqtfkdkslng1ldasqfneiaenlsvyvttyaskqan  
kpvv1mpqfvdylesqls  
sklanliieq1sihlstimkkvd1rglieeqintfdldyiekliieiankelklims1gfilggiigffqglvai fv  
>tr|D2N8I2|D2N8I2\_STAA5  
mnkvilvddhyivrgglrf11stieniev1qdfadgetfleylkehehpdv11dlvmpgmngieiteyikahyphikv1  
v1tsyvddehvisainkga  
dgyemkdvepqqlietirrvnmgekmi hpkqaqdvfetvsqkphytnk1skreiev1remvkgktnkeiaet1fvsektik  
thvshifsk1qvsdrtqaa  
iyamenkli  
>tr|D2N8I5|D2N8I5\_STAA5  
msvriehdtfgeievpadkywgaqterskrnfpvgkermpievvygfaqlkraaalanfd1lgklseakkdaivyacdqi1

Tsompanidou\_et\_al\_Supplemental\_FASTA\_File

sgel dehfp1vwwqtgsqt  
qsnmrvnevsvyanmylkdhsdesihpnddvksqssndtftamhvalyqevetklepalkllrntlkekedkfdsi  
ikigrthlqdatpiklgqe  
isgwrymlrdrctmlseskkhlnlaiggtavgtginahpefgdkvaqyisentgypfvssenkfhal tahdevvqlhgt  
lkalagdlmkvandvrla  
sgpraglaeisipenepgssimpkvntqceml tmvavqvmgndtvvgfassqgnfelnykpvimhntlqsiylladg  
metfnncavgiepieeni  
dnylnqslmlvtalnphigyekaaqiakkahegltlkesaiqtgyvteeqfeawikpedmvdph  
>tr|D2N8I6|D2N8I6\_STAA5  
mlgkywiqlliatviislisikafplaigalylpifkviklqlnlskgliddvnaqtfiksnqsgivisvicllitgi  
lytldgfyasltgvlgtl  
valnpyttivsaileyiltaiatveatkkyrn  
>tr|D2N8J1|D2N8J1\_STAA5  
mpvikinnlnkvfgdnevlkdiuleinqgevvaiigpsgsgkstllrcmlllevptkgqvifegndltekrtqvdklrqk  
mgmvfqfnl fphkkvvdn  
iilapklkkdnndelhkealslldkvglkekadvypnqlsggkqrvaiaaramhpdivl fdeptsaldpevvgdvlk  
vmkd lakegmtmvvvthem  
gfakdvskvifmadgvvvesgtpveifeqqhertqnlarvl  
>tr|D2N8J3|D2N8J3\_STAA5  
msnaknadnkqffskilnsigagvialvpna llgevlkifksgneileltyqlvilisqfmafiigvlaahqfkfngag  
aaivgtsamigsgavvysn  
nsfm lkgigdiints lvviiaclyimvlqnklgsfelilpvlvpivsggigitlpyirkitqaignvihsftdlp1l  
msilisvafslmvtplsl  
vaiataislnglsgaanlgivaacvtflfgslrvnsigvnavlligaakmmipvylknliisipltingiitgiayvl  
qvkgtpl sagfgytglvqp  
inafnrmsgdptmni illa lgyfvipfvsafivhelckkfipiysndiykfevpkq  
>tr|D2N8J5|D2N8J5\_STAA5  
mkvvglnrmrevetelqqrfsdvdfkfykkaseipesdlanldilvgydggineafllrctnlkwiawfatgvntlpldy  
iadhgil tngkgvqakql  
seyilafilddykkmlsydnqrqhiydskitgkrlsgqtvflgtgaiatrtaklakafnmnliglksqgnkdefdei  
ytieslestlphadivina  
lpetqeti hllkkkhefelmkdealfinigrsivketllievlsrvirhayldvfeneplkpnhelyeldnvtitahit  
gndyeakyd lldi fknnlv  
nflnkn glienevdakkgy  
>tr|D2N8J7|D2N8J7\_STAA5  
mnfseserlqqlsneyilggvnspersyavgggavvmkeghgaylydv dgnkfidylqaygpitghahphitkaiqe  
qaakgv lfgtpteleiefs  
kk1rdaipsleki rfvnsgteavmttirvaraytkrnkiikfagsyhgshdlvlvaagsgpsqlgspdsagvpesvarev  
itvpfn dinaykeaiefwg  
deiaav lvepivgnfgmvmpqpgfleevneishsngtlviydevitaf rfhyyaaqdllgvipdl tafgkivggglpigg  
yggrq dimeqvap lgpayq  
agtmagnpl smkagi allevleqdgvyeklds lggqleegllk liekhnitatinriygs ltyftdekvthydqvehsd  
geafgkffklmlnqginla  
pskfeawflttehteedikqtlkaadyafsqmk  
>tr|D2N8J8|D2N8J8\_STAA5  
mntnirysinlkgasflrlrgari fktgiai ilamsiasllpddvglkalagvsavvamqpsiyrsfktvsdqa lgniig  
ailsvtmvtifsdnfiimg  
vtvvvliailfkfnlahvatlasvtaliimgqhtgsfyitafyrfvlvmigvisslvnfvflppk fetkiyynslniss  
difmwfklvln dttefnni  
kqdsnlkqrvek lekiydyseerpi tkkhihqnrkklifrevvqttrqayevlnklsryqndlyllnnnfl lqikld  
lds l tafheqilaslskka  
rynvthvdyeldnpqkkl l stfqhelinhpyqteysfanvmqivaieeyrhhl ehldririsfftyhrs dadieivee  
dfd1  
>tr|D2N8J9|D2N8J9\_STAA5  
mikrylqfvkpykyri fatiivgiikfgipmlipllikyaidgvinnhalttdekvhl tiaigialfi fvivrppvefi  
rqylaqwt snki lydirkk  
lynhlqal sarfyannqvgqv isrvindveqtkdfiltglmniwldcitiiaalsimffldvkl tlaalfi fpyiltvy  
vffgrl rkltrersqalae  
vqgf l hervqgi svksfaiedneaknfdkntnfliralkhtrwnaysfaaintvtdigpiivigvgaylaisgsitvg  
tlaafvgy lellfgplrrl  
vasfttl tgsfasmdrvfqlidedydikngvgaqpieikqgrididhvsfyndneapilkdinlsiekgetvafvgmsg  
ggkstlinliprfydvtsq  
qilidghnikdf l tgs l rnqiglvqqdnifsdvtkenillgrptatdeevveaakmanahdfimnlpqgydtevgervg  
klsggkqr lsiariflnn  
ppiil deatsaldlesesi qealdvlskdrttlivahr l stithadki vvienghivetgtheliakqgayehlysi  
qn1  
>tr|D2N8K1|D2N8K1\_STAA5  
myqqssfkenlihwfdenqremprwrttnpyyiwlsevm lqqtqvktvidyyhrfverfptvevlsqasedevlkywegl

Tsompanidou\_et\_al\_Supplemental\_FASTA\_File

gyysrarnfhtaikevhdk  
yeglvpkdpdqfkaikgvyptqaavmsiaynvpilatvdgnvfrvwsrlnddyrdiklqstrksyeqellpyvtteagtf  
nqammelgalictpknp1c  
lfcpvqenceafdkgtfeklpvksknvskkvieqsvflirnnqgqyllqkrsekllhgmwqfpmfeseharremtekigh  
diqpvtpifelkhqfthl  
twkikyavsgtinierlpddmiwfdlsdrdqytfpvpmskiyqfing  
>tr|D2N8K2|D2N8K2\_STAA5  
mdtathiaigvglatalatqdpamastfgatattlivgslipdgdvtlklkdnatyishrgithsipftilwpilitfli  
ftffsgtnpfhvwmaqla  
vflhvfvdifnsygtqalrpitnkwiqlsvintfdpiiftvlcigivlwvvglhpfavffpiialliiyymirfkmravi  
kqqaikaiqqehhpvkfv  
aptikfmewrvaiqtdahdyvgkaygrnvvfsvdkverqklstdsilwkvkgnkdiirtflnfssiyrwqtttladgsteir  
lidlrylknhdysfvaiah  
vtndnvidhsyigwvftedklqrklyak  
>tr|D2N8K3|D2N8K3\_STAA5  
mldniilyfknlphtkryvterlkqswksflivlaacliliiasetlfsfshltdvkevrwlfrlialivfavlmftiyi  
syhhymndflvtklfnisa  
atpvvimsilsfimlviltmvsalvkpvnfetsyialfyfivmatifvglisvtfglirlltekiniifygicvlcffvl  
piifipnphvfihilm  
nmpyyivngiaqsiifgissmenipyhyfilflcliaavnflarytthaiynktskvtqtdkqdvskdstdeadts  
>tr|D2N8K4|D2N8K4\_STAA5  
mgssivlkllkvthyrnkqkkywlpfgydaqidlnnislhiyqgealgiigepesskamvgqllagaikpdkgkvvc  
tedlfygyiedqslhqt  
eaytaqlvqlfpyeindhkaeqiiyahlgdytkpvnhiskaayaqlllsiarssksniilnhvidyltpqfmerai  
lndyiennltivsigddi  
dkisqvsnyiawfshgglrmegslkqvipsfkeherdrlslnskeeiefldwkknrtripemtynfkrverynhakpp  
kflvrfwtlasgti1gla1  
mmllifnngiisitdftnratmqnenkdpygeklaygiafngsvdmqgdqvtipkysvvtitgensknyrvtadnkty  
yvsdklleyfnpaglyqth  
sfkklapymksnysnyayfnsqllhkkhssvikt1vpdddnrvasvtqppiql1fndnnqlygfvypivdkkelkdkfn  
innniwtkvngycian1  
kedkwiye1  
>tr|D2N8K6|D2N8K6\_STAA5  
mpkittkievqkknkerfn1fldeqfemgidi1d1vkfnlkkqqleaadmaeiqkydhyriglnkaiqylsykkrtkdev  
iqylqkeeiseqaisevie  
ycyreklidhqdyaeslntmirttdkgpkikyqklyqlgiepniiemftelyreqqelddiiaekisktkkqpqnkv  
kekvmqsl1qkgfemetih  
avlnemdfqtqdeavldd1lqrd1ekiynkrkkytqqk1sktieglmrkgykydkikakleesgiadgteie  
>tr|D2N8K7|D2N8K7\_STAA5  
mkrsdrysnsnehfehmkhephyntyyqpvqppkkkkkskrillkilltiliialfigimylstrdnvd1rkiens  
sfvsadnmpyvkqafism  
ederfynhhgfdlkgttal1fstisdrdvqggstitqqvvknyfydnrsftrkvkelfvahrvekqynkneilsfyl  
nyfgdnqytlegaanhyfg  
ttvnknsttmshitvlqsailaskvnapsvyninmsenftqrvstnlekmkqnyinetqyqqamsqlnr  
>tr|D2N8L0|D2N8L0\_STAA5  
mnsvklkqpvsihndpweayndvkehqql1snieftttln1cmrcshcavgyt1qtvdpepldmdliyr1deipn1rt  
msitggepmfssksirnv  
kpl1kyahnrgiyiqmnsn1l1pqdry1diaeyidvmhishnwg1tdefanvgfgamkkqpp1kak1klyeqmisnart1  
seqgmfvsaetm1nqst1p  
h1rkihqevvhdmkcsrheihpmpadfasqlnv1tlaemkkti1hd1l1dfrdediwm1lfg1lpvfp1kddedqk11sr1  
rtaknvttrndp1dgrsr1n  
vnyftgnv1vtdfgdetgtisniqkdk1tdvfdkw1ss1aks1nchcsefsc1gpnv1vknmyypnmd1fdnerhmkq  
qqi1qf  
>tr|D2N8L2|D2N8L2\_STAA5  
mtnykek1qqyaell1kvgmnvqpkqpvfirssvetle1th1liveayahcgasdrvrvysdpt1kr1kfenesvehfanh  
eiksydvearmdyvkrkaa  
n1al1sedp1mdgidsq1lqafqqnara1fkgymesvqknqfpwvaafpskawakrvype1sveeayikfidevfdiv  
ridgndpvenwrq1hian1s  
vyaq1lqqknyhal1hyvsegtd1tvg1aknhiwedatsyvngeqafianipteevftapdrnrvdgyvtkn1p1syngt  
iidqfkl1mfkdgei1dfsa  
ekgeav1kd1intdeg1r1gevalvpddspi1snrt1fynt1fdenaach1aigsayafni1qggtemnveekiasg1nd  
snvhvdfm1gssd1tiygi  
fedgske1vfengnwastf  
>tr|D2N8L6|D2N8L6\_STAA5  
mskkdhssskyl1nsvkeageeskkknksnki1dvdrtyiepq1qf1skkpkddqvff1sr1nkpakykkdsn1s1yliyr  
1gkddasg1laaqmtyh1v1l  
amfpm11f1t1l1pffnik1qsqitnm1snapaetst1k1svigdit1qnssg1l1sig1l1aiwsasngmtaimnsfnvay  
dvedsrngiv1k11svvft

Tsompanidou\_et\_al\_Supplemental\_FASTA\_File

vvmgvvfvvalalptlgsvishf1fgplgfdeqvkwi fnlirivlpiiiiifivfivlysvapnvkklksvlp gavfts i  
iwlagsfgfgwyisnfgny  
sktygsiagiiii111wlyitsfiiivgaeinaiihqrsvikgktpeeaalehddnknhynentryeydedtnathqerty  
hvdehpsdtypeddknikd  
kivdklkkd  
>tr|D2N8L9|D2N8L9\_STAA5  
mthkyistqml iifftalmianfyi ffekigfllvlllgcvlvvygylf hkingllafwigalliaftllsnkytii  
lfvfllllivrylihkfkp  
kkvvatdevmtspsfikqkwfgeqrtpvyiykwedvqiqhgigd lhidltkaanikenntivvrhilgkvqvilpvnyni  
nlhvaafygstyvneksyk  
vennnihieemmkpdnytvniyvstfigdveviyr  
>tr|D2N8M0|D2N8M0\_STAA5  
mnyveryieqflratvrnnikhylmldek mknlddymrylitkkeqlsklidslmltlenkyidiaesfqiqcareinn  
geienikselnkveayyaq  
ietqiqtstekiatektsylinymnava  
>tr|D2N8M1|D2N8M1\_STAA5  
mivkteeelqalkeigyicakvrntmqaatkpgittkel dniakelfeeygaisapihdenfpgqtcisvneevahgips  
krviregdlnidvsalkn  
gyyadtgisfvvgesgdpmkqkvcdvatmafenaia kvkpgtkl snigkavhntarqndlkviknltghgvglslheapa  
hvlnyfdpkdktlltegmv  
lai epfissnasfvtegnwafetsdksfvaqiehtvivtkdgpil ttkiee  
>tr|D2N8M2|D2N8M2\_STAA5  
mndqwykhligartiktgiaifltavfcma ldtpiyailtavvtieptakaslikgyrrlpatvigagfavlf ty lfgd  
qspftyalsatftilfctk  
lklqvgtnvavltslamipghdayifnflsrtltaiiglvtsglinfmvfppkyggveeklsktdalmyklfynrcqe  
lilsrlqsdkseayknif  
nlngqvetlisyqrde lsyhkkkecdwkllnqltkraytrlfithlsniy lpkntrvnfsgdekmal lkissikdif  
ydgskreddsvetlrsti  
kaleisgenqikshilyevlmiyrll dnrya  
>tr|D2N8M3|D2N8M3\_STAA5  
mqhekmdernl tmnstkvilkdasy lshksitfilkdvveednkiyyfdtsatfedqevfefal fdsdmdnlkhie  
ydnpvteiyfi epdlhfti  
idfngellciyidfdsglrhsnmatesgislrinvaksdftkfinelaslh  
>tr|D2N8M4|D2N8M4\_STAA5  
mheltyhfm s dkl nlysdignialrqrakkrnikvnveinetegitfdec diffiggsdreqalatkel skiktp l  
keai edgmpgl ticggyqf  
lgkkyitpdgtel egil dfytesktrltgdiviesdtfgt ivgfenhggrtyhnfgt lghvtfgygnndedrkegih  
yknllgtylhgpi lpknye  
itdyll ekacerkgipfepkeidneaekqakqvlidranrqkksr  
>tr|D2N8M5|D2N8M5\_STAA5  
mrqwtaih laklarkasravgrgtdlpgqiarkvtdilrklaeqvddivfisgtngktttsnlightlkanniqi ihn  
neganmaagjtsafimqst  
pktkiavieidegsiprvlkevtpsmmvftnffrdqmdrfgeidimvnnaetisnkgiklllnaddpfvsrlkiasdti  
vyygmkaahahefeqstmne  
srycpncgrllqdyihynqighyhcqcgfkreqakyeissfdvapflhlnindekydmkiagdfnaynal aaytv lrel  
glneqai kngfetytsdng  
rmqyfkkerkeamin laknpagmnas lsvgeql egekyvis lndnaadgrdtswiydadfeklskqqieaiivtgtrae  
elqlrlklaevvpiiver  
diykataktmdykgftvaipnytslapml eq l nrsfeggqs  
>tr|D2N8M6|D2N8M6\_STAA5  
mlsknllea lndqmnheyfaahaymamaaycdkesyegfanffiqakeerfhgqkiynyindrgahaefravsapkidf  
ssiletfkds l sgeqevtr  
rfynlseiarqdkdyatisflnwfldeqveeeamfethinyltrigddsna lylyekelgartfdee  
>tr|D2N8M7|D2N8M7\_STAA5  
miqdafvaldfetangkrtsicsvgmvkvidsqit etfhtlvnpqdyfsqqnikvhgiqpedvenaptfdyvfpy mmqfi  
adlpvahnafdmvnlhq  
siqni glptpnl tyfcsyqlakrtvdsyryglkhmmefyql dfhghhda lndakacamitfrllknyenl tyvtniygkn  
lkdkg  
>tr|D2N8N0|D2N8N0\_STAA5  
mqaiakndiktgtvvd l theghgvkidrfpifipqalineqieyki ikvkknfaigkllnintrsenrvappciyyerc  
ggcqlgh l syeaql emkke  
qvinl fqrkahfdnski ndtvgmtdpwrnksqipvgkneqnevimgfyrqrshdiidmescliqdsqh qevmknvksi  
lkdlnvsiyqeqlkkg lmr  
hlvvrtyhtdemmvi fvtngkkwpqnavvekil dafpnvtsikqnindshsnvimgrqsitlygkdtiidqltdstfk  
isdqsfyqinseqtekl yn  
kaieyael tgnev l dtycgtgtiglymaphakhvygvevpsaiedaqqnatinqc nnttfvcgkaeevilqwaaggik  
pdvvmvdpprkgcdefiq  
tlltlepkri vyiscnpatqqrda lllsekyqleevtpvdmfpqtthvetvalfnlk



Tsompanidou\_et\_al\_Supplemental\_FASTA\_File

>tr|D2N8N1|D2N8N1\_STAA5  
mrkrariinyntsgkeqfrelpdaliklekagyetsayatekigdatleeramhenydvliiaaggdgtlnevnngiae  
kpnrpklgvipmgtvndfg  
ralhipndimgaldviegthstkvdigkmnryfinlaaggqltqvsetpsklksivgpfayyikgfemlpqmkaavl  
ieydgntvfggeallfflgl  
tnsmagfeklvpdaklddgyftliiveksnlaelghimtlasrgehtkhpkiyekakainissftdlqlnvdgeyygkl  
panflnlerhidvfpndi  
vneelinnahvddnliee  
>tr|D2N8N2|D2N8N2\_STAA5  
mvadldaieglfisievil111tlfivhvngkninfinalaliilrqtv  
>tr|D2N8N3|D2N8N3\_STAA5  
mhfetviglevhvelktdskmfspahfgaepnsntnvidlaypgvlpvvnkravdwamraamalmeiateskfrkn  
yfypdnpkayqisqfdqpi  
gengyidievdtgkriqtrlhmeedagksthkgeyslvdlnrqgtpieivsepdirspeayayleklsriiqytgv  
sdvkmeegs1rcdanislr  
pygqekfgtkaelknlnsfnyvrkgleyeekrqueellnggeigqetrrfdestgktilmrikegsddyryfpepdivp  
yiddawkervrqtipeipd  
erkakyvnelglpaydahvltltekmsdffestiehgadvkltsnwlmggvneylnknqvelldtkltpenlagmiklie  
dgtmsskiakkvfpe1aak  
ggnakqimednglvqisdeatllkfvnealdneqsvedykngkgkamgflvgqimkaskgqanpqlvnqllkqeldkr  
>tr|D2N8N6|D2N8N6\_STAA5  
mltmgtalsrqvdanwqiyimiavyfliliiigfygykqatgnlseymlggrsigpyitalasagasdmsgwmimglpgsv  
ystgl1samwitigt1lgay  
inyfvvaprlrvytelagda1tpdffknrlndknnv1kiisgliivfftythsgfvsggklfesafgldyhfglilv  
afivi1fytffggylavsit  
dffqgvim1iamvmvpiavamnlngwgtfhdvaamkptnl1fkg1sfigiis1fswglgyfgqphiivrfmsikshkm1  
pkarr1giswmavg1lgav  
avg1tg1afvpayhik1edpet1fivmsqv1fhp1vggf1laailaa1mstissq1lvtsss1tedfyklirgeekakth  
qkefvmigr1sv1vvaiva  
iaiaawnpndti1nlvgnawagfgasfsv1v1falywkg1tragavsgmvsgalvviw1awikplahineifglyeiipg  
fivsvivtyvsvsk1tkkpg  
afvetd1nkvrdivrek  
>tr|D2N8N8|D2N8N8\_STAA5  
mad1ssrvnelhd1lnqsyeyvednpsvpdseydk1lhelikeehpeyktvdsptvrvggeaqasfnkvnhdtpm1  
s1gnafnedd1rkfdqri  
eq1gnveymcelk1dglavslkyvdgyfvqgltrgdgttediten1ktihaip1kmkep1nvevrgeaymprsflr1n  
eekekndeq1fanprnaaa  
gs1rq1dsk1takrklsvfiysvndftdfnarsqsealdeldklgfttnknrarvsdidg1leyiekwtsqres1pydid  
g1vikvnd1dqddemgftq  
ksprwajaykfpaeevvtk1ldiel1sigrtgvvtptailepvkvagttvsras1hned1ihdrdirigdsvvvkkagdi  
pevrsiperpedavtyh  
mpthcpscghelvr1egevalrcinpkcqaqlveg1ihfvsrqamnidglg1tki1qqlyqselikdvadifyl1teed1lp  
ldrmgqkkvdn1laaiqqa  
kdns1en1lfg1g1rh1gvkasqvlaekyetidr1lvtvteaelveihdigdkvaqsvvtylenediraliqklkykhvnm  
iykgiktsdieghpefsgk  
tiv1tgk1hqmtrneaskw1tsggakvtssvtkntdvviagedagsk1tkaqslgieiwteqqfvdkqnelns  
>tr|D2N8P0|D2N8P0\_STAA5  
mydikkrhifk1dpakhisdd1daicmsqtdaimiggtddvtednvihlmsrvrryplplvleisniesvmpgdfyf  
vptv1nstdvafhngt1le  
alktyghsidfeevi1fegyvvcnadskvakhtkantd1tted1eayaqmvnhmyr1pvm1yieysgiygdvskvqavseh1  
tktq1fygggisseqgate  
maaiadt1ivgd1iykdikka1ktvkikessk  
>tr|D2N8P3|D2N8P3\_STAA5  
mkrnfpk1ialis1fs1sitpianaesnsnikakdkrhvqvnvedksvptdvrn1aqkdylsyvts1dkiynekasyl  
gepfkiykfnkksdgnyyf  
pv1Integnid1yivt1spkvtkdssssskytinvssflskalnqykddqitiltnskgyvvtqnhkaklv1ktr1ledkk  
vkktes1ptg1nnvtq1kqk  
asvtmptsqfksnnytyneqyvnl1enfki1retqgnngwcagytsa1lnatyntnkyhaeavmrflhpn1lqqqqfqtg  
1tpremiyfgqtqgrsq1  
1nrm1tynevnd1tknknkia1lgsrvesrngmhaghama1vgnak1dngqevii1wnp1wdngfmtq1dakn1vipvsngd  
hyqwyssiygy  
>tr|D2N8P4|D2N8P4\_STAA5  
meqfel1fs1dkfkc1nseatyy1ni1iegewhpq1lndsp1kfil1stsddsdyicky1ntehkq1tlynknssivieifip  
ndnk1il1timntealgtsp  
rmtfikhk  
>tr|D2N8P7|D2N8P7\_STAA5  
msk1qd1v1vqemkvkkri1dsaeime1kqfiknyvqshsfiks1vl1gisggqdst1vgkl1vqmsvnelreegidctfiav  
k1pygvqkdadeveqalqf

Tsompanidou\_et\_al\_Supplemental\_FASTA\_File

iepdeivtvnikpavdqsvs1keagiv1tdfqkgnekarermkvqfsiasnrqg1vvgtdhsaenitgfytkygdgaad  
iapifglnrqgrq1lay1  
gapkq1yektpad1eddkpqlpdedalgvtieaidnylegksvtpreekvienhyirnahkrelaytrytwpk  
>tr|D2N8P8|D2N8P8\_STAA5  
myqledds1mlhndlyginmaesywndniekmavfdlyfrkmpfnsgyavfnglkrvidfiehgfsesdleylksigy  
kddf1sy1kd1kftgsirs  
mgegelcfnep1l1rveapliqaq1iet1l1nivnfht1ittkasrirqiasndklmefgtrraqeidaalwgaraayig  
gfdstsnvragk1fgipvs  
gthahafvqtygdeyvafkkyarhkncvflvdtfht1ksgvpnaikvake1gdkinfvgir1dsgdiay1skaarm1d  
eagftetkiiasnd1deet  
its1kaqgakvds1vgvgtk1itgydqa1gavyk1vaienedgsysdrik1snaekvt1pgkknvyri1nkk1tgaegd  
yit1enenpydeq1k1lfh  
pvhtyk1mfiks1feaid1h1hniyengk1vyqmp1tedesreylaq1qsiwdenkr1f1npqey1pvd1skacw1dnkhk1rife  
vae1hvkemeedne  
>tr|D2N8P9|D2N8P9\_STAA5  
mlfkeaqafienmykechyetqi1nkr1hdieleiketgtythtee1iygakmawrnsnrcigr1fws1nvidardvt  
deas1f1ssityhitqatne  
gk1kpyiti1yapkn1gk1fnnq1iryagy1dnc1gdpae1ketr1anh1gwkg1gtn1fdv1p1iyq1pnes1vkfyeypts1i  
kevpi1ehd1hypk1r1k1n1k  
wyavpi1ism1d1k1iggiv1yptaf1ngw1ymvte1igr1n1fid1dyryn1lek1vada1f1fdt1k1nns1fnk1dra1vel1nyavyhs  
fk1kegvs1vdh1taakqfe  
lfernea1qqgr1qvt1gksw1lapp1spt1tsny1hhgydnt1vkd1pn1ffy1kkkes1nan1qcp1fh  
>tr|D2N8Q0|D2N8Q0\_STAA5  
mq1yy1gpkgt1fsylacr1qyfseneat1fqpk1sn1fevikavadd1dasig1v1piensi1egt1nivada1laqq1dv1fahgeir  
ldin1faly1ngns1nt1sidik  
kvys1apa1sqt1tny1ihq1hfdy1dst1iqs1l1tkieng1vaai1apl1gsgeay1gft1id1thiedy1phn1vtr1flvik1nqq1f  
dnats1mf1lit1pmy1dkpg  
llas1v1nt1fal1fn1n1swies1r1ktq1lgmyr1ffv1qadsait1tdikk1via1ilet1dfk1vem1igafn  
>tr|D2N8Q1|D2N8Q1\_STAA5  
mayfn1qh1qsm1skry1l1tff1sk1kkk1pf1stg1q1ig1il1gp1l1f1l1t1l1ff1hp1qd1pwk1gyv1l1ait1w1iat1w1itea1pi  
aats1l1piv1l1pl1gh1itp  
eqvs1ey1gndi1f1fl1gg1f1aiamer1wn1htr1valti1n1lig1ast1kill1gfm1vat1g1f1sm1fvs1nta1vm1imip1ig1ai  
ikeah1d1qeant1nqts1iqk  
feks1v1la1igy1agt1igg1gt1ig1tpp1i1k1gqym1qh1fghe1sfak1wm1iv1g1ipt1viv1l1git1w1yl1ry1vaf1rhd1k1yl1pg  
gq1t1k1k1del1gk1mky1ee  
kvvq1t1fv1las1l1wit1ref1l1kk1wevt1ss1vad1gtia1if1si1l1fi1pak1ntekh1rri1d1we1vake1pwg1vl1l1fgg1al  
akg1ses1gl1akw1l1geq1k  
l1ngv1spi1l1viv1iti1fv1fl1tevt1snt1atat1mil1pil1at1svav1gv1hp1l1l1mapa1aama1ncay1ml1pv1gt1pp1nai1if1g1sgk  
is1ik1qmas1vg1fw1n1l1sai  
i1i1l1vvy1vmp1iv1lg1idin1q1p1k  
>tr|D2N8Q2|D2N8Q2\_STAA5  
myin1mk1dy1gt1g1ink1tkd1tra1qra1nhgr1ck1ptt1vy1ipk1gty1dick1p1tiy1gnt1l1l1dnet1l1rrch1sg1p1l1kn1gh1rf  
g1fyrg1yng1hsh1ih1k1g1gk1f  
d1mng1vs1yp1n1tam1c1ghaedi1q1lig1vt1knv1sgh1aid1ac1ging1ly1knc1sfeg1fdys1ger1fy1seai1q1ldi1qv1pg1afp  
k1fg1ttd1gti1tkn1vied1cy  
f1gp1sel1pem1gsw1nra1ig1shar1hn1ry1eni1hir1nni1fedi1q1ya1tp1ky1daf1i1n1kf1ince1ggi1ry1l1gv1rd1g1knaad  
v1mt1gk1d1gs1qagi1nm1i1g  
ne1fk1gsm1skd1v1hvr1nyn1nv1khk1dv1l1vgnt1fn1st1qsi1h1led1id1tv1f1sp1veagi1qv1tt1inv1de1ikk  
>tr|D2N8Q3|D2N8Q3\_STAA5  
m1thra1l1vvd1sy1dfi1add1g1l1tc1gk1pg1q1nied1fiv1sr1ind1fn1y1qd1h1ff1lmd1l1hy1l1hd1ih1hes1kl1f1pph1niv1d1tsgr  
ely1gk1vgk1lyet1ika1qpnv  
h1fid1k1try1ds1ff1gtp1lds1l1rers1inq1veiv1gv1ct1dic1vl1hta1isay1n1gyk1is1vpa1eg1vas1fn1qk1ghewa1lah1fk1n1lg  
ae1ve1qh1v  
>tr|D2N8Q5|D2N8Q5\_STAA5  
m1ni1ieq1k1fy1dsk1aff1nt1q1tkd1is1fr1keq1k1k1ska1ksy1es1dile1aly1td1lg1kn1kve1ayate1igit1ks1ik1nar1kel1kn  
wt1kt1kn1vd1tp1ly1l1f1pt1ksy  
i1kke1py1gt1v1ii1ap1fn1yp1fq1lv1fep1liga1ia1ag1nta1i1k1psel1tpn1var1vik1r1inet1fd1any1ie1vie1ggi1eet1qt1l1h1  
p1fdy1v1fft1gs1env1gk1iv1yq  
a1asen1lv1pvt1lem1gg1k1sp1iv1det1an1kvas1eric1fgk1ft1nag1qt1cv1pady1il1vhes1vk1dd1lita1l1skt1l1ref1yg1q1ni1qq  
sp1dy1gr1iv1n1k1hy1hr1ts1l  
l1nsa1qm1n1iv1fg1gh1s1ded1erie1pt1l1dhvt1nds1aim1qee1if1gp1il1p1ilty1qs1l1dea1ia1fi1h1qr1pk1l1s1ly1l1fs1eden1at1q  
rv1ine1l1sf1gg1g1ain1dt1lmh  
l1an1pk1l1p1fgg1vg1as1gm1gry1hg1kys1fdt1f1the1ksy1ik1str1les1gv1h1ppy1kg1k1fy1ik1aff1kn  
>tr|D2N8Q6|D2N8Q6\_STAA5  
m1tngy1igs1y1tk1ng1k1gi1yr1fel1nen1qs1rid1let1g1fe1easty1lvr1nnev1ly1gin1ke1ge1qc1gvas1k1idd1nge1l1h1l1nk  
l1ssk1agt1gc1y1vs1ised1kry  
l1feav1yg1agi1r1mye1l1nt1dt1gei1r1li1qe1lah1df1pt1g1ther1qd1h1pah1y1inq1tp1dg1ky1av1td1gad1riv1ty1k1fd1d1ng1fe  
fykes1l1fk1ds1dg1tr1hie1fh

Tsompanidou\_et\_al\_Supplemental\_FASTA\_File

dngkfayvvhelstsvsvaeyndgkfeelerhltipenfdgdtklaavrshdqqlfvsnrghdsiaifkvlndngqhle  
lvtitesggqfprdfnias  
sddllvcaheggdsvvtvfernkctgkitlcdntrvasegvcvif  
>tr|D2N8Q7|D2N8Q7\_STAA5  
mtsyeeedyrnvprednnpmgrgmikwapfvicnliknli  
>tr|D2N8Q8|D2N8Q8\_STAA5  
mankqveismaewdmniiwnkksvsaneivveiqrknevsdktirtlitrlykkeikrykynniyfysiiikeddikm  
ktaktflnklyggdmkslv  
lnfakneeinnkeieelrdilndisk  
>tr|D2N8Q9|D2N8Q9\_STAA5  
makllimsivsfcfifllllffryilkryfnymlnykvwyltllaglipfipikfsffkfnlnnqeptvesnshlnpn  
inttkpvhefttdihkfnw  
dsidnictviwivlviilsfkflnslllylkyllkqslylnekekdkinkilfnhqykrnivirkaesihspitfwygyki  
ilipslyfksindkklyi  
ilheyahaknrtdlhlifhifsiansynpliqivkrkmihdneveadrflnninknefsyaeaaimdsvlktssfnkn  
ilshsfngkksllkrrlin  
ikegnllkqsklilificiftffimiiqsqflmgqsltdynykkplqsdyqildesknfgsnsgsfvmysmkdkyyiyn  
ekesrkryspdstykiyla  
lfgldrhiisdksnrmswnhnhypfdswnkddqldntaiqnsvnwyferisnqlsknytsdqllqlnygnknlgyskaywl  
edslkisnleqvivlknmm  
eqnnhfsknekkqlssllirknenelygktgtgivingkyngwfvgyvitnhdkyfsthlsdekasgenakfinek  
lkemgvlngq  
>tr|D2N8R0|D2N8R0\_STAA5  
mklilliaialvlsacnstsshakeinnlekkynanigvyaaltdksgkevknadkrfayastskainsailleqvyn  
klnkkvhinkddivayspi  
lekyvgkditlkelieasmkysdntankiineiggikkikrllkllgdkvtnpvryeielnyyspkskdtstpaafgk  
tlnklliangklskknknfl  
ldlmlnnkngdtlikdgvpkdykvadksgqaityasrmdvafvypknqsepiilviftknkdnksdkpndklistaknvi  
nkf  
>tr|D2N8R1|D2N8R1\_STAA5  
mipnnapdekyetdyrkiprkylnpkipqgrgkiwqafatlpqqfeileqiikdqniekpllthdsldnlldqifqi  
kiqndelctisywedgnis  
kytgkilkdeisntfsfsdtnnniynlnnanvcsit  
>tr|D2N8R2|D2N8R2\_STAA5  
mdnkielekledinklqgykvtyqyatainikdnmnpwfekieeilnvkgvirilspdnppvnydywilpgrykrhtke  
yheklekfllekfatnanin  
dglfdqnnihgykykkyiftphieithentlnlffltlftifngtffvieiiedlesinfgsdlystfscvdkkiyplinq  
eknnrqrqyqlygnrhckn  
irdvsrqinriikinskdi feykvsknmgevyylaneneftddpfyedvkiqewlvnapifsfegskkhfrqdgysdny  
infnkasvfvvwmdeqee  
dvlekcsqmalynssanfffletmlnelqlygyqqynlngkkeaalyfrqwilnfkrsiaiiyrteillpslylylylkn  
ndfksppyieelnkeelsl  
ieleqsykeeerseklnkllliisllsiqvvieffsdkninfnisimilimillevfrkr  
>tr|D2N8R3|D2N8R3\_STAA5  
mekfnrqeqllqllhaerkvktekkvdkaindlvqknkeinfnivskhskvskatlyknnkirkkieklreqnreivhkn  
kndgkdalisslkrkvns  
ekekkmlkeesvlysrlyedi  
>tr|D2N8R4|D2N8R4\_STAA5  
msipinlptnstminelctlsrtnikgevliteiyddyffkndewhitafnkfkqfqsiknyrdkrknvffrikskn  
lnlefkyflklivkedws  
lsnlfntgavklnkiakffnevypnlnslldcintlekhwnltennipikrrsstivfgdyeykslasflknmyin  
likfidkreewekdkwdir  
nlekyglsynktltgnynlfekiesikmrelakkylnrlitgdiafatarfyirvltrffqnisknketrnslneldrc  
hieayieflefyaankhlq  
stknfvreektirrfndiitqnyaiapyqdirfliypqdlpkhekknssqidyipdfvleqlfehindhkdlipvww  
iafktglrisdvltlqnn  
lakvngkysiidtiktfvkghripidnkadiavliadskskstkdnnpnyifaiykgkrkgmpftqhmvrhlnhl  
sktkniideggeifhfkth  
qfrhtyavkllnggadiltiqellahsspemlryakllddtkrkafesvidqgafsfvdvgkikniqhsselekaals  
lwqehklnamdnpygtcha  
rlsgdcpymeappcltcnsgkpkcdlaigfsdlvkeyelhkstvkzielaknnnrqdmvekhinilnkyeeilgnikd  
gnifgrsnrikv  
>tr|D2N8R5|D2N8R5\_STAA5  
mkivevkskngtnfmi ldgnnepivdavrylkyldsvkkslntkktyayaalnffvyleskkicykevsvdnfvdfirwm  
ktpfeyenvlsyhrkeksi  
spktinlmtvvsnfidylyrskklvnyfydfmhmeskyskkyksfmhhinkdyrtlknllkvepkkkievltnaevkk  
lleannirdkflilqllye  
tgllrigevslriddikfdfrkghqivlknrfndngtylktgerkifisqslidlyddyvyeiidelisicsdylfvkikg

Tsompanidou\_et\_al\_Supplemental\_FASTA\_File

rnvgeamnysdiyslfrkrl  
khktsinvhphlfrhthatvfynekdikqvqerlghsniaqtinlyvhpteediredwnkvkhqfvfnkge  
>tr|D2N8R6|D2N8R6\_STAA5  
maelnirlealqyagpvevkfyngfvdsvrltiyridainyeidgyvynqqqrqkisifdildivllp  
>tr|D2N8R8|D2N8R8\_STAA5  
mqgvtstdimtfrgshfelgvktgkwlqptp11knrekewkkrvprfdidvnytyqifqtyapqiweelmglsilkmptr  
qiilnfgghyrftdlkesgc  
tvfqqkdfmvrnydyhpatydgryllyqptdsglaqigpvsrvtgrmdgmnesgltmgynfmhrkkpangfvcymigrli  
lencrvkeaiql1keiph  
rssfsyilmkdslnhaivevtprsidvrydnictnhfeilthenrnytkeskerlartisqtnndldmttafk1fnnpqy  
eiysklfkswsgtihtsm  
hpetltayftlgenappeidfkswldgqdl1nithftgnidtdltfank  
>tr|D2N8R9|D2N8R9\_STAA5  
mkisdkrsktrgyaidmnpfhenkkt1tiempdkmikrldissgagsvrisdvd1entsiqsingevviknsnldaldsk  
tnnsptyisksnik  
vvigm1qidksqikqsi1ndhgdiefknmpskvdakastkqgdirfkydskpedtilk1npgtgdsvvknktfingkv  
ksdsv1efytidgnikve  
>tr|D2N8S0|D2N8S0\_STAA5  
mkp11pksitmdrgkefalfeqiede1ncsiyfsdlgcpyqrgsienvngllrqyypkgtdfanitqksldeavkqintr  
prmi1fdyksseem1kyhvs  
tqncepilndcvrhepvn  
>tr|D2N8S1|D2N8S1\_STAA5  
mkkrrkrke1dyktr1aiaky1ndglni1qiskilgrddavlyrevnkrsvdgvynp1laedaikrsisdeqvakrrr  
1ndetkayieek1slkws  
rqiasqiekdtghyisyptiyri1nglvkvdvkrdmrqagkkykssekrkl1dvgarvikyr1kky  
>tr|D2N8S2|D2N8S2\_STAA5  
mrrwfv1ilg1l1l1sacgqkydkeidev1k1ekeskeetkdsnsrkiertsyfkydggkvitvtyl1pfkdsdvttk  
iyk1nettekyekdynqda  
ekyeksnkpeyeennmkk  
>tr|D2N8S3|D2N8S3\_STAA5  
mkqkiimft1vtv1lfcav1igyq1pkqqvkmknqied1qeeqri1rdkngel1sklvkrqsktvisdeekqirevsnf  
vkqmfemkkessfkskapq  
ikp1vtkdydyt1fkdsdkdyd1yddi1tvndi1hvyfdtydpkkdsykvfvqfderietdgd1kiehrqtsaq1dl1vrtse  
gwr1dn1krfn1kplgr  
>tr|D2N8S4|D2N8S4\_STAA5  
mvnkdkdiakkvigktpigvkl1klakvimi1cvvaftfpv1vmf1lapdsnknddagctvsngnvssngidkfnenakg  
gk1legkgkei1q1aeknk  
pvn1fmai1asesqwgkgenatrqnnp1svmgsksihdstyptied1nagakn1ydyviskgl1dtpkkipkyapvgas  
ndpnmnarwiptvek1mk  
d1ggsevktscsngkgsik1fngk1phwsnddpkgk1lytagqctwyaygm1rqmkgpvstywhdahkwndrakaegykv  
dknpeppgal1f1aeqgaggh  
dghyghvavv1gvsdggktf1itemnwega1fkvnert1kmtdgysf1hdke  
>tr|D2N8S5|D2N8S5\_STAA5  
mkhksvyl1cf1il1pi1l1tsvsayavnpvgpshavkpkiekyd1shyrsiysek1gdwnp1fgqeeisrqinnvsdfff  
smtki1agvt1dya1en1fq  
ldv1ndfadk1gdfvgdi1yqk1l1sn1al1t1fi1vcfnaf1i1fsvqgnareak1raf1imcl1igfvgvilanagn1irgtn  
n1gkdl1n1i1mnst1ssidg  
nid1y1hensgm1h1rnq1lfdmt1yrt1y1vmnygtvdeke1kakgkdr1dn1lkqdfskkgeektke1iekev1kenginnk  
ymtggyvf1gk1laisv1gf1i  
it1l1fmsiv1fl1sisfak1ifstfal1fl1fl1v1fswiv1s1fipgf1el1svfsafakt1gyi1ilsacmt1fl1v1v1gl1cik1lansf  
iepn1sqnay1fl1nsif1i1vi  
1fvmykkraqi1infvsrgnis1fspsaigagvm1nrtqerfnk1rheqaqkkakrenqrde1tpp1qndndnd1rrrqdk  
pmp1l1finkenqkngk1rre  
qqesmngndvksasvesnannyskppkasqqehqv1retrqrkdi1rpsqvvnqpl1nnenhsin1rkeqksvqtay1dtdvq  
krq1qnatq1nq1trqsgnr  
nqp1trnsqskdr1l1keqkdi1nkhgk  
>tr|D2N8T7|D2N8T7\_STAA5  
mkkfff1g1l1fvv1fftaati1wfsydknkygk1yqdk1fkddaf1dnvsin1dstel1rikrgnq1frvkydgdnd1liggv  
nss  
>tr|D2N8T9|D2N8T9\_STAA5  
m1y1nkyker1vtsvri1qnrvv1fil1flicsf1gvl1iglyqrhtktvd1sn1leindik1nekfdkkyevnrkik1fdrfkf  
y1nska1hpd1l1tvkvrek1dni  
vk1gi1l1vrdek1ihtnfdgg1gispinnai1en1lgfgykrtkvgn1dfssvki1drdn1k1l1n1lyqd1leikrie1ffsk  
>tr|D2N8U2|D2N8U2\_STAA5  
mk1eh1tkkygsnv1l1ndi1dfdfgdsr1v1gl1gkngvgk1ttvmkvmngni1k1fdgkvd1dnadn1g1fl1iehp1klydnksg  
l1yn1kl1faq1l1gk1gfdkay  
tdk1i1da1fgmrpy1k1kkvkkysmgmkqk1ai1avs1mnkpk1fl1l1deptngmpdgs1dvl1ttik1slvne1ldmril1isshk  
l1edielic1drav1l1rdghf

Tsompanidou\_et\_al\_Supplemental\_FASTA\_File

vqdvnmeevasdttivtdhkdfrtekylaehfqlnvdkadghlminaqknyqvilkalseldiypkyietrkslr  
dtyfninrggdk  
>tr|D2N8U3|D2N8U3\_STAA5  
mkallirnflkrrytliiyvllltlypiyimldstckffylqsfsptiliwilldaghlfrlnrrlgndsyyfymslp  
vskkqllnanyitcivltl  
igtlvistlayeadviepnsiyfstayafaisnflsipiafsqfelerrvkvpvygiyvftiilvpflfsiaivlvnyfv  
lsqssfpdlysylnigfl  
iisivilivnyfkqlnkintrkfkgsr  
>tr|D2N8U4|D2N8U4\_STAA5  
mnaielesnvnyssdqfnlknisfkvpqgfvgtgfigrngagkttiirlimdlyqqpsgvirvleedmdlnpiaiknrigfv  
yaenyfnerwttkqlekmi  
apfyrkwdhqvfefylekfdlpinksiktfstgmkmklslavafshhaelyifdeptsqldplarnelleiiqqeliden  
ktifmsthiisdlekiady  
iihlsdgevilngsgeqlqryqvvsqaledldeelaalliyeekrtgfigltehaqvfeilghkvnittpsienlmv  
ylekrkpkkyheniklmeeg  
f  
>tr|D2N8U6|D2N8U6\_STAA5  
mkhltkifvalaiilfivgyylqatnhesqgiklllaaimfmicafisrsndrrknnk  
>tr|D2N8U7|D2N8U7\_STAA5  
mnpiaqslneqlqqs natafamlsd lqnmfypkgilqsaeaksttynatigmatnkdgkmfassldamfndltpdeif  
syappqgieerdlwqqkm  
lrdnpelesidnmsrpivtnal thgls lvgdlfvnqddtillpehnwgnylvfntrnganlqtypifdkdghytttdslve  
alqsynkdkvimi lnyppn  
ptgytphthkevttiveaikalankgtkviavvddayyglfyedvytqslftaltnlhnailpirldgatkeffawgfrv  
gfmtfgtsdqttkeveak  
vkgli rsni ssgplptqsavkhvlknnkqfdkeieqniqt lkeryevtkevvyadqyhshwqaydfnsgyfmaikvhdv  
peelrkhliekysigvia l  
natdiriafscvekedi phvfdsiakaidlr  
>tr|D2N8U8|D2N8U8\_STAA5  
mkfkslitttialgvlstganfntneasaaakqidkssslhhgyskiqipytitvngtsqnilssltnfnkqqisykd  
ienkvksvlyfnrgisdid  
lrlskqakytvhfkngrkrvvd lkagihtadlintsdikaisvndskkqvkdkeakanvqvpytitvngtsqnilsnlt  
fkknqqisykd lennvksv  
lksnrgitdvdrlrlskqakftvnfkngrtkkvid lkagiytanlntgdiknininvetkkqakdkeakannqvpsinln  
gtttiqsnlafsnkpwt  
yknltakvksvlksdrgvserdlkhakkaytyvfknngkrvihlnsniytanlvhakdikkievtvktgskakaeryvp  
ysiaavgstpnlsdlkfk  
gdsrvsystitkksvskhdrigirelkyakkatyvhfkngrtkkvinlnskisqnlflfvkdikkidvdvktgskak  
adsyvyptiavgstspia  
sklkl snkqligyqdlkknkksvlkhdringidie lfkakqakytvhfkngrtkqvvd lksdiftrnlfsvkdikkididvk  
qhtksnkalnkvaniatkv  
kfpvtingfsvnvsnefalfhphkittndlnaklrlalasdqgitkhdiglsertvykvyfdgsskfvdlkaakqdkv  
fkadikkvdieikf  
>tr|D2N8U9|D2N8U9\_STAA5  
mvkktksntlkaatlalalligaltdnsakaeskkddtdlklvshnvymlstvlypnwgykradligqssyiknnd  
vvi fneafdngasdkllsn  
vkkeypyqtpvlgrsqsgwdktegssystvaedggvaivskypikekiqhvfksgcgfdndsngkfvytkiekngknvhv  
igtthtsedsrccagghdrk  
iraeqmkeisdfvkkknipkdetvyiggdlvnkgtpefkdmklnlnvndvlyaghnstwdpqsnsiakynypngkpehl  
dyiftkdhkqpkqlvnev  
vtekpdpwdvya fpyyyvyndfsdhypikaysk  
>tr|D2N8V0|D2N8V0\_STAA5  
mikqvcknitacs lalstaltvfpassyakinseikqvseknldgetkmytrtattsdsqknitqslqfnfltepyndke  
tvfikakgtigsglrllep  
ngywnstlrwpgsysvsinqvddnntnvt dfapknqdesrevkytygyktggdfs inrggltnitkesnyseisyyqq  
psyrtlldqstsnkgvgwk  
veahsinmghdhtqrqltndsddrvkseifsltrngnlwakdnftpkdkmpvtvsefnpeflavmshdkkdegkskfvv  
hykrsmdefkidwnkhgfw  
gywsgenhvdkkeeklsalyevdwkthnvrfikvlnckeak  
>tr|D2N8V1|D2N8V1\_STAA5  
mknkkrvfiaslscalllisaanteansankdsdqtkkehvdkaqqkekrvndkdntpgpddigkngkvtkrtetv  
ydektnilqn lqfdfidp  
tydknvlvkkqgsihsnl k feshkeennsswlkypseyhvdqvknsrkteildqlpknkistakvdstfsynsggkfd  
svkgvgrtssnsysktisy  
nqqnydtiasgknnwhvhwsvandlkyggevknrnddflyrnrtrstvenpelsfaskyrypalvrsgfnpefltyl  
sneksnektqfevtytrnq  
dvlknkpgihyappileknkdqrlivtyevdwknktvkvikdysdenkpykeg  
>tr|D2N8V3|D2N8V3\_STAA5



Tsompanidou\_et\_al\_Supplemental\_FASTA\_File

yaiigaqnddqgrlllfn  
tediinwhygeintelddfgymwecpdyfnvndqdvilicpqgiepkgdqfnniyqsgyilgkfdieklyehenfvel  
dngfdfyapqtf1dekgr  
vligwmg1peiyeptdnegwahcltiprvlnvengq1kqrpypaleklrhketalgyankftrklhpyegkqyeliidi  
lnddatevyfelrtsktss  
tliaynkrenkitlrdsgl1ptnvegtrstiletplkqlqifvdtssieifcndgervltsrifptedalgiiktste  
sgqvy1qftkyd1kdehk  
>tr|D2N8W9|D2N8W9\_STAA5  
mknisdia1agvskstvsrflnngsvskktsekltkiaehdyqpnqfaqs1rarqthligaiiprmnsyavdetikgl  
akqcqkyesqli1nytgl  
ieaeiqaletlarskvdivlmatditerhievinkmnvpivivgqqheqlhsivhddykagqiigewigqqgyqqvevf  
svsekdiavgihrkrgl1d  
qlakyqikpnihetnftyvqaqkdvavlenveqvdaavgatdialaaykyysdkkdvmpkphqiygfggdpmtqlvsps  
iktiyhnyfeagqcameei  
qqmlkkqmpysvtvdvni  
>tr|D2N8X0|D2N8X0\_STAA5  
maliggicyivinyikvklkyhdaldafgihvggiigav1taffqskkanpdiengfiytdvhiilvqilcvtavvi  
fsivmtfiiakviklitpl  
svteqetnig1dkivhgehayfege1nrfnkhiry  
>tr|D2N8X1|D2N8X1\_STAA5  
mnlndt1fmlct1lw1mtpg1s1fygg1vqsknalntvmqsmav1vtfvwitvgftisfgegn1wfgnweytf1nh  
vgfatqedisphipla1fm  
1fqmmfctiaisi1sgsiaekmfipy11fvviwta1vyspvahvwwgggwinklgvldfaggtvvhitsgvsglv1aim  
igkgnkhsestphnliit1  
iggi1fvwigwygfnvgsaftfdkiam1aftntvisasagaigw1leyf  
>tr|D2N8X3|D2N8X3\_STAA5  
mwmifsg1ivgg1lgfvmqrtrfcltggfrdmyvqknnkmfyalliaitvqsig1lilmttgilqipahsfpilgtvigs  
fifgigiv1agcatgtwy  
ragegligswialvlyavtaaitktgilkpvmkinqptvnnsdisqttgipfwglv1iltiit1flvrtlnkkvrva  
vpklkqrytgi1ryylfekar  
yhpfi1aaia1glial1awpmsastgrndglgittpsanlvhflitgetkfidwgvflvlgifigsyiaargsrefkwr1p  
dkitirnsaiggi1cmgfga  
svaggcsigng1vetatmtwqgwialasmi1vgvwtmshfiv1rpmkkvqqqsakvqqqtqiv  
>tr|D2N8X5|D2N8X5\_STAA5  
mil1q1nhisksfdged1ftdvdfevktgerigivgrngagkst1mkii1agvenydsngvskikn1klgy1tqqmt1nsn  
atvfeemskpfehikrmes  
likeetdw1skhandydsdykthmsryes1snqfeq1egyqyeskiktvlhg1nfseedfnkpindfsggqktr1s1aq  
ml1nepd11111deptnh1d  
1ettkwledyl1ryfkgav1i1shdry1fdkivtqi1ydv1al1gdvkryvgnyee1fi1qrd1ly1qkrmqeyesqqaeikr1et  
fveknitrastsgmaksrr  
kil1ekmeridkpm1daksani1qfgdrntgndvmhvkn1eigyqta1tkpisievskgdhia1igp1ngigk1stliktian  
qqka1ngy1tfgan1qigy  
ydkqae1fksskt1ldyvwdqypl1mekdirav1grf1fvqddvki1ind1sggekar1qla1l1m1qrdn1v1il1deptnh  
1didskem1eqal1qhfegt  
il1fvshdry1fing1ankvfd1tidggkmy1lgdyqyy1iekveeae1kahqeeqsvnvqaheksmeqssy1hnqkeqrreqr  
k1erqi1secene1iet1lett  
il1qideq1tqpevynnpqkane1ai1qkq1dseq1lehamskwee1lqq1  
>tr|D2N8X6|D2N8X6\_STAA5  
msienmrtygqrvyn1wikgvddviycgyqvgkqkind  
>tr|D2N8X7|D2N8X7\_STAA5  
mstnqt1fl1fvia1i1ltsvigivgrymsrqr1lksmvt1wqt1splesfirpnshfdyeyklykdkfeshslvddk1tws  
d1nmnai1fhkmnyn1taig  
emklyac1rgm1s1tnks11s1l1fndnaefrknvtyh1al1igktvyptfpdqitpvkrhni1fl1cpfl1pvisfavifinsq  
vgi1l1fl1mscl1fni1lsat  
1krtyed1lks1fyasv1lkqgytiskikhapqpevnfkqfrtarh1tsvlavvndedigamviklvkli1fml1dyvl1fhs  
iqksytthmnelkncfdyi  
aeldnhys1lamyrr1tecytepqiddsngdivf1selthpliadavandf1sqn1illtgsnasgk1stfmsiaini1las  
aiqtvtag1fvyqpgivft  
smanadd1v1sgdsyfmaelksikriveipdnqkiycfidei1fkg1tntteriaasesv1sfl1heksnfrviaathdielae  
1lkqryenyhfnevienn  
ihfdykikpgkantrnaie1l1kitsfpakiyerakdnvsng  
>tr|D2N8X8|D2N8X8\_STAA5  
mtkdil1lavetscdetsvsvikngrdi1sntv1sqieshkrfggvpevasrhvegitttinealvdadvsmididai  
avtepgg1ligall1igvnaa  
kalafaydk1lipvhh1aghiyanhieep1t1fplialivsgg1htelvmkdh1tfevigetrddavgeaydkvartig1n  
ypggp1qvd1rae1gedty1s  
fprw1ldkdsydf1sfglksavin1q1hnqrqknipi1eanvatsf1qnsv1ev1t1fkai1qackeygvqr1livaggvasnkg  
1rqs1ladqckvndi1q1tip

Tsompanidou\_et\_al\_Supplemental\_FASTA\_File

spk|ctdnaami gvaghylyqqgrfadlalnghsnidleesae  
>tr|D2N8Y0|D2N8Y0\_STAA5  
mnsllidtsnqplsvalmqndevlaeitttdskqnhsvqlmpaisqlfeqskiakqkl daiivaegpgsytg|rigv tvak  
tlaya|nvklygvsslka|  
aatidhtdkllvpvfdarrqavytgi fqwqngqlvtiledqymsiealrafledlnqpfyigkdtvklqddlqgdviaq  
lpnasvmyqli dkpsdvht  
ftpkyhklaeaernwinqknn  
>tr|D2N8Y2|D2N8Y2\_STAA5  
mrsdmikkgdhqaparsllhatgal ksptdmnkpfvai cnsyidivpghvhlreladiakeaireagaipfefntigvdd  
giamghigmrys lpsreii  
adaaetvinahwfdgvfyipncdkitpgmilaamrtvnpaifcsggpmkaglsahgkaltlssmfeavgafkegsiskee  
fldmeqnacptcgs cagmf  
tansmnc|mevlglalpyngtalaisdqrremirqaafklvenikndl kprdivtreaidafaldmamggstntvlhtl  
aianeagidydl erinaia  
krtpylskiapsssysmhdvheaggvpai inelmkkdgtlhpdrivtvtgk|rennegkeiknfdvihpldapydaqggl  
silfgniapkgavikvggv  
dpsiktftgkaicfnshdeaveaidnrtvraghvvi ryegpkgggmpem|aptssivgrglgkdvalitdgrfsgatr  
giaavghispeaasggpia|  
iedgdeitid|tnrtlnvngpedv|arrres|tpfkakvktgylarytalvtsantggvmqvpenni  
>tr|D2N8Y3|D2N8Y3\_STAA5  
mstqhevqnidplkmaeslepeqlnektlndmrsgsev|veallkenvdylfgyppgav|plydtfydgkikhilarh  
eqgavhaaegy arvs gktg  
vvvtsgpgatnvmgtid ahcdslplvvftgqv atpgigkda fquadil smtspitkqnyqvrvedipkivheafhva  
nsgrkqpvv idfpkdmgv|  
atnvd|cdeinipgygvvtepenkdidt fisllkeakkpvvlagagin qsksnqll tqfvnkhqiptvtllglgavpye  
dtlflmggmhgsyasnma  
ltecdllinlgsrfddrlaskpdafapnakivhvdidpseinkvihvd|lgiiadckrflec|lndknvetiehsdvwkhcq  
nnkqkhpfk|geedqv fck  
pqqtieyigkitngeaivtt dvgqhqm waaqfypfknhgqvwts gglgtmgfgipssi gaklanpdktvvcfvgdggfqm  
tnqemallpeygl dvkiv|  
inngtl gmvkqwqdkffnqrfshsvfngqpdfmkmaeaygvkglfidkpeql eeql dtafayqgpali evrispteavn p  
mvpsgksnhemeg|  
>tr|D2N8Y5|D2N8Y5\_STAA5  
mttvyydqdvktdalqgkkiavvygysqghahaqnlkdngydvvigirpgrsfdkakedgfdvpvaeavkqadvimvll  
pdei qgdvyknei epnl ek  
hntlafahgfni hfgvi qppadvdvl vapkgpgh|vrrtfvegsavps|lfgiqqdasgqarnial syakgigatragvi  
ettfkeettdl fgeqav|  
cggvskliqsgfetlveagyqpe layfevl hemklivd|lmyeggmenvrysisntaefgdvysgprv itpdvkenmkav|  
tdiqngnfsnr fiednkng  
fkefyklreeghghqiekv gre|remmpfiksksiek  
>tr|D2N8Y6|D2N8Y6\_STAA5  
msshqi fdtlrdgeqtqgvnftfder|rialql ekwgvdiv eagfpasstgsfksvqiaaqt|tttavcglarckksd  
idavyeatkdaakpvvhvf  
iatspihl ehklmsqedv lasikehvtyakqlfdvvqfspd atrtelplvlkcvqtavdagatvinipdtvgysy hde  
yahifktltesvtssnei i  
ysahchdd|gmavsnslaaieggarriegt vngigeragnaaleevalalyvrndhygaqta|nleektktsdlisryag  
irvprnkai vgnafshes  
gihqdgvl khretye imtpqlvgvsttelplgklsgkhafsek|kalg ydidkeaqid|fkqfkaiadkkksvsdrdiha  
iiqgsehehqalykletlq  
lgyvssglqsavvvikdkeghiyqdssigtgsivai ynavdri fketelidyrinsvtegt daqaevhvnllie gktvn  
gfgidhdi lqasckayvea  
hakfaenvekvgn  
>tr|D2N8Y9|D2N8Y9\_STAA5  
maai kpi ttykgkivpl fndnidtdqi ipkvhlkri sksgfgpaf dewry|pdgsdnpdfnpnkpykgasil itgdnf  
gcgssrehaawal kdygfh  
i i i agsfsdi fymnctknaml pivleknarehlakyveievd|pnqtvsspdksfhfeidetwknklvngl ddi aitlqy  
eslikeyeks|  
>tr|D2N8Z0|D2N8Z0\_STAA5  
mtvkttvstkdi deaf|rlkdivketplql dhylsqkydckvyl kredlqwvrsfklrgaynaisvlsdeakskgitcas  
agnhaqqvaytakklnlna  
vifmpvttplqkvngkffgnsnvevvtgdtfdhclaeal tytsehqm nfidpfnvhtisgggtlakemleqaksdnv  
nfdylfaai gggglisgls  
tyfksyspntki igvepsgassmyesvvvnqv itl pnikfdv gasvarvgdit feiakknvdnyvqvdegavcstild  
myskqai vaepagal svsa  
lenykdhi kgtvvcvissgnndinrmkeieers|lyeemkhyfilnfpqrpgal refvndvlgpqdditkfeylkksq  
ntgtvii giiqlkdhdliq  
lkqrnvqfdpsniyi nenkmlysl|i  
>tr|D2N8Z1|D2N8Z1\_STAA5



Tsompanidou\_et\_al\_Supplemental\_FASTA\_File

mvenlseekfgrtfrhrayfnkr1rttgryllkshdieinpkqyehygedavvkiilhelchylhiagkyqhkdqdf  
kr1sqvgaprncsiesy  
qqranyeyctkchakyiriirkvdtmrncghcngklrmkrqlk  
>tr|D2N8Z2|D2N8Z2\_STAA5  
mdnqlnsijekyqfskkqieavltl1leekntvpfiaryrkeqtggldevqikqiddeyqymvnlqkrkeeviknieqqg  
lltee1kkdilkqnklqr  
edlyrpfkqkktrateakrkglep1aiwmkarkhevsieekaqqfineevqsvedaikgaqdiaeqisdnpkyrtkil  
kdmvhggvlttskkknaed  
ekg1femyyaysepikrianhrvlavnrgekekvlsvkfefdttavedfiarqeinhnvnrsyileaikdslkr1ivps  
iereihadltekaenhaid  
vfsenlrnlllqppmkgkqilgvdpafrtgcklavinpfgtftiakgviyphppvskeaekdfvqmvkaydvqliaign  
gtasreteqfvadlikkhq  
lpvqfiivneagasvysaseiardefpdfqveersavsigrvqdp1selvkidpksigvgqyqhvdnqkalenaltfv  
etavnqvgdvntassll  
qyvsllssqiakniayreengaikhnkelskikrlgaktfeqsigflrivdgsep1dntsihpesykvtyqlldklgfg  
gndlgdalkaklnslmdm  
elaielqvgvptledi1kslkapnrdrdefetpilkdvlsiedlkegmklsgtvrnvdfgafvdigvkqdg1vhvsk  
l1skkfvpknpmdivsvgdiv  
dvwiy1sidknkdkvsltmidphe  
>tr|D2N8Z9|D2N8Z9\_STAA5  
msdkyyrsaymvd1navasnfkvfstlhpntvmavvkanayglsvkvarhlmengatffavat1deaielrmhgita  
kilvlgvlpakdidkaigh  
rvaltvpskqwlkeaknisgeqekklwlhikldtgmgrlgikdtktyqevieiiqqyeqlvfegvfthfacadepgdm  
teqyhrfkdmvneaikey  
ihcqsagsllmdcqfcna1rpgislygyypseyvqqkvkvh1kpsvqlianvvqtktlqagesvsygatytatdpttia  
llpigyadgy1rimqgsfv  
nvighqcevigrvcmdq1tikvpdqvkagdsvilidnhrespqsvevaaekqhtinyevlcnlsr1lpriyhgdqrfvt  
nelk  
>tr|D2N901|D2N901\_STAA5  
msdynfmsphakkvmr1sav1fwipialviliafnl1nw1fweildnyisivssvivillvavftlviapvyrykhcya  
fekhh1rvrnqil1f1dekv  
ipyfriqnididvgpimrryrlat1tlytaggqaeielidrsearr1krwl1nerhlennknee  
>tr|D2N902|D2N902\_STAA5  
msepqklhpsisyfngi1naikqni1vff1fvi1q1kdfdytnpvsylwigivfvfflisyisqivgimntrywiednyfi  
l1tgi1fnkkrkel1nikriq  
svdmtqgvinqmiggvd1qiktspdgiv1sviskqgeyleryidqlqtelktevaqkssteqndncnhdiegnvediak  
gr1devqntnsilnqknkr  
1piyqmnfkes1fmanm1sgaigvtlaalvpiygavrelipwsklnheisqwqv1svs1vlii1llv1iaayiigtitmi  
rfygfsvmleneq1kieyg  
1fnkkkv1vptkr1qavverqsyirr1fgytaihf1itsdfenkkiedddndsgsvtilpfikrdkayqi1qnlvpd1sy  
qqvnegmpl1sgfhrhf1ip  
siivi1tmagigcyfwnq1ll1fti1tvvi1glfvikgylvkhagfkmteeqitiqnfellkriiyyfkahhiigfdtwq  
ht1lkrn1lnnfs1fvakg  
vgaqs1n1kyarskdvq1lkswylrgende  
>tr|D2N903|D2N903\_STAA5  
msdytk1skspksal1yyi1tng1efi1svavyv1fyfiw1rfewpqi1yil1fv1ct1tv1k1iikplwqyhrf1yqvd  
q1svqyrts1f1i1ykeetsr  
ier1qyl1siksn1p1skv1n1ykvgf1mtaght1y1pmmshddvki1earamsn1rgvesdv  
>tr|D2N904|D2N904\_STAA5  
mntirnsic1ti1tmv1l1cgf1f1p1ait1ligq1ff1yq1qang1s1itydn1rivgsk1ligqhtetryf1hgrpsav1dynm1pek  
lyknv1v1ssggsnesngnte  
1iarvkh1hvkfgns1v1tidatt1ssgsg1ldphit1venal1kqapriadarh1istsrvad1iqhrkqrgv1tndyv1v1elni  
al1dkmkd  
>tr|D2N905|D2N905\_STAA5  
mhhv1nkyf1nqtm1vieal1kmsfyk1n1pkq1likn1pimfv1vevgm1ilt1ilic1fpdi1fgtsyl1sqgyl1itifi1ill1tilfan  
fseafaegr1gkaqads1rq  
aqsn1tar1ieengay1rivnate1kagqni1rvengetipadg1vvinglatvdesaitgesapvikesggdfdg1viggtlv  
tsdw1eirv1eseagts1fld  
kmialvegaern1ktpneialft1l1tt1ti1flv1v1vt1ypiasyl1hl1ilpiam1lialtv1clip1ttigg1lsaigiagmdr  
vtqfnv1laksgravevcgd  
vdm1ildktgt1itygnriasef1lpvnq1m1lek1livaaym1ssi1yddtpegksiv1rlakqmyine1pkdidg1tykpftaetr  
msgi1itne1svfkgapnsm  
in1lvkqqgn1ip1nies1cmdv1sskggtp1iviennvm1lgviylkdvikdg1lverfael1rkmgietvmctgdna1ltaati  
aketgvd1rfvaeckpedki  
kvikdeqakghivamtgdgtndapal1aqaniglamnsgtisakeaan1id1dsnptk1lievvkigkq1llmtrgal1tts1  
andvakyfailpalmmsti  
pems1lnimh1lsspk1sai1sami1fna1liiva1lipiamk1gvk1vkgysidri1finm1liygl1gg1lipfigiklidmivqff  
v

Tsompanidou\_et\_al\_Supplemental\_FASTA\_File

>tr|D2N906|D2N906\_STAA5  
meilfltmvmiayvfsgylrvalvqssrvdliftrfenmcfkiigtglehmsaktyvkhflvfngfmgvitfvlliv  
qgwflnphnlncsidla  
fntaisfltnsnlqhngesdvtyltqmi vmtymftssasgyavciamlrrltgltngfyqdivrfivrvllplsc  
lisillmtggvppqtlhanl  
mirtlsghiqhiafgpiaslesikhltngggflagnsatpfenpniwsnfiemgsmlpmsmlflfgrmlsrhgkrvh  
rhallfvamffiafalt  
ltmwseyrgnpi lanlgihganmegkevrfgaglsalftvittaftgsvnmhds ltpgglgpmvlmm lnvvfggegv  
glnmlliyvlltvficslm  
vgktpeylnmpigaremkcivlvflihpililvfsalafmipganesitnpsfhgisqimyemtsaaanngsgfeglkdd  
ttfwnistgiimllsryip  
iilqlmiasslvnkksyhqdkytiaidkpyfgvslivfivllsgltfipvlllgpigefltlk  
>tr|D2N907|D2N907\_STAA5  
mshkqvvtmllcckevmamlivlllvialvlylfyalirsekf  
>tr|D2N908|D2N908\_STAA5  
msnteslnigkkrsgltiyigyspgvgktfemlsnaielfqsnvdikigyiephqrdetnalaeqllkiatnftkhgshh  
fqyldvdriieesptivli  
de lahtnisrdrhekrymdieeilnhgidvhtlniqhieslssqiermtgvhvkervpdyfimsadvlevvdispeqli  
krlkagkvykkdrldvafs  
nfftyahlse lrtltlrvvadlmsdkekvrhnhktslkphiavaisgsiyneavikeafhiaqkehakftaiyidvfeis  
rqykdskqvhqhlmlaks  
lgakvkvvysqtvalgl dewcknqdvtkliigqhirnkrrdffnkplidh lmsfehsynieivpikqipvelkmnkspyr  
pkgkrfaidmlkmi liqii  
cvmnglwiyqldkhesstii lmi fligi illsiwtrsyiigflaaiinvfvnyffteprytfeyvrfdy pitfivsil t  
silt s allkqikfyaatk  
klyrtdllfqfndsikqytvtenllinagyqinqllqssitiyvinqskviktiplqnhidnttqqheqalswvikner  
qagattdtfpginkwlipi  
gtspikgilaidygssqvinpydasilesm lnel slavenvtllkqtresmlqaerqlthsnflrsishdirtp lttimg  
nldilvshskdmsiiekeq  
llvhsfqesqylyllvtnilsltklqssnvqiklqpylvselveeidmilerrhlkkritvsssvdlqfihidsklilqa  
lfnlienavkhtstdtkin  
lsiryasdeqiefavidegpgislkeqqkiefpytgsnkyfkdnqkesmglylylvqtilhkhqsnlqykpnpqphgsif  
yfnidtdfnegdi  
>tr|D2N909|D2N909\_STAA5  
mqskilii eddhai thll dval tldyynvtadnatqahfkiqidkpdvilldlglpdkdglcliseirqhtdipiivis  
arqeeqti iqal dngandy  
mtkpfnvdelrari rvieriakshqetnfvftnglls idfgsksvinnqevhltpnefsll ellsnhkgkvltyemilk  
riygyvnktemp slrvhmt  
slrqklsqchedakdi kthprigyqmlqwkke  
>tr|D2N910|D2N910\_STAA5  
mqnfkelgisdntvqsl esmgfkeptpiqkdsipyalqgidilgqaqtgtgktgafgpi liekvvgkqgvqslilaptre  
lamqvaeql refsrgqgvq  
vvtvfgmpierqikal kkgpqi vvgtpgrvidhlnrrtlktgdihlildeademnmgfiddmrfimdkipavqrqtm  
lfsatmpkaiqalvqqfmk  
spkiiktmmnemsdpqieefytivkelekfdtftnflvdhqpelaivfgrtkrrvdeltsaliskgykaeglhgditqak  
rlevlkkfkndqinilvat  
dvaargldisgvshvynfdipqdtesythrigrtgragkegiavtfvnpiemdyirqiedangrkmsalrpphrkevlqa  
reddikekenwmskdses  
rlkristellneyndvdlaa llqel veandevevqltfekplsrkgrngkpsgsrnrnskrngpkf dskskrskgyssk  
kkstkkfdrkekssggsrp  
mkgtrtfadhqk  
>tr|D2N911|D2N911\_STAA5  
minvtlkqiswipceiedqflnqeingvtidsraisknmlfipfkgenvdghrfvskalqdgagaafyqkgtpidenvs  
gpiiwvedtltalqqalqa  
ylrhvnpkviavtgsngktttkdmiesvlhtefkvkktqgnynneiglp ltileldndteisilemgmsgfheief lsnl  
aqpdia vitnigeshmqdl  
gsregiakakseitigldngt ftydgdellkphvkevenakcisigvatdnalvcsvddrdttgisftinnehydipi  
lgkhnmknatiaiaavghe l  
gltyni iyqnlknvsltgmrmeqhtlenditv indaynaspts mraaidt l stltgrrililgdvlelgenskemhigvg  
nyleekhidvlytfgneak  
yiydsgqghvekaqhfnskddmievltsdlkahdrvlvkgsrgmkleevvnalis  
>tr|D2N912|D2N912\_STAA5  
mtkenicivfggksaehevsil taqvnlnaidkdkyhvdi iyitndgdwrkqnnitteikstdehlhengealeisqllk  
esssgqpydavfpllhgpn  
gedgtiqglfevl dpyvngvlsaassmdklvmkqlfehrglpqlpyisflrseyekyehnilklvndklnypvfvkpa  
nlgssvgiskcnneaelke  
gikeafqdrklvi eggnareievavlgndypeatwpgvevkdva fydykskykdgvqlqipadl dedvqltlnmal  
eafkatdcsglvradffvt

Tsompanidou\_et\_al\_Supplemental\_FASTA\_File

ednqi yinetnampgftafsmypklwenmglsypelitkklieakerhqdkqknkykid  
>tr|D2N917|D2N917\_STAA5  
miellsialkhsniilnsifigafinllfaftiifmerrsansiwawllvlvflplfgfilylllgrqiqrdqifkidk  
edkkglelivdeqlaalkn  
enfsnsnyqjvkfkemiqllynaafllttdndlkiytdgqekfddliqdirnatdyihfqqyiiiqndelgrtilnelgk  
kaeggvevkiyddmgsrg  
lrkkglrpfrnkgghaeaffpsklplinlrnmnrnrhrkivvidgqigyvggfngvdeylgkskkfgywrwthlrivgdav  
nalqlrfildwnsqatrdh  
isyddryfpdvnsrggtigvqiassgpdeeweqikygylkmissakksiyiqsypfipdqafldsikiaalggvvnimip  
nkpdpfvfwatlknaasl  
ldagkvfhydnghlshktlviddeiasvgtanmdhrsftlnfevnafiydqqiakklkqafiddlavsseltkaryanr  
slwikfkegisqllspi  
>tr|D2N918|D2N918\_STAA5  
mqgsdiisaakkymesihqndytghdiahvyrvtalaksiaenegvndtlvielacllhdtvdekvvthankyaelsfl  
sslsstedqehilfiinn  
msyrngkndhvtltlegqivrdadrldaigaigvartfqfaghfgepmwteqmsldkinddlveqlppsaikhffekllk  
leslmhtdtakmiakerhd  
fmmiyllkqfftewnyhd  
>tr|D2N919|D2N919\_STAA5  
msattvsriideaqslhqsypsafpehimmdefksvknvsgkmsfiyadaqthhiidivedrrlsselkkyfyrfslkar  
krvktvsidmhegymtlik  
emfpnakividrffhivqllnralngirvavmnelrttnqplynkfkryaklllkpgedlgafeyrkvalfkewktqkgiv  
kylldqddsln dayqyinq  
lrfklkhndyegfihelkhiplsqthsvvqraiktlnkhayfikntfdyynlsgnpleginnkliklirtsfgygsynhl  
nrillcsklyapkskkev  
kqcsva  
>tr|D2N920|D2N920\_STAA5  
mnnvilktdfdkdnii fdgklekieygrkcffyyakliytpevcpcncckningnlikngsktsritmpkiseyptyi  
mlrkqrfkctceryftae  
tpevdkycfiskkhqlylikqqkfvlnl  
>tr|D2N921|D2N921\_STAA5  
mkkkallplflgimvflagcdyskpekrgffyntfvdpmknvldwlgnnllndnyglaiiilvlviriillpmlsnyk  
nshmmrqkmkvakpevek  
qekvkrartgeekmaange lmqvykkydmnpiksmgclpmlilqipiimglyfvldqldvdlfkyphflwfdlgrpdw  
itiiagvlyfiqayvsskt  
mpdeqrqmgymmmvipsimiiwislssasalglywsvsaaflvvqthfaniyyekvakkevqpfi eayerehnggnkkg  
kntqvvskkkkk  
>tr|D2N922|D2N922\_STAA5  
mfngsylnvyficgtsdvpsrhtihevleaalkagitlfqfrekgesalkgndklvlakelqhlchqydvpfivnddvs  
akeinadgihvgddakvk  
eiaqyftdkii gllsidslgeyaksdlthvdyigvgpiyptpskndahtpvgpemi atfkempqlpivaiggintsnvap  
iveagangisvisaiskse  
niektvnrfdkdfnn  
>tr|D2N924|D2N924\_STAA5  
mikpkialtiagtdptggagvmadlksfhscgvymgvvtsivaqntlvgvqnihnlnhqwvdeqldsvfndtlphaiktg  
miatadtmetirhylvqhe  
sipyvdpvmlaksgdslmdndtknqlqhtllpladvvtpnlpeaeitgltidseekimqagrifineigskgvivkkg  
hsndtdiakdylftkegvq  
tfenerfktkthgtgctfsavitaelakgrp lfdavqkakkfismsiytpeigrgrgvnhfayllkkeglddelsk  
>tr|D2N925|D2N925\_STAA5  
mefsqklyqaakpiindi yeddfiqmllgni qadalrhyllqadaaylkeftnyallipkmsmndvklvleqiefmve  
gevlahdilaqivgesyee  
iiktkvwppsgdhyikhmyfqahsrenaiytiaamapcpyiaelakrsqsdhkl nrekdtakwfdsystemddiin vfe  
slmnklaesmsdkeleqv  
qvfl esciherrffnmamt leqweffgkvnd  
>tr|D2N932|D2N932\_STAA5  
mntlnldivtpngsvynrdnvelvmmqttag eigvmsghiptvaalktgfvkvkfhgdteyiavsdgfvevrkdkvsii v  
qtaetareidveraklaka  
raeshlenddntdihraeralerannlrvaelk  
>tr|D2N933|D2N933\_STAA5  
mgigrvtqvmgpvidvrfehnevkinna lvidvpkeegtqltlevallqlddvrtiamdstdgvrqgmdvkdtkgei  
svpvgdetlgrvfnvlget  
idlkeeisdsvrddpihrqapafdelstevqiletgikvvdllapyikggkig lfggagvgktvliqelinniaqehggi  
svfagvgertregndlyfe  
msdsgvikktamvfgqmneppgarmrvalsgltmaeyfrdeqqdvl lfidnifrftqagsevsallgrmpsavgyqptl  
atemgqlqeritsttkgs  
tsiqavfvpaddytdpapatafahldattnlerkltemgiypavdplastsralepsivgqehyevardvqstlqkyrel  
qdiiailgmdelsdedkqt

Tsompanidou\_et\_al\_Supplemental\_FASTA\_File

verarriqfflsgnfhvaeqftgqkgsyvpvktvanfkdiIdgkydhipedafrlvgsmdvdiakakdmgev  
>tr|D2N935|D2N935\_STAA5  
maikaeisallrsqienyesevsvtdvgtvlqigdgialihgIndvmageIvefhngvlglaqnleesnvgvvlpgyt  
gitegdevkrtgrimevpv  
geeligrvvnlpgpidgggpiinttktrpvekkatgvmrksvdeplqtgikaidalvpigrgqreliigdrqtgkttia  
idtilnqkdqgticiyvai  
gqkdstvranveklrqagalDytivvaasasepsllyiapysgvtmgeefmfngkhvliVyddltkqaaayrelslllr  
rppgreaypgdvfyIhsrl  
IeraaklnddlgggsitalpiietqagdisayvptnvisitdgqiflqsdIffsgvrpainaqqsvsvrggsaqikamkk  
vagtIrlDlasyrelesfa  
qfgsdIdeftasklergkrtvevlkqdqknpIvvehqvlIiyaltkgylddipvvditrfedelnhwaesnatellneir  
etggIpdakfdtainefk  
ksfskse  
>tr|D2N940|D2N940\_STAA5  
msrfynifkqfiqylylIiilgglylfthhafilgliigtgsaintvifesyIakakrpdthistgmmwrylvaiia  
cmiwyfnkshvsiiigi  
ImisyvvviiIrpIkvsk  
>tr|D2N941|D2N941\_STAA5  
mkkimtiIfgtrpeaiIkapIvkaIeqekmIepivvtaqhremIsvIstfeikpydInimksgqtIseitsksitqle  
qviIqlekpdmvlvhgdmt  
tfaggIaafynqvpiIghveaglrsydksyfpfeevnrqlvgvIadIhfaptknaashIInegkysesvvvtgntaidamk  
ytvddnyksnimdkyhdkk  
fiImtahrrenIggpmeniIkvrrIideytdIalvypmhknpkvrDvahkiIlgghdrielielDvvdIhfnfakksyfi  
Itdsggiqeeapsfnkpvl  
vlrsvterpegveagtlkvigtqnqvyqaakeIidderlyhqmseasnpygdgfaserivnhikyylInIitekpsdf  
>tr|D2N943|D2N943\_STAA5  
msyitkqdkviaeaierefqrsnieliIasenfvseavmeaqqsvItnkyaeIyppgrryyggcefvdvtesiaidraKa  
Ifgaehvqvphsgsqanm  
avyIvalemgdtvlgmnlshghIthgapvnfsgkfynfveygvdkdterinydevrklalehkplivagasaysrtid  
fkkfkeiadevnakImvdm  
ahiagIvaaglhnnpveyadfvtttthktIrgprggmIckeykdkidktiIpgiqggplehviaakavafgealennf  
kmyqqqvknakvIaetli  
negfIrvsggtdnhIvavdvkgsigIlgkeaeetIsvgitcnkntipfdqekpIvtsgIrIgtpaattIrgfdekafeev  
akiisIalIknskdeekIqq  
akervakItaeyplyq  
>tr|D2N944|D2N944\_STAA5  
mkdlmIldelkdmsffnkgdicIlgcstsevigekigtvgsmevaetIfnaldvvsketgvtIafqgcehinraitiek  
sqfnplImeevsvvpdvha  
ggsIatyaIqhmkdpiIvvehitvpcgidigqtlIgmhikhvcvprtsvkvqvgqaivtIatsrpkkiggerakyq  
>tr|D2N945|D2N945\_STAA5  
mkilfvctgntcrsplaesiakevmpnhqfesrgiIavnnqgvsnyvediveehIakttIlsqqfteadIkadilImtsy  
shkelieahfgIqnhvftI  
heyvkevgeviDpyggtkemyvhtyeelvsIilklkdiic  
>tr|D2N946|D2N946\_STAA5  
mdtkiwdvreyneIdqyypkineIkdIvInggIglIptetvyglaanatdeavakiyeakgrpsdnplivhihskdqIk  
dftytIldarveklmqafwp  
gpiIfilplkpyglcrkvsgglssvavrmpshsvgrqlIqiIneplaapsanIsgpspttfnhvyqdlngridgivaq  
qseeglestvlDctsfpyk  
IarpgsiIaamiDilpnsiIthadyndteqpiIapgmkykhyspntpltiitdieskiDgdkdwssiaIvpsnkvtfip  
seaqfiqlcqddndvkqas  
hnlydvIhsIdeneniIaayiygfeIndnteaImnrmlkaaghiikgcel  
>tr|D2N947|D2N947\_STAA5  
mnykekldeaihlIqqkgfeqtraewImldvfqwrtrdfvvhmddmpkamimkfdIalqrmIlgepiqyivgfasfygr  
tfdvnsnclIprpeteevm  
IhfIqqIeddativdigtgsvIaitIckekpdInviatdisIeamnarnnaekhqsqiqltgdalkplikegikIng  
IIsnppyidekdmvtmspt  
vtrfepqalIadnhgyaiyesIiedIphvmekgspvfeigynqgealksiInkfpdkkidiikdinghdrivsfkW  
>tr|D2N948|D2N948\_STAA5  
mfgqlIdiveeyeqIneIIsdpdvndsdlrkyskeqadIqktvdvyrnykakkeeladieemIsetddkeevemIkee  
ssgiKaelpneeIkiI  
IpkdpnddkdviveIraaggdeaiIagdlImrmyskyaesqgfkteiveasesdhgykeisfsvsgngaysklkfeng  
ahrvqrvpetesggrihts  
tatvavIpevedveieIrnedIkidtyrsgaggqhvttdsavrihtIptgviatsseksqiqrnekamkvIkarlydm  
kvqeeqkyasqrksavgt  
gdrserIrtynypqsrvtDhriIgtIqIlgqimeghleeiIdaltIseqtdklkelIngeI  
>tr|D2N952|D2N952\_STAA5  
mrdytqyIngewvesnnetievinpateevigkvakgnkadvdKaveaadnyIefrhtsvkerqalldkivkeyenr  
kddivqaitdelgapIIs

Tsompanidou\_et\_al\_Supplemental\_FASTA\_File

ervhyqmglnhfvaardaldnyefeerrgddl vvkvaigvsglitpwnfptnqtslklaaafaagspvvlkpseetpfaa  
vnlai fdkv gvpkgvfnl  
vngdgagvgnplsehpkvrmsftgsgptgskimekaakdfkksvlelggkspyivl dddvikevakattgkvvnntgqv  
ctagtrvlvpnkikdfla  
elkeqfsqvrvgnpredgtqvgpi iskkqfdqvqnyinkgieegael fyggpgkpeglekgyfarptifinvdnqmtiaq  
eeifgpvmsvityndldea  
iqiandtkyglagyvigkdketlhkvarsieagtveineagrkdplfpggykqsglgrewgdygieeflevksiagyfk  
>tr|D2N953|D2N953\_STAA5  
mevcpyleetfki lgrswngliiny lsrcndcsahfsmkrdlktitpra slkl selaqwel vekqiistspvqi iyvl  
tekgealaealhpieawaq  
syvdltdqrtak  
>tr|D2N954|D2N954\_STAA5  
maqeviki rggrrl ngevnisgaknsavai patllaqghvkleglpqisdvktlvsll edlnikaslngtelevdttei  
qnaalpnkvesl rasyym  
mgtmlgrfkkcviglpggcplgprpidqhikgfka lgaidessttsmkieake lkgahifldmvsvatini mlaavya  
tgqtvienaakepevvda  
nfltsmganikgagtstikingvkelhgseyqvipdrieagtymciaaacgenviln nivpkhvetltakf selgvnvdv  
rderirinnapyqfvdk  
tlvypgfadtlqqpitplfmangpsfvtdtiyperfkhveelkrmganievdegatatikpstlhgadvyasdlragacl  
iia gli aegvtti ynkh  
yrgytdiveh lka l gadiwtetv  
>tr|D2N960|D2N960\_STAA5  
mkvgidaggtlikivqe qdnqrftk teltknidqv vewlnqqiek lcltgg nagviaen inipaqifvefdaasqglgi  
llteqghaladyifanvgt  
gtslhyfdgqsqrrvvggigtgggmiqglgyllsqitdykqltdmaqhgdrntidlkvrhiykdteppipgdltaanfghv  
lhlldadftpsnklaavig  
vvgevvttma itvarefktenivyigssfhnaallrkvvedytv lrgckpyyvengafsgaigalylgk  
>tr|D2N961|D2N961\_STAA5  
msyakypffrdil ineci yfasknklvr lnykseayvgvwteesvavsf ltsrdipfdkvvkmdvdrfatyel del fde  
qdhiimnqtmeeeghllnv  
vavtqevmte ldkirikefvqdvakydevygltkkgskqfilisendsdekkphimpvwsiknralkvr dedfeedlit  
iegs vfgewl del rddhka  
vaidlktgvvgt ivsaqlsnel tf  
>tr|D2N962|D2N962\_STAA5  
mtnngnepnl t lsdlykdvvysrpsyisnpwlkpdehqs nfltgrel lianqlpvivheasatdklhqlfqvigkdv  
nsiytfnnqqsyenlikq  
ahkenkkyfyqyihdetilnqqyaldktl fvalnkaripewtngkflpkrkvkieqfeneiknwefpvikpgddl p  
taggygvmi cyhdt dlqka  
itrikdataetns liieqkieekanycvqfayses lgiqylgaatq ltdkygfyngenttnvpehvieagr qimengvn  
qgffgvagfdllvdeddv  
yaidlnfrqngstsmll lane lnsyqkfysyhskgdnthffntilkyvkegcl yplsydygdwygedkvksrfgc iwhg  
dsketv lenecaflaeler  
C  
>tr|D2N963|D2N963\_STAA5  
msekkqildyietnkysyieishriherpelgneeifasrtlidrlkehdfeteieaghatgfiatyds gl d gpaigfl  
aeydalpglhacghniig  
tasv lgaiglkqvieqiggkvvvl gcpaeeggengsakasyvkagvidqidialmihpgnetyktidtlavdvl dvkfyg  
ksahasenadealnal dam  
isyfngvaqlr qhikkqrvhgvildggkaani ipdytharf ytramtrkel dil tekvni argaaiqtgc dyefgpiq  
ngvnefiktpkl d d l faky  
aeevgeaviddffgygstdtgnvshvptihphikigsrnlvghthrfreaaasvhgdealikgakimalmglelitnqd  
vyqdiieehahlkgngk  
>tr|D2N966|D2N966\_STAA5  
mrmidiiekkrdghtlttee inffidgyvkgdipdyqass lamai yfqdmndderaaltmamvns gdmidlsdikgvkvd  
khstggvgdtttlvlapl v  
aavdvpvakmsgrglghtggtidkleaidgfhveideatfvklvnenkvavvgqsgnltpadkklyalrdvtgtvnsipl  
iassimskkiaagadaivl  
dvktgsgafmktledealahamvrignnvgrntmai isdmnqplgraignalel qeaidtlkghgpkdl telvltlgsq  
mvvlankaetleearalli  
eaidsgaalekftfiknqggdetvidhperlpqaqyieykakksgyvtelvsndigvasmm l gagr ltkeddidlavg  
ivlnkkigdkveegesllt  
ihsnrqdvddvkkldssitiadhvvsptlihiite  
>tr|D2N967|D2N967\_STAA5  
mnsakli dhtllkpestrtqidqi ideakaynfksvcvnpthvkaaerladsevlvctvigfplgasttat kafeteda  
iqngadeidmvinigalkd  
grfddvqqdieavvkaakgytvkvi ietvllnhdeivkase l tkaagadfvktstgfaggataedvklm kdtvgadvev  
kasggvrnl edfnkmveag  
atrigasagvqimqgleadsdy

Tsompanidou\_et\_al\_Supplemental\_FASTA\_File

>tr|D2N970|D2N970\_STAA5  
mpivvydgnciycynyviwlqhdlnprnyqfatlkgevgqqffkqqpeaanknsvilqkgdriyfesqaiiqllitalpnr  
tkllgvglwlvpkpvrnfg  
yrmfannrnrnmwktthqpnndyksffliddnakvkltd  
>tr|D2N972|D2N972\_STAA5  
mkqflyialvcgviaglgafhipqpsmtiprivailgiisamltfkdkqtsaslkfsallinvlplcgtfvasn  
>tr|D2N974|D2N974\_STAA5  
mnilviganggvgsllvqqlakenvpftagvrqsqdlalksqgmkailldvendsietltetfkipfdkvi fsvgsgnt  
gadktiivdl dgavksmia  
skeanikhyvmvstydsrrqafddsgdlkpytiakhyaddy lrrsglnytilhpgaltnaagsgkieaaqyfeqgkeipr  
edvatv1keivtsnhfnh  
efqiisgdqdkdal tqfenetd  
>tr|D2N976|D2N976\_STAA5  
mshshhhhdhshvntnnkklvlfisfliiglymfieiiigllanslallsdgihmfsdtfslgvaliafiyaeknatat  
ktfgykrfevllaalfngvt  
lfvisilivfeai krffvpsevqskemliisiiglivnivvaaffmfkggdtslnmr gaf1hvigdl1gsvgaitaail  
iwafgwtiadpiasilvsv  
iilksawgitkssinilmegtpsdvdivittikkdsriqsvhdchvwtisndmnalschvvvdhtltmkecelleni  
ehd1lh1nihhmtiqletp  
nhkhdesiicsgthshshnhhahhhahvh  
>tr|D2N977|D2N977\_STAA5  
mftyfksafknakpqlitliyaliafaviavvllanfqlakyvqtiaiy sqfgqkppgdaylkvia1lliaavsvlfv  
lvqifigitnvmkramshe  
kvkftdlfi afkkgnylksvliglvsiamiivsl1tsllyklfspvsemimsvqssyadsthlvgiaittqsi iivv  
llikaiitwll1ipvfnfm  
tsfvestndkvkthlangfkamngqktffkffigillnliiilfktpvgylisfntqslsqsvaenirvytvmtil  
yvvihaailmgivqyy1kr  
gqkittkdkvktadknkkvvtetpntkvtendkvttsvetktekaqds1ndnttktmtdskpednqpk  
>tr|D2N978|D2N978\_STAA5  
mspkdttrfetkpdhqaqfdwkesinfktdknqriplyigvlllyysrfiimhdne  
>tr|D2N980|D2N980\_STAA5  
mdnvkai f1mdgtihennqastytkdvinrlrekgykvflatgrshseihqlvpqdfavngiissngt igevdgeiif  
khgls1aqvqqi1nlakrq  
qiyyevfpfegnrvs1kedetwlr dmirsqdpingvshsewssrqdalagkidwvtfkpegeyskiylfssnlekitafr  
delkqn hvqlqi svsnssr  
fnaetmayqtdkgtgikemihfginqeetlvigdsndramfefghy tvamknarpeiqa1tsdvtaytneedgaakyl  
akhflad  
>tr|D2N981|D2N981\_STAA5  
mliqldqvgrmkqgktilkniswqinggdkwilyglngagkttllnlnayepattgsvnlfgkmpgkvgyaetvrqhi  
gfvshslllekfqegervid  
vvisgafksigvyqdi ddevrneahqllklvgmsakaqyigylstgekqrvmiara1mgppqvlil depaagldfiare  
sllsils1dsyptlami  
yvthfiieitgnftk1ll1kdgesvqqgliddiltsenmsrffqknvavqrwnnrfsmamle  
>tr|D2N982|D2N982\_STAA5  
marktfsikyseakdlrdkiveslgedakyyqgetsdspdmsdriteyikke1knkiystsvt1vvispnmkesnwidw  
eiysvkmkrgrdrtssn  
gvvgvmmkhngdyswlrnsvinsdghtaihtdnsylydiivknrfnqepieytcdecknidaltgsfis1veedeflgnp  
tky1enayekskkatyni  
crk  
>tr|D2N983|D2N983\_STAA5  
merqqtykekaqhlykvkkinryntksaeeyffsipqvkiylsagrmkkhkenynaseikikkaaleksrknknwkiee  
rlikakrytqkvdpelyni  
ymkayhkkdittetekleil telkkfdtenivrffrk1ndaeqnkmirnlafkylqdyghyvk1rknfkgkkkvqteras  
ldtkkpedlyndltnkniq  
sqkvdydifi shstkdktvedii rvfneqnktcycdwtmdqdy1krkyvgeytkqvlkarme qskmlvllrtensvqsdw  
vsfeieyfenlkkpiyive  
sleelleafsd  
>tr|D2N984|D2N984\_STAA5  
mtidkkkfiekvkalesntaai fagag1scgagyvnwktllneaaeelelnidkeehdlvglaqhyinkkrsgn1ntv  
imeqfstraeltenhklla  
klpidtywttnydcmieka1dsegri vdkrnqnl1tvsvadkdatvykmhgdidsidkiil trddyekynlthpkfrei  
legdl1sktflfigfsftd  
pnisyilsrirlvledntrphycilkeveekeydntee fmyakikqq1hied1srfsietllvkdyieiteilesiykry  
rrkti f1sgateylpfn  
etgkyflhqlskklvendfklvtgfglgvgsyvingvadyinsnkksklqnhlnilpfsqdssgd1d1kevwkknrl emi  
secgmalf1fgnkekdgki  
v1adgleeykiaerqelvr1pinvtgyktn1seqyneeiniqfkeki1kmyneineykcdfsnkqsidelvqkivnlv  
ieikktk

Tsompanidou\_et\_al\_Supplemental\_FASTA\_File

>tr|D2N985|D2N985\_STAA5  
mengmveena fyda l ashdtaehv l gddt l k i a h e l t q s i k e n m s i d w n l c e s a r a k m r v i v r r l l k k y g y p e i s k q  
a v e t v i e q a e l m s e q l a m e  
l  
>tr|D2N986|D2N986\_STAA5  
m q e l e d y k e v q l i i i q m s s l p i g d g k r v f s y l e d g v t p r q y a l a t v s l f n g n e f k i l e v e r e n c a l s m l i l s s t g l v n w n  
p l i d s l l l n l v n s s g t w v k  
e s l e i l e r s n v i i q k a k h s k k e y a h r a k l l i h k m l  
>tr|D2N987|D2N987\_STAA5  
m k f e w l f k q p i s i k a v v k t g g i i l r v n e v k k k e i p f d v i s f s h p e l s k y e k s n e p k k y t m h e l k l s t e e k e k i i d e t v e g  
a t e d f e l a e m n k q v h e y a e  
s p s i v k i  
>tr|D2N988|D2N988\_STAA5  
m y i d g d l r h s l p p d n l e e v d l t i f p q l v r y t e r m d c t r n e r s g y v k  
>tr|D2N989|D2N989\_STAA5  
m n h k v y k l k n w p f a k g e q a q l t w i s s p f r e k k i m i y a y f r a k g r t g k n l n r l g h v t y i s y s t y v y r w  
>tr|D2N990|D2N990\_STAA5  
m l p f f t n p y p d e l l y s a i a r y h f y s g n l d c k d t l e e l f d s r s v i p s m e i g s h l t n l v e k l g p q s v e y l l a n h t i y p y a  
s f l s k q r q m e i l e d v k n n g  
q a l y t r l g i v a g g i c r k d g l y y c d m c a k s d s d k y r e p y i h r e h q l q g i s y c a h e i p l r e y p v t g d s r i e y i r f e l r y m n  
l s d l y e v e p y e e i v i q l a k  
q a y k l l k i p l h s l t k v e i d s m y k a l l r k k n l i t a a n r v r q q d l y q m i k i d l s e e h l t y y e s n f n e e n e y n w v k v l t r n s t  
r h v n p l r h l l i l l y l k q d v  
g d l i v d n g p f r k g p y p c l n r a a k h y k k l v i p s v k v t r d f t k a p i g t f c c s c g f v y a r k g p d n n e d q y r i g r i k a f g h v  
w r k l l k k l l n t g m s i r a i a  
k e l g v d p k t v k k y a e e p t l k e a k a i k p d r l e t y r n d l s e i m c t q p q l t r t e i r n q l c k q m y l y r y a k e w l m a n l p i q r k  
y t e p n r l v d w n a r d r e y v q  
r i k a l h q e l l t v e k p v r i t n s l i w k r l g i t a n i e g y s a k l p s t t t l l n e i e t v k a f i r r c c k v i d q m l e e n e v i k l w k  
v q r i a a i k s h h f h e i k k e l  
s k y i q k s g g v k r d e p q s i  
>tr|D2N991|D2N991\_STAA5  
m d a t s e l a k n d n v f e d y n f g y k l t n e s k y n w l c i n p n v g e v n f e e l i i t t s e l c k q t a e h i k q a q e q l n r v n e l r a r k d  
a i r d c l s a m e a l m t y l t g t  
t d i s a a d k a m r d d e e t w g g g f i k e g i t m w n m f h n k y k d i r h g n n f d i s l i s  
>tr|D2N992|D2N992\_STAA5  
m e f k k q f p d y l n y k n e e y l m n v v t e e l l r e i a q r l p r v y i q q k q n r y l n l d e t i k n a c d v v s i y t n n k k s g i  
>tr|D2N993|D2N993\_STAA5  
m y g v g v l v i d e i q h l l h a k n d k e d m l n f f v t l s n t v g v p t v l i g t s k a q q l f k g n f r q a r r a a s e g s i i w d r m n e d s e e w  
e f f l e t l w e l q c l k t y s e l  
t g d v k k a f y n d c q g i t s v a v n l f i l a q e r a l y d e s n e d e k l t i r v l k k t a k e d m k i i q p t l n a i r k n d f r a m y k y e d i m i  
n l d e l m q s h k a n t e y e g p i  
k e a m k e r k n t l t y k r q e l i e g l s e e v a a i g i f d a l t p s h i k e t t k k l v e n s s i e t d y n l l k t q l i p n l i e l n k k l n e k k v  
k v p s g k v l p l l d a r e k a l  
n q k k h v y e g l k e e n y i k n p m v e f f v t l e  
>tr|D2N994|D2N994\_STAA5  
m s e d d v m d r f m v a s r i t n q d k q s a t n i r y h v l k r i k k f i q p l p i h f e v k r r l s t l i r r g y l a r n p l d k t f l e r i  
>tr|D2N995|D2N995\_STAA5  
m h e g f m t l i k e m f p n a k i v i d r f h i v q l l n r a l n g i r v a v m n e l r t t n q p l y n k f k r y a k l l l k p g e d l g a f e y r k v a l f  
k e w k t q k g i v k y l l d q d d s  
l n d a y q y i n q l r f k l k h n d y e g f i h e l k h m p l s q t h l v v q r a i k t l n k h a y f i k n t f d y n l s n g p l e g i n n k i k l i k r t  
s f s y g n y n h l r n r i l l c s k  
l y a p k s k r k l s n v  
>tr|D2N996|D2N996\_STAA5  
m t q l t l p i e t s v r i p q n d i s r y v n e i v e t i p d s e f d e f r h r g a t s y h p k m m l k i i l y a y t q s v f s g r r i e k l l h d s i r m  
m w l a q n q t p s y k t i n r f r v  
n p n t d a l i e f l f i q f h s q c l k q n l i d d n s i f i d g t k v e a n a r y t f v w k k s i q n h e s k l n e n s k a l y r d l v e e k i i p e i k  
e d g d s d l t i e e i d l i g s h l  
d k e i e d l n h s i q n k d c t q i r k q t r k k r t e i k k f k k k f e d y s e r k s k y e e q s i l k d r n s f s k t d h d a t f m r m k e d h m k n g  
q l k p g y n l q i a t n s q f v l s  
y d l f a n p t d t r t l i p f l t m i q n t f g y l p e y i v a d a g y g s e q n y m a i i d d f n k t p l i t y g m f i k d k t r k f k s d i f n t q n w k  
y d e l n d e f i c p n n k r i g f k  
r y a y r n d r y g f k r d f k l y e c d d c s a c s l r q q c m k p n s k s n k k i m k n y n w e y f k a q i n q l s e p e t k k i y s q r k i d v e p v f  
g f m k a i l g f t r m s v r g i n k  
v k r e l g f v l m a l n i r k i v a r r a g v f m s k r r l y v k l d  
>tr|D2N997|D2N997\_STAA5  
m c g i v g y i g y d n a k e l l l k g l e k l e y r g y d s a g i a v v n d d n t t v f k e k g r i a e l r k v a d s s d f d g p v g i g h t r w a t h g v p  
n h e n s h p h q s s n g r f t l v h  
n g v i e n y e e l k g e y l q g v s f i s e t d t e v i v q l v e y f s n q g l s t e e a f t k v v s l l h g s y a l g l l d a e d k d t i y a k n k s p l

Tsompanidou\_et\_al\_Supplemental\_FASTA\_File

llgvgegfniyasdalaml  
qvtseykeihdheiviivkkdeviikgadgnvverdsyiaeidasdaekgyvahymлкеiheqpavmriiqeyqdaegn1  
kidrdiindvkeadriyvi  
aagtsyhaglvgkeflekwagvptevhvasefvynmp11seklpfvvisqsgetadsravlvtnklghksltitnvags  
t1sreadht111hagpeia  
vastkaytaqiavl1s1sqivakehgreadd11relakvttaieaivddapimeqiatdflettrnaffigrtidynvs  
legalk1keisyiqaeqfa  
gge1khgtialieegtpvvglatqekvn1sirgnvkevvargahpciismeglekegdtyviphvhe11tp1vsvvt1q1  
isyaa1hrd1dvdkprn1  
aksvtve  
>tr|D2N998|D2N998\_STAA5  
msqteekkgigrrvqafgsf1ssmimpnigafiawgfiaaifidngwfpnkdlatlagnmitylip11iafsgrliydl  
rggiaaatatmgvivalpd  
tpm1lgamimgplvgwlmkktqd1iqprtpqgfem1fnfnsagilgfmintiagfkilaplmkfimhilsvavealvhahl  
1plvs11vepakivf1nna  
inhgvftplgadqaakaggsilytiesnpgpglgillaymifgkgtakatsyagaihffggiheiyfpyvlmrpl1fia  
vilggmtgvatyqatgfgf  
kspaspgsfivyc1naprgef1hm11gvflaa1vsfvvaa1mkftkepkqdleataqmettkgkssvasklvssdkn  
vnkeenasgnvsetss1dd  
dpea11dnyntedvdahnyinnihvifacdagmgssamgasmlrnkfkaginditvtntainqlpkdaq1vitqkk1td  
raikqtpnaihisvdfn1n  
spryeel1nn1kkddqa  
>tr|D2N999|D2N999\_STAA5  
m11sirekemiallikyhgqyitihdiaqqlavssrtihrelkgveayltsfs1tlerankkg1riagadsd1ndlkqsi  
aqhqtid1sveeqkvi1iy  
al1qakepvkqys1ageigsvqtlakm1dd1eld1nkyql1s1srkrgegiylvgteskkref1sqlmvnn1nstsvysv  
ienhfvfhs1nqi1hkdfvd  
lerifnver11mdylsalpyqitessyl1tvhiv1sisrikngeyvalnddiyesvqntfehkvase1adklgqi1ydv1  
fnqaeiaf1ti1h1rgakrk  
n1ndts1nncreenikafvkkvemisgmtfad1dt1vdgl1t1h1npain1rlqanietyn1tdmikfkypr1fenv1ra  
1ndcwpd1ifpeseiafiv  
1hfpgs1knqgnr1ni1lvccssgm1gtsr11str1eqvfseieritqasvsd1ks1d1sqydg1i1stvn1didspyl1tvn  
p11pdsd1isyvagf1ntks  
tfqkthdkssnm1dkddvhvetkdidnts1feneqtsn1tsvfekhl1sdekseq1mhhmrsg1t11dsvkiv1stevkqwg  
tyiady1yqcdv1ndpss1f  
ae11leqr1idnpgwi1spypvai1ph1rdnmik1hpd1snhs1fr1rtvnia  
>tr|D2N9A0|D2N9A0\_STAA5  
mps1qndnqtikymi1smfipdn1dfmas1isd1sef1s1k1lesid1t1fmen1p1qe1et11rnk1f1erikkqfi  
>tr|D2N9A2|D2N9A2\_STAA5  
mkavhfgagnigr1g1fy1iladnnvkt1fadvnee1inalahdhqydviladeskt1trvnnvdain1smq1pseal1kqail  
ead1ittav1gvni1lpi1iak  
sfap1f1kek1thvni1vacena1imatd1lkkav1ditgpl1gnni1hfansavdriv1plqkneni1ldvm1vepfyewv1vek1daw  
ygp1elnhikyvd1l1tpyie  
rk11t1vntghay1layagk1fagkatv1davkdssieag1lrrv1laetsqyitnefd1fteaeqagyveki1idrfnnsyl1sdev  
trvgrgt1l1rk1gpkdr1ik  
p1ty1ynkd1ertg11ntaa111kyddtadqetveknnyikehglkaf1seyakvddgladei1ietyn1s1  
>tr|D2N9A3|D2N9A3\_STAA5  
mnl1frqkfs1rkfnvg1fsal1iatvtf1sinpttasaaeqnqpaqnpqapadasaqpnanagaqanptaqpaapanqg  
qpaaqpanqggqanpagga  
aqpaagt1tqpagqgnqadpnnaaqapgnqagqgnnqatpnnnatpanqtqpanapaaaqpaapvaanaqtqdpnasntg  
egsint1t1tfddpa1stnd  
nrqdp1tv1tdh1vngys1inngk1g1fvnse1lrrsdm1fdknp1qnyqargnvaa1lgrvnan1dstdhgnfngi1sktvn1vkpd  
seli1inf1ttm1qtsn1skqgat  
nlv1kdakkntel1atv1nvaktgtah1fkvptdad1rd1lqfipdn1tavadasrit1tnkdgykyysfidnvg1fsgshlyvk  
nrd1lapkatn1keyt1inte  
ignngn1fgas1kadqfkyevt1pqgvtyvnds1ttt1fpngned1stvl1knmtvnydqanankvtfts1qgvttargthtkev1  
fpdks1k1sykvnvanid1t  
pknidfnek1tyrtasdv1innaqpevt1tadpfsvavemnkda1lqqvnsqvddshyttasiaeynk1kqqadtilned  
anhvetanrasqadidglv  
tk1lqaalidnqaaiae1ldakaqekvtaaqskkvtqdevaalvtki1nndknaiaeinkq1ttaqgvttedkngiav1leqd  
vitptv1kppqakqdi1iqavt  
trkqg1kksnas1lqdekdvandkigkietkaikdi1daatnaqveaiktkaindi1nqtapattakaaa1leefdevvqqaq  
dqap1n1pdt1tnee1vaeaie  
rinaakvsgvkaieatt1taqd1lervknee1fkienitdstqt1kmdaykev1kqaatar1kaqnatvsnatdeevaadaavd  
aaqtegl1hd1g1vvksq1qev  
adtkakv1dkina1qtqarv1kpaadtevenayntrkqei1qnsnastteekqaaytel1dtkkqear1n1dtansnsevata  
kdn1siaainq1vqaattkks  
dakaie1aqkaserktaieamnd1stteeqqaakdkvdqavvnanadi1dnaaanndvdnakt1tneatiaa1itpdanv1kppak



Tsompanidou\_et\_al\_Supplemental\_FASTA\_File

qaiadkvqagetaidann  
atteektaakqqvqtekttadaaidgahsnaeveaaknaeiakieaiqpatttkddakqaiatkanerkaaiagtqeita  
eeiaaanavnavteann  
hietansqnevdaqttgeasidqvtpvtnkkatarneittilnklqaiqatpdatdeekqaaeteantenakanqait  
aattnaevdeaktnaeai  
navtpkvmkkqaakdeidqlqaaqtavinndqnatneekaaiaqqlatavtdaknnitaatdnngvdtakdagknsiqst  
qpatavksnaknevdaqvt  
tgnqaidnttgatteekeakdlvskakekayqdiInaqttnvdtqikdqavadiqgitadttikdvakdelatkakeqk  
aliaqtadatteekeqanq  
qvdaqltqgnqnieaqsiddvntakdnaiqaidpiqastdvktnaraellnemqnkiteilndntttneekgkdienvr  
aayeeelnnaatttgdv  
ttakdtavqkvqqlhanpvkkpagkteIdqaaadkkqieqtpnasqqeindakqevdaalnqaktnidqsstneyvdna  
vkegkakinavktfseykk  
dalakiadaynakvneadnsnastsseiaekqklaelkqtadqvnqatskddievqihndlnindytiptgkkesat  
tdlyayadqkknniladtn  
atqdekqqaikqvdaqvqtalesinngvndsvddaltqgkaaidaiqvdatvkpkanqaidkkaqetkesidqsdqlta  
eektaalatikqitdqakq  
gtdatttaevakakaqgleafdnidstekqkaieeletsldqieagvvnvdatteekeaftnaledilskatedis  
dqttnaeiatvksnaleql  
kqrinpvvkknaleaievvnkqieiknadadasakeiartdlgryfdrfadklktqtnaevdelqnvtipaieaiv  
pqkdpnandtngsdnnda  
tansnanatpentgqpnvtestdnanadtsstttnqndaatggttatstnssvdastdnsatgngttkpatetdnat  
paegtrnngtatatnena  
ptgstatapttnastgaassadskdnasvndskqnaevnnsaesqstngkvaqpkksenkakaekdgrdstnqsmvestte  
tlpsaditgpkvpsntekd  
keesttnqtdagqksetnvasneadksegvndtdvsnkpstsasseakekmtsinvskddtatadntdtqtsvgpvan  
nkatqndgtnaspatvsng  
snsanqdmInvtnteenkanaksaqgkvnlkqqaktlpdtgmshnddlypaelalgagmafllirrfkkdqqtee  
>tr|D2N9A7|D2N9A7\_STAA5  
mtkkkgidigvpstfgqrklgvdlgptairyagliprlkqldldvndkgdikvsavdiekfqseqnglryndeiddvtq  
klnkevsasiennrflvl  
ggdhsiavgsvsaiskhynnlgviwydahgdlnipeespsgnihgmpIrlitgegpkellesnsvikpenivligmrdl  
dkgerqfikdhnikftms  
didklgikevientieylksrnavdgvhlslvdaldpIetpgtgrvlggltyreshfalellhqsqsvtsmdlvevnpI  
idhnhntaeqavsligtff  
getll  
>tr|D2N9A8|D2N9A8\_STAA5  
mltvdqvkeligeikdpiiivplketegivevsikeekehsvkvamaqlggapqldlq mavvnlkengaktvgirfet  
lpeekvnqfkpeenkpkt  
iegllsqnnpvefiaiasgkgvgkstvavnalavalaregkkvgldvadiygfsvpdmngidekpgikgkevipverhgv  
kvismaffveenapviwrg  
pmlgkmltnfftevkwdieyliIdlppgtgdvaldvhtmlpsскеiivttphptaafvaaragamakhtehsilgvien  
msyfesketgnkeyvfgk  
ggtkladelntqllgeIpIeqpswnpkdfapsiyqaedrlgkiyssiaqkviaatnk  
>tr|D2N9A9|D2N9A9\_STAA5  
mmakveltrrrnfivavmlisafvailnqtllntalpsimrelninestsqwlvtgfmIvngvmipltaylmdriktrp  
lylaamgtflvgsivaama  
pnfgvlmvarviamagavlmpImqftlftlfskehrghfamglaglvifapaigptvtgliidqaswrvpfiiivgial  
vafifglisissynekyt  
klkdrsvmystigfglmlyafssagdlgftspivigamiissiiylfirrfnisnallnsvfknrtfalctissmii  
mmsmvgpalliplyvqnsI  
slsallsglvimpgaiingimsvftgkyfydygprpliytgftiltittimlclhdtstylylvvyairmfsvsllmm  
pinttginslrneishgt  
aimnfgvrvmagslgtalmvtlmsfgakifsstspshltateikqqsiaigvdisfafvavlvmaayvialfirepkeies  
nrkfk  
>tr|D2N9B0|D2N9B0\_STAA5  
mnylkhkfylnlittiivlfiFVlsgaiflftlfgfgyglSriliyfrlgdftynrsmynllyygsyiiifygfivfaveh  
lmdyfrkmlpenayfrgtt  
fhIisymvattllyfiIhlnyvyinidfwvimviigflyvcklqfypesklnnrk  
>tr|D2N9B1|D2N9B1\_STAA5  
mrIksivtviaIilimfmaaiessiislalptikqdlnagnlisliftayfialvianpivgelltrfkiiyiaiaagltl  
ftvgsImsglsthfsmlii  
srviqgfgsgvmmslsqivpklafeiplrykimgivgsvwgissiiigpIlggilefatwhwlfiyiniapiaiaailvw  
tfhfpeeetvaksfdtkg  
itllyfiIfiglImfallnqghlylnigfvlaIlvalrlfnvekkvsspflpvaefnrmitlvfitdltavclmgfnlyi  
pyvlqeqglspIqsglvi  
fpIsvawitlnfnlhieaklsrkviylssftlllssiiiafgiklpiliacvlilsglsfyiytkdsvivqeetspi  
qmkkmmsfygltknlgasI

Tsompanidou\_et\_al\_Supplemental\_FASTA\_File

gstimgylyalksglfganlhnlgvvsllsvglivvwliyreaasqtke  
>tr|D2N9B2|D2N9B2\_STAA5  
mmskstksndtivetfkdiip1sfgeeignaashgvaalltllvlpyaavhsyivngtlasvsmsiyvisifmmfisst  
iyhsmqnetphkyilriid  
hsmiyvaisgtytpilltiggwigwtvfillwgttlwgilyksiavkvnqk1slivylvmgwgviillpiifirtswif  
ilfi1ggvsvytigawfya  
qknrpyfhmihwifiviasllhliailyfm  
>tr|D2N9B3|D2N9B3\_STAA5  
mldknqlakykqdh1ceyekimsnekealeekvasldldfiaklyndlyinkktiddvsavsevkydiksqmsddeikr  
leeqglqaikeggfavllm  
agggqtr1gykpgkgsfeiegvs1felqakqlkelhrqtghmiqwyimtsdinheetlayfeshnyfygdqeahffkqd  
nivalseagqll1nqqgri  
metpnnnggvfksldkagyleemsngvkiyiflnnidnvlvkvldplfagftvehdyditskti qpkpge svgrlvnvc  
kdtvleyseldpevanqfn  
nanigihafkl1gf1lnavnrelpyhlaiknlkqldenfgvieqptlkfel1fyfdiftygtsfvtlqvpreeefsp1knke  
gkdsvatatealrrmgli  
>tr|D2N9B6|D2N9B6\_STAA5  
mdsfsrkeivigr1kfitmsligillflvpipveqdgqkqttl1pvaflagvlkdvlggvmpflivtiitlsgitlicst  
ilkdklkpdgl1hnafnvr  
igwli1rllavfawmtflrigskviysdetggl1fssllptlvavflfaalflpl1meygl1emlgpifrpvmrplft1  
pgrstvdn1asfigdgtvg  
v1itsrqygegyysreatvisttfsvsitfaivvaetvhmqnqffafylsvivsc1vaavimpriwplnkipdeyake  
vpesartealpegkta1rh  
gfdtatevgikapgi vdfksglktvvdmwfvilpvvmsigtiatiianytpffvilgkpfvpflelmqipeaaqasqi  
igfadmflpsil1iegvqn  
ditrfvigalsisq1iy1sevggvilgskipvsigklfmi flirtiitlpiislmah111  
>tr|D2N9B8|D2N9B8\_STAA5  
maikelssqsaidhkrkrtrt1tymvsvcf1ficvylmaigsskinfsdivhyvtghtdtkatfl1hnvrmp1rmlaglf  
iggalavsgllmqamtrnp  
laspkifgvssgasfvivltiipsleyyalylgwigafiggltyvtlsgatkgmtpiklalagmaih1ffssmtegi  
ilnensneqv1mfwlvgs1s  
smkwdeit1l1pwl1galiatvfigrqltime1gddiakglgqninkvriiigllviiltgmsvsiagpigfvglivphi  
vkryvsknylvmiplt1fi  
gad1111sdv1sr1itypyespgivtsfvga1yflfitikgvkri  
>tr|D2N9B9|D2N9B9\_STAA5  
mrglktfsilglivalflvaacgntdnsskkesstkdtisvkdengt1kvkpkdakrivvleysfadalaaldvkpvgiad  
dgkkkriikpvrekigdyt  
svgtrkqpn1eeisk1kpd1liadssrhkginke1nkiapt1s1ksfdgdykqnidafktiaka1dkekegekr1aehdk  
linkykdeikfdrnqkvlp  
avvakag1lahpnysyvgqflne1lgfkna1sddvtkg1skylkgpylqldtehlad1npermiimtdnakkdsae1kklq  
edatwkk1navknrvdiv  
drdvwarsrglisseemake1velskeqk  
>tr|D2N9C0|D2N9C0\_STAA5  
mahvni1niskikynakvlqtvfqsknmqftpvikciagdrtives1kalginhvaesr1dniisiadqdltyt1l1rtpak  
keisdmi1ekvdmsiqtel1s  
tihhinevaev1gkhhkil1mvdwkdgregvltydv1dyikei1h1knihfvg1afnfmcfksdapsdddifminrfvsa  
vereigyrlki1sggnssm  
lpqll1ynd1gkine1riget1lfrgvdtttnqaiamlyqdaitleaeileikprvntqthesfiqaidigyl1dtkvdnis  
pmdqhini1lgassdh1m1d  
1ngqghyqvgdhis1fs1nyealshsmymkn1hkvyiddskid1l1qnfdvks1pamvnqy  
>tr|D2N9C1|D2N9C1\_STAA5  
mvy1ewakadrniqyrvinaiikeriypeqtfisqkglieiqyhmhvtievvrksaleryeftgditylnkgets1im  
t1eg1ldv1nhdfdi1pise  
r1reelihsrds1vetykqms1hrqt1isqsfkfsr1p1qdinffsw1qhvkdsktd1ltyes1vpeghp1thp1tktklp  
1tmeevrayapefekeip1  
qimmi1ekdhvvtam1dgn1dqfi1dei1peynqi1rvflks1glksedyrailvhpwqydhtigkyfeawiakkil1iptpf  
t1l1skatl1sfrtms1idkp  
yhvkl1pidaqatsavrtvstvttdgpk1syalqnm1nqypgfkvamepfgeyanvdkdrarqlaci1rqkpeidgkgat  
vvsas1vnknpi1dqkvi1d  
sylew1nqg1tkes1ttf1eryaqal1pp1iafi1qnygialeahmqntvvn1gphfdiqfl1vrd1lggsrid1et1qhrvs  
diki1tnds1liads1davia  
kfqhavi1qnqmaeli1hhfnqydcveetel1fni1vqqv1vaha1npt1lphanelkdi1lfgptitvka1l1nmrmenkvkqyl1ni  
el1dnp1ikkev  
>tr|D2N9C2|D2N9C2\_STAA5  
mwagai1adkydgr1l1rit1ss1flvtailcv1ltsyftaipisviiyat1rgil1savetp1rqailpdl1sdi1sttqav  
sfhsfi1nicrs1gpa1ag  
vilavyhaptt1fla1qacyfiav1l1c1p1lhfkvtkipedaarymp1kvi1idyfkl1hmegrqifits1l1imatgfsy1t1l  
pv1tnkvfpgksei1fgiam

Tsompanidou\_et\_al\_Supplemental\_FASTA\_File

tmcaigggiativlpkvlkyigmvnmmylssflfgiallgvvfhnivimficitliglfsqwarttnrvyfqnnvkdyer  
gkvlslimmrdgmipglsl  
lmsicadvfgivrtfsmgisticitmvfylinrklklkleeshgis  
>tr|D2N9C3|D2N9C3\_STAA5  
mnlNli fkeqt1kfnkeegetylflqqhnsdwani fkemilqgrdkvtqr1vtsmhrenlvkartqskkilrldimldi  
stthileiqfpqakqtlya  
pitgehafdrivedgepfyikdnitnmitrvhhpneileciliieepdlknaasdqfqqd1nsatnmtfaisyqalsmqhd  
sap1fniensedsylrse  
qavieghplhpgaklrkglnalqtflyssefnqpi1kivlihs1srtms1skdydtv1hqlf1pdlikqleneftpnfn  
fndyhimivhpwgl1ddv1h  
sdyqaevdke1ieakht1dyag1sfrt1vpkypamsphik1stnvhitgeirt1seqtthngpl1mtrilndilekdvi  
fksyastiidevagihfyn  
eqdeadyqterseq1gt1frkniyqmipqevtpmipsslvatypfnnespivtlikryqsaasmsnfessakswietysk  
allglv1plvtkygialea  
hlqnaia1frkdgl1ldtmyirdfeglridkaqlnemgystshfheksriltdsktsvf1nkafystvqnh1geliltiska  
skdsn1erhmwyivrdv1d  
nifdq1v1sthsnqvnennrineikdtmfapfidykcvttmr1ledeahhytyikvnnplyrenn  
>tr|D2N9C7|D2N9C7\_STAA5  
mknksvslvfwvsvicti1fvafgai1fpkq1lek1tqnitsfialh1fswy1ll1v1v1l1fvcvyl1fsryasit1geeged  
pefs1pswfam1fsagmgi  
glvfwttapeishafk1tpihkagtqsaindamqfsffhwgihawavygivalvfayfshkgygplvsat1tp1l1geka  
mrgplggaidv1aviatvt  
gvaat1gfgalqineglh1flfnvpsnftmqviliviati1ftwsawsgidkgikt1sninm1lafvvl1gl1fivgptlyi  
1ntftnglgnyanffsms  
1ripsggqkfqwlqnwti1fyawwi1swapfvgi1fiarvskgrtikefilglv1fvpavvc1ffavfgasa1ylqdnhiad  
1akaatetatfat1qhyp1  
gfv1slit1l1vimi1ffvtsadsatyv1gml1sssgdinpksfvkvs1gim1alfai1miytgg1taiqn1l1iaalp1svv  
1iamiwsl1ks1seekprn  
snkv1ikh1rdpdv1eyr1ssk1hiden  
>tr|D2N9C8|D2N9C8\_STAA5  
mkm1g1fekp1k1leegn1fkvyeqr1kptpenddi1lvkvn1svnpvdtk1qrqmevtqaprv1g1fdaigtvea1gpdvt1fs  
pgdv1vyags1prqgsnat  
yqlvseai1vakaphni1saneavsl1ptgitayetffdtfki1shnpsenigk1svli1ngaggvgsiatq1akrygl1tvitt  
asrqettewcekmgadi1l  
nhked1vrqfkekei1plvdyi1fctyntd1lyntmiel1kpl1ghittiva1fnedqd1nal1k1ksit1fthe1mfarp1h1rtp  
dmikqheyle1ditkniesg  
hyqptttqvfeg1spenlyqahq1lekqsmigk1lvini  
>tr|D2N9C9|D2N9C9\_STAA5  
mqnkqil1fnki1pegmpqedt1fkiedit1tpk1lesdgv1vqtlyi1svdpymrg1rmtkadsy1vqp1feigkpi1vshivakvids  
tladykkgdvvvgm1pwri  
inhvqanqitkvpttdvp1ldly1sv1gmpgqtayhgl1ldigqpkagdtv1vsaasgavgs1vvgq1akikgcrvvgiaggd  
kkvny1tet1gfdagi1dyk  
kedfaes1aqavpdgidv1yfenvggtvgdevfkh1nr1farvpvcgais1synhpeadig1priqgt1ikkqvm1rgflv1sef  
anafkeaseq1atwvqegk  
iqsqvtiedgfenaprafkn1ftgdnf1gkqv1kvte  
>tr|D2N9D0|D2N9D0\_STAA5  
mkkifv1stt1lavai1igt1itv1fsqrqatfki1qqqf1vkkpi1pt1fl1hgfggsan1sek1fmvkqaekrgvtkdi1ta  
yvskdgavt1fkgk1skdav  
npi1kie1lenr1ggy1dknaawfknv1tk1lqseynfdk1fnfvghsmgn1tfaqym1tygndk1slpq1nkqvni1agt1fngv  
1nmnedvnei1tvkd1gkps  
rmnqpyq1rv1kdi1ykgkiev1ni1ygd1kdgthsdgrvs1nsssk1ky1l1gnspksy1reskyeges1aqs1qlhenenv  
ane1idf1wkk  
>tr|D2N9D3|D2N9D3\_STAA5  
mnreevq1lgfeiva1fagdar1skflea1taa1qagdfakadali1eegn1ciae1ahra1qts1lakea1qgddi1aysvt1mmhgq  
dh1mtt1l1kd1mkh1lef  
ykr1gl  
>tr|D2N9D5|D2N9D5\_STAA5  
mi1t1t1npsvdi1sypita1kl1ddvnr1vqevsktaggk1lvtrv1laqvgepv1lasg1figgel1gqfiakk1ldhadikhaf  
ynikgetrnci1alheggq  
teileqqpeidn1geaagf1khfeq1lekveava1sgsl1pkg1lnqdyyaq1iercqnkgvpv1ildcsgat1qtv1lenpykp  
tvikpnise1lyq1lnqpld  
esles1kqavsqpl1fegi1ewi1sv1gaqgafakhnht1fyrvni1k1sv1n1pvgs1gd1stvagitsa1lnhendqd1l1kkan  
t1gm1n1ageagt1gyvn1lnn  
ydd1fnq1ev1lev  
>tr|D2N9D6|D2N9D6\_STAA5  
mkia1g1cdhi1vtdtkmr1vsef1lkskghevi1dvgytdftr1thypi1fgkkvgeqv1vsgnad1gvcic1gtgvg1innavnkvp1g  
vrsalvrdm1tsa1lyakee1l  
nanvigfggri1ge1l1mcdi1dafinaeyk1pteenk1liakikh1letsnadqadph1ffdef1lekwdrg1eyhd

Tsompanidou\_et\_al\_Supplemental\_FASTA\_File

>tr|D2N9D8|D2N9D8\_STAA5  
mnkherldeiaklvnkkgirtneiveglvnsdmtvrrdlielenkgiltkihgarsnstfgykeishkekhrqiaek  
rfiarkaasliedgdtlff  
gpgttvellaeevnhhtltiitnclpvykillekqtahfrvyliggemrhiteafvgemanamlekfrskmffssnavn  
kgavmtstldeaytqqla1  
snsiekyllidhtkvgkedftsfcqlneltavvmdyedeekvetiktyievd  
>tr|D2N9D9|D2N9D9\_STAA5  
mendletlkhidssnriftftgagvsvasgvpdfrsmgglfdeiskdglspeyllsrdyledapegfinfchkrllfvd  
tmpnivhdwiaklernqqs  
lgvitqnidglhsdagsqyvdelhgtlnrfycnachksytksdvidrtlkhcdncggairpdivlygemldqptiiraln  
kiehadtlvvlgsslvvqp  
aaglisnfkgdnlriinkdrtpydsdatlvihddmvsvkslite  
>tr|D2N9E0|D2N9E0\_STAA5  
mcfdiinnlikklnfrkvnaihslsgdkyqfledgktinntyflavydnainifedlfspdsinlvhvvyvysepyk  
ktnvikfksltidelyyf  
keykkekddnilceefsykcsikdikykklkaisnqdfkglvpninqndnyseyiyinntknfiyhlyddrglwlafnn  
nedarysekyndlisefd  
ned1  
>tr|D2N9E1|D2N9E1\_STAA5  
mtyihfsiitlitgimqmtmyfvkfecrkmp1fmtiifti  
>tr|D2N9E2|D2N9E2\_STAA5  
mnhieiskdvkipvlfgfvfqi pqeetaeavkeaikagyridtaqsylnetevggievsqidrselfittkwienvn  
yedtiksierslqrlnldy  
ldvlvlihqpyndvygswraleelkengkikaigvsnfgvdrivdlgihnqiqqvnqieinpfhqeeqvaalqqenvvv  
eawapfaegknqlfqngll  
qaidkynksiaqvilrwlverdivvlaksvnpermaqnldifdelteedkqiatleesnsqffshadpemikaltsr  
kvdv  
>tr|D2N9E3|D2N9E3\_STAA5  
mktkevvalmni sqdtlryyekvgvipvnrdenyriyndsdlwiyvlvknlnragvsiesliefcrlaqlpkneniqa  
qqkqilnkqleelenlkt  
ihdardllqykidnydnhiakinasdnhdvnierlwerk  
>tr|D2N9E4|D2N9E4\_STAA5  
mtyrmkkwqklstittlmagvitl nggefsvdkhqiavadtnvqtpdyeklrntwldvnygynkydenndamkkkfeat  
ekeaeakllssmktesgrty  
lwagaenletnsshmtrtyrnekieaeamkhkntklktdenktkvkdalewlnhenaygkepdkkvadlktnfksapqkn  
tnlnwwdyeigtpralnt  
lillngdisdekkytapikt fapksdeilssvgkaepakggnlvdiskvkllesieedttmmkesivafnkftyvq  
snatdkerngfykdgsyid  
hkdvpytgaygvvllegisqmpmi ketpfndktqnttlkswiddgflplykgemmdlsrgraisrenetshtasatv  
mksllr1sdtmddstktky  
kqiiktsvksdssynqndylnsysdidmkk1iddksittndltqq1kiyndmrvtyhknkldfaglsmtsknvarye  
singenlkgwhtgagmsyl  
yndsikhyrndfswatdmkr1agtttl dneepkstdvkssktfvggkfdqhasigmdfenqdkltakksyfilndk  
ivflgtgikstdssknvpt  
tienrkangytlytddkqttdasdnqgtnsvfl estnkpknnyghflnkpkitvktethgnweinksqkdtqktdeyy  
evtqkhsnsdnkygyvlyp  
glskdvfkskasqvtvvkqddd fhvkdnesvwagvnysdstqnfeingtkvevkakgmfilkkkddntyecs fynpest  
nsadieskismtgysitn  
kntsttnesgvrfelk  
>tr|D2N9E5|D2N9E5\_STAA5  
mctqndgtmeqiwdkanqfgvavtwkdnsi igfvmrplinydaiknettlyavpttdcyeffwggdnelnyhylyph  
qryaidlvikenhkyknq  
gkvntdyfcfgkdiiapangtvekvvngvqdnsigstnesqflgnyivikhaeneysliahlqqysii vnegqnvkygdi  
igkvgnsgnstephihfq  
mndknieacts1k1rflnnlelikgdvvcglqge  
>tr|D2N9E6|D2N9E6\_STAA5  
mttym1mysipekaggitsvmlnrskllaekgyscalltlddknydpl rakltnsgrl hkqvkinvlyeelkml ydvent  
eienkntqtfeklnllnqe  
gfyiqkdeyeekkyaryfkdnhyimykkwingqlshidyfqrnkrikrhvfqnkilrkeitfndknkmsevkylsndgfc  
ylsywygdnenivni fyfd  
knskevl nfknnkafhsywl dkn1tsndvli ldgigtypkvenmqndikki ftihthfmspysygaeikpefrnmlln  
lkeltdl vvl tkeqkddi  
kqfgdynnikvipnaisfeenltqni reknsiivlqr fvamknithiisainivrkkvkdvk1hiygtgtqkenytklik  
klklqdnvfihdyafdira  
lytkas1svltsdyegl pms1leamsygvpvisypinygpkssi qnningiitkkkdninelakk  
>tr|D2N9E7|D2N9E7\_STAA5  
msmskrlll fdfdyfkhntneedlshl remekllek ltnnevmtavltgstfqs vmdkmdqvnmtfkplhifsd1ss  
kmftwnngeyiesetykkk

Tsompanidou\_et\_al\_Supplemental\_FASTA\_File

v1sepf1fediedilrhisayqnvfeipqrafegnethynfyfhstgnhsndrrialealvryandqnytarfsrsnplag  
dpenaydidftpsnagkly  
atqf1mkkynipvksi1gfgdsgndeaylsylehaylmsnsrdea1kqkfr1tkypyyqgitlhvkefvegkydy  
>tr|D2N9E8|D2N9E8\_STAA5  
mk1ksfvatat1alg1stvgaalpsheasadsnngykemtmdgyhtvpytisvdgitalhrtyfvfpenkkvlyqeidsk  
vknelasqrgvttekinna  
qtatytl1ndgnkkvvn1kknndaknsidpstikqiqivk  
>tr|D2N9E9|D2N9E9\_STAA5  
mtnvlyqght1gt1mag1lkgtasine1lqhgd1giatltsngevif1dgkayhanehkefvelkgdeltpyatvtfkv  
adtsyetskdsseavfaei  
kemmlsen1fsavkisglfkkmhvrmpaqeppytr1idsarrqpeqtetyvkgsvvgfftpel1fhgigsagfwhfand  
drnfgghv1dfevedvkve  
iqnietfeqhfp1qdedfinanidykdiadeireae  
>tr|D2N9F0|D2N9F0\_STAA5  
mtdkkytaadmvidtlknngveyvfgipgakidy1fnaliddgpelivtrheqnaammaqgigr1tgkpgvvlvtsgpgv  
sn1ttg11tatsegdpv1a  
lggqvrnd11r1thqsidnaal1kysskyseevqdpes1sevmtnairiatsgkngasfisipqdvisspveskaislc  
qkps1gvpseh1ndviea  
iknasfpv1lagmrssaeetnairk1vertnlpvvetfqqagvisrelenhffgrvgl1rnqvgdel1rksdlvvtigy  
dpeyeasnwnkel1dtqii  
nidevqaeitnymqpkkeligniaktiemisdvdepfinqqh1deleqlrthideetgikatheegilhpveiiesmqs  
v1tddtvtvdvgshyiw  
arnfrsynprh11fsngmt1gvalpwaisaalvrpntqvsvvagdggl1fssqdetavrkn1niqliwndgkynmve  
fqeemkykrssgvdfgvpv  
fvkyaesfgakglrvtnqee1eaaikegyetdgpvlidipvnykdnik1stnmlpdvfn  
>tr|D2N9F5|D2N9F5\_STAA5  
mknk1iigrylpinsfvh1dprak1mfv1fiiliffchsp1tyl1wv1al1ffmrlakiqlwfl1kgl1tp1fff1ift  
1mmh1f1tkggyv1vewhg  
ftietng1leglyis1rl1g1v1miatim1stspid1tdafer1lap1kmfklpvhqlsmimsialrfipt1mdeldkii  
1aqksrgseissgniatr1  
ksfip11vpl1fi1safqraee1lavamevrgydanvkrtsyrqlkwqlrdt1slimiipiaailfv1kysgv  
>tr|D2N9F6|D2N9F6\_STAA5  
mi1rfdnvsy1tygkgtpyghqaihdvntefeqgyyai1vgqtgsgkst1iqnina1lkpttgtvtvddit1thktdkkyi  
rpvrkrigmv1fqf1pesqlf  
edtverem1fgpknfkmnvdeaknyahr11md1gfsrdvmsqspfqm1sggqmrkiaivsilamnpdiivvdeptag1dpq  
skrqvmr11ks1qt1denkt  
i1ilishdmnevaryadev1vmkegsiv1sqtspkel1fdkkeladwhigl1peivqlqydfeqy1tk1kdialteeafvs1  
ykewqhek  
>tr|D2N9F7|D2N9F7\_STAA5  
medknsiv1fknvs1fqyqsdasft1kdvsfn1pkgqwt1svghngsgkstiak1migienvksgeifynnqt1tddnfek  
1rkdi1g1v1fqnpdnqfvgs  
ivkydva1f1en1havphd1emhrrvseal1kqvdm1eradyepna1sggqkqrvaivasv1al1npsvii1deatsm1dpdarq  
n1ld1vrkvk1sehn1tiis  
ithd1seameadhvi1vmnkg1tvykegtateif1dhaeel1ttig1d1l1p1pikinqm1ghqts1f1tyeg1vdq1  
>tr|D2N9G5|D2N9G5\_STAA5  
miqt1vnffrt1kev1rnki1fft1am1lvi1fkigty1ipagvnpaa1fdnpqgsqgate11nt1fggga1krfs1ifamg1vpyit  
asivm1q1l1qmd1ivpkf1sew  
akqgevgrrk1nnvtry1ais1lafiqs1igma1fqfn1ylkgal1inqsimsy1llialv1tagta1fiw1l1gdqit1qf1gvng  
is1iif1agil1st1pas1liq  
fgqta1fv1gqeds1law1kv1gl1lvs1l1l1tv1gaiyv1leavrki1pi1qyakqta1r1gsqatyl1pl1kvn1sagvip1vifama  
ff1l1prt1t1fyp1dkewa1q  
nianaanp1ssnvgm1vvyiv1i1l1fty1fya1fvqn1pek1madn1kkqgsy1vpgir1pgeqt1kkyit1kvlyr1l1tfvgs1flavi  
sil1pil1atk1fmg1lpqs1iqi  
ggt1s1l1iv1gva1iet1mks1lea1qvs1qkey1kgf1ggr  
>tr|D2N9G7|D2N9G7\_STAA5  
mak1qit1l1trsv1igr1pet1qrkt1veal1g1kkt1nssv1ved1npair1gq1inkvkh1l1tveek  
>tr|D2N9H7|D2N9H7\_STAA5  
mkakei1rd1ttse1ieeq1kss1keel1fn1rfq1atgq1eetar1irtvrktiar1lktvarereieqskanq  
>tr|D2N9I1|D2N9I1\_STAA5  
marsikk1gp1fvdeh1mkkveaqeg1sekkqv1iktws1rrsti1fpn1fight1favyd1grkhv1pvyv1ted1mvghk1l1gefap1trtf  
kghvaddk1ktrr  
>tr|D2N9I9|D2N9I9\_STAA5  
mks1li1laek1psvardi1adal1qin1qkrngy1fennqy1vtwal1gh1lvt1nat1peqy1dkn1kewr1led1piip1kymkt1vvigt  
skqfktvkt1li1dnkvkdi  
i1atdagrege1lvar1li1dkvgnkkp1rr1wi1ssvtkkai1qqgfkn1kdgrqy1nd1yyaa1arseadwivginatral1tt  
kydaq1sl1grv1qtpti1qlv  
ntrqqe1inqf1kpqyyt1sl1tvkg1fdq1lesnqry1tnket1leqivn1knvdgkiksvatkhkksy1pqs1yn1td1lqqdm  
yrry1kig1pket1nt1lqs1ly

Tsompanidou\_et\_al\_Supplemental\_FASTA\_File

erhkvvtyprtdsnyltdmvdtkmeriqatmattykdqarplisktfsskmsifnnqkvsdhhaiiptevrpvmsdl  
relklydmiverflealmp  
pheydaitvtlevaghtfvkenvttvlgfksirqgesikemqpfsegdkvki sntnirehettppeyfnegsllkame  
npqnfqqlkdkkyagtllq  
tggigtvatradiidklfnmnaiesrdgkikvtskgkqilelapeeltsp11taqweek111iergkyqaktfinemkdf  
tkdvvngiknsdrkykhdn  
1tteceptcgkfmi kvtkngqm1vcqdpscktkknvqrktnarcpnckkk1t1fgkgkeavycvcghsetqahmdqrm  
kskssgkvsrkemkkymnk  
negldnnpfkda1kn1n1  
>tr|D2N9J0|D2N9J0\_STAA5  
msivqlydi tqiksfihsnyesasylyklpqyneydvlitdaiespgvfsikendsikailsfaydknkfkvigpfv  
adnyv1svdtfetl fkan  
ssqpdavfnfsfeegi qykp1mkviqasynftdyieartrleedmhqpnii pynkgfyrafsklhtttfkyqaqspq  
diidslddhhh1flvseg  
1lkylyleidsqqsiaei kyfsshvdyrlkgiafellaya1qyafdnfdirkyvfki rnkknklierfnglgfhinyey  
ikfkfesrnvdqtipe  
>tr|D2N9J2|D2N9J2\_STAA5  
mkegitvteqftmi11ialgyflkrinyikatdsqvialvlnvtlpslvivnlnsaelklsfsilpilmiygivakm  
iavwffrkydnhmrsgvm  
mtgamnig1fayplievipktg1iyfgmadiggafvmfityfvgsyfsegsdqdfkylgkkl1qsvplvtyivmfil  
nishih1phvaidffsils  
hanmplsm11lgvlnftlerkyipatikylclhyglalvag1lvh11pvsddmiktt11vtwmfpvgvaiisyyiqfk  
yrt1pfigmttn1tiisi  
iilyvyqavfv  
>tr|D2N9J5|D2N9J5\_STAA5  
mikk11qfslgnkfai1mvv1v1ggvyasak1kle11pnvqnpvisvtttmgatpqstqdeisskidnqvrslayvk  
nvktqsiqnasivtveyen  
ntdmkaeeq1kkeidkikfkdevgqpe1rrnsmdafpvlaysfsnkend1kkvtkv1neqlipklqtvdgvqnaqlngq  
tnreit1kfkqnelekygl  
taddvenylktatrtt1gl1fqfgnkdksvvdgqyqsvdafkninip1t1aggqgqsqsqsdnkqnsamsdvnqaspq  
nskasasnnvsgmptaklg  
d1aditvgdvrtssktngkdavn1qitkaqdantvqvakdvqrkidtfdvdenkdfnvtkmdtakpvekslytmvekas  
1gtivaii v111flrnr1t  
taisiisip1s11malialk1sdvs1n11t1gal1tvaigrviddsivvveniyrr1tdseeq1kgen1lvsattevfkipi  
msst1vtiiv1p1lvfvsq  
svgemfrpfal1afsl1as11vsit1vpalaat1fkkgvkrnrkqhqeg1gvvsttykklhws1nhkwivi1st1il  
vvtivfggpr1gtsfisag  
ddkfl1aitytpkpgeteqav1nhakdveky1kqkkhvkti qysvggsspvdptgstnsmaimveydndtpnfdveadkvi  
khadgfkhpgewnqdlgt  
gagnksvevtvkgsmdaikstvkdieqkmkqvkg1anvksd1sqtydqyeikvdqnkaaengisasqlamh1nen1pek  
tv1tvkengktvdvkvkqn  
kqtdwsedk1nnt1kkptggtik1gdiat1vktttpsk1tqeqgdyattvsakvtnkdvggttrqvmskinn1dkpnnv  
kvniggasddinnamtqla  
faml1aaiiivyl1lvt1fkkg1apft1lfs1pftv1gvi1allitgetisvps1lig1ml1igivvtnaiv1lidrvinneq  
qgmemekealieaggtrirp  
i1mtaiatigalvp11fgqdssiliskglaatvigglisst11t1lvvvpviyei1ft1kkrftkr  
>tr|D2N9J6|D2N9J6\_STAA5  
mekmhitnqehdafvkshpngd11q1tkwaetkk1tgwyarriavgrdgeiqgvaq11fkkvpklpyt1cyisrgfvvdy  
snkealnal1dsakeiaka  
ekayaiki dpdvevdkgtdalqn1kalgfkhkgfkegl skdyi qprmtmitpidktde11nsferrnrskvr1al1krgt  
tversdreg1ktfaelmki  
tgerdgfl1trdisyfeniyda1hedgdael1vkl1dpkeniakvnqel1nelhae1akwqqkmetsekqakkaqn1indaq  
nkiakned1krd1lea1e1e  
hpegiy1sgal1mfagsksy1ygassnefrdfl1pnhhmqtmmkyarehgattydfggtdndpdkdsehyglwafkkvw  
gty1seki gefdyv1nqpl  
yqlieqvkr1tkakiki srk1krk  
>tr|D2N9J7|D2N9J7\_STAA5  
mil1kfdhi1hyidq1drfsfpgdvik1hsggyhkygtfnk1gyinenyie11dvennek1kkmaktieggvafatqivq  
ekyeggfkn1cl1rtdiea  
vkn1lqseqvevvgpiqmerdthkdgki kwq1lyimnqdddeikppffiqweesdmr1tkk1qkyfqkqfsietvivksk  
nrsqtvsnw1kwfdmdive  
endhytd1l1knddyfriedgkvskyhsvi1kdaqatspysifirgaiyrfep1v  
>tr|D2N9J8|D2N9J8\_STAA5  
m1sqeffnsf1tiyrpy1k1laepilekhniyygqwl1lrdiakhqptt1ieishrraiekptark1kaliendlitven  
s1ledkrqkfl1t1tpkghe1  
yeivcl1dvqk1qqavakt1nsqdmqetinvmnqihe1llkeahnd  
>tr|D2N9J9|D2N9J9\_STAA5  
mtnqgs1nkspi1ftksft1nffvnfivyl1cm111vviagyskqafdasds1lag1lvvg1fivgs1igrfatgkfvnqigp

Tsompanidou\_et\_al\_Supplemental\_FASTA\_File

krllfiglialitqllf  
idgslafliivrilingiatavttatgtiaayvtpvnrksegislfslslvlgtaigpflgmllitkyaidllfvicvil  
gilgliislfikvdfevtn  
sktetnvidkprfsihqfiakeailvavimlligvtyasiltylqafalerhlvtaasyfficyaiaslitrpiagrmd  
dkneniivypafimlflsf  
vclissyqswlillagaclglygnlssamsiaikvspikygiatstfyvgldagvgfgpsflglfthmfyseifgf  
maalaitmlvyflihgrh  
varnamn  
>tr|D2N9K1|D2N9K1\_STAA5  
mpkevgddfvflpknelldemariakvyaelgvkkiritggeplmrrdlvliaklnqidgiediglttngllkkh  
gqklydaglrrinvsldai  
ddtlfqsinnrikattileqidyamsiglnvkvnvviqkginddqiipmleyfkdkhieirfiecmdvgndngwdfskv  
vtkdemltmieqhfeidpv  
epkyfgevakyrrhkdnvgvfglitsvsqsfctctrarlssdgkfygclfatadgfnvkafirsgvtdeelkeqfkalw  
qirddrysdertaqtvavr  
qrkkinmnyigg  
>tr|D2N9K2|D2N9K2\_STAA5  
mkaiilagghsvrfgpkafaevngetfysrviktlestnmfneiiistnaqlatqfkypnvviddenhndkgplagiyt  
imkqhpeeeelfvsvdtp  
mitgkaistlyqflvshlienldvaafkedgrfiptiafyspnlgaiktalhsdnysfknvyhelstdslvrdvdap  
sywykninyqhdldaliqk  
|  
>tr|D2N9K3|D2N9K3\_STAA5  
mkvlyfaeikdilqkagedivleqaltvqqfeillferypqiinnkkfquavneefvqksdfiqpndtvalippvsgg  
>tr|D2N9K5|D2N9K5\_STAA5  
milqivgykkskgttlmrhivsfllkahgytvatikhhghgkediqlqdsdvdhmkhfeagadqsivqgfyyqqtvtvrdn  
qnlqtqiieksvtidtnivl  
vegfknafekvvyrdeeeqlvqlqqlsnvcysinvrehedftafeqwllnkikndcdtqlt  
>tr|D2N9K7|D2N9K7\_STAA5  
mtefthinqqghakmvdvsdkqitkrtavahssitvnetiykqisntntkgnvlntaqiagimaakntstiipmchlp  
lgtidvhfnwdetnaplyt  
lniqttvsttgktgvemealtaasvtaitydmtkavdkgmigetylesksggksqdfqrqldq  
>tr|D2N9K8|D2N9K8\_STAA5  
mgehqnvlrntvkaavltvsdtrnfdtdkggqcvrqlqaddvevsdahytivkdekvaaitqvkkwleedidviittg  
gtgiaqrdrvteavkp1lt  
keiegfgeifrylsyvedvgtrallsravagtvnklifsigpstgavklaleklikpelnhliheltk  
>tr|D2N9K9|D2N9K9\_STAA5  
msqerysrqilfkqigeigqkninqkaliigmgaigthvaeglvrakiakliivdrdyiefsnlqrqlyteedalkmm  
pkvvaakkhl1alrsdvd  
ddyiahvdyyflethgqdvdiidatdnfetrqlindfaykhrpwiyygqvqstyteaafipgktpcfnclvpqlpaln  
ltdvtgviqpavtmatsl  
qlrdamkvlteqpidtkitygdwegshysfgfsmqrsdcttcgdvpsypylnkneqryatlcrdrtvqyentsithdi  
lvqflkqhqlnyrsnsymv  
mfefkghrivafkggrflihgmrtrtsdathlmnllfg  
>tr|D2N9L1|D2N9L1\_STAA5  
mpdltpfwisirvavistiivtvlgvfiskwlyrrkgswwkvesllilpivlpptvlgfilliifsprgpigqffanvl  
hlpvftltgaviasvivs  
fplmyqhtvqgfrgidtkmintartmgasetkiflklilplakrsilagammsfaralgefmatlmvagyipnktntlpl  
eiyflveggreneawlwl  
vlvafsvivistinllnkdkykevd  
>tr|D2N9L4|D2N9L4\_STAA5  
masismsdincdgtifendkqliyltpifpqrystsntwlykkmptqerwldklderqhlhtnqgsnyhafsfpeneqld  
nhwmamfkdmfelgime  
yaisesdalanlprnsdveiaivdeshidaylkvayqfslpfgkdyadahekmvrehyqkdvikrlvaylnnepigvvdvi  
esenyieldgfgvleqfrh  
qgigstmqslvgeyalrnhkpvilvadedtakdmyvkqgyvyqsfcyqilkeniei  
>tr|D2N9L6|D2N9L6\_STAA5  
mtkkvyfnhdggvddlvslllqmenvqligvstigadcylepslsasvkiinrfsnediqvapsyergknpfpkewrm  
haffmdalpinpvhva  
snvsdkeafediqlkrqsekvllftgpltdlakaqkdsivqyieklvwmggf1pkgnveepehdgsaewnaywd  
peavkiivfdsdieidmval  
estnqvpltdlvrqrwanerqytdf1gvsyaavpplthfitnstyflwdvlttayignkdlvhsiekkvdvisygpsq  
gktfeckdgrkinvinhvd  
naffdyitalakkvn  
>tr|D2N9L8|D2N9L8\_STAA5  
mndmdnsflitteiqrkwiekfkvigdtfkakaeyndqhsqfpykniewlikegygkltlpkeyggegatiedmvilqsfl  
lge1dgatalsigwhsvv  
qqiyeqklwsqdmleqfaveinngalvnravseaemgsprtrgprsthavkaddgyilngvkytsmskalthiivaayi

Tsompanidou\_et\_al\_Supplemental\_FASTA\_File

ee1ksvgff1vdrnlpgve  
iadnwdvlgmrateshdliIndvkvp1kh1vetekskapngwilhipscylgiaqaarnyavdfaiqhspnsiegtiatl  
ptvqqn1gkmet111carq  
flwstakgyqqykddsqirnstaskvmvmnqglevidlamrivgakslemnrplqryyrdmraglhnpmedaaytnia  
ksitdtf  
>tr|D2N9L9|D2N9L9\_STAA5  
midvllknisqvv1snkwtglfiliglfvanwtvglaamigsiiayafaryinyseaeindglagfnpvltaialtifl  
dksgldivitmial11tlp  
vaaavrevlpykvpmltmpfvivtwftillsgqvkfvdts1klmpqnietsvnfsndrihviqslfegfsqvfieasvi  
ggyciligiliasrkaall  
aviasllsfiival1ggnyddingglfgynfv1maialgytftainpyistflgvlltvvvqlgttt11epfglpaltl  
pfiivtwillfagikndkv  
da  
>tr|D2N9M1|D2N9M1\_STAA5  
mipgeiitksteveinnhhpetvi eventgdrpiqvghfhfyeanaldferelayghldipagaavrfepegdkkevq  
lveyagrki fgfrgmvg  
pidesrvyrptdendeyagvfgdngdenvnkkggkrs  
>tr|D2N9M2|D2N9M2\_STAA5  
msfkmtnqytslygptvgdsirlgdtnlfaiekdyavygeeatfgggksirdgmaqnrvttrddvnavdlvisnavii  
dydkvkkadigikngyifa  
ignagnpdimndvdiigsttdiaaegkivtaggidthvhfinpeqaevalessgitthigggtgasegskattvtpgpw  
hihrmleaaeglpinvgtf  
gkgqatnptalieqinagaig1kvhedwgatpsalshaldvadefdvqialhadtlneagfmedtmaavkdrvlhmyhte  
gagggghapdliksaafsni  
lpsstnptlpythntvdehldmvmithhlnaaipediafadsrirketiaaedvlqdmgvfsmisssdsqamgrvgevitr  
twqvahrmkeqrgpldgdy  
ehndnrikryiakytinpaithgiseyvgisepgkladivlwdpiffgvkpelvkvkglinsavngdangsiptsepmk  
yrkmygqyggnltsstmf  
vsktayenginraln1krmvrvpkni rqlskadmknnsatpkldvdpqtyevyvdegekit snaatelpl tqryflf  
>tr|D2N9M4|D2N9M4\_STAA5  
midhth1rlfqcfsqfptgafshsfgletyiqrni ihddhtfiawlkmflqeqltysdglamrlvydalenddtqkv1h  
idklmfvqn1pketrvgak  
qmgtrmvklalelynspwiawyhqmqdkkaklnpaicftmlghylgvdi etidyylyqnvssltqnavraiplgqtag  
qkivthmipyieetrkqif  
elkeadfgmtapglelnqmahenvnrifis  
>tr|D2N9M5|D2N9M5\_STAA5  
manpikigiggpvagaktq1iekvvr1skemsigvitndiytkedekilvnsgvlpesriigvetggcphtairedasm  
nfaaidellerhddielif  
iesggdnlaatfspelvdfsiyiidvaqgekiprkgggmiksdffvinktdlapyvgasleqmaedtkvfrgkhpftft  
nlktdegldevidwierdt  
llkg1s  
>tr|D2N9M6|D2N9M6\_STAA5  
mdeqqwtgqld1tvffdgrrsvsrdiffekalkvirpvylnqstiptfyivnvgggylgdryrmvnvednakvtltsq  
gatkiyktpsnhvegyqtf  
nlkdnayleyvadpiiayenakfyqhntfnlnssslfytdiltpgysktgeafkyqymhlineiyiedelvtvdydnlln  
pnkqsikeigymehyshy  
sayfihedvqklidsvyetissysntfdrvaisqlpthgfavrifayrtqiiekilgtiqsyiaeniydrkl dflrky  
>tr|D2N9M8|D2N9M8\_STAA5  
milndvnpnd1fptekkgpsvlgiiyqvqgknefegafiatnerlimvdmngqfyrsisyneiekidydgqtimfkf  
nignvpmhdiksdnvemfv  
eyvkqhmiv  
>tr|D2N9N0|D2N9N0\_STAA5  
myqpkniiykgsnfywmdyytikqiiqr1gvnpenlhiivtidtsnel sieqitlllqkivnynvvnvfrikheykellt  
stergkieklvati fnmf  
esnrckiaflindlnttaiqklkr1idnyigvfelyhlepnelntrydkeidhlidyfilplrqi eqvsarskiicdv  
dlinenn1kekitmsdin  
kvte11tnytkfrglimhmsiiseaskeinlr1sififiinilnqlrgiviyqndtmivtkfkhevqcviclpallne  
nsdair1sckglqqfshak  
tkqiv1sidkdnhtsengvlvndimqqhsywanfierniydhs1mvssnsivh1kyhlei  
>tr|D2N9N1|D2N9N1\_STAA5  
mtdnys1hifksmkmsvskan1kiyw1qgtgvvsin1qydvkrndvtvim1ndlyqidghddsvccvvevsaktflk  
fmnanymrgkilnevas  
tlri1iky1iyskikqppynandkii nymcvelms1ntydgshr1vaeevhdy1tnnhhkk1nrkdvinqvsitnkalsd  
mfkatpysnfiqylnhir1  
ehclidi1tskkpieeiasshgfnhysrfih1fketygdtpklirknsptshsinhsq1veidkn  
>tr|D2N9N3|D2N9N3\_STAA5  
mmtrkptfl esistmivmvvvtgfvffdiqipvlliasayaawiakrvgltwqdlekgiaer1ntampailiilav  
iivgswmfsgtvpaliyyg



Tsompanidou\_et\_al\_Supplemental\_FASTA\_File

ldllnpsyflisaffisavtsvatgtawgsastagialisignqlsispgmaagaiagavfgdkmsplsdttlnlaalvt  
kvnifkhirsmmwttipav  
iigllvwfiagfqfkgshndkqiqtllselahiyqiniwvwppliviivc1lfkmatvpamlissfsaiivgtfnhhfkm  
tdgfkai fsgfndsmihqs  
hisssvksllleggmsmtqilvtifcgyafagivekagclevl1ttiskgihsvglitviccialvfaagvasivi  
imvgvlmkdl fekyqvsrf  
vlsrtledsstmvlplipwgtsgiytnqlhvsvgeffiwtpcylcaiiyaiyftgigikkssnrlt  
>tr|D2N9N4|D2N9N4\_STAA5  
mkiavgsngavtaavdmvskghdvklycrnqsisfkqnaiekggfdnnegeerfvkftdisddmeyvlkdaeivqvi  
ipssyieyyadvmaehvtd  
nqliffnmaaamgsirfmnvlredrhietkqplaeantlygtrvdfenaavdlslvrriiffstydrsc1ndcydkvssi  
ydhlvkeesliktnlengn  
pevhpgptllnvgridyagefalykegitkhtvrllhaielerlnlgrrlgfelstakesriergylerdkedep1nr1f  
ntspvfsqipgnhvesry  
l tediayglvlwsslgrvidvptpnidaviviastilerdffeegltvesigldkldlekylk  
>tr|D2N9N6|D2N9N6\_STAA5  
mkk1vtatt1tagigtalvghaqhadaaenytnynnyntttttttttttssishsgnlytagqctwyvydkvgge  
igstwgannwaaaaqgag  
ftvnhtpskgailqssegpghvayvesvnsdgsvtisemnysggpfsvsrtisaseagnynyih  
>tr|D2N9N8|D2N9N8\_STAA5  
mkiavigagiggltaaa1lqeqghtikvfeknesvkeigagigigdnvlkklgnhd1akgiknagqilstmtvlddkdrp  
l1tvklksntlnvtlprqt  
lidiiksyvkddai ftnhevthidnetdkvtihfaeqeseafdlcigadgihskvrqsvnadskvlyqgytcfrgliddi  
dlkhpdcakeywgkrgrvg  
ivp1lnnqaywfi1tinskennhkyssfgkphlqayfnhypnevreildkqsetgillhniyd1kplksfvygrtillgda  
ahattpnmgqgagqameda  
ivlvcfnaydfekalqrydki rvkhtakvikrsrkigkiaqyrsrlvavrnr1mkmmpnalaagqtkflykskek  
>tr|D2N9N9|D2N9N9\_STAA5  
mknfk1rist111ivi1vvfsv11ivnetklfkndvnysfdeavsmqqgkivqtkeedgkfveanneiakamtishk  
dndmkymdi tekvpmsese  
vnq11kgkqil enrgkvfl eaqekeyevnviylvshalvetgngkselakgikdgkkryynffgigafdssavrsyksyae  
keqwtspdkailggakfir  
neyfennq1nlyqmrwnpenpaghgyasdi rwadkiaklmdksykqfgikkddirqtyyk  
>tr|D2N9P1|D2N9P1\_STAA5  
maerissk1rrlekseeqikles1nevteaiaankdsilkaiklikvlddakil dalngavrgrqvi inkfavelnkdiy  
tg11snmasmvf11gelnv  
sd1sdf1nkvnkg1hvanqaspnaktsvrs1fgvlkdddmnrs1tym1nm1kgmsred  
>tr|D2N9P2|D2N9P2\_STAA5  
mqehl1vvt1dgkdy1vepgtn1lefiksqdtfvpsicynesmgpiqtcdtctveidgkierscstvidrpmtvntvndv  
kdaqkealdri1lekhllyc  
tvcdynngdceihntmdawglqhqttyeykekyekdygpfyrdpnqic1lgrcveacqdievnetiridwdrehprviw  
dndvpinesscvscgqcat  
vcpnammevnmegnagymtdtepgslaamid1tkkaepgygp1faisdseaemrkerikktktvctycvgvcsfevwtk  
dreilkvqpshdspankia  
tcvkgkfswhinsdqr1tkplvrkngefheveudealnv1adnftsikekhgpda1sfi1sskatneesy1mqklarqv  
igt1nvdncsrycqpak  
glfrtvghgds1ied1lekaamsvl1gtntaeahpviasrmkraqlfgqkihvfdirkhemaeradr1fyqpkpgtdla  
w1savtky1idhd1hdka  
ieewvedfdeyyks1eftmafaeeatgipeaelikfaecakaesv1cwamgitqqdigdsstaisn111vtgnyrr  
pgtgayp1rg1hnnvqgcsd  
mgsmpdk1tgyqsieadd1rakfekeygvk1n1pkagkdnhemvegihdgqihsllygedtgivdsn1nfvqaafekldf  
mvvqdef1tftatfadv1  
pasp1lekdg1tnterriqrlyqa1kplgeskpdwki fqaiankl1gfdwnykh1pseimdeiar1t1plyagvsyer1legf  
ns1qwpvh1pdgtdep1ly1  
egfnfdngkak1fp1sfdnyfkqdevydi hvnng11leh1fhegnmt1yqtpm1kykvprafveispelaedrgihegaevk  
11setgeav1qvhvtdrvk  
gkeiy1p1nndameng1lgain11t1nsdv1dqytd1tps1ykrts1rlevit1kr1gksp1n1pnn1frvnk1krhpqysv1qvqkkwe  
rpd1y1f1pg1nqvd1k  
>tr|D2N9P3|D2N9P3\_STAA5  
mkrsskskms1pkki1flw1fgi1v1ilavvyvaaki1fitgnki1hnp1drnhsel1rdkkvs1ndgdpftial1fgvdsda  
drkkkgggersds1imi1si  
npk1tkktei1vs1pr1dtraei1vgr1dtteki1ahayayggpn1mavks1lek1lmnvp1idhyat1dmdgl1hnm1dsiggvdvvsnd  
tftvdgvrftk1gq1qthvng  
dqa1k1f1rs1rkeegag1d1fgr1qr1qv1leamankiaspss1ithfns1lmeiqnnvkt1d1t1lg1d1nt1rsnykdand1in  
khq1sgq1g1qsd1glyfi  
pseqskaestk11kdn1le  
>tr|D2N9P4|D2N9P4\_STAA5  
mtdkt1lqq1dk1licsw1kq1idnv1ipq1l1mem1ttetkr1hrfd1vt1nvdk1iq1qqf1q1flath1fqehq1laeeksnem1tne

Tsompanidou\_et\_al\_Supplemental\_FASTA\_File

inhlwimdpidgtanlvkq  
qedyciilayfyegkpmlyvydyphkklykairgegafcnngikmepps1kledaiisfnaqvmnltdvqdlfdasfsy  
rlvgacgl dsmrvakgqfg  
ahintnkpwdiaaqflfaelln1kmttdlgkaidh1kgapfiisnkachetv1k1nanggyqkyr  
>tr|D2N9P6|D2N9P6\_STAA5  
menekkytfdkdiawrd1fiipiigvlsfaltaayivpilfgyyeidsn1ifvgtitqalaytigigafylfhlkvmps  
rlragfayikkywlr1rsit  
yialiliytyeymtqflpkhlqysetanelelnkmfevpvflpvafllivivgpiveeivfrhiligelgkkfnfiams  
ivsvflfafi hvtdakspf  
efgpylilsilvftyiksgrnlgstia1hiannfvsvvisiya  
>tr|D2N9P7|D2N9P7\_STAA5  
minetkymrqg1tnliqi1dtikyntlmtdwiniqthiykfnqivtne1nkfkfetsyiinenqvfyeeiit1lnkrplr  
qvdygnkiqylnfyhtels  
nalfaikfah  
>tr|D2N9P8|D2N9P8\_STAA5  
msnvlteidsqypymtknekkiaf1nspqkvikmrsqdlas1ldistssvirfskkitdggfhd1kiniskyvpkass  
iynve1mnnestes1rtkl  
htrttralnhannelndktidqichclkrsetifiyfgasfvvatdlyqklsriglniq1vqethifatllathnsnds  
vilitnngtqsemqsmkv  
iddyhipiititstrdnvpaqasniv1tygktenemhmgatts1faqmftidilyryvalnyhasldyitqskmalnd  
yrkhl sninfkh  
>tr|D2N9Q0|D2N9Q0\_STAA5  
mlkqilpratkisvifavaffiinyigmekpdilylvgrt1iatlafilic1t1ftiinsperkiklgttlpialiiigii  
fgaif1tvqigvitgliig  
v1atfvweli1eknkgrss  
>tr|D2N9Q3|D2N9Q3\_STAA5  
myravifdfdg1t1idteqhlfnvinkhlemhnadpisidfyrsiggaatd1hdhlikaigsenkd1yeeh1tstt1p  
midtikslmaf1kqrhipm  
aiatssvkseimptfka1glddyievvvgredveqvkdpe1ylsavqq1nymptqclaiedsvngataaiaagldv1vn  
tnkmts1aqdfs1ndyv1vkd  
idydqivarfftk  
>tr|D2N9Q4|D2N9Q4\_STAA5  
mlvaav1gfi1fpqhvat1gkwvpy11g1vm1gmg1t1tpndfkmvfkapravi1gvc1qfsimpt1af1iaksfn1ppdi  
avgv1vgccpggtssnm  
sy1akanvalsvsittvst1lapfvtpaliylfanewlevsflsm1wsvvqv1lipialg1v1qiinrkaekastalpi  
isvva1slilavv1ggskh  
q1l1tg1l1f1v1l1h1v1l1g1yt1gyw1ar11k1drdqdkavsi1evgmqns1glav1la1hfn1piaav1pgav1fs1f1h1nit1g  
p1l1akyw1skk1  
>tr|D2N9Q6|D2N9Q6\_STAA5  
mna1krfgsami1vp1mfaffg1v1lgfat1fknpt1mgs1adqht1fwk1fws1iesggw1v1fthm1ev1fv1gl1p1sl1akk  
apghaa1la1mg1ymfntf  
inail1tqwph1tfgan1ekgvenvpg1ksiagi1at1dtn1l1gg1i1sai1t1w1hn1ryyskr1pem1vg1vf1qg1t1fv1vt1s1ff  
v1lpvaa1tcv1wpt1vqhg  
igsmqhf1iasgy1gw1lyh1flerv1iptg1lhhfiyapi1evgpvv1nhg1kaew1qh1nefakssk1p1keqfpyg1fm1lgg  
ngkvfgc1g1jalamyattp  
kenrkkva1l1pat1tavv1gitep1left1f1fiapy1fv1hav1laasmd1t1myafgv1vgn1mgg1ldf1istnw1p1lgke  
hwgtyvaqvi1g1l1fvaiy  
ff1lfr1l1kfd1p1lprk1kteevk1fskqdyknkkgd1vdpkrastgneyedkaay1d1g1gg1ken1kdvtnc1ttr1r  
l1tvydeskvedtey1fthq  
mahg1lvks1gks1iqvv1gmtvp1qvreafeqmvedqssedk  
>tr|D2N9Q7|D2N9Q7\_STAA5  
mfldeh1nrnfdk1ndnd1hiahf1inthvdecknmkiq1d1aqfthasnat1hrftrk1l1gfdgysdfksy1k1fesnkthq1  
psnsidsfkqe1dstfsy1  
ervdyq1l1tekmtastiy1lygtgraq1nvaseaqri1l1t1l1nhh1v1l1hdeh1l1kmi1nksepnd1ff1i1s1l1sgethe1l  
evtn1l1q1r1qkyf1svttm  
kdnt1aqkany1vvyssntf1y1tdgtdy1ssfi1syhi1ffet1vrkyney1l1hhd1sn  
>tr|D2N9Q8|D2N9Q8\_STAA5  
makfnvenehve1iekfykfspe1lveawtkkd1l1kqwf1mtsartnke1eadvkeggkyrivdqqrngkv1nvi1egiyes  
1vmdeyvkmt1gmpg1set  
qdvi1evefferetgg1tm1fyys1vekerrftn1leykqkkkeyhdamvhgfe1mfdkmyh1vietstqg  
>tr|D2N9Q9|D2N9Q9\_STAA5  
mevhkksnawa1fp1l1l1fva1fl1gvgi1tgdf1tsmp1nvaititviva1l1mnrkesfakkvevftkgaghsni1l1mm1lif  
ilagafsntaekmgg1vkst  
vn1gl1s1lipen1li1vg1l1fvicmfv1sismgtsvg1tvaai1pvgyg1faqatdv1ptalamatvvgg1amfgdn1smisdt1taa  
vrtqhtk1mkdk1frvn1fkiv  
lpgailti1i1ly1l1ng1s1nhaknydyn1ikv1pyi1lv1l1a1lgvn1vi1v1liggt1lagi1gl1dgs1fswmg1ldavs  
kgi1smediami1al1l1gg1l  
vgi1qhnggi1ew1l1qfvr1skvks1rgael1gias1lsvs1adiatan1tisi1msgplakni1adeydv1dsrksas1ildi1fggc

Tsompanidou\_et\_al\_Supplemental\_FASTA\_File

fqgllpyspqvisaagvag  
isp1mlfpysiyipillgvcglvailfnfpk1kkntsqemk  
>tr|D2N9R0|D2N9R0\_STAA5  
mlf1ctsilftcfpikntsfsqtmkkevfmlyftclssnhygywnwhirdvaeas  
>tr|D2N9R1|D2N9R1\_STAA5  
malivsrailflilalafgiatvfpeqklpvyilftlfvvaivsnvwlthqnvkhiikfdkrvayflgvlsgvfyigi  
viygatiigyynfisfiif  
tisivlvqilenilgisirnrpsnkqlkviseqsaqqfkvislilvsivsivfifialmlkwwlllvisiivliiitvam  
ivyekyyttn  
>tr|D2N9R2|D2N9R2\_STAA5  
maaqprrtkfkttdyekqevpglqsempapdcgetsyqgyhr1qgykmlvtggdsaignraaiayakegadvainyl  
pseeqdaqevrqviesgq  
kavlipgdiardeqfnydlveqayqqlggldnvtlvaghqqyhndihgftteeftetfetnvyp1fwtvqakaley1kpgas  
itttssvvgynpsp1lhd  
aaskaaiisltsfsee1gpkgirvncvappgfwsp1qisggppskiptfgqktp1gragqpvelcgyvllaseessy  
ttgqvfvgsggvqid  
>tr|D2N9R3|D2N9R3\_STAA5  
mg1kdqavawrryfhqfpe1sdkefkttkikdilteyhirild1plttglvaevggppsciavrada1piqefveqd  
fksenegvmhacghdihma  
silatavk1keiegt1tgrvkfifqpaee1gygafkiiethalkdvqavlgfhndpsrpigtfaiktgait savdrfefh  
ikvggghaakpeqcndpvi  
vlaql1nsiqsivsrnl1safdeavvtigqiscgntwnviadhayvqgtvrsfdpvrk1vetrlqdiadglaqaynmkin  
l1nyth1pgavmdealthk  
a1avaqhvgykvemmqpl1tgedfsgysqhfpsvfalligshseydl1hhpkykperilekapeyfvfvr1l1he  
>tr|D2N9R5|D2N9R5\_STAA5  
mrkiqakkg1sieckgweqav1rmlynn1dpevaerped1vvyggigkaarnweafeaiekt1relesdetmlvqsgkp  
vavfktheeaprv1isnv  
1vpewanwdhfne1dkkg1imygqmtagswi1yigsqg1vqgyetfaelgnqhfngd1agtv1tag1ggmggaqs1ait  
mnhgvai1cvdidetrvdkr  
idtkycdvktad1dealk1aeeakergegl1sig1vgnavdi1hqailekgfkidi1tdqtsahdp1ngyvpqgysveeakv  
1rekdpkkyvel1sqasmak  
hve1m1efqkravafdyggnirqva1fngvknafdfpgfvpayirp1fcegkppfrfaal1sgdpkdi1eradeemrklfp  
enek11rwl1d1aee1syg  
glpsriaw1gygerakmg1aln1vr1dge1sapivigrdh1dagsvaspnretesmkdgsdavgdwav1nalintaaggs  
wisfhhggvgmgys1lag  
mvvvadgseraer1lerv1ttdsgmgvarhvdagydia1qtakekgihipmidkagdk  
>tr|D2N9R7|D2N9R7\_STAA5  
mykqgepn1wtgr1dsetdpkkfrhfqtvtfed1sk1ektstpsgvgilgyavdkgvalnkgrigakegpdaikqafag1  
pd1nqcet1vdgnyvhdh  
eelid1tqkefat1aaksivnhrqtfl1ggghdiayaqylatrkvpytqsigvinidahfdtraeqqstsgtsfrqileed  
entgy1vl1giaqggntqsl  
fdyakekk1dyvfadel1shvsptikdmierfihehdvimfticmdvidsafapgvsapav1glyphtvlelakriipsd  
kvssvsiaemptydadnr  
tak1van1vhhf1k  
>tr|D2N9R8|D2N9R8\_STAA5  
mlaknvfi1fvstifckyernpnsttnairicpiricvigtdkpvdcnkik1sanv1klyipiiriikgkikasrrsitf  
r1lienfkpaswi1flyl1kts  
iqmiaaingarsvtsnik1tpmtdwks1simdnaivitkktkiviah  
>tr|D2N9R9|D2N9R9\_STAA5  
mntffasivvg1mysvfsanttygtefaaynflytfsfsmilgeliratkgrtiyiattfhasmtf1l1fl1fseeigdlf  
sikviaistaivagyig1  
sliirgiay1ttrrn1leelepny1dhvnddeetnhteaksssnikdvktgvatastvgiakndtent1adepsiheg  
tektesqhhidn1tesnhd  
edhd1tsesvesaesvkhapqsdd1tndsneteqs1kepatykedrrssvvidaekhiekteeqssdknk  
>tr|D2N9S1|D2N9S1\_STAA5  
misihaistgkiqd1pysskrpmsal1dktki1sqt1w1sstgftgdeqaykdhggphkavcgfshknya1yqdd1ps1pt  
hamfgen1tfdy1desdv  
fgnqyr1gealievsei1repcwkiqakynipd1vrrmstsgktgyfrv1kqgyvspndqly1liqepiehr1svqq1nd  
lyndrqndml1ryal1nnp  
fl1sptrrdk1qkmynt1k  
>tr|D2N9S2|D2N9S2\_STAA5  
mnksigiyi1fm1fggi1nr1srivsnemts1iys1k  
>tr|D2N9S3|D2N9S3\_STAA5  
mivevehqrqgvdl1ki1dndetki1ftnygarvswkyhdn1v1gnvveadefyhspfkfgasigrsgridnakfk1  
kgkeyq1leknggeh1hgg  
chg1dnk1fdye1rneiaqikvi1fktv1ksaddhfpgdid1tithiydadhqwsieyeavasedit1fsptnhvyfn1nrd  
nnvvdnhri1ssnq1dmyv1  
dernivtgdi1d1hev1fednkik1sdi1ftsqaq1sqmtrfgg1dhpftvgehkmymvenhefm1evdtdmphpvffftfn

Tsompanidou\_et\_al\_Supplemental\_FASTA\_File

qpdewdspfnikyphsgft  
letqflpndinlygekapsilkagevfnsksfrieekvene  
>tr|D2N9S4|D2N9S4\_STAA5  
mlygviatfqsfpsfgrvyaayggvfimsli famvvdqkmpdkydvigaiicivgvlvmlpsra  
>tr|D2N9S5|D2N9S5\_STAA5  
mhkfwatftltyikkikaksfvifmiiiaalmiglsnidkiinmddgpdkgivaapneqiykvfkqqantfhsdakftk  
vsiedaekevkkhkldkay  
iiklnqrntlqgtijsekrvshedsqkvqalltaiqtnmvagelninkedlqklqaqskvdkvisndevdkvsegqkif  
nyalaygiiflfffivlly  
asqjamejasektsrviemiitsispiqhi fakilgviavavtqiilivlmavicifafdlkdllqgfnvemnlswqii  
ivgiissivgimayvllaa  
ilgsltsriedlnqslmpltlngmiafyiaiftinpdgrlalitsyipflapfqlvvraqtsglqihevilsslisivm  
vavliwiaiktykdsvltf  
erglfnsmkrvfkk  
>tr|D2N9S6|D2N9S6\_STAA5  
mglviehvtkrfgkmtavndmslelesgkmlgflgrngagktttfrmilglsepteghityngkkldktyrnrigylpee  
rglhgkltveeeikylatl  
kgmskieiqqisylwlerfditenrkkridslskgnqqkiqlasmlhkpellildepfsgldpvvnullkeavkdlnw  
gstivysshrmehveelcd  
dvcildkgqlvvsgdinhvrasngnkvviesettlpdltnirgiihsenmkqglqtienedvakdiyqvahqgyvkr  
fqvvepslqdifiekvvggk  
da  
>tr|D2N9S7|D2N9S7\_STAA5  
meqlpqvgfmxsvlfwknyvnfkgrrrseywmalwhlilmvpavcvliinlflffisiaadnealivmsilmiilts  
vytfvyslatfipnlalcu  
rrfhdisrtmlfpmimtvfsiifyivlqiidsyydsdftlmpmglinillvlyfvyglktivmivflcfdsckpanyges  
pkypssiknqpvtssetpek  
agtsetpktpeetdnql  
>tr|D2N9S9|D2N9S9\_STAA5  
mielnaittlclacilyllgkaihvnhvflkricipaviggli failvaal dsfgmvkikldasfiqdfmlaffttig  
lqaslklfklggkvlllyf  
mfcaisiinqivgslakvlnikplngl tagsmsmegghnaaaygktiqlgid saltalaatlglvfggligppv  
vkflikrynlpqhsddtf  
kdysqvaynehlskfnatevffiqftivvfc mavgsyfshlftaqtginvpiyvgs lfvavivrnisesfnfnivdki  
tnqigdvalgifs la lms  
iqliieyklaipliiivlvqvvvmlfavliifrglgkdydaavmvggfighglgatpnamanldvitkkygns pkaylv  
vpivgafli dlignvimg  
fiqwfs  
>tr|D2N9T2|D2N9T2\_STAA5  
mviitqlfthtqtvtsefidhnnhmhdanyniifsdvvnrfnyhngls lkerenlaytlflehttylselslgdvftv  
tlyidydykrhlfltl  
kedgtlastnevmmmginqhtrrsdafpesfstqiahyknqptitwpeqlghkiaiphkgalk  
>tr|D2N9T4|D2N9T4\_STAA5  
mfkndqverffykreienrkkhkqpstlnvkanleklslddmqvfrfnfrhqidkkilyihggfnalqpspfhwrlldk  
itlstlyevvlpipyktpe  
fhiddtfkaiqrvydqlvsevghqnvvmgdgsggalalsfvqflldnqqlpnklylispildatlsnkdisdali eqd  
avl sqfgvneimkkwangl  
pltdkrispingtieglppvymfgggremthpdmklfeqmm lqhhqyiefydypkmvhdfpiypirqshkaikqiaksid  
edvtqnn  
>tr|D2N9T6|D2N9T6\_STAA5  
mtttfiisyivlaliivgvlnflirsrrkakrqkqqfatrqsnsqskfksaldrttdqssqhtareearidnkdnqn  
qvslnkqtegeqdqelfn  
dnkdea faaknpnsee ykvnekikkeknfi fgegvsrgkilaallfgmfia ilnqtllnvalpkintefnisastgqw  
lmtgfm lvn gilipitayl  
fnkysyrklflvalvftigslicaismnpimmvgrvlqaignv lmp lgsiviit iypekrgaamtmgiamilapa  
igptlsgyivqnyhwnvmf  
ygmfiigijailvgfvwklyqytnpkadipgii fstigfgallygfseagnkgwgsveietmfaigiifiilfvirel  
rmkapmlnlevlkfptftl  
ttvinmvm lsl yggmi l lpiylqn lrgfsal ds gllllpgslimgllgp fagkll dtiglkplai fgiavmyatwelt  
klnmdtpymtimgiyvlrs  
fgmafimmprvtaainalprglashgnaf lntmrqlagsigtailvtvmttqtqhlsafgeeldktnpvvdhmrrelas  
qyggqegamkvllqfvnk l  
atvegindafivatifsvalilclflqsnkkakataqkidadnsinhe  
>tr|D2N9T7|D2N9T7\_STAA5  
mkkmilinvi tvvllai giagfyfwnkttsyittdnakvngdqikiaspasgqikslnvkqgdkl dkgdkvatvtvqqg  
dgetkdmelkmpqkgtiak  
ldgmegsmvqagnpi ayaynlddlyvtanidekdikdvevgkdvdvtidgqkasikgkvsigkataasfslmpssnsdg  
nytkvsqvipkitldsep

Tsompanidou\_et\_al\_Supplemental\_FASTA\_File

skqvvpqgmaevkihkn  
>tr|D2N9T8|D2N9T8\_STAA5  
mkrqakieiqlvd1maeypfqeistkmicaycniirstfydykdkfd1ldtinskhekfqf11salhhnfenikqd  
klklykffiiiakykrne  
qffkdilvtypmkt1fidyinlardyyqqimndystvttnkqlyvtyiiggqagvfinwlsngcnespeevadillanti  
klqng  
>tr|D2N9T9|D2N9T9\_STAA5  
myknhnmtq1t1pietsvripqndisryvneivetipdseldef  
>tr|D2N9U1|D2N9U1\_STAA5  
mkscpkcgqqaqddvqictqcghkfdsrqalyrkstdediqtnnikmrkmpwaigffililililffl1rnfnspeaqt  
kilvnaienndkqkvat11  
stkdnkvdseeakvyinyikdevglkqfvsd1kntvhl1nksktsvasyiqtrsgqnilrvskngtryiffdnmsftapt  
kqipvkpkektkyefksgg  
kkkmviaeankvtpignfipgtyripamkstengdfagh1kfdfrqnssetvdvtedfeeanitvt1kgdtk1ndsskkv  
tindremafsssktygppy  
qnkditiisagkakgtfttqtktikasdlkynteit1nfdsediedyvekkekeens1knk1ieffagyslannaafnq  
sdfdfvssyikkgsfydd  
vkkrvskgs1mmisppqidaekhgdkitatvrlvnengkqvdkyeleqgsqdr1qliktsek  
>tr|D2N9U3|D2N9U3\_STAA5  
m11n111ifilivicplilnytl1n1t1cyilvvisif1sliysimtytfpwsmfvtfiiisiim1fkhrylfshtsr1  
fikk11sfsykvlytsa1  
1fistiqspivkgmsmw1ailc1s1iltficylvwtsyrhrsytkevdiivlgagiftefvtpmlaar1draldiyqq  
qasatkiiivsgggpdepi  
sealamqryliahgvdkt1lmeshsintytnflyskqiinnlyheavkivcvtsqfhlralr1laqklglsidvgvsht  
pyhff1hvl1kdy1gvmymq  
yr111t1ycssswficyaafiyns  
>tr|D2N9U4|D2N9U4\_STAA5  
malvvedivknfgeg1setkv1kginfeveqgefvi1ngasgsgktt11tilgg11sqtsgvtlyndaplfdkqhrpsd1  
r1edigfi1qssh1vpy1k  
vieq1t1vgqeagmtkqgsskratq11knig1edr1nvyphq1sggekqrva1mra1fmnpki1ladeptas1dadratk  
vvemirqqikeqqmigi1  
thdrr1feyadrvie1edgkitd  
>tr|D2N9U5|D2N9U5\_STAA5  
mklaikeimfykfrylit1i111simv1fisglaqglgrenis1fehfdndeyvvqkmkepqiexq1sdtqqnqikk  
vihqephkmnvqt1k1snk  
eqdvi1tmndvkqqr1q1kkgdypknahevaindklaadni1rvgdr1hfknnstsyrvsgilndtmyshssiv11ndngfn  
alnkvn1afypvkn1tqqg  
rde1nk1ndvqvvnkd1tdniasyqaeqap1nmmivs1faitaivsaffyvmtiqkisqigilkaigiktrh11salv  
1qilt1tiigvgiaviiiv  
g1sfmmpvtm1p1y1ttqn11mvgi1ilvailgas1sfik1fkvdpieaigga  
>tr|D2N9U6|D2N9U6\_STAA5  
mvqc1vvd1d1pri1nyiash1qtehidatqpsgeaalk1lekqr1vdiavvd1m1d1g1m1d1g1f1q1cnt1k1ndy1dip1v1m1ta  
rdalsdkerafisgtd1dyv  
tkpfekeli1fri1rav1rry1nihsnsemtign1t1nq1syle1lq1vsnk1t1m1pnkef1q11f1m1aar1pk1q1ift1req1iekiw  
gydyegdertvdv1hkr1r  
qr1kk1nat1tietvrgggykvenhv  
>tr|D2N9U7|D2N9U7\_STAA5  
mfk1t1yariaiysitv1lfsal1sfv1tnvy1yhyn1kasndakimkt1k1earq1y1eqs1akp1thi1qy1fkh1lgm1ny1qim1tv  
dqgkhtfygepfredt1s  
qna1nnv1n1nkdyh1gikdkpfa1lvtgff1dnvtdntvgin1fktndgsiav1fmrpdigetfsefrt1lav11m1l1l1f1sis  
1viastysii1rpvk1k1a  
ter1idgdfetpikqtrkdeigt1qyhfnkmres1gqvdmr1qhf1vq1vnsheikt1plthihh11selq1qtsdkt1rqy1i  
ndiytittq1sg1tte111  
1sel1dn1hqh11fddkiqvdq1likdi1rheqfaadeks1liladlesin1flgnqr11hqal1sn11inaikytdvggaidia  
1qhsnn1i1ftisndgspi  
spqaear1ferfykvskh1d1nsng1glaitksie1elhgtiqftqsneyvt1tftit1pnsh  
>tr|D2N9U8|D2N9U8\_STAA5  
mmk1n1finanetes1yidihapkmndhvqsi1navnd1ksht1vg1yidkeihi1nvsdvitfqvinkvntait1snqkfk  
1klr1lyeleq1pghfiri  
skseivnkyi1k111epng1irmy1kdahytyssrrf1ksiker1si  
>tr|D2N9V0|D2N9V0\_STAA5  
mttqhs1ktdv1ligg1gimsat1gt11k1el1spekn1kvfek1aqpgeessnvw1nag1tg1hsal1celny1tkegkdg1tvd1c1sk  
a1k1ineqy1q1skqfway1v  
ktgq1dn1pdrfi1qavphms1fvigednvafiksrvat1kknv1fekm1ksqdeeemkswvp1miegrksdepialtydetg  
tdvnfgal1tak1fdn1leqr  
gveiqyq1qnv1dik1kqksgaw1vkvd1etnetttyesdfvfigaggas1p1l1qktgikqskhiggfpvsg1flrctnqe  
vidrhhakvygkaav1gapp  
msvph1dtrfvdgkrs11fgpfagf1spk1f1ktgshmd1iksvkpnnivtm1sagikems1tkylvsq1m1sndermdd1r

Tsompanidou\_et\_al\_Supplemental\_FASTA\_File

vffpnaknedwevitagqr  
vqvikdtedskgnlqfgevitsddgtlaallgaspastavdimfdvlqrcyrdefkgwepkikemvpsfgyrldhed  
lyhki neevtkylqvk  
>tr|D2N9V2|D2N9V2\_STAA5  
meviamikqinvsnmqkfesqlmkaqsegythvpyaneimiyyqsmldavqlypksivvdytdvgqykndchyfgqssin  
iadwaqnnnyypnliyaiq  
qtlldihyysvetifdlaalltllkgdlsidghvdfdkaplatsasiwetiktiedfdmmsqfylnkmayidhhpipfrn  
lfiedseqlnwpdswlyst  
kfm1pkwlykiakqradnkqlqnfglytkqpnvldkhivfigdhhyiginskylyfyfvkhnpmacyfvtdrrgphfi  
spkseka delinsarvvlv  
endipetlqpngtliqlhgqtpimqlfldskepiknietpfrakrynrlqfdyvihsaddishfyqtafshqanvla  
ygnpkhgyllqkrnesttq  
qqyksfkindqkpvlliyapiglvsaqqpllsdalfkayhvqqvqvdetmlpeevalvapkylsaqdliimsdvvitdysn  
iifdamaidktvalytpnh  
sqyiesqgvnediwrhlskiwytdrqlinnlisqaipvikypqiqhkeqplesisqlliskmtnsk  
>tr|D2N9V3|D2N9V3\_STAA5  
msynhl1terarievlrgenyslrsiarklkrsvstisreisrnnlnqsyqaetaqknyetkrklcgrprtrftpelgni  
ikyylkchwspeqivgrll  
qnqicfktyirwinsnminfelisc1rqkgkrqpketrgkfnigrpissrpkevkkrentfghweadtivssrgskgci  
atfverksryyyvc1mpdr  
ssnsmetainnlikhlpkdavktitvdrgekfcyqni enqfninvyfapysawqrgtntentngllreffpkktldakv  
nqeqlnyal dsinyrprkc  
lnwkfpyevl cde1lh1n  
>tr|D2N9V4|D2N9V4\_STAA5  
mkk1vtglla1s1flaaccgdsdqkdsnekddkakteqqdkktndsskdkkdnkdnkdvndkdnknsandnqqqsns  
natnndqntnnnqnsngq  
ttnnqkssyvapyyqnaapvarqiyppfngnksqalqllpnfqta1naanankfgngkhkyndysieehngnykyvvs  
fkdpnvngkysivtvdytg  
qamvtdpnyqq  
>tr|D2N9V5|D2N9V5\_STAA5  
magiikeiskqdase1velatrtfydtfgsyddkdfdqffkdnytvkgftqei nhvdsfhyfyqedganvgyikmnins  
aqteemgetylevqciyf1  
kdfqgggrgsq1ialaekiaqehnkxkiwlgvwehnpraqafykrhgfkvvgehhfqtgdvtdtdlimekel  
>tr|D2N9V6|D2N9V6\_STAA5  
mavfskekkrgcivvietfkafvidkdesgkvtpfkqlsptdlpkgdvlikvhysginykda1atqdhnavvksympip  
gidlagtiseapgfekg  
eqvitsydlgvshyggfseyarvksewivklpdt1tleesmiygtagytagl aierlekvgmnie dgpvlvrgasggvg  
tlavlm1nelgykviastg  
kqdvsnqll1elgakevidr1pveddhkklpasstwqacvdpvggeginyvtr1nhsgsiavigmtagntytnsvfphil  
rgvnilgidsvftamklrq  
rvwrr1akdlkpen1heikqv itfde1peqlnkvikhenkgrividfgvdk  
>tr|D2N9V7|D2N9V7\_STAA5  
mvkvtidyiptcedyalrinagmspktraeaekglpna1ftvtlydkdr1igmgrvigdggtvfqivdvav1ksyqqggy  
gsqimehimkyiknsvs  
ayvsliadypadklyakfgfiptepdsggmymkf  
>tr|D2N9V8|D2N9V8\_STAA5  
mkdvtiiggpsgl1yasfyaglrdmsvr1idvqselggkmriypekiiwdiggiapkpcheilkdtikqglyfkpevhln  
ervvdirkkserhfevete  
ageiytskaviiagagi1npkqldvkgveryqltn1hyvvqsyrfrkdkdvlisgggntaldwahdiakiaksvtvyr  
kedvsgheamktlvtdlnv  
klcpktriky1vgnddethisev1ehvesgdthtvkfddviishgfdr cnt1lsetssklmdhddcrvkgfgntttsip  
giyacgdivyhdaksh1ia  
safsdganaanlaktyiqpdanaegyvs shhevfkeantivnkhlly  
>tr|D2N9V9|D2N9V9\_STAA5  
manyaifynnininsims1ndnnyqfervnerneyres  
>tr|D2N9W1|D2N9W1\_STAA5  
mni fknk1lwiapiatmi1lvi fs1afypaynpkpkdlpigilnedkgtti qdknvigkkledk1l dsdsnikkwkvd  
sekdl ekdlkdqkifgvai  
idkdfskdamsktqkvmsk keemqqkvasgeippqvqqmkqkmgnqqvevkqakktivsegsslqgsqiasavltg  
mgdninaqitkqsl et1tn  
qnvknaadingltnpvkvdnkk1nkvkdhqaggnapflmfmpiwigsivtsillffafrtsn nivvqhriiasigqmif  
avvaafagsfvyiyfmqgv  
qgfdfdhpnriai fvalailgfvglilgvmvwlgmksipiffilmffsmqlvtl pkqml pesyqkyvydwnpfthyatsv  
rellylnhhielinstmwmf  
igfmi fgavsslvsaivrkhstkrtevps  
>tr|D2N9W2|D2N9W2\_STAA5  
mkedrri rktkssikqaf tkllqekdlekitirdittradinrgt fylhyedkymlladmedeyise1t tytqfdllrgs  
siediantfvnnilknifq

Tsompanidou\_et\_al\_Supplemental\_FASTA\_File

hihdn1efyhti1qlertsq1elkinehiknmqryisinhsggipemyfysyvsगतिसिीkywvmdkqpisvdelak  
hvhnivfngplrimaenr1  
hksn1ds1t  
>tr|D2N9W4|D2N9W4\_STAA5  
mnykqsaedi1naiggeen1damahcatr1rlv1ndes1vneealnmddvvgktfstggqyqiiigsqtvnkvfsemek1  
tgkeasttsevkaqsaknm  
nplqrfvkm1sdi1fvpi1paivaggl1mg1nni1takdlffsgks1idvysqfaglaeminvfanapft1lpiligfsaa  
krfggnpflgaalgmi1vh  
ps1msaydfpkaveagkaipywdfvghinqvgyqqvlpmlvaayilasiekglrkviptvldn1ltp1lsifitaf1t  
fsfvgpitrq1gyw1sdgl  
twlyefggaigglifgl1yapivitgmhhsfiavettliadatktggsfifpiatmsnvaqggaaiaaffiikqnkklkg  
vasaagisa1lgi1tepamf  
gvn1kl1rypfigaivgsgigsayiaffkvkaialgtaglpgfisinpvhagwlhyfvgmtisfivaitvt1liskrkank  
evve  
>tr|D2N9W5|D2N9W5\_STAA5  
mkerghieqlwreekyhv1l1hsqqayqmirna1ktd1sl1hqvqqmiddalliepsigsvcnafdhmwyfkkcaneeerq  
qsk1lkad1fngkid1tqt1  
1df1ae1ankydiqy1l1qsrv1ntkrkr  
>tr|D2N9W6|D2N9W6\_STAA5  
mtcq1kiht1stipsrninimv1fs1tsk1nitingetkdvsnii1inhgdiyninhgeniie1mpvfyfyqqddd  
ffngyl1drh1l1qssnyiks  
liad1istptsss1mgknigqsi1dt1l1keafiridheylpnialsnpvfidcvnyihdnidah1sl1kdiamhcnisesy  
csn1fvry1smnfkdyfts  
ik1lvnain1l1stkh1sittvselagfnshtnfanqfkn1l1hfspkqf1svskiteppqihfqqdnvsqftel1stid1t  
aq1atnttdih1ddfnpkd  
rsqrakvfvrfnsfnel1fqi1fneyy1dinfel1pkpvfiddihdieisqtnyn1l1nrcfek1feknig1l1aiaikstqqf  
etmkq1l1t1f1lqgnqdykt  
skk1lvkfm1lvfcsnsmtaeeih1ch1kiknknkeikysvtvdgfl1etystveqvvdvmqr1kfhyfyfidiensktath1i  
tknqhyhqt1dth1feqykkf  
il1dsgis1stqfvynn1svsgfkytndgknpiq1sdivyh1l1al1rygggisyq1l1ddhsnyis1lynkygsp1l1mhlykm  
frpfvnedieie1tnnyv1sr  
kdnnyhf1l1fnki1ndrymsdvkqdfi1fhne1lpqds1mi1ikt1nhergsiqh1l1ptsdq1lv1yiekei1de1dktnypkte1  
avqeetgrt1fel1k1nhdev  
kyic1fkps  
>tr|D2N9W8|D2N9W8\_STAA5  
mkkkkkgf1gl1gis1liam1ivci1v1vimmtggk1dtyy1gimkdnatiekmisekdesieknvkl1psdadvs1vkk1gdfv1v  
yk1ladsdki1vk1kvdhdd  
vphg1mmki1hdm1gkmhmkh  
>tr|D2N9W9|D2N9W9\_STAA5  
mqvvia1v1gvvvg1l1lyggenvanyik1pfgdvf1n1likmi1vipv1fcs1al1sisnvgesktvgrygwk1tilyfei1tti  
a1gl1gi1f1gn1fkpgag1d  
ptk1l1pkgd1skyqstahaaeqstygnhf1dtivhi1iptn1ffeal1nkge1l1pi1ffav1ffgl1glaav1gkkaepvkef1sgs  
leav1fw1mink1l1klap1gv  
fafic1tti1t1fgas1l1p1l1kl1v1vvvfam1vffv1fail1gl1vawm1cginimni1rilk1sel1l1af1st1sseav1pvm1mkkm  
enf1gspk1dits1fvip1igy1t  
fn1ldgsa1lyqsiaa1l1fvaqmygmh1t1seqiv1m1t1l1mitsk1gmaav1pgtsiv1v1l1tt1lgam1g1paqgl1ai1igvd1rild  
mvr1tcv1n1vign1al1stivia  
kwen1vydkak1gqey1lks1i  
>tr|D2N9X0|D2N9X0\_STAA5  
mkkkkknaikvii1l1fis1livava1fffg1l1ktyqghkniq1l1dsyleeks1kdkik1sekteysakkg1fykev1tkdepgvt  
yv1vqp1istnkg1l1fveg1fdt  
etkks1ktak1hkyfnqnykpsk  
>tr|D2N9X3|D2N9X3\_STAA5  
myktk1ggf1q1t1qt1sl1vvgfmaws1iap1mpfik1qdv1vtegg1si1laip1vilgsv1rvp1fgy1l1tniv1gakwv1ffts1f  
iv1l1fpi1ff1sqa1t1pgm1  
masg1ff1gv1ggai1fsv1gv1t1sv1pky1f1pkekv1glangi1ygm1nigtav1ss1flappi1agi1gw1q1ttv1rsy1lii1al1fal1imfi  
fg1dt1qerki1kv1p1maq1mkt  
l1skny1k1yy1sywy1f1t1fgaf1vafgi1fl1pny1lvnh1fgi1dkvdagi1rsg1vfialat1fl1rpig1gil1gdkfnavkvl1mid1fvi  
mi1igavi1lgis1dhia1l1ftv  
gc1l1tisicagi1ngli1fk1l1vpsy1fsneagsangiv1smm1gg1lg1ff1pp1l1vityvan1tg1ssh1lafi1flav1fgcial1ftmrh  
lyq1keygs1l1khs  
>tr|D2N9X4|D2N9X4\_STAA5  
myk1ini1rsds1vykni1kap1l1ndrds1ftkei1lv1pfkkk1fevqq1pi1hndak1qtmsai1q1fl1daf1qkspk1d1rmsdqmsiq  
y1lnnd1fwsnckkyl1kvaid  
qfany1s1ssqvsnyh1ftv1l1gdsqk1pl1my1lnknrg1gdg1g1pgy1imi1yl1vps1ist1nsmks1liahev1nhmryqy1idwd1gg  
s1li1eliae1gl1aenyves1l  
ygkahi1gpw1vtntn1svrdnvki1knti1ynh1l1h1khi1fesmp1flyg1dd1ink1qd1rsiv1gl1shaagy1acgyh1lvky1fl1qktni  
pi1evatt1paqki1inevte

Tsompanidou\_et\_al\_Supplemental\_FASTA\_File

fwhtht1

>tr|D2N9X5|D2N9X5\_STAA5

maytyt1kdiieitgvtkrthyydeigl1vpnkndknyrvyqqdlek1qk1ilksfdiakikqyisydneylrlk1  
lseqvskldkkisd1q1ir  
rsvcefikghsljdtstilnks1qtqydeaskiyghtkayqsfinrqdn1qsqdirqkl1ttifnqfnqms1shypiqdcn  
divaewksfmntiadfdde

t1cciaktyendtrfkdyfnisydnqnlasyiseavnyflsnenkkdnf

>tr|D2N9X6|D2N9X6\_STAA5

mi1nyqndmevvataadgveayqkvmeypdv11md1smppgesgliatskiadsfpetkilil1tmfddeeylfhvlrng  
akgyilknapeq111air  
tvykgetyvdmk1ttslvnefvsnqdtantsdpfkilskreleilpliakgygneiaek1fsvsvktveahkthimtk  
1g1kskpe1veyal1kk11

ef

>tr|D2N9X8|D2N9X8\_STAA5

mtpeaiiedrrfget1dkirkeegydfaaiafyesnkpsspikwhyvsgnknnrfk1i1lrkgrglagtvmktgkrmia  
nvg1al1gpeekidy11s

es1tav1avp1wyknqvygv11fgqrdgrp1pki1fdnddiqrkfgifnddk

>tr|D2N9Y1|D2N9Y1\_STAA5

mwfnnvetkpgvgypkrwedqehyggwv1nrkgkle1ksgsriskialgkifynpdmp1ikdyepwnynyeh1ttaks  
gnhspvarayseitgdnie  
1ewgpnweddlagghvtgpkdpni1qieedik1qfdetfmyl1pr1cehc1npscvascspgamykrdedg1v1vdqdac  
rgwrycmtgcpykkvyfnw

ktknaekctf1c1prieagmptvcsetctgrmry1gv11ydadrvehaasaadekeleyekq1d1f1n1pfdeeviaqaekdg  
isydwieaaqns1pyk1ai

eyk1afp1hpefrt1p1mvwycp1spimsyfegkntnqnpdai1faieemr1pieylani1ftagdtkpvkeal1qrmammr  
symrsqvtqppfdtsr1er

1g1terqt1k1dmyr11g1lakyedr1fviptshkety1dtyhaqgstgynyggehfgdncegcgvavsgsgktgqei1y1nenfyg  
g1frd

>tr|D2N9Y2|D2N9Y2\_STAA5

mgkfg1nffk1pte1k1fngnws1lesksrewekmyrerwshdkevrt1thgvnctgscswk1fvkngvitwenq1tdyps1cgp  
d1mpeyep1rgc1prg1as1fswy

eysp1ri1k1ypy1rgk1wd1wtea1eenngnrvaawas1ivenedk1k1qy1qargm1gghvrsnwkdvt1d1iaaq1lyt1kky  
gpdri1ag1ft1p1ams1mi1sy

aagar1fi1n1lggem1s1fydwyad1ppaspqiwgeqtdvpessdwynasy1imwgsnvp1trtpdah1f1mte1vryk1gk1kvis  
vap1dyaenvk1fadnw1lapn

pgsdaa1aqam1thvi1qehyvnq1pnerfi1nyakqytdmpfi1m1dedengy1kagr1flrasd1lgqtteq1sew1kpvih1dtis  
ds1lvvpng1tm1gqrweegk

wn1k1l1etedg1skin1pt1smteggye1eti1q1fpy1f1dsd1gdgi1fnr1pip1tr1qvt1langdkvriati1fd1masqy1gvr1rdhk  
1leskgyddaeskytpawqe

a1sgvk1qsvv1iqvakefa1naid1tegrsmi1imgagin1h1wfn1sd1ti1rsi1n1lvm1l1cg1c1qg1vngg1wahyvgqek1cr1pieg  
wst1vafak1dw1qppr1l1qng

tswfy1fatd1qwkyeesn1vdr1ksp1lakteel1khqhpady1n1laar1glw1lpsyp1qfnkns1l1faeak1deg1idsneai1lqr  
a1devk1sk1qt1qfaie1dpd1

kknh1pks1l1fi1wrsn1l1issak1gqey1fmkh1l1g1tksg1l1at1pnedek1pee1itwre1ettg1kl1d1lvs1l1dfr1mat1p1lysd1iv  
1paat1wyek1hd1l1s1stdm1hp

yvh1pfn1pai1dp1wes1rsd1wi1ykt1lakaf1semak1dy1l1pgt1fkdv1t1tp1shdtk1qe1istpy1gvk1d1wsk1ge1ieav1pgr1tm  
pn1faiver1dytk1iydkyvt

1gp1v1lek1gk1vgah1gvs1fgv1seqyee1ksm1l1gtws1d1tneds1vr1trnr1p1ridtarn1vada1iln1issat1ngk1lsqksy1ed1leeq  
tgm1p1kd1issera1eak1isf

1n1itsq1previ1ptav1fpgsnk1qgr1rysp1ft1t1nver1vp1frt1l1tgr1qsyy1vd1hev1fqf1ges1l1pvyk1pt1l1ppmv1fgnr1dkk  
ik1gg1tda1l1v1ry1l1tph1gkw

n1h1smy1qd1nk1hm1t1l1f1rgg1pt1wi1s1nedaek1h1di1qdn1dw1levyn1rngv1vtarav1ishrmp1kgt1mfmyhaq1dkh1i1qtpg1se  
it1dtr1gg1shnap1tri1h1l1kp

tq1lv1ggy1aq1isy1hfny1gpi1gnrd1lyvavr1k1m1kevn1w1led

>tr|D2N9Y3|D2N9Y3\_STAA5

m1svng1y1gk1vy1ligag1p1gn1py1l1tkkaer1l1readv1lydr1l1vnp1l1l1qysk1stte1idvgk1kpyak1hiqqek1inecivea  
arr1ynk1vvr1l1k1ggd1pai1fg

rv1qe1evd1t1nnf1niafe1ivpgv1tsasa1avat1mq1t1gl1tmravak1svt1fstgh1fdse1nev1dvna1lvnggt1laiymg1vkr1  
eki1iaqi1qqy1tdi1dyp1iai

v1fqasc1fne1fvk1gr1sn1ivgk1lehya1ieak1pg1ci1igev1vyt1env1sttsn1ptqq1fyvv1sgsk1hda1l1m1ceh1lydegy1g  
c1l1npdd1tsng1tyh1ssq1yd

yy1dafi1k1qqen1vty1istdradt1ntv1l1ch

>tr|D2N9Y4|D2N9Y4\_STAA5

met1keki1kv1tt1del1tp1igk1k1vivk1geig1fl1tesgt1ihai1hnic1phk1qgp1l1segt1vsgey1vfc1plhd1qkid1l1ntg1iv  
qep1deg1cvd1vye1ev1td1gn

vyi1cl

>tr|D2N9Y5|D2N9Y5\_STAA5

mak1qk1lvm1ign1gm1agi1rtieei1lerand1lydi1tvig1kepyp1nyn1rim1sn1il1qnk1mtve1etim1pyewyee1hdik1l1itnd



Tsompanidou\_et\_al\_Supplemental\_FASTA\_File

pvvdvdrtnqnvttangie  
vaydklifatgskafvipvgstlpsvigwrtiddteqmmniaktkkkaiviggllglectarglldqgmevtvlhlaew  
lmemqldrknmlkadle  
kqgmkfemqantteileddvegkvladgreipadlvvmavgirpytevakesglvnrngivvndvmqtsdsnvfavgec  
aehngkvyglvaplyegqk  
vladhlnketngykgsttfts1kvsgcdlysagqivenaeikgieifnsvdnnykklfkdgnvvgavlygdidgdsrf  
ynmmkkgestedytlvsll  
tkggeeaslsiadmaddeticgngvdkgtivnaitengfttvevtaktkagnscgkckpqiailqhtlgddfvaakp  
agicgctdltrdqivtqir  
akglktskevrvhlnfnknkggpcrpainylnmvphdheaderesrfaneryhaniqndgtfsvipqmrvgvtdadql  
ir1gevakkyhvp1vkvtg  
sqrvglvgkkee1pniwqdlgmrsasaygkkrsvkscvgkefcrrfgtqytr1girlektfeyidtpkfkmgvsgcp  
rscvesgvkdfgvisveng  
fqiyyggnggtevekaef1ttvetedevik1cgalmqyyretgiyaertapw1rr1gfenvkev11dperqnelferimd  
akkaveaepweaitsnaqa  
rkifevekv  
>tr|D2N9Y6|D2N9Y6\_STAA5  
mngniivahgmrrgrnqaleafise1vkddihhyhiaf1esehqdletvmttliqsgvkqlkvvp111fsamhylkdip  
divhemkrwypdikvevse  
plgthp1mrr1ieqricdalageyqqvgvvvahgningkftkaheelqtcvqhlqinkptyartlygeisfihdledia  
rqyqk1ivvp1f1ydg1v  
nkvkqmqmndmvintdihitpsinfdpilkqiindrles1sdsnenikaltsk  
>tr|D2N9Y7|D2N9Y7\_STAA5  
manttir1anendaeti1h1mykaftplrelgidwpsvnan1davkenidknttfvmtiddeiistitvrypwgsvksis  
gypfvwwfatnpeyegky  
gsq11tyveetf1rdt1kaaavt1gtsar1hpw11kiyekrgyeiysehnddglgvimrkvliperfdetilgppf  
>tr|D2N9Y8|D2N9Y8\_STAA5  
miknktvedtystkaivds1ssvqmqqvmvqqtprgrymlksmmagf11sivtvmfmgiktqfasthvdglinlmgaiia  
fs1gl1v1v1t1nse11tsn  
fmyftvgwykvvs1nkmmw11ycf1gni1ggfv1ff1mkyahvmtpentqal1talvqkktvdstwl1niftkgifcnff  
inigi1fismqfkggl1tkaf  
fiacgvivfvyngyehvvfnag1yagmvffnfdavsw1hv1knivfa1gnfvvggi1fvg1vyaf1ngkrnr1eqq  
>tr|D2N9Z0|D2N9Z0\_STAA5  
mtikvednki1fsrtieapiekvfdayttka1fekwfhpkdastkvfrfnavsggdafyaiktptmtsyt1aeyktvkrp  
y1ieyidsfatpqqakdtk  
mpsmki1tsfsen1tktvtstsvfptkeaaqqvinmgveqgmnt1dq1da11k  
>tr|D2N9Z2|D2N9Z2\_STAA5  
mtkk11t1fivsm111tacgkkesattsskngkplvviygdykpyckeldekvmpl1rknyi1dhkveyqfvn1af1gk  
dsivgsrashav1myapks  
f1dfqkq1faaqdenkew1tke11dkhikq1h1dketenki1kdyktkdskswwaaekdkkiakgnhiktptafinge  
kvedpydyesyek11kdk1  
k  
>tr|D2N9Z3|D2N9Z3\_STAA5  
mkrfvatv1111v1f1sgcndkyvkeideavki1qnqkqeq1akkngdrvdhferkdaniyvdydkkii11aykpl1sdd  
evhyaydfsdkrvsykqg  
fdr1ryyqghdadyheenmt1n  
>tr|D2N9Z4|D2N9Z4\_STAA5  
mnfv1t1tsdefnafttkh1fshytqsa1hynhrvd1kgdvh1vgvkddngqviagc11teart1kffkyfythrgpvmdyt  
nqslva1fffk1tsylkqg  
nc1yv1vdp1y1ien1rnad1geivksydn1rafvrtmdt1gykhqgfpvgydsm1sqi1r1sv1d1kdktedq11kemdyqtr  
rn1kktydigvktkt1tid  
etqtff1d1fhmaeekhgfk1fre1pyfeemqk1yddham1klayid1ney1kt1q1kqqq1tae1sgveev1eespn1skkn  
k1krtq1leqq1nsnkrkid  
ntieq1eqdgav1n1asa1fiynehevy1ssgsnpkynaymgayh1qwemikfakahhinrynfygigtgdfsesaedyg  
vqf1kkgfnahveeyigdf  
ikpikp1m1yk1q1ty1khkrr  
>tr|D2N9Z5|D2N9Z5\_STAA5  
miq1n1ni1hks1fndvevikgid1svgkgevvt1igrsgsgktt11rminaleiptegtvfvngktytskdkksqievrkqs  
gm1vfqsyn1fphk1talenv  
meg1itvkk1kkaeareks1e1lekvg1thvkdrphal1sggqqrvaiaralampkvm1fdeptsal1dpe1vndv1kv  
ik1d1anegmtm1v1vthemr  
farevsnniv1fi1hege1geqqapeei1fnpktee1krf1n1vinee  
>tr|D2N9Z7|D2N9Z7\_STAA5  
mkr11fvviafvfi1aacgnssk1deaskdskt1invgtgtyapfs1fhdkdgl1tgydi1dvikavakaeg1k1kfnets  
wds1mfag1dagrfdvianq  
vg1npdrekk1y1kfskpyt1fssav1virenekid1kdfddvk1gkkl1aqt1ftsnygk1akdkgaditkvdgfnqsm1d111skr  
vdgtfnds1sy1dykkqkp  
nakikak1gnaeqsksafafskkvddetvqk1fndg1lkkieengelakigk1kwfgqdvsksk

Tsompanidou\_et\_al\_Supplemental\_FASTA\_File

>tr|D2NA01|D2NA01\_STAA5  
m1tnr1tsvnyvkkrligniqri1skev1yeemqyfank  
>tr|D2NA02|D2NA02\_STAA5  
mknkyisk11vgaatitlatm1sngreakasentqqtstkhqttqnnvtdqqkafyqv1h1kgiteeqrnqyikt1rehp  
eraqevfses1kdsknpr  
rvaqqnafynv1kndn1teqeknnyiaqi kenpdrsqqvwvesvqsskakerqni enadkaikdfqdnkaphdksaayea  
nsk1pkd1rdknrrfvekv  
siekaivrhdervksanda1tk1qkndsienrr1aqrevnkapmdvkeh1qkq1da1vaqkdaekkvapkvapq1qspq  
iekpkaespkvvepq1qsp  
kvevpqsk11gyyqskdsfnfygyk1tdtyksykeydytakyytdkyfkykgtidktv1svfgngyksy1qplkvedqk  
nyvksyaqvrnyvtet1n  
tgkvl1yafyqnpkvvkaaittaetassiknt1sn11sfwk  
>tr|D2NA03|D2NA03\_STAA5  
m1k1nrkkvismikn11tat1avg1iap1anp1fteiskaenkiedigqgaeiikrtqditskr1aitqniqdfvkd  
kynkda1v1vkmqgfissrt  
tysd1kkypyi krmiw1pfqyn1s1ktkdsnvd1ny1lpknk1dsadvsk1gyn1gn1fqsaps1ggngsfnsyktisyn  
qknyvtevesqnsk1gkvwg  
vkansfvtpngqvsaydqy1faqdptgpaardyfvpdnq1ppl1qsgfnpsfitt1shekgkdksefeitygrnmdaty  
ayvtrhr1avdrkhda1fkn  
rnvtvkyevnw1kthevk1k1sitpk  
>tr|D2NA04|D2NA04\_STAA5  
mnqphnik1fnrt1n1i1ttdfyknkvshhsrytntneai  
>tr|D2NA05|D2NA05\_STAA5  
m1knkilatt1svs11ap1anp11enakaandtedigkgn1dve1i1krtedktsnkwgvtqniqdfvkd1kynkda1i1k  
mqgfissrttyynkntnh  
iksmrwpf1qyn1g1ktndk1yvs1iny1lpknk1estnvsqt1gyn1gn1fqsaps1ggngsfnsyksi1syttqnyvseveq  
qnsksv1wg1vkan1sfates  
gqksafdsd1fvgykphskdprdyfvpdse1pp1vqsgfnpsfiatvshekgssdtsefeitygrnmdvthaikrsth1g  
nsy1dg1hrv1hna1fkn1rny1t  
vkyevnw1kthei1kvk1ggn  
>tr|D2NA08|D2NA08\_STAA5  
mysikmrssnqdv1h1sgaeticefdkieqtvqrfynkgffhengqp1d1n1k1iqkimepiqqika1qi1dddka1n1qhl1t  
qecgvtega1n1qgmty1kn  
etvytgai1i1sa1sgkr1dsfgqrgi1rathfsfedinnkgd1nervtda1aiascina1hpyvkge1cvsd11tyttgyfa  
saki1gyhr1fdikpv1ntry  
ggr1i1fvddrid1n1hy1s1fle1stpk1qvi1yetv  
>tr|D2NA09|D2NA09\_STAA5  
mfqeqid11qkq1g1yrs1ksvgy1drqy1evenkrctnytsndy1g1gqiafdqvd1fes1fmrkysy1h1ssr1is1gs1stv  
yeeiesm1adw1l1gysacti  
1nsgydan1a1fni1fkn1tncv1v1fsd1qenhasi1dgik1sg1lekviykh1ldiad1ekr1aeypnq1nipk1i1is1dsv1fstng  
dvvd1gq1vs1khkynat1  
i1ldvshsfgi1enysnyqg1di1tss1skacgayggv1s1sndv1kdm1inhgr1p1iyss1piyn1lyfikrniek1linadd  
rrtk1ns1skyfnq1k1ka1l  
nvny1nssn1pik1fie1fddieaaenihqt1l1khv1ftsyl1ryptv1tkpml1ris1syfhaeqd1dr1feil1hqed  
>tr|D2NA10|D2NA10\_STAA5  
m1lakri1l1gqe1q1tketv1kiyed1tnid1td1l1neay1i1rkhyf1gk1kv1nmi1naksgic1pencgy1cgsrd1k1qk1qry  
a1i1pee1qi1dgakv1ahdn1h  
igt1yci1vmsgr1g1psd1kev1dhis1ntvrt1iks1qhp1q1kicac1g1tnde1qak1k1sagv1dryn1hn1ints1enyhdn1vvt1h1sy  
kdrtd1tie1lmkann1s1pcs  
gvi1cgm1gesn1qdi1v1d1maf1alkem1dads1ipin1fl1hpik1g1tk1fgs1mdd1tpm1kcl1rival1fr1lin1ptke1iri1aggre1vn1rs  
1qpl1a1kaans1i1fv1gdyl1i  
tggq1pnq1ldydm1nd1g1feid1ygt1cen1ken1kndvs1ran  
>tr|D2NA11|D2NA11\_STAA5  
mny1tq1q1k1qdse1yvwh1pft1mqmv1yskeeai1i1ekg1kgsy1ldtng1nky1ldgyas1lwnv1vhghn1nky1lnkv1kkq1lnkia  
hst1l1g1sn1ips1ie1laek1l  
ie1itpsn1l1rkvf1s1d1tgsasveia1ikmay1qywk1nidrekyakknk1fit1nhgy1hgd1tigavsv1ggikt1fhki1fd1ifen  
iqvesps1fyr1snyd1tenem  
maa1i1l1tnie1q1i1iernde1iag1filep1liq1gat1gl1fvh1pkg1fl1keve1k1ckkyd1v1licdevav1g1fgrt1gkm1fac1hedv1q  
pd1im1cl1gkai1tggy1l1plaa  
t1ltsq1ki1yna1fl1sdshg1vnt1ffh1ghty1tgn1qiv1ctvalenir1lyekr1k1l1shietts1st1lekq1l1hal1krhrn1vgd1vr1grg  
1mf1gve1l1vtd1kds1ktp1lei  
ekver1ivr1nckeng1lmi1rn1envit1fv1pvl1smsn1kev1ktm1vri1fkkav1hni1ldrkc  
>tr|D2NA12|D2NA12\_STAA5  
mri1fi1ts1ntd1vgk1tyvtkh1lyha1l1ktr1ghr1vcv1f1kpf1qteer1qdg1t1fpd1lev1fk1necd1sydi1ts1lyt1fk1qpv1sph1af  
k1mad1qi1f1nk1qc1v1dk1kv1v  
1dke1fd1fi1l1iegagg1ig1vpi1yegt1dd1fym1tkd1l1ind1cad1cvi1sv1psk1lgais1dai1vhq1dyv1nhn1vsarn1flim1nry1tds  
yi1ekdn1qmt1ig1k1l1tnk1tv1y  
tfeehat1yen1fseaf1kq1ligv1kne1l1httt

Tsompanidou\_et\_al\_Supplemental\_FASTA\_File

>tr|D2NA13|D2NA13\_STAA5  
mfqitfkiInwmpykarmilgfsmsflnaifialpiflaakifnnvlshkpiymkdilnvviimvllvigrfitayfks  
kshesiayemsakerldig  
dklknvrlygfnsnhsnelttivttldtflenfamkmvdivvngyiliivlilsllvsvwqvsllacigvllsffaiql  
erksrqnapayhvnqqlv  
ekvlevirgigviksfakentslksfnqsvneskrintkiemqyipfnllhllslkvvsimivlvacillymhsidlptl  
imisifsfvifdsvenins  
aahvlemidmtiddiekiknapeldengknltikneniafqvnvnsyddkqviknvnfeiptqtstaiigpsgsgkstlc  
hlllrfdiddgiiiridgv  
dikdmtlstlmskisavfqvylfndtiennilfgnpgatkeeiiraakqacchdfimsipegyqtmnekgsnlsgge  
qrisiarailkdapiiild  
eatssidpeneqliqtaineiskgktvitiakhletiknadqiivlnegeiiqkgshdelirkpgmyqdfiriksksgw  
kl  
>tr|D2NA14|D2NA14\_STAA5  
mnnqtnwikilsgfasdskwkimlsillsiisvfgslvpywavfkiilminnaytinsimvyifialiayisqvccfga  
stmshitayeielseirkk  
laqlmrplpgvveskkigelnkni fvdvetielplahmipevignllsaaiflyimlidwrmasallvtipisifafk  
kvmsgfnetyaeqmksnny  
mnsaivefiegieviktfnqssykykdavdnykihtlnwfkntwgymnlgssvlpstflgilpvgmylisinglnya  
efflcivilslgvvapiknf  
tnyvnhlksiqyaltevnqllileela lssrfmepqhyeiafnvngfsynkdkddlvfkhlsftvpennftaivgasgsg  
kstiaklisrywdvtsgei  
tigginkdiesqldnlvgfvgqdnfllnltfkeniklgnpeatdeavekaaklaqche fieklpdgydtnvgtvgdkl  
sggekqrvtiarmiikdap  
iivldeatayvdpdneqkiqeaInvltdkdtliviahrstiqhadqiivlgkqqilekgshhllllklnngnykkmwdthm  
htkdwgiintghn  
>tr|D2NA15|D2NA15\_STAA5  
mklqtghaeilkfiivggintlnyyvvyllllkllhieymishitgfvavvisyylncyfvyrvkptwrkfisfpitql  
vnvslqtvllvfvswlnl  
paeiapfagliitipitfilskwilkdsn  
>tr|D2NA16|D2NA16\_STAA5  
mqkqkiviapdsfkesmtaqqvgnikqafntvygntlhydiipmadggegtdal mhatgatkytvivndplmrpieac  
yaradeqqiaiemaaasg  
ldllekeernplytssygtgelikdalnhgaktiilgiggsatndgggtgmalsalgvkftdvngdllqmnganlahiaqid  
itnldsrakevtfkvacdv  
snpllgengatyigpqqgadakmipldfamshyhdkiictgksvnpvpgsgaaggmgallaffdtltkgidivfd  
itnfhqrikdadliitgeg  
rmdyqti fgktpvgvalaakqyhipviaicgs lgenyqhvydfgidsaysiisspstedvlnseqnllntatdiaril  
klq  
>tr|D2NA17|D2NA17\_STAA5  
mkrtdkyrdsyqydnqnhrrqsedasyrqqyakgdpeehperyyngdrdyrreqileeeneksrrskwlyiiaillli  
ivaifvtrallnndsdkvs  
ndpkvsqnykkqvenqdgqinqvvnakeniknnqktddiiknlqnqidnlkqqeqnkadskltqfyqdqinklteanna  
lknnasqgkiesmlndint  
kfdsikskleslfdkddnsggn  
>tr|D2NA18|D2NA18\_STAA5  
mqssssktkqfsfllliltlgvmtafgpltidmyvpslpkvqgdfgsttseiqltIsftmiglalggfifgplsdafrkr  
iavsiliifilasglmsmfv  
dqplfltlrfiqgltgqgviviakasagdkfsgnalakflaslmvngiitilaplaggla lsvatwrsiftiltival  
iiligvasqlpktpkelk  
qvnfssvikdfgslkkpafiipmllqgltyvmlfsyssaspfitqklynmtpqqfsmmfavngvgliivsqvvallek  
lhrhllliiltiiqvgva  
liiltltfhlplwvlliafflnvcpvtsigplgftmameertgsgnassllglfqfilggavaplvglkgefntspymi  
iifitailvsliiyfkm  
ikkqhva  
>tr|D2NA21|D2NA21\_STAA5  
mkiqtiadlhidrhnktsedyaleaveivkykndilliagdisnhyqlthqfitqltkqldipvkfvpgnhdlweves  
mttgdiwnnyksmsqlva  
kpfivneewaiightgwydysfaaqrfslde lqkgkhygatwqdkeriswgtsdqnlskiaaeqvkkdllevgnrrvilv  
thvthpfdiivmpphrifd  
fynafigtsdfnplyamfdipysimgvhfrksvmdggrcylcplgyprqwrse diyqeineti qiiei  
>tr|D2NA23|D2NA23\_STAA5  
mallleaflififaviissvinnrfpqiaptafiqialgvvifiipi qvdfqfnsevfmfaviapl fvegthvsrtklley  
rkpillsmalvfatvvgv  
gyfihwiwपालmpaafaiiaailcptdavavsaitrgkllpkgsmtilegesllndaagiisfkiavtalvtgtfslfqa  
veqfiistilglvigaiig  
fvvriidlt tankglkdntltfiqltpfvvyflaeevhasgiaavviaglihglrdr liraqtelqmnyhqiwntf  
syalngfvfvvlgfmiptv

Tsompanidou\_et\_al\_Supplemental\_FASTA\_File

vidifqtepdnfsflivitiliaiaiyacrffvwyfywkdfyfpkniqsyldeehdshetppsrvryafimtmcgihgti  
s1smaltlfpfiitkgqafe  
yrndllfiasfmvlisli1aqivlplitpsaedttfkgmtyqsakifivqkviehfkneskkdkndtnyrpvlnqyfge1  
lfl1nsepdnqntkelkr1  
ediakvietstlerlidkkgatyqdiannyrnivel tethrtasfvekfanffkmlwlr1kamkhyka1nkeskkqefens  
fkdvqkimrivnhni1r1  
keeqnstnvlsvinhyydmrs1kwraqrrkerqensnqipqamfhnk1ealy1qrh11delirknkinnivaaq  
ireninyneiv1slqskh  
>tr|D2NA25|D2NA25\_STAA5  
mttkklyflsisii1vaisaiyit1nsntktr1tndsqqqidtiiehd1qkghipgasilivkngkvflnkggyqdv  
dkkvkaspttkyeiasntk  
aftglailk1aqegr1n1nddvskhvphfkmnyngqnetitikq1laqtsgpsditsedavtnknnr1ndvtraimgde  
1hhkpgeefeysnmyd11  
g1i1qnvtkqsytkyitnswl1kplhmthtsfkqtnnkskndaigyelqgstpvvskpefn1wdtpsaymmtsted1ehwi  
kfq1nppdkyks1vqqshk  
n1sstigeplanayasgwftnndeh1vfhsqt1dnfssfi11n1pkqnygivvan1nseyv1k1veh1ntqivnhkryst  
vasm1nqykdfn1vtvlm  
tt11l1af1fsayrawqmrhgki1lrksk1ttf1sw1t1cl1cia1al1y1alpy1il1gsn1nwsf1vtw1pieik1t1ttt  
fialfsm1it111v1h1ttt  
ikkp  
>tr|D2NA27|D2NA27\_STAA5  
mk1aiagsgalgsfgak1fqagydv1idgytshveavkqgh1nitingeafelnipmyh1ndqpdesiydv1f1fks  
mq1kevmeamkphidneti  
vvtcmng1kheeviaqyvaqsivrgvttwtag1espghsh1l1gsgpveigelvdegkenvikvad11neaelngviskd  
lyqsiwkk1cvngtanals  
tv1ecnmas1nessyak1iyk1tqeivhvatidnvh1nvdevfey1vd1nekvgahypsmyqd1ivnnrkteidyinga  
vat1gkqrhieapvnrfit  
d1ihtkesqrhaqd  
>tr|D2NA28|D2NA28\_STAA5  
mdtskqfrgdnr111g1v1lgvitfw1faqs1vn1vvp1qstysdvgtiniavs1sal1fag1fivgagdvadk1fgrvkit  
yvgl11nvvg11i1itp1  
paf1i1igri1qg1saac1mpst1ai1neyyigtrr1qalsywsigswggsgict1fgg1matyigwrsifvvs111t1la  
my1ikhapetkaepikgm1k  
aeakkfdvig1v1lvvtm1s1nv1itqtshfg1v1sp1il1glivvfics1vgfvyen1kikh1plvd1fsifk1nrgysgatis  
n1f11ngvaggalivintyy  
qq1lgfnssqtgyis1t1y1iav1smi1rvgeki1sqhgpk1r111gsgftvig1l11s1t1f1pemwyivssivgy11fgtg  
lglyatp1stdt1avasapdd  
ksgvasgv1ykmass1gnafgvavsgtv1v1laan1n1n1ggftgmmfna11aiva1f1v1111vpknqtn1  
>tr|D2NA30|D2NA30\_STAA5  
mkk1iky1vvv1v1s1lav1sgcs1pg1gskstkndvkital1stsesqi1shml1r11iehdthgkikpt1vnn1gsstiqhn  
a1ingdanisgvryngtd1  
tgv1keapi1kdpkkami1atqqgfkqkfdq1tffdsygfantya1fmvtketakkyh1etv1sd1akhskd1r1lgmdsswmnrk  
gdgyeg1fkkeygdfgtvr  
pmq1g1vyda1nsek1dva1lgystdgriaayd1kv1kddkqffppyaasavatne11rqhpe1kttink1tgkistsemq  
r1nye1adgk1kepavvae  
f1kkhhy1fdkqkgghk  
>tr|D2NA31|D2NA31\_STAA5  
mie1f1hehgg1mskt1ehfyisiva111aiivavpig1llskt1krtani1ltvag1lqt1pt1lav1aimipi1fgvgktp  
aiva1fiyv11p1ilnntv1  
gvqnids1nikeagksmgmtqf1q1mkdiel1p1al1p1il1ggi1r1ssvyviswat1asyvgagg1gdfi1fng1n1ydp1mivt  
atv1vtal1gvdal1alv  
ekwvvpkg1kvsg  
>tr|D2NA32|D2NA32\_STAA5  
m1sikh1tkiysgnkkavddis1ldiqsgefi1afigtsgsgkttal1rminrmi1eat1egqieidgkdvrsmnpvel1rnigy  
viqqig1lmpht1ikeniv1  
vpk11kwtkeekdkrakil1vd1pes1flerypael1sggqqqrigvvra1aadqdi1ilmdepfgaldpitr1d1lqdlvk  
t1qrk1lgktfi1fvthdme  
aik1ladki1cimsegkvvqfdtpdn1l1rhpandfvrdfigqnr1liqdrpndktvegvmikpitiqaeat1ndavh1mrqkr  
vdti1fvvdrdnh11g1f1di  
ed1nqgi1rghks1r1dtmqqhiytvqidsk1qdsvrtil1krnrvnpvvd1kqrlvg1litravvdivydtiwgdsedtvq  
tehvged1t1sskvheqht  
nvkvr1digddks  
>tr|D2NA33|D2NA33\_STAA5  
mdvyppvtmdaca11qkfd1fcnni1shfrhffdikp1er  
>tr|D2NA34|D2NA34\_STAA5  
mevmt1mekqpneqveaf1nkesqwqeeyky1rt1ifnet1e1eaykwmhpcyt1nnknv1lihgf1knyva11fhkgail  
edkyht1liqqtekvqaarq  
lrfen1eeiqarreeikhyiaeaikaekagkkvkmkkteeyvipke1leakfeempq1lessfyk1tpgrqhqyiyhigqak

Tsompanidou\_et\_al\_Supplemental\_FASTA\_File

rsetrqkrvekyinqileg  
kgmhdk  
>tr|D2NA35|D2NA35\_STAA5  
mnkdkqlhndkinlsqvlglgslgswlfgaweassiaapaaiswvlglvigtiaynyeigtmfpqsggmsnya  
qythgslgfaawanvws  
lvtiipieavsavqymsswpwhwakpmkhlmengsistyglavylivifsllywsvkltsftsllsvfklgvpmlt  
iimlmsgfdtsnyghsas  
tfmpygsapifaattasgi fsfnsfqtinmgseiknpekniargiaislisavlyiilqstfitsmpqsmllqhsqwn  
ginfnspfadlailginw  
laillyieafvspfgtgvsvfvtgrvlrameknghipkflgkmnekyhiprvaiifnaiismimvtlfrdwgtlaavis  
tatlvayltgpttvialrk  
mgptmtrpfrakilkvmaplsfvlaslaiywamwpttaeviliiilglpiyffeyermnrntkkqigglwiivylivl  
silfsfigskefkglnmihy  
pfdfiiviiivalifyyigtssfesvyfratrtrintkmreslnneskssqkif  
>tr|D2NA36|D2NA36\_STAA5  
mkinttggqihgitqgdldiflqipyaepvhndrfkhstlktqwsepidateiqpippqpdnkledffssqsatftehe  
dclylniwbqhdqskkp  
iifyggsfenghgtaelypahlvqndiivitcnrylga lgyldwsyfnkdfhsnnglsdqinvikvhwqfiesfggd  
annitlmqqsagsmsiltl  
lkipdiepyfhkvvlsgalrldtlesarnkaqhfk lmrdyldtdvtslstddilmeklkqsrqpskgldliyapi  
ktgyiqnnypttkpiacy  
tkdegdiyitseqkklspqrfidime lndiplkyedvqtakqslaitchcyfkqpmkqflqqlniqdsnaqlwlaefawh  
dtssahyrsayhilmdvfw  
fgnlqilaahqypttthlkflsrqmndlanfaksgkmpwpmynherryrtyq  
>tr|D2NA37|D2NA37\_STAA5  
msimr1ftfilsifivgmvemvaginmmsqdlhvseavvgqlvtmyaltfaicgpilvkltnrfssrpvllwtllifi  
igngiavapnfsilvgr  
iissaaaaliivkvlaitamlsapknrgkmiglvytgfsnganvfgvpigtvgldvgwrytflfliivsiivglmmiyl  
pkdqeigrpvnheapshe  
nhvtskilrpaevakylitflvliansvtfvfinplilsnghdmsfvsalavngiagvigtslggifsdkitskrwlm  
isvsi fivmmlmnlilpg  
sglllaglfiwnimqstnpavqsgviqhvegdtssvmswnmssl nagigvggi igglvmthvsqavtytsaiigalgl  
ivvftlknnhyaktfkss  
>tr|D2NA39|D2NA39\_STAA5  
mlleikdlvyeasdrvilnhinlkvdkgetiaii gpsgsgkstfqlklicnlisptsqlyfkgkpyddyepelrrhisyl  
lmqqsdlfgetiednmi fp  
svarndkfdkkrakqlidvlgghyqlsskiehmsggerqriaiarqlmytpdillldestsaldinnkekeniifkla  
dqvaimwithestdqsmrh  
fqkritivdgqisntee lnqhe  
>tr|D2NA40|D2NA40\_STAA5  
mnqsvkl1khltdvngiagyemqvkeamrnyiepvsdqii ednlggigfkknaengqysimisghmdevgfmvtkidkhg  
fisftpvggwwnqvm1sqk  
vtittldlgeirgigskpphvtpeerkkpmeiknmfidigvsskeeeagvevgnmvtpysefevltndkyltakaf  
dnrygcalavevlkr1kde  
niginlysgatvqeevlg rgakvaantikpdlaiavdvgiaydtpgmsgqtsdsklggpvmimdatsiahqglrkhhk  
dvakkhnievqwdtppggg  
tdagsihvanegiptmtigtvlrymhsnsvlnvddyensvrlvteivrs lndetyknimw  
>tr|D2NA42|D2NA42\_STAA5  
mtflvmqfivni iigfl1vmvigliwlikdkrqsqhsvlrnypllariryisekmgpelr qylfsgdnegkpfsrnd  
yknivlagkynsrmtsfgt  
tkdyqdgfyiqntmfpqrneisvnttllstfifykianerlfsreeyrvptkidpyylsddhaiklgeh1khpfilkri  
vgqsgmsygalgnaital  
skglakagtwmntgegg1seyhlkngndiifqigpglfgvrdkegnfsedlfkevaqlsnvrafelklaqgaktrgghme  
aekvneeia kirnvepykt  
inspnryefihnaedlirfdq1qq1gqkpvgfkivsvskvseietlvrtmveldkypsfitidggeggtgatfelqdg  
glplftal pivsgmlkyg  
irdkvklaasglvtpdkiaialglgadfvniargmmisvgcimsqqchmntcpvgvattdakkekalivgekqyrvtny  
vtslheglfniaavgvsn  
pteitadhivyrkvdgelqti hdyklklis  
>tr|D2NA43|D2NA43\_STAA5  
msntnkhyieeyateqsrffkrdigfi flyiflvnilpiiivfltfelvavftqqapwgfsfpismnisyllaviislai  
frlmhedafipmirsqiva  
sakykwhilistlsivlfl1lnhfdifa lnvdsftvfdiyp1reygsisliaifsltiilntlicqlifrhiliqels  
rlip1kitivlsviletly  
yypointwefipalilassatylylksnrnfmvsyfyqlavilvlhifm  
>tr|D2NA44|D2NA44\_STAA5  
mkgamawpflrlyiltlmffsanailnvfip1rghdlgatntvigivmgaymltamvfrpwagqiiarvgpikvlriili  
inaialiiygftglegfyv

Tsompanidou\_et\_al\_Supplemental\_FASTA\_File

arvmqgvctaffsmlqglgidaalpeehrsegvslyslfstipnligplvavgiwnannislfaiiviifialtttffgyr  
vtfaeqepdtsdkiekmpf  
navtvfaqffknkelnsgiiimivasivfgavstfvplytvsigfanagifltiqaiavvvarfylrkyipsdgmwhpky  
mvsvlsl1viasfivafgp  
qvgaiifyg sailigmtqamvyptltsylsvflpkvgrnmllglfiacadlgislggalmpisd1vgfkwmlyicgmlv  
ivimimsllkkptprpans  
1  
>tr|D2NA45|D2NA45\_STAA5  
myviki kdveksyqsahvfkrrrt pivkgvsfecpigatia iigesgsgkstlsrmi lgi ekpdkgcvtlndqpmhkkkv  
rrhqigavfqdytsslhpf  
qtvreil fevmcqcddgqpkdvmevqaitlleevgl skaymdkypnm lsggeaqrvaia raicinpkylfdeaissldms  
igtqildl1ih1retrqls  
yifithdiqaatylcdqliifkngkieeqiptsalhksdnaytreli ekqlsf  
>tr|D2NA46|D2NA46\_STAA5  
mtlltvkhltitdtwtddplvsdvnftltkgetlgvig esgsgksitcksigvlnperlrvtgditfdgtsmlslsesql  
kkrygkdi amvmqgsraf  
dpsttv gkqmfetmkvhtsmstqeiektlieymdylslkdpkri lksypym lsggm lqrlmialalalkpklii adeptt  
aldt itqydvleafidikk  
hfdcamifishdl tvinki adrvvmkngqli ehgtresv lhhpehvytkyllstkkkindhfkvmrgdvcd  
>tr|D2NA47|D2NA47\_STAA5  
miilkrllqdkgavialgiivlyvflglaaplvtfydpnhid tankfagmsfqhllgtdhlg rdil trliyai rpsllyv  
fvalfvsvligsilglsg  
yfggfvdalimracdvmlafpsyvvtl alialfgmgaeniimafil trwawfcrvir tsvmqytasdhvrfaktigmndm  
kiihkhimpltladaiis  
sssmcsmilqisgfsflglgvkaptawgmm lnearkvmfthpemm fapgiaiviivmaf nflsdalqiaidprisskdk  
lrvskkgvmqs  
>tr|D2NA50|D2NA50\_STAA5  
mskllmigtgpvaiqlanicylksdyeidm vgrastsekskrlyqaykkeqfevkiqneahqh legkfeinrlykdvkn  
vkgeyetvmmactadayy  
tlqqslsletlqsvkhvili sptfgsqmiveqfmskfsqdievisfstylgdtrivdkeapnhvlttgvk kkl ymgstysn  
stmcqrisv laeqlikiqle  
vvesplhaetrnssl yvhpp lfmndfslkai fegtdvpvyvykl fpegpitmtli remrlmwkemmailqafrvpsvnl1  
qfmvkenypvrpetldegd  
iehfeil pdilqeyllyvrytailidpfsqpdenghyfd fsavpfkqv ykneqdvvqiprmpsedyyrtamiqhigkmlg  
iktpmidqfl tryeascqa  
ykdmhqddhlssqfntnl feedkalv tkfleinrtls  
>tr|D2NA51|D2NA51\_STAA5  
mnfnneiklilqqylekfeahyervlqddqyiealetl mddysefilnpiyeqqfnawrdveekaqlinslqyitaqcv  
kqvevirarrll dgqastt  
gyfdniehcideefgqcsiasndklllv gsgaypmtliqvaketgasvig ididppavdlgr rivnvlapnedititdqk  
vselkdi kdvthiifssti  
plkysileelydlnenvvamrfgdgikai fnypsqaedkwqc vnk hmrpqqifdialykkaaikvgitdv  
>tr|D2NA52|D2NA52\_STAA5  
mnrqviefskynpsgnmtilvshkhdaseyasianqlmaathvcceqvgfiestqnddgn dflvm sgnefcgnatmsyi  
hhlqeshllkdqqfkvkvs  
gcsdlvqcaihdcqyyevqmpqahr vpttinmg nhs wkaieiiyetyvhyvipkvqtteiqhlvetyvrkqqwnhkyk  
tv gmm l fdeqrqflqpliy  
ipeiqsl iwenscsgstasigvfnnyqrndackdftvhqpggsilvtskrchqlgyqtsikgqvttvatgkayie  
>tr|D2NA53|D2NA53\_STAA5  
mlkekesfrllyqaireiadkignqletnsvsllll dfdfehevfdelylailky lntvsienishsellnlientipe  
dreintfvknkii igfann  
yfpelqvlaneiksdmasslk  
>tr|D2NA54|D2NA54\_STAA5  
mkr lenkvavvtgastgigqasaialaqegayvlavdiaeavsktvdkiksn gdnakaytvdisdeqqvvd fvsdikeqf  
gridvlfnnagvdnaagri  
heyptdvydkimvdmrgtflmtkmm lplmmtk ggsivntssfs gqaadlyrsgynaakgavinftksiaieygrdgira  
naiapgtietplvdkltgt  
sedkegktrfrenqkwmtp lgrlgkpeevgklvvfl asdessfitgetiridggvmaytwpgemlsddswkrtle  
>tr|D2NA55|D2NA55\_STAA5  
mtskhqkgsivnrflnsvekignklpdpsvlf flmcvglaimtwis lfnvsvkhp gthqtiyikniishd gftmimnd  
tiknfsefpalglvlavmi  
gigvaektgyfdklmivvnraprflilpti iligilgstagdaat ilpplaam lfikigyhipiaglt mayasavggfa  
anivvgmqdalvysftepa  
trivdsikt nvamwyfiaasvivllpti llvttkliiprlgqyddrlmhddheetsshitdkeahalkwanisfivti  
illii itaipehsflrnakt  
gsllddapl ingvgliilvflvp glvygil skeikntkd l gkmfgdavgsmgtfivivffaaqllaylkwsnlgiaav  
kgakll ehqngivilgi  
vlsamvnm ligsasakwgilgpi fvpmliligfhpaftqviryvgsitnpi tpmmpylpllltyaqydkrmklgalls

Tsompanidou\_et\_al\_Supplemental\_FASTA\_File

s1mpysialsiwvtfvii  
wfl1gipvgpggpi fvk  
>tr|D2NA57|D2NA57\_STAA5  
mnkxhvfiigvilcivvatviylkvkydekekqkaiyykeqgeritlylkhntkeptiksvhfts1ktgpmgdavie  
gyinenkkadvaygspeh  
nyqfggdmiesek1sellkpaqelksqkkskn  
>tr|D2NA58|D2NA58\_STAA5  
mskxhvfiigvilcivvtamh1kmydekekrkaiyykeqgaritlylkhntkeptiksvhftnletspmgsaveie  
gyinenkkdnftayatpeh  
nyqfggamiksegvdk11kpaherkspddikke1nkk  
>tr|D2NA59|D2NA59\_STAA5  
mgsaviegyinenkeddfvayaspennfqfsgdlikser1sellkpaqelkspddikke1nkkksh  
>tr|D2NA60|D2NA60\_STAA5  
mliiliiivcnyl1kidekekqkaiyykeqgeritlylkhntepntiksvhfts1krpmpgdaviegyinenkeddfv  
aygspehnyqfggdmvese  
r1sellkpaherkspddikke1nkkknh  
>tr|D2NA61|D2NA61\_STAA5  
mnsiydkdttyralakeayhlepdqeki fvpyskekkefrivafraqnkfnglkmag1spvekgak1ntdelyivyagtd  
pd1ladfgsdsied1kvgm  
akfggg1ripptkeraiygn1nkkmidyddg1sgisqnimtpisqskesyiftgalinkqpkhvygaahslggglal  
1ngvmynfdgvrafsapnt  
fd11pdevkanyrsekydgkfny1hrsd1ignsd1faqrigtqiygkdvgrfs11npilghgmdtfe1kgd1nrvikmdt  
eemskiasd1kascefvnd  
aiksyqkymddtkaakrierkytkk1rtgnykhi kpsdi edymeel svsgkyefyndtafetvmse1nrirknvesfad  
k1khagekmesrdkeigel  
ykifer  
>tr|D2NA62|D2NA62\_STAA5  
mgf1dd1aesieeqsd1sefkqamkse1qtkevveakakiesidediwdwqttvnkrdaieeycegktaehaier1mqdk  
qdiagmrwtaedaeksckv  
gswfw  
>tr|D2NA63|D2NA63\_STAA5  
miqsmphvskcndkghmkgvwdkikseifrgnkhfkfnsve  
>tr|D2NA64|D2NA64\_STAA5  
mkarkttfeerit1veyyfnhkqsyrevaehfni sygqiyqwaqkyqahgknglidgrgkgkpkssmmtpeekeaeiqal  
kaqnr11emendv1kkfqa  
1eremiqrenksqhtkr1kr  
>tr|D2NA65|D2NA65\_STAA5  
mkt1kgt1fmpkpkvdi dv11yifqeyekgvsfqlidtlqldinvntlypkykyppmvlkh  
>tr|D2NA66|D2NA66\_STAA5  
mpkkti fiigvilcivtgg1y1kmkhdekekqkeiyykeqgeritlylkhntkeptiktvhftn1ktgpmgdieiy  
gyinskkdydfiaynspee  
nyqftgg1tgsnevl gk1knaen1kspekikee1nkkdh  
>tr|D2NA69|D2NA69\_STAA5  
mkdsniisfiysrhdrily1n1vgnr1knnismtkatsnigrf  
>tr|D2NA71|D2NA71\_STAA5  
mwyevsver1psgpsinavlqmrqitavi apehnr1hhdhknk1kndee11inqmsshfkfkgefndvaqgdwvkkakn  
e1ddisk1knigrtev  
>tr|D2NA72|D2NA72\_STAA5  
mfteykk1sd1etaydeerrk1ndk1eq1qeikhqik1dceysydcf1y1knkmdysqesnvkmthiinefndemtqrik  
neemkierskdelkreylk  
eiekmggre  
>tr|D2NA73|D2NA73\_STAA5  
msqteyqikpgnikanseetstvski syeienannsglkkgkineqieglkeegkfpkn1kylksytdpntgttttafkn  
kdtgkv1l gmtgtn1hfee  
mgv1khpfnhsdqdmkdmkem1kdfgadanig1gavtdkdpfhkdtqdfikdikkeyeidtitghslggrdaiilgvsn  
dikni vvn pap1s1tdfr  
iialnmtysaigdieikem1knynghivrfvskdel dgfvsvqfmydtagekiv1nngeghdmgaflrkyaqakilae1  
rkvkgyedannksfksvkd  
ntksk1gkveelrvnw1qanggal tssq1k1lesvsal1iaeg1sq1vkeesnq1ekmydnmkkdfqenwksqeagnki  
gk1shdgvl1talrngday  
eskfetep1tkieqk1ke1ndinsdchnyvskikdsvnaivgndq11asqiagvi  
>tr|D2NA74|D2NA74\_STAA5  
mkkeesskdkqikenfnkt1slyptkn1edfydkegfrdeefekgdkgtwiishkmi1etngrnmesrgmvlyinrnrtrt  
tkgnfvireitedskgysd  
skdkkypvmennri vpmkpi hdek1rkeiedfkffvqygnfkdi ndykdgdi synpnvpsysakyq1sddynvkq1rk  
rydiptkkap111kgdgd  
1kgssvgkn1leftfvenkeeni yftdsvqytpsenn1  
>tr|D2NA75|D2NA75\_STAA5

Tsompanidou\_et\_al\_Supplemental\_FASTA\_File

mmihskkltlgiclvllilivgyvimtktngrnaqi keafnktlnvypktnledfydkegfrdqefdkrdkgtwi insg  
mniqlkggalksramvlyi  
nrnrtrtakgyflisettedkgyvhnkdckypvkmeqnqi iptkpi rddklkkeienfkffvqygd fkd ykdgd isynpn  
vpsysanyqlnnddynvqq  
lrkrydistkrapelklrgsgdlkgssvgskelefnfirneenvyftds infkpte  
>tr|D2NA76|D2NA76\_STAA5  
mkkeesskdqi kenftktlnlyptktnledfydkegfrdqefekgdkgtwidsemvielkdkkmesrsmvlyinrnrtrt  
tkgnfivrelwedskgyaq  
skdtkypvkmehnkiiptkpiaddklrkeienfkffvqygd fkd indyk dgd isynsnvpsysakyqlsnddynvkqlrk  
rydiptkkapkllikgdgd  
lkgssiahknleftfienkeeniyftds infkpte  
>tr|D2NA77|D2NA77\_STAA5  
mnqk kfkntikverskl lpspfdmvyknfeklgyhkqneqffyd nasiiidelrnqswiefkkie k efskkl yshlld  
qdsenyknmtvkegieft  
skhtdeiyalqlsntqsrrsragkefesielvimganiefvtqgsigsgvfesselaklvdcvvp gaaeynl nkrnts l  
istktslrerwqevgdems  
rtkakemylvtl desisektl kliekniiivttksvidknylnssnvisfedmlnelhiql llqwnnygypate lnnkke  
lyqt liekydgnmfvrny  
enmlsniv  
>tr|D2NA78|D2NA78\_STAA5  
mynniitknesd nsip lnygd fikekrnkl nmtqkeladsiglpkfgdrtirrwenyetspsyleyktimnf pdtppyln  
pniydykmidlfagiggtr  
lgfqlhgnvkcvfsswdkfsaktykanfgetpkgditqiadeipthdilvagfpcqafsqaglkkgfndtrgtlffdi  
arilkakrpkcfl lenvkn  
lrshdkgktfdi imntlled ydvssil rardfgcpqn reri yivgfdkqqiknaenfs fpeplpiets lgsilesnvn  
dkytisdr lwyghqrrkre  
hkakngfgysifnetspyntlsaryykdge ilieqnknprkltpreaarlqgfp enyiipvsdtqaykqfgnsvsv  
pvvhaiasni fqvllqkn  
n  
>tr|D2NA79|D2NA79\_STAA5  
mdkelwierandslvkhfyeqqsdieqregfeskl tfgtagirgkfglgegrlnkftiek lalgl srylnaqtnnptivi  
hydirhlstefaqiianvl  
anhqitvylpdykttpel sfavrnlnttagim itashnpkdyngikvygsdgaqlstdaselvsryiedvgdplqidis  
fskhnsyikplpksvaen  
yikhinqmigyipksdlqvvfts lhgtsvpivpellslnfnqfnlveaqckpdpnfssvqsanpedhrafdqavelank  
shadl listdpdadrlgia  
erdahghityfngnqigallnyriqqtsqlrhr lmiqsisvsel tkslarynnveykevl tgf kfi aqeirql ddhqnm  
ifafeesygf lsepfvrkd  
davqivpl iikyaselklygktlkdeleqiyqtvgrhedtlfshtleglegkkkiesimthfrshppqeiqglkvkaied  
yltsevhlkdttstqins  
pksnvirv lfdegfialrpsgtepkilyvs lkcpnfddvaqkinamifs  
>tr|D2NA80|D2NA80\_STAA5  
mtvnivsvifcismvlsiyvaitkdf t lisyinqtti adkhknqi ayifal cislsavflmsailcfeydfialaf l f  
l tialllialfyvcfykit  
kyp  
>tr|D2NA82|D2NA82\_STAA5  
mtgtveesddskpidfeyhtavegaeghaegtieteedsihvdfeesthenskhhadvveyeedtnpgggqvtt esnlve  
fdeestkgivtgavs dh t t  
vedtkeyttesnl iel vde lpeehgqaaggpiee itennhi shsglgtenghnygvideieenshvdikselgyeggqn  
sgnqsfeedteedkpkyeq  
ggni vdi dfdsvpqihgqnnqns feedteedkpkyeqggni idid fdsvpqihgfnkhneiieedtnkdkpnyqfgghn  
svdfeedtlpkvsgqnegq  
qti eedtt ptppevpsepptp ptppevpsepgeptp ptppevpsepptp ptppevpsepptp ptppevpsepptp ptppevpsepptp  
gkvvtpvieinekavap  
tkkqskkse lpetggeestnk gilfggl fsi lglal lrrnknhka  
>tr|D2NA83|D2NA83\_STAA5  
mivvgmgqekeaaaseqnttveesgnsateskasetqt tnnvntid etqsysatsteqpsqstqvtt eapttvqapk  
aetsrvdlpsekaadkgiv  
gtqvdt ttpsnvsei kprmkrsadvtaasekevveeakvtgtdvtskvkveegseivghnnketnvvnpnaervt lkyk  
wkfedgikpgdydf t lsn  
nvethgisp lrvpdiksdgqvmavgeveerki rytfkeyvqgkklkael dln lfidpttvtkrgnqnievtlgekk  
iskqfdikyl dgvkdnwg v  
tvngriht l nkqegrshfayvkpnnqsltsvtvtgqvtsyqknaknptv  
>tr|D2NA84|D2NA84\_STAA5  
mpylrl lftiifslckihlffnsinaily cvfsnekkrvnkklkl lll tlcimsfyylel tyilhtkl lntli  
>tr|D2NA85|D2NA85\_STAA5  
mivvgmqdkeaaaseqkttveengnsatenktsetqtatnvhieetqsynatvteqpsnatqvtt eapkvqapq  
taqpanvetvkeevveea



Tsompanidou\_et\_al\_Supplemental\_FASTA\_File

kpqvkettsqsdnsqgdqrvdltpkkatqnqaaetqvevaqprtvseskprvtrsadvveakeasdaseikgtdvtskvt  
vessi eghnntnkvepha  
ggravlkyklkfedglkkgdyfdftlsnnvntygvstarklpeikngsvvmatgqllgdgki rytftdyidykvnvianl  
nl nlfidprivknngheetl  
tskln gkntekkieveykdgvgykytln gsi etfnkadnkfthvayvkpingnkksesvsitgs ltqgsnvsgdspivkv  
yeyqgketd l pksvsvnl t  
dnskfkdvtsdmqnl tvqengnyql n lek ldktyvi hytgeysketdevnf rtqvsaypensyryysynnhyt l twdn  
glvlysnkadngngqgvkv  
esn n l i fdevt g t g v i t g q y d k n l v t t v e e t d s s t l d i d y h t a i d g e g g y v d g y i e t i e e t d s s a i d i d y h t a v d s e a g  
hvggytesseesnpi dfee  
sthenskhhadvveyeedtnpgggqvtt esnl vefdeestk g i v t g a v s d h t t i e d t k e y t t e s n l i e l v d e l p e e h g q a  
qgpiee itennhhi shsgl  
gtenghnygvieeieenshvdikselgyeggqnsqnsgsfeedteedkpkyeqgnivdidfsvpqihgqnnngqsfee  
dteedkpkyeqgniid  
fdsvpqihgfnkhneiieedtnkdkpnyqfgghnsvdfeedt l p k v s g n e g q q t i e e d t t p p t p t p e v p s e p e t p t p p  
tpevpsepptp p t p t p e v p  
sepgeptp p t p e v p a e p g k p v p p a k e e p k k p s k p v e g g k v v t p v i e i n e k v k a v a p t k k a q s k k s e l p e t g g e e s t n k g m  
l f g g l f s i l g l a l l r r n k k  
nhka

>tr|D2NA86|D2NA86\_STAA5

mkr l v y c f k l d n e f n f k n k y k y k p c v t r v f d d l n t i y r i s n n k i i n

>tr|D2NA88|D2NA88\_STAA5

mkymigvdi g t t s t k s v l y d e n g t f i m k h q i g y d l h t p n v d v s e e n p d e l f d a v l m t i k y i m r e s k v n q d d i k f v s f s a q  
m h s l i a m d q q h r l t n n i t  
wadnraakya tvinevh d g n a i y q r t g t p i h m s p l a k i f w m k h e w q d v f q r t a k f a d i k t y i f y h l f d r y i i d y s m a s a  
t g m f n l e t l d w d v g a l e l l  
g i s e e m l p e l v p t t y v m k g m k e r y a t l m g l n e d t p f v i g a s d g v l s n l g v n s v g k e v a v t i g t s g a i r t v i d k p r t d y k  
g r i f c y v l t e d h y v i g g p v  
n n g g v l r w l r d e l l a s e v e t a k r l g v d p y d v l t q i a k r v k p g a d g l i f h p y l a g e r a p l w n a n a r g s f f g l t l s h k k e h  
m i r a a l e g v l y n l y t v y l a  
l i e v m n e t p k m i k a t g g f a k s e v w r q m m s d i f d t e l v v p e s y e s s c l g a c v l g l k a v g d i e d f s i v s s m v g a t n n h t p i e  
e n v a y q e l e s i f i n l s r s  
l t e n y e q i s d f q r q h m a e n k t q

>tr|D2NA89|D2NA89\_STAA5

mygypekwlegmttgegiaaelrlgivinghiaegtlltenqmakqfnvsrspirdafkllqqnqliqlermgahvlpfge  
qekkemydrlmlsfafs  
rvknqerlpivkemkkql emmkvavkfedaesftkhdfehetlikasnhqylnsfwshlkpvmmalvltsmrqrmqqnp  
q d f e r i h n h q v f i d a v e q  
y d s q i l k e a f h l n f d d v g k d i e g f w l n

>tr|D2NA90|D2NA90\_STAA5

msnystgelaklcnvttrtiqqydrkgilkpqgftegkrrvyteqqrqt le l i l l l k d l g a l s d i d m l l k g e g t l k t l n  
t l l t m k q q e i n q q v k q q q a  
v l d k i k n v q y v n e a s t s p i t h l k d i e h v m s k s a e m k s i r r n i w i s a g i i g i i q y s s i s a i l m k n k w p f l i a l p f m i s y  
g i g i t i y y q r k v a y l c p n c  
q h i f s p s l w a v i k a k h t a t t r r f e c p n c h e t h y c i e v p k t h m s t e q l e v p r t k n n n

>tr|D2NA92|D2NA92\_STAA5

mpftmkgypek w k e f e v i k r q k a i e i a n a m l k e g y l e k d v v p i a a k k a k d w y r a l s k e e i k a l e e n f v q f h t a t m e k t e  
v d s e y a t t d n e e h i q e q s n  
q d k s y f d s e s i v n q s g g v r q r e p l m d g p h p k v v e s f k d v

>tr|D2NA93|D2NA93\_STAA5

m i i p a i i g y l c g n f q f g l l v a t g t l a h i y v f k g p s r s k l r t v i i c n l a f a i c m i l g t l t a t t p l v f g m t l l i v t v i p f y i  
f t a l k i a g p s s t f f i v t f s  
l p i n l p i a p e e a l y r g f a i l v g g v l a t m m v l i t i l l s k n k a e e q a i q n d f k l i s k l l h a y n d k s a f s q v a k t a v d s f k a s  
d k l l i t s n s s s d k l s g r f q  
k l l l l h t s a q q y s e l l e l n a k q i r p l p d e l i e m m d h i i t q r d d r n k n v r y w r k e v t v t e e f q n l f n h i l k i d e m v h a n e  
a r i a y e a e m r k p l y s k r i y  
q n l t l d s i v f r n t l r y a a i m m i a i f i a l m f d f e k a y w i p l s a h t v l l g t s t i h a i e r g i a r g l g t i l g v l v l s v i l l f s i  
p t p v a v i l m g i a a l f t e a l  
v g a n y t i a v v f i t i q v i l m n g l a s q n l t i n i a f p r v i d v a m g i v i a i i g l f v l g q r t a s a l l p y v m a e v v r k e a t l f h y l  
f s e n q y k d d v y q k n t a m n l  
s v k l n n m t q v y n a a n g e l f s d k t l i q n y y p s l f a l e e i s f m l n r a m a n e d r l t i n e q l m g e y l a t f e n i a k h l e l n t e l e  
i k i l p d l p q y n i q s a m m n  
i q h n g f r e r d k n v

>tr|D2NA95|D2NA95\_STAA5

m e q i t e f i s r f g y a a i f i l l e n i l p i v p s e i l t f a g l m s v k h s l s i l t l f i i a t i a s f i g l l i l y y i c r l i s e e r l  
y r f i d r h g k w i k l s k d l k  
r a n d w f k k y g v a v f i c r f i p v l r v l i t i p a g v n r m n v t f t v i s l i g t t i w n f g l l l g r t l s d s f g m l m t g l h t y s r i  
m y v v i i a v i y f a i r y i g k

Tsompanidou\_et\_al\_Supplemental\_FASTA\_File

rkrvk  
>tr|D2NA96|D2NA96\_STAA5  
mtksnrlyilgflaffasliqniytpiiprlyddfqpplfwinatvvggfifivavmqivlgrsidsrdsikvlltglgi  
viissficavthnfilfai  
srlfqaigcgiiplvtltllaklstdngraqamanyqiflscaptlapilgstlgarwdyigifslflvisivlfliiff  
idipnvekgivkltekiee  
kyltdkvfitlvtlglfifftyfsilvylptllnntydigvgisgvflpitsvilgslfykrfskkyneimilrvtit  
gfamftllfgwlnesvji  
lsviifilgtcvgivpallatiiskrfehikgkvlgvfnfvryigmtvgalligiisqplvafyfttitimliiiflyik  
igdfqlkyak  
>tr|D2NA97|D2NA97\_STAA5  
mdmkrevilkqqfierenadkrrrykkeneeldlslstqfhielidndkvnkflsemInvskpaitksikkllakg  
lvveshnefnkrevnyslt  
qegkklisyihdelhekavkkyeevkvfdndemaviveflnrsieelkkeedgln  
>tr|D2NA98|D2NA98\_STAA5  
mdvltiehltkkignktilvedsvfk1krqgqivlgv gangagkttlmkvilgyssfqsgnfvnskdsksnigaliengp  
iypfmsgyenkl1neskn  
tqdidkivsqlhmdeyihkkaktyslmgkqklgiaiaflnkpqfiildepmngldpkavrdvrelivqkaqegvtfliss  
hilselvkitnsiliinkg  
kivtetseee1kqfkend1envl1eiieredqa  
>tr|D2NAA1|D2NAA1\_STAA5  
mri1kesiivafavgvvvgagfatgqeiqffftshgaysisgiivtgllitlggmivmhtghh1ksrnhdsinyflyp  
siargfdiiltmfmlslai  
imtaggastihqsfnlpywlsalilvafilatlflkfdriavlggvtpliaivimiavyyfttshldftaanndaqih  
kqks1spgwwfdainyas1  
qiaaafsflsvmgskvkystlygg1iggliitfl1mminlg1isqfdkikhvd1pt1klatqmspsigiimsvimilv  
iyntvvg1myafasrfsvp  
fsrryfi111tmavityistfigfisligkvfpimglfgfillipvlykglitritgkshid  
>tr|D2NAA2|D2NAA2\_STAA5  
mehifregqkgaptlil1hgtggdefdl1plgealnnyh11sirgqvsengmryfkr1gegvyydeed1afrgqelltf  
ikeaaerydfdiekavlvg  
fsgnsniain1mlrseapfkka1lyaplypieitstkn1sdvsv11smgkhdpi1vplaaseqvin1fktrgaqveevwn  
ghe1tetgltaggqilek  
>tr|D2NAA3|D2NAA3\_STAA5  
mtnnhel1gihhvtamtdaernyfftevl1gmr1vkktvnqddiytyhtffaddvgsagtdmtffdfpnitkgqagtns  
itrpsfrvpnddaliyyeq  
rfdefgvkhegiqel1fgkkl1pfeevdgqvyql1sdelnegvapgvpwknqpvvdkaiygl1pieikvsyfddfknil  
tvygmtti1ahednval1ev  
geggnggqvi1ikddkqpaarqgygevhhsfrvkdhaaieawatkykevginnsgivnrifyealyarvghilieistd  
gpgfmedepyet1geg1sl  
ppflenkreyiesevrpfntkrqhd  
>tr|D2NAA4|D2NAA4\_STAA5  
mdr1tkqslnvfvgmnr1dt1eqitkedvkrygl1nitefavle1lynkgppiq1rirdrvliassisyvvsqledkgwi  
trekd1kddkrvymac1tek  
gqsqmadifpkhaet1tkafdv1tkdel1tlqqafkkl1saqstev  
>tr|D2NAA6|D2NAA6\_STAA5  
mafhdktatqvtnie1nvr1dl1mttfykni1gl1pvkssddnttv1svgtgght1tl1h1ledgrqtspreaglfhiaf11  
pttedlanflyfvaqnmng  
igagdh1ysealyndpepangi1evyrdpssswewqngkvkmdt1evdsqt11thrtdegwqmpakgmigh1h1kthd1  
daayqcyieq1gfhvsdf  
pral1fms1tnhyhh1haantwqsnqarqnaqsyl1thvdiyqpdasthtftapegfditvhsntdlvpek  
>tr|D2NAA8|D2NAA8\_STAA5  
mtkimffgtrdyekema1nwgkknnevttskel1ssvtvdq1kdydgvtmqfgklendvypklesygikqiaqrtaf  
dmydl1lakkhnivisnvp  
syspetiaesvsialq1vrrfpdierrvqahdftwqaeimskpvknmtvaiigtgrigaatakiyagfgatitaydayp  
nkdl1df1tykdsvekaid  
adi1slhvpankesyh1fdkamfdhvkkgailvnaargavintpd1iaavndgt1lgaaidtyeneaayftndwtknkdid  
dkt1le1lieheri1vtphi  
affsdeavqnlvegg1naal1svintgtcetr1n  
>tr|D2NAA9|D2NAA9\_STAA5  
mvkaiavdmdgtfl1dskktydksrfeafitel1nrnditfiaasgnqyak1ksifgdrdmyfisengaviykgnelynyks  
fnrqvfqqvvdfl1nmnqsi  
dq1lvi1cg1ksayil1khtseafkedtrfyyhql1keids1qqlpeddyvkiafninrethpvnveevatqfsndiklvssgh  
dsidi1impnmtkggal1kr1  
1dkwemspsel1mafgdannkdml1afakhsyvmenshdeelfniasavapsndkqgv1t1ieqevlkk  
>tr|D2NAB0|D2NAB0\_STAA5  
mkkwtnr1mtiagvvl1i1vaay1fakphidny1hdkdkdeki1eqydknveqaskdnkqqakpkipkdksvagyi1epd  
adikepvypgpatpeqlnr

Tsompanidou\_et\_al\_Supplemental\_FASTA\_File

gysfaeenesl d d q n i s i a g h t f i d r p n y q f t n l k a a k k g s m v y f k v g n e t r k y k m t s i r d v k p t d v e v l d e q k g k d k q l  
t l i t c d d y n e k t g v w e t r k  
i f v a t e v k  
>tr|D2NAB1|D2NAB1\_STAA5  
m i r c a k k e d l n a i l a i y n d a i i n t t a v y t y e p q t i d e r i a w f e t k q r n h e p i f v f e e n g s v l g f a t f g s f r p w p a y q y t i  
e h s i y v d a s a r g k g i a s q l  
l q h l i v e a k a g y r t l v a g i d a s n e a s i k l h q k f n f k h a g t l t n v g y k f d y w l d l a f y e l d l k d  
>tr|D2NAB6|D2NAB6\_STAA5  
m a n n h s a l r l k g i l a i v g a c l w g l g g t v s d f l f k y k n i n v d w y v t a r l v s g i f l l i m y k m m q p k r s i f s v f q d r m l g  
k l l i f s i l g m l v v q y a y m a  
s i n t g n a a i a t l l q y i a p v y i i w f v i r g v a k l t l f d v l a i m t l l g t f l l l t n g s f s n l v n p e s l f w g i l a g v a l a f y  
t i y p s d l l n r f g s i l i v g w  
a m l i s g v a m n l r h p i w h i d i t k w d i s i i l f l i f g i i g g t a l a f y f f i d s l q y i s a k e t t l f g t v e p v v a v i a s s l w l h v a  
f k p f q i v g i i l i m i l i l l l  
s l k r q p e t l d e  
>tr|D2NAB7|D2NAB7\_STAA5  
m r k k w s t l a f g f l v a a y a h i r i k e k r s v k s y m l e q g i r l s r a k r r f m y k e e a m k a l e k m a p q t a g e y e g t n y q f k m p v k v  
d k h f g s t v y t v n d k q d k h q  
r v v l y a h g g a w f q d p l k i h f e f i d e l a e t l n a k v i m p v y p k i p h q d y q a t y v l f e k l y h d l l n q v a d s k q i v m g d s a g g  
q i a l s f a q l l k e k h i v q p g  
h i v l i s p v l d a t m q h e i p a y l k k d p m v g d g s v f l a e q w a g d t p l d n y k v s p i n g d l d g l g r i t l t v g t k e v l y p d a l n  
l s q l l s a k g i e h d f i p g y y  
q f h i y p v f p i p e r r r f l y q v k n i i n  
>tr|D2NAB8|D2NAB8\_STAA5  
m v k q l n s v v a f r e f i h q y p l a v v h v m r d q c s v c h a v l p q i e d l m q s y p n v p l a v i n q s q v e a i a g e l n i f t v p v d l i f m n  
g k e m h r q g r f i d m q r f e h h  
l k q m n d s v n n d v d e h  
>tr|D2NAC0|D2NAC0\_STAA5  
m f k k l f g q l q r i g k a l m l p v a i l p a a g i l l a f g n a m h n e q l v e i a p w l k n d i i v m i s s v m e a a g q v v f d n l p l l f a v g t a  
l g l a g g d g v a a l a a l v g y l  
i m n a t m g k v l h i t i d d i f s y a k g a k e l s q a a k e p a h a l v l g i p t l q t g v f g g i i m g a l a a w c y n k f y n i t l p p f l g f f a g  
k r f v p i v t s v v a i a t g v v l  
s f a w p p i q d g l n s l s n f l l n k n l t l t t f i f g i e r s l i p f g l h h i f y s p f w f e f g s y t n h a g e l v r g d q r i w m a q l k d g v  
p f t a g a f t t g k y p f m m f g l  
p a a a f a i y k n a r p e r k k v v g g l m l s a g l t a f l t g i t e p l e f s f l f v a p v l y g i h v l l a g t s f l v m h l l g v k i g m t f s g g f  
i d y i l y g l l n w d r s h a l l v  
i p v g i y a i v y y f l f d f a i r k f k l k t p g r e d e e t e i r n s s v a k l p f d v l d a m g g k e n i k h l d a c i t r l r v e v d k s k v d v  
a g i k a l g a s g v l e v g n n m q  
a i f g p k s d q i k h d m a k i m s g e i t k p s e t t v t e e m s d e p v h v e a l g t t d i y a p g v g q i i p l s e v p d q v f a g k m m g d g v g f i  
p e k g e i v a p f d g t v k t i f p  
t k h a i g l e s e s g v e l i h i g i d t v k l n g e g f e s l i n v d e k v t q g p l m k v n l a y l k a h a p s i v t p m i i t n l e n k k l v i e d  
v q d a d p g k l i m t v k  
>tr|D2NAC1|D2NAC1\_STAA5  
m a k i k a n e a l v k a l q a w d i d h l y g i p g d s i d a v v d s l r t v r d q f k f y h r h e e v a s l a a a g y t k l t g k i g v a l s i g g p g l  
i h l l n g m y d a k m d n v p q l i  
l s g q t n s t a l g t k a f e t n l q k l c e d v a v y n h q i e k g d n v f e i v n e a i r t a y e q k g v a v v i c p n d l l t e k i k d t t n k p v d  
t s r p t v v s p k y k d i k k a v k  
l i n k s k k p v m l i g v g a k h a k d e l r e f i e m t k i p v i h s l p a k t i l p d d h p s i g n l g k i g t k t s y q t m q e a d l l i m v g t n y  
p y d y l p k k n i k a i q i d t n  
p k n i g h r f n i n v g i v g d s k i a l h q l t e n i k h v a e r p f l n k t l e r k a v w d k w m e q d k n n s k p l r p e r l m a s i n k f i k d d a  
v i s a d v g t a t v w s t r y l n l  
g v n n k f i i s s w l g t m g c g l p g a m a s k i a y p n r q a i a i a g d g a f q m v m q d f a t a v q y d l p l t v f v l n n k q l a f i k y e q q a a  
g e l e y a v d f s d m d h a k f a e  
a a g g k y t i k s a s e v d a i v e e a l a q d v p t i v d v y v d p n a a p l p g k i v n e e a l g y g k w a f r s i t e d k h l d l d q i p p i s v a a  
k r f l  
>tr|D2NAC2|D2NAC2\_STAA5  
m n d y v q a l l m i l l t v v l y y f a k r l q q k y p n p f l n p a l i a s l g i i f v l l i f g i s y n g y m k g g s w i n h i l n a t v v c l a y p l y  
k n r e k i k d n v s i i f a s v l t  
g y m l n f m l v f l t l k a f g y s k d v i v t l l p r s i t a a v g i e v s h e l g g t d t m t v l f i i t t g l i g s i l g s m l l r f g k f e s s i a k  
g l t y g n a s h a f g t a k a l e m  
d i e s g a f s s i g m i l t a v i s s v l i p v l i i l f y  
>tr|D2NAC6|D2NAC6\_STAA5  
m k y k k i l f r l l i a f a v l f s a d f t y q s v e q t h q s h a a v n y s k n q c t w a f k r r a q v g k p v s n r w g n a k n w y n a r k s k y a  
t g r t p r k f a v m q s t a g y y g  
h v a v v e q v y k n g s i k v s e y n f y r p l k y n t r v l s k k a a r n f n y i y  
>tr|D2NAC7|D2NAC7\_STAA5  
m q s l d k n f r h l s r q q k l q q l v d k q w l s e e q f n i l l n h p l i d e e v a n s l i e n v i a q g a l p v g l l p n i i v d d k a y v v p m m v e  
e p s v v a a s y g a k l v n q t g

Tsompanidou\_et\_al\_Supplemental\_FASTA\_File

gftkvsserimigqivfdgvddteklsadikalekqihkiadeaypsikargggyqriaidtfeqqllslkvfvdtkda  
mgnmlntileaitafkn  
efpqsdi lmsil snhatasvkvqgeidvkd largertgeevakrmerasvlaqvdihraathnkgvmngihavvlatgn  
dtrgaeasahayasrdggy  
rgiatwgydqrqr ligtievpmt laivgggktv lpiakasle ll nvdsaqelghvvaavgl aqnfacra l vsegiaqqg  
hmsl qyks laivvgakgde  
iaqvaealkqeprantqvaeril qd lrsqq  
>tr|D2NAC8|D2NAC8\_STAA5  
mtigidkinfyvpkyvdmaklaearqvdpnkfligigqtemavspvndivsmganaakdiitdedkkkigmvivates  
avdaakaaavqihnl ligi  
pfarcfemkeacyaatpaiqlakdy latrpnekv lviatdtarygl nsggeptqgagavamviahnp silal nedavayt  
edvydfwrptghkyp lvdg  
alskdayir sfqswneyakrqgksladfas lcfhvpftkmgkalesiidnadettqer l rsgyedavdynryvgni y  
gslylslisll enrd lqag  
etig lfsygs vgefysat lvegykdh l dqaahka ll nnrtevsvdayet ffrk rddvdf deeqdavhedrhifylsni  
ennvreyhrpe  
>tr|D2NAC9|D2NAC9\_STAA5  
mdykyyspvr gl elvsdgvsl tav lfenqqddgtreents laifkeatqwl dayfkgdnpeitiplkptgshfqqcw  
nelrqipygt l ttygaiak  
kvgk ll dkpksaqavvgavgsnpl siivpchrvgktgsl tgfgtinnkik ll elenidmsklyvpkhstkp  
>tr|D2NAD0|D2NAD0\_STAA5  
mngffnsdfdsifrrmmqdmqgsnqvgnkkyingkevspe laql tqggnghsaeqsaqafqaaarqqgqggngny  
leqigrnl tqeard gl ldp  
vigrdkeiqetaev lsrtrtknpl vgeagvgktaivegl aqaivegnvpaaikdekiisidissleagtqyrgafeeni  
qk liegvkssnav lffde  
ihqi igsgatgsdsgskgl sdi lkpalsrgeisi igattqdeyrn nilkdaal trrfnev lvnepsakdtveilkgirek  
fehhgvkl pddv l kacvd  
lsiqyipqr ll pdkaidv l ditaah lsaqspavdkvetekrisel endkrkavsaeeykkaddiqneiksl qdklensng  
ehtavatvhdisdtiqr l t  
gipvsqmdndier l knisnr l rski igdqavemvsrair rnr ragfddgnrpigs flfv gptgvgk telakqlaid l fg  
nkda l r l dmseysdttav  
skmigttagyvgyddnsnt l tekvr rnpysvil fdeiekanpqil t ll l qvmd dgn l tdgqgnvinfknti i ictsnagf  
gngndteekdimhemkfff  
rpefl nrfngivefl h l dkdal qdivn ll l ddvqvt l dkkgitmdvsqdakdw lieegydeel garpl rriveqqvr dki  
tdyyl dhtdvkhvdl died  
nelvvkgks  
>tr|D2NAD2|D2NAD2\_STAA5  
menycilgnpvgkts lfnaltgsyeyignwsgvtvekkvgklkenvgqlid lpgtyd l spiskdetvvt dy ll ndsfsg  
iinivdasqlkrnmqltvq  
llelnqpiyigl nmidvatkrigiki dyhklmk l ktpi fpv vartgkgtkh ll geikh lgegyqphfkinydekieetik  
nmcqiimtets hdkygarf  
iaiqfl l nmgiane l nsevvnk l s l rdqvaeqveavsvrremeri rnhyiet ll qdvvt ypedekqyfssridkilth  
ki gmpiflaimw l i fqt  
ftwigtplsdql dafiggtfts vktimnylgvipfl qdlitdgi i agvgsvlvfvpqivvl fffis ll edsgymariav  
lmdrimesfg lsgksfipm  
iigfgcnvpsimaarsieneker l ttiliapfmscsar l pvya l fggiffkenqslv lsl yvlgi imaf l vstvltktv  
lkn d n a i f i v e l p t y r v p s  
ikt lwrstwekakgfvrkagtfi fggs vviw ll syigphginvni nqsf l h i v g s f f g m l v q p l g f g t w q a g a t l g p g f l  
akev i v s s m a i y s s g d a g  
l v n v i q n q f t p l s a y a f m i f i l l y i p c v s t v a a i r k e t y s w k w t a l a v a y p l v t a y v l t f i f y q v g h l f v  
>tr|D2NAD4|D2NAD4\_STAA5  
makfl ykmg t f i a k h k w s t l i a w v i v a a i l i p l a t n a p k f d n d i k m t g l e s l d t n k k i e k h f n q d s e k a q i r v v f k t t k  
ddgil qpsitkdi kktfdd  
ikkddkhi dki sdp yenk g i s k d k t t a f a d i t y d v s q t s l k d g s r d n v k n h l k d l r d n h n v q t e l t g t g m t s t e v g g n s e  
l v g i i v a f v l l i t f g s v i  
aag l p i i s a l i g l a s g v g i s l l t y v f d i p n v t l t l a v m i g l a v g i d y a l f i l f r y r q v m k t e t d f v k g i g l a v g t a g s a  
v i f a g v t v v i a v c g l s l v g  
i d f l a v m g f a s a i s v i f a v f s t l t l p a l i s i f h k r i k v n k l q s n f k k d i d t p w s k f i t g n a l a a v l l g l i l v a a a i p v  
s h m r l g i p d d g v k p a d s t g  
k k a y d i i s d k f g e g f n g q i p m l i n v k d k k d d p q g l q d l q s v y k d i k d k k n v d i v t p p q m s k d n d y a l m v v i p k h g p n a e  
s t n d l v h d l r d y n k d a q d k  
y g f k t e i s g q s v i n i d m s k k l n e a i p l f a t v i v l a f f l l m i v f r s i l i p l k a v l g f v l s l m a t l g f t t f v m q d g f m k g l  
f g i e t t g p m l a f l p v i t i g  
i l f g l a m d y e v f l m s r i h e e y s k t g d n d y s i k v g l k e s g p v i a a a l i m f s v f f a f v f q e d v m i k s m g m a l a f g v l f d a f  
v v r m m l i p a l t k l f g k g s w  
y l p a w l n r i i p r v d i e g h a l e k y k t v e s q e s e a k d s k e t y d t t f k v y p q a t n v s k n q d v h g q d d v r s i v l d d k t m a l y q  
e v k q s a s s l f l y d a l m d y  
q n k h q l n s k q a t n i e q l n k n i e k l n q l l e k n l r n k s

Tsompanidou\_et\_al\_Supplemental\_FASTA\_File

>tr|D2NAD5|D2NAD5\_STAA5  
mketdlrviktkaalssllqlleqqfqtitvnlidnalvhrttfykhfydkydllaylfnqltkdyfardisdrlnh  
pfqtisdtinnkedlrdia  
efqeadaefnkvlknvcikimhndiknrrdrididsdipdnlifiyidsliegfmhwikdekidwpgeeidkifhkvinikik  
>tr|D2NAD6|D2NAD6\_STAA5  
mgialaiwsfkqlsqshldsgffffivylcisyfnsdkhdknktivvhefinv  
>tr|D2NAD7|D2NAD7\_STAA5  
mvvefknepgydfsvqenvmfkkaalkdvekelgqdiplvingekifkddkiksipadtsqviaanaskatkqdvadafk  
aaneaykswktwsandrae  
lmlrvsaiirrrkaeiaaimvyeagkpwdeavgdaaegidfiyyarsmmdlaaggkpvldregehnyfyksigtgvtip  
pwnfpfaimagttlapvva  
gntvllkpaedtpyiayklmeileaglpkgvvnfvpgdpkeigdyldvhdhthfvtftgsratgtriyersavvqegqn  
flkrviaemggkdaiyvde  
nidtdmaaeaivtasfgfsgqkcsacsraivhkdvyleksiklkeltlngtvdntymgpvinkkqfdkiknyieig  
keegkleqgggtddskgyf  
veptiisglskdrimqeeifgpvvgfvkvnfddeaievandtdygltgavitnrehwikavnefdvgnlylrgctsa  
vvyhpfggfkmsgtdakt  
gspdyllhfleqvkvsemf  
>tr|D2NAE0|D2NAE0\_STAA5  
mantkkttltdigtcaacsnrkeklnkladdvnaqvnlttekatveyndpdqhdvqefintiqlhgygvavetvelditg  
mtcaacsstriekvlnkmdg  
vqnatvnlteqakvdyypeetdadklvtriqklgydasikdnkdqtsrkaealqhklikliisavlslp1lmlmfvhl  
fnmhipalftnpwfqfilla  
tpvqfiigwqfyvgayknlrngganmdvlvavgtsaayfysiyemvrwlngsttqphlyfetsavlitlilfgkyleara  
ksqttналгellslakea  
rilkngevmiplnevhvgdtlivkpgkipvdgkiikgmtaidesmltgesipveknvddtvgstmnkngtitmtatk  
vggdalaniiikvveeags  
skapiqradiisgyfvpivvgiallftivwitlvtpgtfepalvasisvlviacpca1glatptsimvgtgraaengil  
fkggefverthqitvld  
ktgtitngrpvvtdyhgddqtlqllataekdsehplaeaivnyakekqltltetttfkavpghgieatidhhhilvgnrk  
lmadndislpkhisddlth  
yerdgktamliavnysltgiavadtvkdhakdaikqlhdmgievamltgdnkntaqaiakqvgidtviallpeekaaq  
iaklqqqgkkvamvgdgvn  
dapa1vkadigiaigtgtevaieaaditilggdlmlipkaiyaskatirnrqnlwfafgyniagipiaalgllapwvag  
aamalssvsvtnalrlkk  
mrleprrkda  
>tr|D2NAE2|D2NAE2\_STAA5  
mtkikimsvrredmpyikawaekhhvevditkealtddnvegvagydgls1sqqip1sehvykrlnelgikqiaqrsagf  
dtydle1ankynlivsnvp  
syspnsiaefavtqainvvrhfnqiqtkvrehdfrweptilskaidlkvavigtgrigrvvadifangyqsdvaydpf  
pnakiatyvdykdtieav  
egadivtlhvpatkynhylfnael fkhfkkgavfvncargslvdtka1ldaldngvikgaaldtyeferklfpsdqrgkt  
lndplleslidredvilt  
hiafyteaavenlivdaldatldv1qtgdtr1rvn  
>tr|D2NAE3|D2NAE3\_STAA5  
misnk1anipdsyfkgtmgrkiehgp1plinmavgipdgptpqqiidhfqkaltipenqkygafhgkevfkaivdfyqr  
qynvtldkedevci1ygtk  
nglvavptcvinpgdyvl1pdpgytdylagvlladgkvpvlnlepphylpdwstvsqiiidkklilylmypnntgstat  
kevfdeaiakfktdtkiv  
hdfaygafgdaknpsilasengkdvaieiy1skgynmsgfrvgfavgnkdmia1kkyqthtnagmfgalqdaaiyal  
nhyddfleeqsnvfkarrd  
rfeam1akadlpfvhakggiyvwletppgydseqfeqlvkeksilvapgkpfngengnryvrisla1ddqqldeaa1rlt  
elaylyk  
>tr|D2NAE4|D2NAE4\_STAA5  
mkiavigagvtglaaaariasqghevtefekntnvggrmnlkkdgftfdmgptivmmpdvkdvftmccgenyedyielr  
qlryiydvfydrddritvp  
tdlaelqhm1esiepgstgfmfsltdvykkyeiarryflertyrkpsdfynmtslvqgaklktlnhadqliehyidnek  
iqkllafqtl1yig1dpkrg  
pslysiipmiemmfgvhf1kkgmygmaaglaqlnkdlgvnielnaeieqiiidpkfkradaikvngdirkfdkilctadf  
psvaes1mpdfapikkypp  
hkiadldyscsaf1myigidi1dvtdqvr1hnvifsdfrgneeiefgr1sydpsiyvyvpavadks1apegktgiyvlm  
ptpelktgsgidwsdealt  
qqikei1yrklatievfedikshivsetiftpn1dfeqtyhakfgsafglmp1laqsnyyrpqnsr1dykdlyfagasthp  
gagvpiv1tsakitvdemi  
kdi1eggv  
>tr|D2NAE5|D2NAE5\_STAA5  
mtmmamnfkychkimkkhsksf1syafd11pedqrkavwaiyavcrkiddsidvygdiqflnqikediqsiekyepyh1hf

Tsompanidou\_et\_al\_Supplemental\_FASTA\_File

hsdrimralqhvaqykni  
afqsfynlidtvykdqgftmfetdaelfgycygvagtvgeltpilsdthetqtdvarrlgeslqlinilrdvgedfen  
eriyfskqr1kqeyvdiae  
vyqnggnhyidlweyyaiaekdfdrvdmdqikvfsieaqpielaariyieildevrqanytlhervfvdkrkkaklfh  
einskyhri  
>tr|D2NAE6|D2NAE6\_STAA5  
mkwlsriltvvtmsmacgalifnrrhq1kaktlnfnhkalitiiiparneekrighllhsiqqqvvpdvivmndgstde  
tarvacsygatvvdvdda  
dgkwygkshacyqgvthactnriafvdadvtf1rkdavetlinqyqlqgekllsvqpyhitkrfyegfsainlmtvvg  
mnvfstladdgrtnqhafgp  
vtlnkedyatggkhsanrhiiegfalgsayts1slpvtvyegfpvafmryqegfqs1qegwtkhlstgaggtkpkim  
taivlw1fgsiasilglcl  
slkyrqmsvgkmltvylsyttqfiylhrrvqgfsnllmvchp1lfmfftkifiqswkqthrygvvewkgrqysiskeq  
>tr|D2NAE7|D2NAE7\_STAA5  
mtkhiiviggglggisaairmaqsgysvslyeqnnhiggkvrnesdgfgfdlgpsiltmpyifeklfeyskkqmsdyvt  
ikr1phqwrstfpgdttid  
lyegiketgqhna1skqdieelqnylnytrridritekgyfnygltdltsqtikfhgplnalinydyvhtmqaidkris  
npylrqmlgyfikyvgsss  
ydapav1sm1fhmqqegglwyveggihhlanaleklareegvtihtgtrvndiktyqrrvtgvrldtgefvcadyiism  
eviptykyllh1dtqrlnk  
1erefepassgyvmh1gvacypqlahhnffftenaylnyhqvfhekvlpddptiylvntnkdhtqapvgyenikvlph  
ipyiqdqpfttedyakfrd  
kildklekmg1tdl1rkhiyedvwtpedieknyrsnrgaiygvvadkkknkgfkfpkesqyfenlyfvvgsvnpgggmpm  
vtlsgqqvsdkinareakn  
rk  
>tr|D2NAE8|D2NAE8\_STAA5  
mkiikkyiktaffcsmywlv1q1n1an1gtrvpdkyfrqkhiifksfnfekhgkfwkwyvrkwkhhildghq1nqniy  
dqrhlmtintdeiekmiie  
tkraeliwhw1lpvii1fikgpglvkyinvfyamianvp1iivqrynrrprtq1l1rilkrgerhd  
>tr|D2NAE9|D2NAE9\_STAA5  
mkkivtatiataglatiafaghdaaaeqnngynsndaqsysytytidaqgnyhytwtgnwnpsq1tqnntyyynnynt  
synnasynnyynhsyqyn  
nytnnsqtatnnyy1tgsgasysttsnvhvtttavpssngrs1sngyasg1lytsgqctyyvfdrvvgkigstwgngas  
nwasaaaassgytvnntpka  
gaimqt1qgyyghvayvegvnsngsvrvsemnyghgagvvtstis1anqagsynfih  
>tr|D2NAF0|D2NAF0\_STAA5  
mdtkdfkr1ekmysp1r1pgldglrafavigi1iyh1naqwlsggl1gvdttffvisgylits1l1iseyrtqkid1l1efw  
krr1kr1lipav1f1icvvl  
tft1l1fkpel1iqmkrdaiaa1fyvsnw1y1sqnvdyfnqfaiepl1khlwslae1eeqfy1l1fplvit1l1hrfkprni1q  
t1fiv1sl1slg1miv1hfi  
tgdnsvyfgtdtr1qt1l1l1gcilafiwppfal1kdkiskiv1s1ldi1gisgfav1mt1ffivgdqdwiynggf1y1isf  
at1fijajavhps1lfakf  
lsmkp1l1i1gkrsys1ly1whyp1ivfvnsy1yvgq1pvy1y1ie1ll1talmae1syrfietpirkkgfkafaf1pkksq  
fartv1v1l1l1vps1iv1s  
gqfda1gkqhaekkekktfkttkkkkvkdkqedkqtanskediksspl1l1gdsvmvdignvftkkipnaqidgkvg  
rqlvdatp1vksqykdyak  
kgqkvvvelgtngaf1tkdq1ne1l1dsfgkadiy1vs1rvprdyegrink1iy1eaaekrsnv1h1vdwykasaghpey1fayd  
gih1leyagskal1td1ivkt  
methatnkk  
>tr|D2NAF1|D2NAF1\_STAA5  
mkk1timass1lava1gvtgyaastgheahaaevnv1dqah1vd1ahnhqdq1naapikdgaydihfvkdqgfqynftsngttw  
swsyeaangqtagfsnvag  
adyttsynqgsdvqsvsynaqsnsnvaavsaptyhny1ststssvr1sngntagatgssaaqimaqrtgvsastwaa1  
jaresngqvnaynpsgag  
1fq1mpgwgptntvdqqinaavkaykaqgl1sawgf  
>tr|D2NAF2|D2NAF2\_STAA5  
mtsikt1tpkdf1frv1sgvaigivag1vpna1lgeifkyfmdyhip1fkt1l1gvvva1qftvpal1galvamkfd1spla  
iavvasaayvgsgaaqfkn  
gawmitg1gd1intmitaa1av1f1l1liqhrvgsma1l1vfptvvggisgaigv1l1l1pytkmitta1ignmvngftelqpiv  
ms1ilismv1fs1li1isp1st  
vaiafaig1tg1aagsasig1sateav1li1igt1skvnr1lgvpl1svffggvkmmipnmvkypilmlpil1ttaivsg1vsa1v  
gihgtkesag1fg1igmvgp  
inafkfmevdsaw1sv1l1ivva1ffvvp1vtaw1ladi1yrkv1rly1tndi1fkfmg  
>tr|D2NAF3|D2NAF3\_STAA5  
mks1isqnsel1dkeignfsn1l1qytf1l1ss1flks1ini1eerhsnayqkgt1fvrsvsaltyhqyn  
>tr|D2NAF5|D2NAF5\_STAA5  
msetdepqgfeh1thni1ln1nqnsq1lmtfi1sk1k1kqhi1i1argnkridyr1synfy1ttyydnveikqidcey1tyam  
aia1l1rhtmsfdnahffa

Tsompanidou\_et\_al\_Supplemental\_FASTA\_File

q1rhpv1  
>tr|D2NAF7|D2NAF7\_STAA5  
miqsmwfnlhvqdleksaqfykalgfkinrnpqmldkmvgiqigqttvilieskhfqnsqqsIntepnevmslvgvntn  
eevdq1vnkvkeaggtvvq  
eptvsqgfygamfkdfdgghfnflvc  
>tr|D2NAF8|D2NAF8\_STAA5  
mkdilvigatgkqgnavvkqllledgwyvsaltrnknnrklsdighphlsivegdlsdsvslqsamkgkyglysiqipivkd  
dvneelrqgmkiieiaeqe  
niqhiyvstaggvnrnrngphfevlakienrlmesninatvikpsffmdnflriakvederitlpefinpnikftmissi  
diakiasyifahpqsftthq  
sieigsdevt1seatifsevtgkstviegefsvgvaekqwlseekgyevdfelmaeinptkls1sdwlkvqdyndk  
>tr|D2NAF9|D2NAF9\_STAA5  
mslnkeqrritaeelqanfeest1svqmiaeklnvttedvekvfamktp1g1fshqlqrfihlvwdvrnvindnikengq  
tpepyty1kgekedywflr  
>tr|D2NAG0|D2NAG0\_STAA5  
mrkdakenrqr1eeiahklfdeegvenismnriakelgigmg1yrhfkdksd1cyyviqrd1difitqfkqikdgyhsn  
yevmqvsl1dyllqfkidhk  
allqcieagnnk1rfyqstfyqel1fdfyd1fksdddiytkfktm1l1qalstrvdfdfqiehrnisieayrny1l1niyld  
evernd  
>tr|D2NAG2|D2NAG2\_STAA5  
mksitfeehyviEDIqketmna1sadprgvpmkvml1eglektgftnadelshhderiqfmmnqdvqi1q1vsyngngspn  
1vgqkaie1c1qkandq1an  
y1aqypnr1fv1gf1at1p1nepeaaareferc1nd1g1fk1gal1m1gra1qd1g1fd1q1d1ky1di1f1k1ta1en1d1v1pi1yl1h1p1ap1v1ns1di  
y1qs1yy1kg1n1ype1v1ta1at1fac  
f1gy1g1wh1id1vg1ih1ah1hl1vl1sg1fd1ry1pk1ln1mi1gh1w1ge1f1p1ff1ler1m1dea1l1fa1eh1nh1pi1sy1f1kn1fy1it1ps1gm1tk1pq1f  
d1lv1k1ke1vg1id1ri1ya1ad1yp  
y1ie1pe1k1g1v1fl1de1l1g1t1dee1ke1ki1sy1t1ng1ak1l1g1l1ss1n  
>tr|D2NAG3|D2NAG3\_STAA5  
met1el1q1gak1l1ry1hq1vg1q1gp1vl1fi1p1gan1gt1gd1fl1p1lae1ql1kd1h1ft1v1v1adr1rd1y1ges1el1te1pl1ds1as1np1ds1dy1rv1kr  
da1qd1ae1l1aks1l1sd1kp1vy1  
l1g1ss1gs1iv1am1hv1k1d1y1pe1vv1k1ia1f1he1pp1int1fl1pd1sty1wnd1k1nd1div1hq1il1te1gle1kg1m1kt1f1ge1t1ni1ap1id1ak1m1ms1q  
pa1d1te1eg1ri1eq1y1kr1tm1f1ws  
k1fe1ir1q1y1th1sd1it1l1dd1ft1k1ys1dk1it1l1ng1td1sr1gs1fp1qd1vn1fy1ink1et1g1ip1vd1ip1gg1hl1gy1iq1k1peg1fad1v1l1nm1wg  
>tr|D2NAG4|D2NAG4\_STAA5  
mki1vi1ig1gf1gg1k1tt1v1nh1lae1sl1nes1lk1p1av1im1ne1fg1k1ms1vd1gal1vs1ed1pl1se1l1te1gc1ic1cam1kad1v1seq1lh1q1yl1  
ke1qp1div1fi1ec1sg1ia1ep1vs  
v1da1cl1tp1il1ap1ft1ti1hm1ig1idas1my1kh1iks1fp1k1di1q1gl1fy1eq1lay1c1sv1fv1nk1ids1adv1et1sk1l1kd1lev1in1pe1ad  
i1qv1gm1hg1sv1tl1pi1sv1rq1mt  
at1sd1nk1h1ks1lh1qm1ih1q1fv1q1sp1vk1ct1ka1q1fik1rl1ac1lp1sh1iy1rl1kg1f1mt1fed1ta1ht1y1li1q1ft1q1g1q1ye1l1tp1va1f1sk1k1v1pe1y  
l1vl1ig1kg1isk1edy1qc1le1q  
>tr|D2NAG5|D2NAG5\_STAA5  
m1lev1ky1dm1rt1gh1y1tp1ine1ph1yl1vi1sh1ad1kl1t1ate1ka1kl1r1ll1i1k1q1kl1dis1lae1sv1ss1pi1ase1hv1ie1ql1tl1fq1herr1h1  
pk1is1at1fl1aw1l1if1l1m1fa  
l1pi1gi1ay1q1f1sd1wf1q1n1y1vs1aw1ie1yl1t1qt1t1l1nh1dil1q1hil1fg1dy1gv1sl1gt1ys1lv1wal1pv1vil1is1l1st1avid1qt1g1l1k1sw1m  
i1wa1ie1ps1ml1ri1gl1q1g1nd1iv  
p1l1eg1fg1c1naa1ais1qa1ah1q1cht1ct1kt1qc1ms1l1is1fg1ss1cs1y1q1ig1at1s1if1sv1ag1k1sw1l1f1mp1yl1il1v1l1gg1il1hn1ri1wl1k1kn  
dq1ql1sv1pl1py1dr1ql1h1ms1ni  
rq1m1l1qm1w1q1ni1qm1fi1v1qa1l1pi1f1iti1cl1iv1sil1st1pil1nv1ls1q1ift1pi1sl1lg1isse1l1sp1gil1f1sm1irk1d1gm1l1fn1lh1q1g  
al1l1q1gm1tat1q1l1l1l1v1ff1ss  
t1ft1acs1vt1mt1ml1kh1l1gg1q1sa1kl1ig1k1qm1v1ts1l1sv1ig1vg1i1v1ki1v1ml1i  
>tr|D2NAG6|D2NAG6\_STAA5  
mqh1hk1vai1ig1aga1ag1igma1it1l1k1df1git1d1v1i1le1k1gt1v1gh1sf1kh1wp1k1str1it1ps1fts1ng1fg1mp1dm1na1ism1dt1spa1ft1fn  
ee1h1is1get1ya1ey1l1qv1van1h  
ye1l1ni1f1ent1v1vt1ni1sv1dd1ay1ti1att1t1ety1h1ady1fi1at1gd1yn1fp1kk1pf1ky1gi1hy1se1ied1fd1fn1kg1q1yv1vig1g1nes1g1fd  
a1ay1ql1ak1ng1sd1ial1yt1st1t  
g1l1nd1pd1ad1ps1vr1l1spy1tr1qr1l1gn1vik1q1g1ari1em1nv1hy1tk1did1f1nd1g1q1y1his1fd1sg1q1sv1l1tp1he1pil1at1g1fd1at1k1n1pi1v1q  
q1l1fat1tn1qd1ik1l1t1th1dest  
ry1p1ni1f1mi1gat1vend1nak1l1cy1iy1k1fr1arf1av1lah1l1t1q1reg1l1pak1q1evi1eny1q1kn1q1my1l1dd1ys1c1cev1s1ct1c  
>tr|D2NAG8|D2NAG8\_STAA5  
msn1kl1dg1ink1mi1t1akh1k1q1m1dd1y1dek1q1ev1ka1l1ides1dal1n1hs1ie1q1ly1q1h1s1ery1yss1n1mas1r1me1q1fr1def1hf1ak1rr1ste1a  
l1ye1qq1q1i1q1hg1i1r1ka1ee1em  
id1lem1rr1nie1iem1vt1keen1kw1k1g  
>tr|D2NAG9|D2NAG9\_STAA5  
m1st1v1qs1di1fk1tn1s1ass1s1ks1av1et1c1nn1v1sk1pek1dest1t1vs1gn1n1ah1sv1idd1l1isk1n1qs1vae1air1tas1dni1q1kv1ge1efd1qt  
d1vm1ig1ne1ig1kn  
>tr|D2NAH0|D2NAH0\_STAA5  
m1ne1qw1le1h1p1l1k1di1ke1isp1v1sg1gd1v1ne1ay1rv1et1dt1d1t1ff1l1l1v1qr1gr1kes1fy1aa1ei1agl1ne1fer1agit1apr1vias1ge1v1ng1d  
ay1lv1m1ty1le1egas1gs1qr1q1l

Tsompanidou\_et\_al\_Supplemental\_FASTA\_File

gqlvaqlhsqqqgeegkfgfslpyeggdisfdnhwqddwrtilfvdkrlhdlkeallnrglwdandikvydkvrsqivaele  
khqskpsllhgdllwggny  
flkdgrpalfdpaplygdrefdigittvfggtsefydaynkhyplakgasyrlefyrllyllmvhllkfgemyrdsvahs  
mdkilqdttg  
>tr|D2NAH1|D2NAH1\_STAA5  
mykllikpflfkiepekahgltidalktlqkfpvlfpvvdklftyknptlsqtiqgntyndpigliagfdkscevpkaleh  
lgfgalelggitpkpqpqn  
ppqrmfrllleddalinrmgfninmkaishlrknayqvpvginvgvnmktpyearyqdyikvidtfkhdsfftniss  
pntenlqnfhkdefsmc  
qalttfkkqhdvtvpiylkltsdmdfdglkallpaitetfdgiilanttrqrdglssankveegglsgrplfernrlrik  
yayqqtngefliigtggvf  
stedaimmrhgalsiqiysslviiepgltkkmnkiarylkdhhdnvsdiiglda  
>tr|D2NAH2|D2NAH2\_STAA5  
maketdnkktvatsdnkdqqnqteederqglngyrktdldleieqelremmktgenetkndykkfkvfslislivi  
laiirfvhkmm  
>tr|D2NAH4|D2NAH4\_STAA5  
mtalfpyiafenskealayeevfgatdvkrlevgeeqashfgmtkeeaqeatmhaefevlgvklcsdsfgradkinng  
islldydvnkedadvkve  
afyeqikdhssieielpfadqfwgkmgiftkygvrwmlhgqdytaiqq  
>tr|D2NAH5|D2NAH5\_STAA5  
mtidrriksqvamrnafielhghqleeitvqqiadladvnrstfythydykdllekledqgleeirdfihdeklnga  
vklstdnihqimtvliemi  
ekdivfyqlmfrmgkdsniheklydlmchlqryknendqingipfsyfmsyvsaglslihrhwvedpnridkvdlirhf  
ntivnggpatiikniq  
>tr|D2NAH6|D2NAH6\_STAA5  
mnghllgnpkltvthvnevkaginhivvdsvygnqemimekdvtvemrdgeklyinifrnkdgkfpvmsadtygkdn  
kpkitnmgalwptlgaip  
ssftpeespdpgfwvndyvkvvalrgsdkskgvlspwskreaedyeviewaakqpsngnigtngvsylavtqwwva  
slnpphllkamipweglndm  
yrevafhggiptdgfyrfwiqgifarwtdnpniedmiqaqqehplfddfwkqrqvpqlsqiktplltcaswstqglhrgs  
fegfkqaaseekwlyvhgr  
kewesyarenlerqksffdfylkeenndwkdtpuviyevrdqfykgefksasafplpnteytplflnaenhtlnhakis  
sahvaqydsedkrqdvsk  
ytfkdteivgnmlklwvstksdmdl fagikkldrgrnevnpdfnhiengqvatglrvshrel dqekstiaqpw  
khetelklsqdeivpveie  
llpsgtl fkggetlevvkgseivignstpgmktryeheetvnmghmiytggkydsqliipivn  
>tr|D2NAH7|D2NAH7\_STAA5  
mirtmnakihrarvteslnyvsitidsdileavdilpnekvaivnnnngarfetyviagergsgkiclngaasrlve  
vgdvviimtyaqllneeeik  
hhapkvavmnednviemihekentivl  
>tr|D2NAH8|D2NAH8\_STAA5  
mtklittvkemghivkaakrsgttigfiptmgaldghlmtvresvstnditvsvfnplqfgpnedfdayprqidkd  
elvsevgadivfhpvedm  
ypgelgidvkvgladvlegakrpghfdgvvtvvnklfnivmpdyayfgkkdaqqlaivkqmvkdfnhaveiigidivre  
adglakssrnvylteqerq  
eavhlskslllaqalyqderqskviidrvtqylshisgcieevavysypqlveqheitgrifislavkfskarlidni  
igae  
>tr|D2NAI0|D2NAI0\_STAA5  
mlsvaiigpgavgttiayelqqsiphtligrhaktityytphepaqdivvkgyedvtntfdviiiavkthqldaviph  
lthlahedtliilaqngyg  
qllehipfkncqvavvysgqkkgdvthfrdyqlriqdnaltrqfrdlvquesqidivleaniqqaiwykllvnlginsit  
algrqtvaimehnpeirtlc  
rqllldgcrvaqaeglnfseqtvdtimtiyqgydemgtsmydivhqqpleveaiqgfyr rarehndtpyltdtiysf  
lrayqqnm  
>tr|D2NAI1|D2NAI1\_STAA5  
mtnvlqhggtlgtlmaglllegtatinelehgngiatltsdgevilfdgkayhanehkefielkgdekvpysitnfk  
asktfplqqlsqddvfaki  
kneml senlfsavkiygtfkhmhvrmmpaqppytrlidsarrqpeekrqdirgaivgfftpeflfhgvsagfhihfadd  
erayggvhldfevdvvve  
iqnfetfqhfpvnnnetfvkakidykdvaeireae  
>tr|D2NAI3|D2NAI3\_STAA5  
mgsffnkiarkedpaiyqndghlkrtrlrvrdflalvgvtivstsi ftlpgivaaehagpavalsflaaivaglvafy  
aemaaampfagsayswvvn  
l fgeffgwwagwallaeyfiavafvasgfsanlrglvkpiyelpaalsnpfgtnggfidiiaaivilltalll srgmse  
aarmenilvilklvailf  
vivgltainvsnyvpfipekvtatgdfggwqgiyagvsmiflayigfdsiaansaealdpqtmprgilgslsiaivlf  
iavalvlgmfhysqyann  
aepvgwalrqsghgvvaaivqaisvigmftaligmmlagsrllsfgrdglpswlslnkhlpnralviltiigvlig



Tsompanidou\_et\_al\_Supplemental\_FASTA\_File

smfpfaflaqllisagtlva  
fmfvslamyrlrkregkdllpipafklplypvlpavtfvlvllvfwlgfreaklytlwifivgiilylsyglrshskknva  
eyhpk  
>tr|D2NAI4|D2NAI4\_STAA5  
mskahqliqedehyfaksgrikyypvidhgygatlvdiegktyidllssassqnvghaprevteaikaqvdkfihytpa  
ymyheslvrakklceiap  
gdfekrvtfgltsdandgiikfaraytgrpyiisftnayhgstfgslsmsaislnmrkhygp11ngfyhipfpdkyrgm  
yeqqansveeylaplkem  
fakyvpadevacivietiqgdggllepvpgyfealekicrehgiliavddiqqgfgrtgtwssvshfnftpdlitfgksl  
aggmpmsaivrkeimnc1  
eapah1fttganpvsceaalatitqmedqsl1qasaekgeyvrkrmnqvwskynsvgdvrgkgl1sigidivsdckl1ktrd  
asaalkicnycfehgvvii  
avagnv1rfqpp1vityeqldtalntiedaltaleagnldqydisggw  
>tr|D2NAI5|D2NAI5\_STAA5  
mr1kv1fhfiaaifisfm1lwmtm1fdiisnqshlka111n1dflipsdntpytleiich1ligsviyfgfv11fhtskr  
ly1cyiplvflfialypf  
lvfiaqrpi1qfsvteligwiithiffms1malviprik  
>tr|D2NAI9|D2NAI9\_STAA5  
mtkninemkafimniydeyrsyieelddcltiqknndtayydvleaind1sndslcvlnhlyinegqeetfeqkflqrn  
khlqnvdfkalf1rprt  
agrhyi1it1wenrqafyhwqnsaeykthkhrgtskgadvtinre1syniri1adm1  
>tr|D2NAJ1|D2NAJ1\_STAA5  
msnknksydyvi1gggsagsv1gnr1sedkdev1vleagrsdyfwd1fiqmpaal1mfpsgnkfydwiystdeephmogr  
kvahargkv1ggss1ngm  
iyqrgn1pmdyegwaepegmetwdfahc1pyfkk1ektygaapydkfrghdgpik1krpatnpl1qsffdagveagyhkt  
pdvngfrqegfgpfdsqvh  
rgrmsasray1hpamkrkn1tvetrafvteihyegrratgvtykngkl1htinanevilsggafntpq11qlsgidse  
flkskge1prvhl1pgvgen  
fedh1evy1qhkckepvs1qps1dikrmpfig1qwi1ftrtgaasnhfegggfvrsnnevdypl1mfhfl1piavrydgqk  
aavahgyqvhvgpmysnr  
gslk1kskdpfekps1rfny1steedkkewveairvarnil1sqkamdpfnggeispgevtdeeildwvrrdgetalhp  
scsakmgpasdpmavvdp1  
tmkvhgmen1rvvdasamprrtngnihapv1mlaekaadi1rgrkpl1epqyidykyghvdenegaievkpyak  
>tr|D2NAJ2|D2NAJ2\_STAA5  
me11kh1sqrqy1dgewvesankntrdi1npynevi1ftvsegtkedaerailaarafesgewsqetaetrgkkvraia  
dkikehrealarlet1dtg  
ktleesyadmddihnvfmyfag1adkdggemidspipdteskivkepvgtvtqitpwnypl1qaswkiapalatgcs1vm  
kpseitpl1ttrvfelmee  
vgfpkg1in1ilgagsev1dvm1sghekd1vsftggietgk1himknaannvtniale1lggknpni1ifddadfelavdqal  
nggyf1hagqvc1sagsr1lv  
qns1kekfeqal1ervkkik1ngngfdadtemgpvi1stehrnkiesymdvakaegatiavggkrpdrdd1kdglffeptvi  
tncdtsmri1vqeevfgpvv  
tvegfeteqea1qlands1yglagavfskdigkaqrvank1klgtwindf1hpyfaqapwgykqsgigrelgkegleey  
1vskhil1tn1npq1lvnwf  
k  
>tr|D2NAJ3|D2NAJ3\_STAA5  
mmtrsqnkqq1leqakdivinsigqtm1lygtnrsvgn1ygtmvfegsmt1demrhq1qmskpsmsagvkk1qefdivkq  
qftrgsrkqhfiaekdff1  
ffrnfft1kkf1reid1nveavkdaqai1npl1essd1teatqeahkikaqldhthvyewleq1teaiesgeifkyfpi  
peqpsdskn  
>tr|D2NAJ5|D2NAJ5\_STAA5  
mt11dikgggyiakiesnsvd1gegvrcsvyvs1gpcfnvcgcykasqkfrygekytdeila1ddcdhdyisgl1s11  
ggpfc1n1dit1n1vkaf1r  
arfgntkt1iwvwtg1fley1andcterrel1syid1v1dgl1fiqhl1fkpd1pykgs1nqriidvqqs1snarmieyivs  
>tr|D2NAJ6|D2NAJ6\_STAA5  
mnqieeal1tg1iskd1pai1vnenankdsdtfstmr1d1tagiv1skysal1nh1lpkhvad1hrgdihfhd1dyhpfqpl1tnc  
cl1daknm1hngfeign1  
v1tspks1qtasaq1lvq1ianvss1syggctvdrvde11styarhneeqrniakqfvkeseidryvdqavtkdindaies  
1eyeint1lytsngqtpfv1  
1gfg1gtdh1srk1qqa1lntrik1glgkdr1tai1fpl1v1fs1ikkgt1n1fspqdpnydik1qal1kcstkrmypd1lnydk1v  
e11gd1fkapmgcrs1flpsw  
kdaegh1fenngrcn1lgvvt1n1prmalesagnmtk1fwe1fyerid1v1hdal1lyrin1r1kdavpnnapilyksgafnyk1k  
etddvae1fknkrati1smg  
y1glyet1atv1fygpdwets1qeak1aft1eil1kemkryqt1kwte1lydiw1fsi1ystps1es1tdr1fcr1ldqer1fgdik1dit1dkg  
yyqns1fhydvr1kdv1tpfek  
1dfek1dyp1yas1ggf1ihy1ceypk1lqhn1ka1eavwd1sydkv1gy1gtn1pidh1cyec1dydg1dfeatekg1fkc1pnc1snd1p  
ktvdv1kr1tcgy1lgn1pvqr  
pvikgrhkei1carvkhmkapke

Tsompanidou\_et\_al\_Supplemental\_FASTA\_File

>tr|D2NAJ7|D2NAJ7\_STAA5  
mnsdnmwlvtvmgljiiisivgliaakkinpvvgmtiipcigamilgysvtdlvgffakglDqvinvvimfifaiiffgim  
ndsglfpkplvkrliImtrg  
nvviVcantaligtiaqlDgagavtflsipaIIPlykaInmnyllilIlIalsaaImmVpWggpMarvaavlkaksvn  
elwyglipiqiigfilvmI  
favyIgfkeqkrikkaiasnelPqtqdidvhklvevyerdqdvrfpvkgrartIpwikwvntaltlavilamliniappe  
fafmigvslalvinfksvd  
eqmerIrahapnalmmaavIiaagmflgvInetgmIkaiatnIkvipaevgpylhiivglIgvpldlItstdayyfavI  
piveqtagqfgvpsvstay  
smvigniigtvsvfspalwlaiglaeanmgtyikyaffwiwgfaivmlviamIlgivti  
>tr|D2NAJ8|D2NAJ8\_STAA5  
mggfVnsIImkdIIsndmrykyeyynrekiIrrtnIik  
>tr|D2NAJ9|D2NAJ9\_STAA5  
mnmpImidltnknvviVgggtvasrraqtIsqyvehmtvisptitekIqnmvdkgvviwkekefepsdivdayIviaatn  
epvrneavkqalpehalfn  
nvgdasngnvfpsalhrdkItisvstDgaspkItksimaelealyppsyssyidflytcrqkikIIditynekqqlsq  
ivsQeyInhdKqaqflawI  
dvrq  
>tr|D2NAK0|D2NAK0\_STAA5  
mkIntsnspftekqvteinnIqtItesqqwIsgfIansndttsdsnqqqIeteVwqqsqiseeqatsttymIqnkep  
hieanqrhvtvlygsesgn  
amrlaeifserIsdighqvvlmsmdeydttniaqledIfiitsthegeppdnawdffeflednapnInhvrysvIalG  
dqtyeffcqaGkdvdalle  
nIgaerickrvdcdIyeedaekwmadiiniidttsegiqsesvisesiksakekkysksnpyqaevlaninIngtdsnk  
etrhieflIddfsesyepg  
dcivalpQndpelveklismIgwDpqspvpiNdhgdtvpivealtshfeftklItpIlnadiyfdneelseriqdeswa  
reyvinrdfidlitdfpti  
elqpenmyqiIrkIppreysissfmatpdevhitvgtvryqahgrerkgvcsvhfaerikpgdivpiylkknpnfkfpm  
kqdiPvimigpgtgiapfr  
ayIqereelgmtgktwlffgdqhrssdflyeeieewlengnltrvdIafsrDqehkeyvqhrimeeserfnewieqga  
iyicgdekcmakdvhaik  
dvlvkerhisqeeaeItrqmkqqqryqrdvy  
>tr|D2NAK2|D2NAK2\_STAA5  
myrninmknmimknnewhtykvskywswIlanIantvK  
>tr|D2NAK3|D2NAK3\_STAA5  
mkIrlIwhivrrqfitqrIviipfilavsvIfmieytIvsigIlsyikqkndflvpfiianffmaltfififyanhfm  
msqrrkefsifmtIgmktk  
smrIivvmetilqfmiisvisiaggyIlgaiIffIfiqkimgsevatIryppfdsvamfitliiIavImgmIIfnIIfsin  
fqrpiTyqhrsdsvisrw  
IryvIivigsaalyIgyfialqddttfgaffkiwivigIviigtytffvgiseiIisilqqvskvyihpryffvvvGmrv  
rIkmnvslatitIltctfI  
ivtIltmtIttyrdmhtimkIItndydIIsfndsktqierqqtiehikrdiqglvnaKdfkvyettIfraslEkNrayk  
Ikqasddipidfignegsi  
fskqsvmitalvtqdynryhqnklhIdnqsigmitvpiIkkqskvgInnevfkvqIIdahaInImmiqdsmlivkdkn  
qIqkvkgfyahqknstis  
infvsgtklttsqIqkIlskydasinskselmvwdrltgglIvfggvsvIvIvigiIflmmyyqkvseayanqhnydi  
mkkIglDngriskitrnqm  
tflfaipitvalihtIissnivytlInmiginnhhiIftsylvaviisflymamykitsyiyakvihqqrn  
>tr|D2NAK6|D2NAK6\_STAA5  
mkIiliveddfviaesIaselekwnygviveqfddIIsifnqhqpqlvlldinIptIngfhwcqeirktsnvpiifissr  
idnmdqimaiqmgddfie  
kpfnlsltiakiqalIrrtydIsvandsmtvkgctIildeakvvyqeqniqlsltelqilklIlfqnedkvsrtasiekc  
wesenfidntIavnmtrI  
rkkInIigvndfiitkknvgykv  
>tr|D2NAK7|D2NAK7\_STAA5  
miIvmIspIliIffivIsileerkrtkkkqIlekekantInqntndtgssnqepsIqqakeqkddkg  
>tr|D2NAK8|D2NAK8\_STAA5  
mIsvkkatkfavanIiivstvfssvtpaIaqsdksskdesfavgnIknkpnvIflvgdgmgpsfntayryyknDphakem  
tptafdsylkgtnrtynd  
pkqniItdsaaggtafssghktyngaIgvdsnkqkvktvlerakekgkstglvstaeltdatpaayaahvtsrddkneiak  
qfykdkingkhkvdlIlgg  
gakyfgksngnlDkkfkkgdydlatnskeIlsksdkdkvlglfadknmpIaidaskdepsIadmqqsaiskIernkkgffI  
mvegasiDksahsnditgv  
msemegefekafddaiIqyakkhkdIvIatadhstggItigkdkgyewnpqpiIksmkhsgsymtekmakgedpekvinegy  
gfkfsqddmkkvkenkkl  
krIkkkeksadvekqtkaIqhaiIqkvndksytgwtsdghtgedvntyaygprsesfsgnientesakiifdfik  
>tr|D2NAL1|D2NAL1\_STAA5  
mrflnnsndpnnaiIapnkvaIvfslIspvsgkasvccfdallewftspIlgfdgafcsIlggvtIesesIesesIeses

Tsompanidou\_et\_al\_Supplemental\_FASTA\_File

eslseseslseseslsdse  
slseseslseseslsdseslseseslsdseslseseslseseslsdseslseseslseseslsksesl  
seseslseseslsepesls  
es  
>tr|D2NAL2|D2NAL2\_STAA5  
mkkridylsnkqnkysirrfvtvgttsvivgatilfgighnhaqaseqsndttqssknasadseknmietspqlnttand  
tsdisantnsanvdstakp  
mstqtsnttttepastnetpptaikdqataakmqdqtvpqeansqvdnkttkdansiatnseknkpnqtldlpqsspqi  
snaqgtskpsvrtravrs1  
tvaepvvnaadakgtvndkvtasn1qlqkttfdpnqsgntfmaanftvtdkvksdyftaklpds1tgngdvdsnsnn  
tmpiadikstngdvakat  
ydi1tktytfvftdyvndkeningqfs1plftdrakapksgydaniniademfdnkitynysspiagidkpnganisq  
iigvdtasgqntykqtvfv  
npkqrvlgnwtvvyikgyqdkieessgkvsatdtklri fevndtskl sdsyyadpndsn1kevtgefnnri fyehpnvasi  
nfgdinktyvvlveghydn  
tgkn1ktqviqenidpatgkdysifgwennenvrygggsadgdsavnpvdptpgppvdpepepeptpdpepspepepept  
pdpepspepepeptpdpep  
spepepeptpdpepspdppdsdsdsdsgdsdsdsdsdsdsdsdsdsdsdsdsdsdsdsdsdsdsdsdsdsdsdsdsdsds  
dsdsdsdsnsdsesdsdsd  
dsdsdsdsdsdsdsdsdsdsdsdsgl r q  
>tr|D2NAL4|D2NAL4\_STAA5  
mkeki via l ggnaiqtkeataeaqqtairramqn1kplfdsparivishngngpqigs1liqqaksnsdttpamp1d t cga  
msqgmigywleteinri1t  
emnsdrvtgvtivtrvevdkddprfdnptkpi gpfytkeeevelqkeqpdsvfkedagrgyrkvvasplpqsilehqlirt  
ladgknivi acggggipvi  
kkentyegveavidkdfaseklatlieadt1mi1tnvenvfinfnepnqqiddidvat1kkyaaqgkfaegsm1pkiea  
airfvesgenkkvii1tnle  
qayealignkgthim  
>tr|D2NAL6|D2NAL6\_STAA5  
mteiqkpydlkgrs1lkesdftkaefeglidfaitlkeykknghhysgkni1lfeknstrtraaftvasidlgahp  
eflgkndiq1gkkesvedt  
akvlgrmfdgiefrgfsqaved1akfsgvpvwng1tdwhptqmladfmtikenfgylegin1tyvgdgrnniahs1mv  
agam1gvnvrictpks1np  
keayvdiakekasgygsvmitdniaeventdaiytdvwsmgeese f e q r i n 1 l k d y q v n q m f d l t g k d s t i f l h c l  
pafhdnt1yqqeiyeky  
laemevtdqif rsehskvfdqaenrmhtikavmaat1gs  
>tr|D2NAL7|D2NAL7\_STAA5  
mtgppikvnseigalktv1lkrpgkelenvpdyldg1l f d d i p y l e v a q k e h d h f a q v l r e e g v e v l y l e k l a a e s i e n  
pqvrsefidv1aeskk1ti  
lgheeeika1fat1snqelvdkimsgvrkeeinpkcth1veyddkypfyldpmpnlyftrdpqasighg1tinrmfwa  
rrresifiqyivkhhrfk  
danipiwlrdcpfnieggdelv1skev1aigvsertsaqaielarrifenpqatfkkvvaieiptsr1fmh1d1tvftm  
idydkftmhsai1kaegnm  
nifii eyddvndkdiakqssh1kdt1edvlgididiqfiptgngdvidgareqwndgsnt1cirpgvvvtydrnyvsnd1l  
rqkgikvieisgselvrgr  
ggprcmsqplfredi  
>tr|D2NAL8|D2NAL8\_STAA5  
mkkskr1eivstivkhhkiykkeqiisyieeyfgvrysattiakd1kelniyrvpidcetwiykainnqteqemrekfkh  
yehevlssiingayiivk  
tspgfaqqinyfidqlnieeilgtvsgndtt1liltasnemaeyvyaklfr  
>tr|D2NAL9|D2NAL9\_STAA5  
mrkfsryafts1atvt1lss1tpaalasdtnhkpatdsinfaitqksdavka1kelpksevnknyhdysvtdvktddkg  
fthyt1qpsvdgvhpadke  
vkvhadkskvv1ingdtdakkvkptnkvt1skdeaadkafnavkidknkkn1qddvikenkveidgdsnkyiynieli  
tvtpeishwkvkidadtga  
vvektnlvkeaatgtgkvlgdtkdini nsidggfsl ed1thqgk1saytfn1dqat1itnedenfvkddqragvda  
nyyakqtydykntfgres  
ydnhgspivs1thvnhyggqdnrnaawigdkmiygdgdgrtftn1sgandvvahe1thgvtqetanleykdqsgalnes  
fsdvfyfvdde1fmged  
vytpgkegdalrsmsnpeqfgqpsmkydytekdnggvhtnsgipnkaaynviqai gkskseqiyyra1teyltsnsnf  
kdclda1yqaakd1ydeqt  
aeqvyeawnevgve  
>tr|D2NAM0|D2NAM0\_STAA5  
mnqttk1caatt1algt1igatvvgtasp1hqeaaattpytyhyghnanfimdkhfinai kydnvtfngik1lakt  
atkkvekydqtfkgvtakg  
neanqlqfi vknnis1kdiqkaygkdlkkennktkesdsgifyyqshkks1giwfvvdhnrvevtvghtpyktsk  
>tr|D2NAM1|D2NAM1\_STAA5  
mkkflitivi1lligalgaifaiyaa1nhstssnhneqdnkathqkkdtevnhqkdentntntnenqnnngvtngnqsstps

Tsompanidou\_et\_al\_Supplemental\_FASTA\_File

tvqnggstapantqpsnpr  
qsnsnhgggsqsstnnqnnqqntppanksnntntpskqtpqaqspkn  
>tr|D2NAM2|D2NAM2\_STAA5  
mlrdhklklqffiknpskhissneiaehvnvsnrvtvrndihvinsnfmdidiivsiksksyqlntsqtletiterythiq  
sykeklllsmayqlmhnk  
sqtqqleqdyllsktvlnfyvriqqwcqkfnialtikkkqgiivdgtnditnaiihlnqlstghvnedlilnelpd  
ahrmmshiqetlqghsi  
ettdiqigqllihlililkrkqslseltdlnhdaklisqsciqqintrlgydlnekvinmfsffiayhfnklidigierif  
iqsyidrlielmqqrhvp  
fnedsilqqnlynhfskaylritqniylnnpvieikklypfvntlfeaidklaidtdiemsedeiafltihfqaaiier  
rtktqlnvviacyyglgvs  
nfltkinnlseeelsvintiklenithyfdndvllitthdipkqtlnilpkhlttikvsplfseddrhkirhvkvkqkn  
pvqahhmdtvnflvvnt  
qkprhtvqifeaqkqilqahhaivegyiesalereksstyignfmaiphgdpekvlqshvlifrtkdvfpwrqhdvklv  
fflaishkdkaftkqmmq  
ianldddsvnhlcslddhslkqqlfeylqe  
>tr|D2NAM3|D2NAM3\_STAA5  
mkivaitscpngiahtymaqekleqvakemgvdikvetqggvgaenvlittqdieadgviaadkqvdlrsrfvgkrline  
nvregihnprgliqsiinq  
dapiyqsetnyhskdrqksksgiqmvyqhlmgvsvmpfivvglliaialtlggettskglvipddsfwksienigs  
afkfmvpilagyiasviad  
kpglvpgmiggaiadgsfygsdagagflggivagflagyiakwidkivpkamapimpiiippiiissvivglififlig  
apissifealttwlkgmqg  
aniilaligamiafdmgppvnkvafifgsaliaegnyavmgmvavavctppiglglatfvqkykfnhseremgkasft  
mglfgitegaipfaaqdp  
riipanmigamiasvlaaigvgdrvahggpivavlggidhilwfiaviiigsivtmittvlllkrtrpviavdapaqhtq  
lhatdiiqhdtvedndvnt  
akhshlnkpsvfnqqtiiadqnmrneaiddtlhqlkvcryehtshlknaileremesttaigmvnaiphaksdvk  
qpivavmknngvkwesld  
gslpqlifliavpnnsqdtlklilqrlskalmndetrqslinanstteiyllmki  
>tr|D2NAM4|D2NAM4\_STAA5  
malflqpvfkdriwggghalkafnydipnettgecwaisahpnpntiingpykdmtdqlwsqhrfldndsrdspfllt  
kvlvandklsqvhpddy  
alkhegelgktecwylidaapgaeiigyvahnkqtlidmidnefdslfkripvkpgdfyyvpagtvhaigsgililet  
qqssdttyriydyrrdq  
gqlrdlhleqskdvieignhepnttpitthidthvtvqfvdnqyfavykwidhgdllkfnkphayclvtiidgtgtlavnd  
khydiqkgsfiltteded  
ihfvgnisaiivshpg  
>tr|D2NAM5|D2NAM5\_STAA5  
mknafklfkmdlkkvaktpavwiilaglaipsfyawfnlwamwdpygntghikvavvnedkgdtingkknvngntmvnt  
lknksfdwqfvsrekadh  
eikmgkyfagjiypskftheitgtlrkqpqkadvefkvnqkinavaskltdtgssvvvekaneqfnktvtralleanka  
gltieenvptinkiknavy  
sackalpkindfankivylnnhqadldkyandfrklgnykgdildaqklnevngaipqlnekaklilalinnypkieka  
lnfaaddvpaqfpikeqg  
niasqgidqangqldakgfvtrsvrgdyqdairraqdlnrrnqqqipqnsaannetsnsapvagnvastppsapng  
ntapnnvtqntapnsna  
pvsttpqstsgkkgqsfadittqvstanentqnitdkdvksmeaaltsllslsnnldtqakaaqkdsqalrnisygi  
lasdkpsdfresldnvksq  
leyttqynqqfidtkeieknenvdlskeidkvaannrineslrlvnqlsnaikngssgtaeatklldqskldsslss  
frdyvkkdlnsslvsisqr  
imdeinkgqtaalsnvqsklntidqvinsgqsilngktridrlqtvlpisqqyisavknaqanfpkvsdvakaanfvr  
ndlpqlerltnatasvnk  
nlpillngydqavglknknqpakkaalsdladfsqnklpdvekdllkankifkklkddavdklidtlkndllkqagii  
npinkktvdvfpvkdygsg  
mtpfytalvsvvgallmvslltvdnkhkslepvltrqvflgkagffimlgmlqalivsvgdllilkagvespvlflit  
ifcsiifnsivytcvslg  
npgkaiaivllvlqagggtfpittpqffqni spylpftyaidslretvggivreiliktliiltlfgigffvvgllil  
kpvtdplmkrvsekvdqsn  
vte  
>tr|D2NAM6|D2NAM6\_STAA5  
mpknkiliyillsttllvlpvlvsptayadtpqkdtaktshdskkstdetskdttskdtdkadnntsnqdnndkkvkt  
iddstsdnsniidfiykn  
pqtninglltknkyddnysltiliqnlnfnlsdisdyeqprngekstndsnknsdnsikndtdtqsskqdkadnqkapks  
nntkpstsnkqsnspkptq  
pnqsnspasddkanqkssskdnqmsdsalsildqysedakktqkydasqskdkneksntknpqlptqdelkhkskp  
aqsfnnndvngkdratslf  
etdpsisnndsgqfnvvdskdtrqfvksiakdahrigqndiyasvmiaqaillesdgsrsalakspnhnlfgikgafkg

Tsompanidou\_et\_al\_Supplemental\_FASTA\_File

nsvpfmtleadgnqlysin  
agfrkypstkeslkdydslikngidgnrtiykptwkseadsykdatshlsktyatdpnyakklnsiikhyqltqfdderm  
pdldkyersikdyddsde  
fkpfrevsdsmpyphgqctwyvynrmkqfgtsisgdldahnwnnraqyrdyqvshstprhaavvfeagqfgadqhyghv  
afvekvnsdgsivisesnv  
kglgiihrtinasaaeelsyitgk  
>tr|D2NAM8|D2NAM8\_STAA5  
makyrqkpfqlyvklscstmmatsiiltnilpydaqaasendteiskeilskqdldkvdkanrqieqlkqlsasskahy  
kaqlneaktasqideiikr  
aneldskdnkgsqiemnggsdiskldqldkldnevsskvdrgqqsgeddlnamkndmsqtattkhgkddkndeamvdk  
aledldhlnqqi rkskdas  
kdpvvttdnnhevaktppndgsghvlnkflsneenqshsnrltdklqgsdkinhamieklaksnastqhytyhklntl  
qsl dqriantqlpkngksd  
lmsevnktkeriksqrniileeartddkkyatqrilesifnkdeadkilkdirvdgktdqqiadqitrhidqlslttsd  
dlltslidqsqksllisq  
ilqtklgkaeadklakdwtnkglsnrqivdqkkhfastgdtssddilkailnnakdkkqaietilatrierqakllad  
litki etdqnkifnlvksa  
lndkaddlnlqkrlnqtkkdi dyvlspivnrpslldrlnkngkttldnklanlmnqgsnll dsipdiptpkpektltlg  
kngllsgllnadgnvslp  
kageaikehwlpisvimgamlmiwlsrrnklnka  
>tr|D2NAN0|D2NAN0\_STAA5  
mtiyninfgigwassgveyaqayrakllrrtnqdtkfvflfdiqseniqtltnqigfedqeviwlyqyfsdisiaptyt  
lddiereighdisfrerng  
kivrlyfngkssfvtyclqneqkdivdraefvinsmlvrkdfysytrifseyyapadnkaklymrqfyngensiayneyi  
dgdnsiyvfadavlynkte  
fiayflqrlnltrddivil drasdigqavlqhkgsdkvgvvi hadhysnmmseqhilwnnyeyqfskakyidffit at  
diqnhmvrqfegqgyr  
rvytipvgsidalsyptlsrkpyamisasrlanekhidwlvkavivakrqvpeltdfygegsektlrkiidthraqdy  
irlghvkldeiytdyelf  
lsastsegfgltlmeavgsllgmiglnvnygnptfirdgengylvpfdtdedsvddvaklahai vmyfngpqtphysis  
yevaqqf mtqdiilkwetl  
vqevlhd  
>tr|D2NAN1|D2NAN1\_STAA5  
mkhkl dvtinelrlksirkivkrintwsdevksysddvlkqktlefkeriasgvdtldtllpeayavareaswrvlgm  
kevqligavilhegniaem  
qtgegkltatmplylnalsgkgytilttndylakrdfeemqplyewlgltaslgfvdivdyeyqkgekrniyehdiyt  
tngrlgfdyldnadsae  
gkflpqlnygiidevdsiil daaqtplvisgaprlqsnlfhivkefvdtliedvhfkmkktkkeiwl lnqgieaaqsyfn  
vedlyseqamvlvrninla  
lraqylfesnvdyfyngdivlidritgrmlpgtklqaglhqai eakegmevstdksvmatitfqnlflkfesfsgmtat  
gklgeseffdlyskivvqv  
ptdkaiqr idepdkvfrsvdekniami hdivelhetgrpvllitrtaeaaeyfskvffqmdipnlliaqnvakeaqmia  
eaqgigsktvatsmagrvt  
diklgegvealglavi ihehmensrvdrqlrgsrgrqgdpgssciyislddylvkrwsdsnl aennqlysl daqrlsq  
slfnrkvkqivvkaqrise  
eqgvkaremanefeksisi qrdlvyeer nrvleiddaenrd fkvlakdvfemfvneekvl tksrvveyiyqnl sfqfnkd  
vacvnfkdkqavvtflleq  
fekqialnrknmqsaayyni fvqkvflka idscwleqvdy lqq lkanvnqrqngqrn aife yhrvalds fevmtrnikr  
mvknicqsmi tfdkegmpv  
ihfp  
>tr|D2NAN3|D2NAN3\_STAA5  
mprkfrv1qiggddlepi fqhkkgs wdyfdig l fefdsgyveaieaiveaegrfdfiyiqapys etltnllqmisepyn  
tyvdesfwsveyeqdenvq  
kyvvqplhynrieernnk leavsfsgygdkvspklalvhpnfkgdvvyqgnsetlsgefgkefkpiaswqnnlvdkd  
kviqiwpefd idgavelqy  
sfrliqtgadgalieqii l tddml dsp lei ptkpfdaysvtvkargngtvhl gpihkrwsrldmgqfl l ggsrfvdsqr  
qefiyyfhp gdmkpplnvy  
fsgyrtaegfegymmkrmapfl l igdprveggsfyisgseyeqgi invieetleklnfkshelilsgl smgsfgalyy  
gaqlnpqaiivgkplvni g  
tiaehmrllrpeefgta l dvlvsnegdtsqasiqal nqkfwqt fqkkslsqtvfaiaymqhddyphafqellpvltahq  
arvmncsipgrhnddspti  
aswfvnfy niiledkfgrvqhaekqni  
>tr|D2NAN4|D2NAN4\_STAA5  
mkyfipawyddqrwwqdtvpyyqlqnn tefddmis lmgmhlendldyr livlnhapnlrtflhrydlyetkywsvfdei  
qgfshhapqai nyhhlkwp  
ddvefvytpyl l kcvtseqtytni yfsqegysiwfeeferdql rryi fddrgylsairy fddqgeasyqeyltingdcv  
lfenfkngrvtvskryqhh  
yqteynnmaqli eekfqamiaqqihedd hvi vasdarhnrqianhipakslsysffknrnetvsdeeqsivknahliv

Tsompanidou\_et\_al\_Supplemental\_FASTA\_File

dsvqlerdlishqekygre  
ntmiriptfetrqspnissqlmetfigvwidgmsdvd1qqmmqr1vdyiaqednyr1111trhqdipmw1recitsvne  
eyqakqnadvnvsalmtpe  
dqddiavktihaehdvvealr1r1r1vidmskepdl1ylqisaisagipqingqtdyvdyngriintvdelddalnyy  
1fy1knwnyayays1klid  
ayaskniinq1delilegendat  
>tr|D2NAN5|D2NAN5\_STAA5  
m1k1l1qqyeyki1ykri1lytcfil1fiy1l1gtnisivsindmqvkhesffkiaismggdvnt1nift1gl1gpw1tsmi1  
m1isyrnmdkymkqts1lek  
hykeril1t1l1sviqsyfviheyvskervhqdnily1t1l1l1vtgtm1l1v1wladknsrygiagppivmvsiiksmmhqkm  
eyidashiviallit1l1vii  
t1fil1f1e1vevripyid1m1nvsatnmrsyl1swkvpagsit1mmsisafv1l1ksgihf1l1smfnkdv1sddmpmmtf1s  
p1gisvyl1viq1m1l1gyf1s  
r1flintkqkskdf1l1ksgnyfsgvkpgkdtery1nyqarrvcwfgsal1vtviigiplyft1fvph1steiyfsvq1l1v1vy  
is1niaet1rty1lyfdkyk  
p1f1nqyw  
>tr|D2NAN6|D2NAN6\_STAA5  
mskrqkefhdslanektrvr1lyksgknwvksigikeiemfkimg1p1fishsivs1qdnqsiskmtgygl1kttaviggaf1i  
nm1hdqqafaasadap1tse  
1ntqsetvgnqsttieaststadstsvtknsssvqtsnsdtvsseksentsttntstsnqqek1tstsestssknttss  
sdtksvastsssteqrtnis  
tnqstasnttsqstapapth1kqtsttststapvkl1rtf1srlamstfastattsavtantitvnkdn1kqymttsgnaty  
dqstg1vt1tqdaysqkga  
it1l1gtridsnksf1h1fsgkvn1gnkyeghnggdgig1fafspgv1getg1ngaavgigg1sna1fgfk1dtyhntstpnvsa  
kaka1dppsvagggafgafv  
t1dstgvastytsssiadnaak1niqptnafqdfdi1nyngdtkvmtvtyagqtwtrnisdwiaksgttnfs1smtastg  
gatn1qqvqfgt1feytesa  
vtqvr1yvdvt1gkdi1ppktysgnvdqvvtidnqqsal1takgynytsvdssyastyndtnktvkmtnagqsvtyyftdvk  
aptvtvgnqti1evgk1tmnp  
iv1l1tt1dngt1gtvntvtg1l1psg1sydsatnsi1gtptkigqstvtv1v1st1dqtnk1st1t1ft1invv1d1t1aptv1tp1gdqs  
sevyspispikiatqdnsg  
nav1ntvtg1l1psg1l1fdst1nntis1gtptnigtst1titiv1stdasgnk1t1t1t1fkyevtrnsmsdsvstsgstqqsqsvstsk  
adsq1saststsgsivvst  
astskstsvs1sdsvsask1stsesnsvssststsl1nsvqsvsssm1sgsvskstsl1sdsisnsssteksesqststsd  
l1rtstsl1sds1vsm1stsgsl  
sksqsl1ststsd1sastsgsvsdstsnis1stses1sesastsd1s1s1ns1iansq1sastsksd1sqstsis1stsdsksmst  
ses1sds1stsgsvsgsl  
iatsqsvststsd1sm1stseivdsistsgslaas1dsksm1svsssm1stsgstses1sdsist1sd1sdks1sl1stsqsgs  
tstststsssvr1mesqst  
sgsm1stsgsdst1st1fsd1stsdksastasses1sqsvststsgsvststsl1stnsertstsm1sdst1stsesd1t  
sd1ststsd1seaisg1ses  
tsi1s1esn1stsd1esksa1f1ses1sestsestses1ss1stas1st1sds1nesg1ststsl1n1st1ss1st1st1stsgs  
ast1ayk1sev1st1st  
stsl1sd1stsl1st1sds1asg1skns1sasm1stsd1strkses1ststsl1sg1stses1eg1stss1esks1d1stms1l1sm1sq  
stsg1stsv1stses1sd1st  
ts1sl1sasm1nq1gid1ns1asqsvsast1st1st1sed1sqst1ssy1t1sq1st1sq1sest1stsm1l1sd1stsm1sr1st1sq1st1st1sas  
l1sg1ses1ed1sq1st1sase  
st1sest1stsl1sd1sest1n1st1sest1sna1st1sas1es1d1ss1stsl1sd1st1sasm1q1s1sed1sq1st1stsl1ns1q1st1st1nrm1st  
it1ses1v1sest1sest1ses  
t1sed1st1stsl1sd1sq1st1sr1st1sas1g1sast1st1st1sd1sr1st1ast1stsm1rt1st1l1ds1q1sm1l1st1st1st1sv1d1st1l1sd1sv1ds  
t1sd1st1st1st1sg1ms1as1sl  
sd1st1st1st1sase1v1m1sv1s1ds1q1sm1ses1v1ny1ses1v1ses1nes1ed1sk1sm1sg1st1sv1sd1sg1l1sv1st1l1rk1ses1v1se1ss1l1sg1sq  
sm1sd1sv1st1d1ss1l1sv1st  
l1rs1ses1v1sed1l1sd1sk1st1sg1st1st1st1sg1st1st1l1sg1ses1v1se1ss1l1sds1sm1d1st1st1sed1l1sg1s1l1sg1st1l1s  
t1ds1l1sd1ks1l1ss1sq1msg  
sest1st1sv1ds1q1ss1st1ns1q1fd1ms1is1ases1dv1st1d1ss1s1sg1n1st1st1l1st1sd1sm1sg1sv1st1st1l1sds1is1g1s1iv  
sd1ss1st1st1ses1l1sd1ma1qs  
q1st1st1sas1gl1st1s1st1sm1ms1ast1st1sq1st1sv1st1l1st1d1s1id1st1s1is1is1g1sq1s1aves1est1sd1st1s1d1ses1l1st1ds  
d1st1st1st1sd1st1sg1st1st  
ses1l1sm1gd1st1sv1d1st1sm1es1d1st1sv1ms1l1st1d1st1s1id1ses1v1st1st1sm1l1st1ses1l1st1sm1sg1sq1s1id1st1st1sm1n  
st1sm1n1st1st1sm1sg1st1st  
es1nsm1h1ps1d1sm1mh1ht1st1st1sr1ss1e1att1st1ses1q1st1sat1sev1tk1hng1tpaq1sekr1p1dt1gd1sik1qng1l1gg1vmt1l1v  
gl1gl1mkr1kkkk1dend1qdds  
qa  
>tr|D2NAN7|D2NAN7\_STAA5  
mnyspkqgvkshg1phdpfks1st1vpr1pigwi1stvskdgkdn1apysqyqnl1twdppmv1mfaanqsv1gdherkdtvknae  
etgw1fvwnmatydl1reavn  
l1sska1l1ppeed1efeyagvt1keacie1apg1frvkes1pv1h1feceyv1qti1ri1pt1gd1pv1st1v1div1igrva1qv1hiddk1vil1dng1l

Tsompanidou\_et\_al\_Supplemental\_FASTA\_File

diksi rpiarlgydytvv  
neifemkapsaskeelaglegrnfdnqsdde  
>tr|D2NAN8|D2NAN8\_STAA5  
mqi1lctsiivsgcsfipkyqtkdipktvsvkdydgqyigehkkrnevflkkhkdeaikkykdyvkdftgydckinlvea  
ytnksgfsekskidglvv  
gtvnydvpfqfrlifvesngiaittftpghinetsaavsammykryeheieqarlkkfsevekngyyamneklqkkqef  
ngvtkqflnfntdsiddlk  
kfkqefksvmh1kgdafnqq1qslinkypqi qknmesefiaydkgenretvanyvwnlqkttndtmklypgnksii fyk  
dkvsatqldehkr1qdsdq  
eisisggenn  
>tr|D2NAN9|D2NAN9\_STAA5  
mhdhtkdi pktvsvkdydgkyigehkkrnevflkkhkdeaikkykdyvkdftgydckvn1veaytnksgfsekskdgl  
vvvgtvnydipfqfrlifv  
esdnqitiittftpgknetsaavaammykhyehdieqarlkkfsevekngyyamneklqkkqefngvtkqylnfntvsid  
d1dkfkkefkpvmh1kgda  
fnqq1qnlinkypqi qknmksefiaydkdanketvadyaws1kktneimktypgekrmr fykdkvspyeldqygrlnp  
dadeiyviggynekk  
>tr|D2NAP0|D2NAP0\_STAA5  
mrkndhitd1daie1ssgwnyndkit1sdeihvngnkykvikdqkptntglgyklyerydndrstgk1iisfdgtdfsd1  
ndvgtd1rlagdsipnqle  
eahkvysdlkqkysdass1sdi efynkykeesidykgksitnaggn1sgai aqylgvldps1svtttnsapipks1trm  
arrdanni hnyhsrsdt1t  
rinigg1myhsmvgkhi flengvstfgalvpahtgynfeeekldhfdqnniinkevytsrnglkiyadmdehtpifwv  
gdaigagtskikldkghla  
d1ndyvhr1teyvnnid1kmdirtsverennnfsqhvnetkdhfkvik1nelegwihnisn1irtkieskadelkgd  
1rt1rdqdn1ld1vgadhi  
insiidfidkitdkiskfikygdffmeaafdivsntivkmfvn1segfedgvreevlah1nvvipniqiiksqvtnfgdg  
indil tqmth1ddnvmvnn  
vpinknatkqtskplaeskn11n1eirkvmeaglaslassini11vpitsklfyiitfvdactpt1snfvgkiewias  
kvpfakttaet1ksfkn1v  
dk1hqqltdmr1ilge1ilqn1111rcktfskmpyyqiaf  
>tr|D2NAP1|D2NAP1\_STAA5  
mqdffkna11sds11rdikvlssnakgdadm1ete1havinamsqnegksvda1  
>tr|D2NAP2|D2NAP2\_STAA5  
milryvtn1klakelyqaskpk1qedkgmiel fehtfglqkelvkyvgiaeattaalysasfinknisrlas1stigils  
vaaykhfeaggqkkgagha  
ld11glat1s11dtfscnkk  
>tr|D2NAP3|D2NAP3\_STAA5  
mhtfdaqsltarenyk11igsiipriafvtt1nqdtvsnaapfsffnivnnhppmiaiavqrvggkrkdal niertgd  
fvvhitdednvqdinetaa  
p1aygdse1srte1s11tsttiktpgikdakmrfeck1sqm11lgdvl dgadliigeivtyhiddsiyegdfkinphalq  
avsrlagndyaklgglfti  
drpek  
>tr|D2NAP4|D2NAP4\_STAA5  
mavvyvaggclwgveaffatipgi ihteagrangrsskldspydgyaecvklhfddrmltitdimnylfeiidpysvnrq  
gndigekeyrtglyscvddh  
lieahqfierrkdrkiavev1p1snyiksaeehqhlekypedmhmchisid1lnkyk  
>tr|D2NAP5|D2NAP5\_STAA5  
mv1rkvimqd1dqia1enigfspeaatpealk1rieiqetfivaekndevigyingpvikeryisddl fknvpanns  
egyi1svlg1lvvapyqgg  
giagr11nyfen1aknqhrhgv1t cres1isfyekygyrnegvseschggikwynlvknikkddev  
>tr|D2NAP8|D2NAP8\_STAA5  
mkekfd1vk11n1lknk1111lpaic1vvsaa1tffvmpdkytastqilvnmksssd1afqnvqsslqsvntyteii  
kspri1dkvsrefdgqyst  
aelnsf1kvtngt1nsqi1tvsvtgnksesdkivnriskvfahdmpkimsvdnvt1lssahdnkvkvspivsvnlvisii  
vgiv1ailiif1ke1ldkr  
ikteedvesq1glpilgsiqkf  
>tr|D2NAP9|D2NAP9\_STAA5  
mkdkiidnait1fsekgydgt1lddiaksvnikkaslyyhfdskksiyeqsvkccfdylnniimnqnksnysidal yqf  
1fefi fdieeryi rmyvq1  
sntpeefsgniygqi1qdl nqslskeiakfydeskikmtkedfqn1111fleswylkasfsqkfgaveesksqfkdevys1  
1nif1kk  
>tr|D2NAQ0|D2NAQ0\_STAA5  
mdelegitf1lacyneseti edt1snv1alkyekkeiii indgssdntaeliykikenndfi fvd1qenrgkana1nqgi  
kqasydyvmc1dadtivdq  
dapyymi enfkhnplgavtgnpri nkssilgkiqtieyas1igcikersqtlagavntisgvft1fkksavvdvgywdt  
dmitediavswk1h1rgyr  
ikyep1amcwm1vpelgg1wkqrvrwaagghev11rdffstmktrkrfplyilmfeqisilwviyiv1lylgy1fitanf

Tsompanidou\_et\_al\_Supplemental\_FASTA\_File

ldytfmtyfsifl1ssft  
mtfinviqftvalfidrsyeknmaglifvswyptvywiinaavlvafpkalkrkkkgyatwsspdrngtqr  
>tr|D2NAQ1|D2NAQ1\_STAA5  
mkyrklilvlslililpvstldghhianadddppkklkykensalalnyhrvrkanflnnfiyffssskeiknysvsqs  
qfesqikwlkshdakfltl  
keflyykkkgkfpkrsvwinfddmdetiye naypilkykipatgf iitghvgeenfhnldmiskkelkemyktglwefe  
ththdlnl sknksklmk  
sseatiikdlnksekyltknfkksqktiaypyglmddklpvikkaglk ygfsleekavtpnsndyyiprilisddafeh  
likrwdgfhekd  
>tr|D2NAQ2|D2NAQ2\_STAA5  
mkkirlelvyraicaiiivthlltqitl khenmeggs l vlqfyirnivifgtpcfiilsqllttlnyqkvtyryl ttr  
vkiyipylimglfysyse  
slltdtsfqkfienvllgqwygyfivvimqffilsy iifkinynlfnskillllsfilqqsfllyftntafhdtvlhy  
yplsentiifgwi fyfflg  
aymgynyervlnflerylvimivlavatyvfvia langdywnvtsfsysltpynsimfivilgicthfktmlfntiqmis  
afsffiyllhpiildsifa  
ytnifedntmvflaisllilglcigvgmilrefyifr fiigkqpyklninay  
>tr|D2NAQ3|D2NAQ3\_STAA5  
mmsqknkysirkfsvgassiliallflsggqaqaakqvnmgsqedtvtasigdqqtrenanyqrengvdeqqhten  
ltnlhdktiseenhrkt  
ddlndqqlkddkkslnnkniqr dttknnnanprdvngleqaindgkqskvasqqqskeadnsqdsnannnlpsqsrk  
vapslnksdqtsqreivne  
teiekvppqknqsndkmtshhfneqevnpqkdektlsvsdlnknqkspveptkndkkkgl nllkssavatlpnkgtk  
el takatgdqtnkvakgg  
yknqdpivlvhgfnqftddinpsvlahywggnk mni r qdleengykayeasi safgsnydravelyyyikggrvdygaah  
aakygherygktyegiykd  
wkpgqkvhlvghsmggqti r qlee l l r ngsreeieyqkkggei splfkgndnmissittlgtphngthasdlagneal  
vrqivfdigkmfgnknsrv  
dfglaqwg lkqkpnesyidyvkrvkqsnlwkskdngfydltregatdlnrktslnpnivykytgeathkalnsdrqkad  
lnmffpfv itgnligkate  
kewrendglvsvissqhpfnqaytnatdkiqkgiwqvtptkhdwdhvdvfgdssdtvrtreelqdfwhhladdlvktek  
vdtkqa  
>tr|D2NAQ4|D2NAQ4\_STAA5  
mkse l snsgidvtvkdv ekymnrynev mkgkng ekakk l clsl l piniivvfi fffvil  
>tr|D2NAQ7|D2NAQ7\_STAA5  
mielwpa idligstsvrlte gkydseekmsrsaeesia yysqfecvnrihivdligakaqharefdyikslrrl ttkdie  
vgggrtksqimdyfaagi  
nycivgtkqidtewlkemahtfpgriylsvdaygedikvngweedtelnlfsfvrqlsdiplggiyytdiakdgkmsgp  
nfeldtgqlvkattipvias  
ggirhqkdiqr laslnvhaa igkaahqasfweglk  
>tr|D2NAQ8|D2NAQ8\_STAA5  
mivivdyglgnisnvkraiehlgyevvsnkknidqaetiilpgvghfdamseikrlnldailakntdkkmigiclgm  
qlmyehsdegdasglgfip  
gnisriqtteypvphlgwnlvskhpm l nqdvfvhsyqapmsenviayaqygt dipaivqfnnyigiqfhpeksgtyglq  
ilrqaiqqgfind  
>tr|D2NAR0|D2NAR0\_STAA5  
miyidknespvtpldektmts iisatpynlypdaayeqfkeayakfygl sseqi i agngsdeliqlmlimpegpaltln  
pddffmyqayaaqvnreiaf  
vdagsdl t f d l e t i l t k i d e v q p s f f i m s n p h n p s g k q f d t v f l t a i a d k m k a i n g y f v i d e a y l d y g k a y d v e m a p h i l  
rmrtlskafgiaglr lgv l  
mstaetiqr i q k i e h p y p l n v f t l n i a t y i f r h r e e t r q f l t m q r q l a e q l k q i f d t h v a d k m s v f p s n a n f v l t k g s a a  
qq l g q y v y e q g f k p r f y d e  
pvmkgyvrystatasqlkqleeivkewsakyd lskttkhs  
>tr|D2NAR1|D2NAR1\_STAA5  
mlnaqqflnqfsleapl deslypiirdicqevkhgdka l kmynl t f d h t k t d h l e i s h e q i k a a f d t l d e k t k q a l q q s  
yerikvygesikqtnqgle  
esvecyeyihplesvgiyvpggkasypstvlmtatlaqvagveni vvtppqpngvsqevlaacyitqvnqvfvvggaqs  
iaalttygtetipkvdkivg  
pgnqfvayakylfgqvgidq iagpteialiidtdadldai vydvfaqaehdelartyvisedaqvlkdesriakalpn  
vdrydivsksi anghyli h  
asn f d e a c h m m t i a p e h a s i q t v n p q p y i e k v k y v g a l f i g h y s p e v i g d y v a g p s h v l p t n r t a r f t n g l s v n d f l t r  
ntvihlskdtfdqiadsaq  
hiahvealynhqqsilirqs  
>tr|D2NAR3|D2NAR3\_STAA5  
mnseqli alkeataflkyfnkadyelvdsvvekldwkqlnhedlqqmgernfwqhehqiyalrndftdqllryssmy  
ptaatkvaytgliirnea  
avqvglenyqpslanvqpslk l f i q f i q q q l r d n v h f v l g h y q l l d a l l d k s l q t p d i l s m i e e r n l s g l v t y l s t e h p  
ivqil kentqqqlnvlehy



Tsompanidou\_et\_al\_Supplemental\_FASTA\_File

ipndhpalvelkiwerwlhtqgykdihl d itaqpprsyvtglfiqchfaenesrvltggyyksiiegfglgltl  
>tr|D2NAR4|D2NAR4\_STAA5  
mhkkyllffllsvallyscskqnekaqnksanpneyakhkskmdewetyhgqvyhvfyhpl itdpkvaftgdthqak  
gnndwmitvsefkkslne l  
yknniyi jvnpdhvydlsshvkakkikl pkgkkl i isiddmnyysymrhgyadr l vldknkhvsettdskghatysd  
dndivpilnkfvkehpdfs  
l ngekvvaltgyegvlgyrtnel tskdytknkkaae evvramkrdgsfashsyghinfektslegiqrdrkrwkdeve  
sivgktdmfvfphgqdrh  
tlaydy l vdkagfkfiagvgpnnftdisttnvyqdrva idgln l fefkyklkpffnpenvyskqdrqffkgnrdyee  
>tr|D2NAR5|D2NAR5\_STAA5  
mtnftfdgahsslefqikhlmvskvkgsfdqfdvavegdindfstlkatatiipssintkneardnhlksdgdfgtdfed  
kitfvtk siteskvvgdl t  
ikgitneetfdvefngvsknmpdgsqvtgiivtgiinrekyginfnqtletggvmlgkdvkfeasae fsise  
>tr|D2NAR6|D2NAR6\_STAA5  
mnemkgmimmtqqdlptlvysgksnsavpiisese lqtitaepwleiskkg l ql eglnfdrqqqlflldvfegni fkvnp  
etkeikrpfvshkanpaai  
kihkdgrl ficylgdfkstggi faatengdn l qdiied l sttyciddmvf dskggfyftdfrgystnslggvyyvapdfk  
tvtpi i qnisvangialst  
dekv l wttettanrlhria leddgvtiqpfgatipyftghegpdscidssdnlyvamygggrvlvfnkrgy pigqili  
pgrdeghmlrsthpqfipg  
tnql i i csndiemdggsmlytvngfakghksyqfq  
>tr|D2NAR7|D2NAR7\_STAA5  
mnyqvllykyttiddpeqfaadh l afckahh l kgrilvstegingtlsgtkeeteqymahm haderfkdmvfkideae g  
hafkkmhvrprkeivaldl  
eedvdprhttgqylspvefrka ledddtviidarndyefdlghfrgairpnitrfrdlpdwikenka l fadkkvvtctg  
girc ekfsgwllkeg fedv  
aq l hggiatygdpetkgqywdgkmyvddrisvdinqvekti igkdwfdgkpceryincanpecnkqilvseeneaky l  
gacsyecakhernryvqan  
nisdnewqqr l tnfddl hqha  
>tr|D2NAR8|D2NAR8\_STAA5  
mhi l vtg fapfdnqdi nssweavtqleni gthtidkl l ltsfkvd ti ink t lasnhydvv laigqaggrnaitperv  
ainiddaripdnnddfqipd  
qaihl dgapayf snlpvkamtqsi inq l pga l nsagt fvcnhi l yhlgy l qdthyph l rfgfihvpyipeqvvgkpd t  
psmpleqivag l taaieai  
sddd l rialgttq  
>tr|D2NAR9|D2NAR9\_STAA5  
mlskqsqdflek l rve l l frgkteeevee l lee ledhl tmaeknedtss i intpiksmadqlspeisl ttglykyitly  
faftlaviiipmfl dlgtf  
dvtiafllyiasivilgvvigm l ilrnt l vrfgdqkityvinvtygiivflwml l ggliikkypisffelsdkqsfiig  
itflilvigtcilikqkiy  
aliv l vis l psliariasifskpdtfn l vsvsil i l niafi i ytfvnrklked  
>tr|D2NAS0|D2NAS0\_STAA5  
msvsdq i kg l l dgailgl i aqgetygyeimtk l knqefpe isegsiy pvlmr l nkkgyvdttikssnggprrkyytit  
dsg l kelki fkskwqalnk  
gm i n l fggendvk  
>tr|D2NAS1|D2NAS1\_STAA5  
mttktvfdvidmg l gy l vnyvdtwkvekv l ddyhkpfsntihwqfghv l tifesa l avagkenid l niyrplfgngsspd  
ewkdevpsigai leg l qt l  
perark l teddlaielkqipvgcn l ee l l vlnaihip l hagkieemsr ilnk l k  
>tr|D2NAS2|D2NAS2\_STAA5  
mnknv l kfmvfim l l niitplfnkneafaardisstnvt d l tvspskiedggkttvkmtfddkngkiqngdtikvawpts  
gtvk i egysktvpltvkge  
qvgqav i tpdgati t fndkvek l sdvsgfaefevqgrn l tqntnsddkvatitsgnkstnvtvhkseagtssvfyyktgd  
mlpedtthvrwfln innek  
syvskd i tikdqi qggq l d l st l ni nvtgthsdyysgpna i tdfekafpgskitvdntkntidvtipqgygs l nsfsin  
ytkti tneqqkefvnnsqa  
wyqehgkeevngksfnhtvhninanagiegtvkge l kv l kqdkdtkapi anvkfk l skkdgsvvkdnqkeieiktdangi  
anika l psgdy l l keieap  
apyi fdkdkeypftmkdtdnqgyftti enakei ektkdvsaqkvwegtqkvkptiyfklyqddnqnttpvdkaeikk l e  
dgttkv twn l pendkng  
t i ky l vke vnaqgedatpegytkkeng l vvtntekpiettsi sgekvwddkdnqdgkrpekvsvn l l angekvkt l dvts  
etnwkyefkn l pkydegkk  
i eytvedhvkd yttidngti i tnkytpgetsatvtnkwdnnnqdgkrpteikvelyqdgkatgktat l nesnnwthtw  
tg l deka nqqvkytvee l  
tkvkgytthvdnndign l ivtnkytpettsi sgekvwddkdnqdgkrpekvsvn l l angekvkt l dvtsetnwkyefkn l  
pkydegkk i eytvedhvkd  
dyttidngti i tnkytpgetsatvtnkwdnnnqdgkrpteikvelyqdgkatgktat l nesnnwthtwtg l deka nqq  
vkytvee l tkvkgytthvd

Tsompanidou\_et\_al\_Supplemental\_FASTA\_File

nddignlivtnkypetpsetsgekvvddkdnqdgkrpekvsvnllangekvktldvtsetnwkyefknlpkydegkkiey  
tvtedhvkdyttdingtii  
tnkypgetsatvtnkwdnnnqdgkrpteikvelyqdkgatgkatalnesnnwthwtgldekakqqvkytveeltkv  
kgytthvdnndmgnlivtn  
kyppekpnkpiyepkpkdktpptkpdhsnkvkptppdkpskvdkddqpkdnktpenplkelpktgmkiitswitwvfig  
ilglylilrkrfns  
>tr|D2NAS3|D2NAS3\_STAA5  
mkntvkyrkfilpivvgliwaltpikpeavdptawymfaifvatiiacitqmpigavsiigftimvlvgivdmktava  
gfgnnsiwliamaffisrg  
fvktglgrrialhfvlfgkktlglaysivgvdliapatpsntaraggimfpiikslesfsgskpkdesarkmgaflvf  
tefqgnlitaamfltamag  
nplagnlasstsnvhitwmnwflaalvpglvslivvpfiikyiyptvketpnakswaenelatmgkiaaekfmigifv  
ialtlwivgsfihidatlt  
afiaal111tgvlwqdiinetgawntlwfsvlvmaaqlnklgfipwlsksiatslgglswpivlvililfyfyshy  
lfasstahisamyaa11gv  
aiaagapplfsalmgffgnllastthyssgpapilfssgyvtqkrwmtmnlilgfvyfiwiglglslwmkvigif  
>tr|D2NAS4|D2NAS4\_STAA5  
mnteykkgiflslsayilwgilpiywqfvdaigafeilafriifsvifmifilavgqqrnafqrdmnqllakpiqlai  
vvagyvitlnwgtfiwvnt  
nghvlqtslgyinplvsillaiflkerfnkfewlailfafigvlymtlkigefpivsiilalsfgtyglkkivhida  
issitiectivapagliy  
iywqqhqmsfglnmssfwllfsgaitaipililfsagakripilsligfiqyvgptimfvlgifvfkepfsidqlitfifi  
wtgivilyslsqyiklkkhp  
vaktl  
>tr|D2NAS5|D2NAS5\_STAA5  
mtlpkigkpatralnsqgiytleavsytkslmemhgvpgkaisilenalfqhqlhfktevhsslpfl1tgdvscnhap  
krqqmidfivataaldiel  
lrs1vttefiwsvpgrfdiygpqilqelshnykeiaslniqsiithgslgsmhgsqilktgtvihfahffefenhkkda  
klskvtsyivvg  
>tr|D2NAS6|D2NAS6\_STAA5  
mikyhmkegyilvfknerlswlpyiaivilhvigfsflwiagkdhhilfgmgilaytlglrhafdadhiaaidntvr  
kllqqrkdpsgvgyfysig  
hssvvlmavflgsvkwakdelphfqdiggtigtlvsgfflvligvlnlilislilnlfaklrreheeaevdallser  
gfvsvrfvgpyfklitrswh  
vlplgflfglfdtaseialla1ssgasqqaisfigilslpilfasgmslldldgvmkyaynwaffnpirkiyyniti  
taisviaalvigmiellqi  
ladklldlhgafwafissiefnylgyilvalflitwlissliwkgfrieghkwsk  
>tr|D2NAS7|D2NAS7\_STAA5  
mniakledylqieptrydqpsiealnnyatrfmltvpfenidvqngkpsvdidalfnkivhdkrggfcyelntffkayl  
qqkgfnpelmsatihptgg  
grsqngshaslvvsinnvfyvtdvgfgdlplnaipitlppdtqpitdisgtfrafnsedkdiyvqkyennhwhtkyea  
efkarqieefdqnieyngt  
hpdsvfvkh111tmpqsfgatmsenh11tkdgtpeklaikdnkqflttyfglnvtisrlensdn  
>tr|D2NAT0|D2NAT0\_STAA5  
mtfnhivlknlrqnlkhyamyls1ffsivlyfsfttlqftkgvnnddsmailkkgalvgsiflfiiviflmyanhlfv  
krtrtrefalfqligltrqn  
ilkmlaleqmivflitgvvgvlcgiagaqllsivsklmslslinlsihfepmalvltifm1viayililfqsslflkrrs  
ilsmmkdsiktvtakvt  
vievisgvlgiamia1lgyymatemfgtfkalmtamtspfiilfltvvgaylffrsvslifk1kkskngrvsitdvvft  
ssimyrmkknams1tiiai  
isavtvtvlcfaalsksntdqtltsmapndfnvvtqaadaqqfeskl1sqqqitfsknayetinvdnvkdvitlengsdsg  
rtnsilsannktgnnaii  
tntkslpnvinihlnkdlvvgksgnetfrvtqedkdkvypnl1sfnspvievspekyqqlktqnnvhtfygydikqtsqk  
kkaqaiakqfgdkiiyydd  
mkkevdatngilifvtsflglaf1vaagciiyikqmdetedelnsfrilkrigfthtdmlkglllkitfnfglplliai1  
havfaaiafmlmgnisfm  
pviiivytliyivfaliafvhsnklikkti  
>tr|D2NAT1|D2NAT1\_STAA5  
mkfrelvkqsyedlknltvtwynvia1amiviv1savttpmigipagllggayylkrreekgk  
>tr|D2NAT3|D2NAT3\_STAA5  
mnl1skqikkyrerdgysqeylaeklyvsrqsi1nwendkslpdihn1lmmcelfnvtl1ddlvkgtipfvpdikaqrs1n1  
wtyvm1ifmtlaai1mgpl  
vvywnwtwgitvaiimgigfyasmkiedl1kevhkmdnydrivafmgkdpsevqttkarntmtnalsi1svvgtl1slif  
1svylankf1  
>tr|D2NAT6|D2NAT6\_STAA5  
mkkpfsklfglknkddilghieedrnsnvesiqierivpnryqprqvfeqnkikelaesihhgllqpivvrpieedmfe  
i1agerfrfrais1n1lpqa  
dvi1rdmdeetavvalieniqren1svveeaeayk11leigdttselaks1gksqsfi1ank1r1llklapkv11r1reg

Tsompanidou\_et\_al\_Supplemental\_FASTA\_File

kiterharavls1sdsege  
alieqviaqklnvkqtedrvrqtgpekvaqnlrfaqdvqtqardevgksiqaiqqtg1hvehkdkdhedyeyekiriyrk  
r  
>tr|D2NAT7|D2NAT7\_STAA5  
mtvewlaeq1kehnie1tetqkhqfqttyr11vewnekmltsitdehdvylkhfydsiapsfydfnqpisicdv gaga  
gfpsip1kimfpq1kvtiv  
dslnkriqf1nhlase1qlqdvsvfihdraetfgkgvyresydvtaravar1sv1selc1plvkkggqfvalkskgee  
leeakfaisvlggnvteth  
tfelpedagerqmfiidkkrtqpkkyprkpgtpnktpllek  
>tr|D2NAT8|D2NAT8\_STAA5  
mvqeydivigaghagveaglasarrgakt1mltin1dniafmpcnpsvvgpakgivvreida1ggqmaktidkthiqmr  
m1ntgkqpavralraqadk  
vlyqqemkrviedeen1himqgmvdeliiednevkgvrtnigteylskaviittgtflrgeiilgnmkysgpnhlpsi  
t1sdn1relgfeivrftk  
tpprvnsktidyskteiqpgddvgrafssetteyildqlpcwltytinaethkviddn1h1samysgmikgtgprycpsie  
dkfvrfndkprhqlflepe  
grntnevyyvg1sts1pehvqrqm1etipglekadmragyaieydaivptqlwptletkmiknlytaggingtsgyeea  
aggg1maginaagkv1ntg  
eki1srsdayigv1idd1vtkgtnepyr11tsraeyr111rhdnad1r1tdmgyelgmiseeryarfnekrqqidaekr  
1sdirikpnehtqaiieq  
ggsr1kdgilaid11rrpemydiileileehq1nadveeqveiqtkyegyinks1qqvekvkrmeekkiped1dyski  
ds1atearek1sevkplni  
aqasrisgvnpadis11iy1leggk1qrvsd  
>tr|D2NAU3|D2NAU3\_STAA5  
msvepqi1rldi1lqtkfkakalqekvyieydkvkadswdrnmriiefnpnk1trdemiwlkqniisymeddgftr1dlaf  
dfedd1sdyyamtdkavkk  
tifygngkpetkyfgvrdsnr1riynkkqerkdnadaevmsehlwrveielkrdmvdywndcfsd1h1lqpdkwtiqr  
tadraivfml1sdeewgk  
1hrnsrtkykn1likeispvd1td1mkst1kanekq1kqkidfwqhefkfwk  
>tr|D2NAU4|D2NAU4\_STAA5  
mlrsdfmysysivrsvkvsgtnttgiqkhvqrennyenedidhskty1nydlvnankqnfnn1idekieqnytgkrki  
rtdaikhidg1litsnddff  
dnqtpedtkqffeyakefleqeygkdn1lyatvhmdektphmhygvvpitddgr1sakevvgnkka1tafqdrfnehvkq  
rgyd1ergqsrvtnakhe  
q1sqykqkteyhkqeyeresqktdhikqkndk1mqeyqks1nt1kkpinvpyeqetekvgg1fskeiqetgnvvisqkdf  
nefqkqikaagdisedyey  
iksgralddkde1rekdd1nkaverienaddfnq1yenakplkenieialk11k11kelervlgrntfaervnk1t  
edepk1ng1agn1ldkkmnp  
elyseqqeqqeqknqkrdrgh1  
>tr|D2NAU6|D2NAU6\_STAA5  
mnl1dfgsektmrtekei1n1vsefayqrsnvkia1legsrtnenikkdkfdydfaffvsdieyftheesw1s1fge11f  
iqkpedmel1fppd1dygys  
y1myfkdgikmdit1n1kdl1nryfsdsdglvki1vdkdn1vtqeivpddsnywlkkpterefydccnefwsvstyvakg  
vfrreilfa1dhfn1l1rp  
e11rmiswyigfnrgfd1s1gknkyfinkyltdkefnm1latfemngyrktyqsfk1ccel1kyysnkvsclgnynypny  
eknienfirnyen  
>tr|D2NAU7|D2NAU7\_STAA5  
mattk1gntksasrainyaeraeeksg1ncdvdyaksyfqtralygkengvqahtviqsfkpgevtakecneiglela  
kkiapdyqvavythtdkdh  
yhnhi1insvn1etgnkyqsneqrdfikkandq1ceerg1svpeksseirytlaeqnmidkdrswkndirmaveetkd  
navdfeefnt11kekgvei  
trvtknvtyrhieedkkvrgnk1gdsydkgviengfaiekfrereereydeyadtfevdwdavaensed1rkrriar  
teetkqasnkiyirdertt  
glerkgiagnqvefekddgg1sr  
>tr|D2NAU8|D2NAU8\_STAA5  
mkkttedfqrgrkvhndfvrl1qkn1nrvnaedieievrkdvygvreeihsm1revkqshehyqkrqkqlftgigam11  
vfm1falimtigrdfmgf1  
hvd1qna1askikasegfisv1wyiayglpyilaig1fiwlyewirarfhd  
>tr|D2NAU9|D2NAU9\_STAA5  
mg11rvqr1nvnkaigikqqr1kkmskkkin1aisiaqvvaq1ilyntyqqykyskysa  
>tr|D2NAV0|D2NAV0\_STAA5  
makitknegensvknkytkpaysnsr1nrhimytppek1hfdamtivgn1nknnahk1sefmsiapqir1lwdilqtkfka  
kalqekvyieydkvkadaw  
drnmrvfnpnk1theem1wlkqniidymeddgftr1dlafdfedd1sdyyamtdksvkk1tifygngkpetkyfgvr  
sdrfiriynkkqerkdnad  
ievmselwrveielkrdmvdywndcfn1h1l1kpdwss1ekvkdqamiym1iheestwglerrtknkyrem1ksisei  
d1td1mk1t1kenekq1kq  
qiefwqrefrwe

Tsompanidou\_et\_al\_Supplemental\_FASTA\_File

>tr|D2NAV1|D2NAV1\_STAA5  
miklrrlngywrsfymqynttkcidenqdnktlkdmtksqkqrpwrekidnvsyadielilkikkafnvkqcgvlfe  
ptdegy1k1hktwfckskl  
cpvcnwrramknsyqagkvi eevvkekptarwlf1t1stknaidgdhleqslkhmskafnk1kmytkvkkn1vgflrste  
vtvnkndgsynqhmhv1lc  
venayfrkkenyitqvewvd1wqka1qvnyrpvanikaikpnqkgdkdiqaaiketskysvksdfltdddernqeivnd  
lekgl yrkrmlsygg1lkq  
khki1n1ddaedgn1intsdedkttdeekahsitaiwnfekqnyy1kd1kr  
>tr|D2NAV2|D2NAV2\_STAA5  
mdm1kn1ndsidiyidqnltkd1nlydiayfvg1peqhyrn1fif1tgig1seyikkrklyfankd1lnkesvtsvaiky  
gysidgftksfkdwsgylp  
sqiyeeqvlisyplksfainvkggidmktrivd1pkinivgkkrvrmqyegvnneieelansitniqkeemnlqniep  
keivnvsyadenfikeeg  
ylthmigvittennisdq1dvinideskwivfenegkfpkvlqdyakiysew1peteyk1anvpmfsftkfndsdsdna  
yseiwvavnn  
>tr|D3ER45|D3ER45\_STAA4  
mk1nt1qlenyryndevt1kchpvdn1igenaagktn1lesiyt1alakshrtsndkelirfnadyakiege1syrhgt  
mpltmf1tkkgkqvkvnh1  
eqsr1tqyigh1nv1faped1nivkgspqirrrfidm1lgqisavy1nd1aayqrilkqkny1kqlq1gqkkd1tmle  
v1nqqfaeyamkvtdkrah  
fiqel1es1akpihagitndkevl1ny1ps1kfdyaqnearleeims1l1sdnmqrekerqis1fgphrddisfdvngmd  
aqtygsqgqrrta1sik1  
aeielmnievgeyp1l1ddv1se1ddsrqth11stiqhkvtftttsvdgidheimnaklyrinqgeiik  
>tr|D3ER51|D3ER51\_STAA4  
math1sfrqgvqecipt1lgyagvgisfgivassqnfsilei1l1clviyagaaqfimcalfiagtpisaiv1tvfivns  
rmf1l1smlapnfktygfw  
nrvg1gslvtdefgvaitpylkg1eaindrwmhgnitay1fwaiscvagalgeyisnpqt1gl1dfaitamfifl1aiag  
fesitksr1riyiv1i1jav  
ivmm1s1smfmpsy1ai1iaatisaalgvmm1eq  
>tr|D3ER53|D3ER53\_STAA4  
mfkeertmtnytvd1n1lgkfitesevidn1r1ryehvyghgqplvvvchaltgnh1tygtddypgwwreiidggyipi  
hdyqf1tfdvigs1pfgss  
p1ndphf1pk1t1lrd1vranergiqalgydkinil1iggs1ggmqamell1ynqqfevdka1ilaatsrtssysrafneiar  
qaihl1ggkeg1s1iarq1lgf  
l1tyr1ssksy1derft1pdevvayqqh1qgnk1kehfd1ncylt1l1dv1dshnidrgrtdvthi1fkn1etkvl1tmgfidd1lyp  
ddqvralgerfkyhrhffv  
pdnvghdgf1l1nf1stwapn1yh1f1n1khfkrk  
>tr|D3ER54|D3ER54\_STAA4  
myk1l1isikevki1aivknmgvayv1fskiqpkati1atit1lvfalalylvp1gl1fal1fatipg1v1wnksiqsfgvs  
al1itvi1ttv1gntfv1sa  
i1l1v1ias1li1gq1l1kerts1kerm1yvttvams1is1liaf1m1l1qt1fgrippsasivk1p1k1q1t1heaitms1gadanmtq1il  
eeg1frqatv1q1pgf1i1i1t  
f1i1v1in1l1vt1fp1v1rk1fkiatp1v1fk1p1fawq1msg1il1wi1y1i1vi1ic1l1ft1gq1ps1vf1qs1il1nf1ql1v1sl1vmy1iq1gl1svi  
h1ff1g1k1ak1gl1pn1avt1l1l1i  
i1gt1l1tp1t1th1vg1l1g1vid1s1n1l1krimkn1nsk1k  
>tr|D3ER64|D3ER64\_STAA4  
mka1l1l1kts1vw1l1v1l1fsv1mg1lwqvs1naaeqytp1kahv1tt1dkattdkq1v1t1p1t1keah1q1f1geea1t1nvs1asaq1t1ade  
i1nnk1v1ts1naf1snk1pst1avs  
tkv1n1eth1dv1t1q1q1ast1q1k1pt1qs1at1ft1s1n1akt1as1l1spr1m1faan1vp1qt1t1th1ki1l1ht1nd1ih1gr1laeek1gr1vig1mak1l1kt1ike  
qek1pd1m1dag1daf1q1gl1p1  
snq1sk1geem1ak1mnav1gy1damav1gn1he1fd1fy1dq1l1k1leg1m1df1p1m1st1nv1y1kd1g1kraf1k1pst1iv1tkng1iry1gi1g1v1t1tp  
et1k1t1k1tr1peg1ig1k1g1ve1fr1dp  
l1qs1v1taem1m1ri1yk1d1v1t1fv1ish1gi1dp1st1qet1wrg1dy1lv1k1q1s1qn1p1l1k1k1rit1vid1gh1s1ht1v1l1qng1qi1y1n1d1alaq1t1gt  
al1an1ig1k1vt1f1ny1r1nge1vs1n  
i1k1ps1l1in1vk1d1ven1tp1nka1laeq1inq1ad1qt1fra1qta1evi1pn1nt1id1fk1ger1dd1v1rt1ret1n1l1gnai1adame1ay1gv1kn1fs1kk  
td1fav1t1ng1ggi1rasi1ak1gk  
v1try1d1l1is1v1p1fg1nt1ia1qid1v1k1gs1dv1wta1feh1sl1gap1tt1q1kd1g1ktv1l1tang1g1l1his1ds1ir1v1y1y1dm1nk1p1sg1krina1iq1il  
n1ket1g1k1fen1id1l1kr1vy1h1vt  
m1nd1ft1as1gg1dg1ys1m1fg1spreegi1s1ld1qv1l1asy1l1ktani1aky1dt1tep1qrm1l1lg1kpav1seq1pak1g1q1g1sk1gs1es1g1k1dv1qp1ig  
ddk1amp1ak1q1pat1g1kv1v1l1  
p1th1rg1t1v1ss1g1te1gs1gr1t1legat1v1ss1k1sgn1ql1vrms1vp1k1gsa1hek1ql1pkt1gt1n1q1ss1spaam1fv1vag1ig1liat1v1rr1kas  
>tr|D3ER82|D3ER82\_STAA4  
mdnk1tye1issaew1vm1ni1w1mk1kyas1anni1ee1iqm1qk1dws1pkt1irt1l1tr1ly1kkg1fidr1k1k1dnki1fqyys1lve1s1d1iky  
k1tskn1f1ink1vy1k1gg1fns1lv  
l1nf1ve1ked1l1sq1de1iee1l1rni1l1nkk  
>tr|D3ER83|D3ER83\_STAA4  
mqv1l1ks1im1l1vit1pv1ks1ic1ps1fy1l1ry1k1yn1ik1q1ik1nv1kns1lig1y1ldc1inv1kn1l1kni1q1rl1cik1nr1h1igt  
>tr|D3ER84|D3ER84\_STAA4

Tsompanidou\_et\_al\_Supplemental\_FASTA\_File

mndnekrv1reijnhhnistrqisknleinkatissilnk1kykslvnevgedstksgrkpi11kvnhlygyfis1d1  
tyssvevmynfydgnvikh  
esydlpdekvs11siikkhidiekldtyngllgsvsihgvdneqhvtylpfhetegisiakkikeitnvpvvvne  
anlsalyernfnhnlsynn  
lia1sihkgigagliinnqlyrgangeageigktlvskvsdneivefhkiedifsqeallhnl1snqlnekmtl1skliqfyn  
eknpvveemeqfinkia  
lihn1ntqfnpna1yincplfnempeileaiknqfkqysrneiqikltsnvkfatllggtlaiiqkvlqindiylidika  
>tr|D3ER88|D3ER88\_STAA4  
mekvlh1iksklqknh1nqyfhfeymylkvkliskivkps  
>tr|D3ER90|D3ER90\_STAA4  
msftcflevikfcvslgffwfiitfsl1vhyn111tgynelt1svhynq11ilw1itnfinnkyrksthtfisfpffs1  
>tr|D3ER95|D3ER95\_STAA4  
mkvqrievenkpypl111dkeyqliepvmkfikyldntgkspntikaycyh1k1lyefmeqrgvilndinfelladfv  
w1rypsasnvidlqskai  
reetvntilnvmsf1dylsr1gefksidvfkqakgrnfkgflhhvknqyqknvlk1rvkkkqirt1rskevqkida  
chtkrdk1ilmlmyegglr  
igevl1r1ledivtdwnqih1tprdvvnayik1rkertihvskelmslytdyliyeyselehdyvfis1kegyfgk  
1kyqsvdlvrrivkrtgi  
eftshmlrhthatq1iregwdvafvqkr1ghahvqtt1ntyvhl1sdqdmknefnkylerkehkk  
>tr|D3ER98|D3ER98\_STAA4  
mkinryitrgisey1s1d1q11lwnmvkerdnqphdylh1fk1qeden1s1theqepaykleyhytnyvknqnalpk  
kvyviredgvdafyyvml1  
peey  
>tr|D3ER99|D3ER99\_STAA4  
mktttqelkqyitr1fq1snnetwecealeeaenilperfindsplahl1tletytyynnelhd1siypflmyannqlis  
vgy1nhfdm1d1f1y1l1tdtkn  
t1iderh11reggthhe  
>tr|D3ERA2|D3ERA2\_STAA4  
mtqt1npsfnpspry1skk1gwykdkppkek1gmp1teve1agpivienkfidp1kntekv1itdedqkvivessd1l1ttqk1  
ps1mkygfs1nekytkd1g  
yalq1m1rnq1pi1s1y1yegv1ilet1p1fgpiv1s1nei1ytt1efdnk1spsdaicentyd1aprgtfdn1wfnmy1kevkg1l1l  
elav1vfg1salv1tsf1khk  
hetefagi1fs1ftg1s1stg1k1staas1lavsvagnptk1gnet1frnwnatrnalegy1snnf1gipiv1fde1ssatfrdt1g1  
lys1tegg1qr1srnv1hgev  
ktpknw1gtsv1stehs1fnds1aqndg1rvrtie1neqft1natnad1nikkavalnyghv1plvaky1linrede1viqwf1y  
kev1dwfeak1kddksnt1gn  
rmfkryav1ttsak1lgrv1latdidiakirdyfidyh1ghtis1ers1ladkaidv1iqfvaqnr1gkfsdegal1knmfeny1g1  
is1kddh1evkmi1anv1fkq  
m1lnnhq1fqdvnnvna1lrdkg1filadrgr1qt1krsvkdns1gkqslvf1yh1kl1dvefas1ilg1tkdks1liqnw1tpandk  
aakel1fksaneg1g1psgvh  
edf  
>tr|D3ERA5|D3ERA5\_STAA4  
maykiddk1qdqr1lvndt1nqidi1pegy1l1hsd1qgs1vytsy1ayyq1ceekgi1rsmsr1kgtpadnapies1fhss1kset1y  
innq1nssnh1ividiveky  
ikny1nnnq1qqk1gylspv1kyrelia  
>tr|D3ERB1|D3ERB1\_STAA4  
msiv1fliv1f1l1s1livsry1lysva1nvpskidv1vfn1piek1iyq1ligtk1lehmsg1kyikh1fl1fng1lmgg1svf1l1i  
qqw1fl1nph1nl1nqsv1s1a  
fntmas1fl1tnt1l1qhyag1etd1sylv1tqmcvit1fl1mftsaas1gyav1ciam1lrr1tgmt1dvign1fyqdit1rfivrv1lipfal  
i1s1fl1isq1gtp1t1kgn1  
viet1sgv1kqt1ayg1pmas1lesikh1gtnggg1fl1gans1tpfen1ptywsnyaeal1smml1pggs1v1f1fgr1mlk1tkl1qihp  
haimi1fvam1fv1m1fig1lvt  
c1lyf1efagn1p1vh1h1gi1aggn1meg1ketr1fg1g1sal1ftt1t1taft1tg1vnm1hds1tp1ggm1vpm1v1mml1nav1fgg1egvg  
l1mnm1iyv1vtv1fics1lmi  
gktp1sy1gmki1egkem1k1ias1fl1vhp1l1il1v1fsalafiv1pgasdal1tnpq1fhgvsq1v1yef1t1ssanng1sgfeg1gdnt  
v1fwn1istg1ivm1l1ary1ipi  
vlq1iliv1ss1lvnkk1tyq1qht1qdv1pinn1ff1ssv1iifi1ill1sg1l1t1f1pd1l1m1gpige1q1ll1ha  
>tr|D3ERB3|D3ERB3\_STAA4  
mfvl1cg1f1fp1lvt1val1gq1v1fpeq1angs1vk1qd1gkv1igsk1ligq1wte1pky1fhgri1sav1nyn1mnan1evkes1g1pas1g1gsn  
ygn1snp1elkkrv1qet1kqe  
gk1k1ss1d1av1tas1g1s1g1ldp1ditv  
>tr|D3ERB7|D3ERB7\_STAA4  
mnsdf1ss1l1l1di1eliq1shii1vkn1dhs1liy1lnemses1llyv1ysv1linv1tsink1lflye1entv1frcit1ssinen1mdc  
i1nhsp1nell1mf1ydl1eqr  
fnn1fin1r1nl1kep1ksr1hty1pt1nsvy1ieln1pl1ql1sed1tyf1ssin1vae1lin1rqs1irk1n1fk  
>tr|D3ERB8|D3ERB8\_STAA4  
mf1nky1yt1keev1vist1qt1lask1fed1did1shdn1ns1fkar1ig1stid1klak1app1nky1tft1elmi1isi1iyfkn1lyigr1d  
kps1sr1kk1gg1n1ife1ivyn

Tsompanidou\_et\_al\_Supplemental\_FASTA\_File

nqmlnsstakl  
>tr|D3ERC2|D3ERC2\_STAA4  
mmcklewddeinfgkisflshshipdrktglelaekygidgvmigsgifhnpfafekeprehtskelldlrlhlslnk  
yekdeirqfkslrrffkiy  
vrgiralanfdin  
>tr|D3ERC7|D3ERC7\_STAA4  
mnkhyqiviiggtagvtvasrllrknqnlekeiaaidpadhyyqplwtlvagavsslkssrkdmesvipeganwikqa  
vssfqpennsvilgdntvv  
yydfllvapgllqinwssikglkenigkngvcsnyspdyvnetwnqisnfkqgnai fthpntpikcggapmkimylaedyf  
rkhkirsnanviyatpkda  
lfdvgkynkeleriveernitvnyynlveidgdkkvatfehikaydrktisydmhvtppmgpldvvkestlsdsegwv  
dvnpttlqhkysnvfalq  
dasnvptsktgaairkqapivannllqvmnqmlthhydgyscpivtgynrlilaefdynkntketmpfnqakerrsm  
y  
ifkkl1pkmywygm1kg1  
i  
>tr|D3ERD1|D3ERD1\_STAA4  
mndmlislvipvfallviggiwviiiegivhiskknkaidnflnqvnkvsetykfataflflilatagisqfylyyivsa  
flfwlviltfagiiflm  
pyglcflplykqkkkqtfkymvyttiglsiclgslslvhttkiymdeggvryyygsfvmkqaggyaylalavlstll  
ivakkatnkneietvdnt  
niter  
>tr|D3ERD6|D3ERD6\_STAA4  
mikrvnk1vlgisflfliisifagcgtgkeaeikksfektlsympiknledlydkegyrddqfdkndkgtwivrssmsiq  
sngkdmnikgmvlymnrnt  
rttngyyyvdviredkghrdnekrypvmvdnkiiptkeikdenikkeienfkffvqygdfkdlskykdgdisynev  
psysakyqltnddynvkq1  
rkryniptnkakplllkgtgnlkgssigykkieftfvekkgeniyfsdglhfnpsedk  
>tr|D3ERE0|D3ERE0\_STAA4  
mqrdyliirvetesmpdfkrlnglmigfvikgeahiydenmtqcnsdifiinhrdlyrfqlqqdgiicyiqfkmkylad  
kfdahcllyfhltatattk  
nihqlrnimarlvsthirhnelsklteqq1viqlmhmihyvprtyhsnqsilnddkvnqvcdyielhfhedlslselse  
yvgwseshlsskfteslgv  
gfqhflnttrihakldltytdeitdia1qngfssaasfartfkfhthqtpkqyrgdrpaitenqqsaqhnyhdrelil  
llndyieemnhfiediekm  
nykeiafkptnqq1nqfnhi1qvgylnllntqyqsqlltchhdqfvnevlaydvmpyimkkl1napftydaeisnifydi  
dlcldflldhnfs1tmhln  
qydsrdyidafkvfihhvalhvshrkdlkfnlyvttlhtsliemidyfka1fpngglyihldqaterhlp1lkrlephin  
hfvfdansndavdfnkmd  
defktasqmiinktnylidlmhrhnlkrplillnwntltgdtfitngeyfrggiieqllk1stkevgygwlnydlhvs  
hcrnerdymnsiel fhqyn  
gkrpyftallfnk1tsnilyddtcivtgtdsnfqillydakhfnpyla1dnqmmratemihlninaledgmykikhf  
tldkengalfnlwrkhhti  
hgmkdksidyvnrmfpllevydiditdtla1nikmitngihlievkryps  
>tr|D3ERE7|D3ERE7\_STAA4  
mkippqrqlaigynvrvtiiksie1leaegfiytkvsgtyvndylneahitknwsemmlwssqrsqyvtvqlinkiet  
ddsylhiskgelgislmp  
iq1kkamsntashiedlsfgynngygyiklrdiivermskqginvgrenvmitsgalhaiqllsigflgqdaiiisntps  
yihstnvfeqlnfrhidvp  
ynqineintiidrfinfknaieyieprfnptgrsltneqkknii1tyserhni1ieddifrdiffsdptpaiktydklg  
kvihiissfsktiapairig  
wivasekiiela  
>tr|D3ERF0|D3ERF0\_STAA4  
mkkknisi1rk1gvgiasvtlgtllisggvtpaanaaqhdeaqqnafyqvlmpnl1nadqrngfiqs1kddpsqsanvlq  
eaqk1ndsqaapkadaqqn  
fnkdqqsafyeilnmpnl1neaqrngfiqs1kddpsqstnvlgeakl1nesqapkadnfnkeqqnafyeilnmpnl1nee  
q  
rngfiqs1kddpsqsanll  
seakl1nesqapkadnfnkeqqnafyeil1h1pn1neeqrngfiqs1kddpsqsanllaeakl1ndaqapkadnfnkeq  
qnafyeil1h1pn1teeqrn  
gfiqs1kddpsvskeilaekl1ndaqapkeednkkpgkedgnkpgkednknpgkedgnkpgkedgnkpgke  
dgnkpgkedgnkpgkedgn  
gvhvvpkgdtvndiakangttadkiaadnkladknmikpgqe1vvdkkqpanhadankaqa1petgeenpfigttvfgl  
slalgaallagrrel  
>tr|D3ERF8|D3ERF8\_STAA4  
minqsiwrsnfrilwlsqfiaiaagltvlp1lpiymas1qn1svveiq1wsgiaiaapavttmiaspiwgk1gdki1rkw  
mvlrallglavcflmalc  
ttplqfvlvrllqglfggvvdassafasaepaedrgkvlgrlqssvsagslvgpliggvtasilgfsallmsiavitfi  
vcifgal1k1ietthmpksq  
tpninkg1rrsfqcl1ctqqtcrfiivgvlanfamygm1tal1splassvnhtaiddrsvigflqsafwtasilsaplwgr

Tsompanidou\_et\_al\_Supplemental\_FASTA\_File

fndksyvksvyifatiacg  
csailqglatnieflmaarilqgltyasaliqsvmfvvvnachqqkgtfvgttnsmllvvgqiigsllsgaaitsttppatt  
fivmgvfvavsslflicst  
itnqindhtlmlwelkqksak  
>tr|D3ERG3|D3ERG3\_STAA4  
mnhihelk1vpvdkid1hetfep1rlektkssieaddfichpilvtamqhgrymvidgvhryts1kalgckkvpvqeih  
etqysistwqhkvpfvqvw  
etlqqehr1pwttettrqepfi1tmchgdteqyl1tkd1geahfqvwekvvasysgccsveriaaggtypcl1sqqdv1mkyq  
p1sykeieavvhkgetvpa  
gvtrfnisgrcln1qvp1a1lkqdddveq1rnwkqfladkfamrcytekvy1veq  
>tr|D3ERH9|D3ERH9\_STAA4  
mtqeiakynvhtkahkrk1ikrwl1aivvl1aii1wafagvps1elksks1e1lks1ifsg1lfhpd1syiyipdged1lrg1  
1etfaiavvgtf1aai1ci  
1laf1ganm1vkl1r1p1vsg1kfil1sv1rv1fpe1vmal1fikav1gpg1sfsg1val1gi1hsv1gm1gk1laed1eg1ldfsaves  
1kasgankikt1vfav1gp  
impaf1sl1ilyrfe1nl1rsas1il1g1gagg1gtp1l1fai1qtr1swdr1vgi1il1gl1vl1mva1vd1l1sg1sir1kriv  
>tr|D3ERJ5|D3ERJ5\_STAA4  
mieiekprietieisedakfgkfvveplergygtt1gnsl1r1r1ll1ssl1pgaav1kyieiegvl1hefsavdnvvedvstiim  
nikqlalkiyseedktlei  
dvrdegevtasdi1thdsveil1npe1lkiatvskggh1k1r1lvankgrg1yalaeqn1tsd1pigvipvds1lyspvervnyt  
ventrvqssdfdk1t1dv  
wtngsi1tpqesvs1laakimteh1nifvg1tdeaqnae1miekeedqkekv1lemsiee1d1svrsync1kraginsvqela  
dkseadm1m1kvrn1lgrks1e  
evkyk1ed1gl1gl1rked  
>tr|D3ERK1|D3ERK1\_STAA4  
miqt1vnffrtkevrnkiff1t1am1lvi1fkigtyipapgvnpaafdnpqgsqgate1lntf1gggalkrfsifamg1vpyit  
asivmq1l1qmd1vpkfsew  
akqgevgrrk1nnvtry1ais1afiqsigmafqfnny1kgali1nqsimsy1llial1v1tagtaf1iwl1gdqitqfgvgng  
is1iifagi1st1pas1iq  
fgqtafvqgedts1law1kv1gl1vs1l1ll1tvgaiyv1eavrkipi1yakkqtaqr1lgsqaty1plkvnsagvipvifama  
ff1lprt1t1fypdkewa  
n1anaanpssnv1gm1vvyiv1li1l1ftyfya1fvqnpekmadn1kkqgsyvp1girpgeqtqkyitkvlyr1l1tfvgsif1lavi  
silpilatkfmg1lpqsi1qi  
ggt1s1l1iv1gva1ietmks1leaqs1qkeykgfggr  
>tr|D3ERK6|D3ERK6\_STAA4  
msrvgk1i1dipsdvtvtfdgnhvtvk1gpkge1srt1nermtfkqeentievvrpsdskedrtnhg1ttrall1nmvqgvs  
qgyvkv1e1lv1gvy1ra1mq  
gkdl1il1nvgyshpveikaenitfsvekntvvkvegiskeqv1galasni1svr1ppepykgk1iryqgeyvrrkegktgk  
>tr|D3ERM5|D3ERM5\_STAA4  
mks1l1laekpsvardiada1qin1qkrngyfennqyivtwa1lgh1vtnatpeqydkn1kewr1ed1piipkymktv1vigt  
skqfktvka1i1dnkvkdi  
i1atdagregelvar1l1dkvgnkkp1r1r1wi1ssvtkka1iqggfkn1kdgrqyndl1yaa1arseadwivginatral1tt  
kydaq1sl1grvqtptiq1v  
ntrq1qein1qf1kpqyft1sl1tvkgfd1q1lesnqrytnket1eqm1vn1knvdgk1k1svatkhkksypqsl1yn1td1lqqdm  
yrry1k1gpket1nt1qsl1y  
erhk1v1typrtdsn1l1ttdmvd1tmkeriqatmattykdqarp1msktf1sskmsif1nnqkvsd1hha1iptevr1pmsd1sn  
relk1lydmi1ver1f1eal1mp  
pheydai1tv1t1evaght1fv1kenvt1v1gfks1irqges1itemq1p1f1segdevk1sktni1rehettppeyfnegs1llkame  
npqnfi1q1kdkkyaqt1kq  
tgg1gtvatradi1dk1l1fmnaiesrdgk1kvtskgkq1ile1apeel1tsp1l1taqweek1l1liergkyqaktfinemkdf  
tkdv1vngi1knsdrkykhdn  
l1ttecptcg1fmikvktkngqm1vcqdpscktkknvqrktnarcpnckkk1t1l1fgkg1eav1yrcvcghsetqahmdqrm  
kks1sgkvs1rkemkkymnk  
neg1d1nnp1fkda1kn1n1  
>tr|D3ERM6|D3ERM6\_STAA4  
mycnm1l1s1l1tf1sve1lynksnkkygndmsivqlyditq1ksf1ehsnyesasylyk1pqqy1neidv1litdaiespgv  
fsikendsika1i1ls1fayd  
knk1fkvi1gp1fvadnyv1svdtfet1fkamtsnqpddavfnfsfeegi1qqykp1mkviqasynftdy1ieartr1leedmhq  
pni1pyhkgfyrafsk1lht  
ttfkyqagspqi1ds1lddhh1l1f1v1seg1l1kgyl1eidsqqs1aeiky1fsshvdyr1lkgiaf1ellaya1qyafdnfd  
irkvyfki1rnknk1lierf  
ng1lgfhi1nyeyi1kfkfes1rnvdqtipe  
>tr|D3ERN5|D3ERN5\_STAA4  
mil1kfdhi1hyidq1ldrfs1fpgdvik1hsggyhhkygtfnk1lgyinenyie1l1dvennek1l1kmaktieggvafatqivq  
ekyeggfkn1c1l1rtdiea  
vkn1l1qseqvev1gpiqmerdthkdgkvkwa1llyimnqdd1eikppffiqweeds1mr1tkk1lqkyf1qkqfsietv1vksk  
nrsqtvsnw1lkwfdm1dive  
endhytd1l1kn1ddiyfriedgkvskyhsvi1kdaqatspysif1rgaiyr1fep1v

Tsompanidou\_et\_al\_Supplemental\_FASTA\_File

>tr|D3ERP2|D3ERP2\_STAA4  
mkqfeivi epiqtegyreftineyqgavvftghvrewtkgvkteyleyeayipmaekklaqigdeinekwpgtitsivh  
rigplqisdiaavliavssp  
hrkdayraneyaierikeivpiwkkeiwedgskwqghqkgnyeekree  
>tr|D3ERQ0|D3ERQ0\_STAA4  
mkmkrfiaivmaflvltagcsnsndnneskkddadngkkqeiqvaaasltadvtkklasefkkehknadikfnyggsal  
rkqiesgapvdfmsantk  
dvda1kdknkahtykyakns1v1igdkdsnytsvkd1kdndkla1gevktvpagkyakqyl dnn1fkeveski vyakd  
vkqvl nyveknakqgfvy  
ktdlykqnkkidtvkvi kevelkkpityeagatsdsklakewmeflksdkakeilkeyhfaa  
>tr|D3ERR3|D3ERR3\_STAA4  
midhth1r1fqfcdsqfptgafshsfletyiqrni ihddhtfiawlkmflqeqltysdglamrlvydalenddtqkv1h  
idklmfvqnlpketrvgak  
qmgrmvklalelynspwawyhqqmqdkkak1npaicftmlghlvgdietetidylyqnvssltqnavraiplgqtag  
qkivthmipyieetrkqif  
elkeadfgmtapgle1nqmahenvnvrfis  
>tr|D3ERR8|D3ERR8\_STAA4  
mskfkvr1tahi1mlkvindmlkysfh1t1tqvkl1n1lvkydndsnsasidr1l1kmeiqskmalq1tisinkmhid  
kieymneldsyjeryfgg  
ytfdfscdyvsyl1ssqelfrn1kcy1nmcq1tleelyvlgilnlhkgqltvkelqgefhhpifavspilkclilkg1vk  
kerce1derrvvtikrek  
fskvtmliqacynylekgiqvkl1nk  
>tr|D3ERS1|D3ERS1\_STAA4  
mlfilyrvnrigenrnfefitnsiffieikkankalet1la  
>tr|D3ERT1|D3ERT1\_STAA4  
mqehlvt1dgkdy1vepgtn1lefiksqdtfvpsicynesmgiqtcdtctveidgkierscstvidr pmtvntvndv  
kdaqkealdri1ekhmlcy  
tvcdynngdceihntmdawglqhqttyeykekyepdygpfyrydpnqci1cgrcveacqdievnetiridwdrehprviw  
dndvpinesscvscgqcat  
vcpnammevnmegnagymtdtepgslaamid1tkkaepgygplfaisdseaemrkerikkktvtctygvgsfevwtk  
dreilkvqpsdspankia  
tcvkgkfswghinsdqr1tkplvrkngefhevewde1nviadnftsikekygpda1sfi ssskatneesylmqklarqv  
igt1nvdncsrycqpak  
glfrtvghggdsgsiedlekaamsvligtntaeahpviasrmkraqlfgqki hvfdirkhemaeradr fyqpkpgtdla  
w1savtky1idhd1hdkaf  
idewddfdyyksletftmafaeatgipeselikfaecakaesvvicwamgitqqdigsdsstaisn111vtgnyrr  
pgtgayplrgnvnvqgcsd  
mgsmpdkitgyysi eaddirakfekeygvkl1pkagkdnhemvegihdgevhsllygedtgivdsninfvqaafekldf  
mvvqdef1tftatyadv1  
paipslekdgftnterriqrlyqa1ep1gdkpdkwki fqaiar1gfdwnykhpseimdevar1tplyagvsydr1egf  
ns1qwpvqpdgtdepily1  
egfnfdngkak1fplsfnyfkqdeiydihvngr11ehfhegnmtyqtpmi kyvprafveispelaedrgihegaevk  
1isetgeavlqvhvtdrvk  
gkeiy1pl1ndamengdlgain11t1nsdvdytdtpsykrtsrlevitkrkgspl1n1nfrvnkkrhpqysvqvqkkwe  
rsdyvfpngqvdk  
>tr|D3ERT6|D3ERT6\_STAA4  
minetkymrqg1tnliqi idtikynt1mtdwniqthiykfnqivtne1nkfkgefetsy1inenqvsyieit11nkrplr  
qvdygnkiqyl nfyhtels  
nalfaikfah  
>tr|D3ERU8|D3ERU8\_STAA4  
mksffivcekevfligkqvkrmevhkksnawalp111fvalflvggiitgdftsmp1nvaititviva11mnrkesfa  
kkvevftkgaghsni11mm  
1ifilagafsntaekmggvkstvn1g1slipenliivglfvicmfvsismgtsvgtvaaiapvgygfaqatdvptalama  
tvvggamfgdn1smisdtt  
iaavrtqhtkmkdkfrvnfkiv1pgailti1ilyfltngis1nhaknydynlikvpyilvl1allgvnviivliggt1  
lagiiglidgsfgwmg1ld  
avskgismediamia11igglvgiiqhnggiel1qfvrskvkskrgaelgias1svsvadiatanntisi1msgplakn  
iadeydvsrksasil dif  
ggcfqg11pyspqi saagvagi splmlfpysiypl1lgvcglia11fnfpk1kknts qemkh  
>tr|D3ERU9|D3ERU9\_STAA4  
malivsra11fl1alafgiatvfpeqk1plyivft1fvavaiimnvwfthqnvkhiikfnkyvayflsfvsgllyigf  
viytl1tigsydv1piiifa  
isiv1vqil enilgisikntr1snkq1kviskqrvaqfkvis1ilvsvsivfifialmlkw111visiivliiitvami  
vyekyttpd  
>tr|D3ERV2|D3ERV2\_STAA4  
mndliinhiael1pkstdkplkgkelde1nvkngtvvikdgki vyagqhtddydatetidaskvvsalvdaht1t  
fgsrehems1krqgksyl  
eilemgggilstvnatretsedd1fkkaehd11tmikhgvlavesksygdrene1kq1kvsnr1aekyd1dmkhtflg



Tsompanidou\_et\_al\_Supplemental\_FASTA\_File

phavpkeassneafleemi  
allpevkgyadfadifcetgvftieqsqhymqkakeagfkvkihadidplggelalaideqaisadhlvassdkgek1r  
nsdtvavllpattfylgke  
dyadargmlndngaialatdynpgssvtnnlqlvmaiaalklklspsevnavtvnaakaidinagtintsdkanlviwd  
apnheyipyhfginhaekv  
ikdgkvi v d n t l s f k a  
>tr|D3ERW4|D3ERW4\_STAA4  
meqlpqvgfmksfvlfwknyvnfkgrrseywmalwhlilmvpavcvliinlflvfisiaadnetlivmsilmiilts  
vytfvyslatfipnlalcv  
rrfhdisrmlfpmimtvfsiifyivlqiidsydsdftlmpmglnillvlyfyvlgltivmivflcfdsckpanyges  
pkypstiknqpvtssetpkt  
peetdnql  
>tr|D3ERW8|D3ERW8\_STAA4  
msdfqreqrknehveiamaqsdamhsdfdkmrfvhhsipsinvdidltsqtpdlmaypiyinamtggsewtkninekl  
avvaretglamavgsthaa  
lnrnrmaetftiarkmnpemifsnvgadvpevakaleavellleaqlqihvnspqelvmpegnrefvtwldniasivsr  
svpviikevgfgmskelmh  
dlqqigvkvvdvsgkggtfnvdierrankdmdylsswgqstveslletayqseisvfasgglrtpldaikslalgak  
atgmsrpflnqvenngiah  
tvayvesfiehmkstimtdaknidl tqkqivfspeimswieqrslnihrg  
>tr|D3ERY9|D3ERY9\_STAA4  
mkrldfvvssiyglvvlspillitallikmespgpai f k q k r p t i n n e l f n i y k f r s m k i d t p n v a t d l m d s t s y i t k t g  
k v i r k t s i d e l p q l l n v l k  
g e m s i v g p r p a l y n q y e l i e k r t k a n v h t i r p g v t g l a q v m g r d d i t d d q k v a y d h y y l t h q s m m l d m y i i y k t i k n i v t  
s e g v h h  
>tr|D3ERZ7|D3ERZ7\_STAA4  
mifsqnlfrcptptcivcrnwesnfsllgptpqlalpveflfeilcvgapd  
>tr|D3ES00|D3ES00\_STAA4  
mikiqq1qhhfgshkvi h n f n l d i s k g e i v t f i g k s g c k s t l l n v i g g f i h p s s g r v i i d n e i k q q p s p d c l m l f q h h n  
llpwktvndnirigfgqki  
sdeenaqlklvdledrgkhfpeqlsggmqrvalcrahvhkpnvilmdeplgaldaftryklqdqlvqlkhktqstiil  
vthdideaiylsdri v l l g  
egcniisqyeitashprsrndshllkirneimetfalnhhqvpeyy1  
>tr|D3ES03|D3ES03\_STAA4  
mtletlikeql d p h l v e v d e g t y y p r t f i q q l f v d g y f g e a a l r k n a e v i e a v s q s c l t t g f c l w c q l a f s t y l e n a t q p  
hlndlqqqlsgeilgat  
glsnmpksfndleklnlehtyvdgqlvvsgrmpavsniedhyfgaishessdefvmfilranqdgitlvekt n f l g v n  
gsatyqitlnqvvpqsqi  
ithdakqaatirpqiayqipir l g s i k s s l e l i d a f s n a q n g i n q y l e y d v e a f k k r y r q l r e e y y a i l d d g n l t s h l  
selislkkdigy11ldvng  
asvvnngsraytpyspqrk1kegfffaaltptlrlhlgkleaelkg  
>tr|D3ES06|D3ES06\_STAA4  
mkr1sttlkvrlnsnflqlittafipfialyldmlsqsigiy1vglvvlkfp1siisgylieifpkllvliyqatm  
vimlvfmgvfgshqlwqi  
gfcvayaiti v w g l q f p v m d t l i m d a i t e d v e h y i y k i s y w m t n l s v a i g a l l g g l m y g y s m l l l f l i a a c i f l i v l f i  
lyiwlpqdrnqvksddkr  
hasryqlqimnifrsyklvlkdrnymllisgfsiimmgefsissyairlkdqfetisigsyditgakmlaillmintv  
vvi1l1tysiskvvlkidfk  
kalitglliyivgysgl1nqfgllvfmiiatvgeiispivseqrkii pkakrgtysavnalghfsetlarlgiv  
lgvfltslmglyifivlt  
igasm1vagvfggkqvntn  
>tr|D3ES11|D3ES11\_STAA4  
mkhqettsqqynfsiikhgdistpqgftaggmhi gl rankkdfgwiysslassaavytlnqfkaaplivedtlqkskg  
klqalvvnсанансctgqq  
giddarqtqtvwvaqqlqipsehvastgvigeylpmdkiktgethikdtnfatpgafneailttdtctkhiavslkidg  
ktvtigg saksgmi h p n m  
atmlafittdasiesntlhqllksstdhtfnmitvdgdtdndmvlvmanhqvehqilsqdhppwetfvdafnfvctfla  
kaiardgeatklisvnvs  
gaksisdarkigktivssnlvksaifgedanfgriitaigysgeidpkctyvqlnqipvvdkgmavlfdeqamsntlth  
ehvtidvqlglgnaaatay  
gcdlsydyvrinasyr  
>tr|D3ES15|D3ES15\_STAA4  
mdyaphtaenvvqnanklidvfrknngfiafvrvnfydgkdvlqpnamislppekgddysrfhhlldkrdddavidkrhf  
safvgtdldlqlrrrgidt  
ivlggvathigvdttdardayqlnynqffvtdmmsaqnetlhqfpidnvfplmgqtittndf1n1n  
>tr|D3ES34|D3ES34\_STAA4  
mitylesfkslyhkafykfvls1s1piflyavikfffsakrknfyannseiseiera1hqyky1sqqsstqihkeal  
kifkaqssntssknieqah

Tsompanidou\_et\_al\_Supplemental\_FASTA\_File

fstyfenllfhkfmikvilalpmfilltiylqplvryiferivmaviviigvsvftilyfspldaaysilgqnatka  
qihqfnvlhhlnepyfiql  
wdtikgvftfdlgttyknevvtkavgeripitiivavlivaliaaipigiisamkrnswlditlmiialiglsipsf  
wqglfilafslklldlpp  
sympehplslilpvlvigtsiaasitrmttrsvlevmrsdyvltayakglsttqvvikhilknaiipivtlvllvaell  
ggsavteqvfningigryi  
vqkqlipdipavmggvvvisivislanliidifyalidpklrseinerk  
>tr|D3ES36|D3ES36\_STAA4  
mkkiiisiaiivlalvlsqcgvptksevaqksskvevkerptihflgqasyendmnivkdqlenagfnvkmniqpdygsy  
rtqrqagnydigidwmtv  
fgdpnyamtafsstgsnslldkdhvdqllnkastqneadvkqtykqiedevvfdkgymaplygskknlyvdnkvldkns  
vglpnsraliwqqfdynns  
rerdrtrplvmtqqdgeiptldpirsiapsvysinmmytrllllldendhlttkgslsrdyavnkdnkafyflrrddyfa  
kvvngqarntgervsaedv  
kfsldrardkksvppnnntynmhkhindikilkdedidqlrkekdkddksiydklikaynvkslttdgqkvnnkdgiyqiv  
kittdqsmprevnylthss  
agilskkfvnqvnqeypkgygdsstipansdgknaIyasgayimtqknayqatfqrnpgfnetekgsygsppkiknitlkf  
ngdpnnaIseIrnhsidmI  
advnqkhfdliksdknlsirkngrksvflmlnikkgifkthpnlrqavvnaidqqdfikfyrgdkfkiaspitplvdtg  
neqrqdllekvekainq  
>tr|D3ES39|D3ES39\_STAA4  
makvlyitahpfnelvsnsmaagkafietyqqqhpdddevkhidlfetyipvidkdvltgwgkmsngetltddeqmkvsrl  
sdileeflsadkyvfvtpm  
wnlsfppvvkayidaisiagktfkysaegpqltdkkvlhiqsrnggyttegaadfemgdrylRtimtflgvpsyeti  
ieghnaephkteekatsi  
naeklattf  
>tr|D3ES46|D3ES46\_STAA4  
mtklkvvgvigvggiagdrhipallklkdtvslvavq dintvqmidvakrfnipqavetpselfkIvdavvictpnkfhad  
lsiealnHgVhvlcekpma  
mteecdrmieaanknhklltvayhyrhtdvamtakkaieagvvgkplvarvqamrrrkvpwgwvftnkalgggslidy  
gchlldslslwllgkdmvph  
evlgktynglSkqpnqindwgtfdhtkfdvddhvtsymtfanrasmqfecswsanikedkvhvsIsgedgginlfpfeiy  
epfrgtifeskanvehned  
iagerqarnfvnalcgieeivvkpeearnvnalieaiyrslndnksiqI  
>tr|D3ES71|D3ES71\_STAA4  
mngdnqqilreivlnptihgkelesifglSrrqlgyriqkinlwleqegyplertsqgnfivsseimtlfkrdvseqm  
lNgnnvifsietrryyImI  
mlfskenamslnhfsidIqvsKntvihdinhvkeqlEdhglsIkySrkhgyeivgdefevrrffikIIdqrlnhditkse  
vlkaInltfediaYqkdki  
kqveqflksrfidksIsslpyvlcvirrrriqsgHvmpIninyqylRdtkeyqateimtqhepdIpeaklyltlhllst  
svqwtldqesdnIsnlma  
iaqmihhfeqitfiniedkeksIqqlllhltPafyrikynltdrdelinplqgnyslfhmVqscqsIteyfgksIpdn  
eIayltmIlgslrrqden  
fdgkikaiivctqgtsvsqmmlyelrnlfpeiiIldaisIrtfenytdydivfSpmfvlthkklfitkvalsenqrkl  
rkevmyinkesadidkei  
nkImaliertttvnditelrdgledfianysistingsivtqnktldladIparhvkrmhvenideaiakasdvIva  
nhfidikiyihemqqvfdds  
ymvimqniaIphaysekhvhtamsmlIqepiymSdgtaihivpiaavdkvthlrallqlrdvaqdndaikriiqsrk  
nsdvneiIknysnkearen  
gwsn  
>tr|D3ES75|D3ES75\_STAA4  
mkaIvktregHgnleIldkevAtplddkvkikvhyagicgtdihtyeghykvnfvtlghefsgeivevgadvkdfkvgd  
rvtsettfyvceceycks  
kdynlcnhrkgigtqvdgaftnyviareeslhhipdevsyqsaamteplacahhgvskiqvnsGdvavvmgppigllva  
qvlkskgatvvvtglndk  
vrlDkaealhmDyvvnIqqtdlktyingitdgygadvvvecsgavpaarqglDiirkkgfysqigifkdaepfdmekvi  
qkeiTvvgSrsqkpadwep  
slqlmadglvnaealvtkiydiSkwdeayqhlksgegikalIkpIlddenegen  
>tr|D3ES94|D3ES94\_STAA4  
mskeaghtflaklgktrIppgkeatdwIiqggaIfsdqkqIlevacnmcttsiylahtygchiqgvdinkkaIekaqeni  
saaglesyiqvqqanavkl  
pfdnqfdIvIneamltmIpaIkekaIreyrvIkpGGIllthdivivneshathvksIsaainvnvSpqtklgwldI  
yhqagfnhvhyhtgpmSlm  
tpkgIlydegivgtikiIknalKkenrPmfckmftmtklrkdmnyitfvakked  
>tr|D3ES97|D3ES97\_STAA4  
msivalliglgpligwffptvaskfggkpvhqiIgatvgtIIfaiIlavvtssgfptgtnllfallsgagwfgqiitf  
kafeIigssrampvttafq  
llgasIwgvfalgnwpgighkiIgfIalvviIlgarmtwserkeasnaknlrravllIlgefgywlysaapqatsidg

Tsompanidou\_et\_al\_Supplemental\_FASTA\_File

ltaflpqamgmvivaviyg  
fmmkxsenpfrnkjtwlqiisgffffafgaltylisaqpnmglatgfilstsvvlatltgiyflkqhktkemvitiig  
lvllilvaasvtvfk  
>tr|D3ES98|D3ES98\_STAA4  
mkkvsikdvareagvsvtvshlnhndsrfsattiknvhavserlgyapnkhakqlrgskiqtigvilpsltnpffsa  
mqsihdhkpsdvd1cf1ts  
tatdlydnikhlidrgidgliaqyisspda1nnylkkhhvpyvvdqndhqgytdfvrtneyqggqlaaqhlieighnh  
miivapydmmanmstrvag  
fvdtlranqlpepqihte1skrgglativddimvqsataifainde1aigilrgliehgisipkdisligyddidyaayv  
spp1ttvaqpitdigkts1  
t111qr1qhlkdsidmielptt1kirattgyh1sn  
>tr|D3ES99|D3ES99\_STAA4  
mfivmknkviilknkifvfeqsikkhnemmyielcd  
>tr|D3ESA5|D3ESA5\_STAA4  
mkpyiq1vlfkqwlqy11lvttivia1vliligyrvahdnfkipitid1dqttasksvnkikqsdyvtikkvdedesy  
ieddvtkkae1ismq1pkg  
fsq1kenr1ketiqlygrddfiggiaieivssslyeqqipniyehledmkqhqsida1nksykhkhtpeskikfvs1tk  
qaqhsisislifavilfvs  
avqvvlhyrlnqqaalgr1sqyh1srfl1styvmtht11111v1lavsl1sqpl1s1l1fy1ks111111yeigivfilf  
hiqtishr1fmtfiyalam  
g1vy1i1fm  
>tr|D3ESC6|D3ESC6\_STAA4  
msyfsnvp1f1lkrgtvfm1tqhs1ktdv1liggimsat1gt11k1el1spekn1kvfek1laqpg1eessnvwnnagtghsa  
1celny1tkekgdgtvdcsk  
aikineqyq1skqfway1vktgq1dnprfiqavphmsfvigednvafiksvat1kksv1fekm1sqdeemkswvp1  
miegrksdepialtydetg  
tdvnfgal1tak1fenleqrgvgi1qykqnv1dikkqksgaw1vkvd1etnetttyesdfvfigaggas1p1l1qktgikqs  
khiggf1pvs1gl1f1rctnqe  
vidrhhakvygkaavgappmsvph1dtrfvdgkrs11fgpfagf1spk1f1ktgshmd1iks1vkpnnivtm1sagikem1st  
kylvsq1m1sndermdd1r  
vffpnaknedwevi1tagrvqvikdtedskgn1qfgtevit1sddgt1aall1gaspgastavdimfdv1qrcyrdefkgwe  
pkikemvpsfgyr1tdhed  
1yhkineevtky1qvk  
>tr|D3ESC7|D3ESC7\_STAA4  
m1vntfn1pfdn111ss1iaaip1v1f1l1cl1tvfkmk1giaait1lv1t1liaip1f1kl1pv1giasgavveg1ffqgi1pig1y  
i1vmmav1lyki1tvesgqf1  
tiqdsi1tn1sqdqri1qv11ig1afnaf1legaag1fgvpia1ca111tq1lgfn1lkaam1cl1vanaasgafgaigipvgvve  
t1k1pgdvs1lgvsqsat1  
t1ai1nfi1ip1f1li1fi1idg1frg1vket1pail1vsityt1tqg11tvfsgpeladi1pp11tm1alavf1skkf1qpkhiyrv  
nkdee1epakahsakav1h  
aws1fiv1tvi1mi1wsap1ffkn1f1pnga1ss1lvfkn1pgt1isev1thkpl1v1t1ni1ig1qt1gta111ti1it1ilmsk1kvn  
fk1davr1f1gvt1fkel1w1lpv  
t1ic1fi1la1ski1t1tyg1l1saamg1qgi1akagn1vfpv1spi1lgwig1vfmt1gsvvnns1fapi1qasvaqqig1tsgs11vsan  
tv1ggvaak1isp1qsi1ai1at  
aav1kqv1gkese11kmt1kysvc11ifi1ciwt1fils11  
>tr|D3ESC8|D3ESC8\_STAA4  
mikq1nvsnmk1fesq1lma1qsegy1thv1vpyane1imi1yqsm1davq1lypksiv1vdy1tdvg1y1knd1chy1fgq1ssini1adwa  
qnnny1pn1li1yai1qqt1d1l  
ihy1sveti1fd1al1t1l1kgd1sidghv1vfdk1api1atsasi1wet1ikti1edf1dms1qfy1lnk1mayid1hh1pip1frn1fied  
seq1nspdn1w1lyst1kfm1p  
kw1lyki1akqradnk1qln1fg1lytk1qpnv1kdhiv1figdh1hqy1ign1skyl1fty1fvk1hnpmt1acy1fv1tddrr1gph1fis1pkse  
kade1linsar1vviv1end1ip  
et1lqpng1t1li1ql1hqg1tpim1ql1f1ds1kepi1kni1et1p1fy1rak1ryn1rw1qf1dy1vi1hs1addi1sh1fy1qta1fp1sh1qan1v1ay1gn1pk  
hqy1llq1kr1nest1tqq1qy1kk  
sfki1ndq1kp1v1lyap1igl1vsaq1pl1sda1fkay1hvv1vqg1vdeai1l1peea1lvap1ky1lsaq1d1ilmsd1v1it1dys1ni1ifda  
mai1dkt1va1lytp1nhs1qy1ie  
sqg1vnedi1wr1h1ski1wy1tdr1q1l1inn1isq1aip1vikyp1iqh1keq1ples1isq1l1l1skm1tsnq  
>tr|D3ESC9|D3ESC9\_STAA4  
mkr1lv1tg1l1a1s1f1la1acg1qds1dqk1dsn1kek1ddk1akte1q1dqk1ktnd1ssk1dkk1dnk1dsk1dv1nk1dnk1d1nsand1nqq1qsns  
nat1ndq1nq1t1nn1q1ss1nq1  
kssy1vapy1y1g1naap1var1q1yp1fi1gn1kt1qa1l1q1l1pn1fq1ta1naanne1ank1fg1snk1vy1ndys1ie1ehng1ny1ky1v1fs1fd1pn  
ang1kys1iv1t1vdy1tg1qam1vt  
dp1ny1qq  
>tr|D3ESD3|D3ESD3\_STAA4  
myas1fy1ag1rdms1vr1lidv1qse1lgg1km1ri1ypeki1iwd1iggi1apk1pche1ilkdt1ikq1gly1fk1pevh1nerv1vdi1rka1erh  
fevete1age1iy1tskav1ia  
igagi1n1pk1q1ldv1kg1v1ery1q1t1n1hy1vv1qs1yrr1fk1dkd1v1is1gg1nta1ldwa1hdi1aki1aks1vt1vyr1ked1vsg1heam1kt1  
vtd1nv1kl1cpk1tri1ky1lv1g

Tsompanidou\_et\_al\_Supplemental\_FASTA\_File

nddethisevvl ehvesgdrhtvkfddvii shgfdrcntll setsskl dmhddcrvkgfgntttsipgiyacgdivyha  
kshliasafsdganaanla  
ktyiqpdanaegyvs shhev fkeanktivnkhly  
>tr|D3ESE5|D3ESE5\_STAA4  
myvensylskqlcflfyvsskeiikkytnylkeydlytytgylvmaiendeklnikklgervfldsgtltpllkklekdd  
yvvtreekdernlqislt  
eggkaiksp lae isvkvfnfnisereasdiinnlrnfvsknfdysdrk  
>tr|D3ESE8|D3ESE8\_STAA4  
mykiniirsdsvyknilkapindrdsiftkeilvvpfk kfevqhmpiynddkqtmsaiqldafqispkdlrmsdqmsiq  
ylnndfwsncekylkvaidd  
qfsnysissqvsnyhftvllgdsqkplmylnknrggdggipgyimiyvpststinsmksliahevnhmryqyidwdgg  
slieliiaeglaenyvesl  
ygkahi gpwvntntwsrdnvkikntiynhlylkhifesmpylgddinklqgrpivglshaagyacgyhlvkyflqktni  
pievattlpaqkiinevte  
fwhtht1  
>tr|D3ESG9|D3ESG9\_STAA4  
mkrfvatvllllvfi sgcn dkyvkeideavkiqnkqeqqlakkngdrvdhferkdaniyvvd kdiilaykplsndd  
evhyaydfsdkrvsykqd  
fdr rryyqhdadyheenmtn  
>tr|D3ESH7|D3ESH7\_STAA4  
mknkyiskllvgaatitlatmisingeakasentqqtstkhqttqnnvtdqqafyqvlhllkgiteeqrnqyikt1rehp  
eraqevfse lkdsknpdr  
rvagqnafynvlkndnlteqeknyiaqikenpdrsqvwvesvqsskakerqni enadkaikdfqdnkaphdksaayea  
nslpkdlrdknrfvekv  
siekaivrhdervksanda islnekdsienrrlaqrevnkapmdvkeh lqql dalvaqkdaekkvapkeapqispq  
iekpkoespkvevpqisp  
kvevpqskllgyyqskdsfnvykylytdtyksykeydytakyntyykykgaidqvtvlgsgsksyiqplkvddkn  
gylakyaqvrnyvtesin  
tgklytffyqnp tlvktaikaqetassikntlnllsfwkssikntlnllsfwk  
>tr|D3ESI6|D3ESI6\_STAA4  
mri fitstntdvgktyvtkhlyhal ktrghrv cvf kpfqteerqdgtpdlevfknecdlsy ditslytfkqpvsp h1af  
kmtdqiflnkqrvldkvkv  
ldkefdfiliegaggiavpiyegtddfymtkdlin d cadcvlsvlpsklgai sdavvhqdyvknkvsasnf1imnrytds  
yiekdnqitigklntktvy  
tfeehatyenfseaf lqqligvknelttt  
>tr|D3ESJ3|D3ESJ3\_STAA4  
mqstktkthfsfllitlgvmtafgpltidmyvpslpkvqgdfg sttseiqlt1sftmiglalqqfifgplsdafgrkr  
iavsiliifilvsglsmfv  
dqplplfltrfiqgl tgggviviakasagdkfsgnalakflasl mvngiitilaplaggla1svatwrsiftiltival  
iiligvasqlpktskdelk  
qvnfssvikdfgsllk k pafii pml1qgltyvmlfsyssas pfitqklynmtpqqfsimfavngvgliivsqvval1vek  
lhrhiliiltiivvgva  
liiltl1tfhlplwvlliafflnvcpvtsigplgftmameertggsgnassllglfqfilggavaplvglkgefntspymi  
iifitail1vilqiifykm  
ikkqhva  
>tr|D3ESK5|D3ESK5\_STAA4  
mkkikyilvfv1sltv1sgcslpgl gskstkndvkitalstsesqiishmlrlliehdthgkikptlvnnlgsstiqhn  
alingdanisgvryngtdl  
tgalkeapikdpkkamiatqqgfkkkfdqtf fdsygfantya fmvtketakkyhletvsdlakhskd1rlgmdsswmnrk  
gdgyegfkkeygfdfgtvr  
pmqiglv ydalntekldvalgystdgriaaydlkvldkdkqffppyaasavatnellrqhpelkttinkltgkistsemq  
rlnyeadgkgepavvae  
flkkhhyfdkqkgghk  
>tr|D3ESK6|D3ESK6\_STAA4  
mieflheggqlmsktlehfyisival1laiivavpigillsktkrtanivltvagvltiptlavla imipifvgktp  
aivalfiyvllpilnntvl  
gvqnidsnikeagksmgmtqfqlmkdvelplalpliiggirlssvyviswatlasvvgagglgdfifnglnlydplmivt  
atvltalalgvda1lalv  
ekwvvpkg1kvsg  
>tr|D3ESL4|D3ESL4\_STAA4  
mqsvkllkhltdvngiagyemqvkeamrnyiepvsdqii ednlggi fgkkaengqysimisghmdevgfmvtkidkhg  
fisftpvvgwvnmqlsqk  
vtittsdgkeirgiigskpphvltp eerkkpmeiknmfidigvsskeaeagvevgnmvtpysefevl andkyltakaf  
dnrygalavevlkr1kde  
niginlysgatvqeevglrgakvaantikpdlaiavdvgiaydtpgmsgqtsdskl gggpvvimmdatsiahqglrk h1k  
dvakehnievqwdtppgg  
tdagsihvanegiptmtigtv1rymhsnsvlnvddyensirlvteivrsln desyknimw  
>tr|D3ESL5|D3ESL5\_STAA4

Tsompanidou\_et\_al\_Supplemental\_FASTA\_File

msnytvki knsaksdlrki khsylkksfleivetl kndpykitqsfeklepky lerysrinhqhrvvytvddrnkevl i  
lsawshyd  
>tr|D3ESL8|D3ESL8\_STAA4  
mtflvmqfivniivvgflltvivigliwlikdkrqsqhsvlrnypllariryisekmgpelrqlfsgdneqkpfsrnd  
yknivlagkynsrmtsfgt  
tkdyqdgfyiqntmfpqrneisvdnttllstfiykianerlfsreeyrvptkidpyylsddhaiklgehkhpfilkri  
vgqsgmsygalgknaital  
skglakagtwmntgegglsyhlkngndiifqigpglfgvrdkegnfseglfkevaqlsnvrafelklaqgaktrgghme  
aekvneeiakirvpepykt  
inspnryefihnaedlirfvdqlqqlgqkpvgfkiivsvkseieltvrtmveldkypsfitidggeggtgatfqlqdg  
glplftal pivsgmlekyg  
irdkvklaasglvtpdkiaialglgadvniargmmisvgcimsqqchmntcpvgvattdakkekalivgekqyrvtny  
vtslheglfniaavgvss  
pteitadhivyrkvdgelqti hdyklklis  
>tr|D3ESM2|D3ESM2\_STAA4  
mikvtdveksyqsahvfkrrrt pivkgvsfecpigatia igesgsgkstl srmlgi ekpdkgcvtlndlpmhkkkvrr  
hqigavfqdytsslhpfqt  
vreilfevmcqdqgqkevmevqaitlleevgl skaymdkypnmlsggeaqrvaiaraicinpyilfdeaissldmsiq  
tqildllihlretrqlsyi  
fi thdiqaatyldqliifkngkieeqiptsalhksdnaytreli ekqlsf  
>tr|D3ESM8|D3ESM8\_STAA4  
mnnfnneiklilqqylekfeahyervlqddqyiealetlmdysefilnpiyeqqfnawrdveekaqlikslqyitaqcv  
kqvevirarrll dgqastt  
gyfdniehcideefgqcsitsndkl llvgsgaypmtliqvaketgasvigididpqa vdlgrrivnvlapnedititdqk  
vselkdikdvthiifssti  
plkysileelydltnenvvamrfgdgikai fnypsqaedkwqcvnkhrpqqi fdialykkaaikvgitdv  
>tr|D3ESM9|D3ESM9\_STAA4  
mnrqvi efskynpsgnmtilvshkhdaseyasianqlmaathvcceqvgfiestqnddgn dflvmsgnefcgnatmsyi  
hhlqeshllkdqqfkvkvs  
gcsdlvqcaihdcqyyevqmpqahr vpttinmgnhswkaleiiyetyvhyvipkvqtteiqhlveafvreqqwhkyk  
tvgmmllfdeqrqlqpliy  
ipeiqsliwenscsgtasigvfnnyqrndackdftvhqpggsilvtskrchqlgyqtsikgqvttvatgkayie  
>tr|D3ESP6|D3ESP6\_STAA4  
mmihsrklrlwlylvllavfigacgmkkeessdkdqikenfnkltllyptknl edfydkegfrdeefekgdkgtwi ihs  
mtietngknmesrglvlyv  
drnrtrtkgefivrelwedkkgysrskekeypvkmehnkiiptkpiaddklrkeiedfkffvqygdfkdindykdgdisy  
nnpvpsysakyqlsnndyn  
vkqlrkrydiptkkapkl llkgdglkgssighknlefifienkeeniyftdsinfkpte  
>tr|D3ESP9|D3ESP9\_STAA4  
mfffyfwgvflynslhkckgfsfhvllslteilkglatmdkelwierandslvkhfyeeqqsdi eqregfeskl tfgtagi  
rgkfglgegrlnkftiek  
alglarylnaqt nsptivihydirhlstefa qianvlanhqitvylpdykttpelsfavrn lnttagimitashnpkd  
yngikvygsdgaqlstdas  
elasryieevgdplqidipiskantsyikpfpksvtd dymkhiqnmigyipksdlqv vftslhgtsvpivpellslnfn  
qfnlvdaqckpdpnfssvq  
sanpedhha fdaqavelankshadllistdpdadrlgiaerdahghityfngnqigallnyriqqtsqlrhr lmiqsivs  
seltkslarynnvkykev  
tgfkfi aqerqlddhqnmifa feesyglsepfvrkdavqivplii kyaselklygkllkdeleqiyqtvgrhedtlf  
shtleglegkkiesimth  
frsnppqeiqglkvkaiedyltsevylhdkdttsqinssksnvi rvlfdegfialrpsgtepkiklyvs lkcpdfddvaq  
kinamif  
>tr|D3ESQ4|D3ESQ4\_STAA4  
mnfndietmvskfkdkkhaeeiaheievrsgylrkaeqykrlef nlsialddvestakdvqtakssankdsvsvkgka  
pntlyiekrnlmkql eml  
gedidknkeslqkakiagekaseyfnkamn  
>tr|D3ESR2|D3ESR2\_STAA4  
menqkqnglkiatwfvilvvtplfgigsivcsinykkydaekgskllqiaii vtiiafvlnllaylgr  
>tr|D3EST5|D3EST5\_STAA4  
mlrgqeerkysirkysigvsvlaatmfvsvsheaqasektptsnaaaqketlnqpggeqgnaitshmqmsgkqlddmhke  
ngksgtvtegd tlqsskh  
qstqnsktirtqndnqvkdqserqgskqshqnatnnterqndqvqnthhaerngsqsttsqsndvdk sqpsipa kvlp  
nhdkaaptsttppsndkta  
pkstkaqdattdkhpngq dthqpahqidakqddtvrqseqkpqv gdlshkidgqnspekptdkntdnkqlikda lqapk  
trsttnaaadakkvrplka  
nqvqplnkypvvfvhgflglvgdnapalypnywggnkfkvieelrkqgynvhqasvsafgsnydravelyyyikgrvdy  
gaahaakygherygkyg  
impnwepgkvhlvghsmggqtir lmeefl rngnkeeiayhkahgeisp lftgghnmvasittlatphngsqaadkfg  
nteavrkimfalnr fmgnk

Tsompanidou\_et\_al\_Supplemental\_FASTA\_File

ysnidlgltqwgfkgqlpnesyidyikrvskskiwtstdnaaydltdlgsaklnmmtsmnpnitytgytgvsshtgplgye  
npdlgtfflmdttsriigh  
darewrkndgvvpvisslhpsnqpfinvntdepatrrgiwqvkpiiqgdhvdfigvdfldfkrkgaelanfytgiind  
llrveateskgtgkask  
>tr|D3EST6|D3EST6\_STAA4  
mteikykvitkdafalpytiikaknqptkgvivyihggglmfkgandlspqyidiltehydliqlsyrllpevsldciie  
dvyasfdaiqsqysncpif  
tfgrssgaylslliarddidgvidfygysrintepfkttnsyakiqaqsinetmiaqltsptpvvdqiaqrflivyva  
rgtgkwinminiadytdsk  
yniapdelktlppvfiahcngdydvpveesehimnhvpstfervnknehdfrrpndeaitiyrkvvdflnaitmv  
>tr|D3ESU9|D3ESU9\_STAA4  
mkdeqlyyfekspvfkammhfsipmmigtllsviyglniyfigfledshmisaisltlpvfailmglnlfgvgagtyi  
srllgakdyskskfvsfs  
iyggialgliviltlvpfdqiaailgargetlaltsnylkvmlsapfvilffileqfaraigapmismigmlasvgn  
iildpilifgfdlnvvgaa  
lgtaisnvaalffiyfkmnsdvsvniklakpnkemlseifkigipafmlsilmgftglvlnlflahygnfaiasygi  
sfrlvqfpeiiimglcegv  
vpliaynfmankgmkdvikavimsigvifvvcmiavftighmvglfttdqaivematfilkvtmaslllmgigflftg  
mlqatgggrgatiimailqg  
aiiipvlfimnalfgltgviwslliaeslcalaamlivyllrdrlvtvdtselieg  
>tr|D3ESV8|D3ESV8\_STAA4  
mwsfksmfntpedpekdayefygvqpgitttptqktcnfvaldlkskdrdaikamfkktvmadrmmgdgtvgktsnpl  
mppvdtgesiglasklti  
tfgiskslmkkgllsskipdafkdlphfpndqliddysgdimiqaacsndsqsfsfavhnlvrpfrdivkvrwaqsgfis  
akgketprnlmafkgdtkh  
prksnqlkdyvfiddgwakhtgycvvrriqihietwdrtaleeqeatfgrkrhsgapltagkefdeidlakdshgeyii  
dkdahtrlakeantsilrr  
afnyvdgtdddrtgnfetgllfiafqkatkqfidiqnngsndklneyithrgsasflvlpvgvskgylgetlfd  
>tr|D3ESV9|D3ESV9\_STAA4  
mvkhyltkfvamliatamvcsfgllksqaaeqsisdvysvitdaksalsnnsisndnkqkaieqvvsavkklsllednse  
gnavksdvrkledakandn  
qkdtlslqtksliayeeklaskdagskikllqqvdakdaamtkaikdknkaeleslnslnqiwtsetvirnydanqy  
gqievallqlriaihkspl  
dtakvshawttfksnidhvdksdtsandqyhvsqldalekaikaiddnqlsnadaalhfieiwpyvegqiqtgdgal  
ytkiedkipyyqsvldehn  
kshvkdgldvinnqikevghsysfvdvmiiflreglevllivmtlmtmrkvkdnkgtasviggaiaglvlsiilaitf  
vetlgnsgilresmeaglg  
ivavilmfivgywmhkrsnakrwndmiknmyanaisngnlvllatiglisvlregveviiwymgigelatkdfiigial  
aivilivfavlfrfivrli  
pifyifrvisififimgfkmvgvsiqklqllgamprhviegfptinwlgfypsyepliaqaayimvvailifkfk  
>tr|D3ESW0|D3ESW0\_STAA4  
mllsfvvtvivvyvssfwmmtpfityitrahvslhafsftemiqiyvmiiffiafcfispvmfyqlwafiapglhnerq  
fiykysffsvllfcagvaf  
afyvgfpriiqfalklsltlispvigfkaylvelirwlftfgilfqplilfiglakfgliditslkhyrkyiyfacfv  
asiappdltlnilltllp  
illfefsmfivkftcrkppth  
>tr|D3ESW2|D3ESW2\_STAA4  
maftlsaiqqahqftgvdfpklfkafkdmgmtynivniqdgatvvhqseddvtssvksnhpvaqksnktivqdvltr  
hqqgtdfetfcdemaeg  
iykwhidiqagtctyidlkeqaiiselipq  
>tr|D3ESW3|D3ESW3\_STAA4  
mnrnlkelrardglnqtqlaklagvsrqtisliernnfmpsvltaikiarifnetvetvfieeedea  
>tr|D3ESW6|D3ESW6\_STAA4  
mkgmflssfyatrkrqtiyifivaiiaagyfavfnpmlssamagvmlitpitdnikhekdsrwmmyvstlpvkrstyiksy  
fafylilfgaslmgivvt  
tvtqsvmigimglmsfgiigaysiifpltfkfgaensnvimivasilllfsfvfffiygmvsagasalefekistegw  
lvvivyavigivitsvsi  
lsikifnkqel  
>tr|D3ESX0|D3ESX0\_STAA4  
mttiktsnlgfprlgrtrewkkaiesywakkiskeeldqtdltdlhkenlllqkyhldsipvgdfslydhildtsllfni  
iperfagrtiddllfdia  
rgnkdhvasalikwfntnyhyivpewdnvepkvsrvllldrfkyaqslnvnahpviogpitfvklskgghqtfeekvtl  
lplykevfeslidagaeyi  
qvdepiivtddsesyentreydyfekagvakkliqtyferahlkflsslpvvglgldfvhdngynlkqieagdfdks  
ktlyagiidgrnwasdie  
akkvldkllahtnelviqpssslhvpvslddetldtsvgeglsfatekldeidallrrllnqndsvkydklkaryerfq  
nqsfknldydfesvrtsrq  
spfaqrieqqqrlnlplptttigsfpqsrevrkyradwknkri tdeayetflkneiarwikiqedigldvlvhgefer

Tsompanidou\_et\_al\_Supplemental\_FASTA\_File

ndmveffgek1qgf1vtfk  
gwwqsygsravkppiiygdkvwtapltdvetvyaqsltdkpvkglm1tgpvtl1nwsfervd1prkvvdqialaineevl  
aleaagikviquvdepalre  
glplrseyheqylkdavlsfklatssvrdeqihthmcysqfgqiihaihd1dadvisietsrshgdlikdfedinydlg  
iglgvydihspriptkee  
ttainrslqqidrs1fwvnpdcglktrkeeevkda1tv1vnavkkrqe  
>tr|D3ESY3|D3ESY3\_STAA4  
mnigyiftnaaggpidsnkisniikggtiketteissikkpvtthtlhshistlaqlgin1kamqehvghsdykksrdi  
htcy  
>tr|D3ESZ4|D3ESZ4\_STAA4  
mneiim1l1rtiptskliqipimqlfidnai1nivqndalliekatharnhlrlwslqghrdipn  
>tr|D3ESZ7|D3ESZ7\_STAA4  
msdyvyn1lvkhhsvrkfknkplsedvvkklveagqsastssflqaysiigiddekiken1revsgppyvvengylfvfv  
idyrrhh1vdqhaetdmen  
aygsteg1lvgaidaalvaeniavtaedmgygivflgslrndvervreil1dpdyvfpvfgmavgepaddengaakprlp  
fdhvfhhnkyhadketqya  
qmadydqtiseyydqrtngrketwsqqiemflgnkar1dmlleqlqksgliqr  
>tr|D3ESZ9|D3ESZ9\_STAA4  
mltkefaqrvelsekqvrkivqhleergyqlskteyrgreatdfkeedielfkdiadvkqtnsydlafdelekekdf1q  
vivkndkn1ptnqnvag1  
ved1r1leiqkmreerh1lgqmmnvhqqqelkelqnltskidsnses1kaiqtsqeaieaqasqakvlaestnkvek  
navtedkadskdskvagv  
tstdakttdkaenagdgatkvdkedqisateaiekasveqsknenaetsnkeatvdadaqhdaeqqvaehaehaskqa  
tsnds1leakaendstasqs  
emsepkpqeekkgffar1fn1  
>tr|D3ET14|D3ET14\_STAA4  
mnmktiakts1algl1ttgaitvttqsvkaekiqstkvdkvpt1kaer1amini1tagansattqaantrqertpk1lekap  
ntneektsaskiekisqpk  
qeeqks1nisampapkqeqsqttesttpkktvtpstntppmqstksdtpqsptikqaqtdmtpkyed1rayytkps  
fefekqfgf11kpwttrf  
mnvipnrfiykialvgkdekkkydgydni1dvfi1lednkyqlkkyvsgitktnskkvdhkaelsvtkkdnqgmisrdv  
seymitkeeis1keldfk1  
rkqliekhn1ygnmgsgtivismknggkytfe1hkk1qehrmadvielgtnidkievnik  
>tr|D3ET15|D3ET15\_STAA4  
mfvkvafl1c1ksdessnpsveshqnfyltnimdfliyltmiqi  
>tr|D3ET19|D3ET19\_STAA4  
mkftaiakai1fvlgil1ttsvmitenqsvnakgyekmnrlydtnk1hqyysgpsyel1tnvsgqsqgydsnv11fnqqnq  
kfqvfl1gkdenkykekth  
gldvfavpelvd1dgri1fsvsgvtkknvksifes1rtpn1lvkkidkdgfsidefffiqkeevs1keldfkirk1likk  
ykyegsadkgrivimkd  
enkyeid1sd1dfermadvinseqiknievnlk  
>tr|D3ET30|D3ET30\_STAA4  
mmgyskrfalyisvmlifaiagcgksdetkegskeeqikksfakt1dmpiknled1ydkegyrdgefkkgdkgtwvis  
svmvkqpkgeimksrgmy1  
flnrnrtakgyfi1vdetsndt1lkktedkekrypvkmvnnkivpidpindkgvkkeienfkffsdygd1kelknykgev  
synseapiysakyqlknnd  
ynvkqlrkrydi1stekap111kgtgd1kgssighkdi1eftfvenqeeniff1tds1leftsseny  
>tr|D3ET44|D3ET44\_STAA4  
mrdkkgpvnkrvdf1snk1nkysirkftvgtasil1gslmyl1gtqqeaaenienptt1kdnvqskevkieevtnkdt  
apqgveaksevtsnkdtie  
heasvkaedis1kktedtpkevanvaevqpkssvthnaepkvrkarsvdegfsditrdsknvvestpitiqqgkeh1fegygs  
vdiqknptd1gvsevtrfn  
vgnen1g1gal1q1knkidfskdfnfkvrannhqsnttgadwgfl1fsknaeeyl1tnggil1gdkg1vns1ggfki1dgy  
iytssmdktekqagqgyrg  
ygafvkn1dssgnsqmvgenidksktnf1nyadn1stntsdgkfhgqr1ndviltv1vastgkmraeyagktwetsitd1g1s  
knqayn1litssqrw1ng  
ginangwmrtd1kgseftftpeapktite1lekk1krfhsrknvn1iri  
>tr|D3ET52|D3ET52\_STAA4  
mfneiwp1lisv1lgivi11lvli1gfk1nkfisl1itsmital1m1gip1tkimeti1ekmgst1ghialif1lgailgk11  
adgggatriad1tikfgg  
khvqam1vaafivgial1ffevglv1lip1vftvakranvsv1kl1gl1pmvta1svthgfl1pphpgpvv1ake1kanvgdv  
1lygmia1aipvt1iagpif  
nkvaqkmipsaytregdisalgaqkeftdqempgfgms11tat1pvil1m1vstitq1vtghdkptn1fesiiymigtagt  
am1iav1fai1vtm1l1mrkr  
kmnhimesvtna1y1pigmm11i1ggggt1fkqvl1dggvgntiakmfegtemsp11lawivaav1ria1lgsatvaa1sttg  
iv1p1l1qssdvna1lvla  
igagsv11shvndagfwmfkeyfg1tvketf1tws11leti1svs1gii1fil1fisl1fv  
>tr|D3ET55|D3ET55\_STAA4

Tsompanidou\_et\_al\_Supplemental\_FASTA\_File

msnystgelaklcnvtrtrtiqyydrkgilkpqgftgkrrvyteqqrqtletlilsldlglcalsdidmllkgegtlktln  
tlltmkqqeinqqvkkqqa  
vlnkiknvqyvneastspithkdiehvmsksaemksirriwisagiigi qyssimssilmknkwpflialpfmncy  
gigvtfyyqqkvaylcpnc  
qhifspslwavikakhtatrrfecpncethycievpkahnsteqleishiqhnn  
>tr|D3ET58|D3ET58\_STAA4  
miipaiigylcgnfqfglvatgtlahiyvfkgsrsklrvii cnlafaicmmlgtltaktplvfgmtllivtvpfyi  
ftalkiagpsstffivtfs  
lpinlpiapeealyrghailvggilatmmvilitivfsknaeeqaiqndfkliskllhtyndkaafqvaktavdsfkas  
dkllitstssndklsrrfq  
kllllhtsaggyisellelnakqirpdpdeliemmdhiaqlndsdenvrywrkevvtvteefqnlfnhilkidemvhane  
ariayeadmrkplyskriy  
qnltdsivfrntlrytaimmiaifialmfdfekaywiplsahtillgtstihaiergmarglgtilgvlvsvillfsi  
ptpvavilmgiaalfteal  
vganyaiavvfitiqvilmnglasqnltniafprvidvaigivaiiglfvlqrtasvllpnvmaevvrkeatl fhyll  
fsenqykdnvyqkntamnl  
svklnnmtqvynaangel fsdktliqnyypsalfaleeisfmlnramanedrltineqlmgeylatfeniakhlelntele  
ikilpdlpqyniysammn  
iqhngfrerdknv  
>tr|D3ET83|D3ET83\_STAA4  
mvkqlnsveafrefihqyplavvhvmdqcsvchavlpqiedlmqsyppnplavinqsqveaiagelniftvpvdlifmn  
gkemhrqgrfidmqrfehh  
lkqmndsvnndvdeheyk  
>tr|D3ETA1|D3ETA1\_STAA4  
mryvisiimgivlaiwsyqqlsqshldsgfiffivvvlcis yfnndkhdknkr  
>tr|D3ETB2|D3ETB2\_STAA4  
mnvmtkhiiviggglggsaairmaqsgysvlyeqnthiggkvrheshdggfdl gpsi ltmpyifeklfeyskkqmsd  
yvtikrphqwrspfpdgt  
tidlyegiketgqhnaikskqdieelqnylnytrridritekgyfnygltdlsqiikfhgplnalinydyvhtmqqaiddk  
risnpylrqmlgyfikyvg  
sssydapavlsmlfhmqqegglwyveggihhlanaleklareegvtihtgarvdniktyqrrvtgvrldtgef vkadyii  
snmeviptykylihldtqr  
lnklerefepassgyvmhlgvacqypqlahhnffftenaylnyqqvfhekvlpddptiylvntnkt dhtqapvyenikv  
lphipyiqdqpfttedyak  
frdkildklekmgldlrkhiiyedvwtpedieknyrsnrgaiygvvadkkknkgfkfpkesqyfenlyfvggsvnpggg  
mpmvtlsgqqvadkinare  
aknrk  
>tr|D3ETB3|D3ETB3\_STAA4  
mktmkkyikt affcsmywlvivqlnianlgtripdkyfrqy iifksfnfekhgkfwk wfyvrkwkhkildghqlnqniy  
dqrhlmtintdeiekmiie  
tkraelihwisilpvii fnkgsrlvkiyini fyanianpviiivqrynrrprtqlllrilkrgerhd  
>tr|D3ETB5|D3ETB5\_STAA4  
mdtkdfkrlekmsprylpgldglrafavigi iihlnaqwlsggflgvdtffvisgylitslliseyyrtqkidllfw  
krrlkr lipavlflicvvl  
tftlifkpeliiqmkrdaiiaaifvsnwyyisqnvdyfnqfaieplkhls laieeqfyllfplvitflhrfkprni iq  
tlfivslislgmlvihfi  
tgdnsvyfgtdtrllgtlll gci lafiwppfalkkdis kkvsvldiigisgfavlm tffivgdqdwiynggfyyisf  
atlfijaiavhpsllfakf  
lsmkplliigkrsyslylwhypii vfvnsyyvqqqpvvyiieilltalmaeisyrfietpirkkgfkafaf lpkkkqg  
fartvlvilllvpsivvl  
gqfdal gkqhaekkekktfkttkkkkvkdkqedkqtanskedikssplligdsvmdignvftkkipnaqidgkv g  
rqlvdatpvksqykdyak  
kgqkvvvelgtngaf tkdqne lldsf gkadiylvsirvprdyegrinkliyeaaekrsnhlv dvykasaghpey fayd  
gihleyagskaltdlivkt  
methatnkk  
>tr|D3ETD2|D3ETD2\_STAA4  
mlevkydmrtghytpiphephy lvishadkl tatekalkrll iikqkl dislaesvsspiasehvieqltlfqherrhl  
rpki satflawllifl mfa  
lpigiayqfswdfqnyvsawiey ltqttllnhdilqhilfgdygvlslgtyslvwalpvvilislstaidqtglkswm  
iwaiepsmlwiglqgndiv  
pllegfgcnaaaisqaahchtctktqcmslisfgsscsyqigatlsifsvagkswlfmpylilvllggilhnriwlkkn  
dqqlsvlpydrqlhmpni  
rqmllqmwqniqmfi vqalpifit iclvisils ltpilnvl sqift pilsllgissel spgil fsmirkdgmllfnlhqg  
allqgmtatqllllvffss  
tftacsvtmtmlkhlggqsal kligqmvtslslvigvgiivki vmlii  
>tr|D3ETE8|D3ETE8\_STAA4  
mktvsqli dmkqkqtki smvtaydfpsakqveaagidmilvgdslgmtvlg yestvqvtladmi hhgravrrgapntfvv  
vdmpigavgismtqdlnha



Tsompanidou\_et\_al\_Supplemental\_FASTA\_File

lklyqetnanai kaegahitpfiekataigipvvahlgltppqsvgmgyklqgatkeaaeqllldaknveqagavalvle  
aipndlaeeiskhltpv  
gigagktdgqvlyhdmlyngvehkakfvkqfadfsvgvdglkqydqevksgafpseeytykkkimnevnnnd  
>tr|D3ETF2|D3ETF2\_STAA4  
mgsffnkiarkedpaiyqkndghlkrtrvrdfalagvgtivstsi ftlpgivaaehagpavalsflaaivaglvafy  
aemaaampfagsayswv  
lfgeffgwvawallae yfiava fvasgfsanlrglvkpi gielpaalsnpfgtnggfidiaaivilltalll srgmse  
aarmenilvilkvla iilf  
vivgltainvsnyvpfi pehkv tatgdfggwqgiyagvsmi flayigf dsiaansaealdp qktmprgilgslsvaivlf  
iavalvlgmfhysqyann  
aepvgwalrqsghgvvaaivqaisvigmftaligmmlagsrllysfgrdglpswls hlnkhlpnralvil tiigvlig  
smfpfaflaqlisagtlva  
fmfvslamyrlrkregkd l pipafklplypvlpaitfvllvfwlgfeaklytliwfvigiiylsyglr hskkndva  
eyhpk  
>tr|D3ETF4|D3ETF4\_STAA4  
mr1kvlfhfiaaifisfmllwmtmldf l isnqshlka lllnldflipsdntpyileiichlligsviyfvfvl fhtskr  
lylcyiplfflfi alypf  
lvfiagrpiqfsvteligwiithiffmslmalviprik  
>tr|D3ETF8|D3ETF8\_STAA4  
myerk1vmqksal fapekyniiseiekyshipdkkailyhntegedisvtyqq lieqsnkvgnvlashgl skgdvlimm  
prsiatyelyiaalkl gva  
iipcsem l rtkdlqyrithgeinavialepftvefekideyaltkfviagqkdgwisleaekenasnklemadttrddm  
ailsytsgtgnpkavthc  
hgwgfah l qmapkhwlci neddlwataapgwqkwvswpflsvlgsgatafvfngrfspetyellelkyqinvlcctpte  
yrmaklqn l ndydlthlh  
savsageplnrevveqkkyfnl tvrdgygqtestlligflk dtpqrigsmgkigpssvtvvddegnsvpantkgniav  
pldlpal fkgyykeperta  
kaqtgkyyitgdlahvdddgywfegrrddi i ssgytigpfevedaltnhpavkecavvakphdirgnivkafvilqdh  
tagddtlvkelqqfvknev  
apykypreiefvddlpktnsgk irrelrdseiekwqqkdsnq  
>tr|D3ETG5|D3ETG5\_STAA4  
mtlldikqgggyiakiesnsfvdgegvrcsvyvs gcpfncv gcykasqkfrygekytdeila eilddcdhdyisglsl  
ggpfcnl diti nlvkafr  
arfngtktiwvwtgflyeylandcterrellysidvlvdglfiqhlfkpdlpykgslnqriidvqqs lsharmieyivs  
>tr|D3ETH2|D3ETH2\_STAA4  
mklrllwhivrrqfitqr lviipfilavsvlfmieytlvsiglnsyikqkndflvpfiianffmaltfififyanhfm  
msqrrkefsifmtl gmtkk  
smrliivmetilqfviisvsiaggyllgai fflfiqkimgsevatlryppfdsvamfitliiavlmgmllifnlfsin  
fqrpi tyqhrsdsvisrw  
lryvli vigsaalygyfialqqdtfgaffkiwiviglvii gtyaffvgisei iisilqqvskvyypfryffvvvgmrv  
rlkmn avslatitlctfl  
ivtltmtl ttyrdmhtitklitndydl sfsdnsksqierqqtienikrdiqgsvnakdfkvyettlfrasl eknrayk  
lkqasddipidfignegai  
fsrqsvmitaftaqdynryhqnklh ldnqsigmitnvpifkkqskvgnnevfvkql dahalnlmmiqdsvlivkdnn  
qlqkvkgfyahqkdstis  
infvfgkktl ttsiqklskkydas insksem lmvwdr l tggli fvggvsvivl v igifl mmykqvseayanqhnydi  
mklgl dngriakitrnqm  
tflfaipitvalihtlissni vyl nmginnhhi fltsyvlaviiisflymamykitsiyakvihqqrn  
>tr|D3ETH7|D3ETH7\_STAA4  
mlsvk katkfavanliivstvfssvtpai aqsdkskdesfavngtnkpnk nvlvlgdgmgpsfntayryyknshakem  
tptafdsylkgtnrtynd  
pkqnitdsaa gtafssghktyngaigvdsnkqkvktvlerakekgkstglvstaeltdatpaayaahvtsrddknei ak  
qfykdkingkhkvdvl g  
gakyfgksngnl dkkfkkgdydlatnskd lsksdkdvlg l fadknmplaidaskdepsladmqqsalsklernkkgffl  
megasidksahsnditgv  
msemegfeka fddai qyakkhkdtlvvatadhstgg l t igdkgyewnpqpi ksmkhs gsymtekmakgedpekvinegy  
gfefs qddmkkvkknkkl  
qkl l kkekdeksadvektka l qhaiqkpvndksytgwtsdghtgedvntyaygprsesfsgnientesakiifdfk  
>tr|D3ETH8|D3ETH8\_STAA4  
mkgvii mstnkndyehmlfyfayktfittadeiiekygmsrqhrrflffinklpgitiks lleileiskqgshatlqklk  
eqgliiekvletdrvrkkl  
ystdkgdqliae l nkaqdel l qniyqqvgsdwydvmealakgrpgdfdikhlkdekes  
>tr|D3ETJ6|D3ETJ6\_STAA4  
mimakrsksr lssl n v agfivdgyngykhaknk l vylslglstvgtvldfyisiksprkfkavavvtlitngar  
lftsi rkvkhey  
>tr|D3ETL1|D3ETL1\_STAA4  
mkqpilnkleslnqeeais l hvpghknmtigh l sq l smtmdkteipglldlhpeevilesmkqvekhsdydayflvngt  
tsgilsviqsfsqkkgdil

Tsompanidou\_et\_al\_Supplemental\_FASTA\_File

marnvhksv1haldisqgeghfiethqsp1tnhynkvn1sr1nndghklavltypnyygetfnveeviks1hq1nipvli  
deahgahfglqgfpdstln  
yqadyvvqsfhkt1pal1mgsvlyihknapyretiiey1syftsspsylimas1esaaefyktydstvffdkraqliec  
lekkgfem1qvddp1k1li  
kyegftghdiqnfwmnahiyle1addyqala1lp1whhddty1fd111rkiedmilpkksvskvkqtq11ttegnykpr  
feytwcd1kkakgkvlar  
hivpyppgipii1fkgetitenmie1vney1etgmivegiknnkilvede  
>tr|D3ETL6|D3ETL6\_STAA4  
mkeallh1drneifekimr1emvvnq1sketse1kahave1veenva1qlendn1kkvl1gndepttidtanskpakavkk  
p1pskdn1ai1ygegfhic  
kgel1fgkhrhgedc1fclv1sd  
>tr|D3ETL7|D3ETL7\_STAA4  
mlkenerfdq1ikedfsi1qnddvfsfstda111ghftkprtkdiv1d1csgngvip111fakhprhieqveiqkt1vdm  
arrtfqfndvdey1tmhm  
d1knvtkvfkpsqyt1vtcnppfyfkenqqhqhqkeahkiarheimct1edcmiaarh11keggr1nmvhradr1mdv1fe  
mrkvn1epkvvfiysvg  
ksaqtivvegrkggnqgleimppfyiynedgnyseemkdvygy  
>tr|D3ETM2|D3ETM2\_STAA4  
mkinefi1vvegrddtervkravecdtietngsaineqt1evirnaqqsrqgvi1tdpdfpgdkirstitehvkgvkhayi  
drekaknkkgkigvehad1  
idikealmhvsspfdeyesidksv1ielglivgkdarrreilsrkl1righsngkq11kk1nafgyteadvraqaled  
>tr|D3ETM7|D3ETM7\_STAA4  
mkiinttr1pealqpyshatvvnqmvvtsgqip1nvdgkivsadvqaatkqvl1en1kvv1eeagsd1nsvakatifikdm  
ndfqkinevygqyfnehkp  
arscvevar1pkdvkveielvskiel  
>tr|D3ETN3|D3ETN3\_STAA4  
mtilt1ikednhfqd1nqvfgqant1vtgl1spsakvtmiaekyaqsnq111itn1lyqadk1etd11qfidaelyky  
pvqdimteefstqspqlms  
erirt1talaqgkkg1fivp1ng1kkw1tpvemwqnhqmt1rvgedidvdqf1nk1vnmgykresvshigefslrggii  
difpligepirielfdtei  
dsirdfdvetqrskdn1eedittasdyiiteevirhlkeelktayentrpkidksvrnd1ketyesfkl1festyfdhqi  
1rr1vafmyetpstiiief  
qkdai1avdefnr1ketees1tvesdsfisni1esngngfigqsfiykddfet1iegypvtyfsl1fattmpik1nhiikfs  
ckpvqqfygqydimrsefq  
ryvnqnyhi1v1vetetkvermqam1semhipsitk1hrsmssgqavi1egsl1segfel1pdmgl1v1itere1fkskqkkq  
rkrtkai1snaek1ksygd1  
nvgdyi1vhvhgvgrylgvet1evgqthr1dyik1qykgt1dq1fvpvdqmdqvqkyvasedktpk1nk1ggsewkktkakv  
qsvediaeeli1d1lykere  
maegyqyg1edaq1ttfel1d1fpyel1tpdqaks1ideik1ddmqsrpmdr11cgdvgygktevavraafkavmegkqvaf1v  
ptt1laqqhyet1iermqd  
fpveiq1msrfrtpkeikqtkeg1ktgfvdivvgthk11skdiqyk1d1g11ivdeeqrfgvhrkerikt1khnvdv1t1t  
atpipr1tlhmsml1gvrd1s  
vietppenr1fvpq1ty1eqnmsfikealere1srdgqvfy1ynkvqsiyekreq1qm1mpdani1avahgqmt1erd1eetm  
1sfinneydi1vt1t1iet  
gvdv1pnant11iedadr1fg1sq1yq1rgrvgrssr1gyay1flhpankv1tenaedr1qaikeftel1gsgfkiamrd1nir  
gagn1lgkqhg1fid1tv1gf  
d1lysqm1leeavn1ekrgikepesevpevevd1n1day1lpteyiane1qakieiyk1l1rktet1fdqi1dikdel1drfndypv  
evar11dive1kvhal1hsg  
it1likdkgki1idih1svkatenidgev1fkatq1lgrtmkv1gvqnnamt1it1tkqnq1w1ds1kfl1vkcieesmr1sdea  
>tr|D3ETN8|D3ETN8\_STAA4  
msievgnk1kgkvtgik1kfgafve1pegksg1lvhisevadnyvenveeh1svgdevdvk1v1siaddgk1s1sikkakdrp  
rrqhtskpshqkpvqkaed  
fekkl1snf1kdsedk1tsikrqtesr1rggkgsr  
>tr|D3ETN9|D3ETN9\_STAA4  
mq1nsgwhvddh1vvavstg1dsmc1lyq11ndykdsyrk1tcl1hvnhgvr1sasieear1f1eaycerh1hid1hikk1dl  
shs1drnnsiqnearikry  
ewfdemmnv1leadv11tahh1ddq1letimyri1fngkstrnk1l1gfdel1skrkgyqiyrp1lavskkeikqferyhipyfe  
desnkdnkyi1rndir1nri  
paidennq1kvsh11kl1kqw1hdeqydi1lqysakqfi1qefv1kfdeqsky1levsrqafn1pns1kmv1v1dc11skyyel1fn  
isaktyeew1fkqf1sskkaq  
fsin1tdkwi1iqiaygk1li1maknngdy1frvqt1ikkpgny1ffnkyr1leihsn1pkc1fpl1tvrtr1qsgdt1fk1ngrdgy  
kkvn1r1fidckvpq1wvrdq  
mpiv1dkqqri1iavgd1lyqq1tikwi1iskngde  
>tr|D3ETQ3|D3ETQ3\_STAA4  
mlcencq1neael1kvkvt1sknkteek1mvcqt1caegh1pwnqaneqpeyqehqdn1feeafv1vkqil1qhl1atk1hgin1fqeva  
fkeekrcpschmt1kd1jah  
vgkfgcancyat1fkddi1diarrvqggq1fehvgk1tphsshk1kia1lkrkieekney1kk1iei1qd1feeaaivr1deika1ka  
esevqhd1da

Tsompanidou\_et\_al\_Supplemental\_FASTA\_File

>tr|D3ETRO|D3ETRO\_STAA4  
mitlyntltrqkevfkpiepgkvmyvcgptvynyihignarpainydvvrryfeyqgynveyvsnftdvddklikrsqe  
lnqsvpeiaekyiaafhed  
vgalnvrkatsnprvmdhmdidiqfikdlvdqgyayesggdvyrtrkrkfegyglshqsiddlkvgaridagehkedald  
ftlwkkakpgeiswnspfg  
egrpgwhiecsvmahelgptidihaggsdlqfpheneiaqseahnhapfanywmhngfinidnekmskslgnfilvhd  
iikevdpdvlrffmismvhy  
rspinylnelvelsarsglerirnsyqlieraqiatnienqqtyidqidailnrfetvmnddfntanaitawydaklan  
kyvlenttstevdkfkav  
yqifsdvlgvplksnade1ldedvekliernearknkdfaradeirdmlksqniiledtpqgvrfkrg  
>tr|D3ETR3|D3ETR3\_STAA4  
mkeryliidgynmigspstlsaiakenleearmqldaianynavisdeicvdaydqsgvereymyhgvtiftkeke  
tadsfieryvyelydkhtk  
hiavtmdmseqhaifgsgayrissremwrldkeneidvskslddisenkprtriplsseilaefekirrghkk  
>tr|D3ETT2|D3ETT2\_STAA4  
mnylkenglyneidtiegangpeikingksyinlssnylglatnedlksaakaaidthgvgagavrtintglldhdele  
etlakfkgteaaiayqsgf  
ncnmaaisavmnkdailsdelnhasiidgcr1skakiirvnhsdmdlakakeavesgqynkmyitdgvfsmgdgva  
klpeiveiaaeefgl1tyvd  
dahgsvmgkgagtvmkhfgldkdfqigtlskaigvvggyvagtkelidwlkaqsrpflfsts1apgdtkaitavkkl  
mdstelhdklwdnaqylkn  
glsklgydtgesetp1tpviigdektqefskr1kdegvyksivfptvprgtgrvrnmptahtkdm1deiaaayekvg  
kemkli  
>tr|D3ETT4|D3ETT4\_STAA4  
msysigidygtasgrvflinttngqvskfvkpythgvieselnlkiphtyalqnsndyleimeegisyivreskidpv  
nivgigidftsstii ftde  
nlnpvhn1kqfknphayvklwkhgkaykeaklyqtaiennkwlghygyvssewmpkimevmnrapeimektayim  
eagdwivnk1tnknvrsnc  
glgfkafwheetgfhydlfdkidpk1skviqdkvsapvvnigevvgkl ddkmaqklglsketmvspfiidahasllgigs  
ekdkemtvmgtstchlm1  
nekqhqvpgisgsvkgaiipe1fayeagqsavgd1fevakqapksyvdeaanrnm1tvfelmekikhqmpgesgliald  
whngnrsv1sdsnl1tgcif  
gl1lqtkhediyrayleatafgtkmimqqyqdwmevekvfacggipkknvmm1diyanvlnkklivmdseyapaigaa  
lgavsggahnsindavdam  
kepil1yeinpeaekvqryet1fkaykalhdihgykkanimkdiqslrveg  
>tr|D3ETT7|D3ETT7\_STAA4  
mewilfdkdgt1iefdrsewkeigvrfvqs1letfpvhnkeaalrqlgvikesidpksvmgsgslqqi1qafndvtgqdt  
dwskstsqklvderipein  
wvegvealid1kakgyqlgivtsdtkkgeqflahtnais1fdli1steadayekpnkvlsp1feqynvdpqkvaivg  
dtandmktasnanlgmaig  
v1tgiatkeelheadi1lnsaadi1lea1n  
>tr|D3ETT8|D3ETT8\_STAA4  
mlpmnnygipqna1itiagtvgvgkst1tqaladkl1nfktsfenvehnpyldkfysdferwsfhlqiyflaerfkeqkrm  
feyggfvqdrsiyedvdi  
fakmheeegtmskedfktysdl1fnamvmtpyfppkpdvmiylecnydevidri1ergremeintdpeywkl1fkryddwin  
sfnacpvvrini1neydihk  
dpe1n1pmidkari1q1tyrqvdr  
>tr|D3ETU1|D3ETU1\_STAA4  
mik1iatdmdgt1lnaahaisqpnidaikyaqeggitvviatgrafy1eaqapvadtd1tvp1yic1ngaevrdetfvmst  
shlnkslvhk1tnvlkdag  
iyyqvysraiytedpqrld1yiydiaeragqhanverikngiqrridngtlkvvdnyda1enipgelimkilafdgnle  
kidkaskilaespnlaiss  
ssrgnieithsdaqkialetiaer1giemkdvmagdn1nd1sm1ekvgypvamengaeevkkiakyvtdtnensgvk  
aimkl1reqqv  
>tr|D3ETU5|D3ETU5\_STAA4  
minrdnkka1tkkgmi1snr1nkfsi1rkytvgtasilvgtt1ifglng1nqeakaaentstenakqddattsdnkevseten  
nsttendstnp1k1ketntd  
sqpeakeesttsstqqqnnvtattetkpn1ekenvkpsdktatedtsvileekkapnytnndvttkpstseiqtkpt  
tpqestniensqpqptpsk  
vndqvtdatnpkepvnskeel1knnpek1kelvrndnndr1stkpvataptsvapkr1nakmrfavaqpaavasnnvnd1  
itvtkqtikvgdgkdnvaa  
ahdgkdi1eydteft1dnkvkkgdtmtinydknvi1psdl1tdkndpid1tdpsgeviakgtfdkatkqitytftdyvdkyed  
ikarl1tlysyidkqavpne  
ts1n1tfatagk1etsqnvs1vdyqdp1mvhgd1sn1qis1ftkl1denkqtieqqiyvnp1kk1tatntkvd1agsvddygnik1  
gngst1idqnte1kvykvn  
pnqq1pqs1nriydfsqyedvtsqfdnkks1fsnnvat1dfgd1insay1ikv1skyt1ptsdgel1diaagtsmrttdkygyyn  
yagysnfi1vtsndtgggdg  
tvkpeeklykigdywedvdkdgvqgtdskekpmav1vt1tpydg1tksvrtdanghyefgg1kdgety1tkfetpagy

Tsompanidou\_et\_al\_Supplemental\_FASTA\_File

lptkvngttdgekdsngss  
itvkingkddmsldtgfykepkynlgdyvwedtnkdgiqdanepgikdvkvtlkdstgkviqgttttdasgkykftdlng  
nytvefetpagytpvknt  
taedkdsngltttgvikdadnmtldsgfyktpkyslgdyvwydsnkdgkqdstekgikdvkvtllnekgevigttktden  
gkyrfdnldsgkykvikf  
pagltqtvtntteddkdadggevdtitdhddftldngyfeedtsdsdsdsdsdsdsdsdsdsdsdsdsdsdsdsdsdsdsds  
sdsdsdsdsdsdsdsdsdsdsdsdsdsdsdsdsdsdsdsdsdsdsdsdsdsdsdsdsdsdsdsdsdsdsdsdsdsdsds  
dsdsdsdsdsdsdsdsdsdsdsdsdsdsdsdsdsdsdsdsdsdsdsdsdsdsdsdsdsdsdsdsdsdsdsdsdsdsds  
sdsdagkhtpvkpmsttkdhhnkakalpetgsenngsnatlfgglfaa|gs|ll|fgrkkqk  
>tr|D3ETU6|D3ETU6\_STAA4  
mnyilgtileskitgvekaqinrlklfkqhgisskcvyvkwnpysytyakqhqiendvftmydyfqkainykktkqvwi  
qwekscrytlkfvnsnd  
vriydeeqfvmahfldkqyhq|nyvnyfdhkrkvrkelydgrgflscsri|gegqriv|enytpngeivi|qkyfddi  
kgkntl|tkv|inedqqqf  
fdtedel|vqy|flhq|lcknndqi|ldrphel|gnviag|lqnsipvvv|lhsth|sgtgngiks|fyk|tvfn|ltrykaivvst  
eqqcqdisqyenkipvin  
ipvgvyanlkyqfdinqeknhisiar|lvenkqikhqievikqlv|tkhpniql|niyghngl|seyrqlvedyhl|sehvk  
fhgfkthinee|akaelm|  
stskmegflailes|svgtpv|sydidygpse|lqdgfngyl|vpkgdin|qmvekvdq|llnntqkl|qqfsinsiesaqy  
nattistkwqniln  
>tr|D3ETV8|D3ETV8\_STAA4  
mktkskvcvaatlalgtligvtvensaptskqvqaaitpytyngyignnanfil|dkn|finaikydnvkfngik|lakt  
tikkevkydqtfkgsakg  
neasqlqfvknnislkdiqkaygkdlk|kengkt|keadsgi|fyyqnakkt|giwfvvdhnr|vvevtv|ghtpyktsk  
>tr|D3ETW1|D3ETW1\_STAA4  
mki|vait|scp|ngi|ahty|maqek|leqv|akem|gvdi|kvet|qggv|gaenv|l|ttq|die|eadg|via|aadk|qvdl|srfv|gkr|line  
nvregih|nprg|liq|riinq  
dapiyqsetnyhskdr|gksk|sgiqmvyqhl|mngvs|fmpf|ivvg|lliaia|l|t|ggettsk|glvip|dds|fwks|ienigs|l  
afkfm|vpil|agya|vsiad  
kpglvp|gmig|gaia|adgs|fygs|dagag|flgg|ivag|flagya|kwi|kdk|vpkam|apim|piiii|piissv|vvg|lififlig  
apisni|fea|l|twl|ksmqg  
aniii|lami|igami|afdm|gppv|nkva|flfgs|aliaegnyavm|gmavav|ctppig|l|glat|fvqy|kfn|hserem|gasft  
mg|lfgi|tega|pfaa|qdp|l  
riipani|igami|asviaa|igvg|drvah|ggpivav|l|ggi|dhv|lwf|ifaviv|gslvt|mttv|lll|krntp|viav|dapa|qhtq  
lhdtdit|qhdte|vdnv|dkt  
akhsh|lnk|pshv|fdqqtmi|tdhdms|rnea|idm|l|ihk|l|kicry|vehtsh|lknaileremesttaigm|nvaiph|aksdvvk  
qpi|vavm|knnhg|vkwds|ld  
gslpqlifliavp|nnsq|dthl|k|l|qr|lska|l|mdetr|qslin|anstte|ylnl|mki  
>tr|D3ETW6|D3ETW6\_STAA4  
makyrgkpfqlyvklscstmmassii|l|tnil|pydaqa|asekdte|iskeilskqd|l|dkvd|kair|qieqlkqls|asskahy  
kaqlneaktasqidei|ikr  
anel|sken|ksshtemng|qsdi|dsk|ldq|l|kd|nev|ssnv|drq|qsgedd|l|nam|kndms|qtattky|gekddknde|amvnk  
aled|dh|lnqqi|hkskda|l  
kdaskdpavsttds|nhevakt|pndgs|ghv|l|nkfl|sneen|qshsnql|tdkl|qgsdk|inhamiekl|aksnastqhytyhk  
lntlqs|ldqriant|qlpkn  
qksd|lmsev|nktkeri|ksqrni|ileelartddkkyatq|silesi|fnk|deadki|l|kdir|vdgktd|qqiadq|itrhid|qls|l  
ttsdd|l|lts|l|dqsq|dks|l  
lisqilqt|klgkae|adkl|adwt|nkg|l|snrqiv|dq|l|k|kfast|gdt|ssdd|l|kail|nna|kdkk|qaiet|l|atrier|qkak  
lladlit|kietd|qnki|fnl  
vksalngkadd|l|nlqkr|l|nqt|kkdi|dyil|spivnr|psl|ldr|lnkngk|ttd|lnk|lan|lmnqgsn|l|l|dsipdi|ptpk|pekt  
l|l|gkng|l|lsg|l|nadgn  
vs|lpkagetikeh|w|l|p|svi|vgamg|v|miw|l|srrnk|l|knka  
>tr|D3ETW8|D3ETW8\_STAA4  
mtiynifngigwassgveyaqayrak|l|rrtn|qdtk|fv|l|dfi|qseni|q|l|tqnig|fkdqevi|wlyqyfsdisi|apttyt  
l|ddiere|l|gheis|frerng  
kivrlyfngkssfv|t|cy|l|qneqk|dvdrae|fvinsm|lvrk|dfysy|trif|seyyapadnkaklymrqfy|nedgsiayneyi  
dgdsyiyv|fedav|lynkte  
fiayflqr|l|n|l|trddi|v|l|dras|digqav|l|qhkg|dskvgvvi|hadhysn|nm|seqhilw|nnyyeyqfskakyidffit|at  
diqnhm|vcrq|fegyq|gyp  
rvyti|pvsida|l|syk|l|s|rkpyami|sasr|lanekhid|w|l|vkaviv|akr|qvpe|l|t|fdi|yeg|sektr|l|rkiid|thraqdy  
ir|l|lghvkl|dei|ynde|l|f  
lsastsegf|gl|t|meav|gsg|l|gmig|l|nvnygn|ptfi|rdgengyl|vpfd|tdeds|vddvi|aklahai|vmyf|nngp|qaphdis  
yevaqqf|mtqdi|l|k|wet|l  
vqev|l|hd  
>tr|D3ETW9|D3ETW9\_STAA4  
mkhkl|dv|tine|l|rlks|irkiv|krintwsdevk|sysdda|l|kqktie|fker|lasg|vdt|l|dt|l|l|peayavare|aswrv|l|gmy  
kevqligai|vl|hegniaem

Tsompanidou\_et\_al\_Supplemental\_FASTA\_File

qtgegkltatmplylnalsgkgytittndylakrdeemqplyewlglstaslgfvddivdyeyqkgekriyehdiyt  
nngrlgfdyldnladsae  
gkflpqlnygiidevdsiiladaqtplvisgaprlqsnlfhivkefvdtliedvhfkmkktkkeitwllnqgieaaqsyfn  
vedlyseqamvlvrninla  
lraqylfesnvdyfyngdivlidritgrmlpgtklqaglhqaiakegmevstdksvmatitfqnlflkfesfsgmtat  
gklgeseffdlyskivvqa  
ptdkaiqrdepdkvfrsvdekniamihdivehetgrpvllitrtaeaaeyfskvlfqmdipnlliaqnvakeaqmia  
eaggigsmtvatsmagrgt  
diklgegvealgglaviihehmensrvdrqlrgrsgrqgdpgssciyislddylvkrwsdsnlaennqlysldaqrlsq  
nlnrkvkqivvkaqrise  
eqgvkaremanefeksisiqrdlveyeernrvleiddeenrdkfaalakdvfemfvneekvltksvveyiyqnlfsfqfnd  
vacvnfkdkqavvtflleq  
fekqlalnrmqmsayyynifvqkvflkaidsawlqvdyllqllkasvnrqngqrnaifeyhrvaldsfevmttrnikr  
mvknicsmitfdkegmpv  
ihfp

>tr|D3ETX2|D3ETX2\_STAA4

mkyfipawyddqrrwgdttvpyyqlnktefddmislmgmhendlidyqlivlnhapnlrtflhrydlyetkyssvfdei  
qgfshhapqainyhhlkwp  
ddvefytypyllkcvtsqytniyfsqegysiwfeeferdqlrriyifddrgylsairyfddqgeasyqqyltingdcv  
lhedlkngrvtvskryqhh  
yqteynnmaqliieekfqamiaqqiheddhdvivasdarhnrqianhipakllsysffknrnetvsdeeqsivknahliv  
dsvqlerdlshqekygre  
ntmiritpferqspnissqlmetfigvwidgmsdadlqqmmqrlvdyiaqedyrrlillsrhqndipmwlrecitsvne  
eyqakqnadvnvsalmtpe  
dqddiiaavkthiaehdvvealrtlrvidmskepdllyqisaisagipqingqtdyvsdydngrintvdelldalny  
lfylknwnyayayslkliid  
ayaskniinqldeliendat

>tr|D3ETX3|D3ETX3\_STAA4

mlkllqqyeykiiykrmltytcfilfiyilgtnisivsnydmqvkhesffkiaismggdvntlniftlglvpwltsmiil  
mlisyrrmdkymkqtslek  
hykeriltlilsviqsyfyfheyvskervhqdnilytililvtgtmllwladknsrygiagppivmvsiksmmhqkm  
eyidashivialliilvii  
tlfillfjelvevripyidlmnvsatnmksylswkvpagsitlmsisafvflksgihfilsfnksisddmpmltfd  
pvgisvylviqmllygyls  
rflintkqkskdfllksgnyfsgvkgpdkdterylnyqarrvcwfgsalvtviigiptyftlfvphlsteiyfsvqlivlvy  
isiniaetirtylyfdkyk  
pflnqyw

>tr|D3ETX6|D3ETX6\_STAA4

mnfrtdsiddlkdffkfeqkpmhlkgdafnqqqlslinkypqiaknmksefiaydkeknretvknawnlqksindimq  
sypstkfvqfykddvpsm  
vdgngrlksdtntvisieggkydenk

>tr|D3ETX9|D3ETX9\_STAA4

mytfdasltarenyklligsiiprpiavttnqdasvnaapfsffnivnnhppmvaiaavqraggkrkdalnierdgd  
fvhitednvqdinetaa  
playgdseisrtgslststtiktpgikdakmrfecklsqmillgdvldgadligeivtyhidddiyegdfkinphalq  
avsrlagndyaklggfti  
krpek

>tr|D3ETY2|D3ETY2\_STAA4

mmidihhilvdiddgpkkieksiallkqakdegvtsivatphllhrydntfqqlvklaelrthpevqaldiklfpqg  
eiritsilkgldngsiqg  
inrskylliefptgevphytkqlffeiqsrgyipiiahpernrsiaknpeilyelvangalsqltssslvggfgkniqkl  
slqfiecnelahfvasdahs  
cdqrpflmqelfhnhkllkysndieallrnassvindnfvyldrptkpgkvsflkwf

>tr|D3ETY3|D3ETY3\_STAA4

mtntrrstsslivheqpkspisekfrgirsnimfanpdsavqsivitseapgagkstiaanlavayaqagyktlivdgd  
rkptqhyifnlpnneglls  
lllnwstyqdsiisteiqldvltsgpipppselitsrafanlydtllmnyfviiidtpvntvtdaqllfskftgnvvy  
vnsennnkdevkkgkeli  
eatgakllgvlnrmpkdkasyyayygtdes

>tr|D3ETZ0|D3ETZ0\_STAA4

mifsnlfrprptpcivcrisfrnsfcwgpakille

>tr|D3ETZ2|D3ETZ2\_STAA4

mtflfqaryiciysintknvkttmiligndkhnslafspffpiitslyrfiyfstsltvtsipellnllfiiifdvll

>tr|D3EU14|D3EU14\_STAA4

mttktvfdvdmglgylvnyvdawkvekvlddyhepfsntihwqfghvltifesaavagkenidlniyrplfngsspd  
ewkdevpsiekielglqtll

perarnlreddlaiekqpivgcnllellvntihiplhagkieemsrllknlk

>tr|D3EU18|D3EU18\_STAA4

Tsompanidou\_et\_al\_Supplemental\_FASTA\_File

mtvfknerlswlpaiaviillhvifgsflwiagkdhilfgmgilaytlglrhafdadhiaaidntvrkllqqrkdpsgv  
gyfsighssvvflmavfl  
gisvkwakdelphfqdiggtigtlvsgfflvligvlnliilislilnfaklrreheeaevdvllesrgfvsrfvgpyfk  
litrshvlpplgflfglgf  
dtaseiallalssgasqqaisfigilsplilfasgmslldtdlgvumkyaynwaffnpirkiiyinititaisvmaalvig  
miellqiladklidhgafw  
afigsiefdylyilvalflitwlissliwkfgriehkws  
>tr|D3EU28|D3EU28\_STAA4  
mifsqnlfrprtparltriexllqahfrsvnycqynfvehrtliyva  
>tr|D3EU35|D3EU35\_STAA4  
melqlaidllnkedaaelankvkdyvdiveigtpiyneglpavkhmadnisvkvladmkimdaadyevsqaikfgadv  
itilgvaedasikaaieea  
hknnkqllvdmiavdlekrakeldemgadyiavhtgydlqaegqspleslrvksviknskvavaggikpdtikdivae  
spdlvivgggianaddpve  
aakqcraaiegk  
>tr|D3EU39|D3EU39\_STAA4  
msviaiaitsflyihivtsyliknmvlqyqiylglkfdynrqvylilikilihiyimltrcilkftlsey  
>tr|D3EU47|D3EU47\_STAA4  
mynretliarieqelvqaegaqhdhdfekhmyaihiltslyastsntphigeqqmnrrianhnpqqsqitqpthqvtaa  
eieamgkvnthshhnhk  
sysqpsnqqrlatdddigngesifdf  
>tr|D3EU50|D3EU50\_STAA4  
mfwilnfi fsflasmffcvifdaprklylscgfvgtcgwmvytlffngfnvhtiyssffgslalglshymarkqkepai  
ifmvtgiiplvpgglayda  
tknlvllnfstaintmlevtliagaialglfadqisklivsgfvksfkr1  
>tr|D3EU62|D3EU62\_STAA4  
mlceskvinknpkyrikyeseylmidlasnwivfffpfwinlipktyvkitkndyeklnivkpvknksigwtifagivl  
lggtvrrntyldfdglek1  
iwsscfigflgvi ffycylnkkl1lvykenkneklr1lpsfknmcftifyylftgfmsyafyllvfenvqn1ily  
iswlfmtmlfmlmmhsii  
dkkvhi1ksnk  
>tr|D3EU72|D3EU72\_STAA4  
mniidqvkgtlveeiaasinkagladeipdiki evpkdtkngdyatni amvltkiakrnpreiaqaivndldtekahvkq  
idiagpgfinfyldnqylt  
aiipeaiekgdqfghvneskgqnv1leyvsanptgdhigharnaavgdalaniltaagynvtreyyindagnqitnlar  
sietrffea1gdnsysmpe  
dgyngkdiieigkdl aekhpeikdyseearlkefrklgveyemak1kndlaefnthfdnwfssetslyekgeilevlakmk  
elgytyeadgatwlrttdf  
kddkdrvli kndgtytyflpdiayhfdkvrngndilid1fgadhgyinrlkasletfgvdsnrleiqimqmvr1mengk  
evkmskrtgnaitlreimd  
evgvdaaryfltmrspdshfdfdmelakeqsqdnpyyaqyaharicsilkakeqgievtaandfttitnekaie1lkk  
vadfeptiesaaehrsahr  
itnyiqdlaahfhkfynaekvltddiektkahvamieavritlknalamvgvsapesm  
>tr|D3EUA3|D3EUA3\_STAA4  
mylvptyredkadnraidkayfekclpgytlinklpsiedsdiddvssidstlmlmsdiiisdyslpi eas1ldip  
tityvydegtydkvrglnq  
fykaipdsykyvteedlimtiqekeh1lsp1fkdwkhyntdks1hq1teyidkmvtk  
>tr|D3EUA6|D3EUA6\_STAA4  
mkn1isiiii1cl1ltsimtpyaqatnsdvtpvqaanqygyag1saayeptsavnvsqtgq1lyqynidtkwnpasmtklm  
tmyl1leavnkgq1slddt  
vtmtkeyimst1pel1sntklypgqvwtiad1lqitvsnssnaaalilakkvskntsdfvdlmnnkakaigmknthfvnp  
tgaensr1rsfaptkykdq  
ertvtardyai1dlhviketpk1ldftkqlaptthavtytfnfslegakms1pgtdglktgssdtanyhntittkrk  
frinqvimgagdyknlgge  
kqrnmgnalmersfdqykyvki1skgeqringkkyvendlydvlpsdfskkyd1lvedgkvhadyprefinkdygpp  
tvevhqpi1qkantsvksm  
weehplfti1ggac1vag1alivhmiinr1frkrk  
>tr|D3EUB0|D3EUB0\_STAA4  
myltilvtlisis1lteswqvetgnsivnai1fggsvglgigvii1laggttagttlariatkyldvstpya1lffdm  
ivvais1tvip1dkvlvtv  
islyigtvmeyvieg1lntkkamti1stnpdk1lakai1deqigr1ltinghyytreekdvlvvisktqvskakr1liq  
idkdaflv1hdvrdvyng  
flade  
>tr|D3EUD2|D3EUD2\_STAA4  
makkfkiimteals1yiwgcni1ntek1et1l1gfykqykalseyidkkyk1s1nd1av1d1tmkhckdekv1mqsf1kta  
mde1d1srk1l1vs1rr1i  
eker1skvrsskderkiyi1lnnddi1skfna1fedveqflni  
>tr|D3EUD4|D3EUD4\_STAA4

Tsompanidou\_et\_al\_Supplemental\_FASTA\_File

mgyvvpkgtifassieisntyslvgcmcpafefkqfelkqselitqyphlksviekyalk  
>tr|D3EUD7|D3EUD7\_STAA4  
miehardmlkrerlffdkmqahigevngtisigcssligqtlpevlslynaqfpnveiqvqvgssteqikanhrdyhvm  
itrnkvmlanthlfndd  
hyfifpknrrddvtklpfiefqadpiyinqikqwyndnleqdyhatitvdqvatckemlisgvgvtlpeimmkniskeq  
fefekveidneplirstfm  
sydpsmlqlpqvdsfvnlmasfveqpa  
>tr|D3EUD8|D3EUD8\_STAA4  
mfaallqiknyklfvanmfllgmgiavtvpvlvlfatkdlgmttnqygl11lasaaisqftvnsiiarfsdthhfnrkiii  
ilallmgalgfsiyffvdt  
iwlfillyaiqqglfapampqlyasaresinvssskdraqfantvlrsmfslglfpgpfigaqliglkgyaglfggtsi  
ilftlv1qvffykdlnih  
pistqqhvekiapnmfkdktl1lpfiafillhigqwmymtmmp1fvtdylkeneqhvgylaslcaglevpfmiilglv1ss  
rlhtrtlliygaiqglfy  
fsgvfknyfymmlagqvflaiflavllgigisyfqi1lpdfpgyastlfsnamvigq1ggn11ggamshwv1envffvs  
aasimlgm1liffkknqki  
tkedmist  
>tr|D3EUF6|D3EUF6\_STAA4  
maiavllnrmfrmehnplfeyiqkediacyfiipeedmssasdlkaqfyrgtlqrfyqslhaekltpyvmsyddiis  
fckennisevviagdmsy  
hleeydilhqrslnfeariavt1irgnhyfkasktmnqqgepykvftsyrkwrpyl1rhrdvyhyd1ksfedfviaspdd  
lvfddivfgssqvieqkw  
qhflldqdiqnyesgrdylpev1tsq1svalaygl1diiei1nd11arydedeanheafirelifrefyyv1mtqypetsy  
qafkpyrqikwsqneanf  
nawcegqtgfp1idaa1me1tqtgfmhnrmmvvsqfltkdlfidwtwgekffrkhlidydaasnihgqwsastgtdav  
pyfrmfnp1rqserfdaka  
lyiktylpi1fnqidakylhdtqrnesnlfeqqielgshyprqmvdhqeakrtqvl1atfkald  
>tr|D3EUF7|D3EUF7\_STAA4  
mtiniiv1ivs1ivfql1iighiwhdig1sylrs1illmm1pfg1gvfiqqvsyyerqypkwvppnikvr1kyiylatfle  
yv1yl1ftdlr  
>tr|D3EUI0|D3EUI0\_STAA4  
mq1fetmkidnghipr1tyhtnr1kcsser1nfkfdelhawrne1ndvttkyhsgqyr1kiv1naeskfetivsp1pekss  
ftakfqv1pkvvnptf1kn  
kterkhlahnhetdl11tsedgkv1efdignivieedgkwytpsykddflkgcmrdylidsdk1vekdfnkneliyyk  
hneir1flins1revadv  
h1cl  
>tr|D3EUI2|D3EUI2\_STAA4  
mkiysqgdqai1vvaiekevskslted11tlrsylieqnyf1ieivpsesdmmivydardmikhhniqsp1lymkalies  
ih1nikhdfnqqdlieipi  
vygskygpdies11khykikletf1elshktqyfvsmmgyspgfpyl1tgnkklyinhtskqkkfipagsv1legkkcgi  
vtdtindw1v1gyt1sl  
fnpkedfar1klgdnikfrpinene1evgafkdvnhn  
>tr|D3EUI5|D3EUI5\_STAA4  
meaykieh1nksyadkti1fdn1d1sisegekig1vgingtgkst11kvigiddftanvmhpnqyr1ryssqkd1ned  
mtvfdav1ssdt11riik  
qyeqavqayaddqsdk1fkrmidaqdamdqhdawdynaeikt1sklgihdttkyikelsggqqkrv1akt1ieqpd11  
11deptnh1dfesiw1in  
yvkqyph1v1fvthdryf1nevstriel1nrgklasypgnyesyiemraerevt1kqqqqkqralykeelawmragakar  
ttkqqarinr1fnd1enev  
qqykddkge1n1aysr1lgkvfeled1skaindkv1feh1teiqkgerigvvgpngagktt11n1lsgedqqfegklkt  
gqtvkvayfkqtdet1drd  
irmidy1reesevakekdgtsvs1itq11erf1fpsathgkkvyk1sggeqkr1y11r11vhqpnv111deptnd1dtet1  
tiledy1htfggtv1tvsh  
dryf1nkvaqsyw1fihdggmeki1gtfedyesykks1dknkst1kqqksy1ttvrkkng1sykekleyeq1mkrieqaev  
rmeeidv1mieasadygki  
kelneekeq1eiqyd1di1trwse1eeikeq  
>tr|D3EUJ0|D3EUJ0\_STAA4  
mgsqtem1fsqn1frrptptciacrisfrns1lcwgp  
>tr|D3EUJ5|D3EUJ5\_STAA4  
mnpkvkgi1ailisaigfsmvffr1lagd1pvfqks1arn1vamfip1fflykyhqp1mfr1ssqp11itrst1gligv  
11niyai1dhmv1sdads1m  
k1n1p1fw1t11s1v1fl1hekvrkyqitamia1ailgm11livkpefsssmips1lag1fsgifaasaytcvra1ssreapyt1vf  
yfs1fsviv1lipftaytye  
pmsqm1ily11lgag1aaav1gq1gvt1laysfaakdis1iftyasi1ftailgfv1fgespdfyat1gyvvi1igasymfek  
arrdakiikk  
>tr|D3EUL5|D3EUL5\_STAA4  
mkiavmtdstys1sqd1ldkyniqiap1svtfddgknftesneiaieefynkmassqtipttsqpaigewitkyem1rdq  
gytdiivic1ssg1sgsyq

Tsompanidou\_et\_al\_Supplemental\_FASTA\_File

ssyqagemvegvnvhafdsklaami egcyv lraiemveegyepqqi iddltnmrehtgaylivddlkn lqksgritgaqa  
wvgtllkmpv l k fedgki  
ipeekvr t k k raiqt lekkl divkdfevt l fvingdh fedgqa lykkl qedcpsgyqvaysefgpvvaahlgsgglg  
gyvgrkirlt  
>tr|D3EUM0|D3EUM0\_STAA4  
maepnfwdnqtkaqdi idkna lkaivngykt l qaevdmdatwd l l qeefdeemked l eqevinfkakvdeyelq l l l d  
gphdannai le l hpgagg t  
esqdwam l frmygrycekk g fkv etvdy l pgdeagiks v t l l i kghnaygy l kaekgvhr l vrispfdsgr rhtsfas  
cdvipdfnndeieieinpd  
ditvdtfragaggqhinktesairithhpsgi vvnqnrsqiknreaamkmlsklyqlkleeqaremaeirgeqkei  
gwgsqirsyvfhpsvmkd  
hrtneetgkv d avm d g d i g p f i e s y l r q t m s h d  
>tr|D3EUM5|D3EUM5\_STAA4  
mkepsivvkgarahan l k d i e l p k n l i v m t g l s g s g k s s l a f d t i y a e g r r y v e s l s a y a r q f l g q m d k p d v d t i e g  
l s p a i s i d q k t t s k n p r s t  
vatvteiydi r l l y a r v g k p y c p n h n i e i e s q t v q m v d r i m e l e a r t k i q l l a p v i a h r k g s h e k l i e d i g k k g y v r l  
ridgeivdvndvpt l d k n k  
nhtievvvdr l v v k d g i e t r l a d s i e t a l e l s e g q l t v d v i d g e d l k f s e s h a c p i c g f s i g e l e p r m f s f n s p f g a c p t  
cdglgqkl tvdvd l v p d k  
dkt l n e g a i e p w i p t s s d f y p t l l k r v c e v y k i n m d k p f k k l t e r q r d i l l y g s g d k e i e f t f t q r q g g t r k r t m v f e g v  
v p n i s r r f h e s p s e y t r e m  
mskymtel p c e t c h g k r l s r e a l s v y v g g l n i g e v v e y s i s q a l n y y k n i d l s e q d q a i a n q i l k e i i s r l t f l n n v g l e  
y l t l n r a s g t l s g g e a q r i  
r l a t q i g s r l t g v l y v l d e p s i g l h q r d n d r l i n t l k e m r d l g n t l i v v e h d d t m r a a d y l v d i g p g a g e h g g q i v s s g  
t p q k v m k d k k s l t g g y l s g  
k k r i d v p e y r r p a s d r k i s i r g a r s n n l k g i d v d i p l s i m t v t g v s g s g k s s l v n e v l y k s l a q k i n k s k v k p g l y d k i  
e g i d q l d k i i d i d q s p i g r  
t p r s n p a t y t g v f d d i r d v f a q t n e a k i r g y q k g r f s f n v k g g r c e a c k g d g i i k i e m h f l p d v y v p c e v c d g k r y n r e t  
l e v t y k g k n i a d i l e m t v e  
e a t q f f e n i p k i k r k l q t l v d v g l g y v t l g q q a t t l s g g e a q r v k l a s e l h k r s t g k s i y i l d e p t t g l h v d d i s r l l k v  
l n r l v e n g d t v v i e h n l d  
v i k t a d y i i d l g p e g g s g g t i v a t g t p e d i a q t k s s y t g k y l k e v l e r d k q n t e d k  
>tr|D3EUP7|D3EUP7\_STAA4  
m a k k k s p g t l a e n r k a r h d y n i e d t i e a g i v l g g t e i k s i r r g s a n l k d s y a q v k n g e m y l n m h i a p y e e g n r f n h d p l  
r s r k l l l h k r e i f k l g e q t  
r e i g y s i v p l k l y l k h g h c k v l l g v a r g k k k y d k r q a l k e k a v k r d v a r d m k a r y  
>tr|D3EUQ8|D3EUQ8\_STAA4  
m t e y l l s a g i c m a i v s i l l i g m a i s n v s k g y a k r f f f f a t s c l v l t l v v v s l s s s a n a s q t d n g v n r s g s e d p t v y s a  
t s t k k l h k e p a t l i k a i d g  
d t v k l m y k g q p m t f r l l l v d t p e t k h p k k g v e k y g p e a s a f t k k m v e n a n k i e v e f d k g q r t d k y g r g l a y i y a d g k m v n  
e a l v r q g l a k v a y v y k p n n  
t h e q l l r k s e a q a k k e k l n i w s e d n a d s g q  
>tr|D3EUR2|D3EUR2\_STAA4  
m n y i k r t i i l l i l f v v v s p i n s p k t i t d n k y s e i q d d k f q l q p g d i i v t k g p v m w g f f g h c s i a i d d k t i l q i e g p g d k p  
t t q s f e s f k y n y a s g k n d w  
m k v y r c s y p g a g k k a e w v k n y e n t n h r y l v t l n l n s k k f t y c t k i i y q a y k f g v s e k s v k s y g l h i i s p y a i k d n f i d  
p y k l r l v k a y  
>tr|D3EUR5|D3EUR5\_STAA4  
m t f y n f i m g f q n d n t p f g i l a e h v s e d k a f p r l e e r h q v i r a y v m s n y t d h q l i e t t n r a i s l y m a n  
>tr|D3EUT1|D3EUT1\_STAA4  
m g k s f s e i n e m i t m p n i q w p e v w t a i v e t l y m t v v s t i f a f i l g l i l g v l l f l s a k g k s i g a r l f y s i v s f i v n l f r a i  
p f i i l i l l i p f t s l i l g t  
i s g p t g a l p a l i i g a a p f y a r l v e i a f k e i d k g v i e a a w s m g a n t w i v i r k v l l p e a m p a l v s g i t v t a i a l v g s t a v a g  
v i g a g g l g n l a y l t g f t r n  
q n d v i l v s t v f i l i i v f i i q f i g d w l t n k l d k r  
>tr|D3EUU0|D3EUU0\_STAA4  
m p v y k d d n t g k w y f s i r y k d v y g n n k r k m q r g f s t k r e a k r a e a i f l n d v n e g y s d s k t f d y v f h h y l e n s d l r p k t k r r  
k q n e y h k h f k a k f g h i k m n  
k i t q n q c q e f r k y l i e n v a s t n s a r t i w s g f k v v i n a k k y f g l r t d p t i s i k p i p r v k p k p k f m m r e e f e e r i k d i e e q  
d y r e l f t l m f y t g l r i g e a  
m a l w t d y n k y k k e i s i n k t m d i s n r t i f p r p k t d s s e d i v p l p k f i n t m l t e r h q r e k e l n k y f d e r s y f i f g g m a p k h  
y s h v q k k f q k a f p h y n i h a  
l r h s y a s y l a n g v d i f v l q s l m r h a q i t e t m g t y s h l y t q k k h d a i a i f d k  
>tr|D3EUU3|D3EUU3\_STAA4  
m n m k e l p k s r l t f k e s m i e s q l a t k t k e e k k q y k q l s v e d k r e i l k e y q s k p r k e v k f e s e i n k s d e n l s k i y q r f s e i  
g v e d l f g t k k e v k e l p m i l  
k d n e i m y v t s g l y n n t y l i v c t d l r l l f l d k g m i y g l k f h e f p f e k i n s v s y k g l l f g e i i i h g s s s i a i g s i s k n  
t v s r m a e t i q e q i s i r e s s



Tsompanidou\_et\_al\_Supplemental\_FASTA\_File

mkpsnsekmsfsvadelikykelldvgvisqeedkqllid  
>tr|D3EUU7|D3EUU7\_STAA4  
mneiktfsndmfsilikqdnennlfdletvakslgftqfkgkqyirwetinkylgkylsqevgkgdfipepmvyklafk  
agnavaekfqdwlamewlp  
airkhgiyatdnvieqtlkdpdyiitvltaykkekeqnl1lqqeigelkpkadyvdeilkstgtlattqiaadygisak  
lnkllhearlqrkvkqvw  
lysehmgsytdsdtitivrsgredtvltrwtqkgrlkiheimtefgyeangga  
>tr|D3EUU1|D3EUU1\_STAA4  
msniyksyllavlcftvtaivlmpflyfttawsiagfasiatfifykeyfyee  
>tr|D3EUU6|D3EUU6\_STAA4  
mlnravlvgrltkdpeirsapngvngvgtftlavrftnaggereadfinvvvfkqaenvknylsgkslagvdgrlqtr  
syenkvgqrvfvtevvads  
vqflepknnnqqpnnnyhqqrtqtgnnpfdnttaittdddipf  
>tr|D3EUU8|D3EUU8\_STAA4  
mnr1riikiallivilaeirsakkikkftpedskgfpditkdsikepk  
>tr|D3EUW0|D3EUW0\_STAA4  
matfrvykesgnfvthkdfihdsni swkakgillyl1srpdnwqiyeteleqhstdglsglksigikeleeigyiqsrk  
rdksgrlgyeylvyeqph  
hirsfnvgktvngktnngktvngkshttnnnstndltnnnntnnegsilsgnptvssipykeiieylnkkagkhfkht  
aktkdfikarwnqdfried  
fkkvidiktaewlntdsdylrpetlfgskfegylnqkiptgtntqlermkydesywd  
>tr|D3EUW4|D3EUW4\_STAA4  
mskynakkveykgivfidskveceyyqylesnmngtnydrieiqpkfelqpkfgkqrpitadiadflwkdgklvevldvkg  
katevanikakifryqyrd  
vnltwickapkytgktwityeelikarrerkreml  
>tr|D3EUW7|D3EUW7\_STAA4  
msivkingkpykftehenelikngltpgmvakrvrggwal1ealhapygmlaeykeivlskimereskeremarqrrk  
eaelrrkkphlfnvpqvh  
rgryacylmendifvkvk  
>tr|D3EUX0|D3EUX0\_STAA4  
mnnreqieqsvi sasayngndtegl1keiedvykkaqafdeileglpnamqdalkeideldavgimtqqvvykyeeeqe  
deki  
>tr|D3EUX4|D3EUX4\_STAA4  
mwemtdvkiiktisggvyfvktaepfekyvertvnfngfiyvsniikqptyiktdtiesitlieergk  
>tr|D3EUX6|D3EUX6\_STAA4  
minipkmkfpkkyteiiikkyknktpeekakieddfikeindkdefyspmanmnehelramlrmmpsli dtgddndd  
>tr|D3EUX7|D3EUX7\_STAA4  
mmikqilrllflamyelgkyvteqvyimmtanddveapsdfaklsdqsdlmraevse  
>tr|D3EUY0|D3EUY0\_STAA4  
mgwliianpffnfkriarelvnemnkltkqr1faevytipgtecygnatksavhagysektaysqgqrm1knveiqn  
yikevetklfdenimsgke  
vlyrltrtargehteveavvktgdykenpdtgkmqlvydehiqlvtskpi sdqnka lem1grhkh1ftdkqevdhkip  
mfvdnipedd  
>tr|D3EUY3|D3EUY3\_STAA4  
mpnkntqeyweegrkaie nelkrdktaeeierilnmnikriekeinafivkygdfagvtlqeaqkiidefdvkafqee  
akrlvenkdfsdranee1k  
kyntkmyvsreqmlkiqiefliayataqtel smreyfestayrvfsdqagilgegvvakevidtivdtqfhgvvserl  
wnteamkqeevianv  
igrhpnayvkdmrkhlnkfegtarqktaaisllytesarvhaqssidsmkeispegyymiakidsrttkvckglng  
ifkvdakigvfnfypmhin  
crsdcallpksmwpkpkpnkrqtkyfggkvksdd  
>tr|D3EUZ0|D3EUZ0\_STAA4  
mni dgl dalnqfhdmktniddvddilqenakeyvvraklkarevmnkgywtgnlsrni rykktgdlytitshaaysg  
flfggtrymeaepfmwpvy  
evirkstveelkalfe  
>tr|D3EUZ2|D3EUZ2\_STAA4  
manmksndriilfrkagekvdatkmlflteygl sheadttdtedmdgsyntggsvestmsgtakmfygddfadedav  
vdrvlyeavevesripgn  
gdatkfkakyfqqfhnkfelkaeangi deyeygvnrgfqrqfatlpeavtklkatgyrfhdttkadal tgedltaip  
qpkvdsstvtpev  
>tr|D3EUZ3|D3EUZ3\_STAA4  
mnveingkslelsgfkflreidnr1glkveqasigqgvsm1pvglesgnpvvigevlaatshlkkqaitinnideald  
eiaenigleefgsdilte1  
gkrpmt rn1vevveaekpaea  
>tr|D3EUZ7|D3EUZ7\_STAA4  
mtiivrppkgngapvpvettlvkknadgvl tfdilenkytyevinaigrwivshvegendkkeyvitvidrksegdrq  
lvectareipidklmidri  
yvntgsftveryfnivfqtgm1fevegkvksskfenggedtrlemfkkglehfgleykitydkkkdrykfv1tpfan

Tsompanidou\_et\_al\_Supplemental\_FASTA\_File

qkasyfisdevnanaikle  
edasdfatfirgygnysgeetfehaglvmearsalaeiygdihaepfdgkvtdqetmdkelqsrllkkslkqslsldflv  
lresypeadpqpqgdivqik  
stklglndlvrvivqvktrginnvirkvqdvltgefneqrymkkvntaanyvsglndvnl snpskaaenlkskvasiaks  
tldlmsrtdlijedkqgkvs  
skvtvtsdgtivhdfidksnikdvktigtigdsvargshaktnftemlgkklakctnlaraggatmatvpigkeavensi  
yrqaeqirgdliilqgtd  
dwlhgywagvpigtddktktfygafcsaievirknnpaskilvmtatrqcmsgttirrktdknlgltdedyvnaqi  
lacselvpydayhtdyf  
kpynpafirkssmpdglhpnerghevimeyliknyyqfyg  
>tr|D3EUZ8|D3EUZ8\_STAA4  
mdnkliitdlsrvfdyryvdeneynfklisdmltdfnfsleyhrnkev fahngeqikyehlnvtssvsdflylgrfsm  
vlghngdginvekdardvn  
tgydhktlqdrlyhdystl daftkkvekavdenykeyrateyr fepkeqepfitdlspytnavmqs fvdprtkiiymt  
qarpgnhym lsr lkpngqf  
idrllvknghgthnayryidgelwysdv ldsnkknkfvr fqrtygeitygnemqdvmpnifndrytsaiynpienlmi  
frreykaserqaknslnfi  
evrsaddidkgidkvl yqmdipmeytsdtqpmqgitydagi lywytgdsntanpnylqgfdiktke llfkrridiggvnn  
nfkgdfqeaegldmyydl  
tgrkalligvtigpnnrhhsisigqrgvnqflkniapqvsmt dsgrvklpiqnpaylsditevghyiytqdtqna  
ldfplpkafrdagwffdv  
pghyngalrqv ltrnstgrnm lkfervidi fnkknngawnfcpqnagywehipksitklsdlkivgl dfyitteeskrft  
dfpkdfkgiagwil evksn  
tpgnttqv lrrnnfasahqffvrnfgtgngswsiiegkeve  
>tr|D3EUZ9|D3EUZ9\_STAA4  
mvvdfnskddnlielqttsqynpvidtnisfyedr gtvlnfavtknkp lsiskhnamtsivlktndfdehgayisd  
elativdaingrmqyvipne  
flkytgrvhaqayftqngsnviverqfnfninqdlnisnfdsktklv yiksiqdltesvkeeedl kkslsdtkslvtei  
dsringqgirleikqneav  
qmitttqdkavqy insefqkivdkeqai fervneveqqingadlvkgnsttnwqskltddygkaiesseqsi eavl rha  
nssmiihi tnakdapekad  
igtlekpggdgvdgssfdestytsksgvlvvyvvdnntaratwypddsndeytkykyigtwypfykkn dgnl tkqfve  
eisnntlnqakqyvdklq  
siswqqhkltehngqs iqklynakgnlea lgagnyyvtsvpdlpgsvesyegy lsvfvkddtnklfnftpynskkiytr  
sitngrleqqwtvpnehks  
tvldfggangvgttinl tepyt nysillvsgtypggvi egfglta lpnaiqlskanvvsdsgngggiiyec llsktsstl  
ridndvyfdl gkts gsgan  
ankvtitkimgwkl  
>tr|D3EV01|D3EV01\_STAA4  
mkmiyptfkdi ktfyvwygykneqikwyvdkg lidkeeya litgekypetkdeksqv  
>tr|D3EV16|D3EV16\_STAA4  
mr ltiyhtndihshl heyerikvmaeqrprlnhpslyvd lgdhvdlsapiteatlgkknvallneakcdvatignn gm  
tishealnhlydeakfivt  
csnvidesghl pnnivssyikdmdgkvl fvaatapftpfyraldwivtdplesikeeikhqrgkfdviivlshcgiffd  
etlcqelpeidvifgsht  
hyfehgeinngvlmaaagkygnylgevnlt feahkvvhtaki ipletlpevetsfeeegktlmsnsviqhpvvlkrsmn  
hiteaayllaqsvceytha  
qcaiinagllvkdivkdevteydi hqmlphpinmvrvr lsgvklkei itksnkqeymyehaaglgfrgni fgyi lnylg  
yihstgryylngeeiedk  
eyvlgtidmytfgryfptlkel pkeylmpelr di fkeklley  
>tr|D3EV21|D3EV21\_STAA4  
myfvdkdktqklaylqaltd dyheskhnhyaferiaqml iessvdignmiidafilrdp gnykdvidilel envitket  
qqeinktvdirkqftydyt  
aldikvimpfddalpyyqfitevtiflhqenvpvtafgkgenq  
>tr|D3EV30|D3EV30\_STAA4  
mvvygadvicascvnaptskdiydlqpllkrkypnisfkytyiditkdndnltdhdlqfierieqdel fyp litmndey  
vadgyiqtkqitr fidqkl  
vne  
>tr|D3EV35|D3EV35\_STAA4  
mnfkl nntlsneintli igipehlnqlerisfnhiditeslerlkhqhiigskvgkiyttafdvqdqtyrlitv glgnlk  
arsyqdm lkiwghlfqyik  
sehiedtyllm dsfiskydl sdvlmacgiqseratyef dhyksskkapfktnl n liseslieldfihegisigqs inla  
rdfs nmpnnv ltpqtfaed  
ivnhfkn tkvkvdvkd ydtlvsegfgllqavgkgs khkprlv tityngkdkdvapialvgkitydsggysiktngmat  
mkfdm cgaanvvgiieaas  
rlqlpvni vglacaenmi neasmkpddvftal sgetvevmntdaegr l vladavyyanqyqpsvimdfatltgaaival  
gddkaafesnskvi lndi  
lqisskvdemvfelpitaterasinh sdiadlvnhtngqgkal faasfvthfsgqtphihfdiagpattnkasyngpkgp

Tsompanidou\_et\_al\_Supplemental\_FASTA\_File

tgfmipitvqwlkqg  
>tr|D3EV36|D3EV36\_STAA4  
minavviavilmiavlclcrlnvvisl fisalvgglisgmsiekvinvfgknivdgaevalsyallggfaalisysgitdy  
lvgkii naihaensrwsrv  
kvkvtiiaallamsimsgnlipvhiafipivipplslfndlkidrrligliigfglcfpyvllpygfgqifqqiisqsf  
akanhpiefnmiwkamlip  
smgyivglliglyvyrkpreyetrkisdsdnvtelkpyilivtivailatflvqtftdsimifgalagvlvffisraynwy  
eldakfvegikimayigvv  
iltangfagvmnatgdidelvktltsitgdnklfsiimmyviglivtlgigssfatiipiaslfipfgasigldtmalia  
ligtasalgdsgspasdst  
lgptaglndvqghdhirtdcvpnflfyniplmifgtiaamv  
>tr|D3EV38|D3EV38\_STAA4  
mhwtiigggiqgtaiaqkllssglttldlitiidphetfcqrfnsytnriempylrspivhhvhppqfhlkqfakqhqytn  
afygyprpelmtfmnhia  
haskqyqltedclvqglvqtlkqedkwhikledgqiittdcvviaigstnipfmpdilkdqnvnhifekehdqvvydkt  
dhivgsqitaahlalklln  
hdndkkih1wlndkieihdfdadpgwlgpknmssf1stksmpernaivqrerhkgsmphelylrkkhikngrinvhkt  
itqisggvintendsvpyq  
qimvatgfeqdfmsqplikqliqnydapinecnypviseklewipnlfvagcfadlelpgpfgrnvmggrkaaerieqaf  
lkqqysa  
>tr|D3EV46|D3EV46\_STAA4  
mkllyrfshktgsgygtiveengddvlvkveqvikhpqkgdlhnp tetegvffherkalshfekrytkrsqldrfdvdlr  
yeds1qqaitdletklkaq  
qtkhaemslaslarlkedyslqykenfk  
>tr|D3EV47|D3EV47\_STAA4  
manypqlnkevqqgeikvmmhtnkgdmtfklfpniapktvenfvthakngyydgitfhrvindfmiqggdptatgmges  
iyggafedefslnvfnlyg  
alsmangpntngsqffivqmkevpqnm1sq1adggwppivdaygekggtpwldqkhtvfgqiidgettlediantkvg  
pqdkplhdvviesidvee  
>tr|D3EV50|D3EV50\_STAA4  
mtksekiieltnhygahnylp1pivi seaegvwwkdpegknymdmlsaysavnqghrhpkiiqalkdqadkvtlvsrafh  
sdnlgewyekicklagkdk  
alpmntgaeavetalkaarrraydvkgepnkaeiafngnfhgrtmapvslsseaeayqrgygp1ldgfrkvdfgvdal  
eaainentaav1vepigge  
aginippegylkaircldehnlfiadeiqag1grsgklfatdwdnvkpdvylgkalggvfpi svvladkevl dvft  
pgshgstfggnplacaasi  
aaldivdedlpgsrlelgdyfkeqlkqidhpsikevrgrglfigvelnesarpycea1keegllckethdtvirfapp1  
iitkeeld1alekirhvfq  
>tr|D3EV53|D3EV53\_STAA4  
mrcmeaiamsnkawggrfevqpeewvdfnasitfdqtlidqdiegsiahatmlanqqiisqqdseqiiglkisqhd  
hqdqiqfsasledih1nie  
helikrigdagglhtgrsrndqvadtmhlytkkqvqdiialikslqsvivdiasnndvtimpgythlqraqpisfahhi  
mtyfwm1qrdqgrfeds1k  
ridinplgaaalsgttypidrhettal1nfgslyens1davsdrdyiietlhnisl1tmvhl1srfaeeiifwstdeakfit  
1sdafstgssimpqkknpd  
maelirgkvgrttghlmsmlmt1kg1playnkdmqedkeglfdavhtikgs1rifegmiqmtinker1nqtvkedfsna  
teladylvtknipfrtahe  
ivgkivleciqqghy1ldvplatyqqhhssidadiydylqpenclkrqsygstgqssvkqqldvakq11sq  
>tr|D3EV63|D3EV63\_STAA4  
mpki vvgavaggatcasqirrlkesdiiifekdrdmsfanca1pyvigevedrkyalaytpekfydrkqitvkythe  
viainderqvtv1nrktn  
eqfeesydk11lspgasans1gfesditft1rn1edtdaidqfikanqvdkvlvigagyvs1evlenlyerglhptlihr  
sdkink1mdadmnp1lde  
ldkreipyr1neeidaingneitfksgkvehydmiiegvgthpnskliessnik1drkgfipvndkfetnvpniyaigdi  
atshyrhvd1pasvplawg  
ahraasivaeqiagnntiefkgflgnnivkffdytfasvgvpnelkqfdykmvevtqgahanyypgnsp1hlrvyydts  
nrqilraaavgkegatkri  
dvlsmammnq1tvde1tefevayappyspkd1inmi gykak  
>tr|D3EV65|D3EV65\_STAA4  
meealkdsm1gal emvidpelgidi vnlglvykvnddegvctvdmt1tsmgcpmpgqi idqvktvlaeipeiqdtevni  
vwsppwtkdmsryakial  
gvs  
>tr|D3EV74|D3EV74\_STAA4  
mklksf1tv1al1gm1attgatvtsnevsaaekdk1patqkakemqnvpytiavdgimafnqsy1n1pkdsq1sy1dlgn  
kvkallydergvtpkier  
aksavyti1twkdgskkevd1kkdsytan1fdsnsikqidiinvkkt  
>tr|D3EV77|D3EV77\_STAA4  
msqnkrvvi1tgmgalspi1gndvkttwenalkgvngidk1tridtepysvhl1agel1knfniedhidk1kearrmrdftqyai

Tsompanidou\_et\_al\_Supplemental\_FASTA\_File

vaareavkdagldindnta  
drigvwigsgiggmetfeiahkqlmdkgprrvspffvpmliipdmatgqvsidlgakgpngatvtacatgtnsigeafkiv  
qrgdadami tggteapith  
maia gfsasralstnddi etacrpfqegrdfvmgegagilvieslesaqarganiyaeivgygttgdayhitapapege  
ggsramqaamddagiepkd  
vqyl nahgtstpvglnevkaikntfgeaakhlkvsstksmtghllgatggieaifsaalsikdskvaptihavtpdped  
ldivpneaqldidtyamsn  
slgfgghnavlvfkkfea  
>tr|D3EV86|D3EV86\_STAA4  
menilevnqikkyki ktgl lqktqyvkvavddvsfsikkgtfglvgesgcgkstlgkviirledatsgsiivngeditr  
lqgkklrksrqyqmi fqd  
pyaslnpmqmvgdii sepilnykklpkeeikkevlyllkcvgl sedaykyahefsggqrqrvgiaralalrpslivade  
pvsal dsvsqsvlnllkd  
lqe qfklsylfiahdlsvvkhisdvigmylghiveiasdkeiyenpkhpytkalissipqidkhnnriilkgelpsp  
nppggcpfhtrcpiakdkc  
kenipqlkdigneqvacyvdkvgl na  
>tr|D3EV94|D3EV94\_STAA4  
menksredinlspvskieysffdpfssdcfklsailsklrieynqyirirhilnpslklvtkcqaqstsnfdnialayk  
aaelqgrvraerfihlmgq  
eii pkrdiitesmicdcinagidlevfkddlqsklteslkidliharemeieqapslvffsedvheeglkveglypyh  
iytyiinelmgkpieknlp  
pkletyiqqqqlvtmee lltiyewpekllnkelkkla iqkiek lky pdgdfwkskmpkisk  
>tr|D3EV97|D3EV97\_STAA4  
mrlyineikikddilycytedsikglsevgqmlvdsdnayafaytlldgkayaylifvqetwtmlhenttkiindelel  
tefhqeltyildnikgnn  
ygkefvatveetfdie  
>tr|D3EVA0|D3EVA0\_STAA4  
mkfkyhisqqetvkaflarhdfskktvsaikngalivndepvtvrkqlmpndileihlpreipsvnlipyarklevlye  
dafi iivtkpnnqctpsr  
ehlheslieqvl yhcqehgeninphivtrldrnttgivifakyghihhlfskvnllkiytclyvgkthtsgieanrrs  
kdsiitrevasdgkyakts  
yevinqndkyslckvhltgrthqirvhfqhigpivgdslydgfhdkihgqvlqctqiyfvhpinknniyitidyqll  
klfnq  
>tr|D3EVA8|D3EVA8\_STAA4  
mqdssl nnyanhknfllmliilflmfargmyilsyinflptvtsiavaitslafsihfiadastnfvigflkkfgtki  
vlttgfilafstflviw  
paspfvii fsammliavspiwimlssveedkrqkmgvyvfwllglvgmvfmllikvhptrfafmmslvvliawi  
lyyfvdkltnyntrpvka  
qlrqivdvtkrhlllfpgil lqgaaiialvpilptyatkvinvstieyvtaiiggigcavsmflsklidnrsrnfmyg  
vilsgfilymiliftlsmi  
vnihivwialaiglmgyilpawntfmarfiksddeqetwgvfnsiqgfgsmigplfgglitqftndlnntfyfsalif  
lvlavfygysfianrekak  
>tr|D3EVC2|D3EVC2\_STAA4  
mskggwywhytl lkgkaycdiyckritfnvkfryvyrhfhwyssnnkfkq  
>tr|D3EVC6|D3EVC6\_STAA4  
mielkdltiqkgnihllkkl nlfkqcgksyaligksgcgkstllntiaglektgkqyvfnqleqfksnfyrdklgylf  
qnyglidnl tvnenldig  
aykkskkekqelkiryieqfglsnslkrkvhtlsggeqqrvalirmmlkdpivmladeptgalpdktgqmiiqslfdlv  
denkvlilathdmainqc  
deiidleqyskvasm  
>tr|D3EVC8|D3EVC8\_STAA4  
mevnkngyli ekhnikdmadki lklvnnv laeefgskareniiekystesilekwl nlfns  
>tr|D3EVD1|D3EVD1\_STAA4  
mryvtmrqfiktvtkilvgyvikfirnk lsgksshptdnkhn  
>tr|D3EVD8|D3EVD8\_STAA4  
mtnrqwetlreydeikyefyegiakvtinrpevrnaftpktvaemidafsrarddqnsvivltgedlafcsggdqkr  
ghggyvgedqiprlnvldl  
qrliriipkpvi amvkgavgggnvlnvcdltiaadnaifgqtgpkvgsfdagygsylarivghkkareiwylcrqyn  
aqealdmglvntvvpdkv  
edetvqwckeimkhsptalrfllkaamnadtglaglqqmagdatllyttdeakegrdafkekrdpdfdqfpkfp  
>tr|D3EVE1|D3EVE1\_STAA4  
mkgkflkvsslfvatlttatlvsspaana lsskamdnhpqqtqsskqtpkikkgnl kpleqrehanvilpnndrhqit  
dttnghyapvtyiqveapt  
gtfi asgvvgkdtlltnkhvvdathgdphal kafpsainqdnypnggftaeqitkysgedlaivkfspneqnkhigev  
vkpatmsnaetqvnqnit  
vtgyppgdkpvatmweskgitylkgeamqydlsttgngsgspvfneknevigihwggvpnefngavfinenvrnflkqni  
edihfanddqppnnpdn  
pnnpdnppnnpdepnnpdnppnnpdnngdnnsdnpd

Tsompanidou\_et\_al\_Supplemental\_FASTA\_File

>tr|D3EVE3|D3EVE3\_STAA4  
mts1kerdyffdnaraililvvfghmlqpytsgdkylsalylviysfhmptflfisgyfaknidkpyylekiskrlivp  
ymiffaffsiyyfltgksd  
elqldpfnpvfalwflitlfffhvilvivrrfnpykvlsvsiisigagfsdnidsylsisrtivffpifylgyiftkkh  
taifknkklipvsiiitfil  
ffiiyvihipinadwl1gsspytslenegqsifspfkrlilygiiliamtaflnlmstkkklytyigsrtlyvyllhglii  
givrfgfewpfdnpislmt  
ylylisisviivyvlstnfvckwtnpiinlqrpsqfkds  
>tr|D3EVE8|D3EVE8\_STAA4  
mnkflkyflilla1vlivvpivfatllfktsqdafessqsdsknanrqsnlrdnkvnpeeqpisilflgiddndgrkkqg  
daehrsdamilttfnqsk  
hqirm1s1prdtisyipkvgyydkithahayggpiaamsveatmnpvdyvrvnmkafveavnelggiyydvpydlne  
pntddtgkikikkgyqkln  
gdealavartrhdsdlkrqqrqmelikilfqkaqevsidskldnviqivgknakhnltnseikalakmyltnveikta  
qlkgkddmlngiyyhpsv  
esiqkylanllrkdl1spindknfdlqrvinhygslip1tp1dss1lrkeqndttddktsnenndstnsdsnsqqqp  
atdqnl1nqnggtqqapqa  
snnqngvvn  
>tr|D3EVE9|D3EVE9\_STAA4  
mkfnkvklvihacvllfiisiali1fhr1qtkthsidpihketklsdneky1vdrnkek vapsklkevynskdpkykkid  
kylqsslfnngsvaiyengk  
lkskgygyqdfekgikntpntmfl1gsaqkfstglllkqleehkinindpvsy1pwfktskpip1kdlmlhqsglyk  
ykskdyknl1dqavkaiqk  
rgidpkykkhmyndgny1vlakvieevtgksyaenytkigdp1klqhtafydeqpfkylakgyaynstglsflrsni  
ldqyygagnlymtp1dmgk  
litqigqykl1fspki1tnp1l1hefgtkypdeyrygyfakpt1nr1nggffgqvftvyndkyvvv1alnvkgnnevrikh  
iyndil1kqnkpyntkgvivi  
q  
>tr|D3EVF6|D3EVF6\_STAA4  
mtriexl1qanfrsvnychynfvehrtliyvsgr1rintstthffckqsii  
>tr|D3EVG7|D3EVG7\_STAA4  
mmkkailsvsnktgivefakaltq1nye1ystggtkril1deanvpvrsvsd1thfpeimdgrvkt1hpavhggiladrnk  
pqh1nelseqhid1lidmvv  
vnlypfqqtvanpdvtmdeaienidiggptml1raaknykhvttivhpadyhev1tr1rnds1desyrqslmikvfehta  
eydeav1rffkgdket1ry  
genpqqsayfvrt1snakht1agak1hgkq1synnikdat1alvkkfdtpaavavkhmnp1cgvgigdtieqafqhaye  
adsqsi1fggival1ravtp  
elaeqlhsif1levi1apkf1tdealdil1kqkknvr1leidmtidsneeefsvs1ggy1vqdkdnyvvpkeemkvvtevapt  
deqweam1lgwkvvpsvks  
nai1l1snkq1tv1g1gagq1mrvgaakialeraie1indhvalvsdgffpmgdtvelaaqhgikai1qpggsikdqdsidma  
nkhgiamvvtgtrhfkh  
>tr|D3EVH2|D3EVH2\_STAA4  
mrrahakp1ttksckvkegymrrahakp1ttksckvkegymrrahakp1ttkgckeeegymhrraha  
>tr|D3EVH6|D3EVH6\_STAA4  
mgfknn1tsn1tnkignsvfkienvd1gkgampttiqel1rerrqraeav1vrks1msstmsvvp1pgldfgvd1klmkdii  
edvni1ygl1dhkqvns1lgd  
dvkerimsaa1qgsqf1gkri1saf1kivi1rdvakrtaakqtkwfpvvgqavsasisy1fmnkigkdhiqkcenviknv  
m  
>tr|D3EVI3|D3EVI3\_STAA4  
m1gsgtemi1fsqn1frrptpar1triexl1lqahfrsvnycqynfveh  
>tr|D3EVI8|D3EVI8\_STAA4  
mapk1lqaqfdavkv1ndtqskfemvqil1dengnvned1vpdl1tdeq1vel1mermvwtril1dqrsis1nrqgr1lgyfapt  
agqeaq1lasqyalekedy  
i1lpgyrdvpp1iwhgl1p1teaf1fsrghfkgngfpegvna1spqii1gaqyi1qaagvafalkkr1gknavaitytg1dggss  
qgdfyeginfaaykapai  
fviqnnya1stprsk1taet1laqkai1avgipgi1qvdgmdal1avyqatkeardravagegpt1lietmtyrygphtmagd  
dprtrytsdedaewekdp  
1vrfrkfl1enkgl1wnedkenevierakadikaa1keadntekqtvt1lmeimyedmpqn1laeqyeiykekesk  
>tr|D3EVK2|D3EVK2\_STAA4  
malygfaqgl1qeagirikq1lmeqn1tietksnpnd1vtnvdkatedfifdtiletynphqv1geeghghdidtskgtw  
vdp1dgt1nfvhqgenfa  
isigiyidgkpyagfvydv1madvlyhakvgegayrgsqpl1kpl1ndsn1lrqsi1iginpnl1tkpil1geifkeivndsrsar  
aygsaa1eivsvatgn1lea  
ymtpr1qp1dfagg1vi1lyevngqasn1l1gepl1tisgpn1silvgnrg1lhqeisndylepyhdt1liq1lheqrfkrksk  
>tr|D3EVK4|D3EVK4\_STAA4  
mtnkredvrn1jai1ahvdh1gktt1vde1lkqsgif1renehvd1ramsndierergit1lakntavdykgtrin1ldtpg  
hadfggeverimk1mvdgvv  
1vvdayegt1mpqtrfv1lka1eqn1kpvvvvnki1dkpsarpegv1dev1dl1fie1leandeq1efpvvyasavngtas1dp

Tsompanidou\_et\_al\_Supplemental\_FASTA\_File

ekqddnlqsllyetiidyvyp  
apidnsdeplqfqaalldydyvgrigigrvfrgkrmrvgdnvslkldgtvknfrvtkifgyfglkrleieeaqagdli  
vsgmedinvgetvtphdhq  
ealpvlrdeptlemtfkvnnsfagregdfvtarqierlnqqleidvslkvsntdspdtwvagrgehlhsilienmr  
regyelqvsqpvviikeid  
gvmcepfervqcevpenagavieslgarkgemvdmtdngltrlifnvpargmigyttefmsmtrgygiinhtfeefr  
prikaqiggrngalisms  
qgsastyailgledrgvnfmepegtevyegmivgehnrendltnitktkhqtnvrsatkdqtqtmrpriltlealqfi  
nddelvevtpesirlrkki  
lnknvrekeakrikqmmqene  
>tr|D3EVK8|D3EVK8\_STAA4  
mvsasmvpatkgtltggidvpqgyfynrqlayvimsfiivffiaflmrvkllsnikvqkgmiitivslllltlvigkdi  
ngskwinlgfmlqase  
lkiailiyipfmiskmprvlskpkliispivlaigctflvflqkdvgtllililvaiifysgigvkvlrfgipavl  
gflvvfvialmagwlsyl  
tarfstltdpfqfesgtgyhisnllainggvfgkglgnsamklylpephtdfifaiiceelgiggllvitleffiv  
yrafqfanktssyfyklvc  
vgiatyfgsqtfvnggisatipltgvplpfiisfggssmislisiamglllivgkqikvdqqrkkqqkvdirrqfn  
>tr|D3EVL1|D3EVL1\_STAA4  
mmskehtlsqnisrvnfkelqqiikmglvqgnlipafagawlavvmtnhsflssipqillmlfgstlimggacalnnyd  
qdidrimpskqnrptvnr  
itdqnlillsfgmmlvgeicflfnipsgvlglmgivgyvsyysiwskrhttwntvigsfpgavppligwvaieggislt  
aialflvvfvcwqpihfya  
aikrkdeyalanipmlpsvkgfkrtrvsmfiwliillpvplllinlgvvfvlatllnlgwialglttfkksdqtkwat  
qmfiyslnylviffvlavi  
vslltli  
>tr|D3EVM8|D3EVM8\_STAA4  
mdsiidrlrprilialmvgamlavsgallqaalqnp laeaniigvssgalimralcmfipqlyfylvllsfigglipfl  
iillhskfrfnvsmilv  
gvalfvllngvleiltqnlmkipqgltmkiwsdvyilavsallgliltlllspklnllnlddiqarsigfnidryrwt  
gllavflasatvaivgqla  
flgiivphvvrklvggnyrvlipfstvigawlllvadllgrviqppleipanailmivggpmliylicsqsrnri  
>tr|D3EVN0|D3EVN0\_STAA4  
maenrltltkgtakdiierlytrhgietlegfdgmfvttqtleqedfdevkiltvwsksqaftdwlsdvfkaahkhvrsk  
nedesspiinnkvitydig  
ysymk  
>tr|D3EVQ0|D3EVQ0\_STAA4  
mkknitktiiastviaaglltqndakaffsyewkgleiaknladqakdderidklmkesdknltpykaetvndlyliv  
kksqgdvkvkavvrikdgg  
prdytfdltrpleenrknkvkngidsiywd  
>tr|D3EVR0|D3EVR0\_STAA4  
msknitkniilttllllgtvlpqnqkpvfsfyseakaysigqdetninelikyqtphfsfsnkwyqydnngniyvelk  
rywsahislwgaeswgn  
nqldryydvfglkdktdqlwvsyretftggvtpaakpsdktynlfvqykdklqtiigahkiyqgnkpvltlkeidfra  
realiknkilytenrnkgk  
lkitgggnnytidlskrhslanvyvknpnkitvdvlf  
>tr|D3EVR1|D3EVR1\_STAA4  
mnnnitkniilttllllgtaftqfpntpinssseakayinqnetvneltkyysqyltfsnstlwqkdngtihatll  
qfswyshiavygpeswgn  
nqlrnksvdi fgikdgetidsfalsqetftggvtpaatsndkhyklnvtykdkketftggfpvyegnkpvltlkeldfri  
rqtlikskklynnsynkgg  
ikitgtdnnytidlskrpstdanryvkkpnakievileksn  
>tr|D3EVS1|D3EVS1\_STAA4  
mgyknili dddtvdfydaeewafhymanvfnhkatkddfli fkinhqhweafqqnkltksevlserfvnyfkhhqme  
vdghradvlfnglaeakv  
kyfdqtletivelskrhdlyivtngvtetqkrlnqtplhkyikki fiseetgyqkpnpeffnyvndigederqhsiiv  
gdslltsdilgginagiatc  
wfnfrgfdhnpqiipdyeinswkqldiv  
>tr|D3EVT9|D3EVT9\_STAA4  
mdyketllmpktdfpmrgglpnkepqi qekwdaedqyhka lekngnetfilhdgppyangnlhmghalnkilkddivry  
ktmqgyfapyvpgwdthgl  
pieqaltkkgvdrkkmstaefrekckefaleqielqkkdfrlrgvrgdfndpyitlkpeyeeaaqirifgemadkglykg  
kkpvywspssesslaeaei  
eyhdkrsasiyvafdvkddkgvvdadakfi iwtttpwtipsnvaitvhpe lkygqynvngkeyiiaealsdavaealdwd  
kasiklekeytgkeleyvv  
aqhpldreslvngdhvtttdagtgcvhtapghgeddyivgqkylpvispidkgyfteeggqfegmfydkankavtdl  
ltegallklldfi thsyph  
dwrtkkpvi fratpqwfasiskvrqidi laientnfkvnwgktriynmvrdrgewvisrqrwgvplpvfyangeiimt

Tsompanidou\_et\_al\_Supplemental\_FASTA\_File

ketvnhvadlfaehgsniw  
fereakdllepgefthpgspngtftketdimdvwfdsgsshrgvletrpelsfpadmylegsdqyrgwfnsittsvatrg  
vspykflshgfvmdgegek  
kmskslgnvlpdqvvkqkgadiarlwvsstydiladvrisdeilkqtsdvyrkirntlrfmlgnindfnpdttdsipesel  
levdryllnrreftasti  
nnyenfdylniyqevqnfivelsnfylidygdilyieqrdsHIRRSMQTVLYQILVDMTKLLAPILVHTAEVWSHTPH  
vkeesvhladmkkvvevdq  
alldkwrtfmlrddvnraletarnekvigksleakvtiasndkfnasefltsfdaalhqlfivsqkvvdkliddqataye  
hgdiviehadgekcercwn  
ysedlgavdelthlcprcqqvkslv  
>tr|D3EVW3|D3EVW3\_STAA4  
mswekenvscqlfkwcakhtsreetymienvrslafdtiqdilinegaysnlrinevlsenelnamdkalfteivvygtvkr  
kytldfylvkpfvktkikaw  
vrqllwmsiyqyvyldkvpnhaiineaveiakerggyhngnvngilrtmmrsdlpdfneiadpkkrmaieysmpkwiid  
hwathygleetetilqsfl  
ettsttvanltraslddiiekldegydvkdhdlypcylhiggqpiihsrsfdkgfvsiqdkssmfvahimnvdrrhdhv  
ldacsapggkachiaevlm  
pegqvdasidhdkidlinfnikkrlrlnikafqhdatkpydktydkilvdapcsglgvmrhkpeikytqskqhieslve  
lqleilenvknnvkiggei  
lystctieqlenenviytflknnknfefepfqhpitgelvktlqimpqdfnsdgffitkirkdn  
>tr|D3EVX3|D3EVX3\_STAA4  
makvnliespysllqkigipkkievllqqlnihtvedlvlylptriedntvidlnqaedqsnvtiegqvytapvvaaffgr  
nkskltvhlmvnniavkci  
ffngpylkkkielelntitvkgkwnrvkqeitgnrvffnsqgtqtqenadvqlpevyrikegikqkqirdqirqaIndvti  
hewltdelekykletldf  
tlnthhpkskedllrarrtyafteflfelrmqwlrlkssdeaeidyldqvksfidrllpfeleaqkssvneifr  
dlkapi rmhrllqgdvgsq  
ktvvaaiemyalktagyqsalmvpteilaeqhaeslmalfgdsmnvaltgsvkgkkrkilleqlengtidcligthali  
qddvifhngvltvdeqhr  
fgvnrqllrekgamtnvlfmtatpiptlavisfgemdvssikqlpkgrkpiittwakheqydkvlmqmtselkkgrqa  
yvicpljessehledvqnv  
valyeslqqyygvsrvglhglksadekdevmqkfsneidvltvsttvvegvnvpnatfmmiydadrfglstlhqlrgr  
vgrsdqqsyvliaspkte  
tgermtimtqttdgfeiserdlmrrgpgdffgvkqsglpdfvanlvedyrmlevardeaaeliqsgvffentyqhlrh  
fveenllhrsfd  
>tr|D3EVY0|D3EVY0\_STAA4  
mvyllksidaigfksfadqtnvqfdkgvtaivgpngsgksnitdaikwvlegqsaksrgskmediifsgaehrkaqnyae  
vqlrldnhskklsdenev  
ivtrrlrsgeseyyinnrarlkdiadflldsglgkeaysiisqgrvdeilnakpidrrqieesagvlykkrkaesl  
nkldqtednltrvedilyd  
legrveplkeeaaiakeyktlshqmksdvvvthdidqytndnrqldqrlnldlqqqqantheadkqrlsqqiqqykgkrh  
qldndvesllyqvlkatea  
fekytgqlnvlleerkknqsetnaryeeeqenlmeilenisneiseaqdtykslkskqkelnavireleeqlyvsdeahde  
kleaikneyytlmseqsdv  
nndirflkhtieeneakksrldsrlevfeqlkdiqqqikttkkeyqqtneksavdkeikniekdldtkaqneyeek  
lyqayrytekmktridsla  
tqeeeytyffngvkhilkaknelkghgavaeiidvpskltaietaalgaslqhvividsekdgrqaiqflkernlgrat  
flplnviqsrvatdiksi  
akeangfisiaseavkvapeyqniignllgntiivdhlkhanelaraikyrrivtlegdivnpggsmtgggarksksil  
sqkdelttmrhqledylrq  
tesfeqqfkelkiksdqsellyfeksqkhntlkeqvhhfemeldrlttqetqikndheefekndgytsdksrqtlsek  
ethlesikaslkrledeie  
rytklskegkesvtktqtlhqqsdlavvkeriktqqtidrlnnqsqqtkhqlkdvkeiaffnsdevmgeqafqnik  
dqingqqetrtrlsdelk  
lkqgrielnqidaqeatlqvchqdilaienhyqdikaesklvlihhaidhlndeyqltverakseytsdesidalrk  
kvklmkmsidelgpvnlna  
ieqfeelnerytflsegrtdlrkaketleqiisemdqevterfketfhaiqghftavfkqlfgggdaelqlteadyltag  
idivvqppgkklqhlsls  
ggeraltaiallfailkvr sapvildeveaaldeanvi ryakylne lsdetqfivithrkgtmefadrlygvtmqesgv  
tklvsvnltiddvlkeeq  
>tr|D3EVY9|D3EVY9\_STAA4  
mviqwypghmakakrevseqllkvdvvfevlvdaripysrnpmidevinqkprvvinlkkdmsnlnemskweqffidkgy  
ypsvdakhgknlkkveaa  
aikataekferekaglkprairami vgi pnvkstlinklakrsiaqtgnkpgvtkqqwikvsnalqll dtpgilwpk  
fedeevgkklstgaidks  
ivhldevaiygl nflinqdlarlkshynievpadaeiiawfdaigkkrglirrgneidyevieliiydirnakignycf  
difikdmteelann  
>tr|D3EVZ5|D3EVZ5\_STAA4





Tsompanidou\_et\_al\_Supplemental\_FASTA\_File

dwmsqahrpgefeydvkyfppkngplgnspiqiaasgpasdwhqieygytkmimsaksvylqspyfipdnsyinaikiaa  
ksgvdvhlmpckpdpplv  
ywafsnasdl1ssgvkiytyengfihskmcliddeivsvgtanmdfrsfeInfevnaavydenlakdlrvayehditks  
kqltkesyanrpls vkfke  
slaklvspil  
>tr|D3EW63|D3EW63\_STAA4  
milsylkiefkvimrkkttlilsilfpvifyilftsilelpedvkpkfykeymysmtvysllsfslltflpdiinekqne  
wrqrlmvtptftftsyyisk  
vvtm1qfaiailvifmvghfykgvamsavqwlesgiflwlgasllitfgilfsllndiqktsalanivtiglavlgglw  
fpintfpnw1qhvahvlp  
yhlrklgvdiasnhhinlifsaiillyvlgssiiavycishkrae  
>tr|D3EW67|D3EW67\_STAA4  
mksnkslamivvaiivglafqfmnhtgpfkkgtnhetvedlmgdkdvhvqrvvdgdtfianqngkeikvr1igvdtpe  
tvkntptvpqpfgeasny  
kktltnqdvyleydekqdrygrtlayvwi skdrmyne1vekg1arekyfspngkyrnvfi eaqnkakqqklniwsk  
>tr|D3EW89|D3EW89\_STAA4  
mkplh1kl1nnfgpflkeeidfskidnne1flisgktgsgktmi fdamtya1fgkasteqreend1rshfadgkqpmstvtf  
efq1nhriykvhrqgpyik  
egnttktnakfdvfemvdgkyeireskvisgtqfiiellgvnadqfrqlfilpqgefkrflisnsrekqgilrt1fdsek  
feaireilkee1kkekaki  
enryqqid1lwgeiesfdddki1g1lelatqqidklienip1lqarskeilafvnesketaikeyeiekk1lennikd  
ninqlnknkidfvqlkeqq  
peideieak1kl1qditn1nyienrekietskanskdi sktnkiln1dcdkrnidkekkmleengd1iesktsfidk  
trv1fndinkyqqsylne  
clitegeqlgde1nn1k1g1lekvedsignesdyekie1lnnaitninneiniikenekakaelk1l1gskqelenqine  
ettimkn1eik1dhdyksk  
1d1ndkesfisetksavki1gdqpcignei1q1ghhidf1siakrqneikeieanihaiksniavh1nseikfvneki1sni  
niktqsd1s1lev1nkr1le  
nena1nnqr1nk1f1eqmkeekdn1tl1qihnkqlr1nkneselk1crd1itefet1skynnitnfevdykkyvqdv1nqh  
elskeiedk1mq1sqrk1i  
eqn1nhyenq1lety1nd1le1neqsiememsr1n1tdndine1i1awrgeqe1eqkrdykkryhefemeiar1es1tk  
dke11dsd1k1kdeyeqk1e  
kmnt1ideysavhyqc1nn1nktq1sivshiny1nqelk1dq1eif1qlaeivsgknnk1n1tenfv1liyy1dq1iaqan1r1  
atmsdnryq1irreavshg  
1sg1eidvfd1hsnksrh1ss1sggetf1qss1ala1gl1seivqq1sggis1lesi1fidegfgt1dqet1eta1dt1l1n1ks  
tgrmvgi1shvselknrip  
1v1evksdq1qs1strfkrn  
>tr|D3EW96|D3EW96\_STAA4  
mamnkqnnysdds1qv1leg1eavrk1rpgmy1gst1dkrg1lhl1vyeiv1dnsvdev1ngygne1dvt1inkdgs1siednrg  
mptgihksgkptve1ftv  
1hagkfg1qgyktsgg1hgvgasvvn1sew1leveihrdgsiyhqs1fknggspssg1vkkgk1kktg1kvt1fkpdd1if  
kastsfn1fdv1ser1qesa  
f1lkn1kit1nd1rsgkerqehy1yeegi1kefvsyvne1gkev1hdvatfsgeang1evdvafqy1ndqyses1lsfvnnvr  
tkdgg1hev1gftam1trvf  
ndyarrine1ktkdn1gdndi1reg1tavsv1ripee1l1qfegq1tksk1gtsearsav1svvadk1lpfyleekgq1sk1  
vkkai1kaqq1area1arkare  
darsgkknkrk1dt1l1sgk1tpaqs1kntekne1yl1vegds1aggs1ak1grdrk1fqail1p1rgkv1intekar1edi1fknee1in  
ti1ht1gagv1gtdfki1eds  
nynrv1i1mtdad1tdgah1qv1ll1tff1kymk1plvqagr1v1ial1p1plyk1legk1gk1ktrveyaw1tdee1nk1qkel1gk1gft  
1qryk1g1em1seq1lwett  
mnpetr1t1irvq1vedevr1sskrvt1l1mgdkv1qprrewi1ekhve1fgm1qedq1sil1dnsev1qvlend1qfdeee1i  
>tr|D3EWA3|D3EWA3\_STAA4  
mnintayfagg1f1wcm1tkp1fd1tdg1iekv1tsg1ymggh1enptyeqv1ksg1tsg1hetvei1qydval1fsynk1le1iff1sv1id  
p1dtgg1qy1qdr1gp1qy1qta1i  
fy1ndh1qke1laety1eq1kntinadkai1atki1llasq1fykaedy1hd1fykkn1peryaeeq1ir1qeyknk1q  
>tr|D3EWA7|D3EWA7\_STAA4  
mttv1fvgl1g1iggs1lasnikyhnpntni1aydad1tsq1ldkaksig1inekc1nyseaikkadviiyatpvaitnkylse  
1idmptkpgv1ivsdtg1stk  
amiqqhesn1l1khni1h1vsghp1magshksgv1nakkh1lfenayy1lvyneprneqaant1kell1spt1akfiv1ttae1hd  
yv1tsvsh1lphivass1lvh  
vsqkngqehh1vnk1laagg1frdi1triassnaqmwkdi1t1snkty1ilemir1qlksq1fdler1liesndsek1l1sffa1qaks  
yrda1lpak1q1gg1ntayd1l  
yvdi1pdesgm1skvty1ims1lhn1sisn1rilevrediygalkisfknptdrergm1qalsdfdcy1iq  
>tr|D3EWA9|D3EWA9\_STAA4  
mdi1fyk1kikanvtpe1vaql1hskki1ilestnqq1tkgrys1v1fdiygt1t1l1ndv1svst1kesyqi1erpyh1l1t1tki  
nedyhni1qdeq1lks1lpfis  
gyvg1tcs1fd1vrhe1fpk1qs1iq1ledhk1qh1dvr1lymveq1vy1vdhyk1de1lyi1atnq1fsnstks1d1enrvnks1ied1tki1q  
p1fmp1tq1df1d1ktkei1qsni

Tsompanidou\_et\_al\_Supplemental\_FASTA\_File

seerfiemiqyfkekitegdmdfqqvpsriykyahasqhlndqsfqlyqnlkrqnpsspymylnidqpyivgsspesfvs  
vkdqivttntpiagtigrge  
ttqidnenmkqlindpkecehrmlvdigrndihrvskigtskitklmvikeyehvmhivseitgkinqnlspmtvianl  
lptgtvsgapklraieriy  
eqyphkrvgvsggyincnhdfalairtmideqyinveagcgvyvdsipekelnetklkaksllvrp  
>tr|D3EWB0|D3EWB0\_STAA4  
milvvdnydsftynlvdivaqhtdvivqypdddnvlnqsvdaviispgpghplddqqlmkiistyqhkpilgiclgaaal  
tcyyggevikgdkvmhgkv  
dtlkvishhqhllyqdipeqfsimryhslisnpdfpeelkitgrtedciqsfehkerphygiqyhpesfatdygvkiit  
nfinlvkeg  
>tr|D3EWB2|D3EWB2\_STAA4  
mtilaevkykqslngyyqdklntlksvkiqnkksfinaiekepklaiiaeikskspvndlperdlsqqisdyekyg  
anavsiltdekyfggsfer  
lqalttkttlplvckdfidplqidvakqagasmillivnilsdqklklynaisqnlvlievhdrheleraykvnak  
ligvnnrdlkrfvtnveht  
ntilenkknhyisesgihdasdvrki l hsgidglligeal mrcdnl seflpq l kmqkvks  
>tr|D3EWB4|D3EWB4\_STAA4  
mnkqitqteadelgffgeyggqyvpelmpaiielkkaykeakadpefqreleyylseyvgratpltyaasyteslggaki  
ylkredlnhtgahkinna  
gqallakrmgkkklvaetgagqhgvasatvaalfdme l vvfmg sedikrqq l nvfrmel l gakkvaveegqgtsdavnk  
alqyvwshvddthyl l gsa  
lgpdpfptivrdfqsvigkeiks qil kkegrlpdaivacigggsnaigt fypfikddvaly gveaagqgedtdkhal aig  
kgsqgv l hgtkmyli qdeg  
gqvqlahsisagldypgigpehsyhdigrvtfenasdtqamnalinfkhegiipaiesahalsyverlaptmskedi  
vvtisgrgdkdmetirgym  
aergland  
>tr|D3EWB7|D3EWB7\_STAA4  
mkfte l tvtefdnfvqnpleshyfqvkenivtrentd gfev l l gikddnnkviaas l fskiptmgsyvyysnrgpvmdf  
sd l glvdyylkel dkyssq  
hqclyvkl dpywlyhlydkdivpfegrekndalvnlfkshgyehgftteydtssqvrwmgvlnlegktpetlkkftdsq  
rkrninkainygvkvrfl  
rdefnlfl dlyreteeragfvsktddyfynfidtygdkvlvplayid l deyvlklqqelndkenrrdqmmakenksdkqm  
kkiaeldkqidhdghe l ln  
aselsktdgpilnlasgvyfanayevnyfsggssekynqfmgpymhwmfminycfdngydrynyfyglsgdftensedygv  
yrfkrqfnvqieeligdfy  
kpihkvyw l fttl dklrkk l kk  
>tr|D3EWB9|D3EWB9\_STAA4  
mrfvfdidgtlcf dgrlidqtiidtl l qlqhdghel ifasarpird l l p l psvfhqhtligangamisqqskisvikai  
htdtyhhi l kiiqkyeldy  
iiddwnyaaql daenai fer l dphklascidvanidtpiki l l nidpaqittil delnkyhqele mihhsneynidit  
aqninkytalqyifdadvk  
yiafgndhndi fmlqhassgyiigpseaythailkl d kikhinnntqaickvlksyk  
>tr|D3EWC5|D3EWC5\_STAA4  
mtlfdmpnylwi t l l imi l l l tiffc l vlnkwfvsavitfvilgvlaffipnfqdkyqp l l gyaaf l aims l l isfl l wy  
ftrnwrkerkarklekqie  
kygyegaelrrkdkk  
>tr|D3EWD5|D3EWD5\_STAA4  
mvrsv l kfggssvsdftkikriaem l kervnqdeqlivvvsamgnttdq l mtnvst l tkapqqlal l l l ttegeqqtvs  
ylsmv l ndigvnaamtgy  
qagiktighh l kskiaqin pqtfeqafqendilvvagfqginehqel t l l grggsdttavslavsnqipceiytdvdgyv  
atdpr l l pkakr l divsye  
emmensal gavl etrsvelakny nipl ylgk l snvkgtwimsneeilekkavtgv aldkhmmhvtisyp l pdnq l l tq  
l fteleegavnvdmi sqiv  
nldglqlsftikdsdfhqisml et l knqyealaykinehyvki sligsgmrdmsgvaskaf l l iennipfyqtttsei  
sisyviddfngqqavekly  
dafni  
>tr|D3EWE6|D3EWE6\_STAA4  
mrhihlqvfgrvqvgfryftqriamnynivgtvqnvd dyveiyaqgd d adierfiqgvi egaspasnvtshqleel e l n  
qkl s dfrsi  
>tr|D3EWG6|D3EWG6\_STAA4  
mtkeyat l aggcfwcmvkpftsypgiksvvsgysgghv d nptykqvctnktghveavqitfdpevtsfenil diyfktfd  
ptddqgqffdr gesyqpv i  
fyhdehqkkaae fkkqq l neqgi fkkpvi t p i kpyknfypaedyhqdykknpvhyqqyrgsgrkafieshwgnqna  
>tr|D3EWH2|D3EWH2\_STAA4  
mkiisisetpnhtmkit l sesregmtsdytkvddsqa findi l kvegvksi fhvmdfi svdkendanwetv l pkvea  
vfe  
>tr|D3EWH3|D3EWH3\_STAA4  
mltfseqnalakidd l mntycnqcpiktr l rklegkthahfcinecsigkeikqlgne l q

Tsompanidou\_et\_al\_Supplemental\_FASTA\_File

>tr|D3EWH5|D3EWH5\_STAA4  
mskrnstgnaswgvgnpteadeksaynnvqvgdgpqreivfpistdnaswggttk  
>tr|D3EWH6|D3EWH6\_STAA4  
makinfdaatkgnpgistcaivikedkqhytythelgemdnhtaewaaciya leharel nvqnal lytdskliadsieag  
yvknankpyfdqieiefek  
dfd11fvkwipreqnkeanqhaqqa lyklikknk  
>tr|D3EWH7|D3EWH7\_STAA4  
mmqwkh1vdneipnaeqtvnyqnaddnaktnfddakrlant11nsdntvndingaiqavndaihnlngdqr1qdakdka  
iqsingalanklikeiasn  
atdqdklijaknaeelansiinninkatsnqavsqvqtagnhaieqvhaneipkakidankdvdkqvqalideidrnpnl  
tdkekqalkdrinqilqqg  
hndinna1tkeeieqakaqlaqa1keikdlvkakenakqdvdkqvqalideidqnpnltdkekqalkdrinqilqqghnd  
innamtkeeieqakaqlaq  
alqdikdlvkakedaknaika1anakrdqinsnpdltpqkaka1keideaekralqvenaqtidqlnrglnlglddir  
nthvwevdeqpavnei fea  
tpeqilvngelivhrddiiteqdilahinlidqlsaevitdpstatisds1takvevt1ldgskvivnvpvkvekel sv  
vkqqaiesienaqqkide  
innsvt1tleqkeaaiaevnk1kqqa1dhvnnapdvhsveeiqqeqayieqfnpeqftieqaksnaiksiedaiqhmid  
eikartd1tdkekqeaia k  
1nqlkeqaiqaiqraqsiseiteqleqfkaqmkaanptakelarkqea1srikdfsnekinsirnseigtadekqaamn  
qineiv1letirdinnaht1  
qqveaalnngiarisavqivisdrakqsstgnesnshltigygtanhpfnstighkkkl1dedddidplhmrhfsnfnf  
nviknaigvvgisgl1asf  
wffiakrrrkedeeeee1erdnnkdsiket1ddtkh1p11fakrrrkedeedvtveekds1nnges1dkvkhtpff1pkr  
rrkedeedvevtnentdek  
v1kdnehsp11fakrrkdkeedvettsieskdedvp11lakknqkdnqskdkksaskntskkvaakkkkkkssknkk  
>tr|D3EWH8|D3EWH8\_STAA4  
mnyrdkiqkfsirkytvgtfstviatlvf1gfnstqahaetaetnpasvvkqkqqsneqtenresqvqnsqnsqnsqsls  
atheneqpnsqanlvnqk  
vaqssttndeqpasqnvntkkdsataattqpdkeskhkqnesqsankngndnraahvenheanvvtasdsdngnvqhd  
rnelqaffdanyhdyrfid  
renadsgtfnyvkqifdkint1lgsndpinnkdlq1aykeleqavalirtmpqrqtsrrsnriqtrsvesraaeprsvs  
dyqnanssyyvenandgsg  
ypvgtyinasskgapynlpttpwnt1kasdskeialmtakqtgdgyqvwikfnkghaphqnmifwaf1padqvpvgrtdf  
vtvnsdgtvqwsghagag  
ankplqqmweygvndpdrshdfk1rnrsqviyswptvhvysled1srasdyfseagatpatkafgrqnfeyingqkpa  
spgvpkvytfiggdasyt  
isfktqgptvnlklyyaaggraleynqlfmysqlyvestqdhqrlng1rqvvrtyrigttrvevsqgnvqtkkvlest  
nlniddfvddplsyvktps  
nkvlgyfptnantnafrpggvqelneyqlsq1ftdqk1qeaartrnpir1lmigfdydpdgygnsetlvpn1tv1pei qhn  
ikffknddtqniaekpfsk  
qaghpvfyvagnqgnasvnlggsvtsiqplrinltsnenftdkdwqitgiprt1hienstnrtnnarernielvgn1lp  
gdyfgtirfgrkeqlfeir  
vkphtptitttaeq1rgtalqkvpvnisgip1dpsalvy1lvaptnqttnggseadqipsytilatgtpdgvhntvtirp  
qdyvvfippvgkqiravvy  
ynkvvgnsnnavt1lpddipptinnpvginakyrgdevnftmgvsdrhsgiknttitt1psgwtsn1tksdnkngsla  
itgrvsmnqafnsditfkv  
satdvnnttndsqs khvsihvgkisedahpiv1ngtekvvvvnptavsndekqsiitafmnknqinirgylastdpvtvd  
nngnvt1hyrdgsst1da  
tnvmtypvkvkseyqtanaaktatvtiakgqsfnigdikqyft1sngqaipngtftnitsdrtipataeqvsqmnaqtqly  
hivasnayhkdtedfyis1  
kivdkqpegdqrvyrtstydl1tdeiskvkqafinanrdvitlaegdisvtntpanganvstitvinkgr1tksfasn1  
anmnflrwnfpqdyvtv  
tnakianrptdgg1swsddhkslierydat1gtqittndil1tmlkattvpg1rnnitgnekakaqaeaggrpnryrttgysq  
snattdgqrqft1ngqviq  
ildinpsngyggqpvtnsntnranhsntvvnepaangagaftidhvksnsthnsdavykaqly1tpygpkyveh  
lnqntgnttdainiyfvps  
dlvnp1svgnythqvfsggetfntitandnfgvqsvtvpntsquitgtvdnnhqhvsatapnvtatsktin1latdts  
gntattsfnvtvklrky  
rvgtssstaanpvriani snnatvsqadqttiins1tftsnapnrnyatasaneitsktvsnvsrtgnnanvtvtvthqdg  
ttstvtvpkhvipeivah  
shyvtvggqdfpangssaadyfk1sngsaipdatitwvsgqapnkdntrigeditvtahilidgett pitktatykvvrt  
vpkhvfetargvlypgvsd  
mydakqyvkpvnnswstnaqhmnfqfvgygpnkdvvgistr1irvtydnrqtedit1lsvkvpdp1ridansvtykag1  
tnqei kvnnvlnssvklf  
kadntplnvt1thgsgfsvvtvsda1pnggikakssi smnvttyttqdehgqvvtrnesvdsndsasvtvtpqlqa  
ttegavfikggdgdgfhv  
erfiqnpphgatvawhdsptwknvtgthktavvt1psggqtrnvevpkvypvanakapsrdvkgqn1thgtnaidyi

tfdpntntngitaawanrg  
qpnnqqagvqhlndvtypgisaakrvpvtvnyqfefpqttyttvtvggtlasgtqasgyahmqnasglptdgftykwnr  
dttgtndanwaamnkpnta  
qvvnakydviynghtfatslpakfvvkdvqakptvtetaagaitiappganqtvnthagnvttyadklvikrngnvttf  
trrrntspwvkeasadvnt  
giygtntngitvaagtfnpadtiqvvatqgsgetisdeqrsddftv vapqpnqattkiwqnghiditpnnpsghlinptqa  
mdiaYTEKVGNGAEHSKTI  
nvvrqgnnqwtiankpdvvtl daqtgkvtfnantikpnssititpkagtghsvssnpstltapahtvntteivkdygsn  
vtaaeinnavqvankrtat  
ikngtamptnlaggstttipvtvyndgsteevqesiftkadkreli taknhlddpvstegkkpgtitqynnarnhaqqq  
intakteaqqvinneratp  
qqvsdal tkvraaqtkidqakallqnkednsq lvt sknlqssvnpvsttagmtqqsidynakkreaeteitaaqrvid  
ngdataqqisdekhrvdna  
ltaInqakhdl tadthaleqavqq l nrtg tttgkkpasitaynnsiralqsd ltsaknsanai i qkpirtvqevqsaltn  
vnrverltqainqlvpla  
dnasalrtaktkldeeinksvtt dgmtqssi qayenakragqtettna qnvinngdatdqqiaaektkveekynslkqai a  
gltpdlaplqtaktqlnd  
idqptsttqmtsasvaafndkl saartki qe idrv lashpdvati rqnvtanaakta l dqarng l tvdkap lenaknql  
qhsidqtsttqmtqdsin  
aynakl taarnkvqqinqyl agsptvdqintntsaanqaksdl dharqal tpdkap l qnaktql eqsinqptdttgmtta  
slnaynqlqaarqlte  
nqvlngnptvqinidkvaeanqakdq l ntarqgl t l drqpal t t l hgasnl nqaqqnftqqinaaqnhaaletiksnit  
alntamtkl kdsvadnti  
ksgnytdatpankqaydnavaakgvi gettnptmdvntvnqaasvkstkda l dgqqnl qrakteatnait hasdl nq  
aqkna l tqvnsaqnvqav  
ndikqttqslntamtgl krgvanhnqvvsdnyvnadtnkkndynnaynhandi ingnaqhpvi tpsdvna l snvtske  
halngeak l naakqeanta  
lghlnnlnnvqrqnlqsqingahqidavntikqnatlnsamgnl r qavadkdqvkrtedyadadtakqaynsavssae  
tiinqtanptmsvddvna  
tsavttksalngdek l vqsktdaaraidalphlnnaqkadvkskinaasni agvntvkqqgtd l n tamgnl qgaindeq  
t l n sqnyqdatpskktay  
tnavqaakdi l nksngqk t kdvteamnqvnsakn l dgtr l l dqakqtakq l n mth l ttaqktn l n qinsgttva  
gvhtvqsnant l dqamnt l  
rqsianndatkasedyvdanndkqtaynnavaaeti inansnpempst it qkaeqvnskta l ngden l atakqnak  
y l n t l t s i t daqknn l i s q  
issatrsvsgvdtvkqnaql d qaman l qngi nnesqvssekyrdadtnkqqeydnaitaakailnkstgpntaqnavea  
alqrvntakdalngdakli  
aaqnaakqhlgtlthittarnd l nqi sqatn lagvesvkqsans l dgamgnl qtaindksgt lasqnl dadeqkrna  
ynqaisaaeti l nkqtgpn  
taktaveqalnnvnsakhalngtqn l nnakqaa ita ingasdl nqkqkda l kaqangaqrvsnandvqrnate l n tamgq  
l qha i adktn t l asskyvn  
adstkqayttkvtnaehi isgtptvtt psevtaaanqvnsakqel ngder l rvakqnantaidal tql ntpqkak l ke  
yggqanrl edvqsvqtnqg  
slnnamkgl rysi anettvkasqnytdaspnnqstynsavsnakgi inqtnptmdtsaitqattqvnnakng l ngaen l  
rnaqntakqnl n t l sh l n  
nqksa i ssqidraghvsevtaaknaate l naqmgnl eqaihdqntvkqgvnftdadkakrdaytnavsraeti l nktqga  
ntskqdveaaiqnvt sakn  
alngdqvntaknaaknaln l n t sinnaqkrdl ttkidqattvagveavsntgtql n taman l qngi ndkant lasenyh  
dadsdkktaytqvnaen  
i l n k n s g n l d k a a v e n a l s q v t n a k g a l n g n h n l e q a k s n a n t t i n g l q h l t t a q k d k l k q v q q a q n v a g v d t v k s s a  
n t l n g a m g t l r n s i q d n t a  
tkngqny l daternktnynnavdsangvinatsnpnmdana inqiatqvtstknal dgthnl tqakqtatnaidgatnl n  
kaqkda l kaqvtsaqrvan  
vtsiqqtane l n tamgql qhgiddentkqtqkyrdaeqs kktaydqavaaakailnkqtgsnsdkaavdra l qqvtstk  
dalngdak l aeakaaarqn  
lgt l n h i t n a q r t a l e g q i n q a t t v d g v n t v k t n a n t l d g a m n s l q g a i n d k d a t l r n q n y l d a d e s k r n a y t q a v t a e  
g l n k q t g g n t s k a d v d n a  
l n a v t r a k a a l n g a e n l n a k t s a t n t i n g l p n l t q l q k d n l k h q v e a q n v v g v n g v k d k g n t l n t a m g a l r t s i q n d n  
t t k t s q n y l d a s d s n k n n y  
n t a v n n a n g v i n a t n n p n m d a n a i n d m a n q v n t t k a a l n g a q n l a q a k t n a t n t i n n a q d l n q k q k d a l k t q v n n a q r v s  
d a n n v g h t a t e l n g a m t a l  
k a a i a d k e r t k a s g n y v n a d q e k r q a y d s k v t n a e n i n g t p n a t l t v n d v n s a a s q v n a a k t a l n g d n n l r v a k e h a n n  
t i d g l a g l n n v q k a k l k e q  
v q s a t t l d g v q t v k n s s q t l n t a m k g l r d s i a n e a t i k a g q n y d a s p n n r n e y d s a v t a a k a i i n q t s n p t m e p n t i t q  
a t s q v t t k e h a l n g a q n l a  
q a k t t a k n n l n n l t s i n n a q k d a l t r n i d g a t t v a g v n q e t a k a t e l n n a m h s l q n g i n d e t q t k q t q k y l d a e p s k k s a  
y d q a v n a a k a i l t k a s g q n  
v d k a a v e q a l q n v n s t k t a l n g d a k l n e a k a a k q t l g t l t h i n n a q r n a l d n e i t q a t n v e g v n t v k a k a q q l d g a m g q

letsirdkdttlqsqnyqd  
addakrtaysqavnfaatlnktaggntpkadveramqavtqantaIngionlerakqaantaitnasdIntkqkealka  
qytsagrsvsaangvehtat  
elntamtaikraiadkadtkasgnyvnadankrqaydekvtaaehivsgtptptltpsdvtnaatqvtnaktqlngnhnl  
evakqantaiddgltslng  
pqkaklkeqvggattlprvqtvrdnaqtIntamkglrdsianeatikagqnytdasqkqndynnavtaakaiigqttsp  
smiaqeiinqakdqvtakqg  
alnggenlrrtaqtnakqhlnglsltnaqkdaakrqiegvthvnevtqaqnadaIntamtnlknigdqntikqgvnft  
dadeakrnaytnavtqaeq  
ilnkaqgpntakdgvetalqnvqraknelngnqnvanakttaknalnlnltsinnaqkaalksqiegattvagvqvstma  
selntamsnlqrgindeaa  
tkaaqkyteadrkqtayndavtaaktlldktagsndnkvaveqalqrvntaktaIngdarlneakntakqqlatmshlt  
naqkanlteqiergttvag  
vggiganagtlngamnlrqsiasdatkssedyqdanadlqnayndavtvaegiiisatnpempndtinqkasqvnsak  
salngdeklaaakqtaksd  
igrldlnnaqrtaanaevdqapnlaavtaaknkatsIntamgnlkhalaeakdntrsvnytdadqpkqqaydtavtqae  
aitnangsnanetqvqaa  
nqInqakndlngdnkvaqaketakralasysnlInaqstaatsqidnattvadvtvaqntanelntamgqlqngindqnt  
vkqqvntfdadqgkdayt  
navtnaqqildkangqnmktaqveaalnqvttaknalngdanvrqaksdakanlgtlthlnnaqkqdltsqiegattvng  
vnsvktkaqldgamrle  
saiankdqtkasenyidaptkktafdnaitqaesylnkdhgtknkdkqaveqaiqsvtstenaIngdanlqcakteatqa  
idnltqIntpqtalkqqv  
naaqrvsgvtdlknasatlInnamdqlkqaiGDHdtivaggytnaspdkqgaytdaynaaknivngspvitaadvtaa  
qrvnnaetslngdtnlat  
akqqakdalrqmthlsdaqkqsitgqidsatqvtgvsvkdnatlndamnlrnsiankdevkasqpyvdadtdkqnay  
ntavtsaeniinatsqptl  
dpsavtqaanqvntnktaIngaqnlankqettaninrlshlnnaqkqdlntqvtnapnistvnqvktkaeqldqamerl  
ingiqdkdqvkqsvnftda  
dpekqtaynavtaeeniinqangtnanqsveaalstvttkqalngdrkvtdaknnanqtlstldnlnnaqkgavtgn  
inqahtvaevtqaiqtage  
IntamgnlknslndkdttlqsqnfadadpekknayneavrnaeniInkstgtnvpkdqveaamnqvnttkaalngtqnl  
kakqhantaiddgltshltna  
qkealkqlvqqsttvaeeagqneqkannvdaamdklrqsiaadnattkqkqnytdaspnkkdaynavttaaggiidqttps  
ldptvinqaagqvstskna  
lngnenleakqqatqslgslndlnnaqkqavtnqingahtvdeanqikqnaqnlntamgnlkqaiadkdatkatvnftd  
adqakqqayntavtnaeni  
iskanggnatqteveqaiqqvnaakqalngnanvqhakdeatalinnsndlnqaqkdaalkqqvqnavttvagvnnvkqtaq  
elnnamtqlkqgiadkeqt  
kadgnfvnadsdkqnaynqavakaealisgtpdvvtvpseitaalnkvtqakndlngntnlatakqnvqhaidqlpnlng  
aqrdeyskqitqatlvprv  
naiqqaattlndamtqlkqgiankaqikgsenyhdadtdkqtaydnavtkaeelkqttntptmpntiqaalkvndtnq  
alngnqkladakdqaktl  
gtldhlnndaqkqalvtqveqapdiatvnnvkqnaqnlInnamtnlnnalqdktetlnsinftdadqakkddytnavshaeg  
ilskangsnasqteveqam  
qrvneakqalngndvqrakdaakqvintandlnqaqkdaalkqqvdaaqtvanvntikqtaqdlngamtqlkqgiadkq  
tkangnfvnadtdkqnayn  
navahaeqiiSGTPnanvdpqqvaqalqqvnaqkqdlngnhnlqvakdnantaidqlpnlngppktaalkdqvshaelvtg  
vnaikqnadalnnamgtlk  
qqiqansqvpqsvdftqadqdkqqaynnaanqaqqiangtptpvlapdvtkavttmnqakdaIngdeklqakqdaIn  
ldtldlnqppqrdalrnqi  
nqaqalatveqtkqnaqvntamgnlkqgiankdtkasenyhdadvdktaytnavsaegiiinqttntptlnpdditra  
ltqvtdaknslngeaklat  
ekqnakdavsgmthlnndaqkqalngqiddspeiatvnnvkqtatsldqamdqlsqaindkdqiadgnylnadpdkqnay  
kqavakaealInkqsgtne  
vqaqvesitnevnaakqalngndnlanakqqakqqlanlthlnndaqkqsfesqitqaplvtdvttinqkaqtlthamell  
rnsvadnqttlasedyha  
taqrqndynkavtaanniinqttsptmpddvngattqvntkvaldgdenlaaakqqannrldqldhlnnaqkqqlsq  
itqssdiaavngkhqtaes  
Intamgnlinaadhqaveqrgnfinadtdkqtayntavneaaaminqktgqnanqteveqaitkvqttlqalngdhnllq  
vaktnatqaidaltsIndp  
qktaalkdqvtaatlvtavhqi eqnantlnqamhglrqsiaqdnatkanskyinedqpeqqnydqavqaanniineqtatl  
dnnainqvaatvnttkaal  
hgdkvlqndkdhakqtvsvlqahlnnaqkhmedtlidsettrtavkqdltevqaldqldalqqsiadkdatrassayvna  
epnkkqaydeavqnaesii  
aglnnptinkgnvssatqavissknaIdgverlaqdkqtagnslnhldqtpaqqqalenqinnattrdkvaeiiaqqa  
lneamkaikesikdppqte  
asskfinedqaqkdaytqavqhakdlinktttdptlaksiidqatqavtdaknnlhgdqklaqdkqratetlnlnslntp

Tsompanidou\_et\_al\_Supplemental\_FASTA\_File

qrqal enqinnaatrgeva  
qkl teaqal nqameal rnsiqdqqtesgskfinedkpkqdayqaavqnakdlinqtnptldkaqveqlthafkqakdn  
lhgdqkladdkqhavtdln  
qlnqlnnpqrqalesqinnaatrgevaqklaeakaldqamqalrnsiqdqqteagskfi nedkpkqdayqaavqnakd  
inqtnptldksqveqltq  
avttakdnlhgdqklardqqavttvna l p n l n h a q q t l t d a i n a p t r t e v a q h v q t a t e l d h a m e t l k n k v d q v n t d  
kaqpnysteatsdkkeavdq  
alqaaqsidptngsnankdaveqal tk l q e k v n e l n g n e r v a e a k t q a k q t i d q l t h l n a d q i a t a k q n i d q a t k l q p i  
aelvdqatqlnqsmdq l q q  
avnehanvegti dytqadsdkqkaykqaiadaenvlkqnankqqvdqalqni lnakqalngdervalaktngkhdidqln  
alnnaqqdgfkgridqsdn  
lnqiqivdeakalnramdq l s q e i t g n e g r t k g s t n y v n a d t q v k q y d e a v d k a q a l d k s s g q n l t a e q v i k l n d a v  
taakka l n g e e r l n n r k a e  
alqrldq l t h l n n a q r l a i q q i n n a e t l n k a s r a i n r a t k l d n a m g a v q q y i d e q h l g v i s s t n y i n a d d n l k a n y d n a  
ianaaheldkvqgnaiaka  
eaeqlkqniidaqnalngdq l a n a k d k a n a f v n s l n g l n q q q d l a h k a i n n a d t v s d v t d i v n n q i d l n d a m e t f s  
>tr|D3EWH9|D3EWH9\_STAA4  
mekpsreafegnkliligivlsvitfwlfaqslnvvpiledsfntdigtvniavsitalfsgmfvvgaggladkygrik  
ltnigiilnlgslis  
nipllliigrliqglsaacimpatlsiiksyigkdrqal sywsigswggsgvcsffggavatllgwrwifilsiiis l  
ialflikgtpetksksisl  
nkfdikglvlviml l t n i l i t k g s e l g v t s l l f i t l l a i a i g s f s l f i v l e k r a t n p l i d f k l f k n k a y t g a t a s n f l  
l n g v a g t l i v a n t f v q r g l  
gysslqagslsitylvmvlimi rvgekllqt l g c k k p m l i g t g v l i v g e c l i s l t f l p e i l y v i c c i i g y l f f g l g l g i y  
atpstdtaianaplekvq  
aagiykmasalggafgvalsgavyaivsntniytgamialwlnagmilsfvii l l l v p k n d t q l  
>tr|D3EWJ6|D3EWJ6\_STAA4  
mvskkkalemidvianmfpdaecelkhdnpfeltiavl l s a q c t d v l n r v t t e l f k k y k t p e d y l a v s d e e l m n d i r s i  
glyrnkakknlcqs lid  
qfngeipqthkeleslagvgrktanvmsvafdepslavdthvervskrlginrwkdnvrqvedrlcsvgipdrwrnrshh  
qliffgryhclarkpkcdi  
cp l l e d c r e g q k r y k a s l k e a  
>tr|D3EWK2|D3EWK2\_STAA4  
mkigitycysmgsggiatelgiklaerghevfitsnipfrirkplnmi fhqvevnqyavfqyppyditlstkiaevi  
keydldlhmhyavphaic  
gilaremsgkdi kimttlhgtdivlgydhs l q g a i k f g i e k s d i v t s v s k s l a q e t h e i i e t n k e i i p i y n f v r e n e f p  
tkhntalksqfjiapdekv  
lihvsnfrqvkriddtiiefakvrekipsklil l g d g p e l v p m r q l t k e l n v e e d v l f l g k q d c v s e f y q l s d l v l l l s e  
kesfglt l l e a m k t g v v p i  
gsnaggikevikhgetgfvdvgdcdsasdyair l l e d k a l y n k l q k n m l a d i a e r f g s e l i t d q y e y y y q k m l n e h n k s  
kge  
>tr|D3EWK4|D3EWK4\_STAA4  
mssiftmi iyfvilmvlp l w a q h k v k s n y e k y s q v r s t s g k t g r e v a l e i l h a n g i y d v e v v k g e g f l t d h y d p k k k v v s  
lspanydrpsvagtaiaah  
evghajqdhqgywflrfraalvpvanlgsslsymimlgil l t a i g s a f g s t a l w i g a g l m s l a v l f s i v t l p v e f d a s s  
ramkqitalnivnekeykh  
arkvl saamtyvaatavavaelvriliarssd  
>tr|D3EWK9|D3EWK9\_STAA4  
mklqttypsnypifieghaidhistyidqfdqsfilid ehvnqyfadkfddilsyenvhkviipagekktkfeqyqet l  
eyilshhvtrntaiiavgg  
gatgdfagfvaatl l r g v h f i q v p t t i l a h d s s v g g k v g i n s k q g k n l i g a f y r p t a v i y d l d f l k t l p f e q i l s g y a e v  
ykhallngesttgeieqhf  
kdreilqslngmdkyiakgi etkldivvadekeqgvrkfln l g h t f g h a v e y n h k i a h g h a v m i g i y q f i v a n i l f n s n  
hdighyiny l t k l g y p l e t  
itdidfeti y q y m l s d k k n d k q g v q m v l i k h f g d i v v q h i d q t t l q h a c e q l k t y f k  
>tr|D3EWL1|D3EWL1\_STAA4  
mknisiilgil m f l k l m e l l y g a i f l d k p l n p i t k i i f i l t l i y i f y l v k e l i i f l k s k y n k s a  
>tr|D3EWL2|D3EWL2\_STAA4  
mwlvimi ihnkarf l c c s k l l e k f y s f l v t r i k k r g i f f i k  
>tr|D3EWM1|D3EWM1\_STAA4  
mmnesc l f i f g k s s c v s e l c k f f k k  
>tr|D3EWM4|D3EWM4\_STAA4  
mqkvesi i g g g p c g l s a a i e q k r k g i d t l i e k g n v e s i y n p t h q t f f s s d k l s i g d v p f i v e s k p r r n q a l v y y  
revvkhq l k v n a f e e v l t  
vkkmnkftit t t k d v y e c r f l t i a t g y y g q h n t l e v e g a d l p k v f h y f k e a h p y f d q d v v i g g k n s a i d a a l e l e k a g  
anvtvlyrggdyspsikpw  
ilpnftalvnhekidmefnanvtqitedtvtyevngeskti hndyvfamigyhpdyeflksvgiqintnefgtapmyinke  
tyetniencyiagviaagn

Tsompanidou\_et\_al\_Supplemental\_FASTA\_File

danti fiengkfhggiaqnm lakkqtples

>tr|D3EWN1|D3EWN1\_STAA4

mkkdfkvngkrfkqidyfdnkndnmkdavdikye l lndqgdptgqkti iyqgtskeainpnpnlkssgfgddwlqnak  
l mnn

>tr|D3EWN2|D3EWN2\_STAA4

mfkrik l i l i a t i i l s g c s t t n n e s n n e t k s v p e e m e a s k y v g g f q l p a e k d a i e f a k k h r k e f e k v g e q f f k d n f g l k  
vkatnvvgkddgvevyvhc  
edhgi v f n a s l p l y k d a i h q k g s m r s n d n g d d m s m m v g t v l s g f e y r a q k e k y d n l y k f l k e n e k k y q t g f t k e a i n k t  
q n v g y q n e y f y i t y l s r n l  
k e y r k y y e p l i h k k d k e f k e g m q r a r k e l n y t a n t d v v s t l f s t k k n f t k d n t v d d v i e l s n k l k d k p n m p q k s q v t i q l  
g k p s i n t k k p f y d d i n p i e

>tr|D3EWN9|D3EWN9\_STAA4

mdnhgiles l l f t a g d e g l d e k q l l e i l d m s k d q l v e l i e n y s s h g l m i q r f g t t y v l t t k k e a a t y i e q l i e q k s q m k l  
s q a a m e v l s i i a y n q p l s r  
s d i e l i r s i n s d g a v k t l i a k g l v e a k v v n e q r s q q l i t t d l f l n v f g i s n i e d l p t t e e d d e m d a f f s n l v n q k g e n n  
d

>tr|D3EQW8|D3EQW8\_STAA4

m q n k v l r i i i i v m l v s v l a l l l t s i i p i l

>tr|D3EWR5|D3EWR5\_STAA4

m s e k y d l v v l g g g t a g y v a a i r a s q l g k k v a i v e r q l l g g t c l h k g c i p t k s l l k s a e v f q t v k q a a m f g v d v k d a n v n  
f e n m l a r k e d i i n q m y q g v  
k h l m q h n h i d i y n g t g r i l g t s i f s p q s g t i s v e y e d g e s d l l p n q f v l i a t g s s p a e l p f l s f d h d k i l s s d d i l s l k t  
l p s s i g i g g g v i g m e f a s  
l m i d l g v d v t v i e a g e r i l p t e s k q a s q l l k k s l s a r g v k f y e g i k l s e n d i n v n e d g v t f e i s s d i i k v d k v l l s i g r k  
p n t s d i g l n n t k i k l s t s g  
h i l t n e f q q t e d k h i a a g d c i g k l q l a h v g s k e g v v a v d h m f e g n p i p v n y n m m p k c i y s q p e i a s i g l n i e q a k a e g m  
k v k s f k v p f k a i g k a v i d s  
h d a n e g y s e m v i d q s t e e i v g i n m i g p h v t e l i n e a s l l q f m n g s a l e l g l t t h a h p s i s e v l m e l g l k a e s r a i h v

>tr|D3EWR6|D3EWR6\_STAA4

m l q t l s i k q f a i e e l e i q f s d g l t v l s g e t g s g k s i i d a i g q l i g m r a s s d f v r h g e k k a v i e g i f d i d e s k d a i h i l  
k n m d i d v d e d f l l v k r e i f  
s s g k s l c k i n n g t v t l q d l r k v m q e l l d i h g q h e t q s l l k q k y h l t l l d n y a e s r y q d l l d k y h q t f q n y k a k k q e l e d l  
e s a d q a l l q r l d l m k f g l e  
e l s e a h l k e g e i e q l e i d i k r i q n s e k l s l a l n n a h m l t d e n a i t d r l y e l s n h l l t i n d i v p n k y d k l k e d i d q f y y i  
l e d a k h e l y d e m a n t e f d e  
q v l n e y e s r m n l l n n l r k r y g k d i s e l i a y q e k l n n e i n k i e n y e q s t s q l r e e i n a l y n q v i e v g q a l s k q r r i v a r e l  
r d h i v s e i q n l q m k d a n l e  
i s f k k l e e p n i d g i e f v e f l i s p n k g e p l k s l n k i a s g g e l s r i m l a l k s i f v k s r g q t a i l f d e v d s g v s g q a a q k m a e  
k m r d i a e y i q v i c i s h l p q  
v a s m s d h h l l i s k s s k d d r t t t q v q e l i g d d k v d e i a r m i s g a s v t d l t r e n a r e m i q h n q r r

>tr|D3EWS6|D3EWS6\_STAA4

m s r i t q v h r i l e q k h l d a i i l s d y n r r y l s g f t g t s g a l i i s k d k q y l i t d f r y i d q a t k q a p n y e i i n r k s t i i g e i k  
e l l h q e n f e n i g f e e h v s  
y d t y l e l n k s r i s l i s i s n t v d k i r d v k d v d e i a l i q k a a n i v d e t y e y i l t v v k a g m t e k e l k a i l e s k m l e l g a d g p s  
f d t i v a s g h r g a l p h g v a s  
d k i i e k g d m i t l d f g a y n g y c s d i t r t f a i g e p d p k l k e i y q i v l e s q m k a i n e i r p g m t g a e a d a i s r n y l e s k y g k  
e f g h s l g h g i g l e i h e g p m  
l a r t i g d k l q v n n c v t v e p g v y i e g l g g i r i e d d i l i t e n g c q v f t k c t k d l i v l t

>tr|D3EWT5|D3EWT5\_STAA4

m i l s k v t n k f v l f q k i p l l i k r h v s i n v k a f s l i e m l v a m m v i s i l l i v p d l i r l s k t f l i e s r e l t t v d f e f f s r d i  
l e d f k g v d k n d i e i r q q r i  
i l h k g e m i e y k l i n n k i i k v v n d r g n i t m i n n v t a f t a n i y y k s i i k i t i t v k v g t n l q t k t i y v

>tr|D3EWT7|D3EWT7\_STAA4

m e k q l q i r k q s a f t m i e m l v m m l i s i f l l l t m t s k g l s n l r v i d d e a n i i s f i t e l n y i k s q a i a n q g y i n v r f y e n s d  
t i k v i e n n k i r f l k l k v g k  
i i n v a k v d i a f d k k g n i n k f g s i t i d n n s i y r i i f h i e k g r i y e k l

>tr|D3EWW8|D3EWW8\_STAA4

m r i d q s i i n e i k d k t d i l d l v s e y v k l e k r g r n y i g l c p f h d e k t p s f t v s e d k q i c h c f g c k k g g n v f q f t q e i k d i s f  
v e a v k e l g d r v n v a v d i e a  
t q s n s n v q i a s d d l q m i e m h e l i q e f y y a l t k t v e g e q a l t y l q e r g f t d a l i k e r g i g f a p d s s h f c h d f l q k k y d i  
e l a y e a g l l s r n e e n f s y y  
d r f r n r i m f p l k n a g g r i v g y s g r t y t g q e p k y l n s p e t p i f q k r k l l y n l d k a r k s i r k l d e i v l l e g f m d v i k s d t a g  
l k n v v a t m g t q l s d e h i t f  
i r k l t s n i t l m f d g d f a g s e a t l k t g q h l l q q g l n v f v i q l p s g m d p d e y i g y g n d a f t t f v k n d k k s f a h y k v s i l k d  
e i a h n d l s y e r y l k e l s h d  
i s l m k s s i l q q k a i n d v a p f f n v s p e q l a n e i q f n q a p a n y p e d e y g g y d e y g g y i e p e p i g m a q f d n l s r q e a e r a f  
l k h l m r d k d t f l n y y e s v d

Tsompanidou\_et\_al\_Supplemental\_FASTA\_File

kdnftnqhfkyyvfevlhdfyaendqynisdavqyvnsnelretlisleqynlndepyleneidyyvneinekgqetiesln  
hklreatrigdvelqkyyl  
qqivaknkerm  
>tr|D3EWW0|D3EWW0\_STAA4  
melsqrgerieievktkgpigtgeqiadklnlratlrdplailtmsgflearprvgyyysgkskqkffnekrlrqfevkdy  
msqpvvlrenttvydaict  
ifledvstlfiinedndfvgvcsrkdllrasmigadihtvpisvnmtrmpnvtyleeselviyaadrmiekeidsipivr  
kkdnqkyevigriskttia  
kllvalyke  
>tr|D3EWW8|D3EWW8\_STAA4  
msvgilifvisviisiittmrenshkdrnqkppqktstdnepkkggffeeiertfkkiseelneeeksskrkyddtlp  
plfdelpkeepkskpvpvpep  
mapkkqpetkpmtekipitvpaepveqkhrpsrqdnsdeirrqlekslrdiktirtidrekeqiakmekrardied  
kylsertkr1klq1lnsq  
nvekd1tksafqfdkdevingmiwseilakpkq1  
>tr|D3EWY4|D3EWY4\_STAA4  
mlyvalsmivglwnsskvlstflfilllyityrknkivyapisflfiifsswylhysqqafinyinyiernsqfneraq  
viqiqrggsdtykgr1slk  
neiyppffltdkknfdlkkiesrncivkgqfkvnenkfvtklqsisvvqsclesnrsnliekhkqfimnriydsqgikfpr  
imalitgdvkeineqfker  
vkeigiyhllavsgshiaavfliyqplkrlnlplfvikgitiivltlyaqytnyapsavraimttlvlitkqikikg  
iqllafafiimfilnplvv  
ydigfqsfiisffimllfpflqqslqslfiitfiaqlasfivaipnfhq1qvwgflsnlifvpyysiilfp1silff  
itshfivgltp1nylvd1s  
fnfhdw1ldlfrtkqshfsvpkfndwifiiifisvyyifwllakrkyilvtfwtiiltllitfptnshhkitmlnvqg  
gdsilyeggknqnv1idtg  
gkviddtkqpsysiskyh1lptlnergineleylilthphndhigeveyiishikikhiviynkgysntlmllsklshk  
yniklmdvrqvsfklgds  
sflffdsfipnsrdkneysiitmiyqnkkvllmgdasknnesllkkynlpeidilkvghhgsktssskefiemikpki  
slissgknmyhlpnievv  
krlqri1rsriynsqngqvtidlddn1kvdnsygnasgl  
>tr|D3EWY9|D3EWY9\_STAA4  
mniekarklvkeklpekrynhs1rvaetaiklaei1ygdtskvelagvlhdfckyddl1gkmyqivrqyelgndllsygse  
ilhgpvcaimeheygind  
eevlmai1kyhttgrqmtkteklifiadyiepgrtipgvddirdmaynqgsldktiyeiskrtvlfliqkditvynktid  
c1nyynsderikdd  
>tr|D3EX05|D3EX05\_STAA4  
mdvrfineqtimiyfenki1seetyrnvtamvrw1rekeileiqdivpsyravliyfdeqaitssklienlelnkfnknv  
havdqtnri1kipvqygg  
ygpdi1eavakhnritveqviekhtskpyliym1gfmppfpyl1ggld1eq1htprnrqpr1kihagsvgiannqtglypsds  
pggwqi1grtp1kvfsser  
epmsmyeagewi1qfyaideqkfiqierdisdgnfnvddwvvienvn  
>tr|D3EX09|D3EX09\_STAA4  
mte1l1vtpks1shmet1id1gadafvigeqkfgl1r1pgefnrqmqteavalahkndkkvyaavngl1fhnyh1davedyin  
flheirvdri1fgdpavvm  
yvkaqenpi1pihwnaet1vtnhfqcnywgkrgasravlareln1dei1nikensnveievqvgqmtcmfqs1krm1l1gnyy  
tfqdrqmkierrndeqs1l  
lydeerqnnypvyedyngthimspndic1ieelapffeagidsfkidgilqteeyinvvteqyrqaidlynedpeiyede  
kfm1idpiee1iqpdrhpf  
egf1ykqtv  
>tr|D3EX12|D3EX12\_STAA4  
msdimgwtaqgl1dt1rineenne1gidq1vdi1kknvgtv1vig1pknmnsig1frgeas1tykek1leaypsieivmwd  
er1stmaaers1leadvsr  
qkrkqv1dkmaavf1lqgy1ds1h  
>tr|D3EX14|D3EX14\_STAA4  
mkk1kasei1rqkyl1dffvekghmvepsaplvpiddt1llw1nsgvat1kkyfdgretpkkprivnsqkairtndienvgf  
tarhhtffem1gnfsigdy  
fkqeaie1fawef1tsdkwmgmepdklyvtihpedmeayniwhkdig1lesri1riegnfwdigegpsgpnteifydrgea  
ygqddpaeemyppgenery  
1evwn1vfsefnhkhdsytp1pnknidtgmg1ermasvsqvrtny1etd1fmpimneiekvsgkqyl1vneqdva1fkvi  
adhirtia1faidsgalpan  
egr1gyvl1rr1l1rravrfsqt1ginepfmyk1lvd1vadimepyypnvkekadfikrvikseerfhet1edglailnelik  
kakattneingkdafklyd  
tygfpiel1teei1avqag1kvdm1ttfesemqqdrdrarqarqnsqsmqvqsev1knitsastfvgydtataqt1lthliyn  
geevs1qveagetvyfmlte  
tpfyavsggqvadtgi1vyndnfei1avsevtkapngqnl1hkgvvqfgqvnvgatvsaevnqndrrdi1qknhsath1lhaal  
ksvl1gdhvnqags1veadr  
l1rfd1fshfgpmtnde1dqver1vnee1iwkgidvni1qemdi1sakemgama1fgekygdvrvvnm1apfsiel1cggihvrn



Tsompanidou\_et\_al\_Supplemental\_FASTA\_File

tseigl fki vsesgtgagv  
rriealtgkaaflyledikefntmksqmkvksddqvvekl tq lqdeekallkql eqr dkeitsl kmgniedqveeingy  
kvlvtevdpnakairstm  
ddfksklqdti i lasnvddkvs mvatvpks ltnnvkagdl ikqmapivggkgggrpdmaqqgggtqpenisks lsfikdy  
ikn l  
>tr |D3EX15 |D3EX15\_STAA4  
msdptlfdysmi kgtveail fqn sdnfytv lkvdtietnedfdtmptvvgflpnivegdvyt fkgqvvdhprygkqlkae  
tfekempqtkeai isylss  
dl fkgvgkktaqnivnt lgdna indil ddhsvlekvsgl skkkqkqiaeqisanqesekimir lhd l gfgpk lsmayqf  
ylgdt ltil drnpyqliyd  
ikgigfnkadqlarnigiayndner lkaal lytleecikqghtyl pinvvid ltvdlvnyqdeeviepekl demlqyln  
eekrliidneqvaipslyy  
seiksvqnl frikthtnkl teieqsd lqm higeiedanqvnyasqkealqtainskvml l tggpgtgkttvikgively  
aeihg lsl dyddyvnddy p  
vvl aaptgraskrl qestgleamtihr ligwnqdtkpedileneinarli idemsvdwl fhqfl savpl daqlifvg  
dedqlpsvpggqv fkd lie  
skaiprvnl tevyrqdgssi elahrml gqkiditqrfhd rsfincanqiptvvekvvtsavnkgyt madiqv l apm  
ykg nagikrlnqvl qdi ln  
pkkkdtreiefgdvv frkgdkvl qlvnrpdni fngdigvivgi fwakenalnkdvlvvd fegneitftkq dmmelthay  
ctsihksqgsefpivimpi  
vkqyfrm lqrpil ytg ltraktslvl l gdp eafdigl ktngqarl tq lctllknyfnsedeemlentatndt gasqttid  
dqveapmssndsgevt sds  
tktdinvl teatmfkidpminmgeitpydfier  
>tr |D3EX19 |D3EX19\_STAA4  
maikysaln lvpiregddertaindmvkl aqhl del syerywiaehhnapnlvssata lliqhtlehtkhirvsggiml  
pnhapli vaefgtmatlf  
pnrvdl glgrapgt dmtasal rrdqhdgvykfpeevs llqqyfgpahqqayvraypavgnvplyilgsst dsahlaar  
kg lpyvfagh fapqqmkea  
ieiykt l fepsdvl depyvivc lntivaenddeaqyl assmaqvmvsitrgrmqpvqp pthdlqnil tpreyamamerqk  
isligsentvqqki qdfme  
tygeveimaissyidkdmql dsyrrfknvinqineknl  
>tr |D3EX37 |D3EX37\_STAA4  
mnermvdqsmhseetdfels lrp rtr lqyigqnsiksnlevfikaaklrhepl dhvllfgppglgkttlsniianemevn  
irtvsgpslerpgdlaail  
sglqqgdvl fideihrl ssvveevlypamedffldi i igkgdearsirid lppftlv gattrags l tgp l rdrfgvhlrl  
eynesdlkei iirtaevl  
gtgideesaie lakrsrgtprvanr llkrvrdfqvnedeqiyiettkhal gl lqv dqhgl dyidhkmmnci ikqynggp  
vgldtiavt i geeritied  
vyepfliqkgflertprgrkatplayehfaksneerg  
>tr |D3EX39 |D3EX39\_STAA4  
mmdnkdykkfyli redvl pesvvtl kikdalksdpt lsiydavkqfd lrsafykyretifvddkml dhreftlilyv  
tdivgm larvldvisklel  
svl tihqsi pmeekatit lsnaksketsvedvialrn ldyvskvelismm  
>tr |D3EX48 |D3EX48\_STAA4  
msiltiiall vil l frvg l silrfliyvg l vllciylgyqgliwll dffqinsgflphfqfn  
>tr |D3EX59 |D3EX59\_STAA4  
mnyleslywihertkfgikpgvkrmewmlaqfnnpqnnikgihvggtnkggstvayl rta l vengyevgtftspfi etfn  
erislngvpisndaivelv  
srikpvsemmeretdlgvatefei itammflyfgeihpvdviveaglgikndstnvftpvl siltsigldhtdilggty  
ldi ardkgai ikpnpviy  
avkneda lkyvreraieqhakpiel dreivvvsqndeftyrykdyeleti lsm lgehqqnaalaital ielneqglie  
ldfnk midgiesvrwtgri  
eqvhdkpl iildgahn sesidal idtikqyhdkekvdil fsaingkpinemvkh lsliahtfyatefd fpkvlrkeevg  
siendeiqlvddyvefikn  
yqgd tl vitgslyfisevkskl dfeal  
>tr |D3EX62 |D3EX62\_STAA4  
mtmiyrnnfivfv l sffisi ilysshvll pfmfgpii asiicvkvfkl dikwpfl lselgivil lgvqigstftknvmdi  
knwls iivvsi lliai  
vmafikkiarintetai lsvipgaltqmlvmaeqdkranllvsl tqtsriifvv lvpfisyffhdgnmhangkltkv  
lpls qvlnigqivilaia i  
fivylimskikfptfqllaplivilivwnfstgltftldhwllnmaqli ymirigvqiahllsd lkgrlaiaitiqnimli  
igalimvyihffdnnpin  
el flgaapggvnqivilvalatgadvamitsyhi friffilfi iapgin yflkyrsnkred  
>tr |D3EX63 |D3EX63\_STAA4  
mtsicvsapgitlkiavsvlirailkinaitiainnieidttiesqlflisittffvnvdpictpnstipnslskngh  
lisslktftqm idaiign  
ingsntcdeyni ilikndkntmk lflyiivmfstsfnk  
>tr |D3EX65 |D3EX65\_STAA4

Tsompanidou\_et\_al\_Supplemental\_FASTA\_File

mrytkseeamkvaetlmpggvnspvrafksvdtpaifmdhggkskiydidgneyidyvlswgplilghrdpqvishlhea  
idkgtsfgastllenklaq  
lvidrvpsiekvrmsvsgteatltdlrlargytgrnkivkfegcyhgshdsllikagsgvatlglpdspgvpegiaknti  
tvpynldalkiafefkgd  
diagvivepvagnmgvvppeiegflqglrditteygallifdevmtgfrvgyhcaqgyfgvtpdlctlgkviggglpvgaf  
ggkkeimdhiaplgniyqa  
gtlsgnplamtsgyetlsqtpetyeyfnlmgdiledglkrvfakhnvpitvnragsmigyflnegpvtnfeqanksdlk  
lfaemyremakegvlpps  
qfegtflstahtkediectiqafdtalsrivk  
>tr|D3EX72|D3EX72\_STAA4  
mfkfnedeenlkcsfcgkdqdvkklvagsgyvicnecielcseiveelaqntseamtelptpkeimdhlneyviggek  
akkslavavynhykriqgl  
gpkeddvelqksnialigtgsgktllaqtlaktlnvpfaiadatslteagyvgddvenillrliaadfdidkaekgii  
yvdeidkiarksentsitr  
dvsgegvqallkilegttasvppqgrkhpnmqemiqiddttnilfilggafdgieevikrnlgekvigfssneadkydeq  
allaqirpedlqayglpe  
figrvpivanletldvtalkniltpknaivkqytkmllddvdlefteealsaisekaiertkgarglrsiieeslidi  
mfdvpsnenvtkvvitaqt  
ineetepealydaegnlinnsksa  
>tr|D3EX84|D3EX84\_STAA4  
mstniaingmrigrmvtrialqnknlnvvasinasyppetiahlinydtthgkynlkvepienglqvgdhkiqlvadnnp  
enlpwkelididaidatgk  
fnhgdkai ahikagakkvlltgpskghvqmlvkgvndnqldieafdisfnascttncigpvakvlnnqfgivnglmttv  
haitndqknidnphkdllr  
arscnesi iptstgaakalkevlpelgklhgmalrvptknsvldlvvdlekevtaeenvqafenaglegievehqpl  
vsdfntnpsaiidakst  
mvmngnkvvkiawydnewgysnrsvdvaeqigalltsketvsas  
>tr|D3EX94|D3EX94\_STAA4  
mrktkivctigpaseseemieklinagmvarlnfshgsheehkgridtirkvakrldkivailldtkgpeirthnmkdg  
iieleergnevi vsmneveg  
tpkfsvtyenlindvqvsyillddglieqlvkdidhakkevkc dilnsgelknkkgvnlpgvrsvlpgitekdaedir  
fgikenvdfiaasfvrrps  
dyleireileeqkani svfpkienqegidniaeilevsdglmvargdmgeippekvpmvqkdllrqcnklgkpvitatq  
mldsmqrnpratreaasdv  
anaiydgtdavmlsgetaaglypeeavktmrniavsaeaaqdykllsdrtklvetslvnaigisvahtalnlnvkaiva  
atesgstartiskyrphsd  
iiaavtpeetarqcsi vwgqvkvkgrkstdallnavatavetgrvsngdliiitagvptgetgttnmmkihlgdei  
angqgigrsvvgttlvae  
tvkdllegkdl skvivtnsidetfvpvvekalgliteengitspsaivglekgiptvvgvekavknisnmlvtidaaqq  
kifegyanvl  
>tr|D3EX99|D3EX99\_STAA4  
mvaylnihtaydl nsslkiedavr lavsenvdalaitdtnvlygfpkydaciannikpifgmtiyvtnglntvetvvl  
aknndgldlyqlssekim  
nsmenvsfellqqfssnliiifknvadehrdivqvfdshedtyldhqsylvqgikhvwiqnvcyqtrqdadtisalaair  
dnakldlindhqedfgahfl  
tekeikqldinqeyltqvdivaqknaelkyhqsllpqyqtpndesakylwrvlvtqlkklelnydvylerykyeykvi  
tnmgfedyflivsdlihya  
ktndvmvgpgrgssagslvsyllgittidpikfnllferflnpervtmpdididfedtrrerviyyvqekygelhvsgiv  
tfghllaravardvgrimg  
fdevtlnessliphklgitldeayqidfdkfvhrnrherwfsickleglprhtsthaagiindhplyeyapltkg  
dtglltqwtmteaerigll  
kidflglrnlsiihqliqvkkdnginidiekpfdqkvfellsqgdttgifiqlesdgvrsvlkkklkpehfedivavts  
lyrpgpmeeiptyitrrhd  
pskvqylhphlepilntygviiyqeqimqiastrandfanfsygeadilrramskknravleserqhfiegakqngyhedisk  
qifdliikfadygfpraha  
vsyskiayimsflkvhypnyfyani lsnvigsektaqmieeakkqgitilppnineshwfykpsqegiylsigtikvgv  
yqsvkvi vderiyngkfkf  
ffdfarripkrvkrkllea lllvgafdafgktrstllqaidqvl dgdlnieqdgflfdiltpkqmyedkeelpdalisq  
yekeylgfyvsqhpvdkkf  
vakqyltikl snaqnykpi lqvfdkvqirrtkngqnmavftlndgietldgvi fpnqfkkydelshndl fivsgkfdh  
rkqgrqliineiqtlatfe  
eqklafakqii rnskqidmfeemikatkenandvlsfydetikqmttlyinqkdsmfnnfiqsfnpsdirli  
>tr|D3EXA7|D3EXA7\_STAA4  
msklilainagssslkfqlirmpeee lvtkglieriglkdsiftievngekvktvdikdhveavdimldafkahniind  
indidgtghrvvhggekfp  
esvaitdevekeieel selaplnpanlmgirafkllpniphvai ftafhqtmpekaylslpyhykdygirkygfh  
gtshkfvsqraaemldkpi  
edlriischingasiaaidggksidtsmgftplagvtmtrsgnidpalipfimektgktaeqvleilnkesgllglsg

Tsompanidou\_et\_al\_Supplemental\_FASTA\_File

tssdlrdlseeaesgkars  
qmaldfaskihkyigsyaarmhgvdvifvtagigensveirakvleglefmgvywdpkknellrgkegfinyphspvk  
vvviptdeesmiardvmtf  
gglk  
>tr|D3EXB2|D3EXB2\_STAA4  
miyldnaattkafeevldtylknvqsmynpnsphkaglqanqlqqakaqinaminsktnydvvtsgatesnllakg  
iayrkfdtakeiitsvleh  
psvlevvryleahegfkvkyvdvkkdgsinlehfkelsdkvglvtcmvnnvtgqiqipqmakviknypkahfhvdav  
qafgkismdlnnidsisls  
ghkfnlkgqgvllvnhiqnveptvhgggqeygvrsgtvlndiamvkamkianenfealnafvtelnndvrqflnkyh  
gvyinsstsgspfvlnisf  
pgvkgevlvnafskydimisttsacsskrnlnevlaamglsdksiegsirlsfgatttkediarfkeifiiyeeikel  
lk  
>tr|D3EXB3|D3EXB3\_STAA4  
mslylnscvimlfslliliktthlitfifkqlfifivpfiyppykrs  
>tr|D3EXB9|D3EXB9\_STAA4  
myyhqpllltpgtpvpdaimeiqapmvghrskdfediaqqafqglkpifigsqndvlltssgtsvleasmlnivped  
hfvvsvsfgafgnrfkqiaq  
tyyknvhiydvwtgeavdvkdfinylstldvekvafsqcetsttvlhpihelgnainqfnsniyfvvdgvscigavdv  
dinkdkidvllvsgsqkaim  
lppglafvayshrakerfkevttkfyldlnkyissqadnstpftpnvslfrgvnayvetvkaegfnhviarhyairnal  
rsalkaldtllvndkdas  
ptvtafkpntnevkiikdelknrfkitiaggqghlkgqilrighmgkispfdilsvsaleiiltehrkvnnyigkgisky  
meviheai  
>tr|D3EXC0|D3EXC0\_STAA4  
mkqfnvlvadpiskdgikalldheqfnvdiqtglseealikiipsyhalivrsqttvteniinaadslkviaragvgvnd  
ininaatlkgilvinapdg  
ntisatehslamllsmarnipqahqsltnkewrnafkgteylyhktlgvigagriglgvakraqsfgmkilafdpyltde  
kaksllsitkatvdeiaqhs  
dfvtlhtpltpktkglinadffakakpslqiinvarggiidekalikaldegqisraaidvfehepatdsplvahdkiiiv  
tphlgastveaqekvaisv  
sneiieilidgtvthavnkmdlniddtvksfinlsqtvgelaiqlmynapssikityggdlasidsslltrtiithi  
lkddlgepvniinalmlln  
qqqvtlniennkaetgfsnylevelsndsvkvgasvftgfgprivrinnfsvdlnkpnqyqivsyhndtpgmvgtgal  
lgkyniniasmtlgrteag  
gdalmilsvdqpvsnniidelkqvgeynqifttelvtqs  
>tr|D3EXC7|D3EXC7\_STAA4  
mnkhhpkllrsfysirkstlgvasvivstlflitsqhqaqaentntsdki senqnnatttqqpkdtnqtqpatqpvita  
knypaadeslkdaikdpal  
enkehdiqpreqvnfqlldknetqyyhffsikdpadvyytkkkaeveldintastwkkfevyennqklpvrllvsyspvp  
edhayirfpvsdgtqelki  
vsstqiddgeetnydytklvfakpiyndpslvksdtndavvtndqsssdasnqtnntnsqntstttnannqpqattms  
qpaqpkssanadqassqa  
hetnsngntndktnessqsdvnqyppadeslqdaiknpaidkehtadnrpidfqmndkgerqfyhyastvepatv  
iftktgpvielglktastw  
kkfevyegdkklpvelvsydsdkdyayirfpvsngtrdvkivssieygenihedydylmvfaqpitnnpddyvdeety  
lqkllapyhkaktlerqvy  
eleklqeklpekykaeykkldqtrveladqvsavtefenvtptndqldlqeahfvvfeseensesvmdgfvhpfyt  
atlngqkyvvmktkddsww  
kdlivegkrvtvskdpknnsrtlfpypdkavynaikvvvanigyegqyhvriinqdintkdddtsqntsepnlvq  
tgqegkvadtvaenssta  
tnpkdasdkadviepesdvkdadnnidkdvqhdvdhlsdmsdnhfdkydlkemdtqiakdtdrvndsvgmssnvtd  
kdsnknkdkvialahivdk  
nnhtgkaakldvvkqnyntdkvtdkkttehlpdihktvdkvtkeagtpskenklsqskmlpktgettssqswgl  
yallgmllaifipkfrkesk  
>tr|D3EXC9|D3EXC9\_STAA4  
mkvevykgaggkhnldyeetyntfdwkdvqafswsetgkmmayecidrhvdqglgdkia lnkdeyrkesytkdmq  
rlnskaanvlsehaevdkg  
drvfi fmsrtpe lyfallgvllkigai vgp lfeafmekavadr lenseakvli tnkallprvpvdklpnlkkivvdedve  
dnyidfis lmetasdefdi  
ewlksddgli lhytsgstgqpgkvlhvqqamlvhyi sgkyvldlqeddvwyctadpgwvtgtsygi fapwlngatnciag  
grfspeqwysmi edfkvti  
wytaptal rmlmsagddivekydlssllrsilsvgeplnpevikwvkkvyglvtl dtwmmtetgghmivnyptmdvklgsm  
gkplpgiqaai iddagne l  
ppnrmgnl aikkgwpsmmyriwknpekyksyfigdwvsgdsaykdedgyfwfqrddv imtagervgpfevesklveh  
eavaeagi igkpdprgei  
ikafvalrkyepte delkeir lfvkegl sahaapreiefkdkl pkrsgkimrrvlkawelndagd l stme  
>tr|D3EXD0|D3EXD0\_STAA4

Tsompanidou\_et\_al\_Supplemental\_FASTA\_File

mnhlktyqsedyihdkqfviegpltyedlkaltdahlfatfrdaedqyealleittlpegriyvarqdelivgyvtfhy  
pdeierwstgnlpylielg  
aievsinfrqllhlaekliqlslstpefedyivitteyywhwdlksklvdfdykklmqrllmatggleifatddpeitshp  
ancmlmarigknitleqqqa  
fddiry mnrfff  
>tr|D3EXF2|D3EXF2\_STAA4  
mnlkknkysirkykvgifstligtvlll snpngaqaalttdnnvqsdt nqatpvnsqdt nvanrglansa qntpnqsat  
tnqstnqalvnhnngsian  
qatptsvqsstpsaqnnhdtgnttatetvsnannkdvsnttl nvpnktnengsgghltlkeiqedvrhssdkpelva  
iaeqasnrpkrrraapa  
dpnatpadpaaaaagnggapvaitapytpttdpnannagqnapnevlsfdngirpstrsvpsvtvvdnlpgftlingg  
kvgvfshamvrtsmfdsgd  
aknyqaqgnvialgrikgndtdhgd fngieksltvnpnselife ntm ttknyqgvtnliiknadndtviaeksvaygp  
iwr1fkvpenvshlkiqfv  
pkndaitdargiyqlrdgykydfvdsiglhsgshvyverrtmeptatnkeftvttslknngnfgasfntddfvykvql  
pegveyvnsltkdfpssn  
sgvdmndfnvtydaanrvitiktstggsgnsparlmpdkildlkyklrvnnvptprtvtfndtlyktytqdfinspaes  
htvstnpytidiimnkda  
qaevdrrjqadyt fasldi fndlkrraqtildenrnnvplnkrvsqvdidslnqmghtlirs vdaenavnkkvdqmed  
lnqndeltdeekqaaiqv  
ieehkneiignigdqttddgvtrikdqigtls gdtatpvvkpnakkairdkatkqreinatpdatedeiqdalnqlat  
detdaidnvt natnadve  
iaknngintigavvpqvthkqaardainqatatkrqqinsreatqee knaalnel tqatnhaleqinqattnadvdnak  
gdglainpiapvtvkkqa  
ardavshdaqhiaeinanpdatqeerqaaidkvnaavtaantniln antnadveqvkt naiqqiqaitpatkvktdakn  
aidksaetqhntifnnda  
tleeqqaaqqlldqavatakqin naadt nqevaqa kdqgtqni vviqpatqvkt darnavndkareaitninatpgatre  
ekqea inrvntlknraltd  
igvtsttamvnsirddavnqigavqphvttkqtatgvlnlatakkqeinqntnatteekqvalnqv d qelatainning  
adtnaevdqaqqlgtkain  
aiqpni vkkpaa lainqhynaklae inatpdatndeknaaintlnqdrqqaiesikqantnaevdqaatvaennidavq  
vdvkkqaardki taevak  
rieavkqtpnatdeekqaavnqinqldqainqinqnqndqvdttt nqavnaidnveaevvikptaiadie kavkekqq  
qidnsldst dnekevasqa  
lakekeka laaidqaqtnsqvnqaatngvsaiki iqpetkvkpaarekinqkanelrakinqdkeataerqvaldkine  
fvnqamtdi tnnrtngqv  
dtt sqal dsialvapehivraardavkqqyeakkqei eqaehatdeekqvalnqlanneklalqinqavtndvkrve  
tngiatlkgvqphivikpe  
aqqaikataenqvesikdtp hatvde ldeanqlisdtl kqaqqeientnqdaavtdvrnqtikaieqikpkvrrkraald  
sieennknql dai rntldt  
tqderdvaidtlnkivntikndiaqnktnaevdrtetdgdndikvilpkvqvkaarqsvgvkaeaqnalidqsdlstee  
erlaakhlveqalngaidq  
inhadktaqvnqdsidaqniiskikpattvkatalqqiqniatnkinlikanneatdeeqniaiaqvekelikakqqias  
avtnadvayllhdekneir  
eiepvnrkasareqlttl fndkkqaeianiqatveernsil aqlqniydaigqidqdrsnaqvdktaslnlqtihld  
vhpikkpdaektindlar  
vtalvqnyrkvsnrnkadal kaitalklqmdeeltartnadvdavlkrfnvalsdieavitekensllridniaqqtya  
kfkaiatpeqlakvkvlid  
qyvadgnr midat lndikqhtqfivdeilaiklpaeatkvspkeiqpapkvctpikeethesrkrveklpntgsegm  
dlplkefalitgaallarr  
rtknekes  
>tr|D3EXG4|D3EXG4\_STAA4  
msqfmdyaiqlanmvqqgtgvnppvgavvvnegrivgigahlrkgdkhaevqaldmaqqnaegatiyitl epcshfgstp  
pcvnkiidckiakvvyatk  
dnl dthgdetlrahgievecvdderasqlyqdffkakakqlpqi tvkvsasldgkqandngqsqwitnkevkdvyklr  
hrhdavltgrrtvelddpq  
yttri qdgknpi kvilsksgnihfnq qiyqdestpiwi ytenpn ltsnqthieiiylkscdlttilhnl ykrvgvtllve  
agptttseflqsnyidefi  
lyyapkliggsnyqfyqndvieipdanqfeivhse llnqnvkltrkk  
>tr|D3EXH9|D3EXH9\_STAA4  
mlkdrnsfsktdhd atfmr mkedhmknqqlkpgynlqiatnsqffypmtyf kppqilel  
>tr|D3EXJ7|D3EXJ7\_STAA4  
mkakyknhqietnekriknhl nrafnreqpmetlvsdltyvkvvggwhyiclfidlnreivgysagknkdanlvskais  
rinhnleqikl fhtdrcke  
fdnhli devletfki krs l stkgcpydnavaeatmkamktefvkqm qfenleqletelfdyvnwynnfrphsslqyltpv  
afknihmktv  
>tr|D3EXK0|D3EXK0\_STAA4  
msntqtknvpelrfpgfegeweeklgnl ttkigsgktpkggsenytnkgipflrsqinrngkl nln dlvyiskdiddem

Tsompanidou\_et\_al\_Supplemental\_FASTA\_File

knsrtyygdvllnitgasi  
grtainsivethanlnqhvciiirkkeyyynffgqyllsrkgkrkiflaqsggsreglnfkeianlki ftptifeeqqi  
gfffskl dqqieleeqkle  
llqqkkcyiqkifsqelrfkdeegnnykgwnkkqlkdvlfnkrtnineneypvltsrqglllqsdykdrktfaesn  
igyfilpknhityrsrdd  
gikfnlnlmidvgiiskyyvpfkgidanqyytlhlnyqlkkeyikyatsqlvlsqkdlqniktklpsyeeqqkigd  
ffseidr1vekqsskvgr1  
kvrkke11qkmfv  
>tr|D3EXK4|D3EXK4\_STAA4  
mnkniviksmaalaitsvtginaavveetqqianaeknvtqvkdttnfpyngvvsfkdatgfvigkntiitnkhvskdy  
kvgdritahpngdkngggi  
ykksisdypgdedisvmnieeqavergpkgnfnenvqafnfakdakvddkikvigyp1paqnsfkqfestgtikrikd  
nilnfdaiyepngsgspv1  
nsnnevigvvyggigkigseyngavyftpqikdfiqkhiq  
>tr|D3EXK6|D3EXK6\_STAA4  
mnknvmvkg1taltiltslgfaenisnqphsiakaeknveitdatkapynsvvafaggtgvvvgkntivtnkhiaksnd  
ifknrvaaahysskgkgggn  
ydvkdiveypked1aivhvetsteglnfnknvsytkfaegakakdrisvigypkgaatkykmfestgtinhisgtfie  
fdayaqpgnsgspvlnskh  
eligilyagsgkdeseknfgvyftpq1kefiqniek  
>tr|D3EXK7|D3EXK7\_STAA4  
mlskhfi1yqkdkdmhghvsetnpyylnneiesnlknvftnrnysiqgeiaksdprnnisrkkfhnsiifn  
>tr|D3EXL5|D3EXL5\_STAA4  
mrr11s111astm1lvacgnannenkkkedeksevkeatkndkpknekknqdinknnneqvqvnnkqpvlnnnsnh  
nnqqqsnnnytviengt  
vteinygqshthttnpi reeyvegetdpykreykhfytpeeaqraqensdqi1remgleperye  
>tr|D3EXL8|D3EXL8\_STAA4  
mkk1stvi11ileivfhnmyvnaqdpdk1delnkvsdyknnkgmtgmnmlytsppvegrgvinsrqflshdlifpie  
yksyevkte1entelann  
ykdkkl1dfgvpfyfyci1pksepdiqnfggcccmyggltnssenerdklitvqvtidnrqslgftittknmvtiqel  
dykarhw1tkek1lyefdg  
safesgyikftekntsfwfd1fpkkelvpfvpykflniygdnkvvdsksikmevflnth  
>tr|D3EXM0|D3EXM0\_STAA4  
mkkctmyggvtehgdgn1dknnstdnshnilikvyenernslsfdiptnkknitaeidykvrnyllkhknl1yefnsspy  
etgyikfi1egsghsfwyd1  
mpesgkkfyptkyl1i yndnktvesksinvevh1tkk  
>tr|D3EXM3|D3EXM3\_STAA4  
mkri1i1v11fcysqnhiatadvgl1n1rnygsypiedhqsinpennh1shq1v1fsmdnstvt1aefknvddvkkfknh  
avdvyl1s1sgyc1knkyi  
yggvt1agdy1eksrripin1wvngqhqt1stdkvstnkk1vt1qaeidtk1rryl1qee1ny1g1fnd1tnkgrnygnkskfs  
sqfnagk11fh1ndgssfs  
ydlfdt1gt1gaes1f1kiy1ndnktvetekf1hdve1sykdes  
>tr|D3EXN7|D3EXN7\_STAA4  
mi1ks1ei1gy1g1fv1rki1efnknfte1fgeneagk1st1qafi1hs1il1fg1fptkkskepr1epr1gnqy1gk1vl1il1ddg1  
ei1ever1kgsa1g1gd1kvyl1  
pngav1rddaw1qkk1ny1skkty1ggi1fsfdv1gl1qdi1hrn1nek1ql1qdy1ll1qaga1g1ste1ftsmrev1nrkkde1lykks1g  
knpi1inq1ie1ql1kq1lesq1  
reeeak1ety1hr1vddrdk1ssrr1en1khn1nq1skmheek1qkeval1hdhsqewks1leqq1niepit1fpek1gvdryekar  
ahkqsl1erdig1rner1laq  
1keeat1qlep1vk1sdi1dafis1lnqqenei1knkefel1taiekdi1ank1rdkde1lqani1gwseth1hdvs1seamksyvseqi  
knkqeqaay1kq1lers1lee  
nkiednavhse1ldsveek1ivpeet1fek1kkeysq1vie1neken1ysk1kerfeieqqek1qkrqk1llrtt1fill1tlvgig1  
tafsf1isnm1lfgi1ifav1  
tl1vf1vigi1mskskevd1yseaitdeieeikaqla1lden1ydl1dfd1deqyri1rdhwqqa1knkdileekrqyiegr1nda  
kgrhde1lqstven1vkde1ly  
1sski1sndl1ivds1stmanika1ldqhis1dl1nqqrqql1vqel1dtfynhaeav1tksq1fvyfnk1sl1fhdvqqw1ksaedtne  
kwrinaentk1lvtne1nh1  
naq1leenkeita1lfdfi1ngteed1fyqh1hedyq1tytsn1sr1fnd1tkyl1enqnysye1lsss1sekttaq1leedh1lat  
qvdey1neqylem1ggqv1sd1  
saq1nhmetdt1tan1rheys1lnq1lndiakdwas1syl1qsl1vdehik1qikdkr1lpqv1ineave1lkh1tdgrytminy  
neds1itvkhvngg1lydpve  
1sqstke1llyval1ris1likv1rpyyp1fpl1vddaf1vhfdkkrtekm1ny1rs1sehyqv1lyftcvkdnivpskevit1nk  
ieeggkr  
>tr|D3EXQ2|D3EXQ2\_STAA4  
mg1sadyapmefeh1tvngktey1agvdi1lakki1akdn1kl1kivnms1f1s1l1gal1ktgkidi1isgmt1stperkk1qvdfs  
dsymm1tknim1lvkkdkvte  
ykdikdfn1kkvga1qkgt1qekiaqte1enasits1sr1lpd1v1al1ksgk1vegav1vekpva1eay1lkqnpk1lgis1nvk1fne  
eekdtv1avpkdspk1l1sq

Tsompanidou\_et\_al\_Supplemental\_FASTA\_File

inkti evkdkg lidkymt naanamnddsgfiskygsfflkgik itilisligvalgsilgafvalmklskikiiswias  
iyieilrgtpmlvqvfvf  
fgitaa lgl disalvcgtialvinssayiaeiiraginavdkgqmeaarslglnyrqtmksvimpqaiknilpalgnefv  
tlkessivstigvgeimf  
naqvvggisfdpftp1lvaaalyfvltfvltrimmiegrlnasd  
>tr|D3EXR2|D3EXR2\_STAA4  
myqqssfkenlihwfdenqremprwttnpyyiwlsevm lqqtqvktvidyyhrfverfptvevlsqasedevlkywegl  
gyysrarnfhtaivevyk  
yeglvpkdpdqfka lkgvgpytqaavmsiaynvp latvdgnvfrvwsr lnddyrdiklqstrksyeqellpyvtteagtf  
nqammelgalictpknp lc  
lfcvpqenceafdkgtfeklpvksknvskkvi eqsvflirnnqgqyl lqkrsekllhgmwqfpmfesehakrkmtekigh  
diqpvtpifelkhqfthl  
twkikvyaasgainietlpddmiwfnlsdrdqytfvpmskiyqfing  
>tr|D3EXT5|D3EXT5\_STAA4  
mhelitihfmsdklnlysdignialrqrakkrnikvnveinetegitfdec diffigggsdreqalatkel skiktp l  
keai edgmpgl ticggyqf  
lgkkyitpdgtelegl gil dfytesktnrltgdiviesdtfgt ivgfenhggrtyhdfgtlghvtfgygnndedkkegih  
yknllgtylhgpi lpknye  
itdyllekacerkgipfepkeidneaeiqakqvlidranrqkksr  
>tr|D3EXU2|D3EXU2\_STAA4  
mrkrari ynptsgkel fkre lpdaliklekagyetsayatekigdatleaeramhenydv liaaggdgtlnevngiae  
kpnrpklgvipmgtvndfg  
ralhipndimgaldv iieghstkvdigkmnryfinlaaggql tqvsyetpsklksivgpfayyikgfemlpqm kavdlr  
ieydgnavfggeallfflgl  
tnsmagfeklvpdaklddgyftliiveksnlaelghimtlasrgehtkhpkiyekakainissftdlqlnv dgeyggkl  
panflnlerhidvfapndi  
vneelinndhvddnliee  
>tr|D3EXU3|D3EXU3\_STAA4  
miadldaiegl fisievil lltl fivhngkninfinalaliilrqtv  
>tr|D3EXW5|D3EXW5\_STAA4  
mivvavnfkwsfelym lkenramnrhvnniynfnhnekgrkktkiytqhrkyfkkm  
>tr|D3EXW6|D3EXW6\_STAA4  
mnieeqkyfyskaffntqqt kdisfrkdqlkkl skaiksyedilealytdlgknkveayateigitlksiknarkelkn  
wtktknvdtpl ylfptksy  
ikkepygtvliiapfnypfq l vfepligaiagnta ikpse ltpnvarvikrlinetfdanyievi eggieetqtlihl  
pfdyvfftsenvgkivyq  
aasenlvptlemggkspv idetanikvasericfgkftnagqtcvapyilvhesvkddlital sktlrefyqgniqq  
spdygrivnlkhyhr ltsl  
lnsaqmni vfgghsdederyieptl dhvtsdsaimqeeifgpilpil tyqsl deaiafihrpkplsl ylf sedenatq  
rvine lsfgggain dlmh  
lanpkl pfgvgasgmryhgykysfdt fthvksyifkstrlesgvhl ppykgkfyikaffkn  
>tr|D3EXW7|D3EXW7\_STAA4  
mtngyigsytkkngkgyr felnenqsridlleigfeleasty lvrnevlyginkegeqcgvaslkiddngelhl llnkc  
l skagtgcyvsisedkry  
lfeavygagii rmyel nthtgeiirliqel ahdfptgtherqdhphahyinqtpdgkyavavtdlgadrivtykfddngfe  
fykes lfkdsdgtrhiehf  
dngkfayvvhel sntvsvae yndgkfeelerhltipenfdgdtklaavr lshdqql yvsnrghdsiaifkvl dngqhle  
lvtitesggqfprdfnias  
sddl l vcaheggdsvvtvfersketgitl cdntrvasegvcvif  
>tr|D3EXX0|D3EXX0\_STAA4  
mwnfikcvfkfvfslvaittlvagvgvafayifk kdfedierktkei isdiesknn  
>tr|D3EXX4|D3EXX4\_STAA4  
mlylnkykervtsvriqnrwvfil flicsfgvl iglyqyrhtktvdlnleindikl nekfdkkyevnkkikfdrfkf  
ynskahpdl tvkvrekndi  
vkgiilvrdek ihtnfdggigspinnaienlgfykrktvgn dfssvkiyidrdnhlkl nlllyqdleikrieffsk  
>tr|D3EXY2|D3EXY2\_STAA4  
mnp laqsl neqlqqs nataftml s dlqgnmfypkgil sqsaeaksttynatigmatnkdgkmfass ldamfndltpdeif  
pyappggee lrdlwqqkm  
lrdnpe l sidnms l pivtnal thgls lvgdl fvnqgdtil lpehnwgnyl vfntrnganl qtypi fdkdghytt ds lve  
alqsynkdkvimi l nypnn  
ptgytpthkevttivdaikal adkgtkvi avddayygl fyedvytqsl fta lsn lnsnailpvr ldgatkeffawgfrv  
gfmtfgtsdqttke v leak  
vkg lirsni ssgpl ptgsavkhvl knnkqfdkeieqniqt lkeryevtkevyadqy hshwqaydfnsgyfmaikvhvd  
peelrkhliekysigvia l  
natd iriafscvekediphvfdsiakaidlr  
>tr|D3EXY8|D3EXY8\_STAA4  
mciviylis livyfici inffimaapfl mtnadyvwt pmttvtl filsl iiflifikt kvvhl tifil nllfsilycl  
pilfy l

Tsompanidou\_et\_al\_Supplemental\_FASTA\_File

>tr|D3EXZ1|D3EXZ1\_STAA4  
mrdgystnsritgvlpnnatikdygayingrwytiangsqrryiatgevdkagnrisgfgkfsav  
>tr|D3EXZ3|D3EXZ3\_STAA4  
mlkrsllfltlvllllfsfssitnevsasssfdkgykkgddasyfeptgpylmvntvgvskgnellsplyvefpikpgt  
tltekiyyvewaldata  
ykefrvvelpsakievtyydknkkeetksfpitekgvvpdlsehiknpgfnlitkvviekk  
>tr|D3EXZ7|D3EXZ7\_STAA4  
mskikkttfllsfiatlitspfvncsekseeingkdllqkkselqgtaIsnlrqtyyhngsaiienkesndqflkntil  
fndfftghqwyndllvdlg  
skdtaniykgkkvdlygvyygyqctggtpfktacmyggvtlhdnqlleekkvpinlwidgkqntvplgtvktknkevte  
qeldlqsrhlyhetynlyn  
tdafngkiqrqliiefhpsgsdsvgydlfgaqqypdtqlriyrdntiksknmhidilytt  
>tr|D3EXZ8|D3EXZ8\_STAA4  
mvlhsskdrkhtasevgkccqyvski semyrvmksfyiidykkgiviyvcisk  
>tr|D3EY04|D3EY04\_STAA4  
mgerikgl sigldl daanlnrsfaeikrnfktlnsdllktgnnfkyteksthsyqrikel dgtitgykknvddlakqyg  
kvsqeggensaeaklrqe  
ynkqanelnfllekelekttttefeefkkaqveaqrmaesgwgktskvfesmgpkltkmgdglksigkglmigvtapvlgia  
aasgkafaevdkgldtvtq  
atgatgge1kklqnsfkdygnfpedaetvggvlgevntrlgftgkelesatesflkfshitgsdgvqavqlitramgda  
gieadeyqsvldmvakaag  
asgisvdtladsitkygapmramgfemkesialfsqweksgvnteiafsglkkaisnwgkagkdpreefkktlaeiertp  
diasatslaieafgakagp  
dlaaikgrfsyqeflktiedsqgtvnqtfkdsesgserfkvamnkllvgadvwasiesafapvmeeliklsvavdw  
fsslsgskrsivifggia  
aai gppvfglgafistvgnavtvlapllasiakagglisflstkvpilgtvftaltgpigivlgvlaglavafaiyaykks  
etfrnfvngai esvkqtf  
nfiqfiqpfidsvknifkqaisaivdfakdiwsqingffnengisivqalqnicfikai fefilnfvikpimfaiwqvm  
qfiwpavkalivstwenik  
gviqgainiilgiikvfsslftgnwrgvwdgimilkgtvqliwnliqlwfvvgkilgvvryfgglkglitiiwvaigv  
fkkslsaiwnatksifgfl  
fnsvksiftmknwlsstwnniksntvgkahslftgvrskftslwnatk difiklrnwmsniwnsikdntvagiagrlwdr  
vrnifgsmrdglksiigki  
kdhiggmvdavkrglnk lieglnwvggklgmdkpkltgttehttttrlvkngkiardt fatvgdkgrngngpngfrnem  
iefpngkrvlt pntdtttay  
lpkgskvynqaqtysmlngt lprfsigtmwkdiksgassafnwtkdqigkgtkwlgdkvgdvlfdienpgkllkyileaf  
gidfnsltkmggiagditk  
aawskikkSATdwi kenleamgggdvvggil dpdkinyhygrtaaytaatgrp fh egvdfpfvyqevrtpmggrltrmpf  
msggygnyvkitsgvidml  
fahlnfkskspsgtmvkpgdvvgltngtgfstgphlfemrrngrhfdpepylrnakkkgrlsiggggatsgsgatyas  
rvirqaqsilggrykgkwi  
hdqmmrvakresnyqsnavnnwdinaqrqgdsrglfqiigstfranakrgytnfnnpvhqgisamqyivrrygwdgfkra  
gdyayatggkvfdgwynlg  
edghpewviptdparndamkmlhyaaaevrgknasknrpsqlssvngfddpslllkmi eqqqqia lllkiaqsndvi  
adkdyqpiideyafdkkvn  
asiekrrerqestkvkfrkggiaiq  
>tr|D3EY07|D3EY07\_STAA4  
mavkhasapkayinitglgfakltkegae lkysditktrglqkigvetggelktayadggpiesgntdgegkislqmhaf  
pkeirkivfnedydedgvy  
eekgkqnyyavwfrqerrdgtfrtvllpkvmftnPKidgetaekdwdfssevegealfplvdkksvrkyifdsanm  
tnhdgdgekgeeflkkil  
geeytgnvtegneetl  
>tr|D3EY08|D3EY08\_STAA4  
mvidilykvhevisqdriirehvninnikfnkypnvkdtvdpfivididdpipttytdgdecaysiyqidvfvkynde  
ynariirnkisnriqkllw  
selkmgnvsngkpeyieefktyrssrvyegifykeen  
>tr|D3EY21|D3EY21\_STAA4  
mikqilrllflameylgkyvteqvyimmtanddveapsdyvfraevse  
>tr|D3EY23|D3EY23\_STAA4  
mleifligfgvylfyriaiiflkskktihtniyemlmlatimistiykhqkthiliaflvmffmsklkqvqgsyee  
>tr|D3EY42|D3EY42\_STAA4  
mqaqnkkiyiydeecnrrpvniqyndgydlmidqrfiemtlerhphlknnfyglidgkefkld  
>tr|D3EY44|D3EY44\_STAA4  
mtdeakfvllqlysiylgriddegmskhsasyfgsdessfnafflgfnfedydavlelkhrdfviasaedggflemalsr  
egiayseseskkdyktlmg  
lirdlkklii  
>tr|D3EY49|D3EY49\_STAA4  
mki knckikketivyevltsgnqpftye lpkdlsshnarkylefiskldgdkltkedsl

Tsompanidou\_et\_al\_Supplemental\_FASTA\_File

>tr|D3EY53|D3EY53\_STAA4  
mrdskpnyccykvsmypnwgqykradligqssyiknndvvi fneafdngasdkllsnvkkeypyqtpvlgrsqsgwdkt  
egsysstvaeedggvaivsk  
ypikekiqhvfksgcgfdndsnkgfvytkiekngkni hvigtqtqsedsrcgaghdrk iraeqmkeisdfvkkknipkde  
tvyiggdlnvnkgtpfekd  
mlknlnvndvlyaghnstwdpqnsiakynypngkpehldyiftdkdhkqpkqlvnevvtেকpkpvdvya fpyyyvyndf  
sdhypikaysk  
>tr|D3EY58|D3EY58\_STAA4  
mvkq1kfsedarqamlrgvdqlanavkvtigpkgrnvl dkeftaplitndgvtiakeieledpyenmgaklvrevant  
neiaggdgtttatvlagami  
qeg1knvtsganpvg1rqgidkavkvaveal hensqkvenkneiaqvgaisaadeeigryiseamekvngdgvitieesn  
g1ntel evvegmaqfdrgyq  
spymvtdsdkmvae lerypilvtdkkissfqd ilplleqvvsnrpilivadevegda ltnivlnrmrgtftavavkapg  
fgdrkamledlailtgaq  
vitddlgldkdasidmgtaskvevtdnttvvdgdgdensidarvsq lksqieetesdfdreklqerlaklaggvavi  
kvgaasetelkerklried  
alnstraaveegivagggtalvnvyqkvseieaegdietgvnivlkal tapvrqiaenaglegsviverlknaepgvgn  
aatnewvnmleagivdptk  
vtrsalqhaasvaamfltteavvasipeknndqpnmggmpgmm  
>tr|D3EY61|D3EY61\_STAA4  
msyhwfkkml1stsil1tssslglathtveakdn lngekpttnlnh nitspsvnsenmnnnetgtphesnqtgnegtgsn  
srdanpdsnnvkpdsnnqn  
pstdskpdpnnqpspnkpdnpkpkpdpkpkpdpkpkpnl dpkdpdpnpkpkpdpkpkpdpkpkpnpdpkpkpdpkpkp  
pnpkdpnkpnppspdpd  
qpgdsnhsggsknggtwnpnasdg snqqwqpngnqgnsqntgndfvsqrflalangaykynpyilnqinklgkdygev  
tde diyniirkqnfsgnay  
l ng1qqqsnyfrfqyfnplkseyyrnldeqvlalitgeigsmplkkpedkpskqrsfephekddftvkkqednkks  
astayskswlaivcsmmvv  
fsm1flfvkrnkknknknesqrr  
>tr|D3EY67|D3EY67\_STAA4  
miptfssii1ffk1kyai vtilvtmiimylsnfatvg1fltlrkytt dpailplyilsfssvsllatylvriskkf  
kksylslnktymiiisfv1  
fatfaffyiystntssngdslipyalvfigliifisv vilmslftlkemeykrnqeeietyyeytlkieainnemrkfr  
hdyvniltt1seyireddm  
ig1rayfnknivpmkdn1qmaiklngienlkvreikglitakilraqemnipisieipdevssinlnmidlrsigiil  
dnaieasteiddpiirvaf  
iesensvtfivmncaddiprihel fquesfstkgegrglglstlkeiadnadnvlldtiiengffiqkveiinn  
>tr|D3EY80|D3EY80\_STAA4  
mnklrrqlsmnsllidtsnqplsva lmqndevlaeitt dskqnhsvqlmpaisqlfeqskiakqql daiivaegpgsytg  
lrigvtvaktlayaldvk1  
ygvss1kalaatidhtdkllvpvfdarrqavytgifwqngqlvtiledqymsiealrafledlnqpfiiygkdtiklqd  
elqgeviaqlpnasvmyql  
idkptdvhtftpkylhklaeaernwinqkn  
>tr|D3EY96|D3EY96\_STAA4  
meefkqhykglidesl tcdkvelikkcekytdevirkdvlpedivdihknyiltlnltredvftldvlqeivkgfgys  
yrdyqr lidklqvhdeid  
lasslqqtm1ktdipqfdisiqigvisvaa kvsgdyfnlidhndgtmsfavadvigkipaalamsmikfgmdsyghsq1  
psdglkrlnrvvekninqn  
mfvtmfygl1yeemh1lycssaghepgyiyrae keefeeisvrgrvlgissqtryqqeipiyl ddiiltdgvtearn  
segtfidkqk1leyikkhk  
hmhpqdivqiyek1k1qnpnkddmtiilikrvn  
>tr|D3EYA6|D3EYA6\_STAA4  
mei1fltmvmityvfsgylrvav1qssrvdliftrfenmcfkiigt dlehmsaktyvkhflafngfmgfitfvlliv  
qqw1flnphnlngsidla  
fntaisfltnsnlqhynge sdvtyltqmi vmtylmftssasgyavciamlrrltgltniignfyqdivrfivr vllplsc  
lisillmtggvpqtlan1  
mir1t1sghiqhi afgpiaslesikh1gtngggflagnsatpfenpniwsnfiemgsmml1pmsml1flgrmlsrhgkrvh  
rhalilfvamffifiailt  
l1tmwseyrgnpi lanlgiygnmegkevrfgaglsalftvittafttgsvnmhds1tpigg1gpmv1mm1nvvf ggegv  
g1mn1l1fv11tvficslv  
vgktpeylnmpigaremkcivlvflihpililv fsalafmipgasesitnpsfhgisqvmymtsaaanngsfeglkdd  
ttfwnistgii1lsryip  
iilq1miasslvnkksyhqdytiaidkpyfgsvl1fvil1sgl1tfipv111gpi gef1tk  
>tr|D3EYB8|D3EYB8\_STAA4  
mqgsdvisaakkymesihqndytghdiahvyrvtalaksiaenegvndt1vielac11hdtvdekvv dankqyvelksfl  
ss1s1stedgeh1fiinn  
msyrngkndhvt1s legqivrdadr1daigaigvartfqfaghfgepmwtehmsldkiind1veqlppsaikhffek1lk  
les1mhtdtakmiakerhd



Tsompanidou\_et\_al\_Supplemental\_FASTA\_File

fmmmylkqfftewnyhd  
>tr|D3EYD9|D3EYD9\_STAA4  
mmkkimti fgtrpeaikmaplvkaleqekmlepivvtaqhremldsvlstfeikpkydlnimksgqtlseitsksitql  
eqviqlekpdmvlvhgdtm  
ttfagglaafynqvpighveaglrsydkyspfpeevnrqlvgvladlhfaptknaashllsegkysesvvtgntaidam  
kytvddnyksnimdkyhdk  
kfilmtahrrenigkpmeni fkavrrlideytdlalvypmhknpkvrevaqkilgshdrielielpldvdfhnfakksyf  
iltdsggiqeeapsfnkp  
lvlsvterpegveagtlkvigtnkqnvyqaakelidderlyhqmseasnpygdgfaserivnhikyylnlitekpsdf  
>tr|D3EYE4|D3EYE4\_STAA4  
mdtkiwdvreyndlqqypkineikdivl nggliglp tetvyglaanatdeeavakiyeakgrpsdnp livhihskvqlk  
dfytldprvek lmqafwp  
gpisfilplkpgylcrkvsgglssvavrmshsvgrql lqineplaapsanlsgrpspttfnhvyqdl naridgiva  
qseeglestvldctsfpyk  
iarpgsitaamiteilpnshahadyndteqpiapgmkykhysntpltiitdieskigndgkdwssiafivpsnkva  
fip seaqfiqlcqddndvkqas  
hnl ydv l h s l denenisaayiygfe l ndntea imnrm l kaagnhi ikge l  
>tr|D3EYG0|D3EYG0\_STAA4  
mtnngnepnl t l s d l y k d v v y t s r p s y i s n p w l k p d e h q s n f l t g r e l l i a n q l p v i v h e a s a t d k l h q l f q v i g k e v p  
n s i f t f n n q s y e n l i k q l  
ahkenkkiyfyihdetilnqqyaldk t l f v a l n n k a r i p e w t n g k f l p k r k v k i e q f e n i k n w e f l v i k p g d d l p  
taggygvmicyhadlqka  
itrikeataetnsliieqkieekanycvqfayses lgiqylgaatq l t d k y g f y n g n e n t t n v p e h v i e a g r q i m e n g v n  
qgffgvagfdllvdeddv  
yaidlnfrqngstsmllane l n s g y q k f y s y h s k g d n t h f f n t i l k y v k e g s l y p l s y y d g d w y g e d k v k s r f g c i w h g  
dsketv l e n e r a f l a e l e h  
y  
>tr|D3EYG4|D3EYG4\_STAA4  
mlcpklfkkrmikmrmidiiekkrdghtltteeinffidgyvkgdipdyqass lamaiyfqdmndderaaltmamvnsdg  
midlsdikgvkvdkhstgg  
vgdtttlv l a p l v a a v d v p v a k m s g r g l g h t g g t i d k l e a i d g f h v e i d e a t f v k l v n e n k v a v v g q s g n l t p a d k k l y a  
l r d v t g t v n s i p l i a s s i m  
skkiaagadaivldvktgsgafmktledaealahamvrignvgrntmaisisdmnqplgraignalelqea id t l k g q p p  
kd l t e l v l t l g s q m v v l a n  
kaetleearallieainsgaa lek f k t f i k n q g g d e t v i d h p e r l p q a y q i e y k a k k s g y v t e l v s n d i g v a s m m l g a g  
rltkeddidlavgilnkk  
igdkveegeslltihsnrqdvddvkkldssitiadhvsptlihiite  
>tr|D3EYH6|D3EYH6\_STAA4  
midkyypilekllsdtseqkfyykri l w q s k e k h g l t c a y t f r a y i l k h d e f t p y i m k c y q  
>tr|D3EYK5|D3EYK5\_STAA4  
mvy lew a k a d r n i q y r v i n a i i k e r i y e p q t f i s q k s l i e i q y h m v l t i e v r k s a l e r y e f t g d i t y l n k g e t s l i i  
t l e g l l d v l n h d f d i p i s e  
rlreelihsrds l v e t y k m s h r q t l i s q s f k f s r l p q d i n f f s w l q h v k d s d k t d d l t y s e s l v p e g h p t h p l t k t k l p  
l t m e e v r a y a p e f e k e i p l  
qimmiiekdhvvtamdgnqfiideiipeyynqirvflkslgksedyrailvhpwqydhtigkyfeawiakkiliptpf  
tilskatl s f r t m s l i d k p  
y h v k l p v d a q a t s a v r t v s t v t t v d g p k l s y a l q n m l n q y p g f k v a m e p f g e y a n v d k d r a r q l a c i i r q k p e i d g k g a t  
v v s a l v n k n p i d q k v i d  
sylewlnqgiktkesittferyaqalippliafiqnygialeahmqnttvnlghpfdiqflvrldlggsridletlqhrvs  
dikitndsliadsidavia  
kfqhaviqnqmaeli h h f n q y d c v e e t e l f n i v q q v a h a i n p t l p h a n e l k d i l f g p t i t v k a l l n m r m e n k v k y l n i  
elndnpikkev  
>tr|D3EYK7|D3EYK7\_STAA4  
mnlnl i f k e g t l k f n k e e q e t y l f l q q h n s d w a n i f k e m i l q g r d k v t q r l v t s m h r e n l v k a r t q s k k i l s r d l i m l d i  
stthileiqfpqakqtlya  
pitgehafdridvegpfiyknditntitrvhphneilecili eapdlknaasdqfqqdlinsatnmtfaisyqalsmqhd  
saplnniensedsylrse  
qavieghplhpgaklrkglnalqtflyssefnqpkikivlihsklsrtmslskdydttvhqlfpdlikqleneftpnfn  
fndyhimivhpwqlddvlh  
sdyqaevdke l i e a k h t l d y a g l s f r t l v p k y p a m s p h i k l s t n v h i t g e i r t l s e q t t h n g p l m t r i l n d i l e k d v i  
fksyastiidevagihfyn  
eqdevdyqterseqlgtlfrkniyqmipqevtpmipsslvatypfnnespivtl ikryqsaaslsdfessakswietysk  
allglviplvtkygialea  
hlqnaiatfrkdglldtmyirdfeg l r i d k a q l n e m g y s t s h f h e k s r i l t d s k t s v f n k a f y s t v q n h l g e l i l t i s k a  
sndsnlerhmwyivrdvld  
nifdqvlv l s t h k s n q v n e n r i n e i k d t m f a p f i d y k c v t t m r l e d e a h y t y i k v n n p l y r e n n  
>tr|D3EYM6|D3EYM6\_STAA4  
mktkevvalmni sqdt l r y y e k v g v i p p v n r d e n g y r i y n d s d l n w i y l v k n l r n a g v s i e s l i e f c r l a q l p k n k n i q t

Tsompanidou\_et\_al\_Supplemental\_FASTA\_File

qqkqilnkqleelnenlkt  
ihardl1lkykidnydnhinaknasdnhddnverlwerk  
>tr|D3EYM8|D3EYM8\_STAA4  
mnktnfgdylnksksrkiyki fdqnlkrefsywqfrklfksytrqsdvhelkvctqnddtmeqiwidkanqfgvavtwkd  
nsigfvmrplinydaikn  
ettlkyavpttdcyevfwggdnelynyhylylhqryaidlvikenhkyknqgkvntdyfcfgkdiiapangtvekvvng  
vqdnsigstnesqflgnyi  
vikhaeneysliahlqqysii vnegqnvkygdf1gkvgnsnstephihfqvmndknieacts1kirflnnlelikgdvv  
cglqge  
>tr|D3EYN2|D3EYN2\_STAA4  
mtdkkytaadmvidtlknngveyvfgipgakidylnaliddgpelivtrheqnaammaqgigr1tgkpgvvlvtsgpgv  
sn1ttg11tatsegdpvla  
lggqvrnd11rlthqsidnaa11kysskyseevqdpes1sevmtnairiatsgkngasfisipqdvisspveskaislc  
qkpnlgvpseqdindviea  
iknasfpvllagmrssaeetnairklvertnlpvvetfqgagvisrelenhffgrvglfrnqvgedllrksdlvvtigy  
dpiyeasnwnkeletqi  
nidevqaeitnymqpkkeligniaktiemisekvdepfinqqh1deleqlrthideetgikatheegilhpveiiesmqs  
v1tdttvtvdvgsyhiwm  
arnfrsynprhl1fsngmqt1gvalpwa1saalvrpntqvsvagdgglfssqdetavrknlniiqliwndgkynmve  
fqeemkykrssgvdgfpvd  
fvkyaesfgakglrvtnqeeleaakegyetdgpvlidipvnykdnik1stmlpvdvn  
>tr|D3EYN4|D3EYN4\_STAA4  
mekieneivnktylainsleelrnmigiksydyfkyclvndhfynvikipkrkkdeyrelmipnmalkniqrwilndvly  
rrgvhkatgfvprksivn  
naiphvgqkyilkmdienffpsitfkqvrkifsemgykfelatalanlctvnnqlpggaptspyianiifynidkrifsy  
cqknnlrytryadditig  
snkvsfskeiireivngynfrinesktimfkpgdrkkvtgiivneki svpktlirevrkqi yfvnkfgleeh1irnnys1  
dyeqqfimsiygkisfikm  
idfkkgvs1qkkfnevlgniessnmyrnidfdidie1hwin  
>tr|D3EYN9|D3EYN9\_STAA4  
mivlyleevpkfisinlkerlnysvhvstgkmpiaalekekvltittececkli  
>tr|D3EYP1|D3EYP1\_STAA4  
mknkhv1qplkkceyqrwidigiqtink11qwkkeeqn1qneeygfsvsdkeqhfstyht  
>tr|D8HAS1|D8HAS1\_STAAF  
mkidy1t1fpemfdgvlhnsimkraenklqintvnrfdyainkhnqvddy pyggggmvlkpepvfnamedldvtkqt  
rvilmcpqgepfshqkave  
1skadhmvficgheygyderirth1vtdeismgdyv1tgge1pamtmdaivr1ipgv1gneqshqddsfsdg11efpqy  
trprefkgl1tvpdv11sgn  
hanidawrheqklirtnkrpd1iekyp1tnadkqilerykig1kkg  
>tr|D8HAS3|D8HAS3\_STAAF  
m1kkwl1nsnvkqflvitfmsv11t11lfsthiyeyivngt1vsgagdgfrqmpfmylyeh1ssfslydasfg1ggdy  
mkg1syys1splmw1nfl  
fikigetvgifnptihfwptnqlimamiraiitfvvtfylfki1hfkrtstmiatilygmstviyfnftwsfygn1ly  
11pls1gleryfqarkig  
ifivaial1fsnfysyqaiiigcylyrliftykydivsrtqklicvisatv1sv1ssvfg1ftgisaf1endrkn  
pndip1ltp1dyhyfffs  
dgffitis1l1tival1sfklyrfyfyr1faivtw1lfigs1sqyfdsafngfsfperrwyilalsssalcglfiqhlst  
1nmkyylirtipvsia11  
yv11spt1h1alivgi11lmlavil1kfs1wryk11tvail1lvimiqqivil1dnknmaikpyqqs1st1kqhdyhsny  
vnq1likkinqnatgpfnr1  
dymdyal1nspfiyhyngislyssi1fngdilkydykt1qinmpidknstyr11gnrqn11slwnvndrirvnhddn1pyg  
fk1insehkdnkvrwi1hskn  
tihypsahiankvfsnkelksp1dkeqam1qgivsnttkdvnthfkankn11sdstik1nsaawqsptk11lqvknngg  
1tvq1prsvsnqfkdlyfe  
md1e11spdkahdvkvneytqernk1tykyrrfvkpv1tirikasdrir1slpkgyrvn1kgygedytt1kdasnslea  
vkvs1tkqgytitknkns  
gyiv1ptaynqgmeatsgdqs1kvekvngvmtgikapknitkiqlsytpppyy11titvfgiicsiiftrwarqk  
>tr|D8HAS5|D8HAS5\_STAAF  
mt1tikevtq11navntieelenhecf1derkgvqnaiarrkalekeqalkekyaeptyfeneilkenpnaiicgidev  
grgplagpvvacat1lnsn  
hny1gl1dds1kvpv1tkr1e1nea1knevtayaygiataeeidefniykatqiamqraidg1svqpth11idamt1dna1p  
qvs11kgdarsvsiaaasi  
makvfrddy1mq1skdypeygfeknagyg1tkqhl1aiddigimkehrksfepiks11  
>tr|D8HAS6|D8HAS6\_STAAF  
mniheyqgkeif1rsmgvavpegrvaf1taeeavekake1nsdvyyvkaqihaggrgkaggvkiaks1seveyake11gkt  
1vthqtgpegkeikrlyie  
egctiqkeyyvgfvidratdqvt1maseeggteieevaaktekifketidpvig1spfqarria1fninipkesvnkaak  
f11alynvfiekdc1sivei

Tsompanidou\_et\_al\_Supplemental\_FASTA\_File

np1vttadgdv1aldakinfdnalfhrkdvvelrdleedpkeieaskhdlsyialdgdigcmvngaglamatmdtinh  
fgnpanfldaggsatrek  
vteafkiilgdenvkgifvni fggimkcdviae giveavkevdltlplvvrlegtnvelgkklkdsglaiepaatmaeg  
aqkivklvkea  
>tr|D8HAS8|D8HAS8\_STAAF  
mkfstlseeeftnytkkhfkhytqsie lynyrnkinheahivgvkddkneviaac1l tearifkfykyfyshrgplldyf  
daklvcyffkelskfykn  
rgvfildvpylienlrdangriiknynnsvivkmlgkigy1hqgyttgysnksqirwisvldlkdkdenqllkemeyqtr  
rnikktieigvkvedlsie  
etrnfyklfqmaeekhgfhfmedyfkrmqei ykdkam1kiacidlneyqdklkiqllkienemmtvnralnenpnskkn  
ksklnglnmq1ssinnris  
kteeliledgpvldlaaalfictddevyylssgsnpkynqymgayhlqwhmikyakshninrynfygitgvfsneaddfg  
vqfkkqgnahveeligdf  
ikpvrpilyk fakli ykv  
>tr|D8HAS9|D8HAS9\_STAAF  
maypvi kegrkkdsylcevnreenvhllrkyafikldhndiikelqklkvsyitymdteypvllkeiyqfplllfy  
kgniklinnmh1lavgar  
dstsyqqslfllsndkskyltivsglaagadamahqialkynlptiavlafghqthypkstlalrnkieekglvisey  
pphtpiakyrfpernrriis  
glskgvli teakeqsgshidfa1eqnrnvylpgsmfnpmtkgnllriqegakvvl nandifedyi  
>tr|D8HAT0|D8HAT0\_STAAF  
mtladnlvivespakaktiekylgkkykvi asmghvrdlprsqmgvdtednyepkyitirgkpvvkelkkhakkaknvf  
lasdpdregeaiawhlski  
leledskenrvvfneitkdavkesfknpreiemnlvdaqqarri1dr1vgynispvlwkkvkkgl sagrvqsvalrlvid  
reneirnfkpeeywtiege  
frykkskfnakflhyknkpfk1kttkkdvekitaa1dgdqfeitnvtkkektrnpanpfttstlqqeaarklnfkarktmm  
vaqql yegid1kkqgtig1  
itymrdstريسdtakaeakqyitdkygesytskrkasgkqgdqdaheairpsstmrtppdmksfltkdqyrlykliwer  
fvasqmapaild tvsl diti  
qgdikfranggtikfkgfmltyvetkdds dsekenlplklergdkvtatqiepaqhytqpprytearlvktleelkigr  
pstyaptidtiqkrnyvk1  
eskrfvptelgeivheqkyefpeiidveftvmetl1dkiaegditwrkvidgffssfkqdvraeeemekieikdepa  
gedcevcgspmvikmgryg  
kfmacsfnfpcrntkai vksigvkcpkcdgdvverkskknrvfygcskypecdfiswdkpi grdcpkcnqylvenkkgk  
ttqvicsncdykeaaqk  
>tr|D8HAT1|D8HAT1\_STAAF  
mtqtvnvi gagl ageaayqlaergikvnliemsvkqtpahhtdkfaelvcns1rgnal tngvgvlkeemr1nsiii  
eaadkarvpagga1avdrh  
dfsgyitetlknhenitvineeinaipdgytiatgplttetlaqeivditgkdqlyfydaaapiiekesidmdkvy1ks  
rydkgeaay1ncpmtedef  
nrfydav1eavapvnsfekekyfegcmpfevmaergrkt11fgpmkpvgl edpktgkrpyavvqlrqddaagtlynivg  
fqth1kwgaqkeviklipg  
lenvd1vrygmhrtfinspdv1nekyelisqpn1qfagqmtgvegyvesaasglvaginlahkilgkgevvp retmi  
gsmayyishaknnknfqpm  
nanfg11ps1etri kdkkeryeaqanraldylenfkkt1  
>tr|D8HAT2|D8HAT2\_STAAF  
mnhieaf1nt1kvern fseht1ksyqddliqfnqfleqehlq1ntfeyrdarnylsylysnh1krtsvsrkist1rtfy  
eywmt1deni1nfpvq1lvh  
pkkeky1pqffyeemeal fktveedtsks1rdrvle1lyatgirvselvnikkqidifyangvtvlgkgskerfvpfg  
aycrqsienylehfkpiqs  
cnhdflivnmkgeaitergvryv1ndivkrtagvsei hphklrhtfath1lnqgad1rtvqs1lghvn1sttgkythvsn  
qq1rkvy1nahprakkene  
t  
>tr|D8HAT9|D8HAT9\_STAAF  
msdiinetksrmqsies1srelanisagrans11ngvtvdyygaptvqq1asinvpear11vispydktsvadieka  
iaan1gvnptsdgeveri  
avpalteerrkervkdvkkiegeakvsvrnirrdmndq1kkdekngditedelrsgtedvqkatdnsikeidqmiadkek  
dimsv  
>tr|D8HAU3|D8HAU3\_STAAF  
mkqskvfiptmrdvpseaeaqshr111ksglikstsgiy1s1platr1vlnnitairqemeridsveilmpalqqaelw  
eesgrwgaygpe1mr1qdr  
hgrqfalgptheelvt1svrnelksykqlpmt1fq1qskfrdekrprfg11rgrefimkdaysfhadeas1dqtyqdmqy  
aysrifervginarpvvd  
sgaiggshthefma1saigedti vysesdyaan1ekaevvyepnhkhttvs1leki etpnvktaqeladflgrpvdeiv  
ktmi1fkvdgeyimvlvrgh  
heindik1ksyfgtdnie1atqdeivn1vganpgs1gpvidkeikiyadnfvqd1nn1vvganedgyh1invvgrdfnv  
deygdfrf1legek1sdgs  
gvahfaegievqqvfk1gtkysesmnat1dnqgkaqplimgcygigisrt1saiveqnhddngivwpksvtpfd1hlis

Tsompanidou\_et\_al\_Supplemental\_FASTA\_File

inpkkddqreladalyaef  
ntkfdvlyddrgeragvkfndadliglplrivvgkrasegivevkerltgdseevhidlmtvitnkydnlk  
>tr|D8HAU4|D8HAU4\_STAAF  
mteqqkfkvladqikisngldaeilnsgeltridvsnkrtwefhitlpqflahedyllfihaieqefkdianvtcrftv  
tngtnqdehaikyfgbcid  
qtaispkvkgqlkqkklismgskvlkvmvsndiernhfdkacngslikafrcngfdidkiiifetndndqeqnlasleahiq  
eedeqsarlateklekma  
ekakqqdnesavdkcqigkpiqienikpiesieeefkvaiegvi fdinlkelksgrhiveikvtdytdslvlkmftrk  
nkddl ehfkalsvgkwvra  
qgrieedtfirdlvmmmsdieeikkatkkdkaekrvefhlhtamsqmdgipnigayvkaadwghpaiavtdhnnvqaf  
pdahaaekhgikmiygme  
gm1vddgvpiaypqdvvlkdatyvfvdtvettglsnqydkieelaavkvhngieidkferfsnpherlsetiinlthitd  
dmlvdapeieevl tefkew  
vgdai fvahnasfdmgfidtgyerlgfgpstngvidtlel srtinteygkhglnflakkygvel tqhhrai ydteatayi  
fikmvqqmkelgvlnhnei  
nkklsnedaykrarpshvtlivnqqglnl fkvivaslvkyfyrtpriprsl ldeyregllvgtacdegel ftavmqkd  
qsqvekiakyydfieiqpp  
alyqdlidreli rd tetlhei yqrlihagdt agipviatgnahylfeh dgiarkiliasqpgnlnrstlpeahfrttde  
mlnefhflgeekahaievk  
ntneladriervvpikde lytprmegane eirelsyanarklygedlpqividrlekelksiingnfaviylisqrlvkk  
slddgylvgsrgsvgssfv  
atmteitevnp lpphycpncktseffndgsvgs gfdlpdktcetcgaplikegqdipfetflgfgkdkvpididlnfsge  
yqpnahnytkvlfgedkvf  
ragtig tvaektafygvkygln dqgihkrgaeidrlvkgctgvkr tttgqhp ggiivvpdy mdiydf tpiqypaddqnsaw  
mthfd fhsihdnlkl di  
lghddptmi rmlgd lsgidp ktipvddkev mqi f stpeslgvtedeilcktg tfgvpefgtgfv rql edtkpttf selv  
qisglshgtdvlna qel  
iktgicdlssvig rddimvylmyag l epsmaf kimesvrkgkglteemi etmkenev pdwyl dsc l kiky mfpk ahaaa  
yvlmavriayfkvh hplyy  
yasyfti rasdfdlitmi kdktsi rntvkdmysrymdlgkkekdvl tvleimnemahrgyrmqpisleksqafefiiegd  
tlippfivsvpgl genvkr  
ivearddgpflskedlnkkaglsqkii eylde lgs l p nlpdkaqlsifdm  
>tr|D8HAU6|D8HAU6\_STAAF  
mdqgtfkviarkdvveevfddrdevdl stalvknpaye igdiyeedvtpkdfgrvgaqaakqavmqr l rdaereil feef  
idkeediltgii drvdhry  
vyvnl gri eavl seaerspnekyipnerikvyvnkveqttkqpqi yvsrshpgllkr l feqevpeiydgtv ivksvarea  
gdrskisv fsenndidav g  
acvgakgarveavveelg gekidivqwnedpkvf vknalspsqvl evivdetnqstvvvpydqlslaigkrqnarlaa  
kltgwkidiksetdareag  
iypvveaekvteedval edadttesteetdvsvetvkekese  
>tr|D8HAU8|D8HAU8\_STAAF  
msidqilnflglamragkvktgesviveikkgnlklvivandasntaklitdkcksykvprkfgrnelgialgkge  
rvnvgitdpgfakmlsmi  
deyhke  
>tr|D8HAV1|D8HAV1\_STAAF  
myngilpvykergl tshdvvfk l rki l ktkki ghtgt l dpevagvl pvcignatrsvdyvmdmgkaye atvsigrsttte  
dqtgdtlemkdvhsadfn n  
ddidrll enfkvgv ieqippmyssvkvngkkl yeyarnnetverpkrkvnikdigri seldfkenechfkirvicgkgyi  
rtlatdigvklgfpahmsk  
ltriesggfv l kds l tleqikelheqds l qnkl fpleyglkg lpsikikdshikkri lngqkfnknefdnkikdqivfid  
ddsekv laiymvhptkese  
ikpkkvfn  
>tr|D8HAV2|D8HAV2\_STAAF  
mkvievthpiqskgyit edvamafgffdgmhkghdkvfdil neiaears lkkavm tfdphpsvvl nprkr rttlyl tpls d  
kiekisqhdidycivvnfs  
srfanvsvedfvenyi iknkvkevi agfdftfgkfgkgnmtvlqeydafnttivskqeienekisttsirqdl ingelqk  
andalgyiysikgtvvqge  
krgrtigfptaniqpsddy l lprkgvyavsieigtenklyrgvanigvkptfhdpnkaevvievni dfedniygervnv  
nwhhflrpeikfdgidplv  
kqmndksraky l l avdfgdevayni  
>tr|D8HAV4|D8HAV4\_STAAF  
msqekkvktewagrslti etgqlakqangavlvrygd tvvl staskeprdgdf fl tvnyee kmyaagkipggfkr  
egrpgdatl tar lidrpi  
rplfpkykhdvqimnmv l sadpdcspqmaami gssma lsvsdi pfqgpi agvngyidgkyi inptveekevsrldlev  
aghkdavn mveagaseite  
qemleai ffgheeigr l vdfqqqivdhi qpvkqefipaerdealveriks l teekglketv l t fdkqqrden l dnlkeei  
vnefideedpenelli ke v  
yailnelvkeevrrliadek i rpdgrkpdei rpldsevgilprthgsgl ftrgqtqal sv l t l galgdyqlidglgpeee

Tsompanidou\_et\_al\_Supplemental\_FASTA\_File

krfmhhyfnfnsvgetgp  
vrapgrreighgalgeralky iipdtadfp ytirivse vlesngsss qasicgstla lmdagvpikapvagi amglv tre  
dsytilltdiqmedal gdm  
dfkvagtkegitai qmdikidgltreieealeqarrgrleimnhmlqtidqprtelsayapkvvtmtikpdkirdivgp  
ggkkineiidetgvkl die  
qdgtifigavdqaminrareiieeitreaevgqtyqatvkriekyga fvglfpgkdallhisqisknriekvedvlkigd  
tievkiteidkqgrvnash  
ralee

>tr|D8HAV6|D8HAV6\_STAAF  
maqakkkstakkkttskkrtnsrkkkndnpiryvia ilvvvlmvlgvfqlgiigr lidsffnylfgysryltyilvllat  
gfityskripktrrtagsi  
vlqiall fvsq l vfhfngsikaerep vlsyvyqsyqhshf pnfggvlgfyll els vplislfgvciitilllcssvill  
tnhqhrdvakvvl enikaw  
fgsfnekmserngekqlkreekar l keeqkarqneqpqikdv sdftevpqerdipiyghtenesksqsqpsrkkrvfdae  
nssnnivnhhqadqeqlt  
eqthnsvesentieeagevt nsvyvppl tllnqpakqkatskaevqrkgqvlentlkdfgvnakvtqikigpavtqyei  
qpaggvkvskivnlhndia  
lalaakdvrieapipgrsavgievpneki slvs lkevldekfpsnklevglgrdisgdpitvplnephllvagstgsg  
ksvcingitsillnakph  
evklmlidpkmvelnyngiphllipvvt nphkaaalekivaemerrydlf qhsstrnikgynelirkqnqeldekqpe  
lpyivvivideladlmmvag  
kevenaiqritqmaraagihlivatqrpsvdvitgiiknripsria favssqtdsrtiigtggaekllgkgdml yvngnd  
ssqtriqqaf lsdqevqdv  
vnyvveqqganyvkemepd apvdksemkseda lydeayl fvveqqkastsllqrqfrigy nrasrlmddlernqvigp qk  
gskprqvlidlnndev

>tr|D8HAV8|D8HAV8\_STAAF  
msrqsqpnihikv spttkfktttivfkfmapleydtitarsllskllvratkkwptdksfnh l adlygayvnstiskfk  
dqhv itfsl eivneryl rn  
geslfnqgl d l l qeiwnp lienka fndnfvnqektllakkieamv d nkaqysflklldhmfeneaykylstggleqiph  
itaetlyhtyqsmi nndqc  
svyvvgnvepesvekqirekfa l kpfdkhqf qhsthdl hdeevdyiveyddvdqaklnmg yrfptqygqsgyaa fvvfnm  
mfggdpsv l fnevrekqs  
laysihsqidgkngylfv lsgvssdkyetakdti isefekikagdfteeklelakkv iishryesedrpk s i eimhnqi  
lleppsketf indiqkvs  
redivsvaekaf l dtiyv ltkggdk

>tr|D8HAV9|D8HAV9\_STAAF  
mkeryyelidervfeqelenglr l fiipkpgfqktfvtyttqfgsl dnqfkplgq dqfvtpdg vahfl ehkl fekeeed  
lftafaednaqanaftsf d  
rtsylfsatdniennikrlltmvetpyftketvdkekgi aaeikmyqeppgyklmfntlramyqqhpirvdiagsvesi  
yditkddlylcyetfyhps  
nmvlfvvgdvnpeei cri vkqhedarnkv nqpkierglvdepedvkeafvtesmk iqsprlmlgfk nkp l qeapqkyvqr  
dlemsl ffe l i fgeetdfy  
qnllnegliddtfgyqfvleptysfsivtsateepdklkkllldelrdkkgnfqdaae fllkkqfigefissl nspeyi  
anqytklyfegvs vfdmld  
ivenitl dsinetsslylnldqqvdsrleikk

>tr|D8HAW1|D8HAW1\_STAAF  
mtvaeckewyleyeieinrpgllgdvssllgm lgisivtingvdqgkrglliktdnlekverfeqiargineieitklkk  
pelrdrlavrhgryieqda  
kdkktfrfrendlgllvdflael fkeeghkl igirgmprvktesivagsvcahkrwl fisstlikqtv rssl ikgeyda  
nhvyiidgavtaresnph  
qelvnevmtlpsikvvehpd l fvetstctmedfdyie l renenqei hydemkkqtvs k n n l dfgdpfgggfgffe

>tr|D8HAW2|D8HAW2\_STAAF  
mtlteleqrtgikremlvhiennefdqlpnknysegfirkyasvvn iepnqliqahqdeipsnqaewdevitvfnnkd l  
dykskskepiqllvimgit  
v l i t l l l w i m l v l i f

>tr|D8HAW3|D8HAW3\_STAAF  
mni p n q i t v f r v l i p v f i l f a l v d f g f g n v s f l g g y e i r i e l l i s g f i f i l a s l s d f v d g y l a r k w n l v t n m g k f l d p l  
adkllvasalivlvqlgl t  
nsvvaii i i arefavtgr l l l qieqgfvsaaq l gkiktavtmvaitwlllgdplatlignslgqm llyigviftilsg i  
eyfykgrdvfkqk

>tr|D8HAW4|D8HAW4\_STAAF  
msia i i a v g s e l l l g q i a n t n g q f l s k v f n e i g q n v l e h k v i g d n k k r l e s s v r h a l e k y d t v i l t g g l g p t k d d l t k h t  
vaqivgkdlvidepslkyi  
esyfeeqqqemtpnnkqqa l viegstv l anhhgmapgmmvnfenkqi i l l p g p p k e m q p m v k n e l l s h f i n h n r i i h s e l  
l r f a g i g e s k v e t v l i d l i  
dkqtnptiapl agshevyir l tanadskeqaqsl i qpvkqeil drige yyygsddt lieqavikkihepfviydgitnga  
lyhr l kevd l ndvlkgmin  
hnekfvdinkpieqqlkdavqfvnk l fnvssai i l l e y d g v v h i g y d n n l e f k t e q f k m s k s r n l l k n r s q n y a l i r l l n

Tsompanidou\_et\_al\_Supplemental\_FASTA\_File

wlrrtn

>tr|D8HAW6|D8HAW6\_STAAF  
mnlslslllllllgiiigvvggyvvarnl11qkqsarqtaedivnqahkeadnikkekllleakeenqilreqteaelrerr  
selqrqetrllqkeenler  
ksdlldkkdeilegkeskieekqqvdakessvqtlmkheqelerisglqtgeaaineqlqrveeelsqdiavlvekek  
eakekvdktake1latavq  
r1aadhtsestvsvnl1pndemkgriigregnrirtletltgidliiddtpeavilsgfdpirreiartalvnlvsdgri  
hpgriedmvekarkevddi  
ireagegatfevnahmhpdlvkiivgrl1nyrtsygnv1khsievahlasmlaaelgedetlakragllhdvgkaidhev  
egshveigvelakkygene  
tvinaihshhgdvpeptsiisilvaaada1saarpmarketlenyirrlerletl1sesydgvekafaiqagreirvivspe  
eid1ksyr1ardiknqie  
delqypghikvtvvretraveyak

>tr|D8HAW9|D8HAW9\_STAAF  
mkpqlswkvvggqgegestgeifatamnrkgylygyrhfssrikgghtnki1rvsttpvhaisddl1diliafdqetid  
vnhhemredsi1ladakak  
pvkpegchaqlielpftatakelgtal1mknmvaigatsalmlntntfeelitnmfsskkgdkvvevniqalnegyqlmq  
r1peidgdfelestal1ph  
l1ymigndaig1gaiagsqfmaaypitpasevmeymi1nskvnavigteteiaavtmaiganyggvraftasagpgls  
l1mmeaig1sgmtetplvii  
ntqrggpstg1lptkqeqsd1mqmiygthgdi1kivvaptdaedafyltmesfn1aeqyqcpvivilsd1qlslgkqtvekl  
dynrieikrgei1qsdier  
eeddkgyfkryal1sngvsprpipgvkggi1hitgvehneegkpsesasnrqqmekrmrkieqlviespveanlqhed  
dilyigfistkgai1qegsn  
r1nqqgikvnti1qirql1hpfptsviqdavnkakkvvvvehnyqq1asi1kmvnihdkienytkydgtp1pheieekg  
kiiateikemv

>tr|D8HAX4|D8HAX4\_STAAF  
mksrk1aitalliainv1lssiiii1pgpvkaapvqhfvnv1svvivgpyw1aqa1lissilrv1fgtgtafafpgsmig  
v1lasmfy1yrkhi1fmaav  
gevlgtgvigsl1icip1ayfl1gldffikpl1mitfivssaigsi1syfl1itl1kkrgil1qrfik

>tr|D8HAX5|D8HAX5\_STAAF  
msnvtppmmqy1kikseyqdc1l1ffr1gldfyemfyedakeasrv1eitl1tkrdakkenpipmcgvpyhsadsyid1l1vnn  
gykvaiceqmedpkqtkgm  
vrrevvri1vtpgtvmeqggvddkqnni1l1sfvmnqpeial1sydcvstgelkvthfndeal11neittin1pnevindnis  
dh1krqin1mvtet1tvret  
l1sseiysvntek1lmyqatq1l1ldyihhtqkrd1shiedvvqyaa1dymkmdfyakrn1eltesir1kskkgt1l1w1md  
etktpmgarr1kqwidrpl  
iskeqiear1divdefshfierdt1l1rty1nqvydier1vgrvsygnv1nard1liq1khsiseipnika1l1nsmnqdt1vq  
vnq1lep1dd1l1di1leqslv  
eep1svkdgg1fkvgfnmq1deyleaskngktw1aelqakerqrtgiksl1k1sfnkvfgyfieitran1qn1qnfepsefgy  
mrkqtl1snaerfi1tdelke  
kedi1lgaedkaie1eyql1fvq1reevkyter1lqqqaki1sel1dc1l1sfaeiaqkynytrpsfsenktle1lvesrhpv  
ervmdydyvpnn1crl1dne  
tfiy1l1itgpnmsgksty1mrqvai1simaqmgayvpckeav1pifdqiftrigaadd1l1vsgkstf1mvem1leaqa1ltyate  
ds1l1ifdeigr1g1t1stydg1  
alaqami1eyvaetshakt1fsthyhel1t1ldqa1ps1knvhvaaneykgeli1flhkvdgavddsygiqvak1ad1lpekv  
israqv1l1sefeasagkks  
sisn1lkmvenepe1inqens1l1sveettdt1l1sqkdfeqasfd1l1fendqeseie1l1qikn1l1nsmtpieal1vkl1sel1qnq1k

>tr|D8HAX6|D8HAX6\_STAAF  
mgkikelqts1lankiaagevverpssvkel1lenaidagateisi1eveesgvqsi1rvvdngsgieaed1gl1vfhrhatsk  
ldqded1fhi1rt1lgfrgea  
lasissvakvt1l1ktctdnangnei1yvengei1l1nhkpakakkgt1dilves1fyntpar1kyikslytelgkitdivnrmam  
shpdi1rial1isdgk1tm1st  
ngsgrtnevmaei1ygmkvard1l1vhisgdt1sdyhie1gfvakpehsrsnkhyisi1fingryiknfm1nkailegyht1l1tig  
rfpic1yini1emdpi1ldvn  
vhptk1levr1l1skeeql1yql1ivski1qea1fkdril1ipknn1ldyvpkknkv1l1hsfeqqkie1feqrqntennqektfspeesns  
kpfmaenqnde1v1kedsy  
npfv1tkt1ses1li1address1gynntrekdedy1fkkqaei1l1qemdqt1f1dsnddt1svqnyenkasddydvndikg1tkskdpkr  
ripyme1ivgqvhgtyi1iaq  
nefgmym1ldqhaaqeri1kyeyfrdkigevtnevqdl1l1p1t1fhfskdeq1l1vidqykne1l1qqvgim1lehfgghdyiv1ssyp  
vwf1pkdeveei1kdmie1li  
lekkvd1kkl1redvai1mmsckks1ikanhy1l1qkhemsd1lidq1l1reaedp1t1cphgrpi1i1nfskyelekl1fkrvm

>tr|D8HAX8|D8HAX8\_STAAF  
mnvy1laef1lgtail1l1fgggvcavn1l1krspangadwiv1itagw1lavtmgyav1gqfsgah1npavsl1al1aldgsfdws  
l1vpgyiv1aqm1lgaivgati  
vwlmy1lphwkate1eagak1gvfstapaiknyfan1l1sei1igtma1l1t1gil1figvnki1adg1nplivgalivaig1sl1gga  
tgyai1npard1lgp1riahai  
l1piagk1ggsn1wsyaivpi1lgpiagg1l1gavvyav1fykht1fnigcaiaivvvi1t1l1ilgyiln1ksskkgdiesiy

Tsompanidou\_et\_al\_Supplemental\_FASTA\_File

>tr|D8HAY0|D8HAY0\_STAAF  
malstfkrehiikknlrndeaydlviiggigtgagialdasergmkvalvemqdfaagtsrsklvhgglyrlkqfqi gvv  
aetgkeraivyengphvtt  
pewmlpmhkggtfgkfstsiglmydrlagvkkserkkmlskketlakeplvkkeglkgggyyveyrtddarltiev  
raaekgaeiinytksehft  
ydknqqvngvkvikltnenytikakkvnaagpwwdvrsgdyarnkkllrtkghvvidqskfplggavyfdtekdg  
rmi faipregkayvgtttdt  
fydnikssp1ttqedrlylida inymfpsvntdediestwagirpliyeegkdpseisrkdeiwegkslltiaggklt  
gyrhmaqdivdlvskrllk  
dygltfspcntkglaissgdvvgksnfdafveqkvdvakgfgidedvarrlaskygsnvdelfniaqtsqyhdklplei  
yvelvysiqgemvykpnfd  
lvrrsgkmyfnikdvldykdsiidimadmldyspaqieayteeveqaikeaahgnnpavke  
>tr|D8HAY1|D8HAY1\_STAAF  
mtekgfkltvqdnthievknvftdvdskgi ihifhgmahmerydklahalskdgfdvirhnrghginidestrghydd  
mkrvlgdafaevaqtvrngv  
dkpyiighsmgsviarlfvetypqyvdglilsgtgmyp1wkglptvkvqlitkiygaekrvewvnqlvsnsfnkkirp  
lrrtqsdwssnptevdnfi  
kdpysgfnvsngllyqtayym1htsq1knkvlnhampillvsgyddplgdygkilk1aniyrkagiknvkvnlyhhr  
hevlfekdhkiwedlfkw  
lnqfykk  
>tr|D8HAY2|D8HAY2\_STAAF  
mnknkpfivvi vgpstasgkelsielakringeiisgdsmqvykymnigtaktvpeemdgiphhlidilnppdtfsayef  
krlaedliitdintrgkvp  
iagggtglyiqsliynyeledetvtpaqlsvvkqklsalehldnqqlheylaqfdeasaknihpnnrqrvlraieyyfktk  
kllsnrkkvqqftenydtl  
ligiemsrktlysrinkrvdimldhglfrevqqlveqgyescsqmaigykelipvingqmiyedavndlkqhsrqykr  
qmtwfkknkmsvhwldkenm  
slqmm1deittqik  
>tr|D8HAY3|D8HAY3\_STAAF  
mianeni qdka lenfkanqtevtvfflngfqmkgvieeydkyvvslnsqgkqhliykhais tytveteggestese  
>tr|D8HAY5|D8HAY5\_STAAF  
maqqqihdtknk1ekavlvghaqddkqfnfestmeelsslsetcqlvlgqitqnrdrvdrkyvvgkkieeiqafief  
kdidvvi tndelttagsks  
lnealgvkiidrtq1leifa1rarskegklqvelaqldyl1prlqghgks1sr1gggigtrgpgetklemdrrhirtrm  
neikhqlrtveehreryrn  
krnqnqvfvqvalvgyanagksswfnv laneetyekdq1fat1dpktrqiqindgfnliisdtvgfiqklptt1iaafkst  
leeakgad1lvhvdsshp  
eyrtqydtvndlikqldmshisqivi fnkkdlcdhasnrpasd1pnvfvs skndgkllvktlfideikrqltyydeiaia  
tnnadrlyflkqhtlvte1  
kydeienvyrikgfkk  
>tr|D8HAY6|D8HAY6\_STAAF  
mkdiskivadvestlapyfkeietayinqekvlnafhvkatesdlqgstgygyddfgrdhleeiyaqafkaedaivrp  
qiisgthaitialqslkh  
gdeliyitgspydtllevigvngngieslmehgvsykdiaklegkidiegvldgvsertkviaiqrskgydqrpsiplde  
ieqvitr1keehpnli1fv  
dncygefverrepi ecgadliagsliknpggg1akiggyiagrkdliercgyrltapgigkeagaslnallemyqgffla  
phvvsqslkga1fts1fle  
kmmnttpkyekrtdliqtvkfetkeqmilfcqsiqhaspinahfspepsympgyeddvimaagtfiggssielsadgp  
irppyeyvvgglt yehvk  
iavtravkqlkeqgli  
>tr|D8HAZ0|D8HAZ0\_STAAF  
mnqfkeiyntiek1lndksisnyrinqdigvsyggiselrsgkrkvnnltletaerlynyqkqleimied  
>tr|D8HAZ1|D8HAZ1\_STAAF  
mnei etii seiek1ltnntpsisknsgvprqtvtldkvgntkikdakfktiiklyeyqkslennsec  
>tr|D8HAZ2|D8HAZ2\_STAAF  
mkmtikvrktnkkekiefligmfiilvilgfkim  
>tr|D8HAZ4|D8HAZ4\_STAAF  
mfkvnysil syppdiy1hsnlavgvafei igesyhkneikfitqrrkilsfdeldnielinmfdglkcefeqtnqslk  
sykkkfvnnyfyfenieykm  
fslkevnnfi ektykyvlhlgldkker1kktekel1ts  
>tr|D8HAZ5|D8HAZ5\_STAAF  
mslryewkstiittnipfsswgesfsnkivsaaidrlvhskvfvktgesyr1kdyktekslnirqs  
>tr|D8HAZ6|D8HAZ6\_STAAF  
mrhdiyegvlyfyimkgikpnyaelgrqyncdsrtvkkyyeagk  
>tr|D8HAZ7|D8HAZ7\_STAAF  
mfenkyrldncinnfypdyniavswqclregktiknki  
>tr|D8HAZ8|D8HAZ8\_STAAF  
mimrk1kednqvi vyeyipdqkiekgkgeitvnl1dskvidy1skvenegilvyrdksfha1lnfidenkftneyiy

Tsompanidou\_et\_al\_Supplemental\_FASTA\_File

awy

>tr|D8HAZ9|D8HAZ9\_STAAF  
mernesitdvtqneeqlnsdeqsqqnektfsqeevsqlikeriarerksderikdakesndsnevayllkdgkvtkv  
ygdqdsvsfmjg

>tr|D8HB00|D8HB00\_STAAF  
mlnhpgqsgfslnlemfienksirtltivtntvvyisktplynqsqvykimkdikqsiimrneavdnilk

>tr|D8HB01|D8HB01\_STAAF  
msiqhldgyisiedffkhmeelskkeelegeinqskskyq

>tr|D8HB02|D8HB02\_STAAF  
mhpwrrsttvphlgnwrdfkffkeregkyrvenkkmkkknykkklkkkli

>tr|D8HB03|D8HB03\_STAAF  
mqlnnekqqrhilntneynnkknssflpsyitidsneiekmtkkefidfpvlfddegnfrkkqvidykkiigksyvngk  
yiemklgkvhysktgfhvv  
pyikke

>tr|D8HB05|D8HB05\_STAAF  
misfendylegahekvkrldvtnlvqasgygfdqftaqaielikdtidcpnatirflvggtqtnqvvinmslesyegvi  
sadtghvavheggaieysg  
hkvitipskegkvsasnvetyetfksdfkdhmvfpgmvyishpteygtlyskseleelckvckqyqlplfmdgarlgy

gmsdqsdmtikdiakycd  
vfyiggtkigalgeaivftkknepkqfttrikhgallakgrltgiqflelftdnlfnisrhaimankmkgdfinkg  
yrlfydsptngqffilsne  
kiaeleqkvkfavwekyddqhrvrfatswatteenlnklleli

>tr|D8HB06|D8HB06\_STAAF  
mqqiklktftaetlellesniflgseeanlklvnitikeieertfpnneefnailtlnsvk

>tr|D8HB07|D8HB07\_STAAF  
mqfsfsndlgtlftiilaiafiinlvlafiiiflernrrtasstwawlfvlvpligfilylffgrtvsarklnknngn  
vltfdal1kqgiesfdkg  
nygtdnkqvqkhhdlvrmlmdqdgfltenkidhfidgndlydqvlqdiknakeyihleyytfaldglgqrilkaeek

lkqglevkiyiddvgskkv  
kmanfdhfslggeveaffasklp1lnfrmnrrnrhrkiividgqlgyvggfnigdeylglgklygwrwthlriqgdavda  
qlrfildwnsqahrpqqe  
ydekyfppknksfgnapiqiaasgpasdwhqieygytkmimsakksvylqspyfipdnsyinaikiaaksgvdvhlmpc

kpdhplvywatfsnasdl  
ssgvkiytyengfihskmcliddeivsvgtanmdfrsfelnfevnavfydenlakdlraayahditkskqlteesyanrp  
lsvkfkeslaklvspi

>tr|D8HB08|D8HB08\_STAAF  
miqisninksfkkkrvlnkisfdiekgtcvaligkngagkstlvdi1snkiiaddgvi fdkdnllqsenrsimfqktifp  
dq1kvieiiikyqsfyep  
ltdviieltkfnsglnqfanqsggqrrl1dfvisligppq1lldeptsnm diemreyfwsiiaklkeenrtilyts

hyieevermsdkiilieng  
eik1ndstshirtnqqsqit1sdeykrklkpkdd1viqknhngtikiiitsnvndtilylqq1hinl1ddieiqksivds  
yfnkkqrgsnydtkl1en  
ri

>tr|D8HB09|D8HB09\_STAAF  
milsylkiefkvlrkkttl1silfpvifyilftsild1pedvvpkyfkeymysmtvysllsfl1tftpldiinekqng  
wrqrlmvtppftftsyyisk  
vvtm1qfaia1l1vmvghfykgvemsavqwlesg1flwlgasllitfgilfsllndiqktsalanivtiglavlgglw

fpintfpnw1qh vah1ps  
yh1rk1gvdiasnhhis1sivi1llyalgsiiavycishkrae

>tr|D8HB10|D8HB10\_STAAF  
mkflkdtsiaeissilyl1fpia1gfnevygpkwlyiisvivfslsylvilvinnr1nt1mfyilfiihyfiicyfvfs  
vhpm1s1fffysafaipft  
fknnvkkmatn1fil1tmi1cltitylvhndyfvamtiyyvillivfdn1kkvkdreyykkeieeknryintliteqerhr

igqdlhdt1ghvfas1sk  
selaykiidsdenakael1aink1sres1nkvreiiddir1psf1eeiesick1kdadiqftfenkelaq11sptkqs  
ilvmiareainnvikhana  
skvygqlramnehk1qfi1qdngegidsgceiksisqrqh1ngt1evesnkgtkliiemptggia

>tr|D8HB11|D8HB11\_STAAF  
misiiaedqnm1rqamvq1kl1hgdfeiladvng1daiki1eahhpdv1ldiemsgmtglevlaeirkkhlnikvii  
vt1fkrpgyfekavandv  
ay1kersieelvetiykyngkkeysas1mts1fftdknp1tpkeqiv1reign1sskeisekl1f1tdgtvrnytsvii

dk1fadnrfdawkkaneq  
wi

>tr|D8HB14|D8HB14\_STAAF  
msfyv1lii1ivaligi1vl1nqrysnskidtevyarkq1liknkalsaeaelrsqm1ssnndvghhayknakrelrkil  
dylengklkydiivtsn  
1atkhpffeyarsfdiivsdig1invdvkswgektfyhfdvpdehdtevsnsniekvvghyisqqyhdqfnssrksiyt

ftetvqpnrviydfdydp



Tsompanidou\_et\_al\_Supplemental\_FASTA\_File

yqlaannakalkdhieqnfqstgviyfsdgtvniiqgseerdkyvdtvstkslrriseaieskhpInkdqvdq  
itaifk  
>tr|D8HB18|D8HB18\_STAAF  
mrrwqglveefkahlpnntpkltlnegntplihcenmskilgidlyvkyeganptgsfkdrgmvmavtkakeqgkiv  
icastgntsasaaayaara  
glkaiivvipegkia lglksqavmygaeivsiegnfdealeivkeiaksgeielvnsvpnfriegqktgsfeivqqldgea  
pdilaipvgnagnitaywk  
gfkeyheakgsq lpkmfqfqaegaspiqnkviknpetiatairignpaswekatnal kesnglidsvtddeileayqlm  
ttkegvfsepasnasiagl  
iklhrqgklpgqkkvva l tngngl kdpdtais l l dnpikplpndkdsiidyikga l  
>tr|D8HB19|D8HB19\_STAAF  
msnvl eltipastanlgvgfdsigma ldkflhlsvketsgtkweyifhddaskqlptdetnfiyhvaqqvaakysvdlpn  
lciemrsdiplarglgssa  
salvgaiyianfgdiqlskhev l qlateieghpdnvaptiyygliagyndvsketsvahidipdvdivvtiptyelkt  
easrralpk l thseavks  
saisntmicalahnyelag l mqqdgfhpyrqh liaefdevktiasqhnayatvisgagptilifsrkensgelvral  
nrnvvtchselvdinvs gv  
keriv yq  
>tr|D8HB22|D8HB22\_STAAF  
mednkmrs lnsrhismiaiggaigtglfvatgnisqagpggailaylvigvlyflmssigelatfypvsgsfssyst  
rfidsslgtmgwlywalw  
slvtsvdvivasnlyfwdtfkffhpitwslifitil l l l l nifsvksfgetefwslslikvltiivfvi fgflmifgilgg  
haygfenytkgqapfvggi  
sgflgv l l vagfsvggt evvavtagesddpkksmpkaikqvfwri l l fyvlsiavigaiipytdps l l rassisqspft  
ivfdrvgiafaasvnavi  
lts l l saansgyttgrmlyslssdkkapkflsklnkttklplral l t tyavviviianfnfnvfn l l eiigsmiiv  
vvgssisqir l rgaikkq  
gqdpnkvlpykapfyp l gpiivitt l l f l l f ggsveyilkdqwnafknflplilal i yfihkiihk kfvkletinlk  
phdydnk  
>tr|D8HB23|D8HB23\_STAAF  
mtmsqqdk l l tgvfghpvsdrensmtagprgplmqdiyfleqmsqfdreviper rmhakgs gafgtftvtkditkytna  
kifseigkqtemfarfstv  
agergaadaerdi r gfa l kfyteegnwd l vgnntpvfffrdpklfvs l nravkrdrptnrmrdannwdfwtglpeal hqv  
tilmsdrqipkdlrhmhgf  
gshysmyndsgervwvkf hfrtqqgien l t deeaeei iatdrdssqrd l feaiekgydkwtmyiqvmteeqaknhkdn  
pfd l tkvwyhdeypliev g  
efel n rnpdnyfmdveqaa faptni i pgl d fspdkmlqgr l fsygdaryr l gvnhwqipvnqpkvggienicpfsrdgq  
mrvvdnnqgggthyyppnh  
gkfdsqpey kkpqfptdgygyeynqrqdddnyfeqqglfr l qsedakeriftntanamegvtddvkr r hirhcykadpe  
ygkgvakalgidinsidle  
tendetyenfek  
>tr|D8HB26|D8HB26\_STAAF  
mkifdyediqlipnkci vesrsecdttiqfgpkkfk l pvvpanmqtmneklakwfaendyfyimhrfdeearipfiknm  
qns glfasisvkvkaefd  
fiek laqeklipeyitidiahghsdsvinmik hikhthipdsfviagnvgtpegvre lenagadatkvigipgrvcitkik  
tgfgtgwqlaalnicska  
arkpl i adggrthgdiaksi rfgasmvmigs l faahees pgetvel dgkqykeyfgsasef qkgehknvegkkmfvhek  
gslmdtlkemqqdlqssis  
yagkd l kslrtvdyvivrn si fngdrd  
>tr|D8HB27|D8HB27\_STAAF  
mkkfi vt vvaflsiii i apitef kpfih l qnevryidihinketisaenkl dtpkkqqfafnniqmmsksdvekt l nk  
pkrvtfneygkwytyydd  
dynnfimisiykdkvnalytnqni i tskskikyntpskvrqr l gepeteivkgrvryeqnkeydvfhknhiyttvfyd  
khqrrnvtav l qvsdamen  
r l keqygapsks l adsfelqnfd l vnaerkqhqlst l kyskqns etarkhskdmaknyfdhtnlkgqspfd r l kkdgit  
fnsagen l ayqvssiyah  
qglmsi ghrkni l ndtfki l gvgvdfndekqpfwtenytg  
>tr|D8HB29|D8HB29\_STAAF  
mmfynkyknvsty i i i f l vssaafai f l l sanvsahseqvyemtdhqiknntinkvyehkdptnseqrdgkvfal in  
>tr|D8HB31|D8HB31\_STAAF  
mfnekdlavdt l ralsid tiekansghpg l pmgaapmayt l wtrh l nfnpqskgyfnrd r fvl saghgsal l ys l l hvs  
gsleleelkqfrqwgsktp  
ghpeyrhtdgvevtgplggfamsvglalaedhlagkfnkegynvvdhytyvl asdgd l megisheaas faghnlks l  
vlydsndisl dgelnkaf  
sentkarfeaygwny l l vkdgn l eeidnaittaksqegpti i evkttigfgspnkagtngvhgap l gederkl t fenyg  
l dpekrfnvseevyei fqn  
tmlkranedesqwns l l keyaetype l aeefk l a isgk l pknkykdelprfelghngasradsgtviqaisktvpsffggs  
adlagsnksnvndatdyss

Tsompanidou\_et\_al\_Supplemental\_FASTA\_File

etpegknvwfgvrefamgaavngmaahgg1hpygatffvfdsylkpalrlssimglnatfifthdsiavgedgpthepie  
qlag1raipnmnvrpadg  
netrvavevalesesptslvltrqnlpvldvpedvveegvrkgaytvygseetpefl11asgsevs1aveaakdlekgg  
ksvrsvsmpnwnafeqqse  
eykesvipssvtkrvaiemasplgwhkyvgtagkviaidgfgasapgd1vvekygftkenilnqvm51  
>tr|D8HB34|D8HB34\_STAAF  
mkihtadwhlgk1ngkq1ledqayildmfvekmkeeediiviagdlydttyskdaimlleqaigklnlelripiim  
isgnhdgkerlnygaswfe  
hnq1firtdfstinspieingvnfytlpyatvsemkhyfeddtiethqqgitrcietiapaidedavnilishltvqggk  
tsdserpl1tigitvesvqkg  
vfdifdyvmlgh1hhpfsieddkikysgsl1qysfseagqakgyrrvtinngiindvfip1kplrqlleisgeyndvine  
kvhvkknkny1hfk1knms  
hitdpms1kqiypnt1altnetfnynennaieisekddmsiemfykhitdkelsdiqskkiknilenelrked  
>tr|D8HB35|D8HB35\_STAAF  
mkplh1k1nnfgpfl1keedfskidnneflisgktgsgktmifdamtyalfgkasteqreend1rshfadgkqpm5vtf  
efq1nhriykvhrqgpyik  
egnttktnakfdvfemvdgkyeireskvisgtqfiiellgvnadqfrqlfilpqgefkrflisnsrekqgilrt1fdsek  
feaireilkeevkkekag1  
enryqqid1lwgeiesfdddkiksl1evatqqidkvienipl1qarskeilafvnesketaikeyeiekktlennilkd  
ninqlnknkidfvqlkegg  
peieeieak1k1lqditn11nyienrekietkiakskkdi1setnki1n1dcdkridkekkmleengd1ieskisfidk  
trv1fndinkyqgsy1nie  
r1rtedeqlgde1nn1k1g1lekvedsignksdyekie1lnnaitninneinvikenekakdelk1l1gskqelenqine  
ektikn1eik1d1cydksk  
1d1ndkesf1seiksavkigdqcpicgneiqlghidfdsiakrqneikeieanihtmesniavhseikfvnekisni  
niktqsd1s1ev1nkr11e  
nena1nnqrd1nkfiemkeekdn1t1qihnkqlr1nknese1kicrd1itefet1skynnitnfevdyykvyqdv1nqhq  
ehskeiedk1iq1sqrk1i  
eqn1nhyenq1letynd1e1neqsieemsr1n1tdndineikawrgeqe1eqkrdykkryhefemeiar1es1tk  
dke1l1dsdk1k1d1ye1kkg  
kmnt1ideysavhyqcqnn1kktqsisvshiny1nqelkdqqeifqlae1lsgknnk1t1enfvl1iyy1dqiaaqan1r1  
atmsdnryq1li1reavshg  
1sg1e1dvfd1h1snksrh1ss1sggetfqssl1al1gl1seivqqqsggis1lesi1fidegfgt1dqet1eta1dt1l1n1ks  
tgrmvgi1shvselknrip  
1v1evksdqy1ks1strfkrn  
>tr|D8HB38|D8HB38\_STAAF  
maanfkeqskkhfd1ngqsytyydl1kaveeggitkvsnl1pysirv1les1l1rqeddfvitddhikal1sqfgkdgnegevp  
fkpsrv1l1qdf1tgv1pavvd  
1as1rkamddvggdi1tkinpevpvd1vi1dhs1vqdsyanpealer1nmk1eferneryqf1nwatkafdynavppatgi  
vhqvn1ey1asv1hvr1dvd  
gektafpdt1vgtdshttm1ngigv1lgwgvggieaeagm1gqpsyfpipevigvrlvns1pqgatatd1al1rvtqelrkk  
gvvgkfveffgpgvqhl1p1  
adrati1nmapeygatcgffpddes1kymk1tgrsdehialvkey1kqnhmffdvekedpnytdvie1d1stveas1sg  
pkrpqdl1i1f1sdmks1fen  
svtapagnqgh1ldksefdkkae1nfkdgskatmktgdiaiaait1sctnts1npyvm1gag1vakkavekg1kvpeyv1kts  
1apgskvvtgyl1rdag1qp  
y1dd1gfn1vgygcttc1g1nsgp1l1pei1ekai1aded1l1vtsv1sgnrn1fegri1hplv1kany1aspq1lvvaya1agtv1did  
1qnep1gi1gndgedvyl1kd  
i1wps1ikevsdtvsvvtpe1fieeynnvynne1l1wne1dvtdqpl1ydfdpn1sty1qnp1sffqg1skepgt1ivp1ng1l1rvm  
gkfgdsv1ttdhi1spaga1g  
k1dtpagky1qd1hqvp1refn1sygsrrgn1hev1mvr1gtfani1riknq1lapgteggfttywptnevmp1fdaamkykedgtg1  
v1v1agndygm1gss1rdwaak  
gt1n1l1gvktvia1qsyer1hrs1nlvm1mgv1p1efk1kgesads1gl1dgtee1svni1denvqphdykv1vtakkqdgdl1ve1da  
mvr1f1ds1v1emdy1rhgg1l  
qmv1l1rnk1laq  
>tr|D8HB42|D8HB42\_STAAF  
mnkqnnysdds1qv1leg1eav1rkrpgmy1gst1dkrg1lhl1vye1v1dns1vdev1ngygne1dvt1inkdgs1siednrgmp  
tg1h1ksgk1ptve1v1ftv1h  
aggk1fg1qgykt1sgg1hgvgasvvnal1sew1leve1hrdgn1y1hqs1fknggsp1sg1lvkkgk1kkt1gkvt1fkpddt1fka  
sts1fn1fdv1ser1l1qesaf1  
1kn1ki1t1nd1r1sgkerqehy1yeegi1kefv1syv1neg1kev1hdvat1fsgeangi1evd1afqy1ndqy1ses1il1sfvnn1vrtk  
dg1g1thevg1fktam1rv1fnd  
yarrine1ktk1kdn1gdndi1reg1tavv1svri1peel1qfegqtk1sk1gtsears1avds1vadk1lpf1yleekgq1l1sk1lvk  
ka1kaqq1area1ark1areda  
rsgkkn1kr1kdt1l1sgk1tpaqskntdkne1yl1vegds1aggs1ak1grdrk1fqai1lp1rgkv1intekar1edi1fknee1inti  
i1ht1igagv1gtdfki1edsny  
nrvi1imt1dad1tdgahi1qv1l1t1fffk1ymk1plv1qagr1via1lpp1lyk1lek1gk1gk1krveyawt1de1nk1l1qkel1gk1gft1lq  
ryk1gl1gem1neq1lw1et1tmn

Tsompanidou\_et\_al\_Supplemental\_FASTA\_File

petrtli rvqvedevr sskrvttlmgdkvqprrewi ekhvfevgmqedqsi ldnsevqvlendqfdeeei  
>tr|D8HB43|D8HB43\_STAAF  
mseii qdls ledvlgdrfgryskyii qeralpdvrdg lkpvrri l yamyssgnthdknfrksaktvgdvigqyphgds  
svyeamvrlsqdwklrhv l  
iemhgnngsidndppaamryteakls llaeellrdinketvsfipnyddttlepmvlpsrfpnl l vngstgisagyatdi  
pphlaeviqat lkyidnp  
ditvnq l mkyi kgpdfptggi i qgidgikkayesgkgriivrskveet l rnrgrkqliiteipyevnksslvkridelra  
dkkvdgivevr detdrtgl  
riaie l kdvnsesiknylyknsdlqisynfnmvaisdgrpk l mgi rqiidsyl nhqievvanrtkfel dnaekrmhive  
glikal sildkvielirss  
knkrdaken l ievyefteeqaeai vmlqlyrl tntdivalegehkelealikql rhildnhdallnvikeelneikkfkf  
ser l slieaeieeikidke  
vmvpseevil smtrhgyi krtirsfnasgvedig l kdgds l lkhqevntqdtvlvftnkgryl fipvhkladi rkelg  
qhsqivpieedevvinvf  
nekdfntdafyvfatqngmikstvp l fkttrfnkpliatkvkenddlisvmrfekdqlitititnkgs l tyntsel sdt  
glraagvksin l kaedfvv  
mtegvsendtilmatqrgs l krisfik lqvakraqgit l lkelknphrivaahvvtgehsqytl ysk sneehglindi  
hkseytngsfivtdddf  
evidmyii  
>tr|D8HB44|D8HB44\_STAAF  
mlpemfral verpet ledgkkgi spfqafaisagsrvgtgni agvataiv lggpgavfwmvviafigaasafieatlaqv  
ykvhdkgdggfrggpayyit  
kg l nqkw l givfailititfafvntvqsntiaes l ntqynispvitgiilaivtaiiifggvrsiatlsslivpimaii  
yigmvlv l lfnldqivpm  
igtii ksafgieqvtggavgaav l qgikrg l fsneagmsapnaaataavphpvkqgliqslgvffdtm l vctataimil  
lysg l kfgesapggvavtq  
salneh l gsaggi l ftiavt l fafssvgnyyygqsnieflstnrvil l ffrclvv l vfmavaktetvwtad l fmg l  
maivniisiig l snvafal  
mkdyqkqkkekgnpvfkpen l ein l fgi sawgankyksdk  
>tr|D8HB47|D8HB47\_STAAF  
mneqevknki fsilkitfatal l fivvitlyrelsginfkdt l vefskinrms l v l l figgas l vil smydvil sralkm  
dis l gkv l rvsyiinalna  
ivgfggfi gagvramvyknythdkklvhfislilism l tgl s l l s l l l v l fhvf das l il dkitwvrvlyvvsff l pl f  
iismvrppdknryvgly  
ct l vscvew l aaavvlyfcgvi vdvhsfmsfiaifiaa l sglvsfipggfgafdlv l l gft l gvpeekv l l m l lly  
rfayyfvpiiail l ssfe  
fgtsakkyiegskyfi pakdvts f l msyqkdi i akips l slailvfftsmiffvnn l tivyda l ydgnhltyyillaiht  
sac l l l l l nvvgiykqsrr  
aifamisil l itvatfftyasyil itwlaifv l l livafrarr l krpvrmrnivam l l fslfilyvnhifiagtlyal  
diytiemhtsv l rryfclt  
il l iaiiigmiaw l fdyqfsvkrisskiedcee i inqyggny l shliysgdqkfftnektaf l myrykass l v l l g d p i  
gdenafdel leafynyaey  
lgydvif yqvt dqhmplyhfnfnqffklgeeai d l tqfstsgkkrgrfrat l nkfdelnisfeieppfstefinelqh  
vsdlw l dnrqemhfsvgqf  
nety l skapi gvmrnenneviafcs l mptyfndaisid l irw l pel d l pl m d g l y l h m l l s k e q g y t k f n m g m a t l s n v  
gqlhysylrer l agrvfeh  
fng l yrfqgl rrykskynpnwepflvyrkdnslwes l skvmrvirhk  
>tr|D8HB49|D8HB49\_STAAF  
mketndneyrrqsehrtsapkrkkkkkirk l piillivillialvvyivhsynsgveyakkhakdvkvhqfngpvknd  
gkisi l v l gadkaqggqsar  
tdsimvvqydfi nkkmmmsvmrdiyadi pygghkinsaya l ggpell rkt l dkn l ginpeyyavvdf t g f e k m i d e l m  
pegvpinvekdmsknigvs  
l kkgnhrlngkellgyarfrhdpegdfgrvrrqqvmqt l kkemvnfrtvvklpkvagilrgyvntnipdsgifqtg l sf  
girgekdvks l tvpi k n s y  
edvntntdgsalqinkntnkqaikdf l den  
>tr|D8HB50|D8HB50\_STAAF  
mynyh l ledrdv l cidqksffasvsciekgl d p l etklavvadtkrqqsvv l aatpk l kelgiktgsr l feiphrndiyi  
inpsmrky l nsvaiskia  
lryipped l hqysideffmdvtdsyhrfsstvhafcer l kreiyetgiyctvgigsnm l l skiamdveakhsqngiaew  
ryqdvptklwpiqpl rdfg  
ginrrteak l nrgi ftigdlakypykflkkefgilgvdm l l hangidqskvrehkhisnpsicksqil mrdyhfd eakv  
vmqeliedvasrvrarkkv  
artihfafgysdeggvhkqytlkdptnlekdiykvvmhfadelcnkqalyrt l sis l sqfinederqsl l fedeyqrkrd  
eclaktidql h l kygkgi v  
skavsfteagtkhgr l g l maghkm  
>tr|D8HB51|D8HB51\_STAAF  
mttv l fvg l g l iggs lasnikyhnptni i aydadtsq l dkaksigiinek l nyseaikkadviiyatpvaitnky l se  
lidmptkpgvivsdtgstk

Tsompanidou\_et\_al\_Supplemental\_FASTA\_File

amiqqhecsllkhnihlvsghpmagshksgvlnakkhlfenayyilyvneprneqaantlkeltsptlakfivttaeemd  
yvtsvshlphivasslvh  
vsqkngqehhlnkllaaggfrditriassnaqmwkditlsnktyilemirqlksqfqlerliesndsekllsffaeks  
yrdalpakqlgglnstayd  
yvdiodesgmiskvtyilslnhisnlnrilevrediygalkisfknptdrergmqaalsdfdcyiq  
>tr|D8HB53|D8HB53\_STAAF  
mdvfykkanvtpevlaqlhskkiiestnqqqtkgrysvifdiygtltlndvlsvstlkesyqiterpyhylltki  
nedyhniqdnqklplpfis  
gyvgtcsfdlvrhefplqsiqlledhkqhdvrlmveqvvyvfdhykdeiyiatnqfsnstksdlenrvnksiedltkiaq  
pfmptqdfdfktkeiqsni  
seerfiemiqyfkekieagdmfqqvpsriykyahhanqhlqslsfqlyqnlkrqnpsspymylnidkpyivgsspesfvs  
vkdqivttntpiagtiqrge  
ttqidnenmkqlndpkecsehrmlvdigrndihrvskigtskitklmvikeyehvmhivsevtgeinqnlspmtvianl  
lptgtvsgapklraieriy  
eqyphkrqvyvsggyincnhdalairtmmideqyinveagcgvydsipekelnetklkaksllvsvp  
>tr|D8HB54|D8HB54\_STAAF  
milvvdnydsftynlvdivahtdviqypddnvlngsvdaviispgpghplddqklmkiissyqdkpilgiclgaqa  
tcyyggevikgdkvmhgkv  
dtisitsnthkvlyqdvpeqfsimryhslisnpdnfpealkitgrtddciaqsfekerphygiqyhpesfatdygvkiit  
nfinlvkkg  
>tr|D8HB55|D8HB55\_STAAF  
mktmtlltriktetillesdikelidilispigtdikyeillssysereiqqeltyivrslintmyphqpcyegamcvc  
gtgdknsfnisttvafv  
vasagvkvikhgksitsnsgstdllnqmkiqttdvddtpnqlnekdlvfigatesypimkymqvrkmigkptilnlvg  
plinpyhltyqmvgvfdpt  
klklvaktikdlgrrraivlhgangmdeatlsdgnliyeltegediknytlnatdyglkyapnsdfkgspeenlaitln  
ilngndrssrrdvvlng  
lslyvaekvdtiaegielastlidngealkkyhqmrge  
>tr|D8HB56|D8HB56\_STAAF  
mtilaeiveyqslngngyyqdklntlksvkiqnkksfvnaiekepklaiaieikksptvndlperdlsqqisdyeky  
anavsiltdkyfggsfr  
lqalttkttlplvckdfiidplqidvakqagasmillivnilsdqklklynaisqnlvlevvhdrheleraykvna  
ligvnnrdlkrfvtnveht  
ntilenkkpnhyysesgihdasdvrkihsgidgligealmrcdnlseflpqkkmqkvks  
>tr|D8HB57|D8HB57\_STAAF  
mklkfcgftsikdvtaasqlpidaigfihyekskrhqtitqikklasavpehidkvcvvvnpdlttiehlvsntpintiq  
lhgtesidfiqekkyssy  
ikitkalaadeniiqninkygfvdlfiidtpsvsygggtgtydwtilkhikdipyliagginseniqtvnqlklshqgy  
dlasgievngkrkiekmta  
ivnivkgdrene  
>tr|D8HB58|D8HB58\_STAAF  
mnkqiqtadeigffgeyggqyvpelmpaiielkkaykeakadpefqreleyylseyvgratpltyaasyteslggaki  
ylkredlnhtgahkinna  
gqallakrmgkkklvaetgagqhgvasatvaalfdmevlvfmgsedikrqqlnvfrmelgkvvavedggqtlsdavnk  
alqyvwshvedthylgsv  
lgpdpfptivrdqsvigkeiksquilkegrlpdaivacigggsnaigtfypfikddvalygveaaggggedtdkhalaign  
kgsqvlhgtkmyliqdeg  
gqvqlahsiasagldypgigpehsyhdigrvtfnasdtqamnalinfkhegiipaiesahalsyverlaptmskedi  
vvtisgrgdkdmetirqym  
aergland  
>tr|D8HB59|D8HB59\_STAAF  
mtklfipyimgkndlienatlsengadiieigvpfsdpvadgpvimeagqqaikqgitidyifeqlekhgnqikcqv  
mtyyniihygeqaffekc  
rdtgvygliipdlpfeisqrllkqqfshygvkiislvamttddkrikeivshaegfiyvtmnattgqngafhpelkrkie  
sikaianvpvavagfirtp  
qhvadikevadvigseivkrfksntreeiikylqsiqqtlnn  
>tr|D8HB60|D8HB60\_STAAF  
mklinerqigvmimkftnlakefgaftdsmpyshftqtvghyelklaegyethlvgiknnnneviaaclltavpvmkvf  
kyfysnrgpvidyenqelv  
hfffnelskyvkkhrclylhidpylpyqylnhdgeitgnagndwffdkmsnlgehtgfhkgfdpvlqiryhsvldlkd  
taddiiknmdglrkrntkk  
vkkngvkvrylseeelpifrsfmedtseskafadrddkfyynrlkyykdrvlvplayinfdeyikelneerdilnkdlnk  
alkdiekrpenkkahnkrd  
nlqqqldaneqkieegkrllqeehgnelepisagffffinpfevvyaggtstnfrhfagsyavqweminyalnhgidrynfy  
gvsqkftedaedagvkvfk  
kgynaieiievvgdfikpinkpvyaytalkkvkdrif  
>tr|D8HB62|D8HB62\_STAAF  
mglldiasirsiernfyqsecvinlksfsetqheaevksgnkvyracyidmehprkskcnpcphadgrrvickhiall

Tsompanidou\_et\_al\_Supplemental\_FASTA\_File

ftaspeaankhitmlneve  
edyhlrrnmwidslkemindmseeelrdaylnmliehgemaelfgldeeeemfedefy  
>tr|D8HB63|D8HB63\_STAAF  
mielkhvtfgynkkqmvldqinitipdgenvgilgesgckstlaslvlglfkpvkgeiylsdnavlpifqhphtsfnpd  
wsietslkealyyrgltd  
ntaqdqlliqh1stfelnaql1tklpsevsggqlqrfnmrsllaqprvlicdeitsnldviaeqnvinilkaqtitln  
hfivishdlsvlqrlnvri  
ivlkdgmivddftieelfnvdrhpytkelvaqfsy  
>tr|D8HB64|D8HB64\_STAAF  
mslidiqnltikntsekslikgidlkiynqqinaligesgagksliakalleylpfdltctydsyqfdgenvsrlskyyg  
htigyisqnyaesfndhtk  
lgkqltaiyrkhyksskeeaalskidkalswvnlqskdilnkysfqlsggqlervyiasvmllepkliaadepvaslda  
gnqvmldllqhvlehggql  
fiithnlshv1kycqyinvlkegqieqgnidhfkyehlhpyteqlikyrtqlkrdyd  
>tr|D8HB65|D8HB65\_STAAF  
mhkifsknnliffvfgafivmivlqffvssenatkvnlsqtfepiswlhllgtddygrdlftriiigarstlfvtvltl  
iaivvigvtlglfagykkq  
wierlv1rfidvglisepfiimialasffqpslwnlvisitvikwmnytrlrsivsemnkyikmaqlfhvptrtili  
rhltpkiipviivlmvddf  
gkiilyisslsfiglgaqppewgamlqqgrdfisshpimliapasviaitilffnltdalrdrllkqrgeydesh  
>tr|D8HB66|D8HB66\_STAAF  
mfiiksmlyrlmhmivlfvistltfilmk1spgnpvdkihlhdvaqvsteqinatkdkg1ndsllvqwwhwmnhllhf  
nlgksfeskepvtqilfny  
apitllisfstlvslcisiplgisakrfhklsvkivrvistlsislpaffigiillfivtnlmnidsvilsqfvlpvf  
t1slgmcaiyir1vrsl  
tllqsnivqasrlrgmnyri1hdllkptilpiipllgis1gsliggtvvienvlfdipgigyl1msiksrdypviqgc  
v1figffvviintiadi1t  
llldpkqr1q1gnpkntntplisessdrha  
>tr|D8HB68|D8HB68\_STAAF  
msqglplredvpvsetwdlvdlfkddqyyesidalvqqanqfhhtyattlnsieqintalaelenilialdr1snyael  
rlsvdtsnieaqvlsakls  
t1yqkivsq1sfveseil1p1eelq1leacyqhyikqlkqkpfqlsasveqvlatsptlnspydlygttkmldit  
fdsfhdgtt1pvd1atfe  
ndyednkdp1frksfksfsdgi1rkyqhttaatyniqvqqekiead1rgfesvidy1l1hsqevtrdmfdrqidmimrdla  
pvmqkyak1lqri1h1g1dnm  
rfed1k1svdpdyepeisiedsknyi1fgalsv1gddytnm1reaydqrwidfaqnkgkdtgafcaspyfthsyvfi1swtg  
kmaefv1laeh1ghaght  
1aqkhqpy1leseasyfveapstmnm1many1fntsdnprfkrwvigsilsrtyyhnmvth1leaayqrevyhkvdqge  
s1napt1neim1nv1ykqff  
gdavdmtegae1twmrqphyymgl1syty1sag1t1gtvvsqkiknegqpavdawlet1kkgsvspvelaniagvditte  
q1k1stiqy1sdlvdevek  
1tdeieqtnn  
>tr|D8HB69|D8HB69\_STAAF  
mai1r1ryqeql1dd1like1rr1ganvyvsiengikslsiddrgfarqtvkndkhiq1lnyninervimlitkqppiasd1  
rmm1ss1kiasd1erigdn  
assianir1r1tkit1ddyv1r1l1ktmg1lam1m1kd1dqafkkkdtv1ireiierdediddlyshii1naty1idndpfvaa  
qah1aarh1erigdh1ini  
aesvyf1y1tg1thyeq  
>tr|D8HB70|D8HB70\_STAAF  
maqt1aqt1k1isq1sht1fdvsq1shhkt1pndt1nshsvi1ystq1n1dlwygenhalq1n1ldiyenqitai1g1psg1ckstyik  
t1nrm1vel1vpt1vkt1agk1l  
yrdqdi1fdq1kysqeql1rt1nvgm1vfq1pnp1f1k1siyd1nityg1pki1hgik1kkv1deiveks1rgaa1wde1kdr1htnays  
1sggq1qrvc1iarcl1aiep  
ev1lmd1epts1aldp1ist1rvee1vqel1kekyti1mvth1mqqaarvsd1ktaff1ngyvneyddtdki1fsnps1nkktedyi  
sgrfg  
>tr|D8HB71|D8HB71\_STAAF  
mettdsnrqs1vdqql1vqkh1ssrtvknkvfkliflact1llg1lv1iall1tqt1likgvsh1n1qfftnfsstpsmagvk  
galigs1w1m1si1p1s1i  
1g1g1tai1yleeyak1nnkft1qfvk1isisn1lagvpsv1vfg1l1gyt1fv1gg1giealkm1gnsilaaaltmt1l1ilpi1ivssq  
eairavp1nsvreasy1glga  
nkwt1tirrv1lpaalp1g1l1tg1fils1sralgetap1vl1igipt1illatpr1sildq1fsalpiq1iftwakmpqee1fnvasa  
gi1v1ll1vil1ilmngv1ai1l  
rnkfsk1kf  
>tr|D8HB72|D8HB72\_STAAF  
mts1stn1vkd1iek1nnk1kgk1hndk1i1pvilaaisaisil1tt1gil1it1l1let1itff1tripitefl1fst1wnpt1gsdpk1fg  
iwal1i1gt1k1itviat1fa  
vpv1gl1gaay1l1seas1y1adrarri1k1pileil1agipt1iv1fgffalt1fvtp1v1rsf1ip1gl1gefna1sp1gl1v1vgim1iv1pl1its1  
sedamasvp1nki1regay1l

Tsompanidou\_et\_al\_Supplemental\_FASTA\_File

gatklevatkvvlpaatsgivasivlaisraigetmivslaagssptaslsstssiqtmtgyiveiatgdatfgsniyys  
iyavgftlfiiftlimnlls  
qwiskrfreey  
>tr|D8HB73|D8HB73\_STAAF  
maldkdivgsieflevvglgstyllkgpngenvklngsemnddlevgeeysfiiyprnsgeellatqnmppditkkyd  
fakvlktdrdgaridvglp  
revlvpwedlpkvkslwpqpgdhllvtlridrenhmygrlasesvvenmftpvhddnlknevieakpyrvlrigsfllse  
sgyki fvh eserkaeprlg  
esvqvriighndkgelngsf1plaherldddgqvi fdllveydge lpfwdksspeaikevfnmskgsfkraighlykqki  
inietgkitltkkgsrid  
ske  
>tr|D8HB74|D8HB74\_STAAF  
mlqvtdvs1rfgdrklfedvnikftegncyligangagkstflkilsgeldsqtghvs1gknerlavlkqdhayeder  
vldvvikgherlyevmkeke  
deiympdfsdedgiraeelegefaemngwnaeadaanllsglgi dptlhdkkmaelennqikvllaqslfgepdvlll  
deptngldipaiswledfl  
infndtvivvshdrhflnnvcthiadldfgkikvyvgnfydqssqlaqkmaqeqnkkeekmelqdfiarfsanask  
skqatsrkkqlekielddi  
qpssrrypfvkftpereindllivqnlsktidgekvl dnvstmpndkailigdseiaktllkilagemepdegsk  
wgvttlsyfpkdnseffe  
gvnmnlvdwlrqyapedeqtetflrgflgrmlfsgeevkkkasvlsgekvrcmlskmmlssanvllldeptnhldesi  
tavndglsfkgsiiftsy  
dfefintianrvidlnkqggvskeipyeeylqeigvlk  
>tr|D8HB75|D8HB75\_STAAF  
mvtrsvlkfggssvsdfkikriaemlkervnqdeqlivvvsamgnttdqlmtvstlktkpkqelaallttgeqqtvs  
ylsmvln digv nakamtgy  
qagikti ghllkskiaqin pqtfeqafqendilvvagfqginehqeltlgrggsdttavala vnsqipceiytdvdgvy  
atdprllpkakrldivsy  
emmema1gagvletrsvlaknyniplylgktsnvkgtwimsneeilekkavtgvaldkhmmhvti syp1pdnqlltq  
lftel eegavnvdmi sqiv  
nldglqlsftikdcdfhgismiletlnqyealakyinehyvkisligsgmrdmsgvaskaf1tliennipfyqtttsei  
sisyviddfngpqavekly  
dafni  
>tr|D8HB76|D8HB76\_STAAF  
mtklavvgatglvgtkml etlnrknipfde1vlfssarsagqevfqqktytvqel tearasehfdyv1msagggtsehf  
aplfeagai vidnssqwr  
maedidlvpevneptftrgii anpcstiqsvvplkv1qdayglkrvayttyqavsgsgmkgkkl aegingkapeayp  
hpiynnvlphidvflengy  
tkeeqkmidetrki lnvpdlkvatcarvpvqdshsveidvtlekeataedikalfdqddrvvlvdnpenneypmainst  
nkdevfvgrirkdsslent  
fhwctsdnllkgaa1navqvleqvmr1kgan  
>tr|D8HB77|D8HB77\_STAAF  
mth1fegvgvaltpftnnknvlealkahvnflennaqai ivngttaesptl ttekelilktvidlvdkrvpviagt  
tndteksiqasiqakalga  
daimli tpyynktnqrglvkhfeai anavklpvvlynvpsrtm tiepetveilsqhpsival kdatndfeyleevkkri  
dtnsfalysgnddvveyy  
ergggqvsvianvipkefqalydaqqsgldiqdqfkipigillsalsvdin pipikaltsylgfgnyelr1plitledd  
tkvlreaynikagene  
>tr|D8HB78|D8HB78\_STAAF  
mnqrvarlaeekgheivgvi eptpkattpyqqyqhiadvkdadvaidfsnpl1fp1ldeefh1plvvattgekekllnk  
lde1sqnmpvffsanmsyg  
vhaltki1laavp1l ddfdie1teahnkvdapsgtleklydvivslkenvtpvydrhelnekrppqdigihsirggti  
vgehevlfagtdeti qith  
raqskdifangai qaaerlvnkpngfytdnl  
>tr|D8HB79|D8HB79\_STAAF  
mvghltaeeii qyisdakkstpi kvylngnfegitypesfkvfgseqskvifceaddwkpfyetygsqfedieiemdrn  
saip1kdl tntnari epga  
fireqaiiedgavvmmgati nigavvgegtmidmnatlggrattgknvhvgagavlagvieppsaspvii eddvligana  
vilegvrvkgai vaagai  
vtqdvpagavvagtpakvikqasevqdtkkeivaalrk1nd  
>tr|D8HB80|D8HB80\_STAAF  
mne1efvtkhrhrlhghpels1hefettayikafldslnikydcpletgviaylegngshtiayradidalpileendvp  
yrsqsdhvmhacghdght  
almlfvqrcdmqdagqlpqnvvfi fpaeeetgganrl ikagafdkypieavfghvnpfadegiavirdeeitasate  
yrffltglsshvadkeqgh  
scgealqhvltqisqiqqfhlnglkrnivhighfkageaintvpsngylegtirtydiddltivknqmki aesvkl1fn  
vdcevkaeagyptinspk  
l1rtqiedalikal dlnvydkptpflfgedfsfygqqlapayfvfigtrnedkgfv1tshlnfdekvlinvanfyenll

Tsompanidou\_et\_al\_Supplemental\_FASTA\_File

nnykev

>tr|D8HB81|D8HB81\_STAAF

mavvknnayhydlefavtqfihagidtfsttslreaiqirqlapnati flmnavyefd lvrehqihmtlpsltyyyhkn  
dlagihvhlefenllhrsg  
fkdlneikevldhhdqnakmiisglwthfgyadefdvdsyniersqweiveallsegyqfdlihaqnsasfyregqi  
llphtharvgialygsrp  
ysslngheivqsltvkahviqvrevqagdygcysfafevtknntklavvdigygdgilrtrakhealingkrypiralmm  
shmfvevdgnvhaqdevil  
ynndirideytfkgvganseqlsamnhds lkkeyisndc

>tr|D8HB82|D8HB82\_STAAF

mtvkynqngel tmdgis lktiaqsfgtptivydelqireqmrryhrafkds glkynisyaskaftciqmvklvaedlql  
divsege lytaleagfeps  
rihfghnntkheiryalennigyfvidsleeielidryandtvqvv lrvnpgveahthefiqtggedskfglsiqygla  
kkaidkvqqslylklgvh  
chigsqiegteafietakivlrlkeqdiqvellnlgggfgikyvegdesfpiesgikditdaikseikvlgidapeigi  
epgrsivgeagvtlyevgt  
ikeipeinkyvsidggmsdhirtal ydakyqallvrnekaddsvtiagklcesgdiiikdaklpssvkrgydylailstg  
ayhysmasnynqm kpsvf  
flkdgkarevikrqs lrlindtk

>tr|D8HB83|D8HB83\_STAAF

mhvpyfqvddfkeiekf iqsnsgmivtvdqgkpiathvplvldkkgddyisghlaktnpqcntlkdnqnvliiyqga  
hsyvssawyekenvptwny  
qavhlygessilseeetid lkrllvkyerhredpvlwdnisentkmqakg ivgfvkkihkieaaykmsqrnekdynni  
iekledesnassvavaevm  
knihpys

>tr|D8HB84|D8HB84\_STAAF

mkyllslvanllvfgvlsaiglninilaammmlvipit isgilffktnldktyiffnilfidfyiiynvhlmalprf  
nsyikaemmelehidv lit  
skdfgfdeiff tlylliliiyyllkkqvksks

>tr|D8HB89|D8HB89\_STAAF

mtenksfkeshplddfisdke lsnttiqkekltieqqkqvdtiskqipndnegllafgsdlqkmsqfshqmldevqsk  
dvgpigdtlsdmsklksv  
npnelntdkpsmlkri fsrakssineifsrmsvsaqvdritiq lqkhqthltrdielltdlydknkqyfd dlslhiaa  
qqkklqleneklpqlqqa  
qqstnqmdiqqvadmqfidrldkriyd lqlsrqialqtapqirmi qvnqalaekiqssiltsiplwknqmaialtlmr  
qrnavaaqravtdttndll  
tanaemlkqnaietatenergividltlkrtrni etieetliiqhg reerqlaekelqqieqdlkshlvnikgpnkq  
s

>tr|D8HB90|D8HB90\_STAAF

mnkntwvigftl famffgagnl ifppnlgldsgqffwpailafvltgiglp llgvi vgal dkegyigalnki spkfsilf  
liiyyltigplfaiprtas  
tsfemtipihsnsialfifti yfivvlyiclnpsklidrigslltp lllitilamiikgyldfsgnsagkgnealy  
hsnfssfaegtqgyltmd  
aiaaiafsmi vvnvklgtgikt nqifkqtltagliaavalifiyislygignhmpvsdmtldqlkskdrnigtyllttm  
astgfgsfgyllgiival  
aclttacglivavseyfhrivpkvsy kafvlvfilmsfianqglnavismsipvlsivypvaitvlliliakfiptkr  
isqqipviivfilsifsvm  
sklgwlkinfieslpl rayslewfpvaiiatilgylvgifvkqdpikyqqe

>tr|D8HB91|D8HB91\_STAAF

msdrfikfndeql dakqvmmlqdlarlll kneqtqvkiqkfpypnpvqnilit swfwshrpshiemaglktdvmlaaygy  
hmmdvqivnevvdktfkh  
pkfyqqlfkll edmrvlnsikierpstaklidrlrdtrisytesqikvyrtktqytdllflylehaflsqdffdipsihs  
dldd ilvnmfilyl pnfqn  
qnsednmylaqrimyqvddi lkedmlneyyy lpktlyntlassefedlkrtdasqv dgeddtsedddnesekadskads  
eskggayleme lhegnse  
tlgndearegdstdmtdm tkkkgksndtlnreegdavgqsqafqldgvnknveikwqipeiepqyvleyqueskdqvqy  
eikdliqi ikktiereqrd  
arfnltkgrlqkdlinwfiddqy klfykkqdl sksfdatftllidasasmhdkaetkkgvvl fhetlkalnikheilsf  
sedafdsdehaqpnine i  
inydystfekdgprialep qddnrdgvairvaserllrrnqhqrflivf sdgepsafnysqdg iidtyeavemsrkfgi  
evfnvflsqdpi tedveqt  
ihniygqyai fvegvahlpghl spllkklllksl

>tr|D8HB93|D8HB93\_STAAF

mlhetwkertpikkveintdakkftvsdm ltvgkqydvineteeyyqi idnsglvgyykytyfkev

>tr|D8HB94|D8HB94\_STAAF

mcglrsitlgttnieqtkhfmvdi lglnceellensirfgdadi spgtr lqfiqvpsrleeshfvigilrtptdsglee  
yaelsskdipfttveln  
gnkyfslednng hifsiysnennygvglgmps fesavnplhqvqglgpvilkvnhvdi tgqiltni fglevfaeyqpdfn

Tsompanidou\_et\_al\_Supplemental\_FASTA\_File

adyhvqvfkigtgglggei  
hImpvetemtpeygavdvefetkdadffnqaksrIdeveipyqtIeqddiesiritensglSfiftlqk  
>tr|D8HB95|D8HB95\_STAAF  
mpevkvpelaesitegtiaewlknvgdsvekgeaileletdkvnvevseeagvlseqIasegdtvevgqaiavigegsg  
naskensndntpqqneetn  
nkkeettksadnaevnqtnddnqqrnatpsarryarengvnlaevspktndvvrkedidkkqqapastqttqqapake  
ekkyngyptkpvirekmsr  
rkktaakklllevsnntamlttfnevdmtnvmeIrkkrkkeqfmkdhgdgkIgfmsfftkasvaalkkypevnaeidgddmi  
tkqyydigvavstddgllv  
pfvrddckknfaeieaeianlavkarekkIglldmvngsfItIinggiIgsmmstpiingnqaailgmhsiiItrpiaidqd  
tienrpmmyialsydhrii  
dgkeavgfIktikelienpedllles  
>tr|D8HB96|D8HB96\_STAAF  
mtnerkevseapvnfganIglmlIyddfIqdpssvpedIqvlfstiknddsivpaIktstssqnsdgtikrvmlidnir  
qyghlkadiypvnpkrkh  
vpkleiedfdIqqtleGISagivsdhfadiydnaeailrmekrykgpiafeythinntergwlkrrietpykvtInn  
nekraIfkqlayvegfeKy  
lhknfvgakrfsiegvdalvpmIqrtitiaakegikniqigmahrgrInvlthvlekpyemmisefmhtdpmkflpedgs  
IqltagwtgdvkyhIggik  
ttdsygtmqrialannpshleivapvvegrtraaqddthragapttdhhkampiihgdaaypggqinfetmnlgnIkgY  
stggsIhiitnrigftte  
pidarsttystdvakgydvpifhvnaddveatieaidiamefrkefhkdvvidIvgyrffghnemdepsitnppvpyqnr  
khdsveyvfgkIvnevgi  
sedemhsfieqvkelrqahdkiIkdakmdnpdmekpadlalplqadeqsftfdhlkeindalltypdgfnIkkInkvI  
ekrhepfnkedglvdwaqa  
eqIafatiIqdgtpirIlgqdsertfshrhavIhdeqtgetytpIhhvpgqkatfdihnsplseaavvgfeygynvenk  
ksfniweaqygdfanmsqm  
ifdnflfssrskwgersglIflphayegqgpehssarlerflqlaennctvvnIssssnyfhllraqaasIseqmrip  
lvvmspksllrnktvakpi  
deftsggfepiltesyqadkvtkvilatgkmfidIkealaknpdesvllvaierlypfpeeeieallaqlpnleevswvq  
eepknqgawlyvpyvkvI  
vadkydIshgriqraapaegdgeihkIvqnkiienalkn  
>tr|D8HBA0|D8HBA0\_STAAF  
mtkiaftgggtvghsvnlIliptaIsqgyealyigskngieremiesqlpeikyypissgkIrryisIlenakdvfkvlk  
gildarkvlkkekpdlIIs  
kggfvsvpvviaaksIniptiihesdltpglankialkfakkiyttfeetInylpkekadfigatiredIknghangyq  
IgfnenkklvIvmgsgI  
skkInsiIrenIdalIqqyqvihtgkgIkdavkksygiqyefvkedItdllaitdtvisragsnaiyefltIripmlI  
vplglIqsrqgdqIdnanhf  
adkyaktideeqItaqilIqelnkmeqertriInmksyeqsytkaelfdkmikdaIn  
>tr|D8HBA2|D8HBA2\_STAAF  
mddkqhtssnderaeiatsnqddqtnsskrvhIkrwqfisiligitilitavitvayifinqisglnktdqanIkie  
nvykiInsdyykkqnsdI  
skaaidgmvkeIkdpyseyltkeqtksfnegvsdgvfvgigaemqkndqimvtspmkgsparagirpkdvitkvngksi  
kgkaIdevvkdvrgkente  
vltvqrgseekdvkikrekIhvsveykkkngvgvitinkfndtsgeIkdavIkahkdglkkivldIrnppglldea  
vkmanifidkgktvvkIek  
gkdteaiqtsndaIkeakmdisilvnegsasasevftgalkdyhkakvygsktfgkgvvqttrefkdgsllkytemkwI  
tpdghyihgkigkpdvtid  
tpkyqslnvipntktfkvgdddkniktigIlsdIgykvdnettqfdqalenqikafqqankIevtgefknketnkftel  
IvekankhddvIdkIiniI  
k  
>tr|D8HBA7|D8HBA7\_STAAF  
mtkqiIvtdstsdIkeyleannihvipIstIiegasyvdqvditseeIfinhiendedvKtsqpaigefisayeelgkdg  
aeiisihlssglsgtfnIa  
yqasqmvdanvtvidsksisfgIgyqiqlvlelvkegvstseivkklnhIrenikIlfvviqIlnqIikggriSktkglig  
nlmkIkpigtIddgrlelv  
hnartqnsIqylkkeaefigdheiksvgvahanvieyvdIkkvfneafhvnnydinvttpvisahTggaigIvvlk  
k  
>tr|D8HBA9|D8HBA9\_STAAF  
mlnsfdaayhsIceevleigntrndrntgtiskfghqlrfdIskgfpIlttkvsfkIvateIlfwikgdtniqyllky  
nnniwnewafenyIksdey  
kgpdmtdfghraIIsdpefnegyneqmkqfkqriIeddtfakqfgdIgnvygkqwrwdvkdgnhfdqIktvieqikhnpd  
srhIvsawnpteidtmal  
ppchtmfqqfyvqdgkIscqlyqrsadiIlgvpfniasyalIthliakecglevgefvtfgdahisnhidaiqtqlare  
sfnpptlkIinsdksIfdin  
yedleivgyeshpaikapiav  
>tr|D8HBB0|D8HBB0\_STAAF



Tsompanidou\_et\_al\_Supplemental\_FASTA\_File

mnaydaymkeiaqqmrgeltqngftsletseavleymnqvnadttfvvinstcgcgaaglarpaavavatqnehrptntv  
tvfagqdkeatatmrefiq  
qapsspsya1fkqgd1vyfmprefiegrdindiamd1kdafdenck  
>tr|D8HBB1|D8HBB1\_STAAF  
meilrieptpsntmkvvlstfredklsntykkveetqprfinqlsidgitsifhvmnflavdkapkadwevilpdika  
vfdsgnkvlsvnepqidn  
hfgeikaelltfkqipypikltstdqelreqlpqtyvdymtqaqtehdnivfmrkwldlgnrygnieevmdgvleevlat  
ypesqlpv1vkhaleenha  
tnnyhfyrhvsldeyhatdnwkr1rm1nhfpkptfedipl1dlalsdekvpvrrqaiv1lgmieskeilpylykglrdk  
spavrrtagdcisd1gype  
alpemv11ddpqkivrwaamfi fdegnaeqlpalkahindsafevklqiemaisriengdealgsvwkqmanrti  
>tr|D8HBB3|D8HBB3\_STAAF  
mntycnqcpiktr1rklegkthahfcinecsigkeikqlgnelq  
>tr|D8HBB4|D8HBB4\_STAAF  
myneilglvtfiatfv1mvlmyrffgkqliawvaigtianiqviktveifgisat1gnvmfasiylatdilndiygrr  
vakravw1gfsstlimiiv  
mq1slhfipapedmaqalhai fdvvprialgsivayiiqqhidvfifslikkvfssdktfiraygstflssiidtal f  
vaiafigslpgtvvfeifi  
ttyv1klastvfnvpfyiaksfylkgkidkldqgy  
>tr|D8HBB5|D8HBB5\_STAAF  
makinfdaatkgnpgistcaivikedeqhytythelgemdnhtaewaaciya leharelnvsnallytdskliadsvnag  
yvknakfkpyfdqleifeq  
dfd11fvkwipreqnkeanqhaqqa1ylikknk  
>tr|D8HBB6|D8HBB6\_STAAF  
mekpsreafeqnnk1ligiv1svitfw1faqs1vnvvpiledsfntdigtvniavsital fsgmfvvgaggladkygrik  
ltnigi1lnilgsl1iis  
n1p111iigr1iqg1saacimpat1siiksyyigkdrqra1sywsigswgsgvcsffggavat1lgrwifilsiis1  
ialflikgtpetksksis1  
nkfdikglv1lvim1sl1nilitkgse1gvts1lfit1laiaigtfs1fiv1ekratnplidfk1fknkaytgatasnfl  
1ngvagt1livantfvqrg1  
gysslqags1sity1vmv1im1rvgek1lqt1gckkpm1igtgvlivgeclis1tflpeilyvicciigy1ffglglgiy  
atpstdtaianap1ekvgv  
aagi1ymasalggafgvalsgavyaivsnm1niytgamialw1nagmailsfvii1111vpkqndtq1  
>tr|D8HBB9|D8HBB9\_STAAF  
m1vavvke1kqgegrvactpenvrk1taaghkviveknag1gsgfsndmyekegakivtheqawead1vikvkephesey  
qyfkknqi1wgf1hlassk  
eivekmqevgvtaisgeti1kngkae1lapmsaiagqrsaimgayyseaqqhgqgt1vtgvhenvdipgstyvi fgggva  
atnaanvalgnakviiie  
1nddrikyledmyaekdv1vkvstpen1aeqikkadvfistilipgakppk1vtremvksmkkgsv1idiaidqgg1tiet  
irpttisdpvyeegv1hy  
gvpnqsgavprts1ma1aqqnid1yleicdkgleqaikdneal1stgvniyqqqvtnglatshd1dykeilnvie  
>tr|D8HBC0|D8HBC0\_STAAF  
mpnk111vdgmal1frhfyats1hkqfmynsqgvptngi1qgfvrh1fsaiheirp1thvavc1wdmgqstfrndmfdgykqn  
rsappeel1pqfdyvkeis  
eqfgfvni1gvknyeaddvigt1laqqystdndv1iitgdkd11qcindnvev1likkgfniynryt1hrfneeyalepqq1  
idika1fmgdtadgyagvkg  
ige1ktaik1liqqyqsv1nvenida1sagqrnk1ind1dely1skrlaeihtqvpidsal1fekmsfatt1nhilsicne  
helhvs1gky1sshf  
>tr|D8HBC1|D8HBC1\_STAAF  
minkeq1d1lyk1k1keveksr1neal1htinqvikkvylqqytcsfvghfsagk1st1in1llieq1dilpsspvttsntaiv  
svsdnhdi1ian1pnqtyak  
1snydevrem1rnq1vdesve1nfqsak1fkgft1qdtpgvdsnvashqsiteqymytsnmi1fytdynhvqse1nfkfm  
khindvg1ipvvfi1inqidk  
hqddel1sf1t1fksrveks1adwgik1lertfyvskfdhpenel1v1ssylis1dqhretiedytsrtveyiteaq1ldyiqs  
ei1qev1led1gi1eae1feqa  
f1nsqqhqa1seeag11nnpdel1maf1knkrkni1enayim1phnmrem1rsylesmsqdfnv1gg1fnkkkkk1liqqqr1  
1tatdal1qehvnq1rqpm  
redmsfvtr1finkkeasdkv1nqhydvpem1eglyqpqtsisntyv1tfsdevvkaikkyveqqstpi1fkei1envqad  
el1ptesdd1keyqrytel  
nelrqs1ttknyrhyyih1des1dk1vd1rqettyqv1atdnaqdnrdnq1lnqntattnmsidiqal1diisdvp1fkrtk  
qdi1het1tridnk1likigv  
fgtfsagkss1inal1geqi1vsspnpttaatte1sygdesyit1ksqsq11deinavveyqnmsfstiedfins1lek1  
ksh1nknq1lafvhavekhy  
n1lyvnm1engekhai1nqqe1kkwsaedeyatfvktvhia1mhdw1kgkiivds1glhsnnqrhtneteqil1tssd1ilyv  
syfnhsftdndkafiehm1k  
dmnq1nenqafk1m1inaad1aesqdd1eavetyvsdal1rqvhlqsd1favssrnal1qaedkgidq1kqsiqqfvdesks  
i1leqqmihq1lqqmdrsyve  
mitefetnkadisrrqqr1tvykdkqr1qhqlidat1qhtdneveeqvyh1nar1klq11ddvksvfnsqmtqnsdfnee

Tsompanidou\_et\_al\_Supplemental\_FASTA\_File

kkvstrvyldqihqr1fle  
qsliterikkyfnkqltegiapivqqlanlhvivnpqfnfesanieqpllhidfndmlnalpkqltkrkilnpgnqrdih  
esicqstlr1lqpqmgilr  
qqlelyvkmaveaesqfesfeaniqtqindllaafdldttlinqlkdkhqqlktily  
>tr|D8HBC2|D8HBC2\_STAAF  
mkntrfnp1qr1hfyaaifiapl1itltisgigy1ffpevenniykneffgdsdvkthqt1ndavhqverqyegffvskvs  
ildepynkritlsdmagnq  
ryvfl dhnnqfvadqnakhtysnmrsihss1ftentiiny1vel tacwtifmilsgtyllikkhlisnkskalrwqkwh  
amigiiaipvfv1vltgl  
pwsqfmgskiaqmmtdngdlggela1nppksd1nel pwatrkknqpassekgssshgnaampqtkldyqisidkveq  
aqksqgikkpfsivypsdkh  
gtfivsnstnsqvtgl dvspykeqtl yfdqysgkklgtikyddygiakwftwgiplheghlfgilnkiinlfcia1lv  
aigmgfvswikrtkntavk  
vphrvkkpasisliiclivgl1mplfg1slilvfielilyikdrakq  
>tr|D8HBC3|D8HBC3\_STAAF  
mgkkmg1g1sialvviavvc1mifssqkttfygymnsntnaekvvsekdlvkhnkivepsndfkkpkgdvklvskd  
dgktfykqevkhddvphg  
1mmki hdmhmn  
>tr|D8HBC4|D8HBC4\_STAAF  
mfq1lavcpmg1eavvareiqelgyetnvengriffegdasavkan1wlrtadrikivvgrfnattfdelfeqtkalp  
esiidkegnfpvqgrsvks  
tlhsvpcqaitkkaiver1rraynekgwlnesgakypvevailkdnv1l1tidtsgsglnrrgyrlaqgeapiketlaas  
lirlanwkgdtp1idpfcg  
sgtiaieac1iaqniapgnrefaseqwnimpanyddyrddeadkmadydkeievyasdi dpemveiakrnaeevgl sdi  
ikfsvkdvnt1tidteepv  
alignppygerigdreveemyryig1mkqhpflstyiltsnefeylvdrkatkrklfngyiectyyqywgkkterk  
tien  
>tr|D8HBC7|D8HBC7\_STAAF  
mnvves1iyevnmqgnfenvksqqqdhdfyqtvkpytehids1lneiklhrefiievpymsnrkfellianieqlsve  
chfkrtsrk1fielkksvq  
ydlqnildgitkegytq  
>tr|D8HBC9|D8HBC9\_STAAF  
mtenkgsqpkngnnggksnksknrvkrtiikiigfmiaffv1llgillfayyawkapafteak1qdpipakiydk  
ngelvktldngqrhehvn1  
kdvpksmkdavlatednrfehgaldykr1fgaigkn1tggfsegast1tqqvkdaf1sqhksigrkaqeylsyrle  
qeyskddi1fqvylnkiyys  
dgv1gikaaakyyfnkd1kdl1naeeay1ag1pqvpnnyniydhpkaaedrkn1vly1mhyhkritdkwedakkid1ka  
n1vnrtaeerqni1dtnqds  
eynsyvfvkse1mnnkafkden1gnv1qsgikiytmdkdvqkt1qndvdngsfyknkdqqvgat1l1dsktgg1va1sg  
grdfkdvvn1nqatdpht  
gss1kp1f1aygpai1enmkwatnha1qdessyqvdgstfrnydvkshgtvsiyda1rqsfnipalkawqsvkqagnadpak  
kfaak1gl1nyegdigpsev  
1ggsasefsptqlasafaa1ianggtynnahsiqkvvtrdgeti1ydh1tshkamsdyt1aymlaem1kgtfkpygsayghv  
sgvnmgaktgtgtygaety  
sqyn1pdnaakdvwi1ngftpqytmvwm1gfskvkqygensfvghsqqeyppflyenvmskissrdgedfkrpssvsgsip  
sinvsgsqdn1ttnrsthg  
gsdtsanssgtaqsnn1ntrsqqsrnsggl1tgi1fn  
>tr|D8HBD0|D8HBD0\_STAAF  
mtni1kevfdn1eqeidv1faknkt1gsseakpy1dqyhski1idyfkqvnditgnidfdn1nqypvvpnmfkerydymier  
kyhfmgyrqmktfk1telik  
mnasyqtr1knkqv  
>tr|D8HBD1|D8HBD1\_STAAF  
mvskkkalemi1dvianmfpdaecelkhdn1pfeltiav1l1saqctdv1vnrvttel1fkkykttedylav1sdeelmndi1rsi  
glyrnkakk1k1cqs1id  
qfng1eipqthk1eles1agvgrktanvmsvafgeps1lavdthvervskrlginrwkdnvrqvedr1c1svipdrwrn1rshh  
ql1ffgryhclarkpkcdi  
cp1ledcregqkrykas1lea  
>tr|D8HBD2|D8HBD2\_STAAF  
mdkyq1karpvvi1rrel1dhysd1gl1deqdlv1llk1iyasetsnkqpsiell1qkgstmqprditmviqn1liqrelle1q  
vqkdeegr1fteymn1dpff  
ek1shil1kqqsmetkeqnskekfkql1frie1d1farpl1spyeiet1nqwidvdkhdt1tiqaal1deans1nkr1sfky1mdr  
i1lnwkknnvkt1d1dsrki  
rekfnkpkm1th1vktvpkfdw1ngen1dgk  
>tr|D8HBD3|D8HBD3\_STAAF  
mkttikqakdh1nqdv1tigaw1ltnkr1ssgkia1flq1rdgtgfmqgvvkvseveevfklakeitqess1lyvtgtit1ednr  
sd1gyemqvk1sie1viseah  
dyp1itpknhgt1ef1mdhrh1wl1rskkqhavmki1rnevi1ratyeffskd1gftkvdppil1tasapegt1sel1fhtkyfdq1daf  
1sqsgq1yleaaamahgkv

Tsompanidou\_et\_al\_Supplemental\_FASTA\_File

fsfgptfraeksktrrrhliefwmiegemafthaesleiqeqyvthvvksvlencklelkiilerdtsklekvatpfpris  
yddaief1kaegfddiewg  
edfgaphetaianhyd1pvfitynyptkikpfymqpnpenetv1cadliapegygeiiggsservddlelleqrvkehgl  
eeasyylldlrrygsvphc  
gfglglertvawisgvehvretapfr1lnrlyp  
>tr|D8HBD4|D8HBD4\_STAAF  
mgmatyavvdlettgnqldfddiiqigitfvrrnqiidtyhsmirtnleippfiqaltsieenmlqqapyfnvqaeiyd  
kikdcifvahnvdfdlnfi  
kkafkdcniqyrpkvidtleifkiafptdksyqlselaeahgitlanahradedaattaklmilafekfeklpldtlkq  
lyylskqlkydlydffem  
vrqydakpldksyekfeqiyrkqvdfkkpttnyngslkslyskavdqgltyrpqqlylaetilddqmhsekamieas  
gsgkslayllaa1myniet  
gkhvmistntkllqsqlllek dipamnealfkina1likksdyislg1sqilkdtsnyevnilkmqlliwitetspg  
diqeln1kggqkmyfdki  
etyvparhdvhyynfikrnaqniqigitnhahlihsdvensiyqlfddcivdeahr1pdya1nqvtnelsyadikyqlgl  
igknenekllkaidqlekq  
rilekldiapidifglkasmneihelneqlfstiftiindsdyddihrfhnvftfetkdilkd1haiidklnktleif  
ngishktvkslrkqlllyk  
dkfknieqslkaghtsfisiknlsqkstirlyvkdyavkdvltkqvlefkfslifisgtlkfnhsfdafkqlfnkdvhfn  
tfevntslsakntsvfip  
sdvasyqkniideyvasivsyiieyttitsskclv1ftsykmmhmvqdm1nelpefedyvvtqqnqnykivqqfnfd  
kail1gtstffegfdfqan  
gikcvmiak1p1mknkhakylmdseftstfkeyvlpdavtrfrqglgrlirndrgiivsfdrlinsnyknffeql  
enyraqkkgdiqqfgk1lrq  
iqkkkk  
>tr|D8HBD6|D8HBD6\_STAAF  
mdks1feqarpi1eqiqdngfeayyvgsvrdivmgnihdidittsatpdeiesifshtipvgkehgtinvvfddenye  
vttfraeedyvdhrrpsgv  
tfvrdlyed1qrrdfmna1amdtayklydyfdgqqdinrri1rtvgiaerfeda1rmirc1rfqsq1sfdiatetfe  
amctqmadikflsierivi  
eltk1mrginveesfnh1ks1kafnympyfeh1dmnqinvtepidle1liaivsvkfdinys1kplk1snrqakdinqi  
qimna1ssiitkeq1kmfv  
ydydtn1iknvmvaadv1kandi1qgheplivn1qtidet1qhlpmhnrkdmmvnggv1mah1naksgpw1kdvlrqieia  
ivtgkvsneete1kwvdn  
hvk1  
>tr|D8HBD7|D8HBD7\_STAAF  
mkig1tcypsmggsg1iate1gik1aerghevfitsnipfrirkp1lnmifhqvevnqyavfqyppydit1stkieavi  
keyd1d1lhmyavphaic  
gilaremsgkdkimtt1hgtditv1gydhs1qgaikfgieksdivtsvsks1aqethei1etnkei1piynfvrenepf  
tkhnta1ksqfgiapdek  
1ihvsnfrqvkr1diti1etfakvrekipsk1i11gdgpe1vpmrqmtkelnveedv1flgkqdcvsefyq1sdlv111se  
kesfg1t11eamktgvvpi  
gsnaggi1kevikhgetgfvdvgsdsasdyair1ledkvlynk1qkn1adiaerfgsel1tdqeyyyyqk1nehnks  
kge  
>tr|D8HBE0|D8HBE0\_STAAF  
mni1fiieggd1tvng1v1mfshsimavqaiyfyrfrkrmigiivamtwv1ndyidyfhlqfpyydfitthvwqigv1  
scclsvfg11lyie1nk11  
kck  
>tr|D8HBE2|D8HBE2\_STAAF  
mediykliddin1qklen1dsrvneaittdnddal1filget1ynfg1mpqglevfrvlyhkypdeselli1yfi1eglmsen  
qtdealey1syvepspek1  
mlead1yqqinmmeva1dk1qea1elepndpi1ihfalaem1lydgqyl1ratseyetv1etgeyqvnvnl1fsmadcs1q  
sgnysdair1lydeinedem  
tsedy1kkaisyd1kndit1qeaikimtt11skdpdyiqgyly1qsl1yeneknypdaietgkegl1rsqfykelmyttgcle  
iehgdanegv111kqa1ev  
dnayqep11i1sdl1yrneedyeai1e1l1tyvdeed1dptfmwh1afaygqeerdkeaqhffelayptmktnidfmsdyf  
y1ietgqkeqait1lnq11  
el1epsnenwhde1sr1qs  
>tr|D8HBE4|D8HBE4\_STAAF  
mk1qttypsnny1yvehgaikyigty1nqfdqs11ideyvnyqfankfddi1syenvhkvii1pagekktkfeqqet1  
ey1lshvtrntai1avvg  
gatgdfagfvaat11rgvhi1qvpttilahdssvvgkvg1n1skqgn1ligafyrptaviy1d1flkt1pfeqilsgyaev  
ykhallngesatqdieqhf  
kdreilqs1ngmdkyiakgi1etk1divvadekeqgvrkf1n1lghtfghaveyyhki1phghavmvgi1yqfivana1fdsk  
hdinhyiqy11q1gyp1dm  
itd1dfet1yqym1s1dkkndkqgvqmv1ir1qfgdivvqhvdq1t1qhaceq1ktyfk  
>tr|D8HBE5|D8HBE5\_STAAF  
mry1tsgeshgpq1tvivegvpan1eikvedinkemfkrqgygrgrrmqiekdtveivsgvrngyt1gspitmvvtndd

Tsompanidou\_et\_al\_Supplemental\_FASTA\_File

fthwrkimgaapisdeere  
nmkrtitkprpghadlvvgmkynhrdlrnvlerssaretarvavgalckvllleqldieiysrvveiggikdkdfydset  
fkanldrndrvrviddgiaq  
amrdkiadeakndgdsiggvqvvenmpvgvgsyvhdrkldgriaqgvvsinafkgsfgegfkkaekpgseiqdaily  
dteleggyrgsnhlggllegg  
msngmpiiivngvmpiptlykplnsvdintkedfkatiersdscavpaasivcehvvafeiakalleefqsnhieqlkqq  
iierrqlnief  
>tr|D8HBE7|D8HBE7\_STAAF  
mneiikkveqrlekaikskdsvleqaslhlssggkrvrpafvilssqfgkdeqtseqtyqvavalelihmatlvhddvi  
dksdkrrgkltjiskwdqt  
tailtgnflalglehlmavkdnrvhqlisesivdvcrgelfqfqdqfnsqqtiiynlrrinrktaalliqlstevgaits  
qsdketvrklmighyigm  
sfqiiddvldftstekklgkpvgsdlnghitlpillemrknpdfklkieqlrrdsdrkefedciqiirksdsideakav  
sskylskaldliselpdgh  
pksllsltkmgsrnt  
>tr|D8HBE9|D8HBE9\_STAAF  
mettvsklerqieerlkgvseyesininhrlgkllsdydipdvakvaclditdtsmrhldditynhlskhsiligdlisah  
fytllaeindlsfqneisk  
aiveinelksslhhaalndyquisqavkietlfpuyitlshfginideseiynylfedisdyypsyfkkynqsevkhylhd  
iqksylksrgn  
>tr|D8HBF1|D8HBF1\_STAAF  
mtkivtfgmgsfgtalavlaenghdvlmwgnkdavdelntchtnkkylyakldvniatsdmtkaiqyadiylmalp  
tkamrevatqindkltskk  
tfihvakgiengtfrkrvsemi edsi speynagigvls gppshaeevvkqpttvaasskdknvskltqdlfmdylrvytn  
ddl igvelgga lkniiava  
sgivagiygdnaaa lmtgrlae isrlgek lgadpmtflg lggigdlivtctsthsrntflgyklgqgesmdqal semn  
mvvegyttksvyhlakek  
nvdmpitnalrvl fenisvkecvkd lmerdkkse  
>tr|D8HBF3|D8HBF3\_STAAF  
mteefnesmindi kegdkvtgevqqvedkqvvhinggkfnngi ipisqlsthhidspsevkegdeveayvtkefdeen  
etgayilsrrgleteksys  
ylqekldnneiieakvtevkvkglvvdvqrgfvpaslistdfiedfsvfdgqti rikveeldpennrvilsrkaveqee  
ndakkdqlqlslnegdvid  
gkvarltqfgafidiggvdglvhvsel shevqtpeevsigqdvkviksidrterislsikdltptpfenikgqfhe  
ndvi egvvrlanfgafve  
iapgvqglvhiseiahkhigtpevelepqqvvnkiligideenervslsikatlpnedvvesdpsttkayleseednpt  
igdmigdklknlk  
>tr|D8HBF4|D8HBF4\_STAAF  
msvtylsiakeadlvtknvlcnnsrkmhyirfsyysnvkvaylrgflfyksikfyyniscreq  
>tr|D8HBF6|D8HBF6\_STAAF  
mkhl1vhtggtismsgdqs nkvvtdinpi smhqdvinqa qidelnpfnvpsphmtiqhvkqlkdiileavtnkyydg  
fvi thgt dtleetaflldl  
ilgieqpvvitgamrssneigsdglynyisairvasdekarhkgvmvfndeihtarvntkhtstntntfqsphngplgv  
ltkdrvqfhhmpyrqqa lk  
nvnekl nvp lvkaymgmpgdi fsfysregidgmviealggnippnalegiqqvlvlnipivlvsrsfngivsptyaydg  
ggyqlaqqgfifsnl ngp  
karlkllvalsnldkaeikayfe  
>tr|D8HBF8|D8HBF8\_STAAF  
msnnfkddfeknrqs idtnshqhdtedvekdqsel ehqdt tenteilqfpprnaqrkr rrdlatnhnkqhhd esqasddn  
ahneagt lddrqvessahs  
svnqepshqdstpqheeyynkna famdkshpepi edndkhetvkdvenntehstvsdkseaeqsqqpkpyfatganqan  
tskd khddvtvkqdkdesk  
dhhs gkkgaai gtagtagvagaagamaaskakkhsndaqnksnsgkannstedkvsqdk skdhngkkgaai gtagtag  
gaasksasaaskphasna  
sqnhdehdhhd rdkerkkggmakvllpliaavliigalai fggmalnnhngtkenkiantkn nadeskd kdt skdask  
dktkstdskskddqdkat  
kdesdndqnnanqannqanqqanqqqqqqrqqggqrhtvngqenlyriai qyygsgspenvekirranglsgn  
nirngqqivip  
>tr|D8HBF9|D8HBF9\_STAAF  
mlhdi lrnkfgfesfkpgqgeiiesimsqhtl gilptgsgkslcyqiptylsgkptliisplisl mddqvmqlkingek  
rvtcihsgmdeiekkhnik  
clrh srflf spefl lqpanfk listidfgmivldeahclsewg ydfrphyaligkvtkhfkdavv laltatapphlqdd  
ltemlavqfnvikttnrp  
nisfkhlnfhddedki ewllpflqqsgptiiyvsskkmclnlaqliydsgfltg iyhgdmnyqerhtvqqqflndipii  
vatsafmginkkdi rti  
fhflstspnyiqeigrgrdge lsa islfqpd dkiyletllfadmitedvqnfeigeflapdkqdvlttlhsfysig  
alkqifkqsfrkqqlgffr  
migyckldqcrkyll effgeyppa qdrccndsnitdivilnkkkvirsigfdeklnqlflr

Tsompanidou\_et\_al\_Supplemental\_FASTA\_File

>tr|D8HBG0|D8HBG0\_STAAF  
mqhiiktalqqtfnynksiyinilvgkkshqtfddacsqqqlslyhslp1lkypsfelflenitefnaemeimlhpryt  
fesmgqtfqaiql1lvqtns  
ntkqhvhfvpi sqnnkiqetvki vnyikenqlqidfenelhnlfkai t1kgpcylhyylqgydepmytrqqvs1iek1  
sqqqlfefemnnlvmmfe  
lesgeytilskiimkpt1lnqytyytr1leqftmediaaqqvki tiedhvleilikgym snyddyveqedqlqflnf  
yqhrger1kfykeqfdt1  
syfqlkv1ivgfergdlnva  
>tr|D8HBG1|D8HBG1\_STAAF  
mdtciacgacgaaapdi dyddegiafvilddnqgtaevpeelyedmedaidgcptsikiadesfdgdalkfe  
>tr|D8HBG2|D8HBG2\_STAAF  
mqqnkr1itism1saiav1tfikfpi p1lppy1t1dfsdvps1latftfgpvagiivalvkn1lnylfsmgdpvgpfan  
flagas11tayai yknkr  
stkslitg1iativmtiv1silnyfv1lplygmifnladiann1kviivsgii pfniikgivisivfillyr1lanflk  
ri  
>tr|D8HBG3|D8HBG3\_STAAF  
mmsr1nsvvik1w1ti1ivttv1l1lsialitfmqyyftqetenairedarriss1veqshnkeeaikysqtlienpgg  
1miinnkhrqstas1snik  
kqm1nevvndhfdvfdkgsvtrnvtikekgssqti1llyptkaqknshskysgvfiykd1ksiedtnnaitiiti  
tavif1tittvaff1ssr  
itkplrr1rdqatr vsegdysykp svttkdeigqlsqafnqmsteieehvdalstsknirdslinsmvegvl ginesrqi  
ilsnkmandimndidedak  
af1l1rqiedtfkskqtemrd1emnarffvvttsyidkieggksgvvvtvrdmtnehn1dqmkdfianvshelrtpis1  
1qgytesivdgi vtepei  
kes1aiv1deskr1nr1vne1lnvarmdaeglsvnkevqpiaa1ldkmki kyrqqadd1glnmtfnyckkrvwsydmdrm  
dqv1tn1idnasrytkpgd  
eiaitcaenesedi1yikdtgtgi apehlqqvfdrfykvd aartrgkqgtg1glfickmiiehggsidvkselgkgtf  
iik1pkpe  
>tr|D8HBG5|D8HBG5\_STAAF  
mtkeler1qkriansgytsrrkaet1isegkvkvngttvtelgtkvkpsdtievegikieledkiyilfhkptqvitsvs  
ddrgrtvvtdyfkdidari  
ypvgr1dytsg1l11ndgeftn1mthpryqikkyvak1kgylmreevka1ekgieledgmtqpaevkvkkqdkdknt  
t1veititegrnrqvrmmf  
ehfghqvtk1sridygp1nvvg1nagegrv1tphvekvmrh1aehgk  
>tr|D8HBG6|D8HBG6\_STAAF  
mdnhgiles1lftagdeg1dekql1e1ldiskdqlvelienysshg1i1qrfgttyv1ttkkeaatyieqli eqksqm1  
sqaamev1s1iaynq1sr  
sdiel1rsinsdgavkt1iakglveakvvneqrsqqlittd1flnvfgissied1ptteeddeemda ffsn1vnqkgenn  
d  
>tr|D8HBG7|D8HBG7\_STAAF  
mtqyevdimyevk1dafngp1d111h1liqkfeidiy dipma1teqymqyvhamkq1einiasey1vlase1lmikskm1  
1pqstsmdvddd pred1v  
gr1ieyqnykeytai1ndmkeerd fyftrptd1shletdeswdpnhtid1telivayqrvknrvelntpskveirketf  
tiqqateqvtsr1kdkdhf  
nffs1lftfsep1eqvvth1f1ailemskagi1nieqqrnfediniirgvnyhfg  
>tr|D8HBG8|D8HBG8\_STAAF  
mqqalinfyyqfhtkqhyf1chdi1edawkaennyskqdavvs1il1fatacyhyrrn1kgayksfnkskei1iqnakdrd  
aly1n1ndyq1l1ieqqiak  
1naakpfssv1l1ptpdrf1i1kanyppydynhetatdpfivdhmrrdrseviaakeeaiqrkhrn  
>tr|D8HBH2|D8HBH2\_STAAF  
mqkni1ksgia1sel1g1gcm1sgtd1kkaeqi1dcavengityfdtadmydkginesvvgka1lkyqrrdivigtkvgn  
r1tndgsttwdpsksyike  
avkgs1kr1gidhid1yq1hggtiddp1detisafdelkqegi1raygissirpnvidyylkhsqietimsqfn1idnrp  
es1ldaihnn1dvkvlargp  
vskg1l1tsnsvn1dnkfkdg1fdyshdelgetiasikeiesn1salfsylv1tshdvlgsiivgassvdqlkenienyht  
kvs1dqikt ararvkd1ley  
tnh1v  
>tr|D8HBH3|D8HBH3\_STAAF  
mncqsesvvr1cvryaeq1svfeeftv1d1lgdisvdqisdstlyytcekf1l1vlqgnvlgvqiitnndestcevkyrk  
mf  
>tr|D8HBH4|D8HBH4\_STAAF  
mkgqhfi vtggtsg1gl1sivrk1lenkvht1lvrdvdkatri fdqelgktinvipcd1nd1kstqalqfedntsfdgfi  
ysag1gyfks1sdhsfsem  
1etyq1n1isfnvlytv1rpy1tsnahivgissqaafstqanaahygaskagfya1lna1r1lespn1h1mtv1nvvgpidtp  
fhqkadpsmkyakkm1gm1m  
ldanqlaedi1ygi1k1kq1e1nrpkwmhha1kmyqi1aprffercf1k1fkna  
>tr|D8HBH5|D8HBH5\_STAAF  
mklvfygagnmaqi1ftgi1nssn1dandiyl1tnksneqal1kafaek1gvnysyddat1l1kdadyv1lgtkphdfdalat

Tsompanidou\_et\_al\_Supplemental\_FASTA\_File

rikphitkdnfcisimagi  
pidyikqqlkcnpvarimptnaqvghsvtgisfsnfdpkskdeindlvkafgsvievsedhlhqvtaigtsgpafly  
hvfeqyvkagtklglekeq  
veesirnliigtskmiersdlsmaqlrknitskgttqagldtlseydlvsi fedclnaavdrsielsniedq  
>tr|D8HBH9|D8HBH9\_STAAF  
mnkqwwkeavayqvyprsfndshdgidlpgmldkldylkdldvwlspmfkspnddngydisdyqeimdefgtmed  
fdrllkgvhdrgmklildl  
vvnhtsdehpwfiesksskdnprdwiywdpkpdgsepnnwesi fngstweydanteqyyfhlfskkqpdlnwgnpevr  
davfemmnwwfdkgidgfr  
vdaitthikktfeagdlpypegktyapafdvdmnqpgiqtwlqemkdrslskydimtvgangvspddaddwvgeengkfn  
mifqfehlglnsgdshfd  
vnsyksvlnrwkqqlenkgnalfienhdqprrvstwgdddkywyesatshaavyflqqgtpfiyqqgeigmtnypfesi  
etfndvavkndyqivkaqq  
gdvdallakykdenrdnsrtpmqwddtlnggftngepwpvnpnyktinvalqledesvlqfykdliqlrksndvyvyg  
qfdlvdansqvfaymrtl  
nekqvlivgnltnheaelvtpfdvshgevklnfydakvnlkqlrpyeacvieIn  
>tr|D8HBI0|D8HBI0\_STAAF  
mvtikdvalkagvspstvsrvikgnqriseatisvkkvmeelnypntaartlitnqtykiglvkkgseepirlnpyfi  
nvlngisetcnqhggygtq  
tvsnnmndlmdevykmiqrmvdafillyskendpikqmlidenmpfivigkptsdidhqfthidndnilasenlthrvi  
eggydelifitekgdfevs  
kdriqqfetiasqnkinyqietsnerevifnymqnlqtrlkdpnikqaiisldamhlhailsvlyelnieipkdvmtat  
fndsylteiasppqtsidi  
kprmlgqqagsailnilknkaqdvieIviidtelkirkstqr  
>tr|D8HBI3|D8HBI3\_STAAF  
mineqrllntflelvqidsetgnestiqipilkekfialglvkedqaakhpklgannlvctmnsaikegevpklyltshm  
dtvvpaisvkvkiddgyi  
ysdgttiIgaddkaglaamlevlqvikeqqiphgqi qfvitvgeesgligakeInselladafgyaidasadvgttvvga  
ptqmlisakiigktahast  
pkegvsainiaakaisrmklgqvdeittsnigkfhggsatnivadevileearshdperiktqvkhmtdvfettaselg  
gkavvtveqsyppgfkind  
etvvkiaqesarnlglSantiiSggsgdsiintfgipsvilgvgyekihttnerpikslnllasqvlEiikivarqsk  
>tr|D8HBI4|D8HBI4\_STAAF  
mlklnpykigfrtiktagmtlgviiskllglndnyassailvvlcikhtkvhsIqaiisrlvscflvlflgsaifslIlgq  
spivlgiivllfipltvvl  
kvqegvitscvillhvfnaKsidthlivnetlllliglsiaftmnlmmpsldkqldeykckieqqiadi fskysyiceky  
edtiaiefealllnikkak  
siafrdvknhfvrnensyhyfdmreeqvelmrmkpliesichkdpllndvasllkeiglNvnsndytamrlhnyetr  
lkldelplptthkaInSra  
siiqilneleeylqiksqfgslkmhseva  
>tr|D8HBI5|D8HBI5\_STAAF  
mdmnfdlymngvvegarneiesagyeqlttaedvdkvlkqdgttlvminsvcgcaggiarpaashalhydvlpdrIvtvf  
agqdeatqrareyfeqya  
psspsfalvkdgkitemi erhqieghdvmvinqlqlfnkyceer  
>tr|D8HBI6|D8HBI6\_STAAF  
meitmpkIgesvhegtieqwlsvvgdhi deyepIcevitdkvtaevpstisgtiteilveagqtvaIdtiickietadek  
tnetteeqakvdehtqks  
tkkasatveqtstakqngprnngfrspvfkIasehdidlsvvgsgfegrvtkkdlmsvienggttaqsdkqvqtqsts  
vatssnqssednsenstip  
vngvrkaiaqnmvnsvteiphawmmievdatnlvntnrnhyknfnkegynltffaffvkavadaIkaypllnsswqgne  
ivlhkdnisiavadenkl  
yvpvikhadeksikgiareintlatkarnkqlttedmqggtftvntgtfgsvssmgiinhpqaailqvesivkkpvid  
dmiairsmvnlcisi dhri  
ldglqtgkfmnhikqrieqytIentniy  
>tr|D8HBI7|D8HBI7\_STAAF  
maklsyleairqagdlaIqqnkdvfilgedvgkkggvfgttqglqqygedrvidtplaesnivgtaigaamvgkrpiae  
iqfadfilpatnqiiseaa  
kmryrsnnewqcplti rapfgggvhgglYhsqsvesifasspgltivipstpydakglIIsiesndpvlyfehkkayrf  
IkeevpeeytvpIlgadv  
kregedltvfcyglmvnycIqaadiIaadginvevdlrtvypIldketiidrakhtgkvllvtednlegsimsesaiia  
ehclfdldapimrIaapdv  
psmpfspvIeneimmnpekiInkmrelaef  
>tr|D8HBI9|D8HBI9\_STAAF  
msekqydlvllgggtagyvaaIrasqlgkkvaiverqllggctIhkgcipktsllksaevfqtvkqaamfgvdvkdanvn  
fenmlarkediniqmyqgv  
khlmqhnhidiyngtgrilgtsifspqsgtisveyedgesdlInpqfvIiatgsspaelpflsfhdkiIssddilslkt  
IpsigIiggvgimefas  
ImidlgvdtvieagerilpteskqasqllkksIargvkyegikIsendisanedgvtfeissdiIkvdkvllsigrk

Tsompanidou\_et\_al\_Supplemental\_FASTA\_File

pntsdiglnntkiklstsg  
hiltnefqqtcdkhiyaagdcigklqlahvgskegvavdhmfegnpipvnynmmpkciysqpeiasiglnieqakaegm  
kvksfkvpfkaigkavids  
hdanegysemvidqsteeivginmigphvtelineasllqfmngsalelglttahapsisevlmelglkaesraihv  
>tr|D8HBJ2|D8HBJ2\_STAAF  
mtnlpmnkli devnne lsvainksvmdtql eesml ysl naggkri rpvl llll tldsl nteyel gmksaialemihtysli  
hddlpamdnddyrrgklt  
hkvygewartlagdalltkafelissddrltdevkikvlqrlsiasghvgmvggqmlmqsegqpidleilemihkktg  
alltfavmsaadianvdda  
tkehlesysyhl gmmfqi kddl dcygdeaklgkkvgsdlennkstyvsllgkdgaedklyhrdaavdelmqideqfnt  
khlleivdlfysrdh  
>tr|D8HBJ7|D8HBJ7\_STAAF  
mkkvlianrgeiavrii rardlgiqtvaiysegdkdalhtqiadeaycvgptlskdsyl nipnilsiatstgdcgvhpg  
ygf laenadfaelceacql  
kfigpsyqsiqkmgikdvakaemikanvpvpgsdg lmkdvseakkiakkigypviikataggggkgirvarnekeletg  
frmteqeaqtafgngglym  
ekfienfrhieiqivgdsygnvihlgerdcti qrrmqklveeapspilddetrremgnaavraakavnyenagtiefiyd  
lndnkfyfmemntriqueh  
pvtemvtgidlvklqlqvamgdvlpkqedikltghaiefri naenpyknfmpspgkieqylapgygvriesacytnt  
ippydsmlvakliiheptr  
deaimagirs lsefvvlgidttipfhikllnndi frsgkfnfnleqnsimndeg  
>tr|D8HBK1|D8HBK1\_STAAF  
mkk lvsivgatlllagcgsqnlapleekttdl rednhqlkl diqelnqqisdskskikglekdkenskktasntkiklm  
nvsstydkvaka lksynd  
iekdvsknkgdknvqsklnqisndiqsahtsykdaidgls lsd ddkktsknidklnsdlnhafddikngyqnkdkkqltk  
gqa lsklnlnaks  
>tr|D8HBK3|D8HBK3\_STAAF  
mtetwnfintgskdpyynmamdeallnfvsrgeidpvirfytwnpatlsigyfqlrkeididkvekkgfvlvrrqtggr  
gvldkeltysvivpeshp  
nmpstvtayrvissgll egfknlgfdtyfavpktpeerqklkqprssvcfdapsweylvvegrkiagsaqtrqkgvilq  
hgsilqdididelfdmfiy  
knerlklmkeafvekavaindisdehitismekafekgfkkglnielkpl elteaqlaeveeltekysdewmfrk  
>tr|D8HBK5|D8HBK5\_STAAF  
mtskssplifersregryayslpisdi ktnsvesll ddkfirknkaefpevaldlvrhytel snknfgv dngfyplgsc  
tmkynpkinekvaripgfs  
eshplqdedqvqgsleiysl qeelkei tgmdevtlqpaagahgewtal mifkayhengeghrdevivpdsahgtnpas  
asfagfksvtvksnergev  
diddlkrvvnentaa imltnpntlgi feknimeireivhnaggllyydganlnaimdkvrpgdmgfdavhlnlhkftgp  
hggggpgsgpvgvvelas  
ylpkpmvikdgdkfkyndiknsigrvkpfyngfyilraytyirtmgatglkevseavlnanyikarlsehfeipykq  
yckhefvlsgrqkefgvr  
tldmakrll dfgvhpptiyfplnveegmmieptetesketldyfidtlisiaeeakndpdkvleaphttvdrleataa  
rkpilkfenlkqek  
>tr|D8HBK7|D8HBK7\_STAAF  
mssdlkqtplyqnyvdrgakivefggwampvqfssikeehnavryeiglfdvshmeievtgkdasqfvqyllsndtdnl  
ttskalytalneeggiid  
dlviykladdnyllvvn aantekdfnwilkhkekfdveqvnsnyqgqlaiqgpkardlinqlvdedvtemkmfefkqdv  
klfganvilsqsgytgedg  
feicynidktekiwdgtleynvmpcglgardt lreaglp lhgqdltesitpyeggiafaskplidadfigksvlkdqke  
ngaprvtglellekgiar  
tgyevmdl dgniigevtsgtqspssgksialamikrdefemgrel lvqvrkrqlkakivkknqidk  
>tr|D8HBK9|D8HBK9\_STAAF  
mvisiillivpd lirlsktfliesrelttvdfeffsrdiledfkgvdrndieirqqriilhkgeemieyklinnkiikvv  
ndrgnitmlnntaftani  
yyksiikitiitvkvgtvqtktiya  
>tr|D8HBL0|D8HBL0\_STAAF  
mkyskckgsflidsmagfliliglitlilipmmnqm qasinhklqtidaskvilttvskinkeelkkgvtigkydikqsdq  
qicaisknttsyqkctiqy  
>tr|D8HBL1|D8HBL1\_STAAF  
mekqlqirkqsaf tmiemlvmm lisi fllltmtskgl snlrviddeaniislitelnyiksqaianqgyinvrfyensd  
tikviennkifrlklkvk  
iinvakvdiafdkkgnikfgsitudnnsiyriifhiekgriryekl  
>tr|D8HBL3|D8HBL3\_STAAF  
mk lqwintfklhskkrqlskaqqidllsnlcnllkygftlyqsqf ln lqmtynkqlgttilseisngapcnqilslig  
ysdtivmqvylaerfgni  
dvleetvnmkvnrkseqrllktlqyplilvsifi amii lnltvipqfqlytsmniqlssfqktsffitslptiivv  
mliivsm laiimkliynkl  
nm lkninvmklplisgyfqlfkyfvtne l vlyfkn gitlqsivdvyinhssdpfrqflgkyllysemgyglpqilek

Tsompanidou\_et\_al\_Supplemental\_FASTA\_File

lkcfkpqlikfvlgqekrg  
klevelklysqilvkqiedkaikqtqflqpilflilglfivaivlvimlpmfqqmqsik  
>tr|D8HBL4|D8HBL4\_STAAF  
mkasdvhfipvknevsikfrindnleqyeqignsiyqkllvymkfqagldvstqqvaqsgrysyhfknkiyflristlpls  
lgqescvirivpqqffqqgk  
stykfndfkhlmkkqglllfsqptgsgkstlmyqmvsyankaInInvisiedpvemqipgqvinqvndkaginyvnsfk  
ailrcdpdviligeirdkd  
vakcvigaslsghlvlttihatdckgailrllemgisvqeliqatnliinqrlvttikqqrqlvceilsqqqlryffshn  
hs1pssfknledklddmtk  
agvicettmdkyi  
>tr|D8HBL7|D8HBL7\_STAAF  
mtkiiiaadvgttcklsliftpelq1hkwsihtdtsdstgytllkgyidsfveknennynfsnvlvgvigvpgpvdfc  
kgtvngavnlywpekvnr  
eifeqfvdcpvyvndanialgekhkgagegaddvaitlgtglgggiisgeivhghngsgaeighfradfdqrfkc  
cgrsgcietvasatgvvn1  
vnfyypkltrfssi1elikenkvtafvdaakagdqfcifitekvanigyglcsiisvtsnpyivlgggmstapili  
enikteyhnlftpaqfet  
eivqaklgndagitgaagliktyvldkegvk  
>tr|D8HBM0|D8HBM0\_STAAF  
mtknei rkyi1hkmknfnkaekrkadtwlrnqffsteeykeanaialvlsfnhevdtfsiieqalmdhkri fvpkmdyl  
hqmtfkeifn1kdi dvndk  
giyyptskgettnldli vvpvgvfqndgyrigygggydrflanyqtktisll ydfqitsfepesfdqpvdkliiyqsa  
>tr|D8HBM2|D8HBM2\_STAAF  
mlkr1keksndeivqntinkrinfi fgvivfi favlv1rlgy1qiaqgshykqiikndenitvnesvprgril drngkv  
vdnaskmaitytrgrkttq  
sem1dtaek1sklikmdtkkiterdkdfwiqlhpkkakammtkeqam1adgsikqdqydqllskigksqldelsskd1  
qvlai fremnagtv1dpqm  
iknedvsekeyaavsqq1sk1pgvntsmdwdrkypygd1rgifgdvstpaegipkeltehy1skgysrndrvgksyley  
qyedv1rgkkkemkyttk  
sgkvtssv1npgargqd1k1tidi1qkevea1ldkqikk1rsqgakdmdnammvqnpkngdila1agkqinksgkmt  
dydigtftsqsfavgsstv  
gt11agyqnkaikvgetmvdelp1hfqgg1tkrsyfnknghvsindkqalmhssnvymfkta1klagdpysgmalpsdis  
spaql1rrglngvg1gvkt  
gid1pnetrgqi ep1tnnpgny1d1siggydyt1pl1sqyvstiandgyriqphigl1tihestnkdevgl1kkkingtv  
1nkvnntekeikqi qegfk  
mafndkdgtgyvsfkdtvvp1tagktgtaevf1ngeprvnstyigyapiddpk1afsi vytnqpvpppw1tggd1grdvin  
yfkq1gkddknkdkk  
>tr|D8HBM6|D8HBM6\_STAAF  
mrgentmtpvfe1knvnyyydhkkv1leninikinkgef1aivgpngagk1llk1ilgl1pl1qsgeifvegidfknkks  
ik1syvsqkanafnsgfpa  
svkev1sg1tktkr1fqtfnkdnekvikvler1nisd1ihknae1sggqqrvmiara1isepav1vldeptngida  
khvsefynt1dq1kqegit  
i1lvthdigvadtatevac1nkh1fhggtdefks1deveiskiyghpvr1fdhqnreccn  
>tr|D8HBM7|D8HBM7\_STAAF  
m1lgshvsmgkkm1legsaieaheygett1fmiytgapqntrrksied1nitkghevmekeygl1snivvhapyi1nianttk  
petf1ngvdf1qqeiertq  
aigakdi1v1hpgahvgagvdaginkieglnev1tndnvr1a1etmagkgteigrsfe1ariidgvhner1svcfdt  
chthdagynvkedfdgv1n  
efdk1igvdrikvvhvndskndrgaakdrhenigfgyigfda1nyivhdsfk1dipkiletpyvgedkknkppykleie  
m1kqqqfdp1dknkvmq  
>tr|D8HBM9|D8HBM9\_STAAF  
mkiad1mt1ldhhvpfrtaeswdnvg1ligdedvevtgvl1aldct1levvneaiekynti1shhpl1fkvts1kangy  
gl1irk1liqhdin1iamht  
n1ldvnpghvnm1lakamgl1knisi1nnqqdvyykvqtyipkdnvgpfkdk1seng1aqegnyeyc1ffesegrqgfkpvge  
anpt1gq1dkieyvdevki  
efmi1dacqksraeq1ikqyhyetpvfd1eikqtslygl1gvmaevdnqmt1edfaadisk1nipsvrvfgesnqkikr  
ia1iggsg1gyeyqavqq  
advfvtd1khhda1dakihgvn1idinhyseyvmkegl1kt1lmnw1ntekinidveastintdpfyi  
>tr|D8HBN0|D8HBN0\_STAAF  
mis1nrr1ttvsr1fkqgtiadigsdhay1piyaiqn1l1cdygiagevi1qppfqaavknvaanq1veridvr1gdglsvi  
npedvidniticm1ggpli  
aki1kdqgd1ksqhr1li1sqniqten1rqt1qq1nyeidei1meekghiyeivvaeystq1li1elssdelkfgpk1l1nn  
kneyfikkwqre1ealyhi  
ksk1nteqhhqr1aqindeiavierv1  
>tr|D8HBN2|D8HBN2\_STAAF  
mridqsi1neikdktdi1ld1vseyv1lekrgrnyig1lcpfhdektps1ftvsedkqi1chc1fgckkggnvfqftqeikdisf  
veavkelgdrvnvavdiea  
tqsnsnvqiasdd1qmiemheliqefyya1lktvegeqal1tylqergftdalikergigfapds1shfchdf1lqkkgydi



Tsomanidou\_et\_al\_Supplemental\_FASTA\_File

elayeagllsrneenfsyy  
drfrnrimgfplknaggrivgyvsgrtytgqepkylnspetpifqkrkllynldkarksirklddevllegfmdviksdtag  
lknvvatmgtqlsdehitf  
irklltsnitlmfdgdfagseatlktgqhlqqglnvfvilqpsgmpdheyigkygndaftafvknkksfahykvsilkd  
eahndlsyerylkelshd  
islmkssllqqkaindvapffnvspeqlaneiqfnqapanyyepedeygyiepepigmaqfdnlrsqekaeraflklhmr  
dkdtflnyyesvdkdnftn  
qhfkyvfevlhdfyaendqynisdavqyvsnelretlisleqyslndepyeneidyyvvinengqetieslnhklrea  
trigdvelqkyylqqivak  
nkerm  
>tr|D8HBN4|D8HBN4\_STAAF  
msgfl earprvgyysgksgkffnek lrfevkdym sqpv lrenttvydaictifledvstlfiinedndfv gvc srk  
dl lrasmigadihtvpisv  
nmtrmpnvtyleeselviyaadrmiekeidsipivrkkdnqkyevigriskttiakllvalyke  
>tr|D8HBN5|D8HBN5\_STAAF  
makdmdtivs lakhr gfvfpgsdiygglsntwdygp lgv elknvkkawwk ffitqspfnvgidaailmnpkvweasghl  
nnfndp midnkds kirya  
dkliedymqdvkgdenfiadgl sfeqmkkiddegivcpvsktanwteirqfnl mfkftqgvtedstneiflrpetaqgi  
fvnyknvqrsrkkllpfgi  
gqigksfrneitpgnfirtrfeqmeleffckpgeeiewqnywktfasdw ltslnmsenmrlrdhdedelshysnatt  
dieykfpfgwgelwgi asr  
tdfdl rkhaehsgedfryhdpetnekyipyciepslgadrvtl aflcdaydeegvegs kdartvlhfhpalapykaa ilp  
lskllsgeaiki feqlssk  
fsidfdesqsigkryrrqdeigt pycvtfdfds lednqvtvrdrdsmeqvmpiseleafltektkf  
>tr|D8HBN6|D8HBN6\_STAAF  
mrkgi iikavdygesdk iitilnehgakvplmarrakkvktglqaqtqlfv yg lfiynqwrngmtlnsvdvisqhyklq  
mdlyvssyaslaetiers  
mdegdiapynyqlqfvleki esgtsaq lmsvvmlkcmkrfgftasfnrcavsgndtqadligysfkfdgaisrqeask  
dvhavil snktlyll dvlq  
klpidkmnslnihgeiidemseil mlyreyagmffksqk linqlkrleq  
>tr|D8HBP2|D8HBP2\_STAAF  
msvgilifvisviisiittmrenshkdrqnqkppqktstdnepkkgffeeiertfkeiseelneeeksskrkyddtlp  
plfdel pkeepskspvvep  
mapkkqhetkpmtekip tvpkaepveqkhrpsrqdnsdeirrqleksl rddiktirt didrekekqiakmek sardiied  
kylsertkrllkqlnsg  
nvekdltk safqfdkdevingmiwseilakpkql  
>tr|D8HBP3|D8HBP3\_STAAF  
mfs lsfiviaviivvallil fsfvpiglwisalaagvhvgigtlv gmlrrvsprkviaplikahkagla lttnglesh y  
laggnvdrvvdaniaa qra  
didlpferaaa idlagrdvleavqmsvnpkvi etpfiagvamngievkakaritvraniarlv ggageetiiarvgegiv  
stigs skhhtevlenpdni  
sktvlskgl dsgtafeilsidiadvdi sknigadlqteqal adkniaqakaeerramavateqemkarvqemhakvveae  
sevplamaealrsgnisvk  
dyynlknieadtgmrnainkrtdhsddespeh  
>tr|D8HBP4|D8HBP4\_STAAF  
mttil estagdtwveqvsniivq piftliltcltflgfvyqlyskk inaagiatlsl lllflglfiqgnvmhsilifs  
igvilvviel fvgavigi  
igmilitisittlgdnllfm lanvivalitvewvilvki fnrkpifldk vilkdstnsesgynshdnrshlv gktaqt  
vdlrpagiifcenerida  
vsdgnfilrnktvki levegtrvvvevd  
>tr|D8HBP7|D8HBP7\_STAAF  
mrydvgskiiltfndqtvy lceiaditsdkiavd lkekqnintel pvdvticsglikadkyewllqkatelgassfiavs  
mersivkl negkvakkier  
wqkikeaaeqsyr l vipsiqfesnlklicdtidnydyiliaeyeeakdgel snfkqtlqqfkaqdkvlmi fgpegglse  
neislfsntstvg lgpri  
lraetaplyalsaisyekelmg  
>tr|D8HBP8|D8HBP8\_STAAF  
mnwte lsiinheavelatn ilenhsngvvi edsddl inqpedkygeiyalkkedypdkgvrlkayfnemtyddklrqr  
ikdel lnl deldqgnvqfs  
eqiaetdwenewknyfhpraskkftivpswetyakeadeelciel dpgmafgtgdhpttsm lkaietylvpqhsv id  
vtgsgils iashligvkr  
ikal didemavsvakenfrnrh cetlieavpgnllkdetekfdivianilahiidemiedayntlneggyf itsgiikek  
yegiqshmervgfkiiseq  
hdngwvc lvgkvse  
>tr|D8HBQ1|D8HBQ1\_STAAF  
mtnkdesvekn testveetnvkqn iddsveqteesghlqdeaieetsdenvieeidpkdqkinelqq ladeneekylrl  
yaefenykrriqkeneink  
tyqaqr vlt di lpaidniera lqiegd detfks lqkgvqm vheslina lkdngleviktegeafdpnihqavvqddn pdf

esgeitqelqkgyklkdrv  
lrpsmvkvnq  
>tr|D8HBQ3|D8HBQ3\_STAAF  
mtvqsayihpfcvrietycdfnkyfiqnpvdeyldalitemstakyrilktmyvgggtptalsinqlerllkairdtf  
titgeytfeanpdelktek  
vqllkygvnrismgvqtfkpe11svlgrthntedytsvlnaknagiksisldlmyhlpkqtiedfeqslldaldmdiq  
hissyglilepktqfynmy  
rkgllklpnedlgadmyq1lmskieqspfhqyeisnfaldghesehknvywfneeyyfgagasgyvdgvrytninpvnh  
yikainkeskailvsnkps  
ltermeeemflglrlnegvssrrfkkkfdqsiesvfgqtinnlkekklivekndaialtnrgkvignevfeafind  
>tr|D8HBQ7|D8HBQ7\_STAAF  
myiayrknkiyapislflifsswylhysqqaifnyinyiernsqfneraqviqirqgsdtykgrlslkneiypfflt  
nkknfdlkkiesrncivkg  
qfkvndnkfvtklqsiyvqsclesnrsnliekhkqfimnriydsigikfpdrimalitgdvkeineqfkervkeigiyhl  
lavsgshiaaivfliyqpl  
krlnlplfvikgitiivlalfaqytnyapsavraimttlvllitkqikikgihllafafiimfilnplvvydigfqfsf  
iisffimllfpflqq1skl  
qslfiitfiaqlasfivaipnfhqiqwvgl1snlifvpyysfilfslsilffitshfivgltp1nylvdl1sfnfhdw1ld  
lftrikqshfsvpkfndwi  
fiiifiisvyyi1fwllakrkiylvtfwti1ilt1litfptnshhkitmlnvqggsilyeggknqnv1idtgkviddtkq  
psysiskyhilptlnergi  
neleylilthphndhigeveyiishikikhiviynkgysnt1ml1sk1shkynik1mdvrqvssfk1gdssflffdsfi  
pnsrdkneysiitmiyqn  
kkv1lmgdasknnes1llkkynlpei1vlkvghhgsktssskefiemikpkis1issgknmyh1pnievvkrlq1risr  
iynsqnqgqvt1lddn1k  
vdsnsygnasgl  
>tr|D8HBQ9|D8HBQ9\_STAAF  
myqf1lrykdf1tqcklyiisavvl1imvl1igfi1fwrqddytrnfenkdtalkqstseiss1sk1ledvqvkdgdnsknkg  
pvyvdvkgavkhpnykmt  
skdrvvd1ldkaq1lddadvsqin1sek1tdqkmi1fiphkgqknvepqigvnsvhvkngntnntkvn1ntasvsewmsvp  
gvqakanaiveyrnqgga  
fgeidd1kkvkgfgsktfdk1ksyftt  
>tr|D8HBR0|D8HBR0\_STAAF  
msqyaems1vydq1tqdpyekwfeivknhckgesni1digcgtgsltvqlea1gnvtgmd1svdm1tvaqksanvwl  
egdmtsfd1qqqfdiit1f  
cdslnylqdetavietfinvyh1tdsgvfi1dvhtvykmm1fnnqsyiddkgdi1lawdavqgd1plsvyhdm1tffir  
hedetysrfdeshfqr1td  
ekty1sw1aqvgfkhvetftdfnidehndaer1ffiakk  
>tr|D8HBR3|D8HBR3\_STAAF  
mkkivlyggqfnpihtahmivasevfhe1qpdefyflpsfmsplkkhdfidvqhr1tmiqmiidel1gfgdicddeikrg  
gqsytydtikafkeqhkds  
elyfvigtqdnq1lekwyqiey1kemvtfvvnr1dknsqvn1namiaiqiprvdisstmirqrvsegksiqvlvpksven  
yikgeg1yeh  
>tr|D8HBR4|D8HBR4\_STAAF  
mltgkqkrylrs1ahnidpi1fqigkgginenmikqid1tlenrelikvhv1qnnfddkelaet1seatrsel1vqvigsm  
iviyreskdnkei1ep  
>tr|D8HBR5|D8HBR5\_STAAF  
mkfavignpishsl1spmhranfnsl1glddtyealnipiedflikeviskkeldgfnitipykeri1pylehideqain  
agavntv1ikdgkwigynt  
dqigyvkg1hsvyp1lenayil1l1gaggaskgiayelakfvkpk1tvanrtmarfeswn1ninqisladaekylaefdiv  
inttpagmagnesi1nlk  
h1spnt1msdiiyipyktpi1leaerkgnhiyng1dmfvyygaesfkiwtnkdadin1smktav1qq1kge  
>tr|D8HBR7|D8HBR7\_STAAF  
mg1vrkffmpnsyvqsi1fqi1dk1vgkgvkgi1td1dnt1vgwdvkeptervkawfkeanekgitit1ivsnnesrvas  
fsqh1di1dfi1karkpmgk  
afdka1tkmni1rpdq1tv1igdm1tdvfggnrrgly1timvvpvkrtdgfitkfn1lierr1l1rhfskkgiy1tween  
>tr|D8HBR8|D8HBR8\_STAAF  
migi1gameeevki1knk1tq1seisvahvkfytgil1kdrevvitqsgigkvnaa1stt1linkfkpdi1intgsagald  
es1nvgdv1isddvkyhda  
datafgyeygq1pmpvafqsskpl1iekvsqvqqqqqq1takvg1ivsgdsfigsveqrqkikka1f1namavemeatai  
aqtcyqfnvpfvvrvavsd  
langeaems1feaf1lekaavsssqtvealvsq1  
>tr|D8HBS0|D8HBS0\_STAAF  
mgfefevkyltgfi1l1l1legi1tnsasaieysd1hhksk1nscr1snakmsfinptq1lenkktndr1l1thd1l1fhdm1fn  
daskkdfkvefeneal1sne  
finknidiyagsysyechggetnktqcsyggvt1sdnnkyddyknipcn1widghqteiel1tavk1kkkivtiqel1dvq1  
rny1sekyk1yekggdivk  
gyvkyhnddek1nveydfyn1ngeyghv1kmyadnkt1nsdk1h1diyl1fks

Tsompanidou\_et\_al\_Supplemental\_FASTA\_File

>tr|D8HBS1|D8HBS1\_STAAF  
mgyrtlksifhehneskmkeeyikrfnssasfntniniipmengkkvndveyplffmvtknlskkqelisinsrkidral  
nslpyaareqyfnl1ide  
lqstneienvfstkqeiahalnqaseflkfrglvdqykkielnkkikvdnvrdiraiydkl1vneineqdkldgelfrk  
nfvghdgstnkyihvglg  
petkiveyigemltflkyfdapppfkimashylfeyihpfydgngvrgrfiiakllsdydnytaltsyvinrnkskyy  
kafmtasnhlncgdltfeft  
dtmlelliaggerildepkmdatekltlyltsykyidieflyllsmdklfgnkrnr1tlidlenilgvgrvkinnti  
kkfgnylvkiksrtiyei  
sdeflnsiik  
>tr|D8HBS2|D8HBS2\_STAAF  
mgrn1klkkesdfetknhr1llgsvflmatsaigpaf1qtavftsqqffasfafail1siidigaqiniwrilvvtg  
lrgqeisnkvvpglgtvis  
iliafgglafnignagaglglnaifglvdkwgaaitaifailifvsksgqkimdvvsmlgivmilvvayvmfvsnpvy  
gdafvhtfapehpmklvlp  
iitlvgtvggyitfagahrildsgikgkqylpfvnqsaiagilttgimrtllflavlgvvvtgvtlssenppasvfeha  
igpigknifgvlfaaams  
svigsaytsatflktlhlkslnkrsnlivivfivistmiflfigkpi11liagaingwilpitlgailiaskkksivgdy  
khpnmfifgiva1vti1  
tgifsfkevlq1f  
>tr|D8HBS3|D8HBS3\_STAAF  
mrvdlncdlgeafgnysfggdhqiip1itsanvacgfahgdenmnetvklakahnvavgahpglpdlkgfgrnidisn  
eeiynlmiyqlgalggfcr  
ihqvkinhvphgalymgakdreiasviaqavydfpslv1vlg1ansyliseaknvg1itasevfadrrieddglvsr  
kesdavitetdealkqv1k  
mvkenkvisknkevtlqadticvhgdgehallfvskireilmkegidis1  
>tr|D8HBS4|D8HBS4\_STAAF  
mlrc1ianrgeiavriiracreygietvavfakgdeqslvhv1adqaicigeanaldsylvnidriisaaqitganaihpg  
ygf1sestkfaqtveeqgi  
afigptkktmemmgdkitarqtvhhagvpvipgsngavnhvseiek1akdigypvikaasggggkgirivkkaed1eka  
fkeaksegkkyfdddrvyv  
eafipvakhvevqvmgdgqnyvh1gerdcsvqrknqk1ieespcaalteerrqqicndavkvaraanyrsagtieflvt  
dtahyfiemnariquehtv  
temraerd1vaaqyl1lehnh1pfsqsd1qfnghv1earinaenpekkfqptpgkvta1h1pqqfnvrvdsllyhgyqvs  
pyds1vakvivkshdras  
aidklkat1demvidgfsttadflyav1nyp1yrdgdakdvdk1flekhqivkgve1  
>tr|D8HBS5|D8HBS5\_STAAF  
mnikkieqiiklvkendvkkfkyknfedeieidftdsnh1aahsnqsnqsmnnd1taskandnsdvstndyhdikspmv  
gtff1qdske1tepi1kv1g  
dkvknkgdi1gyveamkv1nevttvdageiteivadhgtvneydqvlvrik  
>tr|D8HBS6|D8HBS6\_STAAF  
msikilqpg1fstvqdlgrkgyehigfsgagamdqfsfkvaqsl1nndgpaieytlvgptiqfntqntfvitggsvnas1  
nktismnsvilaekgd1  
kigaitkgaryl1fghtinvppiaesyathtrssiggfkgkrl1andvitvkinndfkenigktih1qdd1lpenniih  
ilqgpqfeafseearakiv  
nhpyl1teqsdrmgylregdsvapinqadiisevalgsqvvpndgqpi11ndkqtiggytkiatvckfd1pklaqmkp  
qdtiqfkwisfqaevdknr  
eqms1fne1lkshqktpifdtss1rhtskklatilkgd1  
>tr|D8HBS7|D8HBS7\_STAAF  
mdvrfineqtimiyfenkiseetyrnvtamvrw1rekeileiqdivpsyravliyfydeqvitpsklienlelnkfneknv  
htvnqtnriik1ipvqygg1t  
ygpdi1eevakhnritveqviekhtnkpyliym1gfmppfpylggldeq1htrprnqpr1kihagsvgiannqtglypsds  
pggwqiigrtp1kvfsser  
epmsmyeagewiqfyaideqefiqierdisdgkfnvddwvvienvn  
>tr|D8HBS8|D8HBS8\_STAAF  
menqkqypmtqegfeklerelee1ktvkrpevveki1kvarsfgd1senseydaakdeqgfieqdiqriehmlrnaliied  
tgdnnv1kigktvtfve1p  
gdeeesyqivgsaesdafngk1snespmakaligkgl1ddevrvp1pnggemnvkivniq  
>tr|D8HBT6|D8HBT6\_STAAF  
mkl1kase1rqkyl1dffvekgmvepsap1vpiddt1lwinsgvat1kkyfdgretppkprivnsqkairtndienvgf  
tarhhtffem1gnfsigdy  
fkqeaie1fawef1tsdkwmgmepdklyvtihpedmeayniwhkdigleesri1riegn1fdigegpsgpntefiydrgea  
yqddpaeemyppgenery  
levwn1vfsefnhkhdsytp1pnknidtgmg1ermasvsqvrtny1etd1fmpimneiekvsgkqylvneeqdvafkvi  
adhirtiafa1sdgalpan  
egr1yvl1rr11rravrfsqtlginepfmyk1vdivadimepy1pvnvekadfikrvikseerfhet1edglailnelik  
kakettneingkdafklyd  
tygfpi1eltee1avqag1kvdm1ttfesemqqqrdrarqarqnsqsmqvqsev1knitsastfvgydtataqt1lthliyn

Tsompanidou\_et\_al\_Supplemental\_FASTA\_File

geevsqveagetvyfmlte  
tpfyavsggqvadtgi v yndnfeiavsevtkapngqn l hkgvvqfgqvnvgatvsaevnqndrrdiqkhsathllhaal  
ksvlgdhvnqagslveadr  
lrfdfshfgpmtndeidqverlvneeiwkgidvniqemdiasakemgama l fgekygdvrvvnmapfsielcgghvrn  
tseigl fki vsesgtgagv  
rrieal t gkaaflylediqekfntmksq l kvksddqvvdktqlqdeekal l kql eardkeits l kmgniedqveeingy  
kvlvtevdvpnakairstm  
ddfksklqdti i l lasnvddkvs m vatvpks l tnnvkagdl i kmapivggkgggrpdmaqqgggtqpenisks l sfikdy  
iknl

>tr|D8HBT7|D8HBT7\_STAAF

msdptlfdysmikgtveailfqnsdnfytv l kvdtietnedfdtmtptvvgflpnivegdvyt fkgqvvdhprygkqlkae  
tfekempqtkeai i sylss  
dlfkgvgkkaqni v nt l gdnaindi l ddhsv l ekvsg l skkkkqkqiaeqisanqesekimir l hdl gfgpk l smaiyqf  
ylgdt l t i l drnpyqlid  
ikgigfnkadqlarnigayndner l kaal l ytleecikqghtylpinvvid l tvdvl nyqdeeviepekl dem l qy l n  
eekr l i i dneqvaips l y  
seiksvqnl frikthtnkl teieqsd l qmhigeiedanqvnyasqkealqtainskvml l tggpgtgkttvikgively  
aeihg l s l dyddyvnddyp  
vvl aaptgraskr l qestgleamtihrligwnqdtkpedileneinar l i i idemsmvdtw l fhqflsavpldaqlifvg  
dedqlpsvpggqvfkdlie  
skaiprvnltevyrqdgssielahrmlgqkinitqrfhdrsfincqanqiptvvekvvtsavnkgytmdiqvlapm  
ykgnagikr l nqv l qdi l n  
pkkkdtreiefgdvvrkqgdkvlqlvnrpndni fngdigvivgi fwakenalnkdv l vdfegneitftkqdmme l thay  
ctsihksqgsefpivimpi  
vkqyfrmlqrpi l ytg l trakts l v l l g dpeafdiglktngqarl tqlct l l knyfnseedeem l entatndtgasqttid  
dqveas l ssndseevtsds  
tktdtnvlteatmfki dpmi nmgeitpydfier

>tr|D8HBT8|D8HBT8\_STAAF

midqqt i yqy i qngkieealqal fgnieedpti i eny i nagiv l adaneiekaerffqkal t idskngvfy n l anvyy n  
qqryqeaiklyqqa l qte i  
eqvdcnym i gmafnql esfk l a l pylmtaae l dkdkaevqfyglvlcq l emfneaitqlkhv l tidknhvdarynlg l  
al fmknedi deaithfkea  
vtidpkhl l sqhal ktftkmeeee

>tr|D8HBT9|D8HBT9\_STAAF

msggvds svtahvlkeggydvigi fmknwddtdengvctatedyndvievncqigipyav n fekeywdkvftyfldeyk  
kgrtpnpdv mcnkei k fka  
fl dhamn l gadyvatghyarihrhedghvem l rgvdnnkdqtyflnqlsqqq l skvmfpi gdieksevrriaeeqglvta  
kkkdstgicfi geknfktf  
l sqylpaqpgdm i t l dgkkmghsg l myytigqrhglgiggdgpwfvvgkn l kdnvlyveqgfhhda l ysdyl i asdys  
fvnpednd l dgqfectakf  
ryrqkdtkvfvkrendhalrvtfaepvraitpgqavvfyyqgdvclggatiddvfkneqqlnyvv

>tr|D8HBU0|D8HBU0\_STAAF

meiyvdyaattpvkpevdamm t i ynshygnpssihakgrdarkyl desrrqiaql l gadthei i ftsgatesnntaikg  
ivkaneqlgnhi i tskieh  
hsv l hvfeqleregfdvty l dvddtgaid l dqleetitdktilsvimfvnnevgtvqqiydiqdiiaetnayfhvdavqa  
igh l dvkfdefeidamsit  
ahkfggpkvggal l vkdhvt l dypqlgqeqlkrragten l aqivgmakalqlaeknrddnnihl mnlkeqflvklqera  
ipfelngsmtdatghivnl  
yfpfvevetml t l l dmaqiyvssgsactagstqps hvl damfedeersnhsirfsfne l tteneinaivaehkiyfkfk  
ees

>tr|D8HBU1|D8HBU1\_STAAF

maikysalnlvpi regedertaindmvkl aqhl delsyerywiaehnapnlvssatal l i qhtlehtkhirvsggim l  
pnhapl i vaefgtmat l f  
pnrvd l glgragtdmmtasa l rrdqhdgvykfpeevs l lqqyfgpahqqayvraypavgknvplyilgsstsdahlaar  
kg l pyvfaghfapqmk  
ieiykt l fepsdvldepyv i vclntivaenddeaqyl assmaqvmvsi t rgrmqpvqppthelqnil t preyemamerqk  
is l i gsentvqqki qdfme  
tygevneimaisiydkdmql dsyrrfkvninqinekntf

>tr|D8HBU2|D8HBU2\_STAAF

msfmdk akdavekfknsdneqvknvkdki ney tgsnnvekkenedkek

>tr|D8HBU5|D8HBU5\_STAAF

mrpkni dei i sqqhlvgprgi i rrmvdtkk l tsmi fyggpgigktsiakaisgstqy kfrqlnavtntkkdmqlvveak  
msgqvil l l deihr l dkak  
qdf l l phlengkiv l i gatts n pyhainpairsraqifelyplndedvrqaltraiedeeng l ktyqpkid edamtyfst  
qsqgdvrsalnal elavl s  
adndkdgyrhvt l qdakclqkgafvsdkdgdmdhydvm safksirgsdvnaalhy lar l i eagdlptivrr l l visyed  
iglaspnagqrtl aai esa  
er l glpearip l sqavie l clspksnsamsaidsal sdi rnhvgqipnh l kdghyqgakdlgrsigykyphqyvngyvs

Tsompanidou\_et\_al\_Supplemental\_FASTA\_File

qqylpdklkskiyyepktt  
skseqqlkeiynnllkgrp  
>tr|D8HBU7|D8HBU7\_STAAF  
mskrttycglvteafllgqeitlkgwvnnrrdlgglifvdlrdregivqvfnpafseealkiaetvrseyvvevqgtvtk  
rdpetvnpkiktggvevqv  
tnikvinksetppfsineenvvdenirlykryldlrrqelaqtfkmrhqitrsirylddegffdietspvtlktstpega  
rdylvpsrvhdgefyalpq  
spqlfkqllmigsfdkyyqivkcfredelradrqpeftqvdiemsfvdqedvmqmgemlkkvvkevkgveingafprmt  
ykeamrrygsdkpdrfem  
elidvsqllgrmdfkvfkdtvendgeikaivakgaaeqytrkdmdaldefvniygakglawkvvvedgltpigrflete  
nvetlltltgaeagdlvmf  
vadkpnvvaqslgalrvklakeglidetklnflwvtdwplleydedakryvaahpftspkeadiaklgtapeeaeana  
ydivlgyelgggsirihd  
gelqekmfevlgtfkeqaeqfgflldafkygapphggialglrdlvmlltrtnlrdtiafptasatclltnapgevs  
dkqlleelslrih  
>tr|D8HBV0|D8HBV0\_STAAF  
mkvvvqrvkeasvntdlnnqikkgycllvgigqdsteqdadviakkianarlfeddnklnfniiqqmgeilsvsqftl  
yadvkkgnrpgfsssknpd  
qavkiyeyfndalrayglvtktgefghmrvninndgpvtiiyesqdgkiq  
>tr|D8HBV3|D8HBV3\_STAAF  
mikpykwklikpteyisdeltsklkltpivkkilesksiiideqaiessisdtdinhdsllqsdmktierikraiande  
kilvygdydadgvtsttil  
vttllqllgaqvgwhipnrftegygpnelafnahdegitliitvdngiqghneikmvqdlgvdivtdhheigstlpeay  
aivhpmhpsfnypfqqlcg  
agvayklaqalientpdyfkaivaigtiadlvsltdenrslvkqglkvlnqcptsvkallkeagyndnideetigfiig  
prlnavgrliddaslacell  
mtdeeeaaflaeqvehfnrerkdirvateeamamaemkvkngdlflllakenwegvlgivaskivetfalptlilni  
dreqnhakgsarsidqvs  
feilsahqeliakfgghhmagmtmdienieslaeglnkwmkelssettsldpvkpvdlvtenditiknirdmnrllrpf  
tdfsrpi femdlsvsvk  
aigqqknhlkltlgesniaalfwqngllepeldqepinilgsvqinewngnqspqliiqdiamneqqildyrskrkslp  
ftendknivvlihpksdkv  
naneyyygeei kqgtdkvvlrdlptsmedlsnslqqlqfsqlyivlqhnhsiyfdgipnmdvfkkcykalitkqetniqk  
egmlcqhlsvkpdtlki  
lkvflldlnfvtdedglirinqqpdkrsidsskvyqlrqarmdvekqlllyqdfseikwiksqsls  
>tr|D8HBV4|D8HBV4\_STAAF  
maatysviknvnlgldlqggfevlyqvdplnkgdkidkkaalqstaqtlenrvnvlgvsepkiqveepnrirvqlagvtd  
qnearkilssganltirda  
edkvklsgsdi kqgsakqefkqetnqptvtfkvdkknkfkvteeiskkrdnvmvwwldfkkgdsykkeaqqknpkfi sa  
asvdqipnsdsvei sggfk  
gqegvkkakqiaellnagslpvdлкеiysnsvgaqfgqda ldktvfasfigvaliyflmfgfyrllpglvaiialttyiyl  
tlvafnfigsvltlpglaa  
lvlgvmavdani imyerikdelrigrtikqaftkankssfltifdsnlttviaaavllffgessvkgfatmlllgilmi  
fvtavflsrflslvssn  
ifknqfwlfgvknkrhdinegvdvhdltktsfekwnfvklakpligvsilivvvgvlvilyifklnlgidfssgtrvdfqs  
kqaitqqkveqvkdsglk  
adqiqingkdnkvatvqfkddltraqdnklsdniskfsgdtpqintvspiigqelaknamlaliyasigiiiysvrlfew  
rmglssviallhdfiiva  
ifslfrievdltfiaavltivgysindtvtfdrvrenlqkvvittteqiddivnrslrqtmrsintvltvivvvvai  
lffgaptifnftlalfig  
isgvfssifiavplwgmmkkrqllkspkhklvvykekksndekilv  
>tr|D8HBV7|D8HBV7\_STAAF  
mnilqsrmmrennvnieefdydlpesliaqtplkdrdhsrllvmdretgemkhlhfkdiieyfrpgdtlvlntrvmpar  
lfglkeetgakvemlmtq  
iegndwevllkpakrikvgnklnfgngkiaecikemdqgrimrlhyegilqerldelgemplppyikerlddpdryqt  
vyakesgsaaaptaglhft  
delleteikngvniafvtlhvglgtfrpvsddvndhemhseyyqmaquetadllndtkskghriisvgttsttrletirr  
dhkfvetsgwtnti fypg  
fdfkaidgqitnfhlpkstlvmvlsafstrenvlnayktavnleyrffsfgdamlii  
>tr|D8HBW0|D8HBW0\_STAAF  
mmdnkdykkfyli redvlpesvvtlkkidalsdptlsiydavrqfdlsrsafykyretifpvddkml dhreftlilyv  
tdivgm larvldvisklel  
svltihqsipmeekatitlslnaqsketsvedvialrnldyvskevliissm  
>tr|D8HBW6|D8HBW6\_STAAF  
mlkffknnkllivlcaiivfialiglsirsqsqspeqyigdsvsfgqrvvsypvnfvagtigdffkkgdskeaknkisq  
lesknqgleaenekllel  
dlkdiskfdpistvtlarnpdqwmntividksgskgitsnmavmtsqqfvgrvkvkfkfssqvdlistntragklsvniq  
hgsknifglidrydekns

Tsompanidou\_et\_al\_Supplemental\_FASTA\_File

lvisdinnrdniskgdkvvtsgladqlpsnlyigevtkvqndqyglakevrvtgdadltdlshvyvakrdpktipddesr  
dk  
>tr|D8HBW7|D8HBW7\_STAAF  
mrlifsmikniaviaiiviyaalkyapflkeqdwnpvhdndqtnqvtqptndaqhvysgekyslkendliknvp1s  
qiknfvkmidkgefmavsq  
mnrmayndqyiigrgdefilykfgdesmrvyntefemqqdlnelgqnlqkpenayq  
>tr|D8HBW9|D8HBW9\_STAAF  
mkikemtsemprrerllshgakslniellailintgrkgfssidisnellksasnlnelkkssindliqvkig1qkai  
t1kaafelgermgrraenn  
rikitqpsdvadymiptmkdlqtqehfvil1lnsknvkiescvfkg1nssivhpreifsiavrenanaiavnhhpsgd  
vtpsgeiiittmr1kecgl  
ilgidldhiiigdnrftslveagyfnd  
>tr|D8HBX0|D8HBX0\_STAAF  
mvvllsyscscifsflyqfisietsfdylhrrskdcycnsslkwyelmpiiisf11kgrcncrkrislthflgetfal  
ipivfikydftvynat1fi  
ttyvfl1iftmtditslmlcdrliiycivslslsiypvvfiiismtthifyflfrayigygdvllisalslffplqft  
iyvilftfviag1valitm  
ifkpi1k1fplvpfi1fissfins1fyndihqflggvyf  
>tr|D8HBX1|D8HBX1\_STAAF  
mnyleslywihertkfgikpgvkrmewmlaqfnnpqnnikgihvggtngkgstvaylrtalvengyevgtftspfi1etfn  
erislngvpisndaivel  
srikpvsemmeretdlgvatefeii1tammflygeihpvdviveaglgikndstnvtfpilsiltsigldhtdilggty  
ldiardkgaiikpnpvpiy  
avkneda1kyvreraieqhakpieldreivvvsqndeftyrkydyeleti1sm1gehqkqnaalaitalielneqglie  
ldfnkmidg1esvrwtgri  
eqvhdkpli1ldgahnseidalidtikqyhdkkevdi1fsainekpinemvkh1s1iahtfyatefdfpkalrkeeivg  
siendeiq1vddyvefikn  
yqgd1v1tgslyfisevsk1dfeal  
>tr|D8HBX2|D8HBX2\_STAAF  
memkpydpreveagryeewvknqyfkpsedksketyt1vipppnvtgk1h1ghawdtt1qdi1trmkrmqgydt1ylpg  
mdhagiatqakveak1neq  
gitrydlgrek1leqawdkeeyasfiraqwak1gl1gldysrerft1deg1skavkkvfd1ynkgi1yrgeri1nwdpk  
artalsdi1evihedvggaf  
yhfkyppyadgegfi1eiatrpetm1gdtai1vnpnderykdvigktvilpivgre1piladeyvid1dfgsgamkvtpahd  
pndfeiqqrh1q1eni1vmd  
engkmndkagkyegm1drfdcrkq1ved1keqd1viki1edhvhsvghsersgavvepy1stqwfvrm1dakrs1dnqkt  
dr1dfypqrfehtfnq1wme  
nirdwtisr1q1wwghq1pawyhketgeiyvgeeaptdi1enwqqdedv1dtwfssa1wpfst1gwpd1esedfkryyptna  
1vtgydi1ffwvarmi1fqg  
leftdrppfndv1lhglvraedgrkmsks1ngnvdpm1dvi1deygads1ryfl1atgsspghd1rystekvesvwnfinkiw  
ngarfs1m1nigedfkved1  
d1sgn1sladkwi1tr1netiatvtd1sdkyefgevgralynfi1wddfc1dwyi1emskipmngndeeqk1itrsv1sytd  
n1mrm1h1p1mpfvteki1wq  
s1phegd1ti1vkaswpevres1ifeeskqtmq1lvei1k1svrqs1rvevnt1plskei1pili1qakdkei1ett1sqnkdy1likf  
cnpst1n1istdvei1pekam  
tsvviagkv1v1pleg1idmdkei1sr1eke1ak1qse1drvd1k1snenfvskapekvineekrkkqdyqekydgvkarie  
q1ka  
>tr|D8HBX3|D8HBX3\_STAAF  
mnecafg1tkdpvyl1dyhdv1wgq1lydskal1fk1la1lesqhag1swl1tik1kkeayeeafydfepkvaqmtahdi1dr1m  
tfpni1vh1rkk1leai1vnqa  
qgy1k1eqaygs1fsk1flwsy1vngkpkd1qyehasdri1vddtatq1skd1kqyg1k1flgpvtv1fs1leaaglydah1kdc  
pskp1khn  
>tr|D8HBX4|D8HBX4\_STAAF  
mtmiy1rnn1fiv1v1sffisi1ily1shv1lp1fmg1p1iasii1cvkv1k1ldikwp1fl1selg1iv1lgv1qig1stftknv1vmd1  
kdnw1lsi1ivs1silvial  
vmafi1fkk1iar1intetai1svipgaltq1mlvmaeqd1kran1llvs1l1tqtsri1fvv1vpfi1syffhdgn1mhang1l1tkv  
lp1sqv1n1igq1ivilvial  
fi1vyl1mski1kfpt1f1lap1liv1lvwn1fstg1l1tft1ldhw1lnmaqli1ymirig1vqiah1l1sd1kgr1laiaiti1qnim1li  
igalim1vy1vihff1dnpin  
e1fl1gaap1ggvn1qiv1valat1gad1vamitsyhi1friff1il1fi1ap1ginc1fl1kfrsn1kred  
>tr|D8HBX5|D8HBX5\_STAAF  
mgsd1iv1kv1hic1fvv1ktas1gycy1nkreaqaa1  
>tr|D8HBX6|D8HBX6\_STAAF  
mrytk1see1am1kvaet1mpgg1vn1spv1rafksv1dtpai1fmdh1gk1gskiydi1dgneyi1dyv1swgpl1ilghrd1pqvi1sh1hea  
id1kgts1fgast1l1len1k1laq  
lvidr1vps1iekvr1mvs1sgteat1dt1rl1argyt1grnk1ivk1fegcy1hghsds1llikag1sgvat1gl1pds1pgv1pegi1aknti  
t1pynd1dal1k1afek1fgd  
diag1vive1pvagn1m1gv1ppi1eg1fl1qg1lrdi1tteyga1ll1fdevmt1g1frv1gyh1caqgh1fgvipd1tcl1gkv1iggg1lpvgaf

Tsompanidou\_et\_al\_Supplemental\_FASTA\_File

ggkkeimdhiaplgniyqa  
gtlsgnplamtsgyetlslqtpetyeyfnmlgdiledglkrvfakhnvpitvnragsmigylfnegpvtneqanksdlk  
lfaemyremakegvlpps  
qfegtflstahtkediectiqafdalsrivk  
>tr|D8HBX7|D8HBX7\_STAAF  
mkfdrhrrlrsatmrdrmvrenhvrkedliypifvvekddvkkeikslpgvyqislnlleselkeaydlgiraimffgvp  
nskdnightgayihdgviiq  
atriakkmyddl1ivadtc1ceytdhghcgviddhthdvdndkslp1lvktaisqveagadiiapsnmmdgfvaeirrgl  
deagyynipimsygvkyas  
sffgpfrrdaadsapsfgdrktyqmdpanrlea1relesdlkegcdmmivkpa1syldivrdvknhtnvpvaynvsgeys  
mtkaaaqngwi deer vme  
qmvsmkragadmiityfakdicryldk  
>tr|D8HBX8|D8HBX8\_STAAF  
mkpvvmtqndmqsd1vsiihkpfidikp1nfdih1lnqrydwlifssknvkkffky1kginvdniavigsaktaqyce  
slgiqvdfmpndfsqegfl  
ksfnqtnqki1lpsse1arp1lsaalskdnevvkidlytsvpnkqniqdvkemiehqaidaltfssssavryyfnegfvp  
kfksyfaigeqtartiksy  
qqpvtiaeiqtlesliekilesrg  
>tr|D8HBY1|D8HBY1\_STAAF  
mhfiaisinhrtadvalreqvafrrdalriahedlyetksilenvilstcnrtevyavvdqihtgryyiqrflarafgfe  
vddikamsevkvgdeaveh  
llrvtsgl dsiv1getqilgqirdafflaqstgttgtifnhlfkqaitfakrahnetdiadnavsvsyaavelakkvfgk  
lkskqaiiigagemse1s1  
lnllgsgitditi vnrtenamklaakhqvkydelssl1pn1lesadivisstsqaqyitnemieriaenrkqds1vlid  
iavprdi epgisaitnifn  
ydvdd1kg1vdan1rerqlaati seqipaeihahnewism1gvvpviralrekamaiqaetmidsidrk1pg1sererki  
iskhtks1inqmlkdpikq  
ake1ssdkksnek1elfqni fdieaecpheqakqqkeskvkeisarri fsfe  
>tr|D8HBY4|D8HBY4\_STAAF  
mtatwekkeg neg1ltvtvpaekv nka1dqafkkvkvqinvpgfrkkgvprpifeqrfgvealyqdaid1llpdaygeai  
detdikpvaqpevsvtqie  
kgkdfi featvtvepevklgdykg1eiekqetel sddelqeaids1gh1aemvkedgvvengdtvnid fsgsvdgeef  
eggqaegydl eigsgsfip  
gfeeq legmkvdeekdvvt fpeeyhaeelagkeatfktkvneikfkevpeltdeiane1daeantvdeyken1rkr1ve  
qkatdaenvekeeaikat  
dnttidipeamvntel drmvsefaqriqqgl dlqtyfqisgqdesqlreqmkddaeqrvtkn1l1taiaeaekieatde  
didkelekmskqfnisved  
iknt1gntdi ikndvriqkvid1lrdnakfvegteked  
>tr|D8HBY5|D8HBY5\_STAAF  
msdi1qfnpsskklykdikraeqdqnydlmyeyivqyerqfelteeiammkrml yetgsflelreetivllktgiqqyd  
almiyyvks1iglgqyfea  
vevihqi1devkdhktrmalhplkefakskliedekrltqsltdfdt1smreqth1ilklidnghfqfqtelyilk1snt  
ysn1is1miey1rfanc  
qeltiekymdvtfvpvn1kg1ehtt1kekvipnvmet1ndgalhiaeeahimnhsimiypidiet1fetnkwinaye  
cyfknmlg1kcelqs1daf  
nfiqq1d1nnns  
>tr|D8HBY6|D8HBY6\_STAAF  
mskfdeqi1vvpri1fnnekntfngflnknkpegqni fdalsqyevkrrgdmeedpsyqlisycl1enehgeilvyer  
lsgggsrlhgssigvgg  
hmdvpgaes1nev1rvnaqreleevg1seqdsqnmeiygfinddnevgkvhigvfvkitvstndveaketdt1rikw  
vekgniesyddfetwsali  
lqd1  
>tr|D8HBZ0|D8HBZ0\_STAAF  
mskvqnesnvvkr1g1kdrhismiaiggcigtglfvtsggaihdagalgaligyaiigimvfflmts1gematy1pvsgs  
fstyatrfvdps1gfalgw  
nywfnwvtvaadit1aaqviqywtp1qgipawawsalflvi1fslns1svrvygeseyw1alikkvvtvivfiaig1l1ti  
vgimghfvgfeifnkgeg  
pilggn1ggs1ls1lgv1fiagfsfqgteligitagesenperavpkaikqvfwri1lfyil1aifvigmlipydssalmg  
ggndvatspft1lvfkngf  
afaasfnavi1t1sv1sagnsgmyastrmlysmskdklafetfgktnkngvpym1lvtaiivvii1fvvqsvtegayqyi  
vaasgl1tgfiawvgiavsh  
yrfrrafdkqnydksklyktak1lfpfgpi faailcivvi1gqdvdfiktgdfnfsrflitymgipvflaffiyhklrykt  
kkipleqvd1rqdvsmdel  
kg  
>tr|D8HBZ1|D8HBZ1\_STAAF  
meqiniqfpgnkkafdkgtttdiaqsi spglrkkavagkfnq1vdl1tkplet dgsieivtpgseealev1rhstah1  
mahai krlygnvkfgvgpv  
ieggfyydfdi dqn1ssddfeqiektmkqivnenmkierkvvsrdeake1fsndeykle1lidaipedenvt1ysqgdftd

Tsompanidou\_et\_al\_Supplemental\_FASTA\_File

lcrghvhpstakikefkll  
stagaywrgdsnnkmlqriygtaffdkkelkahlqml eerkerdhrkigkelelftnsq lvgaglp lwl pngatirreie  
ryivdkevsmgydhvytpv  
lanvdlyktsghwdhyqedmfppmq ldetesmvlrpmncphhmmiyankphsyrelpiriaelgtmhryeasgavsglqr  
vrgmtlndshifvrpdqik  
eefkrvnmiiidvykdfg fedysfrlsyrdpedkekyfdddmwnkaenmlkeaadelglsyeeai geaafygpkl dvqv  
ktamgkeetlstaqldfll  
perfdltyigqdgehhrpvvihrgvvstmerfvaf lteetkgafptwlapkqvqiipvnvd lhydyarqlqdelksqgvr  
vsidernekmyki reaqm  
qkipyqi vvgdkevennqvnrqygsdqdetvekdefiwnlvdeir lkkhr  
>tr|D8HBZ2|D8HBZ2\_STAAF  
mkqfksiintsqdfekriekikkevindpdvkrfl eahraeltnamidedlnvlqeykdqqkhydg hkfadcpnfvkghv  
pelyvdnriki rylqpcp  
kikydeerfael itshhmqr dtlnaklkdiymhnrdr ldvamaaddictaitngeqvkglylygpfgtgksfilgai an  
qlskkvrstiiylpefir  
tlkggfkdg sfekklhrv reanilm lddigae vtpwvrdevigpl lhyrmvhelptffs nfdy sel ehhlamtrd gee  
kkaari iervks l stpyf  
lsgenfrnn  
>tr|D8HBZ3|D8HBZ3\_STAAF  
mgrqafefgl rpkdqfkmq hfdlnthlevlnrlyt pligaqavglyhfmtqfvkeshnetlilshyifmnelkinlle  
frqqmdlleaigllkafvk  
hdeqetqfvvyql i qppsah lffndpmlsiflysevehrrfhe lkyfeyqqid lsefkqvtrqftdvfkvpstkididts  
dipinepyqgid lsnesfd  
femlrqmlgkhf isqdivtkdakrlitqlatlygl tadgmkhvilnsit sgqqlsfeemrkqarsyylmehenqmpklqv  
kspatssstakssevnpkp  
qsdefelleqtspidmlasweseptisqktmveel ierekmsfgvinillqfvm lkedmklpkayileiasnwkkkgi  
k takeaynyakkvnqpkne  
gssgnyqrgsyggrrnr iskektpkwlenrdkp seedsakdns vddqqleqdrqafldkl skkweedsq  
>tr|D8HBZ8|D8HBZ8\_STAAF  
mnklvlidgns lsfrafyalpl lsnkagihtnavygfamll ekilkeekpnhflvafdagkttfrhekyseykggrqktp  
pelseqfpyirqlldayhi  
kryeldnyeaddiigt lsk eadkagfqtiiitgd rdltqlatdnvtiyytkkgvtdvdhytpdfiaekyngltpnqi idm  
kg lmgdtsdnipgvagvge  
ktaikllnqfdtvegvyeh ldeisgkklkek lqnskedalmskelatinvdspi evkledtlmthqdeqqekiel fkkle  
fkql ladidqsasvedaie  
ktfeietsfdnvdfts lkeavihfel dggnylrnni lkfs lftgekhi vinaddinnyaelvsw lenpntkkvvydakkt  
yashrlgididqnisfdim  
lasyii dprtsidvqsvvslygqsfvkddvsiyggk kfkvpeddvl npyvasitdaiy fakpnmdkql eeynqvella  
dlelplakil semeeigif  
tdvhdleemekeiqek ldvli rni hdaagedfn inspkqlgvvl fetlqlpvikk tktgystavdvleqlqgehp iidiyi  
leyrqlsklqstyveglqk  
visddqrihtrfnqt laqtr lssvdpnlqni pvrleegrki rkafkptsksdsvilsadysqielrvlahitqdesmkea  
fingddihtatamkvfgve  
adqvds lmrqakavnfgi vygisdyg lsgslgitrkkakafidyl asfpgvkqymsdivkdakalgyvetllhrrryi  
pdi tsrnfnlrgfaertam  
ntpiggsaadi ik lamv kfaqmkettyqaklllqv hdelifevpksevdsfsefvee imenalqldvpl kvdssy gatw  
ydak  
>tr|D8HBZ9|D8HBZ9\_STAAF  
mktiq l hkttlilia illfytfmgillplmhdd lqwfsnyntdil kvgfes l ngryignifei iavhsvl rwl syglis  
mgiw mimhitrckawtsy  
yllafslmlilpsaiy adtygw fagfynyatstlislfi iyycinaii ykekqpvsvtlfyvlcffgqlfmenvtl fhc  
iililaflyeftanrtlny  
kllfsfmiatigti imf snpyrki lfegseyqqvsnnqg ifskfaemists lpygvifsqviilsmiaa liy lllrsd  
ryvhltilkrri imigfit  
lplyyllfynqfl llnkntdig lvgfani ivcgyfafsifvgiylsindrktqitlyslliaicvsastlvivtpiepgnf  
liyvtihvii lli llkefr  
kyksinvnfikvas lvlamiyl safiyvhyehkrvql lkqkikhprqevytves lpfeyhmh hpspinknyqewfnny  
eelpkmtkvkyi pfgsdds  
>tr|D8HC00|D8HC00\_STAAF  
mmkfhhr lml lissil iisfv lgi ihasityvl sekheqalatdarsyiy lvdneidkvkeivkqqnidllitkndk  
kvfssgkl kavnsdnyi q  
kkdvfi fnkkvngyhwi kgy nnditemhwtl wky liltclvvl iclyfasrsfkr tlrpiqevtyatqllangyyhir  
vpesnvvetkal fvstnd l  
arrlqk l nneqki qsnrl kttienipsail midrngkivvankayyeqfnishnieqvgyhgyvnteieqlilesfkvek  
piyeql evainqvhakyfd  
iscvpil trsqks lqgilvmhdi tn lq lenl rrefvanvshel ktpitsikgfaet lidgakndpqs ldmflni ilke  
snries lvt d l lshieq  
hteltdt dymnl s dltrri idn mmtqanqknisihtdiekdvivaqeskiaqv itnlltnainysyedgdinrvvyrd df



Tsompanidou\_et\_al\_Supplemental\_FASTA\_File

rvi fevqdfgigikledqq  
ri ferfyrvdkarsrdsggtglgsitkhiveahqgnievnsqvgkgstfkvilkyke  
>tr|D8HC02|D8HC02\_STAAF  
mtaekitqgteglvnpnepiipfiigdgigpdiwkaasrvidaavekayngekriewkevlagqkafdttgewlpqetld  
tikeyliavkgltpig  
girslnvalrqeldlftclrpvrwfkvgpsvkrpqdvdmvifrentediyaiefkegttevkvidflqnemgatnir  
fpetsgigikpvskegter  
lvraaiqyaiddnrksvtlvhkgnimkftegsfkqwygdlaletfgdqvftwqqydeivekegrdaanaaqekaekgki  
iikdsiadi flqqil trpa  
ehdvvatmnlngdyisdalaaqvggigi appaninyetghaifeathgtapkyaglnkvnpsvsvlssvlml ehlgwqea  
adkitdsiedtiaskvvt  
dfarlm dgae evst safadeliknlk  
>tr|D8HC04|D8HC04\_STAAF  
maeklqrelsnrhigliaiggaigtglflgagqtialtgpsilltyiigfmlfmfmr glgeiiiqntefksfadvtnty  
igpfagfvgtwtywfcwii  
tgmaevtavakyvsfwfpeipnwisalfcvllmsfnllsarlfgelef wfsiikiatiiglivvgfvmilfafktqfgh  
asftnl yehg i fakgasgf  
fmsfqmal fsfvgiemi gvtagetkdpvktipkainsvipirilifyvgalavimsiipwqqvdpdnspfvklfaligipf  
aaglinfvvltaaasscns  
gifsnsrmlfglssqqappnfsktnkygvphvai fassallvaallnyifpdatkvftyvttistvlflvvwgliia  
yiny srkn pdlhknatykl  
lggkymgyli fvffi fvfgllfinvdtraiyfi piwfillgfmylrykriaaksnk  
>tr|D8HC07|D8HC07\_STAAF  
mldfekplfeirnkieslkesqdkndvd lqeeidmleasleretkkiytnlkpwrdrvqiarlqerpttdyipyifesfm  
elhgd rnrfrddpamiggig  
flngravtvigqrgkdkdniry nrfgmahpegyrkalrlmkqaekfnrpiftfidtkgaypgkaaeergqsesiatnli  
emaslkvpviai vige ggs  
ggalgigiankvmlenstysvispegaaallwkdsnlakiaetmkitahdikqlgiiddviselggahkdieqqala  
iksafveql dsleslrde  
iandrfe kfrnig syie  
>tr|D8HC08|D8HC08\_STAAF  
mfkdffnr tkkkyltvqds knndvpagimtkcpkckkimytkelaenlnvcfn cdhhialtaykrieaisdegsftefd  
kgmts anpldfpsyiekie  
kdqqktglkeavvtgtaql dgmkgfvavmdsrfrmgsmgsvigekicriidyctenrlpfilfsasggarmqegii slmq  
mgktsvs lkrhsdagllyi  
sylthpttgvsasfasvgdinlsepkaligfagr rrvieqtinek l pddf qtaefllehgqldkvvhrndmrqt lseilk  
ihqevtk  
>tr|D8HC09|D8HC09\_STAAF  
mslrdealemhkrngqgl evkpnvkvt nkeelslayspgvaepckdiyedkrkvydytikntvavitdgtavlglnig  
peasipvmegkavl fksfa  
gingvpialntntteeiiktvllepnygginledi saprcfeieerlkketnipvfhddqhgtavtmaglvnalrvvn  
kdiakikvvlngagaagia  
ivkllaygvnrnmvmdsr gairfegrsygmnltkdvvakwt nkdkiegsl eevvkdadvfigvsvana lsdm vksmadn  
piifamanpnpeiipddak  
aagarvvtgrsdypnqinnvlafpgi frgaleveathineemkkaaveaiadlidsselnedycipgpfdkrvapsvar  
nvakaamesgvarievdpq  
dvydktmkltdlq  
>tr|D8HC10|D8HC10\_STAAF  
mvaylnihtaydl nsslkiedavr lavsenvdala itdtnvlygfpkfydaciannikpi fgmtiyvtnglntietvvl  
akdnnglkdlyqlssikim  
nsmenvs fellqqfssnliiifknvadehrdivqvf dshedtyldhqsvlvqgikhvwiqtvcyqtpqdadtisalaair  
dntkl dlihdqedfgahfl  
tekeikql dinqeyltqv dviaqkcnaelkyhqsllpqyqtpndesakky lwrvlvtqlkklelnydvyl erlkyeykvi  
tnmgfedyflivsdlihya  
ktndvmvgpgrgssagslv sylngittidpikfnllferflnpervtmpdididfedtrrerviyyvqekygelhvsgiv  
tfghllaravardvgrim g  
fdevt lneisslip hklgitldeayqid dffkfvhrnrherwfsickleglprhtsthaagii indhplyeyapltkg  
dtglltqwtmteaerigll  
kidflglrnlsi ihqil tqvkkdlginidiekipfdnqkvfellsqgdttgifiqlesdgvrsvlkk lkpeh fedivavts  
lyrpgpmeeiptyitrrhn  
pskvqylhphlepi lknthyviiyqeqimqia stfanfsygeadi lrramskknravleserqhfiegakqngyhedisk  
qifdli lkfadygfpraha  
vsyskiayimsflkvhypnyfyani lsnvigsekktaqmieeakkqgitilppnineshwfykpsqegiy l sigtikvgv  
yqsvkvi vder yqngkfkf  
ffdfarripkrvkrkllealilvgafdafgktrstllqaidqvl dgdlnieqdgflfdiltpkqmyedkeelpdalisq  
yekeylgfyvsqhpvdkkf  
vakqylt i fkl s naqnnkpi lvqfdkvkqir tkngqnmafvt lndgi etldgvi fpnqfkkyeallshndl fivsgkfdf  
rkqqrqliineiqtlatfe

Tsompanidou\_et\_al\_Supplemental\_FASTA\_File

eqklafakqiiirkshidtfemikatkenandvvsfydetikqmttlyinqkdsmfnnfiqsfnpsdirli  
>tr|D8HC11|D8HC11\_STAAF  
mistlneimkciendntiirhrvrpdpdaygsqglkyiikkfpqkqvfvavevesslsfigeldnidktyqdalvi  
vcctanapridderystgs  
klikidhhpavdqgdinlvntnasstseiidydlshfndeaiivnkdiasvlylgivgdtgrflfnttsehtmeiagkli  
ghidhnalnkmmekdpk  
mlpfqgyvlqhfelmdgdfcqvkitdvleqfgiqpneasqfvntiadikgkikiwfvavdegseircrlrskgqliindi  
aqdfgggghpnasgsvsvns  
wdefeqlatalrtkl  
>tr|D8HC13|D8HC13\_STAAF  
myknillgvdtqlknekalkevsklagegtvvtvlnaiseqdaqasikagvlnklteerskrlektrkaledygidydq  
iivrgnakeellkhansgk  
yeivvlsnrkaedkkkfvlgsvshkvakratipvlivk  
>tr|D8HC14|D8HC14\_STAAF  
mklshfgqstiylegnnkkvividpfi snpkcdlnietvqvdyivlthghfdhfgdvvelakktratvigsaemadylss  
yhgvenvhgmniiggkanfd  
fgsvkfvaqfhsssfthengipvylgmpmgivfevegktiyhtgdtglfsdmsliakrhpvdvcfvpigdnftmgiddas  
yainefikpkisvpihydt  
fplieqdpqqfkdavngdvqilkpgesvqf  
>tr|D8HC15|D8HC15\_STAAF  
mlrsvykmtkiskiiideInnqqadaawittplnvyyftgyrsepherlfallikkdgkqvlfcpkmeveevkasptgei  
vgylttenpfslypqtink  
lliesehlvarqkqlisgfnvnsfgdvdltikqlrniksedeiskirkaaeladkcieigvsylkegvtereavnhieq  
tikqygvnemsfdtmvlfq  
dhaasphgtppgdrllksneyvldlgviyehycsdmtrtikfgepnkeaqeiynivleatsaiqaikpgiplkdidhia  
rniisekgygyefphrlgh  
glglqehyqdvssstnsnleagmvitiepgiyvpgvagvrieddilvtnegyevlthyek  
>tr|D8HC16|D8HC16\_STAAF  
mkiqipreiknnenrvglspsgvhalvesghtvlvetnagsgsffedvdykeagaeivpeqakvwdvdmvikvkeplese  
ypyfkeglvlflylhane  
ekltqalidrkvisiayetvqlpdrslplspmsevagrmsaqvgaeflqklinggmgiilggvpgvpkgkvtiigggqag  
tnaakialglgadvtildv  
npkrlqqlddlfggrvhtimsnplnieilyvkqsdlvigavlipgakaprvtedmikqmkngsviidiaidqggi fettd  
kitthddptyikhgvvhyha  
vanmpgavprstlalnna lpyalmankgyrea fksnqplslglntykghvtnkgvaeafemeyksveealql  
>tr|D8HC17|D8HC17\_STAAF  
mitykniliavdgsheaewafnragvakrndakltivnvidsrtysseyevydaqftekskhfaeellngykevatnagv  
kdvetrlfegspksiiipkk  
laheinadlimsgtsglnaverfivgsvsesivrhascdvlvvrteelpadfqppqvattqlrekyqn  
>tr|D8HC19|D8HC19\_STAAF  
maeqqtimerl fhtldekaktlnnengqsfi enlg lameqvytderglleqstlqdrkafqfaylslmqeeki qanhqi  
tpdsiglllgflverfmnn  
qee lhi vdi asgaghlsatvkev lpeiavmhh lievdplsrsvhlanfleipfdvypqdaimplpleadivigdfpv  
gyypiderskeflgfeg  
hsyshyllieqainalkdagyaflvpsniftgehvkqlekyiatetemqaflnlpptlfknekarksililqkkksget  
kpvevllanipdfknpsqf  
qgfmetl nqwmdtnrpkk  
>tr|D8HC20|D8HC20\_STAAF  
mteitfkggpihlkgqqinegdfasdfvldndlnqvtladyagkkklisvpsidtgvcdqqrkfnseaskeegivlt  
isadlpfaqrwcasagld  
nvtltsdhrdlsfgenygvvmeelrllaravfvl dadnkvyvkeivsegtdfpdfdaaltaykni  
>tr|D8HC21|D8HC21\_STAAF  
mdl nltmiiiiifgfiaafidsvvggglistpallaiglpssvalgtknklassfgslststikfirsgkvdlyvvaklf  
gfvflasacgayiatmvps  
qilkpliiialssvfi ftllkkdwgntrtftqftfkailfaal filigfydgfvvggtgsfmlfvllvfgdflsaagn  
akvlnfasnigalvlfmvl  
qqvdyviglimatsmiagsytagahfaikqgvgykvlfiiitaililknafdhiqqfv  
>tr|D8HC22|D8HC22\_STAAF  
mkydhllvrygel tlgksnrkkfvnqlrnnvnkslkgldgfvvkgkrdrmyielehdhadineityr lskifgiksispvl  
kvektleamsaaaikfaqq  
feenstfki dvkradknfpmtdtyelqrelggavlk hfdni svnvkrpdheirvevrl daiymyeevvagagglpvgtggk  
tllmlsggidspvagmevm  
rrgvti eaihfhspptsdqakekvieltrilaervgpi klhipfte lqkqvnkvvhprytmtstrmmrvadklvhq  
igalaivngenlgqvasqt  
lshmyainnvtstpv lrp llytdee i i ikskeigt fetsiqpfedccti ftkpnpvtepnfekvvqyesvdfdeeminr  
avenietleitsdyktike  
qqtnqlindfl  
>tr|D8HC23|D8HC23\_STAAF

Tsompanidou\_et\_al\_Supplemental\_FASTA\_File

minerevfiliyl dnaattkafdevldtyvkvnsmyvnpnsphkagldqadqlqqakaqingmvtntmydvvftsgat  
esnnialkgvayrkfdtar  
eiitsvlehpsvlevvryleeregfkvyvdvtdgtidlqhfndlmsdkvglvctmyvnnvtgqi qpipkmaetlknyp  
kahfhvdavqafgkvamd  
tnvdsvs lsgkhfnglkgggvllvnhiqniepiiqgggqeygvrsgtvnlpndiamvkamkmasenlealnafvtelnd  
vrqflnkyhgvyinsstsg  
spfvlnisfpgvkgvlnafskydimisttsacsskrnklnvlaamglsdksiegsirlsfgatttkediarfkeifi  
iieeikelk  
>tr|D8HC24|D8HC24\_STAAF  
mlyiilaiiviliavgvlylrsnrkqiekaierkneietlpfdqnlqslklnlkgctkydamkkdvestnky  
lapveekihnaealldkfs  
fnasqseiddanelmsyeqsyqqledvneiaalykndelydkckvdyremkrdvlanrhqfgeaslleteiekfep  
rleqyevlkadgnyvqahn  
hiaalneqmkqlrsymeeipeli retqkelpgqfdlkygcrdlkvegyl dhvkvdstlqslkte lsfveplisrlele  
eandk lanindkl ddm ydl  
iehevka kndveetkdiitdnlfkakdmnyt lqteieyvrenyyinesdaqsrvqfeneiqslisvyddilkemsksavr  
ysevqdnlyledhvtvin  
dkqeklqnhiqlredeaeaednlrvqskkeevyrllasnltsvperfiimkneidhevrdrvneqfserpihvkqlkd  
kvskilqmntfedeadv  
lnavyaekliqygnryrkdyndvkslnaerlfknrykraieiaeqalesvepgvtkhieevikq  
>tr|D8HC25|D8HC25\_STAAF  
mttinptnytllkkqaasliedehmiai lsnmsallndnl dqnwvgfyll eqnelilgpfqghpacvhipigkvcgt  
avserrtqvadvhqfagh  
iacdanskseivvpi fkdki igvldi dapi tdrfdndkehleaivk iekqla  
>tr|D8HC27|D8HC27\_STAAF  
mtlnklkdelqivshrglpsdfpentmvgvrevmgl nvamleidvhl tdkqhfvi hdetidrtsdgkgriadytlsqlk  
sfdgfykdvafkgeript  
ldevlscl kfdkkl ielkspnlypgieckllafleekkvdatqvviqsfdiecielntlgsiyelgvlskrkywyk  
kpnfsriaqiasvnpny  
lvtrkfvdeahhhqlqvmptvnlktgek lrmgv dglitdnplfik  
>tr|D8HC29|D8HC29\_STAAF  
myyhqpllltpgpptvpda imreiqapmvghrskdfediaqqafqglkpi fgsqndvlltssgtsvleasmlnivped  
hfiivsvgafgnrfkqiaq  
tyyknvhiydvwtgeavdvkdfinylstlnvekvafsqycetsttv lhpihelgnainqfnsniyfvvdgvscigavdv  
dinkdkidvsvgsqkaim  
lppglafvayshrakerfkevttpkfyldlnkyissqadnstpftpnvslfrgvnayvetvkaegfnhviarhyairnal  
rsalkaldl tllvndkdas  
ptvtafkpntndevki ikdelknrfkitiaggqghlkgqilrighmgkis pfdilsvs aleiiltehrkvnyigkgisk  
ymeviheai  
>tr|D8HC30|D8HC30\_STAAF  
mkqfnvlvadpiskdgikalldheqfnvdiqtglseealikiipsyhalivrsqttvteniinaadslkviaragvgvnd  
inidaatlkgilvinapgn  
ntisatehslamlsmarnipqahqsltnkewrnafkgte lyhktlgvigagriglgvakraqsfgmkilafdpyltde  
kaks l sitkatvdeiaqhs  
dfvtlhtpltpktkglinsdffakakpslqi invarggiidekalikaldegqisraaidvfehepatdsplvahdkiiiv  
tphlgastveaqekvaisv  
sneiieilidgtvthavnakmdl sniddtvksfinlsqtvgelaiqlmynapssikityggdlasidssltrtiithi  
lkddl gpevnialmln  
qqvtlnienkaetgfsnylevelsndsvkvgasvftgfgprivrinnfsvdlkpnqyqivsyhndtpgmvgktgal  
lgkyniniasmtlgrteag  
gdalmilsvdqpvsnniidelkqvgeynqiftteltvqs  
>tr|D8HC31|D8HC31\_STAAF  
mdkcyglhshidwetltdndiqdirnrifqkdki lnlkls glnsnwdmlfivfsihlidilkklshdeieafmyqdep  
velklqnistnladrfln  
eqplqlf ldnvkvgnniyaa leefatte l hvsdanl fs l kgalwtlaqevyqwylgsklyeevekkiarttftkyiy  
qeiilrpvdevkvllndlk  
gagfelgiatgrpytetvvpfenlgllpyfeadfiatasdvleamypqarplgkpnpsyiaalygnnrkdyesyink  
qdnivnkddvfivgdsld  
llsaqkigatfigtltglkggaaseleahhadyvinhlgelrgvldn  
>tr|D8HC32|D8HC32\_STAAF  
mykffqnlgrslmlpvailpaaaiagigntlnal haapkiamffttvgttileqlgilfaigvaigmakndgavala  
algyflvtvvlspmklapl  
lgmkaseinsafekmngnvfvgivigliaayaynkfsetelplalsffsgkr lvpimtafyctflvillflwpllysw  
ivkfgesivglsgfagfvy  
gvnrl lip tglhhalnsvfwfdtigindigkfqsgkdaikgitgryqagffpimmfgipaaalamyhtakttqkkqvyg  
wflassvaaffvgvtepie  
fafmfvapi lyvhal l tgl sl fiaatfhwtagsfsaglidvslinpvshplml lvqgvffilyyvirvviqvf  
nlntigrgene lvdptvkv

Tsompanidou\_et\_al\_Supplemental\_FASTA\_File

dniapgendi kqskyhnhaiqileglggqeni vnl tncatr lrl elkdtsi idqqkiknagavgvtnghstqvivgth  
vqqvadeiekh  
>tr|D8HC35|D8HC35\_STAAF  
mtnvl iedlkwrgli yqqtdeggied llnkeqvtlycgadptadslhighllpfltlrrfqehghrpivligggmgid  
psgkseervlqteeqvdkn  
iegiskqmhnifefgtdhgavl vnnrdwlgqis lislflrdygkhvgvnymlgkdsiqsrlehgisyteftytilqaidfg  
hlnrelnckiqvggsdqwg  
nitsgie lmrmygqtdaygl tiplvtksdgkkgksesgavwldaektspyefyqfwinqsdedvikflkyftflgkee  
idrleqskneaphlreak  
tlaeevtfkihgedalndairisqalfsgdlkslsakelkdgfkdvppvltlsnnttnivevlietgispskrqaredvnn  
gaiyingerqqdvsyalap  
edkidgeftiirrgkkkyfmvnyq  
>tr|D8HC37|D8HC37\_STAAF  
mnkhhpk lrsfysirkstlgvasvivstlflitsqhqaqaenttsdki senqnnatttqppkdtntqpatqpanta  
ktypaadeslkdaiknpav  
enkehdi gpreqvnfqll dknnetqyyhffs ikdpadvyytkkkaevel dintastwkkefevyennqklpvr lvsyspvp  
edhayirfpvsdgtqelki  
vsstqiddepetydytklvfakpiyndpslvksdtn dalatndqsssdasnqntntntsnqntsttannannqpqatt dms  
qpaqpkssanadqassqa  
hetnsngntndktnessnqsdvnyqyppades lqdaiknpai idkehtadnwrpidfqmknkgerqfyhyastvepatv  
iftktgpiielglktastw  
kkfevyegdkklpvelvsydsdkdyayirfpvsngtrevkivssieygenihedydylmvfaqpitnnpddyvdeety  
lqkllapyhkaktlerqvy  
eleklqeklpekykaeykkkl dqrveladqvksavtefenvtptndqltdvqeahfvvfeseensesvmdgfvhepfyt  
atlngqkyvmmktkdds yw  
kdlivegkrvtvskdtknnsrtlifpyipdkavynai kvvvanigyegqyhvriinqdiktqdddtsqntsep lnvq  
tgqednvtatdtatnnsie  
ttpseatdkvdli epepdmvkdtdssvdkdahhdvdhl sdmngnthfdkydlkemdtqiakdtdkgvdsnvmsnvdtd  
kdsnkndkviqlahi adk  
nhtgkaakldgvrqnyntdkvtykkttehpsndihktvdkvtkkekagtpskenklsqskmlpktgettssqswwgly  
allgm lalfipkfrkesk  
>tr|D8HC38|D8HC38\_STAAF  
mnvsknflatty fkmhkl nkkgrkklthlsldianqstlqpikdiaasvgisedalepygghyakidinkitprdskg  
kvvlvtamsptpagegst  
vtvgladafhelkknvma lrepa lgp tfgikggatgggyaqlpmedinlhfnngdfhaittanna lsafidnhihqgne  
lgidqrriewkrvl dmndr  
alrhvngl ggp tngvpredgfnitvaseimailclsr sikldkdkisritigytrdrkpvtvadlkvqgalamilkdai  
kpnlvqsi egtpalvhggp  
faniahgcnsilatetardladi vvt eagfgsd lgaekfmdikareagfdpaavvvvatira lkmhggvakdn lkeene  
avkagivnlerhvnnikkf  
gvepvvainafihdtaeveyvkswakennvria ltevwegkgggvd lanevlevidqnsfkplyel elpleqkieki  
vteiyggskvtfsskaqk  
lkqfkengwdnypvcmaktqysfsddqtll gapsgfeitireleaktgagfivaltgaimtmpglpkkpaa lnmvtddg  
haiglf  
>tr|D8HC39|D8HC39\_STAAF  
mkvevykgagghnlkdyeetyntfdwkdv eqafswsetgkmmayecidrhvdqgsgdkialnykdehrkesytkdmq  
rlnskaanvlsehaevdkg  
drvfi fmsrtpe lyfallgv lkgai vgp lfeafmekavadr lenseakv l itnkallprvpvdklpnlkkivvdenve  
dnyidfislmetasdefdi  
ewlksddg lilyhtsgstgqpkglhvqqamlvhyi sgkyvldlqeddvywctadpgwvtgtsygi fapwlngatnciag  
grfspeqwysmi edfkvti  
wytaptalrm lmsagddivekydlss lrsilsvgeplnpevikwakkvyglvtl dtwmm tetgghmivnyptmdvklgsm  
gkplpgiqaai iddagne l  
ppnrmgn laikkgwpsmmyriwknpekyksyfigdwyvsgdsaykdedyfwfqgrvddv imtagervgpfesklveh  
eavaeagi igkpdvrgei  
ikafvalrkgyeptdelkeeri lfvkegl sahaapreiefkd klpktrsgkimrrvlkawelndagd l stme  
>tr|D8HC40|D8HC40\_STAAF  
mnhlkyqsedyihdkqfvi eglthed lkal tfdahltafrdaedqyealleittlpegriyvarqdqlivgyvtfhy  
pdeierwstgnlpylielg  
aievsinfrqlqlaekliqlslsapefedyivitteyywhwdl knskldvfdy klmqrlmatggleifatddpeitshp  
anc lmarigknitleqqqa  
fddiry mnrfff  
>tr|D8HC41|D8HC41\_STAAF  
mqqh lsktayvysdkllqyr fhdqhpfnqmr lkl tte lllnanllspeqivq priatdde lmlihkydyveaikhashgi  
isedeakkyglndeengqf  
khhmrhsativggaltlad limgskv lngchl ggg lhaaqgrasgfc iyndia itaqylakeynqr vli idtdahhgdg  
tqwsfyadnhvt nysihet  
gkflfpgsghytergedigyghtinvplepytedasfl ecfkltvepvvksfkpdiilsvngv dihyrdplthlnct lhs

Tsompanidou\_et\_al\_Supplemental\_FASTA\_File

lyeipyfvkyladtytngk  
vimfggggyniwrwvprawshvflslidqpiqsgylplewinkwkhysse11pkrwedrlndytyvprtkeiseknkla  
lhaswyestrq  
>tr|D8HC43|D8HC43\_STAAF  
msnklesyrseivslnhqildl1skrgelaqkigeeklkqgtriydpqrekemlndlidsnkgpfdntikqlfkeifka  
stdlqksenekhlyvsrk1  
kpedtiivtfdnggiigdnksfvfgpcsvsfeqveavaknlhakgekfirggafkprtspydfqglgveglkilqikd  
kydlnvseivnpndfeva  
deyldvfgigarnmqnfe11keagrkkp11lkr1satieefvyaeyiasqgnqni11lcergirtyekatrntldisa  
vp1lkggthlpvmvdvths  
tgrkdim1ptakaa1avgadgvmavhpdpsvalsdagqcmdldefqtfydelkpladlynakk1k  
>tr|D8HC44|D8HC44\_STAAF  
mtqqqnnkrtlnkhtyqneslprnkdfvvsfitgalvgsalglyfknkvyqkaddlkvkeqelsqkfeerktqleetva  
ftkervegflnkskngea  
lkaqqaaikeasann1sdtsqeaqeiqeaqreaqgetdksaavsneeskavalkaqaaikeasann1sdtsqeaqei  
qeaqkaqeaetdksaavsn  
eepkastlnvskeesqaer1anaakqkqakltpgskesqltealfaekpvakndlkeipqlvttkndvsetetvntdnkd  
tvkqkeakfengvitrkad  
ekttnttavdkksgkqskkttpsnkrnaskastnktssqkkqhnkkssqgakkqsssskstqknnqtsnkskttnakss  
naskksnakvekakskiek  
rtfnd  
>tr|D8HC46|D8HC46\_STAAF  
mhd1ghevqgsdienyvftevalnrgikilpfdannikedmviqgnafassheeivrahqklldvvsyndflgqi1dq  
ytsvavtgahgkttstg1l  
shvmngdkktsfligdgmg1pesdyfafeaceyrrhflsykpdyaimtnidfdhpdylfdindvfdafqemahnvkkg  
i1awgddeh1rkieadvpi  
yyygfkdsddiyaqniqitdkgtafdvdyvdgefvdhflspqygdhtvlnalaviaisyleklldvtnikealetfggvkrr  
fnettianqviivdyahp  
reisatietarkkyphkevavfqphtfsrtqaf1nefaes1skadr1vflceifgsirentgal1tiqdlidkiegaslin  
edsinvleqfdnavvlfmg  
agdiqklqnayldklgmknaf  
>tr|D8HC47|D8HC47\_STAAF  
mswfdklfgedndsndd1hrkkkrrqesqni1ndhds1lpqndiysrprgkfrfpmvsvayenenveqsadtisdekeq  
yhrdyrkqshdsrsqkrhr  
rrrnqtteeqnyseqrgnski1sqs1ikykdshyhtnkpgtyvsaingiekethkskthnmysnntnhrakdstpdyhke  
sftksevp1saifgmkpkk  
lengripvskpsekvesdkqkydyvaktqtsqnkhleqekqndsvvkqgtasksl1denvs1tksapnyskvdntikie  
niyasqivee1rrererkv  
lqkrrfkka1lqqreehnee1qda1qra1demyakqaeryvgdss1ndds1ltdnsteasqlhtngieneavsndenkqa  
siqnedtdthvdespyny  
eevs1nqvsttq1l1sddevtvsdvtsqrqsalqhnvevndqdelknqsr1iadseedgatnkeeysgsqiddaefyelnd  
tevdenttsnsedntnrna  
semhvdapktqehavtesqvnndktvdneielaprkkddqtn1svns1lktndvndghvvedssmneiekhnaeitenv  
qneaeseqnveektienv  
npkkqtekvst1skrpfvnmtpsdkkrrmmdrkkhskvnpelkpvqskqavsesktasqatps1s1sdtsqesntnayktn  
nmtsnvnnq1lghaete  
ndyqnaqqyse1kpsadstqteifeesqddnq1leneqvdstsssvsevsditeeseetthpntsgqqdnddqkdlkp  
sfsnqnedtanenrtrtng  
qdvatnqavqtskpm1rkgnik1psvs1leep1viepdedwitdkkelnda1fyf1vpaevqdvtegpsvtrfel1sve  
kgvksr1talqddikma1  
aakdi1rieapipgtsrvgievnpnqntt1vnlrsiiespsfknaesk1tvamgyrinnepl1mdiaktphaliagatgsgk  
svci1nsi1ms1lyknhpee  
1r1111idpkmvelapyn1lph1lvapvitdvkaatqslkwaveemerrykl1fahyhvrnitafnkkapydermpkivivid  
elad1mmmapqeveqs1ar  
iaqkaracgihm1vatqrvsvnitgl1kaniptriaf1mvsssvdsrt1l1dsggaer1l1gygdm1ly1lgsgmknpirvqgt  
fvsddeiddvvd1kqgre  
pdy1feeke1l1kktqtqsqdel1fddvcaf1mvneghist1liqrhfqigynraari1dqleqlgyvssangskprdvvte  
ad1nke  
>tr|D8HC49|D8HC49\_STAAF  
mntfqmr1k1ker1sh1nvdfkfnreeet1riyrt1dnngit1k1naivakyedkkekivdkivvyvdeai1aqmadktle  
s1ssq1impv1ratsfdkk  
tkqgv1pfi1ydehtaetavyyavdl1gksyr1lidesm1led1kl1teqqi1rems1fnvrk1l1nsy1ttdevkgni1fyf1nsndgy  
dasr1lntaf1ne1jeaqc1q  
gem1lavphqdv1li1adi1rnktgydvma1h1tmeff1tkg1lv1pits1l1sfgykqgh1epi1fil1gknkqkrdp1nvi1qr1leanr  
rkfnkdk  
>tr|D8HC51|D8HC51\_STAAF  
mninkkv1t1qri1qt1telhg1apgf1eevknymt1qqm1apyv1defien1rmgg1ffgvkkskn1pnakrvmi1aahmdeir1fmitn  
itkngmi1qftn1l1ggvandi

Tsompanidou\_et\_al\_Supplemental\_FASTA\_File

wqqqr1vknrngdkigvvsniiphkfrtgsegapeikdltldigaqnedevrergidigdtivphtpftqlsehrysak  
awdnrygcvlaieilellk  
dielvdlyvganvqeevlgakasaemidpdvafvdcspandvkgnqplsgeigkgtlirikdgtmilkpafrdy11  
klveahdiehqqymspggg  
dggeihkanigiptavigvcaryihstsvfdirdyfaars11seaicnldnnqietlqyk  
>tr|D8HC54|D8HC54\_STAAF  
mrvrykpwaedyldhpe1vdmgdgqhagkmtewfdktqpihieigsgmgqfittlaaqnphinyismereksivykvldk  
vkemgltnlkiicndaie1  
neyfkdgevsriylnfsdpwpknrhakrrltyhtflalyqqi1ndegdlhfktdnrglfayslesmsqfgmyftkin1n1  
hqedggsnilteyekkfsd  
kgsriyrmeakfhsqk  
>tr|D8HC56|D8HC56\_STAAF  
mekifl1ngefvspseakvsyndrgyvfvgdiyeyirvyngklftvtehyerflrsaneigldlnysveelielsrklvdm  
nqietgaiyiqatrgvaer  
nhsfptpevipaytksydrpydh1engvngvtvedirwlrcdiks1n1lgnv1akeyavkynaveaiqhrgetvteg  
sssnyai1kdgviythpin  
nyilngitriivikkiakdynipfkeetftvdf1knadevsvsstaevtpvik1dgepvndgkvgpitrqlqegfekyie  
snsi  
>tr|D8HC57|D8HC57\_STAAF  
mwkekvvqyedqiindlkgllaiiesvrddakasedapvgpgprkaldymeiahrdfthdvdhiagriagkgndvlg  
ilchvdvvpagdgwdsnpf  
epvvtedaiiargtlddkgptiaayyaikiledmndvdkkrihmiigtdeesdwkctdryfkteemptlgfapdaefpci  
hgekgttfd1vqdklaed  
qdepdyelitfksgerymvdpdhaearvlvkenmtdviqdfeyfleqnlqgdstvdsgilvltvegkavhgmdpsigvn  
agly1lkflaslndnnaq  
afvafsnrylfn sdfgekmgmkfhtdvmgdvttnigvitydenag1fgin1rypegfefekamdrfaneiqygyfevk1  
gkvqpphyvdkn dpfvqk1  
vtayrnqndmtepytigggyarn1dkgvafgamfssed1mhqkneyitkkqlfnatsiyleaiyslcvve  
>tr|D8HC58|D8HC58\_STAAF  
makgn1fkailgiggavaavlvtrkdsrdk1kaeynkypqdpqsykdnakdkatqlgtianetikevktnpkeyan1kn  
npkaffeekskftefdnk  
tdesi1ekgkfddeggaapnnn1rivteed1kknkna1sdke  
>tr|D8HC59|D8HC59\_STAAF  
mridkfl1anmgvgrnevqk1lkkgl1vnvneqvikspkthiependkisvrgelieyvenvyim1nkpkyisatedhhs  
ktvid1ipeyqhl1nifpvq  
r1dkdtegl11itndgdfnhe1mspnkhvskkyevisanpiteddiqafkegvk1sdgkvkpa1ltyidnqtshvtiyeg  
kyhqvkrmfhsiqnevlh1  
rrikiad1e1dsn1dsgeyr11tendfdk1nyk  
>tr|D8HC61|D8HC61\_STAAF  
mygti1iggppsg1maavaaseqsnv11iekkkg1grklk1sgggrcnvtr1pyaei1knipngkflyspfsifdne  
si1dffesrgvklkeedhg  
rmfpvsnkaqdvvd1vttierqhv1ikeeeavsrievntdqftvhtqsssyvshs1viatggtsvpqtgstgdgykfa  
qd1ghtitel1fptevpits  
aepfiks1nr1kgl1skdvelsv1kkngkkri1shqmdm1fthfgisgp1trcsqfvykeqknqktqhismaidafpelnh  
eqlkqh1ts11sdtppkii  
kns1hg1ieery11fm1eqagidenttshh1snqq1nd1vnmfkgfvfkvngt1pidkafvtgggvs1keiqpktmmsk1  
vpg1fl1cgevl1dihgytg  
ynitsalvtghvag1yaghysasme  
>tr|D8HC62|D8HC62\_STAAF  
mnl1kknkys1rkykvgi1fstligtv111snpngaqa1ttdnvnqsdt1nqatpvnsqdt1nvanrg1ansaantpnqsat  
tnqstnqalvnhnngsian  
qatpapiqpsasptqnnh1sdanstatetvsnannndvvsntt1lvnpnrtnengsggh1t1keiqedvrhssdkpelva  
iaeqasn1rpkrs1rraapa  
dpnatpadpaaaaangtvpagntapytpttdpnannagqnapnev1sfdngirp1stnrsvptv1vvn1pgft1linggk  
vgvfshamvrtsmfdsdn  
knyqaggnvialgrihgt1dndhgd1fngi1ekt1vnpnse1lifentm1stknqg1atnvi1knad1ndtiaektveggpt  
1r1fkvp1dnvrn1kiqfvp  
kndaitdargiyq1kdgkyysfvdsig1hsgshvyverrtmdptatnkeftvtts1knngnsgas1dndfvyyvq1p  
egveyvns1tkdfpsnns  
gvdvndm1nvydaanrvit1k1stgggtanspar1mpdkil1d1ryk1rvnnvptprtvtfnet1tyktytqdfinsaaesh  
tvstnpytidi1mnkda1q  
aevdrriqqadytfas1d1fng1krraqt1ldenrnnvp1nkrvsqad1ids1tnqmght1l1rsvdaenavnkkvdqmed1  
vnqnde1tdeekqaa1qvi  
eehknei1gnig1dqttd1dgvt1rikd1qgi1qt1sgdtatpvvkpnakkairdkatkqrai1natpdatedeiqda1nq1latd  
etdaidnvt1nattntdvet  
aknngint1gavvpq1vthkkaarda1nqatatk1rq1insreatqee1knaal1nel1tqatnha1eqin1qattnad1vdnakg  
dgl1nainpi1apvtv1vkqaa  
rdavshdaq1qhi1aeinanpdatqeerqaa1dkvnaavtaant1lnantnadveq1vkt1nai1qgi1qaitpatkvktdakna

Tsompanidou\_et\_al\_Supplemental\_FASTA\_File

idksaetqhntifnnndat  
leeqqaqqlldqavatakninaadtngevaqakdqgtqniivvqpatqvktadarnavndkareaitninatpgatree  
kqeinrvntlknraltdi  
gvtsttamvnsirddavnqigavqphvttkqtatgvldlatakkeinqntnatteekqvalnqvvdqelatainninqa  
dtnaevdqaaqlgtkaina  
iqpniykkpaalaqinqhyntklaeinatpdatndeknaaintlnqdrqqaiesikqantnaevdqaatvaennidavqv  
dvkkqaardkitaevakr  
ieavkqtpnatdeekqaavnqinqldqafnqinqntndqvdattnqavnaidnveaevvikpkaiadiiekavkekqqq  
idnsldstdnekevasqal  
tkekekalaaiddqatnsqvnqaatngvsaikiiqpetkvkpaarekinqkanelrakinqdkeataeerqvaldkinef  
vnqamtditnrrtnqqvdd  
ttsqaldsialvtpehivragardavkqqyeakkqei eqaehatdeekqvalnqlanneklalqinqavtndvkrvet  
ngiatlkgvqphivikepa  
qqaikasaenqvelikdtpatvdeldeanqlisdtlkkqaqdidnttqdaavndvrnqtikaieqikpkvrrkraaldn  
idesnnnqldairntldtt  
qdernvaidtlnkivnaikndiaqkntnaevdqteadgnnikvilpkvqkpaarqsvsakaeaqnalidqsdlstee  
rllaakhlveqalnqaidqi  
nhadktvqvnqnsidaqniiskikpattvkatalqqiqniatnkinlikanneatdeeqnaaiaqvekelikakqqiasa  
vtnadvayllhdgkneire  
iepvnrkasareqlttllndkkqaieaniqatveernsilalqniydaigqidqdrsqavdktaslnlqtihdldv  
hpikkpdaektinddlarv  
thlvqnyrkvsdrnkadalakaitalklqmdeeltartnadvdavlkrfnvalgdieavitekensllridniaqqtyak  
fkaiataeqlakvkalidq  
yvtgdnrmi dedatln dikqhtqfivdeilaiklpaeatkvspkviqsapkvctpikeethesrkvekelpntgsegmd  
lplkefalitgaallarr  
tknekes  
>tr|D8HC63|D8HC63\_STAAF  
mksittdelknkllsnpvqivdvrtdeetamgyipnaklipmdtipdnldvfnketyyivcaggvrsakvveyleang  
idavnveggmhawgdegle  
iksi  
>tr|D8HC64|D8HC64\_STAAF  
mlnynhnqiekkwqdywdenktfktndnlgqkkfyaldmfypysgaglhvghpegytatdiisrykrmqgynvlhpmgwd  
afglpaeqyaldtgndpre  
ftkknigtfrkqike l gfsydwdrevnttdpeyykwtqwi fiqlynkglayvdevavnwcpalgtvl sneev idgvserg  
ghpvyrkpmkqwlki tey  
adqlladldldwpeslkdmqrnwigrsegakvafvdnaegkvevfttrpdtiygasflvl spehalvnsittdeykek  
vkayqteaskksdlerdtl  
akdksgvftgayainplsgkvqiwiadyvl stygtgaimavpahddrdfefakkfdlpiievi eggnev eaaytgegkh  
insgel dgleneaa itkai  
qll dqkgagekkvnyklrdwlf srqrywgepipvihwedgtmttvpeelplllpetdeikpsgtgesplanidsfvnvi  
dektgmkgrrretntmpqwa  
gscwyylyri dpknemladpek l khwlpvdlyiggvehavlhlllyarfwhkvlydlg ivptkepfqklfnqgmilgegn  
ekmskskgvnpddivqs  
hgadtlllyemfngpldaaiawsekgldgsrrfldrvr livnedgtlsskivttnksldkvyntvkkvtedfetlgf  
ntaisqlmvfinecykvde  
vykpyiegfvkmlapiaphigee l wsklgheesityqpwp tydeallvdeveivvqvnkg l rakikiakdtskeemqei  
alsndnvkasiegdimkv  
iavpqlvnivak  
>tr|D8HC65|D8HC65\_STAAF  
mnikpsvwwlvigmalnitgssflwplntiymkelgksltvaglv lminsfgmvignllggs lfdklggyktiligtft  
clcsttllnffhgwpyav  
wlvmlgfggmipiaymagavwpnggrqtfnaiylaq nigvavgaamggfvaefsfnyiflanlimyvvalvavtqf  
nieinakvkyphlditgk  
knkarfislvl icamfaicwvayiqwestiasftqtinismaqysvlwt ingimilvaqplikpilyllkgnlkkqmfvg  
iifm l sffvtsfaenfti  
fvvgmiiltfgemfvwpavptianqlapdgkqqyqgfvnsaatvgkafgpfllggvlvdafnmrmfimmlllvyalil  
lmvfkentqpkkl da  
>tr|D8HC70|D8HC70\_STAAF  
mallknffiglsnnsflnnaakkvgprlgankvvagntipelintieyln dkniavtvdnlgefvgtveeshakeqilt  
imdalhqhgvykahmsvkl s  
qlgae fdl e layqnlrei llkantynnminidtekyas lqqivqvl drlkgef rnvgtviqaylydshe lvdkyqd lrl  
rlvkaykenesiafqske  
dvdanyikiieqrllnarnftsia thdhriinhvkqfmkenhiekdrmfqmlygfrselaeianegynftiyvpygdd  
wfayfmrrlaerpqn lsla  
vkefvkpaglkrvgiaalgatvm lglstiknlcrk  
>tr|D8HC74|D8HC74\_STAAF  
mdyaiqlanmvqqgtgvnppvgavvvekegrivgigahlrkgdkhaevqaldmaqqnaegatiyitl epcshfgltpcvn  
kiidckiavvyatkdnsl

Tsompanidou\_et\_al\_Supplemental\_FASTA\_File

dthgddt1rdhgievecvdderasqlyqdfkacakqlpqi tvkvsasldgkqandngqsqwitnkevkdvyklrhrhd  
avltgrrtvelddpqttr  
iqdgknpi kvilsksgnihfnqqiyqdestpiwiytenpnlttnqthieiiylkscdlttilhnykrgvgtllveagpt  
ttseflqsnyidefi lyya  
pkligsgnyqfyqndvieipdanqfeivhse llnqnvkltrkk  
>tr|D8HC75|D8HC75\_STAAF  
mrvaiigmgtagsvslrelvkhpkfnqldidlyddkvmgqgvpfqnds sellinmpskmslnl ddetefwkwykqqt  
fnfdeptylprfvfghymk  
sylsmftkypnistiyknvqei ytnsnidetnlytyi cttneqswqaydyvfltcgtfayhdpynlkgkgyiatpyp  
tyntldevneqddiaigt  
glasldvrvyaahhpk lpi tmtsrsanlpsvrgtmidvtfkyltkdklndikkhhfngnapldtlvsflkecaeydidf  
kklvhrtrtgnhiadlkydl  
arptemgifiqsmiehkenlnwiwnslsiedqhfnqkyskmiqlnsnpmpprtaelielienkslilkdledvkhdg  
klyfysyknqesvdiynv  
inatgakshlneldqddqliknlenrqivqahpmggiqii petnqv sprfgtltmniaigqmtngvnlrngvkmiveq  
vahtvsqlydalesneqq  
hsdn  
>tr|D8HC76|D8HC76\_STAAF  
mtykelatylkvlsdssrleildlscgelcaddllefqfsqptlsyhmkalvktlvttrkignkhlyqlnhnifesv  
innlsvhtsnqrcichnl  
ktgec  
>tr|D8HC77|D8HC77\_STAAF  
mmttlatlilvlvlwqpkgl digitaltgafiaiitgvvsfsvfevtgivwnatltfsvvilisfildkvglfew  
saihm lhashknglkmfv  
iillgai vaaffandgaaliltpivlamvknigfnkraifpfi asgfia dttslplivsnlvniisadyfhvgfvryfs  
rmiipnlfslasiivlwi  
yfrkaipktfddnkirkpkda indlklfkiswimlvillfgy liseftkipvsiftgiafiflmlarksnavnikevik  
gapwnivlfsigmyivvfg  
lnagitlilakileyisnyglfstilgmgfisaf lssimnmptvlidaiaigqsnvhgllkegliyanvigsdlgpki  
tpigslatllwhvltgkd  
vkiswgyfktgiiitipvlfitliglyltliif  
>tr|D8HC78|D8HC78\_STAAF  
mtkktyifictgns crsqmaegwakqilaedwnvysagiethgvnpkaieamkevgidisnhtsd lidnniiknsnlvvt  
lcsdadvncpslptnvkke  
hwgfddpagkp wsefqrvrdeikiaienfksr  
>tr|D8HC79|D8HC79\_STAAF  
mnkhkksifgi glvvi favvsflffsmisdqiffkhvksdikvekl nvtlndaakkqinnytsqqvsnkndawrdas  
ateiksamsdgtfidnekq  
kyqfldlskyqgidknrikrm lvdrrptllkhtddf lkaakdkhvnevylishal letgavkse langveidgkkyynfyg  
vgaldkdpiktgaeyakkh  
gwdtpekaissgadfi hkhflsstqntlysmrwnpknpgehqyatdikwaesnatia dfyknmktegkyfkyfykdd  
skhlnk  
>tr|D8HC81|D8HC81\_STAAF  
mndfskyfilitlsgnicytynlendylkfnvynkhhkiihhllkynisyndeyyqlllikmwqlsqiykpskqsls  
sflftrlnfy lidlfrqqn  
qlkdvilcennsptlteqptyfnehd lrlqdi fkl nhkerlwlkly legykqfeiaeims lslstikliktsvkrkcqh  
nfk  
>tr|D8HC82|D8HC82\_STAAF  
mtaienstlihfgegiqlevdepfslvskkcheslalkhfientisn  
>tr|D8HC83|D8HC83\_STAAF  
mnkasfdkkvkkqlwflnkkekqaldqr lssisdddsvnl nkpvtfanaylrqnvfrnketksysmfvtlvvmmfayval  
lgflfglitslsgvqffv  
spkvdlsttvviltiigailmivsiyfikivisyftkk lleikfnsk  
>tr|D8HC84|D8HC84\_STAAF  
minfnrinvsyimn laltihsklilknekkgfsmqkfkdfyddlsvtrgnyfltlmaaffitiilfigivvsevh lly  
smlivlvglillrlfkinl  
fsfkkltlyqviyigga lliyglndlylyfhdvpaneqqleheirntpfyisiftvtiipaiveeivfrgmii rvirfrk  
hlflglvsvlvaslhes  
dtwigylpylysglifglyikt rlevvifmhflnllallfiw  
>tr|D8HC87|D8HC87\_STAAF  
mhrqflssrcqnlffkfklllfevkqmvyvifiggalgallrylisflntdggfpigt lvanltgafvmglltaltitf  
fsnhptlkkaittgflgal  
ttfstfql elihmfdhqqfitllyaitsyvf gillcyvgiklggls  
>tr|D8HC88|D8HC88\_STAAF  
misiilmiggglgaiarsaitdyinhkftsklpiatlivnlisfligltiglsisiswfpaffvtgflgglttfstla  
keltlmmtpkfniklflny  
sllqfiigfiacyigyhi  
>tr|D8HC89|D8HC89\_STAAF



Tsompanidou\_et\_al\_Supplemental\_FASTA\_File

mevktfyngnampqiglgtrfrvendencmesvkyai eqgyrsidtakvygnee qvgagiraglestgiaredlfitskly  
fedfgrenvaaayeaslsr  
lg1kyldlylvhwpgtneavmvdwtwkgmedlyknnkvknigvsnfephelellaqvsikpvinqveyhpyltqhk1kly  
lvahivmeswsp1mnaqi  
lndetikdiage1gkspaqvvlrwnvqhgvtipksvtpnrnsenfqidfefsdeqmtridglnqdkrigpdpktfeg  
>tr|D8HC91|D8HC91\_STAAF  
mdvlgllsilivrrsf1fssqrenfrnlnkeqtm1nkr1ftsesevtteghpdkiadqvsdaildailkddpnarvacet  
tvttgmaliagejstttv  
dipkvvretikeigytrakygydyetmailtaideqspdiaagvdka1eyrdkseeieatgagdqglmfgyatnetet  
ymp1aiylshqlakr1sdv  
rkdgtlnylrpdgkvqvtveydendnpvridtivstqhaedvt1eqiqedikahviyptvpen1neqtkfyinptgrf  
vigppqgdag1tgrkiivd  
tyggyarhgggcfsgkdpktkvdrsaayaaryvaknivaagladqcevqlayaigvaepvsiaidtfgtgkvsegqlveav  
rkhd1rpagi1kml1dlkq  
piykqtaayghfgrtdv1fpwek1dkveelkdavk  
>tr|D8HC92|D8HC92\_STAAF  
msvdytettkidk11kkptshfq1sttq1ynki1dnnegv1telgavnastgkytgrspkdkffvsepsyrndidwgei  
nqpidetf1klyhkv1dy  
1dkkdelyvfkyagsdkdtm1k1tvine1awhn1faknmfirpeskeeatkikpnftivsaphfkadpevdgtksetfv  
iisfkhkvi1iggtage  
mkkg1fsvmny11pmqdi1smhcsanvgekgdvalffg1sgtgktt1sadphrkl1gddehgwnkngvfnieggcyakai  
nlskekepq1fdaikygai  
1entvvaedgsvdfednryentraaypinhidnivpskaahpnti1fltadafgvipisk1nkdaqmyh1sgftsk  
1agtergvtepepsfstcf  
gapffp1hptvyad11ge1id1hdvdvylvntgwtggkygvgr1s1hytrqmvnqaisgk1knaeytkdstfg1sipve  
iedvpktiln1pinawsdke  
kykaqaed1iqrfeknfekfgekvehiakkgsfnk  
>tr|D8HC93|D8HC93\_STAAF  
mpiesfthqfeeity1sdd1qvka1mmtphhevkrivvylrggkqvgrvragr1mqfsdsqtlvigpyyrgdngsegkd  
efyrgd1ndvtq11r11hd  
kypqafihmvgfsrgg1qg11tfqd1pvnsyi1wggvsdi1d1myeervd1rgm1rrmighpkdraayearqaipninen  
sppi1ivhggkdqvgi1hh  
ayyladqle1kgai1hetfyqmaeghvprppamvet1ayikefmnqvshs  
>tr|D8HC94|D8HC94\_STAAF  
mrvkfrkdnrqvn1tfkknnei1adgnhv1aip1fknq11ftkhn1rgiefpggkrrergessaeavtrelyeetgakvkn  
ihyiaqysiethdqt1dfvk  
dvyfieves1vskndy1etagpv1fnc1indie1aqr1f11qd1st1kcv1ervq1sgfyqt  
>tr|D8HC96|D8HC96\_STAAF  
mkl1tal1hfykysep1fksq1vtpkvt1thrd1f1el1iddkgnayfgecna1fqt1dwydhetiasvka1ieqwfedkrnksf  
etyeaal1klvds1lentpaa  
rati1vma1lyqm1fhv1lps1fsvaygatasg1snk1qles1katk1prik1kwt1pqim1hqir1v1rel1df1hq1lvidanes1drq  
dftq1q11lareh1lyieep  
fkdi1sm1dev1dgt1ppia1ldekats1sdi1in1ie1lyn1kv1vvl1kp1fr1gg1dkv1qta1id1t1kshg1kv1vig1gmye1ygl1s  
ryftam1arkg1dyp1gdvtp  
agyyfeqd1v1vaysg11kegr1efrpp1vd1tq1lqpy  
>tr|D8HC97|D8HC97\_STAAF  
mdfw1ykqaq1qng1hia1tdgqksy1qny1yceas1lakr1kayq1srvg1yid1nsiq1si1il1hac1wlanie1iamin1r1  
t1pnem1nqm1rsi1dvq1l1fc  
1l1ple1ref1qivs1lddie1fagtdi1tmnd1mdnt1di1qy1dts1net1vvpk1dsppn1lnts1fn1ddias1im1fts1g1tt1gp1qav  
pqt1frn1hyasa1igckes1g  
fdr1dtn1w1sv1pi1yhis1g1sv11ravie1gft1v1r1vd1k1fnaeq1l1tmikner1ithis1lv1pqt1nw1lmq1gl1hepy1dl1q1il  
1ggak1sat1mieta1lqyn1  
pi1yns1fg1mt1et1cs1qf1tat1pem1l1harp1d1tv1gv1psan1vdi1kik1pn1kegh1gel1mikgan1vm1ngy1lypt1d1tgt1feng1y1fnt  
gd1ae1idhegy1vmi1ydr1rk  
dli1isg1geni1ypy1q1etv1ak1q1f1pgi1s1dav1cv1gh1p1dd1tw1g1qv1pk1ly1fv1ses1di1ska1qli1ay1l1sqh1aky1kv1pkh1fek1vdt1  
pyt1stg1kl1qrnk1lyrg  
>tr|D8HC98|D8HC98\_STAAF  
mkk1fv1k1fg1mk1ic1lm1ly11i1fl1ssc1g1tnk1iv1q1rfe1iqh1net1igs1iyfs1adyah1rgie1kgt1vky1fvd1kv1gskry1lfi  
ey1p1dn1v1nck1p1dfw1kt1k  
ykk1dk1v1tyy1vyl1ien1ddev1fh1sa1lqdm1nri1pidi1add1vat1mg1ksph1qndr1mt1k1lnkn  
>tr|D8HC99|D8HC99\_STAAF  
mntennknq1nq1saknserrgm1kgcggc1is1filli1ill1sac1stm1fsnnd1n1st1nq1sskt1q1tq1kded1ksen1mpeek1ses  
etdkd1q1steev1lanente  
nng1he1idei1tttd1qs1ddei1nt1pnvae1ees1qdd1kdd1nek1qps1dh1q1st1q1p1k1st1et1nk1q1s1fan1ck1q1l1rq1vyp1ngv  
tad1hp1pay1r1ph1ldr1kd1kra  
cepdky  
>tr|D8HCA0|D8HCA0\_STAAF  
msnq1fk1see1err1qwe1q1fa1fn1qqn1qqn1qqy1rq1k1sk1kgw1fw1gc1ggc1vl1fili1i1ig1is1act1ag1it1gn1lg1n1ss1ket1nkt

Tsompanidou\_et\_al\_Supplemental\_FASTA\_File

hkigetvknngdlevtvnsv  
etmksvgpslaptnakgfvvadvtiknkgkealtidssmfklksgdktfeadntgmsanqsdngsiensfflqrinpd  
stagkivfdvsenianak  
dkklevislsvvkkittfdlsdaktskakkdkqdteavavassnsdvnveasattppattssadtdsedseksskdedkq  
nasksdksvekseesneet  
apvepmpqskpttseaspsqnihnedsmdaste  
>tr|D8HCA1|D8HCA1\_STAAF  
mkfkaivaitlslltacganqhksnsksndtnkktqtdnstqsnstekqmpqeaedivrndykargvneyqtlnfk  
tnlersneheyyvehlvrd  
avgtpkrcavnrhngtiniiddmsekdeefafkkrspkynpgmndqaemdnepediqhhdidnkaiqndipdqk  
vddkndknavnkeekhdnr  
ennsaekvk  
>tr|D8HCA3|D8HCA3\_STAAF  
mekneytakneysqlldatysqavaylnkygavtdddykeksymrflngeiksiskgytraseglychhisedkfqn  
lsdlrfisefkysnyqkk  
enlyvcdliehlihaiitkesngqfgvaglcqmikptvidwyigeypkpwamqatkaraylpgilvekllikiddmlk  
gieiydflesr  
>tr|D8HCA4|D8HCA4\_STAAF  
matgivilnnvkaingntilnnlnltipknsitlidgyngsgksvtlklianlykptsgklisngvvsfapdqfpisin  
ltldeyfnylkkikyklpsn  
sklishlvsnfslkqflnfkvkncskgtrqkiniiqclvkpadiyildepfgldkdsidflanylceikskatiissh  
eydinkkiihtfdlksna  
fskqyfnkttevtiifsnadfeikaiqtlfnfsqitkenennrakiivpfsktnitlltiknltvykviskdenlchl  
>tr|D8HCA5|D8HCA5\_STAAF  
mpfikyqniklfrsysfippyaaffiivimlfyfyknqmilpsyassmillyatlswlitiinfnltsiqekhmliqldsk  
lkylnykmfslfssiplv  
mfsilypiitnsfsefdlytiilsiyhlviivmidvlvasfitvqkffsqkyswlllvliyvisiikfaivqsypvlkf  
llffippvgnflnlnkfst  
sdiwskefillnleivlficiaivliniykkseyy  
>tr|D8HCA6|D8HCA6\_STAAF  
mkkryvfvvvallivliaviaytfhkskkehietqekridlyfkhnlhnyksmkitkfqkspvnayfikgyinndkqyk  
fqayintgdegnqfnssig  
ykeekigrllkekdkdrltvdeiekehldkneyeaepplfffsgsl  
>tr|D8HCA7|D8HCA7\_STAAF  
mqgfkekheqlksalccqiglmrsisevrqlnia  
>tr|D8HCA8|D8HCA8\_STAAF  
mkikvlvtviliivfalylkighdekeqyneykeritiumkhnvkgyknisftnfkenpmdgysisgyinndkklst  
agirsiddfqttdisytn  
elgrkfiknpksvseikkeqntsnk  
>tr|D8HCA9|D8HCA9\_STAAF  
mkydekkyydeqkeriiumkynvkgfkeiqfeeqkenldgfvitgyinndkntntfsahmwsednyqfeyissysdkld  
rmmikdektvselkkkink  
kden  
>tr|D8HCB0|D8HCB0\_STAAF  
mkkyiklililiiitcliivgyllhkgkdhietqekridlyfkynlnnyhsmkvtsfkknpmggyfikgfvnnknykf  
davi fsdtnkqfkgdlygk  
edkigel fkekdpkyklsvdeiekehldkseyeaepplfffsgpie  
>tr|D8HCB1|D8HCB1\_STAAF  
mllrdsearilsensydnlsvevytfsnnkqykviekrddtqngfrayvfapvikgvdksqlligyagtnpfslnidir  
tdlqlpihhntnlnkinnh  
ykdlnnstinknyntindkndlfsfsslytkaliggrtpakfapsqmdesdaftesvkkkypdseihpighslgaflaq  
ynlikhlangttaaapnv  
hhsftgdfkkdindgyvyskiriighfddpinnlnffnprigknitsmphydgitdlpfigqhtlesyndfdadgnvke  
mpeleqfnddlslnrfql  
fdpfgiksrfdsikidssiinrtsendfdpfsilnkdklfsndldiegnnkqkedlsidlnpfddelndedepip  
krgdskklkaekksvkk  
ksgsknpgkvvkiqpdevrniastirdrlflynqinaldeyreetisganrildkyqselldsgshefitpydleyme  
lsvessgnfkfynsglmd  
dliqeldqnkklldlqfaeklefaankfeekdleesdvfglfs  
>tr|D8HCB2|D8HCB2\_STAAF  
msskdakksqearlqqkqemrstdnmvsnaknvalksqtlneiietinssqnl egtfegkaseaaqsinklnn  
nenlkekfetllntmking  
>tr|D8HCB3|D8HCB3\_STAAF  
msntqkknvpe lrfpgfegeweeklesii kvnsgkdykhldkgdipvygtggymts vsep lseidavgigrkgtinkpy  
lleapfwtvdtlfyctpkk  
etdifi lslfrkinwkvydestgvpslskqtinkinrfvptnkeqqkigkffskldrqi elqeqklellqqkkgymqk  
ifsqelrfkdengndypew  
envmlqkvldkktegikrgpfggal kkdifvesgyavyeqrnaidyisnfryyinenkykemqsfsvqpdndiimscgti

Tsompanidou\_et\_al\_Supplemental\_FASTA\_File

grlaliphnytkgiinga1  
irfrtnhkirseffli fmrnsnqmrkileanpgsaitnlvpvkelklipfplpvkfeqdkisqfihii nrrieqsekkie  
s1knrkqgf1qklfv  
>tr|D8HCB4|D8HCB4\_STAAF  
msitekqrqqgae1hkk1wsiand1rgdmdasefrnyilg1ifyrflsekaeqeyada1sgedityqeawadeeyred1k  
aelidqvgfyiepqdlfsa  
mireietqdfyiehlatairkvetstlgeesendfiglfsdmd1sstr1gnnvkertaliskvmvnlddl1pfvhsdmeid  
mlgdayefligrfaatagk  
kagefytpqqvskilakivtdgkdk1rhvydptcgs1ll1rvgketqvyryfgqernnttyn1armm1lhdvryenfd  
irnddtlenpaf1ghtfda  
vianppysakwtadskfenderfsgygl1apkskadfafi qhmvyh1ddegmavv1phgv1frgaaegii rrylieekn  
yleaviglpani fygt sip  
tcilvfkkcrqqddnvlfi dasndfekgknqnl1sdaqveriidtyksketidkysysatlqeiadndyn1nipryvdtf  
eeeapid1dqvgqdlknid  
keiaeveqeinay1ke1gv1kde  
>tr|D8HCB5|D8HCB5\_STAAF  
mnkniiiksiaalt1iltsmtgvgttiiegvyqtakaensvklitntnvapysgvtwmgagtgvvgnhtiitnkhvtyhm  
kvgdeikahpngfynggg  
lykvtki vdyppgkediavvqveekstqpkgrkfkdfstskfnia seakenesisii gypnpngnklqmyestgkvlsvngn  
ivtsdaiiqpgsgsp1n  
skreaigvifagntpsgeskrgfavyfspeikkfiadnl dk  
>tr|D8HCB6|D8HCB6\_STAAF  
mnkniviksmaala1iltsvtginaavvdetqqianaeknvtqvkdtvfpyngvvsfkdatgfvigkntiitnkhvskdy  
kvgdritahpngdknggi  
yk1knisdypgned1svinveenavergangynfnenvqafkfkadakvndkikvigyp1paqntfkqfestgtvksikd  
nn1nfdaiiepngsgspv1  
nsnnevvgvvyggi1gkigseyngavyftpqikefiqkhi eq  
>tr|D8HCB7|D8HCB7\_STAAF  
mnknvviks1aaltiltsvtgigat1veevqtakaennvtkikdtni fpytgvvafnsatgfvigkntiltnkhvakny  
kvgdritahpnsdksnggi  
ys1kkiinypgkedvsvigveeraiergpkgfnfndnvtpfkyaagakagdrikvigi phyknkyvlhestgpvmsveg  
ssivysahtesgngsgspv1  
nsnne1vgihfasdvknddnrnaygyftpeikkfiaenidk  
>tr|D8HCB8|D8HCB8\_STAAF  
mntkflgk1vasalv1tt1gtglhssylg1dtnkvvtakaenmteqglwkkvkds1idsqii sgnngesvkvty sng  
tgqsnsvestgnqtgdvfs  
tpsnfsk1nni1ntrqnvgeedfnkv1ngnttwnt1tekleskglitkgqkvtihsnsttvs gvvgek1t nsndinlekr  
finkitie  
>tr|D8HCB9|D8HCB9\_STAAF  
miinelksck1kfskqaltfvpiivtilfilfinwylvnewngrqis1ftasfnait1llisinvyqvinfeenighfn  
hilgkanrlnwlnasmi ft  
ytntaici1llasin1lwhshdmkit1mfigvs1ffnvi1lll1l1f1sif1kdvmaivvgvlmfi fnyvfglevlgdhs wf  
y1pityatryvymfi egsi  
pit1t1aiyiii1t1l1lav1l1fkgnkwsgrtikd  
>tr|D8HCC0|D8HCC0\_STAAF  
mi1hkiegikfknfsmyv1lisp1v1f1cfaitv1faksngtansvspyit1l1fniwpi afipiv1lmacnslfk iem  
rnksfnys1nnsnitkei  
rtkia1l1s1af1vhc1f1vyi1ayigdl1inphpvnam1llvtilfmyvvs1plip1n1f1l1tryfgvfvsil1n1v1svic  
vif1t1ks1f1wv1pwaimq  
rip1vt1gilpng1lvnhnskyfnd1navyisii1silfailt1lnkkswr1k  
>tr|D8HCC1|D8HCC1\_STAAF  
mak1vteniskrfknqdv1khinit1ennevygl1gingagktt1mkii1cgilqqdsgei1l1dnqpmkrnd1hkvgs1ie  
tpatynh1saqdn1kivc1  
nesvdfseiknvl1vn1nvdkkkkvkd1fslgmqkrgiamalikkpeilv1depsng1dpygiqel1rel1k1lteqgts  
ii1sshil1sei1qvladhig  
iihegelkyqqrnnkden1edi1ffkitkgdyk  
>tr|D8HCC2|D8HCC2\_STAAF  
mktikrv1nn1i1s1l1s1ftmstasaseeqyysveykntatfnk1vkna1nvynipe1lhaqikmtkthana1anyk  
ndikyinatcstc1tsekt  
idrtsnes1lfsrqwdmki1tkngasydd1pkhantkia1idtgvmqthdd1knnfstdskn1vp1ngfrgtepetgdvr  
dvndrkghgtmvsqtsan  
gr1igvapnnkftmyrvfsgkkte1lwvskai1vqaandgnqvini svgsyvtv1dkndhqtfrkdekveyda1qkainyak  
kkksivvaaagndgi1dvnd  
kqk1n1qreyqnggevkdv pasmdnvvtvgstdqns1sefsnfgmnytdi1vapggsfay1kqfgedkwmnegymhkeni  
1ttanngriy1qagts1at  
pkvsgv1al1idkyh1lekhpdkaie1lyqhgt sknnkpf1sryghge1dvyka1nvt nqkas  
>tr|D8HCC4|D8HCC4\_STAAF  
mtd1n1l1kkkfqeisevddfi skastetdyfepvt1shgipgl1l1f1dayqkayntnteqivhkyimklapy1qkhqyn

Tsompanidou\_et\_al\_Supplemental\_FASTA\_File

hslfgglsgiafsmdiasq  
ngrnyqniInnideivneienkmdqilqepInpInydtisglagigryllnrvdanatnvkalksiltyfkdiqysqns  
wvvpqesqflesdknyfte  
gninlglahgvlgpmslfaIcvikgitienhqhilkdmykfivdekfccndrwlqrydlisernhfnyirngwcygntgv  
mttlfligqalqddeijqt  
skkvmIqvndkeknIisptichglssqilmlttmnlhfesnvsvyinelinklishykenhlnvfidinenqegvfks  
qkvgllelegvyltlitl  
qntnilneknwtanafIis  
>tr|D8HCC5|D8HCC5\_STAAF  
mntiyepssicmirtpIIsveffnIflnteqikysdlqInaqmkesiltttfnlyrtlqeinfgdgnkkvrdakesllky  
Iirmstrptpfgllsginl  
ghfvneptrIkvgnsIqkyvkvdgewlyklisyiesideyyqnlkviwnskahiindriylneqsaiylInnkdtfsfsik  
nseIIVfikitvtnnitf  
snlaekingefeiydiskayihnlvskeiystirpplsndnlnyiltkIslhndnfvkkireiqklilayekteig  
fgeklykdiIqhmkaIIfkc  
knylqidtkidminngIhqdiatniseaayflwlIsrnnigftdlkalhnrfikeygfeqlvvnkdllsditgfgtsiyn  
evkgdennivmlkqkflha  
IrnndeivinekdvetIIndneinhyhampsadvyaeylgrfynqynelivispitvslnagatfgrfhhlidtetlak  
Iehakahyyqksmhdndve  
fvsinnipkyprnhvlnhdseyeysInlgssnsdskeyeltlddiyvgatfnklylyssqInkrvlfesnmynflkesn  
lyrllreismesvkciem  
ndvsidsfsyspriyrknvIkpaywkinemvlpIpkneewdqqlkyqeqfnipnivlvygdnklllnslanhryll  
mkeykhhkrvrIvesflpq  
skndhvyeivtpiykksyrgpeiIepkykntdiEydkdwfalhihidkpsqdtfiidnlypfvkhIkdkgdidqyflmr  
yIkqsdiIkIrlrnydeny  
nviysilkdwlSficqttevsdyeivsyepeffryggkntideiesffeydsnlavniidndfkferpfivaisimylfe  
mlsisneermeivnyypt  
sykskeirpfkneIvticnpennfeniakhysdiyrIkddnqilrklInkgIkqplatkrsriigsIihmrcnriIfgvdk  
dgerfvIsvkeivktqky  
wcdknd  
>tr|D8HCC7|D8HCC7\_STAAF  
mtcskrviitkachylyvkieanyiIlyltgshenyittksitfhqsqvnIkhstdnieg  
>tr|D8HCC8|D8HCC8\_STAAF  
mcrilgisrasykwvhyqsseleleneqIkreiesiyhkyngiygyrriiyirIklIkgqvnrkriyrImkelnlkavi  
rqkrkpyrrstpqitsenk  
InrqfdidtpnkvwItdvtefkikegskiyIsaiydlgvkrivsyelgpsnqqIvfktnqaiEkventkgilfhdsrg  
fytsktfkhmIdecdmIq  
smrsvskciIngpmegvwtikseiIfrgnkhfkfnsvveeatktihdfilffnheritIkmadv  
>tr|D8HCC9|D8HCC9\_STAAF  
mktIkgalImsIpkvdiIvlymfqeyekgvsfayIIdtlqIdinvntIpykykkykthgietIltqkqynhyskelkl  
kvvneylnsqstqdlaiK  
ynIrsstqvkniIkyvtvgkeIksqsptgvyimkarktIteervtiveyylnhkqsyrevaehfnisygqiYqvwqkyq  
ahgkngIvdgrgkpkpsI  
mtpeeQkeaeIqalIkaqrIlemendvIkkfqaIeremiqrenksrhtkrIkr  
>tr|D8HCD0|D8HCD0\_STAAF  
mekvlIdIvqvkgnntndsaderitshflcsfgcgtgsfnsc  
>tr|D8HCD1|D8HCD1\_STAAF  
mkmkklvkssvatsialImIlnstvdaaqhitpvsekkvddkitlykttatsdndklnisqiltnfikdksydkdtIvlk  
aagnvnsykykpnkdydy  
sqfywggkynsvssesndavnvdvdyapknqneefvqqtIlgysyggdinisngIsggIngsksfsetinykqesyrtti  
drktnhksIgwgvEahkim  
nngwppygrdsydygnelIlggrqssnagqnlIpthqmpIlargnfnpeIsvIshkqndtkkskikvtyqremdry  
tnqwnrlhwignnyknqt  
vtftstyeVdwqnhvtklIgtDsketnpgv  
>tr|D8HCD2|D8HCD2\_STAAF  
mirfdvngsdhanppnneriptphihiyteeynggiaiplkdiedleltdeiesldffmkytnikhdnviesrll  
>tr|D8HCD3|D8HCD3\_STAAF  
mneyfnwlkqnyIfeIldssteittpfknlndfiriyadtIpnneicIsddglIlineImIlgidintktrtkliqniln  
qfnIklvdeIatadvknes  
faqskhnlIqgIlkiydlIttksnvtniIyeevfeIyldreirglavsvsgesglkysidyivsetksqeklvnftn  
nlfdnkitneayIyrdikp  
nrpsrnklepimIiIvndvdhpineraqtvaehenleilkwsknskiiktIIs  
>tr|D8HCD4|D8HCD4\_STAAF  
mtrIIsllastmiIvacgkasnenkemedekktevkkeakknndkpknekknqdiInknnneqvqvnnkqpvlnnnsnh  
nnqqqsnnnyvtviengnt  
vteiyngkshIttnpiIregyvegetdpiykreYkhfytpEeaqraqensdqilremgleperye  
>tr|D8HCD5|D8HCD5\_STAAF  
masftitkrknktstswqydlkhpsfksgkkrksgfktkaeasnaaqIirdledgnniednkkfkeyysdwinikkkq

Tsompanidou\_et\_al\_Supplemental\_FASTA\_File

lsskqfywykrsiklfsef  
fgenmlvkni trseygrflnkyaqghtdetvrkvhgclarcikda lydgyfkkdptydvnikgtekskdekfyitikdy  
lnlleyfkkredeesyifly  
ilgitgarysdvnmtykdlnkangivhlpgtktknskrdvevnprdimrinsklarlprringklfsvshtsvsksfkk  
akeviglnndnitypyslrh  
thtsyllskgipieyiskrlghstisqtlntyshllehkkeqgqrvelfs  
>tr|D8HCD6|D8HCD6\_STAAF  
mtdvii vshmgnsrnhwyqwl ehnl tlegydvtlfnfespeantveqwieamtkqinvrkkdtyfvthglgsitalkyi  
emidqpiegffsiagfked  
aenidldidlsnvtidydnikkkvdfnyglsskndkyvsyketqrlmna legnlrivedggghfleedgftftalqdrmq  
dymtr  
>tr|D8HCD7|D8HCD7\_STAAF  
mie l gpesylgrktimtelakdigleqdivtnktgqsyifaknklypipggsimgiptdikpfvttklispigklragld  
llkptqmrddgdisvgaff  
rarlgnevlenlieplmggiygtidklslmstfnpfkekeefgslikgmkdeknrlkqrqlypgapkqgfkqfkghl  
ssfiealeqdvknkgvtir  
yntsvddiitsqkqykvysnqqedvfdgvlvttphqvflnwfgqdpafdyfktmdsttvatvvlafdekdientydgtg  
fviartsdtitactwtsk  
kwpftapegkvlirayvgkpgdtvddhtdvelsvlrrdl sqmmtfkgdpeftivnr l pksmpqyhvghiqqir qiqah  
ikqtyprrlrvtgasfeavg  
lpdcitqgkvaeeviael  
>tr|D8HCD8|D8HCD8\_STAAF  
mtkkmgllvmaygtpykesdiepyytdirhgkrpseeelqdlkdryefigglsp lagttddqadalvsaln kayadvefk  
lylglkhispfiedaveqm  
hndgi teaivv laphyssfsvgsydkradeeaakygiqlthvkhyeyqpkfieywtnevnetlaqipeehkdtvlvvs  
ahslpkgli ekndpypqe  
lehtallikeqsniehiai gwqsegntgtpwlgpdvqdltrdlyekhkyknfiytpvgfvcehlevlyndyeckvvcdd  
iganyyrpkmpnthplfig  
aivdeiksif  
>tr|D8HCE0|D8HCE0\_STAAF  
mkklytsygytqgflnqikinnpshllqfstadssvi feeteektvlkspsiyevikeigafnedhfycaifipstedhv  
yql ekklisvddnfknfgg  
fksyrllrpvkgttykiyfgfadrqtyedfknsdafkdhfskealshyfgssgqhssyfyerylypik  
>tr|D8HCE1|D8HCE1\_STAAF  
mrnqattlfnkr lhalrkeknyynkfi fngfhmvflilllgafifgygewlkhiptninfaliaavivaltsifmprll  
keadki fl lpfekhm sqfm  
rhailysyfariliql iivvmfplfyninqhnvtfyicfgvialifypvgrlrlwqwysgglktwqvn lisfiifalty  
ylll apkwyiafvmlpv  
lieflvkkykpgflpwekmi aiehrhmnnykfvmnftdvkhlkesavrrsyldillpvpkgskfnsnamylflfirsf  
igrdafi nifrlviiavl  
lmwvlsyplvtaiigclfyvii llqmaqfysqqayglwpqvvpvpeekvikgyeqflyrlmfvictvsvtfiikhmtlf  
yvvlif yivgl l tirsii k  
klkyqetllrd  
>tr|D8HCE2|D8HCE2\_STAAF  
mtvkveqltgggykrpvikdinfelnkgeivgligngagksttikhmlgltpmegslsnsdininddieayrrkl syi  
pespviyeeltleehiemt  
amaydidrdeamnramp llktfrlene lkvfpshfsgmkqkvmiicafivnpelyiidepflgl dplgiqsmldlmvek  
knegrtvlmsthi lataer  
ycdrfi ildegevvafgdlea l rqqgtlhnqtl ddiyhvtqggdvha  
>tr|D8HCE5|D8HCE5\_STAAF  
mcsqkfv l hststlvnqplpiptfafqikqyvvpffiyynnssnl icy  
>tr|D8HCE9|D8HCE9\_STAAF  
miikslei ygyqfvqrkiefnknfteifgeneagksti qafihsilfgfptkkskeprleprlgnqyggklvlilddgl  
eieverikgsaaggdvkvy l  
pngavrddawlqkkl nyskkyqgifsfdvlgldihrnlnekqlqdyllqagal gsteftsmrevinrkkdelykksq  
knpiinqqieqlkql esqi  
reeeakletyhr l vddrdkssrrlenlkhnl nqlskmheekqkevalhdhsqewksleqqlniepitfpekgvdryekar  
ahkqslerdiglrnerlaq  
lkeeatql epvqsdidafislnqqenei knkefel tai ekdi ankqrkd elqanigwsethhdvsseamksyvseqi  
knkqeqaayikqlerslee  
nkiednavhse l dsveekivpeetfekkeysqqvielekenlysklkerfeieqqekqkrqkl lrttfilltlvgigl  
tafsfisnmlfgiifavl  
tlvfvig iimskskedyseaitdeieeikeqlail denydlfdldeqyri rdhwqqa lknkdileekrqyiegr lnda  
kgrhdelqstvenvkdely  
lsskisndlivdsistmanikal dqihsdl nqqrqqlvqel dtfynhaeavtksqfyfnkls l fhdvqqwlksaedne  
kwrinaentklvtnelnl  
naql eennkeitalfdfi nvgteedfyqh hedyqytsnl srfndl tkyl enqnysyel sssl sekttaql eedhllat  
qvdeyneqylemqaqvsl

Tsompanidou\_et\_al\_Supplemental\_FASTA\_File

saqinhmetdtlalanrheyhslnqln diakdwaslsylqslvdehikqikdkrlpqvineaveilkhlt dgrytminy  
nedsitvkhvngglydpve  
lsqstkellyvalrislikvlrpyyppflivddafvhfdkkrtekmlnylrslsehyqvlyftcvkdnivpskevitlnk  
ieeggkr  
>tr|D8HCF1|D8HCF1\_STAAF  
msvgs1vv1ttteiafpteifeknqrtlqikf  
>tr|D8HCF3|D8HCF3\_STAAF  
mna1fiiifmivvgaiiggitnviairm1fhpfpkpyyifkfrvpftpglipkrreeiatkigqvieehlltetlineklk  
seqsqqaiesmiqqqlqkv  
tkdq1sikqitsgidid1eqvlqtngnqyiesqlnnyytkhqntiasllpnqlvtfldqhvdnatdllcdrarnylssa  
kgtqdindmldtffnekkgk  
l1gm1qmfmtkesiadriqqelirltshpkaravtslitneyqtfkdkplnelldasqfneiaenlsvyvtttyaskqan  
kpvvt1mpqfvdylegqls  
sklanliieg1sih1saimkkvd1rglieeqintfd1dyiekliieiankelklims1gfilggiigffqglvaifv  
>tr|D8HCF5|D8HCF5\_STAAF  
mnkvilvddhhivrgglrfl1stieniev1qdfadgetfleylkehehpdvll1d1vmpgmngieiteyikahypdikvl  
v1tsyvdehvisainkga  
dgyemkdvepqq1ietirrvnmgekmihpkaqdvfetvsqkphytnk1skreiev1remvkgktnkeiaet1fvsektik  
thvshifsk1qvsdrtqaa  
iyamenkli  
>tr|D8HCF6|D8HCF6\_STAAF  
meqrtr1al1keiaef1neetemysmtqgalky1iegsnfttgwi1ffinsvgehelvshvalpqs1tadhchyyidgscw  
cvkafnqrr1mkasnivnc  
srin1askafpsqndnithatvplksgqeefg1l1vaspnteisysded1ellesvafqlgsaikriyltdrekeakaan  
ern1ard1hdsvnqm1fs  
vk1tahaaygvsnesiakfaktieetsqnavnemraliwqlkpvg1eqglihaltaysklmhiql1nvveglid1snei  
eeniyralqecinnvkkha  
dtnkmd1t1kqmd1iyidvidygggfeidnvqiasshginnikqrvk1lrgkvtfhsqptkgtqiqt1pik  
>tr|D8HCF7|D8HCF7\_STAAF  
mkfk1ipenfnd1slrd1fqqlkvpkkl1hh1nmskditindkpar1mnkvhtgddvfvtideksnyvpsyryaqikyed  
ddmai1vmkpkgvkthpnd1  
kesnt1mhviy1tidsyvepihr1dqetvgl1ivaknplmkkil1drml1ednditriykanvkal1plkpqtidmpigkd  
kfhskrrvsptggraith  
i1tskmiketvcqleik1dtgrthqirvhl1aeighpvigdp1ygdst1rq1elesykiefvhpl1tkevisvs1dd  
>tr|D8HCF8|D8HCF8\_STAAF  
msvriehdtfgeievpadkywgaqterskrnfpvgkermpievvygfaqlkraaalanfd1gklseakkdaivyacdqi1  
sgel1dehfp1vwwqtgsgt  
qsnm1vnevsvyanmy1kdhqsdesihpnddvnsqssndt1fptamhvalyqevetklepalk1l1rnt1kekedkfdsi  
ikigrth1qdatpik1gqe  
isgwrym1drcetm1seskkhi1n1aiggtavgtginahpefgdkvahyisentgypfvssenkfhal1tahdevvq1hgt  
1ka1agd1mkiandvrw1a  
sgpraglaeis1penepgss1mpgkvnptqcem1tmvavqvmgndtvvgfassqgnfel1vykpvimhnt1qsiy1ladg  
metfnncavgiepieeni  
dny1nqs1m1v1al1nphigyekaaq1akkahkegl1t1kesaiqtgyvteeqfeawikpedmvdph  
>tr|D8HCF9|D8HCF9\_STAAF  
mkleeiyifm1gkywiq1liatviis1sikafplaigaly1pvi1fkvik1ql1n1skgliddvnaqtfiksnqsgivisv  
iccl1itgilyt1ldgfy1a  
s1tgv1gt1val1npyttivsavly1l1taiatveatktkyrn  
>tr|D8HCG3|D8HCG3\_STAAF  
mdtkq1kqdi1daytigi1dsigfttadpfdelkqk1eayhangyasgfeesdia1rtepk1sl1ptarsii1a1avgypnk  
1kgapksvrgdr1rg1fara  
swgqdyhtimkr1dm1laafieskvpdeiksmvdtgv1sdravaerag1gfvgrngfv1nplkg1twtylgem1vsipfe  
pddp1ldscgdcti1cvdrc  
p1salvgnq1lnsqkci1s1fl1tqtkgym1pdqyryki1gnrlygcdt1cqqvc1pknrg1inte1qddi1ilepe1lkpr1vp1l1rms  
nkefkq1tygh1lagawrgkk  
piqrna1lal1ahfnevdaipe1kkvattderpmi1rataywaigqi1lgeardfinanydkedaevqnemikg1dtrre  
>tr|D8HCG5|D8HCG5\_STAAF  
mkcl1irfil1ilg1l1issamvyinptahaeqdaqewekikergel1rvgl1sadyapmefhtvngkteyagv1did1lakkiakd  
nn1klkivnms1f1ds1l1gal  
ktgkidi1i1sgmt1stperkkqvd1fsdsymmtknim1vkkdkvneykdik1dfnkkvgaqkgteqekiaqteienasits1  
sr1pdv1il1alksgkvegav  
vekpvaeay1kqnpk1lgi1snvkfneeekdtvi1avpkdspk1l1sqink1tikevkdkgl1dkymt1naan1mddsgf1skyg  
sff1kgiki1til1is1ligva  
lgsil1gafva1mk1skiki1iswiasiyieil1rgt1pm1lvqfv1vffgitaal1gl1disalvcgtialvinssayiaei1rag  
inavdkgqmeaars1gl1ny  
rqtmsv1mpqaikni1pal1gnefv1tikessivst1igvgeimfnaqvvggis1fdpft1llvaa1lyfv1l1tfv1ltrimm  
iegr1nasd  
>tr|D8HCG6|D8HCG6\_STAAF

Tsompanidou\_et\_al\_Supplemental\_FASTA\_File

msnknadnkqffskilnsigagvvialvpna1lgev1kifksgneileltyqlviliqsfmafiigvlaahqkfnag  
aaivgtsamigsgavvysn  
nsfmlkgigdiints1vviiacliymvlnk1gsfelii1pvlvpivsggiglitlpyirkitqaignvihsftelnpl1  
msilisvafsl1mvtpl1  
vaiataislnglsgaanlgivaacvtflfgslrvnsigvnavlligaakmmipvylnk1iisipltingiitgiayvl  
qvkgtpl1sagfgyt1glvgp  
inafnrmsgdptmni1l1algyfvipfvsafovhelckkfipiysndiykfevpkq  
>tr|D8HCG8|D8HCG8\_STAAF  
mrvvglnrmrevetelqqrfsdvdfkfykkaseipesdladldilvgydgineaf1rrcpnlkwiawfatgvnt1pldy  
iadhgilltngkgvqakq1  
seyilafilddykkmlsydnqrqhiydskitgkrlsgqvt1flgtgaiatktaklakafnm1ig1sksgqkdefdei  
yties1est1pnadivina  
1petqetih1lkkkhfelmkdealfinigrsivkepl1ieilksrvirhayldvfenep1kpnhelyeldnvtitahit  
gndyeakyd1ldifknnlv  
nflnknqlienevdakkgy  
>tr|D8HCH0|D8HCH0\_STAAF  
mnfseser1qq1sneyilggvnspsrsykavgggapvumkeghgaylydvdkn1fidylqaygpiitghahphitnaiqe  
qaakgv1fgtpte1eiefs  
kk1rdaips1ek1rfvnsgeavmttirvaraytkrnkiikfagsyhgshdlv1vaagsgpsqlgspdsagvpsvarev  
itvpfndinaykeaeifwg  
deiaav1vepivgnfgmvpqpgfleevneishngt1viydevitaf1rfhygaaqd1lgvipd1tafgkivgg1pig  
yggrq1dimeqvap1gpayq  
agtmagn1lsmkagia1lev1eqdgyvek1ds1gqql1eeg1l1k1iekhnitatinriygs1tlyftdekvtlyhdqvehsd  
geafgkffk1mlnqgin1a  
pskfeaw1t1tehteedikqt1kaadyafsqmk  
>tr|D8HCH1|D8HCH1\_STAAF  
msias1lpddvg1kalagsavvamqpsiysrftkvsdqa1gniigailsvtmvtifsdnfiimgvtviviailfkfn1  
ahvatlasvta1iimgqht  
gsfyitafyrfvlm1gvi1ss1lvnfvf1ppkfetkiyyns1ni1ssdi1fmwfk1vl1ndt1tefnikqdshn1kqrvek1e  
kiydyseerpi1tkkhih1q  
qnrk1il1frevq1ttrqayev1nk1sryqnd1yl1nnn1fl1qik1ld1ds1tafheqilas1skkarynvthvdyeldnpq  
kkd1l1stfqhelinhpyqt  
eysfanvmqivaaieeyrhh1ehl1dri1s1fftyhrs1dadieiveedfd1  
>tr|D8HCH4|D8HCH4\_STAAF  
myqss1fken1ihw1fdenqremprwttnpyyiwl1sevm1qqtqvktvidyhrfverfptvev1sqasedev1kyweg1  
gyysrarnfhtai1kevhd1k  
yeg1lvpkdpdqfial1kgvgpytqaavmsiaynvp1atvdgnvfrwrs1nddyrdik1qstrksyeqellpyvttesgtf  
nqammelgalictpknp1c  
1fcpvqencvafdkgtfek1lpvksknvskkvi1eqsvf1irnnqgqy1l1qkrsek1l1hgmwqfpmfeseharremtekigh  
diqpvetpi1felkhqfth1  
twkikvyavsgtini1et1pddmiwfd1sdrdqytfvpmskiyqfing  
>tr|D8HCH6|D8HCH6\_STAAF  
mldni1lyfkn1phtkryvter1kqswks1fliv1aac1ilii1anet1fsfsh1tdvkevrw1friialivfvv1mftiyi  
syhhymndf1vtklfnisa  
atp1v1msi1s1fim1vl1tmisa1lvkpvnfetsyialfyfivmatifvglisvtfglir1ll1tekini1fygicv1lcf1ll  
pi1fi1pn1nhv1fin1h1ml  
n1pmy1ivngiaqs1i1fg1ssmen1pyhfy1fil1f1cliaavn1vlarytthai1nkt1skvt1qtdn1qqdvs1ndst1deadts  
>tr|D8HCH8|D8HCH8\_STAAF  
mgidit1vkfn1l1kkgqql1eada1maei1qkydhyr1glnkai1qyl1sykk1rtekevi1qyl1qkee1seqaisevi1eycyrek1  
idhq1dyaes1kntmi1rttd  
kgpk1iyqq1lyq1lgiepni1emfte1yreqqe1ddi1qiaek1sktkk1gpqnkv1kekvm1qsl1iqkgfemetihavlyemd  
ftqdeav1dd1l1qrd1leki  
ynknrkkytqk1l1sktieg1mrkgykydkikak1leesgiadgteie  
>tr|D8HCI4|D8HCI4\_STAAF  
mht1rsphdy1gkivk1r1lpyydvksakvafksrpg1iigceknqfpcdf1tylpiskisdeskrhs1ydfevndetcn1ln  
1nnp1svfvrchkv1st1vysk  
nvhrny1sd1net1n1r1fne1k1s1fdafatd1f  
>tr|D8HCI5|D8HCI5\_STAAF  
mewq1pnnty1viaqnl1tkyqei1tgnsivgdemkvh1lmyyiqktsial1tgnai1deqfegwvhgvp1lps1rg1lfdy1fed  
nts1rnkvndteef1ienai  
yqykyatwa1l1rekshee1sw1nsrkg1sanergy1n1tiedikedankir1lydysydmidefed1deefisah  
>tr|D8HCI6|D8HCI6\_STAAF  
matks1fttdyk1fn1neaek1lvnamksedaqvn1rpnvfaqr1kttee1qnfm1skvkvi1  
>tr|D8HCI7|D8HCI7\_STAAF  
mkfk1nivk1ssvatsi1t1l1m1sntvdaaqhi1tpvsekkvddkit1lykttatsdsdk1k1sqil1tfn1fikdksydkdt1ilk  
aagniy1sgytq1pts1dssin1s  
sqfywgakynv1fsseskdsvni1vdyapknqneefqvqqt1gysyggdini1ng1tgg1ngsksfsetinykqesyrtti  
drktnhks1igwgveahkim

Tsompanidou\_et\_al\_Supplemental\_FASTA\_File

nngwgpygrdssdslygneflggrqsssnanqnf1pthqmpilargnfnpefivslshkqkdvkkskikvtyqremdry  
enfwnnlhwigniknqkr  
athtsiyeidwekhtvklvasqsse  
>tr|D8HCI8|D8HCI8\_STAAF  
mfkrkl1vttslsglivpiatpfggskattnaedigdgaevikrtevdssrkwgvtqnvqfdfvkdkkynkdaliikmqg  
finsrttfndvkqnrnkr  
mvwpfqynigltskdqntsliny1pknkietvdvgtlgyniggkfqsapsgngsfnyksikysqksyvseveqqss  
ktikwgvkansfviaghrw  
saydel1firnttrgpnardyfvdne1pp1itsgfnpsfiatvshekdsdgtsefeitygrnmdvtyaty1pk1g1ype  
rkhnefvnrnfvvkyevnw  
ktyeikvkghn  
>tr|D8HCI9|D8HCI9\_STAAF  
mkysearar1rwyggryidfdgwygyqcadlavdyiwl1eirmwgnakdainndfknmatvyentpsfvpqigdvavf  
tkgiykqyghiglvfnggn  
tnqflileqnydgnantpak1rwdnyygcthfirpkykseg1mnkitnkvkppaqkavgsaskitvgskapyn1kwskg  
ayfnakidg1gatsatryg  
dnrtnyrfdvqgaiyapgtliyvfieidgwcriywnhnewwherlivkevy  
>tr|D8HCJ0|D8HCJ0\_STAAF  
mkqksfwvail1sai1faqniakaigydiqvyteqltdglnailglv1tgv1qdpttkgigdshqaleyeepsrky  
>tr|D8HCJ1|D8HCJ1\_STAAF  
msk1drww1seykevpmvallks1err1cgicc  
>tr|D8HCJ2|D8HCJ2\_STAAF  
m1st1neik1gqktqeqvnik1dkt1daiqkereideknkkendknirdmkmwv1glvgtifgslia1l1rmlmgi  
>tr|D8HCJ3|D8HCJ3\_STAAF  
makei1nnterfi1vqidkegtervvyqdfgfttsemvnaqdfkseenakkiaet1n1lyq1tnkkqrvkvvkeve  
rsd1spevtvnteiv  
>tr|D8HCJ4|D8HCJ4\_STAAF  
mqdnkqglqanpeytihy1sqeimr1tqenailkayiqenkenqqaee  
>tr|D8HCJ5|D8HCJ5\_STAAF  
mihv1dfndki1df1stddps1vraihkrvndnsem1ellisseraekfrerhrvii1rdsnkqwrefi1nwvqdtmdgy  
teieciasy1adittakpy  
apgkfekkttseal1kdv1sdtgwevseqteydg1rttswtsyqtryev1kq1cttykmv1dfyielssntvkgrvvlkk  
kns1fkgeieygd1vg1  
trkidmseikta1iavgpendkgr1el1vvtddaeasqfn1pmryiwgiyepqsddqnmnetr1rslakte1nkrksavm  
syest1std1eatyphe1is  
igdtvrvkhrdfnpplyieaeviaeeyni1senstytfgqpkfkesel1reefnkr1niihqk1ndnisnintivkdvd  
geleyferkihksdtpen  
pvdmlwydtsnpdvav1rrywngrwieatpndvek1ggitreka1fse1nnifin1siqhas11seate11nsey1vdn  
d1kad1qas1davidvynq  
iknn1esmtpetatigr1vdtqa1fleyrkk1qdvtydvedvki1sdrfk11qsqytdekykealg1iatkfg1tvned  
1q1vgepnvksaieaare  
stkeq1r1dyvkt1sdyktdkdgiver1dtaeaert1kgeikdkvt1neyrngleeqkqytddq1sd1snpeikasieqa  
nqeaqea1ksyidaqdd1k  
ekesqayidgkiseeqraiqdaqak1eakqnaelkarnvekkanaaytdnkvestdaqrkt1trygsqiiqngkeiks  
rttkeefnatnr1tsn1la  
eivqnvtdgtt1ryddngvaqal1nigpggir1nadkidisgnrein1liqnmrdkvdktdivns1n1sreg1dinvrig  
ikggdnr1yvqi1qndsie1  
ggivqrtwrgkrstddi1fr1kdgh1rfrnntaggs1ymshfgistyidgegedggsgtiqwwdktysdsgmngitins  
ygvval1tsdnr1rv1esy  
assnikskqapv1ypntdkvpg1nrfaft1snadnayssdgyimfgsdenydygag1rfskernkg1vqivngryatgg  
dtteagy1gkfn1m1krrdg  
nryih1qstd11svgsddagdr1asnsiyrrtysaaan1hitsagtigr1stsarky1ksienqydrdeq1ehskailn1  
pirtwfdkaese1lare1r  
edr1ksedtyk1dryvg1iaeven1glkefvtyddkgeiegiaydr1wih1lipvikeqql1rikkleesknaq  
>tr|D8HCJ6|D8HCJ6\_STAAF  
mqdtiqidnktiew1lvvqrgfeipsfnfvtekesvkgragsiaknry1ndiefd1pliirnek1spggektthddilealv  
kffnikd1tpkk1kfk1sqn  
wywfayfdg1p1k1pknprgsvkftikv1tdpykysvtgnkntaisdqsvsvnsgtadtplivearaikpssyfmitknd  
edyfmgddevtkevkdym  
ppv1hsefrdfk1gwtkmi1tedipsnd1ggkvvgdfvi1n1legeyatnfpdakgwgagtkrg1pkamtdfqitykcive  
qkgkgagrtaqhiydsdgk  
11asi1gyenkyh1drki1ghi1vvt1ynqkgdpk1iydyqnkpvmynkdrivvymr1rrvgnkfsikt1wkd1hikdpdr1rpi  
dmdekewi1dggkfy1qrpas  
i1aiysakyngykwmemng1gsfn1te1lpkpkgardvi1qkgd1vki1dmqaks1vvi1neep1l1seks1fgsny1fnd1sgyse  
1i1qpen1vfd1ttvk1wqdry  
1  
>tr|D8HCJ7|D8HCJ7\_STAAF  
miengmdaekvanmpihff1ldiveskietkrtaksfkdi1f



Tsompanidou\_et\_al\_Supplemental\_FASTA\_File

>tr|D8HCJ9|D8HCJ9\_STAAF  
mieklkqaprflklnlqhfdatgvsgiaigvsnfyyapilkdenewetgagtrirflkeievdrpqdteedygddmva  
tavsngklsvkttfvtvpa  
ddkafIngakkvggykygakdippdvaivferrnhdessewvlgfkgkfrssikgqtkqdkvefqnddvegnfidrlf  
desshvtgydkkgsttgrd  
yvfmetfgktydefmssrgeqnmepvekemkktekvevtsvntdeqvtvkvdatkqlsattepsgqkvtfavteggqya  
svtstglvkglaegnatvt  
atagkqtdtvqitvqsnlem  
>tr|D8HCK0|D8HCK0\_STAAF  
minvtklirnaiannitdevnvfnytiddhfhektdkpiiriypfpnpdyaddneisreyhyqidvwwsqdepneqa  
ekivd11kvinfqcyyp  
lyesdvmsfrhii rakgsilsmkleen  
>tr|D8HCK1|D8HCK1\_STAAF  
mgariesnnieqgknavlkmnlsvivkagamslvplksntpfantkkhardhiavsnvktdrhtsekivtigyakg  
vshrihatefgtmykppql  
fitktekqgknkv1ktmldtakr1qk  
>tr|D8HCK2|D8HCK2\_STAAF  
mkfnsnk1neridfcedvservngnmpkpktilyscfaciqeskesdtqtnlntgskliktiiriidtrgdykptnkhyv  
1hegqrfnikyvkpdyqdk  
sylvvygevv  
>tr|D8HCK3|D8HCK3\_STAAF  
mq1taeelk11kkhckidhnsedd1leiyswafheiasavtdepskyidwfkshslfaraiyplasyfenriayldrd  
1slaphmv1stvhklrgsf  
eqflesennei  
>tr|D8HCK5|D8HCK5\_STAAF  
mktkeelqseisdikrqid1kvkyatra1nde1ekaekleqeitd1rsqiqekqeeldk1kekdgtsenpqsvevnea  
rtyrnqanind1gisiqnt  
kvtsgevrdfteyletrndiqggs1ktdsgfvvipeeivtdilk1kevefn1dkyvtvkrvtngsgkypvvrqsevaale  
kveeleenpelavkppffql  
aydinthrgyfrisreaiedakvnlqelklwmartiaatrnkaiidv1tkgstgstssgfekegkkl1dvkkaks1ddik  
dainlvkl1nyehnavivs  
qtmfak1dkmkdk1gnyli1qpdvkektqqr1lgakieilpdevl1gqkgntli1ign1kdaiv1fdrsqyqaswt1dymhfg  
eclmiavrqdcridyksa  
ivieyddsergegd1glea  
>tr|D8HCK7|D8HCK7\_STAAF  
mgi fysekrdlqyened1qmmvqt1pgfqgk1reykdveaikhsdiftavmmiasdlarmpir1tvngqidysdrvin  
11ntrpnpmyngy1fklvv  
fasa11tshgyveitrdkigkpmn1tfrktseielksdargrlyyfhqridskgniiernvkfedm1dikfysldging1  
s11dt1sr1tesdnngkdf  
1nnf1rngthaggi1kmgv1dnkkardrareefhksfsgtkqagkvv1desm1fdq1levdtevlk1irenksstreia  
gvfgi1phkfgietanmsi  
tdan1dy1st1kpyitcvcae1nfkfndeyvnr1fkfdteirvvdtektqaeidkinidsgkmnideir1qrdglapipgg  
ngsihrvd1nhvnie1vde  
yqmksratdkk1kggeene  
>tr|D8HCK8|D8HCK8\_STAAF  
md1nk1invffn11van1vsil1f1lg1fvini1svyktfgqnmgl1ctgit1livi1sil1nhesnqerr  
>tr|D8HCK9|D8HCK9\_STAAF  
midyvtqyakvvsgei1asqkniqvckrh1sfmenppngchwdnh1snkaiefvem1pdpktneppm1mefqkfivgs1  
ygwr1rgqymftkayisma  
rkqgks1ivsgmsvne11fgqypkfnrqi1vasstyqqaqti1fkmasqqvn1mrskskfi1rektdvrktdiedil1ssvf  
ap1snnpdavidgkdp1vai  
1delasmpddemys1rftg1mt1qknp1t11vstagn1nsqmyqeykyikri1neevradnyfvyaemdsqeevqdetk  
wikamp1leskehrkti1q  
niksdiqde1ekgtsyhk1liknfn1wqaqreds11diedweqattnmpningkdv1yigvd1sr1dd1t1svgf1fpndnk  
kvf1hshsfi1gl1rtn1leqk  
akr1dkinyd1v1ergeadv1trsdsgmi1dykqvidf1mdf1tthd1nvkavcydpwnaqs1fittiesma1dwp1lievgqsf  
ka1sqs1ikefrmw1vadkri  
qhndnt11ttsvnnav1irdgednvkinkmnrqkidpiisiitaftearmhef1qenwaeiyeseefgf  
>tr|D8HCL1|D8HCL1\_STAAF  
msimkrcghpicn11nhnesycdkhkqytneyn1d1rrndpey1rfyksktwqnmrriv11ehdficvscgnqatmvd  
hivptkvdwarr1dksn1q  
p1cdachnqktked1kky  
>tr|D8HCL2|D8HCL2\_STAAF  
meiskyqei1atrthnde11n1nesitcygl1gtqstgnvtd1likqhmfcnpidkgiminel1sealwnian1tnv1gin1d  
eiaghsvnti1lmkpnqti  
nidngi1rqgdkv1fggsky1vdgsign111isndkddrqvtvqdvk1kvde  
>tr|D8HCL3|D8HCL3\_STAAF  
mynrkeiremidnykwmkni1dskvydnestsiaqygyqsampkagtt1snkv1kvkinknalrkydylikkiafidey

Tsompanidou\_et\_al\_Supplemental\_FASTA\_File

eeyitnekdyhilqmlkqr  
eshnrimsildigrndfysrvkdivnilynqqetdtsdtsdssdtsyksytsd  
>tr|D8HCL4|D8HCL4\_STAAF  
mwi tmtivfai lllvcisinsdrareiqalrymndy llddevvktkgynglkeyrielkrmndikk  
>tr|D8HCL5|D8HCL5\_STAAF  
mikqilrllflamyelgkylteqvyimmtanddveapsdyvfraevse  
>tr|D8HCL6|D8HCL6\_STAAF  
mtqylvttfkdstgrkhthitraksnrftvveaeskeakekceaqvkreaviklqglfenirecgk  
>tr|D8HCL7|D8HCL7\_STAAF  
myyvvevngkyllynnnyaggydftddvrharkylnaknasdvarksggkvmyytithevk  
>tr|D8HCL8|D8HCL8\_STAAF  
msitillivlygymifdiliegylkannanradmykgaiiilaitlgfadaydkmailvlllaisfveklkrvqrsdkk  
>tr|D8HCL9|D8HCL9\_STAAF  
mtnilqvkllskdarmpernhktdagydi fsaetvvl epqekaviktdvavsipegyvglltsrsgvsskthlvietgki  
dagyhgnlginikndhedd  
kmqti flrdidneki fekerhlyk lgsyriekgeriaqlvivpiftpelkqvkefesvsergekfgfsgsgv  
>tr|D8HCM0|D8HCM0\_STAAF  
mnnreqieqsvi sasayngndtegllkeiedvykrarafdeilegmtnaiqsvkegie ldeavgimagqvvykyeeeqg  
nd  
>tr|D8HCM1|D8HCM1\_STAAF  
mehgskeyyekqseywfdeaskflkqrdeligdiaklrehnkelekkaiawdrycksvekdlinefgnddervkfgmeln  
nkifmedtne  
>tr|D8HCM2|D8HCM2\_STAAF  
mkikvkkemnlpeliqwawknpe lttgrkrfctenkdnekfiyfswedgrkcftsyfitpedtfvveveeeitgdtvfdrl  
feveyeisegeynptsnrnt  
sineslnddrfcfpikafyilnddltmtliwkdelik  
>tr|D8HCM3|D8HCM3\_STAAF  
madnmckeylnqffgskrylyqdnervahihvvnngtyyfhghivpgwqgvkktfdtaeeletyikqhgleyeeqkqltlf  
>tr|D8HCM4|D8HCM4\_STAAF  
mvktarivrihdkpyrfskfemeli eshgitpgmvskrvkdgwelheamdtpegmrlseyrekktierleqarlerkler  
qrkkeaelrrkkphlfnvp  
qkhprgryacylmendifvkvkk  
>tr|D8HCM5|D8HCM5\_STAAF  
mskynakkveykgyvfdskeveeyrylesnmngtnynrielpkfellpkldkqrkieyia dfalylddklievidikg  
mptevaklkakmfrhkyrn  
iklnwickapkytgktwityeelikarrerremk  
>tr|D8HCM6|D8HCM6\_STAAF  
mpkekylyredgtedikvikykdnevysltgahfsdekkimtdsdllkrfkgahgllyeqelglqatifdi  
>tr|D8HCM7|D8HCM7\_STAAF  
mnmqfksllksmyetkqndpivanvyietgwavnrlldnne lspfddydrveekimneinwkkthikec  
>tr|D8HCM8|D8HCM8\_STAAF  
mamllyrddy nreeddsitgksivecniaknk dgetgiefeyyktqrfft  
>tr|D8HCM9|D8HCM9\_STAAF  
mnyggfeiestiiatllkqpdvleki rvkdy mftnekfktffnyvmdsgkidhqeiy lkatkdkefl dadtitklynsdf  
igyggferyqqelleyyql  
nkanelvtefkqoptnqnfnnlidelkdlktitnk kedgkfkveefveelysdspkkqiktgyklmdykigglesqli  
viaarpsvgktgfalnmml  
niaqngyktssffslettgtsvlkrmlstigtie ltkikeirnltpddl tkltnamdqimklgidisdksnitpqdvraqa  
mrhsdgqqvifidylqlmd  
tdakvdrrevavekisrdlkiianetgaiivllsq lnrgvesrqdkrpm lsdmkesge  
>tr|D8HCN0|D8HCN0\_STAAF  
mpmsktqaleiikkvryvynidfdkpklemwidvlsqngdyqptvkavdgyinsnppppnlpaimrkapkkvsiepvdn  
etathqwmqndpeyvrrq  
kia ldnfmnklaefggdne  
>tr|D8HCN1|D8HCN1\_STAAF  
mgevlwiklkgvmfddskikyiealperdtiitlwkl lltlsgkyneqgyiml senlpyneemlanefnrpinsi rlaiq  
tfetlgmiekvngvikvtn  
wekhqslsdakhkeknlrqrryrerqkklleakdnvtvtl rndteeeeeeeeyknkeereavfsssi kyii anldd  
kltpnqmeqlgfaiddig  
nafeivkvgyeytksksahgylikvlnwakenvktkedaenkiaprknatnadeqntsirny  
>tr|D8HCN2|D8HCN2\_STAAF  
mvksiflqdgeeilvddedykrvnqhtwhktfkdnryrnivnsdkkhlpdfilksfqkiknndftkknlttegnktrwsk  
akfnns skykgvswdkkn  
nwyaciavdkktknlghfvnedeaa kaynavneywggvgyl ni igedrnlkkrnyktnikqlkrgtdknnlrginkikh  
ryyski fysgnyialggyd  
dlnkarlvynkcslylghsdailndvpmt delkefi snwevpdkikal kgedngrsivdkt  
>tr|D8HCN3|D8HCN3\_STAAF  
mpiitsyitqvdgtttvvisgvelgnketllldngfdvevdsvi dppfqtgqqrklifal cndieahtgqprdyrmqmf

Tsompanidou\_et\_al\_Supplemental\_FASTA\_File

qdyvkflygyeerislsnc  
srtiakqieamfewiftnaiplnyktsklmkedknylywatvtrhciicgkphadlahyesdgrmrnrknmnydkhvl  
alcrehnhqghaigvksfd  
dkyqlhdswlkvderlnkmlkgge  
>tr|D8HCN4|D8HCN4\_STAAF  
mlnrtvlvgrltdkpeyrtpngsvsttftiavnrtftnaqgreadfincvtrfrkqaenvnylskgslagvdgrlqsr  
syenkvgqrvfvtevvads  
vqflepknsnqqndnyqqggaqtgnnpfdnteedfsd1pf  
>tr|D8HCN5|D8HCN5\_STAAF  
mnksetvveinkamvafkrkevqplkdknnpffkskyvplenvveaideaatphglstqwalndvdgrvgvatmlmhes  
geyieydpvfmaekntpq  
gagslisylykryslsai fgi tsdqdddgneasgknnnpkqqrtrtqwassetigilrkevisftklikgtdkeapqniveq  
kfdinnykltekqaaeiaq  
kirnaktitggkq  
>tr|D8HCN6|D8HCN6\_STAAF  
manlyel sea fkel snqdel dqtllkdtl dsiaqemnvkvdnvnwrretlgdidvidkeikrlqnllkqkqnltdrlrd  
ylkemletqevdsyrtatn  
hiykrkngaskniideklipkdywlsqapklnskqliddlkdgkdipgvelkvteslvik  
>tr|D8HCN7|D8HCN7\_STAAF  
mkphkfrmaidliervqstsyqvdykynviwvwhysddylgkvasimhnnvdddntilaryekakkmlagevl sdg  
>tr|D8HCN9|D8HCN9\_STAAF  
mtwfeeyvkpsvewerkaeqavlsddevktiteyrkkynnpnhiymsaqnrnylveyldrhtgdivlhnllkllkssrrrvh  
qylmvgqivvpgepkgtiy  
easliir  
>tr|D8HCP0|D8HCP0\_STAAF  
mpphiqqmlyeiqlkagipqklmemqglindettkeekkeneqhl  
>tr|D8HCP1|D8HCP1\_STAAF  
mfegmkykpsefaaayiqtlphalkledfdtddefkeylenrresyfyeylkslefaksfskredetiee  
>tr|D8HCP2|D8HCP2\_STAAF  
mpkii ttpptpentyrgeekfvkkl yatptqihr lfgvsrstvynwlkyyrednlgvqnl yidysatgtliniskleeyli  
rkhhkwc  
>tr|D8HCP3|D8HCP3\_STAAF  
mqelqtfnfeelpvrtlevdgepyfigkdvadilgyangrda lskhvdaedk ltsqiatagqnrnvtiinesglyslifs  
sklenakrfkrwvtsevlp  
tlrktgayqvpdpmaqlrlmfateqtkqeiknvkddvidlkenqkl dagdynfltrtinqrvahiqrlhaitnqkqrs  
el frdinsevkmtgassr  
tnvrqkhfddviemi anwfpsqatlyrikqiemkfenei  
>tr|D8HCP5|D8HCP5\_STAAF  
mlqkfriaeknkllkllkhasyclernnpellravaelkkvs  
>tr|D8HCP6|D8HCP6\_STAAF  
meqitltkeelkeiiakevreaingkkpissgsifnkvrishndfdeinkkfayterlrgadnlglghplsllkkyqhig  
cyenykayaseihdhirkl  
t1safgvtlnsdlkeseydeasrmydm1knfylyryqkrietlssmisnkggttnvtki  
>tr|D8HCP8|D8HCP8\_STAAF  
mserkisqsel srrtgigrnsisdy lngyeakqdkvfelaka lvnveawlmgfdisknrkiennditsiyskltpprqs  
nvlkyatnqleeqnndsdn  
lvdfnisyiqeksevdigyccasagigerlynepiskefvrgyvpahdia lkvngdsmeplfkngqiifiekstikdgqig  
vfiingdayvkkvyvednr  
ltlvslnkkykdlyfydnesvr1vgkvi1  
>tr|D8HCP9|D8HCP9\_STAAF  
mkprkqdekilsdqsyfepiisdscdikfdenkrmmgsifisheevcfirkeedyifkislsevidyntvvtiwnqaf  
ltlndnrkl tvyfvtnsp1  
tgfisi lktymqlsknketiisndclpindeqtkveifdvvglnyegrrelkkl ikkmknndfffflysdllkgnelke  
ellyedkvyeisdyevipg  
vflqkepdpndqnaikvmsneysefhvgvpreyasrlvnhmdnivscnayinggyktldyleekivtkesdyglrv  
hleykv  
>tr|D8HCQ0|D8HCQ0\_STAAF  
mssykeiehlhintggkeltqeieeakafidsqefkdmireakesqrvmeskitdrtkm  
>tr|D8HCQ1|D8HCQ1\_STAAF  
merenlkerllikcqeafimglelynkptikyriegsfficnawelmllakllkdgtsiysdnprtl nlsdviknvy  
tdknqplrinlekiidlrl  
isthlvtedyetvyapffqanilnfseqlqkfhniditrkippqfllslsvnm dilnndeirgkyspviaeklitqkndla  
vtqetnnsnslviplqnti  
iitknpknadfsvnvssdsendani lrelkdpndkyltsfnviqginkqlkaknlefnyfdkkdgknefnnytllslik  
fynlknndkysyhanvtr  
ysqqivdfivkeikhdpniinnikkankr  
>tr|D8HCQ2|D8HCQ2\_STAAF  
mpvykddntgkwyfsirykdvygnnrkrmkrgerkkdaklaesefiqnvkygysdnqpfeyiffdrllkenlsarsiek

Tsompanidou\_et\_al\_Supplemental\_FASTA\_File

rtteynthikerfgnipig  
kitttqctafnrnylndaglsvglarsvwagfkavinyakkhyklydptlsvtpiprtkpkqakfitreefdekveqitn  
dtsrqltkllfysglrige  
alalqwkdydkikeidvknkinlsnrkieynlkretskgiipvpkliremlnkmynesstrykyfdenyfi fgglepir  
yitysyhfksvfpnlkih  
lrhsyasylinngvdmylmeImrhnitetiqtyshlytdkkhqamsifd  
>tr|D8HCQ3|D8HCQ3\_STAAF  
mrnnkpkirinqdpweayndvkehqgltnsneftttlncmrcshcavgytltqvdpepldmdliyrndeipnlrtms  
itggepmfssksirnvvpk  
llkyahnrgiytqmnsnltpqdryldiaeyidvmhishnwgttdefanvgfgamkkqpplkaklklyeqmisnartlse  
qgmfvsaetmlnqstlphl  
rkihqevihdmkcsrheihpmpadfasqlnvltaemkkti hdi l dfrdediwm l fgtlpvfpc l kddedqkllsrlrt  
aknvttrndpdgrsrlnvn  
vftgnvivotdfgdetgtisniqkdkltdvfdkw l ssdlaks l nchcsefsc l gpnvlvknmyypnmdfdknerhmkhqpq  
iiqf  
>tr|D8HCQ4|D8HCQ4\_STAAF  
mtnqdrpmksmseskcyknrqvfpqdtnhhhtmfgg l manideiaaitamkhagaqvvtastds vdf l kpi ktgdilqy  
vamvsyagtssmevvvqir  
iddvfnmhdlaalsyltfvalddegpkphvpgvpeddvekwfydtapqrvrrkarrieskqtieylaqvqhir d  
>tr|D8HCQ5|D8HCQ5\_STAAF  
mnvqpkqpvfirssvetelthliveeahcgasdrvrvysdptlkr l kfenesvehfanheiksydvearm dyvkr gaa  
n l a l i s e d p d l m d g i d s q k  
l q a f q q n a r a f k g y m e s v q k n q f p w v a a f p s k a w a k r v y p e l s v e e a y i k f i d e v f d i v r i d g n d p v e n w r q h i a n l s  
vyaqklqqknyhalhyvse  
gtdltvg l a k n h i w e d a t s y v n g k e a f i a n i p t e e v f t a p d r n r v d g y v t n k l p l s y n g t i i d q f k l m f k d g e i i d f s a  
ekgeavlkdlintdegsrr  
lgevalvpddspisnrnti fynt l f d e n a a c h l a i g s a y a f n i q g g t e m t v e e k i a s g l n d s n v h v d f m i g s s d l t i y g i  
fedgske l v f e n g n w a s t f  
>tr|D8HCQ6|D8HCQ6\_STAAF  
mtneekvlai reklnivnqgl dpekytnaneeeltdiydfvqsrer l spsevtaiadalq l rhd  
>tr|D8HCQ9|D8HCQ9\_STAAF  
mskkdhsskylnsvketgeeskkknksnpkidvdrtyiepqfqs kpkkedqvff l sr l n k p a k y k k d s n f l s y l i y r  
igkddasglaaqmtyhfv l  
amfpmllfl l t l l p f f n i k q s q i t n m l s n a p a e t s t l i k s v i g d i t q n s s g g l l s i g l i l a i w s a n g m t a i m n s f n v a y  
dvedsrngiv l k l l s v v f t  
v m g v v f v a l a l p t l g s v i s h f l f g p l g f d e q v k w i f n l i r i v l p i i i f i v f i v l y s v a p n v k t k l k s v l p g a v f t s i  
i w l a g s f g f g w y i s n f g n y  
sktygsiagi i i l l w l y i t s f i i i v g a e i n a i i h q r s v i k g k t p e e a a l e h d d n k n h y n e n t r y e y d e d t n a t h q r t y  
hvdehpsdtypeddknikd  
kivdklkkd  
>tr|D8HCR3|D8HCR3\_STAAF  
mnyveryieqflratvrnnikhyllm ldek mkn l d d y m r y l i t k k e q l s k l i d s l m l t l e n k y i d i a e a f q i q c a r e i n n  
geienikselnkveayyaq  
ietqiqqtstekietektsylinymnava  
>tr|D8HCR5|D8HCR5\_STAAF  
magpqrhfgtpistdnaswggsqhreystdnaswgr  
>tr|D8HCR7|D8HCR7\_STAAF  
mkptkvilrdasyvhsktsitf l k d v v i e e d n k i f y f d t s a t f e d q e i k f e f a l f d s d m d n l k h m e y d n p v t e i y f i e p  
dlhfmiidfnqellciyid  
fdsglrhsmatesgislrinvtksdftkfinelaslh  
>tr|D8HCR8|D8HCR8\_STAAF  
mheltyhfmsdklnlysdignia l r r a k r n i k v n v e i n e t e g i t f d e c d i f f i g g s d r e q a l a t k e l s k i k t p l  
keai edgmpgl ticggyqf  
lgkkyitpdgtelegil dfytesktnrltgdiviesdtfgt ivgfenhgg rtyhnfgt lghvtfgygnndedkkegih  
yknllgtylhgpi lpknye  
itdyll ekacerkgipfepkeidneakqakqvlidranrqksr  
>tr|D8HCR9|D8HCR9\_STAAF  
mrqwtaih l a k l a r k a s r a v g k r g t d l p g q i a r k v d t d i l r k l a e q v d d i v f i s g t n g k t t t s n l i g h t l q a n n i q i i h n  
neganmaagitsafimqst  
pktkiavieidegsiprvlkevtpsmmvftnffrdqmdrfgeidimvnnaetisnkgiklllnaddpfvsrlkiasdti  
vyygmkaahahefeqstmne  
srycpncgrllqdyihynqighyhcqcgfkreqakyeissfdvapflhlnindekydmkiagdfnaynalaaaytv l r e l  
glneqai kngfetytsdng  
rmqyfkkerkeaminlaknpagmnas lsvgeql egekvyvis lndnaadgrdtswiydadfek lskqqieaiivtgtrae  
elqlrlklaevepiiver  
diykataktmdykgftvaipnytslapml eq l n r s f e g g q s  
>tr|D8HCS4|D8HCS4\_STAAF  
mqaiakndiktgtvvd l theghgvvki drfpi fipqalineaikyikvknfaigkllnintrsenrvappciyyerc

Tsompanidou\_et\_al\_Supplemental\_FASTA\_File

ggcqlqhl syeaql emkke  
qvinlfrkahfdnskindvgtmtdpwrnksqipvgkneqnevimgfyrqrshdiidmescliqdsqhqvemnevksi  
lkdlnvsiyqeqlkkglmr  
hlvvtgyhtdemmiifvtngkkwsqknavvekil dafpnvtsikqnindshsnvimgrqsitlygkdtiidqldtstfk  
isdqsfyginseqteklyn  
kaieyaqltgnevldtycgigtiglymaphakhvygvevpsaiedaqqnatinqcntttfvcgkaeevilqwkaaggik  
pdvumvdprrkgcdetfiq  
tlltlepkrivyiscnpatqqrda11laekyqleevtpvdmfqtthvetvalfnlk  
>tr|D8HCS5|D8HCS5\_STAAF  
mrkrariinyntsgkeqfkrelpdaliklekagyetsayatekigdatleaeramhenydvliiaaggdgtlnevngiae  
kpnrpklgvi pmgtvndfg  
ralhipndimgaldvii eghstkvdigkmnryfinlaaggqltqv syetpsklksivgpfayyikgfemlpqmkaavl r  
ieydgnavfqqeallfflg  
tnsmagfeklvpdaklddgyftliiveksnlaelghimtlasrgehtkhpkiyekakainissftdlqlnv dgeyggkl  
panflnlerhidvfapndi  
vneelinndhvddnliee  
>tr|D8HCS6|D8HCS6\_STAAF  
mvadldaieg lfi sievilhltlfivhvigkninfinalaliilrqtv  
>tr|D8HCS8|D8HCS8\_STAAF  
msiryevenl1tikdkkikpsdvvkdiydaieetdptiksflaldkenaikkaqel delqakdqmdgklfgipmgikd  
nii tnglettcaskmlegf  
vpiyestvmeklnhenavligklnmdefamggstetsyfkktnvpfdhkavpggssggsaaavaaglvpfs lgsdtggsi  
rqpaaycgvvgmkptygrv  
srfglvafassldqigpltrnvkdnaivleaisgadvndstsapvddvdf tseigkdikgkvalpkeylgegvaddvke  
avqnavetlkslgavveev  
slpntkfgipsyyviasseasnlsrfdgirygyhskeahslee lykmsrsefgkevkrri flgtfalssgyydayyk  
sqkvrtlikndfdkvfeny  
dvvvgptapttafnlgeeiddpl tmyandl1t tpvnlaglpgisvpcgqsngripig lqfigkpfdektlyrvayqyetqy  
nlhdvyekl  
>tr|D8HCT1|D8HCT1\_STAAF  
mvkicndgfdeni eehrnlysiaytqnvlsgryknl i i wylktegrfgeikkffanisqgs ltkqlkelesdgilnre  
vyaevppkviysltdkkgd  
ilplidlmekygrmygd  
>tr|D8HCT2|D8HCT2\_STAAF  
menrvskilniekpiiqgpmngltnanfasvseagglgilgnagearitnspfetaekmrlevkkvkkltskpfasti  
mvsedlsytsylidmliee  
nisavlingildqti fnklkennikiifrp l tptienaikseelgadvfvatgfdeggtvpekiigtfsiipmiadaiki  
pviaaggigdvrgrvraafc  
lgaegvfvgsvlptfenpaaenvkqyivdsnaedlilfrt ipsyrs lpgklareleemdkgatneelakhmgggrnm  
rlgm lngdtengyvs vgtg  
ispinsirstksvidl m qdfn  
>tr|D8HCT3|D8HCT3\_STAAF  
mkrtlvllitai filaacgnhkddqagkdnqkhnssnqvkeiatdknvqgdnyrtl l p fkesqargll qdnmansyngg  
dfedgllnlskevfp tdky  
lyqdgqfldkktinaylnpkytkreidkmskdkkdkkanenlglnpshegetdpekiaekspaylsnileqdfygggd  
kgknikgmtiglamnsvy  
ykkekdgptfsklddsevkqgqmaseilsrlrendldkipihfaiykssedsitpgefitqataeksqtklnewh  
ninksallpsstaadye  
nl nnnfkqfndnlqsyfnsftqavgkvkfidkkpqr l v d l p i d y y q a e t i g i t q y v t e q a n k y f d k i d n y e i r i k d g n  
qpralisktkddkep qvhi  
ysn  
>tr|D8HCT6|D8HCT6\_STAAF  
mydikkrhifkldpakhi sdddldai cmsqtdaimiggtddvtednvihlmsrvrryplplvleisniesvmpgdfdyf  
vptvlnstdvafhngtll  
alktyghsidfeevi fegyvcnadskvakhtkantdl ttedleayaqmvnhmyrlpvmyieysgiygdvskvqavseh  
tetglfygggisseqgate  
maaiadtii vgdiiykdikka ltkvikessk  
>tr|D8HCT8|D8HCT8\_STAAF  
mierysreemsniwtdqnryeawleveilaceawselghipkadvqkirqnakvnvera qeieqet rhdvvafrqvset  
lgeerkwvhygl tstdv d  
talsfvikgandii ekdlerfidv laekaknykylmmgrthgvhaepttfgvkmalwytemqrnlqrfkvreeievk  
msgavgtfanippeiesy  
ckhlgigtapvstqt l qrdrhayyat l aliatslekfaveirnlqktetreveeafakgqkssamphkrnpigsenit  
gisrvirgyittayenvpl  
wherdishssaerimlpdv tialdya lnrftnivdr l tvfednmrnnidktfglifsqr vllal linkgmvreeaydkvqp  
kamtswetktpfrelieqd  
esit svltkeeldecfdpkhhlnqvdtiferagla  
>tr|D8HCT9|D8HCT9\_STAAF

Tsompanidou\_et\_al\_Supplemental\_FASTA\_File

mkrnfpklialslslsvtpianaesnsnikakdkkhvqvnedksvptdvrnlaqkdylsyvtsldkiynkekasytl  
gepfkiyknkksdgnnyf  
pvlntegnidiyvtispkvtkysssksytinvspflskvlmqykdqqitiltnskgyyvvtqnhkaklvltkprledkk  
lkktesiptgnvtqlkqk  
asvtmpsqfksnnytyneqyvnlfnfretqgnngwcagytmsallnatyntnkyhaeavmrfllhpnlqqgrfqtg  
ltpremiyfgqtqgrspq  
lnrmtynevndltkknkgiavlgsrvesrngmhaghamaavvgnakldngqeviiwnpwdngfmtqdaknnvipvsngd  
hyrwyssiyyg  
>tr|D8HCU3|D8HCU3\_STAAF  
msklqdivvqemkvkkcidsaeimekqfiknyvqshsfikslvlgisggqdstlvglvqmsvnelreegidctfiav  
klpygvqkdadeveqalrf  
iepdeivtvnikpavdqsvqslkeagivltdfqqgnekaremkvqfsiasnrqgivvgtdhsaenitgfytkygdgaad  
iapifglnkrqgrqllayl  
gapkelyektptadledkppqldedaigvtyeaidnylegkpvtpreekvienhyirnahkrelaytrytwps  
>tr|D8HCU4|D8HCU4\_STAAF  
mlhndlyqinmaesywndniekmavfdlyfrkmpfnsgyavfnglkrvidfiehfghfsesdleylksigykddflsyk  
dlkftgsirsmgegelcfcg  
nepllrveapliqaqlietillnivnfhtlittkasrirqiasndklmefgtrraeqidaalwgaraayiggfdstsnvr  
agklfgipvsgthahafvq  
tygdeyvafkkyarhkncvflvdtfhtlksgvpnaikvakelgdkinfvgirldsgdiaylskearrmldeagftetki  
iasndldeetitslkaqga  
kvdswwgvgtklitgydqpalgavyklvaienedgsysdriksnaekvttpgkknvyriinkktgkaegyitlenep  
ydeqplklfhpvhtykmkf  
iksfeaidlhniyengklvyqmptedesreylaagqlqsiwdenkrflnpqeypvdlskacwdnkhhkri fevaehvkeme  
edne  
>tr|D8HCU8|D8HCU8\_STAAF  
myinmkdygltginktdtraiqralnhgrckpttvyipkgytidckpltiyngtllldnetilrrchsgpllknghrf  
gfyrgyngshihikggkf  
dmngvsypynntamci ghaediqligvtiknvvsghaidacginglyikncsfegfdysgerfyseaiqlidiqvpgapf  
kfgtttgtitknviedcy  
fgpselepmswnraigshsrhnryyenihi rnnifediqyaltplykdafi innkfinceggi rylgvrdgknaad  
vmtgkdlgsqaginmniig  
nefkgsmskdaihvrnynnvkhkdvli vngtfnstqsihmeditvflspveagiqvttinveikk  
>tr|D8HCV0|D8HCV0\_STAAF  
maktiyifghknpdtdaissai maefeq lrgnsgakayrlgdvsatqfaldfnvpapelltdldgqdvilvdhnefq  
qssdtiasatikhvidhhr  
ianfetagplcyraepvgctatilykmfrergfeikpeiaglmlsaiidsllfksptctqqdvkaaeelkdiakvdiqk  
yglmlkagasttdksvef  
llnmdaksftmgdyvtriaqvnavdldvlnrkedlekemlavsakekydlflvlvvtidiinsdskilvvgakdkvgeaf  
nvqleddmafsgvvsrkk  
qivpqi teal tk  
>tr|D8HCV1|D8HCV1\_STAAF  
mniieqkfydskaffntqqtkdisfrkeqlkkl skaiksyedilealytdlgknkveayateigitlksiknarkelkn  
wtktknvdtpllylftksy  
ikkepygtvliiapfnypfqlvfepligaiaagnta ikpse ltpnvarvikrlinetfdanyievi eggieetqtlhl  
pfdyvfftgsvngkivyq  
aasenlvptlemggkspvividetanikvasericfgkftnagqtcvapyilvhesvkddlitalsktlrefygniiqq  
spdygrivnlkhyhr ltsl  
lnsqmni vfgghsdederyieptll dhvtsdsaimqeeifgpilpil tyqsldeafiaihqrpkplsllylfsedenatq  
rvine lsfggaindtlmh  
lanpklpfggv gasgmgryhkysfdtftheksyifkstrlesgvhlppykgkfyikaffkn  
>tr|D8HCV5|D8HCV5\_STAAF  
mqqvtstdimtfgrshfelgvktgkwlqtpllknrekewkkrvprfdidvnytyqifqtyapqiweelmgqlsilkmpr  
qiilnfghyrftdlkesgc  
tvfqqkdfmvrnydyhpatydgryllyqptdsglaqigpvsrvtgrmdgmnesgltmgynfmhrkkpangfvcymigrli  
lencrnvteaiqlleiph  
rrsfsyilmkdslnhaivevtpresidvrydnictnhfeilthenrnytkeskerlartisqtdndldmttafkflfnppqy  
eisky lfkswsgtihtsm  
hpetltayftlgenappeiidfkswldgqdl ni thftgnidtdltfank  
>tr|D8HCV6|D8HCV6\_STAAF  
mkkffffigllfvvfftaatiwfsydknkygkqydkfkddafdnvsinldstelrikrgnqfrvkydgdndilniv  
dktlkvsdkrsktrgyaid  
mnpfhenkktltiempdkmikrlnissgagsvrisdvd lentsiqsingevviksnldaldsktnsptyisksniks  
nikvigtlqidksqikqs  
iflndhgdiiefknmpskvdakastkqgdifkydskpedtilklnpgtgdsvvknktftngkvgsdnvlefytidgnik  
ve  
>tr|D8HCV8|D8HCV8\_STAAF  
mlylnkykervtsvriqnrwvfilflicsfgvliglyqyrhtktvdlnleindiklnvkfdkkyevnkkikfdrfkf

Tsompanidou\_et\_al\_Supplemental\_FASTA\_File

ynskahpdltvkvrekndni  
vkgiilvrdekihtnfdggigspinnaienlgfgykrtkvgnfdssvkiydrdnhlklnllyqdleikrieffsk  
>tr|D8HCW0|D8HCW0\_STAAF  
mriInlvkydlysiFkspLtylailvssliatqsilmansmdnpkhiivygsvfaaakwllliiglmfvvktitrdfsq  
gtiqlymskvkrvgyiis  
ktisiilisiilfalihyvilivvqassngknlafykyvdlwfflilflffglflflitlasqktamifslgvflvlivp  
fikpfitfiprygdkvlada  
fdyipfayltdkmissnfdfsnwqwwislgsviffilnilyvakkdi  
>tr|D8HCW2|D8HCW2\_STAAF  
mkallirnflkrrytliiyvllltlypfyimldstkffyllqsfisptiliiwil daghlfrlnrrlggndsyyfymslp  
vskkqllnanyitcivltl  
igtlvislyayeadviepnsiyfstayafvisnflsipiafsqftelrrvkvpygiyvftiilvpflfsiaivlvnyfv  
lsqssfpnllysyilnigfl  
iisivilivnyfkqlnkintrkfkgsr  
>tr|D8HCW3|D8HCW3\_STAAF  
mnaieIsnvnyssdqfnlknisfkvpqgfvvtgfigrngagkttiirImdlyqpqtgvirvleedmalnpielknrigfv  
yaenyfnerwttkqlekmi  
apfyrkwdhqvfefylekfdlpinksiktfstgmkmklslavafshhaelyifdeptsldplarnelleiiaqqeliden  
ktifmsthijsdlekiady  
iihlsdgevilngskeqlqryqvvsгаiedldelasllifehkrtgfigl tehaqv fkeilghkvnittpsienlmv  
ylekrkpkkyheniklmeeg  
f  
>tr|D8HCW6|D8HCW6\_STAAF  
mnpIaqslneqlqgsnatafamlsdlqnmfypkgiIsqsaeksttynatigmatnkdgkmfassldamfndltpdeif  
pyappqgieelrdlwqqkm  
lrdnpeIsignmslpivtnalthglsIvgdlfvnqgdtilldphnwgnyklvfntrnganlqtypifdkdghytttdslve  
alqsynkdkvimiInypnn  
ptgytpthkevttivdaikaIadkgtkviavvddayyglfyedvytqslftalsnlnsnailpvrldgatkeffawgfrv  
gfmftgtsdqttkveleak  
vkgIirsniSSgpIptqsavkhvlknnkqfdkeieqniqtIkeryevtkevvyadqyhshwqaydfnsgyfmaikvhvdv  
peelrkhliekysigviaI  
natdiriafscvekediphvfdsiakaidlrl  
>tr|D8HCW7|D8HCW7\_STAAF  
mvkktksnslkkvatIalanlllvgaltdnsakaeskkddtdlklvshnvymIstvlvypnwgykradligqssyiknnd  
vviIneafdngasdkllsn  
vkkeypyqtpvlgrsqsgwdktegssystvaedggvaivskypikekiqhvfksgcgfdndsngkfvytkiekngknvhv  
IghthqsedsrCgaghrk  
iraeqmkeIsdfvkkknIpkdetvyiggdlvnkgtpefkdmIknlnvndvlyaghnstwdpqsnIakynypngkpehl  
dyiftdkdhkqpkqlvnev  
vtekpKpWdvyaFpyyyvyndfsdhypikaysk  
>tr|D8HCW8|D8HCW8\_STAAF  
mikqlyknitIcslalstaltvfpatsyakinseikavseknlDgdtkmytrtattsdSqknitqslqfnfitepnydke  
tvfikakgtigsglriIldp  
ngywnstlrwpqsvsvsiqnvddnhtnvtDfapknqdesrevkytygyktggdfsinrgglTgnitkesnysetisyqq  
psyrtilldqstshkgvgwk  
veahlinnmghdhrqltndsdrntkseifsltrngnlwakdnftpkdkmpvtvsegnpeflavmshdkkdegkskfVv  
hykrsmdefkiDwnrhgfw  
gywsgenhvdkkeeklsalyevdwkthdvkfvkvlndnekk  
>tr|D8HCW9|D8HCW9\_STAAF  
mknkkrvliasslscaillsaattqansahkdsdqdnkehvdksqqkdkrnvtnkdknstvpddigkngkitkrteTv  
ydektnilqnlqfdfidp  
tydknvlIvkkqgsIhslnkfeshkeeksnwIkyPseyhvdFqvrnpkteildqlpknkIstakvdstfsyssggkfd  
stkgIgrtssnsysktisy  
nqqnydtiasgknwnhvhsviandIkyggevknrndellfyrntriatvenpelsfaskyrypalvrsgfnpefltyl  
sneksnektqfevtytrnq  
dilknrpgihyappileknkdqgrIivtyevdwknktvkvvdKysddnkpykeg  
>tr|D8HCX0|D8HCX0\_STAAF  
mttfsekekiqlIadiveIqtenneidvcnylkdIldkydikseilkvnehranivaeigngsplalsghmdvvdagn  
qdnwtyppfqItekdgkly  
grgttdmkggImalvltIelkeqnqlpggtirllatageekeqegaklladkgylddvDgliaeptgsgiyahkgsm  
sckvtatgkavhssvPfig  
dnaidtlIefynqfkekyseIkkhdtkheIldvapmfksIlgkeiseedanyasglTavcsiinggkqfnsvpdeaslefn  
vrpvpeydnfdiesffqni  
innvsnklsldipsnhrpvtsdknslittikdvassfvdkddifvsalvgatdassflgdnkdnvdlaiIfgpgnplma  
hqideyiekdmlykyidif  
keasiqylkek  
>tr|D8HCX1|D8HCX1\_STAAF  
mnylmylfcmfIwglInfiavkiqgdsIplevalIyrsIiafslfgvmfififkklklInntnwftiigfglcnftisylll

Tsompanidou\_et\_al\_Supplemental\_FASTA\_File

yygtfyssaaivtlifsmk  
aitpifismvfkkrkisnriyiggglgvsvvviylpdlnsltnefiigvafallgaiitsigdvlslynseskvhpvls  
ntigm1savifllytsfn  
gyrystp1nfwfsllylsilasflawffy1klinnigaesgymvamfpaiggiasvimgeth1sinlvvgiilacmg  
aylalykpkps  
>tr|D8HCX2|D8HCX2\_STAAF  
myktlffdkiaelkeksyriteinriankyp1akgedgkevfvfcsndylgmsqnqevinvmsdalkeygagaggsrn  
iggshkyfk1leneiakwh  
kkdsalvfptgyssndas1qgl1rifpemivfssdknhasiinalsvknkieifehnnvkh1nellnqydinipklivf  
esvysmdgdiapiveivel  
akeynsltfldevhaigmygeegrsgysdvvgvqedidiiqstmakgigiigg1itgdq1lidvirsyssgf1fttalppv  
iaagcltsikivrsndklr  
eelqdktkylkekfkengiavlqskthilpviigdskkceeaak11ldkfnivyqainsptveigterfrinvtpnhtk  
eqmd1lvssivvfdflni  
rrsv  
>tr|D8HCX3|D8HCX3\_STAAF  
mnkvhkp1yfy1m1ffsttiigall1y1pftgkkip1s1dalfiassaftvtg1spvdigsqfn1lgeiv1111iqigg1  
g1vtvt11t1vflnrkism  
knrf1imvtwnidepggvik1ikh1aiys1vteligmic1c1sfipkfgigkg1fl1s1ftsvsafnagfal1knn1idy  
ssdpiviitisi1iifggi  
ghfvvidfinck1sk1slhsk1vl1tts1i1iigaitff1leqfntmqnmglvekiqnsffqsvttrtagfnsidias1  
nkstalm1m1m1f1ggap1  
sasggik1ttfavafi1v1nyirkennsvfnkeisdhkh1ksivtinis1flfisiitfils1inpnis1lik1lfevsa  
fgtvgl1sm1t1teyhg1tk  
i1i1fvmlcgkvg11t11rtfippkspknyrytkgqiyl  
>tr|D8HCX4|D8HCX4\_STAAF  
mklssvintdfevtt1s1y1qk1iivmmn1nmkiskseiarhmgvdi1ravdkysnvfd1yfinssikitt1lnq  
>tr|D8HCX5|D8HCX5\_STAAF  
mtkvvis1selltgdkqevkrkipsv1ni1nsfetisisgsesahdvd1flknksiafdrqn1srth1lvfsqfkskqilv  
syftisnkp1vftkrml1dk  
isnt1kkk1yqkgethsgnd1i1qgy1iaqigknysealatsingnd11t1layekv1legani1fggsyiwieyedvr  
1refyrkfgfteikdhtse  
nn1kmailki  
>tr|D8HCX6|D8HCX6\_STAAF  
matis1tt1dyftkksaqk1idameinenksnvkn1katkikstceien1lkdyrsn  
>tr|D8HCX7|D8HCX7\_STAAF  
mtkrekfaiavti1yivimaigm1lvksfgfnvqpemvkvi1fse1imsilvyvay1kl1klrm1htsfefslw1vpfai  
i1l1calgl1f1ftgdfgrns  
s1i1ilvgitmv1vgfsee1lfrgillhv1lekrtvvys1i1issilfs1l1hsvnilgg1plagmigq1lilt1fgvifsc1  
s1likni1p1lilyhfiwdf  
v1fsqs1vnak1dwl1astai1tevi1ivp1fiytviylqrksh  
>tr|D8HCX8|D8HCX8\_STAAF  
mkkkv1ilt1galcasq1wnsdnasaitvgeanvyksss1nvgyvssseqakry1ds1dd1i1yynsvnrhagyeep1yk  
evydkyqk1f1aeidavnk  
fr1eqk1kvdnynrydrnny1ygltyeryinvyns1kanredfdkevkkiedkhed1mrfyeik1qeqvnqemkn1enqilm  
igqafiktrnkav1dmyrn  
1dmvvg1tteqerqnm1ptnermrkikied1eti1deffndigekrpdnipal1tndehknkemitk1ksdteaaakdvskr  
skn1lgkqk1hns1seevse  
eqkvkynkemeeiekekflask1rnsvvs1iddedngkdkqli1stptnkp1tpptytetitqvpmpv1erqtqqqiy  
napk1lag1ngeshdfttt  
hqspttsnhthnnvfeetsa1pgrksgslvgisqidssh1terekrvikrehvreaqk1vdnykdthsyndrvkaqqk  
vnt1saghqkrfnkqinkv  
ysgq  
>tr|D8HCY0|D8HCY0\_STAAF  
mvsdfesndkitevel1mhynpkvinskikamrsqies1yh1nmnhvitndndmlsvsvsyp1dk1lvlyiieekdkleyym  
ktaqdr1n1fkdiiknyse  
neqqdvmrym1ssgkvknegvier1kvdiykvesrkrqerqnrqeel1hriefnkh1leqvkkels  
>tr|D8HCY1|D8HCY1\_STAAF  
mkefkeqfgyq1snfddmdikgyan1yqkdigkdvsmieqglkq1sitetev1lpeqink1l1gv1nmnevnsntwv1g  
t1tkq1lvssennfnigelp  
tarkevfkellvnrellqt1rdviti1tdehvesipal1tyikdklatngiel1ngsskyfdrreghiytevsdsvvhgs  
drt1dd1l1keifinecvsy  
ett1l1dknnasg1idkdnq1sl1nqgikevsntsmydgikqaikdipqtfrsvsvimntdhhd1like1aqvg1gal  
ayd1tk1fnvshvvvtda  
qdi1fv1gdfghai1yakyepimynkkqa1kgvyqfal1nyvfdiki1vpe1l1rmvkvk  
>tr|D8HCY3|D8HCY3\_STAAF  
mgvcifinhkriayqi1khtpvnvq1mntkyinrvvrrytkkradfelikmyiyqikrrearrarsyk  
>tr|D8HCY4|D8HCY4\_STAAF



Tsompanidou\_et\_al\_Supplemental\_FASTA\_File

mnrsrcmkqijleyiknngstsfveienvfeeegfkykgngaytsghnkniifwmgwneeafnivadlkrdgliemqicpp  
myylidgkglrlpivknkn  
ikidhwlpvtfsln  
>tr|D8HCY5|D8HCY5\_STAAF  
maikkkdriigvkeleipgelklvpnwvlwraewnekqngykvpsingyrasttnkktwcdfesvsieyevdeqysgi  
gfvlsdgnnfvcldidnai  
dkkgqinsealalkmmqlycekspsgtglhcffkgklpdrkkkrtdldielydsarfmtvtgtigqsdicdnqevlnt  
lideyfkenlpvndvree  
sntnmqlsdediinimmskqkdkikdl1qgtyesyfksseavqsllhylaftygknkqmeriflnynnltdkweskr  
gnttwggleldkaiknqkt  
vctksidefnviqgskdikql1nqlgheertkmeenwieegkrgrkpttispikeyilnehltfilfddeentklamy  
qfdegiytqnttiikrvis  
ylepkhnsnkadeviyhltnmvdikektnspylipvkndvfnrktkqlesftpdyiftskidtsyvrqdivpeingwnid  
rwieeiaacndnqvkl1wq  
vindsmngnytrkka1flvngnngkgtfqellsnvigysniaslknvenderfklsvlegktavigddvpvgvyvddss  
nfksvvtgdpvlvefknkp  
lyratfkctviqstngmpkfkdkgtgtrllivpfnanfngikenfkikediyknqqvleyvlykainldfetfdipda  
skmlevfkedndpvygfk  
vnmfdqwtirkvpkyiyafykeycdengynalsnkfykqfehyleneyktdaqqrydneelakriynfndnrnyiepi  
esgknyksyekvklkai  
>tr|D8HCY6|D8HCY6\_STAAF  
mnweiknlmcdlki1kekfedlkdnhgshfedlylhesnhtlnkddvikegfsyherrihndqmfdl11lytekfdelit  
rfdalekassfadqsqdna  
>tr|D8HCY7|D8HCY7\_STAAF  
mkneqkeviqdiyntleavayntsmeyihncvdgkkewmenvnreehlqaiiewalqqiennfdendtemeel  
>tr|D8HCY8|D8HCY8\_STAAF  
mfniinideqevrellegainarveelakekyfmytelanylnlskptieellinnngmkyymvgstyrfkksdvdefmeq  
ltahmniqnndfkqvnikk  
llearq  
>tr|D8HCY9|D8HCY9\_STAAF  
mikqlfnnkeirfielkneywaiatdvakvlgrdafnatkylpehvrvtlkgsttsdkkkarkyqdytvinekgyrlv  
mrsnkaealdfdwcdvl  
velrtstklkeyevfhlmdkekqkeamgnlkngeiaiskdyckaqtisnkavsni fgfpkmvkkedmtnemlelrqqvl  
ndtvefvmfvdeyklplsv  
skhiydeysshqia  
>tr|D8HCZ0|D8HCZ0\_STAAF  
metkvlrlg1iaknghtlrsfakdsnislsylslivnkkaepskmakkiadnlndmeelfvyrteka  
>tr|D8HCZ1|D8HCZ1\_STAAF  
mnqegt1gnaisarkkyp1tleelggkvgvshaf1srvennitpndk1lvkianvldfnesqdf1nefrilagyyni  
dentafnnlkssgrlein  
rfkrekkivdkpyk1nyl1fecenkvyfdiktse1gek1vtielpsdilhdikminleikiitkinsk1lysiennpqi  
eeyqkevektrkefterle  
ks1stydidsvireiyddeyli  
>tr|D8HCZ2|D8HCZ2\_STAAF  
masyekrgntwryrislgkdaetgkykysnsgfkrksdakhaemverqlrngeyiapststfkqvaddwlkqyanevk  
vssvreakaihaierfn  
nkpiqtinkheyqrfvndisaqysknyvdsiastnmi fkyaydmklirilpsegikrpkkkvsveeledteihkkflek  
del1fqflvaknhhspqns  
fevctlaytgmragellalkwsdidfenntiniktynpnkkqyqvltpktessigkipvdphvik1lknykvdvq  
dtwkne1yvdnfvftdvn  
gyp1vik1qlwikailkkt1tnkqisthsfrhthcallieagvhikeiqer1rhkdinttmniyakitnsykkdasqk  
fslmesvskd1f  
>tr|D8HCZ3|D8HCZ3\_STAAF  
mvkqlkfsedarqam1rgvdqlanavkvtigpkgrnvl1dkeftapl1tndgvtiakeieledpyenmgaklvqevant  
neiagdg1ttatv1aqami  
qeg1knvtsganpvg1rqgidkavkvaveal1hensqkvenkneiaqvgaisaadeeigryiseamekvngdvitieesn  
glntelevegmqfdrgyq  
spymvtdskmvaelerpyilvtdk1ssfqdilp1leqvqsnrpilivadevegda1tnivlnrmrgtftavavkapp  
fgdrkamled1al1tgaq  
vitdd1gl1kdasidm1gtaskvevtkdnttvvdgdgdensidarvsq1ksqieetesdfdreklqerlaklaggvavi  
kvgaaasetelkerklried  
alnstraaveegivagggtalvnyyqkvseikaegdi1etgvn1v1kal1tapvrqiaenag1legsviver1knaepgvgn  
aatnewvnm1eagivdptk  
vtrsalqhaasvaamfl1tteavvasipeknndqpnmggmpgmm  
>tr|D8HCZ6|D8HCZ6\_STAAF  
mmef1tkrdyfi1q1nd1kai1sprtt1pil1tgikidakehevil1tgsdseisieitipktvdgedivn1setgsv1pg  
rffvdi1kk1pgkdvk1st  
neqfqt1itsghsefn1sg1dpdqyp1lpqvsrddai1q1svk1lvknviaqtnfavstsetrpvl1tgvnw1iqenelicta

Tsompanidou\_et\_al\_Supplemental\_FASTA\_File

tdshrlavrklqledvsen  
knviipgkalaelnkimsdneedidiffasnqvlfkvgvnvfisrllleghypdtrlfpenyeiklsidngefyhaidra  
sllareggnviklstgdd  
vielsstspeigtvkeevdandveggslkisfnskymmdalkaidndeveveffgtmkpfilkpkgdsvtqlilpirty  
>tr|D8HCZ8|D8HCZ8\_STAAF  
mklntlqlenyrnydevtlkchpvdniligenaagktnllesiytlalakshrtsndkelirfnadyakiegelesyrhgt  
mpltmfittkkgkqvkvnhl  
eqsr1tqyighlnvvlfapedlnivkgsppirrrfidmelgqisavylnl1aqqyqrikqknylkqlq1gqkkdltml  
vlnqqfaeyamkvtdkrah  
fiqeleslakpihagitndkealslnylpslkfdyaqnearleeimsilsdnmqrekergis1fgphrddisfdvngmd  
aqtygsqqqrtaalsikl  
aeielmnievgeypil1ddv1selddsrqthllstiqhkvqtfvttsvdgidheimnaklyrinqgeiik  
>tr|D8HD00|D8HD00\_STAAF  
maelpqsrinernitsemresfldyamsvivaralpvdvrdglkpvhrilyglneqgmtpdksykksarivgdvmgkyhp  
hgdssiyeamvrmaqdfsy  
ryplvdgqgnfgsmgdgaaamrytearmktitel1rdinkdtidfidnydgnerepsv1parfpnllangasgiavgm  
atnippnlte1ingv1sl  
sknpdisiaelmediegpdpftag1ilgksgirrayetgrgsiqmrsravieergggrqrivvteipfqvnkarmiekia  
elvrddkkgidg1tdlrdets  
l1rtgvrvidvrkdanasvilnnykqtplqtsfgvnmialvngprk1inlkealvhylehqktvvrtrtqynlrkakdr  
ahileglrialdhideiis  
tiresdtdkvameslqqrfklsekqaqaildmr1rrltglerdkieaeynellnyiseleailadeevllqlvrde1tei  
rdrfgderrteiq1ggfed  
leded1ipeeqiviti1shnnyikr1pvstyraqnrggrgvqgmntleedfvsq1vt1sthdhvlfftnkgrvyklkgyev  
pelsrqskgipvnaielg  
ndevistmiavkd1esednflvfatkrvgvkrasalnsfrinrngkiaisfreddeliavrltsgqediligthas1ir  
fpestl1rplgrtatgvkgi  
tlregdevvgldvahansvdevlvvtengygkrtpvndyr1snrggkgiktatiterngnvvcittvtgeedlmivtnag  
viir1ldvad1sqngraagq  
vr1ir1lgddqfvstvkvkedadevnedeqstvsedgteqqreavvndetpgnaihtevidseendedgrievrqdfmdr  
veediqqssdedee  
>tr|D8HD02|D8HD02\_STAAF  
mtlyldgetltiediksflqqskieiddalervkksravverieneetvygittgfglfsdvridptqynelqvnli  
rshacglgepfskevalvm  
milr1nt1lkghsgatlelvrq1qffineriipiipqgslgasgd1aplsh1alaligegkv1hrgeeksdsv1reln  
rqplnlqakeglal1ngtq  
amtaggvisyieaed1gyqsewialthqslngiidayrhdvavrnfqeqinvaarmrdwlegst1ttrqaeirvqday  
t1rcipqihgasfqvfnv  
kqql1efemnaandnplifeganetfvissgnfhgqpi1afaldh1klgvselanvserrler1vnpq1ngd1paf1spepg  
lqsgamimqyaaas1vsen  
ktlahpasvdsitssanqedhvsmttaarhgyqiienarrv1aiecvialqaaelkgveg1spktrrkydefrsivpsi  
thdrqfkhkdieavaqylkq  
siyqttach  
>tr|D8HD03|D8HD03\_STAAF  
mldir1frnepdtkskielrgddpkvdeileldeqrrklisateemkarrnkvsseeialkkrnkenaddviaemrtlg  
ddikekdsq1neidnkmgt  
ilcripn1isddvpqgesdednvekkwgtprfssfepkahwdiveelkmadfdraakvsgarfvy1tnegaqleralmn  
ymitkhtthqgytemmvq  
1vnadtmygtgq1pkfeed1fkvekeglytiptaevpltnfyneiiqpgvlpekftgqsacfrseagsagrdr1g1r1  
hqfdkvemvcfeqpedsw  
aleemttnaeail1eelglpyrrvilctgdigfsasktydlevw1psyndykeisscsnctdfqarranirfkrdkaakpe  
laht1ngsglavgrtfaai  
venyqnedgtvtipealvpfmggtqi1skpvk  
>tr|D8HD04|D8HD04\_STAAF  
mtth1sfrqgvqecipt1lgyagvgisfgivassqnfsilei1llclviyagaaqfimcalfiagtpisaiv1tvfivns  
rmf1l1sms1apn1ktygfw  
nrvg1gslvtdefgva1tpylkgeaindrwmhgl1nitay1fwaiscvagal1fgeyisnpqt1gl1dfaitamfi1flaiaq  
fesitksr1riyiv1iiav  
ivmm1sl1smfmpsy1ai1iaatisaalgvmmr  
>tr|D8HD06|D8HD06\_STAAF  
mtnytvdt1n1lgkfit1esgevidn1r1ryehvyghgqpl1vvchal1tgnh1tygtddypgwwrei1dgyipihdyqfl1t  
fdvigsp1fgsssp1ndphf  
pkkl1t1rdivranergiqalgydkinil1gsg1ggmqamell1nqqfevdka1ilaatsrtssysrafneiarqaih1gg  
keg1s1arq1gl1tyr1ssk  
syderft1pdevvayqqh1qgnk1fkehfd1ncyl1t1ldv1dshnidrg1rtdv1thvfkn1etkv1tmgf1idd1lypddqvral  
gerfkyhrhffv1pdnvgdh  
gfl1n1fstwapn1yh1f1n1khfkrk  
>tr|D8HD07|D8HD07\_STAAF

Tsompanidou\_et\_al\_Supplemental\_FASTA\_File

mtrlwaslltviyylsqflp1llivkklpfvqysgieltkaviyiqvlvfliaattiilinlkiknptklelevkepky  
iipwallgfalvmiyqmvv  
sivytqifgtqtspterliiarkiplfiffvsivgplleeyvfrkvi fge l fnaikgnrivafaiattvsslifala  
hndykfipiyfgmgvifs1  
ayvwtkr lavpiihmlqngfvvfqllnpealkkateqanfiyhifip  
>tr|D8HD08|D8HD08\_STAAF  
msyhwfkkmlstsililssslglathtveakdnIngekpttnlnhnitspsvnsemnnetgtphesnqtgnegtgsn  
srdanpnsnnvkpdsnnqn  
pspdkpdpnnpngpepkpdpdpnpkpkpdpdpnpkpkpdpdpnpkpkpdpdpnpkpkpdpdpnpkpkpdpnpkpkp  
pnpsdpnqpgdsnhsggs  
knggtwnpnasdgsnqqwqpnqngnsqntgndfvsqrflalangaykynpyilnqinqlgkdygevtddediynirk  
qnfsqgnaylnglqqqsnyf  
rfqyfnplkseryyrnldeqvlalitgeigsmpdlkkpedkpdskqrsfephekddftvvkkqednkksastayskswla  
ivcsmmvvsimlflfvkr  
nkkknknesqrr  
>tr|D8HD09|D8HD09\_STAAF  
mg1fkdkkamtfdnameerrsiynlksisisddelesmiahavkhvpsffnsqstrivlllndnnkfwdntkailke  
vmgenrdfepteqkidnfk  
hsygtilyedqdvvsqglqeqmpnyydnfaiwstqtnamhqfaiwatalatkgigaslqhynplvdeitsnefnipkskw1  
iaqmpfgdi reagektfn  
pvedrfvikk  
>tr|D8HD10|D8HD10\_STAAF  
mkvqiylpiifgdssknetqitqwfeknmdevdvvlpemwnngydlehlnekadnngqsfsfikhlaekykdiva  
gsvsnirnnqifntafsvn  
ksgqlineydkvhlvpm1rehelftagenvaepfq1sdgtyvtqlicydlrfpellryparsgafiafyvaqwpmr1qh  
whsllkaraiennmfviqt  
nstgfdgnteyaghsivinpngdlvge l nesadiltvdlnlneveqqrenipvfksikldlyk  
>tr|D8HD11|D8HD11\_STAAF  
mnyfdnkidqfatylqkrnldhiqflqvr1gmqvlaknigklivmytlayilniflftlitnltfy1irrhahgahaps  
sfwcyvesillfillplvi  
vnfhinplimiiltvislgvisyapaatkkkkipvrlikrkkyaiivsstffiiitliikepfaqfiqlgiieaitll  
piffikedlk  
>tr|D8HD13|D8HD13\_STAAF  
mkykrnqeeietyyeytlkieainnemrkfrhdyvnilttlseiyreddmpglrdyfnknivpmkdn1qmaiklngien  
lkvreikglitakilrage  
msipisiei pdevthinlnmidlsrsigiildnaieasteiddpiirvafiesensvtfivmncaddiprihelfqesf  
stkgegrglglstlkeiad  
nadnvlldtiiengffiqkveiinn  
>tr|D8HD15|D8HD15\_STAAF  
mrr1fsigealidfipnitnanlkdvqftfkqiggapcnvactvqklgqqaymitqlgndafgdsiietissigvdvskv  
yrtneantalafvslteag  
erdfsyrkpsadmlfepsfvndidvnendvvhfcsvd1vdspmrnahyqlitktlnangtvvfdpnvr1plwdnaedlr  
ktihtflplahivkvsdee  
lefittgihdeneaiqs1ftgnvtvviytkgadgaavylknginhyhsgykvkpvdttgagdafigavisrilatdvlnlt  
qlfenegeeilafsnrvaa  
ivttkygainslptlqeveqaf  
>tr|D8HD16|D8HD16\_STAAF  
mtewtreeryqriedvdteyfk1kqqvdqskfrqqfhiqpetgl1ndpngl1fykgkyvshqwfp1gavhglkywyny  
tsddl1nfkaegpilnpt  
kydshgvysgsafeynghlymytgnhrdnhwqrhasqmiarlkedgsvekfpkpvissqqpegytshfrdpkvfkygeky  
yaaigagnndqqgrlllyn  
tediinwhy1geintelddfgymwecpdyfnvdnqdvilicpqgiepkgnqfkniyqsgyilgkfdiek1tyehenfvel  
dngfdfyapqtf1dekgr  
vligwmg1pei eyptdkegwahcltiprv1nvengqlkqrpypaleklrhketalgyankftrklhpyegkqyeliidi  
lndatevyfelrtsktss  
tliaynkrenkitl1drsdgl1ptnvegtrstl1dtp1kqlqifvdtssieifcndgervltsrifptedalgiiktste  
sgqvy1qftkydlkdeh  
>tr|D8HD17|D8HD17\_STAAF  
mknisdialagvskstvsrflnngsvskktsek1tkiaehdyqpnqfaqs1rarqthligaiiprmnsyavdetikgl  
akqcqkyesq1lnytgln  
ieaeiqaletlarskvdg1v1matditerhievinkmnpivivgqqheqlhsivhddykagqiigewigqqgyqqievf  
svsekdiavgihrkrgl1d  
qlakyqikpnihetnftyveaqkdvanv1enveqvdaavgatd1alaaykyysdkkdvmpkhqiyfggdpmqt1vps  
iktihynyfeagqcameei  
qqm1kkqdmphysvtvdvni  
>tr|D8HD18|D8HD18\_STAAF  
mnlndti1mf1ct11vw1mtpgl1s1fygg1vqskna1ntvmqsmaaiv1vtfvwitvgftisfgng1wfgnweytf1nh  
vgfatqedisphipfal1m

Tsompanidou\_et\_al\_Supplemental\_FASTA\_File

lfqmmfctiaaisilsgsiaekmfipyllfvviwtalvyspvahvwgggwnklglvldfaggtvvhitstgvsvglvaim  
igkgnkhsstphnliitl  
iggifwvgygfnvgsaftfdniamlafntvisasagaigwlileyifkkttsllglllgaalaglvvitpaagyvtyl  
satimamiggi ccyiviny  
ikvklkyhdaldafgihvgggi igavltaffqskkanpeiengfiytdihiilvqilcvtavvifsivmtfiiakviks  
itplsveqetnigldkiv  
hgehayfege lnrfrnkhiry  
>tr|D8HD20|D8HD20\_STAAF  
mwmifsgli vggllgfvqrtrfcltggfrdmyvqknnkmfyalliaitiqsiglliltatgilqipahsfpilgtvigs  
fifgigivlaggcatgtwy  
ragegligswialvlyavtaaitktgilkpvmekinqptninsdmsqttgipfwglvvlitititilvvrtnlnkkvrva  
vpklkqrytgi ryylfekr  
yhpfi aaiaiglia llawpmsastgrndglittpsanlvhflitgetkfidwgvlvlgifigsyiaargsrefkwrp  
dkitirnsaiggi cmgfga  
svaggcsignglvetatmtwqgwialasmivgvwtmshfivrpmkkvqqqsakvqqqtqiv  
>tr|D8HD21|D8HD21\_STAAF  
msdqvkjpratlkrplyrfrvsslkskgidrvnskaidsalqidsatirrdfsyfelgkkgygynidslldffksels  
esdmikiaivgvnlgkal  
ltynfsihddmtiteafdvkedvigqkignvkvkndelittlkkeeidvvlittpeivaqkvadelvqagvkgilnftp  
grintpsdvqvhqidlgie  
lqslffmknyse  
>tr|D8HD22|D8HD22\_STAAF  
millqlnhisksfgediftdvdfevktgerigivgrngagkstlmkiiagi enydsngvskiknlklyltqqmtlnsn  
atvfeemskpfehikrme  
likeetdwl skhandydsdykthmsryeslnsqfeqlegyqyeskiktvlhglfseedfnkpindfsggqktrls laq  
mlnepd11111depthld  
lettkwledylryfkgavii shdryfldkivtqi ydvalgdvkryvgnyee fiqrdlyyqkrmqeyesqqaeikrlet  
fveknitrastsgmaksrr  
kilekmeridkpmldaksaniqfgdrntgndvmhvknleigyqtaitkpsievskgdhiaaigp ngigkstliktiak  
qqkalingditfganlqigy  
ydgkqaefkssktildyvwdqypmnekdirav lgrflfvqddvkkii ndlsggekarlqla11mlqrdnvlildeptnh  
ldidskemleqalqhfegt  
ilfvshdryfinglankvfdltidggkmylgdyqyyiekveeaealkahqeeqsvnvqaheksmeqssyhnqkeqrreqr  
klerqiseceneietlett  
ilqideqltqpevynnpqkanelai qkdseqklehamskweelqqk1  
>tr|D8HD23|D8HD23\_STAAF  
mstnqtflifviai iiltsvigi vgrymrqr lfk smetlwqtispl esfirpnshfdyeyklykdkfeshslvddkts  
dlnmnaifhkmylnltaig  
emklyaclrgmlsitnksllslfndnaefrknvtyhla ligktvyptfpdqitpvkrhnilflcpflpvisfavifinsq  
vgillflmsclfnii lsat  
lkrtyedlksifyasvnlkqgytiskikhapqpevnfkqfrtarhltsvlaevndedigamviklvkli fml dyvl fhs  
iqksytthmnelkncfdyi  
aeldnhyalamyrrtlecytepqiddsndgivf selthpliadavandfslsqnilltgsnasgkstfmsiainiilas  
aiqtvtaskfvyppgivft  
smanaddvls gdsyfmaelksikriveipdnqkiycfideifkgtntteriaasesvlsflheksnfrviaathdielae  
llkqryenyhfnevienn  
ihfdykikpgkantrnaie llkitsfpakiyerakdnvsng  
>tr|D8HD25|D8HD25\_STAAF  
mtkedvppqvfdierrs fndsswtidafyheieqnnfakyfvlefeqqi igylglwividqaqittvaiddnyrgyglgqm  
llkyginyashtcdvmsle  
vravnkvahvyenlgfqyggkrknyygegedamvmwvnlnd  
>tr|D8HD26|D8HD26\_STAAF  
mnsllidtsnqplsva lmqndevlaeitt dskqnhsvqlmpaisqlfeqskitkqldaiivaegpgsytg lrigvtvak  
tlayal dvklygvsslka l  
aatidhtdkllvpvfdarrqavytgi fqwqngqlvtiledqymsiealrafledlnqpfiiygkdtvklqdelqgdviaq  
lpnasvmyqlidkpsdvht  
ftpkyhklaeaernwinqknn  
>tr|D8HD27|D8HD27\_STAAF  
mqgfamflveqlksgdli llngdlgagkttltqfigkalgvrrtinsptfni iksyrgknlklhmdcyrl edsdedlgf  
deffedqaitviesqfik  
dlpathlsinistisentrqiel faqgehyeqikeai ihefaah  
>tr|D8HD28|D8HD28\_STAAF  
mrsdmikkgdhqaparsllhatgalksptdmnkpfvai cnsyidivpghvhlreladiakeaireagaipfefntigvdd  
giamghigmrys lpsreii  
adaaetvina hwdgvyfyi pncdkitpgmi laamrtvpai fcsggpmkaglsahgkaltlssmfeavgafkegsiskee  
fldmeqnacptcgsagmf  
tansmnc1mevlgla lpyngtalavsdqrremi rqaafklvenikndl kprdivtreaidafaldmamggstntv lhtl  
aianeagidydlarinaia

Tsompanidou\_et\_al\_Supplemental\_FASTA\_File

krtpylskiapsssysmhdvheaggvpaiinelmkkdgtlhpyritvtgktrrennegkeiknfdvihpldapydaqgg  
silfigniapgavikvggv  
dpsiktftgkai cfnsheaveaidnrtvraghvvi ryegpkggpmpemlaptssivgrglgkdvalitdgrfsgatr  
giavghispeasggpia  
iedgdeitidlnrtnlnvnpedvlarresltpfkakvtgylarytalvtsantggvmqvpenni  
>tr|D8HD29|D8HD29\_STAAF  
mstkqhevqnidplkmaeslepeqlnektlndmrsgseviveallkenvdylfgyppgavplydytdfydgkikhil arh  
eggavhaaegy arvsgktg  
vvvvtsgpgatnvmgtitdahcdslplvvftgqv atpgigkdafqeadilsmtspitkqnyqvrvedipkivheafhva  
nsgkrkpvv idf pkdmgv  
atnvd l cdeinipgyevvtepenkdidt fisilkeakkpvvlagagingksknqlltqfvnkhiptvtllglgavpye  
dtlflmggmhgsyasna  
ltecdllinlgsrfddraskpdafapnakivhvidpseinkvihvdlgiiadckrfleclndknvetvehsdwvkhcq  
nnkqkhpfk lgeedqvfk  
pqqtieyigkitngeaivttdivgqhmqmwaafypfknhgqcvtsgglgmtgfgipssigaklanpdktvvcfvgdggfqm  
tnqemallpeyglvdkivl  
inngtlmgvkqwdkffnqrfs hsvfngqpdfmkaeaygvkglidkpeql eeql daafayqgpallievrispteavnp  
mvpsgksnhemeg  
>tr|D8HD30|D8HD30\_STAAF  
mtrilk lqvadqvstlnritsafvr lqynidtlhvthseqpgisnmeiqvdiqddtslhilikklkqqinvlmiecydlv  
dnea  
>tr|D8HD33|D8HD33\_STAAF  
mtynivalpgdgigpeilngplsll e iisnkynfnyqie hheffggasidtfgepltektlnackradaillgaiggnwt  
dpnnrpeqgl lklrkslnl  
fanirpttvvk gassl splkeervegtdlvivreltsgiyfgeprhfnhealdsltytreeierivhvafklaasrrgk  
ltsvdkenvlassklwrkv  
vnevsqlypevtvnhllvdacsmhli tnpkqfdvivicenlfgdilsdeasvips glspsasfsndgprlyepihgsap  
diagknvanpfgmilslam  
clreslnqpdadeleqhi fnmiehgqttadlggkln ttdifeilsqklnn  
>tr|D8HD34|D8HD34\_STAAF  
mgqtlfdkvw nrhvl ygklgepqllyidlhlievtspqafeglrlqrklrrpdltfatl dhnvptidifnikdeiank  
qitllqknaidfgvhi fdm  
gsdeqgi vhmvgpetgltpqgktivcgdshtathgafgaiafgigtsevehvfatqtlwqtkpknlkidingtlptgvya  
kdiilhliktygvdfgtgy  
alleftgetiknl smdgrmticnmaieggakygiiqpdditfeyvkgrp fadnfaksvdkwrelysd ddaifdrviel dvs  
tlepqtwtgtnp emgvnfs  
epfpeisdi ndgraydymglepgkaedidlg yvf lgsctnarlsd lieashivkgnkvhpnitai vvpgrsvtkkeak  
lgldtifknagfewrepgc  
smc l gmpdqvpegvhcastsnrnfegrqggarthlvspamaaaaaihgkfvdrkvvv  
>tr|D8HD37|D8HD37\_STAAF  
mvenlseekfg rtrfrcayfnkr lrttgryllkshdieinpkqyehygedaivkiilhelchylhiagkyqhkdqdf  
krlsqvgapr fcnfsiesy  
qqranyeyyctkchakyirirkvdt nrmrcghcngklrmkrqlk  
>tr|D8HD38|D8HD38\_STAAF  
mdnqlinsiiekyqfskkqieavltlleekntvpfiaryrkeqtgg ldevqikqiddeyqymvnlqkrkeeviknieqqg  
lltee lkkdilkqnlqrv  
edlyrpfkqkkktrateakrkglep laiwmkarkhevsieekaqqfineevqsvedaikgaqdiiaeqisdnpyrki l  
kdm yhggl t tskknaed  
ekgiefemyaysepikrianhrv lavnrgekekvsvkfe fdttsvedfiarqein hnnvnrsyileaikdslkr livps  
iereihadl tekaenhaid  
vfsenl rnl l l qppmkgkqilgvdpaf rtgcklavinpfgt fiakgviyphppvs kkeaekdfvqm v kaydvqliaign  
gtasreteqfvadlikkhq  
lpvqfiivneagasvysaseiardefpdfqveersavsigrvqdp lselvkidpksigvgqyqh dvnqalena ltfvv  
etavnqvgdvntassll  
qyvs glssqiakni iayrengaikhnel skikrlgaktfeqsigflrivdgsepldntsihpesykvtyqll dklgfg  
gndlg sdal kaklnsl dmd  
elaie lqv gvp tled iiks lkapnr dprdefetp ilksdvl s iedlkegmklsgtvrnvdfgafv digvkqdg lvhvs k  
l skkf vknpmdivsvgdiv  
dvwisyidknkdkvsl tmi dphe  
>tr|D8HD45|D8HD45\_STAAF  
msdkyrsaymvdlnavasnfkvfstlhp nktvmavvkanayglsvkvarhlmengatffavat ldeaielrmhgita  
kilvlgvlpakdidkaiqh  
rval tvpskqwl keaikn isgeqekklwlhik ldtgmgrlgik dtktyqevieiiqqyeqlvfegvfth facadepgymt  
teqyqrfdm vneai kpey  
ihcqnsagsll mdcqfcna i rpgi slgyypseyvqqkvkvh lkpsvqlianvvqtktlqagesvsygatytatdpttia  
llpig yadgyl rimqgsfv  
nvnghqcevigrvcm dqtivkvpdqvkagds vilidnhrespqsveaaekqhtinyevlcnlsrrlpriyhdgdqrfvt  
nellk

Tsompanidou\_et\_al\_Supplemental\_FASTA\_File

>tr|D8HD46|D8HD46\_STAAF  
mihgigvdlieidrikvlyskqpk1veriltkneqhkfnftheqrkieflagrfatkeafskalgtglgkhvafndidc  
ynde1gkpkidyegfivhv  
sishteqyamsqvleksaf  
>tr|D8HD47|D8HD47\_STAAF  
msdynfmsphakkvmr1sav1fwipialvlliafnilnw1fweildnyisivssvii11lavftlvivpvryrykhcya  
fekhh1rvrngilfldekv  
ipyfriqnididvgpimrryr1at1tlytaggqaeielidrsearr1krw1lnerhlennknee  
>tr|D8HD48|D8HD48\_STAAF  
msepqklhpsiyfngiinaikqniVVffifvifq1kdfdytnpesylwigivfvfflisyisqivgimntrywiednyfi  
1ttg1fnkkrkelnikriq  
svdmtqgvvniiggvd1qiktspdgv1sviskqgeyleryidqlqtelktemaqssteqngnrnhdiegnvediae  
gr1devqnsdsklnqknkr  
ipiymnfkes1famtsgaigt1aalvpiygavre1ipwsklnheisqvwqivsvsvlii111v1lilayiigtiitmi  
rfygfsvmleneq1kieyg  
1fnkkkvtpvtr1qavvehqsyirr1fgytaihf1itsdfenkkieddndsgsvsilpfikrdkayqiiqn1vpd1sy  
qqvnegmp1sgfhrhflip  
siiviamagigcyfwnq1111ftiitvviig1fvikgylyvkhagfkmteeqitiqnfellkriyyfkaahiigfdtwq  
ht1lkrn1lnfsfivakg  
vgaqsin1kyarsedank1kswylrgende  
>tr|D8HD49|D8HD49\_STAAF  
msdytk1skspksal1yyitng1efilsvavyvifyfiw1rfewpqi1y111v1galst1klfikslwqyhrfryqid  
q1svqyrtsf1iyekeetsr  
ier1qylsiksnpiskv1n1ykvgfmtaghtiylpmmshddvkiieartmsn1rgvesdv  
>tr|D8HD50|D8HD50\_STAAF  
mti1nsic1tiitmv1cg1f1p1ait1igq1ffyqqangslitydnrivgskligqhwte1ryf1hgrpsavdynmpek  
1yknvssggsnesngnte  
1jarvkhvkfgnsvtidaatssgsg1dphit1enalkqapriadarhistsrvtd1iqhrkqrgv1tndyvvn1elni  
a1dkmkd  
>tr|D8HD51|D8HD51\_STAAF  
mhhvnkyfnqtmviealkmsfyk1npkq1iknpimfvvevgmilt1ilicfpd1fgtsylsrgylitifi1111tilfan  
fseafae1grgkaqads1rq  
aqsn1tar1ieengayrivnate1kagqni1rvengetipadgvvinglatvdesaitgesapvikesggdfdgviggtlv  
tsdw1eirvseagtsf1d  
kmi1alvegaernktpneialft11tt1tiiflvv1vt1ypiasylh1ilpiam1ialtvclipttigg1lsaigiagmdr  
vtqfnv1aksgravevcgd  
vdvmi1dktgt1tygn1asef1pvnqqmwek1ivaaymssiyddtpegksiv1rakqmyine1pkdidgtykpftaetr  
msgi1tnei1svfkgapnsm  
in1lvkqqqgd1pln1iesicmdvsskggtp1iviennvm1gviy1kdvikdgl1verfael1rkmgietvmctgdna1taati  
akeagvdrfvaeckpedki  
kvikdeqakghivamtgdgtndapalaqaniglamnsgtisakeaan1id1dsnptk1ievvkigkq11mtrgal1ttsf1  
andvakyfai1palmmsti  
pemt1nimh1sspk1sai1salifna1iivalipiamkgvkvkgy1sidri1finn1iygl1gg1ivp1flgik1idmivqff  
v  
>tr|D8HD52|D8HD52\_STAAF  
mei1ilf1tmvm1ayv1fsgy1yrvalvqssrvd1iftrfenvcfki1igtd1ehmsaktyvkh1flafngfmgfitfv11iv  
qqwff1n1pnh1nqsid1a  
fntais1f1tnsn1qhynge1sgvty1tqmi1vmtyl1mftssasgyavciam1rr1tr1tni1ignfyqdivrfivrv11plsc  
lis1ilmtg1gvpq1t1han1  
mir1t1sgh1q1h1afgpi1as1lesikh1gtnggg1flagnsatp1fenpniwsnfiemgsm11pmsm1flfgrm1srhgkrvh  
rhal1ilfvamff1fia1it  
1tmwseyrgnpi1an1giygnmegkevr1fag1salftvittaftgsvnmhds1tp1gg1gpmv1lmm1nvvf1ggeg1v  
g1m1n1li1yv11tvfics1m  
vgktpey1nmpigaremkciv1vfl1ihp1il1v1fsalafm1pgasesitnpsf1hgisqvm1yemtsaaanngsgfeg1kdd  
ttfwn1stgi1m1lsryip  
i1ilq1miass1vnkksyhqdkytiaidkpyfgsv1ivfiv11sg1t1fpv111gpi1gef1t1k  
>tr|D8HD53|D8HD53\_STAAF  
msntes1nigkkr1gsl1tiy1igyspgvktfem1snaie1fqs1ndik1igyiephqr1detna1aeqlpkiatnftkhgshh  
fqy1ldvdri1eesptiv1i  
de1ahtnis1rdrh1ekrymdiee1lnhgidvht1lniqhies1ssqielmtgvhvkervpdyfimsadv1evvdispeqli  
kr1kagkv1ykkdr1dvafs  
nfftyah1sel1rt1t1rtvad1msdkekvrhnhkts1kphiava1sgsiy1neavikeafhiaqkehakftaiy1dvfekon  
rqykdsqkqvhh1mlaks  
1gakvkvy1sqtval1gl1dewcknqdvtk1iigqhi1rnkwrdf1fnkplidh1msfeh1sykieivpikqipvelkmnkspyr  
pkgkrfa1dm1kmi1liqi  
cvmm1glwi1yq1dkhes1ti1mi1fligi1llsiwtr1syi1igflaai1invfv1nyffteprytfevyrfdypitfiv1silt  
silt1sallkq1kfqs1tk  
kqlyrtd11fqfnds1kq1tytven1linagy1qin1q1l1qqsitiy1vinqskviki1plqn1hidnttq1qheqalswvikner

Tsompanidou\_et\_al\_Supplemental\_FASTA\_File

qagatttdtfgpinkwlipi  
gtspikgilaidyqssqvinpydasilesmInelslavenvtllkqtresmlqaerqlthsnflrsishdirptlting  
nldilvshskdmsiiekeq  
llvhsfquesqylyllvtnlsltklqssnvqikvqpylvselveeidmilerrhllkkrivsssvdlqfihidsklilqa  
lfnlienavkhtstdtkin  
lsiryasdeqiefavidegsgisleeqqkiefpytgsnkyfkdnqkesmglylvqtilhkhqsnlqykpnpqphgsif  
yfnidtdfnegdi  
>tr|D8HD54|D8HD54\_STAAF  
mqskilieddhaithl1dvaltldyynvttaenatqahfkqidkpdvilldlglpdkdglcliseirqhtdipiivis  
arqeeqtiigaldngandy  
mtkpfvndelrarivieriakshqetnivftngllsidfgsksvinnhevhltpnefsllellanhkqkvltiemilk  
riyyvntktempstlrvhmt  
slrqklsqchedakdikthprigyqmlqwkek  
>tr|D8HD55|D8HD55\_STAAF  
mgfkeptpiqkdsipyalqgidi1gqaqtgtgktgafgipliekvvgkqgvqslilaptre1amqvaeqlrefsrqgqvq  
vvtvfggmpierqikalck  
gpqivvgtpgrvidhlnrrt1ktgdihlildeademnmgfiddmrfimdkipavqrqtm1fsatmpkaiqalvqqfmk  
spkiiktmmnemsdpqiee  
fytiinkelekdftfnflvdhqpelaivfgrtkrrvdeltsaliskgykaeglhgditqakrlevlkkfkndqinilvat  
dvaargldisgvsyhynfd  
ipqdtesythrigrtgragkegiavtfvnpiemdyirqiedangrkmsalrpphrkevlqareddikekvenwmskeses  
rlkristellneyndvdlv  
aal1qe1veandevvqltfekplsrkgrngkpsgrnrnskrngpkfdskskrsgysskkstkkfdrkekssggsrp  
mkgtrfadhqk  
>tr|D8HD56|D8HD56\_STAAF  
minvtlkqiswipceiedqfinqeingvtidsraisknmlfipfkgenvdghrfvska1qdgagaafyqrgtpidenvs  
gpiiwvedt1talqq1aqa  
ylrhvnpkviavtgsngktttkdmiesvlhtefkvkktqgnynneig1pltilelndnteisilemgmsgfheief1sn1  
aqpdiavitnigeshmqdl  
gsregiakakseitiglkdngtfydgdep1lkphvkevenakcisigvatdnalvcsvddrdttgisftinnkehylp  
1lgkhnknat1a1avghe  
1g1tyntiyqn1knvs1tgmrmeghtlenditv1ndaynaspts1mraaidt1st1tgrri1ilgdvle1genskemhigv  
gnyleekhidvlytfgnea  
kyiydsgqqhvekaqhfnskddmiev1tnd1kahdrv1vkgsrgmkleevnal1s  
>tr|D8HD60|D8HD60\_STAAF  
mihqntiytsgieteeqvsq1terisnmigvhqvniniidgqvtvsyetpan1nsiekeiydegykivf  
>tr|D8HD62|D8HD62\_STAAF  
miell1sialkhsni1nsifigafin11fafti1fmerrsansiwaw11vlvflpl1fgfily111grq1qrdq1fkidk  
edkkg1elivdeqlaalkn  
enfsnsnyq1vkfkemiq1lynnaaf1ttnd1kiytdgqekfdd1iqdirnatdyihfgyy1iqndelgrtilnelgk  
kaeqgvevki1yddmgsrg  
1rkkgl1rpf1rnkgghaeaffpskl1pl1n1rmn1nrnrkiv1vidgq1igyvggfvngdeylgkskkfgywrwth1rivgdav  
nalq1rfildwnsqatrdh  
isyddryfpdvns1gk1gvq1assgpdeeweqikygy1kmissakksiyiqspyfipdqaf1dsikiaalggvdvnimip  
nkpdp1p1fvwat1knaas1  
ldagkvf1hydn1gfl1hskt1l1viddeiasvgtanmdhrsft1nfevna1fiy1dq1iak1kqaf1idd1av1ssel1tkaryakr  
slwikfkegisq11spi1  
>tr|D8HD63|D8HD63\_STAAF  
mqgsdiisaakkymesihqndytghdiahvyrvtalaksiaenegvndt1vie1ac11hd1tvdek1vdank1yve1ksf1  
ss1s1stedqeh1lfi1nn  
msyrngkndhvn1slegqivrdadr1daigavgvartf1qfag1h1fgepmwteh1s1dk1ind1lveq1lppsai1khffek1lk  
les1mhtdtakmiakerhd  
fmmmy1lkqfftewnyhd  
>tr|D8HD64|D8HD64\_STAAF  
mkkkallp1fl1gimvfl1agcdyskpek1rgff1ynt1fvdpmknv1dwl1gn11ndnyglaii1lv1viri1llp1fml1snyk  
nshmmr1qk1mkvakpevek1  
qekvkrartqeeqmaange1liqvykkydmpiksm1gclpml1iqlpiimglyfv1kdq1vdgl1fkyph1flwfd1lgrpdiw  
iti1agvlyfi1qayvsskt  
mpdeqrqmgymmmv1spimi1wis1ssasa1glyws1saaf1lvvqthfaniyyekvakkevqpfi1eayerehnggsnkkg  
kntqvvs1kkkkk  
>tr|D8HD65|D8HD65\_STAAF  
mfngsy1lnvyfi1cgtsdvpshrtihev1eaalkagit1lfqfrekgesa1kgn1d1vlake1qhl1chqydv1pfi1vnddvs1  
ake1nadgi1hvggddakvk  
eiaqyftdki1g1s1sd1geyaksd1thvdyigvgpiyptpskhdah1tpvgpemi1atfkemnpq1lpiva1iggints1vap  
iveagangis1visaiskse  
niektvnr1fkdf1fnn  
>tr|D8HD66|D8HD66\_STAAF  
mnylnk1rienpl1ticytndv1knftang11sigaspamseapeeaeefykvaqall1nigt1taqneqdi1aiaqtane

Tsompanidou\_et\_al\_Supplemental\_FASTA\_File

aglpivfdpvavgastyrk  
qfcklllksakvsvikgnaseilaiddatmkgtdsdanldavaiakkayaiyktaivitgkedvivqgdkaivlang  
p1larvtgagc11ggviag  
flfretedpialeavsvfniaaevaaenencggpgtfspllltdlyhlnettyqqriciqeve  
>tr|D8HD67|D8HD67\_STAAF  
mikpkialtiagtdptggagvmadlksfhscgvymgvvtsivaqntlvgqhinhlnhqwvdeqldsvfndtlphaiktg  
miatadtmetirhylmqhe  
sipyvidpvmaksgdsldndtkqn1qhtl1pladvvtpnlpeaeitgltidseekimqagrifindigskgviikg  
hsndtdiakdy1ftkedvg  
tfenerfktkthgtgctfsavitaelakgrp1feavhkakkfismsiyqtpeigrgrgvnhfayllkeglddelsk  
>tr|D8HD68|D8HD68\_STAAF  
mefsqklyqaakpiindiyyeddfiqm1lgniqadalrhy1qadaaylkeftnlyallipkmnsmdvkflveqiefmve  
gevlahdilaqivgesyee  
iiktkvwppsgdhyikhmyfqahsrenaiytiaamapcpyiaelakrsqsdhklnrekdtakwdfsystemddiinve  
almnklaesmsdkeleqvk  
qvflesciherrffnmamt1eqwefggkvnd  
>tr|D8HD69|D8HD69\_STAAF  
mlkpfakin1qlntkel1gepndmaemncsdpydliwlvpt  
>tr|D8HD70|D8HD70\_STAAF  
mkk11asslavglivagnagheahaseadlnkaslaqmaqsndqtl1nqkpieagaynytfdyegftyhfesdgthfaw  
nyhatgangadmsaqapat  
nnvapsanqanqvqsqeveapqnaqtqqpastsnsqvtatpteskassegssvvnvdh1kqiaqresggnihavnptsg  
aagkyqflqstwdsvapak  
ykgvspanapesvqdaavklyntggaghwvta  
>tr|D8HD72|D8HD72\_STAAF  
mtlillinskiiniklmgcmkktfkavrfqivnehgriieyelledgviinkeesgtgwllleivisnehyetfkeyqne  
qlldirvvitrpandpal1f  
estvksiknfktmsivfechiytlrqyaes1leqliddgl1sgeelkksfnrmmskpk1kdeklee  
>tr|D8HD77|D8HD77\_STAAF  
mgigrvtqvmgpvidvrfehnevpinna1vidvpkeegtiqltleva1qlgddvrtiamdstdgvrqgmvdvkdtkgei  
svpvged1grvfnvlget  
id1keeisdsvrdrpihrqapafdelstevqiletgikvvd1lapyikggkiglfggagvgktvliqelinniaqehggi  
svfagvgertregndlyfe  
msdsgvikktamvfgqmneppgarmrvalsg1tmaeyfrdeggqdv1lfidnifrtqagsevsallgrmpsavgyqpt1  
atemqqlqeritsttkgs  
tsiqavfvpaddytdpapatafahldattnlerkltemgiypavdplastsralepsivgqehyevardvqst1qkyrel  
qdiailgmde1sdedkqt  
verarriff1sqnfhvaeqftgqkgsyvpvktvanfkdi1dgkydhipedafrlvgsmddiviakakdmgev  
>tr|D8HD78|D8HD78\_STAAF  
mkqitkamnvsssk1rraekntkqftpydmkmdaitavagassntnhpmlrprkitrsgylvitsdkglagaysanvl  
kklitdieakhqdsseysi  
vv1gqqgydflknrgydieysqvdvpdqpsfksvqalanhaidlyseeidelniyyshyvsvenkptsrqvlp1sqed  
sskghghlssyefepdkes  
ilsvilpqyvesliygtildakasehatrmtamkna1dnatelidd1sleyrnarqaeitqqiteivggsaale  
>tr|D8HD80|D8HD80\_STAAF  
mvkvankyakalfdvsltdtn1etinee1tvineavkdkieqlkmvdsnptqtaeqrrelingvftdinpyiknmmyvla  
dnrhisl1advfkafqsl1y  
nghynqdfatiestyel1sgeelkivklvtqtkl1skiivdtkinpd1iggfrvkvgttvl1dgsvrndlvqlqrkfrvn  
>tr|D8HD84|D8HD84\_STAAF  
msrfynifkqfiqyfylii1lgglylythafilgl1igvtgsaintcificylakakrpd1histgmnwrylvaiia  
cmiwyfnkahvs1igiivg  
lmisyvvvii1rp11kvsk  
>tr|D8HD85|D8HD85\_STAAF  
mkkimti1fgtrpeaikmaplvkaleqekml1epivvtaqhrem1dsv1stfeikpydlnimksgqt1seitsksitqle  
qvi1lekpdmv1vhgdtmt  
tfaggl1aafynqvpi1ghveagl1rsydksyfp1eevnrq1vgv1ad1hfaptknaash11segkysesvvtgntaidamk  
ytvddnyksnimdkyhdkk  
filmtahrrenigppmeni1fkavrr1ideytd1alvypmhknpkvrevaqkilgshdrieliel1dvvd1fhnfakksyfi  
1tdsggi1qeeapsfnkpv1  
vl1svterpegveagtl1kvigtnkqnyvaake1idderlyhqmseasnygdg1faserivnhikyyl1n1itekpsdf  
>tr|D8HD90|D8HD90\_STAAF  
mdtkiwdvreynd1lqqypkineikdiv1nggl1gl1ptetvyglaanatdeeavakiyeakgrpsdnpl1vhihskvqlk  
dftyt1dprvek1mqafwp  
gp1sfil1p1kpgyl1crkvsg1ssvavrmpshsvgrq1l1qi1nepl1aapsan1sgrpspt1fnhvyqd1ngridgiva  
qseeglestv1dctsfpyk  
iarpgsi1taami1td1lps1ahadyndteqpi1apgmkykhysntpl1ti1tdieski1gndgkdw1syia1fivpsnkaafip  
seaqfi1ql1cqddndvkqas  
hnlydv1h1s1deneni1saayiygfe1ndntea1imnrm1kaagnih1kgcel



Tsompanidou\_et\_al\_Supplemental\_FASTA\_File

>tr|D8HD91|D8HD91\_STAAF  
mvnykek1deaihl1tqqkgfeqtraewlm1dvfqwtrtdfvvhmhdmpkamimkfd1alqrmllgepiqyivgfasfyg  
rtfdvnsnc1iprpeteev  
mlhflqqleddativedigtgsgv1aitlkcekpdlnviatdis1eamnmarnaekhsqsiqf1tgda1kplikegikln  
glisnppyidekdmvtmsp  
tvtrfephqalfadnhgyaiyes1ied1phvmekgspvvfeigynqgealksi1lskfpdkkidiikdinghdrivsfkw  
>tr|D8HD95|D8HD95\_STAAF  
mperertspqyesfhe1yknyttkel1tkakt1kl1tnysk1nkkel1vlaimeaemkdgnnyemgilddiqpdgygf1rt  
vnyskgekdiy1sasqirr  
feikrgdkvtgkvrkpkdnekyyg1lqvdfvndhnaeevkkprphqaltplypderiketetqnystrimdlvtpiglg  
qrglivappkagkts1lke  
ianai1stnkpdk1f1llvgerpeevtd1ersveaaevvhstfdepphhvkvael1lerakrlveigedvi1lmdsitrl  
laraynlvippsgrt1sgg  
ldpas1hkpkaaffgaarnieaggs1tilatalvdtgsrmdmiyee1fgktgnmel1h1drklserripaidigrsstrike  
e1l1sksel1dtl1wq1rnl1f  
tdstdfterf1rk1kksknedffkq1lksaeestktgrpi1  
>tr|D8HD96|D8HD96\_STAAF  
mrdytky1ngewiesnsnetievinpateevigkvakgnkvdvdkaveaadny1lefrhtsvkerqalldkivkeyenr  
kddivqaitdelgap1s1s  
ervhyqmg1nhfvaardaldnyefeerrgddl1v1vkeaigvsglitpwnfptnqts1kl1aaafaagspvvlkpseetpfaa  
vilae1fdkvgv1pkgvfn1  
vngdgagvgnp1sehpkvrmsftgsgptgskimekaakdfkksv1elggkspyiv1ddvdikeaakattgkvvnntgqv  
ctagtrv1vpskikd1fla  
e1keqfsqvrvgnpredgtqv1gpi1skkqfdqvqny1nkgi1eegael1fyggpgkpeg1ekgyfarptifinvdnqmtiaq  
ee1fgpvm1sv1tynd1lea  
iqiandtkygl1agyv1gkde1ihkvars1evgtve1neagrkdpl1pfggykqsg1lgrewgdygieeflevksiagyfk  
>tr|D8HDA0|D8HDA0\_STAAF  
mskilntq1ligi1fnr1lekqsl1eqmaaq1liqai1ggegyvyv1kgyddl1qffes1ilhgder1kssrkl1daikdfkeidst  
drv1l1fapfyndqval1diq  
klid1di1dv1lisnkpktdd1f1pdh1vhfid1stprpiv1ytedydkivqphama1nyvy1diytqmiemtrd1el  
>tr|D8HDA2|D8HDA2\_STAAF  
mkiqdytkqmv1deksfi1d1mayt1l1ndkgetm1nydi1idefra1lgdyeyee1etrvvqfytd1ntdgrf1lvngen1wgl1rd  
wysvddi1eeki1apti1qkfd  
i1ldaddeedqnl1kl1gedemddd1di1paqtdeqee1ndpedeqveee1nhsdivieedede1dedeedfedeedfka  
>tr|D8HDA6|D8HDA6\_STAAF  
mtnngnepn1tl1sdlydkdvvytsrpsyi1snpw1kpd1ehqsnf1tgre1llianq1lpviveasatdk1hq1lfqvigkdv  
nsiytfn1nqqsye1nikq1l  
ahkenkki1yfqi1h1deti1nqyya1ldkt1lfval1nkaripertngkfl1pkrkvkieqfeneiknwvfpf1vikpgddl1p  
taggygvmi1cyh1td1l1qka  
i1trikeataetns1li1eek1eekanycvqfayses1giqy1lgatq1ltdkygfyngnenttnvpehvieagr1imeigvn  
qgffgvagfd1l1vdeddnv  
yaid1nfrqngstsm1llane1nsgyqkfysyhskgdnthffnti1lkyvkegs1ypl1syddgdwygedkvksrfgciwhg  
dsketv1eneraflae1leh  
y  
>tr|D8HDA7|D8HDA7\_STAAF  
msekqi1ldyietnkysyie1ishriherpel1gneef1asrt1idrl1kehdf1eiete1iaghatgfiatyds1gdgpaigf1  
aeydal1pg1ghacghni1ig  
tasv1gai1g1kqv1dqiggkvi1vgcpaeeggengsakasyvkagvidq1dialmi1hpgnetyktid1lavdvl1dvkfyg  
ksahasenadeal1nal1dam  
isyfngvaq1l1qhikkgqrvhgv1ldggkaani1pdytharfytramtrkel1dil1teknqiargaa1iqtgcdyefgpiq  
ngvnefi1ktpk1ldd1lfaky  
aeevgeavi1dddfgyg1stdtgnvshvptihphikigsrnl1vvhthrfreaaasvhgdealikgakimalmg1le1itnqd  
vyqdi1eehah1kgnk  
>tr|D8HDA9|D8HDA9\_STAAF  
mrmidi1iekkrdg1ht1ttee1nffidgyvkgdipdyqass1amaiyfqdmndderaaltmamvns1gdmid1sdingvkvd  
khstggvgd1ttt1vl1ap1lv  
aavdv1pvakmsgrg1ghtggtidk1lea1dgf1hveideatfvk1lvnenkvavvgqsgn1tpadkk1ya1lrdvtgtvnsip1  
iassimskkiaagadaiv1  
dvktgsgafmkt1ledaealahamvrignvgrntmai1sdmnp1lgraignale1lqea1dt1kgqgpkd1telv1tl1gsq  
mvvlankaet1leearal1li  
kaidsgaal1ekfktf1knqggdetvidhper1pqaqyqieykakksgyvte1lvsndigvasmm1lgagr1tkeddid1lavg  
iv1lnkkg1gdkveeges1lt  
ihsnrqdvddv1vkk1ldssitiadhvspt1ihkiite  
>tr|D8HDB0|D8HDB0\_STAAF  
mnsakli1dht1lkpestr1tidqi1ideakaynfksvcvnpthvkaaerladsevl1vctvigfpl1gasttatka1feteda  
iqngadeidmvinigal1kd  
grfddvq1di1eavvkaakghtvkvi1ietv1lnhdeivkase1l1tkaagadfvktstg1faggataedvkl1mkd1tvgadvev  
kasggvrn1ledfnkmveag

Tsompanidou\_et\_al\_Supplemental\_FASTA\_File

atrigasagvqimqgleadsdy  
>tr|D8HDB3|D8HDB3\_STAAF  
mpivvydgnciycynyvliqhdlprnyqfatlkgevgqqffkqhpeaanknsvilqkgdriyfesqaiiqilitalnpr  
tkllgvgllwlvpkpvrnfg  
yrmfannrnmwkttwqndyeksfflddnakvkltd  
>tr|D8HDB5|D8HDB5\_STAAF  
mnilviganggvgsllvqqlakenvpftagvrqsdlalksqgmkailldvendsietltetfkipfdkivsvsggnt  
gadktiivldgavksmia  
skeanikhyvmvstydsrrqafddsgdlkpytiakhyaddyrrsglntytilhpgaltnaagsgkieaaqyfefgkeipr  
edvatvlkeivtsnhfnhq  
efqiisgeqdikdaltqfeiekd  
>tr|D8HDB7|D8HDB7\_STAAF  
mshshhhhdhmshvtttnkkvlfisfliiglymfieiegllanslallsdgihmfsdtfslgvaliafiyaeknatat  
ktfgykrfevllaalfngvt  
lfvisilivfeaikrffvpsevqskemliisiiglivnivvaaffmfkggdtsnlmrgaflhvigdlsgvgaitaail  
iwafgwtiadpiasilvsv  
iilksawgitkssinilmegtpsddidevittikkdsriqsvhdchwvtisndmnalschvvvdhtltmkecelleni  
ehd1lh1nihhmtiqletp  
nhkhdesiicsgthshshnhqahhhahvh  
>tr|D8HDB8|D8HDB8\_STAAF  
mftyfksalknakpqlitliyaliafaviavvylanflakyvqniaiysqfgqkppgdeylkviavlliaaivslfv  
lvqifigitnvmkramshe  
kvkftdlfiafkkiylyksvliglvsiamiivslslltsllyklfspvsemimsvqssyadsthligiaittqsiiiiv  
llikaitwlllipifnfm  
tsfvestndkvkthlangfkamkngqktffkffigillnliiilfktpvgylisfntqslsqsvaenirvytvmtil  
fvihaiilmgivqyylkr  
gqkitkdkvktadkdkkvtepkntkventkvtsvetktekaqdslnnttktmtdskpednqpk  
>tr|D8HDB9|D8HDB9\_STAAF  
mivyrkinidtlkefgcgvcyserisgvkrteivkcldyresdltvvyqldrartikqlielsq  
>tr|D8HDC0|D8HDC0\_STAAF  
mdnvkai fldmdgtihennqastytkdvinrlrekgykvflatgrshseihqlvpqdfavngiissngtigitgevdgeiif  
khgls laqvqqi inlakrq  
qiyyevfpfegnrsvlkedetwmrdmicsqdpingvshsewssrqdalagkidwvtfkpegeyskiylfssnlekitafr  
delkqnhvqlqisvsnsr  
fnaetmayqtdkgtgikemi ehfginqeetlvigdsndramfefghytmknarpeiqa ltsdvtaytneedgaakyl  
akhflad  
>tr|D8HDC1|D8HDC1\_STAAF  
mlitlnhvgrlkqgkpi lqdvswqid egdkwlyglngagktllnlnayepatsgtvnlfgkmpgklgysaenvrqqi  
gfvshsll ekfgegetvid  
vmsgafksiglyknvdddi seahqlklvemsdkaqqfigylstgekqrvmiara lmgppri lildepaagldfiare  
sllnilds lsdtyptlami  
yvthfieetanfskllldgqsiqqgavediltsenmsyffrkkvavqrwnnrfsmamle  
>tr|D8HDC3|D8HDC3\_STAAF  
myngvvl fckyfhnki lki lqffcf tfskylrhiydtlfnfvtiltklifvyie  
>tr|D8HDC4|D8HDC4\_STAAF  
msqteekkgigrrvqafgsflssmimpnigafiawgfiaaifidngwlpnkdlatlagpmityliplliafsggrliydl  
rggiaaatmgvivalpd  
tpmllgamimgplvgwlmkktdqliqprtpqgfemlfnnfsagilgfmtivgkvlapimkfimyilsvaveslvhahl  
lpvsvilvepakilflnna  
inhgvftplgtddaakvgqsilytiesnpgpglgi llaymi fgkgtakatsyagaihffggiheiyfpyvlmrpllfia  
vilggmtgvatyqatgfgf  
ktpaspgsfivyclnaprgef lhmllgvflaalvsfvvaalimkftrepkqdleataqmentkgkksvasklvssdkn  
vnteenasgnvsetssldd  
dpealldnyntedvdahnyynninhvifacdagmgssamgasmlrnkfkkgaginditvntainqlpkdaqlvitqkkltd  
raikqtpnaihsvdnfln  
spryeellnnlkkddqa  
>tr|D8HDC5|D8HDC5\_STAAF  
mlstrekemiallikyhgqyitihdiaqqlavssrtihrelkgveayltsfsltlerankkg lriagedsdlnlkqsi  
aqhqtidlsveeqkvi iiy  
aliquakepvkyslageigsvqtlakmlddleldlnkyqlslsrkrgegiylvgteskkreflsqlmvnnlnstsvsv  
ienhfvfhslnqihkdfvd  
lerifnverllmdylsalpyqltessyltltvhivlsisrikngeyvalnddiydsvqntfehkvase ladklgqiydvt  
fnqaeiafitihlrgakrk  
nlnndslnnrceenkikafvkkvemisgmtfadltdlvdgltlhlnpainrlqanietynpltdmikfkyprlfenvr la  
lndcwpdli fpeseiafiv  
lhfggsiknqgnrflnllvcssmgtsrllstrleqvseieritqasvsdlksldlsqydgiistvnldiaspyltn  
p1lpdsdi syvaqflntks  
tfsethdkssnmikddvhvetkdihgnts feneqtsyltsvlekhlsdekseqlmhmrsgl tllsvkivstevkqwq

Tsompanidou\_et\_al\_Supplemental\_FASTA\_File

tyiadylgqcdvindptsf  
aellegrlidnpgwi l spyvai phl rdnmikhpml itvleep l t l p si q nd n q t i k y m i s m f i p d n d f m a s l v s d l s e  
f l s l k l e s i d t f m e n p g e l  
e t l l r n k f l e r i k k q f i  
>tr|D8HDC7|D8HDC7\_STAAF  
mkavhfgagnigrfgiyiladnnvkvtfadvneeinaalahdhqydviladesktttrvnnvdainsmqpsealkqail  
eadiittavgvni l piiak  
sfapflkektnhvni vacena imatdt l k k a v l d i t g p l g n n i h f a n s a v d r i v p l q k n e n i l d v m v e p f y e w v v e k d a w  
y g p e l n h i k y v d d l t p y i e  
r k l l t v n t g h a y l a y a g k f a g k a t v l d a v k d s s i e a g l r r v l a e t s q y i t n e f d f t e a e q a g y v e k i i d r f n s y l s d e v  
t r v g r g t l r k i g p k d r i i k  
p l t y l y n k d l e r t g l l n t a a l l l k y d d t a d q e t v e k n n y i k e h g l k a f l c e y a k v d d g l a d e i i e a y n s l s  
>tr|D8HDC8|D8HDC8\_STAAF  
mnlfrqqkfsirkfnvgifsaliatvtfistnpttasaaeqnqpaqnpaqpapadantqpnanagaqanptaqpaapanqg  
qpaaqpanqggqanpagga  
aqpntqpagqgnqadpnnaaqaqpgnqaapanqagqgnnqatpnnnatpanqtqpanapaaaqaapvaanaqtqdpnas  
ntgegsinttltfddpais  
tdenrqdptvtvtdkvnngyslinngkigfvnse l r r s d m f d k n n p q n y q a r g n v a a l g r v n a n d s t d h g n f n g i s k t v n v  
k p d s e l i i n f t t m q t n s k q  
g a t n l v i k d a k k n t e l a t v n v a k t g t a h l f k v p t d a d r l d l q f i p d n t a v a d a s r i t t n k d g y k y s f i d n v g l f s g s h l  
y v k n r d l a p k a t n n k e f t i  
n t e i g n n g n f g a s l k a d q f k y e v t l p q g v t y v n d s l t t t f p n g n e d s t v l k n m t v n y d q t a n k v t f t s q g v t t a r g t h t k  
e v l f p d k s l k l s y k v n v a n  
i d t p k n i d f n e k l t y r t a s d v v i n n a q p e v t l t a d p f s v a v e m n k d a l q q v n s q v d n s h y t t a s i a e y n k l k q q a d n i l  
n e d a n h v e t a n r a s q a d i d  
g l v t k l q a a l i d n q a a i a e l d a k a q e k v t a a q s k k v t q d e v a a l v t k i n n d k n n a i a e i n k q t t a q g v t t e k d n g i a v l  
d q d v i t p t v k p q a k q d i i q  
a v t t r k q q i k k s n a s l q d e k d v a n d k i g k i e t n a i k d i d a a t t n a q v e a i k t k a i n d i n q t a p a t t a k a a a l e e f d e v v q  
a q i d q a p l n p d t t n e e v a e  
a i e r i n a a k v s g v k a i e a t t a q d l e r v k n e e i s k i e n i t d s t q t k m d a y n e v k q a a t a r k a q n a t v s n t t n e e v a e a d a  
a v e a a q k q g l h d i q v v k s k  
q e v a e t k s k v l d k i n a i q t a k v k p a a d t e v e n a y n t r k q e i q n s n a s t t e e k q a a y t e l d t k k q e a r t n l d a a n s e v  
a t a k d n g i t a i n q v q a a t t  
k k s d a k a e i a q k a s e r k t a i e a m n d s t t e e q q a a k d k v d q a v v t a n a d i d n a a n a d v d n a k t t s e a t i a a i t p d a n v k p  
t a k q a i a d k v q a q e t a i d v  
n n g a t t e e k a a a k q q v q t e k t t a d t a i d g a h s n a e v e a a k n a e i a k i e a i q p a t t k d d a k q a i t t k a n e r k t a i a q t q d  
i t a e e i a a n a d v d n a v t q  
a n s n i e a a n s q n d v d q a k t n v d q s s t n e y v d n a v k e g k a k i n a v k t f s e y k k d a l a k i a d a y n s k v n e a d n s n a s t s s e i  
a e a k q k l a e l k q t a d q n v n  
q a t s k d d i e v r i h n d l d n i n d y t i p t g k k e t a t t d l y a y a d q k k n n i s a d t n a t q d e k q q a i k q v d q n v q t a l e s i n n g v  
d n g d v d d a l t q g k a a i d a i  
q v d a t v k p k a n q a i e a k a e d t k e s i d h s e q l t a e e k t e a l a t i k q i t d q a k q g i t d a t t t a e v e k a k a q g l e a f d n i q i d  
s t e k q a i e e l e t a l d q i e  
v g v n v d a d a t t e e k e a f t n v l e d i l s k a t e d i s d q t t n a e i a t v k n s a l e q l k a q r i n p v v k n a l e a i r e v n k q i e i i  
k n a d a d a s a k e i a r t d l g r  
y f d r f a d k l d k t q t n t e v a e l q n v t i p a i e a i v p q n d p n a n d t n s g s d n n d a t a n s n a n a t p e n t g q p n v t e s t d n a n a d  
t s t t t n n q n d a a t g g t t a  
t s t n n p s t d d t n n k p t a n k n s s v d a s t d n s a t g n g t t d k p e v e s t n n g t t d k p a t e t d n v t p a e s t t n n n s t t a t n e n a p  
t g s t a t a p t t a s t e a a s s a  
d s k d n a s v n d s k q n a e v n n s a e s q s t n g k v a q p k s e n k a k a e k d g r d s t n q s m v e s t t e t l p s a d i t e p k a s n t s k d k e  
e s t t n q t d a g q l k s e t n v a  
s n e a d k s e g n v d t d v s n k p s t s k p s e a k d a t s t e d s q k a d m a t a d t k d n q a a i g a t a d v n n k a t q n d g a n a s p a t v s k g  
s n s a n q d m l n v t k t k e n k t  
n v k s a q q g k v n k p k q a k t l p d t g m s h n d d l p y a e l a l g a g m a f l i r r f t k k d q q t e e  
>tr|D8HDC9|D8HDC9\_STAAF  
mgkyfgtdgvrvgvanqeltpelafklgryggyvlahnkgekhpvrlvgrdtrvsgemlesaliaglisigaevmrlgiis  
tpgvayltrdmgaelgvmi  
sashnpvadngikffgsdgflsdeqeneiealldqenpelprpvgndivhysdyfegaqkylsylvkstvdvnfeglkiv  
ldgangstsslapflfgdl  
e a d t e t i g c s p d g y n i e k c g s t h p e k l a e k v v e t e s d f g l a f d g d g d r i i a v d e n g q i v d g d q i m f i i g q e m h k n q e l n  
n d m i v s t v m s n l g f y k a l e  
q e g i k s n k t k v g d r y v v e e m c r g n y n l g g e q s g h i v m m d y n t t g d g l l t g i q l a s v i k m t g k s l s e l a g q m k k y p q s l i n  
v r v t d k y r v e e n v d v k e v m  
t k v e v e m n e g r i l v r p s g t e p l v r v m v e a a t d e d a e r f a q q i a d v v q d k m g l d k  
>tr|D8HDD2|D8HDD2\_STAAF  
mgvayvfskiqpkatmiatitlvfvalalylvpglglifalfatipgivilwnksiqsfgisalitviittvlngtflvlsa  
iilvlialsiigqllkekt  
skerilyvttvamslisliafmllqtfgrippsasivkpfkqtlheaitmsgadanmtqileegfrqatvqlpgfiiit

Tsompanidou\_et\_al\_Supplemental\_FASTA\_File

flivlinlivtvpilrkfk  
iatpvfklpawqmsgillwiyiiviicllftgqpsvfqsillnfqlvlsivmyiqglsvihffgkagkgnnavtillli  
igtilltptthivglgvid  
lslnlkrimknnsk  
>tr|D8HDD5|D8HDD5\_STAAF  
mdrmyeqnqmpnhneaeqsvlgsiiddpelinttqevllpesfyrgahqhiframhlnednkeidvvtlmdqlstegt  
neagppqylaelstnvtpt  
rnvqyytdivskhalkrrliqtadsiandgyndeledailsdaerrilelsssresdgfkdirvlgqvyetaeeldqn  
sgqtpgipgyrdldqmta  
gfnrndliilaarpsvgktafalniaqkvathedmytvgifslmgadqlatrmicssgnvdsnrllrtgtmteedwsrft  
lavglstrtkifiddtpgi  
rindlrskcrllkqehglmividyqliqgsgsrasdnrqevseisrtlkalarelecpvialsqslrgveqrqdkrp  
mmsdiresgsieqdadiva  
flyrddyynrgdededddggfepqndengeieiiakqrngptgtvklhfmkqynkftdidyahadmm  
>tr|D8HDD9|D8HDD9\_STAAF  
mnnkehiksvila1lvmsvvltyvmwnfspdianvdntdsksetkplttmtakmdttitpfqiihskndhpegtiat  
vsnvkltkplknkevksv  
ehvrrdhnlimpd1ssdftlfdftydlplstylgqvlmnakvpnhfnfnrlvidhdaddnivlyaiskdrhdyvklttt  
tkndhfldalaaavkkdmqf  
ytdiitnktdidrtthvfapskpek1ktyrmvfntisvekmnailfddstivrssksqvttynttgvanndknekyhy  
knlsedeassskmeetipg  
tfdfinhgghgflnedfrlfstnngsge1tyqrf1ngyptfnkegsnqiqtwtgkqgfydyrrsllrtdvvlnsednktlp  
klesvrsslanssdinfek  
vtniaigyemqndsdhnhievqinse1vprwyveydgewyvyndgrle  
>tr|D8HDE0|D8HDE0\_STAAF  
mnwklktl1fifvfilvni1vlsiyvknvrshinevesnnevnfqeeikvpasilnksvkgikleqitgrskdfsska  
kgdsdl1ttsdggkllnani  
sqsvkvsdnn1kdlkdyvncvfkqseyqlseissgsvkyeqtydnfipilnnskamlfniednkaasykqsmddikpt  
dgadkkhqvigvrkaieal  
yynrylkkgdevinar1gyysvnetnvqllqpneweikvkhgdgkdtntyyveatnnnpkiinh  
>tr|D8HDE2|D8HDE2\_STAAF  
mka111ktsvwl11fsamglwhvsnaaeqhtpmkahavttidkattdkqqvpptkeaahhygeaatnvsasaqgtvdd  
innkvtsnapsnkpstavs  
atvnetrdvdtqqastqkptrtatfkl1snaetas1sprmfaanapqttthkilhtndihgrlaekgrvigmaklktvke  
qekpd1m1dagdafqglpl  
snqskgeemakamnavgydamavgnhefdfydqllklegmldfpm1stnvkydkgkrafkfstivtkngirygiigvttp  
etktrrepegikgvefrdp  
1qsvtaemmriykdvd1fvvishlgidp1stqetwrgdylvkqlsqnpqlkkritvidghshtvlqngqiyndalaqgtg  
alanigkitfnyrngevsn  
ikps1invkdvntv1pkalaeqinqadqtfraqtaeviipnntidfkgerddvrtretnlgnaiadameaygvknfskk  
tdfavtngggi1rasiakgk  
vtrydlisv1pfgntiaqidvkgdsvwtafehslgapttqkdgktvl1tanggl1h1sdsirvyddmnkpsgkrinaiqil  
nketgkfenid1krvyhvt  
mndftasggdysmfggpreegi1dqvlasy1ktan1akydttepqrm11gkpavseqpakqqgskgsesgkdtqpig  
kdkvmpakqpapskv11  
pthrgtvssgregsgrt1legtavssksqk1tmsapksahekq1pktgtdqssspaamfv1itgig1iatvrrrkas  
>tr|D8HDE3|D8HDE3\_STAAF  
mtntks1cpwv1rwnswanpsedsifpcisnvm1vdcgl1lasirwpsfsftcsis1slifsgafssgtsmmsilvygp  
krfsysamacfyfsf  
takmvi1fmsfgppncyql1ssypqvin1ft1fpl1ipi1ffavfdi1f1pfmsnf  
>tr|D8HDE4|D8HDE4\_STAAF  
mknidiaiydidkvicksiennssdlgy1sqsilsh1rnyvehigmkyyfesvnedmtsssn1ynei1qmgidyfrkhyk  
1nw1knfhell1qqsvshyt  
fde1rser1fikyydl1le1kek1kkdfemd11qsl1ykvpl1nid1sd1kgyyhtisq1ignkytdneyevdnsryyiekik  
pfvienkvyeyitfrnand  
ktskyer1igyskyrintnyavk1alerqtisylgikanviiindyeisirpcefnnfakildydl1k1qtnhneykklmk  
11kefn1h11div11ddde  
fne1ec1vn1sesavini1fnv1rlarryil1tnksganv1ry11fvfnri1rl1q1pyirnkcyk1sn1il1dykcvpfdqmp  
ftas1kg1hnp1ny1t1l1qci  
eykgreyel1vrkiqknt1knkkvytikeeieqygvnelidkynnn1yykhrpnreihsfgdnyylyeneqsimsiiks  
ik11snesvegysnsvefw  
1nneyts1dc1kekkei11rmf1snksismvygaagt1gk1st1inhicnff1ydkdviviantntavdnikrki1sniktsti  
skf1ynd1kekyd11i1idea  
gtvsnkdmnr1lenkqfel11ivgdnyqiesidfgnwfeiakdvl1pkni1nel1tnmyrtkndd11lyfwksvrekksn1ne  
i1nmnkystr1desi1fnef  
nkdei1cl1nydgiyginnr11qannkndsviwg1vkeykv1gdpil1fnetnkyspil1fn1lkg1si1eiyvfeeyil1fd1  
e1nkvine1d11le1id1li  
sssenssviri1rvksdgl1ndddndssdsivpfqvsyaisihkaqglefnsvkivisdd1deqitnni1fyta1traren1

Tsompanidou\_et\_al\_Supplemental\_FASTA\_File

kiywsprtekkidniisk  
rnkdlsilksrikkqna  
>tr|D8HDE5|D8HDE5\_STAAF  
mfnttykeiysmfpnkypvhdiedcrtladlqiemfnrintqlykachynkprkhemikklliefiidnkdkskivs  
aepfelneafyaikqncn  
isnnkp1deyiytyfedllsnisntltnnnrangnnpiniyiyvtqrkdgmvcvvgkshfkyefkgneyklvknqegd1  
fkkmdedkgsqkllsslyi  
kdnelkkystcreflddylytawipvlnehatsqleeylgrylinqnvpilnllshtfk  
>tr|D8HDE6|D8HDE6\_STAAF  
mhwkenriksakndtirmvikelkgsyvvgdqvflpgycvllpkrevrllndltleerqnylldmsfvgdammsl1kpt  
rvnyeilgnkdyflhahlf  
qryewedesvrympvwaydasnwsneetaydsdkhdeirnkikneleqlyni  
>tr|D8HDE9|D8HDE9\_STAAF  
myknyntqllipietsvripqndisryvneivetipdsefdefrhrgatsyhpkmmlkiilyaytqsvfsgriekll  
hdsirmmwlaqdqtpsykt  
inrfrvnpntdaliesslfqfhsqclqnlidnnsifidgtkveasanrytfvwkksiqnhesklnenskalyrdlveek  
ipeikedgdsdltieeid  
ligshldkeiedlnhsienedcaqirkqtrkkrtgikkfkkkfdyserkskyeeqksilkdrnsfsktdhdathfmrme  
dymkngqlkpgynlqiatn  
sqfvisydlfqntdtrtliplf1tmiqntfgy1peyivadagyseqnymaiiddfnktp1itygmfikdktrkfsdif  
ntqnwkydelndeficpnn  
krigfkryayrndrygfkrdfklyecddcsacs1rqqcmkpnssknkkimknynewyfkqaqinqklsepetkkiysqrki  
dvepvgfmgkaidftrms  
vrginkvkre1gfv  
>tr|D8HDF1|D8HDF1\_STAAF  
mterkcacnk1fsikvrqpnivaggksaynnvqvggrgpntenfemkfyraqwklgldeinfekisflshshipdrktgl  
elaekygidgvmigrigifh  
npfafaekprehtskelld1lr1h1s1fnkyekdeirqfks1rrffkiyvrgirgaselrhqlmntqsiaearal1defe  
aqmded1kie1  
>tr|D8HDF2|D8HDF2\_STAAF  
mlinin1stikndkrfnatdd  
>tr|D8HDF3|D8HDF3\_STAAF  
mdivnivimlligvfggfigslvgvggaiiypailllp1lfgapaysayasgl1tssqvffst1sgslkarkktefspq  
1vlymgggmiigsm1gaf1  
an1fdatfvntvyiia1a1alt1mfikvkpssekssfnkyllviig1figiisgiigaggafiiipillvlflk1pmntvv  
ansiviafissigafvik1  
iqgyiplydalfligsii1fapig1k1skkvpni1qkwiisilivfaiiq1l1  
>tr|D8HDF4|D8HDF4\_STAAF  
mnydkkminrinriqqg1ngiikmmeegkdckdvitqisaskss1qrlmgiiisenliecvkaaaddeessqelineavn  
1lvksk  
>tr|D8HDF5|D8HDF5\_STAAF  
mkqygekfidefskaelekakqgq1idvrteeeyalghingsilhpvdeiesfnkeknktyyvicrsngnrsanaskylt  
kkgyinv1ldggkyvyeee  
ndsdytqeeyksieikadrkqfnryrg1qcpgpivk1sqemknievgdqievkvtdpgfspdiksvwkqtrhtlvklenn  
ngina1iqkekakdl1dvn1  
sakgtt1v1fsgeldkavaa1iangaraagkdvs1fft1fwg1nal1kkaqtvnvkkqgiakmfd1mlpkknirmp1skmn  
m1glgnmmryvmkkknvd  
slpt1inqaieqnik1liactmsmdvmgiqkeelrdeveyggvgtyigatekces  
>tr|D8HDF6|D8HDF6\_STAAF  
mffkqfydnhl1sqasy1vgcqrtgeaii1dpvrd1skyievadseg1titqatethihadfasgir1dvakr1naniyvsg  
egeda1gyknmpsktqfvk  
hgd1iqvgnvkl1ev1htpgh1pesi1f1ld1gggssvpmg1fsgdf1fvgdigrpd1leksvqikgsteisakqmyesv  
qnikn1pdyvqi1wpghgag  
spcgka1gaip1st1gyekin1nwafneidetkfiel1tsnqpapphh1faqm1qvnqf1gm1lyqs1dyvps1dnkrva1fd1  
r1skeaf1ggghtkgt1in1py  
nkn1fin1q1gwyl1dfekdi1digdkstvekakht1q1ligfdkvagyr1pk1sdi1stqsvhsadmtgkeehv1dvrndeewnn  
ghlyqavn1phgk1l1neni  
pfnkedkiyv1hc1qsgvr1ssi1avgi1leskgfenvvni1regyqdf1pes1k  
>tr|D8HDF7|D8HDF7\_STAAF  
mnkhyqivi1gggtagvtvasr1l1rknqnfkgeia1i1dpadh1hyq1plwt1vgagvss1kssrkdmesvi1pegahwikqa  
vss1fqpen1svi1gdntvv  
yydf1lvvapgl1qinwss1kg1kenigkngvcsn1spdyvnetwnqi1snfkqgnai1fthpnt1pikcggapmkim1ylaedyf  
rkhk1irs1nanvi1yatp1kea  
1fdvgkynke1l1eriveerni1tvnynyn1veidgd1kkvat1fehiktydrkt1isydm1lhvtp1pmgpl1dvvkest1sdsegv  
dvnpt1lqhsys1nvfa1lg  
dasnvptsktgaai1rkqapivann1lqmmn1nqm1l1th1ydg1yts1cp1ivt1gynr1l1laefdynkntketmpfnqaker1rsm1y  
1fkkd1l1pkmywygm1kg1l  
i

Tsompanidou\_et\_al\_Supplemental\_FASTA\_File

>tr|D8HDF9|D8HDF9\_STAAF  
medlkhs1kslgwwdlffaipmfl1faylpnynfitiflniviiiffsigliltthiikiksnk  
>tr|D8HDG0|D8HDG0\_STAAF  
matkkdvhd1flshvnsnavktrkmmgeyiydgvvigglydnrl1vkatsarhqfQdntlvspypgakemilipdfa  
eatn1nd1felikndlnt  
s  
>tr|D8HDG1|D8HDG1\_STAAF  
mlislvipvfallviggiiwmiiegivhiscknkaidnffnkvnkvsetykfattflil1atagisqfylyyivseflf  
llviftfgiagiiflmpyg  
lcf1plytqkkkkqtffkymayttiglsiy1gls1vlvhttkiydeggyvryyysfvmkqaggyaylalav1stlliva  
kkatnknetetvdntnit  
er  
>tr|D8HDG2|D8HDG2\_STAAF  
msqllndt1sawllies1spgevnftaedilsaehfknqtkqaqlqsfdyfeiwnderfiiseekseigeiifkfyrhc  
frysein1kiqdidysd  
ihnpngthcygytfnidkhgkvidsihipmimsalkeieknknanieekfndsvekfvqkvkeiladepinefklkmd  
iaydeyfsvlnskkdglfa  
hyvaiyvkdsdlpqpfnffisdi ekarkspnqtli dyiegevesqrievdenkemfdkflhpsr1pdgrwpsqtefr  
1slmqqlavnqitsgneri  
svngppgtgktt1lkdifahlvvergkelaklnpkdafvktihetddkyvyl1qesiakykmvassnngavenisk  
dlpkieeiinpekckfpe  
yetayanlayelkdfaeiaedligesawglfsgvfgkstinqvldhmlkqdvndigfarllqnennrmgyhelmtewqa  
hgraflee1khvemlkees  
iraydvkscesyskmeqainsekttieeqiyh1nealrdnkeiedlddrinyntkqletlneliksirdsnkgfvnk1  
kaifnseederykkhnaek  
qgl1gqqie1ekckknkned1vsk1kekeklikqltkvqlqldelnsq1qeleayrieskitipekdfwsdnyderqvt  
nlwtsdelqyrram1flra  
mi1hk1111janttiyya1ndfkdrrk1idanpdkvhnawnvmh1ifpvvsttfasfksmyggipkdfidylfideagga  
ipqaavgalyrskkvav  
dpiqiepvvtlesh1idnirknhyvpeylvskeasvqsvadnanqygfwksdatdsnqknwigiplwvhrcl1kpmftia  
nqiyannkmlpsnitvq  
ktgwydvkgnsvqkqfvkehgkvvg1laddwieaiekgknepssfv1spfsavqqikrmlkqqlptridierkinqw  
vdk1igtvhtfqgkeaqv  
yfvigtndtqdgavnwscekpn1lnvavtrakkefyvigdmqriqskpfyeticfervnk  
>tr|D8HDG3|D8HDG3\_STAAF  
mkkfnncilnaisgsqtdknettee1kgakfiilyaysmlv1lalvisnifihilepk1sittieiiivliliesliglrf  
lkeydvkrqkdkenknk  
dfik1ksilvai1fts1al1tagtvadiygitd1gntrsd1ivwsiggiifglvcytmedkk  
>tr|D8HDG6|D8HDG6\_STAAF  
mkkcikt1flsi1lvmsglyhsahasds1skspenwmskl1deskh1teinmpgshdsgsft1tdpvksvaktqdkdy1  
tqmksgrvffdirgrasad  
nm1svhhgmvy1hhe1gkfl1ddakyy1saypnetivmsmkkydsdskvktkfeiefreyyynppqyqnl1fytg1snanpt  
1ketkgkiv1fnrmggyi  
ksygdatsg1wdnatfetkinngs1nlqvqdeykdydkveavkn1lakaktdsnkdn1yvn1svasggsafnst  
ynyashinpeiaktikang  
kartgw1ivdyagypwpgydivseiidsk  
>tr|D8HDG7|D8HDG7\_STAAF  
mqrdy1irvetesmsdfkr1ng1migfvikeahiydehnmqcnsgdifiinhrdlyrfqlqqdgiicyiqfkmky1ad  
kfdvvhc1yfh1tdattk  
nihq1rnimar1vsthirhnel1sk1teqq1viq1lmhmi1hyvprtyhsnqsi1nddkvnqvcdyielhfhed1sl1se1se  
yvgwsh1skkfaes1gv  
gfqh1nttrihak1d1tytdet1dia1qngfssaasfartfkhfthqtpkqyrgdrpaitenqqsaqhnyhdre1il  
1lndyieemnhfiediekv  
nyke1tfqptnhq1nqfnhi1qvgy1rn11ntqyqsq11tchhd1fvnev1aydvmpy1imkkl1napftydae1sn1fydi  
d1c1df11dh1nfs1tmh1d  
qydsr1yidafkv1ihhva1lvshrk1dkfn1yvtt1hts1liemtdy1kalfpnggly1ih1dqaterq1p1lkr1lephid  
hfvfdansndavdfnkmd  
defktasqmi1inktny1id1lmhrhh1krp1il1nwnt1tgdtfitngey1frggi1ieq1l1k1sskvegigyw1nyd1hvs  
hcrnerdymnsie1lfhqyn  
gkrpvyfta1lfnk1tsni1ysddtc1ivtgdtsnfq1llydak1hfnpy1aldnqmmratemih1nina1eegmykikhf  
t1dkengal1fn1wrkhhti  
hgmdkds1dyvnrms1fpk1levy1divtdt1al1nikmi1tngih1ievkrypss  
>tr|D8HDG8|D8HDG8\_STAAF  
mnqqliea1kskedkmi1er1ry1hqhpe1sfhedetakyiaefyk1gkdvvetnvgprgikvtidsgkpgk1lairadfd  
al1pitedt1g1sfasq1kgv  
mhacghdahtaym1vl1aet1aemkds1ftgkvvvi1hqpaeevppggakami1engv1dgvdhv1gvhimstmktgnvy1rpg  
yvq1tgraffk1kvqgkgh  
gssphmandai1vagsyfvta1qtvsrr1spfetgvvt1g1sfdgk1qfnvikdvveiegdvrg1tdatkatie1keikr1s

Tsompanidou\_et\_al\_Supplemental\_FASTA\_File

kglealygvttctleynddy  
palyndpeftecvaktlkeadlefgveicepqpssedfayyakerpsafiytgaavedgeiyphhhpkfniseksllisa  
eavgtvvlodylkgdn  
>tr|D8HDG9|D8HDG9\_STAAF  
mnetyrngnkliigivlgvitfwlfaqslnvvpnlqqsfgadmgtisiasvltalfsgmfvvgaggladkigrvkmtni  
glllsiiigsaliiitnlpa  
llilgriiqgvsaacimpstlaimktyyegaerqraalsywsigswggsgicslfggavattmgwrwififsiiivavlsml  
likgtpetksevtnthkfd  
vaglivlvvmlslnvvitkgaaalgysfwffsliavivaffmflkvekkvdpnlidfkfenkpytgatisnflngv  
agtlivantfvqqglgyta  
lqagylsitylimvlmirvgekllqkmgskrpmllgtfviigialislvflpgifyviscvvgylcfglglgiyatps  
tdtaisnapldkvgvasgi  
ykmasslggafgvaigavyagavaatsihtgamialwvnlmgimafiaifaipnddkrvkdak  
>tr|D8HDH0|D8HDH0\_STAAF  
msvtevi fsfllgglgflyglkimgdglqasagdrldilnkftsnvlgviagivvtiliqsssgttvitiglvtagfm  
tlkqaigvimganigtvtv  
afiigidlgeyampialgaflifffkrskinnigrilfgfgslffglefmgdavkplasl dfgkqlmldmstnpilavi  
vgagltalvqsssatigil  
qefyqqdlislnaaiplvldgnigttilailaslagsiaakraalvhvifnligviiftiflpvvihlisllqdvwllkp  
amtiaavshgfnitntliq  
lpfvaglavi vtlvpgkdiaddykqhlndlvvhagvalqetqkelqnvqqivlsmfedireitkddkklkkleqk  
hqavetindsirnylvris  
tkaitkadverlavmfdvnrslkvaelteeyvaqlkrqhdediritedaqrmdklfnhvaesfdkaidmldvydktkk  
deiversresfniehlrk  
ghikrlnrgecttkgglyidmigvlerigyhsrvsealvglnddvptdeeiattei  
>tr|D8HDH1|D8HDH1\_STAAF  
myssygnyeafarpkkpenvenksayligsglaslaaacflirdgqmegskihileelpkaggsldgenmplkgyvvrgg  
remenhfecldwldfrsips  
leidhasvldefywlakedpnysrcrviekqqrldvdgdftlktaikeildlcltneedlddvkitdvfsddffnsnf  
wiywktmfafepwhsamem  
rrylmrfvhhiggldfsalkftkynqyeslvlpmveylkshgvqfeydvkvedikvdttsqkiareilidrngnaesi  
klindlvfvtngsities  
tygdndtpapptdelggswtlwknlarqspefgnpgkfcqnikkswfvsatsttnkdiidtiesickrdplagktvtg  
giitindsawqisftinrg  
qqfknqpkneistwiyalysdvngdyikkpitescgneicqewlyhlgvptdkiedlakhasntipvmpyitsyfotra  
igdrplvvphqsqnlafig  
nfaeterdvtftteysvrtameavyqllnidrgipevinstfdlrvlmdavyelndhqdlreitkdskmqklalagflkk  
ikgtyiesllkehrll  
>tr|D8HDH3|D8HDH3\_STAAF  
mtlltvnpfdnvglsalvaavpiilflcltvfkmkgi yaalttlvvtlvvalvfvelparvsagaitegvvagifpigy  
ivlmavwlykvsiktgqfs  
iiqdsiasisedqriqllligfcfnaflegaagfgvpiaicavllliqlgfepkaamcliangaagafgaiglpvsiid  
tfnlsgvttldvarysal  
tlpilnfiipfvlvfivdgmkgikeilpviltvsgtytqllllthfgpeladiipslatmvvafvcrkfkpknifrl  
easehkiqkrtpkeivfaw  
spfviltavflvwsapffklfpqggaeslviklpipntvsdlspkgialrldligatgtailtviitilitklkws  
agallveaikelwlpilti  
sailaiakvmtggltvaigqgiakagai fplfspvlwgivfmgsvvnnntlfapiqatvaqqiltsgsllvaantag  
gvaaklispqsiataav  
kkvgeesallkmtlkysii fvaficvwtfilitlif  
>tr|D8HDH4|D8HDH4\_STAAF  
mkkknisyirklgvgiasvtlgtllisggvtpaanaaqhdeaqqnafyqvlmpnl nadqrngfiqslkddpsqsanvlg  
eaqklnsqapkadaqqn  
fnkdqqsafyeilmpnlneeqrngfiqslkddpsqstnvlgeakl nesqapkadnnfnkeqqnafyeilmpnlnee  
qrngfiqslkddpsqsanll  
seakl nesqapkadntfnkeqqnafyeilhlplneeqrngfiqslkddpsqsanllaeaklndaqapkadnkfnkeq  
qnafyeilhlplteeqrn  
gfisllkddpsvskeilaekllndaqapkeednnkpgkedgnkpgkednnkpgkedgnkpgkedgnkpgke  
dnnkpgkedgnkpgkedgn  
kpgkedgnkpgkedgnkpgkedgnkpgkedgnvkvpgdvtndiakangttadkiaadnkladknmikpgqelvdkk  
qpanhadankaqalpetge  
enpfigttvfgglslalgaallagrrel  
>tr|D8HDH5|D8HDH5\_STAAF  
mkynnhdki rdfiieaymfrfkkkvkpeadmtikefilltylfhqqentlpfkivsdlykqsdlvqhikvlvkhsyi  
skvrskiderntyisisee  
grekiaervtldhii kqfnladqsesqmi pkdskeflnmmymyfkniikkhltsfveftilaiitsqnknivllkd  
lieti hkkypqtvrallnl  
kkqgylikerstederkilihmndaqqdhaeqllaqvnqlladkdhlllvfe

Tsompanidou\_et\_al\_Supplemental\_FASTA\_File

>tr|D8HDH6|D8HDH6\_STAAF  
mtekinkkdnyhli faliflavsvsvmmigssfiplqrvlmyfinpndsidqftlevlrlpritlailagaalgmsglm  
lqnvlnkpiaspdiigitg  
gaslsavvfi affshltihllplfavlggavammillvfqtkgqirpttliigismqtlfialvqgllittkqlsaaka  
ytwlvgsl ygatfkdtiil  
gmvilavvpllfvlipkmkisilddpvaiglglvhqrnkliqlitstilvsmailsvgnigfvgliaphiaktivrgsya  
kklmsamigaisiviadl  
igrtlflpkevpagvfiaafgapffiyllltvkk1  
>tr|D8HDH7|D8HDH7\_STAAF  
mllkpkvqiviaglc laivails limgntlvspgtvialfnfdsendlhdvvtgarasrtialltgaalavsgllmq  
ltrnpiaspplfgvnagav  
ffvifstifigiqsfkmivviaf lgaivvtvlvvalgmfrqtlfsphrvilagaaiam lftaftqgilimnetdlqgllf  
wlsqsvslrniwdipwvip  
lvllililifafmaahinilmtsddiatglgniklikwmiimlismlagisvavagsivfvglivpniskrllppnykyl  
ipftalagailmiisdiva  
riiikplelpigvvtavigaivliyimkkgrqr1  
>tr|D8HDH8|D8HDH8\_STAAF  
mnkvikmlvvtlafllvlagcsgnsnkqssdnkdkettsikhamtteikgkpkrvvtlyqgatdvavslgvkpv gaves  
wtqkpkfeyikndlkdtki  
vgqepapnleeisklpdli vaskvrnekvydq lskiaptvstdtvfkfdttklmgkalgekeaedllkkyddkvaaf  
qkdakakykdawplqasvv  
nfradhtriyaggyageilndlgfkrnkdlqkqv dngkdi iqltskesiplmnadhifvksdpnakdaalvkktesewt  
sskewknl davknnqvssd  
ldeitwnlaggyksslk liddlyeklniekqsk  
>tr|D8HDH9|D8HDH9\_STAAF  
mieksqvhdsllsvgtqpmvqlhqlfpkhev fakleympggsmkdrpakyiiehgikhg l itenthli estsgnlg  
alamiakikgllkltcvvd  
kisptnlkiiksyganvemveepdahggy l mtriakvqellatiddaywinqyanelnwqshyhgagteivetikpidy  
fvapvsttgsimgsrkik  
evhpnaqivavdakgsvi fgdkpinrelpgigasrvpeilnrseinqvihvddyqsalgcrklidyegifaggstgsia  
aieqlitsieegativtil  
pdrgdryldlvysdtwlekmksrqgvkse  
>tr|D8HDI1|D8HDI1\_STAAF  
mqnhtavntaqtijlrdlvda ll fedia givsnseitkengqtiliykretqqikipvyfsalnmfryessqpitierrt  
skqpl tatefwqtianmnc  
dl shecevarveeglttaatqlakqlsel dlashpfvmseqfaslkdrpfhplakekrglreadyqvyqaelnqsfplmv  
aavkktmh ihgd tanidel  
esltapikeqatdm lndqals iddyv lfpvhpwqyqhilpnvfakeiseklvllplkfgdylssssmrs lidigapynh  
vkvpfamqslgalrltpr  
ymkngaeqaelrlrq liekdealakyvmvcdetawwsymgqndi fkdqlghl tvqlrkypevlakndtqq lvsmaalaan  
drtlyqmicgkdniskndv  
mtl fediaqvflkv t lsfmgygalpelhgqnil lsfedgrvqkcvlrdhdtvriykpwl tahqslslpkyv v redtpntli  
nedletffayfqt lavsvn  
lyaiidaiqdl fgvsehelmsllkqil knevatiswvtt dqlavrhilfdkqtwpfkqillpllyqrdsggsgmpsgl tt  
vnpnmtvyd  
>tr|D8HDI2|D8HDI2\_STAAF  
minqsiwrsnfrilwlsqfiaia gltvlp lpiymaslnlsvveiq l wsgiaiaapavttmiaspiwgklgdkisrkw  
mvlrallglavcflmalc  
tptlqfvlvrllqglfggv d assafasaeapaedrgkvlgrlqssvsagslv gpliggvtasilgfsallmsiavitfi  
vcifgalklietthmpksq  
tpninkgrrsfqcllctqqtcrfiivgvlanfamymgmltal splassvnhtaidrsvigflqsafwtasil saplwgr  
fndksyvksvyifatiacg  
csailqglatnieflmaari lqgl tysal i qsvmfvvvnachqqlkgtfvgttnsm l v igqiigs lsgaait syttpatt  
fivmgivfavsslfl icst  
itnqindhtlmlwelkqksak  
>tr|D8HDI3|D8HDI3\_STAAF  
mqnkeliqhaayaaierilneyfreenlyqvpqhqwsiqlsdletl tggfaywsamghmyhpev lidgkikk l t ty  
keaiarilghmaqsadnqt  
avqqhmagimsdidsihrtarylqsn ti dyaedryivseqslylghpfhptksasgfseadl ekya pechtsfq lhy l  
avhqdvlltryvegkedqv  
ekvlyqladidiseipkdfi llpihpyqinvlr qhpqymqyseqglidlgvsgdsvyptssvrtvfskalniy lklpih  
vkitnfi r tndleqierti  
daaqviasvkdevetphfklmfeegyral pnp l gqtvepemdl l tnsamivregipnyhadkdi hvlas l fetmpdspt  
skl sqvieqsglapeawle  
cyl drtllpilklfsntgis leahvqntlielkdsipdv cvrdlegic lsr tiatekqlv pnvvaasspvyahdeawh  
r lkyvvvnhlghlvstig  
katrnevvlwqlvahr lmtwkkeyannavfvdcvedlyqtptiaakanlmsk lndcganpiythipn pichnkev syces  
nns



Tsompanidou\_et\_al\_Supplemental\_FASTA\_File

>tr|D8HDI4|D8HDI4\_STAAF  
mnqtilnrvktrvmhqlvssliyenivvyktsyqdgvgfhftiegqdeyrftaekthsfdriritspiervvgdeadttt  
dytqllrevvftfpkndek  
leqfive11qtelkdtqsmqyrestppatpetfndyefyameghqyhsyksrlgftlsdn1kfgpdfvpnvklqwlaid  
kdkvettvsrnvvvnemlr  
qqvgdktyehfvqqieasgkhvndvemipvhpwqfehviqvdlaerlngtv1wlgesde1yhpqqsirtmspidttkyy  
1kvpisitntstkrvlaph  
tienaag1tdw1kqjqqdqty1kde1ktaf1gev1gqsy1ntq1spykqtqvygalgviwreniyhmlideedaipfna1  
yasdkdgvpfienwikqyg  
seawtkqflavairpmihmlyyhgiafeshaqnm1ihengwptrialkdfhdgvrfrkreh1seaash1tlkpmpeahkk  
vnsnsfietdder1vrdf1  
hdafffiniaei1fiiekqydidelqkwkvgkieayqea1pelnnyqhfd1feptiqvekl1ttr11sdselrihhvt  
nplgvgg1tdattiset  
>tr|D8HDI5|D8HDI5\_STAAF  
mqqls1khr1nngdsygi1fnsipdplmieviaasgydfvvidtehvaindetlahliraaeaahiipivrvtavidrdi  
ikvl1dmgargiivphvkd  
etvehivk1sryypqg1rs1nggrmarfgrtp11damemanehimviamiedvegvmaddiaqvegl1dmivegaad1sq  
s1gipwqtrddqv1tshvqh  
ifevvnahgkhfca1predediakwqaqgvq1f1gddrgkiyrh1sas1atskqkgded  
>tr|D8HDI6|D8HDI6\_STAAF  
mri1vqpvi1eq1kaqshpvchyid1vg1leh1lqhits1s1psncqmyyamkansert11dtisqyvegfevasqgeiakg1  
afkpanhi1ifggpgk1tdee  
1ryavsegvqrihvesmhelqr1nailededktqhi11rvn1agpfpnat1hmagrptqfgis1edevddvieaalampni  
h1dgfhfhs1snn1dsn1h  
vdvvt1lyfkkakawsekhqf1pkhin1gggigvnyad1tsqfewdnfvenfkt1liveqemedvt1nfecgrfivahigyy  
vtevd1dikkvhgawyailr  
ggtqqr1r1pvswhnhpfdi1rykdn1pysfekvs1srqdt1vgq1ctpkdvfarevqida1stgdv1vfkyagaygws1  
shhd1f1shphpefi1ytqt  
kede  
>tr|D8HDI7|D8HDI7\_STAAF  
mnh1heh1k1vpvdki1d1hetfep1r1lektkssi1eaddfi1rhpil1vtamqhgrymvidgvhryts1ka1lgckkvvpqei1h  
etqys1stwqhkv1pfgvww  
et1qqehr1pwt1tet1rgeapfi1tmchg1dteqy1lytkd1geah1fqvwekvvasysgccsveriaaqgty1pc1sqqdv1lmkyq  
p1sykei1eavvhkget1pa  
gvtrfnisgrc1n1qvp1a11kqdddveq1rnwkq1fladkfanmrcytekvylveq  
>tr|D8HDI8|D8HDI8\_STAAF  
mdli1gria1wigi1avqmyynv1vismttfi1ifinaegaspeiav1lialvi1il1l1t1ppil1tain1lenkmevkg1tfivy  
a1vafcmfny1ssm1lwvvc  
gi1fliwtkyskdgstgknenkkvdi1estenqfeskdkitke  
>tr|D8HDI9|D8HDI9\_STAAF  
mrknie1l1iwmg1yiqiaymaiia1liyi1ft1ffgsffg1fl11t1gneig1d1lktpts1fmifat1cliifsv1pvtv1laf  
d1skrr1ilkgi1lvvyai1  
aal1ynfvsai1wfiva1s1firks1saentvavqshkgaskqeiryk1vyksvsikhsddsikvahtvgnkkliddkt  
idih1dsse1lkkistdan  
qashkdtckkel1dsqdmiehp1efknpttkn1leg1neevhkdeattkvsdntep1pieskdhvskkd  
>tr|D8HDJ1|D8HDJ1\_STAAF  
mhq1kal1vl1thsryy1kisqkphy1iy1lnknsqsy1l1fl  
>tr|D8HDJ2|D8HDJ2\_STAAF  
merv1itggag1figsh1vdd1qqdydvyl1dnyrtgkrenik1sladdhv1feldireydaveqimktyqfdyvi1hlaalvs  
vaesvekp1lsqe1nvvat  
1r1lei1kkyns1rikrfi1fassaavygd1pdp1pkndqsl1lp1spya1dkyygert1nycs1yniptavvkffn1vfgpr  
qdpksqysgviskmf1dsfe  
hnp1ft1ffgd1qtr1dfvyvydv1vqsvr1imehkdaighgynigtgtftn1levyri1gelygksvehefkearkgdikh  
syadisn1ka1gfv1pkytv  
etg1kdyfn1fevdnie1e1takevems  
>tr|D8HDJ3|D8HDJ3\_STAAF  
mkk1q1kkwkchkn1iedvhinknynyqrk1daleevrkgypikraid1vl1siv1l1c1t1fpim1fi1faia1vidspgnpi  
ysqvrvgkmg1kikiy1klr  
smcknaeknga1qwad1dddri1nvgkfi1rktride1lpq1linv1vkgems1figrperpe1fvel1fssevigfeqrcl1vtpg1  
tg1aq1qgyd1tpqqk1k  
ydmkyihkgs1mme1yis1irt1mvvitgegsr  
>tr|D8HDJ5|D8HDJ5\_STAAF  
menqhnsk1l1t1l1ig1lavfi1qqssvi1agvnvsi1adfit1l1il1vy1l1ffan1h1lkanh1flqffi1ilytyrmi1it1cl1ff  
d1l1fi1tvke1lastvkya  
fvviy1fylgmi1ifk1lgnskkviv1tsy1i1ssvtig1l1fci1ag1lnksp1l1mk1lyfde1irskgl1mndpny1famtqi1it1vla  
kyihny1f1kv1lacg1llw  
s1tttgs1ktafi1i1vl1aiyff1ikk1l1fsrn1avsvsm1lvim1l1l1c1ft1fyn1ny1lfq1sdl1dgl1ps1ldrmasi1feegfa  
s1lndsgsersv1wina1isv

Tsompanidou\_et\_al\_Supplemental\_FASTA\_File

ikytlgfgvglvdyvhigsqingillvahntylqi faewgilfgalfiifmlyllfelrfrfnisgknvtaivvmltmliy  
fltvsnnsryvafilgi  
vfi vqyekmerdrnee  
>tr|D8HDJ6|D8HDJ6\_STAAF  
mksdskeniyyggyqlirtmtpliti piisrafpgsgvgivsfsvnqvflmiasvgvqlyfnrviaksvndkrqls  
qqfwdifvsklflaltvfa  
mymvvitifidyyli flqqgiyigaaldiswfyagtekfkipslnivasgivilsvvifvkdqsdlslyvftiaivt  
vlnqlplfiylkryisfvs  
vnwihwqlfrsslayllpnqqlnlytsiscvvlglvgtyqqvgifsnafniltvaiimintfdlvmpitkmsiqksh  
sltktlannmqililtip  
mvfgliaimpsfylwffgeefastvplmtilailvliiplnmisrqyllivnkirlynasitigavmnlvlclvliyfy  
giygaaiarlitefflliw  
rfiditkinvkl nvvstiqcviaavmmfivlgvvnhyllpptyatllliaigivvyllmmtmknqyvqilrhlrhkti  
>tr|D8HDJ7|D8HDJ7\_STAAF  
mafklpnlpaydalepyidqrtmefhhdhkhntyvtnatvegtelehqsadmianldkvpeavrmsvrnngghfn  
hs1fweilspnseekggyi  
ddikaqwtldefknefankattlfgsgwtlvvndekleivttnqndpltegktpillfdvwehayylkyqnkrpdy  
tafwivn  
>tr|D8HDJ8|D8HDJ8\_STAAF  
mevvyvtqtqpkfltiyntlykeiqigkypsghalptekelcarfdvsrmtlrqaikllaedgivestrgkghfvipqtn  
aqhassmdqfkhpldqill  
acvsmssinyrvdleseytnhlfanhsaviameryyqkkdnshkqadafctfiplnvidtfkvtqneddmktfveqt  
iysnayqsdlkmsitkaph  
fknhsfvfdgdthcwl ietlyaqtpypiminkwyipqeiseltltri rqsdy  
>tr|D8HDK0|D8HDK0\_STAAF  
mnveyskikkavp illflfvfslvidnsfk lsvaiaddlnisvtvswqatlaglvigigavvyaslsdaisirtlfiy  
gvlliiigsii gyifqhqf  
alllvgriiqtaglaaaetlyviyvaky lskedqktylg l stssyslslvigtlsggfistylhwtmflialivvftlp  
flfkllpkentnkahldf  
vgllivatitattvmlf itnfnwlymigaliaiivfalyiknaqrplvnksffqnkryasflfivfvmyaiqlgyiftfpf  
imeqtyhlqldttslllv  
gyivavivgalsgkigeylnskqaiitailialslilpafavgnhisifvismiffagsfalmyapllneaiktidlnm  
tgvaigfynliinvavsvg  
iaiaaalidfkalnfpngdalsshfgiililglmsivglvlfvilnrwtqsek  
>tr|D8HDK1|D8HDK1\_STAAF  
mkfekydhtllkpestrtqidqideakaynfksvcvnpthvkyaerladsevlctvigfplgasttat kafeteda  
iqngadeidmvinigalkd  
grfddvqqdieavvkaakghtvkviievllnhdeivkase ltkaa gadvktstgfaggataedvklmkdtvgadvev  
kasggvrnledfnkmveag  
atrigasagvqimqgleadsdy  
>tr|D8HDK3|D8HDK3\_STAAF  
mtqeiakynvhtkahrklirkwliaivvlaii wafagvpslelksksleilksifsglfhpdisyiyipdgedllrgl  
letfaiaavgtfiaaiici  
plaflgannmvklrpvsgvskfilsvirvfpeivmalifikavgpfsfgvialgihsvgm lgl laediegldfsaves  
lkasgankikt lvfavipq  
impafllilylrfelnrsasilgvigaggigtplifaiqtrswdrvgiiliglvlmvaivdlisgsirkriv  
>tr|D8HDK4|D8HDK4\_STAAF  
mpleiptkydskkkvslktsftfmliivliiwsfiytgfnfgdlmigipqigdlfkqmippdfeylqqittplmldtir  
maivstvl dsivspiall  
casnivhkwisipsrfilnivrtipdl laaifvavfgigqipgilalfilticiigkll yesletidpgpmeamtavg  
ankikwivfgvppqaiissf  
msyvl yafevni rasavlg lvgaggig lfydqt lglfqypktatiilftlvivvvidyistkvrahla  
>tr|D8HDK7|D8HDK7\_STAAF  
mkkikyksltvsaiatvslsalpqs laithesqptkqqrvtl fdrshgqtagaadwvsdgafsdysadiqkqgydvkaid  
ghsniteaslksskifvip  
eanipfkeseqaai vnyvkqgnvvi sdhynadrln nridsseamngyrrgayedmskgmnaeeksstamqgvkssdw l  
stnfgvrfrynalgdlns  
nivsskesfgitegvksvsmhagstlai tnpkakgi vytpeql pakskwshavdqgiyngggkaegpyvai skvgkga  
afigdsslvedsspkyvre  
dngekkktydgfkeqngkllnnitawmskdndgkslkasgl tldtkkll dferpelstepekepwsqppsgykwydpt  
tfkagsygekgadppnt  
pddhtppnqtekvsfdipqnvsvnepfevtihlkgfeanqtlenlrvgiykeggrqigqfsskdndynppgstlptvka  
dengnatikvnakvlesme  
gskirlklgdktlittdfk  
>tr|D8HDK8|D8HDK8\_STAAF  
msniafyvvsdlhgyifptdftsrnqyqpmglllanhvieqdrdqyqdsfkidngdflqgspfcnyliahsgssqplvdf  
ynrmafngt lgnhefnvg  
lpylkd tlrlnypvl caniyendstltdngvqyfqvgdqtvvgig lttqfiphweqpehiqsltfhsafetlqqhlpem

Tsompanidou\_et\_al\_Supplemental\_FASTA\_File

krhadiivvcyhggfekdl  
esgmptevltgenegyamleafskdidi fitghqhrqiaerfkqtaviqpgtrgttvgkvvlstdeyenvsvescellpv  
iddstftideddqlrkql  
edwldyeittlpydmtinhafearvaphpftnfmnyalleksgadvactal fdsasgfkqvvtmrdvinnyfpntfkvl  
avsgaklkeaiersaeyfd  
vkndevsvsadflepqpqhfnfydiyggsynihvgrpkgqrvsnmmiqghavdlkqytyicvnyravggggydmyidap  
vvkdiqvegaqllidflsn  
nnlmripqvvdfkvek  
>tr|D8HDK9|D8HDK9\_STAAF  
mfigknl eyvrklnalsrkelsekinvseqaiwqyetknmmpeiskiydmtsifnvkssyfi seqpeellinsvdkhsia  
fraknykvstkl llnkqyyq  
amylsnltsylfsfvkipdniils linnl d l l ngnleslnkkesikeiakvvrakilqdesneallfmlekagiviyek  
rindsidaysfwskdltfpf  
iilgtknkvavrrnfdlahelghlvhrhiqfdllspeeyktieheadifasefl l p e e a f k k d f d q m t k k s n p d y l a v l  
kekwyvsiqaiamrayylg  
lmsstqyryfwaslnkkgyskep l d d v i e m s r p v k m n s l l k l y f d r n i l t p q k l l n y l k v d e t f l n h l a g i n l k l f k d y  
vnenreynitnlyk  
>tr|D8HDL0|D8HDL0\_STAAF  
mltipekenrgskegeva imidaladkgkka lealskksqeeidhivhqmslaavdqhmvlaklaheetgrgiyedkaik  
nlyaseyiwnsikdnktvg  
i igedkekg l tyvaepigvicgvtpttntsttikami aiktgnpii f a f h p s a q e s s k r a a e v v l e a a m k a g a p k d i i  
q w l e v p s i e a t k q l m n h k g  
ialvlatggsgmvksaystgkpalgvpgnvpnsyiektahikravndi igsktfdngmicaseqvvidkeiykdvtnef  
kvhqayfvkkdelqrlena  
imneqktgikpdivgksaveiaelagipvpentkliiaeisgvgsdyp l s r e k l s p v l a l v k a q s t k q a f q i c e d t l h f g  
glghtavihtedetlqkdf  
glrmkacr v l n t p s a v g g i g d m y n e l i p s l t l g c g s y g r n s i s h n v s a t d l l n i k t i a k r r n t q i f k v p a q i y f e e n a  
ims l t a m d k i e k v m i v c d p  
gmvefgytktvenvlrqrteqpqiki fsevepnpstntvykglemmvdfqpdtiialgggsamdaakamwmffehpetsf  
fgakqkfldigkrtykigm  
penatficipstsgtsevtpfavitdsetnvkyp l a d f a l t p d v a i i d p q f v m s v p k s v t a d t g m d v l t h a m e s y v s v m  
asdytrglslqai kl t f e y  
lks svekgdks rek m h n a s t l a g m a f a n a f l g i a h s i a h k i g g e y g i p h g r a n a i l l p h i i r y n a k d p q k h a l f p k y e f  
fradtdyadialf l g l k g n  
ttealveslakavyelgqsvgiemnlksqgvsee l n e s i d r m a e l a f e d q c t t a n p k e a l i s e i k d i i q t s y d y k q  
>tr|D8HDL1|D8HDL1\_STAAF  
mestlel tkikevlqkn l k i l i l p l l f l i i s a i v t f f v l s p k y a n t q i l v n q t k g d n p q f m a q e v q s n i q l v n t y k e i  
vksprildevskdl d d k y s  
psklssmltintgentqliniqvksghkq d s e k i a n s f a k v t s k q i p k i m s v d n v s i l s k a d g t a v k v a p k t v v n l i g a f  
flglvvaliyiffkvi f d k  
rikdeedvekelglpvlg siqkfn  
>tr|D8HDL4|D8HDL4\_STAAF  
mahlsvklrl l i l a l i d s l i v t f s v f v s y y i l e p y f k t y s v k l l i l a a i s l f i s h h i s a f i f n m y h r a w e y a s v s e l i l i  
vkavttsivitm v v t i v t  
gnrpfrrlylitwmmhliliggsrlfwriyrkylggksfnkkptlvvgaggagsmlirqm l k s d e m k l e p v l a v d d d e h k  
rnititegvkvvgkiadip  
elvrkykikkiiiaiptigqerlkeinni chmdgvel l k m p n i e d v m s g e l e v n q l k k v e v e d l l g r d p v e l d m d m i s n e  
ltnktilvtgaggsigsei  
crqvcnfyperiillghgensiylinrelrnrfgknvdivpiiadvqnrarmfeimemykpyavyhaaahkhvplmednp  
eeavrnnilgtkntaeaaak  
naevkkfvmi stdkavnppnvmgaskriaemi i q s l n d e t h r t n f v a v r f g n v l g s r g s v i p l f k s q i e e g g p v t v t h p e  
mtryfmtipeasrlvlqag  
alaeggefv l d m g e p k i v d l a r n l i k l s g k k e d e i r i t y t g i r p g e k m f e e l m n k d e v h p e q v f e k i y r g k v q h m k c n  
eveaiiqdivndfskeki  
nyangkkgdnyvr  
>tr|D8HDL6|D8HDL6\_STAAF  
mnivitgakgfvgnlkadltsttdhhi fevhrqtkeeelesa l l k a d f v v h l a g v n r p e h d k e f s l g n v s y l d h v l d i l  
trnk k k p a i l l s s i q a t q  
dnpygesklqgeql l r q a e e y g n t v y i y r w p n l f g k w c k p n y n s v i a t f c y k i a r n e e i q v n n r d v e l t l n y v d d i v a e  
ikraiegtptiengvptvp  
nvfkvtlgeivdllykfkqsrldrtlpkldnl fekdlystylsy l p s t d f s y p l l m n v d d r g s f t e f i k t p d r g q v s v n i  
skpgitkgnhwhhtknef  
lvvsgkgvirfrhvn d d e i i e y y v s g d k l e v d i p v g y t h n i e n l g d t d m v t i m v n e m f d p n q p d t y f l e v  
>tr|D8HDL7|D8HDL7\_STAAF  
meklklmtivgt r p e i i l s s t i k a c d q y f n q i l v h t g q n y d t l n q i f f d d l e l r q p d h y l e a v g s n l g e t m g n i i a k a  
y d v l l r e q p d a l l i g d t n  
sclaaavsakr l k i p v f h m e a g n r c f d q n v p e e i n r k i v d h v s d v n l p y t e h s r r y l l d e g f n k a n i f v t g s p m t e v i e a h  
rdkinhsdvl n k l g l e p q q

Tsompanidou\_et\_al\_Supplemental\_FASTA\_File

ylvsahreendi neknfkslmnaindiakkykmpviysthprswkkieeskfefdpvkqlkpfpgffdynalqkdafvv  
lsdsgtlseessilkfpgv  
lirtsterpevlkgtviggitynnliqsvelaremqnnepmidaidykdtvstkvvkiiqsykdiinrntwrk  
>tr|D8HDL8|D8HDL8\_STAAF  
mriailgatnikhmsllshylnhidlninevdiitydkydieehiqginnyykykvdikedwtfikkaiayrfrpyamk  
ilkenhydfviviwgsytgh  
lfksflekyhknkfi lnirdyffennklykymkkivdasrlttssegflkflpkseyriiysynmsiiresnvtgdg  
kkrwpinigfignvrfei  
ngklike landsrfhmqyfgtgseklevfarenfinitfsggfdlketpkylneidilnlnlfgnqialdalsirmyy  
alflnkp iittddtftate  
ankfglgfsinpenlkgigde lmdwynnldvmdinhkrepyrndviennkqfyqeigrifne  
>tr|D8HDL9|D8HDL9\_STAAF  
mnkiyvntsyviai lmfpc lmlgd kplflapisygvglfifsfnsnpnfkfskivydvlgflrlvfpamivffqdsti  
dnlplgqayfnqaviymv  
efiigs lfililsklfkhevsvrsnftlsgssiyivfvlvcgifvafpevrknisfliiktdamgrgteatsglvlf  
vmlfqlalalfl iayas  
ykkkykenpkiiyvvlplaigilnislivgerrisyqlytmvavltvvsllfshkkriniiiisvgifvla lmtlykelyv  
fnysy sealnstsvsnlk  
ivdtlqsyfyggsniaasidylnyngsfkqylfdntravfgfnffvdkkqlitsqlfnqliygskqltghlissagyi  
iyfgplffyl nliani ffa  
flseyiirkshslevifigtyimrlitsifshptplitlismilvvyviaiipgiikkftkkvgie  
>tr|D8HDM1|D8HDM1\_STAAF  
mrlnkfigdsflmilssgiaqviliittpiitrlysp tefgeftifsniamilipiinarydllivntkndrsanilsqi  
sflisllililipifais  
awlypnfildfi fiiimflvsltniftnylnkerkykvlslinvfragsmallqiifglalagsl gliigfslsyiagi  
tlgyktfkkhfnivrdeke  
tkalflenkqlvystpsillns lsfsvvffigilytntevgiygmairvl gipvtiislglski fmqandyiehg  
frnlllkfssilvsvsil  
ymplylfsee lvnillghswvdaitvikiviplfvirlivstvs lsvivlqkqlelilqalfligtvtvfviskm lnt  
flnfv sintvvlivsy mif  
fialyyfaknkqfkns  
>tr|D8HDM4|D8HDM4\_STAAF  
mrknilitgvhyigna lkd klieqghqv dqi nvrnqlwkstsfkgydvlihtaalvhnnspqarlsdymqvmlltkql  
aqkakaedvkqfi fms tma  
vygkeggvgsdqid tqt pmpntnygi skkfaeqalqel isdsfkvaivrppmiygahcpgnf qrlmq lskrlpiipni  
nngrsalyikh ltafidql  
islevtgvyhpqdsfyfdtssvmyeirrqshlktvlinmpsm lnyfnk lsvfrklfgnl tysntlyenna levipgkm  
slviadimdetttkdka  
>tr|D8HDM5|D8HDM5\_STAAF  
mkltvvglyig lpts imfakhgvdvlgvdi nqqtidklqsgqisieepglqevyeevlssgklkvsttpeasdvfiav  
ptpnnddqyrscdis lvmr  
aldsillflekgnti ivesti aptkmddfvkpvienl gftigediylvhcpervlpgkileelvhnriiggvtkaciea  
gkrvyr tfvqgemietdar  
taemsklmentyrdvnia laneltkicnnlninvldviemankhprvni hqpgpgvgghclavdpyfiiakdpenakliq  
tgreinnsmpayvvdttkq  
iikalsgnkvtvfgltykgdvddi respafdiyel nqepdievcaydphveldfvehdmshavkdaslv lilsdhsefk  
nlsdshfdkmkhkvi fdtk  
nvvkssfedvsyynygni fnfidk  
>tr|D8HDM6|D8HDM6\_STAAF  
mclnfrednmkkimvi fgtrpeaikmaplvkeidhngnfeaniv itaqhrdm ldsvl sifdiqadhdlnimqdqqtlag  
ltanalak ldsiinekqpd  
milvhgdttttfvgslaafyhqipvghveagl rthqkyspfeel nrvmvsniael nfaptviaaknllfenkdkesifi  
tgntvidalsttvqndfv  
tiinkhkgkvi lltahrrenigepm hqi fkavrdl adeykdvvfiypmhrnpkvraiaekylsgrnrielielpdaief  
hnftnqsy lvtldsgg iqe  
eaptfgkpv lvrnhterpegveagtsrvigt dydnivrnkqli eddeayqrmsqannpygdgqasrriceaieyyfgl  
rsdkpdefvplrhk  
>tr|D8HDM7|D8HDM7\_STAAF  
mfmaenrlqlkgsaetierfynrqgi etiegfqmfvtklntkdtdevkiltiwesedsfnwlnsdvfkeahknvr  
lksddeqqspi lsnkvfk  
ydiyhyqk  
>tr|D8HDM8|D8HDM8\_STAAF  
mrllilivigli ftalgiagavlp lpttpfl l vavfc farssdrfywnlinqkiykeyvenfy lhrgytlqqkikilisl  
yivigfsiy mvdvlavrig  
liimviiqtav lftfvktlpksnkiee  
>tr|D8HDN0|D8HDN0\_STAAF  
mvnygsinilrsykel flkati lntthl frsgkrmgkkantinrykyfhvhnhqkiqqsskktlwasliitllftvie  
fvgg lvsns lal ldsdfhm

Tsompanidou\_et\_al\_Supplemental\_FASTA\_File

lsdvlalglmslaiyfaskkptarytfgylrfeilaafnglalivisiwilyeaivriiypqpiesgimfmiasigllv  
niiltiilvrslkqednin  
iqsalwhfmgdlinsigvivavvliyftgwriidpiisivisliilrggykitrnawliimesvpqhltdtdqimadikni  
dgidlvhefhlsittehy  
slsahvvlkkkyvgddyqaidqvssllkekygiahstlqienlqlnpldepyfdklt  
>tr|D8HDN1|D8HDN1\_STAAF  
mdkesvvaslarnkkiavetmagqryiierilhtndekhihilpkpdvldvdnikeidenhlnat  
>tr|D8HDN2|D8HDN2\_STAAF  
mtlflleannldfastkeeleakaaslstkriptlievqatenlthgyfiveandeaekqfltkagisiqlvkevrlvg  
kdldevkngdahvdyvtw  
nipegitmdqylarkknsihyeevpevefkrtyvcedmskciclynapdeeavrrarkavdtpidgiekl  
>tr|D8HDN3|D8HDN3\_STAAF  
mikiqq|qhhfglkhvihnfnldiskgeivtfigksgcgkstllniiggfihpssgrviidneikqqpspdcmlfqhhn  
llpwktindnirigfqqki  
sdeinaqlklvlegrgkhfpeqlsggmqrvalcrahvhkpnvilmdeplgaldaftryklqdqvlqkkttestiil  
vthdideaiylsdrivllg  
egcnii sqyditashprs rndshllkirndimetfalnhhqvepeyyl  
>tr|D8HDN4|D8HDN4\_STAAF  
mkr|s|iv|igi|fi|itgcdwqrtskepsknaqqqvikiqylpithsanlmmtkkllsqhnhpkyklelvkfnwpdlmd  
alnsgridgastlielamk  
srqkgsnikavalghhegnvimgqkgmhlnefnngddyrfgiphrysthylllelrkqlkiepghfsyhemspaempa  
alsehritgysvaepfgal  
gek|g|g|k|t|khgddvipdayccvlvlrge|ldqhk|dvaqafvqdykks|g|f|m|ndr|k|q|s|v|d|m|th|f|k|s|r|d|v|t|q|s|a|a|w|  
tsygd|t|k|p|s|g|y|q|e|t|t|l  
vkqhh|fnppayddfvepslykeasrs  
>tr|D8HDN5|D8HDN5\_STAAF  
mtr|t|ink|i|l|pi|it|fi|f|l|gi|wem|v|i|i|ghy|q|p|v|l|l|p|g|p|al|v|g|k|s|i|w|t|f|iv|t|ge|f|q|h|l|a|s|l|w|r|f|v|a|g|f|v|a|l|v|v|a|p|  
l|g|f|l|g|r|n|r|w|l|y|n|a|i|e|p|f|f|  
q|l|r|p|i|s|p|i|a|w|a|p|f|v|l|w|f|g|i|g|l|p|a|i|i|f|i|a|a|f|f|p|iv|f|nt|ik|g|v|rd|ie|p|q|y|l|k|ia|a|n|l|y|l|t|g|w|s|l|y|r|n|i|l|f|p|g|a|f|k|i|  
m|a|g|i|h|m|a|v|g|t|s|w|i|f|l|v|s|g|e|  
m|ig|a|q|s|g|l|g|f|l|v|d|a|r|n|l|n|l|e|d|v|l|a|i|f|f|i|g|l|f|g|f|i|d|r|f|i|s|y|i|e|q|f|i|l|r|r|f|g|e|  
>tr|D8HDN6|D8HDN6\_STAAF  
mtletlikeql|dph|l|ve|d|e|g|t|y|p|r|s|f|i|q|l|f|v|d|g|y|f|g|e|a|t|l|r|k|n|a|e|v|i|e|a|v|s|q|s|c|l|t|t|g|f|c|l|w|c|l|a|f|s|t|y|l|e|n|a|a|q|p|  
h|l|n|k|d|l|q|q|l|l|s|g|e|i|l|g|a|t|  
g|l|s|n|p|m|k|s|f|n|d|l|e|k|l|n|l|e|h|t|y|v|d|g|l|v|v|s|g|r|p|a|v|s|n|i|q|e|d|h|y|f|g|a|i|s|k|h|e|s|s|d|e|f|v|m|f|i|l|r|a|n|q|d|g|i|t|l|v|e|k|t|n|f|l|g|v|n|  
g|s|a|t|y|q|i|t|l|n|q|v|v|p|q|s|q|i|  
i|t|h|d|a|k|q|f|a|i|r|p|q|f|i|a|y|q|i|p|i|g|l|s|i|k|s|s|l|e|i|d|a|f|s|n|a|q|n|g|i|n|q|y|l|e|y|d|v|e|a|f|k|k|r|y|h|q|l|r|e|e|y|a|i|l|d|d|g|n|t|s|h|l|  
n|e|i|s|l|k|k|d|i|g|y|l|l|d|v|n|q|  
a|s|v|v|n|g|s|r|a|y|t|p|s|p|q|v|r|k|l|k|e|g|f|f|f|a|l|t|p|t|l|r|h|l|g|k|l|e|a|e|l|n|s|  
>tr|D8HDN7|D8HDN7\_STAAF  
mkr|s|t|t|l|k|v|r|i|s|n|f|l|q|l|i|t|t|a|f|i|p|f|i|a|l|y|l|t|d|m|l|n|q|s|i|v|g|i|y|l|v|l|v|i|l|k|f|p|l|s|i|s|g|i|i|e|i|f|p|k|a|l|v|i|y|q|l|t|m|  
v|m|l|v|m|g|i|f|s|n|q|l|w|g|i|i|  
f|c|i|a|y|i|f|t|v|w|g|l|q|f|p|v|m|d|t|i|m|d|i|t|e|d|v|e|h|i|y|k|m|s|y|w|i|t|n|l|s|v|i|g|a|l|l|g|g|i|y|g|h|m|i|l|f|l|v|a|a|i|f|i|v|i|v|i|  
l|y|i|w|l|p|e|d|q|n|q|s|v|r|t|v|a|n|a|  
q|t|p|f|y|q|q|f|h|i|l|k|v|l|r|s|y|k|l|v|l|k|d|r|n|y|m|i|s|g|f|i|l|m|m|g|e|f|s|t|s|s|y|i|a|i|r|l|k|d|q|f|e|t|m|s|i|g|p|y|d|i|t|g|a|k|m|l|i|l|m|t|n|t|v|  
g|v|i|l|t|y|f|i|s|k|v|l|k|i|d|f|k|  
i|a|l|v|f|g|l|f|y|i|v|g|y|s|i|t|y|l|n|q|f|s|l|i|l|f|m|i|a|t|i|g|i|e|v|s|i|p|i|e|e|q|r|f|i|i|p|e|d|k|r|g|t|y|s|a|f|h|a|l|g|i|h|m|s|e|t|a|r|l|g|i|v|  
l|g|v|f|l|t|s|l|q|m|g|l|c|m|f|i|l|l|v|  
m|g|a|l|l|l|v|i|g|v|f|r|g|r|k|k|v|i|d|  
>tr|D8HDN8|D8HDN8\_STAAF  
mimgnlrfqqeyfriyknntestthrnaywvklaknveatkmyyalstivqqhasirhffdvttddnltmilheflpfie  
ikqipssanydleaffkq  
elstyhfndsp|fkfk|l|q|f|a|a|y|i|l|d|f|h|v|s|i|f|d|g|s|i|d|i|f|d|d|l|c|n|v|y|r|g|n|t|v|i|n|n|r|q|h|a|h|l|r|n|r|d|d|k|d|n|q|d|a|s|i|  
a|l|d|s|n|y|f|r|l|e|n|n|s|i|h|i|d|s|  
y|l|p|i|k|h|p|f|e|q|a|y|q|t|y|i|d|d|m|t|s|i|d|m|a|s|l|a|v|s|v|l|a|h|i|m|s|q|h|d|v|t|l|g|i|h|v|p|h|l|p|n|d|h|g|i|v|p|l|t|l|i|d|a|k|d|v|c|r|f|  
t|t|d|f|n|k|s|v|l|q|n|m|s|q|l|q|c|a|k|  
s|s|l|s|l|e|i|f|h|c|h|y|q|m|p|p|c|c|n|d|v|i|e|d|h|q|i|h|d|a|h|t|s|l|a|d|i|e|i|f|h|p|h|q|g|f|k|i|i|y|n|s|a|y|d|l|l|s|i|e|t|l|s|d|l|r|n|i|y|l|q|i|t|e|n|  
g|n|k|r|t|t|v|d|e|l|n|m|t|e|r|i|d|i|q|  
l|y|d|d|i|n|l|s|l|p|i|d|d|a|q|t|v|v|t|l|f|e|q|q|v|e|a|t|p|h|v|a|v|q|f|d|g|v|f|i|t|y|q|t|l|n|r|a|n|d|l|h|r|l|r|n|q|y|g|v|e|p|k|d|r|v|a|i|e|k|i|e|m|  
i|a|i|g|v|l|k|a|g|a|y|v|i|p|i|d|p|  
n|y|p|s|r|q|a|y|i|l|k|d|a|t|p|k|v|i|t|y|q|a|l|y|e|n|s|q|i|n|i|h|i|d|l|n|k|i|a|w|k|i|d|n|l|s|e|c|n|t|l|e|h|a|y|v|i|y|t|s|g|t|t|g|n|p|k|g|t|i|p|h|r|g|  
i|v|r|l|h|q|h|y|v|l|n|e|e|t|i|  
l|l|s|g|i|a|f|d|a|t|f|i|y|g|a|l|n|g|g|l|i|v|a|k|e|q|l|n|p|i|v|l|e|q|i|n|e|n|d|v|n|m|w|l|t|s|s|l|f|n|q|i|a|s|i|e|r|i|e|v|l|p|l|k|y|l|i|g|g|e|  
v|l|n|a|k|w|v|d|l|n|q|r|p|h|p|i|  
i|n|g|y|g|p|t|e|n|t|t|f|t|t|y|i|n|p|k|v|p|n|i|p|i|g|k|p|i|l|g|h|v|i|m|q|g|e|r|r|c|g|v|i|p|g|e|l|c|t|s|g|f|g|l|a|a|g|y|l|n|q|p|e|l|t|a|d|k|i|f|k|d|s|  
n|i|n|q|l|m|y|r|s|g|i|v|r|l|p|d|g|  
n|i|d|y|l|r|k|d|k|q|v|i|g|f|i|e|l|s|e|h|a|l|e|r|i|q|g|i|n|k|a|v|v|i|q|h|d|q|d|q|i|v|a|y|e|a|m|h|t|l|s|h|n|i|k|s|q|l|r|m|t|l|p|e|m|i|p|v|  
n|f|m|i|e|q|i|p|i|t|i|n|g|i|d|k|k|

Tsompanidou\_et\_al\_Supplemental\_FASTA\_File

alpmidyvtddayvapstdehllcqi fadi l hvnqvghdnffelfgghslkatlvvnri eastgkrlqigdllqkptvf  
elaqai akvqeqnyevi pe  
aivkddyvlssaqrmyllwksnhkdtvynvpflwr l sselnvaqlrqavqhl ierheilrtqyivddevrqrivadvv  
adfeevi thftdeqeimrq  
fvapfnlekpsqirvryirsp l hay l fidthhi indgmsniqlmndlnalyqhklllpklqykdysewmshrdmtkhrq  
ywl sqfkdevpi lslptdy  
vrpniktngammsfimmqqrql l qkyvekhqitdfmffmsvmtllsryarkddvvvgsvmsarmhkgaeqmlgmfan  
tlvyrgqpspdkmwtfllq  
evkems l gayehqeypfec l vnd l dqshdasrnp l fdvmlvlqnnetnhahfghsklthi qpksvtakfd l sfiieedr  
dytinieyntdlyhsetvr  
hmgncmimidy l khqdtlqicdi pngteel l nwnthvndrm l nvpgnks i isy fnevvsrqgnhvalv mnd l tmye  
tlrnyvdai ahil l sngvg  
ngqrvalfters femiaamlatvkv gasyipididfpkkrqgail edakvtavmsygieiet l pviqlenakgfveske  
ndqydd l hgdqlentam l d  
nemyai yts gttgmpkgvai rqrnl l n l vhawstelqlgdnevflqhanivfdasvmeiyccll nght l vipdreervnp  
aq l qqlinkhrvtvasip l  
qmcsvmedfyiek l itggatstasfvkyiekhcgryfnaygpsestvitsywshqcgdlipetipigkplsniqvyimsd  
gllcgigmpge l ciagds l  
aigyinrpe l madkwqnnpfgkgklyhsgdlarytsdgqief l gridkqvkvngyrieldeienailairgisdcvvtvs  
hfdthdi l nayvgeqrve  
qd l kqylndh l pkymipktimhidcmpl tandkvdttr l npspiqqsnkysepsneieqtfdvdfgevlkqndvgvdd  
dffe l ggnsl eam l v vsh l  
krfghhismqtlyqyktvrqivnymhq nqqs l valp dnl selqni v mtryn l gileds l shrplngt l ltgatgflgay l  
iealqgyshriycfvradn  
eeiawyklmtn l ndy fseetvemml snieivvgdfecmddv l penmdti ihagartdhfgddefekv n vqgtvdvir l  
alqghharliyvstisvgt y  
fditdtedvtfseadvykgq l ltspytrskfyse l kvleavng l dgrivrvgn l tspyng rwhmrniktrfsmv mnd l l  
qlncigvslaempvdfsfv  
dttarqivalaqvntpqi iyhv l spnkmpvks l l ecvkrkeielvsdesfneilqkdmyetig l tsvdreqqlamidtk  
l t l kimnhisekwptitnn  
wlyhwaqyik t i fnk  
>tr|D8HDN9|D8HDN9\_STAAF  
mtvfvmqlqsn l ksieel isqrswsykkprtvnyrynqdk l mhr l gdi l vqygiqhdgtg l l phewhyhisprgkadi vq h  
nrdgqpiyvs l syspyiv  
cvvdkepvgidiekisqr l dwrt l vtcfstneahqics l ndfyqiwtqkesftkl igeglikg l diydmtqshfyqsrev  
kfkqfi fdqfmvqvcflge  
apwsykk l svfq l l ss  
>tr|D8HDP0|D8HDP0\_STAAF  
mgifiyagiigg l lsgivklgwevmfpprtpernatnppqellqqlgfssefthqytftsnmelpwsvfivhfsfsivia  
iicyilvkkyaylamggga  
vfgiivwl fhl iimpimhtvpavwdqpfqehisel fghvwmmtielvrqhfvyrykln  
>tr|D8HDP1|D8HDP1\_STAAF  
mkfivikiggst l sdmhps i inniky l rsnniypi i vhg ggp fineal syqqiephfvng l rvtdkatmtitkhtliadv  
ntalvaqfnqrqcsaiglc  
gl daqlfeikrfdqgygvvptt l nids l sylctkfipi insigfnnhdgefyninadtlayfiaasleapiyv l snia  
gvlindvvipqlpladinq  
yiehgdiygmipkvl daknaiengcpkv i iasgnkpn i eaiy nndfvgttilns  
>tr|D8HDP2|D8HDP2\_STAAF  
mkhqettsqqynfs i ikhgdistpqqftaggmhigl rankkdfgwiysssl assaavyt l nqfkaapl ivtedt l qkskg  
klqalvvn sananstgqg  
giddaqqtqtwaqq l qipsehvastgvigey l pmdkiktgtehindanfttpgafneail ttdtctkhiavslnidg  
ktitigg saksgmi hpnm  
atmlafitt dasiesnt l hq l lksstdhtfnmitvdgd t stndmvlvmanqqvehqilnqdh p qweifvdafnfvctfla  
kaiardgegatklisvnvs  
gaksisdarkigktivssnlvksaifgedanfgri itaigysgeidpnctyvqlnqipvvdkgmavl fdeqamsnt l th  
envtidvqlglgnavatay  
gcd l sydyvrinasyr t  
>tr|D8HDP3|D8HDP3\_STAAF  
mikvgivggsgygaie l i r l lqthphvtiahiyshskvdep l k l t fph l qhimqhfeal tvdnn dcdviffatpapvskt  
cipplvekgihvid l sgaf  
riknreiyeayyketaaqvd l dhaisi sewqsl d nngtk l isnpgcftat l l alhplisekiid l ssiidaktgvs  
gagrslsqr vhfsemnen l  
sayaignhkhkpeiggy l s i agqdvsvi fthplvpmtrgilstiyvkl sseyttes l hklm t syyanqpfvrirdigt f  
pttkevlgsnycdigiyvd  
ettqtalvsvidnlvkgasgqaiqn l ni lydfevttg l kqspvyp  
>tr|D8HDP4|D8HDP4\_STAAF  
mnsiie l tdyysnnyap l klvitkgkgvkvwdtdgkqyidcisgfsvanqghchptivkamteqaskl s i i s r v l y s d n  
l gkweekich l akkdkvlp

Tsompanidou\_et\_al\_Supplemental\_FASTA\_File

lmsgteaveaakiarkwgsevkgitdgqveiamnnfhgrtlgslslshndaykagfhp1lqgtttvdfgdieqltqa  
ispntaaiilepiggeggv  
nipkgyiqavrqlcdkhgllliadeiqvglgrtgkwfameweqvvpdiyilgkalggglypvsavlannvmrvltpgt  
hgstfggnplaiastaa1  
dvlkdeqlverserlgsfl1kallq1khpsikeirgrglfigielntdaapfdvdlqrgilckdthrtiirlsplvid  
keinqivaafqdvfkn  
>tr|D8HDP5|D8HDP5\_STAAF  
mkkkl1tfkenmfigsm1fglffgagnlifpihlqqaagsnvfianlgflitaiglpflgiiagisktsglfeiasrvnk  
tyayiftialylvigpffa  
lprlattsfeiafspflspkqitlylfi fsfvffviawffarkpsrileyigkflnpvflvllaiillfafi hplggisd  
apiskqysnal fngfldg  
yntldal aslafgiiivatikklgienptdiaketiksgtisiimmgiytlaimgtlsighfkl senggialaqitqy  
ylgnygivilslivmvac1  
ktaiglitafsetfeh1pkmnylaiatvvsfisflfanvgtkiimysvpvlmflyplaialivltl fsskf hskiiy  
qctiiftmiaalvdglkas  
pefisstsfsqt1infsqky1pls digmgwfv1sligfiigfiykikhrkipqa  
>tr|D8HDP6|D8HDP6\_STAAF  
minfnkta1vlid1qegilkm dyapytaenvvqnanklidvfrknngfivfvrvkfydgkdalkpnsmsv1ppkecdys  
rfhh1ldkrdgdvfdkrq  
fsafvgtnd1qlrrrgidtivlggvathvgvdtardayqlnydqyfvtdmmsaqnetl hqfpidn1fpimgqtvttsd  
1lniln  
>tr|D8HDP7|D8HDP7\_STAAF  
mkqrigaylidaihragvdkifgvpgdfn1aflddiisnpndwvgtne1nasyaadgyarlnglaalvttfvgvge1sa  
vngiagsyaeripviaitg  
aptraveqagkyvhslgegtfddyrmfahitvaqgyitpenatteiprlintaiaerrpvhlhlpidvaiseieiptp  
fevtaakdt dastyella  
sklhqskqpiiitgheinsfhlhqeledfvnqtqipvaqlslgkafneenpyymgiydgkiaedkirdyvndsd1lni  
gakltdsatagfsyqfnid  
dvvm1nhhnikiddvtndeislps1lqqltdisytnaafpayhrptsdytvgtel1tqqtyfkmmqnlkpnndviad  
qgtsffgayd1alyknntf  
igqplwgsigytlpatlgsq1adkdrn1l1igdgslq1tvqaistmirqhikpvlfvinn dgytverlihgyepynei  
hmdykalpavfggknevi  
hdvesskd1qdtfnainghpdmhfvevkmsvedapkk1idiakafsqqnk  
>tr|D8HDP8|D8HDP8\_STAAF  
mm1qntiamkkqarh1mkvyapvyskhy1asn  
>tr|D8HDP9|D8HDP9\_STAAF  
mintt1evgqvrkklfgqlrigkalm1pvailpaag1l1aigtaiqgealqhy1pfiqnggvqnvaklmtaagsiifen  
1pmifalgvai glaggdv  
aaiaafvgyiimnktmgdflqvtpknvtdpasgyasilgipt1qtgvfggiiigalaawcynkfynin1psylgffagkr  
fvpimmattsfilafpma1  
iwptiqtg1nafstg1ldsntgvavflfgfikr1lipfglhhifhapfwefgswknaagei ihgdqriefeqiregah1  
tagkfmqgefpmmfglpa  
aalaiyhsakpenkkvavag1mgsaaltsfltgiteplefsflfvap1lffihavldglsfl1ly1ldvhlgytfsggid  
y1l1gv1pnktqww1vipv  
glvyaviyyfvfrflivklkyktpgrekqsqavtasatelpyavleamggkanikh1daci tr1rvevndkskvdvpg1  
kd1gasg1levgnmqai f  
gpk1sdq1khemqqimngqvvenpttmeddkdetvvaedksatse1shivhap1tgevtp1sevpdqvfsekmmgdgai  
kpsqgevrappfngkvqmif  
ptkhaig1vsdgle1lihi g1dtk1ngegft1hveegqevkqgd1l1inf1dyirnhaksditpiivtqgnitn1dfk  
qgehni1sfgd1feak  
>tr|D8HDQ0|D8HDQ0\_STAAF  
mtgfsvy1gqpldeayikrmikqgyqmi ftsvqi peeddetkyhyftk1l1n1lkheqvtylidanpsil1tps fyeh1rqy  
daqfmiridhstsieaiea  
imaqg1kcc1nas1isrel1ts1hqqlndft1l1sfchnyyprpdtg1svd1vnkkneliyqfnpkaqiygfivgsg1rgp  
1hkg1ptieatrshspvva  
ak1l1qetgvsevlvgd1liemrqakqlidfcckhrhft1cieevfdttvty1lfdmchkvrpdnpenvirsetsiqic1hsi  
qpqfttqrrigsvtdn1n  
ngryqgemqivrqt1sahdnvnvaqiiked1p1l1sciepn1tdfdqk1treck  
>tr|D8HDQ1|D8HDQ1\_STAAF  
mensttear neatm1demtveea1itmnedqqvplavqkaipq1tkvikktiaqykkgr1iyigagtsgr1gv1daa  
ecvptfntdpheiiigiag  
gqhamtmavegaedhkk1aeed1knid1tskdvvigiasgktpyvig1tfantigattvsiscnehaviseiaqypve  
vkvgpevl1tgstr1ksgta  
qk1il1nm1st1tmvgvgkvydn1midvkatnqk1idrvri1qeicaitydeama1yqvsehdkvatvmgmcgiskea  
trr1l1nngdivkrairdr  
p  
>tr|D8HDQ2|D8HDQ2\_STAAF  
mtkeqq1aeriaavggmdn1dsvmncmtrvrikv1denkvddqelrhidgvmgvi hderiqvvvgpgtvnkvanhmael

Tsompanidou\_et\_al\_Supplemental\_FASTA\_File

sgvklgdpihnhndsekm  
dyksyaadkakankeahkakqkngklnkvksiani fiplipafigagliggiaavlsnlmvagyisgawitqlitvfnv  
ikdgm laylai ftginaak  
efgatpglggviggttlltgiagkni lmvftgeplqpggggiigvifavwilsivekr lhkivpnaidiivtptialli  
vglltifi fmp lagfvds  
lsvvngiisiggvfgfiigasflplvm lglhhi ftphieminqsatyllpiaamagagqvgaalalwvrckrnttl  
rntlkgalpvglgigepl  
iygvtlplgrpfl taciggiggaviggighvgakaigpsgvsllplisdmylgyiagllaayaggfvctylfgttkam  
rqtdllgd  
>tr|D8HDQ4|D8HDQ4\_STAAF  
melneminfvkennkiivt sltiftsvi pelkswyski intenkyrifdrai imigtvlpmyfl lgl nykiyiklle  
rphsefintiwfsligisy  
glilfiaistyrnylaivnrfqlykmcgncdyihpyrfvvnkestlikdcfkvgndlyepgsnykiinlnqtiygyhek  
vesfyqnkndki fhiitln  
rknli rswlfinnwsii lcrftmpivftl fifs lsyfdngiy nafipivi yiftfvfqsii fnk iyt enq lrtqy i qkl  
nsgiev  
>tr|D8HDQ5|D8HDQ5\_STAAF  
mayqseyalenemmqleqlgyervtirndkqll dnfrtilnerhadk legnpltdkefqrlltmidgksifesari lrd  
klplrrdeseiylsfltd  
kswcknkfqvt nqvsvedtykarydvtilinglplvqvelkrrgidineafnqvkr yrkqnytglfryiqmfii sngvet  
ryfsnndsellkshmfyws  
dkqnnrintlqsfaesfmrpcqlakmi srymi inetdrilmamrpyqvavesliqqatetgnngyvwhttgsgktltsf  
kasqilsqqddikkviflv  
drkdldsqtееefnfk fagvdktfntsq lvrqlndkslplivtti qmakai qgnahllkqy ktnkvvfi idechrsqf  
gdmhr lvkqhfknaqyfgf  
tgtprfpenssqdgrttadi fgrclhtylirdaih dgnvl gfsvdyintfknka l kvednsmveaidteevwladkrvel  
vtrhiinnhdkytrnrqys  
siftvqsihaliky yetfkrlnkkleqpltvagi ftkpneddrdgevpyhsreklekmi sdynkkfetnfsttdttneyf  
nhisknvkkgvkdskidil  
ivvnmfltgfdskvln tlyvdkn lmyhdliqaysrtrnrvekeskpf gkivnyrdlkketdda lrvfsqtndtdtilmsy  
eeykkefmdayrelkmi v  
tphmvddiqdeee lkrfveyarllaki ilrlkafdefeftideigmdeqenedykskylavydqvkrataeknkvsilnd  
idfeiemmrndtin vnyim  
nilrqidledkaeqrrnqeqirri ldhaddptlrlkrdli refidnv vpslnkddd idqeyvnfesikkeae fkgfager  
sideqal kti sndyqysgv  
vnphhlkkmigdlplkekrkarkaiesfvaettekygv  
>tr|D8HDQ6|D8HDQ6\_STAAF  
mdnrnm inrvfsqilhqia iknksdvdevdyfyiqgpkni nviqkms lyny l kksyrneyfykntmlnklllgrhsv  
nttaltsempigksiadfi  
llngkgvy yeikte ldkldr ldnq indy yevfnyvvitndkhlnkvm arykdttvgilvlttrntlsevqpkkennsll  
ntkamynflrkeerkrvia  
qnhmdvptyndf teydv lfdvfkeipmtklhnmi selkkrngmkeykdeflaapteikflly fakmtkkdknklyhflk  
ed  
>tr|D8HDQ7|D8HDQ7\_STAAF  
myppy lrgkqnel fairellekg ligdcipii epiky tttfkn tlyqcgekafsinlvvnsk lteeeisnetvehltei  
itknksviqkayl gpsdeg  
ndrlkqqfssnslailtsvddwemfgdknlemvfvppdrhikrklrni pnk giimdpfnklsrnvdyl dnddefysddh  
lyykedgyvafsdysvigg  
eyvdggf splai aihi vyfdeane lrvkhfvdsndrlnpak kffeavdklvtwskn ldnknrsyaigqfeelnenny  
pglglikr lsimhhleimn  
rylesqnenm  
>tr|D8HDQ8|D8HDQ8\_STAAF  
mki cekcfnteiie iivndnskfdncdi dndhlgvki fdttrhidkleqirdylrpalelydisinl pdtfspkegkki  
etal kddwsifnveedki s  
cilnel fkd denidrrvleglvgaki ikdkkytnen livanndwdgfc eslkyknrfhnminlenl affldittnyysi  
eefrerfepl ysrivkfi  
tekse lmsppkgfatagrlnskwivlylstkeqvsieevkpkhndiiyigkvklqknvtkek l kianltnltsnaikag  
dggfrkyfvnyqtlkkih k  
glt npsdeqgidylpfqyladyi rslkydgimyesilqdgtnfvffdqnl fecvnyerkrvsdvkytltkls  
>tr|D8HDQ9|D8HDQ9\_STAAF  
msnll evns lnvqfnydettvqavknvsfel rkkhilg ivgesgsgksitaksi lgl lpdypdhtltgeiifngqsltnl  
stsalqqi rgkdisimifq  
plssl nprl t igkqitevl fqhkrvskseaksmtidilekv gikhatrqfdayphelsggmqrvmiamalil kpqilia  
depttal dastqnl lqlm  
kslyeytetsiifi thdlgavyqfcdmi vmkdgs vvesgtvesi fkspqhtytkrlidaipdihqtrpprplnndillk  
fdrvsdytspsgslyrav  
sdinl airkgetl givgesgskstlaktvvg lkevse gfiwyne lplslfkdelkslrqei qmifqdpfasinprfkv  
idvikrpliihgkvkdndd



Tsompanidou\_et\_al\_Supplemental\_FASTA\_File

iktvvsllekvgldqsflyryphelsggqrqrvsialavepkvivcdeavsaldvsiqkdielellkqlqldfgityl  
fi thdmgvineicdrvam  
kngeivelntediikhppqsyakqlisevaviak  
>tr|D8HDR0|D8HDR0\_STAAF  
mncfrlltsnkfdmmlc|pihkcvnlfytfvyhsnlkiiilqgviiiitylesfkslyhkafykfvlsvlslpiflyav  
ikfffsakrknfyannsei  
seieqalhqkykylsqkssstqihkealkifkaqssntnsknieqahfstyfenvlfhkfiikvilalpmfilltiylq  
plvryiferivmaviviig  
vsvftilyfslpdaaysilgqnatkaqihqfnvlhlnepyfiqlwdtikgvftfdlgttykgnvvtkavgeripit  
iivavlalivaliaaipig  
iisamkrnswlditlmialiglsipsfwgglfilafslklldilppsympehpsililpvlvigtsiaasitrmtssv  
levmrsdyvltayakglst  
tqvvikhilknaiipivtlvllvaeilggsavteqvfningigryivqkqlipdipavmggvvyisivislanliidif  
yalidpklrseinerk  
>tr|D8HDR1|D8HDR1\_STAAF  
mvklttkiaslklfasyaiatyilviltsalnlfkgyvadtfyiaetllivltiiliilteqtwkhhdlwrrivevll  
llmtltgnvftllmfvsir  
ryqrtsqihsyngwesfirkttrhriaiigllilvymltlsivsqtftdtlatknqfnallhgpslaypfgtddfgrdl  
ftrvvvgtklftfsiisihv  
viavifgvlgtiagyfnhidnlmriildvvaipslllavaiiasfgasipnliialsignipsfartmrasvleikrm  
eydaaritgentwniwr  
yilpnaiapmivrfslnigvvvltsslsflglgvapdvaewgnilrtgsnylethsnlaivpgicimfvvlafnfigda  
vrdaIdprijh  
>tr|D8HDR2|D8HDR2\_STAAF  
mkkiiisiaiivlavlsgcgvptksevaqksskvevkerptihflgqasyendmnivkdqlenagfnvkmiqpdygsy  
rtqrqagnydiqidwmtv  
fgdpnyamtafsstgsnllkdkhvdqllnkastqneadvkqtykqiedevvfdkgymaplygskknlyvdknvlkns  
vglpnsraliwqqfdynns  
rerdrplvmtqqdgeiptldpirsiapsvysinmmytrlllldendhlttkgslsrdyavnkdnkafyflrddyfa  
kvvngqarntgervsaedv  
kfsldrardkksvpnnntymhkhindikilkdedidqlrkekdkddksiydklikaynvksltdgqrvnkdgiyqiv  
kittdqsmprevnylthss  
agilskkfvnqvnqeypkgygdsstipansdgknalyasgayimtqknayqatfqrnpgfnetekgsygpakiknitlkf  
ngdpnnaelselrnhsidml  
advnqkhfdlksdknlsiirkngrksvflmlnikkgifkthpnlrqavvnaidqdqfikfyrgdkfkiaspitplvdtg  
neqrqdlekevekaing  
>tr|D8HDR3|D8HDR3\_STAAF  
mvnlndkqtkskeglisvshplaakigkdvldqggnamdaviaiqlalnvvepfasgigggylllyeqstgsitafd  
aretapahvdkqfylddsg  
eyksffdmthgktvavpaipklfdyihkryaklsledlinpaieiaieghsanwatekysrqqharlkyhetaqvft  
engywregdwivqpelgkt  
fqilreqgfnafykgdiakqlvnvvkecggtitledlanydiqikapisatfkdydiysmgpsssggitviqilkllhev  
dlpsmgprsvdclhliqa  
mhlaysdraqyladdnfhevsvhslidddylkarsklidsnkanidiehgvsdcishtdveentetthfcvidkegni  
asfttsigmiygsgitipg  
ygvllntmdgfdvaggineiapyrplsmaptivmhgkpilvtgappaisiasvaqtlinvlvfgmdiqqaidep  
riysshnrIEWepqfsqs  
tilaliarghamehkpdayigdvhglqvdpptyeasggsddtregtvmggevlvirkqplpyrqmydndgfrvyfndvq  
plladqvrwmhgkcwiees  
viriiifevsahiedlrsyenagenyidvwlarkkgyqvalkddglylndeayhsvkrntnayrydrdsitr  
>tr|D8HDR4|D8HDR4\_STAAF  
milnfissiiiiikkiteteenfmaqklyitahpfnelvsnsmaagkafietyqqqhpdddevkhidlfetyipvidkdv  
ltgwgkmsngetltdeqm  
kvsrldsileeflsadkyvfvtpmwnlsfpvkvayidaisiagktfkysaegpqltdkkvlhqsrggyytegpaan  
femgdrylrtimtflgvp  
yetiiieghnaephkteeikatsinnaeklattf  
>tr|D8HDR5|D8HDR5\_STAAF  
mtkrpkriatiiiifslflftiiyiddiqkwnqytdkltnqhkqgghskwedffrgsrivetfgyqhsfdgkhygid  
falpigtpikaptngkvtr  
ifnneiggkvlqvaedngeyhqwyhlkynvkvgrvkagdiiaysgntgkqttgahlhfqrmkggvgnayaedpkpfi  
dklpdgerslyd  
>tr|D8HDR6|D8HDR6\_STAAF  
maqlggapqldlqmavvnaikengaktvgerfetlpeekvnqfkpeenkptiegllsqnnpvefiaiasgkkgvgkst  
vavnlavallaregkkgvlv  
dadiygfsvpdmngidekpgikgkevipverhgvkvismaffveenapviwrgpmlgkmltnfftevkwdieyliildlp  
pgtgvaldvhtmlpsseam  
iivttphptaafvaaragamakhtdhsilgvvenmsyfesketgnkeyvfgkgggkladelntqllgelpleqpswnpk  
dfapsiyqsddrlgkiyss

Tsompanidou\_et\_al\_Supplemental\_FASTA\_File

iaqkviaatnk  
>tr|D8HDR7|D8HDR7\_STAAF  
mmakveltttrrrnfivavmlisafvailnqtllntalpsimrelninestsqwlvtgfmvngvmipltaylmdriktrp  
lylaamgtfllgsivaala  
pnfgvmlarviamgagvmpmqftlftlfskehrgfamglaglvifqfapaigptvtgliidqaswrvpfiiivgial  
vafvfglvsissynevkyt  
klkdrsvmystigfglmlyafssagdlgftspivigaliismviiylfirrqfnisnallnrvfkntfalctissmii  
mmsmvgpalliplyvqns  
slsallsglvimpgaiingimsvftgkfydkygrprliytgftiltittimlclflhtdtsytylivvyairmfsvsllmm  
pinttginslrneeishgt  
aimnfgvrvmagslgtalmvtlmsfgakiflstpshtsneikqqsiaigvdisfgfvavlvmiayviaiafirepeeies  
nrkrf  
>tr|D8HDR8|D8HDR8\_STAAF  
mivnylkhkfylnlittmivlfiavlsgaiflftlfgfgyglriliyfrlgdftynrsmynllyygsyifgyfiifav  
ehlmdyfrkmlpenayfrg  
atfhliisyvattllyfyfiihlvyvinidfwvimviigflyvcklqfypesklnnrk  
>tr|D8HDR9|D8HDR9\_STAAF  
mrksitvialilimfmsaieissialptikqdlagnlisliftayfialvianpivgellersrfkiiyvaiaagl  
fsigsfmcglstnftmlii  
sviqgfgsgvlmslsqivpklafeiplrykimgivgsvwgissiiigpllggilefatwhwlfyinipiaiaailvw  
tfhfpeetvakskfdtkg  
llyfyvfiglimfallnqqllllnflsfilavvairlfkvekhvsspflpvvefnrsitlvfitdllaiclmgnlyi  
pylqeqlglspqsglvi  
fplsvawitlnfnlhrieklsrkviylsftlllvssiiisfgikfplliafvliilaglsfgyiytkdsvivqeetspl  
qmkkmsfygltknlgasi  
gstimglylaiqsgifgpnlhvlsavavisiglivlwvffkeqssqske  
>tr|D8HDS0|D8HDS0\_STAAF  
mmsksskksndtiaetfkdiiplsfgeeignashglaalltllvlpyaavhsyiangtlasvsmsiyvisifmmfisst  
iyhsmqnetphkyilriid  
hsmiyvaisgtytpilltivggwigwtvfillwgttlwgilyksiavknqklsliyvlvmgwvgiillpiifirtswif  
ilfilggvstyigawfya  
qknrpyfhmiwhifiviasllhliailyfm  
>tr|D8HDS1|D8HDS1\_STAAF  
mldknqlakyqdhlcayekimsnekealeekvasldldfiaklyndlyinkktiddvsavsevkydiksqmsdnevr  
leeqqlqakegqfavllm  
aggqgtrlygkpkgsfeiegvsifelqanqlktlnhqsghtiqwyimtsdinheetlayfeahsyfydqeaihffkqd  
nivalseegkllnqgri  
metpngnggvfksldkagyleemsngvkiyflnnidnvlkvldplfagftvehdyditskti qpkpgesvgrlvnvd  
kdtvleyse ldpevanqfn  
nanigihafklgfilnavnrelpyhlaiknlkqldenfgvieqptlkfel fyfditygtsfvtlqvpreefspkne  
gkdsvatatedlrrmgli  
>tr|D8HDS2|D8HDS2\_STAAF  
mtgkthascgmvgalttqyfqtidissvtviiatlasllpdichtqskigrfkiiisffvrlifghrtfthsilfi  
iaflqiiqtpnyymvaii  
iglvshvil dmi tpkgvklfyp lpfvkvtpiqfktggldvlslatalmvgtvvylfqpfindiisnwnkfl  
>tr|D8HDS4|D8HDS4\_STAAF  
mdsfsrkeiigrkfi tmsligillflvpipveqdqkqttl pvaflagvlkdvlggvmpflivtiitlsgitlicst  
ilkdklkpdglmnafnvr  
igwliirilavfawmtflrigskviysdetgglfssllptlvavflfaalflpllmeygllemlgpifrpvmrplftl  
pgrstvdnlasfigdgtvg  
vliitsrqygegyysreatvisttfsvsitfaivvaetvhmqnqffafylsvivsvclvaavimpriwplnkipdeyake  
vpesartealpegktalrh  
gfdtatevgikapgviddfksglktvvdmwfvlpvvmsigtiatiianytpffvilgkpfvpflelmqipeaaqasqi  
igfadmfllpsillegvqn  
ditrfvigalsisqliylsevggvilgskipvsigklfmi flirtiitlpiislmahlll  
>tr|D8HDS5|D8HDS5\_STAAF  
mmttkiirryslitillvisifislcvgsvmihpidaikgiftqddfilneyriprtllgiiigsslaisgaiiqavirn  
plaspdvigiskgaslsav  
iimi fptaplflvpigsflgafavslflsfliskydvkgsklaliglaigaictaivqflirnpleankalvwtgsl  
yghdmsniytilpwfliti  
piiillsyqldvlnlgdavatalglkvktikmllilavilagsaisvvggisflgliaphiarqlignkthviimsgl  
igaiilltfgdglargihpp  
ldipvgviiiaigapyflillrrmk  
>tr|D8HDS6|D8HDS6\_STAAF  
maikeissqsaidhkrkrtrtlyivslcflficiarylnmaigsskinfsdivhyvtghtdtkatflhnvrmpriaglf  
iggavsgllmqamtrnp  
laspkifgvssgasffivfvtiipsleyyalylgligafiggltyvtlsgatkgmtpiklalagmai hlfssmtegi  
ilnensneqvmfwlvgs

Tsompanidou\_et\_al\_Supplemental\_FASTA\_File

smkwdeiltlilpwiigalivtfigrqltimeigddiakglgninkvriiigllviiltgmsvsvagpigfvglivphi  
vkryvsknylvmipltfii  
gadllllsdvlsrliitypyesvpgivtsfvga lyflfitikgvkri  
>tr|D8HDS7|D8HDS7\_STAAF  
mklyilrsgtmrglktfslglivalflvaacngtdnsskkesstkdtsivkdengt kvpkdakrivvleysfada laa  
ldvkpvgiaddgkkkriik  
pvrekigdytsvgrkqpnleeisklkpdliiadssrhkginkeInkiaptlslksfdgdyqninsfktiakaInkeke  
gekr1aehdklikkykdei  
kfdrnqkvlpavvakagllahpnysyvgqflnelgfknaIsddvtkglskylkgpylqldtehladInpermiimtdnak  
kdsaeffklqedptwkkln  
avknrvdivdrdwarsrglissee make lve lskkeqk  
>tr|D8HDS8|D8HDS8\_STAAF  
mahvni niskikynakvlqtvfqsknmqftpvikciagdrtiveslkalginhvaesrldniisiadqdltytllrtpak  
keisdmi ekv dmsigtels  
tihqinevaevlgkhhkllmvdwkdgregvlt ydvldyikeihlknihfvglafnfmcfksdapsdddifminrfvsa  
vereigyrlkiisgg nssm  
lpqll yndlgkine lrigetlfrgvdttt nqaiamlyqdaitleaeileikprvntethesfiqaidigyl dtkvdnis  
pmdqhini lgassdhlmld  
Ingqghyqvgdhisfslnyealshsmymknlhkvyiddskidtl lqnfdvkspamvnyq  
>tr|D8HDS9|D8HDS9\_STAAF  
mylewakadrniqyrvinaiikeriypeqtfisqeslieiqyhmhvtievvrksaleryeftgditylnkgets lim  
tleglldvln ddf eilise  
r1ree lihsrds lvetykqms hrqt l isqsfkfsrlpqdinffswlqhvkdsktd dltyseslvpeghpthpltktklp  
l tmeevrayapefekeip l  
qimmi ekdhvvtamdgn d qfiidei ipeynqirvflkslgksedyrailvhpwqydhtigkyfeawiakkil i p t p f  
tilskatl s frtms lidkp  
y hvklpvdaqatsavrtvstvttvdgpklsyalqnm lnqyppgfkvamepfgeyanvdkdrarqlacii r qpeidgkgat  
vvsaslvnknpidqkvid  
syl ewlnqggtkesitt fierysqalippi afiqnygia leahmqntvvnlgthfdiqflvrldlggsridletlqhrvs  
dikitndsl i adsi davia  
kfqhavi qnqmaeli hfnqydcveeael fnivqqvvhainptl phanel knilfgptitvka ll nmrmenkvkqyl ni  
eldnpi kke v  
>tr|D8HDT0|D8HDT0\_STAAF  
mtkyffsssfllflgnwigqiglnwfvlttyhnavylgivnfcrlvpilllsvagai adkydkgrllritiss flvta  
ilcvl t y s f t a i p i s v i i  
yat l r g i l s a v e t p l r q a i l p d l s d k i s t t q a v s f h s f i i n i c r s i g p a i a g v i l a v y h a p t t f l a q a i c y f i a v l l c l p  
l h f k v t k i p e d a t r y m p l k  
v i i d y f k l h m e g r q i f i t s l l i m a t g f s y t t l l p v l t n k v f p g k s e i f g i a m t m a i g g i a t l v l p k v l k y i g m v n m y y  
l s s l l f g i a l l g v v f h n i v  
i m f i c i t l i g l f s q w a r t t n r v y f q n n v k d y e r g k v l s i i m m d r g m i p l g s l l m s i c a d v f g i v r t f s i m g i s t i c i t m v  
f y f i n r k l k l e e s n h g i  
s  
>tr|D8HDT1|D8HDT1\_STAAF  
mnlnlifkeqtlkfnkeeqetylflqqhnsdwani fkemilqgrdkvtqrlvtsmhrenlvkartqskkil s rdlimldi  
stthileiqfpqakqtlya  
pitgehafdridvegpfiykdditntitrvhphneilecili eapnlknaasdqfqqd linsatnmtfaisyqalsmqhd  
saplfniensedsylrse  
qavieghplhpgakl rkglnalqtfl yssefnqpi klkivlihsksl r t m s l s k d y d t t v h q l f p d l i k q l e n e f t p n f n  
fndyhimivhpwgl d d v l h  
sdyqaevdkkliieakhtldyyaglsfrtlvpkypamsphiklstnvhitgeirtlseqtthngplmtrilndilekdvi  
fksyastii devagihfyn  
eqdeadyqterseqlgtlfrkniyqmipqevtpmipsslvatypfnnespivtl ikryqsaaslsdfessakswvetysk  
allglviplvtkygialea  
hlqnaj at frkdglldtmyirdfeglridkaqlnemgystshfheksrilt dsktsvf nkafystvqnhlgeliltiska  
sndsnlerhmwyivrdvld  
nifdqvlvsthksnqvnenrineikdtmfapfidykcvtmrl eadeahhytyikvnnplyrenn  
>tr|D8HDT4|D8HDT4\_STAAF  
mkrlnkfilglivvvgflfmyiqdgriteyqdyflqfewfp llislaalliliglilvfsifkpthrkpglykdfd  
dghvyvsrkavektafdtv  
akydqvrrqpnvaklynkknksyidikt d f v p n n v q v s l t e a i r a d i k k n v e y f t e m p v r k l e v n v r d q k t s g p r v l  
>tr|D8HDT5|D8HDT5\_STAAF  
mknksvslvfwvslvicti fva fgai f p k q l e k l t q n i t t f i a l h f s w y l l l v l v i l f v c v y i l f s r y a n i t l g e e g e d  
p e f s l p s w f a m l f s a g m g i  
g l v f w t t a e p i s h a f k l t p i h k a g t q s a i n d a m q f s f f h w g i h a w a v y g i v a l v f a y f s f h k g y p g l v s a t l t p l l g e k a  
m r g p l g g a i d v l a v i a t v t  
g v a a t l g f g a l q i n e g l h f l f n v p s n f t m q v i l i v i a t i l f t w s a w s g i d k g i k t l s n i m l f a f v v l i g l f i v g p t l y i  
l n t f t n g l g n y i a n f f s m s  
l r i p s g g q k f q w l q n w t i f y a w w i s w a p f v g i f a r v s k g r t i k e f i l g v l f v p a l v c f i f f a v f g a s a i y l q d n h i a d

Tsompanidou\_et\_al\_Supplemental\_FASTA\_File

iakaatetatfatlgyyp1  
gfvlsli1l1vimi1ffvtsadsatyvlgm1sssgdinpksfvkvsugiimalfaiimiytggtqaiqn11iaalpfsvv  
iamiws1lks1seekprn  
snkvlikhrdpdi1eyrsskhidden  
>tr|D8HDT6|D8HDT6\_STAAF  
mkm1gfekpfk1leegn1fkvyeqrkptpenddi1lvknsisvnpvdtkqrqmevtqvprvl1gfdagtveaigpdt1fs  
pgdvvyfagspnrqgsnat  
yqlvseai1vakaphnisaneavs1p1tgitayetffdtfki1shnpsenvgksm1iingaggvgsiatqiakrygl1tvitt  
asrqettewcekmgadiv1  
nhked1vrqfkekeip1vdyifctyntd1lyntmielikp1ghittivafnedqdl1nalk1ksitfthefmfarpih1rtp  
dmikqhey1editkniesg  
hyqptttqvfe1lspen1yqahq1lekqsmigkl1vini  
>tr|D8HDT7|D8HDT7\_STAAF  
mqnkqi1fnki1pegmpqedt1fki1edvtpk1esdgv1vqt1yisvdpymrgrmtkadsyvqp1feigkpivshvvakvids  
t1adykkgdv1vvgm1pwri  
inhvqadqi1tkvpttdvp1d1y1sv1gmpggtayhg1ldigqpkdgd1tvvsaasgavgs1vvgqiakikgcrvvgiaggd  
kkvny1tet1gfdagidyk  
kedfaea1aqavpdgi1dvyfenvggtvgdevfkh1nrfarvpvcgais1synhpeadig1priqgt1ikkqvmrgfl1vsef  
addfkeaseq1akwvqegk  
iqsqvti1edgfenaprafkn1ftgdnf1gkqvikvte  
>tr|D8HDT8|D8HDT8\_STAAF  
mgvksvkk1fvii1t1lavaii1igsii1tvvfsqrqaqt1fki1qqqfvkkip1t1flhgfggsansek1fmvkqaekrgv1tk  
di1tayvskdgav1tfk1gk1  
skdavnpi1vki1elenr1qgy1dknaawfkn1v1tk1qseynfdk1fnfvghsmgn1tfaqymtygndk1spq1lnkqvni1ag  
tfngv1nmnedvnei1tdk  
dgkps1rmnqpyqg1rv1kdiyk1gkiev1niygd1kdgtqsdgrvs1sssk1ky1l1gns1pksyreskyeges1aqhsq1h  
enenvane1id1flwkk  
>tr|D8HDU0|D8HDU0\_STAAF  
mmqk1liaqiek1gkpf1fek1srniy1rairdgfisamp1vil1fssi1fliayvpni1fgfkwdkgmeai1mkpynytm1glvaf  
1vagttak1st1dsfnr1kle  
stnqinfi1stm1aamcg1fl1asdpakdgg1fl1safmg1tkg1l1tafl1safvtv1vynf1cvkrnit1ikmpkevppni1sqvfk  
d1lipfsavi1i1lyal1d1vi  
rnsfksnvaegi1kl1fep1lftaadgwigvti1ifgafa1fwfvgihg1psivepaiaaityanieanfk1llqagehadki1it  
sgtqmfi1vtfggtgat1lv  
p1fm1mmtkskrnka1igrasvvpt1ffgvnepi1lfgap1vl1npvffip1fvl1apivnwi1fk1fvevl1gmnsfsvn1pw1t1p  
gp1gi1imgt1gfg1lwsf1la  
it1li1vdi1iiyyp1fl1kvydsei1deee1grkesnsd1lekvaanfd1tkkadsilaasgvsedaakasniteqtnv1vl1cag  
ggtsg1l1ana1nkaaeeyh  
vpvkaaaggygahmdimkeyq1li1lapqvasnyedikqdt1r1gik1laktqgaeyik1l1trdgqaal1dfvqqqfen  
>tr|D8HDU3|D8HDU3\_STAAF  
mi1t1t1npsvd1sypl1talk1ddvnr1vqevsktaggk1lnvtr1vlaqvgepv1lasgfiggel1gqfiakk1dhagikhaf  
ynikgetrnci1a1lheggg  
tei1leggpei1dnqeaag1fkhfeq1lekveava1isg1l1pkgl1nqdyaaqi1ercqnkgvpv1l1dcs1gat1qt1v1enpykp  
tvikpnise1lyq1l1nqpl1d  
es1les1kqavsqpl1fegiewi1ivs1gaqgafakhnht1fyrvni1pkisv1lnpvgs1gd1st1vagitsai1lnhendhd1l1kkan  
t1gm1n1ageaq1tgyv1n1nn  
ydd1fkqie1v1ev  
>tr|D8HDU6|D8HDU6\_STAAF  
mnkher1de1jak1vnkkgt1irtneiveg1lnvsdmtvrrd1lielenk1gil1tkihggarsnst1fykeishkekhtrqiaek  
rfiarkaas1liedgdt1l1ff  
gpgttv1ellaeevn1hht1ti1tnc1lpvyk1illekqtah1fray1liggemrh1mteafvgemanam1lek1l1rfsk1mff1ssnavn  
kgavmt1st1deaytqqla1  
snsieky1l1idhtk1vgked1ftsfcq1lne1tavvmdyedeekvetiktyievv  
>tr|D8HDU7|D8HDU7\_STAAF  
mgl1fde1skdg1l1spey1l1srdy1leddpeg1finfchkr1l1fvdtmpn1vh1dwiak1lernqqs1lgvitqnidg1l1hsdagsq  
hvd1elhgt1lnrfycn1achk  
sytk1sd1vidi1tl1khdnc1ggairpdiv1ygem1dqpti1ra1nki1ehadt1lv1l1gss1lvvqpaag1lisnfkgdn1li1ink  
drtpy1dndat1lv1ihddmvs  
vvks1l1mte  
>tr|D8HDU9|D8HDU9\_STAAF  
mktke1vval1mni1sqdt1ryyekvgvppvnr1dengyri1ndsdl1nwiyl1vkn1lnagvsies1liefcrlaql1pkneniqt  
qqkqi1lnkq1leel1nen1lkt  
ihdard1l1qyk1idnydnhi1akinasdn1hddnver1lwerk  
>tr|D8HDV0|D8HDV0\_STAAF  
mtyk1mkkwqk1l1st1t1l1magvit1nggefrs1dkhq1avadt1nvqtpdyek1l1rntw1ldvnygydkydesn1pdmkkk1feat  
e1kark1l1ssmkt1esdrky  
l1wesskd1l1dtk1sadmtr1tyrniekiaeamkhkntk1l1ntp1dnknkvkda1lewl1hk1naygkepvk1leel1ktnf1sksapqkn  
tn1lnwwdyeigt1pral1tnt

Tsompanidou\_et\_al\_Supplemental\_FASTA\_File

lillndqfsneekkkytapiktfdapsdkilssvqgpeqakgnlvdiakvkllesieedkdmknsidsfnkvftyvq  
dsatdkerngfykdgsyid  
hkdvpytgaygvvllegismmpmiketpfdktqynttlkswiddgfmpliykgemmdlsrgraisrenetshtasatv  
mksllrlsdtmddstktry  
kqivktsvesdssyqtdylnsysdismkmslmedstistngltqqlkiyndmdrvtyhknlddfafglsmtsknvarye  
singenlkgwhtgagmsyl  
ynsdvkhyrdnfwatadmkrlagtttleneilktdddkssktfvcgatkaddqhasigmdfenqdkltakksyfilndk  
ivflgtgikstdssknpvt  
tienrkangytlytddiqtsasnindqetnsvflestnkpknigyhffnkpkitvtkeshtgkweinksqksedkkde  
yyevtqkhsntddkygyvl  
ypgitkdnfkskasqvtvkvqddd fhvkdnesvwagvnysdsaktfeingtkvevkvkgmfllkkddktyecsfnpe  
stntasdiessmsgtysi  
tnknasttnesgvcfeltk  
>tr|D8HDV1|D8HDV1\_STAAF  
mnktnfgdylnksksrkiykifdqnlkrefsywqfrklfksytrqsdihelkvctqndgtmeqiwidkanqfgvavtwkd  
nsiigfvmrplinydaikn  
ettlkyavpttdcyevfwggdnelynyhylyphqryaidlvikenhkyknqgkvntdyfcfgkdiiapangtvekvng  
vqdnisgsmnesqflgnyl  
vikhaeneyliahlqqysiiivnegqnvkygdiigkvgnsngstephihfqvmndknieactslkirfinnrelikgdvv  
cglqge  
>tr|D8HDV2|D8HDV2\_STAAF  
mskrlllfdfdetyfkhntneedlnhlremekllekltnnnevitavltgstfqsvmdkmdqvnmtfkplhifsdlskm  
ftwnngeyvesetykkkv1  
sepf1fediedi lrhisaynvefipqrafegnethynfyfhstgnhnndrilealvryandqnytarfsrsnplagdp  
enaydidftpsnagklyat  
qflmkkynipvksilgfgdsgndeaylsylehaylmsnsrdealkqkfrltkypyyqgitlhvkefvegkydy  
>tr|D8HDV3|D8HDV3\_STAAF  
mkllksfvatla lglstvgaa lpsheasadsnngykel tmdgkhtvpytisvdgitalhrtyfvfpenkkvlyqeidsk  
vknelasqrgvttekinna  
qtanytltlndgnkkvvnllknddaknsidpstikqiqivk  
>tr|D8HDV4|D8HDV4\_STAAF  
masvlyqhgltlgtlmagllkgtasinelqhgdligiatltsngevi fldgkayhanehkefvelkgdeltpyatvtfkv  
adtsyetskdsseavfaei  
kekmlsenffsavkislglfkkmhvr lmpaqeppytr ldsarrqpeqtetyvkgavvgfftpel fhgigsagfhvhfand  
drnfgghvldfevkdvkve  
iqnietfeqhfpiqdedfinanidykdiadeireae  
>tr|D8HDV5|D8HDV5\_STAAF  
mtdkkytaadmvidtlknngveyvfgipgakidylfnaliddgpelivtrheqnaammaqgigr ltkpgvvlvtsgpgv  
snlttglltatsegdpv1a  
lggqvrndllrlthqsidnaallkyskysseevqdpeslsevmtnairiatsgkngasfisipqdvisspveskaislc  
qkpnlgvpseqdindviea  
iknasfpvllagmrssadetnairklvertnlpvvetfqgagvisrelenhffgrvglfrnqvgedllrksdlvvtigy  
dpieyeasnwnkeltdtqi  
nidevqaeitnymppkkeligniaktiemiskvdepfinqhldeleqlrahidqetgikatheegilhpveiiesmql  
vltde ttvtvdvgshyiw  
arnfrsynprhl fsgnmtlgvalpwaisaalvrpntqvsvagdgglfssqdetavrknlniqliwndgkynmve  
fqeemkykrssgvdfgppd  
fvkyaesfgakglrvtnqaeleaaikegyetdgpvlidipvnykdniklstnmlpdvfn  
>tr|D8HDV6|D8HDV6\_STAAF  
mteiveflsdgklasrleiqetmg lqksyt seliaelkkleigsegrpgptrylird  
>tr|D8HDV7|D8HDV7\_STAAF  
mtsskyieylqteveggll drkrasinpkdvaqhisafanaeggklvigiedngeisgfnhskakkkevyieapfehlyr  
ipkytyeiievkkrdgtmd  
eilifdiepsydaiitlkddsvylrindksrklthnqitnleydrgrsrrfeelveyssi edvneel vdefkqllntnvd  
neklkargfmregkl tva  
glllfsnninvy lpgarirfmr yegtkeesgrlnivkditfdkalpvairarafintqlreytflgkegrfvtlpeyp  
efawfegminsivhrryd  
qgdhirikmfddrleissp galpasvtlenikeerysrnpklaaal tqykwvresnegvgri fdemkeyfl ddpvysepn  
nssvqlal knniarkkre  
tgrvsniitpel felse neqqelivrhlynqgel taskianiiqrsvptarkrlkeleemniisthgsskndpkrtyyllg  
fe  
>tr|D8HDW0|D8HDW0\_STAAF  
mri lveiayqgnnflgfgiqqngrtvqqqfekllqrmhkrhvrihpsrtdrgvhaiqqyfhfdtel nipmsqwqyamnr  
tlpddiyvnnvvtvdddfh  
crydcvkgkryrykvyaqahrnpfqsglktfipetldldkmnraaqf igthdftgfcskteveskvrtlyqseivktdd  
gfdyivtgsgfl ynmvr1  
vafli evgkgrhevsdvpkllesknrknvpftaaaglylekiyldene llkdfgndikihrkkslqnd  
>tr|D8HDW1|D8HDW1\_STAAF

Tsompanidou\_et\_al\_Supplemental\_FASTA\_File

mknkliigrylpinsfvhhlpraklmfvflfiiliffchsplylvwfaaliffmrlakiqlwflikgltpiffflift  
lmmhifltkggvylvewhg  
itietngileglyisrlrigivmiatimlstspidldaferllaplkmfklpvhqslsmimsialrfiptlmdeldkii  
laqksrgseissgniatr  
ksfipllvplfifafqraeelavamevrgydanvkrtsyrqlkwqlrdtislimiipiaailfvlykysgv  
>tr|D8HDW2|D8HDW2\_STAAF  
mtirfdnvsytyqkgtpyqhahdvntefeqgkyyaivgqtgsgkstliqninalkpttgtvtvdditithktdkkyi  
rpvrkrigmvffpesqlf  
edtveremifgpknfkmnldeaknyahrllmdlgsrdvmsqspfqmssgqmrkiaivsilaampdiivvdeptagldpq  
skrqvmrllkslqtdenkt  
iilishdmnevaryadevilmkegslvsqtspkelfkdkeladwhiglpeivqlqydfeqkyqtklkdiaalteafvs  
ykewqhek  
>tr|D8HDW3|D8HDW3\_STAAF  
msqkilviyskpsqchiqrfinivkydrytrnkrgerqvedknsvivfknsfyqsasftlkdvsnipkgqwtivgh  
ngsgkstiakliigiekvk  
sgeifynnqaitddnfeklrkdigivfnpdnqfvgsivkydvafglenhavphdemhrrvsealkqvdmlderadyepna  
lsggkqrvaivasvialnp  
sviildeatsmlpdarqnlldlvrkvksehnitiisithdlseameadhlivmnkgtykegtaieifdhaeelttigl  
dlpfpikinqlghqtsfl  
tyeglvdq  
>tr|D8HDX7|D8HDX7\_STAAF  
mvakqqkkqkyavreytrcercgrphsvyrkfklicricrelaykgqipgrkasw  
>tr|D8HDX8|D8HDX8\_STAAF  
mkkfnyssvmevpkidkiivnmvgdavqnskvldnaveelelitgqkplvtkakksiatfrlregmpigakvtlrgerm  
yefldklisvslprvrdfq  
gvskkafdgrgnytlgvkeqli fpeidydkvskvrgmdivivttantdearellanfgmpfrk  
>tr|D8HDY4|D8HDY4\_STAAF  
mgqkinpigli rvgiirdweakwyaekdfasllhedlkirfidnelkeasvshveieraanriniaihgtkpgmvigkgg  
seieklrnklinaltdkkvh  
invieikkvdldarlvaniarqlenrasfrvqkqaitramklgakgiktqvsgrlggadiaraeqysegvplhtlra  
didyahaeadttygklgvk  
vwiyrgvlpkntsgggk  
>tr|D8HDZ0|D8HDZ0\_STAAF  
mtkgilgrkigmtqvfngelipvtvveakenvvlqkktvevdgynaiqvqfedkkaykkdaksnyankpaeghakka  
daapkrfirfrnvdvday  
evgqevsvdtfvagdvidvtgvskgkfqgairhgqsrqpmshgshfhrapgsvglmasdasrvfkgqkmpgrmgntvt  
vqnlvqvqdenkvilvk  
gnvpgpkglveirtsikkgnk  
>tr|D8HDZ2|D8HDZ2\_STAAF  
mmknkngpklslaligiflilceffygipflgatfilsfgwqpllnallyliltiillvnrqnairpiaaiipifgivgsf  
laiipflgilihwilfflm  
ilfvlvlsaptyipknarvityqkdghre  
>tr|D8HDZ3|D8HDZ3\_STAAF  
mayilavnpqvlslagvkgvsedmkmdqgai fvatalaafvgsifmgliakypialapgmglnaffaftvvlmtgipwqv  
gltgylfsgiffailvtvg  
freviinaipyqmkmavsagiglitfvglqssgiivknestlvtlghltdppvllaifgivitvilyaiklpgsifigm  
iitavgmftglimpsgi  
vgkipsieptfgaafekdpsqlltiqfliviltflfidffdtagtlvavatqagimkdnklpragralfsdslativg  
svfgttttstsyiestsgva  
vgartgfasivtgccflalffspliavvtsavttpalvvvgvlmaanfaeinwksfevavpafitiimmplsysiatgi  
acgfifypitmliskkhke  
vhpimylvlmlfilyfivhg  
>tr|D8HDZ4|D8HDZ4\_STAAF  
mksli laekpsvardialqinqkrngyfennqyivtvalghlvtnatpeqydknlkewrledlpiipkymktvvigkt  
skqfktvkalilndkvkdi  
iatdagregelvarlildkvgnkplrrlwissvtkkaiqqgfknldgrqyndlyyaalarseadwivginatraltt  
kydaqlslgrvqtptiqlv  
ntrqqeinqfqpqqyytllstlvkgfdqlesnqrytnketleqivnnlknvdgkiksvatkhkksypqsllynltdlqqdm  
yrrykgpketlntlqslly  
erhkvvtyprtdsnlyttmdvdtmkeriqatmattykdqarplisktfsskmsifnnqkvsdhhaiiptevrpvmsdln  
relklydmiverflealmp  
pheydaitvtlevaghtfvkenvttvlgfksirqgesitemqqpfsegdkvki sktnirehettppeyfnegsllkame  
npqnfiqlkdkkyaqtlkq  
tggigtvatradiidklfnmnaiesrdgkikvtskgqilelapeelstpllaqweekllliergkyqaktfinemkdf  
tkdvvnngiknsdrkykhdn  
ltttecptcgkfmikvktkngqmlvcqdpscktkknvqrktnarcpnckkkltlfgkgkeavycvcghsetqahmdqrm  
kskssgkvsrkemkkymnk  
negldnnpfkdaiknl

Tsompanidou\_et\_al\_Supplemental\_FASTA\_File

>tr|D8HDZ5|D8HDZ5\_STAAF  
miltcyntfntsfasiefksksgidearsk  
>tr|D8HDZ6|D8HDZ6\_STAAF  
msivqlyditqiksfiaysnyesylyklpqyneydvlitdaiespgvfsikendsikailsfaydknkfkvigpfv  
adnyvsvetfetlftmt  
snqpdavfnfsfeegiqqykpImkviqasynftdyieartrleedmhqpniiiphkgfyrafsklhtttfkyqaqspq  
diidslddhhhlflfvseg  
llkgylyleidsqqsiaeikyfsshvdyrlkgiafellayalqyafdnfdirkvyfkiRNknklierfnglgfhinyey  
ikfkfesrnvkdqtipe  
>tr|D8HDZ7|D8HDZ7\_STAAF  
mqflfdliallpalfwgsvvlinvfvgggypnqirgttlgalivglgllitgfakfnptviivglisgalwafgqanql  
ksisligvsntmpvstgmq  
lvgttlfsviflgewssmtqiiifgliami llvtgvaltslkaknerqsdnpefkkamgilivstvgvgyvlgdfigvg  
gtdalffqsvgmaiggfil  
smnhktslkstalnllpgviwgignlfmfysqpkvgvatsfslsqlllvivstlggifilgerkdrqmtgiwagiiiivi  
aailgnlk  
>tr|D8HDZ8|D8HDZ8\_STAAF  
mygaylineyhqdfksianfkvlkrmnvmmcyvlflepdiswdi  
>tr|D8HDZ9|D8HDZ9\_STAAF  
miillialgyflkrinyikatdsqviatlvlntvlpslvivnlnsaelklsfsilpilmiygivakmiavwffrkydnh  
mrgsvgmtgamniglfay  
plievipwptgliyfgmadiggafvmfgityfvgsyfsesdqdfkylgkklqsvplvtyivmfilnshihlphvai  
dffsilshanpmsmllg  
vmlnftlerkyipatikylclhyglalvagllvhvllpvstdmikttllvtwmpvgvaiisgyiqfkyrtlpfigmttn  
ltiisiiilyvyqavfv  
>tr|D8HE01|D8HE01\_STAAF  
mqfyllillailylivsfisifkmeviftrilriimgvlllflvalttmsfpenwvfvllllvgnvevtgfkmlkkl  
kgvnilnlmslfi fviyfi  
ltivlf  
>tr|D8HE02|D8HE02\_STAAF  
mikkllqfslgnkfai flmvvlvlggyasaklklellpnvqnpvisvtttmgatpqstqdeisskidnqvrs layvk  
nvktqsiqnasi tvveyen  
ntdmdkaeeqlkkeidkikfkdevgqpe lrrnsmdafpvlaysfsnkendllkvtkvlneqlipklqtvdgvqnaqlngq  
tnreitlkfkqnelekygl  
taddvenyktatrttlglf qfgdkdsivvdgqyqsvdafkninip ltlaggqgqsqsqsdnkqnsamsdvnqasppq  
nskasasnnisgmtaklg  
dladitvgdvrtis ktngkdavn lqitkaqdantvqvakdvqrkidtfdvdenkdfnvtkmtaktakpvekslytmvekas  
lgtivaiivillflnrirt  
taisiisiplslmalialklsdvslniltl gal tvaigrviddsivvveniyrrltdseeqlkgenliisattevfkpi  
msstlvtiivflplvfvsq  
svgemfrpfalafslasllvsitlvpa laatl fkkgvkrnkqh qeglgvsttykklhwslnhkwiviilstlil  
vativfggprlgtfsisag  
ddkflaitytpkpgeteavl nhakdvekylkqkxhvkti qysvggsspvdpstgtnsmaimveydndtpnfdveadkvi  
khadgfkhpgewkngdltg  
gagnksvevtvkgpsmdaikstvkdieqkmkqvkg lanvksdlsqtydqyeikvdqnkaaengisasqlamhlnenlpek  
tvttvkengktvdvkvkqn  
kqtdwsedklnnitlkkptggkiklgdiatl vktttpskl tqeqgdyattvsakvtnkdvggttrqvm skinnldkpnv  
kvniggasddinnamtqla  
famlaaaiivylilvitfkgglapftilfslpftvigviallitgetisvpsligmlmligivvtnaivlidrvinneq  
qgmemkealieaggtrirp  
ilmtaiatigalvp lllfgqdssiliskglaatvigglistlltllvvvpviyeilftlkkrtkr  
>tr|D8HE03|D8HE03\_STAAF  
mekmhitnqehdafvkshpngdl lqltkwaetkkltgwyarriavgrdgeiqgvaql lfkkvplpytlcyisrgfvvdy  
snkealna ldsakeiaka  
ekayaiki dpdvevdkgtdalqn lkalgfkhkgfkegl skdyiqprmtmitpidknddelnsferrnrskvrlal krgt  
tversdreglktfaelmki  
tgerdgfltrdisyfeniydalhedgdaelfvlkldpkeniakvnqelnelhaeikwqqkmetsekqakkaqnmindaq  
nkiaknedlkrdlea leke  
hpegiylsgallmfagsksylygassnefrdflpnhhm qytmmkyarehgattydfggtdndpdkdsehyglwafkkvw  
gtylsekigefdyvlnqpl  
yqlieqvkprltkakiksrklkrk  
>tr|D8HE05|D8HE05\_STAAF  
milkfdhiihydqldrfsfpgdviklhsggyhhkygtfnklgyinenyielldvennekllkmaktieggvafatqivq  
ekyeggfknictl rndiea  
vknklqseqvevvgpiqmerdthkdgvkwqll yimnqdddeikppffiqweesds mrtkklqkyfqkqfsietvivksk  
nqsqtvsnwllkwfdmdive  
endhytdlilknddiyfriedgkvsyhs viikdaqatspysifirgaiyrfeplv  
>tr|D8HE06|D8HE06\_STAAF

Tsompanidou\_et\_al\_Supplemental\_FASTA\_File

m1sqeffnfsfityrpylklaeplilekhniyygqwlilrdiakhqpttlieshrraikptarktlkaliendlitven  
sledkrqkfltltpkghe1  
yeivf1dvqklqqavvaktnisqdmqetinvmnqiheillkeahnd  
>tr|D8HE07|D8HE07\_STAAF  
mtnggslnkspjftksftinffvnfivylcmyl1llvviagyskqafdasds1aglvvg1fivgsligrfatgkfvnqigp  
krllfiglialiitqlllyf  
idgslaflifvrlingiatavvttatgtiaayvtpvnrksegis1fs1slvl1gtaigpflgmllitkyaidllfiicvil  
gilgliis1fikvdfevtn  
nktetnvidkprfsihqfiakeaipvavimlligvtyasiltylqafalerhlvtaasyfficyaiaslitrpiagr1md  
dkneniivypafiml1fsf  
vclissyqswl1llagac1glgygn1ssamsiaikvspikygiatstfyvg1dagvgfpgsflglfthmfisyseifgf  
maalaaitmlvyflihgrh  
vtrnamn  
>tr|D8HE09|D8HE09\_STAAF  
mpdliemivfnvftnrrgpnteadrktaynnvqvgergpnteadsksaynnvqvggrgpnienfkkkfyrqckl1ngapt  
qk1tkvslq  
>tr|D8HE11|D8HE11\_STAAF  
mkaiilagghsvrfgpkafaevngetfyrrvikt1estnmfnei1istnaqlatqfkyppnvviddenhndkgplagiyt  
imkqhpeee1ffvsvdtp  
mitgkavstlyqflvsh1ienh1dvaafkedgrfiptiafyspna1gaitka1hsdnysfknvyhelstdyl1dvr1dvdap  
sywykninyqhd1daliqk  
1  
>tr|D8HE13|D8HE13\_STAAF  
mkqfeivtepiqteqyreftineyqgavvftghvrewtkgikteyleyeayipmaekk1aqigdeinekwpgtitsivh  
rigplqisdiavliavssp  
hrkdayraneyaierikeivpiwkkeiwedgskwqghqkgyeekree  
>tr|D8HE14|D8HE14\_STAAF  
milqivgykkskgtt1mrhivsflkshgytvatikhhghgkediqlqdsdvdmkhfeagadqsivqgfqyqqtvtrv1dn  
qnl1tqiieksvtidtniv1  
vegfnadfekvgyrnee1qv1qq1snvcysinvrehedftafeqwl1nkikndcdtq1t  
>tr|D8HE15|D8HE15\_STAAF  
mvvekrnpipvkeaiqrivnqqssmpaitvaleks1nhilaedivatydiprfdkspydgfairsvdsqgasgnriek  
vidhigagsvsdk1vgdhe  
avrimtgaqipngadavvmfeqtie1edftir1kpfsknenis1kgeetttgdv1kkgqvinpgaiavlatygyaevkv  
ikqpsvaviatgse1ldvn  
dv1edgk1rnsngpmi1ra1eak1glevgiyktqdd1dsgiqvvkeamekhdvittggvsvgdfdy1pei1y1kavkaev1  
fnkvamrpgsvttvafadg  
ky1fg1sgnpsacftgfe1fvkpavkhmcalaevfpqiikat1medftkanpftrfirakat1tsagatvvp1sgfnks1ga  
vvaiahancmvm1pggsrg  
fkaghtvdi1tesdaae111  
>tr|D8HE17|D8HE17\_STAAF  
mgehqnkv1nrtvkaav1tvsdtrdfdtk1ggqcvrql1qaddvevsdahy1tvkdekva1ttqvk1kwee1dvi1ttg  
gtgiaqr1dvtieavkpl1t  
keie1fgel1fry1syvedv1gtr11sravagtvndk1l1fsipgstgavk1alek1likpe1nh1ihel1tk  
>tr|D8HE18|D8HE18\_STAAF  
mgal1thvaeg1vr1agiak1liivdrdyie1fsn1qrq1t1fteeda1k1mmpkvvaak1h1la1rsdv1diddy1ahvdy1fle  
thgqdv1dvi1datdn1fetr  
q11ndfayk1hri1pwi1yggv1qsty1tea1fipgk1tpc1fnc1lpq1lpal1n1tcd1tv1gvi1qpav1tmats1ql1rdamk1v1teq1  
idtki1tygd1iwegsh1ysfg  
f1skm1qrsact1tcgd1vpspy1lnkneq1ryat1l1cgr1dvt1qyenasi1thd1lvq1flk1qh1q1lnyrs1nsym1vmf1efk1ghri1vafk  
ggr1fl1ihgm1trts1dath1m  
n11fg  
>tr|D8HE19|D8HE19\_STAAF  
m1kin1kyq1knt1lirin1iddtepk1iyavrgps1gigk1ttv1nmi1ag1rkt1dea1ievng1l1tdt1akn1vnki1qrr1igy  
1f1qdy1q1f1pnmt1vyk1nit1f  
maep1seh1dq1li1qt1lnidh1mk1qypmt1sg1gea1qrval1ara1stkp1d1l1ldep1fss1ld1ttk1desit1lvk1rif1new1qip  
i1fv1ths1nyeae1qma1he1i  
t1g  
>tr|D8HE20|D8HE20\_STAAF  
mpd1tpf1wis1irvav1isti1vtv1lgi1fiskw1yrrkg1swkv1les1l1ilpiv1l1pptv1lg1filli1ifspr1gpig1qffanv1  
h1lpv1ft1tgavias1v1s  
f1plmy1qhtv1qg1frg1idtk1mintart1mgasetk1f1kl1il1plakrs1ilagimms1fara1lge1fgat1mvagy1ipnktnt1pl  
e1iy1flve1qgre1neaw1lw1l  
v1lvaf1siv1vistin1lnk1dky1kev1d  
>tr|D8HE21|D8HE21\_STAAF  
mkmkr1favviam1lv1lagc1sns1ndn1vsk1dda1angk1qei1qvaa1as1tdvt1kkl1ase1fk1keh1knadik1fny1ggsga1  
rkq1ies1gapvd1v1fms1ant1k  
dv1dal1kdkn1kah1dty1kyakns1lv1ig1dkds1nyts1vkd1k1dndk1la1lge1vkt1vpag1kyakqy1dnnn1l1fke1ves1kiv1yakd



Tsompanidou\_et\_al\_Supplemental\_FASTA\_File

vkqvlnyveknakqgfvy  
ktdlykqnkkidtvkvi kevelkkpityeagatsdsklakewmeflksdkakeilkeyhfaa  
>tr|D8HE22|D8HE22\_STAAF  
mnkdvsldqpi vryedgklfnttdqyvtefpltimvng eefatvicsptnleelvigflasegailkrdelksvliddsk  
gfahvelnkdldgrfgyst  
krmi asccgksrefyfqndaaia ktsmskitltpiqiinmmtrlqsashiyqetgglhnaaisdgl tffvhrqdigrhna  
ldklygfcigrhitvrkv  
lifsgrisseilikaakigvgvilsksapttlavtlandlnitavgfirnggfniyshperiidskq  
>tr|D8HE23|D8HE23\_STAAF  
masismsdiycngtifenddeqliyltspfpqrytsntwiykktpteerwldkderqhqlhtnqgsnyha fspeneql d  
nhwmamfedm felgime l  
yaiesdalanlprnsdveiaivdeshidaylkvayqfslpfgkdyadahekmvrehyqkdvikrlvaylnnepigvvdvi  
esenyiel dgfgvleqfrh  
qgigstiqsligeyaisknhkpiilvadedtakdmyakqgyvyqsfcyqil kedign  
>tr|D8HE24|D8HE24\_STAAF  
mttkqlvytalmtaiia ilglvpviplpfssvpivlqnigiflagvilgrkygtlsvivfl llvvaglp llsggrggigv  
fagpsagfl llypvvafmi  
gairdrfineinfwilfvgilvfgvia ldvigtlimgmiinipftkaisisl aylpgdilkaivasligtallnhsqfrq  
imglk  
>tr|D8HE25|D8HE25\_STAAF  
menvhligvstigadcylepslsasvkiinrfsnediqvapsyergknpfpkewrmhaffmdalpilnepvkhasnvsd  
keafedi iqt lkrqsekv t  
llftgpltdlaka lqkdssivqyiek lvmgg tflpkgnveepehdgsaewnaywdpeavkivf dsdieidmial estnq  
vpltdvrqrwanerqytg  
idflgvsyaavpplthfi tnstyflwdvlttayignkdlvhsiekkvdvisygpsqgktfeckdgrkinvinhv dnnaff  
dyittlakkvn  
>tr|D8HE26|D8HE26\_STAAF  
mkklllp liimllv laacgnqgeknnkaetksyk mddgktvdipkdpkriavv aptyagglkklganivavnqqvdqskv  
lkdkfegvtki ggdvekv  
akekpdlii vystdkdikkykvaptvvvdynkhkyleqqemlgkivgkedkvkawkkdweettakdgkeikkaigqdat  
vs l fdefdkklytygdnwg  
rggevlyqafglkmqpeqqkl takagwaevkqeeiekyagdyivstsegkptpgyestnmwkn lkatkeghivkvdagty  
wyndpytldfmrkd lkek l  
ikaak  
>tr|D8HE27|D8HE27\_STAAF  
mndmdnsflitteiqrkwi ekfkaigdtfkakseyndqhsqfpyknie wlikegygkltl pkayggegati edmvilqsf  
lge ldgatal sigwhsvv  
gqiyeqklwsqdmleqfaveinngalvnravseamgsptrrgprsthavkaddgyilngv ktytsmskal thiivaayi  
eelesvgfflvdrnlpgve  
iadnwdvl gmrateshdli lndvkvp lkh lvetekskapngwilhipscylgiaqaarnyavdfai qhspnsiegtiatl  
ptvqqnl gkmetlll carq  
flwstakgyqqykddsqir nstasaskvmvmnqglevidlamrivgakslemnrplqryyrdmraglhnp pmedaaytnia  
ksitntf  
>tr|D8HE28|D8HE28\_STAAF  
mlqahfcsvnycqynfvehrtliyvpawfyg  
>tr|D8HE29|D8HE29\_STAAF  
midvllknisqvvli snkwtgl filiglfvanwtvglaam lgsiiayafaryinyseaeindglagfnpvltaialtifi l  
dksgldivitmiatlltlp  
vaaavrevl rpykvpmltpfvivtwftillsgqvkfvdt slklmpqni etvnfsnndrihfis l fegfsqv fieasvi  
ggvciligiliasrkaall  
aviasllsfiivalggnyddinqglfgynfv lmaialgytftkainpyistflgvlltvvvqlgtttllepfglpaltl  
pfiivtwillfagikhdkv  
da  
>tr|D8HE30|D8HE30\_STAAF  
mivvaaevarrkrarglkl nhpealalisdell egardktvae lmsygrqilnkedvmdgvehmitdieieatfldgk  
litvhhpiv  
>tr|D8HE31|D8HE31\_STAAF  
mipgeiitksteveinnhpetvieventgdrpiqv gshfhfyeanaal dferemaygkhldipagaavr fepgdkkevq  
lveyagrki fgfrgmvg  
pidesrvyrptdendeyagvfgdngnenvnkkggkrs  
>tr|D8HE33|D8HE33\_STAAF  
miveeiqgnianlsnekqkhvekvy lensdlikriqrvt dhgteigirlkqipidlygdilyaddhmiivdvn sedl  
lvigprt lqemgdiahqlg  
nrhlpaqftetemlvqydy lvedllkslgipyvredrkvnkafrhighshd  
>tr|D8HE34|D8HE34\_STAAF  
midhthlr l fqcfsqfptgafshsfgl etyiqrni ihddhtfiawl kmflqeqltysdglamrlvydalenddtqkv l h  
idklmfvqnlpketrvgak  
qmgtrmvklal elynspwiawy hqqmqnkaklnpaicftmlghhlgvdikti idylyqnvssltqnavraiplgqtag

Tsompanidou\_et\_al\_Supplemental\_FASTA\_File

qkivthmipyieetrkqif  
elkeadfgmtapglelnqmahenvnvrfis  
>tr|D8HE39|D8HE39\_STAAF  
mskfkvkrhtahimlkvindmlkysfhlthtqvkl1n1lvkydndsnsasidr1l1mkeiqskmallqmsyl1nnhqw  
1lkgrdqrdrkltisikk  
mhidkieymnne1sdyierfygqytdfscdyvsyl1ssqell1rn1kcy1nmcq1slee1yvl1gil1nhkgq1tvkelqg  
efhhipifavspilkc1ilk  
glvkkercelderrviktirekfskvtmliqacynylekqivkl1nk  
>tr|D8HE40|D8HE40\_STAAF  
mtdnys1hifksmkmsvkean1kiiyw1qgtgvvsin1qqydikrndvtvim1ndlyqidghddsvccvvevsaktflk  
fmnanymmrkil1tnevas  
tfril1kyl1yskikqppynandki1n1m1cve1ms1ntydgsrhl1vaeevhdy1t1nnhhkkinrkdvinqvsitnkalsd  
mfkatpysnfiqyl1n1h1r1  
ehclidi1ltskkpiee1asshgfnhysrfih1fketygdtpl1rkrysptshsinhsq1veidknie1l1fddtnqssss  
mreidipfeptkrsqmyqp  
kn1y1kgsnfywmdyytik1qi1qr1gvnpen1hi1vt1dtsselsieqit1ll1qkivnynv1v1frikheykell1tster  
gkiek1vat1fnmtfesnr  
ckiaflind1nttaiq1kl1r1idnyigvfeliyh1lepne1ntrydkeidh1idyfil1r1qieqvs1arskiicdvdl1n  
ennd1kekit1s1dinkvte  
11tnyt1kfrgl1ihmsi1easkein1tr1sififi1in1n1q1rgiviyqndtmivtkfkhevqcvic1lpaallnensda  
ir1l1sckgl1qfshaktkqi  
v1s1dkdnhtsengv1vnd1mqhsywk1anfierniydhs1mvssnsivh1kyhlei  
>tr|D8HE42|D8HE42\_STAAF  
mkk1atatiatagfatia1asgnqahaseqdn1ygnpndptsysy1tyt1daqgn1yhtwkg1nwhpsq1lnqdn1gyssyyy  
ngyn1n1n1n1ngysyn1n1s  
ryn1n1s1n1n1n1q1syn1n1n1syntnsyrtggl1gasystss1n1v1qvt1t1mapssn1gr1s1ssgytsgr1n1lytsgqctyyv1fdrv  
ggk1gstwgn1asn1wanaaa  
ragytv1n1tpkaga1imq1ttqgayghvayvesvnsngsvrvsemnygygp1gv1tsrt1sasqassyn1fih  
>tr|D8HE43|D8HE43\_STAAF  
mm1trkptfles1stm1vmv1vvtgfvff1dipi1qv1ll1iasayatwiakrvgl1twqd1lek1giaer1ntampai1l1ilav  
i1vgswm1fsgtvp1aliyyg  
ld1l1n1psyf1l1saffisav1tsvatgtawgsastagial1s1ign1q1lgippgmaagai1agavfgdkm1spl1sdt1n1laalvt  
kvni1fkhi1hsmm1wtt1pas  
i1g1l1vwfi1agf1q1kghs1ndk1qi1qt1l1selaqiyqiniwv1vplivi1vc1l1fkmatvpam1lissfsai1vgtf1nhh1fkm  
tdg1fkatf1sgf1nds1mi1hqs  
hi1ssgyks1lieggm1msmtqi1vti1fcgyafagivekagclev1l1ttiskgi1hsvgs1licitviccialvfaagvasivi  
imvgv1mkd1l1fegyqvsr1s  
v1srt1eds1tmv1l1p1pwgtsg1yytnq1lhvsvgeff1iwtvpcyl1caii1ai1y1gftgig1kks1nsr1t  
>tr|D8HE45|D8HE45\_STAAF  
mttemndi1thhqpnrks1ndenimam1iy1l1s1l1fts1i1gpl1i1w1l1kkdesk1vdragkny1nyt1isyi1iwsiv1lvvit1i  
gvf1liat1d1d1f1i1i1g1f1i  
t1figi1l1sifaf1s1l1sfvft1iacvkyngqeyvip1tirfi  
>tr|D8HE48|D8HE48\_STAAF  
mskil1kcit1lavv1l1ivtacgpn1rskedi1dka1nkdi1skdkpnq1l1tmvvdgdkqmafykkitdqctkktgikvkl1vni1g  
qndq1leni1s1dapagk1gpd  
i1ff1ahdntgsay1lqgl1aae1in1skde1kgfnkqal1kamnydnkqal1paivetta1fynkkl1vknapt1leeveanaak  
1tdskkkqygm1fdaknfy  
fnyp1fl1gnddy1fkkngseydihq1gl1n1skhv1vknauer1qkwydkgyl1pkaathdvmig1l1fkegkv1gqfv1tgpwn1ney  
qet1fgkd1lgvt1l1ptdgk  
pmkp1fl1gvrgwy1seyskhkywakd1mlyi1tskdt1lqkytdemseitgrv1dvkssn1pn1kvfekqarhaempn1ipemrq  
vwepmgnasi1fisngknpk  
qa1ldeatnditqnik1l1hpsqndkkgd  
>tr|D8HE49|D8HE49\_STAAF  
m1tkrnpk1laal1svipgl1qfynkrpikgtiffiffisf1svfysf1n1igf1wgl1ft1lgtvpk1l1ddsr1v1laag1i1s1illv  
afaimlyi1ini1dayr1nae  
rfnrnee1ikdpkarmvatwdktfpy1l1spgt1l1l1fvv1vpl1imfgv1aftnyn1ynapprht1lewgl1dnfkt1lftig  
vwrktffsv1tw1lv1v1v  
att1l1qial1gl1flai1ivnhp1v1vkgk1firtv1l1lpwavs1fvtili1fval1fndefgainndil1qpl1lgvapaw1sdpfwak  
val1igiqv1wlgfp1v1fal1f  
tgv1l1qsi1ssdwyeadmdgasswqkfrnit1fphiyatap1l1imqyagnfnnfn1liyl1fnkggppvsgq1nagstdil1isw  
vyn1l1tfe1fnn1fnmgavvs1l  
i1g1f1ivaiva1fiq1fr1rt1st1fkdegg1  
>tr|D8HE51|D8HE51\_STAAF  
mt1kvgi1igcgg1angkhmps1lqkvek1vemt1afcdvdi1skaacaeaygtdnakvyddyka1l1kddtidv1hvctpn1dsh  
ceitvag1lhagkhvm1cekp  
makttaeaqkmi1dakstgkkl1t1igyqnr1frpdsq1flyksaqrgd1l1gdiyfgkahairravptwgv1l1deaqgggpl1i  
digthald1l1t1wmmdnyep  
esvmgst1fhk1lnkqhdaanawgswnpdef1tvedsafgfi1kmkngati1ilesawain1levdeakcs1sgtkagadmkgd1

Tsompanidou\_et\_al\_Supplemental\_FASTA\_File

rihgedmgtlytkhvelen  
kgvdfyegnevdeaeekawidavvndtepvvkpeqamvvtkileaiyqsaksgkaiyfe  
>tr|D8HE52|D8HE52\_STAAF  
mtklkvvgviggiaqdrhipallklkdtvalvavqdiintvqmidvakrfniphavetpselkldvavvictpnkfhad  
lsiealnghgvhlcekpma  
mtteecdrmieaankncklltvayhyrhtdvaitakkaiesgvvgkplvarvqamrrrkvpwgwvftnkalgggslidy  
gchlldslslwllgkdmvph  
evlgktynglskpqnqindwgtfdhtkfdvddhvtsymtfanrasmqfecswsanikedkvhvsledgginlfpfeiye  
prfgtifeskanvehnedi  
agerqarnfvnalcgieevvkpeearnvnalieaiyrsdlnksiq  
>tr|D8HE53|D8HE53\_STAAF  
mkigvfvslfydknfdemldyaesglmievgtggngpdkfcklde11enedkrqafmksitdrglqisgfschnnpis  
pdpteakeadetlkrkir  
anlldvpvntfsgiaqsdtdakkpnpvtpwptayseydyqnekliipywqdlafakeqdvkiaielhagflvhtpy  
tmlklrkatneyiganldp  
shlwwqgidpiaairilgqanaihfhakdtyinqenvmygltdmqpygnvatrawtfrtvgyghspyvwdiisqlii  
ngydyvlsiehdpimsve  
egfqkacqtlksvniydkpadmwwa  
>tr|D8HE54|D8HE54\_STAAF  
mteedimilsilliffcirvlsvlksisinhskqlkadgaveygvknskflaithvliyvlagveafinkdtfsfangiglvi  
lifayimlvmviktllggiw  
tlklfilpnhpiiksglykitkhpnyflniipeligvlllthatyttillvpyayflyvrikqeeklmni  
>tr|D8HE55|D8HE55\_STAAF  
mnffdihkpnkqip1svqrklwlrnfmqaffvffvymamyli rnnfkaaqpflkeeiglstlelgyiglafsityglg  
ktllgyfvdgrntkriisf  
llilsaitvlimgfvlsyfgsvmgllivlwglnvgfqsvggpasystisrwaprtrkrgrylgfwntshniggaiaggval  
wganvffhgnvigmfifps  
vialligiatlfigkddpeelgnwraeeiweepvdkenidsqgmtkweifkkyilgnpviwilcvsnvfvyivrigidnw  
aplyvsehlfhskgdavnt  
ifyfeigalvasllwgyvsd11kgrraivaigcmfmitfvvlyfytatsvmmvnislfa1glvligpql1ligvsltgfvp  
knaisvangmtgsfaylfg  
dsmakvglaaiaadptrnglnifgyt1sgwtvfvfyialflgmil1givafyeekirs1ki  
>tr|D8HE57|D8HE57\_STAAF  
mtaykpyrhqlrrslfastifpvflviiig1vsfya1yiwiehartihqhvnesqsslhhtekqitqfitqhnnsfqeld1  
tnhhdvtatkrellk1ihq  
qpatlye1sgpnqfitnnyeh1ntknmy1fsthr1kfknstym1kiyantpr1seikkdsrqfalivdqydnyland  
drftigekeyrppqgfmmne  
svk1nhadhr1i1ykdiheniedgit1livmav1vl1vifgfisadnmakrqtkdietiiqkiyyaknrhl1gtyt1kn  
nseleeinnyid1fesne  
qlihsiehterr1rdiqlkeierqfqpflfntmqtiqylit1spklaqtvvqqlsqmlrys1rtnshtvelneelnyie  
qyva1qnr1fddmik1hie  
sseegrqqtigkmm1qplienaikhgrdtes1ditir1tlarqnlh1v1cdngigmssr1qyvrs1nndvfdtkh1gl  
nh1h1nkamiqygshar1hi  
fskrnggt1icykip1srgnvdv  
>tr|D8HE58|D8HE58\_STAAF  
mkskiy1111fl1fl1sscantrhsesdknv1tvspyqsn1irp1nefekqehvkieikhgstqv11sn1hned1serg  
dvfmgv1setidhpedfv  
pyqdtsvtqq1ledyrsnnykvisf11mptvivvnsd1lqgdikirgyqd11qpilkgkiaysnpnttttgyqhmra1ysmh  
hrvsdvhqf1q1dhamq1skt  
skviedvakgkyag1syeqdartwknkgypvsivypiegtm1nvdgialvkna1hphprkklvqyltsrsvqqr1vae1f  
daksirkdvse1qsdqsien  
1knip1ipks1lpdiphhkfsemiq  
>tr|D8HE61|D8HE61\_STAAF  
mkris1kdiavf1k1lyqnkgrfsina111qlimi1fissty1111fnmm1kvagqs1l1tinwmeivshpasvill1i1fil  
svaf1iyvef1s1lvymvya  
gfdri1itfks1fkna1fvnrk1ligvpviffviy1lm1pian1gl1ssv1tkniy1pkfl1teelm1kttk1giiygtf1mia  
vfiln1fk1l1ft1pl1tilnr  
qs1fknmr1swq1tkrnkfr1vieivile1liigail1ti1sgatyla1icvdeegdkflvss1ilfv1kss1lffyy1lftk1  
sl1sv1vl1h1kqenv1dq1p  
glefky1pkprkrs1rffi1smv1avtcfvgynmy1lynntintnisi1ghrgfedkgvensips1kaaakanveyvel1dti  
mtkdkq1fvvshdn1lkr1t  
gvnkn1sesnfkd1vvg1k1mrqngheak1vs1defietak1snvk11velk1phg1kepadyt1qrvid1ilk1khgvehq1rvms  
1dydvmtk1k1keapy1kcg  
y1ip1qfgh1fkets1ldffviedfsyspr1vnqah1enkevytwt1ngeed1tkyl1qtnvdgi1tddpa1ladqi1keek1de  
tyfdr1siri1lfe  
>tr|D8HE62|D8HE62\_STAAF  
mttqmki1kty1vagikaal1dttgik1asksettshtyqh1aldq1heliant1lnk1syl1n1dayqkr1dilaahy1iak  
sairtkn1dqmtk1akhr1e

Tsompanidou\_et\_al\_Supplemental\_FASTA\_File

```
siydsisnplhsqnn
>tr|D8HE63|D8HE63_STAAF
mkkqiislgalavasslftwdnkadaivtkdyskesrvnenskygtlisdwylkgrltslesqfinaldilettyhygeke
ykdakdklmtrilgedqyl
lerkkvqyeeyklyqkykeenptskvkmktfdqytiedlrmreynlteslksavkdfekdvkienqhhdlkpftdem
eekatsrvddlankaysvy
fafvrtdqhkteaalelkakvdvlvgdedkphrisneriekemikdesiedffietglnkpgnitsydsckhhykhse
gfealvketreavanades
wktktvkkygesetkspvvekenkvedpqs pkfdnqqevkttagkaeettqpvaqplvkiqqgtitgeivkgpeyptmen
ktlqgeivqgpdfptmegs
gpslsdnytqpttpnpileglegssskleikpqqtestlkgiqgessdi evkqatetteasqygprrpqfnktpkyvkr
dagtgi reyndgtfgyear
prfnkpsetnaynvttnqdgvtvsygarptqnkasetnaynvtthangqvsygarptqkkpsetnaynvtthangqvsyga
rptynkpsetnaynvtthg
ngqvsygarptykkpsktnaynvtthangqvsygarptqnksetnaynvtthangqvsygarptqnksetnaynvtth
gngqvsygarptynkpskt
naynvtthadgtatygprrvtk
>tr|D8HE64|D8HE64_STAAF
mqeayivaygrsaakakgagal fherpddvaakvlqgvlkridgkfnknmiedvivgtafpeglqqniartialrtgls
dtpvgqtvnrycssglqti
aiaanqimagqgdm lvagvelmsavpmggneptnptlqyddigasypmgltaenvasqfdvsredqdayavrshqray
daqrdgrfkdei ipiqvns
veytnagpkvhtnifdqdefirpdtmealakl rtfvkadgtvtagsaplsdgagfvvlmsgdkvkel dvtpiarfvgy
kavgvdpkimgipayai p
evlslnsvedidlielneafasqtiasikevgldisrtnvnggaialghplgatgamltarllnemgrrpdsrygmvt
mcigvgmgaaai feyvr
>tr|D8HE65|D8HE65_STAAF
mtinkvtvl gagtmgaqlaal fvnaglkvklldivvdkndpnliakksydkitdkkrpllfldlnlashltygnfdddln
ddadlyieavkedieikha
vwqqvlqhakedal fatntsgipinai aqafnekdqerffglhffnpprimklveliptshtkesiildvknfaqnal gk
gvi vndvpgfvanrvgtq
tmndimyraeqhklsvdvda l t g q a i g r p k t g t y a l s d l v g l d i a v s v i k g m q q v p e e t p y f h d v k i v n t l f e n g a l g r
k t k q g f y k k d k e t k a r l v y
dvekdqdyvpasqqplpilinefnkdlvhnldvifnaqdeaglf lwetlrnnfyysainvpkatddfrdidralvwgfnwkl
gpfqlwdamgyervktrme
delgdlpqwisdlggfykqdetieyatpvshfvkdelwdkgdaklsvthdnqlllklqsknnvitdefndalvdaidll
enehytsmviyadgnnfsv
ganlf1mkkahedglvddvvaqs idklhysfnrlkyslkpvtavqgralgggcelvlyspivvaasetyiglv eavgvl
lpsggglaemadrlrtsh
kfdkqasmtkvltniafakvstnafearrygylrdtdtiifntaqrvevalkrakyeaetnyipnprhqyialgedfka
liqqqldaqrrghfisdhd
yhialniatilaggdprntfinqryiqslekigfidllskksyerialhmktgkplrn
>tr|D8HE67|D8HE67_STAAF
mnfdwiktrsd f d d d k p a v i d h a k q t s w t y q q l n a r a d n m a h y l t s q g v k k g d v i g i f a p n d i a i l d l l f a c f k t g a v f l
p l n w r l n p k e i a a i v e d a q
l k l l f y a e k h l s s l t d i d q n l l h m d i d v a q y d e i v n p d y h q p f a t p v e p q d l a a l i y t s g t t g s p k g v m f s y e s f v h n g
a n l e l t y k f n s n y i t i v s t
p m f h v l g f n d t v l p v l m s g g t l i l q r y f n g e e l n d m i a q y h p t f i i m i p t m y s t l r a s n f n p e n f k a m d y i i q g g s q p l
p s i q a a f k y g i n i i n g y g
l t e a p l v l n t p e n s k r k p m s i g k a v m f v d a r i l d d n g e e v p t g e i g e l a i k a k n v t p g y w n k p a e t a k a f h g r y l l t g d
l a k m d d d g d i f i d r k k e l
i i t g g e n v l p s e v e n a l a e h p l v d r c v v g y d h p k y g e s i a a a i l r e d e p n y a e i l d q h m r s r l a g y k v p r m y v p v t h m
p l n s t q k p k l a i r q m m n d
k v s q t l
>tr|D8HE68|D8HE68_STAAF
mevtclqitwhdlqhiikdgdviglpalavanlpaevl ravlaqhdyhtpndlftfilandihs lgaaplddfierm
ikrvimsiltassktaqam
knndieayflpggiathyrqs nqlpgvitkig lntavdprygggkvnt r t t d d l v s l v t i n d e t y l h y t f p s v d v a l l
r g t y a d p q g n i y l t q e a y l
secyhvalntkanhgkviqvka l v d d y q l k p n e v v i p g n l v d y v y v t e d e k n h r q v i q g h y l p a l s g e e r i d g i p e p a l
p f n s r k l i l r r a a q f l t y g
d t i s i g y g i n n e l s n l l h e e c v e h d v q p i l d v g i f g g f v g s r e h f g m n y a d v r m p h d r a w d f i y n n g v s v a y l s f a e v d
q y g n v n s y f n d r l n g c g g
f i d i t q s v n k i i f s g t f v a g s h v t c h n q r l n i e t e g q n k f v s d v s h i d f n a q y s q s l e q e v y f v t d r a v f e l t n q g l k l
i e i a p g l d l h k d i l n q m a f
k p i a d h l k l i d t s i y k e k w g q l k q s i h k v
>tr|D8HE69|D8HE69_STAAF
mkvgksmeglnhrrntekeettqtqsvapntgeevmssaitqstkt s d i h n e s i d k q m e d k a h e t a q n a d l k n e a r s l f d
```

Tsompanidou\_et\_al\_Supplemental\_FASTA\_File

natksigrлагndeslnln  
lkdmfsevfkphktneadeifiagtakttpaicdisewgkpwlfsvrliaftvtfiglwvmaafnntnaipglifiga  
ltvp1sglfffyesnafkn  
isifeviimffiggvflstmvlyrfvvsdqferfgsltffdafvlgveetgkaliivyfvnk1ktnkilnglliga  
aigagfavfesagi1nfa  
lgenvp1ldivftrawtaiggghlwsaivgaaivivkeqhgfefkdidkrflifflsavglhgiwdtsltlilgsdtlki  
filivivwlvfimgagl  
kqvn1lqkefkeggkkvde  
>tr|D8HE70|D8HE70\_STAAF  
mkfkrlatifsavlvsqcgsmhssgkdlnislp1ktsiapyetdvpvkigaaeslfktn dqgkiekv1vksyhpndt  
tldielkdnikfngqgklt  
aekvksslensmkksdlvkyslpissitakgqkltiktssaypelvselanpfmai ytdaksdvnqtpvgtgpyqikdy  
kqsrkislsnfkdywqgkp  
kl dhitvtyqedgnnrvrnlesqkddlitdvpvnkvqdiennqnlkvskesgfrtslimynhtnkkmtksvreal dhiid  
rggiadhiyqgyakpatsp  
fndkipyikepkltkqnieqaktllakdgytkeqplkiklitydgrpelskiaqvlqs dakkanieidiks vddiegylt  
drsawdatmysfgtiprgd  
tgyffnqaykkdgainkgdynnsnvda1inqlnhtvdvkerhnisndiiklssrdvpnsyia yndqivaanskvknkvt  
pegiy1ldyr ttier  
>tr|D8HE72|D8HE72\_STAAF  
mkl nqrvkvfalyfvsivtaniivknnliktliqtiagy tvfaiglkyltkrknk  
>tr|D8HE73|D8HE73\_STAAF  
mlteqekdiikqtvpl1kekgteitstfypkmfka hpe11nmfnqtnqkrmgqssalaqavmaaavnidnls iikpvimp  
vaykhcalqvyaehypivg  
enllkai qdvtgleendpviqawakaygiadvfiqiekeiydqmmwigfkpfkitnikqesediksftveteeydfsef  
tpggyitvdvssdklpyra  
krhysivsgdknhl1fvgkrdvttehege vstil hdeikegd tinlaapvggfv1enttepq1flgsgigvtp1vamy ea  
asakgl dtqmvqvaeneqh  
lpfkdnfnsiashhdnaklythlkdkqgyigae1qvflankpei yicggtkflqsmiealkslnydmrvhyetfipr1  
svav  
>tr|D8HE74|D8HE74\_STAAF  
mnkfkgnkvv1ingavgssyafslvnqsivdelviid1dtekvrgdvmd1khatpyspttvrvkageysdchdadlvvi  
cagaaqkpgetr1dlvskn  
lkifksivgevmaskfdg1flvatnpvdi1gyatwkfsglpkervigsgtildsarfr111seafdvaprvdaqiigeh  
gdte1pvwshaniagqplk  
t1leqrpegkaqieqi fvtqrdaaydi ikakgatyygvamglariteaifrneda v1tvsallegeydeedvyigvpavi  
nrngirnvveiplndeeqs  
kfahsakt1kdimaeeelk  
>tr|D8HE76|D8HE76\_STAAF  
mks1fekaqqfgksfmlpia1lpaag11lgiggal snpntvkaypildit1lqnift1msaagsivfqnlpvi faigvai  
glrsrdkgtaglaa1lgf1  
imnatmng11tjgtlakdq1aqngqgmvlgiqtvetgvfggiitgimtailhnykhkv1ppy1gffggsrfvpivtaf  
aai1lgvlmffiwpsiqag  
iyhvvgfvtktgaitgvfygfilr11gplglhhi fylp fwqta1gg1levkghlvqgtqni ffaqlgdpdvtkyysgvsr  
fmsgrf1tmmfg1cgaala  
iyhtakpehkkvvgg1mlsaaltsf1tgiteplefsf1fvapilyvihaffdg1afmmadifnitigqtfsggidf1lf  
gv1qgnsktnylyvipigi  
vwfclyyivfrf1itkfnfktpgre dkvaaqqveateraqtivaglggednieivdcatr1rvt1hqndkvdkv1lest  
dakgviqqgtgvqviygph  
vtvikneiee1lgd  
>tr|D8HE77|D8HE77\_STAAF  
mkrki vmcdpghddaialilagaidsp1eilavttvagnqsvdknttnalnv1dimgrqdiavakgadrplikpaafas  
eihgesgl dgpk1p stpsr  
qavampasdv1inkvmtsdtptivatgpltnlatalirepriaehiesit1mgggtfgnwtptaefniwvdaeaakrvf  
esgitinvfg1dvthqvla  
ddhvierfesinnpvaqfvv1lqffkkykthfnmdggpihdactily1lqpel1ftmvpvni diehqsp1tygtmavd1  
nhvtgkpanayfatavdve  
evwnlidhklrtye  
>tr|D8HE78|D8HE78\_STAAF  
mngdnqqilreiv1nptihgkelesifgl srrqlgyriqkinlwleqegy pklertsqgnfivsseimt1fkrdvseqqm  
1ngnnvifsietrryylm1  
mlfskenams1nhfsid1qvs kntvi hdi nhvkeq1en hglslkysrkhyeivgdefevrrffiklidqr1nhditkse  
v1ka1n1tfedjayqkdk1  
kqveqf1ksrfidks1sslpyvlcvirrriqsghvinp1ninyqylrdtkeyqateimtqhepd1peakly1tlh11st  
svqwt1lgesdnisn1tma  
iaqmihhfeqitfiniedkekl sqq111h1tpafyrikyn1tdrdelinplqgnyqs1fhmvkqscqs1teyfgks1pdn  
eia y1tm1fggs1rrqden  
fdgkikaiivctqgtsvsqmm1ye1rn1fpei1fldais1rtfeny1ldydivfspmfv1thkk1fitkval seneqrk1

Tsompanidou\_et\_al\_Supplemental\_FASTA\_File

rkevmkyinkesadidkei  
nk1malierthttvnditelrdgledfianysistingsivtqnktldladliparhvkhrihhvenideaiakasdvlva  
nhfidikiyihemqqafdds  
ymvimqniaiphaysekhvhktamsmlilqepiymdsgtaihiivpiaavdkvthlralqlrdvaqdndaikriiqsrk  
nsdvneilknsnkearen  
gwdsn  
>tr|D8HE81|D8HE81\_STAAF  
msryfpivitfdvtvistttlatfdcnpfelqslrfyvinhls  
>tr|D8HE82|D8HE82\_STAAF  
msyftdfvrgfldl gatvilpvvifllglffrqkigaafrrsgltigvafvgiflvidllvknlgpaaqamvknlgvslnv  
idvgwpatssiawassvaa  
fiip1giivnvvlvtkvtktmnvdiwnfwyftaamvyavsgsiwqallaavifqviclkvadwtapmmseffdlpgv  
siatgstisyaggiylvkl  
lqrvpglnkladdepitqkrfgafgesifvgllglgigvlagykpgdiinlgmsmaavmvlmprmvkilmeglmpvses  
artwlnkrfgeheiyigld  
aavalghpavistalilv pitvllavilpgnqvlpfgdlatipfvafivgaagniihsvivgtimiaislyiatdvp  
iftdmakgtvnmqpkgsse  
issidqgnivnylifklfslfn  
>tr|D8HE83|D8HE83\_STAAF  
mka1vktreghgnlelldkevatplddkvkikvhyagicgtidihtyeghykvnfpvtlghefsgeivevgadvkdfkvgd  
rvtsettfyvneceyces  
kdynlcnhrkgigtqvdgaftnyviareeslhipdevsyqsaamteplacahhgvski qvnsqdvavvmgppigllva  
qvlkskgatvvvtgldndk  
vrlkkaeahmdyvvnllqqtldktyingitdgygadvvvecsgavpaarqgldilrkkgfysqigifkdaeipfdmekvi  
qkei tvvgsrsqkpadwep  
slqlmadglvnaealvtkiydi skwdeayqhlksgegikallkplldenegen  
>tr|D8HE86|D8HE86\_STAAF  
miyagilaggigsrmgnvplpkqfldidnkpilhtiekfilvsefneiiatpaqwishtqdilkky nitdqrkvvag  
gtdrnetimniidhirnvn  
ginnddivthdavrpf1tqriikenievaakygavdtvieaidtivmskdkqnihsipvrnemyqqgtpqsfnikllqd  
syalssaakeilsdacki  
ivesghavklvrgelynikvttpydlkvanaiiqgdiadd  
>tr|D8HE87|D8HE87\_STAAF  
minqvyqlvaprqfdvtynnvdi ygnhivrp1ylsicaadqryytgrdenvl rkk1pmslvheavgevvf dskgvfek  
gtkvvmvpntpteqhhiia  
enylassyfrssgydgfmqdyvvmahdrivlpndidlstisytelvsvsyhaiqrferksiplktsfgiwdgnlgyit  
aillrklypeakiyvf gkt  
dyklshfsfvddiftvnqipddlkidhafecvggksqvalqqivehispegsiallgvselpvevntrlvlekgltlig  
ssrsgskdfeqvvdlyrky  
pdiveklallkgheinvtmqdivqafemd1stswgktvlkwti  
>tr|D8HE88|D8HE88\_STAAF  
mtktkqaihidniywervqlyieghsegvdltsqqfvlrnl tetktleanemkidgntficrfnvailddgyylpmdkyl  
fvyhdqleyigqlnpiid  
qayaa1neeqiieynelttngkanyv laneakvfrkggvsqhtvytitpeiasdvnefvfdieitlpqeksgviatsah  
wlhkqgrkasfesrsflfk  
aifnikllhikrsktilftsdsrpn1sgnfkyvyde1lrqkvdfdydiqtvfkanitdrkrwdkfrlpyllgkadyif  
vddfhp1iytvrfrpsqei  
iqvwhavgaftkvgsrtgkkggpfidslnhrsyt kayvssetdipfyaeafgi reenvvptgvprtdvl fdeayatqik  
qemedelpiikgkklvifa  
ptfrngghgtahypffkidferlaryceknavvl fkmhpfvknrl nisrehrqyfidvsdyrevndilfvtdllisdys  
sliyeyavfkpmi fyafd  
ledyitttrdfyepyesfvpgkivqsfdalmdaldnedyevkvvpfldkhfkyqdgrsserlvkd1frr  
>tr|D8HE89|D8HE89\_STAAF  
miktikkliehsiyttfkllsklpnknliyfesfhgkqysdnpkalyeyltehsdaqliwgvkkyehifqqhnvpyvt  
kfsmkwflamprakawmin  
trtpdwlyksprttyiqtwhgtp1kkigldi snvkm1gtntqnyqdgfkkesqrwdylvspnpystsi fqhafhvsrdki  
letgyprndklshkrndte  
yingiktrlnipldkkvimyaptwrdeairegsyqfnvfdiealrqaldddyvillrmhylvtridehddfkdvsd  
yedisdlylisdalvtdys  
svmfdfgvlkrpqi fyayldkygdelrgfyndykkelppivenqtalidalkqidetaneyieartvfyqkfcsledg  
hasqricqtifk  
>tr|D8HE91|D8HE91\_STAAF  
minqvyqlvaprqfevtynnvdiysdyvivrplymsicaadqryytgsrdenvlsqklpmslihegvgevvf dskgvfnk  
gtkvvmvpntptekddvia  
enylkssyfrssghdgfmqdfvllnhdravlpddid1siisytelvtvslhairrfekksisnknrtfgiwdgnlgyit  
aillrklypesakiyvf gkt  
dyklshfsfvddvffinkipegltdhafecvggrgsqsainqmidyispegsiallgvsefpvevntrlvlekgltlig  
ssrsgskdfqdvvdlyiqy

Tsompanidou\_et\_al\_Supplemental\_FASTA\_File

pdivdklallkggefeiatindlteafeadlstswgktvlkwim  
>tr|D8HE93|D8HE93\_STAAF  
mlkiilyaytqsvfsgrriekllhdsirmmwlaqnqtpsytinrfrvnpntdaliesslfifhsqclqknliddnsifi  
dgtkveasaigfvlmalni  
rkiaagravhykmhikkadfyqiinrnqlfyia  
>tr|D8HE94|D8HE94\_STAAF  
minkndivadvtypkaadifrsvgidfccggqvsieeaslekknvdlnellqrlnveqtnpplslnpkflnvssliq  
yiqaaayheplreefknltpl  
yvtklskvhgpnphylvelketydtfkngmlehmqkeddvdvfpklikeyqgevvddintviddlvsdhiatgqllvkmsd  
lassyeppeieacgtwrlvy  
qr1kalevlthevhlenhv1fkkvs  
>tr|D8HE96|D8HE96\_STAAF  
mkaliiddeplarneltyllneiggfeeinaenvketleallinqydiifldvnlmdengielgakiqkmkeppaiifa  
tahdqyavqafelnatdyi  
lkipfgqkrieqavnkrvratkaddnsanaiandmsanfdqslpveiddkihm1kqgniigigthngittihhtnkyett  
eplnryekrlnptyfiri  
rsyiintkhikevqqwfnytmviltngvkmqvggrsfmkdfkasigll  
>tr|D8HE99|D8HE99\_STAAF  
msmqssykr1vkvl1tilvivfsl1vggwyifkneaprptkivdqgghtlvtkgelisgqaiyekygltdygsylngs  
ylgpdytaeahhlyligr  
kyyaqdiyhkqlhklhnaelavvkdkvmkeirinrysekenqlvltpgqvyglkyldyykkefvnnpkqvglnenmikq  
fqnddymvagnkvehlsqf  
ffwgawlsstrlgktsfyttnwpydvdagntlpsagilwtaisvtlliaqlafiiyiqryefdmkptyesere1pkie  
vdskitdsqrkvgy1vvv  
ml1flvqil1gelahyyvenkffgieiqr1fpfniaktwhvqlvifwvattwlaagiyivpkvlgkepkkgv1vdilf  
waliiivmgsmiqewghil  
gwidshw1fghfgweyielgkfwqilfivgmalwvii1crgflpairnkvanhdkrh11t11fvgaiaiplfylas1f  
impnshvtfadyrwwivh  
lwvegi feafavvicflmvnmkltaiettiralyfql1111gtgivgmghyywqgdhsiwlalgsdfsalevvp1c11  
iweaythyrlykksdiafp  
ykgtfi1fastglwnaigagalglintpavnyfehgtqwaahahgsmagvygmfsisialyvfknitkkefwtpkvek  
wikiscwalnvglagmvfi  
tlmpvgyiqlkdalehgywhsr1tsfyeqplvka1mwgrmpwdiiftvgvii1lvvifirgyrh1kpkryv  
>tr|D8HEA1|D8HEA1\_STAAF  
mgnykdyaqdi1tavggvenivnvsydtvrmtihmhhaipstanevtqidgvasvdenetqlvivfneevkyvyqq1q1  
1mddakhqedtnhdavdtq  
eteqkaqvkvttpl1vkapiagrri11kevrdsifrekmgvge1aikaheeskvtapfnglvsmivptkhavgiqsedgv  
divihigvnavd1legkfgk  
cfvqkndrveaggt11qfdqqyiqqqgynadvivvisnsad1gkveltmneiittedvifkifkn  
>tr|D8HEA2|D8HEA2\_STAAF  
mtnl1pqnfmwggalaanqfeggydkggk1svdivm1tsaghgkarqitesidpnhyypnhegidfyhrykedialfkemg  
1kcl1rtsjawtrifpngde  
dvpneeg1afydri1fde1iaagiepvvt1shfemph1lakhyggfrnrevvdyfvhfarvvferykdkvtywmtfneinn  
qmdtsnpi1fwtngval1t  
endnpeevlyqvahhel1asalavr1gkeinp1kfgigtmi1shvpiypyschpkdmmeaqianr1rffffpdvqvrqyypsy  
akkmlarkgydvqwgqegdd  
silqqgtvdyigf1syymstavkhdvdtvvenivng1nhsvenphiatsdwgwaidpdglryt1nvlydryqlplfive  
ngfgavdevvdghihddyr  
iey1kahitaaieavdqgdv1igytpwgi1divsfttgemkkrygl1yvdrndghgtmer1kkdsfywyqqviasngd  
k1  
>tr|D8HEA3|D8HEA3\_STAAF  
mskeaghtflak1gktr1rpggkaatdw1iqggafsqdkqvlvacnmcttsiy1lahtygchiqgvdinkkalekaqeni  
saag1esyiqvqqanavk1  
pfddnqfdi1v1neam1piaikeka1reyrv1kpggill1thdivivneshathvks1saainvvnspqtklgwldlyyq  
agfnhvhyhtgpm1lmtpk  
g1iydegivgt1ki1inna1kknrpmfckmfktmtr1rkdmyitfvakkdh  
>tr|D8HEA6|D8HEA6\_STAAF  
msivallig1gp1igwffptvaskfggkpvhqi1gatvgt1ifai1lavitssglptgtn11fallsgagwfgqiitf  
kafelv1gssrampvttafq  
llgas1wgvfalgnwpgighki1igftaliviligarmtwserkeasnak1rravill1ligefgywlysaapqatsidg  
ltaf1pqamgm1vivaviyg  
fmnikaenpfrnkitw1qi1sgfffa1fgal1ty1isaqpnmnglatgf1lsqtsv1lat1tgiyflkqhktskemvitiig  
lv1ilvaasvtv1fik  
>tr|D8HEA7|D8HEA7\_STAAF  
mkkvsikdvareagvs1vttvsh1nhndsrfssttiknvhavser1gyapnkhakqlrgskiqtigvilps1tnpffsa1  
mqs1hdhkpsdvd1cfl1ts  
tatd1ydnikh1idrgidg1iaqy1sspdal1ny1kkhhvpyv1vdqndhqgytdfvrtneyqggq1aaqhl1ielghnn  
mmivapydmmanmstrvag

Tsompanidou\_et\_al\_Supplemental\_FASTA\_File

fvdtlrtnqlpepgivhteiskrggltivddimvqsataifaindelaigilrgliehgisipkdisligyddidyaayv  
tpplttvaqpitdigktsl  
tlllqr1qhlkdsidmielpttlkirattgyhlsn  
>tr|D8HEA8|D8HEA8\_STAAF  
mfivmknkqvii1knkifvfeksikkhnemmyielcd  
>tr|D8HEB0|D8HEB0\_STAAF  
mnntqsspscsniiiaimlsaltywlfafsfinigplvgqyqtspavlnlsisltsfatgimvaagdiadkigqlrmtym  
mgliismfasllliisdit  
alliigrilqglsaaillpstvgvlnnqfkgdhlrraisylmistvvggiglagviggliafnfgwqtnfiisiviafiai  
lllkgtpkevshsrhpf  
dykmsifavmigsftllltqgfeqgwfstfsficlsifiittlifiierrhevpidfsvlnrnrpfigaflnnfvlns  
glgvtvffiyagthlgls  
aaqsglvtlpyaivavamirlgekatlrfggkmlliigplfpvigitiismtslqpsqyiaavvtgfvicainglvatp  
gltiaifsmpekvglatg  
lykmsgtlggafgialsttvfsmqlnyapsvaatvtfivsvlmlglsaymiipktvks  
>tr|D8HEB1|D8HEB1\_STAAF  
mctgftiqtlnnqvllgrtmdydypldgspavtprnyrwtstggttqgtygfigtgtdmegfiygdgvnehgvaistqy  
frgyssygsthkadamnit  
qneivtwilgyttsiedmkqqasqihvvavylnidigevpplhyhvsdatghsvevsfkegevvikdnpigvltnhpdlnw  
hynlrgyinispypttan  
lllegvtieplgneagtfglpggftsterfvrmafkaniaqndkemdlnnafy1ldavnipigivrphdadnhytmyqt  
vinl1trtlylkyysnei  
valkltdl1nrkdmtifkpekhitirklnndq  
>tr|D8HEB2|D8HEB2\_STAAF  
medvlymkk1taaa1atmgfatftmahqadaaettntqqahtqmstqsqdvsgtyy1idsngdyhhtpdgnwnqamfdn  
keysytfvdaqghthyfyn  
cypknanangsgqyvnpatagdnndytasqsqhi1nqygyqsnvgpdasyshsnnnqaynshngngkvnypngtsnqn  
ggsaskatasghakdaswl  
tsrkqlppygyhgghahygvdypenspvysltdgtvvqagwsnygggnqvtikeansnyqwymhnr1tvsagdkv  
kagdq1aysgstgnstaph  
vhfqrmsggigngyavdptsylqsr  
>tr|D8HEB4|D8HEB4\_STAAF  
mkpyiq1vvfkqwlqy1llvttivialvligmgyrvahdnfkipitidqldtttasksfvnkikqsdyvtikkvdedesy  
ieddvtkkeailsmqipkg  
fsqk1kenr1ketiqlygrddf1ggiaveivssslyeqqipniyehledmkqhqsidainksyhkhtpeskikfvsltk  
qaqhsisislifavilfvs  
avqvvlhyrlnqqaalqrlsqyh1srfklystyvmthtillllvllavsl1sqplslifylkslllilyeigivfilf  
hiqtishrlf1mtfiyalam  
givy1t1fm  
>tr|D8HEB5|D8HEB5\_STAAF  
mktih1fr1yhsf1lkkwyliiy1l1filvallit1t1qhateddnhf1nigvvdkdqssetkl1l1nsigkgsn1gknvsi  
kayddkqaht1l1kqk1qg  
yfvfdkqmtkafykqge1p1svytydqsmksv1sq1tdsvyqr1mrsmg1lafqdl1pkashsdsinvmt1l1itg1  
nrsgafn1epih1ydtgsy  
yaitgfl1ttvfi1fals1ftv1kmnqdtv1kar1kmfhf1sker1l1iral1twfytm1wsivgvvwm1f1sipntfelynwp  
t1aih1syyvtf1ilw1l1  
iell1ttg1l1nsiskv1laivil1v1sg1tiptif1lqhiangv1fniqp1favvtnq1leil1nnyile1hpsf1ylsfi1l1ii  
n1av1vwryrq  
>tr|D8HEB6|D8HEB6\_STAAF  
mskkl1k1iipi1iiv1l1l1ggiawgvya1ffantpknty1kseqhtakmykdyfndrfenevkf1qekm1kdn1s1s1e1s1ad  
asdeivkgl1gipksvvnas  
kikmsyghdpk1kksmin1lepti1adsa1gk1fq1aadkdkhyfesp1fkgkysvnnsd1l1stysk1tgedeetakengitn  
qq1n1nt1l1fsnaq1qqsdy  
skiaekyse1ivdk1ddd1nfdk1gkkee1kvng1eky1kvrpvt1l1sradt1kkit1lav1leakkdkd1kkl1meeq1gat1kdf1e  
kdikkaiddv1ketkkdefa  
kiqskiytekhtivkreit1tdkennktki1gtn1leddk1kl1dya1ldfdq1kytyaeakytik1gvss1kekd1nkys1d1kye  
fgkkteydesk1kl1dnqek  
vdg1tkrqd1kgki1tvaldkysdenef1fenn1dsdvknntqk1st1nigikyaepin1f1lks1stkl1kadid1fdd1sgak1dfn  
s1l1sskn1rek1lekeie1kngg  
kmfes1l1kkask  
>tr|D8HEB7|D8HEB7\_STAAF  
melkvddfv1rni1krpy1l1v1lgvfvvavs1l1ffda1mff1yak1ydk1l1pmy1l1v1fma1ftav1l1im1yiqek1neny1kvekryv1v  
ry1l1n1vi1vgyt1l1p1l1fvs  
iyvfgvvgf1gfdvfnyc1l1gi1l1m1f1isw1lg1l1f1y1kne1fdsen1pnpavnai1ai1i1kl1fafgg1f1yis1l1ivpvt1q1qee1fi  
gl1sif1ini1vd1all1vrsyf  
nyalyks1kk1dieneg1ktm  
>tr|D8HEB8|D8HEB8\_STAAF  
miifil1iti1faiyy1amias1l1f1kseg1fsi1gl1il1dv1imgt1l1fyf1igar1fdnd1l1sn1f1m1fmdt1gsy1f1myfaik1lw



Tsompanidou\_et\_al\_Supplemental\_FASTA\_File

vkpkvnyliakelgeske  
vieeqeldlqtskirgiyffiiisvmlitklrmqpelqadaismnpvfifvgviiiliwlvldiyrkkkygiflftiv  
plvvtiwiiaiiatilis  
>tr|D8HEB9|D8HEB9\_STAAF  
mkktiltmttltlfsmspnsaqaytndsktleakkahpnaqfkvnkdtgaytytydknnapnnnhqnsrtnndndqha  
nqrdlnnnyhsslsqgyt  
hindaidshppqtspsnpltpaipnvednddelnnafskdnkglitgidldelydelqiaefndkaktadgkplalngg  
kiidqplitsknnlytagg  
ctwyvfdkrakdghtistfwdaknwaggassngfkvdhrprrgsilqtvnppfghvayvekvnidgsilisemwigey  
ivssrtisasevssnyih  
>tr|D8HEC1|D8HEC1\_STAAF  
mkkknwiyalivtliiiiavsmiffvqtkygdqsekgsqsvsnknkiahiaivnedqpttyngkkvelgqafikrlane  
knykfetvtrnvaesglkn  
ggyqvmivipenfsklamqldaktpskislqyktavqqeekvakntekvsvnlndfnknlveiyeltsiidnlhnaqknv  
gaimtrehgvnskfsnyll  
npindfpeftdtlvnsisankditkwfqtynksllsandsdtrvntdynvstliekqnsldfdehtamdkmlqdyksqk  
dsvelndnyinalkqmdsqi  
dqqssmqdtgkeeykqtvkenldklreiisqsespfskgmiedyrkqlteslqdelannkdldalnsikmnaqfaenl  
ekqlhddivkepdttdtffi  
ynmskqdfvaaglneneaneyeaivkeakrykneynlkkplaehinltdydnvaqdtsslindgvkvqrtetiksndin  
qltvatdphfnfegdikin  
gkkydikdqsvaldtsnkeykvevngvaklkkdaekdfldkktmhlqllfgqanrqdepndkkatsvvdvtlnhnldgrl  
skdalsqqlsalsrfdahy  
kmctdtkgredkpfndkrliimmvdqvindmesfkddkvavlhqidsmeenskliddilnnknttknedisklidql  
envkktfaeepqepkidkg  
kndefntmssnldeksriseskstqllsdtqesksiadsvsgqlnqvdnvnlhatgralgvrاندlnrqmakndkdne  
lfakefkklvqnskdgdrq  
nqalkafmsnpvgkknlenvlanngntdvisptlflvllmyllsmitayifysyerakgqmnfikddyssknhlwnnvis  
gvigtglvegllvgliam  
nkfhvlagyrakfilmvilmtmvfvlintyllrqvksigmflmiaalglyfvamnllkaagqgvtnkispisyidnmffn  
ylnaehpiglalviltvlv  
iigfvlnmfikhfkkerli  
>tr|D8HEC5|D8HEC5\_STAAF  
mhkliikynkqlkmlnldrgktytisederaditlkslgevihleqnnqgtwqanhtsinkvlvrkgdldditlqlytea  
dyasfaypsiqdtmtigpn  
ayddmviqslmnaaiikdfqsiqesqyvrihdkntdvinyelqeqltnkayigdhiyvegiwlevqadglvlsqntv  
asslirltqemphaqaddy  
ntyhrspriihreptddikierppapiqnntviwrsiippvlmialtvviflvrpigiylmmigmstvtivfgittyf  
sekkkynkdvekrekdyka  
yldnkskeinkaikaqrfslnhyptvaeikdivetkapriyektshhhdflhyklgianveksfkldyqeeefnqrrde  
lfddakelyefytdveqap  
lindlnhgpiayigarhlileelekmliqlstfhsyhdleflfvtredevetlkwarwlphtlrgqningfvynqrtrd  
qiltsiysmikeriqavre  
rsrsneqiiftpqlvfvtmdmsliidhvileyvndlseygisliavedvieslpehvdtiidiksrtegelitkekelv  
qlkftpenidndkeyiar  
rlanlihvehlknaiipdsitflemynvevdqldvnrwrqnetyktmavplgvrkgddilslnlhekahgphglvagtt  
gsgkseiigsyilsainf  
hphevaflldykgggmanlfkdvlhvgtitnldgdeamraltsikaelrkrqrlfgehvnhinqyhklfkegvatep  
mphlfiisdefaelkseqp  
dfmkelvstarigrslgihlilatqkpsgvddqiwsnskfklaalkvqdrqdsneilktpdaaditlppgraylqvgnnei  
yelfqsawsgatydiegdk  
levedktiymindyqqlqainkdlsgeleetkenqteleavidhiesittrleieevkrpwlpplpenvyqedlvetdf  
rkllwsddakeveltlglkd  
vpeeqyggpmvlqkkaghialigspgygrttflhniifdvarhhrpdqahmylfdfgtnglmpvtdiphvadyftvdqe  
dkiakairifndeidrrkk  
ilsqyrvtiseyrklgetiphvfilidnfdavkdsfpqevfenmmikmtreglaldmqvtltasranamktpmyinmk  
triamflydksevsnvvgq  
qkfavkdvvgrallssddnvsfhiqqpfkhdetsyndqindevsamtefykgetpsdipmmpdeikyedyreslslpdi  
vangalpigldyegvtlqk  
ikltepamissenpreiahiaieimmkeidilnekyaiciadssgefakayrhqvanfaeredikaihqlmiedlkqremd  
gpfekdslyiindfkttfid  
ctyipeddvkklitkgpelglnilfvghkelidaydkqidvarkminqfsigirisdqffkfrfiqrepvikeneaym  
vanqayqkirwfk  
>tr|D8HEC8|D8HEC8\_STAAF  
mkdvkridyfsyeeltlggsklplvnfelfdpsnfeekaalielelvtendkltdagfkvatlvreyisaivnirind  
myfapfsyekdeyillsrff  
knngfqiiriinkdiawsvqsypllmrqeksndwdfkqiddetlenlnnesidtigrvleieiynhggdpqqslyniye  
qndllliryplkdkvlvnh

Tsompanidou\_et\_al\_Supplemental\_FASTA\_File

igvintfirelfgfntdenhinkae  
>tr|D8HED0|D8HED0\_STAAF  
mtkdielyltadydnkssiqsvidaiegqdfldvdttdmdavsdvssldedgaisltssvvgpqqsklmgyyyqnellyda  
sqldskmkeiidtpfiedi  
dkafkgitnvkleniliknggghgrdygasgkiakgdakksdsvsideilksdqefvkvividqhykemkkedkksks  
dfekmmtqgascdymtvae  
aeieeqkkkelavdilagvgiialtinvpvagavaagaytaysaanaatgkniitgrklskeerimeglsliplpgmgf  
lkgagkslmlgfgkgekf  
avktglqktmqqavsrispkmgmknsvlnqsrnfaqnthvgqmlsnmrgqatyvqqsrnwigqqaqnvkrivnngldk  
efvipskqqlasagiggin  
faetttlrnmqnmkravtpqnhvthgpkdsmvrsegkshsvssheinskyvespnytkvkygeqyarlrpkklkaniey  
ttrngghiyrtdhkgriev  
yvdnlslkdgdrnnyaqktvggedrldpddgghliarmfggskdidnlvaqskfinrsfkengqwyniekewknainsgk  
evknikmekysgnskrpt  
eflveyivngkeisksikni  
>tr|D8HED1|D8HED1\_STAAF  
mtfeenlskmyneianeisgmipvewekvytiayvdeggevvfnytkpgseelnysdipkdcnvskdlfknswykvyr  
mfde1retfkkedlepwtsc  
cefdftregnlkvsfdyidwiklfgfpgskenyymykkfgvlpemeyemeeirevekyvkeqee  
>tr|D8HED2|D8HED2\_STAAF  
mttkenidilrkpgaqalslaslflmlfsc1tfffglgydrfnpnylkitiieiiiiisllqwirfidfekesaqkykk  
iyarflvvinvlttitavf  
atcnlyyfavqnhydlnfywlmgtisiiisyllviggmftllklpkvkrwggtkthfgllltalsafiyieriey  
ilpnvveskfvimvsiii  
iactqfvafqfimgysrfyifelnteddd  
>tr|D8HED3|D8HED3\_STAAF  
mefllliivvaglyyiyiltavmysekivvlpiiyaiavfvigityifigdsydq1tnfnvilymgslfyawmafrnlwn  
rplllkyknitdsssgivn  
kseynsveslrinieiakykgiislivaivlvtlmtlkstpqitaetrdlisisffilglfiiiiifavwdliirvrkgfta  
fvvirpilfscwlfilnmi  
lsrll  
>tr|D8HED4|D8HED4\_STAAF  
mtfdek1semynkianeisgmipvewekvyamayinerngvfynteprsdelyytsvlnkynisrsefmdsvyelyk  
qfdnlrelfieeglepwtsc  
cefdftsegklnvsfdyidwansefgqmgrehyymykkfgiwpekeyainwvekikdyvkeqeeael  
>tr|D8HED5|D8HED5\_STAAF  
mtfeek1shmyneianeissmipvewenvytiayvtdqagevifnytkpgsdelnyysdipkdcnvskdlfknswlkvyr  
mfde1retfkkedlepwtsc  
cefdftregklnvsfdyidwvrlgfgplakenyymykkfgvmpemkyeinkvkeieqyikeqeeael  
>tr|D8HED6|D8HED6\_STAAF  
mtfeek1semyneiankissmipvewekvyamayideecgevfnynteprsdelfyysvikynllkssfmdsvyelhd  
qfeelreifieeglepwtsc  
cefdftsegklnvsfdyidwtklfegqiakenyymykkfrilpeteyeinkvkeieqyikeqeee  
>tr|D8HED7|D8HED7\_STAAF  
mitkenidtlrkpgaqalslislflilfsc1tfffglgydrfnpnylkitiieiiiiisllqwirfidfekesaqkykk  
iyarflvvinvlttitvfvf  
alcnlyyfaavqnhydlnfywlmgtisiiisyllviggmftllklpkvkrwggtkthfgllltalssfiyiekieiey  
ilpnvveskfvimvsiii  
iactqfvafqfimgysrfyifelnkeddd  
>tr|D8HED8|D8HED8\_STAAF  
mtfeek1semynkianeisgmipvewekvytiayvndrggevvfnytkpgsdelnyytnisrdynvseeifddlwmnlyy  
lfknlnl1fkteghlepwtsc  
cefdftsegklnvsfdyidwiklslgplarenymykkfgvipemeyemeeikeivqyikeqdeaei  
>tr|D8HED9|D8HED9\_STAAF  
mtfeek1sqmyneianeisemipvewekvytiayvdeggevvfnytkpgsdelnyytipreynvsekvfydlwtdlyr  
lfkklrdlfkedlepwtsc  
efdfstsegklnvsfdyidwvnsfpgmgredyymykkfgiwpekeyainrvkkiedyikeqeteel  
>tr|D8HEE0|D8HEE0\_STAAF  
mtfeek1sqmyneianeisgmipveweqvftiayvtdqagevifnytklgseelnysdipkdcniskdlfknsfwkvyr  
mfde1retfkkedlepwtsc  
cefdftregklnvsfdyidwvnsfdq1grenymykkfgvlpemeyemeeikeieqyiksqs  
>tr|D8HEE1|D8HEE1\_STAAF  
medqsene1sasi1nciknidndr1idkitemqnevnsldstlsvlenaknsivaaiek1tn  
>tr|D8HEE2|D8HEE2\_STAAF  
mekikrinkiflsfevipfammi1laf1pviagi1nrlqygrdfgdrvsfycyisimvayaitilleiifyfillknyq  
ydsnie1anrmkvtkvls  
ilyiipglyai1p1fyfrflhirsfrenksgqpayh1f1effikpnrkpie1kdf1fiknr  
>tr|D8HEE3|D8HEE3\_STAAF

Tsompanidou\_et\_al\_Supplemental\_FASTA\_File

mkr1cig1liimmsiinygcgneqnenkyqsqinkvmkiqqethkemvksnevnpefnkdvntyvfdgkliiisyk1  
fkdkdqmfyatyeftkndki  
yykrdinpktyvkehksdykdikvk  
>tr|D8HEE4|D8HEE4\_STAAF  
meklikvtsligiijqsfltlflflflsatgiqpeltttvngeqtiqspetaqatfvtfailfvvs1asd1lgiia  
mkl1fvnrasgilyiiga  
visan11tfiawlisgisv1rynkigkevs  
>tr|D8HEE5|D8HEE5\_STAAF  
mkytwwil1tiagils1asvygf1c1gsfgmlamnmw1fvypthknskalesiskptiilsigtyavfifmsilfyf  
vmkarfmeigiklygelfn  
mfgiplfiiailftigtvfykiqqsrlkq  
>tr|D8HEE6|D8HEE6\_STAAF  
myteianeissmpvewekvytmayiddgggeffnytkpnsdelnyytdipkeynisvqvfd1wmdlyd1feelrd1f  
keedlepwtscfdftkeg  
elkvsfdyidwintefdq1grenyymykkfevipemeyemeeikeieqyikeqdeael  
>tr|D8HEE7|D8HEE7\_STAAF  
mtfeek1sqmyneiankiissmpvewekayamayvnersgevfynyteprsd1vyytstvlnkynisrsefmdsvyelyk  
qfdk1rd1fkeeglepwtscfdftreg1nsvfdyidwansfdq1grenyymykkfgvipemeyemeeikeieqyikeqeeael  
>tr|D8HEE8|D8HEE8\_STAAF  
mtfeek1semyneianeissmpvewekvytiaylddegevvfnytkpnsdelnyytdisrdyniseeifdd1wmnlyy  
1fmlrd1fkkeedlepwtscfdftreg1nsvfdyidwik1gfgpsgkenyymykkfgv1peteyeinkvkevekyvkeqe  
>tr|D8HEE9|D8HEE9\_STAAF  
mqnqprftf1skkkvndkiicn1ks1lasrypyiicinefn  
>tr|D8HEF0|D8HEF0\_STAAF  
mkrmlvvf1mlaivlagc1snkgekyqkdi1dkvykeqnmnkiaskvqntikt1kdqedsnthvykdgkvivigiqlykdr  
ekmyyfayeikdgkaeinr  
eidpikymkdhkadyedenvevekd  
>tr|D8HEF1|D8HEF1\_STAAF  
meksikimtiigivvgglatv1f1fmv1aasgvmttdvsttvngevd1pdaetaaaiftv1flflfifigiisiilgaig  
mfkasknkkmsgi1liiga  
visgnii1tfa1wlvsgik11tnkpkdqisd1s  
>tr|D8HEF2|D8HEF2\_STAAF  
mksedv1vkekhi1kwdki1fygddwvnnvetirtkdi1qsvylkry11rammagfiigii1tvfv1svkathed1ppg1v  
nmasaitfsfalv1l1ftn  
selltsnfm1yftvg1yykvikptrv1ki1f1l1c1fagn1lgaail1fsfmrfsnvmt1pdm1nq1saviehkt1stgfv1silmk  
aifanffinis1lviamqid  
dvlakmfvm1mfgvtifa1fmg1yehvvynsc1fmgg1iyqvdt1hsipaisniaaaf1gnyigg1liig1fyay1ndhhqfy  
knn  
>tr|D8HEF3|D8HEF3\_STAAF  
mw1gmfgfal1tgi1lpfi1v1vafydegvesvgnri1hpwfgfi1favviy1msigafygipraanvayeigtrh1lpvhnq  
wt1i1faai1ffaivywis1  
npski1vdh1gk11tp1111mva11siavi1fnpesa1sapkdkyithpfiags1legyftmd1vaalafsvv1vngyk1kgl  
tdrmki1kyvcfsg1iaai  
11gm1yfalayvgastapgn1fdgtdi1l1tyns1rvf1gsf1gn1vf1gmtv1ilac1l1t1c1ig1vnacat1ftkkhvpkfsyki1fa  
1v1fsi1g1f1ft1l1g1lemi1  
kiavp11t1iypvsia1vl1isfanmfstfrfswayr1latvit1i1silqilnsfn11qgv1ilkwfmm1pladid1law1vp  
fillaiigfi1dv1irrp1k  
qatt  
>tr|D8HEF4|D8HEF4\_STAAF  
mnki1skyiaias1svavtvsapqttnstafakssaevqqtqqasip1sqkvn1gnqnimavawyqnsaeakaly1qgyns  
aktq1dkei1kknkgkhk1a  
iald1detv1dnspyqgyas1ihnkpfpegwhewvqaakakpvygakef1kyadkkgvdiyyisdrdkekd1katqkn1kq  
qgipqakks1h1l1kgkhk  
skesrrq1vgkdhk1vm1fgdn11dftdpkeataesrealiekhkddf1gkkyi1f1pnpmygsweatiy1nnykasdkakd  
k1rknaikqf1dpktgevk  
>tr|D8HEF5|D8HEF5\_STAAF  
mhvrrvalcnv1ht1l1hytrtfyikskfmenainc11f1lygtfkikdqfknayiy1  
>tr|D8HEF6|D8HEF6\_STAAF  
mflawnei1rrnk1kfg1i1igv1l1tmi1sy11f1l1sg1lang1inmkegidkwqadaiv1nkdanqt1vqqsvfnkkdienkyk  
kqat1kqtgeiv1snghqk  
nv1vfgvekss1fvpr1ieghkatkdnv1adet1knkgfkigdt1s1sqsdekhivgftesakynaspvif1tndatia  
kinpr1tgdkinavv1rdt  
nwkd1k1nge1eav1sindfien1lpgykpn1t1nfmis1f1visatvigi1flyvmt1qkts1fgilkaqgftngylanv  
isqt1l1al1fgtaf1g1l1t  
gvtgaf1p1d1avpvkfdv1t1l1vfaiv1mivsv1gs1f1siltirkidp1lkaig  
>tr|D8HEG0|D8HEG0\_STAAF

Tsompanidou\_et\_al\_Supplemental\_FASTA\_File

manlqkyieysrevqqarennqpivallestiishgmpypqnvemattveqirngaipatiaiidgkikiglesedlei  
latnkdvakvsrrdlaeiv  
amqrigattvattmcaamagiqffvtggiggvvhkgaehmdisadleelsktnvtvicagaksildlptkmeyletkgv  
pvigyqtneipafftresg  
ikltsvetperladihltkqqnleggiivanpipyehalskayieaaineavveaenqgikgkdatpflgkivektn  
gkslaaniklvennaalga  
kiavavnkll  
>tr|D8HEG1|D8HEG1\_STAAF  
mnilfaitgiafalvafllfsdrknidfkktlimifiqvlivlfmnttigltitltaigsffeglinvskaginfvfgd  
iqnkngftfflnvllplvf  
isvligifnyikvlpfiikyvgiainkitrmgrlesyfaistamfgqpevyltikdiipklsraklytiatsgmsavsma  
mlgsymqmiepkfvvtavm  
lnifsaliasvinyksdtdveidnltkstetktlngktgkpkkvaffqmigdsamdgfkiavvvavmllafislmea  
inimfgsvglnfkqligyv  
fapiaflmgipwseavpagslmatklnitnefvamldfknvlgdvsartqgiisvylvsfanfgtvgiivgsikgisdkqg  
ekvasfamrlllgstlasi  
isgsiiglvl  
>tr|D8HEG2|D8HEG2\_STAAF  
mkevgfgtlnwvaviyillamfigvyftkrasqstnsfftasgrlpswvvgfsiyattlsaitfmstpekafldwsyi  
agniaivaiiplliyfyvp  
ffkklkvtsayeylearfgpsirvigsllfvvyhlgrvaiviylptlaitsvsdmnpyviaslvgllcilytflggfegv  
vwsdfiqgvi llggalvi  
ilgvminggfgtvfadaiehkklisadnwklnataaaipii flgnifnlyqytasqdvvqryqasds lketnkslwn  
gilalialisaplfygmgtmly  
sfyaheavlpkgfntssvvyfitemppfvaglliaaifaatqstisslnsisacisidikqrffgkgerhevnfar  
fiiiiagi fgfgmslylia  
snsndldwllflvtglfgvplagvfavgi ftkrtntfgvicglilgii fayvyngvgkgnspfyvstisftvafvfayil  
sfivpskhkkdigtife  
kdkpstyi sktatkk  
>tr|D8HEG4|D8HEG4\_STAAF  
mkiffkinrngvskvyyiaidiggtqiksavidkqlnmfdyqqiptpdnkselitdkvyeivtgymkqyhliqpvigiss  
agvdeqkgeivyagptip  
nykgtnfkrllkslspyvkvkndvnaallgelklhqyqaerifcmtlgtgiggayknnqghidngelhkanevgyllryp  
tenttfeqraatsalkkrm  
idggftrsthvpvlfeaaeegddiakqilnewaedvaegiaaiqvmydpgliliggi seqgdnlkyiepkvahylpkd  
yyvapiqttskndaalyg  
clq  
>tr|D8HEG6|D8HEG6\_STAAF  
mlphglivscqalpdep l hssfimskmalaaeyeggavgirantkedilaiketvdlpvigivkrdydhsdvfitatskev  
deliesqcevia l datlqq  
rpketldelvtyrthapnveimadiatveeaknaarl gfdyigtllhgytsytqgqlllyqndfqflkdvlqsvdakvia  
egnvi tpdmykrvmdlgvh  
csvvggaitrpkeitrkrfvqmed  
>tr|D8HEG7|D8HEG7\_STAAF  
mnqyhsnaqqpsawrffvyslvgilcfffipftingntifvdhvhairsiigplmpyvalimiligtalpivrtrfmts  
itnlvitl fkvagaiigim  
yvfkigpsilfkanygpflfeklmp l silipvgaialsllygygllefvgyvimepimrpifktpgksavdavasfvgsy  
slgllitnrvykqgmyknir  
eatii tgfstvsatfmi vaktlg lmp hwnlyfwitlvitfvvtaitawlp pit nesteynggegeqevaiegsrlkt  
ayaeamkqnaltpslvkvn  
wdnldkglemtvgilpsil sigflglivanytpfidwlygifypfiyifpiadqavlakasaisivemflpsllvtkaam  
stkfvvgvsvsaiiffsa  
lvpcilateikipwkl i i wfl rvalsllitipvallifg  
>tr|D8HEG8|D8HEG8\_STAAF  
mlrgqeerkysirkysigvsvlaatmfvvt sheaqasektpttnaaaqketlnqpggegnaitshmqsgkqlddmhke  
ngksgtvtegkdtlqsskh  
qstqnskti r t qndnqvkdserqgsrqshqnnainkterqndqvqnthhaerngsqsttsqsndvdkqspsipaakvip  
nhdkaaptsttppsndkta  
pkstktqdattdkhpngq dthqpahqi idakqddtvrqseqkpqvgdlskhi dgqnspekptdkntdnkqlikda l qapk  
trsttnaaadakkvrplka  
nqvqplnkypvfvhgflglvgdnapalypnywggknfkvieelrkqgynvhqasvsafgsnydravelyyyikggrvdy  
gaahaakygherygktykg  
impnwepgkvhlvghsmggqtir l meefl r ngnkeeia yhkahgeisp lftgghdnmvasittlatphngsqaadkfg  
nteavrkimfalnrfmgnk  
ysnidlgltqwgfklpnesyidyikrvskskiwtssdnaaydl tldgsaklnmmtsmnpnityttytgvsstgplgye  
npdlgtfflmdttsriigh  
dareewrkn dg vvpvisslhpsnqpfvntndepatrrgiwqvkpii qgwdclvlktf  
>tr|D8HEG9|D8HEG9\_STAAF

Tsompanidou\_et\_al\_Supplemental\_FASTA\_File

mwiekfknknetsyryykykdpdytdkwkrsvvlnkntkqaqkeamfrleekikeklhdksneklktlthfslldewl  
eyhtktsfgfvttldnltk  
riknikknssqnl1lnkidtkymqtfinelnsvysanqvkrqlghmkeaikyavkfynypnehlsvtlpkksktiedi  
ekeeakmynylemeqviqi  
rdfilndsnmqyrrarilvagavevqaltgmrigellaalqvkdvdlnkntidingtiriknagfghkdttktagkrki  
ainsrianv1kkimlenkk  
mqqwepnyvdrqfifttcqgnpmqgsrinkr1ssaeslninkkvttthlrhthisllaemnislkaimkrvghtdekt  
ikvythvtekmdreleqkl  
eklv  
>tr|D8HEH0|D8HEH0\_STAAF  
mnylknifhdd1svnnqnyfkailks11livlffialfssdyvtkgwqygfis1s11clclffsk11kfnffn1k1inyk  
e1iifms1v1i1v1dyt1  
sfwqsavspndesiqhfsqtpf111aisiaivpaiaeelirvfl1rvffrkhlfigt1vssflfailhdgstvlidyip  
yfyfgvilsvsylvitkrie  
vpi1hfl1nnfiv1fyif  
>tr|D8HEH1|D8HEH1\_STAAF  
meaieqykkiygvthygeysitfep1rvfklhieranay  
>tr|D8HEH2|D8HEH2\_STAAF  
mkkvig111vst1altacgekdppkkeenkshtqkhkdkppkqektkkvedknppnnsiqnnsnnqnsqnnq1nn  
spsnntpaninendsqnt  
n1ndeyvvsqgwkdeqakafeeykkgkeeeearagasavpganin  
>tr|D8HEH3|D8HEH3\_STAAF  
mngkiyirrn1sevrkaevlyeelahhkltygnildqskwinrkfenyarrhgftsavplheiveahnygvnlyelsey  
1q1sesyileaeqykkiy  
gigthygeysitfep1rvfkykei  
>tr|D8HEH4|D8HEH4\_STAAF  
mennkvrkilsen1qelmdknidqrelaeaigvsqptvsnwiqqtkyprikriqqladyfnvpsriteskkdihqeti  
aahfdkeglteeeieevnr  
fiwvvrnrk  
>tr|D8HEH7|D8HEH7\_STAAF  
mhkr11tqyldeivts1dlh1ingevikvqehmkaesktlhi1ypkdrvvs1dhvlyfdinvkaekndspyps  
>tr|D8HEH8|D8HEH8\_STAAF  
mqalqtksnigemfnieqengeiaisgre1hqa1evktaykdwfprmlkygfeentdytaiakrataqgnmthyidha  
11tdtakeiamiqrsepgk  
rarqfyiqvekawnspemimqralkianntinqletkierdkpkivfadavattktsilvgelakiikqngvnigqrrlf  
ew1rqngfl1krkgvdyndm  
ptqysmerelfeiketsithsdghtsisktpkvtgkqgyfvnkflgekqtt  
>tr|D8HEH9|D8HEH9\_STAAF  
mraqnkviyyyydeegnrrpidiqindgyelmvrshfindtieeipylnnlyalvdgyefkl  
>tr|D8HEI0|D8HEI0\_STAAF  
mpkiitpptpentyrgeekfvk1yatptqihqlfgvsrstvynwlkyyrkdn1gvenlyidysatgtliniskleeyli  
rkhhkwy  
>tr|D8HEI1|D8HEI1\_STAAF  
mtknykdmteeeigr11seksgeylelakeikgeskfdilffsaigvsdgdifiksssalgnafnlaelldnatdfndai  
naiqkrklqkflaidndke  
d  
>tr|D8HEI2|D8HEI2\_STAAF  
myykmgeiknkiinfngfefkvsamkkhdgis1qvkdmmnvp1ksfhvvd1selyiamdamhdvnewikentddydrli  
nlvmrw  
>tr|D8HEI3|D8HEI3\_STAAF  
mekvyvaga1pevg1kl1qehfevemyegkg1vdkdtlikgvknatalis11stnvdkdvidagkdlkiianygagfnni  
dieyareksidvtntpkas  
tnatad1tig1vlavarrivegdl1srttgfdgwap1ffrgrevsgktigiiglgeigsavarrarafmdvlytgprnk  
eekereigakyvdl1k  
nadf1tinaaynpkmhh1idteqfkmmkstaylinasrgpivheqalvqalkdneiegaal1dvyefepditddlks1nnv  
v1tphignatfeardmmsk  
ivanaa1savqgekpqfivn  
>tr|D8HEI5|D8HEI5\_STAAF  
mknkflrist111ivi1vvfai11ivnetklfkndvnysfdeavsmqqgkivqtkeedgkfveanneiakamtishk  
dndmkymdi1tekvpmse  
vnq11kgk1lenrgkvfleakeyevnviylvshalvetgngkselakgikdgkryynffgigafdssavrsyksyae  
keqwtspdkailggakfir  
neyfennq1nlyqmrwnpenpaqhqyasdi1rwadkiak1mdksykqfgikkddirqtyyk  
>tr|D8HEI7|D8HEI7\_STAAF  
maerissk1rrlekseeqiklesinevteaiaankdsilkviklikvlddakildalngavrgrqviinkfave1nkdiy  
tg11tnmasmv1l1gelnv  
sd1sdf1nkvnkg1hvanqaspnaktsvrs11gv1kdddmnrs1tymlnm1kgmsred  
>tr|D8HEI8|D8HEI8\_STAAF

Tsompanidou\_et\_al\_Supplemental\_FASTA\_File

m q e h l v v t l d g k d y l v e p g t n l l e f i k s q d t f v p s i c y n e s m r p i q t c d t c t v e i d g k i e r s c s t v i d r p m t v n t v n n d v  
k d a q k e a l d r i l e k h m l y c  
t v c d y n n g d c e i h n t m d a w l q h q t y e y k e k p y e k d y g p f y r y d p n q c i l c g r c v e a c q d i e v n e t i r i d w d r e h p r v i w  
d n d v p i n e s s c v s c g q c a t  
v c p c n a m m e v n m e g n a g y m t d t e p g s l a a m i d l t k k a e p g y g p l f a i s d s e a e m r k e r i k k t k t v c t y c g v g c s f e v w t k  
d r e i l k v q p s h d s p a n k i a  
t c v k g k f s w g h i n s d q r l t k p l v r k n g e f h e v e w d e a l n v i a d n f t s i k e k y g p d a l s f i s s k a t n e e s y l m q k l a r q v  
i g t n n v d n c s r y c q a p a t k  
g l f r t v g h g g d s g s i e d l e k a a m s v l i g t n t a e a h p v i a s r m k r a q k l f g q k i h v f d i r k h e m a e r a d r f y q p k p g t d l a  
w l s a v t k y i i d h d l h d k a f  
i e e w v e d f d e y y k s l e t f t m a f a e e a t g i p e a l i k f a e e c a k a e s v v i c w a m g i t q q d i g s d s t a i n l l l v t g n y r r  
p g t g a y p l r g h n n v g g c s d  
m g s m p d k i t g y q s i e a d d i r a k f e k e y g v k l n p k v g k d n h e m v e g v h d g e i h s l y l y g e d t g i v d s n i n f v q a a f e k l d f  
m v v q d e f l t f t a t f a d v l  
p a s p s l e k d g t f t n e r r i q r l y q a l k p l g d s k p d w k i f q a i a n k l g f d w n y k h p s e i m d e i a r l t p l y a g v s y e r l e g f  
n s l q w p v h p d g t d e p i l y l  
e g f n f d n g k a k l f p l s f d n y f k q d e v y d i h v n n g r l l e h f h e g n m t y q t p m i k y k v p r a f v e i s p e l a e d r g i h e g a e v k  
l i s e t g e a v l q v h v t d r v k  
g k e i y i p l n n d a m e n g d l g a i n l l t n s d v d q y t d t p s y k r t s c r l e v i t k r g k s p l n p n n f r v n k k r h p q y s v q v q k k w e  
r p d y v f p g n q v d k  
>tr|D8HEJ0|D8HEJ0\_STAAF  
m t d k t l q q i d k l i c s w l k q i d n v i p q l i t e m t t e t k r h r f d l v t n v d k q i q q q f q q f l a t h f p e h q l l a e e k s n e m i t n e  
i n h l w i m d p i d g t a n l v k q  
q e d y c i i l a y f y e g k p m l s y v y d y p h k k l y k a i r g e g a f c n g i k m e e p s l k l e d a i i s f n a q v m l d t v q d l f d a s f s y  
r l v g a c g l d s m r v a k g q f g  
a h i n t n p k p w d i a a q f l f a e l l n l k m t t l d g k a i d h l k g a p f i i s n k a c h e t v l k i l n a n g g y q k y r  
>tr|D8HEJ1|D8HEJ1\_STAAF  
m n k a e r q n l i i t a i q n k k m t a l e l a k y c n v s k r t i l r d i d d l e n g g v k i y a h y g k n g g y q i q q a q s k i a l n l s e t q l s a  
l f l v l n e s q s y s t l p y k s e  
i n a i k q c l s l p q t r l r k l l k r m d f y i k f d d t q h m t l p m l f s d i l i y c t e r n v m l v d h k v d d n i k a e n v i f i g l l c k h g h  
w h a v i y d i a q d k t a e l e i e  
n i i d i s y f g k t i q t r d i s i d n y h q f l n p i d s  
>tr|D8HEJ2|D8HEJ2\_STAAF  
m e n e k k k y t f k d i a w r d l l i i p i i g v l l f a l n i a a y i g p i l f d y e i d s n l i f v a t i t q a l a y t i g i g a f y l f h l k v m p s  
r l r a g f a y i k k y w l r l s i t  
y i a l i l i y t e y m t q f l p k h l q y s e t a n e l e l n k m f e v p a f l p v a f l l i v i v g p i v e e i v f r h i l i g e l g k k f n f i a m s  
i v s v f l f a f i h v t d a k s p f  
e f g p y l i l s i i l v f t y l k s g r n l g s t i a l h i a n n f v s f v i s i y a  
>tr|D8HEJ4|D8HEJ4\_STAAF  
m s n v l t e i d s q p y m t k n e k k i a k f i l n s p q k v i k m r s q d l a s l l d i s t s s v i r f s k k i t d g g f h d l k i n i s k y v p k a s s  
i y n v e l m n n e s t e s l r t k l  
h t r t t r a l n h a n n e l n d k t i d q i c h c l k r s e t i f y g f g a s f v a t d l y q k l s r i g l n i q l v q e t h i f a t l l a t h n s n d s  
v i l i t n n g t q s e m q s m v k v  
i d d y h i p i i t i t s t r d n p v a q a s n i v l t y g k t d e n e m h g a t t s l f a q m f t i d i l y r y v a l n y h a s l d f i t q s k m a l d n  
y r k h l s n i n f k h  
>tr|D8HEJ5|D8HEJ5\_STAAF  
m e n n e l q r g l s a r q i q m i a l g g t i g v g l f m g a t s t i k w t g p s v i l a y l i a g i f l f l i m r a m g e m i y l n p t t g s f a t f a s d  
y i h p a a g y m t a w s n i f q w i  
v v g m e v i a v g e y m k f w f p e l p t w i p g v i a i l l m a a n l f s v k a f e f e f w f a l i k v v t i l m i a g f g l i f f g f g n g g h  
a v g i s n l w t n g g f m p n g i v  
g f f f a l s i v i g s y q g v e l i g i t a g e t k d p q k n i v k a v n g v i w r i l i f y l g a i f v i v s v p w n q l g d i g s p f v a t f a k i g i  
t f a a g l i n f v v l t a a m s g c  
n s g i f s a s r m i y t l a h k g e m p k i f t k i m r n g v p l y t v v a v s l g i l i g a l l n v i l p l y i d g a k s i f v y v s a s i l p g m i p w  
f m i l f s h l r f r k l h p e e v e  
g h p f k m p g g a v t n y l t i l f l i l v l v g m v f n v e t r i s v l i g v i f l t i v t i y y f i r y n k n n v k a k  
>tr|D8HEJ6|D8HEJ6\_STAAF  
m l k q i l p r a t k i s v i f a v a f f i i n y i g m e k p d i l y l v g r t i a t l a f i l i c l t l f t i i n s p e r k i k l g t t l p i a l i i g i i  
f g a i f l t v q i g v i t g l i i g  
v i a t f i w e l i e k n k g g r s s  
>tr|D8HEJ8|D8HEJ8\_STAAF  
m m g y i i l f f l a g p v i l g v g n l v i g p i f n k q t p f r v q v r s f v v g s m i y l i l a t s g y f l l l q g k l  
>tr|D8HEJ9|D8HEJ9\_STAAF  
m y r a v i f d f d g t i i d t e q h l f n v i n k h l e m h n a d p i s i d f y r s s i g g a a t d l h d h l i k a i g e n k d k l y e e h l t s t t l p  
m i d t i k s l m a f l k q r h i p m  
a i a t s s v k a e i l p t f k a l g l d e y i e v v v g r e d v e q v k p d p e l y l s a v q q l n y m p t q c l a i e d s v n g a t a a i a a g l d v i v n  
t n k m t s a q d f s n v d y v a k d  
i d y d q i v a r f f t k  
>tr|D8HEK0|D8HEK0\_STAAF

Tsompanidou\_et\_al\_Supplemental\_FASTA\_File

mfqklsifatkfslvmlvaavigfifpqhvatlgkwvpyllgvmllgmgltitpndfkmvfkapraviigvclqfsimp  
tlafliaaksfhlppdiavg  
vilvgccpggtssnvmstylakanvalsvsittvstllapfvtpaliylfanewlevsflsmlwsvvqvvlipialgivilq  
iinrkiakastalpiisv  
vaislilaiivvggskhqilttglliflvmlhnlvlygtigywlarllkldrddqkavsievvmqnsqglavslaalhfnpi  
aavpgavfsfihnitgpil  
akywskkl  
>tr|D8HEK4|D8HEK4\_STAAF  
mevhkksnawalfp111fvalflvgviiitgdftsiplnvaititviva11mnrkesfakkvevftkgaghnsiilmmlif  
ilagyfsntaekmggvkst  
vnlglslipenliivglfvicmfvsismgtsvgtvaaiapvgygfaqatdvptalamatvvggamfgdnlsmisdttiaa  
vrtqhtkmkdkfrvnfkiv  
lpgailtiilyflngislnhaknydynlikvpyilvlv1allgvnviivliggtllagiiglidgsfgwmglldavs  
kgiismediamialliggl  
vgiiqhnggiawl1qfvrskvkskrgae1giaslsvsvadiatanntisiismgplakniadeydvsrksasilidifggc  
fqgllpyspqvvisaagvag  
ispmlfpysiyipillgvcgliaifnfpklkkeh  
>tr|D8HEK5|D8HEK5\_STAAF  
malivsrailflilalafgiatvfpeqk1plyivftlfvvvaivsnvwlthqnvkkniiikfnkrvayflgvlsgvfyigi  
viygatiigyfnfisfiif  
aisivsitileivlginfnktrpsnkqlkviseqsaqqfkvislilsvsvivfifialmlkwwlllvisiivliiitvam  
ivyekyyttdp  
>tr|D8HEK7|D8HEK7\_STAAF  
mgldqavawrryfhqfpe1sdkefkttkikdiltehhiril1platglvsevgggpsciavrada1piqelveqd  
fksenegvmhacghdihma  
silatavk1keiegtlgrvkfifqpaee1gygafkiiethalkdvqavlgfhndpsrplgtfaiktgait savdrfefh  
ikgvvgghaakpeqcndpvi  
vlaqlinsiqsivsrnl1safheavvtigqiscgntwnviadhayvqgtvrsfdpvvrklvetrlqdiadglaqaynmkin  
l1nyth1pgavmdealthk  
a1avaqhvgykvenmeqpl1tgedfsgysqhfpsvfalligshseydl1hhpkykpderilekvpeyfvfvrllhe  
>tr|D8HEK9|D8HEK9\_STAAF  
mrkiqakkgl1sidckgweqav1rmlynn1dpevaerped1vvyggigkaarnweafeaiekt1relesdetmlvqsgkp  
vavfktheeaprvlisnsi  
1vpewanwdhfne1dkkg1imygqmtagswlyigsqg1vqgtyetfaelgnqhfngd1agvtv1tagl1ggmggaqplait  
mnhgvai1cvdvdetrvdkr  
idtkycdvktad1dealk1aeekergegl1sigl1vgnavdi1hqailekgfkidi1tdqtsahdp1ngyvpqgysveekv  
1rekdpkkyvel1sqasmak  
hve1m1efqkr1gavafdygnni1rqvafnngvknafdfpgfvpayi1rplf1cegkppfrfaal1sgdpkdi1eradeemrkl1fp  
enek11rwl1d1aeekisyq  
gl1psriaw1gygerakmgl1anr1vrde1sapivi1grdh1dagsvaspnretesmkgdsdavgdwav1nal1intaaggs  
wisfhhggvgmgys1hag  
mvvvadgseraer1lerv11tdpgmgvarhvdagydiaiqtakek1gihpimidkagdk  
>tr|D8HEL1|D8HEL1\_STAAF  
mlksinhicfsvrn1ndsihfyrdi1lfgk1111tgkktayfkl1aglwialneekdi1prnei1hisythiaftid1dsefkywh  
qr1kdnnvni1legrvrdi1r  
drqsiyftdpdghk1le1htgt1enr1nyykeakphmtfyk  
>tr|D8HEL2|D8HEL2\_STAAF  
mykqgepn1wtgr1dsetdpkkfrhfqtvtfed1sklekssrpsgvgilgyavdegvalnkg1rigakegpdaikqafag1  
pd1nqfet1vdynvnyhdh  
eelid1tqkefaml1aaksianhrqtfl1ggghdiayaqylatrkvpytqsigvinidahfdtraeqqstsgtsfrqileed  
entdy1vl1giaqggntqsl  
fdyakekkid1yvfadellshvsptikdmierfvhehdv1mfticm1dvidsafapgvsapav1glyphtvle1lakriipsd  
kvssvsiaemntydadnr  
tak1van1vhhflk  
>tr|D8HEL3|D8HEL3\_STAAF  
mknnkisgfwamti1fvffvitma1sim1rdfqsi1igvkhfi1fevtd1apliaa1icil1vfkykkvql1aglkf1sis1kvi  
er1111al1il1pli1li1igmy  
sfntfadsf1llqstgl1svpithilighilmaf1vvefgfrsylv1qnv1etkmtffasivvg1mysv1fsanttygtefaay  
nflytfsfsmilgelirat  
kgrtiyiattfhasmtfgl1fl1fseeigdl1fsikviaistaivag1yig1sl1iirgivy1l1ttrn1lee1epny1dhvnd  
deetnhteakssnikda  
ektgvatastvgiakndteaktaadepsi1hegtektepqhhi1dnqtesnhdehhd1tsesvesaesvkhapqsdd1tndsn  
ede1qs1kepatykedrrs  
svvidaekhi1ekteeqssdknk  
>tr|D8HEL5|D8HEL5\_STAAF  
misihaistgkiqdl1pysskrpmrsa1dktki1sqt1w1sstgftgdeqaykdhggphkavcgf1skhnyalyqdd1ps1pt  
hamfgen1tfdy1desdvy  
fgnqyr1gealievsei1repcwkiqakynipgl1vkrmstsgktgyfrv1lkqgyvspndqly1liqeapiehr1svqq1nd

Tsompanidou\_et\_al\_Supplemental\_FASTA\_File

lyydrqndmlryalnnp  
flsptrrdklqkmyrnlk  
>tr|D8HEL9|D8HEL9\_STAAF  
mmmkacysyffi fsyrimskkvnymnvktnflkwecevrnrve  
>tr|D8HEM0|D8HEM0\_STAAF  
mhkfwatfsltyikkikaksfvifmiiiaalmiglsnidkiinmddgpdkgivaapneqiykvfkqqantfhsdakftk  
vsiedaekevkkhklkay  
iikvnrntlqgtijsekrvshedsqkvqalltaiqtnmvagelninkedlqklqaqskvdkvisndevdkvsegqkif  
nyalaygiiflfffivlly  
asqjamejasektsrviemiitsispiqhi fakilgviavavtqiilivlmavicifafdlkdllqgfnvemnlswqii  
ivgiissivgimayvllaa  
ilgsltsriedlnqslmpltlngmiafyiaiftinnpdgqlalitsyipflapfqlvvraqtsglqihevilsslisivm  
vavliwiaiktykdsvltf  
erglfnsmkrvfkk  
>tr|D8HEM1|D8HEM1\_STAAF  
mglviehvtkrfgkmtavndislelesgkmlgflgrngagktttfrmilglsepteghityngkkldktyrnrigylpee  
rglhgkltveeeikylatl  
kgmskteiqqqsylwlerfditenrkkridslskgnqqkiqlasmlhkpelliiddepfsgldpvneellkeavkdlnw  
gstivysshmehveelcd  
dvcildkgqlvvsgdinhvasngnkvviesettlpdlthirgiihsenmkqgiqltinedvakdiyqvahqgyvkr  
fqvvepslqdifiekvvggk  
da  
>tr|D8HEM2|D8HEM2\_STAAF  
meqlpqvgfmxsvlfwknyvnfkgrrrseywymmlwhlifilpaffvffmgavfvgigdeidakvlsmfgvmililti  
iymllyslatfipnlalsv  
rrfhdisrtmvlpiimcfsivfsivvqfiesyddndfmpigivillvlylyfyglvtvmivflcfdsckpanyges  
pkypssiknqpvtssetpek  
agtsetpktpeetdnql  
>tr|D8HEM3|D8HEM3\_STAAF  
methlkvnasltikichtamftkrvsi sankifhnkvytlhfyns  
>tr|D8HEM5|D8HEM5\_STAAF  
mssliidyheneiyllisqsvpctcgwvdcfslcpsyflihllflnlfliikynnriiyng  
>tr|D8HEM6|D8HEM6\_STAAF  
mielnaittlclacilyllgkainvhnvflkricipapvigglifailvaal dsfgmvkikldasfiqdfmlaffttig  
lgaslklfkllggkvlllyf  
mfcaisvinqnvgvslakvlnikalgltagmsmegghgnaaaygktiqlgidsaltaalaaatglvfggligpv  
vfklikrynlpqhsddtf  
kdysqvaynehlskfnatevffiqftivvfcnavgsyfshtaqtginvpiyvgsfvavivrnisesfnfnivdiki  
tnqigdvalgifsalsms  
iqleiyklaipliivlvqvvmilfavlilfrglgkdydaavmvggfighglgatpnamanldvitkkygnspekaylv  
vpivgafliidligviving  
fiqwfs  
>tr|D8HEM8|D8HEM8\_STAAF  
maltiryqttyepfkvvddikeipkdativwydfdepneqenewfkahfnfdlevddaingprakyksykdyqylvfh  
simgsnyspialnifiqdn  
vlvtyhhqtleslnkvvykymntldaeldcadvivilidmmvdkyfnfvyaal dsvyh fedrhvddrnfkmvmdsvfklr  
sdlikvkrvlfpmqelidt  
mkqngdliidnkhslyiqhiddhlikqrniirtaqemtneirenfesysfrmsimqvltlsvvifspftfiagiymn  
fvnmpalhhygyiclav  
mfviavvliiffrrkkwf  
>tr|D8HEM9|D8HEM9\_STAAF  
mviikqlfthtqtvtsefidhnnhmdanyniifsdvnrfnysghslkerknlaytlflehttylseislgdvftv  
tlyidydykrhlfltl  
kedgtlastngvmmginqhtrrsdafpesfstqiahyknpqptitwpeqlghkiaiphkgalk  
>tr|D8HEN3|D8HEN3\_STAAF  
mtttfiisyivlaliivgvnllilirsrrkakrqkqehfatrqsnsqskfksdlrdttqdssqhtareearidnkdnqn  
qvsldthakgseqdqelfn  
dnkdeafaaknpeseeekvnekikkehknyifgegvsrgkilaallfgmfiaalnqtl lnvalpkintefnisastgqw  
lmtgfmvngilipitayl  
fnkysyrklflvalvftigslcaismnfpimmvgrvlqaigagvimplgsiviitipekrgaamtmgiamilapa  
igptlsgyivqnyhwnvmf  
ygmfiigiailvgfvwfklyqytnpkadipgiifstigfgallygfseagnkgwgsveietmfaigiifiilfvirel  
rmkapmlnlevl kfpftl  
ttvinmvvmslyggmllpiylqnrgfsaldsgllllpgslimgllgpfgaklldtiglkplai fgiavmtyatwelt  
klnmdtpymtingiyvls  
fgmafimmvmtaainalpgrlashgnaflnmrqlagsigtailvtvmttqttqhl safgeeldktnpvvdhmlrelas  
qyggqegamkvllqfvnkl  
atvegindafivatifsiaalilclflqsnkkakataqkidadnsinhe



Tsompanidou\_et\_al\_Supplemental\_FASTA\_File

>tr|D8HEN4|D8HEN4\_STAAF  
mkkmlinivttvvllaiigfyfwnktttsyittndakvngdqikiaspasgqikslnvkqgdkldkgdkvatvtvqgg  
dgetkdme1kmpqkgtiak  
ldgmegsmvqagnpiayaynlldlyvtanidekdikdvevgkdvdvtidgqkasvkgkvd sigkataasfslmpssnsdg  
nytkvsqvipvkitldsep  
skqvvpgmnaevkihkn  
>tr|D8HEN6|D8HEN6\_STAAF  
mndlthfnkrspifiiilgsltaigalsidmflpglpdirhdfqttsnaqlt1smfmg1afgnlfagpisdstgrkrp  
liamiiftlaslgivfvh  
niwlmyalrflqgvttgaaavisraiasdmysgneltkfmal1mlvngiapvvaptiggiilnysvwrvmfviltifgvf  
mvigsllkvpe1tvtre  
ssrglktmfknfkil1ktprfvlpmliqgmtfvilftyisaspfiiqkiygmtaiqfswmfagigitliissqltgyld  
fidsqklmrgmtmiqigv  
ilvtiv1lnhwnfwi1aigfiiliapvtgvatlgftiamdesssgrgssss1lg1vqflfggiasp1vgvkgednpipyi  
iiiiatavilivlqiynmk  
vfktnr  
>tr|D8HEN8|D8HEN8\_STAAF  
mkscpkcgqaqddvqictqcghkfdsrqalyrkstdediqtnnikmrkmpwaigffililililffl1rnfnspqaqt  
kilvnaienndkqkvat11  
stkdnkvdseeakvyinyikdevglkqfvsd1kntvhklnksktsvasyiqtrsgqnilrvskngtryiffdnmsftapt  
kqipivkpektkyefksgg  
kkkmviaeankvtpignfipgtyripamkstengdftghlkfdfrqnssetvdvtedfeanisvt1kgdtk1ndsskkv  
tindremafsssktygppy  
qnkditisasgkagkftttqtktikasd1kynteit1nfdsediedyvekkekeens1knk1ieffagyslannaafnq  
sdfdfvssyikkgssfydd  
vkkrvskgslmmisspqiidaekhgdkitatvr1inengkqvdekeye1eggsqdr1qliktsek  
>tr|D8HEP0|D8HEP0\_STAAF  
m1n1l1l1ifilivicplifnytl1n1t1cyilvvisif1s1iysimtytfpwsmfvtfiiisiim1fkhrylfshtsr1  
fikk11sfsykfvlytsa1  
1fistiqspivkg1smwfailc1s111tfcylvwtvsyrhrsynkevdiivlgagiftefvtpmlaar1draldiyqq  
qasatk1ivsgggpdepi  
pe1amqryli1ahgvdktdilmeshsintytnflyskqiinnlyheavkivcvtsqfhv1ralr1laqklg1sidvgvsht  
pyhff1hvl1kdy1gvmyq  
yr111t1ycssswf1c1yaafiyns  
>tr|D8HEP2|D8HEP2\_STAAF  
mklaikeimfykfrylit1i111simv1fisg1aag1grenis1fehfdndeyvvqkmkepqiexqlsdtqqnqikk  
vihqephkmnvqt1k1snk  
eqdvi1mndvkqqr1q1kkgdypknahevaindk1aadn1rvgdr1hfknstsyrvsgilndtmyahssiv11ndngfn  
alnkvntafypvkn1tqqq  
rde1nk1indvqvsek1d1tgniasyqaeqap1nm1ivs1faitaiv1saffyvmtiqk1sigilkaigiktrh11salv  
1qil1t1ti1gvgiav1iiv  
g1sfmmpvtm1pfylttqnil1mvgifilvailgas1sfvklfkvdpieaigga  
>tr|D8HEP3|D8HEP3\_STAAF  
mvqc1vvdddprilny1ash1qtehidaytqpsgeaalk1lekqrviavvd1mmdgmdgf1cnt1kndydipvim1ta  
rdalsdkerafisgtdddy  
tkpfevkelifrirav1rryninsnsemtign1t1nqsy1elqvsnktmt1pnkef11fmlatrpkqiftreqiiekiw  
gydyegdertvdvhikr1r  
qr1kk1nat1tietvrgggykvenhv  
>tr|D8HEP5|D8HEP5\_STAAF  
mmk1n1finanetesidi1hapkmndhvqsiinavnd1dksht1vg1idkeihiihisdvitfqvinkvntaitrnqkfk  
1klr1ylelek1pghfiri  
skseivnkyciek11lepng1irmy1kdahtysssry1ksiker1si  
>tr|D8HEP6|D8HEP6\_STAAF  
mkn1kns1fis1iig1t1s1ffsm1fadgkyyp1npqstigilythftettvmlisiilw1ligvvff1gdfifkytdw  
gitkativhfittvygflp  
1ailagwfp1t1nyli1iftiifivvyt1liwi1qffrnknyvdtineqlkqk  
>tr|D8HEP7|D8HEP7\_STAAF  
mdqtaftdsrvtktinrihdgmvn1lktkaynditvkdicekgqisrttfythytkddfiysylnt11keakkkflkse  
t1tqai1flkmi1yfw1seg  
q1i1m1lgdesay1lhqv1kks1qqrieinvvpv1ntkml1t1tkeyf11i1fmsnai1gvlqdwvkrgykespevaeimn  
kifenafr  
>tr|D8HEP8|D8HEP8\_STAAF  
mdatiak1dkvektynkhv1neismsinkge1lg1igpsgsgktttik11gmekidsgsaeifahkmpnrka1nr1gy  
mgqtdalyen1tayen1ef  
ygr1sg1kgnv1kdniekhiv1vn1eqa1nkkvaqfsggmkr1slait1laepeli1ildeptvgidpk1rqqiwwqfkq  
mtkngksv1tthvmdeae  
rcdkvg1ivdgrifaidtptn1kqrfnvd1eavfikaeivrqs  
>tr|D8HEP9|D8HEP9\_STAAF

Tsompanidou\_et\_al\_Supplemental\_FASTA\_File

mkilavrrilkemlrdrktrlalmflapililtlmyfifngdendlkigidtsvssnitkqlpssdiktqtfsheniks  
kiennhldgyiyqenqtlh  
viytnepdnksnmikmgikaiqqdkissikhliekapptmkapnkqdikishslygnsdstyfdkmpilmgffvflf  
vflisgiallrerttgtle  
rvlstsirrseivlgyligygfaiiqtliivlfsiyllninlagslwyviliniclaitalsmgifistfansefqmiq  
fiplvavpqqvffsgifple  
nmpdwlgni gyi fplryagdaltnvmikgqgwsniwfdllilmifimafiilnivglkryrqv  
>tr|D8HEQ0|D8HEQ0\_STAAF  
msyfsnvpflfllkrgrtvfvmttqhsktdiviligggimsatlgtllkelspekni kvfeklaqpgessnvwnnagtghsa  
lcelnytkegkdgtvdcsk  
aikineqyqiskqfwaylvktgqldnpdrfiqavphmsfvigednvafiksrvatlkksvlfekmksqdeemkswvpl  
miegrksdepialtydetg  
tdvnfgaltaklfnnleqrgvgiqyqnvldikkqksgawlkvkdletnetttyesdfvfigaggaslp1lqktgikqs  
khiggfpvsglflrctnqe  
vidrhakvygkaavgappmsvphldtrfvdgkrsllfgpfagfspkflktgshmdliksvkpnivtm1sagikemslt  
kylvsq1mlsndermddlr  
vffpnaknedwevitagqrvqvikdtedskgnlqfgtevitssddgtlaallgaspgastavdimfdvlqrcyrdefkgwe  
pkikemvpsfgyrltdhed  
lyhkineevtkylqv  
>tr|D8HEQ2|D8HEQ2\_STAAF  
mikqinvsnmqkfesqlmkaqsegvthvpyaneimiyqsmldavqlypksivvdytvdgqykndchfygqssiniadwa  
qnnnyppnliyaiqqtdl  
ihyysvetifdla1l1tkgdlsidghvfdkplatsasiwetiktiedfdmmsqfynlkmayidhhpipfrnlfied  
seqlnspdnwlystkfm1p  
kwlykiakqraknq1qnfgylytkqpnvldhivfigdhhqyignskylyftvfkhnpmacyfvtdrrgphfisprse  
kadelinsarvv1vendip  
etlqpngtliqlhggtpimqlf1dskepiknietpfyrakrynrlqfdyvihsaddishfyqtafpshqanvlaygnpk  
hgyllqkrnesntqqqyk  
sfkindqkpvllyapiglvsaaqlplsdalfkayhvvvqgvdetmlpeevalvapkylsaqd1ilmsdvitdysniifda  
maidktvalytpnhsqyie  
sqgvnediwrhlskiwytdrq1l1nnlisqaipvikypqihkeqplesisq1ilskmtsng  
>tr|D8HEQ3|D8HEQ3\_STAAF  
mkr1vtg1lals1flaacgqdsdqkdsnekdkakteqqdkktdnsskdkkdnkddskdvknkdnksandnqqqsns  
natnndqngtntnnqssnq  
annnqkssyvapygqnaapvarqiypfngnktqalq1pnfqtalnaanneankfgsnkvyndysieehngnykyvfs  
fkdpnangkysivtdydg  
qamvtdpnyqq  
>tr|D8HEQ4|D8HEQ4\_STAAF  
magiikeiskqdaselvelatrtfydtfgsyddkdfdqffkdnytvkftqei nhvdsfhyfyqedganvgyikmnins  
aqteemgetylevqriyfl  
kdfqgggrgsqlielaekiaqehnkhiwlgvwehnpraqafykrhgfkvvgehhfqtgdvtddlimekel  
>tr|D8HEQ5|D8HEQ5\_STAAF  
mavfskekkrgcivvietfkafvidkdesgkvtptfkqlsptdlpkgdvlikvhysginykda1atqdhnavvksympip  
gidlagtiveseapgfekg  
eqvitysydlgvshyggfseyarvksewiiklpdtl1teesmiygtagytaglaierlekvgmnie dgplvrgasggvg  
tlav1mlnelgykviastg  
kqdvsdq1lelgakevidr1pveddhkplasstwqacvpvggeginyvtr1nhsgsiavigmtagntytnsvfphil  
rgvnilgidsvftamklrq  
rvwrrlakdlkpenlhekqvitfde1peqlnkvikhenkgrividfgvdk  
>tr|D8HEQ6|D8HEQ6\_STAAF  
mvkvtidyptcedycalrinagmspktreaaekglpnalftvtlydkdr1ligmrvigdggtvfqivdiavlksyqqggy  
gsqimehimkyiknsvs  
ayvsliadyadklyakfgfmpptepdsggmyiky  
>tr|D8HER3|D8HER3\_STAAF  
mnykqsaedi1naiggeen1damahcatr1rlv1ndeslvnealnmndvvgkgtfstggqyqiiigsgtvnkvfselek1  
tgkeasttsevkagsaknm  
nplqrfvkm1sdivpiipaivagglmg1lnniltakdlffsgkslidvysqfaglaeminvfanaft1lpiligfsaa  
krfggnpflgaalgmi1vh  
pslmsaydfpkaveagkai pywvfglhinqvgyqqv1pmlvaayilasiekglrkviptvldn1ltp1lsifitaf1t  
fsfvgpitrqlgyw1sdgl  
twlyefggaigglifgllyapivitgmhhsfiavettliadatktggsfifpiatmsnvaqggaaiaaffiikqnkk1kg  
vasaag1sal1gitepamf  
gvn1kl1rypfigaivgsgigsayiaffkvkaialgtaglpgfisinpvhagwlhyfvsmtisfivaitvt1l1skrkank  
evve  
>tr|D8HER4|D8HER4\_STAAF  
mkerghieqlwreekyhv1l1hsqsyqmirnal1ktd1sl1hqvqqm1dalliepsigsvcnafdhmwyfkkcaneerq  
ysk1lkad1ingki1dtqt1  
ldflaelankydvy1l1qsr1v1ntkrkr

Tsompanidou\_et\_al\_Supplemental\_FASTA\_File

>tr|D8HER5|D8HER5\_STAAF  
mtcqlkihtl1stipsrnnimvlfs1tskl1nitingetkdvsnii1inhgdiyninhgeni1elmipvfyfyqqddd  
ffngyl1drh11qssnyiks  
liadlistptss1mgknigqs1idt11keafiridheyl1pnial1snpvfidcvnyihdnidah1slkdiamhcnisesy  
csn1fvry1smnfkdyfts  
iklvnain111stkh1ittvselagfnshntfanqfkny1hfspkqfrs1vskiteppqihfqqdnvsqftelistidlt  
aq1atnttdihiddfnpkd  
rsqrakvfrfsnfel1fqfi1fneyy1dinfel1pkpvfididieisqtnyn11nrcfek1feknig1aiaikstqqf  
etmkq111tfl1qgnqdykt  
skklvkfml1vfcsnsm1tadeih1chl1kiknknkeikysvtvdgfl1etystveqvydv1mqr1kfhyyfidien1sktath1i  
tknqhyh1qtdth1feqykkf  
i1dsg1sstqfvynn1svsgfkytndgknpiq1sdivyh1ial1rygg1isyq11ddhsny1slynkygsp1plmhlykm  
frpfvnedie1itnnyv1sr  
kdnnyh111fnk1ndrymsdvkqdfi1fhnel1pqds1mi1ikt1nhehgsiqh11ptsdq1vyieke1del1dktnypkte1  
avqeetgrtfe1k1nhdev  
kyicfkps  
>tr|D8HER7|D8HER7\_STAAF  
m1ivciv1vimmmtggk1dtyygm1kdnatiekmi1sekdesiek1nvkl1psdadvs1vkkgdfv1vykl1adskivk1vkkvd  
hddvphg1mmki1hdmgkmh  
mkh  
>tr|D8HES1|D8HES1\_STAAF  
m1lnfnqfenq1ffngnpsdt1fkd1lgkqvfn1fstpsfv1tniyetdely1lea1agv1nkedisidfnnt1tiqatrsa  
khkseq11ildernfes1lmr  
qfdfeavdkqhit1asfeng11tit1pkikpsnetts1stisipis  
>tr|D8HES3|D8HES3\_STAAF  
mykini1rsdsvykni1kap1ndrds1ftkei1vpfkkkfeaqhipiyndak1qtmanh1flnafqippkdl1rmsdq1isiq  
y1nndfwsncekyl1kvaid  
qfsnys1ssqvsnyhftv11gdsqkp1my1lnknrggdgg1pgyimi1y1vpstst1nsmks1liahevnh1mrnqyidwdgg  
s1lieli1aeg1aenyves1  
ygkah1gpwv1tntws1rdnvki1kntiynh1h1khi1fesmpy1ygde1ink1qgrpi1vg1shaagy1acgyh1vkyfl1qktni  
pi1evatt1paqi1inevte  
fwhtht1  
>tr|D8HES4|D8HES4\_STAAF  
maytyt1kdi1e1itgvtkrt1hyyde1ig11vpdkndknyrvy1qqd1lek1qk1il1ksfd1diakikqy1isydneq1rk1  
1seqvsk1dkk1sd1qlir  
1svcefi1kghs1lidts1lnkt1qsqydkeas1kyghtkayqs1firrkds1qsqdirhk1ltti1fnkfnhms1shy1piqncs  
d1lvfewka1f1m1tiad1fdde  
t1cc1akt1yed1dtr1fkdyfnsydnq1n1asy1seavny1flsnvksdnf  
>tr|D8HES7|D8HES7\_STAAF  
m1nqf1lwi1fpylc1lvfvaghi1aryrydkfsw1taksseli1erkr1mwgs11fhl1gi1pvffghvvg11lipkswmdavgv  
seh1yhi1gavy1gsi1fgii  
t1lvgm1f11tarrv1t1k1s1rr1ssasdi1fvn11111v1fmgcyat1vtni1qhp1dfnyrts1siw1frq1flm1kpdas1msgv  
pia1fkmh11lgft1imacwp  
ftr1vhv1wsv1plty1inrry1iy1rknkv  
>tr|D8HES8|D8HES8\_STAAF  
maqqlc1fpek1t1fhpk1tfeet1iskdh1payed1vaf1rnvmmt1f1seika1iytdt1fdftk1kap1ymtynk1fdtqkergqm1  
ak1kv1yem1fg1emvdne1  
sdy1pl1m1ql1qvaew1rnd1praeni1qli1imi1edgtyvman1alged1nnp1yayvi1qalrkt1kl1cl1tspkgvkha  
>tr|D8HES9|D8HES9\_STAAF  
mv1n1dkc1ig1chtcsvtckntw1tnr1pgaeym1wfn1vetk1pgvgy1pkrwed1qehy1kggw1lnrk1gkle1lksgr1iskialg  
ki1fynp1dmp1likdy1epwn  
y1nyeh1ttak1sgk1hsp1varayse1itgdnie1iegpn1wed1laggh1vtgpk1dpni1qkieed1kf1qfdet1fmy1lpr1cehc  
1npscv1asc1psg1amykrde  
dgi1v1vdq1dacrgw1rycmt1gpcy1kkvy1fnwkt1nkaek1ct1fc1prieag1mptvc1setct1grmry1lgv1lydadrv1heaasa  
vdek1d1yek1q1di1fln1pfd  
eev1iaqaek1dgi1gydwi1eaaqns1piy1klaiey1klaf1plhpe1frt1mpmv1wycpp1spimsy1fegknt1tqn1pdai1fpaieem  
r1lp1je1ylani1ftag1dtepv  
kgal1qrmam1mrsym1rsqvt1qqp1fdts1r1er1g1iter1qtkdmyr11lg1akyed1rfv1iptshkety1ldtyha1aggstgy1nygg  
ehfgd1nceg1cgvav1gsgkt  
gqe1iyen1fygg1ifrd  
>tr|D8HET0|D8HET0\_STAAF  
mgk1fg1n1ffk1pte1kfng1nws1ilesks1rewek1myrer1wshd1kevrt1thgvn1ctg1scswk1vfkng1vitwen1qtd1dypscgp  
dmp1eyep1rgc1prgas1fswy  
eys1pl1riky1pyi1rgk1wd1lwtea1leen1gnrva1was1ivened1kakqy1qargm1gghv1rsnw1kdvte1iaaq1lytiky  
gp1dri1ag1ft1piam1smisy  
aagar1fi1n1lggem1s1fydwyad1ppasp1qi1wge1qtdvp1ess1dwynasy1imwgs1nvp1l1trtp1dah1f1mte1vrykg1tkvis  
vap1dyaenv1kfad1nw1lapn  
pgs1daai1aqam1thvi1lqehy1vnqp1nerfi1nyakqy1tdmp1flim1dedengy1kagr1flras1d1gqtte1qg1ewkpv1ihdais

Tsompanidou\_et\_al\_Supplemental\_FASTA\_File

dslvvpngtmgrweegkk  
wnlkletdgskintplsmteggyletiqfpyfdsdgdgfnrpiptqvltlangdkvriatidlmasqygvrfrdhk  
leskgyddaeskiytpawqe  
aisgvkqsvviqvakefaqnaidtegrsmiimgaginhwfnstiyrsilnlvmlcgcqgvngggwahyvgqekcrpieg  
wstvafakdwgpprlnqg  
tswfyfatdqwkyeesnvdrlksplakteeikhqhpadyvlaarlgwlpsypqfnknsllfaeakdegiesneailkr  
aidevkskqtqfaiedpd  
kknhpkslfiwrslissakgqeyfmkhllgksgllatpnedekpeeitwreettgklldvvsldfrmtatplysdiv  
lpaatwyekhdlsstdmhp  
yvhpfnpaidplwesrsdwdiyktlakafsemakdylpgtfdkdvttplshdtkqeistpygvvkdwskgeieavpgrtm  
pnfaiverdytkiydyvt  
lgpvlekqkvahgvsfgvseqyeeiksmigtwsdtnddsvranrpridtarvadailsissatngklsqksyedleeq  
tgmpkldisseraaekisf  
lnitsqpreviptavfpgsnekegrryspfttnierlvpfrltlgrqsyyvdhevqqfgeslpyvktlppmvfgnrddk  
ikgtdalvlryltphgkw  
nihsmqdnkhmltlfrggptvwi snedaekhdiqndwlevynrngvvtaravishrmpkgtmfmyhaqdkhiqtpgse  
itdtrggshnaptrihlkp  
tqlvggyaqisyhfnygpiqnrdlyvavrkmkevnwled  
>tr|D8HET1|D8HET1\_STAAF  
mynlikaivlgi1kylktrhlhivflvyggykygkiwiefl  
>tr|D8HET2|D8HET2\_STAAF  
msvdeygvyligagpnpnyltkkaerlireadvilydrlnvnlilqyanltteiidvgkkpyakhiqqekindcivea  
arrynkvvrlkggdpai fg  
rvgeevdtlnehhiafeivpgvtsasaavatmqtgltmrtvaksvtfstghfdseenevdvnslnvggtlaiymgvkr  
gkii tqiqqytdidyai  
vfgascfnefvkvgrl sniilkqhysieakpgicigevvgytentpksydpakqfyvvsghda1mlcehlydegyg  
c1lnpndtsngtyhssqyd  
yydafikqqenvtyistdradantvlch  
>tr|D8HET4|D8HET4\_STAAF  
makqklvmignmagi rteeilerandlyditvigkepypnyrimlnsilqnkmtveetimpyewyeehgielitnd  
svievdranqsvttangie  
vsydkliifatskafvippgstlpsvigwrtiddteqmmniaktkkkaiviggllglecarglldqgmevtvlhlaew  
lmemqldrkganmlkadle  
kqgmkfemqantteileddvegkvladgreipadlvvmavgirpytevakesglvnrngivvndvmqtsdsnvayavgec  
aehngkvyglvaplyeagg  
vladhlnketngykgsttfts1kvsgcdlysagqivenaeikgieifnsvdnykklf1kdgnvvgavlygdiddgsrf  
ymmmkkgstedyt1vs1l  
tkggeeas1siadmaddeticngvdkgtivnaitengfttveevtaktkagnscgkckpqi aqilqhtlgddfvaakp  
ag1cgctdltrdqivtqir  
akglktskevrhvlfnknkggcpkcrpainsylmnyphdhederesrfaneryhaniqndgtfsvipqmrvgvtdadq  
ir1gevakkyhvp1kvvtg  
sqrvglygvkkee1pniwedlgmrsasaygkkrsvkscvgkefcfrfgtqytr1girlektfeyidtpkhfkmgvsgcp  
rscvesgvkdfgiisveng  
fqiyignggtevekaef1ttvetedeviklcalmqyretgiyaertapwlr1rgfenvkev1l1nperqnelferimd  
akkaveapweaitsnaqa  
rkifevekv  
>tr|D8HET5|D8HET5\_STAAF  
miwytirvkg1vnvngni1vahgmrhgrnqallafiselvkddihhydiafleseqdletvmttlvqsgvdhfkivp1  
lifsamhylkdipdivhem  
krrypdi kvevsep1gthplmr1lieqricdalagdeqqvgvmivahgningkftkaheelqicaqnlqiskptyartly  
geisfthdleiiskryqk1  
ivvp1f1ydr1vnkvkqmmnmvinpdihitpsinfdpilkqiindrles1ndsnenikaqtkiktflk  
>tr|D8HET6|D8HET6\_STAAF  
mgjemnttir1anendaet1qq1mykaftplrelgidwpsvnan1davkenidknttfvmtiddeiistitvrypwgsv  
ksisgypfvwffatnpeye  
gkgysq1l1tyveeaf1rdt1ksaavt1gtsar1hpw1l1kiyekrgyeiysehendgd1gvimrv1liperfdetilgq  
ppf  
>tr|D8HET7|D8HET7\_STAAF  
miknktvedtystkai vds1ssvqmkvmmvqqtppgrymlkssmagfl1sivtvfmfgiktqfaithvdglinlmgai  
fslgl1v1v1t1nse1l1tsn  
fmyftvgyvykvs1nkmmwi1lycflgni1ggfv1ff1mkyahvmtpentqal1talvqkktvdstwl1niftkgicfnff  
inigi1fismqfkggltkaf  
fiacgvivfvyngyehvvnag1yagmvffn1davsw1hvlknivfaf1gnfvgggi1fvglvyaf1ngkrnr1leqq  
>tr|D8HEU0|D8HEU0\_STAAF  
mkkklgm111vpavt1s1aacgnddgkdkdgvtkikttyvpl1qsfaeqiggkhkvsvsiypagtd1hsyeptqkdil1sas  
ksd1fmytgdnl1dpavakv  
astikdkdkk1s1edk1dkak11tdqhegheheheghdhekeehhhhggydphv1dpkinqtfakeikdelvkkdpk  
hkddyeknykkl1ndd1kki

Tsompanidou\_et\_al\_Supplemental\_FASTA\_File

dndmkqvtkdkqgnavfshesigyladrygfvqkgiqnmnaedpsqkeltkivkeirdsnakyilyednvankvtetir  
ketdakplkfynmeslnke  
qqkknityqslmksniengikal dsgvkvkddkaeshdkaisdgyfkdeqvkdrelsdyaqewqsvypylkdgtldev  
mehkaendpkksakdlkay  
ydkgyktditnidikgneitftkdgkktgkyeyngkktlkypkgnrgvr fmfklvdgndkd lpkfiqfsdhniapkkae  
hfhi fmgndndal lkemdn  
wptyypsklnkdqi keemlah  
>tr|D8HEU1|D8HEU1\_STAAF  
mdrlnitfspqafadykyfqndkkmvkkine llsidrngal kgigkpek lksnl tgyysrrinhehr lvykvddnhik  
iasckyyh  
>tr|D8HEU5|D8HEU5\_STAAF  
mnfv t ltsdefnaf ttkhfshytqsai hynhrvd lkgdvh lvgvkddngqvi agcll teart l kffkyfythrgpvmdyt  
nqslvafffkalt sylkkq  
nclyvlvdpylie nlnadgeivksydnrafvrtmdt lgykhqgfpvgysmsqirw lsvld lkdktedqllkemdyqtr  
rnkktydigvktktl tid  
etqtf fdl fhmaeekhgkfre lpyfeemqklyddham lklayid lneylkt lqlkqqqltaelsgveealeespskkn  
ktrktqleqq lnsnrkid  
ntieqieqdgavl nlasal fiynehevyl ssgsnpkynaymgayhlqwemik fakahhidrynfygitgdfessedyg  
vqqfkkgnahveeyigdf  
ikpikpllykvqtylnhkrr  
>tr|D8HEU8|D8HEU8\_STAAF  
mkrllfvmi afvfi laacgnsskdkeankdsktinvgttegyapfsfhdkdgl tgydidvikavakeeglklkfnet  
wdsmfagldagrfdvianq  
vginpdrekkykfskpyt fssavlvi renekdi kdfddvkgkkl aqtftsnygklakdkgaditkvdgfnqsm d lllskr  
vdgtfnds lsyldykkqkq  
nakikaikgnaeqsrsafafskvddetvqk fndgl kkieengel akigkkwfgqdvskk  
>tr|D8HEU9|D8HEU9\_STAAF  
mskkqkl tmiitmlggffgl netllvta lpsimkdf eisyqvqwl ttafl l tngiviplsalviqryttrqvflvgi  
siff lgt lgg l sphfat l  
lvari qal gagi mpmmtti l d v f q p h e r g k y m g i f g l v i g l a p a i g p t l s g y l v e y f n w r s l f h v v a p i a a v t f l i g  
fktiknvgttikvpid fjs  
vifsvlgfggylgtssi sek g f d n p i v l v s m i g g i v l v a l f v l r q y r l s t p l l n f a v f k n k q f t v g i i m g v t m v s m i g  
setilpifvgnllhrsal d  
sgl t l l p g a i v m a f m s m t s g a l y e k f g p r k l a l v g m t i v v i t t a y f v m d e q t s t i m l a t v y a i r m v g i a l g l i p v m t h t  
mngl k p e m n a h g s s m t n t v  
qqiagsigtaal itilshasknfsstmsdyngmki dmmnqikvdtmlhgyhagfl fallitvvsffcsfmlqgkkkev d  
srq  
>tr|D8HEV3|D8HEV3\_STAAF  
mltnrltsvnyvkkrl iqniqri l skevlyg  
>tr|D8HEV4|D8HEV4\_STAAF  
mknkyiskllvgaatitlatmisingeakasentqqtstkhqttqnnvtdqqafyqvlhlkgiteeqrnqyikt lrehp  
eraqevfses lkdsknpr  
rvaqna f y n v l k n d l t e q e k n n y i a q i e n p d r s q q v w v e s v q s s k a k e r q n i e n a d k a i k d f q d n k a p h d k s a a y e a  
n s k l p k d l r d k n n r f v e k v  
siekaivrhdervksanda isklnekdsienrrlaqrevnkapmdikehlqkql dalvaqkdaekkvapkvapqiqspq  
iekpkaespkvevpqiqsp  
kvevpqskllgyyqslkdsfnfygykyltdtyksykeydytakyynkyqyqkglidqvtl t t i g s g y g s y i k p l e i k e n s  
gfaqsyaqvrnyvtesin  
tgkvl ya f y q k p e l v k a a i k a e t a s s i k n t i t k l f s f w k  
>tr|D8HEV5|D8HEV5\_STAAF  
minkniltatlavgliaplanpfieiskaenkiedigggaeiikrtqdiaskrlaitqniqdfvkd k k y n k d a l v v k m q  
gfissrttysdlkky pyik  
rmiw p f q y n i s l k t k d s n v d l i n y l p k n k i d s a d v s q l g y n i g g n f q s a p s i g g s g s f n y s k t i s y n q n y v t e v e s q n  
s k g v k w g v k a n s f v t p n g q  
vsaydqyl faqdp t g p a a r d y f v p d n q l p p l i q s g f n p s f i t t l s h e r g k g d k s e f e i t y g r n m d a t y a y v t r h r l a v d r  
khdafknrvvtkyevnw k  
thevkiksi t p k  
>tr|D8HEV6|D8HEV6\_STAAF  
mnepnikl f y l t l n l i i t t d f y k n k v s h s r y t n t n e a i  
>tr|D8HEV9|D8HEV9\_STAAF  
m t s k d i t q i s v i a a i l t i l a v l k i p s i i p g l d f q l s a p a a l l i l a f f g i k y f l g g l l s s v l l l i f g v f n p i n v i i s i i f  
r v i a i a v v y l l k i n v l s l v  
l a s v l g s l v s r l l l s i i l n l p v w v l l n a i p g v i f t l i v a i p l y l t l r k r m a v l l r  
>tr|D8HEW0|D8HEW0\_STAAF  
m y s i k m r s s n q d v h i s g a e t i c e f d k i e q t v q r f y n k g f f h e n g q p d f l n i k i q k i m e p i q q i k a l k i e d d k a n l q h l t  
q e c g v t e q a l n g g m t y i k n  
e t v y t g a i i l s a i s g k r l d s f g r g i r a t h f s f e d i n n k g d l n e r v t d a l a i a s c i n a h p y v k g e l c v s d d l t y t t g y f a  
s g k i g y h r l f d i k p v n t r y

Tsompanidou\_et\_al\_Supplemental\_FASTA\_File

ggriifvddridlnhyisflestpkqvvyetv  
>tr|D8HEW1|D8HEW1\_STAAF  
mmfqqeidl1qqkglyrslksvgyidrqiyevenkrctnytsndylglgqiafdkddferfmrkysyhlsssrllisgsst  
ayeeietklagwlgysact  
ilnsgydanlalfnfkntncvvsdgenhasiidgiklsgletviykhldiadlekrleaypnqnkqkiiisdsvfstn  
gdvvdigq1vs1khkynat  
lildvshsfgienysnyggidiltsslskacgayggvllssndvkdmlinhgrplyssslpiynlyfikrnieklinad  
drtrklslskyfngklka  
lnvnyssnsplikfieddieaaenihqtllkhhvftsylyryptvtpmlrislsyfhteqdvdrlfeilhqed  
>tr|D8HEW3|D8HEW3\_STAAF  
mnytqqlkqkdseyvwhpftqmgvyskeeaiiiekkgksylydtngnyldgyaslwnvvhghnnylnkvikkqlnkia  
hstllgssnipsielaekl  
ieitpsnlrkvfysdtgsaveiaikmayqwkndrekyaknkfitlnhgyhgdtigavsvggiktfhkifkdifen  
iqvespsfyrsnnydtengm  
mtailtnieqilierndeiaqfilepliaggatglfvhpkqglkevdklckkydvlllcdevavgfgrtgkifacnhedvq  
pdimclgkaiaggylplaa  
tlltsqkiydaf1sdshgvntffhghtytgnqivctvalenirlyekrkllshiettsstlekqlhalkrhrnvgdvrgg  
lmfgvelvtdkdsktplei  
ekverivrnckenglmi rnlenvitfvplsmnskevktmvrifkkavhnildrkc  
>tr|D8HEW4|D8HEW4\_STAAF  
mri fitstntdvktyvtkhlyhalrrghrvcvfkipfqtteerqdgtpdlevfknedlsyditlytfkqpvspflaf  
kmaqiflnkqr1dkvkv  
ldkefdfiliegaggiaapiyegtddfytmkdlindcadcvisvlpsklgaisdaivhqdyvnqnsasnf1imnrytds  
yiekdnqmtigkltnktvy  
tfeeyatyenfseaf1kq1igvknelhttt  
>tr|D8HEW5|D8HEW5\_STAAF  
mfqitfki1nwi rpykarmilgfsmsflnaifialpi flaakifnvn1shkpiymkdilnvvimvllvigrfitayfks  
kshesiayemsakerldig  
dklknvr1gyfnshhsnelttivttldtflenfamkmvdivvngyilitvl1sl1lvswqvsllacigvllsffaiql1  
erksrqnapayhnvqnlv  
ekvlevirgigviksfakentslksfnqavneskrintkiemqyipfnllhllslkvvsimivlvac1lymhsid1pt1  
imisifsvifdsvenins  
aahvlemidmtiddiekiknapeldengknltikneniafqvnvnsyddkqviknvnfeiptqtstaiigpsgsgkstlc  
hlllrfdyiddgniridgv  
dikdmt1stlmskisavf1kvy1fndtiennilfgnpgatkeeii raakqacchdfims1pegyqtm1nekgsnlsgger  
qrisiarailkdapiiild  
eatasidpeneh1iqhaidel1skgktvitiakhletiknadqiiv1cdgeiiqrgshdeliqkpgmyqdfitikksagw  
k1  
>tr|D8HEW6|D8HEW6\_STAAF  
mngqtnwikilsgfasdskwkim1sillsiisvsglvpwyavfkii1lmminnaytinsimvyifialiyisqvccfga  
stmlshitayeilseirkk  
laqklmr1plgvveskkigeklnifvdkvetielplahmipevignllsaaiflyimlidwrmasallvtipisifafk  
kvmgsfnetyaeqmksnny  
mnsaivefiegieviktfnqsqssykykdavdnykihtlnwfkntwgymnlgssvlpstflgilpvgmylisingllya  
efflciv1slgvvapi knf  
tnyvnh1ksiqyaltevnqilslee1vlstkfkppqhyeiafnvvgfsynkdkdd1vfkhl1sftvpknnftaivgasgsg  
kstiaklisrywdvtsgei  
tigginikdiesq1nd1vgfvqdnf1ln1lftkenik1gnpeatdeavekaaklaqchefiek1pdgydtnvgtvgdk1  
sggekqrvtiarmi1kdap  
iiv1deatayvdpdneqkiqea1nvl1tdk1liviahr1stiqhadqiiv1lgkqqilekgshhll1klngnykkmwdthm  
htkdwgi1tghn  
>tr|D8HEW7|D8HEW7\_STAAF  
mavvrgfgvfrcsiyyvtnysideqgvqci failq  
>tr|D8HEW8|D8HEW8\_STAAF  
mfn1lidimtsal1sgclvaffahw1rtrnkkgdgk  
>tr|D8HEW9|D8HEW9\_STAAF  
mkqvtvty1ikhkden1f1tnrptevndtvkystdmrdarefdgl1dktvidmskhkaikktvtetieyeevehd  
>tr|D8HEX0|D8HEX0\_STAAF  
mteqtlfeq1n1sknvn1dhte1qngltylawsyahqelkkidpnytrvhefphpdintenyfvpylatpegyfvqsvtv  
kdstetew1p1dfrnks1  
akgsattfdinkaqkr1cvkasa1hg1g1ly1yngeel1psasdndite1leerinqfvn1sqekgrdatidk1mrwlkisni  
nk1sqkqiaeahqkl1dag1  
kq1dseekq  
>tr|D8HEX1|D8HEX1\_STAAF  
mlnr1v1vgr1tkdpe1rstpn1gvn1vgtft1avnrtftnaqgreadfinvv1fkkqaenvkny1skgs1agvdgr1qtr  
sydnkegrrvfvtevvads  
vqf1epknnnkqnnq1hng1qt1gn1pfdnteedfsd1lpf  
>tr|D8HEX2|D8HEX2\_STAAF

Tsompanidou\_et\_al\_Supplemental\_FASTA\_File

mpkitsyitqddgtttvvisgvelgnketllldngfdvevdsvi dppfritgkqrrkifalvkdiehtgqpm dymrhmf  
iefvrmygyderislsnc  
trtqasqii evtl dwtfhndip lsyktsd llkqdkaylywstvnrhciicqkphadlahyetvgrgmnrnkmnhydkhvl  
alcrehhneqhamgvksfd  
dkyh lhdswl kvder lnm lkgengrsivdkt  
>tr|D8HEX3|D8HEX3\_STAAF  
mgevswiklvgm fddski kyiealperdtiitiwvkl ltlsgkyneqgyim lsenlpyneem lanefnr pinsirlaiq  
tfetl gmi ekvngvikvtn  
wekhqsl dskakhkeknkl rqqryrerqkkl leeks nvtvts rndteereeekeeykn keereavfssikyianl  
ddkl tpnqmeql gfai ddi  
gtnafevvkv gveytk sskahggylikv lnnwakenvktkedaehki aprk natddviaaqmekel sdd  
>tr|D8HEX5|D8HEX5\_STAAF  
mnyggfeiestiatllkqpdvleki rvkdymftnek fktffnyvmdsgkidhqeiyl katkdkefl dadtitklynsdf  
igyggfferyqqel lesyql  
nkanelvtefkqqptnqfn nli delkd lktitnkkedg tkkfveefvde l ysdspkkqiktgykl mdykigg lepsqli  
viaarpsv gktgfal nmm l  
niaqngy ktsffs lettgtsv lkrml stitgie ltkikeirnl tppdl tk ltnamdqimkl gidisdksnitp qdvraqa  
msysdrqqvifidylqlmd  
tdakvdr rvavekisrd lkiianetgaiivllsq l nrgvesrqdkrpm lsdmkesggie adaslamllyrddyynreedd  
sitgksivecniaknkdge  
tgiiefeyy kktqrfft  
>tr|D8HEX6|D8HEX6\_STAAF  
mni mqfksllksmyeetkqndpivanvyietgwavnrlldnne l spfdydkveekimneinwkktniekc  
>tr|D8HEX8|D8HEX8\_STAAF  
meieikfnetfeapmgsprprfrntgrfvq tymptsytkhkayiqgqipkl nleralkiel dfyfpllkswskkkksemv  
gqykvtkpdi dnlktvld  
acnghv wkdndqiteitsskryglepkiimrveevi  
>tr|D8HEX9|D8HEX9\_STAAF  
mqqqayinatidirvlteveyqh fddvdkekda lakr lddnpdel lkydnitirhayieeve  
>tr|D8HEY0|D8HEY0\_STAAF  
mklnevfatnlrvimardnsvsqdlhnetgvsrstisgykngkaemvnlvldkladalgvnvsel ftrnhnthkledwi  
ktvvnv  
>tr|D8HEY1|D8HEY1\_STAAF  
maktarivrihdkpyrfsefemeli eshg itpgmvskrvkdgwelheamdaaegmrlseyrekktierleqarlerkler  
qrkkaealrrkkph lfnvp  
qkhsrdpywfdntynqm fkkwqev  
>tr|D8HEY2|D8HEY2\_STAAF  
mpkidsackeylnrffgskrylyqdnervahihvngtyyfhghivpgwqgvkkmfdtae eletyikqhgleyekqkqlt  
lf  
>tr|D8HEY3|D8HEY3\_STAAF  
mmkiki ekevnlpel i qwpwdnpklsgnkrfy pngvrh nchvtfdvdsilcnvtgyvsindkftiqeei  
>tr|D8HEY5|D8HEY5\_STAAF  
mehgskeyyekqseywfdeaskflqrde l igdiaklrehnkelekkaiawdrycksvekdlinefgnddervkfgmel n  
nkifveedtne  
>tr|D8HEY6|D8HEY6\_STAAF  
mnnreqieqsvi sasayngndtegl lkeiedvykkaqafdeilegmtnaiqhsvkegie ldeavgimagqvvykyeeeqe  
nd  
>tr|D8HEY7|D8HEY7\_STAAF  
mntl ttdqlqellqigkefddriptrnlndtvasmie fvwintleffknwkkqpgkpldtqldei adylafslqltl  
tivdeedleettkvmvdl i  
enevtl pklhsvyfvhvmht lteqfvkgidnsivqvl impflyantyysidqlidaykkkmkrnherqdgtagkgyv  
>tr|D8HEY8|D8HEY8\_STAAF  
mtinklknmltniglnvesekl skvevqlfptdqlkdntvlegyscniknwpkfkiwinksnkvtiksr gvqksfdied  
eks l rkelkgfeil  
>tr|D8HEY9|D8HEY9\_STAAF  
mtgyiamlffmsfigsiasvsi fiadltvnhklsqkgllfffllgiilniiailiypigvdygvllk  
>tr|D8HEZ1|D8HEZ1\_STAAF  
mikqifrllfl amyelgkyvteqvyimmtanddveapsdfekiraevsw  
>tr|D8HEZ2|D8HEZ2\_STAAF  
mwivisivilsifllilssishkmtiealey mnyvlfkqlvkngvegi edyeneverirkr lks  
>tr|D8HEZ3|D8HEZ3\_STAAF  
mldkvtqietikydrdvsysyaasrlsthwtnhnmawsdfmqklaqtvrtkedlteynkmskseqadikdvggfvgyllk  
egkrragqvmnrsm l tldi  
dyaaqdmtdi lsmfydfayc l ysthkhreisprlrlvip lkrvnadey eaigrkvadivgmdy fddttyqphrlmywps  
tsndaeffftyedlplldp  
dti lneyvdwtdtlewptssreesktr l adkqgdpeekpgivgafcraytieea ietfipdlyekhstnrytyhegsta  
gglylyennkfayshhntd  
pvsgmlvnsfdlvrihlygaqedtkttdtpvnr lpsykamqraqndevvkkqlindkmtdamedfdeiensddawsetl

Tsompanidou\_et\_al\_Supplemental\_FASTA\_File

eitskgafkasipnleii  
rndpnlkgkiafneftkqieclgkvpwntnfktrqwqgdgdsrlrsyiekiydhhsqtkkdaiisvaiqnayhpvrdy  
nkiwdghkrlerlfiky  
gvedtevrntttkkaltagiarmepgckfdymtlfgpqvgksa11kk1ggawfsdsvsvtgekeyealqgvwlmem  
aelaatrkaevesikhfis  
kqvdrfrvayghyiedfprqci figttknkvdflrdetggrrfwpmtvnpervevnwskltkeeidqiwaekyyeegge  
lflnpeleemrsiqskht  
eespytgiieeylntpipsnwedlsi ferrrfyqgdvdm1ptgnvdyvernkvcalevfvecfgkdkgdsrgsmeirkis  
nilrq1dnwsvydgnksge  
irfgkdygvqiayvrdesleei  
>tr|D8HEZ5|D8HEZ5\_STAAF  
mehlaidfkphnyqkyaidkvidnekyglfldmg1gktvst1tafse1q1ldtkm1viapkqvaktwvdevdkwnh1n  
hlkvs1v1gtpkernaaln  
teadiyvtknkrykcdqykkewpfdmvide1stfkspsqrfksikk1plnrfig1tgtpspns1qdlwaqvyli  
drgerlessfsryreryfk  
pthqvsehvnweldrgseekiyqiedic1smkakdyldmpdrvdtkqtvv1sekerkvyekleknyileseeegtva  
qngas1sq11q1sngavy  
tddedvr1ihdkk1d1leeiieesqgq111fynfkhdkerilqrfkeattledsnykerwnsgdik11iahpasagh1  
n1qqggh1jvwfg1tws1e  
lyqqanar1yrqgnht1ihhimtdntidqrvykalnkel1tqeelmkaikariakhk  
>tr|D8HEZ6|D8HEZ6\_STAAF  
mgstiydikpgtfkyieseiylnenkeikr1r1e1lnptkeqdsniyvgplqkgepvrttelmatr11tnkm1rnlee  
mveavesey1k1pedhkkv  
ir1kywnkek1kmeqighechmhrntvt1rknfvkavayhagik  
>tr|D8HEZ7|D8HEZ7\_STAAF  
mtkhnniykhgrksygydwfyhskawkk1reialdrdny1cqmc1redivtdanivhhiyvdedfnkal1d1n1msvcy  
schnikihandnksn1kki  
rv1ki  
>tr|D8HEZ9|D8HEZ9\_STAAF  
mtikv1nepspk11ttwyaevtqgkiktskyvkkecerh1rylenggkwvfdeela hrpirfiekfckpskgskrq1v1  
qpwhf1igs1fgwvhket  
klrrfkeali1fmgkngkttisgvanyavsqdgengaeih1lanvmkqarilfdeskamikaspk1renfrplrdeihy  
datiskimpqasdsdk1dg  
lnthmgi1fdeihfkdyl1sviknsraarlqpl1iyittagyl1dgp1vnmveagrtd1driiedertfyyl1as1ddd  
d1ndssnwikanpn1gvs1  
d1demkeewekakrtpdergdfitkrfni1fannemsfidypt1qknneivsleelegrpctigydl1setedftaacatf  
aldngkvav1thswipkhh  
veysneki1pyreweedgl1tiqdnpyidyqdv1nwiikmnehyvvekitydranafk1nqelknygfeteetrqgal1s  
palkd1kem1fdgki1fnn  
np1mkwyinnvq1k1drngw1pskqsryrkidgfaaf1ntytdimnkvv1sdkgegniefisikdimr  
>tr|D8HF00|D8HF00\_STAAF  
mnviakenivtrikk1idnwidqsasklydfspwnksfwgvinntletnetifsaik1snsmas1plkmyedykvvn  
tevsd11tvspnns1ssfd  
finqietirnekgnayvlierdiyhpksk1f1lnpdvven1ienqsrelysihaatgnk1livhmdm1hfkhivasnmv  
qgispidv1knttdfdnav  
rtfn1temqkpd1fmlkygsnvgkekrqqv1edf1kqyyeenggil1fepgveieplpkkyvsedivasen1trervanvf  
q1psv1fnaksntnfakne  
elnrfylqht11pivkqyeeefnrk11tktdrekigiln1t1n1i  
>tr|D8HF01|D8HF01\_STAAF  
mskkakyf1mkrkskskgei1fygdivsdkwvesdvtatdfknk1delgdiseidvhinssggsvfeghaiyn1mkmpa  
k1niyvda1aasiasviam  
sgdti1fmhknsf1mi1hnswwmtvgnaeelrktad11ektdavsnsay1dkak1dqehl1kqmdaetw1taeeal1sfgli  
dev1ganeiaas1skeqyk  
rfenvped1kkdvdkitkiddvdtse1vetpkesms1eekekrekikreceilkmt1ny  
>tr|D8HF02|D8HF02\_STAAF  
mpt1ye1kqs1gm1gq1knknde1sqkatdpni1medik1q1etekag1qrrfni1verqvkieekakvkd1tgeayqs  
1sanekmvkakaefyrhai  
1pnefekpsmeaq11halptgndsggk11pkt1skeivsepfakn1rekar1tnikgleiprvsyt1ddd1fitdve  
take1k1kgd1tvkfttnkf  
kvfaa1sd1v1hgsdvd1vnwvena1qsg1laakerkda1avspks1glehmsfyngsvkevegadmydai1nalad1hedy  
rdnat1ymryadyvk1isv  
1sngttn1fd1tpaekvfgkpvvftdaavkpi1vgdfnyfgi1nydg1tytdkdvkkgely1fv1tawydqqr1dsafriak  
akentg1s1ps  
>tr|D8HF03|D8HF03\_STAAF  
msleeik1w1ridynfend1ieg1iqsakse111sgvpdydknd1eyp1fctaiky1iarydesrgysndqs1rskvfnek  
glqkmi1k1kkw  
>tr|D8HF04|D8HF04\_STAAF  
mefnefkdrayffqy1nkgpypdeekm1yscfckiy1npsmkdre1lkatesksg1ti1mrssktey1pqt1nh1vkidr



Tsompanidou\_et\_al\_Supplemental\_FASTA\_File

gsysdklfnieeridtpd  
igyntvvlsek  
>tr|D8HF05|D8HF05\_STAAF  
msveikgipevkklesvygkqamqaksdraIneaseffikaIkkefesfkdtgasieemtskpytkvgsqeravliew  
vgpmnrkniihlnehgytr  
dgkkytprgfgviaktlaaserkyreiikkeIar  
>tr|D8HF06|D8HF06\_STAAF  
mniIntvkgiIlldaekthinsriyykvtenaetskpfvvitpvydIpsdfisdkyIseeyliqidvessnhqktidi  
tkriryIlyqqnIiqassq  
Idayfeetkryvmsrryqgipkniyyknqrie  
>tr|D8HF07|D8HF07\_STAAF  
maegggsykvgfkrlYvgvfnpeatkvvkrmtwedekggtvdInitglapdlvdmfasnkrvwmkkqgtnevksdmsifn  
ipsddIntvigrtkdkgnt  
swvgentrapvvtvigesedglTgqpyvaIlgkTfsIdsiefktrgekaeapeptklTgdwmnrkvdvdgtsqgivygy  
hegkegeeeffkkvfvgyt  
dsedrsedsedsIps  
>tr|D8HF08|D8HF08\_STAAF  
mktklkyvgkddvbaseqgegkvsvtInleadttypkgtyqvsweengkesskvdvpqfktnpIsvgsvftpetksit  
vntddnvepnispstatnk  
tlkytsehpefvtdertgaihgvaegtsvitatstdgsdksgqitvtvtng  
>tr|D8HF10|D8HF10\_STAAF  
meqygtwItevrkqpyvklIeiIneenkeeteekqseqkvitgtdIrkIlfgs  
>tr|D8HF11|D8HF11\_STAAF  
mnekvegmtIelklDhIgvqegmkgIkrqIgvvnsemkanIsafdkseksmekyqarikgIndkIkiqkkmysqvedelk  
qvnanyqkakssvkdvaka  
yIkIveankkekIaldkskeaIksnteIkkaenqykrtnqrkdayqkIkqIrdaeqIknsnqattaqIkrasdavqk  
qsakhkaIveqykqegnqv  
qkIkVqndnIksndkiessyaktntkIkqtekefndInntiknhsanvakaetavnkekaaInIersidkvssemktf  
nkeqmiqshfgkIasqad  
vmskkfssiIgdkmTslgrtmTmgvstpiTlgIgaalktsadfeqgmsrvgaiqasskdIksmsnqavdlgaktsksane  
vakgmeeIaalgnakqtm  
eampgvisaaeasgaemattatvmasainsfgIkasdanhvadIarsandsaadiqymgdalkyagtpakalgvsiedt  
saaIevIlsngIlegsqagt  
alrasfirIlanpskntakemkklgihIlsdakgqfvmgelIrfqfdnmkgmtreqklatvativgteaasglalieagp  
dkinnysksIknsgesk  
aadImkdnIkgaleqIsgafesIaIevgkdItpmiRagaegItkIvdgftIhpgwvrkasvgIaifgasigpavIaggI  
IavgsaakgyasInrria  
entiIlnTnskamksIglqtIflgsttgktskgfkgIagtmIfnIkpinvIknakIaIlfkIlnkngIglaaKsIlfavs  
ggarfagvaIrfIltgpiGa  
tItaitIaykvfktaydrvwfrngingIgetikffgskiIggavrklgdfknyIgsigksfkekfskdmkdgyksIddd  
dlIkvgvnkfkqfmqtmgt  
askkasdtvkvIkgvsketekaIkyvhyseenrimekvrInsgqisedkakkIlnkietdIlnnIaeiekrnkkele  
ktqelIdkysafdeqekqn  
IlttrtekmTcelkksknsIrkSkn  
>tr|D8HF12|D8HF12\_STAAF  
mrikkeqelnkIkeIkekaIldgqiSenerkeiekIenqrrditvkeIlsktekeqerIvrmqrrnaysideaskaik  
eaeakarkarkkevdkqyed  
dviaIknvnIlsksekdlIaIadqrhkdevrkakskkdavdvvkqnkdIdkemdlssgrvykntekwwngIkswwsn  
fredqkkksdkyakeqeer  
arrnrenIkkwfgnawdgvsktgeafskmgrnanhfggemkkmwsgikgipskIssgwssakssvgyhtkaianstgkw  
fgkawqsvksttgsIynqt  
kqkysdasdkawahsksiwrGtskfwfsnayksakgwItdmanksrskwdnisstawsnaksvwkgtskfwfsnyksIkgw  
tgdmysrahdrfdaiSSa  
wsnaksvfngfrkwIlskydwIrdigkdmgraaadIlgknvankaiggInsmigginkiskaitdknIkipIptIstgtIa  
kgvatdnsgaltqptfav  
InrdrgsgnapgggvqevihradgtfhapqgrdvvpIlgvgdsvinandtIkIqrmgvlpkfhggtkkkkwmEqvtenIlgk  
kagdfgskakntahnIkkG  
aeemveaagdkIkdgaswIgdkiGdvwdyvqhpqkIvnkvmsglInifgganattvkiakgaysIlnkkklvdkvkswfed  
fggggdsylfdypIwqrf  
gsyTggInfngrhygvdfgmdpgtniyavkggiadkvwtDyggnsiqiktganewnymhIlskqlvrqqrikagqli  
ksgatgnfvrgahlhfqI  
mqgshpndtakdpmkwIksIkgsgvrsgsvnkaasawagdirraakrmgvnvtsgdvgnIisIiqhesggnagitqss  
slrdinvIlggnpakglIqy  
ipqtfrhyavrgnhniysgydqlIaffnnrywrsqfnprggwspgpryangglitkhqlaevgegdkqemvIptrrk  
raIqlteqvmriIgmDgkp  
nnitvndtstvekIleqIvmIldkgnkltdaIiqtvssqdnIgsndairglekiIlskqsghranannymggItn  
>tr|D8HF13|D8HF13\_STAAF  
mqsfvkiIdgykeevitdfnqIIfIdaraespntndnsvtIngvdgilpgaisfapfslvlrfgydgidvidInIfehfw

Tsompanidou\_et\_al\_Supplemental\_FASTA\_File

rsvfnrrhpyyivitsqmpg  
vkyavntanvtsnlkdgsssteievslnvykgyssvvnwdseflfdsnwmfengipldftpkythtsnqftiwngsttdi  
nprfkhd1kili1n1nasgg  
felvnyttgdtfkynksidkntdfvldgvyayrdinrvgidtnrgiitlapgknefkikgdvsdikttfkfpfiyr  
>tr|D8HF14|D8HF14\_STAAF  
mdyhdh1svmdfnelicen1ldvdygsfkeyye1nearyitftvyrthnsfvfd1licenfiiyhgekytikqtapkve  
gdkvfi evtayhimyefqn  
hsvesnk1dddsetdktpays1deylrygfanqktsvkmytki igdfkrkipidelgnknngleyckeavdlfgciipn  
dteicfyspetfyqrsekv  
iryqyntdtvsatvstlel rtaikvfgkkytaeekknypikttdinysngfikegtyrtetigskatinfnckygnetv  
rftikkgsqggiyklildg  
kqikqiscfaksvqsetidliknidkgkhvlemi flgedpknridrssnkakpcmyvgtekstvl nliadnsgrnqyka  
ivdyvadsakqfgyriant  
qtnedietqdk1lefakkqindtpkte1dvnyigyekieprdsvffvhelmgyntelkvvkl drshpfvnaidevsfsne  
ikdmvqi qqa1nrrviaqd  
nrynyqanrinhl yttst1nspfetmdigsvli  
>tr|D8HF16|D8HF16\_STAAF  
menlylikd1galagrdrakevqn1qrieqfalgl ttefk1hqkaktiqhfaeqiyyngrsaavnks1qsqinalvva  
prnnsaneivqarvnvge  
tfdt1keh1ddwetktqinkeetirelnkktqeildieyrfepdkqefl fvte1apltnavmqsfwfdnrtgivyntqar  
nngym1sr1rpnqgfidds  
livggghgthngyryidde1wiysfi lgnnnt1vrfkytpnveisygkygmqdvftghpekpyitpvinekenkilyr  
ierprsqwelensmyiei  
rs1ddvdknidkv1hki sipmltnetqpmqgvtfdekylywytgdsnpnnrnyltafd1etgeevyqvdadyyggt1dsf  
pgefaeaeglqiyydkdsg  
kka1mlgvtvggdgnrthri fmiqrgilei1hsrgvpfimsdtggrvklpmpdkltnl gmltepglylytdhtvqi  
ddfp1prewrdagwflvkv  
ppqtggdviqi1trnsyarnmmtferv1sgrtgdisdwnyvpknsgkwervpsfitkmsdinivgmsfylltddtkrftd  
fpterkgvagwnlyveasn  
tggfvhr1vrnsvtasaei1lknydsktssgpwt1hegriis  
>tr|D8HF17|D8HF17\_STAAF  
msn1eksvni1entahyenis1nditftrtgesdsv11fnitknnqpl11seenikariairgkgvmvva1eildp1fk  
gt1kfq1pndv1krdgsyq  
aqsvvae1gnsdvvvvertitfnveks1fskipsetk1hyivefqe1ektimdrakamdeaikngedyas1iekakekg1  
sdiq1aksss1delkq1an  
sh1tdlenkaqsyr1fdeqkrymdekhea1fkqsvnsgglvtsgstsnwqkakitkddgkimqitgfdfnpeqrvgdt  
qfiyvsqainyprgvstng  
tveylvvt1sdykrmtyrpntgnkvfvkrkegds1wsewse1aindyntpfetvqsaqskanmaesnaklyaddkfnkrysv  
ifegtangvgst1lynes1  
dqf111fygtfpggd1fegnpf1gggk1s1npsn1pdgdnggggyefgltkssrts1tisndvyfd1gsqrgsganan  
rgtinki1gvrr  
>tr|D8HF18|D8HF18\_STAAF  
mqi1vnkrnei1syaviggfeegidien1penfsqvfrpkafkysngeivfnedyseekddthqqidneenstgasddi1  
rkmvasmqkqvvtk1lm  
qvnkqna1makqiva1fnkk1eevkgetena  
>tr|D8HF20|D8HF20\_STAAF  
mfgftkrhegdwr1tr1eendktmfekfdrieds1raqeki ydk1drnfee1krdkeedekneknaknirdikmwilgl  
igt11stfvia1lktifgi  
>tr|D8HF21|D8HF21\_STAAF  
msk1drww1seykevvpma11ks1errhlcgicc  
>tr|D8HF23|D8HF23\_STAAF  
m1mtrnqaekwfdns1lgkqfnpdgwygfqcydyanmffmlatger1qglyaynipfdnkakiekygqi1knyds1lpqk1  
divvfpskygggaghveiv  
esan1ntfts1fgqnwngkwtngvaqpgwgpvetrvhvhydnpmfyr1nfpds1svkdkakgi1kqatakkeavikpk  
rim1vaghgyndpgavng  
tnerdf1rkyitpniaky1rhagheva1lygssqsqdmqdytgvnvgknkdyglywvksqgydiv1eih1daagesas  
gghvi1ssqfnadtidsi  
qdviknn1gqirgitprnd1lnvnsaeininyr1selgfitknkmdwiknydlyskliagaihgsigglvasekv  
pvkneknppvpayt1dsk  
gvpkykegnytvankgnnvr1dgystnsritgvlpnnttitydgaycingyrwityiansgqrryiatgevdkagnris  
sfkfsai  
>tr|D8HF24|D8HF24\_STAAF  
mh1kircdkfhw1nvqhf1sqvyivasfrtdf111fkdmhq1ftss11laqachwacfrfmieskv1atp1vv  
>tr|D8HF25|D8HF25\_STAAF  
mikvi1111mcv1syi1tnkhny1fvksimygvlfmi1lgas111stvl1vlis1ffn1ledsdyfw1gliq11sgim  
qit1vkit1rk1t1keeei  
1v1ehi1qwti1y1falyqs1ven1kleyin1kdfhs11npsn1nig1f1pal1iltw1it1fk1kidk  
>tr|D8HF26|D8HF26\_STAAF

Tsompanidou\_et\_al\_Supplemental\_FASTA\_File

m1rveategkgtq1kas  
>tr|D8HF27|D8HF27\_STAAF  
mteikdkvltkdafelpytiikaknqptkgaivyihggglmfkgandlspqyidiltehydliqlsyrllpevsldciie  
dvyasfdaiqsqysncpif  
tfgrrsgaylslliardrdidgvidfygysrintepfkttsnyyakiagsvnetmiaqltsptpvvdqiaqrflivyva  
rgtgkwinminiadytdsk  
ynispnelktlppvfvahcngdydvpveesehimnhvphstfervnknehdfdrpndeaitiyrkvvdflnaitmv  
>tr|D8HF28|D8HF28\_STAAF  
myrykpl1qsihlpngiki snrfvlspmtvnastkegyitkadlayaarrsnsagmqvtgaayiepygqlfeygfnidhd  
acipgltm mastmkqhgsl  
aiiqlahagrfsnqailnfrkvgygspmtlhspiehdviamshenkinsiiqqyhdatlraikagfdgveisiaqrlligt  
ffstfsnkrtdhysadslk  
nrarlclevm ravqevidekeapdnfilgfratpeetrsgdlgytidefnqlidwvmdvsniqylaiaswgrhiyqntsrt  
pgehfgrpvngiyvehlag  
r1pliasgginspesaldalqhadvmgsspfvtepdfvhklaehrphdinlefsmadledlaiphaafkdivkmmdyge  
g1kkhtrdalrql eqnyhd  
SSS  
>tr|D8HF29|D8HF29\_STAAF  
menifkikiklmngicrsenmnmkkknkseki  
>tr|D8HF30|D8HF30\_STAAF  
mvlsvldyalidegkdaqkelqdsvtlakladrlgfkriwftehnvpafacsspellmmhtlaqtnhivgsggvmlp  
hyrpykiaehfrmmaaly  
nrldlgignpgttmvkqaldginptydsydesislrdyltikdkpsahlgvqphidhfpemwllsssatsakiaael  
gig1svgtfl1pdinaiha  
akdnidiykkhfqastikmdakvmavfvivadneaevaalqhaldwllgklqfaefehfsvdtaqkyk1ndrdkevi  
qahqariiaqtqeqvkaql  
ddf1atfevdevlvaplipgieqrcktlk1laeyl  
>tr|D8HF32|D8HF32\_STAAF  
metlksnkarleylindmrrerndndvlmpssfedlwe1yrglanvrpalpsvdeylavqdamlsdlnrqhatdlkd1k  
pikgdni fvwggdittlki  
daivnaansrflgcmqanhdcidnihtkagvqvrldcaeiirqqgrnegvgkakitr gynlpakyyihtvgpqi rrlpv  
skmnqdl1akcylsclka  
dqhslnhvafccistgvfafpqdeaaeiairtvesylketnst1kvvfnvftdkdlqlykealnrdae  
>tr|D8HF33|D8HF33\_STAAF  
mqsskwnams11mddktkqaevl rtaideadaivigigagsasdgftvygerftenfpdfekyrffdm1qas1hpygs  
wqeywafesrfitlnyldq  
pvgqsylalks1vegkqyhiitnadnafdaeydmthvfhiqgeyilqqcsqhchaqtyrnddlirkmvvaqqdm1ipw  
emi prcpkcdapmevnrk  
aevgmvedae fhaqlqrynafleqhqqdkvlyleigigyttpqfvkhpqrmtrknenalymtmkkayripnsiqerti  
hltddistlitvalrndst  
tknnnigetevlnrtd  
>tr|D8HF34|D8HF34\_STAAF  
myliepirngeyitdgaialamqvyvqnifl dedilfpoycdpkveigrfqntaievnqdyidkhsi qvrrdtgggav  
yvdkgavnmccl eqdtsi  
ygdqrfyqpai kalhalgatdviqsgrndltlngkkvsgaamt1mnriyggys111dvnyeamdvlkpnrkkiaskg  
iksvrarvghlrealdeky  
rditieefkn1mvtqilgiddikeakryelsdedwesieelaskkyknwdwnyngkspsyeynrserlssgtvditisveq  
nriadcridfgdffggd1k  
dveqalqgtkmtredlthqlkqldivyyfgnvtveslvemils  
>tr|D8HF35|D8HF35\_STAAF  
mqailnfivdilsqpaivaliafiglivqkkaatitsgtikt1glflilsagadvvvrsl epfgkifqhafgvqg1vp  
nneavslal kdfgttaa1  
imvcgmivniliarftnlkyifltghhtfymaaf1ailtvshikgwltivigalvlglimavlpallqptmrkitgndq  
valghfgsisyfaagavqg  
lfgkksksteekfpglslflrestisisitmal1lyfiac1fagvsyvhesisdgnfivfsl1iqgvtfaagvf1iltgv  
r11laeivpafkgiseklv  
pnskpaldcpivfpyaqa navligffvsfitgvigmfilflfggvvilpgvvahfflgataavfgnarggikgavagaaln  
gil1itflp11flpflgelg  
gaattfsdtdflavgivfgnavkymglfgailfiiivgataillkgrqkppq  
>tr|D8HF36|D8HF36\_STAAF  
mki1vvcghglgssfmvemnaqearqlnapdsievehdsimtaspemadlficgrdlaenaerlgdvlvldnildkael  
qqklaek1qqlnmi  
>tr|D8HF38|D8HF38\_STAAF  
m1syrqieilyl1iheqtfipintianqlgvsprt1qydiaieyqaetyhyqvsrnkaagikvttanttilnelehnlt  
nqihfskderlthialklf  
ettdpvstkqlagdvnsrrtiaddikmiqaqldqyh1kl1nyvhnkgnfiigeedhyrkayahfihqymkqaapfi eadi  
fnsesialvrraiiktlns  
enyqlvqsaidg1iyhiliaiqr1nenfsfdipineidkwrhtnqyaiasklienlerscnvtfpeseiifit1hl1lsgk

Tsompanidou\_et\_al\_Supplemental\_FASTA\_File

mtehtassitfeyhdlsqn  
iheliticvsqelgidmskdnkhltslithikpaihrikydm1qpnplrqevmrrypqiieavskhispieqdaairfnd  
eltyitihfassiervath  
kqsmikvvl1cgsgigtsqllksklnhlypefhiwdaysiyqleesrllqdnidyvistvpceisavpvihvdpfinqqs  
rqklnqiindsregrvmkm  
atdgksladllpehriinkqplsiesaitvavqplindgivnsnytaailkqleqfgsymvisphialihagtdyvqng  
vgftltyftegiifgskan  
dpvhlvitlatdhpnahlkalgqlsec1sndlyrqdfldgni fkikqhialtmtkea  
>tr|D8HF40|D8HF40\_STAAF  
mkdeqlyyfekspvfkammhfs1pmmigtllsviyglniyfigfledshmisaisltlpvfailmglnlfgvgagtyi  
srllgakdyskskfvsfs  
iygga1glivilvalpfsdqiaailgargetlaltsnylkvmflsapvilffileqfaraigapmismigmlasvgn  
iildpilifgfdlnvvgaa  
lgtaisnvaalffivyfkmnsdvsvniklakpnkemlseifkigipafmsilmgftglvlnlflahygnfviasygi  
sfrlvqfpeliimglcegv  
vpliaynfmsnkgmkdvikavimsigvifvvcmiavftighmvg1fttdqaivematfilkvtmtsllngigflftg  
mlgatgggrgatimailqg  
vviipvlfimnalfgltgviwslliaeslcalaamlivyllrdrltvdtselieg  
>tr|D8HF41|D8HF41\_STAAF  
myksk1lkyifseesevkd1teekynqdyealtfsfkeetyqsrlakktptkagyfvtcwtkdenncnqpskeafady  
lmiivideelsgyflfpre  
lliekgilttfehkgkmafrvypkwcnglnkraeqtkwqckyflntn  
>tr|D8HF42|D8HF42\_STAAF  
mnflkpakhikplpenqidtykr1rlqvflgifiygygyllrknfslampalqeqgftkaelgfalsavsiaygfskf  
fmgtsdrsnar1flvlg1  
vltainllmgfvpfftsigimfvllflngwfqmgwppsgrvlvhwfsvsergsktalwnvahnvgggimapiaawgi  
tttafinfyg1kgfegvfi  
ypallalijaaisvliirdtpqsqglppieiykndfatsdkktletelttkeilfkyvlnnkwwaiafanifvyfvryg  
vldwapvy1seekhfdlka  
sgwayflyewagipgtllcgyisdkl fkgrrgpagfffm1gvtvfvliywlnppgnawldnvs1iaigfliygpm1ig1  
qaldyvpkkaagtaagltg  
lfgylfgavmanivlgavvdkfgwdvgf1lltaisvfam1sfiltnkvgqetvvh  
>tr|D8HF43|D8HF43\_STAAF  
mnivghhhi smytkdakrnkdfytnvlg1rlveksvndnpsmyh1fygdevgtagtilsf1feipnaghkqpgtetiyrf  
sllvpnqaalhyfekr1en  
ngiksehlyylggqevvfkdeddlei1llvndsfevphqwqhnaeyseipqayqilgigpvelrvrnaartveflenvlgy  
rkrdnksfdv1tlapqgl  
sdfvvieqggqrpgryihhiavntpqmsd1dviykk1qqqpqsngiidryffkslyyrhnsimyefateapgftid  
tpeqlgsq1n1pdf1eae  
reqiesklhei  
>tr|D8HF44|D8HF44\_STAAF  
maklemkn1plef1gylsgdh1lnp1fkgekvseyqrineieaskladeagidvfavgeshqehfttqahtvvlgaiaq  
atkhikvssst1isatp  
rvv1fedfat1dl1shgraeivagrasrtg1fd1fgyd1kdydel1feeklg1lle1nkteritwsgkyrpe1lnmki1fprp  
idnt1piw1ravggppasai  
kagkqgvpm1itt1ggpam1fkdsidayrqaateagfdaspks1pvstas1fytaettqdamrefyph1ntgms1firvgv  
ypkqgfanspdyrealmv  
spqqi1iek1lyqhel1yghqr1fmaql1dfggvpfenvmkniel1gndi1paikk1l1sk  
>tr|D8HF45|D8HF45\_STAAF  
mniv1l1sgstvg1sktriamdd1kne1levineghqielmd1rd1ele1fsvgkny1dttgdvyk1tts1mqadv1figfpif  
qasipgal1knvfd1lpvna  
frdkvig1vatagsskhy1lipemh1kpi1symkahtmqtyv1feekdfsnqqivnddvvfr1kalaqstmr1takvqqqv1  
eeennqydf  
>tr|D8HF47|D8HF47\_STAAF  
mfgmkvnel1r1k1leahdteal1fn1vnrsrds1rew1pwvdateqpsdthafikrg1llqfadng1fcgiwyegt1vgv  
ig1lheinhmhrkts1gyy1  
dkqyegh1imtqaveal1kycfeeid1nr1eisaavn1eksqaiper1gftregm1rdne1l1ngiysssyi1s1lkseyne  
eg  
>tr|D8HF48|D8HF48\_STAAF  
mkk1t1l1l1ast1l1iaacgn1dsk1kddsktsk1kddgvkai1enndma1qakal1ypkvrmy1ersepvaeafgd1dpk1dar1  
adm1keek1ke1kewsgy1hie  
kal1yedk1k1ddmt1k1kdaq1ll1kdake1hakadt1di1tpk1m1lqgsvd1l1nevatski1tgeee1yshtd1lydfkanvegaq  
kiyd1fkpi1lekdkk1l1sd  
di1qm1fdkvnq1l1dkykdnnggyes1fekvsk1drkafadavna1gepl1skmavite  
>tr|D8HF49|D8HF49\_STAAF  
mtneyeqvndstqfsr1rtf1l1km1lig1gagva1igasvg1smws1fksmfntpedpekdayefygvqpgi1ttptqktcnfval  
d1kskdrdaikam1fkwt1  
madrmm1gdgtvgkts1nnp1mppvdtgesig1lgask1t1tfgi1sks1mkk1g1sskipda1fdk1lphfpndq1liddysdgi

Tsompanidou\_et\_al\_Supplemental\_FASTA\_File

miqacsndsqsvsfhavhn1  
vrpfrdivkvrwaqsgfisakgketprnlmafkdgtinprksnqlkdyvfiddgwakhgtycvvrriqihietwdrtale  
eqeatfgrkrhsgapltgg  
kefdeidlakdshgeyi1dkdahtrlakeantsilrrafnyvdgtdrdtgnfetgllfiafqkatqqfigiqnnlgsnd  
klneyithrgsasfivlpg  
vskggylgetlfd  
>tr|D8HF50|D8HF50\_STAAF  
mvhfse|lqr|vkillsfgitvivyvssfwmtpfityitrahvslhafsftemiqiyvmiiffiafcfisvpmfyqlw  
afiapglhnerqfiykys  
ffsvllfcagvafafyvgfpmi iqfalkls|t|lnispvigfkaylielirwlftfgilfq|pilfmg|lakfglidtyslk  
hyrkyiyfacfvlasiiap  
pditlnillt|pl|llfefs|mfivkftcrgepptq  
>tr|D8HF52|D8HF52\_STAAF  
maftlseiqqahqyvtgvd|f|pk|fkefkdmgmtynivniqdgatvvhqseddivtssvksnhpvapssnqsivqdv|tr  
hqgqtdfetfcdemaeg  
iykwhidiqagtctyidlkeqaiiselipq  
>tr|D8HF53|D8HF53\_STAAF  
mnrnlkelrardgl|nqt|laklagvsrqtisliernnfmpsvltaikiarifnetvetifiieeda  
>tr|D8HF54|D8HF54\_STAAF  
mkilryigyl|l|gg|lv|ggi|ggi|gnfd|gl|gien|t|fat|ynn|vv|vis|vati|iii|l|ve|iv|l|mn|q|k|r|a|l|k|y|k|r|l|v|d|e|e|v|d|  
idatdqyellanryv|l|ngs  
ilsilqtviaf|v|l|li|fv|v|gh|e|a|d|i|l|ff|l|p|ff|s|a|i|f|n|t|q|f|l|f|n|r|r|f|d|d|r|p|k|i|a|d|k|n|y|t|e|k|r|e|i|l|d|e|g|e|r|h|i|e|l|  
ialfktyvin|s|il|il|ai|  
figsysiatginqs|f|s|l|l|l|ia|fi|y|n|a|f|s|y|l|l|k|r|r|r|f|y|  
>tr|D8HF55|D8HF55\_STAAF  
mttlnvdrvnkqykdfklqdas|t|iat|net|v|g|l|ig|k|ng|s|g|k|s|t|l|n|i|l|v|g|n|r|h|k|d|ng|s|i|t|f|f|g|e|h|a|a|g|d|v|e|y|k|e|h|i|  
gvvfd|l|rv|p|n|k|l|t|k|i|d|  
kvfqs|y|t|t|w|n|s|q|k|f|f|d|i|k|y|f|e|l|p|l|q|t|k|k|t|f|s|r|g|m|r|m|k|i|a|l|t|i|a|l|s|h|d|v|k|l|l|i|l|d|e|a|t|a|g|m|d|v|s|g|r|e|e|v|m|l|l|e|d|f|v|a|  
qggg|l|l|s|h|s|i|e|d|i|e|q|l|a|  
dk|l|v|f|m|k|d|g|r|m|i|l|t|e|q|k|i|l|l|a|q|y|i|v|t|t|e|d|k|d|v|i|p|h|i|a|r|l|s|k|g|k|y|q|i|l|v|k|d|y|a|e|i|e|n|a|e|p|l|h|i|d|d|a|t|k|i|m|r|g|  
ev  
>tr|D8HF57|D8HF57\_STAAF  
mvnaltpkh|l|a|e|k|r|a|g|f|h|e|l|f|f|d|i|f|v|y|i|a|i|q|i|a|h|v|i|l|t|t|q|n|s|i|s|a|d|l|f|f|k|y|i|v|m|s|l|f|l|w|m|w|s|h|q|t|f|f|t|r|f|g|q|v|t|f|k|  
dvsfmmf|m|f|m|v|f|l|s|n|l|  
ypdfektffpff|l|c|v|i|m|y|l|s|i|g|l|q|y|l|h|i|r|t|g|l|d|y|g|d|k|r|t|c|q|a|f|a|t|v|a|f|v|i|s|f|s|f|s|l|v|l|p|q|s|i|h|y|i|p|g|f|l|g|v|f|i|a|a|t|  
glipfqkyl|v|l|s|p|v|n|m|h|l|  
verfsl|t|i|i|f|g|e|v|l|g|l|a|s|s|f|s|i|h|f|s|i|y|i|f|q|m|i|l|i|s|l|f|g|v|y|i|i|t|e|n|i|h|k|l|s|i|g|f|r|l|s|y|h|l|i|i|n|i|a|l|g|v|i|  
naaivfsn|n|k|l|n|d|l|f|e|i|n|  
mmyisv|l|i|f|y|i|g|l|w|i|t|p|y|h|n|e|l|t|n|a|k|i|s|s|l|g|i|l|v|s|y|i|i|s|i|f|k|g|h|d|q|m|i|i|s|v|s|v|a|t|f|i|m|i|y|f|k|n|q|r|l|q|s|d|e|  
>tr|D8HF58|D8HF58\_STAAF  
mtrvvl|a|a|y|r|t|p|i|g|v|f|g|g|a|f|k|d|v|p|a|y|d|l|g|a|t|i|e|h|i|i|k|e|t|g|l|n|p|s|i|e|i|v|i|g|n|v|l|q|a|g|q|q|n|p|a|r|i|a|a|m|k|g|g|l|p|e|t|v|p|  
aftvnkv|c|g|s|g|l|k|s|i|q|l|a|y|  
qsi|v|t|g|e|i|d|i|v|l|a|g|g|m|e|n|s|q|s|m|l|v|n|n|r|f|g|f|m|g|h|q|s|m|v|d|s|m|v|y|d|l|t|d|v|f|n|q|y|h|m|g|i|t|a|e|n|l|v|e|q|y|i|s|r|e|e|q|d|t|f|a|  
vnsqk|a|v|r|a|q|q|n|g|e|f|d|s|e|  
ivpvs|p|q|r|k|g|e|i|v|v|t|k|d|e|g|v|r|e|n|v|s|v|e|k|l|r|s|r|l|s|a|f|k|k|d|g|t|v|t|a|g|n|s|i|n|d|g|a|m|m|l|v|m|s|e|d|k|a|k|e|l|n|i|e|p|l|a|v|l|d|g|  
fgshgvdps|i|m|g|i|a|p|v|g|a|v|  
ekal|k|r|s|k|k|e|l|s|i|d|i|v|f|e|l|n|e|a|f|a|a|q|s|l|a|v|d|r|e|l|k|l|p|p|e|k|v|n|a|k|g|g|i|a|l|g|h|i|g|p|i|g|a|s|g|a|r|v|l|t|l|h|q|l|n|d|e|v|e|t|g|l|t|s|l|  
c|g|g|g|q|i|a|a|a|v|v|s|k|y|k|  
>tr|D8HF59|D8HF59\_STAAF  
mtqyp|l|w|q|l|n|t|l|k|q|a|t|w|v|d|l|t|h|t|f|d|p|i|p|r|f|s|e|f|e|k|g|e|v|s|t|l|f|t|v|k|d|h|g|f|y|v|q|r|w|i|v|t|q|y|g|h|i|d|i|p|i|h|f|v|e|n|k|r|y|l|e|  
d|i|d|k|e|l|v|l|p|l|i|v|l|d|f|s|t|e|  
vannnd|f|i|v|t|r|i|h|i|e|a|w|e|k|h|g|t|i|e|p|g|t|f|v|a|l|r|t|d|w|s|r|w|p|i|e|t|f|e|n|k|d|s|n|g|q|q|h|a|p|g|w|l|d|a|l|k|y|i|e|r|r|v|e|a|v|g|h|e|  
t|f|d|t|d|a|s|v|d|v|v|k|n|g|d|l|v|g|e|  
ryil|g|q|d|k|y|q|v|e|l|t|n|l|d|q|l|p|t|r|g|i|i|y|i|a|i|s|p|k|p|k|d|a|p|g|f|p|v|r|a|f|i|k|p|s|n|d|  
>tr|D8HF60|D8HF60\_STAAF  
mttiktsn|l|g|f|r|l|g|r|k|r|e|w|k|k|i|a|i|e|s|y|w|a|k|i|s|k|e|l|d|q|t|l|t|d|h|k|e|n|l|l|l|q|k|y|h|l|d|i|p|v|g|d|f|s|l|y|d|h|i|l|d|t|s|l|l|f|i|  
i|p|e|r|f|q|g|r|t|i|d|d|l|l|f|d|i|a|  
rgnkdh|v|a|s|i|k|w|f|n|t|n|y|h|i|v|p|e|w|d|n|v|e|p|k|v|r|n|v|l|l|r|f|k|y|a|q|s|l|n|v|n|a|h|p|i|v|g|p|i|t|f|v|k|l|s|k|g|h|q|t|f|e|e|k|v|k|t|l|  
l|p|y|k|e|v|f|e|s|i|d|i|g|i|a|y|i|  
qvdepi|l|v|t|d|d|s|e|y|i|t|r|e|a|y|d|i|f|e|k|a|g|v|a|k|l|v|i|q|t|y|f|e|r|h|k|f|l|s|l|p|v|g|g|l|g|l|d|f|v|h|d|n|g|y|n|l|k|i|e|a|g|d|f|d|k|s|  
k|t|l|y|i|g|i|d|g|r|n|w|a|s|i|e|  
skkvl|l|d|k|l|l|a|h|t|n|e|l|v|i|q|p|s|s|l|h|v|p|v|l|d|d|e|t|l|d|t|s|v|g|e|l|s|f|a|t|e|k|l|d|e|l|d|i|l|r|l|f|n|q|n|d|s|v|k|y|d|k|l|k|a|y|r|f|q|  
n|q|s|f|k|n|l|d|y|d|f|e|s|v|r|t|s|r|g|  
spfa|q|r|i|d|q|q|k|r|l|n|l|p|d|l|p|t|t|i|g|s|f|p|q|s|r|e|v|r|k|y|r|a|d|w|k|n|k|r|i|t|d|e|a|y|e|t|f|l|k|n|i|a|r|w|i|k|i|q|e|i|g|l|d|v|l|h|g|e|f|e|r|  
ndm|v|e|f|f|g|e|k|l|q|g|f|l|v|t|k|f|  
gww|q|s|y|g|r|a|v|k|p|i|i|y|g|d|v|k|w|t|a|p|l|t|v|d|e|t|v|y|a|q|s|l|t|d|k|p|v|k|m|l|t|g|p|v|i|l|n|w|s|f|e|r|v|d|l|p|r|k|v|v|q|d|q|i|a|i|n|e|e|v|l|  
a|l|e|a|a|g|i|k|v|i|q|v|d|e|p|a|l|r|e|  
g|l|p|r|s|e|y|h|e|q|l|k|d|a|v|l|s|f|k|l|a|t|s|s|r|d|e|t|q|i|h|t|h|m|c|y|s|q|f|g|i|h|i|h|i|d|l|d|a|d|v|i|s|i|e|t|r|s|h|g|d|i|k|d|f|e|i|n|y|d|l|g|

Tsompanidou\_et\_al\_Supplemental\_FASTA\_File

iglgvydihspriptkee  
ttainrslqqidrslfwnpdcglktrkeeevkdaltvlnavkkrqe  
>tr|D8HF61|D8HF61\_STAAF  
msqfltlqkdnvlvadgaigtilysegltdcpeaynlshpdkverihrsyieagadvigtntyganfeklkrfgledkvk  
aihqaavriakkaatkdy  
ilgtvvggrgikqedislqtilyhteiqidtlieegvdallfetyydlleltnvisrtrkkydipiaqltasntnyln  
ggaineglkqlvqcganiv  
glnchhgphhmgesfthielpehaylscypnasllidensefkysdnaqyfgvaqnliregirliggccgttpehikfi  
kesigtlkpvndkkvipip  
tkalfnpsqnkvrqsltskvqerptviieltdtpkhltdtrffeniakldkanvdavtladnslatvrisniaaaslikqy  
ynieplvhitcrdrnligl  
qshllglsligvneilaigtgpskvghlpgatnvydvnskgltelalrfnqgintgdalckrthfniagafnpvrkld  
gavkrlekkiesgmsyfit  
qpvskekiieiyyhatkhlnkpffigimpiasyknaflhnevpgikmsdeilqqfeavkddkaktrelslklskldit  
vheyfnglyiitpfnved  
slelaaysksitahkevil  
>tr|D8HF62|D8HF62\_STAAF  
mtlsketevidwrrrgveyhsanpplydsstfhqtslggdvkydyarsgnpnrelleeklarleqqkfafafasgiaais  
avlltfksgdhvilpddvy  
ggtfrlreqilnrfnieftvttdtkleqiegaiqsntkliyietsnpcfkitdikavskiaekhellvavdntfmpplg  
qsp11lgadivihsatkfl  
sghsdlagavintneaiealyliqngtgnmlsaqdswtlakhltkfpirfkqsvenaqkivsflikqdeisevyypgl  
taahleqaknggavigfrl  
adeskaqqfvdaltlplvsvs1ggvetilshpatmshaalpekvrqergitfglfrlsvgledpdeliadikyalkeafn  
esiphtier  
>tr|D8HF63|D8HF63\_STAAF  
mkdtqlaqitltddstgaianpihlstaykhpklgqstgfdytrtknptrstfetcfaklehgasfatssgmsaiqlc  
nlfkphdeilvsfdlygg  
frlfefyeeqqydikfkyvdfdyeqvekeitdktvalfiepisnpqmiadvkpyyqlckakgl1siidntfltpylstp  
laegadivlshatkyiggh  
ndvlagvvtvkdeslaqqlfdfnmtgat1spidsylllrglktlhlrieraqsnarklakkqslqaidevlysgqtgm  
1s1rlnkaysvakllend  
icifaeslggtetlvtfpytqthvdmpdaekdkrgideylirlslgvenyedierdiiaaldkaqigeiv  
>tr|D8HF64|D8HF64\_STAAF  
mselksedqritktkdeqikqidisdikpnpyqprktfdenh1ndladsikqygilqpivlrktvqgyyivvgerrfra  
skiaglkvysaiikldte  
dmme1avienlqredlnaieeasyr1mtdlkitqqevakrlsksrpyianmlr11hlpkkiadmvdgrltsahgrtl  
laikdeqqmlrlakrvvke  
kwsvrylenhvnelknvssksetdkvdi tkpkfikqqrqlreaygakvdisikksvgkisfefesqddfvr1ieqlnrk  
ygk  
>tr|D8HF65|D8HF65\_STAAF  
mdqymsiisslfepltkietyesvatklamiiyiivalivikildkmiaaggfkiqnkskkgknkrsktlislvqnvvy  
iwwfivittliskfgisve  
gviasagvvg1avfgaqtivkdvitgffiiifesqfdvgdyvkinnggttvaegtvsiglrstrintisgeltl1pnss  
mgeitnysitngtaivkip  
vsudenidnekklnklfts1rskyy1fvsdpvvigidafedtrvilrsvaetipgegfs加里irkevqkmflqegikt  
ppimtpfnhsengv  
>tr|D8HF69|D8HF69\_STAAF  
myivrpnieedakkalverfngilategaevleakdwgkr1layeindfkdgfyivrvksdnkatdefqrlakisddi  
i1rymviredek  
>tr|D8HF72|D8HF72\_STAAF  
mnrktpktt1dglmrhirdnkgiqingstekiq1rnigyfghgkynfflnkeee1nfekfse1halysfdteiks1fykh  
vmfcetaiknr1leivcvn  
sgfd1ds1fqks1t1yyksypgsskykkl1kntr1rrdiydmihehcnspyiyhyihqdrtvplyavfel1t1gnlvf  
ftrcmsqn1nieaqk1k1  
yspafdqsdi1gdi1idcmkg1rnaiahngvlydcrfktgetsnr1keylavkmdihndfdriidyl1l1l1ilicsg1sy  
sktelqriikqfeqn1df1  
rskisestydk1igvrarpk1rs1knf1inn1dfylkt1d  
>tr|D8HF73|D8HF73\_STAAF  
mvkamvqfqi1angmrige1laikrenihedkt1didgtinwitek  
>tr|D8HF74|D8HF74\_STAAF  
mfkkydsknsivlks1sl1gi1ygg1tfgi1ypkadastq1nsssvqdkqf1kveevpn1sekalvkk1ydrys1qnting1ksn  
ksrnwvyserp1nenqvri  
h1egtytvadr1lytpkrnit1nkevvt1kel1dhi1rfahis1ygl1ymgeh1pkgnivintknggkyt1eshkelqkdrenv  
knntddiknvtfelvksvn  
dieqv  
>tr|D8HF75|D8HF75\_STAAF  
mkt1lktity1altiigayaa1filktidshg1tdqfn1lvkeddsyvktte1vstrmddq1r1sysqsafnkegketq1my

Tsompanidou\_et\_al\_Supplemental\_FASTA\_File

tatfdvkphrylki thkgh  
hvetfeevekeevpkkalaklrr  
>tr|D8HF78|D8HF78\_STAAF  
mfgfigmlivggligwaagaimgkdi pggilgn iagi gswl ggtllghwgpelgsiyilpaligsi ilialvtlilra  
vrkk  
>tr|D8HF79|D8HF79\_STAAF  
mtiylvrhgesksnydnkhfrsyfcgql dvp l tetgtksaddl cdyfkekqikhvyvsdl lrtqqtfehi fpydiasttt  
pllrerslgvfegeykdei  
sanpkyekyfn dpkfkdf rhsfsqkapkgesyedvyqrvehfmnhvnedtqkddivivahqvvirclmvyfnnvsreea  
vdlkvenckpyiie  
>tr|D8HF80|D8HF80\_STAAF  
mkvritfiilailstivclflaamhptgpntvtfeqpylftlniimvlvalpslvldiydymfrissailqflgaisw  
fflslilsltqftptflas  
fitsiilfvsa itlaigdksvdkndsh  
>tr|D8HF82|D8HF82\_STAAF  
minliytarcaimkvctscqinmkndiekeyvneiimllrtiptsklvqipmlfidnailnnvssdalliekatha  
rnhlrlwslgghrdiph  
>tr|D8HF83|D8HF83\_STAAF  
mlnadlkqqlkqlllelmegnvefvaslgsddkskelkellteisdm sprlslsekslkrtpsfsvnrpgeetgvtfagip  
lghefnslvlailqvsgra  
pkeksii dqiknlegs fhfetfisl t c q k c p d v v q a l n l m s v i n p n i t h s m i d g a v f r e e s e n i m a v p a v f l n g e e f g n  
grmtiqdilsklgstadas  
efenkepydvli vggg pasgsaaiytarkglrtgivadriggqvndtagienfitvkettgsefssnlaahidqydidam  
tgi ratdi ektdeai kvtl  
engail esktvi iatgagwrkl n i p g e e q l i n k g v a f c p h c d g p l f e n k d v a v i g g g n s g v e a a i d l a g i v n h v t l f e f a  
selkadnvlqdr l r s l s n v  
diktnakttevvgedhvtgiryedmstgeehllnldg i f v q i g l l p n t s w l k d a v e l n e r g e i v i d r n n n t n v p g i f a a g  
dvt dqknkqj i i s m g a g a n  
aalnafdyiirn  
>tr|D8HF85|D8HF85\_STAAF  
msdhvynlvkhhsvrkfnkplsedvvkklveagqsastssflqaysiigiddekikenlrevsgqpyvvengylfvfv  
idyrrhhlvdqhaetmen  
aygstegllvgaidaalvaeniavtaedmg y g i v f l g s l r n d v e r v r e i l d l p d y v f p v f g m a v g e p a d d e n g a a k p r l p  
fdhvfhnkyhadketqya  
qmadydqtiseyydqrtngrketwsqqiemflgnkarldmleqlqksgliqr  
>tr|D8HF86|D8HF86\_STAAF  
mnafltliniivliviivilhmtarkhisfakrvftal g i g i v g v l l h l a y g t h s n v i t s t s d w f n i v g q g y v a l l q m i  
vmp lifisivaaf tkiqig  
ekfakigslififligvtiaaivgvvya l v f g l d a s t i n l g n a e q a r g s e i a k q a k d l t a h t l p q q i l e l l p k n p f l d f  
tgqratstia v i f a s f i g  
faylrvar k p d h g e l l k r a i d a i y s l v m a i v t f v l r l t p y g v l a i m a n t l s t s d f g a i w t l g k f l i a s y a a l i t m y i i h  
liisllgispiryikktl  
evlifaftrs sagalplnvqtqtrrlgvpegianfaatfglsigqngcagiypamlaimvapvanveidlqfivtliav  
viissfgvagvggatfas  
ilvlstlnlpvalagvlisveplidmgrtalnvndsm lagtgtakl tkhwkd t f e s n d n a a l t s h  
>tr|D8HF87|D8HF87\_STAAF  
mltkefaqrvelsekqvrkivqhleergyqlskteyrgreatdfkeediel f k d i a d k v k q t n s y d l a f d e l e k e k d f l q  
vivkndknlpnqnvaql  
vedlrleiqkmreerhllqmmnqv h q q q e l k e l q n q l t t k i d s n s e l k a i q t s q e a i q e a q a s q a k v l a e s t n k v e s  
yavtedkadskskvagvn  
tsidakttdkaenagdgatkvdkedqisateaiekasveqskndkaaetsnkeatvdaeaqhdaeqqvaeahaeaskqa  
tsndsleakaendskasqa  
emaepkpqeekkgffar l f n l  
>tr|D8HF88|D8HF88\_STAAF  
mefkti qsvkdphynealklydtklnslstedkriikrslennktendyv f i v g l e n d v v s l a t a h y e a t t n s a f l i y l  
fakdlpnhdeltmtqlhqi  
ehelnllsnlvhsrsin flmmevpkepadl tqnngliiehr r q f l y e h q f e r q t e i d y i h p t n d g h t k k v d l f l k k n i k l  
tkdiygtsvksnyilkyvf  
angiarei y a l l e e m d l r k p f  
>tr|D8HF89|D8HF89\_STAAF  
madi tvvndtgelynvinqkkselyeseltiiskslhlnldhdeislists g t f s d r m t k l l t g e d g e h a v l s r y n l  
tpdelekyqlilddnm lv  
vgvrdrsshqevlennsayeedithfaeaskgpka  
>tr|D8HF90|D8HF90\_STAAF  
mellgqvkedgvvidekilkvdgflnhpidaklmnevgrtfyeqfkdkgitkiltieasgiapaimaalhfdvpc l fak  
kakupstldgyyetsihsf  
tknktstvi s k e f l s e e d t v l i i d d f l a n g d a s l g l y d i a q q a n a k t a g i g i v v e k s f q n g h q r l e a g l t v s s l c k v a  
slegnkvtlvgee

Tsompanidou\_et\_al\_Supplemental\_FASTA\_File

>tr|D8HF95|D8HF95\_STAAF  
maelpthygtiiktlrkymkltsqklsertgfsqntishengnrrnigvneieiygkglgipsyilhrisdefkekgysp  
tlnfakfdkmysvynkay  
yndgdiyysydlydetikllellkeskinvndidydyvlklykqilstdteksiinyetlantrkssdkkrevtieeig  
efhekykllftnlethnd  
rkka1aeiek1keesiylgek1rlvpnhhydaikgkpmklylyeypdrlehqkkiilekdt  
>tr|D8HF98|D8HF98\_STAAF  
mklnllyitltslltillaisnmyvafstyalitlgfnltgglene  
>tr|D8HF99|D8HF99\_STAAF  
meyihncvdgkkekwienvnreehlqaiiewalqqiennfdfyndteveel  
>tr|D8HFA0|D8HFA0\_STAAF  
mnweiknlmcdiklikeklnlndlnetygwwientyisrdittikeyerycraytehri1neqvlelfgiylnrfdelitr  
dalekassfadqsqdna  
>tr|D8HFA1|D8HFA1\_STAAF  
maikkdsiigvkeleipqelklvpnwvlwraewnekqqnygkvpysingyrasttnkktwcdfesvsieyevdeqysgi  
gfvlsdgnnfvcldidnai  
dkkgqinse1alkmmltycekspsgtglhcfkkgk1pdrkkkrtdldielydsarfmtvtgctigqsdicdnqevlnt  
lidayfkenlpvndvree  
sntnmqlsdediininmkskqkdkikdl1qgtyesyfesseavqsllhylaftygknkqmeriflnynnltdkweskr  
gnttwggleldkaiknqkt  
iytksidefnvipgskdvkqllnqlgheertkmeenwieegkrgrkpttispihcayilnehltfilfddeentklamy  
qfdegiytqnttiikrvis  
ylepkhnskadeviyhltnmvdikektnspylipvkngvfnrktkqlesftpdyifttkistkynpnvvrpn1ngwdf  
hwlyeiacadkeivtlwe  
vindsmngnytrkkaiffvgdgnngkgtfqelisnlvgynvaslkvnefdhefklsvlegkavvigddvpvginiedss  
nfsvvtgdsvlvkvkq  
pyrtefrctviqstngmpkftdktggnrrllivpfnadfnnsenvdikeky1kdnhvleyvlykainlefrftipqv  
skmleiykqndsvydfk  
ieefdqwniqkvpkvvvyryrafceengymgmsdrtyrrefekylgkewntdakcryssideleeivgyinrt1mpfg  
qqhrsnykenlki  
>tr|D8HFA4|D8HFA4\_STAAF  
mkltqthaeilkfiivggintlnyyvvyllllkllhieymishitgfvafvisyylncyfvykvkptwrkfisfpitqi  
vnvs1qtvlllyfvswlnl  
paeiapfagliitipitfilskwilkdsn  
>tr|D8HFA5|D8HFA5\_STAAF  
mq1qkiviapdsfkesmtaqqvgnikqaftnyvgnlthydiipmadggegtdal1mhatgatkytvivndplmrpieac  
yaradeqqiaiemaaasg  
ldllekeernplytssygtgelikdalnhgaktiilgiggsatndggtgmlsalgvkftdvngd11qmnganlahiaqid  
itn1dsrlkevtfkvacdv  
snpllgengvtyiygpqkgadakmipldfamshyhdki1mctgksvnqipgsgaaggmgaa1lafcettl1tkgidvvd  
itdfhqrikdadlvitgeg  
rmdyqti1fgktpvgvalaakqyhipviaicgslgenyqhvydfgidsaysi1sspstledvlqnseqn11ntatdiaril  
klq  
>tr|D8HFA6|D8HFA6\_STAAF  
mkrtdkyrdsyqydnqnhrrqsedasyrqqyakgdpeehperryngdrrequeleeneksrrskkwlyiiiailli  
ivai1vtrallnndsdkvs  
ndpkvsqnykkqvenqdgqinqqvndakeniknqktddiiknlqnqidnlkqqeqnkadskltqfyqdqinklteanna  
1knasqgkiesm1ndint  
kfsdskles1fkddngggn  
>tr|D8HFA7|D8HFA7\_STAAF  
mqssktkthfs1llitlgvmtafgpltidmyvpslpkvqgdfgsttseiqlt1sftmiglalqgfifgplsdafgrkr  
iavs1liifilvsglsmfv  
dq1plfl1trfiqgl1gggviviakasagdkftgnalakflasl1mvngiitilaplaggla1svatwrsiftitival  
i1ligvasq1pktskdelk  
qvnfssvikdfgs1lkkpafiipm1lqgl1tyvm1fsyssaspfitqklynmtppqfsimfavngvliivsqvval1vek  
1hrh1ll1i1lti1qvvgva  
li1lt1tfh1plw1l1afflnvcvptsigplgftmameertgsgnass1lgl1fqfilggavaplvg1kgefntspymi  
i1fitail1vs1qi1y1fkm  
ikkqhva  
>tr|D8HFA8|D8HFA8\_STAAF  
meyqlqqlas1tlvgiketyengraqqhiagfwqrcyqegviad1qlknngdlagilglcipeldgkmsymiavtgdns  
adi1kydvitlasskymvf  
eaqgsvpkavqqkmeevhhyihqyqadtvsapffelyqgdttsekyiteiwmpvkg  
>tr|D8HFA9|D8HFA9\_STAAF  
mnrki1pvkpi1sq1fpi1pmvmgcegvsaamm1qynnqhipateitrhwpthpnnphkgyvghh1fik1gnyhqtifpeay  
vpflqkynpni1vdgtgks1  
ed1kgi1dqgqy1iyhtn1gskp11rvfrfdnkpakqvsni1hvt11igyddy1y1y1idplwshirrg1vl1paiipnrkq  
i1kirkekmeyfnspgrk



Tsompanidou\_et\_al\_Supplemental\_FASTA\_File

ciyvqphsytiengqqnkht  
>tr|D8HFB0|D8HFB0\_STAAF  
mkiqgtiadlhfdhrhkktskdyleaiveivkykndilliagdisnhyqlthqfitqtkqldipvkfvpgnhdliweves  
mttqdiwnnyksmsqclvg  
kpfivneewaiightgwydysfaqrfsldelqrgkhygatwqdkeriswgisdqnlksiaaeqvkkdilevgnrrvilv  
thvvtypdfivpmphrifd  
fynafigtsdfnplyamfdpysimgvhvfrksvmdggrcylcpclyprqwrseidyqeinetiqiiei  
>tr|D8HFB2|D8HFB2\_STAAF  
malleafliifaviissvinnrfrpqiatafiqialgvvifiipiavdqfnsevfmfaviapl1fvegthvsrtklley  
rkpjlmsmalvfatvvgv  
gyfihwiwpalpmpaafaiiaailcptdavavsaitrgkl1pkgsmtileges11ndaagiisfkiavtalvtgtfslfqa  
veqfiistilgvligaiig  
fvvvriridltankglkdntltfiqlltpfvvyflaeevhasgiaavviaglihglrdr1iraqtelqmyhqiwnft  
syalngfvfvvlgfmiptv  
vidifqtepdnfsfli1iailiaiaiyacrffvwyfwykdffyfpkniqsyldeedshetppsvryafimtmcgihgti  
slsmaltl1pfiitkgqafe  
yrndllfiasfmvlislilaqivlpl1t1psaedttfkgmtyqsakifivqkviehfkeskkdkndtnyrpvltqyygel  
lfl1nsepdnqntkelkr1  
ediakvietstlerlidkqktyqdinnyrnive1tethrtasfvekfaffkmlwlr1kaikhykalneskkqefens  
fkdvqkimrivnhni1r1  
keeqnstnvlvslvinhydmsrslkwraqrrkerqensnqipqamfhnk1lea1ylqrh1ldelirknkinnivaag  
ireninyneiv1slqskh  
>tr|D8HFB4|D8HFB4\_STAAF  
mttkklyflsisi11vaisaiyitfnsntktr1tndsqqqidtiiehd1qkghipgasilivkngkvflnkggygqdv  
dkkvkaspttkyeiasntk  
aftglailklaqegrln1ndavskhvphfkmnyngqnetitikq1laqtsgpsditsedsvtknrr1ndvtraimgde  
1hhkpggeefeysnmnyd11  
gliiqnvtkqsytkyitnswl1p1hmthtsfkqtnnkskhdaigyelqgstpvvskpefn1wdt1psaymmtsted1ehwi  
kfq1nppdky1slvqqshk  
n1sstige1nayanayasgwftnndeh1vfhs1g1dnfssfi11n1pkqnygi1v1an1nseyvpk1veh1ntqivnhkryst  
vasm1nqyk1dqfn1v1tm  
tt1111af1fsayrawqmrhgki1lrksk1ttf1sw1t1cl1cia1ial1y1alpy1il1gsn1wsf1vtw1l1pie1k1t1ttt  
fialfsm1l1t111v1l1h1ttt  
ikkp  
>tr|D8HFB5|D8HFB5\_STAAF  
mskifvtgatgligiklvqr1keeghevagfttsengqqklaavnvkayigdil1kadtidqaladfkpei1inqitd1kn  
vdmaantkvr1egsknid  
aakkhdvkkviaqsi1afmyepgeglaneets1dfnstgdrkvtvdgvvg1eetarmdeyvvl1rfgwlygpgtwygkdgm  
iyngfmdgqvt1sdgvtsf  
vh1ddavetsiqaihfengiynvaddapvkgs1efaewykeq1gvepni1diqpaqpf1ergvsnek1fkaagg1t1yktwkdg  
mnp1k  
>tr|D8HFB6|D8HFB6\_STAAF  
mkia1agsgalgsgfakifqagydv1lidgytshveavkqgh1nitingeafelnipmyh1ndqpdesiydv1fl1pks  
mq1kevmeamkphidneti  
vvctmng1kheevi1aqyvaqsivrgvttwtag1espghsh1l1gsgpveigel1vdegkenvikvad11neaelngviskd  
lyqsiwkkicvngtanals  
tv1ecnmas1nessyak1lyk1tqeivhvati1dnv1lnvdevfey1vd1nekv1gahypsmyqd1lvnnrkteidyinga  
vat1gkqrhieapvnrfit  
d1ihtkesqrhaq  
>tr|D8HFB7|D8HFB7\_STAAF  
mdtskqfrgdnr111g1v1g1vitf1w1faqs1vn1lvpl1qstys1sdvgtiniav1s1al1fag1fivgagdvadk1fgrvkit  
yvg1il1nvvg111i1it1p1  
paf1li1gri1iqg1saacimpst1laineyyigtr1r1qalsywsigswggsgict1f1gg1matyigwrsifvvs1ill1t1la  
my1likhapetkaepikgmk  
aeakkfdv1g1v1lv1tm1sl1nviitqtsnfg1lvsp1il1gliv1fvics1lv1gfvyen1kikhpl1vdfsi1fknrgysgatis  
n1fl1ngvaggalivinty  
qqq1gf1nssqtgyis1t1y1liav1smirvgeki1sqhgpkpr111gsgftvig1l1lls1t1fl1pemwyivssivgy1l1fgtg  
lglyatp1st1dtavasapdd  
ksgvasgvykmas1lgnafgvavsgtvytv1aan1ln1lggftgmmfn1allaivaf1v1ll1vpknqtn1  
>tr|D8HFB9|D8HFB9\_STAAF  
mkkikiy1lv1v1s1t1v1sgcs1lp1g1skstkndvkital1stsesqi1shml1r1liehdthgkikpt1vnn1gsstiqhn  
al1ngdani1sgvryngtd1  
tg1v1keapikdpkkamiatqqg1fkkkfdq1t1ffdsyg1fantya1fmvtketakkyh1etv1sd1lakhskd1rl1gmdsswmnrk  
gdgyeg1fkkeyg1fd1fg1tvr  
pmq1g1lvyda1nsek1dva1lgystdgriaayd1kv1kddkq1ffpyaasavatne1l1rqhpe1lkt1tink1tgkistsemq  
r1nye1adg1kgkepav1vae  
f1lkkh1hy1fdk1qkgghk  
>tr|D8HFC0|D8HFC0\_STAAF

Tsompanidou\_et\_al\_Supplemental\_FASTA\_File

mief1hehggqlmsktlehfysisival1laiivavpigi1lsktkrtani1ltvagvlqtiptlav1aimipifvgvkt  
aivalfiyv1lpi1nntv1  
gvqndisnikeagksmgmtqfqlmkdvelplalpliiggir1ssvyviswatlasvvgagglgdfifnglnlydplmivt  
atv1vtalalgvda1lalv  
ekwvvpkg1kvsg  
>tr|D8HFC1|D8HFC1\_STAAF  
mlsikh1tkiysgnkavddis1ldiqsgefi1figtsgsgkttalrminrmi1eatgqieidgkdvrsmnpvelrnnigy  
viqqig1lphmtikeniv1  
vpk1lkwtkkeekdrakel1k1vd1pesflerypaelsggqqrigvvralaaeqdi1lmdpfgaldpitrtd1qdlvk  
tlqrklgk1tfivthdmd  
aikladkicimsegkvvqfdtpdni1rhpandfvrdfigqnr1iqdrpndktvegvmikpitiqaeat1ndavhimrqr  
vdtifvdsnnh1l1gf1di  
edinqqi1rghks1rdtmqghi1yvtqidsk1qdsvrtilkrnvrnvpvddkqrlvg1itranvvd1vydtiwgdsedavq  
tehvgedtasskvheqht  
nvkvr1digdds  
>tr|D8HFC2|D8HFC2\_STAAF  
mgvcppv1mdacal1qkfd1cdni1shfrhff1aikqpier  
>tr|D8HFC3|D8HFC3\_STAAF  
msekqpneqveaf1nkesqwqee1ky1ralifn1eteleeaykwmhpcyt1nnknv1lihgfknyval1fhkgail1edkyh  
t1iqktekvqaar1lrfen  
l1teiqartee1ky1laeai1kaekagkkvemkkteeyvipke1leakfeemp1lessfyk1ltpgrqhqyiy1higqakrsetr  
qkrvekyin1qilegk1gmhd  
k  
>tr|D8HFC4|D8HFC4\_STAAF  
mnkdkq1lhdki1n1sq1v1l1gl1s1ig1sgw1fgaweass1iagpaai1sw1vg1fl1vig1tia1nyie1igt1mf1pq1sg1gms1nya  
qy1th1s1l1gf1ia1aan1w1vs  
l1vt1ipi1e1avs1av1q1m1ss1wp1wh1wak1p1m1kh1l1meng1s1ty1gl1lav1yi1v1i1f1s1l1ny1sw1k1l1ts1ft1s1i1sv1fk1l1g1p1m1t  
i1im1l1sg1fd1ts1ny1gh1sas  
t1f1mp1y1gs1api1fa1att1as1gi1i1fs1fn1sf1qt1i1n1mg1se1ik1n1pek1ni1arg1ia1is1s1av1ly1i1l1q1st1fi1ts1mp1qs1ml1q1h1sg1wn  
g1in1fn1sp1fad1l1ai1l1gi1nw  
l1ai1l1ly1ie1af1v1sp1fg1tg1vs1fv1av1t1gr1v1r1ame1kn1gh1pk1fl1gm1nek1y1hip1rv1ai1fn1ai1s1m1im1vt1l1fr1dw1gt1la1avis  
t1at1l1vay1l1tg1pt1v1ia1l1rk  
mg1pt1m1tr1p1f1r1aki1k1v1m1ap1s1fv1las1lai1y1w1am1w1pt1ta1ev1i1i1il1gl1pi1y1ff1y1ey1rm1nr1nt1k1k1q1ig1gs1l1wi1v1y1l1v1l  
s1il1s1f1ig1ske1fk1gl1nm1ih  
p1fd1fi1v1i1i1v1al1fi1yy1igt1t1ss1fes1vy1fr1rat1r1int1km1res1l1nes1k1ssh  
>tr|D8HFC5|D8HFC5\_STAAF  
mk1int1tg1q1h1gi1td1q1gl1di1fl1g1ipya1epp1v1dn1rf1kh1st1l1kt1q1w1sep1idate1iq1p1pp1q1pd1nk1led1ff1ss1q1st1t1fte1he  
dc1ly1n1i1wk1qh1nd1qt1k1kp1v  
i1iy1fy1g1gs1f1eng1ht1ae1ly1qp1ah1v1q1n1di1v1it1c1ny1r1ga1l1gy1d1ws1yf1nk1df1hs1n1gl1sd1q1in1vik1w1hq1f1ies1fg1d  
ann1it1l1mg1qs1ags1ms1il1t1l  
l1kip1di1epy1fh1kv1v1l1sg1al1rd1t1les1arn1ka1hf1q1k1m1dy1l1dt1gd1v1ts1l1std1il1m1mek1k1qs1rg1ps1kg1d1li1y1api  
k1td1y1iq1n1ny1pt1tk1p1if1acy  
t1k1deg1di1y1t1seq1k1l1sp1q1r1fid1ime1l1nd1ip1l1ky1ed1vt1ak1qs1l1a1ith1cy1fk1q1pm1k1q1fl1q1l1ni1q1ds1nak1l1w1la1ef1aw1h  
d1ts1s1ah1rs1ay1hi1l1dm1v1fw  
fg1n1q1i1la1ah1q1y1pt1tah1k1f1l1sr1qm1q1nd1an1f1ak1sg1k1mp1w1p1my1hn1erry1rty1q  
>tr|D8HFC8|D8HFC8\_STAAF  
m1l1e1kd1l1vy1das1dr1v1l1nh1in1k1vd1k1get1ai1ig1ps1g1sk1st1fq1k1lic1n1is1pts1gt1ly1fk1g1k1py1ddy1epe1il1rr1his1y  
l1mq1sd1l1f1get1ied1nmi1fp  
s1lar1nd1k1fd1k1rak1l1k1d1vg1l1ghy1q1l1ss1kie1hm1sg1ger1ria1iar1q1l1my1tp1di1l1l1dest1ald1inn1kek1ieni1if1kla  
d1q1gv1aim1wi1th1s1dd1q1sm1rh  
f1q1k1rit1iv1dg1q1is1ntee1l1nq1e  
>tr|D8HFC9|D8HFC9\_STAAF  
mn1q1sv1k1l1kh1l1td1v1ng1i1agy1em1qv1ke1am1rny1ie1p1vs1dq1i1ed1n1ggi1fg1k1k1na1eng1q1s1imi1sg1hm1dev1g1fm1vt1kid1kh1g  
fi1s1ft1p1vg1g1wn1q1vm1l1sq1  
vt1it1td1sg1ke1i1rg1i1g1sk1pp1h1l1t1p1eer1kk1p1me1ik1nm1fi1dig1v1ss1kee1e1e1ag1ve1v1gn1mv1tp1yse1fev1land1ky1l1tak1af  
dn1ry1g1cal1ave1l1kr1l1k1de  
ni1gin1ly1sg1at1v1qe1ev1l1rg1ak1va1ant1ip1kd1lai1av1dv1gi1ay1d1tp1g1ms1g1q1ts1dsk1l1gg1p1v1im1md1ats1iah1q1l1rk1h1k  
dv1akk1h1nie1v1q1wd1t1tp1gg1g  
td1ags1ih1van1edi1pt1mt1igt1v1l1ry1m1hs1nv1sv1l1nv1ddy1ensi1r1l1v1te1iv1rs1l1nd1ety1kn1im1w  
>tr|D8HFD1|D8HFD1\_STAAF  
mi1its1pt1ear1k1df1y1q1l1kn1v1nn1h1ep1iy1is1g1na1en1navi1ig1led1w1ks1iq1gt1iy1lest1gt1md1k1vr1erek1d1ss1gt1tn1iddi  
d1wd1n1l  
>tr|D8HFD2|D8HFD2\_STAAF  
mk1k1l1cs1li1v1val1vc1ia1i1als1ac1g1ke1qt1ky1eg1dv1sg1khv1l1ts1ity1k1ddk1v1k1q1st1int1iky1dd1l1g1md1k1de1akk1l1f1akes1i  
fk1d1l1kg1v1ky1k1v1dy1k1dk1k1ai  
eh1ld1idy1te1v1dm1k1l1nr1l1gv1st1ken1k1dis1fek1lek1q1l1k1hr1g1l1kek1dk1m1ddk1w1fit  
>tr|D8HFD3|D8HFD3\_STAAF  
mt1f1l1vm1q1f1iv1ni1iv1vg1fm1l1tv1iv1ig1li1w1lik1dk1r1qs1q1hs1v1rn1yp1l1ar1iry1ise1km1g1pel1rq1yl1f1sg1d1neg1kp1fs1rnd

Tsompanidou\_et\_al\_Supplemental\_FASTA\_File

yknivlagkynsrmtsfgt  
tkdyqdgfyiqntmfpmqrneisvdnttllstfiykianerlfsreeyrvptkidpyylsddhaiklgehkhpfvlkri  
vqsgmsygalgknaital  
skglakagtwmntgegglsyehlkngndiifqigpglfvrdkegnfsedlfkevaqlsnvrafelklvqgaktrgghme  
aekvneeiakirnvepykt  
inspnryefihnaedlirfvdqlqqlgqkpvqgfkivsvskvseietlvrtmveldkypsfitidgdeggtgatfqelqdg  
glplftal pivsgmlekyg  
irdkvklaasgklvtpdkiaialglgadvniargmmisvvcimsqqchmntcpvgvattdakkekalivgekqyrvtny  
vtslheglfniaaavgvss  
pteitadhivyqkvdgelqtihtydklklis  
>tr|D8HFD4|D8HFD4\_STAAF  
msntnkhyieeeyateqsrfkrdigfiflyiflvnilpiiivfltfglvavftqqapwgfsfpismnisyllaviisla  
ifrrmhedafovpmirsqiv  
asakykwhilisftlsivlfl1lnhfyifaInvdsftvfdiyplireygsislaifsltiilntlicqlifrhiligel  
srlipkitivlsviletl  
yyyyyintwwefipalilassatylylksnrnfmvsyfyqlavilvlhifm  
>tr|D8HFD5|D8HFD5\_STAAF  
mkgamawpflrlyiltlmffsanailnvfip1rghdlgatntvigivmgaymltamvfrpwagqiarvgpikvlriili  
inaialiiygftglegyfv  
arvmqgvctaffmslqigiidalpeehrsegvslyslfstipnligplvavgiwnannis1faiviifialtttffgyr  
vtfaeqepdtsdkiempf  
naitvfaqffknkel1nsgiiimivasivfgavstfvplytvs1gfanagifltiqaiavvaarfylrkyipsdgmwhpky  
mvs1sl1viasfvvafgp  
qvgaiifysailigmtqamvypt1tsylsvl1pkvgrnm1lg1fiacadlgis1ggalmgpisd1vgfkwmylicgm1v  
ivimims11kkptprpans  
1  
>tr|D8HFD7|D8HFD7\_STAAF  
mt11tvkh1t1tdtwdqplvsdvnt1tkget1gvigesgsgksitcksivgl1nper1rvtgditfdgkpm1sl1seaql  
kkyrgkdiavmqqgsraf  
dpsttvqkqmfetmkvhtsmstqeiektlieymdylslkdpkri1ksypym1sggm1qrlmialalalkpkliiadeptt  
aldti1qydv1leafidik  
hfdcamifishdl1tvinkiadrvvmkngqliehgtresvl1hhpehvytkyl1stkkkindhfkvmrgdvhd  
>tr|D8HFD8|D8HFD8\_STAAF  
mi11kr11qdkgavialgiivlyvfl1gaaplvtfydpnhidtankfagmsfqh11gtdh1grdil1trliyai1rps1lyv  
fvalfvsvligsilgl1sg  
yfqgfvdalimracdvmlafpsyvvt1alialfgmgaeniimafil1trwawfcrvirtsvmqytasdhvrfaktigmndm  
kiihkhi1m1t1ladi1ais  
ssmcsmi1q1sgfs1gl1gvkaptawgmm1narkvmfthpempvfapgiaiviivmaf1n1sdalqiaidprisskdk  
1rsvkkgvvqs  
>tr|D8HFE0|D8HFE0\_STAAF  
mrk11tkmsam11lasgl11tgcgngk1leekkenq1tyttvkdigdmnphvyggsmsaesmiyep1vrntkdgikp1lak  
kwevsedgktyt1f11rddv  
kfh1dgtp1fdadavkknidavqenkk1hsw1kist1idnvkvkdkytve1n1keayqpalae1amprpyvfvspkdfkngt  
tkdgvk1kfdgtgp1k1geh  
kkdesadfnkndqyweksk1nk1qvakvmpagetaf1smkkgetnfaftddrgtds1dkds1kq1kdtgdyqvkrsqpmn  
tkm1vvns1gk1kdn1avsdk1  
vrqai1ghm1vrndki1akei1ldgqekpatq1faknvt1d1nfdm1ptrkyd1l1kkaes11deagwkk1gkds1dvrqkdgk1nemam  
yydkg1ss1qke1qae1y1qae  
fkkmg1k1n1in1gets1k1iaer1rts1gdyd1m1fn1qt1wg11ydp1qst1iaaf1kakngyes1ats1gienk1dk1i1ns1idda1fki1qng  
kers1day1kni1k1qv1d1degi  
fip1sh1gs1mt1v1vap1kd1lek1vs1ft1qs1qye1lp1fnem1qyk  
>tr|D8HFE1|D8HFE1\_STAAF  
msk11m1igt1gp1vai1qlani1cyl1ks1dye1idm1vgr1ast1seks1rly1qay1kke1q1fev1ki1qneah1qh1legk1fein1rly1kd1vkn  
vkgey1et1vm1act1aday1yd  
t1qq1s1let1l1qsv1kh1vil1is1pt1fg1sq1mive1qf1msk1fs1qdi1evi1sf1styl1gd1triv1dkeap1nhv1tt1gv1kk1lym1gst1h1sn  
stmc1qris1alae1ql1ki1qle  
vves1pl1haetr1nss1lyv1hpp1f1mnd1fs1l1kai1feg1td1vp1vy1vyk1f1peg1pit1mt1li1rem1rlm1wkem1mail1qv1frv1ps1vn11  
qf1mv1ken1yp1vr1pet1ld1deg1  
ieh1fei1lp1dil1qey1ly1vrys1ail1dp1fs1qp1den1ghy1fd1fs1av1pf1k1qv1y1kne1qd1vv1qip1rmp1sed1y1rt1ami1qhi1gk1ml1g  
iq1tp1mid1q1fl1arye1asc1qa  
yk1dm1hq1dq1h1ss1q1fnt1n1feed1kal1vtk1fle1in1rt1s  
>tr|D8HFE2|D8HFE2\_STAAF  
mnn1fn1nei1k1il1qq1yle1k1feah1yerv1qdn1qy1iea1let1m1ddy1se1fil1npi1ye1qq1fnaw1rdve1eka1qliks1ly1ita1qcv  
kq1ve1ir1arr11dg1qast1  
gy1fd1ni1eh1c1deef1gq1cs1ias1ndk111vg1sg1ay1pmt1li1qv1aket1gas1vigi1did1p1qav1dl1griv1nv1lap1ned1it1td1qk  
vse1lk1dik1dv1th1i1fs1sti  
p1kys1ile1y1dl1ten1vv1am1rf1gd1gik1af1nps1qeta1ed1kw1qcv1nk1hmr1pqq1fdialy1kka1ik1vg1it1dv  
>tr|D8HFE3|D8HFE3\_STAAF

Tsompanidou\_et\_al\_Supplemental\_FASTA\_File

mnrqviefskynpsgnmti lvshkhdaseyasianqlmaathvcceqvgfietqnddgnndfhlvmmsgnefcgnatmsyi  
hhlqeshllkdqqfkvkvs  
gcsdlvqcaihdcqyyevqmpqahrsvvpttinmgnhswkaieiiyetyvhyvipvnqvteiqhlvetyvreqqwnhkyk  
tvgmmlfdeqrqflqpliy  
ipeiqsliwenscgsgtasigvfnnyqrndackdftvhqpggsilvtskrchqlgyqtsikgqvttvatgkayie  
>tr|D8HFE4|D8HFE4\_STAAF  
mlkekesfrllygai reiadkigdnqletnsvslllldfdfhehevfdelhlailkyIntvsienishsellnligntipe  
dreintfvknkiiigfann  
yfpeiqvlaneiksdmasslk  
>tr|D8HFE5|D8HFE5\_STAAF  
mkrlnkvavvtgastgiggasaialaqegayvlavdiaevvsetvdkiksngdkakayivdiaseqqidnfaseireqf  
ghvdvlfnnagvdnaagri  
heyptdvydkimvdmrgtflmtkmmplmmtkgsivntasfsgqaadlyrsgynaakgavinftksiaieygrdgira  
naiapgtietplvdkltgt  
cedkegkafrenqkwmtpigrigkpeevgklvflasdessfitgetiridggvmaytwpgemlsddswkrtle  
>tr|D8HFE6|D8HFE6\_STAAF  
mtskhqqkgsivnrflnsvekignklpdpvsvfflmcvglaimtwislfvsvkhpgthqtiyikniishdgtmimnd  
tiknfsefpalglvlavmi  
gigvaektgyfdklmivsvnrprflilptiiligilgstagdaatiilpplaamfikigyphiagltmayasavggfa  
anivvgmqdalvysftepa  
trivdsiktvmnwyfiaasvvlptiillvttkliiprlgqyddrlmhddeetsshitdkeahalkwanisfivti  
illiiitapehsflrnakt  
gsllddaplingvgliilvvflvpglvvygilskeikntkdlgkmgfdavgsmtgfivivffaaqllaylkwsnlgiiaav  
kgakllehgngivlilgii  
vlsamvnmligsasakwglgpifvpmililigfhpafqtviyrvgsitnptipmmpylpllltyaqydkrmklgalls  
slmpysialsvwtvfvi  
wfligipvgpggpi fvk  
>tr|D8HFE8|D8HFE8\_STAAF  
mtkkhvfiigvilcicivatviylkvkydekekqkalyykeqeritlylkhntkepntiktvhftsiktgpmgdavie  
gyinenkkadvaygspeh  
nyqfggdmieseklseilkpanqlkspdeikeeldkkegh  
>tr|D8HFE9|D8HFE9\_STAAF  
mtvltkvavvtgagsgigeaiatlheegkvvilagrndkklqnvanaqlaqsdkvkvptdvtkkeevdelikiaqqftg  
gldivinsagqm lsskitd  
yqvdewdsmdvnikgtlytaqaalptmleqssghliniasisgfevtsstiyatkaavhtitqglekelaktgvkvt  
sispgmvdtaitaaynptd  
rkklepqdiaeavlyaltqpkhvnvneitvrpv  
>tr|D8HFF1|D8HFF1\_STAAF  
mskehlfhfiifsdllnfyinyflifqnsdkfvkyitnpiyleihvilvl  
>tr|D8HFF2|D8HFF2\_STAAF  
mrqitaviapehnrihdhknklkndee llnqmsshfkkfkgefdnvaqgdwvkkaknelddiskklkniqrtev  
>tr|D8HFF3|D8HFF3\_STAAF  
mfteykkisdletaydeerrklndkleqlqeikhqikldceysydcflylknkmdysqesvkmthiinefndemtqrik  
neemkierskdelkseylk  
eiekmggre  
>tr|D8HFF4|D8HFF4\_STAAF  
mvkkdyeiqhgnitsnseetsaiskisyenannngltdrrindqfdlkkhdsfpknltylksftdpntgttttafkn  
edtgkvtlgmtgtvnhlea  
mgnvlehpfhnsdqdekledatldkfradvniglgvtvtdkdpfhktdqdfikdikkeyeidtitghslggrdavi lgvsn  
dikniivvynpaplsirdfr  
ifavenmpasaigdieiekmlknynghivrfvsdkdel dgfvvsqfmydtagekivlnngeghdmeaf l rkyaqakilael  
rkvkgyedannkafkslke  
ntksklgrveelranwlqanggalsssqkllsvsaliiteglsqlvkeessqlekmydnmkkdfqenwksqeagnki  
gkllshdevlta lrngday  
eskfetdpetkikqkllkelndinsdchnyvskikdsvnaivgndqllasqiagvi  
>tr|D8HFF5|D8HFF5\_STAAF  
mihskklklclclilfvfiggcmkqeessdkdqikenfnktslyptkniedfydkegfrdqefekgdkgtwiishkm  
tietngknmesrglilyvd  
rnrtrtkgefivrelwedkkgysrgkekeypvkmehnkiiptkpiaddklrkeienfkffvqygd fkdindykdgd isyn  
pnvpsysaeyqlsnndynv  
kqlrkrydiptkkapklilikgdglkgssighknlefsfvtskeenyftdsinfkpterdk  
>tr|D8HFF6|D8HFF6\_STAAF  
mihsrklrlwlylvllavfigacgmkkeessdkdqikenfnktslyptkniedfydkegfrdqefekgdkgtwivdsem  
vielkgkmesrsmvlyin  
rnrtrtskgnfivrelwedskgytqskdikypvkmehnriiptkpiaddklrkeienfkffvqygd fkdindykdgd isyn  
pnvpsysaeyqlsnndynv  
kqlrkrydiptkkapklilikgdglkgssighknlefsfvtskeenyftdsinfkpte  
>tr|D8HFF7|D8HFF7\_STAAF

Tsompanidou\_et\_al\_Supplemental\_FASTA\_File

msrllndfnqslhkgfidkdishkgnypkllvnnknekvlstiidelqkctefyfsvafitesglaslkaqllldlnkg  
vkgkiltsnylgfnspkmy  
gellk1knvevr1tdiagfhakgyifehkdyssmvi gssn1tsnal kvnyehvllstmkngdlvdsvksefnllwqkst  
plteqwinskyesfeysrl  
eklaeveqtqml1adkvkksveivpn1mqaealrslkairdkakdkaliisatgtgktilcaldvrevnnpkflfivhne  
gilnrakeefkklvpiknd  
sdfglltgkhrvdakylfatiqt1srddnfkqfdenefdyivfdeahrsaastyqrvfnfypkpkfmlgmtatpersdel  
sifelfdyniayeirlqaa  
lesdilcpfhyfgvtdyvhhgikeddvtklryltsdervnyi i qktddygyseilqglifvsskkeaydladklsskgi  
ksvaltgddsvnyrgivie  
klregkinyiitvd1fnegidipevnqvm1rptessii fiqq1grglrksankeyvtvidfignyktnylipialsgdq  
sqnkdneykfltnndsing  
vstinfeevakkqiynsl davslnqnk1ilkayeevenrlghmp1lmdfiqqhsidpsvifskfsnyyeflvrykkidal  
lteneskn1vffsrqiagg  
1kridslvlee1lknelt ydelknkm1nevkditeddidts1rildfsfynagi ekiygspiiernermlr1sdaftnal  
snqtfkifledlielskyn  
nekyqkgngli1lynkysredfski fwnkngssvimgymirsqempifitydkhedisdstkyedefl sqdelkwftks  
nrt1kskevqki1shrakg  
ikmyi f vqkkdddgiyfyy1gtagi egsekqdkmpngsnvvtmd1aldkavrddi yryitn  
>tr|D8HFG0|D8HFG0\_STAAF  
mdkelwierands1vkhfyeeqqsdi e qregfeskl tfgtagi rgkfg1gegrlnkftiek1alglarylnaqtntptivi  
hydirhlstefa qianvl  
anhqitvylpdykttpels favrn1nttagim itashnpkdyngikvygsdgaqlstdaselasryieevgdplhidip  
iskqntsyikpfpksvtdv  
ymkhiqnmigiypksdlqvvfts1hgtsvpivpk1lkslnfnqfn1veaqckpdpnfssvqsanpedhrafdqaielank  
shad1listdpdadrlgia  
erdahghityfngnqigall1nyriqqtsqlrhr1miqsisvssetks1arynnveykevltgfkfiaqeirqlddhqnm  
ifafeesygf1sepfvrk  
davqivpl1ikyase1klygk1kde1eqiyqtvgrhedt1fsht1eg1legkkkiesimthfrsnppqeiqglkvkaied  
yltseyvqldkdttsqins  
pksnvr1v1fdegfiarpsgtepki1yvs1kcpnfddvaqkinamifs  
>tr|D8HFG2|D8HFG2\_STAAF  
mtvnivvsivfcismv1lgiyvaitkdft1isyinqtti adkhknqiyafal cis1savflmsailcfeydfialslf1f  
ltialllialfyvcfykit  
kyp  
>tr|D8HFG3|D8HFG3\_STAAF  
mlylev1knrnfty1lignflrrscfv1fs1qi1wftveltnqssl1k1smmvmsqtlpfiifgiffgaysdkhnkkkily  
1sdli1sl1iiiiiip1la1t  
snlnyltiltistaiti1ncytdpafra1lpeiideeh1atsnalids1lrgsni1lpaligvivilvgnvgiffic1il  
1flgfi1fnallkytnnm1i  
dhskedfsetwef1kqskeip1iiiqfacil1ntglwrv1plf1isn1lkegvgyglatsclgias1lms1img1ls  
ekr1fkfsig1v1wgig1l  
siinvf1psvail1yigat1vlg1qsieg1l1trsvai1iktph1mgkvfs1ssts1nyaadt1slgl1is1liip1l1sl1snif1is  
ggai1sm1slag1kffkks  
m  
>tr|D8HFG4|D8HFG4\_STAAF  
mpkem1pil1dkptiqyiveearagiediiivtgrhkraiedh1dsqk1emv1lkekgksellekvqystelanifyvrq  
keqkg1gha1ssarqfign  
epfav1l1gddivesevpavkq1lidvyeetghsvigvqevpeadthrygiidp1tkngrqyevkkfvekpaqgtapsn1ai  
mgryv1l1tpei1fdylktqke  
gagnei1qltdaierm1nndnqvaydfegerydvgek1gfvkttieyalkddsmreel1trfikelgl  
>tr|D8HFG7|D8HFG7\_STAAF  
mi1vvgm1gqe1ka1a1se1qn1ttvees1gss1gtes1kaset1q1tt1nnvnt1idet1qs1sys1at1ste1qps1qst1qvt1tee1pt1vq1pk  
vetsrvd1psekatd1keia  
gtqvdt1a1qps1nvse1ik1prm1krs1adv1ta1ase1kev1vee1akvt1gtd1vtn1kv1vtess1leg1hk1qgt1nv1nph1naervt1kykws  
feegi1kagdy1fdft1s1nnv  
ethg1st1rkvpe1kss1adn1qvm1ang1qv1nerki1ryt1ftdy1innk1d1tae1ln1n1fid1ptt1vt1kkg1kqk1vevs1lgqnki  
sqefdi1qyl1dgvkdrmgvt  
vngri1dt1nkaeg1kfs1hfayvkpnnqs1ssvtvtgqvtsgykqnknptvkvykhi1gsde1aesvygd1entmk1fqdv1tg  
evt1qytdnggys1nfn1l  
dsknyv1ikyegdydsntna1efqth1lgyynyy1ynts1n1twkngv1afys1nnak1gdg1kdkpndpi1ieksep1id1nikse  
ppvekhe1l1tgt1ees1n1sk  
pidfeyht1aveg1vegha1egiveteeds1ihvd1feesthensk1had1vveyeed1tnpggg1qvtt1esn1lve1fdeestkg1iv1tg  
avsd1htt1vedt1keyt1tes1n  
li1el1vde1l1peeh1ggag1gpi1eei1ten1hhi1shsg1l1gtengh1gny1gvi1eei1eens1hvd1kse1lgyegg1nsgn1qs1feed1tee  
dkpkyeg1ggn1vid1fdsv  
pq1iqg1nng1nqs1feed1tekd1k1pkyeg1ggn1i1did1fdsv1pq1ihg1fnk1hnei1eed1tnk1dkpny1qfg1ghns1vdf1eed1tlpkv  
sgqneg1qqt1eed1t1p1t1p1t

Tsompanidou\_et\_al\_Supplemental\_FASTA\_File

ptpevptepgkpvppakeepkkpskpveqgkvvtpvieinekvkavaptkqkqskkse|petggestnkglm|fgglfsi  
lgla11rrnkndka  
>tr|D8HFG8|D8HFG8\_STAAF  
mivvgmgqdkeaaaseqktttveengnsatdnkvsetqttttvntidetqsysatateqpsnatqvtteapakvqapq  
taqpanvetvkeevvkeea  
kpqvkettsqdnsqdrqvdltpkkvtqnqvaetqvevaqprtvseskprvtrsadvveakdasdvtvkgtdvtskvt  
vesgsieapqgnkvephag  
grvvlkyklkfeqglhkgdydftl|snvntygvstarkvpeikngsvvmatgqllngkiryftdyidykvnvtadle  
inlfidpktivsqngqatit  
stlndketkntlpienpgvsnysanvngsietfdkgnnrftthvayikpqngksdsvsitgtltqgskangnaptvkvy  
evlkdakelpesvyanisd  
stmfkdvtemkdkl|kvenngsykl|diekleksyvi|hydgeyl|sgsdqvnfrthmfgyepeqqykyyythlgyqltwdngl  
vlysnkakgdgtngtites  
nmtfdeeygtgvi|tgqydkn|lvtvveeysstl|didyhtaidgegyvdgyietieetdssaididyhtavdseaghv  
gytesseesnpi|dfeest  
henskhadvveyeedtnpgggqvttesn|vefdeestkgivtgavsdh|ttiedtkeyttesn|ielvdelpeehgqaqg  
piee|tennhhis|shglgt  
enghnygvieeieenshvdikselgyeggqnsqnsfeedteedkpkyeqgnivdi|dfdsvpqihgqnnqnsfeedt  
ekdkpkyeqgnii|didfd  
svpqihgfnkhnei|eedtnkdkpnyqfgghnsvdfeedt|pkvsgqnegqqtieedttptl|tpevpsep|tptptp  
evpsep|tptptpevpse  
petptptpevpsep|eptptpevpsep|gkptptpevpsep|gkpvppakeepknp|skpveqgkvvtpvieinekvkav  
aptkqkqskkse|petggestnkglm|fgglfsi|lgla11rrnknhka  
>tr|D8HFG9|D8HFG9\_STAAF  
mfneiwp|lisvvl|giai|llvli|igfk|ntfis|liitsmita|mlgip|tkimeti|ekmgst|ghialif|lgailgk|ll  
adgggatriad|tliqkfgg  
khvqam|lvaafiv|gia|ffevgl|vllip|lvftvakranvsv|klgl|pmtal|svthgf|lpphpgpvvi|akelkanvgdv  
llygm|iaipvt|liagpi  
nkvaqkm|ipsaytreg|disalga|keftdqempgfgms|lltat|lpvil|mlvst|itq|vtghdkp|tnlfes|iymigtagt  
amliav|lfaivtm|glmrkr  
kmnhimesvt|naiypigmm|liigg|ggtfkqvlidggvgntiakmfegtemsp|illawivaav|lrialgsatvaa|isttg  
ivlp|llqssdv|nvalv|vla  
igagsvi|lshvndagfwm|fkeyfg|lvtket|fltwsl|letii|svsgii|filfis|fv  
>tr|D8HFH0|D8HFH0\_STAAF  
mkymigv|digttstksv|ydengt|fimkhqigyd|lhtp|nvdivseen|pdelfdav|lmtikyimreskv|nqddikfvsf|saq  
mhsliam|dqhqrl|tnnit  
wadnraakya|tvinehdg|naiyq|rtgtpi|hpmsplaki|fwmk|hewqdv|fqrtak|fadiktyi|fyhl|fdryi|idysmasa  
tgmfn|letl|dwdv|galell  
gi|seem|pelv|pttyvm|kgmkeryat|lmg|nedtpf|vigasdgvl|snlgv|nsvgk|gevavt|igtsgairt|vidkprtdyk  
grifcyv|l|tedhyv|igppv  
nnggvv|l|rw|rdellasevetakr|l|gvdpydv|l|tqiakrvkpgadg|li|fhy|lagerap|lwanargsffgl|t|lshkkeh  
miraa|legv|lyn|lytv|la  
li|evmnet|pkmi|katggfakse|lwrq|msdi|fdtelv|vpesyessc|lgacv|lg|kavgdiedfsiv|ssmvgatn|nh|tpe  
envvvyqel|vsi|fin|srs  
l|tenyeqi|ad|fqrqhmaen|ktq  
>tr|D8HFH1|D8HFH1\_STAAF  
mmygypek|wlegmtt|gegiaae|l|rgivn|ghiaegt|l|tenqmakqfnvsr|spirdafk|llqqn|liqlermgahv|lpfg  
eqek|kemyd|rlm|lesf|af  
sr|vknrer|l|pivkemkkq|lemmkvavk|fedaes|ftkhdfefhet|likasnhqyl|nsf|wshl|kpvmma|lv|tsmrqrmqqn  
pqdferi|hhnhqv|fidave  
qydsqil|keafh|lnfddv|gkdiegfw|ln  
>tr|D8HFH2|D8HFH2\_STAAF  
msnystgel|akl|cnvttr|tiqydrk|gil|kpqgft|egkr|rvyeteqqr|qt|le|l|ll|kdl|gca|lsdidm|llk|gegt|l|kt|ln  
t|lltmkq|qein|qvkq|qqa  
v|lnkikn|vqyyvnet|stsp|ith|kdi|ehvmsksaemk|sirrniwisagi|igiiqy|ssimsailmknkwpflialp|fmigy  
gigmtiyy|qrkvay|l|cnc  
qhi|fsp|slwavikakhtatrr|fecp|nchethyci|evpkahisteq|leishi|qhnn  
>tr|D8HFH3|D8HFH3\_STAAF  
myvdrkps|lyled|l|rhdfkns|l|skfengdeafdt|l|gfvel|dhiyssa|l|keistk|lsil|ddnfnhiykhnp|ihhmerrvk  
emrs|liek|lnrkg|l|qsae  
takehi|ldiagi|rvvcny|lddi|yleem|llkqedv|likrkyi|qhp|kengyrs|lhivvsipv|flaervev|lpveiqirt  
igmdmwas|le|hki|ryk|nna  
et|ekyrd|l|kecatei|tevedk|l|qqihskite  
>tr|D8HFH4|D8HFH4\_STAAF  
mektevdseyat|tdneehiqeqs|nqdk|syf|dses|ignqsggv|r|qrep|l|mdgphpkvves|fkdv  
>tr|D8HFH5|D8HFH5\_STAAF  
mpftmkgypek|wkefev|ikrqaie|ianam|l|kegy|lekdv|vpiaakkakdw|yra|l

Tsompanidou\_et\_al\_Supplemental\_FASTA\_File

>tr|D8HFH6|D8HFH6\_STAAF  
miipaiigylcgnfqfglvatgtlahiyvfkgsrsklrvtiicnlaifaicmmlgtltaktplvfgmtllivtvipfyi  
ftalkiagpsstffivtfs  
lpinlpiapeealyrgfai lvggilatmmvilitivfsknkaeeqaiqndfkliskllhtyndksafllkvaktavdsfkas  
dkllitstssndklsrrfq  
kllllhtsaqqiyselelnakqirpdpdeliemdhiaqlndsdenvrywrkevvtveefqnlfnhilkidemvhane  
ariayeadmkrplyskriy  
qnltdsivfrntlrytaimmiafiaimfdfekaywiplsahtvllgtstihaiergmarglgtilglvlsvillfsi  
ptpvavilmgiaalftea  
vganytiavvfitiqvilmnglasqnltniafprvidvamgiviaiiglvlgqrtasallpnvmaevvrkeatlphy  
fsenykddvyqkntamn  
svklnnmtqvynaangel fsdktliqnyypsifaleeisfmlnramanedrltineqlmgeylatfeniakhlelntele  
ikilpdlpqnyiqsamn  
iqhngfrerdknv  
>tr|D8HFH9|D8HFH9\_STAAF  
mtnsnirlyilgflaffasliqniytpiiprlyddfqvplfwinatvggfifivavmqivlgrsidsrdskkvlltggi  
viissficavthnfilfai  
srlfqaigcgiipvtlvtllaklstdngraqamanyqiflscapalapilgstlgarwdyigifsfllvisivlfliiff  
idipnvekgivkltekiee  
kyltdkvfitlvtlglfiflityfsilvlylptllnntydigvisgvlflpitvsvilgslfykrslskkyneimilrvtit  
gfai ftllfgwlnesnvii  
lsviifilgtcvgivpallstiiskrferikgkvlgvfnfvryigmtvgalligiisqplvafyfttitimliiiflyik  
igdfqlyak  
>tr|D8HFI0|D8HFI0\_STAAF  
mkrevilkqqfiierenadkrrrqykkeneeldslstqfhielidndkvnnkflsemInvskpaitksikkllakdlv  
veshnefnkrevnysltqk  
gkkl syihdelhekavkkyeevkvfndemaviveflnrsieelkkeedgld  
>tr|D8HFI1|D8HFI1\_STAAF  
mdvltiehltkkignktil edvsfk lkrqg ivlgv gangagkttlmkvilgyssfqsgnfvnskdsksnigaliengp  
iypfmsgyenllneskn  
tqdidkivsq lhmneyihkkaktyslgmkqklgiaiaflndpqfiildepmgldpkavrdvrelivqkaqegvtfliss  
hilselvkitsniliinkg  
kivtetseeelkqfkndndlenvll diiekedqa  
>tr|D8HFI3|D8HFI3\_STAAF  
mtqiterekkkyldllsqhfdtpeklateiinlesilelpgktehfvsdlhgeyefqhvlnrgsgnvrakindifkdk  
lstkelndltalvyypek  
lqlikcdfqnygqlnvwyittiehl iqlikycsskytrsklrralpegyvfiveellyknefnkksyyetlnqvie  
kqaddliiglaysvqrlvv  
dhlhvvgdiydrpgpdkimdtlinyhsldiqwgnhdv l wvgayagskvclanllricarydnldivedayginl rpllt  
laekyydadnpafkpkkrp  
dkherltqreesqtkihqaiamiqfkleipvikrrpnfemderlvlekvnydtneitvygktyplkdtcfqtvnrndpa  
ellpeeevnmklllsfqg  
seklrrhmsflmrkgsflpcngnllihgci pvdengemesfeidgqtysgqell dvfeyhvrksfdekentddlstldv  
wylwtgkysslfgkramtt  
feryfi adkashkeeknpyyhlredvnmvrkmlsdfgl n pdegriinghtpvkeingedpikadgkmlvidggfskayqs  
ttgiagytllynsfgmqvl  
ahqqfnakekilsegidelsikrivdkelqrkkirntnkgkelqaqidiklmhdryld  
>tr|D8HFI4|D8HFI4\_STAAF  
mriikesiivafafvgvvvgagfatgqei qffftshgaysisgiivtgllitlggmivmhtghhlsrnhdsinyflyp  
siargfdiiltmfmlslai  
imtaggastihqsfnlpywlsalilvvlilatflfkfdrliavlggvtpliaivimiavyyfttshldftaanndaqih  
kqkslspgwwfdainyasl  
qiaaafsflsvmsgskvkyrdstlyggliggliitflmminlglisqfdkikhvdlptlklatqmspsigiimsvimilv  
iyntvvglmyafasrfsvp  
fsrryfi iit mavityistfigfisl igkvfpimglfgfillipvlykglkritgkshid  
>tr|D8HFI5|D8HFI5\_STAAF  
mehifregqkgaptlillhgtggdefdlplgealnenyhllsirgqvsengmryfkrleggyvede lafrgqelltf  
ikeaaerydfdiekavlvg  
fsngsnia inlmlrseapfkka llyaplypievtstknlsdsvllsmgkhdpivplaaseqvinlfktrgaqveevwn  
gheitetgltagqilgk  
>tr|D8HFI6|D8HFI6\_STAAF  
mtnnhellgihhv tamtdaernykfftevl gmr lvkktvnqddiytyhtffaddvgsagtdmtffdfpnitkgqagtns  
itrpsfrvpnddaltyeq  
rdefgkhegiqel fgkkvl pfeevdgqvyqlisde l negvapgvpwkngpvvdkaigy l gpieikvsyfddfknil  
tyvgmttiahednvallev  
geggnggqvil kddk gpaarqgygevhvsfrvkdhaieawatkykevginnsgivnrfyfealyarvghilieistd  
ppgfmedepyetlgeglsl  
ppflenkreyiese vrpfntrqhd

Tsompanidou\_et\_al\_Supplemental\_FASTA\_File

>tr|D8HF17|D8HF17\_STAAF  
mdrtkqslnvfvgmnrldtleqitkedvkryglnitefavlellynkqppiqrirdrvliassisyvvsqledkgwi  
trekdkdkrvymacltek  
gqsqmadi fpkhaetltkafdvltkdeltilqqafkrlsaqstev  
>tr|D8HF19|D8HF19\_STAAF  
mafhdktatqvtnielnvrldlmttfyknilglsvkssddnttvlsvgtgghtlthlledgrqtspreaglfhiafll  
pttedlanflyfvaqknmg  
igagdhlvsealyfndpegngevyrdpssswewqngkvkmdtlevdsqtlthrtdegwqmpakgmighlktthlda  
ayqcyieqlgfqhvsdfpr  
alfmstnhyhhaantwqsnqarqnaqsylthvdiyqpdasthtftapegfditvhsntdlvpek  
>tr|D8HFJ0|D8HFJ0\_STAAF  
msnmnqtimdafhfrhatkqfdpqqkvskedfetilesgrlspsslglepwkfvviqdqalrdelkahswgaakqldtas  
hfvli farknvt rsrpyvq  
hm1rdikkyeaqtipaveqkfdafqadfhisndqalydwsskqtyialgnmmttaallgidscpmegfsltdvttilan  
kgmldteqfglsvmvafgy  
rqqepknktrqayedvievvgpke  
>tr|D8HFJ1|D8HFJ1\_STAAF  
mtkimffgtrdyekema1nwgkknnevttskellssatvdqlkdydgvttmqfgklendvypklesygikqiaqrtaf  
dmydlldlakkhnivisnvp  
syspetiaesvsialqlvrrfpdierrvqahdftwqaeimskpvknmtvsiigtgrigaatakiyagfgatitaydayp  
nkldf1tykdsvkeaidk  
adijslhvpankesyhlfdkamfdhvkkgailvnaargavintpdliaavndgtllgaaidtyeneaayftndwtknkid  
dktllelieherilvtphi  
affsdeavqnlvegglnaalsvintgtcetrln  
>tr|D8HFJ2|D8HFJ2\_STAAF  
mvkaiavdmdgtflskktydkprfeafitelrnrditfiaasgnqyaklksifgdrdmyfisengaviykgnelynyks  
fnwqvfgqvvdylninggi  
dq1vicg1ksayilkhtseafkedtrfyyhq1keidslqqlpeddyvkiafninrethpnvdeevatqfsndiklvssgh  
dsidiimpnmtkggalkr1  
ldkwgmssselmafgdannkdmlafakhsyvmenshdeelfniasavapsndkqgvltiieqevlkk  
>tr|D8HFJ3|D8HFJ3\_STAAF  
mkl1nys1kvknkqlvndcdlnfy1gqinhivgkngvgksllakdfllnsgnipksisqnvtilssssnipnditkdf1  
1sllkskfsnrqtdkiy  
nilnieapsnvl1kn1sdgqkqk1k11sflledhdliildeitnaldkktvneiyeftndfiqshqtktiinithn1sd  
1salpgkyfikd1qieey  
1skeevindyin1  
>tr|D8HFJ4|D8HFJ4\_STAAF  
mkkwtnr1mtiagvvl1lvaay1fakphidny1hdkddekieqydknvkeqaskdkkqqakqipkdkskvagyieipd  
adikepvypgpatpeqlnr  
gvsfaeenes1ddqnisiaghtfidrpnqftn1kaakkgsmyfvkvgnetrkykmtsirdvkptdvevldeqkgkdkq1  
t1itcddynektgvwetrk  
ifvatevk  
>tr|D8HFJ5|D8HFJ5\_STAAF  
mircakked1nailaiyndaiinttavytyepqtidervawfetkqrkhepifvfekngsvlgfatfgsfrpwpaylyti  
ehsiyvdasargkgiasq1  
1hhliveakakgyralvagasnkasiqlhqkfakhagtltnvgfkfnqwdlafyeldlqd  
>tr|D8HFK1|D8HFK1\_STAAF  
mllvlsfkgvrylannhsarl1kgiilaivgac1wlggtvsdf1fkykninvdwyvtar11vsgvf11imykmmpkrs  
ifsvfqrdrmlgkllifsi  
lglm1vvqaymasintgnaaiat1lqyiapyyiiwfvirgvakt1lfdviaiimt1lgtf111tngsfsn1vvnps1f  
wgi1agvalafytiypsd1  
lnrfgsilivgwam1isgvamn1rhpiwhiditkwdisiilflifgiigtalafyffids1qyisakett1fgtvepvv  
aviass1wlhvafkpfqi  
giilimil1111slkrqpet1de  
>tr|D8HFK4|D8HFK4\_STAAF  
mttegl1vaekeievngydidamgvvsniyvirwfdelrtafinqhmystminqgispi1mkteaeykvptihdkpvg  
riylvkaskmkwvfqfeiv  
sahgvycigtqggfyr1sdkkitsvpqvfqdilatk  
>tr|D8HFK5|D8HFK5\_STAAF  
mfkk1fgqlqrigkalmlpvaillaagillaafgnamhneqlveiapwlkndiivmissvmeaagqvfdn1p1lfavgta  
lg1aggdgvaa1a1vgyl  
imnatmgkvlhitiddisfyakgake1sqaakepahalvligiptlqtgvfggiimgalaawcynkfynit1ppflgffag  
krfvpivtsvvaiatgvv1  
sfawppi1qdg1ns1snfl1nkn1l1ttfifgiierslipfglhhifysp1fwefgsytnhagelvrgdqriwmaqlkdgv  
pftagaf1tgkypfmmfg1  
paaafaiyknarperkkvvgglmsagltaf1tgiteplefs1fvapvlygihv1lagts1vmh1lgvki1gmtfsggf  
idyilygl1nwdrshallv  
ipvgivyaiivyy1fdfai1rkfk1ktpgredeeteir1nssvak1pfdv1damggkenikh1dacitr1rvevvdkskvdv



Tsompanidou\_et\_al\_Supplemental\_FASTA\_File

agikalgasgvllevgnnmq  
aifgpkdqikhdmakimsgeitkpsettvteemsdepvhvealgttidiyapgvqqiiplsevpdqvfagkmmgdvgvfi  
pekgeivapfdgtvktifp  
tkhaiglesesgvevlhigidtvklnggefeslinvdekvtqgqplmkvnlaylkahapsivtpmiitnlenkelvied  
vqdadpgklimtvc  
>tr|D8HFK6|D8HFK6\_STAAF  
makikanealvkalqawdihlygipgdsidavvdslrtrvdqfkfyhrheevaslaaagytkltgkigvalsiggpgl  
ihllngmydakmdnvpqli  
lsgqtnstalgtkafqetnlqklcedvavynhqiekgnvfeivneairtayeqkgvavvicpdlltekikdttknpvd  
tsrptvvspsykdiikkavk  
linkskkpvmliygakhakdelrefiemakipvihslpaktiipddhphysignlgkigtksyqtmqeadllimvgtny  
pyvdylpkknikaiqidtn  
pknihrfninvgivgdsialhqitenikhvaerpflnktlerkavwdkwmqdknnnsklrperlmasinkfikdda  
visadvgtatvstrylnl  
gvnnkfiisswltmgcglpgamaskiaypnrqaiiaagdgaqmvmdfatavqydlpltvfvlnnkqlafikyeqkaa  
geleyavdfsmdhakfae  
aaggkgytiksavevaiveealaqdvptivdyvdpnaaplpgkivneeaalgygkwafrsitedkyldldqippisvaa  
krfl  
>tr|D8HFL2|D8HFL2\_STAAF  
mqsldknfrhlsrqqlqqlvdkqwlseeqfnillnhplideevanslienviaqgalpvgllpniivddkayvvpmmve  
epsvvaasygaklvnqtg  
gfkvtvsserimigqivfdgvddteklsadikalekqihkiadeaypsikarggggyqriaidtfpeqqllslkvfvdtkda  
mgnmlntileaitafln  
efpqsdi lmsilsnhatasvvkvqgeidvkdlargertgeevakrmerasvlaqvdihraathnkgvmngihavvlatgn  
dtrgaeasahayasrdggy  
rgiatwrydqecqrligtievpmtilaivgggktvlpiakaslellnvdsaqelghvvaavglagnfaacralvsegiqqg  
hmslqykslavvgakgde  
iaqvaaalkqepnantqvaerilqdlrsqq  
>tr|D8HFL4|D8HFL4\_STAAF  
mvyksyydspvgrlelvsdgvsltavlfenqddstreentslaifkeatqwl dayfkgdnpeitiplkptgshfqqcw  
nelrripygtltygaiak  
kvglvldkpkmsaqavvgvsnplsiivpchrvgktgsltgfggtinnkillelenidmsklyvpkhstkp  
>tr|D8HFL5|D8HFL5\_STAAF  
mnnffnsdfdsilrrmmqdmqnsnqtsnkkyyingkevspeelaqftqggghnsaeqsaqafqqaalrqggqsgngny  
leqigrnl tqeardgll dp  
vigrdkeiqetaevlsrrtknnpilvgeagvgktaivegl aqavegnvpaaikdkeiisidissleagtqyrgafeeni  
qklvegkssqnavlffde  
ihqiigssatgsdsgskgl sdi lkpalsrgeisiigattqdeyrnimkdaaltrrfnevlvsepsakdtveilkgirek  
fethhqvklpddvlkacvd  
lsiqyipqrlpdkaidvlditaahlsaqs paidkvatekrisel ehdkrkavsaeeykkaddiqnvkslqdklensng  
ehtavatvhdisdtiqrllt  
gipvsqmdandierlknissrlrskiigqdkavemvsrairrnragfddgnrpigsflfvpgtgvgktelakqlaidlfg  
nkealirldmseysdttav  
skmigttagyvgyddnsntltekvrnpysvilfdeiekanpqiltlllqvmddgnltdgqgnvinfkntiictsnagf  
gngtdqeyddimqemkkff  
rpeflnrfngiveflhldkeslqeiinllldvqvtldkkgitmvsqdakdwlieegydedlgarplrriveqqvrcki  
tdyyl dhtdvkhvldied  
nelvikgks  
>tr|D8HFL6|D8HFL6\_STAAF  
msiininiliflai fgyalytlvkffkrskqgkcgctcdirdccgteqhtanhfpgk  
>tr|D8HFL7|D8HFL7\_STAAF  
menycilgnpvgktslnfaltgsyeyignwsgvtvekkvgklkenvgqlidlpgytdlspiskdetvvtdyllndsfsg  
iinivdssqlkrnmqltvq  
llelnqpiyiglnmidvatkrigikidyhklmkkllktpifpvvartgkgtkhllegeikhlegeyrphfkinygekieetik  
nmcqiimtetsdkygarf  
iaiqfllnmgiane lnsevvnlsslryqvaeqvgavsvrremerirnhyietllqdvvtypdedkqyfssridkilth  
kyigmpiflaimwli fqt  
ftwigtp lsdqldafiggtftdsvktimnylgvipflqdlitdgiagvgsvlvfpqivvllffisllledsgymariav  
lmdrimesfglsgksfipm  
igfgcnvpsimaarsienekerlttiliapfmscsarlpyalvfgiffkenqslvvlslylvlgiimaflvstvltktv  
lkndnaifive lptyrvps  
ikt lwrstwekakgfvrkagtfiggsvviwllsyvgphginvninqsflhmvgvffgmlvqplgfgtwqagatlvpqgl  
akevivssmaiyssgdag  
lvnviqnfplsayafmifillyipcvstvaairketyswkwtalavayplvtayvltfifyqvghlfv  
>tr|D8HFL9|D8HFL9\_STAAF  
makflykmgtfiakhkwtliawviivaafipiatnapkfdndikmtglksldtnekiekhfnqdsekaqirvfvkttk  
ddgivqpsitkdi kktldd  
ikkddkhi dkvsdpyenkqiskdkttafaditynvsqtslkddsrdnikshlkd lrdnhnvqtel tgtgmtstevgggnse

Tsompanidou\_et\_al\_Supplemental\_FASTA\_File

lvgiivafvllitfgsvi  
aaglpiaisaliglasvgvisllyvfdipnvtltlavmiglavgidyalfilfryrqvmktetdyvkgiglavgtagasa  
vifagvtvviavcglslvg  
idflavmgfasaisvifavfsaltlpalisifhkrikvnlqsnfkdkdidtpwskfitgnalaavllgllilvaaaipv  
shmrllgipddgvpkpadstg  
kkaydiisdkggegfnqgipmlinvdkkddpqqllqdlqsvykdikdkknvdivtppqmskndyalmvviapkqgnae  
stndlvdhldrdyhkdaqdk  
ygfkteisgqsvinidmskklneaipfatvivvaffllmivfrsilipkavlgfvlsimatlgfttfvmqdgfmkgll  
fgiettgpmiaflpvitig  
ilfglamdyevflmsriheeysktgndysikvlgkesgpvivaalimfsvffafvfqedvmiksmgmalafgvlfdaf  
vvrmmliipalklfgkgs  
ylpawlnriiprvdieghalekyktvesqeseakdskeydttkvypqgatnsvkhqdvhgqddarsivlddktmalyq  
evkqqttnplflydalmdy  
qnkhqlnskqgatnieqlnknieklnqllnknlnks  
>tr|D8HFM0|D8HFM0\_STAAF  
mketdlrviktkaalssllqllleqhlftitvnqichnalvhrttfykhfydkydlleylfnqltkayfatdisdrlnh  
pfqtindtinnkedlqkva  
dfqqedaefnkvlknvcikimnddiknsdridvdgdi pnnllfyiygsliegflhwikdekidwpseeidkifhkvin  
kik  
>tr|D8HFM1|D8HFM1\_STAAF  
mgivlviwsfkqlsqshldsgffffivylcisyfnsdkhdknkr  
>tr|D8HFM3|D8HFM3\_STAAF  
mtekekm1aekwydanfdqdlinerarakdicfelnhtrpsdtnkrkelidqlfqttdnvelaipfdtdygnvklgkn  
vfvntncyfmdggqitig  
nvfiqpnccfyatathplnfhrnegfekagpihigsntwfgghvavlpvgvtigegsvigagsvvtkdipphslavgnpck  
vvrkidnevpsalndetl  
n  
>tr|D8HFM4|D8HFM4\_STAAF  
miamrilitgtvailiilglvktiqdyemndtsrqlsdnkdddkihlhnnfknlhakefnpsdff  
>tr|D8HFM5|D8HFM5\_STAAF  
mantkkttditgmtcaacsrieklnklddvnaqvnlttekatveynpdqhdvqefintiqlgygvavetvelditg  
mtcaacsriekvlnkmdg  
vqnatvnlteqakvdypeetdadklvtriqklgydasikdnkdqtsrkaealqhklikliisavlspllmfmvhl  
fnmhipalftnpwfqflla  
tpvqfiigwqfyvgayknlrngganmdvlavgtsaayfysiyemvrwlngsttqphlyfetsavlltllifgkyleara  
ksqttналgellslqakea  
rilkdgnevmpinevhvgdtlivkpgkipvdgkiikgmtaidesmltgesipveknvddtvigstmknkgtitmtatk  
vgdtaalaniikvveeaqs  
skapiqrladiisgyfvpivvgiallftivwitlvtpgtfepalvasisvlviacpcalglatptsimvgtgraaengil  
fkggefverthqitidivld  
ktgtitngrpvvtdyhgddqtlqllataekdsehplaeavnyakekqltltetttfksvpghgieatidhhhilvgnrk  
lmadndislpkhisddlth  
yerdgktamliavnyslgtiiavadtvkdhakdaikqlhdmgievamltgdnkktaqaiakqvgidtvadiilpeekaaq  
iaklqqgkkvamvgdgvn  
dapalvkadigiaigtgtevaieaaditilggdlmlipkaiyaskatirnrqnlwfafgyniagipiaalgllapwvav  
aamalsssvvtnalrlkk  
mrleprrkda  
>tr|D8HFM6|D8HFM6\_STAAF  
msqeilnvegmscghcksavesalnnidgvtsaevnlengqsvsvyqddskvavsqmktiedqgydvv  
>tr|D8HFM7|D8HFM7\_STAAF  
mtkikimsvrredmpyikawaekhhvevdi tkealtddnvegvygdglslsqqiplsghvykrlnelgikqiaqrsagf  
dtydlelankynlivsnvp  
syspnsiaefavnqainvvrhfnqiqtkvrehdfrweptilsksidlkvavigtgrigrvvadifangyqsdvvaydpf  
pnakiatyvdykdtieav  
egadivtlhvpatkynhylfnael fkhfkkgavfvncargslvdtkalldaldngvikgaaldtyeferklfpsdqrgkt  
lndplleslidredviltp  
hiafyteaavenlivdal datldvlqtgdtrlrvn  
>tr|D8HFM8|D8HFM8\_STAAF  
misnklani pdsyfktmgrkiehgpplnimavgipdgptpqqiidhfqkaltipenqkygafhgkemfkqaidvfyqr  
qydvtdkdevecilygtk  
nglvavptcvinpgdyvllpdpgytdylagvlladgkvpplnlpphyldpwskvdsqiidkklilyltypnnpstgstat  
kevfdeaiakfktdtkiv  
hdfaygafgfdaknpsilasengkdvaieiysskgymsgfrvgfavgnkdmialkkyqthtnagmfgalqdaaiyal  
nhyddfleeqsnvfkarrd  
rfeamlakadlpfvhakggiyvwletppgydseqfeqlvkeksilvapgkpfngengnryvrisalddqqldaairla  
elaylyk  
>tr|D8HFN0|D8HFN0\_STAAF  
mtmmamnfkychkimkkhsksfyafdlpedqrkavwaiyavcrkidssidvygdiqlnlqikediqsiekypyehhh

Tsompanidou\_et\_al\_Supplemental\_FASTA\_File

qsdrriimalqhvaghkni  
afqsfynlidtvykdqgftmfetdaelfgycygvagtvgeltpilsdhethtydvarrlgeslqlinilrdvgedfen  
eriyfskqr1kqyevdiae  
vyqngvnnhyidlweyyaiaekdfrdvmqikvfsieaqpielaariyieildevrqanytlhervfvdkrkkaklfh  
einskyhri  
>tr|D8HFN1|D8HFN1\_STAAF  
mkwlsriltvvtmsmacgalifnrrhq1kaktlnfnhkalitiiiparneekrighllhsiiqqqvpvdviumdgstde  
tarvarsyगतवदवdda  
dgkwygkshacyqgvthactnriafvdadvtf1rkdavetlinqyqlqgekllsvqpyhitkrfyegfsainlmtvvg  
mnvfstladdgrtnghafgp  
vtlnkedyyatggksanrhiiegfa1gsaytsqslpvtvyegfpvafmryqegfqs1qegwtkh1stgaggtkpkim  
taiv1w1fgsiasilglc1  
slkyrqmsvgkmltvylsyttqfih1hrrvgqfsnllmvchp1lfmfftkifiqswkqthrygvvewkgrqysiskeq  
>tr|D8HFN2|D8HFN2\_STAAF  
mtkhiiviggglgisaairmaqsgysvslyeqnnhiggkvrhesdgfgfdlgpsiltmpyifek1feyskkqmsdyvt  
ikr1phqwrstfpgdttid  
lyegiketgqhna1lnskdieelqnylnytrridritekgyfnygltd1sqiikfhgplnalinydyvhtmqaidkris  
npflrqmlgyfikyvgss  
ydapav1sm1fhmqqegglwyveagihh1analeklareegvtihtgtrvndiktyqrrvtgvr1dtgefvcadyiism  
eviptykyllh1gtqrlnk  
1erefeypassgyvmh1gvacqypqlahhnffftenaylnyqqvfhekvlpddptiylvntnkdhtqapvgyenikvlph  
ipyiqdqpfttedyakfrd  
kildklekmg1td1rkhiyedvwtpedieknyrsnrgaiygvvadkkknkgfkfpkesqyfenlyfvvgsvnpgggmpm  
vt1sgqqvadkinareakn  
rk  
>tr|D8HFN3|D8HFN3\_STAAF  
mktmkkyiktaffcsmyw1ivq1nian1gtripdkyfrqkhiifksfnfekhgkfwkwyvrkwkhhildghklnrniy  
dqrhlmtintdeiekmiie  
tkraeliwhisilpviiifkqprlvkyinvfyamianvp1ivqrynrrpr1tq1l1rilkrgerhd  
>tr|D8HFN4|D8HFN4\_STAAF  
mkkivtat1ataglatiafaghdaaaeqnngynsndaqsysytytidaqgnyhytwtgnwnpsq1tqnntyyynnynt  
synnasynnyynhsyqyn  
nytnnsqtatnnyy1tgglgasyttsnvhvttaapssngrs1ngyasgnlytsgqctyyvfdrvvgkigstwgngas  
nwasaaaassgytvnntpka  
ga1mqt1qgyyghvayvegvnsngsvrvsemnyghgagvvtstis1anqagsynfih  
>tr|D8HFN5|D8HFN5\_STAAF  
m1tvqkkccehsnwytfn1dal1gtdyimitktry1isv1vcfvak1  
>tr|D8HFN6|D8HFN6\_STAAF  
mdtkdfkrlekmyspry1pgldglrafavigi1iyh1naqwlsggl1gvd1ffvisgylits1l1iseyrtqkid11efw  
krr1kr1lipav1f1icv1  
tft1ifkpelii1qlkrdaiaa1fyvsnw1yisqnvdyfnqfaieplkh1wslaieeqfy11fplvitf11hrfkprni1q  
t1fivslis1glmiaihfi  
tgdnsvyfgdtr1lqt11l1gcilafiwppfal1kdiskivsl1diigisgfav1mt1ffivgdqdwiynggfyiisf  
at1f1ia1avhps1fakf  
1smkp11i1gkrsys1ylwhyp1ivfvnsy1vqgq1pvyvyi1e1l1talmaeisyrfi1etpirkkgfkafaf1pkksq  
fartv1v1l1l1ipsiiv1s  
gqfdal1gkqhaekkek1tefk1tkkkvkkdkqedkqtanskedik1kss1l1igdsvmvdignvftkkipnaqidgkv  
q1vdatp1ivksqykdyak  
kgqkvve1gtngaf1tkdq1ne1l1dsfgkadiy1vsirvprnyegrink1iy1eaaekrpnv1h1vdwykasaghpey1fayd  
g1h1eyagska1td1ivkt  
methatnkk  
>tr|D8HFN7|D8HFN7\_STAAF  
mkk1timass1lava1gvtgyaastgheahaem1vndqah1vd1ahnhqdq1naapikdgaydihfvkdqf1qynftsn1g1ttw  
s1wsy1eaangqtagf1snvag  
ady1ttsynqgsnvqs1vsynaqssns1nveavsaptyh1nyststt1sssvr1sngntagatg1ssaaq1maqr1t1gvsastwaa1  
iaresngqvnaynpsgag  
1fq1t1mpgwg1ptntvdq1inaavkaykaqgl1sawgf  
>tr|D8HFN8|D8HFN8\_STAAF  
mts1ikti1tpkdf1frv1sgvaig1vag1vpna1lgei1fkyfmdy1hpi1fkt1l1gvv1vai1qftvpa1l1galv1amkfd1spla  
ia1vvasaayvgsgaaqfkn  
gawmi1tg1gd1intmi1taaiav1f1illi1qhrvgsma1l1vfptvvgg1sgaig1vl1l1pytkmitta1ignmvngftelqpiv  
ms1ilismv1fs1lii1s1plst  
vaiafaig1t1glaagsa1igisateav1i1igtskvn1rgvpl1svffggv1kmmipnmv1kypilml1pil1ttaivsg1vsa1v  
g1hgtkesagf1g1imvgp  
ina1fkfmevdsaw1sv1l1ivva1ffvvp1vtaw1ladi1yrkv1frlytndi1fkfmg  
>tr|D8HFP0|D8HFP0\_STAAF  
mke1fkeqfgy1q1snfddm1dikgyan1yqkdigkdvsmieqgl1kq1sitetev1l1peqink1l1lgv1nmnev1nqsntwvg  
t1tkq1lvssennf1niqel1p

Tsompanidou\_et\_al\_Supplemental\_FASTA\_File

tarkevfkellvnrrellqtldrdivititddehvesipalatyikdklatngielslngsskyfdrreghiytevsdsvvhgs  
drtldd11keifinecvy  
ett111dknssgldkgnqdlslngqikevsntsdydgikqamkdiptfrnrsvimntehdklike1aqmg1gg1  
agdlsnlfnvshvvtda  
qdifvgdfghaiyakyepimynkkkqalkgvyqfalnyvfdikiipe11rivnik  
>tr|D8HFP1|D8HFP1\_STAAF  
mvsdfesndkitevellmhynpkvinskikamrsqieslyhlnmhvitnendmlsvsvsyp1dklvlyieekdkleyym  
ktaqdr1n1fkdiiknysk  
nerqdvmymlssgkvknegvier1kvdiykesikrqrqnkreelhriefdkhleqvkkels  
>tr|D8HFP2|D8HFP2\_STAAF  
mpifinigewgddekldkavqdvsnanpshpvivddipld  
>tr|D8HFP3|D8HFP3\_STAAF  
mnkkl1mkffivsp11latiatgftvp1ssnqiiktakastndnikd1ldwysgsdaftnsevlndslgsmrikntdg  
sisliifpspyptsfsg  
ekvd1ntkrikksqhtsegwtihfqisgvtntek1ptpielplkvkvhgkdsplkywpkfdkkqlaistldfki rhqltq  
thglyrssdktggywkitm  
ndgstyqsd1skkfeyntekppinideiktieaein  
>tr|D8HFP4|D8HFP4\_STAAF  
mknvnlrdtqahr1ikvseeikdvgtqh1gmralleiaslpvpertkehttsngetktpdemtvrelrelkkqlkqrde  
enaqlsqmkqaqrseeia  
rkqykyg1nnyiftikf  
>tr|D8HFP5|D8HFP5\_STAAF  
mkqmq1skv11stvvvmgsiagsslvmddnaheaqsdnigklnqknest1h1sfekgikgtvdkngk1t1sdgktskvm  
ptnakdkkgnvv1vykkv  
kdgfdvqv1kssqerktnwvkcglgtvvggagtgglggsaasvipglgtvagaiiggvsggatgaaascfg  
>tr|D8HFP6|D8HFP6\_STAAF  
mnsrfiscvili1fsl1v1ftpnvlaesqpdptdelhkaskftglmenmkvlyddryvsatkvksvdkflahdliyni  
sdkk1knydkvkte11ned  
lakkykdevvdvygsnyyvncfsskdnvgkvtggkctmyggitkhegnhfdngn1qnv1irvyenkrntisfevqtdkk  
svtaqeldikarsflinkk  
nlyefnsspyetgyikfiennngt1fydmpapgd1fdqsky1mmyndnktvdsksvkievhl1ttkng  
>tr|D8HFP7|D8HFP7\_STAAF  
mkkrl1fviv11fifssnhtv1sngdvpgn1rnfytkyeyvnlknvdknspeshr1eysykndt1yaefdneyitsd  
1kgknvdvfgisykygyns  
rtiyggvtkaennk1dspriipin1iingkhqtvttksvstdkkmvtaqeidvklrky1qdefniyghndtgkgkeygts  
skfysgfdkgsvvf1hmdg  
snfsyd1fytyg1pesf1kiykdntvdstqf1dveiskr  
>tr|D8HFP8|D8HFP8\_STAAF  
mhnkklkdf1gsdkrma1vkgyiney1ttv1ralnnsdytkgtihtrsign1kqivdnriipknitqntifk1sn1tle  
vnlyerntiyhgdfaiyyp  
vesali1ietdtp1rinhinnnpvqkifiittndwsfnt1elekivdeti1yd1kqedpkqeyi1yknkhgk1py  
>tr|D8HFP9|D8HFP9\_STAAF  
mskninqansk1ntsnkklkqaysksdskn1kviymphw1efysiaihsdvtsnkkrykysysrgtvvyvklgsnigsef  
sgnhfcv1ldnkdkgket  
vtivp1sskgnkny1k1nesv1n1tatd1kkqi1disikvqalaqkyrdidik1stedkkl1sn1nqkanelyrvigvys  
khkgkdyvnisaittik  
rriksindsdptgti1iseddmneiek1kikffsn  
>tr|D8HFQ0|D8HFQ0\_STAAF  
mvpeekgsit1skeaa1ifatakfkpfhnriknnpqktnp1k1henkks  
>tr|D8HFQ1|D8HFQ1\_STAAF  
melsifnygqffvalveyrmenkskfiqytfgnepddiev1dfihhqlvemiddvqtivytknksrkvnppk1qrqiake  
qkkpkystaqaiakeele  
1kkkqkrknykekrdafqkrkreikkvkakekhkgh  
>tr|D8HFQ2|D8HFQ2\_STAAF  
milissc1igenvrydggnd1vr1kk1idsgkai1hacpe11gg1liprepaei1ggd1fdvwnnaakvvtisnkdvtd  
ykhgavt1k1lkyqcdt  
v1kvnspscgsqei1ydgntgnkkkgvgvvtas1ineginvydent1fdqkmietivhek  
>tr|D8HFQ3|D8HFQ3\_STAAF  
mekvailvdggyyrki1sakvygkvtakeradelysycnrqlkethfkeeynklyri1fydcppidkivyhp11kknvfn  
sntdtkkwted1ffkemskk  
rkvalr1ge1seysveyn1kysitkkl1ngsid1nd1kekdfs1slqqkgvdmkig1dias1sfkhqvdki1liagsdf  
vpaak1artegid1fv1ds1  
gadi1rnn1slhidgrrtcdek1kfy1nq1fk  
>tr|D8HFQ4|D8HFQ4\_STAAF  
myletiat1tsrktsetfs1svsk1kdkni1v11knqgvsng1igv1liyg1fissnpkeicaailvyi1gva1ygg1ssn  
is1ffkqgt1pv1al1ism1  
w  
>tr|D8HFQ5|D8HFQ5\_STAAF

Tsompanidou\_et\_al\_Supplemental\_FASTA\_File

mnimltgatghlgthtnqaiandhfhigvrnvekvpedwrgkvsvrqldyfnqesmveafkgmdtvvfipsi ihpsf  
kripevenlvyaakqsgva  
hiifigyyadqhnnpfhmspyfygaarlatsgidytyvrnamymdp lkpylpe lmmhkliypagdrinyitrndiar  
svia iiknpdtwgkrylls  
gysydmkelaa i lseasgteikyepvsletfaemydepkgfgall asmydagargll d qesndfqqlvndqpqt lqsflq  
eni  
>tr|D8HFQ6|D8HFQ6\_STAAF  
mkfkaiakas lal gmlatgvi tsnipvhaktevkqqseadlklyngpsfeykkvtgygfiegkdrfidfiyngqynki  
slvgsdkdkyneevnpdi d  
vfvvregngrqadnhsiggvtktnrgvydyihtpileikkgkeepqsslyqiykedislkeldfklrkqlisqsglysn  
glkqgqititmdgttthti  
dl sqklekermgesidgtkinkilveik  
>tr|D8HFQ8|D8HFQ8\_STAAF  
mkmrtiaktslalglittgaitvttsvkaekvqstkvdkvptlkaerlaminittgantattqaantrqertpklekap  
ntneektstskkeki sqpk  
qeaqkslnisatpapkqeqsqttesttpktkvtippstntppmqstksdtpqsptikqaqvtitpkyedlraymkps  
fefekqfgfmlkpwtvtrf  
mnvipnrfiykia lvgkdekkykdgpydni dvfivlednkyqlkkysvggitktnskkvdhkaelsvttkdnqgmisrdv  
seymitkeeislkeldfkl  
rkqliekhnlygnmgstivimkkkgktyfelhkk lqehr mad viegtnidkievnik  
>tr|D8HFQ9|D8HFQ9\_STAAF  
mfvkvaflclksdetsnvpsveshqnhfylvnimgfliyltmiqi  
>tr|D8HFR0|D8HFR0\_STAAF  
mkittiaktslalglittgvi ttttqaanattpsstkeapqqaanattpsstketpqqtpnattpsstkeapqqaan  
attpsstkeapqtpnat  
tpsstkeapqqaanattpsstkeapqtpnattpsstketpqspttkqvpteinpkfdlrayytkpslefkneigi  
ilkkwttirfmi vpydyfi  
ykialvgkddkkygegvrnvdvfvleennynlekysvggitksnkkvdhkagvritkednkgiishdvsefkitkeq  
islkeldfklrkqlienhn  
lygnvsgskivi kmknggktyfelhkk lqenr mad vidatnidnievnik  
>tr|D8HFR1|D8HFR1\_STAAF  
mkmtaiakas lal g llatgtitsthtvnaseheakyenvtkdifldr dyysgaske lknvtgyryskggkhy lifdkhq  
kftriqifgkdierlktrk  
npgldi fvvkeaanrntvsvsyggvtkknqgaydylnapkfvikkev dagvythvkrhyiykeevslkeldfklrqyli  
qnfdlykkfpkdskikvim  
kdggyytfe l nkk lqtnr msdvidgrniekieasir  
>tr|D8HFR2|D8HFR2\_STAAF  
mkltlakatlalglittgvi ttesqtvkaaestqgqnyks lkyyskpslelinvdglyrqvtdkgvyvwkdrkdyf  
vgllgkdiekypqgehdkq  
daflvieeetvngrysiggl sktnskefskevdkvtrkidessekskdsfk itkeevslkeldfklrkk lmeekly  
gavnrrkgkivvkmmedkf  
ytfel t kklqphrmgdtidgtkikeinveleyk  
>tr|D8HFR3|D8HFR3\_STAAF  
mkltlakatlalglittgvi tsegqavhakekqervqlydikhlyrysses fefsnisgkvenyngsnvvrfnqdgq  
nhqlflgedkakyykqgle  
gqnvfvvkelidpngrlstvggvtkknqssentpflvkkvyggnldasiesfsinkeevslkeldfklirkh l vknydl  
ykgttkygkitfnlkdgek  
keidlgdklqfehmgdelnskdinqiavtinqi  
>tr|D8HFR4|D8HFR4\_STAAF  
mkftviakailvlgilttsami tenqsvnakgkyekmnrlydtnklhqyysgpsyeltnvsgqsqgyydsnlfnqqnq  
kfqvfl l gkdenkyeketh  
gl dvfavpelvdldgri fsvsgvtkknvksifelrtpnl l vkkiddkdgfsid efffiqkeevslkeldfklirk l l i k k  
y klyegsadkgrivimkd  
enkyeidlskldfermadvisseqiknievnlk  
>tr|D8HFR5|D8HFR5\_STAAF  
mkftalakatlalglittgvftaegqtghakveldetqrkyymnlhqyysesfeptnisvksedygysnlfnkqrnk  
afkvfl l gddknkyeketh  
gl dvfavpelidkgyisvggitkknvrsvfgfvsnpslqvkkvdakngfsinel f fiqkeevslkeldfklirk l l i e k  
yrlykgtadkgrivimkd  
ekkheidlsklsfermfdvmskknievnl  
>tr|D8HFR6|D8HFR6\_STAAF  
mkftalakatlalglittgtltteahsghakqesvnkhdkelyryytgktemlkninalkhgknlrfkyrgmkiqvl l  
l gndknrfqrsykgldvf  
fvqekrdkhdifytvsgviqtnktsgvvsapilnvtkekgedafvkgypyikkek it l keldfklrkhliekgylykti  
skdgrvki slkdgfsynld  
l rskl kfkymgevi eskqikdievnlk  
>tr|D8HFR7|D8HFR7\_STAAF  
msitekqrqqaelhkk l wsi and l rgnmdasefrnyilgli fyrf l sekaeqeyadalagedityqeawadgeyredlk

Tsompanidou\_et\_al\_Supplemental\_FASTA\_File

aelidqvgfyiepqdlfsa  
mi reietqdfdiehlatairkvetstlgeesendfiglfsdmdlsstrlgnnvkertaliskvmvnlddlpfvhsdmeid  
mlgdayefligrfaatagk  
kagefytpqqvskilakivtdgkdklrhvdyptcgs1llrvgketqvyryfgqernnttynlarmmllhdvryenfd  
irnddtlenpafightfda  
vi anppysakwtadskfenderfsgyglapkskadfafi qhmvyhl ddegtmavvlphgvlfrgaaegvirryliekn  
yleaviglpanifygtsip  
tcilvfkkcrqqddnvlfidasndfekgnqnhlsdaqveriidtykrketidkysysatlqeiadndynlnipryvdtf  
eeeapidldqvqqdlknid  
keiaieeqeinaylkelgvlkde  
>tr|D8HFR8|D8HFR8\_STAAF  
msntqtknvpelrfpgfegeweeklglglfqksysfsrakegnkktkhihygdihsfkftvl dsdgnipniekavfe  
liqkgdivfadasedysdl  
gkavmidfkpnlisglhthlfrplnnaisnflifytktl sykkfirqqgtgisvl giskksllnlvli prseleqqkv  
gkffskldrqielleeqie  
llqqkkgyiqkifsqelrfkdengddypeweettikeiaqintgkdktdaitngsydfvrs pivykintfsyegeai  
ltvgdgvvgkvfhyvngk  
fdyhqrvyki sdfknnygl llyfyfsqnlketkysaktsvdsvrkdmvanmkvprpiyieqekigqfikkvdnkikiq  
kqviellkqrkka llqkmf  
i  
>tr|D8HFR9|D8HFR9\_STAAF  
mklkniakasalgil ttgmitttaqpvkastlearsqatqdlkdykyggsfdlkniggykegnkvtfiyhnqqidvtlt  
gkeklefnddeeisnvdf  
vvrensdrgitnsnggitysnkdndvksvnmqitkktssntetvtssyysidkenislkeldfklrkhlidngly  
ntepkdski kvtmkdggfy  
tfe lnkk lqthrmgdvidgrniekievn l  
>tr|D8HFS0|D8HFS0\_STAAF  
mrenfk l rkmkgvlsvaitmlyimtngqaeasegsqtvknpkv nateei kaesqpvnqnevssdqtkknfvnl dpikp  
gaqkvtgttlpnqllisi  
dkkdvssvdsegsefistkddgtfeyp lknrkivhnqei evtsssmegleedeeteveeqesndatqkvttpryekaye  
ipkeqlkekdgghqvfi ep  
itegs gi ikghtsvkgkval sinnkfinfeerakdgiskedtkasdgvwmpinekyfdfdkkn pfdnlelkknde is  
l tfapddedealksli fkt  
kvts ledidkaetkydhtkvek vkv lkdvkedlhvdeiygslyhtekgk gil dkegtkvikgk txfanavkvyselgea  
qlfpdi qvdengkfsfdae  
kagfr lqnet lnfavvkpitgdllhgqfvskyidvyespekkerefeeklentpayhklhgdkivgydvqgnpstwfy  
plgekkverttpklek  
>tr|D8HFS1|D8HFS1\_STAAF  
mkvkkvlvatamvgvlatgvgvysnqadakovsqnglv l hddanflehel syidvll dknadqatkdn lrsyfadkg lhs  
ikhii inkakqdgfdvskye  
hvk  
>tr|D8HFS2|D8HFS2\_STAAF  
mkykierreamgy lkkvalyvsililivi vagcgskdtkedsketqiknsfakt l dmpiknledlydkegyrdgefkk  
gdkgtwtlltsfaksnkpg  
eiddegmvlflnrnikkatgyyytskvhdefnekehqkkyhvelknnkivll dnvdek l kqkienfkflsqyadfdklk  
nyqvesittnen vpsyeae  
fklnnsnenvkkl revy pitkkspvkl l hidgidkssigykniefnsvk vdeetavrdvfnfgpsdeds  
>tr|D8HFS3|D8HFS3\_STAAF  
mgy l krigl cisllilii fvtscggknitgdskeqqikksfakt l dmyptenlenfydkegyrdgefkkddkgwtlirse  
mkiqlkeenlesrgavlei  
nrnrtakghyivrevvedsdgmthnhtkrypvmennkmip l kpiddek vkkeieefkffvqygnfkelenykede vsy  
npevpisayqqlknsdyn  
veqlrkryniptkkapkl l lkgsgn lkgssvgyknieftfvenkkeniyftdsvyfnpsedk  
>tr|D8HFS4|D8HFS4\_STAAF  
mkdeqkkeeqtntkdskeeqikksfakt l dmpiknleelydkegyrdgefekgdkgmwtiytdfaksnkpgelndegmv  
lnldrnrtrtakghyfvttf  
yrngklpdeknykiemknnkiilldevkddklkqkienfkffgqyanlkelkkyngdvsinenvpsydveykmsnkdei  
vkelrsrynistekspilk  
mhidgnlkgssvgyrkleidfskrensklsvief l sykpakvnder  
>tr|D8HFS6|D8HFS6\_STAAF  
mtliepdm t l rmpdisttvetlnliskmnaqkenirtviapehkhkykdieng l kgeekv lieqmaqhcea fkanfk gaa  
qgdwksamseidsikddl  
kkins  
>tr|D8HFT0|D8HFT0\_STAAF  
makipvtv lsgylsgskttllnhilqnreg rriavi vndmsevni dkd l vadgggl srtdek l vel sngci cct l rddll  
keverlvkkggidqvies  
tgi sepvpvaqtfsyidde l gid l taicr l dtmvtvvdanrfvhdinsed l l mdrdqsvdetdersiad l lidqvefcdv  
liinkid liseeelaklek

Tsompanidou\_et\_al\_Supplemental\_FASTA\_File

vlsalqptakiikttnsevd1kev1ntqrfdfekasesagwikellesgghashtpeteeygissfvykrrlpfhakrfnd  
wlesmpnnvvrskgiwla  
qynhvac11sqagsscnihpvttywvmsseaqqtqilaerqdvaaewdpeygdrrhtqfviigtlddegaitkeldaclvn  
aqeidadwqqfedpyqwqi  
rpar  
>tr|D8HFT1|D8HFT1\_STAAF  
mvlssffinanikrktthtccpsmdkmqisalsklshfr  
>tr|D8HFT2|D8HFT2\_STAAF  
mseviaainvlllltvtrafqtkratkfctrpiyialdqedh  
>tr|D8HFT4|D8HFT4\_STAAF  
mttqlninsvienakrvitp1spisifaarnpwegleadtfedvakwlrdrvrdvdi fpnkali esavargel desvfnq1  
vtdmllehhyinipqhyin1  
yidniktlkdv pasymhnsndvvd11lekskrmaesyhydv rpsdaldveqgeplseqvnrqmikwtklyidqf1  
sswmpkreysfyhawlhl  
aqhdhsftkaqrqvikglpndpkmtiesvlnhfsiaqedyqayveghlla1pgwagmlyyrsqqhhfeqhlltdylairl  
vveqllvgdefksvtkdce  
srsewfkqtvaswcyysdmpsdvllqhdvneiqt fihfaatmnknvfknlwliawemtyesqlkqkikaghesvagal d  
vnqvnvtendnanqshsvs  
lnatqavdennselnqvgstkaqiafcidvrsepfrrhieaagpfetigiagffglpiqkdavdeqfkhdslpvmvppa  
yrikefadrydmnvyrqqq  
qtmssmfytfklmknvmpslllpelsgpflslstivntimprksraslqkikqkwllkpetkltidrefdrtsdlpvvgf  
tegeqidfalqalkmdlt  
eafapfvvlaghashshnphhaslecgacggassgfnakllami cnrpnvrqglkqagvvi pettvfaaehhtstdt1  
awvyvptlssialdayes  
1ndampmihesnrerlnk1ptigrvnhpveeaqrfasdwsevrpewglaknasfiigrrqltkgidlegrtflhnydwr  
kdkdgtllntiisgpalva  
qwinlqyyastvaphfygsgnkatqvtvsgvgvmqgnasd1myglswqsvmaadrmyhsprllvvvqapdyvvarlla  
nnehfarkvsnhwlrlmsv  
negrfkswi  
>tr|D8HFT6|D8HFT6\_STAAF  
mlsiismchkhftdnikiikfillcilqikhciieiticyfqqfstiyytegvgrinriifvyialitlvrfftpi  
hpsfsnliywflyfipi  
ilcvigfkaekliatmviipnflgilyrlyayvthilfm  
>tr|D8HFT7|D8HFT7\_STAAF  
midkkltspkmtvplfia1livfigmfysvvtndewlknidmgs1twftdyfgepqrqyinnlfnyymtfsaeigdvkgv  
vlisiivtiilfikqrhla  
vwfvtylvsgvimnklidktvlrprpynhlavdtgfsfpgshsnastllyfalmiisvaaktitkvl salvmgilwls  
ilfcrlyfhahyfsdvigg  
tslaiiwalflmvpyfihrrqrv  
>tr|D8HFT8|D8HFT8\_STAAF  
mriktpspsylkgtnghail1hsftgtnrdvkh1vae1ndqgfsyapnypghl11kdfmtynvddweevekayqf1  
vnegyesiatgvs1gg1m  
tlk1aqhyp1kriavmsapkeksddglielvyysqrmsnilndqqassaqlaaidyegeitkfqhfiddimtnlnvi  
kipanilfggkdpasets  
ahfiyeh1gsvdkelng1kdshh1mthgegrdileenvirffnal t  
>tr|D8HFT9|D8HFT9\_STAAF  
mswkygvi pevdlycnvvgil1aly1k11cgemlgi  
>tr|D8HFU0|D8HFU0\_STAAF  
mkrqqsqwksstgfilasagsaiglgamwkpymagi ygggaf1amflifti fvg1p1limeftvgkmgrtyttqiyskl  
tgkkwlniigwngnlavfi  
lfgfysviggwiviyigqvlwqlvifqrinhlqemnf eavisnpw1tvlgqgifi fatmiivmlgvekglekaskvmp1  
lfvfl1iiviks1ldgal  
egvkfilqprvsei tadgil falgqsfft1slgttgmit yasyaskdmtikssaisivmni fvs1laglai fpalhsfg  
yepqegpg11fkvlpmvfs  
qmhlgt1fy1glflmlflfaaltssis1le1nvsnftkndntkrkkvavigsilvfiisipat1sfgilkdvrfagatfd  
nmdfivsn1mplgalgtt  
lvvgq1ldkk11qqyfgkdrfr1fsgwyy1ikyampvvi1lvfivqlfs  
>tr|D8HFU1|D8HFU1\_STAAF  
mityd1igntplvl1lehysddkvkiyak1eqwnpggsvkdr1lgkylvemai qegrvr agqtiveatagntgiglaiaanr  
hh1kckifapygfseekin  
imia1gadvsrtsqsegi1gaqkaarayaekynavymnqfesfhnptdyfht1gpeliselqqidyfvagigsggtftgi  
ary1kqhvhvqcyavepegs  
v1nggpahahdtegi gsekwpi flers1vdg1ftikdqdafrnvks1akhegl1vgsssgaalqgaln1kaqlsegtivv  
vfpdgsdrymskeifnyee  
ndye  
>tr|D8HFU2|D8HFU2\_STAAF  
mnkktk1ihgghtddygtgavttpiyqtstylqddigd1rqgyeysrtanptrssvesviaalengkhgfafssgvaais  
avvm1ldkgdhi1nsdv

Tsompanidou\_et\_al\_Supplemental\_FASTA\_File

ggtyraltkvfrfgievdftthtdsivqairpttkmlfietspnllrvtdikksaeiakehglisvvdntfmpyy  
qnpdlgidivlshsatkyf  
gghsdvvaglvatsddklaerlafisnstggilgpqdsyllvrgiktglrmeqinrsvieiikmlqahpavqqvfhpsi  
eshlnhdvhmaqadghtgv  
iafevkdtesakqlikatsyytlaeslgaveslisvpalmthasipadirakegitdglvrisvgiedtedlvddlkqal  
dtl  
>tr|D8HFU3|D8HFU3\_STAAF  
miefrqvsksfhkkkqtidaikdvsftvnrndifgviygsgagkstlvrlnhleasngqvivdghditnysdkmmrdi  
kkdigmifghfnllnsatv  
fknvamppliskkskteikqrvtemlefvglsdkkdqfpdelsggqkqrvaiaaralvtnpkillcdeatsaldpattasi  
ltllknvngtfgitimit  
hemrvikdicnravmekgqvvetgtvkevshpkttiaqnfsvstviqtepstslirrlndeqvgdfkdykifveetqvt  
qpiindliqlcgrekif  
ssmseiqgntvcymwlrfrnmdkqfddkainqyfkekniqfeevh  
>tr|D8HFU5|D8HFU5\_STAAF  
mkrliqlvivalvllaacgsnndkkvtigvasndtkawekvkelakkddidveikhfsdynlpnkaldgdidmnaqhf  
afldqykkahkgtkisals  
ttvlaplgiysdikdvkvdgkavvipndvsnqaralklleagliklkkdfglagtvkditsnphlkitavdaqqt  
aralsdvdiaavingvatk  
agkdpkndpifleksdsdavkpyinivavndkdlnktyakivelyskeaqkalqedvkdgekpvnlskdeikaietsl  
ak  
>tr|D8HFU6|D8HFU6\_STAAF  
mqkkviaaiigtsaisavaatqanaatthtvkpgesvwaishkygisiaklkslnnltsnlifpnqvlkvsgssnstsns  
srpstnsgggsyytvqagd  
slsliaskygttyqnimrlnlgnlnffiyppgqklkvsgtasssnaasnsrpstnsgggsyytvqagdsllsliaskygtty  
qkimslnlgnlnffiyppgqk  
lktvgnatssnsgsattnrngyntpvfshqnllytwgqctyhvfnrraeigkgistywwnannwdnaaaadgytidnrptv  
gsiaqtdvgyyghvmfver  
vndgsilvsemnysaapgiltvrtvpayqvnyryih  
>tr|D8HFU7|D8HFU7\_STAAF  
makrksqr1sslnvagfivdgyngykyhaknk1vh1slglstvgtvldfyisiksprkfkavavvtlitngarlft  
sirkvkhey  
>tr|D8HFU9|D8HFU9\_STAAF  
mtnndtimlrhyvpqdysmlleafqlsesdlkfvtpeenitaamsdnerypivvmdgrqcvaftlhrkgkvapfsdnqd  
avffrsfsvdgryrnkig  
kvvmeklasfitstfqdineivltvntdnphamalyrqgyqymgdsfmvgrpvhimaltik  
>tr|D8HFV1|D8HFV1\_STAAF  
mflkyrn1ftkpfni1glfciafigailftfnnenfynkpigqi1dvkhsstptkdaqnrdtkyknqlkvkilngqf  
agetttinhqyvkqsadse  
afrthekvllhisnkpsdayiekkrdtltviitglflltvllvgrkvglsilsilnsiailiaiyihqhsnlnfl  
lmtiamicstiltllvtg  
whmrtlitvastigtflsiglteliymtdgkgikyemflslppkdiflasvlislgaimdvaitiasgmheilqr  
phismrrwalagnigq  
imgtmtnilfsylsgalpmfliflknantvtytismnwsleiaraltggigivltipitilfmeifetlrrakq  
>tr|D8HFV2|D8HFV2\_STAAF  
meikqlryfievakrehisetalelniaqsaisrqitlleqelnvslfkkqgrnitltsegkllfnealriehldstie  
qfshgltknksiyigyde  
sdvshmlpliqtfhlnqndthvipnllhdhtiinsvlngnidigfteltpeirkhkqlhmlplfeehyhyapsddpitm  
athppliqfehshiyclap  
faesvkkqlrkitksdvytissqplaqyllrqkegyiissqnihlpeskswidikldhtelkrticaitkepytksdigi  
lltliqq1mtktstfh  
>tr|D8HFV3|D8HFV3\_STAAF  
mhneklikglydyreehdacgifyanmdnkrshdiidkslem1r1ldhrgvggadgitgdgagimteipfaffkqhvt  
fdipgegeyavglffsker  
vlgsehevfkkyfegeglsilgyrnvpvnkdaiakhvadtmpviqqvfidiirdikdvekr1flarkqlefystqcdle1  
yfts1srktivkgw1rsd  
qikklytd1sddlyqsklg1vhsrfstntfpswkrahpnrm1mhngeintikgnvnmraraqhkl1et1fgedqhkvfqi  
vdedgsdsaidna1ef1s  
lamepekaam11ipepwlyneandanvrafyefysylmepwdgptm1sfcngdklga1tdrng1rpgrytitkdnfivfs  
sevgvvdvpesnvafkgq1  
npgk111vdfkqnkviennd1kgaiage1pykawidnhkvdfdfeni1yqdsqwtde1fl1qrqfaytkeehkyiqe1  
vegkdpigamgydapiav  
lnerpes1fn1yfkq1faqvtnppidayrekivtse1sylvgggn1lapdetv1driqlkrpvlneshlaaidqehfk1ty  
1stvyeg1ledalealgre  
avdavkqgaq1lv1ddgr1vdgngfampm1laishvhq1likad1rmstslvaksetrevhhvac1layganaivpyla  
qrtveq1t1teglgqtvvd  
nvktytdv1segvikvmg1stvsyqgaq1feaig1shdvidryftgtqsk1sgisidqidaenkarqsdnylas  
gstfqrqqgqhha1fnpes



Tsompanidou\_et\_al\_Supplemental\_FASTA\_File

ifllqhackendyaqfkayseavnkrtdhirllefkactpididqvepvsdivkrfntgamsygsisaeahetlaqam  
nqlggksnsgeggedakry  
evqvdgsnkvsaiqvasrfgvtsdylqhakeiqikvaqgakpgeggqlpgtkvypwiaktrgstpgiglisppphdi  
ysiedlaqlihdlnkankd  
adiavklvsktgvgtiastvakafadkivisgydggtagspktsiqhagvpweiglaethqtlklnlrsrvkletdgl  
ltgkdvayacalgaeefgf  
ataplvvlgcimmrvchkdctcpvgvatqnkdlnralyrgkahhvnfmhfiaqelreilaslgkkrvedlvgrtdllqrs  
tlkanskaasidveklcp  
fdgpntkeiqqnhlehgfdltnlyeitkpyiaegrrytsftvneqrdrvgitgseiskqygeaglpentinvytng  
agqs laayapkg lmi hhtg  
dandyvgkglsggtvirkapfeerqneiiagnvsfygatggkafingsagerfcirnsugdavvegigdhgleymtgghv  
inlddvgnfngggmssgia  
yvipsdveafvennqldtlfstkvkhqeekafikqml eehvshtnstraihvlkhfdriedvvvkvipkdyqlmmqkih  
hkslhdneamlaafydd  
sktidakhkpavvy  
>tr|D8HFV5|D8HFV5\_STAAF  
mavkregvkai vtaiggkenleaathcvtrlrnlvdkdeskvdka lsnalvkgqfkadhqyqivigpgtvdevyqfid  
etgaqeaskdeakqaaqk  
gnpvqrlikllgdi fipilpaivtagllmginnlltmkg lfgpkaliemyppiadisniinviastafiflpaligwssm  
rvfggspilglvlglilmh  
pqlvsqydlakgniptwnlfgleikqlnyqqqvlpvliaayvlakiekglnkvvhsikmlvvgpvallvtgflafiiig  
pvalligtgtisgvtfifq  
hagwlggaiygllyaplvitglhmf l avdfqlmgssl ggtylwpivaisnicqgsaafgawfvykrkrmvkeegla lts  
gismglvtepamfgvnlp  
lkyphiaaistscvlgaivgmnnvlgkvvggvpafisiqkefwpylivtaiaivvpciltivmshfskqkakeived  
>tr|D8HFV6|D8HFV6\_STAAF  
mskeidwrksvvyqiypksfndttgngigdingiiekldyikllgvdyiwltpvyespmndngydisnyleinedfgtmd  
dfeklikvahqkd lkvmld  
ivinhtstehewfkearkskdnpyrddyffrasedgpptnwhskfggnawkydpetdeyylhlfdsqadlnwdnpevrq  
slyrivnhwidfgvdgfrf  
dvinliskgefksdkigkefytdgprvheflhelnrqtfngtdmmtvgemssttiencikytqperqelnsvfnfhhlk  
vdyvdgekwt nakl dfhk  
keilmqwgrgiydgggwai fwcnhdqprvvsrfgddtseemriqsakmlaialhm lqgtpyiyqgeeigmt dphftsia  
qyrdvesinayhqllsdgh  
eadv lailggksrdnsrtpmqwsddvnagftagkpwidi senyhqvnvrqalqnkdsifytyqkliqlrhthdiitygd  
ivprfmdhnl fvyerhyk  
nqqwlvianfsasavd lpeg lasegrvviqtgtvenntisgfgaivietna  
>tr|D8HFV7|D8HFV7\_STAAF  
mvkqkkfmiyealkedi l ngqi qygeqipsehdlvqlyqssretvrka ldlaldgmiqkihgkgs lviyqevtefpfs  
elvsfkemqeemgvaylte  
vvnevveahevpevqhalninsse l ihivrtrlnqhvkivdedyflksivsdigndvasdsiydylekvlnlnisys  
sksitfepfdeqayqlfgd  
isvaysatvrsivylentmpfqyniskhlanefkfnfdrtrtk  
>tr|D8HFV8|D8HFV8\_STAAF  
mqjylstl tel dydkslnsieesfddnpetswqarakvknlrkspcynfeleviaknenndvvghvllievemnsddkty  
yglaias lsvhpelrgqkl  
grglvqaveerakaqeystvvvdhcfdyfeklgyqnaaehdiklesgdapllvki lwdn l tdaphgivkfphefy  
>tr|D8HFV9|D8HFV9\_STAAF  
mnyqalrmyrppqs fedvvgqehvktlrnaiskekqshayifsgprgtgktsiakvfakainclnstdgepcnechick  
gltqgtnsdvieidaasn  
gvdeirni rdkvkyapseskykyiidevhlmttgafnal l ktleppahafilattephkipptiisraqrfdfkais  
ldqiverlkfvadaqqiec  
edealafiakaseggmrda l simdqaiafgdgtl t l qdalnvtgsvhdealdhl fddivqgdvqasfkkyhqfitegkev  
nrlindmiyfvrdtimnkt  
sekdteyralmnl eldmlyqm idl indtlvsirfsvnqnvhfevllvklaeqikgppqvia nvaepaqi asspntdvl l q  
rmeql eqelktl kaqgvsv  
aptqksskkpargiqksknafsmqqiakvldkankadikllkdhwqevidhaknndkks lvsllqnsepvaasedhvlvk  
feei hceivnk ddekrss  
iesvvcninvknkvvgvpsdqwrvrteylqnrkneggdmpkqqaqqt diaqk kdl fgeetvhvidee  
>tr|D8HFw1|D8HFw1\_STAAF  
mhypepisklidsfmlpgigpktaqr lafhtl dmkeddvqfakalvdvkre l tycsvcghitendpcyicedkqrdrs  
vicveddkdviamekmre  
ykglyhvlhgsi spmdgigpedinipslierlkndevselilamnpl egestamyisrlvkpigikvtr laag lsvggd  
leyadevtl skaiagrtm  
>tr|D8HFw2|D8HFw2\_STAAF  
mkqpilnkleslnqeeais l hvpghknmtighlsql smtmdkteipglldlhpeevilesmkqvekhdsydgyflvngt  
tsgilsviqsfsqkkgdil  
marnvhksvlhaldisqqeghfiethqsp ltnhynkvn lsrlnndghklav l typpnygetfnveevikslhqlnipvli

Tsomanidou\_et\_al\_Supplemental\_FASTA\_File

deahgahfglqgfpdstln  
yqadyvvqsfhktlpa1tmsgvlyihknapykeniieylsyfqtsspsylimaslesaaqfykydstvffdkraqlic  
lekkgfemlqvddplk1li  
kyegftghdiqnwfmnahiyleladdyqalailplwhhddtylfdsl1rkiedmilpkksvsivkqtq11ttegnykpr  
feyvtwcdlkkakgkvlar  
hivpyppgiipifkgetitenmielvneyletgmivegiknnkilvede  
>tr|D8HFW5|D8HFW5\_STAAF  
mdeqqqltnayhsnk1shaylfegddaqtmkqvainfaklilcqt dsqcetkvstynhpdfmyisttenaikkeqveqlv  
rhmq1piestnkvyiied  
fekltyqgensilkfleppndtia11stkeqildtihsr cqhvfykpidkekfinrlveqdmkpvaemistytqi  
dnaialneefd11alrksv  
irwcell1tnksmaligiid11kqaknk1qsltiaavngffedihtkvvvedkqiysd1kndidqyaqk1sfng1ilm  
fdqlteahkkl1nqvnpt1  
vfeqivikgvs  
>tr|D8HFW6|D8HFW6\_STAAF  
mpnviqvqfkgagkleytpndiqvdiiddwvveskrgieigivknp1mdiaeedv1plkniiriaddkdidkfcner  
daenailckdivreggl  
mr1vnceyt1dkskvi1nftaddridfrklvki1aqh1ktrielrqigvrdeak11ggigpcgrslccstflgdfepvsi  
kmakdqnl1nptk1sgac  
gr1mcc1kyendyyeevhaq1pdi geaietpdngkvvalnildismqvklegheqpleykleietmh  
>tr|D8HFX0|D8HFX0\_STAAF  
mavly1vgtpign1adityravdv1krvdmiacedtrvtsklcnhydipt1ksyehnkdkqtafiieql1gl1dvalv  
sdag1pl1sdpgyelvva  
reanikvetvppnag1talmasg1psyvytflgflprkeeksavleqrmhenstliiesphrvtd1ktiakidatr  
qvs1gre1tkkfeqvvtdd  
vtq1qaliqqgdv1kgefvi1iegakanneiswfd1sinehdhyiqtsqmkkpqaikkvaerq1ktnevnytyhqi  
s  
>tr|D8HFX2|D8HFX2\_STAAF  
maketfyt1tpiypsgnl1highaystvagdv1arykrmqgydvry1tgtdehgqkiqekaqkagkteieyldemiagik  
qlwakleisndd1rttee  
rhkhvveqvfer11kqgdylgeyegwysvpdetyytesqlvdpqyengkiiggkspdsghelvkoesyffniskytd  
r11efydqnpdfiqpps1k  
neminnfikpglad1avsrt1fnwgvhpsnpkhvvyvwiadalvnyisalgy1sddes1fnkywpadihlmakeivrfhs  
iiwpi11mal1plpkkvf  
ahgwi1mkdgmkskskgnvvd1nidrygl1datry1lmrel1pfgsdgvftpeafvertnfd1and1gn1vnr1tismink  
yfdgel1payqgpl1heldee  
meama1etvksytesmes1qfsval1stiwkfi1srtnkyid1ettpw1akddsqkdm1gnvmah1ven1ryaav11rpfl1t  
hapkeifeq1n1nnpqfme  
fss1aqygv1tepi1mvtgqpkpi1fpr1dseaeiayikesmqppateeekeepskpq1dikdfdkveikaatiidaehvk  
ksdk11k1qvdl1dseqrqi  
vsgiakfyt1pddi1igkkvavvt11kpak1mgqksegm1saekdgv1t1vs1psaipngavik  
>tr|D8HFX3|D8HFX3\_STAAF  
m1id1thv1l1ndeqy1dd1gevit1rareagvdr1mfvgfnkstieramk1ideydflygi1gwhpvda1idftee1lewies  
1aqhpkv1igigemg1dyhw  
dkspadvqkevfrkqialakr1klpi1ihnreatqdcid1illehaeevvggimhsfsgspei1adivtnk1nfyis1lgppv  
tfknakqpkevakhvsmer  
11vetdapy1sphpyrgrneparvt1vaeqiaelkg1syeevceqt1tknaek1fn1ns  
>tr|D8HFX4|D8HFX4\_STAAF  
mkinefi1vvegrdd1tervk1ravecd1ietngsaineqt1levirnaqq1srgv1v1tdp1dfpgdk1irstitehvkgvkhayi  
drekaknkkgkigvehad1  
idikea1mhvss1pdeayes1dksv1ielg1livgkdarr1reil1srkl1righsngkq11kk1nafgyteadvkqalede  
>tr|D8HFX5|D8HFX5\_STAAF  
m1dnkdi1atps1rtr1aldkygfnfkks1lgqnfl1idvni1inni1idas1daqtgvie1igpgmgs1teqlarhakrv1afei  
dqr1lipv1ndt1spydnt  
vinedi1kanikkavenh1qdcekimvvan1pyyit1tpi1ln1mqdipidgyvmmqkevger1naevgskaygs1siv  
vqyytetskv1tvpksvfm  
pppnvds1ivk1mq1rtepl1vtvdneeaffk1akaa1faqr1rkt1innyqnyfkdgkqhkevilq1wleqagidprr1rget1s  
iqdfak1lyeekkkf1pq1en  
>tr|D8HFX9|D8HFX9\_STAAF  
mki1intr1l1peal1gpyshatv1vngmvytsgq1pl1nvdgkivsadvqaqtkqvl1en1kiv1leeagsd1nsvakati1fikdm  
ndf1kinevygqy1fnehkp  
arscvevar1pkdvkveielvskikel  
>tr|D8HFX1|D8HFX1\_STAAF  
mrrhai1aagkgtrmkskkykvl1hevagkpmvehv1lesvkgsgvdqvvtivghgaesvkgh1gers1ysf1qeeq1gtah  
avqmaksh1ledkegtt1iv  
cgdtpl1tket1let1iahhedanaqatv1sasiqqpygygrivrnasgr1eriveekdatahaekdineissg1fafnkt  
1fek1tqvkn1dnaqgeyy1  
pdv1sl1l1ndggivevyr1tndvee1imgvndrvml1sqaekamqrr1tnhyhml1ngvti1idpdstfi1gpdvi1gsdtvi1epgv

Tsompanidou\_et\_al\_Supplemental\_FASTA\_File

ringrteigedvvgqyse  
innstiengaciqqsvvndasvgantkvgpfaqlrpgaqlgadvkvgnfveikkadlkdgkvshlsyigdavigertni  
cggtitvnydgenkfkktiv  
gkdsfvgcnvnlvapvtigdavlvagstitddvpndslavararqttkegyrk  
>tr|D8HFY5|D8HFY5\_STAAF  
mtilttikednhfqdlnqvfqgantlvgtlspakvtmiaekyaqsnqllitnnyqadkletd11qfvdaelyky  
pvqdimteefstqspqlms  
erirtlatalagkkglfiyplnglkkwltpvemwqnhqmtlrvgedidvdqflnklvnmgykresvshigefslrggii  
difpligepirielfdtei  
dsirdfdvetqrskdniekvdittasdyiiteevirhlkeelksayentrpkidksvrndlketyesfklfestyfdhqi  
lrrlvafmyetpstiidyf  
qkdaiiavdefnriketeesltvesdsfisniiesngngfigqnfikyddfetliegyptvtyfslfattmpiklnhiikfs  
ckpvqqfygqydimrsefq  
ryvnqnyhiivlvvetekvermqamlsenhpsitklhrsmssgqaviiegs1segfelpdmg1vvitere1fkskqkkq  
rkrtkaisnaekiksyqd1  
nvgdyivhvhgvgrylgvetlevgqthrdyiklqykgtdqlfvpvdqmdqvqkyvasedktpklnklggsewkktkakv  
qqsvediaeelidlykere  
maegyqygedtaeqttfeldfpyeltpdqaksideikddmqsrpmdrllcgdvgygktevavraafkavmegkqvaf1v  
ptt1laqqhyetliermqd  
fpveiq1msrfrtpkeikqkteglktgfvdivvgthkl1skdiqykd1gllivdeeqrfgvrhkerikt1khnvdvlt1t  
atpiprthmsmlgvrd1s  
vietppenrfpvqtyvleqnmsfikealere1srdgqvfylynkvqsiyekreq1qmlmpdaniavahgqmterdleetm  
lsfinneydilvtttiie  
gvdvnpantliiedadrfg1sqlyqlrgrvgrssrigyayflhpankvl1tetaedr1qaikeftelgsgfkiamrd1nir  
gagnllgkqqhgfidtvgf  
dlysqm1eeavnkrqikepesevpevevd1n1day1p1teyianeakieiykklrktetfdqiidikdelidrfndypv  
evard1diveikvhalhsg  
itlikdkgkiiidih1svkatenidgev1fkatqplgrtmkvqvannamt1t1tkqnqwl1sk1flvkcieesmrisdea  
>tr|D8HFY6|D8HFY6\_STAAF  
mkhkeafngvvl1taalivikil1savyripyqnilgdtglyayqqvypivalgmilsmnaipsaitqnikyhsdeayak  
avayiq1lvgi1lfiavf  
asniahmmgdsh1tpmiqaasfsfi1figmlgv1rgyyqsannmtvpaisqvieqv1rvgi1ivtivfvdrwgwtiyeagt  
ia1lastigffgssiy1va  
hrp1fkfkmvntak1vwkqfal1svli1faisq1livi1lwqvidsvti1ks1qairvpfdvaitekgyvdrgasfiqmg1ivt  
t1fsfal1p1l1seaikmn  
qvlm1nyanas1kitil1staag1lin1p1lmngvffktnd1t1t1svymitvicvsl1imdmal1laqhavrpi1fvgm  
tag1vik1filn1il1rl1sg  
i1gasm1stv1s1i1fg1ti1hiav1trkyh1ham1rrff1inv1l1gm1vfms1iv1vcv1lniv1tth1grit1gli1ell1caav1lgi1al  
ff1yi1fr1fv1l1tykel1ty1p  
fgsk1lyq1kkgr  
>tr|D8HFZ1|D8HFZ1\_STAAF  
mq1lnsngwhvddhi1vavstg1dismc1lyq1l1ndykdsyrk1tcl1hvnhgvr1sasieear1fleaycerhhid1hikk1d1  
sh1lnrns1iqe1nearikry  
ew1fdemmnv1leadv1l1tah1lddq1letimyri1fngkstrn1kgfde1skrkgyqi1yrp1lavskkeikqferyhipyfe  
desn1kdnkyvrndi1rnri  
pai1dennq1kvsh1l1kl1kqw1hdeqydi1lqysakqfi1qefvkfdeqsky1levsrqafn1l1pns1lkmv1ldc1l1skyye1fn  
isak1tyeew1fkqf1sskkaq  
fs1n1tdkwi1iqi1aygk1i1maknngdty1frvqti1ekpgnyi1fnkyr1leihsn1pkc1l1fpl1svr1trqsgdt1fk1n1grdgy  
kkvnr1fidckvqqwvrdq  
mpiv1dkqqri1i1avgd1lyqqqtikawii1skngde  
>tr|D8HFZ2|D8HFZ2\_STAAF  
mhnd1kevl1teed1qnicke1lgaq1tkdyqgkplvcvgil1kgsamfmsd1likridth1sidfmdvssyhggtestgeva  
i1kd1lgssienkdv1iied  
ile1tg1t1ksite1l1qsrkvn1s1eivt1l1dkpnrrkadi1eakyvgkkipdefvvgygl1dyrelyrn1pyigml1kpevysn  
>tr|D8HFZ3|D8HFZ3\_STAAF  
mqkafrnvl1vivi1igvi1fg1lfsy1lngn1nmpkq1tyng1ftek1ekgd1kt1lei1ppqnvymvsgtkndedysstilyn  
neke1lqi1tdaakqngvk  
l1tikeeek1qsvfvs1l1st1ipvvvia1l1fi1ff1sqaqggsggrmmn1fgk1skakmydnkr1rvr1fsdvagadeekqelie  
ivd1fl1kdnk1fkemgsrip  
kgv1llvgppgtgk1l1aravag1eagapffs1sgsdfvm1fvvgasrvrd1fdnaknapci1fideidavgrqrgagvg  
gghd1ereq1tnq1llvemdg  
fgenegi1imiaatnrpdi1dpal1rpgrfdrqi1qvg1rpdvkgreail1vhaknkp1detvd1kai1sqrtpgfsgad1en1  
lneas1liavregkkidmr  
di1eeatdrvi1agpakksrv1skkernivah1heaght1i1gm1v1deaevvhkvtiv1prgqaggyamm1pkqdr1flmteqe1l  
dkicg1llggrvsed1infne  
vstgasndferatqi1arsmvtqygmskkl1gp1l1qfghsngqv1fl1gkdmqgepnys1sqiayeidkevqrivkeqyerckqil  
lehkeq1l1iaet1l1teet  
l1vaeqi1qs1l1fyegk1l1pei1dydaakv1vkd1edse1fndgk1fgksyeei1rkeq1ledgqrd1esedr1keekdiaedk1keadksdek

Tsompanidou\_et\_al\_Supplemental\_FASTA\_File

depahrqapniekpydpnn  
pdk

>tr|D8HFZ6|D8HFZ6\_STAAF  
mtktkimglnvtpdsfsdggkfnnvesavtrvkammdegadiidvggvstrpghemisleeelnrvlpvveaivgfdvk  
isvdtfrsevaeacklglv  
diindqwaglydhrmfqvakydaeivlmhngngrdepvveemltsllaahqakiagipsnkiwldpgigfaktrnee  
aevmarldeivateypvll  
atsrkrftkemmgydttpverdevtaattaygimkgvravrnhvelnaklakgidflkenenarhnls

>tr|D8HFZ8|D8HFZ8\_STAAF  
miqaylglsgnidresqindaikilneydginvnfnispiyetapvgyteqpnflnlcveiqttltvlqllleclkteec  
lhrvrkerwgprrtdvdi  
lygeemidlpklsvphprnnerafvliplndiaanvieprsklkvkdllfvddsvkryk

>tr|D8HFZ9|D8HFZ9\_STAAF  
mvndkvlaskemyveqkcli fyktlkenv

>tr|D8HG00|D8HG00\_STAAF  
mseemndqmlvrrqklqelydligidpfgskfdrsglssdlkedwdqyskeelvekeadshvaiagrlmtkrkgkagfah  
vqdlagqi qiyvrkdqvgd  
defdlwknadlgdivgvegmfktntgelsvkakkftlltkslrlpdkfhglqdieqyrqryldlitnedstrtfir  
skiiqemrnylnnkglflev  
etpmmhqiaggaaarpfvthhnaaldatlymriaiehlkrlivgglekvyegrfrnegvstrhnpeftmielyeayad  
yhdimdltesmvrhianev  
lgsakvqyngetidlesawtrlhivdavkeatgvdfyevksdeeakalakehgieikdtmkyghilneffeqveetliq  
ptfiyghpteisplakkn  
edprftdrfel fivgrehanaftelndpidqkgrfeaq lvekaqgndeahemdedyiealeygmptgglgigidrlvm  
ltdpsirdvllfpymrqk

>tr|D8HG01|D8HG01\_STAAF  
mkntlyhqlyeklkkiieggfegdkfyskrqlskhlsisqttvehayqllldegyiysrprsgyyvseiesltlntq  
pihslfdddskpktsdet  
ydyafnldeidtkhfpie lfrkyskdlydkthsnkllrhfgqgelhrlrfqlafylftnrgvicdpnqiiigssteqlvng  
lvdlltstfii ekpsypp  
iknildkkqveyeqievednginvdeviksqnivyitpshqfptgyvmdlkkrtqliwagekeerfiieddydefry  
fgkpi paiqgl ysrgekvi  
yistfsksifpscrva ymvlpsymkkyhsqnhi egntvpvhmqnliamfissggferhlnkmrriyrkltiyilnrkpk  
yneqldiqgaetgmhftit  
vkngrtlqecldrknkvklkqvynfdddqdykktpkfilgfggidddalkphvdaliksliik

>tr|D8HG08|D8HG08\_STAAF  
mlfgrlteraqrvalahageearlnhsnigtehlllglmkepegiaakvlesfnitedkvieevklighgdhvgtlhy  
tprakkviele smdearklh  
hnfvgtelilgli renegvaarvfanldlnitkaraqvvalgnpemsnknaqasksnntptl ds lardltviakdgtl  
dpvigrdkeitrviel sr  
rtknpvli gepvgktaiaeglaqai vnevpetlkdkrvmsldmgtv vagtkyrgefeerlkkvmeeiqqagnvilfi  
delhtlv gaggagaidas  
nilkpalargelqcigaltdeyrkniekdaalerrfpvqvdepsvdtvailkgldr dryeahhrinisdeaieaavkl  
snryvsdrflpdkaidli  
easskvr lkshttpnnlkeieqei ekvknkdaavhaqefenaanlrdkqtklekqyeeknewknaqngmstslseedi  
aevia gwtgip ltkinete  
seklls ledtl hervigqkdavnsiskavrraraglkdpkrpigsfiflgptvgk telaralaesmfgdddami rvdms  
efmekhavsrlvgappgyv  
ghddggqltekvrrkpsvilfdeieka hpdvfnillqvl ddghltdtkgrtvdfnti iimtsnvgaqelq dqr fagfg  
gssdgqdyetirktmlkel  
knsfrpeflnr vddiivfhkltkeelkeivtmvnlklnrlseqniniivtdkakdkiaeegy dpeygarpliraiqkti  
ednl selildgnqiegkvv  
tvdhngkefkydiae q tsetktpsqa

>tr|D8HG09|D8HG09\_STAAF  
mlfrqmiac llasvrhssivclsntrivdmrc lnpkiggidvsetdepqgfehthnilninqsqslmtfiksklks  
klkqhii iargkkridyr  
synfyttyd nveikkidceytyampia ilirhmmsfdnahffaqlrhpv l

>tr|D8HG11|D8HG11\_STAAF  
miqsmwfnlhvqdl eksaqfykalgfkinrnpqmldkmvgiqigqttvilienkhfqnsqsln tepnev mislgvntn  
eevdqllnk vkeaggtvvq  
eptvsqgfygamfkldghhfnflvc

>tr|D8HG12|D8HG12\_STAAF  
mkiieiaeqeniqhivystaggnrrrtgphfevlakienrlmesnatiikpsffmdnflriakvederitlpefinp  
nikftmissidiakiasyi  
fahpqs fthqsieigsdevtlsevatifsevtgkstviegefvs gvaekqwl eekgyevdfelmaeinptrlslsdwlvk  
qdynk

>tr|D8HG13|D8HG13\_STAAF  
mslnkeqrri taee lqahfeestlsvqmiaeklnvttedvekvlamkaplgi fshqlqr fihlvwdvrdvindnikngq

Tsompanidou\_et\_al\_Supplemental\_FASTA\_File

tpepytylkgekedywflr  
>tr|D8HG14|D8HG14\_STAAF  
mrkdaienrqrreeiahklfdeegvenismriakeIlgimgtlyrhfkdkSDLcfyviqrdlntfitrkqikddyhsn  
yevmksldylqfkiDNK  
tllhcieagnnklrfyqsafyqeldfyydflksdddfkfktdmllqslstsvfafqiehrhisieayrnyllniyld  
evernd  
>tr|D8HG15|D8HG15\_STAAF  
mtkivlitggnglgyasaealkalgykvyigsrndvrgqqasqklgvhyvqldvtsdysvknaynmiaekegrldilin  
nagisqqfstpskltpdv  
eevyqtnvfgivrmntfvp1lekseqpvvvvssglsfgmvtnpetaeskvnsIaycssksavtm1tlqyakglpnmq  
inaadpgatntdlvgdfsn  
nshhvsegikpiiqIatigadgptgtfingdgempw  
>tr|D8HG16|D8HG16\_STAAF  
mlqt1klevykkcfcnrckhaiqyggeInekyyv  
>tr|D8HG17|D8HG17\_STAAF  
mksitfeehyviEDIqketmnaIsadpkgvpmkvmlleglektgtfnadelshhderiqfmmnqdvqivlsyngngspn  
lygqkaieIcQkandqlan  
yiaqypnrfgfatlpinepeaaarefercindlrfkgaIimgrtqdgflDqkydiifktaenlgvpiylhpapvnsdi  
yqsykgnypevtaatfac  
fgywhidvgihaih1v1sgifdrypklnmighwgefipfflermdealfaelnhpvsyyfknnfyitpsgm1tkpqf  
dlvkkevgidriIyaadyp  
yiepeklgvfldeIgtdeekeisyngakllgIssn  
>tr|D8HG18|D8HG18\_STAAF  
metlelqgaklryhqvqgpvlifipgangtgdlflplaeqlkdhftvavdrdygeseltepIpsasnpdsdyrvkr  
daqdiaelaksIsdepvyI  
lgssgsivamhvlkdypevkkiafheppintflpdstywkdknddivhqiIteglekgmktfgetlniapidakmmsq  
padteegrieqykrmfws  
efeirqythsditlddfstkysdkitllngtdsrgsfpqdvnyinketdipivdipgghlgyiqkegfvadvl1nmwg  
>tr|D8HG19|D8HG19\_STAAF  
mkiviiggflggkttvlnhllaeslkeslKpavimnefgkmsvdgalvsediplseltegciccamkadvselhqlyl  
keqpdvfiEcsgiaepvs  
vlactpIapfttiIhmigvidasmykhiksfpkdiqglfyeqIaycslfvnkidsadvettskllkdlevinpead  
iqvgmhgsvtlPisvrqmt  
atsdnkhkslhqminhqfvqspvkctkaqfIKrlacIpsihyr1kgfntfkdtthtyIiqftqgqyeltpvafskkvpay  
lvIlgkiskedyqcleq  
>tr|D8HG20|D8HG20\_STAAF  
mlEvkydmrtghytpiphephylvishadklatekaklrlIikqklDislaesvsspiasehvieqltlfqherrql  
rpkiSatflawlliflma  
lpigiayqfsdwfqnyvsawieyltqtllnhdilqhilfgdygvlslgtyslvalpvvilislstaidqtgfkswm  
iwtiepsmlriglqgndiv  
pllegfgcnaaaisqaahqchtctktqcmslIsfgsscsyqigatIsifsvagkswlfmpylilvl1ggilhnriwlkkn  
dqqlsvlphdrqlhvpni  
qmllqmwqniqmfiVqalPilsllgisseIspgilfsmirkdgmllfnlhqgaIlgmtatqllllvffsstftacsvt  
mtmllkhlggqsalKligk  
qmvtslslvlgvgiivkiVmlii  
>tr|D8HG21|D8HG21\_STAAF  
mqhhkvaiigagaagimaitlkdfgitdviilekgtvghsfkhwpkstrtitpsftsngfgmpdmnaismdtspaftfn  
eehisgetyaeylqvvanh  
yeInifentvtdisvddafytiatttetyhadyifvatgdynfpkkpfkygiHyseiedfnfnkgqyvviIggnesgfd  
aayqlakngsdialytstt  
glnpdadpsvrIspytrqrIgnvikqgariemnvhytvkdidfndgqyhisfdsgqsVhtphepilatgfdatknpiVq  
qlfvttngdikltthdest  
rypniFmigatvendnaklcyiykfrarfavlahlltqreglpakqdvienyqknqmylDdysccevstc  
>tr|D8HG23|D8HG23\_STAAF  
msnklDginkmitakhkqmdlydekqevkalidesdalhsieqlYqhlgerYssnmasrmeqfrdefhfakrrstea  
lyeqqqiqhgiRkaeeem  
idlemrrnieIematkeenkwkq  
>tr|D8HG24|D8HG24\_STAAF  
mstvqsdiFktnsassIsavetcnvskpdkdesttvsgnnahsviddlIsknqsvaeairtasgniQkvgeafdqt  
dvmigneigkn  
>tr|D8HG25|D8HG25\_STAAF  
mneqwlEhlp1kdiKeisrvsggdvneayrvetdttdtffllvqrgRkesfyvaeIagIneferagitaprviasevngd  
aylvmtyleegasgsqrql  
gqlvaqlhsqqeegkfgfsIpyeggdIsfdnhwpddwctifvdkrmdh1kdeIlnrgIwdandikvydkvrrqivaele  
nhqskpsllhgdlwggnyml  
flqDgrpalfdpaplygdrefdigittvfggftsefydaynkhyplakgasyrlefyrlYllmvhllkfgemyrdsvahs  
mdkiIqdttg  
>tr|D8HG27|D8HG27\_STAAF

Tsompanidou\_et\_al\_Supplemental\_FASTA\_File

mtketdnkktvatsdnkdtqqnqpeenerqglngyrktdldleieqelremmktgenetkndykkfkvflistlvivi  
lairafrvhkmm  
>tr|D8HG29|D8HG29\_STAAF  
mtalfpyiafenskealayeevfgatdvkclvgeeqashfgmtkeeaqeatmhaefvlgvkvlcstdsfgradkinng  
isllidyvnnkedadvke  
afyeqikdhssieielpfadqfwggkmgiftkygvrmwhgqdytaiqq  
>tr|D8HG30|D8HG30\_STAAF  
mtidrriksqvmarnafielhghqleeitvqqiadladvnrstfythydykdlllekledqqleeirdfiqdeknga  
vklstdnihqimtvliemi  
ekdiafyqlmfrmgkdsniheklydlmchlqryknendqingipfsyfmsyvsaglslihrhwvedpnridkvdlmhf  
ntivnggpatiikniq  
>tr|D8HG31|D8HG31\_STAAF  
mnqhl1gnpkltithvnevkgaginhivvdsvqygnqemimekdvtemrdgeklyinifrpnkdgkfpvmsadtygkdn  
kpkintmgalwptlgaip  
ssftpeesdpdpgfwvnpdyvvvkvallrgsdkskgvlspswkreaedyeviewaanqswsngnigtngvsylavtqwwva  
slnpph1kamipweglndm  
yrevafhggsdtgfyrfwtqgifarwdnprniedliqaqqehplfddfwkqrqvp1sqiktp1ltcaswstqglhnrsg  
fegfkqaaseekwlyvhr  
kewesyarenlerqksffdfylkeenndwkdtphviyevrdqfykgefksasafplpnteytplylnaentlnhakis  
sahvaqydsedkrqdvsk  
ytfkdte1vgnmnlklwvstkdsddm1fagikkldrrgnevnfpdfniengqvattglrvshreldeqekstiaqpwh  
khetelklsqdeivpveie  
11psgt1fkqgetlevvvkgseivignstpgmktryeheetvnmghmiyggkydsqliipivn  
>tr|D8HG32|D8HG32\_STAAF  
mkkvis1fvailsvl1ftdnanaennkpegvnensn1pvrqpdanyppgvsdiarvkkldnlidgtkdpdvikqlkddn  
evpnavkakdskivsdcr  
h1lkhpndlidgtkdpvinq1knangtsnnsavnpsikandvhtksnkqmakqqsih1dsksksgkqqlkelpktgvn  
nesntaimalfigl1llvv  
slvtrfik1nsyk  
>tr|D8HG33|D8HG33\_STAAF  
mmnakihrarvtes1nyvgsitidsdileavdilpnekvaivnnngarfetyviagergsgkic1ngaasrlvevgdv  
viimtyaqlneeeikhhap  
kvavmednviemihekentiv1  
>tr|D8HG34|D8HG34\_STAAF  
mtklittvkemqhvkaakrsgttigfiptmga1hdgh1tmvresvstnditvsvfvnplqfgpnedfdayprqidkdl  
elvsevgadivfhpavedm  
ypgelgidvkvgladvlegakrpghfdgvvtvvnklfnivmpdyayfgkkdaqqlaiveqmvkdfnhaveiigidivre  
adglakssrnvylteqerq  
eavh1sksl1laqalyqgerqskviidrvtyqleshisgrieevavysypqlveqheitgrifislavkfskarlidni  
iigae  
>tr|D8HG35|D8HG35\_STAAF  
mkqkqtkismvtaydfpsakqveaagidm1vgdslgmtvlgyestvqvtladmihhgravrrgapntfvvvdmpigavg  
ismtqdlnhalklyqetna  
naikaegahitpfiakataigipvvah1gltpqsvgmgyklqgatkeaaeq1ildakneqagavalvleaipndlaee  
iskhl1tpvigigagkgtd  
gqvlvyhdm1nygvehkakfvkqfadfsvgvdglkqydqevksagfseeytykkkimnevnnnd  
>tr|D8HG36|D8HG36\_STAAF  
mlsvai1gpgavgttiaye1qqs1phttligrhaktityytpvphapaqdivvkgyedvtntfdviiiavkthqldaviph  
1thlahedtliilaqngyg  
q1ehipfkncvqavvyisgqkkgdvvthfrdyqlriqdnaltrqfrdlvqdsqidivleaniqqaiwyk1llvnlgsinsit  
algrqtva1mhnpeirtlc  
rq11ldgcrvaqaegl1nfseqvtimt1yqgypdemgtsmyydivhqqpleveaiqgfiyrrareh1dtpyltdtiysf  
1rayqqnm  
>tr|D8HG37|D8HG37\_STAAF  
mtnvlyghgtlgt1mag1legtatine1lehgn1giatltsdgevi1fdgkayhanehkefielkgddkvyasitnfk  
asktfplqqlsqddvfaqi  
knem1sen1fsavkiygtfkhmhvrmpaqqpppytr1idsarrqpeekrqdirgaivgfftpe1fhgvgvsagfhihfadd  
eraygghv1dfevddvvve  
iqnfetfqghfpvnnetfvkaki dykdvaeei reae  
>tr|D8HG39|D8HG39\_STAAF  
mgsffnkiarkedpaiyqkdgh1krt1rvrdflalvggtivstsift1pgivaahagpavalsf1laaivag1vafty  
aemaaampfagsayswvvn  
1fgeffgwvagwallaeyfiava1vasgfsan1rglvkpiigelpaalsnpgftnggfidiiaaivilltall1srgmse  
aarmenilv1kvlai1lf  
vivgl1ta1nsvnyppfipehkvatgdfggwqgiyagvsmi1flayigfdsiaansaealdpqktmprgilgslsvaivlf  
iaval1vgmfhaysqyann  
aepvgwal1rsgshgvaav1vqaisvigmftaligmmlagsr1llysfgrdg1lpswlsh1ndkhl1pnralviltiigvlig  
smfpfaflaqlisagtlva

Tsompanidou\_et\_al\_Supplemental\_FASTA\_File

fmfvslamyrlrkregkdllpipafklplypvlpavtflvflvfwlgfreaklytlwifvigiilylsyglrshskndva  
eyhpk  
>tr|D8HG40|D8HG40\_STAAF  
mskahqliqedeqyfaksgrikyyp|vidhgygat|vdiiegktyid|lssassqnvghaprevteaikaqvdkfihytpa  
ymyheplvrlakk|ceiap  
gdfekrvtfgltsdandgiikfaraytgrpyiisftnayhgstfsglsmsaislnmrkhygp|lmgfyhipfpdkyrgm  
yeqqansveeylap|kem  
fakyvpadevacivietigddg|lepvpgyfealekicrehgiliavddiqqgfgrtgwtssvshfnftpd|itfgks|  
aggmpmsaivgrkeimnc|  
eapah|fttganpvscea|latiqmiedqs|lqasaekgeyvrkrmnqvwskynsvgdvrgk|sigidivsdck|k|k|trd  
asaalkicnycfehgvvii  
avagn|lrfqpp|lvi|tyeq|l|dta|lntieda|l|tiletgn|l|dqydisgqgw  
>tr|D8HG41|D8HG41\_STAAF  
mr|kvl|fhfiaa|fism|lwm|tm|l|fditsdqsh|ka|ll|n|dfl|ipsdntpyt|lei|ch|l|ligsviyfv|v|l|fhiskr  
|ly|cy|pl|v|f|l|fialypf  
|v|fiaqrpi|f|q|fsv|tel|igwi|ith|iffms|l|malviprik  
>tr|D8HG42|D8HG42\_STAAF  
mnkeq|lekmgkngk|fiaa|ldqsggstpk|alkeygvnedqysnedemf|qlvhdmrtrvvt|spsfspdkil|gailfeqtmr  
evegkytady|ladkgvvpf  
|kvdkg|laeeqngv|l|mkpidn|l|ns|l|dranerhi|fgtkmrsnile|neqqikdvveqqfevakq|iakglvpiiepevn  
inakdkaeiekv|lkaelkk  
g|l|ds|l|nadq|l|vm|l|k|l|t|iptean|lykd|laehpnvrviv|l|sggysrekane|l|k|dnaeliasfsra|lasd|lragqskeefd  
ka|l|gdavesiydasvkn  
>tr|D8HG43|D8HG43\_STAAF  
maksnskdiv|ligav|l|stf|fgsm|l|keiepdwnihvyer|l|drpa|ie|ssn|ernnagtghaal|celnytv|l|qpdgsidieka  
kvineefeiskqf|wghlvk  
sgsienprefin|plphisyvrgknnvk|flkdryeamkafpmf|dni|eytedievmkkwip|l|mmkgrednpgimaaskideg  
tdvnfge|l|trkmaksieah  
pnatvqfnhevvdfeq|l|sngqwevtvknr|l|tgekfkqvtdyv|figaggaip|l|l|qktgipeskh|l|ggfpi|sgqflactnp  
qvieqhdakvygkeppgtp  
pmtvph|l|dtryi|dgqr|l|l|fgpfanvgpk|flkngsn|l|d|l|fksvktynitt|l|laavkn|l|plikysfdqvimtkegcmnh|  
rtfypearnedwq|lytagk  
rvqvikdtphehgk|gfi|q|fgtevn|sqdhtvia|l|gespgasts|svs|alevlernfpeyktkwap|k|k|k|mpsyges|l|ied  
ek|l|mrki|rkqtsk|dle|lgy  
yen  
>tr|D8HG46|D8HG46\_STAAF  
mniydeyrsyviee|l|ddc|l|tiqkndtayydv|leain|l|snds|l|cv|l|nhlyinegqeetfeqk|flqrnkhl|qnvdfka|l  
rflrprtagrhyi|itlwe  
nrqafyhwqnsaeyk|hthkhr|gtskgadvki|inre|lsynirieladm  
>tr|D8HG47|D8HG47\_STAAF  
m|l|nndyeiedtkiag|dscph|yei|l|l|ftksy|flkrsqtmivinkygnelvidik  
>tr|D8HG50|D8HG50\_STAAF  
mellkhl|sqrqyidgewesankn|trdi|inpynqev|l|ftvsegtkedaerailaarafesgewsqetaetr|gk|k|vraia  
dkikehrealer|let|ldtg  
ktleesyadmddi|hnvmyfag|ladkdggemidspipdteskivkepv|gvvtqitpwnyp|l|l|qaswkiapa|atgcs|lvm  
kpseitp|l|tti|rvfelme  
vgfpkg|tin|l|il|gagsev|gdvmsghkevdlvsftg|gietgkhimknaannvtnialel|ggknpniifddadfelavdqal  
nggyfhagqvc|sagsr|lvk  
qnsikdkfeqal|l|drvkkik|l|ng|gfdadtemgpv|istehrnkiesymdvakaegatiav|ggkrpdrdd|l|kdglffeptvi  
tncdtsmri|vqeevfgpvv  
tveg|feteqea|iqlandsiyglagavfsk|digkaqr|vank|l|k|l|gtwindf|hpyfaqapwgg|yqsgigrelgkegleey  
l|vskhil|tntnp|qlvnwfs  
k  
>tr|D8HG51|D8HG51\_STAAF  
mmyggamtrsqnkq|qql|eqakdivinsigqtm|lygtnrsvgnlyg|tmv|fegsmt|l|demrhq|l|qmskpsmsagvkk|l|qe  
fdi|vkq|g|ftrgsrkq|h|fia  
ekdf|fi|frn|fftkk|f|qreid|inveavkdaqai|in|l|lessd|l|teatqeaqkikaq|ldhthvyewleq|l|teaiesgei  
fkyfpipeqps|dsen  
>tr|D8HG53|D8HG53\_STAAF  
mieyd|l|ti|l|ipil|kvayp|ffktverkkwyfsgkev  
>tr|D8HG56|D8HG56\_STAAF  
mssdn|l|wl|tvmg|lii|isiv|g|l|liakkinpvvgmti|ipclgami|l|gysvtd|l|vgffakgl|dqvinv|vimfi|faiiffgim  
ndsg|l|fk|p|l|vkr|l|ilmtrg  
nvivcamtalig|tiaql|dgagavt|fl|sipa|l|plyka|l|nmky|l|l|l|l|l|l|saaimn|mvpgg|p|marvaav|l|kaks|vn  
elwyglipi|qi|igfil|vm|l  
favy|l|gfkeqkri|kka|iasne|l|pqtqdi|dvhl|vevyerdq|dirf|pvkgrartk|pwikwnta|l|t|lavilam|lini|appe  
f|m|igv|slal|vinfksvd  
eqmer|l|rahapna|l|mmaaviaa|agm|fl|gv|l|netgm|l|kaiatn|l|ikvipaev|gpy|lhi|ivg|l|lgvpl|d|l|l|t|stdayy|fav|l

Tsompanidou\_et\_al\_Supplemental\_FASTA\_File

piveqtagqfgvpsvstay  
smvigniigtvsvfspalwlaiglaeanmgtyikyaffwiwgfaivmviamlmgivti  
>tr|D8HG57|D8HG57\_STAAF  
mnmplmidltnknvviogggvasrraqtlsqyiehimvispeiteklnqnmvdkgvviwkekefepsdivdaylviaatn  
eprvneavkqalpehalfn  
nvgdasngnvfpsalhrdkltisvstdgaspltksimaelealypssyssidflytcrqkikvldmnhsekqqlsq  
ivtkeflndtkqaqflawl  
dkk  
>tr|D8HG58|D8HG58\_STAAF  
mklntsnspftekqvteinnllqtlesqqwlsqfllansndtisdsnqqqletevwqqsqiseeqatsttymlnkep  
hieanqrhvtvlygsesgn  
amrlaeifserlsdighqvvlmsmdeydttniaqledlfiiitsthegeppdnawdffefleddnapnlhvrvsvlalg  
dqtyeffcqagkdvdalle  
nlgaerickrvdcdiyeedaekwmadiiniidttsegiqsesvisesiksakekkysksnpyqaevlaninlmgtdsnk  
etrhiefllddfsesyepg  
dcivalpqnpelevklistmglwdpqsppvindhgdtpivealtshfeftkltlp11knadiyfdneelseriqdeswa  
reyvinrdfidlitdfpti  
elqpenmyqilrklppreysi sssfmatpdevhitvgtvryqahgrerkgvcsvhfaerikpgdivpiylkknpnfkfpm  
kqdipvimjgpgtgiapfr  
aylqereelgmtgkwlffgdqhrstdflyeeieewlengnltrvdlafsrdehkeyvqhrimeeserfnewieqgaa  
iyicgdekcmakdvhaik  
dvlvkerhisqeeael11rqmkqqqryqrdvy  
>tr|D8HG60|D8HG60\_STAAF  
mimrgynerycswntaiqcdfnkvrqvkdkdsdrlnsninsniyrvlekcitlynvcsrykralilsehskknif  
nikkav  
>tr|D8HG61|D8HG61\_STAAF  
mnrninmknmmikndewhtykvskywswsilltitnvk  
>tr|D8HG62|D8HG62\_STAAF  
mklrllwhimrrqfitqrlviipfilavsvlfmieytlvsiglnsyikqkndflvpfiianffmalltfififyanhfm  
msqrrkefsifmtlgmtkk  
smrlivvmetilqfmjivsvsiaggyllgai fflfiqkimgsevatlryppfdsvamfitliiavlmgmllifnlfsin  
fqrpi tyqhrsdsvisrw  
lryvli vigsaalygyfialqqdtffgaffkiwiviglvigtyaffvgiseiisilqqvskvyypfryffvvvmrv  
rlknavslatitllctfl  
ivtltmtl ttrydmnhtimklitndydlsfndnsksqierqqtienikrdiqgsvnakdfkyettlfrasl eknrayyk  
lkqasddipidfignegsi  
fskqsvmital tvqdynryhqnlhldnqsigmitnvpifkkqskvglnnevfkvqldaha lnmmiqdsmvlivkdkn  
qlqkvkgyaheqknstis  
infvsgkktl ttsqiklskkydasinsksemvmwdr l tggli fvggvsvivlvigiflmyyqkvseayanqhnydi  
mkkllgldngriskitrnqm  
tflfaipitvalihtlissnivytllnm lginhhifltsyvlaviiisflymamykitsiyakvihqqrn  
>tr|D8HG63|D8HG63\_STAAF  
mllevkhvkvygkgnattalnqmnlsvgagefvaimgesgsgkstllnliasfdgltegdii vdgahlnmknkska l  
yrqmqvfvfvdfnllptm  
tnkenimmp l ilagarkrdieqrvhqltvqlhlegflnkypseisggqkriaiaralvtkptilladeptgal dsktsk  
almm l fqeihqleqtilmv  
thsnidasyaervi fikdgrlnheiyrgeesqlafqqrirts lalvnggsvni  
>tr|D8HG64|D8HG64\_STAAF  
mtflksitqeiaivivifal fglmflylhlp leayllaalgvil llll l ifigikylsflktisqqqqienlenalyqlkne  
qieykndvesyfltwvhqm  
ktpitaaqlllerdepnvvrvrqeviqidnyts lalsylkllnestsdisvtkisinnirpiimkysiqfidqktkihy  
epchhev l tdvrwts l mie  
qlinnal kyargkdiwiefdeqs nqlyvkdnigigi seadlpki fdkgysgyngqrsnssgiglfivkqisthtnhpvs v  
vskqnegttftiqfpde  
>tr|D8HG67|D8HG67\_STAAF  
mlsikkatkfavanliivstvfssvtpai aqsdkstkesfavgn tknpknviflvgdgmgpsfntayryykn dphakem  
tptafdsylkgtnrtysnd  
pkqnitdsaa g tafssghktyngaigvdsnkqkvktvlerakekgkstglvstael tdatpaayaahvtsrddknei ak  
qfykdkingkhkvdl lgg  
gakyfgksngnl dkkfkkgdydlatnskel sksdkdvlg l fadknmplaidaskdepsladmqqsalsklernkkgffl  
megasidksahsnditgv  
msemegfekafddai qyakkhkd tlvvatadhstgg l t igdkgyewnpqpi ksmkhsgsymtekmakgedpekvinegy  
gfefsqddmkkvkenkkl  
krl l kkekdeksadvektka l qhaiqkpvndksytgwtsdghtgedvntyaygprsesfsgnientesakiifdfik  
>tr|D8HG70|D8HG70\_STAAF  
mayislnyhsptigmhqn l tvlpedqsffnndttakplktlml l hglssdettymrytsieryanehklavim pnv dhs  
ayanmayghsydyi l evy  
dyvhqifplskkrddnfiaghsmgygtikfaltqgdkfakavpl savfeaqnlmdlewndfskeaiignlssvkgtehd





Tsompanidou\_et\_al\_Supplemental\_FASTA\_File

iqsyidrlielmqghihvp  
fnedsilqqnlynhfskaylritqniylnnpvieikklypfvntlfeaidklaidtdiemsedeiafltihfqaai  
rtktqlnvviacyyglvs  
nflletkinnlseeisvintiklenithyhdnvdllitthdipkqtlnilpkhlitiikvaplfseddrhkirhvvkqkqn  
pvqahhmdtvnflvnte  
qkprhtvqifeeaqkiqahhaivegyiesalereksstyignfmaiphgdpekvlqshvlifrtkdvpwrqhdvklv  
fflaishkdkaftkqmmq  
ianldddsvnhlcslddhslkqqlfeylqe  
>tr|D8HG82|D8HG82\_STAAF  
mkiavaitscpngiahtymaqekleqvaremgvdikvetqggvgaenvlittqdieadgviaaadkqvdlrsrfvgkrline  
nvregihnrpgrliqriinq  
dapiyqsetnyhskdrksksqimvyqhlmgvsvfmpfivvglliaiaialtlggettskglvipddsfwksienigs  
afkfmvpilagiavsiad  
kpglvpmiggaiaadgsfygsdagagflggivagflagiakwikdikvpkamapimpiiiiipiissvvvglififlig  
apisniifealttwlksmqg  
aniiiilamiigamiafdmggpvnkvaflfgsaliaegnyavmgmvavavctppiglglatfvqkykfnhseremgkasft  
mglfgitegaipfaagdpl  
riipaniigamiasviaaigvgdrvahggpivavlggidhilwftfavivgslvtmitvlllkrntpviavdapaqhtq  
lhdtitqhdtevdndvt  
akhshlnkpsvhfdqtmvitdhmsrneaidmlihklkicryvehtshlknaileremesttaigmnvaiphaksdvk  
qpivavmknngvkwesld  
gslpqlifliavpnnsgdthlkiqlriskaalmndetrqslinanstteiylnlmi  
>tr|D8HG83|D8HG83\_STAAF  
malflqpvfkdriwggahlkafnydi pnkttgecwaisahpnpntiingpykdmtdqlwsqhrelfdndsrdsp1lt  
kvl dandklsvqvhpdddy  
alkhegelgktecwyil daapgaei ygvhahnkqtlidmidnhefdfs1fkripvkpgdfyyvpagtvhaigsgililet  
qqssdttyriydydrdq  
gqlrdlhleqskdvielnhepnttpitthidthvtqfvdnqyfavykwidhgd1kfnkphayclvtiidgtgtlavnd  
khydiqkgsf1ltteded  
ihfvgnisaivshpg  
>tr|D8HG84|D8HG84\_STAAF  
mknafklfkmdlkkvakt pavwii laglai lpsfyawfnlwamwdpygntghikvavvnedkgd tirgkknvngntmvnt  
lknksfdwqfvrekadh  
eikmgkyfagi yipskftheigt1rkqpqkadvefkvnqkinavaskltdtgssvvvekaneqfnktvtralleanka  
gl tieenvptinkiknavy  
sadkalpkindfankivylnnhqadldkyandfrklgnykgdil daqkklnevngaipqlnekaklilalnnypkieka  
lnfaaddvpaqfpikeg  
niasggi dqangqlndakgfvtqvrsvrgdyqdairraqdlnrrnqqqipqnsaannetsnsapaagngvastppsapsg  
diapnnvtqntapnsna  
pvsttpqstsgkkdqs fadi tttqvstanentqnitdkdvksmeaal tgsllslnltdtqakaaqkdsqalrni sygi  
lasdkpsdfresldnvksq  
leyttqynqqfidt1keieknenvdlskeidkvkaannrineslrlvnqlsna1kngssgtaeatklldq1skldss1ss  
frdyvkkdl nss1svs1sq  
imde1nkgqta1snvsk1ntidqvinsgqsilkngktridr1qtvlpsieqqyisavknaqanfpkvsdvakaanfvr  
ndlpqleqr1tnatasvkn  
nlpt1l1ngydqavgl1nknqpkakka1sdladfsqnl1pdvekd1kkankifkkl1dkddavdklidt1knd1kkqagii  
npinkktvdvfpvkdygsg  
mtpfytal svwgal1mvs1l1tdvdkhks1esvl1ttrqvfl1gkagffimlgmlqalivsvgd1l1lkagvespvl1flit  
ifcsiifnsiyvtcvsl1g  
npgkaiav1l1v1lq1aggggtfpiqt1p1qf1qni spylp1ftyaidsl1retvgg1vpeil1tkli1l1l1fgigffvvg1l1  
kpvt1p1mkrvsekv1dqs1n  
vte  
>tr|D8HG85|D8HG85\_STAAF  
mpknkiliy1l1st1l1v1l1pt1vsptayadtpqkdt1t1akt1shdskksnddetskd1t1skdi1dkadnnts1nqdnndkkfkt  
iddst1s1d1s1n1i1d1fiykn1  
pqt1ni1q1l1tknkyddnys1l1t1li1q1n1fn1nsdi1s1dyeqprngekst1nds1nks1d1ns1iknd1tdt1q1ssk1qd1kadn1q1kapks  
nntk1p1st1snk1q1p1ns1pk1pt1q  
pnq1s1n1q1pas1d1k1vn1q1k1ss1sk1dn1q1s1ms1ds1a1l1ds1il1dq1sed1akt1q1k1dy1as1q1sk1kd1k1neks1nt1kn1p1q1l1pt1q1de1l1kh1k1sk1p  
aq1sf1n1d1vn1q1kd1trats1lf  
etdps1s1n1dd1sg1q1fn1vd1sk1d1tr1q1fv1ks1iak1d1ahr1ig1qd1nd1iy1as1vm1ia1aq1il1es1ds1gr1sa1lak1sp1nh1l1fg1ik1g1af1eg  
nsv1pf1nt1lead1gn1q1lys1n  
ag1fr1k1yp1st1kes1lk1dys1d1li1kng1id1gn1rt1iy1k1pt1wk1se1ads1yk1dat1sh1sk1ty1at1dp1ny1akk1ln1si1ik1hy1q1l1t1q1fd1der1m  
pd1dk1yers1ik1dy1dd1ss1de  
fk1pf1rev1s1d1s1mp1y1ph1g1q1ct1wy1vyn1rm1k1q1fg1ts1sg1d1lg1dah1wn1n1ra1q1yr1dy1qv1sh1tp1kr1ha1av1v1fe1ag1q1fg1ad1q1hy1gh1v  
af1vek1vn1sd1gs1ivi1ses1nv  
kg1lg1i1sh1rt1ina1s1aa1eel1sy1it1gk  
>tr|D8HG89|D8HG89\_STAAF  
makyr1g1kp1fq1ly1vk1l1sc1stm1l1ats1i1l1tni1l1py1da1qa1ase1kd1tei1ste1il1sk1qd1l1dk1vd1kan1r1q1ie1q1lk1q1l1sas1sk1ah1y

Tsompanidou\_et\_al\_Supplemental\_FASTA\_File

kaqlneaktasgideiikr  
aneldskdnkgfqi emnggsdi dskldqllkdlnvsskvdrgqqsgedlnamkndvsqtattkhgekddkndeamvnk  
aledldqlnqqihkskds  
edtsedpavsttdnnhevaktppndgfgvhvlnkflsneenqshsnrltdklqgsdkinhamiekmaksnastqhytyhk  
lntlqsl dqriantqlpkn  
qksdlmsevntkeriksqrniileelartddkhatqsilesifnkdeadkilkdirvdgktdqqiadqitrhidqlsl  
ttsddlltslidqsqksl  
lisqilqtklgkaeadklakdwtnkglnsrqivdqlkkhfastgdtssddilkailnnakdkkqaietilatrierqkak  
lladlitki etdqnkifnl  
vksalngkaddllnlqkrlnqtkkdi dyvls pivnrpsll drlnkngktt dlnk lanlmnqgsnll dsipdiptpkpekt  
l tlgkngllsgllnadgn  
vs lpkaggnkrtlvadincwcn gctndlvittq  
>tr|D8HG90|D8HG90\_STAAF  
miklfdyfnhstrklyesfkaskleedltivlndngflpddvispyqffadnhnsenmkprffnqvtpafweikgnns  
atindmgrlrgkifyqsge  
rprivsrvevfdqqrvrfdvyskngikfaqtvydlnrkailkkytaegkeviyenfvtsdvlwdqgksyffpskla  
fvlfkqleitehfvn  
slalpfsvlynlpngsdvlnwqeqcdgnvpgnmqlmckgdmkrhcniipdkneyetmniadakvqsrilqggylyny  
rsrnrtytkeiilitnsdq  
rnikvlvetlpdfkfhiaaitemsdklmqldqyanvhlpsinidrvnelyqlcdiyl dinegneil naveqafdyelli  
lgyrqtahhakvtlsehlf  
ehndeitmeskdqliqml eslkdqqqfrdallaqkaheisreqfeqvfkqales  
>tr|D8HG91|D8HG91\_STAAF  
mtiyninfgigwassgveyaqayrakllrrtnqdtkfvflfdiqseniqtltnigfedqeviwlyqyfsdisiapttyt  
lddiereighdisfrerng  
kivrlyfngkssfvtyclneqkdivdraefvinsmlvrkdfysytrifseyapadnkaklymrqfynengsiayneyi  
dgdssi yv fedavlynkte  
fiayflqrlnlrrddivil drasdigqavlqhkgsdkvgvvi hadhysnm mseqhilwnnyeyqfskakyidffit at  
diqnhm vcrqfeqyqgyrp  
rvyti pvg si dal syptl srksyami sasrl anekhidwlvkavivakrqvpel tfdiygegsektrlrkiidthraqdy  
irlghvkldeiydsyelf  
lsastsegfgltlmeavsglmgiglnvnygnptfirdgengylvpfdtdedsvddvvalahai vmyfngpqtphdis  
yevaqqfntqdiilkwetl  
vqevlhd  
>tr|D8HG92|D8HG92\_STAAF  
mkhkl dvtinelrlksi rkivkrintwsdevksysdda lkqktiefkerlvsgvdtldtllpeayavareaswrvlgmyp  
kevqligai vlhegniaem  
qtgegktltatmplylnalsgkgyli ttn dy lakr dfeemqplyewlgl taslgfvdivdyeyqkgekrniyehdiyt  
tngrlgfdy lidnladsae  
gkflpqlnygiidevdsi il daaqtp lvisgaprlqsnl fhivkefvdtliedvhfkmkktk keiwl lnqgieaaqsyfn  
vedlysekamvlvrninla  
lraqyl feynvdyfyngdiv lidritgrmlpgtklqaglhqai eakegmevstdksvmatitfqnl fklfgsfsgmtat  
gklgeseffdlyskivvqv  
ptdkaiqr idepdkvfrsvdekni amihdive lhetgrpvllitrtaeaaeyfskvlfqmdipnlliaqnvakeaqmia  
eagqigsmtvatsmagrgt  
diklgegvealgglavii hehmensrvdrqlrgsrgrqgdpgssciyislddylvkrwsdsnl aennqlysl daqr lqs  
slfnrkvkqivvkaqrise  
eggvkaremanefeksisi qrdl vyeernrvleiddaenrdfkalakdv femfvneekvltksrvveyiyqnl sfqfnkd  
vacvnfkdkqavvtflleq  
fekqvalnrknmqsayyyni fvqkvflkaidscwleqvdyllqllkasvnrqngqrnai feyhrvaldsfevmtrnikkr  
mvknicqsmi tfdkegmpv  
ihfp  
>tr|D8HG93|D8HG93\_STAAF  
mlknktfkvtwnyisqttfmygskvsfsngevtfinplmpsglpihewlmlkqfskyksapslpilrrgqhyklhfdfa  
tpagsvyfiiifynkngtk  
lsteivksnsitiqypdeayaykimmnaasts lifrc ltitemthqddleyksmrvtki gddqygndrinviaepsda  
yptisndflkp fghvwlve  
rwmddnieenikqlkndlqsqdtlkainlisygksnvfatyvaqhl dckvyrtshedddlkdwfkehvpgnhelkdtv  
evyfkee qdnhl nysrlm  
npvrfl dyldvsklnggevnet  
>tr|D8HG94|D8HG94\_STAAF  
mprkfrvlqigddlepi fqhkkgvswdyfdiglfefds gyveaieaiveaegrfdfiyiqapysetltnllqmisepyn  
tyvdesfwsveyeqdenvg  
kyvvqplhyrnieernkleavsfsgygdkvspkla lvhpnfkgdvvyqgnsel tlgsefgkefkpiaswqnnlv ydkd  
kviqiwpefdidgavelgy  
tfrliqtgadgalieqiil tddml dsp lei ptkpfd ayisvtvkargngtvhl gpihkrwsrldmgqfl l ggsrfvdsqr  
qefiyyfhp gdmkpplnvy  
fsgyrtaegfegyymmkrmapfl ligdprveggsfyigsseyeqgi invidetleklnfkshe l lsglsmgsfgalyy

Tsompanidou\_et\_al\_Supplemental\_FASTA\_File

gaqlnppqaiivgkplvniq  
tiaehmrllrpeefgtaldvlsnegdtsqasiqalnqkfwtfqkkslsqtvfaiaymqhddyphafqellpvltahq  
arvmnrslpgrhndspti  
aswfvnfyiniiledkfgrvqhaekqni  
>tr|D8HG95|D8HG95\_STAAF  
mkyfipawyddqrrwqdtvpyyqtqkntefddmislmgmhlennldyqlivlnhapnirtflhrydlyetkywsvfdei  
qgfshhapqaiynyhllkwp  
ddvefytypllkcvtseqtytniysqegysiwfeeferdqlqrryifddrgylsairyfdnqgeasyqeyltingdcv  
lyenfkngrvstvskryqhh  
yqqieynnmaqliiekfqamiaqqiheddhvivasdarhnrqianhipakllsysffknrnetvsdeeqsivknahliv  
dsvqlerdlshqkygre  
ntmiritpfetrqspnissqlmetfigvwidgmsdadlqmmqrlvdyiaqednyrlilltrhqdipmwlreciasvne  
eyqakqnadvnvsalmtpe  
qdadiavkthiehdvvealrtlrvidmskepdllyqisaisagipqingqtdyvsdydngriiintvdelldalnyy  
lfylknwnyayayslkliid  
ayaskniinqldeliendat  
>tr|D8HG96|D8HG96\_STAAF  
mlkllqqyeykiiykrilytcfilfiyilgtnisivsnydmqvkhesffkiaismggdvntlniftlglgpwltsmiil  
mlisyrmkymkqtslek  
hykeriltlilsviqsyfviheyvskervhqdniyltililvtgtmllwladknsrygiagpmpivmvsiiksmmhqkm  
eyidashivialliilvii  
tlfillfjelvevripyidlmnvsatnmksylswkvpagsitlmmsisafvflksgihfilsfnkdvsddmmpmtdfs  
pigisvylviqmllygfls  
rflintkqkskdflksgnyfsgvkpgkterylnyqarrvcwfgsalvtiigiplyftlfvphlsteiyfsvqlivlvy  
isininiaetirtylyfdkyk  
pflnqyw  
>tr|D8HG97|D8HG97\_STAAF  
mskrkqefhds lanektrvrlyksgknwvksigikeiemfkimglpfishsmvsqdnqsiskkmtgyglkttaviggafv  
nmldhqqafaasadplts  
lntqsetvgngnsttidaststadstsvtknsssvqtsnsdtsvsseksenvtsttstnsqkekltstsestssknttss  
sdtksvtstssteqints  
tnqstasntsqssttptsanlnktsttststapvklrtfslamstfasaattalantitvnkdnlkqymttsnatty  
dqstgvvtltdttsqkga  
itlgtridsnksfhfsgkvnlgkyeghgnggdgigfafspgvlgetglngaavgigglsnafgfkldtyhtstpnssa  
kakadpsnvagggafgafv  
ttdsygvastytssstadnaaklnvqptntfqqfdinyngdtkvmtvkyagqtwtrnisdwiaksgttnfslsmtastg  
gatnlqqvqfgtfeytesa  
vtqvryvdvtgkdiipktysgnvdqvvtidnqqsaltakgynytsvdssyastyndtnktvkmtnagqsvtyyftdvk  
aptvtvgnqtievgktmnp  
ivlitttdngtgtvntvtglpsglSydsatnsiigtptkiqgstvtvvdtdqannksttftinvvdtaptvtpigdk  
sevfspispiniatqdnsg  
navntvtglpsglftdstnttisgtpntigtsttitivstdasgnktttftkyevtrnsmsdsvstsgstqqsqsvtst  
adsqaststsgsintsts  
astskstsvslsdsvsaskslstsesnsvsststslvnsqsvssmssmgsvsksstslsdisnsssteksesvtstsd  
lltstslsdsvmstsgsl  
sksqslststsdasstqsvsdstnsiststseslsegstsesisisnsisnsvsastsksesqstsislstsdsksmst  
seslstdtstsdsvsgsl  
vagsqsvststsdsmstsemisdsmstsgslaasdkmsvssmstsqsgstseslstdsistdsdkslslstsqgs  
tstststssvrmseqst  
sgmstsqsdststsfdstsdskastassesiqsvststsgsvststslstnsertstsmstsdststsedsi  
seststsdiseaisases  
tsislseisidsesqsasafleslsvstsestsesvsstastsldstsesgtsstslstnsstsgssiststsns  
eststfkesvstslstst  
stslstdstslstslstdstsgksdslstsmstsdistsksdstststslsgstsesesdttssseskdstmsmsq  
stgststststslstdst  
tslslsasmnqsgvdsnesqsvsastiststesdslstssytsqsgstsestststslstdstisksstsqsgststas  
lsgsesesdqsstsegst  
sestsedststslsdqstsrstasgastststsdrrstaststsmrtstldsqmslstststsvsdstslsdsv  
sdstdtststsgmstas  
islstdtststbasevmstasidsqsmesvndsesvsesnesdksmsgstsvsdsgslsvstslrkesvseessls  
gsqmsdsvstsdssslsv  
stqrssesvsesdlsdskstsgstststsgslstaslsghsesvseesslstdsismstststsdslsgsilsgst  
slstsdslsdkslssqg  
msgseststsvsdqsststnsqfdmsisasesdsmstsdsssigstststslstdsmstsvsvststslsdiss  
isvdsdssastsestdsm  
aqstststasgslstslsmsaststststsvstslstdsiststsisisgqsavesestststsdstsdslst  
sgstsgstststyelms  
gsthntsvdsdsiststnsgsmstsrhftslstsglmslstdnmsdsvsmststststsmstsmstsdseststas

Tsompanidou\_et\_al\_Supplemental\_FASTA\_File

tslstnsesasvsmsdst  
stmsnstsmsdsdsvsisasesmsasmsdsvsisdstssmsnsmstsesnsihpsnsmstsqthftstsistsesi  
apntnesqstlsatsvssk  
hdaepaqseerlpdtgdsikqngllggvmtllvglglmkrkkkkdendqddsqa  
>tr|D8HG98|D8HG98\_STAAF  
mnyspkqgvrrshglphdpfksstvrprigwistiskdgkdnlapysyqnlwtwppmvmafaanqsvlgdherkdtvknae  
etgwfvmmatydlreavn  
ssskalppeedefeyagvtkeacieapgyrvkespvhfeceyvqtiriptgdpvstvddivigrvaqvhiddkvlndngl  
diksikpiarlgydytvv  
neifemkapsaskeelaglegrnfdnqsdnkk  
>tr|D8HG99|D8HG99\_STAAF  
mhkdqtkdiptktsvkdvdgkyigehkkrnevfllkkhdeaikkykdyvkdftfygdckinlvkaytnksgfseksktgdgl  
vvvgtvnydvpfqrlifv  
esngvaittftpgvhnetsaavaammykryepeierarkfkseveknngyytmneklqkkqefngvtkqflnfntdsid  
dlkfkkefkpvmhlgda  
fnqqqlslinkypqiaknmesefiayydngenretvanyvwnlqkttndtmklypgnksiiifykdkvsasqldehkrllqs  
dsqeisisggendekk  
>tr|D8HGA0|D8HGA0\_STAAF  
mmkkndhitdldaieilssswynsniskndkinvngsmykvikhqqtntnglyklyeryndkptgkliisfdgtdftd  
indvntdlrlagdsipnql  
leagkvydrlrqkyndansldadafykkynlkiddykgsitnagngslsgaiaqylgvl dpglsvtttsnapipksltr  
marrdannihnyhsrsdtl  
trinigglymyhsmvgkhi flengvstfgalvpahtgynfeekekldhfdqnniinkeyvtsrnglkiyadmdehtpifw  
sgdaigagisiklkdghl  
adlndyvhrgrteyvnnidlmkdi rtsverennnfsqhvnetkdhfkviklnelegwihnisnirtkieskadelkg  
nlrtlrdqdnildlvadh  
iinsiidfidkitdki skfikygddfmeaafdivsntivkmfvnlsegfedgvreevlahlnvvipniqiiknqvtnfgd  
gindiltqmthlddnvmvn  
nvpinknatkqtskplaesknlllnleirnkvmesglatlasnillvpetlriialisivdtctstlsyfvvgkiewia  
skvpfakttaetlksfknl  
vdklhqqltdmrllilnelifteyvivemqdfknaillsdsllrdikvlssnakgdadmletehavinatsqnegksvda  
lknstaslknnltklkeql  
dkth  
>tr|D8HGA1|D8HGA1\_STAAF  
milryvtnlklakeilyqaskpkqlqedkgmielfehtfglqkelvkyvgiaeatlaalsasfinknisriaslstigils  
vaaykhfeaggqkkgagha  
ldllglatlslldtfscnkk  
>tr|D8HGA2|D8HGA2\_STAAF  
mhtfdaqsltarenyklligsiipriafvttlnqdasvnaapfsffnivnnhppmiaiavqraggkrkdalniergd  
fvvhitdednvqdinetaa  
playgdseisrtelslltsttiktpgikdakmrfecklsqmllgdvldgadliigeivtyhidddiyegdfkinphalq  
avsrlagndyaklggfti  
krpek  
>tr|D8HGA3|D8HGA3\_STAAF  
mavvyvaggclwgveaffttipgiihtevgrangrsskldspydgyaecvklhfddrmltitdimnylfeiidpysvnrq  
gndigekeyrtglyscvddy  
liearqfierrkdrkiavevlpisnyiksaeehqhlekypedmhmchisidllnkyk  
>tr|D8HGA7|D8HGA7\_STAAF  
midyveetmkefdlvklilnikl11lilpaiclvsaaltffvmpdkytastqilvnmksssdlafqnvqsslqs  
vntyteiksprildkvsr  
efdgqystaelnsflkvtnqtnsqiitvsvttgnksesdkivnriskvfahdmpkimsvdnvtlssahdnvkvspivs  
vnlvisiivgivilailiif  
lkelldkrikteedvesqlglpilgsiqkf  
>tr|D8HGB2|D8HGB2\_STAAF  
mmksqnkysirkfsvgassiliatllflsggqaqaekqvmngsqedvtvaqsigdqqtrenanyqrengvdeqqhten  
ltnklhndktiseenhrkt  
ddlnkdqldkddksslnnkniqrddtknsnanpsdvnqgleqaingdkqskvasqqskadnsqdsnannnlpsqsrk  
ealplnksnqtsqpeivnk  
teiekvppqnnqandkitnynfnnekevppkdektlsvsdlnknqkspveptkdndknglnllkssavatlpnkgtk  
el takakgdqtnkvakqgg  
yknqdpivlvhgfngftddinpsvlahywggnkmnirqdleengykayeasisafgsnydravelyyyikggrvdygaah  
aakygherygktyegiykd  
wkpgqkvhlvghsmggqti rqllellrngnreeieyqkkggeispflkgnndnmissittlgtphngthasdlagneal  
vkqivfdigkmfngknsrv  
dfglaqwgllkqkpnesyidyvkrvqsnlwkskdnfydltregatdlnrktslnpnivykytytgeathkalnsdrqkad  
lnmffpfvitgnligkate  
kewrendglvsvisshqpfnaqytnatdkiqkgiwqvtptkhdwdhvdvfgqdsdvtvhtreeiqdfwhhladdlvktek  
vtdtkqa

Tsompanidou\_et\_al\_Supplemental\_FASTA\_File

>tr|D8HGB3|D8HGB3\_STAAF  
mkk1fneyffttsqataliifslpmtdlftknfllyml1fiviigstffiere1skkyslqekakk1c1s1lpiniivvf  
iffvfi1  
>tr|D8HGB4|D8HGB4\_STAAF  
mtnykidfskglvpailqdnqtqkv1m1gymnqeaafdktiedglvcfysrskqrlwtkgetsghtqrvkdihvdcndti  
lidvipngptchtgsqscf  
ntevpfsvqtlaqtvdsaqsnnksytky1ltegiekitkkygeeaefevvieaikgdkkafvsevade1yhlfv1mhal  
gdfseieaelarrhhkrn  
nfkgerqnieqw  
>tr|D8HGB5|D8HGB5\_STAAF  
mikkriipc1dvkdgrvvkqiqfkg1rdignpvd1amyneagadelvfldiskteeghs1mlevieqtasrlfip1tv  
ggiqs1dditq11nhgadm  
vs1nssa1knpq1kqasdkfgrqciciaidsyddperkahyccthgkmtnikvydvwqqveqlgagellvtsmghdg  
mkggfdiehlakikslvni  
piiasgggsaqhfvelfdqtdvsaglaasilhdrettvqsikevirqggiavr  
>tr|D8HGB6|D8HGB6\_STAAF  
mielwpaidd1igstsvrltegydseekmsrsaeesiaaysqfecvnrihivd1igakaqharefdyiks1rr1ttkdie  
vggirtksqimdyfaagi  
nycivgtkqiqdadw1kemahtfpgriylsvdaygedikvngweedtel1n1fsfvkqlsdiplggiytdiakdgkmsgp  
nfe1tgq1vkattipvias  
ggi1rhqddiqrlas1nvhaai1gkaahqasfweg1k  
>tr|D8HGB7|D8HGB7\_STAAF  
mivivdyg1gn1snvkraiehlgyevvsnkqniidqaeti1lpgvghfdamseikr1n1dailakntdkkmigic1gm  
q1myehsdegdasglgfi  
gn1sriqteypvph1gw1n1vskhpm1nqdv1fvhsyqapmsenviayaqygt dipaivqfnnyigiqfhpeksgtyglq  
1lrqai1ggfind  
>tr|D8HGB9|D8HGB9\_STAAF  
miyidknespit1dektmts1isatpyn1ypdaayeqfkdayakfygl1speqi1agngsdeliqk1m1impegpa1t1n  
pdfmyqayaaqvnreiaf  
vdagsd1tfd1eti1tkidevqpsffimsnphnpsgkqfdia1ftaiadkmaingyfvideay1dygmaydvelaphi1  
rmr1tskafgiag1rlgv1  
istagtiqriqkiehpyplnvft1niatyif1rhrqetsr1ftmqrqlaeq1kqifdthvadkmsvfpsnanfv1tkgsaa  
qq1gqyvyeqgfkprfyde  
qvmkgyvrys1atasq1kqleeivkewstkyd1skttkhs  
>tr|D8HGC0|D8HGC0\_STAAF  
m1naqqf1nqfs1eapl1des1ypi1rdic1evkvhgdk1kmy1n1tfdhtktdh1eisheqikaafdt1dektkqalqqs  
yerikaygesikqtnqgle  
ksvecyeyhp1lesvgiyvpggkasypstvlmtat1aqvagveni1vv1tppqngvskev1aacyitqvnqvfvqvggaqs  
iaal1tygtetipkvdkivg  
pgnqfvayakky1fgqvg1dq1agpteial1iddtad1daivdvfaqaehdelartyvisedaqv1kdesriakalpn  
vdrydivsksianghyli1h  
asn1fdeacyvmt1apehasi1qtvnpqpyiekvkyvgal1fighyspevigdyvagpshv1ptnr1tarftng1svndf1tr  
ntv1h1skdtfdq1adsaq  
hia1hveal1ynhqqs1il1rqs  
>tr|D8HGC1|D8HGC1\_STAAF  
m1riaiakgr1mds1liny1daieftt1set1knrerq111svdni1ecilvkg1sdvpiyveqgiadigivgsd1ilderhyn  
vnn1ldmpfgachfavaak  
pettnyrkiatsyvhtaeyfkskgidvelik1sgsvelacvdmvdgividvqtgttleang1vekqhisdinar1itn  
kaayfkksq1leqfirs1le  
vsiana  
>tr|D8HGC2|D8HGC2\_STAAF  
mgernfwqhehqiyal1rndftdq11ryysmyptaatkva1ygt1i1r1nneaavqvg1enyaps1anvqqs1klfiqfiqqq  
1rdnv1hfvv1ghyq11da1  
1dks1qt1pd1ismieern1sg1vty1stehpivq1ilkentqqq1nv1lehyipndhpalvelkiwerw1htqgyndih1di  
taqpprsyytg1fiqchfa  
enesrv1tggykgsie1gfg1gl1t1  
>tr|D8HGC3|D8HGC3\_STAAF  
mhkky111ff111sva11lyscskqnekaqnksvnpneyakhkskmdewtyhgqvyhvf1yhp1itdpkvaftgdthqak  
gnndwmi1tvsefkks1ne1  
yknyy1i1vnphdvyd1sshvkakkik1pkgkpli1siddmnyysymrhhyadr1vl1dknkhvvsettdskghatysd  
ndi1vpi1nkfvkehpdfs  
1ngekgvva1tgyegv1gyrtne1tskdytknkkaae1evvramkrd1gwsfashsyghinfekts1legikrdtkrkwdeve  
pi1vgktdmf1v1fphgagdrh  
tqaydy1vdeae1kfi1agvgpnnftdi1satnvyqdrva1idg1n1l1fefkyk1kpffnpenvyskkdrqffkgnrdyee  
>tr|D8HGC4|D8HGC4\_STAAF  
mtnftfdgahss1lefqikh1mvskvkg1sfdqfdvavegd1indfst1katati1pssintkneardnh1ksgdffgtdefd  
ki1tfetksvtenkvvgd1t  
ikgi1tneetfdvefngvskn1pmdgsqvtgi1vtgtinrekyginfnqa1etggvm1gkdvkfeasaefsi1se

Tsompanidou\_et\_al\_Supplemental\_FASTA\_File

>tr|D8HGC5|D8HGC5\_STAAF  
msqqd|ptlfysgksnsavpiisese|qtitaepwleiskkg|lqleg|nfdrgqqlf|l|dvfegni|fkvnpetkeikqpf  
vshkanpaaiki|hkdg|rlf  
vcylgdfk|stg|g|fatteng|dni|q|di|ied|l|sttyc|idd|mv|f|d|sk|g|g|fy|ft|d|fr|g|yst|n|p|l|g|g|v|y|v|a|p|d|f|k|t|v|t|p|i|q|n|i  
svangial|stdek|vlw|vte  
ttan|rl|h|ria|led|dg|vt|iq|p|f|g|at|ip|y|y|ft|g|he|g|p|d|s|c|c|i|d|r|d|d|n|l|y|v|a|y|g|g|r|v|l|v|f|n|k|r|g|y|p|i|g|q|i|l|p|g|r|d|e|g|h|m|l  
rsthpq|fip|g|t|n|q|i|i|c|s|n  
diem|g|g|g|s|m|l|y|t|v|n|g|f|a|k|h|q|s|y|q|f|q  
>tr|D8HGC6|D8HGC6\_STAAF  
mnyqv|l|l|y|y|k|y|t|t|d|d|p|e|q|f|a|q|d|h|a|f|c|k|a|h|h|k|g|r|i|l|v|s|t|e|g|i|n|g|t|l|s|g|t|k|e|e|t|e|q|y|m|h|a|h|d|e|r|f|k|m|v|f|k|i|d|d|a|e|g  
hafk|m|h|r|r|p|r|k|e|i|v|a|l|d|l  
ed|v|d|p|r|h|t|t|g|y|l|s|p|v|e|f|r|k|a|l|e|d|d|t|v|i|i|d|a|r|n|d|y|e|f|d|l|g|h|f|r|g|i|r|n|i|r|f|r|d|l|p|d|w|i|k|e|n|k|a|l|f|a|d|k|k|v|t|y|c|t|g  
g|i|r|c|e|k|f|s|g|w|l|l|k|e|g|f|e|d|v  
a|q|l|h|g|g|i|a|t|y|g|k|p|e|t|k|g|y|w|d|g|k|m|y|v|f|d|r|i|s|v|d|i|n|q|v|e|k|i|i|g|k|d|w|f|d|g|k|p|c|e|r|y|i|n|c|a|n|p|e|c|n|k|i|l|v|s|e|e|n|e|a|k|y|l  
g|a|c|s|y|e|c|a|h|h|e|r|n|y|v|q|a|n  
n|i|s|d|n|e|w|q|h|r|l|t|n|f|d|d|l|h|q|h|a  
>tr|D8HGC8|D8HGC8\_STAAF  
mtkt|v|f|d|v|i|d|m|g|l|y|l|v|n|v|y|d|t|w|k|v|e|k|l|d|d|y|h|k|p|f|s|n|i|h|w|q|f|g|h|v|l|t|i|f|e|s|a|l|a|v|a|g|k|e|i|d|l|n|i|y|r|p|l|f|g|n|g|s|s|p|d  
e|w|k|d|e|v|p|s|i|e|t|i|l|e|s|l|q|t|l  
p|e|r|a|r|n|l|e|d|d|l|a|i|e|l|k|p|i|v|g|c|n|l|e|l|l|v|l|n|i|h|i|p|h|a|g|k|i|e|e|m|s|r|i|l|k|n|l|k  
>tr|D8HGC9|D8HGC9\_STAAF  
m|e|n|t|v|k|y|r|k|f|i|l|p|i|v|g|l|i|w|a|l|t|p|f|k|p|d|a|v|d|p|t|a|w|y|m|f|a|i|f|v|a|t|i|i|a|c|i|t|q|p|p|i|g|a|v|s|i|g|f|t|i|m|v|l|v|g|i|v|m|k|t|a|v|a  
g|f|g|n|s|i|w|i|a|m|a|f|f|i|s|r|g  
f|v|k|t|g|l|r|r|i|a|h|f|v|k|l|f|g|k|k|t|l|g|l|a|y|s|i|v|g|v|d|i|l|a|p|a|t|p|s|n|t|a|r|a|g|g|i|m|f|i|i|k|s|l|s|e|s|f|g|s|k|p|k|d|e|s|r|k|m|g|a|f|l|v|f  
t|e|f|q|n|i|t|a|m|f|l|t|a|m|a|g  
n|p|l|a|g|n|l|a|s|t|s|n|v|h|i|t|m|w|n|w|f|l|a|l|v|p|g|i|s|i|l|v|p|f|i|y|i|k|i|y|p|t|v|k|e|t|p|n|a|k|s|w|a|e|n|e|l|a|m|g|i|a|l|a|e|k|f|m|i|g|i|f|v  
i|a|l|t|l|w|i|v|g|s|f|i|h|i|d|a|t|l|t  
a|f|i|a|l|l|l|l|t|g|v|l|t|w|q|d|i|l|n|e|t|g|a|w|n|t|l|w|f|s|v|l|v|l|a|d|q|l|n|k|l|g|f|i|p|w|l|s|k|i|a|t|s|l|g|l|s|w|p|i|v|l|v|i|l|i|l|f|y|f|y|s|y|h  
l|f|a|s|t|h|i|s|a|m|y|a|l|l|g|v  
a|i|a|a|g|a|p|l|f|s|a|l|m|l|g|f|f|g|n|l|l|a|s|t|h|y|s|s|g|p|i|l|f|s|s|g|y|v|t|q|r|w|w|t|m|n|i|l|g|f|v|y|i|i|w|i|g|i|g|s|i|w|m|k|v|i|g|i|f  
>tr|D8HGD0|D8HGD0\_STAAF  
m|i|f|i|l|a|v|g|k|q|r|n|a|f|r|d|m|n|q|l|g|k|p|i|q|l|l|i|v|v|a|g|y|v|i|t|l|n|w|g|t|f|i|w|a|v|t|n|g|h|v|l|q|t|s|l|g|y|i|n|p|l|v|s|i|l|l|a|i|l|f|l|k|e|r  
f|n|k|f|e|w|l|i|l|f|a|i|g|v|l|y|m  
t|l|k|i|g|e|f|i|v|s|i|i|l|a|l|s|f|g|t|y|g|l|k|k|v|h|i|d|i|s|i|t|i|e|c|i|v|t|a|p|a|g|i|y|v|i|y|l|w|q|q|h|q|m|s|f|g|l|n|m|s|s|f|w|l|l|f|s|g|i|t|a|i  
p|i|i|l|f|s|a|g|a|k|r|i|p|l|s|i|g|f  
i|q|y|v|g|p|i|m|f|v|l|g|i|f|v|f|k|e|p|f|i|d|q|i|t|i|f|i|f|i|w|t|g|i|v|l|y|l|s|q|y|i|k|l|k|h|p|v|a|k|l  
>tr|D8HGD1|D8HGD1\_STAAF  
m|t|l|p|k|i|g|k|p|a|t|r|a|l|n|s|g|g|i|y|t|l|e|a|v|s|y|t|k|s|l|m|e|m|h|g|v|g|p|k|i|s|i|l|e|q|a|l|f|q|h|l|h|f|k|t|e|v|h|s|l|p|f|l|t|g|d|v|s|c|h|a|p  
k|r|q|q|i|d|f|i|v|a|t|a|l|d|i|e|l  
l|r|s|l|v|t|t|e|f|i|w|s|v|p|r|f|i|y|g|p|i|l|i|q|e|l|s|h|y|k|i|e|i|a|s|i|n|i|q|s|i|i|h|t|g|c|l|g|m|h|g|i|e|i|l|k|t|g|k|i|h|f|h|f|e|f|e|h|h|k|k|d|a  
k|i|s|k|v|t|s|i|v|v|g  
>tr|D8HGD2|D8HGD2\_STAAF  
m|i|k|y|h|m|k|e|g|i|l|t|v|f|k|n|e|r|l|s|w|l|p|y|i|a|i|v|i|l|h|v|i|g|f|s|f|l|w|i|a|g|d|h|i|l|f|g|m|i|l|a|y|t|l|g|r|h|a|f|d|h|i|a|i|d|n|t|v|r  
k|i|l|q|r|k|d|p|s|g|v|g|f|y|f|s|i|g  
h|s|s|v|v|f|l|m|a|v|f|l|g|v|s|v|k|w|a|k|d|e|l|p|h|f|q|d|i|g|g|t|i|g|t|l|v|s|g|f|f|l|v|i|g|v|l|n|i|i|l|i|s|i|n|i|l|f|a|k|l|r|h|i|e|e|a|e|v|d|a|l|l|e|r  
g|f|v|r|f|v|g|p|y|f|k|i|t|r|s|h  
v|l|p|l|g|f|l|f|g|l|g|f|d|t|a|s|i|a|l|l|a|s|s|g|a|s|q|q|i|s|f|i|g|i|l|s|i|p|i|l|f|a|s|g|m|s|i|l|d|t|l|d|g|v|m|k|y|a|y|n|w|a|f|f|n|p|i|r|k|i|y|n|i|t|i  
t|i|s|v|i|a|a|l|v|i|g|i|e|i|l|l|q|i  
l|a|d|k|l|d|h|g|a|f|w|a|f|i|s|i|e|f|d|y|l|g|i|l|v|a|l|f|i|t|w|i|s|i|l|w|k|f|g|i|e|h|k|w|s|k  
>tr|D8HGD3|D8HGD3\_STAAF  
m|i|n|i|a|k|l|e|n|y|l|q|i|d|s|s|r|y|r|n|r|p|s|i|e|a|l|n|y|y|a|t|r|f|m|l|t|v|p|f|e|i|d|v|q|n|s|k|p|i|s|i|n|i|d|a|l|f|n|k|i|r|v|r|d|r|g|g|f|c|y|e|l|n|t|f|f|k|t|y|l  
q|q|k|g|f|n|p|e|i|m|s|a|i|h|t|p|g|g  
g|r|s|i|n|g|s|h|a|s|l|v|v|i|n|d|v|f|y|v|t|d|v|g|f|d|l|p|h|i|p|i|t|s|e|h|t|q|i|t|d|i|s|g|t|f|r|i|f|n|q|d|k|i|f|y|v|q|k|f|e|n|d|w|r|t|k|y|e|a  
e|f|k|a|k|i|a|d|f|d|k|i|n|k|y|n|g|t  
h|p|d|i|f|v|q|h|l|i|i|t|p|q|s|f|d|r|a|t|m|s|e|h|l|t|l|t|k|a|k|d|i|s|e|k|l|a|v|t|k|d|n|y|q|h|f|l|k|t|y|f|g|l|d|v|i|n|i|e|n|s|d|s|k|s  
>tr|D8HGD4|D8HGD4\_STAAF  
m|e|k|g|n|q|g|i|k|w|s|i|m|g|v|i|l|l|m|a|v|i|f|t|f|i|e|n|f|y|i|a|t|w|i|g|i|f|v|i|n|g|i|v|i|y|r|r|k|a|k|a|l|v|g|g|n|q|n|w|i|l|f|m|g|i|v|i|l|f  
g|i|v|i|f|n|v|g|a|s|a|f|i|y|m|f  
a|f|w|i|f|s|s|i|a|g|i|f|t|f|s|g|s|l|k|i|s|i|v|i|n|i|l|g|i|v|f|g|i|l|l|f|n|p|i|m|g|i|v|i|s|t|m|i|i|a|i|a|f|l|v|g|v|i|y|v|d|a|l|a  
>tr|D8HGD6|D8HGD6\_STAAF  
m|t|f|h|i|v|f|k|n|l|r|q|n|l|h|y|a|m|y|l|f|s|i|f|f|s|i|v|l|y|f|s|f|t|l|q|f|t|k|g|v|n|n|d|s|m|i|i|k|k|g|a|l|v|g|i|f|i|i|v|i|f|i|y|a|h|l|f|v  
k|r|r|t|r|e|f|a|l|f|q|i|g|i|l|r|q|n  
i|l|k|m|l|a|e|q|m|i|v|f|i|t|g|v|v|g|l|c|i|g|i|a|q|l|i|l|s|i|v|s|k|i|m|s|i|n|i|s|i|h|f|e|m|a|l|v|l|i|f|m|l|v|i|a|i|i|l|f|q|s|s|i|f|l|k|r|r|s  
i|l|m|m|k|d|i|k|t|d|v|t|t|a|k|v|t  
t|a|e|i|s|g|v|l|g|i|a|i|a|l|g|y|m|a|t|e|m|f|g|t|f|k|a|l|m|a|m|t|s|p|i|i|l|f|l|t|v|v|g|a|y|i|f|r|s|s|v|s|i|f|k|t|l|k|s|k|n|g|r|v|i|t|d|v|v|f|t  
s|i|m|y|r|m|k|k|n|a|m|s|i|t|i|i|a|i  
i|s|a|v|t|v|l|c|f|a|a|l|s|k|s|i|n|d|q|l|t|s|m|a|p|n|d|f|n|v|a|s|q|d|a|q|f|e|s|k|l|s|q|h|i|t|f|t|k|n|y|e|i|t|v|n|n|v|k|d|q|i|t|l|e|n|g|s|d|g  
r|t|n|i|l|s|a|n|t|k|i|t|g|n|i|i

Tsompanidou\_et\_al\_Supplemental\_FASTA\_File

tntkslpniinihlndklvvgtknetfrvtqedkgkvyplnlsfnspvvevspekyqqkktqnnvhtfygydikqtsqk  
kkaqaiakqfgdkvityde  
mkkevdatngilifvtsflglafvaagciiyikqmdetedelsnfrilkrigfthtdmlkglllkitfnfglplliail  
havfaaiafmlmgnisfm  
pviiivvytliyivfaliafvhsnklikkti  
>tr|D8HGD7|D8HGD7\_STAAF  
mkfrelvkqsyedlknltvtwynvialamivivlstvttpiigipvgllggayylkrreekgk  
>tr|D8HGD8|D8HGD8\_STAAF  
mngtvtkwfnaekgfgfieqenggdvfvhfsgiasdgyktleegqkvtfeitegqrgdqavnvqtv  
>tr|D8HGD9|D8HGD9\_STAAF  
mkffvggfavllsyivsvlpwkefggifatfpavflvsmfitgmqygdkvavhsrgavfgmtgvlvciivtwmmlhmt  
hmlisiivgflswfisav  
cifeavefiaqkrlekshwkagksnsk  
>tr|D8HGE0|D8HGE0\_STAAF  
mfsigsailhfviggiavalasiadkvggklggiaatmpavflaaiialdhrqtqlvemsmnstgaivgilscilt  
vflaslyikhkgyrkgaif  
tvvcwfvislaifsrhl  
>tr|D8HGE2|D8HGE2\_STAAF  
mtvewlaeqlkehnielsetqkqfqttyrllvewnekmltsitdehnylkhfydsiapsfydfnqpisicdvgaga  
gfpisipkimfpqkvtiv  
dlnkriqflnhlaseqlqdvsvfihdraetfgkgvyresydvtaravarlsvlselelplvkkggqfvalksskgee  
leeakfaivlggnvteth  
tfelepagerqmfiidkkrqtpkkyprkpgtpnktpllek  
>tr|D8HGE3|D8HGE3\_STAAF  
mltinldniafmpcnpsvvgpakgivvreidalgqmaktidkthiqmrmIntgkgpavralraqadkvyqqemkrvie  
deenlhimqgmvdeliied  
nekvgrtnigtelylskaviittgtflrgeiilgnmkysgpnhqlpsitlsdnlrelgfdvvrftgtpprvnsktidy  
skteiqpgddvgrafsft  
teyildqlpcwltytนาethkviddnlhl samysgmikgtgprycpsiedkfvrfndkprhqlflepegrntnevyvqgl  
stslpehvqrqmlletipgl  
ekadmmragyaieydaivptqlwptletkmiknlytagqingtsgyeeaggglmaginaagkvIntgekilsrsdayig  
vliddlvtkgtnepyrllt  
sraeyrlllrhdnadlrldmgyelgmi seeryarfnekrqqidaieikrldirikipnehtqaiieqhggsrldkgilai  
dllrrpemydiileilee  
ehqlnadveeqveiqtkyegyinks lqqvekvkrmeekkipedldyskidslateareklsevkplniaqasrisgvnpa  
disilliyieggklqrvsd  
>tr|D8HGE4|D8HGE4\_STAAF  
mldtitsistpmgegaigivr lsgpqaveiadklykgkhllndvpshtinyghiidpeskevveevmvsvlrapktftr  
ediieinchggiltinrvl  
elmttygarmaepgeftkrafIngridlsqaeavmdfirsktdraskvamnqiegrlsdlikkqrqsileilaqvevnid  
ypeyddvedatteflleqs  
keikqeinrlldtgagkimreglstvivgkpnvgkssmlnlnliqdnkaivtevagtttrdvleeyvnrvgvplrlvdtag  
iretedivekigversrka  
lsqadlilfvlnnealtqedytlyevvknedvivivnkmdleqnidinevkdmgntpliqtsmlkqegideleiqird  
lffggevqnqdmtyvsnsr  
hisllkqarqtigdaidaesgvpmdmvqidl trtweilgeiigetasadleldqlfsqfclgk  
>tr|D8HGE6|D8HGE6\_STAAF  
mviiiyliigsalgiipeiandlglnssflknhyvdgiigsifmflifgvfirrvtnaikglehfimrrsaveilfa  
tjgliigllisvmvsfile  
signsifnhfipviitilcyfgfqlgkkrdemlmlpeniarsmsqhtksatpkidtsaiidgrilevirrcgidgn  
ilipqgvine lqivadsnd  
svkrekgkrgldilnelydldyptkvi hptkshdidtmllklakqyhaniittdfnlnkvchvhgikalnvndlseaik  
pnvhggdqlhlltkmgke  
pgqavgylddgtmvvdnanknligshvnlevvsllqtssgrivfakkiedtvs l  
>tr|D8HGE7|D8HGE7\_STAAF  
msdri rvryapsptgy l hignarta l fnylyakhngdfviri edtdkkrnledgetsqfdnlkwlgldwdesvdkdngy  
gpyrqserqhiyqplidql  
laedkaykcynteeleaeareaqargempryggqhahlteeqrqqfeagrqsirfrvpqntysfddmvkgnisfds  
ngigdwvkvkkgdiptynf  
avaiddhymeisdvirgddhisntpkqimiyeafgwepprfghmslivneerklskrdgqilqfieqyrdlgy lpealf  
nfiallqwspegeeeifsk  
eefiki fdekr lskspaffdkqklawvnnqymkqkdtetvfqlal phlikan l ipeapseed l swgrklialyqkemsya  
geivplsemffkempalge  
eeqqvingeqvpe l mth l fsk l ea l epfeaae i kktikevqketgikgkqlfmpirvavtqgmhgpel pntievl gkekv  
lnrlkqyk  
>tr|D8HGE9|D8HGE9\_STAAF  
mitlyntl trqkevfkpi epgvkmyvcgptvynyihignarpainydvrryfeyqgynveyvsnftdvddklikrsqe  
lnqsvpeiaekyiaafhed



Tsompanidou\_et\_al\_Supplemental\_FASTA\_File

vgaInvrkatsnprvmdhmdiiqfikdldvqgyayesggdvyrtrkfkfegyglshqsiddlkvgaridagehkedaId  
ftlwkaksgeiswdspfg  
egrpgwhiecsvmafhelgptidihaggsdlqfpheneiaqseahnhapfanywmhngfinidnekmskslgnfilvhd  
iikevdpdvlrffmismvhy  
rspinynelevesarsglerirnsyqlieeraqiatnienqqtyidqidailnrfetvmnddfntanaitawydlaKlan  
kyvlenttstevdkfkav  
yqifsdvlgvplksnade11dedvek1ieernearknkdfaradeirdmlksqniiledtpqgvrfkrG  
>tr|D8HGF0|D8HGF0\_STAAF  
mnp1tlaymgdavidqyvrtyivlk1kskpnk1hqmskkyvsaksqaqtleylmeqewftdeemdi1krgrnakshkak  
ntdvqtyrkssaieavigf  
lylekreerleal1nkiitivner  
>tr|D8HGF1|D8HGF1\_STAAF  
medtvivgrhavreaaitghpinkiliqegikkqqineilknakdqkiivqtvpsklDflanaphqgvaaliapyeyad  
fdqflkqqkekqglstvl1  
ldgledphn1gsilrtadatgvdgviipkrsvt1tqtvakastgaiehvpvirvtnlaktidd1kdngfwvagteanna  
tdyrnleadmslaivigse  
ggmsr1vsdkcdfyikipmvghvns1nasvaas1mmyevfrkrhdvgei  
>tr|D8HGF3|D8HGF3\_STAAF  
mkydlttqdstikrnna1ndkdfek1vmd1qpliirriktfgfnhydledlyqeilirmyrsvqtfdfsgeqpftnyvqc  
litsvkydy1rkylatnkr  
mdnlineyrvtypcaikrydvenny1nklaike1irqfky1safekdvmy1mceqykpreiaqlmhvkekviynaiqrck  
nkikryfkii  
>tr|D8HGG0|D8HGG0\_STAAF  
mshyydedpsvisneqriqyqlnhhkid1itdngvfskdkvdysdvlvtflkthppgskriadvgcgygpiglmiak  
vsphs1tm1dvnhrala1  
veknqk1ngidnviVKesda1savedksfdfiltnppi ragketvhrifeqa1hr1dsngel1fvviqqkqgmpsakkrmn  
elfgnvevvnkdgyyilr  
sika  
>tr|D8HGG1|D8HGG1\_STAAF  
magqvvyqgrhrkrnyarisevle1pnlieiqtksyewflregliemfrdispiedftgn1s1efvdyrlgepydlee  
sknrdatyaaplrvkvr1i  
iketgeVkeqevfmgdfp1mtdtgtfvingaervivsq1vrpsvyfnekidkngrenydatiipnrgawleyetdakdv  
vyvridrtrk1p1tv11ra  
lgfssdqeivd1lgdneylrntlekdgtenteqalleiyer1rpegeptvenaks1lysrf1dpkryd1asvgryktnkk  
1h1khr1fnqklaepivnt  
etgeivveegtvl1drkideimdvlesnasevfe1hgsvidepveiqsikvyvpndeegr1tttvignafpdsevkci1p  
adiiasmsyffn1sgigy  
tdidh1gnrr1rsvge11qnqfrigl1rmervrermsiqdtesitpqq1nirpviasikeffgssq1sqfmdqanp1  
aelthkrr1salpgg1tr  
eraqmevrdvhyshygrmcpietpegpnig1ins1ssyarvnefgfietyrkvdl1dthaitdqidy1tadeedsyvvaq  
anskl1dengrfmddevvcr  
frgnntvmakekmdymdvspkvvsaa1cipflenddsnra1lmganmqrqavp1mpeapfvgtgmehvaardsgaa1t  
akhrgrvehvesneilvrr  
1veengvehege1dryplakfkrnsngtcynqrpivavgdvveyneiladgpsme1gema1grnvvgf1mtwdgynyeda  
vimser1vkddvytsihie  
eyesear1tk1gpee1trdipnvsesa1kn1ddrgiviyigaevkdgdilvgkvtpkgvte1taer1lhaifgekarevr  
dts1rvphgaggiv1dvkv  
fnreegdd11spgvnq1vrvyivqkrkihvgdkmcrhgnkgviskiVpeedmpylpdgrpidim1nplgvpsrmnigqv  
1elh1gmaakn1gihvasp  
vfdgandddwstieeagmardgktvlydgrtgepf1dnri1svgvmy1klahmvddk1harstgpys1vtqqp1ggkaqf  
ggqrfgemeVwa1eaygaa  
yt1lqe1ltyksddtvgrvktyeaivkgenisrpsvpesfrv1mke1qs1gl1dvkvmdeqndneiemtdvdddvdverkvdl  
qqndapetqkevtd  
>tr|D8HGG2|D8HGG2\_STAAF  
midvnnfhykig1laspek1rswsfgevkkpetinyrt1kpekdg1fcerifgptkdwecscgkykrvrykgmvdrcgv  
evtkskvrrermghie1aa  
pvshiyw1fkgipsrmg11ldmspra1eeviyfasyvvvdpgptglekkt11seae1frdydykypgqfvakmgaegikd11  
eeid1deek11rde1esa  
tgqr1traikr1evesfrnsgnkpswmi1dv1piippeirpmvq1dggrfatsd1ndlyrrvinrnnr1kr11dl1gapg  
iivqnekrm1qeavda1id  
ngrrgrpvtgpgnrp1ks1shm1kgkqgrfrqn11gkrvdysgrsviavgps1kmyqcg1pkemal1el1fkpfvmkelvqr  
eiatniknaks1kiermdde  
vwdv1leevi1rehp11nrapt1hr1giqafept1vegrair1hp1vttaynadfdgdqamavhvp1skeaqaearm1mlaa  
qni1npkdgkpvtpsqdm  
vlgnyy1t1erkdavntgai1fnntnev1kayangfvh1htrigvhassfnntfteeqnkki1atsvgkiifneipdsf  
ayineptqen1er1ktpnry  
fidpt11gegg11keyfene1iepfnkk11gniaevfnrfsitdtsm11drmkd11gfkfsskagitvgvadiv1v1pdqk  
qi1dehek11vdritkqfnr

Tsompanidou\_et\_al\_Supplemental\_FASTA\_File

gliteeerynavveiwtadkdqigelmqslkdktncpifmmsdsgargnasnftqlagmrglmaapsngkiielpitssfre  
gltvleyfisthgarkgla  
dtaiktadsgyltrrlvdvaqdivreedcgtldrgllvsdikegtemiepfieriegrysketirhpetdeiiirpdeli  
tpeiakkittadagieqmyir  
saftcnarhgvcekcygknlategkevgeavgtiaaqsigepgtqltmrtfhtggvagsditqglpriqEIFearnpkg  
qaviteiegvediklakt  
rqqeivvkganetrasylasgtsriiveigqpvqrgevltegsiepknylsvaglnatesyllkevqkvymqgveiddkh  
vevmvrqmlrkvriieagd  
tkllpgslvdihnftdanreakhrkrpatakpvllgitkasletesflsaasfgettrvltadaikgkrddllglkenv  
iigklipagtgmrrysdvk  
yektakpvaevesqtevt  
>tr|D8HGG6|D8HGG6\_STAAF  
marefslktrnigimahidagktttterilytgrihkigethegasqmdwmeqeqdrigititsaattaaweghrvni  
dtpghvdfteverslrvl  
dgavtvldaqsgepqtetvwrqattygvprivfvnkmdklganfeysvstlhdrlqanaapiqlpigaedefeaidlv  
emkcfkynldlgeieeie  
ipedhldraearaslieavaetsdelmekylgdeei svselkeairqattnevfypvlcgtafknkgvqlmldavidyl  
pspldvkpiighrasnpee  
eviakaddsaefaalafkvmtdpyvgkltfrrvysgtmtsgsyvknstkgkrervgrllqmhansrqeidtvysgdi aaa  
vglkdttgtgdtlgeekndi  
ilesmeffepvihilsvepkskadqdkmtqalvklqeedptfhahtdeetgqviiggmgelhdilvdrmkkefnvecnvg  
apmvsyretfkssaqvqgk  
fsrqsggrgqygdvhi eftpnetgagfefenaivggvpreyipsveaglkdamengvlagyp lidvaklydgsyhdvd  
ssemafkiaaslalkeaak  
kcdpvi lepmkvtiempeeymgdimgdvtsrrgrvdmepgrnaqvvnayvplsemfgyatslrsntqgrgtytmyfdh  
yaevpksiaediikkngke  
>tr|D8HGG8|D8HGG8\_STAAF  
mldwfglannkenktiqlrrylhqypeisfeefqthdyivnqlsqslscdi etpigngikatfkglggtptialradfda  
lpveelndvpyksknpgcm  
hacghdghtailltvaeil dekhll egnvvlifqygeeimpqgsqemidagclenvdriygthlwsgyptgtihsraga  
imaspdfsvtikgrgghg  
akphetidpivimaefil saqkiisrtidpvkqavlsfgmiqagtt dsvipdqafckgtvrtf dsdiqnhvmdkmdkllq  
glaiandinydlnyikgyl  
pvhnekayqvi keatndihvrfnesdlmmigedfshylkvrpgaffltgcnegskgitaphhnpkfdidekslkyavav  
flkiieleqvfktn  
>tr|D8HGG9|D8HGG9\_STAAF  
mvqslhefleenyylkenglyneidtiegangpeikingxyinlssnylglatnedlksaakaaidthvgagavrt  
ingtdlhdeleqtlakfk  
gteaaiayqsgfncnmaaisavmnkndailsdelnhasiidgcr lskakiirvnhsdmddlrakakeavesgqynkvm yi  
tdgvfsmgdgvaklpeive  
iaefgllyvddahsgvmgkgagtvkhfglqdkidfqigtlskaigvvggyvagtkelidwlkaqsrpflfsts lapg  
dtkaitavkklmaste lh  
dklwdnaqylknglslklydtgesetpitpvii gdekttefskrlkdegvyvksivfptvprgtgrvrnmptahtkdm  
ldeaiayekvgkemkli  
>tr|D8HGH0|D8HGH0\_STAAF  
msqdvnel skqptpdkaednaffpspyslsqy tapktdfdgvehkgaykdgkwkvlmiaaeeryvllengkmfstgnhpv  
emllplhhmeagfdvdva  
tllsgypaklelwamptedeavistynklkek lkpkkladviknelgpd sdy lsvfipgg haavvgisesedvqqtldwa  
lndrfivtlchgpaa lls  
aglnreksplegysvcvfpds ldeganieigy lprlkwlvadlltkqglkvvnddmtgrtlkdrklltgdsplasnelg  
klavnemlnaiqnk  
>tr|D8HGH1|D8HGH1\_STAAF  
msysigidygtasgrvflinttngqvsvkfvkpythgvieselnglkiphtyalqnsndyleimeegisyivreskvdpv  
nivvgigidftsstii ftde  
nl npvhnlkqfknnphayvklwkhhgaykeaklyqtaiennkwlghygynvssewmi pkimevmnrapeimektayim  
eagdwi vnk ltnknvrsnc  
glgfka fweeetgfhydlfdkidpklskviqdkvsapvvnigeavgkl dhkmaqklglsketmvspfiidahasllgigs  
ekdkemtvmvgtstchlml  
nekqhvpqts gsvkgaiipe lfayeagqsavgd lfdyvakqapksyvdeaanrnmtvfelmnekihqmgesgliald  
whngnrsvlsdsnlgtcif  
gltlqtkhediyrayleatafgtkmimqqyqdw hmevekvfacggipkknvmm diyanvlnkklivmdseyapaigaa i  
lgavsggahnsindavdam  
kepileinpeaekvqryetlfkaykalhdihgykkanimkdiqslrveg  
>tr|D8HGH3|D8HGH3\_STAAF  
msqavkverretlkqkpntsq lfgfkyftdym lsydydadkgwhdlkivpygpieispaaqgvhygqsvfeglkaykrdg  
evalfrpeenfrlnns la  
rl empqvdeael leglkqlvdlerdwipegegqsl yirp fvfategalvggashqykl lliilspsgayygetlkptkiy  
vedeyvravrggvgfakva

Tsompanidou\_et\_al\_Supplemental\_FASTA\_File

gnyaasllaqtnanklgydqvlwldgveqkyieevgsnmiffvengkvitpelngsilpgitrksiielaknlgyeveer  
rvsidel fesydkgeltev  
fgsgtaavispvgtlryedreivinnnetgeitqklydvytgiqngtledkngwrvvvpyk  
>tr|D8HGH5|D8HGH5\_STAAF  
mnygipqnaii tiagtvvgkstltqaladklnfktsfenvehnpyldkfysdferwsfhlqiyflaerfkeqkrmfey  
gggfvqdrsiyedvdi fak  
mheegtmskedfktysdlfnamvmtpyfpkpdvmiylecnydevidriiergremeintdpeywkklfkryddwinsfn  
acpvvrini neydi hkdpd  
slnpmidkiahiiktyrqvdtr  
>tr|D8HGH7|D8HGH7\_STAAF  
mtndiyfmtlaieeakkaaqlgevpigaiitkdevarahnretlqqptahaehiaieraakvlgswrlegctlyvtl  
epcvmcagtivmsriprvv  
ygaddpkggcsgslmnlqqsnfnhraivdkgvlkeacstllttffknlrankkatn  
>tr|D8HGH8|D8HGH8\_STAAF  
mikl iatdmgtllnaaheisqpnidaikyaqeqgittvviatgrafyeadapvadtdltvpyiclngaevrdetfnvmt  
shlnkslvhkitnvlkdag  
iyyqvysraiytedpqrldiyidiaeragqhanverikngiqrridngtlkvvdnydaienipgelimkilafdgnle  
kidkaskilaespnlaiss  
ssrgnieithsdaqgialetiaerleiemkdvmaigdnlnlsmlekvgyppvamengaeevkkiakyvtdtnensgvk  
aimkllreqqv  
>tr|D8HGH9|D8HGH9\_STAAF  
mkgliiigsaqvnshtsalaryltehfkthdieaeifdlaekplnqldfsgttsideikqnmkdllkekamaadflilgt  
pnyhgsysgilknaldhln  
mdyfkmpvgllignsggivssepshlrivrsllgiavptqiathdsdfaknedgsyylndsefqlrarlfvdqivsfa  
hnspeyhlk  
>tr|D8HGI0|D8HGI0\_STAAF  
mnkktatnrkgmipnrlnkfsirkysvgtasilvgttlifglsgheakaaehtngelnqskneatapsenkttekvdsr  
qqnnveqsttsnqpkvnes  
dntsvketteepqnttstqptkqnnatankdnlaaqnistqandvsatpktttikprtlnrmavntvaapqqgtvndk  
vhfsnidiaidkghvnstt  
gktefwatssdvllkanykiddsvkegdtftfkyggyfrpgsvrlpsqtqnllynaqgniiakgiydstnttttytftny  
vdqytnvsgsfeqvafakr  
enattdktaykmevtlgnntyseevivdygnkkaqplissnyinnedlsrmtayvnqpkntytkqtfvtnltgykfnp  
naknfkiyevtdqngfvds  
ftpdtsklkdvttgqfdviysndnktatvdlnkqgtssnkqyiqqvaypdnsstngkidytldtdkkykswsnsysvsn  
gsstangdqkkyngldyvw  
edtnkdgkqdanekgikgyvivilkdsngkeldrtttdengkyqftglngtysefstpagytpptanagtddavdsdgll  
tttgvikdadnmtldsgfy  
ktpkyslgdyvwydsnkdgkqdstekgikdvkvtllnekgevigttkt dengkyrfdnldsgkykvi fekpagltqtgt  
ttkddkdadggevdviti  
hdftldngyfeetsdsdsdsdsdsdsdsdsdsdsdsdsdsdsdsdsdsdsdsdsdsdsdsdsdsdsdsdsdsdsds  
dsdsdsdsdsdsdsdsdsdsdsdsdsdsdsdsdsdsdsdsdsdsdsdsdsdsdsdsdsdsdsdsdsdsdsdsds  
dsdsdsdsdsdsdsdsdsdsdsdsdsdsdsdsdsdsdsdsdsdsdsdsdsdsdsdsdsdsdsdsdsdsdsdsds  
dsdsdsdagkhtpakpmsavkdhhnkakalpetgsenngsnatlfgglfaalgslllfgrrkkqkn  
>tr|D8HGI1|D8HGI1\_STAAF  
mlnrenktamtrkgmvsnrlnkfsirkytvgtasilvgttlifglsgqekaaevtnkemkedatsvndqvskkvdeq  
lnndgntskvdteqlkden  
lnkvanqkevtrvensvakeknnnskpsengkltqsdvkktednatsddqvttvnsqqlntdnttsmssapinvrkdd  
lkfnneevrnvgeksdntd  
nansselikpkttteprlntrmriaaiqpnstsknvnlditsnttltvvdadnktivpaqdyllslksqitvddkvsqg  
dyftikysdtvqvyglne  
diknigdikdpngetiatakhdannlitytftdyvdrfnsvqmginsiydadtipvdkkdvpsvtignqttttta  
ditypaykeadnnsigsaf  
tetvshvgnaedpgyynqvvyvnpmdkdlkganlkveayhpkypanigqinqvtnikiyrvpegytlkgydvnandlv  
dvtdefknkmaygtngsvn  
idfgditsayvnmvntkfqytnsesptlvqmatlssstgnktvstgnalghtnnqsggagqevyikinyvwedtnkngvqe  
lgekvgvntvtvfdnntn  
tkvgeavtkedgsylinlpgdyrvefsnlpqgyevtspkqgnneelsngvssvitvngkdnlsadlgiykpkynlgd  
yvvedinkngiqdqdekgi  
sgvtvtlkdengnvlktvttadgkykftldngnykvefttpegytptstntggndtvsngl tttgvingadnmtlds  
gfyktpkynlgyvwedtn  
kdgkqdssekigsgvtvtlknengevlqttktkdgkyqftglengtykvefetpsgytptqvgsgtdegidsngtsttg  
vikdkdndtidsfgykpty  
nlgyvwedtnkngvqdkdekigsgvtvtlkdendkvlktvtt dengkyqftldngtykvefetpsgytptsvttgndt  
ekdsngl tttgvikdadnm  
tldsgfyktpkyslgdyvwydsnkdgkqdstekgikdvkvtllnekgevigttkt dengkyrfdnldsgkykvi fenpag  
ltqtgtntteddkdadgge



Tsompanidou\_et\_al\_Supplemental\_FASTA\_File

>tr|D8HGJ1|D8HGJ1\_STAAF  
mkfdnyi fdfdg tladtkkgeaatqna fkcagl tepsskeithymgipieesflkladrpldeaalaklidtfrhtyqs  
iekdyiyefagiteatsl  
ynqgkklfvvsskksdvlernlsaiglnhliteavgsdqvsaykpnpegihtivqrynlnsqqtvyigdstfdvemaqha  
gvpsaavtwgahdarsllh  
snpdfiindpseintvl  
>tr|D8HGJ2|D8HGJ2\_STAAF  
mdfnkeninmvdakkaktvvatgignamewfdgvyayttayiganffspvesadirqmltfaalafiaflrpiggvfvf  
giigdkygrkvvlstii  
mafstltigllpsydqiglwapi111larvlqgfstggeyagamtyvaesspdkrrnslgsgleigtlsgyiaasimiam  
lfff1tdeqmasfgwrifp  
llglf1glfglylrrkleespvfendvatqperdninflqii rfyyk difvcfvavffnvtnymvtaylptyleqviki  
datttsvliitcvmaimipl  
alifgkladkigekkvfligtggl1fsiafmlhsqsffvivigifvlgfflstyeatmpgslptmfyshiryrtlsv  
tfnisvsi fggtp1vatw  
lvtktgdp1apayltaivsigflvitflhlstagsk1kgsypnvdneqdrayyaehpkealwwvkerkn  
>tr|D8HGJ3|D8HGJ3\_STAAF  
mnvileqlkihtqkpnidialhiddeiityselnaritsaveslqkyslnpvvainmkspvqsiicylalhr1hkvpmmm  
egkwqstihrq1iekygik  
dviedtglmqsidsmpfidstqlqhypnllhigftsgttglpkayyrdedswlasfevnm1mlkneniaaapgl1sysl  
tlyallfalssgrtfigqt  
tfhpek1lnqcrkissykvamflvptmiks1llvynnehtiqsffssgdklhssifkkikiqandinlieffgtsetsfi  
synlnqqapvesvgmlf1pn  
velkttndhngigticiksnmmfsgyvseqcinn dewfvtn dngyvkeqylyltgrqhdml1iggqniypahver1ltq  
sssidaeaiigipnkrfgq  
igvll1ysgdvt1thknvkqf1nkkvkryeipsmihhvekmyytasgkiarekmismylrge1  
>tr|D8HGJ4|D8HGJ4\_STAAF  
mnqavivaakrtafgkfggt1kh1epeq1lkl1qf1qf1kekyepiviskiddv1gnvvgnggniarka1leaglkdsipgv  
tidr1cgs1lesvqyacrm  
iqagagkvyiaggvestsrapwki krphsvyetalpefyerasfapemsdpsmiqgaenvakmydvsrelqdefayrshq  
1taenvknngnisqe1l1pit  
vkgeifntdes1ksh1pkdnfgrfkpvikggtvtaanscmkndgav1llimekdmayelgfehgl1fkdgvtvgvdsnfp  
gigpvpaisn1lkrnq1ti  
eni1evie1neafsaqvaccqa1nismq1niwggal1asghpygasgaqlvtr1fymfdretmiasmgigggl1gnaalft  
rf  
>tr|D8HGJ5|D8HGJ5\_STAAF  
mqhyll1dsnqr1nvsfskdsvaayyqcf1nqpyrkevpplmcas1wpkfd1fkkyaynel1l1tksainqtqkievdtiyvg  
h1ediecrqirnitrytma  
l1l1tkndhhvitvtqtfikamk  
>tr|D8HGJ6|D8HGJ6\_STAAF  
mkfneiwinelyalvnddnpihnei1vpgqlvsqmm1mamsieanqcqinyvkp1ilineniefieehqemiainddgeik  
ikis1stkn1ry  
>tr|D8HGJ9|D8HGJ9\_STAAF  
mewsqifhdi1tkhdfkamhdf1ekeystai1vypdreniyqafd1ttfenikv1ilgqdp1yhgpnqahglafsvqpnakf  
pps1rnmykeladdigc1vr  
q1ph1qdwareg1ll1ntv1tvrqgeanshrdigwetftdeiikavsd1ykehvv1ilw1gkpaqqkiklidtskhciiksv  
hps1lsayrgffgskpysk  
antylesvgksp1nwcesea  
>tr|D8HGK0|D8HGK0\_STAAF  
mvnret1liarieqel1vqaeqahdhdfekhmyaihilts1yastsntphigeqqmnrrianhnmphsqitqpthqvtaa  
eieamggkvnth1sahhhnk  
sysqpsnqq1ratddd1ignges1fdf  
>tr|D8HGK5|D8HGK5\_STAAF  
msqaaet1dgwys1hl1fyavdwas1r1vpkderdal1vtefqsflentatvrs1ksgdqaiynitgqkad1llw1l1rpmk  
s1lnhienefnkl1riadfl1i  
ptysyvs1viel1sn1lagksdedpyenphikar1lypel1phsdy1cfypmknrrnetynwym1tmeerqk1mydhgmigrky  
agk1kqfi1tgs1vgfdd1f1ew  
gv1l1fsddv1lqfkk1vyemrfdettarygef1gffvgh1intnefdqffais  
>tr|D8HGK6|D8HGK6\_STAAF  
mad1lnv1kdk1sgknvki1lpegederv1taatq1qatdyvtpiv1lgdetkvqs1laqk1n1ldisnie1l1npatse1lkae  
lvqs1fverrk1gkateeqaq  
e1l1nnvnyfgtm1lv1yagkad1lvsgaahstgdtvrpa1lqi1k1tkpgvsrtsgiffmikgdeqyifgdca1npe1lds1gla  
e1avesaksa1sfgmdpkv  
am1s1fstksaksddvtkvq1eavk1laqqkaeek1eai1idgef1qfdaai1vpgvaekkapgak1qgdanvf1vps1leagni  
gykiaqr1lgydavgp1vlq  
g1nspvnd1srgcs1iedvyn1si1taaqalq  
>tr|D8HGK7|D8HGK7\_STAAF  
md1tskyfngvnwryidhss1glepmqsfa1ddt1fcesvgkdisdnvrtwihqhtvilgihdsr1l1p1kdgidy1l1tneig

Tsompanidou\_et\_al\_Supplemental\_FASTA\_File

ynaivrnsgglgvvldqgv  
lnislmfkgqtettideafvmylliskmfedenvdidtmeiehsycpgkfdlsidgkkfagisqrrvrggiavqsylcv  
egsgseralmmqtfyehal  
kgevtkfkypeiepscmasetllnktitvqdvmllylaikdlggvlnmtpitqeeqwrydyfdkmiernkkmidqmq  
>tr|D8HGK8|D8HGK8\_STAAF  
mtrkgygestgkiiigehavtfgapaiavpfnagkikvliealesgnysiksdyvdgmllydapdhkslvnrfvelnn  
iteplavtiqtnlppsrql  
gssaavavafvrasydflgksltkeeliekanwaeqiahgkpsgidtqtivsgkpvwfqqghaetlktlslldgymvvidt  
gvkgstrqavedvhklced  
plymshvkhiqkvlvrasdviehhnfealadi fnechadlkalvtshdkieqlmkigkengaiagkltgagrsgsmllla  
kd1ptaknivkavekagaa  
htwienlgg  
>tr|D8HGK9|D8HGK9\_STAAF  
miksgkarahtnialikywgkkdealiipmnsisvtlekfytetkvtfndqltqdqfwlngekvsgkelekiskymdiv  
rnragedwyaiesdnfvp  
taaglassasayaa laaacnqaldmq1sddk1sr1arigsgsasrsiyggfaewekgysdetsyavplesnhfeddlami  
fvvinqshskkvpstrygmsl  
trntsrfyqwlhdidedlaeakaaqidkdfkr1gevieenglrmhatn1gstppfty1vqesydvma1vhecreagypc  
yftmdagpnvki1vekknk  
qqi1dk11tqfdnnqi1dsdiiatgieie  
>tr|D8HGL2|D8HGL2\_STAAF  
mktyd1ivi1gfgkagkt1akyaastgqhvarieqsskmyggctcinigcipskt1vhdglegktfeasynrknadvnalnn  
knyh11addsnidv1dfka  
qfksntevn1ldqhgd1adsitaphi1intgatsvipnikg1dqakhvfdstg1lnisyqph1lvivgggyialefasmf  
an1gskvtv1ergesfmp1r  
edqdvvahaitd1enksialytnvette1ssddh1ttvhtnvgnf1eadav1laigrkpntd1alentdielgdrgeikvn  
ah1qttvphiyaagd1vkgg  
1qftyis1ddyri1ksalygnqsr1tdnrgsvpytvfi1dpp1srvg1tskeaaaqhydytehq11vsaiprhkinndprg  
1fkvvinnenmi1gat1y  
gkqseelin1ik1aidqni1pytv1rdniythptmaesfnd1fnf  
>tr|D8HGL4|D8HGL4\_STAAF  
mcqylc1ksvelgvfi1vmiyc1kvfaltar1hn  
>tr|D8HGL5|D8HGL5\_STAAF  
msidmy1drsnqassvgn1sqtmsnydalekai1tqfinddalkgkaytsakqffstvlip1stsmkt1sdltkqacd1n  
fvsrytsevd1s1lkesel  
eedirs1sqqitryen1nn1lkkhasdnqqa1ssnqqi1irt1gqqkheleek1rk1refnqkspeifkeveefqkivqqg  
1tqaqn1fwnfstnqfnips  
gkeldwakasheky1kvamgkieqkaeket1nkadfavikayakehpeddipksimkyindnkdsikrdig1ditst1le  
qgginaskfgvfintaggy  
kgpagns1fvevkrtsgn1vfiengskfakggky1gkgvagvgf1igmydd1anddktfgealshnal1ttgigigagagmt  
at1ialfasnpvgwav1ggf  
vfgsvstml1vdwayqnnkagi1kdkadwvghk1ddg1dvvkstekavdsvgeatks1snh1n1pmksw  
>tr|D8HGL7|D8HGL7\_STAAF  
m1ceski1inknakyri1kyngely1mvdii1stwis1ffpfinw1fipkryvkisreefen1nivkpakknv1fwpvagist1f  
avt1rkyth11dtq1dkk1  
viaicci1tfigi1t1fyvr1ikkss1niyntknkrskiv1ipt1knvcft1fgyil1fgg1tm1fl1dall1smsyqni1ivyfa  
wiavim1gff1vnial1i1dk  
nihv1lkn  
>tr|D8HGL8|D8HGL8\_STAAF  
m1ceviai1ykn1pkyri1kynde1ymvni1nnw1vl1fip1lnw1tpkryikisqeeles1ntf1kpaknna1fwpal1gssv1f  
svt1frkym1pl1fnvr1lekti  
viai1ffv1flg1l1ffyl1n1nrr1al1svftm1nkeksqkmi1l1pn1khfff1i1fay1lyfgg1sff1t1yal1itidvqni1ifi  
cw1gavt1mffff1ini1vpigi  
kkahv1l1kkae  
>tr|D8HGL9|D8HGL9\_STAAF  
mkqfvn1gksd1vevfpi1algtnavgghn1ypn1dee1qgkevvrqainhgin1ldt1ayi1ygpersee1vgevv1keypreqi  
kiat1kgshe1fdenqevhq1n  
nqpey1kqqvens1kr1qtdyid1lyyih1fpddnt1pkdqavaal1qel1keggkika1igvsnft1dq1leankdgydv1vq1le  
yn1lhreneav1qycvdh1q  
itfi1pyfp1lasg1lagkydentkfsdhr1ttrrd1fkpgvfeenvrrvka1les1aaahqtsianiv1lafyl1trpaidvi1ipg  
akraeqvienikaadiv1s  
ddeiqyide1fpied  
>tr|D8HGM1|D8HGM1\_STAAF  
mfkvrqvt1ekdv1vqirdvatkawfnty1niyaattvnh1leasyneh1l1kkr1lqeq1fl1vveegndiv1gfanfiygeely  
1sahyv1kpesqhtgygta1  
1neg1sr1fedk1fegvylev1dnkneeavayykeggft1l1rsyepemygek1d1al1mykaf  
>tr|D8HGM5|D8HGM5\_STAAF  
mkdsen1lvffgfev1lvfykmayiyqal1ikygivn

Tsompanidou\_et\_al\_Supplemental\_FASTA\_File

>tr|D8HGM6|D8HGM6\_STAAF  
mdkksvsihtkqvlkqhnekekfetttegtwqqrqsnfiryveqiedatvntikvdddsvklirkgdinmnlhfvegqtt  
ttfydisagriplevktrl  
ilhfvsgdggkklkihyelyqdnemgmsyqyeinykeige  
>tr|D8HGM7|D8HGM7\_STAAF  
mniidqvktlveeiaasinkagladeipdikiievpkdtkngdyatniamvltkiakrnpreiaqaivdnlktekahvkq  
idiagpgfinfylndqylt  
aiipeaiekdgdfgyvneskgqnvllayvsanptgdhigharnaavgdalaniltaagynvtreyyindagnqitnlar  
sietrffealgdnsysmpe  
dgyngkdiieigkdlakhepeikdyseearlkefrklgveyemaklkndlaefnthfdnwfsetslyekgeilevlakmk  
elgytyeadgatwlrttdf  
kddkdrvlikndgtytyflpdiayhfdkvkrngndilidlfgadhhgyinrlkasletfgvdsnrleiqimqmvrmlengk  
evkmskrtnaitlreimd  
evgvdaryfltmrspdfdfdelakeqsqdnpyyaqyahaaricsilkakeqgievaaandftitnekaieillkk  
vadfeptiesaaehrsahr  
itnyiqlashfhkfynaekvltddektkahvamieavritlknalamvgvsapesm  
>tr|D8HGM8|D8HGM8\_STAAF  
mlgtdeylkllyrhmgpqnwwpadndiemmlgailvqntwrnaeiaInqikehthfnphilelpietlqslhssgyf  
ksksltiktlltwlarhhf  
nygeinerykaelrkelslkgigsetadvllvyifgriefipdsytrkiydklgyentksydqllkkvvtlphnftnqda  
nefhalldvfgkhyfrdkd  
iknydflepyfkk  
>tr|D8HGM9|D8HGM9\_STAAF  
mkksliafilifmlvlsqcgmkndkqgsddngsskspsyhrivslmptnteilyelglgkyivgvstvddypkdvkkgkk  
qfdalnlnkeellkakpdl  
ilahesqkatankvlslekqgikvvyvkaqsidetyntfkqigklthhdkaeqlveetkdnidkvidsipahhkksk  
vfievsskpeihtagkhtf  
fndmlekleaqnvysdingwnpvtkesiikknpdilisteaktrsdymdiikkrggfnkinavkntrievngdevsrpg  
prideglkelrdaiyrk  
>tr|D8HGN0|D8HGN0\_STAAF  
mnviiderkenamtfnkvllswivilittsiylfwqlgdindvfnqsilinrvlprllealltgmiltvaglifqtvln  
naladsftlglasgatfgs  
glalfglstlwipvftsitflitlitvitsvlsqgyvrililsglmigalfnslllyflillkprklntianylfgg  
fgdaeysnvsiaitfia  
lfgifiiinqllqllqelksqslglnvqlityialcvasmitainvayvgiigfigmvipqlirkwqwkqslgrqlaln  
iviggqimvmadfigshil  
spvqipasiialigipvlfymlisqskrlh  
>tr|D8HGN1|D8HGN1\_STAAF  
mdlndqikavvfdlegtlldrvksrekfieeqyerfhdylihqvladfkkafielddedndkpdlykeiikrfhvdrltw  
kdlnfdmfemhfyryvfpvy  
dtlytleklsqkgfqiaviangskikqfrlshlglmhvinylstsetvgfrkphpkifedmidqglvpeqimyvग्दा  
lndvaparamgmvsvwykq  
edaeiepleevedftittveelltilpikidnkgenygsiy  
>tr|D8HGN2|D8HGN2\_STAAF  
mdlfrkdgtshystlgegypivlihtvldnysvfnklaaelaksfvvlidlrghgysdkprhieikdfsddivellk  
ylyieevafvchemggiig  
adisvrypftsslmvlnptsiegeipeerlfrkyahiiirndpekqdkflnrkyyrprkmnrlkhvdtneistkee  
iqavkevfknadisqytrn  
vvvptkiiagefgerttrleakevadlipnadfevyqessafpveeqerfvedtasfinkhhdekhv  
>tr|D8HGN3|D8HGN3\_STAAF  
mkklltasiacsvvmvggiantsaeaasgnsidtvkqlikgdhslenvkigesikdvltkynpmysynedgtehyef  
htkkgmllvttgdgkknngk  
vthismmyndangptyqavknyvgkavthteyskvagnfyiekgkttqyfasapkdkniklyridlek  
>tr|D8HGN5|D8HGN5\_STAAF  
mnkvtinpqiqlytiqiegkdpillhgldgnlagfedlqhqlassykvlytdlrghgkssksesydlndhvedlkihme  
klniheahilghdiggvva  
klftdkyayrvkslttiaskkddlihsftqlliqyqddiagfnkseyiillfsklfrnqektmkwyqkqriysikseds  
avairslihkdemyllk  
rtcvptllingehdplikdknhfkleahflnvtkkifehshgaphieepeafmnylnflekvk  
>tr|D8HGN8|D8HGN8\_STAAF  
mlipiqtsvnsrlslytkspfytsfifsvgticlivlnifinpdvflhffsnqtfnytwfvvglllgvgytgnllllp  
klgatltviatvagqimg  
viidftglfgatvhdfnlkaigvllivgiiatmngfnknnllltdqyillfwlllfgifgffppiqtinsalashths  
pafaslvstfigsittlil  
taifnrslklktshlkfgklkpiyftggilgmavtaniilmphmgaaaltligmfgqilmgilidhfglfgspkiamts  
rktigllciltgillrlf  
>tr|D8HGPO|D8HGPO\_STAAF  
mskinhitivlsftkv dangkqtefkrrfaninpdasndqiktfsklerltgetynnieviksvisi

Tsompanidou\_et\_al\_Supplemental\_FASTA\_File

>tr|D8HGP1|D8HGP1\_STAAF  
mnkveaikfnndivkmyeal kikerdyl fffklaihsglkvsel ltitvsqvr liekct lsemckahfhslikiklpet  
lskellqyiedrslnev  
lfqslrtnqvl srqqayrihqasieagienvg lttlrktfayhayqkgpipviqky lghqsaiet l nfiglenecehs  
iyislql  
>tr|D8HGP2|D8HGP2\_STAAF  
mslvyl liai lvmami lmskrralakyagyialiapvissiyfmiqipsvaklqylst sipwikt l din ldl rldgls  
lmfsl iisligiavffyat  
qylssrkdn lprfyfyt lfmfsmigiv lsdntilmyi fwe ltsvssfl isywynngdsqfgaiqs fmitvfgglallv  
gfimlyimtgt nntdi lg  
qadhikhg l fmpmi fmfll gaf tksaqfpfhiw lpramaaptvsay lhsatmvkagif lll rftpl l g lsnmyiyivt  
fvg l itm l fgsitalkwd  
lkgilayst i sq l gmimamvgigg yaqhqqdaiasiyvfv lfaal fhl mnhaifkcal fmgvgildheagsrdi r lsg  
mrqlf pkmnlvmtiaalsm  
agvpflngflskemfl dal tqtgqlsqfslismiaivfvgviasvftftya lymvkevfwtkydskvftkknihewlfs  
lpslilmvlvpviffvpni  
fgkgiivpalravsggnhqidqlaphvsqwhgfnip lll tii i l l gsvlaikvdwkkvftgkirqisvksyemvyrhf  
ekfatkrfkrvmqdr l nq  
iimt l gi fmi i gygyirig lpkvhq l hvsefgplei l aivtvtigislifirqr ltmvilngvigfvvt lffiamkap  
d laltqlvvetit l fiv  
sfsr l pnvprsnankkreikisvs l lmalivsv l ifitqqt dglssisd fylkadkl tggknivnailgdfrald t lfe  
glvliitglgiyt l lnyqd  
rrgqdere  
>tr|D8HGP5|D8HGP5\_STAAF  
mlsn l ilpml l pflcalilvflknndri skylylgtmtitt iislml liyvqrhrpit l dfggwsapfgiqflgds lsl  
imvttasfvit l imaygfg  
rgehkanryh lpsf i l flsvgvigsfltsd lfnlyvmfeim l lasfv l itlgqsveqlraaiyv l niigsw l fl l g l g  
llyktvgt l n fshiamr l n  
dmgdnrvtmislif l vafsa kaalvl fmw lpkayav l ntelaa l faalmtkvgaya l irfft l lfdqhnd l i hpllatm  
aatmvi gaigviaykdik  
kiaayqv i isigfi l g l g tntfagingaif ylvndivvkt l l ffiigslvyitgyrqqy l nglakkepf fgvafimi  
faiggvppfsgfpgkvlif  
qgalqngnyig l t l miitsliamys l frilfy myfgdkdgeevhfkkipqyrkgil silvvvviaigiaapv l lkitnda  
telntndqlyqklvnp h l k  
gee  
>tr|D8HGP7|D8HGP7\_STAAF  
miqtithimiiss l iifgial iic l frlikgpttadrvtfdttsavvmsivgvlsv l mgsvsfl dsimliaiisfvssv  
sirsfiggghvfngnkrn  
l  
>tr|D8HGQ1|D8HGQ1\_STAAF  
ml efveh l ftyqflnralitsiivgvcgtvgs l iv l rgl slm gdamshav lpgvalsflfgipmfigal itgmiasifi  
gyitsssktkpdaaigisf  
taflasgii iis l ntttdlyhilfgn l l aitsaf l ttivigsiv l il i i i f yrplmistfdptf srmsglntt l lhyf  
vm l l l slvtvasiqtvgi  
lvvallitpastaf liskkl ysmmias l isvissivglyysiynipsgativ lctfviy iit l fftkftnrkkrsg l t  
>tr|D8HGQ5|D8HGQ5\_STAAF  
mtveersntakvdi lgvdf dnttm l qmveniktffanqstn l fivtanpeivnyatthqayle linqasyivadgtgvv  
kashrlkqplahrippiel  
mdec l kiahvnqkvf l l gatnevveaaqyalq rypnisfahhhgyid l edetvvkriel fkpdyi fvgmgfpkqeewi  
mthenqfestvmgvggs l  
evfagakkrapyif rkl n i ewiyra l idwkrigr lksipi fmykiakakrktkkak  
>tr|D8HGQ8|D8HGQ8\_STAAF  
mnv l i k kfyh l vvr i l skmi t pqlvdkphivfmm t fpedikpi i kv l nnslyqktv l ttpkqapylsel sddvdviemtn  
rtlykqikalksaqmiid  
nyl l l l ggnktsnqhivqtw hasgal knfg l tdhqvdvsdkaivqqyrkvyqatdfylvgcekmsqcfkqslgateeqm  
lyfg l p r i nkyytadratv  
kaelkdkyg i t nklalyvptyredkadnraidkayfek l pgyt l ink l hpsiehsdiddvssid t st l m l msdi i isdy  
ssl pieas l l diptifyvy  
degtydkvrg l nqfykaipdsykyvteed l imki qekeh l l spl fkdwhkyntdks l hqlteyidkmv tk  
>tr|D8HGQ9|D8HGQ9\_STAAF  
mr l t i i p t c n n e a t i r q l l i s i e s k e h y r i l c i d g g s t d q t i p m i e r l q r e l k h i s l i q l q n a s i a t c i n g l m d i k m t  
dphdsdafmvinptsiv l p  
gkl dr l taafknndnidm v i g r a y n y h g e w k l k s a d e f i k d n r i v t l t e q p d l l t m m s f d g k l f s a k f a e l q c d e t l a n  
tynhailvkamqkatdih l  
vsqmvvgdndivphatsndedfnryiteimkiqrvmem l l l p e q r l l y s d m v d r i l f n n s l k y m n e h p a v t h t t i q l v  
kdyimsmqhsdyvsqnmfd  
iintvefigenwdreiyelwrqtliqvginrptykrfliqlkgrkfahrtksmlkr  
>tr|D8HGR1|D8HGR1\_STAAF



Tsompanidou\_et\_al\_Supplemental\_FASTA\_File

mknlisiiiiicltlsimtpyaqaansdvtvpqaanqygyaglsaaeyptsavnvsqtgqlllyqynidtkwnpasmtklm  
tmyltleavnkgqlslddt  
vtmtkeyimstlpeisntklypgqvwtiadllqitvsnsnaaalilakkvskntsdfvdlmnkakaigmknthfvnp  
tgaensrlrtfaptkykdq  
ertvtardyaieldhviketpkildftkqlaptthavtyytnfnfslegakmslpgtdglktgssdtanyntittkrgrk  
frinqvimgagdyknlgge  
kqrnmgnalmersfdqkyvkiiskgeqringkkyvendlydvlpsdfskkdyklvvedgkvhadyprefinkdygpp  
tvevhqpiiikantvaksm  
waeplftiiggacivaglavhmiinrlfrkrk  
>tr|D8HGR2|D8HGR2\_STAAF  
mkrenplfflkklswpvglivaaaitisslgsllvplftgrivdkfsvshinwnliaifggifvinaallsllglllyll  
skigekeyyairsvlweh  
iqlkmpffdnesgqlmsrltdtkvinefisqklpnllpsivtlvgsllmfilwdkmtlltfitipifvlimplgri  
mqkiststqseianfsl  
grvltemrlvkiinterleldnahknlneyiklgkqakiaavvqipisgimlltiaailgfgaleiatgaitagtlia  
ifyvqiqlsmpilinlslvt  
dykkavgassrieyemqepieptealedsenviddgvlsfehvdvkydvkilddvsfqipqqvsvafvgpsgsgksti  
fnliermeyiesgdikygl  
esvydiplskwrrikyvmsmsmmsgtirdnilyginrhvsdeelinnyaklanchedfimgfdegydtlvgerglklsgg  
qrqridiarsfvknpdill  
ldeatanldseselkigealetlmegrttiviahrstikkagqifldkqvtgrgthselmashakyknfvvsqkld  
>tr|D8HGR6|D8HGR6\_STAAF  
mtrenptplkflsyiigllsmillitlflistligdakiqastiieaifnynpsnqqniineiriprniaavivgmalav  
sgaiiqgvtrngladpali  
glnsgafalalyavlntsfliimfagflgailggavlmigrsrrdgnpmriilagaavsamltalsqgialafrl  
nqvtvfwtaggvsqttwsh  
lkwaipligialfiiltiskqltilnlgelakglgqnvtmirgicliiamilagiavaiagqvafvglmphiarflig  
tdyakilpltalggllvl  
vadmiarylgeapvgaiisfigvpyflylvkkgrsi  
>tr|D8HGR7|D8HGR7\_STAAF  
missnnkrrqwalavfsillflgctwsitsgeynipverffktligqgdaidelilldfrlprmmittelagaalsiga  
ivqsvtknpiaepgllgin  
agggfaialfiatgkinadnfvyvlpilisilggitaaliifisfnknegvtpasmvligvlgqalyggsitimskfdd  
kqsdfiaawfagniwgdew  
pfviaflpwvliivpyllfksntlniiehtgdniarglvrslsrerlilffiamlssaavavagsisfiglmphiakri  
vgprhqflplaiilvgac  
lviadtigkiilqpggvpagivvaiigapyflyliyktnv  
>tr|D8HGR8|D8HGR8\_STAAF  
mkklinkketfltdmleglliahpehdliantvivkkakkekgvavsvggsghepahagfvaegmldaavcgevftspt  
pdkileaikavndgdgvll  
vvknyagdvmnfemaqlaemedinvetvivrddiavtneaqrrgvagtvmhklagylaekgyslteiksrveallpei  
ksigmaiepplypttgyk  
fdieddkmeigigihgekghreevkdidhivgtlldekyektandvilvngmggtplselnivtkyiqqnlartvn  
vakwfvgydymtsldmqgfs  
itivpnkpeylevflapttskyfk  
>tr|D8HGR9|D8HGR9\_STAAF  
mkvndmkarllnleeflkkheseltdraigdgdhvnmvrgfsslkdklddssmqslfkstgmalmsnvggagplyg  
fsfvkmsavakndmnnqdf  
itliqafaavesrkvltnektmydvvaraaklkngetlftndlqqladntkdmvatkgraayfgeeskyidpqaqs  
mvyilnaligdedna  
>tr|D8HGS2|D8HGS2\_STAAF  
mmmknkatkiyfayvgivvgagfstgqevmqfftkyglwaylgviisgfilafigrqvakigtafeatnhestlqyvffe  
kfskvfdyiliffllfgiav  
tmiagagatfeesyntptwlgalimtlaiyvtllldfnkivralgvvtpflivlvliagvylfkghvslaevnqvpea  
siwkgiwfgtiygglafsv  
gfstivaiggdtekrvtsgagamyggiyvtvllalinfalqseyptiknasiptlannihpliatvlsvimlavmynt  
ilglmysfaarftepskn  
yhifiimmvagyllsfvgfaelinklytimgyvgllfivvaviikyfrknadkhhia  
>tr|D8HGS3|D8HGS3\_STAAF  
mknkdnkwtmitalfiavisvllsfhlkqhydqitnenhankdkiniknkvriyqnltynrvfpsklidiitpvdmsna  
klpvifwmhgggyiagdkq  
yknpllakiaeqgyivvnvnyalapqkyptpli qmnqatqfikenkmnlpidfnqviiggdsagaqlasqytaiqtnnq  
lreamkfdqsfkpsqikga  
ilfggfynmqtvretfpriqlfmksytgeedweksfkni sqmstvkqstknypptflsvgdsdpfesqniefskklqel  
nvpvdtlfydgthhlhgy  
qfhlkpesidnikkvllflsrntsssgiqteekpqiensnelplnpln  
>tr|D8HGS4|D8HGS4\_STAAF  
mtrsalkpfnkrvmvtgrihrvlfknyldrhstfkpnvriillkdvdivsgvsidhlwlyetnkyyalamelihqrvkfsa

Tsompanidou\_et\_al\_Supplemental\_FASTA\_File

nvvpvykinrnnnlfvqdy  
gikrkgklvteetyiqnngyqdkiyeklpnidfrledfysken  
>tr|D8HGS6|D8HGS6\_STAAF  
mkpkvllaggtgyigkylseviendaelftiskypdnkktddvemtwiqcdifhyeqvvaamnqidiavffidptknsak  
itqssardltilaadnfr  
aaainqvkkviyipsrydnetierlgaygttvettnlvfkrslnvnelqvskyddvrstmkvvlpkgwtlknvvnhfa  
wmygtkgtfvktekshdqf  
kiyiknkvrplavfkivetadgiitlilsgslvkkytvnqgklefrlikesavvyihlydyiprlfwpiyyfiqapmqk  
mmihgfevdcrikdfqsr  
ksgenmkytk  
>tr|D8HGS8|D8HGS8\_STAAF  
mnnlkwwayflksrmmwifwilflnllmglisliydypidslfyivsnlnsltmifliltyfkevlykhfdkdeiee  
ikhkdltaetpqrhtvdy  
yrqtsahkekvvqglqnmheqtitefvhdiktptvamtllidqeknqerkqallyewsrinsmldtqlyitrlesqrk  
dmyfdyvs1krmvideiq  
trhisqvkigfdvdfkvddyvytdikwcrmiirqilsnalkysenfnieigteIndqhvslyikdygrgiskkdmpri  
ergftstannettssgm  
lylsvskdqlgihlqvtstvgkgttvlifplqneivermsevtnlsf  
>tr|D8HGS9|D8HGS9\_STAAF  
maevlrdinmsieeefiaimgpsgskttllnvlssidyisqgsitlkgkklklsnkelsdirkhdigfiqeynll  
htltvkenimlpltvqkl  
kehmlnryekvaealnildisdkeypse1sggqrqrtsaarafitlpsiiifadeptgaldskstqdllkr1trmneafkst  
iimvthdpvaasyanrvvm  
lkdgqifte1yqgdddktffkeiirvqsvlggvnyd  
>tr|D8HGT0|D8HGT0\_STAAF  
mtfneiifknfrqnlshyaiylfslitsvlyfsfvalkyahklmtesypiikegsqvgysylffiiiafllyanvlf  
krrsyelalyqtlglskfn  
iiyilmleqilifiitailgiiigifgsklllmivftllgikekvpifslravfetlmligvayfltsaqnfilvfkqs  
isqmsknnqvketnhkit  
feevlgligivlittgyylsnivqyydsigtlmfillstvigaylffkssvslvfkmvkkfrkgvisvndvmfsssim  
yrikknafslvmiaisa  
tvs1cfaaisras1ssekytaphdvtikdqkanqlaselnnkiphfnykevihtklykdn1fdvakepynvtit  
sdkiy1pntdlkrqad1fv  
aegsikdlvkhkhkgkaiigtckhhvniklrdkinkiyfmdvd1ggptfv1ndkdyqeirkytkakhivsqfgfdlkhk  
kda1alekankvksiet  
rseai1ss1stgillfvtsflgitfliavcciiyikqidetedelenysilrklgftqkdmargl1kfkimfnfglplvi  
alshayftslaymklmgtt  
nqipvfi1vmglyicmyavfavtaynhskrtirhsi  
>tr|D8HGT3|D8HGT3\_STAAF  
msy1i1vt1javvifsl1fd1fingfhd1navata1vstralt1pk1tailmaavm1nfigalt1ftg1vagt1tkdivdp1kleng  
1vv1laa1laa1iwn1latw  
fygip1ss1shal1g1siagaaiaseg1sfgv1hyqgftk1iiv1livsp1iafcvg1lmys1fkvi1fknan1tranrn1rffq  
iftaa1qs1fshg1ndaq1s  
mgi1t1la1ivanv1ng1svep1qlwvk1facatam1lgt1aig1gwk1iiktvg1gnim1kirpanga1aad1ssa1tifv1ss1lhf1p  
1stthv1vss1ilgvg1asn  
akgvkw1staqrmi1twvit1lpi1safa1afl1fyil1n1ff  
>tr|D8HGT6|D8HGT6\_STAAF  
maksc1h1il1tnneyat1trcqdgiv1fwpidgeielqkfrksk1ieddiyi1nh1dvfsiknnkktim1yl1ssdwfaelgf  
tffnyhytak1likssyn1k  
c1ll1k1tyry1dnq1lndadvr1klqdi1k1i1akeasm1dkkiaq1nqyryayygd1rdeleyiyq1vnqr1tlksvad1klfv  
sksn1ssqf1h1lmgm1gfk  
yid1tkig1ksie1ll1ttdst1sniseh1l1g1fss1stysk1mfksym1ditpneyr1n1skyn1cl1mlkpe1lv1gkmv1qev1kei1  
1nyiehyknh1ltdvi1hide  
dkfetp1kl1fq1tviq1intytem1klv1legi1fkt1lnknsq1vff1imps1ilkskntm1seek1fai1kti1iesd1kiafn1ind  
id1ttyv1veaf1msv1frq1s  
pne1snh1nyev1hvf1d1slme1rtiyr1mil1k1lhn1im1lvk1lgnit1cl1fekpsv1fks1lvsq1ikr1k1f1d1s1li1dn1an1ss  
py1lmg1esde1ll1kni1lhfk  
n1lkqv1ine1ldieq1kli1fl1nven1hk1ln1nkeq1d1snsap1iykt1saly1hn1fag1f1gnif1dn1ha1fnam1hlyd1kng1fkt1  
1gl1ilek1fiey1vsk1pkyen  
syys1fdi1eny1c1vi1ydwrv1eset1imsn1fedsq1yinf1knnv1ndkyl1iviet1densgn1nh1liske1lrdkyew1nps  
1l1skidny1lkpaie1ikehn  
fsnns1ninvt1fnaly1i1kig1k  
>tr|D8HGT7|D8HGT7\_STAAF  
mrktmag1k1ki1mtea1s1lyiwgc1n1ntek1let1l1gfyk1ykal1seyid1kkyk1sl1nd1av1d1tmkhck1dekvl1mqsf  
1ktam1del1d1sr1tk1l1vsi  
rr1lieker1skvr1ssk1derkiy1y1lnddi1skfna1fedveq1f1ni  
>tr|D8HGU0|D8HGU0\_STAAF  
mlq1fl1mk1tl1ndfend1ktilfi1ilkn1hcyeevc1l1sn

Tsompanidou\_et\_al\_Supplemental\_FASTA\_File

>tr|D8HGU3|D8HGU3\_STAAF  
mianaptakeplinklkgalrsgvmdmfaallqiknyklfvanmflmgiavtvpylvlfatkdlgmttnqygl11asa  
aisqftvnsiiaarfsdthh  
fnrkiiiiifallmgalgfsiyffvdtiwlfillyaifqglfapampqlyasaresinvssskdraqfantv1rsmfslgf  
lfgpfigaqliglkgyag1  
fggtisiilftlv1qvffyk1nikhpiستqqhvekiapnmfkdk111pfiafillhigqwmytmnmp1fvtdylkene  
qhvgylaslcaglevpfmi  
ilglvssrlqtrtlliygaifgg1fyfsigvfknfymlagqvflaiflavllgigisyfqdildpfpgyastlfsnamv  
igqlggnllggamshwvgl  
envffvsatsimlgmli1fftknqkitkedvist  
>tr|D8HGU4|D8HGU4\_STAAF  
mtiilwllilaafmlafvglkpiipsvlvlwvglfiyqfgfhnqhlswvfvyvsmalltililcadflankyfvnrfggs  
kfgeyaalgivvlgcfvlp  
pfgiiiiipfilvfive1iqgysferavkvsigsivaf1tssiaqaiimfimiwffidallin  
>tr|D8HGU5|D8HGU5\_STAAF  
mkstaqltkennvkslr1sntdreifenymtymrsdfrvnphdteliinrilkqllsaeqhgllaldffnhdpkahaik  
lkampnetfkni1fkyiyqh  
ivlligivsf1kgf1gffmeksgsnlyfvsfpfsvvvgffivflfiwfsfktiqlqcfnnsnwiwiftylaiillivgff  
yvffipqsl1afgpyiqvs  
nvwfiifsfivmpiglsiekni1skhshtfl  
>tr|D8HGU6|D8HGU6\_STAAF  
mrtlnkdehnyikqianihetllsqvesnykctkl1sialryemiscsrlehtndkiyiyenegqliafiwghfsneksmvn  
iellyvepqfrkl1giatq1  
kia1ekwaktmnakrisstihksnlpmisl1nkdlgyqvshvkmykdid  
>tr|D8HGU7|D8HGU7\_STAAF  
mkl1iisimsvmi1lagcgkseekat1ekdidn1qkenkelkdkkek1qqekek1adkqkd1ekevkd1kpskednkddk  
kykdeasqdkqskdqtk  
s1kdnhkkptstdkdkandkhqs  
>tr|D8HGU9|D8HGU9\_STAAF  
miyceterl1rdwhedd1lpfqkmnanydvrkyfpls1syrse1dmrtmdavikdygigl1favedkeshqwigfigln  
yipetsdypfkel1plyeig  
wrllpefwgkglategakaalk1aeqhqi1dvysftaeankasqrvmekigmpvydhfel1pnlskyhllkrqvryyinlr  
k  
>tr|D8HGV0|D8HGV0\_STAAF  
mkriavycgaskghdpsyi1qkaydl1gkyfaeqgyel1vfgagsigimgai1qdgvl1dhggkaigvmpkml1deheitsqr1te  
l1ilvds1mherknkmaelad  
afvmapggags1leeffemyswaqigi1hekpiaiyningffnpl1qtmidhmi1eegfidpkyr1alapl1cdtkes1iesilnf  
kpl1gtrsyd  
>tr|D8HGV1|D8HGV1\_STAAF  
mthi1idgdacpvvdsi1d1ttetg1fvti1rsfshfsnqlypphvstlyvddgpdavdykivq1stkddivitqdygla  
s11vdkvli1vmhngki1yn  
skniqq1ldkrymnaq1rkqsgrhkgpppftkqdkvfeqs11rviri1keld  
>tr|D8HGV2|D8HGV2\_STAAF  
mdkkkvikfminv1piv1vp1iverkrikqhpdvqkvtdatskvasktsaa1sntasdvkeyvgdkkqdfenkre1kkfa  
rehdpayiekkgek1akqn  
rkdadmki1lqkniekrhkeeqkareknki1qrikdmkksqkyeekag1tpnk1dektekkgd1laeknrkeiakmkk1  
qkniekrhkeeqkrqqead  
kariks1fkkykdyvaksasqqnkenntea  
>tr|D8HGV3|D8HGV3\_STAAF  
mfiiel1kgi1lgvveg1tefapvsstghmi1vddmw1kssefl1gsqaftfkivi1qlgsvfaaawvfrerfleil1higk  
hkhvegennqqr1rskpr1  
n1lhv1vgmvpasil1gl1fddfi1eehl1svptvmig1lvgai1ymi1adkysvkvnkpqtvdqinyfqa1fvigisqavamw  
pgfsrsgst1stgvl1mkln  
hkaasdf1tfimavpim1laasgl1l1khyqdi1qiadipf1ylgfla1aftvgli1aiktfl1hlinkiklipfai1yriv1vifi  
ai1lyfgfgigkgi  
>tr|D8HGV4|D8HGV4\_STAAF  
mkl1ttil1fqyki1fpvlm1flvstgl1gilvitqniliadflaki1rhqfqglwiv1fillgv111ratvqflnqwl1gdtla  
fkvkhm1lrqrviyknngph  
igeqmt1lteni1dglapfyksyl1pqvfksmmvpl1iiiamffihfntalim1litapfip1lyi1fglktrdeskdqmtyl  
nqfsqrfl1niakgl1vtl1k1  
fnrteqtekh1yddstqfr1tmr1lrsaf1sgl1mlefism1lgig1v1aleat1sl1vvfhnidfktaai1ailapefynai  
kd1gga1fhtgkqsegasdv  
vfefleqpnnnef1l1kyeenqkpfi1q1tdisfryddsdr1vl1nd1n1kifkgdqialvgpsgagk1st1thliagvyhpt  
igt1stnqrd1nig1lsqg  
pyi1fsasi1keni1tmfkdi1enniveev1devgl1ldkvs1ftkginti1igeggem1sggqm1rri1elcr1llvmkpd1lvi1fdep  
atgl1diqtehm1iqnvl1fqh  
fkdt1tm1viahrdnti1rh1qrr1lyienr1liaddrni1svnitengdd1  
>tr|D8HGV5|D8HGV5\_STAAF

Tsompanidou\_et\_al\_Supplemental\_FASTA\_File

mktr1kfqvdkd111aiivvgcgs1valamfflsgymvtqsalgaplyalmi1vvtklfgflraitryverlishkatf  
tmlrdi1rvqffgklvnpv  
nyyrkl1ssdli1srmsrvealqniylrvyppvvgltalvtvivlafisighallimvsm1ft1livpwlsskkart1  
kkhaaneqarf1nhfydyk  
agmdelrrfnqtnhyrdnlmaklnhfdklqlkeqrf1tiydfilniam1sifgslvlgliqinegqlniiymtsiv1mv  
11feqavpmtnvayykad  
tdqalhdinevisvpstngkn11tdkydatniyevkdasfkywnqptyv1sdi1fnvnrgekiaivgpsgsgkst11qim  
aglyqldsgs1rfenmdmf  
ei1ddkdkfes1nv11qsqq1fdgtirqn1ftdekdeavqai1fkqld1ehlalerqid1dght1sggeiqr1aiarm11kd  
tastwildepttal1dkqns  
1kvmd1ieahaet1livathd111srfet1iivmingkivekgyqq11anqgalwnmiqyna  
>tr|D8HGV7|D8HGV7\_STAAF  
mknnkdekiri1singfl1gsgktt11thyisel1kndekikiimnefgtfdidsnsisneievhs1ingvcvcd1kqelv  
ye1kaia1kgdvnhi1ea  
tgiahple11vacqdpqivnffekpiiygvl1datrflerhqtentvs1medq1k1sdmi1inkid1vtds1ekidkq1  
smicasiptykttygqvs1  
ee1d1pgkdreiss1hhhhhgiksmtytftgpidrqlfyqfimk1pesv1r1kgvysfrdqpnaiyefqayag1pdygii  
gmqlpl1t1viiget1dtnh  
ir1nq1dm1qft  
>tr|D8HGV8|D8HGV8\_STAAF  
meqiminhyvhfsr1vqgfwranewkmtake1nyfinelvergittmdhadiygdyqces1fgnal1dspelnkiqivt  
kcgii1pskqfdftnghry  
d1sskhivksveqsl1n1nvdy1ds11ihrsp1mdpeqvada1tk1vkqgk1ksfgvsnfnhsyq11nqyikkeklhi  
sinq1el1spyhvds1qdg1t  
mdsm1yqnhvqimawsp1faggki1fdkedikaqrimkviqsiadkygvsdtavmiaw1vki1phrimpilgtsq1kridqae  
gl1n1ddqswfdiytai1  
gq1dip  
>tr|D8HGW0|D8HGW0\_STAAF  
mseekkvkheqqkkek1kkqykpfwivmsfi1liv111papss1pimakav1ailafavimvwteavsy1pvsat1iig  
1mi111gfspvqnl1gek1g  
npksgsav1tgsd11gtnhals1afsgfatsava1vaa1flaaamqetn1hkr1aliv1sivgnktrnivigaiiv1siv  
1affvpsataragavpi1  
1gmiaafkvsksk1las11iitsvqavs1wnigiktaaaq1niva1nfinhq1lgfdvswgewflyaapwsivmsialy1fim  
ikvmppeinti1eggk1dik  
ee1hk1gpvsarew1r1iv1sm1111fwstekv1hpid1sasiti1ialgv1mpkigvmtkwk1hvenkipwg1tiivfgvgis1  
gnv11ktgaaq1w1sdq1tfg  
v1gl1khl1pi1at1ial1it1fn1ih1l1gfasats1ssal1ipvfis1tst1hl1gdqs1igfv1liqqfv1isfg11pvsapqnm1  
aygtgtftvkdf1kagip1  
ti1vgyi1lviv1fsmt1ykw1gl1  
>tr|D8HGW1|D8HGW1\_STAAF  
maiav11nr1mfr1tehnp1feyiyqqkddidacyfi1aeed1mstas1d1kaqfyrgt1qr1fyqs1haek1t1pyvmsyddi1s  
fckennisevv1vag1dmsy  
h1eeydi1h1qrsqfd1qae1itvt1vrgnhyfkasktmkqgepykvfts1fykkwrpy1r1rdvyhyd1nelidiv1iapnn  
1kdvq1dagss1qaheqekw  
qq1flehd1qnyengrey1lpe1ltsq1sialayg11di1ei1fnd11sryeedesnyea1firelifrefyyv1lmtqypesah  
qs1fkpkyrh1nwsenead1f  
kawcdgqtg1fp1idaamme1rqtgfmhnr1mrmvvsq1f1tkd1finwtwgedffrky1lidyaasnvhgwqwsastgtdav  
pyfr1mfnp1rqserfdpka  
lyikty1lpv1nqidakyl1hdthrnese1fkqgie1lgrhypkqivdhqekrsqvl1atfka1d  
>tr|D8HGW2|D8HGW2\_STAAF  
mnsryariy1flv1fias1fenkiyqf1mt1n1flayipfels111r1lfrpnkkyewp1f1iysfi1fv1111pntfymvtd1  
ih1nq1fg1fnfyag1n1few  
kyfty111gv1flaiyvmi1iyfeil1t1tshpw1nr1iiv1ilm1fng1fgiyigr1flr1hsvyffnepirv1nhilks1tid  
tai1fvc1fmvm1mqaa111fg  
kgvr1kk  
>tr|D8HGW3|D8HGW3\_STAAF  
mk1qksnht111v1lekgedi1ecittfaddq1d1tftsvsgigacddv1lkffn1ttkqyeekhit1eple1ts11gnisr1  
dnghfah1hatfgtqsyet  
fsg1hlakai1vsataeiv1tvtdm1diq1rtfndsvgl1n11dpq  
>tr|D8HGW4|D8HGW4\_STAAF  
mnkqi1lvlyfni1flif1gig1lvip1vpvylkd1gl1tgsd1gl1vaafalsqmi1ispfggt1adk1lgkkl1iicig1lil1fsv  
sef1mfai1gqn1fl1mlsr1v  
iggmsagm1vmpgvtg1iadi1spshqakn1fgy1msai1nsg1fil1pgg1igg1fmaeashrmpfyfaga1gilafimsiv1lihd  
pkkvstngf1qk1lepq1l1tk  
inwkvfi1tpv1it1vl1sfg1lsafet1ys1ytadkvnyspkdisiaitggg1fgal1fqiyffdkfmykfseltfiaws1ly  
svv1l111lvf1angywsim1  
isfvv1fig1fdmi1rpa1itnyf1sniagerqg1fagg1n1stftsmgn1fig1pliaga1fdv1hieapiy1maigvs1lagvviv1liek  
qhrak1kqgd1

Tsompanidou\_et\_al\_Supplemental\_FASTA\_File

>tr|D8HGW5|D8HGW5\_STAAF  
mtvkn1flgfvaviltvc1ig1lilatnevalakvhktintlnainvstedtykkmdilnihtakasevnenkvkqnhf  
khrvnanksnsfneqecqv  
iadryadkhindnyglerisktnhgynyvvsndnstsqqhvsisnqgiitk  
>tr|D8HGW6|D8HGW6\_STAAF  
maknkktnamrmldrakikyevhsfevpeehlsqgevae1iqanvktvftklvlentkhehfvpvsetldmkkaaal  
vgekk1qlmpldn1knvtg  
yirggcspvgmkt1fptvvdqscenyshisvsgglrtmqitiavedlititkgkigavihe  
>tr|D8HGW8|D8HGW8\_STAAF  
miytvtfnpsidyviftndfkidglnratatykfaggkginvsrvlktlevestalgefaggfpgkfiidslnnsaiqsfnf  
ievdedtrinvtktgget  
einappphitstqfeq1lqqiknttsedivivagsvpssipsdayaiaqitaqtgaklvvdaekelaesv1pyhplfik  
pnkdelevmfnttvnsdtd  
vikiygr11vdkgaqsv1ggdgaiyidkeisikavnppgkvntvsvsgdstvagmvagiasgl1iekafqqavacgta  
tafdedlatrdaiekiksq  
vtisv1dge  
>tr|D8HGW9|D8HGW9\_STAAF  
mrvtelltkdtiamd1mandkngvide1vnqldkagk1sdvasfkeaihnrqssttgigegiaiphakvaavkspaiaf  
gkskegvdyqslmqpah1  
ffmiaapeggaqthldalak1sgilmdenvrek1lhasspeevlaiidhaddeatkeeeaeaeqqvaaveanqdtngsn  
epyv1avtacctgiahtym  
arda1kkqadkmgikikvetngssgiknh1teqdiknatgiivaadvhvetdrfdgknvvevpvadgikrpeelinkald  
tsrkpfvardgqrkgnsnd  
sqek1spgkafykh1mngvsnmlplvisggilmai1vflfgansfdpkssaynafaeq1wnigsksafaliipilsgfiar  
siadkpgfasglvggm1ai  
sgsgf1ggi1agflagyltqgvkamtrk1pqa1leg1kptliyp11tvatg11miy1vfnppasw1nh11ldg1nn1sgs  
niv11g1v1gamm1aidmgg  
pfnkaayvfatgaliegnaa1taamiggmip1aiatam1firrkftkeqrgsiipnyvmgmsfitegaipfaaadplr  
vipsmm1gsg1gga1alg1  
gsritaphggi1ivigtgdah11qt1ia11vg1t1vsal1ygl1kpk1teteieasksmde  
>tr|D8HGX0|D8HGX0\_STAAF  
mseli1yngkvytedgk1dngyihvkdgqivaige1vndkaa1dndtt1nkiq1vidakghhvvp1gfidih1hggygqdamdg  
sydglkylsen11segtts  
ylattmtqstdk1dka1iniakyeveqdvhnaae1vgih1legpfi1senkvgaqhpqyvvrp1fidkikh1f1qetang1ikim  
tfapevegabe1aletykdd  
iif1sightvatye1eave1vergakhvth1ynaatp1fqhrep1g1vfgaaw1nda1lhtem1vdgthshpasvaiayrmkgnr  
f1y1itdamrakgmpegeyd  
1ggqkvtvqsqar1laga1agsi1kmnhg1ln1isftgd1ldh1lrvts1nqaia1lgiddr1kgsikv1nkdad1vilddd  
mnvkstikqgkvhtfs  
>tr|D8HGX3|D8HGX3\_STAAF  
mki1rvvipcfnegevi1tqthq1ltei1sqdssvkgydynm1fidg1stdtt1demq1latidrhvsi1sfsrnf1gkeam  
iag1yq1hstefdavim1dcd  
1qhppey1ipkmi1egfmegy1dvi1akrd1rsgenfsrkt1shlyy1k1vnc1fveev1qfdd1gv1gdfr11sqravksias1leeyn  
rfskgl1few1gyntkv1fty  
qnvarqkgeskws1fkk1fn1ygidgl1sfnskp1rmmiy1gl1f1f1sisvly1i1y1lfinim1sgvni1pgyf1stiaa1111gg  
iq1lis1igv1gey1igri1yye  
vkar1pky1iqatn1lssi1endek1dthkvysk  
>tr|D8HGX6|D8HGX6\_STAAF  
mnk1111vtfii1rvsg1ivm1mqgyek1tggft1kg1vpvian1tdspewyk1ffanivahtts1fdivv1plgeia1igl  
1ifgv1fayaas1ffgafv1mi  
ny1ladmi1ftyp1qltff1i11lms1h1flkq1is1kei1inyfr1grknr1gekidp1ltdrg  
>tr|D8HGX8|D8HGX8\_STAAF  
mi1vy1ilini1ai1vv1litgf1nlyrh1mqh1sls1am1l1sitina1fintfi1dkyn1fitl1ctit1mfii1wt1ilqfy1idkk1kpvy  
itd1qkfi1ai1iltiv1v1ltq  
rvtdf1sstq1siym1sip1lapa1fi1iggim1fist1fn1l1detaenn1kikk1lmikg1lii1inis1fivmm1v1ltpywy1ly1ivy  
1if1l1f1l1wqrvy1kf  
>tr|D8HGY3|D8HGY3\_STAAF  
mri1eynyryy1teneyk1qyhi1q1kgf1ikkyvatk1advge1vihfaqa1qqrq1gryvs1ly1syea1akyfn1hvmcths1lakdd  
iyavays1fekaes1instye  
hqtsy1vskhh1fs1fvesse1vmm1tnikrv1qqaive1gety1qvnytar1tdni1yypist1yer1l1tqfsng1nyta11qtdei1qva  
sispe1l1ffqkg1qfnnvd1nv  
i1iskp1mkg1tmprg1kteaed1qyykt1qtssk1draenv1mivd11rndi1grisq1sgsikvyk1lffi1etykt1vfqmt1smvsgt  
1ktntd1ltq1ilis1fpcgs  
itgap1k1ntmky1ikq1lesspr1giy1cgaig111l1ptedd1kmi1fni1pirtiey1kygqai1yvgag1itid1skpkdevne1fyakt  
kilem1  
>tr|D8HGY4|D8HGY4\_STAAF  
mq1fetmki1dng1hipr1tyhtnr1kcsser1nfk1fdeh1awrne1ndvt1tkyh1sgqyr1kiv1naesk1fetiv1splpekss  
ftak1fqv1pkavn1ptfinn

Tsompanidou\_et\_al\_Supplemental\_FASTA\_File

ktterkhlahnhetdli111tsedgkvlefdignivieedgkwytpsykndf1kgcmrdylidsdklvekdfnkneliyky  
hneir1flinslrevadv  
h1c1  
>tr|D8HGY5|D8HGY5\_STAAF  
miivya1111ilvyvnyrlvnr11senriyvvrliatittvisfilvyalirelmpfvvramdlmyhq  
>tr|D8HGY8|D8HGY8\_STAAF  
mssqkkkis1faff11tvitit1ktyfsyyvdfs1gvkglvqn1111mpys1valv1svf1ffkgkka1fwfmfiggf11  
tfl1yanvvyfrffsdf1t  
fst1nqvgvnesmggavsasfkwydfvyfidt1vylf1l1fktkw1dtkafskkfvpvmaasvalff1n1afaetdrpe  
11trtfdhky1vkylgpy  
ftvydgvtiennqkalasedd1tkv1nytkqrqtepnpeyygvakkniikihlesfqtflinkkvngkevtpflnk1  
ssgkeqftyfnpffhqtgq  
gktsdseftmdns1yglpqsafslkgdntyqslpaildqkqgyksdvmhgdyktfwnrdqvykhfgidkfydatyydms  
dknvvnlglkdkiffkdsa  
nyqakmkspfyshli11tnhypft1dekdatieksntgdavdgyiqtary1dea1eeyind1kkkglydsvimiygdh  
ygisenhnamek11geki  
tpakftd1nrtgfwik1pgksgginneyagqvdmpt11hlagidtkny1mfgt11f1skghnqvvpfrngdf1tkdykyv  
ngkiysnknelittqpad  
feknkkqvekd1emsdnlngd1rfyknpdfkkvnpiskykyetgpkansk  
>tr|D8HGY9|D8HGY9\_STAAF  
meaykiehlnksyadkti1fdn1d1si1segekiglvgingtgkst11kvigiddftanvmhpnqyri1ryssqkd1ned  
mtvfdav1ssdt11riik  
qyeqavqayaddqsd1k1krmda1qdamd1qhdawdynaeikt1sk1gihdttkyikelsggqqkrvvlakt1ieqpd11  
11deptnh1dfesi1swlin  
yvkqyph1v1fvthdryfl1nevstriie1nrgk1asypgnyesyiemraerevti1qkqqkqralykeelawmragakar  
ttkqgarin1rfd11enevn  
qqykddkge1n1aysr1gkqvfeled1skaindkv1feh1tei1qkgerigvvgpngagktt11n11sgedqqfegk1kt  
gqtvkvayfkqtdet1drd  
irmidyl1reese1akekdgtsvsitq11erf1f1psathgkkyk1sggeqkr1y11r11vhqpnv111deptnd1dtet1  
tiledy1htfggtvitvsh  
dryfl1nkvaqsywfi1hdggmeki1gtfedyesykks1dknkst1kqqsksstivrkkn1sykekleyeq1mkrieqae  
rmeidv1mieasadygki  
kelneekeq1eiqyd1di1trwse1eeikeq  
>tr|D8HGZ0|D8HGZ0\_STAAF  
mmqqt1shyfyet1frpgqeei1skv1dhrnv1gvl1ptgggksicyqvpg111ggttivisplis1mkdqvdq1kamgiq  
aaf1nss1tqkeqgrieka  
1sngeiqf1yvaperfenryfl1nm1qrikih1vafdeahc1skwghdfrpsyknviskvft1pqdftiial1tatatvevq  
qdi1rek1niaqtd1qiktst  
krrn1i1fkvnptyqrqkfi1dyikthdedagii1ycstrkqveel1qea1esqkiesviyhagl1snkereeaqndf1dfrvk  
vvvatnafgm1gidksnvr1f  
vihynmpgd1esyqaeagrardg1kseci11fserdin1heyf1tvsqaddykdkmgekl1tkmiqytkkkcleativ  
hyfepnekleeeqcsncv  
qqdksynmtqakmi1sciarmkqesysvi1qv1rgestdyikykyd1qisthgl1mkgyttse1shlide1rfkgf1ne  
nde1imcdtsi1kk11snev  
evfttpfkqkatekvfintvegdrv1f1sq1vevrkkl1sdkl1tiapvs1fsdyt1eefakrkpaskqadminidgvgsyk1  
khycpaf1eti1qnykakv  
>tr|D8HGZ1|D8HGZ1\_STAAF  
mikfknv1tkrydkhavdn1sfd1negeffv1ligpsgcgktt1tkminr1ih1segyiyfkdkpisdyvyemrwdigyv  
lqqa1fphmtikeni1aqv  
pqmkkwkekdi1dkrvdel1emvglepekyknrkpdel1sggqrqrvgvira1aadppvil1mdepfsaldpisrekl1qddli  
elqt1kikkt1i1fvthdiq  
amk1gdki11neghieq1dtpgefknnpqsefvkqfmgsh1eddapcveenai1rd1dimkpidvetsmsaypivydq  
qiev1yqyl1seservi1vmq  
edsigqyvi1drkdi1fky1sqkkevaqhd  
>tr|D8HGZ2|D8HGZ2\_STAAF  
mtnffdi1serkgq1fstmiehiqisfia1liataiavpl1gill1tkktiseivmniaail1qtips1all1g1mip1fgig  
rvpai1alvvyal1pilrn  
tytgi1kevdp11ieakgigmpfrr1tkvel1piampvimagvrtamv1iigtatlaal1igagglgd1111gidrnas1  
111gaipaallai1fdli1  
rfmak1sykk11mt1lgv1mii1ilaiaipmfaqgdkit1lag1lgsepsiitnmykilieetkntvevkdgm1gktaf1f  
nal1ksddidgyl1eftgtv1  
gel1tkep1kskeekkykqakqsl1ekkyqmtm1kpmkynntya1avkrdfakqhni1rtigd1nkvkdk1kpgft1efndr  
pdgykavqkayn1n1dnir  
tmepk1ryqa1inkgn1n1idaystdae1kqydmv1kddkhvfppyqgap1fkes1f1kkhpeikkp1nk1enki1sdedmq  
mmnykv1tvknedpytvakd  
y1kakglik  
>tr|D8HGZ3|D8HGZ3\_STAAF  
mkeq1nq1sayqpg1spral1kekygiegd1y1k1lasnen1ygpspkvkeaisah1de1yypetgspt1kaa1skh1nvdq

Tsompanidou\_et\_al\_Supplemental\_FASTA\_File

srilfgagldevilmsra  
vltpgdti vtseatfgqyyhnaivesanviqvp lkdggfdlegilkevneds lwlcnpnntgtyfnhes ldsflsqv  
pphvpvii deayfefvtae  
dypdtl alqqkydnafllrtfskayglag lrvgyvbasehaiekwni irppfnvtriseyaavaaledqqylkevthkns  
vererfyqlpqskhflpsq  
tnfi fvtkrvne lyeal lnvgcitrpfptgvritigfkeqndkml evl snfkye  
>tr|D8HGZ4|D8HGZ4\_STAAF  
mterkcacnk lfsilvrgpnteadeksaynnvqvgdgpqhreigfpistdnaswggttk  
>tr|D8HGZ5|D8HGZ5\_STAAF  
mtrksiaidmdevladt lgeiidavnfrad l gikmealngqklkhvipehdglitevl repgfrrhlkvmphaqevvkk l  
tehdvyiataamdvptsf  
sdyewll effpfl dpqhfvcgrknivkady liddnprql eiftgt pimtavhni nndrfervns wkdveqyfl dnie  
kek  
>tr|D8HGZ6|D8HGZ6\_STAAF  
menkythgv lfyhehsg lkninqgigevttal ssickh lsiqlsenegdiikycqeiktknyakdvdl filggdgtvne  
lingvmthdl qlpigilpg  
gtfndftkt lniapnhkqaseqmi saqvgydvikinnyal nfvglglivqnaenvqdgskdifgk l syigstvtkl n  
ptqfnyql tidktyset  
tmil sangpfiggsripltd l spqdelntfi fneqsfsilndi fkkrdsmnwneitqgiehipgkkl slttdpamkvdi  
dgeisletpidieipnai  
qlltvnd l  
>tr|D8HGZ8|D8HGZ8\_STAAF  
mahgrqdelqdit l lgnqntynfdyrpdl esfdnk hqgrdyfvk fncpeftslcpitgqpdfatiyisyipnvkmve  
skslklylfsfrnhgd fhe  
dcmniimnd l ielmdphyievwgkftprggisidpytnygrpn skyekmaehr l mhdlypeknr  
>tr|D8HH01|D8HH01\_STAAF  
mkiyfsftgnvrrfirkte l entleitaen cmepvnepfii vtgtigfgevpepvqsfl evnhqyirgvaasgnrnwgl  
nfakagrtiseeynvp l lm  
kfelhgknkdvi efknkvgnfnen hgrekvqsy  
>tr|D8HH02|D8HH02\_STAAF  
mktmeekkyhnie l nnevtkrredgffs l ekdqea l vayleevkdkti ffdteier l rylvdndfyfnvfdiysead l i  
itdyaksipfnfasymsas  
kffkdya l ktnksqy ledynqhvaival ylangnkaqakqfi samveqryqpatptfl nagrarrgelvscfl levdds  
l nsinfidstakql skigg  
gvain l skl rargeaikgikgvakgvlpi aks leggsyadql gqrpgagavy l ni fhydveefl dtkkvnaded l r l st  
istglivpskffdlakegk  
dfymfaphtvkeeygt l ddidlekyddmvanpnvekkknarem l nli aqtqlqsgypylmfkdnanrvhpn snigqi  
kmsnlctei fqlqetsiin  
dygiedeikrdiscn l glnivnmesgkfrdsvhsgmdal tvsvdvan iqnapgvrkansel hsvg l gvmnlhgy l akn  
kigyeseekdfani fmm  
mnfysiersmeiakergikyqdfeksdyangkyfefyttqefepqfekvrel fdgmaiptsedwklqqdveqyglyhay  
rlajaptqsisyvqnatss  
vmpivdqier rtygnaetfypmpfl spqtmwyksafntdqmklidliatiqthidqgistilyvnseistrelarlyvy  
ahykg l ksl yyrnk l lsv  
eectscsi  
>tr|D8HH04|D8HH04\_STAAF  
mfyft l skqnthsekl n fsl ianinkidtklfer l lklg  
>tr|D8HH07|D8HH07\_STAAF  
miqvgnl tktinnqmi ledisidiekgl t sligpnagk st l lsaicrlirfdngevki dgr l msdyknnd l skkisl  
kqtnhtemnitveq l vnfg  
rfpyskgr l tkedhdvnda l dl l qlqdirnrniks l sggqrqrayiamtiaqdt eyil l ldepln l ndmkhavqimqtlk  
mlahkmnkaiviv l hdnf  
ascysdqival kngqlvksdlkdnv i qsnv l sdlydm diqiehirnqriclyfk d  
>tr|D8HH08|D8HH08\_STAAF  
mkk tvly l v l avmfl l aacgnnsdkeqsksetkgs kdtvki ennykmrgekkgdsakvketvevpknpenavv l dyga  
l dvmkemg l sdkvka l pkg  
eggks l pnflesfkddkytnvgn l kevnfdkiaatkpevi f isgrtanqkn l defkkaapakivyvgadekn l igsmkq  
ntenigkiydkevkake l n  
kd l dnki asm kdktnfnktvmy l l vnege l stfgpkgrfgglvydt l gfnavdkkvsnsnhgqnvsneyvnkenpdvil  
amdrqqavsgk stakqal n  
npv l knvkaikedkvyn l dpklwyfaagsttttikqiee l dkvvk  
>tr|D8HH12|D8HH12\_STAAF  
mkkivi iavla l fvv isacgnkekeaqhftkqfkdv eqkqel qhvmdni h l keidh l sktdtdknskefkalqedv  
knhlipkfeayyksaknl p  
ddtmkvkql kkeymalanekkdaiyqlkkfig l cnqsi kyne dil dytkqfeknrykveseikladnksean l ttkleh  
nnkal rdtakn l ddsken  
evkgai knhimpi ekqitdin qtni s khvnarknaiemy sl qny ntrietikvsek l skvdvdk l pkkgidithg  
dkafekkleleek

Tsompanidou\_et\_al\_Supplemental\_FASTA\_File

>tr|D8HH14|D8HH14\_STAAF  
mkvlvamdefhgiissyqanryveeavasqietadvvqvp1fng rhellsvflwqsgqkyripvhdadmnevegvygqt  
dtgmtviegn1f1kgkkipi  
vertsyglgeminhalndakhvvislggidsfdagagmlqalgaqfyddegrrvdmrqgagvikyirrm dmsnlhpkme  
tariqvmsdfssrlygkqs  
eimqthdahqlnhnqaaeidnliwyfse1fkse1kiaigpverggaggiaav1nglyqaeiltshalvdqlthlenlve  
qadliifgegl nendq1le  
ttl1riaelchkhqkvaiaicataekfd1fesqgv tamfntfidmpetytdfkmglqirhytvqslk11kthfnvev  
>tr|D8HH15|D8HH15\_STAAF  
mknqlidr1tryttidtqsdpkstttptstekqwd11h1lekelqq1glptdl dengylfatlesnidadvptvgflahvd  
tspdfnasnvkppqiienyd  
gkpyk1gntkrv1dpkvfpe1nsfvght1mvt dgts11gaddkagiveimeaicylqehpeikhgtirigftpdeeigr  
phkfdvdrfnadfaytmdg  
syygelqyesfnaeavitchgvnvhpgsaknamvnair1geqfds11pdsevpertegyegfyh1mnfegtvekat1qy  
iirdhdkkqfelrkkri1e  
irddinahfenypkvdisdqyfnmaekilp1phiidipkrvfak1dipantepirggtdgsq1sfmg1ptpni1ftgcn  
fhgpyeyasidvmekavqv  
iig1vediaenh  
>tr|D8HH17|D8HH17\_STAAF  
mpdsitiidenkvidvvl1iagr11lesgaetyrvedtmnriahsyglhntysfvsstai1fs1ndrtstr1irvqerttd  
1ekialtns1srkisnkel  
tideaksefih1qhas1qysf1tnffaaaiacgff1fmfggvasdcwiaviaggsafl1tfsfvqryiqikffsefvaaav  
visiaatftklgiatnqdi  
itiasvmlvpgil1tnaird1lagellagmsrgveaal1tafaigagvaiv11ii  
>tr|D8HH21|D8HH21\_STAAF  
mkiavmtdstys1sqdl1dkyniqiap1svtfddgknftesneiaieefynkmassqtipttsqpaigewitkyem1kdq  
gytdiivic1ssgisgsyq  
ssyqagemveggnvhafdsklaamiegcyv1raiemveegyepqqiidd1tnmrehtgaylivdd1kn1qksgritgaqa  
wvgt11kmkpv1kfedgki  
ipeekvr1tkkraiqt1lekkv1divkdfevt1fv1ngdhfedgqalykk1qddcpsayqvaysefgpvvaah1gsggl1  
gyvgrk1rlt  
>tr|D8HH22|D8HH22\_STAAF  
mdnvtrykitesqsasqayyh1sfe1seqqsyasehivrairmrqt11lyavtgagktemmfqgiqyarrqgdniav1s  
prvdvvveiskrikdaf1n  
edid11hqssqqfeghfvvctvhq1lyrfkqhfdt1fidevdafl1smdks1qqa1kssskvehat1ymtatppkq11se  
ipneni1klparfhkks1p  
vpkyryfk1nnk1qkml1yri1ldq1innqryt1vffn1ietmiktfsvykqkitk1tyihsedvfrfekveq1rnghfdv  
iftt1ilergftman1dv  
vidahqytqea1iqiagr1vgrk1ecptgkv1ffhegvsmmniqakkeiqkmn1a1krgwide  
>tr|D8HH27|D8HH27\_STAAF  
mkks11tvsvs1laf1a1lnnaahaqqhgtqvktpvqhnvsvnvaqatqspttytvvagds1ykieh1h1t1nq1lysynp  
gvtp1ifpgdvis1vpqnk  
vkqtkvvkspvrkasqakvvkqpvaqaskvvvqapqavakavnvaykpahvqksvptvpvahnyk1svanrgn1ya  
ygnctyyafdrraq1grsi  
gslwgnannwnyaakvagfkvdktpevgai1qtaagpyghvgvsvnpngt1tvsemnyagfnvksr1t1npgkynyi  
h  
>tr|D8HH28|D8HH28\_STAAF  
meeviemgvhgyfkr1sdmer1ir1pgkfkyfehnvaahsfkvtkiaqylatveeyhgrkinwks1yeka1nhdfaevft  
gdiktvpkyasse1klk1fs  
qveemvetf1eeei1p1qyrdivyqrl1qegkdds1legq1lsvadkid11lyetfgeiqkrnpeel1ffeyems1eti1qfd  
h1asvqdfinni1ipem1te  
nfiprte1rettmn1lnkrkeene  
>tr|D8HH30|D8HH30\_STAAF  
mvehypfk1hsdfepqgdppqaikeivegikagkrhqt11gatgtgktftmsnvikevgkpt1iahnkt1agqlysefk  
effpenrveyfvsyydyq  
peayvpst1dfiekdas1nde1dq1r1hsatsa1ferddv1iasvsciylgnpeeykd1vsvrvgmendrse11rk1v  
dvqytrnd1dfqrgtfrvr  
gdvvei1fpaskee1c1rveffgdeidri1revny1tgev1kerehfai1pashfv1treek1kvaierie1keleer1kelrd  
enk1leaqr1leqrtny1de  
mmremgfcsgienysvhl1t1rpl1gstpyt11dyfgddw1imideshvt1pqvrgmyngdrarkqv1vdhgfr1psaldnr  
p1kfeefeektkq1lvysa  
tpgpyei1ehtdkmveqi1rptg11dpk1evrptenqidd11seiqr1vernerv1vtt1tkkmsed1t1tmkeagikvny  
1hseikt1ler1e1ird1rm  
gtydivig1n11regidipevs1lvv1ildadkegf1rsnr1liqt1igraarndkgev1myadkmt1dsmkyaidetqrrrei  
qm1khnek1hgi1tpkt1nkk1  
hd1isatvendenndkaqt1v1pkmtkkerqkt1dni1ekemkqaak1ld1fekate1rdm1felkaeg  
>tr|D8HH31|D8HH31\_STAAF  
mkepsi1vkgarahn1kdidie1lpkn1livmtg1sgsgkss1afdtiyaegqrryves1sayaqf1lgqmdkpdvdtieg



Tsomanidou\_et\_al\_Supplemental\_FASTA\_File

lspaisidqkttsknprst  
vatvteiydyirllaryarvgkpycpnhnieiesqtvqqmvdqimleartkiqllapviahrkgsheklidigkkgyvr  
ridgeivdvndvptldrnk  
nhtievvvdrllvkdgietrldsietalelseglvtvdvidgedlksfshacpicgfsigeleprmfsmfnspfgacpt  
cdglgqkltdvdvlvvpdk  
dktlnegaiepwiptssdfyptllkrvcevykinmdkpfkklterqrdillysgdkeieftftqrrggtrkrmtvfev  
vpnisrrfhespseytrem  
mskymtelpcetchgkrlsrealsvyvggnigevveysisqalnyykninlseqdqaianqilkeiisrltflnngle  
yltlnrasgtlsggeaqri  
rlatqigsrltgvlvldepsiglhrdndrlintlkemrdlgnltivvehdddtmraadylddigpgagehggqivssg  
tpqkvmkdkksltgqylsg  
kkriepeyrrpasdrkisirgarsnllkgvdvdiplsimtvvtgvsrgskslvnevlykslaqinkskvkpglydki  
egidqldkiididqspigr  
tprsnpatyrgvfdidrdvfaqtneakirgyqkgrfsfnvkgrceackgdgikiemhflpdvyvpcevcdgkrynret  
levtykgkniadilemve  
eatqffenipkirkqltldvvglygtlqqattlsggeaqrvklaselhkrstgksiyildepttghvddisrllkv  
lnrlvengdtvviiehnld  
viktadyiidlpgpegsgggativatgtpediaqtkssytgkylkevlrdkqntedk  
>tr|D8HH33|D8HH33\_STAAF  
mgivfnyidpvafnlqplsvrwygiiavgillgyfvaqralvkaglhkdtlvdiifysalfgfiaariyfvifqwpyya  
enpgeikiwhggiaihgg  
liggfiaqvckvknlnpfqigdivapsiilaqgigrwgnfmnheahggpvsrafleqlhlnpfiiemyingqyyhpt  
flyesiwdvagfiilvnir  
khklgetfflyltwysigrffiegrrtdslmltsnirvaqlvsillilisislivyrrikynpplyskvgalpwptkkv  
k  
>tr|D8HH34|D8HH34\_STAAF  
mrkflsktyhhtnplwhvyrlvkfskvfkvniiiefskfipsmvlkrihykllninignqssiaykvmldifypeliti  
gnsnvigynvtilthealv  
defrygpvtigsntliganatilpgitigdnvkaagtvvskdipdngfaygnpmyikmirr  
>tr|D8HH35|D8HH35\_STAAF  
maqknnnviptfddafyrkmanqfkqreykraaeyfekvlelspddleiqidyaqclvqlgiakkaehlfydniynr  
hledsfyelsqlnievnep  
nkafllfginyvvsddqdyrdeldqmfvdvkyqseeqieleaqlfvvqilfqylfsqgrlkdaknyvlhqpqevqehravr  
nllamrylylgeydtakal  
yeallqedstdiyalchytlllyntkeneqyqyliklknkvpmnddesfklgivlsylkqyrasqlllyplykkkfls  
iqmynalaynyylgeede  
shyywdkllkqiskveighapwvienskevfdqhilpllsqddshyrlygiffldqngkeivmtesiwqvlennnyekl  
yltylvqgltnklldfih  
glltlyhnelfvsendlmvawinqgeliiaekvldtdvepyigafiylyfknqprnvtknqittwlgitqyknkmiel  
lsi  
>tr|D8HH37|D8HH37\_STAAF  
mrvgvwaptqriskrnstgnaswgvgnptenfekkfyrqcelgcgqhrefrkeilqamrvgvwaptqriskrnstgnag  
wgvgnkekltdsqflqamq  
vggaptqkltsqlltimcklgrdndkeilfl  
>tr|D8HH39|D8HH39\_STAAF  
mrqikvvligggtglsvmarglrefpiditaitvadnggstgkirdemdipagdirnviaalsdsesvlsqlfqyrfe  
enqisghslgnlliaagmt  
itndfghaikalsklnikgrvipstntsvqlnavmedgeivfgetnipkhhkiddrvflepnvqpmeeaidalreadl  
ivlgpgslytsvisnlnv  
gisdalihsdapklyvsnvmtqpgetdgysvkdhidaihrqagqpfidyvicstqtfnvaqlkkyeekhskpvevnael  
ekesinvktssnlveisen  
hlvrhntkvlstmiydialelistipfvpsdkrk  
>tr|D8HH42|D8HH42\_STAAF  
mkgiellnnpflnkgtaftneerkqlgleglpanvrtleqqaeqcyeqfkakqtdfekrlflmaifnrnrtlfykltse  
hlvefmpiiydpviaqsie  
qynerfsrpqdavflsvdrdqieqelnvangrdirlivvtdaegilgigdwgvdgvdiaigklivytaaaginpsqvl  
pvsldvgtneqllkddly  
lgnrhkrvddetyyafvdkfvsavrkeypnallhwedfgrghaknildkyedtllptfnddiqgtgvtlagvlgalnisk  
vdytnqtflyvggtagmg  
itnilkdelikqgvseekanqhfymdkqgllddmdldteaqqvfaknrnefsntvnwnlkevienikptvligtstq  
tgaftedavkemlkhterp  
mifplsntklaetaqdlkwtngkaligtgipyndieyngvnysigqannaalmpgllgglaskakkvnqqilsaas  
halggmvpdepgaavllp  
vekihqcسرائاکاواقسیدقنائتیددکااےایوپیکیسی  
>tr|D8HH43|D8HH43\_STAAF  
mkqyli tgggtmvgsqlvneikkdshtilttrhdqisndkksyvwnaksgwehkvpqnidvvinlagatlnkrwtpey  
kqtlmlsrqstqalyelf  
ksrnkapkvlfnasatgyppdlfmsytesyktlpdfldsvyqwerfaqqfeqlgtrvvigrfgiilsneggalqtmk

Tsompanidou\_et\_al\_Supplemental\_FASTA\_File

1pyeyyiggk1gsgqqwys  
 wihindliqailflinnesasgpfnl tapiperqnlfgyt laramhkphetwaps lamrli1lgmstvvldtqkvlpnki  
 qalgfqqfky snl kmaledl  
 isk  
 >tr|D8HH44|D8HH44\_STAAF  
 mcktlhdtnegnknltpfssgpvr1scgsflfisyshyrsiqsinflnkfknt  
 >tr|D8HH46|D8HH46\_STAAF  
 mpveigrsqflvygapptcivcrnwesnfsm1gpipnfhclyklgiqfhyvgapdfnwksllqakfcsvnyy  
 >tr|D8HH56|D8HH56\_STAAF  
 mnlkqsieeiingpeyepmsvsdfqdalglssadsfrdlikvlveleqsgliersktdryqkkhsskgqsklikgtlsqn  
 kkgfaf1rpedkmedi fi  
 pptkinraldgdtviveihqskgehkgkiegevk siekhsvtqvvtysqarhfvgfvipddkrimqdifipkgqslgavd  
 ghkvlvqi tkyadgsdne  
 ghisailghkndpgvdi1siyqhgieiefpdevlqaeatpdniedseikgrhdlrne1titidgadaklddaisvkk  
 langntqltvsiadvsyyv  
 tegsaldeaydratsvylvdrvipmiphrlsngics1n1pnvdr1t1scrmeiddsgrvvkheifdsvihsdyrmydav  
 nqiitekdp1irkqyneit  
 pmldlaqdl1snrliqmrkrgeidfdiseakvlvnedgiptdvqlrqrgegerliesfmlianetvaehfskl1dvpfiyr  
 vheqpsdr1rqffdfitn  
 fgimikgtgedihpttlqkvqevegrpeqmvi1stmm1rsmqahyddvnlghfgl1saeyythftspirrypd1tvhrli  
 rkyli eksmdnkevkrwed  
 klpelaehtskrerraieaerdtdelkkaeymiqhigdefegivssvanfgmfie1pntiegmvhianmtddyyrfeerq  
 maligerqakvfrigdtvk  
 vkvthvdvder1idfqi vgmplpkndrsqrpargkti qaktrgks1dksksddkghkkkgkqrkgknerkndksngskyk  
 pfykdksvkkkarrkkk  
 >tr|D8HH58|D8HH58\_STAAF  
 mkkvmgillastli1lgacghqdsakkestshkkkesdnee1nee1kefkskknmdikikgdtivsdkfeakikepfiin  
 ekdekkyiafkmeitakk  
 ddkd1npssishdyini1tqddkntvnl1rdgy11sdkkykawtehnqdqikkgktaqamfiyelrgdgnin1lvhkysed  
 ktvdsksfkysklktedfs  
 hraetreevekkefefeeykkeqerekekekqkddd1nev  
 >tr|D8HH59|D8HH59\_STAAF  
 mqyies11qelfni1leshki1st1fnyskr  
 >tr|D8HH60|D8HH60\_STAAF  
 miniisalgsigt1fimalfyfvsvsvqlyqmki1sflpalgfnqilleregdl1nimnsatdehkhkdyiklynlgggaak  
 kiaiev11gndkviqkkyv  
 nilpskegym1pinkvnyeelertienngyead1nvrmtyyhnvsrkqqevilkqqidrfntynnkeiydlqfi  
 >tr|D8HH61|D8HH61\_STAAF  
 mqirqihqhd1faqvdl1rtafensehgygnese1vdqir1sdytdnnel1vav1qnevvggh11sevyldnetqreigl  
 v1apvsdihhqngkigkr  
 liqalereailkgynf1svlgwptyygn1gyqrasmydi1ppydgipdeaflike1kvns1agktgtinytsafeki  
 >tr|D8HH62|D8HH62\_STAAF  
 mmmkkkekhairkksigvas1vgt1igfg11sskeadasensvtqdsdsasneskssdsssvnaapkt1dntv1sdtktt  
 nt1ngets1vaqnpaqqett  
 qsastnatteetpvtgeat1ttatqantpattqssntnaeelvnqtsnerasnd1ntvssvns1pqnstnaenvst1tqdt  
 teatpsnnesapqstdasn  
 kdvv1nqavntsaprmrafs1laavaadapaagtdi1tnql1tdvkv1tdsgttvyphqagyvk1nygfsvpnsavkgdtfkit  
 vpkel1n1ngvtstakvppi  
 magdqvl1angvidsdgnvy1yftdyvdtkenvtan1tmpayidpenvtktgnvt1ttgigtntasktv1idyekyqfhn  
 1s1kg1tidq1dktntyrq  
 tiyvnp1sgd1nv1pal1tgn1ipntksna1idakntdikvyrvdnand1sesyvnpsdfedvt1nqvris1fpanqykvef  
 ptdedq1t1tpy1vvnghi  
 dpastgd1al1rstfygydsnf1wrsmswdneva1fnngsgsgdgidkpvvpeqpdepgeiepipedsdsdpgsdsgsdns  
 dsdgsdgsd1st1sd1sd1sa  
 dsdsasdsdsasdsdsasdsdsasdsdsdsdsdsdsdsdsdsdsdsdsasdsdsdsdsdsdsdsdsdsdsdsdsds  
 dsdsdsdsdsdsdsdsds  
 dsdsdsdsdsdsdsdsdsdsdsdsdsdsdsdsdsdsdsdsdsdsdsdsdsdsdsdsdsdsdsdsdsdsdsdsdsds  
 dsdsdsdsdsdsdsdsdsdsdsdsdsdsdsdsdsdsdsdsdsdsdsdsdsdsdsdsdsdsdsdsdsdsdsdsdsds  
 dsdsdsesdsdsdsdsds  
 sasdsdgsd1sd1sd1sgsd1sd1sd1sgsd1sd1ssdsdsdsasds1sd1tesdndsdsesdsnsdsdsgsn1nvpp  
 nspkng1tnafnkneakdsk  
 ep1pdtgsegeans1liw11as11gs111frrkenkdkk  
 >tr|D8HH63|D8HH63\_STAAF  
 mknk11v1s1galcvsqiwesnr1savvsgeknpyvskale1lkgtsnksntyenyres1en1ifs1sfadyekyeepeyn  
 navkkyqqk1fmaedda1kt  
 fl1seek1lekt1dssrnsng11gl1therytyi1fdt1lknkqef1qei1qein1knsd1kdfndteqynadveinn1enkvlm  
 lgytff1sty1kdeveelyse  
 1d1i1vge1vq1dsk1kravn1qm1srkked1esi1dkff1keik1qerpenipal1tsdknhnqsmal1k1ksdteaktdvskr  
 skrs1lesqyk1stske1vse

Tsompanidou\_et\_al\_Supplemental\_FASTA\_File

qqkadyerkakerkerf1drqskkpepvvsleydfekqrfnnanekqlvvsaptkkptpptytettttqvpmpptverqtq  
eqivykapkqlaglgesh  
dfstthqtpttsnhthnnvfeetsalpgrktgslvglsqidssh1terekrvikrehvreaqklvenykdhthsykdr1  
naqqkvnt1ssghqkrfnk  
qinkvyngk  
>tr|D8HH64|D8HH64\_STAAF  
mkkklfv1tmst1fatq1insnhanastesvdknfvvpsginkiiipaydefksapkvvgs1adnknfiasedk1kkis  
dpsaaskivdknfavpesk  
lgnivpeykeinnrvvatnnpasqqvdkhfvakpgevnrfitqknvnhhfittqthykkvitsyksthvhkhvnhatds  
inkhfi vkpseaprythps  
qslminhyfavpgyhahkfvtpghasikinhfcvvpqinsfkvippyghnshrmhvpsfqnttathqnakvnkaydyky  
yysykvvgvkkysfsqs  
ngyki gkps1nikvnyqyavpspsphyvpefkgs1paprv  
>tr|D8HH65|D8HH65\_STAAF  
mkrkv1v1tmgvicatq1whsnhana1vtesvetnfvvksdnenv1qthteitteekfsiveksq1nklks1sndnye  
yd1htnqtgikkgwlygys  
eidsshftdrkrvirrdhvkeaqslindykdtqsyed1akatakvt1sqshqny1nkqidkvnnkiektekr  
>tr|D8HH66|D8HH66\_STAAF  
mtey11sagicmaivsi1ligmaisnsvskgqykrffffatsclv1t1vvvss1sssanasqtdngvnrsgsedptvysa  
tstkk1hkepatlikaidg  
dtvklmykgqpm1f11v1dtpetkhpkkgvkygpeasaf1tkmvenakkievefdkgq1rdkygrglayiyadgkmvn  
ealvrqglakvayvykpnn  
theq11rkseaqakkek1niwseadnadsq  
>tr|D8HH68|D8HH68\_STAAF  
msewhinnqstkp1liqqaekq1sivkplpngsfqilteidlengnisnidhs11vsvdpkaleisifdav  
>tr|D8HH69|D8HH69\_STAAF  
mne1tkeqkytiakfyk1yiersnnetetvanffgdakdarenyfcdryqef1tncqilinqkyltgev1ddniynis  
ilnktfiefeqnfg  
>tr|D8HH70|D8HH70\_STAAF  
mnyikrti11l1fvvvspsinspktiadnkysei1qddkfqlqpgdi1itkgpvmwgffghcsiaiddktilqiegpgdkp  
ttqsfesfkynyasgkndw  
mkvyrcsyppgagkaadwvkknyentnhrylv1n1n1skkftyctki1yqaykfgvseksvksyglhiispyaikdnfid  
syk1rlvkay  
>tr|D8HH76|D8HH76\_STAAF  
mvtaiihgfi1aig1ilp1gaqnvfi1nqganqkyryv1paiitag1sds11iiiavvgvsiiims1pvlqaiiyivgl  
ifl1mymawtiwhdkpstgd  
eaqimspmkqvsfalvs1lnphai1dtigvigssaalygsnki1aftiacisvsw1wff11ailgkmvgsidktgk11t  
iinkissiiiiivalmilq  
k1iq1if  
>tr|D8HH78|D8HH78\_STAAF  
mai1hyetkatnvggrkghvytdra1di1divppaqadgkatnpeq1faagyvscfngafd11lkqnkvrdahpevt1tvr  
leddpdespklsvsidat  
iknvisqeeaeqylqmahefcpyskatqgninvd1nvnvvd  
>tr|D8HH79|D8HH79\_STAAF  
mthvevvatiapqlyieetliqkinhridaidvle1ridqienvtvdqvaem1tk1kvmqdsfk11vtyr1k1qgggyqf  
tndly1n1isdlaningid  
midiewqadidiekh1ri1th1qqynkevvi1shnfegtp1delq1ffk1mqkfnpeyvklavmphnkndv1n11qams  
tfsdtmdckvvgis1msklg  
lisrtaqgvfggaltygc1gepqagq1dvtd1kaqvtly  
>tr|D8HH80|D8HH80\_STAAF  
melqqai1anrrsvkkfkrdmhidda1lyqai1kaadapnhgmrepwr1vvhvpkdr1lgdmskdiskfafsnel1dkqqchyd  
avtk1ggm1111ktdprq  
rqndenyf1afgayaqnlm111yeag1gtcwksplyiydpkvrkt1gikkdev1agfly1tdleedmpkaprknrnlitly  
>tr|D8HH84|D8HH84\_STAAF  
mken11gti1iwsivtfyysrmmkimn1ailkikiggs  
>tr|D8HH85|D8HH85\_STAAF  
m1ni1qdvsh1skkeqkaynr1fvesvengn1pv1pcieid1kemqet1sqskiggmp1f1ksfkdipl1dennvpmv11aqi  
n1nd1peqqe1fpvnegi1  
qfwi1ssedqmygmsen1kgnn1nsr1vyikepitd1s1leniqm1h1ks1ldadnedip1fsgafsiefr1skqtitctdykyd  
edv1alwnkvnpsfalksm  
fggyde1mepvcntftakepfnq1lggy1pyfdq1dpr1tndqe1kmydrv11qidstrdg1nssi1wgd1giani1lvkstdle  
amk1fddymyswdcs  
>tr|D8HH86|D8HH86\_STAAF  
mmmai1v1nkvi1vegskdkkrvqqviaepvni1cthtgmsidk1ddmies1ydkqv1v1ladsddegdr1rnwfkry1sece  
hi1fidktycqvancpkqyl  
ahv1skhgftckketps1pninner1v1vne  
>tr|D8HH90|D8HH90\_STAAF  
mkk1fg1il1v1t1favv1aacng1sksggddkkitvgaspaphae1lekakp1lekkgye1diktindy1t1pnk11ldkgei

Tsompanidou\_et\_al\_Supplemental\_FASTA\_File

danyfqhtpylntekkdkg  
ykiivsagdvhlpmavyskkykslkelpkgatvyvsnpaeqgrflkffvdaglikikkvgkiedakfsditenkkdikf  
nnkqsae1pkinygnedad  
aviinsnfaieqklnpkkdsiavesakdnpyanliavkeghqddkkikaliev1qskdiqdfinekyngavipak  
>tr|D8HH92|D8HH92\_STAAF  
mqqfkwinilkfamgtsdlvpgvsggtiall1ldiynqfiasisgifsrrfwsftfsipiiigml1lamslnlfnyll  
sqhhiptmfffggliigiv  
pyllkisyktsfttkhymviagiailivitlmngdkhagetl1stgliikyfiagmcassamllpgisgsfmllvf  
gyygtvmlaisevkl1nfa  
glp1llavfgvlagfiisskiiqyfl1thhklmtfaliigfvvgs1favfpglptn1vmwfvslvvfiigfivsl1lgri  
taene  
>tr|D8HH94|D8HH94\_STAAF  
mttdilniseeqldyskahnepswmte1rkka1kl1tet1empkpdkt1rkwdfdsfkqhdkgdv1yqslsq1pesvre  
iidvnhsknlviqhnntia  
ytqvddnaskdgvivegladalnmhsdlvqkyfmdavtvdehritalhtalvnggvfvyvpknvvvehpvyvvlhdde  
nasfynhviivteesaevt  
yvenylsnasgegnq1niiseviagansni1tygsvdymdkgftg1iirrgiteadasinwalgl1mneqsqi1dntt1n1fg  
drstss1ksvvvgtgeqki  
n1tskivqyketdgy1lkhgvmkehassvfngigyikhggtksianqesrv1ml1sehargdanp1llidedyvqaghaa  
svgrvdpdq1ly1msrgis  
qraer1v1hgfl1dpvvre1pi1edvkrq1revierkvs1k  
>tr|D8HH95|D8HH95\_STAAF  
maehsfdvnevikdfp1ldqkvngkr1lay1dstatsqtpvqv1nvl1edyykrynsnvhrghvt1lgs1atdgyenaretr  
rfinakyfeei1ftrg1ta  
sin1vahsygdanveegde1vvt1emehhanivpwqqlakrknat1k1fipmtadgel1niedikqtindk1kivaiahisnv  
lgtindvkt1iaeiahqgha  
i1svdgaqaaphm1k1dmqemnadfysfsgkhm1gptgigv1fgkre1l1qkmpie1fggdm1dfvskydatwad1ptkfea  
gtp1iaqaig1laeairyle  
rigfdaihkyeqeltiyaye1qmsaiegieiygppkdr1ragvitfn1qdvhphdvatavdtegvavraghhcaqpl1mkwln  
vsstarasfyiyntkedid  
qlinalkqtkeffsyef  
>tr|D8HH98|D8HH98\_STAAF  
mpqscvcvvalstindyflhkskiglinky1kay1sirfsyk1k1atvmw1l1fvi1gikmvsivisgsqe  
>tr|D8HH99|D8HH99\_STAAF  
myfv1aifti1sasvs1gysfqacasshninayya1srs1pl1fl1aifs1lvihsaif1itisiamilvqfl1daivgyk1sk  
dvfkygplatsvvn1l1l  
ivf1f  
>tr|D8HHA2|D8HHA2\_STAAF  
minig1tgwgdhys1yed1erqtdk1ktyaghpvvel1datyyai1qpernilkwiketpdt1fefv1k1hqal1tlhadykt  
fadtrqel1fdqfknml1ep1  
qtqk1lamv1vqfppwfd1cnaqniky1lyvrqql1qafpmcvefr1hqswfsdafkeq1laf1tehqiihavvdepqvk1dgs  
vplvnri1tneiafvryhgr  
nhygwtkk1dmsdqewrdvry1lydyneqel1d1aqkaq1laqkakkvyvi1fn1nsgghaannaktyqr1lnieyeglapq  
1kl1f  
>tr|D8HHA3|D8HHA3\_STAAF  
m1l1tit1l1v1l1g1g1sai1gsivgigg1iivpt1vyl1gvehg1l1hnittqiaigtssv1ilivt1gl1sssl1gyl1k1tkqv1dik  
ngsif1fg1l1pgs1l1gsf1  
sry1l1tesfn1lyf1g1f1l1fvail1mvrnk1k1pfk1fdkpk1yekt1yvdakgktyhysv1pl1fafitt1flig1l1tg1fg1g1g  
galmtpl1m1liv1r1f1pphva  
vgt1smm1i1ff1ssv1m1s1ighiaqghvawgyai1li1ssy1fgak1g1vk1n1qs1iks1d1tv1t1l1rtv1m1l1mgiy1li1rali  
>tr|D8HHA4|D8HHA4\_STAAF  
mr1l1tiyhtndi1hsh1l1heyerikaymaeqrpr1nhps1lyvd1gdhvd1sapiteat1lgkknval1neakcdvatignegm  
tishealnh1lydeakfivt  
csnvidesh1l1pnniv1ssy1k1didgk1l1fvaatapft1pfyraldwivtd1plesikeeiehqrgkfdv1l1vlshcgiffd  
et1lcqel1peidv1fgshth  
hyfehgeinngv1maaagkygny1lgevn1tfeahkvvhtaki1plet1pev1ktsfeeegkt1msnpv1iqhpv1lkrsmn  
hiteaay1l1laqs1vceytha  
qcaii1nag1l1vkdivkdevtey1dihqm1lphpinmvr1r1sgvkl1kei1aksnkqeymyehaag1l1gfrgnifggy1lyn1lg  
yihstgryy1ngeeiedgk  
eyv1gtidmytfgryfpt1kel1pkey1mpefl1rdifkell1ey  
>tr|D8HHA6|D8HHA6\_STAAF  
mikvdqhyfeli1enyrecfnee1qfiarysdi1dkydyivgdygydql1rl1kgfykdsnkkaemskrfsni1qdyifeycnfg  
cpyfv1rh1skqevk1klie  
evhpsdvidddk1l1qdvkikptiqdte1h  
>tr|D8HHA8|D8HHA8\_STAAF  
myfvdkd1l1tqk1lay1l1qal1tddyheskhnhyaferiaq1m1iessvdignmiidaf1l1rdpgnykdvidile1lenvitket  
qqainktvd1rkqftdyt  
aldikvimp1m1fddal1pykqfi1tevt1fl1hqenvpvt1afgkgenq

Tsompanidou\_et\_al\_Supplemental\_FASTA\_File

>tr|D8HHB0|D8HHB0\_STAAF  
mvkivvsrkpdklyqqlsklgdvmmwqkslvmpmkdqfvtaIrdadacfitlseqidaeilaqspnlkvianmavgydn  
idvesatennvvtntpnv  
ltettaelgftlm laiarriveaekyveadawqswgpyllsgkdvfnstigiymgdigkafarrlqgfntnilyhnrsr  
hkdaeadfnatyvsfetll  
aesdfiictapl tkethhkfnaeafeqmkn dai finigrqivdeta lidaldnkeilacgl dvl anepidhthplmgrd  
nvlitphigsasvtrdnm  
iqlciknieavmtngvphtpvn  
>tr|D8HHB2|D8HHB2\_STAAF  
mtdiinklqafadanpqsiavrhttdeltyqqImdessklahr lqgskkpmil fghmspymivgmigaikagcgyvpvdt  
sipedrikmi inkvqpefv  
fnntdesfeslegevftiediktsqdpvi fdsqikdndtvtytiftsgstgepkgvqieyaslvqftewml elnksgneqq  
wlnqapfsfdlsvmaityc  
lasggtlnlvdknminkpkl nelm tatpiniwvstpsfmemclllptl neeqygs lnefffcgeilphraaka lvsrfp  
satlyntygpteatvavts  
iqitqeil dqyptlpvgverpgarlsttdege lvi eqqsvslgy lkn dqktaevfnfdgirttyhtgdkakfengqwf iq  
gridfqiklngyrmeleei  
etqlrqsefvkeai vvpvykndkvihligai vpttevt dnaemtkniknd lksrlpeymi prkfewmeqlpltsngkidr  
kkiaeving  
>tr|D8HHB6|D8HHB6\_STAAF  
mptedttmfdqvaevierl rpfllrdggdcs lidvedgivklqlhgacgtcpsstitl kagieralheevpgvieveqvf  
>tr|D8HHC1|D8HHC1\_STAAF  
maqdrkkvlvlgagyagltvtklqkaisteaeit linkneyhyeatwlheasagtl nyedvlypvesvlkkdkvnfvq  
aevtkidrdakkvetnggi  
ydfdilvvalgvsetfgiegmkdhafqienvitarelsrhiedkfanyaaskekddndlsilvggagftgveflgeltd  
ripe lcskygvdqnkvkit  
cveaapkmlpmfseelvnhasvyledrgvefkiatpivacnekgvvevdgekkqlnagtsvwaagvrsgklmeesfegv  
krgrivtkqdltingydni  
fvigdcsafipageerplpttaqiamqqesvaknikrilngestee feyvdrgtvcs l gshdgvgm vfgkpiagkkaaf  
mkkvidtravfkiggigla  
fkkgkf  
>tr|D8HHC2|D8HHC2\_STAAF  
mnfkl nntlsneintli igipehlnqlerisfnhiditeslerlkhqhiigskvgkiyttafdvqdqtyrlitvlglnlk  
trsyqdm lkiwghlfqyik  
sehiedtyllm dsfiskydq lsdvlmacgiqseratyefdhkssk kapfktlnliseslieldfihegisigqslnla  
rdfs nmpnvltpqtfaed  
ivnhfktkvkvevkd ydtlvsegfgllqavgkgs khkprlv tityngkdkdeapialvgkgitydsggysiktngmat  
mkydmcgaanvvgiieaas  
rlqlpvni vglacaenmineasmkpddvftalsgetvevmntdaegr l vladavyyanqyqpsvimdfatltgaaival  
gddkaaa fesnsvilndi  
lqisskvdemvfelpitaterasikh sdiadlvnhtngqgkal faasfvthfsgqtphihfdiagpattnkasynpkip  
tgfmiptivqwlkqq  
>tr|D8HHC3|D8HHC3\_STAAF  
minavviavil mivlclcrlnvvisl fisalvgglisgmsiekvinvfgnivdgaevalsyallggfaalisysgitdy  
lvgkii naihaensrwsrv  
kvkvtiiallamsimsqlipvhiafipivipp lslfndlkidrrligliigfglcfpyvllpygfgqifqqiiqsgf  
akanhpiefnmiwkam lip  
smgyivgl liglyvyrkpreyetrkisdsdnvtelkpyilivtivilatflvqtftds mifgalagvlvffisraynwy  
eldakfiegikimayigvv  
iltangfagvmatgdidelvktltsitgdnk lfsiimmyviglivtlgigssfatipiaslfipfgasigldtmalia  
ligtasal gds gspadst  
lgptaglnvdgghdhir dtecvpnflfyniplmifgtiaamvl  
>tr|D8HHC5|D8HHC5\_STAAF  
mhwtiiggigqgtaiaklls sgl ttdrltiidphetfcqrfnsytnriempylrspivhhvhppqfhlkqfakqhqytn  
afygyprpel t mfmhdia  
haskqyql edclvqglvqtldkqgd khikledgqi ittdcvviaigstnipmpdil kdkqvnvih fekehqvvydkt  
dhivgs gitaahla lkl n  
hdddki h lwl nkdieihdfdadpgwlgpknmssflstksmrernaivqrerhkg smphelylrlk khikn grinvhktp  
itqisdglintendsvpyq  
qimvatgfeqdfmsqplikql iqnydapinecnypviseklewipnlfvagcfadlelgpfgrnvmggrkaaerieqaf l  
klqqysa  
>tr|D8HHC8|D8HHC8\_STAAF  
mavqlvlnfiavfwl fvtnsy ttnfvlgfifglvlyvllhrvlpgrfyvitlyrivklviiflielikanf dvlkiii  
kpsiknepgffvyhtdlkk  
dwqivllsnlitltpgtvvlgsddrtkiyihaidfstkeqevesiktslekivrevgei  
>tr|D8HHC9|D8HHC9\_STAAF  
miesnmlvltlvipvitaillvfigkrpiikryvalggtllt lvaaiinlanvkhgpl rvelgswkapysivfvldifs  
alliitsiitaivilysy

Tsompanidou\_et\_al\_Supplemental\_FASTA\_File

qtigiereryyyyfsvlflmigiigafsttgdifnlfvffevflmssyflilvigstkiqlqetikyvlvnnvsssffvmgv  
ailysvvtlnladisnkl  
anlsahdsglvnivfiflffvfatkgvfpmfvwlpsayyappipiaffgalltkvgvyaiartlsffsdnvsfshyv  
ilflalltiifgcvgavay  
anikkiiynvmiavgvilvgvamtesgmigaiyytlhdmlvklalflligimikitgtadlrqfgglikrypvlgwsf  
fiaalslagippfsgfygk  
ffivqstfergfylsgvivilsslvlysviriflqgffgqpkgydlnnkvdvlylttiaivavvitvlyglsadylypm  
vkagaetfynpstyvkav  
ggk  
>tr|D8HHD0|D8HHD0\_STAAF  
mifvsgiltaisvylvlskslirivmgttllthaanflitmgglkhgtvpiyeankvsyvdipqaliltaiviafatt  
affvlafartykelgtdnv  
esmgvpedd  
>tr|D8HHD2|D8HHD2\_STAAF  
msllhiavilplifaliipilyrffkrihlgwfvlpvipivifiymtlitktmsgntvmktlnwmpfhgmnfdlyldglg  
llfsllisgigsllvlysi  
gylskseqlgnfycyllfmgamlgvvlsdnviilylfwelstfssflisfwrerqasihgaqksliitvfgglslgg  
iillaiptqsfisqymiqh  
aseiqnspffifamilimigaftksaqfpfiwlpdameaptvpsaylshatmvkaglyliarmtpifaasqgwiwtvtl  
vglitlffwaslnatkqqd  
kgilafstvsqgmimamlgigaisyhyqgddskiyaaftaafhlinhatfkagalmitgavdhstgtrdvkklggll  
timpisftitvitalmag  
vppfngflskesflettftasqanlfsvdtlgylfpiigivgsvftfvysikfimhiffgqykeqlpkkahevsilmll  
spailatlvivfglfpgil  
tnsiiepatssihntviddvefhhmfhgltpafllstlviiylgillivtfsywkllqrqpgkltfnwynrsanvipnys  
ekmtnsyvtdysrnnlvii  
fgalilltfvtvsvpfninfkdvspirifevcivilllsaafllilfaksrlfsiimlsavgyavsvlfiiffkapdlalt  
qfvvesistalfllcfyh  
pnlnrynekrsfqltnaliaggvglsviiigliaygnrhfesiskfyqehvydlahgknmvnvilvdfrgmdtlfessvl  
giaglavytmiklrkkrt  
qgnevknhe  
>tr|D8HHD6|D8HHD6\_STAAF  
mkskyepfjdkvelpngvelrnrflaplthissnddgtisdielpyiekrsqdvgitinaasnsvdvgkafpgqpsiah  
dsdieglkrlatamkknda  
kalvqihhggaaqalpeltpdgdvvaspislksfgqkqehsaremtneeikqaikdfgeatraieagfdgveihganhy  
lihgfvsppynrrndvwan  
qykfpvavieevlkeakeaygnkdfivgyrlspeaespgitmeiteelvnkishmpidyihvsmdthattregkyagge  
rlplihkwingrmpiligi  
siftadealdavenvgdlvaigrellldyqfvekikdgredeiinyfdperednhhltpnlwhqfnegfyplprkdk  
>tr|D8HHD9|D8HHD9\_STAAF  
mtnssksftkfmaasavftmgflsvptagaeqtnqiankpqaiqwhntlnertftiahrgasgyapehtfqaydkshne  
lkasyieidlqrtkdghlv  
amhdetvnrtnghrvedytldeklqldagswfnkkykpyarasyknakvptldeilerygnanyyietkspdvypgm  
eeqlaslkhhllnnkl  
knghvmiqsfsdeslkkihrqnkhpvlvklvdkgelqqfndqrakeirsyaiglgpdytdlteqnthhllkdlgfivhpyt  
vnekadmrlnkygvdgvf  
tnfadkykeviki  
>tr|D8HHE1|D8HHE1\_STAAF  
mkekiylaysggltdtsavqwlidkgydvaccldvgegkdldivykaldmgaiiechiidatkefsdeyvsvaikgnlm  
yenayplvsalsrpliakk  
lveiaektnsvgiahgctgkndqvrfevaikalnpslkafapvrewawsreeeidaikhnipvsinhdsphysidqnlw  
granecgiledpyaapped  
afdlnaleetpdtadeiiltfvkgipvqidgktyelddliltlnalagkhgigrithvenrlvgiksreiyeapaaevi  
lkahkaletitltdvahf  
kpiiiekqfaeqlynglwfspldslklfidstqqyvsgdvriklfkgnainvgrkspytlydeklatytkedafnqdaav  
gfidiyglptqvnamlhgg  
ysneq  
>tr|D8HHE3|D8HHE3\_STAAF  
mleslyrkiqivliiltavvcfngllntnvtlktninifvfsgilllaficwayvklnkfk  
>tr|D8HHE4|D8HHE4\_STAAF  
msfhqveewfeifrqfgyllpfillyriraiipvflalyiliniqaygpilgiliswlglisgtftvlylickrlvnterm  
qrikqrtavqrlisfidrg  
glipfllcfpftptlfnvaslshirpkyyfivlalsklvstiilgylgkeittilthplrgiimlvlivfwivgk  
kleqhfmgskke  
>tr|D8HHE5|D8HHE5\_STAAF  
mkkvvkylisllaiiivlvqftfviaghvipnndmsptlnkgdrvivnkikvtfnqlnngdiityrrgneiytsriiak  
pgqsmافرqqhlyrddrpv  
dasyaknrkikdfslnrfkelgdgdiipnfnvvlndhdnqhdsrqfglvdkkdiignisltyypfskwtiqfks

Tsompanidou\_et\_al\_Supplemental\_FASTA\_File

>tr|D8HHE7|D8HHE7\_STAAF  
mtlhaylgragtgkstkmlteikqkmdkdpdgpiliiaptqstfqlaqafvndpelngslrtevlhferlshrifqevg  
syseqklskaatemmiyni  
vqeqqkylklyqsqakyygfsekltteiqdqfkyavtpehlesfiadknmqtrtknkledialiyrefeqriqnefitge  
dalqyfidcmpkxewlkra  
diyidgfhfntstieyliikgliyaksvtiilttdgnhdqfslfrkpsevlrhiieianelnisierqyfnqlyrfnqnd  
lkhleqefdalqinrvacq  
ghinilesatmreeineiarriivdi rdkqlryqdiailyrdesyaylfdsilplynipynidtkrsmthhpvmemirs  
ieviqsnwqvnplrlkt  
dvl tasy lksaylvdllenfvlergiygkrwlddel fnvehf skmgrkahl tederntfeqvklkkdvidkilhfekq  
msqaatvkdfatafyesme  
yfelpnqlinterdel dlngnhekaeeidqiwngliqilddlvlvfgdepmsmerfle vfdigleqlefv mipqtl dqvsi  
gtmdlakvdnkqhvyivgm  
ndgtmpqptassli deekkyfeqqanvelsptsdilqmdaefvcyamtrakgnvtfsyslm gssgddkeispflnqi  
qslfnqleitnipqyhev  
plslmqhakqtkitlfealrawlddeivadswldayqvirdsdllnqgl dylmsaltfdnetvklgetlskelygkeina  
svsrfeqyqqcpfkhyash  
gklnertkyelqnfldgdi fhsvlkyiseringdfkqldlkkirqltneaileeilpkvqfnllnssayrylsrrigai  
vettlsalkyqgtyskfm  
khfetsfrkprtndeli aqtl tttqgipinirgqidridtytkndtsfvni idykssegsatl dtkvyygm qmqmmt  
mdivlnkqrlgltdivk  
gglyfhhvheprikfkswadidedkleqdlkkfklsglvnadqtvialdirlep kftsdivpvglnkdgs lskrgsqv  
adeatiykfiqhknkenfie  
tasnimdghte vap lkykqlpcafc syqsvchvdgmidskryrtv detinpieaiqniniddefggeq

>tr|D8HHE8|D8HHE8\_STAAF  
mtipekppgviwtdaqwsiyatgqdvlvaaaagsgktavlveriiqkilrdgidvdrllvvtftnl saremkhrvdqri  
geasiadpanahlknqrik  
ihqaqistlhfsc lkligqhydvlnidpnfrtsseaenillleqtidevieqhydil dpafielteqlssdrsdqfrmi  
ikqlyffsvanpnptnwd  
qlvtpyeeeaqqaqliqlldl skvfitaayda lnkaydlfsmmdgvdkhlaviederrlmgrvleggfidipyltghef  
garlpnvtakikeanemmv  
daladaklqykkykslidkvsdyfsreaddlkadmqq laprvkylarivkdvmsenrkkrsknildfsdyehfalqil  
tnedgspseiaesyqhfg  
eilvdeyqdt nrvqekilsciktgdehngnl fmvgdvksiykfrqadpslfi ekyqrftidgdgtgrridlsqnfrsrk  
evl sttnyifkhmmdeqvg  
evnydesaqlyygapydesdhpvn lkv lveadqehsdltgseqeahfiveqvkdilehqkvydmktgsyrsatykdivil  
ersfgqarnlqqafknedi  
pfhvnsregyfeqtevr lvsflraidnplqdiy lvglmrsviyqf kedelaqir ilspnddyfyqsivnyindeaada  
lvdklkmf lsdisyqqys  
kdhpyqlidkfyndhyviqy fsgliggrgrranlyglfnkaiefenssfrglyqfirfideli ergkdfgeenvvgpnd  
nvvrmmtihsskglepfv  
iysgl skdfnrklqpvilnqqfglgmdyfdvdkemafpslasvayravaekelvseemrlvyvaltrakeqlyligrv  
kndksllleqlsisgehi  
avnerltsnpfhlisyis lskhsasipddl kfekdiaqiedssrpnvnisivyfedvstetildndeysvnqletmqn  
gnedvkaqikhqldyqpy  
vndtkkpskqsvselkrqyeteesgtsyervrqrigrifstyerpkflseqgkrkaneigtlmhtvmqhlpfkkeriseve  
lhqyidglidkhiieadak  
kdi rmdemtfinsklisyiaaeqvyrelpfvvnqalvdqlpqgdedvsiiqgmidlifvkdgvhyfvdyktdafnrrr  
gmtdeeigtq lknkyiqm  
kyyqntlqtlnkevkglyffkfgtlql

>tr|D8HHE1|D8HHE1\_STAAF  
mpkivvvgavaggatcasqirrdkesdii fekd rdm sfanca lpyvigevedrkyal aytp ekfydrkqitvktyhe  
viainderqtvsvl nkrktn  
eqfeesydklilspgasans l gfesditftln ledtdaidqfikanqvdkvlvvgagyvslevlenlyerglhptlihr  
skinklmdadmnqpi lde  
ldkreipyr lneeivvineneitfksgkvehydmiievggthpnskfinessnikldrkgfipvndkfetvnpniyaigdi  
atshyrhvd l pasvplawg  
ahraasivaeqi agndtiefkfg lgnnivkffdyt fasvgvkpnelkqfdykmvevtqgahanyypgnsp lhlrvyydts  
nrqilraaavgkegatkri  
dvlsmammnqltvdeltefevayappshpkdlinmi gykak

>tr|D8HHE4|D8HHE4\_STAAF  
mktkgftkykkmrympgl dglraiavlgiiyhlnkqwtggflgvdtffvisgylitslllkeyddtgiiklksfwir  
rlkrllpavivllmvvgta  
tlllksdnii rvkhdiaaif yvsnwyyiakdvnyfeqfsfmp lkh lws laieeqfyiffvilvtllltikkrykigfi  
flgvsii slg lmmfiysin  
gdhsrvyfgdtr lqtllgvilaf l wppfk l kndppkvvkyvidsigslsfi v lllffi indetnwi ydggyflisil  
tlfiiasvvhpstwiakif  
snplvftgkrsyslylwhfavisfvhsyyvdgqipvyvyfidisltiifael syrfietpfrkegikalnrpsyipqf

Tsompanidou\_et\_al\_Supplemental\_FASTA\_File

irmaivvtllipfmlllv  
afnkygkdiigekansfdttiednylmriapidnihidglvsekkkesdvyannikplligdsvmdigesfkssvpksr  
idgkvgrqlyqtllplvkan  
ysqykkssdqvlelgtngdftvkqlddlnqfgkakiylntrvpriyeavnrlldaakrksnvtlidwykrsqghs  
eyfapdgvhleykgvialk  
deilkalkkk  
>tr|D8HHF5|D8HHF5\_STAAF  
mdinkmtyavqsalqqaveisqqhklqnieieailsaalnesesyksileranievdqlnkayedkIntyasvegdniq  
ygqyisqqanqlitkaesy  
mkeyedeyismehilcsamdidqttkhyinnkvevikeikkvrggnhvtsqnpevnyealakygrdlveevrqgkmpv  
igrdeeirntirilsrktk  
nnpvligepvgktaiveglaqrivkkdvpepldktvfeldlsalvagakyrgefeerlkavlkevkesdgriilfide  
ihmlvgagktgdagdnm  
lkpmlargehcgattlneyreyiekdsalerrfqkvavsepdvettisilrglkeryevyhgvrirdraivaalasd  
ryitdrflpdkaidlvdaq  
catirtemgsnpteldqvnrrvmqleieesalknesdnaskqrqlqelqeeLANEKEKqaalqsrvesekekianlqakra  
qldesrqaledagtnnle  
kaaelqygtipqlekelrelednfqdegedtdrmi revvtdeei gdivsqwtgipvsklvetereklhlhlsdilhrvv  
gqdkavdlvsdavvrag  
ikdnpnrpigsflfgptgvkte laks laas lfdsekhmiridmseyekhavsrligappgyighdeggqlteavrnp  
ysvilldevekahtdvfnv  
llqildegrltdskgrsvdfkntiimtsnigsqvl lenvketgeitstekavmtslnayfkpeilnrmddivlfkpls  
iddmsmivdkiltqlnrl  
leqrisievsddakawlgqayepqygarplkrfvqrqietplarmmikegfpegt tikvnlnsdnntfnaekihe  
>tr|D8HHF6|D8HHF6\_STAAF  
mnl dwytfvilaktlnyrlaseeinl tipsihkqiknleqhlvklfetyksqiil tedghtflpiaqsfi eqyesgik  
hiqlkktmfqsklnvvss  
yatfimpkflksffnehpfidvslhvknieniekdinnhtydigisrnqpk lrevhsekvcegkivliapnkennhlte  
asl fekykiisdnhpeyws  
slknnilniyekaqlsindvhtsikliemngisflpiyittsnynisvintkilqapisftyiyskkespeilafik  
sfkkyianeq  
>tr|D8HHF7|D8HHF7\_STAAF  
mcttiedefnihqfrdilspekelvvltrlnekeikkivklkihnlvkvilfpisdlhikekl nfnskyyiqkikcdldi  
lkdkkkgvdicfedatrts  
rekkeymeiiskyqrvrtvfadvvgcstpleygdi fnyfvkkysniifsahchndlglatantlaailngakqietfl  
gigeragnapieeiitlt  
kkqiesteftlpdyktsiniskildfqisenkpiigenifkhesgihqdgtkkninmyqylvpsdlglknsqvvpfis  
nisskkihkfksivnte  
eidenisfyklvnkfspevapedtvdllqiikrrskdgnfk  
>tr|D8HHF9|D8HHF9\_STAAF  
mnlkilgiylrifsrayfypfllyifliqgysiiqlleilmasygiaaf lfslykeckfkcicnlkdsnlvseifkii  
glllllyqnylilvvaqi  
llgl sysmmagvdtai knritnekyvqnksnsymflsllisgiigsylyginikwpiimtgifsil tiiiirctlvenr  
elnligetkgkikflpee  
kfwil hysflralilgffigfipiniyndlkl nlnqfivl tcytvmgfvssryl tkylnykvfseiclvifliiytyqs  
fiavtismi flgissgltr  
pqtinklssssnlrvm lnyaetlyfifniaflmggylytigitqylilfisllifiyliiifyftrreghenkn  
>tr|D8HHG0|D8HHG0\_STAAF  
mkiktefkgnnipyeyaagadvdsingnpiksfpfevtelpegtkylawslidydaipvcgfawihwsvanvsvsgnsi  
sikadlsrtkgdyvqgkns  
ftsgllaedfseienhyvgptppdkdhqyel tvyaldhslnlknngfylneflkevnqhkidqtsinligrki  
>tr|D8HHG7|D8HHG7\_STAAF  
maenknl sindhsnaamthtsdai assdfiireldlnqepemqresknfwqdawaqlkrnklavvgmigliiivifaf  
igpvinkhdyaegnvhhrn  
lpakipvldkvpflpfdgkdadgkdaykaanakenywfgtqldgrdlwtrtwkgaqis lfigvvaamldi figvvygais  
gffggrvdtimqrilevia  
sipnlivvilfvli fepsiwtiilamsitgwlgmsrvvrgef lklknqefvmasktlgaskfklikhilpntlgaivvt  
smftipsaiffeaf lsfig  
igvpapqtslgs l vndgramlliyphelfipamilsllilffylfsdglrdafdpkmrk  
>tr|D8HHG9|D8HHG9\_STAAF  
mkndevllsikhkqyfnagknevraienisfeiykgetlglvgesgcgksttgksiikln ditsgeilyegididqir  
krkdllkfnkqimifqdp  
yaslnprlkvmdivaegidihhlatdkrerkrvyd lletvlglskehanryphefsggqrqrigiaralavepefiade  
pialdvsigaqvvnlk  
lqrekgitflfi ahdl smvkiysdriavmhfgkiveigpaddiyqyplhdytksllsaipqdpesersrkrfsyiddea  
nnhlrqlheirpkhfvfst  
edeaarlrknllvtqd  
>tr|D8HHH0|D8HHH0\_STAAF



Tsompanidou\_et\_al\_Supplemental\_FASTA\_File

mtrklktlilifvatialsqanddgiysdkgqvfrkilsadltsltdtslitdeissevtaqtfeglytlgkgdkpvlgv  
akafpekskdgktlkvklr  
sdakwsngdkvtaqdfvyawrktvdpktgsefayimgdiknasdistgkkpveqlgikalddetlqielekpvpyinqll  
alntfapqnekvakkygkn  
ygtaadravynpfpkvddwkqedktllsknqyywdkknvklkvnykvikdlqagaslydtesvddavitadqvnkykdn  
kglnfvltsgtffvkmnek  
qypdfknknrlraiaqidkkgvdsvkngsipsdtltakgiakapngkdyastmnsplkynpkearehwdkakkekgk  
neltfsmntedtpdakisa  
eyiksqveknlpvgtlkikqlpfkqrvslelsnnfeaslsgwsadydpmayletmttgsaqnntdwnkeydqllkvar  
tklalqpneryenlkkaee  
mflgdapvapiyqkgvahlnpqvkgliyhkfgpnnslkhyidksidketgkkkk  
>tr|D8HHH1|D8HHH1\_STAAF  
mgklykylivivlvsacgkssnkdegvkdattetskhkggtlnvaltappsgvysllnsthadavvegyfnesl  
laidkkrpkayiaswkdi  
epakkiefkikkgikwhdgnelkiddwiysievlanakyegayypsveni qgakdyhegkadhisglkkiddytmqvtfd  
kkqenyltgfitgpllsk  
ylsdvpikdlaksdkirkyipigipykvkkipgeavqlvkfddywqgkpaldkinlkvidqaqiikamekgdidvtna  
tgtmakdakssnaglkvl  
apsldygligfvshdydkkanktgkvrpkayedkelrkamlyaidrekwikaffngyaseinsfvpsmhwiaadpkelndy  
kydpekakki1dklgykdr  
dgdgfredpkgnkfeinfxhysgsnptfeprraaidkfwekvglktnvklvefgkyndlanaskdmevyfrswaggtdp  
dpsdlyhtdrpqnemrtvl  
pkdqyldda1dfekvgidekkrkd iyvkwqkymndelpglpmfqqksitivndkvrnl dieigtdqsllyntkea  
>tr|D8HHH3|D8HHH3\_STAAF  
menilevnqikkykiktgl1lqktqyvkdvdvsfsikkgtfglvgesgckstlgkviirledatsgsiivngeditr  
lqgkklrksrqyqmi fqd  
pyaslnpmqmvgdii sepi lnykklpkeeikkevelyllkcvgl sedayykyahefsggqrqrvgiaralalrpslivade  
pvsaldsvsgsvlnllkd  
lqeqfnlsylfi ahdlsvvkhisdvigmylghiveiasdkeiyenpkhpytkalissipqidklnknriilkgelpsp  
nppqgcpfhtrcpiaqdmc  
kksmpelkdigneqvacyvdvkdln  
>tr|D8HHH4|D8HHH4\_STAAF  
miklllkr1g1mip1li1isivvflaiiqgdpfsl1qngkikqea1naqrek1g1ndsiphqyirwnhvihgd1ges  
ikykrpvidvieeripnti  
llgamsliityiisfalgitsgrysysltdytvqifnylmlaipsfiagvfaiifsfelqwfpgsvdinlkegtfey  
ymskiyhtflpaftlglls  
tagiyqylrndienskkydvl tarskg1smnkinykhilrns1lipiitflgadivsilggavitetifsyngigklfle  
svigqdyplmmaltlffsf  
lgllgnlisditygfidprirn  
>tr|D8HHH5|D8HHH5\_STAAF  
mqnkskspfki1skfihnkiam1siif1liitivsi1apliapfpvnqdl1nikgemtaqnilgtdsggrdnf1ly  
agris1sgitstigm1li  
gitvgvisgyfggvd1l mritefvmlfpflifaivlnaalgdkiknpygsai1vlviiv1swggiarlvrgkvlqek  
eneyflaaksigtptykii  
lkh1l1pni1svvivqat1lfagmi1vesgl1sflgfgiskai1pswgn1sdaqegdv1sgkpw1wmpaimit1tilsinf  
vgeg1kdafnprgr  
>tr|D8HHH7|D8HHH7\_STAAF  
mnfihsnr1rvcm1lftsp1sctscrkakaw1qehdipyternifsehl1tideikqil1kmtedgtdeiistrsktyqkln  
vdi1sl1plqdl1ysi1iqdnp  
g1l1rrpi1ldnkr1lqvgynedei1rrfl1prkvr1tfql1qeaqrmvd  
>tr|D8HHH8|D8HHH8\_STAAF  
mriervd1ttvkl1fity1sdi1eargfsred1wtnr1krgeeffwsmmde1ineedfvvegplwi1qvha1fekgvevt1skskn  
edmmnmsddatdqfdeq  
qell1aqt1legedq1eel1feqrtkekesqgskrqkssarkntrtiivkfn1ledvin1yayhsnpittefedllymvdgtyy  
yavhfdshvdqevindsys  
q1lefayptdrtevy1lndyaki1mshnvtaqvrryfpetae  
>tr|D8HHH9|D8HHH9\_STAAF  
m1val1neekerv1latta1rktqyfc1pvcgkqvil1krg1kvi1shfahkh1aeqkcf1nnesikhyksk1lilaqmmqqgckv  
ei1epfl1keikq1pdi1linn  
kyvie1qyspi1pykqil1rtegl1kkmgykvs1l1ndvdychnk1vkfn1hfqsmf1inpitrk1lhtfn1lekkqimmfqqiqyi  
gghkyvaekgnakise1fn  
eapcdyhavyk1skfa1nqyikyrwqns1vlept1samyq1hl1tdqevvhnygyif1peqi1yienhpiewq1lqvdl1wkng  
ksk1lvsdn1nyfk1lkkfi1v  
a1lesktai1iek1linny1k1ssdr1gndvqil1f  
>tr|D8HHI3|D8HHI3\_STAAF  
matnheiefkqmitas1ynk1lqekyfkds1v1fkqvny1idtpdfk1lkehrsal1rivkdnqyem1lktpakvg1lieynyi  
vdikpem1li1s1ndn1l1pdd  
irqi1iveqfgvkdtt1silgal1t1tyr1qetkykgd1l1v1dkseyfd1ttdye1lefevk1dynqgsqkfqsl1neln1ehhqpl

Tsompanidou\_et\_al\_Supplemental\_FASTA\_File

nkvrffkktlennin  
>tr|D8HHI4|D8HHI4\_STAAF  
mrllyneikikddtlycytedsikglsevgqmlvdsdnyafaytlldgkayaylifvqetwtmlhenmtkiiindelel  
tefhqeltyildnikgnnn  
ygkefvatveetfdie  
>tr|D8HHI7|D8HHI7\_STAAF  
mkfkyhisqqetvkvflarhdfskktvsaikngalivndepvtvrkqlmpndileihlpqeipsvnlipyarklevlye  
dafiiivtkpnnqncipsr  
ehpheslieqvlyhcqvhgeninphivtrldrnttgivifakyghihhlfskgnlkkityctlvygkthssgiieanirrs  
kdsjitrevasdgkyakts  
yevinqndkyslckvhltgrthqirvhfqhigpivgdslydgfhdkihgqvlqctqiyfvhpinknniyitidykqll  
klfnq1  
>tr|D8HHI8|D8HHI8\_STAAF  
msmntdekervqeeiydetlldqylenddidqfrdeflalhtyeqgeyfedttdenrqkifqylspeevanffdqldidd  
deyellfdkmmatyashi  
eemsydnvdiineltkpkvaslltlmnkddaneikallhydedtaggimtteylslkahtpvkealllvkaqapdaeti  
yvivvdddgklvgvlsr  
dliivaendayiedimnervisvnnvaddqedvaqvmrudydfmavpvidyqehllgiitiddildvmeedeadysrlagvs  
didstndsiiaktalkr1pw  
liiltflgmitatilirfektlenvalaafipiisgmsgnsgtqslavsvrnttgeineqskfrialreagsgvlsgv  
vcstilftiivaiyhp11  
alivagstcamtvgtfvgsmp11mnklnidpavasgpfittindiismliyfglatsfmayli  
>tr|D8HHJ1|D8HHJ1\_STAAF  
mlnkvwfrtgislmlfiliklfmevhevftpiatiigsvflpflisgflfyiclpfnllekvgfprwasittimlalf  
aiglivafvapiiisnin  
nlisqtpalqkeaeqiikfalqaqmdklpedvtsritnmvksmgdgvtnilsnslqyitslistifllimvpffliym1kd  
hekfiavakffkgerkvf  
fvdlltdlnftlksyiggqvtsvilgifyigysiidlpyip11vlfagvanlipflgswlsfapaaailgiidspttffi  
wcciitliahqlegniitp  
nvmgkslsihpltiivv1laagd1ggftlvliavplyav1ktvvsnikyrqriidkansvkd  
>tr|D8HHJ2|D8HHJ2\_STAAF  
mieklvtflnevwskp1vygllitgvlftlrmrffqvrhfkemirlmfqgekspngissfqaiamslagrvgtgnivgv  
staifigggpavfwmwita  
flgassafiestlqqifkrvenneyrggpayyieygiggkfgkiygiifaivtiisvlllpvgqsnaiaasmhnaihvp  
qwlmggiVVVvlgliifgg  
vrsianvatavvpfmai1yilmaviiiciniqevpalfalifksafglqsafggivgamieigvkrghysneagqgtgph  
aaaaevshpskqglvqaf  
svyidtlfvctataliil1isgtyntdgtvnangtphlikdggiiyvenatgkdysgtamyaqagidkafhgsgyqfdptf  
sgvgsyfiafalfffaf1t  
ilsyyyitetnvayl1rnqnnqvssvfiniarvii1fatfygavktadvawafgd1gvg1mawl1niaiwi1hkpvav1  
kdyeiqkkr1ngynavyq  
pdpnk1pnavfw1ktyper1kqarvkk  
>tr|D8HHJ3|D8HHJ3\_STAAF  
mlfekagkinkhvl1ysdi1nrdvt1siylpesynqlvkynvilcfdgldflrfgriqrtyeslikeariddaiivgfhye  
dvdkrreefhpqgsrsh1t  
iqsvgkeilpfidstfst1kvgnar1lvgdslagsial1tal1typtifsrval1sphsdekvl1klnqcankeq1tiwhv  
ig1dekdf1lptngkrad1f  
ltpnrelaeqikkyntiyydefegghqkwkdwk11sdillyflskntddqlye  
>tr|D8HHJ5|D8HHJ5\_STAAF  
mqdss1nnyanhknfi1mliil1l1mefargmyilsyin1lptvtsiavaitslafsihfiadastnfvig1llkkfgtki  
v1ttgfilaf1s1flviwf  
paspfvii1fsal1mgiavspiwvim1ssveedkrqkmgvyv1sw1lg11vgmvfm11likvhptrfafmms1v1iawi  
lyfvdk1ltnytrpvka  
qlrqivdvtkrh111fpgi1l1qgaai1alvpil1ptyatkvinvstiey1vai1iggigcavsm1flsklidnrsrnfmys  
vilsgfilym1l1ft1smi  
vnihi1vwi1alaig1lmyg11lpawntfmarfiksdeqetwgvfnsiqgfgsmigp1lfgglitqftnn1nntfyfsalif  
1vlavfygsyfi1anrekak  
>tr|D8HHJ7|D8HHJ7\_STAAF  
mdast1fk1kvkrv1lgs1leqqid1ttdsrtaregsifvasvgytvdshkfcqsvadqgck1vvvneqslpanvtqvv  
vpdt1rvasi1aht1fdyp  
shq1vtfgvtgtnktsiatmih1iqrk1lqknsay1gtngfqinetkktganttpetvsltkkikeavdagaesmt1levs  
shglv1gr1rgvefdvai1f  
sn1tqdh1dfhgtmeayghaks11fsq1ged1skekyv1lndds1fsey1rtvtpyevfsygid1eaaqfmakniqes1qg  
vsfd1vtpfg1typvks1pyv  
gkfnisni1maami1avwskgts1leti1kaven1epvegr1lev1dps1pid1i1dyah1tadgmkn1lidavqp1fvkqk1l1flv  
gmagerd1tktpemgrvac  
radyv1ftpdnpanddpkml1taelakgathqnyie1ddraegikhaidiaepgd1tv1askgrepyqimpghikvphrdd  
1ig1leaaykkf1ggppvgq

Tsompanidou\_et\_al\_Supplemental\_FASTA\_File

>tr|D8HHK0|D8HHK0\_STAAF  
mdigkkhvipksqyrrkrreffhnedreenlnghqdkqnidnttskkaekqihkdsidkherfknslsshleqrnrdrvne  
nkaeesksnqdskstynrd  
hyltdvsvkkqnsldsvdqdteksskyeqnseatlstkstdkvestnmrklsddknkvgeehqvlskpsehdketridf  
essrtdsdssiqtetikkd  
ssdgnkgsnlksevlsdksntvklsesddevnnqkpltlpeeqlkrqqsneqtktytygdseqndksnhendlshht  
psisddkdnvmredhivdd  
npdndintpslskidddrkldekihvedkhkqnadssetvgyqsqssashrstekrmainldklnqqkntktsann  
qkkatsklngkratnnys  
dilkkfwmmywpklvilmgiiilivilnaifnvnkndrmndndadaqytttmknantvksvvtvenetskdsslpk  
dkasqdevgsgvvykkskd  
tlyivtnahvvgdenkqitfsnksvvgkvlgdkwslavvkatssdssvkeiaigdsnnlvlgepilvvgnpvgdf  
kgtvtegiisglrnrnpid  
fdkdnkydm1mkafqidasnpgnsggavvregkligvvaakismpnvenmsfaipvnevqkivkdletkgkidypdv  
vkmkniaslnsferqavkl  
pgkvkngvvdvqvdnngladqsglkkgdvite1dgklleddlrfraqiifshkddlksitakiyrdgkekeinikl  
>tr|D8HHK2|D8HHK2\_STAAF  
mmekneninveilttsdmshflngdygsniyragyvqvraqnhrvilldsggslagslaayyyaivapykrhpmikl  
mnrmyhdasgvspsefkgf  
lsfltrslarfpwlsanieynvtkepyfstpycikhfgdlkiaivgtadglmeneysemeqdvsiektlvaskwir  
yiheveepdfliivyhgg  
nkisntknkkassneaklmeelgvidlmitahqhtivgqdhetyyvqagqake1vhlslinffkrtttydvesidsk  
vidlneyeedqelldtfy  
drkavaywsqeiisdkgllmsvnglqdlvcqthpfsqllhdaih1afdnditcvhvpmmgekg1sgqirnedlyhaypyp  
dkpmdmtisgnikdi1ey  
syshldfvneqlsltiidetlctmwqgfnye1dmnqepqrvmldqidltsyrvtmtdycyrnyknylnkaiihesyde  
tmstliaek1rdpnyrisc  
sdfvkvkr  
>tr|D8HHK5|D8HHK5\_STAAF  
mkf1snntdptlnlameeyvlnknpaeesyflfyinrpsiiivgknqntieevnqtyidahnidvvrissggavyhdt  
gnlnfsfidddgnsfnf  
qkftepivqalslgvnaeltgrndiqvgqakisgnamvkvkrmfshgtlm1nsdldevqnalvnpakikskgiksvr  
krvaniqeflndpleieef  
kkii1ktifgeaeveeyk1tdedweniek1sndkyrtwewnygrnpkyfereekfekgfvqikfdvkrkiehaki1fgd  
ffvgvdvtd1enalvgclh  
dfeh1eealseydlhnyfgdidrhe1ir1ms  
>tr|D8HHK8|D8HHK8\_STAAF  
mknki1fgai1ylslalglstaayasteyaeggtwshgvgkyvwsyyyghkghgataigkyrsfsgytragvkakasat  
knnwwnrayyniy  
>tr|D8HHK9|D8HHK9\_STAAF  
mkwfkli1dvtifiliai1l1fvytykeneel1pdtkypiavtwnkkykneykrinqfaknenvaiykstsnytnknv  
dkdiyvfnskattitpfn  
akynihylsddel1kkdkgsyfvkdnfdvskfinflkeygvtaesykidhmmiavgvikqmnivvp1sallivyfiyy  
ifekninfktyaikylhgf  
tlrkii1fenfskkctywvtliitqil1ttsvlwilnytgnd1l1filr1vl1lsc1filitisvinlwtflm1ln1nianmik  
gkqhfktrfintvcksil  
1vl1iasvmientsvikd1nkiketekywnv1ddyti1efapyhetkqslidm1l1rseq1vkaseaenail1fkpkgdsvd  
ndnfspegnv1lvnqfw  
s1yhkqfqpdi1knqknvevi1p1qk1fhamr1ne1nqayhswf1fvqnknknk1s1qf1inkdyri1fs1dardsrh1s  
f1eap1i1vnvqas1l1sndf  
yyami1sggy1fknyda1vkniekyh1d1ge1sgitnykdsvmemyhenn1kl1tv1nfsqii1ai1li1i1i1l1fdvkyyfeq  
hrk1l1vik1lygyst1ran  
yryll1inni1vvf1g1ftnvi1hshy1immi1fatil1vvqil1l1qics1lyyhgr1rfnevikef  
>tr|D8HHL1|D8HHL1\_STAAF  
mie1kd1ti1qkgnthi1kk1n1k1fqcgsya1igksgcgkst1l1nti1aglektgkqyvyfngq1eqfksnfyrdk1gylf  
qnyglidn1tvnen1dig1  
ayk1k1skekeq1k1ry1eqfg1sns1lkrkvht1sggeqqrvali1rmm1kdpivml1adeptgal1dpktgqmi1qs1fd1v  
nenkv1l1athdmai1anq  
dei1d1leqyrkvasm  
>tr|D8HHL3|D8HHL3\_STAAF  
madki1q1vnndv1laefgskareni1ekystesi1ekw1n1fnr  
>tr|D8HHL5|D8HHL5\_STAAF  
myrni1vk1lvfm1li1vvavagcgkdteekttemttikdelgteki1enpkrvvv1eysfady1aal1dmkpvgi1addgssk  
ni1tksvrdki1gayesvgsr  
ppqnm1evisk1kpd1li1adv1rhkkiksel1skiaptim1vsgtdgysani1eafktvakavgekegekr1lekhdkilaei  
rkkieqst1ksafafg1sr  
agmf1innedt1mgqf1ikmg1qpevtkdktht1vgerkggpyi1ynnee1ani1npkvmi1atdgktdknrtkfidpavwks  
1kavkdnkvydvdrnkwlk

Tsompanidou\_et\_al\_Supplemental\_FASTA\_File

srgiasesmaedlekiakak  
>tr|D8HHL8|D8HHL8\_STAAF  
mirqarpedrfdiaklvymvddmlelvkhlpkdmvldaieksvdatyrtyqhilvyevenkvagciisysgenelek  
yekawelldlpeeikqygt  
plpvkeakddeyyietiatfeayrgrgiatklltsllesnthvkwslncdinneaalklyhkvgfisdgqielykhmyhh  
livk  
>tr|D8HHM0|D8HHM0\_STAAF  
matgvleddivkeiydsskewsvvevklsqslpstlfhltneagdrfymrlnnrtsyfygaiqlfknsknkqsif  
kdwelkhnitfihpsek  
hhlrvvggfqfsshksddewrefglnhfvlpevlstdnngtfltytvkresftvealndlmdlfnnsdidvdeqigei  
trnediykddwrqlvveai  
esinneekivlarrrikfdkdisipyilkqayskeknsyifllesqdsiffstpeqlikvnnkilstkavagtikrsq  
dededtknveaflkdnknl  
iehrfvvdsilhdikpyitelhydtkpiklndhlyhlyteikaplkddsysislidnlhptpalggypkefamdfieqke  
fgtrglygapvgiydiydd  
cefivairsmlikkaqatlfagcgivkdsdpdseiaetnlkftpmmnalgvdmngks  
>tr|D8HHM2|D8HHM2\_STAAF  
mthynnyeanvetnqvllvhgflsdsrtyhnhidkytdichvitidlpghgedqssmdetwdfdyittlldrilkykd  
ksitlfgysmggrvalyya  
inghipisnlilestspgikeeanglerrlvddarakvldiagielfvndweklplfqsqlelpveiqhqirqqrllsqsp  
qkmakalrdygtgqmpnlw  
prlkeikvptlilageydekfvqiakkmanlipnskcklisatghtihvedsdefdtmilgflkeeqnd  
>tr|D8HHM5|D8HHM5\_STAAF  
mnsscksrvfniisimvsmllslgafanskakadshskqleinvksdkvpqkvkdlaaqqfagyakaldkqsnaaktg  
kyelgeafkiykfngedn  
syyypvikdgiyytlltspknkddlkskedmnysvkisnfiakldqikdknsnitvltdekgfyfeedgkvrllvat  
plpgnvkekesaktvsakl  
kqelkntvtptkveeneaiedqvqyentlnkfki reqqfdnswcagfsmalnatkntdtynahdimrtlypevseqd  
lncatfpmqmi eygksqg  
rdihyqegvpsyeqvdltkdnvgimilaqsvsqnpndphlghalavvgnakindqekliwynpwtelisiqdadsllh  
lsfnrdynwygsmigy  
>tr|D8HHM6|D8HHM6\_STAAF  
mkgkflkvsslfvatlttatlvsspaana lsskamdnhpqqqtqtdkqqtqkqkgnlkpleqrehanvilpnndrhqit  
dtnghyapvtyiqveapt  
gtfi asgvvgkdtlltnkhvvdathgdphal kafpsainqdnypnggftaeqitkysgegdlaivkfspneqkhi gev  
vkpatmsnaetqvnqnit  
vtgypgdkpvmweskgkitylkgeamqydllstggngsgspvfneknevigihwggvpnefngavfinenvrnflkqni  
edinfanndqpnnpdnpnn  
pdnpnnpdepnnpdnpnnpdnpnnpdepnnpdnpdngdnnsndnpdaa  
>tr|D8HHM7|D8HHM7\_STAAF  
mltynccsklkhsnnispliliyilwpnnyysnvtiyykqilslrsqflsyllff  
>tr|D8HHM8|D8HHM8\_STAAF  
mklslnsksylrapsirgfsnrmmnl ddcvnltigqpdfmpdvkkayvdainndktsyshnkgll etreaisqyfkn  
ryhfsydpeeii vtngase  
aidttlrsiiepgdei iipgpiyagi plievlggkpiyidttatqfkitpdal eshispkktkavllnyptnptgvvlkr  
nevlnivvllkypifiis  
deiyaentfsgkhvsfaefedirdqliligglskshsatgirigflgpqylidkltfmhayncicanvpaqiacitaln  
egleapkymneayverrny  
lvseltklgfeitaqpegafyifpsikhitdddfefcvdllesthlaivpgssftefgkgfvrisayayemdvllkegmkrll  
akylntk  
>tr|D8HHM9|D8HHM9\_STAAF  
mts lkerdyffd naraililvvfghmlqpytsgdkylsalylviysfhmptflfisgyfaknidkpyylekiskrllivp  
ymiffaffsiyyfltgksd  
elqldpfnpvfalwflitlfffhvilvivrrfnpykvlsvsiisigagfsdnidsylsisrtivffpifylgyiftkkh  
taifknkklipllsiitfil  
ffiiyyvihpinadwllgsspytslenegqsvfspfkrllilygiiliamtaflnlmstkkklytyigsrtlyvyllhglii  
givrgefwpfdnplmt  
ylyllisisviivyvllstnfvckwtnpiinlqrpsqfks  
>tr|D8HHN1|D8HHN1\_STAAF  
mlgvinrmakkfnyklpsmvaltlvgavtahqvaaettqdqttknvl dsnkvkatteqakaevknptqnisgtqvyyq  
dpai vqpktannktgnaqv  
sqkvdtavngdtranqsattntqpvakststtapkntntvtnagyslvddeednsenqinpeliksaakpaaletyk  
aaapkaatttapkakteat  
pkvttfsasaqprsvaatpktslpkykpvnssindyirknllkapkieedytsyfkyayrngvrpegivvhdtandr  
stingeisymknyqnafv  
hafvdgdriietaptdyllsvgvavgnprfinveivhthdyasfarsmnyadyaatqlqyyglkpsaeydngntvwith  
yavskyllggtldhadphgyl  
rshnysydqlydlinekylikmgkvapwgtqstttpttspkpttspkptststgkl tvaanngvaqikptnsglyttvyd

Tsompanidou\_et\_al\_Supplemental\_FASTA\_File

ktgkatneqvktfavskta  
tlgnqkfy1vqdynsgnkfgwvkegdvvyntakspvvnvqsysikpgtklytvpwgtskqvagsvsgsgnqtfkaskqqq  
idksiylygsvngksgwvs  
kaylvd takptpttpkpstpttnklvtvsslngvaqinaknnglfttvdydtkgkptkevqktfavtkeaslggnkfy1v  
kdynsptligwvkqgdviiy  
nnakspvnmqtytvkpgtklysvpwgtykqeagavsgtgnqtfkatkqqqidksiylygtvngksgwvs kaylavpaap  
kkavaqptavkayavtkp  
qttqtvs kiazvknntgirasvyektakngakyadrtfyvtkerahgnetyvllnntshniplgwfvnkdlnvqnlgke  
vkttkyvtvnksnnglsmv  
pwgtnqviltgnniaggtfnatkqsvvgkdvlygtinnrtgwnakdlaptavkpttsaakdynytyvikngngyyy  
vtpnsdtakyslkafneq  
favvkeqvingqtwyygklsngklawikstdlake likyngtgmtnqvaqiqaglykpvqrvpgkwt danfndvkha  
mdtkrlaqdpalkyqflrl  
dqpqnisi dkinqflkgkglenggaafnkaa qmyginevylis halletgngtsqlakgadvvnnkvvtnsntkyhnvf  
giaaydndplregikyakq  
agwdtvskaivggakfignsyvkgqntlykmrwnpahpgthqyatdvdwaninakiikgyydkigevgkyfdipqyk  
>tr|D8HHN2|D8HHN2\_STAAF  
mfskvnnqkml edcfyirkkvfveeqvpeeseideyeseihligyngqpvatari rpinettvkiervavtkshrgq  
gmgrmlmqaves lakdegf  
yva imnaqchai pfyeslnfk mrgnifleegiehiemt kkltsln  
>tr|D8HHN3|D8HHN3\_STAAF  
msrkyekianingmfnmleqqihsqdmahfrseffynhehreneyalliyknsienpivdgacyilalpeifnsvd  
vfeselpfswvydengite  
tmkslsiplqylvaalevtdvni fkp sgftmgmnnwniaqmri fwqytaiirkeal  
>tr|D8HHN4|D8HHN4\_STAAF  
mnkfvkyflllallvli vvpivfatllfktsqdafessqds knanrqsnlrdnkvnpeeqpisilflgidndgrkkgq  
daehrsdami lttfnqsk  
hqirm lsi prdtisyipkvgyydkithahayggpiaamdsveatmnpvdyvrvnmkafveavnelggiydvpydlne  
pntddtgkikikkgyqkln  
gdealavatrhhdsdlkrqqrqmelikilfqkaqevdsidkldnviqivgknakhnltnseikalakmyltn dveikta  
qlkgkddmlngiyyhpsv  
esi qkylanllr ndlelspndkndfl dqrvinhygs lip ltp l dssllrkeqndttdkdkssntdds nnsnnngvnnq  
qqpttgqntnqdqgni qqt  
pqasnnqngvvn  
>tr|D8HHN5|D8HHN5\_STAAF  
mkfnkvklvihacvllfi isialifhr lqtkt hsi epihketklsdnekylvdrnkek vapsklkevynskdpkykkid  
kylqsslfn gsvaiyengk  
lmskgygyqdfekgikntpntmfligsaqkfstglllkqleehkinindpvskyipwfkt skpiplkdmlhqsglyk  
yksskdyknl dqavrai qk  
rgidpkkykkhmyndgnylv lakvieevtgksyaenytkigdp lklqhtafydeqpfkylakgyaynstglsflr pni  
ldqyygagnlymtptdmgk  
litqiqqyk l fspkitnpl l h efgtkqypdeyrygyakptlnrlnggffgqvftvyyndkyvvv lalnvkgnnevri kh  
iyndilkqnkpyntkgv iv  
q  
>tr|D8HHN6|D8HHN6\_STAAF  
mstimkhtvgfiasivl tllavyvtlyts ltfhakltiifgfafvqagllmfmh ltegdgrlqtfkvifalvitlcf  
vvgtywvmqgghssh  
>tr|D8HHP1|D8HHP1\_STAAF  
mvaki ldgkqiakdyrqglqsqvealkek gftpk lsvilvngd gasqsyvrskkkae kigmiseivhle etateevln  
elnrl nndsvsgilvqvp  
lpkqvseqkileainpdkdvdfhpinigklyideqtfvpctplgimeilkhadidlegkn avvigrshivgqpvsklll  
qknasvti l hsrskdmasy  
lkdadvisavgkpglvtkdvvkegavii dvgn tpdengk lkgdvdydavkeiagaitpvpggvpl titmvlnntllae  
kmrrgvds  
>tr|D8HHP2|D8HHP2\_STAAF  
mkvavimgsssdwkimgescnml dyfeipyekqvvsahrtpkmmvqfasearkrgidiii agaggaah lpgmvasl ttp  
vigvpietkslkgidslls  
ivqmpggipvattaigaagaknagilaarm lsiq nsslvekl nqyessliqkvedmqnelq  
>tr|D8HHP3|D8HHP3\_STAAF  
mnfnklkfgatig igggqlgkmmaqsaqkmg ykvavl dpaedcpcryvahefiqakyddeka lnqlgqkcdvityefen  
isaqqlkl lcekynipqgy  
qaiqlldqr lteket lknagtkvvpfivskestdidkaietlgyppfivktrfgydgkgqvl innekdlqegfklietse  
cvaekylnikkevs ltvtr  
gnnqityfp lqenehrnqil fktivparidktaeakeqvnkii qsihfigtftveffidtnnqlyvnei aprphnsg hy  
sieacdysqfdthilavtg  
qslpnsie l lkpavmmnl kgdl dl l enefnehpewhlhiy gkserkdsrkmghmtvl tndvnqteq dmyakfegsnysm  
tll yegkakrifstnqene  
lrveykdevtagngak kdtmaggrlnnqitsiifkylqengieshfikqlseteqlvkpvkiiplevvvrniasgsitk

Tsompanidou\_et\_al\_Supplemental\_FASTA\_File

r1gjengevfrep1veffy  
knda1ndpli1ddhik11n1atdkdiet1k1tkaleinqlk1k1mdamnlk1lvd1kiefgktetgqilladeispdtrcw  
dkatnanfdkdvyrntgs  
lietyqif1nkled1k  
>tr|D8HHP5|D8HHP5\_STAAF  
mkfav1vfpgsncdrdmfnaaiksgveaeyvdyrets1sgfdgvlipggfsfgdylrsgamasvapiisevkr1aægkp  
v1gvcngfq1lteig11pg  
a11hdsh1f1srnee1k1vnnqtaftn1yeqgekviypvahgeghyctdeiyq1kannq1ilkyvnnpngsyddiag  
ivnekgnvcgmmphpera1  
et11gtdsgvklfeamvkswreqhv  
>tr|D8HHP6|D8HHP6\_STAAF  
mskfiepsveeik1ekvyqdm1sdqeyekvcdi1grqpnftetg1fsvmwsehcsykshskpf1kqfptsgehv1mgpge  
gagvvd1gdnqavvfkves  
hnhpsaiepyggaatgvggi1rdi1sigarpin1lns1rfge1dnkqnqr11kgv1kgiggygncigipttageiefder  
ydgnp1vnamcvgvinhdm  
iqkgtakgvgnsviyv1ktgrdgihgatfaseelteeseskrpsvq1gd1p1v1gk1meat1eaitfdelvgiqdmgaag  
1tsssemaakggsg1h1r  
1eqvptrepg1spyem1setqerm11vvekgteqk1d1fdkhe1dsavigevt1dnrfv1tyddevyadipveplade  
apvyilegeeknyntsknd  
ythidvkd1ffk11khptiaskhy1ydqy1dqqvganti1kpg1qasvvrvegtnkaiastidgearyvynnp1yeggkvvv  
aeyrn1iavgatp1amt1d  
c1nygspekkeiyq11dstkgmaeacdi1ktpvvsngv1slynetkgts1fptpvvgmvg1ienvny1ndfepqvgdkly  
1igdtkddf1gsg1lek1iy  
gkvnhefes1d1s1sevekgesiktai1regv1shvqtvgk1g1l1it1ak1sahygl1g1kssiditnaq1fsetqgryvsv  
ksgk1n1idnaieig11td  
sdfkv1t1p1te1isen1v1sdik1iwegai1aq11ttq1d  
>tr|D8HHP8|D8HHP8\_STAAF  
mskayeqsgvni1hageaverm1sshvkr1tmrke1vig11gg1fgatfd1sq1nmtapv1vsgtd1gv1gk1k1aidy1gk1h1dsi  
g1d1av1am1cv1ndi11tt1gaep  
1y1f1d1y1iatn1kv1pe1ieq1ivk1g1s1dac1vet1nta1ig1geta1em1gemy1hegey1dvag1favg1avek1ddy1vdg1seve1eg1qv1vi  
g1lass1g1h1sng1s1vrk1li  
nesg1d1asn1fd1nr1p1fd1v1fleptk1lyvk1p1v1a1l1kke1vs1ik1am1n1hit1gg1fyeni1pra1lpaga1ar1id1tts1fptk1ifdw  
1qqqgn1dknemy1n1fnmg  
igy1tv1vde1kdvs1ra1ki1laeqnveayq1igrivk1nestaie1f1gv  
>tr|D8HHQ0|D8HHQ0\_STAAF  
mkkai1svsnktg1ivefakaltq1nye1ystg1g1tkr1il1deanvp1vrs1vsd1lthfpe1imdgrvkt1hpavhgg1iladrnkp  
qh1ne1seqh1id1m1v1v1  
n1yp1fq1qt1vanp1dvtm1dea1eni1dig1g1ptm1raa1knykhv1ttiv1hpadyqev1tr1rnds1desyrqslmikvfehtae  
ydeai1vrffk1gdket1ryg  
enpqq1sayfv1rtsnakht1iagakq1lhgkq1synnikdadat1alvkkfdtpaavavkhmnp1cgv1g1gd1tieqafqhayea  
dsq1s1fgg1iva1nravtpe  
1aeq1h1si1flevi1iapkft1dea1di1kqkknvr11leidmtidsneeefsvs1vggy1lvqdkdnyvvpkeemkv1vte1vapt1d  
eqweam1lgwkv1vps1vksn  
ai1il1snk1qt1vg1igag1qmnrvgaakia1eraie1indhva1vsd1g1ff1p1mgdt1velaaqhgik1ai1qp1ggs1ik1dqs1idman  
khg1iamvvtg1tr1hfkh  
>tr|D8HHQ1|D8HHQ1\_STAAF  
mnv1v1igag1greha1layk1lnqsn1lvkqv1fvipg1neamtpiaevhteisesdhqg1il1dfakq1nvdwv1vigpeq1plidgla  
di1l1rang1fk1vfg1pnk1qaaq  
iegs1k1fakk1imek1yniptadyke1verkkda1tyiencel1pvv1k1kd1glaagkgv1i1adtieaarsaie1imy1gde1eeg1tv  
vfet1fle1geef1s1lmt1fvng  
d1lav1p1fd1ciaqdhk1raf1dhdeg1pntgg1mgaycpv1phis1ddv1kl1t1netiaq1piakam1negy1qff1gvlyig1ailtkd1gpk  
vie1fnar1fgd1peaq11sr  
mes1dlmqh1i1d1deg1krte1fkwnes1ivgvm1askgyp1dayekghkvsgfd1neny1fvsg1lkkqgd1ftv1sggrv1ilaig  
kgdnv1hdaqr1dayekv1sqi  
qsdh1fyrh1dianka1lq1k  
>tr|D8HHQ2|D8HHQ2\_STAAF  
myeqw1kvr1qs1fvddvni1itk1fl1gi1il1fff1i1fvhn1fd1mlyit1il1m1v1fl1mfng1tqfkitaitifit1sigfall1ss1fm  
i1lyng1sht1ik1fg1fihit  
tes1lvrg1lhvs1rtia1sff1g1il1a1ltsq1v1mifys1mqh1lkvkskvayafmaairmip1miss1liq1lrrs1lkmryqmid  
van1yrg1kr1fk1h1iip11s  
qn1irkahq1svamesk1gfrdgprtyyynvp1fsykdvifiiv1liai1itlayy1csit1pitg1iddv1r1grvg  
>tr|D8HHQ3|D8HHQ3\_STAAF  
mkyde1livd1p1sgvi1fqdpds1qfcm1pkvyee1afv1lenrqv1predmda1iina1nmvn1nvt1pety1ikd1sggm1kqklai  
vet1il1q1sk1t1f1l1deptam  
1dvq1ated1wtk1lie1l1wed1qt1vive1hkvkhi1wnh1vdrvi1lmdyngni1iadecpe1il1qkyv1h1l1seygv1wh1prawe1fap  
sr1vdf1pt1tnsh1l1q1fkng1r  
i1irgk1st1l1fsd1leig1lgewit1itgang1sgk1t1lesim1qlikyqgd1vyfenqr1tkikhaakhmy1lv1yqnpelq1fitn  
svyde1in1ihfnh1l1skd1qsd

Tsompanidou\_et\_al\_Supplemental\_FASTA\_File

detigllkll1dlenvkdqhpyelsigqkrrlsvatalsskadiifldeptfgldshntfqliklfqkrinlgqsivmvth  
ddeierypsrrlksidga  
llcdgdtnv  
>tr|D8HHQ5|D8HHQ5\_STAAF  
msnenqnkkaaekakeveeklkdkkeektedinqtkqdiqdtln  
>tr|D8HHQ8|D8HHQ8\_STAAF  
mgfknnltsnltnkignsvfkieninekgampttikeInerrqraeaivkrkslmsstmsvvpigldfgvdlklmkdii  
edvnkiygl dhkqvns lgd  
dvkervmsaaaigqsqfigrissaf lkivirdvakrtaakqtkwfpvvgqavsasisyyf m nkigkdhiqkcenvikv  
m  
>tr|D8HHQ9|D8HHQ9\_STAAF  
meqnsyviidetgiharpatmlvqtasfdsdieqleyngkknv lksimgvmslgvgkdaeitiyadgsdesdaiqaisdv  
lskegltk  
>tr|D8HHR0|D8HHR0\_STAAF  
msklkigiaasdgvaiakayllvepdl t fdknekvtdvegevakfn saieaskveltkirnaevqlgadkaaifdahll  
vlldpelipiqdkiknen  
anaataltdvttqfv tifesmdneymkeraadirvskrvlshilgvelnpnsmidesvvivgndltpsdaqlnkefvq  
gfatniggrtshsaimrs  
leipavgtksitqevkqgdmivdg l ngdvi vnptedeliayqdkreryfadkkelqklrdadtvtvdgvhaelaanig  
tpndlpvgviengaagigly  
rtefl ymgrdqmp teeeeq feaykeveamngkrvvvrtldiggdke lsylnlpeemnpflgyrairlclaqqdifrpqlr  
allrasvygklnimfpmva  
tinefreakaill eekenlkneghdisddielgimveipataaladvfakevdf fsigtndliqytlaadrmservsly  
qpynpsilrlvkqvieash  
kegkw t gmcgemagdetaiplllg l g l d e f s m s a t s i l k a r r q i n g l s k n e m t e l a n r a v d c a t q e e v i e l v n n y v k  
>tr|D8HHR1|D8HHR1\_STAAF  
mseivytqndc p p c t f v k n y l n e h q i d f e e r n i n n q q y r n e m i d f d a f s t p f i l l n g n p m y h v d f d e i n k v l n i q d  
>tr|D8HHR2|D8HHR2\_STAAF  
mdtveisrfl iamtlavhiifati g v g m p l m f a i a e f l g i r k n d l q y i a m a k r w a k a y t i t v a v g v t g t i i g l q l s l i w  
ptfmemghvialplfmet  
fafffeaiflsiylytwdrfknkcthf l i s i p v i i g g s f a f f i t s v n s f m n t p a g f e l k n g k m v n v q p i e a m f n p s f i v  
rsfhvittagmtmafviav  
iaafkllrnrqpkdtyvhkka l k m s m i v g f f s t l l s m l a g d l s a k f l h k f q e k l a a y e w h f d t s s h a k l l l f g v l d e k t  
qqvkgaie l p g l l s f l a d n  
svtkkvqglndf p k s l h p p m i v h y f f d l m v t m g i l c f v i s g v y v l t l m f k k l r k f s t h k w m l y g i l l t g p a s m l a i e f g w  
fltemgrqpwi v r g y m r v a  
eaatqaggi t f v t i l f g i l y i i m y t c a y v l i r m f k n k p a y e d v n r l a k k q g g e i e k  
>tr|D8HHR7|D8HHR7\_STAAF  
mltmkdiirdghptlrqkaaelelptkeeketliamreflvnsqdeeiakryglrsgvglaapqiniskrmiavlipdd  
gsgksydym l v n p k i v s h s  
vqea l p t g e g c l s v d d n v a g l v h r h n r i t i k a d i e g n d i q l r l k g y p a i v f q h e i d h l n g v m f y d h i d k d h p l q p h t d  
avev  
>tr|D8HHR8|D8HHR8\_STAAF  
mkfgktiavvl assvllagcttdkkeikaylkqvdkikddeepiktvgkkiaeldekkkk l t e d v n s k d t a v r g k a v k d l  
iknaddr l k e f e k e e d a i k  
kseqdfkkakshvndindvkrkevq l d d v l k e y k l h g e y s k a y k n a v n s e k t l f k y l n q n d a t q q g v n e k s k a i e q n  
ykk l k e v s e k y t k v l n k v g  
kekqvdqfk  
>tr|D8HHS4|D8HHS4\_STAAF  
mnignkiknlrriknltqeelaertdl skgyisqiesehaspsmetflniievlgttpseffkdsenekvlykkeeqv iy  
deydegyilnwlvsksney  
dmepliltl k p g a s y k n f n p s e s d t f i y c m s g q i t l n l g k e i y q a q e e d v l y f k a r d n h r l s n e l n n e t r i l i v a t a s y l  
>tr|D8HHS6|D8HHS6\_STAAF  
mrntnkfl lipyl l m v i f i i v p v l l i y f s f l d i n g h f s f t n y q q i f t k k y l k m f a y s i l y a a l i t i t l a i s y p a a y  
itrskfqnillmimiptw  
inlllkyafigllshdgvinqffh l f n l p s f n l l f t t g a f l v v a s y i y i p f m i l p i f n s m k a i p n n l l q a s s d l g a s p f  
ytfrkvimptkegvmtgi  
qvtfips l s l f m i t r l i a g n k v i n i g t a i e e q f l t i q n y g m g s t i a l f l i v f m a f i l i i t k s s n g r g  
>tr|D8HHS9|D8HHS9\_STAAF  
mageqftqikrpvsrltekvlgwlcwvml l v l t v i t m f i a l v s f s n t s i a n l e n t l n n n a f i q q l l a g n y n t t q f v i w  
lqngiwaiivyfivcllis  
flalismsnirilsgflflisaivtipvl l l i v t l i p i l f f i a m m l f i r k d k v e m v a p q y e e y n g p i y d y r e p v y e r p  
qpkddydvpyeke l d k s  
ntvydqeqerdkydqfpkraveseynderteeepsvl srqakykqksteelgi eddgyyaepvdpkelkaqqkrekae  
ikakkekrkaynqrmker  
rknqpsavsqrrmnfeerrqiynndi seernssevkdkkege  
>tr|D8HHT1|D8HHT1\_STAAF  
mnnkrhstneqlsldeinntikf d h r s s n k q k f l s f l g p g l l v a v g y m d p g n w i t s m q g g a q y g y t l l f v i l i s s l s a m l

Tsompanidou\_et\_al\_Supplemental\_FASTA\_File

lqsmtvr1glatgmdlaqm  
trhylsrpiaiifwiiaelaiiatdiaevigsaialnllfniplivgalitvldvfl11fimkygfrkieaivgtliftv  
lfiifiveyisspqlnavl  
ngfiphsetitnngilyialgiigatimphnlylhssivqsrtysrhneekaqaikfatidsniqlsiafvnc111vl  
gaslffnsnaddlggydl  
yhalktepvlgatmgaimstlfavallasgqnstitgtlagqivmegflrlhipnwlrrlitrslavipvivcliifrgn  
aakieqllvfsqvflsia1  
pfc1iplqlatsnkd1mgpfynktwvniiswtliiilsilnvy1ivqtffqelqg  
>tr|D8HHT3|D8HHT3\_STAAF  
malygfaqgliqeagirikqlmeqnl tietksnpndlvtnvdkatedfifdtil etypnhqv1geeghghdidtskgtvw  
vvdpidgtlnfvhqgenfa  
isiciyidgkpyagfvvdmadvlyhakvgegayrgsqplktlndsnlrqsiiginpnwltkpilgeifkeivndrsar  
aygsaaleivsvatgnlea  
ymtprlqpwdfagglvilyevngqasn11gepltisgpnsvlvgng1hqeisndylephrdaliqlheqrfrkrsk  
>tr|D8HHT4|D8HHT4\_STAAF  
mtnkredvrniaiahvdhgktt1vde1lkqsgifrenehvdramsndierergitilakntavdykgtrinildtpg  
hadfggeverimkmdgvv  
1vvdagegtmpqtrfv1kka1eqnlkpvvvvnk1dkpsarpegvdevld1fie1eandeqlfpvvyasavngtasldp  
dkqddnlqslyetiidyvp  
apinnsdeplqfva1ldyndyvgrigigrvfrgkmrvgdnvslikldgtvknfrvtkifgyfglkrleieeaqagd1ia  
vsgmedinvgetvtphdhq  
ealpv1rideptlemtfkvnnspfagregdfvtarq1qerlnqqletdvs1kvsntdspdtwvavrgelhl1silienmr  
regyelqvskpqiikeid  
gvmcepfervqcevqgenagavieslgarkgemvdm1tttdngltr1ifnvpargmigyttfmsmtrgygiinhtfeefr  
prikaqiggrrngal1sm1d  
qgsastyailgledrgvnfmepegtevyegmivgehnrend1tvn1tktkhqtnvrsatkdqtqtmmrpril1tlealqfi  
nddelvevtpesi1r1rkk1  
1nknvrekeakrikqmmqene  
>tr|D8HHT5|D8HHT5\_STAAF  
miqikgavkfpit1dsttwifddrkvsied1ekgvfdgskpidfednhewnrailegqtnppt1nseikykkramlegsf  
vinmtpffkhsephdsatt  
ir1snehdyldipid1lpy1ffqfakdgkrlysdngvdsfiynqedgysyrinhvthievi  
>tr|D8HHT7|D8HHT7\_STAAF  
mknfrsilryigktskfidyp1lvtyiv1slig1vmvysasmvpatkgt1tggidvpgtyfynrqlayvimsfiivffia  
flmnvkl1snikvqkgmi1  
tivs11111tlvigkdingkswin1gfmnlqasel1kia1ilyipfmiskmprv1skpk1ilspiv1al1gctflvflqk  
dvgqt11111ilvaiifys  
g1gvnkvlrfgipav1gflvvfiialmagw1psyltarfst1tdpfqfesgtgyhisn11a1ignggvfgkg1gnsamk1  
gylpephtdfifaiceel  
g1igg11vit1leffivyr1afqfanktssyfyk1vcvgiatyfgsqtfniggisatip1tgvp1lpfisfggssmis1sia  
mg111ivgkqikvdqqrkk  
qqkvdi1rrqfn  
>tr|D8HHT8|D8HHT8\_STAAF  
mkqikk11vanrgeiairi1fraaaeldistvaiysnedkss1hrykadesylvgsd1gpaesyl1nieri1dvakqanvda  
ihpgygf1seneqfarrca  
eegikfigph1eh1dmfgdkvkarttaikad1pvipgtdgpiksyelakefaeeagf1mikatsggggkgmrvireese  
ledafhrakseaksfgns  
evyieridnphkievqivgdehgnivh1ferdcsvqrrhqkvvevapsvgl1spt1rqr1cdaa1qlmenikyvnagtve  
flvsgdefffi1evnprvq  
ehtitemvtgidi1vktqilvaagad1fgee1nmpqqkdi1t1gyai1qcritt1ed1ndfmpdtgti1ayr1sggfgvr1d  
agdgfqqae1spyyd11v  
k1sthai1sfkqaeekmvr1remri1rgvkt1n1pfl1invmk1kft1sgdyttk1fieetp1eldi1qps1ldrgtkt1ley1gnv  
tingf1pnvekr1pkpdyela  
s1ptv1sskias1fsgtkq11devg1pk1gvaew1kkqddv11tdtt1frdahq11latrv1rtk1dmini1asktadv1fdg1fs1le  
m1wggat1fdvayn1flkenpw  
er1er1rka1ipnv1fqm11rasnavgyk1nypdnv1ihk1fvqesakagid1vfri1fd1snwvd1qm1kvaneav1qeagk1isegti  
cytgdi1npersni1ytley  
yvklake1eregf1h1aikdmag11kpkaaye1lige1lktavd1pih1lthtd1sgng11tykqaidagvdi1dtavasmsg  
1tsqpsans1lyalngfpr  
hl1rtdie1gmes1shyw1stv1rtyysdfesdik1spnte1iyqhempggqysn1sqaks1glger1fdevk1dmyrrvn1flgdi  
vk1vtp1sskvvgd1malymvq  
nd1deqsvi1tdgyk1ldf1pesvvs1ffkge1igqpvngfnkd1lqav1ilk1gqeal1tar1pgeyle1pvd1fekvrel1eeeqgpvt  
eqdi1syv1lypk1vyeqyiq  
trnqygn1s1ldtpt1fff1gm1rnetve1ieidk1gkrl1iik1letise1pdengn1rti1yamngqarri1yikden1vhtnanvkp  
kadksnpsh1gaqmpgsvt  
evkvs1vgetvkanq11liteamk1metti1qapfdg1vikqvtvnngdi1atgd11lieiekatd  
>tr|D8HHU0|D8HHU0\_STAAF  
mskeht1sqnisrvnfke1lqqi1kmg1lvqgn1lipafagaw1lavm1tnhs1f1ssipq11lm1fgst1imggacal1nnyy1dq



Tsompanidou\_et\_al\_Supplemental\_FASTA\_File

didrimpskqnrptvnnri  
tdqnllllsfgmmlvgeicflflnipsgvlgimgivgyvsyysiwskrhttwntvigsfpgavppligwvaieggishta  
iaflvfwqpihfya  
ikrkdeyalanipmlpsvkgfkrtrvsmfiwliiillpvp111inlgvvfvlat11nlgwialglttfkksdqtkwatq  
mfiysllylvi fflaviv  
slltli  
>tr|D8HHU2|D8HHU2\_STAAF  
mkkliirvvgvlfvlgfliylyfysprlkdvlenpnkgnkvrseqvnksnhaenpkpkegvgtwvkgdikvltskfgq  
adrvyprfdgyknyvfkdk  
nsyyivstkreeivsvyatgekvnsplkigqhsaeifnhtsinpepsfkvdgkkyefelsdedlktqtlkygniyaqv  
ysdqskkvlsvrfltkem  
ladiepyrlnsnstseehnrpveqnpnqlislyevtnemrklkglkplkinsdlahiasnlyeatsngsdsvefteda  
lrgqldkdhvtykttagnv  
gyafndvptlihswnsdihrsr1lnskydemggdvmrduysliflek  
>tr|D8HHU4|D8HHU4\_STAAF  
mkkvnrni1navlvagfvss1lminknkvitkkqtipvffkgnapyifahrggmalrpeqtqlafdyakqlgvdgfetd  
vrltkdqqlivfhdatvdr  
ttngsgkvsahlaelkkldagyhfkdingltpyrghahtailtfdellkqypdmyinvdlkdapesyegsiapqimfdt  
iaenqafdrvlvtsfykeq  
ivrfnkiaggsvaigasqevteaf1kyh1lggryyqlaqtqmpthfkginltsrfikwlnmnpvipygygvnsinl  
mndlyqkahti vdrpd1  
aqqfkqti nknq  
>tr|D8HHU7|D8HHU7\_STAAF  
mrviagkhkskalesmegrntrptmdkvkegifslydvsgigldlfagsgalgiealsrgmdkvi fvdqnfkavkviks  
nianldleaqsevyknnad  
ralka1skrdiqfdvifldppynglidkalkl isefnllkengiivcefsnheeidyqpfmikryhygltdtlllek  
e  
>tr|D8HHU9|D8HHU9\_STAAF  
mksvgliteynpfhngqyhinqskltnadvtiaimgnfvmrgepaiynkftrakmalstadlvielpataslssgdh  
faelavkvadymsvdtiaf  
gsenndikt1kqlahsineieqsessfsqkvkegkspriisellehhealaspnnilgisylkaiakhakninaisikre  
naqhhdslqhhqfasgt  
irtsii sqddhwhhvvpkdiqhlvvtphitlnqifpylkyqiamttas1kniyvttegfenrlksnneatdfhhfvks  
lktkrythythr1lmv1  
lnikptdvtrnihavkvlamndrgrqylkh1ktafprqyitninksnahyftneikathiynaisgkqtdfntpviiq  
yr  
>tr|D8HHV2|D8HHV2\_STAAF  
mkvaiytrvstleqkekghsieeqerkl raysdindwkihkyvtdagysgakkdrpalqemlneidnfdlilvykl drlt  
rsvkd1leilelfenknvs  
frsatevydtt samgr1fv1vgamaewerttiqertamgrrasarkglaktvppfydrvndkfvpnaykvlrfavee  
akkgtslreit mkl nnsky  
kaplgknwhrsvirsalispvargh1vfgd1fventheaiiseeykeikqrisektstivkhnaifrskl1cpncnqk  
1t1ntvkhtpkknkevwyk  
lyfcvncntknknacniderelkqfylnlkqfd1tsytknqpketedvgidiek1rkerarcqtlfiegmknkdeaf  
piisridqeirdyenrksd  
nksksfdyekiknfkys11ngwelmedelktefikmaiknihfeyvrgigkrqns1ritgiefy  
>tr|D8HHV3|D8HHV3\_STAAF  
mnekyitrevfeqfekridnk1ds1pdrmadkmdakisglearqtkwfvgiaistaigglslivgavglivn1fi  
>tr|D8HHV4|D8HHV4\_STAAF  
menirpmisn1sfykdeqenkaikdfsd1efnplyfdft1sgineisthknmyitilyydkvpppyglssvpeyqin  
evwqda1sntslkyidysl  
k1td1sfahglrnydfsknyqn1kiiytdyqidfqninskel11lmkhnnkhd1fytkvsmiprvkqg  
>tr|D8HHV6|D8HHV6\_STAAF  
mssfssn1er1mknrdmsd1aelvdvnr1ttvtrwrkgirspkl1dk1peianvfgvkl1dihmddskiieeihvss  
q1tpprqs1v1kyatnqle  
eqnndsdd1vdfnsyiqeksevd1ygcasagigerlynepiskefvrgyvpahdialkvngdsmeplfkngqiifiek  
htikdgqigvfiingdayv  
kkvyvednr1t1vs1nkkykd1hfydnesvr1vgkvi1  
>tr|D8HHV7|D8HHV7\_STAAF  
mhkd1ysfrkaaknqdfmgs1igvsqqyqkrergeisin1deami fskaletpiqelfpeyffiervpkmhkneits
