# Supplementary material
Source: PubMed Central journal article supplement (PMC3568538)
Supplement: AEM.03157-12_zam999104060so6.pdf [file AEM.03157-12_zam999104060so6.pdf]

Tsompanidou\_et\_al\_Supplemental\_FASTA\_File

>tr|D8HHW0|D8HHW0\_STAAF  
msktyksyliavlcftvlaivlmpflyfttawsiagfasiatfi fykeyfyevdd  
>tr|D8HHW1|D8HHW1\_STAAF  
myyeigeiirknihingfdkcliilkqmgisiqvkdmnvpikhayvdeddlsmaselfnqaidewieentdeqdrli  
nlvmrw  
>tr|D8HHW2|D8HHW2\_STAAF  
mnqtvtyiirhrdmpi yitnkptdnnsdi systnrrn rarefngmeeasinmdyhkaikktvtetieyeevehd  
>tr|D8HHW3|D8HHW3\_STAAF  
mlnrtvlgvrltkdpe lrstpngvngvgtftlavnrftnaqgereadfinvvvfkkqaenvknyl skgslagvdgrlqtr  
sydnkdgkrvfvtevvads  
vqflepknnnqqpnnnyhqqrtqtgnnpfdnteadfsdlpf  
>tr|D8HHW4|D8HHW4\_STAAF  
mnkllidypiqvlpklaeligneaivlqqihywl nnskhhkydgtwifnsypewqkqpfwslitiktisylekqnl  
llignynkakfkdtkwyti  
nyqtiegmi rpsyqndttsvskrddgvyqndttntidy tetnkhretddvsksfkyistnleiiqnp lkaeqleheiksf  
kqdqfeivkvatdyckgnn  
kglny11tv1knwnkegvsdkesaenk1kprntkktetddviaaqmekelsdg  
>tr|D8HHW5|D8HHW5\_STAAF  
mnyggfeiestiatllkqpdvleki rvkdymftnekfktffnyvmdsgkidhqeiylkatkdkefldadtitklynsdf  
igygferyqqelleyqnl  
nkanelvtefkqqptnqfnfnlidelkdlktitnk kedgkfkveefveelysdspkkqiktgyklmdykigg lepsqli  
viaarpsvgktgfalnmml  
niaqngyktffslettgtsvlkrm1stitgie ltkikeirnltpddl tklt namdqimklgidisdksnitpqdvraqa  
mrhsdgqqvifidylqlmd  
tdakvdrvavekisrdliianetgaiivllsq lnrqvesrqdkrpm1sdmkesggieadaslamllyrddyynredd  
sitgksivecniaknkdge  
tgiefeyyktqrfft  
>tr|D8HHW6|D8HHW6\_STAAF  
mni mqfksllksmyeetkqndpivanvyietgwavnrlldnna1spfdeydkvekkimneinwkkthikec  
>tr|D8HHW7|D8HHW7\_STAAF  
mskynakkveykgivf dskveceyyqylesnmngtnydhieiqpkfellpkldkqrkieyia dfalylddklievidikg  
mptevaklkakmfrhkynrn  
iklnw ickapkytgktwityeelikarrerkremk  
>tr|D8HHW8|D8HHW8\_STAAF  
melieshgitpgmvskrvkdgwelheamdaegmr1seyrekktierleqarlerklerqrkkaelrrkkphlfnvpqk  
hsrdpywfdntynqm fkkw  
qev  
>tr|D8HHX0|D8HHX0\_STAAF  
mmkiki kevnlpeliqwpwdnpklsgnkrfypngvrhnhcvtfdvdsilcnvtgyvsindkftiqeeivnnenqskkrn  
eft  
>tr|D8HHY0|D8HHY0\_STAAF  
miki ekhdikkleeyiqhidnyrrelkmreyelleshepdnagagksslpgn piercaikkfsdnryntlnrivngvdr1  
idesdedt1ellrfrywdc  
pigcyewediahyfgtsktsilrrrnalidklakyigyv  
>tr|D8HHY1|D8HHY1\_STAAF  
mmtkderirfykskewqttrkrvlerdnyecqckrdgklttydkskhksldvdhilslehpefahdlnnetlcikch  
nkkekrfikkenkwkdek  
>tr|D8HHY2|D8HHY2\_STAAF  
mynppsynhfkagdemeiivdenlvlekerlqvlykdipsnklkvvdgliiqaarlrvml dymwedikekgdyd1ftqs  
ekappyererpvaklfnar  
daayqkiiqqlsdllpeekedtetsddy1  
>tr|D8HHY3|D8HHY3\_STAAF  
misnkyvdeyinlwkggkii lnkeridlfnylqthiysrddvyfdeqkiedcikfiekwyftlpfqrfiiani flidkn  
tdeafftefavmrggggk  
nglisaidsf1stplhg vkeyhisivansedqaktsfdeirtvlmdnkrnktgktpkapyevskteiinratksvirynt  
sntktkdggregcvifdei  
hyffgpemvvnkrvgglgkknrrt fyistdgfvregyidamkhkiasvls gkvknsrlfafyckl ddpkevddrqtweka  
npm1hkp1seyakt11sti  
eeeyndlpfnrsnkpef mtkrmn1pevdlekviapwkeilatnreipnldnqmciggldfanirdfasvgllfrknddyi  
wlghsfvrqgflddvklep  
pikewekmgl1tivddvieieyivdwflkarekyglekviadnyrtdivrrafedagikle vlrnpkaihgl1lapridt  
mfakhnviygdnp1mrwft  
nnvavkvkpdgnkeyikkdenrrktgdgmafva1yraddivdkdmska1dalmsidf  
>tr|D8HHY4|D8HHY4\_STAAF  
msilekifktrkdisymldlmi edlsqqayvkr1aids cie fvaravaqshfkvl egnriqkndvyyklnikpntd1ss  
dsfwqqviyklidynevli  
vvsdske1liadsfyreyyal yddi fkdvtvkdytyqrtftmqeviylykynnkvthfveslfedygkifgrmigaqlkn  
yqirgilksassaydekni

Tsompanidou\_et\_al\_Supplemental\_FASTA\_File

eklqafntkvfntfnknqlaiapliefgyqelsnggknsmpfseelsemrdaiknvalmigipglygetadleknt  
lvfekfcltp11kkigne1  
naklitqsmlykdtrieivgvnkdp1qyaeaidklvssgsftrnevrimlgeepsdnpeldeylitknyekansgende  
kekdentlkggdedesgd  
>tr|D8HHY5|D8HHY5\_STAAF  
mkaeikgvi vsnedkwvyemlgmdstcpkdvltqlefsdedvdiiinsnggnlvagseyythlrahkgkvnvritaiias  
aasliamagdhie mspvar  
mmihnpssiaggevkdlnhaaetlehvgqimaeyavragknkqelvemmaketwlnadeaieggfadskmfendnmqiv  
asdtqvlskdvlrvta1v  
sktpevnididaiankviekinmkekeseidvadskvsangfsrflf  
>tr|D8HHY6|D8HHY6\_STAAF  
mtinlsetfanaknefinavngepqrqnelygdminq1feetklqakaeaervsslpkssqslsanqrkffmeinksv  
gykeekllpeetidrifed  
ltnhp1ladlgiknaglr1kflksetsgvavwgkifgeikgqldaafseetaiqnkltafvvlpkdlnfdgpawierfv  
rvqieeafavaleaaf1kg  
tgnnepiglnrqvqkgvsvsgnvypekeeqgtlftanprktvnelvqvfkyhstnekkgsvavkgnvtmvvnpsdafaieq  
aqythlnangvyvta1pfn  
lnviestaqesgkvltvykgydygylaggi niqyeqtlalddmdlytakqfaygakdnkvaavwkl1dkdqkpsasdd  
ees1  
>tr|D8HHY7|D8HHY7\_STAAF  
makfkvi rfdk1lehkqhkykvgdlypaegydsrvd11tnqvknkydkvyivp1dkl1tkqellelcel snvkpsssmvk  
sei n11ngenngd  
>tr|D8HHY8|D8HHY8\_STAAF  
maidl1lvkfsleki dynsedeflkel1kmsytr1knqcgtfel dnlagqel1lnrtryayqd1lehfnenyradlidf  
sls1mevskseesi  
>tr|D8HHY9|D8HHY9\_STAAF  
mkkvfkkpkittrr1ktrvyfyeyvenagpeagekegk1lyscwasvdgvlreleqaisngtqndiriyirdprgdy1p  
neehyleieskyfrsr1ni  
kqispd1dnkdfim1rggyss  
>tr|D8HHZ0|D8HHZ0\_STAAF  
msvkvtdralenelekrfgvkemkvqdraliagakviveevknq1kpskdtgalinevsftepewirgkrtitihwrg  
pkdryklvhl1enghvqkg  
tgkfkpkamggvnrai rggqnkyfet1kre1kk1  
>tr|D8HHZ1|D8HHZ1\_STAAF  
midilykvhvisqdriirehvninnikfnkypnvkdtdvpfiviediddpipttytdgyecaysyivqidvfvkfnky  
nari1rnkisnr1qk1lws  
elkmgnvsngkpeyieefktyrstrvyegi fykeek  
>tr|D8HHZ2|D8HHZ2\_STAAF  
mavkhasap kayfni tglgfakltkegakleysditktrglqkigvetggd1ktayadggpiesgntdgegkis1qmhaf  
pkeirki vfnedydedgvy  
eetgkqnyvai wfrqerrdgtfrtv11pkvmftn pkidgetaekdwdfssevegealfplidnkksvrkyifdsanm  
tnhdngnekgeeaf1kkl1  
gkeytveasgdees1  
>tr|D8HHZ3|D8HHZ3\_STAAF  
mkyttkqtdivsisddgqitaksqgiatvtaiagnksdsitinveg  
>tr|D8HHZ4|D8HHZ4\_STAAF  
mak1krni1q1vedpkanevklqtyltphfisfeivyeamd1vdeiedenstmkpreiadr1mdmvkiydnqftvkd1k  
ermhapdgmnalreqvvfi  
tggqteetrnfiqnmk  
>tr|D8HHZ6|D8HHZ6\_STAAF  
mgerikglsigld1dsan1nrs1teikrnfrt1nsd1kl1tgnnfkytekstsdysqrikel dgtiagykknvdd1akqyd  
kaakeggensaeaq1rqe  
ynkqanelny1lere1lqktsaeefeekkaqveaqrmaesgwgktskifesm gpk1tkmgdglksigkgmmigvtapvlgia  
aasgkafaevdkgl dtvtq  
atgatgge1kkl1qnsfkyvynfpadaetvggv1gevntr1gftgkelesatesflk fshitgtdgvqavqlitramgda  
gvevdeyqg1ldmvakaaq  
asgisvdt1adsitkygapmramgfemkesialfsqweksgvnteiafsglkkaisnwgkagkdpreefkk1laeiektp  
diasats1aieafgakagp  
dladaikggrfsyqeflktiedsqgtvnqtfkdsesgerfkvamnk1klvgadvwasiesafapvmeelikk1svavdw  
fslsdgykrsivi fggia  
aagpvvfg1gafistignavtv1ap1lagiakadglisflstkvpilgtvftaltgpigivlgvlaglavafaiyaykks  
etfrnfvngaidsvkqtf  
nfiqfiqpfidsvknifnqaisaivdfakdiwsqingffnengisivqalqnicnfikai fefilnfvikpimfaiwqvm  
qfiwpavkalivstwenik  
gviqgalni1lgfikffs1ftgnwrgvwdgivi mlkgtvqliwnliqlwfvvgkilgvvkyfgg11kglitiiwvaiigv  
fkks1saiwnatksifgl  
fnsvksift1knw1ntwssirtntigkaqslfsgvkskftnlwnatkdiftk1rnwmsniwnsikdntvgivgrlwdr  
vrnifgsmrdglksiigki

Tsompanidou\_et\_al\_Supplemental\_FASTA\_File

kdhiggmvdavkrglnklieglnwvggklgmkipkltgttehttttrlvkngkiardtfatvdkgrngngpfrnem  
iefpngkrvltptndttay  
lpkgskvynqaqtsmlngt1prfsigtmwkdiksghhrhltgqkik  
>tr|D8HHZ7|D8HHZ7\_STAAF  
mdfidnpgkllnyvlqafgvdfssltkgmgiagditkaawskikkksaikwledafaesgdggvldmsklrylyghtaayt  
retgrpfheglfdyiyep  
vpstingraqvmpfhnggygkwvkiwkgaleviyahlskykvktgqqvrvqgtvgisgntgfstgphlyemrwnghrd  
plpwlrknnnggksapggg  
gaanarraikaagnilggrykaswitemmrvasresnytanavnwdsnaragipsrgmfqmidpsfrayaksygnpl  
npthqaisamryivgkwvp  
rtgswraafkragyayatggkvynglyhlgeegypp1rvptdparkneamkm1hyaaaevrgrkasknkrpsqlssvng  
fddps111knieqqqqa  
111kiaqsndviadkdyqpiideyafdkknvasiekrrerqestkvkfrkggiaiq  
>tr|D8HHZ8|D8HHZ8\_STAAF  
midtikvnnkti1pwllyvergfeipsfnyv1ktenvdgrsgsiykrlesysfdiplvvrndylshngikthddvlnel  
kffnyeeqvk1qfkskdw  
wnayfegpik1hkeftipvkftikvvltdpykysvtgnkntaisdqsvsvngsgtadtplivearaikpssyfmitknded  
yfmvgddevtkevkdympp  
vyhsefrdfkgwtkmitedipsndlggkvggdfvisnlgegykatnfpdakgwgagtkrglpkamtdfqitykciveqk  
kgagartaqhiydsdgk11  
asigyenkyhdkighivvtlynqkgdpkkydyqnkpvmynkdrivvym1rrvgnkfsiktwkfdhikdpdrkpidm  
dekewidggkfyqrpasii  
aiysakyngykwmemnglgsfnteilpkpkgardviiqkgdlvkidmqaksvviineepmlseksfgsnyfnvdsgyseli  
iqpenvfdtvkwqdryl  
>tr|D8HI01|D8HI01\_STAAF  
mdeiqkiknelad1ttkvdgkveelttrvddievlanetadhvln1rqehtehhnelreshkelkdkqekvndenleqtk  
ilnr1eeryqvqvdaqkn  
eektlaqnkwlvgaiwalvtivmiavitasitalip  
>tr|D8HI02|D8HI02\_STAAF  
mkkkrktafilt1civim1vtsp1vngsekseeikekd1hkkselqgvaldn1rqiyhngkaitenkesdnqflqhtilf  
ngfftdhpwynd11vdfds  
kv1adkygk1kvd1ygayygcaggtpnktacmyggvt1hdnrlteekkvpin1wldgkqntvpletvktkkevvtq  
eld1qarhylhgkyn1ys  
dtfdgkvqrg1ivfhtstpsvnydlfgaqqysnt11riyrndktinsenmhidilytt  
>tr|D8HI03|D8HI03\_STAAF  
mdinwklrfknkavltglvga111fikqitdlfgld1stqlnqasaiigailt11tgigvitdptskgvadssiaqtyqa  
prdskskeeqvtwksqds  
s1tpe1stkapkeydtsqpf1tdasndvgfdvneyhyggdnasktn  
>tr|D8HI04|D8HI04\_STAAF  
mqak1tkkefielwktsegkqfnid1wygfcfdyanagwqvlfgyn1kgvgakdipsannfnglatvyqntpdf1aqqg  
dmv1vfgsnygagyghvaw  
ieat1dyiivyeqnl1gggwtgdvqqpgsgwekvtrrqhaydfpmwfi1rpnfksetaprsvqsptqapkketapqpkav  
elkiikdvvkgydlpkrgrs  
npgvnnseffinmi  
>tr|D8HI05|D8HI05\_STAAF  
mteiwkdvin1yegyymvsnmgrvks1krvkhggsvtrtyptvil1kpnkvafdyfvt1nknsirksryvhn1vmeafvg  
ekklgyevnhknedksdnr  
lenleyitskennnygtriersikkstngkrskkikgthiitgeevyfpsiaekrqygnhisdaigrkrnhcykykwe  
fi  
>tr|D8HI06|D8HI06\_STAAF  
mgadnstfl1kneqatfqecar11kkwglpanrntir1hneftstscphrsv1htgfdpvtrg11pedkr1q1kdyfikq  
iraymdgkipvatvsness  
assntv1kpv1asawkrnkgytyyeesarftngnqpi1tvrkvpp1scpvgyqf1qpggycdytsv11qdnhvw1eyewqgn  
fyyipi1rswdgtpppnqiv  
gelwgtis  
>tr|D8HI07|D8HI07\_STAAF  
mnkqqkefksfysirkssl1gvasvai1111msnseaqaeeetggnteaqpkteavaspstttekapeakpvanavsv  
snkeveaptsetkeakevk  
apketkev1kpgakadnntypilnqelreai1knpaikdkdhsapnsrpidfemkkengeqqfyhyassv1kparviftdskp  
eielgl1qsgqfwrkfevye  
gd1k1pik1vsydtvkd1yayirfsvsngtkavkivssthfnnkeekydylme1faqpi1ynsaekfkteedykaek11apy  
kkakt1erqvyel1nkiqdk  
1pek1kaeykkk1leetkka1deqvksaitefqnvqptnekmt1dqdtkyvvyesvennesmmdt1fvkhpiktgm1ngkky  
mvmettnddywkdfmvegg  
rvrtiskdakntrti1fpyiegk1lydai1kvvhvkti1dydgqyhvri1vdkeaftkanadksnkkeqqdnsakkettpak  
pskptpspvekesqkqdsq  
kddnkqsp1sevendasseskdktpstkpakaevesssttpkvvsttqnvakpttasset1divvqtsagsseakdsa  
plqkanikntndghtqsqn

Tsompanidou\_et\_al\_Supplemental\_FASTA\_File

nkntqenkakslpqtgeesnkdmtpmlmafllaissivafvlprkrkn  
>tr|D8HI08|D8HI08\_STAAF  
mtkhylnskyqseqrssamkkitmgtasiilgslvyigadsqqvnaateatnatnnsaqvsqatsqipinfvqkdgsse  
kshmdmymqhpqkvikqnn  
kyyfqavlnsasfwkeykfyannqelattvnddkkadtrtinavavepgykslttkvhivvpqinynhrytthlefeka  
iptladaakpnnvpvqpk  
paqkptpteqtkpvqpkiekvkptvttskvednhstkvvstdttkdqtktsahtvktttqataeqnkvtqpkdvatak  
sesnnqavsdknsqgtnkv  
tkqnevkhqetskdsakelpktgltsvdfnistvafatlaallgslslllfrkesk  
>tr|D8HI09|D8HI09\_STAAF  
msiegkheniiskntakdertsefevsklngkidgkidvyidekvngkpfkydhynitykfngptdvaganapgkddkn  
sasgsdkgsdgattgqses  
nssnkdkvenpqtngatpayiyaipvaslalliatlfrkkskgnve  
>tr|D8HI10|D8HI10\_STAAF  
mrnvkqiatksiaaislgltyttmigsvladeikypsakfnqpeakdkteltssifdekikenkalellifnqenkvn  
teeqqlvdekaqlisdmtg  
kiylqvk1kgqidkeqlvfqndkneefpvikdekddtivri1ieqhmdkinmhvkt1dekkn1dnkemvysihfkekkn  
qhddakevpskhqngennq  
dq1kkdidkkdsqksdikerrts1ftekg1ndipvqkdkvqqdsnkkienerpkasgt1kvenspptvkkvendhkeqp  
khkdekskkkekvvvekek  
alpafnrddsknssq1ssdikeldepnhkkqym1faagivlati1lisahlysrkrngqv  
>tr|D8HI11|D8HI11\_STAAF  
mt1dk1d1pivgkpkpsykt1pnrykdvpiegpmepnveavkk1kpthvlsvstikdemqpfyq1nmkgyfydfds1kg  
mqksitq1gdqfnrkaqak  
e1ndh1nsvkqkienkaakqkkhpkv1ilmgvpgsy1vatdksyig1lvkiaggenvikvkdrqyissnten1lninpd1  
i1r1phgmpeevkkmf1qke  
fkqndiwkhfkavknnhv1d1e1evpfgitanvdadkamtq1y1d1fykdkk  
>tr|D8HI12|D8HI12\_STAAF  
mmiknkkk11f1c1l1v1i1atayisfvtgtik1sfndlitkfttgsneavdsi1d1r1p1ri1iammvgam1lavsgallqa  
alqnp1aeani1igvssgal  
imralcm1fipqlyfy1p1l1s1figg1ipf1i1iv1hskfrfnavsmilvgvalfv1l1ngv1e1itqnp1mkipqg1tmki  
wsdvyi1lavsallg1i1t1  
l1spk1n1l1n1ddvqarsigfnidryrw1tg1lavflasatvaivgq1af1gi1vphvvrk1vggnyrv1lipfstvigaw  
l1lvad1lgrv1qpp1eip  
ana1lmi1vggpm1iy1licqsqrnri  
>tr|D8HI14|D8HI14\_STAAF  
mkfmaenr1t1tkgtakdi1erfytrhgi1et1egfdgmfv1tq1teq1edfdevki1twkskeaf1tdw1ksdvfkaahkhv  
rsknedesspi1nnkvity  
digysymk  
>tr|D8HI15|D8HI15\_STAAF  
meqitsaqnri1kqank1kkkrerdk1gl1iegvl1ieeayqsgiv1tq1faiepar1dqqi1ayaqevfeinmkvaes  
lsg1tvtppqgffai1iekpqy  
diskaqqv1l1drvdqdpn1gt1irtadaagmdavimekg1ttdpyqdkv1rasqgsvf1h1pimt1d1d1t1f1tqfngpvyg  
tal1navayke1vtsidsfa  
l1l1gnegegvnp1ellaht1qn1i1piygkaes1nvaiags1llyh1kg  
>tr|D8HI17|D8HI17\_STAAF  
mlisnew1keyvt1dsvsn1aer1trtgievdd1idytkdik1lvvgfvkskekhpdadk1nvcqv1d1gedepvqivcg  
apnvdagqyv1vakvggr1  
pggik1krak1rgersegm1cs1qeig1ssny1pksfesgiyv1fsesqvp1gtdalqaly1ndqvme1fd1tpnrada1smi  
gtaye1vaal1yntkmtkpet  
tsne1elsand1eltv1t1enedkvpyysarvvhdvt1iep1spiwmqar1likag1rpinnv1disny1lleygqpl1hmf1d1qda  
igsq1qvvrqanegekm1tt  
l1d1ter1ell1tsdiv1tng1qtpialagvmggdf1sevkehtsn1ivieg1a1f1dsvs1r1htsr1r1n1rsess1rfekgi1atefv  
deavdracy1l1q1tyangkv  
l1kdrvssg1elgaf1itpidi1tadkinrt1igfd1sqndiv1tifnq1lgfdte1nddv1tvqvp1srrk1ditiked1ieevary  
gyddip1st1lp1fekvtsgq  
l1tdr1qy1ktrmv1kev1legag1ldqaitys1vskedataf1amqqr1tid1l1mpm1seahas1rqs1l1ph1leaasynvarknkd  
vk1lfe1ignv1ffangege1lp  
dqve1yls1igt1dyvvnqwg1kktvdfylakgvvdrvsek1n1efsyrrad1idg1lhpgr1tae1illenkvv1gfigel1hpt  
lae1nd1krtyv1fel1n1fda  
l1mavsvgy1nyqpt1r1fpgmsrdia1evdqni1paad1l1stihaggn1ilkdt1l1vfdvy1qgeh1lekgkksia1ir1ny1l1dte  
et1tdervskv1qaeiea1l  
ieggavir  
>tr|D8HI18|D8HI18\_STAAF  
mkgftqmani1vfk1l1sdkdi1ttlmsri1sfdten1lpqgmkarakyqntt1vniyqsgkvmf1qgnhaeavse1llpqhsq1lntn  
ktkkknmans1ffe1q1t1myd  
qfnc1igsdeags1dyfgp1l1tvcaafvtkehvp1l1kt1lgvddsk1l1tdtkive1laeq1lvtf1iphs1l1tlhnekyni1qqakg  
wtqvk1mkav1l1hnea1knv1

Tsompanidou\_et\_al\_Supplemental\_FASTA\_File

ekidssqldyividqfakrevyshyalsdipkktkfetkgeskslaiavasiiisryafvtymdqiskninmtipkgag  
akvdviaaikiikygisrl  
dtiskkhfknrekaqki1kp1  
>tr|D8HI19|D8HI19\_STAAF  
myvnyenvivtqfkhdkvlnrkfft1fhfiikrt1sh1  
>tr|D8HI20|D8HI20\_STAAF  
maqfknkvnsindqlftivgednpehi ryvahlvdgkikelgykaagldtsrkailtavnimhekvllleenrrlkqqi  
hklqqreq  
>tr|D8HI21|D8HI21\_STAAF  
mvidfiiiiiffvyfiivgfrngfwlsmihlsativslwiasqfyksiverlivfipypkttafnttfafhfnhlqnrfea  
ivaf1mit1fckfilylii  
vtfdkiiayqnihi fsramgmivgvfmitiivlhftlylla1ypnealqhq1kisivshslihipylsaftin1  
>tr|D8HI22|D8HI22\_STAAF  
mtkkdvik1lleqiatymelkgentfkisayrkaaqslelderpldeisdvtelkgigkgvaevindyretgesqylqq1q  
eevpeglip11kiqglgsk  
kiaklykelnivdkas1qvacengkvselsgfakkteqnileavkqlgakkdrypidqmrr1nqeiiidyt1nyidqys  
sagsfrrfkemskldfii  
stdnpkavqq11nipnkveavngtkvslelayddetigvdfriepsafyht1qhftgskehni1ri1qlakardev  
seygieqadgt1iqydsea  
kiyehfnvnfippamredgsefdkd1sniit1ddingdihmhttsdga1firdmveaniakgykfmvitdhsqslrvan  
glqver11rqneeikaldk  
eyseidiysgtemdi1pdgs1dyddeilaq1dyvigaihqsfnqseeqimerlanacrnpvyvrhiahptgriigrdgyk  
pnieqlmalseetntvlei  
nanphr1d1nadivrkypnvk1tintdahhtnh1dfmnygvataqkgfvtkdrvinalsreafkdfiennik1kk  
>tr|D8HI23|D8HI23\_STAAF  
mrqkt1dv1efekikslvanetisd1glekvnqmpatnfetvfvqmeetdeiaqiynkhr1ps1sg1skvsafihradi  
ggv1nvsel1nikrliqvq  
nqkftfyng1veededvkyp1ddkmnq1pvltd1fqinetcdtyd1ydnasyelqgirskisstnq1rirqnl1drivks  
qanqk1sdaivtvrnern  
vipvkaeyrqdfng1vhdqsasgq1lyiepssvmemnq1sr1rhdeaiekeril1tq1tgyvaadkdallvaeqvmgq1d  
fliakarysrsikgtkpi  
keertvylpkayhpl1nretvvaniefmedietvii1tgpntggktvt1kt1gl1ivmaqsg1lipt1dgsq1svfknvy  
cdigdeqsi1eqs1stfssh  
mtnivei1khadkhs1vl1fde1lgagtdpsegaalams1ldhvrkigs1vmatthypelkaysynregvmnasvefdvdt1  
sptyk11mgvppgrsnafdi  
skk1g1s1niinkaktmigtdekeinemies1ernykrvetqr1eldr1vkeaeqvhd1skqyqqf1qnyeks1ieeake  
kanqkikaatkeaddi1kd  
1rq1reqkgadvkehel1dkkk1ddh1yeaksikqnvqkqkydkivagdevkv1sygqkgevl1eivndeeav1qmg1ikm  
k1piedlekkqekvkp1k  
m1vtrqnrqt1kte1d1rgyryeda1ie1dqy1dqav1snyeqvyi1hgkgtga1qkgvqqh1kkhksvsd1frggmpsegg  
fgvtvat1k  
>tr|D8HI25|D8HI25\_STAAF  
medykqriknk1nvvpmpgcy1mkdrndqviyvgkakk1rn1rsyftgahdaktr1vge1irrfefivtssetes111  
e1n1likyqpryni11kdd  
ksyppiki1tkekypr11vtrtvkqgtgkyfgypnaysaqetkk11driypyrkcdkmpdk1c1yyhigqclgpcvynvd  
1skyaqmtkei1tdf1nged  
kt11ks1leerm1tases1dferakeyrd1iqhiqnl1tnkqkimssdk1tirdvfgysvdkgwmc1qvffir1qgnmikrdtt  
mip1qqteeeefy1tfiggf  
ys1nqhil1pkevhnpr1ldkemi1qsvvdkivqpargpkkdmvd1aahnakvs1nnkfelisrdesrtikaieelgtqmg  
iqtp1ri1eafdnsni1qgvd  
pvsamvt1vdgkpdkknrykyk1ktvkgpddyksmrevrrrrysrv1neg1p1pdl1ivdggkgghmngvidvl1qnel1gld  
ipvag1qkndkhqtse1ly  
gasaeiv1p1kknsqafy11hri1qdevhrfai1t1fhrqtrqktg1ksil1ddid1giggkrkt111rt1fsg1ikkmeat1edfk  
nigipenvakn1heq1hk  
>tr|D8HI26|D8HI26\_STAAF  
maqsknefyl1rrihs11gi1pigaf1lvh11lvnhqatqgaeafnkasnfmes1pfl1ive1flfiyipllyhgl1fghi1af  
takenvghys1frnwm1f1f  
qrvs1g1l1t1fi1figih1wqtr1lqkafygkevnyd1mhet1lqhp1gwai1fyi1c1i1avvf1hfang1lws1flvtwgg1lqspksqr  
vftwvs1liv1flvisyigvt  
ai1afm  
>tr|D8HI27|D8HI27\_STAAF  
maekh1livvgg1lag1mst1kaaekgahvd1fsvvpvkrshsvcaqgg1ngavntkgegdspwih1fdd1tyvggdf1anqp  
pvkamteaapki1ih1ldrm  
gvmfnrt1neg1ldfrr1fggt1l1hrtayagattgq11lya1deqvravevd1lvtkyegwef1g1ivkgddd1sargivaqnm  
ttae1ietfgsdavimatgg  
pgi1fgk1t1nsm1intgsa1sivyqqg1aiyangefi1qihpta1pgddk1rlmsesargeggriwtykdgkpwyl1eekypd  
ygn1lvprdi1atrei1fdvci  
nqk1g1ingenmvy1d1shkdphe1dvk1l1ggi1e1iekftgdd1prkvp1mki1fpavhysmgg1lyvdydqmtnik1gl1faagec

Tsompanidou\_et\_al\_Supplemental\_FASTA\_File

dfsqhggnrlgansllsai  
yggtvagpnaieyisnidrsytdmdesi fekrkaeeqerfdkllamrgtenayklhrelgeimtanvtvreneklletd  
kkivelmkryedi dmedtq  
twsnqavfftrqlwnmlvlarvitigaynrnesrgahykpefperndeewlktmasfqgafekpqftyddvdvsli ppr  
krdytskskggkk  
>tr|D8HI28|D8HI28\_STAAF  
mteqsvkntpqhetqskpkqktvkl iikrqdtsdskpyeetfeipyrenl nviac lmeirrnvpnikgkktppvwdmnc  
leevcgacsmvingrarqs  
csaivdqleqpirlepmtfpvir d lqvdrsrmdnlkrmkawipidgtydlpggprmppekkrqtayelskmtcgvcle  
vcpnvtennkfvgaqaisq  
vrlfnlhptgsmtkderlnal mgtgg lqqcngsqncvnacpkgip l t t s i a a m n r e t t f h m f s f f g s d h e v e  
>tr|D8HI29|D8HI29\_STAAF  
mnkpigvidsgvggl tvakeimrql pnetiyy l g d i g r c p y g p r p g e q v k y t v e i a r k l m e f d i k m l v i a c n t a t a v a l  
eylqk t l s i p v i g i e p g a  
rtaimttrnqnlv l g t e g t i k s e a y r t h i k r i n p h v e v h g a c p g f v p l v e q m r y s d p t i t s i v i h q t l k r w r n s e s d t  
vilgcthypllykpiydyf  
ggkktvissgletarevsal l t f s n e h a s y t e h p d h r f f a t g d p t h i t n i i k e w l n l s v n v e r i s v n d  
>tr|D8HI30|D8HI30\_STAAF  
mkeiviasnngk indfkvi f p d y h v i g i s e l i p d f d v e e t g s t f e e n a i l k s e a a a k a l n k t v i a d d s g l e v f a l n g e p  
giysaryagenksdeanie  
kllnklgnttdrraqfvcvismsgp d m e t k v f k g t i s g e i a d g k y g e n g f g y d p i f y v p k l d k t m a q l s k e q k g q i s h r r  
nainllqaflegdknv  
>tr|D8HI31|D8HI31\_STAAF  
mskwii v s d n h t e s g v l y q i y e m h p d a d v y l h l g d s e f a y d d t e l s l f n r v k g n c d f y e f e n e a v a k c n d v k a f y t h g h  
lyqvnrt r d l l a e k g l e l g  
clfafyghthvakyeyingvhinpgsisqsrsmeetyaeviiddqtlhgtinfknrhetishttf  
>tr|D8HI32|D8HI32\_STAAF  
mkri vil g n v i d g p i w l n h v d y l v k s v l l k s i k l r f q e v r n f e i l v k i m n r i h i  
>tr|D8HI33|D8HI33\_STAAF  
mknkfigksil siaais l t v s t f a s e s h a q t k n a e t v k k y n e y q t n f k k q v n k k v v d a q k a v n l f k r t r t v a t h r k a q r a  
vnlihfhqhsyekkk l q r q i  
dlv l k y n t l k  
>tr|D8HI34|D8HI34\_STAAF  
mkrksnvl ti i k i v t d l v a t v l i i r a l l n s r k d a k  
>tr|D8HI35|D8HI35\_STAAF  
mkkavvrikdggprdytfd l t r p l e e n r k n i k v v k n g e i d s i y w d  
>tr|D8HI38|D8HI38\_STAAF  
mkfkkyi l t g t l a l l s s t a i a t i e g n k a d a s s k k d y i i q s e f h d k r i a e e l r t l l n k s n v y a l a a g s l n p y y k r t i m m n  
eyrakaalrsnnfakmada  
kva lekiykeineinr  
>tr|D8HI39|D8HI39\_STAAF  
msveigdpis l c w g p a n f h c l l k l v i q f l s v g a h p n f h c l  
>tr|D8HI40|D8HI40\_STAAF  
mnkhinkkatkl l e d y k k v q r k s k e t d r g c l k s v i m l i v l f f l i i f g i v a c s t n v n f f f q  
>tr|D8HI42|D8HI42\_STAAF  
mafndwein v v s g e h e v v a n e k s l f v i d e f y d v a i a i y y l d g k l k v a h v n y g s d f t i d v a n k v f e l n i q n p n v d e h  
>tr|D8HI43|D8HI43\_STAAF  
mktrivssvtt l l l g s i l m n p v a a a d s d i n i k t g t t d i g s n t t v k t g d l v t y d k e n g m h k k v f y s f i d d k n h n k l l v  
irtkgtiagqyrvyseega  
nks gl a w p s a f k v q l q l p d n e v a q i s d y y p r n s i d t k e y m s t l t y g f n g n v t g d d t g k i g g l i g a n v s i g h t l k y v q p d f  
ktilesptdkkv gwkvifn  
nmvngnwgpydrdswnpvynql f m k t r n g s m k a a d n f l d p n k a s s l l s s g f s p d f a t v i t m d r k a s k q q t n i d v i y e r v  
rddyqlhwtstnwkgtntk  
dkwtdr s s e r y k i d e w e k e e m t n  
>tr|D8HI44|D8HI44\_STAAF  
mklfyivll i i w l n i f l g n e i i h t l t v l i t t l y i v n s r k g i k n d r v e  
>tr|D8HI46|D8HI46\_STAAF  
mnknitkni l t t t l l l g t v l p q n q k p v f s f y s e a k a y i g q d e t n e l i k y y t q p h f s f s n k w l y q y d n g n i y v e l k  
ryswhahis l w g a e s w g n i  
nqlkdryvdvfg l k d k d t d q l w s y r e t f t g g v t p a a k p s d k t y n l f v q y k d k l q t i i g a h k i y q g n k p v l t l k e i d f r a  
realiknki l y n e n r n k g k  
l k i t g g g n n f t i d l s k r l h s d l a n v y v k n p n k i t v d v l f d  
>tr|D8HI47|D8HI47\_STAAF  
mnnitkki l l s t t l l l g t a s t q f p n t p i s s t e a k a y i n q n e t n v n e l t k y y s q k h l t f s n k t l w q k d n g t i h a t l l  
qfswyshi q v y g p e s w g n i  
nqlrnksvdi fgikdgetidsfal s q e t f t g g v t p a a t p n d k h y k l n v t y k d k a e t f t g g f p v y e g n k p v l t l k e l d f r i  
rtl i k s k k l y n n s y n k g g  
iki t g a d n n y t i d l s k r l p s t d a n r y v k k p n a k i e v i l e k s n

Tsompanidou\_et\_al\_Supplemental\_FASTA\_File

>tr|D8HI48|D8HI48\_STAAF  
mkknimnk1vlstallllgttstqlpktpisfsseakaynisenetnelikyqtqphfslsgkwlwqkpnsgihatlq  
twvwyshiqvfgseswgni  
nqlrnkyvdi fgtkdedtvegywydetftggvtpaatssdkpyrlflkysdkqqtigghefykgnkpvltlkeldfri  
rqtliknkklyneefnkgg  
ikitadgnnytidlskk1kltdtnryvknknaqievileksn  
>tr|D8HI50|D8HI50\_STAAF  
makivvalggna1gkspqeqlvknktslvglitkgheivishngnpqvgsinlglnyaahnggpafpfaecgamsq  
ayigyqlqeslqnelhsig  
mdkqvvtlvtqvevdendpafnnpkspiglfynkeaeqikekgfifvedagrgyrrvpsppisiiellesiktlikn  
dtlviaaggggipvireqh  
dgfkgidavidkdktsallganiqcdqliiltaidyvyinfntenqqplkttndelkryidenqfakgsm1pkieaais  
fiennpkgsvlitslneld  
aaiegkvgtvikk  
>tr|D8HI51|D8HI51\_STAAF  
mpgafmilfilvaviatwvipagaysklsyepssqelkivnphnqvkkvpgtqqeldkmgvkikieqfksgainkpv  
ipntyrlkqhpapegit  
ssmvegtieavdimvfilvlggligvqasgsfesglla1tkktkghefmlivfvsilmiiggtl1cgieeeeavafypilv  
pifialgydsivsvgaifl  
assvgstfstinpfsvviasnaagttfdglywrigacivgai fvisylywyckkikkdpkasysyedkdafeqqwsvlk  
dddsahftlrkkiiltl1fv  
lpfpimvwgvm1tqgwwfpvmasafliftiimfiagtgksglgekgtdafvngasslvgsliiglarginlvlnegmi  
sdtihfsslvqhm1sgpl  
fiivllfifflgfvps1sglavlsmpifapladviprfvivytyqfgyam1flaptglvmatlqmlnmryshwfr  
fvwpvavfvlifggv1it  
qvl1ys  
>tr|D8HI52|D8HI52\_STAAF  
mfssiyh1kfqsn1ifayatkyllnntthipvsvskt1fvkcvishplfmlfsqpyvscvtktvskyifftiniyhr  
snitlkyfkniiik  
>tr|D8HI53|D8HI53\_STAAF  
mrlqkap1vtsglvlg1lgn1lkd1sl1navc1g1fa1liwih1lctmlkyfnnveq1nsp1vssvfttffmsgflg  
tylntffsnitfinn1it  
piwilclvgimthmi1fsiky1kdfs1envypswtvlfigia1ag1tapvsgyffigq1tviygfvatciv1pivfkr1k  
afplqtsikpntsticapf  
s1vaaayviafpkanafivi1ll1laqifyfyiiiqlpk1lkepfspvsaftfp1visata1kns1pvlmfpviwkg1l  
fienvllatviv1rvfigyl  
hff1kknqdkf1rnasq  
>tr|D8HI54|D8HI54\_STAAF  
mrnqiqk1l1dsd1ss1h1skqtgvpqstihrmrkkers1dnms1knael1ykfangifsdn  
>tr|D8HI57|D8HI57\_STAAF  
mgk1gykni1idfd1t1vdfydaee1wafhymanvfnhkatkdd1l1tfkkinhqweafqkn1tksevlserfvnyfkhh  
qmevdghradv1frng1ae  
akvkyfdqt1etive1skrhdyivangvtetqkrr1nqtq1lhkyik1kifiseetgyqkpnpeffnyv1fndigederqs  
iivgds1tsd1l1gginagi  
atcwf1nfrgfdhnp1gi1pdye1nswkq1ndiv1r  
>tr|D8HI58|D8HI58\_STAAF  
mseikr1einyktdel1fenfrvfgnk1d1ymvne1ngqmi1dassdspfygi1fvgdql1garmal1kkgdvee1yfpdfedyi  
1lwk1lev1pkyqnr1gyase  
1idfaks1fnmpika1igrnds1kdf1lhgftdveaknieghdvl1lwkp  
>tr|D8HI59|D8HI59\_STAAF  
mdckvvs1nekdqfipk1kssdpvitgl1fqydaaqts1fekrmskenngreaalanvireymsd1k1sseqel1niqylan  
gskvvi1ggqag1f1ggp1y  
tfhki1fsi1it1ske1tdthkq1vvpv1fw1agedhdfdevnhtfvynenhgs1hkvkyhtmempettvsryypdkaelkqt  
1ktmfihmketvhtqg1le  
icdriidqyds1wtdm1fka1l1hetfkaygv1fidaqfep1rkmeapmfk1k1kqh1l1ddafratqqr1tqnqg1kamiqtd  
tnvhl1flhdenmrq1lvt1y  
gkhfk1nkt1dkty1ikee1iniaenqel1fsnnv1trp1meew1fntvaf1iggpseikywaelkdvfel1fdvempivm1r1  
rity1ndriek1l1skynip  
1ekvlvdgvegersk1f1reqashqf1ekvegmieqqr1lnq1l1devagnqnn1n1vnkneih1iqydy1lkry1l1nie  
rendismkqf1reiqet1lhp  
mgl1qer1iwnp1qi1ndfgtdv1fkp1styppl1sy1tfdhi1i1kp  
>tr|D8HI61|D8HI61\_STAAF  
m1netidy1lnvkengvy1dct1lggagha1y1lnq1l1ddgr1iaidq1d1aidnakev1kdh1hkvt1fvhsn1frel1tq1lk  
d1niekv1dgi1yyd1lgv1ssp  
q1ldipergfsy1hhd1td1m1rmdqt1qel1taye1vnnwsy1ealvki1fyrygeek1fskqi1arrieahreqp1ttt1el1vdi1  
kegipakarrk1ggh1pakrv  
fqa1r1avnde1safedsieqae1lvkdgris1vit1fhs1ledr1ckqv1feyek1gpev1prgl1pvipeaytpk1krvnrk1p  
it1ateed1ddn1rarsak1l

Tsompanidou\_et\_al\_Supplemental\_FASTA\_File

rvaeilk  
>tr|D8HI64|D8HI64\_STAAF  
mifvyallalvitfvlpvliptlkrmkfgqsireegpqshmkkgtptmggltfllsivitslvaiifveqanpiilll  
fvtigfgligfidyivv  
kknngltskqkflaqigiaiffvlsvfhlvnfstsihipftnvaiplsfayvifivfwqvgfsnavnldgldglat  
glsiiqftmyaismfvlg  
taigifciimlfallgflpyninpakvfmgtgslalggifatisimlnqelslifiglvfvietsvmsqvasfklgtgk  
rifkmspihhhfeligwse  
wkvvtvfwavglisgliglwivh  
>tr|D8HI65|D8HI65\_STAAF  
mlnytglenknvlvvglaksgyeaakllsklganvtvndgkldsqdahakdesmgisvsvsgshpltlldnnpivknp  
ipytsiideavkrglki  
tevelsylimseapiavtngtngkttvtsligdmfkkstrtgrlsgnigyvaskvaqevkptdylvtelssfqllgiekyk  
phiaitniysahlhyen  
lennyqnakkqiyknqteedylicnyhqrqvieseeikaktlyfstqqevdgiykdgfivykqvriintedlvlpgehnl  
enilaavlacilagvpika  
iidslttfsgiehrlyvgvtnrtnkyyndskatntlatqfalnsfnqpiiwlcgglrdgnefdelipymenvrvmvfvgg  
tkakfaklgnsgqksviea  
nnvedavdkvqdiiepndvllspacaswdqystfeergekfierfrahpsy  
>tr|D8HI66|D8HI66\_STAAF  
mddktkndqgesnedkdelelfttrntskrrqrkrskathfsnqnkddtsqqaefdeeiylinkdfkkeeskdenndsas  
shandnidstsdnieie  
dyrynqeidddnesngiavdneqsqsapkeqnsdsndeetvtkkerkskvtklpltleekrklrrkrqkriqysviti  
vlliavililymfsplskia  
hvningnnhvstskinkvlgvkndsmytfskknaindleadpliksvaihklpntlnvditeneialvkykgkylpl  
lengkllkgsndvkindap  
vmdgfkgtkeddmikalsemtpvrryaevtyapsknqsrielfttdglqvigdistiskmkyppqmsqslsrds  
klktrgyidlsvgasfipy  
rgntstqsesdknvtkssqeenqakeelqsvlnkinkqsskn  
>tr|D8HI70|D8HI70\_STAAF  
mrvkdnlqqistqindkseknnfstkpnviavtkyvtierakeayeagirhfgenrlegffqkkealpsdavihfigslq  
srkvkdvindvdyfhaldr  
lslakeinkraehkikcflqvnvsgeaskhgialedvdqfigdlkkydkieivglmtmapltddeayirsflkqlrlkke  
eiqrlnleyapcdeismgm  
sndyliaveegatfvrigtklvgeee  
>tr|D8HI75|D8HI75\_STAAF  
mdyketllmpktdfpmrgglpnkepqi qekwdaedqyhka lekngnetfilhdgppyangnlhmghalnkilkddivry  
ktmqgyapyvpgwdthgl  
pieqaltkkgvdrkkmstaefrekckefaleqielqkkdfrlrgvrdfndpyitlkpeyeeaqirifgemadkgllykg  
kkpvywspssesslaeaei  
eyhdkrsasiyvafdvkddkgvvdadakfiwtttpwtipsnvaitvhpekygqynvngkyiiaeaalsdavaealdwd  
kasiklekeytgeleyvv  
aqhpldreslvngdhvtttagtgcvhtapghgeddyivgqkylpvispidkgyfteeggqfegmfydkankavtdl  
ltekgaillklfdiithsyph  
dwrtkkpvi fratpqwfasiskvrqildai entnfkvnwgktriymvrdrgevisrqrwgvplpvfyangeiimt  
ketvnhvadlfaehgsniw  
fereakdlpegfthpgspngtftketdimdvwfdsgsshrvgl etrpelsfpadmylegsdyrgwfnssittsvatrg  
vspykflshgfvmdgekg  
kmskslgnvvpdqvvkqkadiarlwsstydladvisdeilkqtsdvyrkirntlrfmlgnindfnpdtdsvpesel  
levdryllnrleftasti  
nnyenfdylniyqevqnfivelnsfyldygkdilyieqrdsirrsmqtlyqilvdmtkllapilvhtaeevwshtph  
vkeesvhladmpkvvevdq  
alldkwrtfmnlrddvnraretarnekvigksleakvtiasndkfnasefltsfdalhqlfivsqkvvdkliddqataye  
hgdiviehadgekercwn  
ysedlgavdelthlcpccqvvkslv  
>tr|D8HI76|D8HI76\_STAAF  
myhnsnanfvngitlnvrknelkpfyedvlglninetltsiqyevgqnnhvitlvelqngrepmlseaglphiaiklp  
qisdlanllihlseydipv  
nggiqpaslsffedpegngfkfyvdkdeaqwtrqndlvkidi rplnvprlvshatkllwlgipddaiigalhikthls  
evkdyyldyfgleqsaymd  
dysiflasngyyqhlamndwvsatkrvenfdtyglavidfhypetthlnlqgpdgiyyrfnhfeved  
>tr|D8HI77|D8HI77\_STAAF  
mkpnsksnkkimknyneffkaqinqklsepetkkiysqrkidvepvfgfmkailgftmrvrginkvkvrelgfvlmaln  
irkiaagravhykihiikka  
dfyqiinrnglftlpknlmsqaps  
>tr|D8HI78|D8HI78\_STAAF  
mkngqlkpgynlqiatsqfvl sydlfnpdttrtlipfltlkignmtlmmnlyvlitke  
>tr|D8HI79|D8HI79\_STAAF



Tsompanidou\_et\_al\_Supplemental\_FASTA\_File

mtrrerrsfseyklqmvrlfengkprneiireydltpsalgkwikqhqtgtfnhqdnlsdeekeliklrkevqhlkmen  
dilk  
>tr|D8HI80|D8HI80\_STAAF  
mhkkyfigtsiliavfvvifdqvtkyiattmkigdsfemiphflnitshrnngaawgilsgkmtffffiitiilialvy  
ffikdaqnlfmqvaisll  
fagalgnfidrvltgevdfidtnifgydfpifniadsslitigviliiaialkdtshkkekvev  
>tr|D8HI81|D8HI81\_STAAF  
metyefniddkeqtmrvdkllpelnsdwsrnqiqdwikaglvvandkvksnykvklnhdhivvtekevveadilpenln  
ldiyyedddvavvykpkgm  
vvhpspghytntlvnglmyqikdlsgingeirpgivhridmtdsgllmvakndiahrglveqlmdksvkrkyialvhgni  
phdygtidapigrnkndrq  
smavvddgkeavthfnvlehfkdytlvecqletgrthqirvhmkyigfplvgdpkygpkktldiggqalvagligfehvp  
tgeyerhaelpqdfedll  
dtirkra  
>tr|D8HI86|D8HI86\_STAAF  
mqskrylvledgsfyegyrsgdnltvgeivfntamtgyqetispsytgqitftypignyginrddfeslvptlngi  
vykeasahpsnfrqkktlh  
dilelhqipgiagvdrsiirkiqhgvkagftdrkedidqlvkhllqqvelpkneveivstktpyvstgkdlsvlvdf  
gkkqniivrelnvrgcnvtv  
pvytttaeeilamadgvmllngpgnpevvecaipmiqgilgkipffgiclgqhlfalsqgassfkmkfghranhpvkn  
letgkiditsqnhgyaidi  
dskstdlevthlalndgtvegkhhktpafsvqyhpeanpgpsdsnylfdffvamntnfkekerhina  
>tr|D8HI87|D8HI87\_STAAF  
mpkrndiktllvigsgpiigqaaefdyagtqacalakeegyrvilvnsnpatimtdkeiadkvyieplthdfiariirk  
eqpdallptlggqgtlnma  
iqhlesgvlqdnvqllgtelstiqqaedremftrlmndlnvpvpesdivntveqafkfeqvgypivrpafmtggg  
gichndeelheivsnghy  
spatqclleksiaqfkeieyevmrkndnaiivcnmenidpvgihtgdsivvapsqtlsvveyqmlrdvslkviralgie  
ggcnvqlaldphsfdyii  
evnprvsrssalaskatgypiaklaakiavgltdemlnpitgtsyaafeptldyviskiprfpfdkfekgereigtqmk  
atgevmaigrtyeesllka  
irsleygvhhllpngesfdldyikerishqdderlffigeairrgttleeihmtqidyfflhfqnidielhqlkehq  
gdleylyakdygfsdkti  
ahrfnmteeevyqlrmendikpvykmvdtcaafesstpyyygytetenesiitdkekilvlgsgpirigggvefdyatv  
havwaiqkageyaiivnnn  
petvstdfsisdklyfeplteedvmniinlekpkgvvvqfggqtainladklakhgvkilgtslenlnraedrkefeall  
rkinvpqpgkatspeea  
lanaaeigyvvvrpsylvlgrameivdndkelenymtqavkaspehpvlvdryltgkeievdaicdgetviipgimehi  
eragvhsqdsiavppqt  
tedelatledytiklakglniigliniqfviahdgvylvnprsrtpvflskitdipmaqlamraigeikltdmgyqe  
gvqpyaegfvkapvfsfn  
klnvdiitlgpemkstgevimgkdttekalfkgltgsgvevkdhgtvltvtsdkdeevvklagrlnevgykilatsgta  
nklaeydipaevvgkigge  
ndlltrinqgdvqivintmtkgkeverdgfqi rrttvengipcltsldtanaltnviesmtftmrqm  
>tr|D8HI88|D8HI88\_STAAF  
mkdlpialdfeskekvnqfldlfdeslfvkvgmelfyqegpqlineikerghdvfldklhdipntvgkameglaklnv  
dlvnvhaaggvkmmseaik  
glrkhnqhtkiiavtqltsttedmlrheqniqtsieeavlnyaklanaagldgvvcsplesrmlteklgasflkvtpgir  
pkgasqddqhrirttpear  
qlgsthiivgrpitqsdnpvesyhkikeswlv  
>tr|D8HI92|D8HI92\_STAAF  
maydglftkkmvslqflitgrvhkinqpdndtilmvvrqnrqnhqllsihpnfsrlqlttkkydnpfnppmfarvfrk  
hleggiesikqigndrri  
eidiskdeigdtiyrvtileimgkhsnllvdenrkieegfkhltptnhyrtvmpgfnyeapptqhkmpyditgaev  
lkyidfnagniakqllnqf  
egfspnitneivnrqfmsstlpeafdevmaetklpptpifhknhetgkedfyfiklnqfnddtvtydslnlldrfyd  
argerervkqrandlvrfv  
qqqlhkyqnlaklieeyeqsknkdeqlygelitaniyrikqgdevtalnyytneevviplnptkspsanaqyyykqy  
nrmktrerehqhgqitkd  
nidystieqqlhhsvhidideirdeleagqfkmqrknqtkkkkeqiqqlhyvstdgddiyvgknnkqndyltnkkakkt  
ytwlhtkdipgshvvi fnd  
apsdtti keaamlagyfskagnsgqipvdytliknvhkpsgakpgfvtydnqktlyatpdyehiqkmmqs  
>tr|D8HI95|D8HI95\_STAAF  
mkkillavtggiaaykaidltskltqsgyevrvmtnhaqkfvtplafqaisrnavytdtfeenpsei qhialgdwada  
iivapatantiaklsvgia  
ddlvtstllatetpkfiapamnvhmyenkrtqqniniiledgyhfi epsgflacgyvakgrmeepiqivsvidahfqs  
nranssfqdkralvtagp  
tievidpvrfsnrssgkmgyaiaea lnrrgai vltvtgpttledpkdievihvqsaeemfeqvtsrfdeqdivvkaaav

Tsompanidou\_et\_al\_Supplemental\_FASTA\_File

sdytpvdvlehkmkkqgdg  
lsvsfkrtdkilkylgehktqsyliqfaaetedienyaqqklrkknadviisnvgdmsigfssddneltmhfknnekvn  
ikkkgkvvlaaqiidelet  
rwq  
>tr|D8HI96|D8HI96\_STAAF  
miakvivdvasksvdykfdyipeqlesviqpgvrivpfgprtiqgyvmevtaepdaqldvsklkkieevkdiqpelts  
elialewmgsthvikris  
mlevmlpsaikakyykafkmdkddievpstllqkfdkhgyyyykdaqknndiqllmkllkddiveektiltqnitkktkra  
vrviogyhpdevlaklekv  
ikqydlyaylseeqhktifltdiedmgfsskssldglikkgyvekydavverdpfkdrvfeqeskqqltedqfkayeaika  
kivsqqetfllhgvgtgsg  
ktevylqtiiedvlsqgkqammllpeialtpqmvllrfkrrfgddvavlhsglsngerydewqkirdgrarvsvgarssvfa  
pfknlgliiideehesty  
gedypryhareiaqwrseyhpcvllgsatpclesyaraekgyvhlslprnrvnqqaalpeidivdmreealsegnrsmfsk  
dlreaiqlrlrdreqvvlf  
lnrrgyasfmlcrdcgyvpqpcncdisltyhkttllkchycgyqetppnqpcncesehirqvgtgtqkveellqqefed  
ariirmdvdttskkgahek  
lltefekngdillgtqmiakgldypnitlvglvlnadtmllnlpdfrasertyqlltqvagragrhekagqviiqtypndh  
ysilvdvqkndyltfyrgem  
yrklgkyppyyylinfthshkemkkvmeasqhvkiillqhltekalvlgpspaalarinnefrfqilvkyksepqlqa  
iqflddyhekfikela  
kidiqpqmmm  
>tr|D8HI97|D8HI97\_STAAF  
mkkllgc111imllvvagcsfggnhllsskseeqetvkkeseekdpdlekkfeeiekkmgikdapsldklpmlte  
ksftnsgiqgwkdykelm  
gkveladyrftkdskgssikdvdaaffkkgkikrkviethddvkqvywyvdpdgkkignsntpvfyaeimtkykdglv  
yasvepgsyvihkdaiky  
ddysklkllsqlltkldhpkpvpysvaqiksfgvpltsvsfmthgskdtkdevmpalayftfspknyedksnpdpkvlnlv  
smdflnassdfgnahfvvl  
skyikeyesnyetasddsllk  
>tr|D8HI98|D8HI98\_STAAF  
mfeqkvgiikreanviisnstggkemqvnkviyillalflgsfghkfyagknmqgilhlifcwtgiphilaisavitv  
fkpadeqgnvtl  
>tr|D8HIA0|D8HIA0\_STAAF  
mtkiiimgtpdfsttvlemliאהדviaavvtqpdprvgrkrvmtpppvkkmkydlpvyqpeklsqseleqllqldvd  
livtaafgqllpesllalp  
klgainvhasllpkryggapihqaiidgeqetgitimykkldagniiisqqaikieendnvgtmhdklsvlgadllket  
lpsiiegtnevpqddtqa  
tfasnirrederiswnkpgqvfnqirglspwpvayttmddtnlkiydaelvetnkinepgtiettkkaiivatndnea  
vaikdmqlagkkrmlaany  
lsgaqltvgkklil  
>tr|D8HIA1|D8HIA1\_STAAF  
mienvrslafdtiqdilineaysnlrinevlseneInvmdkalfteivgytvkrkytldfylvkpfvktkikawvrqllwm  
siygyvylkvpnhaiine  
aveiakerggyhngnvngilrtmmrsdlpdfnei adpkkrmaieysmpkwiidhwathygleetetilqsfllettstsv  
ranltraslddiiekldqe  
gydvkdhdllpyclhiggqpiihsrsfdgfvsiqdkssmfvahimnvdrhdhvl dacsapggkachiaevlmpegqvda  
sdihdhkidlinfnikkllr  
ltnikafqhdatkpydktydkilvdapcsglgvmrhkpeikytqskqhieslvdllqleilenvknnvkiggeivystcti  
eqlenenviytflknknf  
efepfqhpi tgelvktlqimpqdfnsdgffitkirkdn  
>tr|D8HIA3|D8HIA3\_STAAF  
mleaqfftdtqghrdknedaggi fynqtnqllvlcdgmghkagevaskfvtdelksrfealenlieqhqaenwlrnnik  
dinfqlyhyaqenaeykgm  
gttcvcalvfeksavianvgdsrayvinsrqieqitsdhsfvnlvltgqitpeafthpqrniitkvmgtdkrvspdlf  
ikrlnfydylllnsdgldt  
yvk dneikrllvkegtiedhgdqllmqaladnhskdnvtilaaiegdkv  
>tr|D8HIA4|D8HIA4\_STAAF  
migkiinerykivdklgggmstvy laedtilnikvaikai fipprekeetlkrferevhnssqlshqnivsmidvdeed  
dcyylvmeyiegtlseyi  
eshgp1svdtainftnqilgikahdmrivhrdikpqnillidsnktlki fdfgiakalsetsltqtnhvlgtvqyfspe  
qakgeatdectdiysigiv  
lyemlvgeppfngetavsiaikhiqdsvpnvttvdvrkdipqslsnvilratekdkanrykti qemkddlssvlhenrane  
dvyeldkmttiavplkked  
lakhisehksnqpkrettqvpi vngpahhqqfqkpegmlyeakpkkkstrkivllslifslmialvsfvamamfgnkye  
etpdvigksvkeaeqifnk  
nllk1gkirsysdkypeneiiktptntgervergdsdvviskgpekvmknvignl pkeqalqklkslgkdvkiekvy  
nnqapkgyanqsvtante

Tsompanidou\_et\_al\_Supplemental\_FASTA\_File

iaihdsniklyeslgikqvyvedfehksfskakaleekgfkveskeesyddidegdvisqspkgsvdegstisfvvsk  
gkksdssdvktttesvdvp  
ytkndksqkvkvyikdkdndgstekgsfditsdqidiplriekgtasyivkvdgktaeveksyddi  
>tr|D8HIA5|D8HIA5\_STAAF  
mktgrivksisgvyqvdnngerfntkprglfrkkkfspvvgdivefdvqinegyihqvyerknelkrppvsnidtlviv  
msavepnfstqlldrflvi  
ahsyqlnarvlvtkkdktpiekqfeinelkiyenigyetefignddrkkiveawpaglivlsgqsgvgkstflnhyrp  
elnletndiskslnrgkht  
trhvelferqngyiadtpgfalsgfdhidkdeikdyflelnrygetckfrncnhikepncnvkhqleignisqfrydhy  
qlfneisnrkvry  
>tr|D8HIA7|D8HIA7\_STAAF  
mhinllcsdrhlpqdiwaksnegkwggvdrgalillkhqipffsvgdffsvskeerqllteqlqikpvqaekadtdla  
avdkavalgfdstiygat  
ggrldhffgaiqlllkayykhdvhievidqqnieellpkqhtvekdkssypyisfipmtddvelslagfkylnarqmln  
igstltisneieslqakvi  
vhdglllqirstdln  
>tr|D8HIB0|D8HIB0\_STAAF  
miskingklfadmiiqgaqlsnadlvdslnvypvpdgdgtmnlmtsgreevenlsknigelgktfsgllmgar  
gnsqvi lsqfrgfccknie  
seseinskl laesfqagvetaykavmkpvegtiltvakdaaqaavekanntedcielmeiyivkaneslentpnllavlk  
evgvvdsqgkglcvyegf  
lkalkeveakvakldkdefvhdehdfhgintediigyctemmvrfgknkkafdeqefrqdmsqfgdsllvindeei  
vkvhvhteypgkvfnfygq  
ygeliklkvenmreqhrevi rkeqhtakpkmetvetaitismgegiseifksmgathiissgqtmnpstedivkvieqs  
kckraillpnnknilmase  
qaasivdaevvptksipqgisalfqydvdalenkaqmadsvnnvksqsltyavrtdkidgveikkdafmgltedki  
vssqsdqllttvtellneml  
aedseil tviigqdaeqvtndminwi eeypdvevevheggqpiyqyffsve  
>tr|D8HIB1|D8HIB1\_STAAF  
makvnliespysllqlkgigpkkievlqqlnihtvedlvlylptriedntvidlnqaedqsnvtiegqvyrapvvaaffgr  
nkskltvhlmvnniavkci  
ffnqpylkkie lnqti tvkgkwnrvkqeitgnrvffnsqgtqtqenadvqlepvyrikegikqkqirdqirqalndvti  
hewltde lrekykletldf  
tlnlthhpkskedllrarrtyafteflfelrmqwl nrllekssdeaieidyldqvksfidrlpfe lteaqsksveifr  
dlkapi rmhrllqgdvgsq  
ktvvaai cmyal ktagyqsal mpptelaeqhaeslia lfgdsmnval l tsvkqkkrkilleqlengt idcligthali  
qddvi fhnvglvitdeqhr  
fgvnqrqllrekgamtvlfmtatpirtlaisvfgemdsvsikqlpkgrkpiittwakheqydkvlmqmtselkkgrqa  
yvicpliesseh ledvqnv  
valyeslqqyygvsrvglhglksadekdevmqkfsneidvlvsttvvegvnvpnatfmmiydadrfglstlhqlrgr  
vgrsdqqsycvliaspkte  
tgierrmtimgtdgfel serdl emrgpgdffgvkqsglpdfvanlvedyrmlvardeaaeliqsgvffentyqhlrh  
fveenllhrsfd  
>tr|D8HIB2|D8HIB2\_STAAF  
mrgetlklkkdkrreairqqidsnptdhe lsdlfqvsiqtirlrtylnipelrkrkrlvaeknydqissieeqefig  
dliqvnvkaqsildits  
dsvfyktgiarghvlfaqanslcvalikqptvlthessi qfiekvklndtvraearvvnqtakhyyveksyvkhtlvfk  
gnfkmfydkrg  
>tr|D8HIB4|D8HIB4\_STAAF  
msktaiifpggaqkvqmaqdlynnndqateiltsaantldfdiletmftdedgklgetentqpallthssallaalknl  
npdftmghslgeysslvaa  
dvl sfedavkivrkrqqlmaqaftgvgsmaavlgldfdkveicks lssddkii epanincpgqivvsghkalide lve  
kgkslgakrvmplavsgpf  
hsslmkvi eedfssyinqfewhdakfpvvqnvnaqgetdkeviksnmvkqlyspvqfinstewlidqgvdhfieigpgkv  
lsglikkinrdvkltsiq  
ledvkgwnand  
>tr|D8HIB5|D8HIB5\_STAAF  
mqmtksalvtgasrgigrsialqlaegynvavnyagskekaevveikakgvdsfaiqanvadadevkamikevvsqf  
gsldvlvnnagitrnllm  
rmkeqewddvidtnlkgvfnciqkatpqlrqrsgai n lssvvgavgnpgqanyvatkagvigltksaarel asrgitv  
navapgfivsdmtdalsde  
lkeqmltqi plarfqqtdiantvaf lasdkakyitgqti hvnggmym  
>tr|D8HIB8|D8HIB8\_STAAF  
mylksidaigfksfadqtnvqfdkgvtaivgpngsgksnitdaikwvlgeqsaks lrgskmediifsgaehrkaqnyae  
vqlrldnhsksklsvdenev  
ivtrrl yrgeseyyinnrarlkdiadl fldsglgeaysiisqgrvdeilnakpidrrqiieesagvlkykkrkaesl  
nkldqtednltrvedilyd  
legrvepl keeaaiakeyktlshqmkhsdivvtvh didqytnnrqldqrlnldlqqqqankeadqrlsqqiqqykgkrh

Tsompanidou\_et\_al\_Supplemental\_FASTA\_File

qldndveslnyqlvkatea  
fekytgqlnvleerkknqsetnaryeeeqenliellenisneiseaqdtykslkskqkelnavireleeqlyvsdeahde  
kleekneyyt1mseqsdv  
nndirflkhtieeneakksrldsr1vevfeqlkdiqqqikttkkeyqqtneksavdkeikniekd1tdtkkaqneyeek  
lyqayrytekmtidslt  
tqeeytyffngvkhilkanke1kghgavaeiidvpskltqaietalgaslqhvividsekdrqaiqlkernlgrat  
flplnviqsrvtatdiksi  
akeangfisiaseavkvspeyqniign1lgn1iivdhlkhanelaraikytrivtlegdivnpggsmtgggarksksil  
sqkdelttmrhqlledylrq  
tesfeqqfkelkiksdq1selyfeksqkhnt1keqvhhfemldr1ttqetqikndheefekndgytsdksrqtlsek  
ethlesikas1krledeie  
rytk1skegkesvtktqqt1hqkqsd1avvkeriktqqqtidrl1nqsqqtkhq1ndvkeiaffnsdevmgeqafqnik  
dqingqqetrtr1sdelk  
1kgqrie1neqidageat1qvchqdi1aienhyqdikaesk1dvl1hhaidh1ndeyqltverakseytsdesida1rk  
kvk1mkmsidelgpvn1na  
ieqfeelnerytflsegrtd1rkaket1eqi1semdqevterfketfhaiqghftavfkq1fgggdaelq1teady1tag  
idivvqppgk1qh1s11s  
ggeral1taial1fai1kvrsapfvi1deveaaldeanvi1ryakyl1nel1sdetqfivi1thrkgtmefadrlygv1tmqesgv  
tk1vsvn1ntiddv1keeq  
>tr|D8HIB9|D8HIB9\_STAAF  
msffkr1kdkfatnkeneevks1teeqqdk1edthsegstqdvnd1aenaevkkkprk1seaddddglisiedfeeie  
aqkmgakfkag1eksrqnf  
qeqln1liaryrkvdedffea1eem1itadvfgntvmt1tee1rmeaqrriqdted1revivekiveiyhqeddseam  
n1ledgr1nvi1mvgvngv  
ktt1gk1ayrykmegkkvm1aagdt1fragaidq1kvwgervgvdvisqsegsdpaavmydainaaknkgvdilicdtag  
r1qktn1mqelekvkrvi  
nravpdaphea11c1dattgqna1sqarnfkevtntvgiv1tk1dgtakggiv1airnelhipvkyvg1geq1dd1qpfn  
pesyvyg1fadmieqnee1  
ttvendqivteekddnhgak  
>tr|D8HIC3|D8HIC3\_STAAF  
mrvevgqivnthgikgeikvksnsdftdvr1fpgqv1tvvhnnnd1eytvkshrvhkg1hml1tfeginnindiehlkgss  
iyqerdhediv1eenefyy  
sdi1gctv1ddqetpigrvini1fetgandv1vikskeylipyiadvvkevdienkki1itpmeg11d  
>tr|D9RAZ3|D9RAZ3\_STAAJ  
msitekqrqqaelhkk1lwsian1d1rgnmdasefrnyil1glif1yrf1sekaeqeyadalagedityqeawtdeeyred1k  
aelidqvgfy1iepqd1fsa  
mi1rietqdfdieh1atairkvetst1geesendf1gl1fsdmd1sstr1gnnkertaliskvmin1dd1p1fvhsdmeid  
m1gdayef1igrfaatagk  
kagefytpqqvski1akivtdgkdk1rhvydptcgs111rvgketkvyryfgqernntty1narmm11hdvryenfd  
irnddt1enpaf1lgn1t1fda  
vi1anppysakwtadsk1fenderfsgygl1apkskadfafi1qhmvyh1ddeg1tmavv1phgvl1frgaagvirry1liekn  
yleav1glpani1fygtsip  
tcil1vfkk1srqqddn1l1idasndf1ekgnqnh1tdtqvdri1dtykrketidkysysat1qeiadndyn1nipryvdtf  
eeeepid1leqvqqd1knid  
keiaieqe1inay1kelgvlkde  
>tr|D9RAZ4|D9RAZ4\_STAAJ  
mnkn1i1ksiaal1t1tsmtgvgttmvegi1qqtakaehnvkqitntnvapysg1vsigsgtg1fivgkntivtnkhvvagm  
eigah1iahpngeynnggf  
ykvk1kivrysgqedia1ihvedkavhpknrnfkdytsilkiaseakenerisivgyep1yinkf1qmyestgkvlsvkgnt  
i1sdafvepgnsgsavfns  
kyevvgvh1fagngpankstkggyvyfspeikkfiadntdk  
>tr|D9RAZ5|D9RAZ5\_STAAJ  
mnkn1i1ksiaal1t1tsvtsvggttmvegi1qqtakaehnvtkitntsispykgil1rvgagtg1fvvgkntil1tnrhvakdv  
qvgstvl1ahp1ngentdggv  
ykvk1kivpyagsad1ai1vqveedsvypknkkfsenteil1t1sevkaneriaivgypp1yknkhmyqstgtvl1singdk  
l1vsdafaegngsgspvfn  
knevvav1lysgdq1ghskkesysvyftpeikkfiadntek  
>tr|D9RAZ6|D9RAZ6\_STAAJ  
mnkn1l1viksiaal1t1tsmtg1gds1vredkq1q1akaeknvtqvkdt1nvsp1ykgv1vafkdatg1fivgknti1tnkhvskdy  
kvgdri1tahp1ngdkngngi  
yk1k1k1sdy1pgnedi1svmveekavergangynfnenveafk1fakdakvddkikvigypl1paqnt1fkqfestgtvksikd  
nn1n1fday1iepgnsgspvl  
nsnnevvgv1yggig1kigseyngavyft1pqikefi1qkhi1eq  
>tr|D9RAZ7|D9RAZ7\_STAAJ  
mnknv1viksiaal1t1tsvtg1lgtt1vdnvqqtakaennvtkvkdt1nifpytg1vval1ssatg1fvvgkntil1tnkhvskyy  
kvgdri1tahp1nsdkngngi  
yt1k1k1tdy1pgked1svihveera1vergpkgfn1ndnvt1pfkyaagakigerikvigyep1yknkyil1hestgpvasing  
ssi1vysahvevgngsgspvl

Tsompanidou\_et\_al\_Supplemental\_FASTA\_File

nsnne1vgihyasdanngnknkygyvftpeikkfiaenidk  
>tr|D9RAZ8|D9RAZ8\_STAAJ  
mfesagvilskhfi1yqnkkdmhqvsetnqyylnneiesnlknvftnlnsiqvkiaksnp  
>tr|D9RAZ9|D9RAZ9\_STAAJ  
mntkl1gk1vasalvt1tg1hssylgldtnkvvtakads1sdgqlwlgvknplidaqiisgnkdeeikvtylrd  
gvsnvvsaygnndggfste  
sidfkslkqid1tkenvqddfne1dakntwns1tek1kshglvkngqk1sihssnptpvsgtvgeevstggenk1tr  
linkitid  
>tr|D9RB00|D9RB00\_STAAJ  
mldiffikdvmaiivagi1mfifnvyfglevlgdpswfy1pityatryvymiegnipvmmtkviyiiit111aillfkf  
nkwsrtikd  
>tr|D9RB01|D9RB01\_STAAJ  
mhlk1nded1ny1ln1skeileqynikiddnckgd1sitscnsyff1tsyflkpgkatinfreyryns1lrl1ndgf  
hknsneki1rgrnifsk  
kefiqkadgvthmkayplpykifedssdfvkq1ft1leytktnhdnki1etn1fmsw  
>tr|D9RB02|D9RB02\_STAAJ  
mhdntiksiskdyfdylqteskfip1enetiefyspivdyfgds1svnisfsgnrykladhget1wnmeqfgld1tnhkk  
qkkyq1lnn1vqnyglvie  
nkhinfytnrid1sqaihdyvlaiseisylgilkeniks1fkdevmqyflsnrkiypnm1f1efkvegksk1ihsfeavf  
pgeateyvktikridkna  
knv1fdwndvevhrknfnfsnar1niiteqqddiseavstmsqynvev1fsfenkkqleekfsnv  
>tr|D9RB03|D9RB03\_STAAJ  
mtvkvhylgigkfi1sigdlveietieetlyntiiry  
>tr|D9RB04|D9RB04\_STAAJ  
mkmkklvkssvatsial1mlsntvdaaqhitpvsekkvddkitlykttatsdndk1nisqil1tnfikdk1sydkd1vlk  
aagn1sgyk1kpnk1pdyn  
sqfywgkynsvssesndavnvd1yapknqneefvqqt1gysyggd1nisng1sgg1ngsksfsetinykqesyrtti  
drktnhksigwgveahkim  
nngwgygrdsyptygne1flggrqssnagqf1p1hmp1l1argfn1p1ef1sv1shkqndtkk1k1kvtyqremdry  
tnqwr1hwignnyknqt  
vtftstyevdwqnh1tk1igt1dsk1etnpgv  
>tr|D9RB05|D9RB05\_STAAJ  
mfkkkmlaat1svgl1apl1aspihesrantni1enig1dgaevikr1tedvsskkwgtqnvqfd1vkdkkynkdalivkmqg  
finsrtsfsdvkgsgyelt  
krmiw1p1fqyn1g1mtkdpnvs1iny1lpknki1et1dv1gq1t1gyn1ggn1fqsaps1ggn1gsfnysk1tisytqksyvsevdq  
nkskvkwgvkanefvtpdg  
kksahdry1fvqspngpsgsarey1fapdnq1p1liqsgfn1psfittishektsetsefeisygrn1dityat1fprtgi  
yaerkhnafvnrnfvvrye  
vnwktheikvkghn  
>tr|D9RB06|D9RB06\_STAAJ  
msnanygk1i1h1lvt1sn1t1nieenp1q1snyesey1lekn1iktq1fikstksrs1yeettyh1k1tngd1lnqpgt1klw  
t  
>tr|D9RB07|D9RB07\_STAAJ  
mikqvlrks1ntvkehidsnfqkn1ifslv1f1p1f1vpy1i1id1lvh1snnqeyfk1llssish1flmffvtaislyail  
sip1tsnscrkssfrkisk  
vi1y1f1vff1y1lshhinidiskmdsswhfya1flcffi1syk1tekimkvckwi1fneesnndeg1rtqk1lffittv1fgt  
is1fstianv1vaikqf1n  
>tr|D9RB08|D9RB08\_STAAJ  
mkkei1kkqwviwt1lvt1sffsigtpgiai1p1f1s1ya1sk1ilv1nk1fvep1d1vt1qn1keknksini1enqkikreiqe  
1kn1kkd1lissieegt1el  
ehitsy1ndel1fkydiel1typfd1vevdssqintyikk1qmkekel1n1leevki1fnvstenkrh1qnaqakqi1rlfnaet  
sq1inkvnsknie1smqki  
fksyegin1kifetdnvripet1ldik1e1ld1mhkyqvkie1deki1rreer1ar1keieqaekemekk1kel1dkdirhqnn  
eikk1tmy1lnntd1lqveke  
lyieki1rel1dqs1kd1nserenvedrkdnaqsgfvyi1snigsfgeny1kigvtr1lepmdrine1ssasvp1fedvhal  
ifsenafelen1k1heyfkk  
yknkvng1rkeffkvn1eikdkv1seh1nstvqf1idepka1qyret1rl1ts1  
>tr|D9RB09|D9RB09\_STAAJ  
mirfdvngsdhanppnneriptphihiyteeynnggiaiplkdied1eltdeieies1dffmkytnikhdnvii1epr1l  
>tr|D9RB10|D9RB10\_STAAJ  
mktieermneyfnw1kqny1fke1dsste1t1p1fknh1ndfiri1yadt1p1neic1sddg1tine1emlgidintktrtk  
liqni1nqfn1klvdkeit  
advknes1faqskhn1iqg1ilkiyd1lt1tksnvt1ni1fyeev1eflydreir1glaqvs1vsgesglkysidyivsetksqpe  
k1lvnftn1ndfnkitneay  
iyrdikpn1rpsrnk1lepim1li1vndvdhpineraqtvaehen1e1ilkw1snkski1et1ts  
>tr|D9RB12|D9RB12\_STAAJ  
mksvai1igagi1tg1ssay1flkqdpnidvti1feasnrpggki1qsy1rkdgy1miel1gpsy1lgrktimtelakdigleqdi  
vtnttgqsyi1faknk1lypi

Tsompanidou\_et\_al\_Supplemental\_FASTA\_File

pggsimgiptdkpfvttklisplgkrlagldllkkptqmqdgdsvgaffrarlgnevlenlieplmggiygtddkls  
lmstfnpfkeeeafgsl  
kgmkdekkr1kqrqlypgapkgqfkqfkhglssfiealeqdvknkgvtiryntsvddiitsqkqykvivsnqqedvfdg  
vlvtphqvflnwfgqdpafdyfktmdsttvatvvlafddkdientydgtgfviartsdtditactwtsskwpfttpegkvlirayvkgpgdsvddht  
dnelvsivrrdlsqmmtfk  
gdpeftivnr1pkssmpgyhvghiqqirqiqahikqtyprrvtgasfeavglpdcitqgkvaaeeviael  
>tr|D9RB13|D9RB13\_STAAJ  
mtkkmgllvmaygtpykesdiepyytdirhgkrpseeelqdlkdryefigglspilagttddqadalvsaln kayadvefk  
lylgkhispfiedaveqm  
hndgi tea itvvlaphyssfsvgsydkradeeaakygiqlthvkhyeqpkfiewtnkvetlaqipeehkdtvlvvs  
ahslpkgliekndpypqe  
lehtallikeqsniyiaigwqsegntgtpwlgpdvqdltrdlyekhkyknfiytpvgfvcehlevlyndyeckvvcdd  
iganyyrpkmpnthplfig  
aivdeiksif  
>tr|D9RB14|D9RB14\_STAAJ  
mvhknnti1kmikgeethttpvwfmrqagsqpeyrklkekyslfdithqpelcayvthlpvdnyhtdaailykdimp  
1kpigvdveiksgigpvh  
npiktiqdvklsqiperdvpyvldtikllteeklnvpligftgapftlasymieggpskynftkammyrdeatwfal  
mnhlvdsvkyvtaqveag  
aeliqifdswvgalnvedyrryikphmir1isevkekhdvpvilfgvgashlinewndlpidvlgldwrtsinqaqqlgv  
tktlqgnldpsillapwnv  
ieer1kpi1dqgmengkhi fn1ghgvfpevqpet1rkvsefvhtytqr  
>tr|D9RB16|D9RB16\_STAAJ  
mrnqatt1fnkr1halrkeknyynkfi fnghfmvfl1llgafifgygewlkhiptninfaliaaviva1tsifmprp11  
keadki11pfekhmsqfm  
rhailysyfariliqliivivmfp1fyninqhnavafyicfgvsalifpyvgr1r1rwqwyqsglktwqvn1isfiifal ty  
y111apkwiyivfvmvalpv  
lieflvkkypgflpwekmi aiehrhmnnykfvmnftdvkhlkesavr syldi11pvpkgskfnsnamylflfirsf  
igrdafi1frlviiav1  
lmwlsyplvtaiigc1fyi11lqmaqfysqqayglwpqvwvpveekvikgyeqflyr1mfvictvfavtfiikhmtlf  
yv11fyivgl1tirsik  
k1kyqet11rd  
>tr|D9RB20|D9RB20\_STAAJ  
mflckrqidinarfglpriafmsavatiimflvsyevmyflsntplsdhrhflif111vfmtyp1hksih11fflpyrksf  
kvhkltkrkwlifentyvn  
qpvhkfyfcin1ilpli1salfvy1tisfpqyghyfmfl1alnfgisitd11ylkii1fsnygyieehstginilkki  
knph1  
>tr|D9RB21|D9RB21\_STAAJ  
mkmin1ivpvtasal1gacgasatdskent1isskagdvvadtmkkigkdqianasftem1nkiladkyknkvndkk  
ideqiekmqkqyggkdkfe  
kalqqqgl1adkyken1rtaayhkel1sdkikisdseikedskkashilikvskksdkegl1ddkeakqkaeeiqevsk  
npskfgeiakkesmdtgsa  
kkdge1gyv1kgqtdkdfekal1fk1kdgevsdvkssfyghy1kadkptdfnsekqslkek1vdqkvqknpk11tdaykd  
11keydvdfkdrdksvve  
dkilnpek1kqggaggqsgmsq  
>tr|D9RB23|D9RB23\_STAAJ  
miiks1eiygygqfvqrkiefnknfteifgeneagksti qafihsilfgfptkkskepr1epr1gnqyggklvl1iddgl  
eieverikgsaggdvkvy1  
pngavrddaw1qkkl1nyi skktyqgifsfdvlg1qdihrn1nekqlqdy11lqagalgstefsmrevinrkkdelykksq  
knp1inqqieqlkqlesqi  
reeeak1etyhr1vddrdkssrr1en1khn1nq1skmheekqkevalhdhsqewksleqq1niep1tfpekgvdryekar  
ahkqslerdig1rner1aq  
1keeatq1epvkgsd1dafis1nqqeneiknefeltai ekdiankqrdkdelqanigwsethhdvsseamksyvseqi  
knkqeqaayikq1erslee  
nkiednavhse1dsveekivpeetfekkeysqqvieleken1ysklkerfeieqqekqkrqk11rttf111tlvgig1  
tafsf1snm1fgiifav1  
tlvfvig1imskskvdyseaitdeieeikaqlsil denyd1dfd1deqyri rdhwqqa1knkdileekrqyiegr1nda  
kgrhdelqstvenvkdely  
1ssk1snd1ivdsistmanika1dqhis1nqqrqqlvqeldtfynhaeavtksqfvfnk1slfhdvqqw1ksaedtne  
kwrinaentk1vine1nh1  
naqleennekita1fdfi1ngteedfyqhedyqtytsn1srfd1tkylenqnysyel1ss1sekttaqleedh1lat  
qvdeyneqylemqaqvsd1  
saqinhmetdt1lan1rheyhs1knq1ndiakdwas1sylqs1vdehikqikdkr1ppvineaveilkh1tdgrytminy  
nedsitvkhvngglydpve  
1sqstkellyvalris1ikvlrpyypfp1ivddafvhfdkkrtkmlny1rs1sehyqvlyftcvkdnivpskevit1nk  
ieggkr  
>tr|D9RB26|D9RB26\_STAAJ

Tsompanidou\_et\_al\_Supplemental\_FASTA\_File

mna1fiiifmiivvgaiiggintvniairm1fhpfpkpyyifkfrvpftpglipkrreeiatkigqvieehlltetlineklk  
seqsqqaiesmiqqqlqkl  
tkdq1sikqitsgididlevlqtngnqyiesqlnnyytnhqntiasllpnqlvtfldqhvdnatd1l1cdrarkylssv  
kgtqdindmldtffnekkgk  
ligmlqmfmtkesiadriqqelirltshpkartivtslitneyqtfkdrplnelldasqfneiaenlsvyvtttyaskqan  
kpvvtlmpqfvdylegqls  
sklanliieqlsihlstimkkvd1rglieeqintfdldyiekliveiankelklims1gfilggiigffqglvaifv  
>tr|D9RB27|D9RB27\_STAAJ  
mdrqsftdliqtkfkmvrieagytqdtmaqtiglskktlvqiekervlpnwttcisicalfrdsevl1nstfgcdpleivq  
tisrnhcaypnhaptsdly  
wnnietrngyilqsnkvsniyrvl1pndnqpi fgtskmreaetyf1rnakeelvhi  
>tr|D9RB28|D9RB28\_STAAJ  
mnkvilvddhyivrgqlrfl1stieniev1qdfadgetfleylkehehpdiv1l1lvmppgmngieiteyikahypdikvl  
v1tsyvdehvisainkga  
dgyemkdvepqlieti1rrvmngekmihpkaqdvfetvsqkphytnk1skreiev1remvkgktnkeiaet1fvsektik  
thvshifsk1qvsdrtaaa  
iyamenkli  
>tr|D9RB30|D9RB30\_STAAJ  
mkfk1penfnd1slrdifqqlkvpkkl1hh1nmskditindkpar1mdkvhtgddvfvptideksnyvpsyryaqikyed  
ddmaivmkpkkgvkt1hnd1  
kesnt1mnhviytvdsdyvepihr1dqetvgl1livaknplmkkil1drmlenditriykanvka1l1pkpqtidmpigkd  
kfhskrrv1sptggrai1h  
i1tskmi1ketvc1leik1dtgrthqirvhl1aeighpvigdp1lygdst1lrqle1esykiefvhpl1tkevisis1dd  
>tr|D9RB31|D9RB31\_STAAJ  
msvriehdtfgeievpadkywgaqterskrnfpvgkermpievvygfaqlkraaalanfd1gk1skakkdaivyaqdqil  
sge1dehfp1vwwqtgsgt  
qsnm1vnevvsyvanmy1kdhqsdesihpnddvnsqssndt1fptamhvalyqevetklept1k1l1rnt1kekedkfdsi  
iki1grth1qdatpikvgqe  
isgwrym1drceim1seskkhi1n1aiggtavgtginahpefgdkvahyisenmgypfvssenkfhal1tahdevvq1hgt  
1kalagdlmkiandvrwla  
sgpraglaeisipeneppgssimp1gkvntqcem1tmvavqvmgndtvvgfassqgnfel1vykpvimhnt1qsiy1ladg  
metf1nncavgiepi1eeni  
dny1nqslm1lvtal1nphigyekaaq1akkahkegl1t1kesai1qgyvteeqfeawikpedmvdph  
>tr|D9RB32|D9RB32\_STAAJ  
m1gkywiq1liatvii1s1isikafplaigaly1pvi1fkvik1ql1n1skgliddvnaqt1fiksnqsgivisvic1l1itgi  
lyt1ldgfyas1tgv1gt1  
vv1npyttiv1savlyi1l1taiatveatktk1yrn  
>tr|D9RB33|D9RB33\_STAAJ  
mtepqhseigf1pistdi1aswngn1pqtqk1laesq1tityk1lag1qhseigf1listdian1lwkraehseigf1listddas  
>tr|D9RB35|D9RB35\_STAAJ  
mam1fk1vfdnsq1lvaeyaadi1irkqf1nnp1tti1agf1h1dtd1qapv1de1l1kniekhavdfs1qini1ldyddkksyfealgi  
pagqvyp1ayekdaie1lia  
dk1iktkenkgk1l1qvvs1ideggk1nvs1irqgl1meareif1vvtgankrdvvek1lyqengkts1fepad1kahr1mvn1vild  
keaaag1pedvkayf1tsrf  
a  
>tr|D9RB36|D9RB36\_STAAJ  
mtnhiv1lyqpeipantgni1artcagt1nth1h1likp1lgfrtd1dkm1krag1dywefv1nityhdsieaffettng1eyy1l1tk  
fgkktysd1fd1fshhdkdfy  
fi1fgkettg1lpdwvkekyqdtal1ripmsehirs1n1nsntaa1l1iyeal1rqnf1p1gl  
>tr|D9RB37|D9RB37\_STAAJ  
mdtkq1kqdi1dyay1tigidsigfttad1pfdel1kqk1leayhangyasgfeesd1al1rtepk1sl1ptarsii1a1avgypnk  
1kgapksvrgdr1rg1fara  
swgqdyhtimkr1ldm1laafieskvpdveiksmvdtgvl1sdravaerag1gfvgrngfv1n1pk1gtwtyl1gem1vsipfe  
pddp1ldscgdc1ticvdrc  
ptsalvngq1lnsqk1cis1fl1tqtkgym1pdqyryki1gnr1lygcdt1cqvc1pknrg1inte1qddi1ilepeil1kpr1lv1l1rms  
nkefkq1tygh1lagawrgk1k  
piqrna1l1alahfnevdaipe1lkkvattd1derpmi1rataywaigqil1geardfinanyd1qedaevqnemikg1ldtrre  
>tr|D9RB39|D9RB39\_STAAJ  
mkcl1r1filv1lg1l1issamvy1n1ptahaeqdtwek1ikerge1lrvgl1sadyapmef1htvngkteyagv1did1akki1akd  
n1k1k1ivnms1f1s1l1ga  
ktgkidi1i1sgmt1stper1kkqvd1f1sdsym1tknim1lvk1dkvneyk1dik1dfn1kkvgaqk1gteqekiaqteienas1ts1  
sr1lpdvi1al1ksgkvegav  
vekpvaeay1kqnpk1l1gisnkv1fneeekdtvi1avpkdspk1l1sqinktikevkdkgl1dkymt1naanam1ddsgf1iskyg  
sff1kgik1it1il1is1l1gva  
lgsil1gafval1mkl1skiki1swiasiyieil1rgt1pml1vqv1fivff1gitaal1gl1disalvc1gtialvinssayiaei1rag  
inavdkgqmeaars1gl1ny  
rqtmksv1mpqaikn1l1pal1gnefv1t1likessiv1st1igvgeim1fnaqv1vgis1fdp1ftpl1lvaay1fvl1tfvl1trimm  
iegrmn1asd

Tsompanidou\_et\_al\_Supplemental\_FASTA\_File

>tr|D9RB40|D9RB40\_STAAJ  
msnaknadnkqffskilnsigagvvialvpna1lgevlkifksgneileltyqlviliqsfmafiigvlaahqfkfngag  
aaivgtsamigsgavvysn  
nsfm1kgigdiints1vviac1iymi1qnklgsfelil1pvlvpivsggiglit1pyirkitqaignvihsftdlnp11  
msilisvafsl1mvtpis1  
vaiataislng1gsgaan1givaacvtflfsg1rvnsigvnav1ligaakmmipvylkn1iisipltingiitgiiayvl  
qvkgtpl1sagfgyt1glvgp  
inafnrmsgdptmni11algyfvipfvsafivhelckkfipiysndiykfevpkq  
>tr|D9RB42|D9RB42\_STAAJ  
mkvvg1nrmrevete1qrrfsdvdfkfykkaseipesdlad1dilvgdyggineaf1rrcpnlkwiawfatgvnt1pldy  
iadhg111tngkgvqakq1  
sey11af1lddykkml1sydnqrqhiydskitgkrl1sgqtv1flgtgaiatrtaklakafnm1lig1sksgqnkhefdei  
ytieslest1pnadivina  
1petqeti111kknhfel1kdeaf1inigrgtivkealliev1ksrvirhay1d1vfenep1kpnhelyeldnvtitahit  
gndyeakyd11di1fknn1v  
nfl1kn1glienevdtkkgy  
>tr|D9RB44|D9RB44\_STAAJ  
mnfseser1qql1sney11ggvnspsrsykavgggapvumkeghgay1ydv1dgnkfidyl1qaygpiitghahphitkaiqe  
qaakgv1ygtpte1eie1efs  
kk11rdaips1leki1rfvns1gteamttirvaraytkrnki1kfagsyhgshdl1v1vaagsgpsql1gspdsagvpesvarev  
itvpfnd1naykeai1efwg  
deiaav1vepi1vgn1fgm1vmpqpg1fleevne1shnngt1viydevita1frfhygaaqd11lgvipd1taf1gkivggg1pigg  
yggrqd1imeqvap1gpayq  
agt1magn1l1smkagi1allev1leqdgvyek1nr1lger1leng1le1liekhqitat1inriygs1tlyftdek1vthydqvehsd  
geaf1gk1ffk1m1nqgin1la  
psk1feaw1fl1ttehte1edikqt1kaadyafsqmk  
>tr|D9RB46|D9RB46\_STAAJ  
mikry1qfvkpykyri1fati1vgi1kfgipm1lip1li1kya1idgvinnhalttdek1vhh1tiaigial1fivivrppiefi  
rqy1laqwt1snki1lydir1kk  
1ynh1qa1sarfyannqvgqv1srvin1dveqtkdfil1t1g1mniw1ldciti1ialsimff1ldvkl1tlaal1fipfyil1tvy  
vffgr1rkl1trersqalae  
vqgf1her1vqgi1svvks1faiedneaknfdkntnfl1tra1lkhtrwnaysfaaintvtdigpiivigvgay1aisgsitvg  
t1laaf1vgyle11lfgp1lrr1  
vasft1t1qsfasmdrvfql1idedy1dikngvgaqpieitqgrididhvsf1qyndneapil1kdi1n1sieketva1fvgmsg  
ggk1st1in1liprfydv1tsg  
q1lidghn1kdf1l1tgs1lnrqig1lvqqd1n1lfsdtvkeni11lgrptatdeev1eaakmanahdfimn1pqgydtevgergv  
k1sggqkqr1s1ari1flnn  
pp1il1deatsal1desesi1qea1dv1skdr1tlivahr1stithadkivvienghivetgthreliakqgayehlysi  
qn1  
>tr|D9RB48|D9RB48\_STAAJ  
myqqs1fken1li1hwfd1enqrem1pwrqttnpyyi1w1sevm1lqqtqvktvidy1yhrf1verfptvev1sqasedev1kyweg1  
gyys1rarn1fhtai1kevhd1k  
yeg1lv1pkdpdqfka1kgvgpytqaavmsi1aynvp1latvdgnv1frw1sr1nddyrdik1qstrksyeqel1pyvtteagtf  
nqamm1e1gal1ictpknp1lc  
1fcp1iqenceaf1dkgt1fek1lpvksknvskkvieqsvfl1rnnqgqy1l1qkrsek11hg1mwqf1p1mfeseharremtekigh  
di1qpvetpi1fel1khqfth1  
twk1ikyav1sgt1iniet1pddmiwfd1sdrdqyt1fpvpmskiyrfing  
>tr|D9RB49|D9RB49\_STAAJ  
mdtathia1igv1l1atal1qdpamastfgatatt1ivgs1lipdgdtv1kl1kdnaty1ishrgithsipftilwpilitfli  
ftffsg1tnp1fhvwmwaqla  
vfl1hv1fvd1fnsygtqal1rpi1tnkwiql1svintfdpi1iftvl1cigiv1lwig1lhp1favffpiialliiyymirfkmravi  
kqqa1l1kai1qqeh1hp1kv1fv  
aptik1fmewr1vai1qtdahdyvgkaygrnv1v1fsdkverq1t1stdsi1lwkvkgnkdi1rtfl1nfssiy1rwq1tt1ladssteir  
lid1ry1l1kndhys1fvaiah  
vtndn1vi1dhsy1igwv1ftedk1lqrklyak  
>tr|D9RB50|D9RB50\_STAAJ  
m1dnii1lyfkn1l1phtkryvter1kqswks1fliv1laacliliiaset1lfsfsh1tdv1kev1rw1lfriialiv1fav1lmftiyi  
syhhymnd1flvtkl1fnisa  
atp1vvimsi1l1sfim1lvt1misa1lvkpv1nfetsyialfyfivmatifvg1lisvtf1glir1lltekinii1fygicvl1cflvl  
pii1fipn1pnhv1finhilml  
n1pmyyivngiaqs1i1fg1ssmenipyhfyfil1fl1cliaavn1v1laryt1thaiynktskvtqtdnqqdvsndstdeadtss  
>tr|D9RB51|D9RB51\_STAAJ  
mgssiv1k1l1kv1thyyrnkqnkkwyl1p1fgydaedid1lnnis1lhiyqgealgi1gepesska1vgq1l1lagaikpdkgkvvc  
ted1fygyiedqsl1ihqt1v  
eayta1glvq1l1fpye1indhkaeqi1iyah1lgdyk1tkpv1nhi1skaayaq1ll1s1iarssksni1i1lnhvidyl1tpqf1meraie  
l1ndyienn1t1visigddi1r  
dk1isqvsny1iaw1fshg1l1rmegs1lkqvips1fkeherd1r1s1lnskeeienfd1ldwkknr1tripem1tyn1fkrverynhakpp  
kfl1vrfwt1lasgt1ilg1al



Tsompanidou\_et\_al\_Supplemental\_FASTA\_File

mmllifnngiisitdftrnatmqnenkdpygeklaygiafngsvdmqgdkqvtipkysvvtitgensknyrvtadnkty  
yvgkdkleyfnpaglyqth  
sfkklapymksnysnyayfnsqlhkkhssviktlvppddnrfvasvtqqpiqlfndnnqlygfvypivdkkelkdkfn  
inniwi tkvngycianl  
kedkwiyiel  
>tr|D9RB52|D9RB52\_STAAJ  
meqkklsemsepelrheiqlykekmrkaemngilneydvyqskvivaesylvdrkkieigkiykltdgsnqyfkverlkg  
ifawgrfrfnsdepeeglpi  
allq  
>tr|D9RB55|D9RB55\_STAAJ  
mtkkvaiilanefedieysspkealenagfntevigdtansevvgkhgekvtvdvgiaeakpeeydallipggfspdhlr  
gdtegrygtfakyftkndv  
ptfaichgpqilidtdldkgrtltavlnvrkdlsnagahvvdsvvddnnivtsrvpddlddfnreivkqlq  
>tr|D9RB57|D9RB57\_STAAJ  
mnsvklkqpvsinyndpweayndvkehqgltsnieftttlnlcmrcshcavgytlqtvdepldmdliyrndeipnlrt  
msitggepmfksksirnv  
kpllkyaahngiytqmnsnltpqdryldiaeyidvmhishnwgtddefanvgfgamkkqpplkaklklyeqmisanrt  
seqgmfvsaetmlnqstlp  
hlrkihqevvhdmkcsrheihmpypadfasqlnvltaemkktihdildfrdediwmfghtlpvfpclkddeqkllsr  
rtaknvttrndpdgrsrln  
vnyftgnvvtdfgdetgtisniqkkltdvfdkwlssdlakslnchcsefscigpnvlvknmyypnmdfdknerhmkq  
pqiiqf  
>tr|D9RB58|D9RB58\_STAAJ  
mtnqdrpmksmseskcyknrvfpqdtnhhhtmfggtlmanideiaaitamkhagaqvvtastdsvdfkpiktgdilqy  
vamvsyagtsmvevvqir  
iddvfnnkhdlaalsyltfvaldddgkpkhvpvgvpeddvekwyfytapqrverrkarrieskqtieylaqvqhir  
>tr|D9RB59|D9RB59\_STAAJ  
mtnykek1qqyael1vkvgmnvqpkqvfirssvetlelthliveeayhcgasdvrvvysdptlkr1kfenesvehfan  
eiksydvearmdyvkrgaa  
nla1isedpdlmdgidsqklqafqqnarafkgymesvqknqfpwvvaafpskawakrvpelsveeayikfidvfdv  
ridgndpvenwrqhianls  
vyaqklqqknyhalhyvsegdltvglakniwedatsyngkeqafianipteevftapdrnrvdgyvtnklplsyngt  
iidqfklmfkdgeiidfsa  
kkgeavlnldintdegrrlgevalpddspisnrntifyntlfdenaachlaigsayafniqggtemtveekiasgln  
snvhdfmigsdltiygi  
fedgskelvfengnwastf  
>tr|D9RB62|D9RB62\_STAAJ  
menkfvpgliligaviggaisladkstrqalvqsvrdakngnrtrkpskvsikdevlywkdvveirrnpelerslkda  
ketfvnrknqr  
>tr|D9RB63|D9RB63\_STAAJ  
mskdhssskylnsvkeaqeeskkknksnpkidvdrtyiepqqfqsckpkkedqvfflsrlnkpakykkdsnflslylir  
igkddasglaaqmtyhfv  
amfpmllfltlpffnikqsqitnmlsnapaetstliksvigditqnssgllsiglilaiwsasngmtaimnsfnvay  
dvedsrngivkl1svvft  
vvmgvfvvalapl1gsvishflfgplgfdeqkwifnlirivlpiiiiifivfivlysvapnvkklksvlpavfts  
iwlagsfgfgwyisnfgny  
sktygsiagi1111wlyitsfiiivgaeinaiihqrsvikgktpaeaalehddnknhynentryeyelvtnathq  
hvdehpsdtypeddknikd  
kivdklkkd  
>tr|D9RB64|D9RB64\_STAAJ  
mtikvlfvddhemvrigissy1stqsdi evvgegasgkeaiakahelkpdllmdllmedmdgveattqikkdlpqikvl  
mltsfiedkevyraldagv  
dsyilkttsakdiadavrktsgesvfepevlvkmrnrmkkraelyemlteremeillliakgysnqeiasashitikt  
kthvsnilsklevqdrta  
viyafqhnliq  
>tr|D9RB70|D9RB70\_STAAJ  
mqhekmmnernl1tmkptkvl1rdasyvhsksitfildkvieednkiyyfdtsatfedqevkfefal1dsdmdnlkhme  
yenvpteiyfiepd1hfti  
idfngellciyidfdsglrhsnmatesgisl1rinvtksdftkfinelaslh  
>tr|D9RB72|D9RB72\_STAAJ  
mrqwtaih1aklarkasravgkkgtd1pgqiarkvtdilrklaeqvddivfisgtngktttsnlightlkanniqiihn  
neganmaagitsafimqst  
pktkiavieidegsiprvlkevtpsmmvftnffrdqmdrfgeidimvnniaetisnkgikll1ngddpfvsr1kiasdti  
vyygmkaahahefeqstme  
srycpncgrllqdyihynqighyhcqcgfkreqakyei1ssfdvapflhlnindekydmkiagdfnaynalaaytv1rel  
g1neqai1kngfetytsdng  
rmqyfkkerkeamin1aknpgmnas1svgeq1egekvvis1ndnaadgrdtswiydadfel1skqqieaiivtgtrae  
elq1rlklaevevpiiver

Tsompanidou\_et\_al\_Supplemental\_FASTA\_File

diykataktmdykgftvaiipnytslapmleqlnrsfeggqs  
>tr|D9RB74|D9RB74\_STAAJ  
miqdafvaldfetangkrtsicsvgmvkvidsqitetfhtlvnpqdyfsqqnikvhgiqpedvenaptfdyvfpyymmqqfi  
adlpvvaahnaafdmvnlhg  
siqniqlptpnlyfcsyqlakrtvdsyryglkhmmefyqldfhghhdaIndakacamitfrllknyenlthvtniygkn  
lkdkg  
>tr|D9RB75|D9RB75\_STAAJ  
mterriihidmdyffagvemrdnpklkgkpvi vggkasnrgvvstasyearkygvhsampmsqahklcpngyfvtsnfga  
yretsaqimsifrsytdkv  
epmsldeaylditelvrpdlpaskiaqfirkdileqtqltasagvsynkflaklasgmnpdgmtdvidyrnvhdilmald  
igdfpgvgkaskkvmhdhg  
iftgkdllynksefelihlfgrgrglynkargidhsevkstrvrksvgttertfatdvnddeeilrkvwelsgktaeglnk  
lqksaktvtvikthqfet  
lskqmslrdsvsendiayllyndlkdpdvpirligvtvgnleqstfknmtiydfi  
>tr|D9RB76|D9RB76\_STAAJ  
mhkidltnnfqmrriiqlvialfvilftykwalgvavvdqniinlvgyfagfiillilhelihralflfkdkdsk  
pmfnikkdrilfqtadayf  
nkwwqfsiimlspililstgllilikvfygsslifmfsmhtaycfidillvaltissfkyvqqdedsiylyhqkptq  
>tr|D9RB77|D9RB77\_STAAJ  
mqaiakndiktgtvvdltheghvkvdrfpifipqalineqieykiikvknfaigkllnintrsenrvappciyyerc  
ggcqlqhl syesqlemkke  
qvlnlfrkaqfdnskindtvgmtdpwyrnksqipvgkneqnevimgfyrqrshdiidmescliqdsqhqevmnevksi  
lkdlnvsiyqeqlkkglmr  
hlvrtgyhtdemmiifvtngkkwpqnavvekil dafpnvtsikqnindshsnvimgrqsitlygkdtiidqldstfk  
isdqsfyqinseqtekyln  
kaieyaqltgnvvltdtycgigtiglymaphakhvygvevpsaiedaqqnatinqcnnttfvcgkaeevilqwaqgik  
pdvvmvdprrkgcdefiq  
tlltlepkriyiscnpatqqrdrvlllaekyqleevtpvdmfpqtthvetvalfnlk  
>tr|D9RB82|D9RB82\_STAAJ  
mltmgtalsqqvdanwqtyimiavyflilivigfygykqatgnlseymlggrsigpyital sagasdmmsgwmimglpqsv  
ystgl samwitigtigay  
inyfvvaprlrvytelagdaitlpdffknrlndknnvkiisgliivvfftythsgfvsqgklfesafgldyhfglilv  
afivifytffggylavsit  
dffqgvimliamvmvipvamnlngwgtfhdvaamkptnl nlfkgl sfigiislsfswglgyfgqphiivr fmsikshkml  
pkarrlgi swmavglgav  
avgltgiafvpayhikledpetlifvmsqvl fhpvlvggfllaa ilaa imstissqllvtsssltedfyklirgeekakth  
qkefvimigr lsvlvaiva  
iaiaawnpndtilnlgvna wagfgasf splvl falywkg ltragavsgmvs galvvivw iawikplahineifglyeiipg  
fivsvivtyvvs kltkkpg  
afvetdlnkvrdivrek  
>tr|D9RB83|D9RB83\_STAAJ  
mkrtlvllitai fllaacgnhkddqagkdnqkhnssnqvkeiatdknvqgdnyrtllpfkesqargllqdnmansyngg  
dfedgllnl skevfptdky  
lydqgqfl dkk tinaylnpk ytkreidk msekd kdkkanenlglnpshegetdpeki aekspaylsnileqdfygggdt  
kgknikgmtiglamnsvy  
ykkekdgptfsklldsevkqgkqmaseilsrlrendldkipihfaiyqssedsitpgefitqataeksqtklnewh  
nineksallpsstaadye  
nl nnnfkqfndnlqsyfsnftqavgvkfvdkkqprlvvd lpidyygqaetigitqyvteqankyfdkidnyeirikdgn  
qpralisktkddkep qvhi  
ysn  
>tr|D9RB84|D9RB84\_STAAJ  
madlssrvnelhdllnqsyeyvednpsvpdseydkllhelikeehpeyktvdsptvrvggeaqaasfnkvnhdtpml  
slgnafnedl rkfdqri r  
eqignveymcelkidglavslkyvdgyfvqgltrgdgtteditenlktihaiplkmkeplnvevrgeaymprsrflrln  
eekendeq lfanprnaaa  
gs l rql dskl takrklsvfiysvndftdfnarsqseal deldklgfttnknrarnnidgvleyiekwtsqreslpydid  
givikvndldqqdemgftq  
ksprwaiaykfpaevvtkll die l sigrtgvvtptail epkvagttvsraslhnedlihdridrigdsvvvkkagdi  
pevvr siperrpedavtyh  
mpthcpscghe l vriegevalrcinpkcqaqlvegl ihfvsrqamnidglgtki iqqlyqselikdvadifyl teedllp  
ldrmgqkkvndllaaigqa  
kdnslenllfglgrhlgvkasqlaekyetidrlltvteaelveihdigdkvaqsvvtylenediraliqklkdkhvm  
iykgiktsdieghpefsgk  
tiviltgk l hqmrneaskw lasqgaktvssvtkntdvviagedagskl tkaqslgieiwteqqfvdkqnesns  
>tr|D9RB86|D9RB86\_STAAJ  
mydikkrhifkldpakhisdddldaicmsqtdaimiggtddvtednvihlmsrvrryplplvl eisniesvmpgdfyf  
vptvlnstdvafhngtll e  
alktyghsidfeevi fegyvvcnadskvakhtkantdl ttedleayaqmvnhmyrlpvmymeysgiygdvskvqavseh l

Tsompanidou\_et\_al\_Supplemental\_FASTA\_File

tetqlfygggisseqqate  
maaiadtiivgdiiykdikkaiktvikikessk  
>tr|D9RB88|D9RB88\_STAAJ  
mierysreemsniwtdqnryeawleveilaceawselghipkadvqkirqnakvnveraieieqetrhdvaftrqvset  
lgeerkwvhyglststdvvd  
talsfvikqandiiekdlerfienvlaekaknykylmmgrthgvhaepttfgvkmalwytemqrnlqrfkqvreeievkg  
msgavgtfanippeiesyv  
ckhlgigtapvstqtlqrdrhayyatlaaliatslekfaveirnltktetreveeafakgqkssamphkrnpigsenit  
gisrvirgyittayenvpl  
wherdishssaerimlpdvialdyaInrftnivdrltvfednmrnnidktfglifsqrvllalinkgmvreeaydkvqp  
kamiswetktpfrelieq  
esitsvltkeeldecfdpkhhlnqvdtiferagla  
>tr|D9RB89|D9RB89\_STAAJ  
mkrnfpkliaslilsvtpianaesnsniktdkhhqvvnvedksvptdvrnlaqkdylysvtsldkiynkekasyl  
gepfkiykfnkksdgnyyf  
pvlntegnidivtispkvtkyssskskytinvspflskvlngykdqqitiltnskgyyvvtqnhkaklvltktrledkk  
lkktesiptgnvtqlkqk  
asvtmptsqfksnnytyneqyvnlentfriretqgnngwcagytsallnatyntnkyhaeavmrfhpnlqqgrfqftg  
ltpremiyfgqtqgrspql  
lnrmttynevndltknnkgiavlgsrvesrngmhaghamavvgnakldngqeviiwnpwdngfmtqdaknniipvsngd  
hyqwysygy  
>tr|D9RB90|D9RB90\_STAAJ  
meqfelksidkfkcnseakyylniiegewhpqdlndsplkfilstsdssdyickyintehkqltlynknssivieifip  
ndnkililtimnteaigtsp  
rmtfikhks  
>tr|D9RB91|D9RB91\_STAAJ  
mkfkvnenetiadcslrmkmgypvkriekpvfqqndgtvevshqeiifvgkkiq  
>tr|D9RB93|D9RB93\_STAAJ  
msklqdvivqemkvkkridsaeimekqfiknyvqshsfikslvlgisggqdstlvglvqmsvnelreegidctfiav  
klpygvqkdadeveqalrf  
iepdeivtunikpavdqsvslkeagivltdfqgnekakermrvqfsiasnrqgiviivgdhsaenitgfytkygdgaad  
iapifglnrqgrqlayl  
gapkelyektptadledkqplpdedalgvtyeaidnylegkpvspreekvienhyirnahkrelaytrytwpk  
>tr|D9RB94|D9RB94\_STAAJ  
myqladdsmlhndlyqinmaesywndniekmavfdlyfrkmpfnsgyavfnglkrvidfiehfghfsesdleylksigy  
kddflsylvkdlkftgsirs  
mgegelcfnepllrveapliqaqlietillnivfhtlittkasrirqiasndklmefgtrraqeidaalwgaraayig  
gfdstsnvraklfgipvs  
gthahafvqtygdeyvafkkyarhkncvflvdtfhtlksgvpnaikvakevgdkinfvgirlsdgdiaylskearmld  
eagftetkiasndldeet  
itslkaqqakvdsqvgvtklitgydqpalgavyklvaienddgtytdriklsnaekvttpgkknvyriinkktgkaegd  
yitlenenpydeqplklfh  
pvhtykmkfkfsfeaidlhhniyengklyqmptedesreylaagqlsiwdenkrflnpqeypvdlskacwdnkhhkrife  
vaehvkemedne  
>tr|D9RB95|D9RB95\_STAAJ  
mlfkeaqaftenmykechyetqiinkrlhdieleiketgtythteeeliygakmawrnsnrcigrfwdslnvvdardvt  
deasflssityhitqatne  
gklkpyitiyapndgpkifnnqliryagydnsgdpaeketrlnahlgwkkgntfdvlpliyqlpnesvkfyeyptsli  
kevpiehnhyplrklnlk  
wyavpiisnmdlkggivyptapfngwymvteigvrnfiddyrynllkvadafefdtlknnsfnkdralvelnyavyhs  
fkkegvsivdh1taakqfe  
lferneaqqgrkvtkwswlapp1spt1tsnyhhgydntvrdpnffykkqeshanqcpfh  
>tr|D9RB96|D9RB96\_STAAJ  
mqlyylgpkgtfsylacrqyfseneatfqpksnlfevikavaddtsigvvpensiiegtinivadalaqqdvfahgeir  
ldinfalyngtdsidsik  
kvysiapaisqtnnyihqhfaydyvdstiqsltkiengvaaiaplgsgeaygftpidthiedyphnvrflviknqqf  
dqnatslmflitpmhdkpg  
llasvntfalfninlswiesrp1ktqlgmyrffvqadsaittdikkviailetldfkvemigafn  
>tr|D9RB97|D9RB97\_STAAJ  
mvyfnghqsmiskrylfffskskkkpfqsagqlig1ilgp1lfl1t1lffhpqdlpwkgvyv1aitlwiatwiteaipi  
aats1lpiv1lp1gh1lt  
eqvsseygndiif1lfggfilaamerwnlhrvaltiinligastskillgfmvatgflsmfvsntaavmimipiglai  
ikeahdlqeantnqtsiqk  
feks1vlaigyagtigg1gt1igtpp1i1kgqymqhfghesfakwmivgiptviv1l1gitwlylryvafrhdlkylpg  
gqtlkqkldelgkmyee  
kvvtifvlas1lwtref1lkkwevtssvadgtiaifisillfiipakntekhrriidwevake1pwgv1ilfggla1  
akgiseglakw1geq1ks  
1ngvspiliviviti1v1fl1tevtstataatmi1pilat1svavgvhp1llmapaamaancaymlpvgtppnaiifgsgk

Tsompanidou\_et\_al\_Supplemental\_FASTA\_File

isikqmasvgfwvnlsai  
iilvvyvmpivlgidingplpk  
>tr|D9RB98|D9RB98\_STAAJ  
myinmkdygltginktdtraiqraInhgrckpttvypkgytickpltiyngntllldnetilrrchsgp11knghrf  
gfyrgyngshihikggkf  
dmngvsypynntamcihaediqligvtiknvvsghaidacginglyikncsfegfdysgerfyseaiqlidiqvpgapf  
kfgttgdgtiknviiedcy  
fgpse1pemgswraigshrhnyenihi rnni fediqgaltplkykdafi innkfinceggi rylgvr dgknaad  
vmtgkdlgsqaginmniig  
nefkgmskdaihvrnynnlkhkdvli vngtfnkstqsih ledidtvflspieagiqvttinveikk  
>tr|D9RBA0|D9RBA0\_STAAJ  
maktiyifghknpdtda issai maefeq lrgnsgakayrlgdvsatqfal dknfvpapelltdldgqdvilvdhnefq  
qssdtiasatikhvidhhr  
ianfetagplcyraepvgctatilykmfrergfeikpeiaglm1sai sds11fksptctqqdvkaaeelkdiakvdiqk  
ygl dmlkagasttdksvef  
11nmdaksftmgdyvtr iaqnavd1devlnrkedlekem1avsakekydlfvlvvt diinsdskilv vgaekdkvgeaf  
nvqleddmaf1sgvvsrkk  
qivpqi teal tk  
>tr|D9RBA1|D9RBA1\_STAAJ  
mniieqkfydskaffntqqtkdisfrkeqlkkl skaiksyedilealytdlgknkveayateigitlksiknar kelkn  
wtktknvdtpllylfp tksy  
ikkepygtvlii apfnypfqlvfep ligaiagntai ikpse1tpnvarvikrlinetfdanyievi eggieetqtlihl  
pfdyvfftgse nvgkivyq  
aasenlvptlemggkspv idetanikvasericfgkftnagqtcvapydilvhesvkddlital sktlrefyggniqq  
spdygli vnlkhyhr1ts1  
1nsaqmni vfgghsdederyiept1ldhvtsdsaimqeeifgpilpil tyqsldeai afihqrpkplsl ylf sedenatq  
rvine1sfgggai ndtlmh  
lanpk1pfggv gasgmgr yhgkysfdtftheksyifkstrlesgvhlppykgkfyikaffkn  
>tr|D9RBA2|D9RBA2\_STAAJ  
mtngyigsytkkngkgiyr felnenqsrid1letgfeleasty lvrnevlyginkegeqcgvaslkiddngelhl1nks  
lsskagtgcysis edkry  
1feavygagii rmyelnthtgei irliqel ahdfptgther qdhphahyinqtpdgkyvavtdlgadrivtykfddngfe  
fykes1fkdsdgtr hiefh  
dngkfayvvhel sntvsvae yndgkfeelerh1tipenfdgdtklaavr1shdqql yvsnrghdsiaifkvl dngqhle  
1vtitesggqfprdfnias  
sdd11vcaheggdsvvtvfer nketgkitl cdntrvasegvcvif  
>tr|D9RBA5|D9RBA5\_STAAJ  
mqqytsdimtfrgshfelgvktgw1qqtpl1knrekewkkrvprfdi dvnetyqifq tyapqiweelmg1qsil kmpr  
qiilnfghyrftdl kesgc  
tvfqgkdfmvrnydyhpatydgry1lyqptdsglaqigpvsrvtgrmdgmnesgl tmgynfmhrkkpangfvcymigrli  
1encrvteaiql1keiph  
rssfsyilm dkslnhaivevtprsidvrydnictnhfeil thenrnytkeskerlvrtisqtnnn1dmttafk1fnnpqy  
eisky1fkswsgtihtsm y  
hpet1tayftlgenappeid fkswldgqdl nithftgnidtdl tfank  
>tr|D9RBA6|D9RBA6\_STAAJ  
mkkfff ig11fvvfftaati iwf sydknkygkqydktkddafdnvsin1dstel rikrgnqfrvkydgdndil iniv  
dkt1kisdkrsktrgyaid  
mnpfhenkkt1tiempdkmirk1nissgagsvr isdvd1entsiqsingevviksn1dal dsktnnsptyisksnikns  
nikvvi gtlqidksqikqs  
if1ndhgdiefknmpskvdakastkqgdi rfykyskpedtilk1npgtgds vknktftngkvgksdnl eftyidgnik  
ve  
>tr|D9RBA7|D9RBA7\_STAAJ  
mnkitylne1etal dalprh1rdqmyeyeryfyeqelngvdeeeil kklkdpqdva aetkarsvi dyaes kptfenisr  
avaas1slgilsifvilip  
vsivglfv1alflis1111fcpi11lasaisrgivdsisnvffaisysglglvfiivifkileyiyr1ilkyllwyikt v  
kgsvrk  
>tr|D9RBA9|D9RBA9\_STAAJ  
mtn1etyfknsqplneyidgmkt nqdtv1siyqsfel peddsrikkikemny skvlvitedwcdammnlpilkhiseal  
nlevrvfhrddtklidqy  
1tngksraipi fv1ndqfeqetvwgpranevqkfvt dvradklpskdhpdyadlekethlvisnryktdasfwkavyns  
i1nk1enk  
>tr|D9RBB0|D9RBB0\_STAAJ  
mri1nlvkydlysi fkspltylai lvss1iatqsil mansmdnpkhi ivygsvfaaakw111iig1mfvvk titrdfsq  
gtiqlymskvktrvgyiis  
ktisi1ilisil falihyvilivvqassngkn1afskyvdnlwffli1fl1ffgl1fl1flitlasqktami fslgvflvlivp  
fikpfi tfiprygdkvl da  
fdyipfayltdkmi ssnfdfsnwqwwis1gsiviffilnilyvakkdi  
>tr|D9RBB2|D9RBB2\_STAAJ

Tsomanidou\_et\_al\_Supplemental\_FASTA\_File

mkallirnflrrytllyvllllylpyfymldstckfyllqsfisptiliwilldaghlfrlnrrlgndsyyfymslp  
vskkqllnanyitcivltl  
igtvislyayeadviepnisyfstayafvisnflsipaafsqtelrrrvkvpvygiyvftiilvpflfsiaivlvnyfv  
lsqssfpdlysylnigfl  
iisivilivnyfkqlnkintrkfkqgsr  
>tr|D9RBB3|D9RBB3\_STAAJ  
mnaielesnvnyssdqfnlnknsfsvkvpqgfvgtgfigrngagkttiirlimdlyqpqtgvirvleedmalnpielknrigfv  
yaenyfnerwttkglekmi  
apfyrkwdhqvfevfyflekfdlpinksiktfstgmkmlslavafshhaelyifdeptsgldplarnelleiiaqqeliden  
ktifmsthiisdlekiady  
iihlsdgevilngskeqlqryqvvsгаiedldeelasllifeehkrtgfigltheaqvfkeilghkvnittpsienlmv  
ylekrkpkkyheniklmeeg  
f  
>tr|D9RBB5|D9RBB5\_STAAJ  
mkhltkvfvvllaiilfiigyylqatnhesqgiklllaaimfmicafisrsndrrknsk  
>tr|D9RBB6|D9RBB6\_STAAJ  
mnpiaqlneqlqgsnatafamlsdlqnmfypkgilqsaeaksttynatigmatnkdgkmfassldamfndltpdeif  
pyappqgieelrdlwqkkm  
lrdnpelesidnmslpivtnalthglslvgdlfvngqdtillpehnwgnylvfntnrganlqtypifdkdghytttdslve  
alqsynkdkvimllnypnn  
ptgytphthdevttivnaiktldagktivavvddayyglfyedvytqslftaltnlnsnavlprldgatkeffawgfrv  
gfmtfgtsdqttkeveak  
vkgliirsnissgplptqsavkhvlknnkqfdkeieqniqtlkeryevtkevyadqyhsqwqaydfnsgyfmaikvhvd  
peelrkhliekysigvia  
natdiriafscvekediphvfdsiakaidlr  
>tr|D9RBB7|D9RBB7\_STAAJ  
mkfpvtinkfenlvsnefvfynarkitindlsiklksamandqgikhdiglaeravykvyfknsskyvdltketykdgk  
vfkadikkvdielkf  
>tr|D9RBB8|D9RBB8\_STAAJ  
mkfkslittlalgvlastganfntneasaakqldkssslhhgyskinvpytitvngtstnilssltnknqnisykd  
lenkvksvlksnrgisdid  
lrlskqakytvhfknngtkkvidlksgvytanlintsdikaisvndtkkhvkdnnkvkanyqvpytitvngtstnilssl  
tfkknqnisykdenkvks  
vlksnrgisdidlrlskqakytvhfknngtkkvidlksgvytanlintsniksininvdikkhvkdkakvnyqvpsinln  
gtstnilsnlfsnkpwt  
yknltsqiksvlkhdrqiseqdlkyakkaytyvfknngkriqlnknknytanlvhakdvkrieitvktgpkakadryvp  
ytiavngtstpilsklkls  
qkelsykylnkvksvlksnrgisdidlrlskqakytvhfknngkqvvnlsdiftpnlfsakdikkididvqhtkksk  
knk  
>tr|D9RBD2|D9RBD2\_STAAJ  
mgerikglsgldlmaanlrsfaeikrnfktlnsdllkltgnnfkyteksthsyqrikeIdgtitgykknvddlakqyg  
kvsqeqgensaeaqklrqe  
ynkqanelnflkelelftettefeefkkaqveaqmaesgwgktskvfesmgpkltkmgdglksigkglmigvtapvlgia  
aasgkafaevdkgltdvtq  
atgatggelkklqnsfkdvgnfpadaetvggvlgevntrlgftgkelesatesflkfshittgsegvqavqlitramda  
gieadeyqsvldmvakaaq  
asgisvdtladsitkygapmramgfemkesialfsqweksgvnteiafsglkkaisnwgkagknpreefkktlaeiekt  
diasatslaieafgakagp  
dladaikggrfsgygefllktiedsqgtvnqtfkdsesgserfkvamnkllvgadvwtsiesafapvmeelikklsiavdw  
fslsdgskrsivifggia  
aaigpvvfglgafistignavtvlapllagiakadglisflstkvpilgtvftaltgpigivlgvlaglavaftiaykks  
etfrnfvngaiiesvkqtf  
nfiqfiqpfidsvknifkqaisaivdfakdiwsqingffnengisivqalqnicnfikaiifeffiinvikpimfaiwqvm  
qfiwpavkalivstwenik  
gviqgalniilgfikffsslftgnwrgvwdgivmilkgtvqliwnliqlwfvvgkilgvvryfgglkglisgiwgvikgi  
ftkslsaiwnatksifgfl  
ynsvksiftnmknwlsstwnniksntvgkahlftgvrskftslwnatkdihtklrnwmsniwnsikdnmvgiagrldk  
vrnifgsmdglksiiigki  
kdhiaggmvdavkrglnklieglnwvggklgmdkpkltgttehttttrlvkngkiardtfatvgdkgrngpngfrnem  
iefpngkrvltptdtay  
lpkgskvynqaqtysmlngtlprfsigtmwkdiksgassafnwtkdqigkgtkwlgdkvgdvmdfidnpgkllnyvlqaf  
gvdfssltkmggiagditk  
aawskikkksaikwledafaesgdggvldmnlrylyghaaytretgrpfheglfdyiyepvpstingraqvmpfhngg  
ykwkvikgaleviyah  
skykvktgqvrvvgqtvgisngtgfstgphlyhemrwnghrhdpwpwrknngggkstpoggngaanarraikaaqnilgg  
rykaswintemmrvasres  
nytanavnwdsnaragisprgmfamidpsfrayaksgynnpnphthqaisamryivgkwvprtgsraafkragyaya  
tgkqvfdgwynlgedghpe

Tsompanidou\_et\_al\_Supplemental\_FASTA\_File

wiipdparndamki lhyaaaevrgkkasknkrpsqlsdngfddpsl11kmiqqqqqial11kiaqsndviadkdyq  
piideyafdkkvnasiokr  
erqestkvkfrkkggiaiq  
>tr|D9RBD3|D9RBD3\_STAAJ  
mdlengkdanevlkmpfhyvlsiyqnknndiseekaealidaf  
>tr|D9RBD5|D9RBD5\_STAAJ  
mkyttddqtnivinsdggvtaeaqgiatvkatvgnmsdtitinvea  
>tr|D9RBE2|D9RBE2\_STAAJ  
mtinlsetfanaknefinavngepqrqnelygdminqlfeetklqakaeaervsslpsaqs1sanqrsffmdinkv  
nykeekllpeetidrifed  
ltnhplladlgiknaglr1kflksetsgvavwgkiygeikgqldaafsetaiqnkltafvvlpkdlndfgpawierfv  
rvqieeafavalettf1kg  
tgkdqpiqlnrqvqkgvsvtegaypekeeqgtlftanpratvnelmqvfkyhstnekgksvavkgnvtmvnpsdafevq  
aqythlnangvyvta1pfn  
lnviestvqeagkvltyvkglydgylagginvqkfketa1ddmdlytakqfaygakdnkvaavwk1dlkghkpa1egt  
eet1  
>tr|D9RBE4|D9RBE4\_STAAJ  
msilekifktrkdiytmd1dmiel1sqgayvkr1aidsciefvaravaqshfkvlegnriqkndvyyklnikpntdlss  
dsfwqqvjyklidynevli  
vvsdske1liadsfyreealyddifkdvtvkdytyqrtftmqeviy1kynnnkvthfves1fedygkifgrmigaqlkn  
yqirgilkassaydekni  
ek1qaftnk1fntfnknqlaiapliefgyeel1snggknsmpfse1selmrdaiknvalmigippglygetadlekt  
1vfekfcltp1kkigne1  
naklitqsmlykdtrieivgvnkkdplqyaeaidklvssgsftrnevrimlgeepsdnpeldeylitknyekansgende  
kekdent1kggdedesgd  
>tr|D9RBE7|D9RBE7\_STAAJ  
mvntpgskkskaikilgeragar1rdnfnkpcitppl1tilrqvmkwr1  
>tr|D9RBE8|D9RBE8\_STAAJ  
mmtkderirfykskewq1trkrv1erdnyecqckrdgk1ttydkskrks1dvdhilslehpefahd1nnlet1cikch  
nkkekrfikkenkwkdek  
>tr|D9RBF0|D9RBF0\_STAAJ  
mwi1mtivfai111vcisinsdrareiqalrymndy11devvktkgyngleeyrielkrmnndikk  
>tr|D9RBF2|D9RBF2\_STAAJ  
mri1fydliv11faflisiyiiddgviinalg1fgmykiidsfseniikr  
>tr|D9RBF4|D9RBF4\_STAAJ  
mtqylvt1fkdstgrkhthitkaksnrftvveaeskeeakeryeaqvkravikvgqlfenirecgk  
>tr|D9RBF5|D9RBF5\_STAAJ  
mn11tvdq1kell1qi1qkefddript1d1rdskiayvveffewfnt1etfknwkkkpgkpldvq1deladmlafglsianq  
vgvsseei1keaiessfknt  
efhkmfnfkdkafaqdavstpqii1kfeypdq1aivividiaynl1sidq1idaykkkmkrnherqdg1tadagkgyv  
>tr|D9RBF6|D9RBF6\_STAAJ  
m1e1idqrda11eeky1nddwwye1dyw1nkrkseseqididrv1kfielkr  
>tr|D9RBF7|D9RBF7\_STAAJ  
mewkr1knvvp1hpviknkn1ksvyv1tkdnvke1vqkelg1ffeifneev11tgflsfqripiyi1winpkshktpryyfane  
he1eryef1ede  
>tr|D9RBF8|D9RBF8\_STAAJ  
ms1svgdkvynhetnes1eivq1vgdir1dthyk1sddsvisi1dfitkpiylikgde  
>tr|D9RBF9|D9RBF9\_STAAJ  
mn1nreqieqsv1stsayingndtegl1keiedvykkaqafde1ldgmtnaiqhsvkegve1deavgimagqvykyeeeqe  
ney  
>tr|D9RBG0|D9RBG0\_STAAJ  
mnyetgfq1gvmear1kkmrkqrdackqrdelivdiak1rerneelenmwrvtkne11gryehyckire1lhpeskanr  
igaly1ggkstad11l1sr  
eel1dgtnefyef1gqmeedtne  
>tr|D9RBG1|D9RBG1\_STAAJ  
mtdnarkey1nqffgskry1yqdnervahihvngtyy1fhghivpgwqgvkktfdtaee1eiyikqhgleyeeqkel1tf  
>tr|D9RBG2|D9RBG2\_STAAJ  
markariv1tndkpyrfskfemeli1eshgitagmvskrvkdgwel1heamdapegtr1seyrekktier1eqarlerkler  
krkreael1rrkkph1fnvp  
qkhprgryacy1mendi1fvkvkk  
>tr|D9RBG6|D9RBG6\_STAAJ  
m1nrt1lvgr1trdpel1rttqsgvnvasft1avnrtftnaqgreadfiniivfkkqaenvnky1skgslagvdgr1qtr  
nyenkegqrvyvtvadv  
iqf1epknsndtqdd1yqqqvqqr1gqsqs1nkpvpkdn1pnan1cpi1eiddnd1pf  
>tr|D9RBG7|D9RBG7\_STAAJ  
mtagtqqamnfeshr1ctiakqel1rigtws1lpfdiehdanepva11qst1gyki1lyvtdtky1kykfngi1thmm1ev  
ny1yemqenikngsvhsa  
lanrimeshfs1ehaigm1kand1tr1leeih1ih1ssqnsnaky1kreiqvtgvpvyvgg1

Tsompanidou\_et\_al\_Supplemental\_FASTA\_File

>tr|D9RBG9|D9RBG9\_STAAJ  
mdikinkltisnfacigeesfnfdgkdtkiyggnatgktttatalqwlfdkglgdgstsfnvplnekneenyeliptv  
faefeidgkittfkkeshp  
kytingktnrkeysrsrtkkqyindesikvkdykaridelidedvflitnpqafnlldwkkrrsllfeiakpindedvi  
ktnddfkelnnilgdheie  
tkkkiltkikqinkdikdipirinqtqqnkqdvpefdndryaiikqeieqleneridiqngaeenlrnqladkqselk  
riednnsasnenkihtltn  
elhvengtvanlkrlnqnkqiaheenrrnql1enhkg1ksdleaknqkfeylddnvcscgqqlpaeqvneareka1  
qkfnaskskeletiqtsin  
hiisegkkipiieklednnnlqikineaeersariqnkinklktthvdvtqtdeykavmleineinqrsnrkti qd  
kvsiddkiselteqeksei  
evsrsieksnhlddvise1rneedr1ldekekysnlyilkeftttkvkmlteninnefdiaefklfntlvngeleetc  
sttvngveydsglnnasri  
nvgldiintlshkfkvtapifidnaesvteliktesqqiqlivneqdkklrmeti  
>tr|D9RBH0|D9RBH0\_STAAJ  
myykgdvcqkvinvdgfdkflavkkqdysilvnl1ledrfidsinitdendlytal dilnqsiyewieentderdri  
nlvmrw  
>tr|D9RBH3|D9RBH3\_STAAJ  
myidplknvrfsinvisnveisksmaikqslkpyql di inrninlfsdfkvdfhl n nliemfnlrnsfsslftqrn  
lfseetiksfkelyrfdde  
ivlqaqqtirdfyinptaistlaeainstypineqstykrhdefvkriendfphpfkklirwsngiaagadiqifvtnyi  
nendliqns1ivaivc11  
sflstycshskk  
>tr|D9RBH8|D9RBH8\_STAAJ  
meq11tkeecveqcinkdlk1ldyrvqqileglsesttygdarnkletlkiiaeshfktehasviyklalkkldekin  
atpik  
>tr|D9RBH9|D9RBH9\_STAAJ  
mhkdlyssrkaakknqdfmgs1igvsgqqygkrergeipinldeami fskaletpiqelfpeyffiervpkmhkneits  
>tr|D9RBI0|D9RBI0\_STAAJ  
mssfssnlerl mnrkrdmsdelaelvdrnttvtrwrkgirspkl dklpeianvfgvkl dlihdmdskieeihvss  
qltpprqs nvlkyatnqle  
eqnnds n1vdfnsyiqeksevdiygcasagigerlynepiskefvrgyvpahdia1kvngdsmeplfknqqiifieksh  
tikdgqigvfiingdayvk  
kvyvednr11vs1nkkykd1hfydnesvr1vgkvi1  
>tr|D9RBI2|D9RBI2\_STAAJ  
mnsykeiehlhintggkeltqeqieeaksfidsqgfkdmireakesrqrvmeskidtrtkm  
>tr|D9RBI4|D9RBI4\_STAAJ  
meekrykvyrgei iyadfgkgvghefsykhfcivinkkdnknngkvtvipltskskhnafvnihlipflntlkq  
>tr|D9RBI5|D9RBI5\_STAAJ  
mktrcydgkkwgyefkyegkryrkkgfrtkreansagldk1nelrsgfnidnyit1eeyfenwiktykqpvvcentyrhy  
rna1qhiqkhkigkme1sk  
inrqvyqkfindyskehaketirktngairsalddalydglifknpaykvnykagkptksekekfisvteyeilkdhvrk  
krtrsslalfimictgcrv  
sgarnikiehinqvntifiderktdtspryisiaksdm khimdvistfaisydgyifkeagsiinlhainna1ksacr  
nnipitshalrhthcsyl  
lakgsihyiskrlghkniaittsvysh1leekfneedkkttkilesm  
>tr|D9RBI7|D9RBI7\_STAAJ  
mikplfkntics1aistaltvfpvtshakinseikqvseknldgdtkmytrtattsd sqknitqslqfnfltepyndke  
tfvikakgtigsglrilep  
ngywnst1rwpgsysvs1qnvdnntnvt dfapknqdesrevkytygyktggdfs inrggl tgnitkesnysetisyqq  
psyrt11dqstsnkgvgwk  
veah1innmghdtrqltndsdrntkseifsltrngnlwakdnftpknkmpvtvsegnpeflavmshdkkdkgskfvv  
hykrsmdefkidwnrhgfw  
gywsgenhvdkkeek1salyevdwkthdvkfvk1ndnekk  
>tr|D9RBI8|D9RBI8\_STAAJ  
mknkkrvliass1sca111saattqansahkdsdqdkkehvdksqqkekrvtnkdknspvpddigknkitkrte tv  
ydekt n1lqn1qfdfidp  
tydknvl1vkkqgsihsn1kfeshkeeksnw1kypseyhvdfqvrnrkteildqlpknkistakvdstfsyssgkfd  
stkgigrtssnsysktisy  
nqqnydtiasgknwnhvhswviand1kyggevknrndellfyrntriatvenpelsfaskyrypalvrsgfnpefltyl  
sneksnektqfevtytrnq  
dilknrpgihyappileknkdgqrlivtyevdwknktkvvdskysddnkpykeg  
>tr|D9RBI9|D9RBI9\_STAAJ  
mttfsekekvql1adivelqtenneidvcnylnk1fdkynikseilkvnehranivaeigygsplal sghmdvvdagn  
hdnwsyppfq1tekdgkly  
grgttdmkgglmalvslie1elkeqnelphgtir1latageekeqegak1ladkgy1ddvdgliaeptgsgiyahkgs m  
sckvtatgkavhssvppfig  
dnaidtl1efynlfkekyse1kkqdtkheldvapmfks1igkeiseedanyasgl1tavcs1inggkqfnsvpdeas1efn

Tsompanidou\_et\_al\_Supplemental\_FASTA\_File

vrpvpeydnfdiepfqni  
indvdsqklsldipsnhrpvtSDKNSklittikdvassyvdKddifvsalvgatdassflgdnkdnvdlaifgpgnplma  
hqideyiekdmylkyidif  
keasikylkek  
>tr|D9RBJ0|D9RBJ0\_STAAJ  
mnkvhkp1yfymlffsttiiga11lylpftgkkipisfldalfiassaftvtglspvdigsqfnilgeivillliqigg1  
givtv11tlvflnrkism  
knrfliMvtwnidepggviklikh1aiysliteligmic1clsfipkfgigkg1flslftsvsafnagfalfknlidy  
ssdpiviitisiliiifggi  
ghfvvidfinckk1sk1slhsk1vl1tts1iliiigaitff11eqfntmqhmg1iekignsffqsvttrtagfnsidias1  
nkstalm1m1lmfiggap1  
saaggik1ttfavafi1v1nyirkennsvfnkeisdkhik1sivtinis1flf1itiitfils1iinpnislik1l1fevvs1a  
fgtvglsm1ntteyhg1tk  
iiii1fvmlcgkvg11t11rtfippkspknyrytkgqiyl  
>tr|D9RBJ1|D9RBJ1\_STAAJ  
mvkq1kfsedarqam1rgvdq1anavkv1tigpkgrnv1dkeftap1itndgvti1akeieledpyenmgak1vqevant  
neiagdg1ttatv1aqami  
qeg1knvtsganpvgl1rqgidkavk1vaveal1hensqkvenk1eiaqvgaisaadeeigryiseamekvngdgvitieen  
g1ntelevveg1mqfdrqy1  
spymvtds1dkmvaelerpy1lvtDKK1ssfqdi1pl1eqvvsnrp1ilivadeveg1altniv1nrMrgtftavavk1pg  
fgdr1kamled1ailtga1q  
vi1dd1gl1d1kdatid1m1gtaskvevtk1dnttv1dgdgdensid1arvsq1ksqieetes1dfdrekl1qer1ak1laggv1a  
kvgaasete1ker1ried  
al1nstraaveeg1vagg1tal1vny1qv1seieaegdi1etgvn1v1kal1tapvr1qiaenag1legsviver1knaepgv1gfn  
aatnew1nm1eagiv1dptk  
v1rsal1ghaasvaam1fl1tteavvas1ipekn1ndqpn1mggmpgmm  
>tr|D9RBJ2|D9RBJ2\_STAAJ  
m1kpignrv1i1e1kkeqeq1ttksgiv1l1tdsakeksnegv1vavgtgr11ndgtrvt1pevkegdrvv1fqyagtevkrdnet  
y1l1need1laviv  
>tr|D9RBJ3|D9RBJ3\_STAAJ  
m1rlwas1l1tvi1iy1isq1flp1l1ivk1ksfvqysgieltkaviyiq1vl1fliaatti1ilin1kiknptk1ele1vkepkky  
i1pwall1gfalvmiyqm1vv  
si1vytqi1fgtq1ts1pnter1livi1arkip1lfi1ffvsivg1p1leeyvfrkvi1fgel1fnaikgnrivafaiattvss1lifa1a  
hndy1kfi1pi1yfgmgv1fs1  
ayvwtkr1lavpi1ihm1lqngfvv1fq1l1npeal1kkateqanfiyhi1fip  
>tr|D9RBJ4|D9RBJ4\_STAAJ  
msyh1wfkk1m1sts1il1ss1s1gl1atqtveakdn1ngekptt1n1nhvt1spsv1nseinnnetgtphesnqtgnegtdsn  
srdanpds1n1nvkpds1n1nq  
pspds1kpd1pnn1pnp1gpn1kpd1pdk1pkpn1pepk1pd1pdk1pkpd1pdk1pkpd1pdk1pkpd1pdk1pkpn1pns1pd1pn1qpgds  
nhsgg1sknggtwn1pnasdg  
snqgq1wqpn1gnq1nsq1nptgndfvsqr1fla1langaykynpyi1nqink1gkefgevtdediyni1irkqnfsgnay1ng1q  
qqsny1frf1qyfn1pk1sery  
yrn1deqv1l1al1tge1igs1mpd1kkpedk1pds1kqrs1fephekddftv1vkkqedn1kksastaysksw1aivcsmmv1v1sim1  
fl1fvkrn1kkkn1knes1qrr  
>tr|D9RBJ6|D9RBJ6\_STAAJ  
mkvqi1yq1lpi1ifgdssknetqi1tqwfeknmtevdv1v1pemwnngyd1leh1nekadn1lgqsfsfikh1laekykvd1va  
gsvsn1rnnqi1fntafsv1n  
ksgq1lineydkv1h1vpm1rehe1fl1tagenvaepf1q1sdgtyvtq1licyd1lrfpe1l1ryparsgaki1afyvaqwpms1rl1qh  
whs1l1karaienn1mf1vigt  
nstgfd1gnseyaghs1iv1npgnd1l1vge1lnesadil1tvd1n1neveqqrenipvfksik1d1lyk  
>tr|D9RBJ7|D9RBJ7\_STAAJ  
mmsc1l1il1ri1f1ilikegvis1maqdi1istig1d1lvkw1iidtvnkftk  
>tr|D9RBJ8|D9RBJ8\_STAAJ  
mnyfdn1kidqfaty1lqkrn1ldhiq1flqvr1l1gmqvlaknigklivmytiayilnififtlitnisfy1lirryahgahaps  
sfwcy1iesit1fiv1p1lv  
l1hf1hinet1lmmf1l1al1isvgv1vikiyapaatrkkp1ipar1lvkqkryfsi1iistilfiit1l1fvkepytqfi1qlgii1qait1l  
piyysked  
>tr|D9RBK0|D9RBK0\_STAAJ  
mea1lndyn1y1v1fvivqvs1lmffisafisgirykksdyiyi1igiv1lssvyffdkigsislvvitifiiflyfkirlysvf  
lvmvtqi1ilycanfv1yiii  
fsy1iitishsvfiv1lpi1flvvyvsisyalayilnrilkringty1slnkkfltvitiviv1tfs1l1faysqidasdasti  
kqys1l1fl1gii1l1silif  
iysqft1k1emkykrnqee1ietyyeyt1kieainnemrkfrhdyvn1l1tt1seyireddmng1lrdyfnknivpmkdn1lqmn  
al1k1ngien1kvreikg1l  
tak1l1raqem1n1pisi1eipdevtr1n1nmid1srsig1il1dnaieasseiddpiirvafiesensvtfivmncaddipr  
ihel1f1qesf1stkgegr1lg  
l1st1kei1adnadn1v1ldti1engffiqkvei1inn  
>tr|D9RBK2|D9RBK2\_STAAJ



Tsompanidou\_et\_al\_Supplemental\_FASTA\_File

mrrlfsigealidfipnitanlkdvqfttkqiggapcnvactvqklgqqaymitqlgndafgdsiietissigvdvskv  
yrtneantalafvslteag  
erdfsyrkpsadmlfeprfvndidvndvvhfcsvdldvspmrvahyqlitktlnangtvvfdpnvrplwdnaedlr  
qtihtflplahivkvsdee  
lefittgihdeneaiqslftgnvtvviytkgadgaavylknginhyhsgynvkvpdttgagdafigavisrilatdvlnlt  
qlfenegeeilafsnrvaa  
ivttkygainslptlqeveqaf  
>tr|D9RBK3|D9RBK3\_STAAJ  
mtewtreeryqriedvteyfkllkqqvdqskfrqqfhiqpetgllndpnglifkygkyvshqwfplgavhglkywyny  
tsddlinfkaegpilnptd  
kydshgvysgsafeyngllymytgnhrdnhwqrhasqmiarlkedgsvekfpkpvisqqpegytshfrdpkvfkygeky  
yaiigaqndqgrlllyn  
tediinwhygeintelddfgymwecpdyfnvdnqdvilicpqgiepkgdqfkniyqsgyilgkfdieklyehenfvel  
dnqdfyapqtfldkgr  
vligwmglopeiyptdnegwahcltiprvlnvengqlkqrpypaleklrhketalgyankftrklhpyegkqyelidi  
lndatevyfelrtsktss  
tliaynkrenkitldrdsqllptnvegtrstildtpkqlqifvdtssieifcndgervltsrifptedalgiiktste  
sgqvyqlftkydlkdehk  
>tr|D9RBK4|D9RBK4\_STAAJ  
mknisdiaaklagvskstvsrflnngsvskktsekltriiaehdyqpnqfaqlrarqthligaiiprmnsyavdetikgl  
akqcqkyesqllinytgn  
ieaeiqaletlarskvdgivilmatditerhievinkmnpivivgqqheqlhsivhddykagqiigewigqqgyqqievf  
svsekdiavgihrkrglld  
qlakyqikpnihetnftyveaqkdvavlenvkqvdaivgatdialaaykyysdkkdvmpkphqiygfggdpmtqlvps  
iktihynyfeagqcameei  
qqmllkkqdmypsvtvdvni  
>tr|D9RBK5|D9RBK5\_STAAJ  
mnlndtifmflctllvwlmtpglslyfygglvqsknalntvmqsmavlvtfwvitvgftisfgngnlwfgnweyflnh  
vgfatqedisphipfalfm  
lfqmmfctiaisilsgsiaekmfipyllfvviwtaivyspvahwwgggwinklgvldfaggtvvhitsgvsqglvaim  
igkgnkhsestphnliitl  
iggifvwiowygfngsafafdniamlafntvisasagaigwllileyifkkttsllglllgalaglvvitpaagyvtyl  
satimaliggicyiviny  
ikvklkyhdaldafgihgvggiigavltavfqsakkanpdiengfiytdihiilvqilcvtavvifsivmtfiiakvikl  
itplsveqetnigldkiv  
hgehayfegeInrfnkhiry  
>tr|D9RBK6|D9RBK6\_STAAJ  
mihelgtvgmvpfpflieaqkmatlksgdelkidfdctqateaipnwaaengypvtneyeqidnaswtititqkv  
>tr|D9RBK7|D9RBK7\_STAAJ  
mwmifsglivggllgfvqrtrfcltggrfdmrvqknnkmfyalliaitiqsiglliltatgilqipahsfpilgtvigs  
fifgigivlaggcatgtwy  
ragegligswialvlyavtaaitktgilkpvmkinqptnvnsdmsqttgipfwglvviltiitiflvvrtlnkkvrva  
vpklkrytgiyyllfekr  
yhpfiiaaiaiglliallawpmsastgrndglgittpsanlvhflitgetkfidwgvflvlgifigsyiaargsrefkwrp  
dkitirnsaiggi cmgfga  
svaggcsignglvetatmtwqgwialasmivgvwtmshfifvrpmkkvqqqsakvqqqtqiv  
>tr|D9RBK9|D9RBK9\_STAAJ  
mllqlnhisksfdgediftdvdfevktgerigivgrngagkstmkiiagvenydsngvskiknlklyltqqmtlnsn  
atvfeemskpfehikrmes  
likeetdwlskhandydsdyrthmsryeslnsqfeqlegyyeskiaktvlyglfseedfnkpindfsggqktrlsiaq  
mllnepdllddeptnhld  
lettkwledylryfkgaivii shdryfldkivtqi ydvalgdvkryvnyee fiqrdlyyqkrmqeyesqqaeikrlet  
fveknitrastsgmaksrr  
kilekmeridkpmldaksaniqfgfdrntgndvmhvknleigyqtaitkpsievskgdhiaaigpningkstkliktian  
qqkalingditfganlqigy  
ydkqkaefksskti ldyvwdqyplmekdiravlg rflfvqddvkkii ndlsggekarlqlallmlqrdnvlildeptnh  
ldidskemleqalqhfegt  
ilfvshdryfinglankvfdltidggkmylgdyqyyiekveeaealkahqeeqsvnvqaheksmeqssyhnqkeqrreqr  
klerqiseceneietlett  
ilqideqltqpevynnpqkanelaiqkdseqklehamskweelqqk  
>tr|D9RBL0|D9RBL0\_STAAJ  
mstnqtflifviaiilltsvigivgrymsrqrllksmetlwqtispleafirpnshfdyeyklykekfeshslvddktws  
dlnmnaifhkmnynltaig  
emklyaclrgmlsitnksllslfndnaefrknvtyhla ligktvyptfpdqitpvkrhnilflcpflpiisfavifinsq  
vgillflmsclfnii lsat  
lkrtyeddlksifyasnvlkqgytiskikhapqpevnfkqfrtarhltsvlaevndedigamviklvkli fml dyvl fhs  
iqksytthmnelkncfdyi  
aeldnhyalamyrrtlecytepqiddsndgivfselthpliadsvandfslsqnilltgsnasgkstmksiainiilas

Tsompanidou\_et\_al\_Supplemental\_FASTA\_File

aiqvtvtaskfvyqpgivft  
smanaddvlsdgsyfmaelksikriveipdnqkiycfideifkgtntteriaasesvlsflheksnfrviaathdielae  
llkqryenyhfnevienn  
ihfdykikpgkantrnaie1lkitsfpakiyerakdnvsng  
>tr|D9RBL1|D9RBL1\_STAAJ  
mtkdililavetscdetsvsvikngrdilsnvtlsqieshkrfggvpevasrhvegitttinealvdadvsmidai  
avteggpligalligvnaa  
kalafaydkplipvhiaghiyanhieep1tfplialivsgghtelvymkdhltfevigetrddavgeaydkvartigl  
ypggpvdrlaaegedtys  
fprvwlkdsydfsfglksavinglnhrqknipieanvatsfqnsvevltfkaiqackeygvqrlivaggvasnkg  
lrqsladqckvndiq1tip  
spklctdnaami gvaghylyqqgrfadlglnghsnidleesae  
>tr|D9RBL2|D9RBL2\_STAAJ  
mdqqskeq1nremtkedvpqvfdierrsfndsswtidafyheieqnnfakyfvlefeqqiigylglwividqaqittva  
iednyrgyglqmllkygi  
nyashtcdvmslevrvnnkvaqhvyenlgfyqggkrknyygegedamvmwvnlnd  
>tr|D9RBL3|D9RBL3\_STAAJ  
mnsllidtsnqplsvalmqndevlaeitttdskqnhsvglmpaisqlfeqskiakqldtiivaegpgsytg1rigvtvak  
tlayalvdklygvsslka1  
aatidhtdkllvpvfdarrqavytgi fqwknq1vtil edqymsiealrafledlnqpfyigkdtvklqdelqgdviaq  
1pnasvmyqlidkpsdvht  
ftpkylhlaeaernwinsqknn  
>tr|D9RBL4|D9RBL4\_STAAJ  
mnekhngestli kinndemnfamflveqlksgd1llngdlgagkttltqfigkalgvrrtinsptfniiksyrkn  
lk1hmdcyrledsdedlg  
fdeffedqaitviewsqfkd1lpathlsinistisentrqiel faqgehyeqikeaiihefaah  
>tr|D9RBL6|D9RBL6\_STAAJ  
mstqhevqnidplkmaeslepeqlnektlndmrsgsev1veal1kenvdy1fgypggav1plydtyfdgkikhilarh  
eqgavhaaegyavsvgktg  
vvvvtsgpgatnvmgtidahcdslplvvftgqvattpgigkdafqeadil smtspitkqnyqvkrvedipkivheafhva  
nsgrkp1v1dfpkdmgv1  
atnvd1cdeinipgyevvtepenkdidt fis1lkeakkpvlagaginqsksnq1l1tqfvnkhqiptvt1l1glgavpye  
dt1flgmggmhgsyanma  
ltecd1l1n1gsrfd1askpdafapnakivhvdidpseinkvihvd1giiadckrfleclndknvetvehsdwvkhcq  
nnkqkhpfk1geedsvfck  
pqqtieyigkitngeaivttvdvghqmwaafypfknhgqwtsgglgtmgfipssigaklanpdktvvcfvgdggfqm  
tnqemallpeyglvki1  
inngt1gmvkqwkdfnqrfsvfnqpdfmkmaeaygvkglidkpeql eeql daafayqgpali evrispteavn  
mvp1sgksnhemeg1  
>tr|D9RBL7|D9RBL7\_STAAJ  
mtrilk1qvadqvstlnritsafvr1qynidtlhvthseqpgisnmeiqvdiqddts1hilikk1kqqinvtiecydlv  
dnea  
>tr|D9RBL9|D9RBL9\_STAAJ  
mssh1qifdt1rdgeqtpgvnftfder1rialqlekvgdvieagfpasstgsfksvqiaaqt1tttavcglarckksd  
idavyeatkdaakpvhvf  
iatspih1ehk1kmsqedvlasikehvtiakqlfdvqv1spedatrtelplfvkcvqtavdagatvinipdtvgysyde  
yahifkt1tesvissnei  
ysahchdd1gmavsnslaaieggarrigtvngigeragnaaleevalalyvrndhygaqtvlnleetkkt1s1sryag  
irvprnkai1vgqafshes  
gihqdgvlkhretyeimtpqlvgvsttelplgk1sgkhafsek1kalgydidkeaqid1fkqfkaiadkkksvsdrdiha  
1iqgsehehqalyk1let1q  
1qyvssglqsavvvkdkkeghiyqdssigtgsivaiynavdrifketelidyrinsvtegt1daqaevhvn1liegktn  
gfgidhdilqasckayvea  
hakfaaenvekvgn  
>tr|D9RBM0|D9RBM0\_STAAJ  
mtynivalpgdgigpei1ngsls1lei1snkynfnyqiehhfeggasid1fgepltektlnackradai1lgaiggpkwt  
dpn1rpeqgl1k1rks1n1  
fanirpttvkgass1sp1kqervegtd1vivreltsgiyfgeprhfnhealds1tytreeierivhvafklaasrrgk  
1tsvdkenvlassklwrkv  
vnevsqlypevtvnh11vdacsmh1itnpkqfdv1vcen1fgdilsdeasv1pgslgl1spsasf1sndgprlyepihgsap  
diagknvanpfgmi1slam  
clres1nqpdade1eqhiynmiehgqttad1ggk1nttdifeilsqk1nh  
>tr|D9RBM3|D9RBM3\_STAAJ  
mtvkttvstkdideaf1r1kd1vketplq1ldhy1sqkydckvylkred1qvwrsfk1rgaynaisv1sdeakskgitcas  
agnhaqgvaytak1n1na  
vifmpvttplqkvngkffgnsvvev1tgdtfdhclaeal1tytsehqmnfidpfnvhtisgggtlakemleqaksdnv  
nfdylfaa1gggl1sgis  
tyfksyspntki1gvepsgassmyesvvvnqvit1pni1dkfvdgasvarvgditfeiakknvdnyvqvdegavcstild

Tsompanidou\_et\_al\_Supplemental\_FASTA\_File

myskqai va epa gal s vsa  
lenykdhikgktvvcii sgnndinrmkeieersllyeemkhyfilnfpqrp gal refvndvl g p q d d i t k f e y l k k s s q  
ntgtvii gi q l k d h d d l i q  
lkqr v n h f d p s n i y i n e n k m l y s l l i  
>tr|D9RBM4|D9RBM4\_STAAJ  
mndkl q r m v e n l s e e k f g r t f r h c a y f n k r l r t t g g r y l l k s h d i e i n p k q y e h y g e d a v v k i i l h e l c h y h l h i a g k g  
y q h k d q d f k r l s q q v g a p r  
f c n s i e s y q q r a n y e y c t k c h a k y i r i r k v d t t r m r c g h c n g k l r m k r q l k  
>tr|D9RBM5|D9RBM5\_STAAJ  
m d n q l i n s i i e k y q f s k k q i e a v l t l l e e k n t v p f i a r y r k e q t g g l d e v q i k q i d d e y q y m v n l q k r k e e v i k n i e q q g  
l l t e e l k k d i l k q n k l q r v  
e d l y r p f k g k k k t r a t e a k r k g l e p l a i w m k a r k h e v s i e e k a q q f i n e e v q s v e d a i k g a q d i a e q i s d n p k y r t k i l  
k d m y h q g v l t t s k k k n a e d  
e k g i f e m y a y e p i k r i a n h r v l a v n r g e k e k v l s v k f e f d t t s v e d f i a r q e i n h n n v n r s y i l e a i k d s l k r l i v p s  
i e r e i h a d l t e k a e n h a i d  
v f s e n l r n l l l q p p m g k q i l g v d p a f r t g c k l a v i n p f g t f i a k g v i y p h p p v t k k e a a e k d f v q m v k a y d v q l i a i g n  
g t a s r e t e q f v a d l i k k h q  
l p v q f i i v n e a g a s v y s a s e i a r d e f p d f q v e e r s a v s i g r r v q d p l s e l v k i d p k s i g v g y q h d v n q a l e n a l t f v v  
e t a v n q v g v d v n t a s s l l  
q y v s g l s s q i a k n i a y r e n g a i k h n k e l s k i k r l g a k t f e q s i g f l r i v d g s e p l d n t s i h p e s y k v t y k l l d k l g f g  
g n d l g s d a l k a k l n s l d m d  
e l a i e l q v g v p t l e d i k s l k a p n r d p r e f e t p i l k s d v l s i e d l k e g m k l s g t v r n v v d f g a f v d i g v k q d g l v h v s k  
l s k k f v k n p m d i v s v g d i v  
d v w i y s i d k n k d k v s l t m i d p h e  
>tr|D9RBM7|D9RBM7\_STAAJ  
m q s k e d f i e m r v p a s a e y v s l i r l t l s g v f s r a g a t y d d i e d a k i a v s e a v t n a v k h a y k e k n n v g i i n i y f e i l e d k i k  
i v i s d k g d s f d y e t t k s k i  
g p y d k e n i d f l r e g g l g l f l i e s l m d e v t v y k e s g v t i s m t k y i k k e q v r n g e r v e i s  
>tr|D9RBN2|D9RBN2\_STAAJ  
m s d k y r s a y m n v d l n a v a s n f k v f s t l h p n k t v m a v v k a n a y g l s v k v a r h l m e n g a t f f a v a t l d e a i e l r m h g i t a  
k i l v l g v l p a k d i d e a i q h  
r v a l t v p s k q w l k e a i k n i s g e q e k k l w l h i k l d t g m g r l g i k d t k t y q e v i e i i q q y e q l v f e g v f t h f a c a d e p g d m t  
t e q y q r f k d m v n e a i k p e y  
i h c q n s a g s l l m d c q f c n a i r p g i s l y g y p s e y v q q k v k v h l k p s v q l i a n v v q t k t l q a g e s v s y g a t y t a t d p t t i a  
l l p i g y a d g y l r i m q g s f v  
n v n g h q c e v v g r v c m d q t i v k v p d q v k a g d s v i l i d n h r e s p q s v e a a e k q h t i n y e v l c n l s r r l p r i y h d g d q r f v t  
n e l l k  
>tr|D9RBN3|D9RBN3\_STAAJ  
m i h g i g v d l i e i d r i k v l y s k q p k l v e r i l t k n e q h k f n n f t h e q r k i e f l a g r f a t k e a f s k a l g t g l g k h v a f n d i d c  
y n d e l g k p k i d y e g f i v h v  
s i s h t e h y a m s q i v l e k s a f  
>tr|D9RBN4|D9RBN4\_STAAJ  
m r d y n f m s p h a k k v m r l s a v l f w i p i a l v l l i a f n i l n w l f w e i l d n y i s i v s s v i i l l v v v f t l v i a p v y r y k h c r y a  
f e k h h l r v r n g i l f l d e k v  
i p y f r i q n i d i d v g p i m r r y r l a t l t l y t a g g q a e i e l d r s e a r r l k r w l n n e r h l e n n k n e e  
>tr|D9RBN5|D9RBN5\_STAAJ  
m s e p k l h p i s y f n g i i n a i k q n i v v f f i f v i f q l k d f d y t n p e s y l w i g i v f v f f l l s y i s q i v g i m n t r y w i e d n y f i  
l t t g i f n k r k e l n i k r i q  
s v d m t q g v n q i g g v d l i q i k t p s d g i v l s v i s k k q g e y l e r y i d q l q t e l k t e m a q s s t e q n g n r n q d i e g n v e d i a e  
g r l d e v q n s d s k l n q k n k r  
i p i y q m n f k e s l f m a m t s g a i g v t l a a l v p i y g a v r e l i p w s k l n h e i s q w q i v s v s v l i i l l v l i l a y i i g t i t m i  
r f y g f s v m l e n e q l k i e y g  
l f n k k k v t v p t k r l q a v v e r q s y i r r l f g y t a i h f i i t s d f e n k k i e d d n d s g s v s i l p f i k r d k a y q i i q n l v p d l s y  
q q v n e g m p f s g f h r h f l i p  
s i i v i a m a g i g c y f w n q l l l f t i i t v v i i g l f v i k g y l y v k h a g f k m t e e q i t i q n f e l l k r n i y y f k a h h i i g f d t w q  
h t l l k r n l n n f s f i v a k g  
v g a q s i n l k y a r s e d a n k l k s w y l r g e n d e g l  
>tr|D9RBN6|D9RBN6\_STAAJ  
m s v y t k l s k s p k s a l l y y i t n g i e f i l s v a y v i f y f i w l r f e w p n y l i y i l l v l g a l s t l k l f i k p l w q y h c r f y q i d  
q l s v q y r t s f l i y k e e t s r  
i e r l q y l s i k s n p i s k a l n l y k v g f m t a g t i y l p m m s h d d v k i i e a r t m s n l r g v e s d v  
>tr|D9RBN7|D9RBN7\_STAAJ  
m n t i r n s i c l t i i t m v l c g f l p l a i t l i g q i f f y q q a n g s l i t y d n r i v g s k l i g q h w t e t r y f h g r p s a v d y n m n p e k  
l y k n g v s s g g s n e s n g n t e  
l i a r v k h h v k f g n s n v t i d a t s s g s g l d p h i t v e n a l k q a p r i a d a r h i s t s r v a d l i q h r k q r g v l t n d y v n v l e l n i  
a l d k m k d  
>tr|D9RBN8|D9RBN8\_STAAJ  
m h h v n k y n q t m v i e a l k m s f y k l n p k q l i k n p i m f v v e v g m i l t l i l i c f p d i f g t s y l s r g y l i t i f i i l l i t i l f a n

Tsompanidou\_et\_al\_Supplemental\_FASTA\_File

fseafaegrkgaqadslrq  
aqsnlarlieengayrivnatekagqnrvengetipadgvvinglatvdesaitgesapvikesggdfdgviggtlv  
tsdwleirvseagtsfld  
kmialvegaernktpneialftlltltiiflvvvtlypiasyhlhlpiamlialtvclipptiggllsaigiagmdr  
vtqfnvlaksgravevcgd  
vdvml dktgtitygnriaseflpvnqqmweklivaaymssiyddtpegksivr lakqmyinelpkdidgtykpftaetr  
msgiitneisvfkgapnsm  
inlvkqqgniplnieslcmdvsskggtp liviennvmlgvlylkdvikdglverfaelrkmgietvmctgdnahtaati  
akeagvdrfvaeckpedki  
kvikdeqakghivamtgdgtndapalaqadiglamnsgtisakeaanlidldsnptklievkigkqllmtrgalttfsl  
andvakyfailpalmmsti  
pemtslnimhlsspsksaisalifnaliivalipiamkgvkvkgyssidrifinnmliygllggliaflgiklidmivqff  
v

>tr|D9RBN9|D9RBN9\_STAAJ  
meiilfltmvmiayvfgslyrlalvqssrvdliftrfenmcfkiigtdlehmsaktyvkhflafngfmgfitfvlliv  
qqwflnphnlngsidla  
fntaisfltnsnlqhngesgvtyltqmivmtylmftssasgyavciamlrrltgltniignfyqdivrfivrllplsc  
lisillmtggvptlnanl  
mirtlsghiqhiafgpiaslesikhltngggflagnsatpfenpniwsnfiemgsmlpmsmlflfgrmlsrhgkrvh  
rhailfvamffifiailt  
ltmwteyrgnpi lanlgiygnmegkevrfgaglsalftvittafttgsvnmhds ltp lgg lgpmlmm lnnvfvgggegv  
glmnliiyvlltvficslm  
vgktpelmpigaremkcivlvflihpililvsa lafmpgasesitnpsfhgisqvmymtsaaanngsgfeglkdd  
ttfwnistgiimllsryip  
iilqlmiasslvnkksyhdqkytiaidkpyfgsvlivfivllsgltfipvlllpgigefltk

>tr|D9RBP0|D9RBP0\_STAAJ  
msnteslnigkkrgsltiyigspvgktfemlsnaiefqsnvdiklgyiephqr detnalaeqlpkiatnftkhgshh  
fqyldvdriieesptivli  
de lahtnisrdrhekrymdieeilnhgidvhtlniqhieslssqielmtgvyvkerpdyfimsadvlevvdispeqli  
krlkagkvykkdrldvafs  
nfftyahlse lrtltlrvadlmsdkekvrnhktslkphiaavaisgsiyneavikeafhiaqkehakftaiyidvfekn  
rqykdskqvhhqlmlaks  
lgakvkvvysqtvalgl dewcknqdvtkliigqhirnkwrdfnkp lidh lmsfehkykieivpikqipvelkmnkspyr  
pkgkrfaidmlkmi liqi  
cvmmlwi yqldkhesstii lmi fligi illsiwtrsyi igflaai invfvfnyffteprytfeyrfdypitfivsilt  
silt sal lkqikfqsyt  
kqlyrtdllfqfnds ikqytvenllinagyqinqllqssitiyvinqskviktip lqnhidnttqqheqalswviker  
qagattdtfpginkw lipi  
gtspikgilaidyqssqvinpydasilesmlnel slavenvtllkqtresmlqaerqlthsnflrsishdirtp lttimg  
nldilvshskdmsiiekeq  
llvhsfqesqlyllvtnilsltklqssnvqiklqpylvselveidmilerrhlkkritvsssvdlqfihidsklilqa  
lfnlienavkhtstdtkin  
lsiryasdeqiefavidegpgisleeqqkiefpytgs lkitkkawd

>tr|D9RBP2|D9RBP2\_STAAJ  
mqnfkelgisdntvqsl esmgfkeptpiqkdsipyalqgidilgqaqtgtgktgafgpi liekvvgkqgvqslilaptre  
lamqvaeql refsrgggvq  
vvtvfgmpierqikal kkgpqi vvgtpgrvidhlnrrtlkt dgihtlildeademnmgfiddmrfimdkipavqrqtm  
lfsatmpkaiqalvqqfmk  
spkiiktmmnemsdpqieefytivkelekfdtftnflv hqpelavfgrtkrrvdeltsaliskgykaeglhgditqak  
rlevlkkfkndqini lvat  
dvaargldisgvshvynfdipqdtesythrigrtgragkegiavtfvnpiemdyir qiedangrkmsalrpphrkevlqa  
reddikekvenwmskeses  
rlkristellneyndvdlvaallqel veandevvqltfekplsrkgrngkpsgsrnrnskrngn pkfdgkskrskgyssk  
kkgnk fdrkeks ggsrp  
mkgtrfadhqk

>tr|D9RBP3|D9RBP3\_STAAJ  
minvtlkqiqswipceiedqflnqeingvtidsraisknmlfipfkgenvdghrfvskalqdgagaafyqrgtpidenvs  
gpviwvedtltalqq laqa  
ylrhvnpkviavtgsngktttkdmiesvlhtefkvkktqgnynneig lpltilelndnteisilemgmsgfheief lsnl  
aqpdia vintigesmqdl  
gsregiakakseitiglk dngt fiydgdep llkphvkevenakcisigvatdntlvcsvddrdttgisftinnkehyd lp  
ilgkhnmknatiaia vghel  
lglyntiyqn lknvsltgmrmeqhtl enditv indaynaspts mraaidt lsltgrirililgdvlelgenskemhigv  
gnyleekhidvlytfgnea  
kyiydsgqqhvekaqhfnskddmi evltn dl kahdcv lvkgsrgmkleevvnalis

>tr|D9RBP8|D9RBP8\_STAAJ  
mteqdnahseqikt nlsrlnriegqvrainmieedvyddvltqiratr salnsvatk lleqhmks cimknvqgaq  
eeameellvtfqklid

Tsompanidou\_et\_al\_Supplemental\_FASTA\_File

>tr|D9RBP9|D9RBP9\_STAAJ  
miellsialkhsniinsifigafinl1faftiifmerrsansiwawllvlvflplfgfilylllgrqirdqifkidk  
edkkglelivdeqlaalkn  
enfsnsnyqivkfkemiqmllynnaaf1ttndlkiytdgqekfddliqdirnatdyihfqqyiiqndelgrtilnelgk  
kaeggvevkiilyddmgsrg  
lrkkglrpfrdkgghaeffpsklplinlrnmnrnrhkivvidgqigygvgfngvdeylgkskkfgywrwthlrivgdav  
nalqlrfildwnsqatrhd  
isyddryfpdvnsqgqassgpdeeweqikygy1kmissakksiyiqsypfipdqafldsikiaalggvvnimip  
nkpdpfvpfwatlknas1  
ldagvkvfhydnghlshktlviddeiasvgtanmdhrsftlnfevnafiydqqiakk1kqafiddlavsseltkaryakr  
slwikfkegisqllspi1  
>tr|D9RBQ0|D9RBQ0\_STAAJ  
mqqsdiisaakymksiinhndytghdiahvyrvtalaksiaenegvndtlvielac1lhdtvdekvvthankyvelksfl  
ss1s1siedqehilfiinn  
msyrngkndhvtl1legqivrdadrldaigaigvartfqfaghfgpepmwteqms1dkind1veqlppsaikhffek11k  
les1mhtdtakmiakerhd  
fmmmy1kqfftewnyhd  
>tr|D9RBQ2|D9RBQ2\_STAAJ  
mfngsylnvyficgisdvpsrhrtihevleaalkagit1fqfrekgesalkgndklvlakelqhlchqydvpfivnddvs1  
akeinadgihvggddakvk  
eiaqyftdkiig1s1sd1deyaksd1thvdyigvgpiyptpskhdahtpvgpemi1atfkempq1pivaiggin1tsnvap  
iveagangisv1saikse  
niektvnr1fkdf1fnn  
>tr|D9RBQ3|D9RBQ3\_STAAJ  
mnylnkiri1enpl1ticytndvvnkftang11sigaspamseapeeaeefykvaqallinigt1taqneqdi1aiaqtane  
ag1pivfdpvavgastyrk  
qfck111ksakvsvikgnaseilaliddatmkgtdsdanldavaiakkayaiyktaivitgkedvivqgdkaivlang  
p1larvtgagc11ggviag  
fl1retpdieal1eavsvfniaaevaenencggpgtfspl11dtlyh1nettyqqri1riqeve  
>tr|D9RBQ4|D9RBQ4\_STAAJ  
mikpkialtiagt1dtpggagvmad1ksfhscgvymvsvtsivaqnt1gvqhih1nhqwvdeq1dsvfndt1phaiktg  
miatadtmetirhy1mqhe  
sipyvidpvm1aksgds1mdndtkn1lqht11pladvvtpn1peaeitgt1tidseekimqagrifineigsngvi1kkg  
hsndtdiakdy1ftkegvq  
tfenkrfktktht1gtgctfsavitaelakgrp1feavhkakkf1smsiytpeigrgrgpvn1hfay1kkegl1ddek1sk  
>tr|D9RBQ5|D9RBQ5\_STAAJ  
mefsqklyqaakpi1indiyeddfiqm11gni1qadalrhy1qadaay1keftn1yallipkmnsmdvk1flveqiefmve  
gevlahdi1aqivgesyee  
i1k1k1vwppsgdhy1khmyfqahsrenaiytiaamapcpyiaelak1ksqsdhk1nrekdtakwfd1fystemddi1nvfe  
al1mnklaesmsdke1eqvk  
qv1f1esci1herrf1f1mam1teqwe1fggkvnd  
>tr|D9RBQ6|D9RBQ6\_STAAJ  
mkk1t1lass1avgl1g1vagnagheahasead1nkas1laqmaqsndqt1nqkpieagaynyt1fdyeg1ftyh1fesdg1th1faw  
nyhatgangadmsvqapat  
nnvapsavqanqvqsqeveapqnaqtqppqastsnnsqvtatpteskassegssvvnah1kqiaqresggnihavnptsg  
aagkyq1flqstwdsvapak  
ykgvspanapesvqdaavk1lyntggaghwvta  
>tr|D9RBQ8|D9RBQ8\_STAAJ  
mktfkavr1f1qvnehgri1eye1edgvi1nkeesgtgw1leivi1snehyet1fkeyq1dseq11dirv1vitrpandpal1fes  
tvksikn1fkttmsiv1f1ech  
iyt1lrqqaes11leq1liddg1sgeel1kks1fnrmmqskpk1kdeklee  
>tr|D9RBR0|D9RBR0\_STAAJ  
mdkivikggnk1tgevkvegaknav1pil1tas1lasdkpsk1vnvpalsdvetinnv1tt1nadvtykkdenavvdatk  
t1neeap1yeyvskmrasil  
vmgp11ar1ghaiva1pggcaigsrpieqhi1kgfeal1gaeih1engniyanakdg1kgtsih1ldf1psvgatqni1maas1  
akgk1t1lienaakepeivd1  
anyin1emggri1tgagtdt1tingves1hgvehai1pdrieagt11iagaitrgdi1fvrga1kehmas1vykleemgve1d  
yqedg1rvraeg1d1qpvd1  
kt1lphpg1f1ptdmqsmma111tanghkvvtet1vfen1rfmhvae1fkrman1invegrs1ak1legksq1lqgaqvkatd1raaa  
al1lag1vadgktsvte1n  
h1ldrgyv1d1hgk1kq1lgadierind  
>tr|D9RBR2|D9RBR2\_STAAJ  
mkmr1lqqa1ffnssqpcrrgn1kek1dsq1flqtmqvgvqrnk1fckni1isvp1ppi1fkyt1lavfnd1kep1lhks1lmv1lyqf  
1pp1mfci1fks1  
>tr|D9RBR5|D9RBR5\_STAAJ  
mas1keid1trik1stkkmkqi1tkammvsssk1rraekntkq1ftpydmkmdaitavagassntnhpml1rprki1trsgylv  
itsdkgl1agaysanv1kk1  
itdieakhqdsseysiv1lgqqgvdf1knrgydi1eysqvdvpdqps1fksvqalanhaid1lyseeide1lniyyshyvs1

Tsompanidou\_et\_al\_Supplemental\_FASTA\_File

enkptfrqvlplsqedssk  
ghghlssyefepdkesilsvilpqyvesliygtildakasehatrmtamknatdnateliddlsleynrarqaeitqqit  
eivggsaale  
>tr|D9RBS0|D9RBS0\_STAAJ  
mdhksp|vswnlfgfdivfnlssilmlilvtaflvflaiictrnlkkrptgkqnfvewifdfvrgiiegmmawkkggqfh  
flavtlilyifianmglp  
fsivtkdhtlwwksptadatvtltlsttiilltqfygikmrgtkqylkgyvqpfwplaiinvfeftstltlglrllygni  
fageiilltllaglffnepa  
wgwiisipgllivwqafsvifvgtiqayifimlsmvymshkvadeh  
>tr|D9RBS2|D9RBS2\_STAAJ  
mkkimtifgtrpeaikmaplvkaleqekmllepivvtaqhremldsvlstfeikpydlnimksgqtlseitsksitqle  
qviqllekpdmvlvhgdmt  
tfagglaaafynqvpighveaglrsydksypfeevnrqlvgvladlhfaptknaashllsegknsesvvvtgntaidamk  
ytvddnyksnimdkyhdkk  
filmtahrrenigqpmeni fkavrrlideytdlalvypmhknpkvrevaqkilgshdrielielpdvdfhnfakksyfi  
ltdsggiqeeapsfnkpv  
vlrsvterpegveagtlkvigtqnqvyqaakelidderlyhqmseasnygdgfaserivnhikyynlitekpsdf  
>tr|D9RBS7|D9RBS7\_STAAJ  
mdtkiwdvreyneqlqypkineikdivlmggliglp tetvyglaanatdeeavakiyeakgrpsdnp livhihskgqlk  
dftytldprveklmqafwp  
gpisfilplkpylcrkvsglssvavrmpshsvgrqlqineplaapsanlsgprspptfnhvdydlngridgivaq  
qseeglestvl dctsfpk  
iarpgsitaamitdilpnshadyndteqpiapgmkykhysntpltiitdieskigndgdwssiafivpsnkvaqip  
sdaqfiqlcddndvkqas  
hnlvdvllhsldeneni saayigfelndnteamnrmkaagnhiikgcel  
>tr|D9RBS8|D9RBS8\_STAAJ  
mvnykek|deaihl tqkqgfeqtraewlml dvfqwtrtdfvvvhmddmpkamimkfdlalqrmllgepiqyivgfasfyg  
rtfdvnsnc liprpeteev  
mlhfllqql eddativdigtgsgvlaitlkcekpdlnviatdisleamniarnnaekhsqiqfltgda l kplikegikln  
glisnppyidekdmvtmsp  
tvtrfepqal fadnhgyaiyesiedlphvmekgspvvfeigynqgealksiilnkfpdkkidiidqdinghdrivsfkw  
>tr|D9RBS9|D9RBS9\_STAAJ  
mfdqldiveeryeqllne ll sdpdvndsdklrkyskeqadlqktvdvyrnykakkeeladieemlsetddkeevemlkee  
ssgikaelpnleee|kll  
ipkdpnddkdveiraagdeaaifagd l mrmyskyaesqgfk teiveasesdhggykeisfsvsgngaysklkfeng  
ahrvqrvpetesggrihts  
tatvavlpevedveieirnedlkidtyrsgaggqhvttdsavrihlptgviatsseksiqnrekamkvlkarlydm  
kvqeeqkyasqrksavg  
gdrserirtynypqsrvt dhrigltlqklgqimeghleeida l t l seqtdklkelnge l  
>tr|D9RBT6|D9RBT6\_STAAJ  
mplvsmkemlidakengyavqyninnleftqailvsqeenapvilgvsegaarymsgfytikmveglmhdlnitipv  
aihldhgssfekckeaida  
gftsvmidashspfeenvattkkvveyahekgvsveaelgtvggqeddvvadgiyadpkceqlvektgidalapa lgs  
vhgpykgepklgfkemeei  
glstgplvlhggtgipkdiqkaipfgtakinvntenqiasakavrdvlnndkevydprkylgpareaiketvkgkike  
fgtsnrak  
>tr|D9RBT7|D9RBT7\_STAAJ  
mskilntqligifnrlekqsleiqmaaqllqai ggegyvyvkgyddlqffenfv l h sderl kssrkl daikdfkeidst  
drvllf spfyndqvaldig  
klidldidvvlisnkpktddfpdhlvhfidlstprpivytedydkivqphama lnyvydiytqmie mtrdle l  
>tr|D9RBT9|D9RBT9\_STAAJ  
mkiqdytkqmvdksfidmaytl l ndkgetmlydiidefra l gdyeyeeietrvvqfytdlntdgrflnvgenlwg l rd  
wysvddieekiaptiqkfd  
il daddeedqnlklgedemddd d i paqtddqeelndpedeqveeeinh sdivieedede l dedeed fedeedfka  
>tr|D9RBU0|D9RBU0\_STAAJ  
make l cfegitlkafdeqyrsaingfelnerqqiys l pkeviddai ndadrianvaindknevvgffvlhryyqhegyd  
tpenvvyirs l sinekyg  
fgygtkimmslpqyvqgvfpdfnhlylvvdaendawnlyeragfmhtatkeegpigkerlyyldl dskhvss lklees  
rsevtvhiinlmidgqk  
gfialeqigermniaaievdkysrfgngissalrq lptyl rknydn l nviamilfgenn d fklclnsnfveieqtddyv  
vfeky lny  
>tr|D9RBU3|D9RBU3\_STAAJ  
mtnngnepnl t lsdlydkdvvytsrpsyisnpwlpkdehqs n fltgre llianqlpviveasatdklhq l fqvigkevp  
nsiytfnnqsyenlikql  
ahkenkkyfyihdetilnqqyyal dkt l fvalnnkaripewtngkflpkrkvkieqfeneiknwefpfvikpgddlp  
taggygvmicyhdadlqka  
itrikeataetns l iieqkieekanycvqfayses lgiqylgaatq l tdkygfyngenttnvpehvieagrqimengvn  
qgffgvagfdllvdeddnv

Tsompanidou\_et\_al\_Supplemental\_FASTA\_File

yaidlnfrqngstsmlllaneInsgyqkfysyhskgdnthffntilkyvkegslypIyydgdwgyedkvksrfgciwhg  
dsketvIeneraflaeleh

y  
>tr|D9RBU4|D9RBU4\_STAAJ  
msekqilDyietnkysyieishriherpelgneeifasrtlidrlkehdfeteiaghatgfiatydsIgdpaigfl  
aeydalpgIghacghniig  
tasvIgaigIqkvidqiggkvvvIgcpaeggengsakasyvkagvidqialmihpgnetyktidtlavdvIldvkfyg  
ksahasenadealnaldam  
isyfngvaqlrghikkqrvhgvIldggkaaniipdytharfyttramtrkeldilteknqiargaaigtgdyefgpiq  
ngvnefiktpkIddIafaky  
aeevgeavidddfygstdtgnvshvptihphikigsrnlvghthrfreaaasvhgdealikgakimalmgIelitnqd  
vyqdiieehahIkgngk

>tr|D9RBU6|D9RBU6\_STAAJ  
mnilryllgigfsvigvlhfttrerqfrniipkclplrktavIvtgifeilfgIallikkpsqclktinIflIavfpani  
ymavkkIplgdqIptwqI  
ylrlpmqfvImgIkkI

>tr|D9RBU7|D9RBU7\_STAAJ  
mrmidiiekkrdghtIteeinffidgyvkgdipdyqassIamaiyfQdmndderaalTmamvnsGmidIldikgvkvd  
khstggvgdtttlvlapIv  
aavdvpvakmsgrIghgtgidkIeaidgfhveideatfvklvnenkvavvgqsgnltpadkkIyalrdvtgtvnsipI  
iassimskkiaagadaivI  
dvktgsgafmktIedaealahamvrignnvgrntmaiiSDmnqplgcaignaleIqeaIdtlkgqgpkdlteIvlIlgsg  
mvvlankaetIleartIli  
eaidsgaalEkftfiknggdetvidhperIppaqyqieyakksgyvtelvsndigvasmmIaggrItkeddidIavg  
ivlnkkgdkveegesIlt  
ihsnrqdvddvkkIldssitiadhvsptIihkiite

>tr|D9RBU8|D9RBU8\_STAAJ  
mnsakIidhtIlkpestrtqidqideakaynfksvcvnpthvkyaerIadsevlctvigfplgasttatkafeteda  
ihngadeidmvinIgalKd  
grfdvqqdieavvkaakghtvkvietvlInhdeivkaseIkaagadfvktstgfaggataedvklmkdvtgadvev  
kasggvrnIedfnkmveag  
atrigasagvqimqgleadsy

>tr|D9RBV0|D9RBV0\_STAAJ  
msnqqdvvkeInqqvanwtvaytkInhfhwvkgpnffsIhvkfeelyneasqyvdelaerIlavggnpvgtltecleqs  
ivkeaakgysaeqmveels  
qdftniskqIlekaieIagnagddvsedmfIgmqtsvdkhnwmfksyls

>tr|D9RBV1|D9RBV1\_STAAJ  
mpivvydgncIycynyviwIiqhdIprnyqfatIkevgqqffeqhpeaanknsvilqkgdriyfesqaiiqIitalpnr  
tkllvgglwIvpkpvrnfg  
yrmfannrnrnmwktIwhqpndyeksffIddnakvkltd

>tr|D9RBV2|D9RBV2\_STAAJ  
mtaetnyfwIncgynrwnhnepIvgqtaIefesgahfnpsqgfrakkkakvgdqviIyqvqtdtglIgcgeiIsvetgaqn  
kIrvqfrfneqIkpIatady  
IkrsealefrmsnmketIfnqitaefdlisglgkgeikiIpryfflaeteefepgnqytiythtyngikrnghfytqle  
egdniifynrtknqsvvgi  
gevskhihekppipgrtnstvievsyekditpitIstlnkhpklknlyflqenakqaiasmsqaqydaiiemsdnngIks  
pfemvqkpdmlIesekeeaI  
kpfIllvdrkeegIkaandIqkananpviItghpnfsedmlygkylpnetgalyyregfitqImpkkdksylvidnfn  
ridtdifqtyinvIlegyev  
tlprynkdgnmiIksrqkdsfyfnpnwhivgitydsleeikekysdqflkytrivkvkhd

>tr|D9RBV5|D9RBV5\_STAAJ  
mnilvijangggvslIvqqIakenvaftagvrqsqIlnalksqgmkaIldvendsietItefIkpfdkviIsvsgsgnt  
gadktiIvdIlgavksmi  
skeanikhyvmvstydsrrqafddsgdlkpytiakhyaddyIrrsgInytilhpgaltnaagsgkieaaqyfdgkgeipr  
edvatvlkeivtsnhfnhq  
efqiIsgehdikdalIqfeiekd

>tr|D9RBV8|D9RBV8\_STAAJ  
mftyfksaIknakpqlIitIiyaliafaviavvyllanfqlakyvqtiaIysqfgqkppvdayIkvIavlliaavvsIlfv  
IvqIfigitnmkramshe  
kvkftdlfiakkgnyIksvIglvsiamiivslIstIlyklfspvsemimnsVqssyadsthlvgiaittqsiiivv  
llikaiitwllIipvfnfm  
tsfvestndkvkthlangfkamngqktffkffigilllnliiIlfktpvgylisfntqslsqsvaeniIrvyvtvmtiI  
fvvihalimIvgyylkr  
gqkItkdkvktadknkkvvttepkntkvendkvttsvetktekaqdsIndnttktmtdskpednqpk

>tr|D9RBV9|D9RBV9\_STAAJ  
mdnvkaIflmdgtIlhennkastytkdvinqlrekqfkvflatgrshseihqlvpqdfvvdgiIssngtIgevdghtif  
khglstqvkqIvdlakqq  
hiyyevfpfegnrvalkedetwmrdmihsqdpiingvshsewssrqdalagkiewvsefpegeyskiylfssnlekittfr

Tsompanidou\_et\_al\_Supplemental\_FASTA\_File

delkqnhvqhlhisvsnsr  
fnaetmayqtdkgtgikemiehfgirqdetlvigdsndramfefghytmamknarpeiqaaltdsvttytneedgaakyl  
aehflae  
>tr|D9RBW0|D9RBW0\_STAAJ  
mlitlnhvgrlkqgkpiqdvswqiakgdkwlyglngagkttllnilnayepatsgtvnlfngmpgklysaenvrqqi  
gfvshsllkfqegetvid  
vmsgafksiglyknvdddiiseahqlinlvemsdkaqqfigylstgekqrvmiaralmgqprilildepaagldfiare  
sllnilsldstyptlami  
yvthfieeitanski111kdqgsiqqgavediltsemshffrkkvavqrwnqrfsmmle  
>tr|D9RBW2|D9RBW2\_STAAJ  
msqteekkgigrrvqafgsflssmimpnigafiawgfiaaifidngwfpnkdlatlagpmityliplliafsggrliydl  
rggiaaatmgvivalpd  
tpmlgamimgplvgwlmkktqliqprtpqgfemlfnnfsagilgfimtiagfkilapimkfmhilsvaveslvhahl  
lpvsvilvepakivflna  
inhgvftplgadqaakagqsilytiesnpgpglgi1laymifgkgtakatsyagaihffggiheiyfpyvlmrplfia  
vilggmtgvatyqatgfgf  
kspaspgsfivyc1naprgef1hm1lgvflaalsvfvaalimkftkepkqdleataqmettkgkssvasklvssdkd  
akveenasgnvsetssldd  
dpealldnyntedvdahnyynninhvifacdagmgssamgasm1rnkfkkgaginditvtntainqlpkdaqlvitqkkltd  
raikqtpnaihsvdnfln  
spryeellnnlkkddqa  
>tr|D9RBW3|D9RBW3\_STAAJ  
ml1strekemiallikyhgqyitihdiaqqlavssrtihrelkgveayltsfsltlerankkg1riagadsdlnlksqi  
aqhqtidlsveeqkviiv  
aliquakepvkqyslageigsvqtlakmlddleldlnkyqlslsrkrgegiylvgteskkreflsqlmvnnlnstsvsv  
ienhfvfhslnqihkdfvd  
lerifnverllmdylsalpyqltessylt1tvhivlsisrikngeyvalnddiydsqvntfehkvase1adklgqiydvt  
fnqaeiafihlrgakrk  
n1ndtssnqceenkikafvkkvemisgmifad1d1vdgl1h1npainrlqanietynpltdmikfkyprlfenvr1a  
1ndcwpd1ifpeseiafiv  
1hfggsiknqgnrfln1lvcssmgtsr11strleqvseieritqasvsd1ks1d1sqydgii1stvn1didspyltvn  
p1lpdsdi1syvaqflntks  
tfgethdkssnmi1dkddvhvetkdidgnts1feneqtsyltsvfeknl1sdekseq1mhhmrsg1t11dsvkivstevkqwq  
tyiadylyqcdv1ndptsf  
ae1leqr1idnpgwi1spypvaiph1rdnrkhpmitvleep1t1psiqndnqtikymismfipdndfmas1vsd1se  
fl1slqlesid1fmekpge1  
et11rnkfleriknqfi  
>tr|D9RBW4|D9RBW4\_STAAJ  
msg1fsndni1lnvnvssqneaiekagkalvdsgavtdayiqamkdreqvstfmgnglaiphgtdeaktnvihsg1t11  
qipegvdwdgevvkvvgi  
agkdgehd1l1skiaitfseeenvdrivqaksaeekqvfeaea  
>tr|D9RBW5|D9RBW5\_STAAJ  
mkavhfgagnigrfgiyiladnnkvtfadvneqiinalatehqydviladeskttrvnnveainsmqpseelkqail  
eadiittavgn1lpiiak  
sfapflkektnhvni1vacenaimatd1lkqav1ditgplsdnihfansavdrivplqknenildvmvepfyewviekdaw  
ygpelnhikyvdd1tpeie  
rk1l1tvntghaylayagkfadkatv1daiedssi eag1rrv1setskyitnefdfteaqagyvekiidrfnnsylsdev  
trvgrgt1rkigpkdriik  
p1tylynkd1ertgl1ntaal11kyddtadqetveknyikehglkaf1seyakvddgladeieayns1p  
>tr|D9RBW6|D9RBW6\_STAAJ  
mn1frqqkfs1rkfnvgi1fsal1atvtfi1stnpttasaaeqnpa1nqpaqpadantqpanagaaqanpaaqpaapanqg  
qpaaqpanqggqanpagga  
aqpntqpagqgnqadpnnaaqaqpgnqaapanqagqgnnatpnnnatpanqtqpanapaavqpaapvaanvqtqdpnas  
ntgegsint1t1fddpais  
tdenrqdptvtvtdkvnngyl1nngkigfvnse1rrsdmfdknpnyqakgnvaalgrvnandstdhgnfngi1sktvnv  
kpdse1i1nfttmqtnskq  
gatn1vikdakkntelatvnavktgtah1fkvptdadr1dlqfipdntavadasrittnkdgykyysfidnvg1fsgsh1  
yvknr1lapkatnnkeyti  
nte1gnngnfgas1kadqfkyevt1pqgvtyvnds1tttfnngnedstvlknmtvnydqanankvtftsqqvttargthtk  
ev1fpdks1kl1sykvnvt  
idtpkni1dfnek1tyrtasdvvinnaqpevt1tadpfsvavemnkda1qqvnsqvdnshyttasiaeynklkqqadtil  
nedanhvetanrasqadid  
glvnlqaa1idnqaa1ae1dakaqekvtaaqskkvtqdevaalvtkinndknaiaeinkqtaaqgvtttekdnngiav1  
eqdvi1tptvkkpqqakqdi1q  
avttrkqgikksnas1qdekdvandkigkietkaikdi1daattnaqveviktka1indinqtapstsakaaaleefdevvq  
aqidqap1n1pdttneevae  
a1erinaakvsgvkaieatttaqdlervknee1fkienitdstqtkmgaykevkaatarktqnatvsnatdeevaeada  
avdaaqkeglhdiqvvksq



Tsompanidou\_et\_al\_Supplemental\_FASTA\_File

qevaetkktvlkdnaiqtqarvkpaadaavenaynrkqeiqnsnastteekeaaaeldakkqeartnidaansndv  
atakdnaiainqvqaatt  
kkadakaeiaqkaserktaieamnastteeqqaakdkvdqavvtanadidnaaantdvdnakttneatiaaitpdanvkp  
takqaiadvqagetaida  
nngatteektaakqqvqtektadaaidgahsnaeveaaknaeiakieaiqpatttkddakqaiatkanerktaiaqtqd  
itaeiaaanadvdnaatq  
ansnieaansqndvdqaktngetsidqvtpvknkatarneittvlnnklqeiqatpdatdeekqaaeteantenakanq  
vitaattnaevdeaktnae  
tainavtpkvmkkqaakdeidqlqaaqtavinndqnatneekaaiaqqlatavtdaknnitaatddngvdqakdagknsi  
qstqpatavksnakndvdq  
avtaqnqaidnttgatteeknaakdlvskakekayqdiinaqttndvtqikdqavadiggitadttikdvakdelatkan  
dqkaqiaqaadatteekeq  
anqqvdaqltqgnqnienaqsiddvntakdnaiqaidpiqaatdvktnaraellnemqnkiteilsdntttneekgkdie  
pvraayeeqgnnaant  
gdvstakdtavqkvqqlhanpvkkpagkteidqvadkktqieqtpnasqqeindakqevdaalinqaktndvdsstneyv  
dnavekgkakinavktfse  
ykkdalakieaaynskvneadnsnastsseiaekqklaelkqtadqvnqatskddievqihndldnindytiptgkke  
sattldlyayadqkknnsa  
dtnatqdekqqaingvqnvqtalesinnvgdngdvdaltdqgkaaidavqvdatvkpkanqaidakaedtkdsiehseq  
ltseekaealatikqitdq  
akkgitdatttaevkakaqgleafdniqidsthkqqaieletaalkieanvntdatieekeaftntledilskate  
disdqttnaeietvknnal  
eklkgqqinpeakknaikeienavnkqketinnadankaaketaindlrsrshdrfvedlvkvqsnaevaelqnvtipaie  
aivpqpndpdandtngtdn  
ndatansnatpentgqpnvsettdngkadaspttsnnsdaatgettatsatddandkppqansssvdastnsptmdndvt  
skpevestnngttdkpvte  
tdnatpaestiinnstttatnenaptgstatapttasteaassadskdnasvndskqnaevnnsaesqstngkvaqpkse  
nkakaekddrdstnqsmve  
sttetlpsaditepnvpsntskdkeestsngtdagqlksetnvasnetdkspskadtevsnpkptsasseakdkmtstnv  
sqkddtatadntdqksvg  
pyannkakdmqtdmkaslvtsngsnsanqdmInvtkteenkanaksaaqqgkvnpkqqtktlptdgmshnddlypael  
algagmafliirrfktdkq  
tee

>tr|D9RBX0|D9RBX0\_STAAJ  
mtkkaidiigapstfgqrklgvdlgptairyaglisrlkqldldvydkgdikvpavniekfhsseqglrnydeiidvng  
klnkvvsasiennrflvl  
ggdhsiavgsvaiskhynnlgviwydahgdlnipeespsgnihgmpiriltgegpkellesnsvikpenivligmrdl  
dkgerqfikdhniktftms  
didklgikevientieylksrnavdgvhlsldvdaaldpletpgtgrvlgglisyreshfalellhqshlissidlvvnp  
idrnnhtaeqavslvgtf  
getll

>tr|D9RBX1|D9RBX1\_STAAJ  
mltvdqkkelvgeikdpiiadvplketegivevsikeekhevsvklamaqlggapqldlqmvvnaalkengaktvgirfet  
lpeekvnqfkpkeenkpkt  
iegllsqnnpvefiaiasgkggvgkstvavnlavalaaregkkgvldvadiygfsvpdmngidekpgikgkevipverhgv  
kvismaffveenapviwrg  
pmlgkmltnfftevkwdieyilidlpptgdvaldvhtmlpsскеiivttphptaafvaaragamakhtdhsilgvven  
msyfesketgnkeyvfgk  
ggtkladeintqllgeplleqpswnpkdfapsiyqsddrlgkiyssiaqkviaatnk

>tr|D9RBX2|D9RBX2\_STAAJ  
makveltrrrnrfivavmlisafvailnqtllntalpsimrelninestsqvlvtgfmvngvmipltaylmdriktrpl  
ylaamgtfllgsivaalap  
nfgvmlarviamgagvlpmlmqftlftlfskehrfamglaglvifapagptvtgllidqaswrvpfiivgialv  
afvfglvsissynevkytk  
ldkrsvmystigfglmlyafssagldgftspvvgamiissiiylfirrqfnisnallnlrvfknrtfalctissmiiim  
msmvgpalliplyvqnsls  
lsallsglvimpgaiingimsvftgkydygprplytgftiltittimlcfllhtdtsytylivvyairmfsvsllmmp  
inttginslneeishgta  
imnfgvmagslgtalmvtlmsfgakiflstspshltsneikqqsiaigvdisfgfvavlvmiayviaifirepeeiesn  
rrkf

>tr|D9RBX3|D9RBX3\_STAAJ  
mnylkhkfylnlittmivlfiivlsgaifltflgfglyglrslilhfrlgdftynrsmynllyygsyifgyfiifaveh  
lmdyfrkmlpenayfrgat  
fhlysyvattllyfiihlnyvyinidfwvimviigflyvcklqfypesklnnrk

>tr|D9RBX4|D9RBX4\_STAAJ  
mrllksitvialimfmsaieissialptikqdlnagnlisliftayfialvianpivgellsrfkiiyvaiaaglll  
fsigsfmcglstnftmlii  
srviqgfgsgvlmslsqivpklafeiplrykimgivgsvwgissigp1lgggilefatwhwlfiyiniipiaiaailviw

Tsompanidou\_et\_al\_Supplemental\_FASTA\_File

tfhfpeeetvakskfdtkg  
ltlfyvfiglimfallnqgl111nflsfilavvairlfkvekhvsspflpvvefnrsitlvfitd11taiclmgnflyi  
pvy1qeqlglsp1qsglvi  
fplsvawitlnfnlhrieklsrkviy11sft11lvssiiisfgiklp11iafv1ilaglsfgyiytkdsvivqeetspl  
qmkkmmsfygltknlgasi  
gstimglyyaiqsgifgpn1hvn1savavisigliv1wvffkeqssqske  
>tr|D9RBX5|D9RBX5\_STAAJ  
mskstksndti vetfkdi p1sfg eeignaashglaa11t11v1pyaavhsyahgtlasvmsiyvisifmmfissti  
yhsmqnetphkyilriidh  
smiyvaisgtytpi11tvvgwigwtvfi11wggt11wgilyksiavkvnqk1slivylvmgwvgi11piifirtswifi  
lfi1lfgvsytigawfyag  
knrpyf1hmiwhifivias11h1iailyfm  
>tr|D9RBX9|D9RBX9\_STAAJ  
mdsfsrkeivigr1kfi1tmsligi11fl1pipveqdgqkq11pva1flagv1kdv1gdvmpilivtiit1sgiltlicst  
i1kdk1kpdgl1mnafnvr  
igw1il1rilavi1fawmtfl1rigskviysdetg11fss11pt1vav1faa1flp11meygl1em1lgi1frp1imr1p1ft1  
pgrstvdn1las1figdgtvg  
v1itsrqygegyysrreatvisttfsvvsitfaivvaetv1hm1qnqffafylsvivsc1vaavimpriw1p1nkipdeyake  
vpesartealpegk1alrh  
gfdtatevgikapgv1dffksg1ktvidmwf1ilpvvmsigtiati1anytpffvilgkpfvpfle1mqipeaaqasqi  
igfadmf1ps1iliegvan  
di1trfvigalsisq1iy1sevvgvilgskipvsigk1fmi1flirtiit1piis1mah111  
>tr|D9RBY0|D9RBY0\_STAAJ  
mmtakmirrys1liv11iisifis1cvgsvmihpidaikgiftqdnfilneyriprt11gii1gss1laisgaiiqavirn  
plaspdvigiskgas1aav  
i1imi1ftapl1fv1lpi1gsfv1gafav1s1f1sfliskydvksgk1alig1aigai1ctavq11ir1npleankalv1wtgs1  
yghdmsniyt1ilpw1fliti  
pi1i11syq1ldv1n1lgd1avata1glk1vktikm111ilav1lgsaisvvggis1flg1iaphiarq1lignk1tlhvi1msg1  
igai11tfgd1largi1hpp  
ldipvgv1iai1igapy1fl11rrmk  
>tr|D9RBY1|D9RBY1\_STAAJ  
maikqissqsaidykrkr1rtt1tyivsvcf1ficvyl1nmaigsskinfsdivh1ysghtdtkas111hvr1mprmiag1f  
iggalavsg11mqam1trnp  
laspkifgvssgasfviv1vti1ips1leyya1ylgvigafvgg1tvyt1sgatkgmtpik1alagmai1h1ffssmtegi1  
i1lnensneqvmf1w1lvg1s  
smk1de1it1ilpw1igaliv1tifi1grq1t1me1lgddiak1lgqn1inkvri1ig11vi1iltgmsvsvagpigfvglivphi  
vkryvskny1vmip1t1fii  
gad1111sdv1sr1ity1pyes1pvgiv1tsfv1galy1flit1ikgvkri  
>tr|D9RBY2|D9RBY2\_STAAJ  
mrg1ktfgi1gl1ival1vaacgntd1nsskkes1tkdt1svkdeng1tvkvpkdakriv1veysfada1aal1dvkpvgiad  
dgkkkri1kpvrek1gdyt  
svgtrkqpn1leeisk1kpd1liad1ssrhkginke1nkiapt1s1ksfdgdykqn1insfktiaka1nkekegekr1aehdk  
likkykdeik1fdrnqk1vp  
avvakag11ahpnys1yvgq1f1ne1lgf1kna1sddvtkg1skylkgpy1q1dte1ladvnpermi1imtdhakkdspefk1k1q  
edatwkk1navknnrvd1v  
drdvwarsg1lisseemake1velskeqk  
>tr|D9RBY3|D9RBY3\_STAAJ  
mahvni1nisk1ynakv1qtvfqsknmqftpvikciagdr1tives1kalginhvaesr1dniisiadq1ltyt11rtpak  
ke1sdmi1ekvdmsiq1tels  
tihqinevaev1lgkkhki11mvdwkdgregvq1tydv1ldyikei1h1knihfvg1lafn1mcfksdapsddd1fminrfvsa  
vereigyr1ki1sggn1ssm  
lpq1l1ynd1lgkine1lriget1lfrgvd1tt1nqai1amlyqda1itleae1ileikprvntq1thes1flqai1vdigyl1dtkv1dnis  
pmdq1h1ni1lgassdh1m1d  
1ngqghyqvgdh1s1f1s1l1nyealshsmymkn1lykvyiddskid1t11qnfdvkspamv1nqy  
>tr|D9RBY4|D9RBY4\_STAAJ  
mvy1ewakadrni1qyrvinai1ikeri1ypeq1tfisqksg1iei1qyhmh1vtievvrksaleryeftgdity1nkgets1ii  
t1leg11dv1nhdf1dipise  
r1ree1ihsrds1lvetyk1qmshrq1t1isqsfkfsr1lpqd1nffsw1lqhvkdsktd1d1tyses1lvpeghp1thp1tktk1p  
1tmeevrayapefekei1p1  
qimmi1ekdhv1ctam1dgn1dqfi1dei1peynqi1rvf1ks1glksedyrailvhpwqydh1tigkyfeawiakk1ilip1tpf  
t1l1skat1s1frtms1likp  
yhvkl1pvdaqatsavrtv1stvt1tdvgpk1sya1qn1m1nqyppgfkvamepfgeyanvdkdrarq1laci1irqpeidgk1gat  
vvsas1lvnknp1idqk1vid  
syl1ew1nqg1tkes1ttfi1erysqalip1pliafi1qnygia1leahmqntvvn1lgphfdi1qflvr1dlggs1rid1et1lqhrvs  
diki1tnds1liads1davia  
kfqhavi1qnqmae1ih1hfnqydcveete1fni1vqqv1vaha1npt1lphanelkdi1lfgpt1itvka11nmrmenkvkqy1ni  
e1ldnpi1kkev  
>tr|D9RBY5|D9RBY5\_STAAJ

Tsompanidou\_et\_al\_Supplemental\_FASTA\_File

mtkyffsssfllflgnwigqiglnwfvlttyhnavylgivnfcrlvpilllsvwagaidkydkgrllritisssflvta  
ilcvltsyftaipisvii  
yatlrqilsavetplrqaillpdljdkisttqavsfhfsfiinicrsigpaiagvilavyhapttflaqaicyfiavllclp  
lhfkvtkipedatrymplk  
viidyfklhmegrqifitsllimatgfsyttllpvltnkvfpgkseifgiamtmaiggiiatlvlpkvlkyigmvnmmy  
lsslfgiallgvvfhniv  
imficitlglfswarttnrvyfqnkvdyergkllsiimmdrgmiplgslmsicadvfgivrtfsimgisticitmv  
fyfinrklklkleeshgi  
s

>tr|D9RBY6|D9RBY6\_STAAJ

mnli fkeqtlkfnkeeqetylflqqhndwani fkemilqgrdkvtqrlvtsmhrenlvkartqskkil srdlimldist  
thileiqfpqakqtlyapi  
tgehafdrivedegpyikdditntitrvhphneileciliieapdlknaasdqfqqdlinsatnmtfaisyqalsmqhdsa  
plfniiensedsylrseqa  
vieghplhpgaklrkglnalqtflyssefnqplikivlihsksrtmslskdydttvhqlfpdlikqleneftpkfntfn  
dyhimivhpwqlddvfhsd  
yqaevdkelieakhtldyyaglsfrtlvpkypamsphiklstnvhitgeirtlseqtthngplmtrilndilekdvfk  
syastidevagihfyneq  
deadyqterseqlgtlfrkniyqipqevtpmipsslvatypfnnespivtlkryqsaaslsdfessakswietyskal  
lglvipvlvtygia Leahl  
qnaiatfrkdglldtmyirdfeglridkvqlnelgyntshfheksrilt dsktsvf nkafystvqnhlgeliltiskasn  
dsnlerhmwyivr dvl d ni  
fdqlvlsthsnqvnenrineikdtmfapfidykcvttmrledeahhytyikvnnplyrenn

>tr|D9RBZ0|D9RBZ0\_STAAJ

mknksvslvfwslvicti fva fgai fpkql ekltqnittfialhfswylll vlvlv fvcvylf sryanitlgeeged  
pefslpswfamlsfagmi  
glvfwttapeishafkltpihkagtqsaindamqsf fhwgihawavygivalvfayfsfhkgypglvsatftp llgkka  
mrgplggaidvlaviatvt  
gvaatlfggalqineglhflfnvpsnftmqvilaiatiltwsawsgidkgiktlsninmlafvvliglfivgptlyi  
lntftnglgnyanffsms  
lripsggqkfqwlqnwti fyawwi swapfvgi fiarvskgrtikefilglvfpalvcfiffavfgasaiylqdnhiad  
iakaatetatfatlhyppl  
gfvlslitllvimi ffvtsadsatyvlgm lsssgdinpksvkvswgiimalfaiimiytggtqaiqnlliaalpfsv  
iamiwslkslseekprn  
snkvlkh rdpdileyrsskhiden

>tr|D9RBZ1|D9RBZ1\_STAAJ

mkmigfekpfkleegnlfkvyeqrkptpenddilvkvnsvnpvdtkqrqmevtqaprvgfdaigtveaigpdvtlfs  
pgdvvyagspnrqgsnat  
yqlvseai vakaphnisaneavslptgitayetffdtfkisqnpsenigksvliingaggvgsiatqiakryglvtitt  
asrqettewcekmgadivl  
nhkedlvrqfkekeiplvdyifctyntdlyyntmielikplghittivafnedqdl nal klsitfthefmfarpihrt  
dmikqheyleditkniesg  
hyqptttqvfe glspenlyqahqllekqsmigklvini

>tr|D9RBZ2|D9RBZ2\_STAAJ

mgnkqilfnkvpegmpqedt fkieiditpklesdglvqtlyisvdpymrgmrtkadsyvqpfeigkpivshvvakvids  
tladykkgdvvvgmlpwri  
inhvqadqitkvpttdvpldlylsvlgmpgqtayhglldigqpkpgetvvisaasgavgsvvgqiakikgcrvvgiaggd  
kkvnyltetlgfdagidyk  
kadfake laqavpdgvdvyfenvggvtgdevfkylnrfarvpvcgaissynnpeedigpriqgtlikkqvmrgflvsef  
andfkaaseqlatwvqegk  
iqsqvtiedgfenaprafknlftgdnfgkqvikvte

>tr|D9RBZ4|D9RBZ4\_STAAJ

mtktlpedfifggataayqaegatntdgkgrvawdtyleenywyaepasdfynrypvdl elsekfgvngirisiawsri  
fpngygevnpgkveyyhkl  
faechrhvepvtlhhfdtpevlhkdgdflnrkmidyfvdyaecfkefpevkywttfneigpigdgqylvgkfppgik  
ydfekvfqshhnmvahar  
avklfkdggyqgeigvvalptkypfdpsnpedvraaeledi hnkfil datylgkysretmegvqhilsvnggklnitd  
edyaildaakdlndflgin  
yymsdwrmrgydgeseithnatgdkggsyqlkgvgqrefdvdpvprtdwdwmiypqglydqimrvvkdyppyhkiyiteng  
lykdefiesektvhddar  
idyvrqhl nviadaikdganvkgfyiws lmdvfswsngyekryglfyvdfetqerypkksaywykel aetkeik

>tr|D9RBZ5|D9RBZ5\_STAAJ

mmqk liaqiekqkpfeklsrniylrairdgfisampvilfssifllia yvpni fgfkwdkgmeailmkpnytmglvaf  
lvagttaksltdsfnrkle  
stnqinfi stmlaamcgflflaspakdggflsafmgtkglltaflsafvtvivynfcvkrnitikmpkevppnisqvfk  
dlipfsaviiilyaldlvi  
rnsfksnvaegilkfep lftaadwigvtiifgafalwfvvihgpsivepaiaaityanieanfkl lqagehadkiit  
sgtqmfi vtfggtgatlv

Tsompanidou\_et\_al\_Supplemental\_FASTA\_File

pfmfmwmtkskrnkaigrasvvtffgvnepilfgaplvlnpvffipfvlapivnvwifklfvevlgmnsfsvnlpwttt  
gplgiimgtgfglwsfvla  
itlilvdiitiiyppflkvdyseildeeegrkesndlkekvaanfdukkadsilaasgvsddaakasniteqtnvlvlcag  
ggtsgllanaInkaaeeyh  
vpvkaaaggygahmdimkeyqlilapqvasnyedikqdttrlgiklaktqgaeyikltrdgqaaldfvqqqfen  
>tr|D9RBZ8|D9RBZ8\_STAAJ  
miltltnpsvdisypltalklddvnrqvsvsktaggklnvtrvlaqvgepvasgfiggelgqfiakkldhadikhaf  
ynikgetrnciailheggg  
teileggpeidnqeaagfikhfeqllkekveavaisgslpkglnqdyyaqiercqnsvpvildcsgatlqtvlenpykp  
tvikpniseyqlnqpld  
esleslkqavsqplfegiewiivslgaggaafakhnhtfyrvniptisvlnpvgsgdstvagitsailnhendqdllkan  
tlgmInageaqtgyvlnn  
yddlnqievlev  
>tr|D9RC00|D9RC00\_STAAJ  
maiigsdeagrkrlekvksylldnkydvvdvteggqevdfvdatlavakdvqsqegnlgividafgagsfmvatkikgmi  
aaevsdersgymtrghnns  
rmitvgseivgdtlaknvvgkfvegkydgrhqi rvdmlnkmc  
>tr|D9RC02|D9RC02\_STAAJ  
mendlvtkhilqshriafttgagvsvasgvpdfrsmgglfdeiskdglspyllsrdyleddpegfinfchkrllfvd  
tkpniwhwiaklernqqs  
lgvitqnidglhsdagsqhvdelhgtlnrfycnechksytksdvidrtlkhdncggairpdivlygemldqptiiraln  
kiehadtlvvlgsllvqp  
aaglisnfkgdnlilinkdrtpydsdatlvihddmvsvvkslnte  
>tr|D9RC03|D9RC03\_STAAJ  
mkisnflmfvaiifllilclffnltnkplkvaildtgvnkasvdsksiskefvksskginkhgdciasieiefqnniviy  
dakvlnndglgtvedtisg  
idwai knsvinmsygfthnyeklhkkikeanskgiilvangndifgqkeypasyketisigvmknknsksifnsngn  
adlyjssrneirknfnnts  
eataiatnrliknyknnlnradknevisiikqe  
>tr|D9RC04|D9RC04\_STAAJ  
msfdinnldikklnfrkvknaihslsgdkyqlledgktinntyflavydnainifedlfspdsinlvhvvyvynepyk  
ktnvikfkftsltidelhyf  
keykkekdndilceefsykcsikdikykklkai snqdfkglvpninqndtyseiyiinntknliyhlyddrglwlafnn  
nedarysekyndlisefd  
nedi  
>tr|D9RC05|D9RC05\_STAAJ  
mkfkifksfjclvtfavllsgfgniqageenvlikensqvadsishadvtesktgeistvntsikdeevslnttlnnfe  
tgeinlngkignnkeekni  
nysvdlyadendiagylidnktgekhpfdtrlseasaaplvvavmaarfikwaikkygknvvnkavktnthniaknv  
nksllndkgvsigkftqkv  
kgknpwrdpdkwtisknkgqphggsywklinnkgkriasltkegkilre  
>tr|D9RC06|D9RC06\_STAAJ  
mnhieiskdvkipvlfgvfqipqeqtaeavkaikagrylidtaqsylnetevgqgieasgidrselfittkwienvn  
yedtiksierslqrlnldy  
ldlvlihqpyndvygswraleelkengkikaigvsnfgvdrivdlignhqiqpvqnqieinpffhqeeqvaalqqenvv  
eawapfaegknqlfqql  
qaiadkynksiaqvvlrwlverdivvlaksvnpermaqnldifdfelteedkqiatleesnsqffshaepemikaltsr  
elvd  
>tr|D9RC07|D9RC07\_STAAJ  
mktkevvalmni sqdtlryyevgvi pppvnrdenyriyndsdlwiyvlknlnragvsiesliefcr laqlpkneniqa  
qqkqilnkqleelenlkt  
ihdardllqykidnydnhiakinasndhdanverlwerk  
>tr|D9RC09|D9RC09\_STAAJ  
mmeftikrdyfiqldntlkaisprttlpiltgikidakeheviltgsdseisieitipktvdgedivnissetgsvvlpg  
rffvdiikkllpgkdvklst  
neqfqtllitshsefnlsgldpdqypllpqvsrdaiqlsvkvlknviaqtnfavstsetrpvlgtvwnliqenelicta  
tdshrlavrklkledvsen  
knvii pgka laelnkimsdneedidiffasnqvlfkvgvnfiserllleghypdtrlfpenyeiklsidngefyhaidra  
sllareggnnviklstgdd  
vvelsstspeigtvkeevdandveggsllkifsnskymmdalkaidndeveveffgtmkpfilpkgddsvtqlilpirty  
>tr|D9RC10|D9RC10\_STAAJ  
mvqevvvegdi nlgqflktegieesggakwflqdevvlingaretrrgkkl ehqdridipelpedagsfliihqgeq  
>tr|D9RC12|D9RC12\_STAAJ  
mvtalsdvntdnygagqivlegleavrkrpomyigstserglhhlvweivdnsidealagyanqievviekdnwikt  
dnrgripvdiqekmgrpav  
eviltvlhaggkfggggykvsagl hvgvssvvnalsqdl evyvrnetiyhqaykkgvpqfdlkevgttdktgtvirfka  
dgeiftettvnyetlqqr  
irelaflnkgiqitl rderdeenvredsyhyeggiksyvellnekkepihdepiyihqskddieveiaiqynsgyatnll

Tsompanidou\_et\_al\_Supplemental\_FASTA\_File

tyannihtyeggthedgfk  
raltrvlnsyglsskimkeekdrlsgedtregmtaiisikhgdpqfegqtktklgnsevrqvvdklfsehferflyenpq  
vartvvekgimaararvaa  
kkarevtrrksalldvaslpgkladcsskspeeceiflvegdsaggstksgrdsrtqailplrgkilnvekarldrilnnn  
eirqmitafgtgiggdfd  
akaryhki vimtdadvdgahirtlllffyrfmrplieagyvyiaapplykltqgkqkyvyndrelDKlkselnptpkw  
siarykglgemnadqlwet  
tmpehrallqvkleadaeqtfemlmgdvvenrrqfiednavyanldf  
>tr|D9RC13|D9RC13\_STAAJ  
maelpqsrinernitsemresfldyamsvivaralpdrvrdgkpvhrriylglnegqmtpdksyksarivgdvmgkyhp  
hgdssiyeamvrmaqdfsy  
ryp1vdgqgnfgsmgdgaaamrytearmkitlellrdinktidfidnydgnerepsvlparfpnllangasgiavgm  
atnippnhtelingvls  
sknpdisjaelmediegdftagllgksgirrayetgrgsiqmrsravieerggrqrivvteipfqvnkarmiekia  
elvrddkidgtdlrdets  
lrtgvrvidvrkdanasvillnlykqtp1qtsfgvnmialvngprk1inlkealvhylehqktvrrrtqynlrkakdr  
ahileg1rialdhideiis  
tiresdtkvameslqqrflsekqaqaildmrlrrltglerdkieaeynellnyiseleailadeevllqlvrdeltei  
rdrfgddrrteiq1ggfed  
lededlipeequivitlshnnyikr1pvstyraqnrggrgvqgmntleedfvsq1vtlsthdhv1fftnkgrvyklkgyev  
pelsrqskgipvvnaiele  
ndevistm1avkdlesednflvfatkrvvrksalsnfsrinrngkiaisfreddeliavr1tsgqediligtshas1ir  
fpest1rplgrtatgvkgi  
tlregdevvgldvahansvdevlvvtengygkrtpvndyr1snrggkigtatiterngnvvcittvtgeedlmivtnag  
viir1dvadisqngraaq  
vr1ir1gddqfvstvkvkedadevnedeqstvsedgteqqreavvndetpgnaih1tevidseendedgrievrqdfmdr  
veediqqssdedee  
>tr|D9RC15|D9RC15\_STAAJ  
mtlyldgetltiediksf1qqqtnieivdealerkksrdvverieneetvygittgfglfsdvridstqynelqvnli  
rshacglgkpfскевалm  
mvlr1nt1lkgHsgatldlvkqlqffineriipvipqqgslgasgd1aplsh1alaligegkvfykdvemdsadv1kqln  
rqp1nlqakeglalingtq  
amtaggvisyieaedlgyqsewialthqslngiidayrhevHAVrn1fqqeinqvaarmrdwlegst1ttrqaeirvqday  
tlrcipqihgasfqvfnyv  
kqql1efemnaandnplifeadetfvissgnfhgqpitfalDh1kl1gvselanvserrler1vnpq1ngdl1paf1spepg  
lqsgamimqyaaas1vsen  
ktlahpasvdsitssanqedhvsmttaarhgyqienarrv1aiecvialqaaelkgveglspktrrkyeefrnivpsi  
thdrqfhkdieavahylkq  
siyqtsech  
>tr|D9RC16|D9RC16\_STAAJ  
m1dir1frnepdtkckielrgddpkvdeileldeqrrklisateemkarrnkVseeialkkrnkenaddviaemrtlg  
ddikekdnqlneidnkmts  
ilcripn1sddvpqgesdednvevkkwgtprefdfepkahdiveelkmadfdraakvsGARfvy1tnegaqleralmn  
ymitkh1ttqhg1ytemmvpg  
1vnadtmygtgq1pkfeed1fkvekeglytiptaevpltnfyrnei1qpgvlpekftgqsacfrseagsagrdr1g1r1  
hqfdkvemvrfeqpedsw  
aleemttnaeailleelglpyrrvilctgdigfsasktyd1evw1psyndykeisscsnctdfqarranirfkrdkaakpe  
laht1ngsglavgrtfaai  
venyqnedgtvtipealvpfmggktqisksik  
>tr|D9RC17|D9RC17\_STAAJ  
mtthlsfrgqvqeci1t1lgyagvgisfgivassqnfsilei1llclviyagaaqfimcalfiagtpisaiv1tvfivns  
rmf1l1smlapnfktygfw  
nrvg1gslvt1detfgvai1tpylkgeaindrwmhgl1nitay1fwaiscvagal1fgeyisnpqt1gl1dfaitamfi1flaiaq  
fepitksr1riyiv1i1av  
ivmm1slsmfmpsy1ailiaatisaalgvmmr  
>tr|D9RC18|D9RC18\_STAAJ  
mit1hnm1lil1llcgivt1liriipfimi1skvq1pdvvvrw1sfipit1ftal1vids1iqqtphgegyt1nipyia1lip  
tvi1siitrs1titiisgi  
vimav1rfff  
>tr|D9RC19|D9RC19\_STAAJ  
mtnytvd1t1n1lgkfit1esgevidn1rlryehvgyhgqplvvchal1tgnh1tygtddypgwwrei1dgyyipihdyqfl1t  
fdvigspfgsssp1ndthf  
pkkl1t1rdivranergiqalgydkiniliggs1ggmqamellnqqfevdkaillaatsrtssysrafneiarqaih1gg  
kegl1s1arq1gl1tyr1ssk  
syderft1pdevvayqqhqqnkfkehfd1ncymt1ldv1dshnidrg1rtdvthvfkn1etkvl1tmgfidd1lypddqvral  
serfkyhrhffvpdnhgh  
gfl1nfn1wapn1yhfl1n1khfkrk  
>tr|D9RC20|D9RC20\_STAAJ

Tsompanidou\_et\_al\_Supplemental\_FASTA\_File

mfskiqpkatmiatitlvfvalalyvpglgfalfatipgivilwnksiqsfgisalitviittvlgnfvlsailvl  
iasliigqllkertskeri  
lyvttvamslisliafmlqtfgrippsasivkpfkqtlheaitmsgadanmtqileegfrqatvqlpgfiiitflivl  
inlivtfpilrkfkiatpv  
fkplfawqmsgillwiyiiviicllftgqpsvfqsillnfqlvlslvmyiqglsvihffgkaglpnavtilllfigtil  
tptthivglgvidlslnl  
krimknnsk  
>tr|D9RC21|D9RC21\_STAAJ  
mnrqstkkallipfvimiitaivlmgvwfifnslialiasivlvmiivsiiilfrqalmkmdsyvdglisaqisttnkai  
khlpgiivldendhiew  
nqfmdthmeanvisesvnevfpnilkqldrvksveieynqyhfvrysendhcllyffдитеqvqtnelyenskpiaatlf  
ldnydeitqnmndtqrsei  
nsmvtrvisrwateyniffkryssdqfvaylnqkiladleeskfdilsqpreksvgyraqtllsigvgegtenlidlge  
sqsgldlalgrggdvaik  
singnvrffyggktdpmekrtrvarvishalkdilaegdkviimghkrpdlidaigaaigvsrfammnleayivlnetdi  
dptlrrvmneidkkpelre  
rfitsddawdmmstkttvivdthkpelvldenvlnkanrkviddhrrgesfisnplliymepyasstaeltelleyq  
pteqrtrlestvmyagii  
vdrnftlrtgsrtfdaasyrahgadtiltqhflkddvdtyinrselirtvkvedngiaiahgsedkiyhpvtvaqaad  
ellslegieasyvvarred  
nligisarslgsvnvqltmealggghltnaatqlkgvtveeaiqlqqaiteqlrseda  
>tr|D9RC23|D9RC23\_STAAJ  
mdrmyeqnqmpnhnaeqsvlgsiiddpelinttqevllpesfyrgahqhiframhlnednkeidvvtlmdqlstegt  
neagppylaeltstnvt  
rnvqyytdivskhalrrliqtadsiandgyndeledailsdaerrilelsssresdgfkdirvlgqvyetaeeldqn  
sgtppgiptgyrdldqmta  
gfnrdliilaarpsvgktafalniaqkvathedmytvgifslmgadqlatrmicssgnvdsnrtrtgmteedwsrft  
iavgklsrtkifiddtpgi  
rindlrskcrllkqehglmividyqliqgsgsrasdnrqqevseisrtlkalarelecpvialsqsrqveqrqdkrp  
mmsdi resgsieqdadiva  
flyrddyynrggdeddddsgefepqndengeieiiakqrngptgtvklhfmkqynkftdi dyahadmm  
>tr|D9RC24|D9RC24\_STAAJ  
mssivvvtqwgdegkgtidflaeqsdvifarfggnaghtiqfggetykhlpvpsgifykdklavigngvvdpvall  
keldglnergipstnlris  
nraqvilpyhlaqdeyeerlrgdnkigttkkigipayvdkvqrigirmadlleketferllksnieykqayfkgmfnetc  
psfdei feyyaagqrke  
fvtdtskilddaavadekvl fegaqgmldidhgtypfvtsnpiagnvtvgtvgpftvskvigvckaytsrvgdgfp  
tel fdedghhievregreyg  
tttgrprrvwgfdsvvlrhrsrrvsgitdlsinsidvltgldtvki ctayeldgkeitayanldqlkrckpifeelpgwt  
edvtsvrtlee lpenarky  
lerise lcnvqisifsvgpdreqtnllkelw  
>tr|D9RC27|D9RC27\_STAAJ  
mnnekihksviallvmsvlytmvwnfspdianvdntdsksetkplttptakmdttitpfqiihskndhpegtiat  
vsnvkltkplknkevksv  
ehvrrdhnlimpdlssdftlfdftydlplstylgqvlmnakvpnhfnfnrlvidhdaddnivlayaiskdrhdyvklttt  
tkndhfldalaavkkdmqp  
ytdiitnkdtidrtthvfapskpekltktyrmvntisvekmnilfddstivrssksgvttynntgvanyndknekyhy  
knlse deassskmeetipg  
tfdfinhggflnedfllstnnqsgeltyqrfngyptfnkegsnqivwtwgekgyfdyrrsllrtdvvlnsednkslp  
klesvrsslansdinfek  
vtniaigyemqdnsdnhhievqinse lprwyveydgewyvyndgrle  
>tr|D9RC28|D9RC28\_STAAJ  
mnwkltktlfifvfilvnilvlsi yvknvrshinevesnnevnfqeeikvpasilnksvkikleqitgrskdfsska  
kgdsdltaadggkllnani  
sqsvksdnnlkdldkdyvnrkrfkgseyqlseissgsvkyeqtydnfpilnnskamlfniednkaasykqsmddikpt  
dgadkkhqvigvrkaieal  
yynrylkkgdevinarlgyysvnetnvqlqp nweikvkhgdgkdtntyyveatnnpkiinh  
>tr|D9RC29|D9RC29\_STAAJ  
msvlasgstgnatfvenekgslldvdlgtgkmeelfsqidrniqdlngilvthehidhikglglarkyqlpiyanekt  
wqaiekkdsripvdqkfif  
npyetksia gfdvesfnvshdaidp qfyifhnykkftilttdtgyvsdrmkgmirgsdafi feshhdvdm lrmcrypwkt  
kqrlgdmghvsnedagha  
mtdvigtntkriylshlsqdnmmdlarmsvgqvlnehdidtekevllcdtdkaiptpiyti  
>tr|D9RC30|D9RC30\_STAAJ  
mkalllksvvlvllfsvmgllwhvsnaaeqhtpmkaqvttidkattdkqvtptkeaaahygeeaatnvsasaqgtade  
innkvtfnapsnkpstavs  
ttvnethdvdaqstqkptqsatfkl snaktaslsprmf aanapqtthki lhtndihgrlaeekgrvigmaklktvke  
qekpdlmdagdafqglpl

Tsompanidou\_et\_al\_Supplemental\_FASTA\_File

snqskgeemakamnavgydamavgnhefdgydqllklegmldfpmlstnvkydkgkrafkpstivtkngirygiigvttp  
etktrpegikgvefrdp  
lgsvttaemrriykdvdttfvislhidpsetwrgdylvkqlsqnpqlkkritvidghshtvlqngqiynndalaqtgt  
alanigkitfnyrngevsn  
ikpslinvkdvenvtpnkalaeqinqadqtfracqaeviipntidfkgerddvrtretnlgnaiadameaygvknfskk  
tdfavtngggi rasiakgk  
vtrydlisvlpfgntiaqidvkgdsvwtafehslgapttqkdgktvl tangglhisdsirvydymnkpsgkrinaiqil  
nketgkfenidlkrvyhvt  
mndftasggdgy smfggpreegi sldqvlasy lktanlakydttepqrml lgpavseqpakqqgsgksesgkdtqpid  
kdkvmpakqpasgkvll  
payrgtvssgregs dralegtavssksqkqlasmsapksahekqlpktgtdqssspaamfvltvgigliatvrrrkas  
>tr|D9RC31|D9RC31\_STAAJ  
mkitilavgklkekywkqiaeyekrlgpytkidievpdekapenmsdkeieqvkekegqrilakikpqstvitieiqg  
kmlsseglaqelnhrmtgg  
qsdfvfviggsnglhkdi lqrsnyalsfskmtfphqmmrvlieqvyrafkimrgeayhk  
>tr|D9RC48|D9RC48\_STAAJ  
miptleeiidkygnlvdylkfdvtveyedllllrsldlnehqkmdrvsfikkhl nsnfdyllddtefrsinkiysnl  
imthinsqnnnfkrnpfin  
eeqlksllaikvdahmsydsnitskalaekntqkr lvtkidtlynqskkeneyvrlgekisytklenhwkylyneiqf  
ynlnqglisyvaleqeyaw  
afnlnefylielylkafkgqkkt dyefgkklnefiqsyvillidirlpvvrlyiirdivdtcegekndykritlieesi  
kkyryvkdqikrfknglee  
sllnatlsieqnmkvkidykaycfprekthnnieynvs lffkalda lkk  
>tr|D9RC49|D9RC49\_STAAJ  
mhreskyieykk srkg lsnidwstysafanteggtiylgieekkie dkkvfvsvgvedpekmi edfwnalygrskvsqni  
lsnkdvki vnienkaciei  
hvpeapyskkpiyvdkkd lvykrvddadriateeykfmi vnsqddidte lldnydmsdl nhesienyrkl lllkntnde  
ryanmsql dlmidlgayrk  
drsskdqykmttac l lffgkynaisdrfpqfql dyfkktny ldtwdkdrissgd lgned lnvysffekvl ik ltdniee  
sfs lndgl trqnyard lkv  
airealvnt l mhayydtkqsi kinvcedfie fypngmrinkedfi hghskdrnsil st l frvgysekagsggpri fd  
vnrhklktpei eltdmdt  
nvvlwkqdlmkefekype ldkkviky i dygsiskgeal kmenmteyqfrn ilklkddnl ikkegegpaktyv lieske  
adilrtkkviks lesffrn  
k  
>tr|D9RC50|D9RC50\_STAAJ  
msgyqlpqaqitqsvhskdi tgneahv l dvrndnewnngl sqavhvphgk lletdlpfnrndviyvdcqsgirssiai  
gilehkgyhni invnegyk  
diy ls  
>tr|D9RC53|D9RC53\_STAAJ  
mktni l n l dne lenteyvegkpyvqygi kyernqal rnea ikihgttckvcgfdkakygd lgegfi eihhlkpmfsikr  
eikvnpqkd lvp lcsnchk  
mihrntkkpl tikeltkivnysk  
>tr|D9RC54|D9RC54\_STAAJ  
mkfteveviehlvkaykeagkptyphenlygrnhsisgiged llgayl isrlegvqifidqpl smidks lstrypdlli  
cedneikni levkmd lgyq  
rkfdidycrkkeewi snivgkqcv lsrkredkipmni addikfhvviysenngpkrfdeeimpivnetcphievylvtsq  
qhpnlvvn legininkde  
feilvnt l  
>tr|D9RC55|D9RC55\_STAAJ  
msnlhlssiqli fddmrkdyyi idsfkfykneny l vfirrfkgkfikrinkfakvql tfykestmkns l vveannngli  
vndynml ynffgiesssfq  
kg l fpyes l neaipnevnl nsssekni slskelykddikemdkiyctgvtr l segrkrsernekakr l rpal yeffdd  
hsitfnfshewkeksdeq  
ikrdavnrl  
>tr|D9RC56|D9RC56\_STAAJ  
mir l kspqielkdviqdc iynfrdsnkkesieki ipeiekfhdkyreyasknel h l fkd pfasnnd lnnilvglytnkls  
kinekarnyyn l imnytte  
tndvvi fsdefki cpl qtttevnt l dhyl ptkfplsavsp l n lipi cskcnknksdyfsenahsn l lhiy fddiseshw  
lksnvkfsfdkiefimdi  
dffvdasafnnki l lsrventfnkynigqtye ilaktafnqvds flrtfiasgedkl kediy ni ikhyndenrweyvfy  
neisqntwpsi ikafnky  
iefnknv  
>tr|D9RC57|D9RC57\_STAAJ  
mnlyi ikyrekl dkgfy l ikhnwndygyktrfd llyydghe mevigvki gktesftstteddi lnnqeni fslgthtd  
yysnlyklgnnekly l r  
lndiahn l e l fqavqdyrvtqvs l mrgkfhktvreqfhri ikqav l tsyefqfk kediki dfqvnpsnpps n l hgiig  
sngvgktr l lkdilngfl d

Tsompanidou\_et\_al\_Supplemental\_FASTA\_File

sqanyiinkdsknsfyddniftnalfisfsifdtleinqtqknfsyigvknidengskrnknndeladefvnsire  
iynrndesserwsrfiev  
glnlffelnksednkksfkrqfnklsqgkivvlsitkmvervvektlilldeplylhppllasymkvistllteqng  
vgiisthspvvmqelgksn  
vnmikssddniyitkprletygenlgtltrevfgfeientgyyetlvnlvnegyeyddiiekyknslgiearsilrtllk  
hkrieq  
>tr|D9RC58|D9RC58\_STAAJ  
masigfeeklwqaadklrgsmdaaeyknvalgiiflkyvsdsfeekyee1lndeyadeedkdeylaeni fwpkesrwqy  
indnskkpeigqi idkami  
aiereneslkgvlpkdyarpa1dkek1gdiid1ftfkvgdseskkqdv1grvyeyfiakfasaegknagefytpasivk1  
lvemvepyegriydpccgs  
ggmfvqserfverhqr1dnavyggesnpttwklakmnlairgidnd1gdhadtfnhd1hkd1kadfilanppfnasd  
wgrek1lddyrrwfkfjppk  
gnanyawiehmisklapsqtagfvlangsmstsgkdeleirknlieqdlvecivt1pgq1fystqipvc1wfvtknkakn  
gknerrgevlfidarnigs  
mvsrt1kevsddeikdianvyhswrgtinnqyedkagfckvakteeikneyiltpgryvglaeveedsepfeqkmerit  
ad1seqfakskeledqirk  
s1eg1gygv  
>tr|D9RC59|D9RC59\_STAAJ  
mefetfn1tdlytissglsknrkyfgtgpfltfkdvfdn1ilpnefsgqviteekerekysvkkgd1fltrtsekqnel  
gisavalldykntatfnqft  
krlrpnkyenk1lpvfaafyfrsnfrnqvnsmsimstraslnnemisklkitips1qnqmkishilla1llkkekingk  
iianleelsqt1fkrwfvd  
fefpdengnpykssggemvdse1gkiprswkvde1gnyikiksgkrpknkvdkedienvvpiigaskivgytndylynek  
iiiigrvgthgviqrfstr  
twpsdntfvitsdfesiiyqvlksidyis1nrgstqpl1sqdkintkvmpnat1l1skyqkknhilkmmdqkiienk  
k1tq1rdt1l1pk1msgeie  
ipddievnedelsi  
>tr|D9RC60|D9RC60\_STAAJ  
msfqfsedd1eqvalkwfeg1gysvkngrdssdngimneresdkdvfddr1leaalrrinpe1lnsaieqamreisi eks  
ps1lennrsfhemintgie  
vehynddgetind1vyvfdfnpgnndflavnq1tvvngdykkrdiv1fing1pvvvielknstnesvgiedgyhql et  
ykmripq1fnhnavlvtst  
gvntkags1tadydrfntwrtdkgktdedsstfrs1dilihgm1nkdv1ld1rhfv1fqddgkgnivkilaayhqqyavn  
kaidraieatsehgdgkkg  
viwhtqgsgks1tmvffsgk1iql1npt1vvvtdrnd1dnqlygtfvkskgrsgk1l1rqtpkqaesrkelkellsves  
ggivfttmqkfepeegqvt  
mda1tdrknvvmadeahrtqygfkatydekqgikygyakylrda1pnasfvgtgtpvsstdkntqmvfgnyidvydm  
tqsvedgstvkiyyesrii  
p1n1ptd1dideaydvtsgqeetksr1kskwsrieal1sgaeqrvalatdiinhfetrqkamkgkmivtmsrriavd  
lydeivr1kpewhsdddck  
gvikvmtgsssdppnqfkhigpkkrn1lenrmkdvndelq1vivrdmw1tgfdvpsmhtmyidkpmkghnlmqaiarv  
nrvfidkpgg1ivdyvgia  
es1keal1keytdsrdqtdgtdtdkale1lmkydi1iqdm1ynhdssdfesedq1nryna1sntmdy1iig1genererfvt  
tytelskafalcateeaag  
e1nseiaf1kavksg1vk1l1appsegskrkktpaeieaeinq1lisksvvteevd1yq1t1gienpd1sil1sdd1fkdv eg  
1qkknvave1lnk1lkggv  
ks1mktnttvskrfsem1ksiqkynnr1sieaskvieeliqmakeinqekergkel1gsteeiafydalashetakeamd  
dke1raiahel1tktvknm  
svdwskrusakamrvqvr1l1kkygyppd1qkmaveqvveqaelmasqqyk  
>tr|D9RC61|D9RC61\_STAAJ  
mkfd1iisnimigilvicsafalmfvyiqrk1tpeqyfsfseff1igr1n1k1ilnrmiliasfncilflilknffe  
elvcsmcilst1lgsilii  
ypafki rhd1pnemks1lnmyvsfvfla1iist1tvft1lv1fddisivt1wqehksgii1y1ll1vps1ffnptnye  
kkmeyaiekhresekeike  
t1iinneti1ipdetkssspfkikkvfr1lnrimkdd  
>tr|D9RC62|D9RC62\_STAAJ  
mieyy1k1i1hl1fennkcei1hl1kknfndnfdm1syiycienmhrgsni1kiaeyilvkyfqkycikkdfsigpfqvkks  
fcvsnn1yles1dk1le1h  
ssahvinefienkky1lnnei1slyhsgkvmtdsfst1myig1lfkhfssyl1riheekttdnk1tny  
>tr|D9RC63|D9RC63\_STAAJ  
mkntdkatqqtqkevwwksd1yks1l1sfdeseneliqstttvtvpkdtwviinakdkd  
>tr|D9RC64|D9RC64\_STAAJ  
mtetkaidthah1wnedy1dk1gk1l1gsqgtevakginqsasked1lekrfkmmddagvd1qiisatpqpqwgteeahqs  
aqeindlyer1vqqypdrf  
laygav1pyvdqae1eaaq1l1kkdefvgia1ptivkdkvsvadkqfepffaamnelnatlyihptgcaqsp1vndyq1  
ewvigap1lestfi1tlq1ik  
neipqkypnikfhis1l1gga1pffmtrikdnyedwnafni1dpyev1nrqfwydtanfheps1insietfgkdkfmmgsdf



Tsompanidou\_et\_al\_Supplemental\_FASTA\_File

pyfqdekytrgvdyiknsn  
idpdingilrgnaiefygieenhsh  
>tr|D9RC66|D9RC66\_STAAJ  
mrnvyafnidlkqrnrviavvmigafvgvlnqtlmtilpeimkdfvssstaqwlttifmlvngimipitaflierftl  
rslffnatcflmigsficom  
lginfpmllvgrsiqalgagilmltqtllfifmppekrgmamgmfglvigfapaigptaagwfvnifdwrylflvllli  
gmvdvfygylslpnitel  
kpnleklsvilstvsfggllygfstagnlgwshpmvyitiivaiviltififrqlklespllefrvfkyndfsvamiliv  
lmfmflfignltlpiymqt  
mmkwsplesglilpgglimglspvtgklfdkiggrilsimglmitigallmaqfsqnttqlyviisfsvtmlgnami  
mtpmttqalnhalprqyah  
gtamntirqvsaaigtgilvtlmtglgktslsgsqglihglditfyvvaliafigtiaaffirkq  
>tr|D9RC67|D9RC67\_STAAJ  
meknqrkkrsdaeynqqiiltmedlleggedisakkmsdiakisgvgvgtlyrhfesktllcqaimdkkvdqmfieied  
ilaentqwpvrkinvilt  
kyldlkeanfttlnfielkssshsssvinipfferlknlliqgfenvhsiadldfklnlmlnafssdfyfvyfkhkqkltkq  
qfldklldlflk  
>tr|D9RC68|D9RC68\_STAAJ  
mitidskinkqiaknlslegmyvtreqqiqilhainkkeitnelirkiakf  
>tr|D9RC69|D9RC69\_STAAJ  
mrkvilitllfgyscylleakaetqndpniseInkasqytgshniwyllynsdpvkakktksdkflshdfivpinsp  
ghydyvktekdstmassf  
dgkevdifgvnyfhqcyfsneniqcdsnqgagskktcmgygitlennenntnriqipivkvkyendsvtlsfdinidketvt  
iqeldykvrnkliskinly  
hlggtsyetygikfienanryywdmmpdpsftqskylmiyrnetvesakteievhltkk  
>tr|D9RC70|D9RC70\_STAAJ  
mkenfwselprpffilapmedvtdivfrhvvsearpdvffteftntesfchpegihsvrgrltsedeqpmvahiwgdk  
peqfretsiaqlakmgfkgi  
dlnmgcpvanvakkkgksglilrpdvaeiiqatkagglpvsvktrlgyyeidewkdwlkhvfeqidianlsihlrtrkem  
skvdahwelieaiknlrde  
iapntlltingdipdrktglelaekygidgvmigrigifhnpfafekprehtske1ld1lr1h1s1fnkyekdeirqfs  
lrrffkiyvrgirgase1r  
hqlmntqsiacara1ldefeaqmdedvkle1  
>tr|D9RC71|D9RC71\_STAAJ  
medlkqslkg1gwydlffivpmlflvylpnynfitifiniviiiffsigliltthiikidsntk  
>tr|D9RC72|D9RC72\_STAAJ  
mtyrmkkwqk1st1l1magvitlndgefsvdkhriavadtntqtpnyeklrntwldvnysynqydekndamkkkfeat  
ekeak1lkemktesgrty  
lwagaenletnsshmtrtyrniekiaeamkhkntklktdenktkvkealewlhknaygkeplkkleelktnfsksapqkn  
tnlnwwdyeigtpralnt  
llllngdisndekkkytapiktfapnsdkilssvgqpeqakggnlvditkvklllesiieedkdmkksidsfnkvftyvq  
dsatgkerngyfdggsyid  
hkdvpytgaygvvllegisqmpmiketpfketsqkdtlkswidgfmpliyksemmdlrsgraisrenetshtasatv  
mks1lr1sdavdestkaky  
kkivktsvksdssyqtdylnsysdikmkslmadstistngltqqlkiyndmrvtyhknldfafa1g1smtsknvarye  
sinnen1kgwhtgagmsyl  
ynsdvkhryrdnfwatadmtr1pgttt1ndmpstntknnsvfggklnkyasigmdfenqknt1takksyfilndkivf  
1gtgikstdssknpmttve  
nrkaneytmykddkqtasndeetnsvf1estdnknigyhflnkpkitvkkesqtgkwseinksqksddkkdeyyevtq  
khsntdskyayvlypgitk  
dnfkskasqvsivkqddd1hvvkdnesvwagvnydsaktfeingtkvevkdkgmfilkkkddktyecsfnpestntas  
dieskismtgysitknas  
ttnesgvrfelk  
>tr|D9RC73|D9RC73\_STAAJ  
mkisrlisi1l1lnerkrvsahel1se1mevsqrtyrdieainiagipvysipgvvggfeimenfkidkntftene1as1  
lisnsnfpek1knndffnt  
nlkikslipkdklnsietqveqfqlsdshwne1rnideqlifknaiqnqvlkikyinh1gnkterevepyqlilkagh  
wycyvcy1rddfr1lk1n  
rvih1qeleskfikmyidp1l1stnri1fek1kmtik1rvhesiver1ldfcdydsfrqennryyvdfpfidnsyyfqli  
lsfgdkceviepteirnm  
kqtikkmadnyk  
>tr|D9RC74|D9RC74\_STAAJ  
mknvyfyi1dgladwe1sn1lae1n1skrffkdaqtiniemvsnksittmgginikpeclieeisiskdtflilpgsd  
twndskh1pviniake1ls  
nggyvaai1cgatipi1adigilnehyhtsnd1ly1ksfssnyhgqklyidqpsvsykn1itasstgalmwtkdilhhldvf  
khstldawfnystgnsky  
yfelqqt1nkddn  
>tr|D9RC76|D9RC76\_STAAJ

Tsompanidou\_et\_al\_Supplemental\_FASTA\_File

manvlyqhgltgtlmgallkgtasinelqhgdlgiatltgsngevifldgkayhanehkefvelkgdeltpyatvtfkv  
adtsyekdkdsseavfaei  
kekmlsenlfsavkisglfkkmhvrmmpaqeppytrlidsarrqpeqtetyvkgsvvgfftpelfhgigsagfhvhfand  
drnfgghvldfevedvke  
iqnietfeqhfpigdedfinanidykdiadeireae  
>tr|D9RC77|D9RC77\_STAAJ  
mtdkkytaadmvidtlknngveyvfgipgakidylnaliddgpelivtrheqnaammaqgigrltgkpgvvlvtsgpgv  
snlttglltatsegdpvla  
lggqykrndllrlthqsidnaallkysskyseevqdpeslsevmtnairiatsgkngasfisipqdvisspveskaislc  
qkpnlgvpsekdiindviea  
iknasfpvllagmrssaeetnairklvertnlpvvetfqgagvisrelenhffgrvglfrnqvgedllrksdlvvtigy  
dpiyeaswnkeltdqii  
nidevqaeitnymqpkkeligniaktiemisdvdepfinqqhldeleqlrahidqetgikatheegilhpveiiismqk  
vltdevtvtvdvgshyiw  
arnfrsynprhlfsngmqlgvalpwaisaalvrpntqvsvagdgglfssqdetavrknlniiqliwndgkynmve  
fqeemkykrssgvdfgpvd  
fvkyaesfgakglrvtnqeeleaaikegyetdgpvlidipvnykdniklstnmlpdvfn  
>tr|D9RC78|D9RC78\_STAAJ  
myrespsmmelvvrehniqkaikkvknkgagpidgmkvseiqqhftqyfpkikqklllegtykpvavkkveipkangkkr  
vlgipvvrdrviqqaikqv  
iepsidrtfshkshgfrprnrstgtalkecasyyeagytiavdcdlkqcfdnihdklmylferhikdkavstfirrsiqv  
gaidlsgevaerkigapqg  
gvistllcnilyheldkelekrnhrfvryaddfvi fvktkragervmsikt fihktlklevnndkskvgsptrlkflsc  
lmskvnqgyrfrptteakr  
nlkrlkwltrrsrpgsfqdiiteinrvtrgwinyfgkgfikerflqelepwnrrirqlilkwrkktkkykmlrkygld  
hdsamriassrkkywr1ss  
thevhralttkr1rkwglls1tqlaemayary  
>tr|D9RC79|D9RC79\_STAAJ  
msgkw1h1tqggli sgthvttnneksadvivgkmyrrteqysykvknggyrftscrkqrtswqlmer  
>tr|D9RC80|D9RC80\_STAAJ  
mt1tvd1kkqpyevfd1tesdclh1knknfifgkngrgkst1tkmieneyregynifvfdgfnivvneqlnaiilgenn  
ksiqnkiddidgk1leitk  
kekeinlklks1dentdfvsedvnkhe1lnkniyqeki ydnkkkeiqtflkqkakflkeltnprvsktynrddlqreis  
sakkleteevkkcekilkt  
edkeidnyel1dfnfek1hnqvlgiinyelneivsfeelnkpnkkefaekglslhnpgdcklfcgniveneryfkleky  
fkvdeindl1rskvnilige  
ldnvksiks1qkndei yfeh1red1slveekykv1leernyidnligglkekcrtpysndiampnliesqyityikeh  
nkiiekhn1fsknikyeye  
qaekr1ryhyisvii eekqynenwkgyyientilqenykkleks1kd1qdeikklegndeqnetdn1ksiknnink1si  
ers1lesvqstekwvni  
ndk1kkigktn1kl1leknednvehyihddtngtreitk1stgekniisflyfmes1vdirndfknkiiii fddpmnsn  
ddtmqy1iiqellnlyrgk  
nskknfnskydyfic1thvfylniqpygeqrkvikngkveetkytkmnyrienkrimkisnvkedlnthydswie  
1kemyelk1insmlsmrr  
iletii kfngydqkfyend1valklfnvnshsidd1tadmigndveellrifremfknniedhfnkrwn  
>tr|D9RC81|D9RC81\_STAAJ  
mqckrcgnkefteatqymkikkks1singleiksifckkcg1vkdi evlnpqnfe  
>tr|D9RC84|D9RC84\_STAAJ  
mrilveiyaggnflgfqi qngrtvqqfek1lqrmhkrhrihpsrtdrgvhaiqqyfhdte1nipmsqwqyamnr  
tlpddiyvnnvvtvdddfh  
crydcvgkryrykvyaqhrdpfqsglktfipet1ld1kdmnraaqqfkgthdftgfcqsqkteveskvrtlyqseivktdd  
gfdyivtgsflynmvrvl  
1af1ievkggrhevsdvpk1lesknrknvpftapaeglylekiyldene1lkdfgndikihrkks1qnd  
>tr|D9RC86|D9RC86\_STAAJ  
mtirfvnvsyqkgtpyqhqaihdvntefeqgyyai vqqtgsgkstliqninal1kpttgvtvdditithktdkyi  
rpvrkrigmvfqfpeqlf  
edtveremi fgkpnfkmnldeaknyahr1lkd1gfsrdvmsqspfqmssgqmrkiaivsilampndiivvdeptagldpq  
skrqvmr1lks1qtdenkt  
iilishdmnevaryadevi vmkegsivsqtspkelfkdek1adwhiglpeivqlqydfeqyqtklkdia1teeafvs1  
ykwqhek  
>tr|D9RC87|D9RC87\_STAAJ  
medknsv1vfknsfgyqsasft1kdvsfnipkgqwtsvighngsgkstiaklmigi ekvksgeifynnqtitddnfek  
1rkdigivfqnpdnqfvgs  
ivkydvafgl enhavphdemhrrvsealkqvdm1eradyepnalsggkqrvaivasv1alnpsvii1deatsm1dpdarq  
n1ld1vrkvksehnitiis  
ithd1seameadhivmknkgtyvegtateifdhaeel1tig1d1pfpikinqlghqtsfltyeg1vdq1  
>tr|D9RC91|D9RC91\_STAAJ  
mariagvdiprekrvis1tyiygigtstaqkileeanvsadtrvkd1tdde1grirevvdgykvegd1rretnlnikr1

Tsompanidou\_et\_al\_Supplemental\_FASTA\_File

meissyrgirhrrglpvrg  
qtkknartrkqpvktvankkk  
>tr|D9RCB7|D9RCB7\_STAAJ  
mknngpklsaligifliiceffygipflgatfilsfgwqpllnallyliltiillvnrqnairpiaaiipifgivgsfla  
iipflgilihwilfflmi  
fvlvvsaptyipknarvityqkdghre  
>tr|D9RCB9|D9RCB9\_STAAJ  
mksli laekpsvardiadalqinqkrngyfennqyivtwalghlvtnatpegydenlkewrledlpiipkymktvvigkt  
skqfktvkalilndkvkdi  
iatdagregelvarlildkvgnkklrrlwissvtkkaiqqgfknlkdgrqyndlyyaalarseadwivginatraltt  
kydaqlslgrvqtptiqlv  
ntrqqeinqfqpqqytlsltvkgfdqlesnqrytnketleqivnnlknvdgkiksvatkhhksypqsllynltdlqqdm  
yrryikgpketlntlqsl  
erhkvvtyprtdsnyltdmvdmtkeriqatmattykdqarpmsktfsskmsifnnqkvsdhhaiiptevrpvmsdl  
relklydmiverflealmp  
pheydaitvtlevaghtfvkenvttvlgfksirqgesitemqqpfsegdevkisktnirehettpeyfnegsllkame  
npqnfiqlkdkkyagtllq  
tggigtvatradiidklnmnaiesrdgkikvtskgqilelapeeltsp11taqweek111iergkyqaktfinemkdf  
tkdvngiknsdrkykhdn  
lttcepcgkfmikvktknqgm1vcqdpcktkknvqrktnarcpnckkk1t1fgkgkeavycvcghsetqahmdqrm  
ksksgkvsrkemkkymnk  
negldnnpfkda1kn1n1  
>tr|D9RCC0|D9RCC0\_STAAJ  
msivqlyditqiksfihsnyesasylyklpqyneydvlitdaiespgvfsikendsikailsfaydknkfkvigpfv  
adnyvsvetfetlfkamt  
snqpdavfnfsfeegiqyp1mkviqasynftdyieartrleedmhqpniiiphkgfyrafsklhtttfkyqaqspq  
diidslddhhhl1fvseg  
llkgylyleidsqqsiaei kyfsshvdyrlkgiafellayalqyafdnfdirkvyfki rnkknklierfnglghinyey  
ikfkfesrvkdqtipe  
>tr|D9RCC2|D9RCC2\_STAAJ  
mteqftmiillialgyflkrinyikatdsqviatlvlvntlpslvivnlnsaelklsfsilpilmiygivakmiavfff  
rkydnhmrgsvgmmtgann  
iglfayplieviwpktglyfgmadiggafvmfgytyfvgsyfsesdqdqdfkylgkllqsvplvtyivmfilnishih  
lphvaidffsilshanmp  
smillgym1nftlerkyipatikylclhyglalvagllvhvllpsddmikttllvtwmfpvgvaiisyyiqfkyrtlpf  
igmtnl1tiisiiilyvy  
qavfv  
>tr|D9RCC3|D9RCC3\_STAAJ  
mslenqlaelkydyvr1qgdlekreslnldtsalvrklkdieneirnvraqmqd  
>tr|D9RCC4|D9RCC4\_STAAJ  
mqfyli1lailylivsfisifkmevvftrilriimgvlllflvalttmsfpenwvfvllllagnvevtgfkmlkkl  
kgvni1n1mslfi1viyfi  
ltivlf  
>tr|D9RCC5|D9RCC5\_STAAJ  
mikkllqfslgnkfai1mvvlvlggyasak1klellpnvqnpvisvtttmpgatpqstqdeisskidnqvrs1ayvk  
nvktqsiqnasivtveyen  
ntdmkaeeqlkkeidkikfkdevgqpe1rrnsmdafpvlaysfsnkend1kkvkv1neqlipklqtvdgvqnaqlngq  
tnreitlkfkqnelekygl  
taddveny1ktatrtt1gl1fqfgdkdksivvdgqyqsvdafkninip1t1aggqqsqsqsdnkqnsamsdvnqaspq  
nskasannisgmp1vklgd  
laditvqdvrtis1ktnqkdavn1qitkaqdvntvqvakdvqrkidt1fvdenkdfnvtktmdtakpvkslytmvekas1  
gtivaiivillflnrirtt  
aisiisip1sl1malialk1sdvs1nilt1gal1tvaigrviddsivvveniyrr1tdseeqlkgenliisattevfkpim  
sst1vtiivfl1plvfsvgs  
vgemfrpfal1afsl1as1lvsit1vpalaat1fkkgvkrnkqhheglgvsttykkvlhws1nhkwiviil1st1ilv  
atvvfggpr1gtsfisagd  
dkflaitytpkpgeteqavl1nhaqdvky1kqkkhvktiqysvgssvpdptgstnsmvimveydndtpnfdveadvik  
hadgfkhpgewnqdlgtg  
agnksvevtvkgpsmdaikstvkdieqkmkqvkg1anvksd1sqtydqyeikvdqnkaaengisasqlamh1nen1peka  
vttvkengktvdvkvkqk  
qtdwsedk1n1t1kkptgdik1gdiat1vktttpsk1tqeaggdyattvsakvtnkdvvggtrqvmskinn1dkpnnvk  
vniggasddinnamtq1af  
amlaaiivyl1vitfkgglapftil1fs1pftvigviallitgetisvpsligml1ligivvtnaivlidrvinneqq  
gmemekealieaggtrirpi  
1mtaiatigalvp11fgqdssiliskglaatvigglisst11t1vvvpviyeilft1kkrftkr  
>tr|D9RCC6|D9RCC6\_STAAJ  
mekmhitnqehdafvkshpngd1lq1tkwaetkkl1tgwyarriavgrdgeiqgvaq11fkkvk1pyt1cyisrgfvvdy  
snkealnal1dsake1aka

Tsompanidou\_et\_al\_Supplemental\_FASTA\_File

ekayai k i d p d v e d k g t d a l q n l k a l g f k h k g f k e g l s k d y i q p r m t m i t p i d k n d d e l l n s f e r n r s k v r l a l k r g t  
t v e r s d r e g l k t f a e l m k i  
t g e r d g f l t r d i s y f e n i y d a l h e d g d a e l f l v k l d p k e n i a k v n q e l n e l h a e i a k w q q k m e t s e k q a k k a q n m i n d a q  
n k i a k n e d l k r d l e a l e k e  
h p e g i y l s g a l l m f a g s k s y y l g a s s n e f r d f l p n h m q y t m m k y a r e h g a t t y d f g g t d n d p d k d s e h y g l w a f k k v w  
g t y l s e k i g e f d y v l n q p l  
y q l i e q v k p r l t k a k i k i s r k l k r k  
>tr|D9RCC7|D9RCC7\_STAAJ  
m i l k f d h i i h y i d q l d r f s f p g d v i k l h s g g y h h k y g t f n k l g y i n e n y i e l l d v e n n e k l k k m a k t i e g g v a f a t q i v q  
e k y e g g f k n i c l r t n d i e a  
v k n k l q s e q v e v g p i q m e r d t h k d g k v k w q l l y i m n q d d d d d e i k p p f f i q w e e s d s m r i k k l q k y f q k q f s i e t v i k  
s k n r s q t v s n w l k w f d m d i  
v e e n d h y t d l i l k n d d i y f r i e d g k v s k y h s v i i k d a q a t s p y s i f i r g a i y r f e p l v  
>tr|D9RCC8|D9RCC8\_STAAJ  
m l s e f f n s f i t i y r p y l k l a e p i l e k h n i y y g w l i l r d i a k y q p t t l i e i s h r r a i e k p t a r k t l k a l i e n d l i t v e n  
s l e d k r q k f l t l t p k g h e l  
y g i v c l d v q l q g a v v a k t n i s q d q m q e t i n v m n q i h e i l l k e a h n d  
>tr|D9RCC9|D9RCC9\_STAAJ  
m i n g g s l n k s p i f t k s f t i n f l v n f i v y l c m y l l l v v i a g y s k q a f d a s d s l a g l v v g l f i v g s l i g r f a t g k f v n q i g p  
k r l l f i g l i a l i i t q l i y f  
i d g s l a f l i f v r l i n g i a t a v v t t a t g t i a a y v t p v n r k s e g i s l f s l s l v l g t a i g p f l g m l l i t k y a i n l l f i i c v i l  
g i l g l i i s l f i k v d f e v t n  
n k t e t n v i d k p r f s i h q f i a k e a i p v a v i m l l i g v t y a s i l t y l q a f a l e r h l v t a a s y f f i c y a i a s l i t r p i a g r l m d  
d k n e n i i v y p a f i m l f l s f  
v c l i s s y q s w l i l l a g a c l g l y g n l s s a m q s i a i k v s p p i k y i a t s t f y v g l d a g v g f g p s f l g l f t h m f s y s e i f g f  
m a a l a i i t m l v y f l i h g r h  
v t r n a m n  
>tr|D9RCD1|D9RCD1\_STAAJ  
m p k e v f g d d f v f l p k n e l l t f d e m a r i a k v y a e l g v k k i r i t g g e p l m r r d l d l l i a k l n q i d g i e d i g l t t n g l l l k k h  
g q k l y d a g l r r i n v s l d a i  
d d t l f q s i n n r n i k a t t i l e q i d y a t s i g l n v k v n v i q k g i n d d q i i p m l e y f k d k h i e i r f i e f m d v g n d n g w d f s k v  
v t k d e m l t m i e q h f e i d p v  
e p k y f g e v a k y y r h k d n g v q f g l i t s v s q s f c s t c t r a r l s s d g k f y g c l f a t v d g f n v k a f i r s g v t d e e l k e q f k a l w  
q i r d d r y s d e r t a q t v a n r  
q r k k i n m n y i g g  
>tr|D9RCD3|D9RCD3\_STAAJ  
m k v l y f a e i k d i l q k a g e d i m l e a l t v q q f e d l l f e r y p q i n n k k f q v a v n e e f v q k s d f i q p n d t v a l i p p v s g g  
>tr|D9RCD4|D9RCD4\_STAAJ  
m k q f e i v t e p i q t e q y r e f t i n e y q g a v v v f t g h v r e w t k g v k t e y l e y e a y i t m a e k k l a q i g d e i n e k w p g t i t s i v h  
r i g p l q i s d i a v l i a v s s p  
h r k d a y r a n e y a i e r i k e i v p i w k k e i w e d g s k w q g h q k g n y e e a k r e e  
>tr|D9RCD5|D9RCD5\_STAAJ  
m i l q i v g y k k s g k t l m r h i v s f l k s h g y t v a t i k h h g h g k e d i q l q d s d v d h m k h f e a g a d q s i v q g f q y q q t v t r v d n  
q n l t q i i e k s v t i d n v v l  
v e g f k n a d f e k v v v y r n e e l q v l q q l s n v c y s i n v r e h e d f t a f e q w l l n k i k n d c d t q l t  
>tr|D9RCD8|D9RCD8\_STAAJ  
m g e h q n v k l n r t v k a a v l t v s d t r d f d t k g g q c v r q l l q a d d v e v s d a h y t i v k d e k v a i t t q v k k w l e e d i d v i i t t g  
g t g i a q r d v t i e a v k p l l t  
k e i e g f g e l f r y l s y e d v g t r a l l s r a v a g t i n n k l i f s i p g s t g a v k l a l e k l i k e l n h l i h e l t k  
>tr|D9RCD9|D9RCD9\_STAAJ  
m s q e r y s r q i l f k q i g e i g s k i n q k c a l i i g m g a l g t h v a e g l v r a g i a k l i i v d r d y i e f s n l q r q t l f t e e d a l k m m  
p k v v a a k k h l l a l r s d v d i  
d d y i a h v d y y f l e t h g q d v d v i i d a t n f e t r q l i n d f a y k h r i p w i y g g v v q s t y e a a f i p g k t p c f n c l v p q l p a l n  
l t c d t v g v i q p a v t m a t s l  
q l r d a m k v l t e q p i d t k i t y g d i w e g s h y s f g f s k m q r s a c t t c g d v p s y p y l n k n e q r y a t l c g r d t v q y e n a s i t h d i  
l v q f l k q h g l n y r s n s y m v  
m f e f k g h r i v a f k g g r f l i h g m t r t s d a i h l m n l l f g  
>tr|D9RCE0|D9RCE0\_STAAJ  
m l k i n l k y q l k n t l i r i n i n d e p k i y a v r g p s g i g k t t v l n m i a g l r k a d e a i i e v n g q l l t d t a k n v n k i q q r r i g y  
l f q d y q l f p n m t v y k n i t f  
m a e p s e h i d q l i q t l n i d h l m k y p m t l s g g e a q r v a l a r a l s t k p d l i l l d e p f s s l d d t t k d e s i t l v k r i f n e w q i p  
i i f v t h s n y e a e q m a h e i i  
t i e  
>tr|D9RCE2|D9RCE2\_STAAJ  
m k m k r f i a i v m a l f l v l a g c s n s n d n q d n k k d d a a n g k k e i q v a a a a s l t d v t k k l a s e f k k e h k n a d i k f n y g g s g a l  
r k q i e s a p v d v f m s a n t k  
d v d a l k d k n k a h d t y k y a k n s l v l i g d k d s n y t s v k d l k d n d k l a l g e v k t v p a g y a k q y l d n n n l f k e v e s k i v y a k d  
v k q v l n y v e k g n a k q g f v y

Tsompanidou\_et\_al\_Supplemental\_FASTA\_File

ktdlykqnkkidtvkvi kevelkkpityeagatsdsklakewmeflksdkakeilkeyhfaa  
>tr|D9RCE3|D9RCE3\_STAAJ  
mnkdvs1gqpi vryedgk1fnttdqyvtefpltimvngeefatvicsptnlee1vigflasegailkrdelksvliddsk  
gfahvelnkd1gdrfgyst  
krmiasccgksrefyfndaaia ktsmskitltpiqi inmmtr1qsashiyqetgglhnaaisdgl1tffvhrqdigrhna  
1dklygfc1qrhitvrdkv  
lifsgrisseilikaakigvgvilksapttlavtlandlnitavgfirnggfniyshperiidseq  
>tr|D9RCE6|D9RCE6\_STAAJ  
mikkvyfnhdggvdd1vs1f111qmenvh1igvstigadcyleps1sasvki inrfsnediqvapsyergknpfpkewrm  
haffmdalpi1nepvkhva  
snvsdkeafedi1qtlkrqsevt11ftgpltdlaka1qkdssivqyiek1vwmggtf1pkgnveepehdgsaewnaywd  
peavki vfdsdieidmval  
estnqvp1tdvrqrwanerqytgidf1gvsyaavpplthfitnstyflwdv1ttayignkd1vhsiekkvdvigygpsq  
gktfeckdgrkinvinhd  
naffnyitalakkvn  
>tr|D9RCE8|D9RCE8\_STAAJ  
mndmdnsflitteiqrkwi ekfkaigt ftkakse yndqhsqfpykniewlikegygk1t1pkayggegati edmvilqsf  
1gel dgata1sigwhvsv  
gqiyeqk1wsqdm1eqfaveinnga1vnravseaemgsprtrgprsthavkaddgylngvkytsmskalthiivaayi  
eelsvgff1vdrn1pgve  
iadhwd1gmrateshd11lndvkvp1khlvetekskapngwilhipscylgiaqaarnyavdfaiqhspnsiegtiatl  
stvqqn1gkmet111carq  
flwstakgyqqykddsqirnst saskvmvmnqglevid1amrivgakslemnrplqryyrdmraglhnppmedaaytnia  
ksitntf  
>tr|D9RCE9|D9RCE9\_STAAJ  
mkmvdv11knisqvv1isnkwgt1filig1fvanwtvglaam1gsiiayafaryinyseaeindglagfnpv1taialti  
fldksg1divitmiat11t  
1pvaaavrev1rpykvpmltmpfvivtwftv11sgqkvfdvts1klmpqni etvnfn snnrhi fiqs1fegfsqvfi eas  
viggvciligi1ivsrkaa  
1lavias11sfiiva11ggnyddinq1fgynfv1maialgytftainpyistflgv11tvvvq1gttt11epfg1pal  
t1pfiivtwi11fagikh d  
kvda  
>tr|D9RCF1|D9RCF1\_STAAJ  
mipgei1tksteveinnhhpetvievkntgdrpi1qvqshfhfyeanaa1dferemaygkhl1dipagaavr1fepgdkkevq  
1veyagrki1fgfrgmvg  
pidesrvyrptdendeyagvfgdngdenvnkkggkrs  
>tr|D9RCF2|D9RCF2\_STAAJ  
msfkmtqnqyts1ygptvgds1r1lgdtn1faqiekdyavygeeatfgggks1rdgmaqnprvtrddvnavd1visnavii  
dydkvvkadigi1kngyifa  
ignagnpdimdndvdi1igsttdviaaegkivtaggidthvhfinpeqaeva1esgvtt1higggtgasegskattvtppgw  
hihrm1leaeg1pinvgft  
gkgqatnptal1ieqinaga1glkvhedwgatpsa1sna1dvadefdvqialhad1t1neagfmedtmaavkdrv1lhmyhte  
gagghapd1iksaa fsn1  
1psstnpt1pytqntvdeh1dmvmithh1naaipediafadsri1rketiaaedv1qdmgvfsmisssdqamgrvgevitr  
twqvahr1mkeqrgpldgdf  
ehndnrikryiakytinpaithgiseyvgsiepgkladiv1wdpiffgvkpelivkgg1insavngdangsiptsepqk  
yrkmygqyggnitstsmtf  
vsktayenginra1n1krmvrvpkni1rqlskadmknnsatpnl1dvdppqtevyv dgekitsqaatel1tqryflf  
>tr|D9RCF3|D9RCF3\_STAAJ  
miieeiqgnian1sdsekqkhvekvy1lensd1vkriqrvt dhgnei gir1kqid1lqygdi1yaddhmi1ivdvnse dv  
1viqprt1qemgdiahqlg  
nrh1paqftetem1vqdy1ved11kn1gipyvhedrkvnkafrihighshd  
>tr|D9RCF4|D9RCF4\_STAAJ  
midhkh1r1fqfcdsqfptgafshsfgletyiqrnvihdnqtfiaw1kmflteq1tysdglamr1vydalenndaqkv1n  
1dk11fvqn1pketrvgak  
qmgt1rmvkl1ale1ydcqwi1twyhqamkeknak1npa1cftm1lgh1lgvdi eti1dy1lyqnvss1tqnavraip1lgqtag  
qqvvthmipyieatrkhif  
elkesdfgmtapgle1nqmahenvnvri fis  
>tr|D9RCF5|D9RCF5\_STAAJ  
manpiki1giggpvagaktq1iekvvr1skemsigvitndiytkedekilvnsevlpesriigvetggcphtaire dasm  
nfaaidel1erhddielif  
iesggdn1aatfspelvdfsiyi1dvaqgeki1prkggqgmiksdffvinktd1apyvgas1eqmaedtkvfrgkrpftft  
n1ktdegl1devidwierdt  
11kg1s  
>tr|D9RCF9|D9RCF9\_STAAJ  
mskfkvr1rtah1mlkvindm1kysfh1t1tqvkl1n1lvkydndsnsasidr11kmkeiqskmallqm1sy1nnhqw  
11kgrdqrdrk1tisink  
mhidkieymne1sdyieryfgqytdfscdyvsy11ssqd1frn1kcy1nmcq1sleelyv1giln1hkqgl1tvkelqg

Tsompanidou\_et\_al\_Supplemental\_FASTA\_File

efhhipfavspilkclilk  
glvkkrdvn  
>tr|D9RCG0|D9RCG0\_STAAJ  
mtdnyslhiyksmkssvkeanlkiiywlggtgvvsinlqqydvkrndvtvimlndlyqidghddsvccvvevsaktflk  
fmnanymmrkilnevas  
tfrilikylysiikqqsynandkiinymcvelmslntydgsrhlvaeevhdylnnnhkkknrkdvinqvsitnkalsd  
mfkatpysnfiqylnhir  
ehclidiltskkpieeiasshgfhnysrfihlfketygntpklikrksptshsinhsqleveidknieelfddtnqssss  
mreidipfeptkrsqmyqp  
kniiykgnsfywmdyytikqiiqrlygnpenlhiivtidtsnelsieqitlllqkivnynvvnvfrikheykelltster  
gkieklvati fnmtfesnr  
ckiaflindlnttaiqklkrldnyigvfeliyylepnelntrydkeidhlidyfilplrqi eqvsarskiicdvdlin  
enndlkekitifdinkvte  
llntnytkfrglmhmsi easkeinl trlsififiinl nrlrgiviyqndtmivtkfkhevqcviclpaa llensda  
ir lskglqqfshaktkqi  
vlsidkdnhtsengvlvndimqqhsywkani fierniydhs lmvssnsivhlkyhlei  
>tr|D9RCG1|D9RCG1\_STAAJ  
mkkia tatiatagfatiaiasgnqahaseqdn ygynpdptsysy tytidaqgnhytwkgnwhpsqlnqdn gyysyyy  
ngynnynynnngysynn  
ysrnnysnnsynnnynnsyntnsyrtgglgasytssnqvtttmapssngrsissgytsgnlytsgqctyyvfd  
rvggkigstwg naswana  
aaragytvntpkagaimqttqgayghvayvesvnsngsvrvsemnygygpgvvtstis asqassynfih  
>tr|D9RCG2|D9RCG2\_STAAJ  
marqpsflesistivmvi vvtgfvffdi piqvlliasayaawiakrvgltwqdlekgiadr lntampai fiilavgi  
ivgswmfsgtvpaliyygl  
dl npsyflisaffisaitsvatgtawgsastagialisignqlgippgmaagai agavfgdkmsplsdtt nlaalv tk  
vnifkhihsmmwttipasi  
igllvwfiagcqfkghsndkqiqtllselaqiyqiniwvwp liviivcllfkmatvpailissfsaiivgtfnhhfkmt  
dgfkatfsgfndsmihqsh  
issvksll eqggmmsmtqilvtifcgyafagivekagclevllttiskgihsvglitviccialvfaagvasivii  
mvgvlmkdl fekyqvsrv  
l srtledsstmvlplipwgtsgiytnqlhsvsgeffiwtpcylcaii aiigyftgigkks  
>tr|D9RCG3|D9RCG3\_STAAJ  
mkiaivgsgngavtaavdmvdkghevkl ycrnqsinkfqnaidkggfdfnnegeerfveftdisddmeyvlkdaeivqvi  
ipssyieyyadvmaehvtn  
dqllifnmaaamgairf mnlvledrhidtkpqlaeantltygtrvdfenakvdlsl nvrri ffstydrsc lndcydkvssi  
dylvkeesliktnleng  
pevhpgptllnvgridyagefalykegitkhtvrllhaielerlnlgrrlg felstakesriergyl erdkedep lnr lf  
ntspvf sqipgnhvesry  
l tediayglvlwsslgrvidvptpnidaviviastilerdff eegltveeigldkl dlekylk  
>tr|D9RCG4|D9RCG4\_STAAJ  
mtemndvtnqqpnrksndenimamliy lls lfts iigpliiwllkkdesk lvdragknyfnyti syi iwsivlviitfi  
gvliatdidfiviigfii  
tfigilsifafsilsvfttiacvkyngqeyvip lti rfi  
>tr|D9RCG6|D9RCG6\_STAAJ  
mekvyvagaipevgkl lqehfevemyegkglvdkdtlikgvknaialisllstnvdkdvidagkdlkii anygagfnni  
dieyareksidvtn tpkas  
tnatadltiglv lavarrivegdqlsrttgfdgwaplffrgrevsgktigiiglgeigsavarrarafmdvlytgpnrk  
eekerejgakyvdl tllk  
nadfittinaayn pkmhhlidteqfkmkstaylinasrgpivheqalvqalkdneiegaal dv yefepditddlkslnv  
vltp hignatfeardmmsk  
ivanaaisavqgekppfvvn  
>tr|D9RCG7|D9RCG7\_STAAJ  
mkia iigagigg ltaaalqeqghtikvfeknesvkeigagigigdnvlkklgnhd lakgiknagqilstmtvl ddkdrp  
l tvtklksntlnvtlprqt  
lidiiksyvkddai ftnhevthidnesdkvtihfaeqeseafdl cigadgihs kvrsvnadskvlyqgytcfrgliddi  
dlkhpdcakeywg rkgvrg  
ivp llnnqaywfi tinskennhkyssfgkphlqayfnhypnevreil dkqsetgillhniyd l kplksfvygrtillgda  
ahattpnmgqgagqamed  
ivl vncfnaydfekalqrydkirvkh takvikrsrkigkiaqyrsrlvavrnrimkmpnalaagqtkflykskek  
>tr|D9RCG8|D9RCG8\_STAAJ  
mkkkfkiristlllmiilvifavllivnetklfkndvnysfdeavsmqqgkivqtkeedgkfveanneiakamtishk  
dndmkymdi tekvpmsese  
vnqllkgk gilenrgkvfl eaqekyevnviylvshalvetgngkse lakgikdgkryynffgigafdssavssgksyae  
keqwispdkaiiggakfir  
neyfennqlnlyqmrwnpenpaqhgyasdi rwadkiaklmdksykqfgikkddir qtyyk  
>tr|D9RCH0|D9RCH0\_STAAJ  
maerissk irrlekseeqikleslnevteaiaankdsilkaiklikvl ddakil dalngavrgrqvi inkfave l nkdiy

Tsompanidou\_et\_al\_Supplemental\_FASTA\_File

tglltnmasmvfllgelnv  
sdlseflnkvnkglhvanqaspnaktsvrsllgvlkdddmnrslytmInmlkgmsred  
>tr|D9RCH1|D9RCH1\_STAAJ  
mqehlvtldgkdyivepgtnllefiksqdtfvpsicynesmgpiqtcdtctveidgkierscstvidrpmtvntvndv  
kdaqkealdriলেখ্মlyc  
tvcdynngdceihntmdawglqhqttyeykekyekdygpfyrydpnqciLcgrcveacqdievnetiridwdrehprviw  
dndvpinesscvscgqcat  
vcpcnammevnmegnagymtdtepgslaamidltkkaepgygplfaisdseaemrkerikkktvctycvgvcsfewtk  
dreilkvqpshdspankia  
tcvkgkfwghinsdqrLtkplvrkngefheveudealnvIadnftsikekygpdaLsfisskatneesyLmqklarqv  
igtinnvdncsrycQapatk  
glfrtvghggdsGsiEdlekaamsvIigtntaeahpviasrmkraqklfgqkihvfdirkhemaeradrfyqpkpgtdla  
wlsavtkyiidhdLhdkaF  
ieewvedfdeyyksletftmafaeeatgipeaelikfaecakaesvicwamgitqqdigdsstaisnlllvtgnyrr  
pgtgayplrgnhnvqgcsd  
mgsmpdkiTgyqsieaddirakfekeygvklnpkvgkdnhemvegvdhgeihslylygedtgivdsninfvqaafekldf  
mvvqdeflftatfadvvl  
paspslekdgftnterriqrlyqaLkplgdsKpdwkiFqaianklgfdwnykhPseimdeiarLtplyagvsyerlegf  
nslqwpvhpdgtdepiLyL  
egfnfdngkaklfplsfdnyfkqdevydiHvngrlLehfhegnmtyqtpmikykvprafveispelaedrgihegaevk  
LisetgeavLqvhvtdrvk  
gkeiyiplnndamengdlgainlltnsdvdqytdtpsyrktsrLevitkrGksplNpnnfrvnkkrhpqysvqvqkkwe  
rpdvYfpgnqvdk  
>tr|D9RCH2|D9RCH2\_STAAJ  
mkrsskskmslpkklflwafgIlvIlaivavyvaakifitgnkihnpldrnhseLrdkkvsLndgdpftialfgvdsda  
drkkkgggersdsimiLsi  
npkttkteivsiPrdrseivgrgttekiAhayayggpnmavksleklmNvpidhyatidmdglhnmidsiggvdvsnd  
tftvdgvrftkgqQthvng  
dqalKfirsrkeegaggdfgrqqrqqivleamankiaspsstihfnsLmneiQnnvktDLtLgdLntirsnykdandtIn  
khqLsgqggiqsDgLyfyi  
pseqskaestkllkdnle  
>tr|D9RCH3|D9RCH3\_STAAJ  
mtdktlqqidkliswLkqidnvipqLitemttetkrhrfdLvtnvdkqiqqqfqqflathfpehqllaeksnkmitne  
inhlwimdpidgtanlvkq  
qedyciilayfyegkpmLsyvydyphkklykairgegafcngikmeppsLkledaiisfnaqvmnLdtvqdlfdasfsy  
rlvgacglDsmrvakggqfg  
ahintnpkpwdiaaqflfaeLlnLkmttldgkaidhLkgapfiisnkachetvLkilnanggyqkyr  
>tr|D9RCH5|D9RCH5\_STAAJ  
menekkytFkdIawrdLliipiigvifyaLtiaayigpilfdyyeidsnLifvatitqalaytigigafylfhLkvmPs  
rlragfayikkywLrlsit  
yiaLilIytyeymtqflpkhlqysetaneleLnmfevpafLpvafllivivgpiveeivfrhiligelgkknfiams  
ivsvflfafihvtdakspF  
efgpylilsiiLvftylksgrnlgstiaLhiannfvsvfvisisiya  
>tr|D9RCH6|D9RCH6\_STAAJ  
minetkymrqqitnliqiIdtikyntLmtdwniqthiykfnqivtneLnkfkGfetsyLinenqvsyieitllnkrplR  
qvdygnkiqylnfyhtels  
naLfaikfah  
>tr|D9RCH8|D9RCH8\_STAAJ  
mennelqrgLsarqiQmialggTigvgLfmGatstikwtgPsvilayliagiLflimramgemiylnpttgsfatfasd  
yihpaagymtawsniFqwi  
vvgmseviavgeymkfwfpeLptwipgiaillmaanLfsvkafgefefwfalivvtiilmiagfgliffgfgnggh  
avgisnlwtnggfmpngiv  
gfffaLsivigsyqgveligitagetkdpqknivkavngviwriLifylgaiFvsvypwnqLgdigspfvatfakigi  
tfaaglinfvvLtaamsgc  
nsgifsasrmiytLahkgempkiFtkimrngvpLytvvavslgiligaLlnvilplyidgaksifvyvysasilpgmipw  
fmilfshLrfrklhpeeve  
ghpfkmpggavsnyLtilflilvlvgmvfnvetrisvligvifltivtiyyfiryknknnvkak  
>tr|D9RCH9|D9RCH9\_STAAJ  
mlkqilpratkisvifavaffiinyigmykpdilyLvgrtiatLafilicLtlftiinsperkiklgttlpialigii  
fgaifltvqigvitgliig  
viatfiweliEknkggrss  
>tr|D9RCI3|D9RCI3\_STAAJ  
mfqkLsifatksflvwmLvaavigfiFpqhvatLgkwvpyllgivmlgmglTitpndfkmvfkapraviigvclqfsimp  
tLafiiaKsfhlppdiavg  
vilvgccpggtssnvmSylakanvaLsvsittvstllapfvtpaliylfandwLevsflsmLwsvvqvvlipialgivilq  
iinrkiAekastalpiisv  
vaislilaivvggskhqiLttglliflvvilhnlvlygtigywlarllkldrqqdkavsievgmqnsGLavsLaalhfnpi  
aavpgavfsfihnitgpil

Tsompanidou\_et\_al\_Supplemental\_FASTA\_File

akywskk1  
>tr|D9RCI5|D9RCI5\_STAAJ  
mnaikrfgsamivpvlmfaffgivilgfatlfknptimgsladqhtfwkfwsviesggwvifthmevvfvvglpplsakk  
apghaalaaimgylmfntf  
inailtqwphtfganlekgvenvpglksiagiatltdnilggiiisaiitwihnyyskrlepemvgvfqgltfvvtisff  
vmlplaaaitcviwptvqhg  
igsmqhfiiasgyigwlyhflervliptglhhfiyapievgpvvnhglkaewlqhlnefakstklkeqfpygfmllqg  
ngkvfgclgjalamyattp  
kenrkkvaallipatlavvvgitepleftflfiapylfvlhavlaasmdtmyafgvvgnmgglldfistnwlpigke  
hwgtyvaqvvglifvaiy  
fflfrflilkfdiplpgrkkteeevklfskqdyknkkgdsvdskrastgneyedkaayyldglggenikdvtncttrlr  
ltyvdeskvadteyftqq  
mahglvksqgsiqvvgmtvpqvreafeqmvedqssedk  
>tr|D9RCI6|D9RCI6\_STAAJ  
mfldehinrnfkdlnndlhiahfinthidecknmkiqdlaqfthasnatihrftrklgfdgysdfksylkfesnkthql  
psnsidsfkqeidstfsyl  
ervdyqlltekmytastiylygtgraqlnvaseaqrilltlhnhvivlhdehelkmiInksepndlffiiislsgethell  
evtnllqlrqkyfisvttm  
kdntlaqkanyvnyvssntfylvtdgtdyssfisyhi ffetlvkyneyllhndisn  
>tr|D9RCI7|D9RCI7\_STAAJ  
makfnvenehveveieklykfspeelvyeawtkkdlkqwfmtsartnkeikadvkeggkyrivdqqrngkvnviegiyes  
lvmdeyvkmtigmpglset  
qdviefferetggqmlyfyrslvekerrftnleykqkkkeyhdamvhgfeImfdkmyhvietstqq  
>tr|D9RCI9|D9RCI9\_STAAJ  
malivyraillilalafgiatvfpeqklplyilftlvvvaivsni  
>tr|D9RCJ0|D9RCJ0\_STAAJ  
matqdprrtkfkttdyekqevpglqsempapdcgetsyqghqrlqgykmlvtggdsaiagraaaiayakegadvainyl  
pseeqdaqevrqviesgq  
kavlipgdirdeqfnydlvehayqqlgldnvtlvaghqqyhddihgftteafetetfenvyplfwtvqakaleykpgas  
itttssvqgynpspilhdy  
aaskaaiislktsfseelgpkgirvncvappgfwspqlqisggqpqskiptfgqktpgragqpvelcgyvllaseessy  
ttgqvfgvsggvqid  
>tr|D9RCJ1|D9RCJ1\_STAAJ  
mgldqavawrryfhqfpeIsdkefkttqkikdiltehhirilDlplktglvaevggglsciavradaidapiqelveqd  
fksenegvmhacghdihma  
silatavklkeiegtlgrvkfifqpaeeIghgafkiiethalqdvqavlgfhndpsrpvgtfaiktgait savdrfefh  
ikgvghaakpeqcdnpvi  
vIaqIinsiqsivsrnlSafdeavvtigqiscgntwnviadhayvqgtvrsfdpvvrkIietrlqdiadglaqaynmkin  
lNythlpGavmndealthk  
aiavaqhvgykvemmqplTigedfsgysqhfpsvfalligshseydlhhpqykpderilekvpeyfvfvrllhe  
>tr|D9RCJ2|D9RCJ2\_STAAJ  
myknynmtqltlpietsvripqndisryvneivetipdsefdefrhrgatsyhpkmmlkiilyaytqsvfsgrriekll  
hdsirmmwlaqngtpsykt  
inrfrvnpntdaliesslfiqfhsqclqknIiddnsifidgkveananrytfvwkksiqnhesklnenskaIyrdIveek  
IipeikedgdsdlTieeid  
ligshldkeiedlnhsiqnedctqirkqtrkrkteikkfkkkfdyserkskyeeqksilkdrrnsfsktdhdafmrmke  
dhmkngqlkpgynlqiatn  
sqfvlsydlfqnpdtrtlipfltmihntfgylpeyivadagygseqnymaiiddfnktpIitygmfikdktrkfkdsif  
ntqnwkydelnDeficpnn  
krigfkryayrndrygfkrdflIeyddcsacsIrrqcmkpnssknkkimknynweyfkaqinqIsepetkkiysqrki  
dvepvfgfmkailgftms  
vrginkvkreIgfvlmalnrkivarravyqihlkkadfyqiinrnqlfyia  
>tr|D9RCJ3|D9RCJ3\_STAAJ  
mndliinhiaelilprstdkplkgkeldeInvvkngtvvikdgkivyagqhtddydatetidasgkvvspalvdahtlIt  
fggsrehemslkrqgksyl  
eillemgggilstvnatretseddlfkkaehdlItmiKhgvlavesksyglDreneIklqlkvsnrIaekydldmkhtflg  
phavpkeassneafleemi  
allpevkqyadfadi fctegvftieqsqhymqakeagfkvihadeidplggIelaideqaisadhIvassdkgekIrl  
nsdtvavllpattfylgke  
dyadargmlDnngaiIatdynpgssvtnnlqlvmaiaalklklspnevnavtvnaakaidinagtintgdkanIviwd  
apnheyIpyhfginhakv  
ikdgkviVdntIsfka  
>tr|D9RCJ6|D9RCJ6\_STAAJ  
mykqgepnIwtgrIdsetdpkkfrhfqtvtfedlSkIekssrpsgvgilgyavdkgvalnkgrigakegpdaiKqafagI  
pdlnqcealvdygnvyhdy  
eelIdtqkefamlaaksianhrqtflIggghdiayaqylatrkyvptqsigvinidahfdtraeqqstsgtsfrqileed  
entdyIvlgiaggntqsl  
fdyakekkigyvfadelIshvsptikdmierfvhehdvImfticmdvidsafapgvsapavlglyphtvlelakriipsd



Tsompanidou\_et\_al\_Supplemental\_FASTA\_File

kvssvsiaemntydadnr  
taklvanlvhhflk  
>tr|D9RCJ7|D9RCJ7\_STAAJ  
mknknksgfqwamti fvvf vitma lsim lrd fqs iigvkhfi fevtd lapliaa icilvfkykkvqlaglkfsislkvi  
erllalilpliiiligmy  
sfntfadsfillqstglsvpithilighilmafvvfegfrsylvqnvvetkmtffasivvglymsvsvsanttygtefaay  
nflytfafsmilgelirat  
kgrtiyiattfhasmtfglifl fseeigdlfsikviaistaivavgyiglsliirgiaylttrrnleelepnnyldhvnd  
deennhteaksssni kda  
ektgvatastvgiakndtekteaadepsihegtektepqhhi dnqtesnhnehhditsesvesaesvkhapqsddl tndsn  
edeiqslkepatykedrrs  
svvidaekhiekteeqssdknk  
>tr|D9RCJ8|D9RCJ8\_STAAJ  
mkdvkalklmtlndvlsqingdmtlgigtgstme lllpqmaqlikergyniigvctsnkiaflakelgikiceindvdhi  
dlaidgadevdpslniikg  
gggal frekvidemasrfvvvvdetkmvqylgetfklpvevdkfnwyhilrkiesyadikverrvnedvafitdngnyil  
dcklpgkidpykfheylih  
ltgvfetgyflmdaqvigtqegvkilek  
>tr|D9RCJ9|D9RCJ9\_STAAJ  
misihaistgkiqdlpysskrpmrsa ldktki sqttwl sstgftgdeqaykdhggphkavcgfskhnyalyqddlptlpt  
hamfgenltfdyl desdy  
fgnqyrlgealievsei repcwkiqakynipdlvkrmstsgktgyfrvlkqgyvpsdqlyliqeapiehr lsvqq lnd  
lyndrnqndmi ryalnnp  
flsptrrdklekmyntlk  
>tr|D9RCK0|D9RCK0\_STAAJ  
mivevehqrqgvdlidikndetkii ftnygarvsvskyhdnivilgnvveadefyh snpfkfgasigrysgri dnakfk l  
kgkeyqleknngehhlgg  
chgl dnlfdyeirneiaqikvifktvlksaddhfpgdidvtithiydadhqwsieyeavaseditfsptnhvyfnlnrd  
nnvvdnhri ssngldmyvl  
dernivtgdvdlhev fednkiklsdi ftsqhaqlsqmtrfggl dhpftvgehkmymvenhefmlevdt dmphvvfftn  
qp dewdspfn iykphsgft  
letqflpndinlygekapsilkagevfnsksfr ieekevnd  
>tr|D9RCK1|D9RCK1\_STAAJ  
mlypififilag lceigggyliwlwl regqsslvg liggvilmlgyviatfqs fpsfgrvyaayggvf iimsli famvvd  
kqmpdkydvigaiicivg  
lvmllpsra  
>tr|D9RCK2|D9RCK2\_STAAJ  
mhkfwatftl tyikkikaksfvim iiaalmiglsnidkiinmfddgpdki gvaapneqiykvfkqqantfhsdakftk  
vsiedaekevkkhnl dkay  
iikvqnrtlggtiisekrvshedsqkvqalltaiqtnmvagelninkedlqlkaqskvdknvisndevdkvsegqki f  
nyalaygiifmffivlny  
asqjamejasektsrvie miitsispiqhi fakilgviavavtqiilivilmavici fafdldkdl lqgfnvemnqlswqii  
ivgiissivgimaylfaa  
ilgsltsriedlnqslmpmtllgmiafyiaiftinnpdgqlalitsyipflapflvvraqtsglqihevilsslisivm  
vavliwiaiktykesvltf  
erglfnsmkrvfkk  
>tr|D9RCK3|D9RCK3\_STAAJ  
mglviehvtrfkgmtavndmslelesgkmlgflgrngagktttfrmilglsepteghityngkkl dktmynrigylpee  
rglhgkl tveeelkylatl  
kqmskteiqqqisywlerfditenrkkridslskgnqqkiql lasmlhkpellildepfsgldpvnevllkeavkdln dw  
gstivysshmehveelcd  
dvcildkqqlvvs gdinhrasngnk kvviesetsl pdlthirgi ihsenmkqglq ltienedvakdiyqv vahqgyvkr  
fqvvepslqdi fiekvggk  
da  
>tr|D9RCK4|D9RCK4\_STAAJ  
meqlhqvgfmksfv lfwknyvnftgrsrseywmm lwhlilmvpavcvliis lflffisiaadnetlivmsilmiilts  
vytfvyslatfipnlalcv  
rrfhdisrtml fpmimtafsiifyivlqiidsyydsdftlmpmglnillvlyfyvlygtivmivflcfdskpanyges  
pkypssiknqpv tseapek  
tgtsetpktpeetdnql  
>tr|D9RCK7|D9RCK7\_STAAJ  
myknymtqltlpietsvripqndisryvneivetipdsefdefrhrgatsyhpkmmlkiilyaytqsvfsgriekll  
hdsirmmwlaqngtpsykt  
inrfrvnpntdali eslfiqfhsqclkn liddnsifidgtkveananrytfvkk siqnhesklnenska lyrdlveek  
iipeikedgdsdl tieeid  
ligshldkeiedlnhsiqnedctqir kqtrkrkteikkfkkkfddyserkskyeeqksilkdncfsktdhaatfmmke  
dhmkngqlkpgynlqi atn  
sqfvlsydlfnqntdtrtlipfltmiantfgy lpeyivadagygseqnymai iddfnktplitygmfikdktrkfk sdif

Tsompanidou\_et\_al\_Supplemental\_FASTA\_File

ntqwnkydelndeficpnn  
krigfkryayrndrygfkrdfklyeyddcsacs1rqqcmkpnsksnkkimknyweyfkaqinqklsepetkkiysqrki  
dvepvfgfmkailgftrms  
vrginkvkrelgfvlnalnirkivarravyqihlkkadfyqiinrnqlfyia  
>tr|D9RCK8|D9RCK8\_STAAJ  
msdfqreqrknehveiamaqsdamhsdfdkmrfvhsipsinvndidltsqtpdlmmapvyinamtggsewtkninel  
avvaretglamavgsthaa  
lnrprmaetftiarkmnpemgifsngadvpekaleave1leaqlqihvnspqelvmpegnrefvtwldniasivsr  
svpviikevfgmskelmh  
dlqqigvkvvdvsgkggtfnvdienerankdmdylsswgqstvesllettayqseisvfasgglrtpldaikslalgak  
atgmsrpflnqvenngiah  
tvayvesfiehmsimtmldakniddltqkqivfspeilswieqrslnihrg  
>tr|D9RCK9|D9RCK9\_STAAJ  
malti ryqttyepfkvddikeipkdativwydfdepneqenewfkahfnfndlevddaingmprakyksykydyqylvfh  
simgsnyspialnifiqdn  
vlvtyhhqtleslnrvvykymnaldae1dcadvvilidmvmvdkyfnfvya1edsvyhfedrhvddrfnmvmdnfvklr  
sdlikvkrvlfpmqelidt  
mkqngdliidnkhslyiqhiddhlikqrniirtaqemtneirenfesytsfrmsimqvltlsvvifsp1tftiagi ygm  
fvnmpalhlhygyi1lav  
mfviavvliiifrrkkwf  
>tr|D9RCL0|D9RCL0\_STAAJ  
mviikqlfthtqtvtsefidhnnhmdanyniifsdvnrfrnshgls1kerenlayt1ftlehttylselslgdvftv  
tlyidydykr1hlfl1t1t  
kedgtlastnevmmginqhtrrsdafpesfstqianyyknqptitwpeqlghkiaipykgalk  
>tr|D9RCL1|D9RCL1\_STAAJ  
matekdindlflnhvnsnavktrkmmgeyiydygvvigglydnrl1vkatsarhqfdntlvssyggakemilipdit  
eatn1tn1feci1knd1kk  
>tr|D9RCL2|D9RCL2\_STAAJ  
mtdl1kiknfr1fflaei1safgvgistvganwylidktnds1lgim1alnvlsgflaspiggladkynrrniility  
11qvily1livialvmigf  
etyl1vigfai1vngigwttymatsrs1vkqil1kpdqytdans1leis1qtgmfiagg1sgilyeingftliamtimmfli  
si1m1fr1hvd1kpthsee  
stns11qey11gw1k1kdn1mmi1figvisi1pmvftmi1fnis1lpgyvyn1vk1ssv1qfgfsd1mlygigg1cag1is1ails  
kk1stkv1li1fl1y1fil1vin  
sa1fi1wins1af1yl1figs1fil1gys1siri1ymntaimntvsdkyvgrsfti1wts1s111qsfi1ap1flgr1wine1indk1fgfy  
i1il1s1li1fv1t111vnkt  
dkikyahkee  
>tr|D9RCL3|D9RCL3\_STAAJ  
mitclfgssrkdgnsaiaven1lkn1nvnfnvlyqsniekvtdnrhskganfhdndyeqilikvlesdiiifstplywys  
msas1klfidrwtelr1rdt  
qidn1fke1msqkky1li1i1ggdn1phtkaqpl1vnq1k1lifem1itnyr1fligegnkpydi1nds1qfikelan1n1alkkg  
diy1d  
>tr|D9RCL6|D9RCL6\_STAAJ  
mkqsvnfksktn1laan1lytpeqfdeskkypaitvchpgggvkeqtagmyaek1aefgyvtvvydashqgesegspryle  
dpfartedvrasvdy1tt1  
dfvndndri1gal1gvcagggytvsaa1rterrika1atvsmvdigal1frkgpgdvvsiddq1afmtqvadqrtaeangadygi  
tgyvpeei1ddsmpenstm1v  
qghdy1ytargqhknapk111rsfsevt1tfapftyide11tqpflaiagteadtieysvdavekaagdnnelykiegas  
hd1ydi1peyv1nqv1pk1le  
sfyket1  
>tr|D9RCL8|D9RCL8\_STAAJ  
mqnrndfiel1dra1ikegmr1v1digcatgevtq1iakrvgevevgvdvnes11kianennqynnvsyqysdiyq1p  
etmgyfdaivgrrv1my1p  
daekclq1ilks1il1kpegi1cfqesda1ntgvgada1pl1hqsatqwiwetvkqeggnihigqnl1yn1fnkngmhvvdyfae  
aviqtsmdnd1aw1vdvm1  
prmkahgvinddfs1defk1n1leheamnnqcafi1rdmafgi1gka  
>tr|D9RCL9|D9RCL9\_STAAJ  
mkkfnwi1na1sgs1tdkngttee1kgakfi1lyaysm1vl1alvisnifihilepk1sitteiiiv1lilies1lig1rf  
1keydvkr1gk1denk1knsk  
dfvk1ks1ilvai1lfts1al1tagtvadiygitd1gntrsd1livsiggi1fg1lvcytmedkk  
>tr|D9RCM0|D9RCM0\_STAAJ  
mkkcikt1flsvi1lvms1glyhsahasds1skspenwmsk1deskh1te1nmpgshds1gsft1tdpvksvwaktqdkdy1  
tqmks1gvr1ffdi1rgras1d  
nm1sv1hg1mv1yl1hhe1lgk1fl1ddakyy1saypnetivms1mkk1dyds1skv1tkt1fee1freyyynnpqyqnl1fy1tgs1nanpt  
1ketk1gki1vl1fn1rmg1tyi  
ks1gy1gad1ts1gi1wad1nat1fet1kin1ngn1n1lqv1qdey1kdy1dkk1veavk1n1lak1aktdsn1kdn1vyv1n1flsv1as1ggs1afnst  
ny1ash1n1pei1akt1kang  
kartgw1livdy1agyp1wpgy1ddiv1sei1idsnk

Tsompanidou\_et\_al\_Supplemental\_FASTA\_File

>tr|D9RCM1|D9RCM1\_STAAJ  
mmkrlnklvlgiiflllvisitagcgigkeavkksfektlsmpiknledlydkegyrddqfdkndkgtwiinsqmaiq  
nkgealkikgmllkinrnt  
rsakgfyytneiktekyevaqdngkypvkmi dnkfpaeevkdekikteiqnfkffaqs nfkdlmnykdgdisynepv  
psysakyqltnddynvkql  
rkrydiptnkakpfi lkgtdlgkssvgykkieftfveneneni yftdslyfepsedk  
>tr|D9RCM2|D9RCM2\_STAAJ  
mtkkeykidpgkiksneetsaiasisyeienandnglnkariteqvtylnqdkfpkndyiesytdpstgttatafln  
kdtgkvtvsmagtnfhgdq  
ikkvalssmspllfppskqdmkdvrgtmkdgaadlaigvglvnykgkhfantqqfienlqkkyeidvtvghslggrdaif  
lglyrnyknvaynpaple  
vksirnkllggqlfrnttfpdeky lkelmdnydgditkvitqkdgl dylvkhtdhltcgdvlrinngqghamenflgekeq  
reieelmlvkgyrdandk  
afkalkntekklgkideiskllqtnggv lsssqqkll etlvafsvaegl skmvdqelqq lknmfnlmdkfeanwkda  
qasdivgkhl sypekvsal  
lndggvnesk latephneikeklnkitd lskkynsy lqieksineivakdqqlagqigdl i  
>tr|D9RCM3|D9RCM3\_STAAJ  
mfeeykiddlenayeielkriereiqlsdlkyhlreneqsydafl ylnknmyseesnakvrrlveefdyeadsyir  
qkelkledykeeirreyiq  
qsekimeak  
>tr|D9RCM4|D9RCM4\_STAAJ  
mgipdp lsnpsnpllgdswmvgd lkkrqekelittviap ehdekhrenkskmmksekqlinq lnhghtfksdfknvak  
gdwvnmkamqdlklgne l k  
kimn  
>tr|D9RCM5|D9RCM5\_STAAJ  
mnqqlieal skedkmierrylhqpel sfhedetakyiaefykgkdevetnvgprgikv tidsgkpgktlairadfd  
alpitedtg lsfasqngv  
mhacghdahtaymlvl aetlaemkdsftgkvvvi hqpaeevppggakami engvldgdvhlgvhvmstmkgtkvyyrpg  
yvqtgraffklkvqgkgh  
gssphmandai vagsyfvta lqtvsrrl spfetgvvtigsfdgkqfnvikdvveiegdvrgltdatkatiekeikrls  
kglealygvttctleynddy  
palyndpfteyvaktlkead l efgveicep ppsedfayyakerpsafiytgaavedgeiyphhpkfniseksllisa  
eavgtvvl dylkgdn  
>tr|D9RCM6|D9RCM6\_STAAJ  
mnetyrngnkllilgivilg vitfwlfaqs lvnvvpnlqqsfgadmgtisiavsltal fsgmfvvgaggladkigrvkmtni  
glllssiigsal iitnlpa  
llilgriiqgvsaacimpst laimktyyegaerqral sywsgswggsgics lfggavattmgwrwififsiivav lsm l  
likgtpetksevtnthkfd  
vaglivlvvmlsl nvvitkgaalgyts l wffglia vvvvaffifl kvekkvdnplidfk lfenkpytgatisnflngv  
agtlivantfvqqglgyta  
lqagylsitylimvlmi rvgekllqkmgskrpm l lgtfviigialis l vflpgifyviscvvgylcfglglgiyatps  
tdta isnap ldkvgvasgi  
ykmasslggafgva isgavyagavaatsihtgamialwvnlmgiafia ilfaipnddkrakdak  
>tr|D9RCM7|D9RCM7\_STAAJ  
mkkilltgasyigshlme k lkenhdia isrnidnkknernvtwksad lfdlaeindvmegidtaiylvhsmmpsaklt  
qasfedmdai l adnfakaa  
rqngvkhi vmsglipnddqlsph lrsrlecerilgsygvpttl ragliigskgssypilktlver l palvlpkwaynq  
tvpvaiddivqgl ykvvsr  
spkvneaidigglhmtykdlfkqtaev ldkrlpmid lpiipiwl skfwklisgvpkemvyp l mdslihnmtrdqkriv  
egisigmdykesvqale  
eastskkkqtstiktvdkdvraisrvvlpkhmnmsalaeiyanflnkitlnivnsnfdeea fiislplllkelllllekd t  
qtsdedrvsykiiggd fal  
ahnggnar l efr l pnsdscialqeyept l pwwvykytqakvhksvmlfkfnlymkrhnqklssvtkqglivgav l ga  
livksyksrny  
>tr|D9RCM8|D9RCM8\_STAAJ  
mtfkrllktivkvvtpllggrligkyavqnarkdykdnakpl spgyifpi vwsilyttigiayaiisgksnnakvkti  
yyaqlslnylwsilyfkfk  
lrfaaliesfilltavimmtvkffkvkriagi ilipym l wstfasyltvgnwllnkdnp r yteqk  
>tr|D9RCN0|D9RCN0\_STAAJ  
myysygnyeafarpkpenvenksayligsglas laaacflirdgqmegskihileelpkaggsldgeniplkgyvvrgg  
remenhfec lwdlfrsips  
leidnasvldefywl nkedpnysrcrviekqqr l vtdgdft ltkkaikeildlcltneed lddvkitdvfsdfffnsnf  
wiywktmfafepwhsamem  
rrylmr fvh higg l adfsal kftkynqyes l v l pmvey l kshgvqfeydvkvedikvdvttsqiare ilhrhgkaesi  
kltvddl vfvtngsitess  
rygdntpapptnelggswtlwknlarqspefgnpdkfcqnipekswfsatsttnkeiidtiesickrdplagktvtg  
giitindsawqmsftinrq  
qqfkdpeneistwiyaly sdvngdyikkpitecsgneicqewlyhlgvstdkiedlakhasntipvmpyitsyf mtra

Tsompanidou\_et\_al\_Supplemental\_FASTA\_File

igdrplvvphgsqnlafig  
nfaeterdvtftteysvrtameavyqllnidrgvpevinspfdlrvlmdavyelndhqdlreitkdskmqklaalsgfllk  
vkgtiyetllkehkl  
>tr|D9RCN1|D9RCN1\_STAAJ  
mskirsftilslliyammcytmnysklptkvpihynlagdadnfadkwlllingafiviwliffiagryyerfakws  
hynhtpreiqtiklflstl  
nleimsyisifmleiwqiqhnhqlnllwfnmifiiiigltlvi fcllptihkmrdsq  
>tr|D9RCN3|D9RCN3\_STAAJ  
mkkknisyirklgvgiasvtlgtllisggvtpaanaaqhdeaqqnafyqvlmpnl nadqrngfiqs lkddpsqsanvlg  
eaqklnsdgapkadaqqnn  
fnkdqqsafyeilnmpnlneqrngfiqs lkddpsqstnvlgeakklnesqapkadnnfnkeqqnafyeilnmpnlnee  
rngfiqs lkddpsqsanll  
seaklnesqapkadnkfnkeqqnafyeilnlpnlneeqrngfiqs lkddpsqsanllaeakln daqapkadnkfnkeq  
qnafyeilnlpnlteegr  
gfiqs lkddpsvskeilaekln daqapkeednnkpgkedgnkpgkedgnkpgkedgnkpgkedgnkpgkedgnkpgke  
dgnkpgkedgnkpgkedgn  
gvhvvpqgdvndiakangttadkiaadnk ladknmikpgqe lvdkkqpanhadankaqa lpetgeenpfigttvfggl  
slalgaallagrrrel  
>tr|D9RCN4|D9RCN4\_STAAJ  
mkynnhdkirdfiiieaymfrfkkkvkpevdmtikefilltylfhqentlpfkki vsdlycqsdlvqhiklvkhsyi  
skvrskiderntyisisee  
grekiaervtlfdhikqfnladqsesqmipkdskeflnmmymyfkniikkhltsfveftilaiitsqnknivllkd  
lieti h h kypqtvrallnll  
kkqgylikerstederkilihmdaqqdhaeqllaqvnqlladkdhlllvfe  
>tr|D9RCN5|D9RCN5\_STAAJ  
mtekin kkdnyhli faliflaivsvsmmigssfiplqrvlmyfinpndsidqftlevlrlpritlailagaalmsglm  
lqvnlnpiaspdiigitg  
gaslsavvfi affshltihllplfavlggavammillvfqtkgqirpttliigismqtlfialvqglittkqlsaaka  
ytwlvgslygatfkdtiil  
gmvilavvp llflvipkmsi lddpvaiglglvhqrmlqliqitstvlvsmails vgnigfvgliaphiaktivrgsya  
kklmsamigaisiviadl  
igrtlflpkevpagvfiaafgapffiyllltvkkll  
>tr|D9RCN6|D9RCN6\_STAAJ  
mllkpkvqiviaglc laivails lmigntlvspgtvialfnfdsendlhdvvtgarasrtiaalltgaalavsgllmqa  
ltnpiaspplfgvnagav  
ffvifsitfiqisfkmivviaflgai vvtlvvalgmfrqtlfsphrvilagaaiam lftaftqgilimnetdlqglf  
wlgsvslrniwdipwip  
lvllililifafmaahinilmtsd diatglgniklikwmiimlismlagisvavagsivfvglivpniskrllppnykyl  
ipftaltgailmiisdiva  
riiikplelpigvvtavigaivliyimkkgrqrll  
>tr|D9RCP0|D9RCP0\_STAAJ  
mqnhtavntaqtii lrdlvda ll fediacivsnseitkengqtiliykretqqikipvyfsalnmfryessqpitier  
rt  
skqpltaefwqtianmnc  
dlshewearveeglltaatqlakqlsel d l ashpfvmseqfas lkdrpfhplakekrglreadyqvyqaelnqsfp  
lmv  
aavkkt h mihgdtanidel  
enltapikrqatdm lhdkglsid dyvlfpvhpwqyqhilpnvfakeiseklvllplkfgdylssssmrs lidisap  
ynh  
vkvpfamqslgalrltpt  
ymkngeqaeqllrq liekde alakyvmvcdetawwsymgqndi fkdqlghltvqlrkyevlakndtqq lvsma  
alaan  
drtlyqmicgkdniskndv  
mtl fediarvflkvtsfmqygalpelhgqnilsfedgrvqkcvlrdhdtvriykpwl tahqsls l pkyv  
vredtpntli  
nedletffayqtlavsvn  
lyaiidaiqdlfgvsehelmsllkqil knevat iswvtt dqlavrhilfdkqtwpfkqillp llyqrdsgggs  
mpsgllt  
vnpnmvtyd  
>tr|D9RCP1|D9RCP1\_STAAJ  
minqsiwrsnfri l wlsqfiaia gltvlp l l piymas l qn l svveiq l wsgiaia apavttmiaspiw  
gklgdki srkw  
mvlrallglavclflmawc  
ttpqlqv lvrllqglfggvvdassafasaepaedrgkvlgrlqssvsagslvgpliggvtasilgfsallmsi  
avitfi  
vcifgal k lietthmpksq  
tpninkgrrsfqcllctqqtcrfiivgvlanfamym l talspl assvnhtaidrsvigflqsafwtasil  
saplwgr  
fndksyvksvyifatiacg  
csailqglatnieflmaarilqgl tysal i qsvmfvvvnachqqlkgtfvgttnsm l vigqi igslsga  
aitsyttpatt  
fivmgivfavsslflicst  
itnqindhtl mklwelkqksak  
>tr|D9RCP2|D9RCP2\_STAAJ  
mqnkeliqhaayaai erilneyfreenlyqvpqhqwsiqlsel etltgefrywsamghmyhpevwlidgk  
skkitty  
keaiarilqhmagsadnqht  
avqghmagimsdidsnrtarylqsn tidyaedryivseqslylg hpfhptksasgfseadl ekya  
pechtsfq lhyll  
avhqdvlltryvegkedqv

Tsompanidou\_et\_al\_Supplemental\_FASTA\_File

ekvlyqladidiseipkdfllpihpyqinlraqppmqyseqglikdlgvsgdsvyptssvrtvfskalniylklpih  
vkitnfi rtdleqierti  
daaqviasvkdevetphfklmfeegyralpnp l gqtvepemdlltnsamivregipnyhadkdi hvlaslfetmpdspt  
sklsqviegsglaaeawle  
cyl d r t l l p i l k l f s n t g i s l e a h v q n t l i e l k d g i p e v c y v r d l e g i c l s r t i a t e k q l v p n v v a a s s p v v y a h d e a w h  
r l k y y v v n h l g h l v s t i g  
katrnevvlwklvahrlmtwkkeyannavfvacvedlyqkptiaakanlmsklndcganpiythipnpihnkevsyces  
nns

>tr|D9RCP3|D9RCP3\_STAAJ

mnqtjlnrvktrvmhqlvssliyeniviyktsyqdgvgfhftiegqdeyrftaekthsfdrirtsperiervvgdeadttt  
dytqllrevvftfpkndek  
leqfivellqtelkdtqsmqyresnppatpetfndyefyameghqyhsyksrlgftlsdnlkfgpdfvpnvklqlwlaid  
kdklettvsrnvvnemlr  
qqvgdktyehfvqqieasghvndvemipvhpwqfehviqvdlaerlngtv l w l g e s d e l y h p q q s i r t m s p i d t t k y y  
lkvpisitntstkrvlaph  
tienaai q t d w l k q i q q d t y l k d e l k t a f l g e v l g q s y l n t q l s p y k q t q v y a l g v i w r e n i y h m l i d e e d a i p f n a l  
yasdkdgvpfienwikqyg  
seawtkqflavairpmihmlyyhgiafeshaqnmmlhengwptrialkdfhdgvrfrkrehlseaashltlkpmpeahkk  
vnsnsfi etdderlvrdfl  
hdafffiniaeiilfiekqydideklqwkwkgiieayqea f e l n n y k h f d l f e p t i q v e k l t t r l l s d e l r i h h v t  
nplgvvgitdattiset

>tr|D9RCP4|D9RCP4\_STAAJ

mqqlslkhrlnngdsvygifsnsipdplmieviaasgydfvvidtehva indetlahliraeeahiipivrvtavidrdi  
ikvl dm g a r g i i v p h v k d h  
etvehivkl s r y p p q l r s l n g g r m a r f g r t p l l d a m e m a n e h i m v i a m i e d v e g v m a i d d i a q v e g l d m i v e g a a d l s q  
slgipwqtrddqv tshvqh  
ifevvnahgkhfcalpredediakwqaqgvqtflgddrgkiyrhlsas latskqkgded

>tr|D9RCP5|D9RCP5\_STAAJ

mri v q p v i e q l k a q s h p v c h y i y d l v g l e h h l q h i t s s l p s n c m y y a m k a n s e r t i l d t i s q y v e g f e v a s q g e i a k g l  
afkptnhii fggpgktdee  
lryavsegvgrihvesmhelqrlnailededktqhllrvnlagpfpnatlhmagrptqfgisedevdevieaalampki  
hldgfhfhsisnlnsnlh  
vdvkllyfkkakawsekyrfplkhinlgggigvnyadltsqfewdnfvenfktliveqemedvtlnfecgrfivahigyy  
vtevl d i k k v h d a w y a i l r  
ggtqqfrl p v s w q h n h p f e i y r y k d n p y s f e k v s i s r q d t t l v g q l c t p k d v f a r e v q i d a i s t g d v i v f k y a g a y g w s i  
shhdf lshphpefiyltqt  
kede

>tr|D9RCP7|D9RCP7\_STAAJ

mnmnl i i g k i a i w i g i v v q i f y s v v i s i t t f i l f i n a k g a s p e i a v l i a l v i i l i l t l p p i l t a i n l e n k m e v k g t l f i  
vyai v a f c m f n y l s s i l w v  
vcgfl i w t k y s k g e s t d d e n e k v d i e s t e n q f d s k d k i t k e

>tr|D9RCP8|D9RCP8\_STAAJ

mrknie l i l i w m g i y i q i a y m a i i a l l i y i f t l f f g s f f g f l f l l t g n e i g d l l k t p t s f m i f a t c l i i f s v l p v t v l a f  
d l s k r r i l k g i i l v y a i i  
aallnfvsa ilwfi va is l f i r k k s l s a e n t v a v q s h k g a s k q e i r y k l v y k s v s i k h s d d s i k v a h t v g n k k l i d d k t  
idihldsseilkkistdan  
qashkdtckke ldsqdmehpefknp t t k n l e g l n e e i h k d e a t t k v d s d n t e p p i e s k d h v s k k d

>tr|D9RCQ2|D9RCQ2\_STAAJ

mki i y c i t k a d n g g a q t h i q l a n h f c v h d v y v i v g n h g p m i e q l d a r v n v i i e h l v g p i d f k q d i l a v k v l a q l f s k  
ikp d v i h l h s s k a g t v g r i  
akfiskskdtrvvftahgwaftegvkpakkflylviek l m s r i t d s i i c v s d f d k q l a l k y r f n r l k l t t i h n g i a d v p a  
vkqtlksqshnnigevvgm  
l p n k q d l q i n a p t k h q f v m i a r f a y p k l p q n l i a a e i l k l h n s n h a h f t f i g d g p t l n d c q q v v q a g l e n d v t f l g n v  
inashllsqydtfiliskh  
eglpisiieamatglpviashvggise l v t d n g i c m m n n q p e t i a k v l e k y l i d s d y i k m s n q s r k r y l e c f t e e k m i k e  
vedvngkstq

>tr|D9RCQ3|D9RCQ3\_STAAJ

menghnsklltlll iglavfiqqssviagvnvsiadfitllilvyllffanhllkanhflqffiilytyrmiitlcllff  
ddlifitvkevlaskvya  
fvviyfy l g m i i f k l g n s k k v i v t s y i i s s v t i g l f c i i a g l n k s p l l m k l l y f d e i r s k g l m n d p n y f a m t q i i t l v l a  
kyvhnyvfkviacgillw  
sltttgsktafiilivlaiyffikk l f s r n a v s v s m l v i m l i l l c f t f y n i n y l f q l s d l d g l p s l d r m a s i f e e g f a  
slndsgsersvwinaijsv  
ikyt l g f g v g l v d y v h i g s q i n g i l l v a h n t y l q i f a e w g i l f g a l f i i f m l y l l f e l f r f n i s g k n v t a i v m l t m l i y  
fltvsnnsryvafilgii  
vfivqyekmerdrnee

>tr|D9RCQ4|D9RCQ4\_STAAJ

mksdskleni i y q g l y q l i r t m t p l i t i p i s r a f g p s g v g i v s f s f n i v q y f l m i a s v g v q l y f n r v i a k s v n d k r q l s

Tsompanidou\_et\_al\_Supplemental\_FASTA\_File

qqfwdifvsklllsltvfa  
myiavitifidyyliifllggyiigaaldiswfyagtekfkipslnivasvivilsvvifvkdqsdlslyvftiaivt  
vlnqplfiylykryisfis  
vnwihvwqlfrsslayllpngqlnlytsiscvvlglvgtyqqvgifsnafniltvaiimintfdlvmipritkmsiqksh  
sltktlannmqililtvp  
mvfgliaimpsfylwffgeefastvplmtilailvliiplnmlisrqyllivnkirlynasitigavmnlvlclvliyfy  
giygaaiarlitefflliw  
rfiditkinvklnivstiqcviaavmmfivlgvvnhyllpptyatllliaigivvyllmmtmknqyvqilrhlrhkti  
>tr|D9RCQ6|D9RCQ6\_STAAJ  
mkklatvgslivtstfvfssmpfqnahadttsmnvsnkqsqnvqnrhpyggvvpqgmtqaqytelekalpqlsagsnmqd  
ynmkydatqniadkynvi  
ittnvgvfkphavrdmnghalpltkdgnfyqtnvdangvnhggsemvqntghmsqqghmnqnthmnqqphmqgghmqss  
nhqmmspanmhssnhqmn  
qsnkkvlpagesmtssiltasiaallvsglflafrrrstnk  
>tr|D9RCQ9|D9RCQ9\_STAAJ  
mnveysikkavpillefivfslvidnsfkisvaiaddlnisvttvswqatlaglvigigavvyaslsdaisirtlfy  
gviliiigsiiigyifqhgf  
alllvgriiqtaglaaaetlyviyvakylskedqktylgstssyslslvigtlsggfistylhwtnmfliailivvftlp  
flfklpkennnkahldf  
vglilvatiattvmlfitnfnwlymigaliaiivfalyiknaqrplvnksffqnkryasflfivfvmyaiqlgyiftfpf  
imeqiyhlqldttslllv  
gyivavivgalsgkigeylnskqaiitailialslilpafavgnhisifvismiffagsfalmyapllneaiktidfnm  
tgvaigfynliinvavsvg  
iaiaaalidfkalinfpndalsshfgiiliilglmsivglvlfvilnrwtqsek  
>tr|D9RCR0|D9RCR0\_STAAJ  
mkfkyidhtllkpestrtidqiideakaynfksvcvnpthvkyaaerladsevlvctvigfplgasttatkafededa  
ihngadeidmvinigalkd  
grfddvqqdieavvkaakghtkvviietvllnhdeivkaseltkaagadfvktstgffaggataedvklmktv gadvev  
kasggvrnledfnkmveag  
atrigasagvqimqgleadsdy  
>tr|D9RCR2|D9RCR2\_STAAJ  
mtqeiakynvhtkahkrklikrwlaiavvlaiiifafagvpslelksksleilksifsglfhpdisyiyipdgedllrgl  
letfaiavvgtfiaaiici  
plafngannmvklrpvsgvskfilsvirvfpeivmalifikavggpsfsgvialgihsvgmglkllaedi egldfsaves  
lkasgankiktlfavipq  
iipafllslilyrfelnlrsasilgligaggigtplifaiqtrswdrvgiiliglvmvaivdlisgsirkriv  
>tr|D9RCR4|D9RCR4\_STAAJ  
msqiefknvskvypnghvglninlniekgeftvivglsgagkstllrsvnrldhitsgeifiqgksitkahgkallemr  
rnigmi fqhfnlvkrssvl  
rnvlsgrvgyhptwkmvlgfpkedkikamdalervnildkynqrsdelsggqqqrisiaraalcqeseiiladepvasld  
plttkqvmddlrkinqelg  
itilnlnhfvdlakeygtrieglrdgevydgpaseatddvfseiygrtikedeklgvn  
>tr|D9RCR5|D9RCR5\_STAAJ  
mkkfkclfvmlavivfaaacgnssldnqknasndsksksggykpkeltvqfvpsqmagtleakakplekllskelgip  
vkvsstnyntiveamksk  
kvdvfglppatylahdqkaadlllqaqrfgvkedgsaskelvdsykseilvkkdskiksldkldgkklialqdvststagy  
tflamlkneaginatkdm  
kivnvkghdqavisllngdvdaavfndarntvkkdqpnvfkdrilkltaqipndtisvrpdmkdfqeklkafvdia  
kskeghkiisevshgyt  
etkdsnfdivreyeklvkdmk  
>tr|D9RCR6|D9RCR6\_STAAJ  
mkkikyksltvsaiivatvslsvlpqslaitesqptkqqrvtlfdrrshgqtagaadwvsdgafsdysadiqkqgydvkaid  
ghsniteaslksskifvfp  
eanipfkeseqaaivnyvkqgnvvi sdhynadrnl nridsseamngyrrgayedmskgmnaeeksstamqgvkssdw  
stnfgvrfrynalgdlnts  
nivsskesfgitegvksvsmhagstlai tnpkakgivytpel pakskwshavdqgiyngggkaafigdsslvedsspk  
yvredngekktydgfkeq  
dngkllnntawmskdndgkslkasgltdtkkll dferperstepekepwsqppsgykwydpttfkagsygsekgap  
qpntpdhtppnqnekvsf  
dipqnvsvnepfevtihlkgfeanqlenlrvgiykeggrqigqfsskdndynppgystlptvkadengnatikvnakvl  
esmegskirklgdktlit  
tdfk  
>tr|D9RCR7|D9RCR7\_STAAJ  
msniafyvsvdhgyifpdtfts rnqyqpmglllanhvieqdrkqydsfkidngdflqgsafcnlyliahsgssqplvdf  
ynrmafdfgtlgnhefnvg  
lqylkdtlrrlnypvlcaniyendstldngvqyfvgdqvtvgvigl ttqfiphweqpehiqsltfhsafdtlqqhlpem  
krhadii vvcyhggfekdl  
esgtptevltgenegyamleafskeidifitghqhrqiaerfkqtaviqqgtrgttvkvvlstdeyenvsvescellpv

Tsompanidou\_et\_al\_Supplemental\_FASTA\_File

iddptftideddqhirkq1  
edwldyeittlpydmtinhafearvaphpftnfmnyalleksgadvactalfdsasgfkqvvtmrdvinnypfntfkvl  
avsgaklkeaiersaeyfd  
vkndevsvsadlepkpghfnydiygglsytihvgrpkqrvsdmmiqghavdlkqytyicvnyravgggqydmidap  
vvkdiqvegaqllidflsn  
nmlmripqvvdvfkvek  
>tr|D9RCR8|D9RCR8\_STAAJ  
mfigknl eyvrkl nalsrkelsekivseqaiwqyetknmmpeiskiydmtsifnvkssyfiseqpeellinsvdkhsia  
fraknykvstkl1nkqyyq  
amylsnltsylfsfvkipdnii slinnlndllngnleslnkkesiketakovrakilqdesneallfmlekagiviyek  
rindsidaysfwskdqtpf  
iilgtknkgavrrnfdlahelghlvhrhiqfdllspeeyktieheadifasefllpeea fkkdfdqmtkksnpdylav  
kekwyvsiqaiamrayylg  
lmsstqyryfwaslnkkgykskepddviemsrpvkmnsllklyfdrniltpqkllnylkvdetflnhlaginlklfkdy  
vnenreynitnlyk  
>tr|D9RCR9|D9RCR9\_STAAJ  
mltipekenrgskeqevaimidaladkkgkalealskksqeeidhivhqmslaavdqhmvlaklaheetgrgiyedkaik  
nlyaseyiwnsikdnktvg  
iigedkekglytaepigvicgvtpttntsttifikamiaiktgnpii fafhpsaqesskraaevvleaamkagapkdi  
qwievpsieatkqlmnhkg  
ialvlatggsgmvsaystgkpalvgpgnvpseyiektahikravndiigsktfdngmicaseqvvidkeiykdvtnef  
kahqayfvkkdelqr lena  
imneqktgikpdvigsaveiaelagipvpentkliiaeisgvgsdyp lsreklspvalvkaqstkqafqicedtlhfg  
glghtavihtedetlqkdf  
glrmkacrvlvntpsavggigdmynelipsltlgcgsygrnsishvsatdlnikaiakrrntqifkvpaiyfeena  
imslttmdkiekvmi vcdp  
gmvefgytktvnvlrqrteqpqiki fsevepnpstntvykglemmvd fqpdtialgggsamdaakamwmffehpetsf  
fgakqkfldigkrtykigm  
pekatficipstsgtgvsevtpfavitdsetnvkyp l adfaltpdvaiidp qfvmsvpksvtadtgmdvlthamesyvsvm  
asdytrglslqaikltfey  
lkssvekgdksrek mhnastlagmafanaflgiahsiahkiggeygi phgranailphiirynakdpqkhalfpkyef  
fradtdyadialkflglkgn  
ttealveslakavyelgqsvgiemnlksqgvseeelnesidrmaelafedqcttanpkealiseikdiqtsydykq  
>tr|D9RCS0|D9RCS0\_STAAJ  
mestletkikevlqknkiliilplllfiisaivtffvlspkyqantqilvnqtkgdnpqfma qevqsniaqlvntykei  
vksprildevsklddkys  
psklssmltintgentqiniqvksghkqdseki ansfakvtskqipkimsvdnvsilskadgtavkvapktvvnligaf  
flglvialiyiffkvi fdk  
rikdeedvekelglpvlgsiqkfn  
>tr|D9RCS3|D9RCS3\_STAAJ  
mahlsvk1rl1lialidslivtfsvfvsyylepyfktysvkl1lilaaislfishhisafifnmyhraweyasvselili  
vkavttsivitmvvvtivt  
gnrpfrrlylitwmmhliiggslfwriyrkylggksfnkkptlvvgagqagsmlirqlksdemklepvlavdddehk  
rnititegvkvqgiadip  
elvrkykikkiiiaiptiggerlkeinni chmdgvelkmpniedvmsgelevnqlkkvevedllgrdpvelmdmi sne  
ltnktilvtgaggsigsei  
crqvcnfyperiilghgensiylinrelrnrfgknvdivpiiadvqn rarmfeimemykpyavyhaaahkhvplmednp  
eeavrnnilgtkntaeaa k  
naevkkfvmistdkavnppnvmgaskriaemi iqs lndethrtnfvavrfgnvlgsrgsviplfksqieeggpvvtvthe  
mtryfmtipeasrlvlqag  
alaeggefvldmgepvkivdlarnliklsgkkeddiritytgirpgekmfeelmnkdevhpeqv fekiyrgkvqhmkcn  
eveaiiqdivndfskekii  
nyangkkgdnyvr  
>tr|D9RCS5|D9RCS5\_STAAJ  
mni vitgagkfgvgnlkadltsttdhhi fevhrqtkeeelesa llkadfvvhlagvnrpehdkefslgnvsyldhvl dil  
trnk kkpail lsssiqatq  
dnp ygesklqgeqllrqyaee yntvyiy rwpnlfgkwckpnynsviatfcykiarneeiqvnnrdveltlnyvddia e  
ikraiegnptiengvptvp  
nvfkvtlgeivdllykfkqsrldrtlpkldnlfekdlstylyslastdfsypllmnvddrgsftefiktpdrgqsvni  
skpgitkgnhwhhtknekf  
lvvsgkgvirfrhvn ddei eyvsgdklevvdipvgythni enlgdtmvtimwvnmfdpnqpdyfl ev  
>tr|D9RCS7|D9RCS7\_STAAJ  
mriailgatnikhmsllshylnhidlninevdi iytdkydieehiqginnykykvdikedwtfikkaiayrfrpyamk  
ilkenhydfviwgsytgh  
lfksflekyhknkfi lni rdyffennk likyrmkividar lttlssegflkflpksekyriiysynmsi iresnvt dgf  
kkwrpinigfignvr fnei  
nqklikelandsrfhmqyfgtgseklevfarenfinitfsggfdlketpkylnkidilnllfgnqnia ldtalsirmyy  
alflnkpiittddtftate

Tsompanidou\_et\_al\_Supplemental\_FASTA\_File

ankfgl gfsvnpnlkgigdelmdwynldvmdinhkreayrndviennkqfyqeigrifne  
>tr|D9RCS8|D9RCS8\_STAAJ  
mnkinyntsvyviaiImfpcImlgdkp1lflapisygvglfifsfnnpnfkfskivydvlgflrlvfipvmivffqdsti  
dnlp1ggayfnqaviymvs  
efiigs1fili1sklfkhevsvrnsftlsgssiyivfvlvicgifvafpevrknisfliiktdamgrgtevtsglnvlf  
vm1fqlalallfliiayas  
ykkikenpkiiyvv1plaigilnislivgerrsyqlytmvavltvvs1lfskhkrriniiisvgifv1almtlykelyv  
fnyssysealnstsvsnlk  
ivdtlqsyfygpsniaasidylnyngsfkqylfdntravfgfnffvdkqlitsqlfnqliygsq1tghlissagygi  
iyfgplffyl1liani ffa  
flseyiirkshslevifigtyiymrlitsifshptpl1tlismilvvyviaiipgiikkftkkvgve  
>tr|D9RCS9|D9RCS9\_STAAJ  
miivktfmskvfrl1mntpl1llykkeyltgyyfenkvagw1wawkavpfl1gints1pfpaditvrmhnpnnivfdknd  
ihifqspgtyfnfsviy  
igrvvyiapnvgiitanhnik1kshapedvki gnyswigmnsvilpgvelgehtivgagsvvtksfpegnvviggnpa  
kvikki  
>tr|D9RCT0|D9RCT0\_STAAJ  
mrlnkfigdsflmilssgiaqviliittppiitrlysp1tefgeftifsniamilipiinaryd1livntkndrsanilsqi  
sflis1l1l1lipifa1s  
awlypnfildfi1iim1flvs1tniftnyl1nkerkykvl1ninvfragsmallqiifgl1algs1gliigfslsyiagi  
t1gyktfkhhfnivrdkee  
tkal1fenkqlvystps1l1ns1sfsvvffigilytntevgiygmairvlgipvtiis1g1ski1fmqqandyiehgn  
frn1l1kfsfilv1vsi1l  
yvp1ylfseelvn1l1ghswvdaitvikiviplfvirlivstvs1sviv1kqql1el1lqal1fligttatfvism1n1t  
flnfv1sintiv1ivsy1mif  
fia1lyyfaknkqfkns  
>tr|D9RCT1|D9RCT1\_STAAJ  
msekkil1l1cqfyfpeyvssat1ptqlaed1ianhinvdvmcgpweysnhkqvsktemhrgirirrlkysrfnkskvg  
riinffs1lfskfvini1pkm  
1kydq1lvysnppi1p1lipdv1hr1lkkkysfvvydiapdnaiktgstrpgsmidk1mryinrhvyknaenviv1gtemk  
ny1lnhq1sknadnihvip  
nwydmrqlqdnriyndt1fkayreydkil1ysgnmgqlqmet1is1flk1nkdpqt1tilcghgkkfadvktai1edhri  
envk1mfef1t1gtdyadv1k  
iadvcias1ikegvg1gvpsknygy1aakp1vl1mdkqsd1ivqhv1eqydagi1qidngdahai1ynf1inthsskel1hemge  
rahq1fkdkyt1reint1mky  
yn1lk  
>tr|D9RCT3|D9RCT3\_STAAJ  
mrkn1l1itgvhgy1gnal1kdk1lieqghqvdqi1nvrnqlwksts1fkgydv1ihta1lvhnnspqar1sdymqvm1l1tkql  
aqkakaedvkqfi1fmstma  
vygkeggvgksdq1dtqtsmnp1t1nygi1skkfaeqal1qel1sds1fkvaiv1rppmiygahcpgnfqr1mq1skrl1pi1pni  
n1nqrsal1yikh1tafvdq1l  
is1lev1tgv1yhpqds1fyfdt1ssvmyei1rrkshrktv1linmss1lnkyf1nkl1svfrk1lfgn1tysnt1yennal1evipgkm  
s1viad1mdett1tkdka  
>tr|D9RCT4|D9RCT4\_STAAJ  
mk1l1tvvg1lgy1gl1pts1imfakhgvdv1lgvdin1qqt1dk1lqsgqis1ieepgl1kvyeev1lssgk1kvsttpeasdv1fivav  
ptp1nnd1qyrscd1islvmr  
a1l1ds1il1pf1lek1nti1vesti1apkt1mddf1vkpvien1l1gft1gedi1yl1vhc1perv1pgk1ile1lvhnn1ri1ggv1tkaciea  
gkrv1yrt1fvqgem1ietdar  
taemsk1lment1yrdvnia1lane1tkicnn1ninv1dviemank1hprvnia1hqpg1gvghc1lavdpy1fi1akdpenak1liq  
tgreinns1mpay1vvd1ttkq  
i1ika1sgnkvt1vfg1ltykgdvddi1respafdi1yell1nqepdi1evcay1dphvel1dfvdhdmshavkdas1vl1ilsdhsefk  
n1l1sdsh1fdk1mkhkvi1fdtk  
nvvk1ssf1edvs1yyn1ygni1fn1fidk  
>tr|D9RCT5|D9RCT5\_STAAJ  
mkkimv1ifgtr1pea1kmap1lvkeidhngn1feaniv1itaqhrd1m1dsv1sifdi1qadhd1nimqdqqt1lagitana1ak1ld  
si1ineeqp1dmi1lvhgd1ttt  
tfvgs1laafyhq1pvghveag1lrthqkysp1fpeel1nrvms1niael1nfapt1viaakn1l1fenkdkerifitgntvidals  
ttvqnd1fvsti1inkhkgk1k  
vill1tahrren1igepm1hq1fkavrd1adeykdvvfi1ypmhrnpkvraiaeky1lsgnr1rieli1ep1daiefh1nftnqsy1lv  
l1tdsggi1qeeapt1fgkp1vl  
v1lrn1hterpegveag1tsrvigt1dydnivrnvq1lieddeayq1rmsqannpygd1gqasr1riceaieyyf1gl1rsdkpdefvp  
l1rhk  
>tr|D9RCT6|D9RCT6\_STAAJ  
mfmaenr1ql1kqgsaeetierfynr1qgi1etieg1fqmfvtk1lntkdtdevki1ltiweseds1fnw1lnsdvfneahknvr  
lksdh1dgqqs1p1lnkv1fk  
ydi1gyhyqk  
>tr|D9RCT8|D9RCT8\_STAAJ  
mavnvr1dyiaenygl1fingefvkgssdetievt1npatget1shitrakdkdv1dhavevaq1eafesw1ltskseraqm1rd



Tsompanidou\_et\_al\_Supplemental\_FASTA\_File

igdklmaqkdkiamietln  
ngkpi rettaidipfaarhfyfasvieteegtvndidkdtmsivrhepigvgavvawnfpmllaawkiapaaagnti  
viqpsstplsllevakif  
qevlpkgvvniltgkgsesgnainfhgdgvdksftgstdvgyqvaaeahlvpatelelggsaniilddanldlavegi  
qlgilfnqgevcsagsrll  
vhekiydqlvprlqeaafsnikvgdpqdeatqmsqtgkdqldkiqsyidaakesdaqilagghrltengldkgfffeptl  
iavpdnhhklageeifgpv  
ltvikvkddeaidiandseyglaggvfsqnitralniakavrtgriwintynqvpegapfgykksigiretykgaIsn  
yqvkniyidtsnalkgly  
>tr|D9RCU0|D9RCU0\_STAAJ  
mdkesvvaslarnkkiavetmtgqryierilhtndekhihilpkpkdvldvdsikdidenhldnat  
>tr|D9RCU1|D9RCU1\_STAAJ  
mtlflleannldfastkeeakasslstkriptlievqatenlthgyfiveandeaekqflteagisiqlvkevrlvg  
kdldevkngdahvdylvw  
nipegitmdqylarkkksvhyeevpevefkrtyvcedmskciclynapdeeavrrarkavdtpidgiekl  
>tr|D9RCU2|D9RCU2\_STAAJ  
mikiqqqhhfgshkvihnfnleiskgeivtfigksgcgkstllniiggfihpssgrviidneikqqpspdcmlfghhn  
llpwktindnirigfqaki  
sdeenaqlklvdlegrgkhfpeqlsggmqrvalcrahvhkpnvilmdeplgaldafttryklqdqlvqlkhtestii  
vthdideaivlsdrivllg  
egcniisqyditashprsrndshllkirndimetfalnhhqvpeyyll  
>tr|D9RCU3|D9RCU3\_STAAJ  
mkrllsiiviigifitgcdwqrtskepskkpsknaqqvikigylpithsanlmmtkkllsqhnhpkyklelvkfnwp  
dlmdalnsgridgastlie  
lamkskqkgsnikavalghhegnvimgqkgmhlnefnngddyhfgiphrysthylllelrkqlkiepghfsyhemspa  
empaalsehritgysvaep  
fgalgeklgkgkklkhgddvipdayccvlvlrgelldqhkdvafvqdykksfgkmndrkqsvdimthhfkqsrdrvltq  
saawtsygdltikpsgyqe  
ittlvkqhhfnppayddfvepslykeasrs  
>tr|D9RCU4|D9RCU4\_STAAJ  
mtrltinkiiilpiitfiifligiwemviiighyqpvlpgpalvgksiwtfivtgeifqhlaislwrfvagfvallvaip  
lglflgrnrwlynaieplf  
qlirpispawapfvllwfgigslpaiaaiffpivfntikgvrdepqylkiaaannltgwslyrnifpgafkqi  
magihmavgtswiflvsg  
migaqsglglivdarnmlnledvlaaiffiglfgfii drfis yveqfilrrfge  
>tr|D9RCU5|D9RCU5\_STAAJ  
mtletlikeql dphlvevedgtyyprtfiqqfvdgyfgeatlrknaevieavsqsclettgflwcqlafstylenatqp  
hlnndlqqllsgeilgat  
glsnmpksfndleklnlehtyvvgqlvvsgrmpavsniqedhyfgaishessdefvmfilranqdgittvektnflgvn  
gsatyqitlnqvvpqsqi  
ithdakqaatirpqiayqipiglsikslelidafснаnginyleydveafkkryhqlreeyyailddgnltshl  
nelislkkdigyllldvng  
asvvnngsraytpyspqrklkegfffaaltptlrhlgkleteIs  
>tr|D9RCU6|D9RCU6\_STAAJ  
mkrllsttlkvrlisnflqliittafipfiaalyldmlsqsigiyvlglvvlkfplesiisgylieifpkklvlviyqatm  
vimlvfmgifgshqlwqii  
gfcvayaitiivwglqfpvmdtlimdaitedvehyiykisywmtnlsvaigallgglmygysmlfliaaciflivlff  
lyiwlpqdrnqvksddkr  
hasryqklqimnifrsyklvlkdrnymllisgfsiimmgefsissyairlkdqfetisigsyditgakmlaillmintv  
vviilltysiskvvlkidfk  
kalitglliyivgysgltylnqfgllvfmiaivatgeiispivseqrkkipkargtysavnalghifsetlarlgiv  
lgafllttlqmglymfivlt  
igasmvavfggqnk  
>tr|D9RCU7|D9RCU7\_STAAJ  
mkeglfmimgnlrfqqeyfryknntestthrnaywvklaknveatkmyalstivqqhasirhffdvttddnltmilhe  
flpfieikvpsssanydl  
eaffkqelstyhndspkfkfklqfadaafilddfhvsi fddsqidi fddlcnayrdntvikntrqhahlnkndden  
qdashlaaldsnyfrlenns  
dihidsylpikhpfeqalyqtyliddmtsidmaslavsvylanqimsqqhdvtlgi hvps hlpndlhgnivplttidak  
dvcqrfttdfnkcvlqnms  
qlqaksslsleti fchyhmmccndviedvhqihahtsladieifphqhgfkiiynsaaydl lsietlsdlvrniyl  
qiteengnkrttvdklnlm  
terdiqlyddinlspeiddaqtvtlfeqqveatpnhvavqfdgvfityqtl narandlahrlrnqygvpe ndr vavia  
eksiemi iamigvlkagga  
yvpidtnypsdrqayi lkd atpkvvi tyqalyengkqinhi dlnkiawknidnlskntledhayviytsgttgpnkgt  
liphrgivrlvhqnhvpl  
nekttilsgtiafdaatfeiygallnggklivakkeqllnpivleqlinendvntmwltsslnqiaserievlpky  
lliggevl nakwvdl nqr

Tsompanidou\_et\_al\_Supplemental\_FASTA\_File

pkhpgiingyptenttfttynipnkvpnrpigi gkpi lgthvymqgerrcgv gipgelctsgfglaagyl nqpe ltad  
kfikdsni nq lmyrsgdiv  
rllpdgnidylyrkdkqv kirgfrie lsevehaleri qginkavvivqnhdqdyivayyeamht lshnkiks qlrmtlp  
eymipvnfmhieqipitin  
gkldkka lpimdyvtd dayvapstdteh llcqi fadi lhnvqvgihdnff elgghsl katlvvnri eastgkrl qigdl l  
qkptvfe laqai akvqeqn  
yevipeaivkddyvlssaqrmyllwksnhkdtvynipflwr lsselnvaqlrqavqh liarheilrtqyivv ddevrqr  
ivadvvadfeevnthftde  
qeimrqfvapfnlekpsqirvryir splhayl fidthhi indgmsni qlmndlnalyqhklllplklqykdysewmshrd  
mtkhrqywlsgfkdevpi l  
slptdyvrpniktngammsftm nqmrql lqkyvekqh itdfmffmsvmt ll sryarkddvvvgs vmsarmhkgteqm  
l gmfantlvyr gqpspdkm  
wtqflqevkems leayehqey pfecl vndldqshdasrnlfdvmlvlqnnetnhahfghsklthi qpksvtakfdlsfi  
ieedrddyti nieyntdly  
hsetvrhmgnqcmimidyil khqdklqic dipndtee ll nwnthvnnrm lnpvgnksi isy fnevvsrqgnhvalvmd  
ltmtyetl rnyvdaiahml  
l sngvgngqrval fters femiaam latvkgasy ipididfpkkrqgail edakvtavmsygie iettlpviqlenakg  
fveskeneqyddlhgdqle  
ntaml dnemya iytsgttgmpkgvairqrnl lnlvhawstelqlgdnevflqhanivfdasvmeiyc ll nghtlvipdr  
eervnpaqlqq llnkhrvt  
vasiplqmcsvmedfyiek litggatstasfvkyiekhcgtyfnaygpsestvitsy wshqcgd lipetipigkplsn iq  
vyimsdgl lcgigmpgelc  
iagds laigy inrpe lmadkwqnpfgkgklylsgdlarytsdgqief lgridkqvkvngyrieldeienailairgis d  
cvvtvshfdthdi lnayyv  
geqlveqdlkqylndhlpkymi pkti thidcmplttndkvdttr lnpnspiqqs nkvysepsneieqt fvdvfgevlkqn  
dvgvdddff elggns leam  
lvvshlkqfghhismqtlyqyktvrqivnymhq nqslvalpdl selqnimtrynl giledslshrplngtlltgatg  
flgay liealqgyshriyc  
firadnee iawyklmtn lndyfseetvemml snievivgd fecmddvilpenmdtvihagartdhfgdndefekv nvggt  
vdvir laqqhharliyvst  
isvgytfditdedvtfseadvkygqlltspytrskfy selkvleavnngldgrivrvgnl tspyng rwhmrniktrfsm  
vmdllqlnci gvs laemp  
vdfsfdttarqiva laqvntpqiyhvlspnkmpvksll ecvkrkeielvsdesfne ilqkdmyetig ltsvdreqql  
amidtkl tlkimnhisekw  
ptitnnwlyhwaqyik tinfk  
>tr|D9RCU8|D9RCU8\_STAAJ  
mtvfvmqlqsnlksieel isqsrwsykkprtvnyrynqdkl mhr lgdilvqygiqhd tgl lphewhyhisprgkadi vqh  
nrdgqpiyvslsypiyv  
cvvdkepvgidieki sqrlwrtlv tcfstneaqqics lndfyqiwtqkesftkl igeglikgl diydmtqshfyqs rev  
kfkqfi fdqfmvqvcflgq  
apwgykkvsvfqllss  
>tr|D9RCU9|D9RCU9\_STAAJ  
mtkrqmi ifiyagi gglsgivkl gwevmfprrtpernatnppqellqqlgfssefthq tytfsn melpwvsfivhfsf  
siviaiyci lvkkyayla  
mgqgavfgiviwvlfhli impimhtvpavwdqpfqehisel fghvwmmtielvrqhfvyrykln  
>tr|D9RCV0|D9RCV0\_STAAJ  
mkfivikiggst lsdmhpssi innikh lrsnniypiivhgggp fineal snqqiephfvnglrvtdkatmtitkhtliadv  
ntalvaqfnqh qcsaiglc  
gldaq lfeikrfdqqygyv pttlnids lsy lctkfvp iinsigfnnhdgefyninadt layfiatsleapiyv lsnia  
gvlindv vipqlpladinq  
yiehgdiygg mipkvl daknai engcpkv iiasgnkpn iieaiyndfvgttilkslv  
>tr|D9RCV1|D9RCV1\_STAAJ  
mkhqettsqqynfsi ikhgd istpqgftaggmhigl rankkdfgwi yss lassaavytlnqfkaapl ivtedtlqkskg  
klqalvvn sanansctgqq  
giddaqttqtwvaqqlqip sehvavastgvigeyl pmdkiktgtehindanfttpgafneail ttdtctkhiavslnidg  
kti tiggsakgsgmi hpnm  
atmlafitt dasiesntlhqllksstdhtfnmi tvdgd tstdmvlvmanqqvehqilnqdhppwetfvdafnfvctfla  
kaiardgegatklisvnvs  
gaksisdarkigktivssnlvksaifgedanfgri itaigysgeidp nctyvqlnqipvvdkgmavl fdeqamsntlth  
envtidvqlgl gnaaatay  
gcdlsydyvrinasyr t  
>tr|D9RCV2|D9RCV2\_STAAJ  
mikvgivggsgygaie lirl lqthphvtiahiyshskvdeplkl t fphlqh imqhfeal tvdnn dcdviffatpapvskt  
cipplvekgihvidlsgaf  
riknreiyeayketaaagddlnhaiysi sewqsl dngtkl isnp gcfptatlla l hplisekivdlssi idaktgvs  
gagrs lsrvhfsemnenl  
sayavghkhkpei eqyls iagqdvsvif tphlvpmtrgil stiyvkl sseyttes l hklm tsyyanqpfvri rdigt f  
pttkevlgsnycdigi yvd

Tsompanidou\_et\_al\_Supplemental\_FASTA\_File

ettqtailvsvidnlvkgasgqaiqnlnilydfvettgkqspvyp  
>tr|D9RCV3|D9RCV3\_STAAJ  
mnsiieitdyysnnyaplkvlitkgkgvkwvtdgkqidcisgfsvanqghchptivkamteqasklsiisrvlysdn  
lgkweekichlakdkvlp  
lmsgteaveaaiarkwgsevkgitdgqveiamnnfnhgrtlgslslshndaykagfhp1lqgtttvdvfgdieqltqa  
ispntaaiilepiqgeggy  
nippngyiqavrqlcdkhqlliadeiqvlgtrtgkwfameweqvvpdiylgkalggglypvsavlannvrmvltpgt  
hgstfggnplaiastaal  
dvlkdeqlverserlgsfllkallqlkhsikeirgrglfigielntdaapfvdqliqrgilckdthrtiirlsplvid  
keeinqivaafqdvfkn  
>tr|D9RCV4|D9RCV4\_STAAJ  
mkkkl1tfkenmfigsm1fglffgagnlifpihlgaagsnvfianlgflitaiglpflgiaigisktsglfeiasrvnk  
tyayiftialylv1gpffa  
lprlattsfeiafspf1spkqitlylfi fsfvffviawffarkpsrileyigkflnpvflvllaiillfafi hplggisd  
apiskqyqsna1fngfldg  
yntldalasalafgiiivatikklgienptdiaketiksgtisiimmgiytl1aimgtlsighfkl senggialaqitqy  
ylgnygivllslivmvacl  
ktaiglitafsetfeh1fpkmnylaiatvvsfisflfanvgtkiimysvpvlmflyplaiialivltl1fsskfhsktiy  
qctiffmtiaalvdglkas  
pefisstsfstl1nfgqky1pl1sdigmwvvlsligfiigfiykikhrkipqa  
>tr|D9RCV5|D9RCV5\_STAAJ  
mdyapytaenvvqnank1idifrknngfivfvrvkfydgkdalkpnsmsv1ppkegddysrfhh1ldkrdgdvidkrqf  
safvgtd1dlqlrrrgidt  
ivlggvathvgvdtardayqlnyaqyvtdmmsaqnet1hqfpidn1fpimgqtvttsdiln1n  
>tr|D9RCV6|D9RCV6\_STAAJ  
mkqrigaylidaihragvdkifgvpdgn1af1ddi1snpnvdwvntnelnasyaadgyar1nglaalvttfvgv1sa  
vngiagsyaeripviaitg  
aptraveqagkyvhhs1gegtfddyrkmfahitvaqgyitpenatteiprlintaiaerrpvh1hlpidvaiseiemtp  
fevtpahtdapkyiel1t  
sklqqakqpii1tgheinsfhlhqe1edfvnqthipvaqlslgkga fneenpyymgiydgkiaedkirdyvdsd1l1ni  
gak1tdsatagfsyqfnid  
dvvm1nhhnikidvtdndtvs1ps1lkq1snvsytnsasfpvyqrptspdytvgtepl1tqqtyfkmmqnl1kpndviad  
qgtsffgayd1alyknntf  
igqplwgsigytlpatlgsq1adkdrn111igdgs1qltvqaistmirqhikpvl1fvinnogytver1ihgmyepynei  
hmdykalpavfggknvei  
hdvesskd1qdtfnainghpdmhfvevkmsvedapkk1idiakafsqqn  
>tr|D9RCV7|D9RCV7\_STAAJ  
mkralidd1eiqn1rger1smmlqntiakkkqarh1ikayapvlsvii  
>tr|D9RCV8|D9RCV8\_STAAJ  
mrkk1fgqlqrigkalmlpvailpaag111aigtamqges1qhy1pfiqnggvqtvak1mtgaggi1fdn1pmi1falgva  
iglaggdgvaai1aafvgyi  
imnktmgdflqvtpkngvdpasgyasilgipt1qtgvfggii1galaawcynkfynin1psylgffagkrfvpimmatts  
filafpma1iwptiqsgln  
afstg11dsntgvavfl1fgfikr11lipfg1hhi1fhapfwfegswknaagdi1hgdqrifieqiregahl1tagkfmqgef  
pvmmfgl1paa1aiyhtak  
penkkvvag1mgsaaltsf1tgitepl1efsf1fvap11ffihavldg1sfl1tly11dl1hlygtfsggfidyfl1gilpnk  
tqww1vipvg1vyaviyyf  
vfrflivklkyktpgrekqsqaatasatelpyav1eamggkanikh1ldacitr1rvevndkskvdvpg1kdlgasgve  
vgnmqai1fgpsdqikhe  
mqqimngqvvenpttmeddkdetvvaedksatse1shivhap1tgevtp1sevpdqvfsekmmgdgiaikpsqgevrp  
fngkvqmi1fptkhaig1vs  
dsg1e11ihig1dtvk1ngegft1hveegqevkqgd11infd1dyirkhaksditpi1vtqgnitn1dfkqgehg1nisfg  
dq1feak  
>tr|D9RCV9|D9RCV9\_STAAJ  
mtgfsvy1gqpldeayikrmikqgyqmi1ftsvqipeeddetkyhyftk11n1lkheqvtylidansil1tps fyehl1rqy  
daqmiridhstsieaiea  
imaqglkcc1nasii1srellts1hqqlndft11sfchnyyprpdtg1svd1vnkkneliyqfnpkaqi ygfi vgs glrgp  
1hkg1ptieatrshpva  
ak11qetgvsevlvgds1iemrqakq1idfckhrhft1cieevfddttvty1fdmchkvrdnpenvirsetsrqicphsi  
qpqfttqrrigs1vtdn1n  
ngryqgemqivrq1sahdnvnvaqiiked1p11sciepndtfd1qktreckk  
>tr|D9RCW0|D9RCW0\_STAAJ  
mensttear neatmh1demtveea1itmnedqqvplavrkaipqltkvikktiaqykkggriyigagtsgr1glv1daa  
ecvptfntdpheii1giag  
gqhamtmavegaedhkk1laeed1knid1tskdvvigiaasgktpyviggl1fantigattvsiscnehaiiseiaqypve  
vkvgpevl1tgstr1ksgta  
qk11inmisti1mvvgkyvdydn1midvkatnqklidrvri1qeicaitydeama1yqvsehdkvatvmgmcgiskeea  
trr11nngdivkrairdr

Tsompanidou\_et\_al\_Supplemental\_FASTA\_File

p  
>tr|D9RCW1|D9RCW1\_STAAJ  
mtkeqq1aer1iaavggmdnidsvmncmtrvrikvldenkvddqelrhidgvmgviheriqvvvgpgtvnkvanhmael  
sgvklgdpiiphnhdsekml  
dyksyaadkaktneahkakqkngklnkvksianifiplipafigagliggiaavlnlmvagyisgawitqlitvfnv  
ikdgm1aylaiiftginaak  
efgatpglggaviggttlltgiagknilmnvftgeplqpggggiigvifavwilsivekr1hkivpnaidiivtptialli  
vglltifi1fmp1agivsdsl  
lsvvngiisigvfgfiigasflplvm1glh1ftpihieminqsgatyl1piaamagagqvgaalalwvrckrnttl  
rntlkgalpvgflgigep1  
iygt1plgrpfl1taciggiggaviggighigakaignsgvs11plisdnmylgyiag1laayaggfvctylfgttkam  
rqt11gd  
>tr|D9RCW3|D9RCW3\_STAAJ  
mayqseyalenemngleqlgyervtirndkq11dnfrtilnerhadklegnpltdkefqr11tmidgksifesari1rd  
klpl1rrdeseiylsfltd  
kswcknkfqvtnqvsvedtykarydvtilinglplvqvelkrrgidineafnqvkrkqnytg1fryiqmfiisngvet  
ryfsnndsellkshmfyws  
dkqnkrinilqsftetfmrpcqlakmisryminetdrilmamrpyqvyaaealvqqatetgngyiwhttgsgk1tsf  
kasqilsqsesikkviflv  
drkd1dsqtееefnkfakgavdkfntsq1vrq1ndks1plivtti1qmkakaiqgnah11eqyknkvvfiidechrsqf  
gdmhr1vkqhfknayfgf  
tgtprfpenssqdgrttadi1fgrcl1htylirdaih1dgnv1gfsvdyintfknalkaednsmveaidteevwladkrvel  
varhiinnhdkytrnrqys  
siftvqsihalikyyetfkr1nkk1eqpltvagiftfkpneddrdgevpyhsrek1ekmisdynkkfetnfst1dthneyf  
nhisknvkkgvkdskidil  
ivnmf1tgfdskv1nt1yvdrs1myhd1iqaysrtrnvekeskpfkivnyrd1kktdda1rvfsqtdadtilmrsy  
eeykkefmeayhelkmi1vp  
tphmvd1qdeee1krfveayr11aki11r1tafdefeftvdeigmdaqenedyksylavdqvrstaeknkvsilnd  
idfeiemrnt1invnyim  
n1lrqid1edkaeqrrnreqirri1dhaddpt1r1krd1ikefidnvps1nkddnideayvnfesikkeae1fkgfager  
sideqal1ktisndyqysgv  
vnphq1kqmi1gd1pl1kekrkarkaiesfvaettekdyv  
>tr|D9RCW4|D9RCW4\_STAAJ  
mdnrnminrvfsqk1l1hqia1knksdvdeaydfyiqgpkninv1qkmks1ynylkksyrneyfykntm1nk111grhsv  
ntt1al1sempigksiadfi  
11ngkgvvyektel1dk1dr1dnq1indyevfnv1vvi1tndkh1nkvmaykdttvgilv1tsrnt1sevqpkenns11  
ntkaiynf1rkeerkvia  
qnhmdvptyndf1teydv1fdvfkeipmtk1hnmi1selkkrngmkeykdeflaapteik1f1lyfakmtkkdknklyh1fk  
ed  
>tr|D9RCW5|D9RCW5\_STAAJ  
myppy1rgkqnel1fair1lekgl1gdc1qpi1epiky1ttf1knt1qycgeka1fsin1lvnsk1teee1snetveh1tei  
itknksv1qkay1gpsdeg  
ndr1lkq1fssns1ai1tsvddwemfgdkn1emvfvppdrh1krk1rnipnkgi1impfnk1srnvdy1dnddefysddh  
lyykedgyvafsdsvigg  
eyvdggf1sp1ai1ai1hivyfdeane1rvkhfvsdsnndrsnpgkkf1feavdk1vtwskn1diknrsya1lgqfe1nenny  
pg1g1kr1simhh1leimn  
rylesqnenm  
>tr|D9RCW6|D9RCW6\_STAAJ  
mkicekcfnteivei1iandnsfdncdi1dndh1gvki1fdttk1dkle1lirdyl1rpale1ydisin1pdtfsl1kegkki  
eia1kddws1fnveeaqis  
ci1nel1fkdden1drrv1led1vgaki1indkkytnkn1li1vanndwdgfc1es1kyknrfhnmin1en1aff1dittnyysi  
eefrerfep1yrs1rvkfi  
tekse1msp1kgfatagr1nskwi1svly1stkeqvs1eev1pkphndi1iyigkvk1qknvtkek1kian1tn1tsnaikag  
ddgfrkyf1vnhqt1kk1nk  
gi1tnpsdeqgi1dy1pfqyladyi1rs1kydgi1myesi1lqdg1fnfv1fdqdl1fecvnyerkrvsdvkyl1tk1s  
>tr|D9RCW7|D9RCW7\_STAAJ  
msn1levns1nvqfn1ydeatvqavknvsfel1rkkh1lgivgesgsgksitaksilg11lpdypdht1tgei1fngqs1tn1  
sts1alq1rgkdis1mfq  
pl1ss1npr1t1igkqitevl1fqhkrvskseaksmtidilekv1gikhatrqfdayphel1sggm1rqrvmia1mal1il1kpqilia  
de1pttal1dastqnl1qlm  
ks1leyteasi1fi1thd1gavyqfcd1div1mkdgs1vvesgtvesi1fkspqhty1tkr1lidaip1dihqtrppr1nndi1llk  
fdrvs1dyk1spgs1lyrav  
ndin1ai1rkget1g1vgesgsgkst1aktvvg1kevsegfi1wynel1pl1s1fkdel1ks1rqiemi1fqdpfasinpr1fkv  
idv1krpl1i1hgkvk1dndd  
i1ktvvs1lekvg1dqsf1lyryp1hel1sggqr1qrvs1aralavepkv1vcdeavsa1dvs1iqkdi1e1llk1ql1dfgityl  
fi1thdmgvineic1drvam  
kngei1v1nntedi1khpqsd1yakqlisevafiar  
>tr|D9RCW8|D9RCW8\_STAAJ

Tsompanidou\_et\_al\_Supplemental\_FASTA\_File

mpiflyavikfffsakiknfyannseiseieqalhqkykylsqqsstqihkealkifkaqsntnsknieqahfstyfe  
nvlfhkfimikvilalpmf  
illtiylqplvryiferivmaviviigvivsvftilyfspldaaysilgnatkaqihqfnvlhhlnepyfiqlwdtikg  
vftfdlgttyknevvtka  
vgeripitiiyavvalivaliaaipigiiisamkrnswlditlmialiglsipsfwqglfilafslklldilppsymph  
pislilpvlvigtsiaasi  
trmrtrssvlevmrsvlytayaglsttqvvikhilknaiipivtlvgllvaeilggsavteqvfnigigryivqkqli  
pdipavmggvvvisivisl  
anliidiyfialidpklrseinerk  
>tr|D9RCW9|D9RCW9\_STAAJ  
mvklttkiaslklfasyaiatyilviltsalnlfkgyvadtfyiaetllivltiiliiiltteqtwkhydwrivevll  
llmtltgnvftllmfvsir  
ryqrtsqihsyngwesfirkttrhriaigllilvymltlsivsqftfdttlatknqfnalhgpslaypfgtddfgrdl  
ftrvvvgtklftfsisiisv  
viavifgvllgtiagyfnhidnlmirldvfvaislllavaiiasfgasipnlialsignipsfartmrasvleikrm  
eyvdaaritgentwniwr  
yilpnaiapmivrfslnigvvvlttsslsflglgvapdvaewgnilrtgsnylethsnlaivpgicimfvvlafnfigda  
vrdaaldprih  
>tr|D9RCX0|D9RCX0\_STAAJ  
mkkiiisiaiivlalvlsqcgvptksevaqksskvevkerptihflgqasyendmnivkdqlenagfnvkmniqpdygsy  
rtqrqagnydiqidwmtv  
fgdpnyamtafsstgnsllkdkhvdqllnkastqneadvkstyqiedevvfdkgymaplygskknlyvdnkvldkns  
vglpnsraliwqqfdynns  
rerdrtrplvmtqqdgeiptldpirsiapsvysinmmytrlllllendhlttkgslsrdyavnkdnkafyflrrddyfa  
kvvngqarntgervsaedv  
kfsldrardkksvpnnntynmhkhindikilkdedidqlrkekdkddnsiydklikaynvksltdgqkvnnkgyiyqiv  
kittdqsmprevnylthss  
agilskkfvgvngqeypkgygdsstipansdgknalyasgayimtqknayqatfqrnpgfnetekgsygpakiknitlkf  
ngdpnna1selrnhsidml  
advnqkhfdlikdknlsiri kngrksvflmlnikkgi fkthpnlrqavvnaidqdqfikfyrgdkfkiaspitplvdtg  
neqrqdlekeveainq  
>tr|D9RCX1|D9RCX1\_STAAJ  
mvinlndkqtkskegli svshplaakigkdvldqggnamdaviaiqlalnvvepfasgigggylllyeqstgsitafd  
aretapahvdqkfylddsg  
eyksffdmthgktvavpaipklfdyihkryaklsledlinpaie laieghsanwatekysrqqharltnyhetaqvfth  
engywregdwi vqpelgkt  
fqilreggfnafykgdiakqlvnnvkacggtitledlanydiqikapisatfkdydiysmgpsssggitviqilkllhev  
dlpsmgprsvdyllhliqa  
mhlaysdraqyladdnfhevqvslidddy lkarsklidsnkanidiehgvsncishtdveenhtetthfcvidkegni  
asfttsigmiiygsgitipg  
ygvllnttmdgfdvaggineiapyrkrlsnmaptivmhgkpi ltv gaggaisiiasvaqtlinvlvfgmdiqqaidep  
riysshpnriewepqfsq  
tilalialarghamehkpdayigdvhglqvdpptyeasggsddtregtvmggevlvirkqplpyrqmydndgfrvyfndvql  
plyaeqvrwmhgkfwiees  
virii fpevsvhiedlrsyeiagenyidi vwlarknayqvalkdnglylndeayhsvkrntnayrydrdsitr  
>tr|D9RCX2|D9RCX2\_STAAJ  
mkayki fwl nlaaiiisivvsggmflamkweqihlkdglkkvlstypiknetlyeidghdnphyenngqdkwyiessy  
svvksdelkedrmllevd  
knthkitgdtdtindrknvthsthsypikvvnkivctkdvdpe lqkiginyqfliqsgdlpsilnsndlkithdpt  
tdyynlsgklsndnpsvkq  
lkrrynipknastkvelkgmsdlkgnnhqdqklyfyfsspgkdqiiyqesltynkiseh  
>tr|D9RCX3|D9RCX3\_STAAJ  
makvlyitahpfnelvsnmaagkafietyqqhpdevkhidlfetyipvidkdvl tvgwkmsngetltdeeqmksr l  
sdileeflsadkyvfvtpm  
wnlsfppvvkayidaisiagktfkysaegpqltdkkvlhiqsrnggytegpaaanfemgdryl rtimtflgvpsyetii  
ieghnaephkteekatsi  
nnaeklattf  
>tr|D9RCX4|D9RCX4\_STAAJ  
mtrkrpkrilatiii flsllftiiyiddiqwfnqytdkl tqnhkgkghskwedffrgsr itetfgkyqhspfdgkhygid  
falpkgtpi kaptnqkvtr  
ifne lggkv lqiaedngeyhqwy lhd kynvkv gdrvkagdi iaysgntgkqttgahlhfqrmkggvgnayaedpkpfi  
dq lpdgerslydl  
>tr|D9RCX5|D9RCX5\_STAAJ  
maeklehi kktydnnntvvkdfnlhitdkefivfvgsqcgkstlrmvaglesitsgdfyidgermndvqpknr diam  
vfqnyalyphmtvf fenmaf  
glklrkvnkkeieqkvneaei lglteylgrkpkalsggqrqrvalgrairvdakvflmdeplsnldaklrvqmrteilk  
lhr lntttiyvthd qtea  
l tmasrivv lkdgdimqvgtpreiydapnci fvaqfigspamm l natvemdg lkv gthhfk lhnkkfek lkaagy l dke

Tsompanidou\_et\_al\_Supplemental\_FASTA\_File

iiIgiRaediheepifiqt  
spetqfesevvvseIIgseimvHstfggmeliSkldSrtqvmASdkitlafdmnkchffdektgnriv  
>tr|D9RCX6|D9RCX6\_STAAJ  
mskiIkciTlvvmlIivtacgpnrskedidkaInknnskdKpnqI tmvvdgdKqmafykkitdqytkktgikvklvniG  
qndqlenisIdapagkGpd  
iffIahdntgsayIqglaseikIskdeIkgfnkqaIkamnydnkqIalpaivettaIfynkklvknaptleeveanaak  
Itdskkkqygmlfdaknfy  
fnypflfgnddyifkknngseydihqIglnskhvvnkaerIqkwydkgyIpkathdvmigIfkegkvqqfvTgpwniney  
qetfgkdlgvttIptdggk  
pmkpfIgvrgwylseyskhkywakdlmIyitskdtIqkytdemseitgrvdkvssnplkvfekqarhaepmpnipemrq  
vwepmgnaSifisngknPk  
qaIdeatnditqnikIhpsqndkkGd  
>tr|D9RCX9|D9RCX9\_STAAJ  
mtikvgiIgcggiangkhmpslqkvenvemiafcdvdisKaacaeeaygtdnakvyddykaIIkddtidvihvctPndsh  
ceitvagIhagkhvmcekP  
makttaeaqkmiDtakstgkklItyqnrfrpdsqflyksaqrgdlGdiyfgkahairravptwgvflneeaaqgggpli  
digthaldItIwmmdnyep  
esvmgstfhkInkqhdaanawgswnpdefTvedsafgfiKmkngatiIlesawainsIevdeakcsIsgtkagadmkgI  
rihgEdmgTlytkhvelen  
kgvdfyegnevdeaeeeeakawidavvndtepvvkpeqamvvtkileaiyqsaksgkaiyfe  
>tr|D9RCY0|D9RCY0\_STAAJ  
mtklkvGvIvgggiAqdrhipaIIkIkdTvsIvavqdintvqmidvakrfniphavetpselfkIvdavvictPnkfhad  
IsiealnHgVhVlcekPma  
mtteecdrmieaanknhkIItvayhyrhtdvaitakkaieagvvgkplvarvqamrrrkvpGwgvftnkaIqgggsIidy  
gchIIIdIsIwIIgkdmvph  
evIgktyngIlskqpnqIndwgtfdhtkfdvddhvtsymtfanrasmqfecswsanikedkvhvsIsgedgginIlfpeiy  
eprfgaiFeskanvehned  
iagerqarnfvnacIgieeivvkpeearnvnalieaiyrSdlDnksiql  
>tr|D9RCY1|D9RCY1\_STAAJ  
mklgvfsvlfydknFedmIlyvaesglDmiEvgtggngpdkfckIdellenedkrqafmksitdrgIqisgfschnnpis  
pdpteakeadetIrkTirI  
anIIdvpvntfsgIagsddtakkpnwpvtPwptayseiYdyqWnekIipYqdlaefakeqdvkiaielhagflvhtpy  
tmklIreatneyiganIdp  
shIwwqgidpiaaIriIlgqanaIhhfhakdtyingenvmyglTdmqpygnvatrawtfrtvgyghspyvwaDiisqlii  
ngdyvIIsiehedpimsve  
egfqkacqtIksvniydkpadmwwa  
>tr|D9RCY5|D9RCY5\_STAAJ  
mtaykpyrhqIrrsIfastifpvlviigIvsfyaiyiwiehrtihqhVdesqssIhhtekqiqtfitqhnnsfqeldI  
tnhhdvTatkrellkIihq  
qpattIyyeIsgpnqfitnnyehIntknmyIfsthqIlfknstymIkiyantprIseikkdsrqfalivdqydniIyand  
drftvgekyrpqqfgfme  
svkInhanhrIiYkdiheniedgitIlivmaivIvIvIvifgfisadnmakrqtkdietiIkiyyaknrhIgtYtpIkn  
nseleeinnyiydlfesne  
qIhsiehterrIrdiqlkeierqfphflntmqtiqylitIspklaqtvvqqlsqmlryslrtnshtvelneelnyie  
qyvaIqnrIrdmIklhie  
sseeahqtigkmmIqplienaiKhgrdtesIditirItlarqnlhvIvcdngigmssslqyvrqslnndvfdtkhIgl  
nhIhnkamiqygsharIhi  
fskrnqgtIicykiplsrGnvDv  
>tr|D9RCY6|D9RCY6\_STAAJ  
mkskiyiIIIfIflsacanthsesdknvlTvsPyqsnIirpInefekqehvkieikhgstqvlIsnlhnedfserg  
dvfmggvIsetidhpedfv  
pyqdtSvtqqIledyrSnnkyvtsfIImptvivvnsdlqgdikiRgyqdlIqpiIkgkiaysnpnttttgyqhmraiySmh  
hrvsdvhqfQdhamqIskt  
skviedvakgkyagIlyeqdartwknkgypvsivypiegtmInvdgialvknahphpkrkklvqyltsrsvqqrIvaef  
daksiRkdVseqsdqsiEn  
IknIplIpkSkIpdIphhkflEmiq  
>tr|D9RCY9|D9RCY9\_STAAJ  
mkrisKdiwavfkIIyqnkgrfsinaIIlqlimiFisstylIIlfnmmIkvagqsqItnnwmeivshpasvilliiIfil  
svafliyvefslIvmyva  
gfdRqviTfksifknaFvnvrklIgvPviffviyImImpianIglssvItknIyipkflteelmkttkgiiygtfmva  
vfiInfkIiftIpltiInr  
qsIlfknmrIswqitkrnkfrIvieivileIigailtIisgatflaiyvdeegdkflvssilfvvlksalffyyIftkl  
sIisvlvIhIkqenvIdqp  
glEfkyPkprkskffivsmIIavtcfiGynmyIlynstintnisiighrgfedkgvensipsIkaakaanveyvelDti  
mtkdkqfvvshdnIkrIt  
gvnknisesnfkdVvgIkmrqngreakIvsIdefmetakqsnvklIvelkphgkepadytqrvidilkkhgvehqyrvms  
IydvmTkIkkeapyIkcg  
yiIplqfghfketsIdffviedfsysprIvnqahIenkevytwtingeedItkylqtnvdgiitddpaladqiKeekKde

Tsompanidou\_et\_al\_Supplemental\_FASTA\_File

tyfdrsirilfe  
>tr|D9RCZ0|D9RCZ0\_STAAJ  
mttqmki ktylvagikaalldttgiklasksettshtyqrqalvdqlheliantdlnklscnlndayqkrdilaahyiaak  
sairtknldqmtkakhrle  
siydsisnplhsqnn  
>tr|D9RCZ1|D9RCZ1\_STAAJ  
mkkqiislgalavasslftwdnkadaivtkdyskesrvnenskkgatvsdyyywkiidsleaqftgaidlledykygdsi  
ykeakdr1mtrvlgedqyl  
lkkkideyelykkwykssnknntnmltfhkynlynltmneyndifnslkdavyqfnkevkeiehkndlkqfdkdgedkat  
keyydlvseidtlvvtyya  
dkdygehake1rakldli1gtdnphkvtnerikkemiddlnsiiddffmetkqnrpsitkydptkhnfkeksenkpnf  
dklveetkkavkeadeswk  
nktvkkyeetvtskspivkeekkvkepqlpkvgnqqevkttagkadettqpvaqplvkiqqgtiygetvkgpdyptmenkt  
lqgeivqgpdfptmeqnrp  
slsnnytntpltnpileglegssskleikpqgtestlkgiqgessdievkpqasetteashyparpqfnktpkyvkyrda  
gtgi reyndgtfgyearpr  
fnkpsetnaynvtthngqvsygarptqnkpsktnaynvtthangqvsygarptqnkpsktnaynvtthngqvsygarp  
tqnkpsktnaynvtthang  
qvsygarptqnkpsktnaynvtthangqvsygarptykkpsetnaynvtthadgtatygprvtk  
>tr|D9RCZ2|D9RCZ2\_STAAJ  
mqeayivaygrsaakakqgalfherpddvaakvlqgv1kridgkfnknmiedvivgtafpeg1qgqniartialrtgl  
dtpvgqtvnrycssglqti  
aiaanqimagqgdi1vaggvelmsavpmggnepntnptlqyddigasypmgltaenasqfdvsredqdayavrshqray  
daqrdgrfkneiipiqvns  
veytnagpkihntifdqdefirpdtmealaklrtvfkadgtvtagtsaplsdgagfvvlmsgdkvkelgvtpiarfvgy  
kavgvdpkimgigpayaip  
evlslsnlsvedidlielneafasqtiasikevgldisrtnvnggaialghplgatgamltarl1nemgrpdsrygmvt  
mcigvgmgaaaifeyvr  
>tr|D9RCZ3|D9RCZ3\_STAAJ  
mtinkvtvl gagtmgqalaa1fvnag1kvk1ldiivdkndpnliakksydkitdkkrp1lfd1n1ash1tygnfddd1vn  
ddadlyieavkedieikha  
vwqqvlqhakedalfatntsgipinaiaqafnekdqerffglhffnpprimklveliptshtkesiildvknfaqnvlgk  
gviivndvpgfvanrvgtq  
tmndimyraeqhklsvdvdaltgqaigrpktgtyalsdlvgldiavsvikgmqqvpeetpyfhdvki vntlfengalgr  
ktkqgfyykkdketkarlv  
dvekdqyvpsqpqlpilinefnkdlvhnldvifnaqdeaglf1wetlrnnfyysainvpkatddfrdidralvwgfnwk1  
gpfqlwdamgyervktrme  
delgd1pqwisldsgfykqdetieyatpvshfvkdelwdkgdaklsithddq1llklqsknnvitdefnda1vdaid1l  
enehytsmviyadgnnfsv  
gan1flmkkahedglvddvvaqsidklhysfnrlkyslkipvtavqgralgggcelvlyspivvaasetyig1veavgvl  
lpsggglaemadrlctsh  
kfddkqasmtkvlniafarvstnafearrygylrtdt1ifntaqrvevalkrakyeaetnyipkpykyig1gedfka  
l1ggqldaqrgrghfisdhd  
yhi1niat1laggd1prntfinqryiqslekigfid1lksksyeriahmlktgkplrn  
>tr|D9RCZ4|D9RCZ4\_STAAJ  
mtfeketv1kt1fpedv1siakgltdgeveflqqvds1leskyreninqhwidatvpedyfdk1gelnyfnnp1lykdc  
nakmpsq1fqffmsy1lar  
fdislal1gvhqglghntfyggskeqiakyvpklqshelrtcfaltepehgsdvaggetvaerqgdtwvingekkw  
ggahvsdvipvfavnketg  
kphcfvvrpeqgdvdiividnkialrivpnalikltnkvdeadr1qnitsfkdiakilystragvaymatggmagalra  
tldyvterkqfgkpiskyq  
liqeklammggnlaqamatcaqlanmqahgeydevatstakmmnalrlretvamgrgitggngiladdydiarffsdaea  
iytyegtheinalvigr1  
tgdsafv  
>tr|D9RCZ5|D9RCZ5\_STAAJ  
mnfdwiktrsd1dddkpavidhakqtswtyqq1naradmahyltsqgvkkgdvigifapndiaild1l1facfktgavf1  
plnwr1npkeiaaivedaq  
kl1lfyaekhlsslididqn1lhmdidvaqydeivnpdyhqpfqatpvepqdlaaliytsgttgs pkgvmfsvyesfvhng  
anleltykfnsnyitivist  
pmfhvlgfndtv1pvlmsggt1ilqryfngeelndmiaaqyhptfiimiptmyyst1rasnfnpenframdyi1qggsqpl  
psiqaa1fkqyginiingy  
l1teapl1vntpenskrkpmsigkavmfvdarilddngeevptgeigelaikaknvtpgywnkpaetakafhgrylltg  
lakmdddgdifiidrkkel  
i1tggen1psevenalaehplvdrcvvvygdhpkkygesiaaa1ilredephyaeildqhmrs1lagykvprmyvpvthm  
plnstqkpk1larqmmnd  
kvsqt1  
>tr|D9RCZ6|D9RCZ6\_STAAJ  
mkqitwhdlqhiikgdviglipalavan1paev1ravlaqhdtyhtpnd1tfilandihs1gaaplddfiermikrvi

Tsompanidou\_et\_al\_Supplemental\_FASTA\_File

msiltassktaqamknndi  
eayflpqgi iathyrqsnqllpgvitkigIntavdprygggkvnttrtddlvslvtindetyllytfpsvdvallrgtya  
dqgniy l t q e a y l s e c y h  
va l n t k a n h g k v i v q v k a l v d d y q l k p n e v v i p g n l v d y v y v t e d e k n h r q v i q s h y l p a l p g e e r i d g i p e p a l p f n s r  
k l i l r r a a q f l t y g d t i s i  
g y g i n n e l s n l l h e e c v e h d v q p i l d v g i f g g f v g s r e h f g m n y n a d v r m p h d r a w d f i y n n g v s v a y l s f a e v d q y g n v  
n v s y f n d r l n g c g g f i d i t  
q s v k k i i f s g t f v a g s h v s c h n q r l n i e t e g q n q k f v s d v s h i d f n a q y s q s l e q e v y f v t d r a v f e l t n q g l k l i e i a p  
g l d l h k d i l n q m a f k p i i a  
d h l k l i d t s i y k e k w g g l k q s i h k v  
>tr|D9RCZ7|D9RCZ7\_STAAJ  
m e g l n h r r n t e k e e i t q t q s v a p n t s e e g m s s a i t q s t k t s d i h n e s i d k q m e a k a h e t a q n a d l k n e a r s l f d n a t k s i  
g r l a g n d e s l n l n l k d m f s  
e v f k p h t k n e a d e i f i a g t a k t t p a i c d i s e e w g k p w l f s r v f i a f t v t f i g l w m a a i f n n t n a i p g l i f i g a l t v p l s  
g l f f f y e s n a f k n i s i f e v  
i i m f f i g g v f s l l s t m v l y r f v v f s d q f e r f g s l t f f d a f l v g l v e e t g k a l i i v y f v n k l k t n k i l n g l l i g a a i g a g f  
a v f e s a g y i l n f a l g e n v p  
l l d i v f t r a w t a i g g h l v w s a i v g a a i v i a k e q h g f e f k d i l d k r f l i f f l s a v g l h g i w d t s l t i l g s d t l k i f i l i v v  
v w i l v f i l m g a g l k q v n t l  
q k e f k e q r k k v d e  
>tr|D9RCZ8|D9RCZ8\_STAAJ  
m t d a l q q k i h i e l l d l l d d v k f e l t e l n a q k g l y i n g p a n q l l k r g v h m a y v q g q k a i d n i m t i v e q q l e d q h f l e h y d  
k f q n e v a h r n y d k t a n f a e  
l s d i p r q f d n f l d q f y q i k g y f i i t h i n t l i g d f h s e s h  
>tr|D9RCZ9|D9RCZ9\_STAAJ  
m i r n r v m n s v v n k y l l h n r s i m f k n d q d v e r f f y k r e i e n r k k h k q p s t l n v k a n l e k l s l d d m q v f r f n f r h q i d k k i l  
y i h g g f n a l q p s p f h w r l l  
d k i t l s t l y e v v l p i y p k t p e f h i d d t f q a i q r v y d q l v s e v g h q n v v m g d g s g g a l a l s f v q s l l d n q q p l p n k l y l i  
s p i l d a t l s n k d i s d a l i e  
q d a v l s q f g v n e i m k k w a n g l p l t d k r i s p i n g t i e g l p p v y m f g g g r e m t h p d m k l f e q m m l q h h q y i e f y d y p k m v h d  
f p i y p i r q s h k a i k q i a k s  
i d e d v t q n k  
>tr|D9RD00|D9RD00\_STAAJ  
m t n p n q r l e p f d e t f q q p n i h r g k r y g k k k r s l v s m i i q i i v v i l t a i a g y s m w k q p i f n i v f t k e a v d f d g i k n f n e t i  
g k m h g l n i n l g n i n d l q q g  
i d r l i l v f n g f f i l c i v s l v i t i l t i v f n r t v l k v v n i l v l t i m l v i t l y f s y i i k a l a q e i a d a l k k y l n v p p d q v i t  
e a d a i h n g i i l l g c s i g l i  
v i s l f f r n r m p r l k  
>tr|D9RD01|D9RD01\_STAAJ  
m t t t f i i s y i v l a l i i v g v i n l l l i r s r r k a k r q q e q h f a t r q s n q s k f k a s d l d r t t d q s s q h t a r e a r i d n k d n q n  
q v s l t d h a k g s e q d q e l f n  
d n k d d e a f a a k n p e s e e y k v n e k i k k e h k n y i f g e g v s r g k i l a a l l f g m f i a i l n q t l l n v a l p k i n t e f n i s a s t g q w  
l m t g f m l v n g i l i p i t a y l  
f n k y s y r k l f l v a l v l f t i g s l i c a i s m n f p i m m v g r v l q a i g a g v l m p l g s i v i i t i y p p e k r g a a m g t m g i a m i l a p a  
i g p t l s g y i v q n y h w n v m f  
y g m f i i g i a i l v g f v w f k l y q y t t n p k a d i p g i i f s t i g f g a l l y g f s e a g n k g w s v e i e t m f a i g i i f i i l f v i r e l  
r m k a p m l n l e v l k f p t f t l  
t t v i n m v m m s l y g g m i l l p i y l q n l r g f s a l d s g l l l l p g s l i m g l l g p f a g k l l d t i g l k p l a i f g i a v m t y a t w e l t  
k l n m d t p y m t i m g i y v l r s  
f g m a f i m p m v t a a i n a l p g r l a s h g n a f l n t m r q l a g s i g t a i l v t v m t t q t t q h l s a f g e e l d k t n p v v q d h m r e l a s  
q y g g e q e g a m k v l l q f v n k l  
a t v e g i n d a f i v a t i f s i a l i l c l f l q s n k k a t a q n i d a d n s i n h e  
>tr|D9RD03|D9RD03\_STAAJ  
m k r q a k i e i q n a l v d l m a e y p f q e i s t k m i c a y c n i n r s t f y d y k d k f d l l d t i n s k h k e k f q f l l s a l h h n f e n i k q d  
k l k l y k f f i i i a k y i k h n e  
q f f k d i l v t y p m k t l f i d y i n l a r d y y q q i m n d y s t t v t n k q l y v t y i i g g q a g v f i n w l s n g c n e s p e e v a d i l l a n t i  
k l q n q  
>tr|D9RD04|D9RD04\_STAAJ  
m n d l t h f n k r s p i f i i l g s l t a i g a l s i d m f l p g l p d i r h d f q t t t s n a q l t l s m f m i g l a f g n l f a g p i s d s t g r r k p  
l i a m i i f t l a s l g i v f v h  
n i w l m v a l r f l q g v t g g a a v i s r a i a s d m y s g n e l t k f m a l l m l v n g i a p v i a p t l g g i l n y s i w r m v f i l t i f g f v  
m v i g s l l k v p e s l t v t n e  
s s s g l k t m f k n f k i l l k t p r f v l p m l i q g m t f v i l f t y i s a s p f i i q k i y g m t a i q f s w m f a g i g i t l i s s q l t g y l v d  
f i d s q k l m r v m t m i q i i g v  
i l v t i v l l n h w n f w i l a i g f i i l i a p v t g v a t l g f t i a m d e s s s g r g s s s s l l g l v q f l f g g i a s p l v g v k g e d n p i y i  
i i i a t a v i l i l q i y n m k  
v f k t n r  
>tr|D9RD05|D9RD05\_STAAJ



Tsompanidou\_et\_al\_Supplemental\_FASTA\_File

mkscpkcgqqaqddvqictqcgkhfdrsqa1yrkstdediqtnnikmrkmpwaigffililililffllrnfnspeaqt  
kilvnaienndkqkvatll  
stkdnkvdseeakvyinyikdevgfkqfvsdlkntvhklnksktsvasyiqtrsgqnilrvskngtryiffdnmsftapt  
kqipivkpekktkyefksgg  
kkkmviaeankvtpignfipgtyripamkstengdfaghlkfdfrqnssetvdvtedfeeanisvtlkgdtklndsskkv  
tindremafsssktygppy  
qnkditisasgkvkgkftttqktikasdlkynteitlnfedsediedyvekkekeenslnkklieffagyslannaafnq  
sdfdfvssyikkgsfydd  
vkkrvskgs1mmisppqiidaekhgkitatvrlnengkqvdkyeleqgsqdr1qliktsek  
>tr|D9RD07|D9RD07\_STAAJ  
mlgagiftetvtpmlaarldraldiyqqasatkiivsgggqdepipealamqryliahgvdktidmeshsintytnf  
lyskqiinnlyheavkivc  
vtsqfhv1ralrlaqklgl sidvgvshtpyhfflhvlikdylgvmyqyrllltlycswfwiclyaaafiys  
>tr|D9RD08|D9RD08\_STAAJ  
malvvedivknfgeg1setkvlkginfeveqgefvi1ngasgsgkttlltilggllsqtsgtvlyndaplfdkqhrpsdl  
rledigfiqsshlvpylk  
vieqtlvgqeamtkqqsskraiql1knigledrlnvyphqlsggekqrva1mrafmnpkiiladeptasldadratk  
vvem1sq1keqmqimigimi  
thdrrlfeyadrvieledgkitd  
>tr|D9RD09|D9RD09\_STAAJ  
mklaikeimfykfrylitlii1llsimvlfisglaqglgrenis1fehfdndeyvvqkmkepqiexqlsdtqqnqikk  
vihqepykmnvqtlk1snk  
eqdvi1mndvkqqr1qlkkgdypknahevaindklaadnirvgdr1hfknnstsyrvsgilndtmyahssiv1lndngfn  
alnkvn1afypvkn1tqqg  
rde1nk1ndvqvsekd1gniasyqaeqap1nmmiv1sfaitaiv1saffyvmtiqkisqigilkaigiktrh1l1salv  
1qil1t1tiigvgiaviiiv  
gl1sfmmpvtm1p1y1ttqni1lmvgi1filv1ailgas1sfvk1fkvd1pieaigga  
>tr|D9RD10|D9RD10\_STAAJ  
mvqclvvdddpr1nyia1sh1qtehidaytqpsgeaalk1lekqr1vdiavvd1mmdgmdg1f1c1nt1kndy1dip1v1m1ta  
rdal1s1dkeraf1sgtd1dyv  
tkpfevkelifri1rav1rrynins1sekt1gn1t1nq1syle1lqvs1nkt1mt1pnkef1q1l1f1m1laarpk1q1ftreq1iekiw  
gydegdertvdv1hikr1r  
qr1kk1nat1tietvrgqgykvenhv  
>tr|D9RD11|D9RD11\_STAAJ  
mfktlyariaiysitv1lfsal1sfv1tnvy1yhyn1kasndakimkt1k1earqy1eqs1akp1thi1qy1fkh1lgqmnyqimti  
dqkghktfygepfredtl1s  
qna1nnv1lnnqdyhgikdkpfa1fvtgffdnvtdntvgin1fktkdgsiavfmrpdigetfsefrtflav1l1m1l1l1f1sis  
1viastysii1rpvkk1kla  
ter1ldgdfetpikqtrkdeigt1qyhfnkmres1gqvdmr1qhf1vqns1sheikt1plthihh1l1selq1qtsdkt1rqyi  
ndiytittq1sgltte1l1  
1se1dn1h1q1l1fddki1qvnl1kdi1rheqfaadeks1li1ladlesin1flgnr1l1hqa1sn1l1inaikytdvggaidia  
1qshhni1ftisndgspi  
spqaear1ferfyk1vskhdnsng1glaitksii1elhgtiq1ftsneyittftit1pnsh  
>tr|D9RD12|D9RD12\_STAAJ  
mmk1nl1finanetes1yid1hapkmndhvqsi1navnd1dksht1vg1yidkeihiihisdvitfvinknvtait1snqkfk  
1klr1lyelek1qlpghfiri  
skseivnkyciek1llepng1irmy1kdahytyssrry1ksiker1si  
>tr|D9RD13|D9RD13\_STAAJ  
mkn1kns1l1fis1li1igt1l1s1l1ffsm1fadgkyyp1npqstigilythftettvmlisi1l1w1l1ligvvf1l1gd1f1kytdw  
gitkativhfitt1yvgf1p  
1ailagwfp1t1ny1li1ifti1fivvyt1liwii1qffrnkiyvdtineq1lkq1k  
>tr|D9RD14|D9RD14\_STAAJ  
mttqhs1ktdv1liggimsat1gt1l1kel1spekn1kvfek1laqpgeessnvwnnagtghsalcelnytkegkdgtvdcsk  
aikineqyqiskqfwaylv  
ktgg1dn1pdrfi1qavphmsfvigednvafiksrvat1kksv1fekm1ksqdeemkswvplmiegrksdepialtydetg  
tdvnfgaltak1fnn1leqr  
gvgi1qykqnvdik1kqksgaw1vkvd1etnetttyesdfvfigaggas1p1l1qktgikqskhiggf1pvs1gl1f1rctnqe  
vidrhhakvygkaavgapp  
msvph1dtrfvdgkrs1l1fgpfagf1spk1f1ktgshmd1iksvkpnnivtm1sagikems1tkylvsq1ml1sndermdd1r  
vffpnaknedwevitagqr  
vqvikdtedskgn1qfgtevit1sddgt1laal1gaspgastavdimfdilqrcyrdefkgwepkikemvpsfgyr1tdhed  
lyhkineevtkylqvk  
>tr|D9RD16|D9RD16\_STAAJ  
meviamikqinvsnmqkfesqlmkaqsegythvpyaneimi1yqsm1davqlypksivvdytvdggykndchyfgqssin  
iadwag1nnyppn1liyaiq  
qt1ld1ihy1svet1fd1al1t1l1kgd1sidghv1fdkap1latsasiwetiktiedfdmmsqfylnkmayidhhpipfrn  
1fiedseq1nspdnw1lyst  
kfm1pkw1lykiakqradnkq1qnfglytkqpnv1kdhivfigdhqyignskylfityfvkhn1pmtacyfvtd1rrgphfi

Tsompanidou\_et\_al\_Supplemental\_FASTA\_File

sprsekadelinsarvvlv  
endipetlqpngtliqlhgtipimqlfldskepiknietafyrakrynrlqfdyvihsaddishfyqtafshqanvla  
ygnpkhgyllqkrnesttq  
qqyksfkindqkpvlllyapiglvsaqqlplsdaifkayhvsvvqgvdetmlpeeaivapkylsaqdlilmsdvvitdysn  
iifdamaidktvalytpnh  
sqyiesggvnediwrhlskiwytdrqlinnlisqaipvikypqihkeqplesisqlilskmtnsq  
>tr|D9RD18|D9RD18\_STAAJ  
magiikeiskqdaseiveatrtfydtfgsyyddkdfdqffednytvекftqeinhvdsfhyfyqedganvgyikmnins  
aqteemgetylevqriyfl  
kdfqgggrgsqlielaekiaqehnkhiwlgvwehnpraqafykrhgfkvvgahhfqtgdvtdtdlimekel  
>tr|D9RD20|D9RD20\_STAAJ  
mvkvytdiptcedycalrinagmspktleaaekglpnaifvtvlydkdriligmrvigdggtvfqivdiavlksyqqggy  
gsqimehimkyiknsvsvs  
ayvsvliadypadklyakfgfmpptepdsggmyiky  
>tr|D9RD21|D9RD21\_STAAJ  
mkdvtiiggppsglyasfyaglrmdsvrividvqselggkmriypekiidwiggiapkpcheilkdtikqglyfkpevhln  
ervydi rkkaerhfevete  
ageiytskaviiagagiinpkqldvkgveryqltnlhyvvsyrfrkdkdvlisgggntaldwahdiakiaksvtvyr  
kedvsgheamktlvtdlnv  
klcpktrikyivgnddethisevvlhvvsgdthtvkfddviishgfdrcntllsetssklmhdcdcrvkfgntttsip  
giyacgdivyhdakshlia  
safsdganaanlaktyiqpdanaegyvsshhevfkeantivnkhlly  
>tr|D9RD23|D9RD23\_STAAJ  
mnifknkllwiapiatmiilvifslafypaynpkpkdlpigilnedkgtti qdknvigkkledkllsdsnikkwkvd  
sekdlekdldkdkifgvai  
idkdfskdamsktqkvmdskeemqqkvasgeippqvqqmkqkmgnqqvevkqakktivsegsslqgsqiasavltg  
mgdninaqitkqslletlts  
qnvkvnaadingltnpvkvdneklnkvkdhqaggnapflmfmpiwigsivtsillffafrtsnnivvqhriiasigqmif  
avvaafagsfvyiyfmqgv  
qgfdfdhpnriai fvalailgfvglilgvmvwlgmksipiffilmffsmqlvtl pkqmlpesyqkyvydwnpfthyatsv  
rellylnhhielnstmmwf  
igfmi fgavsslvsaivrkhstkrtevps  
>tr|D9RD26|D9RD26\_STAAJ  
mnykqsaeelnaiggeenldamahcatrlrlvlsdeslvneeanmmdvvkgftstggqyqiiigsgtvnkvfselek  
tgkeasttsevkaqsaknm  
nplqrfvkmldsifvpiipavagglimglnniltakdlffsgkslidvysqfaglaeminvfanapftllpiligfsaa  
krfggnpflgaalgmilvh  
pslmsaydfpkaveagkai pywdfvghinqvgyqqvlpmlvaayilasiekglrkviptvldnlltpllsifitafllt  
fsfvgpitrqlywlsdgl  
twlyefggaigglifgllyapivitgmhhsfiavettliadatktggsfifpiatmsnvaqggaaiaaffiikqnkklkg  
vasaagisallgitepamf  
gvnlklryppfigaivgsgigsayiaffkvkaialgtaglpgfisinpvhagwlhyfvgmtisfivaitvtlilskrkank  
evve  
>tr|D9RD27|D9RD27\_STAAJ  
mkerghieqlwreekyhvlhsqqsyqmirnalktdlslhqvqqmiddalliepsigsvcnafdhmwyfkkcaneerq  
qskllkadfingkidtqt  
ldflaelankydvqyllqsrvlntkrkr  
>tr|D9RD28|D9RD28\_STAAJ  
mtcqkkihhtlstipsrninnimvlfsltsklnitiningetkdvsniiilnhgdiyninhgeniieImipvfyfyqqddd  
ffngyl drhllqssnyiks  
liadlistptsslmgnigqsiddtllkeafiridheylpnialsnpvfidcvnyihdnidahlsldkdiamhcnisesy  
csnlfvrylsmnfkdyfts  
iklvnainlllstkhsittvselagfnshntfanqfknylhfspkqfrslvskiteppqihfqdnvsqftelistidlt  
aqlatnttdihiddfnpkd  
rsqrakvfvrfnsfnelfqfifneyydingfehlpkpvvfiddihdieisqtnynllnrcfeklfekniglaiaikstqqf  
etmkqllitflqgnqdykt  
skklvkfmlvfcnsmtaeeihlchlknknkeikysvtvdgfl etystveqvydvmmqrkfhyyfidiensktathli  
tknqhyhqt dthfeaykkf  
ildsgisstqfvynnlsvsgfkytndgknpiqlsdivyhliallrygggisqyllddhsnyislynkygspplmhlykm  
frpfvnedieitnnyvlsr  
kdnyhfllfnkndrymsdvkqdfifhnelpqdsImiiktlnhehgsiqhllptsdqlvyiekeildeIdktnypkte  
avgeetgrtfelklnhdev  
kyicfkps  
>tr|D9RD30|D9RD30\_STAAJ  
mknkkgfglgisliamlivcivlvimmmtgkkdtyyigmkdnatiekmisekdesieknvklpsdadvsvkkgdfviv  
ykladskivkvkvdhdd  
vphglmmki hdmgkmhmkh  
>tr|D9RD34|D9RD34\_STAAJ

Tsompanidou\_et\_al\_Supplemental\_FASTA\_File

mnfnqfenqnfngnpsdtfkdlgkqvfnfstpsfvtniyetdelyyleaelagvnkedisidfnntltiqatrsakh  
kseqllildernfeslmrqf  
dfeavdkqhitasfenglltitlplkikpsnktsstsipis  
>tr|D9RD35|D9RD35\_STAAJ  
myktkggfqltqltllsvvgfmawsiiaplmpfikqdvntegqisiilaipvilgsvlrvpfgyltnivgakwvfftsf  
ivllfpiffllsqatpgml  
masgfflvgggaisvsgvtsvpkyfpkekvglangiymgnigtavssflappiagiigwqttrtyliiialfalimfi  
fgdtqerki kvplmaqmt  
lsknyklyylsywyfiftgafvafgflpnlylvnhfgidkvdagirsqvfialatflrpiggilgdkfnavkvlmidfvv  
miiigaiilgisdhialftv  
gcltisicagigngli fklvpsyflneagsangivsmmglggffpplvityvanltgsshafiflavfgcialftmrh  
lyqkeyslnkg  
>tr|D9RD38|D9RD38\_STAAJ  
mtpelaiiedrrfgetldkirkkeegydfaaiafyesnkpsspikwhyvsgnkknrfkliilrkgrglagtmktgkrmvia  
nvglalgpseekidypll  
esltavlavplwyknqvygvllfgqrdgrplpki fdnddiqrkfgifnddn  
>tr|D9RD42|D9RD42\_STAAJ  
mgkfglnffkptekfngnwsilesksrewekmyrerwshdkevrtthgvnctgscswkvfvkngvitwenqtdypscgp  
dmpeyeprgcprgasfswy  
eysplrikypyrkglwdlwealeenngnrvaawasivenedkakqykqargmgghvrsnwkdvteiaaqllytikky  
gpdriagftpipamsisy  
aagarfinllggemlsfydwyadlppaspqiwegeqtdvpessdwynasyiimwgsnvp ltrtpdahfimtevyrgtkvis  
vapdyaenvkfadnwlapn  
pgsdaai aqamthvllqehyvnqnerfinyakqytdmpfiiml dedengykagrflrasdlgqtteqgewkpvihdais  
dsvvpngtmqgrweedkk  
wnlkl etedgskinp t l smtegye letiqfpyf dsgdgi fnrpi ptrqvtlangdkvriatid lmasqygvr rfdhk  
leskgyddaeskytpawqe  
aisgvkqsvviqvakefaqaaidtegrsmiimgaginhwfnstiyrsilnlvmlcgcqgvngggwahyvgqekcrpieg  
wstvafakdwqpprlqng  
tswfyfatdqkweesnvdr lksplakteelkhqhpadyvlarlgwlpsypqfnknsllfaeakdegiesneailkr  
aidevkskqtqfaiedpl  
kknhpkslfiwrsnlissakgqeyfmkhllgksgllatpnedekpeeitwreettgkl dlvsldfrmtatplysdiv  
lpaatwyekhd lssdmhp  
yvhpfnpaidplwesrsdwdiyktlakafsemakdylpgtfdkvttplshdtkqeistpygvvkdwskgeieavpgrtm  
pnfaiverdytkiydkyvt  
lgpvlekkgv gahgvsfgvseqyee lksmlgtwsdtnddsvransprid tarnvadail sissatngkl sqksyedleeq  
tgmp lkdisseraaekisf  
lnitsqpreviptavfpgsnkqrryspfttnierlvpfrltlgrqsyyvdhevqqfgeslpyvktlppmvfgnr dkk  
ikggtalvlryltphgkw  
nihsm yqdnk hmltlfrggptvwi snedaekhd iqndndwlevynrngvvtaravishrmpkgtmfmyhaqdkhiqtgse  
itdtrggshnaptrihlkp  
tqlvggyaqisyhfnyygpignqrdlyvavrkmkevnwled  
>tr|D9RD43|D9RD43\_STAAJ  
msvdeykvyligaggnpnlytkkaerli readvilydr lvnplilqyanltteiidvgkkpyakhiaqekindcivea  
arrynkvvrlkggdpaifg  
rvqeevdtlnehhaifeivpgvtsasaavatmqtgl tmrtvaksvtfstghfdseenev dvnslvnggtlaiymgvkr l  
gk iitqi qytdidypivi  
vfqascfnefvkg rlnisisklqhysieakpgiciigevvgytentpk sydptkqfyvvs gskhdalmlceylydkgyg  
c llnpndtsngtyhpsqyd  
yydafikqgenvtyistdradantvlch  
>tr|D9RD44|D9RD44\_STAAJ  
metkekikvttl deltp ligk kvi vkgkeig l fltesgkihahnicphkqgp l segtvsgeyvfcplhdqkidlntg iv  
qepdegcvdvyevetdgn  
vyicl  
>tr|D9RD45|D9RD45\_STAAJ  
makqklvmignmagi rteeilerandlyditvigkepypnynriml snilqnkmtveetimpyewyeehgielitnd  
pvievdranqsvttangie  
vsydklifatgskafvipvgstlpsvigwrtiddtekmmniaktkkkaiviggllglecarglldqgmevtvlhlaew  
lmemql drkagnmlkadle  
kqgmkfemqantte ilgeddvegvkladgreipadlvvmavgirpytevak esgl dvnrgivvndvmqtsdsnvayavgec  
aehngkvylvaplyeqgk  
vladhlnketngykgsttfts lkvsgcdlysagqivenaeikgieifnsvdnnyk kflkdgnvvgavlygdid dgsrf  
ynmmkkgstedyt lvsll  
tkggeeaslsiadmaddeticgcnvgdktivnaikengfitvevtaktkagnscgkckpqi aqilqhtlgddfvaakp  
agtcgctdltrdqivtqir  
akglktskevrhvl nfnknkggcpkcrpainyylnmvphd hederesrfaneryhaniqndgtfsvipqmr ggvtdadql  
ir lgevakkyhvp lkvvtg  
sqrvglygvkkee l pniwedlgmrsasaygk ktrsvkscv gkefc rfgtqytr l girlektfeyidtp hkfkmvgvsgcp

Tsompanidou\_et\_al\_Supplemental\_FASTA\_File

rscvesgvkdfgiisveng  
fqiyyggnggtevekaeflittvetedeviklcalmqyyretgiyaertapwlrrlgfenvkevllnperqnelferimd  
akkaveaepweaitsnaqa  
rkifevekv  
>tr|D9RD46|D9RD46\_STAAJ  
mngniivahgmrhgrnqallafisevlkddihhydiaflsehqdletvmttlvqsgvdhfkivpllifsamhylkdip  
divhemkrrypdi kvevse  
plgthplmrrlieqricdalagdeqqvgvmvahgningkftkaheelqicaqlriskptyartlygeisfthdleris  
kryqkllivvplflydgrlv  
nkvkqrmnmvinpdihitpsinfdpilkqiindrleslndsnenikaqtktfkl  
>tr|D9RD47|D9RD47\_STAAJ  
mtnttirlanendaetlqqlymykaftplrelgidwpsvnanldavkenidknttfvmtiddeiistitvrfpwgsvksis  
gypfvwwfatnpeyegky  
gsqllityveeafldrtilksaavtlgtsarlhplwllkiyekrgyeiysehnddglgvimrkvliperfdetilgqppf  
>tr|D9RD48|D9RD48\_STAAJ  
miknktvedtystkaivdsissvqmqqvmvqtpgrymlksmmagflsivtvmfmgiktqfasthvdglinlmgaiia  
fslglvlvvtlnselltsn  
fmyftvgyykvvsinkmmwillycflgnilggfvlfflmkyahvmtpemtqaltaqvkktdstwl niftkgifcnff  
inigi fismqfkggltkaf  
fiacgvi vfyvmgyehvvfnaglyagmvffnl davswlhvlnivfaflgnfvvggi fvglvyaflngkrnrleqq  
>tr|D9RD51|D9RD51\_STAAJ  
mkkklgmlllvavtllsaaacnnddgkdkdgvtkittvypqlsfaeqiggkhkvsvsiypagtdlshyeptqkdilsas  
ksdlfmytgdnl dpvakkv  
astikdkdkkllslekdldkalltdqhegeehheghdhekeehhhggypdphvldpkinqtfakeikdelvkkdpkh  
kddyeknykklnddlkkid  
ndmkqvtkdkqgnavfshesigy ladrygvqkqigqnmnaedpsqkeltkivkeirdsnakyilyednvankvtetirk  
etdakplkfynmeslnkeg  
qkkdni tyqslmksnienigkal dsgvkvkddkaeskhdkaidsgyfkdeqvkdrelsd yagewqsvypylkdgtldevm  
ehkaendpkksakdlkayy  
dkgyktditnidi kgneitftkdgkktgkyeyngkktlkypkgnrgvr fmfklvdgndkd lpkfiqfsdhniapkaeh  
fhifmgndnda llkemdnw  
ptyypsklnkdqikeemlah  
>tr|D9RD52|D9RD52\_STAAJ  
marlnitfspqafedykyfqndkkmvkkine llksidrngal kgigkpek lksnl tgyysrrinhehr lvytvddnhik  
iasckyyh  
>tr|D9RD54|D9RD54\_STAAJ  
mtkkl lltl fivsm liltacgkkesattssksgkplivi ygdykpyckeldekvmplrknyidnhkveyqfvnlaf lkg  
dsivgsrashav lmyapks  
fldfqkql faaqdenkewl tke ll dkhi kql hldketenki ikdyktkdskswkaaekdkkiakdnhikttptafinge  
kvedpydyesyekllkdk  
k  
>tr|D9RD56|D9RD56\_STAAJ  
mnfvlttsdefnafttkhfshytqsai hynhrvd lkgdvh lvgvkddngeviagc llteartlkffkyfythrgpvmdyt  
nqslvafffkalt sylkkq  
nclyvlvdpylie lnradgeivksydnrafvrtmdtlgykhqgfvpvgysmsqirwlsvldlkdktedqllkemdyqtr  
rnikktydigvktktl tid  
etqtfddl fhmaeekhgkfre lpyfeemqklyddhamlkl ayid lkeylktlqlkqqqltaelsgveealeespnskkn  
ktrtql eqqlnsnrkid  
ntieqiegdgavlnlasal fiynehevyy lssgsnpkynaymgayhlqwemik fakahhidrynfygitgdfessedyg  
vqfkkgnahveeyigdf  
ikpikpllykvqtylnhkr  
>tr|D9RD57|D9RD57\_STAAJ  
miqlnnihksfndvevikgidlsveqgevvtligrsgsgkttllrminaleiptegtyvngktytskdkksqievrkqs  
gmvfqsynl fphktalenv  
meglitvkkllkdeargkslell ekvglthvkdqrphal sggqqrvaiaral amnpkvm l fdeptsaldpelvndvlkv  
ikdlanegmtmvivthemr  
fakevsnnivfihegmigeqgtpeemfnrpkteelrrflnvinee  
>tr|D9RD60|D9RD60\_STAAJ  
mskkqkl tmiitmlmgffgl netllvta lpsimkdfesytqvqlttaflltngiviplsalviqryttrqvflvgi  
siffllgtllgg l sphfatl  
lvariiqal gagi mmp lmm ttildvfqphergkymg ifglviglapaigptlsgylveyfnwrs lfhvvapiaavtflig  
fktiknvgttikvpidfis  
vifsvl gfggllygtssjsek gfdnpi vlsvmiggvvlvalfv lrqyr l stpllnfavfknkqftvgi iimgvtmvs mig  
setilpifvqnl lhrsald  
sgltilpgai vmafmsmtsgalyerfgprkla lvgmai vvitayfvvmdeqtstimlatvyairmvgialglipvmtht  
mnqlk pemnahgssmtntv  
qqiagsigtaal itilshasknfsptmsdyngmknidmmnqikvdtmlhgyhagflfallitvvsffcsfmlqgkkevdsr  
srq

Tsompanidou\_et\_al\_Supplemental\_FASTA\_File

>tr|D9RD62|D9RD62\_STAAJ  
mshnenlklahqgaylsliuyiilsivkyvtgfvfnsaavradaInmtdiivslaviiglkiisikpadrnhpyghlkse  
nisslsvfvmfvgiqvv  
iqnaprflkeddvvpnaitiivslisglvmlivfavnrakrsksslnsaakdnlsdsvsigtaiglftqigfpiv  
diilatllgllivytgfgi  
fkeai fmsdgnfeteleayrndilevdevqevksikgryhgssvfidvtivdanlsiveahqicdnvehhllkkgiss  
vyvhpepdhl

>tr|D9RD63|D9RD63\_STAAJ  
mknkyiskllvgaatitlatmisingeakasentqqtstkkqqtqnnyvtdqqkafyqvllhkgiteeqrnqyiktIrehp  
eraqevfseslkdsknpr  
rvaqqnafynvlkndnlteqeknyiaaikenpdrsqqvvesvqaskakerqnenankaiqdfqdnkaphdksaayea  
nsk1pkdlrdknrfvekv  
siekaivrhdervkaandaatk1qkddsienrrlaqrevnkapmdvkeh1qkqldtIvaqkdakkksspkevpqi qspq  
iekpkaespkvevpki qsp  
kvevpqskllgyyqslkdsfnnygykyldttsykykydytakyyynkyqykgli dqtvlttigsgygsyikplevskes  
gnlaksyaqvrnyvtesin  
tgkvltyfyqnp1vktaikaqetassikntitglfnsfwk

>tr|D9RD64|D9RD64\_STAAJ  
miknkil tatlavglia p1anpfi eiskaenki edigggaei krtqditskr Iaitqni qdfvkd kkyndalv kmaq  
gfissrttsydllkkyppik  
rmiwpfqynis1ktkdpnvdl inylpknkidsadvsqklygniggnfqtapsiggsgsfnyktsin qnknyvtevesqn  
skgvgwgikansfvtpngq  
vsaydqylfa qdptgpaardyfvpdnq1ppliqsgfnpsfittlshergkgdksefeitygrnmdatyayvtrhlavr  
khdafknrvtkyevnw  
thevkiksitpk

>tr|D9RD65|D9RD65\_STAAJ  
mlknkmlattl sisliaplatplfenakaandtedigkgsdveiikrtedktsnkwgvtniqdfvkd kkyndalilk  
mqgfissrtaynykksnh  
vkamrwf qyni g1ktndpvnsl inylpknkienstnvsqtlygniggnfqsapslgngsfnykssisytqqnyvseveq  
qnskglwgvkansfates  
gqksafdsdl fvgypkpskdprdyfvpdse l1p1vqsgfnpsfiatvshekgsgdtsefeitygrnmdvthaikrsthyg  
nsyldghrvhnafvnrny  
vkyevnwkttheikvkqgn

>tr|D9RD66|D9RD66\_STAAJ  
mknk1v kssvatsmal111sntanaegkitpvsvkkvdkvtlykttatadskfki sqiltfnfikdksydkdtlvk  
aagninsgyekpnpkdydf  
sklywgakynvis ssgsndsvnvdyapknqneefvqntlygtf ggdisisnglsgg1ngntafsetinykqesyrtt1  
srntnyknvgwgveahkim  
nngwgp yg rdsfhptygne lflagrqs ssyagqnfiaqh qmp11sr snfnpeflsvlshkqngakkskitvtyqremdly  
qirwn gywaganyknfkt  
rtfks ty eidwenhkvk11dtketeink

>tr|D9RD67|D9RD67\_STAAJ  
mtskdmtqisaiaa iltlavlkipsi1pgldfqlsapva l1laffgikkyf1gg1lssi11lilgvfnpinvmis1tf  
rliaifvvyllk invls1v  
lasvlgs11sr11l1si11n1pvwav11ntipgii ftii laiplyltlrkrmav11r

>tr|D9RD68|D9RD68\_STAAJ  
mysikmrssnqdvhisgaeticefdkieqtvr fyngkffhengqpdflnikiqkii epiqqikalqiiedd kanl qhlt  
qecgvteqalnqgmryien  
etvytgaii1satsgkrl dsfgqrgi rathfsfedin kanltervk dalaiascv nahsyvkgelcvsd d1tyttgyfa  
saki gyhrlfdi kpntry  
ggriifvdds idldhyis fl estpkqviyetv

>tr|D9RD69|D9RD69\_STAAJ  
mfqeqid11qqkglyrs1ksvgyidr qyievekerfvnftsndylglgqiafdkddferfmrkysyh1sssr1isgssva  
yeeiesmlsgwlgysacti  
fnngydanlal fni fkntrcnv fsdqenhasiidgiklsglekviykhldiadlekr laeapn qniqkiii dsdfstng  
dvvdigq1vs1k hkynat1  
ildvshsfgienysnyqgidiltssl skacgayggvilssndvkdm1inhgrpiysss1piynlyfikrnieklinadd  
rrtklns1skyfnqk1ka1  
nvny nssnspikfiefddieaeni hqt11khhvftsylryptvtpm1ris1syfhte qdvdr1feilhqed

>tr|D9RD71|D9RD71\_STAAJ  
mnytqqlkqkdseywhpftqmgvyskeeaii iekgkgsylydtngnyldgyaslvvnvhghnkylnkvikqlnkia  
hst11gssnipsielaekl  
ieitpsn1rkvfysdtgsasveiaikmayqywnidrekyaknkfit1nhgyhgdtigavsvggikt fhkifkdlifen  
iqvesp1lyrsnyeteaem  
maailqnieqilidrndeia gfilepli qgatglfvhpk gflkeveklcnkynill icdevavgfgrtgk mfachhedvq  
pdimclgkai tggylp1aa  
t1tsqki ydafi1sdshgvntffhghtytgnqivctvaleninlyekrk11sqikktsttlekqlqtlkrhpnigdvrg  
1mfgve1vadkdkstplei

Tsompanidou\_et\_al\_Supplemental\_FASTA\_File

ekverivrnckenglmi rnlenvitfvplsmnskevktmvrifkkavhnildrkc  
>tr|D9RD72|D9RD72\_STAAJ  
mri f i t s t n t d v g k t y v t k h l y y a m k t r g h r v c i f k p f q t e e r q d g t f p d l e v f k n e c d l s y d i t s l y t f k q p v s p h l a f  
k m a d q i f l n k q r v l e k v k v  
l d k e f d i v l j e g a g g i g v p l y e g t d d f y m t k d l i n d c a d c v i s v l p s k l g a i s d a i v h q d y v n q n v s a s n f l i m n r y t d s  
y i e k d n q m t i g k l n k t v y  
t f e e h a t y e n f s e a f l k q l i g v k n e l h t t t  
>tr|D9RD73|D9RD73\_STAAJ  
m k l t q t h a e i l k f v i v g g i n t l n y y v v y l l l l k l f r i e y m i s h i t g f i v a f v i s y l n c y f v y r v k p t w r k f i s f p i t q l  
v n v s l q t v l l y v f v s w l n l  
p a e i a p f a g l v i t i p i t f v l s k w i l k d s n  
>tr|D9RD74|D9RD74\_STAAJ  
m q l q k i v i a p d s f k e s m t a q q v g n i i k q a f t n v f g n t l h y d i i p m a d g g e g t t d a l m h a t g a t k y t v i v n d p l m r p i e a c  
y a r a d e q q i a i e m a a s g  
l d l l e k e e r n p l y t s s y g t g e l i k d a l n h g a k t i i l g i g g s a t n d g g t g m l s a l g v k f t d v n g d l l q m n g a n l a h i a q i d  
i t n l d t r l k e v t f k v a c d v  
n n p l l g e h g a t y i y g p q k g a d a k m i p k l d f a m s h y h d k i k m c t g k s v n q i p g s g a a g m g a a l l a f c e t t l t k g i d v v f d  
i t d f h q r i k d a d l v i t g e g  
r m d y q t i f g k t p v g v a l a a k q y h i p v i a i c g s l g e n y q h v y d f g i d s a y s i i s s p s t l e d v l q n s e q n l l n t a t d i a r i l  
k l q  
>tr|D9RD75|D9RD75\_STAAJ  
m k r t d k y r d s y q y d n q n q n h r r q s e d a s y r q q y a k g d p e e h p e r y n g r d y r r e q i l e e n e k s r r s k k w l y i i i a i l l i  
i v a i f v t r a l l n n d s d k v s  
n d p e v s q n y k k q v e n q d g q i n q q v d n a k e n i k n n q k t d d i i k n l q n q i d n l k q e q n k a d s k l t q f y q d q i n k l t e a n n a  
l k n n a s q g k i e s m l n d i n t  
k f d s i k s k l e s l f k d d n g g a n  
>tr|D9RD76|D9RD76\_STAAJ  
m q s s k t k t k h f s f l l l i t l g v m t a f g p l t i d m y v p s l p k v q g d f g s t t s e i q l t l s f t m i g l a l g q f i f g p l s d a f g r k r  
i a v s i l i i f i l v s g l s m f v  
d q l p l f l t l r f i q g l t g g g v i v i a k a s a g d k f s g n a l a k f l a s l m v v n g i i t i l a p l a g g l a s v a t w r s i f t i l t i v a l  
i l i g v a s q l p k t s k d e l k  
q v n f s v i k d f g s l l k k p a f i i p m l l q g l t y v m l f s y s s a s p f i t q k l y n m t p q q f s v m f a v n g v g l i i v s q v a l l v e k  
l h r h i l l i i l t i i q v v g v a  
l i i l t l t f h l p l w l l i a f f l n v c p v t s i g p l g f t m a m e e r t g g s g n a s l l g l f q f i l g g a v a p l v g l k g e f n t s p y m i  
i i f i t a i l l v s l q i i y f k m  
i k k q h v a  
>tr|D9RD77|D9RD77\_STAAJ  
m e y q l q q l a s l t l v g i k e t y e n g r q a q q h i a g f w q r c y q e g v i a d l q l k n n g d l a g i l g l c i p e l d g k m s y m i a v t g d n s  
a d i e k y d v i t l a s s k y m v f  
e a g g s v p k a v q q k m e e v h h y i h q y a e t v k s a p f f e l y q d g d t t s e k y i t e i w m p v k g  
>tr|D9RD79|D9RD79\_STAAJ  
m k i g t j a d l h i d r h n k k t s e d y l e a l v e i v k y k n l d i l l i a g d i s n h y q l t h q f i t q l t k q l d i p v k f v p g n h d l w e v e s  
m t t q d i w n n y k s m s q l v g  
k p f i v n e w a i i g h t g w y d y s f a a q r f s l d e l q r g k h y g a t w q d k e r i s w g i s d q n l s k i a a e q v k k d i l e v g n r r v i l v  
t h v v t h p d f i v p m p h r i f d  
f y n a f i g t s d f n p l y a m f d i p y s i m g h v h f r k s v m d d g r c y l c p c l g y p r q w r s e d i y q e i n e t i q i e i  
>tr|D9RD81|D9RD81\_STAAJ  
m a l l e a f l i f i f a v i i s s v i n n r f p q i p t a f i q i a l g v v i f i i p i q v d f q f n s e v f m f a v i a p l l f v e g t h v s r t k l l e y  
r k p i l l m s m a l v f a t v v g v  
g y f i h w i w p a l p m p a a f a i a a i l c p t d a v a s a i t r g k l l p k g s m t i l e g e s l l n d a a g i i s f k i a v t a l v t g t f s l f q a  
v e q f i i s t i l g v l i g a i i g  
f v v v r i r i d l t a n k g l k d n n t l t f i q l l t p f v v y f l a e e v h a s g i i a v v i a g l i h g l e r d r l i r a q t e l q m n y h q i w n t f  
s y a l n g f v f v v l g f m i p t v  
v i d i f q t e p d n f s f l i v i t i l i a i a i y a c r f v w v y f w y k d f y f p k n i q s y l d e e h d s h e t p p s r v r y a f i m t m c g i h g t i  
s l s m a l t l p f i i t k g q a f e  
y r n d l l f i a s f m v l i s l i l a q i v l p l i t p s a e d t t f k g m t y q s a k i f i v q k v i q h f k n e s k k d k n d t n y r p v l n q y y g e l  
l f l l n s e p d n q n t k e l k r l  
e d i a k v i e t s t l e r l i d k g k a t y q d i n n y r n i v e l t e t h r t a s f v e k f a n f f k m l w l r l k a m k h y k a l n k e s k k q e f e n s  
f k d v q k i m r i v n h n i l r l  
k e e q n s t n v l e v s l v i n h y d m s r s l k w r a q r r k e r q e n s n q i p q a m f h n h k l e a l y l q r h l l d e l i r k n k i n n i v a a q  
i r e n i n y n e i v l s l q s k d  
>tr|D9RD82|D9RD82\_STAAJ  
m f n q f k r l i i g q p k n r e l k d e k i s k f k g l a i l s s d a l s s v a y g p e q i l i t l s v v g a v a t w y t l p i a g a v l i l l a a l i m s  
y r q i i y a y p k g g g a y m v s k  
t n l g e k w g l l a g g s l l v d y i l t v a s i s s g a d a f v a a f p s l y g h k v l i a c l l v l f i l i l n l r g l t e s a t v l s y p v y l f i i  
g l v l i l i f i g t f r v a t g d i q  
p h m h a s v g t a v p g v l f l l k a f s s g a s l t g v e a i s a v t n f r e p s a n n a v k t l i a m g s i l a f l l v g i v g l a y v y g i m p  
q t e t t v l s q l a m q i f g d n a

Tsompanidou\_et\_al\_Supplemental\_FASTA\_File

afyfvqattvmilvlaantgftafpmlaasmskdkymprmftrvgrdlgysnsiilglvialiiivfdgmtedliplya  
vgvfipftlaqfgmviwk  
herpknwlsklsvnllggivtfivfmillitkfsqvwpiiliflpfvviffkinkhyrdiaeqlrssidvlnvdvdrnl  
aivpitsittavdksiyya  
qmlanndviavhsfgdedekafgekwrhfpdvrilvhseysriirpisrfidkinrkandqnymitvvipecitkkr  
whnlhntslrmklyliy  
qknvncvctipfklkk  
>tr|D9RD83|D9RD83\_STAAJ  
mttkklyflsisiiilvaisaiyitlnsntktrltndsqqqidtiiehdllqkghippgasilivkngkvflnkgygyqdv  
dkkvkaspttkyeiasntk  
aftglailklaqegrlnlndavskhvphfkmnyngqtetitikqlaqtsgipsditsedavtnknrlndvtraimgde  
lhhkpggefeysnmnydl  
gliinqvntkqsytkyitnswlklplhmthtsfkqtnnkskhdaigyelqgstpvvskpefnlwdtpsaymmtstedlehwi  
kfglnppdkykslvqqshk  
nlststigeptanayasgwftnndehlvfhsgtldnfssfillnpkqnygivvianlseyvplvehlntqivnhkryst  
vasmlnqyknqfnivtvlm  
ttlillafisayrawqmrhgkiilrksklttflswlrlcsciaialilyalpylilgsnwsfvltwlpieiklitt  
lialfstlivillflhtki  
tkk  
>tr|D9RD84|D9RD84\_STAAJ  
mskifvtgatgligiklvqrllkeeghevagfttsengqqklaavnvkeyigdilkadtidqaladfkpeiiinqitdlkn  
vdmaantkvrriegsknlid  
aakkhdvkkviaqsiayfmyepgeganeetsldfnstgdrkvtvdgvvgleetarmdeyvvlrfgwlyggptwygkdg  
inyqfmdgqvtlsdgvtstf  
vhlldavetsiqaihfenyinvaddepvkgsefaewyqaqlgvepnidipaqpfergvsnekfkaqggsliyktwkdg  
mpik  
>tr|D9RD85|D9RD85\_STAAJ  
mkiaiaagsgalgsgfgaklfqagygtlidgytshveavkqghlnitingeafelnipmyhndqpdesydvvlfpks  
mqllkevmeamkphidneti  
vvtmnglkheeviaqyvaqsivrgvttwttaglespghshllgsgpveigelvdegkenvikvadllneaelngviskd  
lygsiwkkicvngtanals  
tylecnmaslnessyakliyktqeiwhvatidnvhlnvdevfeylvdlnekvgahypsmyqdlivnnrkteidyinga  
vatlgkqrhieapvnrfit  
dlihtkesqrhaqd  
>tr|D9RD86|D9RD86\_STAAJ  
mdtskqfrgdnrlilgivilgvitfwlfaqlvnlvvpqlqstysdvgtniavslsalfaglfivgagdvadkfgrvkit  
yvgliilnvgsliiitpl  
pafliigriiqglsaacimpstlaiineyyigtrrqralsywsigswgsgictlfgglmatyigwrsifvvsilltlla  
mylikhapetkaepikgm  
aeakkfdviglivilvtmlslnviiqtstshfglvspililglivvficslvgfvyenkiikhplvdfsifknrgysgatis  
nflingvaggalivintyy  
qqqlgfnsstqgyislyliavlsmirvgekihsqhgkprlllgsgftviglillsstflpemwyivssivgyllfgig  
lgyatpstdtavasapdd  
ksgvasgykmaslgnafgvavsgtvytvlaanlnlnlggftgmmfnallaiiaflvilllvpknqtnl  
>tr|D9RD88|D9RD88\_STAAJ  
mkkikyilvvlvslvtlsgcslpplgskstkndvkitalstsesqiishmlrliehdthgkikptlvnllgsstiqhn  
alingdanisgvryngtdl  
tgalkeapikdpkkamiatqqgfkkkfdqtfdsygfantyaamvtketakkyhletvsdlakhskdrlngmdsswmnrk  
gdgyegfkkeygfdftvr  
pmqiglvydalnsekldvalgystdgriaaydlkvlkddkqffppyaasavatnellrqhpelkttinkltgkistsemq  
rlnyeadgkgepavvae  
flkkhhyfdkqkgghk  
>tr|D9RD89|D9RD89\_STAAJ  
mieflheggqlmsktlehyfisivalilaiivavpigillsktkrtaniiltvagvlqtiptlavlaimipifvggktp  
aivalfiyvllpilnntvl  
gvqnidsnikeagksmgmtqfqlmkdvelplalplilggiirlssvyviswatlasvvgagglgdfifnglnlydplmivt  
atvlvtalalgidallaiv  
ekwvvpkglkvsq  
>tr|D9RD90|D9RD90\_STAAJ  
mlsikhltkisygnkavddisldiqsgefiatfigtsgsgkttalrminrmieategqieidgkdvrsmnpvelrrnigy  
viqqiglmphmtikenivl  
vplllkwskeekdrakeliklvdlpesflerypaelsggqqqrigvvralaaeqdiilmdepfgaldpitrtdlqdlvk  
tlqrklgkftifvthdmd  
aikaladkicimsegkvvqfdtpdnrlrhpandfvrdfigqnrliqdrpndktvegvmikpitiqaeatlndavhimrqr  
vdtifvvdrrkhlilgflidi  
edinqqirghkslrdtmqqhiytvqidsklqdsvrtilkrnrvnpvvdrrqlvglitravvdivydtiwgdsedtvq  
tehvgedtasskvheqht  
nvkvrDIGDDKS

Tsompanidou\_et\_al\_Supplemental\_FASTA\_File

>tr|D9RD91|D9RD91\_STAAJ  
msekqsneqveaflnkesqweeyky1ralifneteleaykwmhpcytlnnknvvlhgfknvya11fhkgailedkyh  
tliqqtekvqaarqlrfen  
lteiqvrteeikyylaeaikaekagkkvemkkteeyvipkeleakfeempqllessfykltppgrqhqiyyhigqakrsetr  
qkrvekyinqilegkghmd  
k  
>tr|D9RD92|D9RD92\_STAAJ  
mnkdkqlhndkinlsqvl1lg1gsligsgwlfgabeassiagpaaiiswvlglvigtiaynyeigtmfpqsggmsnya  
qythgs1lgfiaawanwvs  
lvtiipieavsavqymsswpwhwakpmkhlmengsistygl1avyliiii1fs11nywsvk11tsfts1isvfk1gvpmlt  
iim1mlsgfdtsnyghsas  
tfmppygsapifaattasgiifsnfsqtiinmgseiknpekniargiaisl1savlyiilqstfitsmpqsm1qhsqwk  
ginfnspfadlaillginw  
laillyieafvsgfvtgsvfvavtgrvlrameknghipkflgkmnekyhiprvaiifnaiismimvtlfrdwatlaavis  
tatlvayltgpttvia1rk  
mgptmtrpfrakilkvmap1sfvlaslaiywamwpttaeviliilglpiyffeyermnrntkkqiggs1wiivyliv1  
silsf1gskfkg1nmiyh  
pfdfiiviiivaliifyigtssfesvyfratrntkmres1nneskssh  
>tr|D9RD93|D9RD93\_STAAJ  
mkinttggqihgitqdgldifligipyaepvhdnrfkhstlktqwsepidateiqpippqpdnkledffssqsttftthe  
dcl1yn1wkqhndqtkkp  
iifyfyggsfenghgtaelypahlvqnn1iiv1tcnyrlgalgyl1dwsyfnkdfhsnng1sdqinvikvwhqfiesfggd  
annit1mgqsagsmsilt1  
lkipdiepyfhkvvl1sgalr1dtlesahnkaqhfqkmm1dyldtdvts1stddil1mak1kqsrqpskgldliyapi  
ktdyiqnnypttkpifacy  
tkdegdiyitseqkklspqrfidime1ndiplkyedvhtakqslaithecyfkqpmkqflqq1niqdsnaqlwlaefawh  
dtssahyrsayhil1dmvfw  
fgn1qilaahqypttah1kflsrqm1qnd1anfaksgkmpwpmynherryrytyq  
>tr|D9RD95|D9RD95\_STAAJ  
msntalgl1tal1lvipi1iisykeglhiikdlivat1ravvq1iilgl1lhyifkindkwl1v1cvfviivnaswntisrs  
spvmhhvfl1isfvai1fvgt  
al1plagt1atgaitftanevipiggl1anngliainlayqnl1drafvqdgtniesk1sla1atpklaskgairesirlaiv  
ptidsvkt1ygl1vsipgmmt  
gliiggvpp1qaikfql1vvfihttatimsaliaty1sygqffnarhq1varntdvkses  
>tr|D9RD96|D9RD96\_STAAJ  
m1leikdlvykasdri1dhislkvdkgesia1igpsgsgkstfqkqicnl1sptsge1lyfkgkpyndydpeelrqrisy  
1mqsd1fgetiednmi1fp  
s1arndkfdkkrakql1kdvlg1ghyq1sskiehmsggerqriaiarq1mytpdi1111destsaldinnkekeniifkla  
dggvaimwi1thsd1d1qsmrh  
fqkritivdgqisntee1nqhe  
>tr|D9RDA0|D9RDA0\_STAAJ  
mkk1cs1ivvalvcia1sacgkeqtkt1yegdvsgkhv1tsitykddkv1kqstintikyddl1gmdkdeakkl1faksesi  
fkn1kgvkykvdykdkkai  
eh1ld1dytevd1mkk1nkr1lgvstkenkdisfeklekq1khrgl1kekdkmddk  
>tr|D9RDA2|D9RDA2\_STAAJ  
msntnkh1yieeeyateqsrffkrdigfi1flyi1flvni1lpivivfst1gliaiftqapwdf1ffpis1nisc1l1lavi1sla  
if1rmhedafvpm1rsqiv  
asakykwhi1sft1siv1fl11nhfdifa1nvdaftvfdi1yplireygsi1liaif1s1ti1ilntlicql1frhiliqel  
sr1ip1k1it1iv1svilet1  
yy1pyintw1wefipal1lassaty1lyksnrnfmvsyfyqlavil1vlhifm  
>tr|D9RDA3|D9RDA3\_STAAJ  
mkgamawp1fl1ryil1tmffsanai1nvfipl1rghd1gatntvigivmgayml1tamvfrpwagq1iarvgpikvl1riili  
inaia1li1y1gft1g1egyfv  
arvmqgvct1affms1qlgi1idalpehrsegv1s1y1fstipn1ligpl1vavgiwnasni1s1faivi1fial1tttffgyr  
vtfaeqep1dtsdkiekmpf  
navtvfa1qffknkell1nsg1imivasivfgavstfvplytvs1lgfanagif1ltiqaiavvaarfyl1rkyipsdgmwhpky  
mvs1v1s1llviasfvvafgp  
qvgai1fygsai1ligmtqamvpypt1tsy1sv1lpkvgrnm1lg1fiacad1gvs1lggalmpisdlvgfkwm1ylicgm1v  
ivimims1llk1kptsr1pans  
1  
>tr|D9RDA5|D9RDA5\_STAAJ  
mt111tvkh1lt1tdtwt1d1qpl1vrdv1hftvtkget1lgvig1esgsgksit1cksivgl1nper1rvtgd1itfdgkpm1sl1seaql  
kkyrgkdi1amvmq1qgsraf  
dpsttv1gk1qmfet1mkvhtsmstqeiekt1ieymdyl1skdpkri1ksypym1sggm1qr1mia1al1al1kpklii1adeptt  
ald1ti1tqydv1leafidikk  
hfdcamif1shd1tvink1iadr1v1vmkngq1iehg1tresv1lhpehvytky1l1stkk1kindh1fkvmrgdvhd  
>tr|D9RDA6|D9RDA6\_STAAJ  
mi1lkr1l1qdkgavia1lgiiv1lyvil1glaap1vtfydpnhid1tankfagmsf1qh1l1gtdh1lgrdi1l1trliayairps1llyv



Tsompanidou\_et\_al\_Supplemental\_FASTA\_File

fvalfvsvlignsilgflsg  
yfqqfvdalimracdvmlafpsyvvtlialialfgmgaeniimafiltrwawfcrvirtsvmqytasdhvrfaktigmndm  
kiihkhimpltladiais  
sssmcsmilqisgfsflglgkaptawgmmInearkvmfthpemmfapgiaiivmafnlssdsLqvaidprisskek  
Lrsvkkgvvq  
>tr|D9RDA8|D9RDA8\_STAAJ  
mrkltkmsamllasgiiltgcggngleekkenkqlyttvtkdigdmnphvyggsmsaesmiyepLvrntkdgikp1lak  
kwdisedgktytflrddv  
kfhdgtpfdadavkknidavqqnklhswlki stlidnvkvkdytvelslkeayqpalaelamprpyvfvspkdfkngt  
tkdgvkfdgtgpfklgeh  
kkdesadfnkndqyweksklnkvqakvmpagetaflsmkgetnfaftddrgtdsldkdsLkqLkdtgdyqvkrsqpmn  
tkmlvvnsqkknnavsdt  
vrqai ghmvnrckiakeil dggekpatqL faknvtdinfdmptrkydlkkaeslldeagwkkgkdsdvrqkdgknl emam  
yydkgsssqqeaeqlgae  
fkkmgi klningetsdkiaerrtsgdylmfnqtwgll ydpqstiaafkakngyesatsgienkdkiy nsiddafkiqng  
kersdayknilkqiddegi  
fipishgsmtvvpkdlkvsftqsqyeLpfnemqyk  
>tr|D9RDA9|D9RDA9\_STAAJ  
mskllmigtgpvaqlanicylksdyeidmvgrastsekskrlyraykkekrfevkqneahrhlegkfeinrlykdvkn  
vkgeyetvmmactadayd  
tlqqLsletlqsvkhvliisptfgsqmiveqfmskfsqdievisfstylgdtrildkevnhvlttgvkkllymgsthsn  
stmcqhinalseqlniqle  
vvesplhaetrnsslyvhppflmndfsLkai fegtdvpvyvylfpegpitmtli remrlmwkemailqafrvpsvnl1  
qfmvkenypvrpetldegd  
iehfeilpdilqeyllvyrytailidpfsqpdekghyfdfsavpfkvykneqdvvqiprmpsedyyrtamiqhigkmlg  
iktpmidqfltryearcqa  
ykdmhqdqqlssqfntnlfeedkalvtfkleinrtlsy  
>tr|D9RDB0|D9RDB0\_STAAJ  
mnfnneiklilqqylekfeahyervlqddqyiealetlmdysefilnpiyeqqfnawrdveekaqlikslyitaqcv  
kqvevirarrll dgqastt  
gyfdniehcideefgqcsishdklllvsgaypmtliqvaketgasvigididppavdlgrivnvlapnedititdqk  
velkdikdvthiifssti  
plkysileelydlnenvvamrfgdgikalfnpsqettkdkwqcvnkhmrppqifdialykkaaikvgitdv  
>tr|D9RDB1|D9RDB1\_STAAJ  
mnrqviefskynpsgnmtlilhskhdaseyasianqlmaathvcceqvgfiestqnddgnnfhlvmsgnefcgnatmsyi  
hhlqeshllkdqkfkvkvs  
gcsdlvqcaihdcqyevqmpqahrsvpttinmgnhswkaieiiyetyvhyvipvnqvttetiqhlvetfvreqqwndkyk  
tvqmm1fdeqrqflqpliy  
ipeiqsliwenscgsgtasigvfnyqrndackdftvhqpggsilvtskrchqlgyqtsikgqvttvatgkayie  
>tr|D9RDB2|D9RDB2\_STAAJ  
mlnekesfrllyqaireladkigdnqletnsisllllldfdfehevfdklylailkyLntvsieninhidllnlidntipe  
dreintfvknkjiigfann  
yfpelqilaneiksdmasslkq  
>tr|D9RDB3|D9RDB3\_STAAJ  
mkrLenkvavvtgastgigqasaialaqegayvlavdi seavsetvnkiesngdnakayivdiaseqqidnfaseireqi  
ghvdvlfnagvdnaagri  
heyptdvydkimvdmrgtflmtkmm1plmmtkgsivntssfsqgaadlyrsgynaakgavinftksiaieygrdgira  
naiapgtietplvdkligt  
sedeegkafrenqkwmtplgrlgkpeevgklvflasdessfitgetiridggvmaytwpgemlssdswkgtle  
>tr|D9RDB4|D9RDB4\_STAAJ  
mtskerqkgsivnsflnsvekignklpdpsvlfllmcvglailtwlvslfnvsvkhpgthqtihvknishdgtmimnd  
aiknfsefpalglvlavmi  
gigvaektgyfdklmivvnraprflilptiiligilgstagdaatiilpplaamlfiki gyhipiagltmayasavggfa  
anivvgmqdalvysftdpa  
trivesektvamnwyfiaasvvllptiillvttkliiprlgqyddrlmhddheetsshitdkeahalkwanisfivti  
illii taipesflrnakt  
gsllddaplingvgliilvvflvpglvygilskeikntkdlgkmgfdavgsmgtfivivffaaqllaylkwsnlgiaav  
kgakllehgngivliilgii  
vlsamvnm1igsasakwgilgpi fvpmliligfhpaftqviryvgsditnpi tpmmpylp1ll1tyaakydkrmklgalls  
slmpysiasivwtvfvii  
wfl1gipvgpsgpi fvk  
>tr|D9RDB6|D9RDB6\_STAAJ  
mskkkililtsimlililsvagihfkmkydekekqkaiyykeqqueritlylkhntkeptiktvhftslkrqpmgdavie  
gyinenkeddfvaygspeh  
nyqfggdmi eseklse1lkpanqlkspdeikeelkkegh  
>tr|D9RDB7|D9RDB7\_STAAJ  
mtkkhvfiigvilcivatviyLkvkhdekekqkalyykeqqueritlylkhntkeptiktvhftliltgpmgdavie  
gyinenkkadfvaygspeh

Tsompanidou\_et\_al\_Supplemental\_FASTA\_File

hyqfggsliksknlstllkphqtktpdeikkeleskkndr  
>tr|D9RDB8|D9RDB8\_STAAJ  
mtvltkvavvtgagsgi geiatllheegkvilagrnkdklqnvanaqlaqsdkvvptdvtkkeevdelikiaaqtfg  
gldivinsagqm lsskitd  
yqvdewsdmidvnikgtlytaqaalptmleqssghliniasisgfevtksstiyatkaavhtitqglekelaktgvkvt  
sispgmvdaitatynptd  
rkklepqdiaeavlyaltqpkhvnvneitvrpv  
>tr|D9RDC1|D9RDC1\_STAAJ  
mkkeesskdkqikenfnktlslyptknl edfydkegfrdeefekgdkgtwiiysemviepkgkmetrgmvlyinrnrtrt  
tkgnfi vneitddndgrpi  
dnkkkypvkmehnkiiptkplndkllkeienfkffvqygnfk dindykdgd isynpnvpsysakyqlnnddynvqqllrk  
rydiptkqapklllkgdgd  
lkgssigsknleftfvenkeenyftdsvqytpsedyesn  
>tr|D9RDC3|D9RDC3\_STAAJ  
mfttyknine lenaydeerkqlndafnql delrhqtrrkceqmydhflylkhkmny sedamirmtr iiesfdretnqir  
hhemkledykdelrreylk  
qsdrriegde  
>tr|D9RDC4|D9RDC4\_STAAJ  
mslpeyki sdnikgnseetsavskisyeienannnglndesikrqikkaqnnr fpenlsyvrsytdpktgtttsafln  
kdtgkvtl gmtgtvnhkda  
ilkqtfgvpsyqgyidasetlkdigadvnighsvtdkdkphykntqdfiknikkdydidiitghslggrdamilgmsndi  
khivvynpaplaikdvsgl  
yadqee lkklikeydghivrvsvdededlagvrnhlyetagekivlkngeghamsgilmsrtqai ilaelnkvkgyqden  
nkalksvrkqtrhrllhke  
tlanwiqitggplsssqqqllealtaltiaeglnqlvneesqhlkkmyhvmahkfgdnwkkakqkvgneigekltsaevi  
delrkggayeskletdpr  
kiddkikklndvykncngyiakikqsieaivsndqmlasqidgmm  
>tr|D9RDC5|D9RDC5\_STAAJ  
mihskkl tlgiclvllii liggyv imtkengrnaqi keafnktlkvyptknl ddfydkegfrdqefdkrdkgtwii nsgm  
niqfkggal ksremvlyin  
nrtrttkgyfi vgeitkdkkgythdkdkkypvkmehnkiiptkpi kdekllkeienfkffvqygnfkdfkdykngdi syn  
pnvpsysakyqlsndynv  
qqllrkrydiptkqape lllkgdgd lkgssigskdlef nfvrnkeenvyfsdsvlftpseddkl  
>tr|D9RDC6|D9RDC6\_STAAJ  
mihsrklrlwlylvllavfigacgmkkeesskdkqikenfnktlslyptknl edfydkegfrdqefekgdkgtwii hskm  
tietngkdmesrglvlyvd  
nrtrttkgefivrelwedkkgyrsrsekeypvkmehnr iiptkpi addklrkeienfkffvqygd fkdindykdgd isyn  
pnvpsysaeyqlsndynv  
kqlrkrydiptkkapkllikgdgd lkgssighknlefsfvtskeenyftdsinfkpte  
>tr|D9RDC7|D9RDC7\_STAAJ  
msrllndfnqslhkgfidkyishkgnyapakllvnknkvlstii delqk cetfyfsvafitesglaslkaqll dlnkg  
vkgkilt snylgfnspkmy  
ge llklknvevrltdiagfhakgyi fehkydssmvi gssnltsnal kvnyehnvllstmkngdlvsvknefdllwqnst  
plteqwinskykesfeyrs  
eklaeveqtqml ladkvkksveivpnlmqaealrslkairdkaknkali isatgtgktil caldvrevnpnkflfivhne  
gilnrakeefkklvptknd  
sdfglltgkhrvdaky lfatiqtl srddnfkqfdekefdyivfdeahrsaastyqrvfnyfkpkfmlgmtatpersdel  
sifel fdyniayeirlqaa  
lesdilcpfhyfgvtdyvhqgikeddvtklryltsdervnyi iaktddygyseilqgli fvsskkeaydladklsskgi  
ksvaltgddsvnyrqvie  
kllkegkinyiitvdlnegidipevnqvm lrp tessiifiqqllrgl rks snkeyvtvidfignyktny lipialsgdq  
sqnk dnykfltnndsing  
vstinfeevakkqiynsl davslnqnkllikaye evenrlghmp lmdfiqqhsidpsvifskfsnyyeflvkykkidal  
ltenesknlvffsrqiap  
lkridslvlellkneltydelknkmnevkditeddidtsl rildfsfynagi ekiygs pierner mir lsdaftnal  
snqtfkifledlielskyn  
nekyqkgknglil ynky s redfski fnwnkngssvim gymiksqempifitydkhedisdstkyedeflsqdelkwftks  
nrllktkevqkllshrakg  
ikmyi fvk kdddgi yfylygtagi egsekqdkmpngsnvvtmdlal dkavrddi yryltn  
>tr|D9RDC8|D9RDC8\_STAAJ  
mkkvinvgaii fsdnkllcaqrseemslplmwefpggkieknetekealireirem kcdlivgdkvitteheydfgiv  
klttykctlnrelptl teh  
ksiewlsinelklnwapadipavnkimteg  
>tr|D9RDC9|D9RDC9\_STAAJ  
mdkelwierandslvkhfyeeqsdieqregfeskl tfgtagirgkfglgegrlnkftiekla lglarylnaqtnnptivi  
hydrhlstefa qianvl  
anhqii vlyl pdykttpe lsfavn lnttagimitashnpkdyngikvygsdgaqlstdaselasryieevgdplqidip  
iskqntsyikpfpksvtdd



Tsompanidou\_et\_al\_Supplemental\_FASTA\_File

eyyrtpraghersinqfpfisfdriieftafdlvdklltqpvlfiaqseagtlwqsenayeralepkdihiveganhfdm  
ydkepfvteavekmksfyg  
qyl  
>tr|D9RDE0|D9RDE0\_STAAJ  
mkfkslatiiaaatlvlsqcgsthsqgdlnislpkktksiapyetdvpvkigaaeslfktnqgkiekvlvksyhpnd  
ttldlelkdnikfngqkl  
taekvksslensmkkSDLVkfslpissitakgqkltiktksaypelvselanpfmaiyytdaksdvnqtpvgtgpyeikd  
ykqsqkislakfkdywqgk  
pkldhitytyqedgnnrvrnleskkadlitdvpvknveditsdkhlkvsksqgrtsllmynhtnkkmtkpvrealdnvi  
drqgiadhyygyakpats  
pfnkipyikepkltkqndkdkdlakegytknhplkiklitydgrpelskiaqvlqsdakkanieidiksVddiegyL  
tdrsawdatmysfgtiPrG  
dtgyyfnqaykkdgaingknydnsvddlidqlnhtvnderhnisndiiklssqdvpsniayndqivaansvknkykv  
tpgyilydyqttier  
>tr|D9RDE1|D9RDE1\_STAAJ  
mtidigriyhnkertaivrvldrvwprgmskstanldywldvapstelrkwfhhnpklfgafkekykkelrdndaqna  
afkelkalvekhnvllly  
aakdiehnqavilqqlnt  
>tr|D9RDE2|D9RDE2\_STAAJ  
mklngryvkvfalyfvsiiitaniivknnnliktliqtiagytfavglkyltkrknk  
>tr|D9RDE3|D9RDE3\_STAAJ  
mlteqekdiikqtpvlkekgteitstfypkmfkaPELLnmfnqtnqkrmgqssalaqavmaaavnidnlgvikpvimp  
vaykhcalqvaehypivg  
enllkaiqdvgleendpviqawakaygviadvfiqiekdiyqmmwigfkipkitnikqesadiksftvetdaydfsqf  
tpgqyitvdvssdklpyra  
krhysivsgdknhltfgvkrdvtidhegevstilhdeikegdminlaapvggfvlenttepqlflgsgigvtplvamfea  
asakgietaqmvqaeneeh  
lpfkdnfdisiarrhgnanvythlkdeqgyigaeelqvflankpeiyicggtkflqsmiealkslnydmrvhyetfiprL  
svav  
>tr|D9RDE5|D9RDE5\_STAAJ  
mkslfekaqqfgksfmLpiaailpaaglllgiggalsnpntvkaypilditllqni ftlmsaagsivfqnlpvi faigvai  
glrsdkgtaglaallgfL  
imnatmnglltiigtLakdqlaangqgmvlgiqtvetgvfggiitgimtailhnykhkvvlppylgffggsrfvpivtaf  
aailglvLmffiwpsiqag  
iyhvqgfvtktgaigtfvvgfirlngplglhhi fylpfwqtaLggtlevkghlvqgtqni ffaqlgdpdvtkyysgvsr  
fmsgrfittmmfglcaala  
iyhtakpehkkvvggmlsaaltsflgtiteplefsflfvapilyvihaffdglafmmadifnitigqtfsggidflf  
gvlqgnsktnylyvipigi  
vwfcllyyivfrflitkfnfktpgrekvaqqveateraqtivaglggednieivdcatrlrvtlhqndkvdkvll est  
gakgviqqgtgvqviygph  
vtvikneveellgd  
>tr|D9RDE6|D9RDE6\_STAAJ  
mkrkiimdcdpghddaialilagaidspleilavttvagnqsvdknttnalnvldimgrqdiavakgadrplikpaafas  
eihgesglDgpklpstpsr  
qavampasdviinkvmtsdtpvtivatgpltnvatalireprivehiesitlmgggtfgnwtptaefniwvdaeaakrvf  
esgitinvfgldvthqvla  
ddhvierfesinnpvaqfvvellqffkkykthfnmdggpihdactilyllqpelftmpvni dieqqsplygtmavdl  
nhvtgkpanayfattvdve  
evwnlidhklrtye  
>tr|D9RDE7|D9RDE7\_STAAJ  
mngdnqqilreivlnptihgkelesifglrrqlgyriqkinlwleqegypklertsqgnfivsseimtlfkrdvseqqm  
LngnnvifsietrryyLmL  
mlfskenamslnhfsidlvskntvihdinhvkeqlgnhglsLkysrkhyeivgdefevrrffiklidqrlnhditkse  
vLkalnltfediaayqkdkl  
kqveqflksrfidksLslpyvlcvirriiqsghvinplninyqylrdtkeyqateimqhepdLpeaklyltlhllst  
svqwtldgesdnisnlma  
iaqmihhfeqitfiniedkeklsqqlllhltPafyrikynltdrdelinplqgnyqsLfhmvkqscqsLteyfgksLpdn  
eiyaltmLfggsLrrqden  
fdgkikaiivctqgtsvsgmmlyelrnlfpelldaisLrtfenytdydivfspmfvLthkklfitkvalseneqrkL  
rkdvmyinkesadidkei  
nkLmalierttvtvnditelrdgledfianysistingsivtqnktldladliparhvkihvenideaiakasdvLva  
nhfidikiyihemqqvfdss  
ymvimqniaiphaysekhvhtamsmlilqepiymdgtaihivpiaavdkvthlralqlrdvaqnddaikriiqsrk  
nsdvneilkynsketrgn  
gwdsn  
>tr|D9RDE8|D9RDE8\_STAAJ  
mgqqlvhkenimlnlsatdkesvlsqmsdvlyqngfvkstfkDavidrekefatglpthlcsvaiphtdvehinhrtigv  
avlekevpfiemgtldqqt

Tsompanidou\_et\_al\_Supplemental\_FASTA\_File

evkivfmlamdvdqllqllmqifqseekleqilrktkdqaalatingyleyn  
>tr|D9RDF1|D9RDF1\_STAAJ  
mkaivktreghgnlelldevatplddkvkikvhyagictdihtyeghykvnfvtlghefsgeivevgadvkdfkvgd  
rvtsettfyvcneceycks  
kdynlcnhrkgigtqvdgaftnyviareeslhhipdevsyqsamteplacahhgvskvqvnsgdvavvmgpgpigllva  
qvlkskgatvvvtgldndk  
vrlkkaeahmdyvvnllqtdlktyingitdgygadvvvecsgavpaarqgldilrkkgfysqigifkdaeipfdmekvi  
qkeittvvgssrsqkpadwep  
slqlmadglvnaealvtkiydi skwdeayqhlksgegikallkplldenegen  
>tr|D9RDF3|D9RDF3\_STAAJ  
mkaiklygvedlryednekpiiesandiivkvratgicgsdtsryckmgyikgmpfghesfgvvdaisdvthvvnvgdk  
vtgcpaipcyqceyclkge  
yarceklfvigsyepgsfaeyvklpaqnvkvpdndvyeaamvepsavvahgfyksniqpgmtvavmgcgsigllaiqw  
arifgaahiaididahl  
diakslgahqtinskeenlekfienhyanqidlaiesgaktvigtqiltpkkggevvllgipyddieidrvhfekilrn  
elvtvcgswnclessnfpkge  
wtatlhymktkdinvkpiishflplekqpetfdklnkkerfdkvmftiy  
>tr|D9RDF4|D9RDF4\_STAAJ  
miyagilaggigsrmgnvplpkqfldidnkpilihtiekfilvsdfneiiatpaqwishtqdilkkynitdqrkvvag  
gtdrnetimniidhirvn  
ginnddivthdavrpflltqrikenievaakygavdtvieaidtivmskdkqnirsipvrnemyqgqtpqsfnikllqd  
syralsseqkeilsdacki  
ivesghavklvrgelynikvttpydlkianaiiqgdiadd  
>tr|D9RDF6|D9RDF6\_STAAJ  
mtkktqaihidniywervqlyieghsegvdltsqqfvlrnltetktleanemkidgntflcrfnvailddgyylpmdkyl  
fvyhdgleyigqllnpiid  
qayaaaneeqieeynelttqngkanyvlaneakvfrkqgvsqhtvytitpeiasdvnefvfdieitlpqeksgviatsah  
wlhkqghkasfesrsflfk  
aifnltkllhikrsktilftsdsrpnlsnfykyvydelrkvdfdydiktvfkanitdrkrwrkfrlpyllgkadyif  
vddfhpliytrvrfrpsqei  
iqvwhavgafktvgfstrtgkkgpfiidslnhrsytkaivssetdipfyaeafgireenvvptgvprtdvlfdeyatqik  
qemedelpiikgkvlfa  
ptfrngnghtahypffkidferlarycekhnavvlfkmpfvknrlnisrehrqyfidvsdhrevndilfvtdllisdys  
sliyeyavfkpmyaf  
ledyittrdfyepyesfvpgkivqsfdalmdaldnedyevkvvpfldkhfkyqmgrslerlvdldfr  
>tr|D9RDF7|D9RDF7\_STAAJ  
miktikkliehsyttfklslkpnkniyfesfhgkqysdnpkalyeyltehsdaqliwgkkyehifqqhnpvyvt  
kfsmkwflamprakawmin  
trtpdwlyksprttylqtwhgtplkkigldisnvmkgntntqnyqdgfkkesqrwdylvspnypstysifqhafhvsrdki  
letgyprndkshkrndte  
yingiktrlnipldkkvimyaptwrdeai regsyqfnvfdiealrqalddnyvillrmhylvtrvdehddfkdvsd  
yedisdlylisdvlitdys  
svmfdygvlkrpqi fyaydlekygdelrgfyndykelppivenqaalietlkhiditandyvaarta fyqkycs ledg  
yasqricqtlfk  
>tr|D9RDF8|D9RDF8\_STAAJ  
mkyagilaggigsrmgnvplpkqfldidnkpilihtlekfilindfekiiatpqqwmthtkdtrkfkisderieviqg  
gsdrndtimnivkhiestn  
gindddivthdavrpfllthrikeniqaaleygavdtvidaidtivtskdnqtidaipvrnemyqgqtpqsfninllke  
syaqlsdeqksilsdacki  
ivetnkpvrllvkgelynikvttpydlkvanaiirggiadd  
>tr|D9RDG1|D9RDG1\_STAAJ  
mkfsvivptynsekyitelns lakqdfpktefevvvddcstdqtlgivekyrnklnlkvsqletnsggpgkprnvalk  
qaegefvlfvdsdyyinke  
tlkdaaafidehsvllikmgvngrgvpqsmfketapevtllnsriiytlspktyrtallkndiyfpeelksaedq  
lftmkaylnanrisvlsdk  
ayyyatkregehmsayvspedfyevmrilitelinaldeeshkdqilaeflnrhfsfsrtngfslkvkledqpqwinal  
gdfiqavpervdalvskl  
rpllhyarakdinyrtveesyrgqyyhfdvidgklniqfnegepffegidiakpkvkmatafkfdnhkivteltnefm  
igeghydvrllkhsrnkhh  
tmyvplsvnankqyrfnimledikpylpkekiwdvflvqigtevfevrvgnrnkyaaytaetsalihlnndfyrlytpyf  
tkdfnnislyftaitltds  
ismklkgknkiiltglrdgyvfeegmasvllkddmimgmlsqtsevevillskdikkrdfknivkln tahmtylkl  
>tr|D9RDG2|D9RDG2\_STAAJ  
minkndivadvtdypkaadifrsvgidfccggqisieaslekknvdlnellqrln dieqnttpgslnpkflnvssliq  
yiqaaayheplreefknlt  
yvtklskvhgpnhyvlvelketydtfkngml ehmqkeddvdfpklikeyqgevvddintviddsvdhiatgqllvkmsd  
ltsyeppeieacgtwrlvy  
qrlkalevlthevhlenhvlfkks

Tsompanidou\_et\_al\_Supplemental\_FASTA\_File

```
>tr|D9RDG3|D9RDG3_STAAJ
m1sltm1llervgl1i1layvlmniayfkn1mrrrtwkarwqlciifslfalmsnltgividhqhs1sgsvyfr1dddv
slantrvltigvaglvggp
fvglfvgvvisg1frvymggadaqvylissifigiagyfglqaqrrkrypsiaksamigivmemiqmlsiltfshdkaya
vd1sl1alpmiivnsvgt
aifmsi1istlkqeeqmkavqthdv1qlm1nqtlpyfkegl1nresaqqiamiikn1mkvsavaitskneilshvgagsdhh
iptneiltslskdv1ksgk
1kevhtkeeigcshpncplraaivi1plemhgsivgt1kmyftnpndltfverqlaeglani1fssqielgeaetqsk11kd
aeiksl1qaqvsp1hfffsi
ntisalvrinsekare1llelsyffran1qgskqhtit1dke1sqvray1s1eqarypgrfnin1nvedkyrdv1vppf1
iqilvenaikhaftnrkqg
ndidvsviketathvriivqdnqg1skdkm1l1getsvesesgtgsalen1n1r1kgl1fgksaalqfestssgttfwcv
1pyerqeee
>tr|D9RDG6|D9RDG6_STAAJ
minh1al1ntpyfgi1lsvipfflati1fektrff1fap1fvsmvfgvaflyltgipykykiggdi1yff1epaticfa
iplykkrev1vkhwhriig
g1gigtvval1i1ltfak1aqfandv1lsm1pqaattaialpvsagiggikelts1lavi1ngviiyalgnkflk1fritn
piarg1al1gtsght1gvap
ake1gpveemasia1v1vgvvvavvpvfvviff
>tr|D9RDG7|D9RDG7_STAAJ
msmqssykr1vkvl1ti1vivfsi1lvggwyi1fkneaprptkivdqgght1vtkgel1sgqaiyekygltdygsylngs
ylgpdytaeal1hhy1igmr
kyyaqdiyhkq1hk1lnhae1lavvkdkvmkei1rinrysekenq1v1tpgqvylkylqdykkefvnnpkqvg1nenmikq
fqnddymvagnkveh1sqf
ffwgaw1sst1drp1gk1tfsyt1nnpwydv1dagnt1psagi1wta1svt1liag1afii1yiqryefdmkptyeserelpkie
vskit1dsqrkvgkyl1vvv
m1l1flvqil1ge1lahyyvenkffgieiqr1l1pfniaktwhvq1l1vi1fwattwlaagi1y1vpkv1gkepkkgv1vdilf
wal1i1v1vmgsmigewgh1l
gwids1hww1fgh1f1gweyie1lgkfwqil1fi1vgmv1lvwi1l1crg1fl1pairnk1vqanhdkrh1l1t1l1fvgaiaip1ly1as1f
impnshvt1fadyrwwi1vh
1wvegi1feafav1l1g1fl1mvmk1l1tti1ettiralyf1q1l1l1l1gtg1v1gmghyywqgdhsiw1al1gscfsa1evvp1c1l
iweaythyr1lykksdia1fp
ykg1t1f1astg1wnaigaga1g1fl1ntpavnyfehgtq1wtaahahgsmagvygmfsiaia1y1vfknitk1k1efwtpkvek
wikiscwa1nvg1lagmvfi
t1mpvgyi1q1kda1lehgywhsr1ts1fyep1lvka1m1wgrmpwdi1iftvgvii1lvfi1r1gyrh1k1pk1yrv
>tr|D9RDG9|D9RDG9_STAAJ
mgnkykdyaqdi1lavggveni1vnvsydtvrmtihmh1aipstanevtq1digvasvdenetq1lvivfneevkyvyqq1q1
1mddakhqedt1nh1d1avdtq
eteqkaqvkvtt1pi1lvkapiagrri1l1kevrdsi1frekmvgeglaikaheeskviapfng1lvsmivptkhavgiqsedgv
divihigvntvd1legk1gk1f
cfvkqndrveagq1t1l1qfdqy1iqe1ggynsdv1vvi1nsad1lgkvel1tmnei1ttedv1f1k1fkn
>tr|D9RDH0|D9RDH0_STAAJ
mtn1pqn1fmwga1laanqfeggydkggkgl1sv1dvmtsgahgkarq1itesidpnhyypnhegidfyhrykedia1fkemg
1k1c1r1tsia1wtr1fpngde
dvpneeg1afydri1fdeli1aqqiepvvt1shfemp1hlakhyggf1rnrevvdy1fvhfarvvferykdkvtymt1fneinn
qmdtsnpi1flwt1nsgval1t
endnpeev1lyq1vahel1lasa1lavrl1gke1n1pk1f1k1igtmi1shvpi1yp1schpkdmmeaqian1r1ffffpdv1q1vrgy1psy
akkmlarkgydfgwqegdd
si1lqqgtvdy1ig1fsyymstavkhvd1ttvenni1vng1lnhsvenphiatsdwgwa1dpdgl1ryt1n1v1ynryq1l1p1five
ngfgavdevvdghihddyr
iey1k1ahitaaieavdqgdv1ligytpwgi1divsfttgemkkrygliyvdrnd1dghgtmer1lkdsfywyqqviasngd
k1
>tr|D9RDH1|D9RDH1_STAAJ
mlywri1pnieaggntvynnr1vgrp1prt1qrtskrnstgnaswrgpniek1lehqfqqamrvgegqk
>tr|D9RDH2|D9RDH2_STAAJ
mskeaght1flak1gktr1rpggkaatdw1liqqgafsqdkqv1levacnmcttsi1ylahtygchiqqvdi1skkalekaqeni
saag1gsy1iqvqqanavk1l
pfddnqfdi1v1neam1tm1piaikeka1reyrv1kpgg1l1thdivivneshathvks1saainv1nvspqtk1gwd1l
ynqagfn1hvhyhtgpm1slm
tpkg1iydegi1vgt1ki1inna1kkenr1pmfckm1fktmtk1rkd1mnyit1fvakkeh
>tr|D9RDH3|D9RDH3_STAAJ
mtnkvv1lgstnvdqf1t1veryaqpget1hveeaqka1fgggkganqaiatarmqadttf1tkigtgdgvad1iledfkaah
id1tsy1ikt1teaktgqafi
tvnaegqnti1yvygganmt1mtpedi1nakdai1nadfvvaq1levpi1pai1a1afeiakshgvttv1n1papaka1pnell1s1
idi1vpnetae1llsgikv
tneqsmkdnany1fl1sgikt1v1it1lgkqgy1fatkn1qsqhieaykvnaid1ttaagdt1figafvsr1nksqdn1ladainfg
nkass1tvqk1hgaqasip1l
leevnqv
```

Tsompanidou\_et\_al\_Supplemental\_FASTA\_File

>tr|D9RDH5|D9RDH5\_STAAJ  
msivalliglgpligwffftvaskfggkpvhqiiigatvgtlifaiilavvtssgftgtnllfallsgagwfgqiitf  
kafelvgsrampvttafq  
llgaslwgvfalgnwpgighkiigftalvviligarntvserkeasnaknlrravilllidgefywlysaapqatsidg  
ltaflpqamgmviavviyg  
fmmkaenpfrnkitwlqiisgffffafgaltylisaqpnmglatgfilsqtsvlatltgiyflkqhkskemvitiig  
lvilvaasvtvfik  
>tr|D9RDH6|D9RDH6\_STAAJ  
mkkvsikdvareagvsvtvshilnhdsrfsattiknvhavserlgyapnkhakqlrgskiqtigvilpsltnpffsa  
mqsihdhkpsdvdicflts  
tatdlydnikhlidrgidgliiaqyisspdalnnylkkhhvpyvvlqdndhqgytdfvrtneyqggqlaaqhllelghnn  
mmivapydmmanmstrvdg  
fvdtlrrnqlpepqiivhtelskrngltivddimvqsataifaindelaignilrgliehgisipkdisligyddidyaayv  
spltvvaqpitdigkis  
tlllqr1qhlkdsidmielpttlkirattghhfsn  
>tr|D9RDH8|D9RDH8\_STAAJ  
mmtqssprsniiiaimlsaltywlfagsfinigplvgqytqspavlnlslsitsfatgimvaagdiadkigqlrmt  
mgliismvasllliisdit  
alliiigrilqglsaiilpstvgvlnnqfkgdhlrraisylmistvggiglagviggliafnfgwqtnfiisiviafia  
lllkgtpkvsqpsrhphf  
dykmsifavmigsftllltqgfeqgwfstfsficlsifiittlifiierrhevpidfsvlnrnpfigaflnnfvlns  
glgvtvffiyagthlgls  
aaqsglvtlpyaivavamirlgekattrfggkmlliigplfpvigitiiismtslqpsqyiiavvigfvicaignglvatp  
gltiaifsmpekvglatg  
lykmsgtlggafgialsttvfsm1qlnyapsvaatvtfivsvlmlilgslsaymiipktvks  
>tr|D9RDH9|D9RDH9\_STAAJ  
mctgftiqtlnnqvllgrtmdydypldgspavtprnyrwrtsrtgttgqyqyfigtgtdmegfiygdgvnehgvaistqy  
frgyssygsthkadamnit  
qneivtwilgyttsiedmkqqasqihvvavylnidigevpplhyhvsdatghsvevsfkegevvikdnpigvlnthpdlw  
hysnlrqyinisypatan  
llegvtieplgneagtfglpggftsterfvrmafmkaniaqndkemdlnafy1ldavnipigivrphdadnhytmyqt  
vinl1trtlyikyysnei  
valkltddlinrkdmtifkpekhitirklnndq  
>tr|D9RDI0|D9RDI0\_STAAJ  
mkk1taaa1atmgfatftmahqadaaettntqqahtqmstqsqdvsvygytytidsngdyhhtpdgnwnqamfdnkeysyt  
fvdaqghmhyfyncypkna  
nangsgqtyvnpatagdnndytasqsqhiinqyqsnvgpdasyshsnnnqaynshdngkvnypngtsnqnggsask  
atasghakdaswltsrkql  
qpygqyhgggahygvdypenspvysltdgtvvqagwsnygggnqvtikeansnyqwymhnnrltvsagdkvkagdq  
aysgstgnstaphvhfqrn  
sgtgnqyavdptsylqsr  
>tr|D9RDI2|D9RDI2\_STAAJ  
mkpyiq1vvfkqwlqy1lvttivislvligmgyrvahdnfkipitidldqtasksfvnkikqsdvvtikkvaedesy  
ieddvtkkeailsmqipkg  
fsqklkenr1ketiqlygrddfiggiaveivsssl1yeqqipniiyehledmkqhqsidainksyhkhtpeskikfvsltk  
qaqhsisislifavilfvs  
avqvvlhyrlnqqaalqr1sqyhl1srfl1styvmtht1ll1ll1lavsl1ysqpl1s1l1fy1ks1ll1liyeigivfilf  
hiqtishrl1fmtfiyalam  
givyliifm  
>tr|D9RDI3|D9RDI3\_STAAJ  
mktih1friyhsf1lkkwyl1iy1l1filaallit1lttiqhvteddnhf1nigvvdkdqssetkl1l1nsigkgsn1gknvsi  
kayddkqaht1l1kqk1lgg  
yfvfdkqmtkafykqgel1p1svytydqqsmskv1sq1tdsvyqr1lmsmgg1lafqdl1apkashsdsinvmt1litgl  
nrsgafn1epihlydtgsy  
yaitgflatvfi1fals1ftv1k1mnqdtv1kar1k1mfhfsker1l1i1ral1twfyt1ml1wsivgvv1wimfsipntfelynwp  
t1aih1syv1t1l1w1l1  
iel1ttg1l1nsiskv1laiv1l1v1sg1tiptif1lqhiangv1fniqp1favv1tnq1lleil1nnyile1l1hpsf1ylsfi1l1li  
n1lav1lwryrq  
>tr|D9RDI4|D9RDI4\_STAAJ  
mskkl1k1i1pi1i1v1l1l1iggiawgvyaffantpknty1k1seqqtakmykdyfndrfenevkf1qekmkdnsf1ssle1lsad  
asdeivkgl1gipksvvnas  
k1kmsyghdpk1kkesmin1leptiadsa1gkfq1aadkdkhyfesp1fkgkysvnnsd1l1stysk1tgedeetakengitn  
qq1n1nt1l1fsnaqaggsdy  
sk1aekyse1l1vdk1l1ddn1fdk1gkkeeikvng1eky1kvrpvt1l1sradtkkit1lav1leakdkdk1kk1meeqgatkdf  
kdikkaiddvketkkdefa  
kiqskiytekt1ivkreit1tdkennktk1kg1tnt1eddk1kl1dya1l1fdq1d1kytyaeakyt1kgvss1kekdnkyndkye  
fgkkteydesk1kl1dnqek  
vdg1tkrqdkgkit1valdkysdeneftfennidsdvknntqk1st1nigikiyaee1p1n1f1l1ks1st1kl1kadid1fd1d1sgakdfn

Tsompanidou\_et\_al\_Supplemental\_FASTA\_File

s1sskdreklekeiekngg  
kmfesilkkask  
>tr|D9RDI5|D9RDI5\_STAAJ  
melkvddfvknikrpyltvlgvfvvayslffds1mffygklydklpvyl1vfmftavilimmyiqeknknykvekryvv  
ryltlnvivygtlp1llas  
iyvfgvagfgfnvfywlgivmm1f1swlg1f1fyknkfdsenpnkavnviaiik1fafgg1fyistivpntadeekfi  
ytsilinlasdallvrsyf  
nyalyksikkdiekgldn  
>tr|D9RDI6|D9RDI6\_STAAJ  
meikeivanikrpyltpfvifti11s1ffda1mffnsklydklp1lylvvflifaiivvsillylqeksekvkveknviwy  
mtlnvitgysmplfiasty  
vvgavndidvfywgcgvalm1f1swlg1f1fyknefdsenpnpavnfiiaitklafalatifyiskvapsiadeknfifl  
silinlgvdallvrsyfny  
alyksikkdienegktm  
>tr|D9RDI7|D9RDI7\_STAAJ  
miiifilitifa1y1iamias1fksegfsiig1ildvvilgtlifyyfigarfvdnd1snflafmhlgsfvymyfaik1w  
vkpkvnyliakeldeske  
vieeqeld1qtsk1rgiyffiiavvm1iak1rmqpelqadavsmnpvfnfyr1cyhfn1antrys  
>tr|D9RDI8|D9RDI8\_STAAJ  
mkktil1mtt11fmspsaqaytnsktleakka1pnaqf1kvnkdtgaytytydknntpnnh1qnsr1tndnhqha  
nqrd1nnqyhss1sgqyt  
hindaidshtppqtspsnpltpaipnvednddelnna1fskdnkg1itgid1delydelqiaefndkaktadgkplalngg  
kiidqplitsknnlytagg  
ctwv1fdkrakdghtistf1wgdaknwagqassngf1kvd1rqptrgsil1qtvngpfghvayvekvnidgsilise1mnwige1y  
ivssrtisasevssnyih  
>tr|D9RDJ0|D9RDJ0\_STAAJ  
mkkknwiyalivtliiiiavsmi1ffvqtkygdqsekg1sqsvsnknk1hiaivnedqpttyngkkvelgqafikr1ane  
knyk1fetvtrnvaesglkn  
ggyqvmivipenfsklamqldaktpskis1lqyktav1gqeevakntekvsvsn1ndfnkn1veiy1ltsiidn1hnaqknv  
gaimtrehgvnskfsny1l  
npindfpe1ftdt1vnsisankd1tkwfq1ty1nks11sands1tfrvntdynvst1iekqss1fdeqntamdkv1qdyksqk  
nsvelndyinv1kqmdsqi  
dqqs1nmqdtgkeeyk1qtvken1dr1rdi1ksqes1pfsk1gmiedyrk1qltes1qdelannk1d1qda1nsikmnaqfaen1  
ek1qlhddivkepdtdt1t1fi  
ynmskqdfiaag1nedeankyeaivkeakrykneyn1kkp1tehin1tdydnqvaqdtss1indgvkvq1rtetiksndin  
q1tvatdphfnfegdikin  
gkkydikdqs1vq1dtsnkeykvevngvak1kkdaekdf1kdktmh1q11fgqanrqde1pndkkatsvvdvt1nhn1dgr1  
skda1sq1s1salsrfdahy  
kmytdtkgredk1pfdnkr1idm1mvdqvin1dmes1fkddk1vav1hqidsmeensdk1iddi1lnkknttknedisk1idq1  
envkktfaeepgepkidk1g  
kndefntmss1ndkeis1risekstq11sdtqesks1adsvsg1lnqvdnnvnk1hatgra1lgvrand1nrqmakndkdne  
1fakefkkv1qnskdgdrq  
nqa1kafmsnpvqkkn1env1ann1gntdvi1spt1fv1lmy11smitayifysyerakgqmn1fikddyssknh1wnnvits  
gvigt1t1veglivgl1am  
nkfhv1lagyrakfi1mvi1lmmvfv1inty11rqvksigm1flmiaa1glyfvamnn1kaagqgvtnkisp1syidnmffn  
y1naehp1glalviltvlv  
i1gfv1nmfikhfkker1i  
>tr|D9RDJ2|D9RDJ2\_STAAJ  
mnqhvktfdftnyngtydlavpay1pikn1ialv1ds1ldisi1fdvntqikvmtkgq11vendr1idyqiadgdilk1l  
>tr|D9RDJ3|D9RDJ3\_STAAJ  
mvkn1hnpknemqdm1tp1daeeaa1ktklr1dmreipkssikpeh1flmy11leqhs1pyfidael1telrdsfqi1hydindnh  
tpfdn1ksftknek1ry1l  
nikn1eevnrtryt1fv1lapdel1fftrdg1lpiaktrg1qnvd1p1pvseae1fltryka1lvi1cafnekqsfdalvegn1elh  
kgtpfetk1vieaat1d1l1t  
s1fldeqy1kqeqdysenyavrkvghtvfkwaigmtt1sv1lia1flaflyfsvmkhneriekgyqa1fvkddytqvlnty  
dd1dgk1k1dkealy1yaks  
yiqtnkqg1lekdkken1lnnvtpnsnkdy1lywme1lgqgh1deaidiaty1ldnditk1alink1neiknngd1sndkrs  
eetkkyndk1qdi1dkekg  
vkdekakseeakakdek1kqeenek1kqeqaqkdk1ekrqeaerkk  
>tr|D9RDJ4|D9RDJ4\_STAAJ  
mhk1liikynk1q1km1n1rdgktyt1sederadit1ks1lgevih1eqnnqgtwqanhts1inkvlvrkgd1ddit1qlytea  
dyssfayps1qdtmt1igpn  
ayddmvi1qslmna1iikdfqsiqesqyvri1vhdkn1tdvyinyel1qeqltnkayigdh1yvegiw1levqadg1nvl1sqntv  
ass1l1rtqemphaqaddy  
ntyhrs1p1ri1h1reptdd1kierpp1qpiqknntviwrsi1pp1vmialtvvif1lvrpigi1yilm1mig1mstvtivfgittyf  
sekkkynkdv1ekrekdyka  
y1dnkskei1nkaikaqrfs1nyhyptvaeikdivetkapriyektshh1hdf1hyk1lgianveks1fk1dyqee1fnqrde  
1fd1dake1yefytdveqap



Tsompanidou\_et\_al\_Supplemental\_FASTA\_File

lindlnhgpiayigarhlileelekmlqlstfhshyhdleflvtrdevetlkwarwlphmtlrgqningrvynqrtrd  
qiltsiysmikeriqavre  
rsrsneqiiiftpqlvfvitdmsliidhvileyvndlseygisliifvedvieslpehvditiidiksrtegelitkekelv  
qlkftpenidnvdkeyiar  
rlanlihvehlknaiptsitflemynvkevqdldvnrwrqnetyktmavplgvrqkddilslnlhekahgphglvagtt  
gsgkseiiqsyilslainf  
hphevaflldykgggmanlfkdvlhlgvtitnldgdeamraltsikaelrkrqrlfgehvdnhinqyhlkfkgevatp  
mphlfiisdefaelkseqp  
dfmkelvstarigrslgihlilatqkpsgvddqiwsnskfklalkvqdrqdsneilktpdaaditlpgraylqvgnnei  
yelfqsawsgatydiegdk  
levedktiymindygqlqainkdlsgledeetkenqteleavidhiesittrleieevkrpwlpplpenvyqedlvetdf  
rk1wsddakeveltlglkd  
vpeeqyqgpmilqlkkaghialigspgygrttflhniifdvarhhrpdqahmylfdfgtnglmpvtdiphvadyftvdqe  
dkiakairifndeidrrkk  
ilsqyrvtisseyrklgetiphvfilidnfdavkdsfpqevfenmmikmtreglaldmqvtltasranamktpmyimnk  
triamflydksevsnvvgq  
qkfavkdvvgrallssddnvsfhigqpfkhdetksyndqindevsamtefykgetpndipmmpdeikyedyreslslpdi  
vangalpigldyegvtlqk  
ikltepamissenpreiahiaeimkeidilnekyaciadssgefkyrhhvanfaerediraihqlmiedlkqremd  
gpfekdslyiindfktfid  
ctyipeddvkklitkgpelglnilfvghkelidaydkqidvarkminqfsigirisdqffkfrfiqrepvikeneaym  
vanqayqkirwfk  
>tr|D9RDJ7|D9RDJ7\_STAAJ  
mkdvkridyfsyeeltlggsklpvnfelfdpsnfeekaaliekeltendklttagfkvatlvreyisaivnirind  
myfapfsyekdeyillsrf  
knngfqiiriinkdiawsvqsyp1lmrqeksndwdfkqiddetlenlnnesidtigrvleieiynhggdpqqslyniye  
qndllliryplkdkvlvnh  
igvintfirelfgfdtdenhinkae  
>tr|D9RDJ9|D9RDJ9\_STAAJ  
mtkdielyltadynekssiqsvidaeqqdflvdttmddavsdvssldedgaisltssvvgpqqsklmgyyqnelydya  
sqldskmkeiidtpfiedi  
dkafkgitnvkleni1ikngghgrdtygasgkiakgdakksdsvysideilksdqefvkvldqhykemkkedkklks  
dfekmmtqgascdymtva  
aeieeqkkkelavdilagvgiialtinvpvagavaagaytaysaanaatgkniitgrklskeerimeglsliplpgmgf  
lkgagkslmlgfkggkf  
avktglqktmqavshispmgmmknsvlnqsrnfaqnthvgqmlsnmrgqathtvqqsrnwigqaqnvkrivngldk  
eiahpfkqqlapagmggik  
faettlrmgqnmkravtpqnhvthgpkdsmvrsegkhsvsheinskyvespnytkvefgehyarlrpkklkaniey  
ttptghiyrtdhkgriev  
yvdlslkdgdrnnyaqktvggedr1pdddghliarmfggskdidnlvaqskfinrpfkengdwyklekewkealtsgd  
evknikmevkysgnskrpi  
efnvsyeinnkpkvksieni  
>tr|D9RDK0|D9RDK0\_STAAJ  
mtfeekiskiyeveaneisgmipvewekvytiayvddgggevvfnnytkpgsdelnytyipreynvsekvfydlwtdlyr  
lfkklrnafkeedlepwt  
cefdftdrgklvnsfdyidwmnsefgpmgredyymykkfgilpekeyainrvkkiedyvkeqeeaedr  
>tr|D9RDK1|D9RDK1\_STAAJ  
mttkenidtlrkpqaqlslaslfmifsc1tfffglayerfpnylkkittieliiiiisllqwirfidfekesaqkykk  
iyarflvvinlvtitavf  
atcnlyyvalqnhydlnfywlmgtisiiisylllviggmftllklpkvtrwggktrfgl1l1alsafiyieriey  
ilvpngveskfvimvsiii  
iactqfvafqfimqysrfyife1nkeddd  
>tr|D9RDK3|D9RDK3\_STAAJ  
mnfeeklseyneianeisgmipvewekvytmayiddgggevvfnnytkpgsdelnyysdipkdcnvskdifknsfwkvyr  
mfkklrnafkeeghepwt  
cefdftdrgklvnsfdyidwiklgfgpsgkenyymykkfgvlpeteyeinkvkevekyvkeqe  
>tr|D9RDK4|D9RDK4\_STAAJ  
mkri1vvflmlaivlagcsnkgekyqkdidkvykeqnmkiaskvqntikttdikqedsnthvykngkvivigiqlykdr  
ekmyyfpyeikdgkaeinr  
eidpikymkdhkadyedenvevekk  
>tr|D9RDK5|D9RDK5\_STAAJ  
meksikimtiigivvgglatvfl1l1mvlaasgvmttdvsttvngevdpvdaetaaaiftvlflflfifgiisiilgaig  
mfkasknkkmsgilliga  
visgnitfalw1sgik1l1tnnkpksidsls  
>tr|D9RDK7|D9RDK7\_STAAJ  
mkkqviisglmlfslffgagnl1fppmlghtagqnmwigmlgfaltgillpfitvivvafydegvesvgnrihpwfgfif  
avviymsgafygipraan  
vayeigtrh1lpvhnqwtliifaiffaiivywislnpskivdnlgl1l1tp1l1l1mval1siavifnpsalsapdkyit

Tsompanidou\_et\_al\_Supplemental\_FASTA\_File

hpfigsgslegyftmdlvaa  
lafsvviingykfkgldtrmkiikyvcfsgliaaillgmifyalayvgastapgnfdgtdiltynslrvfgsfgnivfg  
mtvilacttciglvnaca  
tftkhhvpkfsyki fvlifstigflfttlglemilkiavplltliypvsialvlisfanmfstfrfswayrlatvitlii  
silqilnsfnllhgvilkw  
fmm1pladidlawlvpfm1faiigfiidvvirrpqatt  
>tr|D9RDK8|D9RDK8\_STAAJ  
mnvrfpigq1kvpetitsahiegtweineyssklgsivnhldeelnrtyrqgawtvrqlvhhivdsq1nlylrlkla1  
tdnepyvsefnqeqwalqs  
dydlpvqvsvdllrnlnirvvalikeisttqlsrafelqntgrvtvgetiaklswherhhlahiqialsqfneec  
>tr|D9RDK9|D9RDK9\_STAAJ  
mnkiskyiaiaslsvavtvsapqtnstafakssaevqqtqqasipasqkvnlgqnimavawyqnsaeakaly1qgyns  
aktqldkeikknkgkhkla  
ialdldevlndspyggyasihnkpfpegwhewvqaakakpvygakeflkyadkkgvdiyyisdrdkekd1katqkn1kq  
qgipqakkshil1kkgkddk  
skesrrqmvgkdhk1vm1fgdn1ldftdpkeataesrealiekhkddfgkkyiifpnpmysweatiyunnykasdkkd  
k1rknaikqfdpktgeik  
>tr|D9RDL0|D9RDL0\_STAAJ  
mflawneirrnklkfgliigvltmisy11f11sglanglinmkegidkwqadaivlnkdanqtvqqsvfnkkdienkyk  
kqat1kqtgeivsnghqkd  
nvlvfgvekssfi vpslidghkatkdnv1adet1knkgfkigdt1t1sqdek1hivgftesakynaspvifndatia  
kinpr1sgdkinavvrtd  
nwkdk1nqk1eavsinfdien1pgykpn1t1nfms1fvisatvigiflyvmt1qkts1fgilkaqgftngylanvv  
isqt1ilal1fgtafg111t  
gvtgaf1pdavpvkfdv1t11vfav1mivsv1gs1fsiltirkidplkaig  
>tr|D9RDL3|D9RDL3\_STAAJ  
msdsekeilkr1kdn1p1sqrelae1g1srpsvani1sg1iqkeyvmgkayv1nedypivcigaanvdrkfyvhkd1va  
etsn1pvtstrsiggvarni  
aen1gr1getvaf1sasgqds1ewemikr1stpfm1dhvqqfenastgsy1aliskegdmtygladmevfdyitpeflik  
rsh11kkakci1vd1n1lgk  
ea1n1f1cayttkhqik1v1ittvsspkmnmpds1havdwi1tnkdetety1n1kietted1kvaakrwnd1gvkniivtn  
gvkel1yrsgeeei1ksvm  
psnsvkdv1tgagds1fcaavvsw1ngmsted1liagmvnaktietkytvrqnl1dqql1yhdmedykngkftkvy  
>tr|D9RDL4|D9RDL4\_STAAJ  
man1qkyi1eysrevqqarennp1vales1t1ishgmpypqnvemattveq1ir1nngaipatia1idgkikiglesed1ei  
latnkdvakvsrrd1aeiv  
amkrigattvattm1caamagi1qffvtgg1ggv1hkaehtmd1sad1eel1sktnvtvicagaks1ld1pktmey1etkgv  
pv1gyqtne1pafftresg  
vk1tssvetper1adihl1tkqa1n1leggi1vanpipreya1skayikai1neavieaenqg1kgkdatp11lgkivektn  
gks1aanik1vennaalga  
kiavavnk11  
>tr|D9RDL5|D9RDL5\_STAAJ  
mni1fai1giafal1fvaf1fsfdrknidfrkt1imi1fvqvl1vl1fmmnttig1til1talgsffegliniskagin1fvfgd  
iqnkgftff1nv11plvf  
isv1igi1fnyikv1lpfiikyvgia1inkitrmgr1esyfa1stamfgqpevy1tikdi1pr1sraklytiatsgmsav1sma  
mlgsymqmi1epkfvvtavm  
1n1fsa1iiasvin1pyksddndveidn1tkstetksvnektgkpkkvaffq1migdsamdgfkiavvvavm1lafis1lea  
ini1fgsvd1n1fkq1lgyv  
fapi1af1mg1pwseavpags1matk1isnefvam1dfknv1gnvsartqgi1svylvsfanfgtvgi1vgsikgisdkqg  
ekvasfamr111gst1asi  
isgsi1glv1  
>tr|D9RDL6|D9RDL6\_STAAJ  
mkevgfgt1n1wvavi1y11lam1ligvyftkrasqstnsff1tasgr1pswvvgfsiyatt1saitfmstpekaf1tdwsi  
agniaivai1p1li1yfyvp  
ffk1k1kvt1sayey1earf1gpsi1rvigs11fvvyh1grvaivi1y1pt1aitsv1sdm1pyivas1vg11cilyt1f1ggfegv  
vwsdf1ggv111gga1lvi1  
il1gvmn1k1ggfgtv1fada1iehk1lisadnwk1ntaaa1api1if1gni1fnn1yqytasqdv1vqryqasds1ketnks1wtn  
gi1al1isap1fygmgtm1y  
s1fya1eav1pk1g1fnt1ssv1pyf1il1temp1pfvag11iaa1faaaqst1ss1nsisacisid1kqrff1gk1gserhevn1far  
lv1ii1agi1fg1gms1ly1ia  
snsnd1wd1f1fv1tg1fgv1plagvfavgi1f1krtnt1fgvic1gl1il1gii1fayv1ngv1gkgnsp1fyvst1sftvaf1v1fay1il  
sfivpskhk1kdi1tg1tife  
kdkpsty1sktat1k  
>tr|D9RDM0|D9RDM0\_STAAJ  
mlphg1livscqal1pdep1hss1f1mskma1laayeggavgi1rantked1lvikeavd1pvigivkrdyehsdv1f1tatskev  
deliesrcevia1dat1lq  
rpket1del1v1syi1rthapnveimadiatveeaknaar1gfdyigt1t1hgytsytqgq11yqndf1q1kdv1lqsvdakvia  
egnvi1tpdmykrvmd1lgvh

Tsompanidou\_et\_al\_Supplemental\_FASTA\_File

csvvggaitrpkaitkrfvqimed  
>tr|D9RDM1|D9RDM1\_STAAJ  
mnqyhsnaqqpsawsffvyslvgilcffiipftingnntifvdhvhlairsiigplmpyvalimiligtalpivrtrfmts  
itnlvitlflkvagaiigim  
yvfkiqpsilfkanygpflfeklmpplsilipvgaialsllvgygllefvgyvymepimrpifktpgksavdavasfvgsy  
slgllitnrvykqgmykr  
eatiatgfstvsatfmiivaktlglmphwnlyfwitlvitfvvtaitawlppitnesteynggegeqevaiegsrlkt  
ayaeamkqnvltpslvkny  
wdn1kdglemtvgilpsilsigflglivanytpfidwlygifypfiyifpiadqavlakasaisivemflpsllvtkaai  
stkfvvgvsvsaiiffsa  
lvpcilateikipvwklliiwflrvplsllitipvallifg  
>tr|D9RDM2|D9RDM2\_STAAJ  
mlrgqeerkysirkysigvsvlaatmfvvtshaqasektpttnaaqketlnqsgeqgnaitshmqsgkqlddmhke  
ngksgtvttegtlqsskh  
qstqnsktiirtqndnqvkdserqgskqshqnnatnkterqndqvqnthhaernesqsttsqsndvdkspvpaqkvip  
nhdkaaptsttppsndkta  
pkstkaqdasdkhpnqgdthqpahqiidakqddnhvqseqkpqvvdlskhdgqnspekptdkntdnkqlikda1qapk  
trsttnaaadakkirp1ka  
nqvqplnkypvvfwhgflglvgdnalypnywggknfkvieelrkqgynvhqasvsafgsnydravelyyyikgrvdy  
gaahaakygherygktykg  
imprnwepgkvhlvghsmggqtiirlmeeflrngnkeeiayhqahgeisplftgghnmvasittlatphngsqaadkfg  
nteavrkimfalnrfrmgnk  
ysnidlgltqwgfkqlpnesyidyikrvskskiwtssddnaaydltdgsaklnmmtsmnpnityttytgvsstgplgye  
npdlgtfflmdttsriigh  
dareewrknqdvvpvisslhpsnqpfvntnepatrrgiwkvkilqgdhvdfigvdfldfkrkgaelanfytgiind  
llrveategkgtl1kas  
>tr|D9RDM3|D9RDM3\_STAAJ  
mteikdkviktdefelpytiikakhqptkgaivyihggglmfkgandlspqyidiltehydliqlsyrllpevsldcie  
dvyasfdaiqsqysncpif  
tfgrrsgaylslliardridgvidfygysgintepfkmansyyakiaqsvnetvlaqltsptpii qdqiqrfllygya  
rgtgewinminiadytdsk  
ynispnelktlppvfahcngdydvpveesehimnhvphstfervnknehdfrrpndeaitiyrkvvdflnaitma  
>tr|D9RDM4|D9RDM4\_STAAJ  
myrykpl1qsihlpngiki snrfvlspmtvntstkegyitkadlayaarrnsagmqvtgaayiepygqlfeygfnidhd  
acipgltnmastmkqhs1  
aiiq1ahagrfsnqai1nfgkvygspmtl hspidhdviamshenkinsiiqqyrdatlraikagfdgveisiaqrlligt  
ffstfsnkrtdhygads1k  
nrar1clvmravqevdikqapdnfilgfratpeetrsgdlgytidedfnqlidwvmdvsniqylaiaswgrhiyqntsrt  
pgehfgprvnqivyehlag  
ripliasgginspesaldalqhadvmgmsppfvtepdfvhklaeqrpqdidlefsmedlenlaipraafkdivkmmdyge  
glkkhtrdalrqlaqnyhd  
tsskdnfs  
>tr|D9RDM5|D9RDM5\_STAAJ  
mvl1svldyalidegkdaqkalqdsvtlakladrlgfkriwftehnvpafacsspellmmhtlaqtnhivrgsggvm1p  
hyrpykiaehfrmmaaly  
nrldlgiggnlgttmvkaaldginpkysydesislrdyltikdkpsahlgvqphidhfpemwllsssatsakiaael  
gig1svgtfl1pdinaia  
akdnidiykkyfqastikmdakvmasfvivadnaevaahlhaldwllgklqfaefehfsvdtaqkyk1ndrdkemi  
qahqariiaqtqevkaql  
ddfiatfevdevlvaplipgieqrcktlk1laeyl  
>tr|D9RDM7|D9RDM7\_STAAJ  
metlksnkarleylindmrrerndndvlmpssfedlwe1yrglanvrpalpsvdeylavqdamlsdlnrqhvtdlkd1k  
pikgdni1fvwgqdi1t1ki  
dai1vnaansrflgcmqanhdcidni1htkagvqvrldcaei1rqqrnegvgkakitr gynlpakyyi1htvgpqi1rrlpv  
skmnqdl1lakcy1scl1ka  
dqqs1nhiafcci1stgvfafpqdeaaei1avrtvesylketnst1kvvfnvftdkdlqlykeafkrdae  
>tr|D9RDM8|D9RDM8\_STAAJ  
mqsskwnams1l1mddk1kqaevl1rtaideadaivigigagsasdgftvgerftenfpd1fiek1yrf1fdmlqas1l1hpygs  
wqeywafesrfit1nyldq  
pvgqsy1al1ks1vegkqyhi1ttnadna1fdaaeydmthvfhiqgeyil1rqcsqhchaqtyr1nddl1irkmvvaqqdm1lipw  
emi1prcpkcdapmevnrk  
aevgmvedae1fhaql1qrynaf1eqhqddkvly1leigigy1t1pqf1vkhp1qrm1trk1nena1ym1tm1kkay1rip1ksiqdr1ti  
hl1tddi1st1litta1rndst  
tknni1getedv1nrtd  
>tr|D9RDM9|D9RDM9\_STAAJ  
myli1epi1rngeyi1adgaia1lamqvyv1nqni1flgedi1l1fpyy1cdp1kveigr1fqnta1evn1qdyi1dehhi1qv1rr1dtgggav  
yvdkgavn1mcci1leq1dtsi  
ygd1qr1fy1qpai1ka1lht1gat1dvi1qsg1rnd1l1ng1kkv1sga1mt1mn1ri1ygg1s1ll1dv1nye1amd1kv1kpnr1kki1askg

Tsompanidou\_et\_al\_Supplemental\_FASTA\_File

iksvararvghlrealdeety  
rditieafknlmvtqilgindi keakryeltdadweaideladkkyknwdwnyngkspsyeynrserlssgtvditiseq  
nriadcryygdffgggdik  
dveqvlqgtkmtredllhqkqldivvyfgnvtveslvemils  
>tr|D9RDN0|D9RDN0\_STAAJ  
mqailnftvdi lsqpailvaliafiglivqkkpaatitsgtiktigflilsagadvvvrsl epfgkifqhafgvqgivp  
nneavslalkdfgttaa l  
imvcgmivniliarftnlkyifltghhtfymaafilai ltvshikgwltivigalvlglimavlpallqptmrkitgndq  
valghfgsisyfaagavgg  
lfkgskssteeikfpkglslrestisisitmal lyfiac l fagvsyvhesisdgqnfivfsl iqqvtfaagvfii l tgv  
rli laeivpafkgiseklv  
pnskpaldcpivfpya qnavligffvsfitgvigmfilflfggvvilpgvvahfflgataavfgnarggikgavagaaln  
gilitflplflplfge l g  
gaattfsdtdflavgivfnavkymglfgailfiiivgataillkgrqkppq  
>tr|D9RDN2|D9RDN2\_STAAJ  
msldilsttriiivkeqvndwteaitiasqpllqe qieeggyvqamidsvnelgpyiviapeiaiaharpnndvhqvgls l  
lknqhvfcdedhyasli  
fvl saidnhshlsvlqnlatvlgdsktvqqlliatnaqdiknilkeh d  
>tr|D9RDN3|D9RDN3\_STAAJ  
nlsyrqieilylliheqt fipintianqlgvsprt i qydiaieqyaetyhyqvsrnkaagikvttanttilnelehnlt  
nqihfskderlthialklf  
ettdpvstkqlaqdvnsr rtiaddikmiqaqldqyhlklnyvhnkgfniigeedhyrkayahfihqymkqaapfieadi  
fnsesialvrraiiktlnr  
enyhlvqsaidg liyhi laiqrlnenfsfdipineidkwrhtnqyaiaskmienlerscnvtfpeseiifitlhl l gsk  
mtehtassitfeyhdlsqn  
ihelitcvsqelgidmskdnk lhtslithikpaihrikydm lqpn l r qevmrrypqiieavskhispieqdaairfnd  
eltyitihfassiervaty  
kqsmikvvl lcgsgigtsqllksklnhlypefhiwdaysiyqleesrl l qdnidyvistvpceisavpvihvdpfinqqs  
rqlnqiindsre qrvmkm  
atdgksladllpehriinkqpl siesaitvavqplindgivnsnytaailkql eqfgsymvisphialihagtdyvqng  
vgfalyftegiifgskan  
dpvhlvitl atdhpnah lkalgqlsec l sndl yrqdfldgnifkikqhialtm tkea  
>tr|D9RDN4|D9RDN4\_STAAJ  
meftysylfrmi shemkqk adqkleqfdi tneqghtlgylyahqqdgl tqndiakalqrtgptvsnllrnlerkkli yry  
vdaqdtrkknig l t tsgik  
lveaftsifdemeqtlvsq l seeeneqmkan ltkmlsslq  
>tr|D9RDN5|D9RDN5\_STAAJ  
mkdeql yf fekspvfkamhfs l pmmigt l lsviyg l niyfigfl edshmisais l tlpvfailmg l gn l fgv g agtyi  
srllgakdyskskfvsfs  
iyggialglivilvalpfsdqiaailgarget laltsnylkvmlsapfvilffileqfaraigapmismigmlasvgn  
iildpilifgfdlnvvgaa  
lgtaisnvaalffiv yf mksndvsvniklakpnkem l sei f kigipaf lmsilmgftglvlnlflahygnfaiasygi  
sfrlvqfpeliimglcegv  
vpliaynfmsnkgrmkdvikt vimsigvifvvcmiavftighmvg lfttdqavematfilkvtmtslll ngigflftg  
mlqatgqgrgati mailqg  
aiiipvlfimnalfgltgviwslliaes l calaamlivy l lrdrlvt dt selieg  
>tr|D9RDN6|D9RDN6\_STAAJ  
myksk illkyifseesevkd l teekynqdyea l tfsfkeetyqsr l akktptkagyfv t cwtkdenncnqpskeafady  
lmiivideelsgyflfpre  
lliekgil ttfekhkgmafrvypkwc nqlnkr aeqtkwqckyffey  
>tr|D9RDN7|D9RDN7\_STAAJ  
mnflkpakhikplpenqid dtykr l r lqvflgifi gyagyyl l rkd fslampalqeqgftkaelgfalsavsia ygfskf  
fmg tvsdrsnariflvlg l  
vltaivnl lmgfvpffts g igimfv l l flngwfqgmwppsgrv l vhwfsvsergsktalwnvahnvgggimapiaawgi  
tttafinfgylkgfegvfi  
ypallal iiaaisyvlirdtpqsqglppi eykndfatsdkkt l etel t tkeilfk yvlnnkwwaiafani fvyfvryg  
vldwapvy l seekhfd l ka  
sgwayflyewagipgt l lcgysdk l fkgrrgpagfffm l gvtvfvliyw l nppgnaw l dnvs l iaigfliygpm l ig l  
qaldyvpkkaagtaag l t g  
lfgylfgavmanivlgavvdkgfwdvgf illtaivfam l sfil twnkv gqetvhh  
>tr|D9RDN8|D9RDN8\_STAAJ  
mnivghhhi smytkdakrnkdfytnvlg l r lveksvndnpsmyh lfygdevgtagtilsf feipnaghkqpgtetiyrf  
sllvpnqaalhyfekr l en  
ngikshlyy l gqegvfkdedd l eiillvndsfevphqwqh nayseipqayqilgigpvelrvrnaartveflenvlgy  
rkrdnesfdv l tlapqgly  
sdfvvi eqqqrerpgrgyihhiavntpqmsdl daiykk lqqqpqsngiidryffkslyyrhnsim yefateapgftid  
tpveqlgsq l n l p d f l eae  
reqiesklhei

Tsompanidou\_et\_al\_Supplemental\_FASTA\_File

>tr|D9RDN9|D9RDN9\_STAAJ  
maklemnknptlefglyslgdhllnfpkgekvsyegrineieaskladeagidvfavgeshqehfttqahtvvlgaiaq  
atkhhkvssstiiisatdp  
vrvfedfatldlishgraeivagrasrtgfdlfgydldkydelfeeklnlllelnkteritwsgkyrpeInrmkifprp  
idntlpiwrvaggppasai  
kagkqgvpmmitlpgpamnfkgsidayrhaateagfdaspkslpvstaslfytaettqdamrefyphlntgmsfirvgv  
ypkqgfanspdyrealmgv  
spqqiiekilyqhelyghqrfmaqldfggvpfenvmknieligneiipaikkhlpk  
>tr|D9RDP0|D9RDP0\_STAAJ  
mniy11sgstvgsktrtamdy1knelevineghqielmd1rdlelefsvgknyldttgdvyklttslmqadvifigfpif  
qasipgalknvfdllpvna  
frdkviglvatagsskhylipeh1kpi1symkahtmqtyvfieerdfsnqqivnddvvfr1kalaqstmrtakvqqqv1  
eennqydf  
>tr|D9RDP1|D9RDP1\_STAAJ  
mas1knkhfmig1sftfivalfsflaaklpildkvgaltiailiailyrhfrgypeqyssgitfsskyllrfaiilyglk  
lnifdiigqgsr11aidvg  
vvifsivmm1fvnk11hgdknia11lgvgtgvcgaaiaavapifksrekdtaisigialigtifsliytaiyaifsm  
tnvygawsgvs1heiahvv  
laggfgsdalkia11gk1grvf11ip1tiv11ilimrfrsnessskgrisipyfligfvimalvntyvtipsallnilnt  
vstic11mamvalglnvaf  
kd1knra1kplmti1itsic11sslafivvhwly5  
>tr|D9RDP2|D9RDP2\_STAAJ  
mfgmkvneqi1ki1leahdtealfn1vnrsrds1rew1pwvdateqpsdthafikrg11qfadngngfcgiwyegr1agv  
vg1heinhmhrkts1gyy1  
dkqfegkgvmtqavet1kycfeeid1nr1eisavnnrksqaiper1gftkegm1rdne11ngiysssyiys11kseyd  
qk  
>tr|D9RDP3|D9RDP3\_STAAJ  
mkk1tt111ast11iaacgnddskkddsktskkddgvkaelkqatkaydytdeq1neflkgtekfvkaiennDMAQAKA  
lypkvrmyersepvaeaf  
gd1dpki1dar1admkeekkekewsgyhki1ekd1yednki1ddmtkkdaq11kdake1hakadt1ditpk1mlqgsvd11n  
evatski1tgeeeiyshtd1  
ydfkanvegaqkiyd1fkpi1ekdkk1sddiqtnfdkvq11dkydknggyesfekvskdrkafadavna1geplsk  
mavite  
>tr|D9RDP4|D9RDP4\_STAAJ  
mtnyeqvndstqfsrrtflkmlgiggagvaigasgvsvsfsksmfntpedpekdayefhgkvqpgittptqktchfva1  
dlkskdrdaiksmfkkwtv  
madrmmgdgtvgkasknplmpvdtgeaiglgask1t1tfg1sksmkkig1sgkipdtfkdi1phfndq1iddysdgi  
miqacsndsqs1fhavhn1  
vrpfrdvkvvrwaqsgf1sakgketprn1mafkdgtinprksnq1kdyvfiddgwakhgtycvvrriqihietwdrta1e  
eqeatfgrkrhsgap1tgg  
kefdeid1kakdshgeyi1dkdahtr1lakeantsi1rrafnyvdgtdertgnfetg11fiafqkatkqfidiqn1gsnd  
k1neyi1thrgsasf1v1pg  
vskggy1get1fd  
>tr|D9RDP5|D9RDP5\_STAAJ  
mkhylikivati1t1vmv1sfg11ksqgveqhs1sdvysvitdaksalssnki1sndskkdavkkvsvsgk1s1ddnseg  
navksd1rk1kdaksnadq  
tda1sq1tks1iayeek1askdagskik11qqqidgkdramtkaikdknaeles1nns1nqi1wtsnetvirnydanqyg  
qieva11qlria1ihksp1d  
takvshawttfksni1dhvdkkssasesnqfhvsq1nde1dkaikaidsnq1sdadta1thfieiwpyvegq1qtkdgaly  
tkiedkipyyqsv1deh1k  
shvkdglvdinnqi1kevvg1hsysfvdmii1flreglev11ivmt1ttmtrnvndkkgtasviggaiag1v1s1ilaitfv  
et1ngsgil1resveag1gi  
vav11mf1vgvwmhkr1snakrwndmi1kmyanaisng1v1latig1isv1regvevi1fymgmigelatkdfi1giala  
ivi1ii1fal1frfivk1lip  
ifyi1frv1si1fi1imgfkm1gvs1qk1q11gamprhviegfptinw1lgfypsyepliaqvii1ivafl1fkfk  
>tr|D9RDP6|D9RDP6\_STAAJ  
mvhfse1rhr1vki11sfiiavi1vyvssfwmtsviscitrant1hafsftemi1qiyvmi1ffiafcfispvmfyqlw  
afiapglhnerqfiykys  
1fsv11fi1fgvafafy1gfpmi1qfalk1stt1nispvigfkay1velirw1lftfgil1q1pil1fig1tk1glidtt1k  
hyrkyiyfacv1asi1ap  
pd1t1ni11t1pl1111f1fsmfivkftcrvkpph  
>tr|D9RDP7|D9RDP7\_STAAJ  
mitntfilg1tgpts1lvvisi1ali1fgpk11pqfgraigst1kefsated1dkeshdtpskeskqqrerd  
>tr|D9RDP8|D9RDP8\_STAAJ  
maft1saiqqahqqftgvd1fpk1fka1kdmgmtynivni1qngtatyvhqseddivtssvkstipvaqksnktmvqdv1tr  
hqqgqtdfetfcdema1eag  
iykwhidi1qagtctyid1lkeqai1selipq  
>tr|D9RDQ0|D9RDQ0\_STAAJ

Tsompanidou\_et\_al\_Supplemental\_FASTA\_File

mkilryigy1llgg1vggi1gnfdg1gien1tfatynnvvvisivati1iilvegi1lmnqrralkykr1vdeevd  
idatdqyellanryv1ngs  
ilsilqtviaf1v1li1fvvghaaanam1fflipffasai1ntqft1fnrrfddrmpkiadknytekrleildegerhie1  
valfktyain1sl1il1ai  
figsysiatg1ngsfs1ll1ia1fiynafsy1llkrrrfy  
>tr|D9RDQ1|D9RDQ1\_STAAJ  
mtt1lnvdrvnkqykdsdfklqdas1tistnetvg1igkngsgkst1linilvgnrhkdngs1affgeehaaddveykehi  
gvvfd1rvpnk1tikdid  
kvfqniyttwnsqkffdl1kyfel1pqqtkiktfsrgmrmkia1tia1shdvk1ll1ildeatagmdvsgreevmeiledfva  
qggg1l1sshisedie1la  
dk1vfmkdgki1lteqkdi1laqygivttedkdveipnh1miasr1skgkyqilvkdyaeienaep1khiddatkiimrg  
ev  
>tr|D9RDQ2|D9RDQ2\_STAAJ  
mkgmflssfyatrktqyiyfivai1aagyfavfnp1mssamagvm1itpitdnikhekdsrwmmyvst1pvkrsdyiksy  
fafyl1lfgas1miglvvt  
t1vtqsvm1gimsg1msfgi1gaysi1fp1tfkfgaensnvimicas1ll1isfvvfffiygmvsagasalefekistegw  
lvviyav1g1vitsvsi  
1siki1fnkqel  
>tr|D9RDQ3|D9RDQ3\_STAAJ  
mffdl1fvyaiqkiahv1l1ttqngs1sael1ffkyivms1flw1mwshqt1fftnrfgqvtfkdvsm1nmf1mvfl1sns1  
ypdfekt1ffpff1lcva1my  
1sig1qy1l1hirtg1dygd1krctqafatvafvis1fls1flsv1lpqsihyipg1flgvfiaatg1lipf1qy1lv1spvnmh1  
verfs1l1t1i1fge1v1sl  
assfs1ierfsy1iy1fqfmi1lis1fgvywiitenyinhk1ltsig1fr1syth1ll1nia1lgvinaaivfsnsk1ndl1fein  
mmyisv1vfy1glw1itpy  
fhne1tnakyisys1gi1lvmsyivs1l1fkghdhvmi1svsvatfc1m1iyfknqr1rnkhe  
>tr|D9RDQ4|D9RDQ4\_STAAJ  
mtrvv1aaayrtp1g1vggafkdvpayd1gat1iehiiketg1npseinevi1gnv1qagqgnpariaamk1g1petvp  
aftv1nkvcg1sg1ks1q1lay  
qsivt1gendiv1lagmen1msqsp1lvnns1rfg1fkmghqsmvds1mvyd1g1tdvfnqyhmg1itaen1veqyg1sreeqdtfa  
vnsqk1kavraqng1ef1dse  
ivpvs1pqrkgepi1vvtkdegvrenvsvek1sr1rpa1fkkgdgtv1tagnas1indgaamm1vmsedkake1nieplav1dg  
fgshgvdps1imgi1apvgav  
eka1krseke1s1divfel1neafaaqs1lavdre1kl1ppekv1nvkggaia1lghp1igasgarv1vt1l1hq1nde1vetg1ts1  
ci1ggg1ai1aavv1skyk  
>tr|D9RDQ5|D9RDQ5\_STAAJ  
mtqyp1wqg1nt1kqatwvd1tht1fdpei1prfse1fekge1vst1ftvkdhgfyvqrwniv1tqyg1thidapihfvenkry1e  
did1ke1lv1pliv1df1ste  
vvnnd1fiv1trahie1aweke1hgtiepg1tfva1rtdwskrwpnietfenkdsngq1qhagpgw1gdal1ky1lieersveav1ghe  
tfdtdas1vdv1kngd1l1vge  
ry1l1gqdkyqve1l1tn1dq1ptrgai1yaispkpkdapg1fpvrafaikpsnd  
>tr|D9RDQ6|D9RDQ6\_STAAJ  
mttiktsn1l1g1fpr1l1grkrewkkaiesywakkiskee1dq1td1lhken1ll1qkyyh1dsipvgd1fs1ydh1l1dts1l1fni  
iperf1qgrt1idd1l1fdia  
rgnkdhvasa1likw1fntnyhyivpewdnvepkvsr1v1ldr1fkyaqs1lnvna1hpvi1vgpitfvk1skgghqt1feekvt1  
l1plykevfes1lidagaeyi  
q1vdep1lvt1ddsesyeni1treaydy1fekagvakk1lviq1tyferah1kfl1ss1lpvgg1gl1dfvhdngyn1lkqieagn1fdks  
ki1lyagi1dgr1nvw1asdie  
akkv1l1dk1l1ahtne1lv1iqps1s1lhvpvs1l1d1et1dtsv1geg1sfatek1de1dal1rr1fnqgdnakydk1lkaryer1fq  
nqs1fkn1dydfesv1rtsrq  
spfaqr1ieqqkr1n1lpd1l1pttt1igs1fpqs1revrkyradwknk1ritdesyet1flkneiarwiki1qedig1ldv1vhgefer  
ndmveff1gek1l1gg1lv1tkf  
gwwqs1ygs1ravkppi1ygd1vkwtap1l1tv1detvyaqs1l1tdkpvk1gm1tg1pvti1nws1fervd1prkv1vqdqiala1ineev1  
aleaagi1kviq1vdepa1lre  
g1p1rse1yheq1ylkdav1s1fkl1atssvr1detqih1thmcysq1fgqi1haihd1dadvisi1etsrshgd1likdfediny1dlg  
ig1lgvyd1ihs1pript1keei  
tta1nr1s1lqq1dr1s1l1fwvnpdcg1l1ktrkeeev1kda1tv1l1navk1krqe  
>tr|D9RDQ7|D9RDQ7\_STAAJ  
msqf1l1tq1l1kdnv1ladga1gti1lyse1g1d1tcpeayn1shpd1kverih1rsyieagadvi1qtnt1yganfek1lkrfg1ledkvk  
ai1hqaavri1akkaat1kdyt  
i1lgtv1gg1frg1kqeds1l1q1tilyhte1iqid1t1ieegvda1l1fety1dleel1tnvit1rtrkkydipi1iaql1tasntny1lvn  
gg1aineg1lkq1lvqcg1aniv  
g1lnch1h1gph1hm1ges1fth1ielpeha1flscypnas1l1diense1fkysdnaqy1fgqvaqnl1iregvr1l1iggccgt1tpehikfi  
kesi1qt1l1kpvn1dkkvi1pip  
tkal1fnps1gnkvr1qs1l1tskv1qerptv1ie1l1dtpkh1d1drffeni1ak1ldkanvdav1ladns1latvris1niaaas1likqy  
yniepl1vhit1crdn1lig1  
qsh1l1g1s1ligvnei1ai1tgdp1skvgh1lpgatnv1ydvnsk1g1tel1al1rfnqg1intd1gdal1kkrthfni1agafnp1vrk1ld  
gavkr1lekkiesgmsy1fit

Tsompanidou\_et\_al\_Supplemental\_FASTA\_File

qpvysekiieiyhatkhlnksffigimpiasyknaflhnevpgikmsdeilqqfeavkddkaktrelslklskdlidi  
vheyfnglyiitpfqnv  
slelaaysksitahkeail  
>tr|D9RDQ8|D9RDQ8\_STAAJ  
mtlsketevidfwrgrgveyhsanpplydsstfhqkclggdvkydyarsgnpnrelleeklarlehgkfafafasgiaais  
avlltfksgdhvilpddvy  
ggtfrl teqilnrfrniefttvdttkieqiedaiqsntkliyietsnpcfkidikavsniakkhrllvavdntfmpplg  
qsp111gadivihsatkf1  
sghsdliagavitnndeirealyliqngtgmlsaqdsmlakhlktfpirfkqsvenaqkivsflieqeeisevyypgl  
nsahleqaenggaviglr1  
kdeskaqqfvda1t1plvsvs1ggietilshpatmshaalpeevretrgitfglfr1svgl edpdeliadikyalkeafn  
esiph tier  
>tr|D9RDQ9|D9RDQ9\_STAAJ  
mkdtqlaquitltdstgaianpihlstaykhpklgqstgfdytrtknptrstfetcfaklehgiatfatssgmsaiqlc  
nlfkphdeilvsfdlyggf  
fr1fefyeqqydikfkyvdfdyevl1nhitdktvalfiepisnpqmiadvkpyyqlckakgl1siidntfltpylstp  
laegadivlshatkyiggh  
ndvlagvvtvkdetlaqqlfdfnmtgat1spidsy111rglkt1hlrieraqsarklakkcslqaidevlysgqtgm  
1s1r1nkaysaak1len1d  
ic1faes1ggtet1vtfpytqthvdmpdaekdkrgideyl1r1slgvenyedierdi1qaldkaqigeiv  
>tr|D9RDR0|D9RDR0\_STAAJ  
mksedqritktkdeqikqidisdikqnpypqrktfdenh1ndladsikqygilqpiv1rktvqgyyivvgerrfraski  
ag1kyvsavik1d1dedmm  
elavien1gred1naieeaeasyqr1mtd1kitqevakr1sksrpyianm1r11h1pkkiadmvdgr1tsahgrt1lai  
kdeqqm1r1akrvvkekws  
vrylenhvn1knvssksetdkvdi1tkpkfikqqrqlre1yqakvdisikksvgkisfefesqedflriieqlnr1rygk  
>tr|D9RDR1|D9RDR1\_STAAJ  
mnqvmni1ss1fep1tkietyeniatkiamiiyiivalivikilnkmieggfk1qknskksnkkrskt1s1lvqnvvy  
1vwfivitt1skfgisve  
gviasagvvg1avgfgagtivkdvitgffii1fesqfdvgdyvkinnggttvaegt1vksig1rstrintisgelt1pnss  
mgeitnysi1ngtaivkip  
vsdenidnvekk1nk1fts1rskyy1fvsvp1vigidafedtrv1lrvsaetipgeg1fsgariirkevqkm1f1qegikt  
pp1imtpfnhsengv  
>tr|D9RDR3|D9RDR3\_STAAJ  
ma1tagiv1p1nvk1st1fnaitkagalaanypfatidp1nvgivevpdar11kleemvqpkkt1pttfeftdiagivkga  
skgeglgnk1f1sh1revda  
icqvvra1fdddnvthvagr1vdpiddievinmelv1ladlesvekr1prie1klarqkdkaemevr1lttikealengkpar  
sidfneedqkwv1nqaq11t  
skkm1lyianvgede1geddn1dkvkai1reyaqedsevivisakieeee1at1ddedkem1fled1gieepgl1dr1irttye1  
1glstyftagv1qevr1w1tf  
kqgm1tapq1cagi1htdfergfi1raevtsyddyvqyggesgakeagr1r1legkeyimqdgdivh1frfv  
>tr|D9RDR8|D9RDR8\_STAAJ  
mkkddt1aeikp1nfdeq1iak1qmni1ffni1dtekane1l1rkny1ffk1layfrkn1fekknnggyfiefay1sdlatidm  
k1rytm1hit1diehs1k  
1v1kl1itenkqedgyki1idef1cidksynnsnfdtnsrtp1eevmetkiknkneifkhmnkrgql1pak1nkyqnp1pawc  
iefmql1gqfvs1f1nfy1yk  
ynde1rvani1mp1lvkni1rnksahn1qsian1nydsrspqyl1fekgnnig1srnmf1gikn1fidt1fat1elhnqvc1nai  
iqaryhd1dq1qnrykrne  
syykna1aikrff1aldki1dfnrpkv  
>tr|D9RDR9|D9RDR9\_STAAJ  
mvkamvqfqi1angm1rigellaikreninyedkt1didgtinwitkk1trehse  
>tr|D9RDS0|D9RDS0\_STAAJ  
mfkkydsknsi1v1ks1s1lgi1ygg1tfgi1ypkadastq1nsssvqdkql1qkveevpn1seka1vk1klydryskd1tingksn  
ksrnwv1yser1p1nenqvri  
h1legtyrvadr1vytpkrni1nkevvt1kel1dhi1rfahi1sygl1ymgeh1pkgnivintkdggkyl1eshkel1qk1drenv  
kintddi1knvtfel1vksv1n  
dieqv  
>tr|D9RDS1|D9RDS1\_STAAJ  
mkt1lktity1al1ti1gayaa1c1lktidshg1tdqfn1lvkeddsyvktt1evstrmddq1r1sysqsa1fnkegeetq1lmy  
tatfdvkphry1k1thkgh  
hvetfeevekeevpkka1lak1lr  
>tr|D9RDS5|D9RDS5\_STAAJ  
mttqsf1fmni11ldgatqrh1pff1icqilv1fl1fptsphvn111fn1pilptfsni11hidh1fankkddn  
>tr|D9RDS6|D9RDS6\_STAAJ  
mkkikkai1paag1gtrf1patkampkem1pil1dkptiqyiveeaa1ragiedii1vtgrhkraiedh1f1dsqkel1emv1lke  
kgk1se1lek1vq1st1elani  
fyvrqkeqkgl1ghai1ssarqfignepfav11gddivesevpavkqlidvyeetghsvigvqevpeadthrygiidp1tkn  
grqyevkkfvekp1sg1tap

Tsompanidou\_et\_al\_Supplemental\_FASTA\_File

snlaimgryvltpeifdylktqkegagneiqldaiermndnqvyaydfegerydvgek1gfvkttieya1kddsmree  
lrfikelgl  
>tr|D9RDS7|D9RDS7\_STAAJ  
mknlnrygirkhk1gaasvflgtmivvgmgqdkeaaaseqktttveengnsatdnkvssetqtttanvntieetqsynatv  
teqpsnatqvtteeapkv  
qapqtaqpanletvkeevvkeeakpvettpqpdnsgnrqvdltppkatqnqvtethvevaqprkaseskprvtrsadv  
veakdaktvtdtvtskvt  
vtessieghnntnkvephaggravlkyk1kfedglkkgdyfdftlennvntygvtarklpeikngsvvmatgqllgdgk  
iryfttdyidykvntanl  
nlnlfdprivknngeetltskingntekkieveykdvgvgyytnlngsietfnkadnkfthvayvkpingnkssvsi  
tgs1tqgsnvsgdspivkv  
yeyqketd1pksvsnltdnskfkdvtmdmknltvqengnyq1nlekldktyvihtgeysketdevnfrtqvsaype  
nsryysyynnhyt1twdn  
glvlysnkadngngqkvkesnli fdeitgtgvikgqydknlvtvveeysstldidyhtaidgegyvdgyietiee  
tdssaididyhtavdseag  
hvggytesseesnpidfeesthenskhhadvveyeedtnpgggqvttesenlvefdeestkgivtgavsdhthvedtkeyt  
tesnlielvdelphegga  
qgpieeientennhishsglgtenghnygvieeieenshvdikselgyeggqniqnqsfeedteedkpkyeqgnividid  
fdsvpqi hgqkqgdgsfee  
dtekdkpkvehggnididfdsvphihgfnkheieeedtnkdkpnqyfgghnsvdfeedtlpkvsgqnegqqtieedt  
sptpptepepsepetp  
tpevpsepgeptpptepevpsepptpptepevpsepgeptpptepevpsepptpvpakeepkpkpskpvqqkvvtpviei  
nekvkavptkqtqskkse  
lpetggeestnkmlfgglfslglallrrnkknha  
>tr|D9RDS8|D9RDS8\_STAAJ  
mfneiwp1isvvlgia1llvliigfklntfislitsmitalmlgip1tkimetiengkmgstlghialifglgailgkll  
adgggatriadtliqkfgg  
khvqam1vaafivgia1ffevglvllip1vftvakranvsv1k1glpmvta1svthgflpphpgpvviakelkanvgev  
llygmiaipvtliagpif  
nkvaqkmipsaytregdisalgaqkeftdqempgfgmslltatlpvilmliatitq1vtghdkptnliesiymigtagt  
amliavlfaivtmglmrkr  
kmnhimesvtnaiypigm1liigggtfkqvlidggvgntiakmfegtemspillawivaav1ria1lgsatvaaisttg  
ivlp1lqssdvnavlvla  
igagsvilshvndagfwmfkeyfg1tvketfltwslletii1svs1gii1filfislfv  
>tr|D9RDS9|D9RDS9\_STAAJ  
mkymigvdi1gttstksvlydengt1f1mkhqigydl1htpnvdvseenpdel1fdav1mtikyimreskvnqddikfvsfsaq  
mhs1iamdqhqrl1tnnit  
wadnraakyatv1nevhdgnaiyqrtgtpihpmsplaki1fwmkhewqdvfqr1tkfadiktyifyh1fdryiidysmasa  
tgmfn1et1dwdveale1l  
g1skem1peivpttyvmkgmkkryat1mg1nedtpf1igasdgvl1n1lgvns1vgkgevav1t1gts1gairt1vidkprtdyk  
grifcyv1tedhyv1ggpv  
nnggv11rw1rdel1asevetakr1gvdpydv1tqiakrvkpgadgl1f1hpy1lagerap1lwanargsffgl1t1shkkeh  
m1raalegv1ly1n1ytv1la  
1ievmm1etpkmi1katggfaksevwrqmsdi1fdtel1v1pesyess1lgacv1gl1kavgdiedfsiv1ssm1vgatn1nhtpik  
envavyqdl1vsi1fin1srs  
l1tenyeq1ad1fqrqhmaentq  
>tr|D9RDT0|D9RDT0\_STAAJ  
mmygypekw1egmttgesiaaelr1lgivnghiaegt1l1tenqmakqfnvsrspirdafk1l1qqnq1liq1l1ermgahv1lpfg  
eqekkemyl1rl1ml1esfaf  
sr1vkn1rer1lp1vkemkkq1lemmkvavkfedaes1f1tkhdfefhet1likasnhqyl1nsf1wsh1kpvmma1vl1tsmrqrmqqn  
pqdferi1hnh1qv1fidave  
qydsq1l1keafh1ln1fd1dv1gkdi1egf1w1n  
>tr|D9RDT1|D9RDT1\_STAAJ  
msnystgelak1cnv1ttr1tiqydrk1g1l1kpqgft1egkr1rvy1teqqr1qt1el1l1ll1kd1l1gca1l1sdi1d1m1l1kgegt1l1kt1n  
t1l1tmkq1qei1nq1vkq1qqa  
v1nki1knv1qyyv1net1stsp1ith1kdi1ehv1msksaemks1ir1rni1wisagi1gigi1qy1ssimsa1ilmknkwp1fia1lp1fmigy  
gigi1tiyy1qrkvay1l1cpnc  
qhi1f1sps1wav1ikakhtatrr1fecpnchethycievpk1ahm1steq1leis1riq1hnn  
>tr|D9RDT3|D9RDT3\_STAAJ  
mpftmkgypekwe1fev1krqkaieianam1kegy1ekdvvpiaakkakdwyralskeeikal1eenfvqfhtatmekte  
vdseyattdnee1hi1qe1qsn  
qdksy1f1dses1gnq1sgv1vrq1rep1mdg1p1hpkv1ves1fkdv  
>tr|D9RDT4|D9RDT4\_STAAJ  
mi1pai1igyl1cgn1fq1gl1vatg1lahiyv1fkgsrsk1l1rtvi1icn1lafai1cm1lgt1taktp1lvfgmt1l1ivt1vipfyi  
ftalki1agps1stff1iv1tfs  
lpin1l1pia1peea1lyrg1fai1vgg1latmmv1litiv1f1sknkaeeqai1qndf1kl1isk1l1hty1ndksa1fl1kvaktav1ds1f1kas  
dk1l1l1it1st1ssndk1l1srr1fq  
k1l1l1l1htsaqgi1yse1lle1nakqir1p1deli1emmdhi1aq1l1dnsden1vrywr1kevtv1seefqn1fnh1ilkidemvhane



Tsompanidou\_et\_al\_Supplemental\_FASTA\_File

ariayeadmrkplyskriy  
qnltdsivfrntlrytaimmiiaifialmfnfekaywiplsahtillgtstihaiergmarglgtilglvlsvillfsi  
ptpvaviimgiaalfteal  
vganyaiavvfitiqvilmnglasqnltniafprvidvamgiviaiiglfvlgrtasallpnvmaevvrkeatlphy  
fsenykddvvyqkntamn  
svklmmtqvynaangel fsdktliqnyypsifaleeisfmlnramanedrltineqlmgeylatfeniakhlelnsele  
ikilpdlpqnyiqsamn  
iqhngfrerdksv  
>tr|D9RDT5|D9RDT5\_STAAJ  
mdranisyiakqmmddlgmtkppqglasffslgyalmqvpsgm laekfgprkmitialvwvsaftiltgmikhgliy  
vrflfgvgeapmypsnavf  
nsfwfsknekgrassallagsyfgpvlapivtiaivnafnwqavfyifgavgilmavlwaiiakdlpeqhrmvneakrf  
imenrdivatekssppwnd  
ffkrfsfyaiaiqyfvvqfiitflwlpityltevfhnfkemisslpwllmfflilsagaisdrvlgmgrskfvargv  
iaiaqfivfavsii favrt  
gnlyvsifwls lggigismgmswaaatd lgrnfsgtvsgwmnlwgnigalisp llaglfvehlgwtmtfqllivpavi  
avimwfyvkpdqplivsdd  
kaiek  
>tr|D9RDT7|D9RDT7\_STAAJ  
mtnsnirlyilgflaffasliqniytpiiprlyddfqvplfwinatvggfifivavmqivlgrsidsrskkvlltglgi  
viissficavthnfilfai  
srliqaigcgiipvtl tllaklstdngraqamanyqiflscapalapilgstlgarwdyigifsfllvisivlfliiff  
idipnvekgivkltkiee  
kyltdkvfitlvtlglfftyfsilvylp illnntydigvgisgvlflpitsvilgslfykr lskkyneimilrvtit  
gfai ftllfgwlnesnvii  
lsviifilgtcvgivpallstii skrfehikgkvlgvfnfvryigmtvgalligiisqplvafyfttitimliiiflyik  
igdfqlkyak  
>tr|D9RDT8|D9RDT8\_STAAJ  
mdmkrevifklqqfiierenadkrrqykkenel dls l tqfhie lidndkvnnkflsem lnvskpaitksikkllakg  
lvveshnefnkrevnyslt  
qegkkl syihdelhekavkkyeevlkvfdndemaviveflnrsieelkkedg lnd  
>tr|D9RDT9|D9RDT9\_STAAJ  
mdvvtvehl tkkignktiledisl tkrghivglvgangagkttlmkvilgyssfqsgnfvniknksksnigalieng  
iypfmsgyenkl lneskn  
tqdidkivsq l nmeeyihkkaktys l gmkkqlgiaiaflndpqfvldep mngldpkavrdvrelivqkaqegvtfliss  
hilselvkitnsil iinkg  
kivtetseeekqfknd lenvll diieredqa  
>tr|D9RDU0|D9RDU0\_STAAJ  
mgtlikqecfklykkkstfiapivf illmvaqgyiatkynitpkenftsgfn glawfsflliiqastiismefhygtikn  
llyreysrttm iiskii t  
fiisl iyfai tiasigigs l ffn d l nifessgnqlslfnqlllvs lgtfv gwlv lsl tlllscatnstgvaiavgivf  
yfastilavvqtlllekie  
wlkwnpinmmnmiqtvekgfskstk l elhel figniyisiflilvvfifkknv  
>tr|D9RDU1|D9RDU1\_STAAJ  
mtqitekelkkkyld l lsnqfndtpek lateiinlesilelpgktehfvsd l hgeyefqhv l rngsgnvrakindifker  
l stkelnd l talvyypedk  
lklksdfqscgqlnvwyittiehl elikycsskytrsk l rkalpkqyvyiieellyksneyqnkksyyetlvnqvie l  
kqaddliiglaysvqr l v  
dhlhvvgdiydrpqpdkimdt linyhs l diqwnhdv l wvgayagskvclan l lricarydn l diiedaygin l rp l l t  
laekyydadnpafkpkkrp  
dkher l tqreesqitkihqaiamiqfkleipiikrrpnfemeer l vlekvn ydtneitvygntyp l kdtcfqtvrndpa  
el l peeeevmnl l l sfqg  
seklrrhmsflmrkgsly l pyngn l l ihgcipvdengemesfeidghtysgqell d v feyhvrksfdekentdd l std l v  
wylwtgkysslfgkramtt  
feryfiadkashkeeknpyyh l redvnmvrkml sdfgl nadegriinghtpvkeingedpikadgkmlvidggfskayqs  
ttgiagyt l l ynsfgmq l v  
ahqqfnakekilsegidelsikrvvdkelqrkkirdtnigkd l qaqidilkm l mhdryld  
>tr|D9RDU2|D9RDU2\_STAAJ  
mafafvgvvvgagfatgqei qfftshgaysisgiivtgl l itl ggmivmhtghlksrnhdsdsinyflypsiargfdi i  
l tmfmlslaiimtaggast  
ihqsfnlpywlsalilvafilat l flkfdrlia v l ggvtpfliaivimiavyfttsh l dftaanndaqihkqks l spgw  
wfdainyas l qiaaafs l f l  
svmgskvkyrdstlygg l iggl iitfl l mmin l glisqfdkikhvd l ptlklatqm spsigiimsvimilviyntvvg l m  
yafasrfsvpfskryfii i  
itmavityistfigfisl igkvpimg l fgfillipviykglikritgkshid  
>tr|D9RDU3|D9RDU3\_STAAJ  
mehifregqkapt l i l l hgtggdef d l l plgealenyh l l sirgqvsengmryfkr l gegvydeed l efrgqellaf  
ikeaderydfdiekavlvg

Tsompanidou\_et\_al\_Supplemental\_FASTA\_File

fsngsniaainlmrseapfkka1lyaplypvevtstkdl5nsvs1lsmgkhdpivp1aaseqvin1fktrgavveevwn  
gheitesgltagqqilek  
>tr|D9RDU4|D9RDU4\_STAAJ  
mtnnhk1lgihhvtamtdaernykfftevlgmrlvkkvtvqddiytyhtffaddvgsagtdmtffdfpdipkgqagtns  
itrpsfrvpndealyyeq  
rfdefgvkhgeiqelfgkkvlpfeevdgqvyqlisdelnegvapgvpwkngpvpedkaiyglgpieikvsydfdknile  
tvygmttiehednvallev  
gegngggqvilikddkappaarqgygevhvsfrvenhdalkawatkykevginnsgivnrfyfealyarvghilieistd  
gpgfmedepyetlgegls1  
ppflenkreyieseirpfntkr  
>tr|D9RDU5|D9RDU5\_STAAJ  
mdrtkqs1nvfvgmnr1dtleqitkedvkryglnitefavlellynkqpqiqrirdrvliassisyvvsqledkgwi  
trekdkdkrvymas1tei  
gqsqmadifpkhaet1tkafdv1tedelat1qqafkkl1saqstev  
>tr|D9RDU6|D9RDU6\_STAAJ  
msnleikqgenkfyigddenna1aeityrfvdneinidhtgvsdelggqgvkklvkavveharenn1kiascsfakh  
mlekedsyqdvylg  
>tr|D9RDU7|D9RDU7\_STAAJ  
mafhdktatqvtnie1nvrde1lmttfykni1glsvkssddnksv1svngnght1t1h1ledgrqpsreagl1hiaf1l  
pttedlanflyfvaqkhmg  
igagdh1vsealyfndpegngevyrdrssswewqngkvkmdt1levdsqt1l1thrtdegwqmpakcmigh1h1kthd1  
naayqcyieqlgfqhvsdf  
pral1fms1nhyh1h1aantwqsnqarqnaqsyl1thvdiyqpdasthtftapegfditvhsntdlvpek  
>tr|D9RDU8|D9RDU8\_STAAJ  
msnmnqtimdafhfrhatkqfdpqqkvskefetesgr1spss1glepwkfvviqdqalrdelkahswgaakqldtas  
hfvli1farknvt1srspyvq  
hmlrdikkyaetipaveqkfdafqadfhisdndqalydwsskqtyialgnmmttaallgidscpmegfsl1dtvtdilan  
kgildteqfg1svmva1fg  
rqdppknktrqayedv1ewvgpr  
>tr|D9RDV0|D9RDV0\_STAAJ  
mvkaiavdmdgtf1dskktydkprfeaitel1nrnditfiaasnqyak1ksifgdrdmyfisengaviykgnelynyks  
fnrqv1fqqvdy1lnmqsi  
dq1v1cglksayil1khtseafkedtrfyyhql1keids1qqlpeddyvki1afninrethpnvdeevatqfsndiklvssgh  
dsidi1impnmtkgqal1kr1  
1dkwgmssse1mafgdannkdm1lafakhsyvmenshdeefniasavapsndkqgv1tieqev1nk  
>tr|D9RDV1|D9RDV1\_STAAJ  
mk1nny1kvknkq1vdncd1nfy1lqqin1hivgkngvgks1lakdf1l1nsgnipksisqnv1l1sssnipnditkdf1  
1s1l1kskfnnnrq1tfdkiy  
ni1nieaip1snv1l1kn1sdgqkqk1k1l1sf1ledhd1i1ildeitna1dkktvneiyef1ndfiqshqtkti1nith1sd  
1salpgkyfi1fkdl1qieey  
qskeevindyin1  
>tr|D9RDV2|D9RDV2\_STAAJ  
mk1efkksisnk1iytlglv1fi1fl1lgyfl1pigidkvkn1sysqfffssytvatqlgl1l1fsfviayfinkeysnkni1  
fyk1igdn1ftffykksv  
1ffec1vfi1siti1isijysnfshy1l1i1l1fs1vilqyil1vgtismvsn1il1slgisivywigsvilvainknifg  
ivapfeasntmyraveki1  
n1nestficpte1intv1ffv1l1ivntiv1l1srkrwl1kigm  
>tr|D9RDV4|D9RDV4\_STAAJ  
mircakked1nai1aiyndai1nttavytyepqtideriawfetkqhnhepi1fvfesdgnv1lgfatfgsfrpwpayqyti  
ehsiyv1dasargkiasq1  
lqhliveakakgyraliagidasnkasiql1hqkfgfkhagtl1nvgfknqwl1lafyeld1qd  
>tr|D9RDV6|D9RDV6\_STAAJ  
maksydyqsafdi1gpvmg1psssh1tagavkignsarai1l1gdipknieihyesfaqthqghgtdvaivggamgystfdn  
rikss1eiaaddgikidi1  
eeegdsigqhpncayikssr1ndgryie1igisiggtikikgihing1lqvd1nhgl1pilvvdgnmtkaqvn1hfindindm  
k1dckdefikidck1lv  
ip1nkaisest1ntikekysdv1nvsyin  
>tr|D9RDV9|D9RDV9\_STAAJ  
mnnhsal1rlkgi1lai1vgac1lwg1l1ggtvsdf1l1fkykni1nv1dwyvtar1lv1vsgv1l1imykmmpkrsi1fsvfqdrml1gk  
l1l1fs1l1gm1lv1vqyaymas  
intgnaai1at1l1qyi1apvyi1i1wfvirgvak1t1fdv1lai1imt1l1gtf1l1l1tngs1fsn1lv1vpas1l1fwg1l1agvalafyt  
iy1psd1l1nrfgs1l1ivgwa  
m1l1sgiamn1l1rhp1whiditkwdisi1l1fl1f1g1iggtalafyffids1l1qyisakett1l1fgtvepvvaviass1l1whvaf  
kpfqivgi1l1imil1l1l1s  
l1krqpk1eide  
>tr|D9RDW0|D9RDW0\_STAAJ  
mrkkwst1lafgfl1vaayah1rikekrsvksym1eqgir1l1srskrrfmykeeakka1ekmapqtageyegt1nyqf1kmpvkm  
dkhfgstvytvndkqdkh

Tsompanidou\_et\_al\_Supplemental\_FASTA\_File

rvvlyahggawfqdplkihfeidelaelnakvimpvypki phqdyqatyvlfeklyhdllnqvadskqivvmgdsagg  
qialsfqallkekhivqpp  
hivlispvl datmqhpei pdyllkdpvmvgdsvflaeqwagdtpl dnykvspingdl dglgritltvgtkevlypdaln  
lsqllsakgiehdfipgyy  
qfhiypvfpiperrrflyqikniin  
>tr|D9RDW1|D9RDW1\_STAAJ  
mvkqlnsveafqafinghplavvhvmdqcsvchavlpqiedlmqsyppnplavinqshveaiagelniftvpvdlifmd  
gkemhrqgrfidmqrfehh  
lkqmndsvnndvdeh  
>tr|D9RDW2|D9RDW2\_STAAJ  
mttegl1vaekeievngydidamgvvsni vyirw fedl rtfvfinqhmystminqgispi lmkteaeykvpvtihdkpvg  
riylvkaskmkwifkfeiv  
sqsgihcigtqiggfyr1s dkkitrpvqvfqdi lttk  
>tr|D9RDW3|D9RDW3\_STAAJ  
mfkkl1fgqlqrigkalm1pvailpaagi1lafgnamhneqlveiapw1kndiivmissvmeaagqvfdnlpl1favgta  
lglaggdgvaalalvgyl  
imnatmgkvlhitidifsyaksakelsqaakdपालvlgiptlqtgvfggiimgalaawcynkfynitlppflgffag  
krfvpi vtsvvaivtgvvl  
sfawppi qdglngl snfl1nknltl ttfi fgiierslipfgl hifyspffefgsytdhagel vrgdqriwmaqlkdgv  
pftagaf t t g k y p f m m f g l  
paaafai yknarperkkvvgg1msagltafltgiteplefsflfvapvlygihvllagtsflvmhllgvkigmtfsggf  
idyilygl1nwdrshallv  
ipvgivyai vvyflfdfairkfk1ktpgredeeteir nssvaklpfdvldamggkenikhldacitr1rvevvdkskvdv  
agikal gasgvlevgnmq  
aifgpkdq1khdmakimsgeitk psettvteemsdepvhveal gstdiyapgvqqi ip1sevpdqvfagkmmgdgv gfi  
pekgeivapfdgtvktifp  
tkhaiglesesgvevli higidtvklnggefeslinvdekvtqqplmkvnlaylkehapsivtpiitnledkelvied  
vqvdpgkl imtvk  
>tr|D9RDW4|D9RDW4\_STAAJ  
makikanealvkalqawdihlygipgdsidavvds1rtvrdqfkfyhrheevaslaaagytkltgkigvalsiggpgl  
ihllngmydakmdnvpq1  
lsgqtntalgtkafqetlnklcedvavynhqiekgnvfeivneairtaye qkgvavvicpndlltekikdttkpv d  
tsrptvvspsykdi kkavk  
linkskkpvm1igvgakhakdelrefiemakipvihs1pakti1pddhpysignlgkigtksyqtmqdadllimvgtny  
pyvdy1pkknikaiqidtn  
pnnighrfninvgi vgdskialhq1teni khvaerpf1nktlerkavwdkwm eqdknnnskp1rperlmasinkfikdda  
visadvgtatvwstryln1  
gvnnkfi1ssw1gtmgcglpgamaskiaypnrqai ai agdgafqvmqdfatavqydlpl1tvfvlnnkqlafikyeqqaa  
geleyavdfsmdhakfae  
aaggkgytik sasevdaiveeal aqvptivdvyvdpnaaplpgkivneealgygkwafrsitedkhlldlqippsvaa  
krf1  
>tr|D9RDW8|D9RDW8\_STAAJ  
mqnflgddtp1gelvdwinqdsnfprevkshseilsyfrtnpcpesisvpvikralsvfnqftnvq  
>tr|D9RDX0|D9RDX0\_STAAJ  
mqnldknfrh1sreek1qqlvdqkw1seeqfdillnhplideevanslienviaqgt1pvgllpniivdeksyvpmve  
epsvvaaasygalvnqtg  
gftkvsserimigqivfdgvedtek1sadi ktlekqihkiadeaysikargggyqriaidtfpeqqllslkvfvdtkda  
mganmlntileaitaf1asn  
efpqsdilmsil snhatasvkvqgeidvkd1argertgeevakrmerasv1aqidihraathnkgvmngihavvlatgn  
dtrgaeasahayasrdgqy  
rgiatwrydqrqr1igti evpmt1aivgggktv1piakaslellnvesaqelghvvaavgl aqnfacravsegiqqg  
hmslqyks1aivvgakgde  
iakvaeal kqep rantqvaeril qdlrsq  
>tr|D9RDX1|D9RDX1\_STAAJ  
mtigidkinfyvpkyvdmaklaearqvdpnkfligigqtemavspvndivsmganaakdiitdedkknigmvivate s  
aidaakaaavqihnl1giq  
pfarcfemkeacyaatpa iq1akdy1atrpnekvlviatdtarygl nsggeptqgagavamvithnpsilalnedavayt  
edvydfwrptghkyp1vdg  
alskday1rsfqswneyakrqgk1adfas1cfhvpftkmgkalesiidnadettqerllsgyedavdynryvgni y t  
gsly1slis1lenrd1qag  
etig1fsygsngsvgefysat1vegykdh1dqaahkal1nrtevsvdayetffkrfddvdfdeqqdavhedrhifylsni  
ennvreyhrpe  
>tr|D9RDX2|D9RDX2\_STAAJ  
myksyyspvg1elvsdgvslia v1fenqqddgtreents1aifkeatqwl dayfkgdnpeitiplkptgshfqqcw  
nelrq1pygtl1tygaiak  
kvgk1ldkpkmsaqavggavgsnplsiivpchrvgktgsltgfggtinnkik1lelenidmsklyvpkhstkp  
>tr|D9RDX3|D9RDX3\_STAAJ  
mnnffnsdfdsilrrmmqdmqnsnqtsnkkyiingkevspeelaqftqqggnhsaeqsaqafqqaalrqqgqsgngny

Tsompanidou\_et\_al\_Supplemental\_FASTA\_File

leqigrnlqtgeardglldp  
vigrdkeiqetaevlsrrtknnpilvgeagvgktaiveglaqaivegnvpaaikdkeiisidissleagtqyrgafeeni  
qklvegkssqntvlfefe  
ihqiigsgatgsdsgskglndilpkalsrgeisiigattqdeyrnrimkdaaltrrfnevlnepsakdtveilkgirek  
feehhqvklpddvllkacvd  
lsiqyipqrlpdkaidvlditaahlsaqspaidkvatekriselchdrkrkavsakeykdaddiqneikslqdklensng  
ehtavatvhdisdtigrllt  
gipvsqmdandierlknissrlrskiigqdkavemvsrairrragfddgnrpigsflfvpgtvgvktelakqlaidlfg  
nkealirldmseysdttav  
skmigttagyvygddnsntltekvrnpysvilfdeiekanpqiltlllqvmdgndtdgqgnvinfkntiicstsnagf  
ngtdqeyddimqemkkff  
rpeflnrfrngiveflhldkeslqeiinlllddvqvtldkkgitmvsqdakdwlieegydeelgarplrriveqqvrcki  
tdyylhdtdvkhvldied  
nellvkgks  
>tr|D9RDX4|D9RDX4\_STAAJ  
msvlniliflaifgyalytlvkffkrskqgkcgctceidndccsteqhtanhfpgk  
>tr|D9RDX5|D9RDX5\_STAAJ  
menycilgnpvgktslfnaltgsyeyignwsgvtvekkvgklkenvgqlidlpgytdlspiskdetvvtdyllndsfsg  
iinivdasqlkrnmqltvq  
llelnqpiyiglnmidvatkrigikidyhklmkkllktpifpvvartgkgtkhllgeikhleggyqphfkinygekieetik  
nmcqiimtetsdkygarf  
iaiqfllnmqianeInsevnklssirdqvaeqveavsvrremerirnhietllqdvvtypdedkqyfssridkilth  
kyigmpiflaimwliqftt  
ftwigtplsdqldafiggtfstdsvktimnylgvipflqdlitdgiagvgsvlvfpqivvlfffiisllledsgymariav  
lmdrimesfglsgksfipm  
iigfgcnvpsimaarsienerltiliapfmscsarlpvyaifvgiffkenqslvvlslylvlgiimaflvstvtktv  
lkndnaifiveptyrvps  
iktllwrstwekakgfvrkagtfiggsvviwllsyvgphginvninqsflhmvgdffgmvlvqplgfgtwaqatlvpgfl  
akevivssmaiyssgdag  
lvnviqngftplsayaflmifillyipcvstvaairketyswkwtalavtypvtayvltfifyqvghlfv  
>tr|D9RDX7|D9RDX7\_STAAJ  
makflykmgtfiakhkwsaliawivivaaifipiatnapkfdndikmtglksldtnekiekhfnqdsekaqirrvfkttk  
ddgivqpsitkdkktldd  
ikkddkhdikisdpyenkqiskdktafaditydvsqtslkddsrndvkskldlrdnhnvqtelgtgtmstdiggense  
lvgiivafvllitfgsvi  
aaglpiaisaliglasvgviiislltyafdi pnvlttlavmiglavgidyalfilfryrqvmktetdyikgiglavgtaga  
vifagvtvviavcglslvg  
idflavmgfasaisvifavfsaltllpalisifhkrikvnlqsnfkdidtpwskfitgnalaavllgliilvaaipv  
shmrllgipddgvkpadstg  
kkaydiisdkggegfnqgipmlinvkdkkddpqqllqdlqsvykdikdkknvdivtppqmskdneyalmvviiphkgpnae  
stndlvhdldrhykdaqdk  
ygfkteisggsvinidmskklneaiplfasvivvaffllmivfrsilipkavlgfvlsimatlgfttlvmqdgfmkgll  
fgiettgpmalfpvitig  
ilfglamdyevflmsriheysktgdndysikvglkesgpvivaalimfsvffafvfqedvmiksmgmalafgvlfdaf  
vvrmmllipaltklfgkgs  
ylpawlnriiprvdieghalekyktvesqeseakdskeydttkvypqgatnvskhqdvhgqddarsivlddktmalyq  
evkqqsasslflydalmdy  
qnkhqlnskqqatnieqlnknieklngllleknlnks  
>tr|D9RDX8|D9RDX8\_STAAJ  
mketdlrviktkaalssllqllleqqllfqtitvnqicdnalvhrttfykhfydydlleylfnqltkdyfardisdrlnh  
pfqtisdtinnkedlreia  
efqeediefnkvlknvcikimhddiknrdrididsdvpdnlifiyidsliegfmhwikdekidwppedidnifhrlini  
kik  
>tr|D9RDX9|D9RDX9\_STAAJ  
mvvefknepgydfsvqenvdmfkkaalkdvekelgqdiplvingeki fkddkiks inpadtsqvianaskatkedvedafk  
aaneaykswktwsandrae  
lmlrvsaiirrrkaeiaaimvyeagkpweavgdagidfiyyarsmmdlaggkpvldregehnyfyksigtgvtip  
pwnfpfaimagtllapvva  
gntvllkpaedtpyiayklmeileaglpkgvvnfvpgdpkeigdyldhkdthfvftgstratgtriyersavvhegqn  
flkrviaemggkdaivvde  
nidtdmaaeiavtsafgfgskcsacsraivhkdydevleksikltkeltlngtvdntymgpvinkkqfdkiknyieig  
keegkleqgggtddskeyf  
veptiisglkskdrimqeeifgpvvgfvkvnvdeai evandtdygltgavitnnrehwikavnefdvgnlylnrgctsa  
vgyhpfggfkmsgtakt  
gspdyllhfleqvsemf  
>tr|D9RDY0|D9RDY0\_STAAJ  
mtekekm1aekwydanfdqdlinerarakdicfelnhtrpsatnkrkelidqlfqttdnvelaipfdtdygnvklgkn  
vfvntncyfmdggqitig

Tsompanidou\_et\_al\_Supplemental\_FASTA\_File

nvfigpncgfyatathpInfhhrnegfekagpihigsntwfgghvavlpvgvtigegsvigagsvvtkdippnslavgnpck  
vireidneyppggqfcgkd  
>tr|D9RDY2|D9RDY2\_STAAJ  
mantkktltditgmtcaacsnrlekklnklddvnaqvnlttekatveyndpdqhdvqefintiqlhgygvavetvelditg  
mtcaacsstriekvlnkmdg  
vqnatvnlteqakvdyypeetdadklvtriklgydasikdnkdqtsrkaealqhklikliisavlslp11mlmfvh1  
fmmhipsifmnpwfqflla  
tpvqfiigwqfyvgayknlnnganmdvlvavgtsaayfysiyemvrwlngsttqphlyfetsavlitlilfgkyleara  
ksqtnalge11slakea  
rilkdgne1mip1nevhvgdtlivkpgkipvdgkiikgmtaidesmltgesipveknvddtvgstmnkngtitmtatk  
vggdalanikvveeaqs  
skapigr1adiisgyfvpi1vvgial1t1fiwvit1vtpgtfepalvasisv1viacpalglatptsimvgtgraaengil  
fkggefverahqidditvld  
ktgtitngrpvtvdyhgddqtlqllataendsehplaeaivnyakekqlt1tetttkavpghgieatidhhilvgnrk  
1madndis1pkhisdd1th  
yerdgktamliavnysltgiavadtvdhakdaikqlhdmgievam1tgdnkntaqaiakqvgidtvialipeekaaq  
iaklqqgkkvamvgdgvn  
dapa1vkadigiaigtgevaieaaditilggdlm1ipkaiyaskatirnrqnl1fwafgyniagipiaalg1lapwvag  
aamalssvsvtna1r1kk  
mr1eprrkda  
>tr|D9RDY3|D9RDY3\_STAAJ  
msqeilnvegmscghcksavesalnnidgvtsaevnlengqvsyqydds kvavsqmkdaiedqgydvv  
>tr|D9RDY4|D9RDY4\_STAAJ  
mnnkvkgdvkmtkikimsvrredmpyikawaekhhvevditkealtdnvegvagydg1slsqqip1sehvykr1nelgi  
kqiaqrsagfdtydlelan  
kyn1ivsnrpsyspnsiaefavnqain1vrhfnqitkvrehdfrweptilsksik1kvavigtgrigrvadifangy  
qsdvvaydpfnakiatyv  
dykdtieeavegadv1trvpatkynhy1fnael1fkhfkkgavfvncargslvdtka1lda1dnglikgaal1dyeyer  
1fspdqrkpl1ndp1les1  
igredviltph1afyteaaven1ivda1dat1dv1qtgdtr1rvn  
>tr|D9RDY5|D9RDY5\_STAAJ  
misnk1anipdsyfgktm1grkiehgp1p1inmavgi1pdgtpqgi1dhfqa1tipenqkygafhgkeafkqai1vdfyqr  
qynvt1dkedevci1ygtk  
ng1lavptcvinpgdyv1lpdpgytdy1agv1ladgkpv1n1lepphy1pdwskvdsqi1dktkli1y1typnntgstat  
kevfdeaiakfkdt1tkiv  
hdfaygafgfdaknps1lasengkdvaie1ys1skgynmsgfrvgfavgnkdm1qalkkyqthtnagmfgalqdaaiya1  
nyddfl1eeqsnvfkarrd  
rfeam1akad1p1fvhakggiyvw1etpsgydseqfeq1lvkeksil1vapgkpf1gengnryvris1alddqkl1deaair1t  
elaylye  
>tr|D9RDY6|D9RDY6\_STAAJ  
mkiav1gagvtgl1aaaari1asqghev1teknshvggrm1n1kkdgft1dmgptiv1mpdvkdvftacgknykdyielk  
ql1ryiydv1yfd1rdd1rtvp  
td1aelq1m1les1iepgt1g1fms1f1tdvykkye1i1arry1fl1ertyr1kpsdfynmts1liqg1k1kt1n1hadq1liehyidnek  
iq1k1l1afqt1ly1igidp1kr1g  
ps1lys1ip1mi1emm1f1gv1h1f1kgg1my1gma1q1gla1q1n1kd1lg1v1h1el1dae1ieki1id1pk1f1krada1k1vng1dir1k1fdk1il1ctad1f  
pnvaes1mp1df1ap1k1k1ypp  
hk1iad1dys1cs1af1my1igi1did1vtd1qvr1ln1hvi1fsdd1fr1gni1ee1fegr1lsy1dps1iy1vy1vpav1adks1lapeg1kt1gi1y1vm  
pt1pel1kt1g1sg1id1ws1de1al1t  
qq1ike1i1yr1k1lat1iev1fed1ik1shiv1set1ift1pnd1feq1ty1hak1fg1saf1gl1mpt1laqs1ny1rp1qn1vs1rdy1kd1ly1fag1ast1hp  
gag1vp1iv1ts1aki1tv1demi  
kd1ieq1gv  
>tr|D9RDY7|D9RDY7\_STAAJ  
mtm1md1mn1f1ky1chk1im1k1k1h1sks1fsya1fd1lp1kn1qr1kav1wai1yav1cr1k1idd1sid1vy1gdi1q1fl1n1q1iked1iq1iekh1ple1h1hf  
qsd1rr1im1al1q1y1va1qh1nqi  
af1qs1fyn1lid1ty1kd1qh1ft1mf1et1dte1ll1gcy1gv1agt1v1ge1vl1tp1ils1dy1tt1q1ty1dvar1rl1ges1ql1in1il1rdv1ged1len  
er1y1fs1k1qr1n1q1yev1diae  
vy1h1kg1id1ery1ial1weyy1aa1iaek1df1qd1vmd1q1ik1v1fs1ieaq1pii1elaari1y1ie1il1devr1qany1t1herv1fd1kkk1kad1lfh  
e1insky1hkv  
>tr|D9RDY8|D9RDY8\_STAAJ  
mkw1sri1l1tvi1v1tms1mac1gal1mf1n1rr1hq1kakt1ln1fn1h1kalt1ii1par1neek1righ1l1hs1ii1qq1vp1dv1iv1mnd1gst1de  
tar1vars1ygat1v1dv1v1ddt  
dg1kwy1gk1sh1acy1qgv1thact1nsia1fvd1adv1t1fl1rk1d1av1et1ln1qy1ql1q1ge1k1g1l1sv1qpy1hit1kr1cy1eg1fsa1if1n1mt1v1vg  
mn1vf1st1ld1dg1qt1n1q1q1af1gp  
vt1l1tn1k1tdy1y1t1d1gh1kn1an1qhi1ieg1fal1gn1ayas1ql1pvt1vy1eg1fp1fva1f1rmy1q1eg1f1s1l1q1eg1wt1kh1st1gag1gt1np1kim  
tai1vl1wl1fg1sias1il1gl1cl  
s1lky1rq1ms1vg1kml1tvyl1sy1tt1q1fiy1l1hrr1v1g1q1fs1n1lmv1ch1p1l1fm1fft1k1ifi1q1sw1k1q1thry1gv1vew1k1gr1qy1q1t1kek  
>tr|D9RDY9|D9RDY9\_STAAJ  
mtkhi1iv1gg1l1ggi1saa1irma1q1sg1ys1vs1lye1qn1h1gg1k1vn1r1hes1dg1fg1fd1l1gps1il1tmp1y1ife1k1fe1ys1nk1q1ms1dy1vt

Tsompanidou\_et\_al\_Supplemental\_FASTA\_File

ikr1phqwr5ffpdggtid  
lyegiketgqhna1skmdieelqnylnytrridritekgyfnygltdltsqiikfhgplnalinydyvhtmqaidkris  
npylrqmlgyfikyvgsss  
ydapavlsmlfhmqqegglwyveggihhlanaleklareegvtihtgarvndiktyqrcvtgvrldtgefvcadyiism  
eviptykyllhldtqrlnk  
lerefepassgyvmhlgvacypqlahhnffftenaylnyqqvfhekvlpddptiylvntnkdhtqapvgyenikvlph  
ipyiqdqpfttedyakfrn  
kildklekmgldlrkhiyedvwtpedieknyhsnrgaiygvvadkkknkgfkfpkesqyfenlyfvggsvnpgggmpm  
vtlsgqqvadkinarevkn  
rk  
>tr|D9RDZ0|D9RDZ0\_STAAJ  
mktmkkyiktaffcsmywlvqlnianlgtripnkyfrqkhiifksfnfekhgkfwkwyvrkwkhkildghqlnrniy  
dqrhlmtinsdeiekmiie  
tkraelihwisilpvii fnkgrprlvkyinifyamianvpriivqrynrrprtql1r1lkrgerhd  
>tr|D9RDZ1|D9RDZ1\_STAAJ  
mkkivtatiataglatiafaghdqaqaeeqnnngynsndaqsystytidaqgnyhytwtgnwnpsqleqnntyyynnynt  
ynnsynnsynnnynhs  
yqynnytnsqtatnnyytgsgasysttsnvhvttaapssngrsingsyasgsllytsgqctyyvfdrvvgkigstw  
gnasnwasaaaassgytvnn  
tpkagaimqttqgyghvayvegvnsngsvrvsemnyhgagvtsrtisanqagsynfih  
>tr|D9RDZ2|D9RDZ2\_STAAJ  
mdtkdfkrlekmysprylpgldglrafavigiiahlnaqwlsggflgvdttffvisgylitslliseyyrtqkidllfhw  
krrlkr1lipavlflicvvl  
tftlifkpeliiqmkrdaiaaifyvsnwuyisqnvdyfnqfaieplkh1wslaieeqfyllfplvitfllhrfkprniiq  
tlfivslislgmivihfi  
tgdnsvyfgtdtr1qt1llgcilafiwppfalkdiskivvsldiigisgfav1mtlffivgdqdwiynggfyyisf  
atlfiaiaihpsslfakf  
lsmkp1lijgkrsyslylwhypivfvnsyyvqqqipyvyiieilltalmaeisyrfietpirkkgfkaaf1pkkkqg  
fartv1vill1vpsivvl  
gqfdalgkqhaekkekktfkttkkkvkkdkqedkqaanskedikkssplligdsvmdignvftkkipnaqidgkvg  
rqlvdatpivksqykdyak  
kgqkvve1gtngaftknqlnelldsfgakdiylvsirvprdyegrinkliyeaaekrsnhlvdykaseghpeyfyad  
ghleyagskaltdlivkt  
methatnkk  
>tr|D9RDZ3|D9RDZ3\_STAAJ  
mkktimasslavalgvtgyaastgheahaaevnvdaqh1vdlahnhqdqlnaapikdgydihfvkdgfyqnf1sngttw  
swsyeaangqtagfsnvag  
adyttsynqgsnvqsynsnaqssnsnveavsaptyhnyststtsssvr1sngntagatgssaaqimaqrtgvsastwaa  
iaresngqvnaynpsgasg  
lfqtmppgwptntvdqqinaavkaykaqgl1sawgf  
>tr|D9RDZ5|D9RDZ5\_STAAJ  
mknsisqnsel1dkeignfsn1lqytfilssflksiniieerhsnayqkgtlfvrsvsal1tyhqh  
>tr|D9RDZ7|D9RDZ7\_STAAJ  
msetdepqgfehthn1lninqskslmtf1tsklks1kqrii1argkkridyrlsynfyttydnveikkidceytham  
pia1l1rhtmsfdnahffa  
qlrhpv1  
>tr|D9RDZ9|D9RDZ9\_STAAJ  
miqsmwfn1hvqdlksaqfykalgfkinrnpqml1dkmvgiqigrttivilienkhfqnsqqs1ntepnevms1lgvntn  
kevdq1vnkvkeaggtvvq  
eptvsqgfygamfk1dgghfn1vc  
>tr|D9RE00|D9RE00\_STAAJ  
mkd1lvigatgkgnavvkq1ledgwyvsal1trnknnrkl1sdighph1sivegd1sdsvs1qlamkvkyglysiqpivkd  
dvneelrqgmkiieiaeqe  
niqhi1vystaggnrnr1rtgphfevlakienr1mesninatvikpsffmdnflriakvederit1pefinpnikftmissi  
diakiasyifahpqsftq  
sieigsdevt1seati1fsevtgkstviegefsvgvaekqweekgyevdfelmaeinpr1sl1sdw1kvqdyndk  
>tr|D9RE01|D9RE01\_STAAJ  
ms1nkeqrritaeelqahfeest1svqmiaek1nvttedvekal1amkap1g1fshqlqr1fihsvwdvrdvinnikengq  
tpepyt1kgekedywflr  
>tr|D9RE02|D9RE02\_STAAJ  
mrkdaienr1riei1ahkl1fdeegveni1smnriake1gigmg1lyrhfkdkd1lcfyviqtd1ntf1trfkqikddyhsd  
yevmks1dy1l1qfkidnk  
t1l1hci1eag1nk1rfyqsafyqel1dfyyd1lksddi1ftkfktdm1l1qsl1stsvf1afqiehrhisieayrny1l1niy1d  
evernd  
>tr|D9RE03|D9RE03\_STAAJ  
mtki1v1tggng1gyasaeal1kalgykyigsrndvrgqqasqk1gvhyvq1dvtsdysvknaynmiaekegr1dil1n  
nagisqgfsapsk1tprdv  
eevyqtnvfgivrmmtfvpl1lekseqpvvvvnvssgl1sgf1gmvt1nsetaeskvnslayc1ssksavtm1t1l1qyak1lpnmq

Tsompanidou\_et\_al\_Supplemental\_FASTA\_File

inaadpgatntdlvgdfsn  
nakhvsegikpiiklatidengptgtfingngempw  
>tr|D9RE04|D9RE04\_STAAJ  
mksitfeehyvideiqketmna itadpngvpmkvmldglekktgftnadelshndkriqfmdnqnvqivlsyngngspn  
lvgqkaie l c q k a n n q l a d  
yisqhpdrfv g f a t l p i n e p e a a a q e f e r c v n e l g f k g a l i m g r t q d s f l d q d k y d v i f k t a e a l e v p i y l h p a p v n s d i  
yqsykgnypevtaatfac  
fgygwhidvgihaihvlsgifdrypklni i ghwgefipfflermdealladhlnhpiisyfknfyitpsgm ltkpqf  
dlvkkevgidri lyaadyp  
yiepeklgvflde l g l t d e e k e k i s y t n g a k l l g l s s n n  
>tr|D9RE05|D9RE05\_STAAJ  
mkiviiggf l g g g k t t v l n h l l a e s l k e s l k p a v i m n e f g k m s v d g a l v s e d i p l s e l t e g c i c c a m k a d v s e q l h q l y l  
keqpddivfiecsgiaepvs  
vldac l t p i l a p f t t i h m i g v i d a s m y k h i k s f p k d i q g l f y e q l a y c s v v f n k i d s a h v d t t s k l l k d l e v i n p d a d  
iqvqm h g r v a l p i s v s q m t  
atsdnkhkslhqminhqfvqspvkctkaqfikrlac l p s h i y r l k g f m t f e d t t h t y l i q f t q g q y e l t p v a f s k k v p e y  
l v l i g k g i s k e d y q c l e q  
>tr|D9RE06|D9RE06\_STAAJ  
mlevkydmrtghytpipnephylvishadkl tatekalkrl l l i i k q k l d i s l a e s v s s p i a s e h v i e q l t l f q h e r r h l  
rpkisatflaw l l i f l m f a  
l p i g i a y q f s d w f q n q y v s a w i e y l t q t t l n h d i l q h i l f g d y g v l s l g t y s l v w a l p v v i l i s l s t a v i d q t g l k s w m  
i w a i e p s m l r i g l q g n d i v  
p l l e g f g c n a a a i s q a a h q c h t c t k t q c m s f i s f g s s c s y q i g a t l s i f s v a g k s w l f m p y l i l v l l g g i l h n r i w l k k n  
d q l s v p l p y d r q l h m p n i  
h q m l l q m w q n i q m f i v q a l p i f i t i c l i v s v l s l t p i l n v l s q i f t p i l s l l g i s s e l s p g i l f s m i r k d g m l l f n l q q g  
a l l q g m t a i q l l l l v f f s s  
t f t a c s v t m t m l l k h l g g k s a l k l i g k m v t s l s l v i g v g l i v k m i m m i i  
>tr|D9RE07|D9RE07\_STAAJ  
mqhkhvai igagaagigma i t l k d f g i e d v i i l e k g t v g h s f k h w p k s t r t i t p s f t s n g f g m p d m n a i s m d t s p a f t f n  
eeh is g e t y a e y l q v v a n h  
y e l n i f e n t v v t n i s v d d a y t i a t t t e t y h a d y i f v a t g d y n f p k k p f k y g i h y s e i e d f d n f n g q y v v i g g n e s g f d  
a a y q l a k n g s d i a l y t s t t  
g l n d p d a d p s v r l s p y t r q r l g n v i k q g a r i e m n v h y t v k d i d f n d g q y h i s f d s g q s v h t p h e p i l a t g f d a t k n p i v q  
q l f v t t n q d i k l t t h d e s t  
r y p n i f m i g a t v e n d n a k l c y i y k f r a r f a v l a h l l t q r e g l p a k q d v i e n y q n q m y l d d y s c c e v s c t c  
>tr|D9RE08|D9RE08\_STAAJ  
metigsiiylkegsqklmi inrgpiveienqkymfdysackypigvvedeiyyfneenidsvifkgysdqdevrfqel fd  
nmkqnl dseiqrgevtqg  
>tr|D9RE09|D9RE09\_STAAJ  
msnkgdgin km i t a k h k q m d d l y d e k r e v k a l i d e s d a l n h s i d q l y q h l g e r y s s n m a s r m e q f r d e f h f a k r r s t e a  
l y e q q q q i q h g i r k a e e e m  
n d l e m r r n v e i e t v t k e e n k w k q  
>tr|D9RE10|D9RE10\_STAAJ  
mstvqsdi fktnsassiksavetcnvskpkddesttvs g n n a h s v i d d l i s k n q s v a e a i r t a s d n i q k v g e a f d q t  
d v m i g n e i g k n  
>tr|D9RE11|D9RE11\_STAAJ  
mneqwlehlplkdikeisrvsggdvneayrvetdttdtffllvqrgrkesfyaaeiaglnkferagitaprvi asgevngd  
aylvmtyleegasgsqrql  
gqlvaqlhsqqgeegkfgfslpyeggdisfdnhwqddwctifvdkrmehlkdellnrglwdandikvydkvrrqivaele  
khqskpsllhgd l w g g n y m  
f l q d g r p a l f d p a p l y g d r e f d i g i t t v f g g t s e f y d a y n k h y p l a g a s y r l e f y r l y l l m v h l l k f g e m y r d s v a h s  
m d k i l q d t t g  
>tr|D9RE12|D9RE12\_STAAJ  
myklikpflfkiepekahgl t i d a l k t l q k f p v l f p v d k l f t y k n p t l s q t i q g n t y d n p i g l a a g f d k s c e v p k a l e h  
l g f g a l e l g g i t p k p q p g n  
p q p r m f r l l e d d a l i n r m g f n n i g m n k a l s h l r k n a y q v p v g i n v g v n k m t p y e a r y q d y i k v i d t f k h d v s f f t v n i s s  
p n t e n l q n f h d k d e f s m l c  
q a l t t f k k q h d v t v p i y l k l t s d m d f d g l k a l l p a i t e t f d g i l a n t t r q r d g l t s a n k v e e g g l s g r p l f e r n l k l i k  
y a y q q t n g e f l i i g t g g v f  
s i e d a i k m m r h g a s l i q i y s s l v i e g p g l t k k m n k g i a r y l k d h h f d n v s d i i g l d a  
>tr|D9RE13|D9RE13\_STAAJ  
mtketdnkktvatsdnkdtqqnqpederkglngyrktdldleieqelremmktgenetkndykkfkvflistlvivi  
l a i i r f v h k m m  
>tr|D9RE16|D9RE16\_STAAJ  
mtidrri rksqvamrnafiel l h q h l e e i t v q q i a d l a d v n r s t f y t y y d k y d l l e k l e d q q l e e i r n f i h d e k l n g a  
v k l s t d n i h q i m t v l i e m i  
e k d i v f y q l m f r m g k s n i h e k l y d l i m c h l q r y k n e n d q i n g i p f s y f m s y v s g a g l s l i r h w v e d p n r i d k v d l i r h f  
n t i v n q g p a t i i k n i q

Tsompanidou\_et\_al\_Supplemental\_FASTA\_File

>tr|D9RE17|D9RE17\_STAAJ  
mnqhl1gnpkltvthvnevkgaginhivvdsqvqngemimekdvtvemrdgeklyinifrpnkdgkfpvmsadtygkdn  
kpkitnmgp1wptlgtipt  
ssftpeespdpgfwvpndyvkvvalrgsdkskgv1spwskreaedyeviewaanqswsngnigtngvsylavtqwwva  
s1npph1kamipweg1ndm  
yrevsfhggipdtgfyrfwtqgi farwtdnpniedliqaqqehpl fddfkwqrqvp1seiktp1ltcaswstqglhrgs  
fegfkqaaseekwlyvhgr  
kewesyarenlerqksffdfyl keenndwkdtphviyevrdqfykgefksasaf1pnteytply1naenht1nhakis  
sahvaqyds1dkqddi rfk  
ytfdkdte1vgnmnlklwvrttdsddm1fagikk1drrgnevnfpdfnhiengqvattgw1rvshrel dqekstiaqpwh  
khetelk1sqdeivpveie  
11psgt1fkqget1evivkgseivignstpgmktryeheetvknghmiytggkydsq1iipvin  
>tr|D9RE18|D9RE18\_STAAJ  
mkkvis1fvai1sv1iftdnanaennkpegvnensn1ipvrqpdanyppgvsdiarvkk1dn1idgtdkdpvikq1kddn  
evqnavkangskivsdc  
h1lkhpdn1idgtdkdpvinq1kngnvtssngavnpsvkandthtksnkqiakqqsnhwdsksksghkqqlkelpktgen  
nesntaimalfgt1llvv  
sfmtrf1k1nshq  
>tr|D9RE19|D9RE19\_STAAJ  
mirtmnakihrarvtes1nyvgsitidsdileavdilpnekvaivnnngarfetyviagkrsgkic1ngaasrlve  
vgdvviimtyaq1neeeik  
hhapkva1mnednviemihekentiv1  
>tr|D9RE20|D9RE20\_STAAJ  
mtklittvkemqhi vkaakrsgttigfiptmga1hdgh1tmvresvstnditvsvfvnplqfgpnedfdayprqidk1  
elvsevgadiv1fhpavedm  
ypge1g1dvkvgpladv1legakrpgfdgvvtvvnk1fnivmpdyayfgkkaqqlaiveqmvkdfnhaveiigidivre  
adglakssrnvy1tekerg  
eavh1skslq1aqa1yqderqskvi idrvtqy1eshisgrieevavysypq1veqheitgrifislavkfskar1idni  
iigae  
>tr|D9RE22|D9RE22\_STAAJ  
mlsvai1gpgavgttiaye1qqslpht1ligrhaktityy1tvphapaqdivvkgyedvtntfdviiiavkthq1daviph  
1th1ahedt1i1laqngyg  
q1lehipfkncvqavvy1sgqkkgdv1thfrdyq1riqdnaltrqfrdlvqdsqidiv1leaniqqaiwyk1llvn1ginsit  
algrqtva1mhnpeirtlc  
rq11ldgcrvaqaeg1nfseqvt1imtiyqgypdemgtsmyydivhqqp1leveaiqgfiyqrareh1dtpyl1dtiysf  
1rayqqnm  
>tr|D9RE25|D9RE25\_STAAJ  
mgsffnkiarkedpaiyqkdg1krt1rvrdfla1lgvgtivstsift1pgivaahagpavals1flaaivag1vafty  
aemaaampfagsayswvvnv  
1fgeffgwwagwa1laeyfiava1vasgfsan1rglvkpi1gielpaalsnpfgtnggfidiiaaivillta1llsrgmse  
aarmenilv1kvlai1lf  
vivgl1ta1nvsnyvpfipehkv1tatgdfggwqgiyagvsmi1flayigf1dsiaansaealdpqktm1prgilg1slsai1vf  
iava1lv1gm1fhsyqann  
aepvgwa1rqsghgvvaaivqaisvigmftaligmmlagsr1llysfgrdg1lpsw1sh1ndkh1pnralv1iltiigv1ig  
smfpfa1flaqlisag1lva  
fmfvslamyrlrkregkd1pipafk1p1ypv1pavt1fv1l1vfwlg1feaklyt1iwfivgi1ily1syglr1hskkndva  
eyhpk  
>tr|D9RE26|D9RE26\_STAAJ  
mskahq1iqedehy1faksgrikyyp1vidhgygat1vdiiegktyid1lssassqnvghaprevteaikaqvdkfihytpa  
ymyheplvr1lakk1lceiap  
gdfekrv1tfg1tgsdandgiikfaraytgrpyi1sftnayhgstf1gslmsais1nmrkhygp1l1ngfyhipfpdkyrgm  
yeqqansveey1apl1kem  
fakyvpadevaciv1eti1qdggl1epvpgyfealekicrehgiliavddi1qqgfgrtg1twssvshfnftpd1itfgks1  
aggmpmsai1vgrkeimnc1  
eapah1fttganpvsceaa1latiqmiedqsl1qasaekgeyvkrmnqvwskynsvgdvrgkgl1sigidivsdkk1ktrd  
asaalkicnycfehgvvii  
avagnv1rfqpp1vityeq1ldta1ntieda1taletgn1dqydisgggw  
>tr|D9RE28|D9RE28\_STAAJ  
mnkeq1ekmkgkgfi1aal1dqsggstpkalkeygvnedqysnedemfqlvhdmrtrvvtsp1sfpdkilgailfeqtmr  
evegkytady1adkgvvpf  
1kvdkgl1aeeqngvq1mkpidn1ds1l1dranerhi1fgtkmrsnile1neqqikdvveqqfevakqiiakglvpiiepevn  
inakdkadiekv1kaelkk  
g1ds1nadq1vm1kl1tiptean1ykdl1aehpnvrviv1sggysrekane1lkdnal1iasfsralasdlragqskeefd  
ka1gdavesiydasvkn  
>tr|D9RE30|D9RE30\_STAAJ  
mhprktsq1pl1ilki1ln1aligivi1v1thtefq1nagdsnv1l1nwdirgl1tsyifsf1ilvalvsklilifitrqr  
ts  
>tr|D9RE32|D9RE32\_STAAJ



Tsompanidou\_et\_al\_Supplemental\_FASTA\_File

mnidyeyrsyvieelddcltiqknndtayydvleaindlsndslcvlnhlyinegqeetfeqkflqrnkhlnkvdgfkal  
rflrprtagrhyiitlwe  
nrqafyhwqnsaeykthtkhrgtskgadvkiinrelysynirieladm  
>tr|D9RE34|D9RE34\_STAAJ  
msnknksydyviiggsgagsvlgnr1sedkdkev1vleagrsdyfwdlfiqmpaalmpfsgnkfydwiystdeephmogr  
kvahargkvlgssingm  
iyqrgnmpdyegwaepegmetwdfahclpyfkklektygaapydkfrghdgpiklkrpatnplfqsffdagveagyhkt  
pdvngfrqegfgpfdsqvh  
rgrrmsasraylhpamkrknlvtetrafvteihyevrratgvtykngklhtidanevilsggafntpqllqlsgigdse  
flkskgeprvhlpgvgen  
fedhlevyiqhkckepvslqpsldikrmpfiglqwi ftrtgaaasnhegggfvrsnnevdyplmfhflpiavrydgqk  
aavahgyqvhvgpmysnr  
gslkikskdpfekpsirfnylstedkkewveairvarnilsqkamdpfnggeispggevtdeedldwvrrdgetalhp  
scsakmgpasdpmavdpl  
tmkvhgmenlrvdasamprttngnihapvlmlaekaadiirgrkpleqyidykykhgvhdenegaievkpyak  
>tr|D9RE35|D9RE35\_STAAJ  
mellkhlsgqrqidgewvestnkntrdiinpyqeviftvsegtkddaeraillaarafesgewsqetaetrgkkvraia  
dkikehrealarletldtg  
ktleesyadmdihnvfmyfagladkdggemidspipdteskivkepvgtqitpwnypllqaswkiapalatgcs1vm  
kpseitp1ttrvfelme  
vgfpgktinlilgagsevgdvmsghkevdlvsftggetgkhimknaannvtnialelggkpniiifddadfelavdqal  
nggyfhagqvcagsrilv  
qnsikdkfeqalidrvkkiklgnfgdadtemgpvistehrnkiesymdvakaegatiavggkrpdrddlkdg1ffeptvi  
tncdtsmriqvqeevfgpvv  
tvegfeteqeaqilandsiyglagavfskdigkaqrvanklklgtwindfhyfaqapwgykqsgigrelgkegleey  
lvskhilntnplvnwfs  
k  
>tr|D9RE36|D9RE36\_STAAJ  
mtrsqnkqqleqakdivinsigqtm1ygtnrsvgnlygtmvfegsmtldemrhqlqmskpsmsagvkk1qefdivkqq  
ftrgrskqhfiaekdffif  
frnfftkkfqreidinveavkgaqaiinpllessdlteaqeaqikaqldhthvyewleqlteaiesgeifkyfpi  
eqpsden  
>tr|D9RE40|D9RE40\_STAAJ  
mnsdnmwl1vmgl1i1i1sigvlliakkinpvvgmtiipclgamilgysvtdlvlgffakgl1dqvinvvimfifaiiffgim  
ndsgl1fkl1vkr1l1mtrg  
nvvi1vcamta1igti1a1q1dgagavt1l1sipa1l1plyka1nmky1l1l1l1l1saaimmvpwggpmarvaav1kaks  
vnelwygl1piqi1gfilvml  
favy1gfkeqkrikkaierne1pqtqdidvhk1vevyerdqdvrfpvkgrartkpwikwvntal1lavilam1mni  
apef1f1m1gvs1al1vinfksvd  
eqmer1rahapna1mmaavi1aagm1fgv1netgm1kaiatn1likvipaevgpylhiivg1l1gvpl1d1l1t1st  
dayyfav1  
piveqtagqfgvpsvstay  
smvigni1gtfvspfspalw1aiglaeanmgyi1kyaffwiwgfaivmlvia1l1mgivti  
>tr|D9RE41|D9RE41\_STAAJ  
mnmpl1mid1tnknvvi1vggvvasrraqt1sqyiehimvispeitek1qnmvdkgvviwkekefepsdivdayl  
viaatn  
eprvneavkqalpehalfn  
nvgdasngvvpfalhrdkl1tisvstgdgaspk1tksimaelea1yppsyssyidflytcrqkikvl1dmnhsekq  
q1l1sq  
ivsqe1lnhdkqaqflaw1  
dvr  
>tr|D9RE42|D9RE42\_STAAJ  
mkl1ntsns1p1ftekq1vte1inn1l1qt1tesqqw1sgf1l1ansndttsesnqq1letevwq1l1qiseeqatsttym  
l1qnkep  
hieanqrhvtvlygsesgn  
amr1laei1fser1sdighqv1lmsmdeydttniaq1led1fi1tsthegeppdnawd1ffef1ledn1apnlyh  
vrysv1al1g  
dqtyeffc1qagkdvda1le  
n1gaerickrvdcdi1yee1daekwmadi1nmidttsegi1sesvise1ksakekkysksnpyqae1lanin1ng  
tdsnk  
etrhie1f1l1ddfes1yepg  
dciva1lpqndpe1vek1ism1gwdp1qspvpindhgdtpivea1tshf1eftk1t1l1p1l1knadiy1fdnee1  
seriqdeswa  
reyvinrd1fd1itdfpti  
elqpenmyqi1rkl1ppreysi1sss1matp1devhitvgtvryqahgrerkgvcsvhfaerikpgdivpiy1l1k  
kn1pn1fk1fpm  
kqdi1pvi1m1gp1gtgi1apfr  
ay1qeree1gmtgk1tw1ffgdqhr1ssdf1yeeieew1engn1trvd1af1srdqehkeyvqhrimeeser1  
newieqga  
i1y1cgdek1makdv1hqaik  
dvl1vkerhis1qeeae1l1l1rqmk1qqryqrdvy  
>tr|D9RE43|D9RE43\_STAAJ  
mnmrnydi1evsdyk1g1tyk1levfrgkvi1lvntateciy1seq1kk1let1fqyk1drgfv1v1sfpnn1  
fdnrqpgsnee1  
l1kisrek1fgvt1fpvlakis  
vngdehp1fth1kneq1pgi1fgspikwn1ftkfi1idrqn1vnr1fl1med1pl1distnie1llqess  
>tr|D9RE44|D9RE44\_STAAJ  
mkl1r1l1whim1rrq1fitqr1vi1pfi1lavsv1fmi1eyt1vsig1lnsyik1qknd1flvpfi1ian1ffma1l1t1fi  
fifian1hfm

Tsompanidou\_et\_al\_Supplemental\_FASTA\_File

msqrrkefsifmtlgmtkk  
smrlivvmetilqfviisvsiaggyllgai fflfiqkimgsevatlryy pfdsvamfitliiia vlmgmllifnlf sin  
fqrpi tyghrsdssvisrw  
lryvli vigsaalygyfia lqqdttfgaffkiwiviglv iigtyaffvgisei iisilqqvskvyypfyffvvvmrv  
rlknavslatitllctfl  
ivtltmtlttyrdmnh timkliandydlsfndnsksqierqqmienikrdiqgsvnvkdfkvyettlfrasl eknrayyk  
lkqasddipidfignegai  
fsrqsvmitaftaqdynryhqnlh ldnqsigmitnvpifkkqskvglnnevfkvkqldaha lnmmiqdsmvlivkdn  
qlqkvkgyaheqkktis  
infvfgtklttsqikl skkydasinsksem lmwdr lttgglifv ggvsvivlvigifl mmykqvseayanqhnydi  
mklgl dngriakitrnqm  
tflfaipitvalihtlissnivytllnmiginnhifltsyviaviiisflymamykitsyiyakvihqqrn  
>tr|D9RE45|D9RE45\_STAAJ  
mllevkhvkvygkgnattalnqmn lsvgagefvaimgesgsgkstllnliasfdgltegd iivdgahlnmknkska l  
yrqmqv gfvfdfnllptm  
tnkenimmp lila garkrdieqrvhq ltvqlhlegflnkypseisggqkriaiaralvtkptilladeptgal dsktsk  
almm l fqeihqleqtilmv  
thsnidasyaervi fikdgrlyheiyrgesqlafqqr itdsalvnggsvni  
>tr|D9RE46|D9RE46\_STAAJ  
mtflksitqeiaivivifal fglmflylh lpleayllalgvil lllllifigikylsvfktisqqqqienlenalyqlkne  
qieykndvesyfltwvhqm  
ktpitaaqlllerdepnvvrvrqeviqidnytsal sylklln etsdisvtkisinnirpiimkysiqfidqktkihy  
epchhev ltdvrwtslmie  
qlinnalkyargkdiwiefdeqsnqlyvkdn gigi seadlpki fdkgysgyngqrqsns sigl fivkqisthtn hpsv  
vskqnegttftiqfpde  
>tr|D9RE47|D9RE47\_STAAJ  
mkiliveddfviaes lase lkkwnygviveqfddil sifnqhqpqlvlldinlpt lngfhwqceirktsnvpiifissr  
idnmdqimaiqmgddfie  
kpfnlsltiakiqallrrtyd lsvandsmtvkgct lildeakvvyqe qsiqlsltelqilkl l fqedkyvsrtaliec  
wesenfidntlavnmtr l  
rkk lntigvndfiitkknvgykv  
>tr|D9RE48|D9RE48\_STAAJ  
mlsp lliiffivlsileerkrtkkkqlekekantlnqntndtessnqeps lqqakeqkddkv  
>tr|D9RE49|D9RE49\_STAAJ  
mlsvkkatkfavanliivstvfssvtpai aqsdkskdesfavgn tknpknviflvgdgm gpsfntayryy kndphakem  
tptafdsylkgtnrtynd  
pkqni tdsaaggtafssghktynga igvdsnkqkvkvtlerakekgk stglvstael tdatpaayaahvts rddknei ak  
qfykdkingkhkvdl lgg  
gakyfgksngnl dkkfkkgdydlatnske lsksdkdkvlgl fadknmplaidaskdeps ladmqqsa lnklernkkgffl  
mvegasidksahsnditgv  
msemegfekafddai qyakkhkd tlvatadhstgg lti gkdkgyewnpqpi ksmkhs gsymtekmakgedpekvinegy  
gfefs qddmkkvkenkl  
krllkkeksadevqtkal qhaiqkpvndksytgwtsdghtgedvntyaygprses fsgnientesaki ifdifik  
>tr|D9RE50|D9RE50\_STAAJ  
mstnkndyehmlfyfayktfittadeiiekygmsrqhhrflffinklpgitiks lleileiskqgshat lqklkeqglii  
ekvletdrrvkklystdkg  
dqliael nkaqdel lqniyqqvgsdwydvmeal akgrpgdfdikhlkdekes  
>tr|D9RE51|D9RE51\_STAAJ  
mayislnyhsptigmhqn ltvilpedqsffnndttakplktlml lhg lssdetty mrytsieryanehklavim pnv dhs  
ayanmayghsyydyilevy  
dyvhqifplskkrddnfiaghsmggygtikfaltqgdk fakavpl savfeaqnlmdlewndfskeaiign lssvkgtehd  
pyllidkavaedkqipkl  
imcgkqdflyqdn ldfidh lsrknvpyqfedgpgdhdyaywdqaikraitw mvnd  
>tr|D9RE52|D9RE52\_STAAJ  
mkkridylsnkqnkysir rftvgttsv ivgatilfgighnqaqaseqsndttqssknasvdsekntietpqlnttand  
tsdisantnsanvdstakp  
mstqtsnttttepastnetp qptaikdqataakmqdrtpvqean sqvdkttndansittnselkn pqtldlpqsspqti  
snaqgtskpsvrtravrs l  
avaepvnaadakgtvnvgvqtasdfklekttfdpnqsgntfmsanftvtdkvksgdyftaklpds l tngndvdysn sn  
tmpiadi kstngdvvakat  
ydilkttytfvftdyvndkeningqfslpl ftdrakapks giydani niademfnki tynysspi agidkpngani ssq  
igvdtasgqntykqtvf  
npkqr v l gntwvyikgyqdkieessgkvsatdtkl rifevndtskl sdsyadpndsnlkevtdqfkdki tykyqnv asi  
nfgdi tkyvvlveghydn  
tgkn lktqviqeni dpatgkdysi fgwnnenvvrygggsadgsavnkdp tpgppvdpepnpepepspepepeptdpe  
pepeptdpepspdpepe  
tpdpepspepdpsdsdsds dsdsdsdsdsdsdsdsdsdsdsdsdsdsdsdsdsdsdsdsdsdsdsdsdsdsdsdsds  
dsdsdsdsdsdsdsdsds

Tsompanidou\_et\_al\_Supplemental\_FASTA\_File

```

sdldsdsdsdsdsdsdsdsdsdsdsdsdsdsdsdsdsdsdsdsdsdsdsdsdsdsdsdsdsdsdsdsdsdsdsdsdsdsdsdsdsdsdsdsds
ldsdsdsdsdsdsdsdsdsdsdsdsdsdsdsdsdsdsdsdsdsdsdsdsdsdsdsdsdsdsdsdsdsdsdsdsdsdsdsdsdsdsdsdsdsds
dsdsdsdsdsdsdsdsdsdsdsdsdsdsdsdsdsdsdsdsdsdsdsdsdsdsdsdsdsdsdsdsdsdsdsdsdsdsdsdsdsdsdsdsdsdsrvtpnneqkapsnpkdevn
hsnkaskqhktadalpetgd
ksentnatlfgamallgslllfrkrkqdhkeka
>tr|D9RE54|D9RE54_STAAJ
mkekiivalggnaigtkeataeaqqtairramqnlkplfdsparivishgnpqiigsllliqqaksnsdttampldtcga
msqgmigywleteinrilt
emnsdrtvgtivtrvevdkndprfdnptkpigpytkeeveelqkeqpdsvfkedagrgyrkvvasplpqsilehqlirt
ladgkniviaggggipvi
kkentyegveavidkdfaseklatlleadtlniltvnenvfinfnepnqqiddidvatlkkyaaqgkfaegsmkpkiea
airfvesgenkkviiitnle
qayealignkgtihm
>tr|D9RE55|D9RE55_STAAJ
mnesgdnklsksslglvigsimggafnismdmggkagglaiiigwiitaigmislafvfqnltnerpeldggiysyaq
agfgdfvgfisawgywfsa
flgnvayatllmsavgnffpifkggntlpsiiwasllwgvhflilkgvetaafinsivtvaklipillviicmiiafnf
dtfktgffgmtsegvlpfs
wastmsqvksmtlvwvfigiegavifssraknkkdvgsatviglisvliiyflttvlaagvilqnhisqldspmaqv
lativggwgstlniglli
svlgawlgwtllagelppivakdglpkwfakenkngapvnallitnlvqlflismftqsayqfaflassailypym
fsafyqvkytlehrqgatt
kqwtigiiiaslyaiwliyaaginyllltmlyipallvysivqknnqrliksdiylfmiiivlavigliklmgintinvf
>tr|D9RE56|D9RE56_STAAJ
mteiqkpydlkgrsllkesdfktaefeglidfaitlkeykknkikhhyllsgkniallfeknstrtraaftvasidlgahp
eflgkndiqlgkkesvedt
akvlgrmf dgiefrgfsqqavedlakfsgvpwngltdwhptqmladfntikenfgyleginltyvgdgrnniahslmv
agamlgvnvriictpkslnp
keayvdiakekasqfggsvmitdniaeventdaiytdvwmgeeseefeqrinllkdyqvqqmfdltgkdstiflhc1
pafhdtnltlygqeiyeqy
laemevtdqifrsehskvfdqaenrmhtikavmaatlgs
>tr|D9RE57|D9RE57_STAAJ
mtdgpikvnseigalktvllkrpgkelenvpdyldgllfdipylevaqkehhdhfaqlrdegvevlyleklaaesien
pqvrsefidvllaeskkti
lgheeeikalfatlsnqelvdkimsgvrkeeinpkcthlveyyddkypfyldmpnlyftrdpqasighgitinrmfwa
rrresi fiqi yivkhhprfk
danipiwlrdc pfnieggdelvlskdvlaigvsertsaqaielarrifenpqatfkkvvaieiptsrtfmhldtvtm
idydkftmhsailkaegnm
nifiiyddvknkiaikqsshlkdtledvlgiddiqfiptngdvidgareqwndgsntl cirpgvvvtydrnyvsndl1
rkgkikviejsgselvrgr
gprcmsqplfredi
>tr|D9RE59|D9RE59_STAAJ
mrkfsryaftsmaavtllstlspaalaidssnknpanndikfevtqksdavlkelpksevkniyqdyavtdvktddkg
fthylqpsvdgvhadpke
vkvhadksgkvvlingtdakkvkptnkvtlskddaadkafkavkidkhkaknlkdkvikenveidgdsnkyyvneli
tytpei shkwkidaqtge
ilekmlvkkeaetgkkgvlgtkdininsidggfslledlthqgklsafsfnvdtqgatlitnedenfvkdeqragvda
nyyakqtydykdtfgres
ydnqgspivsllthvnyggqdnrnaawigdkmiygdgdgrtftslsgandvvaehlthgvtqetanleykdqsgalnes
fsdvfgyfvddedflmged
vytpgkegdalrsmnspeqfggpahmkdyvftekdnggvhtnsyipnkaaynviqaigskseqiyyralteyltsnsnf
kdckdalyyaakdlydeqt
aeqvyawnevgve
>tr|D9RE60|D9RE60_STAAJ
mnktskvcvaatlalgtligvvensaptskqaqaaitpytyngyignnanfil dknfinaikydnvknfngiklakt n
tikvkekydqtkf gvsakg
neasqlqfvvknnsilkdikaygkdlkkengktkeadsgifyyqnakkalgiwfvvdhnrvevtvghtpyktsk
>tr|D9RE61|D9RE61_STAAJ
mkkllitiviivliga lgfaiyaa inhstsssnnqeqenkathkkteteendqqdsadkadknqngnvtngnqsstp
stvqngstapsntqpaq
kdsnsknnaahsgqsstnnqnnqqntppanksnntntpskqtpqvqspkn
>tr|D9RE62|D9RE62_STAAJ
mlrdhrlkl1qffiknpskhissneiaehvsvsntvrndinvinsnfmddiivsiskgyqlntsqtletiterythiq
sykekllismayqlmhnk
sqtllqlegdyllsktvlndyfvriqqwcqkfnialtikkkqgi vvdgtdnditnaihlnqlssghvhvedlilnelpd
shqrmishiigetlqahsi
ettdiqigllihliiikrkslneldtlnhdsklisqscikqinerlgydlnekvinmfsffigyhfnklidigierif
iqsyidrlielmqqhivp
    
```

Tsompanidou\_et\_al\_Supplemental\_FASTA\_File

fnedsilqqnlynhfskaylritqniylnnpvieikklypfvntlfefaiklaidtdiemsedeiafltihfqaai  
rtktqlnvviacyyglgvs  
nfltkinnlseeisvintiklenithyhdndvllitthdipkqtlnilpkhlitiikvaplfseddrhkirhvvkqkqn  
pvqahhhmdtvnflvvnte  
qkprhtvqifeeaqkilqahhaivegyiesalereksstyignfmaiphgdpekvqlqshvlifrtkdvfpwrqhdvklv  
fflaishkdkafkqmmq  
ianlddsvnhlcslddhslkqqlfeylqe  
>tr|D9RE63|D9RE63\_STAAJ  
mtiylvrhgesksnydnkhfrsyfcgqldvpltdtgtsaddladyfkekqikhvyvsdlrtqqtfehifpydiasttt  
pllrerslgvfegeykdei  
sanpkyekyfnppnfkdfrrhsfsqkapegesyedvyqrvehfmnhvnedtqkddivivahqvvirclmvyfnnvsreea  
vdlkvenckpyie  
>tr|D9RE64|D9RE64\_STAAJ  
mkvritfiilailstivclflaamhptgpntvtfeqpylftlniimvlvalpslvlaiydymfrissailqflgaisw  
fflslilsltqftptlas  
fitsiilfastiitlaiggksfdkndsh  
>tr|D9RE65|D9RE65\_STAAJ  
mrqimgilggienlrafkkasnsnmldakwywlkfivskishf  
>tr|D9RE66|D9RE66\_STAAJ  
mkkrl11stflastliltgcasdqsdnedhhtstgihapksakletkdi fnsdkknsdisdaemkqaiekyllsvnsdil  
dnkyimqhkldkqidsqtk  
vtekqaetlshlnlavkndlhfkfvtennipkeykkpvelmnyfkaInstianvdedieklsyqpqnkinivdvptk  
yagdvkkqdkikdfiks  
kg1ksdvidk  
>tr|D9RE67|D9RE67\_STAAJ  
mldvhfiypgklqnackynlptpkegfevtihalrpenihkiyhmdnseqr fietliskgnpvtivnsrdvnilklt  
hlgfvyqlnenefvnnff  
lryinsevlndaygefesldtinmhlndeafrvrqhtrlndvtlehalmlktndelkticrqygikgfsnknkqnlvel  
imtaffnnhiieqvftna  
tlfefdilssilesdanyrlnneliefeklqlinfnnfltsfhyyyydfeydclilpndvrkhienvnqvngdfekav  
nqfvdeqti ekslaefena  
lslsfmddevldmllkddfedfgttdslrsdaitqliseikkglidkkdilplriilgsvnlygilstnhllyltqrf  
ydatfskeelqysldtlag  
telyyieddfvfhvplfdvveseasgidi sdegyyvpasveeliyydrhhyllksdseikaftsylrkqinikndiekey  
vnei111rtiptsklvqp  
imqlfidnai lnnvqndaliekatharnhrlwslqghrdiph  
>tr|D9RE68|D9RE68\_STAAJ  
mlnadlkqqlkqllelmegnvefvaslgsddkskelkellteisdmsprlslsekslkrtpsfsvnrpgeetgvtfagip  
lghefnslvlalqvsgra  
pkekqsijdqiknlegs fhfetfislctqkcpdvqaalnlmsvinpnithsmidgavfreesenimavpavflngeefgn  
grmtiqdilsklgstadas  
efenkepydvli vgggspasgsaaiytarkglrtgivadriggqvndtagienfitvkettgsefssnlaahidqydidam  
tgiratdiektdeai kvtl  
engavlesktviiatgagwrknipgeeqlinkgvafcpchdgp lfenkdvaviggngsgveaaidlagivnhvtlfe  
selkadnvlqdr lrs l pnv  
diktnakttevgedhvtgiryedmstgeehlndgifvqigllpntswlkdavelnergeividrnntnvpigi faag  
dvt dqknkqiiismgagan  
aalnafdyiirn  
>tr|D9RE70|D9RE70\_STAAJ  
msdhvynlvkhhsvrkfknkplsedvkk lveagqsastssflqaysi igiddemikenlrevsgqpyvengylfvfa  
idyrrhhlvdqhaetdmen  
aygstegllvgaidaalvaeniavtaedmgygivflgslrndverveil dlpdyvfpvfgmavgepaddengaakprlp  
fdhvfhhnkyhadketqya  
qmadydqti seydyqrtngrketwsqqiemflgnkarldmleqlqksgliqr  
>tr|D9RE71|D9RE71\_STAAJ  
mnaf1tliniivliviivilhmmarkhisfakrvftaligivfgvllhlaygthsnitstsdwfnivgqgyvallqmi  
vmp1ifisivaafkqiqig  
ekfakigsli f1igtvtiaaivgvvya l vfgldastinlgnaeqargseiakqakdltahtlpqqilellpknpldf  
tgqratstiaavifasfig  
faylrvarqpdhgellkraidaiyslvaivtfvlrltpygvla imantlstsdfgaiwtlgkfliasyaalitmyiih  
lvilsllgispiryvkk1  
evlifaftrsrsagalplnvqtqtrrlgvpegianfaatfglsigqngcagiypamlaimvapvanveidlqfivtliav  
viissfgvagvggatfas  
ilvstlnl pvalagvlisveplidmgrtalnvndsm lagtgtakl tkhwkdtfesndnaaltsh  
>tr|D9RE72|D9RE72\_STAAJ  
mltkefaqrvelsekqvrkivqhleergyqlskteyrgreatdfkeedie lfkdiadvkqtnsydlafdelekekdf lq  
vivkndkn1ptnqnvag1  
vedlrl eiqkmreerhllgqmmnqvhhqqqelkelqnl ttkidsnseslkaiqtsqeaieqaqasqakvlaestnkves

Tsompanidou\_et\_al\_Supplemental\_FASTA\_File

navtedkadskskvagvn  
tstdaktdtkaenagdgatatkvdkedqisateaiekasveqskndkaaetsnkeatvdaeaqhdaeqqvaeahaeaskqa  
tsndsleakaendstasqs  
emaepkpqeekkgffarlnl  
>tr|D9RE74|D9RE74\_STAAJ  
maditvndtgelynvinqkkselyleteelaiisksklhlnldhdeislistsqgtsdrmtklltgedgehavlrsynl  
apdelekykqliiddkmlv  
vavrdnsshkevgehnsayeeidithfaeaskgpka  
>tr|D9RE76|D9RE76\_STAAJ  
mknliilsvqhlamyagaiivpiivgtslkftpeqiaylvtvdi fmcgvatflqankvtgtglpivlgctftavapmili  
gqtkgidvlygslflsgil  
viiapffshlvkffppvvtgsvvtiiginlmpvamnylagggakdygdvknillglmtliiilvlqrfttgfiksi  
liglvtigtigagllgmvdg  
nqvnhagwlgipvpfrfsgfsfdvtstlvffivaivsliestgyvalseitgkklkerkdfkrkytaeglaivlgsifns  
fpytaysqnvglvs1sgak  
knnviygmvvlllicgcipklgalaniiplvlggami amfgmvmaygvsilghidfkqnlliiavsvglgtgisavp  
qafkglgqfawltqngiv  
lgaiiaailnfffnngikyqteenvk  
>tr|D9RE78|D9RE78\_STAAJ  
mdmakeqeliilvldfgsqynqlitrriremgyvelhdheisieikkmpkgiilsggpnsvyeegsftidpeiynlgi  
pvlgi cygmqlttkl1ggk  
veranereygkaiinaksdelfaglpaeqtvwmshsdkvieiepegfeviadspstyaaiedkkriygvqfhpevrhte  
ygnl1nnfvrrvcdckgq  
wtmenfieieiekiqrvgdrrvlcamsggvds svavllhkaigdqltcifvdhgl1rkgegdmvmeqfgegfnmniir  
vnakdrfmnk1kgvsdpeq  
krkiignefvyvfddeask1kgvdf1aagtytdviesgtktaqtikshhvgglpedmefeliepintlfddevrklgi  
elgipehlvwrqpfpgpgl  
girvlgeitedkleivresdailrqvireeglereiwqyftvlpniqsvgvmgdyrtydhtvgiravtsidgmtsfari  
dwevlqkissrivnevdhv  
nravyditskppstiewe  
>tr|D9RE79|D9RE79\_STAAJ  
mhnknefnkklkdfigsdkrmalvkgiyneyklttv1ralnnsdytkgtihtrsidnlkqidnriipknitqntifkls  
nliievnlyerntiyhgdf  
aiyy1vesaliietdprlinhinnpvqkifiittndwsfntlelekivdetiidydkqedpkqyeilyknkhgk1py  
>tr|D9RE80|D9RE80\_STAAJ  
mskninqansk1ntsnkklkqaysksdsknlkviympwhlefysiaihsdvtnkkryksysrgtvvyvklgsnigsef  
sgnhfcvilndkndkqget  
vtivplsskgnknh1klnesvlnltatdlkkqiidi sskvqalaqkyrdidikiistedkllsnlnqkanelyrvigvys  
khkgkdyvnisaittisk  
rriskindsdptgtiiseddineiekqlkikffsn  
>tr|D9RE81|D9RE81\_STAAJ  
mvpeekgsitlskeaaiifatakfpfnriknpqktnpflklhenkks  
>tr|D9RE82|D9RE82\_STAAJ  
menkskfiqyftgnepddievldfihhqlikmidvvtivytknisrkvnpkrlqrqiakeqkpkystqvqiaikkele  
lkkkqkrkryk  
>tr|D9RE83|D9RE83\_STAAJ  
milisscligenvrydggnglnvr1kelidsgkaihacpellgmliprepaeiigdgfdvwnnvakvitisnkdvtd  
kygaiatlklkkyqcdt  
vilkanspscgsgeiydgnftgnkkkgvgvatal1negikvydensffdqnmietivhek  
>tr|D9RE84|D9RE84\_STAAJ  
mnkedylnkivseki sngaedsttefkvnnddpktigeyisaln satledkdyaymiwgiedeskvvgtkfhpnakk  
ggedlqnwlhrmikpsidf  
tfdtidydgknitilripkaihqisfngeefirvgsykkklrdypekekqlwkkfqlpfeslsaylvknydeifelld  
yesyykllkqplpiqkdl  
idhfkheeiikenegnvyitnlgai1laknldnfkplkrkaprvikygnkietiseqvgtkgyacgfeglikiyinnll  
psnevigevfretvqmype  
lairelvanslihqdl1sgagpvieifdnrieivnpgtplikverfldsppksrneslas1lrrmgiceergtgidkvi  
setekyqlpaplitlydef  
ikvtlhaykdi ndmtreekiratymhac1kyvesesitnqslrkrfgledkkisvisriikdtvaeeyikpvdpetsprh  
mryipywa  
>tr|D9RE85|D9RE85\_STAAJ  
mnivstilii fvaieffymyletattsrtsetfnisigklkdkniklllknqgvynlgivlllyglffssnpkeic  
aailvyiigvaiygg1ssn  
isiffkqgt1pvla1ism1w  
>tr|D9RE86|D9RE86\_STAAJ  
mnimltgatnglkhitkqaidnhidhfyigirniekmpkewdgkvsvrqldyfnqasmveafkgmdtvvfipsi ihpsf  
kripevenlvyaakksqva  
hiifigyadqhnnpfhmspyfgyaer1latsgidytyvr mamymdp1kpylpelmmhkliypagdgrinyitrndiar

Tsompanidou\_et\_al\_Supplemental\_FASTA\_File

giiaiknpdwtgkrylls  
gysydmkelaai1seasgteikyepvsletfaemydepkgfgallasmydagarglldqesndfqqlvndqpqtlsflq  
eni  
>tr|D9RE87|D9RE87\_STAAJ  
mewhiganimwvdcsvyviexsnlnrlglkimkftiakasla1gmlatgvtstntqsvqaktevkqqsese1khyysgp  
sfehkkvtgfkyledgkhy  
levtvqqhsritllesdkdkfkegensnidvfvvregagrqatnysiggvktntsvqyidyintpileikkgnedaqti  
yygiykedislkeldfklr  
kqlisqsglysnlkgqgititmkdgttthtidlskklekermgesidgtniekilveik  
>tr|D9RE88|D9RE88\_STAAJ  
mkmsiakvslvlgilatgvnttteqpvaekkpivisensklksyypsteyknttgysiipdikfmniiqntv  
nnla1vgkdkqhyhagvhr  
nlnifyaedknfnnggkysiggitkasdkavdqiaearvikedhtgeydydffpfkvdkedmslkeidfkvrkylienng  
lygemssgsiivqtknygr  
ytfeldkklqedrmsdiidatsierievkvvka  
>tr|D9RE89|D9RE89\_STAAJ  
mkmttiakasla1glltagvtttqtanaekastanpeqapkasakastpsstnikvtqptstattppssnvdtppqst  
npatppieinpkylray  
ytkpsfefekqfgfmlkpwttvrfmniipnrfiykialvgkddkkykdgpydnidvfvilednkyqlkkyvsggitktns  
kkvdhkaelnitkednkgk  
issdvseykitkeeislkeldfklrkqlieqhnygnisggtivikmnggkytfe1hkk1qehrmadvidgtnidsiev  
nik  
>tr|D9RE90|D9RE90\_STAAJ  
mkmttiaktsla1gllttgvittttqaanattpsstkletpqptptstkteqspkanaenvlatnpeqspkanaekattp  
astdiktpqstpnattpps  
ikvetppspntkqvpteinpkylrayytkpslefneigiilkwttrfmiivpdyfiykialvgkddkkygegvhr  
hvdafivleeknyeveiy  
svggi tksnkkvdhkagiritkednkgti shdvseykitkeeislkeldfklrkqliekhnlygnvsgskivikmngg  
kytfe1hkk1qehrmadvi  
dgtndsienvik  
>tr|D9RE91|D9RE91\_STAAJ  
mkmtaiivkasla1gllatgittsthtqtnaseheskyenvtkdifldrduysgaske1knvighyskggrhy1vidknr  
kfrtrvgifgkdierrkark  
npgldi fvvkeaanrntgvysyggvttkknkgaydylnaprfaqkkdegdgiatydrhihiykeevslkeldfklrqyli  
qnfglykkfpkdskikvtm  
kdggyytfe1nkk1qtnrmsdvidgrniekievdir  
>tr|D9RE92|D9RE92\_STAAJ  
mk1k1iakatla1gllatgvittesqtvkaaestqgqhnykslkyyskpsielknldg1yrqkvtdkgvyvwknrkdyf  
vgllgkdiekypqgehdkq  
daf1vieeetvngrqysigg1sktnskefskevdkvtrkndessekskdsfkiteeislkeldfklrkk1meekly  
gavnrrkgkivvkmmedkf  
ytfeltkklqphrmgdtidgtkikeinveleyk  
>tr|D9RE93|D9RE93\_STAAJ  
mk1k1iakatla1gllttgvittteggavhakdkqervqlydikldhryysapsfeysnigkvenyngsnvvrfeqkdkq  
nhqlfllgkdkkeeykeglk  
gqnvfvvqelidpngr1stvggvtkknkssetnth1fvnkvyggnldasidsflinkeevslkeldfkirkqlvekygl  
ykgttkygkitinlkdekk  
evldlgdklqfermgdvlnskdiqniavtinqi  
>tr|D9RE94|D9RE94\_STAAJ  
mk1k1iakatlvlgiltsvitaesqtvhakgkyekmnrlydtnklhqqysghsyeltnvsgqsqsyydsnvllfnqqnq  
kfqvfl1gkdenkykekth  
gldvfavpelvdldgrifsvsigitkknvksifes1rtpnllvkkiddkdgfsidefffiqkeelslkeldfkirk1likk  
ykl1yegaadkgrivimkd  
enkyeid1sdlk1dfermadvinseqiknievnlk  
>tr|D9RE95|D9RE95\_STAAJ  
mk1k1iakatla1gllttgtl1tevhsghakqnqksvnkhdekalhryytgnfkemkninalkhgknnlrfkyrgmktqv  
llpgneyrkyqrrytgld  
vffvqerrdkhdisyvvgvktknktsqfvsepr1nvtkengkdafvkgypyhinkeeislkeldfklrkhl1ekyglyk  
tisakegrvki1kdgfsyn  
ldlrykl1dfkymgevidskqikdievnlk  
>tr|D9RE96|D9RE96\_STAAJ  
msitekqrqqgae1hkk1wsiand1rgnmdasefrnyilg1ifyrflsekaeqeyadalagedityqeawadeeyred1k  
aelidqvgfyiepqd1fsa  
mireietqdfdieh1atairkvetst1geesendfig1fsdmd1sstr1gnnvkertaliskvmin1dd1pfvhsdmeid  
mlgdayefligrfaatagk  
kagefytpqqvskilakivtdgkdk1rhvydptcgs1ll1rvgketkvyryfgqernnttyn1armn1llhdvryenfd  
irnddt1enpaf1ngtfd  
vianppysakwi adskfenderfsgygl1apkskadfafi qhmvy1lddegmavv1phgv1frgaaegvirryliekn

Tsompanidou\_et\_al\_Supplemental\_FASTA\_File

yleaviglpanifygtsip  
tcilvfkkcrqqddnvlfdasndfekgknqnhlsdaqveriintykrketidkysysatlqeiadndynlnipryvdaf  
eeeapidldqvqqdlnid  
keiaeiqeinaylkelgvlkde  
>tr|D9RE97|D9RE97\_STAAJ  
msntqtknvpelrfpgfegeweekledlglfqksysfsrakegngtkkhihygdihskfktvldsdgnipniiekavfe  
liqkgdivfadasedysdl  
gkavmidfepnslisglhthlfrplnnaishfli fytktlsykkfirqqgtgisvlgiskksllnlnvliprseleqqki  
gffskldrqielleekle  
llqqkkgymqkifsqelrfkdengndypewenkriedianvngftpstnnneywdndknwlsdiagmnqkylykngk  
iskdaaknymkvkndtlm  
sfklitigklaiivkaplytneaichfiwkvkintefiyyylslnlnistfgvqavkgvtlnndsinsiivklpneeeqni  
akfllevdktvnnqlvktk  
llkqrkkgllqrmfv  
>tr|D9RE98|D9RE98\_STAAJ  
mklkniakasalgi lttgmitttaqpvkaieqsrsvtskdtqelksyysgtgfnfnvsgyreenkmnvivgqqlnvi  
sllgsdkerfddgkdynd  
dvfvvregsgkqadnissiggitktenkykdtvkhvnmfiyrntshntttvkstfhniykeeislkeldfklrkqlidnh  
dlyktepkdskitvtmng  
gytfeInkklqehrmgdvidgtkikeinveln  
>tr|D9RE99|D9RE99\_STAAJ  
mrenfklrkmgvlgvsvaitmlyimtygeaeasetsdaighnvnkteesetasqlvqnkeinadqtkkntvkl dpikp  
gdqkvtgttlpnqllisi  
dkkdvssfdsgnslvmskedgkfyedlgrkivhnqei evtsssteglfddeedeveesstekasveeestdakaty  
tpryekaykipneqlnken  
ghhqvfi epitegsgikghtsvkgkvalsinnkfinfeesvkggvskedtkassdgiwmpidekgyfnfdfktrfdnl  
elkegndisl tfppeded  
alkplifkktvtsledidkaetkydhtkvkvkvl dnvkedlhvdeiygsl yhtdkgkildkegtkvikgktkfanavv  
kvdselgeaqlfpdlqvne  
kgefsfdshgagfrlqngekl nftvvdpi tgl lsnfvskeidi eetpeqkadrefdermentpayyklygdki vgfdt  
ndfpi twfyplgekkverk  
apklek  
>tr|D9REA1|D9REA1\_STAAJ  
mkykterreamgykrfalyismilifaiagcgknetkegskeeqikksfaktldmypi knledlydkegyrdgefkk  
gdkgwtlltsfkskspg  
viddegmvllylnrntkkatgyyfvnkiyddi sknqnekkyrvelknnkivlldnvedeklkqkienfkffsqyadfdlk  
nyqdgstitnenvpsyeae  
yknnsdsnvkklrevypitikkapil kvhidgdikgssigykkieykfskvkdeettlrdyl nfgpsded  
>tr|D9REA2|D9REA2\_STAAJ  
mgnlksfalyisililivagcgsnetkedskeeqikksfaktldmypi knledlydkegyrdgefkkgdkgtwvrs  
emi qpkgesltsrgmily  
mnrnrtrttgyfsiddidsrknlderetekkyvkmnki iptvikdek lkeienfkffvqygsfkgienyensdis  
ynsegpiysakylkndey  
nvkelrkrydiptekapkl llkgsgdlkgssvgykeiefifl  
>tr|D9REA3|D9REA3\_STAAJ  
mrfkrvlyisvii ltvfi igcdssstsekskegsketqikksfaktldmypi knledlydkegyrdgefkkgdkgmw  
tiytdfaksnkpdel sneg  
mflsl drnrtrtakgyyfvrtfyrkdkl pyrknkyvemknnki illdkvedkklkqkienfkffsqyanlkelknysngdv  
sinenvpsydvykmsnkd  
envkqlrsryniptdkspvl kmhidgnlkgssvgdrleidfskrenshlsvidsldyqaaetnkdde  
>tr|D9REA4|D9REA4\_STAAJ  
mksikriglclisllissifvtscggdnkitgdsketqikksfaktldmypi knledlydkegyrdgefkkgdkgmwtiyt  
dfaksnksdel ddegmvl n  
l drnrtrtakgyyfvkkfyekdkl pdrknkyvemknnki illdkvedpnlkkrienfkffgqyanfkdenyngdvsinw  
nvpsydveykmsnkdenvk  
qlrsryniptdkapml kmhidgnlkgssvgykrleidfskedrdi svidylsykpark  
>tr|D9REA5|D9REA5\_STAAJ  
meylkr lalfisvii ltfimgcdsqsdtaenpegskeaqikksfsktldmypi knledlydkegyrdgefekgdkgmw  
tiytdfaksnkpgel sneg  
mvllyl drnrtrtakghyfvktfynkgkfpdrknkyvemknnki illdkvddpnlkkrienfkffgqysnl eelksyngdv  
sinwnvpsydvykmsnkd  
eivkelrsryniptdkapvl kmhidgnlkgssvgykkl eidfskgeksdlsvidslnfqpakvdedde  
>tr|D9REA6|D9REA6\_STAAJ  
mksikriglclisllilii fvtscggknkitgdskedqikksfaktldmypi knledfydkegyrdgefkkddkgwtlirse  
mkiqlkgenlesrgavlei  
nrnrtrtakgnyivrevvedsgmthnhtkrypvmeknnki iplkipiddekikkeikkfkffvqygnfkelenykdgevy  
npevpisyaqyqlknsdyn  
veqlrkrynptkkapkl llkgsgnlkgssvgyknief tvenkeenyiftdsvyfnpsedk

Tsompanidou\_et\_al\_Supplemental\_FASTA\_File

>tr|D9REA7|D9REA7\_STAAJ  
mkdeqtnktgskeeqikksfaktldvyptknl edfydkegyrdgefkkgdkgtwvirsemttelknenmeskgmvvrlnr  
nsrtctgeyfvrvikedse  
gkvysderkypikiennkiipkpiddekikkeienfkffvqygdngfenykdgevsynpeapiysaqyqlknsdynve  
qlrkryniptkkapkl11k  
gsgnlkgssvgyknieytfvendeeniyftdsinynpsgd  
>tr|D9REA8|D9REA8\_STAAJ  
mkkteytiqsdkiqsneetssisqisyeienannhglkkkkyinqiqslksdkgfpsnleyidshtdkkhgvtasafln  
kdtgkviigmtgtfnfkea  
lakql11pdfaitkqdridsaetkkdlmsdaqigtppsdnskhfeetqefikkiknydidfitghslggreavilgms  
ngipnivvynpapiaaryl  
nhnsrlfkllykgykgnitrivsdkdwlniikghtnytyfgneivvhngkshdmagflteeqekaikkekkvqgyveen  
nksfvinsnnamsklasie  
llrammttnggw1sssqqvleslta1tiaqsfngliedeinqikkmynekkkkfeknwedaqkagnavgkditvnevl  
ealdegvnessmvgepkq  
misakekqlsrigssisnyitrvrssineivdkdqaalasqiggl  
>tr|D9REA9|D9REA9\_STAAJ  
mfnginnkneleesynsekkriene1qn1nelrhtrkenersydvfyqlkhemnysedaqrmtrnieayeqeineir  
kqewkleeykedlksyek  
qldk1sd  
>tr|D9REB0|D9REB0\_STAAJ  
mspmigpvi gpdvdpdiksmiknaqkenirtviapekhkykdienglkgeekvlieqmaqhceafkanfkgaagg  
dwvksamseidsikddlkk  
ins  
>tr|D9REB2|D9REB2\_STAAJ  
makipvtv1sgylsgktt1lnhilqnregriavivndmsevnikd1vadgglsrtdek1velsngcicct1rdd11  
keverlvkkggidqivies  
tgisepvpaqtfsyidde1gid1taicr1dtmvtvvdanrfvhdinsed11m1rdqsvdetdersiad11idqvefcdv  
liinkid1iseeelaklek  
vlsalqptakiikttnsevd1kev1ntqrfdfekasesagwikel esgghashtpeteeygissfvykrr1pfhakrfnd  
wlesmpnnvvrskgiw1a  
qynhvac11sqagsscnihpvtwyvasmseaaqtqi1aerqdvaaewdseygdrhtqfviigt1deek1tkel1daclvn  
aqeidadwqqfedpyqwqi  
rpar  
>tr|D9REB5|D9REB5\_STAAJ  
mgiagiikf1kglikkftgk  
>tr|D9REB7|D9REB7\_STAAJ  
m1sfq11fslfvialia1isgl1flapvmpmryik1hlyilvmpvlfavigffgihgqhvlgpfkidr1sw1lagfvma  
lgfiiqkfsmry1lgdhh  
rhyfplftait1sfaslawmsed1r1malcwgmt11clt11mnvnr1fwkvpresak1ssmt11cgw1afvgaivsiyatg  
ewrvpghiahtws11tnv  
11vlavmipaaqfpfhrw1iesvtaptvsaimhagivnaggv11trfapifdngfals1111lssisv11gsgislvq  
dykrq1vgstmsqmgfmlv  
qcalgvysaaiih11l1hgi1fkatl1flqsgsivkrfnipkqasakdaygwiwgrv1aiivaf1fwmsdrsayev1sali  
laws11vswnqmvafskgr  
mar1vgm11isivtfiyi1ithnyfygv1qnitthattptisvi1svvilifgs11siwarrystafavlyvw1vnlg  
earskaieshpn1lky1  
>tr|D9REB8|D9REB8\_STAAJ  
mttq1ninsvienakrvitp1spisi faarnpweg1eadtfedvaew1hd1kdvd1fpdkaliesavkrge1desifnq1  
vtdm11lehhy1niphyn1  
yidnik11kdvpasymhnsndvvd11lekskrmaesyhydvprpsdai1deqgmp1seqvnrqmikwtklyidqf1  
sswmpkreysfyhaw1h1  
aqhdhsftkaqrqvi1kglpndpkmtiesv1nhfsidqedyqayvegh11alp1gwagm1yrsqqhhfeqh11tdylair1  
vveq11vgdefksvtkdce  
srsewfkqtvaswcysdmpsdv11qhdvneiqt1fihfaatmnknvfknlw1iawemtyesq1kqkikaghesvvgald  
aiqenvsendnangshsvs  
1natqavdennse1nqvg1t1stkaqiafcidvrsepfrrhieaagpfetigiagffglpiqkdavdeqfkhdslpvmvppa  
yrikefadrydmvyrqq  
qtmssmfyt1k1mknvmps111pelsgpf1s1stivntimprksras1kqikqkw1kkpetk1tidrefdrtsd1pvgf  
tegeqidfalqalkmd1t  
eafapfv1laghashhnp1has1ecgacggassgnak11ami1nrpnvrqglkqagvyipettvfaaaehhtstdm1  
awvyv1pdt1sala1dayes  
1ndamp1sehanrer1dk1ptigrvnhpveeaqrfasdwsevrpewglaknasfi1grrq1tkgid1egrtf1hnydwr  
kdkdgt11nti1sgpalva  
qwin1qyyastvaphfygsgnkatqvtvtsgvgvmqgnasdlmyglswqsvmaadr1myhspir11vivqapdyvvar11a  
nnehfarkvsnhwl1r1msv  
neegr1fkswi  
>tr|D9REC0|D9REC0\_STAAJ



Tsompanidou\_et\_al\_Supplemental\_FASTA\_File

midkkltspkmtvplflialivfigmfysvvtntqewlknidmgsltwftdyfgepqrqyvnnlfnyymtfsaeigdvkgv  
vlisiivtiilfikqrhla  
vwfvtylvsgvimnklikdvtlrrprynhlavdtgfsfpgshnastllyfalmiisvaaktitkvlalsvmgilwls  
ilfcrlyfhahyfsdvgg  
tslaiiwalflmvpyfinhrrqrv  
>tr|D9REC1|D9REC1\_STAAJ  
mriktpspsylkgtnghai111hsftgtnrdvkhlaae1ndqgfscyapnypghg111kdfmtynvddwweevekayqf1  
vnegyesisatgvs1gg1m  
tlklaghyp1kriavmsapkeksddglieh1vyysqrmsdilndqqassaqlaaiddegeitkfqhfiddimtn1nvi  
kmpanilfggkdapsyets  
ahfiyeh1gsvdke1ng1kdshh1mthgegrdvleenvirffna1t  
>tr|D9REC2|D9REC2\_STAAJ  
mkrqqsqwkstgfilasagsaig1gamwkfpymagiyygggaflamfliftifvg1p1limeftvgkmgertyttqiysk1  
tgkkwlni1gwngnlavfi  
1fgfysviggwivi1yiqv1wq1vifqrinhlqemnfavispnw1tlv1gqg1fifatmiivm1gvekglekaskvmp1  
1fvf1i1i1viks1t1dga1  
egvkfilqprvseitadgilfalgsff1t1s1gttgmitasyaskdmtikssaisivmni1fvsv1aglaifpalhsfg  
yepqegp11fkvlpmvfa  
qmhlgt1fy1gflv1flfaaltssis1le1nvsnf1tkndntkrkkvavigsilvfiisipats1fgilkdvrfgagtifd  
nmdfivsnv1mplgalgtt  
1vvq11dkk11qyfgkdrfr1fsgwy1likyampvvi1lvfiv1q1fs  
>tr|D9REC3|D9REC3\_STAAJ  
mityd1igntplv1lehyesdkvkiyak1eqwnpggsvkdr1gkylvekaiqegrvrageqtiveatagntgiglaiaanr  
hh1kckifapygfseekin  
imialgadvsrtsqsegmhgaqlaarsyaekygavymnqfesehnpdyfht1gpel1tsalqqidyfvagigsggtftgt  
ary1kqh1hvqcyavepegs  
v1nggpahadtegi1gsekwpif1ers1vdg1ftikd1qdafrnks1lakheg11vgsssgaalqgaln1kaql1segtivv  
vfpdgsdrymskeifnyee  
ndye  
>tr|D9REC4|D9REC4\_STAAJ  
mnkktk1ihgghttddytagvttpiyqtstylqddigd1rqgyesrtanptrssvesviaalengkhgfafssgvaais  
avm11dkgdhi11nsdv  
ggyraltkv1trf1ge1vdfvdtthtdsivqairpttkm1fietspn11rvtdikksaeiakehg1isvvdntf1mtpy  
qnp1dlgidiv1hsatky1  
gghsdvvag1vatsddk1laer1afisnstg1l1gpqdsy11l1vrgikt1gl1rmeqinrsvie1iikm1qahpavqqvf1hpsi  
esh1nhdvhmaqadghtg  
iafevkdtesakq1ikatsyyt1aes1gaves1isvpa1mthasipadirakegitdglvr1isigiedted1vdd1kqa1  
dt1  
>tr|D9REC5|D9REC5\_STAAJ  
miefrqvsksf1hkkkqt1idal1kdvsvftvnrndi1fgvigysgagk1st1vr1vn1leaasngqv1vdghdi1tnysekgmrei  
kkdi1gmi1fqhfn11nsatv  
fknvamp11l1skkskteik1qrvtem1efvg1s1dkk1dqf1pde1sgg1qk1rvai1ara1vtnpk111cdeats1dpattasi  
1t11knvnt1fgit1immit  
hemrvik1d1cnrvam1ekgqvvetgtvkevfshp1kttiaqnfsvstviqtepst1s1irr1nde1qv1gdfk1dykif1ieetqvt  
qpi1nd1iq1c1grevki1f  
ssmseiqgntvcymw1rfnmdq1qfddta1nqyf1kekni1qfeevh  
>tr|D9REC7|D9REC7\_STAAJ  
mkr1ig1vivalv1laacs1nndkkvt1gvasndtkawekvkelakkddi1dveikhfsdyn1pnka1ndgdi1dmnafqhf  
af1dqy1k1kahkgtk1sals  
ttv1apl1giysdki1k1kkvkd1gkavvipndvsnqara1k11leaag1lik1kkdf1lagtvkdi1tsnpk1h1kitavdaqqt  
ara1sdvdi1avinngvatk  
agkdpkndpi1fleksns1davkpyini1vavndkd1dnktyakivelyhskeaqa1qedvkdgekpvn1skdeikaiets1  
ak  
>tr|D9REC9|D9REC9\_STAAJ  
makrsksqr1ss11nvagfi1vdgyngykyhaknk1lvyls1gl1stvgtv1ldfyisiksprkfkavavvt1itngar1ft  
sir1kvkhey  
>tr|D9RED4|D9RED4\_STAAJ  
meikq1ryfi1evakrehi1setale1niaqsaisrqit11leq1lnvs1fkkqgrnim1tsegk11fnealri1eh1dstie  
qfqshg1tknksiy1gyde  
sdvshml1p1liqt1f1h1qndthvipn11dhdti1nsv1ngnidig1f1eltpeirkhkq1hml1plfeehyh1yapsddpitm  
athpp1liq1fehshiy1clap  
faesvkkq1l1rkitksdvyt1issq1laqy11l1rqkegyi1ssqni1h1peskswidik1dhtel1krticaitkepytksdigi  
11t1liqq1mtktst1fh  
>tr|D9RED5|D9RED5\_STAAJ  
mhnek1likglydyreehdac1gifyanmdnkrshdi1dks1lem1rr1dhr1ggvgadgitgdgagimteipfaffkqvtd  
fdipgegeyavglffsker  
ilgseheavfkk1yfege1silgyrnvpvnkda1akhvad1tmpvi1qqvfi1dirdiedvekr1flarkq1lefystqcdle1  
yfts1srktivykgw1rsd

Tsompanidou\_et\_al\_Supplemental\_FASTA\_File

qikklytdlsddlygsklglvhsrfsntfswkrahpnrmhmngeintikgnvnmrqrhklletlfgedqhkvfqi  
vdedgsdsaidnalefls  
lamepekaamllipepwlneandanvrafyefysflmepwdgptmifcngdklgaaltdrnglrpgrytitkdnfivfs  
sevgvvdvpesnvafkgql  
npgklllvdvfkqkviennldkgaiaelpykawidnhkvdfdfeniqyqdsqwkdetlflklrqrfaytkeeihkyiqel  
vegkkdpiamgydapiav  
lnerpeslfnyfkqlfaqvtnppidayreki vtse lsy lgggnllapdetvldriqlkrpvl neshlaaidqehfklty  
lstvyegdlealealgre  
avdavkqgaqilvliddsglvdngnfampmlaishvhqllikadlrmstslvaksetrevhvacllayganaivpyla  
qrtveqltltelgggtvvd  
nvktytdvlsegvikvmakmgistvqsyqgaqifeaiglshdvidryftgtqsklsgisidqidaenkarqqsddnylas  
gstfwrqggqh hafnpes  
ifllqhackendyaqfkayseavnkrtdhirhllfkactpididqvepvsdivkrfntgamsygsisaeahetlaqam  
nqlggksnsgegedakry  
evqvdgsnkvsaiqv asgrfgvtsdylqhakeiqikvaqgakpgeggqlpgtkvypwiaktrgstpgiglisppphdi  
ysiedlaqlihdlnkankd  
adiavklvsktgvgtiasgvakafadkivisgydggtagspktsiqhagvpweiglaethqtlklnldrsvkletdgtk  
ltgkdvayacalgaefgf  
ataplvvlgcimmrvchkdtcpvgvatqnkd lralyrgkahhvvnmfhfiaqelreilaslgkrlledlvgrtdllqrs  
tlkanskaasidvekl lcp  
fdgpntkeiqqnhnlehgf dlnlyeitkpyiaegrrytsftvneqrdrvgitgseiskqygeaglpentinvytng  
agqslaayapkglmihhtg  
dandyvgkglsggtvirkapfeerqneiiagnvsfygatggkafingsagerfcirnsqvdvvvegigdhgleymtgghv  
inlgdvgnkfgqgmssgia  
yvipdsveafvennql d t l s f t k i k h q e e k a f i k q m l e e h v s h t n s t r a i h v l k h f d r i e d v v v k v i p k d y q l m m q k i h l  
hqs l h d n e d e a m l a a f y d d  
sktidakhhkpavvy  
>tr|D9RED6|D9RED6\_STAAJ  
mgefkgfmydkqylge l s l v d r l k h h k a y q r f t k e d a s i q g a r c m d c g t p f c q t g q y g r e t i g c p i g n y i p e w n d l v  
yhqdfktayerlsetnfp  
dftgrvcpapcesacvmkinresiaikgiertiidea fengwvapkvsrrrdekvaivgsgpagltaaeelnllgyqvt  
iyeraresgglmygipnm  
klkdvdvrrrikmeegaiafingvevgvidkatleseydaiilctgaqkgrdlplegrmgdihfamdylteqtqlln  
geiddititakdknviig  
agdtgadcvatalrencksivqfnkytklpeaitftenaswplampvfkmdyahqeyeakfgkepraygvqtmrydvddk  
gqirglytqi leggengmv  
mkegperfwpadlvllsigfegteptvpnafniktdrnrivadtdnyqtnekvfaagdarrrgqslvwwaiegrgvaka  
vdqylaskvcv  
>tr|D9RED7|D9RED7\_STAAJ  
mavkredvkaivtaiggkenleaathcvtrlr l v l k d e s k v d k d a l s n n a l v k g q f k a d h q y q i v i g p g t v d e v y k q f i d  
etgaqeaskdeakqaaqk  
gnpvqrlikllgdi f i p i l p a i v t a g l l m g i n l l t m k g l f g p k a l i e m p p q i a d i s n i i n v i a s t a f i f l p a l i g w s s m  
rvfggspllgvlglilmh  
pq l v s q y d l a k g n i p t w n l f g l e i k q l n y q g q v l p v l i a a y v l a k i e k g l n k v v h s i k m l v v g p v a l l v t g f l a f i i g  
pvalligtgitsgvtffg  
hagwlggaiygllyapl vitglh h m f l a v d f q l m g s s l g g t y l w p i v a i s n i c q g s a a f g a w f v y k r r k m v k e e g l a l t s  
gisgm l g v t e p a m f g v n l p  
l k y p f i a a i s t s c v l g a i v g m n n v l g k v g v g g v p a f i s i q e f w p v y l i v t a i a i v v p c i l t i v m s h f s k q k a k e i v e d  
>tr|D9RED8|D9RED8\_STAAJ  
mskeidwrksvvyqiypksfndttngigdingiiekldyikllgvdyiwltpvyespmndngydisnyleinedfgtmd  
dfeklikvahqkd l k v m l d  
ivinhtstehewfkearksdknpyrddyffrasedgpptnwhskfggnawkydsetdeyylhlfdvsqadlnwdnpevrq  
slyrivnhwidfgvdgfrf  
dvinliskgefksdkigkefytdgprvheflyelnrqtfgntdmmtvgemssttiencikytqperqelnsvfnfhhlk  
vdyvdgekwtnakldfhkl  
keilmqwgrgiydgggw nai f w c n h d q p r v s r f g d d t s e e m r i q s a k m l a i a l h m l q g t p y i y q g e e i g m t d p h f t s i a  
qyrdvesinayhql l segh  
eadv l a i l g g k s r d n s r t p m q w s d d v n a g f t t g k p w i d i p e n y h q v n v r q a l n k d s i f y t y q k l i q l r h t h d i i t y g d  
ivprfmdhdhlfvyerhyk  
nqqwlvianfsasavdlpegltcegrvviqtgtvenntisgfgaivietna  
>tr|D9RED9|D9RED9\_STAAJ  
mvkqkkfmiyealkeelneqiygeqipsehdlvqlyqssretvrkal d l l a l d g m i q k i h g k g s l v i y q e v t e f p f s  
elvsfkemqeemgvaylte  
vvnevveahevpevqhalninsse l i h i v r t r r l n q h v k i v d e d y f l k s i v s d i g n d v a s d s i y d y l e k v l n l n i s y s  
sksitfepfdeqayqlfgd  
vsveysatvrsivylentmpfqynisklanefkfnfdrtrtk  
>tr|D9REE1|D9REE1\_STAAJ  
mnyqalyrmyrpqsfedvvgqehvktlrnaiskekqshayifsgprgtgktsiakvfakainclnstdgepcnechick

Tsompanidou\_et\_al\_Supplemental\_FASTA\_File

gjtqgtnsdvieidaasn  
gvdei rnrdrkvkyapseskykvyiidevhl ttgafna llktleppahai filattephkippti israqrfdfkais  
ldqiver l kfvadaqqie c  
edealafiakaseggmrda lsimdqia fgdgt l t l qda l nvtgsvhdeahnl fddivqgdvqasfkkyhqfitegkev  
nrlindmiyfvrdtimnkt  
sekdteyr al mnl e l d mlyqmid l indt l vsir fsvnqnv hfev l l v k l aeqikgppqvia nvaepaqi asspntdvl l q  
rmeql e qe l k t l k a g g v s v  
apvqksskkpargiqksnafsmqqiakv l dkankadik l l k d h w q e v i d h a k n n d k k s l v s l l q n s e p v a a s e d h v l v k  
feeeihceivnkdekrss  
iesvvcni vnk n v k v g v p s d q w q r v r t e y l q n r k n e g d d m p k q a q q t d i a q k a k d l f g e e t v h v i d e e  
>tr|D9REE4|D9REE4\_STAAJ  
mkqpilnkleslnqeeaislhvpghknmtighlsq lsmtmdkteipgl d d l h p e e v i l e s m k q v e k h s d y d g y f l v n g t  
tsgilsviqsfsqkkgdi l  
marnvhksvlhaldisqgeghfiethqsp l t n h y n k v n l s r l n n d g h k l a v l t y p n y y g e t f n v e e v i k s l h q l n i p v l i  
deahgahfgl qgfpdstln  
yqadyvvqs fhkt l p a l t m g s v l y i h k n a p y r e n i e f l s y f q t s s p s y l i m a s l e s a a q f y k t y d s n m f f d k r a q l i e c  
lekkgfemlqvddplkl l i  
kyegftghdiqnwfmnahiyeladdyqalailplwhhddtyl f d s l l r k i e d m i l p k k s v s i v k t q l l t t e g n y k p k r  
feyvtwcdlkkakgkvlar  
hivpyppgipii fkgetitenmielvneyletgmivegiknnkilvede  
>tr|D9REE5|D9REE5\_STAAJ  
msafitfegpegsqkttvinevyhr l v k d y d v i m t r e p g g v p t g e e i r k i v l e g n d m d i r t e a m l f a a s r r e h l v l k v i p  
alkegkvvlcdryidssla  
yqgyargigveevrt l n e f a i n g l y p d l t i y l n v s a e v g r e r i k n s r n q n r l d q e d l k f h e k v i e g y q e i i h n e s q r f k  
svnadqplenvvedtyqti  
iky l e k i  
>tr|D9REE7|D9REE7\_STAAJ  
mdeqqqltnayhsnk lshay l f e g d d a q t m k q v a i n f a k l i l c q t d s q c e t k v s t y n h p d f m y i s t t e n a i k k e q v e q l v  
rhmq l p i e s t n k v y i e d  
fekl tvqgensil k f l e e p p d n t i a i l l s t k p e q i l d t i h s r c q h v y f k p i d k e k f i n r l v e q d m s k p v a e m i s t y t t q i  
dnamalnee f d l l a l r k s v  
irwcellltnkpmaligi d l l k q a k n k k l q s l t i a a v n g f f e d i i l t k v n v e d k q i y s d l k n d i d q a a k l s f n q l i l m  
fdqlteahkkl n q n v n p t l  
vfeqivikgvs  
>tr|D9REE8|D9REE8\_STAAJ  
mpnvigvqfqkagkleyytpndiqvdi ddwvveskrgeieigivknplmdiaeedvvlplkniiriaddkdidkfcner  
daenalilckdivregld  
mr l v n c e y t l d k s k v i f n f t a d d r i d f r k l v k i l a q y l k t r i e l r q i g v r d e a k l l g g i g p c g r s l c c s t f l g d f e p v s i  
kmakdqnl sl n p t k i s g a c  
gr l m c c l k y e n d y e e v r a q l p d i g e a i e t p d g n g k v v a l n i l d i s m q v k l e g h e q p l e y k l e e i e t m h  
>tr|D9REF0|D9REF0\_STAAJ  
mlkenerfdq l i k e d f s i i q n d d v f s f s t d a l l l g h f t k p r t k d i v l d l c s g n g v i p l l l f a k h p r h i e g v e i q k t l v d m  
arrtfqfndvdeyltmh m  
dlknvtkvfkpsqytlvtcnpnyfkenqqhqhqkeahkiarheimctledcmiaarhl l k e g g r l n m v h r a d r l m d v l f e  
mrkvnjepkvvfiyskvg  
ksaqtivvegrkgnqgleimppfyiynedgnyseemkevygg  
>tr|D9REF3|D9REF3\_STAAJ  
maketfyittpiypsgnlhighaystvagdviarykrmqgydvryltgtdehgqki qekaqkagkteieyldemiagik  
qlwakleisnddfirttee  
rhkhvveqvferllkqgdylgeyegwysvpdetyytesqlvdpqyengkiiggkspdsghel vkeesyffniskytd  
rll e f y d q n p d f i q p p s r k  
neminnfikpgladlavsrtsfwgvhpsnpkhvvywidalvnyisalgy l s d d e s l f n k y w p a d i h l m a k e i v r f h s  
iiwpillmal d l p l p k k v f  
ahgwi l m k d g k m s k s k g n v d p n i l d r y g l d a t r y y l m r e l p f g s d g v f t p e a f v e r t n f d l a n d l g n l v n r t i s m i n k  
yfdgelpayqplheldee  
meamal etvksytesmes l q f s v a l s t v w k f i s r t n k y i d e t t p w l a k d d s q k d m l g n v m a h l v e n i r y a a v l l r p f l t  
hapkeifeql n i n n p q f m e  
fssleqygvltesimvtgqpkpifprldseaeiyikesmqppateeekeepskpqidikdfkveikaatiidaehvk  
ksdkllkiqvdl d s e q r q i  
vsgiakfytpddi igkkvavvtnlkpak l m g q k s e g m i l s a e k d g v l t l v s l p s a i p n g a v i k  
>tr|D9REF5|D9REF5\_STAAJ  
mkinefi vvegrddtervkravecdtietngsaineqtlevirnaqqsrqgiviltdpdpfgdkirstitehvkgvkhayi  
drekaknkkgkigvehad l  
idikealmhvssp f d e a y e s i d k s v l i e l g l i v g k d a r r r r d i l s r k l r i g h s n g k q l l k k l n a f g y t e a d v r q a l e d e  
>tr|D9REF6|D9REF6\_STAAJ  
mldnkdiatpsrtralldkygnfnkkslgqnflidvniinniidasdidaqtgvieigpgmgs lteqlarhakrv lafei  
dqr lipvlndt l s p y d n v t  
vinedilkanikeavenhl qdcekimvvanlpyyittpillnlmqddipidgyvmmqkevger lnaevgskaygslsiv

Tsompanidou\_et\_al\_Supplemental\_FASTA\_File

vqyytetskvltpvksvfm  
ppnvdsvvklmqrteplvtvdneeaffklakaafaqrrktinnyqnyfdgkqhkevilqwlmaqidsrrrgetls  
iqdfaklyeekkkfpqlen  
>tr|D9REF8|D9REF8\_STAAJ  
miyetapakinfldtlfkrndgyheiemittvdlnrldtlfhrkrdrkivveiehnyvpsnhknlayraaqlfieyqql  
kqgvtsidkeipvsagla  
ggsadaaatlrglnrlnfnigasleelaalngskigt dipfcyknkta lctgrgekieflnkppsawvilakpnl gisspdi  
fkl in ldkrydvhtkmcye  
alenrdyqqlcqslnrlepisvskhpqidlknmlksgadgalmsgsgptvyglarkesqakniynavngccnevylv  
rllg  
>tr|D9REG0|D9REG0\_STAAJ  
mkiinttrlpealppyshatvngmvytsgqiplnvdgkivsadvqaatkqvl enlkivleeagsdlnsvakatifikdm  
ndfqkinevygqyfnhkp  
arscvevarlprdkveielvskikel  
>tr|D9REG6|D9REG6\_STAAJ  
mtilttikednhfqdlnqvfqqantlvgtlsp sakvtmiaekyaqsnqqlllitnnyqadkletdlqfidaedlyky  
pvqdimteefstqspqlms  
erirtlta laqgkglfivplnglkkwlt pvemwqnhqmtlrvgedidvdqflnklvnmgykresvshigefslrggi  
difpligepirielfdtei  
dsirfdvetqrskdnievdittasdyiiteevishlkeelktayentrpkidksvrndlketyesfklfestyfdhqi  
lrrlvafmyetpstiidyf  
qkdaiiavdefnricketeesltvesdsfisniiesngngfigqsfi kyddfetliegyptvyfsl fattmpiklnhiikfs  
ckpvqqfygqydimrsefq  
ryvnqnyhivvvetetkvermqam lsemhipsitklhrsmssgqaviiegs lsegfel pdmgllviterelfskskkkq  
rkrtkaisnaekisygd  
nvgdyivvhhgvgrylgvetlevgqthr dyiklqykgt dqlfvpdqmdqvqkyvasedktpklnklggsewkktkakv  
qqsvediaeelidlykere  
maegyqygedtaeqttfel d fpyeltpdqaks ideikddmqksrpm d rllcgdvgygktevavraafkavmegkqvaflv  
pttilaqghyetliermqd  
fpveiq lmsrfrtpkeikqtkeglktgfvdivvgthkl lskdiqykdgl l livdeeqrfgv rhkerikt l khndvltlt  
atpiprthmsmlgvrdls  
vietppenrfpvqtyvleqmsfikealere lsr dgqvfylynkvqsiyekreq l qm lmpdaniavahgq mterdleem  
lsfinneydilvttti et  
gvdvpnantliiedadrfglsqlyqlrgrvgrssrigyayflhpankvl tetaedr l qaikeftel gsgfkiamrdlnir  
gagnllgkqhgfidtvgf  
dlysqmleeavnekr gieepesevpevevdlnldayl pteyiane qakieiykklrktetfdqi idikdelidrfndypv  
evarlldiveikvhalhsg  
itlikdkgkiidihlsvkatenidgevl fkatqplgrtmkvqvqnnamtitl tkqnqwl dslkflvkcieesmr isdea  
>tr|D9REG7|D9REG7\_STAAJ  
mkhkeafngvvv ltaalivikil savyripyqnil gdtglyayqqvypivalgmilsmnaipsaitq nigkysdeayak  
avayiq lvgillfi aifvf  
anniahmmgdshltpmiqaas lsfifigmlgv lrgyyqsanmtvpaisqvieqvrv giiivt ivifvdr gwtiyeagt  
ialastigflgssylva  
hrpfkfk m vntaki vwkqfalsv lifaisqlivilwqvidsvtiikslqairvpfdvaitekgyvdr gasfiqmg l ivt  
ttfsfalip l lsdai kmn  
kvlm nryanaskitilistaagiglinlplmngvffktndltl tsvymitvicvslimmdmallqaqhavrpi fvgm  
taglvikfilniilir lsg  
iigasistvvsliifgti ihavtkkyhlhamrrffm vvf gmvfmsivvqlvl fivtthgritgliellcaaf l g iaal  
fyyifkfnv l tykeltylp  
fgsklyqmkkgr  
>tr|D9REG8|D9REG8\_STAAJ  
mahtitivglngyiddlplgiykflktqdkvyartldhpvieslqdel t fqsfdhvyethdqfedvyndivaqlvetan  
ekdivyavpghprvaettt  
vkl lal akdntdidvklvggksfiddvfeavnvd pndgftll datsl qevtlnvrthltitqvysamvaanlkitlmery  
pdyypvqivtgarsgdan  
vvtcplyel d hdenafnnltsvfvpki t tptylyhdfdfaevitldvdedkgcpwdkvqthetlkrylleetfel feai  
dneddwhmieelgdillqv  
llhtsigkkegyidikevitslnakmirrhphifgdanaetid l keiwskakdaegkqprvkfekvfaehflnlyektk  
dksfdeaalqwl ekgesn  
t  
>tr|D9REH2|D9REH2\_STAAJ  
mq lnsngwhvddhivvavstgidsmc llyql lndykdsyrkl tclvhnhgvr sasieearfleaycerhhidlhikkldl  
shsl drnnsiqnearikry  
ewfdemmnvleadvll tahh lddqletimyri fngkstrnk l gfdel skrkgyqiyrpllavskkeikqferyhipyfe  
desnkdnkyvrndi rnri  
paidennqlkvshllklkqwhdeqydlqysakqfiqesvkfdeqskylevsrqafnnl pns l kmvvl dcl l skyyel fn  
isaktyeewfkqfsskkaq  
fsinladkwiiqiaygkliimaknngdyfrvqtiekpgnyi fnkyrleihsnl pkcl fpl tvrtrqsgdtfkl ngrdgy

Tsompanidou\_et\_al\_Supplemental\_FASTA\_File

kkvnr1fidckvqqwvrdq  
mpivldkqqriiavgdlyqqqtikqwiiiskngde  
>tr|D9REH7|D9REH7\_STAAJ  
mtkktimgilnvtpsdfsddgkfnnvesavtrvkammdegadiidvggvstrpghemvsleeeInrvlpvveaivgfdvk  
isvdtfrsevaeacklglv  
diindqwaglydhmfqivakydaeiilmhngngrdepvveemltsllaahqakiagipsnkiwldpgigfaktrnee  
aevmarldelvateypvll  
atsrkrftkemmgydttpverdevtaattaygimkgvravrvhvelnaklakgidflkenenarhnls  
>tr|D9REH8|D9REH8\_STAAJ  
mqdtiflkgmrfygyhgvlsaneigqifkvdvtlkvdlaeagrtdnvidtvhygevfeevksimegkavnlllehlaeri  
anrinsqynrvmetkvrit  
kenppipghydgvgieivrenk  
>tr|D9REH9|D9REH9\_STAAJ  
miqaylglsnigdresqlndaikilneyeginvsnispiyetapvyteqpnflnlcveiqttlvtlqllecclkteec  
lhrvrkerwgprrtdvdi  
lygeemidlpklsvphprmerafvliplndiaanvieprsklkvkd1vfvdsvkryk  
>tr|D9REI0|D9REI0\_STAAJ  
mseemndqmlvrrqklqelyd1g1dpfgskfdrsglssdlkeewdqyskeelvekeadshvaiagrlmtrkgkgkagfah  
vqdlagqi qiyvrkdqvgd  
defdlwknadlgdivgvegmftntgelsvkakkftlltkslrplpdkfhglqdieqyrqryldlitnedstrtfir  
skiiqemrnylnnkgflev  
etpmmhqiaggaaarpfvthhna1datlymriaiehlhkr1ivgg1ekvyegrfrnegvstrhnpeftmielyeayad  
yhd1mdltesmvrhianev  
lgsakvqyngetidlesawtr1hivdavkeatgvdfyevksdeekalakeygieikdtmkyghilneffeqkveetliq  
ptfiyghpteisplaknp  
edprftdrfel1fivgrehanafte1ndpidqkgrfeaq1vekaqndeahemdedyiealeympptgg1gigidr1vml  
1tdsp1rdv11fpymrqk  
>tr|D9REI1|D9REI1\_STAAJ  
mkn1lyhq1yek1kkqi1egqfegdkfyskrq1skh1sisqttvehayq111deg1ysrprsgyyvseies1tilntq  
pihs1fddd1sykpktsden  
ydyafnlde1dtkhfpie1lfrkyskd1ydkthsnk11rghfqqel1hrfqlafylftnrgvicdpnqi1igssteqlvng  
1vd11ytstfi1ekpsypp  
ikni1dkkqveyeqi1evedng1nvdeviksqn1vyitpshqfptgyvmd1lkkrtq1liqwaqekeerfi1eddysefry  
fgkpi1aiqq1lysrgekvi  
yi1stfsks1fpsc1rvaym1v1pysimkkyhsqn1hiegn1tvpvhmqn1liatfissgg1ferh1nkmrriyrk1tyilnr1kp  
ykeq1diqgaetgmhftit  
vkn1l1lqec1drankv1k1qvynfddd1qdykktpkf1l1gfgg1ddd1alkphvda1iks1iik  
>tr|D9REI2|D9REI2\_STAAJ  
mski1gsdrvkrgmaemqkggvi1mdvvn1eaeqari1aeeagavavma1ervpsd1raaggvarmanpkiveevmnavsipvm  
akarighi1tearv1eamgv  
dy1de1ev1tpadeeyh1rkdqftvp1fvcgcrn1lgeaar1rigegaam1rtkgepgtgniveavrhmrvnsevsr1tvmn  
ddeim1tfakdigapye1lk  
qikengr1pvvn1faaggvatp1qdaa1mme1lgadgv1fvgsg1fksedpek1fakaivqatthyqdyeligr1asdlgtamkg  
1dinq1s1leermqergw  
>tr|D9REI3|D9REI3\_STAAJ  
mkigv1alqgavrehir1hie1sghegiavkkveqleeiegl1lpggestt1rr1mny1g1fkealqnst1lpmfgtcagliv  
1aqdi1vgeegyl1nk1nitv  
qrnsfgrq1vdsfete1ldkigiatdiegvfi1raphiekvqggvdi1lckvnekivavqqgkylgvsfhpel1tddyrvtdyfi  
nhivkkhs1myakstny  
>tr|D9REI4|D9REI4\_STAAJ  
mht1ligi1igi1ff1alaf1fssdrkni1rwkyvgi1laiq1lifaf1llkttmgikviggisngfny1ll1kaadgvnfvfgg  
iqyidpkpp1ff1sv1lpi  
vfisai1g1lqytki1lpli1nv1lgfl1skingmgr1lesynavaaa1lgqsev1fisikkq1lpyipkqrlyt1tasamstvs  
asiigayft1liepkyvta  
vv1n1lfggfii1asi1npykvneedd1l1veeteerqqsffem1geyil1dgfkvavivgam1ligyiaiaia1l1ngivsnifs  
tvsggaiswdfq1tligfvf  
apfa1lvgvpwq1davqagsvmatk1l1snefvamqal1gk1sdl1sehakgvtsv1lvsfanfssigi1sgaiks1ndkkgdt  
varfg1k1l1fgat1sv1fis  
aaiagffi  
>tr|D9REI5|D9REI5\_STAAJ  
mkiva1itscp1ngiahty1maqek1leqvakemgvdikvetqggvgaenv1ttqdieeadgv1iaadkqvdl1srfvgkr1line  
nvregih1nprg1liqri1nh  
dapiyqsetnyhskdrdksksgiqmvyqh1mngv1sfmvpfi1vvgg1liaia1l1t1ggettskg1vipdds1fwksienigs1  
afkfmvp1ilagya1vsiad  
kpg1lvpgmi1gga1aadgsfygsdagag1l1ggi1vag1lagya1kwikdikvpkamapimp1iiipi1ssvvvg1lifi1lig  
ap1snifeal1ttw1k1svqg  
ani1i1lami1gami1fdmgppvnkva1l1fgsa1liaegnyavmgm1vavavctppig1l1atfvqkykfnhseremgkasft  
mg1lfgi1tega1pfaaqdp1

Tsompanidou\_et\_al\_Supplemental\_FASTA\_File

riipanmigamiasviaaigvgdrvahggpivavlggidhilwfilavivgslvtmitvlllkrntpviavdapaqhtq  
lhdtitqhdtevdndnt  
akhslnkpsvhfdqtmvithdmsrneaidmlihkiki cryvehtshlknaileremesttaigmnvaiphaksdvvk  
qpivavmknngvkwesld  
gslpqlifliavpnsqgdthlkiqriskalmndetrqslinasstteiylnlmi  
>tr|D9REI6|D9REI6\_STAAJ  
malflqpvfkdriwggialkafnydipnkttgcewaisahpnpntiingpykdmtdqlwsqhrelfdndsrdspfltt  
kvl dandklsvqvhpdddy  
alkhegelgktecwyildaapgaei ygvhahnkqtlidmidnhefdfsifkripvkpgdfyyvpagtvhaigsgililet  
qqssdttyriydydrdq  
gqlrdlhleqskdvielnhepnttpitthidthvtqfvdnqyfavykwidhgdlkfnkphayclvtiidgtgtlavnd  
khydiqkgssfiltteded  
ihfvgnisaivshpg  
>tr|D9REI7|D9REI7\_STAAJ  
mknafklfkmdlkkvakt pavwii laglai lpsfyawfnlwamwdpygntghikvavvedkgd tirgkknvngntmvnt  
lknksfdwqfvsrekadh  
eikmgkyfagiyipskftheitgtlrkqpqkadvefkvnqkinavaskltdtgssvvvekanefnktvtralleanka  
gl tieenvptinkiknavy  
sadalpkindfankivylnnhqadldkyandfrklgnykgidldaqqklnvngaipqlnekaklilalnnypkieka  
lnfaaddvpaqfпкиnggl  
niasqgidqangqlndakgfvtrsvrgdyqdavrraqdl nrrnqqqipqnsaannetsnsapaagngvastppsapsg  
dtapnnvtqntapnsna  
pvsttpqstsgkkgqsfaditqtqvstanentqnitdkdvksmeaal tgsllslsnnldtqakaaqkdsqalrnisygi  
lasdkpsdfresldnvksg  
leyttqynqqfidtkeieknenvnl skeidkvkaannrineslrlvnqlsna lknsgsgtaeatklldqlskldsslss  
frdyvkkdl nsslvsisqr  
imde lknkgkalsnvqsklntidqvinsgqailkngktridr lqtvlpsieqqyisavknaqanfpkvksdvakaanfvr  
ndlpql eqrltnatasvnk  
nlptllngydqavgl nknqppakka lsdladfaqnklpdvekd lkkankifkkl dkdavdklidtlknd lkkqagii a  
npinkktvdvfpvkdygsg  
mtpfytal svwgal mvsll tvdnkhkslesvlttrqvflgkagffimlgmlqalivsvgdllil kagvespvlflit  
ifcsiifnsivytcvslg  
npgkaiavllvlqiaggggtfpittpqffqni spylpftyaidslretvggivrepeilitkliiltlfgigffvvgllil  
kpvt dplmkrvsekvdqsn  
vte  
>tr|D9REI8|D9REI8\_STAAJ  
mpknkiliy llsttlv lptlvsp taya dtpqkdttakt tshdskksnddetskdttskdtdkadnntsnqdnndkkfkt  
iddstsdnsniidfiyknl  
pqtninglltknkyddnyslttliqn lfnlnsdisdyeqprngekstndsnknsdnsikndtdkqstkqdkadnqkapks  
nntkpsnsnkqpspkptq  
pnqnsqpasddkgnkqssskdnqmsdsal dsil dqysedakktqkdyasqskdkneksntkntqlptqdelkhkskp  
aqsfnnvdnqkdratslf  
etdpsisnndsgqfnvvdskdtrqfvksi akdahr igqndiyasvmiaqail esdsgrsalakspnhnlfgikgafeg  
nsvpfntleadgnqlysin  
agfrkypstkes lkdysdlikngidgnrtiykptwkseadsykdatshl sktyatdpnyakklnsi ikhyqltqfdderm  
pdldkyersikdyddsde  
fkpfrevsdsmpyphgqctwyvynrmkqfgtsi sgd lgdahnwnnraqyrdyqvsh tprhaavvfeagqfgadqhyghv  
afvekvnsdgsivisesnv  
kglgii shrtinaaaaeelsyitgk  
>tr|D9REJ0|D9REJ0\_STAAJ  
makyrgkpfqlyvklscstmmvtsiiltnilpydaqaasekdteiskeilskqdlldkvekanrqidqlkqlsaskahy  
kaqlnvaktasqideiikr  
aneldnkdnkgs hiemngqsdi dskldqllkdlnvsskvdrgqqsgeddlnaikndmsqtattkhgekdnkndeamvnk  
aledldhlnqqihkskdas  
kdtse dtavstddnnhevakt pnn dgsghvlnkfl sneenqshsnrltdklqgsdkinhamiekl aksnastqhytyhk  
lntlqsl drriantqlpkn  
qksdlmsevntkeriksqrniilee lartddkhatqsilesifnkdeadkil kdirvdgktdqqiadqitrhidqlsl  
ttsddlltslidqsqksl  
lisqilqtklgkaeadklakdwtnkgl snrqivdqlkhhfastgd tssddilkailn nakdkkqaietilatrierqkak  
lladlitki etdqnikfnl  
vksalngkaddllnlqkrlnqtkkdidyvlspivnrpsll drlnkngktt dlnk lanlmnqgsnll dsipdiptpkpekt  
l tlgkngllsgllnadgn  
vs lpkagetikehwlpi svivgamgv lmiwlsrrnklnka  
>tr|D9REJ1|D9REJ1\_STAAJ  
mikll dyfndhsrkl yesfkaskleedlitv lndngflpddvispyqffadnhntenmkprffnqvtpafweikgnns  
atindmgrlrgkifyqsge  
rprivsvrvefddqqrvfvdyskngikfaqtvydlnrkailkky mtaegkeviyenfvtsd vil dwqgksyffpskla  
fv lffikqleitehhfvn

Tsompanidou\_et\_al\_Supplemental\_FASTA\_File

slalpfsvlynlpskgsdvlvwqehcngnvpqnmqlmckgdmkrhcniipdkneyetmlniadakvksrilqggylyny  
rsnrnytkeiviltnsdql  
rnikvlvetlpdfkfhiaaitemsdklmqldqyanvhlpsinidrvnelyqlcdiyldinegneilnaveqafdyelli  
lgyrqtahhakvtlsehlf  
ehndeitmeskdqliqmleslkdqqqfrdallaqkahaheisreqfeqvfkqales  
>tr|D9REJ2|D9REJ2\_STAAJ  
mtiyninfgigwassgveyaqayrakllrrtnqdtkfvflfdiqseniqtltnqigfedqeviwlyqyfsdisiapttyt  
lddiereighdisfrerng  
kivrlyfngkssfvtyclqneqkdivdraefvinsmlvrkdfysytrifseyyapadnkaklymrqfynengsiayneyi  
dgdssiyvfedavlynkte  
fiayflqrlnlrrddivildrasdigqavlqhkqgskvgvvihadhysnmnmseqhilwnnyeyqfskakyidffit  
diqnhmvrqfegyqgyrpr  
rvytiptvgsidalysyptlrrkpyamisasrlanekhidwlvkavivakrqvpeltdiygegsektrlrkiidthraqdy  
irlghvkldeiytdyelf  
lsastsegfgltlmeavgsglmgiglnvnygnptfirdgengylvpfdtdedsvddviaklahaivmvfngpqtphd  
yevaqqfntqdiilkwetl  
vqevlhd  
>tr|D9REJ3|D9REJ3\_STAAJ  
mkhklvdtinelrlksirkivkrintwsdevksysddalkqktiefkerlasgvdtldtllpeayavareaswrvlgm  
kevqligaivlhegniaem  
qtgegkltatmplylnallgkgytilttndylakrdeemqplyewlgltaslgfvidvyeyqkgekrniyehdiyt  
tngrlgfdyldnladsae  
gkflpqlnygiidevdsiildaaqtplvisgaprlqsnlfhivkefvdtliedvhfkmkktkkeitwllnqgieaaqsyfn  
vedlysekamvlvrninla  
lraqylfesnvdyfvyngdivlidritgrmlpgtklqaglhqaiakegmevstdksvmatitfqnlfkifgsfsgmtat  
gklgeseffdlyskivvqv  
ptdkaiqrdepdkvfrsvdekniamihdivehetgrpvllitrtaeaaeyfskvffqmdipnlliaqnvakeaqmia  
eaggigsmtvatsmagrgt  
diklgegvealgglaviihemensrvdrqlrgsrgrqgdpgssciyislddylvkrwsdsnlennqlysldaqrlsq  
slfnrkvkqivvkaqrise  
eggvkaremanefeksijisqrdlveyeernrvleiddaenrdfkalakdvfemfvneekvltsrvveyiyqnl  
vacvfkdkqavvtflleq  
fekqvalnrknigsayyynifvqkvflkaidsawlqevdyllqqlkasvnrqngqrnaifeyrvaldsfevmt  
rnikkrmvknicqsmifdkegmpv  
ihfp  
>tr|D9REJ4|D9REJ4\_STAAJ  
mlknktfkvtwnyisqttfmygskvsfsngevtfinplmpsglpihewlmlkqfskyksapslpilrrgqhyklhfd  
tpagsvyfiiifynkngtk  
lsteivksnsitiqypdeayaykimmnaastslifrcilitemthqddleyksmqvtkigddqygndrinviaep  
sdv  
yptisndflkpfghvwlve  
rwmddnieenikqlkndlqsqdtltaimlisygsksnvfatyvaqhlcdkvyrtsheddllkgwlt  
ehvpgnhelkdt  
nv  
evyfkeeqdkhlnymrslm  
npvrflldylvsklnggevnet  
>tr|D9REJ5|D9REJ5\_STAAJ  
mprkfrvlqigddlepiqhkkgvswdyfdiglfefdsygeaieaiveaegrfdfiyiqapyselt  
nllqmisepyn  
tyvdesfwsveyeqdenvq  
kyvvqplhyrnieernnkleavsfsgygdkvspklaivhpnfkgdvvyqgnseltsgefgkefkpiaswq  
nllvydkd  
kviqiwpfedi dgavklqy  
tfrliqtgadgalieqiiiltddmldsplei ptkpfdaysvtvkargngtvhlgpikhwrsl  
dmgqflggsrfvdsqr  
qefiyyfhpqdmkpplnvy  
fsgyrtaegfegyymmkrmnaflligdprveggsfyigsseyeqgiinvidetleklnfkshelilsgl  
smgsfgalyy  
gaqlnpqaiivgkplvnig  
tiaehmrlrpeefgtaidvlvsnegdtsqasiqalnqkfwqtfqkkslsqtvfaiaymqhddy  
dphafqellpvlvthq  
arvmnrslpgrhndspti  
aswfvnfyniiledkfgrvqhaekqni  
>tr|D9REJ6|D9REJ6\_STAAJ  
mkyfipawyddqrrwqdtvpyyqtqnktefddmislmgmhlennldyqlivlnhapnirtflhrydlyet  
kywsvfdei  
qgfshhapqainyhhlkwp  
ddvefytypllkcvtseqtytni yfsqegysiwfeferdqlqrryifddrgylsairyfdnqgeasy  
qeyltingdcv  
lhedlkngrvtvskryqhh  
yqteynnmaqlieekfqamiaaqqiheddhdvivasdarhnrqianhipakllsysffknrnetvsde  
eyqsivknahliv  
dsvqlerdlishqekyqre  
ntmiriptfetrqspnissqlmetfigwwidgmsdadlqmmqrlvdyiahedyrllillsrhqndip  
mwlrecitsvne  
eyqvkqnadvnvsalmtpe  
dqddiiaavktihaehdvvealrtlrividskepdllyqisaisagipqingqtdyvsdydngrilnt  
vdelldalny  
lfylknwnyayayslkliid  
ayaskniinqldellegendat  
>tr|D9REJ7|D9REJ7\_STAAJ

Tsompanidou\_et\_al\_Supplemental\_FASTA\_File

m1k1l1qqeyeykiykrilytcfilfiyilgtnisivsnydmqvkhetffkiaismggdvntlnlftlglgpwltsmiil  
mlisyrnmdkymkqtslek  
hykeriltliisviqsyfviheyvskqrvhqdniyltililvtgtmllwladknsrygiagmpivmvsiiksmmhqkm  
eyidashivialliilvii  
tlfil1fj1el1evripyid1mnvsatnmksylswkvpagsitlmsisafvflksgihfilsifnksisddmpmltfd  
pvgisvylviqmllgyfls  
rflintkqkkskdf1ksgnyfsevkgpkdterylnyqarrvcwfgsalvtiigiptyftl1fvph1steiyfsvqlivlvy  
isinaetirtylyfdkyk  
pflnqyw  
>tr|D9REJ8|D9REJ8\_STAAJ  
mskrqkefhds1anektrvrlyksgknwvksigikeiemfkingl1pfishsivsqdnsiskkmtgyglkttaviggaftv  
nm1hdqqaafaasdapl1tse  
1ntqsetvgnqnsttieaststadstsvtknsssvqtsnsdivsseksenvtsttntstsnqqek1tstsestssknttss  
sdtksvaststseqpints  
tnqstasntstqssttpssan1nktsttststapvklrtfsrlamstfasaattsavtantitvnkdn1kqymttsgnaty  
dqstgivt1tqdaysqkga  
it1gtridsnksfhfsgkvn1gnkyegnnggdgigfafspgvlgetg1ngaavgigg1snafgfk1dtyhntskpnsaa  
kanadpsnvagggafgafv  
ttdsygvattytsnstadnaak1nvqptntf1qdfdi1nyngdtkvmtvkyagqtwrnisdwiaksgttnfslsmtastg  
gatn1qqvqfgtfeytesa  
vtqvryvdvtgkdi1ppktysgnvdqvvtidnqqsaltakgynytsvdssyastyndtnktvkmtnagqsvtyyftdvk  
aptvtvgnqti1evgktnmp  
iv1tttdngtgv1ntvtgl1psgl1sydsatnsi1igtptnigqstvtvst1dqannksttftinvvdt1taptvt1pidqs  
sevyspispikiatqdnsg  
navtntvtgl1psgl1tfdstnt1sgtptnigtst1tivst1dasgnk1t1t1t1fkyevtrnsmsdsvstsgstqqsqsvstsk  
adsqaststsgsimtst  
vstskststslsdsvsasks1stsesnsvsststsl1vnsqsvsssmgsvskstslsdsisnssstekses1ststsd  
1rtstslsdsvsmtsgsl  
sksqslststsdas1qsvsdstsnstses1sesastsd1sisnsiansqsasasksd1sqstsis1stsdsksmst  
ses1sdststsgsvsgsl  
iatsqsvststsdsmstseivdsistsgsl1sadsksmsvsssmstsgstses1sdsqstsd1sdks1slstsqsgs  
tststst1savrt1sesqst  
sgsmstsgsdst1stsf1sdstsdksastasses1sqaststsgsmststslstnsertstsmstst1stsesd1t  
sdststsd1seaisgses  
ts1slsenstsd1sesksasaf1ses1sestsestses1sgstsdstslsdstsesg1ststsl1n1stsgsasiststsn  
estsmfkesvstslstst  
stslsdstslstslsdsagksnsl1savstsd1strkses1ststslsgstsesegst1sasesk1sdstsm1smsq  
stsgstststses1sdst  
ts1sl1samnqsgvdsn1sasqaststsi1stsesdsqst1sas1snqststsi1rmstias1esvsest1esg1stsestses  
dststslsdsqst1srtsa  
sgastststsd1srtsaststsmrtst1dsqsm1stststsvsdstslsdsvsdstsdstststsgmsas1slsd1t  
stst1sasevmsas1sdsg  
mesvnds1esvnsesdksmsgstsvsdsgslsvstslrk1sesvse1ss1sgsqmsdsvstsd1ss1svst1qrss  
esvse1sd1sk1stsgst  
ststsgslststslsg1sesvse1ss1sds1msd1ststsd1sn1sg1si1sg1st1stsd1sd1sk1l1ss1sq1sm1sg1se1t  
stsvsd1qs1sst1sn1q1fd  
ms1sase1sd1m1st1sd1ss1sg1sn1stst1stsd1sm1sg1svstststslsds1sg1si1svd1ss1stst1ses1sd1ma1q1st  
tsag1st1s1ss1ms1asa  
stst1sq1stsvst1stsd1sidst1si1sg1sq1save1stsd1st1sd1ses1stsg1sd1stst1sd1stsg1ststsvse1  
stsg1stsvsd1stsm1ses  
dstsvms1qd1kd1st1sid1sesv1stst1stsd1stst1ses1stsm1sg1sq1sid1stst1sm1sg1stst1ses1nm1h1pd1sm1  
mh1th1st1st1s1st1ses1iap  
ntnes1q1st1satsv1ssk1h1daepaq1seer1pdtg1ds1kqng1l1ggvmt1l1vg1gl1mkr1kkk1kyend1qdds1qa  
>tr|D9REJ9|D9REJ9\_STAAJ  
m1nyspkqgv1rshg1phdp1fks1stv1pr1pigwi1stvsk1dg1kdn1lapys1qyqnl1twdpp1vm1faan1qsv1lgdher1kdt1vknae  
etgwf1vwn1maty1dl1reavn  
l1sska1l1ppeed1efn1fagvt1kek1cieapgyrvkes1pv1h1feceyv1q1tiri1ptg1dpv1st1divi1grva1qvh1iddk1vil1dng1l  
d1ks1k1piar1lgyy1dy1tvv  
nei1fem1kapa1as1kee1lag1legrn1fdn1qs1dekr  
>tr|D9REK0|D9REK0\_STAAJ  
mrk1l1mqim1l1cas1i1l1sgcs1fm1hk1dqtk1dipktv1svk1dy1dgy1igehkkr1nev1l1kkh1k1dea1kky1kay1v1kdt1fyd1ck1in  
l1iday1tnk1sg1f1seks1tdg  
l1vi1gtv1ny1dip1qfr1l1f1ves1nng1ia1itt1ft1pgh1k1nets1aava1ammy1krye1heie1qar1l1kf1sev1q1kng1yy1am1nek1l1qv  
kqefngv1trqy1l1nfr1td1si  
dd1dk1fk1ke1fk1pvm1h1kg1dafn1q1l1qsl1inkyp1qi1qkn1mk1sefi1ay1d1ke1kn1ret1vk1nya  
>tr|D9REK1|D9REK1\_STAAJ  
mrtnny1td1daik1l1ssaw1nypk1lvtg1kna1l1sd1l1rdik1v1ssnak1gdadm1lete1rav1inams1qneg1ksvd1alkns  
tas1knn1tk1l1keq1ldktt



Tsompanidou\_et\_al\_Supplemental\_FASTA\_File

h  
>tr|D9REK2|D9REK2\_STAAJ  
milryatn1klakelyqaskpk1qedkgmie1fehtfglqkelvkvvgiaeattaalysasfinknisrlaslstigils  
vatykhfeagggkkgagha  
ldl1glat1s1ldtfscnk  
>tr|D9REK3|D9REK3\_STAAJ  
mytfdaqs1tarenklligsiiprpiavvt1nqdasvnaapfsffnivnnhppmiaiavqraggkrkdalniergd  
fvvhitdednvqdinetaa  
playgdse1srk1s1lasttiktpgikdakmrfeck1sqm11gdvldgadliigeivtyhiddsiyegdfkinphalq  
avsrlagndyaklggi1fti  
krpek  
>tr|D9REK4|D9REK4\_STAAJ  
mavvyvaggclwgvaeaffitmpg1lhteagrangrssk1dspydgyaecvklhfddrmltitdimnylfeiidpysvnqq  
gndigekeyrtg1yrcvddh  
liearqfierrkdrdq1avev1plsnyiksaeehqhlekypedmhmchiskd1lnkyk  
>tr|D9REK5|D9REK5\_STAAJ  
mv1rkvimqldq1ialenigfspeeaatpealk1rieiqetfivaekndevigyingpvikeryisddl1kfvptnns  
eggyisvlg1vvapnyqgq  
giagr1lnyfen1aknqhrhgv1t1cres1isfyekygyrnegvseschggikwynlvknikkddv  
>tr|D9REK7|D9REK7\_STAAJ  
mntnrrstss1ivheqpkspisekfrgirsnimfanpdsavqsivitseapgagkstiaanlavayaqagykt1ivdgm  
rkptqhy1fnlpnneg1ss  
11lnwstyqds1isteied1dv1tsgpipnpse1itsrafanlydt1lmnynfviidtpvntvtdaq1fskftgnvvy  
vvnennkdevkkgkeli  
eatgak1lgv1nrmpkdksasyayygtdes  
>tr|D9REK9|D9REK9\_STAAJ  
mkdk1idnait1fsekgydgt1lddiaksvnikkaslyyhfdskksiyeqsvkccfdy1nniimmunqksnysidalqf  
1fef1fdieery1rmyvq1  
sntpeefsgniyq1qd1nqs1skeiakfydeskikmskedfqn1111fleswylkasfsqkfgaveesksqfkdevys1  
1nif1kk  
>tr|D9REL1|D9REL1\_STAAJ  
mvkprgreypt1kss1nivretaliaiscvfwy1clv1lvyig1tifeihdesintirvalnienteildifetmgifai  
iifvfftisiliqkwqrgr  
es  
>tr|D9REL2|D9REL2\_STAAJ  
mkyrk1iilv1siliilpvst1dghhianaddppk1kykensala1nyhrvrkanflnnfiyffssskeiknysvsqs  
qfesqikw1kshdakfl1t  
kef1yykkkgkfpkrswinfdmdetiye1naysip1lkykipatgf1itghvgeenfh1dmiskkelkemyktglwefe  
ththd1hn1sknnksk1mk  
aseati1kd1nkseky1tknfkksqkt1aypygl1mddk1pvikkag1kygfs1leekavtpnsndyyiprilisddafeh  
1ikrwdgfhekd  
>tr|D9REL3|D9REL3\_STAAJ  
mkkir1lelylraicaii1ith1l1tqit1khenleggs1vlqfyirnivifgtpcfi1lsq11tt1nyqkvtyryl1tr  
vkiylipy1lmg1fysy  
s11tdssfnkqfienv1lgwygyfi1vvimqff1lsy1ifkinyn1fnsk1111sfilqqs1lyyftntafhd1v1hy  
yplsent1ifgwi1fyff1g  
aymgyner1v1nflery1vimivlavatyfvfialangdywnvtsfsys1tpynsimfiv1lgicthfktm1fntiqmis  
afsffiy1lhp1ilds1fa  
ytnifedntmi1flais1l1filg1cigvgm1lrefy1ifr1igkqpyk1ninay  
>tr|D9REL4|D9REL4\_STAAJ  
mksqnkys1rkfsvgass1iat1l1f1sggqaqaekqvmngnsqedtvt1aqs1gdqqr1gnanyqrengvdeqqhten1  
tkn1hndkt1iseknhrktd  
d1nkq1kdkkss1nnkniqrdttknnanpsdvng1leqaindgkqskvasqqqskeadnsqdsnann1psqsr1tke  
al1pnksnqtsqreivnkt  
eiekvppqnnqandki1tnynfnneqevkpkdekt1svsd1knnqkspveptkdndkng1n1l1kssavat1pnkg1tke  
1takakgdq1tnkvakqgy  
knqdp1v1vhgfn1gftdd1npsv1ahywggnkmn1rqd1eengykayeas1safgsnydravel1yyyikggrvdygaaha  
akygherygktyegi1ykdw  
kpgqkv1lvghsmggqti1r1lee1l1rngnree1eyqkkhggei1spl1fgnndnmissitt1gtphngthasdlagnealv  
rq1vfdigk1mfgnknsrvd  
fg1aqwg1kqkpnesy1dyvkrvkqsn1wkskdngfyd1tregatd1nrkts1n1pnivykytytgeathka1nsdrqkad1  
nmffpfvitgn1ligkatek  
ewrendg1vsvi1ssqhpfnqaytnatdk1iqk1giwqvtptkhdwdhvd1fvqgdssdtvrtreel1qdfwhh1add1vk1tekv  
tdtkqa  
>tr|D9REL5|D9REL5\_STAAJ  
mkk1fneyffttsqatali1ifs1pmt1d1ftkn1l1ym1l1fiii1gstffiere1skkys1qekakk1cl1s1l1piniivf  
iffi1fi1  
>tr|D9REL6|D9REL6\_STAAJ

Tsompanidou\_et\_al\_Supplemental\_FASTA\_File

mvassmvispvtvsentanaennkfdtnkdykinqnvaniynnleknsnelkiidknnlkselsnsgidvtvkdvk  
ymnrynevmkgknggekake  
nlvafnkevekkqknttsnrdaclvtvgfahtttatgamaalgvsqpigwvgtgmaalyaggsiacnm  
>tr|D9REL7|D9REL7\_STAAJ  
mtkykidfskglvpailqdnqtqvlmlgymnqeaafdktiedgvvcfysrskqrlwtkgetsghtqhvkdihvdcndti  
lidvipngptchtgsqscf  
ntevpfsvqtlagtvsqsaqsnneksytkylltegiekitkkygeeafevviaikgdkkafvsevadehyhlfvlmhal  
dvdfseieaelarrhkrn  
nfkgerqnieqw  
>tr|D9REL8|D9REL8\_STAAJ  
mikkriipcldvkdgrvkgiqfkgldrignpvdlamyneagadelvfldiskteeghslmlevieqtascflfipltvg  
ggjqsldditqllnhgdk  
vslnssalnkpqlikqasdkfgrqciciaidsyddperkthyccthgkmtnikvydvwqqveqlgagellvtsmghdg  
mkggfdiehlakikslvni  
piiasgggnaqhfvelfeqtdvsaglaasilhdrettvqsikavirqggitvr  
>tr|D9REL9|D9REL9\_STAAJ  
mielwpaiddlgstsvrltegydseekmsrsaeesiaysqfecvnrihivdligakaqharefdyikslrrlittkdie  
vggirtksqimdyfaagi  
nycivgtkqi qdt dwlkemahtfpgriylsvdaygedikvngweedtelnlfsfvkqlsdiplggiytdiakdgkmsgp  
nfeletgrlvktttipvias  
ggi rhqqdiqr laslnvhaai gkaahqasfweglk  
>tr|D9REM0|D9REM0\_STAAJ  
mivivdyglnisnvrakiehlgyevvsnnpkiidqaetiilpgvghfdamseikrlnldailakntdkkmigiclgm  
qlmyehsdegdasglgfi  
gnisriqtkypphlgwnnlvskhpmlnqdvfvhsyqapmsenviayaqygt dipaivqfnnyigiqfhpeksgtyglq  
ilrqai qggfvnd  
>tr|D9REM1|D9REM1\_STAAJ  
miyqqrntaetqlnisiddqspshintgvgflnhmltltftfhsglslnieaaggdidvddhhvtedigivigqlllemi  
kdkkhfvrygtmyipmdet  
larvvvdisgrpylsfnatlskekvgtfdtelveeffravvinarlthidliirggnthheieaifkafsralgialtat  
ddqrvpsskgvie  
>tr|D9REM2|D9REM2\_STAAJ  
miyidknespvtpldektmtsisisatpynlypdaayeqfkdayakfyglspeqi agngsdeliqlkmlimpegpaltln  
pdffmyqayaaqvnreiaf  
vdagsdl t f d l e t i l t k i d e v q p s f f i m s n p h n p s g k f d t a f l t a i a d k m k a l n g y f v i d e a y l d y g m v y d v e l a p h i l  
rmrtlskafgiaglr lgv  
istagtiqriqkiehpylnvftlniatyifr hreetsrfltmqrqlaeqlkqifdthvadkmsvfpsnanfvltkgsaa  
qllgqyvyeqgfkprfyde  
pvmkgyvrysiatasqlkleeivkewsakylskttkhs  
>tr|D9REM3|D9REM3\_STAAJ  
mlnaqqflnqfsl eapldeslypiirdicqevkvhgdkalkmynl t f d h t k t d h l e i s h e q i k a a f d t l d e k t k q a l q q s  
yerikaygesikqtnqgle  
ksvecyeyhplsvgiyppgkasypstvlmtatlaqvagveni vvvtpqpngvsqevlaacyitqvnqvfvvggaqs  
iaaltgytetipkvdkivg  
pgnqfvayakylfgqvgidqiaqpteialiiddtadldaivdvfaqaehdelartyvisedaqvlkdesriakvlpn  
vdrydivsksianghlyih  
asnfv eachvmtiapehasiqtvnpppyiekvkvgalfighyspevigdyvagpshvlpnrtarftnglsvndfltr  
ntvihlskdtfeqiadsaq  
hiahvealynhqgsilirqs  
>tr|D9REM4|D9REM4\_STAAJ  
mlriaiakgrlmdslinyldaiefttsetlnkrerqllsvdniecilvkgdsdvpivyveqgiadigivgsdilderhyn  
vnnlldmpfgachfavaak  
pettkyhkiatsyvhtaeyfksgidvelikngsvelacivdmvdgividvqtgttleanglvekqhisdinarlitn  
kaayfkksqlieqfirsle  
vsiana  
>tr|D9REM5|D9REM5\_STAAJ  
mnseqlialkesetaflkyfnkadye l v d f s v v e k l d w k q l n h e d l q q m g e r n f w q h e h q i a l r n d f t d q l l r y s m y  
ptaatkvytgliirnea  
avqvglenyapslanvqslklfiqfiqqqlrdnvhfvlghyqlldalldkslqtpdilsmieernlsglvtylstehp  
ivqil kentqqqlnvlehy  
ipndhpalve l niwqqw l h t q g y n d i h l d i t a q p p r s y y t g l f i q c h a e n e s r v l t g g y y k s i e g f g l g l t l  
>tr|D9REM6|D9REM6\_STAAJ  
mhkkylllfflllsvallyscskqnekaqnksvnpneyakhkskmdewetyhgqvyhlfyphl itdpkvaftgdthqak  
gnndwmitvsefkkslne  
yknyyivnphdvydlsshvkakkiklpgkklpiisiddmnyysymrhhyadr l v l d k n k h v v s e t t d s k g h a t y s d  
dndivpinl kvkehpdfs  
l n g e k g v v a l t g y e v l g y r t n e l t s k d y t k n k k a e e v v r a m k r d g w s f a s h y g h i n f e k t s l e g i k r d t k r w k d e v e  
pivgktdmfvfphgaqdrh

Tsompanidou\_et\_al\_Supplemental\_FASTA\_File

tqaynylvdeaefkfiagvgpnnftdi satnvyqdrva idglnl fefkyklkpfnpenvyskqdrqffkgnrdyee  
>tr|D9REM7|D9REM7\_STAAJ  
mipssshlielynicshpqnitytpkglnhskldtqrwiekwrnhwqqyqfyfvlvkkidysvigicgyeyrqlkqetv  
lnlfyklhpsfegqgyace  
aitaitnfvnyidqetvkvirtnkcnhrslnlaerlnfkrddtmdidiisqgddivfyk  
>tr|D9REM8|D9REM8\_STAAJ  
mnqyntigfhpqnsrihqlnatvkl1f1lvvsisamvtydtrylilisassillfkyahiewkqvrfvvkkfilfftilni  
iavyifdpeygvkiynqrt  
elingigrftltsqelfylfnlilkyistvplaliflfttnpshfaaslnqlgmnykisyavslalryipdiqetyfnis  
qaqgargydnskakkftsr  
vkgikrimlplifssieridistamelrqfgqykrtrwyvkkqlkddyvvlcltlllmlvvtlfflnnsryfnpw  
>tr|D9REM9|D9REM9\_STAAJ  
mtepiisfkdfsfqyhsqatptlqninvdiypgekvlvvgasgskstfancinglipfktrgnitgelyinnqdatvgc  
lhersnvgtvlqdtgqf  
igltaaedmafllennceqddmkknvsywaekvgmiehlnhrpqdlsqgqkqrvsllgqilhrtpilildepianlpa  
tghetmrllnniheektst  
mivvehrlleeslddtfdrvl1fkdgkiianttpsdllkssklkeagireplyctalkyaevdvesidnlanlrevcmseh  
vkfkvkkwidktssndnk  
yksep1le1nev cvqysdysnsvlnnvqlnvyrremlsivghngagkstlakaicgfliditgniqfcnkqfnqlsisers  
efvayvmqnpnhmiseskmi  
ydevalglrargmkesdikrvenvlki cglyafnrwpiaalsyqkkrvtiasvllnpeiildeptagqdfyhynei  
msflie1nrqgkttiimith  
dmhllseyssrtvvl1skgqvadtppvlv1ndkktceiaslrqtslfemaeyigisepqklvqlfinhdrkvrrq  
>tr|D9REN0|D9REN0\_STAAJ  
mkkqdisvktvvaigigaavfvlgrfvviptgfpntnietsyaflalisai fgp fag lmtglvghaikdfttygsawws  
wvicsgiigc1ygwiglkl  
n1ssgrfsrksmiyfnigqianicwaliaptldilinyepankvytqgvisavl niisvigiigtillkayassqikkg  
slrke  
>tr|D9REN2|D9REN2\_STAAJ  
mtnftfdgahsslefqikhlmvskvksfdqfdvavegdindfstlkatatiipssintkneardnhlksqgdfgtdfedf  
kitfvtksvseskvvgdl  
ikgitneetfdvefnqsknmpdgsqvtgiiivtginrenyginfnqal etggvmlgkdvkfeasae fsise  
>tr|D9REN3|D9REN3\_STAAJ  
msqqd1pt1fysgksnsavpiisese1qtitaepwleiskkg1ql eglnfdrqqqlf1ldvfegnikvnpetkeikqpf  
vshkanpaaikihkdgrlf  
vcylgdfkstggi faatengdniqdiiedlattyciddmvf dskggfyftdfrgystnplggvyyvapdfktvtpi qni  
svangialstdekvlwvte  
ttanrlhrialeddgvti qpfgatipyftghegpdsc cidrddnlyvamygqgrvlvfnkr gypigqilipgreghml  
rsthpqfipgtngliicsn  
diemgggsmlytvngfakghqs fqfq  
>tr|D9REN4|D9REN4\_STAAJ  
mnyqvllykyttiddpeqfaqdhlafckahh1kgri1vstegingt1sgtkeeteqymahmhaderfkdmvfkideaeg  
hafkkmhvrprkeivald1  
eedvdprh1ttgqylspvefrka1edddtviidarndyefd1ghfrgairpdi1trfrd1pdwikenkel fadkkvvt yctg  
gircekfsgwllkegfedv  
aq1hggiatygdpetkgqywdgkmyvddrisvdinqvektii gkdwfdgkpceryincanpecnkqilvseeneaky1  
gacsyecakhernryvqan  
nisdnewqhr1tnfdd1hqha  
>tr|D9REN5|D9REN5\_STAAJ  
mhi1vtgfapfdnqinpsweavtqleniigthtidklklptsfkkvdtiinkt lasnhydvvlaiqqaggrsaitperi  
ainiddaripnddfqpid  
qaihl1dgapayfsl1pvkamtqsiinqglp galnsagtyvcnh1lyh1gylqdkhyph1rfgfihvpyipeqigkpd  
psmtlenivtgltaaieai  
sddd1rialgte  
>tr|D9REN6|D9REN6\_STAAJ  
mtktvfdv1dmglgylvnyvdawkvekl1ddyhkpfsntihwqfghvltifesa1avagkenidlniyrplfnggsspd  
ewkdevpsigtileglqt1  
pervrkl1tedd1aie1kqpivgcnn1ee1lvlnaihip1hagkieemsr1lkn1k  
>tr|D9REN7|D9REN7\_STAAJ  
mentvkyrkfilpivvgll1waltpfkpdavdptawymfaifvatiacitqmpigavsiigftimvlvgivdmktava  
gfgnnsi1liamaffisrg  
fvktglgrrialhfvl1fgkkt1glaysivgvdl1lapatpsntaraggimfpiiks1sesfsgskpkdgsarkmgaf1vf  
tefqgnlitaamfltamag  
nplaqn1asstsnvhitwmwflaa1vpglvs1livvpfiikyiyptvketpnakswaenelatmgkia1aekfmigifv  
val1twivgsfihidat1t  
afia1al11stgvl1twqdi1netgawnt1vwfsv1v1madq1nkl1gfipw1sksiats1gg1swpiv1vil1ilfyfyshy  
1fasstahisamyaal1gv  
aiaagapplfsalmlgffgn1lastthyssgpapil1fssgyvtqkrwmtmnl1lgfvyfi1wigl1gslwmkvigif

Tsompanidou\_et\_al\_Supplemental\_FASTA\_File

>tr|D9REN8|D9REN8\_STAAJ  
mnte ykk g i f l a s a y i l w g i l p i y w q f v d e i g a f e i l a f r i i f s a i f m i f i l a v g q k r n a f q r d m n q l l g k p i q l l a i  
v v a g y v i t l n w g t f i w a v t  
n g h v l q t s l g y i n p l v s i l l a l i f l k e r f n k f e w l a i l f a f i g v l y m t l k i g e f p i v s i l a l s f g t y g l l k k v v h i d a  
i s s i t i e c i v t a p a g i y v  
i y l w q q h q m s f g f n m s s f w l l f s g a i t a v p l i l f s a g a k r i p l s l i g f i q y v g p t i m f v l g i f v f k e p f s i d q l i t f i f i  
w t g i v l y s l s q y i k l k k h p  
v a k t l s n d  
>tr|D9REN9|D9REN9\_STAAJ  
m n l p k i g k p a t r a l n a g g i h t l e t a s q h t k s f l s g l h g v g p k a i s i l e q a l s e h n l h f k q e s n h v l p f s l t g n v s c s h a p  
k c q q m i d f i v a t a t l d i e l  
l r s l v t p q f i w s v p g h f d i h g p q i l i q e l s e h q d h i e s i n i q s i i t h g h l g a l h g t q i l k n g t q i h f a d f f e f e k h k k d a  
k v s k v t s y i v i d  
>tr|D9REP0|D9REP0\_STAAJ  
m i k y h v m k e g y i l t v f k n e r l s w l p y i a i v i l l h v i g f s f l w i a g k d h i l f g m g i l a y t l g l r h a f d a d h i a a i d n t v r  
k l l q q r k d p s g v g f y f s i g  
h s s v v f l m a v f l g v s v k w a k d e l p h f q d i g g t i g t l v s g f f l v l i g v l n l i l i s l i n l f a k l r r e h i e e a e v d a l l e s r  
g f v s r f v g p y f k l i t r s w h  
v l p l g f l f g l g f d t a s e i a l l a l s s g a s q q a i s f i g i l s l p i l f a s g m s l l d t l d g v m k y a y n w a f f n p i r k i y n i t i  
t a i s v m a a l v i g m i e l l q i  
l a d k l d l h g a f w a f i s s i e f d y l g y i l v a l f l i t w l i s s l i w k f g r i e h k w s k  
>tr|D9REP1|D9REP1\_STAAJ  
m n i a k l e n y l q i d s s r y n r p s i e a l n y y a t r f m l t v p f e n i d v q n s k p i s i n i d a l f n k i v h d k r g g f c y e l n s f f k a y l  
f q k g f n p q l m s a t i h t p n g  
g r s l n g s h a s l v v p i n n v f y v t d v g f g d l p l h a m p i t s s d q t q p v t d i s g t f r a i f e n e m e l f y v q k f e n d s w n t k y e a  
e f k p k q i e d f n s n i e y n q t  
n p d s i f v k h l l i t m p q s f g r a t m s e n h l t l t r n g s s e k f d v t k d n y k h f s e k y f g l n v t i n r i e n n s k t  
>tr|D9REP2|D9REP2\_STAAJ  
m a k a n g g i k w s s l i m g v l l m l a v v i t f p i e n f y a i t w l i g l f v l i n g v i q i v y r r k a k a l v g g s q s w i v f m g v v d i l f  
g l l v i f n v g a s a f f i y m f  
a f w f i f s s i a g l f t f s g s g n l k l i s v i f n v l g i v f g v i l l f n p l m g i v f i s t m i a i a f v f i g v i y i v d a l a  
>tr|D9REP4|D9REP4\_STAAJ  
m t f n h i i f k n l r q n l k h y a m y l f s l f f s i v l y f s f t t l q f t k g v n n d d s m a i i k k g a l v g s i f l f i i v i f l m y a n h l f v  
k r r t r e f a l f q l i g l t r q n  
i l k m l a e q m i v f l i t g v v g l c g i a g a q l l s i v s k l m s l s i n l s i h f e p m a l v l t i l m l i i a y v l i l f q s s l f l k r r s  
i l s m m k d s i k t d v t t a k v t  
v k e i s g v l g i a m i a l g y y m a t e m f g t f k a l t m a m i s p f i i l f l t v a g a y l f f r s s v s l i f k t l k k s k n g r v s i t d v v f t  
s s i m y r m k k n a m s l t i i a i  
i s a v t v t v l c f a a l s k s n t d q t l t s m a p n e f n v v a s q d a q q f e s k l s q q h i t f t k n y e t i t v n n v k d q v i t l e n g s d g  
h t n s i l s a n n k v t g n n a i i  
t n t k s l p n v i n i h l n k d l v v k g t k n e t f r v t q e d k d k v y p l n l s f n s p v i e v s p e k y q q l k t q n n v h t f y g y d i k a t s q k  
e k a q a i a k q f g d k v i t y d e  
m k k e v d a t n g i l i f v t s f l g l a f l v a a g c i i y i k m d e t e d e l s n f r i l k r i g f t h t d m l k g l l l k i t f n f g l p l l i a i l  
h a v f a a i a f m k l m g n i s f m  
p v i i v i v y t l i y i v f a l i a f v h s n k l i k k t i  
>tr|D9REP5|D9REP5\_STAAJ  
m k f r e l v k q s y e d l k n l t v t w y n v i a l a m i v i v l s t v t t p i i g i p a g l l g g a y l k r r e e k g k  
>tr|D9REP7|D9REP7\_STAAJ  
m n l s k q i k k y r e r d g y s e y l a e k l y v s r q s i n w e n d k s l p d i h n l l m m c e l f n v t l d d l v k g t i p f v p d i k a q r s l n l  
w t y v m l i f m t l a a i l m g p l  
v v y w n w t w g i t v a i i m g i g f y a s m k i e d l k k v h k m d n y d r i v a f m n g k d p s e v q t t k a r n t m t n a l s i i s v v g t l s l i i f  
l s v y l a n k f l  
>tr|D9REP8|D9REP8\_STAAJ  
m k l t l m k f f v g g f a v l l s y i v s v t l p w k e f g g i f a t f p a v f l v s m f i t g m q y g d k v a v h v s r g a v f g m t g v l v c i l v t w m  
m l q m t h m w l l s i i v g f l s w  
f i s a v c i f e a v e f i a q k r l e k h s w k t g k s n s k  
>tr|D9REP9|D9REP9\_STAAJ  
m f s i g s a i l h f v i g g i a v a l a s i i a d n v g g k l g g i a t m p a v f l a a i a l a l d h r g t q l v e m s m l s t g a i v g i l s c i l t  
v f l t s l y i k h k g y r k g a i f  
t v v c w f v i s l a i f s i r h l  
>tr|D9REQ1|D9REQ1\_STAAJ  
m t v e w l a e q l k e h n i e l t e t q k q f q t y y r l l v e w n e k m n l t s i t d e h d v y l k h f y d s i a p s f y f d f n q p i s i c d v g a g a  
g f p s i p l k i m f p q l k v t i v  
d s l n k r i q f l n h l a s e l q l q d v s f i h d r a e t f g k g y r e s y d v v t a r a v a r l s v l s e l c l p l v k k g g q f v a l k s s k g e e  
l e e a k f a i s v l g g n v t e t h  
t f e l p e d a g e r q m f i d k k r q t p k y p r k p g t p n k t p l l e k  
>tr|D9REQ2|D9REQ2\_STAAJ  
m a q e y d v i v i g a g h a g v e a g l a s a r r g a k t l m l t i n l d n i a f m p c n p s v g g p a k g i v v r e i d a l g g q m a k t i d k t h i q m r

Tsompanidou\_et\_al\_Supplemental\_FASTA\_File

mIntgkgpavralraqadk  
vlyqqemkrviedeenlhimqgmvdeliiednevkgvrtnigteylskaviittgtflrgeiilgnmkysgpnhq|psi  
t|sdn|relgfdivrftktg  
tpprvnskti|dysktei|qpgddvgrafs|fettey|ldq|pcw|tytnaethk|viddn|l|hsamysgmikgtgpry|psie  
dkfvrfndkprhq|flepe  
grntnevyvqg|lsts|pehvq|qm|letipg|lekadmm|ragya|ieydaiv|ptq|lwpt|letkm|kn|lytagq|ingts|gyeea  
aggg|l|magina|agkv|lntg  
ekil|sr|sday|igv|lidd|vtk|gtne|pyr|l|tsraeyr|l|l|rh|dnad|l|rl|tdm|gye|l|gmise|eryar|fnekr|kqida|eikr  
l|sdir|ikpneht|qai|ieqh  
ggsr|l|kdgi|laid|l|rrp|emtydi|ilei|leehq|lnadveeqveiqtkyegy|inks|lqqvekvkrmeekkiped|dyski  
ds|latearek|l|sevk|plni  
aqasr|isgvn|padisi|l|liyl|eqgk|lqr|vsd  
>tr|D9REQ8|D9REQ8\_STAAJ  
mthn|ihd|nisqwmksneetpivmssr|l|arn|lenh|vhp|lmyatendgfrv|inevqda|l|pnfel|mr|ldqmd|qqsk|lkmva  
kh|lispel|ikqpaav|l|vn  
ddes|l|svmine|edh|iriqamgt|dt|l|qalynqassid|eldrs|ldisydeq|lgy|l|ttc|ptnigtg|mrasm|l|hlpg|l|sim  
krm|triaq|tinrf|gytirg  
iygegs|v|yghty|qvsnq|l|tlgk|selei|iet|tevv|nqi|heek|qir|qk|ld|tynq|letq|drvfrs|l|gilqncr|mitmea  
syr|l|sevkl|gid|l|nyielq  
n|fkfne|l|mvai|qspfl|l|deedd|ksvkekr|adil|rehik  
>tr|D9RER1|D9RER1\_STAAJ  
mni|vkl|mvii|y|liigsal|gii|ipei|and|l|glq|nssf|l|knhyvd|giigsifm|flifgv|firrv|t|naikg|lehfim|rsa  
vei|l|fatig|liig|l|l|svm  
vs|file|signsi|fnh|fipvi|it|l|cyfg|f|qfg|l|kkr|dem|l|mf|l|peniars|msqhtksat|pkii|dtsai|idgr|ilevirc  
gf|idgn|l|l|pqgvine|l|qi  
vadsn|svk|rek|gkrg|ldi|l|ne|lyd|l|dyptk|vihptksh|did|tm|l|l|klak|qyhasi|itt|dfn|l|kvch|vhgika|l|nvnd  
l|seai|kpn|vhqgd|l|h|l|l  
tkm|gkepg|qavgy|l|ddgtm|vvvdn|akn|l|igsh|vn|levvs|l|l|qtss|grivf|akkied|tvs|l  
>tr|D9RER3|D9RER3\_STAAJ  
mlkrm|rddi|kmvfeq|dpaar|st|levitty|agl|havwsh|liahk|lynqkkyvaaraisqisrfftgieihpgakigkr|lfi  
dhgmgv|vigetct|igdnvt  
iyqgv|t|l|ggtg|kergrh|pdigdnv|liaagakv|lgnikinsvnigansvvlqsvpsystvvgipghivkqdgvrvgk|tf  
dhr|hl|pdp|iyeqi|khlerq  
lektrngeiqddy|i  
>tr|D9RER4|D9RER4\_STAAJ  
mit|lynt|l|trq|kevfkpi|epgkvkmyvcgptvyny|ihignarpainydvrry|feyqgynevysnftdvddk|likrsqe  
l|nqsvpe|iaeky|iaafhd  
vga|l|nvrkatsn|prvmdh|ddi|i|qfikd|l|vdqgyayesggdvyfrtrk|fegyglshqsidd|l|kvgaridagehkedald  
ft|l|wkkakpgei|swdspfg  
egrpgw|hiecsvmafhe|l|gptidi|haggsd|l|qfphene|iaqseahn|hapfanywmhngfinidnekmsks|lgnfilvhd  
i|ikevdp|dv|l|rfm|isvhy  
rspinyn|lelvesarsg|lerirnsyqlieeraqiatnienq|qtyid|qida|l|nr|fetvm|nddfntanaitawyd|laklan  
ky|l|entt|stev|idkfkav  
yqifsdv|l|gvp|l|ksknade|l|l|dedveklieer|nearknkdfaradeir|dm|lksqni|iledtpqgvrfkrg  
>tr|D9RER5|D9RER5\_STAAJ  
mdnq|qdnhik|l|npl|t|laymgdavl|dqyvrt|yiv|l|k|kskpn|l|hqmskkyvsaksqaqt|leylmeqewftdeem|ilkr  
grnakshtkakntdvq|tyr  
kssaieav|igfly|lekreer|lev|l|nkiitivner  
>tr|D9RER6|D9RER6\_STAAJ  
medtvi|vgrhavreai|tghpinkil|iqegikkqqineilknakdqkiivq|tvpkskl|df|lanaphqgvaaliapyeyad  
fdqf|l|kqqkekeg|l|stvl  
ldg|ledphn|lgsilrtadatgvdgviipkrrsvt|l|tqtvakastgaiehpvirvtn|aktidd|l|kdn|gfwvagteanna  
tdyrnleadmsl|aivigse  
gggmsr|lvsdkcdfyikipmvghvns|lnasvaas|lmyevfrkrhdvgei  
>tr|D9RER7|D9RER7\_STAAJ  
mkeryli|idgynm|ggsq|l|saiakenleearmq|l|idai|anynavisdeii|cvfdaydqsgvereymyhgvtiftkeke  
tadsfieryvyelydkhtk  
hitv|vtsdm|seqhai|fgsgayrissremwr|l|keneidvsksl|ddisenkprtriplsseilae|fekir|rghhkk  
>tr|D9RER8|D9RER8\_STAAJ  
mkyd|l|ttqdsti|krnna|indkdfek|l|vmd|l|qpl|i|irrikt|fgfnhyd|ledlyqeilirmysvqtfd|fsgeqpftnyvqc  
l|itsvkydylrky|latnkr  
mdn|lineyrv|t|ypcaikrydvenny|l|n|l|aikelir|qfky|lsafekdvmyl|nceqykpreiaqlmhvkekviynaiqrck  
nkikryfkm|  
>tr|D9RES5|D9RES5\_STAAJ  
mshyydedpsvi|sneqri|qyqlkhhkid|l|itdngv|fskdkvdysdvl|vqtflkthppgskriadv|gcgygpig|lmiak  
vsphhsit|ml|dvnhr|alal  
veknk|l|ngidn|vkesda|l|savedks|fdfil|t|nppi|ragketv|hri|feqa|l|hr|l|dsngel|fvvi|qkqgmp|sakkrmn  
el|fgnvevvnkdkgyyilr

Tsompanidou\_et\_al\_Supplemental\_FASTA\_File

sika

```
>tr|D9RES9|D9RES9_STAAJ
mptinq|vrkprqskikkdspar|nkgfnskkkkftd|nspqkrvctrvtgtmpkknpsalrkyarvr|snnieinayi
pgighnlqehsvlvrggr
vkd|pgvryhivrgaldtsgvdgrrkgrslygtkpkpn
>tr|D9RET3|D9RET3_STAAJ
mldwfg|lannkenktiqlrrylhqype|sfeefqthdyivnqlsq|lscdietspighngikatfkg|lgtgptialradfda
lpveelndvpyksknpgcm
hacghdghtail|tvaeildehkh|legnvvlifqygeeimpggsqemidag|ledvdriygt|hlwsgyptgtihsraga
imaspdefsvtikgrgghg
akphetidpivimaefil|saqkiisrtidpvkqavl|sfgmiaqagtt|svipdqafckgtvrt|f|dsdiqnhvidkmdk|llq
glaiandinyd|l|nyikgy|
pvhnekayqvi|keatndihvrfnesd|lmmigedfshyl|kvrpgaff|l|tgcgneskgitaphhnpk|fdideks|kyavav
flkiieleqvfktn
>tr|D9RET4|D9RET4_STAAJ
mvqslhefleeniny|lkenglyneid|tiegangpeiking|ksyin|lssny|l|glatned|lksaakaaid|thgvagavrt
ingt|ld|l|hdeleqt|lakfk
gteaaiayqsgfncnmaai|savmnkndai|l|sdelnhasi|idgcr|l|skaki|rvnhsdmd|l|rakakeavesgqynk|vmyi
tdgvfsmgdgvak|l|peive
iaefgl|l|tyvddahgsgvmgkagatvkhfg|l|qdkidf|qigt|l|skaigvvggyvag|tkelidw|l|kaqsrp|l|fstslapg
dtkaitavkkl|l|maste|l|h
dklwdnaqyl|kng|l|sk|l|gydtgeset|pitpvi|igdekt|tqefsk|l|kdegvyvksiv|fptvprgt|grvrnmpt|aah|tkdm
l|deaiaayekvgkem|l|i
>tr|D9RET5|D9RET5_STAAJ
msqdvnel|skqtpdkaedna|ffpsys|l|sqtapkt|dfdgvehkgaykd|gkwkvl|miaaeryv|l|lengkm|fstgnhpv
em|l|p|l|hh|l|meagfdv|dva
t|l|sgypvkl|elwampteddavi|stynk|l|kek|l|kqpk|l|advikne|l|gpdsdy|l|svfi|pgg|haavvg|isesedv|qqt|l|dwa
l|dndrfiv|t|l|chgpaa|l|l|s
ag|l|nreks|p|legysvcv|f|pds|l|deganie|eigyl|pgr|l|kwl|vad|l|l|tkqg|l|kvvnddm|t|grt|l|kdrk|l|l|tgdspl|asne|l|g
k|l|avnem|l|naiqnk
>tr|D9RET6|D9RET6_STAAJ
msysigidygtasgrv|fl|intngqvvs|kfvkpythgvi|ese|l|ng|l|kiphtya|l|qnsndyleimeegisyivreskidpv
n|ivgig|idfts|sti|iftde
n|l|npvh|n|kqfknphayv|k|lwkhhgaykeak|lyqta|ien|nnkwl|ghygynvs|sewmipkimevmnr|apeimektayim
eagdw|v|nk|l|tnknvrs|nc
glgfkafweeetg|fhyd|l|fdki|dpk|l|skvi|qdkvsapvvn|igeavg|l|ddkmaq|k|l|g|sketmvspfi|idahas|l|lgigs
ekdkemtvm|mg|t|sch|l|m|l
nekqhvp|ggi|sgsvk|gai|ipe|l|fayeagqsavgd|l|feyvakqapksyv|deaanr|nmtv|fel|mekikhqmpges|gliald
whngnrsv|l|sdsn|l|tg|c|if
gl|t|l|qtkhedi|yray|leata|fgtkmimqyq|dwhmevekv|facgg|ipkknavm|mdiyanv|l|nkk|l|ivm|dseyapa|igaa|
l|gavsggahns|indav|dam
kepi|lye|in|petekv|qryet|l|fkayka|l|hdi|hykkanimk|diq|l|rveg
>tr|D9RET8|D9RET8_STAAJ
msqavkverret|l|kqk|pnts|q|l|gfgkyftdym|l|sydydadkgwhd|l|kivp|f|gpie|is|paaqgvhygqsv|feg|l|kaykrdg
evalfrpeen|fkr|l|nns|l|a
r|l|empqv|deae|l|leg|l|kq|l|vdierdwipe|gegq|s|lyir|p|fv|fatega|l|vggashqy|k|l|l|i|l|spsg|ayy|gget|l|kptkiy
vedeyvravrgg|v|gfakva
gnyaa|l|laqtnank|l|gydqvl|w|ldgveqky|e|evgsmn|iffvengkvit|peln|gsil|pgitrks|i|ielakn|lgyeveer
r|v|s|idel|fesydk|gel|tev
fgsgtaavis|pvg|t|l|ryedreiv|nnetgeit|qklydvytgi|qngt|ledkngwrvvv|pky
>tr|D9RET9|D9RET9_STAAJ
mewilfdkdgt|l|iefdr|swekigvrfvqs|l|let|fpvhnkeaa|l|rq|l|gvikesidpksvmgsgs|l|qqi|qafndvtgqdt|t
dwsks|tsqk|l|vderipe|in
wvegvkealid|l|kakgyq|l|givtsdtkk|gveq|flahtnats|l|fd|l|i|steadayekpnpkvl|spl|fekynvdpqkva|ivg
dtandmktas|an|l|gmaig
v|l|t|giat|keel|headi|l|lnsaadi|ieal|n
>tr|D9REU0|D9REU0_STAAJ
mnygipqna|i|ti|agtvgv|k|st|l|tqa|l|adk|l|nfkts|fenvehnpy|l|dkfysdferws|f|hl|qiy|flaer|fkeqkrmfey
gggfvqdrsi|yedvdi|fak
mheee|gtmsked|f|k|tysd|l|fnamv|mtpy|f|pkp|dmi|ylecny|devi|dri|iergre|meint|dpeywk|l|fkryddw|insfn
acpvvrin|iney|dihkdpd
s|l|n|p|mid|k|iar|i|k|tyr|qv|dtr
>tr|D9REU1|D9REU1_STAAJ
mnkpfiaie|g|p|igv|k|ss|lahk|l|sq|t|l|dfyeekei|itenp|f|l|sdfyedi|skws|f|qtemff|l|cnrykqf|qdv|t|q|l|nqgvvs
dyh|ih|knki|faknt|l|ssve
fqkfskiy|di|l|tedm|impnmi|if|dad|l|dv|l|ksriakrnrs|feh|q|iedey|l|l|k|k|dyrkyyes|l|qsn|g|snvvl|id|ttsi
df|l|kneqdyedi|l|hi|l|pm
igditne
```

Tsompanidou\_et\_al\_Supplemental\_FASTA\_File

```

>tr|D9REU3|D9REU3_STAAJ
mkliatdmdgtllnaaheisqpnidaikyaqeggitvviatgrafyaeapvadtdltpyiclngaevrdetfnvmst
shlkslvhkitnvlkdag
iyyqvvytsraiyledpqrldiyidiaeragqhanverirngiqrriidngtlkvvdnydaiedipgelimkilafdadle
kidkaskilaespnlavss
ssrgnieithsdaqgialetiaerlgiemkdvmaigdnIndvsmlakagypvamengadevkeiakfitdtnensvgvk
aimkllreqqd
>tr|D9REU4|D9REU4_STAAJ
mkgliiigsaqvnshntalatytltehfkthnieaiefdlaenlnqldfsqttpsvdeikqniknlkdkamaadflilgt
pnhygsysgilknaldhln
mdyfkmpvglignsggisvsseplshlrivrsllgiavptqiathdsdfaknedgsyyIndsefqlrarlfvdqivsfv
nnspehllk
>tr|D9REU5|D9REU5_STAAJ
mnnkkatnrkgmipnrlnkfsirkysvgtasilvgttlifglsgheakaaehtngelnqsknettvpentenktekvdss
qnnieqsttsnqpkvnes
dntsvketteepqntststqptkqndatankdnlaaqnistqandvsatpkktttikprtlnrmavntvaapqqgtvnndk
vhfkdiidiaidkghvnqtt
gktefwatssdvllkanytiddsvkegdtftfkygqyfrpgsvrlpsktqlynaqgniakgiydsetnsttytftny
vdqytnisgsieqvsfakr
enattdktaykmevtlgnsyskevivdygnkkaqplisstnyinedlsrnm tayvnpkntytkqtfvtnltgykfnp
naknfkiyevtdqngfvds
ftpdtskllkdvgtqfdviysndkntatvdmlkgqstsnkqyiqqvaypdnsstdngkidytldtdktkyswsnsysnvn
gstangdqkynlgdyvw
edtnkdqkdanekgikgyvivilkdsngkelrdtttdengkyqftglngtysvefstpagytpptanagtddavsdgll
tttgvikdadnmtldsgfy
ktpkyslgyvwydsnkdgkqdstekgikgvktlqnekgevigttetdengkyrfdnldsgkykvikfekpagltqtgtn
tteddkdadggevdtitd
hddftldngyeeetsdsdsdsdsdsdsdsdsdsdsdsdsdsdsdsdsdsdsdsdsdsdsdsdsdsdsdsdsdsdsdsds
dsdsdsdsdsdsdsdsdsdsdsdsdsdsdsdsdsdsdsdsdsdsdsdsdsdsdsdsdsdsdsdsdsdsdsdsdsdsds
sdsdsdsdsdsdsdsdsdsdsdsdsdsdsdsdsdsdsdsdsdsdsdsdsdsdsdsdsdsdsdsdsdsdsdsdsdsdsds
dsdsdsdsdsdsdsdsdsdsdsdsdsdsdsdsdsdsdsdsdsdsdsdsdsdsdsdsdsdsdsdsdsdsdsdsdsdsds
dsdsdsdsdsdsdsdsdsdsdsdsdsdsdpdsdsdsdsdsdsdsdsdsdsdsdsdsdsdsdsdsdsdsdsdsdsdsds
sdsdsdsdsdsdsdsdsdsdsdsdsdsdsdsdsdsdsdsdsdsdsdsdsdsdsdsdsdsdsdsdsdsdsdsdsdsdsds
sdsdsdsdsdsdsdsdsdsdsdsdsdsdsdsdsdsdsdsdsdsdsdsdsdsdsdsdsdsdsdsdsdsdsdsdsdsdsds
dakttesttlivksdaiksn
aetlvdnnsnnsennadiilpkstapkrlntrmriaavkpssteaknvnlditsnttltvvdadknnkivpaqdylak
sqitvddkvksgdyftiky
sdvtqvyglmpediknigdikdpnngetiatakhdantlitytftdyvdrfnsvqmginsiyimdadtivskndvefn
vtigndttkttaniqypdy
vsrdnnsigsaftetvshagnaedpgyqkvtvynpsekslnaklkveayhkdydpnvvgqinkdvtkikiyqapkyvl
nkgydvntqnlidvteqfk
dkitygandsvndvfgsinnsyvmvdtkfeyttseptlvqmatltsdgnrsvstgnalgftnnqsggagqevykiyny
vvedtnkngvqelgekvgv
nvtvtfdnntntkvgavtkedgsylipnlpngdyrvefslnpqgyevtpskqgnneeldsngvssvitvngkdnlsad
lgiypkynlgdyvwedt
kngiqdqgekrgsvtvtlkdendkvltkvttdadgkykftdlenгыkvefftpagytpstntggndtvsngl tttg
vikdadnmtldsgfyktpk
ynlgnyvwedtndkdgkqdstekrgsvtvtlknengevlqtktkdkgkyqftglengtykvefftpagytpqvsgnd
esvdsngtsttgiikdkdn
dtdsgfykpkynlgdyvwedtndkngiqdqgekrgsvtvtlkdendkvltkvttdadgkykftdlenгыkvefftpag
ypptvtvsngndtekdsngl
tttgvikdadnmtldsgfyktpkyslgyvwydsnkdgkqdstekgikdvttlqnekgevigttetdengkyrfdnlds
gkykvikfekpagltqtgtn
tteddkdadggevdtitdhddftldngyfeetsdsdsdsdsdsdsdsdsdsdsdsdsdsdsdsdsdsdsdsdsdsdsds
dsdsdsdsdsdsdsdsdsdsdsdsdsdsdsdsdsdsdsdsdsdsdsdsdsdsdsdsdsdsdsdsdsdsdsdsdsdsds
dsdsdsdsdsdsdsdsdsdsdsdsdsdsdsdsdsdsdsdsdsdsdsdsdsdsdsdsdsdsdsdsdsdsdsdsdsdsds
dsdsdsdsdsdsdsdsdsdsdsdsdsdsdagkhtpvkpsvtdhkhkakaalpetgsenngsnnatlfgglfaa lgsll
lfgrrkkqknk
>tr|D9REU7|D9REU7_STAAJ
minrdnkkaitkkgmipsnrlnkfsirkytvgtasilvgttlifglngqekaastaentstenakqddattsdnkevseten
nsttennstnpikketntd
    
```

Tsompanidou\_et\_al\_Supplemental\_FASTA\_File

sqpeakeesttsstqqqnnvtattetkpnienkvpstktatedtsvileekkapnntndvttkpstseiqtktpt  
tpqestniensqpqtpsk  
vndqvtatnnpkqtvnsvskedlknpeklkelvrseentdhstkpvataptsvapkrlnakmrfavaqpaavasnnvndl  
ikvktqtkvvgdkdnvaa  
ahdgkdi eydteftidnkvvkgtmtinydknvipsdltdkndpiditdpsgeviakgtfdkatkqitytftdyvdkyed  
ikarl tlysyidkqvvpne  
tslnltfatagketsqnvsvdyqdpmvhgdsniqsiftkldenktieqqiyvnpkkttatntkvdiaqsqvdgygnikl  
nggstiidqnteikvykvn  
pnqqlpqsnrlydfsqyedvtsqfdnkksfsnnvatldfgdinsayii kvvskytptsdgel diaagtsmrtdkygyyn  
yagysnfi vtsndsgggdg  
tvkpeeklyki gdyvvedvdkdgvqgtdskekpmavltl typdgttksvrt danghyefggldkgetytkfetpagy  
lptkvn gtt dgekdsngss  
vtvkingkddmsldtgfykepynlgdyvvedtnkdgiqdanepgikdvkvtlkdstgkvigttdasgkykftldng  
nytvefetpagytpvknt  
taedkdsngltttgvikdadnml dsgfyktpkyslgdyvwydsnkdgkqdp tek gikdvtvtl qnekgevigttkten  
gkyrfdnldsgkykvi fek  
pagl tqgtntteddkdadggevdtitdhddftidngyfeetsdsdsdsdsdsdsdsdsdsdsdsdsdsdsdsdsdsds  
sdsdsdsdsdsdsdsdsds  
sdsdsdsdsdsdsdsdsdsdsdsdsdsdsdsdsdsdsdsdsdsdsdsdsdsdsdsdsdsdsdsdsdsdsdsdsdsdsds  
khtpvkpm satkdhhnkakal petgsennsnnat l fgg l faa l g s l l l fgrkkqnk  
>tr|D9REU8|D9REU8\_STAAJ  
mnyilgtileskitgvekaqinrlklfkqhgi sskcvyvkwnpysytyakqhqiendlftmydyfqkainykktkqvni  
qwekscrytlkfvnsnd  
vriydeeqfimyahfldkqyhqlnyvnyfdhkrkvrkrel ydgrgflscsril gegqrivlenyytpngeivi qkyfddi  
kgkntl tkvil nedghqqf  
fdtedel vqyflhq lcknndqi il drphel gnviaglnqsipvivl hsthls gtdiks fyk tvfnl trykaivvst  
ekyqdisyyienkipvin  
ipvgyanlkyqfdinqdknhiisiarlv enkqikhqievikqlv tkhpniqlniyghnglseyrqlvedyhlsehvk  
fhgfkthineeiakaelml  
stskmegflajleslsvgtpvisydvdygpse liqdgfngylvppgdinqmvekvdel nntqklqqfsinsiesaaqf  
netnsvtkwqniln  
>tr|D9REU9|D9REU9\_STAAJ  
mnyfvgnslgvnlgtiekaiinrlnlfkemgrpaqcvflswrylyrnaqnyitssdyinmydffqeatylernepfawl  
sywtdechytikhvenshd  
fryidqerflmyahfqdpkyri ldyvnhfdsqrrkvrkrdfydvrgflscsrilvdkqqt lceffynpegntklekyfsyk  
dgkpevqkiivyankqyf  
fnnetelgaffikqlyqhd lffsdrnvytapi fnltpesipvvavlhsthiknidal dsspfnvykamfenlsryrai  
ivsteqqkidvskrinnei  
pvvni pvgysetidtpvqtl dqrsvklisvaryspekqlhqqi elikrlsvyvpkielhmygfgseskklneliqygle  
nhvylrgflsnldqeysda  
ylslitsnmegfslalleslahgvpvisydiygpnelitpdfngylitkndedal fhkvyvidhpevqqr lskgslak  
aqyskaslikqwdqfvr l  
i  
>tr|D9REV1|D9REV1\_STAAJ  
mtderrhvlvifphddetfssagtlasyvqrgvpvtyacltlgqmgrnlgnppfatreslpsirereleackvigitdl  
rkmglrdktvefepye hid  
gmiksliddtnpsliisfygyavhpheatadavirtvermpkeerprltlvafsn datealgepdinqnditdfkelki  
kafeahasqtgpfllkqlas  
peidgkqhsfl tvepywtyhfs  
>tr|D9REV2|D9REV2\_STAAJ  
mepikeqevlellasyehkpvy l hvetngayan hfdqrvfnagtlrniqitythaqlkggnkepyriglkl snggwvy  
vqglthyevehdefliag  
fnyegqlaaaleiseqpfnl  
>tr|D9REV3|D9REV3\_STAAJ  
mkvlnlgskeqasfyvace lykemafnqectlglatggtmdlyeqlvkl llnknqlnvdhvttfnldeyvgliashpqsy  
hyymddmlfkqypyfnrkn  
ihipngdaddmnaeasryndllgqqgqr diqilgigenghigfnepgtlfdsvthivdltkstikansryfeneddvpkq  
aismg lani fqakri illa  
fgekkraaityl nqeisvdpatl l hkhpnveiy l ddeacpknvaki hvdemd  
>tr|D9REV4|D9REV4\_STAAJ  
melqlaidllnkedaaelankvkdydviveigtpiiy neglpavkhmadnisnvkvladmkimdaadyevsqaikfgadv  
itilgvaedasikaieea  
hknnkqllvdmilavqdl ekrake ldemgadyiavhtgydlqaeqqspleslrvksviknskavaggikpdtiktivae  
npdlvivgggianadpve  
aakqcraaie gk  
>tr|D9REV5|D9REV5\_STAAJ  
matfsnyqilidel ttt lshveadefstfaskil haehi fvagkgrsgfvansfamrlnqlgkqahvvgesttpaiksnd



Tsompanidou\_et\_al\_Supplemental\_FASTA\_File

vfviisgsgstehlrllad  
kaksvgadivlittnkdsaignlagtnivlpagtkydehgsaqplgsifeqasqlfldsvvmglmtemnvseqtmqqnha  
nle  
>tr|D9REV6|D9REV6\_STAAJ  
mkfenyifdfdgtdltdtkkcevatsafkacgltepsaqnithymgipieesflkladrpldeaalaklidtfrhtyqs  
iekdyiyefagiteaitsl  
ynqgkklfvvsskksdvlernlsaiglnhliteavgsdqvsaykpnpegihtivqrynlnsqqtvyigdstfdvemaqha  
gvpasaavtwgahdarsllh  
snpdfiindpseintvl  
>tr|D9REV7|D9REV7\_STAAJ  
mdfnkeninmvdakkaktvvatgignamewfdgvyayttayiganffspvesadirqmltfaalafiaflrpiggvfvf  
giigdkygrkvvlstii  
mafstltigllpsydqiglwapi111larvlqgfstggeyagamtyvaesspdkrns1gsgleigt1sgyiaasimiav  
lffl1tdeqmasfgwripf  
llglflglfglylrrkleespvfendvatqperdninflqiirfyykdivcfvavvffnvtnymvtaylptyleqvikl  
datttsv1itcvmaimipl  
almfkgldkigekkvfligtgg1t1fsiafml1hsqsfvviviigifilgff1styeatmpgslptmfyshiryrtlsv  
tfnisvsi fggttlvatw  
lvtktgdplapayltaivsigflvitflhlstags1kgsypnvdneqdrayyaehpkealwwvkerkd  
>tr|D9REV8|D9REV8\_STAAJ  
mnvileqlkthtqnkpnidialhiddeitysqlnaritsaves1qkyslnpvvainmkspvqsiicylalhr1hkvpmmm  
egkwqstihrq1iekgyik  
dviedtglmqsidsmpfidstqlqhypnllhigftsgttglpkayrdedswlasfevnm1mlknenaiapgp1sys1  
tlyallfalssgrtffigqt  
tfhpekllnqcrkissykvamflvptmiks1llvynnehti qsfssgd1hssifkkiknqandinlieffgtsetsfi  
synlnqqapvesvgv1fnp  
velktnhdhngigticiksnmmfsgyvseqcinndewfvtnngyvkeqylyl1tgrqhdml1iggqniypahverh1tq  
sssideaaiigipnkrfgq  
igvllysgdvt1thknvkqflkkkvkryeipskihhvekmyytasgkiarekmysylrge1  
>tr|D9REV9|D9REV9\_STAAJ  
mnqavivaakrtafgkyggtlkhlepeqllkplfqhfkekyepviskidddv1gnvvngngniarkalleaglkdsipgv  
tidrccgs1esvqyacrm  
iqagagkvyiagvestsrapwkikrphsvyetalpefyerassapemsdpsmiqgaenvakmydisrelqdefayrshq  
ltaenvkngnisqeilpit  
vkgeifntdes1kshipkdnfgrfkpvikggtvtaanscmkndgavllimekdmayelgfehgl1fkdgvtvgvdsnfp  
gigppvaisnllkrnq1ti  
eni evieineafsaqvaccqa1n1sntq1niwggalasghpygasgaqlvtr1fymfdkeimiasmgigg1gnaalft  
rf  
>tr|D9REW0|D9REW0\_STAAJ  
mqhys1dsngr1nvsfskdsvaayyqcfnpqyrkevpp1mcas1wskfd1fkkyansel1l1tksainqtqkievdtiyvg  
h1ediecrqirnitrytma  
l1l1tkndqhv1tvtqtfikamk  
>tr|D9REW1|D9REW1\_STAAJ  
mkfneiwinelyalvnddnpihnei vpgqlvsqmm1mams1eanqcqinyvkipilineniefieehqemiainddgeik  
ikis1stknry  
>tr|D9REW4|D9REW4\_STAAJ  
mewsqifhd1ttkhdfkamhdf1ekeystai vpdreniyqafd1tpfenikvvilgqdpvhgpnqahglafsvqpnakf  
pps1rnmykeladdigcivr  
qph1qdwaregv11ntv1tvrqgeanshrdigwetftdeii kavskyehvvfilwgkpaqqkiklidtskhciiksv  
hsp1sayrgffgskpysk  
antylesvgksp1nwcese  
>tr|D9REW5|D9REW5\_STAAJ  
mynretliarieqelvqaeqahdhdfekhmyaihiltslyastsktphigeqqmnhrianhnqmpqsqitqpthqvtaa  
eieamggkvnthshhhnk  
sysqpsnqqrlatdddigngesifdf  
>tr|D9REW7|D9REW7\_STAAJ  
mekknkqidrgdlkqn1sekvwaiaygscigwgafilpgdwiksgpiaasigivigallmiliavsygalverfpvsg  
gafafs1sfgrvsvffss  
wfl1tfgyv1cvalnatafs1lvkfl1pdv1nngklytiagwdvyitei1iatv111vfm1vtirgasvsgslqyyfcvam  
vivv11mffgsffgnnfa1  
en1qp1aepskgw1svivsvapwayvgfdn1pqttaeefnfapnktfklivys1laas1tyvvmilytgw1stshqs1  
ngqlw1tgavtqtafyig  
lgv1aia1mmg1ftg1ngflmsssr11fsmgrsgimptmfsklshkyktpyvaiiflvsvs1iapw1grtal1twivdmss  
tgvs1ayf1tclsaak1fs  
ynkqsntyapvyktfaiigsfvsfifla111vpgspaal1apsyiallgwliig1liffviryk1knmdndelsr1ilnr  
senevddmieepekektk  
>tr|D9REW9|D9REW9\_STAAJ  
mdinseeqkevlikdvmlaarv1lesgaegtrvedtmtriakklgyesesnsfvtnvtviqft1hsesfpri1fritsrdt

Tsompanidou\_et\_al\_Supplemental\_FASTA\_File

nlikisqankisrqitne  
islaeaktqlekvyvakrdsslpfgkfaaamiamsflylqggrlidvltailagslgylvteildrklhaqfipefigsl  
vigiavightliptgdla  
tiiiavmpivpgvliitnaiqdlfgghmlmfttkslealvtafgigagvgsvlilv  
>tr|D9REX0|D9REX0\_STAAJ  
msqaaetldgwyslhlfyavdwaslrivpkderdalvtefqsflentatvrssksqdaaiynitgqkadlllwlfrpemk  
slnhienefnklriadfli  
ptysyvsvielsnylagksdedpyenphikarlypelphsdyicfypmnkrnetywymltmeerqklmydhgmigrky  
agkikqfitgsvgfddfew  
gvtlfsddvlqfkkivyemrfdettarygefsgffvghintnefdqffais  
>tr|D9REX1|D9REX1\_STAAJ  
madllnvldkklsgknvkiivpegedervltaatqlqatdyvtpivlgdetkvqslaqlnlndisnielinpatsekae  
lvqsfverrkateeqaq  
elnnvnyfgtmlytgkagdlvsgaahstgdtvrpalqiiktkpgvsrtsgiffmikgdeqhi fgdcainpeldsqgla  
eavesaksaalsfgmdpkv  
amlsfstkgsaksddvtkvqevklaqqkaeeekleaiidgefqfdaaivpgvaekkapgaklqgdanvfvfplsleagni  
gykiaqrlggydavgpvlq  
glnspvndlsrgcsiedvynlsiitaaqalq  
>tr|D9REX3|D9REX3\_STAAJ  
mtrkgygestgkiiilgehavtfgapaiavpfnagkikvliealesgnysiksdydgmlydapdhkslvnrfvelnn  
iteplavtiqtnlppsrql  
gssaavavafvrasdyflgksltkeeliekanwaeqiahgkpsgidtqtivsgkpvwfqqghaetlktlslngymvvidt  
gvkgstrqavedvhkiced  
pqymshvkhiqklvlrasdvi ehhnfealadi fnechadlkal tvshdkieqlmkigkengaiagkltgagrsgsmllla  
kdlptaknivkavekagaa  
htwienlgg  
>tr|D9REX4|D9REX4\_STAAJ  
miksgkarahtniaalikywgkkdealiipmnsisvtlekfytetkvtfndqltqdqfmlngekvsgkelekiskymdiv  
rnragedwyaiesdnfvp  
taaglassasayaa laaacnqaldlqlsddksrlarigsgsasrsiyggfaewekgysdetsyavplesdhfedelami  
fvvinqshkkvpsrygmsl  
trntsrfyqywlhdhidedlaeakaaqidkdfkrngevieenglrmhatnlgstppftylvqesydvma lvhecreagypc  
yftmdagpnvki lvekknk  
qqiidklltqfdnnqiidsdiatgieie  
>tr|D9REX7|D9REX7\_STAAJ  
mktydliivigfgkagktlakaastgqhavieqsskmyggctcinigcipsktlvhdglegktfeasynrknadvnalnn  
knyhlladdsnidvldfka  
kfsntevnlldqhgdiasditaphiintgatsvipnikgl dqakhvfdstgllnisyqpkhlvivgggyialefasmf  
anlgskvtvl ergesfmp  
edqdvvahajtdlenkgialhtnvetelssdnyhttvhtnvgnfadavllaigrkpntdalenldielgdrgeikvn  
aqlqtsvphiyaagdvgg  
lqftyjlsddyriikstlygnqsrtdnrgsvpytvfidpplsrgltskeaaaqhydytehqllvsaiprhkinndsrg  
lfkvvinnenmiltatly  
gkqseeliniiklaidqniptyvlrdniythptmaesfndlnf  
>tr|D9REX8|D9REX8\_STAAJ  
mnlfniavhvafltkhhsekfnsslaelctlnpvqlrrvtqvlvldlkmidtirgkdggylandqsadvs latlykhf  
vlekehtrlftgdegshc  
qiarniattmshyqqdeqniinfykektikdviediqkedlcheni  
>tr|D9REX9|D9REX9\_STAAJ  
msidmyldrnrnqassvgnlsqtmnsnydalekai tqfinddal kgkaytsakqffstvliplstsmktlsdltkqacd  
fvsrytsevdslkesel  
eedirs lsqitryenlnnkhasdnqqaissnqqiiqtlgqqkheleeklrklrefnqkspeifkeveefqkivqqg  
ltqaqnfwnfstnqfnips  
gkel dwakashekylkvamgkiehkaeketlnkadfavikayakehpeddipksimkyindnkdsikrdiglditstlle  
qgginaskfgvfintaggy  
kgpagnsfvevkrtsgnvfiengskfakggkylgkgvagvgfgygmyddlanddktfgealshngmtlaagiggtavg  
aiaafvlsnpvgwtvlag  
lavsglafaadwayqtnklglkdktdwvghkidesmeaveksadsrvntvgeatkniqkqfnsmkwaw  
>tr|D9REY0|D9REY0\_STAAJ  
mlceskqi yknpkyrviryndeyfmidlvstwityflpminwfvpkkyakisekefeslniikpvknni fwpvagssvlf  
giilrkygnffnvqfekkl  
aitvffimligmliyfylnkkklki fntnvvnknrivliptfkqgclivfayiflgsasiftltilttesqniifi  
twvii tmfffflvnmasign  
ekvhvimknn  
>tr|D9REY1|D9REY1\_STAAJ  
mymkvygyktngkevetllcesrv idkngkyriikyndeylmidlvstwtlflpminwlipkkyvkiskefddlnivk  
ptknrafwpaaggsvlfgv  
tfrkytqflnilleknmviviccaiflgvlilflflnrklrleiynnssskgkiilfplslnkfcftifyyflfgglsima

Tsompanidou\_et\_al\_Supplemental\_FASTA\_File

lsmlltlnpqniigfigwl  
vmtagffllnmssiidkkiyvlskntvek  
>tr|D9REY2|D9REY2\_STAAJ  
myylkltrwkndglagftagsvssilvywtqrnelgikgkndwighkldagidaveksaektvdgvenvmvklqkvfli  
i  
>tr|D9REY3|D9REY3\_STAAJ  
mlceviaiyknpyriikyndeylmvniinnwlvlfipllnwltpkryikisqeeleslntfkipaknafwpaigssvlf  
svtfrkymplfnvrlekti  
viaiffvflgillffylnlrrrlalsvftmneksqkmillpnlkhfffiifaylyfggfsfftlyalitidvqniifi  
cwgavtmffffinivpigi  
kkahvillkks  
>tr|D9REY4|D9REY4\_STAAJ  
mitvlfggsrpngntaqtkfalqleyqwidvtqhfkpirdvrrhttetitsyddylpildkilasdtiifaspvywy  
sisaplkafiehwsetlqd  
krypnfkaqmaekdfrevilvggdcpkikakpaitqmksldflgatlngyigtakpgdimkdnyalaratewnsilq  
>tr|D9REY5|D9REY5\_STAAJ  
mfkvrqatekdvvqirdvatkawfntylniyaattvnhlleasnehhlkkrllqeqflvveegndivgfanfiygeely  
lsahyvkpesqhtgygta  
lneglsrfedkfevylevdnkneeavayykeggftilrsyqpemysekldlalmykaf  
>tr|D9REY7|D9REY7\_STAAJ  
msekkgnfnfiikndpldghkgtngislsldniapvfdivankeafidiggmharakvekgvkwitdkaavegdeakeyw  
lcwvterneqgpyyaglt  
acyllvnkairrgyksmphevnmmdksmkhhiidqigdenkailkdfllmhdegmwhssdalhqafn  
>tr|D9REZ0|D9REZ0\_STAAJ  
mniidqvkqtlveeiaasinagladeipdikevpkdtkngdyatniamvltkiakrnpreiaqaivdnldtekhvkq  
idiagpgfinfyldnqylt  
aiipeaiekgdqfyvneskgqnvllveysanptgdhigharnaavgdalaniltaagynvtreyyindagnqitnar  
sietrffeaigdnssymp  
dgyngkdiieigkdlakhepeikdyseearlkefrklgveyemaklkndlaefnthfdnwfssetslyekgeilevlakmk  
elgytyeadgatwlrttdf  
kddkdrvlikndgtytyflpdiahyfdkvkrngndilidlgadhgyinrlkasletfgvdsnrleiqimqmvrlemngk  
evkmskrtgnaitlreimd  
evgvydaaryfltmrspdshfdfdmelakeqsqdnpyyaqyaharicsilkakeqgievtaandfttitnekaieillk  
vadfeptiesaaehrsahr  
itnyiqlaahfhkfyneakvltddiektkahvamiavritlknalamvgvsapesm  
>tr|D9REZ1|D9REZ1\_STAAJ  
mlgtdeleykllyrhmgpqnwppadndiemmlgailvqntwrnaeiaInqikehthfnphilelpietlqslirpsgyf  
ksksltikslltwltrydf  
nyqeineryksklrneillskigigsetadvllvyifgriefipdsyarkiydklgyentksydqfkkvvtlpshtnqda  
nefhalldvfgkhyfrdkd  
iknydflepyfkk  
>tr|D9REZ2|D9REZ2\_STAAJ  
mksliafili fmlvls gcmkndkqgsddngsskspyhrivslmpsn teilyelglgkyivgvstvddypkdvkngkk  
qfdalnlnkeellkakpd  
ilahesqkatankvlsslkqgikvvyvkdvsidetyntfkqigklthhekqaeqlveetkdnidkvidsipahhkksk  
vfievsskpeihtagkhtf  
fndmlekleaqnvsdingwnpvtkesiikknpdilisteaktrsdymdiikkrggfnkinavkntrievngdevsrpg  
prideglkelrdaiyrk  
>tr|D9REZ5|D9REZ5\_STAAJ  
mdlfrkdgtshystlgegypivlihtvldnysvfnklaaelaksfvvlidlrhgygskprhieikdfsddiveillk  
ylyieevafvchemggiig  
adisvrypftsslmvlnptsiegepeerlfrkyahiiirndpekqdkflnrkyyrprkmnrlkhvvdneistkee  
iqavkevfknadisqtyrn  
vvvptkiiagefgerttrleakevadliqnadfevyqessafpveeqerfvedtasfinkhhdekhv  
>tr|D9REZ6|D9REZ6\_STAAJ  
mkklltasiiaacsvvmgvgiantsaeaasgnsidtvkqlikgdqslenvkigesikdvltkyknpmysynedgtehyef  
htkkgmllvttgdgkknngk  
vthismmyndangptyqavknyvgkavthteyskvagnfyiekgkttqyfasapkdchniklyridlek  
>tr|D9REZ7|D9REZ7\_STAAJ  
mrindkllenedyfnhkglsphliddikekvitdiknsekdkdyieykrkspaqiilmiqrnlfalqmpviffiin  
filsylydkqyvqfqa  
gmslfyc lvi fpm ti vvy lrsqkny lrsnkiemimgtiaaisllliilqafnitwgvipitnfgfqffffigilvia  
gifykrlefsgigllfcqk  
tvdamihnpqsaqifsl iwi llvvlviyftirlssrtr l  
>tr|D9REZ8|D9REZ8\_STAAJ  
mnkvtinpqiqlytiegkdpdii lhgldgnlagfedlqhqlassykvlytdlrhggkssksesydlndhvedlkilme  
klniheahilghdlggvva  
klftdkyayrvkslttiaskkddlihsftqlli qyqddiagfnkseyillfsklfrnqektmkwyqkqriysikseds

Tsompanidou\_et\_al\_Supplemental\_FASTA\_File

avairslilhkdepmylkk  
rtcvptllingehdpdikdnhfk Leahflnvtkki fehsghaphieepeaflsylnflksvs  
>tr|D9RF00|D9RF00\_STAAJ  
mlipiqtsvnsrslslytkspfytsfifsvgticlivlnifinpdvflhffsnqtfnytwfvvgllgvgyltgnllllp  
klgatltviatvaggiimg  
viidtfglfgatihdfnlkaigvllliigivimnqfnknllltdqyllfwlllfgifgffppiqtinsalashths  
pafaslvstfigsitllil  
taifnrslklktshlkfgklkpiyftggilgmavtaniilmphmgaalttligmfqilmgilidhfglfgspkiamts  
rktigllciltgiiillrlf  
>tr|D9RF03|D9RF03\_STAAJ  
mnkveaikfnddivkmyealnikserdyllffklaihsglkvsellltitvsqvrliectlsemckahfhslikirlpet  
lshellqyiedrslsnev  
lfqslrtnqvlrsrqayriihqasieagienvglttlrktfayhayqkgpipviqkylghqsaietlnfiglenecehs  
iyislg  
>tr|D9RF04|D9RF04\_STAAJ  
mslvyliaailvimamillmskrralakyagyaliapvissiyfliqipsvaklqylstsipwiktldinldlrldgls  
lmfslisligiavffyat  
qylssrkdnlprfyfyllfmfsmigivlsdntilmyvfweltsvssflisyywnngdsqfgaiqsfmtvfgglallv  
gfimlyimtgtnnitdilig  
qadhikhgllfmpmifmfllgafktsaqfpfhiwlpramaaptpvsaylshatmvkagiflllqftpllglsnmyiyivt  
fvglitmlfgsitalkqwd  
lkgilaystisqgmimamvigggfsqhqqdvlapiytfvlfgalflhlmhaifkcalfmvgvildheagsrdirilsg  
mrqlfpkmlvmtiaalsm  
agvpflngflskemfldaltqtgqlsqfslismiaivfvgviasvftftyalymvkevfwtkydskiftkknihewpfls  
lpslilmvlpviffvpni  
fgkgiivpalravsaghhqidqlaphvsqwhgfnipllltiillgsvlaikvdwkkvftgkirqisvsksyemvyrhf  
ekfatkrfkrvmqdrlnqy  
iimtligimiiigygyirtglpkvhqhlhvsefgpleilaivtvtigislifirqltmvilngvigfvvtlffiamkap  
dlatqlvvetitllifiv  
sfsrlnvprsnankkreikisvsllmalivvslifitqqtgdllssidsfylkadkltggnivnailgdfraldtlfe  
glvliitglgiytllyqd  
rrgqdere  
>tr|D9RF07|D9RF07\_STAAJ  
mlsnllilpmlpflcalilvflknndriskyllygtmtittiislmllyvrrhrpitldfggwsapfgiqflgdslls  
imvttasfvitlimaygfg  
rgehkanryhlpsfiflsvgvigsfltsdvfnlyvmfeimllasfvlitlgqsveqlraaiyvvlniigswflllgig  
lyktvgtlnfshiamrln  
dmgdnrtvmtisliflvafsakaa vlfmwlpkayavln telaa lfaalmtkvgayalirfftllfdqhndlihp llatm  
aatmvigaigviaykdik  
kiaayqviiisigfiilglgtntfagingaifylvndivvktllffiiigslyvitgyrqqynglakkeplfgvafimi  
faiggvppfsgfpgkvlif  
qgalqngnyigla lmiitsliamyslfri lfy myfgdkdgeevnfkkiplyrkrilsilvvvvviaigiaapvvlntvtsda  
telntsdqlyqklnphlk  
ged  
>tr|D9RF10|D9RF10\_STAAJ  
meitkeifsliaavmlllgsfialisaigivkfqdvflrshaatksstlsvlltligvliyfvntgffsvrlllslvfi  
nltspvgmhlvaraayrng  
aymyrknddthasillssneqnsiealqlrakkreehrkkwyqnd  
>tr|D9RF14|D9RF14\_STAAJ  
ml etkdl nlf lgnkhvlnkisl sipvrgei igimgp ngagksslksligefnatgkll ynkp iqqlqhityipqkah  
idldfpisveqvilsgcyk  
eigwfrppnksardklkqllsdleleslrhrqiselsggqlqrvalvaralmsesevyfldepfvgidfsseklimtkien  
lkqggqliliihhdlskak  
qyfdriillnqt lryfgdseeamsvtrlnetfmsstdcdspsqrsnitc  
>tr|D9RF16|D9RF16\_STAAJ  
mnylnsnffnttiqlniyiivivaacyiaihqyrhkpvlnyldvilnyipvlthefghvlnfklaggrakdlvivtnprer  
qqtllqqgfaitqsrhlagg  
wlttiggyfmpmlliglasshyqipsffiftyllifiyfliltsrkgs pivvitlisimlyfilkdeniveiqllvtm  
syqyilgvllgevlqsswt  
iakltfqrpspqwdgsalshvpi fiystiwiifnlyavnillkythlin  
>tr|D9RF17|D9RF17\_STAAJ  
mtveersntakvdilgvdfndntmlqmveniktffanqstnllfivtanpeivnyatthqaylelinqasyivadgtgvv  
kashrlkqplahripgie  
mdec lki ahvnhkqvlllgatnevveaaqyglqarypnisfahhhgyidledetvkvriel fkpdyifvngmfpkqewi  
mthenqfkstvmmgvggs  
evfagakkrapyifrklniewyralidwkrigr lksipi fmyki akarkikkar  
>tr|D9RF19|D9RF19\_STAAJ  
msaigtvfkehvknfyliqr laqfqvki inhsnylgvawelinpvmqimvywmvfglgirsnapihgvpfywllvgism

Tsompanidou\_et\_al\_Supplemental\_FASTA\_File

wffinqgilegtkai tqkf  
nqvskmnfp lsi iptyivtsr fyghlg llllvi iacmftgi ypsihii qlliyvpfcffltasvtlltstlgvlvrdtqm  
lmqailr ilfyfspiwl p  
knhgisglihemmkynpvyfiaesyraail yhewyfmvhwklmlynfgivai ffaigaylhmkyrdqfadfl  
>tr|D9RF20|D9RF20\_STAAJ  
mitpquidkphivfmmfpedikpiika lnssyqktvlttpkqapylse lsdvdvdiemtrtlvkqikal kstqmiii  
dnyyllggynktsnqhiv  
qtwhasgal knfgltdhqvdvsdkamvqqyrkvyqatdfylvgceqmsqcfkqslgateeqmlyfglprinkyttadtrat  
vkaelkdkygitnklalyv  
ptyredkadnraidkayfetc lpgytlinkl hpsiehsdiddvssidstlmlmsdiiisdysl pieaslldiptifyv  
ydeetydkvrglnqfykai  
pdsykyteedlimti qekehllsp lfkdwkyntdkslhq lteyidkmvtk  
>tr|D9RF21|D9RF21\_STAAJ  
mr lti iiptcneatirql isieskehyril cidggstdqt ipmierl qrelkhisliqlq nasiatcinkglmdikmt  
nphdsdafmvinptsivlp  
gkl drltaafknndnidm vigraynyhgewklksadefikdnrivtiteqpdlltmmsfdgklfsakfaelqcdetlan  
tynhai lvkamqkatdihl  
vsqmi vgdndidthat snnedfnryiteimki rqrvmemlllpeqrllysdmvdri lfnns lkyymnehpavthttiqlv  
kdyimcmqhsdyvsqnmfd  
iintvefigenwdreiyelwrqtliqvginrptykrfliqlkgrkfahrtksmlkr  
>tr|D9RF22|D9RF22\_STAAJ  
mkrvitygytdllhyghie llrraremgdy livalstdefnqikhkksydyeqrkmmlesiryvdlvipekgwgqkedd  
vkkfdvdvfmghdwegef  
df lkd kceviylkrtegi sttkikqelygdak  
>tr|D9RF23|D9RF23\_STAAJ  
mkn l i s i i i l c l t l s i m t p y a q a n s d v t p v q a a n q y g y a g l s a a y e p t s a v n v s q t g q l l y q y n i d t k w n p a s m t k l m  
tmyl tleavnkgqlslddt  
vtmt nkeyimstlpe lsn tklypgqvwtiadllqitvsnsnaaalilakkvskntsd fvd lmnkakaigmknthfvnp  
tgaensrlrtfaptkykdq  
ertvttardyai ldlhviketpkil dftkqlaptthavtytfnfsl egakmslpgtdglktgssdtanyhntittkr gk  
frinqvimgagdyknlgge  
kqrnmngnal mersfdqkyvki lskgeqringkkyiendlydvlpsdfskkdyklvvedgkvhadyprefinkdygpp  
tvevhqpiiqkantvaksm  
wae hplftiiggac l v a g l a l i v h m i n r l f r k r k  
>tr|D9RF27|D9RF27\_STAAJ  
mnr l h g q q v k i g y g d n t i i n k l d v e i p d g k v t s i g p n g c g k s t l l k a l s r l l a v k e g e v f l d g e n i h t q s t k e i a k k i a  
ilpqspevadgl tvgelvs  
ygrfphqkgfgrltaedk keidwamevtgtdkfrhsindlsggqrqrwiamalaqrtdiifldeptyldichqleil  
el vqkl nqeqgctivmvlh  
dinqairfsdhliamkegd iatgstedvltqeilekvfnidvvlskdpktgkpllvtydlcrrays  
>tr|D9RF28|D9RF28\_STAAJ  
mt nrenptplkflsyiig lsmillitlfistligdakiqastieaifnynpsnqqqniineiriprniaavivgmalav  
sgaiiqgvtrngladpali  
glnsgasfalalt yavlpntsf lilmfagflgailggavlmigrsrrdgfnpmriilagaavsamltalsqgialafrl  
nqtvtfwtaggvsgttwsh  
lkwaip ligialfiiltiskqltilnlg eslakglgqnvtmirgicliiamilagiavaiagqvafvglm vphiarflig  
tdyakilpl tallggllvl  
vadviarylgeapvgaiisfigvpyflylvkkggrsi  
>tr|D9RF29|D9RF29\_STAAJ  
missnnkrrqwialavfsillflgctwsitsgeynipverffktligqgdaidelilldf r l p r m m i t i l a g a a l s i s g a  
ivqsvtknpi aepgilgin  
agggfaialfiaigkinadnfvyvlp lisi lggitaalii f i f s l n k n e g v t p a s m v l i g v l q t a l y g g s i t i m s k f d d  
kqsd fiaawfagniwgdew  
pfviaflpwvliipyllfksntlni ihtgdniarglgvrlsrerlilffia vmlssaavavagsisfiglmgphiakri  
vgprhqlflpiailvgac l  
lviadtigkiilqpggvpagivvaiigapyflylmyktnv  
>tr|D9RF30|D9RF30\_STAAJ  
mkl linketfltdm legfliahpe ldi antvivkkakeqgvaivsgggsghepahagfvaegml daavcgevftspt  
pdkileaikavdngdgvll  
vvknyagdvmnfemaqelaemedinvetvivrddiavtneaqrrgvagt vfvhklagylaekgysl teiksrveallpei  
ksigmaiepplvpttgkyg  
fdieddkmeigigihgekghreevkdnihvgtllde lykevtandvilmvngmggtplselnivtkyiqqnlaarsvn  
vakwfvgdymts ldmqgfs  
itivpnkpeyleaf lapttsqyfk  
>tr|D9RF31|D9RF31\_STAAJ  
mkvndmkarllnleetfkkhese ltel draigdgdhgvnmvrgfss lkdkl dssmqslfkstgmalmsnvggasgplyg  
fsfvkmsavakddmhnqdf  
itliqafaeavesrgkvtlnektmydvvaraaklngetl t f n d l q q l a d n t k d m v a t k g r a a y f g e e s k y i d p g a q s

Tsompanidou\_et\_al\_Supplemental\_FASTA\_File

mvyilnaligdednd  
>tr|D9RF32|D9RF32\_STAAJ  
mtkiilvshskeiasgtsllkqmagdvdiipigglpdgsigtsfdiiqevltkleddalcfydigsemnvdmaiemyd  
gnyrvlkvdapivegsfia  
avklsiggsiddalaeikqsf  
>tr|D9RF34|D9RF34\_STAAJ  
mmmneatkigfayvgivvgagfstgqevmqfftkyglwaylgviisgfilafigrqvakigtafeatnhestlqyvfg  
kfskvfdyiliffllfgiav  
tmiagagatfeesyntplgalimtlaiyvtllldfnkivralgvvtpflivlvliagvylfkghvs laevnqvpea  
siwkgi wfgtiyggla fsv  
gfstivaiggdtekrvtsgagamyggiityvtllalinalqseyptiknasiptlannihpliatvlsvimlavmynt  
ilg lmysfaarftepskk  
yhi fi iimmvagylsfv gfaelinklytimgyv glfi v vaviiky fkrknadkkhia  
>tr|D9RF35|D9RF35\_STAAJ  
mnkdnkwtmital fitvisvllaflhkqhydqttnenhankdkiniknknariyqnltynrvfpskl diitpvdmsna  
klpvi fwmhgggyiagdkq  
yknpllakiaeggyivvnvnyal apqkyptpli qm nqatqfikenkmlpidfnqvi iggdsagaqlasqftaiqt nq  
lreamkfdqsfkpsqikga  
ilfggfynmqtvretfpriqlf mksytgeedweksfkni sqmstvqstknypptflsvgdsdpfesqniefskklqel  
nvpvdtlfydgthhlhqy  
qfhlkpesidnikkvllflsrntsssgiqteekpqi enpsnelplnpln  
>tr|D9RF36|D9RF36\_STAAJ  
mtrsal kpfknkrvmvtgrihrvlfknyldr hstfkpnvri llkdvivsgvsidhlwlyetnkyyalamelihqrvkfsa  
nvppykinrnnnlfvqdy  
gikrkgklvteeayiqnngyqdkiyeklpnidfrledfysken  
>tr|D9RF39|D9RF39\_STAAJ  
mqillveddntlfqelkkelqwdfnvagi edfgkvm dtesfnpeivildvqlpkydgywcrkmrevsnvpilflssr  
dnpm dqvmsmelgaddymq  
kpfytnvliaklqaiyrrvyeftaekrtltwqdaiidlskdsiqkgddtifl sktemiileilitkknqivsr diita  
lwddeafvsdntltvnvr  
lrkklseismdsaietkvgkgymahe  
>tr|D9RF40|D9RF40\_STAAJ  
mnnlkwayflksrknwifwiflfnflmlgisli dydfpidslfyivsl nsltmifliltyfkevlykhfdkdeiee  
ikhkdl aetpqrhtvdy l  
yrqisahkekvveqqllq lnmheqtitefvhdikt pvtamkllidqeknqerkqallyews rinsmldtqlyitrlesqrk  
dmyfdyvs lkrmvideiq l  
trhisqvkigfdvdfkvddyvtdikwcrmiirqil snalkysenfnieigte lndqhvsl yikdygrgiskkdmpri f  
ergftstanrnettssgm g  
lylvnsvkdlgihlqvtstvgkgttvr lifplqneivermsevtnlsf  
>tr|D9RF41|D9RF41\_STAAJ  
mail evkqltkiygtkma qevlrdinmsieegefiaimgpsgskttllnvlssidyisqgsitlkgkkl ekl snkels  
dirkhdigfi fqeynllht  
ltvkenimlpltvqkl dkehmlnryekvaevlnil disdkypselsggqrqrtsaarafitlpsii fadeptgal dskst  
qdllkr ltrmneafksti i  
mvthdpvaasyanrvvm lkdgqifte lyqgddd khtffkei irvqsvlggvnydl  
>tr|D9RF42|D9RF42\_STAAJ  
mtfneiifknfrqnlshyaiylfslitsvlyfsvalkyahkl nmtesy piikegsqvg syflffiiiafllyanv lfi  
krrsyelalyqtlglskfn  
iiyilmfeqllifiitailgiiigifgsklllmivftllgikekvp iifslravfetlmligvayfltsaqnfilvfq s  
isqmsknqvkethnk it  
feevvlgilgivilittgyylslnivqyydsigt lmfllstvigaylffkssvslvfk m vkkfrkgvisvndvmfsssim  
yrikknafsltvma isai  
tvsvlcfaaisraslsseikytaphdvtikdqkanqlaselnnqkiphfnykevihtklykdnlfdvakepynvtit  
sdkfipntdlkrqqadlfv  
aegsikdlvkhkkgkavigt kkhvnikl rkdinkiyf mtdvdllggptfv lndkdyqeirkytkakhivsqfgfdlkhk  
kdalalekankvksiet  
rseai sssltgillfvtsflgitfliavcciiyikqidetedelenysilrklgftqkdmarglkfkimfnfglplvi  
alshayftslaym lmgtt  
nqipvfivmglyi cmyavfavtaynhs kr t irhsi  
>tr|D9RF47|D9RF47\_STAAJ  
makschliltneyattrcqdgivlwpidgeielqkfrkskiieddiyi inhldvfsiknnkktimlylssdwfaelgf  
tffnyhytaklikssynlk  
clllkltyrylndqplndadvrklqdiiki iakeasmk kki aqnqyryayygd l rdeleyiqnvnqr ltlksvadklfv  
sksnlssqfhlmgmgfkk  
yidtlkigksieillttdstisnisehlgfssstyskmfksymditpneyrnlskynkclmlkpeplvgkmvqeikei i  
lnyiehyknhltdvhide  
dkfetpklfqtviqintyemklvflegi fktllnksqvffimpsilskntmseeekfaiktiiesdlkiafnind  
iettyyveafmsvfrqis

Tsompanidou\_et\_al\_Supplemental\_FASTA\_File

pnelsnhnyevhvfvdlslmeirtiyrmlklhnmInvklgnitclfekpsvfkslvsqikrklkfdsliidnanlss  
pymgesdelllknihfk  
nlkqvinedieqekliflnvenhkllnkeqdlsnsapliyktlsalyhnfdgfglnifdnhqafnamhlydkngfkt  
lglilekfiyevskpkyen  
sysifdienyyclyidwrvi esetimsnfedsqvyinfknnvlnkylivietldensgnihliskelrdkyewnps  
llskidnylkaieikehn  
fsdnslninvtfnalyiikigkk  
>tr|D9RF50|D9RF50\_STAAJ  
mksaeqwideqlshpeggyfretirevldgrrapfssiyfltddnishfhridadevwythagdsltihminpdge  
yttatlgtdiqngdvlqyy  
vpkgtifassieisntyslvgcmcqafefkqfelkqselitqyphlksviekyalk  
>tr|D9RF53|D9RF53\_STAAJ  
mdegqlvanastakeplinklkgdkgiqlvanapta  
>tr|D9RF54|D9RF54\_STAAJ  
mdmfaallqiknyklfvanmfllgmgiavtvpvylvlfatkdlgmttnqyglilasaaissqftvnsiifarfsdthhfrki  
iiallmgalgfsiyffv  
dtiwlfiillyaifqglfapampqlyasaresinvssskdraqfantvlrsmfslglfpgpfigaqliglkgyaglfggti  
siilftlvqvfkykdlndi  
kqapistqqhvekiapnmfkdkl11lpfiailhigqwmymtmnmp1fvtdylkeneqhvgylaslcaglevpfmiilgv  
ssrlqtrtlliygavfggl  
fyfsgvfknyfmm1agqvflaiflavllgigisyfqi1lpdfpgyastlfsnamvigq1gg11ggamshwvlgenvff  
vsaasimlgmvliffktnq  
kitkedvist  
>tr|D9RF55|D9RF55\_STAAJ  
mtiilwlliaafmlafvglikpvipsvlvlwvgfliyqfgfhnqhlswvfvyvsmalltililcadflankyfvnrfggs  
kfgyaaligvvgcfvlp  
pfgiipfllvfieliggysferavkvsigsivaf1tssiaraimfimiwffidallin  
>tr|D9RF57|D9RF57\_STAAJ  
mralnkdehnyikqianihetllsqaesnykctklisialryemiscrlehtndkiyiyenegqliafiwghfsneksmn  
iellyvepqrklgiatql  
kialekwtmnafrisstihksnlpmislnkd1gyqvshvmykdid  
>tr|D9RF58|D9RF58\_STAAJ  
mkkliisimsvm1lagcgkseekatlekdidn1qkenkelkdkkek1qqekek1adkqkd1ekvkd1kpskednkddk  
kdedknkdkdkdkdeasq  
gkqskdstkssdkdnhkkptstdkdqkandkhqs  
>tr|D9RF59|D9RF59\_STAAJ  
mheqdfrilegqdi1pelgrelenitgrtiadstgeikrviah1pnfesdtdtfvatyrlnhqqdfidatftalksdra  
r1kevphvelisyisksk  
>tr|D9RF62|D9RF62\_STAAJ  
mthi1dgdacpvvdsi1d1ttetg1fvti1rsfshfsnqlypphvstlyvddgpdavdykivq1stkddiv1tqdygla  
s11vdkv1vmhngkiyn  
skniqq1ldkrymnaq1rkqggrhkgpppftkqdkvfeqs11kvihrike1d  
>tr|D9RF63|D9RF63\_STAAJ  
mdkkkvikfm1n1piv1vp1iverkrikqhpdvqkvtdatskvasktsaaisntasdvkeyvgdkkqdfenkre1kkfa  
rehdpayiekkgek1akqn  
rkdaekmki1qkniekrhkeeqkarekneiqrikdmkksqyeekag1tpnk1dektekkgd1laeknrkeiakmkk1  
qkniekrhkeeqkrqead  
kariks1kkykdyvaksasqqnenntea  
>tr|D9RF65|D9RF65\_STAAJ  
mkk1ttilfqy1k1fpv1m1flvstgl1gilvitqniliadflakii1rhqfqglwiv1fillgvl11ratvqflnqwl1gdtla  
fkvkhm1rqrv1yknngph  
igeqmt11tenidglapfyksylpqvfksmmvpl111iamffihfntalim1litapf1l1fyi1fgl1ktrdeskdqmtyl  
nqfsqrflniakglvt1kl1  
fnrteqtekh1yddstqf1rltmr1lrsaf1sg1m1lefism1lg1glv1aleat1slvvfhnidfktaaiailapefynai  
k1lgqafhtgkqsegasdv  
vfe1leqpnnnef1lkheenqkpfi1q1tdisfryddsdr1vlnd1n1lei1fgkdqialvgpsgagk1st1thliagvyhpt  
igt1sinqrd1nig1lsq  
py1fsas1keni1tmfkdienniveev1devgl1dkvqsftkginti1ieggem1sggqmrri1elcr11vmkpd1l1vifdep  
atgl1diqtehm1qnv1fqh  
fkdttm1viah1rdnt1rh1lqrr1yienr1liaddrnisv1nitengdd1  
>tr|D9RF66|D9RF66\_STAAJ  
mktr1kf1qvdkd111lavvgvcgs1valamff1sgymvtqsalgap1yalmi1lvvtvkl1fgflraitryver1ishkatf  
tm1rdi1rvqffgkl1vnvip  
nyrk1sssd1l1srmi1srveal1qniyl1rvyppv1vigtalvtv1v1lafisighal1imvsm1ft11lipw1lsskkart1  
kkhaaneqarf1nhfydk  
agmdel1rrfnq1nhyrd1lmak1nhfdk1qlkeqrfl1tiydfilni1iam1sifgs1vl1g1liqinegq1ni1ymtsiv1mi  
11l1feqavpmt1nvayykad  
tdqal1hdinevisvpstngn1r1tdkydatni1yevkdas1fkywnq1tyv1sdi1nfnvrgeki1aivgpsgsgk1st11qim

Tsompanidou\_et\_al\_Supplemental\_FASTA\_File

aglyqldsgsirfenmdmf  
eiddkdkfeslnvllqsqqfdgtirqnftdekdeavqaifkqldlehlalerqidldghtlsgeiqr laiarmllkd  
tastwildepttaldkqns  
lkvmdlieahaetlivathdltllsrfetivmingkivekgnyyqllanqgalwnmiqyna  
>tr|D9RF71|D9RF71\_STAAJ  
mseekkvkherqknektkkqykpfwivmsfiilivvlllptpsslpmakavla ilafavimwvteavsyvsatliig  
lmilllgfspvqnlgeklg  
npksgsavltgsdlgtnhalslafsgfatsavalvaaalflaamqetnlhkr lalivlsivgnktrnivigaiivsi  
laffvpsataragavvpi  
lgmiaafkvsksklasl iitsvqavsiwnigiktaaaqnivainfinhqlgfdvswgewflyaapwsivmsialy  
ikvmppeintiieggkdlk  
eelhklgpvsarewrlivismllllfwstekvlhpidasitiialgvmlpkigvmtwkhvenkipwgtiivfgvgis  
gnvllktgaaqwlstdqtf  
vlgkhlpiatitlfnilihlgfasatslssalipvfisltstlhlgdqsigfvliqqfvisfgflpvsapqnm  
aygtgtftvkdfkagip  
tivgyilvivfsmtywkwlgll  
>tr|D9RF72|D9RF72\_STAAJ  
mavavllnrmfrmehnplfeyiyqqkedi dacyfiiteedmssasdlkaqfyrgtlqrfyqslhaeklt  
pyvmsyddiis  
fckennisevviagdmsy  
hleeydiihqrslfneariavtlirgnhyfkasktmnqqgepykvfts fykkwrpylrhrdiyhyd lksfed  
viaspdd  
lvfddiafgssqieqk  
qhfldqdiqnyesgrdylsevltsqslvalaygll diieifndllarydedeanyea firelifrefyyv  
lmtqypetsy  
qafkpkyrqikwsqneadf  
nawcegqtgfpiidaaimeltqtgfmhnrmmvvsqfltkdlfidwtwgekffrkhlidydaasni  
hgwqwsastgtdav  
pyfrmfnpirqserfdaka  
lyiktylpi fnqidakylhdtqrnesnlfeqqielglhyprqmvdhqekrtqvl atfkald  
>tr|D9RF73|D9RF73\_STAAJ  
mtiniivlivsijgfqliighiwhdiglsylrsillmmlpfglgvfiqqvsyyerqypkwvppnik  
vr lkyiylatfle  
yvlyl t lftdilr  
>tr|D9RF74|D9RF74\_STAAJ  
mqsryariyflilfivslfetkiqfmtlnlflayipfelsllrlfkpnkkyewpffiiysfi  
fvlll pntfymvtdl  
ihlnqfqnfyaglnl sew  
kyftylllgvflavyvml iyfeiltltshrwlnrlivvvlmflngfgyigrflrlhsvyffn  
ep l hvl nhilesltk  
tamfvcfmvmaqaaillfg  
kgvrlnk  
>tr|D9RF76|D9RF76\_STAAJ  
mnkqifvlyfni fliflgiglvipvpvylkd lglgtgsdlgl lvaafalsqmiispfggtlad  
klgkkl iicigllifsv  
sefmfavghnfsvlmlsr  
iggmsagmvmvgvtgliadisps hqkaknfgymsaiinsgfilpggiggfmaevsh  
rmpfyfagalgilafimsivlihd  
pkksttsqfqllepqltk  
inwkvfitpviltvlvsfglsafetlylytadkvnyspkdisiaitgggigfalqiyffdk  
fmkyfseltfiawsll  
svvvlvllviadgywtimv  
isfvvfigfdmirpaityfsniagerqgfaglnstftsmgnfigpliagalfdv hieapi  
y maigvslagvvivliek  
qhraklkeqnm  
>tr|D9RF77|D9RF77\_STAAJ  
mtvknlf lfgfvaviltvc ligllilatneda lakvhtintlnainvstedtykkmdilniht  
akasemnenakkqnhf  
khrvnanksnsfneqecq  
iadryadkhindnyglerisktnhgynyvysndnsts kqhvsi snqgiitk  
>tr|D9RF78|D9RF78\_STAAJ  
maknkktnamrml drakikyevhsfevpeehlsgqevaeliqanvktvftklvlentkhe  
hfvfvpvsetldmkkaaal  
vgekkqlmpldnlknvtg  
yirggcspvgmktl fptvvdksenyshisvsgglrtmqitiavedlititkgkigavihe  
>tr|D9RF79|D9RF79\_STAAJ  
miitekrhelileelshkdf ltlqelidrtgcsastirrdlsklqqlgklqrvhggam  
lkenrmveanlteklatnldk  
kmiakiaanqindneclfi  
dagsstlelikiyakdiivvtnglthveallkkgiktimggqv kentlatigssvmeil  
rrycfdkafigmngldiel  
gltpdegealvkqtamsl  
anqsfvlidhskfnkvfarvp llesttiitsekalnqeslkeyqqkyhfiggtl  
>tr|D9RF80|D9RF80\_STAAJ  
miytvtfnpsidyviftnfdkidglnratatykfaggginvsrvlktldvestal g  
faggfpgkfiidtl nnsaiqsnf  
ievdetrinvklktgget  
einappphitstqfeql lqqiknttsedivivagsvpssipsdayaqiaqitaqtg  
aklvvdaekelaesv lpyhplfik  
pnkdelevmfnttvnsdad  
vikygrllvdkgasvivilggdgaiyidkeisikavnppqkvvntvsgdstvagm  
vagi asgl tiekafqqavacgta  
tafdedlatrdaigkiskq  
vtisvl dge  
>tr|D9RF81|D9RF81\_STAAJ  
mrvtel ltkdtiamdmandkngvide lvnqldkaglsdvasfkeaihnresqsttg  
igegiaiphakvaavkspai af



Tsompanidou\_et\_al\_Supplemental\_FASTA\_File

gkskegvdyqsldmqpah1  
ffmiaapeggaqthldalaksgilmdenvrekllhasspeevlaiidhaddeatkeeeaeaeaaqvaaveanqdtngsn  
epyvltavtacctgiatym  
ardalkkqadkmgikikvetngssgiknhlteqdiknatgiivaadvhvetdrfdgknvvevpvadgikrpeelinkald  
tsrkpfvardgqrkgnsnd  
sqeklspgkafykhlmngvsnmplvisggilmaivflfgansfdpkssdynafaeqlwnigsksafaliipilsgfiar  
siadkpgfasglvggm lai  
sgsgfiggiiagflagyltqgvkamtrklpqaaleglkptliyplltvtatgllmiyvnppaswlnhllldglnnls  
nivllglvigammaidmngg  
pfnkaayvfatgaliegnaapitaamiggmipplaiatamlifrkftkeqrgsiipnyvmgmsfitegaipfaaadplr  
vipsmmiggsgiggaiagl  
gsritaphggiivigtgdgahl1qtliallvgtlvsaliyglkpklteteieasksmde  
>tr|D9RF82|D9RF82\_STAAJ  
mseliinyngkvytedgkidygiyhvkdgqivaigevddkaaaidndttknkiqidakghhvvpgfidihihggygdamd  
sydglkylsenllsegts  
ylttmtqstdkikaltniakyeaeqdvhnaaeivgihlegpfi senkvgaqhpqyvvrpfidkikhfquetanglikim  
tfapevegakealetykdd  
iifsiqhtvatyeaveaveergakhvthlynaatpfqhrepvgvfgaawln dalhtemivdgthshpasvaiayrmkgn  
fylltdamrakgmpegeyd  
lggqkvtvqsqarlangalagsilknmhglrnlsftgtdldhlwrvtslnqaialgidrksikvknkdadlvildd  
mrvkstikgkvhtfs  
>tr|D9RF83|D9RF83\_STAAJ  
metstiiisliifillialttvfvfgsefalvkiratrieqladegnkpakivkkmianldyylsacqlgitvtslglglwlg  
eptfekllhpi feainlpt  
al tttisfavsfiivtylhvvlgelapksiaiqhteklalvyarplyfygnimkpliwlmngsarviirmfgvnpdaqtd  
amseeekiinnsyngge  
inqtelaymqnifsderhakdimvpqrtqmitlnepfnvdelletikehqftrypitddgdgdhikgfinvkeflteyas  
gktiki anyihelpmiset  
trisdalirmqrehvhmsliideyggtagiltmedileevgeirdefdddevndivkidnktfqvngrvllddlteefg  
iefddsedidtigglqsr  
ntnlqkddyvdttydrwvseidnhqiiwvmlnyefnearptiggsdedekse  
>tr|D9RF85|D9RF85\_STAAJ  
mki rvvipcfnegeviqtthqqlteilsqdssvkgdydnmlfiddgstddtidemqhl atidrhvsyisfsrnfgkeaam  
iagyqhstkfdavimidcd  
lqhpeyypkmi egfmegcdqviakrdrsgenfsrktlshlyyklvncfveevqfddgvgdfrllsqravksiasleeyn  
rfskglfewigyntkvfty  
qnvarqkgeskwsfklfnygidglisfnskplrmmylglfifsisvlyiylfinimisgvnipgyfstiaailllgg  
iqllisigvveyigriyye  
vkarpyyiqatnlssiendekdthkvysk  
>tr|D9RF90|D9RF90\_STAAJ  
mivyliniaivvltitgfnlyrhmqmhlslsamllsitinafintfiidkynfitlctitmfiiwtilqfyidkklkpv  
itdqkfiailtivvsltq  
rvtdfsstqsiymspflapafiiggimlfistfnldetaennkikklmikgliiinisfivmmvltpywyllyly  
lifllflwqkvkyf  
>tr|D9RF91|D9RF91\_STAAJ  
makipvleifgptiggegrvigrktmfvrtagcdyrscwdsaftwdgsaksdiklmtaeeydelkriggdlnfhvtis  
gnpalikgiqelvdlfqd  
kgifsaletqgskfqpwmtqidldtisppkpsstmpdlkkldevitqcvpsslnlkvvfvddkdydfakmihhrypdip  
fylvgnpylsvsdvnhte  
kleryeqldvlmqsndmnhvyvlpqlhtllwsnkkgv  
>tr|D9RF93|D9RF93\_STAAJ  
mesvlnnekai vvfsggdsttclfyakkhfkevelvtfnygqrhdteieiakqiaqdqgmkhhlvdmsllsqlltpnal  
qhdmeitnnedgipntfvp  
arnllflsfagalayqigakhiitgvcetdfsgypdcrdsfiksmnvtlslamdkdfvihtplmwlnkaetwkl sdelev  
ldyirtktl tcyngi igdg  
cgcpachlrqrglnqyleskga  
>tr|D9RF94|D9RF94\_STAAJ  
milvidnndsftynli dyiktqtkltvqvvgidnlliedi inmkpnaivispggpnddypilnevleqfyqrvpilgvc  
lqfqcivsyfggniihgyh  
pvhghttqlrhtnegifqglpqfnvmryhsl iadgatfpnclkitakndeeiimafehitfpvfgvqyhpesilseygy  
rqvelflskvgdycenri  
>tr|D9RF95|D9RF95\_STAAJ  
mrieynyryylteneykqyhiqlkgfikkyvatklldvgevi hfaqaqqrqgryvslylsyeaakyfnhvmythslakdd  
iyavaysfekaesinstye  
hqtsyvskhhsfvessevmmtnikrvqqaivegetyqvnytarlkdniiypistlyerltqfsngnyta llqtdei qva  
sispelffqkgqfnvndv  
iiskpmkgtmprgkteaedqyyktlqtsskdraenmivd llnrdigrisqsgsikvyklffieayktvfqmtsmvsgt  
lktntdliqiltsl fpcgs

Tsompanidou\_et\_al\_Supplemental\_FASTA\_File

itgapklnmkyikqllessprgiycgaiglllpteddkmifnirptieykygqaiygagagitidskpkdevnefyakt  
kilem

>tr|D9RF96|D9RF96\_STAAJ

mqlfetmkidnghiprltyhtnricksserlnfkfdehawrneIndvttkynsgqyrlikivlnaesefetivsppekss  
ftakfqvlpktnptfinn  
ktterkhlahnhetdliiltsedgkvlefdignivieeegkwytpsykddflkgcmrdylidsdklvekdfnkneliyky  
hneirflinslrevadv  
hlcl

>tr|D9RF98|D9RF98\_STAAJ

msiieksglfssfqdfgrrgyehdgvipcgaldtlaheianrlvandkneatlemtnkmatirfteptlialaggnvka  
yehmtispyklylldkgd  
vlfkretsytssrvylavgggfeldawlgnsstdfnvkiggfkgtrldqgdeiklkrdytdrhkklfenlahtkqtdwgid  
gyalsfnymsdvfhvknk  
gtedfkedaigrfvkhdvkvtskanrmgmmlegekikafyedmpyqtvkkgtiqikrdgtpiillndhytlgsypqigt  
iasyhltklaqkpqgsrlk  
fqfidiltaeknlvkysnwlnqlfhgieyrmqlemmk

>tr|D9RF99|D9RF99\_STAAJ

mssqkkkislfafflltvititlkyfsyyvdfslgvkglvqnillmpyslvalvsvflffkkgkafwfmfiggfll  
tfllyanvvyfrffsdfllt  
fstlnqvgvnesmgavsfkwydfvyfidtlvylfili ftkwldtkafskkfvpvvmaasvalfflnlafaetdrpe  
lltrtfdhkylvkylgpy  
ftvydgvtienqqkalseddltkvlntkqrqtepnpeyygvakkniikihlesfqtflinkkvngkevtpflnk  
ssgkqftyfnpffhtgq  
gktsdseftmdnslgllpqsafslkgdntyqslpaildqkqgyksdvmhgdyktfwnrdqvykhfgidkfydatyydms  
dknvnlgldkdiffkdsa  
nyakmkspfyshliltlnhypftldekdatieksntgdatvdgyiqtaryldealeeyindlkkkglydsvimiygdh  
ygisenhnamekllegeki  
tpakftdlnrtgfwikipgksgginneyagqvdmptilhlagidtknylmfgtdlfskghnqvvpfrngdfitkdykyv  
ngkiysnknelittqpad  
feknkkqvekdlemsdnvngdlrfyknpdfkkvnpkykyetgpkansk

>tr|D9RFA0|D9RFA0\_STAAJ

meaykiehlnksyadktifdnldlsidegekiglvgingtgkstllkviggiddftanvmhpnqyri ryssqkdlned  
mtvfdavlsdtttllriik  
qyeqtvqayaddqsdklfkrmdaquadmdqhdawdynaeiktisklgihdttkyikelsggqqkrvvlaktlieqpdll  
lldeptnhldfesinwlin  
yvkqyphvtlvfthdryflnevstrielnrngklasypgnyesyiemraerevtlqqqqkqralykeelawmragakar  
ttkqqarinrfdlenev  
qqykddkgeInlaysrlgkqvfeledlska indkvliehlteiiqgerigvvgpngagkttllnilsgedqqfegklkt  
gqtvkvayfkqtdetldrd  
irmidyreeseiaekdgtsvsitqllerflfpsathgkkyvklsggeqkrlyllrllvhqpnvllldeptndldtetl  
tiledyihftfggtvitvsh  
dryflnkvaqsywfihdggmekiigtfedyesyksldknkstlkqqkssttvrknglsykekleyeqlmkrieqae  
rmeidvlnieasadygki  
kelneekeqleiqydliditrwseleeikeqq

>tr|D9RFA1|D9RFA1\_STAAJ

mqqtlschyfgyetfrpgqeeiiskvl dhrnvlgvlp tgggksicyqvpgl lggttivisplislmkdqvdlkamgiga  
aflnsstlqkeqgriekal  
sngeiqflyvaperfenryflnmqlrikihlfafdeahciskwghdfrpsyqnviskvftlpqdfitlaltatatvevqq  
direklniaqtdiktstk  
rrnli fknptyqrqkfil dyikthdedagiiycstrkqveelqea lesqkiesviyhaglsnkereeaqndflfdrvkv  
vvatnafgmgidksnrvf  
ihynmpgdlesyyqeaagrardglksecillfserdinlheyfitvsqaddydkmgekltkmiqytktkkcleativh  
yfepekleeceqcsncvq  
qdksynmtqeamiisciar mkqesysviiqvlrgestdyikygydqisthglmkgyttsetshlide lrfkgflnen  
deilmcdtsikkllsneve  
vfttppfkqkatekvfintvegdrvlfsqlvevrkksdkl tiapvsi fsdytleefakrpkaskqdmnidgvgsyklk  
hycpafletiqnykav

>tr|D9RFA2|D9RFA2\_STAAJ

mikfknvtkrygkhvavdnisfninegeffvl igpsgcgktttlkminrlhlsegiiyfkdkpisdypvyemrwdigv  
lqqialfphmtikeniaqv  
pqmkkwkekdidkrvdellemvglepekyknrkpdelsggqrqrvviralaadppvilmdpfsaldpisreklqddli  
elqtiki kktii fvthdiq  
amklgdki cllneghiejidtpgefknnpqsefvkqfmgshleddapcveenaiirdldimkpidvtsmsaypivdng  
pievlyqhl seservi mq  
edsvggyvidrkdfkylsqkkevaqhd

>tr|D9RFA3|D9RFA3\_STAAJ

mtnffdi lserkgqlfstmiehiqisfialliataiavplgilltkktiseivmniaailqtipsalallgmlpifgig  
rvpaiialvvyallpilrn

Tsompanidou\_et\_al\_Supplemental\_FASTA\_File

tytgikevdpstlieaakgimkpfrrltkvelpiampvimagvrtamvliigtatlaaligagglgdlllglidrnnasl  
illgaipsallaiifdlil  
rfmaklsykkllmtlgvimiilaiaipmfaqgdkitlagklgsepsiitnmykilieetkntvevkdmgktaflf  
nalksddidgyleftgtvl  
geltkepkskeekkvyeqakqsllekkyqmtmlkpmkynntyalavkrdfakqhnrirtigdlnkvkdqkpgftlefndr  
pdgykavqkaynlndnr  
tmepklryqainkgninlidaystdaelkqydmvvlkddkhvfppyqgaplfkesflkkhpeikkplnklenkisedmq  
mmnykvtvknedpytvakd  
ylkakglik  
>tr|D9RFA4|D9RFA4\_STAAJ  
mkeqlnqlsayqpglspralkekygiegdlyklnasnenlygppskvkeaisahldelyyypetgsptlkaaishlnvdq  
srilfgagildevilmisra  
vltpgdtivtseatfgyyhnaivesanviqvpkdgdflegilkevnedslnwlnpnnpptgtyfnhesldsflsqv  
pphvpviideayfefvtae  
dypdtlalqkydnafllrtfskayglaglrvgyvvhasehaiekwniirppfnvtriseyaavaaledqqylkevthkns  
vererfyqlpqsehflpsq  
tnfi fvktrvnelyeallnvgcitrpfptgvritigfkeqndkmldvlnsfkye  
>tr|D9RFA5|D9RFA5\_STAAJ  
mtrksiaidmdevladtlgeidavnfradlgikmealngqklkhvipehdglitevirepgffrhlkvmphaqevvkk  
tkhydvyiataamdvpstf  
sdyewilleffpflpqlhfvfcgrknivkadylidnprqlieiftgtpimftavhninddrfervnswkdveqyflndie  
k  
>tr|D9RFA6|D9RFA6\_STAAJ  
mrnknsleafhvankmhilgpqqrefrkeilqtmrvgagpnteklerqflqaeqvggapt  
>tr|D9RFA7|D9RFA7\_STAAJ  
menkythgvlfyhehsglkninqgigevttalssickhlsiqlsenegdiikycqeiktknyakdvdlfilggdgtvne  
lingvmtndlqlpigi lpg  
gtfndftktlni apnhkqaseqmtsavqgtydvikinnyalnfvglglivqnaenvqdgskdifgklsyigstvtlln  
ptqfnqyltidktyset  
tmilsangpfiggsripitdlsqdgelntfifneqsfsilndifkkrdsnmwneitqgiehipgkksltdpamkvdi  
dgeisletpidievipnai  
qlltvndl  
>tr|D9RFB1|D9RFB1\_STAAJ  
mkiyfsftgnvrrfirkteletleitaencmepvhepfii vtgtigfgevpepvqsfl evnhqyirgvaasgnrnwgl  
nfakagrtiseeynvpilm  
kfelhgknkdviefnkvgnfnenhgrevqsy  
>tr|D9RFB4|D9RFB4\_STAAJ  
mkyllkgnillllmlltiislfigvselikdlhhtesqrnilfssriprtmsiliagsslalaglimqmmqnfvs  
pttagtmewaklgiliall  
ffptghillklvfavicsicgtflfvkiidfikvkdvifvpllgimmggivasfttfislrtnavqsigwnlgnfaiit  
sgryeilylsipllaly  
fanhftivgmkdftnnlgsyeklinialfitatitalvvvtvgtlpflglvipniisiyrgdhlknaiphtmmgaif  
vlfsvdivgrivvypyeini  
gltigvfgtiiflillmkgrknyaqq  
>tr|D9RFB5|D9RFB5\_STAAJ  
mrnnkkimlliavtllismlylvfgidieifeyqfssrlrkfiliilvgaaitsvifqaitnrltpsimgldavy  
lfikvlpvflfgiqsvvvt  
nvylnfiltiltmvlfalilfqgifikghfsiyfilligvllgtffrsitgfiqlimdpsflaiqssmfanfnsnsl  
tfsavllvillvitilll  
pyldvlllgraeainlgsyekltriillvsvlsvstalvgpitflglitvnlahelmktyehkyiliaticlswisl  
fsaqwvvenvfeattensi  
lidliggsyfiylvrrrnaq  
>tr|D9RFB6|D9RFB6\_STAAJ  
miqvgnlktinnqmi ledisidiekgltsligpngagkstllsaicrlirfdegevkidgqlmsdyknndlskkisil  
kqtnhtemnitveqlvnfg  
rfpyskgrltkedhdvnda ldlqlqdirnrnikslsggqrqrayiamtiaqdtteyilldepnlnlmdkhavqimqtlk  
mlahkmnkaivivlhdinf  
ascysdqivalkngqlvksdlkdnviqssvlsdlymdidiehirnqriclyfdk  
>tr|D9RFB7|D9RFB7\_STAAJ  
mkkvtlylvlavmfllaacgnnsdkeqsksetkgsketvkiennykmrgekkgdsdakkvketvevpknknnavvldyga  
ldvmkemglsvkvalpkg  
eggkspnflsfkddkytnvgnlkevnfdkiaatkpevifisgrtanqknldefkkaapakivyvgadeknlisgmq  
ntenigkiydkevakein  
kdldnkiasmkdktknfnktvmyllvnegestfgpkgrfgglvydtlgfnavdkkvsnsnhgqnsneyvnkenpdvil  
amdrqqavsgkstakqaln  
npvlknvkaikedkvynldpk1wyfaagsttttikqieeldkvvk  
>tr|D9RFB8|D9RFB8\_STAAJ  
minkdiyqalqqlipneki kvdeplkrytytktggnadfyiptkneevqavvyayqneipvtylgnsgniiireggir

Tsompanidou\_et\_al\_Supplemental\_FASTA\_File

givislslldhievsddai  
tagsgaaiidvsrvaradyaltglefacgipgsiggavymnagayggevkdciydalcvneqgslilklttkeleldyrnsi  
iqkehllvleaaftlapgk  
lteiqakmddlterreskqpleypscgsvfqrppghfagkliqdsnlgqhriggvevstkhagfmvndngtatdyenli  
hyvqktvkekfgielnrev  
riigehpkes  
>tr|D9RFB9|D9RFB9\_STAAJ  
mysnvqpfinsdltncfqsqyteiesllfnlldspvkytkhiggthhfkystepildilvgvenlhditsldekrlnyvg  
fyrllhkkynkkvmmakfnn  
fhelkqqvrllhiqmntqtfesylaaldylstnddialqfntkkhqilqhslltirqyemqkqqyfeklckkyll  
>tr|D9RFC0|D9RFC0\_STAAJ  
mkkiviiaavlailfvvisacgnkekeaqhftkqfkdvkqkkelqhvmdnihlkeidhlsktdtdknskefkalqedv  
knhlipkfeayyksaknlp  
ddtmkvkkllkkeymlanekkdaiyqlkkfiglcnqsikynediodytkqfeknrykveseikladnkseatnlttkleh  
nkalrtdakknlddsken  
evkgainhimpmieqitdinqtnisdkhvnarknaiemyyslqnyytrietikvseklskvdvdklpkkgiditng  
dkafekkleleek  
>tr|D9RFC2|D9RFC2\_STAAJ  
mkvlvamdefhgiissyqanryveeavasqietadvvqvpfngrhellsvflwsggqyriqvhdadmnevegyvgt  
dtgmtviagnlflkgkkipi  
vertsylgeminhaldndakhvvislggidsfdagagmlqalgaqfydegrvvdmrqgagvikyirrmmsnlhpkme  
tariqvmsdfssrllygkqs  
eimqtydahqlnhnqaaeidnliwyfsefksekliaigpverggagggiaavlnglyqaeiltshalvdqlthlenlve  
qadliifgeglendqllle  
ttlriaelchkhqkvaiaicataekfdlfesqgvmtamfntfidmpesytdfkmglqirhytvqslkllkthfnvev  
>tr|D9RFC3|D9RFC3\_STAAJ  
mknqlidrltryttidtsdpksttppstekqwdllhlllekelqqlglptdl dengylfatlesnidadvptvgflahvd  
tspdfnasnvkpgiieny  
gkpyklgntrkvl dpkvfpe lns lvghtlmvtdgtsllgaddkagiveimeaicylqehpeikhgtirigftpdeeigr  
phkfdvdrfnadfaytmdg  
sqygelqyesfnaaeavitchgvnvhpgsaknamvnairlgeqfdsllpdsevpertegyegfyhlmnfegtvekatlqy  
iirdhdkkqfelrkkri le  
irddinahfenypkvdisdqyfnmaekilplphiidipkrvfakldipantepirggtgdgsqslsfmgllptpni ftgcn  
fhgpyeyasidvmekavqv  
iigivediaenn  
>tr|D9RFC8|D9RFC8\_STAAJ  
mtqniitvkkehienvisksrfiahi kpvqnedekafiaaikkehdathncsaytigpemniqkanddgeptgtagv  
pmldilkkldvhnacvvvt  
ryfggiklggggliraysgavrdviydirvelreaipcivtlnydqtgkfeyelasthfmllnqtytdkvsyyidvks  
dyeafinfnqmtagnfdl  
teetpkqlpfdipte  
>tr|D9RFD0|D9RFD0\_STAAJ  
mrqtilliyavtgagktemmfqgiyarrqgdniavsprvdvveickrikdaflnedidilhqqssqqfeghfvvctvh  
qlyrfkqhfdtifi devda  
fplsmdkslqqaalkssskvkhatiymtatppkqllseipheniiklparfhkkslpvpyryfkl nnnkiqkml yrilqd  
qinkqrytlvffnietmi  
ktfsvykqkitkltyvh sedvfrfekveqlrnghfdviftttilergftmanldvvidahqytqealiquagrvgkle  
cptgkvlffhegvsmmniq  
akkeiqkmnklaalkrgwide  
>tr|D9RFD1|D9RFD1\_STAAJ  
mnnclscgaklyenitiynl fkkpnr ldrckenwdnikldikarrcsrclkhlnqdeaycl dckflsahfnlmeqlycq  
fqydgllmkemihqykflkd  
yylcellahlieipqtsydyivpipsspahdlsrtfnpieavlkakgirfdkilmsnrpkqshltkkerladenpfiiid  
tel dlngkeillvddiytt  
gltihragcklyaknirkfkvfafar  
>tr|D9RFD5|D9RFD5\_STAAJ  
mkksltvtvssvlafalannaahaqqhgtqvktpvqhnyvsnvqaqtqspttytvvagdslykialehhltnlqlysynp  
gvtplifpgdvislvpnk  
vkqtkvkvspvrkasqakkvvkqsvqqaskkvvkqapqavakavnvaykpaqvqksvptvpvahnyksvanrgnlya  
ygnctyyafdrraqlgrsi  
gslwgnannwnyaakvagfkvdktpvegai fqaagpyghvgvsvnpngt itvsemnyagfnvksrt ilnpgkynyi  
h  
>tr|D9RFD8|D9RFD8\_STAAJ  
mvehypfkihsdfepqgdqpaakeivegikagkrhqtllgatgtgkftmsnvikevgkptliiahnktlagqlysefk  
effpenrveyfvsvydyyyq  
peayvpstdtfiekdasindeidqlrhsatsalferddviiiasvsciylgnpeeykdlvsvrvgmendrse llrk lv  
dvqytrndidfqrgrfrvr  
gdvvei fpaskeelc irveffgdeidri revnyltgevlkerehfai fpushfvtreeklkvaieriekeleerlkelrd

Tsompanidou\_et\_al\_Supplemental\_FASTA\_File

enk1leaqrleqrtnydl  
mmremgfcsgienysvhltrlp1gstpyt1ldyfgddwlimideshvtlpqvrngmyngdrarkqvlvdhgfrlpsaldnr  
p1kfeefeektkqlvyvsa  
tpgpyeihtdkmveqirptg1ldpkiivrptenqid1lseiqrverndrvlvtl1tkkmsed1ttymkeagikvny  
lhseiktlerieiidrlm  
gtydivgin1lregidipevslvvil1dadkegf1rsnrsl1qitigraarndkgevimyadkmtsdsmkyaidetqrrrei  
qmkhnekhg1tpktinkki  
hdl1satvendenndkaqtvipkmttkkerqktidniekemkqaakldfekatelrdmlfelkaeg  
>tr|D9RFD9|D9RFD9\_STAAJ  
mkepsivvkgarahan1kdidie1pknk1ivmtg1sgsgksslafdtiyaegqrryveslsayarqflgqmdkpdvdtieg  
1spaisidqkttsknprst  
vatvteiydyr1lyarvgkpycpnhnieiesqtvqqmvdrimelartkiq1lapviahrkgshekliedigkkgyvrl  
ridgeivdvndvpt1dknk  
nhtievvdrl1vkdgietr1ladsietale1segql1tdvieged1kfseshacpicgfsigeleprmf1fnspfgacpt  
cdg1gqkl1tdvd1vvpdk  
dkt1negaiepwiptssdfypt1lkrvcevykinmdkpfkkl1terqrd1llysgdkeieftftqrggtrkr1tmvfegv  
vprisrrfhespseytrem  
mskymtel1petchgkrl1sreal1svyvg1nigevevysisqal1nyknin1seqdqai1anqilkei1sr1tfl1nvgle  
yl1l1nrasgt1sggeagri  
r1atqigsr1tg1v1v1desig1l1hrdndr1int1kemrd1gnt1ivvehdddtmraady1vdigpgagehggqiv1ssg  
tpqkvmkdkks1tgqyl1sg  
kkrievepyrrpasnrkis1rgarsn1kgvdvdi1psimtvvtgvs1sgkssl1vnevlyks1aqkinksk1kpglydki  
egidq1dki1ididqspigr  
tprsnpaty1tg1v1ddi1rdvfaqtneaki1rgyqkgrfs1fnvkggrceackgdgi1kiemh1l1pdv1v1pcevcdgkrynret  
levtykgkni1adilemtve  
eatqffeni1pk1krkl1q1l1vdv1g1gyvt1gq1att1sggeaqrvklase1l1hrstgk1siy1ildeptt1ghvddisr1l1kv  
1nr1lvengdtv1v1iehn1d  
viktadyi1id1gpegsggg1t1vatgt1pedi1aqt1kssyt1gky1kev1erdkqntedk  
>tr|D9RFE0|D9RFE0\_STAAJ  
myrespsmmel1vvrehni1kaik1kvkknkgappi1dgmkvsei1qghfaqyf1pk1kqk1legtykpqavk1kveipkangkr  
1vgipvvrdrvi1qqaikqv  
i1epsidrtf1sk1shg1fr1prnstg1tal1kecasyyeagyti1avdcd1k1qcfdn1hdk1lmy1l1ferhikdkavst1firrs1qv  
gaid1sgevaerki1gapqg  
gvist1l1cniy1l1hel1dke1lkrnhrf1vryaddfvi1fvk1tkrager1vmsikt1fihkt1k1levnndk1skvgspr1k1flsc  
1mskvngtyr1fr1ptteakr  
n1lkrn1kwl1trrs1rpgsfqdi1iteinrvtrgwinyfgkgf1krfl1qelepw1nrrir1q1l1lkrwkk1tkkykm1rkygld  
hdsamri1assr1kkywr1ss  
thev1hral1t1tkr1l1hk1wg1l1s1tq1laetayary  
>tr|D9RFE1|D9RFE1\_STAAJ  
mtrfrcrvnhiniyiemnpleakfrtss1rswktdqadahk1laqlapt1katet1smyedi1ffelrerarfh1e1eneqnr1  
kfeiveq1l1hqt1fpg1lek1f  
ssrys1vial1n1aer1fth1pdmvrnm1didt1l1shifh1stdkg1l1smnkaenyahq1lvni1aresypnvdrhs1flvekar1l1ir1q  
1kqsiq1h1kq1l1dedmi1qla  
q1ldcfehi1hs1pgig1k1saami1gel1gdi1trfksnq1lnafvgidikryqsgstqsrda1nkrgnkarr1l1fwv1mni  
i1rgqhhfdnhv1vdy1yyl1r  
kqphekahktavi1acin1l1kti1hyl1vmnqk1lydyqmsph  
>tr|D9RFE3|D9RFE3\_STAAJ  
mgivfnyidpva1fn1gp1svrwygii1avgil1gyfvaqral1vkag1lhkdt1vdi1ifysal1fgfiaariy1fvi1fqwpyya  
enpgei1ki1whggia1hgg  
l1ggfi1ag1v1ckvkn1npf1qigdivapsi1laqg1grwgn1fmnheahgg1pvsrafleq1l1h1pnfi1enmyingqyyhpt  
f1yesiw1dvagfi1il1vnir  
kh1kl1getff1ly1iwysigrffieg1l1rtds1l1mts1nirvaq1l1vs1l1l1isis1l1ivyrri1kynpp1lyskvga1lpwptkkv  
k  
>tr|D9RFE4|D9RFE4\_STAAJ  
mrkflsktyhhtnplwhvyrlvkfskvfknviiiefskfipsmvlkrhiyqilninignqssiaykvml1d1fypel1iti  
gsnsvigynvt1l1thevl1v  
defrygpvt1igsnt1liganati1lpgit1igdnvkvaagt1v1vskdip1dngfaygnpmyikmirr  
>tr|D9RFE5|D9RFE5\_STAAJ  
maqknnnvi1pmtfddafyrkmanqkfkqreykraaeyfekvle1spdd1lei1q1dyaqcl1vq1lgiakkaeh1fydni1ynr  
h1ledsfye1l1sq1nievnep  
nkaf1fg1iny1v1sdd1qdyrde1dqmf1dvkyqseeqie1leaql1fvvqil1fqyl1fsqgr1kdaknyv1l1hqpqevqdhrvvr  
n1lamcy1ly1geydtaka1l  
yea1l1qedst1dya1l1chyt1l1lyntk1eneqyqky1k1il1nk1vpmnddes1fk1giv1l1sy1lkqyrasq1l1ly1p1y1kkgk1fls  
i1qmy1nalaynyy1l1geede  
shyywdk1kq1iskveighapwvienskevfdqhil1p1l1qsddshyr1lyg1f1l1dq1ngkeivmtesiwq1v1en1l1nyek1  
y1ty1l1vqg1l1nk1ldf1ihr  
g1l1tyhne1l1fvsend1lmvawinqge1liaekvd1tdvepyigafiy1lyfknqprnvtkkqittw1gitqy1k1nkmi1efl  
l1si

Tsompanidou\_et\_al\_Supplemental\_FASTA\_File

>tr|D9RFE8|D9RFE8\_STAAJ  
mrqikvvliggggtglsvmarglrefpiditaitvtvadnggstgkirdemdipagdirnviaalsdsesvlsqfqrfe  
enqisghslgnlliamtn  
itndfghaikalskiinikgrvipstntsvqlnavmedgeivfgetnipkkkkidrvflpndvqpmeeaidalreadl  
ivlgpgslytsvisnlcvn  
gisdalihsdapklyvsnvmtqpgetdgysvkdhidaihrqagqsfidyvicstqtfnraqvlkkyeekhskpvevnael  
ekesinvktssnlveisen  
hlvrhntkvlstmiydialelistipfvpsdkrk  
>tr|D9RFF1|D9RFF1\_STAAJ  
mkqyliitgggtgmvgsqlvneikkdsshitiltrhdqisndkkisyvnwaksgwehkvpqnidvvinlagatlnkrwtpey  
kqtlmlsriqstqalyelf  
ksrnrnapkvlfnasatgyppdlfmsytevyktlpfdflsdivyqwerfaqqfeqlgtrvvigrfgmilnseggalqtmk  
lpyeyyiggklgsgqqwys  
whindliqailflinnesasgpfnltapiperqnlfgytaramhkphetwapslamrliilqgmstvvldtqkvlpnki  
qalgfqfkylnkmaledl  
ine  
>tr|D9RFF2|D9RFF2\_STAAJ  
msnqnydynknedgskkkmsttakvvsiatvlllllgglvfai fayvdhsnkakermIneqkqeqkekrqkenaekerkkk  
qeekeqneldsqanqyq  
lpqqnqyqyvppqqqaptkqrakeendkaskdeskdskddkasqksddnqkktddnkqpaqpkppqqptpkpnnnqq  
nnqsnqqtppapqqnsqs  
ttnkqnnandk  
>tr|D9RFF5|D9RFF5\_STAAJ  
makkivsdldlkgktvlvradfnvplkdgeitndnrivqalptiqyieqggkivlfshlgkvkeesdkaktlirpvaed  
lskkldekvfvpetrgek  
leaaikdlkegdvllventryedldgkkeskndpdlgkywaslgdvfvndafgtahrehasnvgisthletaagflmdke  
ikfiggvvndphkpvvail  
ggakvsdkinvi knlvniadkiiiggmaytflkaagkeigisllleedkidfakdllekhgdktivlpvdtkvakefsnda  
kittvpsgsipadqegmdi  
gpntvklfadelegahtvvwngpmgvfefsnaqgtigvckaiianlkdaiteiggdsaaaaaislgfendfthistgga  
sleylegkelpgikainnk  
>tr|D9RFF6|D9RFF6\_STAAJ  
mrtpiagnwkmnktvqeakdfvna lptlpdskevesvicapaildal ttavkegkaqgleigaqntyfedngaftget  
spvaladlgvkyvvhgse  
rrelfhetdeeinkkahai fkhgmpii cvgetdeeresgkandvvgeqvkkavaglseqlksvviayepiwaigtgks  
stsedanemcafvrqtiag  
lsskevsatriqyggsvkpnnikeymaqtdidgalvggaslkvedfvqllegak  
>tr|D9RFF7|D9RFF7\_STAAJ  
makkptalii dgfanresehnavklankpnfdryynkypttqieasgl dvglpegqmgmsevghmnigagrivyqslt  
rinksiedgdfendvlnn  
ai ahvnsdstlhi fgllsdggvhshykhlfallelakkqgvekvyvhafldgrdvdkksalkyieeteakfnelgigqf  
asvsgryyamdrkrwate  
kkaynai rnfadptyatakegeasynegl tdefvvpfivenqndgvndgdavi fynfrpdraaqlseifanrafegfkv  
eqvkdlyatftkyndnid  
aai vfevdlnntigeiaqnnnl tqlriaetkeyphvtyfmsggrneefkgerrrlidspkvatydlkpemsayevkdal  
lee lnkgdldliilnfanp  
dmvghsgml eptikaieavdec lgevvdkildmdgyaiitadhgnsdqvl tdddqpmthtttnpvvivotkegvtlretg  
rlgd laptll dlnveqpe  
dmtgeslikh  
>tr|D9RFF8|D9RFF8\_STAAJ  
mpii tdvyarevldsrnptvevev ltesgafgralvpsgastgeheavelrdgdksrylgkgvtkavenvneiiapei i  
egefsvldqvsidkmmial  
dgtpnkgkl ganailgvsiaavaaadllgqplykylggfnqkqlpvpmninvnggshsdapiaf qefmilpv gattfke  
slrwgtei fhnlksilskr  
gletavgdeggfapkfegtedavetii qai eaagykpgeevflgfdcassefyengvydyskfegeygakrtaaevdy l  
eqlvdkypii tiedgmden  
dwdgwqql terigdrvqlvgddlvtnteilakgiengignsilikvnqigtltetfdaiemaqkagyttavvshrsgete  
dtiadiavatnaggiktg  
slsrtdriakynqllriedelfetakydgiksfnldk  
>tr|D9RFG1|D9RFG1\_STAAJ  
mqiklpkpfefeegkravlllhgftgnssdvraqlgrflqkkytsyapqyeghaappeeilqsspfwfkda ldgydylv  
eggydei vvagls lggdfa  
lklslnrdvkgivtmcapmggktegaiyegfleyarnfkkyegkdqetidnemhhfkptetlkel seal dtikeqvdevl  
dpilviqaendkmi dpqsa  
nyiydhvdsddkdi kwysesghviti dkekeqv fediyqfl esldwse  
>tr|D9RFG2|D9RFG2\_STAAJ  
mnlkqsi eei inkpeyemsvsdfqdal glssadsfrdlikvlveleqsgliertktdryqkhhsskghsklikgtlsqn  
kkgfaf lrpdedmedi fi

Tsompanidou\_et\_al\_Supplemental\_FASTA\_File

pptkinraldgdvtiveihqskgehkgkiegevkseikhsvtqvvgtysearhfgfvi pddkrimqdifipkgqslgavd  
ghkvlvqitkyadgsdnp  
ghisailghkndpgvdi lsiiyqhgieiefpdevlqaeatpdnieidseikgrhdlrneititidgadaklddaisvkk  
langntqltvsiadvsyyv  
tegsaldkeaydratsvylvdrvipmiphrlsngicslnpndrlltscrmeiddsgrvvkheifdsvihsdyrmydav  
nqii tek dptireqyneit  
pml d laqdl snrli qmrkrgeidfdiseakvlvnedgiptdvqlrqrgegerliesfmlianetvaehfskldvpfiyr  
vheqpsdr l r g f f d f i t n  
fgimikgtgedihpttlqkvqeevegrpeqmvistmmlrsmqqahyddvnlghfglsaeyythftspirrypdltvhrli  
rkylijeksmdnkevkrwed  
klpelahtskrerraieaerdtdelkkaemyiqhigdefegivssvanfgmfie l pntiegmvhianmtddyrfeerq  
maligerqakvfrigdtvk  
vkvthvdvderlidfqivgmp l pknrsqrpargkti qaktrgksldksksddkghkkkgkqrkgknerkndksngskhk  
pfykdksvkkkarrkkk  
>tr|D9RFG4|D9RFG4\_STAAJ  
mndls l s s f l k r s n k f m q f n c f i c l i l i i v f y i i g m n i q d f s d f p s k d l n h k v t y n f n g f l e i f v n n a f i v p l v s l i l t i  
i p i p y l y f i p t i s t i y s l s  
v i i g v t f s y k l n e g i a i f i g i l p h g i l e i y l t s i e l s m l f l l n a y i r k n s m l f r k r k e a l p k f f v l l k s i v k y l l i f l  
p v a f l c a l i e i t v t p t v y k  
f l t n i i  
>tr|D9RFG5|D9RFG5\_STAAJ  
mkkvmgillastlilgacghqdsakkestshkkkendneelneelkefkskknmdikikgdtivsdkfeakikepfiin  
ekdekkyiafkmeitakk  
ddkdl n p s s i s h d y i n i t q d d k n t v n k l r d g y l l s d k k y k d w t e h n q d i k k d k t a q a m f i y e l r g d g n i n l n v h k y s e d  
k t v d s k s f k f s k l k t e d f s  
h r a e t r e e v e k k e k e y e e e y k k e q e r e k e k e q k d d d h s g l d e v  
>tr|D9RFG6|D9RFG6\_STAAJ  
m i n i s a i g s i g t f i m a l f y f v s v s v q l y m k i s f l p a l g f n q i l l e r g g n q l n i m s a t e e h h k d y i k l y n l g g g a a k  
k i a i e v l l g n d k v i q k k y v  
n i l p s k e g y m l p i n k n v y e e l e r t i e n n g y e a d l n v r m t y y h n v s r k q q e v i l k g q i d r f n t y n n k e i y d l q f i  
>tr|D9RFG7|D9RFG7\_STAAJ  
m q i k q i h q h d f a q v d q l i r t a f e n s e h y g n e s e l v d q i r l s d t y d n n e l v a v l q n e v v g h l l s e v y l d n e a q r e i g l  
v l a p v s v d i h h q n k g i g k r  
l i q a l e r e a r l k g y n f i s v l g w p k y a n l g y q r a s m y d i y p p y d g i p d e a f l i k e l k v n s l a g k i g t i n y t s a f e k i  
>tr|D9RFG8|D9RFG8\_STAAJ  
m m k k q e k h a i r k k s i g v a s v l v g t l i g f g l l s s k e a d a s e n s v t q s d s a s n e s k s n d p s s v n a a p k t d n t n v s d s n t t t  
n t n s d e t n v a q n p a q g e t t  
q s a s t n a t t e e t p v t g e a t t a n q a n t p a t t q s s n t n a e e l v n q t s n e t t s n d t n t v s s v n s p q n s t n a e n v s t t q d t s t  
e a t p s n n e s a p q s k d a s n k  
d v v n q a v n t s a p r m r a f s l a a v a a d a p a t g t d i t n q l t n v t v g i d s g t t v y p h q a g y v k l n y g f s v p n s a v q g d t f k i t v  
p k e l n l n g v t s t a k v p p i m  
a g d q v l a n g v i d s d g n v i y t f t d y v n t k d d v k a t l t m p a y i d p e n v t k t g n v t l t t g i g t n t d s k t v l i d y e k y g q f h n l  
s i k g t i d q i d k t n n t y r q t  
i y v n p s g d n v v l p a l t g n l i p n t k s n a l i d a k n t d i k v y r v d n a n d l s e s y y v n t s d f e d v t n q v r i s f p n a n q y k v e f p  
t d d d q i t t p y i v v v n g h i d  
p a s t g d l a l r s t f y g y d s n f i w r s m s w d n e a f n n g s g s g d i d k p v v p e q p d e p g e i e p i p e d s d s d p g s d s g s d s g s d  
s n s d s g s d s g s d s d s a s d s  
d s d s g s d s g s d s d s a s d s n s d s g s d s g s d s d s a s d s d s d s g s d s g s d s d s a s d s d s a s d s d s a s d s d s a s d s d s  
a s d s a s d s a s d s a s d s a  
s d s d s d s d s d s d s n s d s d s a s d s d s g s d s d s d s d s d s d s d s d s d s d s d s d s d s d s d s d s d s d s d s d s d s d s d s d s  
s d s d s d s d s a s d s d s g s d s  
d s d s d s d s d s d s d s d s e s d s d s d s d s d s a s d s d s g s d s d s d s d s d s g s a s d s s s d s d s d s d s d s d s d s a s d s d s  
g s d s d s s s d s d s g s d s d s d  
n d y d s e d s n s d s d s g s n n n v p p n s p k n g t n a s n k n e a k d s k e p l p d t g s e g e a n t s l i w g l l a s l g s l l l f r r k k e n k  
d k k  
>tr|D9RFG9|D9RFG9\_STAAJ  
m k n k l l v l s l g a l c v s q i w e s n r a s a v v s g e k n p y v s e s l k l t g s k s t v v t p a m y k e n l e s l i s s l s f a d y e k y y e p e f k  
d v v k k y q r f m a e d a a l k k  
f f r e e y f i k e n k n s d e m l g i t q e r y k y i y d k l k s n n d e f m r e i k e i k d s h p d l k d f a n q q h e s d v k i n d l e n k v l m l g y  
a f k n e s e a r l n l y s k l d l i  
l g y k s y e r l y k k p t n s r m l k e k i e d l e s i i d e f f e e i n k e r p k d i p v l s e y e h e n k e k a i t l k s d t e a a k n d e t k r s k r s  
k r s l n t q n h k s a s q e v s e q  
q k a e y e k r a e e r k a r f l d k q k n k q t p l m s l e y d f e h k q r v d n e n d k q l v v s a p t k k p t p p t y t e t t t q v p m p a v e r q a q  
q q i v y k t p k p l a g l n g e s h  
d f t t t h q s p t t s n h t h n n v e f e e t s a l p g r k s g s l v g l s q i d s s h l t e r e k r v i k r e h v r e a q k l v d n y k d t h s y k d r l  
n a q q k v n t l s e g h q k r f n k  
q i n k v y n g k  
>tr|D9RFH0|D9RFH0\_STAAJ

Tsompanidou\_et\_al\_Supplemental\_FASTA\_File

mkkklfvltmstlfatqfmsnhasltesvdknfvvpsginkipsydefksapkvnvsnltdknfvvseglnki  
sdpsaaskivdknfvvps  
klgnivpeykeinrrvvnatnnpasqqvdkhfvakgpevnrfitqnkvnyhfitqtthykkvitsyksthvhkhvnhatd  
sinkhfi vkpseaprythp  
sqslminhyfavpgyhahkfvtppghasikinhfvcvvpqinsfkvippyghnshrmhvpsfqntttathqnakvnkaydyk  
yyysykvvkgvkkysfsq  
sngyikgkpslnikvnyqavpsyspthyvpefkgslpapr  
>tr|D9RFH1|D9RFH1\_STAAJ  
mkrkvlvltmgvicatqlwhpnhana ltesietnfvvksdnknllqthteitteekfsiveksqlnklkslndnyie  
ydltngtgi kkgwlygys  
eidsshftdrkrvirrdhvkeagslindykytqkyedfakatakvtlsqshqnylnkqidnvnqiektekr  
>tr|D9RFH2|D9RFH2\_STAAJ  
mteyllsagicmaivsiligmaisnsvskgqykrffffatsclvlilvvvsslssanasqtdngvnrgsedptvysa  
tstkkllhkepatlikaidg  
dtvklmykgqpmtrllvdtpetkhpkkgvekygpeasafkkmvenakkievefdkgqrtdkygrglayiyadgkmvn  
ealvrqglakvayvykpnn  
theqllrkseaqakkkklniwsednadsgq  
>tr|D9RFH4|D9RFH4\_STAAJ  
msewhinnqstkpfligqaeqlsivkplpngsfqilteidlengvnnidhslsvsvdlkaleisifdav  
>tr|D9RFH5|D9RFH5\_STAAJ  
mnelteqkytiakfyklyiersnnetetvanffgnakdarenyfcdryqdfntncqilinqkyltgevladdniynis  
ilnktfiefeqnfg  
>tr|D9RFH6|D9RFH6\_STAAJ  
mnyikrtiillilfvvvspinspktiadkysei qddkfqlqpgdiitkgpvmwgffghcsiaiddktilqiepggdkp  
ttqsfesfkynyasgkndw  
mkvyrcsyppgagkaadwvkknyentnhrylvtnlnskkftyctkiyqaykfgvseksvksyglhiispyaikdnfid  
pyklrlvkt  
>tr|D9RFH8|D9RFH8\_STAAJ  
mnillnainivittfvifnilitynkdlddlwllpgiicgvilivsfiamitknwlseilffinivlvlyyiyipi  
fysftg  
>tr|D9RFH9|D9RFH9\_STAAJ  
mtfynfimgfndntpfilaehvsedkafprleerhqvirayvisnytdhqliettnraislyman  
>tr|D9RFI2|D9RFI2\_STAAJ  
mvtaiihgfilaigliplgaqnvfinqqanqpyryvlpaiitaglsdsliliiavvgvsiiimslpvlqaiiyivgl  
iflmyawtiwhdkpstdg  
eaqimspmkqvsfalsvllnphaildtigvigssaalysgsnkiaftiacisvswlwffllailgkmvgsidktgkllt  
iinkissiviivalmilq  
kllqllf  
>tr|D9RFI5|D9RFI5\_STAAJ  
mthvevatiapqlsieetliqkinhridaidvlelridqienvtvdqvaemitklkvmqdsfkllvtyrtrlqgygqf  
tndlylnlisdlaningid  
midiewqadidiekhgrithlqqynkevvishnhfestppldelqfiyfkqkfnpeyvklavmphnkidvlnllqams  
tfsdtmdckvvgismsklg  
lisrtaqgvfggaltgygigepqapqgidvtdlkaqvtly  
>tr|D9RFI6|D9RFI6\_STAAJ  
melqqaianrrsvkkfkdkmhiddallyqai ekaadapnhgmrepwrvvhvpkdrldgmskdiskfafpneldkqqchyd  
avtklqgmllilktprq  
rqndenyfafgayaqnlmlllyeagigtcwksplyiydpkvrktlgikkdevlagflyltdleedmpkaprknrlitly  
>tr|D9RFJ0|D9RFJ0\_STAAJ  
mlniqdvshlskkeqkaynrfvesvenglpvlpci emdlkemqeetlsqskiggmpflksfkdipldennvpmvllaqi  
nlnldlpeqqel fpvnegil  
qfwissedqmygmsenlkgnninsrlvyikepitdlskldiqahksl dadnedipfsgafsiefrlskqtitctdykyd  
edvialwnknpsfalksm  
fggydelmepvcntftarepfnqlggypyfdqidprtndqelkmydrvllqidstrdgnsiiwgdlgianilvkstdle  
amkfdymyswdcs  
>tr|D9RFJ1|D9RFJ1\_STAAJ  
maivnkviivegskdkrvqqviaepvniicthtgmsidklldmieslydkqvfvladsddegdrirnwfkrylsesehi  
fidktycqvancpkqylah  
vlskhgftckketpflpninnerlvlvne  
>tr|D9RFJ5|D9RFJ5\_STAAJ  
mkkllfgllvltfavvllaacngsgskgsddkkitvgaspaphaeilekappllekkgyeldiktindyttpnkllkgei  
danyfqhtpylntekkdkg  
yki vsagdvhl epmavyskkykslke lpkgatvyvsnpaeqgrflkffvdaglikikkgvkiedakfsditenkkdikf  
nnkqsaefl pkiyqnedad  
aviinsnfaieqklnpkkdsiavesakdnpyanliavkeghqddkkikalievlskdiqdfinekyngavipak  
>tr|D9RFJ9|D9RFJ9\_STAAJ  
mtdilni seeqlvdyskahnepswmte lrkka lkl tetl empkpdktl rkwd fdsfkqhdkgdvyqs lsql pesvre  
iidvdhsknlviqhnaia



Tsompanidou\_et\_al\_Supplemental\_FASTA\_File

ytqvddnaskdgvivegladalnmhsdlvqkyfmdavtvdehritalhtalvnggvfyvvpknvvvehpvqvvlhdde  
nasfynhviivteesaevt  
yvenylsnasgegnqlniiseviagansnitygsvdymdkgftghiiirrgiteadasinwalglmnegsqiidnttnlfg  
drstsslksvvvgtgeqki  
nltskivqygetdgyilkhgvmekehassvfngigyikhggtksianqesrvlmlsehargdanpillideddvqaghaa  
svgrvdpdqlylmsrgis  
qraerlvihgfldpvvreelpiedvkrqlrevierkvs  
>tr|D9RFK0|D9RFK0\_STAAJ  
maehsfvnevikdfpildqkvngkrlayldstatsqtpvqvlvledyykrynsnvhrvgvhtlgslatdgyenaretvr  
rfinakyfeeii ftrgtta  
sinlvahsygdanveegdeivvtemehhani vpwqqlakrknailkfipmtadgelnieidikqtindktkivaiahisnv  
lgtindvktiaeahqhg  
iisvdgaqaaphmklmdegnadfyfsghkmlgptgigvlfgkrellqkmpiefggmidfvskydatwadlptkfea  
gtpliagaiglaearyle  
rigfdaihkyeqeltiyaeqmsaiegieiygppkdcragvitfnlqdvhphdvatavdtegvavraghhcaqplmkwln  
vsstarasfyiyntkedvd  
qlinalkqtkeffsyef  
>tr|D9RFK1|D9RFK1\_STAAJ  
mnfnndqlyrsvimdhynprnkgvldngsmtvdmnptcgdri rltfdieggiikdakfegegcsismasasmmtqav  
kghslgeamqmsqeftkmm  
lgedyvi teemgdiealqgvsqfparikatlawkalekgtvakegkaegttee  
>tr|D9RFK3|D9RFK3\_STAAJ  
myfvlaiftiisavslgysiqacasshninayyalrsrslplflaifslvihsaiflitisiamilvqvl daivgyksk  
dvfkygplatsvvnliil  
ivflf  
>tr|D9RFK4|D9RFK4\_STAAJ  
miaaiiilifisffffsgsetaltaanktkfkteadkgdkkakgikvllekpsfittiliggnvanillptlvtimalrw  
gisvgiasavltvviilis  
evipksvaatfpdkitrlyvpiinicvimfrpitlllnkldtsinrslskgppqehqfskeefktmlaiaghegalneie  
tsrlegvinfenlkkvdvd  
tprinvtafasnatyeeyvetvmnpytrypviegdi dnvigvfhskyllawsnkkedqitnysakplfvnehnkaewv  
lrkmtisrkhlaivldefg  
gteaivshedlieellgmeiedemdkkekeklsqqqiqfqrknrvsi  
>tr|D9RFK5|D9RFK5\_STAAJ  
mwnknrltqm lsieypi iqagmagsttpklvasvsnsnglgtigagyfntqqledeidyvrqltsnsfgvvnfvpsqqsy  
tssqienmnawl kpyrral  
hleppvki teeqqfkchidtiikkqvpvccftfgipnesiikrlkeanikligtatsvdeai anekagmdaivaqgsea  
gghrgsflnpgnqlpmvgt  
islvpqivdvvsipviaaggimdgrgvlasivlgaegvqmgtafltsqdsnasellrdai insketdtvvtkafsgklar  
ginrfrfeemsqyegdipd  
ypiqnel tssirkaaanigdkelthmwsqsprlatthpantimsniinqinqimqyk  
>tr|D9RFK6|D9RFK6\_STAAJ  
minigltgwgdhyslyedlerqtdklktyaghfpvvel datyiaipernilkwiketpdtfefvkihaqltlhadykt  
fadtrqelfdqfknmllep  
htqkklamvlvqfppwfdcaqnikiylyvrqqqlqafpmcvefrhqswwsfdafkeqtlafltehqiihavvdepqvkdg  
vplvnritneiafvryhgr  
nhygwtkkdmsdqewrdvrylydynekelidlaqkaqilaqkakkvyvifnnsngghaannaktyqrllnieyeglapqq  
lklf  
>tr|D9RFK7|D9RFK7\_STAAJ  
mlltitllvliglgsaiigsivgiggiiivptlvylgvehgllhnittqiaigtssvilivtglssslgylktkqvdk  
ngsiflfgllpgsllgsfi  
sryltfesfnlyfgiflivaillmvrnkikpfkifdkpkyektyvdakgktyhysvplfafittfligiltglfgigg  
galmtplmlivfrfpphva  
vgtsmmmi ffssvmssighiaqghvawgyaailiissyfgakigvknqsiksdtvvtllrtvmlmgilyliirali  
>tr|D9RFK8|D9RFK8\_STAAJ  
mrltiyhtndihshlheyerikaymaehrprlnhpslyvdldghvdlsapiteatlgkknvallneakcdvatignnmg  
tishealnhlydeakfivt  
csnvidesghlpnivsscikdidgkivilfaatapftpfyraldwivtdplesikeeielqrgkfdvlivlshcgiffd  
etlcqelpeidvifgshth  
hyfehgeinngvlmaaagygnylgevnltfeahkvvhtakiipletlpevksfeeegktlmsnpviahpvlkrsmn  
hiteaayllaqsvceytha  
qcaiinagllvkdivkdevteydi hqmlphpinmvrvr lsgvklkei iaksnkqeymyehaaglgfrgnvfgyiylng  
yihstgryylngeeieddk  
eyvltidmytfgryfpptlkelpkeylmpelfrdifkekllay  
>tr|D9RFL1|D9RFL1\_STAAJ  
midmylyddneesqvqfvfgehgyrdlmlvhtnrhygktlvlnmqtnkfgiigtddlkeegyiahilgvnseegdeit  
eylnevih  
>tr|D9RFL2|D9RFL2\_STAAJ

Tsompanidou\_et\_al\_Supplemental\_FASTA\_File

myfvdkdkltqklaylqaltddyheskhnhyafiaeriqamliessvdignmiidafilrdpignykdvidilelenvitket  
qqainktvdirkqftydyi  
aldikvimpfddalpyykqfitevtflhqenvpvtafgkgenq  
>tr|D9RFL4|D9RFL4\_STAAJ  
mvkivvsrkkipdkfyqq|sklgdvvmwqkslvmpknqfvta|rdadacfitlseqidaeilqspnlkvianmavgydn  
idvesatannvvvntnptnv  
ltettaelgftlmlaiarriveaekyveadawqswgpyllsgkdvfnstigiymgdigkafarrlqgfntkilyhnrsr  
hkdaeadfnatyvsfetll  
aesdfiictapltkethhkfnaeafaqmknadainigrqivdeta|lidalnkeilacgl|dvlane|pidhthplmgrd  
nvlitphigsasvttrdnm  
iq|ciknieavmtngvphtpvn  
>tr|D9RFM4|D9RFM4\_STAAJ  
mptvilteaaayevkdm|kanempdgy|kikvngggctgl|tygmgaeeappgenvleyfgl|kvlvdkkdapv|ngttid  
fkqslmgggfdidnpnaia  
scgcgssfrtakvagnpenc  
>tr|D9RFM6|D9RFM6\_STAAJ  
mnfkl|nnt|sneint|iigipeh|nqlerisfnhiditesler|lkhqhiigskvgkiy|ttafdvqdq|tyr|litv|glgnlk  
trsyqdm|kiwgh|lfqyik  
sehiedtyllm|dsfiskydq|sdv|macgiqseratyef|dhyksskkapf|ktn|nlises|lieldfi|hegisig|qsina  
rdfs|nmp|pnv|ltpetfaed  
ivnhf|kntkvkvev|kdydt|lvseg|fgllqav|gksgkhkpr|lvtityng|kdkdeapialv|gkgityd|sggysik|tkngmat  
mkydm|cgaanv|vgi|ieaas  
rlq|pln|ivgvl|acaen|mineasm|kpddv|ftal|sgetvev|mntda|egr|lv|ladav|yyanqy|qpsv|imd|fat|l|t|gaa|ival  
gddk|aaafes|nsk|vil|ndi  
lq|ssk|vde|mvfel|pitateras|ikh|sdiad|lvnht|ngqg|kal|faasfv|thfsg|qtphih|fdiag|pattnk|asyng|pkgp  
tgfm|ipti|vqwl|kqg  
>tr|D9RFM8|D9RFM8\_STAAJ  
mth|lletfems|idhqedg|lvvismsv|tdkvkq|pfgylhggasial|getacs|lgsan|lidttk|fipl|glemnan|hihsakd  
grvtatae|i|hqgksthv  
dikikndkeq|litvmrgt|vai|kplk  
>tr|D9RFM9|D9RFM9\_STAAJ  
mhw|tiigg|gigtai|aqkl|lssgl|ttdr|l|tiid|phetf|cqr|fnsy|tnriempyl|rspiv|hvh|pqp|fhl|kqfak|qh|qytn  
afygy|qrpe|l|tmf|ldhia  
haskqy|q|edc|lvqg|lvq|tdk|qedkwhik|ledgqi|itt|dcv|viaig|stn|ipf|mpd|ilkdk|qn|vni|f|ek|hd|qv|vydkt  
dhiv|gsg|taah|la|k|lln  
hddd|k|h|l|w|lnk|die|h|df|dad|pgw|lg|pkn|ms|f|l|stk|s|mp|erna|iv|qr|er|h|k|g|s|mp|h|ely|l|r|l|k|h|k|n|g|r|in|v|h|k|t|p  
itqi|sdg|l|intends|vpyq  
qimvatg|feq|dfms|qpl|kq|liq|nydapi|nec|ny|pvise|k|lew|ipn|lfv|agcfad|le|l|gp|fgr|nm|ggr|kaa|erie|qaf|l  
klqqysa  
>tr|D9RFN3|D9RFN3\_STAAJ  
miesn|mlv|tl|vip|vitai|llv|fig|krpm|ikryva|l|ggt|ll|t|l|vaai|in|lanv|khg|pl|rvel|gsw|kapys|iv|fv|ldifs  
all|its|i|itai|vil|ysy  
qtigiereryyyy|fsvl|l|ligi|igaf|ttg|di|fn|lvf|ffev|flm|ssy|fl|vig|stki|ql|qet|iky|vl|nv|v|sss|ff|vm|gv  
ailysv|vgt|ln|ladi|snkl  
an|sah|dsg|lvni|vfi|l|fi|fv|fat|kag|v|fpm|fvw|lpsayy|appi|iaff|gall|tkv|gyai|art|sl|ffs|dnv|sfshyv  
ilfl|all|ti|ifgc|vgavay  
anikk|i|lyn|vmi|av|gvi|lv|gvam|tes|gmigai|yyt|l|hd|ml|vk|la|l|fl|ligi|mit|gtad|l|rq|fgg|lik|ryp|vl|gwsf  
fiaa|slag|ipp|lsg|fygk  
ffiv|qstf|erg|fy|sg|viv|l|ss|lv|lys|vir|if|l|qg|ffg|qpk|gyd|lnnk|vdv|kyl|ttia|ivav|vitv|lyg|lsady|lypm  
vkag|etf|ynp|sty|vkav|l  
ggk  
>tr|D9RFN6|D9RFN6\_STAAJ  
msllhiavil|plifali|ipilyrffkrih|lgwfv|lpvpivifiyml|t|lik|ttmsgntvmkt|lnwmp|hfgmn|fdly|ldg|lg  
llfs|llis|gigs|lv|lysi  
gylskseq|lgnfy|cyll|fmgam|lgv|l|sdnvi|ily|fwel|tsf|ss|fl|isf|w|rerqasiygaqksliitvfgg|sl|l|gg  
i|ll|aiptq|sfsiqymiqh  
aseiqnspffifamilimigaf|tk|saq|p|fyi|w|pdameapt|pvsay|l|hsat|mvkaglyliar|mtpi|faasqgwiwtvtl  
vglit|l|fwas|lnat|kq|qd|l  
kgilafstvsq|gmimam|lgigaisyhyqgddski|yaaftaai|fhlinhat|fkga|l|mitgavdhstgtrdvkkl|gg|ll  
tvmpisftitvital|smag  
vppfngflskesf|l|ettftasqan|l|fsvdt|l|gy|l|fpi|igiv|gsvft|fvysik|fimhi|ffgqy|kpeql|pkkahevsilml|l  
spailat|lviv|fgl|fpgil  
tns|i|epat|ss|inht|v|iddve|f|hm|fhg|l|tpaf|l|st|lvii|lgill|vt|fsy|wvkl|l|qr|qpgk|l|t|fny|wyn|rsan|vipnys  
ekmtssyvt|dys|rnn|lvii  
fgal|ill|tfvt|v|fsv|pfn|nfkdv|spiri|fevcivil|l|saaf|l|il|faksr|l|fsi|im|savg|yavsv|l|fi|ffk|apd|l|alt  
qfvesistal|fl|lcfyhl  
pn|l|ryne|krs|f|l|tna|l|aggv|l|svii|igliay|gnrh|fesiskfyqehvyd|lahgkn|mvn|vil|vd|frg|mdt|lfessv|l  
giaglav|ytmik|l|rkk|rqt

Tsompanidou\_et\_al\_Supplemental\_FASTA\_File

qgnevknhe  
>tr|D9RFP0|D9RFP0\_STAAJ  
mkskyep1fdkvelpngvelrnrflaplthissndngtisdelvpyiekrsvdgitinaasnsdvgkafpgqpsiah  
dsdieglkrlatamknga  
kalvqihhggaaqalpeltpdgdvvaspislksfgqkqehsaremtneeieqaikdfgeatraieagfdgveihganhy  
lihqvspynrrndvwan  
qykpavieevlkeakeaygnkdfivgyrlspeaespgitmeiteelnkishmpidiyihvsmdthattregkyagqe  
rplihkwingrmpilig  
siftadealdavenvgdlvaigre11ldyqfvekikdgredeiinyfdperednhltpnlwhqfnegfyp1prkdk  
>tr|D9RFP1|D9RFP1\_STAAJ  
mtksekiieltahygnhlylplpiviseagvwdkpegnkymdm1saysavnqghrhpkiiaqalkdqadkv1vsrafh  
sdnlgeyekicklagkdk  
alpmntgaeavetalkaarwaydvkgepnkaeiafngnfhgtrmapvslsseayqrgygp1ldgfrkvdfgdvdal  
kaainentaav1vepigge  
aginippegylkaircldehnlfiadeiqag1grsgklfatdwdnvkpdvylgkalgggvfpi1svladkevl1dvft  
pgshgstfggnplacaasi  
aaldivded1pgrsle1gdylfkeq1kqinhpsikevrgr1figvelnesarpycealkeeg11ckethdvtirfapp1  
iitkeeld1alek1rhvfq  
>tr|D9RFP3|D9RFP3\_STAAJ  
mtnssksftk1maasavftmgflsvptagaetnqiankpaiaqwhnt1tnerfttiahrgasgyapehtfqaydkshne  
1kasyieid1qrtkdghlv  
amhdetvnrtnghgkvedy1delkq1dagswfnkkykpyarasyknakvpt1deilerygnanyyietkspdvvtgm  
eeq1las1kkhh11nnnk1  
knghvmiqsfsdes1kkihqnkhvplvklvdkgelqqfndqr1keirsyaig1gpdytd1teqnthh1kdlgfivhpyt  
vnekadm1r1nkygvdgvf  
tnfadkykevik  
>tr|D9RFP7|D9RFP7\_STAAJ  
msfhqveewfeifrgfy1pgfilliyiraiipvfplalyiliniqaygpilgiliswlg1isgtftvylickrlvnterm  
qrikqrtavqrlisfidrq  
glip1f11cftp1tnt1infvas1shirpkyfiv1lassklvst1ilgy1gkeitt1lthp1rgilm1vvlivfwivgk  
kleqhfmgskke  
>tr|D9RFP9|D9RFP9\_STAAJ  
mkkel1ewi1siavafv1l1fivgk1fivtpytikgesmdpt1kdgervavni1igyktgglekgnvvvf1hanknddyvkrvi  
gvp1gd1kveykndt1lyvngk  
kqdepy1nyn1khhkqgdy1tg1fvkd1pnanpksnv1pkgy1lv1gd1nevskdsraf1g1idedq1vgkvs1frfw1p1se  
fkynfn1pentkn  
>tr|D9RFQ0|D9RFQ0\_STAAJ  
mt1hay1gragtgkstkml1teikqk1kadpl1gdpi1liaptqstfq1eqafvndpe1ngs1rtevl1hfer1shrifqevg  
syseq1kskaatemmi1nyi  
vqeqqkyl1klyqsqakyygfsek1teq1qdfkkyavtpehlesfiadknmqrtrtkn1ledialiyrefeqriqkefitge  
dalqy1fidcm1pksew1kca  
diyidg1fhnfstiey1liikg1likyaksvti1l1ttdgnhdqf1l1frkpsevl1rhieeianel1nisierqyfkqsyrfn1qd  
1kh1eqefdalq1inrvacq  
ghini1esgtmreeineiarriivdi1rdkq1ryqdia1ilyrdesyay1f1dsil1plynipy1nidtkrsmthhpvmemirs1  
1evi1qsnwqvnpm1r1l1kt  
dv1tasy1ksay1vd1lenfv1l1ergiygkrw1dde1fnvehf1skmgrkahl1tederntfeqv1k1kkdvfdk1lh1fekq  
msqaetv1kdfatafyesme  
yfel1pnq1l1mterde1ld1ngnhekaee1dqiwng1liq1l1dd1lv1vfgdepmsmer1levfd1ig1eq1efvmipqt1dqvs1  
gtmd1akvdnkqhvylvgm  
ndgtmp1qpvtass1l1tdeekkyfeqqanvel1sptsdi1l1qmdeafvcyamtrakgnvt1fsys1mgssgd1dkeisp1fnq1  
qs1fnq1lei1tnipqyhev1n  
pls1mqh1akqt1kit1feal1rawl1ddeivadsw1dayqv1irdsdh1nqg1dylmsal1tfdnetv1k1get1skd1lygkeina  
svsr1fegy1qcp1fkhyash  
g1k1nertkye1qnfd1gdi1fhsv1kyiseringdfkpl1dlk1k1rql1tnealee1l1pkvqfn1l1nssayry1srrigai  
vett1sa1kyqgtysk1fmp  
khfets1fr1rkpr1tndeli1aqt1tttqgipini1rgqidridtytkndtsfvni1idykssegsat1d1tkvy1ygm1qm1m1mty  
mdiv1qnkqr1gl1tdivkp  
gg1ly1fhv1heprik1fkswad1dedk1leq1d1ikk1fk1sg1lvnsdqt1vidaldir1lep1kftsd1ivpvg1lnkdgs1skrgsqv  
adeati1yk1fiqhnkenfie  
tasni1mdg1tevap1kykqk1l1pca1fcsy1qsvchvdgm1diskryrtv1detin1pieai1qninid1defg1geq  
>tr|D9RFQ1|D9RFQ1\_STAAJ  
mtipek1pggvi1wtdaqw1siyatgqdv1vaaagsgktav1veri1qk1ilrdgidvdrl1lv1vftn1sarem1khrvdqri  
qeasi1adpanah1kngr1k  
ihqaq1st1hsf1ck1liq1qhydv1nidpn1frts1seaeni1l1leqtidevieqhydi1dpafiel1teq1ssdr1sddq1frmi  
ikq1lyff1svanpn1ptnw1ld  
q1lv1tpyeeevqqaq1liq1l1td1l1skvfi1taayda1nkayd1fsm1dgvdkh1laviederr1mgrv1legg1fidipyl1tghef  
gar1pnvtaki1keanemmv  
dale1dak1qykyk1s1idkvksdyfs1readd1kadmq1laprvkylarivkdv1msefnr1kkrskni1ldfsdyehfalq1il

Tsompanidou\_et\_al\_Supplemental\_FASTA\_File

tnedgspseiaesyqrhfg  
eivdeyqdtnrvekiilsciktgdehngnlfmvgdvkqsiykrqadpslfiekyqrftldgdgtgrridlsqnfrsrk  
evlsttnyifkhmmedeqvg  
evnydesaqlyygapydesdhpvnllkvleaqehsdltgseaqahfiveqvkdilehqkvydmktgsyrsatykdivil  
ersfgqarnlqqafknedi  
pfhvnsregyfeqtevrllvsflraidnplqdiyvlglmrsviyqfkedelaqirilspnddyfyqsivnyindeaada  
lvdklkmflsdiqsyqqys  
kdhpyvqlidkfyndhyviqyfsqgliggrgrranlyglfnkaiefenssfrglyqfirfidelierngkdfgeenvvgpnd  
nvvrmtihsskglefpfv  
iysglskdfnkrdlkqpvlnqqfnglmdyfdvdkemafpslasvafravaekelvseemrlvyvaltrakeqlyligrv  
kndkslleleqlsisgehi  
avnerltsnpnfhlisylskhqsesipddlkefkdiaqiedssrpnvnisiyfedvstetildndeyrsvnqletmqn  
gnevkaqikhqldyqpy  
vndtkkpskqsvselkrqyeteesgtsyervrqrigrifstyerpklseqgkrkaneigtlmhtvmqhlpfkkeriseve  
lhqyidgldikhieadk  
kdiirmeimtfinseylisiiaeaevyrelpfvvnqalvdqfpegdedvsiiqgmidlifvkdgvhyfvdyktdafnrrr  
gmtdeeigkqllnkkykiqm  
kyyqntlqtilnkevkglyffkfgtlq  
>tr|D9RFQ3|D9RFQ3\_STAAJ  
mlhhlhlswwlaiifiatylnisknqggtpyfkplhmvlrlfmltlisgfwiliqsfmngganhmltlkmlcgvavv  
glmevsiakrkrheqshmt  
fwitialiitmvlgvilplgpisklfgig  
>tr|D9RFQ4|D9RFQ4\_STAAJ  
myknynmtqtlpietsvripqndisryvneivetipdsefdefhrhgatsyhpkmmlkiilyaytqsvfsgrriekll  
hdsirmmwlaqngtpsykt  
inrfrvnpntdalisefiqfhsqclqnliiddnsifidgkveananrytfvwkksiqnhesklenskaalyrdlveek  
iipeikedgdsdltieeid  
ligshldkeiedlnnsiqnedctqirkqtrkkerteikkfkkkfdyserkskyeeqksilkdrnsfsktdhdafmrmke  
dhmkngqlkpgynlqiatn  
sqfvllydlnfnptdtrtlipfltmiantfgylpeyivadagyqseqnymaiiddfnktpilitygmfikdktrkfkdsif  
ntqwnkydelndeficpns  
krigfkryayrndrygfkrdfklyeyddcsacsllrqcmkpnsksnkkimknynweyfkaqinqklsetkkiysqrki  
dvepvfgfmkailgftms  
vrginkvkreigfvmlalnirkivarravyqihlkkadfyqiinnrqlfyia  
>tr|D9RFQ5|D9RFQ5\_STAAJ  
mpkivvvgavagatcasqirrlldkesdiiiefkdrdmsfancaipyvigevedrkyalaytpekfydrkqitvktyhe  
viainderqtvsvlrnrktn  
eqfeesydkliispgasanslgfesditftlnledtdaidqfikanqvdkvlvvgagyvslevlenlyerglhptlihr  
sdkinklmdadmngpilde  
ldkreipyrlnneeivaingneitfksgkvehydmiievggthpnskfinessnikldrkgfipvndkfetvnpniyaigdi  
atshyrhvdipasvplawg  
ahraasivaeqiagnndiefkgflgnnivkffdytfasvgvkpnelkqfdykmvevtqgahanyypgnspnlhrvyydts  
nrqilraavgkegvdkri  
dvlsmammnkltvdeltefevayappyspkdlinmi gykak  
>tr|D9RFQ8|D9RFQ8\_STAAJ  
mktkgftkykrmrypgldglraiavlgiiyhlnkqwlgtgflgvdttffvisgylitslllkeyddtgiiklksfwir  
rlkrllpavivllmvvgt  
tlllksdniirvkhdiaaifyvsnwyyiakdvnyfeqfsfmpklkhlwslaeefyiffpvilvtllltikkrykigfi  
fwgvsiiisglmmfysin  
gdhsrvyfgtdtrtlqlllgvilafllwppfklkndppkvvkyvidsiglsfivlillffiiindetnwydggfylisil  
tllijasvvhpstwiakif  
snpvlvfigkrsyslylwhfavisfvhsyyvdgqipvyvyfidislitii faelsyrfietspfrkegikalnrpsyipqf  
irmaivvtllipfmllivg  
afnkygkdiigekansfdttiednylmriapidnihidglvsekkkesdvyunikpelligdsvmdigesfkssvpksr  
idgkvgrlyqtllplvkan  
ysqykkssdqvlelgtngdftvkqlddlnqfgkakilylvntrvpriyeavnrlldaakrksnvtlidwykrsqghs  
eyfapdgvhleykgvialk  
deilkalkkk  
>tr|D9RFQ9|D9RFQ9\_STAAJ  
mdinkmtayavqsallqavelssqhklnqnieieailsaalnesesyksileranievdqlnkayedklnntyasvegdniq  
yqyisqqanqlitkaesy  
mkeyedeyismehilrsamdidqttkhyinnkvevikeikkvrggnhvtsqnpevnnyaalakygrdlveevrqgkmdpv  
igrdeei rntiril srktk  
nnpvligeppvgktaiveglarivkkdvpeslldktvfelldlsalvagakyrgefeerlkavlkevkesdgriilfide  
ihmlvgagktgdagdagnm  
lkmplargehlcigattlneyreyiekdsalerrfqkvavsepdvedtisilrglkeryevyhgvrirdralvaaelsd  
ryitdrflpdkaidlvda  
catirtemgsnpteldqvnrrvmqlieeesalknesdnaskqrllqelqee lanekekqaalqsrvesekekiaklqekra

Tsompanidou\_et\_al\_Supplemental\_FASTA\_File

qldesrqaledagtnnnle  
kaaelqygtipqlelelrednfqdegedtdrmi revvtdeeigdivsqwtgipvsklvetereklhlslsilhkrvv  
gqdkavdlvsdavvrag  
ikdnpnrpigsflflgptgvkte laks laas lfdsekmi ridmseymekhavsrligappgyighdeggqlteavrrnp  
ysvilldevekahtdvfnv  
llqildegrltdskgrsvdfknti iimtsnigsqvl lenvketgeiteste kavmts lnayfkpeilnrmddivlfkpls  
iddmsmi vdkiltqlnir l  
leqrisievsddakawlggeayepqygarplkrfvqrqietplarmmikegfpegt tikvnlnsdnntfnvekihe  
>tr|D9RFR0|D9RFR0\_STAAJ  
mnl dwyyt fvilaktlnyrlaseeinltipsihkqiknleqhlvklfetyknqii ltedghtflpiaqsfieqyesgik  
hiqlkktmfqsklnvvss  
yiatfimpkf1ksffnenpfidvslhvknienekdinhtydigisrnqpk lrevhsekvcegekivliapnkennllte  
asl fekykiisdnhpeyws  
slknnilniydkaqflsindvhtsikliemnggisflpiyittnsdynisiintkilqapisftyiyskkespeilafik  
sfkkyianeql  
>tr|D9RFR1|D9RFR1\_STAAJ  
mki ktefkggnipyeyaagtdvsdsingnpiksfpfevtelpegtkylawslidydaipvcgfawihwsvanvsvsgnsi  
sikadlsrikgdvqqkns  
ftsgllaedfseienhyvgtpptpkdhqyelavyaldhslnlknngfylneflkevnqhkidqtsinligrki  
>tr|D9RFR5|D9RFR5\_STAAJ  
msqnkrvvtgmga lspigndvkttwenalkgvngidkitridtepyshlagelknfniedhidkkearrmrdftqyai  
vaareavkdaqldinenta  
drigwigsigmetfeiahkqlmdkgprrvspffvpm lipmatgqvsidlgakgpngatvtacatgtnsigefkiv  
qrgdadami tggteapi th  
maia gfsasra l stnddi etacrpfqegrdfvmgegagilvieslesaqarganiyaeivgygttgdayhitapapege  
ggsramqaamddagiepkd  
vqyl nahgtstpvglnevkaikntfgeaakh lksstksmtghllgatggieaifsa lksikskvaptihavtpdped  
ldivpneaqldi tyamsn  
slfggghnavlvfkfea  
>tr|D9RFR6|D9RFR6\_STAAJ  
myknynmtqlt lpietsvripqndisryvneivetipdsefdefrhrgatsyhpkmmlkiilyaytqsvfsgrriekll  
hdsi rmmwlaqdqtpsykt  
inrfgvnptdalies lfiqfhsqclqn liddksifidgtkveasanrytfvkk siqnhesklnenska l yrdlveek  
iipeikedgsdl tieeid  
ligshl dkeiedlnhsiqnedctqirkqtrkrteikkfkkkfd dyserkskyeeqksil kdrnsfsktdhd atfmr mke  
dhmkngqlkpgynlqiatn  
sqfvl sydlfnqptdtrtl ipfl tmiqntfgylpeyivadagygseqnymai iddfnktp litygmfikdktrkfk sdif  
ntqnwkydelndeficpnn  
krigfkryayrndrygfkrdfkl yecddcsacs l rqqcmkpnssknkkimknynweyfkaqinqklsepetkkiysqrki  
dvepvfgfmkailgfrms  
vrginkvkre l gfv lmalnirkivarravyqihlkkadfyqi inrnqlfyia  
>tr|D9RFR7|D9RFR7\_STAAJ  
mlkkwlgmalitpmltfiifffnshtiitylnilfyvsliifisiflillvqegifdatsygfrrlkyqmssskkkksis  
ddpffnpgvevkkhefyvst  
wiiplllinilyfimtivilslilv  
>tr|D9RFR9|D9RFR9\_STAAJ  
maenknnl sindhsnaamthtsdai assdfiirkldlnqepemqresknfwqdawaqlkrnklavvgmisliiivifaf  
igpvinkhdyaeqnvqhrn  
lpakipvlkvpflpfdgdgdagkdaykaanakenywfgtq lgrdlwtrtwkgaqislfigvvaamldifigvvygais  
gffggrvdtimqri levia  
sipnlivvilfvli fepsiwtiilamsitgwlgmsrvvrgef lklknqefvmasktlgaskfk l ifkhilpntlgaivvt  
smftvpsaif feaf l sfig  
igvpapqts l gslvndgram lliyphe l fipamvsl l ilffylfsdglrdafdpkmrk  
>tr|D9RFS1|D9RFS1\_STAAJ  
mkndevlls i knlkqyfnagkknevraienis feiykget lglvgesgcksttgksiik lnditsgeilyegidiqkir  
krkdllkfnkqimifqdp  
yaslnprlkvmdivaegidihhlatdkrdkrkrvydlletv glskehanryphefsggqrqrigiaralavepefiade  
pisa l dsviqagvvnllk  
lqrekgitflfi ahdl smvkiysdriavmhfgkiveigpaddiyqplhdytksllsaipqdpesersrkrfsyiddea  
snhlrqlheirp qhf vfst  
eeearl rknllvtqd  
>tr|D9RFS2|D9RFS2\_STAAJ  
mtrklktlililvatit lsgcanddg iysdkgqvfrkilssdlts l dts l itdeissevtaqt feglytlgkgdkpvlgv  
akafpekskdgk l kvklr  
ndakwsngdkvtaqdfvyawrktvdpktgsefayimgdiknasdi stgkpkveqlgikalddet l qielekpvpyinqll  
alntfapqnekvakkygkn  
ygtaadravynp fkvdkwkdqekt l lsknqyywdkknvkl dkvnykvikdlqagaslydtesvddavitadqvnkykdn  
kglnfv l ttgtffvkmnek

Tsompanidou\_et\_al\_Supplemental\_FASTA\_File

qypdfknknrlrlaiqaiddkgyvsvknngsipsdtltakgiakapngkdyastmnsplkynpkearahwdkakkekgk  
neltfsmntedtpdakisa  
eyiksveknlpqvtlkikqlpfpkqrvslelsnnfeaslsgwsadydpmayletmttgsaqnntdwnkeydqllkvar  
tklalqpneryenlkkaee  
mflgdapvapiyqkgvahlnpqvkgliykhfgpnnslkhyidksidketgkkkk  
>tr|D9RFS3|D9RFS3\_STAAJ  
maislviiittitfflmkmpgspfnaklspdqyilnekyglnpipiqylnymknvftgdfgysfqyhnqpvwdiikp  
rlipslemgitamiigvli  
gllgvasaakqntwidycatlislavsvpsfvlavllqfvfavklrwpfvagwegistvilpsfalsaiivatvtryi  
raellevlksdyillararak  
gvpnkrvlykhalrnalipvtvlpmmasiltgtltieni fgvpgldqfvrsiatndfpvimattilfssffivsi fl  
vdmlyiidpriiqggrn  
ngd  
>tr|D9RFS4|D9RFS4\_STAAJ  
mvidenkkqltstdfefkkdkinqeflnvknksfwqdgwsqrlrknklavigmiglimiilfalpapavsqhnsteqnvtd  
rnlpkipllekvdylpfn  
gkdvngkdykevgskdyylfgtdqlgrdlwsrtwegarislfigvvaaildifiqvlfgaisgyggkldiimqriiei  
iasipnliivilfvlifep  
siwtiilamsvtgwismsrvvrgef1ktknlefvqaskalgasnlrlifkhillpntlgaiivtsmftvpsaiffeaf1sf  
igigvpapqtslgs1vndg  
ksml1iyphe1fipatis1li1ffylfsdglrdafdpkmrk  
>tr|D9RFS5|D9RFS5\_STAAJ  
mkkvlevknlevsfevedg1vnavrgidycihegeilaivgesgsgksvatkai1k1fggengkitngyvkkffwed1vek  
nekelakirgkdiami1fqd  
pmtslnptmki1gkqimeplmi1hkkmrkdakgkaveild1vgiknaelrfkdyphqfsggqrqrivigmalacepk1lia  
depttal1dvtmqsqi1idl  
kilqkktntai1fi1thd1gvvaniadkvs1vmycgei1etgkveel1fypkhp1ytwg1lasmt1esnsk1liaipg1tp  
n1lkppig1dafarrsaya1  
nvd1fkyeapwfq1spthfvksw1l1dsrapkvi1ppetvkckfkel1synferp1kvegvsfneq  
>tr|D9RFS6|D9RFS6\_STAAJ  
mnnv1veikn1tki1fnknkneikaiddvsin1kgeal1givesg1cgkstfgks1ir1levpeetiffegkdinkits  
r1rds1n1nkriqmi1fqdpy  
as1npr1kvmdivgegi1dihklaenkaernek1y1k1le1vg1nkehanryph1efsggqrqrigiaral1svepd1li1adep  
isal1dvs1qaqi1ini1kk1  
qkernt1l1fiahd1smvkyvsdriavmhkgrivei1asser1yqnp1lhnytk1s1isampqdpqyerervreiykdsfdn  
nseyk1reiekdhfvf1tsi  
nkael1rqpk1  
>tr|D9RFS7|D9RFS7\_STAAJ  
mkisk1ky1l1nfi1fi1li1sgcskegiysdkgqvfrkvi1pqdmst1dtt1itdavsgdisnqv1feg1ft1dkndkakai  
ake1pkksnggk1t1tfk1r  
kdakwsngdpvtaydfvyawrk1vdpktgseyayimsdi1qnadsinsgk1pvekl1gikal1skyeleik1krpipyine1l  
al1snfypqnek1vakkygek  
ygl1kpqnavyngp1fkvd1twraedki1l1sknnfywdkknvk1dkvnyki1kdkqagas1fetgsvdd1l1adqvkkys  
sa1lqkri1tsgnffik1fnqk  
kveefknqdl1rmaiala1dkkgyveavkndgsiysntftakgvak1sngddyissinspl1kydkkaek1hwekakke1n1  
knftfsmntedtpdskisa  
eyikaqieknl1pgvkmki1rql1pfpkqr1seefkmt1yets1tgwaadydp1t1ty1stmtkdn1pnqntdwsnkkyd1ylgein  
gell1gevskrdnr1mkedee  
l1l1ndvpl1apiyqkgeah1tnpkvkg1qyhvvgpdt1l1kyvyidk  
>tr|D9RFT0|D9RFT0\_STAAJ  
mriervddttvk1lfi1tysdi1eargfsred1wtnrkrgeeffwsmmdeineedfvvegplwi1qvahafekgvevtiskskn  
edmmnmsddd1atdqfdeq  
qell1aqt1leged1leel1feartke1eaqgskrqkssarkntrti1vkfnd1ledvin1yayhsnpl1ttefed1lymvdgtyy  
yavhfdshvdqev1indsys  
q1l1efayptdr1tevy1lndyaki1imshnvtaqvrryfpette  
>tr|D9RFT1|D9RFT1\_STAAJ  
mlvalneekerv1atta1rktqyfc1pvcgkqv1l1krgl1kvishfahkhlaeqkcfnetikhyksk1lilaqmiqqgckv  
ei1ep1f1keik1q1pd1linn  
kyvie1lqyspi1pykqml1rtegl1kkmg1ykvsw1l1ndvdychnk1vkfnhfqsmfinpi1trk1lhtfn1lekkqimmfqqiqyi  
gghkyvaekrnaki1sel1fn  
eapcdyhav1y1kskfa1inqyikycrwqns1vlept1samyql1q1tdqevvhnygyi1fpeqi1yienhpiewq1qvdlw1kng  
ksk1lvsdn1nyfk1kkfi1v  
alesk1tai1iek1linny1nissdrgndvq1l1f  
>tr|D9RFT2|D9RFT2\_STAAJ  
msqq1treeqndkypeytwd1l1tti1fkdeafeaafkevesel1gkeeqfkg1higdsae1t1yna1ele1edt1g1tk1lekvyvya  
h1kqdd1t1tenderk1ytmgsr  
ahq1li1ikfssaws1lvpei1lqidedki1qsfvnsydk1lqkfafd1k1linekrph1ldaetek1l1teaqda1stpsnvygmf  
snad1lvfedaidkdgnahp

Tsompanidou\_et\_al\_Supplemental\_FASTA\_File

ltqgtfikylesddrklresayrnvykaygahnntlgatlagevkkvfnarthnyktarekaalsnnhipenvydnlvkt  
vhkylpllhrytelrke11  
glddlkmydlytplikdikfempyeeakewmlkalepmgeeylnvvkeglnnrvdvkyenkgrsggyssgahltnpfil  
lnwsntisdlytlvhefgh  
sahsyfsrkfqsnsdyti fvaevastcneal1sdymdkhl1ddekrl111nqelerfrat1frqtmfaefehkihtiee  
agepltptrmneeyaklnk  
lyfgdsvetdediskewsrphfymnyyvyqyatgysaaqslshqiltegpavdryineflkkgsnypieilknagvd  
mttpepieqacevfeqkln  
afeklmka  
>tr|D9RFT3|D9RFT3\_STAAJ  
mage1rimenksredin1spvskieiyffdpfssdcfkl1sailsk1rieynqyirirhilnps1kv1tkcqaqstsnfd  
ni1alaykaaelqgrvraer  
fihlmqneiipkrdiitesmicdciqnagidlevfkddlqkskltes1kid1hiaremeieqaps1vffsedvheeglkv  
eglypyhiytyiinelmgk  
piekn1ppk1etyiqqq1vtmee11tiyewpek11nkelkk1tiqqkieklkypdgdfwkskmpkiksk  
>tr|D9RFT4|D9RFT4\_STAAJ  
mttptydiigkealydmidyfyt1vekder1nh1fpgdfaetsrkqkqf1tqf1ggpniiyteehghpm1rkrhmaftite  
ferdawlenmqtainraaf  
pqvgdy1fer1r1tanhmvns  
>tr|D9RFT8|D9RFT8\_STAAJ  
mrytiltkgdsksnal1khkmmnymkdfmiedsenpeivisvggdgt11qafhshym1skvafvgvhtghlgfyadwlp  
hevekl1ieinnsefvie  
yp1leiimryndngyetry1al1neatmtkengstlvvdn1rgkhferfrgdglcvstpsgstaynkalgga1ihpslea  
mqiteiasinnrvfrtvg  
plv1pkhhtcl1spvnhdt1rmtidhvsikhknvnsiqyrvanekvr1farfrpfpfwrkvhdsfissdeer  
>tr|D9RFT9|D9RFT9\_STAAJ  
mkfkyhisqqetvktflarhdfskktvsaiknngalivndepvtvrkqlmpndileih1pqi1psvnliparkvevlye  
dafiiivtkpnnqncpsr  
ehphes1ieq1lyhcqehgeninphivtr1drnttgivi1fakyghihh1fskgn1kkiytc1lyvgkthtsgieanirrs  
kdsiitrevasdgkyakts  
yevinqndkys1ckvh1htgrthqirvhfqh1ghpivgdslydghdkihgqvlqctqiyfvhpinknniyitidykq11  
klfnq1  
>tr|D9RFU1|D9RFU1\_STAAJ  
mef1slv1v1laaf1tpiivnr1nin1flpvvvaie1lmgivigns1lniverdsil1nilst1lgfi1flm1f1sgleidfkafk  
kdkrarqgqnddessipgh  
ln1altv1f1f1m1i1s1il1layv1fkwl1gl1vddv1lmvii1st1s1lgvv1pt1kemnimrttigqf1llv1avl1d1vtm1llt  
vysaingqggstiw1ligil  
vvftaisyl1gvqfkrms1flqk1lmdgttqigiravfali1llvalaegvgaenilgaf1lagvvvs1lnpdeemvekl1dsf  
gygffipi1ffimvgvd1ni  
pslikepk11i1ipilivafiisklipvmfirrwfdmktiasaf11tst1slviaaakiser1naisaetsgil1ilsav  
itcvfvp1i1fkk1fpvpde  
fnrkievsl1gknq1l1tipiaqn1tsqlydvt1lyyrkd1sdr1rq1sdd1tmie1adyeqd1vler1gl1fdrdivvc1atnddd  
inrkvak1akahqvervic  
r1lesttd1tel1vdsgie1fssyl1snk1illkg1lietpnm1ln1snvets1lyeiqm1nykyeniql1rnfpfggdi1fvriir  
nnesivphgdtq1rygdr1  
ivtgakeyvd1kqelefyf  
>tr|D9RFU3|D9RFU3\_STAAJ  
m1nkvw1frtgial1im1fil1kl1fmev1hevftpiati1gsv1flp1fisg1flyic1lpfqn1lekvgfprwasittim1alf  
ai1glivafvapii1snin  
n1isqtpal1qkeaeq1ikfalaqmdk1pedvtsritnmvksmgdgvtnil1sn1qyits1listif1l1mvppf1liym1kd  
hekfi1pavak1ffkggrkvf  
fvd11td1nft1ksy1ggqvtvsvil1gifyigysiid1pyip1llv1fagvan1ip1flgsw1sfapaa1ilgiidsptt1fi  
wcci1t1iahq1legni1tp  
nvmgks1sihp1tiivv1laagd1ggft1v1liav1plyav1ktvvsni1fkyrqriidkansvkd  
>tr|D9RFU4|D9RFU4\_STAAJ  
mieklvt1fl1nev1vskp1vyg1llitgvlft1lrmrffqvrhfkemir1lmf1qgekspngissfqaiams1agrvtgnivgv  
stai1figgpgavfwmwita  
flgassafiest1lqqi1fkrvenneyrggpaiyieygiggkfgkiygiifaivti1svgl1llpgvqsnaia1ssmhnaihvp  
qwl1m1ggi1vv1il1gli1ifgg  
vrsianvatavvpfmai1yil1mavi1icini1qevpal1falifksafgl1qsafggivgamieigvkr1g1ysneagggtgph  
aaaaevshpskqglvqaf  
svyid1tlfvctatali1il1sgtynvtdgtvnan1gtp1h1ikdgeiyvenatgkdysgtamyaqagidka1fhgsgyqfdptf  
sgvgsyfi1af1fff1aftt  
il1sy1yit1etnvay1l1rnqnnq1vssv1finiarvii1lfatfygavktadvawafgd1lgv1lmaw1ni1aiwil1hkpavna1  
kdyei1qkkrl1ngynavyq  
pdsnk1pnavfw1lkyper1kqarvkk  
>tr|D9RFU5|D9RFU5\_STAAJ  
m1efkagkinkhvl1ysdi1nrdvt1siyl1pesynql1vkynvil1cfdg1ldf1lrfgr1qrtyes1likeariddai1vgfhye

Tsompanidou\_et\_al\_Supplemental\_FASTA\_File

dvdkrreefhpggsrshlt  
iqsvgkeilpfidstfstlkvgnarlvgdslagsiallaltptytifiersvamlsphsdekvlldklnqcankeqltiwhv  
igldekdftlptngkradf  
ltpnrelaeqikkynityyydefegghqwkdwkpllsdillyflskntddklye  
>tr|D9RFU7|D9RFU7\_STAAJ  
mqdsslannyanhknfilmlilflmfargmyilsyinflptvtsiavaitslafsihfiadastnfvigflkkfgtki  
vlttgfilafstlflviwf  
paspfvii fsammgiavspiwimlssveedkrqkmgvyvswllglvgmvfmnlkikhptrfafmmslvvliswi  
lyyfvdkltnyntrpvka  
qlrqivdvtkrhlllfpqllqgaaiaalpilyatkvinvstieyvtvaiiggigcavsmflsklidnrsrnfmyg  
vilsgfilymiliftlsmi  
vnihivwialaiglmgyllpawntfmarfiksdeqeetwgvfnsiqgfgsmigplfgglitqftnnlnntfyfsalif  
lvlavfygsyfiarekak  
>tr|D9RFU8|D9RFU8\_STAAJ  
mvtqnkkiilitgsfngnmqvtqsvnqlndmnlhdlsviehdlfmeahpiltsickkwyinsfkyfrnmykgfyysrp  
dkldkcfykyglnklinl  
likekpdliilftfptpvmvsteqfninipvatvmtdyrlhknwitpystryvatketkqdfidvgidpstvkvgtgipi  
dnkfetpinqkqlidnll  
dpdkqtilmsagafgvskgfdtmitdilaksanaqvmicgkskelkrsltakfksnenvlilgytkhmnewmassqlmi  
tkpggititegfarcipmi  
flnpapqqelena lyfeekgfgkiadtpeeaikivasltngneqltnmistmeqdkikyatqticrdlldlighssqqe  
iygkvplyarffvk  
>tr|D9RFV0|D9RFV0\_STAAJ  
mynkrli degktidvylfealndqiiiaipdwfwsyqmamtdeetcfeailmqflvfkeeeeaesiasqltdwietykk  
ekd  
>tr|D9RFV1|D9RFV1\_STAAJ  
mnlkqevesrktfaiishpdagkttltekllfyfgai reagtvkgkktgkfatsdwmkveqergisvtssvmqfyddyk  
inildtpghedfstedtyrt  
lmavdsavmvidcakgiepqtllklfkvckmrgipiftfinkldrvgkepfelldeieetlnietypmnwpigmgqsffgi  
idrksktiepfredeeni  
lnddfelheedhai ndsafeqaieelmveeageafdndallsgdltpvffgsalanfgvqfnlnayvdfapmpnarqtk  
eevevspfddsfsqgifi  
qanmdpkhrdriafmrsvsagafergmdvtlqrtnkkqii trstsfmaddketvnhavagdiiglydtgnyqigdtlvggk  
qtysfqdlpqftpeifmkv  
sahnvmkqkhfhkgieqlvqegaiyyktlhtnqii lgavqllqfevfehrmkneyndvvmepvgrkiarwienedqit  
dkmntsrsilvkdryddlv  
flfenefatrwfeekfpeiklysl  
>tr|D9RFV3|D9RFV3\_STAAJ  
mdigkkhvipksqyrrkrreffhnedreenlnqhqdqknidnttskkadkekhkdsinkherfkns lsshleqnrndvne  
nkaeesksnqdsksaynr  
hylltdvskkqnsldldvdqkteksydeqnseatlstkstdkvestdmrklssdknkvgeehqvlskpsehdketridf  
essrtdsdssmqtekkd  
ssdgnkssnlksevidskntvpkl sesddevnnqkpl tpeeqklkrqqsneqtktytygdseqndksnhendlshht  
psisddkdnvmrenhivdd  
npdndinapsl sktgddrkldekihvedkhkqnadssetvgysqssashrstekrnmaindhdklngqkpnktlann  
qkkatsklnkgratnnys  
dilkkfwmmywpklvilmgiiilivilnai fnnvknndrmdndadaqytttmknanntvksvvtvenetskdsslpi  
dkasqdevgsgvvykksgd  
tlyivtnahvvgdenqkiftsnksvvgkvl gkdksdlavvkatssdssvkeiaigdsnnlvlgepilvvgnpvgdf  
kgtvtegiisglrnvpid  
fdkdnkydmkafqidasvnpngsggavvnregkl igvvaakismpnvenmsfaipvnevqkivkdletkgkidypdv  
vkmkniaslnsferqavkl  
pgkvkngvvvdqvdnngladqsgllkgdvitel dgklledl rfrqii fshkddlksitakiyrdgkekeinikl  
>tr|D9RFV5|D9RFV5\_STAAJ  
mekneninveillttsdmhshflngdygsniyragtyvnqvraqnhrvilldsggslagslaayyaivapykrhpmiklm  
nrmhydasgvspsefkfgl  
sfltrisialarfplsanieynvtkepyfstpycikhfgdlkiaivgtadglmeneysemeqdvsiektlvaskrwiry  
iheveepdfliviyhggl  
kisnstknkassneaklmeelgvidlmitahqhqtivgqdhetyyvqagqakevlhlsinfkkrtttydvesidskv  
idlneyeedqelldltyd  
rkavaywsqeiisdkgllsvnglqdlvcqthpfsqllhdaihlaafdnditcvhvpmmgekglsgqirnedlyhayypd  
kpmdmitsgqnikdileys  
yshldfvneqlsltiidetlctmwqgfnye idmneqpgqrvmldqidltkysrvmttdycyrnyknylnkaiihesydet  
mstliaeklrpnryiscs  
dnfvvknr  
>tr|D9RFV6|D9RFV6\_STAAJ  
mysqniyvirkgdmvirpafdddqrngseiirfdktrianpfpkvqkiiersckfygntylgkkaetnritgisskppil  
ltpflfptyffpthsdrqne



Tsompanidou\_et\_al\_Supplemental\_FASTA\_File

niwl nmhyienikelknrkckvtfinnessiilhvsyhs lwhqynnsi fyymvdkqsrmvsknpdqpidynkatlnvfea  
ltrysl fedk  
>tr|D9RFV7|D9RFV7\_STAAJ  
mkyntnvkhttleafvttvndlgie liinea lrevrkrqlieliddalvnkdeaafnqytteyk nleaf lge  
>tr|D9RFV8|D9RFV8\_STAAJ  
mkfissnnitdptlnlameeyvlnknpaeesyflfyinrpsiiivgknqntieevnqtyidahnidvvrri sgggavyhdt  
gnlnfsfitdddgnsfhnf  
qkftepivqalqslgvnael tgrndiqvgqakisgnamvkvknrmfshgtlmlnsdldevqnal kvpakikskgiksvr  
krvaniqeflndpleieef  
kkii lktj fgeteveeyk l tdedweniek l sndkyrtwewnygrnpkynfereekfekgfvqikfdvkrkiehaki fgd  
ffgv gdivid lenalvgclh  
dfehieea lseydlyhyfgdidrhelir lms  
>tr|D9RFW0|D9RFW0\_STAAJ  
mkiiska ltwfiisfiifh l ilfimwgehqeywlytgimliagisyvfyqrdieskrlltsigvgiitailimlqlf  
slitsnlsygslike lart  
gvnwkwqmlvtllfvipchelymrtvlqkelthfsipkwvailitacssslfyildnwwivtfifvaqvilslyeytr  
riattsva qivaiillif  
na  
>tr|D9RFW1|D9RFW1\_STAAJ  
msavsmfgliiimvikdmvqqllentdhlvviqelv  
>tr|D9RFW2|D9RFW2\_STAAJ  
mkwfkliildvtifiliaillfvytykeneeilpdtkypia vtdwnkkyskneiykrinqfaknenvaiykstsnytnknv  
dkdiyvfnskaktitpf n  
akynihylsddellkkekgsyfvkdknfdvskfinflkeygvtaesykidhmmiavgvikqmnivvplssllyvyfiyy  
ifekninfkayaiky l ngf  
tlrkii fenfskkctywtliitqmllttsvlwilnytgnldl filrlvllscl filtisvinlwtflmlnlnianmik  
gkqhfktrfintvcksil  
lvliasvmientsvikdlnkiketekywnvlddytiefapyhetkqslidnmlrseqlvkaseaenailfkpkgdsvd  
ndnfs pdegnvilvnnqfw  
siyhkqfqp dipiknqnvev i p qkfhamrneinqayhswfefvqnknknknlslqfinkdyrif t f dardsrhls  
fieapiivnvgasdlndf  
yyamisggylfknydalvkniekyhldgeisgitnykdsvmemyhennlkl tvlnfsqiiiaiiiiilfdvkyyfeq  
hrkllvikklygyst lran  
yryllinnivvfigilt nvilshyimmifatilvvqillqicslyyhgrrfnevikef  
>tr|D9RFW3|D9RFW3\_STAAJ  
mkfiiaillglivsitiafti ihhpi ldrfnpflkteysyakvpkgtqqyvni taysergekldyk l t fngf s p s rtyve  
ikhkgqyvisityvekedt  
pkevrqe  
>tr|D9RFW4|D9RFW4\_STAAJ  
mie lkdltiqkgnthilkklnl k fqcgsyaligksgcgkstllntiaglektgkqyvyfngql eqfksnfyrdklgy l f  
qnyglidnltvnenldig l  
aykkskkek eq l kiryieqfglsnslkrkvhtlsggeqqrvalirmmlkdptvmladeptgal d p k t g q m i i q s l f g l v  
nenkv l i l a t h d m a i a n q c  
deid l eqyrkvasm  
>tr|D9RFW5|D9RFW5\_STAAJ  
mtrtyniigil sclisfiimalpmiwytasalwffpgaimillslv v fcyiktqnqlhlllvlni i i l l f f s l p l l l  
s  
>tr|D9RFW6|D9RFW6\_STAAJ  
mekginyddanilkldm n q v r c n k l v v d d i f k d y e q i k p t i e i e k g n a i l k l n g y f v a s i l e t l n l n r v k k l y v d e d y y  
y t y n e l i v k y t e v k e  
>tr|D9RFW7|D9RFW7\_STAAJ  
mkkvymmvhelvdkggmtssmf n r s r e f y d a n i s a d i v t f d y k g n y d e i i k n l k k q g k m d s r t k m y n v f e y f k q i s n s k  
h f k s n r l l y k h i s e r l k n t  
ieieeskgsirffditgttyaiyirksktekvidffkd n q r i e r f s f n n n k v h m k e t f n i d n k v c y q v f y d e k g f p y i s r  
ninasngavgktylivckk  
efknlalcvyyleklikdnknsimicdgp g s f p k m f n t k h k n a q y g v i h v n h e n f d d s g a f k k s e k f i e n a d n i n g  
vivltdaqrldilqqfdvk  
niftisnfvkihkapkqftekivghisrmvptkridllidvae l v k k d e t v k f h i y g e g s v k g i v k k i i d k k l e n h v  
llkgytttppqcl edfklv  
vsts qyegqgl smieami skrpvafdi kygpsdfiednkngylienhnindmadkilhlvndvlaeefgskarenie  
kystesilekwlnlfn  
>tr|D9RFW9|D9RFW9\_STAAJ  
mnrnivklvfm l i l v v a v a g c g k d t e e k t e m t t i k d e l g t e k i k k n p k r v v l e y s f a d y l a a l d m k a v g i a d d g s s k  
n i t k s v r d k i g a y e s v g s r  
p q p n m e v i s k l k p d l i i a d i s r h k k i k s e l s k i a p t i m l v s g t g d y n a n i e a f k t v a k a v g k e k e g e k r l e k h d k i l a e i  
r k k i e q s t l k s a f a f g i s r  
a g m f i n n e d t f m g q f l i k m g i q p e v t k d k t t h v g e r k g g p y i l n n e e l a n i n p k v m i l a t d g k t d k n r t k f i d p a v w k s  
l k a v d n k v y d v r n k w l k

Tsompanidou\_et\_al\_Supplemental\_FASTA\_File

srgiasesmaedlekiakak  
>tr|D9RFX2|D9RFX2\_STAAJ  
mirqarpedrfdiaklvymvddmlelvkhlpkdmvldaiekscvdatyrtfyqhilvyevenkvagciisysgenelek  
yekawellldlpekikqygt  
plpvkeakddeyyietiatfeayrgrgiatklltsllesnthvkwslncdinneaalklyqkvfgisdgqielykhmyhh  
livk  
>tr|D9RFX3|D9RFX3\_STAAJ  
msnqyqqystvkkywhlmphtltasvvpvlvgsaaskiyflgsedhikislfiamllacllliqaatnmfneydykkg  
ddhesvgiggaivrngmsp  
elvlrlaiafyilaaiglflaanssfwllpvgvlvcmapvglytggppfpiwtpfgeifsgvfmgmfiiviaaffiqtgni  
qsyviwlsvpivitiglin  
mannirdrvkdkasgrktlpiilgknaslftmaimyfiayafivltiikpggslyfyllaallsfmpvkvirrfkndtp  
ptmmpamaaagknttffgl  
lyalgiyisalfagi  
>tr|D9RFX4|D9RFX4\_STAAJ  
matgvlreddivkeiydsskewvsvevklslqslpdlstlflhtdneagdrfymrlnndnrtsyfygaiqlfknsknkqsif  
kdweklkhnitfihpqsek  
hhlrvggqfssshksdewrefglnhfvlpevlilstdnngtfltytvkresftvealndlmdlfnnsdidvdeqigei  
trnediykddwrqlvveai  
esinneekivlarrlikfdkdisipyilkqayskeknsyifllesqdsiffstpeqlikvnnkilstkavagtikrsq  
dededtknveafldknkl  
iehqvvdslhdikpyitelhydtkpiklndhlyhlyteikaplkddsylidnlhptpalggypkefaidfieqke  
fgtrglygapvgiydiydd  
cefivairsmlikkaqatlfagcgivkdsdpdseletnlkftpmnalgvdmngks  
>tr|D9RFX5|D9RFX5\_STAAJ  
mgnhkaalkqvftfaseiyaygrevvispgsrstplalafeahpnihtwihpdersaaffavgligserpvailcts  
gtaanytpaiaesqisri  
plivltsdrpHELsvgapqainqvmfnnyvsyefdmpiaddsketidaiyyqmiasqlygphkgpihfnlpfrdp  
tpdlnatelltsemkilph  
yqksidasalrhilnkkgliivgdmqhqveldqiltystiydlpiladplshlrkfdhpnvictydllfrsgldlkvdfv  
irvgkpvisklnqwlkkt  
dafqilvqndkidvfpiaadisyeisandffrslmedttvnrsvlekwqlekkgrkeikcyleqatdesafvge  
lik  
ktsekdaifisnsmprdv  
dnlllnknidvyanrgangidgivstalgmavhkritlligdlstfyhdmngllmsklinni qmnivllnndgggifsylpq  
kesatdyferlfgtptgl  
feytaklyqfdfkrfnsvsefknatllsetstiyelitnrednfkqhqiylqklsemihdtl  
>tr|D9RFX6|D9RFX6\_STAAJ  
mthynyeavetnqvllvlgflsdsrtyhnhidkytnichvitidlpghgedqssidetwnfdyittlldrildkykd  
tsitlfgysmggrvalyya  
inghipisnlllestspgikeeanqlerrlvddarakvldiagielvndweklplfqsqlelpveiqhqirqrslsqsp  
qkmakalrdygtgqmpnlw  
prlkeikvptlilageydekfvqiakkmanlipnskcklisatgthihvedsdefdtmilgflkeeqnd  
>tr|D9RFX7|D9RFX7\_STAAJ  
mtnrqwetlreydeikyefyegiakvtinrpevrnaftpktvaemidafsrardnqnvsvivltggedlafcsggdqkr  
ghggyvgedqiprlnvldl  
qrliiriipkpviavmkgvavgggnvlnvcdltiaadnaifgqtgpkvgsfdagygsylarivghkkareiwylcrqyn  
aqealdmglvntvvpldkv  
edetvqwckeimkhsptalrfllkaamnadtglagllqqmagdatllyyttdeakegrdafkekrdpdfdqfpkfp  
>tr|D9RFX8|D9RFX8\_STAAJ  
myqlqfinlvdyttklthleqtninlfignwsnhqlqksicirhgdntshnqyhilfidtahqrikfssidneeiiyild  
yddtqhilmtsskqig  
srpivyerlv  
>tr|D9RFX9|D9RFX9\_STAAJ  
mnsscksrvfniisiimvsmllslgafntnnkakadshskqleinvksdkvpqkvkdlqqqfagyakaldkqsna  
ktg  
kyelgeafkiykfngedn  
syypvikdkivytltspknkddlkskedmnysvklsnfiaklddqikdksnitiltdekgfyfeedgkvr  
lvkat  
plpgnvkekesaktvsakl  
kqelkntvtptkveeneaiqedqvqyentlnkfkireqqfdnswcagfsmalnatkntdtynahdimrtlypev  
seqd  
lpcatfnpqmi eygksgg  
rdihyqegvpsyeqvdltkdnvgimilaqsvsqnpndphlghalavvgnakindqekliwynpwtel  
siqdadssllh  
lsfnrdynwygsmigy  
>tr|D9RFY0|D9RFY0\_STAAJ  
mkgkflkvsslvatlttatlvsspaanafsskamdnhtqqtqtdkqtpkiqkgnlkpleqrehanvilpnnrhqit  
dtngghyapvtyiqveapt  
gtfiagvvvgkdtlltnkhvvdathgdphalkafpsainqdnypnggftaeqitkysgedlaivkfspneq  
nkhi gev  
vkpatmsnaetqvnqnit  
vtgypgdkpvaatmweskgkitylkgeamqydlstggngsgspvfneknevigihwggvpnefngavfin  
envrnflkqni  
edin fanddqpnndpsn

Tsompanidou\_et\_al\_Supplemental\_FASTA\_File

pdepnnpdnpnnpdnpnnpddepnnpdnpdnpdngdnnsdnpdaa  
>tr|D9RFY1|D9RFY1\_STAAJ  
mklslnsksylrapsirqfsnrmmnlddcvnlrtigqpdfmpdvvkayvdainndktsyshnkgllretraisqyfkn  
ryhfsydpeeivtngase  
aidttlrsiiepgdeiipgpiyagipliedvggkpiyidttatqfkltpdaleshispkktavllnyptnptgvvlkr  
nevlnivvllkypifiis  
deiyaentfsgkhvsfaefeardqililigglskshsatgirigflilgpqylidkltfmhayncicanvpaqiacitaln  
egleapkymneayverny  
lvseltklgefitaqpegafyifpsikhitdddfefcvdllesthlaivpgssftefgkgfvrisyayemdvakegmkrl  
akylntk  
>tr|D9RFY2|D9RFY2\_STAAJ  
mts1kerdyffdnaraililvfvghmlqpytsgdkylsalyviysfhmptflfisygafaknidkpyylekiskrlivp  
ymiffaffsiyyfltgksd  
elglpfnpvfalwflitlfffhvilvivrrfnpykvlsvsiisigagfsdnidsylsirtivffpifylgyiftkkh  
taifknkklipvsiiitfil  
ffiiyvihpinadwllgsspytslenegqsvfspfkrililygiiliamtaflnlmstkkklytyigstlyvyllhglii  
givrgfewypfdnplmt  
ylylisisviivylstnfvckwtnpiinlqrssqfks  
>tr|D9RFY4|D9RFY4\_STAAJ  
makkfnyklpsmvaltlvgavtahqvaaettqdqttnknlvsnkvkatteqakaevknptqnisgtqvyqdpavq  
ktannktgnaqvsqkvda  
qvnqgdransatntnkpvaktsttapktntnvtnagyslvdeddnsenqinpeliksaakpaaletykaaapkaa  
tttapkakteatpkvttfs  
asaqprsvaatpktslpkykpqvnssindyirknllkapkieedytsyfkyayrngvgrpegivvhdtrandrstingei  
symknnyqnafvhafvdgd  
riietaptdy1swgvavgnprfinveivhthdyasfarsmnyadyaatqlqyyglkpdsaeydngntvwthyavskyl  
ggtdhadphgylrshnysy  
dqlydlinekylkmgkvapwgqtsttpttpskpttpskpststgkltvaanngvaqikptnsglyttvydktgkatn  
evqktfavsktatlgnqkf  
ylvqdynsgnkfgwvkegdvvyntakspvvnqsysikpgtklytvpwgtpkqvagsvsgsgnqtfkaskqqqidksiy  
ygsvngksgwvskaylvd  
akptptpkpstpttnklvtsslngvaqinaknglfttvydktgkptkevqktfavtkeaslggnkfy1vkdynspsli  
gwkqgdviynnakspv  
mqtytvkpgtklysvpwgtykqagavsgtgnqtfkatkqqqidksiylygtvngksgwvskaylavpaapkkavaqkt  
avkayavtkpqtqtvtvski  
aqvkpntgirasvyektakngakyadrtfyvtkerahgnetyvllnntshniplgwfnvkdlnvqnlgkevkttkyvt  
nksnnglsmvpwgtknqvi  
ltnniaaggtfnatkqsvgkdvlygtinnrtgwnakdltaptavkpttsaakdynytyvikngngyyyvtpnsdak  
yslkafneqpfavvkeqvi  
nggtwyygklsngklawikstdlake1ikynqrgmtlnqvaqiqaglykpvqvrpvgkwtdanfndvkhamdtkrlaqd  
palkyqflrldqpqnisi  
kinqflkgkvlenqgaafnkaaqmyginevylishalletgnqtsqlakgadvvnnkvvtnsntkyhvnfgiaayndp  
lregikyakqagwdtvska  
ivggakfignsyvkagqntlykmrwpahpgthqyatdvdwaninakiikgyydkigevgkyfdipqyk  
>tr|D9RFY5|D9RFY5\_STAAJ  
mfskvnnqemledcfyirkkvfveeqvpeeseideyesesihligyngqpavatarirpisettvkiervavikshrrq  
gmgrmlmqaveslakdegf  
yvatmnaqchaipfyeslnfkmrngnifleegiehiemtktltsln  
>tr|D9RFY7|D9RFY7\_STAAJ  
mnkflkyflilla1vlivpivfatllfktsqdafessqdsknarqsnlrdnkvnpeeqpisilflgiddndgrkkgq  
daehrsdamiltfnqsk  
hqirm1siprdtisyipkvgydyki1thahayggpiaamdsveatmnpvdyvrvnmkafveavnelggiyydvpydne  
pntddtgkikikkyqkln  
gdealavartrhhdslkrqqrqmelikilfqkaqevdsidklndviqivgknakhnltseikalakmylndveikta  
qlkgkddmlngiyyhpsv  
esiqkylanllrnllelspindknfdlqrvinhygslip1tp1dss1lrkeqndttdkdkssntddsnsnnngvnnq  
qqpttgqntnqdgqniqqt  
pqasnnqngvvn  
>tr|D9RFY8|D9RFY8\_STAAJ  
mkfnkvklvihcvllfiisia1ifhr1qtkthsiepihketklsdneky1vdrnkekvapsk1kevynskdpkykkid  
kylqsslfnsvaiyengk  
lkmkgygyqdfekgikntpntmfligsaqkfstglllkqleehkinindpvslylpwfktskpip1kdlmlhqsglyk  
yksskdyknl1dqavka1qk  
rgidpkkykkhmyndgnylvlakvieevtgksyaenytkigdp1klqhtafydeqpfkylakgyaynstglsflrpn1  
ldqyygagnlymtptdmgk  
litq1qqy1lfsk1tnp1lhefgtkyqpedeyrygyvkptlnr1nggffgqvftvyyndkyvvv1alnvkgnnevrikh  
iyndi1kqnkpyntkgviv  
q

Tsompanidou\_et\_al\_Supplemental\_FASTA\_File

>tr|D9RFZ5|D9RFZ5\_STAAJ  
mldyfeipyekqvvsahrtpkmmvqfasearergidiiiagaggaahlpgmvaslttlpvigvpietkslkgidsllsiv  
qmpggipvattaigaagak  
nagi laarmismqnpstveklngyessliqkvedmqnelq  
>tr|D9RFZ6|D9RFZ6\_STAAJ  
mnfnklkfgatigiiggqglgkmmaqsaqkmgkykvavldpaedcpcryvahefiqakydekaalnqlgqkcdvityefen  
isaqqlklcekyripqgy  
qaiqlldrkteketlksagtkvvpfsvkestidkaietlgypfivktrfggydgkqvlinnekdqegfklietse  
cvaekylnikkevstvttr  
gnnnqityfplqenehrnqilfktivparidkmaeakeqvnkiiqsihfigtftveffidsnnqlyvneiaprphnsghy  
sieacdysqfdthilavtg  
qslpnsielkpvmmnlkgkldl1enefnehpewhhiygkserkdsrkmgmtvltnvndvnteqdmyakfegsn  
>tr|D9RFZ7|D9RFZ7\_STAAJ  
mtllyegkakrifstnqenelrveykdevtagngakdtmagkgrlnnqitsiifkylqengieshfiqqlseteqlvkp  
vkiipllevvrniasgsit  
krlgfengevfrepiveffyknda1ndplittddhvkllniasdedieilkskalkinnv1kqlmnamnlklvdfkiefgk  
tetgqilladeispdtcri  
wkatnanfdkdvyrrntgslietyqiflnkledlk  
>tr|D9RFZ9|D9RFZ9\_STAAJ  
mkfavlvfpgsncdrdmfnaaiksgveaeyvdyretslsgfdgvlipggfsfgdylrsgamasvapiisevkr1aagkp  
vlgvnqgfqilteigllpg  
allhndshlfi srnee1eivnnqtaftnlyeqgekviypvahgeghyctdeiyqqlkannqiilkannpnsgsyddiag  
ivnekgnvcgmmphpera1  
etllgtsgvklfeamvkswreghv  
>tr|D9RG00|D9RG00\_STAAJ  
mskfiepsveeklekvyqdmgl sdqeyekvcdilgrqpnftetgifsvmsehcsykhskpflkqfptsgehv1mmpge  
gagvvdigdnqavvfkves  
hnhpsaiepyqgaatgvvggiirdivsigarpinllns1rfgelndkqnqrllkgvkviggygncigipttageiefder  
ydgnp1vnamcvgvindh  
iqkgtakgvgnsvi yvglktgrdgihgatfaseelteeseskrpsvqigdpfvgkklmeatleaitfdelvgiqdmgaag  
ltsssemaakggsglhlr  
leqvptrepgispyemmlsetqermllvvekgteqkflldfdkheldsavigevtdtrfvltyddevyadipveplade  
apvyilegeeknyntsknd  
ythidvkdttffkl1khptiaskhylydqyqqvgantiikpglqasvvrvegtnkaiastidgearyvynnpyeggkmv  
aeayrnl1avgatplamt  
c1nygspekkeiyqqlidstkgmaeacdi1ktpvvsgnsvlynetkgtsiftpvvgmvglienvny1ndfepqvgdkly  
ligdtkddfsgsleklly  
gkvnhefesld1ssevekgesiktai regvlshvqtvgkgllitlaklsahyglgkssiditnaqlfsetqgryvsv  
ksgktlnidnaieiglltd  
sdnfvttpteyteisensdikriwegaiaqclttqd  
>tr|D9RG01|D9RG01\_STAAJ  
mfgiwnhpeaaqltymg1hs1qhrqgegagivvsnqnelkgergl1lteaikddqmer1kgyqhaighvryatsgnkgi  
eniqpflyhfydmvsgich  
ngnlinakslrqnlkqgai fhsssdtevimhli rrskaptfeea1kes1rkvkggftfailtkdalygavdpnairplv  
vgkmdgtyilasetcaid  
vlgaefvqdi hageyv vindkgitvksythhtttaisameyiyfarpdstiagknvhavrkasgkkl aqespnadmvg  
vpnssl saasyaeeiglp  
yemglvknqyvartfiqptqelreqqvrvkl savkdivdgkniilvddsivrgttirrivkmlkdsgankvhvriaspf  
mfpsfygidvsttaelisa  
skspeetkdyigadslaylsvdgliesigldydapysglcvesftgdypaglydyeanykah1shrqqyisknkhffds  
egn1nv  
>tr|D9RG02|D9RG02\_STAAJ  
mskayeqsgvni hageavermsshvkrtrmkevigglggfgatfdlsq1nmtapvlvsgtdgvgtklklaidyghkhsi  
gidavamcvndil ttgaep  
lyfl dyiatnkvvpevieqivkgsdacetntal iggetaemgemyhegeydvagfavgavekddyvdgsevkegqvvi  
glassgihsgyslvrkli  
nesgidlasnfenrpfidvfl eptklyvkpvalkkevsikamnhitgggyfenipralpagaaridttstfptkifdw  
lqqgnidtnemynifnm  
igytvivdekdv sralki laeqnveayqighivknestaiellgv  
>tr|D9RG03|D9RG03\_STAAJ  
mviaifasgsgsnfenivehvesgk1enievta lytdhqna fcidrakkhdipvyinepkqfdskaayeqhlvtllned  
kvewiilagymligpdll  
asfegk1nihps1lpkygidaigqayhsdttitgstvhvdsgmtgeieeqrqcdirpddskeqleekvkkleyely  
psviakivk  
>tr|D9RG05|D9RG05\_STAAJ  
mnvlvigaggrehalayklnqsnlvkqvfvipgneamtpiaevhteisesdhqgil dfakqnvdwv vigpeqplidgla  
dilrangfkvfpgpnkqaaq  
iegsklfakkimekyniptadykeverkkdal tyiencelpvvvkkdgl aagkgvi adtieaarsaieimygdeeeegt

Tsompanidou\_et\_al\_Supplemental\_FASTA\_File

vfeaflegeefs lmtfvng  
dlavpfdciaqdhkrafhddegpntggmgaycpvphisddvklktnetiaqpitkamlnegyqffgvlyigailtkdgpk  
viefnarfgdpeaqvllsr  
mesdlmqhiidldegkltefkwnesivgvmlaskgypdayekghkvsqgfdlnenyfvsglkkqgdftvtsggrvilaig  
kgdnhvdaqrdayekvsqi  
qsdlfyrhdiankaqlk  
>tr|D9RG06|D9RG06\_STAAJ  
myeqwkvrsfvddvniitklflgiilfffiifvhnfdmlyitilmvlflmfngtqfkitaitisigfallsslfm  
ilyngshtilkfgfihit  
teslvrglhvs lrtiaisffgiliaaltsqvvmifyslmqhlkvkskvayafmaairmipmissliqlrrslkmryqmid  
aanyrglkrfkhliiplls  
qnirkahqlsvameskgfrdgprrtyyynvpfsykdvifiivliaiitlayycsitlpitgiddvrlgrvg  
>tr|D9RG07|D9RG07\_STAAJ  
mlkvsdlrlkypsgqrkifdhlnitidqkekvlllgpsgcgkstllnvlsqivpnlielpmkydelivdplsgvifqdpd  
sqfcmkvyeelafvlenr  
qvpredmdaliinaInmvnlvntpetyikdlsggmkkqlaivetilqqsktfldeptamldvqatedlwtklieledwq  
tvvivehkvkhiwhvdrv  
ilmdyngniiadecpeii lqkyvhlseygvwhprawefapsrvdfpttnshllqfkngriirgkstllsfsdleiglge  
wititgtngsgkttllesl  
mqlikyqgdvyfenqrlltkikaakhmylvynpelqfitnsvydeinifhnlskdqsddeitqlkllldenvkdqhp  
yelsiqkrrllsvatalss  
kadiifldeptfgldshntfqliklfqkrinlgqsivmvtthdeiierypsrrlkisdgalldcdgdtnv  
>tr|D9RG09|D9RG09\_STAAJ  
myknynmtqtlpietsvripqndisryvneivetipdsefdefrhrhgatsyhpkmmlkiilyaytqsvfsgrriekll  
hdsirmmwlaqdgtpsykt  
inrfrvnpntdaliesslfiqfhsqclqnliddksifidgkveasanrytfvwkksiqnhesklenska lyrdlveek  
iipeikedgdsdltieeid  
ligshldkeiedlnhsiqnedctqirkqtrkkriteikkfkkkfdyserkskyeeqksilkdrnsfsktdhdafmrmke  
dhmkngqlkpgynlqiatn  
sqfvllydflqnpdtrtlipfltmiantfgylpeyvadagyqseqnymaiiddfnktpitygmfikdktrkfkdsif  
ntqwnkydelndeficpnn  
krigfkrayrnrndrygfrdfklyecddcsacs lqqcmkpnssknkimknynweyfkaqinqklsepetkkiysqrki  
dvepvfgfmkailgfrms  
vrginkvkreigfvmlalnirkivarravyqihlklklisik  
>tr|D9RG13|D9RG13\_STAAJ  
mgfknnltsnltnkignsvfkienekgampttikeInerrqraeaivkrkslmsstmsvvpipglfdgvdllkmlkdi  
edvnkiygl dhkqvnslgd  
dvkerimsaaaqqsqfignkrissafkivirdvakrtaakqtkwfpvvgqavsasisyymnkigkdhiqkcenviknv  
m  
>tr|D9RG18|D9RG18\_STAAJ  
miyafigitvlwflficyiiasidfgagffalshskltgdekkinhlsrylnpvwevtnvffvffvfgvfgffpesiky  
lgtvllipgsialimislr  
nsfyafenygqdtklawmiymgvsgllipaslstaltiteggyinvrnvidldwvqlllspfawsvflaiisvlyiss  
gfltyyakkandesaynl  
rqwhiflgppmiiclfvflslriqnsehfysavfdywwmfaisflffalasl1tffkkkhglafvfvilqmmfaffgyg  
isklpyllpfpvkitdayv  
npemgwtlvivfilgllllpslillrlfvfdkeyvegkks  
>tr|D9RG23|D9RG23\_STAAJ  
mkfgktiavvlavslagcttdkkekaylkqvdkikdeepiktvgkkiaeldekklkltedvnskdtavrgkavkd  
iknaddrlkefekeedaik  
kseqdfkkakshvndindvkrkevqlddvllkeykylhgeyskayknvnseltfkylnqndatqqgvnekskaieqn  
ykkllkevskytkvlnkvg  
kekqdvqdfk  
>tr|D9RG26|D9RG26\_STAAJ  
mafefrlpdigegihegeivkwfvkagdtieeddvlaevqndksvveipspsvsgtveevmveegtavvgdvivkidapd  
aedmqfkgghdddsskeep  
akeeapaeqapvatqteevdenrtvkampsvrkyarekgvnikavsgsgkngritkedvdaylnggaptasnestasatn  
eevaetpaapaavslegdf  
petteki pamrraikamvnskhtaphvtlmd eidvqalwdhrkkfkeiaaeqgkltflpyvvalvsalkkypalnts  
fneeageivhkhynigia  
adtdrgllvpvkhadrkifqisdeinelavkardgkltademkgatctisnigsaggqwfptvinhpevailgigria  
qkpivkdgeivaapvalsl  
lsfdhrqidgatqnamnhikrllnnpellmeg  
>tr|D9RG28|D9RG28\_STAAJ  
meyeypidlwsneemsvinffnhvekyyesgvtagdfmdaykrfkeivpakaekqifntfekssgynsykavqdvkt  
hseeqrvtgkk  
>tr|D9RG31|D9RG31\_STAAJ  
mrntnkfllypyllwmvifiivpvvlliyfsfldinghfsftnyqqifttkylkmfaysilyaalitiitlaisyapaay

Tsompanidou\_et\_al\_Supplemental\_FASTA\_File

itrskfqnilmimiipw  
inlllkyafigllshdgvinqffhlfnlpsfnllftngafllvvasyiyipfmilpifnsmkaipnllqassdlgaspf  
ytrkvimpltkegvmtgi  
qvtfipslsfmitrliagnkvinigtaiieeqfltiqnygmgstiaiflivmfafilitkssngrg  
>tr|D9RG33|D9RG33\_STAAJ  
mkrflqliigalvvgmlcltshwfskeqvhtnqkiyvynwgeyidpelikkfeketgiqvvyetfdsneameakirng  
gthydvafpseytvqklkr  
dhlllpidhknvpniknldsdymmsfdkgnkyslpyffgtvgilynkekypnesfdswkslynpkfkniillvdgarei  
igmslnklgynlndrnshh  
lkaerdltklapqvrvgvdeitmmllqqnegniavvswgvaaplvdqgdkynyvipkegsnlwfdnmvipktaqnkega  
ykfmmflldaknnkqntef  
vgyatpnkaarqllpkkikddhrfyptkkeqerlevykdlgpevlseynefnfkmslk  
>tr|D9RG35|D9RG35\_STAAJ  
mnrkpelimawiansisiyilvmglisyfslksgnasqreealaklsqnggkvsldmlhttigalailistlyiaifat  
icikgrrklsiilfviai  
vsllmalnilaiivlwiivmimliskkesketthkdddeiyh  
>tr|D9RG36|D9RG36\_STAAJ  
mnnkrhstneqlsldoinntikfdrssnkqkflsflgpgllvavgymdpgnwitsmqggaqygytllfvilisslsaml  
lqsmtvrlgiatgmdlaqm  
trhylsrpiaiiwiiaelaiatdiaevigsaialnllfniplivalitvldvflllfimkygfrkieaivgtliftv  
lffifiveyisspqlnavl  
ngfiphseiitngilyialgiigatimphnlylhssivqsrtysrhneekaqaikfatidsniqlsiafvnclllv  
gaslffnsnaddlggydl  
yhalktepvlgatmgaimstlfavallasgqnstitgtlagqivmegflrlhipnwlrilitrslavipvivcliifkgn  
aakieqllvfsqvflsia  
pfccliplqlatsnkdlmgpfynktwniiswtliiilsilnvyliiqtfelqg  
>tr|D9RG37|D9RG37\_STAAJ  
mtkytfkpkdfkafnvegldarmealneyirpqlhelgeyfsdfftstgetfyphvakharrsvnppkdtwvafatnkr  
gykmlphfqi gmfedqlfv  
mfgimheakdkatrakvferkfaiqqlpddyrvcldhmkpdkpfikdltdddlkeaiqrainvkkgeffiaraitpdk  
rlksdkafiafleetfdqf  
lpfysa  
>tr|D9RG38|D9RG38\_STAAJ  
malygfaqqliqeagirikqlmeqnl tietksnpndlvtvndkatedfifdtiletyphqvlgeeghghdidtskgtw  
vvdpidgtlnfvhqgenfa  
isigiyidgkpyagfvymadvlyhakvgegayrgsqplkplndsnlrqsiiginpnwltkpvlgeifkdvvnisrsar  
aygsaaleivsvatgnlea  
ymtprlqpwfagglvilinevdgqasnllgepltiggnsvlvgnpgvhreildvylephrdaliqlheqrfkrksk  
>tr|D9RG40|D9RG40\_STAAJ  
mtnkredvrnjaiiahvdhgkttlvde1lkqsgifrenehvdramsndierergitilakntavdykgtrinildtpg  
hadfggeverimkmvdgvv  
lvvdayegetmpqtrfvllkkaeqnlkpvvvnkiddkpsarpegvvdvldlfielendeqlfpvvyasavngtasldp  
dkqddnlqsllyetiidyvp  
apidnsdeplqfqailldyndyvgrigirvfrgkmrvgdvnslikldgtvknfrvtfkifgyfglkrleieeaqagdli  
vsgmedinvgetvtphdhq  
ealpvlrಿದೆptlemfknnsfagregdfvtarqierlnqqltdvslkvsntdspdtwvagrgehlhsilienmr  
regyelqvsqpviikeid  
gvmcepfervqcevqenagavieslgarkgemvdmtdnglrlifnvpargmigyttfmsmtrgygiinhtfeefr  
prikaqiggrngalisms  
qgsastyailgledrgvnfmepgtevyegmivgehnrendltnitkthqtnvrsatkdqtqtmnrpriltlealqfi  
nddelvevtpesirlrkki  
lnknvreckekrikqmmqene  
>tr|D9RG41|D9RG41\_STAAJ  
miqikgavkfpitldsttwifddrkvsiedlekgvfdgskpidfednhewnrailegqtnpptlnseikykkramlegs  
vinmtpffkhsephdsatt  
irlsnehdhldipidllpylffqfakdgrlysdngvdsfiynqengysnrinhvthievi  
>tr|D9RG44|D9RG44\_STAAJ  
mkqikkllvanrgeiairifraaaeldistvaiysnedksslhrykadesylvgsdlgpaesylneriidvakqanvda  
ihpgygfllseneqfarrca  
eegikfigphlehlmdfmgdkvkarttaikadlpvipgtdgpiksyelakefaeeagfplmikatsggggkgmrvreese  
ledafhrakseaksfgns  
evyierydnpkhi evqigdehgnivhlferdcsvqrrhqkvvevapsvglsptrqricdaaiqlmenikyvnagtve  
flvsgdeffffjevnpvqv  
ehtitemvtgidivktqilvaagadlfgeeinmpqqkdittlgyaiqcritteditndfmpdtgttiayrssggfgvrl  
agdgfqqaeispyydsllv  
klsthaifskqaeekmvrslremrigrvktnipflinvmknkftsgdyttkfiheetpelfdiqpsldrgtktleiygnv  
tingfpnvekrpkpdyela  
siptvssskiasfsgtkqlldevgpkgvaewkkqddvlltdtfrdahqslatrvtkdmniasktadvfdkgfsl

Tsompanidou\_et\_al\_Supplemental\_FASTA\_File

mwggatfdvaynflkenpw  
erlerlrkaipnvlfqmlrasnavgyknydpnvihkfvqesakagidvfri fdslnwvdqmkvaneavqeagkisegti  
cytgdiInpersniytley  
yvkIakeleregfhilaikdmagllkpkaaeyeligelkaavdlpihlthtdtsngnglltykqaidagvdiidtavasmg  
ltsqpsanslyyalngfpr  
hlrtdiegmeslshywstvrtyysdfesdikspnteiyqhempggqysnlssqakslglerfdevkdmyrrvnflfgdi  
vkvtpsskvvgdmalymvq  
ndldeqsvitdgykl dfpesvvsffkgeigqpvngfnkdIqavilkqgealtarpgeylepvdfekvrelleeeqqgpvt  
eqdiisyvlypkvyeyiq  
trnqygnlsll dtptfffgmrngetveieidkgrliiketisepdengnrtyyamngqarriyikdenvhtnanvkp  
kadksnpshigaqmpgsvt  
evkvsvesvkanqplli teamkmettiqapfdgvikqvtvnngdtiatgdllieiekatd  
>tr|D9RG48|D9RG48\_STAAJ  
mkkliirvvgvflvqgfllyl fysprlkfdvlenpnkgkvn rseqvnksnhaenpkpkegvgtwvkgdikvltskfgq  
adrvyprfdgyknyvfkdk  
nsyyivstkreeivsvyatgekvvnspIkgqhsaeifnhtsinpepsfkvdgkkyefelsdedlktqtlikygniyaqv  
ysdqskkvlsvrfltkem  
IadiepyrlnsnftsehnkrpveqnpnqlislyevtnemrklkgIklplkinsdlahiasnlyeatsngsdsvefteda  
lrgqldknhvtykttaqnv  
gyafndvptlihswnsdihrsrllnskydemggdvmrdislyl fiek  
>tr|D9RG50|D9RG50\_STAAJ  
mkkvnrrniI ntvIvgagfvssllminknkvitkkqtIpaaffkgnapyifahrggmalrpeqtqlafdyakqlgvdgfetd  
vrI tkdqqlivfhdatvdr  
ttngsgkvsvhtlaelkkI daayhfkdingltpyrghahtailtfdellkqypdmyinvdlkdapesyegsiapqimfdt  
iaenqafdrvIvtsfykeq  
ivrfnkiaggsvai gasqgeveafIkyhllggryyqplaqt fmpthfkgidltssrfikwI ndmniipgyygvnsidI  
mndlyqkahtivtdrpdI  
aqqfkqtIpnk  
>tr|D9RG53|D9RG53\_STAAJ  
mrviagkhkskaIesmeqrnrtrptmdkvkegI fnslydvsgigldI fagsgalgiealsrgmdkvi fvdqnfkavkviks  
nlanldleaqsevyknnad  
ralkaIskryiqfdvifldppynkgIidkaIklisefnllkengiivcefsnheeidyqpfmikryhygltdtlllekq  
e  
>tr|D9RG55|D9RG55\_STAAJ  
mksvgliteynpfhngqyhinqsklltnadvtiaimgnfvmrgepaiyskftrakmalstadIvielpatasI ssgdh  
faelavkvadymnvdtiaf  
gsenndiktIklqIahsineieqsesfsqkvkegksypriisellehealaspnnilgisylkaiakhakninaisikre  
naqhhdslIqhHQfasgts  
irtsIisqddhwhhvvpkdiqhlvytphitInqI fpylkyqIiamttesI kniyvttegfenrlksnneatdfhhfvks  
lktkrytythigrllmnl  
InikptdvtrnihavkvIamndrgrqylkhIktafperqyitninksnahyftneikathiyinaisgqqqtdfntpviiqq  
yr  
>tr|D9RG56|D9RG56\_STAAJ  
mkwsitqlrkyqgkpfefdqtsvfdnlkesldIldIspitiqqqltikstevvadihitgtytmpcartIvpvkvpI dvt  
ttevfdIlegynqynddqqd  
vdehyhiikdgmvnIhdivediviiekpmrayseqsdqmI tvnggewivedqI delakqqeqddsesrqvdprIqlklqq  
lydkeq  
>tr|D9RG58|D9RG58\_STAAJ  
mnkqqkefksfysIrkssl gvasvaistllllmsngeaqaeeetggnteaqpkteavaspstttkkapeaksvanavsv  
snkeveaptpetkeakevk  
asketkevkaakadnntypIlnqelreaiknpaikdkdhsapnsrpidfemkkengeqqfyhyassvkparviftskp  
eielglqsqqfwrkfevye  
gdkklpikIvsydtvkdyayI rfsvsngtkavkivssthfnkeekydytImefaqpIynsadmfkteedykaekllapy  
kkaktlerqvyelnkIqdk  
IpekIkaeykkkIleetkkaIdeqvksaitefqnvqptnekitdIqdtkyvvyesvennesmmdtIvkhpiktgmI ngkky  
mvmettnddywkdfmvegg  
rvrtIiskdakntrtiI fpyvegkIlydaivkvhvktidydgqyhvrivdkeaftkanadktnkkeqqdnsakkettpak  
pskptpspvekesqkqdsq  
kddnkqstsvekendassesgkdktpatkpakaevesssttptkvsttqnvaqpttassettkdvvqtsagsseakdsa  
plqkanikntndghtqsqn  
nkntqenkaksI pqtgeesnkdmIplmaIlaI ssivafvlprkrkn  
>tr|D9RG59|D9RG59\_STAAJ  
mtkhylnskyqseqrssamkkI tmgtasiI lsslyigadsqqvnaatdatnatnnsqvsvsatsqpinfqvqkdgss  
kshmdymqhpgkvikqnn  
kyyfqavlnnasfwkeykfynannqelattvvnddkkadtrtin vavepgyksI ttkvhivvpqinynhrytthlefeka  
iptIadaakpnnvkpvqpk  
paqpktpteqtkpvqpkvekvkptvttskvednhstkvvsttdtkdqtktahtvktaqtaeqnkvqtpvkdvatak  
sesnnqavsdnksqqtnkv

Tsompanidou\_et\_al\_Supplemental\_FASTA\_File

tkqnetpkqaskakelpktgltsvdfnstvafatla1lgs1s111fkrkesk  
>tr|D9RG60|D9RG60\_STAAJ  
mkn1lkvfnttilal1111atfnsanaadsgt1nyevykyntndtsiandyfnkpakyikkngklyvqitvnhshwitg  
msieghekiiskntakde  
rtsefevsk1ngkvdgkidvyidekvngkpfkydhhyntiykfnngptdvaganapgkddknsasgsdkgsdgattgqses  
nssnkdkvenpqtagnagtpa  
yiyaipvaslalliait1fvrkkskgnve  
>tr|D9RG61|D9RG61\_STAAJ  
mrnvkqiatksii1111gilttyttmigsvladeikypsakfnqpeakdkteltssifdekikenkale111fnqenknv  
teeqqlvdekaqlisdmtg  
kiylqvk1kgqidkeqlvfqndkneefpfvikdekddtivri1ieqhmdkinmhvktlaakkdl1nkemvysihfkekkv  
qhddakevpskhqngennq  
dq1kkdidkksqksdikerrts1ftekg1ndisvqkdkvqqsdkkienerpkasgt1kvenspptvkk1endhkeqp  
khkdekskkkek1kvekek  
alpafnrddsknssq1ssdikeldephkkqym1faagivlati111isahlysrkrngqv  
>tr|D9RG62|D9RG62\_STAAJ  
mriiky1tilvisviltscqssssqestksgefrivpttval1tmtldkl1dpivgkptsykt1pnrykdvpeigqpmet  
nveavk1kpthv1svsti  
kdemqpfyk1nmkgyfydfds1kgmqksitq1gdqfnrkaqakelndh1nsvkqkienkaakqkkhpkv11imgvpgsy  
1vatdksyigdlvkiagge  
nvikvkdrqyissnten11ninpdil1r1phgmpeevkkmf1qkefkqndiwhkfkavknnhvvd1eevpfgitanvdadk  
amtqlydlfykdkk  
>tr|D9RG63|D9RG63\_STAAJ  
minkkk11f1c11viliatayisfvgtik1sfndlitkfttgsneavdsiid1r1prilialmvgamlavsgallqaa  
1qnp1aeaniigvssgali  
mralcm1fipqlyf1p11sfigg1ipf1i111hskfrfnvsmilvgvalfv11ngvleiltqnp1mkipqg1tmkiw  
sdvyi1avsallg1ilt11  
1spk1n11n1ddiqarsignidryrw1tg1lavflasatvaivgq1af1giivphvvrk1vggnyrv1lipfstvigaw1  
11vad11grviqpp1eipa  
nailmivggpm1iy1icqsqrnri  
>tr|D9RG64|D9RG64\_STAAJ  
mrmkrf1tivq111vvi111fgykivqtyiedkqeranyek1qqkfqm1mskhqahvrpqfes1ekinkdivgwik1sgt  
s1nypv1qgktnhdy1n1d  
ferehrrkgs1fmdfrnelk1nhnti1yghhvgdntmfdv1edy1kqsfyekhktiefdnkygkyq1qvfsayktttkd  
nyirtdfendqdyqq1fde  
tkrksvinsdvnvtvdkim1stcedaysettkrivvvtkiikvs  
>tr|D9RG66|D9RG66\_STAAJ  
meqitsaqnr1kqank1kkkrerdktg1aliegvl1eeayqsgv1vitq1faiepar1dqqi1ayaqevfeinmkvaes  
1sgtvtpqgffai1ekpqy  
diskaqqv11idrvqdpng1gt1irtadaagmdavimekg1tdpyqdkv1rasqgsvf1hpvmtqdl1dtfitqfngpvpyg  
talnavtykevtssdsfa  
111gnegegvnpellah1ttqn1iipi1ygkaes1nvaiagsi1lyh1kg  
>tr|D9RG68|D9RG68\_STAAJ  
m1isnew1keyvtiddsvsn1aer1trtgievdd1idytkdik1lvvgfvkskekhpdadk1nvcqv1digedepvqivcg  
apnvdagqyv1vakvggr1  
pggikikrak1rgersegmics1qeig1issny1pksfesgiyvfsesqvp1gtdalqaly1ddqvme1fd1tpnrada1smi  
gtayevaalyntkmtkpet  
tsnel1sandel1vtienedkvpyysarvvhdv1tiepsiwmar1likag1rpinnv1disnyv1leygqpl1hmf1dqs  
igsq1ivvrqanegekmtt  
1ddterel1tsdivi1ngqtpialagvmggdfse1vkehtsniviegai1fdsvs1rhtsr1n1rsess1rfekgiatefv  
deavdracy1lqtyangkv  
1kdrvssgelgafitpiditadkinrtigfd1sqndiv1ifnq1lgfdte1nddv1tvqvpsrrkditiked1ieevary  
gyddipst1pvfektsgq  
1tdrqykt1rmvke1vlegaldqaitys1vskedataf1mqqrqtid11mpm1seahas1rqs11ph1ieaasynvarknkd  
vk1feignvffangdgelp  
dqvey1sgiltgdyvvnqwgk1ketvdfylakgvvdrvsekl1n1efsyrradidgl1hpgrtae1llenkvvgf1igelhpt  
laadnd1krtyvfe1nfda  
1mavsvgyinyepi1prfpgmsrdia1evdqnipaad11stihaggn1kdt1lvfdvyqgeh1legkksiair1ny1dte  
et1tdervskvqaeieaal  
ieggavir  
>tr|D9RG69|D9RG69\_STAAJ  
manivfk1sdkditt1msri1sfdten1pqgmkarakyqnttvni1yqsgkv1mqgnhaeavse11pqhsq1ntnktkkkn  
mansf1eqt1mydqfncig  
sdeagsgdyf1gpl1tvcaafvtkehvpilkt1gvddsk1ltdtkive1aeq1vtfiphs111lhnekyni1qqakgwtqvk  
kav1hneai1knv1kkidss  
qldyiv1dqfakrevishya1sdip1pkktkfetkgesks1aiavasii1sryafvtymdqiskninmtipkgagakvdvi  
aaki1kkygisr1ldt1skk  
hfk1nrekaqk1ilkp1



Tsompanidou\_et\_al\_Supplemental\_FASTA\_File

>tr|D9RG71|D9RG71\_STAAJ  
mvidfiiiiiffvyfvivgfrgrfwlsmihlsativslwiasqfyksiverlivfipypkttafnttfafhfnhlqnrfea  
ivaflmitlfcckfiylilii  
vtfdkivayqnihi fsramgmivgvfitiivlhftlyllalypnealqhqklsivshslifhipylsaftinl  
>tr|D9RG72|D9RG72\_STAAJ  
mtkkdvtklleqiatymelkgentfkisayrkaaqslelderpldeisdvteikgigkgvaevindyretgesqylqqlq  
eevpeglipllkiqglgsk  
kiaklykelnivdkaslqvacengkvselsgfakkteqnilavkqlgakkdrypidqmrrlnqeidiyidtlnyidqys  
sagsfrfrfkemskldfii  
stdnkpavqqqllnipnkvevavgnatkvslelayddetigvdfrieepsafyhtlqhftgskehnrirqlakardev  
seygieqadgtliqydsea  
kiyehfnvnfippamredgsefdkldsnitlddingdihmhttsdgaafsirdmveaniakgykfmvitdhsqslrvan  
glqverllrqneeikaldk  
eyseidiysgtemdilpdgslidydeilaqldyvigaihqsfnqseeqimerlanacrnpvvrhiahptgriigrdgyk  
pnieqlmalaeetntvlei  
nanphrldlnadivrkypnvklntintdahhtnhldfmygvataqkgfvtkdrvinalsreafkdfiennikkk  
>tr|D9RG73|D9RG73\_STAAJ  
mrqktldvlefekikslvanetisdglgkvnmmpatnfetvfvqmeetdeiaqiynkhrllpslsglskvsafihradi  
ggvlnvselnlkrliqvq  
nqfktfynqlveedegvkiyilddkmnqlpvltdlqqinetcdtydlydnasyelqgirsksstnqrirqnl drivks  
qanqkkl sdai vtvrnern  
vipvkaeyrqdfngivhdqsasgqlyiepsvsvemnnqisrlrhdeaiekeriltqltgyvaadkdallvaeqvmgqld  
fliakarysrsikgtkpi f  
keertvylpkayhpllnretvvantiefmedietviitgpntggktvtlktlglivmaqsglliptldgsqslsvfkny  
cdigdegsieqslstfssh  
mtniveilkhadhkslvlfedelgagtdpsegaa lamsil dhvrkigs lvmatthypelkaysynregvmnasvefdvdtl  
sptykllmgvpgsrnafdi  
skklglslniinkaktmigtdekeinemieslernykrvetqrleldr lvkeaeqvhdldskyyqqfnyeks lieeake  
kanqkikaatkeaddiikd  
lrqlreqkgadvkehelidkkkrlddhyevksikqnvqkqkydkivagdevkvl sygqkgevl eivndeeai vqmg i km  
klpiedlekkqkekvkptk  
mvtqrnrqtikteldlrgyryedalie ldqyl dqavl snyeqvyi ihgkgtg alqkgvqqhlkhhksvsdfrggmpsegg  
fgvtvatlk  
>tr|D9RG75|D9RG75\_STAAJ  
medykqrikknklnvvpmpgcy lmkdrndqviyvkkakl rnr lrsyftgahdaktrlvgeirrfefivtsseteslll  
elnlikqyqprynillkdd  
ksyfpikitekkyprlvtrtvkqgtgkyfgypnaysaqetkklldriypyrkcdkmpdklclyyhigqclgpcvydvd  
l skyaqmtkeitgflnged  
ktlksleermltasesldferakeyrdliqhiqnlnkqkimssdktir d vfgysvdkgwmcivffirqgnmikrdtt  
mip lqqteeeefytfiggf  
ysl nqhilpkvehvprnl dkemi qsvvdtkivqpvrgpkkdmvdl aahnakvsl nnkfelisrdesrtikaieelgtqmg  
iqtpirieafdnsniqqvd  
pvsamvtfidgkpdkknrykykiktvgpddyksmrevrrrrysrvlneglp lpdliivdggkghmngvidvlqnelgld  
ipvaglqkndkhtselly  
gasaeivplkksqafyllhriqdevhrfai t fhrqtrqktglksilddidgigskrktlllrsfgsikmkeatledfk  
nigipenvaknlheqlhk  
>tr|D9RG76|D9RG76\_STAAJ  
maqsknefyllrihsllgiiipigaflvvhllvnhqatqgaeafnkasnfmeslpfliiveflfiyiplllyhglfghiiaf  
takenvghsifrnwmfff  
qrvsqiltfifiqihlwqtr lqkafygkevnydlmhetlqhpgwai fyici vavvfhfanglwsflvtwgg lqspksqr  
vftwvslivflvisyigvt  
aiaafm  
>tr|D9RG77|D9RG77\_STAAJ  
maekhlivvggglaglmstikaaekgahvd l fsvvpvkrshsvcaqggingavntkgegdspwihfddtvyygdf lanqp  
pvkamteaapki ihll dr m  
gvmfnrtnegll dfrffgg t l hrtayagattgqqllyal deqvrayevdglv tkyegweflgivkgddd sargivaqnm  
ttaeietfgsdavimatgg  
pgiifgkttntsmintgsaasivyqqgaiyangefiqihptaipgddklrlmsesargeggriwtykdgkpwyl eekypd  
ygnlvprdiatreifdvc  
nqklgingenmvyldlshkdphe ldvklggieieyekftgddprkvpmkifpavhysmgglyvdydqmntikglfaagec  
dfsqhggnr l gansllsai  
yggvtvagnaidyisnidrsytdmdesi fekrkaeeqerfdkllamrgtenayklhrelgeimtanvtvrenekll etd  
kkive lmkryedidmedtg  
twsnqavfftrqlwnmlvlarv itigaynrnesrgahykpefperndeewl kttmasfqgafekpqftyddvdvs lippr  
krdytsksksggkk  
>tr|D9RG80|D9RG80\_STAAJ  
mkeiviasnngk indfkvi fpdyhvigi selipdfdveetgstfeenailkseaaakalnktviaddsglevfalngep  
giysaryagenksdeanie

Tsompanidou\_et\_al\_Supplemental\_FASTA\_File

kllnklgnntdcraqfvcvismsgpdmekvfkgtvsgeiadgkygengfgydpi fyvpkldkmaqskseekgqishrr  
nainllqaflegdknv  
>tr|D9RG81|D9RG81\_STAAJ  
mskwiivsdnhtesgi lyqiyekhsdadvflhlgdsefeyndtelslfnrvkgncdfypefeneavikcndvkvfythgh  
lyqvnrrallaekahelg  
clfafyghthvakyeyingvhvinpgsisqsrsmeetyaeiivddetkhglinfknrqyetvshttf  
>tr|D9RG82|D9RG82\_STAAJ  
mknkfigksilmaavsltvsmfageshaqtknveaakkydqyqtnfkkqvnkkvmdaqkavnlfkrtrtvathrkaqra  
vnlihfqhsyekkk1qrqi  
dlv1kyntlk  
>tr|D9RG83|D9RG83\_STAAJ  
mknkntkviastviatslltqsndakaffsyewkgleiakkeadqakkdeeradklikeadeknehykgktvedlyvia  
kkmgkgntiavvikdggk  
ngyytfditrplehrknipvvgsgseitwq  
>tr|D9RG84|D9RG84\_STAAJ  
miikiltillllci lsylvtnrkkpflflktl fmgvffifigiyislaisaviygiaqfitidfgsfflmgiiililissi  
fq1fivrllfrkknvd1te  
vvvlehlqwflvyfaiyqavnekmdindinidnfqsvffdvsnlnlvilptliiswvtfnyrmrsyk  
>tr|D9RG85|D9RG85\_STAAJ  
mknkliaksl1aiaaigittttastadasegygprekkpvsinhniveyndgtfkyqsrpkfnttpkyikfrhdynive  
yndgtfygprphfnkpa  
ksvatlkkeqk1iqaqnlvrefekthtvsahrkaqkavn1vsfeynvkkmilqeridqvlkqglvr  
>tr|D9RG86|D9RG86\_STAAJ  
mkfkkyivagtlavllsttavstldgnkadasshdnyltqskyhdckiaeelksllrqsnyvdlaaqslnryykrtimmn  
eyrakaalkkndfksmaea  
kvgleniykeideiir  
>tr|D9RG87|D9RG87\_STAAJ  
mnkhinkkatkl1edykkvqqrkteetdrgclksvimlivlflfiifigivacsthvnffq  
>tr|D9RG90|D9RG90\_STAAJ  
mte1neiinaikslfesesyki sknsgvpyqtvd1rngtkiedarftrtiklysyytslkeqs  
>tr|D9RG91|D9RG91\_STAAJ  
mrksitnkiilttlll1gttatqtpnsp1nvstdakayyidqdetninelikyqtqkpltfsnrwllyqyddgnyivefk  
rysawahirlwgaeswgn  
nqlrdhyvdvfglkdedtrqlwvyrdfggvtpaasssdkps1fvqykdklqtiigahkmyqgnkpitl1keidfra  
realiknkilyhenrnkgk  
lkitgggndytid1skrlhsdlanvyvknppkitvevlid  
>tr|D9RG92|D9RG92\_STAAJ  
migtatsqfphspi smsseakayni sesetnvseltkyytqrhl1tfsnkwlwqkdngti hatllqlswfshiqvfgpesw  
gninq1rnkyvdi falkdy  
etwrtym1aetftggvtpaakpsdkhykln1tykdksgtfigeypyftgnkpv1t1kevdfrirqtliknklyhgnyn  
kghikitggsnytidlnk  
r1kstdanryvknppqtahieilleksn  
>tr|D9RG93|D9RG93\_STAAJ  
mknkimklvl1stall1gttstqlpktpisfsseakayni senetninelikyqtqph1slsgkwlwqkpngti hatlq  
twwythiqvfgpeswgn  
nqlrdkyvdi fgtkdedtvegywydetftggvtpaatssdkhyk1slkyrdklqtmigglefyqgnkpvit1keldfvr  
rqtliknklyngefnkgg  
ikitgggnytid1skkl1tdtnryvknprnteieilleksr  
>tr|D9RG94|D9RG94\_STAAJ  
mknlnrsfl1ldfsrqevel1t1sedlkrakyigtekpm1knknvallfekdsttrtrcafevaahdqganvtylgpt  
gsqmgkettkdtarvlgg  
mydgieyrgfsqrtvetlaesygvvwngl1tdedhptqvladfl1takevlkkdyadinftyvgdgrnnvanalmqgaaim  
gmfnh1vcpe1nptdel1  
nrcknjaavnggn1l1tdidqgvkgsdviytdvwsmgpepdevwkerlellkpyqvnkemmdktgnpnvifehclpsfh  
nadt1kigqqifekygi rem  
evtdevfeskasvfvgeaenrmhtikavmval1gef  
>tr|D9RG95|D9RG95\_STAAJ  
makivvalggna1gkspqeql1vkntakslvg1itkgheivishngnpqvg sinlglnyaaehnqgpsfpfaecgamsq  
ayigyqlqes1qnelhsig  
mdkqvvt1vtqvevdendpafnnpkpi glfynkeeaeqikdkgfifvedagrgyrrvpsppisiielesiktlikn  
dt1viaaggggipvireq  
dgfkgidavidkdktsa1lganiqcdq1iiltaidyvyinfntenqqplkttnvdelkryidenqfakgsm1pkieaa is  
fiennpkgsvl1its1nel1d  
aallegkvgtvikk  
>tr|D9RG96|D9RG96\_STAAJ  
mentnnesekerkflkmpgafml1fil1tvvaviatwvipagaysk1syepssqelkivnphnqvkkvpgtqqel1dkmgv  
kiki1eqfksgainkpsip  
ntyerk1qhpapgeqitssmvegtieavdimvfilvlggligvvasgsfesglla1tkk1kghefmlivfvsilmiigg

Tsompanidou\_et\_al\_Supplemental\_FASTA\_File

t l c g i e e e a v a f y p i l v p i  
f i a l g y d s i v s v g a i f l a s s v g s t f s t i n p f s v v i a s n a a g t t f t d g l y w r i g a c i v g a i f v i s y l y w y c k k i k k d p k a s  
y s y e d k d a f e q q w s v l k d d  
d s a h f t l r k k i i l t l f v l p f p i m v w g v m t q g w w f p v m a s a f l i f t i i m f i a g t g k s g l g e k g t v d a f v n g a s s l v g v s l  
i i g l a r g i n l v l n e g m i s d  
t i l h f s s l v q h m s g p l f i i v l l f i f f c l g f i v p s s s g l a v l s m p i f a p l a d t v g i p r f v i v t t y q f g q y a m l f l a p t g l  
v m a t l q m l n m r y s h w f r f v  
w p v v a f v l i f g g g v l i t q v l i y s  
>tr|D9RG97|D9RG97\_STAAJ  
m t h l t k v l d t l t g m c v v l l f s k y f v a y a n m v f d w k l r w y l l e n i p h l p i l f i l m f i f g v p s e m i k d r k r k n g v  
>tr|D9RG98|D9RG98\_STAAJ  
m r l q k a p l v t s g l v l g l l g l g n l l k d l s l t l n a v c g i f a f l i w i h l l c t m l k y f n n v k e q l n s p l v s s v f t t f f m s g f l g  
t t y l n t f f s n i t f i n n l i t  
p i w i l c l v g i m t h m i i f s i k y l k d f s l e n v y p s w t v l f i g i a i a g l t v p v s g y f f i g q l t v i y g f v a t c i v l p i v f k r l k  
a f p l q t s i k p n t s t i c a p f  
s l v a a y v i a f p k a n a f i v i i l l l l a q i f y f y i i i q l p k l l k e p f s p v f s a f t f p l v i s a t a l k n c l p v l m f p v i w k g l l  
f i e v l l a t v i v l r v f i g y l  
h f f f k k e n q d k f l r n a s q  
>tr|D9RGA1|D9RGA1\_STAAJ  
m g y k n i l i d f d d t i v d f y d a e e w a f h y m a n v f n h k a t k d d f l t f k k i n h q h w e a f q q n k l t k s e v l s e r f v n y f k h h q m e  
v d g h r a d v l f r n g l a e a k i  
k y f d q t l e t i v e l w k r h d l y i v t n g v t e t q r r l n q t p l h k y i k k i f i s e e t g y q k p n p e f f n y v f n d i g e d e r q h s i i v  
g d s l t s d i l g g i n a g i a t c  
c f n f r g f d h n p g i i p d y e i n s w k q l n e i v r  
>tr|D9RGA3|D9RGA3\_STAAJ  
m d c k v v s l n e k d q f i p k i k s g d p v i t g l f q y d a a q t s f e k r m s k e n n g r e a a l a n v i r e y m s d l k l s s e q e l n i q h l a n  
g s k v v i g g q q a g l f g g p l y  
t f h k i f s i i t l s k e l d t h k q q v p v f w i a g e d h d f d e v n h t f v y n e n h g s l h k v k y h t m e m p e t t v s r y y p d k a e l k q t  
l k t m f i h m k e t v h t q g l l e  
i c d r i d q y d s w t d m f k a l l h e t f k a y g v l f i d a q f e p l r k m e a p m f k k i l k k h q l l d d a f r a t q q r t q n q g l k a m i q t d  
t n v h l f l h d e n m r q l v s y d  
g k y f k l n k t d k t y i k e e i i n i a e n q p e l f s n n v t r p l m e e w l f n t v a f i g g p s e i k y w a e l k d v f e l f d v e m p i v m p r l  
r i t y l n d r i e k l l s k y n i p  
l e k v l v d g v e g e r s k f i r e q a s h q f i e k v e g m i e q q r r l n q d l l d e v a g n q n n i n l v n k n e i h i q q y d y l l k r y l l n i e  
r e n d i s m k q f r e i q e t l h p  
m g g l q e r i w n p l q i l n d f g t d v f k p s t y p p l s y t f d h i i k p  
>tr|D9RGA5|D9RGA5\_STAAJ  
m f h h i s v m l n e t i d y l n v k e n g v y i d c t l g g a g h a l y l l n q l n d d g r l i a i d q d q a a i d n a k e v l k d h l h k v t f v h s n f r  
e l t q i l k d l n i e k v d g i y y  
d l g v s s p q l d i p e r g f s y h h d a t l d m r m d q t q e l t a y e i v n n w s y e a l v k i f y r y g e e k f s k q i a r r i e a h r e q q p i t t t  
l e l v d i i k e g i p a k a r r k g  
g h p a k r v f q a l r i a v n d e l s a f e d s i e q a i e l v k v d g r i s v i t f h s l e d r l c k q v f q e y e k g p e v p r g l p v v p e a y t p k l  
k r v n r k p i t a t e e d l d n n  
r a s a k l r v a e i l k  
>tr|D9RGA7|D9RGA7\_STAAJ  
m l f f i l v l r i s y i m i t g h s n g q d l v m k a n e k y l v k n a q q p e r g k i y d r n g k v l a e d v e r y k l v a v i d k k a s a n s k k p r h v  
v d k k e t a k k l s t v i d m k p e  
e i e k r l s q k k a f q i e f g r k g t n l t y q d k l k i e k m n l p g i s l l p e t e r f y p n g n f a s h l i g r a q n p d t g e l k g a l g v e k i  
f d s y l s g s k g s l r y i h d i w  
g y i a p n t k k e k q p k r g d d v h l t i d s n i q v f v e e a l d g m v e r y q p k d l f a v v m d a k t g e i l a y s q r p t f n p e t g k d f g k k w  
a n d l y q n t y e p g s t f k s y g  
l a a a i q e g a f d p d k k y k s g h r d i m s r i s d w n r v g w g e i p m s l g f t y s s n t l m m h l q d l v g a d k m k s w y e r f g f g k s t k g  
m f d g e a p g q i g w s n e l q q k  
t s s f g q s t t v t p v q m l q a q s a f f n d g n m l k p w f v n s v e n p v s k r q f y k g q k i a g k p i t k d t a e k v e q l d l v v n s k k s h  
a a n y r i d g y e v e g k t g t a q  
v a a p n g g y v k g p n p y f v s f m g d a p k n p k v i v y a g m s l a q n d q e a y e l g v s k a f k p i m e n t l k y l n v g s k s d d t s n a e  
y s k v p d v e g q d k q k a i d n v  
s a k s l e p v t i g s g t q i k a q s i k a g n k v l p h s k v l l l t d g d l t m p d m s g w t k e d v i a f e n l t n i k v n l k g s g f v s h q s i s k  
g q l t e k d k i d v e f s s e n v  
d s n s t n n s d s n s d d k k k s d s k t d k d k s d  
>tr|D9RGA8|D9RGA8\_STAAJ  
m i f v y a l l a l v i t f v l v p v l i p t l k r m k f g q s i r e e g p q s h m k k t g t p t m g g l t f l l s i v i t s l v a i i f v e q a n p i i l l l  
f v t i g f g l i g f i d d y i i v v  
k k n n g g l t s k q k f l a q i g a i i f f v l s n v f h l v n f s t s i h i p f t n v a i p l s f a y v i f i v f w q v g f s n a v n l t d g l d g l a t  
g l s i i g f t m y a i m s f v l g e  
t a i g i f c i m l f a l l g f l p y n i n p a k v f m g d t g s l a l g g i f a t i s i m l n q e l s l i f i g l v f v i e t l s v m l q v a s f k l t g k  
r i f k m s p i h h h f e l i g w s e  
w k v v t v f w a v g l v s g l i g l w i g v h

Tsompanidou\_et\_al\_Supplemental\_FASTA\_File

>tr|D9RGA9|D9RGA9\_STAAJ  
m1nytglenknvlvvglaksgyeaakl1sklganvtvndgkdl1sqdahakdlesmgisvsvsgshpl1l1dnnp1ivknp1g  
ipytvsi1yeavkr1ki1  
tevels1y1iseapi1iavt1gtngkttvts1igdmf1kksr1tgr1sgn1y1vaskva1evkptdyl1vtel1ssf1ll1gi1ekyk  
phiai1itni1ysah1dyhen  
l1enyqnakkq1yknqteedy1licnyhqrqv1iesee1kakt1yf1stqqevdgi1yikdgf1iv1ykgvri1inted1vl1pgehn1  
eni1laav1aci1lagvp1ika  
i1ids1l1ttf1sg1iehr1l1qyvgt1nr1tnkyyndskatnt1latqfal1nsfnqpi1iwl1cgg1ldrgnefdel1ipymenvramv1vfgq  
tkakfak1l1gnsqgksv1iea  
nnvedavdkvqdi1epndv1l1spacaswdqystfeergekfierfrah1psy  
>tr|D9RGB0|D9RGB0\_STAAJ  
mddktkndqgesnedkde1elftrnts1krrrqrkrskathfsnqnkddtsqqaefdeeiyl1inkdfk1keqsneenndsas  
shandnn1dd1std1sn1nene  
dyrynpe1iddqnesngi1avddeqqsapkeqnsdsndeetvtk1kerkskvtq1l1kpl1tleekr1klrrkrqkriqysv1it1l  
v1l1i1avi1li1ymf1spl1skia  
hvningnnhv1stskinkvl1gvkndsrm1y1tfskknaind1leedpl1iksveihkq1lpnt1lnv1ditenei1al1vkykgkyl1pl  
l1eng1k1l1kgsndv1kindap  
vm1dgf1k1t1k1ddm1ka1l1semtpevrry1iaevtyapsknq1sri1el1fttdg1l1q1vigdist1skkmk1yppqmsq1sl1rd1ssg  
k1l1ktrgy1idl1sv1gasf1ipy  
rgntstq1sesdknvtk1ssqeenqakee1l1qsv1lnk1kq1sskn  
>tr|D9RGB5|D9RGB5\_STAAJ  
msh1al1kd1l1fsgffv1ddeeevevpdkqqqvneapakeqsq1ttkqna1k1svppqksasry1tttseernnrmsnyskn1sr  
nvvtmnnatp1n1nasq1essk  
mcl1feprv1fsdtq1diadelknrrat1vn1l1qridkvsakri1d1l1sgtvyaig1gdi1qrvgt1d1fl1ctpdn1vevagsit1dhi  
enmehs1fd  
>tr|D9RGB6|D9RGB6\_STAAJ  
mdin1v1ati1fkfi1l1fvvei1yyfgmi1y1ff1tswvpsi1retkvgy1flakiyep1l1qpfrk1vippigi1idissiaa1fv1l1v1f  
qk1g1l1qi1fnw1li1q1l1q  
>tr|D9RGB7|D9RGB7\_STAAJ  
mvfyn1ffk1vgi1nidi1yqhfrqee1yeli1dq1l1tdkcd1qaeqhyapv1l1thf1ldprgqy1ilevi1cgsyed1l1nsv1fyggpnaerk  
rai1is1pny1epkesdf1d1t  
l1mei1dypek1fv1tlkhqhi1l1gtl1ms1l1giereqvgdi1ivneri1qfv1l1tsr1lesf1im1el1qrikgasvk1lytipvt1dmi1qsne  
nw1kiesatv1ss1rl1dv1vik  
em1rksrti1akq1liekkrvknht1ivdsad1fq1l1qand1l1isi1qgf1grahit1d1l1ggk1tkkdkthityrt1l1fk  
>tr|D9RGB8|D9RGB8\_STAAJ  
mpft1pnei1kn1kefsrvkng1leptevan1fleq1l1steier1l1kedkkq1lekvi1eer1dn1iksyqd1vhqsvsdal1iaqakagee  
tk1qaaek1qaeai1araq1q  
adq1mvgdavekarr1lafqt1edmkrqskvfrs1r1frm1l1veaq1d1l1knedw1dyl1l1nyd1l1dae1qvt1eni1hh1hend1lkp1dea  
qaaanaq1nset1sses1nsq  
ndsnd1seat1kk  
>tr|D9RGB9|D9RGB9\_STAAJ  
mdyket1l1mpk1tdf1p1mrgg1l1pn1kepqi1qekwdaedqyhka1lekkn1gnetfi1l1hdgpp1yangn1l1hmgha1lnk1ilkdfivry  
k1tmqg1fyap1yvp1gwd1thg1l  
p1ieqal1tkkgvdrk1km1stae1f1rekckefaleqiel1qkkdfrr1l1gvr1gdfnd1pyit1l1kpey1eaaqirif1gemadk1gliykg  
k1kpvyw1sp1ssess1laeaei  
eyh1dkrsasi1yvafdvkddk1gvvdadakfi1iwt1t1pwt1ipsnva1itv1hpel1kygqyningeky1iaeal1sdavaeal1dwd  
kas1ikle1key1tg1ke1leyv1v  
aqh1p1fdres1l1vingdhv1ttdag1tgc1vhtapghgeddy1ivgqkyel1pvis1pid1dkgv1fteegg1qfegm1fydkankav1td1l  
l1tek1gal1k1ldfi1th1syph  
dwr1tkkpvi1fratp1qwfasi1skvrqdi1ldai1entnf1kvnwgk1triy1nmvrdr1gewvis1rqrvwgvp1lpvfyaengdi1imt  
ketvnhvad1l1faehgsniw  
fereake1l1peg1fthpg1sngt1ftketdi1mdv1wfdsg1sshrgv1etrpel1sfpadmy1legsdqyrgwf1nssittav1atrg  
v1spyk1f1l1shg1f1vmd1ge1gk  
kmsk1slgnv1ip1dqvvk1qkgadiar1l1wv1sst1dyl1advrisde1ilkqtsdvyrki1rnt1l1rfm1lgn1indfnp1dtdsv1pesel  
l1evdry1l1nr1l1reft1asti  
nnyen1fdyl1ni1yqevq1nfinvel1snf1yldygkdi1lyieqrdshir1rsmqt1vlyqil1vdm1tk1l1lapil1vhtaeevwsht1ph  
v1keesvh1ladmpk1vvevdq  
a1l1dkwrt1fm1n1rddv1nra1etarnek1vigks1leakvtiasndk1fnase1l1tsfda1lhq1l1fiv1sqvkvvd1k1ddqataye  
hgdi1viehad1gek1cerc1wn  
ysed1lgavde1l1th1cprc1qqv1vks1lv  
>tr|D9RGC2|D9RGC2\_STAAJ  
metyefni1tdkeqtgmr1vdk1l1l1pel1nsdwsrnqi1qdwi1kag1lvvandk1v1vksnykvk1l1ndhi1vvtekevead1l1pen1n  
l1di1yyedddvavvyk1pk1g1m  
v1vhps1pghyt1nt1l1vng1l1myq1ikn1l1sgingei1rpgi1vhr1idm1d1tsg1l1lmvakndia1hrg1l1veq1l1mdk1svkrkyia1lvhgni  
ph1dygti1dapi1grnkndr1q  
smav1vddg1keav1thfnv1lehfkdyt1l1vecq1letgr1thqi1rvhmkyig1fpl1vgdpkygpkkt1d1dig1gqal1hag1lig1feh1pv  
tgeyierhael1pqdfed1l1  
dt1irk1rda

Tsompanidou\_et\_al\_Supplemental\_FASTA\_File

>tr|D9RGC4|D9RGC4\_STAAJ  
mqndemfertvkvplvdnekppqawafslqhlfamfgatvlpvfltglpisaallasgigtlllyilitkaqipaylgs  
sfafitpiitglsthsldg  
mlvalfmsgvmyviigliklsgtawlmklppvvvgpvimviglslaptavnmamypngdmkgynisflivamitllv  
tiavqgffkqfslslipvl  
giivgyvvaifmgivkfdaimsakwidfphiylpfdyvpshlglvlvmipivftvsehighqmvlnkivgrnffekp  
gldksiidgdstmfasi  
ggppsttygenigvlaitriysiyviggaaviaivlafigkftalissiptpvmggvsillfgiiaasglrmlveskvdf  
annrnlviasvillvgign  
lvfnlkeiginlqiegmalaaalsgiilnlilpkkekqnn  
>tr|D9RGC5|D9RGC5\_STAAJ  
mnhllsmehlstqiykliqkasqfksgerqlpnfegkyvanlffenstrtkcsfemaeklglktisfetstssvskge  
slydtcktleigcdllvi  
rhpfnnyeklaninipianagdgsgqhptqslldlmtiyeegyefeglnvllicgdiknsrvarsnyhslkalganvmfn  
spnawiddsleapvynidd  
vietvdivmlriqherhglaeetrfaaddyhqkhglnevrynklqehaivmhpapvnrgeiqsdleveaskrifkqme  
ngvylrmavideilk  
>tr|D9RGC6|D9RGC6\_STAAJ  
mklknkgvlqngelqqadlidgkvikqiapeiapsngvdiidakghfvsagfvdvhvhlrepggeyketietgtkaa  
rggfttvcmpnttrpvpds  
vehfealqliddnaqrvlpyasittrqlgkelvdfpalvkegafaftddgvgvqtasmyegmieaakvkvivahce  
dnllyggamhegkrskel  
gipgipnicesvqiardvllaeaagchyhvchvstkesvrvidakragihvtaevtphl111teddipgnnaiykmnpp  
lstedrealvlgllldgti  
dciatdhaphardekaqpmekapfgivgsetafpllythfvkngdwtlqqldvdyltikpcetfnleygtlkengyadlti  
idlseqeikgedf1skad  
ntpfigykvynpiltmvegevkfegdk  
>tr|D9RGC7|D9RGC7\_STAAJ  
mqskrylvledgsfyegyr1gsdnltvgeivfntamtgyqetisdpstygqiiitftyp1ignygirddfeslvptl1ngi  
vvkeasahpsnfrqk1lh  
dvlelhqipgiagvdtrsi1rki1rghv1kagftdrkedidq1vkh1qqel1pkneveivstktpyvstgkdlsvlvdf  
gkkqni1vre1nvrncnvtv  
vpytttaeeilamapdgvmlsngpgnpevvecapmiqgilgkipffgic1ghqlfal1sqgassfkmkfghrghanhpvkn  
letgkvdi1tsqnhgyaidi  
ds1kstd1evth1a1ndgtveg1khkk1pafsvqyhpeanpgpsdsny1fddf1vamtnfkekerhina  
>tr|D9RGC8|D9RGC8\_STAAJ  
mpkrndikti1vigsgpi1igqaaefdyagtqac1alkeegyrvilvnsnpatimtdkeiadkvyieplthdfiari1rk  
eqpdal1pt1ggqtg1nma  
iq1hesgv1qdnvq1lgtel1tsiqqaedremf1mnd1nvpvpsedivntveqafk1fkeqvgyp1ivrpaftmggtg  
gichndee1heivsnghy  
spatqcl1eks1agfkeieyevmrkndnai1vvcnmenidpvgihtgdsivvapsq1sdveyqm1rdvs1kviralgie  
ggcnvq1aldphsfdyyi  
evnprvsr1salaskatgypiak1aakiavgl1tdem1n1pitgtsyaafept1dyviskipr1fpfdk1fekgerel1gtqmk  
atgevmaigrtyees1lka  
irs1leygvhh1gl1ngesfel1dyikerishqdder1ffigeairrgt1leeihmtqidyff1lkhfqni1diehq1kehq  
gdley1kyakdygfsdkti  
ahr1nmttee1vyql1rmeneikpvykmvdtcaae1fesstpyyygtyetenesi1tdkekil1vlgsgpir1igqgvefdyatv  
havwai1kageyai1vnnn  
petvstdfs1sdklyfep1teedvmni1inlekpkgvv1vqfggq1tain1adklakhgvki1lgt1slen1nraedrkefeal1  
rkinvpq1pqqktatspeea  
1anaae1gypvvvrpsv1lggrameivdndkelenymtqavkaspehp1vdry1tgkeievdaicdgetvi1ipgimehi  
eragvhs1gdsiavyp1pqt1  
tedelat1ledytik1akgl1niig1liniqfviahdgv1vlevnprsr1rtvp1flskitdipmaql1amrai1gek1tdmgyqe  
gvqpyaeg1fvkapv1sfn  
k1knvdi1tl1gpe1mktgevmgkdt1leka1fkg1tgsgvevkdhgtv1mtvsdk1keevk1laqr1nevgyki1latsgta  
nk1laeydi1paevvg1kigge  
nd1l1tri1ngdvq1ivintmtkg1keverdg1fqi1rrttvengip1cl1ts1d1tanal1nviesmt1ftmrqm  
>tr|D9RGC9|D9RGC9\_STAAJ  
mkdlpi1aldfes1kekv1nq1fd1ldes1fvkvgm1fyqegp1lineikerghdv1fd1kl1hdipntvgkameglak1nv  
d1lvn1vhaag1gvkmm1seaik  
gl1rkhnqhtki1avtq1l1sttedm1rheqni1qtsieeav1nyak1anaag1dgvvc1plesrml1tekl1sts1flkvtpgir  
pkgasqdd1qhrittppear  
ql1gsthi1vvgrpi1qsdnpvesyhkikesw1v  
>tr|D9RGD1|D9RGD1\_STAAJ  
mndktskd1lygkik1hcnefinhsnds1l1sshdvdes1tkqkhi1knktti1dhnd1lfkhvki1l1rkqgqi  
>tr|D9RGD3|D9RGD3\_STAAJ  
maydgl1ftkk1mves1qf1ttgrv1hkin1qpdndti1mvvrqnrqnhq1ll1sihpnfsr1ql1ttkkydnp1fnppmfarvfrk  
h1leggi1esik1qigndrri

Tsompanidou\_et\_al\_Supplemental\_FASTA\_File

eidikskeidgtiyrvtvleimgkhsnlilvngenrkiegfkhltpntnhyrtvmpgfnyeapptqhkmnpdyitgaev  
lkyidfnagnjakqllnqf  
egfspli tneivnrrqfmsstlpeafdevmaetklpptpi fhknhetgkedfyfiklnqfnddtvtydslnlldrfdy  
trgerervkqrandlvrfv  
qqqlhkyqnklaklieeyeqsknkdeqlygelitaniyrikqgdkevta lnyytneevviplnptkspsanaqyykqy  
nrmktrerehqhqiqltkd  
nidystieqqllhhsvhdiideirde laeqgfmqqrknqtkkkkeqiqqhyvstdgddiyvgknnkandylnkkakkt  
htwlhtkdipgshvvi fnd  
apsdtti keaamlagyfskasnsgqipvdytliknvhkpsgakpgfvtydnqklyatpdyehiqkmkqs  
>tr|D9RGD6|D9RGD6\_STAAJ  
mkkillavtggiaaykaidltskltsqgyevrvm ltnhaqkfvtplafqaisrnavytdtfeenpsei qhia lgdwada  
iivapatantiaklsvgia  
ddlvtstllatetpkfiapamnvhmyenkrtqqnini lkedgyhfiepgsgflacgyvakgrmeep lqivsvidahfqs  
nrlanssfqdkralvtagg  
tievidpvrfrvsnrssgkmgyaiaea lnrngai vtlvagpttledpkdievihvqsaeemfeqvtsrfdeqdivvkaaav  
sdytpvdvlehkmkkqgdg  
lsvsfkrtkdilkylgehktssqyligfaetedienyaqqklrkknadvii snnvgdmsigfssddnel tmhfknnekvn  
ikkgkkvvlaaqil delet  
rwq  
>tr|D9RGD7|D9RGD7\_STAAJ  
miakvi dvasksvdykfdy iipeql esviqpgvrvi vpfgp rtiqgyvmevtaepdaql dvskl kkievkd iqpel ts  
elial sewmgsthvikris  
mlevmlpsaikakyykafkmdkdi evpsallqkfdkhgyyyykdaqknndiqllmkllkddiveektiltqnitkkkra  
vrvi egyhpdevlaklekv  
ikqydlyayl seeqhktif l tdi edmgf skssldglikkgyvekydavverdpfkdrvfeqeskqh l tedqfkayeaika  
kivsqegetfllhgvtgsg  
ktevylqti edvlsqgkqamm l vpeialtpqmv l rfkrrfgddvav l hsg l sngery dewqki rdgrarvsvgarssvfa  
pfknlgliiideehestyk  
qedypryhareiaqwrseyh hcpvilgsatpclesyaraekgyvhlslprnrvnqaalpeidivdmree l segnrsmfsk  
dlreaiqlrl drqe qvvl f  
lnrrgyasfml crdcgyvpcpncdis l tyhkttdllkchycgyqetppnqcpncesehirvgtgtqkveellqqefed  
ariirmdvdttskkgahk  
lltefekngndi l lgtqmiakgl dypnit l vgvlnadtm l nlpdfrasertyqll tqvagrgrhekagqvii qtypndh  
ysil dvqkndy l tfyrgem  
eyrk l gkyppyyyl infti shkemkkvmeasqhvhk illqh l teka l vlgpspaalarinnefrfqilvkyksepgllqa  
iqfl ddyhekfikela l  
kidi dpqmmm  
>tr|D9RGD8|D9RGD8\_STAAJ  
mkktlgc lllim l lvagcsfggnhkssskkseeskqetvkkeseekdpkvahyknk ekiakvkavpvlekiepfite  
ktfmnstgm gwkdyks l m  
nqvkl adynftkeskgasmedvdkffknkgvkrkevtt ydglkqvnywyvdks gkkggsdtpvfyaeil tkykdgkli  
yasvepgsysysknnavnl  
dkve l d l smfsl kdpkpvpysvaqmei ssvpvtsvsvftkgnhkdt npekeqvdmpqlay l tvspqlyhdkdhdpd  
hiig l valpylnasrdfgn  
ahysv l n n l skemkelasrs l d l dk  
>tr|D9RGD9|D9RGD9\_STAAJ  
mqvkviiyil l a l f l gsfghkfyagknmqgil h l i f cwtgiphilaisavitvfkpadeqgnvt l  
>tr|D9RGE0|D9RGE0\_STAAJ  
maikk l v pashpil t kkaqavik fdds l kr l l qd l edtmyaqeaag l capqinqslqvai idmemegllqlvnpkiirqs  
netitdl egsit l pdvyge  
vtrskmi vvesydvngnkvel tahedvarmi l hiidqmngipfteradri l tekeveayfind  
>tr|D9RGE1|D9RGE1\_STAAJ  
mtkii fmgtpdfsttv l em l iaehdvi avvtqpdprpvgrkrvmtpppvkkvamkyd l pvypqek l sgsee l eq l l q l dvd  
l i v t a a f g q l l p e s l l a l p  
klgainvhas l l pkyrggapihqai idgeqetgitimymvkk l dagnii sqqaikieendvgtmhdklsvlgadllket  
lpsii egt nesvpqddtqa  
tfasni rrederi swnkpgqvfnqirgl spwpvayttmddin l ki ydaelvetnkinepgtii ettkkaiivatndnea  
vaikdmql agkkrmlaany  
lsgaqnt l vgkkl i  
>tr|D9RGE2|D9RGE2\_STAAJ  
mienvrs l afdtiqdi l negaysn l rinev l sene l namdka l fteivgytvkrkyt l dfyl kpfvktkikawvrq l lwm  
siyqyvyl dkvpnhaiine  
aveiakerggyhngnvngi l rtmmsrd l pdfnei adpkkrmaieysmpkwi idhwathygleetet l qsflettsttv  
ran l tras l ddi e k l qde  
gydv ekdh l pyc l higgqpi ihsrs fkdgfvsi qdkssmfvahimnvdrhdhvl dacsapggkachiaev l mpegqvda  
sdi hdkid l infnikl r  
ltnikafqhdatkpydktydkilvdapcsg l gvmrhkpeikytqskqhies l vdlql eilenvknnvkiggei iystcti  
eq lenenviytflknknf

Tsompanidou\_et\_al\_Supplemental\_FASTA\_File

efepfqhpitgelvktlqimpqdfnsdgffitkirkdn  
>tr|D9RGE5|D9RGE5\_STAAJ  
migkiinerykiavdklgggmstvyiaedtilnikvaikai fipprekaetlkrferevhnssqshqnvismidvdeed  
dcyylvmeyiegtlseyi  
eshgplsvdtaifntnqilgdikahdmrivhrdikpnilidsnktlki fdfgiakalsetsltqtnhvlgtvqyfspe  
qakgeatdectdiysigiv  
lyemlvgeppfngetavsiaikhiqdsvpnvttvdvrkdipqslsnvilratekdkanrykti qemkddlssvlhenrane  
dvyeldkmktiavplkked  
lakhi sehksnqpkrettqvpi vngpahhqqfqkpegmlyepkpkkkstrkivllsllifslmlialvsfvamamfgnkye  
etpdivgksvkeaeqi fnk  
nnlklgkirsysdkypenei ikttpntgervergdsdvvisk gpekvpmpnviglpkeqalqklkslgldkdvkiekvy  
nngapkyianqsvtante  
iaihdsniklyeslgikqvyyddfehksfskakkaleekgfkveskeesyddidegdivisqspkgksvdegstisfvvsk  
gkkdedsdvksttasvdvp  
ytkndkpkqvkyikdkdndgstekgsfditsdqidiplriekgktasyivkvdgktvaekevsyddi  
>tr|D9RGE6|D9RGE6\_STAAJ  
mktgri vksisgvyqvdvngerfntkprglfrkkkfspvvgdivefdvqinegyihqvyerknelkrppvsnidtlviv  
msavepnfstqlldrflvi  
ahsyqlnarvltkkdktpiekql einellkiyenigyete fignddrkkiveawpaglivlsgqsgvgkstflnhyrp  
enletndiskslnrgkht  
trhvelferngyi adtpgfsaldfdhidkdeikdyflelnrygetckfrncnhikepncnvkhqleigniaqfrydhy  
qlfneisnrkvry  
>tr|D9RGE8|D9RGE8\_STAAJ  
mhinllcsdrhlpqdiwaksnegkwggvdrgalillkhqipffsvgd fdsvskeerqllteqlqikpvqaekadtdlal  
avdkavalg fdsitiygat  
ggrldhffgaiqlllkkaykhdvhievidqqnie llpsgqhtvekdkssypyisfipmtddvelslagfkynlarqmln  
igstltisneieslqakvt  
vhdglilqirstdln  
>tr|D9RGF1|D9RGF1\_STAAJ  
miskingklfadmi iqgaqnl snadlvdslnvypvpdgdgtgnmltmtsgreevennl sknigelgktfsgllmgar  
gnsqvi lsqlfrgfcnkiet  
seseinskl laesfqagvetaykavmkpvegtiltvakdaaqaavekan tedcielmeyii vkaneslentpnllavlk  
evgvvdsggkgl cvyegf  
lkal kgekvakvdkdefvhdehdfhg vintedi iygyctemmvrfgknkka fdeqefrqdmsqfgdsllvindeei  
vkvvhvhteypgkvfnfygq  
ygelikl kvenmreqhrevi rkeqhsakpmetvetaitiismgegisei fksmgathi isggqtmnpstedivkvi eqs  
kckraii l pnnknilmase  
qaasivdaevvptksipqgisalfqyvdatleenkaqmadsvnnvks gsltyavrtdkidgveikkdafmgliedki  
vssqsqdlttvtellneml  
aedseil tvi iggdaeqavtdnminw ieeqypdvevevheggqpiyqyffsve  
>tr|D9RGF2|D9RGF2\_STAAJ  
makvn liespysllqlkgipkkiev lqqlnihtvedlvlylptriedntvidlnqaedqsnvtieggvytapvvaffgr  
nkskl tvhlmvnniavkci  
ffnqpylkkie lnqti tvkgkwnrvkqeitgnrfffnsqgtqnqenadvql epvyrikegikqkqirdqirqa lndvti  
hewlt delrekyk letldf  
tlnlthhpkskedll rarrtyafte l fl felrmqwl nrlekssdeaie idyldqvksfidr lpfel teaqkssvneifr  
dlkapi rmhrllqgdvgs  
ktvvaai cmyal ktagyqsal mvpte ilaeqhaes lialfgdsmnval l tgsvk gkkrkilleqlengt idcligthali  
gdvifhngv lvi tdeqhr  
fgvnqrqll rekgamt nvlfmtatpi prt laisvfgemdvssikqlpkgrkpi ittwakheqydkvlmqmtselkkgrqa  
yvicpliesse h ledvqnv  
valyeslqqyygvsrvgl lhgkl sadekdevmqkfsneidvlvsttvvegvnvpnatfmmiydadrfglstlhqlrgr  
vgrsdqqsycvliaspkte  
tgiertimtqttdg felserdlemrgpgdffgvkqsglpdf lvanlvedyrml evardeaaeliqsgvffentyqhlrr  
fveenllhrsfd  
>tr|D9RGF4|D9RGF4\_STAAJ  
mvklaidmmggdnapi v leavqkavedfkdle iilfgdekyklnheriefrhcseki emedepvraikrkkdssmvkm  
aavksgeadgcvsagntg  
almsag l fivgrikv arpalvvtlptidgkgfvfldv ganadakpehllqyaqlgdiyaqkirgidnpkisllnigtep  
akgns ltkksysll dqedt  
lnfvgni eaktlmdgdtdvvvdgytgnmv lkn legtak sigkmlkdtimsstknki agailkkdl da fakkm dyseygg  
svllg legtvvka h gssna  
kafysai rqaki ageqni vqtmketvgesne  
>tr|D9RGF5|D9RGF5\_STAAJ  
msktai ifpggaqkv gmaqdlynnndqateiltsaantldfdv letmftdedgklgetentqpal lthssallaa lkn l  
npdftmg hslgeyslvaa  
dvl s fedavki vrkrqql maqafptgvgsmaavlgldfdk vdeicks lssddkiiepani ncpqqiivsvghkelidelve  
kgkslgakrvmp lavsgpf

Tsompanidou\_et\_al\_Supplemental\_FASTA\_File

hsslmkvi eedflnyinqfewrdakfpvqvnaqgetdkevixnmvqklyspvqfinstewlidqgvdhfieigpgkv  
lsglikkk  
>tr|D9RGF9|D9RGF9\_STAAJ  
mvyksidaigfksfadqtnvqfdkgvtaivgpngsgksnitdaikwlvgeqsaksrsgskmediifsgaehrkaqnyae  
vqlrldnhskklsvdenev  
ivtrrlrsgeseyyinnrarlkdiadlfldsglgkeaysiisqgrvdeilnakpidrrqiiesagvlkykkrkaesl  
nklldqtednltrvedilyd  
legrveplkeeaiakeyktlshqmkhsdivvtvhdidqytndnrqldqrlnldlqqqqantheadkqrlsqqiqqykgrh  
qldndveslntyqlvkatea  
fekytgqlnvleerkknqsetnaryeeeqenliellenisneiseaqdtykslkskqkelnavireleeqlyvsdeahde  
kleekneyytlmseqsdv  
nndirflkhtieeneakksrldsrlevfeqlkdiqdqikttkkeyqqtnkelsavdkeiknieknltdtkkaqneyeek  
lyqayrytekmtktridsla  
tqeeeytyffngvkhiakankelkghgavaeiidvpskltaietaigaslvhvidsekdgrqaiqlkernlgrat  
flplnvigsvrvvatdiksi  
akevngfisiaseavkapeyqniignlntiivdhlkhanelaraikyrrivtlegdivnpggsmtgggarksksil  
sqkdelttmrhqlledylrq  
tesfeqqfelkiksdqlselyfeksqkhtlkeqvhhfemldrlettqetqikndheefekndgytsdksrqtsek  
ethlesikaslrledeie  
rytklkskegkesvtktqqlhqqsdlavvkeriktqqtidrlnnqsqqtkhqlndvkeiaffnsdevmgeqafqnik  
dqingqqetrtrlsdelk  
lkqqrielnegidaqeatlvchqdi laienhyqdikaeqskldvlihhaidhlndeyqltverakseystsdesidalrk  
kvklmksidelgpvnlna  
ieqfeelnerytflseqrtdlrkaketleqisemdqevterfketfhaiqghftavfkqlfgggdaelqlteadyltag  
idivvqppgkklqhlsls  
ggeraltaiailfailkvrsvfvldeveaaldeanviryakylnelsetqfivithrkgtmefadrlygvtmqesgv  
tklsvsnlntiddvlkeeq  
>tr|D9RGG4|D9RGG4\_STAAJ  
mrvevgqivnthgikgeikvksnsdftdvrfaqgqvlvvhnnndleytvkshrvhkgllhmltfeginnindiehlkgs  
iyqerdhedivleeny  
sdiigctvfdqetpigrvini fetgandvvikskeylipyadiadvkevdvenkiiikpmeglld  
>tr|D9RGG5|D9RGG5\_STAAJ  
mkidytlfpemfdgvl nhsimkraqennklqintvnrdayainkhnqvddypyggqgmvlkpepvfnamedldvteqt  
rvilmcpqgepfshqkave  
lskadhivficghyegyderirthlvtdeismgdyvltggelpamtvtdaivr lipgvlgneqshqddsfsdgllefpqy  
trprefkgltpdvllsgn  
hanidawrheqklirtnkrpdliekyplnadkqilerykiglkkg  
>tr|D9RGG7|D9RGG7\_STAAJ  
mvnavltykpsacyccgvknegqihkhgkrvsritllktqgyntylnlakqrfkclecngtftaktsivdescfisrcvt  
qkvi eeatkvkteidtaed  
ncispstvsrirtkaanslrikpfnclpehiamdefksvknvtgmsfifidndthdvidilenrttrflrayferfhk  
nrqqvktvtidmyepvrl  
frdlfpnaaiifdrfhvqlnrelnkyrvqvmneyrnkkpdytifknnwkvllmdtsktilfskyrwnksfkaykrssd  
ivefmlskddilrshyelv  
qqlredlklcnwpkfinrlnsvsrksvskgvkvvkyyrkhqrmrntvyypafnngaieginnklikrisfgyrnfn  
nfkarimmi fslykgekkl  
ttkpnnglaa  
>tr|D9RGG8|D9RGG8\_STAAJ  
mcndtlellrikdenikyinqeidviikgkqqlmly  
>tr|D9RGG9|D9RGG9\_STAAJ  
mlkkwlnsnvkqflvitfmsviltlilfsthiydivngtvfsgagdgfrqmpfqmylyehlssfslydasfglggdy  
mkglysyyslspimwlnfl  
fikigetigifnpttihfwptnqlimamiraiitfvvtfylfkilhfkrstnmiatilygmstvviyfnftwsfygnlly  
llplsilgleryfqarkig  
ifivaialtlfsnfyfsyqaiiigcylyrliftykydivsrtqklicvisatvsvlssvfglftgisaflendirkqn  
pnvdipfltpldyhyfffs  
dgffitisiltivalfsklyrfyfyrifaivtwilfigslsqyfdsafngfsfperrwyilalsssalcglfiqhlst  
lnmkyylirtipvsiaall  
yvllspthplalivgiillmvlavilkfslwrykkltvailvlivmiqqivilnknmaikpyqqsstlkqhdysny  
vnqlikkinqnatgpfnr  
dymdyalnspfiyhngislyssi fngdilkydyktlqinmpidknstyrllgnrqnlslwnindrirvnhddnlypg  
fkirsehkdnkvrwihskn  
tihypsahitnkvsneklspldkeqamlggivsnntkdvnthfkanknlldstiklnsaawqsptkhlqvknngg  
ltvqlpksvsnqfkdllye  
mdlellspdkahdvkneytqernltykyrrfvtpvtirikasdrirlslpkgkyrvnlkgygedyttlkdasnslea  
kvsktkqgytiknkns  
gyivlptayngmeatsgdqslkvekvngvmtgikapknitkiqlsytppyyllititvfgiicsiiftrwarqk  
>tr|D9RGH0|D9RGH0\_STAAJ



Tsompanidou\_et\_al\_Supplemental\_FASTA\_File

mviqwyppghmakakrevseqlkkvdvvelvdaripysrnpmi devinqkprvvi lnkkdmsnlnemskweqffidkgy  
ypvsvdakhgknlkkveaa  
aikstaekferekakglkprairamivgipnvgkstlinklakrsiaqtgnkpgvtkqqqwikvgnalqll dtpgilwpk  
fedeevgkklstgaidks  
ivhldevaiygnfliqndlarlkahykievpedaeiawfdaigkkrglirrgneidyevieliiydirnakignycf  
difkdmteelandann  
>tr|D9RGH1|D9RGH1\_STAAJ  
mtltikevtqlinavntieelenhecfl derkgvqnaia rrrkalekeqalkekyvemtyfeneilkenpnaiicgidev  
grgplagpvvacatilnsn  
hnylglddskkvpvtrklelnea lknevtafafgiataeeidefniykatqiamqraidglsvqpthllidamtldnalp  
qvslikgdarsvsiaaasi  
makvfrddymtqlskdypeygfeknagygkqhllaiddigimkehrksfepiksll  
>tr|D9RGH3|D9RGH3\_STAAJ  
msvfidkntkvmvgigtstalfhtkqmdygtkivagvtpgkqgvvegvpvfntveaknetgatvsviyvpalfaad  
sileaadadldmvi citech  
ipvl dmvkvkrylqgrktrlvgnpcpgvitadeckigimpyihkkghvgvsrsrgtlyeavhqlteegigqttavgig  
gdpvngtnfidv lkafned  
detkavvmigeiggtaeeeaewikanmtkpvvgfiggqtappgkrmgagaiisggkgtaeekiktlnicgvktaatps  
eigstlieaakeagiyesl  
ltvnk  
>tr|D9RGH4|D9RGH4\_STAAJ  
mnkqqskvrysirkvsigil sisigmflal gmsnkayadeidkskdftrgyeqnvfakselnanknttkdkikneavvkt  
sdtstklndksaisngnei  
nqdikisntpknssqgnllvnnneptkeikianleaqnsnqkkvknkgtnnyfgyysfreapktqiytvkkgdtlsaial  
kykttvsniaqntnnianpn  
lifigqklkvpmtplvepkptvssnksnsnstlnylktlenrgwdfdgsyqwcfdlvnywnhlyghglkgygakd  
ipyannfnseakiyhntpt  
fkaepgdllvvsgrfggyghtaivlngdydglmkfqsldqnwnnggwkaevahkvvnyendmifirpfkka  
>tr|D9RGH5|D9RGH5\_STAAJ  
mkfstlseefntytkkhfkhytqsie lnyrnkinheahivgvkddkneviaaclltearifikfykyfyshrgplldyf  
daklvcyffkelskfiykn  
rgvfilvdpylie nlr dangriiknynnsvivkmlgkigy lhggyttgysnksqirwisvldlkdkdenqllkemeyqtr  
rnikktieigvkvedlsie  
etnrfyflfqmaedkhghfhnedyfkrmqeiykdkamliacidlneyqdklkiqllkienemmtvnralnenpnskkn  
ksklnglnmqllssinnris  
kteeliledgpvldlaaal fctddevyylssgsnpkynqymgayhlqwhmiyakshninrynfygitgvfsneaddfg  
vqfkkgnahveelidgf  
ikpvrpilykfakliyk  
>tr|D9RGH6|D9RGH6\_STAAJ  
mirfl1klywahfstkqihqflmaypnvikeggrkksdylcewv nreenvhllrkyafikldhndiikelqklkvsyi  
tymdteyvp1lkeiyqfp1  
llfykgniklinnmhhlavvgardstsytqqsleflsndkskyltivsglaqgadamaqhialkynlptiavlafghqt  
hypkstlalnkrkieeiglv  
iseypphtpiakryfpernrriisgl skgvliteakeqsgshiti dfa leqnrnyvylpgsmfnpmtkgnllriqegakvv  
lnandifedyyi  
>tr|D9RGH8|D9RGH8\_STAAJ  
mtqtvnigaglagseaayqlaergikvnl iemrpvktpahhtdkfaelvcnslnrgnal tngvgvlkeemrrlnsiii  
eaadkarvpaggalavdrh  
dfsgyitevlknhenitvneeinaipdgyt iatgplttetlaqeivditgkdqlyfydaaapiiekesidmdkvyllks  
rydkgeaaylncpmtedef  
nrfydavleavapvns fekeyfegcmpfevmaergrktllfgpmkpvgl edpktgkrpyavvqlrqddaagtlynivg  
fqthlkwgaqkevikiipg  
lenvdivrygmhrntfinspdvlnkeyelispn iqfagqmtgvegyvesaasglvaginlahkilgkgevvpfetmi  
gsmayyishaknnknfqpm  
nanfgllpsletrikdkkeryeaqanraldylenfkktl  
>tr|D9RGH9|D9RGH9\_STAAJ  
mnhiqeaflntlkvern fsehtlksyqddliqfnqfleqehlqlntfeyrdarnylslysnhlkrtsvsrkistlrtyf  
eywmtldenii nfpvqlvh  
pkkeylpqffyeemealfktveedtskslrdrvilellyatg irvselvnikkqdidfyangvtvlgkgskerfvpfg  
aycrqsieny lehfkpijs  
ckhdfli vnmkgeaitergvryvln divkrtagvsei hphklrhtfathllnqgadl rtvqsllghvnlsttgythvsn  
qqlrkvylnahprakkene  
t  
>tr|D9RGI2|D9RGI2\_STAAJ  
msllsktrelnl1qkhkgiavfdkvaqtissvtvtnvfivsrngkilgsslnellksqriiqmleerhipseyterlm  
evkqtesnididnvlvfp  
penrelfvdsrttifi piggerlgtlvlgrvhddfnendlv lgeyaatvigmeilrekshsevekeardkaaitma insl  
sysekaiehi feelggt

Tsompanidou\_et\_al\_Supplemental\_FASTA\_File

glliaskvadrvgitrsvina1rklesagviesrslgmkgtfikvkkekfldeleksk  
>tr|D9RGJ0|D9RGJ0\_STAAJ  
mkqskvfiptrmdvpseaeaqshrlllksqliqstsgiyssylplatrvlnnitaivrqemeridsveilmpalqqaelw  
eesgrwgaygpelmrldqr  
hgrqfalgptheelvtsvrne1ksyqlpmtlfqijskfrdekrprfgllrgrefimkdaysfhadeasldqtyqdmq  
aysrifervginarpvvd  
sgaiggshthefmalisaigedtivyskesdyaaniekaevvyepnhkhttvqplekietpnvktaqeladflgrpvdeiv  
ktmifkvdgeyimvlvrgh  
heindik1ksyfgtdnie1atqdeivnlvganpgslgpvidkeikiyadnfvqdlnnlvganedgyhlinvnrdfnv  
deygdfri1egeklsgs  
gvahfaegievqqvfk1gkysesmnaflnqgkaqplimgcygigisrtlsaveqnhddngivwpksvspfdvhlis  
inpkkddqreladqlyakf  
nekfdvlyddrqreragvknad1ig1plrivvgkrasegivevker1tgdeevhiddlmtvitnkydnlk  
>tr|D9RGJ1|D9RGJ1\_STAAJ  
mamteqqkfkvladqikisnqldaei1nsgeltridvsnkrtwefhitlpqflahedyllfihaieqefkdianvtcrf  
tvtnqdehaikyfgbc  
idqta1spkvkgqlkqkkl1msgkv1kvmvsndiernhfdkacngslikafnrcgfdidkii fetndndqeqnlasleah  
iqeedeqsar1atek1ekm  
kaekakqqdnesavdkcwigkpiqienikpiesieeefkvaiegvi1fdin1kelksgrhiveikvtdytdslvlkmft  
rknkdd1ehfka1svgkw  
raqgrieedt1rd1vmmmsdieeikkatkkdkaekrvefhl1htamsqmdgipnigayvkqaadwghpaiavtdhmvq  
afpdahaaaekhgikmiyg  
megm1vddgvpiaykpqdv1kdatyvfvvetg1snqydkie1laavkvhngeiidkferfsnpher1setiinlthi  
tdm1vdapeieev1tefk  
ewvgdai1fvahnasfdmgfi1dtgyer1gfgpstngvidt1el1sr1teyghg1nflakkygvel1tqhhraydteata  
yifi1kmvqqmkelgvl1nh  
einkk1sedaykrarpshvt1ivqnqqg1kn1fkivsaslvyfyrtprisr1ldeyreg1lvtacdege1ftavmq  
kdqsveki1akyydfieiq  
ppalyqd1idreli1rdtet1heiyqr1ihagdtgipviatgnahyl1fehdiarki1iasqpgn1nrst1peahfrtt  
dem1nefh1lgeekaheiv  
vktne1adriervvpi1kde1lytprmeganeei1relsyanklyged1pqividr1lekelksi1gngfaviylisqrlv  
kks1ddgy1vgsrgsvgss  
fvatmte1tevp1p1phy1cpnctseffndgsvsgfd1pdkctcctcgap1ikegqdipfet1lgfkgdkvpdid1nfs  
geyqpnahnytkvl1fgedk  
vfragt1igtvaektafgyvkgylndqgihkrgaeidr1lvkgctgvkr1ttgqhp1ggi1vvpdymdiydftpiqypaddqns  
awm1thfd1fhs1hdnvl1kl  
di1ghddptmi1rmlqd1sgidpki1pvddkevmqi1fstpes1gvtedeil1cktgt1fgvpe1fgtgv1rqm1edtkptt1fse  
lvqi1sg1shgtdvwl1gnaq  
eliktgi1cd1ssvig1rddimvylmyag1lepsmaf1kimesvrkgkg1teemietmkenev1pdwyl1dsc1kikymf1pkaha  
aayv1mavriay1fkvh1pl  
yyyasyfti1rasfd1li1mikd1ktsi1rntvkdmysrymd1gkkekdv1ltv1eimnemahrgyrmq1is1leksqafefi1e  
gdt1lippfi1svpg1lgenva  
kriveard1dgp1f1sked1lnkka1g1sqki1ey1de1lgs1pl1pdkaa1lsif1dm  
>tr|D9RGJ3|D9RGJ3\_STAAJ  
mssne1llateylekekkiprav1idaieaalitaykknysarnvrve1nmdqgtfkviarkdvveevfddrdevd1st  
alvknpaye1gdiyeedvt  
pkdfgrvgaqaakqavmqr1rdaereil1feefidkeedil1tgi1drvdhryvyvnl1grieav1searspnekyipneri  
kvyvknveq1ttk1gpqi1yvs  
rshpg1lkr1feqevpe1igdtv1ivksvareagdrski1svfsenndidav1gacv1gakgarveavve1lggek1divq1wne  
dpkv1fvkna1l1spsq1levi  
vdetnqstvvv1pdyq1sl1aigkrqnar1laak1tgwkid1ksetdareagi1p1vveakvteedval1edadttesteev  
tdsv1etnvekes  
>tr|D9RGJ6|D9RGJ6\_STAAJ  
mskqriyeyake1nl1kskei1delksmnievsnhmqaleddqika1dkkf1kkeqkndnkqstqnnhqssnqnqngqqk  
dnknq1q1q1nknknkn  
nknknknknkp1q1q1paapkei1pskvtyqegitv1gefadk1nvesse1i1kk1fl1lgivaninqs1nqetieli1addygveve  
eevvineed1siy1fedekd  
dpeaierpavvt1imghvdhgktt1l1dsi1rhtkvtageaggitqhi1gayqi1endgkkit1fldtpghaafttmrargaqvt1d  
it1ilvvaaddgvmpqtiea  
inhakeaevpi1i1vavnkidkptsnpdrvmqel1teygl1pedwggeti1fvpl1salsgdgidd1lemigl1vaevqelkanpk  
n1ravgtvieae1ldksrgps  
as1llvqngt1nv1gdai1vvgntygri1ramvnd1lgriktagp1st1pveit1gindv1p1qagdrfv1v1fsdekqarrigesrheas  
ivqqrqesknvs1dn1feq  
mkqgemkd1nvi1kgdvqgsvea1laas1mkidvegvn1vri1htav1gainesdvt1lanasngi1ig1fvnrpdsgakraaea  
envdmr1lhrv1yinviee1e  
samkg1ldpe1fee1q1v1ggaevrqt1fkvskvgti1agcyv1te1gkitr1nagvrii1rdg1ivqyegel1dt1kr1fkddakevakgy  
ecgi1tienyndl1kegdvie  
afemveikr

Tsompanidou\_et\_al\_Supplemental\_FASTA\_File

>tr|D9RGJ8|D9RGJ8\_STAAJ  
myngilpvykerltsldvfvfklrki1kttkightgtldpevagvlpvcignatrsvdyvmdmgkayeatvsigrsttte  
dqtgdtlemkgvhsadfnv  
ddidrllenfkgvieqippmyssvkvngklyeyarnnetverpkrkvnikdigrisedfkenechfki rvicgkgyi  
rtlatdigvklgfpahmsk  
ltriesggfv1kds1tleqikelheqds1qnklfp1eyglkg1psikikdshikkri1ngqkfnknefdnkikdqivfid  
ddsekv1aiymvhptkese  
ikpkkvfn  
>tr|D9RGK1|D9RGK1\_STAAJ  
msqekkvftewagrs1tietgqlakqangavlrygdttv1statakeprdgdfpltvnyekmyaagkipggfkr  
egrpgdat1tar1idrpi  
rplfpgykhdvqimnmvlsadpdcspqmaamigssmalvsdipfqqpiagvngyidgkyiinptveekevsrldlev  
aghkdavnmeagaseite  
qemleai1ffgheeigr1vdfqqqivdhiqpvkqefipaerdealvervks1teekglketv1tfdkqqrden1dn1keei  
vnefideedpenellikev  
yailnelvkeevrr1adekirpdgrkpdeirpldsevgilprthgsgl1ftrgqtqalsv1t1galgdyqlidglgpeee  
krfmhhyfnfnsvgetgp  
vrapgrreighgalgeralky1ipdtadfpytirivsevlengsssqasicgst1almdagvpikapvagiamp1vtre  
dsyt1ltdiqgmedal1gdm  
dfkvagtkegitaiqmdikidgltreieealeqarrgrleimnhmlqtidqprtelsayapkvvtmtikpdkirdivgp  
ggkkineiidetgvkl1die  
qdgtifigavdqaminrareieeitreavggtyqatvkriekyga1fvgl1fpgkdal1hisqisknriekvedv1kigd  
kievkiteidkqgrvnash  
ralee  
>tr|D9RGK3|D9RGK3\_STAAJ  
maqakkkstakkkttskrtnsrkkkndnpiryvia1lvv1mv1gvfqlgiigr1idsffny1fgysryltyilv1lat  
gf1tyskripktrrtagsi  
vlqial1fvsqlvfhfngikaerepvl1syvyqsyqshf1pfnfggvl1gfy1le1svplis1fgvciit1llcssv1ll  
tnhg1rdvakvalenikaw  
fgsfnekmsernqekql1kreekar1keeqkarqnerpqikdv1sdftevp1qerdipiyghtenesksqsqpsrkkrvfdae  
nssnnivnhhqadqkeq1t  
eqthsvseventieeentvnsyvvpp1t1lnqakqatskaevqrkgqvlent1kdfgvnakvtqikigpavtqyei  
qpaqgvkvs1vnlhndia  
lalaakdvrieapipgrsavgievpneki1sv1kevldekf1psnkl1evgl1grdisgdpitvpl1nemph1lvagstgsg  
ksvcing1its1llnakph  
evklm1ldpkmvelnvyngh1p1l1pvvtnphkaa1qalekivaemerryd1f1qhsstrnikgynel1irkqnqeldekqpe  
lpyivv1vdelad1mmvag  
kevenaiqritqmaragih1livatqrpsvdvitgiiknripsria1favssqtdsrtiigtggaek1l1gkgdml1yvngd  
ssqtri1qgaf1sdqevqdv  
vnyvveqqqanyvkemepdapvd1ksemkseda1ydeay1fvveqqkasts1l1qrqfrigynrasr1mddlernq1v1gpqk  
gskprqvl1id1nndev  
>tr|D9RGK5|D9RGK5\_STAAJ  
msrqsqpnih1kvspttkfktttiv1fkfmap1eydtitars1l1sk1l1vratkkwptdksf1nnh1ad1y1gayvnst1skfk  
dqhv1tfs1eivnery1rn  
ges1fnqgl1d1l1qei1wnp1ienkafnd1fnvnekt1l1akki1eamv1dnkaqys1f1k1l1dhmfeneayky1stgq1eqiph  
itaet1lyhtyqsm1nndqc  
svy1vgn1v1epes1vkkqi1rekfa1kpfdkhqf1qshth1hdeevdy1veyddvdqak1nmgyr1fptqygqsgyaaf1v1vnm  
m1fggd1pss1v1fnevrek1gs  
laysihsq1idgkngyl1fv1sgvssdkyetakdti1sefekikagdf1teekle1lakkvi1shryesedr1pks1ieimhnqi  
l1eqpqs1kerf1indiq1kvs  
rediv1svaekaf1dti1yv1tkggdk  
>tr|D9RGK7|D9RGK7\_STAAJ  
mka1v1lgsgs1gseivkq1l1tdgfevyvqyrt1dine1tskfn1ddkvr1fiqad1sqt1didkt1fgdiks1dcliyasqg  
s1lygv1qdmkdh1dacyq  
lnv1ql1r1r1cryfvd1r1qsdngri1v1ssiwgetgasmeti1ystmksaq1gfvka1sqel1altsvtvna1apgf1vagnm  
asewq1edelq1amine1lpq  
r1v1lpsevahtcay1lyhpnarsvtgti1qvngawyi  
>tr|D9RGL1|D9RGL1\_STAAJ  
msia1i1avgse1ll1gqiantngqf1skvfne1igqnv1lehkvigdnkkr1lessvrhalekydvt1l1tgg1gptkdd1tkht  
vaq1vgkd1v1ideps1lkyi  
esy1fee1qgqem1tpnkqga1viegst1v1snhhgmapgmmv1nfenkqi1l1l1pgppkemqpmvknellshfinhnriihse1  
l1rfag1geskvetv1lidli  
dkqt1npt1iap1agshevy1r1tanadskeqas1liqpvkqe1ldrige1yygsddt1lieqavikkihepf1viydg1tnga  
lyhr1kevd1ndv1lkgmin  
hnenfvd1inkpieq1lkdavqfvnk1fnvssai1l1eydgvvh1gydnn1efktekfkmsksr1l1knrsqnyal1r1lln  
w1rttn  
>tr|D9RGL2|D9RGL2\_STAAJ  
mdndrqkal1dtv1knmeks1fgkgavmkl1gdni1grrvst1tstgsvt1dna1lgvggypkgri1eiygpessgkttvalhaia

Tsompanidou\_et\_al\_Supplemental\_FASTA\_File

evqsnggvaafi daehald  
peyaqalgvdidnlylsqpdhgeqgleiaefvrsgavdivvdsvaaltpkaeiegemdthvglqarlmsqalrklsq  
aisksnttaifinqirekv  
gvmfgnpettppggralkfyssvrlevrraeqlkqqgeivgnrtkikvvknkvappfrvaevdimygggiskegelidlgv  
endivdksgawysyngerm  
gggkenvkmylkenpqfkeeidrk1rek1gisdgdveetedapkslfdee  
>tr|D9RGL6|D9RGL6\_STAAJ  
mkpqlswkvgggggegiestgeifatamnrkgylygyrhfssrikgghtnknirvsttpvhaisddldiliafdqetid  
vnhhemredsii1adakak  
pykpegchaqlielpftatakelgta1mknmvaigatsalmn1ntntfeelitnmfsskkgdkvvevniqalnegyqlmq  
r1peidgdfelestdalp  
lymigndaig1gaiagsqfmaaypitpasevmeymi1anskvngaviqtedeiaavtmaiganyggvraftasagpg1s  
1mmeaig1sgmtetplvi  
ntqrggpstglptkqeqsd1mqmiygthgdipki1vaptdaedafyltmeafn1aeqyqcpvivilsd1ql1slgkqtvek1  
dynrieikrgei1qsdier  
eeddkgyfkryt1tsngvsprpipgvkkgihhitgvehneegkpsesasnrqqmekrmrkieq1liespvean1qheda  
dilyigfistkgaieqgsn  
r1nqqgikvntiq1rqlhpfptsviqdavnkakvvvvehnyqq1asi1k1mnvni1hdkienytkydgtp1pheieekg  
k1iateikemv  
>tr|D9RGL9|D9RGL9\_STAAJ  
mneeqrkassvd1aerdkkaekdyskyfehvyqppn1keakkrgkqevrynrdfqidekyrgmgnerftliktygcqm  
ahdteviagi1ealgyqat  
tdintadvilintcairenaenkvfseign1kh1kkerpdiligvcgmsqeesvvnk1ksyqnvdmifgthnihlpe  
i1eeay1skamvvevwske  
gdvien1pkvregnikawvnimygcdkfcctycivpftrgkrsrrpedi1devrelaregykeit1lgqnvnsygd1qd  
ieydlgd1l1qaiskiaipr  
vrfttshpwwfdthm1dvi1seggnivphi1hpvqsgnav1kimgrkytresyl1lvkrikdripnval1ttdiivgypne  
seeqfeet1tlydevgfeh  
aytylysqrldgtpaakmkdnv1dvkker1qr1nkkvghysqiamskyegqvtv1cegs1kddqvlagytdknk1vnf  
kapkemig1k1levrideak  
qys1ngsfvkevepemviq  
>tr|D9RGM1|D9RGM1\_STAAJ  
mksrklaita1lia1nv1lssii1i1p1gpvkaapvqhfvn1savivgpyw1aqa1liss1lrv1fgtgtafapfpgsmig  
v1l1asmfy1yrkhi1fmaav  
gevlgtgvi1g1s1lici1play1gl1qdffik1plmitfivssa1igs1imsy1f1l1it1kkr1gil1qrfik  
>tr|D9RGM2|D9RGM2\_STAAJ  
msnvtppmmqy1k1kseyqdc1l1ffr1l1gdfyemfyedakeasrv1eit1tkrdakkenpipmcgvpyhsadsyid1l1vn  
gykvaiceqmedpkqtkgm  
vrrevvri1vtpgtvmeqggvddkqny1l1sfvmnqpeia1sycdvstgelkvthfnde1t1l1neittin1pnevvin1d1n1s  
dh1krqin1mvtet1tvret  
l1ssei1svnqtehk1myqatq1l1l1dyihhtqkrd1shiedvvqyaa1idymkmdfyakrn1eltes1rlkskkg1t1l1w1md  
etktpmgarr1kqwidrpl  
is1keqiear1divdefsa1hfierdt1rty1nqvydier1vgrvsygnv1nard1l1q1khsiseipnikal1nsmnqdt1vq  
vnq1lep1dd1l1di1eqs1v  
eep1svkdgg1fkvgfnmq1deyleaskngktw1aelqakerqrtgik1skisfnkvfygfieitran1qn1fepsefgy  
mrkqt1snaerfi1tdelke  
kedi1l1gaedkaie1eyq1fvq1reevkyter1lqqak1i1sel1dcl1qsfaeiaqkynytrpsfsenkt1el1vesrhpv  
ervmdy1ndy1vpnn1cr1dne  
tfiy1litgpnmsgk1stymrqvai1simaqmgayvpckeav1pifdqiftrigaadd1vsgk1stfmvem1eaqka1tyate  
ds1l1ifdeigr1gtstydg1  
alaqam1eyvaetshakt1fsthyhel1ttdqa1ts1knvhvaaneykgel1flhk1vkd1gavddsygiqvak1ad1l1pek  
v1sraqv1il1sefasagkks  
s1sn1lkmvenep1inqens1svkett1d1sqkdfeqasfd1fendqeseie1lqikn1l1nsmtpiea1vk1sel1qnq1k  
>tr|D9RGM3|D9RGM3\_STAAJ  
mgkike1l1qts1lankiaagevverpssvke1l1ena1dagate1sieve1sgvqs1rvv1dng1sgieaed1gl1vfhrhatsk  
l1dqded1f1h1rt1l1gfrgea  
las1ssvakvt1ktctdnangneiyvengei1nhkpakakkgt1d1l1ves1fyntpar1kyikslytelgkitdivnrmam  
shpdiria1l1sdgk1tm1st  
ngsgr1tnevmae1ygmkvard1vhisg1dtsdyhie1gfvakpehsrsnkhyisifingryiknfm1nkailegyht1l1tig  
rfpicy1iniemdp1l1vdvn  
vhtk1levr1skeeq1lyq1l1ivski1qea1fkdril1ipknn1dyvpkknkv1hsfeqqkiefeqrqntennqektfsseesns  
kp1fmaenqnde1v1kedsy  
np1fvtktses1li1adressgynntrekdkdyfkkqgei1l1qemdqt1f1dsnddt1svqnyenkasddyvdndikgtskdpkr  
ripyme1ivgqv1hgt1y1iaq  
ne1fgmym1dqhaaqerikyeyfrdkigevtnevq1d1l1ip1t1fhfskdeq1l1vidqykne1lqqvgim1ehfgghdyivssyp  
v1wfpkdevee1ik1dmieli  
l1eekkvdi1k1redvaimmsckksikanhy1lqkhem1sd1l1dq1l1reaedp1t1cphgrpi1i1nfskyelek1l1fkrvm  
>tr|D9RGM6|D9RGM6\_STAAJ

Tsompanidou\_et\_al\_Supplemental\_FASTA\_File

mekyilsidqgttssrailfnqkgeiagvaqrefkqyfpqsgwvehdaneiwtsvlavmtevinendvradqiagigitn  
qrettvvdtkhtgrpiya  
iwwsrqtqsi cselkqqgyeqtfrdktgllldpyfagtkvkwidnvegarekaengdlfgtidtwlvklskaahi  
tdysnasrtlmfnihdlew  
dellelltvpknmpevkpssevygktidyhfygqevpiagvagdqqaalfgqacfergdvkntygtggfmlmntgdka  
vksesgllttiaygidkv  
nyalegsifvsgsaiqwlrdglrminsapqsesyatrvdstegvyvvpafvlgtpywdseargai fgltrgtekehfir  
atleslcyqtrdvmeamsk  
dsgidvqslrvdggavknnfimqfqadivntsverpei qetta lgaaylaglavgfweskdidiaknwkleekfdpkmden  
ereklyrgwkkaveatqvf  
kte  
>tr|D9RGM8|D9RGM8\_STAAJ  
mtekqfkltvqdntrievkvfnvntvndskgi ihfhgmaehmkrydklahalskhgfdvirhnrghginidestrghydd  
mkrvigdafevaqtvrngv  
dkpyiighsmgsviarlfvetypqyvdglilsgtgmyplwkg lptvkvqlitkiygaekrvewvnqlvsnsfnkkip  
lrtqsdwssnptevdnfi  
kdpysgfnvsnglllyqtayym lhtsq lknikvl nhampillvsgyddplgdygkigilk laniyrkagiknvkvnlyhhr  
hevlfekdhdkiwedlfkw  
lnqfykk  
>tr|D9RGM9|D9RGM9\_STAAJ  
mnknkpfivvi vgpstasgk tselakringeiisgds mqv ykhnigtaktvpeemdgiphhlidilnpddtfsayef  
krlaedlitdtnrgkvp  
iaggtglyiqsli nyeledetvtpaq lsvkqklsalehldnqqlhdylaefdavsaenihpnrqrvlraieyy ltk  
kllsnrkkvqgftenydtl  
llgiemsrktlysrinkrvnimldhglfrevqqlveqgyescqsmqai gykelipvingqmiyedavndlkqhsrqykr  
qmtwfkknkmsvhwldkenm  
slqmm ldeittqik  
>tr|D9RGN0|D9RGN0\_STAAJ  
mianeni qdka lenfkanqtevtvfflngfqmkgvieeydkyvvs lnsqgkqhliykhai styttvetesqestese  
>tr|D9RGN2|D9RGN2\_STAAJ  
maqqqihdtknklekavlvghaqddkqfnfestmeelsslsetcql evlgqitqnrdrvdrkyvvgkkieei qafief  
kdidvvitndel ttaqsk  
lnealgvki idrtq lileifalrarskegklqvelaqldyl lprlqghgks lsr lgggigtrgpgetklemdrrhirtrm  
neikhqltveehreryrn  
krnqnqvfqvalvgytnagksswfnv laneetyekdq lfatldpktrqiqindgfnliisdtvgfiqklptt liaafkst  
leeakgadllvhvdssh  
eyrtqydtvndlikql dmshisqivi fnkkdlcdhasnrpasdlpnvfvs skndgdkllvktlfideikrqltyydeaie  
tnnadrlyflkqhtlvte l  
kydeienvyrikgfkk  
>tr|D9RGN3|D9RGN3\_STAAJ  
mkdiskivadvestlapyfkeieetayinqekvl nafhvkatesdlqgstgygyddfgrdhleeiyaqafkaedaivrp  
qiisgthaitialqsl lkh  
gdeliyitgspydll levigvngngies lmehgvsyk dialkegkidiesvldgvsertkviaiqrskgydqrpsiplde  
ieevitr lkevhpnili fv  
dncygefverrepi ecgadliagsliknpggg lakiggyiagrkdliercgyrltapgigkeagaslnallemyqgffla  
phvvsqslkgalfts lfle  
kmmnttpkyekrtdliqtvkfdtkeqmisfcqsiqhaspinahfspepsympgyeddvimaagt fiqgssielsadgp  
irppyeayvqgglyehvk  
iavtravkqlkeggli  
>tr|D9RGN6|D9RGN6\_STAAJ  
mnqfkeiyntiekllndksisnyrinqdtcvsyggiselrsgkrkvenltletaeklynyqkhleimied  
>tr|D9RGN7|D9RGN7\_STAAJ  
mnei etiseiekllanntpysisknsgvprqtvt dlnvgktkikeakfktiiklyeyqrtlenktec  
>tr|D9RGN9|D9RGN9\_STAAJ  
mfkvnysil syypdiylhcnlavgafei igesyhkneikfitqrrkilsfddeidnlelinmfl dglkcefeqtnqslk  
sykkkfvnnyfyfenieykm  
fds lkevnnfi ektykfv lhlgl dkker lkktekel lts  
>tr|D9RGP0|D9RGP0\_STAAJ  
maniakakseif rnytlgfatlatiikmffiegdipslvlyyevmkmntl tktriiifiny ligilalifafyiilmsia  
v  
>tr|D9RGP1|D9RGP1\_STAAJ  
mrtvvdrrprtqykkvafnllfyqfsknanfepiacrpyrpqtksveslakfveqrlrpydyefydaveliglvndlche  
lnhleisqateqrp idvfn  
yeekehlnsfnakll dtyienecirivskesminfrndkysvptkyigeelkmi fnnstgelliysts  
>tr|D9RGP2|D9RGP2\_STAAJ  
mnsverkeddqvi vyeyipqdkiek gkektvnl dskvidykl skvenekgilvyrdksfhailnfidenkfpneyiya  
wy  
>tr|D9RGP3|D9RGP3\_STAAJ

Tsompanidou\_et\_al\_Supplemental\_FASTA\_File

mllsyttvsngilnelldtkvgtgei111kdkfnqkeitdfeivgksfvegnyidttfekvyyfrtgtlvvqyvknve  
>tr|D9RGP4|D9RGP4\_STAAJ  
mriarayghkvkvi1kdniiignvinfenpiesdtgnfvmdldtsmgiysiddseikdiqiink  
>tr|D9RGP5|D9RGP5\_STAAJ  
mpyvgnwrkffkeregkyqveddttkdelqakvlgkkiyitdqaikvryvdipthtkeenqfiqeqhtclmpkktm  
iamk  
>tr|D9RGP6|D9RGP6\_STAAJ  
mlfnskpnsivmlhnhpgqsgfs1nd1kmfignksiqtittivtnysvvhisktslynqsqvykimkdikqsitirnea  
ivdnilk  
>tr|D9RGP8|D9RGP8\_STAAJ  
mlikikeindksvtykyfnpndgnikpgiiqmdidslevinaeksslekntrdnyfihaidriyintskglfpeselva  
wg  
>tr|D9RGP9|D9RGP9\_STAAJ  
mipavnappmhpwcrstavphvgnwrkffkeregkyqvevkeaklqeiaksqmkeidsgkikieincekqnrhmlghh  
lynenkkepf  
>tr|D9RGQ0|D9RGQ0\_STAAJ  
mstgnli1sderfdlkeiinfngiigkvhidnvyietrqgkvhyisktghahivpyidk  
>tr|D9RGQ1|D9RGQ1\_STAAJ  
mriedayrkdvii11nneeyegfvtdyenefesetgnlvvdiqtdfavysfdeviksirllk  
>tr|D9RGQ3|D9RGQ3\_STAAJ  
mikmelrksigldedivegmslsvlvvikaqkiapflficverml11  
>tr|D9RGQ4|D9RGQ4\_STAAJ  
misfendylegahekv1kr1vdtnlvqasgygfdqftaqaielikdtidcpnatirflvggtqtnqvinsmlseyegv1  
sadtghvavheggaiefsg  
hkvitlpsnegkisasevetyetfkcdfkcdhmvfpgmvyishpteygtlyskselealskickqyqlplfmdgarlgy  
almsdqsdmtikdiakycd  
vfyiggtkigalceaiivftknnepkqfttrikhhgallakgrlgtgiqflelftddlyfkisrhaimankmqgffinkg  
yrlyfdspnqqffilsne  
kiaeleqkvkfavwekyddqhrvrfatswatteenlnk1leli  
>tr|D9RGQ5|D9RGQ5\_STAAJ  
meqiklktftaetlellekninaflsseeanlk1vnitikeieertfpnneefnailt1svnk  
>tr|D9RGQ6|D9RGQ6\_STAAJ  
mqfsfsndlgtlftiilaiafiinlvlafiiflernrrtasstwawlfvlvflpligfilylffgrtvsarklnknngn  
v1tdfdal1kqqiesfdtg  
nygtdnkqvqkhhdlvrm1lmdqdgfltennidhfidgndlydqvlqdiknakeyihleytfa1dglgqrilka1eek  
1kqglevki1yddvgskkv  
kmanfdhfks1ggeveaffask1p11nfrmnrrnrhkiividgqlgyvggnigdeylglgklywrwth1riqgdavda  
1q1r1ildwnsqahrpqfe  
ydvkyfppkngplgnspiqiaasgpasdwhqieygytkmimsaksvylqspyfpndsyinaikiaaksgvdvhlmpc  
kpdhplvywatysnasdl1  
ssgvkiytyengfihskmcliddemsvgtanmdfrsfel1nfevna1fydek1akdlrvayehditkskq1tkesyarnp  
1svkfkes1ak1vspil  
>tr|D9RGQ7|D9RGQ7\_STAAJ  
miqisniyksfnkrvc1knisfeieqgkcialigkngagkstlidiligkvnansgeifdkdk1lqsenrsimfqktmfp  
dq1kvieinlyqsfyenp  
1pleeie1tkfdssq1nqfvnk1sggqar1ldfvlsligqpq1l1ldeptstmdieireyfwsiienlkednrtilyts  
hyieevermsdki1lieng  
ei1lndstshirtnqqsq1t1seeykrk1k1dkdd1viqknhngtikikiitsvndtilylqqlhinl1ddieiqksivds  
yfnkkqrgsnydtk1len  
ri  
>tr|D9RGQ8|D9RGQ8\_STAAJ  
mil1sy1kiefkvimrkkt111silfpvifyilfts1ld1pedv1kpkfykeymysmtvys11sfs11t1fpl1diinekng  
wrqr1mvt1pft1tsy1isk  
vvk1mlqfalailvi1fmvghfykgvamsavqwlesg1flwlgas1litfgilfs1lndiqktstlanit1iclavlgglw  
fpikt1fpnw1qhvah1ps  
yh1ck1gvdiasnhh1n1isfgi1i1yalgsi1avyc1rsf1kkae  
>tr|D9RGQ9|D9RGQ9\_STAAJ  
mkf1kgnsiaelss1ly1ifpiagi1fneihgpkwlyi1lvs1fsvsy1ilvt1lnr1nh1tly1illmi1hyvi1icy1vlf  
ihp1ms1lff1ysafa1ipft  
fkksvkkas1ymft1t1iicsi1tysfyndyfvaimiyyvill1il1dnf1kkmrnreyqkeieeknrhint1iaeqerhr  
igq1hd1lghvfas1slk  
selayk1idsdiektkael1aink1sres1nkvrei1ddik1psf1eeidsigk1v1ndadidftfenkelaq1vsptkqs  
mlvm1area1nnvikhana  
skvhgk1ktvnnhk1l1mi1eddgk1idsgcevksisqr1vq1ngt1lavdstngtki1ieistggiv  
>tr|D9RGR0|D9RGR0\_STAAJ  
mis1liaedqnm1rqamvq1ik1lghdfe1ladtyng1damk1ieeynpnv1ildiempgmg1levlae1rkkh1nikvii  
vt1fkrpgy1fekavvndvd  
ayv1kersieelvet1inkvngekeysat1m1tsffvd1knp1tpkeqiv1reigng1sskeisek1fltdgtvrnytstii

Tsompanidou\_et\_al\_Supplemental\_FASTA\_File

dklfadnrfdawkkaneqg  
wi  
>tr|D9RGR1|D9RGR1\_STAAJ  
mnisnentvtliaviaiivgflqiffklplivsavl sillgilvgfivyliafykkrkk  
>tr|D9RGR2|D9RGR2\_STAAJ  
mksnkslamivvaiiivsvlafqfmnhtgpfkkgtnqestqdlkgkdkvhvqrvvdgdtfianqngkeikvrligvdtpe  
tvkntpvqpygkeasnys  
kktltnqdvyleydekekqdrygrtlayvwl skdrmykelvekglarekyfspngkyrnvfi eqnakakqqklniws  
>tr|D9RGR3|D9RGR3\_STAAJ  
msfylvliiiiivvltgiltvlnqrysnskidtevyarkqlikknkaalsaenaelsqmlssnndvghhayknakrelrkil  
dsyleeglkkydiivtsn  
latkhpffefarsfdfiivsdiglinvdvkswgektfyhfdvpdehdtemsnisniekvvghyisqqyhdqfnssrsaiyt  
ftetvqpnrvvydfydydp  
yqlaannakaldhieqnfnfkvqstgviyfsdgtvniiqgseerdkyvdvtstksslrriiseaieiskhplnkeqvdaq  
itafk  
>tr|D9RGR4|D9RGR4\_STAAJ  
mrvneinakeqlvdlmktssqflkfghgevamqlfndelklpsiveicverkr lsdvkvipqsyallyidkqdqaiak  
edlslskiakvyvqyddtt  
imsvfvydvndewifrlpnrirpk sniyfhslnwdvdyikpeivlmydlmqhhqyhhsnykrvidalsyyqffilkf  
vvegrikdaiqrinn  
>tr|D9RGR5|D9RGR5\_STAAJ  
mkvskfggssvsnatqikkvlnivnsdperkivivsapgrhndvkttdllirlyekvinhl dyhdkkreiiqryddiv  
kelqmdesilriidqtleh  
yieqlknkprll dal lscgedfnaqlialynnsqgiptkyvspkeagiyvtdvpqqaqildsayeeikklnrydeklii  
pgffgvshegyivtfprgg  
sditgaiissgvratl yenftdvsgifkanpnii kdpelieeityremrelsyagfsvfhdealplykdripvvikntn  
rpqdkgtyilhdreinakn  
visgiscdkdftvinikkylnmrqvgftrkilgvlednnisfdhmpsgidtisivmrskqiqnketkvlneirkkcdvde  
lsiehdlailmivgegmnk  
vigtankithalaeskinlkminqgaseismmfgi hvddaekavlstyefcyhgvalknlc dkn  
>tr|D9RGR6|D9RGR6\_STAAJ  
mkl niallgltvgsgvvkii enrqiqdtlnkdivikhilvr dkskkrplnisqyhltedvneilnddsldiivevm  
ggiptvdwlrta lknkkh  
vitankdl lavhkl ledlaengvalkfeasvaggipivnainnglnanniskfmgilngtsnfilskmtkeqttfea  
ldeakrlgfaeadptddve  
gvdaarkvvi tsylsfnqviklndvkrrgisgvtltdinvadqlgykikligkgyengkvnasveptlidkkhqlaave  
deynaiyvigdavgdtmfy  
gkgagslatgsavvsdl lnvalffesdlhtlpphfelktktremmsdaeinikeksnffvvvnhvkg sienfenelka  
ilpfhrlrvanydnqaya  
avivglesspeal itkhgyevdkvypvegv  
>tr|D9RGR8|D9RGR8\_STAAJ  
msnvl eltipastanlgvgfdisgmaldkflhlsvketsgkweyifhddaskqlptdetnfiyhvaqqaakysvdlpn  
lcie mrsigiplarglss  
salvgaiyianyfgdiqlskhev lqlateieghpdnvaptiyggliagyndvsketsvahidipdvdivvtiptyelt  
easrralpqklthseavks  
saisntmicalahnye laglmqqdgfhpyrqh liaefedvkii akqh hayatvisgagptilifsrkensgelvral  
nrnvtchselvdinvsgv  
kerivyq  
>tr|D9RGR9|D9RGR9\_STAAJ  
mtnykvvvlmdm dttllnsdnvi seetanyl taiqeegyvv lasgrptegmiptardlklpehhsy iisyngsktinmtn  
eeevsksigkqdfdeivd  
ycrdrgffvlytyhdgqi ydseheymnieael tglpmkrvddikayiqgdvpkvmgvydvanitearidlngvfndnvda  
ttskpf flfmakdvskgn  
aikalchk lgyvdqviafgdsmndksmfevaglai amgnasdelkqyadeitldhnengiphalkl l  
>tr|D9RGS0|D9RGS0\_STAAJ  
migqtnl fddvlkqderfvi vvqaleekngqlkrtlreypgl nhkqmdl fthlkel fseesfaenqsafsitvytnld  
ytadqiyahvkrfrgkhdw  
tqtak  
>tr|D9RGS1|D9RGS1\_STAAJ  
mednkmrslnsrhismia iggaigtgl fvatgnisqagpggailaylvigvml yflmssigelatfypvsgsfssyst  
rfidssl gftmgwlywalw  
slvtsvdvivasnlyfwdt fklfhpitwslifitil llllni fsvksfgetefwlslikvltiivfvi fgflmifgilgg  
haygfenytkggapfvggi  
sgflgvll vagfsvgttevvavt agesddpkksmpkaikqvfwri llfyvlsiavigaiipytdpsll rassisqspft  
ivfdrv gi afaasv inavi  
ltsllsaansgvtytgrml yslssdkkapqflsklnkttklplral lttayvvviiyanfn snavnll eiigsmiiv  
vvgssiwsi rlrqaikkq  
gqdpnkvlpykapfyp lgp iivittllfl fggsv eyilkdqwl nafknflplilal iyfihkiihktkf vkletinlk

Tsompanidou\_et\_al\_Supplemental\_FASTA\_File

phdydnqk  
>tr|D9RGS2|D9RGS2\_STAAJ  
msqqdkkltgfvghpvsdrensmtagprgp1lmqdiyfleqmsqfdrevipermhakgsgafgtftvtditkytnaki  
fseigkqtemfarfstvag  
ergaadaerdirgfalkfyteegnwdlvgnntpvfffrdpklfvslnravkrdrprtnmrdaqnwdftglpealhqvti  
lmsdrqipkdlrhmhgfgs  
htysmyndsgervvwkfhfrtqqgienltdeeaeeiasdrdssqrdlfeaiekgdypkwtmyiqvmteeqakshkdnf  
dltkvwyhdeyplievgef  
elnrnpdnyfmdveqaafaptniipglfspdmlqgrlfsygdaryr1gvnhwqipvnqpkvggienicpfsrdgqmr  
vvdnnqgggthyypnnhgk  
fdsqpeykkppfptdgygyeynqrqddnyfeqpgklfrlqsedakeriftntanamegvtddvkrrihrcykadpeyg  
kgvaka1gidinsidlete  
ndetyenfek  
>tr|D9RGS4|D9RGS4\_STAAJ  
makkskiakerkreelnkyyelrkelkakgdyealrk1prdsspr1trrckvtgrprgvlrkfemsriaafrehahkgq  
ipgvkkssw  
>tr|D9RGS6|D9RGS6\_STAAJ  
mdtpkkqfafnniqmmsksdvektlnkprvtfnegtkwytyyddynnfimisyikdkvnalytnqniitskkskik  
yntpksvvrqr1gepetei  
vkgrvryeqnnkeydvfhknhiyttvfydkhrrnvtavlqvsdamenr1keqygapsks1adsfelqnfdlvnaerkqh  
qlstlkyskqnssetarkhs  
kdmaknhfydhtnlkgqspdr1kkdgitfnsagenlaygqvssiyahqglmsighrkn1lndtfkilgvgvdfndekq  
pftwentytg  
>tr|D9RGS8|D9RGS8\_STAAJ  
mfynkyknvstyii1flvssaafai11sanvsahseqvyemtdhqiknntinkayehkdptnseqrggkvfal1n  
>tr|D9RGT0|D9RGT0\_STAAJ  
mfnekqqlavdtlral1sidiiekansghpg1pmgaapmaytlwtrh1nfnpqskdyfnrdrfvl1saghsa11ys11hvs  
gs1e1e1kqfrqwgsktp  
ghpeyrhtdgvevtgpl1ggfamsvglalaedhlagkfnkegynvvdhytyvl1asgd1megisheaasfaghnl1sk1  
vvlydsndisldgelnkaf  
sentkarfeaygwnyl1vkdgndleeidnaittaksqegptiievkttigfgspnkagtngvhgap1gederkl1tfenyg  
ldpekrfnvseevyeifqn  
tmlkranedesqwns1lekyaetypelaefk1a1sgklpknykdelprfelghngasradsgtviqaisktvpsffggs  
adlagsnksnvdndatdyss  
etpegknvfwg1refamgaavngmaahgg1hpygatffv1sdylkpa1rl1ssimg1natfifthdsiavgedgpthepie  
qlag1raipnmnvi1rpadg  
netrvaveval1ses1tpts1vl1trqn1pvl1dvpedvveegvrkgaytyvgseetpef111asgsevs1aveaakdlekgg  
ksvr1vsm1pnwnafeqqse  
eykesvipssvtkrvai1emaspl1gwhkyvgtagkvia1idgfgasapgd1vvekygftkeni1nqvm1  
>tr|D9RGT3|D9RGT3\_STAAJ  
mki1htadwh1gk11ngkq11edqay11dmfvekmkeepdi1vi1agdy1dttypskdaim11leqaigk11nle1ripi1m  
isgnhdgker1nygaswfe  
hnq1firtdfts1nspie1ngvnyf1t1pyatvsemkhyfeddtiethqqgitrcietiapaidedavn1ish1tvqqgk  
tsdserp1t1igtvesvqg  
vfd1fdyvm1gh1h1hpf1sieddkikysg11qysfseagqakgyrrvtindgi1ndvfiplkpl1rql1eisgeyndvine  
kvhvkndny1hfk1knms  
hitdpmms1kqiypnt1a1t1netfn1yneennaie1sekddmsi1emfynhitdkk1sdiqskkik1n1ene1rked  
>tr|D9RGT4|D9RGT4\_STAAJ  
mkp1h1k11n1nfgp1f1kee1dfskidne1f1isgktgsgktmi1fdamya1fgkasteqreend1rshfadgkqpm1svtf  
efq1nhriykv1hrqgpyik  
egnttktnakfdv1femvdgkye1reskvisgtqfi1e1l1gvnadqfrq1f1il1pqgefkrfl1s1nsrekqg1l1rt1fdsek  
feai1re1l1keevk1kekagi  
enryqqa11lwq1e1sfdddk1kg11levatq1dkvienip11qarskei1afvnesketaikeye1iekkt1enni1kd  
ninq1lnknk1dfvq1keqg  
peiee1eak1k11l1qdi1t1n1nyienreki1etkianckkdi1sktnk1n1l1ecd1krtid1kek1m1eeng1lieskis1fidk  
trv1fnd1inkyqgsy1nie  
r1rtegeq1gde1lnn1ikg1lekvedsignnesdyeki1e1lnnaitninne1invikenekaka1e1dk11gskqel1enqine  
ets1ilkn1e1k1drydksk  
1d1ndkesf1se1ksavki1gdqpc1gnei1qd1ghhi1dfdsi1akrqneikei1eani1haiksni1avh1nseik1fvneki1sni  
niktqsd1fs1lev1nkr1le  
nena1nnqr1nk1fie1qmkeekdn1t1qi1h1nkq1r1lnk1nese1kl1crd1lite1fet1skynni1tnfevdykkyv1qdv1nqhq  
e1skei1edk1liq1sqrk1i  
eqnn1nhyeng1lety1nnd1e1neqs1iememsr1n1td1dnd1inei1awrgeqek1eqkrdytkkryhefemeiar1les1tk  
dke1l1dsd1k11dey1el1kkg  
kmnt1l1deysav1hyqc1qnn1nktq1sivshiny1nqel1kdq1eif1qlaeivsgknnk1n1t1enf1v1liyy1dqia1qa1n1r1  
atmsdnryq1l1rreavshg  
1sg1e1dvfd1h1snksrh1ss1sggetf1qss1ala1al1g1seiv1qqsggis1lesi1fidegfgt1dqet1eta1dt1l1n1ks  
tgrmvgi1shvselknrip



Tsompanidou\_et\_al\_Supplemental\_FASTA\_File

lvlevksdqyqsstrfkrn  
>tr|D9RGT7|D9RGT7\_STAAJ  
maanfkeqskkhfdlngqsytyydlkaveeqgitkvsnlpysirvllsllrqeddfvitddhikalsqfgkdgnegevp  
fkpsrvilqdfgtgpavvd  
laslrkamddvggditkinpevpvdlvidhsvqvsyanpealermlkfefernyeryqflnwatkafdynavppatgi  
vhqvnleylasvvhvrdivd  
gektafptdlvgtdshttmngigvlgwgvvggieaeagmlgqpsyfpipevigvrlvnsllpqgatatlalrvtqelrkk  
gvvgkfveffgpgvqhlp  
adratiannapeygartcgffpvddeslkymkltgrsdehialvkeylkqnhmffdvekedpnytdvieldlstveaslsq  
pkrrpdliflsdmkssfen  
svtapagnqghglksefddkkaeinfkdgskatmktgdiaiaaitsctntsnpvmlgaglvakkavekglkvpeyvks  
lapgskvvtgylrdaglpq  
ylldlgfnlvgygcttcignsgpllpeiakaiadedllvtsvlsgrnrfegrihplvkanylasplvvayalagtvdid  
lqnepigkgnegedvylkd  
iwpsikevsvtdvsvtpeelfieeynnvynnelwndidvtdqplydfpnstyiqnpsffqglskepgtivplnglrv  
gkfgdsvttthispagaig  
kdtpagkyldhqvpi refnsygsrrgnhevvrgrtfanirirknqlapgteggfttywptnevmpifdtamkykedgtgl  
vvlagnygmssrdwaak  
gtnllgvktviaqsyerihrsnlvmmgvlpelfkkgesadslgldgteisvni denvqphdyvkvttakkqgdglvefda  
mvrfdslvemdyrhggi  
qmvlnkllaq  
>tr|D9RGU1|D9RGU1\_STAAJ  
mamnkqnnysddsivlegleavrkrpgmyigstdkrglhlhlyveivdsvdevlgygneydvtinkdgsisiednrg  
mptgihkskptveviftv  
lhaggkfgqgyktsgglhvgasvvnalsewleveihrdgniyhqsfknggspssglvkkgkktktgtkvtfkpdtdif  
kastsfnfdvlserlqesa  
fllknkkitlndlrsgkerqehyheegi kefvsvnegkevldhvatfsgeangievdfafqyndqysesilsfvnvr  
tkdggthevgfktamtrvf  
ndyarrinektkdknldgndiregl tavsvripeellqfegqtksklgtsearsavdsvadklpfyleekgqlsksl  
vkkai kaqqareaarkare  
darsgkknkrkdtllsgkltpaqsntdknelylvegdsaggsaklgrdrkfqailplrgkvintekarledifkneein  
tihtigagvgtdfkieds  
nynrvijimtdatdgahiqvlllftffkymkplvqagrvia lpplyklekgkgtkrveyawtdeelnklqkelgkgt  
lqrykglgemneqlwett  
mnpetrllirvqvedevrskrvttlmgdkvqprrewiekhvefgmqedqsilnsevqvlendqfdeeei  
>tr|D9RGU2|D9RGU2\_STAAJ  
mseiidlsledvlgdrfgryskyiqeralpdvrdglkpvrri llyamyssgnthdknfrksaktvgdvigqyphgds  
svyeamvrllsqdwklrhv  
iemhgnngsindppaamryteakslsllaeellrdinketvsfipnyddttlepmlpsrfrnllvngstgisagyatdi  
pphllaeviqatlkylidnp  
ditvnqlmkyikgpdfptggi iqgidgikkayesgkgrivrskveetl rngrkqliiteipyevnksslvkride lra  
dkkvdgivevrde dtrgl  
riaie lkkdvnsesiknylyknsdlqisynfnmvaisdgrpklmgirqiidsylnhqievvanrtkfeldnaekrmhive  
glikal sildkvielirss  
knkrdakenlievyefteeqaeaimlqlyrlntdivalegehkelealikqlrhildnhdallnvikeelneikkkfk  
serlslieaeieeikidke  
vmvpseevils mtrhgyikrtsirsfnasgvediglkdgdsllkhqevntqdtvlvftnkgrylfipvhkladirwkelg  
qhvsqivpieedevvinvf  
nekdftnda fyvfatqnmikkstvp lfktrfnkpliatkvkenddlisvmrfekdqlititnkgmsltyntsel sdt  
glraagvksinlkaedfvv  
mtegvsendtilmatqrgslkrisfki lqvakraqgitllkelkknphrivaahvvtgehsqytl ysksneehglindi  
hkseytngsfivdtddfg  
evidmyis  
>tr|D9RGU4|D9RGU4\_STAAJ  
mgeyivtktl nnnvvctnndqeviligkgigfnkkegmvln dqtntiekiykl dseqqkahykslveiaddnvlqviid  
slnfnisntamnvdsqllv  
sltdhii faykr lkqnqv snpfvmetmqly sdayhiakqv idqlnaaldvhfpedeigfialhiasntedlsmhemtli  
nnvikgidii esdlvttv  
dkeslqyqrfirhvqflirrlrrkeyihaqddfvs miknhypicyntaykiltmiqkqfdvniseseiyltlhihhfee  
rinqs  
>tr|D9RGU6|D9RGU6\_STAAJ  
mnqevknkifsilkitfatalfi fvvitlyrelsginfdktlvefskinrmslvllfigggaslvilsmydvilsralkm  
dislgkvlrvsyiinalna  
ivfggfi gagvramvyknythdkklvhfislilismltgslslslivfhvfdasli lnk itwvrwlyavslflplf  
iismvrppdknrryvglyc  
ctlvscvewlaaavlylfgvividvhsfmsfiaifiaalsglvsfipggfgafdllvllgftlgvpeekvllmllly  
rfayfvpvialilssfe  
fgtsakkyiegskyfipakdvtsflmsyqkdiakipsllailvfftsmiffvnnltivydal ydgnhlttylllaiht

Tsompanidou\_et\_al\_Supplemental\_FASTA\_File

sac11111nvvgiykqsrr  
aiyamisiiliivatlfityasyilitwlaiaifallivafrarrlkrpirmnrvamllfsifilyinhifiagtfyal  
dvytiemhtsvlkyfwit  
iliiiaivgaiawlfdyqfskvrissnieeceeiidqyggnylshliysgdkqfftnedknaflmyrykasslvvlgdpi  
gdenafdelleafynyaey  
lgydvi fyqvtdqhmpl yhnfgnqffklgeeaiidltqfstsgkkrgrfratlnkfdelnisfeieppfstefineiqh  
vsdlwldnrqemhfsvgqf  
netyl skapigvmrnenneviafcs lmpyfn dai svdlirwl pel dlp lmdglylhmllwskeqgytkfmgmatlsnv  
gqlhysylrerlagrvfeh  
fnglyrfqglrrykskynpnwepflvyrkdnslweslskvmrvirk  
>tr|D9RGV0|D9RGV0\_STAAJ  
mttvlfvglglliggs lasnikyhnptniia ydadtsql dkaksigiinekflnyseaikkadviiyatpvaitnkylse  
lidmptkpgvsvsdgtgsk  
amiqqhecsllknhihlvshgpmagshksgvl nakkhl fenayyilvynepneqaanmlkellsptlakfivttae eh  
yvtsvvshlphivasslvh  
vsqkngqehhlvnlk laaggfrditriassnvqmwkditlsnktyilemirqlksqfqdlerliesndsekllsffaeaks  
yrdalpakqlggln taydl  
yvdi pdesgmiskvtyilslnhisnrlrilevrediygalkisfknptdrermqalsdfdcyiq  
>tr|D9RGV1|D9RGV1\_STAAJ  
mepilemiktldinspsgdteeaiqfvekyakdlgyqttltnkgallitvpgkndevqrcitahvdtlgamveikedg  
rlaieiligftynaiegey  
cqiktdagqiygticlhetsvhvyrnnheiprdqkhmeiridevttseedtkslgisvgdfvsfdprt vitssgfiks r  
hl ddkasvamiqlkkk  
eeqii lphttqfyisneeigyganasidskikeyialdmgalgdgqasdeytsicakdasgpyhkqlkshlvnlckin  
nipykvdiypygsdasaa  
lhagadi rhglfgagiesshamerthidsikatekllayaclspie  
>tr|D9RGV2|D9RGV2\_STAAJ  
mdvfykkikanvtpv laqlhskkii lestnqqqtkgrysvifdiygtltlndvlsvstlkesyqiterpyhyltcki  
nedyhniqdeqlkslpfis  
gyvgtc sfdlvrh efpklqsiq ledhkqh dvrlymveqvyvf dhykde lyiatnqfsnstksdlenrvnksiedltk iq  
pfmptqdfdfktkeiqsn  
seerfiemi qyfkekit egdmf qvvsriykyahhanqhl nqlsfqlyqn lkrqnpspymyylnidqpyivgsspesfvs  
vkdqivtt npiagtiqrge  
ttqidnenmkql lndpkecsehrmlvd lgrndihrvskigtskitklmvikeyehvmhivseitgkinqlspmtvianl  
lptgtvsgapklraieriy  
eqyphkrvgvsggyincnhd falairtmmideqyinveagcgvyvdsipekelnetklkaksll evsp  
>tr|D9RGV3|D9RGV3\_STAAJ  
milvvdnydsftynlvdivaqhtdivqypddnnvlnqsvdaviispgpghl dddqqlmkiistyqdkpilgiclgaqa l  
tcyyggevikgdkvmhgkv  
dtl kvishhqllyqdipeqfsimryhslisnpdnfpealkitgrtedciqsfehkerphygiqyhpesfatdygvkiit  
nfinlvkkg  
>tr|D9RGV4|D9RGV4\_STAAJ  
mtlltriktetil lesdikldil ispsigt dikeyellssysereiqqeltyivrs lintmyphqpcyegamvcvgtg  
gdknsfnisttvafvvas  
agvkvikhgnksitsnsgstdlnqmniqt tvtddtpnqlnekdlvfigatesypimkymqvrkmigkptilnlvgpli  
npyhltyqmv gvf dptklk  
lvaktikdlgrkrai v lhgangmdeat lsgdnliye ltedgeiknytlnatdyglkhapnsdfkgspeenlaitlniln  
gkdqssrrdvvl naglsl  
yvaekvdtiaegielattlidngealkkyhqmrge  
>tr|D9RGV5|D9RGV5\_STAAJ  
mtilaevkykqsl lqngyyqdklntlksvkiqnkksfinaiekepklaiiaeiksksptvndlperdl sqqisdyekyg  
anavsil tdekyfggsfer  
lqalttkttlpvlckdfiidplqidvakqagasmi llivnilsdqqlkdlynyaisqnlevlvevhdrheleraykvnak  
lidvnnrdlkrfvtnveht  
ntilenkkpnhyiisesgihnasdvrki l hsgidgl lligea lmrcdnl seflpqlkmqkvks  
>tr|D9RGV6|D9RGV6\_STAAJ  
mklkfcgftsiedvtatsqlpidaigfi hyekskrhqtitqikk lasavpehidkvcvvvnplttiehvlsntpintiq  
lhgtesidfiqeikkkyss  
ikittkalaadeni iqni nkykgfvd lfiidtpsvsycgtgqtydwtikhikdipyliagginseniqtvnqlklshqgy  
dlasgievngrkdiekmta  
ivnivkgdrene  
>tr|D9RGV7|D9RGV7\_STAAJ  
mtklfipyimgnkdlienatllsengadi e igvpsdpvadgpvimeagqqaikqgitidyifeqlekhgnqikcqv l  
mtyyniichygeqaffekc  
rdtgvygliipdlpfe lsqr l kqqfshygvkiislvamttddkrikeivshaegfiyvtmattgqngaf r pelkrkie  
sikaianvpv v agfirtp  
qhvadikevadvigsei vkrfkantreeiiky l qsiqhaln  
>tr|D9RGV8|D9RGV8\_STAAJ

Tsompanidou\_et\_al\_Supplemental\_FASTA\_File

mkftnl takefgaftdmsmpyshftqtvgheylklaegyethlvigiknnneviaac1ltavpvmkvfkyfysnrgpvidy  
enqelvhffffnel skyvkk  
hrcllylhidpylpyqylnhdgeitgnagnwffdkmsnl gfehtgfhkgfdpvlqiryhsvldlkdtaddiiknmdglr  
krntkkvkkngvkvrf1se  
eelpi frsmedtseskafadrddkfyynrlkykkrvlpvlayinfdeyikelneerdi lnkdlnkalkdi ekrenkk  
ahnkrdnlqqqldanaqi  
eegkr lkeehgnelpisagffffinpfevvyaggt снаfrhfagsyavqweminya lnhgidrynfygvs gkftedaeda  
gvvkfkkgy naei eyvgd  
fikpinkpvyaaytal kkvkdri f  
>tr|D9RGV9|D9RGV9\_STAAJ  
mkfte ltvteydnfvqnp slesh yfvkeniv trendgfevllgikddnnkviaas lfskiptmgsyvyysnrgpvmdf  
sd1glvdyylkel dky1qq  
hqcl yvkl dpywlyhlydkdivp fegrekndalvnlfkshgyehhgftteydtssqvrwmgvlnlegktpetlkktf dsq  
rkrninkainygvkvrf1e  
rdefnl f1dlyreteeragfvs ktddyfynfidtygd kvlpvlayid ldeyvklqqe lndkenrrdqmmakenksdkqm  
kkiael dki dhdqhel n  
aselcktdgpiln lasgyfanayevnyfsggssekynqfmgpymmhwfm inycfdngydrynfylsgdftensedygv  
yrfkr gfnvqieel igdfy  
kpihkvkyw lfttdklrkk1kk  
>tr|D9RGW0|D9RGW0\_STAAJ  
mnriekhaktf iilm1m1fwifmsfi fqllfp sknlttyealkyythlkgyygl dhiskgiayiacvliplnfff  
rfndikkdnny nniistlf  
lllyflvngisliiqgftaef tislisksnihsnhefavnl fryviqeggisfstylvcnfcii mwlffscsllkerkpv  
vrcli iisc1klilil1f  
llsillviyqtqsaqilfvfidflnfvalilvy lctnpnrgidkiacvk  
>tr|D9RGW1|D9RGW1\_STAAJ  
mkfvfdidgtlcfngksidpsiidal lqlnaghelvfasarpi rdllpvlpevfqhqt ligangamisqqsnisvikpi  
qactyhhilriiqkyeldy  
iiddwnyaakldaenaiferldphklascinvanidtpikiillnieppqitsilnelneyrqelei iihhsnefnidit  
aqninkytalqyiygkdve  
yiafgndhdivmlqyanngyivgpsedythtilkl dhvthidshaqaicsslnlyv  
>tr|D9RGW2|D9RGW2\_STAAJ  
mgll diasirsi ergfsyyqskcvinlksysetqfeavkgsnvyhcyidme hprkskcncphadgrrvickhiall  
ftaspeaankhiimlneve  
edyh1rrnmwidslkemvndmsee lrdaylnmliehgemaelfgldeedlfededefy  
>tr|D9RGW3|D9RGW3\_STAAJ  
mielkhvtfgynkrqviledinikihdgenvgilgesgsgkstlaallgllkpmngriymsddavlpifqhaltsfnpd  
wtiedslkealkyyrrlka  
ddnqrelllqhl snydl dsqllsnypnevsggqlqrfnmrsllaqprvl icdeitsnldviaeqnvisilkeqtianln  
hlvvishd1svlqr1vnri  
ivikdgaivddfetvel fnsdrhtytkel tqvftf  
>tr|D9RGW4|D9RGW4\_STAAJ  
mslidiqnliiknqkgkslinginlkiyqqvna l igesgagksltvka lldflpsd lncqydhyyfnknvnmqql yg  
htvgyisqnyaesfnhsk  
lgkqliaiy rthfkvskeaalsqigkalswvnl sseeilkkysfq lsggqlervyiasvmlpelii adepvasldvin  
gykimdl1qhivkehgg1  
fiithnlshvlkycdyinvikdgiiehg dikhfkc dtlqpyteflikyrtqlkrdhnd  
>tr|D9RGW5|D9RGW5\_STAAJ  
mlsltkgnftfyifiyliimiilqffvnsadatkvnl sqtfe piswthllgtddygrdlftrvivarstlfitiltl  
iaiviigt1gl1lagykkg  
wierii lrvdigl sipefiimialasffqpsiwnlviait iikwmnytr lrsivnsel tkpyikmakl fhpvtrvill  
rh1tpkimpsii vlmvdf  
gkii lyissl sfiglgaqptpewgam lqlgrdfisshpimliapasviatt ilfnltgdalrdkllkqrgeyyesh  
>tr|D9RGW6|D9RGW6\_STAAJ  
mfmirsi lhrliqmivvlfvistl tfilmk l spgnpvdki l hldvahvsaeqinateeklg l kds lvsqwwqwmkqlfq l  
nlgrsfetkepvts l fey  
apptll isfstl vls laisiplgvlsakhyhkltdkvirtvstl sislpaffigiillfi ft nlnidsalwnqfvlpvf  
tlslgm cayiir lirsnl  
slyqsnivkssrlrgmseryilmhdllkptllpiipllgis lgs ligg tvvienlfdipgigy llmsiksrdypiiqgc  
vlfigffvvlintiadvlt  
llfdpkqr lhfknqknnsnvsslesgdqra  
>tr|D9RGW7|D9RGW7\_STAAJ  
mtlfdmpnylwi ttlimi lltvfcc l vlnkwfvsavitfvvlglv affipnfqeikyqpl lgyaaf laimslisflly  
ftrnwrkdrkarklekqie  
kygyegaelrrkdkk  
>tr|D9RGW8|D9RGW8\_STAAJ  
msqglpl redvpvsetwdl tdlfkddqyyesiesllqqanqfhhtyattlnsieqintalaelenilialdclsn yael  
rlsvdtsnieaqvlsakls

Tsompanidou\_et\_al\_Supplemental\_FASTA\_File

ttygkivsr1sfveseilelpeeilqqleescpyqhyikqlikqkpfqlsasveql1at1spt1nspydlygttkml1dit  
fdsfehgdgttpvdyatfe  
ndyednkdpfrrksfksfsgdirkyqhttaatynmqvqqekiead1rgfesvidy11hsqevtrdmfdrqidmimrdla  
pvmqkyak11qrihg1ndm  
rfkd1k1svdpdyepeisiedskkyifga1svlgdyytm1reaydqrwidfaqnkgkdtgafcaspyfthsyvfiwtg  
kmaefv1ahelghaghft  
1aqkhqpy1eseasmyfveapstmnem1many1fntsdnprfkrwvigsilsrtyyhnmvth1leaayqrevyrkvdqge  
s1napt1neim1svykqff  
gdavemtegae1twmrqphyymglysytsag1tigitvvsqkiknegqpaidawlet1kkggsvspvelakiagvditt  
qplkttiqyisdlvdevk  
1tdeiekann  
>tr|D9RGX0|D9RGX0\_STAAJ  
maqt1aqtq1sqshftfndsqshhtpndtnshsviystqnl1lwygenhalqnl1diyenqitaiigpsgcgkstyik  
t1nrmvelvpsvktag1l  
yrdq1fdqkyskeq1rtnvqmvfqqnpfpksiydnitygpkihgiknkvl1deiveks1rgaaiwde1kdr1htnays  
1sggqqqrvc1arclaiep  
ev11mdeptsaldpist1rveel1vqe1kekyti1mvthnmqqaarvsdktaff1ngyvneyddtdki1fsnpsnkktedyi  
sgrfg  
>tr|D9RGX1|D9RGX1\_STAAJ  
mettdnrrqs1vdqq1vqkh1ssrtvknkvfli1flact11glv1lia11tqt1likgvsh1n1qfftnfsstpsmagvk  
galigs1w1m1si1p1si1  
1gigtai1yleeyaknnkftqfvkisisn1agvpsvfvgl1gyt1fvvgagiealkmgnsilaaal1tmt11il1piivssq  
eai1ravpnsv1reasyglga  
nkwt1rrv1paalp1gtg1f1s1sralgetap1vl1igipt11latpr1ldqfsalpiq1ftwakmpqee1fqi1asa  
gi1v11v1il1mngvai1l  
rnkfskkf  
>tr|D9RGX3|D9RGX3\_STAAJ  
mkkwqfvgttal1gat11lgacggnggsgnsd1kgeakgdgsstvap1iek1nekwaqdhsdak1sagqagt1gagf1kfi  
agdi1dfadasr1pkdeekq  
k1qdkn1kykef1k1aqdgvtvavnk1endfvde1dkq1kai1ysgkaktwkdvnskwpdkk1navspnsshgtydffenev  
mknedikaeknadt1naisv  
svtknkegi1gyfgyfynvqkdk1kevki1k1dengkateptkkt1qdnsya1srp1fiyvneka1kdnkvmsefikfv1ed  
kgkaee1eagyvaapektyk  
sq1dd1kaf1dknqksddkksddkksedkk  
>tr|D9RGX4|D9RGX4\_STAAJ  
maldkdivgs1eflevig1qgsty11kgp1ngenvk1nqsemndd1el1evgeeysffiy1pnrsge1fatq1nmpdi1tkdkyd  
fakv1ktdrdgar1dvglp  
rev1vpwed1pkvks1wpqgdh11vt1ridrenhmygr1asesvven1mftpvhddnmknevieakpyrv1rigsf11se  
sgyki1fvheserkaep1rg  
esvqvri1ghndkge1ngsf1p1l1aher1dddgqvi1fd11veydge1pfdwksspea1kevfnmskgsfkraigh1lykqi  
inietgki1t1tkgwsrid  
ske  
>tr|D9RGX5|D9RGX5\_STAAJ  
m1qvtdvs1rfgdrk1fedvnikftegncygl1igangagkstf1k1l1sge1dsqtghvs1lgkner1av1kqdhayeder  
v1dvvikgher1yevmkek  
deiymkp1dfsdedg1raae1egefaemngwnaeadaan11sg1gidpt1hdkkmaelennqkikv11aqs1fgepdv11l  
deptng1dipai1swledf1  
inf1dntv1vshdrh1f1nnvcthiad1dfgki1kvyvgn1ydfwyqssq1laqkmaeqnkkkeekmkelqdfiarfsanask  
skqatsrkkq1leki1lddi  
qpssr1ryp1fvkftpereign11ivqn1sktidgekvl1dvsftmnpndkail1gidseiakt11kilagemepdegsyk  
wgv1tts1syf1pkdnseffe  
gvnm1vdw1rqyapedeqtet1f1rgf1grm1fsg1eevkkkasv1sggekvr1cm1skmm1ssanv111deptnh1d1esi  
tavndg1ksf1kgsi1i1f1tsy  
dfefintianrvid1nkqggvskei1pyeey1qeigv1k  
>tr|D9RGX6|D9RGX6\_STAAJ  
m1vtrsv1kfggssvsdftkikriaem1kervnqdeq1livvvsamgnttdq1lmtnvst1tktpkqqel1a111ttgeqqtv  
y1smv1ndigvnakamtgy  
qagiktighh1kskiaq1n1pqtfeqafqend1lvvagfqginehqel1t1lgrggsdttava1avsnqipceiytdvdgvy  
atdpr1lpkkr1divsye  
emmemsalgagv1etrsv1elaknynip1y1l1gkt1snvkgtwimsnee1lekkavtgv1aldkhmmhvtisyp1pdnq11tq  
1fte1eegavnvdmi1sqiv  
n1dg1q1sft1kdsdfhq1smilet1knqyea1aykinehyvki1sligsgmrdmsgvaskaf1t1liennipfyq1tttsei  
si1syv1iddfngq1qavek1y  
dafni  
>tr|D9RGX7|D9RGX7\_STAAJ  
m1tklavvgatg1vgtkm1et1nrkn1pfdel1v1fssarsagqev1fgktytvqel1tearaseh1fdyv1msaggg1tsehf  
ap1f1ekagaivi1dnssqwr  
maedi1divpevneptf1trg1ianpncsti1qsvvp1kv1qdayg1krvayttyqavsgsgmkgk1kdl1aeging1kapeayp

Tsompanidou\_et\_al\_Supplemental\_FASTA\_File

hpiynnvlphidvflengy  
tkeeqkmidetrki lnapdlkvtatcarvpvqdshsveidvtlekeataedikal fdqddrvvlvdnpenneypmainst  
nkdevfvgri rrrds lent  
fhvwctsdnllkgaalnavqvl eqvmrlkgan  
>tr|D9RGX8|D9RGX8\_STAAJ  
mthlfegvgval ttpftnnkvnlea l kahvnfl lenntqai ivngttaesptlttdekelilk tvidlvdkrvpvi agtg  
tndteksiqasiqakalga  
daimli tpyynktnqrgl vkhfeai adavkl pvvlynvpsrtnmtiepetveilsqhpsival kdatndfeyleevkkri  
dtnsfal ysgnddnvveyy  
qrggkgvisvianvipkefqalydaqqsgldiqdqfkipigillsalsvdin pipikal tsylgfgnyelrlplitletd  
tkvl reayni fkagene  
>tr|D9RGX9|D9RGX9\_STAAJ  
mkilligygamnqrvarlaeekgheivgvi eptkattpyqqyqhiadvkdadvaidfsnplllfp ll deefhllpllvat  
tgekekllnk ldel sqnmp  
vffsanmsygvhaltki laaavpl lddfdiel teahhnkkvdapsgtleklydvivsl kenvtpvydrhelnekrppqi  
gihsirggti vgehevlfa  
gtdeti qi thraqskdi fangai qaaerl vnkpngfytdnl  
>tr|D9RGY0|D9RGY0\_STAAJ  
mvqhl taeeiqyis dakkstpkvyl ngnfegitypesfkvfqseqskvifceaddwkhfyeiygsqfedieiemdrn  
saipkl dltntnariepga  
fi reqaiiedgavvmmgatini gavvgegtmi dmnatlggrattgknvhvgagavlagvieppsaspvieddvligana  
vilegvrvgkgaivaagai  
vtqdv pagavvagtpakvikqasevqdtkkeivaalrk lnd  
>tr|D9RGY1|D9RGY1\_STAAJ  
mnelefvtkhrhrl hqhpe lsh efettayikaf ldslnikydcpletgviay legngshtiayradidal pileendvp  
yrsqsdhvmhacghdghtt  
almlfvqrckdmqdagl pqnvvfi fqpaetgganrl ikagafdkypieavf gihvnpfadegiavirdeeitasate  
yrffltgl sshvadkeqgh  
scgealqhv l tqisqi qqfhlngl krnivhighfkageaintvpsngylegtirtydiddltivknqmki aesvkl lfn  
vdcev kfaegy ptpinspk  
lrtqi edalikad l nvydkptpfl fgedfsfygqql apayfvfigtrnedkgfvtgl htshlnfdekvlinvvnfyenll  
nnykev  
>tr|D9RGY2|D9RGY2\_STAAJ  
mtatwsvnkki flqna iavknnqip mavvknnayhydlefavsqfihagidtfstts lreaikvrql apdatifl mnavy  
efd l vrehqihmtlpslty  
yynhkndl agihvh l efenll hrsqfkd l nei kevl kdhhqnqnakmi isglwthfyg adefvdpdynversqwmeivet  
llfegyqfdli haqnsasf  
yregqell phhtharvgial ygsrpyssl nqhdivqsl tvkanviqvhevqagdycgysfafevtkntkl avvdigygd  
gil rtrakhealingkryp  
ira l mshmfvevdgnvhaqdevi lynn dirideytfkgvganseql samnhds l kkeyisndc  
>tr|D9RGY3|D9RGY3\_STAAJ  
mtvkynqngel tmdgis l kti aqsfgtptivydelqi reqmrryhrafk esglkynisyaskaftcl qmvklvaeedlql  
dvvsegelytal eagfeps  
rihfhgnnkktkheiryalenki gyfvidsleeid lidryandtvqvvirvnp gveahthe fiqtggedskfglsiqygl a  
ktaiekv l qskhlklkgvh  
chigsqiegteafietakiv l hw l kehni qvdll nlgggfgikyvegdesfpiekgikeitdaiksevqll gietpelgi  
epgrsivgeagvtlyevgt  
ikeipgvnkyvsidgmsdhirtal ydakyqall vn rnedssdtvtiagkl cesgdii ikdakl pssvkr g dylailstg  
ayhysmssnynqm qkpsvf  
flkdgkarevvkrqsl rqli indtk  
>tr|D9RGY4|D9RGY4\_STAAJ  
mhpkyfqvddfkeiemfiqsn sfgmivtvdqgkpl athvplvl dkkgdyyicgh laktnpqfntlkdnqnvl iiyqga  
hsyissawyeken vptwny  
qavhlygessil seeetid l krll vkyerhredpvl wdnisentkmqakg ivgfkvkihkieaaykmsqrnekdynni  
iek l edesnassvavaevm  
keihpyl  
>tr|D9RGY5|D9RGY5\_STAAJ  
mkyli lslvanll vfgvl saigninilaammilvipititgil f fktnl dktyi ffnill fidfy yiyvnhlmalprf  
nsyikaemmeledidv lit  
skdfgfdeil ffftlyll llii lyllkkqvktks  
>tr|D9RGZ0|D9RGZ0\_STAAJ  
mtenksfkeshpl ddfisdkel sn tti qkek l tieqqkqvdtiskqip l dnegllafgsdl qkqmsqfshqml devqsk  
dvgpigt lsd l msk l ksv  
npnelntdkpsml kri fsrakssineifsrmsvsavqdritiq l qkhqth l trdie l ldtlydknkqy fdd lslhiiaa  
qqkklqlenekl pqlqqa  
qqtt nqmdiqq vadmqgf idr l dkriyd l qlsrqialqtapqirmi qvnqalaekiqssiltsiplwknqmaialt lmr  
qrnavaaqravtdtndll  
tanaemlkqna ietat energivld l t l krtqrni etieetliiqqhgreerqlaekelqqleqdlkshlvnikgpnkq

Tsompanidou\_et\_al\_Supplemental\_FASTA\_File

S

```
>tr|D9RGZ1|D9RGZ1_STAAJ
mnkntwiigftlfamffgagnlifppnlgldsgkffwpailafvltgiglp11lgvivgsldkegyigalnkispkfsilf
lviiyltigplfaiprtas
tsfemtipihsnssialfiftiiflvlyicinsklidrigs11tp11litilamiikgylfdsgnsagkgnealy
hsnfssfaegftqgyltmd
aiaaiafsmivnavklgtitktnqifkqtltagliaavalifiyislgfignhmpvsdatlqelnskdrnigtyllttm
aatgfgslgkyl1giiva1
ac1ttacgliavseyfhrivpkvsykafvlvfilmsfianqglnavismsipvlsivypvaitvlliliakfiptkr
isqqipviivfilsifsvi
sklgwlkinfieslplrayslewfpvaiiatilgy1vgifvkqdpikyqqe
>tr|D9RGZ2|D9RGZ2_STAAJ
msdrfikfndeqldakqvmmlqdlar111kneqtqvkiqkfpypnpvqnv1itswfwshrpshiemag1ktdvmlaaygy
hmdvqivnevvdqktfkfkh
pkfyqqlfk1ledmrv1nsikverpstaklid1r1dtrisytesqikvyrtktqytd11f1ylehaf1sqdffdipsihs
d1ddilvnmfly1pnffqn
qnsednmylaqrimyqvddi1kedm1neyyy1pktlyntlaspefed1krtdasqvdgqddtsedddnqsekadsksads
eskggaylemelhegqns
t1gndearregdatddmtdmmtkkgksnet1nreegdavgqsqafq1dgvnknveikwqipeiepqyvleyqeskqdvqy
eikdliqiikktiereqrd
arfnltkgr1kqdl1nwfiddqfk1fykqdd1sksfdatft11idasasmhdkaetmkgv1fhet1kd1nikheilsf
sedafdsdehvqpn1inei
inyntsfekdgprima1epqddnrdgvairiaser1mrrnqhqrflivfsdgepsafnysqdg1idtyeavemsrkfgi
evfnvflsqepitavedeqt
ihniygqyai1fvegvalpgh1sp11kk111ks1
>tr|D9RGZ5|D9RGZ5_STAAJ
mcglrsit1gttnieqtkhfmvdi1gl1nceellensirfgdadi1spgtr1qfiqvpseql1eshfvig1rtptdsglee
yae1lsskeipftttkeln
gnkyfsfednng1fsiysnennygv1gmpsfesavnp1hqvq1gpvilknvhvdi1tgqil1tnifglevfaeyqpdfn
adyhvqvfk1gtgg1ggei
h1mpvetem1peygavdqvefetkdadffnqaksr1deveipyqt1eqddiesiritensgl1sfi1ft1qk
>tr|D9RGZ6|D9RGZ6_STAAJ
mpevkvpelaesitegtiaew1knvgdsvekgeaile1etdkvnvevseeagv1seq1asegdtvevgqaiavigegsg
naskensndntpqqneetn
nkkeett1ksadnaevnqtnddnqqrnatpsarryarengvn1aevspktndvvrkedi1dkkqqapastqttqqapake
ekkyngyptkpvirekmsr
rkktaak11levsnntam1ttfnevdmtnvme1rkrkkdqfmdhdgk1lgfmsfftkasvaalkkypevnaeidgddmi
tkqydydgavstddg1lv
pfvrddckknfaeiaean1lavkarekk1gl1ddmvngsf1tinggi1fgsmmstpiingnqaailgmhs1itripiaidqd
tienrpmmyialsydhrii
dgkeavgf1ktikelienped11les
>tr|D9RGZ7|D9RGZ7_STAAJ
mtnerkevseapvnfgan1glm1dlyddf1qdpssvped1qvlfstiknddsivps1kstssqnsdgtikrvmlidnir
qygh1kadiyvpnpkrkh
vpklejedfd1dqqtlegisagivsdhfadiydnayea1lrmekrykgpiafeythinntergw1krrietpykvt1nn
nekralfk1layvegfyky
1hknfvgakrfsiegvdalvpm1qrtitiaakegikniqigmahrgr1nvlthv1lekpyemmisefmhtdpmkflpedgs
1q1tagwtgdvkyh1ggik
ttdsygtm1ria1annpsh1eivapvvegrtraaqddtqragapttdhhkampiihgdaaypgqginfetm1gn1kgy
stggs1hiitn1rigf1tte
pidarsttystdvakgydvp1fhnaddveatiea1diamefrkefhdvvid1vgyr1fghnemdepsitnppvpyqnr
khdsveyvfgk1lvnegvi
sedemhsfi1eqvqkel1raqhdkin1kadkmdnpdmekpad1al1plqadeqsftfdh1keindall1typdgfn1kk1nkvl
ekrhepfnkedglvdwaqa
eq1afat11qdgtp1r1tgqdsertfshrhav1hdeqtgetytp1hhvpdqkatfdihnspl1seaavvgfeygynvenk
ksfniweaqygd1fanmsqm
ifdn1f1ssrskwgersg1t1f1phayegqgpehssarlerf1qlaennctvvn1ssssnyfh11raqaas1dseqm1rp
1vmspk11rnktvakpi
deftsggfep1ltesyqadkvtkvilatgkmfid1keal1aknpdesv11vaierlypfpeeeiet11aq1pn1leevswvq
eepknqgaw1yvpyvkv1
vadkyd1syhgri1qraapaegdgeihk1lvqnk1ienalkn
>tr|D9RH00|D9RH00_STAAJ
mtnp1rtkrcggd1vcgidnhfq111yisenhcq1etktffeyflrivnkthdyailenkkicisq
>tr|D9RH01|D9RH01_STAAJ
msqwkr1s11ivft1vfgi1affhesr1gkwidnevye1fyssesfittsim1gatkvgevwam1cis111vay1mlkrh
kiealfal1mal1sgilnp
a1kni1fdrerpt11r1iditgfsf1psghamgstayf1gsgiy11nr1nqgnsk1gil1glcaam1ll1sisrvy1lgvhyptd
i1agi1ggv1fci1st111
```

Tsompanidou\_et\_al\_Supplemental\_FASTA\_File

rnklin  
>tr|D9RH02|D9RH02\_STAAJ  
mtkiaftgggtvghsvnlsliptalsqgyealyigskngieremiesqlpeikyypissgklrryislenakdvfkvlk  
gildarkvllkkepdllfs  
kggfsvvpvjaakslniptiihesdltpglankialkfakkiyttfeetlnylpkekadfigatiredlknghahsgyq  
lrgfnenkkvllvmggslg  
skklnsiirenldallqqyqvihtgkglkdnqvkksygiqyefvkedltdllaitdtvisragsnaiyefltripmll  
vplglqdsgdqidnanhf  
adkgyakaiddeeqлтаqillqelnemeqertriinnmksyeqsytkaelfdkmikdaIn  
>tr|D9RH04|D9RH04\_STAAJ  
mddkghtssdderagiatsnqddqntsskrvhkrwqfisiligtilitavitvayifinqkisglnktdqanlnkie  
nykilnsdykkqssdkl  
skaaidgmvkelkdpseylkteqtksfnegvsgdfvgigaemqkndqimvtspmkgspaeragirpkdvtkvngksi  
kgkaldevvkdvrgkente  
vltvqrgseekdvkikrekihvsveykkkgkvgvitinkfndtsgeikdavlkahkdglkkivldlrnppglldea  
vkmanifidkgtvvklek  
gkdteaiqtsndaIkeakmdisilvnegsasasevftgalldynkakvygsktfgkgvvqttrefkdgsllkytemkwI  
tpdghyihgkikpdtid  
tpkyqslnvipntktfkvgdddkniktikiglsalgykvdnettqfdqalenqvkaqqtnklevtgefnetnkftel  
Ivekankhddvldklinil  
k  
>tr|D9RH06|D9RH06\_STAAJ  
mfkklfgkgkevqkdiayapltgeyvkiedipdpvfaqkmmgegfginptegevvspiagrvdnvfptkhaiglkadng  
Iellvhigldtvqldgeg  
evlvssgdevnvqdpIvrfnleyinnaksvispiitntdqaasiniydenavikgetkvidvtmn  
>tr|D9RH07|D9RH07\_STAAJ  
mlkkdkseItdieyivtqengteppfmeywnhfakgiyvdkisgkplftseekfhsecgwpsfskaIdddeieIvdk  
fgmlrtevrseesnshlg  
vIIndgpkessgIrycinsaaIqfipyekleeIgygdIshfdk  
>tr|D9RH08|D9RH08\_STAAJ  
mtkeyatIagcfcwcmvkpftsypgiksvvsgysgghvndpntyeqvctnqtghveavqitfdpevtsfenIldiyfktfd  
ptddqgqffdragesyqpi  
fyhdehqkkaaeIkkqglneqgIkkpviItpikyknfypaedyhqdykknpvhyyyqrgsgrkafieshwgnqna  
>tr|D9RH09|D9RH09\_STAAJ  
mtkqiivtdstsdIskeyleannihvipIstIegtsyvqvditseeIfinhiendedvIksqpaigefisayeeIgdg  
aeIisihlssgIsgtfnta  
yqasqmvdanvtvidsksisfgIgyqIqhlveIvkegvstseivkklnhIrenikIfvvigqInqIkggrisktkgIlg  
nlmkiIkpigtIddgrlelv  
hnartqnsIqylkkeaefIgdheiksvgvahanvieyvdIkkvfneafhvnydinvtppvisahtgqgaiglvvlk  
k  
>tr|D9RH11|D9RH11\_STAAJ  
mlnsfdaayhsIceevleIgntrndrtntgtIskfgqIrfdlIskgfpllttkkvsfklvateIlfwikgdtniqyllky  
nniwnewafenyIksdey  
kgpdmtdfghraIldpefneqykeqmkgfkqriIedntfakqfgdIgnvygkqwrwdvkdgnhfdqIktvieqikhnpd  
srrihvsawnpteItdmaI  
ppchtmfIqfyvqdgIscqlyqrsadiIlgvpfniasyaIltthliakecglevgefvtfgdahiyshidaiqtqlare  
sfnpptIkinsdksifdin  
yedleivdyeshpaIkapiav  
>tr|D9RH13|D9RH13\_STAAJ  
meIriepItpspntmkvvlIsytredklIsntykkveetqpefinqllsidgitsifhvmnflavdkapkadwevilpdika  
afsdanqvlesvneqpidn  
hfgeikaelltfkgipyqikIIsadqelreqIpqtyvdhmtqaqtahdnivfmrkwldIgnrygnieevmdgvleevlat  
ypesqIplvlkhaIleenha  
tnnyhfyrhvsIdeyhatdnwktIrmInhfpkptfediplldlaIIsdekvpvrrqaivllgmieskeIpylykglrdk  
spavrrtagdcIsdlgye  
alpemvlllddpqkivrwraamfIdegnaeqIpal kahindnafevklqiemaisriengdealgsvwkqmanrti  
>tr|D9RH15|D9RH15\_STAAJ  
myneIlgIvtfivtfvlmvlmyrffgkqgliawvaigtianiIqviktveifgisatIgnvmfasiylatdiIldiygrr  
vakravwIgfssIlimiiv  
mqIsIhfiIpedmaqkaIhaIfdvpriaIgsivayiIghidvfifslIkkvfssdkIffiraygstflssiIdtalI  
vaiafigslpgtvvfeifi  
ttyvlkIastvfnvpfygiaksfyrkgkIdklDqy  
>tr|D9RH16|D9RH16\_STAAJ  
makinfdaatkgnpgIstcaivIkedeqhytytheIgemdnhtaewaaciyaIkhareIlnvsnaIlytdskIiadsvnag  
yvknakfkpyfdqleIfeK  
dfdllfvkwIpreqnkeanqhaqqaIykIkknk  
>tr|D9RH17|D9RH17\_STAAJ  
mnyrdkiqkfsIrktyvtgfstviatlvflgfntsqahaaetnqpasefkqkqssneqtenresqvqssqnsqnsqtIs

Tsompanidou\_et\_al\_Supplemental\_FASTA\_File

tpneeqsnnnqtshvgen  
eaqpstteheqpvsnkqskndandtvakpqsdkketsqeqnenhvankpvdneatyveshqanvvtasdatengvqh  
drnelqaffdanyhdyrfi  
drenadsgtfnvykgifdkintlgsndpinnkdlqalaykeleqavalirtmpqrqqsrrssriqtrsvesrsaepsv  
sdyqnanssyyvenandgs  
gypvgtynasnkgapynlpttpwntlkasaakeialitakqtgdgyqwwikfnkghaphdnmiywfalpadqvpvgrtd  
fvtvnadgtvqwsngaga  
gankplpqmwpngvndsrsdwfki rnrsgqviydwptvhinsltdlaragdyfseagataatkafgrqifeyingdrpte  
spgvprvytfigkdasyt  
isfktqgptinklyaaagara leynqlfmysqlyvestqdqqrlngl rqtvrntrylgttkrvevshgnvqtkkvl ess  
nlnddfvddplsyvktps  
nkvlgyftnanangfrpggvqelneyqlsqfltdqklqdaartrnpirlmigfdypdgygnsetlvpnltvlpei qhn  
ikfyknddtqniadkpasr  
qaghpi fyvyagnqgnasvnl ggsvttiqplrinltsnenftdkdwqitgiprtlhienstnrtnnarernielvgnllp  
gdyfgtirfgrkeqlfeir  
vkphtptitttaeqlrgtalqkvpvtvsnipldpsalvylitptaqtnggseadqipsnytilatgtpdgvhntitipp  
kdyvfvippegrqikamiy  
ynkfvasnfsngvtl pdnipp tlenpvginakyrgdevsftiaaadrhtglknttittlpsgwtsnlaktnsdhngti  
titgrvamnqafnsditfk  
vaatdnanttdnqskhvsihvgqisedahpivlgnekvvvnptalsnekqsiinafmknqnirgylassnpvvv  
dnnngvntihyrdgssttd  
atnvmtyepvvkseyqtanapktatvtiakqgsfsigdikqyftlsngqaipsgtftnitsdrtiptaqevsqmnaqtql  
yhitasnayhkdtedfyit  
lki vdkqpegdqrvtstydltadei skvkqafinanrdaitfaegdisvntnpganvstitvninkgrl tksftsn  
lanmflrwnfpqdyts  
wtakianrptdggls wsdhksliyrydatlgtqittndiltmlkatttvpglrnnitgnekaqaetggrpnrttgys  
qsnattdgqrqftlngqvi  
qvl diinpsngygggs vansvransnstvvnvnepaangagaftidhvvknnstrnatdavykaqlyltpygpkyve  
hlnqntgnttdainiyfvp  
sdlnptisvgnyanhqvfsgtftntitandnfgvqsvtvpntsqtigtvdnnhqhsatapnvtsttktinlvatdt  
sgntattsfnvtvklrdk  
yrvgtsttanpvrianiannatvsqadqtaiinslfttetvpnrsvyrasaneitsktvsnsrtgnnahvtvtvyqd  
gttstvtvpkhvipeivs  
nphytvqqdfpagnssasyfklngsavpdatitwvsgqapnkdntrigedinvtahilidgett pitktstykvvs  
svpkhv fetnrgvvfpgvs  
dvydakqyvpvndswtqnaqrmnfqftnsygpskdvvgistrdirvtydnhqtiikilakvkpdprridgnsvtykag  
lnqqikinnvlssssikl  
fkadntplti ntttygsntavvtvsdalpngeikarssismnvttyttqdehgravdvtrtesvdsnds atvtvpqlq  
atsqgpvfi kggdgd fdfgh  
verfi qnpph gatvtwqdn pdtwkntvgnthktavvtl pngqgrnvevpkvypvanakapsrdvkgqnlthgtnaidy  
itfdpntntngitatanr  
qqpnnqqagvqs lnvdvtypgi saakrvpvtvnvyqfefpqnstttvggtlasgtqasgyaqmqnatglptdgftykwn  
naatgtndanwaamknpm  
akvvnakydvinynghtfatslpakfvvkdvpakptvtettagviti apganqtvnthagnvttyadklvikrngsvvts  
ftrrrntspwmkeasaanv  
tgi vgtngitvaagtfnpadti qvvatqgsgetisdeqrsddftv vapqpnqattki wqnghiditpnnpsghlinptq  
amdi aytekvngaehtskt  
lsvvrgqnnqwti ankpdvvtl dahtgkvtfnantikpsaititpkagtghsasnpsltapaahvtntteivkdygs  
nvtaaeinnavqankrta  
tikngtamptnlaggsttipvtvtyndgsseevqetiftkdkrelitaknhl dhdvstegkkpgtitiqynnai hnaqq  
qinaakteaqqvinnerat  
pqqsda ltkvraaqtkineakallnkednsq lvtsknnlqnsvnqvpsttgmtqqsidnynakkreaese itaaqrvi  
dngdataqqisdekqrvdn  
al talnqakhdltadthaleqavqqlnrtgtttgkkpasitaynns mhalqsd ltsaknsanai ikpirtvqevqsalt  
nvnrvndrl tqainqlvp  
adnsalrtaktkldeeinksvtt dgmqtssiqayenakraqqttestnaqnvinnngdatdqqi aeektkveekynslkqai  
agltplaplqtaktqlqn  
didqptsttgmtsasvatfneklsaartki qeidrvlashpdvati rqnvtanaaksa ldqarngl tvdkaplenaktq  
lqhsidqtsttgmtqds  
naynakl taarnkiqqinqv lagsptvdqintntsaanqaksdl dharqalt pdktp lqtaktql eqsinqptdttgmtt  
aslnaynqlqaarqlae  
inqv lngnptvqni ndkvteanqakdq lntarqgl tldrqpaltlhgasnl nqaqqnnftqqinaaqnhaaletiksni  
talnnamtklkesvadnnt  
iksgqnytdatqankqaydnavaakgvi gettnptmdvntvnqkaasvkstkda ldgqqnl qrakteatnait hasdln  
qaqkna lttqqvnsaqnvga  
vndikqttqslntamtnl khgvanhqv lqsdnyvnadtnkkndynnaynhandi ingnaqhpvi tpsdvnnal snvtsk  
eqalngntkl naakqeant  
alghl nlnnaqrqnlqsqinnahqidavntikqnatnl nsamgnl r qavadkdqvrteadyadadtakq naynsavssa



etiinqttntmsvddvnr  
atsavtsnknaingdeklaqsktdaaraidalphlnnaqkadvkskinaasniagvntvkqggdIntamgnlqga inde  
qttlnsqnyqdatpskka  
ytnavqaakdi ngarganktkdqvteamnqvnsaknldgtrlldqakqtakqqlnmmthltpaqktnltnqinsgttv  
agvhmvqsnantldqamnt  
lrsiankdetkasedyldanndkqtaynnavaaaeti inansnpempstittqaeqvnsaktaIngdenlatakqnak  
tylntltsitdaqknnlis  
qitsatrvsgvdtvkqnaqhl dqamsnlqnginnesqvssekyrdadtnkqqeydnaitaakailnkstgpntaqnave  
aalqrvntakdalngdakl  
iaaqaakqhlgtlthittaqrndlnqisratnlagvesvkqsansldgamgnlqta indkaatl asqfnl dadeqkrn  
aynqavsaaeti lnkqngp  
ntaksaveqalnnlntakhalngtqnlnnakqaaitaingasdl nqkqkda lkaqangaqrvsnaqdvqrnate lntamg  
tlkhaiadkntlasskyv  
nadstkqnayttkvtnaehi isgtptvttptsevtaaanqvnsakqelngderlrvakqnantaidal tq lntppkaklk  
eqvgqanrledvqsvqtnq  
qalnnamkg l rdsianettvrasqnytdaspnnqstynsavsnakgi inqtnnptmeasaitqattqvngknglngaen  
l rnaqaakqnlntlshlt  
nnqksaisssidraghvsevtaaknaate lntqmgnleqaihdqntvkvsvkftdadkakrdaytnavsraeailnktqg  
antskqdvaaiaqvnsak  
nalngdqvntnaknaaknalnntsinnaqkrdlttkidqattvagveavsntgtqlntamaslqngindkantlaseny  
hdadsdkktayiqavtnae  
nilnknsqsnldkaavenalsqvtnakgalngnhnleqaksnanttinglqhllttaqkdklkqqvqqaqnvagvdtvkss  
antlngamgtlrnsiqdna  
atknqnyldatesnktynnavdsangvinatsnpnmdana inqiatqvstknaldgthnl tqakqtatnaidgatnl  
nkaqkdal kaqvtsaqrva  
nvtsiqqtane lntamgqlqhgiddenatkqtqkyrdaeqskktaydqavaaakailnkqsgsnsdkaavdra lqqvtst  
kdalngdaklaeakaaakq  
nlgtlnhinaqrtalegqinqattvdgvntvktnantldgamns lqgsindkdatl rqnnyldadeskrnaytqvataa  
egilnkqgtgntskadvn  
alnavtrakaalngaenl rnaktsatntinglplntqlqkdnlkhqveqaqnvagvngvkdkgntlntamgalrtsiqnd  
ntktsqnyldasdsnknn  
yntavnnangvinatnnpnmdanaingmanqvnttkaalngaqlaqaktnatntinnahdl nqkqkda lktqvnaqrv  
sdannvqhtate lnsamta  
lkaanadkertkasgnyvnadqekrqaydskvtnaeni isgtpnatl tandvnsatsqvnaakta lngdnnlrvakenan  
ntidglsl nnaqkaklke  
qvqsattldgvqtvknssqtlntamkg l rdsianeatikagqnytdaspnnrneydsavtaakai inqtsnptmepntit  
qatsqvttkeqalngaql  
aqakttaknnlnntsinnaqkdal thsidgattvagvnqesakate lnnamhs lqngindetqtkqtqkyl daepskks  
aydqavtaakailtkasgq  
nydkaaveqalqvnstktalngdaklneakaaakqtlgtlthinnaqrta l dneitqatnvegvntvkakaqql dgamg  
qletsirldkdtllsqnyq  
daddakrtaysqavnaaati lnktaggntpkadveramqvanta l ngiqnlerakqaantaitnasdlntkqkealk  
aqvtsagrsvsaangvehta  
telntamta lkraidkaetkasgnyvnadankrqaydekvtnaenivsgtptptltpsdvtnaatqvtnaktqlngnhn  
levakqnantaieglssl n  
gpqkaklkeqvgqattl pnvqtvrdnaqt lntamkg l rdsianeatikagqnytdasqnkqtdynnavtaakai igqtsn  
ptmnaqei nqakdqvtakq  
qalngqenl rtaqtnakqhlnglsltdaqkdaakrqiegathvnevtqaqnnadalntamtnlknqidqntikqgvnf  
tdadeakrnaytnavtqae  
qilnkagqpntakdnvesalqnvqraknelngnqvenakttaknalnntsinnaqkealksqidsattvagvnqvstt  
aselntamsnlqngindea  
atkaaqtytdardkqtayndavtaaktll dktagsndnkaaveqalqrvntaksa l ngdarlneakntakqqlatmshl  
tdaqkanlteqiergttva  
gvqgiqanagtl dqamnl rqsiaskdatskssedyqdanadlqnaynravsaegi isatnnpempdttinqkasqvnsa  
ksalngdeklaaakqtaks  
digrltdl nnaqrtaanaevdqapnlaavtaaknkats lntamsnlkna laekdntrsvnytdadqpkqaydtavtqa  
egitnangsnanetqvqav  
lnqlnqaksdlngnkvqaakeakra lasynl nnaqstaatsqidnattvagvtaaqntanelntamgqlqngindqn  
tvkqqvntfdadqgkkey  
tnavtnagqil dkangqnmtkaqveaalnqvttaknalngdanvrqaksdakanlgtlthlnnaqkqdltsqiesattvn  
gvngvktkaqldgamqr l  
qsai ankdtkasenyidaptkktaydnaitqaesylnkdrngankdkqaveqai qsvtttenalngdanl qraksdatq  
aidnlthlntppkta l kqq  
vnaaqrsvgtl knsats l nnamdq l kqsiahdhtivaggnytnaspdkgaytdaynaaknivngspnvi tnaadvta  
atqrvnaetglngdtnla  
takqqakdal rqmthl sdaqkqsi tgqidsatqvgtvqsvkdnatnl dnamq l rnsiankdevkasqpyidattdkqna  
yntavtsaeni inatsqpt  
ldpsavtqaanqvntnkta l ngaqlankkqettanir lshlnnaqkqdlntqvtnapnistvnqvktkaeqldqamer

lingiqdkdqvkqsvnftd  
adpekqqaytsavtaeeniinqangtnanqsqveaalstvtttkqalngdrkvtadaknnanqtlstldnlnnaqkaavtg  
ninqahtvaevtqaiqtaq  
elntamgnlkslnkdttlssqnfddadpekknayneavrnaeniInkstgtnvpkdqveaamqvnttkaalngtqn  
ekakqhantaidglshltn  
aqkda1kq1vqqsttvaeeagqneqkannvdaamdk1rqs1adnatkqnqnytdaspnkkdaynavttaqgiidqttsp  
tldptvinqaagqvsttkn  
alngnen1eaakqqatqslsldnlnnaqkqavtdqingahtvdeanqikqnaqnlntamgnlkqaiadkdatkatvnft  
dadqakqqayntavtneaen  
iiskanggnatqaeveqaiqqvnatkqalngnanvqhakdeatalinnsndlnqaqkda1kqqvqnattvagvnnvkqta  
qelnnamtq1kqgiadkeq  
tkadgnfvnadpdkqnaykqavdkaeal1sgtpdavvtpeitaa1nkvtqakng1ngntnlatakqnvqhaidq1pnl  
qaqrdeyskqitqatlvpn  
vna1qqaatt1ndamtq1kqgiadkaqikgsenyhdadtktaydnvntkae11kqttntmpntiqa1tkvndtn  
qalngnqkladakqdaktt  
fgtldh1ndaqkqal1ttqveqapdiatvnnvkqnaqnl1namtn1sna1qdktet1nsinytdadqgkkdaytnavahae  
g1lskangsnasqteveqa  
mqr1vneakqalngndnvqrakdaakqv1tnandlnqaqkda1kqqvdaaqtvanvntikqtaqd1nqamtq1kqgisdkd  
qtkangnfvnadpekqnay  
nnavahaeqi1sgtpnanvdpqvaqalqqvtqakdd1ngnhnlqvakdnantaidn1pnl1nqpksa1kdqvshae1vt  
gvna1kqnadal1namgt1  
kqqiqansqvpqsvdftqadqkqqaynnaanaqqaiangtptpvl1tpdtvtqavttmqakda1ngdek1ahakqea1a  
n1dt1rd1nqpqrda1rnq  
inqaqa1atveqtkqnaqnvntamgnlkqgiankdtvkasenyhdadadkqtaytnavsqaegiinqttnt1npdeitr  
al1tqvtadakng1ngdak1a  
tekqnakdavnamt1ndaqkqalngq1dqspei1atvtqvkqtats1dhamdq1sqaindkaqt1adgny1nadpdkqna  
ykqavakaes11dkqsgtn  
evqagveri1nevntakqalngndn1anakqqakqqlan1th1ndaqkqs1fesqitqap1vtdvttinqaqa1dhame1  
1rnsi1adnqat1asedyhd  
ataqrqndynqavtaanni1inqttsptmpdevnsattqvntkvaldgden1aaakqqannr1dq1dh1lnnaqkqqlqs  
q1tqssdi1aavnghkqtae  
s1ntamgn1ina1adhqaveqrnyvna1tdkqtayttavneaeamin1kqtgqnanqteveqainkvqtt1qa1ngdhn1  
qvakanatqai1dal1ss1nd  
pqkta1kdqvtaat1vtavhqi1eqnant1nqamhgl1resi1qdnaatkansiy1inedqpeqqnydqavqaanni1ineqtat  
1dnna1nqaattvnttkaa  
1hgdkv1qndkdhakqtvsq1lah1lnnaqkhmedt1idsettrtavnhd1teaqa1dq1mda1qqsi1adkdathassayvn  
aepnkkqaydeavqnaesi  
i1ag1nnp1tinkgnvssatqavtsskna1dgver1aqdkqtagns1nh1dq1tpaqqqa1enqinnattrdkvaei1iaqaq  
a1neamka1kesi1kdqpp1t  
easskfi1nedqaqkdaytqavqhakd1inktt1dpt1aks1idqatqavtdaknn1hgdk1aqdkqratet1nn1sn1nt  
pqrqa1enqinnatrgev  
aqk1teaqa1nqamea1rnsi1qdqqqteagskfi1nedkppkdayqaavqnakd1inqtsnpt1dkaqveq1tqavnqakd  
n1hgdk1ladkqhavtd1  
ng1ng1nnp1qrqa1lesqinnatrgevaq1laeaka1dqamqs1rnsi1qdqqqtesgskfi1nedkppkdayqaavqnakd  
1inqtgnpt1dksqveq1t  
qavttakdn1hgdk1ardqqqavttvia1pnl1haqqqa1tdainaaptrtevaqhvqtate1dhamea1knkvdqvnt  
dkaqpn1yteastdkkeavd  
qa1qaaqs1tdptngsnankdaveqa1tk1lqekene1ngnervaeaktqakqnidq1th1nadq1atakqnidqatq1qp  
iae1vdqatq1nqsmgq1q  
qavndhtnveq1tvd1ytdqadsdkqkaykqai1adaenv1kqnankqqvdqa1qni1nakqa1ngderve1aksngkhd1dq1  
na1lnnaqqdg1fkgr1dqsn  
d1nq1qqi1vdeaka1nhamdq1sqe1itgnegr1tkgstnyvna1tdqv1kvydeavdkakqa1dkstgqn1taeqvik1nda  
vtaakea1ngeer1n1nrks  
ea1qr1dq1th1lnnaqrq1aiqqinnat1nkasrainravq1ddamgavqqy1ideh1ldvisstny1inaddn1kanydn  
a1anaahe1dkvqgsa1iak  
aeaeq1kqni1idaqna1ngdqnl1anakekana1fvdt1ng1nqqqqdhahqainnadt1vvgit1divnnqid1ndamet1kq  
1vdnei1ptaeqsvnyqna1d  
dnaks1nfd1dakr1lant1l1nsdntn1vndingai1qsvnda1iqn1ngdq1r1qeakdeai1qsinqa1adk1keieasnat1dqk  
1iaknkae1lans1inn1in  
katsnq1avte1vqtagna1ieqvhane1pkaki1danndv1dnrvqal1ideid1rnpn1tdkekqa1kdrinqi1lqqghnd1inn  
amtkee1ieqaker1laqa1q  
dikd1lvkakenakq1dvdkqvqal1ideid1qnpn1tdkekqa1kdrinqi1lqqghnd1inna1tkee1ieqaka1laqa1qdik  
d1lvkakedakna1ika1ana  
krdq1nsnpd1tpeqkaka1lkeideakra1qnvena1qskdq1nqr1n1ng1ledi1rnthv1evdeqpavndi1seatpeq1il  
vngeli1vhrddi1iteqdi1l  
ah1n1lidq1kaev1itdpstat1ids1takvevt1ldgskv1vnpvkvveke1tvvkqqaiesi1enaqqkine1innhat  
1tpeqkeaa1ieavn1lkqk  
aieq1innaad1vhtveev1qnqeqahieqfnpdqft1dqaksna1k1s1tdai1qhmi1deinaskd1tdkekqea1sk1nq1kd

Tsompanidou\_et\_al\_Supplemental\_FASTA\_File

qsiquaigraqsiveitgq1  
dqfkaqlkaanpfakelenrkkaaaiskikdistdkidrirnstigtaerqaamnrineivletirdinnahtlqqveaa  
lmgierilavqivtsdhs  
khssnsdgqsnshlhvgygtvnhpfnsppighkkklqddeidplhmhrhfgdrignviknalgvvgisgllasfwwfiak  
rrrkedeeeeeieirdnskd  
kkkgsiegtkhlpllfakrrrkedeedaiveekdslnndesldkvkhtpfflpkrrrkedeedvevtntentdekvldqne  
hspvliakrrrdkeedvet  
ttsieskdedvp1llakkkdqkdnqskgkksaskktskkvaakkkkkkkskknk  
>tr|D9RH18|D9RH18\_STAAJ  
mekpsreafegnnklligivlsvitfwlfaqslnvvpiledsfntdigtvniavsitalfsgmfvvgaggladkygrik  
ltnigiilnigsllyiis  
nplllliigrliqglsaacimpatlsiiksyigkdrqraalsywsigswgsgvcsffggavatllgwrwifilsiiis1  
ialflikgtpetksksis1  
nkfdikglvllvimllsnilitkgselgvtsllfitllaiaigtfs1fivlekratnplidfk1fknkaytgatasnfl  
lmgvagtliantvfvrgl  
gysslqagslsitylvmvlimirvgekllqtlgckkplmigtgvlivgef1is1tflpeiivyviccivgyllffglglgiy  
atpstdtaianaplekvvg  
aagiykmasalggafgvalsgavyaivsntniytgamialwlnagmgilsfvi1lllvpkqndtq1  
>tr|D9RH19|D9RH19\_STAAJ  
msgkelqknigffsafaivmgtvigsgvffk1snvtevtgtagmalfwflggiiticag1taaelaaaiPETGG1tky  
ieytygdwgf1sgwaqsf  
iyfpanvaalavfatq1lnlflhsagllipvaiasalsivlinflgskaggilqsvtlviklipiivivi1fgifqsgni  
tfs1ipstgnsngfftai  
gsgllatmfaydgwihvgnvage1kkpkrd1plaisvgigcimavyllinatfl1t1piellagn1naasdtSkilfgey  
ggkiiitigilisvygting  
ytmrgmrpyamaerkllpfsh1fak1tksgapwfgaiiql1iaimmsmgafdtitnmlifviw1fycmsfvavi1rk  
repmrpykvp1lypi1p1  
ia1lsgsv1int1ftqfilamigilitalgipvykkkkqkat  
>tr|D9RH20|D9RH20\_STAAJ  
mtntvt1qtahivslgdieeakasikpfi1rrtp1iksmy1sqnitkgnvyl1klenmqftgsfk1frgasnkinh1sdeqk  
akgi1gasagnhaqgval1  
akllg1dati1mpetapiakqnatkgygakvilkgknfnet1lymee1akengmtivhpyddk1vmagqgtig1leilddi  
wnvntvi1vpvggg1liagi  
ata1ksfnpsi1hi1gvqaenvh1gmaesfykrd1tehredsti1adgcvkvpgekyevvkh1lvd1filvseeie1hamqd  
1mqrakii1tegaga1p1taa  
i1sgkidkkw1legknvval1vsggnvd1trvsgviehgl1niadtskgvvg  
>tr|D9RH21|D9RH21\_STAAJ  
m1vavvke1kqgegrvactpenvrk1tdaghkvl1veknagigsgfsnemyeqegakivsheqawead1vikvkephesey  
qyfkdkqi1iwgf1h1lassk  
qivekmqevgvtai1sgetivkngkae1lapmsai1agqrsaimgayysea1hgqgg1tvtgvhenvni1pgstyvi1fgggva  
atnatnval1glnakvi1le  
1nddriky1kekytdkdv1vkstpen1aeiekkadvfistil1ipgakppk1vtremvksmkkgsv1idiaidqgg1tiet  
1rpttisdpvyeeegv1hy  
gvnqpgavprt1stmalaggnidy1leicdkgleqaikdneal1stginiykgqvtnkg1atshd1dfkeil1nvik  
>tr|D9RH23|D9RH23\_STAAJ  
minkeq1d1lyk1k1keveksrneal1htinqvikkvyl1qytcsvfghfsagk1st1in1lieq1d1lps1pvttsntaiv  
svsdnhdi1ian1pnqtyak  
1snydevremnrqnvd1vesveinfqsakfengft1qdtpgvdsnvashqsiteqymytsnmi1fytdynhiqsel1nfkfm  
khindvgipvvfi1inqidk  
hqddel1sfstfksrveksiadwgik1ertfyvskfdhpenel1v1ssylis1ldqhrettedytsrtveyiteaq1dyiqs  
ei1qev1ed1g1eeae1feqa  
f1nsqghqai1seeaq1l1nnpde1maf1knkrkni1enayimphnmrem1rsylesmsqdfnv1gg1fnkkkkk1qi1qqqr1  
1tatdal1qehvnq1rqp1m  
redmsfvtr1finkkeasdkvl1nqhydvpemieg1lyqpqtsisntyv1tfsdevvkaikkyveqqstpi1fkei1envqad  
e1p1teesdd1keyqryte1  
nel1rqs1ttknyrhyyih1des1dk1lvdrqettyqv1atdnaqdnrdnq1lnqntattnmsidi1qakaldi1sdvp1fkrtk  
qdi1het1tridnk1likigv  
fgtfsagkss1ina1l1gehil1vsspnpttaatte1sygdesyit1ksqsq1l1deinavveyqdisfstiedfins1dle1k1  
ksh1lnknq1lafvhavekhy  
n1lyvnm1engekhai1nqqe1kkwsaedeyatfvktv1hial1mhdw1kgki1vds1gl1hsnnqrhtneteqi1tssd1ilyv  
syfnhs1ftdndkafiehm1k  
dmnq1lnenqafk1mvi1naad1aesqdd1eavetyvsda1lrqvh1qsdi1favssrna1qaedkgid1q1kqsi1qqfv1desks  
i1leqqmi1hq1qqm1drsyve  
mi1tefetnkadi1srrqr1tvykdkqr1qhql1idati1qstdneveeqvyh1nar1kl1q1l1ddvksvfnsqmtqnsdfnee  
kkvstrvy1ldqi1hqr1fle  
qs1literikkyfnkq1teqi1apivqql1ad1hv1vnpqfnfesanieq1l1hidfndm1nal1pkq1l1tkrkil1npngqrdih  
esi1cqst1gl1lqpq1ml1r  
qq1ledyvk1maveaesqfesfeaniqtq1ind1laf1d1dt1l1nq1l1kdkhqq1l1ktily

Tsompanidou\_et\_al\_Supplemental\_FASTA\_File

>tr|D9RH24|D9RH24\_STAAJ  
mkntfnplqr|hfyaaifiapl|lit|tisgigylffpevenniykneffgdsdvkthqt|ndavhqierqyegffvskvs  
ildepynkrit|lsmagnq  
ryaf|dhnnqfvadqnakhtysnmrsihsslftentiiny|veltacwtfmilsqy|llikkhlisnkskalrwqkwh  
amigv|iaipvfv|vltgl  
pwsqfmgskiagmmdtngd|lqgqelainppksd|nel|pwatrnknqpasssekssshhignaampqtkldyqisidkvvq  
vqkagi|kpfsv|vpsdkn  
gtfivsntsnsgvtgl|dvspykeqtlyfdqysgkklgtikyddygiakwftwgiplheghlfgilnkiin|lvciallv  
aigmgfi|swikrktntavk  
vphrvkkpasis|iicliv|gl|lmp|lfg|sl|lvfielilyikdrakq  
>tr|D9RH26|D9RH26\_STAAJ  
mfq|lavcpmg|leavvareiqelgyetnvengriffegdasai|vkan|wl|rtadrikivvgrfnattfdel|feqtkalpw  
esi|idkegnf|pvqgrsvks  
tlhsvpd|cqaitkkaiver|rraynekgl|nesgaky|pvevailk|dnv|ll|tidtsgs|gl|nrrgyr|laqgeapiket|laas  
lirlanwk|gdtpl|idpfcg  
sgtia|ieac|liaqni|apgfn|refv|seqwn|impany|ddyrd|eadkm|adydke|ievyas|didp|emvei|akrnae|evgl|sdi  
ikfsvk|dvnt|l|tidteepv  
alignpp|yger|ig|dreeve|emyry|igk|lmkq|pfl|sty|l|tsnke|feyl|vdrkat|krkl|fngy|iectyy|qywg|kkaerk  
tien  
>tr|D9RH27|D9RH27\_STAAJ  
mltqse|mi|vvfv|ldetin|qgin|ltamkyp|kssi|wie  
>tr|D9RH28|D9RH28\_STAAJ  
msdvs|k|lsak|diyek|dfekt|margyr|reevdaf|lddi|adyqk|madmn|nevkl|seenh|kl|kkel|eelr|rvatsr|pqd  
nksf|ssn|ttt|nass|nnvd  
ilkris|n|lekav|fgk  
>tr|D9RH29|D9RH29\_STAAJ  
mvktvy|vtgyk|sfe|lni|fkddape|vhy|lkqf|ikhkie|eq|l|deg|lew|vli|qgqmg|ielw|taevv|ielqr|tyds|lkfavitp  
fqg|htekw|nehnq|skyani  
ikhady|vdsi|fhtsy|qgp|f|kqad|qfm|ehsdq|alliy|dee|qeasp|kffkq|mlvdf|mdk|tnyt|cdi|vtf|delta|findl  
qwsed|qsf  
>tr|D9RH30|D9RH30\_STAAJ  
mndvves|liyevn|smqqn|fenvks|qqqd|hdfyqt|vkteh|ids|l|neik|l|href|i|evpym|nsrk|fellian|ieql|sve  
chfkr|tsr|kl|fiel|k|svq  
ydlqni|ldgvt|kegyt|g  
>tr|D9RH31|D9RH31\_STAAJ  
mny|p|ngk|pyrk|nsai|dggk|ktaaf|sni|eygg|rgms|lekdi|ehs|nafyl|ksdi|av|ihk|kpt|pvqi|vvn|nypr|skav|inea  
yfrtp|sttdy|ngvy|qgyyi  
dfeak|etkn|ktsf|pln|ihd|hqveh|mknay|qqk|giv|flmi|rfkt|ldevy|llpysk|fevfw|kryk|dniks|itv|deir|kng  
yhipy|qyqpr|ldyl|kavdk  
lil|desedrv  
>tr|D9RH32|D9RH32\_STAAJ  
mtenk|gss|qpk|kngn|nggk|nsn|kknrv|krti|i|ki|gfm|iaffv|ll|gill|fayy|awka|pafteak|lqdp|ipaki|ydk  
ngel|vkt|ldng|rhehvnl  
kdvpk|smk|davl|atednr|fyehga|ldykr|lfga|igkn|l|tggf|gsegast|l|tqqv|vkdafl|sqhks|igrka|qeyl|syr|le  
qeysk|ddi|fqvy|lnki|yys  
dgv|tgikaa|akyyf|nkdl|kd|ln|laeeay|lagl|pqvp|nyni|ydhpk|aaedr|kntv|lyl|mhyh|kritd|kqwed|akkid|lka  
nlvnr|tpeer|qnid|tnqds  
eynsy|vnfv|kse|lmmn|kafk|den|lgnv|lqsg|ikiyt|nmdk|dvqkt|lqndv|dngs|fykn|kdqqv|gatil|dskt|gg|lva|isg  
grdfk|dvvn|rnqat|dpht  
gssl|kpfl|aygpai|enmk|watn|hai|qdessy|qvdgst|frny|dvkshgt|vsiyda|l|rsfn|ipalkaw|qsvk|qnagnd|apk  
kfaak|lgl|nyeg|digp|sev  
l|ggsa|sefs|ptql|asa|faai|anggt|ynnahsi|qkvv|trdget|ieydht|shkams|dytaym|laem|lkg|t|fkpy|gsay|ghgv  
sgvnm|gakt|gtgty|gaety  
sqyn|lpdna|akdvwi|ngft|pqtmsv|wmgfs|kvkqy|gensfv|ghsqqe|ypqfly|envmski|ssrdged|fkrp|ssvsgsip  
sinvsg|sqdn|ntnr|sthg  
gsdts|anssg|taqs|nnntr|sqsr|nsggl|tgi|fn  
>tr|D9RH33|D9RH33\_STAAJ  
mtnit|kevfd|nlere|idv|fakn|ktlgs|neakpy|ldey|hski|idyfk|qvnd|itsnid|fdnl|nqyp|vvp|mnf|keryd|ymier  
kyhfm|gyr|qmk|t|fktel|ik  
mnasy|qtr|lknk|qv  
>tr|D9RH34|D9RH34\_STAAJ  
mvskk|kale|migvian|mpda|ecel|khdnp|feltiav|llsaq|ctdv|lvnr|vttel|fkkyk|tpedyl|avsde|elmndi|rsi  
glyrn|kakk|nikk|l|cqs|lid  
qfng|ei|pqth|keles|lagv|grktan|vmsvaf|deps|lavdth|vervskr|lgin|rwk|dnvr|qvedr|l|csvi|prdr|wnr|shh  
qliff|gryh|clark|pkcdi  
cpl|ledc|regq|kryka|slkea  
>tr|D9RH37|D9RH37\_STAAJ  
mgmaty|avvd|lettgn|qldfddi|iqigit|fvrnnqi|idtyh|smir|tnle|ippfi|qal|tsieen|mlqqapy|fnqva|qei|yd

Tsompanidou\_et\_al\_Supplemental\_FASTA\_File

kikdcifvahnvdfdlnfi  
kkafkdcniqyrpkvidtleifkiafptdkysq]selaeahgitlanahradedaattaklmilafekfeklpldtlkq  
lyylskq]kydlydi]ffem  
vrqydakpldkseykfeqiyirkqvdfkkpntnyngslkslyskavnq]gltyrpqq]ylaetil]dq]lmhsekamieas]l  
gsgks]lay]laal]myniet  
gkhvmistntk]l]qsq]l]lekdipamneal]nfkina]ll]ksksdyis]l]glisq]l]kddtsnyevn]l]kmq]l]liwitetpsg  
diqel]nl]kggqkmyfdqki  
etyvparhdvhyynfikrnaqniqigintnahlihsdvensiyq]l]fddci]vdeahr]lpdya]lnqvtne]lsyadi]kyq]l]g]l  
igknenek]l]l]kaid]q]leq  
r]lekl]diapidi]fg]lkasmnei]hel]neq]l]fstifti]indsdvyddi]hrfhnvft]fetkdi]l]kd]l]hai]idk]l]nkt]leif  
ngishktvks]l]rkq]l]ly]l]k  
dkfknieqsl]kaghtsfisikn]lsqkstir]lyvkdyavkdvl]tkqv]lekfks]l]ifisgt]lkfnhs]dfakq]l]fnkdvhfn  
tfevnts]l]qsakntsvfip  
sdvasyqkni]deyvasi]yiey]ttit]ssk]l]vl]fts]ykm]hm]vq]dm]l]nel]p]efedy]vvl]tqqn]qny]kiv]qqf]n]n]fd  
kail]l]gt]st]ffeg]fd]fqan  
gikcvmiak]l]p]fm]nk]h]naky]w]l]md]se]ft]st]fkey]v]p]dav]tr]fr]q]gl]r]l]ir]n]end]rgi]iv]s]f]ddr]l]ins]ny]kn]ffeq]l  
enyrqkk]gdi]qq]fg]k]l]l]rq  
iqkkkq  
>tr|D9RH38|D9RH38\_STAAJ  
mskysqdv]l]q]l]lykn]k]pny]is]g]q]siaes]l]ni]srtavk]k]vid]q]l]k]legckids]vnh]k]gh]l]l]q]l]p]di]wy]q]gi]id]qyt]k]ssa  
l]fd]f]se]vy]ds]id]st]q]laak  
ks]l]vg]n]q]ss]ff]il]s]de]qt]k]gr]gr]fr]nr]hw]ss]sk]g]q]gl]w]ms]sv]l]r]pn]vaf]sm]isk]fn]l]fia]l]gir]dai]qh]fs]q]dev]k]k]w]pn  
di]y]id]ng]k]vc]g]l]tem]van  
nd]gie]ai]ic]g]ig]in]l]t]q]l]ed]f]des]i]r]hr]ats]i]q]l]h]dk]n]l]dry]q]fler]l]l]qe]iek]ryn]q]fl]t]l]p]f]se]ire]eya]a]as]ni]w  
nr]t]l]l]ft]end]k]q]f]kg]q]aid  
l]dy]d]gy]l]iv]r]de]age]shr]l]is]ad]id]f  
>tr|D9RH39|D9RH39\_STAAJ  
mdks]l]feq]ar]pi]le]q]id]ng]fe]ay]y]v]g]gs]vr]dy]vm]gr]ni]h]did]it]ts]at]p]de]ies]i]fs]ht]ip]vg]ke]hg]t]in]v]v]f]nd]en]ye  
vt]t]f]rae]edy]vd]h]rr]ps]gv  
tf]vr]d]ly]ed]l]q]rr]d]ft]m]nai]am]dtay]k]ly]dy]fd]g]q]q]di]n]n]ri]i]rt]vg]ia]eer]f]q]eda]l]r]mi]r]cl]rf]q]s]q]l]s]fd]iat]et]fe  
am]rt]q]m]ad]ik]f]l]s]ier]ivi  
e]l]tk]l]mr]gn]n]vees]f]nh]l]ks]l]ka]f]ny]mp]y]feh]l]di]n]q]i]n]v]te]pid]le]l]lia]iv]sv]k]fd]in]ys]l]k]p]l]k]l]sn]rq]vk]di]n]q]yi  
qim]nal]ps]vit]ke]q]l]km]fv  
y]dy]d]tn]l]ik]n]vm]a]adv]l]k]andi]q]g]he]p]l]iv]n]l]qt]id]et]l]hr]l]p]mh]nr]k]d]mm]v]ng]gv]l]may]l]nak]sg]pw]l]kd]vl]r]q]ie]ia  
i]vt]g]k]vs]ne]ete]i]l]kw]vd]n  
hvk]i  
>tr|D9RH40|D9RH40\_STAAJ  
mk]ig]it]c]yp]sm]g]gs]gi]i]ate]lg]ik]laer]g]hev]h]fits]nip]f]ri]rk]p]l]n]mi]fh]q]ve]n]q]y]av]f]q]y]pp]y]di]t]l]st]kia]evi  
key]d]l]d]l]h]m]hy]av]pha]ic  
gi]l]are]m]sg]k]d]ik]im]t]t]l]hg]td]i]t]v]l]gy]d]hs]l]q]ga]ik]f]gi]eks]di]v]ts]vs]ks]l]aq]ethe]i]iet]n]ke]i]ipi]yn]fv]rene]fp  
tk]h]nt]al]ks]q]y]gi]ap]de]kv  
l]ih]vs]n]fr]q]v]k]rid]ti]iet]fak]v]rek]ips]k]l]i]l]l]gd]gp]el]v]pm]rq]m]t]kel]n]vee]dv]l]f]l]g]k]q]dc]v]se]fy]q]l]sd]l]v]l]l]l]se  
kes]fg]l]t]l]leam]kt]g]v]vp]i  
gs]n]aggi]ke]vik]h]get]g]fv]vd]gd]cd]sas]ay]air]l]led]kv]l]yn]k]l]q]kn]l]adiaer]fg]sel]it]dq]y]ey]y]y]q]m]l]neh]n]ks  
k]ge  
>tr|D9RH42|D9RH42\_STAAJ  
ms]l]l]ssi]f]t]mi]iy]f]vi]l]m]v]l]p]l]wa]qh]k]v]ks]nyek]ys]q]vr]st]sg]kt]gre]val]eil]hang]iy]d]ev]v]k]geg]f]l]t]d]hy]d]p]k]k]k  
v]vs]l]span]y]dr]ps]vag]tai  
aa]hev]gh]ai]q]d]h]q]y]w]f]l]r]fraa]l]p]van]l]g]ss]l]symi]im]l]gi]l]ta]igs]af]g]stal]wig]ag]l]ms]l]av]l]fs]iv]t]l]p]ve]fd  
ass]ram]k]q]ita]l]ni]v]ne]ke  
y]kh]ark]v]l]saa]m]ty]va]at]av]ava]el]vri]iliar]ss]d  
>tr|D9RH43|D9RH43\_STAAJ  
mt]int]f]w]q]yt]l]y]q]r]sw]l]mm]l]l]ic]n]il]gm]iy]gy]i]wy]ge]q]l]s]ht]p]w]q]f]ki]fv]pd]s]pt]ail]fl]vis]is]l]il]irk]q]ns]f]ida]la  
fv]t]l]f]ky]gi]w]av]im]n]l]fi  
ie]gg]di]t]v]ng]l]v]l]mf]sh]s]imav]qai]y]fy]pr]f]kr]sm]igi]svam]tw]v]l]ndy]idy]f]hl]q]f]py]y]d]fit]th]v]w]q]ig]v]l]scc]l]sv  
fg]l]l]ly]ie]l]nk]l]l]k]k  
>tr|D9RH44|D9RH44\_STAAJ  
m]set]l]n]q]i]kas]fi]ey]l]l]f]q]yr]f]ks]ri]av]w]l]ny]l]kv]neak]l]ani]h]f]vd]tk]inh]het]le]iaev]g]sh]as]ai]q]ft]k]r]nik]l]m]n  
t]nei]fd]y]ian]h]nca]fd]iq  
h]fan]v]sk]re]qr]l]dd]l]iva]q]l]tes]psy]q]ty]l]hd]l]ns]ma]id]rh]k]hal]l]idy]l]l]h]nid]l]s]l]q]m]nek]qr]fy]q]l]t]q]il]nt]l]k]l]vn  
k]hn]q]fed]l]add  
>tr|D9RH45|D9RH45\_STAAJ  
me]di]y]k]l]id]d]in]l]q]k]len]l]dsr]v]ne]ait]td]nd]dal]fi]l]get]l]yn]fg]l]mp]q]q]lev]fr]v]ly]h]k]yp]des]e]l]li]y]fi]eg]l]ms]en  
qt]de]ale]y]l]sy]ve]ps]pek]l  
m]lead]ly]q]q]i]n]m]me]vai]dk]l]q]e]ale]lep]nd]pi]ih]fa]laem]l]y]d]g]q]y]l]rat]se]yet]v]let]ge]y]q]v]ng]v]n]l]fs]r]mad]cs]l]q  
sg]nys]dai]r]l]y]de]i]nedem  
t]sedy]l]k]k]ais]y]d]k]nd]i]t]q]e]aik]im]t]l]l]sk]dp]dy]i]q]y]l]y]l]qs]l]y]ene]kn]yp]dai]et]g]ke]gl]r]l]sq]fy]kel]my]tt]g]cle  
i]eh]gd]an]eg]v]l]l]k]q]ale]v

Tsompanidou\_et\_al\_Supplemental\_FASTA\_File

dnayqep11ilsdlyrneedyeaiie1ltyvdeed1dptfmwhlafaygqeerdkeaqhffelayptmktnidfmsdfyf  
ylietgqkeqaitilnq11  
elepsnenwhde1sr1qs  
>tr|D9RH47|D9RH47\_STAAJ  
mk1qttypsnnypiyvehgaikyigtylnqfdqsfl1ideyvnyqfankfddilsyenvhkiipagekktkfhqyqetl  
eyilshhvtrntaiiavgg  
gatgdfagfvaat1lrgvhiqvpttilahdssvvggkvginskqgknligafyrptaviyd1df1ktlpfeqilsgyaev  
ykhallngesatqdieqqf  
kdreilqslngmdkyiakgietsk1divvadekeqgvrkfln1ghtfghaveyyhkiiphghavmvgiyqfivana1fdsk  
hdinhyiqylrq1gyp1dm  
itd1dfetlyqym1sdkknkqgvqmv1irqfgdivvqhdq1tlqhaceq1ktyfk  
>tr|D9RH48|D9RH48\_STAAJ  
mryltsghsgppqltvivegipanleikvedinkemfkrqggygrgrrmqiekdtveivsgvrngytlgspitmvvtndd  
fthwrkimgaapiseere  
nmkrtitkprpghad1vggmkyhrd1rnv1erssaretaarvavgalckv1lq1ldidiysrvveiggikdrdfydset  
fkan1drndvrviddsiaq  
amrdkideaknegdsiggvqvvenmpvgvgsyvhdrk1dgkiaqgvvsinafkgvsfgegfkaaekpgseiqrdeily  
nseigyrgsnh1gg1egg  
msgmpii1vngvmkpiptlykp1nsvdintkedfkatiersdscavpaasivcehvvafeiakalleefqsnhieq1kqq  
iierq1nief  
>tr|D9RH49|D9RH49\_STAAJ  
mknisi1ilgilmlksmellygai1fdkplnpltkiifiltliyifylvkelii1flkskynksa  
>tr|D9RH50|D9RH50\_STAAJ  
mertflmikpdavqrn1igevisrierkg1klvgaklmqvpme1aethygehqqkpfynd1isf1tsapvfamvvegeda  
vnvsrhi1gstnpseasp  
sirgd1gl1tvgrni1hgsds1esaerein1wfneneitsyasprdawlye  
>tr|D9RH51|D9RH51\_STAAJ  
mak1nmneikkvegr1ekaikskdsv1eqas1hl1ssggkrvrpafvilssqfgkdeqtseqtyqvavale1ihmatlv  
hddvidksdkrrgk1tik  
kwdqttail1tgn1la1glehl1mavkdnrvhqlisesivdvcrge1lfqfdqfnsqqtii1nyl1rrinrktall1q1lstev  
gait1sqsdketvrk1kmig  
hyigmsfqi1ddv1dftstekk1gkpvgsd1lnghit1pillemrknpdfk1kieq1rrdserkefeeci1iirksdsid  
eakavsskylska1dlise  
1pdghpks111s1tkkmg1srnt  
>tr|D9RH53|D9RH53\_STAAJ  
mettvsk1lerqieer1kgvseyesininhr1gk1l1dsyidp1dvakvac1tidtsmrh1dditynh1skhsil1gd1isah  
fyt1lae1nd1sfqne1isk  
aiveine1kss1hhqa1neyeisqai1vkiet1lfpfit1shfginidesei1nyl1fedmsdyypsyfkkynqsevkhylhd  
iqksylksrgn  
>tr|D9RH55|D9RH55\_STAAJ  
mtk1tvfgmgsfg1alanv1aenghdv1mwgknq1davde1ntchtnkky1kyak1dvn1iatsdmtkai1qyadi1lmalp  
tkamrevatq1ndk1ltsk  
tfihvakgieng1tkfrvsemieds1spefnagigv1sgpshae1vvvkqpttvaasskdknvsk1tqdl1fmdy1lrvytn  
dd1igv1lgga1kni1iava  
sgivagi1gygdna1ka1lmtrg1lae1sr1gekl1gadpmt1fl1ggig1d1ivtct1sthsrnft1lgyk1gggesmdqal1semn  
mvvegi1yttksvyh1lakek  
nvdmpitna1lyrv1feni1svkecvk1lmerdkkse  
>tr|D9RH56|D9RH56\_STAAJ  
mtkpi1vai1vgrpnvgk1stifnr1vgervs1ivedtpgvtrdri1y1ssgew1thdfni1dtggie1gdapfqtqira1qae1iai  
deadvi1fmv1nreg1l1tqs  
demvaq1lyk1skkp1v1lanvk1vnm1emrtd1vdydfys1lgfgepyp1sgshg1lg1gd1ldav1shfgeee1dpydedt1rls  
i1igrpnvgk1ssl1vna1ilge  
drvi1svn1vagt1trda1dteys1dgqdy1lidtagm1rkk1gkvyestekysv1ra1kaiersn1v1v1vidae1qgie1eqdkrv  
agya1heggkav1tvvnk1wd  
tvek1dsk1tmkk1fedevrke1fqf1dyaqia1fvsaker1tr1rt1l1fpy1nease1nhkkrv1qsst1nev1vtda1ismn1pt1tdkg  
rr1lnvfyat1qva1iep1ptfv  
vfvndve1lmhfsy1krylenq1raaf1gfeg1tpih1i1arkrn  
>tr|D9RH58|D9RH58\_STAAJ  
mnainia1ldgpa1agk1stia1krvase1smi1yvdtg1amyra1ltykyl1k1nk1ted1fak1ldv1dqt1td1l1tykad1kgqc1vil1dne  
dvt1df1rnndvt1qhvs1yva  
skep1vrs1favkk1qke1laaekgi1vmdgr1dig1tvv1lpdad1lkvymias1veaer1rykdnq1lrgiesn1fed1krdi1eardqy  
dmnre1ispl1rkaddav1t1d  
ttgks1ieev1tde1lamvs1qik  
>tr|D9RH59|D9RH59\_STAAJ  
mkh1l1vi1htggt1smsq1d1qsnkv1vtnd1inpi1smhqd1vinqya1qide1lnp1fnvps1phmti1qhv1kq1kdi1ileav1tnkyy1dg  
fvi1thgtd1leeta1fl1dl  
i1lgieq1pvv1itgam1rssne1igsd1glyni1sai1rvas1dekar1hkgvm1vfn1deih1tar1nvt1kthts1ntnt1fqsp1nhg1plgv  
l1tkdr1vqf1hhmpyr1qqa1le

Tsompanidou\_et\_al\_Supplemental\_FASTA\_File

nvneklnvp1vkaymgmpgdi fsfysregidgmviealggmmpsa legiqqlvslnipivlvsrsfngivspityaydg  
ggyqlaqqgfifsnl ngp  
kar1k1l1valsn1dkaeiksyfe1  
>tr|D9RH60|D9RH60\_STAAJ  
mqkvesi igggpcgl saieqrkrkidtliiekgnvvesiynphtqtfsssdksigdvpfiveeskprnqalvyy  
revvkhq1kvnafeevlt  
vkkmnkftitttkdvycrfltiatgyyqhntlevegadlpkvfhyfkeahpyfdqdvviiggknsaidaaalelekag  
anvtvlyrggdyspsikpw  
ilpnftalvnhekihmfanvsqitedtvtyevngeskti hndyv famigyhpdyeflksvgiqintnefgiapmyne  
tyetniencyiagviaagn  
danti fiengkfhggi iaqsm1akkqtples  
>tr|D9RH61|D9RH61\_STAAJ  
msnnfkddfeknrqs idt nshqhdtedvekdqselhqdtienteqqfpprnaqrrkr rrdlatnhnkqvhnesqtsedn  
vqneagtiddrvqessht  
esqepshqdstpqqheeyknafamdkshpepi edndnhetvkdaenntehtstvsdkseaeqsqqpkpyfatganqset  
skdkhdnvtvkqdkdeskd  
hhsghkkaaigagtagvagaagamgvskakhsndaqnksnsdkvnstedkasqdkskdhngkkkaaigagtaglagg  
aaksasasaaskphasnna  
qnndehdndrdkepkkgmakv1lp1iaavliigal aifggmaln nhngtkenkiantnknnadeskdkdtskdaskd  
kskstdskskddqdkatk  
desdndqnnanqannqanqanqqanqanqqqqqrqggqrhtvngqenlyriai qyygsgspenvekirranglsgnn  
irngqqivip  
>tr|D9RH62|D9RH62\_STAAJ  
mlhdilrnkfgfesfkpgqaei esimsqhtlgi lptgsgkslcyqiptylsgkptliisplisl mddqvmqlkingek  
rvtcihsgmdeiekkhnik  
clrhstrfiflspfl1qpsnfklismidfgmivldeahclsewgydfrphyaligkvtkhfkeavv1altatapphlqdd  
ltemlaiqfnvikttnrp  
nisfkhlnfhddedkiewl1pflqqsgptiiyvsskkmc1nlaqliydsgfltgihgdmnyqerhtvqqflnndipii  
vatsafmginkkdi rti  
hfh1stspnsyiqeigrardgelsqaislfqpdkiylet1lfadmit eedvqnfeigeflapdkqdvltt1hsfysig  
alkqi fksfkrkqlgfr  
migyckldqcrkyll effgeyppaqdrccndsnitdivilnkkkvi rsigfdek1qn1flr  
>tr|D9RH63|D9RH63\_STAAJ  
mqhi kta1qqtfnktnksiy n1lgvkkshqtffdacsqqqlslyhslp1lkypsfelflekin efnaemeimlhpryt  
fesmgqtfqaiql1vqtm  
ntmqdfrfvpi sqnkiqetvki vnyikenklqidfenelhn1fkaitlkgpcylhyylqgydepmytrqqvsliek1  
sqqqlfeyemnlvtmmfe  
lesgeyti1ski imkpt1lnqyitytr1leqftmediaaqqvki ntiedhvleilikgym snyddyveqedqqqflnf  
yqqrger1kfykeqfdt1  
syfqlkv1ivgfergdlnva  
>tr|D9RH65|D9RH65\_STAAJ  
mqqnkr1itism1saiafvltfikfpipflppy1tldfsdvps1latftfgpvagiivalvkn1lnylfnmgdpvgpfan  
flagasfl1tayaiyknkr  
stkslitgliativmtiv1silnyfv1lp1ygmifnladiann1kviivsgii pfniikgiiisivfillyr1lanflk  
ri  
>tr|D9RH66|D9RH66\_STAAJ  
meseskkdtnteiksvpeemeaskyvgqgfppaekdaiefakkrkefekvgeqffkdnf1kvkatnvvgkddgvevy  
vhcddhgi vfnas1plykd  
aihqgsmrsndngdmsmmvgtv1sgfeyraqekydnykffkenekkyqytgftkeainktqnvgyqneyfyityls  
rn1keyrkyep1ihkndk  
efkegmqrarke1nytansntvat1fstndkknrkekinvid1sekiestkmpfkntittqlgnkligtkkarfddkk  
vvsfgafede  
>tr|D9RH67|D9RH67\_STAAJ  
mlkkak1l1iat1llsgcsttnnesnnetksvpeemeaskyvgqgfppaekdaiefakkrkefekvgeqffkdnf1k  
vkatnvvgkddgvevyvhc  
ddhgi vfnas1plykdaiyqgsmrsndngdmsmmvgtv1sgfeyraqekydnykffkenekkyqytgftneainkt  
qnvgyqneyfyitylsrnl  
keyrkyep1ihkndkefkegmqrarkevnyaantdatvat1fstknftkdntiddviel snklkdkpnpqksqvtiq1  
gkpsintkpfyddinpie  
g  
>tr|D9RH72|D9RH72\_STAAJ  
mdakv1tryiv1l1alvngflankgispivdeesvssiiltvvaly ttykdnptsqegkwanqklkkykaeskyrkatg  
qapikevmtptnmndtnd1  
g  
>tr|D9RH78|D9RH78\_STAAJ  
mateevkika1l1kndkqy fpathwkaingipyagssdidglpqdgiisvddknkl dklkigeagiiqnsivqkspngklw  
k1tvddsgk1gtv1fy  
>tr|D9RH82|D9RH82\_STAAJ

Tsompanidou\_et\_al\_Supplemental\_FASTA\_File

mikfeikdrktgktesytkedvmtgeaekcyeyelvnqenkkeapnatkmrqrqllvdlfkdegltedvlnkmstk  
tytkalqdi freingedee  
dsetepeemgkteeqsq  
>tr|D9RH86|D9RH86\_STAAJ  
msveikgipevlnklesvygkqamqaksdka|neaseffikal kkefesfkdtgasieemtkskpytkvgsqeravliw  
vgpmnrkniihlnehgytr  
dgkkytprgfgviaktlaaserkykeiikke|lar  
>tr|D9RH91|D9RH91\_STAAJ  
mnviakenivtrikkklidnwidqsasklydfspwknksfwgvinntletnetifsaitkl snsmas|plkmyedykvvn  
tevsd|l|tvspnns|lssfd  
finqietirnekgnayvlierdihqpsklf|l|n|pdvven|lienqsrelyysihaatgnklivhnm|dm|lhfkhivasnmv  
qgispidv|l|knttdfdnav  
rtfnl|temqkpd|fmlkygsnvgkekrqqv|ledfkqy|eenggil|fqepgve|ieplpkkyvsedivasen|l|trervanvf  
qlpsvflnarsntnfakne  
elnr|fy|l|qht|l|l|p|vkq|yee|fnr|k|l|l|t|k|t|d|r|e|k|n|r|y|f|k|f|n|v|k|s|y|l|r|a|d|s|a|t|q|a|e|v|y|f|k|a|v|r|s|g|y|t|i|n|d|i|r|e|w|e|d|l|p|p|v|  
eggdkpl|s|g|d|l|y|i|d|t|p|l|  
elrks|l|k|g|g|d|k|n|v|e|s|  
>tr|D9RH94|D9RH94\_STAAJ  
mtkhnniykhgrksygydwfyhskawkk|l|reial|drdn|l|c|q|mc|l|rediv|tdaniv|hh|iyvded|fnka|e|l|dn|l|msvcy  
gchnkihangndksn|l|k|k|i|  
rv|l|k|i|  
>tr|D9RH96|D9RH96\_STAAJ  
maidfkphsyqkya|idkvidnekyg|f|l|dmg|l|g|k|t|v|s|t|l|a|f|s|e|l|q|l|d|t|k|k|m|l|v|i|t|p|k|q|v|a|k|d|t|w|v|d|e|v|d|k|w|h|n|h|k|  
vs|l|v|l|g|t|p|k|e|r|n|d|a|l|n|t|e|a|  
diyvt|nkent|k|w|l|c|d|q|y|k|k|e|w|p|d|m|v|v|i|d|e|l|s|t|f|k|s|p|k|s|q|r|f|k|s|i|k|k|k|l|p|l|i|r|f|i|g|l|t|g|t|p|s|p|n|s|l|q|d|l|w|a|q|v|y|i|d|r|g|  
er|l|e|s|f|s|r|y|r|e|r|y|f|k|p|h|  
qvsehi|f|k|w|e|l|r|d|g|s|e|e|i|y|k|i|e|d|i|c|l|s|m|k|a|k|d|y|l|d|m|p|d|r|v|d|t|k|q|t|v|l|s|e|k|e|r|k|v|y|e|e|l|e|k|n|y|i|l|e|s|e|e|g|t|v|v|a|q|n|g|  
as|l|s|q|k|l|l|q|l|s|n|g|a|v|y|t|d|e|  
edvr|l|i|h|d|k|k|l|d|k|l|e|e|i|e|e|s|q|g|q|i|l|l|f|y|n|f|k|h|d|k|e|r|i|l|q|r|f|k|e|a|t|l|e|d|s|n|y|k|e|r|w|n|s|g|d|i|k|l|i|a|h|p|a|s|a|g|h|l|n|l|q|  
qggh|i|v|w|f|g|l|t|w|s|l|e|l|y|q|  
qanar|l|y|r|q|g|q|h|t|i|i|h|i|m|t|d|n|i|d|q|r|v|y|k|a|l|q|n|k|e|l|t|q|e|l|m|k|a|i|k|a|r|i|a|h|k|h|  
>tr|D9RHA1|D9RHA1\_STAAJ  
mikk|l|k|m|d|g|f|d|i|f|i|v|g|i|l|s|l|f|g|i|f|a|l|l|l|v|i|t|l|p|i|y|t|v|a|s|y|q|h|k|e|h|q|g|t|i|d|k|y|n|k|r|q|d|k|e|d|k|f|y|i|v|l|n|k|q|v|i|e|n|s|d|l|  
l|f|k|k|k|f|d|s|a|i|q|a|r|l|k|v|g|d|  
kvevt|t|y|r|i|h|f|l|n|l|y|p|v|l|y|e|v|k|k|v|d|k|q|  
>tr|D9RHA6|D9RHA6\_STAAJ  
mnnreqieqs|i|s|a|s|a|y|n|g|n|d|t|e|g|l|l|k|e|i|e|d|v|y|k|k|a|q|a|f|d|e|i|l|e|g|l|p|n|a|m|q|d|a|l|k|e|d|i|g|l|d|e|a|v|g|i|m|t|g|q|v|v|y|k|y|e|e|d|q|e|  
n|d|  
>tr|D9RHA7|D9RHA7\_STAAJ  
mtdsarker|l|n|q|f|f|g|s|k|r|y|l|y|q|d|n|e|r|v|a|h|t|v|n|g|t|y|f|h|g|h|i|v|p|g|w|q|s|v|k|k|t|f|d|t|a|e|l|e|i|y|i|k|q|h|g|l|e|y|e|e|q|k|l|t|l|f|  
>tr|D9RHB1|D9RHB1\_STAAJ  
mqhqay|n|a|s|v|i|r|i|p|t|e|v|e|s|v|n|y|n|q|i|d|k|e|k|e|n|l|a|d|y|l|f|n|n|p|g|e|l|l|k|y|n|v|i|n|i|k|v|l|d|l|e|v|e|  
>tr|D9RHB2|D9RHB2\_STAAJ  
mni|d|i|e|t|y|s|s|n|i|s|k|c|g|a|y|k|y|t|e|a|e|d|f|e|i|l|i|a|y|i|d|g|g|i|s|i|a|i|d|m|t|k|v|d|n|e|p|h|f|a|d|f|e|t|f|k|i|a|l|f|d|p|a|v|k|y|a|f|n|a|n|f|e|  
r|t|c|l|a|h|f|n|k|q|m|p|p|e|w|i|c|  
tmv|n|s|m|r|i|g|l|p|a|s|l|d|k|v|g|e|v|r|l|q|n|q|k|d|k|a|g|k|n|i|r|y|f|s|i|p|c|k|p|t|k|v|n|g|r|r|n|l|p|h|d|l|e|k|w|q|q|f|i|d|y|c|i|r|d|v|e|v|e|m|i|  
a|h|k|i|k|d|f|p|v|t|a|i|e|q|a|y|w|v|f|  
dqh|n|d|r|g|i|k|l|s|k|s|l|m|l|g|a|n|v|l|d|k|s|k|e|l|l|n|q|a|h|i|t|g|l|e|n|p|n|s|p|t|q|l|l|a|w|l|k|d|d|q|g|l|d|i|p|n|l|q|k|k|t|v|q|e|y|l|k|e|a|t|g|k|a|  
k|m|l|e|r|l|q|m|s|k|t|s|v|k|k|y|n|  
k|m|h|m|m|c|s|d|e|r|v|r|g|l|f|q|f|y|g|a|g|t|r|w|a|g|r|g|v|q|l|q|n|l|t|k|h|y|i|s|d|t|e|l|i|a|r|d|i|l|e|q|r|f|d|d|l|l|l|n|v|h|p|q|d|l|s|q|l|v|r|t|t|  
f|t|a|e|e|g|n|e|l|a|v|s|d|f|s|i|e|i|a|  
r|v|i|a|y|a|k|e|q|r|l|d|v|f|n|h|g|i|y|e|a|s|q|m|f|n|v|p|v|e|i|t|k|g|d|l|r|q|k|g|k|v|s|e|l|a|l|g|y|q|g|g|a|g|a|k|a|m|g|a|l|e|m|g|i|e|e|n|e|l|q|  
g|l|v|d|s|w|r|n|a|n|p|i|v|n|f|w|k|a|  
c|q|e|a|i|n|t|v|k|s|r|k|h|h|h|g|v|r|f|y|m|k|k|g|f|l|m|i|e|l|p|s|g|r|a|l|a|y|p|k|a|s|v|g|e|n|s|w|g|s|q|v|v|e|f|m|g|l|d|l|r|k|w|s|k|l|k|t|y|g|g|k|l|v|e|n|  
i|v|q|a|t|a|r|d|l|l|a|i|s|i|a|r|l|e|a|  
s|g|f|i|v|g|h|v|h|d|e|i|v|i|e|i|p|r|g|s|n|g|l|k|e|i|e|i|m|n|k|p|v|d|w|a|k|g|l|n|l|n|s|d|g|f|t|s|p|f|y|m|k|d|  
>tr|D9RHB9|D9RHB9\_STAAJ  
msdyk|s|y|l|i|a|v|l|c|f|t|v|l|i|a|i|v|l|p|l|y|f|t|t|a|w|i|a|g|f|a|i|a|t|f|i|y|y|k|e|y|f|y|e|  
>tr|D9RHC1|D9RHC1\_STAAJ  
mnk|k|s|e|g|l|d|i|i|p|r|i|r|r|d|h|a|s|v|e|l|t|e|r|r|l|r|k|e|i|l|g|i|s|i|k|k|g|d|y|s|y|l|e|i|n|k|v|f|y|a|l|d|r|e|l|q|r|a|n|n|k|l|  
>tr|D9RHC2|D9RHC2\_STAAJ  
m|l|t|q|y|l|d|k|e|i|v|t|s|l|d|h|l|i|n|g|e|v|i|k|v|q|e|h|i|k|d|a|e|s|k|t|h|i|h|p|k|d|r|v|v|s|l|d|h|v|l|y|f|d|i|n|v|k|g|e|k|n|e|s|p|y|s|  
>tr|D9RHC6|D9RHC6\_STAAJ  
m|g|l|y|e|l|c|i|n|n|e|i|k|i|e|e|t|d|q|l|p|n|f|q|p|g|c|y|m|n|g|i|y|i|r|r|n|l|s|e|r|k|a|e|v|l|y|e|l|a|h|h|k|l|t|y|g|n|i|l|d|q|t|k|w|i|r|k|f|e|n|y|a|r|  
r|h|g|f|t|s|a|v|p|l|h|i|e|i|v|e|h|n|y|  
g|v|r|n|l|y|e|l|s|e|y|l|q|l|s|e|y|i|l|e|i|e|q|y|k|i|y|g|i|g|h|t|y|g|e|y|i|t|f|e|p|l|r|v|f|y|k|e|i|  
>tr|D9RHC8|D9RHC8\_STAAJ  
m|e|t|n|k|i|d|i|m|n|y|e|f|p|k|r|y|t|e|a|k|g|l|v|a|q|p|i|t|t|i|n|s|a|r|r|v|e|n|e|d|m|t|v|c|i|l|d|q|d|d|v|m|d|i|f|d|r|i|i|t|v|y|c|p|e|n|g|t|a|t|d|e|



Tsompanidou\_et\_al\_Supplemental\_FASTA\_File

yfceiifnsddtftlkr1s  
nyvtikdrsympskindvntgkvvr1frdfk  
>tr|D9RHD0|D9RHD0\_STAAJ  
mtqflgallltgvlgyipykyltmiglvseknkvintpvl1fsietcliwfysfiifnvd1knlnliqlltglkanil  
flfi fvl tvfvfnplivkf  
iiwlinitrkfmkl dci slldkrdklfnngkpvfivikdfenriieege1ktynsagsdfd1leverqdfkvsdlpsnd  
elyikhtlvd1kqkik1d1  
ylmney  
>tr|D9RHD1|D9RHD1\_STAAJ  
mwiekfknknetkyryykykdpdkwkrvsv1nknkqsqkeamfrleekikeklnkssselktltfhalldewl  
eyhiktsgskl tlnniki  
r1rn1kryssen11lnk1dtkymqifink1sdiysqnqvtrqlgdmkgaikyavkfynypneylltnvkipkrrktiedi  
ekdeskmynylemnqvlqi  
rdhilndnklhkrnr1isilevqaltgmrigelqalqekdid1lnktinitgtihrikyeegfykdttktisksri  
sinsrtveifkii1lenkm  
lkrwnssyvdrqfifttkgnplcnnqiagvlkkttkalnmnkvtthtfrhthit1lvemvslkaimkrvghvdekt  
iriythvtekmdreltqk1  
enips  
>tr|D9RHD2|D9RHD2\_STAAJ  
mnkindrd1telssywyqnidikkefivngkrfkqid synddksn1ngaadikiyellddkskptgqqtiiyqgtsne  
ainpnp1kssgfgddw1q  
nak1mndndestdylkqtdqlsnqykkk1ledadr1nsdf1kkyrmesgnfknktivadggnsaggakyygqakhpnek  
vvatdsamipyaaawqkfar  
prfdnmi sfnstnd11tw1qdpfikdmpgkrvni ndgvpr1dalidshvgykrk1nrkdntydtvpliki ksvkdteikn  
gkkvkk1tini1dmdgrip  
inwvtgdsiarsgkgtlik1n1en1dal sklitgetsgmlaecvif1nesfnisenenknfadrkkqlsegfkdkin1fq  
leemertliskinsleeva  
detiesisavkh11pdfaldal kerine1fkgiksfi ekvydsidneileifknidhdfrdgvs eemkh1kvvkqnier  
iknqndiygrqiaeirsim  
kqqdati1dgnfqincsgenmvqglvipsnylgrkmkilkdhiddgikkiadyvqgiydeyaskivdvikylintipkir  
kn1rhaiem1nvkkkefls  
1ipnvtcnyikt1leelnd1lgkwep1nd1kavsp1len1ddivknmkplivqmi fepshyddmfisrkaltpvfssv  
1  
>tr|D9RHD3|D9RHD3\_STAAJ  
meneskdtntetkvsp eemeaskyvgqgfppaekdaiefakhrkefekvgeqffkdnfg1kvkatnvvgkddgvevy  
vhcedhgi vfnas1plykd  
aihqkgmsrnsndgddmsmmvgtv1sgfeyraqekydnylykffkenekkyqytgftkeaintqnvgykneyfyityss  
rs1keyrkyep1lrkndk  
efkegmerarkevnyaantdatvat1fstkknftkdntvddvielsdklyn1knkpkdstitigiqkptintkkafyddnr  
pieygvhskde  
>tr|D9RHD4|D9RHD4\_STAAJ  
mmsr1nsvvik1w1ti1ivttv1i11sialitfmqyyftqetenairedarriss1veqshnkeeaikysqtlienpgg  
1mi1nnkhrqstas1snik  
kqmlnevvnndhfdvfdkgksvtrnvtikegssqtyi11gyptkaqknshskysgvfiykd1ksiedtnnaitiitii  
tavi1t1t1tvfaff1ssr  
itkplr1rdqatr vsegdysykpsvttkdeigqlsqafnqmsteieehvdalstsknirdslinsmvegvl ginesrqi  
i1snkmandimndideddk  
af11rqiedtfkskqtemrd1emnarffvvttsyidkieqggksgvvvtvrdmtnehn1dqmkkdfianvshe1rtpis1  
lqgytesivdgi vtepei  
kes1aiv1deskr1nr1vne11nvarmdaeg1svnkevqpiaa11dkmkikyrrqadd1gl1nmtfnyckkrvwsydmdrm  
dqv1tn1idnasrytkpgd  
eiaitcaenesedi1yikdtgtgiapehlqqvfdrfykvdhaartrgkqgtgl1gfickmii eehggsidvkselgkgttf  
iik1pkpe  
>tr|D9RHD6|D9RHD6\_STAAJ  
mtkeler1qkriansgytsrrkaet1isegkvkvngttvtelgtkvkpsdtievegikieledkiyilfhkptqvitsvs  
ddrgtrvvtdyfkidari  
ypvgr1dydtsg1111tndgeftnlmthpryqikkyvak1kgy1mreevka1ekgieledgmtqpaevkvkkqdkdknt  
t1veititegrnrqvrmmf  
ehfghqvtk1sr1eygp1nvvg1nagegrv1tphevkvmrh1aehgk  
>tr|D9RHD7|D9RHD7\_STAAJ  
mdnhgiles11ftagdeg1dek1le1ldiskdqlve1ienysshgliiqrfgttyv1ttkkaatyieqlieqksqmk1  
sqaamev1siaynqplsr  
sdiel1rsinsdgavkt1iakglveakvveqrsqqlittd1flnvfgisnied1ptteeddeemdaffsn1vnqkgenn  
d  
>tr|D9RHD8|D9RHD8\_STAAJ  
myevkl1dafngpl111h1iqkfeidiy dipma1teqymqyvhamkq1einiasey1vlase11mikskm11pqstsdm  
dfdddpred1vgr1ieyqn  
ykeytai1ndmkeerdfyftkrptd1shletdeswdpnhtid1telivayqrvknrvelntpsksveirketftiqgateq

Tsompanidou\_et\_al\_Supplemental\_FASTA\_File

vtsr1kdkdhfnffs1ftf  
sepieqvvtthflailemskagiinieqqrnfedinivrgvnyhfg  
>tr|D9RHD9|D9RHD9\_STAAJ  
mqqalinfyyqfhtkqhyflchdiledawkaennyskdavvs1ilfatacyhyrrnnlkgayksfykskeiiqnakdrd  
alylnlndyqllieqqiak  
lnaakpfssvilpitpderiikanyppydynhetatdpfivdhhmrrdrseviaakeeaiqlrkhrn  
>tr|D9RHE0|D9RHE0\_STAAJ  
metiieeylrfiqiekglssntigayrrdlkkyqdyntehehishidfidrqliqec1ghlidqgqsaksiarfistirsf  
hqfaiirekyaakdptvllid  
spkydkklpdlvndevlalletpdlinkingyrdrtmlellyatgmrsvselihlelehvnlingfvrvfvgkgdkerivpl  
gdavieyltetyietirpql  
lkkvttevlf1nmhgp1srqaiwkmiqngvkanikktltphtlrhsfathllengadlravqemlghsdisttqlyth  
vksqirkmynqfhptra  
>tr|D9RHE2|D9RHE2\_STAAJ  
mdlnektidrtviyngkivdveihtvtlpngetstrelvyhngavavcavtpkkevvlvkqyrkpvekp1leipagkled  
dedrveaakreleeeetgyi  
ake1thvvdmygspgfcdeqlsiyftdn1qegtvhldefevvikvpienvksmlmkeiedaktiialqhl1lnynhs  
k  
>tr|D9RHE3|D9RHE3\_STAAJ  
mqkn1ksgia1selglgcm1gtdlkkaeqiidcaientyfdtadmydkginesvvgkallkyqrrddivigtvgn  
rltkdgsttwdpsksyike  
avkgs1krlgidhidlyqlhggtiddp1dqtisafdelkqegii raygissirpnvidyylkhsqietimsqfnlidnpr  
es1ldaihndvkv1largp  
vskgl1tsnsvnl1dnkfkdg1fdyshdelgetiasikeiesn1salfnyl1tshdvlgsiivgassvdqlkenidnyha  
kvs1dqiktara1rvkdley  
tnh1v  
>tr|D9RHE4|D9RHE4\_STAAJ  
mncqsesvvr1cvryaeqlsvfeeftv1dilsd1svdqfsdstlyytcekfkl1vlqgnvlgvqv1tnndesicevkyrk  
mf  
>tr|D9RHE5|D9RHE5\_STAAJ  
mkgqhfivtggts1gl1sivrk11dnkvrvt11vrdvdkatrifeqeigtinvipcd1ndmksiqalkfenntsfdfgi  
ysaglgyfksisehsvsem  
ietyqln1isfnvlytvlrpyltsnahivgissqaafftqanaahygaskagfya1mna1rlespn1h1mtvvnvgpidtp  
fhqkadpsmkyakkmgkim  
ldanqlaedi1yig1k1kq1einrpkwmhha1kmyqiaprffercfkl1fkna  
>tr|D9RHE8|D9RHE8\_STAAJ  
mstknkhipcl1it1fgatgd1shrkl1fpsi1fhlyqqdn1dehia1igigrditnddfrnqvks1qkhvkdtnk1idafm  
ehvfyhrhdvsneesyqe1  
1efsneldskfk1ngnr1fy1lamapqffgvisdy1kssgl1tdtngfkr1viekpfgsd1ksaea1nnqirksfkeeeiy  
idhylgkdmvqn1ev1rfa  
namfeplwnnky1sniqvtss1elgvedrggyessga1kdmvqnm1qmva1lameapis1nsedi1raekvkv1ks1rh  
fqsedvkn1fvrgqygegy  
idgkqv1kayrnedrvaddsn1tptfvsgkl1tidnfrwagvpfy1rtgkrmsk1tiqvvefkevpnm1lyetdk11dsn11  
viniqpnegvs1h1nakkn  
tqg1etepvq1sysmsaqdkmntvdayen11fdcl1kgdatn1fthweel1kstw1kfvda1iqdewn1mvdpefpnyesgtngp1  
esd111ardgnhwwddiq  
>tr|D9RHF0|D9RHF0\_STAAJ  
mnkqwwkeavayqyprsfnds1nhdgi1gd1pgmi1dk1dyl1kd1gi1dvi1w1spm1fks1pnddngy1dsdyqe1mdefgtmed  
fdr11kgvhdrgmk1li1dl  
vvnhtsdehpwf1iesksskdn1pkrdwy1wqdpkpdgsepnnwesi1fngstweydanteqyyf1h1fskkqpdl1wgnpevr  
davfemmnwwfdkg1dgfr  
vdai1th1kktfeagdl1pvpegktyapa1fdvdmnqpgi1qtw1qemkdr1s1skydim1tvgeangv1spddaddwvgeengkfn  
mi1fqfeh1glwnsgdshfd  
vnsyksv1nswqk1lenkgwna1fi1enhdqprrvstwgddd1kywesat1shaavy1lqqgtpfiyqqge1gmtnypfesi  
etfndvavkndyqi1vkaqg  
gdvdal1lakykdenrdns1rtpmqwdd1l1nggftng1epwfpvnpnykt1invaq1ledesv1lqfykd1li1ql1rksndvvyg  
qfd1vdaensqv1faytrt1  
nekqvl1ivgn1tnhea1l1tvpfd1shgevk1fn1ydakvn1kq1l1rpyeacvie1n  
>tr|D9RHF1|D9RHF1\_STAAJ  
mvtikdval1kagvspstvsvrikgnqri1seati1skvkkvmeel1nyfpntaart1itnqtykig1vl1kgseepi1r1n1pfiy  
nvl1lg1setcnqhg1ygtq  
tvsnn1nd1mdevykmi1kqrmvdafi1l1yskendpikq1ml1idesmpfi1vigkptsd1idhqfthidndn1lasen1l1rhvi  
eggydeli1fi1tekgdfevs  
kdr1iqgfetiasqn1kinyqi1ietsnerevi1fnymqn1l1htr1kdpnikqai1s1dam1h1lail1svlye1lnie1ipkdvmtat  
fndsyl1teiasppgts1idi  
kprml1gqqa1gai1n1l1knkaqdvie1l1vidtel1kirkstqr  
>tr|D9RHF3|D9RHF3\_STAAJ  
mnyh1sgygi1hynea1asf1gesseryaft1lyqn1kkki1yashaqiseq1knsns1l1pl1t1iniyfeekds1khyice

Tsompanidou\_et\_al\_Supplemental\_FASTA\_File

ddviqwip1kslyhpdrrv  
lip1qmlvlfdkti fkdekqftnsgvstgtashetfeks1tnsiieilqidsynlwwyggiegkaisvniaeklnewfkr  
esivhkflndfvsftdis  
fdkpihvuvcevksakd1slpkyvvgvqgdtnleqciyrs1lecvtvleytmtevsnthfkniseniknhpidn1dd  
nvmyyakyglfnmhrki  
tfqniknkn1heinelkhl1syacy1ditpvefynkn1lvvrsfipe1ltialpsyppy1hprykeiggiindiph1  
a  
>tr|D9RHF4|D9RHF4\_STAAJ  
mktfikpkdlfveennseyilkkgy1hqhsiaidkeessknfivkftliaenqielnendddviddfnkl1tq1n1ihkki  
dtfnkicijtdkvakaffk  
dhldqvdeiyefnevlerheiet1nnqksn1sinevkkqqsklanmnvfvilsyanqpfikafn1tn1lditytlvfy  
dnenvfftniqhgetgcye  
clerqlvskfpgkieny1vpdeqnqgiyn1klysyilsimineinnieiygdst1ignvlhfy1lptyeynfnfnkrqstc  
stcstinnvl1fkeqnksa  
n1lkrmlendn1  
>tr|D9RHF5|D9RHF5\_STAAJ  
minyq1kgmfnghs1fl1nddnianndnrnnaqi1lgnqeses1ky1lnvnhqr1sdfksmlaynetnyaalvnehqil  
neindedtrslpksdkkik  
esfynvl1nhrkstrkfts femackelst1lksf1g1aprkvveygdiktstrfyasagglpyidiy1innvedydkgiy1  
yq1shs11k1ivaqkdint  
ddilegdnidiencn1lvffgynfns1flkygela1lns1ieigcmshnfd1vits1gytgcpiagfkkn1iek1le1dh  
vneh1lftnicgke  
>tr|D9RHF6|D9RHF6\_STAAJ  
mlkrqemrvie1lagiv1saiitaiaistgyfiinkngyanfdvn1lgn1lyriqnygvsgepiitnimflgvils1ll  
viiellvatnkrqkq  
>tr|D9RHF7|D9RHF7\_STAAJ  
minkil1sikmqfrvpi1svffs1l1fpiimiivi1lsygnfsigngrhfidkyflistsig1l1piafisfpiwlsesiene  
t1kr1kyfevniss1livsn  
i1sycflaifsvilnii1gkvffs1tlpntqyfiafffqifynia1l1migtfla1l1rkskv1l1plgm1l1flty1miig  
vfvqygel1pnvl1keignwi  
pikyvtndfysiwinermwdas1fl1n1slyiivt1sv1s1fiykfk  
>tr|D9RHF8|D9RHF8\_STAAJ  
mes1mtikn1kvdi1nrki1ln1nnstiniyskdkialigkngagkt1linc1l1neikysgvidrkikskdigivfgenky  
gd1ikvhe1iy1itayskr  
skqfkaftkaf1sleh1inkfvkd1sl1geqkr1tvgl1v1neqqkly1fde1tsg1ldyekrq1l1qktke1tqnkavikith  
yfdevenwank1liidkge  
1lyygsidqffskfyha1ieienqel1dyqvr1viek1inadvyfntkivthnkeqmndvin1lnerkiefkinmqniyst  
y1l1st1lee1  
>tr|D9RHG0|D9RHG0\_STAAJ  
mineqr1l1ntf1el1vqidsetgnestiqpil1kekfi1al1g1dvkedeaakhpkl1gann1vctmkstieegevpkly1tsh  
dtvvpainvrpivkddgy1  
ysdgt1l1gaddkaglaam1lev1qvikeqqiphgqi1qfvitvgeesgligake1nse1l1dadfgya1idasadvgttvga  
ptqml1saki1fgktahast  
pkegvsainiaakaisrmk1lgqvdeittanigkfhggsatnivadevileae1arshdperiktqvkhtdvfettase1g  
gkavvtveqsyppgfk1indn  
etv1kiaqesarn1gl1santi1sgggsdgsi1ntfgipsv1l1gvgyeki1htnermpiks1n1lasqv1e1iikivarqsk  
>tr|D9RHG1|D9RHG1\_STAAJ  
mlk1npyki1gfrtiktavgmt1l1gvi1sk1l1d1nyassail1v1lcikhtkvhs1lqai1sr1vsc1fl1v1flgsaif1s1l1gq  
sp1v1l1gi1v1l1fip1l1tvv1  
kvqegv1tscv1l1hvf1naksidah1livnet1l1l1gl1s1aftm1l1mmps1ldkq1l1deykckieqqi1adifskysyiceky  
ed1tia1e1fea1l1l1nikkak  
siafrdvkn1hfvrnensy1hyfdmreeqve1l1mrmp1liesichkdp1l1ndvas1l1keig1lnvnsndytamr1lnlyetr  
1k1del1p1ptthka1nsra  
s1iqi1ne1leey1l1q1ksqf1s1l1kmhseva  
>tr|D9RHG3|D9RHG3\_STAAJ  
me1tmpk1l1gesvhegtieqwl1svgdh1deyep1cevitdkvtaevpstisgtite1l1veagqtva1diti1ckietadek  
tnektee1qakvdehtqks  
tkkas1iveqtstanqnhprnngryspv1vfl1aseh1did1sqvvgsgfegrvtkkd1lmsvienggttaqsdqkvqtqsts  
vdtssnqssednsenstip  
vngvrka1aqnmvns1vtei1phawmmievd1atn1vnt1rnhyknsfknkegyn1tffaffvkavada1kayp1l1nsswqgne  
iv1l1hkdin1s1iavadenk1  
yvpvikhadeksiki1gare1nt1latkarnkq1l1taedmqqgtftvntgtfgsvssmgi1nhpqaail1qvesivkkpvin  
dm1ai1rn1mvn1lc1s1idhri  
ldg1qtgk1fmnhik1qrieqyt1lentniy  
>tr|D9RHG4|D9RHG4\_STAAJ  
mak1sylea1rqagd1al1qqnkdvfi1gedvgkkgvfgttqgl1qqygedrvidt1plaesn1vgtaigaamvgkrpiae  
iqfadfi1l1patnqi1seaa  
kmryrsnnewqcpl1ti1rapfgggvhhg1lyhsqsiesi1fasspg1t1vipstpydakg1l1l1ssiesndp1vlyfehkkayrf

Tsompanidou\_et\_al\_Supplemental\_FASTA\_File

lkeevpeeytvp1gkadv  
kregedltvfcyglmvnyc1qaadi laadginvevd1rtvyp1dketiidrakhtgkvllvtednlegsimsesvaiia  
ehclfel dapi mrlaapdv  
psmpfspv1eneimmnpeki1nkmrelaef  
>tr|D9RHG5|D9RHG5\_STAAJ  
midyks1glseed1kviykwmd1grkider1w11nragkipfvsvsgqqeatqigmaya1eegditapyyrd1afvtymg  
isaydtf1safgkddvns  
ggkqmpshfssrakni1sqsspvatqiphavgaalalkmdgkikkiatavtvegssnqgdfhegl1nfagvhklpfcviiin  
nkyaisvpds1qyaaek1s  
dralgygi1hgeqvdgndplamykamkearera1sqqgst1ieavtsrmtahssdddqyrkteerea1kkadcnkfkke  
11sagiiddaw1aeieaeh  
kdiinkatkaaedapypsveeayafvyeeg1n  
>tr|D9RHG6|D9RHG6\_STAAJ  
msekqydlv1ggtagyvaairasq1gkkvaiverq11ggct1hkgcip1tks11ksaevfqtvkqaamfgvdvkdanvn  
fenmlarkediiinqmyqgv  
khlmqhnhidiyngtgr11gtsifspqsgtisveyedges11pnqfvliatgsspaelp1fsfdhdkilssddilalkt  
1pssigi1ggvgimefas  
1mid1gvdvtvieager11ptesqasq11kns1sargvkfyegik1sendininedgvtfeissdiikvdkv11sigrk  
pntsdig1nntkik11stsg  
hil1nefqtedkhiyaagdcig1qlahvgskegvavdhmfegnpipvnynmmpkciysqpeiasig1nieqakaegm  
kvksfkvpfkaigkavids  
hdanegysemvidqsteeivginmigphvtelineas11qfmngsale1gl1tthahpsisevlmel1g1kaesraihv  
>tr|D9RHG7|D9RHG7\_STAAJ  
mlqt1sikqfaiiee1e1qfsdgl1tv1sgetgsgksiiidaigq11gmrassdfvrhgekkaviegifdideskdaihil  
knmdidvdedf11vkreif  
ssgks1lckinnqvt1qdl1rkvmqe11dihgqhetq11kqkyh1t11dnysesryqd11dkyhqtfqnykakkkeled1  
esadqallqr1d1mkfgle  
el1seahlkegeieq1e1dikriqnsek1s1al1nahmt1tdenaidrlyel1snh11tindivpnkydk1kedidqfyi  
1edakhe1ydemantefde  
qvlneyesrm11ln1krkygkdiseliayqek1nneinki1neyeqstsq1reeinalynqvievqgalskqrrivare1  
rdhivseiqn1qmkanle  
isfkk1leepnidgiefvef1ispnkgeplks1nkiasgges1rim1alksifvksrgqtailfdevdsgvsgqaaqkmae  
kmrdiaeyiqvicish1pq  
vasmsdh11isksskddrtttqvqel1gddkvdiearmisgasvtd1trenaremiqhnqrr  
>tr|D9RHG9|D9RHG9\_STAAJ  
mnk1idevne1svainksv1dtqleesm1ys1naggkri1rpv1111t1d1s1nte1yelgmksaia1emihtys1ihdd1p  
amdnddyrrgk11tnhkvyg  
ewtailagdal1tkafel1ssddr1tdevkikv1qr1siasghv1gmvggq11dmqsegqpid1et1emihtktgalltf  
avmsaadi1anvdatkeh1  
esysy1h1gmmfqi1kdd11dcygdeak1gkkvgsd11ennkstysv11gkdgaedk1tyhrdaavde1tqideqfntk11le  
ivd1fysrdh  
>tr|D9RHH1|D9RHH1\_STAAJ  
msdy1svs1tkyiky1fdqdp1h1qsv1ikgel1snfkkh1ssgh1y1fnvkdesvisammf1kgsask1nfepkegdev11e  
arvsvferrngyqi1yvnkm  
q1dgi1gn1yqk1lea1kkk1teegcfdkankksipkfpk1k1av1tastgaairdihstinsrf1laeqiqistlvqgekak  
ddi1ekieyads1lgvdtii  
vgrgggsied1wnfneeavvraiyncktpi1savghetdft1sdfaadi1raatptqaaviatpdqyellqqiqyqft1t  
rfikkh1leqqrkvhel1ss  
yykfkqpt11ydgq11rd1lekr1kqqiqatfeqqrh1m11lqqryn1ka11ssvnqeqqnnf1q1tnq1vk11nksk1s  
yknd1knkven1nn1sptn  
tm1rgyai1vnkkdevit1stkd1tendq1t1tmkdgl1vdakvtkvrcnd  
>tr|D9RHH4|D9RHH4\_STAAJ  
mkkv1lianrgei1avri1racrd1lgi1qtvaiysegdkdalhtqiadeaycvgpt1skdsy1nipni1s1atstgdcgvhpg  
ygf1aenadfael1ceacq1  
kfi1gpsyqsi1qkmgikdvakaemikanvpvpgsdgl1mkdvseakkiakkigypviikataggggk1rvardekeletg  
frmt1eqeaqtafngg1ym  
ekfi1enfrhieiqi1vgdsygnvih1lgerdcti1qrrmqk1veeapspilddetremgnaavraakavnyenagtiefiyd  
1ndnkfy1memntri1qveh  
pvtemvtg1d1vk1ql1qvamgdv1pykqedik1tghaiefri1naenpyknfmpspgkieqylapgggygvriesacytnyt  
i1ppyds1mvak1i1heptr  
yea1magi1ral1sefv1lgidttipfhi1k11nndi1frsgk1fnt1fleqnsimndeg  
>tr|D9RHH5|D9RHH5\_STAAJ  
mnfkeike11e1ldkst1teiniedtkgkv1t1kkeketi1itpqi1sqmpveaaaipmpqvqstdsnkteapkptsdnhkt  
i1napmvgtfyk1spspdeea  
yvqvgdtvs1nettvc1leamk1fnei1qaeisgeivei1vedgqmveygqpl1fkvk  
>tr|D9RHH7|D9RHH7\_STAAJ  
msritqvhri1leqkh1daii11sdyrnry1sgftgtsgali1skdkqy1itdfryidqatqasnyeii1nrkstiigeik  
e11hqenfenvgfeghhvs

Tsompanidou\_et\_al\_Supplemental\_FASTA\_File

ydtylelnksrislisisntvdki rnvkdadeialiqkaanivdetyeyiltvkvagmtekelkailleskml elgadgps  
fdtivasghrgvlp hgvast  
dkiekgdmiltldfgayyngcsditrtfaigepdklkeiyqivlesqmkaineirpgmtgaeadaisrnyleskgygk  
efghslghgigleiehegpm  
lartiqdklqinnvctvepgvyiegllgiri eddil itengcqvftkctkd livlt  
>tr|D9RHI3|D9RHI3\_STAAJ  
mshryipltekdkqemlqtigaksigelfgdvpsdillnrdlniaegeaettllrrlnriasknitkethstflgagvyd  
hyapsvvdamisrsefyta  
ytpyqpeisqgelqai fefqtl iceltmdvanssmydgmstfaeacilafsqtkknkiivskglhyqalqv lhtyakt  
kefevveidldgtvtdlkk  
leaavddetaavavqypnfygsiedlekihsfiedkka lfivyanplalgltpggsfgadivvgdtqpf gipa qfggph  
cgyfattkk lmrkvpgrlv  
gqtqddegnrgfvltlqareqhirrdkatsnicsnqalnalassiamsal gkqgiydiavqniehanyakqqfikkgfev  
lggtsfnefvkfdkpiqq  
vneelvkyniiggfdlgvvsddfknhmliavtelrtkdeidtfvekage lnd  
>tr|D9RHI4|D9RHI4\_STAAJ  
mssdlkqtplyqnyvdrgakivefggwampvqfssikeehnavryeig lfdvshngeievtgkdasqfvqyllsndtdnl  
ttskalytalcneeggid  
dlviykladdnyllvnaante kdfnwilkhkekfdveqvnsrygqlaiqgpkardlinqlvdedvtemkmfefkqgv  
klfganvilsqsgytgedg  
feicynidtekiwdglleykvmcplgardtlrleaglp lhgqdltesitpyeggiafaskplidafigksvlkdqke  
ngaprvtglellekgiar  
tgyevmdl dgniigevtsgtqspssgksialamikrdefemgrel lqvvrkrqlkakivkknqidk  
>tr|D9RHI6|D9RHI6\_STAAJ  
mlfqkipllikrhvysinvkafslie mlvammvisitllivpd lirlskaf lnesrelttvdfeffsrdiledfkgvdrn  
dieirgqrii lhkgeemie  
fklinnkiikvvndrgnitmln nvtaftaniyyksiikititvkvgtvntvqtktiyv  
>tr|D9RHI8|D9RHI8\_STAAJ  
mekqlqirkqsaf tmiemlvmm lisisifllltmtfkg lsnlrviddeaniislitelnyiksqaianqgyinvrfyensd  
tikviennkifrlklkvqk  
iinvakvdiafdkkg ninkfsgsitidnnsiyriifhiekgriryek l  
>tr|D9RHJ0|D9RHJ0\_STAAJ  
mklqwintfklhskkrqlskaqqidllsnlcnllkygftlyqsqflnlqmayknkqlgatilseisngapcnqilslig  
ysdtivmqvylaerfgni  
dvleetvnymkvnrkseqrllktlqyplilvsifiamiiilnltpvqqfqltysmniqlssfqktsffitslptiivv  
mliivsm laiimkliynkl  
nm lkninvmklplisgyfqlfktyfvtnelvlfykngitlqsvdvynhssdpfrqflgkyllysemgyglpqilek  
lkcfkpqlikfvlqgekrq  
klevelklysqilvkqiedkaikqtqflqpilflilglfivaivlvimlpmfqqmqsik  
>tr|D9RHJ1|D9RHJ1\_STAAJ  
mkilfgeiinkaiemkasdvhfipvknevsikfrindnleqyeqignsiyqkllvymkfqagldvstqqaqsgryslf  
nkjyflristlpls lgqes  
cvi rvpqffqgkstyknfndfkhlmkkqglll fsgptgsgkstlmyqmvsyanka lnlnvisiedpvemqipgivaqin  
vndkaginyvnsfkailrc  
dpdviligeirdkdvakcviqas lshglvlttlhatdckgailrllemgisvqeliqatnliinqrlvttikqqrqlvce  
ilsqqqlryffshhslps  
sfknl edkl ddm tkagvi cettmdkyi  
>tr|D9RHJ2|D9RHJ2\_STAAJ  
mrissltglvdtntyfiendkavilidpsgesekiikklnqinkplkail lthahfdhigavddivdrfdvpvymheae  
fdflkdpvkngadkfkqyg  
lpiitskvtpelnegsteiegfkfnvlhtpghspsltyvfdefavvgdtlfnngigrtdlykgdyetladsiqdkife  
legdlplfpghgpyttvdd  
eqlnpflhg  
>tr|D9RHJ4|D9RHJ4\_STAAJ  
mtkii laadvgttcklgi ftpeleqlhkwsihtdtsdstgftllkgiydsfvekvnnennynfsnvlvgv igvpgpvdfe  
kgtvngavnlywpekvnr  
eifeqfvdcpyvdndaniaalgekhkgagegaddvva itlgtl ggggisngeivhngsgaeighfradfdqrfkn  
cgrsgcietvasatgvnl  
vdfyypkltrssi lelikenkv takavfdaakagdqfcifitekvan yigylcsiisvtsnpyivl gggmstaggpili  
enikteyhnl tftpaqfet  
eivqaklgndagitgaagliktyvldkegvk  
>tr|D9RHJ6|D9RHJ6\_STAAJ  
mnidkqfwktiyywirylnfdivsrekddqeiwlahkrkkqvvi fkhikstqeirfnkakvlehkdeianfisfepqsf  
efyyftesefseeqlnevs  
pirikfnv rhtkdlikhmpniflarlisedndkktymfykrkv ldnfldkymqkfs patytiifvnvliwlc milyln  
nfsdvklldvglvhfnv  
hgewyri vtsmflhfsfehilmnmls lfi fgkivea iigswrmltvyfiag lfgnfvslsfn tttisv gasgai fgligs  
ifammyvsktfnkmlgql

Tsompanidou\_et\_al\_Supplemental\_FASTA\_File

lialvilvgvslfmsnininvahiggfigglitligyyykvnrfwilligmlvifialqiriftikedniynklikdd  
mtsgnydnaqni vkqtink  
nyaddqtyylsgmimatinsksegmtewerglrmfpksgllnfelaianslnddekaikyvrkalnadpkntdyinlek  
elksnesknk  
>tr|D9RHJ7|D9RHJ7\_STAAJ  
mtkneirkyihkmknfnkaekrkadtwlrnqffateeykeanaialvlsfnhevdtfsiieqalmdhkri fvpkmdyl n  
hqmtfkeifnlkdidvdk  
giyyptskgettnldlivpgvgfndgyrigygggydrflanyqtktislydfqitsfepesfdqpvdkliiyqsa  
>tr|D9RHK2|D9RHK2\_STAAJ  
midallnfdmryslisgiligfiapligafivvrrlsliadalshvtlggisfgmflltimptlvfinpmwfgilfaiv  
gallieklrtsytaygeia  
ipiimsagialsafisladgfnqeivglfsgisavnisdlttiiviavivlfitlfykelfilsfdeyskvigipk  
wiqflfivivamvisasmr  
vvgillvsaltilpiaismritksfkqlillsvflgelsvilglvlafymdispggvivvllvillvitmayqkmrmfk  
kganineyk  
>tr|D9RHK3|D9RHK3\_STAAJ  
mtpvfe1knvnyydhkklveninikinkgef laivgpngagkstllklilglplqsgeifvegidfknkksiklsyv  
sqkanafnsgfpasvkev  
lsglktkr1fgtfnskdnekvikvlerlnisdlihkniaelsggqqrvmiaralispavlvldeptngidakhvsef  
yntldq1kqegitiilvth  
digvadtatevaclnkh1hfhgttdefksldeveiskiyghpvrfdhqnreccn  
>tr|D9RHK6|D9RHK6\_STAAJ  
mkiadlmalldhhvprtaeswdnvglligdedvevtgvlaldctlevvneaiekgyntiishhplifkgvtslkangy  
gliirkliqhdinliamht  
nldvnpghvnmmlakamglknisiinnqqdvyykvqtiyikdnvgpfkdklsenglaqegnyeycffesegrqgfkpvge  
anptiqidkiydevki  
efmidacqksraeqlikqyhyetpvfdfeikqtslyglvmaevdnqmtledfatdiksklnipsvrvfgesnqkikr  
iaiggsgigyeyqavqqg  
tdvfvtdgikhhdaldakihgvn1idinhyseyvmkeglktllmnwfnTekinidveastintdpfyi  
>tr|D9RHK7|D9RHK7\_STAAJ  
mislnnr1ttvsrflkqgtiadigsdhaylpiyaiqnh1cdcgiageviqgpfaavknvaanqlvdridvrlgdglsvi  
hpedvidniticmggpl  
akilkdgqdklsghprlilqsniqteslqrtlqq1nyeideimeekghiyeivvaeystqlielssdelkfgpklln  
kneyfikkwqrelealyhi  
kskInteqhhqrlaq1neeisviervl  
>tr|D9RHK9|D9RHK9\_STAAJ  
mridqsiineikdktdildlvseyvklekrgrnyiglcpfhdektpsftvsedkqichcfckkggnvfqftqeikdisf  
veavkelgdrvnvavdiea  
tqsnsnvqiasddlqmiemheliqefyya1tkktvegeqal ty1qergftdalikergigfapds shfchdf1qkkgydi  
elayeagllsrneenfsy  
drfrnr1mfp1knaqgrivgysgrtytgqepkylnspetpifqkrk1lynldkarksirk1deivllegfmdviksdtag  
1knvatmgtqlsdehtf  
irk1tsnit1mfddgfageat1ktgqh1lqqglnvfviqlpsgmpdteyigkygndafttfvknkksfahykvsilkd  
eiahd1syerylkelshd  
islmkssi1qqka1ndvapffnvspeqlaneiqfnqapanyyepedeygyiepepigmaqfdnl srqekaeraflkhlmr  
dkdtflnyyesvdkdnftn  
qhfkyyfevlhd fyaendqynisdavqyvnsnelretlisleqys1ndepyeneidyyvvinengqetieslnhklrea  
trigdvelqkhy1qqivak  
nkerm  
>tr|D9RHL1|D9RHL1\_STAAJ  
mnltrat1rpd1ailtmsgflearpvgyyysgkskkgffnek1rqfevkdymsqpvlrenttvydaictifledvst1  
fiinedndfvgvcsrkdl1  
rasmigsdihtvpi svnmtrmpnvtyleeselviyaadrmiiekeidsipivrkkdnqkyevigriskttiakllvalyke  
>tr|D9RHL3|D9RHL3\_STAAJ  
mlmrqkgiikavdygesdkii1ilnehgakvplmarrakkvktglqaqtqlfvylfiynqwrngmtlnsvdvisqhyk  
1qmdlyvssyaslaetie  
rsmdegdiapynyql1qfvleki esgtsaq1msvvvm1kcmkrfgftasfnrcavsgndtqadligysfkfdgaisrqa  
skdihavilsnktly1ldv  
1qklpidkmns1nihqeiidemseiilmlyreyagmffksqk1inq1krleq  
>tr|D9RHL6|D9RHL6\_STAAJ  
mkrfkya1dglkiliqkdykfl1hvfamivaivfglvlninriewifiliaialvltvealntaieyvvd1vtveyhdla  
kyakdiaafsvlivsilaf  
iiglivflphfialf  
>tr|D9RHL7|D9RHL7\_STAAJ  
mftidfsdhtglvkdawykqid1lefakkeehieddaelsvtfvdkqeiqeinrtyrdkdkvtdvisfaleedepdidf  
sgfdiprvl gdiictdva  
qeqannyghsfere1gfla1hgfl1lgydhmteadekemfgrqdtinaygltrd  
>tr|D9RHL8|D9RHL8\_STAAJ

Tsompanidou\_et\_al\_Supplemental\_FASTA\_File

mpgi iqiddmngsqalignndehlkaieesfdvvi hargqevavkgtkienvekaesvlinllkvidlgnnitikdveaa  
ikmahntiqhllldlydee  
itkdafgktraktmgqriyvnamknndlvfgigpagtgktflavvyaakqlrkavkrivltrpaveageslgflpgdl  
kekvdpylrplydglytv  
gceqterfi ergi ei ap laymrgtledafvildeaqntthaqmkmltrlgfgskmvvtgdqtqidlpkgvksglkea  
vsrlhvkgsilklldqsd  
vvrhplvskiihyegen  
>tr|D9RHM0|D9RHM0\_STAAJ  
mfslsfiviaviivvallilfsfvpiglwisalaagvhvgigtlvgrmlrrvsprkviaplikahkaglaalttnqlshy  
laggnvdrvdaniaaagra  
didlpferaaaidlagrdvleavqmsvnpkvi etpfiagvamngievkakaritvraniarlvvgageetiiarvgegiv  
stigs skhhtevlenpdni  
sktvlskgl dsgtafeilsidiadvdisknigadlqteqaladkniaqaka eerramavateqemkarvqemhakvveae  
sevplamaealrsgnisvk  
dyynl knieadtgmrnainkrtdqsddelpeh  
>tr|D9RHM1|D9RHM1\_STAAJ  
msynnflqmttilestagdtweqvsniivqipftliltcltflgfiyqlyskkinaagiiatlsllilflgfliggnvn  
mhsilifsigvilvvieif  
vvgavigiigmilitisittlgnllfmlanvivaliltivewilvkifnrkipfldkvilkdstnsesgynshdnrsh  
lvgktaqtvdlrpgaiif  
ceneridavsdgnfilrnktvki levegtrvvvrevd  
>tr|D9RHM3|D9RHM3\_STAAJ  
mstvafhtlgckvnhyeteaiwqlfkeanyervdfeanadvfintctvtntgdksrqii rrair qn pdavicvtgcya  
qtssaeimeipgvdvvt  
qdrhkllyidefrkerqpingvgnimknrkyeeldvpyftdrtraslkiqegcnnfctfciipwarglmrsrdpekvve  
qatqlvnsqykeivltgih  
tggvgqdlkdynlaqlldletingleri rissieasqltdevidvlerstkvvrhlhiplqsgsdvllkrmrkytmdr  
fserl tk l hka l pdlavts  
dvi v g f p g e t e a e f q e t y d f i v k h k f s e l h v f p y s p r i g t p a a r m d d q i d e e v k n e r v h k l i t l s n q l g k l y a s k f d q d v  
levipeegntvgtlvgya  
dnymkvqfegdesligqivkkitqanypnegqaikvdfatnksdrevlv  
>tr|D9RHM4|D9RHM4\_STAAJ  
mqryfidqnadvsqrffitkkedi hhitnmrydvgskiiltfndqtvylceiaditsdqiavdllkekqnintel pvdvt  
icsglikadkyewllqkat  
elgassfiavsmersivklneakvakkierwqkiikeaaeqsyr lvipsiqfesnlklicdtidnydyiliayeeeakdg  
elsnfkqtlqqfkaqdkvl  
mifgpeggl seneis lfsntstvvglgprilraetaplyalsaisyekelmg  
>tr|D9RHM5|D9RHM5\_STAAJ  
mnwte lsiiinheavelatnilenhgsvviedsddl inqpedkygeiyalkkedypdkgvrlkayfnemtyddklrqr  
ikdel l n l d e l d q h n v g f s  
eqiaetdwenewknyfhprfraskkftivpswetyakeadeelciel dpgmafgtgdhpttsmcl kaietyvlpqhsvid  
vgtgsgilsiashtgvr  
ika didemavsvakenrrnhcetlieavpgnllkdetekfdivianilahiidemiedayntlneggyfittsgiikek  
yegiqshmervgfkiiseq  
hdngwvc lvgqkvse  
>tr|D9RHM8|D9RHM8\_STAAJ  
mtnkdesvekn testveetnvkqniddsveqteeskghlqdeaieetsdenvieeidpkdqkinelqqladeneekylrl  
yaefenykrriqkeneink  
tyqaqrvtldilpaidniera l qiegd detfislqkgvqmveslina lkdngleviktegeafdpnihqavvqddhpdf  
esgeitqelqkgyklkdrv  
lrpsmvkvng  
>tr|D9RHN0|D9RHN0\_STAAJ  
mtvqsayihipfcvri ctycdfnkyfiqnqpvdeyldalitemstakyrnlktmyvgggtptalsinqlerllkairdtf  
tigitgeyfeanpdelkke  
vqll ek y g v n r i s m g v q t f k p e l l s v l g r t h n t e d i y t s v l n a k n a g i k s i s l d l m y h l p k q t i e d f e q s l d l a l d m d i q  
hissyglilepktqfynmy  
rkglklpnedlgadmyqllskieqspfhqyeisnfal dghesehknvywfneeyyfgagasgyvdgvrytninpvnh  
yikainkeskailvsnkps  
ltermeemflglrlnegvssrrfkkkfdqsiesvfgqtinnlkekqlivekndaialtnrgkvignevfeafind  
>tr|D9RHN1|D9RHN1\_STAAJ  
mgpghreigfpi stdnaswrgpntee ldfqflqtmqvggaptqrnwisnfyrqcklgwdneinfakisflfhs l m h e f n s  
cnsifkyi lplanv  
>tr|D9RHN4|D9RHN4\_STAAJ  
msdnivaiygdvpel vekqsaeiisqflksdrddfnvkynlyeteiapiveetltpffs dkkailvknayiftgeksp  
kdmahnv d q l i e f i e k y d g  
enlivfeiyqnkl derkk l t k t l k n h a r l k k i e q m s e e e i k k w i q s k l n e n f k d i k r d a l d l f i e l t g i n f n i v s q e i e k  
l i l f l g d r p t i n k q d v n q i  
inrsleqnvfl l t e y i q k r k k e q a i h l v k d l i t m k e e p i k l l a l i t s n y r l f y q c k i l s q k g y s g q q i a k t i g v h p y r v k

Tsompanidou\_et\_al\_Supplemental\_FASTA\_File

1algqvrhyqldellniid  
acaetdyklkssymdkqlmlelfils1  
>tr|D9RHN5|D9RHN5\_STAAJ  
mivgvlwnsskvlstflflllyiayrknkivyapislfliifsswylhysqqaiynyiniernsqfneraqviiqirg  
gsdtykgrlslnkneiyppf  
ltnkknfdlkkiesrncivkgqfkvndnkfvtklqsiivqsclesnwnliekhkqfimmriyngsikfpdrimalitg  
dvkeineqfkervkeigiy  
hllavsgshjaaivfliyqplkrlnlplfvikgitiivlafaytnyapsavraiimttlvllitkqikikgiqllafafa  
fiimfilnplvvydigfqf  
sfiisffimllfpflqqslsklqslfiitfiaqlasfivaipnfhqlqwgvlfnlsvpyysilfplsilffitshfiv  
gltplnylvdlsfnfhdwl  
ldlftrikqshfsvpkfnwifiiifiisvyyifc1lakrkyilvtfctiil1litfptnshhkitmlnvgqgdsilye  
ggknqnvli dtggkvmddt  
kqpsysiskyhilptlnerginleylilthphndhigeveyiishikikhiviynkgysntlmllsklshkyniklmd  
vrqvsfklgdssflffds  
fipnsrdkneysiitmiyqnkkvllmgdasknesllkkynlpeidilkvghgsktssskefiemikpkisliissgk  
nmmyhlpnievkr1qgrir  
sriynsqngqvtidlddn1kvdsnsygnasgl  
>tr|D9RHN7|D9RHN7\_STAAJ  
myqfllrykdf1tqwklyiisavvlmvligfifwrqddytsrnfenkdtalkqstsensslskledvqvkdgdnsknkg  
pvyvdvkgavkhpnykmt  
skdrvvd1ldkaqlldadvsqinlsek1tdqkmi fiphkgqknvepqigvnsvhvkngntntkvn1ntasvselmsvp  
gvqgakanaveyrnqgga  
fqiiddlkkvkgfgsktfdk1ksyftt  
>tr|D9RHN8|D9RHN8\_STAAJ  
msqyaems1vydqltgdqpyekwfeivknhckdesnildigcgtgsltvqlaalgnvtgmd1svdmltvaaqksanvwl  
egdmtsfdlqqqfdiitif  
cdslnylqdetavietfinvyhhltdsgvfi fdvhtvykmm1fnnqsyiddkgdiflawdavqgd1plsvyhdmtffir  
hedesysrfdeshfartfd  
ektylswlaqvgfkhetfdfnrdehndaerlffiaak  
>tr|D9RHP1|D9RHP1\_STAAJ  
mkkivlyggqfnpihtahmivasevfhelqpedefyflpsfmsplkkhhdfidvqhr1tmiqmiidelgfgdicddeikrg  
ggsytydtikafkeqhkds  
elyfvigtqynqlekwyqieylkemitfvvnrknqsvndnamiaiqiprvdisstmirqrvsegksiqvlvpskven  
yikgeglyeh  
>tr|D9RHP3|D9RHP3\_STAAJ  
mkfavignpishslspvmhranfnslglddtyealnipedfhlkeiiske1dgnitiphkeriipyldyvdeqain  
agavntvlikdkgwi gynt  
dgi gyvkg1hsvypdlenayililgaggaskgiayelakfvkpkltvanrtmarfeswnlninqisladaekylaefdiv  
inttpagmagnnesiinlk  
h1spnt1msdiiyipyktpileeaerkgnhiyngldmfvyqgaesfkiwtnkdadin smktavlqq1kge  
>tr|D9RHP4|D9RHP4\_STAAJ  
msdilkcigcgaqlsedknkpgfvpehnmfrddvicrrcfr1knynevqdvgl esedflkl1sgladkkgivvrvdvf  
dfegsfinavkriygnkki  
ilaankld1lpkqinkrrvkewlkr tarkygleaedvvlisaekgwidd1lssianirenedvyivgttnvgkstlink  
lieasvgekdvvttsrfpg  
ttldmidipldetsfmydtpgiiqdhqmthlvsekelkiimpkkeikqrvyqlneaqtlffgg1aridvsggkrplvcf  
fsndlnihrtktenandlw  
rnq1gd1ltpgnpqnf1nevavr1etgkekrdvmisglgfitigpgakvivrvpkndvvlrnsil  
>tr|D9RHP6|D9RHP6\_STAAJ  
migiigameeevtlknkl1tqlseisvahvkfytgilkdrevvitqsgigkvnaaisttllinkfkpdiiintgsagald  
es1nvgdvlisddvkyhda  
datafgyeygqipmpvafqsskpliekvsqvqqq1takvg1ivsgdsfigsveqrqkikkafpnamavemeataiaq  
tcyqfnvpfvvravsdla  
ngeaemsfeaflekaavssqtvealvsq1  
>tr|D9RHP8|D9RHP8\_STAAJ  
mlegiltnsasaieysdlhhksklnskr1snakmsfinptqlenkktnr1lthd1l1fhdmflndaskkdfkvefenel  
snefinknidiyagsysye  
chgetnktqcsygvvtlidnkyndknipcn1widghqteiel1tavtkkkivtiqel1dvqlrnylnkkyklye  
>tr|D9RHQ0|D9RHQ0\_STAAJ  
mrvd1ncd1geafgnysfgdhqiip1itsanvacgfhadenvmnetvklakahnvavgahpglpdlkgfgrnidisn  
eeiynlmiyqlgalggfcr  
ihqvkinhvkphgalymgakdrgiasviaqavydfps1vlvglansyliseaknvg1itasevfadrryeddgqlvsr  
kesdavitdtdealkqvlk  
mvkenkvisknkevt1qadticvhgdgehal1fvskiireilmkegidiqs1  
>tr|D9RHQ1|D9RHQ1\_STAAJ  
mlcclianrgeiavri1racreygietvavyakgdeqslhvh1adqaicigeanaldsylvnidriisaaitganaihpq  
ygl1sestkfaqtveeqgi



Tsompanidou\_et\_al\_Supplemental\_FASTA\_File

afigptkktmemmgdkitarqtvvhagvpvpi psgngavnhvsei eklakdigypvikaasgggkggirivkkaedleka  
fkeakseggkkyfdddrvyv  
eafipvakhvevqvmgdgnyvhlgerdcsvqrknqk lieespcaalteerrqqicndavkvaraanyrsagtieflvt  
dtahyfiemnariquehtv  
temraerdlvvaqlyl lehnhlpfsqsdiqfnghvhearinaenpekkfqptpgkvtahlhpqgfivr vdsll yhygqvs  
pyyds1vakvivkshdrqs  
aidklkatldemvidgfsttadflyavl nyplyrdgdakdvdikflekhqivkgvel  
>tr|D9RHQ2|D9RHQ2\_STAAJ  
mniekieqiiklvkendvkkfkyknfedeieidftdsnhlaahsnqsnqsmnndltaskandnsdvstndyhdiks pmv  
gtfflqdskektepivkvg  
dkvnkgdiigyveamkv1nevttvdageiteivadhgtnveydqvlvrik  
>tr|D9RHQ3|D9RHQ3\_STAAJ  
msikilqpglfstvdqlgrkgyehigfsgagamdqfsfkvaqslinndgpaieytligptiqfntqntfvitggs vnasl  
nktismnsvilaekgdil  
kigaitkgarylftghntinvppiaecyathtrssiggfkgkrl landvitvkinndfkenigktihlqddll penniih  
ilqgpqfeafseearakiv  
nhpyliteqsdrmgylregdsvapinqadiisevalgs vqvpndgqpiillndkqtiggytkiatvckfdl pkl aqmkp  
qdtiqfkwisfqeavdknr  
eqmslfneilkshektpi fdtssl rhtskklatilkgdl  
>tr|D9RHQ4|D9RHQ4\_STAAJ  
mdvr finegtimiyfenkiseetyrnvtamvrw irekeileiqdivpsyravli yfdeqaitpsklienlelnkfnknv  
havngtnriiki pvqygg  
ygpdieevakhnritveqviekhtskpyli ymlgfm p gfpylggld eqlytprnrqprlkihagsvgiannqtglypsds  
pggwqiigrtp1kvfsser  
epmsmyeagewiqfyaideqefiqierdisdgnfnvddwvvienvn  
>tr|D9RHQ7|D9RHQ7\_STAAJ  
mktieeikstpktvmkkpellapagnlek1kiavhygadavflggqeyglrsnadnftmeeiaegvefanrygakiyvtt  
niahdeniegle sylrn1  
ektgatgiivadplieetckevapkleihlstqqs1snykaveyweegldr vvlaretgamemremkekvdieieafih  
gamciaysgrct1snhmta  
rdsnr ggcqscrdwye1levddsge1dvfydqgevt p fampskdlkliesipqmm digvds1kiegrmksihyiatvvs  
vyrkvidayaadpenfkin  
pewlieldkanrdtapaffegtpgyeeqmfgqqskkspfdfcglvldynedtkiatiqqrnnfkpgqeieffgpeiet  
ftqvveaiydeegns1daa  
rhp1qivqikvdrpiypnmmrkeig  
>tr|D9RHQ9|D9RHQ9\_STAAJ  
mddlnkkyli dlhghqns siev1refaevnevpi vdr1tldlikqlirmnnvknileigtaigyssmqfasisddihvtt  
iernetmiqyaknlatyh  
fenqvriiegna1dqfenvndkvydmi fidaakaqskkf feiytp1lkhqglvitdnvlyhgfvsdigivrsrnvrqmk  
kvqdynewlikppgyttf  
lniddglaisikge  
>tr|D9RHR3|D9RHR3\_STAAJ  
mklkaseir qkyldffvekghmvepsap1vpiddtllw insgvatlkkyfdgretpkkprivnsqkairtndienvgf  
tarhhtffemlgnfsigdy  
fkqeaiefawefltsdkwmgmepdklyvtihpedmeayniwhkdigleesriiri egnfwdigegpsgpnteifydrgea  
ygqddpseemyppgenery  
levwnlvfsefnhkhdsytp1pnknidtgmglermasvsqvrtnyetdlfmpimneiekvsgkqylvneeqdvafkvi  
adhirtiafaids galpan  
egrqyvlr1rravrqsqt1ginepfmyklvdivadimepyypnvkesadfikrvikseerfhetledglailnelik  
kakvttneisgkdafklyd  
tygfpielteeiavqag1kvdm ttfesemqqrrdrarqarqnsqsmqvqsevlnkitfastfvgydtataqt1thliyn  
geevsqveagetvyfmlte  
tpfyavsggvadtgi vyndnfeiavsevtkapngqn1hkgvvqfgqvnvgatvsaevnqndrrdiqknhsathllhaal  
ksvlgdhvnqags1veadr  
1rfd fshfgpmtnde idqverlvnee iwkgidvniqemdi asakemgama1fgekygdvrvvnmapfsielcggi hvrn  
tseigl fki vsesgtgagv  
rrieal tgkaaflylediqekfntmksq1kvksddqvvdktqlqdeekal1kql eqrdkeits1kmgnie dqveingy  
kvlvtevdvpnakairstm  
ddfksklqdti1ilasnvd kvsmvatvpks1tnnvkagdl1kqmapivggkggprpdmaqqgggtqpenisks1sfikdy  
ikn1  
>tr|D9RHR4|D9RHR4\_STAAJ  
msdptlfdysmi kgtvea1lfqnsdnfytv1kvdtietnedfdtmtvvgflpnivegdvytfkgqvvdhprygkqlkae  
tfekempqtkeai1sy1ss  
dlfkgygkktaqn1vnt1gdna ind1ddhsv1ekvsg1skkkqkqiaeqisanqesekimir1hd1gfgpk1smai yqf  
ylgdt1tildrnpyqliyd  
ikgigfnkadqlarnigiyandner1kaal1ytleecikgghtylpinvvid1tvdv1nyqdeeviepekldemlqyl n  
eekrliidneqvai pslyy  
seiksvqn1frikthtnk1teieqsd1qmhigeiedanqvnyasqkealqtainskvml1tgpggtgkttvikgively

Tsompanidou\_et\_al\_Supplemental\_FASTA\_File

aeihglsldyddvnddy  
vvlaptgraskrlqestgleamtihrligwnqdtkpedileneinarliiidemsmvdtwlfhqflsavpldaqlifvg  
dedqlpsvgpgqvfkdlie  
skaiprvnltevyrgqdgssielahrmklgqkiditqrfhdrsfincqanqiptvvekvvtsavnkgytmdiqvlapm  
ykgnagikrlnqvlqdi ln  
pkkkdtreiefgdvvrkqdkvlqlvnrpndnifngdigvivgfwakenalnkdvlvdfegneitftkqdmelthay  
ctsihksqgsefpivimpi  
vkqyfrmlqrpi lytg ltraktslvllgdpeafdiglktngqarl tqlctllknyfnsedeemlentatndtgasqttid  
dqveas lssndseevtsds  
tktdtnvlteatmfkidpminmgeitpydfier  
>tr|D9RHR5|D9RHR5\_STAAJ  
midqqtityqiangkieealqalfgnieedptiienyinatgvladaneiekaerffqkaltidpknvfyfnlanvyyn  
qqrypeaiklyqqa lqtei  
eqvdcnymigmafnglesfklalpylmtaaeldkdkdaevqfygivilcqlmfneaitqlkhvltidknhvdarynlg  
al fmknedideaitfhkea  
vtidpkhl lsqhal ktftkmeeee  
>tr|D9RHR8|D9RHR8\_STAAJ  
maikysaln lvpiregedertaindmvkl aqhlde lsyerywiaehnapnlvssata lliqhtlehtkhirvgsggiml  
pnhapli vaefgtmatlf  
pnrvdlglrapgtdmmtasalarrdqhdgvykfpeevsllqqyfgpahqqayvraypavgknvplyilgsstdsahlaar  
kg lpyvfaghfapqkmea  
iei yktl fepsdvldepyvivclntivaenddeaqyl assmaqvmvsitrgrmqpvqppthelqniltpreyamamerqk  
isligsentvqqkiqdfme  
tygevneimaisiyidkdmql dsyrrfkvninqinkntl  
>tr|D9RHS2|D9RHS2\_STAAJ  
msteplasrmpkni dei isqhlvgprgi irrmvdtkkltsmi fyppgigktsiakaisgstqykfrqlnavtntkkd  
mq l vveeakmsgqvil lld  
eihrl dkakqdfllph lengkivilgattsnpyhainpairsraqifelyplndedvrqal traiedeekglktyqpkid  
edamayfstqsqgdvrsal  
nalelavlsadndkdgyrhv tldakdc lqkgafvsdkdgmhydvmsafqksirgsdvnaalhy larlieagdlptivr  
rllvisyedig laspnagg  
rtlaaiesarlg lpearip lsqavie lclspksnsamsaidsal sdirnghvgqipnh lkdghyqgakdlgrsigykyp  
hgyvngyvsqqylpdklkn  
kiyyepktskseqqlkeiynnllkqrp  
>tr|D9RHS3|D9RHS3\_STAAJ  
mkhqfsrne laigqqgl d l l kqqtvvilvgggvgsfaaealartnighi ilidkddvditvnvrqlhal tttvgqskvs l  
meeriklinpdckvtp lhm  
fyteetyeiefdnydi dyvdasdtimykvhl mkecl drgikvissmgaanktdprftisdiskthtdpmaki irqklk  
klgirkgipvvsdespiv  
iredvkdivgdknainrkgqmpssnafvpsvvglicasyvndvlkdipvrrikdkgq  
>tr|D9RHS5|D9RHS5\_STAAJ  
miki prgtqdl pedskkwyrienql delmtfnykeirtpi festdl fargvgdstdvqkemytfdkkgdrsitl rpe  
gtaavvrsyiehkmggnp  
qpi klyngpmfryerkqkryrqfnqfveaigaenpsvdaevlamvmhiyqsfglkhklvinsvgdmasrkeyneal  
vkhfepv ihefcsdcqsr l  
htnprml dckvdrdkeaiktapritdf l neeskayyeqv kayl d d lgiayiedpnlvrg l dyythtafel mmdnpydg  
aittlcgggryngll e l l d  
gpsetgigfal sierllla leegieldeenld l fivtmgdqadryavkllnh l rhngikadkdy l qrkikgqmkqadr  
lgakftivigd qelennki  
dvknmttgesetieldalveyfkk  
>tr|D9RHS8|D9RHS8\_STAAJ  
mnepypsadevlhkaksylsadeyeyv lksyhiayeahkgqfrknglpyimhpiqvagiltemrldgptivagflhdvi  
edtpytfedvkemfneeva  
rivdgvtklkkvkyskeeqaenhrklfi aiakdvrvilvkladr lnhmrtlkamprekqirisretleiyaplahrlg  
intikweledtalryidnv  
qyfrivnlmkkkrseredayietaidrirtemdrnriegdingrpkhisiyrkmmkqkqfdqifdl lairvivnsindc  
yailglvhtlwkmpgrfk  
dyi ampqnlyqslhttvvgpngdpleiqirtfdmheiaehgvaahwaykegkkvsekdyqknlnwlkelaeadtss  
daqefmetlkydlqsdkvy  
aftpasdvi elpygavpidfaya ihsevgnk migavngkivpidyilqtgdiveirtsksygsr dwlkivksssakg  
kiksffkkqdrssniekgr  
mmveaeikeqgfrvedi l tekniqvvnkynfaneddl faavfggvtslqi vnk lterqrildkqralneaqevtkslp  
ikdnii tdsgyvveglenv  
likl skccnpi pggdivgyitkghgikvhrtdcpnikneter l invewkskdatqkyqvdl evtaydrngllnev l qav  
sstagnlikvsgrsdi dkn  
aiinisvmvknvndvyrvvekikqlgdvytvtrvwn  
>tr|D9RHT0|D9RHT0\_STAAJ  
mikpykwkltkpaeyisdeltsklkltpivkkl esksiideqai esis dtdinhda l q lsdmtktierikraiane

Tsompanidou\_et\_al\_Supplemental\_FASTA\_File

kilvygdydadgvtstti1  
vttlqllgaqvgwhipnrftegygpnelafnahdegitliitvdngiqghneikmvqdlgvdvividhdheigstlpeay  
aivhpmhpsfnypfqqlcg  
agvayklaqalientpdyfkaivaigtiadlvsltdenrslvkqglkvlnqdcptsvkallkeagyndnideetigfiig  
prlnavgrlddaslace11  
mtddeeeaaflaeqvehfnrerkdiratiteeamamaetkvnkdfl1llakenwhegvlgivaskivetfalptlilni  
dreqnhakgsarsidqvs  
feilsahqeliakfgghmaagmtmdienieslaeglnkwmkelskttslpvpkpvdl1kenditiknirdmnr1rpf  
tdfsrpi femddlsvsvk  
aigqqknh1kl1t1gesniaalfwqngl1lepelqdeqpinilgsvqinewngnqspqliiqdiamneqqildyrskrkslp  
ftendeniavlihpksdkv  
naneyyygeeiqqtdkvvlrdlptsmed1sns1qqlqfsqlyivlqhnhsiyfdgipnmdvfkkykalitkqetniqk  
egm11cqh1svkpd11kfm  
1kvf1d1kfvtdedg1irinqqpdkrsidsskvyqlrqrmvkekq1lyqdfseikwiksq1s  
>tr|D9RHT1|D9RHT1\_STAAJ  
mkkssriiaf111v11fagmaatyksviknvn1g1d1qggfevlyqvdp1nkgdkidkka1qstaqt1enrvn1vgse  
pk1qveepnr1rvq1agvt  
dqnearkilssqan1tir1daedkv1sgsdi1kqsakqefkqetnqptvtfvkdknkfkvteeiskkrndvmv1w1df  
kkgdsykkeaqkknkpfis  
aasvdqpinsdsveisggfkgqegvkkakqiaellnags1pvd1keiysnsvgaqfgqda1dktvfasfigvaliy1fml  
gfyrlpg1vaiialt1tyiy  
1t1vafn1f1sgv1t1pg1aa1v1vgvmavdani1myerikdel1rigrtikqafskankssfl1t1fdsn1ttviaav1ff  
fgessvkgfatm111g1im  
ifvtav1sr1f1s1l1vssni1fknqfw1fgvkknrhdinegvdvhd1ktsfekwnfvklakpligvsilivvvg1vily  
ifk1n1g1idfssgtrvdfq  
skqaitqkveqvkdsg1kadq1qingkdnkvatvqfkdd1traqdn1sdnikskfgdtpqintvspiigqelaknam  
1al1yasig1i1yvs1rfe  
wrmg1ssv1a1l1hdvfi1vai1f1s1f1riedv1t1fiaav1t1ivgysindt1vt1fdrvren1qkvkvittteqiddivnrsir  
qtmtrsintv1t1v1v1v1v1a  
1l1ffgapt1fnft1a1f1ig1isgvfss1fiav1wgmmkkrq1kkspkh1lvvykekksndek1lv  
>tr|D9RHT3|D9RHT3\_STAAJ  
mpavtyehiktckqsgar1g1vhtphgsfetpmpfvgtkatvktmspeelrqieaki1l1gntyhl1w1lqpgndi1khagg  
1hkfmnwdgpi1tdsggfg  
v1fs1sn1rk1teegvefrhhtngsk1f1speksmqi1qnd1gsdimmafdecppmpaeydyvkk1s1erttrwakrc1dahq  
rpedq1f1g1i1q1gg1yed1  
reqsakd1vel1dfp1g1ya1igg1svgepkpvmymvehte1qfmpkdkpry1mgvgspda1iecsirgmdmfdcv1p1triarn  
gtcmts1qgr1v1iknakfvd  
d1r1p1d1encd1ytcqnsrayir1h1ikaet1f1g1ir1t1ti1h1n1h1f1l1k1l1medi1rqair1edr1ld1f1ke1ffe1qy1g1nvenpk  
nf  
>tr|D9RHT5|D9RHT5\_STAAJ  
mnermvdqsmhseetdfels1rpr1r1qyigqnsiks1n1evfikaak1rhep1dhv1l1fgpp1g1ktt1sn1ianemevn  
irtvsgps1erpgd1laail  
sg1lqpgd1v1f1de1hr1ssvveev1ypamedff1di1igkgdearsirid1ppft1vgattrags1tg1p1rd1rfgvh1r1  
eynesd1kei1i1rtaev1  
gtgiddesajelakrsrgtprvanr1l1krvrd1fqvnedeqiyiettkhalg1l1qv1dqhg1ldyidhkmmnci1kqynggp  
vg1dtiavt1geeritied  
vyep1fi1qkg1f1ertprgrkatp1layehfaksneere  
>tr|D9RHT7|D9RHT7\_STAAJ  
mdnkdykkfy1i1redv1pesvvt1k1k1da1ksdpt1siydavkqfd1srsafykyret1fpvddkml1dhreft1ilyvt  
divgm1arv1dv1sk1le1s  
v1t1ihq1sip1leekatit1s1n1aksketsvedviga1rn1dyvskvelismm  
>tr|D9RHT8|D9RHT8\_STAAJ  
mfvdqvkis1kagdgngi1tayrrekyvpfggpaggdggkgasvvfevdeg1rt1ldfryqrhfkaskgengqssnmhgk  
naed1v1kvppgti1k1nve  
tdev1ad1vedgqravvakggrrgrnsrfatprnpapdfsekgepgkel1dvs1el1k1l1adv1lg1v1f1sv1gk1st1l1sivs  
kakpkigayhfttikpn1g  
vvstpdqrsfvmad1pg1iegasdgvg1ghqf1rhvertkvivhmidmsgsegrepiedykvinqelaayeqr1edr1pqi  
vvankmd1pesqdn1i1fk  
eeigedvpvipvst1trdnidq1lyaiadkleeykdvdftveeesvginrvlykhtpsqdkftisrdddgayvvsgnai  
ermfkmtdfnsdpavrrfa  
rqmrsmgiddal1rergckngdivr1lggefefve  
>tr|D9RHU3|D9RHU3\_STAAJ  
m1k1ffknnk1ivv1caiivfialig1s1rsqsqspeeqyigdsvsfgqrvvsypvnfvagtigdffkkgdskesknkisq  
1esknq1leaenek1k1ke1  
d1k1di1sk1fdp1istv1arnpdqwmntivi1dkgsksgitsnmavmtsqqfvgvrvtkvknkfssqvdl1stntragk1svniq  
hgsknifgl1drydekns  
1visdinnrdn1skgdkvvtsg1adq1psn1lyigevtkvqndqyglakevrvktgad1td1shvyvakrdpkipddesr  
dk

Tsompanidou\_et\_al\_Supplemental\_FASTA\_File

>tr|D9RHU7|D9RHU7\_STAAJ  
mvytmqlniknepvtkrnlitlaltstvgilvtalagvivotkqafpllsvaigsiftgivwgl11sgsyalirflsnafg  
rk  
>tr|D9RHU8|D9RHU8\_STAAJ  
mkikemtsemprer11shgaks1sntellailintgrkgfssidisnellksasn1nelkkssindliqvkig1qkai  
t1kaafelgermgrraenn  
rikitqpsdvadyimptmkdlqtqehfvil11nknvvikescvfkgt1nssivhpreifsiavrenanaiavnhhpsgd  
vtpsqedil1ttr1kecgl  
ilgid11dhiiigdnrfts1veagyfdend  
>tr|D9RHU9|D9RHU9\_STAAJ  
mvv11syscscifsflyqfisietsfdylhrrskcdycnsslkwyelmpiisf11kgrcncrkris1thflgetfal  
ipivfikydfityvnatlfi  
ttyvfl1iftmtdits1mldcr1iiycivsls1siypvafiiismtthifyflfrayigygdv11isals1ffplqft  
iyv11ftfviag1valitm  
ifkpik11plvpfi1fisffins1fyndihqflggvyf  
>tr|D9RHV0|D9RHV0\_STAAJ  
mnyleslywihertkfgikpgvkrmewmlaqfnnpqnnikgihvggtngkgstvayl1rtalvengyevgtftspfietsfn  
eris1ngvpisndaivelv  
srikp1semmeretd1gvatefeiitammflyfgeihpvdviveagl1gikndstnvtf1ilsiltsig1dhtdilggty  
ldi1ardkgaiikpnpvpiy  
avkneda1kyvreraieqhakpieldreivvvsqndeftyrykdyeleti11sm1gehqkqnaalaitalie1neqglie  
ldfnk1midg1esvrwtgri  
eqvhdkp1i1ldgahnsesidalidtikqyhdkkvdilfsaingkpinemvkh1s1liahtfyatefdfpkalrkeeivg  
siendeig1lvddyvefikn  
yqgd11vitgslyfisevks1dfeal  
>tr|D9RHV1|D9RHV1\_STAAJ  
memkpydpreveagryekwvkngyfkpsedksketyt1vipppnvtgk11h1ghawdtt1qdiitrmkrmqgydt1ylpg  
mdhagiatqakveak1neq  
gitryd1grek1legawdwkeeyasfiraqwak1g1g1dysrerft1deg1skavkkvfd1ynkgi1yrgeri1nwdpk  
artalsdi1evihedvggaf  
yhfkyppadgegfi1eatrpetm1gdtai1vnpnderykdvigktvilpivgre1piladeyvdi1dfgsgamkvtpahd  
pndfeig1qrh1q1leni1ivmd  
engkmndkagkyegmdrfdcrkq1ved1keqd1viki1edhvhsvghsersgavvepy1stqwfvrmed1akrs1dnqkt  
dr1dfypqrfehtfnqwm  
nirdw1tsr1q1wwghq1pawyhketgeiyvgeeapt1dienwqqdedv1dtwfssa1wpfst1gwpd1esedfkryyptna  
1vtgydi1ffwvarmi1fqg  
leftdr1rpfndv11hgl1vraedgrkmsks1ngvdpmdvi1deygads1ryfl1atgsspghd1rystekvesvwnfinkiw  
ngarfs1mni1gedfkved1  
d1sgn1sladkwi1ltr1netiatvtd1sdkyefgevgralynfi1wddfc1dwyiemskipmngndeeqk1itrsv1sytd  
nimrm1lhp1mpfvtekiwq  
s1p1hegdt1ivkaswpevres1ifeeskqtmqqlvei1iks1vrqs1rvevnt1skeip1iliqakdkei1ett1sqnkdylikf  
cnpst1n1istdveipekam  
tsvvi1agkv1pl1eg1idmdkei1sr1eke1ak1qse1drvd1k1sn1enf1vskapekvineekrkkqdyqekydgvkarie  
q1ka  
>tr|D9RHV2|D9RHV2\_STAAJ  
mnecafg1tkdpvyl1dyhdhv1wgq1lydskal1fk11a1lesqhag1swl1tik1kkeayeeafydfep1ekvaqmtahdi1dr1m  
t1f1pni1v1hrk1kieai1v1nqa  
qgy1k1ie1qaygs1fsk1flwsy1vngkpkd1qyehasdri1tvdd1tatq1skd1kqyg1fk1l1gpvt1v1fs1leaag1lydah1kdc  
pskpkhn  
>tr|D9RHV3|D9RHV3\_STAAJ  
mtmiyrnn1fiv1v1sff1si1yssh11lp1f1mfg1pii1asi1cvk1v1r1d1k1wp1f11sel1g1iv11lgv1q1gst1ftknv1v1mdi  
kdnw1s1i1v1s1sil1via1  
vmafi1f1k1iar1intetai1lsvip1galt1qml1vmaeqd1kran11lv1s1l1tqts1ri1fvv1vpfi1syff1hdgn1mhvngk1tkv  
l1pl1sqv1n1igq1v1ilaia1  
fi1vy1l1msk1ik1fpt1fq1l1ap1liv1liv1wnf1stg1l1tft1ldhw11nmaq1liym1irig1vqiah11sdl1kgr1l1aia1itiq1nim1li  
igalim1vy1vih1ff1d1nnp1in  
e1fl1gaap1ggv1nq1iv1valat1gad1vam1tsyhi1friff1il1fi1iap1giny1fl1kfr1snkred  
>tr|D9RHV4|D9RHV4\_STAAJ  
mrytk1seeam1kvaet1mpggv1nspv1rafksv1dtpai1fmdhg1gk1skiydi1dgneyi1dyv1swg1pl1l1ghrd1p1qvi1sh1hea  
idk1gts1fgast11len1laq  
l1vidr1vps1iek1vrm1vsg1teat1ldt1lr1argyt1grnk1ivk1fegcy1hghsds11likagsgvat1gl1pds1pgv1pegiaknti  
tvp1ynd1dal1kia1fek1fgd  
di1ag1v1ev1p1vagn1mgv1vppi1eg1fl1qg1rdit1tey1gall1f1devmt1g1frv1gyh1caqgh1fgv1tpd1l1tcl1gkv1igg1l1pvgaf  
ggk1kei1mdhi1apl1gni1yqa  
gt1l1sgn1pl1amt1sgyet1l1sq1l1tpety1ey1f1nm1l1gd1iledg1l1krv1ft1khnv1pitv1nrags1m1igy1fl1neg1pv1tn1feq1anks1dlk  
l1faemy1remake1g1v1l1pps  
qfeg1t1fl1staht1kedi1ekti1qaf1dta1l1srivk  
>tr|D9RHV6|D9RHV6\_STAAJ

Tsompanidou\_et\_al\_Supplemental\_FASTA\_File

mkpvvmtqtndmqsdvsihkpfdikplnfdihllnqrydwlifssknavkffykykginvdniavigsaktaqyce  
slgirvdfmpndfsqegfl  
ksfnqtnkiillpsseIarp11laalskdnevkidlytsvpnkqniqdvkemiehqqidaltfssssavryyfnegfvp  
kfksyfaigeqtartiksy  
qqpvtiaeigtlesliekilesrg  
>tr|D9RHV7|D9RHV7\_STAAJ  
mrklvvgrrsklaltqsqqfidklkavepnleieikeivtkgdrivdkqlskvvgkglfvkeiqhel fekniDMAIHS1  
kdvpvipegltlgcipdr  
elpfdayiskthtplsqIpegsiigtsslrrgaqilskypnleikwirgnidtrleklqtedydaiilaaglrmmgwsd  
divtsylrdrtllpaiggg  
algiecrsdeelltlskvhndevakcvtaertflaemdgsqvpIagyatisdqkeieftglimtpdgkerfeytIng  
tnpvelgkksnklkqga  
yeiikrIneqh  
>tr|D9RHW0|D9RHW0\_STAAJ  
mkvnpnnieliisavkeeqpetelsevalsgrsnvgkstfinsmigrknmartsqqpgktqtlInfyndeqlifvdvpg  
ygyakvsktqrekfgkmie  
eyitkrenlqlviqlvdIrhntqddilmynylkhfdiptlvictkedkipkgkvqkhikniktqlmdpddtivsyssi  
qnnkqqiwnIiepyis  
>tr|D9RHW1|D9RHW1\_STAAJ  
mfkfnedeenlksfcgkdqdklIvagsgvyicnecielcseiveelaqtseaitelptpkeimdhIneyvigqek  
akksIavavynhykriqqI  
gpkeddvellqksniaIigptsgsktllaqtlaktInvpfaiadatsIteagyvgddvenillrIliqaadfdidkaekgiI  
yvdeidkiarksentsitr  
dvsgegvqqaIlkiIegttasvppqgrkhpqemiqidttnilfilggafdgieevikrIgekvigfssneadkydeq  
allaqIrpelqayglIpe  
figrvpivanletIldvtalkniltqpknaIvkqytkmleIddvdIefteealsaisekaiertkgargIrsiieesIidi  
mfdvpsnenvtkvvitaqt  
ineetepelydeegnInnksktsa  
>tr|D9RHW2|D9RHW2\_STAAJ  
mtatwekkegneglltvtvpaekvnaIdqafkkvkvqIinvpgfrkgkvrpIfeqrfgvealyqdaidillpdaygeai  
detdikpvaqpevsvtqie  
kgkdfIfeatvtvepevkIgdYkgIeiekqetelSddeIqeaIdhsIghIaemvkedgvvengdtvnIdfsgsvdgeef  
eggqaegydlEiGsgsfip  
gfeeqlegmkvdeekdvvtfpeeyhaeeIagkeatfktkvneikfkevpeltdeianeIdaeantvdeykenIrkrlae  
qkatdaenvekeeaItkat  
dnttidipeamvnteIrmvsefaqriqqgldIqtyfqiSgqdesqlreqmkddaeqrvtknltIItaiaeaekieatde  
didkelekmskqfnisved  
ikntIlgntdiIknvriqkvidllrdnakfvegteked  
>tr|D9RHW3|D9RHW3\_STAAJ  
msdiIqfpnsskklykdiIkræqdqnydlmyeyivqyerqfelteeiammkrmlIyetgsfleIreetivllktgiqqyd  
almIyyvksIigIqyfea  
vevihqiIdevkdhktrmalhpIkefakskIiedekrltqlltdfdtIsmreqthIilklidnghfqqfetvlyilksnt  
ysnIisImieyIrfancet  
qeltiekygmdvtfvpanIkgIehttlkekvipnvmetIndgalhiaeeahimnhsimiypidietIfetnkwinaye  
cyfknmlglkcelqsIdaf  
nfiqqldInnns  
>tr|D9RHW4|D9RHW4\_STAAJ  
mskfdeqiIvvpreeIfnnekniIingflnknkpegqniIdalsqyevkrrgdmeedpsyqlisycIlenehgeilvyer  
Isgggearlhqssigvgg  
hmdvpgaesinevlrvnaqreleeevglseqdsqnmeYigfinddnnevkvhigvfvkitvstndveaketdtIrikw  
vekgniesyddfetwsali  
IqdI  
>tr|D9RHW6|D9RHW6\_STAAJ  
mpkmkthrgaakrvkrtasgqlkrsraftshlfankstkqrqlrkarIvsksdmkrvkqllaykk  
>tr|D9RHW8|D9RHW8\_STAAJ  
mskvqnesnvvkrglkdrhismaiggcigtglfvtsggaihdagalgaligyaiigimvfflmtslgematylpvsgs  
fstyatrfvdpslgfalgw  
nywfnwvtvaaditiaaqviqywtpIqgipawawsalflviifslnsIsvrvygeseywIalIkvitvivfiaigllti  
vgimghvvgfeifnkgeg  
pIlgnlggsllsilgvfliagfsfqgteligitagesenperavpkaikqvfwriIlfyilafvigmlipydssalmg  
gsdnvatspftlvfkngagf  
afaasfnaviItsvlSagnsgmyastrmlysmskklafetfgktnkngvpymsslvtaiivviiIvIqlstkgayeyi  
vaasgltgfiawvgiavsh  
yrfrrafdkqnydkskIkytakIpfpgplfagflcivviigqdvdfiktgdfnfsrflitymgipvflaffiyhklrykt  
kkipleqvdlrqdvsmdEI  
kg  
>tr|D9RHX1|D9RHX1\_STAAJ  
mgrqafefglrpkdqfkviqhfdIntnhlevInrlytpligtqavglyhfmtqfvkeshnetIIsHyifmnelkinlle

Tsompanidou\_et\_al\_Supplemental\_FASTA\_File

frqqmdlleaigllkafvk  
hdeqetqfvyqliqppsahlfndpmlsiflysevehrrfhefkkyfeyqqidlsefkqvtrqftdvfkvpstkididts  
dipinepyqgidlsnesfd  
femlrqmlgkhfisdvtdkdrilitqlatlygladtadmkhvlnsitsgqqslsfeemrkqarsyylmehenqmpklqv  
kspatssstakssevnkp  
qsdewfelleqtspidmlaswseseptisqktmveelerekmsfgvinillqfvmkedmklpkayileiasnwkkkgi  
ktakeaynyakkvngpkne  
gssgnyqkrqsyggqrnriskektpkwlenrdkpseedsakdnsvddqleqdrqafldklskkweedsq  
>tr|D9RHX3|D9RHX3\_STAAJ  
mstniaingmgrigrmvtrialqnknlnvvasinasyppetiahlinydtthgkynlkvepienglqvghkiklvadrnp  
enlpwkeldidiaidatgk  
fnhgdkaiahikagakkvlltgpskgghvqmvvkgvnddqldieafdfsnascttncigpvakvlnnqfgivnglmttv  
haitndqknidnphkdlrr  
arscnesiipstgaaaklevlpeleglghmalrvptknsvldlvvdlekevtavevnaqafenaglegiievehqpl  
vsdfntnphsaiidakst  
mvmsgnkvkviawydnewgysnrsvdvaeqigalltsketvsas  
>tr|D9RHX4|D9RHX4\_STAAJ  
mpkviqlltggiaskstsvsellsvfgfkvvdadkaareavkkgskglaqvrevfgdeaidengemnrwymdgvfnhpek  
rlelnaiihpivrimeee  
kqeylkqgyvnmidiplfeneleatvdevvvytsesiqmdrlmqrnslledakarvysqisidkksrmadhvidnlg  
dklelkqnlerllkeegy  
ekpnygeed  
>tr|D9RHX5|D9RHX5\_STAAJ  
mpelpevehvkrgepyvinqkiehvifsdkviiegkdqgketiikgieltdftkltsegytitnvkrskyivfqldnkre  
kriilishlgmaggfivde  
ledimipnyrkhhwhvifelsndkklisysdirrfgeirnavsvasypsflieiapepsnealtyylnrihqqsnnkpkikq  
vil dhkviagcgniyacea  
lfragvlpdkkikdlyqqqemvfyyvrevleegikhggtisdyrhadgktgemqlhlnvykqpvckvcgsqietkia  
trnshycpvcqk  
>tr|D9RHX6|D9RHX6\_STAAJ  
mnklvldgnslsfrafyalpllnskagihnavygfamllekilkeekpnhflvafdagkttfrhekyseykgrqktp  
pelseqfpyirqlldayhi  
kryeldnyeaddigtlskeadkagfqtiiitgdrdlqtatdnvtiyytkkgvtdvdhytpdfiaekyngltpnqiidm  
kglmgtdsdnpgvavge  
ktaikllnqfdtvegvyehleisgkklkeklnskedalskelatinvdspievkledtlnthqdeqqekielfkkle  
fkqlladidqsasvedaie  
ktfeietsfdnidftslikeaaihfeldggnylrnnilkfslftgekhiwinaddinnyvelvswlenpntkkvvydakkt  
yvashrleidignisfdim  
lasyii dpsrtisdvqsvslygqsfvkddvsyggkfkvpeddvl npyvasitdaiyfakpnmdkqleeynqvella  
dlelplakilsemeeigy  
tdvhdleemekeiqekldvlinrihdaagedfninspkqlgvvlfetlqlpvikkktgystavdvleqlqgehpiidiy  
leyrqlsklqstyevegkq  
visddqrihtrfnqtlagtgrlssvdpnlqnipvrleegrkirkafkptsksdsvilsadysqielrvlahitqdesmkea  
fingddihtatamkfvge  
adqvdslmrrqakavnfgivygisdyglsqslgitrkkakafidylasfpgvkqymsdivkdakalgyvetllhrrryi  
pdi tsrnfnlrgfaertam  
ntpiqgsaadiiklamvkfaqmkettyqaklllqvhdelifevpksevdsfsefveeimenalqldvplkvdsyगत  
yda  
>tr|D9RHX7|D9RHX7\_STAAJ  
mktiqlhkttliliaillfytfmgillplmhddlqwfsnyntdilkgvfaslngryignifeiavhsvlrlwlsyglis  
mgiwmimhitrckawtsy  
yllafslmlilpsaiyadtfgwfagfynyatstlislfiyycinaiiyekekqpsvtvlfyvlcffgqlfmentl fhc  
iililaflyeftanrtlny  
kllfsfmjatigtiimfsnpyrkiifegseyqqvsnnqgifskaemlstslpygvifsqviilsmiaaliyillrsd  
ryvhltilkrriimigfit  
lplyyllfynqfllnkntdiglvqfanvivcgafafsvfgyilsindrktqitlysliaicvsastlvivtpiepgnf  
livytihviiilvkefr  
kyksinvnfikvaslvlamiylsafiyvhyehkrvqlkqkikhprqevytveslpfehymhhsppinknyqewfnny  
eelpkmtkvkiypfgsdds  
>tr|D9RHX8|D9RHX8\_STAAJ  
mmkfhhrmlmliissilissfvtlgiihasityvlsekheqalatdarsyylvqdneidkvkeivkqnidllitknde  
kvfssgklkaipnsdsfiq  
kkdvfi fnkkvngyhvwikgynnditemhwtlwylltclvvlliclyfasrsfkrtilrpiqevtyatqllangyyhir  
vpesnvvetkalfvstndl  
arrlqklneqkiqsnrlkttienipsailmidrngki vankayyeqfnishnieqvyghgyvnteieqlilesfkvek  
piyeqlvainingvhakyfd  
iscypiltrsqsllgillvmhdi tnkqlenl rrefvanvshe lktpitsikgfaetlidgakndaesldmflniilke  
snrieslvtdllldshieq

Tsompanidou\_et\_al\_Supplemental\_FASTA\_File

hteltdtdymnlSDLtrriidnmmtqanqknisihtdiekdvivaqeskiavqitnlltnainysyedgdinvrvyrdff  
rvifevqdfgigikledqq  
ri ferfyrvdkarsrdsggtglglsitkhiveahqgnievnsqvkgstfkvilkyke  
>tr|D9RHY0|D9RHY0\_STAAJ  
mqiknedvkfggkitmtaekitqgteglnvpnepiipfiigdigpdiwkaasrvidaavekayngekriewkevlagqk  
afdttgewlpqetldtike  
yliavkgplttpigggirslnvalrqeldlftclrpvrwfkgvpspvkrpqdvdmvifrentediyagiefkegttevk  
vidflqnemgatnirfpet  
sgigikpvskegterlvraaiqyaiddnrrksvtlvhkgnimkftegsfkqwygdlaletfgdqvftwqydeivenegr  
aanaaqekaekgkiiid  
siadiflqqiltrpaehdvatmnlngdyisda laaqvggigiapganinyetghaifeathgtapkyaglnkvpssvi  
lssvlmlhlgwqeaadki  
tdsiedtiaskvtydfarldmgaeevstsafadeliknlk  
>tr|D9RHY2|D9RHY2\_STAAJ  
maeklqrelsnrhiqliaiggaigtglflgagqtialtgpsilltyiigfmlfmfmrgei iiqntefksfadvtnty  
igpfagfvtgwywfcwi  
tgmaevtavakyvsfwfpeipnwisal fcvllmsfnllsarlfgelef wfsiikiatiiglivgvfmilfafktqfgh  
asftnl yehgipkgasgf  
fmsfqmal fsfvgiemigtvagetkdpvktipkainsvpirilifyvgalavimsiipwqqvdpdnspfvklfaligipf  
aaglinfvvltaaasscns  
gifsnsrmlfglssqqappnfsktnkygvphvaifassalllvaallnyifpdatkvftvttistvlflvwwgliia  
yinyrknplhknatykl  
lggkymgyli fvfifi fvgllfinvdtrrai yfipi wfillgfmylrykriaaksnk  
>tr|D9RHY3|D9RHY3\_STAAJ  
mrktkivctigpaseseemieklinagmvarlnfshgsheehkgridtirkvakrldkivailldtkgpeirthnmkdg  
iie lergnevivsmneveg  
tpekfsvtyenlindvqgsyillddg l ielqvkdi dhakkevkc dilnsgelknkkgvnlpgvrvs lpgitekdaedir  
fgikenvd fiaasfvrrps  
dvleirei leeqkani svfpkienqegidniaeilevsgdlmvargdmgeippekvpmvqkd l i rqc nklgkp vitatq  
mldsmqrnpratreaasdv  
ana ydgtdavmlsgetaaglypeeavk tmrniavsaaaqdykllsdrtklvetslvnaigisvahtalnlnvkaiva  
atesgstartiskyrphsd  
iia vtpseetarqcsi vwgvpvkvkgrkstdallnnavatavetgrvtngdlii itagvptgetgttnmmkihlgvdei  
angggigrsvvgttlvae  
tvkdlegkdlsdkvivotnsidetfvpyveka l g l i t e e n g i t s p s a i v g l e k g i p t v v g e k a v k n i s n m l v t i d a a g g  
kifegyanvl  
>tr|D9RHY8|D9RHY8\_STAAJ  
mvaylnihtaydl l nsslkiedavr l avsenvealaitdtnvlygfpkfydaciannikpifgmtiyvtnglntietvvl  
akdnnglkdlyqlsskikm  
nsmenvsfellqqfssnl i i fknvadehrdivqvfdshedtyldhsvlvqgikhwiqnvcyqtrqdad t i s a l a a i r  
dntkldlihdqedfgahfl  
tekeikql dinqgy l tqvdviaqkcnaelkyhqsllpqyqtpndesakky l w r v l v t q l k k l e l n y d v y l e r l k y e y k v i  
tnmgfedyflivsdlihya  
ktndvmvgpgrgssags l vsyllgittidpikfnllferflnpervtmpdididfedtrrerviyyvqekygelhvsgiv  
tfghllaravardvgrim  
fdevt l n e i s s l i p h k l r i t l d e a y q i d d f k k f v h r n h r e r w f s i c k k l e g l p r h t s t h a a g i i n d h p l y e y a p l t k g  
dtglltqwtmteaerigll  
kidflglrnlsiihqil tqvkkd l g i n i d i e k i p f d d q k v f d l l s q g d t t g i f q l e s d g v r s v l k k l k p e h f e d i v a v t s  
lyrpgpmeeiptyitrrhd  
pskvqylhphlepi l kntygviiyqeqimqia stfanfsygeadil rramskknravleserqhfiegakengyhedisk  
qifdli l k f a d y g f p r a h a  
vsyskiayimsflkvhyppyfyani l snvigsekktaqmieeakkqgitilppnineshwfykpsqegiy l s i g t i k g v g  
yqsvkvi v d e r y q n g k f k d  
ffdfarripkrvkrll e a l i l v g a f d a f g k t r s t l l q a i d q v l d g d l n e q d g f l f d i l t p k q i y e d k e e l p d a l i s q  
yekeylgfyvsqhpvdkkf  
vakqylti fkl snaggnkpi l vqfdkvkqir t k n g k n m a f v t l n d g i e t l d g v i f p n q f k k y e e l l s h n d l f i v s g k f d l  
rkqqrqliineiqtlatfe  
eqklafakqii i rnkshid t f e e m i k a t k e n a n d v v l s f y d e t i k m t t l g y i n q k d s m f n n f i q s f n p s d i r l i  
>tr|D9RHY9|D9RHY9\_STAAJ  
mistlneimkci edndtii hrhrvpdpdaygsq l g l k y i i q k f p q k v f a v g e a e s s l s f i g e l d n i d d k t y q d a l v i  
vcdtanapridderystg  
klidikhhpavdqygdinlvntnasstsei y d l i t h f n d e a i v n k d i a r v l y l g i v g d t g r f l f n t s e h t m e i a g k l i  
ghdidhna l l n k m m e k d p k  
mlpfqgyvlqhfel m d d g f c v k i t k d v l e q f g i q p n e a s q f v n t i a d i k g l k i w v f a v d e g s e i r c r l r s k g q l i i n d i  
aqdfggghpnasgsvs  
wdefeq l a t a l r t k l n  
>tr|D9RHZ2|D9RHZ2\_STAAJ  
mimtvvldfl yys l s n q q l v s n k t i l n q k h n q y h n p a g v d y g a p t w k l t k k s a y y n v q v g v g p n i e n f e k k f y r q c k l g w

Tsompanidou\_et\_al\_Supplemental\_FASTA\_File

aptwkltkksaynnvqvgv  
gpqhvs  
>tr|D9RHZ4|D9RHZ4\_STAAJ  
mtkiskiiidelnngqadaawittpInvyftgyrsepherlfallikkdgkqvlfcpkmeveevkaspftgeivgyldte  
npfslpqtinkllieseh  
ltvarqkqlisgfnvnsfgdvdltikqlrniksedeinkirkaaeladkcieigvsylkegvtereavnhieqtikqygv  
nemsfdtmvlfgdhaasph  
gtpgdrnlksneyvlfldgviyehycsdmtrtikfgepnkeaqeiynivleatsaiqaikpgiplkdidhiarniisek  
gygeyfphrlghglqeh  
eyqdvstnsnlleagmvi tiepgiyvpgvagvrieddiltnegyevlthyek  
>tr|D9RHZ9|D9RHZ9\_STAAJ  
mteitfkggpihlkgqqinegdfapdfvtlndlnqvtladyagkkklisvsvpsidtgvcdqqrkfnseaskeegivlt  
isadlpfaqrwcasagld  
nvitlsdhrdlsgenygvmeelrllaravfvl dadnkvykeivsegtdfpdfdaaltaykni  
>tr|D9RI02|D9RI02\_STAAJ  
miyldnaattkafeevldtylknqsiyynpnsphkaglqanqlqqakaqinaminsktnydvvtsgatesnnialkg  
vsyrkfdtakeiitsvleh  
psvlevvryleahegfkvkyvdvkkdgsinlehfkelmsdkvglvtcmvnnvtgqi qipqmaeviknypkahfhvdv  
qafgkismdltndsvsls  
ghkfnlkgqgvllvnhiqneptvhgggqeygvrsgtvnlndiamvkamkianenlealnafvtelnndvrqflnkyq  
gyinssasgspfvlnisf  
pgvkgevlvnafskydimisttsacs skrnklnvlaamgl sdsiegsirlsfgatttkediarfkeifiiyeeikel  
lk  
>tr|D9RI04|D9RI04\_STAAJ  
mttinptnytlkkqaasliedehmiai lsnmsallndnl dqvwnvgfyll eqnelilgpfqghpacvhipigkvcgt  
avserrtqvadvhqfegh  
iacdanskseivvpi fkddki igvldidapitdrfdndkehleaivkii ekqla  
>tr|D9RI06|D9RI06\_STAAJ  
mtlnklkdelqivshrglpsafpentmssyrqame ldidmleidvhltkdqhfvi hdetidrtsdggriadyt lsqlk  
sfdfgsykdvafkgeript  
ldevlscl kfdkllielkspnlypgieckllafleekkvdatqvviqsf dieciek lntlgsiyelgv lcskrywyk  
kpnfsriaqiasyvnpny  
lvtrkfvdeahhhqlqvmptvnlkageklrqmgvdglitdnpklfik  
>tr|D9RI10|D9RI10\_STAAJ  
mkkilfdvdgvflseercfdvsaltvye lmdkcyglshidwetltdndiqdirnri fkdki lnlkls glnsndm  
lfivfshlidi lkk lshd  
eieafmyqdepvelkwqnistnl adcfnlneqlplqfl dnvkvgknniyaaleefaitelhvdatl fslkgalwtlaqe  
vyqewylgsklyeevekki  
arttftkgyiyqeiilrpvdevkvllndlk gagfelgiatgrpytetvvpfenlgllpyfeadfiatasdvleakmypyq  
arplgkpnpsyaalygn  
nrdkyesyinkqdnivnkddvfivgds ladllsaqkigatfigtltglkgkdaageleahadyvinhlge lrgvldnl  
>tr|D9RI11|D9RI11\_STAAJ  
mykffqnlgrslmpvailpaaaiagigntlnal haapkiamffttvgttileqlgilfaigvaigmakndgavalaa  
algyflvtvvlspmklapl  
lgmkaseinsafekmngnvgvfgivigliaayaynkfsetelplalsffsgkr lvpimtafyctflvillflwpllysw  
ivkfgesivglsgfagfvy  
gvannlliptglhhalnsvfwfdtigindigkfqsgkdaikgitgryqagffpimmfgipaaalamyhtakttqkkqvyg  
wflassvaaffvgvtepie  
fafmfvapilyvhal lglslfiaatfhwtagsfsaglidvylslinpvshplmllvqgivffilyyvi frvviqvf  
nlntigrgene lvdptvkk  
dniapgendikqskyhnhaiqileglggqenivnltnca trlrlelk dtsiidqqkiknagavgvtnghstqvivgth  
vqqvadeiekh  
>tr|D9RI16|D9RI16\_STAAJ  
mnkhhpk lrsfysirkstlgvasvivstlflitsqhqaqaentntsdki senqnnatttqppkdtntqtqpatqpanta  
ksypaadeslkdaiknpav  
enkehdi gpreqvnfqll dknnetqyyhffs ikdpadvyytkkkaevel dintastwkkfevyennqklpvr lvsyspvp  
edhayirfpvsdgtqelki  
vsstqid dgaetnydytklv fakpiyndpslvksdtn datndqsssdasnqtntntsnqntsttnnannqpqatt dms  
qpaqpkssvnadqassqa  
hetnsgntndktnessnqsdvnqyppades lqdaiknpaiidkehtadnwrpidfqmknkgerqfyhyastvepatv  
iftktgpii elglktastw  
kkfevyegdkklpvelvsydsdkdyayirfpvsngtrevkivssieygenihedydylmvfaqpitnnpddyvdeety  
lqllapyhkaktlerqvy  
elklqeklpekykaeykkkl dqrveladqvksavtefenvtptndqltdlqeahfvvfeseensesvmdgfvehpfyt  
atlngqkyvmmktkdds yw  
kdlivegkrvtvskdpknnsrtl ifpyipdkavynai kvvvanigyegqyhvriinqdiktdddtsqntseplnvq  
tgqednvtatdtatnsie  
ttpseatdkvdviepesdmvkdtdssvdkdahlni dhssdmsgnthfdkydlkemdtqiakdtkdvnsvgmssnvtdtd



Tsompanidou\_et\_al\_Supplemental\_FASTA\_File

kgsnknkdkviqlahiadk  
nkvnntgtetnidtmkyhpiistikvtdkkttehlpdihktvdktvkakekagtpskenklsqskmlpktgettssqsw  
glyallgmialfipkfrke  
sk  
>tr|D9RI17|D9RI17\_STAAJ  
mthlsdl dianqstlqpikdiaasvgisedalepygyhakidinkitprdskgkvvlvtamsptpagegstvtvlgad  
afhelkknvmvalrepaig  
ptfgikggatgggyaqvlpmedinlhfnngdfhaittannaalsafidnhihqgneidqrriewkrvlmdndralrhvvn  
glggptngvpredgfni tv  
aseimailclsrsikldkdkisritigytrdrkpvtvadlkvqgalamilkdaikpnlvqsi egtpalvhggpfaniahg  
cnsilatetardladi vvt  
eagfgsdlgakfmdikareagfdpaavvvvati ralkmhggvakdnlkeenveavkagivnl erhvnnikkfgvepvva  
inafi htdaeveyvkswa  
kennvrialtevekqggvd lanevlevidqpn s fkp lyel elpleqkiekivteiygskvtfsskaqkqlkqfken  
gwdny pvc maktqysfsdd  
qtllgapsgfeiti releaktgagfiva l tgvimtmpglpkkpaalnm dvtddghaiglf  
>tr|D9RI18|D9RI18\_STAAJ  
mkvevykgvqgkhnldyeetyntfdwk dveqafswsetgkmmayecidrhvdqgsgdkialnykdehrkesytkdmq  
rlsnkaanvlsehaevdkg  
drvfi fmsrtpelyfallg ilkigaivgpl feafmekavadr lenseakvli tnka llprvpvdkl pdlkkivvdedve  
dnyidfi slmetasdefdi  
ewlksddgli lhytsgstgqpkgv l hvqqam l vhyi sgkyvdl qeddvwyctadpgwvtgtsygi fapw lngatnciag  
grfspeqwysmi edfkvti  
wytapta l mmsagddi vekydl s lrsi lsvgepl npevikwakkvygl tv ldtwmm tetgghmivnyptmdvkl gsm  
gkplpgi qaai iddagne l  
ppnrmg nla ikkgwpsmm yriwknpekyksyfi gdwvysgdsaykdedgyfwfqgrvddv imtagervgpfeveskl veh  
eavaeagi igkpdvrgei  
ikafvalrkgyeptde l keeir l fvkegl sahaapreiefkdkl pktrsgkimrrvl kawel ndagdl stme  
>tr|D9RI19|D9RI19\_STAAJ  
mnhl ktyqcedyyihgkqfviegp l tyed l ka l t f d a h l t a f r d a e d q y e a l l e i t t l p e g r i y v a r q d q l i v g y v t f h y  
pdeierwstgnlpylielg  
aievsinfrqlqlaekliqlslstpefedyivitteyywhwdl knskl dvfdy kkl mqr l matgg lei fatddpeitshp  
anclmarigknit leqqqa  
fddi rymnrfff  
>tr|D9RI20|D9RI20\_STAAJ  
mqqhssktayvysdkllqyr fhdqhpfnqmr l klttel l lnan l lspeqivqpriatd delml i hkydyvea i khashgi  
isedeakkyglndeengqf  
khhmrhsativggaltladlimsgkv l ngchl ggg l hhaqpgrasgfcyndia itaqylakeynqr vli idtdahhg dg  
tqwsfyadnhvttysihet  
gkfl fpgsghytergedigyghtvnp l epytedas fl ecfk l tvepvvksfkpdi l lsvngvdi hyrdpl thlnct l hs  
lyeipyfvky l adtytngk  
vimfggggyniwrvvprawshvflslidqpiqsgylplewinkwkhyssellpkrwedr l ndytyvprtkeiseknkla  
lhaswyestrq  
>tr|D9RI22|D9RI22\_STAAJ  
msnkl esyrseivslnhqil dl l skrgelaqkigeeklkqgtriydpqrekem l nd l idsnkgpfn dntikql fkeifka  
stdlqksenekhlyvsrk l  
kpedti v t f d n g g i i g d g n k s f v f g p c s v e s f e q v e a v a k n l l a k g e k f i r g g a f k p r t s p y d f q g l g v e g l k i l k q i k d  
kyd l n v v s e i v n p n d f e v a  
deyl d v f q i g a r n m q n f e l l k e a g r t k k p i l l k r g l s a t i e e f v y a a e y i a s q g n q n i i l c e r g i r t y e k a t r n t l d i s a  
v p i l k q g t h l p v m v d v t h s  
tgrkdim l p t a k a a l a v g a d g v m a e v h p d p s v a l s d a g q q m d l e f q a f y d e l k p l a d l y n a k k l k  
>tr|D9RI23|D9RI23\_STAAJ  
mtqqqnkr t l knkhtyqnepl pnrkdfvvsfi tgalvgsalglyfknkvyqkaddlkvkeqelsqkfeerktqleetva  
ytkervegf l nksknegaa  
lkaqqaai keeasann l s d t s q e a q e i q e a k r e a q e t d k s a a v s n e e s k a a a l k a q q a a i k e e a s a n n l s d t s q e a q e i  
q e a k k e a q a e k d k s v a v s n  
eepkast l n v s k e e s q a e r l a n a a k q k a k l t p g s k e s q l t e a l f a e k p v a k n d l k e i p q l v t k k n d v s e t e t v n t d n k d  
t v k q k e a k f e n g v i t r k s d  
ekttntavdkksgkqskkttspnkrnaskastnktsgqkkqhnkksaqqakkqsssskstqknnqtsnkskttkakss  
nasktsnakveakskiek  
rtfnd  
>tr|D9RI26|D9RI26\_STAAJ  
mswfdkl fgedndsnddl i hrkkkrrqesqni dndhds l l p q n d i y s r p r g k f r f p m s v a y e n e n v e q s a d t i s d e k e q  
yhrdyrkqshdrsqrkrh  
rrrnqtteeqnyseqrgnski sqqsi kykdshyhtnkp gtyvsaingiekethkskahnmysnntnhrakdstpdyhke  
sfktsevp sai fgtmkpkk  
lengripvskpkesdkkydkyvaktqtsqnkql eqekqndsvvkqgtaskssdenvssttksmpnyskvdntikie  
niasqiveeirrererkv

Tsompanidou\_et\_al\_Supplemental\_FASTA\_File

lqkrrfkka1qqkreehkneeqdaiqraidemyakqaeryvgdsslnddsldtdnstasqlhtngieneavsndenkqp  
siqnedtdthvdespyny  
eevs1nqvsttkqlsddevtvsdvtsqrqsalqhnvevnnqdelknqsrliadseedgatnkeeysgsqiddaefyelnd  
tevdeattsnsedntnrda  
semhvdapktqehvvtesgvnnidktvdneielaprhhkddqtnlsvns1ktndvndghvledssmneiekqnaeitenv  
qneaaeseqnveektieni  
npkkqtekvstlskrpfnvmtpsdkkrmmdrkkhskvnpvelkpvqskqavsesktesqatpssstsdqesntnayktn  
nmtsnnvennqlighaete  
ndyqnaqhyseqkpsadsiqteifeesqddnqleneqvdstpssvsevsvditeeseetthpntsgqqdnddqkdlqp  
sfsnqnedtanenrprtnq  
pdvatnqavqtskpmirkgniklpsvs1leepqvi epdedwitdkkkelndalfyfnvpaevqdvtegpsvtrfelsve  
kgvksritalqddikmal  
aakdiri epipgtsrvgievnpnqpttvnlrsiiespsfknaeskltvamgyrinnepl1mdiaktphaliagatgsgk  
svciinsilmsllyknhpee  
lrl1lidpkmvelapynghplvapvitdvkaatqslkwaveemerryklfahyhvrnitafnkapydermpkivivid  
eladlmmmapqeveqsar  
iaqkaracgihmlvatqrpvsnvitglikaniptriafmvsssvdsrtildsggaer1lgygdmlylgsgmknpirvqgt  
fvsddeiddvvdfikqqre  
pdylfeekellkktqtqsqdel fddvcafmvneghistsliqrhfqigyraariidhleqlgyvssangskprdvvyte  
adlnke  
>tr|D9RI27|D9RI27\_STAAJ  
mnlfynpkyvgdvaflqiepevegnynkkgnvveitnegnvvgynifeiskditieetghikltdelvnvfqkri seag  
fdyknadlspkfvvgvye  
tkdkhpdadklsvlnvngndtlqivcgapnveagqkvvakvgavmpsgmvikdaelrgvassgmicsmkelnlpnape  
ekgimvln dsyeigqaffe  
>tr|D9RI30|D9RI30\_STAAJ  
mninkkvtlqriqt1te1hgapgf eeeknymtqqmapyvdefienrmggffgvkksknpnakrvmiaahmdeigfmitn  
itkngmiqftnlggvandi  
wqgqrlviknrngdkii gvvsnipkhf rtgsegapeikdltdigaqnedevrergidigtivphtsftqlsehrysak  
awdnrygcvlaieilellk  
dielvdlyvganvqeevlgakasaemidpdvafvdcspandvkgnqplsgelgkgtlirikdgtmilkpafrdy1l  
klveahdiehgympggt  
dggeihkanigiptavigvcaryihstsvfdirdyfaars1lseaicnldnnqietlqyk  
>tr|D9RI33|D9RI33\_STAAJ  
mrirykpwaedy1kdhpelvdmdgqhagkmtewfdktqpihieigsgmqgfittlaaqnphinyismereksivykvldk  
vkemgltnikiicndaie1  
neyfkdgevsriyl nfsdpwpknrhakrrl tyhtflalyqqi1ndegd1hfktdnrglfayslesmsqfgmyftkin1n1  
hqedgsni1teyekkf sd  
kgsriyrmeakfhsqk  
>tr|D9RI34|D9RI34\_STAAJ  
meqfyqlgwt1dsaggasgeaymaeqdgqklflkrnsnpfiaals aegivpk1vwtkrietgevvtaqhwngre1ssne  
mkqtrvah1lkkihnsrpl  
lsm1krmemepitpeimlnkinas1srevlthhivrks1tyleehmps1dsrfftvhgdvnhnnw1l sdrdel1vdwe  
gamiadpaidigm1lynvy  
pqqqwsew1etygvqes1n1nkrmkwytvigsiglvqwyeekrykdmntw1kflnevmsnmfi  
>tr|D9RI35|D9RI35\_STAAJ  
mekif1ngefvspseakvsyndrgyvfgdgiyeyirvyngklftvtehyerflrsaneigldlnysveelie1srklvdm  
nqietgaiyiqatrgvaer  
nhsfptpevepaiyaytksydrpydh1engvngvtvedirw1rcdiks1n1lgnvlakeyavkynaveaiqhrgetvteg  
ssnayaikdgvitythpin  
ny1l ngitri vikkiakdynipfkeetftvdf1knadevsvsstaevtpvik1dgepvndgkvgpitrqlqegfkyie  
shsi  
>tr|D9RI37|D9RI37\_STAAJ  
makgn1fkailgiggavaav1vtrkdsrdk1kteynkyqdpqsykdnakdkatqlgtianetikevkanpkeyan1kn  
npkaffeeekskfteydnk  
tdesiekkgfddeggaapnnn1rivteed1kknkna1sdke  
>tr|D9RI38|D9RI38\_STAAJ  
mridkfl anmgvgt rnevqk1lkkglvnvneqvikspkthiependk1svrgelieyvenvyimlnkpkgyisatedhhs  
ktvidlipyqh1nifpv  
rldkdtegl11itndgdfnhe1mspnkhvskkyevisanpiteddiqafkegvt1sdgkvkpa1ltyidnqtshvtiyeg  
kyhqvkrmfhsiqnevlh1  
rrikiadle1dsn1dsgeyr1l tendfdk1nyk  
>tr|D9RI39|D9RI39\_STAAJ  
mseskemvrgtflitisi1itkvlglvfiipfnyliggqenmapftyayapyniaiaavatagvplaaskyvakynaigay  
kvsqkfykssfivmsitgv  
lglvlyflapyselt1arnvhdkngsvddi twiiriismvvi fipvlatwrgifqgyksmgptavsevteqiarvif  
iligsylvlnvfdgsilla  
ngiatfaavgaiigiftlwywrkrkhnidrmvesdytdidvsygkmykeiiaysipfvivsnyp1fn1vdqfthnga

Tsompanidou\_et\_al\_Supplemental\_FASTA\_File

lslvgjpsqlqdi ffnmln  
mstnkivmipstlsagfavslipyitktfaegrhemhqi rtsigvlmfitvpasigimalaqplftvfgydpivlgh  
dphhdgsrllfyapvail  
isllsvtasmlqgidkqkltvyvilasvviklalnypliml fhtpgailstsi allfaigcnfyilkkyakfkfsyswih  
fakiflysfimm lgvelfv  
flanlfleptklgyliiii lgvvtvgil iygtitikr ladeflgeipeklrrrvrflr  
>tr|D9RI40|D9RI40\_STAAJ  
mygtiiggppsglmaavaaseqssnvliekkg lgrklkisgggrcnvtnr lpyaeiiknipgngkflyspfsifdne  
siidffesrgvklkeedhg  
rmfpvsnkagdvdtlvtti egqhv tikeeeavsrie vntdqftvhtqsssyvshslviatggtsvpqtgstgdgykfa  
qdlghtitel fptevpits  
aepfiksnrlkglslkdvelsvlkkngkkrishqmdmlfthfgisgpatlrcsqfvykeqknqktqhismaidafpelnh  
eqlkqhitsllsdtppkii  
knslhgli eeryllfmlegagidenttshhl snqqlndlvnmfkgfefkvngtlpidkafvtgggvs lkeiqpktmmskl  
vpglflcgevl dihgtygg  
ynitsalvtghvaglyaghysasme  
>tr|D9RI41|D9RI41\_STAAJ  
mnlkknkysirkvkvgifstligtvll snpngaqa ltt dnnvqsdt nqatpvnsqdt nvanrglansa qntpnqsat  
pnqstnqalvnhnngsian  
qatpapiqpsaspaqnnhsdanstatetvsnannndvvsnttl nvpnrtnengsgghl tlkeiqedvrhssdkpelva  
iaeqasnrrpkrrraapa  
dpnatpadpaaaaagnggapvaitapytpttdpnannagqnapnevlsfdngirpstrsvpsvtvvdnlpgftlingg  
kvgvlshamvrtsmfeags  
nrtygaqgnvalgrisgtdasnhgdfngi eks ltvnpnselife nt mptkngqgatnviikngvntdiaektiedgp  
tlrlfkvpdvnllkiqfv  
pkndaidtrgiyqlkdgykydfvdsig l hsgshvyverrtmeptatnkeftvtts lknngnsgas ldtndfvyqvql  
pegveyvnsltkdfpsnn  
sgvdvndmntydaanrvitiktstgggtansparlmpdkildlryklrvnnvptprtvtfndt l tyktytqdfinspaes  
htvstnpytidiimnkda l  
qaevdrriqqadyt fas ldi fndlkrraqtilaenrnnvplnkrvsqadidtltnqm qntlirs vdaenavnqkadqmed  
lvnqndel tdeekqaaigv  
ieqhkgnii gdi gdttdagvtrikdqqiqt lsgdtatpvvknakkairdkatkqra iinatpdatedei qdalnqltt  
detdaidnvt natnadve  
takngintigavvpqvt hkaarda inqatatkrrqqinsreatqee knaalnel tqatnhaleqinqattnadvdnak  
gdgl nainpiapvtvkkqa  
ardavshdaqqiati nanpdatqeerqaa idkvnaavaaantni lnantnadveqvkt naitqgiqai qpatkvktdakn  
aidksaetqhnti fnnnda  
tleeqgaaqqlldqavatakq ninaadtnqeva qakdqgtqni vviqpatqvkt darnavnekaretitninatpgatre  
ekqea idrvnt lknra lnd  
igvtsttamvnsirdda inqigavqphvttkqtatgvlndlatakqei nqntnatteekqvalnqv dqlatainning  
adtnaevdqaqqagtgain  
aiqpniikkpaa leqikqhynak laei nqtpdatddeknaaint l nqerqqai esikqantnaevdqaatvaennidavq  
dvvkkqaardki taevak  
rievvkqtpnatdeekqaavnring lkdqal nqinqdhtndqvdattnqmitaidnveadvvvpkaiadie kafkekqq  
qidnsidstdnekevatqa  
larekeka laaidqaqtnnqvnaatdgl saikivqpetkvkpaareqinqanelraqinqdkeataerqaa l nkind  
fvnqamsdisndrtnqqvt  
dtktaqal d niaqvnephivraaardavnqqyeakkqei eqaehatdeekqvalnqltnkeralq ninqavtndnvkhve  
ngiatlkgvephivvkpe  
aqqai kasadkqvdsikdtpdatvde ldeanqlisdt l kkaqqei entnqdaavtdvrnqtikaieqikpkvrrkraald  
sieennknql dai rntldt  
tqderdva idtl nki vntikndiaqnktnaevdr tetdgdndikvilpkvqv kpaarqsvgvkaeaqnalidqsd l stee  
erlaakh lveqalnkainq  
inhadktaqv nqdsinagniiskikpattvkataiqqi qniatnkinlikanneatdeeqnaaiaqvekelikakqqias  
avtnadvayllhdekneir  
eiepvinrkasareqltt l fndkkqai eaniqatveerdsilaqlqniydaigqidqdrsn tqvdktas lnlqti hld  
vhpikkpdaektindlar  
vtalvqnyrkvsdrnkada l kaitalk l qmdeeltartnadvdav l krfnvalgdieavitekens l lridniaqqtya  
kfkaiatpeglakvkv lid  
qyvadgnrmi dedat lndi kqhtqfivdeilaik l paeatkvspkviqsapkvctpi kkeethesrkvekel pntgsegm  
dlplkefalitgaallarr  
rtknekes  
>tr|D9RI43|D9RI43\_STAAJ  
mnynhnqi ekkwqdywdenktfktndnl gqkkfyal dmfpypsgag l hvghpegyatatdi isrykrmqgynvlhpmgwda  
fglpaeqyal dtgndpref  
tkkniqt fkrqike l gfsydw drevnttdpeyykwtqwi fiql ynkg layvdevavnwcpalgtvl sneev idgvsergg  
hpvyrkpmkqvw lki teya  
dqllad l dldw pes l kdmqrnwigrsegakvsfdvntk gkvevfttrpdtiygasflvl spehalvnsittdeykekv

Tsompanidou\_et\_al\_Supplemental\_FASTA\_File

kayqteaskksdlertdla  
kdksgvftgayainplsgekvqiwiadyvlstygtgaimavpahddrdyefakkfdlpiievi egg nveeaaytgegkhi  
nsgeldgleneaaitkaiq  
lleqkgvgekkvnyklrdwlfsrqrywgepipvihwedgtmttvpeelplllpetdeikpsgtgesplanidsfvnvvd  
ektgmkgrrretntmpqwg  
scwylyryidpknenmladpekllkhwlpvdlyiggvehavlllyarfwhklydlgivptkepfqklfnqgmilgegne  
kmskskgnvinpddivqsh  
gadtlrlyemfmgpldaaiawsekgldgsrrfldrvwrilmvnedgtlsskivttnksldkvynqtvkkvtedfetlgfn  
taisqlmvfinecykvdev  
ykpyiegfvkmlapiaphigee l wsklgheesityqpwptydeallvddeveivvqvgngklrakikiakdtskeemqeia  
lsndvksaiegkdimkvi  
avpqklnivak  
>tr|D9RI45|D9RI45\_STAAJ  
mgnhfqysfenkryhtwnyhlnkfgqki fkvaldggfdcpnrdgtvahggctfcsaagsgdfagnradsiaavqfkeike  
kmhekwhegkyiayfqaft  
nthapvavlekefepvlekepgvgvlsigtrpdc l pddvveyladlnqrtylwvelglqtihqstsdlinrahdmktyydg  
vaklrkhninvcthiingl  
pgedydmmtakevaqmdvqgikihllhllkgtpmvkqydkglltfmtqeeytnlvvdqlevippemivhritgdgp id  
imvypmwsvnkwevlngid  
aelarrnsygg l rykskvkq  
>tr|D9RI48|D9RI48\_STAAJ  
mwkweaendakgvviahnilehtgryayvitmlrrngyhvimgd l pggqgtsrankgqienfqtyhesll dwlkianey  
kiptyvlvgvggllilnl  
lekvelpiegmmlispmlelqkngknrkdklvsnigkiskdtrfnvgvepkdltrnleiveetvndg l mlkkatyhwynt  
inetmktmahihdiqplp  
tllmygtkdli v dtraidefkekyqtpelyfkawqgyfhevhnepervedmryiltflnsvntmgfiveddeivei  
>tr|D9RI49|D9RI49\_STAAJ  
mallknffiglsnnsflnnaakkvgprlgankvvagntipqlintiehlndkniavtdnlgefvgtveeshakeqilt  
imdahlhghgvnahmsvkl s  
qlgaefdlelayqnlrei llkansynmhinidtekyaslqqivqvl drltgef rnvgtviqaylydspelvdkyqdrlr  
rlvkaykenesiafqske  
dvdanyikiieqrllnarnftsiahdhriinhvkqfmkenhiekdrmfqmlygfrselaeianegynftiyvpygdd  
wfayfmrrlaerpqnls la  
vkefvkpaglkrvgiaaalgatvm l glstikk l crk  
>tr|D9RI50|D9RI50\_STAAJ  
mnfegkligkdlkvai vvsr fndfitgr l legakdtlirhdvnednidvafvpgafeiplvakklaasgnydavitlgcv  
irgatshydyvcnevakgv  
skvndqtdvpvifgilttesieqaveragtkagnkgaeaavsaiemanllksika  
>tr|D9RI51|D9RI51\_STAAJ  
mqfdnidsalmalngetiivvddenrenegd l vavtewmndntin fmakearglicapvskdiaqrldlvqmvndnsdi  
fgtqftvsidhvdtttgis  
ayertl takklidpsseakdfnrpghlfp l vaqdkgvlarngh teaavdlakltg akpagviceimnddgtmakgqdlqk  
fkekhlkmitidli eyr  
kklepeiefkakvkmpdfgfdmygfkatytd eeivvltkgairqhenvr l hsac l tgdifhsqr cdcgaql essmkyi  
nehggmiy l p q egrgig l  
lnk l rayeli e ggydtvan l a l g fded l rdyhiaaqilkyfniehinllsnpskfeglkqygidiaerievivpetvh  
nhdymetkkikmghli  
>tr|D9RI52|D9RI52\_STAAJ  
mftgiveiegvvksvqirgsvrtieieahkitadmhigdsisvngac l tvidfdqtsftvqvikgtentky l advkrqse  
vnleramsngnrfggfv l  
ghvdelgtvskinetanakiitiqcsqhinnqlvkqgsitvdgvs l tvfdkddnsfdihlipetr r st ilsskklgdkvh  
letdvl fkyvenilnkdkd  
qlsvdk l rafgf  
>tr|D9RI53|D9RI53\_STAAJ  
mdyaiqlanmvqgqgvnppvgavvvkegrivgigahlrkgnkhaevqal dmaqqnaegatiyit l epcshfgstppcvn  
kiidckiakvvyatkdnsl  
dthgddtlrahgievecvdderasqlyqdfkakakqlpqi tvkvsas l dgkqandngqsqwitnkevkdvyklrhrhd  
avltgrrtvelddpqttr  
iqdgknpi kvilskgnihfnqiyqdestliwiytenp l ttnqthieiiylkscd l ttilhnykrvgvtllveagpt  
ttseflqsnyidefi l yya  
pkligsgnyqfyqtn dvi eipdanqfeivhse l lnqnvkltrkk  
>tr|D9RI54|D9RI54\_STAAJ  
mrvaiigmgtagsv l relvkhpkfnqldidlyddkvmggqvpfnqds sellinmpskkms l n l d d e t e f w k w y k q q t d  
fnfdepay l p r f v f g h y m q  
sylsmftkkypnistnyknqveiytnsnidetn l tyi c t t n s e q s w q a y d y v f l t c g t f a y h d p y n l k g k k g y i a t p y p  
tynt l d e v n e l d d i a i g t  
g l a s l d v v r y v a a h h p k l p i t m t s r s a h l p s v r g t m i d v t f k y l t k d k l n d i k k h h f g n a p l d t l v s l f l k e c a e y d i d f  
kklvhrtrtgnhiad l kydl

Tsompanidou\_et\_al\_Supplemental\_FASTA\_File

arptemgi fqs miehlkenlnwiwnslsiedqhfnqkyskmiqlnsnmpprtaelielienkslilkkdledvkhgd  
klyyfsyknqesvdiynv  
inatgakhlneldqddqliknlenrqivqahpmggiqipetnqv sprfgltlnmiaigqmtngvnlrngvkmiveq  
vahtvsqlydalesneqqq  
rsdnq  
>tr|D9RI55|D9RI55\_STAAJ  
mtykevatylkvlsdssrleildllscge|cacd|lvhfqfsqpt|syhmka|lvktn|vttrkignkhlyq|lnhnifesv  
innlsvhtsnqrcichnf  
ktgec  
>tr|D9RI56|D9RI56\_STAAJ  
mmttlatliflvtllfv|wqpk|ldigital|tgafiavitgvvsfsvdfevtgivwnat|tfvsvilis|ildkvg|few  
saihm|lhas|kng|lkmfvy  
iillgai|vaaffand|gaal|ilt|piv|lamvkn|igf|skrai|pf|ias|gfi|adtts|l|plivsn|lvni|isady|fhvg|fvryfs  
rmfipn|fsl|asi|iv|lw|  
yfrkai|pkt|fddn|ikppk|da|ind|k|l|f|k|is|w|iv|lv|ill|fy|l|ise|ft|kip|vs|ift|gia|fi|fl|ml|arks|nav|nike|vik  
gapwn|iv|fs|igmy|iv|vfg  
lnragi|tl|il|aki|ley|is|ny|gl|fst|il|gm|gf|is|af|l|ss|imn|n|mp|tv|l|ida|ia|ig|qs|nv|h|gm|l|ke|gl|ian|vig|sd|lg|pki  
tpigs|lat|ll|wh|lv|t|qkd  
vki|sw|gt|y|f|kt|g|i|i|t|ip|v|f|it|ll|g|ly|t|li|if  
>tr|D9RI57|D9RI57\_STAAJ  
myknynmtq|tl|piets|vri|p|ndi|sry|vnes|vet|ip|d|se|f|def|rhrg|atsy|hp|kmm|l|ki|ily|ayt|qsv|f|sgr|riek|ll  
hdsi|rm|mw|la|qd|q|t|psy|kt  
inrfr|vnp|ntd|al|ies|l|fi|q|f|hs|q|l|kqn|l|idd|ks|i|f|id|gt|k|ve|as|an|ryt|f|vw|kks|i|qn|hes|k|ln|ens|ka|lyrd|l|veek  
i|ipe|ked|gds|d|tie|eid  
ligsh|l|d|ke|ied|ln|hs|i|qned|ct|q|irk|qtr|kkr|te|ikk|f|k|k|k|f|ddy|ser|ks|ky|ee|qks|il|kdr|ns|fs|ktd|hd|at|f|mr|me  
dhmkng|q|lep|gyn|l|qiatn  
sqfv|l|syd|l|fq|n|p|td|tr|t|lip|fl|tmi|qnt|f|gy|l|pey|iv|ad|agy|g|se|qny|mai|idd|fn|k|t|pl|ity|gm|fik|dk|tr|k|f|ks|dif  
ntqn|ky|de|l|nd|ef|ic|pnn  
krig|f|kry|ayr|ndry|g|f|krd|f|k|lyec|dd|cs|acs|l|rqq|cm|kp|ns|ks|nkk|im|knyn|wey|f|ka|qin|q|l|se|pet|k|ki|ys|qr|ki  
dvep|vf|g|fm|kai|l|g|f|tr|ms  
vrgink|vk|rel|g|fv|l|mal|nir|kiv|arrav|yy|qih|l|kk|ad|fy|qi|in|rn|q|ly|ia  
>tr|D9RI60|D9RI60\_STAAJ  
mkfnd|vyn|kh|h|k|i|ih|l|l|kk|yni|syn|de|yy|q|ll|ik|mw|q|l|sq|iy|kp|ss|k|q|s|l|ss|f|l|f|tr|l|n|fy|l|id|l|fr|qqn|q|l|kd|vil  
cenns|pt|te|q|ty|f|neh|d  
lrl|qdi|f|k|l|n|hrer|l|wk|ly|leg|y|k|q|fe|ia|e|ims|l|s|l|st|ik|lik|ts|v|kr|kc|q|hn|fn  
>tr|D9RI61|D9RI61\_STAAJ  
mqdnst|ky|l|ly|iq|tats|nh|let|ncv|fl|h|cdy|ile|vp|ink|lvs|y|yak|l|h|ss|qsv|li|etak|nil|n|ink|l|vpi|yin|akt|il|f  
plkhkrap|iq|iy|inah|yiv  
gmtai|en|st|l|ih|f|q|egi|q|lev|dep|fs|lvs|kk|ches|l|alk|h|fient|isn  
>tr|D9RI62|D9RI62\_STAAJ  
mnkas|fd|k|k|v|k|k|q|l|wf|l|nk|kek|qa|ld|qr|l|ssi|ddd|svn|l|nk|pvt|fanay|l|rqh|vfr|nket|ksys|mfvt|lvmm|fayva|l  
lg|l|f|l|fg|l|its|l|sgv|q|ffv  
spkvd|l|stt|v|il|ti|igail|miv|siy|fikiv|tsy|ftk|lleik|fnsk  
>tr|D9RI63|D9RI63\_STAAJ  
mqkfk|dff|ydd|lsv|trgny|fl|t|lma|aff|iti|il|fig|iv|v|sev|yll|ysm|liv|l|vg|l|ill|rl|f|kin|l|fs|f|k|l|t|l|sq|viy|i  
ggalliy|g|ldn|ly|ly|f|hdv  
paneq|le|qe|ir|nt|p|fy|is|ift|vt|i|paive|eiv|frgmi|ir|vif|r|kh|l|fl|gl|iv|ss|lv|fas|l|hes|d|twi|gyl|py|ly|sgli  
fgli|y|ikt|kr|levvi|fmhf  
lnn|l|a|l|fi|iw|r  
>tr|D9RI66|D9RI66\_STAAJ  
mqyvy|fi|gga|l|gall|ry|l|is|f|lnt|dgg|fpigt|lvant|gaf|vmg|lltalt|iaff|snhpt|lkkait|tgflgal|ttfstfq  
lelihm|fd|h|qq|fit|l|l|lya  
itsy|vf|g|il|cy|vg|ik|l|gg|ls  
>tr|D9RI67|D9RI67\_STAAJ  
misiilvm|igg|fgais|rsait|dyfn|hk|f|tsk|lpiat|livn|l|vgs|fl|igl|tig|l|sis|sw|f|paff|vtg|fl|gg|l|ttfst|la  
keltl|mmtp|k|fn|l|fl|ny  
sllqfi|igfi|acy|igyhi  
>tr|D9RI68|D9RI68\_STAAJ  
mevkt|fyng|ntmp|q|ig|lgt|frv|end|en|cmes|v|kya|ie|qgyrs|id|tak|vyg|nee|qvgagi|rag|lest|giared|l|fits|kly  
fedfgren|vaa|eas|l|s|r  
lg|lky|ld|ly|lv|hwp|gtne|avm|vdt|wkg|med|lyknn|kvkn|igv|sn|fep|he|alla|qvs|ikp|vin|qvey|hpy|l|tkh|k|l|kly  
laaqhivmes|wsp|l|ma|qai  
lndetik|dia|qelg|kspaqv|l|rnv|qhg|vvt|ipks|vtpnr|isen|fqi|dfel|sde|qm|trid|gl|nqdkri|gpd|pkk|feg  
>tr|D9RI69|D9RI69\_STAAJ  
mdlssp|vvig|li|avvia|l|ffv|l|flval|gskk|kvr|qteekye|qqeqnikks|sheealekeri|qnkktitkq|qedyn|hm  
stk|dreida|l|k|l|f|sk|nhse  
yvt|dmr|l|igi|rer|lv|k|ekri|rped|mhmani|fl|pkd|gf|n|ier|ish|lv|l|trt|g|ly|i|ids|q|llkgh|vyngi|sggq|fkd|lpp  
meqv|fdt|ld|l|dksr|pqtiv

Tsompanidou\_et\_al\_Supplemental\_FASTA\_File

mdqnddkrslsfvnysdqieaikqlaedlqkhlgakytptsilyfnpknegdvtsinyqnsavkvlvgaeqldeffnkf  
vfhgriqynvedlqqmmdk  
iesfn  
>tr|D9RI71|D9RI71\_STAAJ  
msvdytettkidkllkkptshfqlsttqlynkilnndnegvltelgavnastgkytgrspkdkffvsepsyrndidwgei  
nqpidetf1klyhkvldy  
ldkkdelyvfkgyagsdkdtmklvtinelawhnlfaknmfirpeskeeatkikpnftivsaphfkadpevdgtksetfv  
iisfkhkviliggteyage  
mkkgifsvmnyllpmqdimsmhcsanvgekgdvalffglsgtgkttlsadphrkligddehgwnkngvfnieggcyakai  
nlskekepqi fdaikygai  
lentvvaedgsvdfednrytentraaypinhidnivpskaahpntiifltadafgvippisklnkdqamyhflsgftsk  
lagtergvtepepsfstcf  
gapffplhptvyadllgelidldhdvdvylvntgwtggkygvgrislhytrqmvnqaisgklknaeyrkdstfglsipve  
iedvpktlinpinawsdke  
kykaqaedliqrfeknfekfgekvehiaekgsfnk  
>tr|D9RI72|D9RI72\_STAAJ  
mdfikrkrmpiesfthqfeeitylsddlqvkalmmtprehvkrivvylrggkqgvrvragrlmqfsdsqtlvigpyyrg  
nngsegkdefyrgdlnvdt  
qllrllhnkypqafihmvgsrgglqgl1tfqdlpvssyiwggvsdidlmyeervdlrgmlrrmighpkkdraayearq  
aipninenppilivhggk  
dqvgi hhayladqlelkgvthetfyqmaeghvprppamvetltyikefmnqvelhs  
>tr|D9RI73|D9RI73\_STAAJ  
mrvkfrdkdnrqi ltfkkdnevadgnhvlaiptfknqllftkhnirgiefpggkregressaeavtrelyeetgakvkn  
ihyaqytiethdqidfvk  
dvyfi evkslvskndyletagpvl fncindielaqrsflldstilkcvervqslgyfyt  
>tr|D9RI75|D9RI75\_STAAJ  
mkltalhfkyseqfksqivtpkvtlthrdclfieiidkgyfygecnaftdwyndfetsvkealqqwfigiknksf  
esyaaalellaplentpaa  
rativmalyqmfvhlpfsfvaygatasglsnkqleslkatkptriklkwtpqimhqirvlrelldfhfqvidanesldrq  
dftqlqllarehilyieep  
fkdismldevdgtippialdekatslsdiinlielynvkvvvlkpfrlggidkvqtaidtlkshgkvvigmyeygls  
ryftamlarkgdysgdvtp  
agyyfeqdvvahsgilkegrlefrpplvdltqlqpy  
>tr|D9RI76|D9RI76\_STAAJ  
mdfwlykqaqqnghhiaitdggesythylyceaslakrlkayqqsrvglyidnsiqsviliahacwlanieiamintrl  
tpnemknqmrsvdqlifc  
tlplelrgfqivslddiefagtditmgllndtmdiqdtsnetvvpkdslnpnlntsfnllddiasimftsgttgpqkav  
pqtfrnhysaigckeslg  
fdrdtnwlsvlpiyhigslsvllravieftvrvdkfnaeqil tmiknerithislvpqtlnwlmqqglhepydlqkil  
lggaklsatmietaalqynl  
piynsfqmtetcsqfltatpemlhvrpdtvgmpsanvdkvknpnkeghgelmikganvmnglyptdltgtfengyfnt  
gdiaeidhegyvmydrnk  
dliisggeniypyqietvakqfpgisdavcvghpddtwghvpklyfvsesniskaqliaylsqhlakykvpyfekvdtl  
pytstgklqrnklnrg  
>tr|D9RI77|D9RI77\_STAAJ  
mlylliflsscgtnnkivgqrfeiqhnetigsiyfsadyahirgiekgvtkyfvdkvgs krylfieyipdnvlncpkpdf  
wktlkykkdkvtzyvyvie  
nllddevfhlsalqdinripidiadvatmgksphqndrmtlklknkn  
>tr|D9RI78|D9RI78\_STAAJ  
mki tykyrgdplntennknqnsakserrgmkgcggclisfilliillsacsmmfnsndsttnqssktqltqkden  
knedkpeeksetktddelq  
steevpanentennqheideitttdqsddeintpnaedksqddlkdlnekqpps dhhqstqpktspstetnkqqs fan  
ckqlrqvypngvtadhpay  
rphldrkdkracepdky  
>tr|D9RI79|D9RI79\_STAAJ  
msnqfkseeerrqweqfafaqnaqqhqqyqgkkskkgwfwgcgglvlfiliiigisactagitgnlgnssketnkt  
hki getvkngdlevtvnsv  
etmksvgpslaptnakgfvvadvtiknkgkealtidssmfklksgdktfeadntgmsanqsdngsiensfflqrinpd  
staqgkivfdvsenianak  
dkklevislsvkkitfdlsdaktstakdkkdqteavavassnsdnvnyeasattpattssadtdsedseksskdedkq  
nssksdkssveksesneet  
apvepmpqskpttseaspsqni hnedsmydaste  
>tr|D9RI80|D9RI80\_STAAJ  
mkfkai vai t l s l l t a c g a n q h k e n s s k s n d t n k k t q q t d n t t q s n t e k q m t p q e a e d i v r n d y k a r g a n e n q t l n y k  
t n l e r s n e h e y y v e h l v r d  
avgtplkrcaivnrhngtini fddmsekdkeefafkkrspkynpgmsdqaemdnesediqhhdinnnkaiqndtpnqk  
vdkndknavnkeekhdnr  
vnksaeikvk

Tsompanidou\_et\_al\_Supplemental\_FASTA\_File

>tr|D9RI81|D9RI81\_STAAJ  
mitfeniqqlekytltmthglfnqklglgisidnaehtlftpymmetlsslvgvkpdiidlihgkteledfaafnlssidtt  
vtvc1qrtee1lkqyknve  
fndkilinwhimqk  
>tr|D9RI82|D9RI82\_STAAJ  
mekneytakyneysqlldatysqavayllnkygavtdddykeksytrflngeiksiskgytraseglychhisedkfqn  
lsdlrfisefkypynyqkk  
enlvycdliehlilhaiitkesngqfgvaglcqmikptvidwyigeypkpwamqatkaraylpgilvekllikiddmlk  
gieiydflesr  
>tr|D9RI83|D9RI83\_STAAJ  
mkviekvhyedi lepkiivr1fqplvknkmdqlfitsehfaididkl1fqln1tvkyikmegntsgylsgrtiyinnhsi  
nntrfaiare1ghylykyk  
dnndnsinnlreitiesdvnqfsvd1lmpkkqiealvynfyevnninlssglsekernk1lnlissklevskiaaglrly  
nlgih  
>tr|D9RI84|D9RI84\_STAAJ  
mkqisigyeeiygdri fshf1keqevknwktvnqiekehldkneyeaepplfffsgsl  
>tr|D9RI85|D9RI85\_STAAJ  
mdr1kys1kvglal11fctlnylvpmqsnafsiisafavllm11vyiflglk  
>tr|D9RI86|D9RI86\_STAAJ  
minqn1fdelekkckledifteeikkykaedqlragktqyvetgkdatlylssaytktiaalgagaisvisaltggl  
vgagvggflgsiaasnidd  
skgy1k1k1knaeeeyvtgekwyq  
>tr|D9RI87|D9RI87\_STAAJ  
mrhiatwemeeiey1h1ddedkedi lyfekeddkviavtnilwtgsgfndi  
>tr|D9RI88|D9RI88\_STAAJ  
mkkkyiliivsviligmiviayahnkqkkdhyietqekrinlffkynlnqyqslkvtrfklpmdsyfiggyinnkdye  
fqafinvggrkqfardigy  
deeklgk11keqevknwktvdqiikkehdksyeyaepplfffsgsl  
>tr|D9RI89|D9RI89\_STAAJ  
mggyivdgyinhdknydfkv1isatdnhqfedsigyddktfgklfkekdhknelkpkdiiikkehdksdyeadpplfffs  
grle  
>tr|D9RI90|D9RI90\_STAAJ  
mkkkyiliivsviligmiviayahnkqkkdhyietqekrinlffkynlnqyqslkvtrfklpmdsyfiggyinnkdye  
>tr|D9RI91|D9RI91\_STAAJ  
mkkryvfmvva11ig11iayvhnkqikyhyiktqekridlyfkhnlnnyknmkvtdfhknpmggyfvegyindnkdye  
fqasidsggddqfhdigy  
dgdki1g1fkekdpyk1svdeiekehldksyeyaepplfffsgrle  
>tr|D9RI92|D9RI92\_STAAJ  
mtykmmkwqk1st1t1lmagvit1nggef1rsiekhqiavadtnvqtpdyek1kktw1dvnvygdqydennqdmkkkfdak  
ekeak11ddmktdnrty  
1wdsak1dkksadmtktyrnekieaeamrhknts1ktdenk1kitgaikw1hnhvygkdpdkkvad1ttnrkekds1sk  
nns1nwwdyeigtpraltn  
t111mddm1tkdemksyskpi1stysps1sk11ssvgesedakgn1vdiskv11esvieedvdmkksidsfnkvftv  
qdsatgkarnqfykdgsy1  
dhqdvpytgaygv11dgi1sqmmpmi1kespfkhtqdkat1snwidegfmp1iykgemmd1srgraisrenetshtasatv  
mks11r1sdtmdestktry  
kqivktsvksdssydsnd1tsysdi1dkm11mddkti1sakeqtq1kiyndmrvtyhnd1dfafgl1smtsknvarye  
sinnen1kgwh1tgagmsy1  
ynsdvkh1yrenf1wattmtr1pgtt11ndmqstntkndksfvvgtk1nnyasigmdfenqdk1takksyfilndkivf  
igtgik1stdsskkp1tsve  
nrkangy1klykddie1ttsdvn1aethsv11les1sdtkkn1gyh1fdkpi1itvkketh1gkwk1dinnsq1sttqknddyev  
tqthnts1enkyay1lypg1  
sksd1fksknn1sv1kqded1fhv1kdndgv1fagv1nysd1stkt1faingat1velkek1gm1filkk1ddk1tyecs1fyn1pestns  
as1dies1kisi1agy1titnkn  
vt1ns1dag1vn1fel1tk  
>tr|D9RI93|D9RI93\_STAAJ  
mivfi111111lgg1fl1kmkydemky1deqkerik1fmkynvkgfkeiqfee1qkenqmdgys1sgyinndkn1sftagirt  
idd1fqfd1tdis1yde1lgrk  
i1kn1pks1vse1kkeqnts1nk  
>tr|D9RI94|D9RI94\_STAAJ  
merkk1i1fi1is1li1a111stgy1lnknk1dhy1ietqekridlyfkynlnnyhsmkvts1fkkt1pmggyivdgyvnhnknye  
fkvl1isatdnhqfedsigy  
ddktfgklfkekdhknelkptdiikkehdksyeyaepplfffsgpl  
>tr|D9RI95|D9RI95\_STAAJ  
mkytdkiyhkvsdf1sysk1kkdntyki1sgqdykvi1ekrddtqng1frayv1fapv1ikgkvdk1sq11lgyagtdp1slndiht  
dlq1pih1hntn1nkinnhy  
kd1kn1sti1hkkynt1kdknd1lfs1sn1fnkv1l1fge1lwaak1fapt1qmdes1daf1tesvkk1kypd1sei1hpl1ghs1lga1flaqy  
n1likh1n1dng1tt1faap1nvy

Tsompanidou\_et\_al\_Supplemental\_FASTA\_File

hsftgdffkdidngvydskirnighfndpinfnffdhpiogenitvmphydgifitalpligqhtlesyndfdadgtvkem  
peleqfnhdplnrrfqfl  
dpfginsrffdsfkidssilnrpsendfdpfailnkdklfesnldverfnkhkddlsidlnplddeIndddplipkr  
gdkkllkaekessvkkkgk  
gskntgkvvkiqpdevrniantirdrflynqitnaldeykeetisganrildkyqselsgshefitpydleqymeila  
vegssgnfkfynsglmdl  
iqeldqkkdlqfaeklefaankfeekdleesdvfglfs  
>tr|D9RI96|D9RI96\_STAAJ  
msskdakksqearlqqlkqemrnrtdnmvsnvknvalksqtlneiietinssqnl egtfegkaseaaqsinklkn  
nenlkqkfetllntmking  
>tr|D9RI97|D9RI97\_STAAJ  
meklneaknyidsdel fal fidgqwgvgktyyiknilkefddkieiryislyglqslyeiksiiisklintstknlrk  
vlksmknfqvpylnmnnf  
sdnilryiddnslkkiknslmknksalliidvermsdkvsfeeflgfirndlidyl dckvlfignl delnkkadhkn  
sekiisrilkfpnnrevam  
divnsnlpelfvknisskel fngffdisdekkeiifekskqnnlykyyhlnmrtlnlvsnfkliinkmqdeikyksk  
fkityislfislfilyne  
frsgnl neseikdlqftyndfnln tktsialfkylyknelanyvffeielknlllygifdesiflknitnfnkeedak  
adlnvlkeffklsele  
ekeigaieikdknnenfnvkaylsllnlkgknyliddikiseledelvdnydlhqnnlivgdtinrldlvsfsneq  
lyeeikskdrlinkrttl  
mtsiyngyletilngdftnrklkeayigmkdidtieiynnlkvsnelkssnekiinlsafirndhcnndniql eyi  
igemkklkdgtkdrvtqmc  
fslldtlkgiide  
>tr|D9RI98|D9RI98\_STAAJ  
msntqkknape lrfpefegewkekkledtlefikdgthgthenvngpwl sakniknkiisddrkisesdykkiyk  
nyklekgdllltivgtigr  
aai vknppniafqrsvailktkatydvvgfiqflqtkyfknl lrrkqvvsaaqpglylgdirkikisitnieeqrkigif  
fskl drqieleeqklellq  
qqkkgy mki fsqel rfdkengndypkweekkiediasqvygggtptntkikefwngdipwiqssdvkvn dlilqqcnkfi  
sknsielssaklipansia  
ivtrvgvgklclvefdyatsqdfslsslkydklysllytmkkisanlqgtsikgitkkelldsiikiphnl eeqk  
igdlfykidkysfnkcki  
emlkslkqglkkmfi  
>tr|D9RI99|D9RI99\_STAAJ  
mnnilvqaprllnkhkkckrfitstyqtkirkevfimsiklynineeyrekfyqipkvfftnpkyiklsndakmawgilrd  
rldlsikngwvdsktgny  
fyyknepqnilnckkdvikikkeIn  
>tr|D9RIA0|D9RIA0\_STAAJ  
miqtvvaaavlyiatavdlvlvlliffaraktrkeyrniyvgqylgsiililvsflafvlnyvpek wilgllglipiy  
gikvaiyddcegekrakke  
lnekglsklvgtvaivtiascgadniglvpyfvtsvtnlll tlvfliliff lvftaqk lanipgigeivekfsrwim  
aiiyialglfiiiendtiq  
tilgfif  
>tr|D9RIA2|D9RIA2\_STAAJ  
msntkikyqifisstyldli eerqavveavlnsnipagmel fnssksqwe itqwinesdavi lllgssygtidseen  
isystemeynfakslgkpiy  
vfemnkastesakskld deftkvkenrlispnindiselkskvsqtlmqsvpseikensgwirvqdcgknvkkllkld  
aiqrldtydfllkeelyki  
fmyvktfyqhtpfddsyiedienyllyennphksfmkikvydyknflkhlkn ililikqgkplaqaghfklsfyeed  
lklknykttlvdikgl  
khfykecdrc lkaynifieginkhlye  
>tr|D9RIA3|D9RIA3\_STAAJ  
mtknqnfietkeykrfaefcdacikyqyigicygqpgvgktlssryyt nwdtiekvnhrgwedlaskttddilsvdkif  
ynapaekqtklndlysit  
aiidlgklhvvnkyghehskhysdmfkyidliivdeidr lkvqhleqlraiydehnlamifigmpgiekksrypqls  
rigfahefdnlskdethhi  
leykwqdlgfdlkledftdyeaittiikitgnfrlihr lfaqidrimdingldkistevvetardslvigir  
>tr|D9RIA4|D9RIA4\_STAAJ  
mknkekylnfseakrkkatqkyniikpfilgeqslssiskskgialstlyrwnksykeqglk gliyatradkgtrkiep  
kiideierlal mkrnsia  
tahrkitnyckennfdipsyqiysvikampksvidfshqgekyqnykdliqiressrpneiwqadhtll difildqkg  
ninrpwltiimddysraia  
gyflsfdapqcskhsinttpsme  
>tr|D9RIA6|D9RIA6\_STAAJ  
mankqveismaewdmniwdkksvsaneivvei qykevsdktirtlitrlykkeiikrykseniyfyssnikeddikm  
ktaktflnklyggdmkslv  
lnfakneelnkeieelrdilndisk



Tsompanidou\_et\_al\_Supplemental\_FASTA\_File

>tr|D9RIA7|D9RIA7\_STAAJ  
msivvykylkegvkmakllmsvsvfcfiflllvffryilkryfnslnykwyltvlaglipfipikfsfikfnvnng  
aptveskshdlnhniittk  
pvqefatdihkfnwdsidnictviwlvliilsfkflkallylkyllkkslylneneknidtilfnhqyknvirkae  
aigspitfwygyiilips  
syfksvidkrlyiilheyahaknrtdlhliifnifsiimsynplvhivkrkiidneveadrflnninknefktyaes  
imdsvlktsffnknilshs  
fngkksllknrlinikeadlkkqsklilificiftffimiiqsqflmgqsltdynykkplqsdyqildesknfgsnsgsf  
vmysmkkdkyyiynekesr  
kryspdstykiylalfgldrhiisdksnrmswnhkhylfeswnkeqdlntamqnsvnwyferisnqipknytaaqlkqln  
ygnenlgsykywmedslk  
isnlqevivfknmmeqnnhfsskaknqlssllikknekyelygktgtgivingkyngwfvgyvitnhdkyyfathlsdg  
npsgknaelisekilkgmg  
vlnqg  
>tr|D9RIA9|D9RIA9\_STAAJ  
mrwksmivgyarvssndqnlrqenlktfcaekiftekqsgksienrpvlqeaInflrmgdrfvvesidclgrnydevi  
htvnylkdkvqglimitslp  
mmnevgnplldkfmkdliaqilamvseqerneskrqaqqiqvakekgvykgrpllyspnakdpqkriiyhrvmelee  
gqsiskakevniqrqiy  
rikndndli  
>tr|D9RIB5|D9RIB5\_STAAJ  
myeiktknvggwfhekqetgniviktdefekytkqikaamilddyeciksgkslkaekqneslneeltsvhenekl  
veefndlaqrynyllsene  
kkdkeInytlklfnqvfkiksmmkeeryhtlinhidnhldnski revmtidnde qffkkyqaqereiifkedredgy  
tl  
>tr|D9RIB6|D9RIB6\_STAAJ  
mktfihnklllyqcqtikgvqlfktlllkgntpfmwmqkhsfyvaktlllkgntplgieipccsraeqapkvvfkkiyk  
nilkssrgatyfss  
>tr|D9RIB9|D9RIB9\_STAAJ  
mfgdqrqeatkyvikegyqdiyflnkgewyyfevrsvwrgkhiirvkdglgwrkeivte  
>tr|D9RIC0|D9RIC0\_STAAJ  
mksvkr1seelgvskqtiFNnikrlnietikqentsfikedtdiekiiqrvnenkkkygfesatedkqkkesdninfesk  
sdaqiveilknqintlnng  
iekqesrhettiefyrkelqerskllenqqvalesnkkikqlenqlekehlnypfdtstnarqnvdaqektyttspvn  
inrdqetketeiqykdis  
gsqsdestqgeeaqredvsanpndndsdi eekseetepkkgfwsrlfgn  
>tr|D9RIC3|D9RIC3\_STAAK  
medlekvlitggagfigshlvddlqqdydvylndnyrtgkreniksladdhvfeldireydaveqimktyqfdyvihlaa  
lvsvaesvekpilsqein  
vatlkllletikkynshikrfifassaavygdldlpksdqslilplspyaikyygerttlnycslyniptavvkffnvf  
gprqdpksqysgviskmfd  
sfehnkpfthfgdglqtrdfvyvydvqsvrimehkдавghgynigtgtftnllevyriigelygksvehdfkearkgd  
ikhsyadisnlkalgfvpk  
ytvetgldyfnfevdnieevtakevems  
>tr|D9RIC4|D9RIC4\_STAAK  
mkk1qrkkwkcreigieavhnkgayqrkltdleevkkyfpikraidlvlsivllfltpimfifaiaividspgnpiy  
sqvrvkgmgk1ikiyklrs  
mcknaekngaqwadkddritnvgkfirkrtridelpqlinvvkgemsfigprperpefvelfsseiigfeqrclvtpglt  
glaqiggydltppqklky  
dmkyihkgs1mmelyisirtlmvvitgegsr  
>tr|D9RIC6|D9RIC6\_STAAK  
menghnsky1tlllglavfiqqssviagvnvsiadfitllilvyllffanhllkanhflqffiiilytyrmiitlcllff  
ddlifitvkevlaskvya  
fvviyfy1gmiifklgnskkvivtsyiissvtiglfciaglnksp1lmlk1lyfdeirskglmndpnyfamtqiitlvla  
ykyihnyi1kvlacgillw  
sltttgsktafii1lvlaiyffikk1fsrnasvsvmlvimlillcftfyniny1lfqlsdlalpsldrmasifeegfa  
slndsgsersvwinaisv  
ikytlgfgvg1vdyvhigsqingillvahnty1qifaewgilfgal1ifmiy1lfel1frfnisgknvtaivvmltmiy  
fltvsfnsryvafilgii  
vfivqyekmerdrnee  
>tr|D9RIC7|D9RIC7\_STAAK  
mksds1keni1yqglyqlirtmtplitipiisrafgpsgvivsfsfnivqyflmiasvgvqlyfnrviaksvndkrqls  
qqfwdifvsk1flaltvfa  
mymvvitifidddyli1flqqgiyigaa1diswfyagtekfkips1snivasv1svv1fvkdqsd1slyvftiaivt  
vlnq1plfiylkryisfvs  
vnwihvwqlfrsslay1lppngqlnlytsiscv1glvgtyqqvgifsnafniltvaiimintfdlvmpitkmc1qqsh  
sltk1lanmniqliltip  
mvfgliaimpsfylwffgeefastvplmtlailvl1iplnmlisrqy1llivnkirlynasitigavmnlvlclvliyfy

Tsomanidou\_et\_al\_Supplemental\_FASTA\_File

giygaaiarlitefflliw  
rfiditkinvklnivstiqcviaavmmfivlgvvnhyllpptyatllliaigivvyllmmtmknqyvqilrhlrhkti  
>tr|D9RID0|D9RID0\_STAAK  
mevvvyvtqtqpkfltiyntlykeiqigkypsghalpkekelcarfdvsrmtlrqaikllaedgivestrqkghfvipqtn  
aqhassmdqfkhpldqill  
drvsmssinyrvdleseytnhlfanhpsaviameryyqkkdnshkqadafcftfipInvidtfdkvtqneddmktfveqt  
iysnayqsdlkmsitkaph  
fknhshvfdgdthcwlletlyaqtpypiminkwyipqeiseltrtrirgsdy  
>tr|D9RID1|D9RID1\_STAAK  
mkstphikpmndveiaetvllpgdp|rakfiaetylddveqfntvrnmfgftgtykgkksvmsgmgmpsigiysyeli  
htfgckkllrvgscgamqe  
nidlydvivaqgastdsnyvqqyqlpghfapiasyqllekavetardkgvrhvhggnvllssdifynadttaserwmmgil  
gvemesaalymnaiyagve  
algvftvsdhlihetsttpeereraftdmieialslv  
>tr|D9RID5|D9RID5\_STAAK  
mtqeiekynvhtkahkrkllkrwliaivvlaiiwafagvpslelksksleilksifsglfhpdisyiyipdgedllrgl  
letfaiavvgtfiaaiici  
plaflgannmvlrpsvsgskfilsvirvfpeivmalifikavgpgsfsgvialgihsvgmglkllaediesldfsaves  
lkasgankiktlfavipq  
impafllsliyrfelnlrsasilgligaggigtplifaiqtrswdrvgiiliglvmvaivdlisgsirkrii  
>tr|D9RID6|D9RID6\_STAAK  
mpletptkydsllkkkvs|ktsftfmliivliiwsfiytgfnfgdlmigipqigd|fkqmippdfeylqqittpmltdtir  
maivstvlgsivspiall  
casnivhkwtsipsrfilnivrtipdllaaifvavfgigqipgilalfilticiigkllyesletidpgpmeamtavg  
ankikwivfgvvpqaissf  
msyvlyafevni rasavlg|vgaggig|fydqt|glfqyptatiilftlvivvvidyistkvrahla  
>tr|D9RIE0|D9RIE0\_STAAK  
msniafyvsvdhgyifptdftsrnqyqpmglllanhvieqdrdqysfki dngdflqgspfcnyliahsgssqplvdf  
ynrmafdfgtlgnhefnvg  
lpylkdtrrlnypvlcaniyendstldngvqyfvgdqtvgvigl|ttqfiphweqpehiqsltfhsafatlqqhlpem  
kryadiivvcyhggefdi  
esgtptevltgenegyml|eafskdidi fitghqhrqiaerfkqtaviqpgrgttvqkvvlstdeyenvsvescellpv  
iddptftideddqhirkql  
edwldyeittlpydmmihafearvaphpftnfmnyal|leksgadvactal|fdsasgfkqvvtmrdvinnyfpntfkvl  
avsgfklkqaiersaeyfd  
vkndevsvsadlepkpghfnydiyggvsy|ihvgrpkqrvsnmmiqghavdlkqytyicvnyravggggydmyidap  
vkdiquvegaqlldflsn  
nk|mr|ipqvvd|fkvek  
>tr|D9RIE2|D9RIE2\_STAAK  
mfigknl|eyvrk|lnal|srkel|sekinvseqaiwqyetknmmpeinkiydmtsifnvkssy|fiseqpeellinsvdkhsia  
fraknykvstkl|nkqyyq  
amylsn|tsyl|fsfvkip|dnii|slinn|ddll|ngn|les|nkkesiketakvvrakilqdesneallfm|lekagiviyek  
rinds|days|fwskd|qtpf  
iil|gt|nk|gvavrrn|fd|lahe|lgh|lv|hrhi|qfd|ll|speeyktieheadi|fase|ll|peeafk|kdf|dqmtk|ksn|pdy|lav|l  
kekwyvs|qai|amray|lg  
lmsstqyryfwas|lnkkgykskep|ddvi|emsrpvkmns|llkly|fd|rn|iltpqk|llny|lkvd|et|flnh|lagin|kl|fkdy  
vnenreynitnlyk  
>tr|D9RIE5|D9RIE5\_STAAK  
mskkenttttl|fyekpkst|isek|frgirs|nifskangevkr|llvt|sekpgagk|stvsnvaityaqagyktliidgdm  
rkptqny|fneqnnng|lsn  
lii|grttm|sea|ittte|idn|ldll|tagp|ppnptel|igser|fkel|vnl|fnerydii|ivdtp|pvntvt|daqlyaraikds|ll  
vidsekndknevkkakt|m  
ekagsn|lgv|lnkakvdksss|yhyygde  
>tr|D9RIE7|D9RIE7\_STAAK  
mtfsvfvsyyl|epyfktysvkl|lilaais|lfishhisafifnmyhrawayasvselilivkavttsivitmfvftivtg  
nrpffrly|litwmmh|lilil  
ggsr|fwriyrky|lggksfnkkpt|lvvgaggagsm|lrqm|ksdem|klepvlavdddehkrnititegvkvqgkiadipe  
lvrkykikk|iiiaipt|igg  
erlke|inni|chmdgve|llkmpniedvmsge|levnqlkkveved|llgrdpvel|mdmisneltnktilvtgaggsigseic  
rqvcnfyperi|llghgen  
siylinre|lnrfgkn|vdi|vpia|advqn|rarmfeimemykpyavyhaaahkhvplmednpeeavrnnilgtkntaeaakn  
aevkkfvmistdkavnppn  
vmgaskriaemi|iqs|ndethrtnfvavrfgnvl|gsrgsvipl|fksqieeggpv|tvthpemtryfmtipeasr|vlqaga  
laeggefv|ldmgepv|kiv  
dlarn|lik|sgk|keddi|ritftgi|rpgekmyeel|mnkdei|hpeqv|feki|yrgkvqhmkcneveaiiqdivndfskekiin  
yangkkgdnyvr  
>tr|D9RIE9|D9RIE9\_STAAK  
mtlnivitgakgfvgn|k|kad|ltsttdhhi|fevhrqtkeee|lesa|llkadfvvh|lagvnrpehdkefslgnvsyl|dhvld

Tsompanidou\_et\_al\_Supplemental\_FASTA\_File

iltrntkpkpailsssiqa  
tqdnpygesklqgeqllrayaeeygntvyiywrpnlfgkwckpnynsviatfcykiarneeiqvnnrnveltlnyvddiv  
aekraiegnptiengvpt  
vpnvfkvtlgeivdllykfkqsrldrtlplkldnlfekdlstylyslpstdfsypllmnvddrgsftefiktpdrgqsv  
niskpgitkgnhwhhtkne  
kflvvsqgkvi rfrhvdneiieyyvsgdklevdipvgythnienlgtdmvtimwvnmfdpnqpdyflev  
>tr|D9RIF2|D9RIF2\_STAAK  
mlgdkp11flapisygvglfifsnnpnfkfskivydvlgflrlvfipamivffqdstidnlp1gqdyfnqaviyisve  
fiigs1fili1sklfkhev  
vsrnsftlsgssiyivfvlvicgifvafpevrknisfliiktdamgrgteatsglnvlfvmlfqlalal1fliiayasy  
kkykenpkiiyvilplaig  
ilnislivgerrsyqlytmvavltvvs11fskhkrriniiii svgifvla1mtlykelyvfnysseysealnstsvsnlki  
vdtlqsyfygpsniaasid  
ylnyngsfkqylfdntravfgfnffvdkkqlitsqlfnqliygskqltghlissagygiyfgplffylnlianiffaf  
lseyiirkshslevifigt  
yiymlitsifshptpl1tlismilvvyviaiipgiiikkftkkvgie  
>tr|D9RIF6|D9RIF6\_STAAK  
mkr1fdvvs1yglvvlsp11litallikmespgpai f kqkrptinnelfniykfrsmkidtpnvatdlmdstayitktg  
kvirktidelpl1nvlk  
gemsivgprpalynqyeliekrtkanvhtirpgvtglaqvmgrdditddqkvaydhyylthqsmml dmyi i yktiknivt  
segvhh  
>tr|D9RIF7|D9RIF7\_STAAK  
mrknilitgvhgyignalkdklieqghqvdqinvrnqlwkstsfkgydvl ihtaalvhnnspqarl sdymqvm11tkql  
aqkakaedvkqfifmstma  
vygkegvgksdqidqtqpmnptnygiskfaeqalqelisdfkvaivrppmiygahcpgnfqrlmq1skrlpiipni  
nngrsalyikh1tafidq1  
islevtgvhyhpqdsfyfdtssvmyeirrqshrkt11nmpsm1nkyfnk1svfrklfgnltytsntlyennalevipgkm  
slviadimdetttkdka  
>tr|D9RIG3|D9RIG3\_STAAK  
mngkkantinrykyfhhvdhkiqqsskktlwasliit11ftviefvgglvsns1al1sdsfhlmsdv1alglsm1aiyf  
askkptarytfgy1rfeil  
aaf1ng1alivisiwilyeavriiypqpiesgimfmiasig11vniiltvilvrs1kqedniniqsalwhfmgdl1nsi  
gvivavliiyftgwriidp  
iisivisliilrggykitrnaw1ilmesvpqhltdq1iadiknidgilvhefhlwsittehys1sahvv1dkkyegdd  
yqaidqvss11kekygiah  
st1qienlq1npldepyfdk1t  
>tr|D9RIG4|D9RIG4\_STAAK  
mdkesvvas1arnkkiavetmtgryiierilhtndekhihilpkpdv1dvdtikdiden1ddat  
>tr|D9RIG6|D9RIG6\_STAAK  
mikiqq1qhhfgshkvi hnf1diskeivtfigksgcgkst11niiggfihpssgrviidneikqqpspdc1mlfqh1h  
11pwktindnirigfqqki  
sdeei naq1k1vd1egrghfpeq1sggmqqrvalcrahvhkpnvilmdeplgaldafttryklqdq1vq1khhktesti1  
vthdideaiy1sdriv1lg  
egcniisqyeitashprs1ndsh11kirneimetfalnhhqvpepy1  
>tr|D9RIG7|D9RIG7\_STAAK  
mkr1siiviigifii1tgcdwqraskepsnnaqhqqvikigy1pithsvn1mmtk11sqhnhpkykle1vkfnnwpd1md  
alnsgridgast1ielamk  
skqkgsnikavalghhegnvimgqkgh1nefnngddyhfgiphrysthy11lealreq1kikpghfsyhemspaempa  
alshritgysvaepfgal  
gek1gkgt1khgddvipdayccv1vlrge11dqhkavaqafaqdykksfgkmndrkqsvdimthhfkqsr1v1tqsaaw  
tsygd1tikpsgyqe1t1  
vkqhh1fnppayddfvepslykeasrs  
>tr|D9RIG9|D9RIG9\_STAAK  
mtletlikeq1dph1vevdegtyyprt1fiqq1fvdgyfgeat1rknaevieavsqsc1ttgfc1wcqlafstylenatqp  
h1nnd1qq11sge1lgat  
g1snpmksfnd1lek1n1lehtyv1dg1lvvsgrmpavsn1qedhyfgaiskhessdefvmf11ranqdg1t1vekt1n1fgv1  
gsatyq1t1nqvavpqsq1  
i1thdakfaati1rpqfiayq1ipig1siks1le1idafsn1a1ng1ny1leydveg1fkryr1q1reeyy1ailddgn1tsh1  
nelis1kkdigy111dvnq  
asvvnngsraytpspqvrk1kegfffa1tpt1rh1gk1lea1kg  
>tr|D9RIH0|D9RIH0\_STAAK  
msfkdnwai ahmtgvlskvesfy1ndkrnesm1hytrtekikqmykeidvnemesvvgakfvklftdid1nddevisifv  
fdksie  
>tr|D9RIH1|D9RIH1\_STAAK  
mkivalfpeaveggdnq11ntkka1glktfleergqefi1ladnged1dkh1pdm1dvi1sapfypaymtreriekapn1k  
lai1tagvgsdhvd1aase  
h1ngvvevtgsntvs1aehavmd11i11rnyeeghrqsvegwn1sqvgnha1elqhk1tigi1fgfgrigq1vaer1lapfn  
vt1qhydpinqqdhk1skf

Tsompanidou\_et\_al\_Supplemental\_FASTA\_File

vsfdelvstsdaitihapltpetdnlfdkdvl srmkksylvntargkivnrda lvealasehlqgyagdvwyppapad  
hpwrmpnamtvhysgmt  
leakriedgvkdi lerffnhepfqdkdiivasgriasksyak  
>tr|D9RIH6|D9RIH6\_STAAK  
mkhqettsqhnfsiikhgdistpqqftaggmhiglrankkdfgwiyssslassaavytlnqfkaaplivedtllqsksg  
klqalvvnсананstctggq  
giddaqqtqtwaqqlqipsehvastgvigeylpmdkiktgethindanfatpgafneailltdtctkhiavslnidg  
ktiitigg saksgmihpnm  
atmlafittdasiesntlhqllksstdhtfnmitvdgdstndmvlvmanqqvehqilnqdhppqwetfvdafnfvctfla  
kaiardgegatklisvnvs  
gaksisdarkigktivssnlvksaifgedanfgriitaigysgeidpncityvqlnqipvvdkgmavlfdeqamsntlth  
envtidvqlglnaaatay  
gcdlsydyvrinasyr  
>tr|D9RIH7|D9RIH7\_STAAK  
mikvgivggsgygaieilrlqthphvtiahiyshskvdeplkltfphlqhimqhfealtvdnndcdviffatpapvskt  
cipplvekgihvidlsgaf  
riknreiyeayketaaagddlnhaiysisewqslndngtklisnpgcfptatlalhlplisekivdlssiidaktgvs  
gagrslsqrvhfsemnenl  
sayaignhkhkpeiegylsiiagqdvsviftphlvpmtrgilstiyvklssseytteslhlkmltsyyanqpfvrirdigt  
pttkevlgsnycdigiyyd  
ettqtailisvidnlvkgasgqaiqnlnilydfvettgllkqspvyp  
>tr|D9RIH8|D9RIH8\_STAAK  
mnsiieldyysnnyapklvitegkkgkvwtdgkqyidc isgfsvanqghchptivkamteqasklsiisrvlysdn  
lgweekichlakdkvlp  
lsgteaveaaiarkwgsdvkgitdgqveiamnnfnhgrtlgslslshndayksgfhp llqgktvdfgdieqltqa  
ispntaailepiggeggv  
nipkgyiqavrqlcdkhqilliadeiqvlg rrtgkwfameweqvvpdiyilgkalggglypvsavlannvmrvltpgt  
hgstfggnplaiastaa  
dvlkdeqlverserlgsflkallqkhpsikeirgrglfigielntdaapfveqlikrgilckdthrtiirlspplvid  
keeinqivaafqdvfkn  
>tr|D9RIH9|D9RIH9\_STAAK  
mkkkltfkenmfigsmfglffgagnlifpihlqqaagsnvfianlgflitaiglpflgiaigisktsglfeiasrvnk  
tyayiftialylvigpffa  
lprlattsfeiafspflspkqitlylfi fsfvffviawffarkpsrileyigkflnpvflvllaiillfafi hplggisd  
apiskqysnalnfgfldg  
yntldalasalafgiiivatikklgienptdiaketiksgtisiimmgiytl laimgt lsighfkl senggialaqitqy  
ylgnygivilslivmvacl  
ktaiglitafsetfehlfpkmnylaiatvvsfisflfanvgtkiimysvpvlmflyplai alivltlfskfhhskiy  
qctiffmiaalvdglkas  
pefisstsfstl infsqkylp lsdigmwvvlsligfiigfiy kikhkipqa  
>tr|D9RII0|D9RII0\_STAAK  
mdyaphtaenvvqanklieafkrnngfiafvrvnfydgkdalqpnamislppekgddyshfhylldkrdddavidkrqf  
safvgtdldlqlrrrgidt  
ivlgvathvgvdttdardayqlnydqyfvtdmmsaqnetlhqfpidnvfplmgqtittndllniln  
>tr|D9RII1|D9RII1\_STAAK  
mkqrigaylidaihragvdkifgvpqdfnlaflddiisnvnvdwvgtne lnasyaadgyarlnglaalvttfvgv gelsa  
vngiagsyaeripviaitg  
aptraveqagkyvhslgegtfddyrkmfahitvaaggyitpenaateiprlintaiaerrpvhlhlpidvaiseieiptp  
fevtaakdtastyielv  
sklhqskqpiiitgheinsfhlhqeledfvnqtqipvaqlslgkafneenpyymgiydgkiaedkir dyvdsndlilni  
gakltdsatagfsyqfnid  
dvvmnlhhnikiddvtndeislsslqqltdi sytnnasfpayhrptspdyvtgtep lttqytfkmmqnlkpn dviiad  
qgtsffgaydla lyksntf  
igqplwgsigytlpatlgsqladkdrnlll igdgs lqltvqaistmirqhikpvlfvinn dgytverlihgmyepynei  
hmdykalpavfggknvei  
hdvesskd lqevfntinghpdvmyfvevkmsvedapklidiakafsqnk  
>tr|D9RII3|D9RII3\_STAAK  
mtgfsyylgqlldeayikrmikqgyqmi ftsvqi peeddetkyhyftkl1nllkheqvtylidanpsiltpsfyehlryq  
daqfmiridhstsieaiea  
imaqglkcclnasiisrelltslhqqlndftllsfchnyprpdtglsvdlnkkneliyqfnpkaqi ygfi vgsgrgp  
lhkg lptieatrshspvva  
akllqetgvsevlvgdslieirqakqlidfckhrhftlcieevfddttvtylfdmchkvrpdnpenvirsetsrqicphsi  
qpqfttqrriglvtdnln  
ngryqgemqivrqtlsahdsvnvvaqiikedlp llsciepn dtdfdqktreck  
>tr|D9RII4|D9RII4\_STAAK  
mensttear neatmhl demtveeali tmnkedqqvplavrkaipqltkvikktiaqykkgrliyigagtsgrlgvldaa  
ecvptfntdpheigiig  
gqhamtmavegaedhkklaeedlnkidltskdvvigiasgktpyvigltfantigattvsiscnehaviseiaqypve

Tsompanidou\_et\_al\_Supplemental\_FASTA\_File

vkvgpevtgstrlkshta  
qklllnmsttmvgvgkyvndlmidvkatnqklidrsvriiqeicaitydeamalyqvsehdkvatvmgmcgiskeea  
trrlngdivkrairdrq  
p  
>tr|D9RII7|D9RII7\_STAAK  
mayqseyalenemmqleqlgyervtirdnkqlldnfrtilnerhadklegnpltdkefqrlltmidgksifesarilrd  
klplrrddeseiylsfltd  
kswcknkfqvtngvsvedtykarydvtilinglplvqvelkrrgidineafnqvkrkrykqnytglfryiqmfiiisngvet  
ryfsnndsellkshmfyws  
dkqnnrintlqsfaesfmrpcqlakmi srymiinetdriImamrpyqvyavealiqqatetgnngyvwhttgsgktltsf  
kasqilsqqddikkviflv  
drkdldsqtееefnkfakgavdkfntsqvlvrqIndkslplivtti qmakaiqgnahlleqyktknkvfiidechrsqf  
gdmhrlvkqhfknaqyfgf  
tgtprfpenssqdgrttadifgrclhtylirdaihgdgnl gfsvdyintfknkaikaednsmveaidteewladkrvel  
vtrhiinnhdkytrnrqys  
siftvqsihalikyeyfkrlnkkleqpltvagiftfkpeddrdgevpyhsrekleimisdynkkfetnfsttdttneyf  
nhisknvkkgvkdskidil  
ivvnmfltgfdskvlnltyvdknlmyhdliqaysrtrnrvekeskpfkivnyrdlkketdda lrvfsqtndtdtilmrsy  
eeykkefidayrelkmivp  
tphmvddiqdeee lkrfveayrllakiilrlkafdefeftideigmdeqenedykskylavydqvkrataeknkvsilnd  
idfeiemmrndtinvyim  
nilrqidledkaeqrrnqequirri ldhaddptlrlkrdlirefidnvpslnkddyidqeyvnfesikkeae fkgfager  
sideqalktisndyqysgv  
vnpahlkkmigdlplkekrkarkaiesfvaettekygv  
>tr|D9RII9|D9RII9\_STAAK  
msnlllevnslnvgfnydettvqavknvsfelrkkhilgivgesgsgksitaksilglpdpdhtltgeiifngqsltnl  
stsalqqirgkdisimifqd  
plsslprlrigkqitevlfqhkrvskseaksmtidilekvgikhatrqfdayphelsggmrqrvmiamalilkpqilia  
depttal dastqngllqlm  
kslyeytetsiifi thdlgavyqfcddivmkgdsvvesgtvesifkspqhtytkr lidaipdihqtrpprplnndillk  
fdrvsdytspsgslyrav  
ndinldirkgetlgivgesgskstlaktvvg lkevsegiwyne lpls lfkdelkslrqei qmifqdpfasinprfkv  
idvikrpliihgkvkdndd  
iiktivsllekvglgqs flyrphelsggqrqrvs iara lavepkvivcdeavsaldvsiqkdiellkqlqldfgityl  
fi thdmgvineicdrvavm  
kngeivelnntedi khpgsdyakqlisevaviak  
>tr|D9RIJ6|D9RIJ6\_STAAK  
mkplh1kl1nnfgpflkeedfskidnne lflisgktgsgktmi fdamtyal fgkasteqreendlrshfadgkqpmstvf  
efqlnhriykvhrqgpyik  
egnttktnakfdvfemvdgkyeireskvisgtqfiellgvnadqfrqlfilpqgefkrflisnsrekqgilrtlf dsek  
feaireilkeevkkekagq  
enryqqidllwgeiesfdddni kgllavatqqidklienipllqarskeilasvnesketaikefeiekktlennilkd  
ni nqlnknkidfvqlkeq  
peiegieaklkllditnllyienreki etkianskkdis ktnkilnldcdkrnidkekmlengd lieskisfidk  
trvlfndinkyqgsylnie  
rlrtegeqlgdelndlikgletvedsignqsdyekie lntitninneiniikenekakael dkl lsgskqelenqine  
etsilknleikldrydtkk  
ldlndkesfiseiksavnigdqpcigneiqdlghhidfdsiakrqneikeieanihaiksniavhseikfvnekilni  
niktqsdfslevlnkrll  
nena lnnqrdlnkfi eqmkeekdnltlqihnkqlrlnkneselklcrdlitefetlskynnitnfevdykkyvqdvnhq  
elskeiedklmqlsqrkli  
eqnnlnhyenqletyndlelneqsiememsrlnltdndidei iawrgeqe leqkrdykkryhefemeiarlesl tk  
dke lldsklkdeyelkkg  
kmntlideysavhyqcqnninktsivshinylnqelkdqgefqlaeivsgknnknl tlenfvliyyldqiaaqanrl  
atmsdnryqlirreavshg  
lsgleidvfdl hsnksrhisslsggetfqsslalalglseivqqsggislesifidegfgtldqetleta ldtllnks  
tgrmvgiishvselknrip  
lvlevksdqysstrfkrn  
>tr|D9RIJ7|D9RIJ7\_STAAK  
mlkefkefalkgnvldlaiavvmgaafnkiisslveniimpligkifgsvdfakewsfwgikyglfiqsvidfiiiafal  
fivkiantl mkkeee  
avveenvvllteirdllreknnf  
>tr|D9RIK0|D9RIK0\_STAAK  
miysiteiearyaetdkmgviyhgnyatwfevarldyisklgfsyadmekrgiispvtdlnvnykksifypekvkvktwv  
ekysrlrsvykyeifnek  
elattgstelicikedt fkiprldryfpdwheayskvqtl nnegktveimdgidsl  
>tr|D9RIK4|D9RIK4\_STAAK  
mseiiqdl sledvlgdrfgryskyiiqeralpdvrdglkpvrri llyamyssgnthdknfrksaktvgdvigqyphgdf

Tsompanidou\_et\_al\_Supplemental\_FASTA\_File

svyeamvr1sqdwk1rhv1  
iemhgngsidndppaamryteak1s1lae11rdinketvsfipnyddttlepmv1psr1fn11vngstgisagyatdi  
pph1laeviqat1kyidnp  
ditvnlmkyikgpdfptggiqgidgikkayesgkgrivrskveet1rngrkqliiteipyevnksslvkridelra  
dkkvdivevrdetdrtgl  
riaie1kkdvnsesiknylyknsdlqisynfnmvaisdgrpk1mgirqiidsylnhqievvanrtkfeldnaekmhive  
glikalsildkvielirss  
knkrdaken1jevteeqaeavmlqlyr1tntdivalegehkelealikqlrhildnhdallnvikeelneikkkfk  
ser1s1ieaeieeikidke  
vmvpseev1smtrhgyikrtsirsfnasgvedig1kdgds11khqevntqdtvlvftnkgrylfipvhkladirwkelg  
qhsqivpieedevvinvf  
nekdfntdafyvfatqngmikstvp1fkttrfnkpliatkvknddlisvmrfekdq1itvitnkgms1tyntselst  
glraagvksin1kaedfvv  
mtegsenttilmatqrgskrisfki1qvakraqgit11kelknphrivaahvvtgehsqytlsysksneehglindi  
hkseqytngsfivtdddf  
evidmyis  
>tr|D9RIK6|D9RIK6\_STAAK  
mtqvht1kseeiqs1ieysvkddvskni1ttvfnqlmenqrtey1qakeyertenrqsqrnggyersfttrvgtle1kv  
prtrdghfsptvferyqrn  
ekalmasm1emyvsgvstrkvsiveelcgksvsksfvss1teql1epmvnewqnr11seknypylmtdvlyikvreenrv  
1skschiaig1tkdgdrei  
igfmiqsgeseetwtffey1kerg1qgte1visdahkg1vsairksftnsvwqrcqvhl1rni1fttipkknksfreav  
kgifkftdin1areaknr1  
ihdyidqpkyskacas1ddg1fedafqy1vqgnshnr1kstnlier1nqevrrreki1rifpnqtsanr1ligavlmd1hde  
wiyssrkyinfdk  
>tr|D9RIK9|D9RIK9\_STAAK  
mnqevknkifsilkitfatal1fvaitlyrelsginfdkt1vefskinrms1v11figggas1vilsmydvilsralkm  
dis1gkv1rvsyiinalna  
ivgfggf1gagvramvyknythdkk1vhfislilism1tg1s11s11ivfhvfdas1ildkitwvrwlyvvsff1p1f  
i1ysmvrppdknrrfvgl  
ct1vscvew1aaavlyf1cgvivdahvsfmsfiaifiaa1sg1vsfipgg1gafd1v11gft1gvpeekv11m11ly  
rfayfvpvialil1ssfe  
fgtsakkyiegskyfipakdvmsf1msyqkdiakips1slailvfftsmiffvnn1tivydal1ydg1nh1tyy11aiht  
sac11111nvvgiykqsrr  
aiifamis1ilitvatfftyasyilitw1aiifv11ivafrarr1krpvrnrnivam11fslfilyvnhifiag1t1ya1  
diy1tiemhtsv1ryyfw1t  
il1ia1i1gmiaw1fdyqfsvkrisskiedcee1inqyggny1shliysgd1kqfft1nenktaf1myrykass1v1vgd1p1  
gdenafdel1leafynyaey  
1gydvi1fyqvt1dqhmp1lyhnf1gnqffk1lgeeai1dl1tqfst1sgk1rrg1frat1nkfdel1nisf1ieppf1stefinel1qh  
vsd1w1dnrgemh1fsvgef  
neey1skapigvmr1neeneviafcs1mptyfndaisvd1irw1pel1d1p1mdg1yl1hm11wskeqgytkf1nmgm1at1snv  
q1l1hcsyl1rer1agr1vfeh  
fng1lyrfqg1l1rry1kskynp1wep1r1vyr1kdn1s1wes1skvmr1virhk  
>tr|D9RIL0|D9RIL0\_STAAK  
mtkpfd1tdg1iekvt1sgymgghienptyeqvks1gtsgh1etveiqy1dval1fsynk11leiffsv1d1p1dtggqy1qdr1gpqy  
qtai1fy1tnd1hqel1aetyi  
eq1knt1inadkai1atki1pasqfy1kaedy1hqdfy1kkn1peryaeeqki1rqeyknkq  
>tr|D9RIL9|D9RIL9\_STAAK  
mti1sei1vkyk1qs11qngy1yqdk1nt1ksvki1qnkks1fintie1kep1klai1aeiksk1sptvnd1per1dsqqi1sdy1dyg  
anav1silt1deky1fggs1fer  
1qa1ttk1t1p1v1ckdfi1idp1qidv1akq1agasm11ivn1ilsdk1q1kd1lyna1sqn1lev1vev1hdr1heleray1kvnak  
1igvnr1rd1krfvt1nveht  
nt1lenk1tnhy1ysesg1hdas1dvrki1hsg1idg11ligea1lrcdn1sef1p1q1k1mqkvks  
>tr|D9RIM2|D9RIM2\_STAAK  
mgnkd1lienat11sengadi1eigvp1fsdpvad1gpvimeag1qqaikqgit1idi1fnq1ekhgd1qikcnyv1lmt1yyni1ich  
ygeq1affek1rdt1gv1ygl1  
ipd1lpye1sqr1kq1qfshy1gvki1is1vam1ttd1krik1div1shaeg1fiy1vtm1natt1gngaf1hpel1krkies1ikaianvp  
vvag1f1irt1pqh1vad1ikev  
adg1v1ig1sei1vkr1fks1ntreei1ky1lqsi1qqt1lnn  
>tr|D9RIM3|D9RIM3\_STAAK  
mimk1ftn1take1fgaft1d1smpy1shft1qt1vghye1kl1aegyeth1vgiknnn1neviaac11tavpvmkv1fkyfysnr1gpvi  
dyenqel1vhfff1ne1skyy  
kkhrc1ly1hidpy1lpyqy1nhdgeit1gnagndw1ffdkmsn1lgfeht1ghk1gfdpvl1qiryhs1v1ldk1dktaddi1iknmdg  
1rkrnt1k1kvk1ngv1kvr1f1  
see1lpi1frs1medtses1kafad1rddk1fyynr1kyyk1drv1lvp1layin1fdey1ikelneer1dilnkd1lnka1kdi1ekrpen  
kkahnkr1dn1qq1ldaneq  
ki1eegr1l1qeeh1gnel1p1sag1fff1in1pfev1vyag1gtsna1frh1fagsy1avqwem1inya1nhgid1ryn1fyg1vsgk1ftedae  
dagv1vk1fkkg1yna1e1ieyv

Tsompanidou\_et\_al\_Supplemental\_FASTA\_File

gdfikpinkpvyaaytalkkvkdrif  
>tr|D9RIN0|D9RIN0\_STAAK  
mivvlfvistltfllmklspgnpvdkilhldvaqvsteqinatkdkglnsdlvqwwhmnhlhfnlgksfeskepvt  
qilfnyapitllisfstlv  
vslcisiplgiaakrfhkwtkdvirvistlsislpaffigiillfivtnlmnidsvilshfilpvitlslgmcayiiirl  
vrsnllmllqsnivqasrl  
rgmnerylidhllkptilpiipllgislgsliggtvvienvlfdipgigyllmidsiksrdypviqgcvlfigffvviint  
iadlltllldpkqrlqign  
pkiktntplisessdrha  
>tr|D9RIN2|D9RIN2\_STAAK  
mnvlyqrsdymsgglplredvpvsetwdlvdlfkddqyyesidalvqqanqfhhtyattlnsieqintalaelenilia  
ldrlnsyaerlsvdtsni  
eaqvlsaklsttygkivsqslsveseilelpeeilqqleescpyqhyikqlikqkpfqlsasveqvlatsptlnspyd  
ygttkmlditfdfsfehdt  
typdyatfendyednkdpferrksfksfsdgi rkyqhttaatynmqvqqekieadlrgfesvidyllhsqevtrdmfdr  
qidmimrdlapvmqkyakl  
lqrihgldnmrfedlkisvdpdyepeisiedsknyifgalvlgddytnmlreaydqrwidfaqnkgkdtgafcaspyft  
hsyvfi swtgkmaeafvla  
helghaghftlaqhqpyleseasmyfveapstmnemlmanylnfntsdnprfkrwvigsilsrtyyhnmvthlleaayqr  
evyhkvdqgeslnaptlne  
imlnvykqffgdavdmtegae ltwmrqphyymglysytyagltigtvvsqkiknegqpavdawletlkkgsvspvela  
niagvdi tteqplkstiqy  
isdldvevekl tdeieqann  
>tr|D9RIN7|D9RIN7\_STAAK  
mkkwqfvgttalgatlllgacggnggsgnsdlkgeakgdgsstvapiveklnekwaqdhsdakisagqagtggafqkfi  
agdidfadasrpikdeekq  
klqdknikykefkiaqdgvtvavnkndfvdelkdkqlkaiysgkaktwkdvnskwpdkkinavspnsshgtydffenev  
mknedikaeknadtnaivs  
svtknkegi gyfgyfvyvqnkdklkevki dengkateptkkti qdnsyalsrplfiyvneka lkdnkvmsefikfvled  
kgkaeeagyvaapektyk  
sqlddlkafidknqksddkksddkksedkk  
>tr|D9RIN8|D9RIN8\_STAAK  
maldkdivgsieflevvgllqgsty lkgpngenvkl nqsemndd delevgeesffiyprngel fatqnpditkdkyd  
fakvkt drdgaridvglp  
revlvpwedl pkvks lwpqpgdyllvtl ridrenhmygrlasesvvenmftpvhddnlknevieakpyrvlrigsfllse  
sgyki fvheserkaeprlg  
esvqvri ghndkge lngsf lplaher ldddggvifdl lveydge lpfwdksspea ikevf nmskgsfkraighlykqi  
inietgkialtkkgwsrmd  
ske  
>tr|D9RIN9|D9RIN9\_STAAK  
mlqvtvsl rfgdrkl fedvnik ftegencygligangagkstflkilsgel dsqtghvs l gknerlavlkqdhayeder  
vldvvikgherlyevmke  
deiympdfsdgedgiraeele gefaemngwnaadaanllsgl gidptlhdkkmaelennqkikvllaqslfgepdvlll  
deptngldipaiswledfl  
infndntvivvshdrhflnnvcthiadldfgkikvyvgn ydfwyqssqlaqkmaqeqnkkeekmkelqdfiarfsanask  
skqatsrkkqlekielddi  
qpssrryp fvkftpereign dllivqnl sktidgekvl dnisftmnpndkailig dseiakttflkilagemepdegisyk  
wgvttlsyfpkdnseffe  
gvnmnlvdwlrqyapedetetflrgflgrmlfsgeevkkkasvls ggekvr cm lskmm lssanvllldeptnhldlesi  
tavndg lksfkgsiiftsy  
dfefintianrvidlnkqggvskeipyeeylqeigvlk  
>tr|D9RIP0|D9RIP0\_STAAK  
mlkervnqdeqlivvvsamgnttdqlmtnvstl tkapkqela lllttgeqqtvsylsmv lndigm nakamtgyqagikt  
ighhlkskiaqinpqtfeg  
afqendilvvagfgginehqe lttlgrggsdtta valavsnqipceiytdvdgvyatdprllpkakrldivsyemmems  
algagvletrsvelaknyn  
iplylgktl snvkgtwiisneeilekkavtgv aldkhmmhvtisyp lpdnqlltqlfteleegavnvd misqivnldglq  
lsftikdsdfhqisml et  
lknqyeal ayki nehyvki sligsgmrdmsgvaskaf l tliennipfyqtttseisisyviddfngqqaveklydafni  
>tr|D9RIP7|D9RIP7\_STAAK  
mtvkynqngel tmdgis lktiaqsfgtptivydelqireqmrryhrafdsgl kynisyaskaftci qmvklvaeedlql  
dvvsegelytaleagfeps  
rihfghnntktheiryalennigyfvidsleeielidryandtvqvv lrvnpgveahthefiqtggedskfglsiqygl  
kkaidkvqskhllklkgvh  
chigsqiegteafietakivl rwlkeqqiqvellnlgggfgikyvegdesfpiesgikditdaikseikvlgidapeigi  
epgrsvgeagvtlyevgt  
ikeipeinkyvsidggmsdhirtal ydakyqallvnrneeaddsvtiagklcesgdi iikdaklpssvkr gdy lailstg  
ayhysmasnynqm kpsvf

Tsompanidou\_et\_al\_Supplemental\_FASTA\_File

f1kdgkarevikrqs1rq1iindtk  
>tr|D9RIQ5|D9RIQ5\_STAAK  
mnkntwvigft1famffgagnlifppnlgldsgqffwpailafvltgiglp11lgviva1dkegyiga1nkispkfsilf  
liiiyltigplfaiprtas  
tsfemti1piihnszialfiftiifivvlyic1npsklidrigs11tp11litilamiikgyl1dfsgnsagkgnealy  
hsnfssfaegftqgyltmd  
aiaaiafsm1vnavkltg1tktnqifkq1tagliaavalifiyis1gyignhmpvsdmt1dq1kskdrnigty11ttm  
astgfgsfgyllgiiva1  
aclttacg1ivavseyfhrivpkvsykafvlvfilmsfianqg1navismsipv1sivypvaitv111iliakfiptkr  
isqqipviivfilsifsvi  
sklgwlkiiifies1plrays1ewfpvaiiatilgy1vgifvkqdpikyqge  
>tr|D9RIQ6|D9RIQ6\_STAAK  
msdrfikfndeq1dakqvm1qdlar111kneqtqvkiqkfpypnpvqnv1itswfshrpshiemag1ktdvmlaaygy  
hmdvqivnevvdqktfkh  
pkfyq1fk1ledmrv1nsikverpstak1id1r1dtrisytesqikvyrtktqytd11f1ylehaf1sqdffdi1sihs  
d1ddi1vnmf1y1pnffqn  
qnsednmy1aqrimyqvddi1kedm1neyy1pkt1ynt1aspefd1krtdasqvdgqddtsedddnesekadskads  
eskgg1ylemelhegqns  
t1gndearregdatddmtdm1tkkgkgsndt1nreegdavgqsqafq1dgvnknveikwqipeiepqyv1eyqeskqdvqy  
eikdliqi1kktiereqrd  
arf1n1tkgr1qkd1inwf1ddqyk1fykkq1d1sksfdatft11idasasmhdkmaetkkgv1fhet1ka1nikhe1l1sf  
sedafdsdehaqpn1ine1  
inydystfekdgprima1epqddnrdgvairvaser1mrrnqhqrflivfsdgepsafnysqdg1idtyeavemsrkfgi  
evfnv1fsqdp1tedveqt  
ihniygqyai1fvegvalpgh1sp11kk111ks1  
>tr|D9RIR0|D9RIR0\_STAAK  
mpvkvpe1aes1tegtiaew1knvgdsvekgeaile1etdkvnvevseeagv1seq1asegdtvevqgaia1iegsg  
naskensndntpqqneetn  
nkkeett1nsvdkaevnqanddnqqrinatpsarryarengvn1aevspk1ndvvrkedi1dkkqqapastq1tqqasake  
ekkyngyptkpv1rekmsr  
rkktaak11levsn1tam1ttfnevdm1nvmel1rkrkkeqf1mkdh1dg1k1gfms1fft1kasva1kkypevnae1dgddmi  
tkqy1digvav1stddg1lv  
pfvr1cdkknfaeieaen1lavkarekk1gl1ddmvngsft1tinggi1fgsmm1stpi1ngnqaailgmh1si1trpia1dq  
t1enr1pmyia1sydhri1  
dgkeav1g1f1ktikelienped11les  
>tr|D9RIR1|D9RIR1\_STAAK  
mtnerkevseapvnfgan1gl1m1dlydd1f1qdpssvped1qv1fstiknddsivpa1k1stssqnsdg1tikrvmlidnir  
qygh1kadiy1pvpnpkrkh  
vpkleiedf1dq1tlegisagivsdhfadiydnayeailrmekrykgpiafeythinntergw1krrietpykvt1nn  
nekra1fkq1ayveg1fky  
1hkn1fvgakrfsiegvdalvpm1q1rtit1iaakegikniqigmahrgr1nvlthv1lekpyemmisefmhtdpmk1f1pedgs  
1q1tagwtg1dvkyh1ggik  
ttdsygtm1qria1annpsh1eivapvvegrtraaqddtqragapttdhhkampi1ihgdaaypgqginfetm1gn1kgy  
stggs1hi1t1n1rig1fte  
pidar1st1y1tdvakgydvp1fhnaddveatiea1diamefrkef1hkdv1vid1vgyrrfghnemdeps1tnpvpyqnr  
khdsveyv1fgk1lvnegvi  
sedemhs1fieqv1kel1raqhdki1nkadkmdn1pdmekpad1al1plqadeqsftfdh1keinda11ty1pdgfn1lkk1nkv1  
ekrhepf1nkedg1vdwaqa  
eq1afat1ilqdg1tpir1tgqdsertfshrhav1hdeqtgekytp1hhvpdqkatfdihnsplseaavvgfeygynvenk  
ksfniweaqy1gdfanmsqm  
ifdn1f1fssr1skwgersg1t1f1phayegqgpehssar1erfl1q1laaennctvvn1ssssnyf1ll1raqaas1dseqm1p  
1vms1pks11rnktv1akpi  
deftsgg1fep1ltesyqadkvtkvilatgkmfid1keal1aknpdesv1lvaierlypfpeeeiea1llaq1pn1leevswvq  
eepknqgaw1lyvpyvkv1  
vadkyd1syhgri1qraapaegdgeihk1lvqnki1ena1knn  
>tr|D9RIR8|D9RIR8\_STAAK  
mkrt1dkyr1dsyqydnq1nqhrrqsedasyrqqyakgdpeehperryng1rdyrreqileeneksr1rskkwly1iaa1lli  
ivaifv1tr1al1nnds1dkvs  
ndpkvsqnykkqvenqdgqi1nqqv1dnakeni1knnqktddi1kn1qnqi1dn1kqqeqnkadsk1tqfyqdqink1teanna  
1knnasqgkiesm1ndint  
kfd1s1ksk1les1fkddnggan  
>tr|D9RIR9|D9RIR9\_STAAK  
mqstktk1khfs1111it1lgvmtafgpl1tidmyvps1pkvqgdfg1sttseiql1tsftmig1al1gqfi1fgpl1sda1fgrkr  
iavs1li1i1f1lvsg1smf1v  
dq1pl1f1t1rfiqg1tgggviviakasagdkfsgnalakflasl1mvngi1itilap1aggl1alsvatwrsift1iltiva1  
i1ligvasq1pktskde1k  
qvn1fssv1kdfgs1l1kkpafi1ipm1l1qg1tyvm1fsyssaspfitqklynmtpqqfsimfavngvgliivsqvval1vek  
1hrh1l1li1ilti1qvvgva



Tsompanidou\_et\_al\_Supplemental\_FASTA\_File

liiltltfhlplwvlliafflnvcpvtsigplgftmameertgsgnassllglfqfilggavaplvglkgefntspymi  
iifitailvsliqiifykm  
ikkqhva  
>tr|D9RIS1|D9RIS1\_STAAK  
mnrkilpvkpijsqifpimvmgcegvsaammlyqnnqhipateimrhwphpnphkgyvghhlfiklgnyhqti fpeay  
vpflqkynpnivdgtgksl  
edlkgiidqggpvllyhtnlgskpllrvf rfdnkpakqvsnihvtlligyddyidplwshirrglvpaiipnrkqii  
kirkekmeysfnspgrkci  
yvqphsytienqqqkht  
>tr|D9RIS8|D9RIS8\_STAAK  
mtnlndedqsrtaprsfqfestllffiyisilimtvisrdchflviipktpinprvadfl  
>tr|D9RIT4|D9RIT4\_STAAK  
mriirhi fyeegemilsi khltkisygnkkavddisldiqsgefi afigtsgsgkttalrminrmieategqieidgkd  
vrsmnpvelrrnigyviqq  
iglmphmtikenivlpkllkwtkEEKdrakeliklvd lpesflerypaelsggqqqrigvvr alaaeqdiilmdepfg  
aldpitrtdlqdlvktlqr  
klgktfi fvthdmdeaikladkicimsegkvvqfdtpdnilrh pandfvrdfigqnrliqdrpndktvegvmikpitiqa  
eatlndavhimrkrvdti  
fvvdsnnhllgfl d ied ingirghkslrdtmq qhiytvqidsklqdsvrt ilkrnvrnvpvddqqr lvgli tranvvd  
ivydtiwgdse dtvqtehv  
gedtasskvheqhttnkvrdigddks  
>tr|D9RIT7|D9RIT7\_STAAK  
mkinttggqihgigtqgdldifl gipyaeppvhdnrfkhstlktq wsep idateiqippqpdnkledffssqsttfehe  
dclylniwkqhndqtkkp v  
iiyfyggsfenghgtaelypahlvqnn diiv itcnyrlgalgyl dwsyfnkdfhsngl sdqinvikvwhqfiesfggd  
annitlmqqsagsmsiltl  
lk ipdiepyfhkvvllsgalrldtlesarnkaqhfqkmmldyldtdvtslstndilm maklkqsr gpskgldli yapi  
ktdyiqnnypttkpifacy  
tkdegdiyitseqkklspqr fidimelndiplkyedvtakqqs lvithcyfkqpmkqflqqlniqdsnaqlwlaefawh  
dtssahyrsayhil dmvfw  
fgnlqilaahqypttahlkflsrqm qndlanfaksgkmpwpm yhnerryrtyq  
>tr|D9RIT8|D9RIT8\_STAAK  
mrlftfilsifivgmvmemvagi mnlmsqdlhvseavvgqlvtmyaltfaicgpilvkltnrfssrpvllwtllifiign  
giavapnfsilvvgriis  
saaaaliivkvlaitamlsapknrgkmiglv ytgfsganvfgvpigtvigdlvgwrytflfliivsiivgflmmiylpkd  
qeiqr gpvnhetpshenhv  
tskilrpaevakyl iitflvl iansvtfvfinplilsnghdmsfvslallvngiagvigtslggifsdkitskrwlmisv  
sifivmllmnlilpgsgl  
llaglfiwnimq wstnpavqsgviqhvegdtsqvm swnmssl nagigvggi igglvmthvsvqaitytsaiigalglivv  
ftlknhyaktfkss  
>tr|D9RIU1|D9RIU1\_STAAK  
mnmnqsvklklh ltdvngi agyemqvkeamrnyi epvsdqii ednlggi fgknaengqysimisghmdevgfmvtkid  
khgfisftpv gwwnqvm l  
sqkv titt dsgeirgi igskpphvtpeerkkpmeiknmfidigvsskeae e agvevgnmvtpysefevlandkylta  
kafdnrygcalaievlkr l  
kdeniginlysgatvqeevlg rakvaantikpdlai avdvgi aydtpgmsgqtsdskl gggpvvimmdatsiahqglrk  
hikdvakehnievqwdttp  
ggtdagsihvanegiptmtigtvlrymhsnvsvlnvddyensirlvteivrsln desyknimw  
>tr|D9RIU6|D9RIU6\_STAAK  
msntnkhyieeeyateqsrffkrdigfiflyiflvnilpiiivlftfglvavftqqapwgfsfpismnisyllaviisla  
ifrlmheda fipmirsqiv  
asakykwhilisftlsvvlfl llnhfni falnvdsftvfdi yplikgygsisli aifsltiilntlicqlifrhiliqel  
srliplkitivlsiilet l  
fyppyintwwefipalilagsatylylkl yrnfmvsyfyqlavilvlhifm  
>tr|D9RIV0|D9RIV0\_STAAK  
miilkrllqdkgavialgiivlyvflgl aaplvtfydpnhid tankfagmsfqhllgtdhlg rdiltrl iyairpsllyv  
fvalfvsvligsilglfsg  
yfggfvdalimracdvm lafpsyvvtl alialfgmgaeniimafil trwawfcrvirtsvmqytasdhvrfaktigmndm  
kiihkhimpltladaiis  
sssmcsmilqisgfsflglgvkaptawgmm lnearkvmfthpemm fapgiaiviivmaf nflsdalqiaidprisskdk  
lrvskkgvvqs  
>tr|D9RIV2|D9RIV2\_STAAK  
msamllasglil tgcggngleekkenkqlyttvtkd igdmnphvyggsmsaesmiyep lvrntkdgikpllakkwvse  
dgktytfhlrddvkfh dgt  
pfdadavkknidavqenklhswlki stlidnvkvkdytvelnlkeayqpalaelamprpyvfvspkdfkngttkdgvk  
kfdgtgpfklgehkkdesa  
dfnkndqywg ekslnkvqakvmpagetafl smkgetnfaftddrgtdsldkds lkqlkdtgdyqvkrsqpmntkmlvv  
nsgkknnavsdtvrqai g

Tsompanidou\_et\_al\_Supplemental\_FASTA\_File

hmvnrckiakei1dgqekpatq1faknvtidnfdmptkyd1lkaes11deagwkkgkdsdvrqkdgknlmamydkgs  
ssqkeqaeylqaefkkmgi  
k1ningetsdki aertrsgdyd1mfnqtwg1lydpqstiaafkakngyesatsgienkdkiynsiddafkiqngkersda  
ykn1lkqiddegifipish  
gsmtvvpkd1ekvsftqsqye1pfnemqyk  
>tr|D9RIV5|D9RIV5\_STAAK  
mt1lvshskhdaseyasiaanqlmaathvcceqvgfiestqnddgnfdh1vmsgnefcgnatmsyihh1qesh11kdqqfkv  
kvsqcsd1vqcaihdcqyy  
evqmpqahrsvpttinmgnhswkaieiiyetyvhyvipkvqtteiqh1veafvreqqshkyktvgmmlfdeqrqflqp  
liyipeiqsliwenscgs  
tasigvfnnyqrndackdftvhqpggsilvtskrchqlgyqtsikgqvttvatgkayie  
>tr|D9RIV9|D9RIV9\_STAAK  
mhfkmydekekqkaiyykeqgeritly1khntketntiksvhftn1etspmgsaviegyinenkeddftayaspehnyq  
fggamiksegvdk1lkpah  
erkspekikee1dkkegh  
>tr|D9RIW1|D9RIW1\_STAAK  
mnkihvfiiigvilcivasviy1kvkydekekqkaiyykeqgeritly1khntkeptiktvhfts1krqpmgdavie  
gyinenkeddfvaygspeh  
nyqfggs1ikskn1st1lkpvhqtkspdeikkeleskkndr  
>tr|D9RIW3|D9RIW3\_STAAK  
mtyherv1alraeskrtafdfrfed1fskeew1smslaerqaekaf rhevknmddvrmpfssvhdaqvk1ynvvsyng  
ikrnfkqvenegf  
>tr|D9RIW7|D9RIW7\_STAAK  
msr11ndfnqslhkgfidkhi shkgnytpk11vnknkv1stiidelqkctfyfsvafitesglas1kaq11d1snkg  
vkgk11tsnylgnspkmy  
ge11k1knvevr1tdiagfhakgyi fehkdyssmvi gssn1tsn1kvnyehv11stmkngd1vdsvksefd1lwqkst  
plteqwinsykesfeyrs1  
ek1aeveqtm1ladkvkksveivpn1mqaealrslkairdkakdka1iisatgtgktilcaldvrevnnpnkflfivhne  
gilnrakeefkkl1pknd  
sdfg11tgkhrvdaky1fatiqt1srddn1fkqfdenefdyivfdeahrsaastyqrvfnyfkpkfmlgmtatpersdel  
sifelfdyniayeir1qaa  
lesdi1cpfhyfgvtdyvhqgikeddvtk1ryltsdervnyi1qktdyygysgeilqgli1fvsskkeayd1adk1sskgi  
ksvaltgddsnyrqivie  
k1kegkinyi1tvd1fnegidipevnqvm1rptessi1fiqq1grglrksskeyvtvidfignyktny1lipialsgdq  
sqnkdnk1kfltnndsing  
vstinfeevakkqiynslavsl1nqnk11lkayeeven1lghmp11mdfiqqhsidpsvifskfsnyyeflvrykkid1  
lteneskn1vffsrqiap  
1krids1v1ee11kneltyde1knkm1nevkditeddidts1rildfsfynpgiekiygspiierner1r1sdaftna1  
snqtfnm1fled1ielskyn  
nekyqkgkng11lynkysredfski1fnwnkngssvimgymiksqempifitydkhedisdstkyedef1sqdelkwftks  
nrtleskevqk1lshrakg  
ikmyi1fvqkkdddgiyfy1lgtagi1egsekqdkmpngsnvvtmd1aldkavrddiyr1tn  
>tr|D9RIW9|D9RIW9\_STAAK  
mdkelwierands1vkhfyeqqsdi1eqregfeskl1tfgtag1rgkfg1lgegr1nkftiek1alglary1naqtnsptivi  
hydirh1stefaqiianv1  
anhqitvy1pdykttpelsfavrn1nttagimitashnpkdyngikvygsdgaql1stdaselasryieevgdplqidip  
iskqnts1y1kpfkpsvtd  
ymkhiqnm1gyi1pksd1lqvfts1hgtsvpivpe11qsl1fnqfn1veaqckpdpnfssvqsanpedhrafdqavelank  
shad11istdpdadrlgia  
erdahghityfngnigal11nyriqqt1srlhr1miqsisvsel1tkslarynnveykev1tgfkfiaqeir1qlddhqnm  
ifafeesygf1sepfvrk  
davqivp11ikyase1klygk1kde1eqiyqtvgrhed11fsht1legfegkkkinaimtkfrsnppqeiqglkvkaied  
yltseyvhl1dkdttsqins  
pksnvirv1fdegfiar1psgtepki1lyvs1kcpnfddvaqkinamifs  
>tr|D9RIX0|D9RIX0\_STAAK  
maqyakhyeqksdssnaht1nsssaieqhtmsnlas1dlyapvrnitssrdihpiyfmtkd  
>tr|D9RIX1|D9RIX1\_STAAK  
mvi1giyvaitkdf11sfinqtaiadkhknqiyift1cis1savflmssil1sfeydfialaf1fltia11lialfyvc  
fykitkyp  
>tr|D9RIX5|D9RIX5\_STAAK  
mkkikkai1paag1gtrf1patkampkem1pil1dkptiqyiveearagiediiivtgrhkraiedhfsqkelemv1ke  
kgksel1ekvgystelani  
fyvrqkeqkg1gha1issarqfignepfav11gddivesevpavkq1idvyeetghsvigvqevpeadthrygiidpltkn  
grqyevkkfvekpaggtap  
sn1aimgryv1tpeifdy1ktqkegagnei1q1tdaiernmndnqvyaydfegerydvgek1gfvkttieya1kddsmree  
1trfikalg1  
>tr|D9RIX9|D9RIX9\_STAAK  
mmkgvsrhvfrivqai1mkr1vycfk1dndefn1kk

Tsompanidou\_et\_al\_Supplemental\_FASTA\_File

>tr|D9RIY6|D9RIY6\_STAAK  
miipaiigylcgnfqfgllvatgtlahiyvfkgpsrsklrvviicnlaifaicmmlgtltaktplvfgmtllivtvipfyi  
ftalkiagpsstffivtfs  
lpinlpiapeealyrgfai lvggilatmmvilitivfsknkaeeqaiqndfkliskllhtyndksafllqvaktavdsfkas  
dkllitstssndklsrrfq  
kllllhtsaqqiyselelnakqirplpdeliemmdhiiiaqlnseenvrywrkevvtvteefqnlfnhilkidemvhane  
ariayeadmkrplyskriy  
qnltdsiivrntlrytaimmiiaifialmfdfekaywiplsahtillgtstihaiergmarglgtilglvlsvillfsi  
ptpvavilmgiaalfteal  
vganyaiavvfitiqvilmnglasqnltniafprvidvamgiviaiiglfvlqgertasallpnvmaevvrkeatlphy  
fsenykddvyqkntamn  
svklnnmtqvynaangel fsdktliqnyypsifaleeisfmlnramanedrltineqlmgeylaifeniakhfelntele  
ikilpdlpqnyiqsamn  
iqhngfrerdknv  
>tr|D9RIZ0|D9RIZ0\_STAAK  
mkrevilkqqfiierenadkrrqykkeneedlsltqfhielidndkvnkflsemInvskpaitksikkllakdlv  
veshnefnkrevncsltkq  
gkkl syihdelheksvkkyeevkvfddemavieflnrsieelkkedgln  
>tr|D9RIZ4|D9RIZ4\_STAAK  
makvlyitahpfnelvsnmaagkafietyqqhpdevkhidlfetyipvidkdvlwtgwgkmsnetltddeqmkvsrl  
sdileeflsadkyvfvtpm  
wnlsfppvkvayidaisiagktfkysaegpqltdkkvlhiqsrqgytepaadfemgdrylrtimtflgvpsyeti  
ieghnaephkteeikatsi  
nnaeklattf  
>tr|D9RIZ7|D9RIZ7\_STAAK  
mllivtacgpnrskedidkalknksdkpnlmwwdgdqkmafykkitdqytkktgikvklvnigqndqlenisldap  
agkdpdfflahdntgsay  
lqglaaekl skdelkgfnkqalkamnydnkqalpaivettafynkklvknaptleeveanaakltdskkkqygm  
daknfyfnyplfgnddyi  
fkkngseydihqglnskhvvknaerlqkydkgylpkaathdvimglfkegkvqfvtpgwnineyqetfgkdlgvttl  
ptdggkpmkpflvrgwyl  
seyskhkywakdlmlyitskdtlqkytdemseitgrvdkssnplkvfekqarhaempnitemrqvwepmgnasifis  
ngknpkqaldeatnditqn  
ikilhpsqndkkgd  
>tr|D9RIZ8|D9RIZ8\_STAAK  
mtrknpklaallsvipglgqfynkrpikgtiffiffisfivsfynlignfwglftlgtvpklldsrlllaqgiisillv  
afaimlyvini daynae  
rfrnreeikdpkarmvatwkdtpyllispgtflifvvvplifmfgvaftynlynapprhtlewgldnftlftig  
vwrktffsvitwltvltv  
attlqjalglflaiivnhpvvkgkkfirtvlilpwavpsfvtilifvalfndefgainndilqpllgvapawlsdpfws  
valigiqvwl gfpvfalf  
tgvlsqsisdwyeadmdgasswqkfrnitfphviyatapllimqyagnfnfnliylfnkgppvsgnagstdilsw  
vynltfefnfnmgavvs  
iigfivaivafiqfrvstfkdegg  
>tr|D9RJ00|D9RJ00\_STAAK  
mtikvgiigcggiangkhmpslqkvenvemi afcdvdiskaacaeaygtdnakvyddykallkddtidvihvctpndsh  
ceitvaglhagkhvmcekp  
makttaeaqkmi dtakstgkklitigyqnrfrpdsqflyksaqrgldgiyfgkahairravptwgvfldeeaqgggpli  
digthaldltlwmmdnyep  
esvmgstfhklnkqhdaanawgswnpdefvtsafgfikmngatiilesawainslevdeakcs lsgtkagadmkgd  
rihgedmgtlytkhvelen  
kgvdfyegnevdkaeekawidavvndtepvvkeqamvvtkileaiyqsaksgkaiyfe  
>tr|D9RJ02|D9RJ02\_STAAK  
mki gvsvlfydkn fedmldyvaesldmievgtggngpdkfckldellenedkrqafmksitdrglqisgfschnnpis  
pdpteakeadetl rktir  
anlldvpvntfsgisgddtakkpnpwptpwptayseydyqwnekli pywqdl aefakeqdvkiaielhagflvhtpy  
tmklreatneyiganldp  
shlwwqgidpaairilgqanaihhfakdtyinqenvmygltdmqpygnvatrawtfrtvgyghspyvwdiisqlii  
ngydyvlsiehedpimsve  
egfqkacqtlksvniydkpadmwwa  
>tr|D9RJ07|D9RJ07\_STAAK  
mkskiyillfliflsactnrhsesdknvlvtspsyqsnlirpilndfekqehvkieikhgstqvlslsnlhnedlserg  
dvfmggvsetidhpedfv  
pyqdtsvtqqledyrnknkyvtsflmptvivvnsdlqgdikiqgyqdlqpilkgkiaysnpnttttgyqhmraiyasmh  
hrvsdvhqfdhamqlskt  
skviedvakgkyaglsyeqdartwknkgypvsivypiegtmlnvdgialvknahphpkrkklvqyltsrsvqqr lvaef  
daksirkdvseqsdsien  
lnkniplipksklpdiphhkfllemi

Tsompanidou\_et\_al\_Supplemental\_FASTA\_File

>tr|D9RJ11|D9RJ11\_STAAK  
mknikmklNIKAMRsvImkRISKdiwavfkllYqNkgrfsina111qLimifissty1111fnmmlkvagqsqtinnwm  
eivshpasv1111iifilsv  
afliyvefsl1vymvyagfdrqitfksifknaFVnvrkligvpviffviylmlmpianlg1ssvltkniyipkfltee  
lmkttkgi1iygtfmiavf  
ilnflkliftlpltilnrqslfknmr1swqitkrnkfr1vieivile1iigailtliisgatylaicvdeegdkflvssil  
fvvlksslffyy1ftk1sl  
isvlv1h1kqenv1dqpg1efkypkprksrffiismvlavtcfiGynmyllynntintnisiighrgfedkgvensips  
1kaaakanveyveltdimt  
kdkqfvvshdnn1krltgvnknisesnfkdvvg1kmrqngheak1vs1defietakqsnvkl1velkphgkepadytqrv  
idilkkhgvehqyrvm1d  
ydvmtkl1kkeepylkccgyi1plqfghfkets1dffviedfsyspr1vnqahsenkevYtwtingeed1tkylqtnvdgi  
tddpaladqi1keekkdety  
fdrsi1r1lfe

>tr|D9RJ18|D9RJ18\_STAAK  
mkqitwhdlqhi1kdddvig1palavan1paev1ravlaqhdtyhtpnd1tfilandihs1gvapdl1ddfiermikrvi  
msil1tassktaqamknndi  
eayf1pqgi1athyrqsng11pgvitkiG1ntavdpryggkvnt1rtdd1vs1vtiddety1hytfpsvdv11rgtya  
dqggniy1tqesy1secyh  
va1nakanhgkvivqvkdl1vddyq1kpnevviPgn1vdyvyvtedeknrqviqshyl1palsgeeridgipepal1pfnsr  
klil1rraaqf1tygdtisi  
gyginne1sn11heecvehdvqpi1dvgi1fggfvg1srehfgmynadvrmphdrawdfiYngvsvay1sfaevdqygnv  
nvsyfndr1ngcggfidit  
qsvnki1ifsgtfvagshvschnqr1nietegqnqkfvsdvshidfnaqysqs1eqevyfvtdravfeltnqg1klieiap  
gld1hkdi1nqmafkipia  
dh1kl1idtsiykekWge1kqsihkv

>tr|D9RJ20|D9RJ20\_STAAK  
meg1nhqrntekeettqtqsvapntgeegmssastqstktSDihnesidkqmeakahetaqntdl1knears1fdnatksi  
gr1agndes1n1n1kdmfs  
evfkphtkneadei1fiagtakttpaicdi1seewgkpw1fsrvfiaftvtfig1lwmaai1fnntnaipglifigaltvpl1s  
gl1fffyenasafknisi1fev  
iimffigv1fs11stmv1yrfv1v1sdqferfgs1tffdaf1vg1veetgkai1ivyfvnkl1ktnkilng1ligaaigagf  
avfesagi1n1falgenvp  
11divf1trawtaiggh1vwsaivgaaivi1akeqhg1fefkdi1fdkrfliff1savgl1hgiwdts1tilgsdt1kifilivi  
vwi1vfi1mgag1kqvn11  
qkefkeqqkkvde

>tr|D9RJ27|D9RJ27\_STAAK  
mkrki1imdc1pghddaia11ilagaidsp1e1lavttvagnqsvdknttna1nv1ldimgrqdivvakgadrpl1kpvafas  
eihgesg1dgpk1p1stpsr  
qavampasdv1inkvmtsdtpvtivatgp1tnvatali1repriaehiesit1mgggtfgnwtptaefniwvdaeaakrvf  
esgit1nvfg1dvthqvla  
dehvierfes1innpvaqfvve11qffkkykthfnmdgppi1hdactily11qpel1ftmvpvni1diehqsp1tygtmavdl  
nhvtgkpanayfatavdve  
evwn1idhk1rtye

>tr|D9RJ28|D9RJ28\_STAAK  
mdynghgn1imieicmlkmlqktqntkiyakisia1f

>tr|D9RJ29|D9RJ29\_STAAK  
mngdnqqi1reiv1nptihgk1esifg1srrq1gyriqkin1wleqegypl1ertsqgnfivsseimt1fkrdvseqqm  
1ngnnvifnietrrry1ml  
m1fskenams1nhfsid1qvskntvi1hdinhvkeq1edhg1slkysrk1hgyeivgdefevrrffiklidqr1nhditkse  
v1ka1n1t1fediyqkdk1  
kqveqf1ksrfidks1sslpyv1cvirrriqsghvinp1lninyqyl1rdtkeyqateimtqhepdl1peakly1t1h11st  
svqwt1d1qesdn1sn1tma  
idqm1hhfeqitfiniedkek1sq111h1tpafyrikynt1drdelin1plqgnyqs1f1hmvkqscqs1teyfgks1pdn  
eiay1tm1fgs1rrqden  
fdgkikai1ivctqgtsvsgmm1yeln1fpei1fldais1rtfeny1tdydivf1spmfvl1thkkl1fitkval1seneqrk1  
rkevmyin1kesadidkei  
nk1ma1liertttvndite1rdg1ledfianysistingsivtqnkt1dlad1liparyvkrihhvenideaiakasdv1va  
nhfidikiyihemqqa1fdds  
ymvimqni1aiphaysekhvhtamsm1ilqepiym1sdgtaihiivpiaavdkvth1ral1q1rdvaqndaikriiqsrk  
nsdvnei1knysnkearen  
gwdsn

>tr|D9RJ30|D9RJ30\_STAAK  
mhkenim1n1satdkesv1sqmsdv1fqngfvk1stfk1davidrekefatg1p1th1c1svaiphtdv1ehinhrtigvav1lek  
evpfie1mgt1dqgtevkiv  
fm1amd1kvddq1k11qqlmqi1fqseek1eqi1l1rtkdeti1lat1indy1kyn

>tr|D9RJ33|D9RJ33\_STAAK  
mka1vktreghgn1e1ldkevatp1ddkvkikvhyagi1cgtdi1htyeghykv1nfpvt1lghefsgeivevgadvkdfkvgd

Tsompanidou\_et\_al\_Supplemental\_FASTA\_File

rvtsettfyvcneceyces  
kdynlcnhrkgigtqvdgaftnyviareeslhripdevsyqsaamteplacahhgvskiqvnsqdvavvmgsgpigllva  
qvlkskgatvvvtgldndk  
vrlkdaeahmdyvvnlgqtdlktyingitdgygadvvvecsgavpaarqglidlrkkgfysqigifkdaeitfdmekvi  
qkeitvvgrsrsqkpadwep  
slqlmadglvnaealvtkiydiskwdeayqhlksgegikallkplldenenegen  
>tr|D9RJ39|D9RJ39\_STAAK  
mcfhiyelndwidyfilqndnsvtgwdinqcsmlyevilavvd  
>tr|D9RJ44|D9RJ44\_STAAK  
mkfsvivptynsekyitelnslakqdfpktefevvvddcstdqtlqivekyrnklnlkvsqletnsgggpkprnvalk  
qaegefvlfdvsddyinke  
tlkdaaafidehsvllikmkgvnrgvqpqsmfketapevtllnsriiytlspktyrtallkndiyfpeelksaedq  
lftmkaylnanrisvlsdk  
ayyyatkregehmsayvspedfyevmrliaveilnadleeahkdqilaeflnrhfsfsrtngfsfkvkleddppqwinal  
gdfiqavpervdalvmskl  
rpllhyaarakdinyrtveesyrggqyyrfdivdgklniqfnegepyfegidiakpkvkmatafkfdnhkivteltnefm  
igeghydvrlklhsrnkhh  
tmyvplsvnankqyrfnimledikaylpkekiwdvflvqigtevfevrvgnqrnkyaytaetsalihlnndfyrlltpyf  
tkdfnnislyftaitltds  
ismklkgknkiiitgldrgyvfeegasvvlkddmvmgmlsqtsenevqillskdikkrdfknivklntahityplnk  
>tr|D9RJ45|D9RJ45\_STAAK  
minkndivadvtvtdypkaadifrsvgidfccggqvsieaaslekknvdlnellqrlneveqtnpplsnpkflnvssliq  
yiqsayheplreefknlt  
yvtklsvhgpnhpylvelketydtfknnglhemqkddvdfpklikeyeqgevddintviddlsdhiatgqllvkms  
ltsyeppeieacgtwrlvy  
qr1kalevlthevhlenhvlfkks  
>tr|D9RJ55|D9RJ55\_STAAK  
mtnkvvilgstnvdqfltvaryaqpgetlhveeaqkafgggkganqaiatarmqadttfitkigtgdgvadfiledfkaah  
idtsyiikttaektgqafi  
tvnaegqntiyyvgganmtmpedvinakdaiinadvvaqlevpipaisafeiakahgvttvlnpapakalpnells  
idiivpneteaelsgikv  
tneqsmkdnanyflslgikvtliltgkqgtyfatknqsqhieaykvnaidttaagdtfigafvsrlnksqdnladaidfg  
nkassltvqkhgaqasip  
leevnqv  
>tr|D9RJ58|D9RJ58\_STAAK  
mkkvsikdvareagvsvtvshlnhndsrfsattiknvhavserlgyapnkakqlrgskigtigvilpsltnpffsal  
mqsihdhkpdsdvlcflts  
tatdlydnikhliidrgidgliaqyisspdalnnylkkhhvpyvvlqndhqgytdfvrtneyqggqlaaqhlieleghnn  
mmivapydmmanmstrvag  
fvdtrlanqlpepqihteiskrggltivddimvqsataifaindelaignlrgliehgisipkdisligyddidyaayv  
sppltvaqpitdigktsl  
tlllqr1qhlkdsidmielpttlkirattgyhln  
>tr|D9RJ59|D9RJ59\_STAAK  
mqfklkeeeiisflelkyepefefeygrllvgqhkrdldvyyfgdtflmctiisfktfeiketvelsydavnrvlkdgw  
lfrkmrietmqvlykygts  
klmltdfqkdnykyiqgqkqrvi fenghfv  
>tr|D9RJ61|D9RJ61\_STAAK  
mctgftiqtl1nnqvl1grtmdydyp1dgsavtpnrnyrwtstrgttgqtqygfigtgtdmegfiygdgvnehgvaistqy  
frgyssygsthkadamnit  
qneivtwilgyttsiedmkqqasqihvvavylndigevpplhyhvsdvtghsaevsfkegevvikdnpigvltnhpdlw  
hysnlrqyini spypatak  
llegvsieplgneagtfglpggftsterfvrmafkaniaqndkemdlnafy1ldavnipigivrphdadnhytmyqt  
vinl1trtlykygsnei  
valkltddl1nrkdmmi1fkpekhitirk1ndnq  
>tr|D9RJ64|D9RJ64\_STAAK  
mkpyiq1vvfkqwlqy11vttvialvligmgyrvahdnfkipitiqld1dqttasksfvnkikqsdyvtikkvdedesy  
ieddvtkkaeailsmqipkg  
fsqklkenr1ketiqlygrddfiggiaveivsslyeqqipniyehledmkqhqsidainksykhhipeskikfvs1tk  
qaqhsisislifavilfvs  
avqvihyrlnqqaalqr1sqyh1srfklystyvmtht1ll1v1lavsl1sqplslifylks1ll1liyeigivfilf  
hiqtishrlf1mtfiyalam  
givy1sifm  
>tr|D9RJ65|D9RJ65\_STAAK  
miy1l1f1laall1t1l1t1qhvteddnhfnigvvdkdqssetkl1l1nsigkgsnl1gknvsikayddkqaht1lkqk1qg  
yfvfdkgmtkafykqgel  
isvytydqsmksv1sq1tdsvyqr1mrsmg1lafqdlapkashdsinvmt1l1itg1nrsgafn1lepihlydtgsy  
yaitgfl1ttv1fals1ft  
vlk1mqdtv1kar1kmf1hfsker1li1ralitwfytm1wsivgvv1v1fsipntfelynwpt1aih1syv1t1l1w1li

Tsompanidou\_et\_al\_Supplemental\_FASTA\_File

iel1ttgllnsiskvilai  
vilvlsgltpiiflqhiangvfnipfavvtnqlleilnnyilelhpshfysfia11iinlavlvwryrq  
>tr|D9RJ66|D9RJ66\_STAAK  
mir1gkmsdlqilnlveeakelikehdneqwdqyp1lehefeediakdylyvleendkiygfivvdqdaqewyddidwp  
vnregafvihrltgskeyk  
gaatel1fnyvidvkvargaevilttdfalnkpaqglfakfgfhkvgeqlmeyppydkgepfyayykn1ke  
>tr|D9RJ73|D9RJ73\_STAAK  
mt1silvahdlgrvigfenqvpwh1pndlkhvkk1stght1vmgrktfesigkplnrrivv1tsdtsfnvegvdvihsi  
ediyq1pghvfi1fggtly  
eemidkvddmyitviegkfrgdtffppytfedwevassvegk1dekntiphtflhlirkk  
>tr|D9RJ77|D9RJ77\_STAAK  
mki1sesregmtsdytkvddsqa1findil1kvegksifhvmdfisvdkendanwetv1pkveavfe  
>tr|D9RJ80|D9RJ80\_STAAK  
mgpnteddeksaynnvqvdgppqreigfpi1stdnaswggttk  
>tr|D9RJ83|D9RJ83\_STAAK  
mekpsreafegnnk1ligiv1svitfw1faqs1vnvvpiledsfntdigtvniavsital1fsgmfvvgaggladkygrik  
1tnigi1n1lgs11iis  
nipl11iigr1iqg1saacimpat1siiksyigkdrqra1sywsigswgsgvcsffggavat1lgwrwifilsiiis1  
ialfl1kgtpetksksis1  
nkfdikglv11vim1sl1nilitkgselgvts11fit11aiaigsf1fivlekratnplidfk1fknkaytgatasnfl  
1ngvagt1livantfvqrg1  
gysslqags1sity1vmv1mirvgek11qt1gckkpm1igtgvlivgeclis1tflpeifyvicciigylffglglgiy  
atpstdtaianap1ekvgv  
aagiykmasalggafgvalsgavyaivsnmtniytgamialw1nagmgilsfvi1111vpkqneimien  
>tr|D9RJ93|D9RJ93\_STAAK  
mekmsdvs1k1sakdiyekdfektmargyrreevdaf1ddiadyqkmadmnevklseenhklkkel1e1rlrvatsr  
pqdnksfssn1ttntssn  
nvdil1krisn1ekavfgk  
>tr|D9RJ96|D9RJ96\_STAAK  
m11isrgvfd1ndf1rlkvfssynni1hdki1lylrkfl1d11d1tdntfekivksnyiec  
>tr|D9RJ97|D9RJ97\_STAAK  
mny1p1ngkpyrknsa1dggk1taafsni1eygg1rgms1ekdi1ehsntf1ylksdi1avi1hkk1ptpvqiv1vnv1pkrskavinea  
yfr1tpst1tdyngvyggyy1  
dfeaketknktsf1lnni1hdh1qvehmknayqqk1g1v1f1mirfkt1devy11pyskfevfwkrykdnikksitvdeirkng  
yh1pyqyqpr1dy1lkavdk  
1il1desedrv  
>tr|D9RJA1|D9RJA1\_STAAK  
mdkyq1karpvvi1rre11dhysd1gl1deqdlv1llk1liyaset1snkqpsie11lqkgstmqprdi1tmviqn1liqre11le1q  
vqkdeegr1fteym1ldpff  
ek1sh1lkqqsmetke1nskekfkq1frv1ledtfarp1spyeiet1nqwidvdkhdta1iqaal1deans1nk1sfkyidr  
i11nwkk1nvkt1idderski  
rekfnk1pkm1th1vkt1vpk1fdw1ngen1dgk  
>tr|D9RJA3|D9RJA3\_STAAK  
mgmatyavvd1lettgnq1dfddi1iqigitfvrnqi1dtyhsmir1nleippfiqal1tsieen1lqqapyfnqvaqeyd  
k1kdc1fvahnvd1fd1nfi  
kkafkdcni1qyrpk1vidt1lei1fiafptdksyq1selaeahgit1anahradedaattak1milafekfek1pldt1kq  
1yylskq1kyd1ydiffem  
vrqydakp1dksyekfeq1iyrkqvdfkkpttnyngs1kslyskavdq1gltyrppq1ylaet1ldq1mhsekamieas1  
gsgks1lay11laalmy1niet  
gkhv1m1stntk11lqsq11lekdi1pamnealnfkina11lksksdyis1glisq1lkddtsnyevni1kmq11liwitetpsg  
diqe1n1kggqkmyfdqki  
etyvpar1hdvhy1nfikrnaqni1qigitnhah1ihssvensiyq1fddcivdeahr1pdyal1nqvtnel1syadikyq1gl  
igknenek11kaidq1lekq  
ri1lek1diapidi1fg1kasmnei1helneq1fstifti1indsdyddi1hrfhnvftfetkdi1kdlhai1dk1nktleif  
ngishktvks1rkq11ly1k  
dkfkni1eqs1kaghtsfi1sikn1sqksti1rlyvkdyavkdvl1tkqv1lekfks1l1f1sgt1kfns1feafkq1fnkdvhfn  
tfevnts1qsaknts1vfip  
sdvasyqkni1deyvasivsyi1eyttitsskclv1fts1ykmhmvqdm1nel1pefedyvvl1tqqnqnykivqqfnnfd  
kai1lgtst1ffegfd1fqan  
gikcvmiak1lpf1mnkhnakyw1mdseftstfkeyv1pdavtr1frqgl1gr1irnendrgi1ivs1fddr1linsnykn1ffeqt1  
enyrqkkgdi1qqfgk11lrq  
iqkkkk  
>tr|D9RJA5|D9RJA5\_STAAK  
mdks1feqarp1leq1qdngfeayyvgsvr1dyvmgrni1hdidit1tsatpdeies1fshtipvgkehgt1invv1fndenye  
vt1fraeedyvd1hrrpsgv  
tfvrd1yed1lqrrdftmna1iamdtayk1lydyfdgqddinnri1rtvgiaer1fgedal1mircl1rfqsq1sfdiatetfe  
amriqmadik1f1sierivi  
el1tk1lrgi1nveksfnh1ks1kafn1mpyfeh1dmnqin1vteaid1le1liaivs1kfdinys1kpl1k1snrqvk1dinqi

Tsompanidou\_et\_al\_Supplemental\_FASTA\_File

qimnalpsitkeq1kmfv  
ydydthliknvmvaadvlkandiqgheplivnlqtidetlhr1pmhnrkdmmvnggv1mahlnaksgpw1kdv1rqieia  
1vtgkvsneeteilkwvdn  
hvki  
>tr|D9RJA6|D9RJA6\_STAAK  
mgsggiateligiklaerghevfhitsnipfri rkp1pnmifhqvevnqyavfqyppyditlstkiaevikedyldl1hm  
hyavphaicgilaremsgk  
dikimtt1hgtdivlgydhs1qgaikfgieksdivtsvsks1aqethei ietnkei ipiynfvrenefptkhntalksq  
fgiapdekvl1hvsnfrqv  
kridtietfakvrekipsk1i1l1gdgpe1vpmrqltke1nveedv1f1gkqdcvsefyq1sd1v1l1sekesfg1t1le  
amktgvvpigsnaggikey  
ikhgetgfvdvgdcdsasdyair1ledkvlynk1qkmladiaerfgselitdqeyyyyqkmlnehnkskge  
>tr|D9RJB3|D9RJB3\_STAAK  
mk1qttypsnnypiyvehgaidhistryidqfdqsfilidehvnqyfadkfddilsyenvhkvi ipagektktfeqqetl  
eyilshvtrntaiiavgg  
gatgdfagfiaat1lrgvfhivp1t1lahdssvggkvnginsqgkn1igafyrptaviydl1df1kt1pfeqilsgyaev  
ykhallngesatqdieghf  
kdreilqslngmdkyiakgi etk1diviadekeqgvrkf1n1ghtfghaveyyhk1phghavmgviyqfivana1fdsk  
hdinhyyq1q1gyp1dm  
itd1dfetlyqym1sdkkndkqgvqmv1irqfgdivvqhvdq1t1qhaceq1ktyfk  
>tr|D9RJC5|D9RJC5\_STAAK  
mkainia1dgpavvgkstiakrvase1smiyvdtgamyraltky1k1nktedfak1vdq1t1d1tykadkgqc1v1dne  
dvtdf1rnndvtqhvsvva  
skepvrsfavkkqkelaekg1vmdgrdigtv1p1dad1kvymiasveeraerrykdn1lrgiesnfed1krdieardqy  
dmnreisplrkaddavt1d  
ttgksieevtde1lamvsqik  
>tr|D9RJC6|D9RJC6\_STAAK  
msqdqsnkvvtndinpi smhqdvinqyaide1n1pfnvpsphmtiqhvqk1kdiileavtnkyydgvfithgtdtleeta  
f1ld1l1gi eqpvvitgam  
rssneigsdg1ynyi sa1rvasdekarhkgvmvfn1deih1tarnvkthtsntntfqsphgplgv1tkdrvqfhmpyr  
qqa1envndk1nvplvkay  
mgmpgd1fsfysregidgmviealgggn1ppsa1leviq1vs1nipiv1vsrsfngivsp1tyaydggyq1laqqgf1fsn  
g1ngpkar1k1lvalsn1  
dkaeiksyfel  
>tr|D9RJC8|D9RJC8\_STAAK  
mamsnnfkddfeknrqs1d1tnshqdh1tedvekdqsel1ehqdtienteqqfpprnaqrkr1rrrd1atnhnkqvhn1esqtse  
dnvqneagtidd1r1qvessh  
stesqepshqdst1p1qheeyynkna1famdkshpepi edndkhdtiknaen1tehstvsdkseaeqsqqpkpyfttganqs  
etsknehndns1vkqdd1qdep  
kehngkkaa1a1gagtagvagaagamaaskakkhsndaqnsnsgkannstedkasqdkskdhngkkaa1gagtagla  
ggaaksasa1skphasnn  
asqnhdehdnhdrdkerkkggmak1v1l1piaav1i1galai1fggma1nnhngtkenkiantkn1nadeskdkdtskdas  
kdksk1tdsdskskedq1dka  
tkdesdndqnnanqannqanqanqqanqanqqqqqrqggqrhtvdgqen1yria1qyygsgspenvekirrang1sg  
nnirngqq1vip  
>tr|D9RJD5|D9RJD5\_STAAK  
mnkindrd1tel1ssyryqdin1kndndftvnekrfkqadvfedlyrek1kdtnk1reyn1lqnetfksa  
>tr|D9RJD9|D9RJD9\_STAAK  
mkkfigsv1att1i1ggcstmeneskkdtktetksvpeemeasky1vgg1fppaeknaie1fakkhrkef1ekvgeqffkdn  
fg1kvkatnvvgkddgvev  
yv1hcedhgi1vfnas1p1lykda1hqgsmrsndngddmsmmvgtv1sgfeyraqkekydn1ykffkenekkyqytgtfkea  
inktqnvgykneyfy1tys  
srs1keyrkyep1l1rkndkefkegmerarkevnyaantdat1fstkknftkdntvddvie1sdklyn1knkpdksti  
tiqigkptintkka1fyddn  
rpieygvhskde  
>tr|D9RJE4|D9RJE4\_STAAK  
mehifregqngapt1i1l1hgtggdefd1l1p1geal1nenyh1ls1irgqvsengmryfkr1lgegyv1deed1a1frgqell1tf  
ikeaaerydf1iekav1vg  
fsngsni1ain1mlrseal1fkka1lyap1ypvevtstk1sdsv1l1smgkhdpiv1laaseqvin1fntrgaqveevwk  
ghe1tetgltagq1lgk  
>tr|D9RJE8|D9RJE8\_STAAK  
mafhdktatqv1niv1nvrd1d1mttfykni1gl1svkssddnttv1svgtgght1t1h1ledgrqtspreag1fhi1af1l  
ptted1an1flyfvaqknmg  
igagdh1vseal1y1fndpegngi1evyrdrpssswewqngkvkmdt1levdsq1t1l1thrtdegwqgmpakgmigh1h1kthd1  
daaygcyieq1lgf1qhv1sdf  
pra1lms1tnhyh1hiaantwqsnqarqnnsqsyl1thvdi1yqpdasthtftapegfd1tvhsntd1vpek  
>tr|D9RJE9|D9RJE9\_STAAK  
msnmnq1timdafh1frhatkqf1dpqkkvskedfetilesgr1spss1glepwkfvvi1qdqal1rde1kahswgaakq1d1tas

Tsompanidou\_et\_al\_Supplemental\_FASTA\_File

hfvlifarknvtrsrpyvq  
hmlrdikkyaqtipaveqkfdafkadhisdndqalydwsskqtyialgnmmttaallgidscpmegfsltdvttilan  
kgildteqfglsvmvafgy  
rqeppknktrqayedviwvvpke  
>tr|D9RJF0|D9RJF0\_STAAK  
mtkimffgtrdyekemalnwgkknnevttskellssatvdqlkdydgvttmqfgklendvypklesygikqiaqrtagf  
dmydlldakkhnivisnvp  
syspetiaeysvsialqlvrrfpdierrvqahdftwqaeimskpvknmtvaiigtgrigaatakiyagfgatitaydayp  
nkldfltykdsvkeaid  
adiislhvpankesyhlfdkamfdhvkkgailvnaargavintpdliaavndgtllgaaidtyeneaayftndwtknkid  
dktllelieherilvtphi  
affsdeavqnlvegglnaalsvintgtcetrln  
>tr|D9RJF1|D9RJF1\_STAAK  
mvkaiavdmdgtfldskktydklrfeafitelrnrditfiaasgnqyaklksifgdrdmyfisengaviyngnelynyks  
fnrqvfqqvdylnmkqsi  
dqlvicglksayilkhtseafkedtrfyyhqlkeidslqqlpeddyvkiafninrethpvnveevatqfsndiklvssgn  
dsidiimpnmtkggalkr1  
ldkwemspselmafgdannkdm1afakhsyvmenshdeelfniasavapsndkqgvltiieqevlkk  
>tr|D9RJF3|D9RJF3\_STAAK  
mklefkkksisnkiytlvvlftflfllygflpigidkvsksysqfffssytvatqlgfl1fsfviayfinkeysnknil  
fykligdniftffykkvav  
lffec1vfiilsitiisiiysdfshy111i1fslvilqyilvvgtismvspnilislgisivywigsvilvainknifg  
ivapfeasntmyravekil  
nnestfmcpteiinivsvffv11fivntiv111srkrwlkigm  
>tr|D9RJG0|D9RJG0\_STAAK  
mrkkwstlafgflvaayahirikekrsvksymleqgir1srakrrfmykeeamkalekmapqtageyegtynyqfkmpvk  
dkhfgstvytvndkqdkhq  
rvvlyahggawfqdp1kihfevide1aetlnakvimpvypkiiphqdyqatyv1feklyhd11nqvadskqivvmgdsagg  
qialsfqll1kekshivqpg  
hivlispvldatmqhpeipdyllkdpvmvgdgsvflaeqwagdtpldnykvspingldglgrit1tvgtkevlpda1n  
lsqllsagjehdfipgyy  
qfhiypvfpiperrrrf1yqvkniin  
>tr|D9RJG3|D9RJG3\_STAAK  
mfkk1fgqlqrigkalm1pvailpaagillafgnamhneqlveiapwlkndiivmissvmeaagqvfdn1p11favgta  
1glaggdgvaa1aalvgyl  
imnatmgkvlhitiddifsyakgake1sqaakepahalvligpt1qtgvfggiimgalaawcynkfynit1ppflgffag  
krfvpivtsvva1atgv11  
sfawppiqdglns1snf1lnkn1l1ttfifgiierslipfglhhifyspffwefgsytnhagelvrgdqriwmaqlkdgv  
pftagaf1tgkypfmmfg1  
paaafaiyknarperkkvvgg1msagltaf1tgiteplefs1fvapvlygihv1lagtsflvmh11gvkigmtfsggf  
idy1lyg11nwdrshallv  
ipvgiyvayvyf1fdfairkfk1ktpgredeeteirns1vak1pfdv1damggkenikh1dacitr1rvevdkskvdv  
agikalgasg1evgnnmq  
a1fgpksdq1khdma1msgeitkpsettvteemsdepvhvealgttdiyapiggi1p1sevpdqvfagkmmgdvgvfi  
pekgei1iapfdgtvkti1fp  
tkhaig1sesgvev1ihigidtvk1ngegfes1invdekvtqgq1mkvn1ay1kahapsivtpmiit1nlenkelvied  
vqdadpgk1imtvk  
>tr|D9RJG4|D9RJG4\_STAAK  
makikanealvkalqawdihlygipgdsidavvds1rtvrdqfkfyhrheevas1aaagytk1tgkigvalsigppg1  
ih11ngmydakmdnvpq1i  
1sgqtnstalg1kafqetn1qk1cedvavynhqiekgnvfeivneairtaye1qkgvavvicpn11tekikdttnkpvd  
tsrptv1spkykdikkavk  
1inkskkpvm1igvgakhakdelrefiemakipvihs1pakti1pddhphysign1gkigtksyqtmqead11imvgtny  
pyvdy1pkknika1qidtn  
pknihrfn1nvgivgds1ialhq1tenikhvaerp1nkt1erkavwdkwm1eqdknnnskp1rper1masinkfikdda  
visadvgtatvwstry1n1  
gvnnkfi1ssw1gtmgcg1pgaiaskiaypnrqai1aiagdgafqmvmdfatavqyd1p1tvfv1nnkq1afikyeqqaa  
geleyavdfsmdhakfae  
aaggkgytik1sasevdaivee1aqdvptivdvydpnaap1pgkivneealgygkwaf1rsitedkh1ld1dqippisvaa  
krf1  
>tr|D9RJG7|D9RJG7\_STAAK  
mkyfi1evvkqggmtnasks1yiaqptiskaikdienemgtp1fdrskrh11ltdagq1fyekskeivalydy1psemer1  
ng1etghinmgmsavmnmk  
i1ini1gafhqypnvtyn1lienggktieqqi1indevdigvt1pvdhhi1fdytt1dked1rliv1srehr1akyetvkle  
d1agedfil1fnkdfylndk  
i1ienaknvgfvptvaqisqwhvied1vtne1lgisil1ptsiseq1ngdvk11riedahvhwe1lgvvkkdkq1shattkw  
ief1kdr1g  
>tr|D9RJG9|D9RJG9\_STAAK



Tsompanidou\_et\_al\_Supplemental\_FASTA\_File

mylrdgi kehfilkkvrkkfkklnainsdiqnmyaenqglletdkti idkvlstdvtnshdineylflknyldktq  
>tr|D9RJH3|D9RJH3\_STAAK  
mngffnsdfdsifrrmkmqgsnqvgnkkyyingkevspeelaqltqqgnhsaeqsaqafqaaarqqgqggngny  
leqigrnlteardgllpdm  
vigrdkeiqetaevlsrrtknnpilvgeagvgktaiveglaaivegnvpaaikdeii svdissleagtqyrgafeeni  
qk liegvkssqnavlffde  
ihqi igsgatgsdsgskgl sdi lkpalsrgeisi igattqdeyrn nilkdaaltrrfnevlnepsakdtveilkgirek  
feehhqvklpddvllkacvd  
lsiqyipqrlpdkaidvlditaahlsaqsavdkvetekriselendkrkavsaeeykkaddiqneikslqdklensng  
ehtavatvhdisditiqrllt  
gipvsqmdndierlnkisnr lrski igdqavemvsrairrrragfddgnrpigsflvfgptgvgk telakqlaidlfg  
nkda lirlmseysdttav  
skmigttagyvyddnsntltekvrrnpysvilfdeiekanpqiltlllqvmdgdnltdgqgnvinfknti iic tsnagf  
gngndaeekdimhemkkff  
rpeflnrfrngiveflhlkdka lqdivnllldvqvtldkkgitmdvsqdakdwlieegydeelgarplrriveqqvrcki  
tdyyl dhtdvkhvdi dved  
nelvvkkgk  
>tr|D9RJH5|D9RJH5\_STAAK  
menycilgnpnvktslfnal tgsyeyignwsgvtvekkvgklkenvgqlidlpqtydlspiskdetvvtdyllndsfsg  
iinivdasqlkrnmqltvq  
llelnqpiyiglnmidvatkrigiki dyhklmkklktpi fpvvar tkgktyllgeikh lgegyqphfkinygekieetik  
nmcqimtetshdkygarf  
iaiqflinnmqiane lnsevvnlsslrdqvaeqvgavsvrremerirnhyietllqdvvtypdedkqyfssridkilth  
kyigmpiflaimwli fqt  
ftwigtplsdqldafiggtftdsvktimnylgvipflqdlitdgi agvgsvlvfvppqvvlfffisll edsgymariav  
lmdrimesfglsgksfipm  
igfgcnvpsimaarsienekerlttiliapfmscsarlpvyalvvgiffkenqslvvlsllyvlgiimaflvstvltkti  
lkndnaifive lptyrvps  
ikt lwrstwekakgfvrkagtfifggsvviwllsyvgphginvninqsflhmvg sffgmlvqplgfgtwagatlvpgfl  
akevivssmgityssgdag  
lvnviqnqftpl sayafmifillyipcvstvaa irketyswkwtalavayplvtayvltfifyqvghlfv  
>tr|D9RJI0|D9RJI0\_STAAK  
mvvefknepgydfsvqenvdmfkka lkdvekelgqdiplvingeki fkddkiks inpadtsqvianaskatkq dvedafk  
aaneaykswktwsandrae  
lmlrvsaiirrrkaeiaaimvyeagkpwdeavgdaaegidfi eyyarsmmdl aagkpvl dregehnyfyksigtgvtip  
pwnfpfaimagttlapvva  
gntvllkpaedtpyia yklmeileaglpkgvvnfvpgdpkeigdyldvhkdthfvftgstratgtriyersavvqegqn  
flkrviaemggkdai vvd  
nidtdmaaeai vtsafgfgsgqkcsacsraivhkdvdevleksi kltkel tlgntv dntymgpvinkkqfdkiknyieig  
keegleqgggtdds kgyf  
veptiisg lskdrimqeeifgpvvgfvkvndfdeaie vandtdygltgavitnnrehwikavnefdvgnlylnrgctsa  
vvyghpfggfkmsgt dakt  
gspdyllhfleqkvvsemf  
>tr|D9RJI5|D9RJI5\_STAAK  
mnnkvkgdvkmtkikimsvrredmpyikawaekhhvevditkeal tddnvegvagydgls lsqqip lsehvykrlnelgi  
kqiaqrsagfdtydlelan  
kynlivsnvpsyspsniaefavnqainvvrhfnqitkvrehdfrweptilsksidlkvavigtgrigrv vadi fangy  
qsdvvaydpfnakiatyv  
dykdtieavegadivtlvpatkynhylfnael fkhfkkdavfvncargslvdtka ll dalngvikgaal dtyeferk  
lfpsdqrgktlndlllesl  
idredviltphiafyteaavenlivdal datldvltqgdtr lrvn  
>tr|D9RJI6|D9RJI6\_STAAK  
misnklanipdsyfghtmgrkiehgp lplimavgipdgptpqqiidhfqkaltipenqkygafhgkeafkqaidvfyqr  
qynvlt dkedevci lygtk  
nglvavptcvinpgdyvllpdpgytdylagvlladgkpvplnl epphylpdwskvdski idktkliyltypnnp t gstat  
kevldeaiakfkdt dtkiv  
hdfaygafgfdaknpsilasengkdvaie iysl skgynmsgfrvgfavgnkdmiqalkkyqthtnagmfgalqdaaiyal  
nhyddfleeqsnvfkarrd  
rfeamltkadlpffhakggiyvwletppgydseqfeqflvkeksilvapgkpf gengnryvrisalddqqldeaa irlt  
elaylye  
>tr|D9RJI7|D9RJI7\_STAAK  
mkiavigagvtglaaaariasqghev ti feknnnvggrrmnlkkgdftfdmgptivmmpdvkykdvftmcgknyedyielr  
qlryiydvfydrddci tvp  
tdlaelqhmlesiepgsthgfm sfltdvykkyeiarryflertyrkpsdfynmts lvqgaklktlnhadqliehyidnek  
iqkllafqtl yigidpkr g  
pslysiipmiemmfgvhfikkgy mygmaaglaqlnkdlgvnie lnaieieqi iidpkfkradaikvngdir kfdkilctadf  
psvaeslmpdfapikkypp  
hkiadldyscsaf lmyigidi dvt dqvrlnhvi faddfrgnieeifegr lshdpsiyvyvpavadkslapqgqtgiyv l m

Tsompanidou\_et\_al\_Supplemental\_FASTA\_File

ptpelktgsgidwsdealt  
dqikdviyrklatievfedikshivsetiftpndfeqtyhakfgsafglmptlaqsnyyrpqnvrsrdykdlyfagasthp  
gagvpivltsakitvdemi  
kdieggv  
>tr|D9RJI8|D9RJI8\_STAAK  
mtmmdmfnkychkimkkhsksfsyafdllpedqrkavwaiyavcrkiddsidvygdiqflnqikediqsiekyppeyhhf  
qsdrrimma lqhvaqhkn  
afqsfynlidtvykdqhfetfetael fgycygvagtvgeltpilsdhethqtdvarrlgeslqlinilrdvgedfen  
eriyfskqr1kqyevdiae  
vyqngvnnhyidlweyyaiaekdfdrvdmdqikvfsieaqpiielaariyieildevrqanytlhervfvekrkkaklfh  
einskyhri  
>tr|D9RJI9|D9RJI9\_STAAK  
macgalifnrhqlkaktlnfnhkal tiiiparneekrighllhsiiqqvvpdvivmndgstdetacvarsyगतववद  
vddadgkwygkshacyggv  
thactnriafvdadvflrkdavealinqyqlqgekllsvqpyhitkrfyegfsaifnlmtvvgmnvfstl ddrtrnqh  
afgpvtltnkedyatggh  
ksanrhiegfalgsaytsqslpvtvyegfpfvafmyqegfqs1qegwtkh1stgaggtkpkimaaivlwlfgsiasil  
glc1slkyrqmsvgkmltv  
ylsyttqfiylhrrvgqfsn1lmvchp11mffftki fiqswkqmhrygvvewkgrqysiskeq  
>tr|D9RJJ1|D9RJJ1\_STAAK  
mkimkkyiktaffcsmywlvqlnianlgtripdkyfrqkhiifksfnfekhgkfwkwyvrkwkhkil dghkl nriy  
dqrhlmtinideiekmiie  
tkraelihwisilpvii fngkprvvykyni fyanianvpiiivqrynrrprtql1rilkrgerhd  
>tr|D9RJJ4|D9RJJ4\_STAAK  
mkktimasslavalgtvgyaagtghqahaaevnvdaqhlvdlahnhqdqlnaapikdgdihfvkdgfyngftsn gttw  
swsyeaangqttagfsnvag  
adyttsynqgsnvqsvsynaqsnsnveavsaptyhnyststtsssvr1sngntagatgssaaqimaqrtgvpastwaa  
iaresngqvnaynpsgasg  
lfqtmqwgptntvdqqinaavkaykaqglgawgf  
>tr|D9RJJ6|D9RJJ6\_STAAK  
mknsisqnsel dkeignfsiillqytfyfi fiki h  
>tr|D9RJJ8|D9RJJ8\_STAAK  
micp1lanvrhssivclnntcrivdtrclntkiggigvsetdepqgsehtnrlninqnsqslmtf1tsklksklkqhi  
iiargnkridyr1synfyt  
tydnveikkidceytyamaia ilirhtmsfdnahffaqlrhpvl  
>tr|D9RJK1|D9RJK1\_STAAK  
mkdilvigatgkqgnavvkqll edgwyvsaltrnknnrkl sdighph1sivegd1sdsvs1qsamkgyglysiqipivkd  
dvseelrqgmkiieiaeqe  
niqhivystaggnrnrngshfevlakienr1mesninatvikpsffmdnflriakvederitlpefinpnikftmissi  
diakiasyvfehlqsftq  
sieigsdevtl1seaati fsevtgkstviegefvs gvaekqwl eekgyevdfelmaeinptr1slsdwlkvqdyndk  
>tr|D9RJK9|D9RJK9\_STAAK  
mqhhkvaiigagaagimaitlkdfigtdvii lekgtvghsfkhwpkstrtitpsftsngfgmpdmnaismdtspaftfn  
eehisgetyaeylqvvanh  
yelni fentvvtni svddaytiatttetyhadyi fvatgdynfpkkpfkygi hyseiedfdnfngqyvvggnesgfd  
aayqlakngsdialytstt  
g1ndpdadpsvr1spytrqr1gnvikqgariemnvhytvkdidfndgqyhisfdsgqsvltphepivatdfdatknpivq  
qlfattnqdiklthdest  
rypni fmagatvendnaklcyiykfrarfavlahlltqreglpakqevienyqknqmyl ddscccevsctc  
>tr|D9RJL0|D9RJL0\_STAAK  
mtknqnfi etkeykrfaefcdacikyqyigicygqpgvgktlssryytnwntiekqvnhrwedlaskttddilsvnkif  
ytapaekqtr1sndlysis  
asidlgkklhivnkyghdshkshysdmfkyidliivdeidr1kvqhleqlrai ydehnlami figmpgiekkl srypqlys  
rigfahefdnl skdethhi  
leykwqdlgfd1kledftdyeaittiikitkgnfrlihr1faqidrimdingldkistevvetardslvigir  
>tr|D9RJL3|D9RJL3\_STAAK  
mankqveismaewdmni iwgkksvsaneivvei qykevsdktirtlitrlykkeiikrykseniyfyssnikeddikm  
ktaktflnklyggdmkslv  
1nfaknee1nnkeieelrdilndisck  
>tr|D9RJL9|D9RJL9\_STAAK  
mskklkiiipiiivl1l iggiawgvyaaffantpknty1kseqtakmykdyfndrfenevkfqekmkdnsflssl elsad  
asdeivkg1gipksvvnas  
kikmsyghdpkkeksminleptiadsal gkfqlaadkdkhyfespl fkgkysvnnsd11styskl tgedetakengitn  
qq1n1nt1fsnaqaqgsdy  
skiaekyselivdkl ddnfdkgkkeeikvngedykvrpvt1t1sradtkkitlavleakkdkdlkklmeeqgttkdfe  
kdikkaiddvketkkdefa  
kiqskiytektivkreititdkennktkigtntleddk1kl dya1dfdqkytyaeakytikgvsskekdnkysdye  
fgkkteydeskik1dnqek

Tsompanidou\_et\_al\_Supplemental\_FASTA\_File

vdgtrqdkgkitaValdkysdneftfennidsdvnntqkstlnigikyaeepinfilksstklkadidddsgakdfn  
s1sskdreklekeiekngg  
kmfesilkkask  
>tr|D9RJM0|D9RJM0\_STAAK  
mvimkkti11tmtt1t1fmspsnaqaytndsktleakkahpnaqfkvnkdtgaytytydksnapnnnhqnsrtdnh  
qhangrdlnnnqyhsslsg  
qythindaidshtppqtspsn1tpaipnvednddelnnafskdnkg1itgidldelydelqiaefndkaktadgkplal  
ngkiiidqplitsknnlyt  
agqctwyvfdkrakdghti1stfwgdaknwagqassngfkvdrhptrgsilqtvngpfgvhayvekvnidgsilisemwi  
geyivssrtisaseissyn  
yih  
>tr|D9RJM2|D9RJM2\_STAAK  
mkkknwiyalivtliiiiavsmiffvqtkygdqsekgsqsvsnknnkihiaivnedqpttyngkkvelgqafikrlane  
knykftvtrnvaesglkn  
ggyqvmivipenfsklamqldaktpskislqyktavqqeevakntekvsvnlndfnkn1veiyltsiidnlhnaqknv  
gaimtrehgvnskfsnyll  
npindfpe1ftdtlvnsisankditkwfqtynksllsandsdfrvntdynvstliekqns1fdehntamdkmlqdyksqk  
dsveldnyinalkqmdsqi  
dqqssmqdtgkeeykqtvkenldklreiiqsqespfskgmiedyrkqlteslqdelannkd1qdalnsikmnaqfaen1  
ek1lhddivkepsdttfi  
ynmskqdfiaaglneadeankyeaivkeakrykneynlkkplaehin1tdydnqvaqdtss1indgvkvqrtetiksndin  
qltvatdphfnfegdikin  
gkkydikdqvsltdtsnkeykvevngvaklkkdaekdf1kdktmh1q11fgqanrqdepndkkatsvvdvtlnhnlmgr1  
skdalsqq1salsrfdahy  
kmytdtkgredkpfndkr1idmmvdqvindmesfkddkvav1hqidsmeensdkliddilnkknttknkedisklidq1  
envkktfaeepqepkidkg  
kndefntmssnldeksri1seksq11sdtqesktiadsvsg1nq1dnvnk1hatgralgvrاند1nrqmakndkdne  
1fakefkkv1qnskdgdrq  
nqal1kafmsnpvqkkn1envlanngntdvispt1fv11my11smitayifysyerakgqmnfikddyssknnlwnnait  
gvigatglveg1ivglia  
nkfhvlagyrakf1lmv1lmmvfv1inty11rqvksigmflmiaalglyfvamn1kaagqgvtnkisp1syidnmffn  
y1naehp1glalv1ltvlv  
iigfv1nmfikhfkkerli  
>tr|D9RJM6|D9RJM6\_STAAK  
mhk1iikynkq1km1n1rdgktytisederadit1ks1gevih1eqnngtqanhts1nkvlvrkgd1ddit1qlytea  
dyasfaypsiqdtmtisgn  
ayddmviqslmna1iikdfqsiqetqyvri1vhdkntdvyinyelqeq1tnkayigdhivyevigwlevqadglv1sqntv  
ass1ir1tqemphaqaddy  
ntyhrspr1ihreptddikierrppqi1qknntviwrs1i1pp1vial1tvvif1vrpigiyl1mmigmstvtivfgittyf  
sekkkynkdvekrekdyka  
y1dnkskeinkaikarfs1nyhyptvaeikdivetkapriyektshhhd1fhyklgianveksfk1dyqeeefnqrde  
1fddakelyefytdvegap  
lindlnhgpiayigarh1leelekml1q1stfhsyhd1ef1fvtredevet1kwarw1phmt1rgqnr1rgfvynqrtrd  
q1t1siysmikertqavre  
rsrsneqi1ftpq1lvf1tdms1iidhv1leyvnd1seygis1ifvedvies1pehvdti1diksrtegelitkekelv  
q1kftpenidndkeyiar  
r1an1ihveh1knaipds1t1flemynvevdq1dvvn1rwrqnetyktmavp1gvr1gkdd1s1n1hekahgphglvagtt  
gswksei1qsy1s1lainf  
hpheva1fli1dykggman1fkd1vh1vgtit1ndgdeamra1tsikaelrkrq1fgehdvnhin1qyhklfkegvatep  
mphi1fi1sdefaelkseqp  
dfmkelvstarigr1s1gih1latqkpsgvddqiwsnskfk1alkvqdrqdsne1lkt1pdaadit1pgray1qvgnnei  
y1fqsawsgatydiegdk  
1evedktiymindyq1lqainkd1sg1edeetkenqteleavidhiesittr1eieevkrpw1pp1penvyqed1vetdf  
rk1wsddakevel1glkd  
vpeeqyqgpmv1q1kkaghialigspgygrtt1f1hni1fdvarhhrpdqahmy1fdfgtng1mpvtdiphvadyftvdqe  
dkiakairkihdiiserkr  
11sqervvnieqynketgnsipnvf1iidnydtvkespfmeeyeemmskv1treg1algvyi1lsgsrssaiksaiftnik  
trvay1lfennelt1niigs  
ykkgykdvkgraa1nddnftqf1aqpfelaegqtyneriknevaqmkefyvgdypkhipmmpdkvfmedi1reayd1eki  
iheehk1p1gl1dfedvelv  
s1d1tsssi1vtaikptemekmndvimss1svysknqfv1l1vdaednmsqysedvtsyysapsd1snir1lgfkqeiarkn  
geksi1eeckiv1finnikrf  
nq1tgmtedeirv1fnegqkvni1iiasg1ysdtigaf1dreskmmvrtinqalishkiseqefirvkd1rfgepelkvgem  
yyinnqeyqkik1lmeq  
>tr|D9RJM9|D9RJM9\_STAAK  
msevhnmqksidss1saintkvst1ssinn1integfecqtassvknysktfhlqsikkietinkdfksdiaksirkfq  
sevdnnasai1dedeikky  
kkdiddal1kdvfksskdangaisdvsd1ttakkikten1ankmgdfnkdidqtver1ttfdannsidgdktdnlitelsg

Tsompanidou\_et\_al\_Supplemental\_FASTA\_File

vnsyvknmkpnrarissts  
gkiegaiarhktseelvrwqytemlsenlyktpglaskaasdiitqagreyyaikavngsalarkeylkrdrinklin  
kmknq1krms1vlntdrq  
nikiknavkmasefarnnpfkkgnlvnmwmskvqyqsvsaqilkkglqdknfkytfgdakkffdtadmkaavtefknf  
vpqni retffkknlsktsk  
al kknmskfw nedikggikefkldfankni igklglklkgkalkplgfitaitdnigkkswqeklvmgvdl saigas  
aaagaavgtai plpvvgtv  
agalagaavgialdykipyl dksatelakdgin sginkvksfgkvtsgfktvfg  
>tr|D9RJN1|D9RJN1\_STAAK  
mevgmlimpfcvkitfeidkndwnalndtvneffmdkdi yptgpiifqrelaglg eykytayaialndelq dipelniky  
idclevgptlstkcf feed  
feraykeieyvanenniki lnqpyyhmvd yfggtafeiyaqvdldesevyg  
>tr|D9RJN2|D9RJN2\_STAAK  
mmknvayktyfdvtmddyedilkdftnlaiskgktitgpltfavtqidlqkrmidlfisvgkcfksneelsyrtyfcl d  
nmlhgri tsnnfiteial  
ledmnefasdnnl tftspyyhtmrksfsgeggwidvkakvyend  
>tr|D9RJN6|D9RJN6\_STAAK  
mtfeeklsemyneianki ssmpvewekvytmayiddggge vffnytkinsdelnyytdipkeynisvqvfdlwmnlyy  
lfknlrnlfkteehep wts  
cefdft rdgklnvsfdyidwintefdqlgrenyymy kki gvi pemeyeme eikeieqyiksqs  
>tr|D9RJP0|D9RJP0\_STAAK  
mkytwwilltiagils ltsvygf ilclgsfgmlalnvmwlfvytphknskalesiskpti ilsiigtyavfifmsilfyf  
vmkarfmeigiklygepfk  
mfgipifimaiilftigtvfykiqqsrlkq  
>tr|D9RJP1|D9RJP1\_STAAK  
mtfeeklsemyneianeicgmipvewekvytiayvndrgge vffnytkpgsdelnyymn isrdynvseeifddlwmelyr  
sfkklrni fkeeghep wts  
cefdft negklkvsfdyid  
>tr|D9RJP2|D9RJP2\_STAAK  
mtiigivvqglatv fsl lmlvlaasgvmttdvsttvngevd pvdetaaaiftvlflflfifgiisiilgaigmfkaskn  
kkmsgillii gavisgnii  
tfalwlvsgiklltnkpkdeisdls  
>tr|D9RJP7|D9RJP7\_STAAK  
mlkfenviksfdggnrieavkdt nfeinkgdivalvgpsgsgkstfltmagalqtptsghilinnqdittmkqkalakv  
rmseigfilqatnlvpfl t  
vkqqftllkkknkvnmsnedyqq lmsqlg ltsllnk lpseisggqqrvaia kalytnpsiiladeptaaldtenaievi  
kilrdqakkrkkaciivth  
derlkaycdrsyhmkdgvlnlenetve  
>tr|D9RJP9|D9RJP9\_STAAK  
msdsek dilkrikdnpfi s qrelaeaig lsrpsvani isg liqkeyvmgkayvlnedypivcigaanvdrkfyvhkd lva  
etsn pvtstrsiggv arni  
aenlgrlgetvaf l sasggdsewemikrlstpfmnl dhvqqfenastgsy taliskegdmtygladmevf dyitpeflik  
rshllkkakciivdlngk  
ealnflcayttkhqiklvittvsspk mknmpds lhaidwiitnkdetetylnlkiestddlki akrwndlgvknv ivtn  
gvkeliyrsgeeeiiksvm  
psnsvkgvtgagdsfcaavvyswlngmstediliagmvnaktietkytvrqnl dqqqlyhdmedykn gkftkv y  
>tr|D9RJQ0|D9RJQ0\_STAAK  
manlqkyieysrevqqarennpiva lestiishgmpypqnvemvttveqiir nngaipatiaiidgkikiglesedlei  
latskdvakvsrrdl aevv  
amkrigattvattmicaamagi qffvtggiggv hkgaehtmdisadleelsktnvtvicagaksil dlpktmeyletkgv  
pvigyqtne l pafftresg  
vkl tssvetperladihl tkqqnl leggi vvanpipyehal skayieaiineavveaenqgikgkdatpfl l gkivektn  
gkslaaniklvnavlga  
kiavavnkll  
>tr|D9RJQ5|D9RJQ5\_STAAK  
mkfenrvqryqhlftktdkrivnyirngysdafstinslahaigtspatmtrfshkl dyenfqdlkfniqqemtetvie  
nspiiqrihkyhqqiiqqt  
gef indiiqtfdklqssrhilfaglgssgl satefyymirmglkgnvtt dshl mkisasllshsdmfiamsngnts  
elisaevakshgayvvai  
tnfegskltdcadlvlltt dqsrrntdhqfintqiatlflidivsyhl lentnl s qtyqhtksiil dnk  
>tr|D9RJQ7|D9RJQ7\_STAAK  
mnqyhsnaqqpsawrffvyslvgilc ffpftingnnti fvdhvlairsiigplmpyvalimiligaltal pivrrt fmts  
itnlvitl fkvagamigim  
yvfkgpsilfkanygpflfekl mmpsilipvgaialsl lvgygll efvgyvimepimrpi fktpgksaidavasfvgsy  
slgllitnrvykqgmy nkr  
eatiiatgfstvsatfmii iaktlg lmp hwnlyfwitlvitfvvtaitawlp pitnesteynggegeqevaiegsrlkt  
ayaeamkqnal tpslvknv  
wdnlkdglemtvgilpsil sigflglivanytpfidwlyg iyfpiyifpiadqav lakasaisivemflpsllvtkaam

Tsompanidou\_et\_al\_Supplemental\_FASTA\_File

stkfvvgvsvsaiiffsa  
lvpcilateikipvwklliiwflrvalsllitipvallifg  
>tr|D9RJR1|D9RJR1\_STAAK  
myrykpllqsihlpngikisnrfvlspmtvnastkegyitkadlayaarrsnsagmqvtgaayiepygqlfeygfnidhd  
acipgltnmastmkqhgsl  
aiiqlahagrfsnqailnfgkvygspmtlhspiehdviamshenkinsiiqqyrdatlraikagfdgveisiaqrlliqt  
ffstfsnkrtdhygadslk  
nrarlclevmravqevidekeapdnfilgfratpeetrgsdlgytidefnqlidwvmdvsniqylaiaswgrhiyqntsrt  
pgehfgprvniqivyehlag  
ripliasgginspesaldalqhadmvgmsspfvtepdfvhklseqrphdidlefsmadlenlaipraafkdivkmmdyge  
gllkhtdrdalrqlqnyhd  
tsskdnfs  
>tr|D9RJR4|D9RJR4\_STAAK  
metlksnkarleylindmrrerndndvlmpssfedlwelyrglanvrpalpsdeylavqdamlsdlnrqhvtdlkdlk  
pikgdnifwggdittlki  
daiвнаansrflgcmqanhdcidniihtkagvqvrldcaeiirqqgrnegvgkakitr gynlpakyyihtvgpqi rrlpv  
sklnqdlakcylsclkla  
dqqslnhiafccistgvfafpqqdeaaeiavrtvesylketnstlkvvfnvftdkdlqlykeafnrdae  
>tr|D9RJR5|D9RJR5\_STAAK  
mddktkqaevl rtaideadaivigagmsasdgftyvgerftenfpdfiekryffdmqlqaslhpyswqeywafesrfi  
tlnyldqpvqqsylalsl  
vedkqyhiitnadnafdaaeydmthvfhiqgeyilqqcsqhchaqtyrnddlirkmvvaqqdm lipwemiprcpkcdap  
mevnrkrkaevgmvedaeafh  
aqlqrynafleqhkddkvlyleigigyttpqfvkhpqrmtrknenalymtmkkayripnsiqertihlstedistlitt  
alrndsttqnnigetkdv  
lnrtd  
>tr|D9RJR8|D9RJR8\_STAAK  
mqailnfi vdi lsqpailvaliafiglivqkkpaatitsgtikt ilglilsagadvvvrsl epfgkifqhafgvqgivp  
nneavslalkdfgttaa l  
imvcgmivniliarftnlkyifltghhtfymaaf laiiltvshikgwltivigalvlglimavlpallqptmrkitgndq  
valghfgsisyfaagavgg  
lfkgksksteekfpgklsflrestisisitmal lyfiac lfagvsyvesisdgqnfivfsl iqqvtfaagvf iiltgv  
rli laeivpafkgiseklv  
pnskpaldcpivfpyaqa navligffvsfitgvigmfilflfggvvilpgvvahfflgataavfgnarggikgavagaaln  
gil itflplflplflgelg  
gaattfsdtdflavgivfgnavkmg lfgailfiiivgataillkgrqkppq  
>tr|D9RJS5|D9RJS5\_STAAK  
mnflkpakhi kplpenqid dtykr lrlqvflgifi gyagyyl l rknfslampalqeqgftkaelgfalsavsia ygfskf  
fmgtvsdrsnarilvlgl  
al tai vnlmgfvpfftsgigimfvllflngwfqgmwppsgrvlvhwfsvsergsktalwnvahvvggimapiaawgi  
tttafinfgylkgfegvfi  
ypallalijaaisvvlirdtpqsqglppieiykndfatsdkktletelttkeilfkyvlnnkwwaiafanifvyfvryg  
ldwapvy lseekhfdlka  
sgwayflyewagipgtllcgyisdkl fkgrrgpagffflm gvtvfvliywlnppgnawldnvs liaigfli ygpvm ligl  
qaldyvpkkaagtaagltg  
lfgylfgtvmanivlgavvdkfgwdvgfilltaisvfamlsfiltnkvqgetvvh  
>tr|D9RJS6|D9RJS6\_STAAK  
mytkdakrnkdfytnvlg lrlveksvnqdnp smyhlfygdevgtagtilsffeipnaghkqpgtetiyrfsl lvpnqaal  
hyfekr lenngikserlyy  
lggegvvfkdeddleii llvndsfevphqwqh nayseipqayqilgigpvelrvrnaartveflenvlgyrkrdnksfdv  
ltlapqglysdfvvieqqg  
qrerpprgyihhiavntpqmsdl daiykk lqqpqsns giidryffkslyyrhnsimefateapgftidtpveqlgsq l  
nlpdfleaereqiesklhe  
i  
>tr|D9RJS8|D9RJS8\_STAAK  
mni vllsgstvgsktriamddl knelevineghqielmdlrelelefsvgknyldttgdvyklttslmqadvifigpif  
qasipgal knvfdllpvna  
frdkviglvatagsskhy lipemh lkpil symkahtmqtyvfieekdfsnqqivnddvvfrlkal aqstmrtakvqqqv f  
eeennqydf  
>tr|D9RJS9|D9RJS9\_STAAK  
maslknkhfmigls ltfivalfsflaaklpildkv galtiaailiailyrhfrgypeqyssgitfsskyllrfaiilyglk  
lnifdiiggqskllaidvg  
vvi fsivmm lfvnkllhgdknia lllvggtgvcgaaiaavapifksrekdtaisigiialigtifsl iytaiysifsmt  
tnvygawsgvs lhei ahvv  
laggf ggsdalkiall gklgrvfllipltivlilimrfrs sessskgrisipyfligfvimalvntyvtipsallnilnt  
vsticllmamvalglnvaf  
kdlnralkplmtiitsic lsslafivvhwlys  
>tr|D9RJT0|D9RJT0\_STAAK

Tsompanidou\_et\_al\_Supplemental\_FASTA\_File

mssasfnsilalfcrifkykfgmnnkvviklscvignldinqsnrhynaywrgpnkeadeksaynnvqvgdgpqhreigs  
vistdnaswrgpnienfek  
kfykqcklqkdnkfkicvvtlicyynndlqnymkne  
>tr|D9RJT5|D9RJT5\_STAAK  
mtpfityitrahvslhafsftemiqiyvmiiffiafcfispvmfyqlwafiapglhnerqfiykysffsvllfcagvaf  
afyvgfpmiifalklslt  
lnispvigfaylieliwlftfgllfqllpilmglakfglidttslkhyrkyiyfacfvlasiiappdltlnilltlpl  
illfefsmfivkftcrqk  
pth  
>tr|D9RJT6|D9RJT6\_STAAK  
mitntfilgitgptslvvisiialii fgpkklpqfgraigstlkefsatedldkeshdtpskeskqreq  
>tr|D9RJU8|D9RJU8\_STAAK  
mqqalinfyqfhtkqhyflchdiledawkaennyskdavvsllfatacyhyrrnllkgayksfnkskeiiqnakdrd  
alylnlnvyqllieqqiak  
lnaakpfssvilpitpvferiikanyppydynqetatdpfivdhmrrdrseviaakeeaiqlrkhrn  
>tr|D9RJW3|D9RJW3\_STAAK  
mineqrllntffelvqidsetgnestiqpilkekfiagldvkedeaakhpklgannlvctmnstieegevpklyltshm  
dtvvpainvkpivkddgyi  
ysdgttilgaddkaglaamlevlqvikeqqiphgqi qfvitvgeesgligake lnselldadfgyaidasadvgttvvga  
ptqmlisakifgkthast  
pkegvsainiaakaisrmklgqvdeittanigkfhggsatnivadevileearshdperiktqvkhtdvfettaselg  
gkavvtveqsyppgkindn  
eavvkiaquesarnlglstantiisgggsdgsiintfgipsvilgvgyekihttnermpikslnllasqvleikiivarhsk  
>tr|D9RJW8|D9RJW8\_STAAK  
maklsyleairqaqdlalqqnkdyvilgedvgrkggvfgttqglqqkygedrvidtplaesnivgtaigaamvgkrpia  
iqfadfilpatnqiiseaa  
kmryrsnndwqcpitirapfgggvhgglshysqsiesifasspgltivipstpydakglllssiesndpvl yfehkkayrf  
lkeevpeeytvp l gkadv  
kregedltvfcyglmvnyc l qaadi laadginvevd lrtvyp l dketiidrakhtgkvl l vtednlegsimsesvsaia  
ehclfdldapimrlaapdv  
psmpfsvpleneimmnpeki l nkmrelaef  
>tr|D9RJX3|D9RJX3\_STAAK  
mnkli devnne lsvainksvmdtqleesml ylnaggkri rpvlllll t l dsl nteyel gmksaiale mihtysli hddlp  
amdnddyrrgkltnhkvyg  
ewtailagdal tkafelissddrltdevkikvlqrlsiasghvgmvggqml dmqsegqidletlemihkktgalltf  
avmsaadianvddttkeh l  
esysyhl gmmfqi kddl dcygdeaklgkkgvslennkstyvsllgkdgaedklyhrdaavdel tqideqfntkhll  
ivdlfysrdh  
>tr|D9RJX5|D9RJX5\_STAAK  
msdylsvsal tkyiky kfdqph l qsvlikgel snfkhhssghlyfnvkdkesvisammfkgasklnfepkegdevlle  
arvsvferrgnyqiyvnm  
qldgignlyqkleal kkk l teegcfdkankksipkfpkkiavltastgaairdihstinsrfplaeqiqistlvqgekak  
ddiiekieyadslgvdtti  
vgrgggsiedlwnfneeavvraiyncktpiisavghetdftlsdfaadi raatptqaaviatpdqyellqqiqyyqftlt  
rfikkhleqqrkvhelss  
yykfkqptll ydqqi rrdlekr l kqqiqatfeqqrhr l mllqqryn l kallssvnqeqqnnlqltnqlvkl l nskils  
ykndlknkven l n l sptn  
tmlrgyai vnk kdevitstkd l tendql t l tmkdglvdakvtkvrcnd  
>tr|D9RJY1|D9RJY1\_STAAK  
msritqvhri leqkhl daii l lsdynrrylsgftgtsgaliiskdkqylitdfryidqatqapnyeiinrkstiigeik  
ellhqenfenvgfeghhvs  
ydtyle l nksris l isisntvdkir d vkdadeial iqkaanivdetyeyil tvvkagmtekelkaileskml elgadgps  
fdtivasghrgal phgvas  
dkii ekdm i t l dfgayngycsdi trtfaigepdpklkeiyqivlesqmka ineirpgmtgaeadaisrnyleskgygk  
efghslghgigleihgpm  
lartiqdk l qvnnctvepgvyieg l ggi rieddil tengcqvftkctkd l ivlt  
>tr|D9RJY7|D9RJY7\_STAAK  
mshryipl tekdkqem lqtigaksigelfgdvpsdillnr dlniaegeaettllrrlnriasknitkethsflgagvyd  
hyapsvvdamisrsefyta  
ytpyqpeisqgelqai fefqtl icel tdm dvanssmydgm t sfaecilafsqtkknkivvskglhyqalqvlhtyaktr  
kefevveid l dgtvtd l k  
leaavddetaavavqypnfygsiedlekihsfiedkka l fivyanplal glltppg l fgadivvgdtqpf gipa qfggph  
cgyfattkklmrkvpprlv  
ggtqddegnrgfv l t l qareqhirrdkatsnicnqalnalassiamsal gkqgiydiavqniehanyakqffikkgfev  
ldgtsfnefvvfkdkpiqq  
vneelvkyni iggfd l gvvsddfnhm l iavtelrtkdeidtfvekagelnd  
>tr|D9RJZ1|D9RJZ1\_STAAK  
mtnkfv l fqkip llikrhvysinvkafsliemlvammfisitllivpd lirlsktfliesrdl t tvdfeffsrdilddfk

Tsompanidou\_et\_al\_Supplemental\_FASTA\_File

gvdrndieirghriilhkg  
eemieylinnkiiikvndrgnitminnvtaftaniyyksiikititvkvgtvqtktiyv  
>tr|D9RJZ2|D9RJZ2\_STAAK  
magflliglittlllppmmnqmqasinhkltqidaskvilttvskinkeelkkgvtigkydmkqsdqqicaisknttsyqk  
tcigq  
>tr|D9RJZ3|D9RJZ3\_STAAK  
mekqlqirkqsaftmiemlvmmllisifllltmtskglslrviddeaniisfitelnyiksqaianqgyinvrfyensd  
tikviennkifrflklkvqk  
iinvakvdiiafdkkggnkfgsitiynnsiyriifhiekgriryekl  
>tr|D9RJZ4|D9RJZ4\_STAAK  
mllvllliislllililipniakqtahiqstgcnraqvmvnsqieayaalkhnrnpssiedliadgfikeaqtcksgteti  
sngeavan  
>tr|D9RK00|D9RK00\_STAAK  
mndkqfwkttiyywirylnfdivsrekddqeiwlahkrkkqvviqkqhkstqeirfdkakvlehkdeianfisfepqsf  
efyyftesefseeqlnevs  
pirikfnvirhtkdlikhmpniflarlisedndkktymfykrkvltndfldkymqkfspatytiifvnvliwlcmyln  
nfsdvklldvvgglvhfnv  
hgewyriivtsmfllhfsfehilmmllsflifgkiveaigswrmltvyfiaglfgnfvsfsntttisvgasgafgligs  
ifammyvsktfnkmlgq  
liaivilvgvslfmsninhigggfigglitligyyykvrnriwilligmlvifialqiriftikedniynklikdd  
mtsgnydnaqniavkqtink  
nyaddqtyylsgmimatinsksegmtewerglrmfpksgllnfelaianslnddekalkyvrkalnadpkntdyinlek  
elksiesknk  
>tr|D9RK01|D9RK01\_STAAK  
mtknei rkyilhkknfnkaekrkadtwlrnqffateeykeanaialvlsfnhevdtfsieqalmdhkri fvpkmdyl n  
hqmtfkeifnlkdidvdk  
giyyptskgettnldliivpgvgfqqdgyrigygggydrflanyqtktislllydfqitsfepesfdqpvdkliiyqaa  
>tr|D9RK04|D9RK04\_STAAK  
mafelpklypafdalephfdketmeihdrhhntyvtklnaavegtdlesksieevanldsvpaniqtavrnnggghln  
hsllfwel l spnseekgtv  
ekikeqwgsl eefkkefadkaaarfgsgwawlvvnngql eivttnqdnpl tegktpilgldvwehayylkyqnkrpdyi  
gafwnvvnwkvdelynat  
k  
>tr|D9RK11|D9RK11\_STAAK  
mislnnrllttvsrflkqgtiadigsdhaylpiyaiqnhlcecgiaageviqgpfaavknvaanqlvdridvrlgdglsvi  
qpedvidniticmggpli  
akilkdqdklsqhrllilqsniqtenlrqtlqqlnyeideimeekghiyeivvaeystelielssdelkfgpklln  
kneyfikwqrelealyhi  
ksklnteqhhqrlaqindeiaviervl  
>tr|D9RK22|D9RK22\_STAAK  
mneialfkgvrippykyidfmfagvlafiflvryriylfidyksvkkldiltlfayfkphllylligtaiifvickli  
aqflirfktkdaemietq  
ghnrvtvikttteyipidyqteydyptmfykrkksfvihikkdgsrfqdnyleletieipmfnselvekkhigrylr  
yefmplykkrivmgeqe  
sntifydtkiaithqitwdfvkaphglvtgitggktyflfyvirelfrhsevrlldpkvsdlsfmrkavigddkvadtk  
gqilkqlreannemeerfr  
lmdssdykigndfnfdmryfii fdevtaftstldkkelqemndyliniimkgrqagvfmfltaqrpadvikgnvrd  
qlglrvslgnlsndgyrmt  
fgqtdkefqtihdsdigrgyisilgqynepilfdaplmeqydfvedvkqilnke  
>tr|D9RK23|D9RK23\_STAAK  
mnlkapyaglrdnlllktgevwayyrvrsesistanydakeeskkrmryflesikgyqdfhfemydhldl rnkfkeis  
kdfddeafnvaeyysketi  
dvleqelqmitnsvmgvki reladdavtlkeilkstlsdtaerivsnfgfdvnl ddkildkyktferdladsflgigg  
erltene layiirkpfin  
athdvqeessrraitdiynavidptrlsvlevendnekfytttvvddfpldmeythlfekaqnmpfpvechvkakiinn  
ekvkkkfrakinhkqgak  
ekqdtgdsasedvqdnlfvlnqmerevtgsgvfiewvmfviksddyrdckrkakrlmkrllketqiyavnpladqlqlyf  
qclhgnl finkywlqrrt  
atgiaenlfgvsqslgtktgygridkfi rsvsreeavassrdiilfslllaakgikgavsdspvhlitgqtgkgsfl  
akllwiytsffkgqmlwyd  
pksefaewfdrvteskemqekypifinhlktfkyvtlnyedstnygcldpivfldgieanemlksvfdeiks fenyhhie  
taiyqaisdtveerengkk  
vgslnvieklnnedehvknagdllfektqnnilkvlsdgtnpalniqekatilqvkgldmpkaddtssystseknqi  
tllmlligkflkfgsrrdv  
qttifidegwaftasrggkkgvrikrtgrsennslvfitqsvkdkadddggngfchfafdekderedilkslgleyske  
spenmemlkdllkkgqci fs  
dfygrvgkmvvhcpfeemteafrtqedsasskaeekfam  
>tr|D9RK27|D9RK27\_STAAK

Tsompanidou\_et\_al\_Supplemental\_FASTA\_File

meavvdwvqvtfhidpisaviedviglpitlfkkrnsngiyfyngyefsniklyssddesmgihlqltgtgcrefehhl  
qqlnktwqdfdkclsuna  
nfrtridiaiddyktylkvp1likkaekaecvsrfragsaingfnlsdgrskgatfyigskqsnlycrfyeknyeqafkrh  
cdvediglwryeiqrka  
yavncakvlrtdniseivksilhnnlrfispkdgndknkrwplyrpwalfikdteklnttrptlksiednlwdlck  
qvattldtvltaesmaqse  
glltdtdfldki lahsqfndehtnrinhylealkqkklksdkc  
>tr|D9RK30|D9RK30\_STAAK  
makkndyrftykykflkqygsntfickmyhisiedleffevmnr  
>tr|D9RK32|D9RK32\_STAAK  
mitakhkqmdlydekqevkalidesdahnshieqlyqhlgerysnmasrmeqfrdefhfakrrstealyeqqqiqh  
dirkaeemidlemrrnie  
iemvtkeenkwkq  
>tr|D9RK36|D9RK36\_STAAK  
mtketdnkktvatsdnkdtqqnqpederqglngyrktdldleieqelremmktgenetkndykkfkvflistliivi  
laiirfvhkmm  
>tr|D9RK39|D9RK39\_STAAK  
mtidrriksqvamrnafielhghqleeitvqqiadladvnrstfythydykdllekledqqleeirdfihdeklnga  
vklstdnihqimvtliemi  
ekdiafyqlmfrmgksniheklydlmchlqryknendqingipfsyfmsyvsaglsliirhwvedpnridkvdliirhf  
ntivnggpatiikniq  
>tr|D9RK40|D9RK40\_STAAK  
mnghllgnpkltvthvnevkaginhivvdsvqygnqemimekdvtvemrdgeklyinifrpnkdgkfpvmsadtygkdn  
kpkitnmgalwptlgaip  
ssftpeespdpgfwvndyvvvkvallrgsdkskgvlspwskreaedyeviewaanqswsngnigtngvsylavtqwvva  
slnpph1kampiweglndm  
yrevafhggitdtgyrfwtqgi farwtdnpniedliqaqqehpldfdfwkqrqvp1sqiktp1ltcaswstqglhnrgrs  
fegfkhaaseekwlyvhgr  
kewesyarenlerqksvdfy1keenndwkdtpuviyevrdqfykgefksasaf1pnteytplylnaenhtlnhakis  
sahvaqydsedrkdvsfk  
ytfdkdte1vgnmnlklwvsttdsdmd1fagikkldrgrnevnfpdfnhiengqvattglrvshreldeqekstiaqpwh  
khetelk1sqdeivpveie  
llpsgt1fkqgetlevvkgseivignstpgmktryeheetvknghmiytgskydsqliipivn  
>tr|D9RK42|D9RK42\_STAAK  
mtklittvkemqhi vkaakrsgttigfiptmgalhdghlmtvresvstnditvsvfvnplqfgpnedfdayprqidkl  
elvsevgadivfhpavedm  
ypgelgidvkvgladvlegakrpghfdgvvtvvnklfnivmpdyayfgkkdaqqlaiveqmvkdfnhaveiigidivre  
adglakssrnvylteqerq  
eavhlsks11laqalyqderqskviidkvtqyleshisgrieevavysypqlveqheitgrifislavkfskarlidni  
iigae  
>tr|D9RK43|D9RK43\_STAAK  
mktvsqli dmkqkqtkismvtaydfpsakqveaagidmilvgdslgmtvlgyestvqvtladmihhgravrrgapntfvv  
vmpigavgismtqdlha  
1klyqetnanai kaegahitpfi ekataigipvahlg1tpqsvgmgyklqgatkeaaeq1ildaknvekagavalvle  
aipndlaeeiskhltpvi  
gigagkgtgdgv1vyhdm1nygiehkakfvkqfadfsvgvdglkqydqevksgafpseeytykkkimnevnnnd  
>tr|D9RK44|D9RK44\_STAAK  
mlsvai igpgavgtti vye1qqslphttligrhaktityyvtphapaqdivvkgyedvtntfdviiiavkthqldaviph  
lthlahedtliilaqngyg  
qlehipfkncvqavvyisgkkgdvvthfrdyqlriqdnaltrqfrdlvqdsqidivleaniqqaiwykllvnlnginsit  
algrqtva imhnpeirtlc  
rqllldgcrvaqaegl1nfseqvtvdtimtiyqgypdemgtsmyydivhqqpleveaiqgfiyrrarehnl dtpyl dtiysf  
1rayqqnm  
>tr|D9RK49|D9RK49\_STAAK  
mypflvfiaqrpi fqsvteligwiithiffmslmalviprik  
>tr|D9RK57|D9RK57\_STAAK  
mmyggammtrsqnkqqq1eqakdivinsigqtmldygnrsvgnlygtmvfegsmtldemrhqlqmskpsmsagvkk1qe  
fdivkqgftrgrkqhfa  
ekdffiffrnfftkkfqreidinveavkdaqai inpllessd1teaetqeahkikaql dhthvyewleql teaiesgei  
fkyfpipeqssdskn  
>tr|D9RK60|D9RK60\_STAAK  
mnqieealtgliskdpaivnenankdsdtfstmrldtagivsksyalnhllpkhvadahqrgdihfhldlyhpfqplntc  
clidaknm1hngfeignan  
vtspsiqtasalvqiianvsssyyggctvdrvdel1styarnheeqhrniakqfvkeseidryvdqqvtdkindaies  
leyeintlytsnggtpfvt  
lgfglgtdhlsrkigqai1ntrikglgkdrttai fpk1vfsikkgnfspdnydikqlalkcstkrmypdilnydklv  
eilgd1kapmgcrsflpsw  
kdaeghfenngrcnlgvvt1nlprmalesagnmtkfwefyeridvlhdallyrinrlkdavpnnapilyksgafnyk1k



Tsompanidou\_et\_al\_Supplemental\_FASTA\_File

etddvaelfknkratismg  
yiglyetatvfygpnwetsqeakaftleilkemkryqtkwtefydiwfsiystpsesltdrfcrldqerfgdikditdkg  
yyqnsfhydvrkdvtpfek  
ldfekdypyytsggfihyceypklqhnlka leavwdysydkvgylgtnipidhcyecdydgdfatekgfkpcncgndnp  
ktvdvkrctcgylgnpvqr  
pvikgrhkeicarvkhmkapke  
>tr|D9RK62|D9RK62\_STAAK  
mgyfvnslimkdlndmrkyeyynreki rrrtnlik  
>tr|D9RK63|D9RK63\_STAAK  
msmplmidltnknvvi vgggtvasrraqtlsqyvehmtvisptiteklnqnmvdkgvviwkgefeepsdivdaylviaatn  
eprvneavkqalpehalfn  
nvgdasngnvfpsalhrdkltisvstdgaspltksimaealealypssysyidflytcrqkikllditynekqllsq  
ilsqeylnhdkqaqflawl  
dvrq  
>tr|D9RK67|D9RK67\_STAAK  
mklrllwhivrrqfitqriviipfilavsvlfmieytlvsiglnsyikqkndflvpfiianffmalltfififyanhfm  
msqrrkefsifmtlgmtkk  
smrlivvmetilqfmiisvisiaggyllgai fflfiqkingsevatlryppfdtvamfitliiavlmgmllifnlfsin  
fqrpi tyqhrsdsvisrw  
lryvli vigsaalygyfialqqdtfgaffkiwiviglviiigtyaffvgiseiisilqqvskvyypryffvvgmrv  
rlknavslatitllctfl  
ivtltmtltyrdmnhitmkli tndydlsfndnsksqierqqtiehikrdiqgsvnakdfkyettlfrasl eknrayyk  
lkqasddipidfignegsi  
fskqsmital tvqdynryhqnklhldnqsigmitnvpifkkqskvglnnevfkvkqldahalnmmiqdsmvlivkdnn  
qlqkvkgfyahqkkstis  
infvsgtklttsqiqklskkydasinsksemvmwdr l tggli fvggvsvivl v igiflmyykvseayanqhnydi  
mkklgldngriskitrnqm  
tflfaipitvalihtlissnivytllnm lginnhhifl tcyvlaviiisflymamykitsiyiakvihqqrn  
>tr|D9RK68|D9RK68\_STAAK  
mllevkhvkvygkgnatta lnqmn lsvgagefvaimgesgskstllnliasfdgltegd iivdgehlnnmknkska l  
yrqqmvgfvfgdfnlptm  
tnkenimmp l ilagakrkdieqrvhqltvqlhlegflnkypseisggqkriaiaralvtkptilladeptgal dsktsk  
almklfgeihql egtilmv  
thsnidasyaervi fikdgrlyheiyrgesqlvfqqritdsalvnggsvni  
>tr|D9RK69|D9RK69\_STAAK  
mnamtflksitqeiaivivifal fglmflylh lpleaylla lgvil llllll ifigikylsfvktisqqqqienlenalyql  
kneqieykndvesyfltwv  
hqmktpti aaqll l erdepvvnrvr qeviqidnytslalsylkl l netsdisv tkisinnii rpiimkysiqfidqtk  
ihyepchhev l tdvrwts l  
mieqlinna l kyargkdiwiefdeqfnqlyvkdn g igisead l pki fdkgysgyngqrsnssgig l fivkqisththnp  
vsvskqnegtftiqfpd  
e  
>tr|D9RK71|D9RK71\_STAAK  
mlspllii f fivlsileerkrtkkql ekekantlnqntndtessnqeps lqqakeqkdng  
>tr|D9RK75|D9RK75\_STAAK  
mkkridylsnkqnkysirrfvtvgttsvivgatil fgighqaqaseqsndttqsskn nasadsekntietpqlnttand  
tsdisantnsanvdstakt  
mstqtsnttttepastnetpptaikdqataakmqdqtvpqeansqvdnkttndanniatnse l knpqtldlpqsspqti  
snaqgtskpsvrtravrs l  
avaepvnaadakgtvndkvtdasdfklektafdpnqsgntfmaanfkvtgqvks g dyftaklpdsvtngdvdysnsn  
tmpiadi kstngdvvakat  
ydiltktytfvftdyvndkeningqfs l plftdrakapks g tydaniniademfdnkitynysspiagidkpnganissq  
igvdtasgqntykqtvfv  
npkqr v l gntwvyikgyqdkieessgkvsatdtklri fevndtskl sdsyyadpndsnlkevtgefkdki sykydnvasi  
nfgdinktyvvlveghydn  
tgknlktqviqenidpatgkdysifgwnnenvvrygggsadgdsavnpvdptpgppvdpepepeptpdpepspepepept  
pdpepspepdpsdsdsds  
gsdsdsdsdsdsdsdsdsdsdsdsdsdsdsdsdsdsdsdsdsdsdsdsdsdsdsdsdsdsdsdsdsdsdsdsdsdsds  
dsdsdsdsdsdsdsdsdsds  
sdsdsdsdsdsdsdsdsdsdsdsdsdsdsdsdsdsdsdsdsdsdsdsdsdsdsdsdsdsdsdsdsdsdsdsdsrvtpnneq  
kapsnpkgevnhsnkaskq  
hqtdalpetgdksentnat l fdamval l gsl l l frkrkqdhkeka  
>tr|D9RK77|D9RK77\_STAAK  
mffkrsdknmkekivialggna iqtkeataeaqqtairramqnlkplfdsparivishngnpqiggl l iqqaksndttp  
amp l dtcgamsqgmigywl  
eteinri l temnsdrvtgvtivrvevdkddprfdnptkpi gpfytkeeveelqkeqpgsvfkedagrgyrkvvasplpqs  
ilehqlirtladgnivia  
cggggipvikentyegveavidkdfaseklat l ieadt l miltnvenvfinfnepnqqqiddidvat l kkyaaqgkfae

Tsompanidou\_et\_al\_Supplemental\_FASTA\_File

gsm1pkieaairfvesgen  
kkviiitnleqayealignkgthim  
>tr|D9RK78|D9RK78\_STAAK  
mmnesgdnlksksslglvigmiggafnismdmggkagglaiiigwiitaigmislafvfqnltnerpelddggiysy  
aqagfgdfvgfjsawgywf  
saf1gnvayatllmsavgnffpifkkgntlpsiiivaslllwgvhflilkgvetaafinsivtvaklipillviicmiaf  
nfdtftktgffgmtsegvlp  
fswastmsqvkstmlvtvwwfigiegavifssraknkkdvgsatviglisvliiyflltvlaqgvilqnhisqldpsma  
qvlasivgwgstlvnigl  
iisvlgawlgwtllagelpfivakdglfprkfakenkngapvnallitnilvqlflism1ftqsayqfafslassailyp  
ymfsafyqvkytlehrqqa  
ttkqwtigiasiyaiwliyaaginyllltmllyipallvysivqknnqtrlikdsyilfmiiivlaviglikllmgtin  
vf  
>tr|D9RK81|D9RK81\_STAAK  
mkkskr1eivstivkkhkiykeqiisyeeyfgvrysattiakdlkelniyrvpidcetwiykainnqteqemrefkh  
ycehev1ssiingayivk  
tspgfaqqinyfidqlnieeilgtvsgndtlliltasndmaevyvaklfk  
>tr|D9RK82|D9RK82\_STAAK  
matvtllssltpaalasdtnhkpatdsinfeitqksdavkalke1pksevnknyhdysvtdvktddkkgfthyt1qpsvd  
gvhapdkevkvhadksgkv  
vlingtdakvkptnkvt1skdeaadkafnavkidknaknlqddvikenkveidgdsnkyiynielitvtpeishkwv  
kidadtgavvektnlvkea  
aatgtgkgv1gdtkdininsinggfslled1thqgklsaynfnndtqgatlitnedenfvkddqragvdanyyakqtydy  
kntfgresydnhgspivs1  
thvnhyggqdnrnnaawigdkmiygdgdgrtftnlsgandvvahe1thgvtqetanleykdqsgalnesfsdvfgyfvdd  
edflmgedvytpgkegdal  
rsmnpeqfgqpsmhkdyvytekdnngvhtnsgipnkaaynviqaiqgskseqiyyralteyltsnsnfdckdalyqaa  
kdlydeqtaeqvyeawnev  
gve  
>tr|D9RK91|D9RK91\_STAAK  
mmatsiiltnilpydaqavsekdeiske1l1skqdlldkvdkanrqieqlkqlsaskahykaqlneaktasqideiikr  
aneldskdnkgsqiemngq  
sdisdkldqllkd1nevsskvdrgqqsdedd1namkndmsqtattkhekddkndeamnkaledldh1sqiqhkseda  
vsttdnnhevaktppndgs  
ghv1nkfl1sneengshsnrltdklqgsdkinhamiek1aksnastqhytyhk1nt1qsl1dqriantqlpknqksdlmse  
vnkteriksqrniileel  
artddkkhatqri1esifnkdeadkilkd1rvdgdktddqiadqitrhidq1sl1ttsdd1l1ts1idqsdks1l1sqilqt  
k1gkaeadk1akdwtngk1  
snrqivdq1kkhfastgdtsddi1kai1lnnakdkkqaietilatrierqkak1ladlitkietdqnkifnlvksalngk  
add1ln1qkr1ngtkkdid  
yv1spivnrps1ldr1nkngktt1nk1an1mnqgsn1ldsipdiptpkpekt1tlgkng1lsg1lnadgnvslpkage  
tjehwlpisv1vgamgv1  
miw1srrnk1knka  
>tr|D9RK95|D9RK95\_STAAK  
mkdtqlaqit1tddstg1aianpih1staykhpklgqstgfdytrtknptrstfetcfaklehgiastatssgmsaiqlc  
n1fkphdei1vsfdlygg1  
fr1fefeyeqydidkfyvdfdyeqvekeitdktvalfiepisnpqmiavidvkpyyqlckakg1l1siidntfltpylstp  
laegadiv1hsatkyiggh  
ndv1agvvtvkdeslaqglfdfnmtgat1spidsy1llrglkt1hl1rieraqsnark1akkcqs1qaidvlysgqtgm  
1sl1rnkaysvakt1len1d  
icifaes1gg1tet1vtfpytqthvdmpdaekdkrgideyl1rl1slgvenyedierdi1qaldkaqigeiv  
>tr|D9RK96|D9RK96\_STAAK  
mksedqritktkdeqikqidi1sdikpnpyqrktfdenh1nd1adsikqygilqpiv1rktvqgyyivvgerrfraski  
aglkyvsai1kdl1tdedmm  
e1avien1qred1naieeasyr1mtd1kitqqevakr1sksrpyianm1rl1hl1pkkiadmvdgr1tsahgrt1lai  
kdeqgm1rl1akrvvkekws  
vry1enhvne1knvssksetdkvdi1tkpkfikqerq1reqygtkvd1sikksvgkisfefsdeqdfvriieq1nrrygk  
>tr|D9RKA2|D9RKA2\_STAAK  
m1nrvv1vgr1tkdpeyrttspgsvatft1avnrtftnaqgreadfincv1frrqadnvny1skgs1agvdgr1qsr  
nyenqegrrvfvtevmc1ds  
vqf1epknaqqnggqrrqne1fdyggfggqsgqnsynnsntkqsdnpfanangpidisddd1pf  
>tr|D9RKA3|D9RKA3\_STAAK  
magpprrggrrrrkkvcyftangi1thidykdtel1krfisergkilprrvtgsakyqrm1ttaikrsrhmal1pyvkeeq  
>tr|D9RKA4|D9RKA4\_STAAK  
mehnnninkkykkf1rsi1y1ldfginighef1sgrhfgiv1nkndspyns1vtvvp1ssknkkhyl1plqnivfkts1sil  
nktvdniefd1dvinhiv1f  
tvie1inkn1lnt1leqntidy1lddfaiktrfpterevinksknivesfn1yndpknfsal1fny1lidvnrkskvnn1r  
evinkykkfdkntfactqn

Tsompanidou\_et\_al\_Supplemental\_FASTA\_File

vvtisklrlki naedpsgrmkldfdsmklvdneiknlin  
>tr|D9RKA5|D9RKA5\_STAAK  
mwvreitknnstayrylerytdpltgkyktvsvtrnknnvrsqkdaqlenkiieqrkxhystkqlenltfhdadewle  
hykthsgskpttikexsn  
tntvknaidskvliskithtylqniinewakshsighvqslvivirsvfyafkyydldhdisvldkidipkkaqtrnefq  
akrnyledsevkellecf  
dylkhkrhatrknyemvkalvefqinngmrigellaiktndvdenktleidgtinwvtdvvtgafgvkettktsksy  
rtigltaqsinllklmle  
nkkengwndkfidrgyifntagspidlnkvnniikeatdissinkrvtthtlrhthistlaqlginlkaiqervghsdy  
kttleiythvtdkmakdmm  
nklegigs  
>tr|D9RKA7|D9RKA7\_STAAK  
mfmtvkevaqllriserhtyklkknviphthkiggkilvnerlletlekkev  
>tr|D9RKA9|D9RKA9\_STAAK  
mkmyltyiclvslltillaisnmyvafsvygmmtvygfnltgeittcenklllqkq  
>tr|D9RKB0|D9RKB0\_STAAK  
mlnippkvfeqyfpdvskdvqvaclemdlskiteiknkkkvg  
>tr|D9RKB1|D9RKB1\_STAAK  
meikqkyqlskvki levlyeedkfqsdkdyhyqdkalyeyalklvhnglfnilaelfedeaflildevtmtlsdvmk  
etghvryrsvidekgehkh  
ttdrkghvigmlawalldyagnievel  
>tr|D9RKB2|D9RKB2\_STAAK  
mnweindlfsdkllkdrfedlkdnhghwfeelyphepnhlnkdeliregasyherrihnnqmfldfhlyieqfdkiie  
kfheiekassenfgeesdd  
aknsikvae  
>tr|D9RKB3|D9RKB3\_STAAK  
mneikleydthsvvhyesldsrfsnfskpkwsklvnklsvpieanykyargvaiygdmdkddtdengneykkyrkden  
iyrdvldyddiplrl  
hdaitetlkgvsmwyhttfhnrtesprvrlyialnehisadeyrkytkvleski ghpvdegisyqpsramalpvkksndsi  
yifyndapilsvetleew  
skelksqykesnkfkyprrdnefwksiafgvstgnrnqmltsligvllnrrvpdpvyaycfmwncncpplnsrefna  
tfesiykrehr  
>tr|D9RKB4|D9RKB4\_STAAK  
mtifpdlentmfdekdfdgkfkfyefalflyeeyhgcyidnrphvftgkkyeplnidvvrkitikyipslreqqk  
evfglktlclgnhqeacp  
aryiglkngiydtveerlnpfpqyyitniidvdfdkgaqsdlierfikdisneeeveqliyemigyglyrnfqlqav  
fyyspgngkttllkllh  
fynpentalsfndlnkfkpanlqgklvniaddipnrikdtgnfkii vtgnyitlefkgqdafefkpyvklifasnel  
pmsndksegfyrmmviipm  
lrfkgggkqkdpmlnklitphnmsallnla lkgkrtlenneiiepkarktkeeyqfennpvlqfiedatdkdyrql  
pvvegrntdkayeiyqiwc  
vnngyhhlnkfnfskelakigyktvsyysrveekskrfykentiniydvdsilkklte  
>tr|D9RKB5|D9RKB5\_STAAK  
mnnikgelvnyiknagtsfveiekvdenafdykggaytsavnnivywygwnkqafnlvsdlvndgviemnicessii  
yivdgkglnfpi lksddvd  
tyhwlpvtftiskkemecv  
>tr|D9RKB6|D9RKB6\_STAAK  
mnekhni fnrfgnrntsiqtavkdyfi eyrkgdeikyfpelatvvkalnidlhdstvsnengpkfdiklnlytgd  
mdqigde  
>tr|D9RKB7|D9RKB7\_STAAK  
mnieianqfvtragtllryytgllehskvqpccklyndpfdmvyvmngklfghvyikdckvrqsfelaspkhtegli  
rsieghyvgyelhegkqls  
isdmmasqlfedeyfmyglqtyaesnnsdvfeylengfdtdtlegiqssntdvianiemyqiatginepapelvegkl  
vtefvqdekatqedykale  
rkltelkssyyslnk  
>tr|D9RKB9|D9RKB9\_STAAK  
mtttitgtdwvfyndrryrnlldgfdelitetslirggyktviknmdnkalslqskfelgqilldeheekivei  
qqkeessyenpqvemlkr  
qdieakvnlidaee lfnlvynanpkttvye lniykkaiesrltedenvrlkpyfdvlvekvipyrrneeyqkleynyn  
vlrqfglqngqpvikhsd  
gdieiniqskynevfna  
>tr|D9RKC0|D9RKC0\_STAAK  
mklktknclyyrngdnkseyqlltqfnpafinkkikmcefqiesmyhlsastttcdeiigvsvsypieklvikiet  
karlqnyknrsisnmvllk  
mvlnhytereqqvvykmrsngrykpyvierlqgdlyqasikqrserqkqrniaienskiarvnayhqsshkvv  
>tr|D9RKC1|D9RKC1\_STAAK  
mdkqkikgfvcdyhertrsdvli dddintdeffsigdensnewmtddniddhivknhlemivdrvandkefyifdsliqg  
rsfkdisnvlsecseqsvrl

Tsompanidou\_et\_al\_Supplemental\_FASTA\_File

wyetl1dkivevie  
>tr|D9RKC2|D9RKC2\_STAAK  
msdltakqarfvneryrtlnvtqsaikagysansahvtgcrllkkphikqyiqeqdkiidenvltake11hvltnaavg  
detetkevkvkrgeykenp  
qsgkvqlvynehvelievpi kpsdr1kardmlgkyk1ftdkhdngnvpifinigewgdgdeeldkavkdvsntnphnt  
vivddipld  
>tr|D9RKC3|D9RKC3\_STAAK  
mkpfeshnkq1ki1rrrgmepssakrd1enenyniingykdlfleldvngnflvpdkyqgthfkevfslykl1drkfr  
nvlleyllvfethiksris  
yyfsekyrephsylyfknyssdtsktdsivkmvvtfssvmsnrknkplkhyinthngvplwilvnyl1t1gnvskmysnld  
ddl1levakdykrkl1erdy  
ktrvqitpsdvdsilqqahmfrnvcaheerlydykidraksrani fanyнкиydkyevptmngsyvfdllis1cl1flnk  
dykl1vknmdklisnyshs  
fytitiddlytkmnpdqtkildm1  
>tr|D9RKC4|D9RKC4\_STAAK  
mkhvkendlahgefkw1ekvgldkyqasrfikvaneqsklhssanlg1kalyqiatipvehreekqqtssgemktpyem  
tnkereefkrq1kqrdeen  
aq1qsqmeqqrseeiarkqykyglnnyiftikf  
>tr|D9RKC5|D9RKC5\_STAAK  
mkqam1skv11stvvvmgsiagsslvmddnaheqsdnigklnqknestl1hsfekgikgtvdkngk1t1sdgktskvm  
ptnakdkkgnvvlvykkv  
kdgfdvqv1kssqerktnwvkcglgtvggagtgglggsaasvipglgtvagaiiggvsggatgaaascfg  
>tr|D9RKD3|D9RKD3\_STAAK  
mimmkvritfiilailstivclflaamhptgpntvtfeqpylftlniimvlvalpsvlaiydymssfrissailqflga  
iswfflsl1sl1tqftpft  
lasfitsi11ftstiitlaiggksvekndsp  
>tr|D9RKD8|D9RKD8\_STAAK  
mgnvsehvn1vkkhsvrkfknkplsedvkk1veagqsastssflqaysiigiddekiken1revsgqpyvengylf  
vfvdyrhh1vdqhaetd  
menaygstegllvgaidaalvaeniavtaedmgyg1vflgs1rndvervreild1pdyvfpvfgmavgepaddengaakp  
r1pfdhvfhhnkyhadket  
qyaqmadydqtiseydyqrtngrketwsqqiemflgnkarldmleqlqksgliqr  
>tr|D9RKE7|D9RKE7\_STAAK  
mvkdpikkakngtyyfran1gydskgk1qkyrsgfntkkeareeysk11lmkpeelsenkdkmtfkhyifeiflpwykt  
qvkl1rtyenr1ptikkhfs  
yfdkmavsdiepidvqnwq1k1skkckssyvraqglfsvamdraivlgitttnpskiignvkkqskiefwtkeefekv  
isliykedyyqhflfislw  
flfmtgmriqeatiqwedidfdsgvltinktlyyknqsnryfvepktkasvrhivldkct1tyl1sewkevqqnliqtdf  
vmsyngiptqkht1syaie  
ryaklagihri1rhghshas11ismgenpliikdr1ghedi1t1gtyghlypnnsfevank1ngaisfkeakqnydt  
spknqftvdylnkemkv  
q  
>tr|D9RKF0|D9RKF0\_STAAK  
meenhmkiinigvlahvdagkt1tes1lynsgaitelgsvdkgtrtdnt1lerqrgitiqtgitsfqwentkvnid  
pghmdflaevyrs1svldg  
a111isakdgvaqtril1fhalrkmgiptiffinkidqngid1stvyqdikek1saeivikqkvelypnmcvtnfteseq  
wdtviqndd1lekymsgk  
s1eale1eqees1rfqncs1fplyhgsaksnidnlievitnkfyssthrgpselcgnvfkieytkkrqlayirlysg  
v1h1rdsrvrsekekikvt  
emytsingelckidraysgeivilqneflk1nsvlgdtk1lpqrkkienphl1qttepskpeqrem11dalleisdsd  
p1lryyvdstthei1sfl  
gkvqmevisal1qekyhveielkeptviymerp1knaeytihi evppnpfwasig1svsp1plgsgmqyessvs1gyl1nq  
sfqnavmegi1rygceqgly  
gwnvtdck1cfkyglyspvstpadfrm1tpivleqaf1rkagtel1epylsfkvyapqeyl1srayndapkycanivntq1  
knevii1geiparciqdy  
rnd1tfftng1svclaelkgyqvttgepvcqtr1nsridkvrymfnk1t  
>tr|D9RKF1|D9RKF1\_STAAK  
m1fittkqmnqmi1kierkekkekpkkskpskqrkvpmikvgtthk1t1fv1wv1l1gsvgfyknftaidthtvrete  
i1kqqivdtnqvesfvksf  
akdyfswqqsqeaidkrnek1thyl1tee1qv1neemirkd1ptsssvndiqwqvsqvnentfev1fsveqvitedkde  
t1ssfhvvvhidesdmv  
i1knptmskkpksdyqpkqlesdhtvdtetmdeitsfletffqlyptatekel1tyyvsnhv1pminkeyvfeelvnpif  
trkdnqvi1vnvavkyldqe  
tkatqisqfel1lekqdnwkivk  
>tr|D9RKF2|D9RKF2\_STAAK  
mvfs1fff111flvi1ffaddtdsgennkdssipqggvtvspevlahrpliekygkeygiedyvsyila1mqvesggaed  
vmqsses1glppns1stee  
sikqgvkyfse11tsaeqqgvdi1dsviqsyngggflnyvrshgkkytyelaeqfskeksggkadynpniaipvnggwr

Tsompanidou\_et\_al\_Supplemental\_FASTA\_File

ynygnqfyvqlvsqyltdt  
spfeddetvqvimdealkyegfpyvfggaspttsfdcsqliqvydkagislprvaqdqydatqeismeeaqagdliiff  
hstynagtyvthvaiyleg  
nrfyhagdpigygdlsrywqdhligarrvihn  
>tr|D9RKF3|D9RKF3\_STAAK  
mtqkqkkf1hyswit11cvgv1111gt1gnavqatg1vdetidtsneyskyg1nqyq1dyyvdsnswg1lpwnwsdgigq  
svmyglyaitnfiwtisly  
lsnatgylvkeaya1dfisqtsaigenmqtiagitpnngfsssgfyvgf111filivgiyvaytg1vkrettkviravln  
fvvfv11sasfiayapdyi  
akindfskdvstas1nigtktiv1pntdsqgkdsvdmirds1fsvqvkqpw111qygstdvealgeerves11stspdtnn  
gedrenvveeiedhdnty  
11l1pktisr1gtvff1fvfnigisifv111tgimifsqv1fiifam1pisf11sm1psfdgmgrhaitklfnvimtrag  
it1iitvafsis1tm1yls1y  
asspffm1m1flqivtfagi1yfk1gd1ms1fs1qsnds1qm1grqv1r1pr1qmm1nr1qtr1rf1qrsmski1frgkagstkqktmt  
tkqnqtnkanhtrqnertt  
pkketa1snvkkqggigqr1gektahv1dtknr1vnkrkqakqqiqatpthvkya1hqgkenvthnvtdfkqsmadtka  
qrkqgrmnqqeqkrkniaq  
kr1el1dkakekr1rkenpsspvnqnhvrkrqqtvtpv1santkrenhqrp1kkeqkqktppkqfnqrk1nkrtdkrqgq  
t  
>tr|D9RKF4|D9RKF4\_STAAK  
maypikymedn1vfnhdgevfayyelipynys1f1ssdekiqvhdnfcq1liaqnr1d1gkiha1lq1latessi1ratqeqskei  
tgr1kei1ayekideqteal  
ismigdnqvdyrffigfkl1y1neqevsvknvgkeiqkafaeffhgvnhk1rgdfvsmpmaeierfskmeq1lesk1srrf  
qirk1lekddfyi1iehlyg  
qtgvpfddydh1pkryedkkv1vkkydi1kptrclieenqry1rieqedtttyvayftinsivgel1dfpnseifyyqqq  
qftf1v1dtsm1nveivankk  
al1stvrnk1kkel1kd1dshawes1dnet1stnv1d1alesv1de1esn1dqtkesmyk1syvvr1vsakn1del1kqrcdevkdfyd  
d1sik1vrp1fgdm1gl1hne  
fipsskry1ndy1qyvtsdf1ag1lgfatqmi1gensgi1yvgyn1dtgrni1ylqps1lasqgikgsvt1nal1asafigs1ggg  
ksfsnm1lvysv1fggqa  
tivdpkaergewket1pdi1aheiniv1n1tsendnkg1ldpyv1il1k1pkdses1aidi1l1t1f1tgissrdsekfpv1rkair  
svtqskqrg111videlrk  
edtpisnsi1adhiesfvdydfah11fsdgsvtqsis1lekq1ni1iqvad1v1pdsnssfeeyttmell1svam1livistfal  
dfihdsrsi1fki1vd1deaw  
s1f1qvaqgka1smr1lvragrnagvyfv1tqnadd11dek1mknig1k1f1af1rst1d1veikk1tleffgvdkedennqkr1r  
elengq1lv1sdi1ygrv1gvm  
qfhp1ifee11haf1dtrppvr1nevee  
>tr|D9RKF7|D9RKF7\_STAAK  
mnqfr1lee1ckq1rl1ph1plav1dnds1fetkeew1m1n11ene1l1t1cree1kmar1lyrqakfpvr1rt1dnyewhdhiaipnet  
tkdelis1s1fir1qkenavf  
vgtpgtgkth1laca1lgmatkvgi1etr1fwr1vsd1vse1lerqwsnt1lgafkhrfdkvk1i1ildemgyvpftkegae11fq  
1isdwyetks1i1vtsn1lef  
sqwnkvfidtr1taal1vdr1ihhahi1sftgesfr1kna1lskik  
>tr|D9RKF9|D9RKF9\_STAAK  
memkvyvan1grynege1vgawftppi1deemaerig1nedyeeya1ihdfel1pfdvdeytpisein1r1ceaiqeiegtpi  
yne1kei1qgmwf1ss1lee1l  
enkedihcysdcds1medvaryyveetgq1gevpsn1qnyidyqs1grdmeiegn1y1vtshg1vfeycq  
>tr|D9RKG0|D9RKG0\_STAAK  
mftndqfks11ikt1erkssnyyeggneivskmki1sevt1detddftyykykkgwnt1ctyl1k1rvp1fdd1dffeshk  
d1itqtassiydkqgdnv1  
vdt1il1vp1penyev1nfsq1k1isdvvsqai1edaesfmsngeyqrafdrvh1tafhgylie1ilkkyeitvprden1sklysr  
iqq1liekeiqpteladivk  
ttir1ssngm1iss1nearnrhs1lahpntni1gkreak1ligis1stvt1dyisgyl1dk  
>tr|D9RKG1|D9RKG1\_STAAK  
mvl1ai1v1ig1fl1gfkrefsk1lig1fli1a1iavgl1vfnaagvkdv11n1ln1fnri1ga  
>tr|D9RKG2|D9RKG2\_STAAK  
meneki1wike1kekr1aygvsqnk1lavashit1rpy1sdi1etgkavptqqvked11nal1erfn1pdn1lem1fdyvri1rfpt  
ndvaqi1gev1r1nmdym1  
hedfgyysy1pehyrfgdi1v1vshdvskgv11elkgkgrqfen11laqhrs1wydffqdcme1hkgi1fkr1d1l1a1ndktgi  
1nipd1lakkckqee1c1svf  
rsfknyrsge1l1vrdekpy1mgnt1yigs1k1sevyfci1yekdyeqyvkn1dvpl1edaevkn1rfeir1kndratqamkd1lah  
qqaektafei1nryi1rfad  
kddtkrrs1dwtnerwew1figknrga1r1ttqpepys1fert1nw1lhq1vapt1kiasil1dv1ngtti1istmi1qkak1tek  
hek1lieq1hlamed1lit  
>tr|D9RKG3|D9RKG3\_STAAK  
m1p1l1hdrgeri1kandkh1vyhf1is11vvf1lv11p1fhwrt1qsvnwqavq1d1tff1yq1lhtpyf1wss1il1tal1fvcglis  
wlyyhyrids1ikq1lehrk  
1armi1lenh1weaeetq1segffkd1pskk1tkqri1rhfpki1yrmkdgl1ih1hveit1lgyqyq11lh1lenk1letglycelv

Tsompanidou\_et\_al\_Supplemental\_FASTA\_File

ektlkdsyveyvlllydtig  
nrigiedvvaqdgrvklmesvywefds lphml iaggtgsgksyfi ltliesllhtnaklyildpknadladlgavmnnvy  
yrkedmlacinqfyedmid  
rsetmkqhpnyktgenyaylgl sanflifdeyvamm dmlgresttvihklkqivmlgrqagfflilacqrpdkayfsdgi  
rdnfnfrvalgrmsemgfg  
mmfgsdtqkqffl kpi kgrgyvdtgksviseftytlvpkrydf lgeigkviqkkqsepvphevkgtgsdl  
>tr|D9RKG4|D9RKG4\_STAAK  
mtntplilkeipkdeaisfirqyhyskil sr lckyflgifseekllgvvelgwgtqplqtirk lfpdsslqtt dyleigk  
mcf l pemnqtnyfgsqals  
alikwlkehtdchflytladgiegkcyvyqasnf fycgyf ktsvyrdkqswekihprsarllleearfeqvekkhwl  
qafceykgiek ingrmfry  
lypl tkeakkllghtlyrrhyypkekn lrfekriayqkyeaisqptfdkqariyntqlf  
>tr|D9RKH1|D9RKH1\_STAAK  
mstvfhtlgckvnyeteaiwql fkeanyervdfeanadvf vintctvtntgd kksrqii rrair qnpdavicvtgcya  
qtssaeimeipgvdvvvtg  
qdrhkl lgyidefrkerqpingvgnimknrkyeel dvp yftdrtras lkiqegcnnfctfciipwargl mrsrdpekvve  
qatqlvnsgykeivltgih  
tgyygd lkdynlaql lrdletingleririssieasql tdevidvlerstkvvrhlhip lqsgsd tvlkrmrkytmdr  
fserl tk l hkalpdlavts  
dvi v gfpgeteafqetyd fivkhkfse l h v f p s p r i g t p a v r m d d q i d e e i k n e r v h k l i t l s n q l g k l y a s k f d q d v  
l e v i p e e g g d t e g t l v g y a  
d n y m k v q f e g d e s l i g q i v k v i t q a n y p l n e g q a i k v v d f a t n k s d r e v l v  
>tr|D9RKH2|D9RKH2\_STAAK  
mqryfidqnadvsqrffitkkedihhitnmrydvgskiiltfndqtvylceiaditsdkievd lkekqnintel pvdvt  
icsglikadkyewllqkat  
elgassfiavsmersivklneakaakkierwqkiikeaaeqsyr l v i p s i q f e s n l k l i c d t i d n y d i l i a y e e e a k d g  
el snfkqt lqqfnaqdkvl  
mifgpeggl seneis lfsntstvvglgprilraetaplyalsaisyekelmg  
>tr|D9RKH4|D9RKH4\_STAAK  
makrdyyevlgin daskdeikkayrkl skkyhpdinkeegadekfkeiseayevl sddnkrasydqfghdgpqgfgggg  
fngsdfggfsgfgggf  
ifssffgggrdrdpnapqkdd l q y t m t l t f e a v f g t t k e i s i r k d v t c e t c h g d g a k p g t s k k t c s y c n g a g h v a v e q  
n t i l g r v r t e q v c p k c n g s  
gqefeeactchkgktenktvkl evk v p e g v d n e q q i r l a g e s p g v n g p a g d l y v v f r v k p s e t f k r d g d d i y y k l n v  
sfpqaal gdeikiptlnne  
vmltipagtqtgkqfrlkek g i k n v h g y g y d l y v d i k v v t p t k l t d r q k e l m k e f a q l n g e e i n e q p s n f k d r a k r f f k  
ge  
>tr|D9RKH5|D9RKH5\_STAAK  
mskiigidlgttnscvtvlegdepkviqnpegrsttspvafknetqvgevakraqaitnptvqsikrhmgtdykvdie  
gksytpqeisamilqnln  
taesylgekvdkavitpayfndaerqatkdagkiagleveriineptaaalaygl dkt d k d e k v l v f d l g g g t f d v s i l  
elgdgvfevlstagnklg  
gddfdqviidy lvaefkkgendv l s q d k m a l q r l k d a e k a k k d l s g v s q t q i s l p f i s a g e n g p l h l e v n l t r s k f e e l  
sdsli r r t m e p t r q a m k d a  
gltnsdi devilvggstripavqeavkkeigkepnkgvnpdevvamgaa iqggvitgdvkdvvlldvtp l s l g i e i l g g r  
mntliern t t i p t s k s q i y  
staidnqpsvdvhv l q g e r p m a a d n k t l g r f q l t d i p p a e r g k p q i e v t f d i d k n g i v n v t a k d l g t n k e q r i t i q s s s  
lsdeei drmvkdaevnaea  
dkkrreevd l r n e a d s l v f q v e k t l t d l g e n i g e e d k k s a e e k k d a l k t a l e g q d i e d i k s k k e e l e k v i q e l s a k v y e q  
aaqqqqaaqqanagqnnds  
tvedae fkevkddd k k  
>tr|D9RKH7|D9RKH7\_STAAK  
mitdrqlsilnaivedyvd f g q p v g s k t l i e r h n l n v s p a t i r n e m k q l e d l n y i e k t h s s s g r s p s q l g f r y y v n r l l e  
qtshqktnklrrlnqlive  
ngydvssal tyfade lsnisqyttlvvhpnhkqdiinnvhliranpnlvimvivfssghvehvhl asdipfnndklntis  
nfvtnkltefnqnlqddiv  
sfvqseqeeifinkllntmnnhisnqnsiymggkvklidalnesnvssiqipilqyiesnriaelldisspninvkign  
eiddslsdisivtsqyhfd  
etlkgqiavigptamhyqnvilnriw  
>tr|D9RKH8|D9RKH8\_STAAK  
mtvqsayihpfcvri c y c d f n k y f i q n p v d e y l d a l i t e m s t a k y r i l k t m y v g g g t p t a l s i n q l e r l l k a i r d t f  
titgey t f e a n p d e l t k e k  
vqll ekygvkrismgvqtfkpe llsvlgrthntedi y t s v l n a k n a g i k s i s l d l m y h l p k q t i e d f e q s l d l a l d m d i q  
hissyglilepktqfynmy  
rkgllklpnedlgadmyql lmskieqspfhqyeisnfaldghesehnkvwywfneeyyfggagasgyvdgvrytninpvnh  
yikainkeskailvsnkps  
ltermeeemflglrlnegvsssr f k k k f d q s i e s v f g q t i n n l k e k e l i v e k n d v i a l t n r g k v i g n e v f e a f l i n d  
>tr|D9RKI4|D9RKI4\_STAAK

Tsompanidou\_et\_al\_Supplemental\_FASTA\_File

myqfllrykdflltqwklyl savvlmvligfi fwrqddytsrnfenkdtalkqstsensslskvedvqvkdgdnsknkg  
pvyvdvkgavkhpnykmt  
skdrvvdlllkaqlledadvsqinlseklt dqkmi fiphkgqknvepqievnsvhekngntnntkvnlnntasvselmsvp  
vggqakanaveyrnqgga  
fgeiddlkkvkgfgsktfdklksyftt  
>tr|D9RKI6|D9RKI6\_STAAK  
mnsqellaiavdaidnkkgedtislemkgisdmtdyfvvthgnnerqvqaiaravkevaneqnievkrmegy nearwili  
dladvvvvhvfhkdernyn  
ieklyqdaplesysqvay  
>tr|D9RKJ0|D9RKJ0\_STAAK  
mhranfnslglddtyealnipedfhlkeiiskkelegfnitiphkeriipyldyvdeqainagavntvlikdgkwigy  
ntdgiyvkgllhsyypdle  
nayllilgaggaskgiayelakfvkpkltvanrtmarfeswnlninqisladaekylaefdivinttpagmagnnesiin  
lkhlsptlmsdiviypyk  
tpileeaerkgnhiyngldmfvyqgaesfkiwtknkdadinsmktavllqqlkge  
>tr|D9RKJ3|D9RKJ3\_STAAK  
migiigameeevtllknklqtqlseisvahvkfytgilkdrevvitqsgigkvnaaisttllinkfkpdviintgsagald  
eslnvgdvllsddvkyhda  
datafgyeygqipmpvafqsskpliekvsqvqqqqltakvglivsgdsfigsveqrqkikkafpnamavemeataiaq  
tcyqfnvpfvvrvavsdla  
ngeaemsfeaflekaavsssqtvealvsqll  
>tr|D9RKJ4|D9RKJ4\_STAAK  
msskiiiydtkllelifikkqkfytmkimilvvvvikm  
>tr|D9RKJ6|D9RKJ6\_STAAK  
mgfevkylltgfililllegiftnsasaieydlhhkskfdskrlsnakmsfinptqlenktndrllkhdllfhdmfvn  
ddwkkdfkvefenealski  
finkdidi fagnygygchggatnktqcsyggvtlsdnkyddyknipcnlwidghqteieltavtkkkkivtiqelevql  
rnylnekyklyeqggdivk  
gyvkyynddeqnveydfynl ngeygrevlkmyadnktinsdkllhldiylfks  
>tr|D9RKJ7|D9RKJ7\_STAAK  
mgyrtlksi fehneskmkeeyikrfnslasfntniniipmengkkvndleyplffmvtknlskkqelisinsrkidral  
nslpyaareqyfdllide  
lqstneienvfstkqei ahalnqaseflkfrglvdqykeielnkkikvdnvrdiraiydklvsneineqdkldgel frk  
nfvghdgstknkihvgll  
petkivefigemlflkyfdapqpfkimashylfeyihpfydgngvrgrfiiakllsdydnytal tfsyvinrnkskyy  
kafmtasnlncgdltfeif  
dtmlelllaggeridelipkmdatekltlyltsykydyeflyllsmdklfgnkrnrlltidlenilgvgrvkinnti  
kkydnylvkiksrrptiyei  
sdeflnsiik  
>tr|D9RKK2|D9RKK2\_STAAK  
msikilqpgl fstvqdlgrigyehigfsgagamdqsfkvaqslinndgpaieytligptiqfntqntfvitggsinasl  
nktismnsvilaekgdl  
kigaitkgargyltfghsinvpsiaesyathtrssiggfkgkrladdvitvkinndfkenigktihlqddllpenniih  
ilqppqfeafsearakiv  
nhpyliteqsdrmgyrlegdsvapinqadiisevalgsqvvpndgqpillndkqtiggytkiatvckfdlplklaqmkp  
qdti qfkwisfgeavdknr  
eqmslfneilkshqktpifdtsslrhtskklatilkgdl  
>tr|D9RKK8|D9RKK8\_STAAK  
mddlnkkyllidlhqhqnssiev lrefaevnevpidrlltdlikqlirmnnvknileigtaigyssmqfasisddihvtt  
iernetmiyaknlatyh  
fenqvriiegnaleqfenvndkvydmi fidaakaqskkf feiytpllkhqglvitdnvlyhgfvsdigivrsrnvrqmvk  
kvqdynewllkqpgytnf  
lniddglaisikge  
>tr|D9RKL0|D9RKL0\_STAAK  
mlqhkilgl dvgsrtvgiaisdimgwtaqgldtlrineenne lgidqlvdiikkhnvgtvvgllpknmnsigfrgeasl  
tyekllleaypsieivmwd  
erlstmaaerslleadvsrqkrkqvdkmaavfilqgyldsllh  
>tr|D9RKL3|D9RKL3\_STAAK  
mikgtveailfqnsdnfytlkvdtietnedfdtmptvvgflpnivegdvyt fkgqvvdhprygkqlkaetfekempqtk  
eaiisylssdlfkvgvkk  
aqniventlgdnaindilldhsvlekvsgllskkkqkqiaeqisanqesekimirlhdlgfgpklsmaiyqfylgdtltild  
rnpqyliydikgigfnkad  
qlarnigiayndnerlkaalltyleecikqghtylpinvidl tvdvl nyqdeeviepekldemlqylneekrliidneq  
vaipslyysei ksvqnlfr  
ikthtnklteieqsdllqmhigeiedanqvnyaasqkealqtainskvmlltggpgtgkttvikgivelyaeihgllsldyd  
dyvnddyppvllaaptgras  
kr lqestgleamtihrligwnqdtkpedileneinarliiidemsmvdtwllfhqflsavpldaqlifvgdedqlpsvpgg  
qvfkdlieskaiprvnlte

Tsompanidou\_et\_al\_Supplemental\_FASTA\_File

vyrqqdgssiielahrmklgqkidiqrfrhdsfincqanqiptvvekvvtsavnkgytmadiqvlapmykgnagikrln  
qvlqdiInpkkkdtreief  
gdvvrfrkgdkvlqlvnrpndnifngdigvivgi fwakenalnkdvlvdfegneitftkqdmmlthayctsihksqgse  
fpivimpivkqyfrmlqrp  
ilytgltraktslvllgdpeafdiglktngqarlqllctllknyfnsedeemlentatndtgasqttiddqveapmsnd  
seevmsdstktdtnvltea  
tmfkidpminmgeitpydfier  
>tr|D9RKL6|D9RKL6\_STAAK  
meiyadyaattpvkpevvdammtyynshygnpssihakgrdarkyldesrrqiaqllgadtheiiftsgatesnntaikg  
ivkaneglgnhhiitskieh  
hsvlhvfeqleregfdvtylvdvdtgaidldqleetitdktlsvsimfvnnevgtvqqiydiqdiaetnayfhvdavqa  
ighldvkfdefeidamsit  
ahkfggpkvgallvkdhvtldypqlggeqelkrragtenlaqivgmakalqlaeknrddnnihlmnlkeqflvklqera  
ipfelngsmtatghivnl  
yfpfvevetmltldmaqiyvssgsactagstqpsshvldamfedeersnhsirfsfneltteneinaivaeihkiyfkfk  
ees  
>tr|D9RKL7|D9RKL7\_STAAK  
maikysalnlpiregedeqtaindmvnlqahldelsyerywiaehnapnlvssataalliqhtlehtkhirvsggiml  
pnhaplivaeqfgtmatlf  
pnrvdlglgrapgtmdmtasa lrrdqhdgvykfpeevsllqqyfgpahqqayvraysavgknvplyilgsstdsahlaar  
kglypvfaghfapqmqkea  
ieiyltlfepsdvldepyvivclntivaenddeaqyllassmaqvmvsitrgrmqpvqppthelqniltpreyamamerqk  
isligsentvqqi iqdfme  
tygeveimaissyidkdmqldsyrrfkvninqinekntl  
>tr|D9RKM5|D9RKM5\_STAAK  
mkkieawlskkglnkrtlivviafvlfii flflll nsnsedsgnitktenaelrtgpnaaypviyvekghfkkgkv  
gkwievedtssnekawiag  
whntnldivadntkeknp lqgktivldpghggsdqgassntkykslekdytltkakelqrtlekegatvkmtrtddyvsl  
enrdikgdaylsihndale  
ssnangmtvywyhdnqraladtldatiqkkgllsnrgsrqenyqvlrqtvpavllelgyisnptdetmikdqlhrqile  
qaivdglkiyfsa  
>tr|D9RKM9|D9RKM9\_STAAK  
mikpkykwltkpaeyisdeltsklkltpivkkilesksii deqai es iis dtdinhdaqlsdmkttierikraiande  
kilvygydadgtattil  
vitlqllgaqvgwhipnrftegygpnelafnahdegitliitvdngiqghneikmvqdlgvdivvtdhheigstlpeay  
aivhpmhpsfnypfqqlcg  
agvayklaqalienvpdyfkaivaigtiadlvsltdenrslvkqglkv lndqcptsvkallkeagyndnideetigfiig  
prlnavgrl ddsalacell  
mtdveeeasflaeqvehfnrerkdiratiteamamaetkvkkgdlflllakenwegvlgivaskivetfalptlilni  
dreqnhakgsarsidqvsml  
feilsahqeliakfgghhmagmtmdienieslaeglnkwmkelsktsldpvkqvdl lltenditiknirdmnr lrpfg  
tdfsrpi femd lsvssvk  
aigqqknhlkl tlgesiaal fwqngllepelqdeqpinilgsvqinewngnqspqii iqdiamneqqildyrskrkslp  
ftendeni vvl ihpksdkv  
naneyyygee ikqtdkvvlrdlptsmedl snslqq lqfsqlyivlqhnhsiyfdgipnmdifkkykalitkqetniqk  
egml lcg h lsvkpd tlkfm  
lkvfl d l kfv t qe d g l i r i n q p d k r s i d s s k v y q l r q r m d v e k q l l y q d f s e i k n w i k s q l s  
>tr|D9RKN1|D9RKN1\_STAAK  
mirpqqkrakqhrelinni qsggrittiggikgtvkavdettv vitvnghtel t fekpaikqv d p s  
>tr|D9RKN2|D9RKN2\_STAAK  
mpavtyehiktckqsgarlgivhtphgsfetpmpmpvgtkatvktmspeelrqieakiilgntyhlwlpqgndiikhagg  
lhkfmnwdgpiltdsggfg  
vflsnl r kiteegvefrhhtngsklflspeksmqiqndlg sdimmafdecppmpaeydyvkksierttrwakrcldahq  
rpedqal fgi qgggedl  
reqsakdlveldfpgyaigg lsvgepkpvmymvehte qfmpkdkprylmgvgspdali ec sirgmdmfdcvlp triarn  
gtcmts qgr lvi knakfad  
dlrpldencdycycnysrayirhlikaetfgirlttihnlhfl lkl medir qairedr lldfkeeyfeqygl nvenpk  
nf  
>tr|D9RKN5|D9RKN5\_STAAK  
myayvkgklthlypthvvetagvyeyiqtpnsysfqkhl dhevlihtslivredaqllygfsseeekdmflsl ikvtgi  
gksalailatstpnevkr  
aienendtyl tkfpgigkktarqivldlkgkvki teedsdsl lqvdatstvqdqfvqeamlaleal gyskrelakvektl  
nknkydsvdeavkagqlv  
vs  
>tr|D9RKP5|D9RKP5\_STAAK  
mtiyninfgigwassgveyaqayrakllrrtnqdtkfvfl d fi qseniqtltqnig fedqeviwlyqyfsdisi apttyt  
lddiere lghdisfrerng  
kivrlyfngkssfvtyclqneqkdivdraefvinsmlvrkdfysytrifseyyapadnkaklymrqfyngensityneyi



Tsompanidou\_et\_al\_Supplemental\_FASTA\_File

dgdssiyv fedavlynkte  
fiayflqrlnltrddivil drasdigqavlqhk gds kvgvvi hadhysnm mseqhilwnnyeyqfskakyidffitat  
diqnhm vcrqfeqyqgyrp  
rvyti pvg s idalsyptl srkpyami sarlanekh idwlvkavivakrqvpel t fdi ygegse ktr l rki idthraqdy  
irllghvkldeiytdyelf  
lsastsegf g l t lmeavgs g l g m i g l n v n y g n p t f i r d g e n g y l v p f d t d e d s v d d v a k l a h a i v m y f n g p q t p h y i s  
yevaqqf mtqdiilkwetl  
vqevlhd  
>tr|D9RKP6|D9RKP6\_STAAK  
mkrintwsdevksysddv lkqktlefkeriasgvdtldtllpeayavareaswrvlgmpkqvligai vlhegniaemq  
tgegktltatmplylnals  
gkgtlylittndylakr dfeemqplyewlgltaslgfvdivdyeyqkgekrniyehdiiyttngrlgfdy lidnladsaeg  
kflpqlnygiidevdsiil  
daaqtplvisgaprlqsnlfhivkefvdtliedvhfkmkktkkeiwl lnqgieaaqsyfnvedlyseqamvlvrninlal  
raqylfesnvdyfyngdi  
vlidritgrmlpgtklqaglhqaeakegmevstdksvmatitfqnl fklfesfsgmtatgklgeseffdlyskivvqvp  
tdkaiqridepdkvfrsvd  
ekniamidive lhetgrpvllitrtaeaaeyfskvffqmdipnlliaqnvakeaqmiaeagqigsmtvatsmagrgtd  
iklgevealgglaviihe  
hmensrvdrqlrgsrgrgdpgssciyislddy l vkrwsds nlaennqlysl daqr l sqsslfnrkvkqivvkaqri see  
qqvkaremanefeksi siq  
rdlyveernrvleiddaenrd fkv lakdv femfvneekvl tksrvveyiyqnl sfqfnkdvacv n fkdqavvtflleqf  
ekqialnrknmqsayyyni  
fvqkvflkaids cwl eqvdy lqq lkanvnqrqngqrnai feyhrvaldsfev mtrnikkrmvknicqsmi t f d k e g m p v i  
hfp  
>tr|D9RKP7|D9RKP7\_STAAK  
mlknktfkvtwnyisqttfmygskvsfsngevtfinplmpsglpihewlmlkqfskyksapslpilrrgqhyklhfd fda  
tpagsvyfiiifynkngtk  
lsteivksnsitiqypdeayaykikmnaasts lifrc l t i t e m t h q d n l e y k s m r v t k i g d d q y g n d r i n v i i a e p s d a  
yptisndflksfghvw lve  
rwmddniegnikqlkndlqsqdtlkainlisygsksnvfatyvaqhl dckvyrtshedd l k e w f t e h v p g n h e l k d t n v  
evyfkeeqdnhl n y m s r l m  
npvrfl dy l d v s k l n g g e v n e t  
>tr|D9RKQ1|D9RKQ1\_STAAK  
mskrqkefhds lanektrvrlyksgknwvks g i k e i e m f k i m g l p f i s h s l v s q d n q s i s k k i t g y g l k t t a v i g g a f t v  
nm l h d q q a f a a s d a p l t s e  
lntqsetvg n q n s t t i e a s t s t d s t s v t k n s s e q t s n s d t v s s e k s e n v t s t t n s t s n q q e k l t s t s e s t s p k n t t s s  
s d t k s v t s i s s t d q q t n t s  
tnqstasnttsqsttpasanlnktsttststapikl r t f s r l a m s t f a s a a t t s a v t a n t i t v n k d n l k q y m t t s g n a t y  
dqstgivtl tqdaysqkga  
itlgt r i d s n k s f h f s g k v n l g n k y e g n g g d g i g f a f s p g v l g e t g l n g a a v g i g g l s n a f g f k l d t y h n t s k p n a a a  
kanadpsnvagggafgafv  
ttdsygvatty t s s a a d n a a k l k v q p t n n t f q d f d i n y n g d t k v m t v t y a g q t w t r n i s d w i a k s g t t n f s l s m t a s t g  
gatnlqqvqfgtfeytesa  
vtqvryvdvtgkdiippktysgnvdqvvtidnqqsal takgynytsvdssyastyndtnktvkmt nagqsvtyyftdvk  
aptvtvgnqtievgktmnp  
ivl t t t d n g t g t v t n t v t g l p s g l s y d s a t n s i i g t p t k i g q s t v t v s t d q a n n k s t t t t f t i n v d t t a p t v t p i g d q s  
sevyspispikiatqdnsg  
navntvtglpsgl t f d s t n n t i s g t p t n i g t s t i t i v s t d a s g n k t t t t f k y e v t r n s m s d s v s t s g s t q q s q s v s t s k  
adsqsaststsgsi v v s t s  
astskstsvslsdsvsasks l s t s e s n s v s s t s t s l v n s q v s s s m s g s v s k s t s l s d s i s n s s t e k s e l s t s t s d s  
l r t s t s l s d s v s m s t s g s l  
sksqslststsdas t s q s v s d s t s n s i s t s e s l s e s a s t s d s i s i s n s i a n s q s a s t s k s d s q s t s i s l s t s d s k s m s t  
s e l s d s t s t s d s v s g s l s  
iatsqsvstssds m s t s e m i s d m s t s g s l a a s d s k s m s v s s m s t s q s g s t s e s l s d s i s t s d s d s k s l s l s t s q s g s  
tstststssvrtsest  
sgmsasqfdstsis t s f s d s t s d s k s a s t a s s e s i s q s v s t s t s g s v s t s t s l s t s n s e r t s t s m s d s t s l s t s e s d s t  
s d s t s t s d s i s e a i s g s e s  
tsislse n s t s d s e s k s a f l s e s l s e s t s e s t s e s l s g s t s d s t s l s d s n s e s g s t s t s l s n s t s s s t s i s t s i s g s  
ast sayk s d s v s t s l s t s t  
stslsdstslstslsdasgskns l s a s m s t s d s i s t r k s e s l s t s d s l s v s t s e s e s g s t s s s e s k s d s t s m s l s m s q  
sigstsvstses lsdst  
tslslsasmnqsgvdsnsasqaststststsesdsqstssytsqstsqsestststslsdstsmr r s t s q s g s t s t s a s  
lsasesedsqsistsasd  
stseststslsdststsnstsestskai stsasasesdssstslsdstasmqssedsqstsas lnsqststsnrmst  
itsevsestsegstses  
tse d s t s i s d s e s v s t s m s l s t s d s t s t s e s l s t s m s g s q s i s d s t s t s m s n s t s m s n s t s t s m s g s t s t s e s n s m h  
pdsmsmhhtststsrss

Tsompanidou\_et\_al\_Supplemental\_FASTA\_File

seattstsesqstlsatsevtkhngtpaqsekr1pdtgdsikqngllggvmtllvglg1mkrkkkkdendqddsqa  
>tr|D9RKQ2|D9RKQ2\_STAAK  
mnyspkqgvsshglphdpfksstvrprigwistvskdgkdnlapysqyqnltdwppmvmafaanqsvlgdherkdtvknae  
etgwfvmnmatydlreavn  
lsskalppeedefeyagvtkeacieapgyrvkespvhfecyvtiriptgdtvstvddivigrvaqvhiddkfilndngkl  
diksikpiarlgydydtvv  
neifemkapsaskeelaglegrnfdnqsdnke  
>tr|D9RKQ3|D9RKQ3\_STAAK  
ml etel havinamsqnegksvda1knstas1knn1tk1keqldkttth  
>tr|D9RKQ4|D9RKQ4\_STAAK  
mikqppffkksnigrnkmi1ryvtn1klake1yqaskpk1qedkgmiel1fehtfglqkelvkyvgiaeattaalysasfi  
nknisrlas1stigi1saa  
aykhfeagqgkkgaha1d1lg1at1s11dtfscnkk  
>tr|D9RKQ6|D9RKQ6\_STAAK  
mavvyvaggclwgveaffttipgi1hteagrangrsk1dspydgyaecvklhfddrmltitdimnylfeiidpysvnrq  
gndigekeyrtglyscvddh  
liearqfierrkdrkiavev1plsnysaeehqqh1ekypedmhmchisid1lnkyk  
>tr|D9RKQ8|D9RKQ8\_STAAK  
midihnhilvdiiddgpkkieksial1kqakdegvtsivatphhlhprydntfqqvlvklaelrthpevqaldiklfpqqe  
iritdsilqglndngsiqgi  
nrskylliefptgevphytkqlf1feiqsrgyipiiahpernrsiaknpeilyelvangalsqltssslvggfgkniqkls  
lqfiecnlahfvasdahsc  
dqrpf1mqel1fhnhk1kkysndieal1rnassvindnfvyldrptkpgkvksflkwf  
>tr|D9RKQ9|D9RKQ9\_STAAK  
mntnrrstsslivheqpkspisekfrgirsnimfanpdsavqsivitseapgagkstiaanlavayaqagyktlivdgm  
rkptqhyifnlpnneglss  
ll1nwstyqdsiisteied1dv1tsgpipppselitsrafanlydt1lmnyfviiidtpvntvtdaq1fskftgnvvy  
vnsennkdevkkkge1ie  
atgak1lgv1lnrmpkdkksasyayygtdes  
>tr|D9RKR0|D9RKR0\_STAAK  
mntmidyveetmekfdlvk1ln1lknk1l1l1lpaiclvvsaa1tffvmpdkytastqilvnmkksssd1afqnvqss  
lqsvntyteiki1ksprildk  
vsrefdgqyltaelnsflkvtnqtnsqiitvsvttnksesdkivnriskvfahdmpkimsvdnvt1ssahdnkvsp  
ivsvnlvisiivgvlail  
iif1kelldkrikteedvesqlglpilgsiqk  
>tr|D9RKR3|D9RKR3\_STAAK  
mkyrk1i1vl1s1i1ilpvskldghhi1anaddppkklkykensa1alnyhrvrkanfln1nfiyffssskeiknysvsqs  
qfesqikw1kshdakfl1t1  
kef1lykkkkgkfpkrsvwinfdmdeti1yenaypilkykipatgfii1tghvgeenfh1ldmiskkelkemyktglwefe  
ththdmh1sknnksklm  
aseati1kd1nkseky1tknfkksqkti1aypygl1mddk1pvikkag1kygfs1leekavtpnsndyyiprilisddafeh  
likrwdgfhed  
>tr|D9RKR4|D9RKR4\_STAAK  
mkkir1el1vyl1raicaiiivth1ltqit1lkenmeggs1vlqfyirnivifgtpcfiilsqll1ttlnyqkvtyryl1tr  
vki1lipy1lmg1fysyse  
s11tdtsf1qkqfienv1lgwygyfivvimqffilsy1i1fkinyn1fnski1ll1sfilqqs1lyyftntafhdtv1hy  
yplsentii1fgwi1fyff1g  
aymgnyerv1nflery1vimivlavatyfvfialangdywnvtsfsys1tpynsimfiv1lgicthfktm1fntiqmis  
afsffiy1fy1l1hpi1ld  
s1lfaytn1fedntmv1flais1l1fil1gl1cigvgm1lrefy1frfi1gkpyk1lninay  
>tr|D9RKR6|D9RKR6\_STAAK  
mkse1snsgidvtvkdvekyrnrynev1mkgk1ksyvcry1lis  
>tr|D9RKR7|D9RKR7\_STAAK  
mtnyki1dfskglvpailqdnqtqvl1m1gymnqea1fdktiedgvvcfysrskqrlwtkgetsghtqrvkdihvdcndti  
lidvipngptchtgsqscf  
nte1vpfsvqt1laqtvd1saqs1nneksytky1l1tegi1eki1tkkygee1fevvi1eai1kgdkkafvsevadelyh1fvlmha1  
gvdfseieaelarrhhkrn  
n1fkgerqnieq1w  
>tr|D9RKS2|D9RKS2\_STAAK  
miyidknespvtpldqktmts1i1satpyn1ypda1yeqfkeayakfygl1speqi1iagngsdeliqk1m1impegpvt1ln  
p1dffmyqaya1aqvnreiaf  
vdarsd1tfd1let1l1tkidevqps1ffims1nphnpsgkqfdta1fltai1admka1ingy1fvi1deay1dygkaydvemaphi1  
rmrt1skafgi1agl1rgv1  
mstvetiqri1qti1ehpy1l1nvft1niaty1frhreet1srfl1tmqrq1laeq1kqi1fdthvadkmsvfpsnanfv1tkgsaa  
qq1lgqyvyeqgfkprfyde  
pvmkgyvrysi1atas1kq1leeivkewsakyd1skttkhs  
>tr|D9RKS3|D9RKS3\_STAAK  
mlnaqqf1nqfs1leap1des1ypi1rdi1c1evkv1hgdkal1kmyn1tfdhtktdh1eisheqikaafdt1dektkqalqqs

Tsompanidou\_et\_al\_Supplemental\_FASTA\_File

yerikaygesikqmnqgle  
esvecyeyihplesvgiyvpggkasypstvlmtatlaqvagveni vvtppqngvsqevlaacyitqvnqvffggaqs  
iaalygtetipkvdkivg  
pgnqfvayakylfgqvgidqiaqpteialiiddtadldaivdvfaqaehdelartyvisedaqvlkdesriakalpn  
vdrydivsksianghylih  
asnfdeachvmtiapehasiqtvnpqpyiekvkvvgalfighyspevigdyvagpshvlpnrtarftnglsvndfltr  
ntvihlskdtfdqiadsaq  
hiahvealynhqgsilirqs  
>tr|D9RKS9|D9RKS9\_STAAK  
mtepiisfkdfsfgyhsqatptlqniinvdiypgekvlvvgasgsgkstfancinglipfktkgnvtgelhinndatvsc  
lhkrsnvvgtvlqdtgqf  
igltaaedmafllenncveqddmknvsywaekvdmielhnrpqdlsggqkqrsvlggilihrtpilildeplanldpa  
tghetlrlnniheetkst  
miivehrleeslddtfdrvllfdgkiianttpsdllkssklkeagireplyctalkyaevdvesidnlanlrevcmseh  
vkfkvkkwidktsnndnk  
yksep1le1nevcvqysdysnsvlnnvqlnvyrremlsivghngagkstlakaicgfliditgniqfcnkgfnqlsisers  
efigyvmqnpnhmiseskmi  
ydevalglrargmkesdikirvenvlkicglyafnrwpiaalsygqkkrvtiasvlnpeiiildeptagqdfyhynei  
msflielnrqgkttiimith  
dmhllseyssrtvvlskgqvadtptvlvlnkckiceiaslrqtslfemaeyigisepqkqliqlfinhdrkvrq  
>tr|D9RKT1|D9RKT1\_STAAK  
mgnylvlsdfglsgdavsamygvaytvssdi rvenlthdippydiwvasyrlyqtvkywpgkgtvfvsvvdpvgvsdrss  
iacltysghyitpdngsl  
shikhyegikkvieidevksrlphseestfhgrdvayngarlaankiaferlggainvdsiealeiseatknedsvtg  
sidi1dirfgslwtnipla  
flksleivhgnnlvvtiyhqdkkvyqniikfarsfadvnvgeplvyvnslnigvavnqdsfsdlyhigtgndwtihlsk  
apsi  
>tr|D9RKT3|D9RKT3\_STAAK  
mkmi vktnemkgmimmsqgd1ptlfysgksnsavpiisese1qtitaeplwleiskglqlleglnfdrqqglflldvfegn  
ifkvnpetkeikrpfvshk  
anpaaikihkdgrlfiacylgdfkstggifaatengdniqdiiedlsteyciddmvfaskggfyftdfrgystnplggvyy  
vtpdfktvtptiinqisvan  
gialstdekv1wvtettanrlhrialeddgvtiqpfgatipyftghegpdscidsddnlyvamygggrvlvfnkrqyp  
igqilipsrdeghmlrsth  
pqfipgtngliicsndiemdggsmlytvngfakghksyqfq  
>tr|D9RKT4|D9RKT4\_STAAK  
mnyqvllykyttiddpeqfaqdh1afckahh1kgri1vstegingtlsgtkeeteqymahmaderfknmvfkideag  
hafkkmhvrprkeivaldl  
eedvdprhttgqylspvefrka1edddtviidarndyefdlghfrgairpni1trfrdlpdwikenka1fadkkvvtctg  
gircfekfsgwllkegfedv  
aq1hggiatygdpetkgywdgkmyvddrisvdinqvektii gkdwfdgkpceryincanpecnkqilvseeneakyl  
gacsydcakhernryvqan  
n1sgnewqqr1tnfddl1hqa  
>tr|D9RKT7|D9RKT7\_STAAK  
m1lniitplfnkneafaardisstnvtld1tvspskiedggkttvkmtdkngkiqngdtikvawptsgtvkiegysktv  
sl1tvkgeqvggavitpdga  
titfndkveklsvsgfaefevqgrnltqtntsddkvatitsgnkstnvtvhkseagtssvfyyktgdm1pedtthvrfw  
l1nnekryvskditi1kdq  
iqggqld1stln1nvtgthsnyysgpna1tdfeka1fpgskitvdntkntidvtipqgygs1nsfsinykkitneqqke  
fvnnsqawyqehgkeevng  
kafnhtvhninanagi1egtvkge1kv1kqdkdtkapi1anvkfk1skkdgs1vkd1nqkeieiktdangianika1psgdyi  
1keieapapytfdkdkkeyp  
ftmktdnqgyfttienakeiektkdvs1aqkvwegtqkvkptiyfklykqddnqnttpvdkae1kk1edgttkvtwsn1p  
endkngk1ky1vkevnaq  
gkdt1tpegytkkedglv1ntekpietts1sgekv1ddkdnqdgkrpekvs1n11angekvk1ldvtsetnwkyefkn1p  
kydegk1k1ey1tvtedhvkd  
y1tding1tti1nky1tpgets1atv1knwdd1nnqdgkrp1te1kve1yqdgkatgk1tat1nes1nnw1th1wtg1dekakgq1v  
ky1tvee1tkvngy1tth1v1dn  
ndmgn1iv1tnky1tpek1pnkpi1ypek1pkdk1tpp1tkpdhs1nk1v1kpt1pp1dkpsk1vd1kdd1qpkdn1k1tkpen1p1ke1l1pkt1gmki1  
tsw1tw1f1gi1gl1yl1ilr  
krfns  
>tr|D9RKU1|D9RKU1\_STAAK  
mikyhvmkegyil1tvfkner1sw1pyiaiv1llhv1gfgflwiagkdh1il1fgmgilay1t1glrhafdadh1aa1idntvr  
k1l1qqrk1dps1gv1gy1fs1ig  
hss1v1fl1mav1fl1gvs1kv1wak1del1ph1fd1ig1t1g1t1v1sg1ff1vl1ig1v1ln1il1is1ln1lfak1lrre1hiee1evd1allesr  
g1fvs1rfvg1py1fk1l1tr1sh  
v1p1gl1fl1gl1g1fd1t1se1a1lla1l1sg1as1q1ais1fi1g1ils1p1il1fas1gms1l1ld1t1dg1vm1ky1ay1nw1aff1n1pir1ki1y1n1iti  
ta1svia1al1vig1mi1ell1qi

Tsompanidou\_et\_al\_Supplemental\_FASTA\_File

ladkldlhgafwafissiefdylgyilvalflitwlissliwkfgriehkwsk  
>tr|D9RKU3|D9RKU3\_STAAK  
mekgnqgikwsslimgvllmlavviftfpiefyaitwliglflvlingviqivyrkakaivggngnqwilfmgivdilf  
glivifnvgassaffiymf  
afwfi fssiaglftfsgsgslklisvifnllgivfgvillfnplmgivfistmiaiafvfvgviyvvdala  
>tr|D9RKU5|D9RKU5\_STAAK  
mtfnhivlknlrqnlkhyamylfslffsivlyfsfttlqftkgvnnddsmaiikkgalvgsiflfiiiviflmyanhlfv  
krrtrefalfqligltrqn  
ilkmlaleqmivfiitgvvgvlcgiagaqllsivsklmslsinlsihfepmalvltlmliaiyililfqsslflkrrs  
ilsmmkdsvktdvtakvt  
vievisgvlgiamialgyymatemfgtfkalmtamtspfiilfltvvgaylffrsvsli fktlkkskngrvsitdvvft  
ssimyrmkknamsltiaai  
isavtvvlfcaalsksntdqtltsmapndfnvasqdaqfesklsqqhifsknyyetitv dnvkdqvitlengsdsg  
rtnsil santkl tgnnai  
tntkslpnvinihlndlvvkgtknetfrvtqedkdkvypnl snfspvievspekyqqlktqnnvhtfygydikqtsqk  
kkaqaiakqfgdkiiyydd  
mkkevdatngilifvtsflglafvaagciiyikqmdetedelsnfrilkrigfthtdmlkglllkitfnfglplliaail  
havfaaiafmlmgnisfm  
pviiiviytliyivfaliafvhsnklikkti  
>tr|D9RKU7|D9RKU7\_STAAK  
mpaqrglnehsgilrrsgldkeldfnlvtddhiisvaqkinhrprkslgyrtplevfmsfikddklssli  
>tr|D9RKU9|D9RKU9\_STAAK  
mvikeaninnsnksintknineniysknrrnyidnfnkskdl niesslehdln tdkitvdaslkdnyknkldktydvkfl  
rivnendfkaeftdqdtge  
kiiydtnevkasiapvvavlgfiakqglkkaikqygtvvtsmirtspqvaqaakklgysatkhvshgkkvfkknsg  
rpqyisvdkdghrggawkg  
assiknlgskktrsgtydanlkrigd  
>tr|D9RKV1|D9RKV1\_STAAK  
myiiyiflyspicqyffdkltdiyfvelykiyvnvhtkdkngisi  
>tr|D9RKV3|D9RKV3\_STAAK  
mnlskqikkyrerdgysqeylaeklyvsrqsiswendkslpdihnllmcdlnvntlddlvkgtipfapdikaqrslnl  
wtyvmlifmtlaailtgpl  
vvywnwawgitiyiviyygyasmkiedfkvhkmdnydrivafmgkdpsevqttkarniktgvl sfiafvgaailial  
ismhlan kfl  
>tr|D9RKV6|D9RKV6\_STAAK  
mkkpfsklfglnkddiighieenrnsnvesiqierivpnryqprqvfe pnkikelaesihhgllqpivvrpieedmfe  
iagerrfraislnlpqa  
dviirdmdeetavvalieni qrenlsvveeaeaykllleigdtqtaselakslgksqsfianklrllklapkvllrlreg  
kiterharavlsldsege  
alieqviaqklnvkqtedrvrqtgpekvkaqnlrfeqdvqtardevgksiqaiqqiglhvehkdkdhedyyeiki riyk  
r  
>tr|D9RKW5|D9RKW5\_STAAK  
mseiadliekmyghyytpqtmsnitsfteevtafngr elhdryaa ymdatyi plkrktvakeaihiavgirpdgskev  
lsyaiaptesitiweeill  
dlqerglnkvllfitdglkgmvga isrfypkarfqhccvhsrni shkvrddrkevcd dfkmvyqasskeval eargaf  
aekwktsypkvvesilnd  
hlltfydfplairksiy stnliesfnkqikkyshrkeqf qneesmerflvssfdtynqkflgrshkgfqaageleqm ls  
qlien  
>tr|D9RKX1|D9RKX1\_STAAK  
mkfkaiakasialgm latgvitsnvqsvqakaevkqqesese lkhynkpilerknvtgfykdegkhylevtvqqhsri  
tllgsdkdkfkdgensnid  
vfilregdsrqatnysiggv tksnsvqyidyintpileikkdnedvlkdfyyiskedislkel dyrl reraikqhglysn  
glkqgqititmdgttthti  
dlsqklekermgesidgtkinkilvemk  
>tr|D9RKX4|D9RKX4\_STAAK  
mfvkvaflclksdetsnvpsveshqnhfyltnimdfliyltmiqi  
>tr|D9RKX5|D9RKX5\_STAAK  
mkittiaktsialgl lttgvit tttqaanattpsstkeapqstppstkieapqskpnattppstkeapqqtanattpp  
stkvtppstntppmqst  
ksdtpqspttkqvpteinpnfkd lrayytkpslefkneigiilkkwttirfmnvvpdyfiy kialvgkddkkygegvhrn  
vdfvvl eennynlekysv  
ggi tksnkkvdhkagvritkednkg tishdvsefkitkeqis lkeldfklrkqlieknnlygnvsgskivikmknngky  
tfe lhkk lqenrmadvidg  
tnidnievnik  
>tr|D9RKY1|D9RKY1\_STAAK  
msitekqrqqaelhkk lwsian dlrgnmdasefrnyilgli fyrf lsekaeqeyada lsgedit yqea wadeeyredlk  
aelidqvgfyiepedlfsa  
mireietqdfdiehlatairkvetstlgeesendfiglfsdmdl sstrlgnnvkertaliskvmvnlldlpfvhsdmeid

Tsompanidou\_et\_al\_Supplemental\_FASTA\_File

m1gdayefligrfaatagk  
kagefytpqqvskilakivtdgdkl rhvydptcgs111rvgketqvyryfgqernnttynlarmm11hdvryenfd  
irndtlenpaf1gntfda  
vianppysakwtadskfenderfsgyglapkskadfafi qhmvyhlddegtmavvlphgvlfrgaagvirryliekn  
yleaviglpani fygt sip  
tcilvfkkcrqddnvlfidasndfekgknqnhlsdaqveriidtykrketidkysysatlqeiadndynlnipryvdtf  
eeeapidldqvqqdlnkid  
keiaeiqeinaylkelglkde  
>tr|D9RKY4|D9RKY4\_STAAK  
mkvg1vsvaitmlyimnggaeasenqnal isnivdnqekqnnvnqavqpqntnetskvpnfvklndikpgdtsiqg  
ttl pnf111tidkkdvss  
vedsdssfmsdkdgnfkydlngrkivhnqei evssdpylgddeedeveetsteevgaeesteekatytppryekay  
eipkeqlkekdgghqvfi  
pitgsiikghtsvkgkval sinnkfinfetnanggnkeeksgsegiwmpiddkgyfnfdktrfddlelkkndei  
stfapddedealks1fk  
tkvtsledidkaetkydhtkvekvvk1kdvkedlhvdeiygsl yhtekgkildkegtkvikgktkfanavkvdselge  
gqefpdlqvdekgefsfdv  
dhagfrlqngel nftvvdpitgellsgnfvsknidiyespeakadrefdermentpayhklhgdkivgydtngfpitwf  
yplgekkverkaplek  
>tr|D9RKY6|D9RKY6\_STAAK  
mgy1krfalyisvmlifaiagcgknetkedskeeqikksfaktldmypi knledlydkegyrdsefekgdkgmwtiyt  
dfaksnkpgel ddegmvl n  
ldnrtrtakghyfvttfyrngklpdeknykiemknki i11devkddklkqkienfkffgqyadfks1ksynngdvsins  
nvpsydakfmsnkdenk  
qlrsryniptekapilkmhidg1kgssvgykkl eidskeense1svvds1nfqpakknkde  
>tr|D9RKY7|D9RKY7\_STAAK  
msvfiigcdsssnaenqredskeeqikksfaktldmypi knledlydkegyrdgefekgdkgtwvlysamvsqpkges1  
ksrgm1kl drnkrtakgs  
yirelkedknhdvqknekkyvpk1vnnrivlikdvkdkk1kk  
>tr|D9RKY8|D9RKY8\_STAAK  
milsifvtscdgdnkitgdsketqikksfaktldmypi knledlydkegyrdgefkkgdkgmwtiytdfakgnksdeldd  
egmvl nldnrtrtakgyf  
vkkfyekdk1pdrknykvemknki i11dkvedpn1kkrienfkffgqyanfkd1enyngdvsinwnvpsydveykmsn  
kdenvkqlrsryniptdka  
pm1kmhidg1kgssvgykrleidskegrdisvidylsykpak  
>tr|D9RKZ0|D9RKZ0\_STAAK  
magcesnkitgdsketqikksfaktldvyptknledfydkegyrdgefkkgdkgkwirsemttelknemvskgmvir1  
nrnsrtctgeyfvrikk  
segkvysderkypvmennki i11kpiddekvkkeieefkffvqygnfkelenykdgevtynpeapiysaqyqlknsdyn  
veqlrkrynitkkap11  
1kgsgn1kgssvgyknieftfvenkeeni yftdsinfnpsedk  
>tr|D9RKZ1|D9RKZ1\_STAAK  
malymsvf111ifivgcrnmkdeqkkeeqtntdskeeqikksfektldmypi knleelydkegyrdgefkkgdkgmwti  
ytdfaksnkqggl snegmv  
lyldnrtrtakghyfvktfynkgkfpdrknykvemknki i11dkvedtn1kkrienfkffgqyan1kelknyngdvsin  
nenvpsydakfmsnkden  
vkqlrsryniptdkapvlkmhidgn1kgssvgykkl eidskgsd1svids1nfqpakvdedde  
>tr|D9RKZ3|D9RKZ3\_STAAK  
mkdeqkkeeqtntdskeeqikksfaktldmypi knledlydkegyrdgefkkgdkgtwtitgfsksnkpgvlddegmv  
lylnrnakkatgyfvnk  
yddisknhnekkyrvelknnki v11dnvedkklkqkienfkffsqyadfdk1knyqdgnttnenvpsyeaqymnnsdk  
nvkklreijyptttnsn1  
klyidgdikgssvgykkiye fskdkgqettlrdyl nfgpsegenve  
>tr|D9RKZ4|D9RKZ4\_STAAK  
mrm1srkykid1kainqntestsaiskasyevenannngl skrdvinqfnd1kkmkkfpsnleyvdsytds1tgvttsaf  
1nkdtgkvt1gmtgt1qd  
eafkklkegefsrqvtnaletvkdgyad1kilyspasdnyryantqefinkikskydidfitghslggrdavvl gmsn  
gipnivvynpapisits1n  
pnspdgkrl1elyknykgnitrfaenda1ten1kkykhyvffgndkvfkngkghemegflteeeqkaikke1kk1qgya  
eennksfvknsna1sk1a  
sie11ranmmttngg1ssqqkvl es1taltiaqsfsliddeinqikkmynekkkfgknwedaqkagkavged1svn  
gv1naldegqvnessmvre  
peqm1sakerqlstigssvsnyimrvr1sineivdkdqvlasqig11  
>tr|D9RKZ5|D9RKZ5\_STAAK  
mfngiinnkneleesyesekkriene1qn1nelrhtrkenersydvfy1khemnysedaqrkmtrnieayeqeineir  
kqewkleeyked1kksyek  
q1dk1sd  
>tr|D9RKZ6|D9RKZ6\_STAAK

Tsompanidou\_et\_al\_Supplemental\_FASTA\_File

meaqkenirtviapekhkykdienglkgeekvlieqmaqhfcanfkfgaaqgdwvksamseidsikddlkins  
>tr|D9RKZ8|D9RKZ8\_STAAK  
makipvtvlsqylsgskttlnhilqnrgrriavivndmsevnikdldvadgglsrtdeklvelsngcicctlrddll  
keverlvkkggidqivies  
tgiseppvaqtfsyiddegidltaicrldtmvtvvdanrfvhdinsedllmrdqsvdetdersiadllidqvefcdv  
liinkidliiseelaklek  
mlsalqptakiikttnsevdikevIntqrdfekasesagwikellesgghashtpeteeygissfvykrrlpfhakrfnd  
wlesmpnnvvrskgiwla  
qynhvacllsqagsscnihpvtwyvasmseaaqtqilaerqdvaaewdpeydrhtqfviigteldeekltkelclvn  
aqeidadwqqfedpyqwqi  
rpar  
>tr|D9RL04|D9RL04\_STAAK  
mlsfqllfslfvialialisgllflapvmpmryiklhlyilvmpvlfavigffgihgqhvlgpfkidrlswllagfvma  
lgiikfsmryllgdhhy  
rhyfplftaitsfaslawmsedlrmlalcwgitllcltllmvrnfkwkpresaklssmtflcgwlaafvgaivtiyatg  
ewrvpqhivhptwslltnv  
llvlavmipaaqfpfhrwliesvtaptvsaimhagivnaggviltrfapifdngfalsllilssisvllgsgislvqv  
dykrqlvgstmsqmgfmlv  
qcalgvysaaiihlilhgifkatlflqsgsivkrfnipkqasakdaygwimgrvlaiivafllfwssdrsayevelsali  
lgwslsvwnqmvafskgr  
marlvgmilialivtfiyvithnyfyavlqnitthattptvsviisvivilifgslsivvarhryskafavlyvwlvnlg  
earskaieshpnylkky  
>tr|D9RL07|D9RL07\_STAAK  
mchkhftdnikiikfllcilqikhcieiticyfqtstiyiytegvrrinrvifvyialitlvrfftpihpsfsn  
liywifvlyfipiilcvig  
fkaekliatmviipnflgilyrlyayvthilfm  
>tr|D9RL09|D9RL09\_STAAK  
mriktpspsylkgtnghailhsftgtrndvkhlaaelndqgfsycapnypghglllkdfmtynvddweevekayqfl  
vnegyesisatgvsllgllm  
tlklaqhypkriavmsapkeksddglielvyysqrmsnilndqqassaqlaaiddyegeitkfqhfiddimtnlvi  
kmpanilfggkdapsyets  
ahfiyehlgsvdkelnglkdshhlmthgegrdileenvirffnal  
>tr|D9RL10|D9RL10\_STAAK  
mgiapevwmwrvgdidgvvcgeilahvysvepenlm  
>tr|D9RL16|D9RL16\_STAAK  
mqkkviaaigtasavaatqanaatthtvkpgesvwaisnkygisiaklkslnnltsnlifpnqvlkvsgssnstsns  
srpstnsgggsyytvqagd  
slsliaskygttyqnmrlnglnnffiyppgqklkvsgtasssnaasnsrpstnsgggsyytvqagdsllsliaskygtty  
qkimsnglnnffiyppgqk  
lkvtgnastnsgsattnrgyntpvfshqnltywqctyhvfnraeigkgistywnannwdnaaadgytidnrptvg  
siaqtdvgyyghvmfverv  
nndgsilvsemnysaapgiltyrtvpayqvnyryih  
>tr|D9RL34|D9RL34\_STAAK  
mdeqqqltnayhsklshaylfegddaqtmkqvainfaklilcqt dsqctkvstynhpdfmyisttenaikkeqveqlv  
rhmqqlpiestnkvyied  
fekltvqgensilkfleppndtiaillstkpeqildtihsrqhvfykpidkekfinrlveqnmkpvaeimistyttqi  
dnamalneeftllaalksv  
irwcellltnkpmaligiidllkqaknkqlslltiaavngffedihtkvvedkqiysdlkndidqyaqklsfnqlilm  
fdqlteahkklqnvnptl  
vfeqivikgvs  
>tr|D9RL37|D9RL37\_STAAK  
mqknpkdtqnfitskhhvkeilnhtniskqdnvieigsgkghftkelvkmsrsviaieidggllcqvtkavnpnsenikv  
iqtdilkfshpkhinykiy  
gnipynistdivkritfesqakysylivekgfakrlqnlqralgllmvemdikmlkkvpplyfhpkpsvdsvlivlerh  
qpliskdykkysfvykw  
vnreyrvlftknqfrqalkhanvtninklskeqflsifnsyklfh  
>tr|D9RL46|D9RL46\_STAAK  
mnecafgtkdpvyl dyhdhvqqplydskaifkllaesqhaglswltilkkkeayeeafydfepkvaqmtaqdidrllm  
tfpnivhhrkkleaivnqa  
qgyllieqaygsfskflwsyvngpkpdlqyehasdritvddtatqlskdlkqygfkflgpvtvsvfleaaglydahldc  
pskpkhn  
>tr|D9RL48|D9RL48\_STAAK  
midaiigpningsntcdeysrlikndktntmklflyiiamfstsfnkk  
>tr|D9RL49|D9RL49\_STAAK  
mrytkseeamkvaetlmpggvnspvrafksvdtpai fmdhgkgskiydidgneyidyvlswgplilghrdpqvishlhea  
ldkgtstfgastllenklaq  
lvidrpsiekvrmsvsgteatldtllrlygtgrnkivkfegcyhghsdlkagsgvatlgldpspgvpegiaknti  
tvpyndldalkiafekfgn

Tsompanidou\_et\_al\_Supplemental\_FASTA\_File

diagvivepvagnmgvvppeiegflqglrditteygallifdevmtgfrvgyhcaqgyfgvtpdlctlgkviggglpvga  
ggkkeimdhiaaplgniyqa  
gtlsgnplamtsgyetlsqtpetyeyfnmldgiledglkrvfakhnvpitvnragsmi gyflnegpvtnfeqanksdlk  
lfaemyremakegvflpps  
qfegtflstahtkediectiqafdta lsrvk  
>tr|D9RL57|D9RL57\_STAAK  
mtatwekkegellttvtvpaekvnka l dqafkkvkvqinvpgfrkkgvprpifeqrfgvealyqdaidillpdaygeai  
detdikpvaqpevsvtqie  
kgkdfeatvtvepevklgdykgleiekqetelsd delqeaids lghlaemvkedgvvengdtvnid fsgsvdgeef  
eggqaegydleigsgsfip  
gfeeqlegmkvdeekdvvtfpeeyhaeelagkeatfktkvneikfkevpeltdeiane l daeantvdeykenl rkr lae  
qkatdaenaenvekeeeait  
katdnttidipeamvntel drmvsefaqriqqgl dlqtyfqisgqdetqlreqmkddaeqrvtntltai aaeakiea  
tedidkelekmskqfnis  
vedikntlgntdiikndvriqkvidllrdnakfvegteked  
>tr|D9RL58|D9RL58\_STAAK  
msdiiqfnpsskklykdikraeqdqnydlmyeyivqyerqfelteeiammkrml yetgsflelreetivllktgiqqyd  
almiyyvksliglgyfea  
vevihqijdevkdhktrmalhplkefakskliedekrltqsladfdt lsmreqthlilk lidnghfqfquetvlyilksnt  
synlislmieylrfanct  
qeltiekymdvtfvpanlkglehttlkekvipnvmet lndgalhiaeeahimnhsimiypidietl fetnkwinaye  
cyfknmlglkcelqsidaf  
nfiqqldlnnns  
>tr|D9RL68|D9RL68\_STAAK  
mstniaingmrigrmvlrialqnknlnvvasyppetiahlinydtthgkynlkvepienglqvgnhkiklvadrnp  
enlpwkel didiaidatgk  
fnhgdkai ahikagakkvlltgpskghvqm vvkgvndnqldieafdi fsnascttncigpvakvlnnqfgivnglmttv  
haitndqknidnphkd lrr  
arscnesi iptstgaakalkev lpelegklhgmalrvptknsv lvd l vvdlekevt aeevnqafenaglegiievehqpl  
vsdfntnpsaiidakst  
mvmsgnkvkviawydnewgysnr vvdvaeqigalltsketvsas  
>tr|D9RL70|D9RL70\_STAAK  
mpelpevehvkrgepyvinqkiehvi fsdkviegkaqgketiikgiel dtfktlseghtitnverrskyivfqldnkre  
qrtlshlgmaggffivde  
ledimipnyrkwhwhvifelsndkklisdi rrfgeir nvasvasyps fleiaepf sneal tyyl nrihqqs nknkpikq  
vildhkv iagcgniyacea  
lfragvlpdkkvkd lthqqemvfyyvrevleegikyggtsisdyrhadgktgemqlhlnvykqvckvcgsqietkia  
trnshycpvcqk  
>tr|D9RL77|D9RL77\_STAAK  
maeklqrelsrnhiqliaiggaigtglflgagqtialtgpsilltyiigfmlfmfmg lgei iiqntefksfadvtnty  
igpfagfvgtwtywfcwii  
tgmaevtavakysfwfpeipnwisal fcvllmsfnllsarlfgelef wfsiikiatiiglivvgfvmilfafktqfgh  
asftnl yehgifakgasgf  
fmsfmal fsfvgiemigt tagetkdpvktipkainsvpirilifyvgalavimsiipwqqvdpdnspfvklfaligipf  
aaglinfvv ltaasscns  
gifsnsrm lfglssqqappnfsktnkygvphvaifassal llvaallnyifdatkvftyvttistvlflvvwgliaa  
yinyrknpd l hknatykl  
lggkymgyli fvffifvfgllfinvdtraiyfi piwfillafmylrykriaaksnk  
>tr|D9RL85|D9RL85\_STAAK  
mistlneimkci ednti i hrhvrpdpdaygsq l gkyi qkfpqkvfvavgeaess l sfigel d niddktyqdalvi  
vcdtanapridderystgr  
klidikhhpavdqgdinlvntnasstsei ydl ishfn deaivnk diasvlylgivgd tgrflfnntsehtmeiagkli  
ghdidhna llnkmmekdpk  
mlpfqgyvlqhfel mddgfcqvkit edvleqfgiqpneasqfvntiadikglkiwvfavdegneircr l rskgqliindi  
aqdfggghpnasgsvds  
wdefeq latalrtkl n  
>tr|D9RL90|D9RL90\_STAAK  
mimevdgmki gipreiknnenrvgl spsgvalvesghtvlvetnagsgsffedvdykeagaeiva eqakvwdvdmvikv  
keplesey pyfkeglv lft  
ylhaneekltqalidrkvisiayetvqlpdrslpl l spmsevagrmsaqvgaeflqklnggmgi l lggvpgvpkgkvti  
igggagtnaakialglga  
dvtill dvnprlqqlddlfggrvhtimsnplnielyvkqsd l vlgavlipgakapr l vtedmikqmknsviidiaidqg  
giffettdkitthddptyik  
hgvvnyavanmpgavprtst lalnnat l pyalmlankgyreafksnqplslglntykghvtnkgvaeafemeyksveea l  
q l  
>tr|D9RL98|D9RL98\_STAAK  
mlfsl l l iktthlitfifkql l l fivpfiyppykrearqrivg  
>tr|D9RLA0|D9RLA0\_STAAK

Tsompanidou\_et\_al\_Supplemental\_FASTA\_File

mttinptnytllkkqaasliedehhmiailsnmsallndndqinwvgfyllleqnelilgpfqghpacvhipigkvcgt  
avserrtqi vadvhqfegh  
iacdanskseivvpi fkddki igvldidapitdrfddndkehleaivkii ekqla  
>tr|D9RLA1|D9RLA1\_STAAK  
marfrgsnwkkrrlgislsgtgkelekrpyapgqhgpnqrkklseyglqlrekqklrylygmterqfrntfdiagkkfg  
vhgenfmillasrl davvy  
slglartrrrqarqlvnhshilvdgkrvdi psvsvkpggtisvrexsklniivesveinnfvpeyl nfdads lgtgtfvr l  
perselpaeineqliveyy  
sr  
>tr|D9RLA7|D9RLA7\_STAAK  
mykffqnlg rslmlpvailpaaaiagigntlnalhatpkiamffttvgttileqlgilfaigvaigmakndgavala  
tlgyflvtvvlspmklapl  
l gmkaseinsafekmngnvnfvigivigliaayaynkfsetelplalsffsgkr lvpimtafyctflvvillflwpllysw  
ivkfgesivglsgfgafiy  
gvnrl lip tglhhalnsvfwdtigindigkfqsgkdaikgitgryqagffpimmfgipaaalamyhtakttqkkqvyg  
wflassvaaffvgvtepie  
fafmfvapi lyvvhalltgls l fiaatfhwtagsfsaglidyvls linpvsnhplmllvqgvvffilyyvi frvviqvf  
n lntigr gene l v d p t v k  
dniapgendikgskyhghaiqileglggqenivnl tncatrlrl elkdtsiidkqkiknagavgvtvngkhstqvivgth  
vqvadeiekh l  
>tr|D9RLA8|D9RLA8\_STAAK  
miskilnfilvkmkslyvigkdnipkdkyvvctthesynevimlgmalypnqihymakkel fknkwigkfltslnafp  
vdrenpgpstlkrpinllk  
dnktvgifptgsrtsqegap l krgastiam l skspilpvayvgptkihglltgqayinigkpidindl p k d l k r n e r i d y  
itkeietrtaklqelhei  
vks l  
>tr|D9RLB6|D9RLB6\_STAAK  
maketfyittpiypsgnlhighaystvagdviarykrmqgydvryltgtdehgqkiqekaqkagkteieyldemiagik  
qlwakleisnddfrttee  
rhkhvveqvferllkqgdilygeyegwysvpdetyytesqlvdpqyengkiiggkspdsghelvekeesyffniskytd  
rllefydqnpdfiqppsrk  
neminnfikpgladlavsrtswngvvhvpsnpkhvvvwidalvnyisalgy l s d d e s l f n k y w p a d i h l m a k e i v r f h s  
i i w p i l l m a l d l p l p k k v f  
ahgwi l m k d g k m s k s k g n v d p n i l d r y g l d a t r y y l m r e l p f g s d g v f t p e a f v e r t n f d l a n d l g n l v n r t i s m v n k  
yfdgel payqgp l h e l d e e  
meamaletvksytesmes l q f s v a l s t v w k f i s r t n k y i d e t t p w l a k d d s q k d m l g n v m a h l v e n i r y a a v l l r p f l t  
hapkeifeqlninnp q f m e  
fssleqygvlnesimvtgqpkpifprldseaeiayikesmqppatkeekkeipskqpidikdfdkveikaatiidaehvk  
ksdkllkiqvdldsegrqi  
vsgiakfytpddi igkkvavvtnlkpak l m g q k s e g m i l s a e k d g v l t l v s l p s a i p n g a v i k  
>tr|D9RLB9|D9RLB9\_STAAK  
mneevkml d n k d i a t p s r t r a l l d k y g f n f k k s l g q n f l i d v n i i n n i d a s d i d a q t g v i e i g p g m g s l t e q l a r h a k r  
v l a f e i d q r l i p v l n d t l s  
pydnvtvinedilkanikeavenh l d c e k i m v v a n l p y y i t t p i l l n l m q d i p i d g y v v m m q k e v g e r l n a e v g s k a y  
g s l s i v v q y y t e t s k v l t v  
pksvfmpppnvdsivvklmqrteplvtvdneeaffklakaaafaqrktinnnyqnyfdkgkqhkevilqwleqagidpr  
rgetlsiqdfaklyeekkk  
fpqlen  
>tr|D9RLC2|D9RLC2\_STAAK  
mnhpnlip l t f f v k k f k q a k s s i s e d v q i i k n t f q k e l g t v i t t a g a s g g v t y k p m m s k e e a t e v v n e v i t l l e e k e r  
l l p g g y l f l s d l v g n p s l l  
nkvgkliasimeekldavvtiatkgislanavani l n l p v v i r k d n k v t e g s t v s i n y v s g s s r k i e t m v l s k r t l a e  
n s n v l v v d d f m r a g g s i n g  
v m n l m n e f k a h v k g v s v l e s k e v k q r l i e d y t s l v k l s d v d e y n q e f n v e p g n s l s k f s  
>tr|D9RLC6|D9RLC6\_STAAK  
maagkgtrmkskkykv l h e v a g k p m v e h v l e s v k g s g v d q v v t i v g h a e s v k g h l g e r s l y s f q e e q l g t a h a v q m a k s  
h l e d k e g t t i v v c g d t p l i  
t k e t l e t l i a h h e d a n a q a t v l s a s i q p y g y g r i v r n a s g r l e r i v e e k d a t q a e k d i n e i s s g i f a f n n k t l f e k l t q  
v k n d n a q g e y y l p d v l s l i  
l n d g g i v e y r t n d v e e i m g v n d r v m l s q a e k a m q r r t n h y h m l n g v t i i d p d s t y i g p d v t i g s d t v i e p g v r i n g r t e  
i g e d v v i g q y s e i n n s t i e  
n g a c i q q s v v n d a s v g a n t k v g p f a q l r p g a q l g a d v k v g n f v e i k k a d l k d g a k v s h l s y i g d a v i g e r t n i g c g t i v  
n y d g e n k f k t i v g k d s f v g  
c n v n l v a p v t i g d d v l v a a g s t i t d d v p n d s l a v a r a r q t t k e g y r k  
>tr|D9RLC7|D9RLC7\_STAAK  
mkgnealaevadqvgielgkcsvkrfsdgeiqinieesirgcvdfiiqptsypvnlhlmellimidackrasaatiniv  
vpygyarqdrkarsrepi  
taklvanlietagatrmialdlhapqi q g f f d i p i d h l m g v p i l a k h f k d d p n i n p e e c v v v s p d h g g v t r a r k l a d i l k



Tsompanidou\_et\_al\_Supplemental\_FASTA\_File

tpiaidkrrprpnvaevm  
nivgeiegrtaiiiddiidtagtitlaaqaikdkgakevyaccthpvlsgpakeriensaikeivtntsihldedrksn  
tkelsvagliaaqaiirvye  
resvsvlfd  
>tr|D9RLD3|D9RLD3\_STAAK  
mrlDkylkvsrlikrrtlakevsdqgritingnvakagsdvkvedvltirfgqklvtvkvtalnehaskdnakgmyeiie  
errleea  
>tr|D9RLD6|D9RLD6\_STAAK  
mqlnsngwhvddhivvavstgidsmc1lyqllndykdsyrklctlhvnhgvrasiiearfleaycerhhidlhikkldl  
shslrdnnsiqnearikry  
ewfdemmnvleadvlltahhlddqletimyri fngkstrnklgfde1skrkgyqiyrp1lavskkeikqferyhipyfe  
desnkdknyvrndirnrri  
paidennqlkvshllklkqhwhdeqydilqysakqfiqefvkfdeqskylevsrqafnlnpslkmvvlcdllskyyelfn  
isaktyeewfkqfsskkag  
fsinltdkwiiqiaygk1iimaknngdyfrvqtikkpgnyi fnkyrleihsnlpkclfp1tvrtrqsgdtfklngrdgy  
kkvnr1fidckvpqvwrdq  
mpivldkqqriiavgdlyqqqtikkwiiiskngde  
>tr|D9RLD8|D9RLD8\_STAAK  
mpkqltyngfteklkgd1ktleiqqqnvymvsgtkndedysstilynnekelqkitdaakkqngvklitikeekqsv  
fvsilstlipvviallfi  
fflsqaqggsggrmmnfgkksakmydnkrrvrfsdvagadeekqelieivdf1kdnkkfkemgsripkgvllvgppgt  
gk1laravageagapffs  
isgsdfvemfvvgasrvrd1fdnaknapcii fideidavgrqrgagvggghdereqtl nqllvemdgfgenegiimia  
atnrpdildpa1lrpgrfd  
rqi qvgrpdvkgrea1lhvahnkpldetvd1kaisqrtpgfsgadlenllneasliavregkkidmrdieeatdrvia  
gpakksrvisskernivah  
heaghtii gmv1deaevvhkvtivprgqaggyamm1pkqdrflmteqe1ldkicgllggrvsedinfnvstgasndfer  
atqiar smvtqygmskklg  
plqfghsngqvflgkdmqgepnysqiayeidkevqrivkeqyerckqil1lehkeqlil1iaetllteetlvaeqiqlfy  
egklpei dydaakvvkded  
sefndgkfgksyeeirkeq1edqrdesedrkeekdiaedkheadksdekdepahqqapniekpydpnhpdnk  
>tr|D9RLE3|D9RLE3\_STAAK  
miqaylglsgnigdresq1ndaiki1neydginvsni spiyetapvgyteqpnfln1lcveiqtt1tv1qllecl1kteec  
lhrirkerwgp1tdvdi1  
lygeemid1pk1svphprmerafvlip1ndiaanvveprsk1kvkd1lvfddsvkryk  
>tr|D9RLF3|D9RLF3\_STAAK  
makkkvifecmacgyqspkwmgkpcncgawnqmeeivekaanpkhgvtkelagkvqk1nsikhettprv1tdsaefnrv  
lggg1vsgslv1igdpqi  
gkst111qicas1sqkkkvl1ytgees1sqt1raer1dedsselqvlaetd1leviyqtvkeeqpdl1lvdsiqtiyhpe  
issapgsvsqvestqslm  
niakqmiatfivghvtkegqiagpr1lehmvdtvlyfegdehhayrilravknrfgstnemg1femkqsg1kgvnpse  
mfleer1stnvp1gstivatm  
egtrp1lievq1vtpt1fnprmatgidhnr1s1l1mav1ekkeny1lqqqdayikvaggvkl1tepavdl1svivatass  
fkdkavdg1dcyigevg1t  
gevr1rvsrieqrvqeaak1gfkrv1ipknniggwtypepigiqvigt1vhev1sfa1hs  
>tr|D9RLF6|D9RLF6\_STAAK  
mvfeqdpaa1st1evitt1yag1havwsh1iahk1ynqkkyvaara1sqisrfftgieihpgakigkr1fidhgmgvvige  
tctigdnvt1yqgv1l1ggt  
gkergrhpd1gdnv1iaagakv1gnikinsvnigansv1qsvpsystvvgipghivkqdgvrvgktfdhrh1tdpiy  
eqikh1erq1lektrngeiq  
ddy1i  
>tr|D9RLF7|D9RLF7\_STAAK  
mitlynt1trqkevfkpi1epgkvkmyvcgptvyny1hignarpainydvvrryfeqqynveyvsnftdvddk1ikrsqe  
1nqsvpe1aeky1aafhed  
vgal1nrkatsnprvmdhmd1diqf1kd1vdqgyayesggdv1frtrkfegyglshqsidd1kvgaridagehkedald  
ft1lwkakpgei1swdspfg  
egrpgwhiecsvm1afhelgptidihaggsd1qfphene1aqseahn1hapfanywmhngfinidnekmsks1gnfilvhd  
i1kevd1pdl1rffm1svhy  
rspiny1nel1vesarsg1leri1nsyq1ieeraqiat1nenq1tyidq1dail1nrfetvmnddfntanaitawyd1aklan  
kyv1lent1stev1dkfkav  
yqifsdv1gvp1lksknade1l1deyveklieer1narknd1faradeir1dm1ksqni1ledtpqgv1frkg  
>tr|D9RLH0|D9RLH0\_STAAK  
mkiglaspek1rsws1fgevkkpet1inyrt1kpekdg1fceri1fgptkdwe1scgkykrvrykgm1vcdrcgvevtkskvr1r  
ermghie1aapvsh1iw1yfk  
gipsrmg1ll1dmspra1leeviyfasyvvdp1gptg1lekt1l1seae1frdy1dkyp1gqfvakmgaegik1l1leed1l1deed1  
k1l1rde1lesatgqr1trai  
kr1evves1frnsg1nkpswmi1dvl1pi1ppeir1pmvq1ldggr1fatsd1lnd1lyrrv1nrnr1kr1l1dl1gapgi1vqnekrm  
1qeavdal1idngrr1grpvt

Tsompanidou\_et\_al\_Supplemental\_FASTA\_File

gpgnrplkslshmlkgkqgrfrqnllgkrvdysgrsviavgpslkmqcglpkemalelfpkpfvmkelvqreiatnikna  
kskiermddevwdvleevi  
rehpvl1nraptlhr1gigafep1vegrairlhp1vtaynadfdgdqmvhvp1skeaqaearmlmlaaqnilnpgdg  
kpvtvpsqdmvlgnyylt1  
erkdavntgai fntnev1kayangfvh1htrigvhassfnptfteeqnkkilatsvgkii fneiipdsfayineptqe  
n1erktpryfidptt1ge  
gg1keyfeneeli epfnkkflgniaevfnrfsitdtsmml drmkdlgfkfsskagitvgvadivvlpdkqqildehek1  
vdritkqfnrgl1iteeery  
navveiwtdakdqigelmqs1dktnpifmmsdsgargnasnftqlagmrglmaapsgkiielpitssfregltvleyfi  
sthgarkgladta1ktads  
gyltrrlvdvaqdvivreedcgtdrg1lvsdikegtemiepfieriegrysketirhpemdeiirpdelitpeiakk1t  
dagieqmyirsafctnarh  
gvcekcygknl atgekevgeavgtiaaqsigepgtqltmrtfhtggvagsditqglpriqei fearnpkgqaviteieg  
vvediklakdrqgeivvkg  
anetrylasgtsriiveigqpvqrgevltegsiepkny1svaglnatesyllkevqvyrmqgveiddkhvevmvrqm1  
rkvriieagdtk1lpgslv  
dihnftdanrea1fkhrkrpatakpv1lgitkas1etesflsaasfgettrv1tdaaikgkrdd1lglkenviigklipag  
tgmrrysdvkyektakpva  
evesqtevt

>tr|D9RLI3|D9RLI3\_STAAK

mswfdklfgednsndd1hrkkkrrqesqni dndhds1lpqnndiysrprgkfrfpmsvayenenveqsadtisdekeq  
yhrdyrkqshdsrsqkrhr  
rrrnqtteeqnyseqrgnski sqsikykdshyhtnkpgtvsaingiekethkpkthmynsnntnhrakdstpdyhke  
sfktsevp1saifgmkhkk  
lengripvskpsekvesdkqkydyvaktqtsqnkqleqekqndsvvkqgtaskssdenvssttksmpnyskvdntikie  
nyasqiveei rrrererkv  
lqkrrfkka1lqqreehkneeqda1qraidemyakqaeryvgdss1ndds1tdnstdasqlhtngienetvsndenka  
siqnedtndthvdespyny  
eevs1nqvsttkq1sddevtvsnvtsqhqsalqhnvevndkde1knqsr1iadseedgatnkeeysgsqiddaefyelnd  
tevedttsniedtnrna  
semhvdapktqeyavtesqvnndktvdneielaprkkddqtn1svns1ktndvndnhvvedssmneieknaeitenv  
qneaaeseqnveektienv  
npkkqtekvst1skrpfnvmtpsdkkrmmdrkkhskvnpelkpvqskqavsermpasqatpssrdsqesntnayktn  
nmtsnvennq1lghaete  
ndyqnaqqyse1kpsvdstqtei feesqddnq1neqvdaqstsssvsevsditeeseetthpntsgqqdnddqkd1qs  
sfsnknedtanenrprtnq  
qdvatnqavqtskpmi rkgpnik1psvs1leepqviesdedwitdkkkelnda1fyfnvpaevqdvtegpsvtrfel1sve  
kgvksritalqddikma1  
aakdi rieapipgtsrvgievnpnqpttvn1rsiiespsfknaesk1tvamgyrinnepl1mdiaktphaliagatgsgk  
svci1nsilms1lyknhpee  
lrl1l1idpkmvelapynq1ph1vapv1tdvkaatqslkwaveemerryklfahyhvrnitafnkapydermpkivivid  
elad1mmmapqeveqsar  
iaqkaracgihmlvatqprsvnvitglikaniptriafmvsssvdsrtildsggaer1lgygdmlylgsgmnkpirvqgt  
fvsddeiddvvd1kqgre  
pdy1feekel1kktqtsqdel1fddvcafvmneghist1lqrhfqigynraariidqleqlgyvssangskprdvvte  
ad1nke

>tr|D9RLI4|D9RLI4\_STAAK

mnlfynpkyvgdiaflqiepevegelnyknkgnvveitnegnvvgynifeiskditi eekghik1tdelvnvfqkriskag  
fdyklnad1spkfvvyge  
tkdkhpdadk1sv1nvnvndt1qivcgapnveagqkvvakvgavmpsgmvikdaelrgvassgmicsmkel1n1pnape  
ekgimv1ndsyeigqaffe

>tr|D9RLI9|D9RLI9\_STAAK

mkigdisihylnggntkmdggamfgvvpkplwskqyanernqin1pthpiliqtaqynliidagigngklsekqlrnfg  
vdeeshi1adlanyn1tpk  
di dyv1mthmfdhaag1tdqaghai fena1hvqqdewhefiapnirskstywdknkgdysnk1l1fekhfepvl1gikm  
qhsghsfghti1tiesqg  
dkavhmgdi fpttahknplwvtayddypmqsi rekermi pyfiqqqywf1fyhdenyfavkysdngenidayilret1vd  
nn

>tr|D9RLJ5|D9RLJ5\_STAAK

makgn1fkailgiggavaav1vtrkdsrdk1kaeynkyqdpqsykdnakdkatq1gtianetikevktnpkeyanr1kn  
npkaffkeekskfteydnk  
tdesiekkgfddeggaapnnn1rivt

>tr|D9RLJ6|D9RLJ6\_STAAK

mridkfl anmgvgt1rnevkq1lkkglvvnveqvikspkthiependkitvrgelieyienvyim1nkpkyisatedhhs  
ktvid1ipeyq1lnifpv  
r1dkdtegl11i1ndgdfnhelmspnkhvskkyevisanpiteddiqafkegvt1tdgkvkpailtyidnqtshvtiyeg  
kyhqvkrmfhsiqnevlh1  
rrikiad1el1dsn1dsgeyr11tendfdk1nyk

Tsompanidou\_et\_al\_Supplemental\_FASTA\_File

>tr|D9RLJ7|D9RLJ7\_STAAK  
mseskemvrgtflitisiilitkvlglfiipfnyliggqenmapftyayapyniaiatagvplaaskyvakynaigay  
kvsqkfykssfi vmsitgv  
lgflvlyflapyiseltarnihdkngsvdditwiiriismvvi fipvlatwrgifqgyksmgptavsevteqiarvif  
iligsylvlnvfdgsilla  
ngiatfaavgaiigiftlwywrkrkhnidrmvesdytdidvsygkmykeiiaysipfvivslnyplfnlvdqfthnga  
lslvgipsqlqdi ffnmln  
mstnkivmipstlsagfavslipyitktfaegrhemhqi rtsigvlmfitvpasigimalaqplftvfgydpivlgh  
dphhdgsrllfyyapvail  
isllsvtasmlqgdkqkltvyvilasvviklalnypliml fhtpgailstsi allfaigcnfyilkkyakfkfsyswih  
fakiflysfimm lgvelf  
flanlfleptklgyliiilgvvtvgiliygtitiktrladeflgeipeklrrrvrflr  
>tr|D9RLK0|D9RLK0\_STAAK  
mksittde lknklleskpqvivdvrtdetamgyipnaklipmdtipdnlnsfkn eiyyivcaggvrsakvveyleang  
idavnveggmhawgdegle  
iksi  
>tr|D9RLK1|D9RLK1\_STAAK  
mnynhni ekkwqdywdenktfktndnl gqkkfyaldmfpypsgaglhvghpegytatdiisrykrmqgynvlhpmgwa  
fglpaeqyal dtgndpref  
tkkniqtfrkrike lgsfydw drevnttdpeyykwtqwi fiqlynkglayvdevavnwcpalgtvl sneev idgvsergg  
hpvyrkpmkqvw lki teya  
dqlladlddldw pesl kdmqrnwi grsegakvsfdvntegkvevfttrpdtiygasflvlspehalvnsittdeykekv  
kayqteaskksdlertdla  
kdksgvftgayatnplsg ekvqiwi adyvl stygtgaimavpahddr dyefakkfdlpii eviegg nveeaaytgegkhi  
nsgel dgleneaa itkaiq  
lleqkgagekkvnyklrdw lfsrqrywgepipvihwedgtmttvpeelplllpetde ikpsgtgesplanidsfvnvvd  
ektgmkgrrretntmpq wag  
scwyy lryidpknemladpek lkhwl pvdlyiggvehavhllyarfwhkvlyd laivptkepfqklfnqgmilgegne  
kmskskgnvinpddivqsh  
gadtlrlyemfmgpldaai awsekgldgsrrfl drvwr lmvnedgtlsskivtt nksldkvynqtvkktedfetlgfn  
taisqlmvfi necykvdev  
ykpyiegfvmk lapiaphigeelwsklgheesityqpwptydeallvddeveivvqvnk l rakikiakdtskeemqeia  
lsndnvkasie gkdimkvi  
avpqlvnivak  
>tr|D9RLK6|D9RLK6\_STAAK  
mnensktlyrdlveeki ipeikedgsdl tieeidligshldkeiedcaqirkqtrkkelkdetvdahlflelf  
>tr|D9RLK7|D9RLK7\_STAAK  
mtpyttnrnrfvr ipqndisryvneivetipdsefdefrhrgatsyhpkmmlkiilyaytqsvfsgriekllhdsirm  
mwlaqqdtlsyktinrfrv  
npntd alieslfiqfysqcl kqn lidnnsifidgtkveasanrytlvrkkvfkitrn  
>tr|D9RLK9|D9RLK9\_STAAK  
mlisfiynnmdnntinrn l hsefaimllkinekgav  
>tr|D9RLL2|D9RLL2\_STAAK  
mqfdnidsal malkngepi ivvddenrenegdlvavtewmndntin fmakearglicapvskdiaqrldlvqmvddnsdi  
fgtqftvsidhvdtttgis  
ayertl taknlidpsseakdfnrpghlfp lvaqdkgvl arnghteaavdlakltg akpagviceimnddgtmakgqdlqk  
fkekhl kmitidli eyr  
kklepeie fka kvmpdfgtfdmygfkatytdeeivvltkgairqhenvr l hsa l tgdifhsqr cdcgaql essmkyi  
nehgmi iylpqegrigil  
lnkl rayelie qgydtvanlal gfded l rdyhiaaqilkyfniehinllsnpskfeglklygidiaerievivpetvh  
nhdymetkkikmghli  
>tr|D9RLL4|D9RLL4\_STAAK  
mdyaiqlanmvqgqtgvnppvgavivkegrivgigahlrkgdkhaevqaldmaqqnaegatiyit lepcshfgstppcvn  
kiidckiakvvyatkdnsl  
dthgdetlrahgievecvdderasqlyq dffkakakqlp qitvksasldgkqandngqsqwitnkevkdvyklrhrhd  
avltgrrtvelddpqttr  
iqdgknpikvilsksgni hfnq qiyqdestpiwiytenpnlttnqthieiiylkscdl ttilhnykrvgvtllveagpt  
ttseflqsnyidefi lyya  
pkligsgnyqfyqtn dieipdanqfeivhse llnqnvkltlrkk  
>tr|D9RLL8|D9RLL8\_STAAK  
mynnndlrgvdmnkhkksifgi iglvvi favvsflffsmi sdqiffkhvksdikiel nvtlndaakkqinnytsqqvs  
nkkndawrdasateiksam  
dsgtfidnekqkyqfldl skyqgidknrikrmlvdrptllkhtddf lkaakdkhvnevylishal letgavkselangve  
idgkkyynfygvgal dkd p  
iktgaeyakkhgwdtpeka isggadfi hkhflsstdqntlysmrwnpknpgehqyatdikwaesnat i adfyknmkteg  
kyfkyfvykddskhlnk  
>tr|D9RLM1|D9RLM1\_STAAK  
maaffiti ilfigivvsehllysmlivlvg lillrlfkinlfsfkkltlsqviiyiggalliygldnlylyfhdvpane

Tsompanidou\_et\_al\_Supplemental\_FASTA\_File

qqleqairntpfyisiftv  
tiipaiveevfrgmiiirvifrkhlfnglivsslvfaslhesdtwigylpylysglifgliyiktrlevvifmhflnnl  
lallfiwr  
>tr|D9RLM2|D9RLM2\_STAAK  
maklnvevfadgadieemkaayknqvdgfttnpslmakagvtdykafaeeavkeipdasisfevfaddletmekeaa  
lkqygenfvkpiivntkge  
stiplikklsadnvrlnvtavytieqvkeiteavtegvptyvsvfagriadtgvdlplmkeavkvthskdgvkllwasc  
relfnviqadeigadiitc  
padvvkkvntnlgrdineisvdtvkgfakdiqssglsi  
>tr|D9RLM3|D9RLM3\_STAAK  
msiifadrsiksllkpdadwiriaskslpwiilivilvhifsivrtfgfi  
>tr|D9RLM5|D9RLM5\_STAAK  
misiilvmiggfgaiarsaitdyfnhkftsklpiatlivnlvgsfligltiglsisiswfpaffvtgflgglttfstla  
keltlmmtpkfninlflny  
sllqfiigfiacyigyhi  
>tr|D9RLN1|D9RLN1\_STAAK  
maiiddfnktpilitygmfikdktrkfsdi fntqnwkydelndeficpnnkrigfkryayrndrygfkrdklyecddcs  
acsllrqcmkpnsksnkk  
mknyneweyfkvqinqklssepetkkiysqrkidvepvfgfmkailgltrtsvrginkvkreigfvlmalnirkiaaqravh  
ykihikkadfyqiinrnql  
fyia  
>tr|D9RLN5|D9RLN5\_STAAK  
msvdytettkidkllkptshfqlsttqlynkil dnnegvltelgavnastgkytgrspkdkffvsepsyrnidwgei  
nqpideetflklyhki ldy  
ldkkdeyvfkgyagsdkdtmllktvine lawhnlfaknmfirpeskeeatkikpnftivsaphfkadpevdgtksetfv  
iisfkhkviliggteyage  
mkkgifsvmnyllpmqdimsmhcsanvgekgdvalffglsgtgkttlsadphrkligddehgwnkngvfnieggcyakai  
nlskekepqifdaikygai  
lentvvaedgsvdfednryentraaypinhidnivvpskaahpntiifltadafgvippisklnkdqamyhflsgftsk  
lagtergvtepepsfstcf  
gapffplhptvyadllgelidldhdvdylvntgwtggkygvgrrislhytrqmvnqaisgklknaeytkdstfglsipve  
ledvpktilnpinawsdke  
kykaqaedliqrfeknfekfgekvehiaekgsfnk  
>tr|D9RLN7|D9RLN7\_STAAK  
mgfkrkrmpieyftthqfeeitylsddlqvkalmmtphevnrivvylrggkqgvrvragrlmqfsdsqtlvigpyyrg  
nngsegkdefyrgdlnvdt  
qllrllhdkyphafihmvgfsrgglqgl1tfdq1pvtsyiwggvsdidlmyeervdlrgmlrrmighpkkdraayearq  
aipninensppilivhggk  
dqvgvghhayylvdqlelkgathetfyqmaeghvprppamvetltyikefmnqvshs  
>tr|D9RLP2|D9RLP2\_STAAK  
mlylliflsscstnkiivqgrfeiqhnetigsiyfsadyahirgiekgtakfyidkvgs krylfi eyipdnvlnckpdf  
wktlkykkdkvtyyyvie  
nllddevfhlsalqdmnrpidiaddvatmgksphqndrmtlklknkn  
>tr|D9RLP9|D9RLP9\_STAAK  
mprkgsvpkrdvlpdpihnsklvtkl linkimldgkrgrtaqri lysafdlveqrsgrdalevfeeainnimpvlevkarrv  
ggsnyqvpvevrperrtl  
glrwlvnyarlrgektmedrlaneildaanntggavkkredthkmaeankafahyrw  
>tr|D9RLQ5|D9RLQ5\_STAAK  
mkpythgvi eselnglkiphtyalqnsndyleimeegisyivreskidpdnigigidftsstii ftdenlnpvhnlkqf  
knnphayvklwkhghayke  
aeklyqtaiennnkwlghygynvssewmi pkimevmnrapeimektayimeagdwivnkltnknvrsncglgfkafwee  
tgfhylfdkidpklskvi  
qdkvsapvvnigeavgkl ddkmaqklglsketmvspfiidahasllgigsekdkemtvmgtstchlmlnekqhqvpgis  
gsvkgaiipe l fayeagqs  
avgdl feyvakaqapsyvdearenmtvfe l mnekikhqmpgesglialdwhngnrsvlsdsnl tgcifgltlqtkhedi  
yrayleatafgtkmimqy  
qdwhmevekvfacggipkknvmmdiyanvlnkklivmdseyapaigaa ilgavsggahnsindavdamkepilyeinpe  
aekvqryetl f kaykalhd  
ihgykkanimkdiqslrveg  
>tr|D9RLQ8|D9RLQ8\_STAAK  
mqklimtkipfneakhgnklslqc1llsiegdflyyyi  
>tr|D9RLQ9|D9RLQ9\_STAAK  
mewilfdkdgtliefdrswekigvrqvslletfpvhnkeaalrqlgvikesidpksvmgsgslqqiiqafndvtgqdt  
dwskstsqklvderipein  
wvegykealidlkakgyglgivtsdtkkgveqflahtnatslfdliisteadayekpnpkvlsp l feqynvdpqkvaivg  
dtandmktasnanlgmaig  
vltgiatkeelheadiilnsaadilealn  
>tr|D9RLR1|D9RLR1\_STAAK

Tsompanidou\_et\_al\_Supplemental\_FASTA\_File

msiltfgdvnmnkpfiaieggpigvkslshklstldfyeekeiitenpflsdfyediskswfqtemfflcnrykqfqd  
vtqlnqgvvsdyhihknki  
fakntlssvefokfskiydiltedmimpnmiifldadldvlksriakrnrsfehqi edeyllklkkdyreyyeslqsngs  
nvvlidtttsidflkneqdy  
edilhiilpmigditne  
>tr|D9RLR3|D9RLR3\_STAAK  
mdgtllnaaheisqpnidaikyaqeggitvviatgrafyaeapvadtdltvpyiclngaevrdefnvmstshlnkslv  
hkitnvlkdagiyyqvyts  
raiyledpqrldiyidiaeragqhanverikngiqrridngtlkvvdnydaienipgelimkilafdgnlekidkaski  
laespnlai:ssssrgniei  
thsdaqgialetiaerlgiemkevmsigdnldlsmlekvgyvpmengaeevkkiakyvtdtnensvgvkaikmlre  
qqv  
>tr|D9RLR5|D9RLR5\_STAAK  
mgtasilvgttlifglngqeaakaestnkelneattsasdnqssdkvdmqqlnqedntkndnqkemvssqgnettsngnk  
liekesvqsttgkvevst  
aksdeqaspkstnedlntkqtisnqealqpdlqenksvvnvqptneenkvdaktesttlnvksdaiksnedlvdnnsn  
snennadiilpkstapkr  
lntrmriaavqpssteaknvdnitsntlttvvdadknkivpaqdyllksqitvddkvksgdyftikysdtvqvygln  
pediknigdikpnngeti  
atakhdannliityftdyvdrfnsvqmginyisydmadtipvskndvefnvtigntttkttaniqypdyvvnknsgs  
aftetvshvgnkenpgyyk  
qtiyvnpenslnaklkvqayhssypnnginkdvtidikiyqvpkgytlnkgydvntkeltdvtngylqkitygdns  
avidfgnadsayvmmvntk  
fqytensesptlvqmatlssstgnksvstgna l gftnnqsggagqevyki gnyvwedtnkngvqelgekvgvntvtvfdnn  
tntkvgeavtkedgsylip  
nlpngdyrvefsnlpkgyevtpskqgnneeldsnglssvitvngkdnlsadlgiykpkyngdyvwedtnkngiqdqdek  
gisgvtvtlkdengvltk  
vttadgkykftdlngnykvefttpegytptvtvsgsdi ekdsngl tttgvingadnmtldsgfyktpkyngnyvwed  
tnkdgkqdstekgisgvtv  
tlknengevlqttktdkdkgyqftglengtykvefetpsgytptqvsgtdegidsngtsttgvikdkdndtidsgfykp  
tynlgdyvwedtnkngvqk  
kdekgisgvtvtlkdengvltkvttdengkyqftdlngtykvefetpsgytptsvtsngdtekdsngl tttgvikdad  
nmtldsgfyktpkyslgdy  
vwydsnkdgkqdstekgidkvkvtllnekgevigttkt dengkykfdnldsgkykvi fekpagl tqgtntteddkdadg  
gevdvtidhddftldngy  
yeeetsdsdsdsdsdsdsdrdsdsdsdsdsdsdsdsdsdsdsdsdsdsdsdsdsdsdsdsdsdsdsdsdsdsdsdsdsdsdsds  
dsdsdsdsdsdsdsdsdsdsdsdsdsdsdsdsdsdsdsdsdsdsdsdsdsdsdsdsdsdsdsdsdsdsdsdsdsdsdsdsdsds  
dsdsdsdsdsdsdsdsdsdsdsdsdsdsdsdsdsdsdsdsdsdsdsdsdsdsdsdsdsdsdsdsdsdsdsdsdsdsdsdsdsds  
dsdsdsdsdsdsdsdsda  
gkhtpvkpmsttkdhnkakalpetgnensgsnnatlfgglfaa lgslllfgrrkkqnk  
>tr|D9RLR6|D9RLR6\_STAAK  
minrdnkkaiktkgmisnrlnkfsirkytvgtasilvgttlifglngqeaakaentstenakqdattsdnkevseten  
nttennstnpikketnd  
sqpeakkestssstqkqnnvtattetkpnienekvpstdktatedtsvileekkapnntndvttkptstseiqtktpt  
tpqestniensqpqptpsk  
vndqvtatnpkepvnskee lknpek lkelvrndsntdhstkpvataptsvapkrvna kmrfavaqpaavasnnvdn  
ikvtkqtkivgdgkdnvaa  
ahdgkdi eydteftidnkvvkkgdtmtinydknvipsdltdkndpiditdpsgeviakgtfdkatkqitytftdyvdkyed  
iksrlltlysyidkktvpne  
tslnltfatagketsqnvtvdyqdpmvhgdsniqsi ftkl dedkqtieqqiyvnp l kksatntkvdiaagsvddygnikl  
gngstiidqnteikvykn  
sdqqlpqsnriydfsqyedvtsqfdnkksfsnnvatlfdgdinsayii kvvskytptsdgel diaagtsmrttdkygyyn  
yagysnfivtsndtgggdg  
tvkpeeklykigyvwedvdkdgvqgtdskekpmavlvltltpydgttksvrt danghyefggldkgetytkfetptgy  
lptkvngttdekdsgss  
vtvkingkddmsldtgfykekyngdyvwedtnkdgiqdanepgidkvkvtlkdstgkvi gttttasgkykftdlng  
nytvefetpagytpvknt  
taddkdsngl tttgvikdadnmtldsgfyktpkyslgdyvwydsnkdgkqdstekgidvtvtlqnekgevigttkten  
gkyrfdnldsgkykvi fek  
pagl tqvtntteddkdadgevdvtidhddftldngyfeedtsdsdsdsdsdsdsdsdsdsdsdsdsdsdsdsdsdsdsdsds  
dsdsdsdsdsdsdsdsdsdsdsdsdsdsdsdsdsdsdsdsdsdsdsdsdsdsdsdsdsdsdsdsdsdsdsdsdsdsdsdsdsds  
dsdsdsdsdsdsdsdsdsdsdsdsdsdsdsdsdsdsdsdsdsdsdsdsdsdsdsdsdsdsdsdsdsdsdsdsdsdsdsdsdsds  
dsdagkhtpvkpmsttkdh  
hnkakalpetgsenngsnnatlfgglfaa lgslllfgrrkkqnk  
>tr|D9RLS1|D9RLS1\_STAAK  
mepikegevidllasfehkpvylhvetngayanhdqrvfnagtlrniqitythaqlkgnkepyriglklnggwvy  
vqglthfevnehdefliag  
fnyegqlaaalqiserpfnl

Tsompanidou\_et\_al\_Supplemental\_FASTA\_File

>tr|D9RLS9|D9RLS9\_STAAK  
maayyqcfngpyrkevpplmcaslpkfdl fkyanseliltksainqtqkievdtiyvghlediecrqtrnitrytma  
l1tkndqhvittvtqtfika  
mk  
>tr|D9RLT7|D9RLT7\_STAAK  
myt1ffngfnvhtiyssffgs1alg1lshymarkqkepaiifmvtgiipvpaglaydatknlvllnfstaintmlevt  
liagaialg1lfadqiskl  
ivsgfvksfkr1  
>tr|D9RLT9|D9RLT9\_STAAK  
msqaaetldgwyslhlfyavdwaslripkderdalvtefqsflentatvrssksqgaiyinitgqkadlllwf1rpemk  
slnhienefnklriadfli  
ptysvsvielnsylagksdedpyenphikar1ype1phsdyicfypmknrrnetynwym1tmeerqklmydhgmigrky  
agkikqfitgsvgfddfew  
gvt1fsddv1qfkkivyemrfdettarygefsgffvghiiintnefdqffais  
>tr|D9RLU6|D9RLU6\_STAAK  
mkytdlivigfgktgk1akyaastgqhavieqspkmyggctcinigcipsk1vhdglegksfeasynrknadvnalnn  
knyh1laddnidvldfka  
qfksntevn1ldqhddivdsitaphiiintgatsvipnikgldqakhvfdstg1lnisyqph1vivgggyialefasmf  
anlgskvtv1ergesfmp  
edqdvvaygidlenkiahtnvetelssdnhhttvhtnvdnfeadavllaigrkpn1dalentdielgdrgeikvn  
ah1qttvphiyaagdvkkg  
lqftyislddyriksalygnqsrtdnrgsvpytvfidpplsvrg1tskeaaaqhydytehq1lvsaiprhkinndprg  
1fkvvinnenmilgatly  
gkqseelinik1aidqniptyv1rdniythptmaesfnd1fnf  
>tr|D9RLU8|D9RLU8\_STAAK  
msidmy1drsngassvgn1sqtmnsnydalekaitqfinddal1kgkaytsakqffstvlip1stsmkt1sdltkqacdn  
fvsrytsevdslkese1  
eedirs1sqqitryen1nn1kkhasdnqqaissnqqiirt1gqqkheleek1rklrefnqkspeifkeveefqkivqqg  
1tqaqnfwnfstnqfnips  
gkel1dwakashekylkvamgkiehkaeket1nkadfavikayakehpddipksilkyindnkdsikrdig1ditst1le  
qginaskfgvfiintaggy  
kqpagnsfvevkrtsgnvfiengskfakggkylgkgvagvgf1gmydd1anddktfgealshngmtlaagsagtavga  
glatfv1gsnpgwv1lag  
1amstv1algt1iyqnn1fg1kdkvdwvghkidnsidvkkttksmsdsvgnavseakniisnhinpmkwaw  
>tr|D9RLV1|D9RLV1\_STAAK  
mlceteiinknpkyrvikyddeylmvdv1rtwlvlyffpfinrfipkrcaakisreeyek1ntvkpvknknfwpvvggt1ll  
gatsrkyih1lniqlekr  
vif1cfv1f1c1il1ffv1lnrk1klkvfdnkkeeqi1ilvpt1knav1ilygy1l1ggmsilal1sm1l1tenqnlitfia  
wgmgl1mlff1m1nit1ivnk  
tvkvikr  
>tr|D9RLV3|D9RLV3\_STAAK  
milnrgaileqgnktakvikselitnyimlat1qiknn  
>tr|D9RLV5|D9RLV5\_STAAK  
mlceskvinknpkyriikydeylmid1asnwi1vfff1pfinw1lipktyvkitkndyek1nivkpvknksigwtifagiv1  
1gg1vrrntyl1fdfglee1  
iwssc1fig1fleii1ffycyl1nk1l1niyenesknel1kl1l1psfknict1fyyl1ftgfmsygafyl1lvfenvqnlily  
vsw1f1mt1mf1m1m1hsii  
dkkvhi1flksnk  
>tr|D9RLV8|D9RLV8\_STAAK  
mlceteninknpkyriikydeylmid1vstwl1alffpminw1lipkkyvkisekdfet1nivktakinsfwpvagstv1f  
gvm1rrysh1fivkyeysi  
vilicci1ilgi1ffly1nqk1klqiynenknsnkii1fpt1ks1clsivlyiy1lgggsfftiym1l1tievqni1lfi  
t1fvi1ff1f1n1mcs1lyd  
nkvhv1fk  
>tr|D9RLW0|D9RLW0\_STAAK  
myy1kl1trwkndglagftagsi1sailvywt1nqnef1gikdkndwi1ghk1ldvgidaveksaektvdgvenvmvkl1qkvfli  
i  
>tr|D9RLW6|D9RLW6\_STAAK  
mevis1sekkgnfn1i1kndp1dghkgtnigsisl1dniapvfidvankeafidiggmhararvekgvkwitdkaavegde  
akeyw1cwtterneqgpy  
yag1tacy1lvnkai1rrgyksmpvhnmmdksmkhhiidqigdenkailkdf1mnhdegmwhssdal1hqafn  
>tr|D9RLW8|D9RLW8\_STAAK  
msskl1dkkvs1qtkqv1kqhnekekfefttegtwqqrqsnf1ryveqiedatvntikvddsvkl1irkgdinm1lh1fve  
gq1tt1fydisagriplev  
kt1ri1hfvsgdggk1kihyelyqdnekmg1syqeyinykeige  
>tr|D9RLX1|D9RLX1\_STAAK  
mkdndkqgsndngsskspyhri1vs1mpsn1teilyel1gkyivgvstvddypkdvkkgkqfda1ln1nke1llkakpd1i  
lahesqkatankv1sslek

Tsompanidou\_et\_al\_Supplemental\_FASTA\_File

qgikvvyvkdaqsidetynntfkgqigklthhdkqaeqlveetkdnidkvidsipahhkkskvfievsskpeihtagkhtff  
ndmlekleaqnvydingw  
npvtkesiiknpdilisestaktrsdymdiikkrggfnkinavkntrievngdevsrpgprideglkelrdaiyrk  
>tr|D9RLX2|D9RLX2\_STAAK  
mnviiderkenamtnkvllswivilittsiylfwqlgdindvfnqsilinvrlprllealltgmiltvaglifqtvln  
naladsftlglasgatfsg  
glalflglttlwpvftsitfslitlitvsvlsqgyprililsglmigalfnslllyflillkprklntianylfgg  
fgdaeysnvsiaitfiia  
lfgifiilnqlkllqlgelksqslglvqlityialciasmitainvayvgiigfigmvipqlirkwqwkqslgrqlaln  
ivtggqimvmadfigshil  
spvqipasiialigipvlfymlisqskrlh  
>tr|D9RLX4|D9RLX4\_STAAK  
mdlfrkdgtshystlgegypvlihtvldnysvfnklaaelaksfvvlidlrhgygskprhieikdfsddiveilk  
lyieevafvchemsgii  
adisvrypftssltlvnptsiegeipeerlfrkyahiiirnwdekqdkflnkrkyrprkmnrlkhvdtneistkee  
iqavkevfknadisqytrn  
vvvptkiiagefgerttrleakevadliqnadfevyqessafpveeqerfvedtaafinkhhdekhv  
>tr|D9RLY1|D9RLY1\_STAAK  
mkydekkyydeqkeritiumkynvkgynisfanfkenpmdgysisgyinndkklstfagirsvdffqfdtdisytdelg  
rkfnknpsvseikkeqnt  
snk  
>tr|D9RLY2|D9RLY2\_STAAK  
maflllhnytfdieysnlidddyikslknkldshlhfsidkiknsmtteygrgtgaygdfgryvfgyavrnnwvkgfksdq  
dlsnialmri femgydakl  
hgefdmwvnrndfnnsieriskkyqwiayyeilaklvdkfpdvqysglwddyirdidptlllleidkeskilvpslps  
hqsnewvntkvfdetklf  
leididnhryiclskfnfekrekeipfedrdsicyflamgyfynkedsneiikgyennydrginiprahsiylyeywse  
ayknykegyltesdgklcp  
aiyeyfweildysvkdksisfyipckeivdyfsliteegvwktkfgeticinskllfednecllikkesllnflntkklsl  
igwkilylekislrdrqeww  
ynvfyddgkynkkikndmskirrf  
>tr|D9RLY4|D9RLY4\_STAAK  
mqakkikrhrqnefifilndskkeinehnknllhenyistidyseldekiglli  
>tr|D9RLY6|D9RLY6\_STAAK  
maiigagitglssayflkqdpnidvtifeasnrpggkqsyrkdgyimielgpesylgrktimtelakdigleqdivtnt  
tgqsyifaknklypiggsg  
imgiptdikpfvttklispkgklragfdllkkptqmqgdsvgaffrarlgnevlentieplmggiygtidiklslmst  
fnpfkekeeeafgslkqmk  
deknkrkqrqlypgapkgqfkqfkhglssfiealeqdvknkgvtiryntsvddiitsqkqykyvyndqleevydgvlvt  
tphqvflnwfgqdpafdyf  
ktmdsttvatvvlafdekdiendhgtgfviartsdtid tactwtsskwpfttpegkvlirayvgkpgdttvddhtdnel  
vsivrrdlsqmmftkgdpe  
ftivnrpkssmpqyhvghiqqirqiqahikqtyprrlvtgasfeavglpdcitqgkvaeeviael  
>tr|D9RLY7|D9RLY7\_STAAK  
mtkkmgllvmaygtpykesdiepyytdirhgkrpseeelqdlkdryefigglspagttddqadalvsaln kayadvefk  
lylglkhispfiedaveqm  
hndgiteaitvvlaphyssfsvgsydkradeeaaqyqilthvkhyeapkfieywtknvnetlaqipeehkdtvlvvs  
ahslpkglienkndpypqe  
lehtallikeqsniehiaigwqsegntgtpwlgpdvqdltrdlyekhkyknfiytpvgfvcehlevlyndyeckvvcdd  
iganyyprkmpnthplfig  
aivdeiksif  
>tr|D9RLZ0|D9RLZ0\_STAAK  
mvfllillgafifgygewlkhiptninfsliaavivaltsifpmrpllkeadkifllpfekhmsqfmrhailysyfaril  
iqliivivmfpfyninqh  
nvafyicfgvsalifpyvglrlrwqwyqsglktwqvnlsifitfaltyylllapkwyiafvmvalpvlieflvkkykpgf  
lypwekmiaiehrhmnny  
kfvnmftdvkhlkesavrrsyldillvpkgskfnsnamylflfirsfirgrdafniifrlviiavllmwlsyplvtai  
igclfvyiiillqmaqfysq  
qayglwpqvwvpeekvikgyeqflyrlmfvictvfavtfikhmtlfyvvlifyivglltirsiiikklyqetllrd  
>tr|D9RLZ6|D9RLZ6\_STAAK  
mrnielnpgdsvdhfflvhkatqgvtaqgkdymlhlqdkseieakfwtatknmatikpeeivhvkgdiiinyrgnkq  
mkvnqirlattedqkteq  
fvdgaplspaeiqeeishylldienanlqritrhlkkyqerfytypaasshhhnfasglshvltmlriaksicdiyp  
lnksllysgiihdigkvr  
elsgpvatsytvegnllghisiasdevveaarelniegeeimllrhmilshhgkleygspklylkeaeilcyidnidar  
mmfekaykktdkgqftdk  
ifglenrkfynpesld  
>tr|D9RM03|D9RM03\_STAAK

Tsompanidou\_et\_al\_Supplemental\_FASTA\_File

meqrtrlallkeiaeflneetemysmtqgalkyliegnfttgiwffinsvgehelvshvalpqsltadhchyikdgcsw  
cvkafnqrrl mkasni vnc  
srinlaskafpsqndnhtatvplksgqe qfgilnvaspnteisydedlellesvafqlgsaikriyldtrekaakin  
ennrlardlhdsvnqmlfs  
vkl tahaa ygm snesiakqafk tieetsqnavnemraliwqlkpvgleqqlihaltaysklmhiqlnvnveglidlsnei  
eeniyra l qecin vkkha  
dtnkmdl tl kq mndi lyidvidygggfeidnvqiasshginnikqrvkllrgkvtfhsqptkgtqi qftipik  
>tr | D9RM04 | D9RM04\_STAAK  
mkfki penfndls lrdifqqlkvpkklhhlnmskditindkpar lmdkvhtgddvfvptideksnyvpsyrayaqiked  
ddmaivm kpkgvkthpnd l  
kesntl mnhviy tidsdyvepihrldqetv gl livaknplmkkil drml ednditriykanvka l lplkpqtidmpigkd  
kfhsnkrcvsptggraith  
iltskmikeavcql eikldtgrthqirvhl aeighpvigdp lygdstlrqlelesykiefvhpltkewisvsldd  
>tr | D9RM18 | D9RM18\_STAAK  
mrvtel ltkdtiamd lmandkngvide lvnql dkagk lsdvasfkeaihnresqsttgigegiaiphakvaavkspaiaf  
gkskagvdyqsl dmqpah l  
ffmiaapeggaqth l dalak lsgilmdenvrekllhasspeevlai ideaddevtkeeeeaeaeaqvataeqsskqsneq  
yv lavtacptgiahtymar  
dal kqadkmgiki kvetngssgikh lteqdienatgi vaadvhv etdrfdgknvvevpvadgikrpeelinkaldts  
rkpfvardgqrkgsnsdsq  
ekl spgkafykh lmgvsnm lplvisggilmai vflfgansfnpksseyna faeqlwnigsksafali ipilsgfiarsi  
adkpgf asglv ggm laisg  
gsfgiggii agflagy ltggvkamtrkl pqa leglkptliyp lltvtatgll miyafnp paswl nhllldglnnlsgsni  
vlglvgammaidm ggp f  
nkaayvatgali eгнааpitaamiggm iplaiatamli frkrftke qrgsi ipnyvmgmsfitegaipfaaadpl rvi  
psmmigsgiggai aglgs  
ritaphggi i vvgtdgahllqt liallvgtlvsaliy glipkl teteie asksmde  
>tr | D9RM21 | D9RM21\_STAAK  
mpsv glvgyki sdedm tkvvnaaidagyraf dtayfydneasl gralkdngvdredl fittkl wndyqgyektfe yfkks  
ienl qtdyldl fl ihwpc e  
adgl fl ety kameely egqkvkaigvcnfnvhhlek lmaqssi kpmvnqievhp yfnqqel qefcdrhdikvtawmplmr  
nrgll ddpvivi kiae kyhk  
tpaqvvl rwhlahnri ipksqtpkri qenidil dfnleltevaeida ln rnarqgkn pddvkigdlk  
>tr | D9RM24 | D9RM24\_STAAK  
mddeqdi vdicq tyfeyegykv tttts gkeais llsndidimvldimmpevngydivkemkrqkl dipfiyl taktqehd  
tiyal tlgaddyvkp fsp  
relvl rinnll trmkkyhhqpveql sfde ltl inskvvtvnghevpmrikefellwylasrenevisksellekvwygd  
yyedantvnhihri rek l  
ekesfttytittvwglgykfersr  
>tr | D9RM48 | D9RM48\_STAAK  
meekky nhie lnevtkrredgffslekd qealvayleevkdktiffdteierlrylvdndfyfnvf diyseadlieitd  
yaksipfnfasymsaskff  
kdaylktndksqyledynqhvaivaly langnkaqakqfi samveqryqpatptflnagrarrgel vscfllevddslns  
infidstakq lskiggva  
inl skl rargeaikgikgvakgv lpi aksleggfsy adqlqrrpgagavylnifhydveefl dtkkvnadedlrlstist  
g l i v p s k f f d l a k e g k d f y  
mfaphtvkeeygv l d d i d l e k y y d m v a n p n v e k k k n a r e m l n l i a q t q l q s g p y l m f k d n a n r v h p n s n i g q i k m s  
nlctei fql qetsi indy  
iedeikrdiscnlgslnivvmesgkfrdsvhsgmdaltvsdvaniqnagvrkanselhsvglgvmnlhgy laknkig  
yeseekdfani fmmmnf  
ysiersmeiakergikyqdfeksydangkyfeyttqefepqfekvrelfdgmaiptsedwklqqdveqgylyhayrla  
iapqsisyvqnatssvmp  
ivdqier rtygnaetfypmpflspqtmwyyksafntdqmklidliatiqthidqgisti lyvnseistrelar lyvyahy  
kg l k s l y y t r n k l l s v e e c  
tscsi  
>tr | D9RM50 | D9RM50\_STAAK  
mimii inlkgekfvmyllkgnl lllllll lltiislfigvselsikdlhltesqrnilfssriprtmsiliagsslala  
glimqmmqnfvspttag  
tmewaklgiliallffptghllklvfavicsicgtflfvkiidfikvkdvifvpllgimmggivasftttfisl rtnavq  
signwlngnfaitsgrye  
ilylsipllaaltylfanhftivmgkdfntnlglsyeklinialfitatitalvvvtvgtlpflglvipniisiyrgdh l  
knaiphtmm l g a i f v l f s d  
ivgrivvpyeinigtigvfgtiiflillmkgrknyaqq  
>tr | D9RM51 | D9RM51\_STAAK  
m l l i a v t l l i s m l y l f v g i d f e i f e y q f s s r l r k f i l i l v g a a i a t s v v i f q a i t n n r l l t p s i m g l d a v y l f i k v l p v  
l f g i q s v w v t n v y l n f i l  
t l i t m v l f a l i l f q g i f k i g h f s i y f i l l i g v l l g t f f r s i t g f i q l i m d p e s f l a i q s s m f a n f n a s n s n l v t f s a v l l  
v i l l v i t i l l l p y l d v l l l



Tsompanidou\_et\_al\_Supplemental\_FASTA\_File

graeainlgisyekltrillvsvlsvstalgpfitflglltnvlaheImktyehkyiliaticlswislfsaqwvve  
nvfeattensilidliggs  
yfiy11vrrrnag  
>tr|D9RM72|D9RM72\_STAAK  
mlaf1a1lnnaahaqqhgtqvktpvqhnyvsnvqaqtqspttytvvagdslykialehhltnqlysynpgvtp1ifpgdv  
islvpqnkvkqtakvkspv  
rkaqakkvkqpvqqaskkvvkvqapkvavtktnvaykpaqvksvptvpvahnyksvanrgnlyaygnctyyafdr  
raq1grsigs1wgnannwn  
yaakvagfkvdktpevgai1qtaagpyghvgvsvnpngtitvsemnyagfnvksrti1npgkynyih  
>tr|D9RM74|D9RM74\_STAAK  
mvvlfsvitrskwvgtit1iligasiykeyfhnewiifidvvs1lagyliidqlefhkhqdedr  
>tr|D9RM79|D9RM79\_STAAK  
msveiesieheleesvas1rqagvritpqrqailrylisshthtadeiyqalspdfpnisvatiynn1rvfkdigivke  
lygdssrfdfnthnyh  
iiceqcgkivdfqpp1neier1aqhmtfdvthhrmeiygvckecqdk  
>tr|D9RM81|D9RM81\_STAAK  
mlqkgeqfpi1klenqdgvtitndt1kgkka1iyfyprndtptctteacdfrnd1emfnd1dvavygisgdskkkhqnf1  
ekhg1nfd11vdedfk1ak  
etgvvyq1kksfgkesmgivrtt1ideqgkv1dvielkvkvtqieelkn1lg  
>tr|D9RM82|D9RM82\_STAAK  
mnfseser1qqlsney11ggvnspsrsykvagggapvumkeghgaylydvgnkfidylqaygpiitghahphitkaiqe  
qaakgv1fgtpteleie1fs  
kk1rdaips1ekirfvnsgteavmttirvaraytkrniikfagsyhgshdl1lvaagsgpsqlgspdsagvpesvarev  
itvpfn1inaykeae1efwg  
deiaav1vepivgnfgmvpqpgfleevneishnngt1viydevitaf1rfhygaaqd1lgvipd1tafgkivggg1pigg  
ygrqdi1meqvap1gpayq  
agtmagn1lsmkagi11lev1eqdgvyek1ds1gqq1eeg11k1iekhnitatinriygs1tlyftdekvthydqvehsd  
geafgk1ffk1m1nqgin1a  
pskfeaw1t1tehteedikqt1kaadyafs1qm  
>tr|D9RM85|D9RM85\_STAAK  
mvres1pkegenikiqsykhdgkihrvwset1lkgtdhvvigndht1vtesdgrtwitrepai1vyfhseywfnvicmf  
redgi1yy1cn1sspfvcde  
eal1ky1dy1di1kvypngkyh11dedeyeqhnmqmnyp1h1di1l1rrnvd1l1qqwieqkkgp1fapdf1kvwkeryk1irq  
y  
>tr|D9RM91|D9RM91\_STAAK  
mgidi1dt1vkfn1kkgqq1eada1maei1qkydhyr1glnkai1qylsykk1rtekevi1qylqkee1seqaisevi1eycyre1l  
idhq1dyaes1kntm1irttd  
kgpk1iyqk1yq1lgi1epnie1eifte1lyreqqe1ddi1iqiaeki1sktkk1gpqnkvkekvms1liqkgfemeti1havlnemd  
ftqdeav1dd1l1qrd1eki  
ynknrkk1ytqk1lisk1tieg1mrkgykydkikak1leesgi1adgte1ie  
>tr|D9RM94|D9RM94\_STAAK  
mneqqt1eqikar1nkfi1qdi1dhvnpdevrved1dewig1ldqleekvkl1vsk  
>tr|D9RM95|D9RM95\_STAAK  
mqak1tkkefi1ew1ktse1gkqfnvd1wygfqcfdyanagkv1lfg1llk1gvgakdi1pfannfdg1atvyqntpdf1a1ppg  
dmv1vfgsnygagyghvaw  
ieat1dy1i1vyeqnw1gggwt1dgie1eqpgwgwekvtr1rqhaydfpmw1firpnf1ksetaprs1vqsptqapkket1akppkai  
el1ki1kdvvkgyd1l1pkrgg  
npgki1vihndagsk1gataeayrn1g1vnap1sr1eagi1ahsyvsgnt1vwqal1desqvgwht1anqvgnk1yyygi1evc1qsmga  
dnat1fl1kneqat1f1qecar1  
l1kkwg1panrnti1r1l1hneft1stscph1r1ssv1lhtgfdpvtr1g1l1pedkr1l1q1kdyfik1qiraymdgk1ipvat1vsd1ess1ass  
ntvk1pvasawkrnk1ygyty  
meesar1ftngnqpi1tvrki1gpf1l1scpvayqf1qpggy1c1dytevm1l1qdghv1wvgytwegq1ryy1l1pirtwngs1appnq1il1gd1  
wge1is  
>tr|D9RM97|D9RM97\_STAAK  
mkg1nfknvkkfi1yegeeytkvyagni1qvkkpss1fvik1lpknkypdsi1eestakwt1ingvepnk1syqvti1envrsgimr  
vsqtn1gssd1l1gisgvnsg  
vaskni1nfsnpsgm1lyvt1s1dvysgspt1tie  
>tr|D9RM98|D9RM98\_STAAK  
myki1kdvetri1kndgv1ldg1vgcrfytedentasi1rigindkqgrid1lkahg1ltp1r1hl1fmedgsi1fknepl1iddv1vkg  
f1lyki1pkkvi1khagyvrc  
k1fl1e1eek1ihvanfs1fni1dsgiesavake1idvkl1vddaitri1l1kdnat1d1l1skdfkeki1dkdvisyie1knesrfkga  
kgdkgepgg1ppg1akgeagk1k  
geqgvpgkng1tvvs1inpdtkmwq1idgkdt1dikaep1l1dkin1ianveg1ledk1l1qevetik1dtt1l1ndskmytdtkiael1vd  
sapesm1nt1relaeai1qnn  
sisesv1lqq1gskvsted1feefkqt1l1ndlyapkn1hnderyv1l1ssqaf1tkqqadn1lyq1lksasqptvkiwtgtene1ny  
yqkdpnt1ly1l1kg  
>tr|D9RM99|D9RM99\_STAAK  
mg1lpnpk1trkptasev1vewaksni1gkrini1dnyrgsqc1wdtpnfi1fkrywg1fv1twgnakd1manyryp1kgfrfyryss1gfv

Tsompanidou\_et\_al\_Supplemental\_FASTA\_File

pepgdiavwhpgngigsdg  
htai vvgpsnksyfysvdgnwnvnsnswtgsppgrlvrhpyvsvtgfvrrppyskdtskpsstdtssaskandstigeakkp  
qfkevktikytaisvldk  
eehfidhivvmgdersdigglyikesmhmrsvdeiytrnkfisdyeiphlyvdreatwlarptnfddprhpnwlvievc  
ggqtdskrqflnqiqali  
rgvwlsgidkn1sett1kvdpnirwsmkd1inydlikqipdnakyeqvkkmletyikrdiltrenikevttktiri  
sdktsvdsastrgptpsde  
kpsivtetspftfqaaldrqmsrgnpkkshtwganatraqtssamnvkriwesntqcyqm1nlgkyqgisvsalnilk  
gkgtldgggkafaeackn  
nineiyliahaflesgygtsnfasgrygaynyfgigafndpdyamtfaknkgwtspakaimggasfvrkdyinkgqnt1  
yri rwnpknpathqyatai  
ewcqhqastiaklykqiglkgyftrdkyk  
>tr|D9RMA3|D9RMA3\_STAAK  
mivdnfskddn1ielqttsqynpiidtnisfyedrgrtgvlmfavtknnrplsissehvktsivlktddynvdrgayisd  
eltivdaingrlqyvipne  
flkhsgkvhaqffttqngsnvvverqfsfniendlvsgfdgitklvyiksqdtieavgkdfnqlkqnmadtqtliakv  
ndsatkgiqqeiekqnei  
qaitatqtsatqavtaevdkivekeqai fervneveqqingadlvkgnsttnwqskltddygkaiesyeqsidsvlsav  
ntsriihitnatdapektd  
igtlekpgqdgvdgssdestytsksvglvyvvdnntaratwypddsndeytkykygtwypfykknndgnl tkqfve  
etsnna1nqakqyvddkfg  
ttswqqhkmteangqsivqn1nnaqgd1gyltagnyatrvpdlpgsvesyegy1svfvkddtnklfnftpynskkiytr  
sitngrlepqwtvpnehks  
tv1fdggangvgttin1tepytnysil1vsgtyppggvi egfglta1pnaiqlskanvvsdgnnggiyec11sktsst1  
ridndvyfd1gktssgsan  
ankvtitkimgwk  
>tr|D9RMA4|D9RMA4\_STAAK  
mayglits1hsmtgrkivaqheyryr1degmsklekmfiyhqkeiyahsakqiky1ndsvedy1ty1ngrfsnmilgh  
ngdginevkdaridntgyg  
hkt1qdrlyhdyst1dafkkekavdehykeyrateyrfepkeqepfid1spytnavmqsfvwdprtki1ymtqarp  
gnhym1sr1kpnqgfjdr1  
lvknghgthnayryidgelwiysav1dsnkknkfvrfqyrtgeitygnemqdvmpnifndrytsaiynpven1mifre  
ykpterq1kns1nfvevrs  
addidkgidkvl1yqmdipmeysdtqpmqgi tydagi1lywtgdsntanpnylqgfdiktke11fkrridiggvnnnfkg  
dfqeaegl1dmyydl1etgrk  
alligvtigpgnrrhhs1ysigqrgvnqflkniapqvsmtsdsggrvklpiqnpay1sdi1tevghyyiytqdtqna1dfp  
1pkafrdagwffdv1pgry  
ngalrqv1trnstgrnmlkfervidifnknngawnfcpqnagywehipknitk1sd1kivgl1dfyitteeskrftdfpk  
dfkgiagwi1levksntpgn  
ttqv1rrnnf1psahqflvrnfgtgvgkws1fegkvve  
>tr|D9RMA5|D9RMA5\_STAAK  
mpv11ks1qgvghaihvntk1nek1nedst1didmienastfdaigaitkmwtitnikgedd1neyvivm1dkstignki  
1ksikargkeldd1nnsri  
yqeynesftgveffntvfkgtisykyv1htkvdaskfeg1gkgdtr1eifkkg1eryh1eyeyeaktktfhlydel1skvag  
yyiksgvnadnvkiqedas  
kcyty1rgygdfdgqqtft1eag1qfefthp1aql1igkreapplidgrikkedv1kksmelvikksvtasis1dfvaqpeh  
fpeanprigdvvrvaepti  
gynd1vrive1tthrdaynni1kqdv1lgdftmrdryrkaiheatnyvknvkttkspakylre1nakvnas1sinne1v  
knekinakvdkmstktvt  
tangtimydf1tsqssi1rnksigtigdsvargshaktnftem1gkkl1kakttn1arggatmatvpigkeavensiyrae  
qirgd1i1lqgtdddw1hg  
ywagvpigt1dkt1dktfygafcsaievirknnpdskilvmtatr1qcpmsgt1irrkdt1knk1gl1tledyvnaqil1acse  
1dvpv1fdayhtdyfkpynp  
afrkasmedg1hpnekghemyel1kdyysfyd  
>tr|D9RMA6|D9RMA6\_STAAK  
miahdvei1kngvkyrvs1dnphitykh1rv1dynvigsgykrnysp1dcvdgrf1hnyakeeykkel1r1ryevpkia1yash  
1ksdiq1t1fygrfy1rela  
tpdntik1fenmfep1eqefel1dyvdgrq1lyvg1vsevsfdttktageft1tfettel1pffesigystd1lesdnd1leksw  
pdria1nendrs1qmtfyn  
tssgd1vyngdval1tqfnqfnvveie1aedvkaddkgft1fyndkgnisvikdvd1kagdkii1fdnkhtyrgn1nidlyn  
kt1leqpv1lypgwnh1fkanr  
1mkkiv1frh1k1lyyr  
>tr|D9RMA7|D9RMA7\_STAAK  
meknflar1tai1sdfkrnmrta1qrmaktdipde1ktevtani1rdyqrel1traksmaqrwrehkvnidadaskvkqvisf  
vkaelsni1rrkkveidgda  
sg1krnvatskam1agwrkhtvk1ldf1dttgmtkmqval1tagkra1dqyqstmdgiasnirtfgti1faqqvkg1miasiq  
1ipviag1lpaimav1nav  
gv1gggvi1glagafsvagvgavfgamaita1kmvkdgt1avtkevqnfrnasdql1kttwqg1vkenqasi1fnamsagir

Tsompanidou\_et\_al\_Supplemental\_FASTA\_File

gvtsamsq1kpf1sevsm1  
veanarefenvkhsetakafealnsiggai fgd1lnaagrfgdglvni ftqlmp1fkfvsqglqn1siafqnwansva  
gqnaikafidytttn1pk1  
gqifgnvfagi gn1miafaqnssni fdwlvkltsqfrawseqvgqsqgfkdfisyvqengptimqligniikalvafgta  
mapiaskl1ldfi tn1lagfi  
aklfethpavaqi igvmgi1ggafwalmapvvaissv1tnvfg1slfsvvkkilefvrtsslvtgalealtgvfgtisap  
ilaviavigafigv1vylw  
ktenfrntiteawngvktavsgai qgvvgw1telwgkiqst1qpimpilqvlqqifmqvlgvlvigiitnmni iqglw  
t1tiafqaigtvisvavq  
iivglftaliq1lltgdfsgawetikttitnvl dtiwqymqsvwesigf1tgvmnr1tsmfgtswsqiwst1tnfvssiw  
ntvtswfsrvassvaekmg  
qa1nfiitkgsewvsn1wntvtsfaskvadgfkrvvsnvgdgmknaldkiksffsdf1nagaeligkvaegvanaahkvv  
savgdaissawdsvtsvs  
ghggsg1gkglavsqakvmatsfgkftselgst1tdgfnds1tpsvdghmtndvqshmkenrpi vntvrnegd1nm  
ikshiddmdakdgsfn1m  
>tr|D9RMA8|D9RMA8\_STAAK  
msndelms1paewndwi igarqalidrdialygaqnavaqags1krfvrqnerhyi irgqedgyekmkqrelakn  
krkreiqkqgtrkflns1k  
tshkgg  
>tr|D9RMA9|D9RMA9\_STAAK  
mtettfnpit1l1tinneevkakatfmdfktakkfateqednkrkqtisgftnvynallerdtvaivdfwecataylgks  
apkredieaeimeieren  
dt1n1lqgalvnmnsgffkqksr1fwtqmnqaps1akedekegagakagiemknnykeimtvapy  
>tr|D9RMB2|D9RMB2\_STAAK  
makvkygnwd1vkelenyerdierwvkrgiakttakihntiis1mpvdtgy1resvtmdfdggftgvinigseyaiyv  
ygtgiyatgaggsrakkip  
wsykdangkwh1ttkgqhaqpfwepaidagraffnkyfs  
>tr|D9RMB3|D9RMB3\_STAAK  
mfnpfdefphti ei geievvgtyperksnetikgfm dtptsset1kfhqmskdfdrnlytphyhipitnkt1fnyeg  
ktyevvgepvdaqgqhe1n  
l1r1rvrpigkg  
>tr|D9RMB4|D9RMB4\_STAAK  
mnakdvkming1slndssndeqieyli eeyksvaedycnqkfdkvepsgvkkaeicikfgttgnisartmgtvsytyv  
tdipssayay1mpyrklsw  
gkryv  
>tr|D9RMB5|D9RMB5\_STAAK  
mykvierfedaqdnghyqvqgd1yprdg1evseerftelsttnrrn1iaikffedkqveqseasadeqks1sdmkvae1  
kelakk1eikgysdmkkde  
likalegvk  
>tr|D9RMB6|D9RMB6\_STAAK  
mpqgvtktsnqi ipevlapmmqaqlekk1rfasfaevdst1lqqpgdt1t1pafvysgdaqvvaegekiptdiletkre  
akirkiakgtsitdeall  
gygdpqgeqvrqghlahankvndv1ealmgak1tvnaditk1ng1qsaidkfned1epmv1fvnpldagk1rgdastn  
ftrate1gddiivkgafge  
algaiivrsnk1eagta1lakkgavk1ilkrdff1evardastkttalysdkhyvaylydeskavkitkgs1em  
>tr|D9RMB7|D9RMB7\_STAAK  
md1yt1lqqfkdgeidkqkvidaidesksgmvprsr1ndknteieelkeeiskrdeqivk1qdsvkddsei qkeleelkn  
qnsewetkyketq1nnavk  
lavakeandandi1afinkde1elvdgtvkg1dkaiet1keskpy1fasskpvgktpqgggnpds1gvtkekfdnmsvae  
rne1y1ndretfek1vnqn  
>tr|D9RMB8|D9RMB8\_STAAK  
mpnkkd1tiknqndideyids1iskaekpieq1fanr1keikqi iadmfekyqsddvyvtwtefnkynr1nkel1trigt  
mltddyrvakmiqksqed  
ayiekf1ms1ly1etasqtsmqfdvpskevitsaieqpiefir1vpt1qkhrdev1kkir1hitqgimsgegyskiakai  
rddigmskaqs1rvartea  
gramsqag1dsalvaqkng1qmykywqatkdrtrrdthrh1dgakkkidepfkssgcvgqapkl1fvgvnsakenincrc  
1myyidedd1psttrvrkd  
dgttevipqmdyrewekykrkrk  
>tr|D9RMB9|D9RMB9\_STAAK  
mypsqtqtei fdai vrtnnkpet1eemi vryikqhl ek1peisigqeyeqrpdivkepkipvatgavdp1kpddrmit  
nhan1vdqkvsyivgkpi  
afkhtddevvkri dev1gnrfdk1hsv1tgasnkgiew1hpy1deegefkl1rvpaeqgipiwtdkehelea fi rmyk  
1enetkveywdkvtvnyyv  
yeng1lipdysnn1enskthfstgswgkipfipfknd1emsdi fmykt1idaynr1sd1sntfkdsneltyv1knydd  
qelpefkr1lryygai kvs  
dnggvd1iqvevpvensky1de1yqkim1fgqavdfssdkfgsapsgvaleflytn1n1kadklarkakvaiqellwfv  
fehfdikgehkdvdi sfny  
nkvante1qvqtaqqs1mgivshetv1enhpved1qaeleri eqeqmeynkq1pn1ddggadgaqqqersnnkese

Tsompanidou\_et\_al\_Supplemental\_FASTA\_File

>tr|D9RMC0|D9RMC0\_STAAK  
minemlnpkqqevwncfndkpkvliasgakragktyvfllflmhiatykdkglnfiiggatqasirrnllddmelilg  
reltdksnavkifgnkvv  
vfdgqnsdawkkargftsagaflnegtalnfmfikeyfsrscsykgarilidtnpenpmhpvkkydidksgqrlsngrlni  
kafqftlfdntfldeeyie  
siasptgmftdrdiygkwvsaegvvykdfkekvhyyteefkktqikrkyagvdwgyehygsimvvaedfdgnkyvie  
ehahrhkeiddwvaiakgv  
ikrhgdilfycdtarpehierfrrekikaryadkaviagievirflklnkisiiekvslfkeeyinyvwkdnadepvk  
lnddtldalryavytankp  
sgtgfn  
>tr|D9RMC1|D9RMC1\_STAAK  
mikltpkqekfvlgliiegksqrkayidagystkgksekdidvlasrvakngkvctryeelrqaevaeqskwtrqafeeye  
wlkntakndievegkkt  
adaflasldgmrmtlgnvlnkkieteikmlkqidqmdksennsqaeavakaliklagvnd  
>tr|D9RMC2|D9RMC2\_STAAK  
migthkmcnvladvipeydsnsiaqygiqatlpkpggensskvedvvvrlerankryaqmlkevefinqsqqrighvdf  
cfllellkgyndaiikk  
pnsklrnrnflarrdelaekiyllq  
>tr|D9RMC3|D9RMC3\_STAAK  
mikqilrllflamyelgkyvteqvyimmtanddveapsdfaklsdqcdlraevse  
>tr|D9RMC8|D9RMC8\_STAAK  
mnyetgfqlsvmdarlkkmrqrdeykkqryeligviaklrdcnkelekkasawdrycksverdlinkfgnddervkfgm  
elnnkifmeddtne  
>tr|D9RMC9|D9RMC9\_STAAK  
mikivkkemrldelikwarenpelskglflakvfnsgfvrfrntntcsissfipidtpfiveveeitedtvfdrife  
vyeleqaymsalhtsisi  
nerlentffptkafyilndglmtliwkdgrlve  
>tr|D9RMD0|D9RMD0\_STAAK  
mvsarkehlnqffgskrylyqdnervahihvngtyyfhghivpgwqgvkktfdtaeeleiyikqhgleyeeqqltlf  
>tr|D9RMD1|D9RMD1\_STAAK  
mkkkgltpeivrnravakwelseaipdfgmklndyrkiqitkalereremarqrrkeaelrrkkphlfnvpqkhpgrgy  
acylmendifpkvrv  
>tr|D9RMD2|D9RMD2\_STAAK  
mtlidaskydkvstlitydrgrsgkdlinqvvpkpkvkiidgkmmvseivkkylnskgllyriskgltdgaliapp  
qenplntlnmkmsr  
>tr|D9RMD3|D9RMD3\_STAAK  
mqqqayinatidiripteveyqhddvdkeketladylynpdeileydnlkirvnveve  
>tr|D9RMD4|D9RMD4\_STAAK  
mskynakkveykgivfidskveceyyqylesnkgntnydrieiqpkfellpkldkqrkieyiafdalyldgklievidikg  
mptevaklkakifrhkyrn  
iklnwickapkytgktwityeelikarrerkremk  
>tr|D9RMD5|D9RMD5\_STAAK  
mpkekylyredgtedikvikykdvnnevyslsgahfsdekkimtdsdlkrfkgahgllyehqglqatidfi  
>tr|D9RMD6|D9RMD6\_STAAK  
myeetkqsdpiavanvyietgwavnrlldnneispfddydrvekkimneinwkkthikec  
>tr|D9RMD7|D9RMD7\_STAAK  
mnyggfeiestiatllkqpdvlekirvkdydftnekfktffnyvmdvgkidhqeylkatkdkefldadtitklynsdf  
igygyfferyqqellesyqi  
nkake1vtefkqqtqnfnnlidelkdlktitrkedgkfkveefvdelysdspkkqiktgyklmdykigglesqli  
viaarpsvgktgfalnmml  
niaqngytsffslettgtsvlkrmlstitgieltkikeirnltpddltkltnamdkimklgididsksnitppdvraqa  
mrhsdrqqvifidylqlmd  
tdakvdrvavekisrdlkiianetgaiivllsqlnrgvesrqdkrpmldmkesggiadaslamllyrddyynrdedd  
sitgksivecniaknkdge  
tgiiefeyyktqrfft  
>tr|D9RMD8|D9RMD8\_STAAK  
mpmsktqaleiikkvryvynidfdkpkfemwldvlsqngdyqptvkavdgyinsnppppnlpaimrkapkkvsiepvdn  
etathqwmqndpeyvrrq  
kia1dnfmlklaefggdne  
>tr|D9RMD9|D9RMD9\_STAAK  
mkllddypiqvlpklaeligneaivlqqihywnnskkydgtkwi fnsypewqkqpfwsertikrtfgslekqnl  
lhvgnynkagfdrtkwysi  
nyetlnklvarpsgngptmrtwnhdargqndptntidy tetnkhetddvsksfkyistnleiiqnplkaeqleheiks  
fkqdqfeivkvatdycken  
nkglnyl1tvlnwnkegvsdkesaenk1kprnskkettdviaqmeke1sdd  
>tr|D9RME0|D9RME0\_STAAK  
mpii1tsyitqddgtttvvisgvelnketllldngfdvevdsvidpfaqitgkqrrkifalvkdieeytgqpmmdymrhmf  
ieyvrtyygyderis1snc

Tsompanidou\_et\_al\_Supplemental\_FASTA\_File

trtqasqieatldwtfyndiplsyktsnllkqdksflywstvnrcvfcgkphadlahyeavgrgmnrnkmnydkhvl  
alcrqhhneqhaigvksfd  
dkyqlhdswikvderlnkmlkgekne  
>tr|D9RME1|D9RME1\_STAAK  
mlnrtvlvgrltkdpeIRSTPngvngvgtftlavnrftnaggereadfinvvvfkkaenvknylskgslagvdgrlqtr  
sydnkdgkrvfvtevadn  
vqflepknnnqqpsnyhqqrtqtgnnpfdnttaittdddllpf  
>tr|D9RME5|D9RME5\_STAAK  
mnkvs1skvnnkiylyhyreniqliynnveknrtllqqnhprqs  
>tr|D9RME2|D9RME2\_STAAK  
milpml1pf1calilvflknndriskylylgtmtittislmlliyvqrhrpitldfggwsapfgiqflgds1slimvtt  
asfvitlimaygfggrgeh  
anryhlpsfilflsvgvgsfltsdlfnlyvmfeimllasfvlitlgqsveqlraaiyvvlniigswfl1lgiglllykt  
vgtlnfshiamrlnndmgdn  
rtvtmisliflvafsakaalvlfmwlpkayavIntelaalfaalmtkvgayalirfftllfdqhdlihp1latmaaitm  
vigaigviaykdkkiaay  
qviiisigfiilglgtntfagingaifylvndivvktllffiiigslyvitgyrqqynglakkeplfgvafiimiifaigg  
vppfsgfpgkvlifqgalq  
ngnyigla1miitsliamyslfri1fymyfgdkdgeevnfkkiplyrkrilsilvvviaigiaapvvlntvtsdate1nt  
sdqlyqk1vnp1kged  
>tr|D9RME3|D9RME3\_STAAK  
mnqivlniiaflwv1fqdedhfkfstffsgy1igliviyilhrffsddfyrkiwaikflgvlyqlitssistinyi  
lftktdmnp11syetr1t  
sdwsitfltiliitpgstvirisqdskkffihsidvsekekdsllrsikhyed1ilevsr  
>tr|D9RME6|D9RME6\_STAAK  
mvtmiap11fvegvnsvrvhlrkyikpvmmalglvittvigv1fihwiwpdlpigaafaiailcptdavavqaitkg  
kvlpkgamtilleges11nd  
aagisfkiavgv1vtgafslvdavq1fliasiggavvg1ligma1vrfr1t1mrrgyeninmftiiq11tpfvtyliae  
1fhasgiaavvaglvhg  
erdri1mqvrtq1qmsynhtwnilgyv1ngfvfsilgflvpeviikiiktephn1ifligitivvalavylfrfvwyvly  
pyfyla1spfqkmmtkndd  
dnpttekppkrs1yalim1tcgvhgtislaialt1pyflaghhafty1rnd11fiasgmvi1slvaqvl1p11tkpakt  
vignmsfkvariyl1eqvi  
dylnqkstfetsfkygnvikeyhdk1af1ktvekddenskeler1qkiafnvetk1les1vdegqitnsvlenymryaer  
tgyvrqas1irmiv11rg  
allkrrvqtrvnsass1svtdnlme1nkink1vhynvvsr1skettkdnt1evgmvc1dgy1mrien1tps1nffnsas1edt  
itkik1nal1regrr1rel  
idtdevsegtalk1reainydemv1vdsmt  
>tr|D9RME9|D9RME9\_STAAK  
m1etkd1n1flngkhv1knis1slipvrgei1gimgp1ngagkss1liks1ligefnatgk1lynkpiqq1q1hityipqkah  
id1dfpisveq1v1sgcyk  
e1gwf1rrpnksardk1kq11sd1e1es1lhrhq1se1sggq1qr1v1varalmsesevy1f1dep1fv1gidf1sse1kl1imtkien  
1kqggk1l1i1ih1hd1lskak  
qyfdri11nqt1ryfgd1seamsvtr1netfms1stdcsdpsqrsnitc  
>tr|D9RMG4|D9RMG4\_STAAK  
msaigtv1fkehvk1nfyliqr1aqf1qvki1nhsny1gvawel1npvmq1imvyvmv1fg1girsnapihgvp1fvyl1vgism  
wffingq1legtkaitqk1f  
nqvs1k1m1f1psi1sty1vtr1fygh1g1111viiacm1ftgi1psih1iiq11liyvp1fcff1tasvt11tst1glv1vrdtq1m  
1mqail1r1lyf1sp1l1wlp  
knhgis1glihemkyn1pvyfiaesyraa1lyhewy1fmdhkw1m1ynfgivai1ffaigay1hmkyrdq1fad1  
>tr|D9RMG5|D9RMG5\_STAAK  
mitp1qv1dkphiv1fmm1t1pedikpi1ka1nssy1qktv1t1tpk1qapyl1se1sddvd1viemtr1t1vkqika1k1saqm1ii  
dnyy111ggynk1tsnq1hiv  
qtwhasga1knfg1tdhqvdvsdkamv1qyrkvyqatdfylvgceqms1qcfkqslgateeqm1lyfg1lprinkyyt1ad1rat  
vkael1kdkygi1tnk1v1lyv  
ptyredk1adn1raidkay1fek1lpgyt1link1hpsieds1diddvss1idtst1mlmsdi1i1sdyss1l1pieas11dipti1fyv  
ydegtyd1qvrg1nqfykai  
pdsykv1yteed1imti1qekeh11sp1fkdw1hkyntdks1hq1l1teyidk1mvtk  
>tr|D9RMG6|D9RMG6\_STAAK  
mlisieskehyr1l1cidgg1stdqt1ipmier1qrelkhis1liq1qnasiatc1inkgl1mdik1mtdphds1dafm1vikptsiv1  
pgk1dr1taafk1nnd1nidm  
vigqrayny1hgewk1ksadefikdn1rivt1teqp11smms1fdgk1fsakfael1qcdet1antynhailvkamqkatdih  
1vsqm1vgdndid1thatsn  
dedfnry1iteimki1rqrvmem111peqr11lysdmvdri1fnns1kyymnehpavthtti1q1vkdy1msmqhsdyvsqnmf  
diintve1figenw1dreie  
1wrqt1liqvginr1ptyk1kfl1iq1lgrk1fahrtk1sm1lkr  
>tr|D9RMH1|D9RMH1\_STAAK  
mnktvkd1il1v1lgsfi1faagvna1fi1sgn1leggv1tg1ai1lyya1fhispa1itn1flvna1viaigyk1flskrsm1yl1til

Tsompanidou\_et\_al\_Supplemental\_FASTA\_File

vtilisiflslteswqvet  
gnsivnai fggvsvglgiviilaggttagttilariatkyldvstpyallffdmivvaisltvipldkvlvtvislyig  
tkvmevyieglntkkamti  
istnnpdklakaidedqigrgltilnghgyytreekdvlyvvisktqvskakrlikqidkdaflvihdvrdivyngngflade  
>tr|D9RMH3|D9RMH3\_STAAK  
millitlfistligdakiqastiieaifnynpsnqqniineiriprniaavivgmalavsgaiiqgvtrngladpalig  
lmsgasfalalyavlnt  
sflilmfagflgailggavlmigrsrrdgnpmriilagaavsamltalsqgialafrlnqvtvfttaggvsgttwshl  
kwaipligialfiiltisk  
qltilnlgeslakglgnvtmrigicliiamilagiavaiagqvafvglmvpfiarfligtadyakilpltalggilvlv  
adviarylgeapvgaisf  
igvpyflylvkkggrsi  
>tr|D9RMH4|D9RMH4\_STAAK  
mmtilagaalsisgavsvtknpiapgilginaggfaialfiaigkinadnfvyvplisilggittaliififsf  
nknevtpasmligvglg  
talyggsitimskfddkqsdafiaawfagniwgdewpviaflpwliiipyllfksntlnihtgdniarglgvrslsrer  
lilffiavmllssaavavag  
sisfiglmgphiakrivgprhqlflpiailvgacllviadtigkivlqpggpagivvaiigapyflylmyktnv  
>tr|D9RMI3|D9RMI3\_STAAK  
mkpkvllaggtgyigkylseviendaelfaiskypdnkktddvemtwiqcdifhyeqvvaamnqidiavffidptknsak  
itqssardltliaadnfrg  
aaainqvkkviyipsrydnetierlgaygtpvettnlvfkrslvnvelqvskyddvrstmkvvlpkgwtlknvnhfia  
wmgytkgtfvktekshdqf  
kiyiknkvrlavfkieetadgiitlilsgslvkkytvnqgklefrlikesavvyihlydyiprlfwpiyyfiqapmqk  
mmihgfevdcrikdfqsr  
ksgenmkytk  
>tr|D9RMI5|D9RMI5\_STAAK  
mkwvayflksrnmwifwiflfnflmlgislidydfpidslfyivslnlsltmifllltyfkevlykhfdkdeieeikh  
kdlaetpqrhtvdylrq  
isahkekvvqqllqlnmheqtitefvhdiktpviamkllidqeknqerkqallyewsrinsmldtqlyitrlesqrkmy  
fdyvslnrmvideiqtrh  
isqvkigifdvdfkvdvdyvtdikwcrmiirqilsnalkysenfnieigteIndqhslyikydygrgiskkdmpriferg  
ftstanrnettssgmgly  
vnsvkdqglghlqvtstvgkgttvlrlifpqlneivermsevtnlsf  
>tr|D9RMI7|D9RMI7\_STAAK  
mtesypikegsqvgysylffiiiafllyanvlfikrrsyelalyqtlglskfniiylmleqllifiitailgiigif  
gsklllmivftllgikekv  
piifslravfetlmigvayfltsaqnfilvfksisqmsknqketnhnitfeevl gilgvlittgyylslnivq  
yydsigtlmfillstviga  
ylffkssvslvfkmvkkfrkgvisvndvmfssimyrikknafslvtmaisisaitvsvlcfaaisraslsseikytaphd  
vtikdqkanqlaselnnq  
kiphfynyevihtklykdnlfdvakepynvtitsdkyipntdlkrgqadlfvaegsikdlvkhkkhgkaiigtkkhhv  
niklrkdinkiyfmdtdvl  
ggptfvlnkdqyqerkytkakhivsqfgfdlkhkkdalaekaknkvdksietrseaisissltgillfvtsflgitf  
liavcciiyikgidetede  
lenysilrklgftqkdmarglkfkimfnfglplvialshayftslaymklmgtnqipvfivmglyicmyavfavtaynh  
skrtirhsi  
>tr|D9RMJ1|D9RMJ1\_STAAK  
mywii fgi gcy lqqflplswrqp lsf gll i i l a t l v f e r a r r f g l i i s h i y a v v i g l l s y a t f t t y l q n l g p d i f y k n  
ialaifafiafgiigyffv  
gdassigkylfvtilitliasligiflqnpifytiitvsl11fllytlydfnr1krgdyspremgfnlfinllniikdi  
lylanmfr  
>tr|D9RMJ3|D9RMJ3\_STAAK  
mnteletllgfykqykalseyidkkyklslnlavldl tmkhckdekvlmqsf lktamdeldlsrtkllvsirrlieke  
r1skvrsskderkiyiyl  
nddiskfnal fedveqflni  
>tr|D9RMJ5|D9RMJ5\_STAAK  
mksaeqwidelqlshpeggyfretirevldgrrapfssiyfl1tddnishfhridadevwyhagds1tihminpdge  
yttatlgtdiqngdvlqyv  
vpkgtifassieisntfslvgmcqpa fefkqfel f k q s e l i t q y p h l k s v i e k y a l k  
>tr|D9RMJ7|D9RMJ7\_STAAK  
mkkvrdplevtvvggniivaddnykwqlipekkrysitvmfdnkgnp1eyyfdiniknitqkgnartvdlcl d v l a l p s  
geyelvdedd1mfaleseq  
itkkqfheaymiahqimaelendfkqfkkimycfnkinakaqnhqkpnktniekskqikpkqynqtknhqqqkn  
>tr|D9RMJ8|D9RMJ8\_STAAK  
mkiedyrllitldetktrkaaeilyisqpavtqr1kaienafgvdifirtkkqlitttegtmiiehardmlkrerlffd  
kmqahigevngtisigcss  
ligqtilpevlslynaqfpnveiqvqvgsteqikanhrdyhvmitrgnkvmnlanth1fnddhyfifpknrrddvktlpf

Tsompanidou\_et\_al\_Supplemental\_FASTA\_File

iefqadpiyinqikewynd  
nleqdyhatitvdqvatckemlisvgvtilpeimmkniskeqfefekveidneplirstfmsydpmslqlpqvdsfvnl  
masfveqpk  
>tr|D9RMK9|D9RMK9\_STAAK  
mfiielikgiilgvvegltfapvsstghmilvddiwlksseflgsqsaftfkiviqlgsvfaaawvfrerfleilhighk  
hkhvegnddqrrskprl  
nllhvlvgmpagilglfddfieehlfsvptvmiglfvgaiymiadkysakvknqptvdqisyfqaavfigisqavamw  
pgfsrsgstistgvlmkln  
hkaasdffimavpimlaasglslkhyqdiqiadipfyilgflaafvvgliaktflhlinkiklipfaiyrivlvifi  
ailyfgfgigkgi  
>tr|D9RML0|D9RML0\_STAAK  
mvstglgiivitqniliadflakiihqfqlwivlfillgvllratvqflnqwlgdtafkvkhmlrqrviykngnph  
igeqmtitenidglapfy  
ksylpqvfkssmvpiliiiamffihfntalimlitapfiplfyiifglktrdeskdqmtylngfsqrflniakglvtlkl  
fnrteqtekhyyddstqfr  
tltmrilrsafisglmlefismlgiglvaleatlslvvfhnidfktaaiailapefynaikdlgqafhtgkqsegasdv  
vfefleqpnyneflkye  
engkpfiqltdisfryddsdrvlndlnleifkgdqialvgpsgagkstlthliagvyqptigtistnqrdlnigilsqq  
pyifsaikenitmfkdie  
nntieevldevglldkvqsfkgingintiieggemlsggqmrriecrllvmkpdlvifdepatglidiqtehmiqnlvfh  
fkdttmiviahrdntirhl  
qrrlyiengrliaddrnisvnitengddl  
>tr|D9RML1|D9RML1\_STAAK  
mktrlkfqvdkdllaivvgvcslvalamfflsgymvtqsalgaplyalmilvvtvklfgflraitryverlishkatf  
tmlrdirvqffgklvnvip  
nyrkllssdlisrmisrvealqniylrvyppvvgltalvtvivlafisighallimvsmftllivpwlsskkartl  
kkhaaneqarflnhfydyk  
agmdelrrfnqinhyrdnlmaklnhfdklqlkeqrfltiydfilniamlsifgslvlgliqinagqlniymtsivlmv  
lflfeqavpmtnvayykad  
tdqalhdinevisvpstngkkrlnkydatniyevkdasfkywnqptyvlsdinfvnrgekiaivgpsgsgkstllqim  
aglyqldsgsvrfenmdmf  
eidkdkfeslnvllqsqfldgtirqlftdekdeavqaifkqldlehlaalerqidldghtlsggeiqrlaitrmlld  
tastwildepttaldkqns  
lkvmdlieahaetlivathdltlrsfetiiwingkivekgyqqllanqgalwnmiqyna  
>tr|D9RML4|D9RML4\_STAAK  
minhyvhfsrlvqgfwranewkmtakelnyfineilvergittmdhadiygdyqceslfgnaldispelnrkiqivtkcgi  
ilpskqfdftnghrydls  
khivksveqslinlnvdyldsllhrpslmdpeqvadaatkvlkqgklsfgvsfnhsqyqllnqyimkerlhising  
lelspyhvdsldqgtmdsm  
yqnhvqimawspfaggkifdkedikaqrimkvvqsiadkygvsdtavmiawlkiphrimpilgtsqlkridqaieglql  
nlddqswwfdiytaigqdi  
p  
>tr|D9RML6|D9RML6\_STAAK  
mseekhvveheqqkkektkkqykpfiwmsfiilivlllpapsslpmakavlaiafavimwvteavsyvpsatliig  
lmilllgfspvqnlgeklg  
npsksailagsdlgtghalslafsgfatsavaalvaaalflaamqetnlhkrallvlsivgnktrnivigaiivliv  
laffvpsataragavvpi  
lgmiaafkvsksklasllitsvqavsiwnigiktaaaqnvainfinhqlgfdvswgewflyaapwsivmsvallyfim  
ikvmppeintiieggkdlk  
eelhklgpvsprewrlivismllllfwstekvlhpidasitiialgvmlmpkigvmtwkhvenkipwgtiivfgvgisl  
gnvllktgaaqwlsgdtfg  
vlgklhlpiaatliatlnilnihlgfasatslssalipvfisltstlhlgdqsigfvliqqfvisfgflpvsapqnm  
aygtgtftvkdfkagipl  
tivgyilvifvsmtywkwlgll  
>tr|D9RMM2|D9RMM2\_STAAK  
maeqlnlyqrinkakhsmeqfvkdtkgyqsyvsgsvlhlklnpelyknginitfktaephfeqvtvivkgekieflvs  
lnvhytinvdnpeekies  
sifaigqddpskalgtaltyseryflmkffglptdeddadakqkkerytkpdakaigtlkeefkfsefmqslgkevsv  
ndvheillgindiqlssa  
itainklnewtkqakgne  
>tr|D9RMM3|D9RMM3\_STAAK  
mnelqereletfeqddrfkvtdltsanwvfkldaittkeneinelankeierinewkdkeveklqsgkeylqslvieyf  
riqkeqskfklntpygkv  
tarkgskviqvsneqevikqlqrgfdnykvtkkisqsdikkdfnvtengtliangevlegasivekptsytkvge  
>tr|D9RMM4|D9RMM4\_STAAK  
myyeigevcqkvinvdgdffklavkkkdhslvnlldedrfidsinitdendlytalidilnqsiyewieentderdrli  
nlvmrw  
>tr|D9RMM5|D9RMM5\_STAAK

Tsompanidou\_et\_al\_Supplemental\_FASTA\_File

msktyksyllavlcftvlavlpmpflyfttawsiagfasiatfi fykeyfyee  
>tr|D9RMM7|D9RMM7\_STAAK  
mnninltqrqldliknqailsklpvevyakaantmnnsyvmnaleiqstvnvmsirinqsklsdwasymhqvtknhp  
mfksnlfseki ldefissn  
sfpenevrkvsthlrksfvdtvdvplgktvnsahpiddvntkesdkifyksinqyflapsssfvhdvsltvaksavnm  
fvrtanddyvnyffstavi  
avcyvasclanafdlnkrkyfk  
>tr|D9RMM8|D9RMM8\_STAAK  
mqalqtksnigemfniekengeiaisarelykalevkkrf sawaeinlkhfkenrdftsvltstvnngavrql edya l  
tldvakhvammsgtekgfd  
freyfigiekawnspeimqral kiantinqletkierdkpkivfadavattktsilvgelakiikqnginigqrrlfe  
wlrqngflkrkgvdymp  
tqysmerelfeiketsithsdghtsisktpkvtgkgqyfvnkflgek  
>tr|D9RMM0|D9RMM0\_STAAK  
meqtikqflefrkqftpaqwheinriidgqfskkaaelqlddqdvevikniitqqkimk  
>tr|D9RMM1|D9RMM1\_STAAK  
mneiktfsndmfsilikqdnennlfdletvaks l gftqfkgkqyirwetinkylgkylsqevgkgdfipepmvyklafk  
agnavaekfqdw lamevlp  
airkhgiyatdnvieqtlkdpdyiitv lteykkekeqnlllqqeigelkpkadyvdeilkstgtlattqiaadygisakq  
lnklhearlqrkvnkqvw  
lysehmgsytesytiaivrsdgretdvlqtrwtqkgrlkiheimtefyeanvta  
>tr|D9RMM3|D9RMM3\_STAAK  
mtfaelertl gfsngqirrwekt kpgidkvqkiadhfdvsvdyl lgrekdeysgedksedilimhratenmteaqrqal  
tileamfddwdldtk  
>tr|D9RMM4|D9RMM4\_STAAK  
mkl nyeksffksakavyeitnglynlsfpldifeiiskdkrik lvtfsefsqntgtlyfkipsifgseeafhirkgd kai  
ivyndllpmnr l rftlahe  
yghfimghtgvnl nktftykdyrriaeeyeansfasc l lfp l hirykyinnfnieqisykyqmsfqaihiavkvirrhi  
hnglndymsnnyhaeny  
lsfleekmesksdfinefyaydl ti  
>tr|D9RMM5|D9RMM5\_STAAK  
mkel pksr l tfkesmi esqylatktkeekkqyql svedkreilkeyqskprkev kfeseinksdenlskiyqrfseigv  
edlfgtkkevke l pmi lkd  
nenimvvtsglynnnty l ivctdl r l l f l dkgmiyglkfhefpfekinsvsykgl l fgei iihgsssiaigsiskntv  
srmaetiqeqisi ressmk  
psnsekmsfsvadeli kykelldvgvisqeedk k k q l l did  
>tr|D9RMM6|D9RMM6\_STAAK  
mernstkkssdkil kavnnfeevcns gkfkfy l d d w l f t k s i i f k n e t t l t n q k n f k v y p r g t i v y a k l g v n i g s e f s  
gnhfcvvl nknknrneli  
ti v p l t s k d t k f s l k l q e n l i l k a l e k m k t d h k t l r f d l d r i k e m h a r s t k v k n l n p a i e k e l d e i e n n y m q l a k i e r y  
erfvqkqyaipsqvitis  
kkristlndydp t g h i s f n e e t l k i e d f m k a n i l s  
>tr|D9RMM7|D9RMM7\_STAAK  
mpvykdngtgkwyfsi rykdvygnnkrkmrgferkkdak laese fi qnvkygysdnqpfeyiffdr l knenlsarsiek  
rtteynthikerfgnipig  
kitttqctaf rny l lndag lsvdyarsv w a g f k a v i n y a k k h y k l l y d p t l s v t p i p r t k p q a k f i t r e e f d e k v e q i t n  
dtsrqltr l l f y s g l r i g e  
alalqwkdydkl keidvknknlnsrkieynlkkesskgiipvpnliremlknmynesskrykyfdenyfi fgglepir  
yvtysyhfksvfnlkih  
lrhsyasylinngvdmyl l m e l m r h s n i t e t i q t y s h l y t d k k h q a m s i f d  
>tr|D9RMP7|D9RMP7\_STAAK  
mafwigalliaft l lsnkyt i i l f v f l l l l i v r y l i h k f k p k k v a t d e v m t s p s f i k q k w f g e a r t p v y v y k w e d v q i  
qhgidlhid l t k a n i k e  
nntivvrhilgkvqvilpvnynlnhvaafygstyvneksykvennihieemm k p d n y t v n i y v s t f i g d v e v i y r  
>tr|D9RMQ1|D9RMQ1\_STAAK  
mvimqhekmndernl tmkptkvi lkdasy l h s k t s i t f i l k d v v i e e d n k i y y f d t s a t f e d q e v k f e f a l f d s d m d n l k  
hmdcdnpvteiyfiepd l h  
fti idfnqel l c i y i d f d s g l r h s n m a t e s g i s l r i n v a k s d f t k f i n e l a s l h  
>tr|D9RMQ2|D9RMQ2\_STAAK  
mhel t i y h f m s d k l n l y s d i g n i a l r q r a k k r n i k v n v e i n e t e g i t f d e c d i f f i g g s d r e q a l a t k e l s k i k t p l  
keai edgmpgl ticggyqf  
lgkkyitpdgtelegl g l d f y t e s k t n r l t g d i v i e s d t f g t i v g f e n h g g r t y h d f g t l g h v t f g y g n d e d k k e g i h  
ykn l l g t y l h g p i l p k n y e  
itdy l l e k a c e h k g i p f e p k e i d n e a e i q a k q v l i d r a n r q k k s r  
>tr|D9RMQ5|D9RMQ5\_STAAK  
miqdafvaldfetangkrtsicsvgmvkvidsqitetfht l v n p q d y f s q n i k i h g i q e d v e n a p t f d y v f p y m m q f i  
adlpvahnaafdmvnlhq  
siqni gl p t p n l t y f c s y q l a k r t v d s y r y g l k h m m e f y q l d f h g h h d a l n d a k a c a m i t f r l l k n y e n l t y v t n i y g k n



Tsompanidou\_et\_al\_Supplemental\_FASTA\_File

lkdkg  
>tr|D9RMR1|D9RMR1\_STAAK  
mfspspahfgaepnsntnvidlaypgvlpvvnkravdwamraamaInmeiateskfrknyfypdnpkayqisqfdqipg  
engyidi evdgetkrigit  
r1hmeedagksthkgeyslvdlnrqgtp1ieivsepdirspeayaylek1rsiiqytgvsdvkmeegslrcdanislrp  
ygqekfgtkaelknlnsf  
yvrkgleeyeekrgeee11nggeiggetrrfdestgktilmrvekgsddyryfpepdivplyiddawkervrqtipe1pde  
rkakyvnelglpaydahv1  
t1tkemsdffestiehgadvk1tsnw1mggvneylnknqve11dtkltpenlagmik1iedgtmsskiakkvfpelaakg  
gnakqimednglvqisdea  
t1lkfvnealdnneqsvedykngkgkamgflvgqimkaskgqanq1vnq11kqel1dkr  
>tr|D9RMR7|D9RMR7\_STAAK  
mna11nhmnteqseavktttegp11imagagsgktrvl1thriay11dekdvspynv1aitftnkaaremker1vqklvgdqa  
eviw1mstf1hsmcvr11rrd  
adrigiernfti1idptdqksvkvdl1knenidskkfep1rmfigaisn1knelktpadaqkeatdyhsqmvatvysgyqrq  
1srnealdfd1imttin1  
fervpe1veyqnkfqyihvdeyqdt1nkaqyt1vk11askfkn1cvvgdsdqsiygwrgadiqnilsfekdypeantif1  
eqnyrstkt11naanevik  
nns1erkp1kglwtantngeki1hyyeamterdeae1fvireimk1hqrngkkyqdmailyrtnaqsrv1leetfmksnmpytmvg  
gqkfydrkeikd11syr1  
iansnddis1qriinvpkr1gvgpssvekvqnyalqnnismfdalgeadfig1skkv1teclnfyeliqsl1ikeqefle1ih  
eivdev1kqsgyrem1ere  
ntlesrsr1lenidefmsvpk1dyeentp1leeqslin1fltd1slvadideadtengvt1mtmhsakglefpivfimgmes1  
fphiraiseddhemgeer  
ricyvaitraeev1yithatsrmlfgrpqsnmpsrfl1keipes11enhssgkrqti1qpkakpfakrgfsqrttstkkqv1  
ssdwnvgdkvmhkawgegm  
vsnvnekngs1eldi1fksqgpk1r11aqfapi1ekked  
>tr|D9RMS2|D9RMS2\_STAAK  
mqgympvk1riekpvf1qeqkdgtvevshqei1vfgk1iq  
>tr|D9RMS9|D9RMS9\_STAAK  
mkdygl1tginktkdtra1qra1lnrgrckpttvy1pkgydickp1tiyngtt111dnet11rrchsgp11kngr1rfgyr  
gynghshih1kkgkfdmng  
vsypynntamc1ighaedi1q1igvtiknvvsghaidacgingly1kscsfegfidysgerf1yseai1qldi1qvpgafpkfgt  
tdgtitknv1iedcyf1gps  
e1lpemgsw1nra1gshasrhnr1yyeni1hirnni1fedi1qgyaltp1kykda1fi1nnkfinceggi1rylgvr1dgknaadvmtg  
kd1g1sqag1inmni1ignefk  
gmskda1hvrnynnvkhkdv1ivngtfn1nstqsi1h1ledid1tvf1spveagi1qvttin1vdeikk  
>tr|D9RMT4|D9RMT4\_STAAK  
mtngy1g1sytkkngk1giyrfel1nenqsrid11etgfe1easty1vrnnev1yginkegeq1cgvas1kiddngel1h1lnkc  
l1sskag1tgcyvs1isedkry  
1feavygagi1myel1nthtgei1r1iqel1ahdfptg1therqdyphahy1inqtpdgkyvavtd1gadrivtyk1fddngfe  
fykes1fkdsdg1trhie1fh  
dngk1fayv1vhe1sntvsvae1yndgkfeelerh1t1ipenfdg1tklaavr1shdq1qflyvsnrghdsia1fkvl1dngqhle  
1vti1tesgg1qfprdn1fias  
sdd11l1vcahe1qgds1vvtvfer1nketgkit1cdntrvasegvcvif  
>tr|D9RMT6|D9RMT6\_STAAK  
mfkfvf1slvait1tlvagvgv1afayifk1kdfedierktkei1sdi1esknn  
>tr|D9RMU5|D9RMU5\_STAAK  
mpagyt1dknnvpyk1ketgnytv1anvkgnnvr1dgystnsritgvl1pnnat1kydgaycingyrwityiansgqrryiatg  
evdkagnr1issfgn1fsav  
>tr|D9RMU6|D9RMU6\_STAAK  
mki1rksil1agt1lav1asp1vtn1dkneaq1asts1ptsneyqnek1anelks11del1nvnelatgs1nty1ykr1tikisg1  
kamyal1kskdfk1kmseak1y  
q1lqki1yneidealk1sky  
>tr|D9RMU7|D9RMU7\_STAAK  
maap1fl1mtnadyv1wtpmt1vt1f1il1s1liif1fiktkdv1h1t1ifil1n1l1fsilycl1pil1fy1  
>tr|D9RMU9|D9RMU9\_STAAK  
maqknnn1vj1pmtf1ddafyr1kmakqkfkqreykrae1yfe1kvl1el1spddmeiq1idyaqcl1vq1lgiakkaeh1fydnii1ynr  
h1ledsfye1lsq1nievnep  
nka1fl1fginy1v1vsddq1dyrdel1dqmfdv1kyqseeqie1leaqlfvvq1il1fy1lfsqgr1kdaknyv1hqpp1evqdhrvvr  
n1lamcy1ly1geydtakal  
yeal1l1qedst1di1yalchyt111yntkeneqyqy1k1ilnk1vvp1mnddesf1k1g1v1sy1lkqyrasq1lly1plykkgk1fls  
iqmy1nalaynyy1ylgeede  
shywdk1lkq1skveighapw1vienskevfdqhil1p1l1qsddshyr1lyg1f1ldq1ngkeiv1mtesiwq1vlen1lnnyek1  
yl1ty1l1vqg1tl1nk1ldfi1hr  
gl1t1lyhnel1fvsendvmvaw1inqgeli1aekvd1sdvepy1igafiy1lyfknqprnv1tkkqittw1gitqy1k1nkmi1efl  
1si  
>tr|D9RMV1|D9RMV1\_STAAK

Tsompanidou\_et\_al\_Supplemental\_FASTA\_File

mdnnekeksksellvvtglsgagkslviqcledmgyfcvndlppvllpkfvelmeqgnpslrkvaiaidlrgkelfnslv  
avvdkvksesdviidvmfl  
easteklisrykgtrrahplmeqgkrslnainderekhsqirsianfvidttklspkelkerirryyedefetftinv  
tsfgfkhgqidmadlvfdv  
rflnppyvvdrlrpltgldkdvynyvmkwketeiffekltdlldfmipgykkegksqlviaigctggqhrsvalaerlgn  
ylnevfeynyvvhhrdahi  
esgekk

>tr|D9RMV9|D9RMV9\_STAAK  
makki vsdldlkgktvlrvadfnpvlkdgeitndnrivqalpitiqyieqggkivlfshlgkvkeesdkakltlrpvaed  
lskkldekvfvpetrgek  
leaaidlkegdvllventryedlgkkeskndpelgkywaslgdvfvndafgtahrehasnvgisthletaagflmdke  
ikfiggvvndphkpvaial  
ggakvsdkiinvknlniadiiigggmvytflkaqgkeigislleedkidfakdllekhgdkivlpvdtkvakefsnda  
kitvpsdsipadqegmdi  
gpntvklfadelegahtvvnngpmgvfefsnaqgtigvckaiianlkdaitiigggdsaaaaislgfendfthistggga  
sleylegkelpgikainnk

>tr|D9RMW0|D9RMW0\_STAAK  
mfni vtgkqsqddivfhfhski ftkqgvs lmrtpiagnwkmktvqeakdfvna lptlpdskevesvicapaiql dalt  
tavkegkaqgleigaqnty  
fedngaftgetspvaladlgvkyvvi ghserrel fhetdee inkkahai fkhgmpii cvgetdeeresgkandvvgeqv  
kkavaglsedqlksvviay  
epiwaigtksstsedanemcafvrtiadlsskevseatriqggsvkpnnikeymaqt didgalvggaslkvedfvql  
legak

>tr|D9RMW6|D9RMW6\_STAAK  
mnlkqsi eei inqpeyepmsvsdfqdalglssadsfrdlikvlveleqsgliertktdryqkksyrgqsklikgtlsqn  
kkgfaflrpededmedi fi  
pptkinralgdgtviveihqskgehkgkiegevk siekhsvtqvvgtysearhfgfvipddkrimqdifipkqgslgavd  
ghkvlvqitkyadgsdpe  
ghisailghkndpgvdi lsiiyqhgieiefpdevlqaeavpdhienteikgrhdlrde ltitidgadakldda isvkk  
langntqltvsiadvsyyv  
tegsaldkeaydratsvylvdrvipmiphrlsngicslnpnvdr ltlscrmeidasgrvvkheifdsvihsdyrmydav  
nqii tekdpni reqyneit  
pml dlaqdl snrli qmrkr rgeidfdi seakvlvnedgiptdvqlrqrgegerliesfmlianetvaehfskldvpfiyr  
vheqpsdr lrqffdfitn  
fgimikgtgedihpttlqkvqeevegrpeqmvi stmm l rsmqqahyddvnlghfglsaeyythftspirrypdltvhrli  
rkyliek smdnkevkrwed  
klpelaehtskrerraieaerdtdelkkaeymi qhigdefegivssvanfgmfie l pntiegmvhianmtddy rfeerq  
maligerqakvfrigdtvk  
vkvthvdvderlidfqivgmp lpkndrsqrpargkt iqaktrgksldksksddkgrkkkgkqrkgknqrndksgnskhh  
pfykdksvkkkarrkkk

>tr|D9RMX2|D9RMX2\_STAAK  
mkkkekha irkksigvasvlgtligfgllsskeadasensvtqdsdsasnesksndsssvsaapktddtnvsdtktsnt  
ngetsvaqnpaqqettqs  
sstnatteetpvtgeat tttntqantpattqssntnaeelvnqtsnettsndtntvssvnsqpnstnaenvsttqdtste  
atpsnnesapqstdasnk d  
vvnqavntsapr mrafs laavaadapaagtditnqltnvtvgidsgttvyphqagyvklnygfsvpnsavkgdtfk itvp  
kelnlngvtstakvppima  
gdqvl angvidsdgnviyftdyvntkddvkatltmpayinpenvkktgnvtlatgigstt tanktvldyeykygfynls  
ikgtidqidktnntyrqti  
yvnpsgdnv iapvl tgnlkpntdsnalidqqnts ikvykvdaadlseyfvnpenfedvtnsvnitfpnpnykvefnt  
pddqittpyivvvnghidp  
nsgdla lrstlygynsni iwrsmwdneva fngsgsgdgidkpvvpeqpedepgeiepipedsdsdpgdsdgsdssds  
gdsdgsdstsdsgdsdsas d  
sdsasdsdsasdsdsasdsdsasdsdsdndsdsdsdsdsdsdsdsdsdsdsdsdsdsdsdsdsdsdsdsdsdsdsdsdsds  
sdsdsdsdsdsdsdsdsds  
dsdsdsdsdsdsdsdsdsdsdsdsdsdsdsdsdsdsdsdsdsdsdsdsdsdsdsdsdsdsdsdsdsdsdsdsdsdsdsdsdsds  
dsdsdsdsdsdsdsdsds  
sdsdsdsdsdsdsesdsdsesdsdsdsdsdsdsdsdsdsdsdsdsdsasdsdsgdsdssdsdsesdsnsdsesgsnnnvpp  
nspkngtnasnknkneakdsk  
ep l p dtgsedeantsliwgl lasigslllfrkкенkdkk

>tr|D9RMX4|D9RMX4\_STAAK  
mkkkllvl tmstl fatqimnsnhakasvtesvdkkfvpesginki ipaydefknspkvnvsnltdnknfvasedklnki  
adssaaski vdknfvvpes  
klgnivpeykei nrvvatnnpasqqvdkhfvakgpevnrfitqnkvnhhfi ttqthykkvitsyksthvhkhvnhakh  
sinkhfi vkpsesprythp  
sqsl iikhhfavpgyhahkfvtpghasiki nhfcvvpqinsfkvippyghnshrmhvpsfqnttathqnakvnkaydyk  
yfysykvvkgvkkkyfsfq  
sngyikgkpslni knvnyqavpsyspthyvpefkgs l paprv

Tsompanidou\_et\_al\_Supplemental\_FASTA\_File

>tr|D9RMX8|D9RMX8\_STAAK  
msewhinnqstkpfligqaekqlsivkplpngrfqilteinlengnisnidhsllvsdpkaleisifdav  
>tr|D9RMY4|D9RMY4\_STAAK  
mrhgqtlfnfkgliqgfgdspitelgiaaqkarsyyetkginfdlyasstqerasdtlenvapnqsyrfrkglkewhfg  
ifegesvylfdnlykpedl  
fgdrivpfkgearqqveerivktlhdimsqtknna1vvshgtimgvflryclkldeaalkhnigncni1kfeydngtffkv  
elidpnl  
>tr|D9RMY5|D9RMY5\_STAAK  
mvtaiihgfilaiiglilplgaqnvfiFnqganqpkryrvlpaiitaglsdslliiiavvgvsiiimtlpvlqaiiyivgl  
iflmyawtiwhdkpstgd  
etqimspmkqvsfalsvsl1nphaildtigvigssaalygsnki aftiacisvswlwffllailgkmvgsidktgkllt  
iinkissiiiiivalmilq  
k1iqllf  
>tr|D9RMY9|D9RMY9\_STAAK  
melqqaianrrsvkkfkrdmhiddallyqai ekaadapnhgmrepwrvvhvpkdr1gdmskdiskfafpneldkqqchyd  
avtklggmll1l1ktdprq  
rqndenyfafgayaqlmll1yeagigtckwksplyiydlkvrktlgikkdevlagflyltdlegdmpkaprkrnrnitly  
>tr|D9RMZ2|D9RMZ2\_STAAK  
maypnelkyskehewkvvegnvaiigiteyaqselgdivfvelpetddeinegdtfgsvsvktvselyapisgkvvevn  
eeledspefvnespyekaw  
mvkvgisdesqiealltaekysemige  
>tr|D9RMZ3|D9RMZ3\_STAAK  
mkekllgtiwsiatfyysrmmemlailkikiggs  
>tr|D9RMZ4|D9RMZ4\_STAAK  
mlniqdvshl skkeqkaynrfvesvenglpvlpci emdlkemqetlnqskiggmpflksfkdipldennvpmvllaqi  
nlddlpeqqel fpvkegil  
qfwissedqmygmsen1kgnninsrlvyikepitdlsleniqah1ksldadnedipfsgafsiefrl skqtitctdykyd  
edv1alwnkvnp sfalkfn  
hsinnss  
>tr|D9RN01|D9RN01\_STAAK  
mfggydelmepvcntftakepfnq1ggypyfdqidprtdqelkmydrvl1qidstrdgnssiiwgd1gianilvkstdl  
eamkfdymyswdcs  
>tr|D9RN02|D9RN02\_STAAK  
mmmai vnkviivegksdkkrvqqviaepvniicthtgmsidklldmieslydkqvfv1adsddegdrirnwfkryl sese  
hifidktycqvancpkqyl  
ahv1skhgftckketpl1pninner1vlvne  
>tr|D9RN09|D9RN09\_STAAK  
mnkifri1tvs1ffftflknn1ayadvgin1rnfyanyepelqgvssgnfstshqleyidgkytlys qfhneyeakr  
1kdhkvdi fgisysglcnt  
kymyggitlanq1dkprnipin1lvngkqntistdkvstqkkevtaqeidik1rky1qneyniygfnkttkkqeygyqs  
kfnsgfnkgkitfhl1nne  
sftydlfytggtgqaesflkiyndnktidaenfhl1dveisyekte  
>tr|D9RN10|D9RN10\_STAAK  
mtfgei1kker vswk1svkelst1sgvsqtyisk1engkrnfp1letifn1ligfkthieykmgse spfyeinnsyldei  
1imfinssnstisdrdpne  
litqfneyydv1tkkkqnenski esdifsnik1vkgttkkeviekpyfd1nw11tqneyevffdrsfl1dnnflnkkhf  
tekdmyyynv1ndnd1kti  
kdli1vvf1lnkynyi knkddffniftnseddktkrdalyki1yetd  
>tr|D9RN11|D9RN11\_STAAK  
myhertenpdtktvmk1ceyfnitpneffgiiekegvk  
>tr|D9RN13|D9RN13\_STAAK  
mdvgskamkmy1tyic1vs11ti111aisnmyvafsvyawlit1gcn1tgg1ene  
>tr|D9RN14|D9RN14\_STAAK  
mnneqkeviehvvq1el1svmn1lesyehteyvngievseisrekhlelimkwcaqelknnfqlekge  
>tr|D9RN15|D9RN15\_STAAK  
mnweikdlmcdievikqkindvatkhawfvedrfvkneletkrehinfsasylehriqnehtvellqvy1kefge1iqkf  
heiekas1qadqsesna  
>tr|D9RN16|D9RN16\_STAAK  
mneikleydthsvvhyes1dsrsfksfskpkwsklink1svpieanykyargvavygdikngandhgei1kkhrndvvnv  
vyrdv1ldydeind1kq1  
heissal1nvawfwh1sfsh1teqarirlyip1nerisaddyrytkvlankighkvdegsyqpsrcfalpviqkghif  
ikrvndcpi1dvdm1eqws  
kefeqsgnspnikgytrrdsaywr diafgvsegerntlasitgy1lrryvdpn1vyglvsawasvckppinqsevnntf  
ks1lkkdskss  
>tr|D9RN17|D9RN17\_STAAK  
menvtndevfemidsrtgvl1nandwksq1rrsattqalkkttt1nae1ilcndes1kg1lvqydafekvtklkr1pywrskg  
danywadi1dthvishid  
k1ynvqfsrd1id1tviekeayqnr1fhpiksmieskswdgikriet1fidylgaednhynrevtkkwmmgavariyqpgik

Tsompanidou\_et\_al\_Supplemental\_FASTA\_File

ydsmiilyggqvgkstav  
sklgghwynqsi ktfkgdevy kklqgswiceieelsafqkstiedikg fisai vdiyrasygkrterhprqcvfvgttnn  
yeflkdqtdgnrrffpitt d  
knkatkspfd d ltpdvvgqmfaeakvyfdenptdka l l l dkeasema l kvqeahsekda l vgeieeflerpipsdywrt  
leekrvsahviddqdyik l  
ygdgk l i e l pntkpgayvwr d kvcsmei wkvmmkrddqpqqh l r k i d k a l r n t n y c g t v k k q t r y g e g i g k q y g f s v d l  
asyykn l kv  
>tr|D9RN19|D9RN19\_STAAK  
mndkeki ynq l hhdapiqi i papen l fveyieadev wvsvvcmal skahnin fydsddvgcidkaatcsikkfnpetge  
feqf skmaqkevtq  
>tr|D9RN20|D9RN20\_STAAK  
mni etivnqfetragt l l rryytg l l e h s k v q p y c f k l y n d p f d m v y v m n g k l f g h v y i k d c k v r q s f e l a s p k h t e g l i  
rsieghyvgyelhdgkqls  
isdvmasql fedeyfmyglqtyaesnsvfeylengfdtdtlegiqsntdvianiemyqlatginepapelvegkl  
vtefvqdenatqedykale  
rk l n d l k a s y y s l s k  
>tr|D9RN21|D9RN21\_STAAK  
mktesyfkeynqfvidqqkai qeleqerna leskiki d k s t y k q l i m d g q d d k a d n l y q a t d a d e k k l k a l n k r l e t k k s  
vskevkyqktie l l khqse  
lsslyesekqsalgklkvadaynei ideiedindryedehqyasyisqeqlyddkearealngyfrenif t s y i n g n d  
l p y e h n n k l f l k c  
>tr|D9RN22|D9RN22\_STAAK  
mlkgkdny metkye l n n t k k v a n a f g l n e e d t n l l i n a v d l d i k n m q e i s s e l q q v e q s k q k y g t t l q n l a k q n r i i k  
>tr|D9RN23|D9RN23\_STAAK  
mk l l k t k n c l y r n g d n k l s e y q l l t q f n p a f i n k k i k m c e f q i e s m y h m s a s t t t c d e i m g v v s v s y p i e k l v i k i e t  
kag l q n y k n r s i n n m a l l k  
k v l n h y t e k e q k v v k y m r s n g r y k p y n v i e r l q g d l y q a s i k q r s e r q k q r n i a i e n s k i a r v n a y h q s s h v k v v  
>tr|D9RN25|D9RN25\_STAAK  
msdl takqarf vneyi r t l n v t q s a i k a g y s a n s a h v t g r l l k k p h i k q y i q e q k d k i i d e n v l t a k e l l h v l t n a a v g  
detetkev v v k r g e y k e n p  
q s g k v q l v y n e h e l i e v p i k p s d r l k a r d m l g k y y k l f t d k h d i n g n v p i f i n i g e w d g d d e e l d k a v k d v s n a n p n h t  
v i v d d i p l e d  
>tr|D9RN27|D9RN27\_STAAK  
mfynaski t i n d l s i k l k s a m a n d q g i t k h d i g l a e r a v y k v y f k n g s s k y v d l k t e y k d e r v f k a t d i k k v d i e l k f  
>tr|D9RN31|D9RN31\_STAAK  
mnaie l s n v n y s s d q f n l k n i s f k v p q g f v t g f i g r n g a g k t t i r l i m d l y q p q t g v i r v l e e d m a l n p i e l k n r i g f v  
ysenyfnerwttkqlekm i  
apfyrkwdhqvfefylekfdlpinksiktfstgmkmk l s l a v a f s h h a e l y i f d e p t s g l d p l a r n e l l e i i q q e l i d e n  
k t i f m s t h i i s d l e k i a d y  
i i h l s d g e v i l n g s k e q l l q r y q v v s g a i e d l d d e l a s l l i y e e h k r t g f i g l t e h a q v f k e i l g h k v n i t t p s i e n l m v  
y l e k r k p k y h e n i k l m e e g  
f  
>tr|D9RN36|D9RN36\_STAAK  
mnyfrykqfnkdvi tvavgyylryalsyrdiselrgrgvnv h s t v y r w v q e y a p i l y q i w k k k h k k a y y k w r i d e t y i  
k i k g k w s y l y r a i d a e g h t  
l d i w l r k q r d n h s a y a f i k r l i k q f g k p q k v i t d q a p s t k v a m v k v i k a f k l k p d c h c t s k y l n n l i e q d h r h i k v r k t r  
y q s i n t a k n t l k g i e c i y a  
l y k n r r s l q i y g f s p c h e i s i m l a s  
>tr|D9RN37|D9RN37\_STAAK  
mt l s i i v a h d q r v i g y q n q l p w h l p n d l k h i k q l t t g n t l v m a r k t f n s i g k p l p n r r n v l t n q a s f h e g v d i n s l  
d e i k e l s g h v f i f g g q t l y  
e a m i d q v d d m y i t v i d g k f g g d t f f p p y t f e n w e v e s s v e g q l d e k n t i p h t f l h l v r r k g k  
>tr|D9RN38|D9RN38\_STAAK  
mynpfdeayhglceeileignrdrthtgtiskfghqlrfdltkgfpllttkkvsfklvatellwfikgdtniqyllky  
nniwnewafenyvqsddy  
hgpdmtdfghrsqgdpefneqykeemkkfkerilnddafakkygnlgnvygkqwrwdwedkngnhydqlksviqqiktprn  
srrhivsawnp teid smal  
ppchtmf q f y v q e g l n c q l y q r s a d i f l g v p f n i a s y a l l t h l v a k e c g l e v g e f i h t f g d a h i y s n h m d a i h t q l s r d  
s y l p p q l k i n t d k s i f d i n  
y e d l e l i n y e s h p a i k a p i a v  
>tr|D9RN40|D9RN40\_STAAK  
mqnki f q y i h l q y l r t d a g r i n f m l i e n p f t y k p r k k p i d l d e i q k h k n t i k k f n e i f k q g n n l e n l l k r m k k p s n m n f  
h i a i s e d n l l t s d n p v i a t  
d n w n q i m l p i t p n i l i e f q e d k i n s s n d l r v i l k k k  
>tr|D9RN41|D9RN41\_STAAK  
meikeyfeiantilrwlsvi f p l f g i i s k l v d r n n i m p n k e r l g r l f k n i l r f i g l v i l l d i l m f l s i s e i f s e v k n  
i n s i k s d l w s a f y i f t a f n  
v v y a i f l f p l f i k e k k y e v e l t h n n k m k y i v r d r v e d k d d g k l i y v d e d e n k e y e e n i i d i k k r e s r v t f i p h v a l f

Tsompanidou\_et\_al\_Supplemental\_FASTA\_File

sinkdal ketkvfpmwlrw  
slfiilvgvdytjai tclka lydlwrwdfgkllipfrifstfpvvlvleitvfvflyktwlgknklkyhnkkkgdsem  
k1nekeafmislknfr  
gvrnktpeimkddtlnyggkqqlddienkcvknvfryseinkdfvygllsllisykvgtngreqayrnfittqyvngnve  
eliqfmrrellgeydhair  
rhqvliefmekre  
>tr|D9RN42|D9RN42\_STAAK  
maivlvetlki fgi evkqmv yqhinqyl fkhqkdpvkvaiicqki feyratqneittmqqlfqniyrylrndlklglet  
avalnphdlr dyfliqsyy  
yhvi  
>tr|D9RN43|D9RN43\_STAAK  
mgkniqrtl tiytklrdhhyvnp llaetfhvhprsiqrdledirdflndqhqh llydhhtqnyymshqtmtddqv tps  
vtyemthqlyqq lqhhyqt  
yvlnkndahkm lvtfqmapseaihfcf tyrhalrlvspdtlfaqfttel iqlqmiymkga l  
>tr|D9RN44|D9RN44\_STAAK  
mfqslkqlnhlrl yqntqq lntssflrfvqsvfqivprwfwfyivlvsivfpfeigkepfvplsappimtqlvhlyt fi  
vmlspl tlytirfvksis  
ftrfywglvkhedrfterhnqri rekrqkvyaddryafnynrrnghwtatni daeknrnraemngawfi amgy lglfllf  
fvgaymi imyfiivpvaig  
vvlhmykyqafqk  
>tr|D9RN45|D9RN45\_STAAK  
mktkqllsttaiagtlll tgl napqakaesningsnavdiiqqvdkqhgnqpd lirygqpkdhgdyevtt nknsgvggt  
gitrlykdgtvkhstdssg  
qdfktfghyedts shdqnttqaatqhtetsqhdttntqlpetgqshtgittmvgivalmagigfiarrashka  
>tr|D9RN46|D9RN46\_STAAK  
mkksii smisl tfl lagcghnqaanqthvkl gdmhqdqhisylvk kednptptkds vvtayivtqngkqtvyssdqas  
drtlgdfkdksktdi idma  
kkddraafqyekkemk keiqklvnrkqlkdhdgfk lkasdfqtqpetai khldnmt yqapppkvriqvtedetgnhstr  
eafaihpqgigntkqpedv  
gdieqvmtesg isnal nenkgtidyl ttdkhpnhmi afdi aggtadv ydkkyafisqndgelnlvtpvgkktk giqfda  
pdsryvqdqk  
>tr|D9RN47|D9RN47\_STAAK  
myhhiqmyleqlgydiv e villfekvdqn hadmdelntlnqlasav yihcqrhnl laythp ptpfdpyeliewfvfqsyd  
rdit  
>tr|D9RN48|D9RN48\_STAAK  
mnqskiaklrkdksltqen laekacvtvrtiqrieageevssetlknisnal dvtinel fesiassdkeeeimeiakeqq  
kqfhyrrneqltfrfiafg  
vifvflglfgi fvggln glkqdiygiwifm flflslammyvl nvliskkldekypmtvgmnnkrsnmkqqpvkngwefm  
arywwiifpigglswl ip  
eltgk  
>tr|D9RN49|D9RN49\_STAAK  
mndnsheafakskkkkhkgngnkhncfpvgnsefcttp  
>tr|D9RN50|D9RN50\_STAAK  
mkssl filkehfnlyl mkr laqfemki snknylgtawel inpsiqifmywfifglgfrnrtvenipfi fwlivgism  
wffvnqgilngtkavtsky  
kqvakmnp lsi lssyivl skfythillilimlicalngyyptiytlqllifipytl lltmtitlltstlav iirdvqm  
lmqal mriiffissilylp  
tntlvlkv iqfnpiyfiaesyraail yqnwffithwkl slynltfl litfvlgsl l hvkyreqfadfl  
>tr|D9RN51|D9RN51\_STAAK  
mllretedyekkyki gnvmgtaficivifslmkstplsdlsflkyihfase illiagli insvpdfltwnikniifdli  
iisflivffiwv  
>tr|D9RN52|D9RN52\_STAAK  
mddmktikmvadelnvtkqtvvnnaknl nisfekengvnyiddndylkivekitkkerttqnkenkkseityenteknry  
nnsdgfetlktkvnelekq  
veifetrakndekyienl tkqldqqs nvtlnkl lenqqilalesnkkiqklehqleerqlsysfdkstdrenfdvq  
easytsdsvntdqyqkeek  
kpevqpkdisesqqdeksqqddsfnqndk diaieetqt kkgfwsrlfgg  
>tr|D9RN56|D9RN56\_STAAK  
mniveneicirtl idddfplmlkw ltdervlefyggrdkytleslkkhytepwedevfrvii eynnpigyggiykmyd  
elytdyhypktdeivygmd  
qfigepnywskgigt tryiklifeflkkernanavi l dphknp rairayqksgfriedlpehelhegk kedcylmeyry  
ddnatnvkamkyliehyfd  
nfkvdsieieggydsvaylvnneyi fktkfstnkkkgyakekai ynflntnletnvkipnieysyisdel silgykeik  
gtfltp eiytmseeqn l  
lkrdiasflrqmhgl dytdi sectidnkqnvleeyillretiynd ltdiekdyiesfmerlnattvfegkkclchndfsc  
nhllldgnnr l tgiidfgd  
sgii deycdfiy ll edseeigt nfgedil rmygnidiekakeyqdiv eeypietivygiknikqefi engrkeiykrt  
ykd

Tsompanidou\_et\_al\_Supplemental\_FASTA\_File

>tr|D9RN58|D9RN58\_STAAK  
misfftkttddmmtskkrwta1vvlavslfvvtmdmtilimalpelvrelepgstqqlwivdiyslvlagfiip1safadk  
wgrkkalltgfalglvsl  
aiffaesae1viairfllgiagalimptt1smirvifenpkeratalavwsiassigavfgpiiggalleqfswhsafli  
nvpfaiiavvagfl1pes  
klskekshswdipst1lsiagmiglvwsikefskegladiipwvivilaitmivifvkrnlsssdpmldvrlfkkrsfsa  
gtiaafmtmfamasv11la  
sqwlqvveel1spfkagly11pmaigdmvfapiapgl1aarfgpkiv1psgigiaaigmfimyffghpl1systemalalilvg  
agmaslavasalim1letpt  
skagnaaaveesmyd1gnvfgvav1gsl1ssmlyrvfl1dissfsskgivgd1ahvaeesvvgavevakatgikqlaneavt  
sfndafvatalvggiimi  
isivvy11ipks1ditkqk  
>tr|D9RN59|D9RN59\_STAAK  
mnlkdkilgvake1fikngynatttgeivk1sesskgnlyyhfkten1fleilnieeskweqwkkeqikcktnrekfy  
lynel1stteyypl1qna1  
iefyteyyktns1nekmnk1enkyidayhvi1fkegn1ngewc1indvnavskia1aanavngivtfttheqnerik1mnkfs  
qif1ng1sk  
>tr|D9RN61|D9RN61\_STAAK  
mnlipfii11ifsc1lwtaitnky1pset1dkkgqqdryderqrkmfieilaksfiwivycmlft1vlkftgl1spsiegs  
fsqypeiffiival1flmlf  
nyyttnkkytsk  
>tr|D9RN63|D9RN63\_STAAK  
mkhfanenkmiyvhi1rqankkafmnyekvcvatdayetedkvdn1lehklgyeseieki1dyiikgsvak1n1  
>tr|D9RN67|D9RN67\_STAAK  
maneiikkterfi1lvqidkegterv1yqdfvgsfttsdsasyaqdfkseenakkiaet1n1lyq1tgnqngvkvvkevvd  
rtd1ssdksvdsetm  
>tr|D9RN69|D9RN69\_STAAK  
mihv1dfndki1idf1stddps1vraihkrnvndnsem1ellisseraekfrerhrvi1irdsnkqwrefiinwvqdtmdgy  
teieciasy1adittakpy  
apgkfekkttseal1kdv1sdtgwevseqteydg1rttswtsyqtryev1kql1cttykmv1dfyielssntvkgrvvlkk  
kns1fkgkeieygd1vg1  
trkidmsei1kta1iavgpndkgkr1el1vvtddaaqsqfn1pmryiwgiyepqsddqnmnetr1sslakte1nkrksavm  
syeitstd1levtyphei1s  
igdtvrvkhrdfnpplyveaeviaeeyni1isenstytfgqpkfekesel1reefnkr1n1lihqk1ndnisnintivkdvd  
geleyferki1hksdtpen  
pvndt1lwydtsnpdvav1rrywngrwieetpndvek1ggi1reka1fse1nni1fin1siqhas1l1seate1lnsey1vdn  
d1kad1qas1davidvynq  
iknn1esmtpetatigr1vdtqa1fl1eyrkk1qdvytdvedvki1aisdrfk1l1qsqytdekykealei1atkfg1tvned  
l1qlvgepnvksaieaare  
stkeq1rdyvkt1sdyktdkdgiver1dtaeaertt1kgeikdkvt1neyrng1leeqkqytdddq1sd1snpeikasieqa  
nqeaqea1ksyidaqdd1k  
ekesqayadgki1seeqraiqdaqak1eeakqnael1karnaekkanaytdnkvestdaqrkt1trygsqiiqngkeik1  
rttkeefnatnr1t1sn1n  
eivqnvtdg1tti1ryddngvaqa1nvvgprgir1n1adkidingnrein1li1qnmrdkvdktdivns1n1sreg1dinvrig  
ikggdnnryvqi1qndsie1  
ggivqrtwrgkr1stddi1ftr1kdgh1rfrnntaggs1ymshfgisty1idgegedgssgti1qwwdktysdsgmngitins  
ygvvaltsdynri1idsy  
asanie1reapi1ysptknkpg1nrfaft1snadsayetdgy1imfgsdenykygag1rfskrsnkg1lvqvvngdyatgg  
dttiesgm1gkfn1vkrrdg  
nsyvsiqsyd1lavgsdnagdrvasnsiykrtysapan1hitsagtigratsakkykisienqyineddqfshskeik1  
pirtwfdkyese1makele  
sgk1l1sddt1fk1srhtg1iaeevee1gfnefviyddngeiegiaydr1lvwh1lipi1knqqskiek1leeline  
>tr|D9RN70|D9RN70\_STAAK  
mvrndylshngi1kthddv1nel1vkffnyeeqvl1qfkskdwywnayfegpik1hkeftipvkftikv1tdpykysvtgn  
kntaisdqsvsvnsgtadt  
plivearai1kps1syfmi1tkndedy1fmvgddevtkevkdympvyhsefrdfkgwtkmited1psnd1ggkvvgdfvisn1  
gegykatn1fpdakg1vwgag  
tkrg1pkamt1dfqi1tyk1iveqkgkgagrtahiydsdgk1lasigyenykhdrkighivvt1ynqkgdpkkiydyqnp  
imyn1drivvymr1rrvgn  
kfsiktwk1fdhi1kdpdrkpi1dmdekewidggkfyqrpasii1aiysakyngykwmemng1gsfnte1l1pkpkgardviiq  
kgd1vkidm1qaks1v1nee  
pm1seks1fgsny1fndsgyse1li1qipenvfdttvkwdry1  
>tr|D9RN73|D9RN73\_STAAK  
mkyttdqt1n1vsinrdgqvtaeaqgiatvkatvgnm1sdtitinvea  
>tr|D9RN74|D9RN74\_STAAK  
mavkhasap1kayini1tg1gfak1tkegae1kysdi1tktrgl1kqigvetggel1ktayadggpi1esgntdgegkisi1qmhaf  
pkei1rki1vfnedydedgvy  
eekqgkqny1vavwfrqerrdgtfrtvl1pkvmftn1pkidgetaekdwdf1sseevegeal1fl1vdkksvrkyi1f1dsanm

Tsompanidou\_et\_al\_Supplemental\_FASTA\_File

tnhggdgekgeeaf1kki1  
geeytgnvtedneet1  
>tr|D9RN76|D9RN76\_STAAK  
msvkvigdkalerelekrfgikemvkvqdkaliagakviveevkkq1kpskdtgalinevsfskpewingkrtitvhwrg  
skdrykivhlieyghvqke  
tgkfikpkamggvnrairggqnkyfet1kre1kk1  
>tr|D9RN81|D9RN81\_STAAK  
meikgvisnedkwvyem1gmdstcpkdv1tq1efsdedvdi1insnggn1vagseyyth1rahkgkvnvritaiiasaa  
s1iamagdhiemspvarmm  
ihnpssiaggeakdlnhaaet1ehvgqimaeayavragknkqelvemmaretwlnadeaieqgfadskmfendnmqivas  
ntqv1skdv1nrvtalvsk  
tpevnididaiankviekinmkekeseidvadskvsangfsrflf  
>tr|D9RN83|D9RN83\_STAAK  
misknyvdeyin1wkqgki1lnkerid1fny1qkhiysrddvyfdeqkiedcikfiekwyfpt1pfqrfiiianiflidkn  
tdeafftefaifmgrrggk  
nglisaisdf1stplhgkkeyhisivansedqaktsfdeirtvlmdnkrnktgktpkapyevskakiinratksvirynt  
sntktkdggregcvifdei  
hyffgpemvvnkrqglgkknrrtfyistdgfvregyidamkhkiasv1sgkvknsr1lafyck1ddpkevddrqtweka  
nplhkp1seyakt11sti  
eeeynd1pfnsnkpefmrn1pevd1ekviapwkeilatnreipn1dnqmciggl1dfanirdfasvg11frknddyi  
w1ghsfvrqgfl1ddvklep  
pikewekmg11tiivddvieieyivdwflkarekyglekviadnyrtdivrrafedagiklev1rnpkaihgl1lapridt  
mfakhnviygdnp1mrwft  
nnvavkvkpdgnkeyikkdenrrktgdgfmavhalyraddivdkdmskalda1msidf  
>tr|D9RN87|D9RN87\_STAAK  
mwitmtivfai111vcisinsdrareiqalrymndy11deviktgyngleeyrielkrmnndikk  
>tr|D9RN89|D9RN89\_STAAK  
mtqylvttfkdstgrkhthitraksnqrfivveaeskeeakekyeaqvkrdavik1gqlfenirecgk  
>tr|D9RN92|D9RN92\_STAAK  
mnyetgfqlgvmdar1kkmrkqrdeykkqrde1igdiaevkrkakafdeidn1iyevfemncfkfsfinenkel1ildse  
sn1ffs1kdcank1dlvkv  
fihwvsrscienmspertsqvf1qtgfe1yigkh1tkkdyemytcfgng1nsdgaysyarr11nipegiaq  
>tr|D9RN95|D9RN95\_STAAK  
melieshgitagmvskrvkdgwelheamdapegtr1seyrekktier1eqarlerklerkrkreael1rkkph1fnvpqk  
hprgracy11lendi1fvkv  
kk  
>tr|D9RN96|D9RN96\_STAAK  
meieikfnevfnapmgsprprfrktgrfvqtypmstykthkayiqgqmpk1n1eralkie1dfyfp11kswskkkksemv  
gqykvtkpdidn1iktvl  
acnghvwkddnqiteitsskrygiepkii1rieei  
>tr|D9RN97|D9RN97\_STAAK  
mevnylnridkdntdndgi1kannvn1pnedneayvei1ftmrsvesnsweneknkkri1ddendqni1gklrvnyki  
icdfstereekmrda1lei  
iepyfrkevet11snmk1pnfilpyrfwenedn  
>tr|D9RN98|D9RN98\_STAAK  
mkitnir1ksankksvkklyflegidaiekiennyekkv1vsi1legirgystqnykiecdfkkfhyrifqyyri1krkl  
ketvknfdekqvqt1skiy  
nk1cnvsdknnyigqiletyikyirtedsvykighepivyhkrks1hgkesysnr11dfvtienrkti1ilcecan1qr  
efggl1ikhfnkprfqk1q1  
mnh1edk1kqchsgnekpn1fveikkv1vtafaptnqnl1pryqreipiltisdmk1nmv1  
>tr|D9RNA3|D9RNA3\_STAAK  
mnevaehsfdvnevikdfpi1dqkvngkr1ay1dstatsqtpvqvl1vledyykrynsnvhrvgvht1gslatdgyenare  
tvrrfinakyfee1iftrg  
ttasin1vahsygdanveegdeivvtemehhanivpwqqlakrknat1kfipmtadgel1niedikqtindkktkivaiahi  
sn1lgtindvktiaeiahq  
hgai1svdgaqaaphmk1dmqemnadfysfsgkml1gptgigvl1fgkrell1qkmepiefggmidfvskydatwad1ptk  
feagt1piaqai1glaeair  
y1erigfdai1hkyeqeltiyayeqmsaiegieiygppkdraggvitfn1qdvphdvatavdtegvavraghhcaqplmk  
w1nvsstarasfyiyntke  
dvdq1inalkqtkeffsyef  
>tr|D9RNA6|D9RNA6\_STAAK  
mvdkattqiqhdcgirv1vfik1liesyikys1dnsilvr1rfv  
>tr|D9RNA7|D9RNA7\_STAAK  
mi1vqf1daivgyksedvfkygplatsvvn1illiv1f1f  
>tr|D9RNC7|D9RNC7\_STAAK  
makggdyvfnq1endpdvdv1eygc1thcgicsag1yalvngdivegdspeellqnyahiketwif  
>tr|D9RNC9|D9RNC9\_STAAK  
maqdrkkv1v1gagyag1qtvtkl1qkaisteaeit1linkneyheatw1heasagt1nyedv1ypvesv1kkdkvnfvq

Tsompanidou\_et\_al\_Supplemental\_FASTA\_File

aevtkidrdakkvetnggi  
ydfdilvvalgvsetfriemgdhafqienvitarelsrhiedkfanyaaskekddndlsilvggagftgveflgeltd  
ripelcskygvdqnkvkit  
cveaapkmlpmfseelnhavsyledrgvefkiatpivacnekgvvevdgekkqqlnagtsvwaagvrgsklmeesfegv  
krgrivtkqdltingydni  
fvi gdc safi pageerplpttaqiamqqgesvaknikri l ngesteefeyvdrgtvcs l gshdgvgmvf gkpi agkkaaf  
mkkvidtravfkiggigla  
fkkgkf  
>tr|D9RND3|D9RND3\_STAAK  
mhwtiiggiggtaiakllssgltdr ltiidphetfcqrfnsytnriempylrspivhhvhppqpfhlkqfakqhqytn  
afygyqrpel t m f m d h i a  
haskyql edclvqglvgtldkqedkwhikledgqiittdcvviaigstnipfmpdil kdkqvnhi fekel dqvvydkt  
dhivgsgitaahlaklln  
hdndkkih1wlnkdieihdfdadpgwlgpknmssflstksmpernaivqrerhkgmpheylrlkkhikngrinvhktp  
itqisggvintendsvpyq  
qimvatgfeqdfmsqplikqliqnydapinecnypviseklewipnlfvagcfadlel gpfgrnmv m g r k a a e r i e q a f l  
klqqysa  
>tr|D9RND4|D9RND4\_STAAK  
mikiilis l a l i f v i g a l i s a l a a i g l l r l e d v y s r a h a a g k a s t l g a m s l l f g t f l y f i a t q g f v n m q l i v a i i f v l i  
t g p l s s h m i m k a a y n i k t p  
ytkktkvdeisedlkdtkl  
>tr|D9RND5|D9RND5\_STAAK  
mnhviiiviaiiivvismlamlirvvl g p s l a d r v v a l d a i g l q l m a v i a l f s i l l n i k y m i v v i m m i g i l a f l g t a v f s  
k f m d k g k v i e h d q n h t d  
>tr|D9RNE1|D9RNE1\_STAAK  
mkl y r f s h k t g s y g v t i v e n g d d v l v k v e q v i k h p k q g d l h n p t e t e g v f f h d r k a l s h f e k r y t k r s q l r d f n v d v l r  
y e d s l q q a i t d l e t k l k a q  
q t k h a e m s l a s l a r l k e d y s l q y k e n f k  
>tr|D9RNE5|D9RNE5\_STAAK  
mmkrgdmmtksekieletnhygahnylpipiviseagvwwkdpegnkydm l s a y s a v n q g h r h p k i i q a l k d q a d k v t  
l v s r a f h s d n l g e w y e k i c  
k l a g k d k a l p m t g a e a v e t a l k a a r r w a y d v k g i e p n k a e i i a f n g n f h g r t m a p v s l s s e a e y q r g y g p l l d g f r k v d  
f g d v d a l k a a i n e n t a a v l  
v e p i q q e a g i n i p p e g y l k a i r e l c d e h n v l f i a d e i q a g l g r s g k l f a t d w d n v k p d v y i l g k a l g g g v f p i s v v l a d k  
e v l d v f t p g s h g s t f g g n p  
l a c a a s i a a l d v i v d e d l p g r s l e l g d y f k e q l k q i d h p s i k e v r g r g l f i g v e l n e s a r p y c e a l k e e g l l c k e t h d t v  
i r f a p p l i i t k e e l d l a l e  
k i r h v f q  
>tr|D9RNE7|D9RNE7\_STAAK  
maasavftmgflsvptagaeqtnqiankpqaiqwhtnltnerfttiahrgasgyapehtfqaydkshnelkasyieidlq  
rtkdghlvamhdetvnrtt  
n h g k v e d y t l d e l k q l d a g s w f n k k y p k y a r a s y k n a k v p t l d e i l e r y g p n a n y y i e t k s p d v y p g m e e q l l a s l k k h  
h l l n n k l k n g h v m i q s f s  
d e s l k k i h r q n k h v p l v k l v d k g e l q q f n d q r l k e i r s y a i g l g p d y t d l t e q n t h l k d l g f i v h p y t v n e k a d m l r l n  
k y g v d g v f t n f a d k y k e v i  
k  
>tr|D9RNF6|D9RNF6\_STAAK  
mkflsfkyndktsygvkredavwdltqvfadfaegd f h p k t l l a g l q q n h t l d f q e q v r k a v v a a e d s g k a e d y k i s f  
n d i e f l p p v t p p n n v i a f g  
r n y k d h a n e l n h e v e k l y v f t k a a s l t g d n a t i p n h k d i t d q l d y e g e l g i v i g k s g e k i p k a l a l d y v y g y t i i n d i t  
d r k a q s e q d q a f l s k s l t g  
g c p m g p y i v t k d e l p l p e n v n i v t k v n n e i r q d g n t g e m i l k i d e l i e e i s k y v a l h p g d i i a t g t p a g v g a m q p p k f l  
q p g d e v k v t i d n i g t l t t y  
i a k  
>tr|D9RNG2|D9RNG2\_STAAK  
mdinkmtyavqsalqqavel sqhklqnieieailsaalneseslyksileranievdqlnkayedklntyasvegdniq  
ygqyisqqanqlitkaesy  
mkeyedeyismehilrsamididqtkhyinnkvevikeiikkvrggnhvtsqnpevnyealakygrdlveevrqqgkmpv  
igrdeeri rntirilsrktk  
nnpvligeppvgktaiveglagrivkkdvpe l l d k t v f e l d l s a l v a g a k y r g e f e e r l k a v l k e v k e s d g r i i l f i d e  
i h m l v g a g k t d g a m d a g n m  
l k p m l a r g e l h c i g a t t l n e y r e y i e k d s a l e r r f q k v a v s e p d v e d t i s i l r g l k e r y e v y h g v r i q d r a l v a a a e l s d  
r y i t d r f l p d k a i d l v d q a  
c a t i r t e m g s n p t e l d q v n r r v m q l e i e e s a l k n e s d n a s k q r l q e l q e e l a n e k e k q a a l q s r v e s e k e k i a n l q e k r a  
q l d e s r q a l e d a g t n n n l e  
k a a e l q y g t i p q l e k e l r e l e d n f q d e g e d t d r m i r e v v t d e e i g d i v s q w t g i p v s k l v e t e r e k l l h l s d i l h k r v v  
g d k s v d l v s d a v r a r a g  
i k d p n r p i g s f l f l g p t g v g k t e l a k s l a a s l f d s e k h m i r i d m s e y m e k h a v s r l i g a p p y i g h d e g g q l t e a v r n p



Tsompanidou\_et\_al\_Supplemental\_FASTA\_File

ysvilldevekahtdvfnv  
llqildegrrtdskgrsvdfknti i imtsnigsqvl lenvketgeitstekavmtslnayfkpeilnrmddivl fkp ls  
iddmsmi vdkil tq lnir l  
leqrisievsddakawlggeayepqygarplkrfvqrqietplarmmikegfpegt tikvnl nsdnnl tfnvekihe  
>tr|D9RNG6|D9RNG6\_STAAK  
mlnrtilvgrl trdpe lrttqsgvnvasftlavnrftnaqgereadfiniivfkkqaenvnky lskgs l tgv dgr l qtr  
nyenkegqrvyvteviads  
iqfl epknsndtqqdlyqqvqqtrgqsqysnnkpvkdn pfananvpieiddnd lpf  
>tr|D9RNG8|D9RNG8\_STAAK  
mtennklqti eqqlvqeknvsdnvlnkvr vlesqgnlelpndyspsnamkqawlqisqdnklmscndtskanalldmvtq  
glnpaknqcyfipygnkmq  
lqrsyhg nvmmlkrdagaqdvvaqviykgdtfkqemggtgrikaikheqdffnidkeniigayctivfndgrdnyievm  
ieqikqawmqssmi kdeka  
lqnskthnnfkeemaktvinraakryintstdsnlfkyaqeseqrqrkevldaevenanqeqldfeqpvl eeaqyte l  
endkpidvsdf eeikepat  
ekeseeepf  
>tr|D9RNG9|D9RNG9\_STAAK  
mkinkl t isnfagikeekfnfdgkdakiygnnatgktttatalqwl lfdkgl dgstksfnvpvl nekneenyeliptvfa  
efeidgkittfk keshpky  
tingktnrkeysrsrtkkqyindesikvkdykaridelidedvfk litnpqafnlldwkkrrsl l feiakpindedvikt  
nddfkelnni lgdheietk  
kkiltdkikqinkdikdipiringtqqnkqdvpefdndrya i ikqeieqleneridiqngkeeinlrnqladkqselkri  
ednnsasnenkihaltne l  
hvengtvanl ktr l kqnkq qitheenrrnrl lenhkg lksdl ekaknqkfeyl ddnvcscgqql paeqvneareka l qk  
fnaskskeletiqtsinhi  
isegkkipiiek leddnnnlqikineaeersariqnkinklktthvdvtqtdeykavml e ineqkr snirk tiqdkv  
sgiddkisel tqekseiev  
srsieksnkh lddvise l rneedr l l dekekys hdyil keftttkvkml teninnefdiaefkl fntlvngeleetcst  
tvngveydsg lnnasrin v  
gl diintl skhfkv tapifidnaesv teliktesqqiqlivneqdkklrmeti  
>tr|D9RNH4|D9RNH4\_STAAK  
meaqnk kvyydeannrr l l signl dtyll adiksrfglykkaipdl dnl yiqidgiefky  
>tr|D9RNH5|D9RNH5\_STAAK  
mqalqtksnigemfnieqengeia isgre l hqalevktpykkwfermsdygfeenidyvvt di fvhnp l ggrnqt dha  
l t l dtakei amiqrsepgk  
rarqyfiqvekawnspe m qra l k ianntinqletkierdkpkivfadavattktsilv gelakiikqngvni grr l f  
ewl rqnqgl ikrkgv dym  
ptqysmere l feiketsi thsdghtsisktpkvtgkqqyfvnkflgekqt  
>tr|D9RNH9|D9RNH9\_STAAK  
mfkgdknmssfssnler l mnrkrdmsdse l aelvdvnr tvtvrwrkgi r spkl dklpeianvf gvkpl dlihdmdski e  
eihnvssql tpprqs nvlk  
yatnql eeqnndsdl vdfnsyieqeksevd iygcasagiger l ynepiskefvrgyvpahdia l kvngdsmepl fknqqi  
ifiekshtikdgqigvfii  
ngdayvkkvyvednr l t l vs l nkykd l hfydnesvr l vgkvi l  
>tr|D9RNI0|D9RNI0\_STAAK  
mn l kevdini eewemveipfyteee l tyr l knd l pitksefeequesknefl  
>tr|D9RNI3|D9RNI3\_STAAK  
meekrykvyrgei iyadfgkgvghefsykhfcivinkkdnknngkvtvipl tskskhnafvnihlikpfl ntlkqsiak  
hekkiesieni inqnpnd l  
kviyyarflcdsl knemkqydfvenkl n l n l vdkssyaktq ditti skdrilnyikdl svlirlpkhetdr l vnicfkkms  
>tr|D9RNI5|D9RNI5\_STAAK  
mypoqgykrad l igqssyiknndvvi fneafdngasdk l l snvkkeypyqtpvlgrsqsgwdktegsysstvae dggva  
ivskypikekiqhvfks g  
gfdnds nkgfvytkiekngknvhvigthtqsedsr cagahdrki raeqmkei sdfvkkknipkdetvyiggdl nvnkgtp  
efkdm l kn l n vndvlyagh  
nstwdpqsnsiakynypngkpeh l dyi ftdkdhkqpkql vnevvt ekpkpvdvya fpyyyvyndfsdhypikaysk  
>tr|D9RNI6|D9RNI6\_STAAK  
mikqlcknitict l a l sttftv l patsfakinseikqvsekn l dgdtkmytr tattsdsqknitqslqfnfltepyndke  
tvfikakgtigsg l r l idp  
ngywnst l rwpgsysvsiqnvdnnntnvt dfapknqdesrevkytygyktggdfs inrggl tgnitkesnysetisyqq  
psyr t l l dqstshkgvgwk  
veah l inmg h d htrql tndsdnr tkseifsl trngnl wakdnftpkdkmpvtvsegfnpeflavmshdkkdkgksqfvv  
hykrsmdefki dwnrhgfw  
gyws genhvdekeek l sal yevdwkthnkvfvk l ndnekk  
>tr|D9RNJ1|D9RNJ1\_STAAK  
mnkvhkp lyf y l m l ffstti ga l lly l pftgkkipisfl dal fiassaftvtgl spvdigsqfnilgeivillliqigg l  
gi v t v t l l t l v f l n r k i s m  
knrf l i m v t w n i d e p g g v i k l i k h l a i y s l v t e l i g m i c l c l s f i p k f g i g k l f l s l f t s v s a f n a g f a l f k n n l i d y

Tsompanidou\_et\_al\_Supplemental\_FASTA\_File

ssdpiviitisiliiifggi  
ghfvvidfinckklslkslshsklvltttsiliiigaitfflleqfntmqhmglvkignsffqsvttrtagfnsidias  
nkstalmmlmfmfiggapl  
saaggikittfavafivlnyirkennsvfnkeisdkhiklsivtinisflfisiitfilsinpnislkllfevsva  
fgtvglsmltteyhgitk  
iiifvmlcgkvglltllrtfippkspknyrytkgqiy  
>tr|D9RNJ3|D9RNJ3\_STAAK  
mgnkqcislnllsddtfavisvmttltgailggiapsiygftspidkkssfraisdweqqrnnvkdllmmllpftlls  
llivififqfaysklfnti  
aiiifiiiilvmmff  
>tr|D9RNJ5|D9RNJ5\_STAAK  
mvkqlkfseadarqamlrgvdqlanavkvrtigpkgrnvvldkeftaplitndgvtiakeieledpyenmgaklvqevant  
neiagdgtttatvlaqami  
geglnkvtsganpvglrqgidkavkavealshensqkvenkneiaqvgaisaadeeigryiseamekvngdgvitiees  
glnlelevvegmgfdrgyq  
spymvtdsdkmvaeleerpyilvtdkkissfqdillpqqvqsnrpilivadevegdaaltnivlnrmrgtftvvavkapg  
fgdrkamledlailltgaq  
vitddlgldlkdasidmlgtaskvevtdnttvvdgdgdensidarvsqllksqieetesdfdreklqerlaklaggvavi  
kygaasetelkerklried  
alnstraaveegivagggalvnvyqkvseieaegdietgvnivlkaltpvrqiaenaglegsriverlknaepgvgn  
aatnewnmleegivdptk  
vtrsalqhaasvaamfltteavvasipeknndqpnmggmpgmm  
>tr|D9RNJ8|D9RNJ8\_STAAK  
msyhwfkkmlstsililssslglathtveakdnlgekpptnlhnhitspsvnsemnnetgtphesnqtgnegtgsn  
srdanpdsnnvkpdsnnqn  
pstdskpdpnnpnpsnpkdpdpdpkpkpdpdpkpkpdpdpkpkpdpdpkpkpdpdpkpkpdpdpkpkpdpdpkpkp  
pnpkdpnpkpnpspdpd  
qqgdsnhsggsknggtwnpnasdgsgqgqwpngnqgnsqntgndfvsqrflalangaykynpyilnqinklgkdygev  
tdediyiirkqnfsgnay  
lnglqqqsnyfrfqyfnplkseryyrndeqlalitseigsmpdlkkpedkpdskqrsfephekddftvvkkqednkks  
astayskswlavcsmmvv  
fsimlflfvkrnkknknesqrr  
>tr|D9RNK4|D9RNK4\_STAAK  
mkykrnqeeietyyeytlkieainnemrkfrhdyvnilttseyireddmpglrdyfnknivpmkdnlqmaiklngien  
lkvreikglitakilraqe  
mnipisieiipdevssinlnmidlsrsigiilnaieasteiddpiirvafiesensvtfivmncaddipriehelfqesf  
stkgegrglglstlkeiad  
nadvlldtiengffiqkveiinn  
>tr|D9RNK6|D9RNK6\_STAAK  
mrrlfsigealidfipnvtanlkdvqftfkqiggapcnvactvqklgqqaymitqlgndafgdsiietissigvdvskv  
yrtneantalafvslteag  
erdfsyrkpsadmlfepsfvndidvnendvvhfcsvdldvspmrdaahyqlitktlnangtvvfdpnvrlplwdnaedlr  
qtihtflplahivkvsdee  
lefittgihdeneaiqsiftgnvtvviytkgadgaavylknginhyhsgykvkpvdttgagdavigavisrilatdvlnlt  
qlfenegeeilafsnrvaa  
ivttkygainslptlqeveqaf  
>tr|D9RNK9|D9RNK9\_STAAK  
mflctllvmltpglslyfgglvqsknalntvmqsmavlvtfvwtvgftisfgngnlwfgnweytflnhvgfatqed  
isphifalflmqmmfct  
iaisilsgsiaekmkfipyllfvviwtaivyspvahvwgswinklgvldfaggtvvhtsvgsvglvaimigkgnkhs  
estphnliitliggifvwi  
gwygfnvgsaftfdniamlftntvisasagaigwileyifkkttsllgllgalaglvvitpaagyvtylsatimali  
ggiccyivinyikvklkyh  
daldafgihgvggiigavltavfqsakkanpdiengfiytdihiilvqilcvtavvifsivmtfiiakviklitplsvte  
qetnigldkivhgehayfe  
gelnrfnkhiry  
>tr|D9RNLO|D9RNLO\_STAAK  
mvpfpplieaqkkmatlqsgdelkidfdctqateaipnwaaengypvtnyeqidnaswtitiqkv  
>tr|D9RNL9|D9RNL9\_STAAK  
mikkgdhqaparsllhatgalsptdmnkpfvaicnsyidivpghvlreladiakeaireagaipfefntigvddgiam  
ghigmrys lpsreiiadaa  
etvinahwfdgvfyipncdkiptgmi laamrtvnpaifcsggpmkaglsahgkaltlssmfeavgafkegsiskeefldm  
eqnacptcgcagmftans  
mnclemevlgltlpyngtalavsdqrremi rqaafklvenikndl kprdivtreaidafaldmamggstntvhltaian  
eagidydlarinaiakrtp  
ylskiapssysmhdvheaggvpaiinelmkkgdtlhpdrivtvtgkltrennegkeiknfdivhpldapydaqglsilf  
gniapkgavikvggvdpsi  
ktftgkaicfnshdeaveaidnrtvraghvvi ryegpkgggmpemlaptssivgrglgkdvalitdgrfsgatrgiav

Tsompanidou\_et\_al\_Supplemental\_FASTA\_File

ghispeaasggpialiedg  
deitidlnrtnlnvnpedvlarresltpfkakvktgylarytalvtsantggvmqvpenni  
>tr|D9RNM1|D9RNM1\_STAAK  
mtrilkqvadqvstlnritsafvrlyqnidtlhvthseqpgisnmeiqvdiqddtslhilikk1kqqinvltvecydlv  
dnea  
>tr|D9RNM2|D9RNM2\_STAAK  
mttvyydqdvktdalqgkkiavvygysqghahaqnlkdngydvvigirpgrsfdkakedgfdvpvaeavkqadvimvl  
pdeiqgdvykneiepnlek  
hna1afahgfnihfvgviqppadvdvflvapkgpghlvrrtfevgsavpslfgiqqgasqarnialsyakgigatragvi  
ettfkeetetdlfgeqavl  
cggvskliqsgfetlveagyqpelayfevlhemklivdlmyeggmenvrysisntaefgdvysgprvitpdvkenmkavl  
tdiqngnfsnrifiednkng  
fkefyklreeqhgqiekvgre1remmpfiksksiek  
>tr|D9RNM8|D9RNM8\_STAAK  
mdamsrietarslflclkrqnskhkerwlgevktfesdetrvnkynkkqs  
>tr|D9RNN7|D9RNN7\_STAAK  
mnvdlnavasnfkvfstlhpntvmavvkanayglsgvkarhlmengatffavatldaie1rmhgitakilvlgvlpa  
kdidkaiqhrvaltpvskq  
wlkeaknisgeqekklwlhikldtgmgrlgikdtktyqevieiiqqyeqlvfegvfthfacadepgdmteqyqrfkdm  
vneaikpeyihcqsagsl  
lmdcqcfnairpgislygyypseyvqqkvkvhlkpsvqlianvvtktlqagesvsygatytatdpttia1lpigyadgy  
lrimqgsfvnvnghqcevi  
grvcmdqtiivkvpdqvkagdsvilidnhrespqsvevvaekqhtinyevlcnlsrrlpriyhdgdqrfvtne1lk  
>tr|D9RNP1|D9RNP1\_STAAK  
miattgatvagnevsaaekdklpatqkakemqnvpytiavdgimafnqsylnlpkdsq1syldlgnkvkallydergvtp  
ekirnaksvyti1twkdgs  
kkevdlkkdsytanlfdnsikqidinvtk  
>tr|D9RNP3|D9RNP3\_STAAK  
mnvgikgfgayapekiidnayfeql1dtsdewiskmtgikerhwaddqdtsdlayeaslkaiadagiqpedidmiivat  
atgdmfpftvanmlqerlg  
tgkvasmdqlaacsgfmysmitakqyvqsgdyhnilvvgadklskitdldrstavlfgdgagaviigevsdgrgiisye  
mgsdgtgghlyldkdtgk  
lkmngrevfkfavrimgdastrvvekanltsddidlfiphqanirimesarerlgiskdkmsvsvnkygntsaa1p1si  
dqelkngkikdddtiv1vg  
fggg1twgamtikwkg  
>tr|D9RNP5|D9RNP5\_STAAK  
mlkkwlgmalitpiltfiwlfnshtiitylnilfyvsliifisiflillvqegifdatsygfrrlkyqmssskkkksis  
ddpffnpgqevkkehfvst  
wiip111inilyfimtivils1lv  
>tr|D9RNQ1|D9RNQ1\_STAAK  
mgk1ikyis111ivv1v1sacgkssnkdegvkdattetskhkggtlnvaltappsgvys11nsthadvvegyfnes1  
latdkkirpkayaswkdi  
epakkiefkikkgikwhdne1kiddwiysiev1ankdyegayypsveni1qakdyhegktdhisglkkiddytmqvtf  
kkqenyltgfitgp11skk  
ylsdvpikdlaksdkirkybigpykvkkipgeavqlvkfddywqgkpaldkinlkvidqaqii1kamekgdidvanda  
tgamakdakssnag1kvl  
aps1dygligfvshdydkkanktgkvrpkyedkelrkamlyaidrekwikaffngyaseinsfvpsmhwiaanpkd1ndy  
kydpekakki1dklgykdr  
dgdgfredpkgnkfeinfkhygsnptfeprtaaikdfwekvglktnvklvefgkynedlanaskdmevyfrswaggtdp  
dpsdlyhtdrpqnemrtvl  
pkdqyldda1dfekvgidekkrkdiyvkwqymndelpglpmfqqksitier  
>tr|D9RNQ2|D9RNQ2\_STAAK  
mnv11evkd1ets1kinnewlatvenisfelskgevlgivgesgcgsilsksiik11pekisk1sngevidgkridt  
1nekq1ldirgndiami1fq  
epmtalnpvftiknqlvesikshkiskkeanklakd11kkvgiarqdeilnsyphqlsggmqrvmiamaiscspk11i  
adepttal1dvtiqagild1  
lkelqketqmaimmi1thd1svvae1cdkvlvmyagqivefggikeilnhpkhpytqk11stipkl1keeqr1letiegivp  
siqafhvnkcrfanrcnkk  
1dicnnqspkmhvcedvivrchlykneykei  
>tr|D9RNQ4|D9RNQ4\_STAAK  
mip1111isivv1s1ai1qpgdpsd1qngkikqea1naqrek1glndsiphqyirwvnhvihgd1gesikykrpvidvi  
eeripnti1lgams1iity  
iisfalgit1sgrys1ltdy1vqi1fny1mla1psfiagvfaifi1sfelqwpf1qgsvdin1lkegtfeymskiyhtflp  
aft1gl1stagi1qylrnd  
i1enskkydyl1tarsk1g1smnkiyknkilrns1lipi1tflgadi1vsilggavitetifsyngigk1fl1esvigqdyplmm  
al1lffs1fl1gn1isdi  
tygf1dpr1rsn  
>tr|D9RNQ5|D9RNQ5\_STAAK

Tsompanidou\_et\_al\_Supplemental\_FASTA\_File

mqnkskspfkiafksfihnkiamlsvifllitivsiiafliapfpvnqgdllnikgemtaqnilgtdsggrdnfsrllly  
agrislsigitstigmllli  
gltvgvisgyfggividtllmritefvmfplifaiavlnaalgdkiknpygsaiilvlviivlswggiarlvrgkvlqek  
eneyflaaksigtptykii  
lkhllpnllsvivqatllfagmivvesglsflgfgiskaipswgnmlsdaqegdvvisgkpwimppaimitltilsinf  
vgegidafnprgr  
>tr|D9RNQ6|D9RNQ6\_STAAK  
metlfsqiqpsgiptignyigalkqfvdvqndydcyfcivdqhai tmpqdrllkrlkqtrqlaaiylasgidpdkaifiq  
sevpahvqagwmlttiasv  
gelermtqykdkakavegipaglltypplmaadivlyntnivpvgddqkqhie ltrnlvdrfnrsryndvlvkpeirmpk  
vggrvmslqdptrkmsksd  
dnaknfislldepnvaakkiksavtdsdgiikfdrdnkpgitnllisiyaglt dkpikdieakeyegegygfkgdlaeivk  
afvefqekyesfynsdll  
ddildggrdkahkvsfktvkkmekamglgrkr  
>tr|D9RNQ9|D9RNQ9\_STAAK  
msqqlsreeqerkyypeytdwllttifkdeafeaafkevenelgkeeqfkghigdsaelynaleledtlgkkl ekvyvya  
hlkqgdtdtndkytgmesr  
ahqllikfssawslvpeilqidedkiqsfvnsydklqkfafdlklinekrphildaetekllteaqdalstpsnvymf  
snadlvfedaidkdgnahp  
ltqgtfikyletddrklresafnvykaygahnntlgatlagevknvfnarthnyktarekalsnnhipenvydnlvkt  
vhkylpllhrytelrkel  
glddlkmydlytplikdikfempyeeakewmlkalepmgeeylnvvkegl nrrwvdyenkgrsggyssgahltnpfil  
lnwsntisdlytlvhefgh  
sahsyfsrkfqsnsdyti fvaevastcnealldsymdkhl ddekrllllnqelerfratlf rqtmaefehkihaiee  
agepltptrmneeayaklnk  
lyfgdsveddediskewsriphfymnyvyqyatgsaaqslshqiltegpavdryineflkkgssnypieilk nagvd  
mttpepieqacevfeqkln  
afeklmka  
>tr|D9RNR2|D9RNR2\_STAAK  
matnheiefkqmitasiynklqekyfkdsvlfkqvnyyidtpdfklkehrsalri rvkdnqyemtltktpakvgll eynyi  
vdikpemnlisndnlpdd  
irqiiveqfgvkdttllsilgal ttyrqetkykgdllvldkseyfdtt dyelefevkdynqglqkfqsl lnelnehqpl  
nkvrffkkketlsnnin  
>tr|D9RNR6|D9RNR6\_STAAK  
mkfkyhisqqetvktflarhdfskktvsaikngalivndepvtvrkqlmtndileihlpreipsvnlipyarklevlye  
dafiiivtkpnnqncpsr  
ehpheslieqvl yhcqehgeniphivtrldrnttgivifakyghihhlfskvnlkkiytclyvgkthtsgieanirrs  
kdriitrevasdgkyakts  
yevinqndkyslckvhlhtgrthqirvhfqhigpivgdslydgfhdkihgqvlqctqiyfvhpinknniyitidykqll  
klfnql  
>tr|D9RNR8|D9RNR8\_STAAK  
meflslvivvlaaflltpiivnrlninlfpvvvaeilmgivignsflniverdsilnilstlgfiflmflsgleidfkafk  
kdkrarqgqnddessipgh  
lnlaltvfafimiisillayvfwlglvddvllmviiistislgvvvptlkemnimrttigqfillvavladlvtmillt  
vygaingqggstiwligil  
vvftaisyilgvqfkrmsflqklmdgttqigiravfaliillvalaegvgaenilgaflagvvvsllnpdeemvekldsf  
gygffipiffimvgvdlni  
pslikepkl liipilivafiisklipvmfirrwfdmkttiasaflltstlslviaaakiserlnaisaetsgililsav  
itcvfvpii fkkllfpvpe  
fnrkievsligknqltipiaqnlt sqlydvtlyyrkdlsdrrqlsdditmieiadyeqdvlerlgldfdrdivvcattddd  
inrkvaklahqvervic  
rlesttdttdelvdsgienfssylsnkllkglietpvnllsnvetslyeiqmlnykyeniqlrnfpfggdii fvriir  
nnesivphgdtqlrygdr  
ivtgakeyvdelkqelefyf  
>tr|D9RNS1|D9RNS1\_STAAK  
mevhevftpiatiigsvflpflisgflfyiclpfqnllekvgfprwasittimlalfaiigliva fvpaiisninnlis  
qtpalqkeaeqikfalq  
mdklpedvtsritnmvksmgdgvtnl snslqyitslistifllimvpffliymldhek fipavakffkgerkvffvd  
ltdlnftlksyiqgqvts  
vilgflyigysiidlpyipllvl fagvanlipflgswlsfapaa ilgiidspttfiwvciitliahqlegniitpnmvg  
klsihpltiivvilaagd  
lggftlvliavplyavltkvsnifkyrqriidkansvkd  
>tr|D9RNS8|D9RNS8\_STAAK  
mamt1deetcfeailmqflvfkeeeeaesiasqltdwietykkekd  
>tr|D9RNT1|D9RNT1\_STAAK  
mewtlvdigkhhvipksqyrrkrreffhnedreenlnqhdkqnidnttskkadkqihkdsidkherfkns lsshleqrn  
rdvnenkaeesksnqdsks  
aynrhdhyltddvskkqnsldsvdqdekskyeqnseatlstkstdkvestemrklssdknkvgheeqhvlskpsehdk

Tsompanidou\_et\_al\_Supplemental\_FASTA\_File

tridsessrtdsdssmqte  
kikkdssdgnkssnlksev isdksntvpl sesddevnnqkpl t lpeeqlqrqqsneqtktytygdseqndksnhend  
lshhipsiddkndvmren  
hivddnppndintpsl sktdddrkldeki hvedkhkqnadssetvgysqstashrstekrn isindhdklngqkntkt  
sannqkkatsklnkgrat  
nnysdilkkfwmmypklvilmgiiilivilnaifnvnkndrmdndadaqy tttmknantvksvvtvenetskd  
sslpkdkasqdevgsgvvy  
kksgd tlyivtnahvvgdenkqitfsnksvvgkvl gkdkwsdlavvkatsdssvkeiaigdsnnlvlgepilvvgnp  
lgvdfkgtvtegiisglr  
nvpidfdkdknydm lmkafqid asvnpngsggavvnregkl igvvaakismpnvenmsfaipvnevqkivkdletkgkid  
ypdvgvkmkniaslnsfer  
qavklpgkvkngvvvdqvdnngladqsglkkgdvite l dgklleddlrfrqiifshkddlksitakiyrdgkekeinikl  
k  
>tr|D9RNU3|D9RNU3\_STAAK  
mekgifydnanvlkldtnqlnenikviddifikneyeieptievengntklklngyfiyasiispnl nkl nlyveefy  
htynelivkytevke  
>tr|D9RNU6|D9RNU6\_STAAK  
mlilvvavagcgkdkteektemttikdelgtekikknprvvl eysfadylaaldmkpvgiaddgstknitksvrkig  
ayesvgsrpqpnmeviskl  
kpdliiadvsrhkkikselkiaptimlvsgtdynanieafktvakavgkekegekrlekhdkilaeirkkieqstlks  
afafgisragmfinnedtf  
mgqflikmgqpevtkdkttvgerkggpyiylnee laninpkvmlatdgktdknrtkfidpavwkslkavkdnkvyd  
vdrnkwlksrgiiasema  
edlekaekak  
>tr|D9RNU7|D9RNU7\_STAAK  
mrqfikrtvkti lvgvikfirnk lsgksshptdnkhn  
>tr|D9RNV1|D9RNV1\_STAAK  
matgvl eddivkeiygsskewvsvevkl sqsl dpstl fhlt dneagdrfymr lndnrtsyfygaiqlfknsknkqsif  
kdweklkhnitfihpseq  
hhlrvvggfqfsshksdewrefgl nhfv lpevl istdnngtfl tytvkresftvealnd lmdlfnnsdidvdeqigei  
trnediykddwrqlvvei  
esinneki vlarrrlikfdkdisipyilkqayskeknsyifllesqdsiffstpeqlikvnnkilstkavagtikrsq  
dededtknveafldknkl  
iehrfvvdsilhdikpyitelhydtkpki lknhdlyhlyteikaplkddsysis lidnlhptpalggypkefamdfieqke  
fgtrglygapvgiydiydd  
cefivairsmlikkaqatlfagcgvkdsdpdse laetnlkftpmnalgvdmngks  
>tr|D9RNV6|D9RNV6\_STAAK  
mvsmlilslgafannkakadshskql einvksdkvpqkvkdl aqqqfagyakal dkqsnaktgkyelgeafkiykfng  
ednsyyyypvikdgkiyyt l  
tlspknkddlnkskedmnysvki snfiakdl dqikdknsnitv l tdekgyfeedgkvr l vkatplpgnvkekasaktvs  
aklkqelkntvtptkveen  
eaiqedqvqyentlknfki reqqfdnswcagfsmaallnatkntdtynahdimrtlypevseqdl pncatfpnqmi eygk  
sgrdihyqegvpsyeqvd  
qitkdnvgimilaqsvsqnpndphlghalavvgnakindqekliwynpwtel siqdadsslhlsfnrdynwygsmigy  
>tr|D9RNV8|D9RNV8\_STAAK  
mklslnsnskyl rapsirqfsnrmmnl ddcvnl tigqpdfmpdvkkayidainndktsyshnkgll etreaisqyfn  
ryhfsydpeeiivtngase  
aidttlrsiiepgdei iipgiyagi plievlggkpiyidttatqfkitpdal eshispktkavllnyptnptgvvlkr  
nevl ninvnlkkyplfiis  
deiyaentfsgkhvsfaefedirdqliligglskshsatgirigflgpqylidkltfmhayncicanvpaqiacitaln  
egleapkymneayverrny  
lvseltklgfeitaqpegafyifpsikhitdddfefcvdllesthlaivpgssftefgkfvrisayayemdv lkegmkr l  
akylntk  
>tr|D9RNW4|D9RNW4\_STAAK  
msphakkmr l savl fwipialvlliafnlnwl fweildnhlsivssviiillvavftlviapvyrykhcra yafekhh l  
rvrngilfldekvi pyfri  
qnididvgpimrryrlatltlytaggqaeielidrearrlkrwl nnerhlennkee  
>tr|D9RNW8|D9RNW8\_STAAK  
mekmhvnkyfnqtmviealkmsfyklnlkqliknpimfvvegmiltlilicfpdifgtsylsrgylitifiillitil  
fanfseafaegrkaqads  
lrqaqsnl tarlieengayrivnate l kagqnrvengetipadgvinglatvdesaitgesapvikesggdfdgvig  
tlvtsdwleirvseagts  
fldkmialvegaernktpneialftlltltiiflvvitypiasyhlilpiamlialtvclipttiggllsaigiag  
mdrvtqfnvlaksgravev  
cgdvdmil dktgtitygnriaseflpvnqqmleklivaaymssi yddtpegksivrlakqmyinelpkdidgtykpfta  
etrmsgiitneisvfkgap  
nsmilvkqqgniplnie slcmdvsskggtp liviennvmlgviylkdvikdglverftelrkmgietvmctgdnalta  
atiakeagvdrfvaeckpe

Tsompanidou\_et\_al\_Supplemental\_FASTA\_File

dkikvikdeqakghivamtgdgtndapalaqaniglamnsgtisakeaanlidlidsnptk lievvkigkqllmtrgaltt  
fslandvakyfailpalmm  
stipemtslnimhlsspkaisalifnaliivalipiamkgvkvkgsidrifinnliygllivpflgiklidmiv  
qffv  
>tr|D9RNW9|D9RNW9\_STAAK  
mmvmityvfgslyrvalvqssrvdliftrfenmcfkiigtldlehmsaktyvkhflafngfmgfitfvllivqqwflnlp  
nhnlngsidlafntaisfl  
tnsnlqhngesdvtyltqmi vmtylmftssasgyavciamlrrltgltniignfyqdivrfivrllplsclisillmt  
ggvptlhanlmi rtsgh  
iqhiafgpiaslesikhltngggflagnsatpfenpniwsnfiemgsmllpmsmlflfgrmlsrhgkrvhrhalilfv  
amffifiailtltmwseyr  
gnpilanlgiygnmegkevrfgaglsalftvittaftgsvnmhds ltpigglgpmvlmmlnvvfvggegvglmnllif  
vlltvficslmvgktpeyl  
nmpigaremkci vlvflihpililvsa lafmipgasesitnpsfhgisqvmymtsaaanngsgfeglkddttfwnist  
gimllsryipiilqlmia  
sslvnkksyhdqkytiaidkpyfgvslivfivllsgltfipvlllgpigeftlk  
>tr|D9RNX2|D9RNX2\_STAAK  
mqnfkelgisdntvqsl esmgfkeptpiqkdsipyalqgidilgqaqtgtgktgafgpi liekvvgkqgvqslilaptre  
lamqvaeql refsrgggvq  
vvtvfgmpierkikal kkgpqi vvgtpgrvidhlnrrtlktgdihlildeademnmgfiddmrfimdkipavqrqi  
lfsatmpkaiqalvqqfmk  
spkiiktmmnemsdpqieefytivkelekfdtftnflvdhqpelaivfgrtkrrvdeltsaliskgykaeglhgditqak  
rlevlkkfkndqinilvat  
dvaargldisgvshvynfdipqdtesythrigrtgragkegiavtfvnpiemdyirqiedangrkmsalrpphrkevlqa  
reddikekenwmskeses  
rlkristellneyndvdlaa llqel veandevevqltfekplsrkgrngkpsgsrnrnskrngpkf dskskrskgyssk  
kkstkkfdrkekssggsrp  
mkgtrtfadhqk  
>tr|D9RNX3|D9RNX3\_STAAK  
minvtlkqiswipceiedqflnqeingvtidsraisknmlfipfkgenvdghrfvskalqdgagaafyqrgtpidenvs  
gpiiwvedtltalqqlaqa  
ylrhvnpkviavtgsngktttkdmiesvlhtefkvkktqgnynneiglp ltileldndteisilemgmsgfheief lsnl  
aqpdia vtnigeshmqdl  
gsregiakakseitiglkdngtfiydgdep llkphvkevenakcisigvatdnalvcsvddrdttgisftinnkehylp  
ilgkhnmknatiaia vgh  
lgliyntyqn lknvsltgmrmeqhtl enditvindaynasptsmaaidt l stltgrirililgdvlelgenskemhigv  
gnyleekhidvlytfgnea  
kyiydsqqhvekaqhfnskddmievlindlkahdrvlvkgsrgmkleevnalis  
>tr|D9RNX4|D9RNX4\_STAAK  
meenemtkenicivfggksaehevsil taqnvlnaidkkyhvdi iytndgdwrkqnnitaeikstdehlhengealei  
sqlkesssgqpydavfpl  
lhgpngedgtiqqlfevl dpyvngvlsaassmdklvmkqlfehrglpqlypysflrseyekyehnilklvndklnypv  
fvkpanlgssvgiskcne  
aelkegikeafqfdrklvieqgvnareievavlgndypeatwpgdevkdvafydykskykdgvqlqipadl dedvqltl  
rnmaleafkatdcsglvra  
dffvtednqi yinetnampgftafsmypklwenmglsypelitk lie lakerhqdkqknkykid  
>tr|D9RNX5|D9RNX5\_STAAK  
mnyssrqppdkhwlrkvdwlvatiavlaifsvllinsamgggqysanfgirqifyyilgai fagiimfispkkikhyty  
llyflicl llligllvipes  
pitpiingakswytfgpisipsefmkiililalarvvsrhngftfnksfqsdl l lffkiigvslvpsilillqndlgtt  
lvlaaiiagvmlvsgitwr  
ilapifitgigamtvilgilyapalienllgvqlyqmgrinswldpytyssgdgyh lteslkaigsgqllgkgynehgev  
yipenhtdfifsvigeelg  
figsvililiflflfhlrlaakiedqfnkifivgfvllvfhilqnigmtiqllpiigi plpfisyggsalwsmmtgi  
givlsiiyyhepkryvdlyh  
pksn  
>tr|D9RNY7|D9RNY7\_STAAK  
mkkttl asslavglivagnagheahaseadlnkaslaqmaqsndqtl nqkpieagaynytf dyegftyhfesdgthfaw  
nyhatgtngadmsaqapat  
nnvapsavqanqvqsqeveapnaqtqqpastsnsqvtatpteskssegssvvnahlkqiaqresggnihavnptsg  
aagkyqflqstwdsvapak  
ykgvspanapesvqdaavklyntggaghwvta  
>tr|D9RNZ4|D9RNZ4\_STAAK  
mgigrvtqvmgpvidvrfehnevkinnalvidvpkeegtiqltlevalqlgddvrtiamdstdgvrqgmvdvkdtkgei  
svpvgdetlgrvfnvlget  
idlkeeidsvrrdpirhrqapafdelstevqiletgikvvdllapyikggkig lfggagvgktvliqelinniaqehggi  
svfagvgertregndlyfe  
msdsgvikktamvfgqmneppgarmrvalsgltmaeyfrdeqqgdvllfidnifrftqagsevsa llgrmpsavgyqptl

Tsompanidou\_et\_al\_Supplemental\_FASTA\_File

atemgqlqeritsttkgsv  
tsiqavfvpaddytdpapatafahldattnerkltemgiypavdplastsralepsivgqehyevacdvsqstlqkyrel  
qdiiailgmde1sdedkqt  
verarriqfflsqnfhvaeqftgqkgsyvpvktvanfkdi1dgkydhipedafrlvgsmddiviakakdmgvev  
>tr|D9RP07|D9RP07\_STAAK  
minkkgvikldtkiwdvreyne1qqypkineikdivlנגגליג1ptetvyglaanatdeeavakiyeakgrpsdnp1iv  
hihskgqlkdfyty1dprv  
ek1mqafwpgpisfilplklgy1crkvsgglssvavrmpshsvgrqllqiineplaapsan1sgrpspttfnhvyqd1ng  
ridg1vqaeqseeg1estv  
ldctsfpykiarpgsitaamiteilpnsiahadyndteqpiapgmkykhyspntpltiitdieskiyndgkdwsiafiv  
psnkva1ipseaqfiqlcq  
ddndvkqashn1ydv1hs1deneni1saayiygfe1ndnteamnrm1kaagnhiikge1  
>tr|D9RP13|D9RP13\_STAAK  
mrdytkqy1ngewvesnsnetievinpateevigkvakgnkadvdkaevaaddvylefrhtsvkerqalldkivkeyenr  
kddivqaitdelgap1s1s  
ervhyqmg1nhfvaarda1dnye1feerrgdd1vvkeagivsglitpwnfptnqts1klaaafaagspvvlkpseetpfaa  
vilaeifdkvgvpkgvfn1  
vngdgagvgn1sehpkmmsftgsgptgskimekaakdfkks1le1ggkspyiv1ddvdikeaakattgkvvnntgqv  
ctagtrv1vpnkikdaf1a  
e1keqfsqrvrvgnpredgtqvgpi1skkqfdqvqny1inkgiegae1fyggpgkpeg1ekgyfarptifinvdnqmtiaq  
eeifgpmsvitynd1dea  
iqiandtkyglagyvigkdket1hkvarsieagtveineagrkd1pfggykqsg1grewgdygieeflevksiagyfk  
>tr|D9RP22|D9RP22\_STAAK  
mtnngnepn1t1sd1ydkdvvytsrpsyi1snpw1kpdehqsn1ftgre1lianqlpvivheasatk1hq1fqvigkevp  
nsiytfnqqsyen1ikq1  
ahkenkkiyfqi1hdeti1nqqyya1dkt1fva1nnkaripewtngk1f1pkrkvkieqfeneiknwef1vikpgdd1p  
taggygvm1cyhad1lqka  
itrikeataetns1iieqkieekanycvqfayses1giqylgaatq1tdkygfyngenttnvpehvieagrqimengvn  
qgffgvagfd11vdeddv  
yaid1nfrqngstsm11lane1nsgyqkfysyhskgdnthffnti1kyvkegs1yp1syddgdwygedkvksrfgciwhg  
dsketv1eneraf1ae1eh  
y  
>tr|D9RP32|D9RP32\_STAAK  
mtiprivai1gi1sam1tfkdkqis1as1kfsa11inv1plcgtfvasn  
>tr|D9RP34|D9RP34\_STAAK  
mni1viganggvgs1lvqqlakenvpftagvrqsdl1na1ksqgmka1ilvdvendsiet1tetf1kpfdkvifsvsggyt  
gadk1i1vd1dgavksm1ra  
skeanikhyvm1stydsrrqafddsgd1kpytiakhyaddy1rrsg1nyti1lhpga1tnaagsgkieaaqyfdgkgeipr  
edvatv1keivtsnhfnhq  
efqi1sgdqdikdal1tqfenetd  
>tr|D9RP35|D9RP35\_STAAK  
mseqyse1ntdt1ervtei1fkvlgdynri1rimel1svseasvghishq1n1sqsnvshq1k1l1ksvh1vkakrqgsmiy  
s1ddihvatm1kqai1hhan  
hpkesg1  
>tr|D9RP38|D9RP38\_STAAK  
mv1ivvpivfat11fktsqdafessqdsknanrqsn1rdnkvnpeeqpis1ilf1gidndgrkrkkgqdaehrsdamilt  
tfnqskhq1irm1s1prdti  
sy1pkvgyydk1thahayggpiaamdsveatmnpvdyvrvnmkafveavne1ggiiydvpyd1nepntddtgkikikk  
gyk1ngde1lavatr1rh  
ds1lkrqgmeli1k1lfqkaevdsi1k1dnviqi1vgknakhn1t1nseika1akmy1tndveiktaqlkgkddm1ngiy  
yyhpsves1iqyan1l1rkd  
le1spindknfd1dqrv1nhygs1ip1tp1dns11rkeqndttdkdktsnensdstnssnqqqpatdqnsnqnqgg  
qqapqasnngvvn  
>tr|D9RP45|D9RP45\_STAAK  
mvaki1dgkqiakdyrqgl1dqvea1kekgftpk1svilvngdgasqsyvrskkkaekigmiseivh1leetateev1n  
e1nr1nndsvsg1lvqvp  
1pkqvseqk1lea1npekdvdfhpinigklyideqtfvpctplgime1lkhadidlegknnavvigrshivgqpvsk111  
qknasvt1l1hsrskdmasy  
1kdadv1svavgkpg1vtkdvvkegavi1dvgn1tpdeng1kgdvdydavkei1agaitpvpggvgl1titmv1nnt11ae  
kmrrgids  
>tr|D9RP46|D9RP46\_STAAK  
m1dyfe1pyekqvvsahrtpkmmvqfasearergini1iagaggaah1pgmvas1tt1pvigvpietks1kgids11siv  
qmpgg1pvatta1gaagak  
nagi1aarm1siqnp1s1vek1nqyess1iqkvedmqnelq  
>tr|D9RP55|D9RP55\_STAAK  
mkkai1svsnktg1ivefakaltq1nye1ystggtkri1ldeanvprsvsd1thfpeimdgvrkt1hpavhggiladrnkp  
qh1ne1seghid1lidm1vvv  
n1lypfqqtvanp1dvtm1dea1eni1digp1tm1raaaknykhvt1ivhpadyqev1tr1rnds1desyrqslmikvfehtae

Tsompanidou\_et\_al\_Supplemental\_FASTA\_File

ydeaiivrffkgdketlryg  
enpqqsayfvrtsnakhtiagakqlhgkqlsynnikdadatlalvkkfdtpatvavkhmnpvcgvigdtieqafqhayea  
dsqsi fggivalnrvtp  
laeqlhsifleviapkftdealdilkqkknvrllleidmtidsneeevsvsggylvqdkdnyvvpkeemkvvtevapt  
eqweamlgwkvvpsvksn  
aillsnkqvtvgigagqmnrvgakialeraieindhvalvsdgffpmdtvelaaqhgikaiiqpggsikdqdsidman  
khgiamvvtgtrhfkh  
>tr|D9RP66|D9RP66\_STAAK  
mseiiyytqndcppctfvknylnehhidfeerninnqyrnemidfdafstpfllngnmpyhvdldeinkvlniqd  
>tr|D9RP81|D9RP81\_STAAK  
mvifiivpvvlliyfsfldinghfsftnyqqifttkylkmfaysilyaasitiitltisypaayitrskfqnilmimi  
iptwinllktcafignls  
hdgvinqffhlfnlpsfnllfttgafllvasyiyipmilpifnsmkaipnllqassdlgaspytfrkvimpltkegv  
mtgiqvtfipslsfmitr  
liagnkvinigtaiieeqfltiqnygmstiaiflivfmafiliitkssnrg  
>tr|D9RP82|D9RP82\_STAAK  
mfysfnsgnmihfehftlehyqslfqnhdhmsvifntiavallaasistvigtfgaiaiyylrnkkfkvtlltlnvml  
vssdvvigasflimfttig  
hftglglgfwtlshiafcipvtviiivlpqlyemnnmlnaardlgatepqlsniiipnilpsiiggffmaltysldd  
ftvsffvtgngfsvlsv  
yamarkgismainaistllfavivlgilgyyliqyvinkkklikrgvk  
>tr|D9RP98|D9RP98\_STAAK  
mknmgvpilptisttcivisailiaigwrliwkreinkhknvmlaavfaltffliyasrtifigntafggpasikkyt  
iflffhinlatiggilglv  
qiitafkdkynvhrkfgpfasviwftaitgvavyllyvlypggettslikatfgh  
>tr|D9RPA8|D9RPA8\_STAAK  
mftyfksafknakpqlitliyalafaviavvllanfqlakyaqtiaiyqfgqkppvdaylkviavlliaavvslfv  
lvqifigitnvmkramshe  
kvkftdlfiakkgnylksvliglvsiamiivslslltsllyklfspvsemimsvqssyadsthligiaittqsiiiv  
llikaiitwlllipifnfm  
tsfvestndkvkthlangfkamngqktffkffigillnliiilfktpvgylisfntqslsqsvaenirvytvmtil  
fvviahaiimgivqyylkr  
gqkitkdkvktadknkkvvtpeknkvtvendkvttsvetktekaqdslnnttktmtdskpednqpk  
>tr|D9RPA9|D9RPA9\_STAAK  
mivyrkinidtlkefgcgvyserisgvkrteivkcldyresdtlvvyqldrigrttkllielsq  
>tr|D9RPB7|D9RPB7\_STAAK  
mkavhfgagnigrfgiyiladnnkvtfadvneeinalahdhqydviladeskttrvnnvdainsmqpsealkqail  
eadiiittavgvnilpiiak  
sfapflkekthvnivacenaimatdtlkkavlditgplgnnihfansavdrivplqknenildvmvepfyewvvekdw  
ygpelnhikyvddltpyie  
rklltvntghaylayagkfagkatvldavedssieaglrsvlaetsqyitnefdfteaeqaayvekiidrfnnsylsdev  
trvgrgtlrkigpkdriik  
pltylnkdlergtlntaallkyddtadqetveknyikehglkafseyakvddgladeieaynsls  
>tr|D9RPC3|D9RPC3\_STAAK  
mlisafvailnqtllntalpsimrelninestsqwlvtgfmvngvmipltaylmdriktrplylaamgtfligsivaal  
apnfgvmlarviamgag  
vimpimqftlftlfskehrgfamglaglvifqfapaigptvtgliidqaswrvpfiiivgiaialafvfglvsissynevky  
tkldkrsvmystigfglm  
yafssagdlgftspivigalilsmviylfirrqfnitnallnrvfknrtfalctissmiimsmvgpalliplyvqns  
lslsallsglvimpgaiin  
gimsvftgkyfydygprplytqftiltittimlclhldtsytilivvyairmfsvsllmpinttginslrneeishg  
taimnfgvmagslgtalm  
vtlmsfgakifltspshtateikqqsiaigvdisfafvavlmaayvialfirepkeiesnrkf  
>tr|D9RPD1|D9RPD1\_STAAK  
mihpidaikgftqddfllneyriprtllgiiigsslaisgaiiqavirnpaspdvigiskgaslaaviiimtftapl  
fvlpigsflgafavslfls  
fliskydvkgsklaliglaigaictaivqflirnpleankalvwtgslgyhdmsniytilpwflitipiillssyqld  
vlnlgdavatalglkvkti  
kmlililavilagsaisvvggisflgliaphiarqlignkthviimsgligailtfgdglargihppldipvgvii  
igapyflillrrmk  
>tr|D9RPD2|D9RPD2\_STAAK  
maigsskinfsdiihyvtghdtkatflhnvrmpmriaglfiggallavsgllmqamtrnplaspki fgvssgasffivf  
vtiipaaleyalygvig  
afiggltvytlsgatkgmtpiklalagmaihffssmtegiilnensneqvmfwlvgslssmkwdeiltipwiigali  
vtifigrqltimeigddia  
kglgninkvriiigllviltgmsvsvagpigfvglivphivkryvsknylvmipltfiigadlllsvdlsrlitypy  
espgivtsfvgalylfifi  
tikgvkri



Tsompanidou\_et\_al\_Supplemental\_FASTA\_File

>tr|D9RPD5|D9RPD5\_STAAK  
mvylewakadrnigyrvinaiikeriypeqtfisqkgsliieiqymhvl tievvrksaleryeftgditylnkgetslii  
tleglldvlnhdfdiipse  
rlreelihsrdslvetykqmshrqtliqsqfksrllpqdinffswlqhvksdsktdltyse svpeghpthpltktklp  
ltmeevrayapefekeipl  
qimmiekhvvctamdgnqfiideiipeyyinqirvflkslgklsedyrailvhpwqydhigkyfeawiakkiliptpf  
tilskatl sfrtmslidkp  
y hvklpvdaqatsavrtvstvtvdgpklsyalqnm lnqypvfkvamepfgeyanvdkdrarqlacii rkpheidgkgat  
vvsaslvnknpi dqkvivd  
sylewlnqgjtkesittfieryaqalippliafiqnygialeahmqntvvnlgphfdiqflvrldlggsridletlqhrvs  
dikitndsliadsidavia  
kfqhaviqmqmaeli hhnfydcveetelnivqqvvahainptlphanelkdilfgptitvka llnmrmenkvkqyl ni  
eldnpikkev  
>tr|D9RPD6|D9RPD6\_STAAK  
mwagaidkydkgrllritissflvtailcvltsyftaipisviiyatlr gilsavetplrqailpdl sdstkisttqav  
sfhsfiinicrsigpaia g  
vilavyhapttflaqaicyfiavllc lplhfkvtkipedasrymplkviidyfklhmegrqifitsllimatgfsyttll  
pvltnkvfpgkseifgiam  
tmcaiggiaiatlvlpkvlyigymvnmmylssflfgiallgvfvhnivimficitliglfsqwarttnrvyfqnkvkdyer  
gkvlslimmdrgmip lgs l  
lmsicadvfgivrtfsmgisticitmvfyfinrklklkleesnhgis  
>tr|D9RPE0|D9RPE0\_STAAK  
mkpnsksnkkimknyvweyfkvqinqklsepetkkiysqrkidvepvfgfmkailgftrmsvrginkvkrelgfv lmaln  
irkiaaqravhykihikka  
dfyqiinrnqlfyia  
>tr|D9RPE7|D9RPE7\_STAAK  
mkkifvii ttllavaii gsiimvvfsqrqaqt fkiqqqfvkkipitlflhgfggsansekfmvkqaekrgvtdi ita  
yvskdgavtfkglrkdv  
npivkie lennrgqyldknaawfknvltk lqseynfdkfnfvghsmgnltfaqymtygndkslpq lnkqvniavtfngv  
lnmnedvneitvdkdgkps  
rmnqpyqqlrvlkdiykgkievlniygd lkdgthsdgrvsns sskslkyllgnspksyreskyegeptqhsq lhenenv  
anelidflwkk  
>tr|D9RPE8|D9RPE8\_STAAK  
mtkklpedfifggataayqaegatntdgkgrvawdtyleenywyaepasdfynrypvdl elsekfgvngirisiawsri  
fpngygevnpgkgyeyhkl  
faechkrhvepfvtlhhfdtpevlhkdgdflnrktidyfvdyae ycfkefpevywttfneigpigdgqylvgkfppgik  
ydfekvfqshhnmvahar  
avklfdggykgeigvvh alptkypfdpsnpedvraae ledi ihnkfil datylgkysretmegvqhilsvnggklnitd  
edyaildaaklndflgin  
yymdwmrgydgeseithnatgdkggsyq lkgvgqrefdvdp rtdwdwmiypqglydqimrvvkdyppyhkiyiteng  
lgykdefiesektvhdar  
idyvrqhl nviadaidganvkgyfiws lmdvfwswngyekryglfyvdfetqerypkksaywykelaetkeik  
>tr|D9RPF0|D9RPF0\_STAAK  
mnkqkqefksfysirkssl gvasvaistllllmsngeaqa aaetggnteaqpkteavasptttsek apetkpvnavs  
vsnkeveaptsetkeakev  
kevkapketkevkaakatnntypilnqel reaiknpaikdkdhsapnsrpidfemkkkdgtqqfyhyassvkparvift  
dskpeielglqsqgfwrkf  
evyegdkklpiklvsydtvkdyayirfsvsngtkavkivssthfnkeekydytlmefaapiyns adkfkteedykaekl  
lapykkaktlerqvyelnk  
iqdklpek lkaeykkk ledtkkaldeqvksaitefqnvqptnek mtdlqdtkyvvyesvennesmmdt fvkhpiktgm ln  
gkkymvmettnddywkdfm  
vegqrvrtiskdnntrtii fpyvegklydaivkvhvtidydgqyhvrivdkeaf tkantdksnkkeqqdnsakkea  
tpatpskptpspvekesqk  
qdsqkddnkqlpsvekendassesgkdkt patkptkgeve ssttpkvvsttqnvakpttasskttkdvvqtsagssea  
kdsaplqkanikntndght  
qsqnnktqenkakslpqtgeesnk dmtlplmallalssivafvlprkrkn  
>tr|D9RPF7|D9RPF7\_STAAK  
maenrltltkgtakdiierfytrhgi etlegfdgmfvttqt leqedfdevkil tvwkskqaftdw lksdvfkaahkhvrsk  
nedesspiinnkvitydig  
ysymk  
>tr|D9RPG3|D9RPG3\_STAAK  
mvidfii iiffl yfvigfrgfwlsmihlsativslwiasqfyksiverlivfipypkttafnttfa fhfnhlqnrfea  
ivaf lmi tlfckfilylii  
vtfdkiiayqnihi fsramgmivgvf mtii vlhftlyllalypnealqhqlkisivshslifhipylsaftinl  
>tr|D9RPG4|D9RPG4\_STAAK  
mtkkdvikll eqiatymelkgentfkisayrkaaslelderpldeisdv telkgigkgvaevindyretgesqylqq lq  
eevpeglip llikiqglgsk  
kiaklykelnivdkas lqvacengkvselsgfakkteqni leavkqlgakkdrypidqmrrlnqeidiyidtl nyidqys

Tsompanidou\_et\_al\_Supplemental\_FASTA\_File

sagsfrfrfkmekskdlfdi  
stdnkvavqqqlnlnipnkvevavngtkvslelayddetigvdfrieypsafyhtlqhftgskehnrirqlakardek  
seygieqadgtliqydsea  
kijehfnvnfippamredgsefdkdl sniitiddingdihmhttsdgaafsirdmveaniakgykfmvitdhsqslrvan  
glqverllrqneeikaldk  
eyseidiysgtemdilpdgsldydeilaqldyvigaihqsfnqseeqimerlanacrnpvyrhiahptgriigrdyk  
pnieqlmalaeentvlei  
nanphrldlsadivrkypnvtintdahhtnldfmyngvataqkgfvtkdrvinalsreafkdfienntklk  
>tr|D9RPI2|D9RPI2\_STAAK  
mkthivssvtlllgsilmpvanaadsdiniktgttdigsnttvktgdlvtydkengmhkkvfysfiddknhnkllv  
irtkgtiagqrvyseega  
nksglawpsafkvqlqldpnevaqisdyprnsidtkkeymstlygfnvntgddtgkiggliganvsightlkyvqpdf  
ktilesptdkkvgwkvifn  
nmvngwgpypdrdswnpvgnqlfmktrngsmkaadnfldpnkassllsgfspdfatvitmdrkaskqqtndviyerv  
rddyqlhwtstnwkgntk  
dkwidrsserykidwekeemtn  
>tr|D9RPI4|D9RPI4\_STAAK  
mfesesgykisknsgvpyqtvdlnrgtkledarfriiklysyyslkeh  
>tr|D9RPI7|D9RPI7\_STAAK  
mknimnkvlstallletstqlpktpisfsseakaynisenetnelikyynqphfslsgkwlwqkpnghatql  
twvwyshiqvfgseswgni  
nqlrnkyvdi fgtkdedtvegywydetftggvtpaatssdkpyrlflkysdkqqtii gghefykgnkpvltlkeldfri  
rqtliknklyngefnkgg  
ikitadgnnytidlskklkldtnryvknprnaeievileksn  
>tr|D9RPI9|D9RPI9\_STAAK  
mmaki vvalggna l gkspqeqlelvkntakslvglitkgeivishngnpqvg sinlgl nyaaehnqgpafpfaecgams  
qayigyqlqeslqnelhsi  
gmdkqvvtlv tqvevdendpafnnpkpi glfynkeaeai qkekgfi fvedagrgyrrvvp spqpisielesiktlik  
ndtlviaaggggipvireq  
hdgfkgidavikdktasal ganiqcqliiltaidyvyinfntenqplkttnvdelkryigenqfakgsm lpkieaai  
sfiennpkgsvlitslne l  
daalegkvgtvik  
>tr|D9RPJ0|D9RPJ0\_STAAK  
mentinesekkrfklmpgafmilfil tvvaviatwvipagaysklsyepssqelkivnphnqvkkvpgtqqeldkmgv  
kiki eqfksvainkpvsip  
ntyerlkqhpapeqitssmvegtieavdimvfilvlggligvvqasgsfesglla ltkktkgefm livfvsilmiigg  
tlcgieeeavafp ilvpi  
fi algydsivsvgai flassvgstfstinpfsvviasnaagttfdg lywrigacivgai fvisylywyckkikndpkas  
ysyedkdafeqqswvlkdd  
dsahftlrkkiiltl fvlpfpimvvgvmtqgwfpvmasaflifti iimfiagt gkslg gekgtvdafvngasslv gvs l  
iiglarginlvlnegmisd  
tilhfssslvqhmsgplfiivllfi ffc l gfi v pssglavlsm pi fapladv giprfv ivttyqfgqyam lflaptgl  
vmatlqmlnmryshwfrfv  
wpvva fvlifggv litqvliys  
>tr|D9RPJ1|D9RPJ1\_STAAK  
mvfdwnlrwylleniphlpilfil mfi fgvpsemikdrqrknngv  
>tr|D9RPJ2|D9RPJ2\_STAAK  
mrlqkaplvtsglvlgllgnllkdls l tlnavcgifafl iwhllctmikyfnnvkeqln splvssvfttffmsgflg  
tlyntffsnitfinslit  
piwilclvgimthm iisiky l kdfs l knvypswtvl figiaia gltapvsgyffigqltviygfvatcivlpivfkr l k  
afplqtsikpntsticapf  
slvaaayviafpkanafivii flllaqif yfyii iqlpkllkep fspvsaftfplvisata l knslpvlmfpdiwkgll  
fievl latvivr vfigyl  
hfflkkekqdkflrnasq  
>tr|D9RPJ8|D9RPJ8\_STAAK  
mdckvvs l nek dqfipkikssdpvitglfqydaa qtsfekrmskenngreaalanvi reymd l klsseqeln iqhlan  
gskvvi gggqag l fggply  
tfhkifsiitlskeltdthkqqvvpvfw i agedhdfdevnhtfvynenhgs l hkvyht mpettsvryypdkaelkqt  
lktmfihm ketvhtqglle  
icdriidqyds wtdmfkal l hetfkaygv l fidaqfep l rkmeampfkki l kkhqll ddafratqqrtnqgl namiqtd  
tnvhlflhdenmrqlvsyd  
gkhfkl nkt dkyi keei iniaenqpel fsnnvtrplmeew l fntvafvggpseiky waelkdv fel fdvempivm pr l  
ri ty l ndriek l lskynip  
lekvlvdgvegerskfi reqashqfi ekvegmieqrr l nkdll devagnqnnin l vnknnei hiqqydyll kryllnie  
rendismkqfreigetlhp  
mglqeriwnplqilndfgtdv fkpstypplsy tfdhi ikp  
>tr|D9RPK2|D9RPK2\_STAAK  
makqkiki kknkigavllvlgllffilvlrisyimi tghsnqdlvmkaneky l vknaqqpergkiydrngkvl aedv

Tsompanidou\_et\_al\_Supplemental\_FASTA\_File

eryklvavidkkasansk  
prhvvdkketakk1stvinmkpeeiekr1sqkkaqiefgrkgtn1tyqdk1kiekm1pgis1lpeterfypngnfash  
1igraqknpdtgelkga1g  
veki fdsylsgskgs1ryihdiwgyiapntkkeqkprgddvhl1tidsniqvveea1dgmveryqpkdlfavvmdaktg  
eilaysqrptfnpetgkdf  
gkkwand1yqntyepgstfksyglaaaiqegafdpdkkyksghrdingsrisdwnrvwgweipms1gftysnt1mmhlq  
dlvgadmkswyerfgfgk  
stkgmfdgeapggiwsnelqaktssfgqstvtvpqmlqaqsaffndgnmlkpwfvnsvenpvskrqfykgqkqiagkp  
itkdtakveqld1lvns  
kkshaanyridgyevegktgtaqvaapngggvykgnpyfvsfmgdapkknkviyagms1aqknd1eayelgvskafk  
piment1ky1nvgkskddt  
snaeyskvpdvegqdkqkaidnvsaks1epvtigsgtqikaqsikagnkv1phskv111tdgd1tmpdmsgwtkedviaf  
en1tnikvn1kgsfvshq  
siskgqk1tekdkidvefsensvdsnstnsdsnsddkkksdsktdkksd  
>tr|D9RPK8|D9RPK8\_STAAK  
mndnfkkqph1iyee1lqqgit1gitttrgdg1sdypknafmmaryidrrpynitqhq1qlaeeiafdrknwvfp1qthe  
nkvacitkddigtnd1t  
dalhg1damtydsnv11tmcyadcvpvyfystkhhfialahagwrgtyteivkev1khvnfd1kd1hvvigpstssye  
indd1knkfet1pidsany  
ietrgrdrhg1dlkkanaa1liyygvpeniyttayatseh1elffsyr1ekgqtgrmlafigqq  
>tr|D9RPL4|D9RPL4\_STAAK  
mdyket11mpktdfpmrgg1pnkepqi qekwdaedqyhka1eknkgnetfilhdgppyangnlhmghalnk1kdfivry  
ktmqgfyapyvpgwdthg1  
pieqal1tkkgvdrkkmstaefrekckefaleqielqkkdfr1lgvrgdfndpyit1kpeyeeaaqirifgemadkgl1ykg  
kkpvywspssess1aeaei  
eyhdkrsasiyvafdvkddkgvvdadakfi1wtttpwtipsnvaitvhpe1kygqynvngekyi1aealsdavaealdwd  
kasiklekeytgkeleyvv  
aqhpf1dres1vingdhvttdagtgcvtapghgeddyivgqkyelpv1spiddkgvftteggqfegmfydkankavtd1  
1tekgal1k1dfi1thsyph  
dwrtkkpvi1fratpwwfasi1skvrqdi1dai1entnfkvnwgktriynmvrdrgevwisrqrwgvplpvfyaengei1mt  
ketvnhvad1faehgsniw  
fereakdl1pegfthpgsngtftketdimdvwfdsgsshrgv1etrpel1spadmy1egsdqyrgwfnssittsvatrg  
vspykf11shgfvmdgegk  
kmsks1gnv1vpdqvvkqkgadiar1lwsst1y1advrisde1l1kqtsdvyrkirnt1rfm1gn1ndfnpdtdsipesel  
1evdry11nr1reftasti  
nnyenf1dyl1niyqevqfn1nvelsnfy1dygkdi1lyieqrdshir1rsmqtvlyqilvdmtk11lapilvhtaeevwshtph  
vkeevh1adm1pkvvevdq  
a11dkwrtf1m1rddvnr1a1etarnek1vigks1leakvtiasndkfnasef1tsfda1hq1fivsqkvvd1k1ddqataye  
hgdiviehadgekercwn  
ysed1gavde1th1cprcqqvks1v  
>tr|D9RPL5|D9RPL5\_STAAK  
myhnsnanfvngit1nvrkdne1kpfyedilg1ni1net1tsiqyevgqnnhvit1velqngrepl1mseagl1fhaiklp  
qisdlan11ih1seydipv  
nggiqpas1s1ffedpegngfkfyvdkdeaqwrqnn1vkid1rpl1nvpr1vshatk11w1lgipddai1galhiktih1s  
evkeyy1dyfg1eqsaymd  
dysif1lasngyyqhlamndwvsatkrvenfdtygl1aivdfhyphet1h1n1lqgpdgiyrrfnhieved  
>tr|D9RPM3|D9RPM3\_STAAK  
mksnqkiasieq1snnegi1sala1fdqrgal1krmmakhqteeptvaqieq1kv1vaeeltqyassil1dpeygl1pasda  
rnkdcg111layektgydvn  
akgh1pdc11vewsakr1keqganavk11lyydvdaeeiniqkkayierigsecvaedipfflev1tyddnipdngsvef  
akvkprkvneamk1fsepr  
fnvdv1kvevpvnmkyvegfaegevvytkeeaahfkddqdaath1pyiyl1sagvsael1fget1kfaheagakfngvlcgr  
atwsgavqvyiegedaar  
ewl1rttgfknidd1nkvlkdtatswkqrk  
>tr|D9RPM7|D9RPM7\_STAAK  
mnkher1deiak1vnkkgti1rtneivegl1nvsdmtvrrd1lielenkgil1tkihggarsnstf1qykeishkekht1r1qiaek  
rfiakkaasi1iedgdt1ff  
gpgttve11aeevnhht1tiitnc1lpyki1lekqtahfrvyl1iggemrhiteafvgemanam1lek1rfskmffssnavn  
kgavmtst1deaytqqla1  
snsieky11idhtkvgkedftsfcq1nel1tavvmdyedeekvetiktyievd  
>tr|D9RPN1|D9RPN1\_STAAK  
mktkevvalmni1sqdt1ryyevgvi1ppvnrdenyriyndsdl1nwiylvkn1rnagvsies1iefcrlaqlpkneniqa  
qqkqi1nkqleel1nen1kt  
ihdard11qyki1dnydnh1akinasdnyddnver1werk  
>tr|D9RPN2|D9RPN2\_STAAK  
midc1yastffvdc1tvdshlyt1tnfek1nhyl1iifiahaqhketcq  
>tr|D9RPN3|D9RPN3\_STAAK  
mtyrikkwqk1stit1lmagvit1nggefrsvdkhqi1avadtnvqtpdyek1rntw1ldvnygydkyden1pdmkkkfdat

Tsompanidou\_et\_al\_Supplemental\_FASTA\_File

keatnllkemktesgrky  
lwsaetletnsshmtrtryniekiaeamrnpkttlntdenkkkvkdalewlhknaygkepdkkvkel senftkttgknt  
nlwwdyeigt pkslntnl  
illndqfsneekkkftapi ktfapdsdki lssvgkaelakgnlvdiskvllleciieedkdmkksidsfnkvftyvqd  
satgkerngfykdgsyidh  
qdvpytgaygvvllegisqmpmiketpfnktdqndttlkswidgfmpliykgemmdlsrgraisrenetshsasatvm  
ksllrslsdamddstkakyk  
kivkssvesdssykqndylnsysdidmkslmtdnsiskngltqqlkiyndmrvtyhknkldfafgl smtsknvayes  
ingenlkgwhtgagmsyly  
nsdvkhyhndfwvtadmkr lsgtttl dneil ktdtdkksktfvvgtkvddqhasigmdfenqdkltakksyfilndki  
vflgtgikstdssknpvtt  
ienrkangytl ytdkqttnsdnqennsvfl estdtkknigyhflnkpkitsskeshtgkweinksqkdtqktdeyyev  
tqkhsnsdnkygyvlypgl  
skdvfktkkdevtvkqgddfhvkdnesvwagvnysnstqtdinntkvevakgmfilkkkddntyecsfynpestns  
asdi eskismtgysitkn  
tstsnesgvhfeltk  
>tr|D9RPN9|D9RPN9\_STAAK  
medfykmeeefflksklplylysfnyvdeytmklldrgrisi lntktnkdcifdiskyiheniifrrdifelndirddd  
lkykingynievylsgele  
kivkhlfenkfdveygyfi lfikpifeivfssnyvkeefntkiesseyresl dsfneilmkyleneinfkevwwkyidel  
fkklnvgkllihkkiesli  
ssydkkisdscmyskvfeqyknvvl dkvyvseykyksdnlikvf sedvwnimgykyneyftnrddttlkitnsyigq  
sfgtegnrnvidrigkgh  
klqeimtyqpenrktvli fykiqpndiyitnqygkeavsrlkri leqsipkeyidlseislitffkpeynkqhvnnefn  
slssskiknlakendgiii  
ylnfkdvnyqli segntfflqnhicivcsikif  
>tr|D9RPP0|D9RPP0\_STAAK  
meihvytgplcgfneyinsevkeyhrfmeli reyniivrasdtfgthdvdgifdteienlvi fsndfasvtthvitnfin  
ivtigrnikkiyiqnppkr  
vfqslnsfhdeieieinyeyttlkddvinfykeqmagski igqtdakkqmsidlykhtslennkptvml yypgsvgk  
elakeiakkykgnitriqf  
smmqndesfnyifgdehavs lskdlvdretnvvlid fdkvlp iyyvfyqmfd egie danykvdvsncifiltsnfn  
siaeavni gepvfsrids  
cikflyltqEEKqkvi enklneilsslnekekrivtaynllekyketeididniryllkkitndiytiifedelfntdii  
d  
>tr|D9RPP1|D9RPP1\_STAAK  
mdl lqi ekkgnlktkvqlmhdekgsasgeskvnmefgkqsavkqifdsllgmsasasasingnitgervaktilentl  
iydfldtvefrkkktiidi  
segfkl niqqdtmyfatitpiasmfegskhldeee lsfvskmneairsikygfeligtrgnenrvfrfniesfknyr  
iqdlkfmnl tlysvlgei  
skenlndykefdlnqqakpsgigkfgkirseatkedkyqvvdvilagvk  
>tr|D9RPP4|D9RPP4\_STAAK  
mrqtfmanesnierkwyvdaegqtlgr l ssevasilrgknkvtytphvdtgdyvivinaskieftgnketdkvyvrhsn  
hpggiksitage lrrtne  
rliensikgm l pstrlgekqgkkl fvyggaehphaaqqpenyelrg  
>tr|D9RPP5|D9RPP5\_STAAK  
mri lveiayqgnnflgfqi qngrtvqqfekllqrmhkrhvrihpsrtdrgvhaiqqyfhdte l nipsqwqyamnr  
tlpddiyvnnvtvdddfr  
crydcvgkryrykvyqaqhrdpfqsglktfipetldlgkmnraaqqfigthdftgfc sqkteveskvtlyqseivktdd  
gfdyivtgsghlynmvrvl  
vafli evgkgrhevsdvpkllesknrknvpftapaeglylekiyl denellkdfgndikihrkkslqnd  
>tr|D9RPQ6|D9RPQ6\_STAAK  
mnffrtkevrnkiff tlamlvi fki gtyipapgvnpaafndpqsqgate lntfggalkrfsifamgivyitasivm  
qllqmdivpkfsewakge  
vgrkl nnvtrylaislafiqsigmafqnnylkgaliinqsim syl lialvltagtafliwlgd qitqfgvngisiii  
fagilstl pasliqfgqta  
fvqgedtslawl kvlgllvs lilltvgaiyvleavrkipiqyakkqtaqr lgsqatylplkvnsagvipvifama fflp  
rtl tlfypdkewa qniana  
anpssnvgmvvyivliilftyfya fvqnpekmadnlkkqgsyvpgirpgeqt kkyitkvlyrltfvgsiflavisilpi  
latkfmglpqs iqiggtsl  
livigvaietmks leaqvsqkeykgfggr  
>tr|D9RPR9|D9RPR9\_STAAK  
ml lpkrvkyrrqhrpkkttgrskggnvtfgefglqatttswitsrqiesariamtrymkr ggvkwwikifhtpytkkple  
vrmgagkgavegwiavvkp  
gril fevagvseevarealrlashklpvktkfvkree l ggetnes  
>tr|D9RPS0|D9RPS0\_STAAK  
mggkinpigli rvgiirdweakwyaekdfasllhedl kir kfidnelkeasvshveieraanrinia ihtgkpgmvigkgg  
seieklnkl nvltdkkvh

Tsompanidou\_et\_al\_Supplemental\_FASTA\_File

invieikkvdldarlvaniarqlenrasfrvqkqaitramklgakgiktqvsgrlggadiaraeqysegtpvhltra  
didyahaeadttygklgvk  
vwiyrgvlpkntsgggk  
>tr|D9RPT0|D9RPT0\_STAAK  
mksli laekpsvardiadalqinqkrngyfennqyivtwalghlvtnatpegydknlkewrledlpiipkymktvvigkt  
skqfktvkaliidnkvkdi  
iatdagregelvarli ldkvgnkkpirrlwvsvtkkaiqqgfknldgrqyndlyyaalarseadwivginatraltt  
kydaqlslgrvqtptiqlv  
ntrqqeinqfqpqqyftls ltvkgfdqlesnqrytnketleqmvnlnkvdgkiksvatkhhksypqsllyntdlqqdm  
yrrykipketlntlqsl  
erhkvvtyprtdsnlyttmdvtdmkeriqatmattykdqarpmskftsskmsifnnqkvsdhhaiiptevrpvmsdlsn  
relklydmiverflealmp  
pheydvi tvtlevaghtfv lkenvttvlgfksirggesitemqqpfsegdevkisktnirehettpeyfnegsllkame  
npqnfqqlkdkkyaqtlkq  
tggigtvatradiidklfnmaiesrdgkikvtskgqilelapeeltsp11taqweek111iergkyqaktfinemkdf  
tkdvngiknsdrkykhdn  
lttecptcgfmikvktkngqm lvcqpscktkknvqrktnarcpnckkk1t1fgkgkeavycvcghsetqahmdqrm  
kskssgkvsrkemkkymnk  
negldnnpfkda1kn1n1  
>tr|D9RPT3|D9RPT3\_STAAK  
mygayliyehqdfksianfkvlkrminvmcycvlflepris  
>tr|D9RPT4|D9RPT4\_STAAK  
mkegitvteqftmiillialgyflkrinfikatdsqviatlvlvntlpslvivnlnsaelklsfsilpilmiygivakm  
iavwffrkydnhmrsgvm  
mtgamniglfayplievipkgtglyfvmadiggafvmfgityfvgsyfsegdqdfkylgkkl1qsvplvtyivmfil  
nishi1hphvaidffsils  
hanmplsmillgvm1nftlerkyipatikylclhyglalvagllvyvllpsddmikttllvtwmfpvgvaiisyyiqfk  
yrtltfigmttnltiisi  
iilyvyqavfv  
>tr|D9RPT7|D9RPT7\_STAAK  
mvvlvlggyasaklk1el1pnvqnpvsvtttmgatpqstqdeisskidnqvrs1ayvknvktqsiqnasivtveye  
ntdmkkaeeq1kkeidki  
kfkdevgqpelrrnsmdafpvlaysfsnkend1kkvtkv1neqlipklqtvdgvqnaqlngqtnreitlkfkqnelekyg  
ltadveny1ktatrttl  
glfagfdkdksvvdgqysvda1kninip1t1aggqqsqsqsdnkqnsamsdvnqaspqnskasapnnisgmptak1  
gd1aditvgdvrtisikt  
gkdavn1q1tkagdantvqakdvqrkidtfdvdenkdfnvtktmdtakpvekslytmvekas1gtivaiivillflnrir  
ttaisiisip1s11malia  
1k1sdvs1n11t1gal1tvaigrviddsivvveniyrr1tdseeq1kgen1iisattevfkpimsst1vtiivflplvfv  
gsvgemfrpfa1a1afs11  
as11vsit1vpalaat1fkkgvkrnrkqhgeg1gvvsttykvlhws1nhkwivi1st1ilvativfggpr1gtsfisa  
gddkflaitytpkpgeteq  
av1nhakdveky1kqkxhvtiqysvggssvpdptgstnsmaimveydndtpnfdveadkvikhadgfkhpgeknqdlg  
tgagnksvevtvkgpsmda  
ikstvkdieqkmqvgk1anvksd1sqtydqyeikvdqnkaaengisasqlamh1nen1pektvttvkengktvdvkvkq  
nkqtdwsedk1nnt1kkp  
tgg1k1gdiat1vktttpsk1tqeegdyattvsakvtnkdvggttrqvmskinn1dkpnnkvkniggasddinnamtq1  
afam1aaiivyl1vitf  
kglapftilfs1pftvigviallitgetisvpsligm1ligivvtnaivlidrvinneqqgmemkealieaggtrir  
p1lmtaiatigalvp1lfg  
qdssiliskgl1aatvigg1isst11t1vvvpviyeilft1kkrtkr  
>tr|D9RPT9|D9RPT9\_STAAK  
mtstmerivn1fnrdd1ikmkkidninvkkisitrklk  
>tr|D9RPV1|D9RPV1\_STAAK  
msekeiwekv1eiaqek1savystf1kdtelytikdgeaiv1ssipfnawlnqqyaeiiqailfdvvyevkphfitt  
eelansnnetatpkeatk  
pstettednhv1greqfnahntfdt1fvi1pgnrfphaas1lavaepakaynplfiyggvlgkth1mhaighhv1dnnpd  
akviytssekftnefiksi  
rdnegeafrreryrnidv1liddiqfiqnkvqtqeeffytfnelhqnnkqivissdrppkeiaqledr1rsrfewglivdi  
tppdyetrmailqkkiee  
k1dippealnyi1anqisnrelegaltr1laysq1lgkpitte1taea1kdi1iapkskkitiqdiqkivgqyyvrie  
dfsakkrtsiayprqiam  
ylsreltdfs1pkigeefggrdhttvihahekiskd1kedp1fkqevenlekeirnv  
>tr|D9RPV9|D9RPV9\_STAAK  
m1dir1frnepdtkskielrgddpkvvdeile1deqrrk1isateemkarrnkvsseeialkkrnkenaddviaemrtlg  
ddikekdsq1neidskmtg  
ilcripn1isddvppgesdednvekkwgtprefs1fepkahwdivelkmadfdraakvsгарfvyltnegaqleralmn  
ymitkhttqhytemmvpq

Tsompanidou\_et\_al\_Supplemental\_FASTA\_File

lvnadtmvgtgq1pkfeedlfkvekeglytiptaevpltnfyneiiqpgvlpekftgqsacfrseagsagrdrtrglir1  
hqfdkvemvrfeqpedsw  
aleemttnaeailleelglpyrrvilctgdigfsasktydlewlpsyndykeisscsnctdfqarranirfkrdkaakpe  
lahtlngsglavgrtfaai  
venyqnedgtvtipealvpfmggkqtiskpvk  
>tr|D9RPW1|D9RPW1\_STAAK  
miskvqlpdvvrwlsfipitlftalvidsiiqqtphgegytlnipyiialiptvilsitrsltitiisgivimaalrf  
ff  
>tr|D9RPW2|D9RPW2\_STAAK  
mtnyvtvtlnlgefittgsgevidnlrlryehvgyhgqplvvvchaltnghltygtddyggwreiidggyvpihdyqfl  
fdvigspfgssplndphf  
pkkl1rdivranergiqalgydkiniligslggmqamellynrqfevdkaillaatsrtssysrafneiarqaihlgg  
keglsiarqlgfltyrskk  
syderftpdevvayqqhgnkferfdlncyltllvdldshnidgrtdvthvfknletkvlmtgfiddllypddqvral  
gerfkyhrhffvpdnhvgh  
gfl1nfstwapnlyhf1nlkhfkrk  
>tr|D9RPW6|D9RPW6\_STAAK  
mdrmyeqnqmpnhneaeqsvlgsiiddpelinttqevllpesfyrgahqhiframhlnednkeidvvtlmdqlstegt  
neagppqylaelstnvt  
rnvqyytdivskhalkrrliqtadsiandgyndeledailsdaerrilelsssresdgfkirdvlgqvyetaeeldqn  
sgqtpgiptgyrdldqmta  
gfnrndliilaarpsvgktafalniaqkvathedmytvgifslmgadqlatrmicssgnvdsnr1rtgtmtekdwsrft  
iavgk1srtkifiddtpgi  
rindlrskcr1kqehglmividyqliqgsgsrasdnrqevseisrtlkalarelecpvialsq1srgveqrqdkrp  
mmsdi resgsieqdadiva  
flyrddyynrggdedddggfepqndengeieiiakqrngptgtvklhfmkqynkftdidyahadmm  
>tr|D9RPW9|D9RPW9\_STAAK  
mkwlkqlqslhtklvivyvlliiigmqiiglyftnnlekelldnfkknitqyakqlaisiekvydekgsvnaqkdiqnll  
seyanrqeigeirfidkdkq  
iiattkqsnrslinqkandssvqkalslgqsnhdh1lkdygggkdrvwvynipkvdkkvigniyieskindvynq1nn  
inqifivgtaisl1itv1  
gffiar1tkpitdmrnqtvmeskdn1ytrvkiygndeigela1afn1skrvqeaqantesekr1dsvithmsdgiia  
tdrrgriri vndmalkmlg  
makediigymlsv1sledefkleeiqenndsflld1neeqliarvnfstivqetgfvtygiavlhdvteqqqvererr  
efvanvshelrtp1tsmns  
yiealeegawkdeelaqqlsvtreetermir1vnd1lq1skmdnesdqinkeiidfnmfinkiinrhemstkdttfird  
ipkktiftefdpdkmtqv  
dnv1tnamkysrgdkrvefhvkqnp1ynrmtirikdngigipinkvdki1drfyrvdkartrkmggtglglaiskeivea  
hngriwansveggtsifi  
tlpcevi edgdwde  
>tr|D9RPX3|D9RPX3\_STAAK  
mkall1ktsvwl1lfsamglwqvssaaeqhtpmkahavttidkattdkqvpptkeaahhygeeaatnvsasaqgtadd  
tnkvtsnapsnkpstavs  
ttvnetrdvdtqastqkptrtatfkl1snaktas1sprmfatnvpqttthkilhtndihgrlaeekgrvigmaklktvke  
qekpdl1dagdafqglp1  
snqskgeemakamnavgydamavgnhefdfygdq1kklegmldfpm1stnvykdgkrafkpstivtkngicygiigvttp  
etk1ktrpegi1kgvefrdp  
lqsvtaemmriykdvd1fvvish1gidpstqetwrgdylvkqlsqnpq1kkritvidghshtvlqngqiynndalaqgt  
alanigkitfnyrngevs  
ikps1invkdvenvtpnkalaeqinqadqtfraqtaevii pntidfkgerddvrtretnlgnaiadameaygvknfsk  
tdfavtngggi rasiakgk  
vtrydl1sv1pfgntiaqidvkgsdvwtafehslgapttqkdgktvl1tanggl1hisdsirvyd1mknkpsgkrinaiqil  
nketgkfenid1krvyhvt  
mndftasggdgymsfggpreegisl1dqvlasy1ktan1akydttepqrm1lgkpavseqpakqqsskgsesgkdaqpig  
kdkvmdpakqpapskv11  
pahrgtvssgregsdr1legtavssksqk1lasmsapkgsthekq1pktgtdqssspaamfv1vagigliatvrrrkas  
>tr|D9RPX4|D9RPX4\_STAAK  
mvifmsfgppncyqlssypqvin1ft1fpl1iipiffavfdi1ftfmpnf  
>tr|D9RPX9|D9RPX9\_STAAK  
mmkd1pia1dfeskekvnqf1d1fdes1fvkvgmel1fyqegpql1neikerghdv1d1kl1hdipntvgkameglak1n  
vd1vnvhaaggvkmmseai  
kg1rkhnqdtki1avtql1sttedm1rheqniqtsieeav1nyak1anaag1dgvvcsp1esrm1tek1gts1flkvtpgi  
rpkgasqndqhr1ttpeea  
rq1gsthi1vgrpi1tksdnpvesyhkikeswlv  
>tr|D9RPY8|D9RPY8\_STAAK  
miakvi1dvasksvdykfdy1ipeql1esvi1qpgvrvi1vpfgprti1qgyvmevtaepdaq1dvsk1kki1evkdi1qpelts  
el1al1sewm1gsth1vikris  
m1levm1psa1kakykka1fkmkddie1psa1l1qkfdkhgyyyk1daqknndiq1l1mk1l1kddiveekt1l1tqn1tkk1kra

Tsompanidou\_et\_al\_Supplemental\_FASTA\_File

vrvi egyhpdevlaklekv  
irkqydl yal seeqktilfdiedmgfskssldglikkgyvekydavverdpfkdrvfeqeskqqltedqykayeai ka  
kivsgeqetfllhgvtgsg  
ktevylgtiedvlsqgkqamm l vpeialtpqmv lrfkr rfgddvav l hsg l sngerydewqkir dgrarvsvgarssvfa  
pfknlgliiideehestyk  
qedypryhareiaqwrseyhhcpvilgsatpclesyaraekgyvhlslpnrvnqqa lpeidivdmree lsegrnsmfsk  
dlreaiqlrldrgeqvvlf  
lnrrgyasfmlcrdcgyvpqpcncdis l tyhktt d l kchycgyqetppnqpcncesehirvgtgtqkveellqqefed  
ariirmdvdttskkgahk  
lltefekngndi l lgtqmiakgl dypnit l vgl nadtm l n l p dfrasertyq l l tqvagragrhekagqviiqtypndh  
ysil dvqkndyltfyrgem  
eyrk l gkyppyyyl inftishkemkkvmvasqhvkhil l qhltekalvl gspaa l arinnefrqilvkyksepgllqa  
iqfl ddyhekfikela l  
kidi p q m m m  
>tr|D9RPZ4|D9RPZ4\_STAAK  
mitaekkkknkflpnfdkqsiyslrfdemqnlvveqqqkfrakqifewlyqkrvdsidemtnl skdlrqllkdnftvtt  
l ttv vk qeskdgtikflfe  
l qdgyti etvlmrhdygnsvcvttqv gcrigctfcast l gglk r n l eageivsqv l tvqaldateervsqivimgigep  
fenydemmdflrivndns  
lnigarhitvstsgipriydfadediqin favslhaakdevrsrlmpinraynveklieaiqqyqekt nrrvtfeyglf  
ggvndqleharelahlkig  
lnchvnlipvnhvpernyvktakndi f kfeke l krlginatirreqgsdidaacq l rakerqvetr  
>tr|D9RPZ6|D9RPZ6\_STAAK  
migkiinerykivdkl gggmstvylaedtilnikvaikai fipprekeet l krferevhnsq l shqnivsmidvdeed  
dcyylvmeyiegt l sey l  
eshgplsvdtainftnqil d gikahdmrivhrdikpqn ilidsnkt l k i f dfgiakalsets l tqtnhvlgtvqyfspe  
qakgeatdectdiysigiv  
lyem l vgeppfngetavsia ikhiqdsvpnvtt dvrkdipqslsnvilratekdkanrykti qemkdd l ssv l henrane  
dvyel d kmkti avplkked  
l akhi sehsnqpkrettqvpi vngpahhqqf qkpegtyepkpkkkstrkiv l l s l i f s l l m i a l v s f v a m a m f g n k y e  
etp d v i g k s v k e a e q i f n k  
n n l k l g k i s r s y s d k y p e n e i k t t p n t g e r v e r g d s v d v i s k g p e k v k m p n v i g l p k e e a l q k l k s l g l k d v t i e k v y  
n n g a p k g y i a n q s v t a n t e  
i a i h d s n i k l y e s l g i k q v y v e d f e h k s f s k a k k a l e e k g f k v e s k e e y s d d i d e g d v i s q s p k g s v d e g s t i s f v v s k  
g k k s d s s d v k t t t e s v d v p  
y t g k n d k s q k v k v y i k d k d n d g s t e k g s f d i t s d q r i d i p l r i e k g t a s y i v k v d g k t v a e k e v s y d d v  
>tr|D9RQ03|D9RQ03\_STAAK  
makvnliespysl l q l k g i g p k k i e v l q q l n i h t v e d l v l y l p t r y e d n t v i d l n q a e d q s n v t i e g q v y t a p v v a f f g r  
n k s k l t v h l m v n n i a v k c i  
f f n g p y l k k k i e l n q t i t v k g k w n r v k q e i t g n r v f f n s q g t q t e n a d v q l e p v y r i k e g i k q k q i r d q i r q a l n d v t i  
h e w l t d e l r e k y k l e t l d f  
t l n t l h h p k s k e d l l r a r r t y a f t e l f l f e l r m q w l n r l e k s s d e a i e i d y d i d q v k s f i d r l p f e l t e a q k s s v n e i f r  
d l k a p i r m h r l l g d v g s g  
k t v v a a i c m y a l k t a g y q s a l m v p t e i l a e q h a e s l m a l f g d s m n v a l l t g s v k g k r k i l l e q l e n g t i d c l i g t h a l i  
q d d v i f h n v g l v i t d e q h r  
f g v n q r q l l r e k g a m t n v l f m t a t p i p r t l a i s v f g e m d v s s i k q l p k g r k p i i t t w a k h e q y d k v l m q m t s e l k k g r q a  
y v i c p l i e s s e h l e d v q n v  
v a l y e s l q q y y g v s r v g l l h g k l s a d e k d e v m q k f s n h e i n v l v s t t v e v g v n v p n a t f m m i y d a d r f g l s i l h q l r g r  
v g r s d q s y c v l i a s p k t e  
t g i e r m t i m t q t t d g f e l s e r d l e m r g p g d f f g v k q s g l p d f l v a n l v e d y r m l e v a r d e a a e l i q s g v f f e n t y q h l r h  
f v e e n l l h r s f d  
>tr|D9RQ06|D9RQ06\_STAAK  
m n q m s k t a i i f p g q g a q k v g m a q d l f n n d q a t e i l t s a a n t l d f d i l e t m f t d e e g k l g e t e n t q p a l l t h s s a l l a a l  
k n l n p d f t m g h s l g e y s s l  
v a a d v l s f e d a v k i v r k r g a l m a q a f p t g v g s m a a v l g l d f d k v d e i c k s l s s d d k i e p a n i n c p g q i v v s g h k a l i d e  
l v e k g k s l g a k r v m p l a v s  
g p f h s s l m k v i e e d f s s y i n q f e w r d a k f p v v q n v n a g g e t d k e v i k s n m v k q l y s p v q f i n s t e w l i d q g v d h f i e i g p  
g k v l s g l i k k i n r d v k l t s  
i q t l e d v k g w n e n d  
>tr|D9RQ09|D9RQ09\_STAAK  
m s k q k k s e i v n r f r k r f d t k m t e l g f t y q n i d l y q q a f s h s s f i n d f m n r l d h n e r l e f l g d a v l e l t v s r y l f d k h p n  
l p e g n l t k m r a t i v c e p s l  
v i f a n k i g l n e m i l l g k g e e k t g g r t r p s l i s d a f e a f i g a l y l d q g l d i w k f a e k v i f p h v e q n e l l g v v d f k t q f q e  
y v h q n k g d v t y n l i k e e g  
p a h h r l f t s e v i l q g e a i a e g k g k t k k e s e q r a a e s a y k l k q i k  
>tr|D9RQ18|D9RQ18\_STAAK  
m k v e d n v l k k w l n s n v k q f f v i t f i s v i l t l i l f s t h i y d i v n g t v f s g a g d g f r q m p p f q m y l y e h l r s f s s y d a s  
f g l g g d y m k g l s y y s l s p

Tsompanidou\_et\_al\_Supplemental\_FASTA\_File

lmlwlnflfikigetvgifnpttihfwptnqlimamiraiitfvvtfylfkilhfkrnsamiatilygmstvvivyfnftws  
fygnllyllplsilglery  
fqqrkigifivaialtlfnsfyfsyyqaiiigcylyrliftykydivsrtqklicvisatvlsvlssvfglftgisaf1  
endrknqnpndipfltpld  
yhyfffsdggfytisiltival1sfklyrfyfyr1faivtwilfigs1sqyfdsafngfsfperrwvylalssalcg1  
fiqhlstlnmkyylirtip  
vciaailyvllsptphlalivgiillivlavilkfslwrykkltvailvlivmiqqivildnknmaikpyqqslstlkq  
hdyhsnyvnqlikkinqna  
tgsfnridymsdya1nspfiyhngislyssi1fngdilkydykt1qinmpidknstyr1lgnrqnl1slwnvndrivnh  
ddnlpygfkiksehkdnkv  
rwihsntihypsahitnkvsfnskelksp1dkeqam1qgivsnnikdvnthfkank11sdstik1nsaawqsptkh11q  
vkqnnng1tvqlpkvsnsq  
fkdlyfemdle11spdkahdvkneytqernk1tykyrrvvtpv1tirikapdrirl1spkgkyrvnlkgygedytt1kd  
asns1eavkvs1tkhgyti  
tknknssgyiv1ptaynqgm1katsgdqs1kveqngvmtgikapknitkiq1sytpyyyl1tititifiicsiiftrwa  
rqk  
>tr|D9RQ19|D9RQ19\_STAAK  
makakrevseq1kkvdvfvfelvdaripysrnpmiddevinqprvvl1nkkdmsn1nems1kweqffidkgyypvsvdakh  
gkn1kkveaaa1kataekf  
erekakg1kprairami1vgipnvgk1stlnklakrsiaqtgnkpgv1tkqqwikvgna1q11dtpgilw1pkfedeev1gk1  
1st1tgai1kdsiv1hldevai  
ygn1fl1iqndlar1kshynievpedaei1awfdaigkkr1g1lirrgneidyevaei1liyd1rnakignycfd1fdmtee  
landann  
>tr|D9RQ23|D9RQ23\_STAAK  
mnkqgskvrysi1rkvsigil1sisigmfla1lgmsnkayadeidkskdftrgyeqnvfaksel1nanknttkdkiknegavkt  
sdt1sk1dnksaisngnei  
nqdikisntpknssqgn1lvinnel1tkeikian1leaqsnsqk1tnkvtnnyfgyys1freapktqi1y1tvkkgdt1saia1  
kykttvsniqntnnianpn  
li1figgk1kvpmt1p1vepkp1ktvssnksns1sst1nyl1kt1enrgwdf1dgsy1gwqcf1lvnvywnh1lyghg1kgygk1d  
ipyannfnseaki1yhntpt  
fkaepgd1lvf1sgrf1gggygh1taiv1ngdydgk1mkfqs1dqwnnggw1rkaevahkv1vnyendmi1firpfkka  
>tr|D9RQ30|D9RQ30\_STAAK  
mklmdtagi1rltpkeivsk1neyivgqndakr1kvaia1l1rnryrrs1l1deeskqe1spkni1migptgv1gktei1armakv  
vgapfikveatk1ftevgvy  
grdvesmvr1d1vdvsr1lvkaqkks1lvqdeatakanek1vk11vpsmkkkasqtn1ples1fggaipn1fgqnnedeepp  
teeiktr1seikrq1leegk  
lekekvrikveqdp1galgm1gt1nqnmqemmnq1mpkkk1verevavetarki1ladyadelidqesanqea1elaeqmg  
ii1fideidkvatnnh1nsgq  
dvsrqqvqrdi1lpi1legsviqt1kygtvntehm1lfigagafh1vskpsd1lipelqgrfp1irvels1svedfvri1ltepk1s  
likqyea1l1qteev1tnft  
deaitr1aeiayqvnq1dtdnigarr1hti1lekml1ed1sfeapsmpnavvd1itp1qyvddk1ksistnk1d1safi1  
>tr|D9RQ43|D9RQ43\_STAAK  
mkkkki1pmrkci1lnemhpk1kdmirvvvnkegei1fadvtgkk1qrgayvskdvamvekaqqe1lekyfkaskeq1dpvy  
kei1r1iyreeipk  
>tr|D9RQ45|D9RQ45\_STAAK  
mni1rsdyskqri1yeyake1ln1kskei1delksmnievsnhmq1aleddqika1dkkfkeqkndnkqstqnnhqksnq  
nqnkgqk1dnknq1qnnk  
gnkgnkknrrnnkknknknkpqnqpaapkei1pskvtyqegitvgefak1lnvessei1kk1fl1lgivaninqs1nqetie  
li1addygvevee1evvinee  
d1siy1fedekddpeaierpavvtimghvdhgk1t1l1dsi1rhtkvtageaggitqhi1gayqiendgk1it1fldtpghaaft  
tmrargaqvt1diti1lvvaa  
ddgvmpqtiea1nhakeaevpi1ivavnkidkptsnpdrvmqel1teyglip1edwggeti1fvplsa1sgdgid1d1lemiglv  
aevqelkanpk1nravgtvi  
eae1dksrgpsa1llvqngt1nvgdai1vvgntygr1ramvnd1lgqriktagp1stpeitg1indvpqagdrfv1fsdekqa  
rri1gesrheasi1iqqrqes  
knvs1dn1lfeqm1qgemkd1nvi1kgdvqgsvea1laas1mkidveg1vnvrii1htavgain1sdvtlanasngi1igfnvr  
pdsgakraeae1vndmr1h  
rvinyv1eeiesamk1gl1dpefee1qvig1qaevrqt1fkvskvgti1agcyvtegitr1nagvrii1rdgivqyegel1d1lkrf  
kddakev1akgyec1gitien  
ynd1kegdviea1femveikr  
>tr|D9RQ49|D9RQ49\_STAAK  
maisqerknei1keyrvhetd1tgspevqiav1taeinavneh1rthkkdh1srrg1llkmvgrrrh1l1nyl1rskdiqryre  
liks1lgirr  
>tr|D9RQ51|D9RQ51\_STAAK  
mgehqnk1lnrtvkaav1l1tvsdtr1d1tdk1ggqcvr1q11qaddvevsdahy1tivkdekva1ittqvk1kwee1didvi1ittg  
gtgiaqr1dvtieavk1p1lt  
keidg1fge1l1fry1syvedv1gtr1al1sravagt1vnnk1l1fsipg1stgavk1la1lek1likpe1lnh1lihel1tk  
>tr|D9RQ61|D9RQ61\_STAAK



Tsompanidou\_et\_al\_Supplemental\_FASTA\_File

mndmdnsflitteiqrkwi ekfkvi rdtfkakaeyndqhsqfpykni ewlikegygkltl pkayggegati edmvilqsf  
lge ldgata l sigwhvsuv  
gqiyeqk lwsqdmleqfaveinnga lvn ravseaemgsprgrpsthavkaddgyilngv ktytsmskal thiivaayi  
eelesvgfflvdrnlpgve  
iadnwdvlm rateshdli lndvkvplkh lvetekskapngwilhipscylgiaqaarnyavdfai qhspsniegtiatl  
stvqqnl gkmetlll carq  
flwstakgyqqkddsqi rnptsaskvmvmnqglevid lamrivgakslemnrplqryyrdmraglhnp pmedaaytnia  
ksitdtf  
>tr|D9RQ65|D9RQ65\_STAAK  
mtqnqytslygptvgdsirlgdtnlfa qiekdyavygeeatfgggksirdgmaq nprvtrddv nvalvisnaviidyd k  
vkvadigikngyifaigna  
gnpdimdndvdi igsttdiaaegki vtaggidthvhfinpeqaeva lesgitthigggtgasegskattvtppgwhihr  
mleaaeglpinvgftgkqg  
atnptalieqinagaiglvhedwgatpsalshaldvade fdvqialhadtlneagfmedtmaavkdrv lhm yhtegagg  
ghapdliksaafsnlps  
tnptlpythntvdehldmvmithhlnaaipediafadsrirketiaaedvlqdmgvfsmisssdqamgrvgevitrwqv  
ahr mkeqrgpldgdfehnd  
nnrikryiakytinpai thgiseyvgsiepgkladivlwdpiffgvkpelvkv gglinsavngdangsiptsepmkyrkm  
ygyggntststmfsvskt  
ayenginralnlkrmvrpvknirqlskadmknnsatpkldvdpqtyevyvdegeki tsnaatelpl tqryflf  
>tr|D9RQ72|D9RQ72\_STAAK  
mskfkvkr l tahilmkvindmlkysfhltltqvkl nllvkydndsnsasidsllk mkeiqskmallqmlsylnnhqw  
llkgrdqrdrkltisink  
mhidkieymnel sdyier yfgqytdfscdyvsyllssqellrn lkcylnmcqlsleelyvlgilnlhkqqltvkelqg  
efhhpifavspilklilk  
glvkkercel derrvivi tkrekfsvtmliqacynylekqivnl nk  
>tr|D9RQ75|D9RQ75\_STAAK  
mmkrkptflesistmivmvvvvtgfvff dipiqvlliasayatwiakrvgltwqdlek giaerlntampailiilav g  
iivgswmfsgtvpaliyyg  
ldllnpsyflisaffisavt svatgtawgsastagialisignqlgippgmaagai agavfgdkmsplsdtt nlaalvt  
kvnifkhihsmmwttipas  
iigllvwfiagfkg hsdnkqitllselaqiyqiniwvwp liviivcllfkmatvpamlissfsaiivgtfnhhfkm  
tdgfkatfsgfnesmihqs  
hissvksll eqggmsmtqilvtifcgyafagivekagcle vllttiskgihsvgl icitviccialvfaagvasivi  
imvgvlmkdl fekyqvsrs  
vlsrtledsstmvlplipwgtsgiytnqlhvsveeffiwtvpcylcaiaiaiygftgigikkssnrlt  
>tr|D9RQ85|D9RQ85\_STAAK  
mtdktlqqidkliswllkridnvipqlimemttetkrhrfdlvtndvdkiqqqfqqflathfpehqllaeeksnemitne  
inhlwimdpidgtanlvkq  
qedyciilayfyegkpmlyvydyphkklyka irgegafcn gikmepps lkledaiisfnaqvmnldtvqldf dasfsy  
rlvgacgldsmrvakggfg  
ahintnkpwdiaaqflfaelnlkmttdgkaidh lkgapfiisnkachetv lki lnanggyqkyr  
>tr|D9RQ93|D9RQ93\_STAAK  
mgyiilfflagpvilgvnlgvpi fnkqtpfrvqrsfvvgs miylilatigyflllqgkl  
>tr|D9RQ94|D9RQ94\_STAAK  
myravifdfdg tiidteqhlfnvinkhl emhnadpisidfy rssidgaatldh dlikaigsenkd klyeehltsttlp  
midtikslmaf lqkrhipm  
aiatssvkaeimptfka lglddyievvv gredveqvkdpeylsavqq lnymp tqclai edsvngataaiaagldv ivn  
tnkmts aqdfsnvnyvakd  
idydqivarfftk  
>tr|D9RQA2|D9RQA2\_STAAK  
malivsrailflilafgiatvfpeqklplyivftlfvavai vsvwfvthqnvk khiikfnkyvayflsvsgllyigf  
viytltigsydvlp iifa  
isivlvqil enilgisikntr lsnkqlkviskqr vqfkvislilvsvsivfifialmlkwwlllvisiivliiitvami  
vyekyyttd  
>tr|D9RQA5|D9RQA5\_STAAK  
mndliinhiaelilprstdkplkgkelde lnnvkn gtvvikdgki vyagthtd dydatetid asgvvspalvdahtl t  
fggsrehemslkrqgksyl  
eilem gggilstvnatretseddlfkkaehdl ltmikhgv lavesksygl drene lqklksnr laekydldmkhtflg  
phavpkeassneafleemi  
allpevkqyadfadifcetgvftieqsqhymqakeagfkvki hadeidplgg lelaideqaisadh lvasssdkgek l r  
nsdtvavllpattfylgke  
dyadargml dngai alatdynpgssvtnnlqlvmaiaalklklspnevnavtvnaakaidinagtintgdkanlv iwd  
apnheyipyhfgin haekv  
ikdgkvi vdvntvsfka  
>tr|D9RQB5|D9RQB5\_STAAK  
mhkfwatftl tyikkikaksfvi fmiiiaalmig lsnidki inmfddgpdki gvaapneqiykvfkqqantfhsdakftk  
vsiedaekevkhkldkay

Tsompanidou\_et\_al\_Supplemental\_FASTA\_File

ikvnrntlqgtiisekrvshedsqkvqalltaiqtnmvagelninkedlqklqaqskvdkvisndevdkvsegqkif  
nyalaygiiflmffivlvy  
asqameiasektsrviemiitsispiqhi fakilgviavavtqiilivlmavici fafdldllqgfnvemnqlswqii  
ivgiissivgitayvllaa  
ilgsltsriedlngslmpltllgmiafyiaiftinnpdgqalaltsyipflapfqlvvraqtsglqiyevilsslisivm  
vavliwiaiktykdsvltf  
erglfnsmkrvfkk  
>tr|D9RQB6|D9RQB6\_STAAK  
mglviehvtkrfgkmtavndislklesgkmlgflgrngagktttfrmilglsepteghityngkkl dktmynrigylpee  
rglhgkl tveee lkylatl  
kgmskteiqqqisywlerfditenrkkridslskgnqqkiql lasmlhkpellildepfsgldpvnvellkeavkdldw  
gstivysshmehveelcd  
dvcildkqqlvvsgdinhvrasngnkvviesettlpdltnirgiihsenmkqglqtienedvakdiyqvahqgyvkr  
fqvvepslqdi fiekvggk  
da  
>tr|D9RQB8|D9RQB8\_STAAK  
mdfvnndtrqiakkllgvkviyqdtqttytgiveteaylgln draahgyggkitpkvtslykrggtiyahvmhthllin  
fvtksegipeglviraiep  
eegl samfrnrgkgyevtngpgkwtkafnpraiddgat lndcr lsidtknrkypkdiasprigipnkgdwthkslryt  
vkgnpfvsmrksdcmfpe  
dtwk  
>tr|D9RQC2|D9RQC2\_STAAK  
mviikqlfthtqtvtsefidhnnhmdanyniifsdvnrfnshgls lkerenlaytlf tlehttyl selslgdvftv  
tlyiydydykrhlfltl  
kedgtlastnevmmginqhtrrsdafpesfstqiahyynqstittwpeqlghkiaiphkgalk  
>tr|D9RQC5|D9RQC5\_STAAK  
mtnpnqrlepfdetfqqpnihrgekrygkkrs lvs mi iq iivvil tai agysmwkqpi fnivftkesvdfdgiknfneti  
gkmhqlninlgnindlqqg  
idrllilvfnqffilcivslvitiiltivfnrtvlkvvnillvltimlvitlyfsyiika laqeiadvfkkyulnvppdqvit  
eadaihngiillgcsigll  
vislffrnrmprlk  
>tr|D9RQC6|D9RQC6\_STAAK  
mtttfiisyiialii vgvlnflirsrkkgrkqqeqfttrqsnqskfkasdl dkttdqstqrmtheelrvdnqddhs  
qvs lngytkgsekdeaft  
nnkdeevaaknpesee ykvnekikkehnfi fgegvsrgkilaallfgmfia ilnqtllnvalpkintefnisastgqw  
lmtgfm lvn gil pitayl  
fnkysyrklflvalvftgslcaismnfpimmvgrvlqagigavlmp lgsiviit iypekrgaamtmgiamilapa  
igptlsgyivqnyhwnvmf  
ygmfiigiai ligfvwfklyqytnpkadipgii fstigfgallygfseagnkgwgsveietmfaigiifiilfvirel  
rmkspm lnlevlkfptftl  
ttiinmvmlsl yggm illpiylqn lrgfsaldsgllllpgslimgllgp fagkll dtiglkplai fgiavmtyatwelt  
klnmdtpymtingiyv lrs  
fgmafimm pmvtaainal pgrlashgnaf lntmrqlagsigtailvtvmttqtqhlsafgeeldktnpvvdh mrelas  
yggqegamkvllqfvnk l  
atvegindafivati fsia ilclflqsnkkekataqkl dadnsinhe  
>tr|D9RQC7|D9RQC7\_STAAK  
mqvkl ikekrtnnvkksdwdkgdlyktlvhdklpkqlkvhikedkysvvgkvatgnyskvpwisidenitketkdgy  
ylvylfhpegegiylslng  
gwsksidmfprdknaakrvltlsselnkyitsnefntgrfyaaenkdsyd lndypsgyshgsirfkyydlnegftee  
dmledlkkflelfnelask  
vtktsyds lvnsideiqedseieeirtaqdkdtlkeveapkgiipkykkgvskttkndseieksnkenl tgvkgeklal  
nyfnelidnkidedkkeqf  
rni lndnpgsqhghgydlvafdpntndkavekfieiktstsssieepffmslnemfamkeykqkylilrifnvsgkep qf  
yfidpyanyskfkdvddli  
dkvfnvegsvalnl  
>tr|D9RQD3|D9RQD3\_STAAK  
mtreermkivheikerildkygddvkaigvygslgrqtdgpysdiemmcvmsteeafshewttgawkvevnfdseeill  
dyaqvesdwp lthgffs  
ilpiydsgylekvyqtaksveaqt fhdaicaliveelfeyagkwrnirvqgpttflpsl tvqvamagamliglhhricy  
ttsasvlteavkqsd lpsg  
ydhlcqfvmgq lsdsek lleslenfwngiqewterhgyivdvskripf  
>tr|D9RQE0|D9RQE0\_STAAK  
mdnktyeissaewevmni iwmkkyastnniieei qmqkdwspktirtlitrlykkgfidrkkdnki fqyyslveesdiky  
ktsknfinkvykggfnslv  
lnfvekedlsqdeieelrni lnkk  
>tr|D9RQE4|D9RQE4\_STAAK  
mtimlligvlggfi sg ligigga i iypaililpp ligipaysayasgl tssqvffstlsgsl narkqapafspklviym  
gggmligsm lga ilas lfn

Tsompanidou\_et\_al\_Supplemental\_FASTA\_File

atfvntvyviiailalilmfikvkpttqetkskpllfiiivgfgigvisgivgaggafiiipvllaflklpmntvvnsia  
iafissvgaffiklmqgyi  
pvesaifliie  
>tr|D9RQE5|D9RQE5\_STAAK  
miatilatavyvatgidylvililifsqvkkqkvkhiwiggyigtaivigasllvaqgvnlipqqwigllgllplyl  
gvkiwikgeededessils  
lfssgkfnqlfltmifivlassaddfsiyipyfttismseifivtivflimvgvlcyvsyrilasfdfisetikeyerwiv  
pivfiglgiyilfengtfn  
alisfl  
>tr|D9RQE6|D9RQE6\_STAAK  
mdsstktlledkqvyrvegfsancagkfeknvkelsgvhdakvnfgaskidvfgsatvedlekagafenlkvapekarr  
rvepvtedknvyrvvegfs  
cancagkfeknvqlagvqadakvnfgaskidvygntsveelekagafenlkvipeklanpsiqavkedtkapkeekipfy  
kkhstllfatlliafgyls  
hfvngednlvtsmflvssiviggyslfkvgfqnlirfdfdmktlmtvavigaaiigewaeasivvilfaisalerfsmd  
rarqsirslmdiapkealv  
rrnggeimihvddiavgdimivkpggekiamdgiingvsavnqaaitgesvpvaktvdddevfagtlneegllvkitkyv  
edttiskiihlveeaqger  
apaqafvdkfakyytpimviaalvavvplffggswdtwvyqglavlvvgpcalvittpisivsaignaakkgvlikg  
gyleeelgaikaiafdktg  
tltkgvpvtdfkvlndqveekelfsiitaleysrphlasaimkkaeqdnitysdvrkdfstigrigiqnidgttyy  
igsprlfkelnvdfslef  
enkvvlnqngktamiigtqtilgviavadevretsknivilkhlqngikqtimltdgnqgtaeaigahvgvsdiqsell  
pqdkldyikkmaehgna  
migdgvndapalaastvgiamggagtdtaietadialmgddlslkpfavrslrktlniikanitfaigikiialllvipg  
wllwiallsmgatilva  
lnslrlmrvkdk  
>tr|D9RQE8|D9RQE8\_STAAK  
mnkqvrntteivrakqksqktrekvdkaiskfsiegkainfnsiakeanvskswlykehdirqrieslrrqitsnvvs  
kpkksrseeiliktikrr  
vmelekenkklnqniqklygdlynke  
>tr|D9RQE9|D9RQE9\_STAAK  
mnasskrkiisqseiskkiavmneemqgfwnanswdirkcphpsaielsknpalrnrwvrfervknlwlrtelkyfyfyh  
lnngiwnaktvwiirkgtvi  
nkmldfldlkypsiitevpdkamteyrtyltkqgvritttnykitanqektpvkansyyvtnlkqfiefyedfyfdg  
eewdkdvdrnllpddk  
vnptqeytinfkgfrntyfkqlvkrycklrlnmdsfsyvsdiaqklkeffnflidikfkxvrvhqltrveieaylse  
mmgikpstitgrisi legl  
fstlhrlewdvpskllitypedypki prakprfidefvleqlnshldklpeyiatmtmivqecgmriselctlkkgclle  
dkdgyflkyqgwmkkeh  
ivpiskevvlkivredkvseefpdseylfprkdgspkqetfrgelnklayeqnivdklgeiyrfhahafhrsvgtrmi  
nngvpphivqkflghespe  
mtrsyahifdetlknftkfqeklvtnngdvlndddsevddvelqwfkkninaqvlpngycrlpviaggcphanacldc  
thfctskqflpqheeqler  
teelltiakdkwqrqietnsrvkerleqiigsltg  
>tr|D9RQF0|D9RQF0\_STAAK  
mvkedtlwylkrrieepkdaadimrdfignadrehfiliclnsknepthietvsigtinfavihpreifktaillsnatgm  
ighnhpsgdiltiv  
>tr|D9RQF3|D9RQF3\_STAAK  
mdthssdkrhshysyynneryrkgemskryitrsianylpamlqqqlwklvaqreneqfkeleeidyfhiqfqnmhns  
qlyikhkqerpeyvkihka  
nyskaininkvyiireddvdlsyyvmllpeey  
>tr|D9RQF4|D9RQF4\_STAAK  
mtlekqlkeyitnlnlpkdekweceieevadnilpdqyirlgpltnkilhtytyysdtlherhiypfilyyqqlia  
gyidetndmfdlylhntvm  
plldqrhllekenynne  
>tr|D9RQF5|D9RQF5\_STAAK  
mqqlkqkrvgiyvrsteiqstegysidgqinqireycdfnnfvvdvyadrgisgksmnrpelqrllkdanegqidsvm  
vyktnrlarntsdllkive  
dlhrqnveffslsermevntssgklmlqilasfsefernnivenvfmgqtrraqegyyqgnlplydkipdskelminq  
heanivkyifesyakghy  
rkiana lnhkgyvtkkgpfsigsvtiylsnpfyvgkiqfakykdwnekrkglndkpiiiaegkhspiiiaqldwkvqlr  
kkqvsqkppqvhgkgnllt  
gihvcpqcgapmaasntntlkdgtkkri ryyscsnfrnkgskvcsansvradviekvmdqileivksdkvinqvlerv  
nqenkvdigalnhdiaykq  
qqydevsgklhnlvktiednpdltsalkatihqyetqlditnqmnlkqqnqeklsydtkqiaallqrifqniesmdk  
aqlkalyltvidridirkd  
gnhkkqfyvtlklneeiikqlfnntpldevllstsslflpqtlllqi

Tsompanidou\_et\_al\_Supplemental\_FASTA\_File

>tr|D9RQF6|D9RQF6\_STAAK  
mkraigy1rqsttkqqs1paqkqae1lapkhniqniqyisdkqsgtrtdnrtgyqqvteriqqrqcdvlccyr1nr1hrn  
1kna1k1mk1cqkyhvhi1  
svhdgyfdmdkafdr1k1ni fms1ae1esdnigeqvkngr1rekakqgk1itthapfgyhyqngtffi inndesptvkavfn  
y1lqgygykkiagyledn  
k1itrkpyqvrni1mnpnycgrvinqygqynnmvppivsatkyehaqairnkq1hcipsen1kqkikpcpcdst1tnm  
tirkkht1ryyicpknmne  
srfvcsfkginaqk1evqvl atcqnfqngq1yskinna1hqr1kkqrviakst1tqeqlidklakgmidaesfrkqth  
1mqkhkktissisdnqlqt  
s1qkviqksft1nm1hpyideiritknka1vgiyfkneplnivnqtsqssia  
>tr|D9RQF8|D9RQF8\_STAAK  
mkekefyt1kravtsiafn1pvgtmfmyhd1nvravn1csteiqdvgwrwfahfvkytpn1pfivvgkkgss1lylktap  
npmnhqnnwkggnn  
>tr|D9RQF9|D9RQF9\_STAAK  
miptieeiidkygs1vdc1kfd1sgevyed1111rs1sd1nehqkmhrvsfiqkhfnpnfdy11ddsefrsmnkiyrn1n  
tmtiynsqnnefk1kpf1n  
eeq1ks11aikkvdeh1sydpsitskala1dinktqkr1vtkpn1lynrskkeneyvr1ggkisytkmekhweylhnei qy  
yn1tnqlisyvalekeyaw  
af1ne1fy1iely1kafkgqkktghefeeg1nafiqsyvi111idir1ptvr1y1irrivdecekesdnqkrik1ieesi  
kkyryvkeqierfgnalke  
e1s1at1sieqnm1eakidyyknyyyprkkqsit1sttyqcf1k1  
>tr|D9RQG0|D9RQG0\_STAAK  
mfr1kkwy1kqkgyfcrvgekwdns1shenihsyvdr1leyetetrrngqpteey1lassgekined1rsgtndhkei1  
evfdkykvkedi1t1yrtvs  
priy1k1meknkn1ngvd1felgi1hts1ikgyesreegyk1rvkvkkgtpafyvgn1tgeeshyyevivvn1k1kiis  
iedyyincevv  
>tr|D9RQG6|D9RQG6\_STAAK  
mrnvya1nid1kqnrnriavvmigafvgv1nqt1mtt1lpeimkdfvssstaqwl1ttifm1vngimipitafl1ierft1  
rs1ffnatc1f1migsf1cm  
1ginfpm111grs1qal1gagi1mpltqt11f1mfpp1ekrgm1mgmfg1lvigfapaigptaagwfvni1fdwry1fl1v11i  
gm1dfvfy1s1l1p1n1te1s  
kpn1dk1svi1stv1sfgg1lygfstagn1g1wshpmvni1tiaaiv1l1tvf1frq1k1lesp1lefrv1fkyndfsvami1iv  
1mf1m1f1ign1t1l1piymgt  
mmkwsp1lesg1l1lpgg1img1l1spvtgk1fdk1iggr1s1imgm1timigal1maqfsqnttqlyvi1isfsvtm1gnami  
mtpmttqal1nalprqy1ah  
gtamnt1rqvsaai1gtg1lvt1mtg1gktss1sgsqg1ihg1ditfyvvaliafigt1iaffirkh  
>tr|D9RQG8|D9RQG8\_STAAK  
mvstgsy1l1sel1pcivayknndivg1l1tykvydeyie1is1dsfvenkgigsh1lnyaeeiasdmskrsisvittneni  
kalyfyqknkyritdvi1fd  
avteark1kpsipemgengie1rdeiv1kkc1  
>tr|D9RQG9|D9RQG9\_STAAK  
mkenf1wse1l1prpff1l1apmedvtdiv1frh1v1searpdvffteftntesfchpegi1hsvrgr1tfsedeqp1v1vahi1wgdk  
peqfrets1qlakmgfkgi  
d1nm1gcpvanvakkkgsg1l1l1rpdvae1i1qat1kaggl1p1svktr1lgyy1eidewkdw1khvfeq1dian1sih1l1rtrkem  
skvdahwe1liea1kn1rde  
iapnt1l1ting1dipdrktg1le1aekygidgvm1grgi1fhn1p1fafek1prehtckel1d1l1r1h1s1l1fnkyekdeir1qfks  
1r1rffki1yvrgi1rgase1r  
hq1lmtq1siaearal1defeaqmdedv1k1e1  
>tr|D9RQH0|D9RQH0\_STAAK  
matekdvd1f1nhvnsnavktrkmmgeyivvydgvvigglydnr1l1vkatsarhqf1qdnalvspypg1akemil1ipdfa  
eatn1tn1fec1knd1kn  
>tr|D9RQH1|D9RQH1\_STAAK  
ml1s1lvipvfall1vigg1i1wmi1iegivhi1skknkaidnff1knkvsetykfatt1fl1il1atagisqfylyyivse1fl1f  
1l1v1ftf1gi1agi1f1lmpyg  
1cf1p1lykqkkkkqt1fkky1mayttig1siy1g1s1lv1vhttkiy1mdeggvryyygsfvmkqaggyay1alav1st1l1liva  
kkatknkk1ietvdntnit  
er  
>tr|D9RQH6|D9RQH6\_STAAK  
mqr1dy1l1rvetes1m1dfkr1ng1lmigf1vikgeahiyden1mtqcnsgdi1fi1nhrd1lyrf1ql1qgdgi1ciy1qf1qmky1lad  
k1fdd1vhc1lyf1h1tdattk  
ni1hq1l1rni1mar1vst1hirhne1sk1lteqq1lvi1q1l1mhmi1hyvprtyhsnqsi1l1nddkvnqvc1dyiel1hfhed1sl1se1se  
yvgw1sesh1skkfaes1gv  
gfq1h1f1nt1tr1ehak1d1tyt1det1dial1qngf1ssaas1fart1fkf1h1tqtpkqyrgdrpaitenqqs1aqhnyhdre1l1l  
1l1ndyieemnhf1iediekv  
nyke1itf1qptnhq1nqfnhi1qvgy1rn1l1ntqyqsq1l1tchsd1fqvnev1laydvmpy1imkk1napf1tydae1isni1fydi  
d1cl1df1l1dh1nfs1tmh1n  
qydsrdy1idafk1vfi1h1hval1hvshrk1dkfn1lyvt1l1hns1liemi1dyfka1lf1pngg1lyvh1dqaterh1p1l1kr1lephid  
hfvfdans1ndav1dfnk1mnd

Tsompanidou\_et\_al\_Supplemental\_FASTA\_File

defktasqmiinknnylidlmhrhhlkrplilnwnntlgtdfitngeyfrggiieqlklkskvegigywlnydlhvs  
hcknerdymnsielfhqyn  
gkrpvyftallfinkltsniylsddtcivtgdtsnfqillydakhfnpylaIdnqnmratemihlninaleegyikikhf  
tldekngalfnlwrkhhti  
hgmdkdsidyvnrmsfpklevydidvtdtlaInikmitngihlievkrypss  
>tr|D9RQH7|D9RQH7\_STAAK  
mndmnqqliealkskedkmieirrylhqhpeIsfhetakyaiefykdkvevetnvgrgikvtidsgkpgktaira  
dfdalpitedtglSfasqn  
kgvmhacghdahtaymlvlaetlaemkdsftgkvvviHqpaeevppggakamiengvldgvdhvlgvhvmstmetgnvyy  
rpgyvqtgraffklkvqgk  
gghgssphmandaiVagsyfvtalqtvsrrlSpfetgvvtigSfdgkqgfNvikdvveiegdvrgltdatkatiekeik  
rIskglealygvttleyn  
ddypalyndpefteyvaktlkeadlefgveicepppsedfayakerpsafiytgaavedgeiyphhhpkfkiseksll  
isaavgtvvldylkgdn  
>tr|D9RQI3|D9RQI3\_STAAK  
mmtlqihTggInlkkniysirklvgviasvtlgtllisggvtpaanaaqhdeaqqnafyqvlNmpnlNadqrngfiqsI  
kddpsqsanvlgeaqklnD  
sqapkadaqnkfnkdrqsafyeilNmpnlneeqrngfiqsIkddpsqsanllaeakklnesqapkadnkfnkeqqnafy  
eilhlpnlneeqrngfigs  
lkddpsqsanllaeakklndaqapkadnkfnkeqqnafyeilhlpnlteeqrngfiqsIkddpsvskeilaekklndaq  
apkeednnkpgkednnkpg  
kedgnkpgkednkpgkedgnkpgkedgnkpgkedgnkpgkedgnghvkvkpgdgvndiakangttadkiaadnkIadkn  
mikpgqeIvvdkkqpanha  
dankaqaIpetgeenpfigttvfgglSlalgaallagrrel  
>tr|D9RQI8|D9RQI8\_STAAK  
mieksqachdsllsvgttPmvqlhqlfpkhevfaIeymnpGGsmkdrpakyiiehgiKhglitenthlIestsgnlgI  
alamiakiKglkltcvvdP  
kisptnlkiIksyanvemveepdehggylmTriakvqellatiddaywinqyanelNwqshyhagateivetikqpidy  
fvapvttsimgmrkik  
evhpnaiVavdakgsVifgdKpinrelPggiasrvpeiInrseinqvihvddyqsalgcrklIdyegifaggstgsiia  
aieqlitsieegativtI  
pdrgdryldlvysdtwlekmksrqgvkse  
>tr|D9RQI9|D9RQI9\_STAAK  
mnremlyInrSdieqagghsQvyvdaItealTahahndfvqplkpylRqdpenghiadriIampshiggehaIsgikwi  
gskhdnpskrnmerasgvi  
IlndpetnyPiavmeasIssmrtaavsviaakhIakkgfkdlTiIgcglIgdKqlqsmleqfdhiervfydqfseaca  
rfvdrwqqqrpeInfiate  
nakeavsngEvvtictvtdPpyieydwlqkgafisniSImdvhkevfikadkvvddwsqcnrekktinqIvlegkfske  
alhaelgqlvtgdtPgred  
ddeiIlNpmgmaiedIssayfiyqqaqqnigttInly  
>tr|D9RQJ0|D9RQJ0\_STAAK  
mqnhtavntaqtiiIrdIvdalIfediagivsnseitkengqtiliykretqkikiPyvysalNmfryessqpitiEgra  
skpltaefwqtianmnc  
dlshewearveeglttaatqlakqlseldashpvmseqfaslkdrpfhplakekrglreadyqvyqaelnqsfpImv  
aavkktqmihgdtanidel  
esltapikeqatdmIhdqglSiddyvlfpvhpwqyqhIlpnvfakeireklvvpIplkfgdylsasmrsliniaapynh  
vkvpfamqslgalrltPtr  
ymkngeqaerllrqIiekdamIakyvtvcdetawwsymqqndiIkdqIghltvqlrkypevlakndtqqIvsmaalaan  
drtylqmicgkdniskkdv  
mtIlfediaqvflkvtlsfmqygalpelhgqniIlsfedgrvqkcvlrdhdTVriykpwlTahqlslpkyvvredtpntli  
nedletffayqtlavsvn  
lyaiidaiqdlfgvsehelmsllkqilKnevatiSwvttDqlavrhiIldkqtwpfkqilIpllyqrdsGggsmpsgltt  
vnpnvmtyd  
>tr|D9RQJ3|D9RQJ3\_STAAK  
mvsslIyenivvykasyqdgvyftieGndseyrfTaekthsfdriIritspiervvgdeadttdytqllrevvftfpkn  
dekleqfivelIqtelkdt  
qsmqyresnppatpetfndyefyameghqyhsyksrlgftlSdnIkfgpDfvpnvklqwlaidkdkvettvsrnvvvne  
mlrqvgdktYehfvqqie  
asghvndvemiPvhpwqfehviqvdlaeerlngtvIwlgesdeIyhpqqsirtmspidttkyylkvpisitntstkrvl  
aphtienaagItDWlkqIq  
qqdtylkdeIktafIgevlIqgsyIntqIspykqtvygaIgvwreniyhmIideedaipfnalyasdkdgvpfienwik  
qygseawtkqflavaIrpm  
ihmlyyhgiafeshagnmmIihengwPtriaIkdFhdgvrFkreHlseaashltIkpmpeahkkvnsnsfietdderlvr  
dfIhdafffiniaeiIIfi  
ekqygiIekIqkwvkgiIeayqeafpeInnyqHfdIfeptiqvekIttrllsdselrihhvtnplvgggitdattise  
t  
>tr|D9RQJ4|D9RQJ4\_STAAK  
mieviaasgydfvvidtehvaIndetlahIraaeaahIpiVrvTavidrdiIkvlDmgargiivphvkDretvehivk

Tsompanidou\_et\_al\_Supplemental\_FASTA\_File

lsryyppgglrslnnggrmar  
fgrtp1ldamemanehimviamiedvegvmaddiaqveglmdivegaadlsqslgipwqtrddqvtshvqhi fevvnah  
gkhfca1predediakwqa  
qgvqtfilgddrgkiyrhlsaslataskqkgded  
>tr|D9RQK4|D9RQK4\_STAAK  
mlipvfifalvdfgfgnvsflggyeiriellisgfifilaslsdfvdgylarkwnlvtnmgkfldpladkllvasaliv  
lvqlgltnsvvaiiire  
favtglrllqieggfvsaagqlgkiktavtmvaitwlllgdplatliglslgqillyigviftilsgieyfykgrdvfkq  
k  
>tr|D9RQK5|D9RQK5\_STAAK  
msiaiiavgse1llgqiantngqflskvfneigqnvlehkvigdnkkrlessvrhalekydtviltgglgptkddltkht  
vaqivgkdlvidepslkyi  
esyfeeqqemtpnnkqgalviegstvltnhhgmapgmmvfenkqiillpgppkemqpmvknellshfinhnriihsel  
lrfagigeskvetilidli  
dkqtnptiaplgshevyirltanadskeqaqsliqpvkqeildrigeyygsddtlieqavikkihepfviydgitnga  
lyhr1kevdlndv1kgmin  
hnenfvdkpieqq1kdavqfvnklfnvssaiilleydgvvhigydnfefkteqfkmkskrnllknrsqnyalirlln  
wlrttn  
>tr|D9RQK6|D9RQK6\_STAAK  
mdndrqka1dvtiknmeksfgkgavmklgdni grrvsttstgsvtldnalvggygpkgrieiygpessgkttvalhaia  
evqsnggvaafi daehald  
peyaqalgvdi dnlyl sqpdhgegg1eiaeafvrsgavdivvdsvaaltpkaeiegemgdthvg1qarlmsqalrklsg  
aisksnttai finqirekv  
gvmfgnppetpggralkfyssvrlevrraeqlkqqeivgnrtkikvvknkvappfrvaevdimygggiskegelidlgv  
endivdksgawysyngerm  
gggkenvkmylkenpqikeidrk1reklgisgdveetedapkslfdee  
>tr|D9RQK7|D9RQK7\_STAAK  
mnlsl111il1lgii1gvvggyvvarn111kqsqarqtaedivnqahkeadnikkek1leakeenqilreqteaelrerr  
selqrqetr11kkeenler  
ksd1ldkkdeileqkeskieekqqvdakessvqtlimkheqelerisgl1tqeeaineqlqrveeelsqdiavlvekek  
eakekvdktake1latavq  
r1aadhtsestvsvvnlpndemkgriigregri nrtletltgidliiddtpeavilsgfdpirreiartalvnlvsdgr  
hpgriedmvekarkevddi  
ireageqatfevnaahmhpdlvki vgr1nyrtsygnv1khsievahlasmlaaelgedetlakragllhdvgkaidhev  
egshveigvelakkygene  
tvinaihshhgdvpeptsii silvaada1saarqgarketlenyirrlerlet1sesydgveka faiqagreirvivspe  
eiddlksyrlardiknqie  
delqypghikvtvvretraveyak  
>tr|D9RQK9|D9RQK9\_STAAK  
mfigdivgkigrda1etyipqlkqkykptvtivnaenaahgkgltekiyqllrngvdfmtmgnhtyggreiydfideak  
rlvrpanfpdeapgimrf  
iqindiklavinqgrafmpdi ddpfkkadqlvkeaeqtpfi vdfhaettsekyamghldgrasavvgththiqtad  
erilpkgtgyitdvgmtgf  
ydgilginktevierfirts1pqrhvvpnegrsvlsgvvidlkegkthierilinddhpfstf  
>tr|D9RQL1|D9RQL1\_STAAK  
matfkdfrrnvkpnwpcgdfsvqaa1qkaaanig1epeevaiitgigcsgrlsgyinsygvhsihgralplaqgvkma  
nkdl1tviasggdgdyaig  
mghtihalrrnmnmyivmdnqi ygltkgqtspsavgvfvtkttpkgnieknvaplelalssgatfvaqgfssdikgltk  
lieda1nhdgfsfvnvsp  
cvtynkintydwfkeh1tsvddienydstkqlatktviehes1vtgivyqdketpsyesqikelddtplakrdikited  
tfnalteqfi  
>tr|D9RQL7|D9RQL7\_STAAK  
mgkikelqts1ankiaagevverpssvvel1enaidagateisieveesgvqsirvvdngsgieaedlg1vfhrhatsk  
ldqded1fhir1lgfrgea  
lasissvakvt1ktctdnangneiyvengeilnhkpakakkgt dilves1fyntpar1kyikslytelgkitdivnrmam  
shpdirialisdgktmlst  
ngsgrtnevmaei ygmkvardlvhisgdsdyhi egfvakpehsrsnkhyisifingryiknfm1nkaillegyht1ltig  
rfpicyniemdpilvdvn  
vhptklevr1skeeqlyqlivskiqeafkdri lipknnldyvpkknkv1hsfeqqkiefeqrqntennqektfsseesns  
kpfmeenqndeivikedsy  
npfvtktses1iaddressgynntrekdedyfkqqe1lqemdqtfdsndgttvqnyenkasddyvdndikgtskdpkr  
ripymeivgqvhgtyiaq  
nefgmymidqhaaqerikyeyfrdkigevtnevqdl1ipltfhfskdeqlvidqyknelqqvgimlehfgghdyivssyp  
vwf1pkdeveei ikdmieli  
leekkvdi kklredvai mmsckksikanhy1qkhemsdlidqlreaedpftcphgrpi iinfskyelek1fkrvm  
>tr|D9RQM1|D9RQM1\_STAAK  
ma1stfkrhikkn1rndeaydlviiggigtgagialdasergmkvalvemqdfaagtssrstklvhgg1ryl1kqf1igvv  
aetgkerai vyengphvtt

Tsompanidou\_et\_al\_Supplemental\_FASTA\_File

pewmllpmhkggtfgkfstsiglgmydrlagvkkserkkm|skketlakeplvkkeglkgggyyveyrtddarltievkm  
raekgaeiinytksehft  
ydknqgvngvkvdkltnenytikakkvnaagpwwdvrsgdyarnkk|rltkgvhvidqskfplgqavyfdtekdg  
rmi faipregkayvgtdtd  
fydnikssplttqedrlylida inymfsvnvtdediestwagirp|liyeegkdpseisrkdeiwegksglltiaggklt  
gyrhmaqdivd|vskrlkk  
dygltfspcntkglaisggdvvggsknfda fveqkvdvakgfgidedvarrlaskygsnvdel fniaqtsqyhdklplei  
yvelvysiqgemvykpdf  
lvrrsgkmyfnikdv|dykdavidmadm|dyspaqieayteeveqaikeaahgnnpavke  
>tr|D9RQM2|D9RQM2\_STAAK  
mmtekqfkl|tvqdn|nievkvntdvdskgi|hi fhgmaehmerydk|laha|skhgfdvirhnrhghginidestrghyd  
dmkrvigdafevaqtvrng  
vdkpyi|iighsmgsvar|lfvetyppqyvdgl|lsgtgmys|wkg|lptvkv|qlitkiygaekrvewvnlvsnsfnkkir  
plrtqsdw|issnpi|evdnf  
ikdpysgfnvsng|lyqtaym|lhtsq|lknmkm|lnhamp|llvsygdplgdgk|gilk|laniyrkagiknvkvnlyhkh  
rhev|fekdhkiwed|fk  
wlnqfykk  
>tr|D9RQM4|D9RQM4\_STAAK  
mianeni|qdkalen|fkanqtevtvff|ngfqmkgvieeydkyvvs|lnsqgq|hliykh|aistytvetegqastese  
>tr|D9RQM8|D9RQM8\_STAAK  
mavfmsvsvsk|tdl|tprqi|ryyethelik|pertegqkr|lfs|lndler|leiks|lekgnikgikqi|ydsqehl|tde  
qe|rkkm|ivdatq|kpiget  
lpinrgd|l|srfik  
>tr|D9RQN0|D9RQN0\_STAAK  
mncydei|fntikel|ienke|issyq|inkdtg|isygninam|rrerrien|slknak|ilyeyakkv|  
>tr|D9RQN9|D9RQN9\_STAAK  
mskfcakyf|thini|indshiek|llk|l|ysinm|ikykv|  
>tr|D9RQP0|D9RQP0\_STAAK  
m|dsq|ldgn|take|ses|fel|veefes|iekak|kns|skdk  
>tr|D9RQP2|D9RQP2\_STAAK  
m|ghh|lynenki|rai|lnkk|lpsytil|sid|l|nell|rekm|stgn|l|sderfd|lkei|inf|nqi|igkihienv|ietrk|gk  
vhy|sktgah|ivpyidk  
>tr|D9RQP4|D9RQP4\_STAAK  
m|lemi|sngkmt|mk|lnnvk|qkrhi|lctney|nknkn|nss|l|psyti|idsn|esekmt|kfe|idipvl|fddegn|frik|qvidy|k  
ki|gksy|vngky|etklg|k  
vhy|sktg|fhv|pyike  
>tr|D9RQP5|D9RQP5\_STAAK  
mnlqsyig|k|l|vkl|t|ltnk|ligk|vidf|ddk|v|dnfd|gyns|ieid|tgrity|disenk|ktivl|q  
>tr|D9RQP6|D9RQP6\_STAAK  
m|lil|v|lgn|vvis|fendy|lega|hekv|lkr|l|v|dtn|lvqas|gygfd|qftaq|aiek|k|dtid|cpnatir|flv|ggtq|tnqv|vin  
sm|lesy|egvis|adtgh|vav  
heggaiey|sghk|vit|ipskeg|kvsas|dvety|metf|ksdf|k|dhmv|fpgm|vyish|p|teygt|lysk|seleel|ckvck|qyqlp  
lfmdgar|lgyg|lmsdq|sdm  
tikdiakyc|dvfy|iggtk|igal|cgea|ivft|k|nepk|qft|trikh|hgallakgr|l|tgi|q|fle|lft|dn|lyfn|isrhai|eman  
k|mkdg|fknkgyr|lyfd|spt  
nq|qff|il|snek|iae|legkv|kfav|weky|ddq|hrv|rfat|swat|teen|lnk|lle|i  
>tr|D9RQP7|D9RQP7\_STAAK  
meqik|l|ktft|aetle|le|lekk|ina|fls|seatn|l|k|l|vnitike|ieert|fpn|neefnail|t|lsvnk  
>tr|D9RQQ2|D9RQQ2\_STAAK  
mtsli|iaed|qnm|l|qamv|lik|l|hgdf|eilad|t|dng|ldam|k|ieey|n|p|nv|vild|empg|mtg|lev|lae|irk|k|h|nik|vii  
vt|tfk|rpgy|fekav|vndvd  
ayv|lkers|ieel|vkt|inkv|nge|keysat|l|mts|ffv|dkkp|l|tpkeq|ivl|reig|ngl|sske|isek|l|fldgt|vrnyts|vii  
dk|l|fadnr|fdaw|kkanekg  
wi  
>tr|D9RQQ6|D9RQQ6\_STAAK  
msfyv|l|iiii|valigi|l|vlnq|rysnski|dtevyark|qlikknka|lsaena|elsqm|l|ssnndv|ghhayknakrelrki|l  
dsyleng|k|lky|ydi|ivtsn  
latkhpffeyars|fdfi|ivsdig|linvd|k|swgekt|fyhfdvpdehdte|isnsnieivvghyisqyhdqfnssrksiyt  
ftetvqpnrv|ydfdydp  
yqlaannakal|kdhieqnfnfvqstgviyfsdgtvni|qgseerdkyvdtvstksslriiseaie|l|skhp|lnkeqv|dq  
itai|fk  
>tr|D9RQQ8|D9RQQ8\_STAAK  
mkvskfggssvsnatq|ikkv|l|nivnsdperkiv|ivsagpkrhdndikttd|l|lirlyekvinh|ldyhdkkreiiqryddiv  
ielqmdesilrtidvt|leh  
yinglknepkr|llda|l|scgedfnaqlialynnsqgiptkyispeagi|fvtdvpqeaqil|dsayseikk|l|rdydek|lii  
pgffgvshegyivt|fprgg  
sdtgais|sgvrat|iyenftdvsgiykanpniikdpelieeityremrelsyagfsvfhdealqplykdripvvikntn  
rpqdkgtfi|vhdrein|akn

Tsompanidou\_et\_al\_Supplemental\_FASTA\_File

visgiscdkdftviniykkylmnrqvgftrkilogvednnisfdhmpsgidtisivmrskqiqnketkvlneirqkcdvde  
lsiehdlailmi vgegmnk  
vigtankithalaeskinlkminqgaseismmfgi hvddaekavlstyefcyhgvalknl cdkn  
>tr|D9RQR3|D9RQR3\_STAAK  
migqtnl fddv1kqderfvi vvaaleekngqllkrtl reypgl nhkqmdl fmlkel fseesfaenqsafsitvytnld  
ytadqiyahvkrfrgkhdw  
tqtak  
>tr|D9RQR9|D9RQR9\_STAAK  
msksdvektlnkpkrvtfneygtkwytyydddynnfimisy mdkdvna lytnqni itskski kyntpksvvrqr lgepet  
eivkgrvryeqnnkeydvf  
hknhiyttvf ydkhrrnvtav lqvsdamenr lkeqygapsks ladsfel qnfdlvnaerkqhql stlkyskqns etark  
hskdmannhyfdhtnlkgq  
spfdrlkkdgitfn sagen layqvssiyahqgl mnsighrkn ilndtfkilgv gvd fndekqpfwtenytg  
>tr|D9RQS4|D9RQS4\_STAAK  
milinvitvvvllaigi agfyfwnktt syvttdnakvngdqiki aspasgqiks lnvkqgd kldkgdkvaivtvqqgdge  
tkdmdlkmpqkgtiakldg  
megsmvqagnp iayaynl dlyvtanidekdikdvevgkdvdvtidgqkasikgk vdsigkataasfslmpssnsdgnyt  
kvsqvipvkitlesepskq  
vvpqmnaevki hkn  
>tr|D9RQS6|D9RQS6\_STAAK  
mndlthfnkrspifi iilgsltaigalsidmflpglpdir hdfqttsnaqlt lsmfmi glafgnl fagpisdstgrkpk  
liamiift laslgivfvh  
niwlmval rflqgv tggaaavisraiasdmysgnel tkfmal lmlvngiapvvaptiggi ilnysvwrvmfviltifgfv  
mvigsllkypes lvtvre  
sssglktmfknfkil lktprfv lpmliqgmtfvil ftyisaspfii qkiygmtai qfswmfagigitli issqltgyld  
fidsqklmrgmtmiqigv  
ilvtivllnhwfwl laigfi iliapvtgvat lgtiamdsssrgssssllglvqflfggvasplvgvkgednpi pyi  
iiiiatavil iilqiynmk  
vfktnr  
>tr|D9RQT1|D9RQT1\_STAAK  
malvvedivknfgegl setkv lkginfeveqgefvi lngasgsgkttll tilgllsqtsgtvlyndapl fdkqhrpsdl  
rledigfi fqsshlvpylk  
vieqltlvgqeagmtkqqsstraiql lknigledr lnyvphqlsggekqrva imrafmnpki iladeptasldad ratk  
fvemirqqikeqqm igimi  
thdr rlfeyadrvie ledgkitd  
>tr|D9RQT8|D9RQT8\_STAAK  
mlvntfnpfdnll slliaaipivfl lcltvfkmkgi yaaitlvvtlliaipffklpv giasgavvegffqgiipigy  
ivmmavll ykitvesgqfl  
tiqdsitnisqdqriqvll igfafnaflegaagfgvpiaica ll tqlgfnplkaam lclvanaasgafgaigipvgvve  
tlklpgdsvlvgvsqsatl  
tlaifnfiipfl lfiidgfrgvetlpailvvsitytltqglltvfsgpeladiipp lltmlalavfskkfqpkihyrv  
nkdeejepakahsakavl h  
awspfi vltvimiwsapffkn lflpnga lsslvfkn lpgtisevthkplv ltniigqtgtail ltiitilmskkvn  
fkdagrlfgvtfkelwlpv  
lticfilaiskittysgl saamgqgiakagnvfpvl spilgwigvfmtgsvvnns l fapiqasvaqqigtsgsllsan  
tvggvaaklispqsiaiat  
aavkqvkesell kmtlkysvc l lificiwtfilsll  
>tr|D9RQT9|D9RQT9\_STAAK  
meviamikqinvsnmqkfesqlmkaqseg ythvpyane imiyqsmldavqlypksivvdytv dgqykndchyfgqssin  
iadwaqnnnyy p nliyaiq  
qtl dlihyysveti fdla llltkgd lsidghv vdfkapiatsasiwetiktiedfdmmsqfylnk mayidhhpipfrn  
lfiedseq lns p d n w l y s t  
kfm l p k w l y k i a k q r a d n k q l q n f g l y t k q p n v l k d h i v f i g d h h q y i g n s k y l f t y f v k h n p m t a c y f v t d d r r g p h f i  
spksekadelinsarvviv  
endipetlqpngtliqlhgtpimql fl dskepikni etp fy rakrynrl qfdyvihsaddishfyqtafpshqanvla  
ygnpkhgyllqksnesttq  
qqy k s f k i n d q k p v l l y a p i g l v s a q q l p l s d a l f k a y h v v v q g v d e a i l p e e a l v a p k y l s a q d l i l m s d v v i t d y s n  
i i f d a m a i d k t v a l y t p n h  
sqyiesqgvnediwrhl skiwytdrql linnl isqai p v i k y p q i q h k e a p l e s i s q l i l s k m t s n q  
>tr|D9RQU0|D9RQU0\_STAAK  
mkr lvtglla slfla acgdsdqkdgnkekddkakteqqdkktndsskdkkdnkddskdvknkdnknsandnqqqsns  
natnndqngt nnnqssnng  
annnqkssy vapyyqnaapvarqi ypfngknqalqql pnfqta lnaanneankfgsnkv yndysieehngnykyv fs  
fkdpnangkysivtvdytg  
qamvtdpnyqq  
>tr|D9RQU5|D9RQU5\_STAAK  
manyaiyfnnini nsimalndnnyqfehverneyres  
>tr|D9RQV3|D9RQV3\_STAAK



Tsompanidou\_et\_al\_Supplemental\_FASTA\_File

msnsgaiqaienvlatskvglstaynnkpnrymvfyndgltlytktnihsakvkeikdnpaayvllgyndttnrsfve  
meatieivteqevldwle  
tqdkssffsskedpelcvlrvvpqsiklmdksldtpikidl  
>tr|D9RQV5|D9RQV5\_STAAK  
mqvvia1vlgvvvglllyggenvanyikpfgdvflnlikmivipvfvfcsalalsisnvgesktvgrygwktilyfeiitti  
aiglgiiifgnlfpkpgagld  
ptklpkgdiskyqstahaeeqstygnhfidtivhiiptnffeaInkgeIlpiffavffglglaavgkkaepvkeflsgs  
leavfwminkilklaplgv  
faficttiitfgasalpllk1vlvvvfamvffvfailglvawmcginimniirilkselllafstsnseavlpvmmkkm  
enfgspkeitsfvipigy  
fnldgsalyqsiaalfvaqmygmhltlseqivlmltImitskgmaavpgtsivvllttlgamglpaqglaliigvdrild  
mvrtecvnignalstivia  
kwenvydkakgqeylksi  
>tr|D9RQV7|D9RQV7\_STAAK  
maiendeklnikkIgervfldsgltlplkklekkydvrtreekdernlqislteqgkaiksplaeisvkvfnefnise  
reasdiinnlrnfvsknfd  
ysdkk  
>tr|D9RQV9|D9RQV9\_STAAK  
milmkvkrmyktkggfgltlqt1slvvgfmawsiiaplmpfikqdvntegqisiilaipvilgsvlrvpfgyltnivga  
kwvfftsfivllfpiffis  
qaqtgmlmasgfflgvggafsvgvtsvpkyfpkekvglangiymgnigtavssflappiagiigwqttvrsyliia  
lfalimfi fgdtqerkiv  
plmaqmktlSknyklyylsywyfitfgafvafgflpnlylnhfgidkvdagirsgvfialatflrpiggilgdkfnavk  
vlmidfvvmiigaiilgis  
dhialftvgcltisicagignglifklvpsyflneagsangivsmgglggffpplvityvanltgsshlafiflavfgc  
ialftmrhlyqkeygslkn  
g  
>tr|D9RQW0|D9RQW0\_STAAK  
mlfknafiymktnidkvlttyifyydcekvniirifpyl  
>tr|D9RQW3|D9RQW3\_STAAK  
minedsigldtllkkyehsiekiyfaddngkiiamndaakdilseednysavanaichrcegytnaydvqsckdcfls  
mqvqatnfvqvmktdkqkv  
mpftatyqlidqdrghaftlqnvsqieqqeklhqqrmmrktisagenerkrisrelhdsviqemlnvdvqlrllkyqe  
dttkllledaeniyivakl  
iddirmsvelrpalddlgleaafksyfkqfeenygikiiytsnikntrfdsdietvyrvvqeaInalkyadvnein  
vgirqtgrhlvaevidagn  
gfdpsskpkgsnglygmneraelvsgsvnietkigegtnvtlnipi  
>tr|D9RQW7|D9RQW7\_STAAK  
mkikaqvamvlnldkcigchtcsvtckntwtnrpgaeymwfnnvetkpgvgypkrwedqehykggwvlnrkkgklelksgs  
riskialgkifynpdmpli  
kdyepwnynyehlttaksgkhspvarayseitgdnieiwgpnweddlagghvtgpkdpniqkieedikqfdefmmy  
lprlcehclnpscvascps  
gamykrdedgvlvdqacrgwrycmtgcpykkyvfnwktkaekctfcfprieagmptvcsetctgrmrylgvlllydad  
rvheaasavdekdlyekql  
diflmpfdeeviaqaekdgigydwieaaqnspiyklaieyklaflphpefrtmpmvwycpplspimsyfeqknttqnpda  
ifpaieemrlpieylanif  
tagdtepvkgaIqrmammrsymrsqvtqppfdtsrlerlgi terqtkdmyrllglakyedrfviptshketyldtyhaag  
stgynyggehfgdncegcg  
vavsgktggeiynefyggi frd  
>tr|D9RQW9|D9RQW9\_STAAK  
msveeygvlylgagpgnpyltkkaerli readvilydrlnvnlilqyanltteiidvgkkpytkhiqqekindcivea  
arrynkvrllkggdpaifg  
rvqeevdtlnehhifaeivpgvtsasaavatmqtgltmrtvaksvtfstghfdseenevvnslvnggtlaiymgvkrll  
gkiiitqiqqytdidypiai  
vfgascfnefvkgrlsniisklqhysieakpgicigevdytentpksydpmkqfyvsvsgskhdalmlcehlydegyg  
c1lnpndtsngtyhssqyd  
yydafikqqenvtyistdradantvlch  
>tr|D9RQX2|D9RQX2\_STAAK  
mngniivahgmrhgrnqaleafiselvekddihhydiaflsehqldletvmttliqsgvdhfkivpllisamhyllkdip  
nivhemkrrypdikvevse  
plgthplmrrlieqricdalagdeqqvgvmvahgningkftkaheelqicaqlqiskptyartlygeisfthdlesis  
kryqk1ivvplfllydgrlv  
nkvkqqmndmvinthftpsinfdpilkqiindrleslmipmki  
>tr|D9RQY4|D9RQY4\_STAAK  
mflnlInseqghaldaakqafgpmleglvkysipitlvtfvlgliialftalmristskilrsisrvyvsiiirgtpmivql  
fiifygipevllndad  
nqwtlapvvaaiiglslnvayaseiirggiisipkgqteaaysigmtygqtiqriilpqairvsipalngntflslikdt  
sllgfilvaemfrkaqeva

Tsompanidou\_et\_al\_Supplemental\_FASTA\_File

sttyeyltiyvlvalmywvvcfiisiiqgiyesyiergyrs  
>tr|D9RQY9|D9RQY9\_STAAK  
mknkyiskllvgaatitlatmingseakasentqqtstkhqttqnnvtdqqkafyqvhlkgitteeqrnqyiktirehp  
eraqevfseslkdsknpr  
rvaqqnafysvlkndnlteqeknnyaiaikenpdrsqqvsvsqskakerqnieadkaikdfqdnkaphdksaayea  
nsk1pkdlrdknrfvekv  
siekaivrhdervksandaisklnekdsienrrlaqrevnkampdvkeh1qkqlda1vaqkdaekkvapkeapqispq  
iepkvespkvevpqisp  
kvevpqskllgyyqslkdsfnygykyltdtyksykeydytakyntyykykgaidqvtlvtlvgsgksyiqplkvddkn  
gylaksyaqvrnyvtesin  
tgkvltyfyqnptlvktaikaqetassikntlnllsfwk  
>tr|D9RQZ3|D9RQZ3\_STAAK  
mtskditqisviaailtilavlkipsiipglfdq1sapaallilaffgikkyflggl1ss1111vfgvfnpinviisiif  
rviajavvyllkinvls1v  
lasvlgslvsrll1s1ilnlpwvvl1naipgviftlivaiplyltlrkrmavllr  
>tr|D9RQZ4|D9RQZ4\_STAAK  
mkfqqeidl1qqkglyrslksvgyidrqiyevenkrctnytsndylglgqiafdkddferfmrkysyhl1ssr1isgsst  
ayeeietmlagwlgysact  
ilnsgydanlalfnikntncvvsdqnhasiidgiklsglekviykhldiadlekrlekypnqnipkiiisdsvfstn  
gdvvdigq1vslkhkynat  
lildvshsfgienysnyqgvdl1tss1skacgayggv1ssndvkdmlinhgrplyssslpiynlyfikrnieklinad  
drtrtklnslskyfnqk1ka  
lnvnyssnspikfiefdieaaenihqtllkhhvftsylryptvtkpm1ris1syfhteqididrlfeilhqed  
>tr|D9RQZ9|D9RQZ9\_STAAK  
mnnqtnwikilsgfasdskwkim1sillsiisvfgslvpywavfkilmmintytinsimvyifialiyisqvccfga  
stmlshitayeilseirkk  
laqklmr1plgvveskkigeklnifvdkvetielplahmipevignll1saaiflyimlidwrmasallvtipisifafk  
kvmsgfnetyaeqmksnny  
mnsaivefiegieviktfnqsqssykykdavdnykihtlnwfkntwgymnlgasvlpstflgilpvgmylisingl1nya  
efflciv1slgvvapiknf  
tnyvnhlksiqyaltevnq1slee1v1stkfkpkqhyeiafnvngfsynkdkdd1vfkhl1sftvpennftaivgasgsg  
kstiaklisrywdvt1sgei  
tiggini1kdi1esq1nd1vgfvqdnf1ln1l1t1fkenik1gnpeatdeavekaaklaqchefiek1pdgydtnvgtvgdk1  
sggekqrvtiarmi1kdap  
iiv1deatvyvdpdneqk1qea1nvl1tdk1t1iviahr1stiqhadqiiv1lgkq1ilekgshh111k1ngnykkmwdthm  
htkdwgintghn  
>tr|E4PXG1|E4PXG1\_STAAH  
mnyfrykqfdkdv1tvavgyylryalsyrdiseilregeriyvhstiyrvwqeyapilyqiwkknkqayykwidetyi  
kikgqwnylyraidaght  
ldis1rkkrdnhsaytfikr1likqfgkpmi1tnqapstkvamskvikdfk1tpnchcnskyln1ieqdhrikvrkis  
yqsintakntikgieciyg  
lykknrrslqiygfsprvisimlas  
>tr|E4PXG2|E4PXG2\_STAAH  
mksyqaqkvieevikepkarw1fl1l1stknaidgdt1eqslkhl1tkafdrvsrykkvkqnlvgfmrstevtvnkndgs  
ynqhmhvl1cvenayfrkk  
enyitqeevwn1wqkalqvdyrvvnikaikpnqkgdkdiesaiketskysvksdfl1tddeknqeivsd1lekglyrkr  
mlsygg1lkqkhk1ln1dd  
aedgn1intsdedkitdeeakahsitaiwnfekqnyl1rh  
>tr|E4PXG3|E4PXG3\_STAAH  
mkrs1filqi1lgi1fl1ffi1yqamqn1h1dtwfi1lytvffiff1sswfdkhykks  
>tr|E4PXG4|E4PXG4\_STAAH  
mikvsn1nqywssfymqynttr1sitenqdnk1tkdmtksgkqrpwrekkidnrvfcckvkk  
>tr|E4PXG5|E4PXG5\_STAAH  
msyentcdvicvhedkvnnals1fledk1sk1ln1leki1cdek1k1i1sl1iked1cvcd1sl1lkmsiastshh1r1l1  
yknev1dfykdgkmayyfi  
kddeireffsknhegf  
>tr|E4PXG6|E4PXG6\_STAAH  
miqtvvaavlyiatavdl1vill1ffaraktrkeyrdiyvgqylgsi1il1vs1flafv1nyvpekwilgllg1piyl  
gikvtiyddcegekrakke  
1nekgl1sk1lvg1tvaiv1tiascgadnig1fvpyfv1lsvtn1l1l1fv1l1l1ff1vftaq1lanipgigeivekfsrwim  
aiiyialglfiiiendtiq  
tilgfif  
>tr|E4PXG7|E4PXG7\_STAAH  
mfniviri1aifykr1rdimk1ktfatfthrq1ldkqvr1flkndihv1leiqr1snwlyisai1vf1yedk  
>tr|E4PXG8|E4PXG8\_STAAH  
mfnkrh1fed1eanhig1fv1kn1ys1lkrkyepnkym1l1sqt1kisaks1vtn1f1dtah1han1kisiky1f1tspc1fsk1flgq  
fsyq1l1rnfn1t1ksp  
>tr|E4PXG9|E4PXG9\_STAAH

Tsompanidou\_et\_al\_Supplemental\_FASTA\_File

m1sygg1lkqkxhki1n1ddaedgn1intsdedkttdeekahsita1wnfekqny1rh  
>tr|E4PXH0|E4PXH0\_STAAH  
mqnqyftvqenykerfyqipkvfftsenykn1tndmkia1yailrd1n1siknswdvedgniyfvysneklmeilnckke  
kltkikkglendglliqkr  
rglnkpnilylmpivterdiykiekeendvepygekevrksnvqkfenrtsrsskierpevrksntndtdfndidfndt  
enndmnd1ndikykn1sn  
hsnqfthnfddkem1lgefpeqltny1lkydyrd1eikavilkakksfnshedmym1ediedeilts1kr1kkaih  
rgvkgqketinsmqaylmg  
t1lteleethalymrrknmkqynifnq  
>tr|E4PXH1|E4PXH1\_STAAH  
mksvkk1see1gsvkqti1fnnikr1nietikqentsfikedtdiekiiqrvenkkkygfesttedkqkkgrii1l1nrk  
am1k  
>tr|E4PXH2|E4PXH2\_STAAH  
mqerskl1lenqqv1alesnkkiqk1enq1ekeh1nypfdtstntrqnvdaqektyttnpvni1rdqeetketeiqykdi  
sgsqdestqgeeakredv  
pan1ndndsdi1eekseetepkkgfwsr1fgs  
>tr|E4PXH3|E4PXH3\_STAAH  
mklaeaikeqrelkgwsqeelan1lksvrqsvskwesaknyps1diliams1dfgitidhlikgdtcfkkvilegnyren  
nrvpfi1vdflydfw1lffp  
vavf1vwaihss1d  
>tr|E4PXH4|E4PXH4\_STAAH  
mik1envfvkkgkn1ldecnfnfekgksya1vgesgagkst1lni1agfedvsqgsiyiedk1lkkkvdfyryt1glyf  
qnfallenqtisqn1d1a1  
kfkknkkn1m1k1kev1kkvs1d1dikrivns1sggeqqrvalar1l1kdpki1ladeptgs1dtkngkivid1l1n1d  
enktmivvthd1d1akrfd  
vivnise1rn  
>tr|E4PXH5|E4PXH5\_STAAH  
mkrt1iivtsv1l1i1i1s1l1vrneh1drfnp1l1kekvsyakvpkdtqdyrni1tvyskngekksyk1dflgydptkeyvk  
vnhkgkyvrsieyitkdip  
sf1k  
>tr|E4PXH6|E4PXH6\_STAAH  
mkkfk1f1dfst1l1isg1l1fl1ffkeseei1pessni1tisnwdksnskskvl1daiesgakanqniqi1rsvkdfdnkqe  
ffvfnskrnnsd1l1rnkts  
l1tspd1l1nreikgkyyi1gehfnvee1tse1kkag1tseveyinrni1l1ffelvidnd1l1vpfi1flgvly1llyylydrgh  
h1kfyavqk1hgfsttri1  
fhnih1kiiyw1l1tsiffian1liihian1eldf1mfvr1fiv1l1fvfacitt1l1wisys1l1k1nipl1tlkgkkyk  
fsifmg1ftkctm1v1l1sf  
l1aqn1naytk1knidysekiwqk1enyyt1leispni1r1leekq1letnvyn1likkseqlgg1l1knnianpdknnyip  
engnvffinnn1f1nfykni  
npdfkmi1anhsdki1nvfi1ppr1qsqkseiqknhqgwidf1qkqknkvdvqvl1sknsvsfsdr1ttn1kfgyl1dspiv1l1  
tpdd1tgdfy1laavsqgy  
l1fkdl1dt1kq1l1kdnh1laeeisgitnykds1v1neinetk1tkmiit1v1t1i1invfilliatvfeti1qy1fswnrkq1l1l1rki  
hgs1l1fssnvryl1tis1l1  
s1m1aytthi1fcski1l1liivsiai1iqy1l1qiayiky1lekyfkd1l1mrei  
>tr|E4PXH7|E4PXH7\_STAAH  
mkkkfvsscias1til1fgt1lgvtykaeatv1l1aggvshgigkhyvwshyshnkrnhgstavgkyss1fsgvarpgvqsk  
asapkawgg1nktfys1h  
>tr|E4PXH8|E4PXH8\_STAAH  
mi1gyarvssidqn1lerq1dn1ktfgvek1ftekqsgksvenr1fi1qea1nfvr1mgdrfvvesid1r1grnydei1etvny  
l1kekdvq1l1mits1l1pmmnev  
ignp1l1dkf1mkdi1i1iqi1lamvseqerneskr1raqq1iqvakekgykgrp1l1yspnakdpqkrviyhrv1vem1eegqais  
ki1akevni1trqtvyri1khd  
kg1s  
>tr|E4PXI0|E4PXI0\_STAAH  
mak1l1imsivsfcfi1f1l1l1ffryi1lkryfnym1nykvwyl1t1laglipfipikfs1l1kfnvn1nqaptveskshd1l1hn  
inttkpiqefttdihkfnw  
dsidni1ctviw1v1l1vi1l1sfk1fl1ka1lly1lky1lkkqs1y1lneneknidtil1fnhqyknivirkaeti1qspit1fwygyi  
i1lipssy1fksvidkr1kyi  
i1l1heyahaknr1dt1h1l1i1fni1fsi1msyn1lvhi1vkrki1hdneveadr1fv1lnninknefktyaesimds1v1nvpffnkn  
i1shsfngkks1l1krr1in  
ikean1kkqsk1l1l1ifici1ft1l1mvi1qsqf1mgqs1tdynykkp1lhdyq1l1dski1fgsnsgsfvmysmkdkyyi1yn  
ekesrkryspnstykyi1la  
mfg1ldrhi1indensr1mswnhkhypfdawnkeq1d1ntamqns1vnwyferi1sdqipknytatq1kq1l1nygnkn1l1gsyky1sym  
eds1k1sn1leqv1v1fknmm  
eqnnh1fskkaknq1l1ss1l1l1kknekye1lygktgtgi1vngky1nngw1fvgyv1t1nhdkyyfath1sdgkpsgknaeliseki  
l1kemgv1ngq  
>tr|E4PXI3|E4PXI3\_STAAH  
mknkeky1l1tnfseakrkkai1qkyni1kpfil1geqs1l1ssi1skskgial1stlyrwnksykeqgl1kgl1yatradkgtrkiep

Tsompanidou\_et\_al\_Supplemental\_FASTA\_File

mideierlalmnkrsnia  
tahrkitnyckennfdipsyqiyvikampksvidfshqgekyqnykdliqiressrpneiwqadhtlldifildqkg  
nirpwlitiimddysraia  
gyflsfdapnaqntaltlhqaiwnkndtnwpcgipekfytdhgsdftshmeqvaidlkinlmfsvkgvprgrgkierf  
fqtvnqtfleqlpgyinnn  
dtpsnlinfhfneeklryfliedynqkehstihhttpisrwnshffpnmssleqlldllleipksrkvhsgdihfqgfr  
ysntnlaayvgeyvlryn  
pndmaeirvfyrdelftaicpeiadysidikdiqharsqrrkhlkqniaspsttelikeekncgyspqqettknvkkkr  
yrnd  
>tr|E4PXI4|E4PXI4\_STAAH  
mtknqnfietkeykrfaefcdacikyqyigicygqpgvgkltssryytndwtiekqvnhrwedlaskttddilsvdkif  
ytapaekqtklndlysit  
asidlgqklhvvnykyghehskhysdmfkyidliivdeidrllkvqhleqlraiydehnlamifigmpgiekklrypqlys  
rigfahefdnlskdethhi  
leykwqdlgfdlkledftdyeaittiikitkgnfrlihrifaqidrimdingldkistevvetardslvigir  
>tr|E4PXI5|E4PXI5\_STAAH  
mcyidsemenkgryaryvddisfsfnfeekdkfyrdfnklcmkyelkindkktevndfpyihpqnkdfifnyfknys  
nskdetwiigiknfdlci  
deerkgnkgaiksfvientlkkkkinkhqiskifgyrnnitkfnilqfildlslkdskltnrcslsllnyltikmddkk  
ivskqvkqyfknrneeirk  
llvfynknyhqetyqilyviveydvdi11kndvls11nntdnls11tiy1rkswkien11kkidnlfknskddyp  
atvgvmsqnlwyfryfiyy  
likenviskkeinsycmsqkygsnqkyksdlwnyinskdndveffsel1leekvplidlnyvnli  
>tr|E4PXI6|E4PXI6\_STAAH  
mkskkrmerlyddlfsntflinygyfditpknnqdltelnsygsdafylkifnmsklaeyitynpfyikkffndrnirs  
tepiiftjpknntsrryk  
ipniysylnlmffmqenkkefkevfltnkfstskffslpfdfdkftdnlkk1lyggnhilnvdlnsfyhslythsipwv  
imgkknakkerkvfqi  
>tr|E4PXI7|E4PXI7\_STAAH  
mknlsffikntlvltstallfssfepvvhaaenkevktvendnvefnelleqgeyiwevlrsrdegfkmfldeqrafn  
pnfdndvllakqegalnss  
vfannsmtlnsnkptprgpiगतlkaikalspslrhggtaiswiikplsrkhavlvkysrkmsnaidrldkstksaven  
afvkagiprsdaktlyiv  
flvi  
>tr|E5AZI9|E5AZI9\_STAAG  
mqynttrci denqdneltkdmksgkqrpwrekki dnvsyadi leilkikkafnvkqcgvnlefkptdegyllk1hktwfc  
ksklcpvcnwrramknsyq  
akvievevkepkarwlf1l1stknaidgdtleqslkhltkafdr1srykkvkqnlvgflrstevtvnkndgsynqhmh  
vllcvensyfkknkanyitq  
eewvn1wqkalqvnypvanikaikpnqkgdkdiqaaiketskysvksdfltdddernqeivndlekglyrkrmlsygg  
llkqkhki1n1ddaedgnl  
intsdedkttdееekahsitaiwnfekqnyylkd1kr  
>tr|E5AZJ0|E5AZJ0\_STAAG  
mqynttrsitenqdnktlkdmtksgkqrpwrekki dnvr fckvk  
>tr|E5AZJ1|E5AZJ1\_STAAG  
msyentcdvicvhedkvnnalsfledksskllnilekicdekklii1slikedelcvcdislilkmvastshh1r1l  
yknevldfykdgkmayyfi  
kddeireffsknhgef  
>tr|E5AZJ3|E5AZJ3\_STAAG  
mfshcffipigvvayflffykddfdemeekydyhednk  
>tr|E5AZJ4|E5AZJ4\_STAAG  
mknkdtvldkgyviatilnvffllglifishfenlyililyvilmginaiy1vvkvl1nfkkn  
>tr|E5AZJ5|E5AZJ5\_STAAG  
mntki1tgmtgsslerkinnfindnqievidikfsssvfyfgvmiik  
>tr|E5AZJ6|E5AZJ6\_STAAG  
mlsyggllkekhhki1n1ddaedgnlintsdedkttdееekahsitaiwnfekqnyylkn1rs  
>tr|E5AZJ7|E5AZJ7\_STAAG  
mpnfekyn1sqvkerfyqlpkylfedayfkmsaeakimya1lkdrfelisqnewvdrnnniyfi1snkhlceylgyge  
qkiik1kkelvnfn1ltqe  
rvgl1nkpnrlly1l1kpn1di eas1tke1pnsqfqnnesgssrtvn1sgqel1pnsqsdte1nntnyienedndtydmndii  
snt1innhhsnhtnhtkt  
efnndalkfvleelpqqldy1skfeireiriiksv1llkgkksfntshdtyrledvefeivsv1krfkam1l1qknetv  
eamqgy1mqsi kaeleeth  
alymrrknmkqynifnq  
>tr|E5AZJ8|E5AZJ8\_STAAG  
mktikmvadelnvtkqti vnnaklni1sfkkenginyindndclkiiekittktertqnkesikkerfnentaefekhiy  
nnsnsfes1ktkvneleq  
ieifetrakndekyien1tkql1dqqs1nvt1nk11enqqla1lesnkkiqk1enqleerq1nysfdtatndrqs1npq

Tsompanidou\_et\_al\_Supplemental\_FASTA\_File

eatfteeyqnsnqqqkkiq  
pieaelnhkgitkakkddsanedvlkrddkseeiesgpedrevetpkkgfwsrlfgs  
>tr|E5AZJ9|E5AZJ9\_STAAG  
mksnyqsqkviieefkekpnsrwlfltltsirnaiggdtleqnlthltesfrrlkykkisknligfmhstevtvnkndgs  
ynqhmhvlcvenayfrkk  
kyitqtelvdlwqqaikvnyrpvvnikaikpkrr  
>tr|E5AZK0|E5AZK0\_STAAG  
mlsygrllkqkhklnlndnvedgnlntsdedkttdееekahsitaiwnfekqnylrh  
>tr|E5AZK1|E5AZK1\_STAAG  
miacislgisifalgsiytvfyqrkkdnnlrrpqlflesqnkqtvdyyiginldiggyeklqeydvlltfinttqvriid  
lsvsidvrkndtfdylsk  
aleekennfdiekdmfgndtygwdkvfgleettkeki svldggdsfelrpsifsaillgamylnrndftesnftidfdv  
kilynhd fankgkyvcvk  
tvsvnityeraigppwvydsiifdkl  
>tr|E5AZK2|E5AZK2\_STAAG  
mslkdiefwmslydikdvwflilipivisivklknkndlyqtrnvekikmvlnktrflilitigaliylvsmiiffslsa  
ypkdevmeyiskwdnigsf  
tiliimyamfpivtipflgerrnrffleknnneviereiidrvyingkdklilkdgegiqteknvtdidnltfkiqdk  
kswiamediqkiflkfqr  
skkkrisifificsiptvylawnlpsiidmftklqkwtdifmyisfftllililielyvyivykslfkkv  
>tr|E5AZK3|E5AZK3\_STAAG  
malgilsklamagivltsvtgaatlgvssiahevhaenanqehfektlegkvlnfkdvlskntisikdfskavenelk  
nkgfdpseykfkfvkvgh  
svyqssdgnlivgnehigtataefnptkhhklygyeseiekiidyiknitskdldsvnmqnkifyihlqylrtdagr  
infmli enpftykprkkp  
idldeiqkhkntiikfnei fkqgnlenlkrmkkpsnmfhiaisednlltsdnpiatdnwnqimlpitpnilieqf  
dkinssndlrvilknktr  
yvneatintanyfiisneftryqkyidnrfnnknweigyphvnkn  
>tr|E5AZK4|E5AZK4\_STAAG  
mkkfnili alfftslvispnvanenidsvkekelhkkse lssalnmkhsyadknpigenkstgdqflentllyk  
kfftdlinfedlinfnks  
emaqhfsknvdvyairysincyggeidrtactyggvtphegnklkerkipinlwingvqkevsldkvqtdkknvtvqe  
ldaqarrylqkdllklynnd  
tlggkiqrgkiefdssdgsksydlfdvkgdfpekqlriysdnkltstehhidilyek  
>tr|E5AZK5|E5AZK5\_STAAG  
mtfsltkvamsgliltgaigtagsvsvpvanveakaaefnpkvdkllkfevskk  
>tr|E5AZK6|E5AZK6\_STAAG  
mkktilifilifstltilitlplvysdsknetikeknlhkkse lssitlnl rhiyffnek gisekimtedqfldytllfks  
ffishsqyndllvqfdske  
tvnkfkqkqvdlgyssygfqcsggkpnktacmyggvtlhennqlydtkkipinlwidsirtvvpdivktnkkkvtiqel  
dlqaryylhkqynlynpst  
fdgkiqkglivfhtskeplvsydlfnvigqypdkllkiyqdnkiiesenmhidiylytslivlisplvl  
>tr|E5AZK7|E5AZK7\_STAAG  
mlnki1111svtfm11ffslhsvsakpdprpge lnrvsdykknkgtmgnveslykdkaviaenvkntraqflghdlifpi  
pyseykevks efinkktad  
kfkdkrldvfgipyfytclvpknesreefidgvcyiggvtmhstadsiskniivpvtvdkqqfsftistnkktvtvqe  
ldykvrrwltnnklyefd  
gsayetgyikfi eenkdsfwydlfpkklvpfipykfvniygdnktidassvkievhlttt  
>tr|E5AZK8|E5AZK8\_STAAG  
mfnavvvrksasnvsykvvetvdesylskgdvlkvvyssinykdm lalqynggvirdypmipgidfagivessndkfke  
gdnvltgydvgvthtgff  
seyaqvpge wivpipqemsikesmvygtagftaalsifelekygmniksqpeilvsgatggvgsvaiqilrkigyenita  
ivrkekqieiakklgakqv  
iieddnkplkkgifdyfldtvgnnvtlyglkrlnyqgvatvcgnvagnslnani lpfilrgikligidsvcvdhired  
iwsklanewnignslyne  
igfeefyktdqllkgghlgrtilkv  
>tr|E5AZK9|E5AZK9\_STAAG  
mdilsnipdivegskfkvlpia lgvfklllikqfktypsagvil  
>tr|E5AZL0|E5AZL0\_STAAG  
mskkdli trqtdnenrrtvl instnkakdlwptlekkayqlnnyfanl tneetvfvkkillkinettf  
>tr|E5AZL1|E5AZL1\_STAAG  
migy arvssidqnlerqlenlktfgaekiftekqsgksienrpvlqevlnfvrmgdrfvvesidrlgrnydeiie tvny  
lkekdvqlmitslpmnev  
ignhlldkfmdliiqilamvseqerneskr rraqgiqvakdkgykgrp llyspnakdpqkrviyhrvvemleegqais  
kiakevni trqtvyriknd  
kglcw  
>tr|E5AZL2|E5AZL2\_STAAG  
migy arvstglqnldlqedqlnqygceki fndhmsgskskrpgldkaiefarsgdtivvwrldrlgrnmedliilvnel

Tsompanidou\_et\_al\_Supplemental\_FASTA\_File

nnergvsfhsleenitmdks  
sstgqllfhlfafaefernlilerssagriaarargrygrpeklnkqdlkllktlydngtpiktiaeqkwvsrttiyr  
ylnklnnqenkdk  
>tr|E5AZL4|E5AZL4\_STAAG  
makllitsvsvfcfiflllvffkyilkryfnyslnykvwyltvlaglipfipikfsfiklnnvnqaptveskshdlnhn  
inttkpvqefttdihkfnw  
dsidnictvwvwlviilsfkflksllylkyllkqslylneneknidtilfnhqyknivirkaeti qspitfwygyi  
ilipssyfksvdkrlkyi  
ilheyahaknrtdlhliifnifsivmsynplihivkrkiidneveadrflnninknefktyaesimsvlnipffnkn  
ilshsfngkksllkrrlin  
ikeanllkqsklipificiftflmviqsqflmgqsitdynykkplqndhqil desknfgsnsgsfvmysmkdkyyiyn  
ekesrkryspdstykiyla  
mfgldhhiisdksnrmswnhkhypfeswnkeqdlntamqnsvnwyferisnqipknytaaqlkqlnygnenlgsykywm  
edslkisnleqvivfknmm  
eqnnhfskkaknqlsssllikknekyelygktgtgivingkyngwfvgyvitnhdkyyfathlsdgkpsgknaeliseki  
lkemgvlngg  
>tr|E5AZL5|E5AZL5\_STAAG  
mkklifliaialvlsacnsnsphakklnlekkynahigvyaaltdksgkevknfsdkrfayastskainsailleqipyn  
klnkkihinkddivayspi  
lekyvgkditlkeliasmtydsntannkiikeiggikkvkqrlkelgdkvtnpvryeielnyyspkskkdtstpaaafgk  
tlnklianqklskenkkl  
ldlmlnnsksgdtlikdgvskdckvadksgqaityasrmdvafvypkgqsepivlvi ftknkdnksdkpndklisetaksvm  
kef  
>tr|E5AZL6|E5AZL6\_STAAG  
mcyidsemenkgyryaryvddisfsfnfeekdkfyrdfnklcmkyelkindkktevndfpyihpqnkdfifnyfknys  
nskdetwiigiknfidlci  
deerkgnkgaisifpvientlkkkkinkhqiskifgyrnnitkfnilqfil dlslkdskltnrcslsllnyltikmddkk  
ivskqvkyfknrneerik  
llvfynknyhqeayqilvyiveydvdi llkndvlsllnentdnlslltiy l rkswkienllkkidnlfknskddyp  
atigvmsqnlwyfryfiyy  
likenviskkeinsycmsqkygsnqkyksdlwnyinskdndveffsel leekvplidlnyvnli  
>tr|E5AZL9|E5AZL9\_STAAG  
mkkvnkeyllnfiivtfllgiiipisvlv fsipffsiigfqslnadlnissl itinwysnmmfynigialffivtyli  
fifllefii flhikykkkf  
nniilfiffitanmivlnliilki fynihinlyfqifiyslcfy llfthkeiykifeenksk  
>tr|E5QQL6|E5QQL6\_STAAG  
mvdnfral mniilmglpgagkgqtqaseivkkfpiphistgdmfrkaikeetelgkeaksymdrge lvpdevtvgivker  
iseddakkgflldgfp rti  
eqaealnnimselrnidavinievpeeel mnr l tgrricescgttyhlvfnppkvegididggklyqreddn petvan  
rlsvnikqskpildfydqk  
gvlnkndgskdisdvtkdvidildh  
>tr|E5QQM3|E5QQM3\_STAAG  
msqk ilviyskpsqfqrfinivkydrytrnkrgerqvedknsvivfnvsvfyqs dasftlkdvsnipkgqwt sivgh  
ngsgkstiaklmigiekvk  
sgeifynnqaitddnfeklrkdigivfnpdnqfvgsivkydvafglenhavphdemhrrvsealeqvdmleradyepna  
lsggkqrvaivasvlnp  
sviil deatsmldpdarqnlldlvrvkvhsehnitiisithdlseameadhvimnkgtykegtateifdhaeelttigl  
dlpfpikinqm lghqtsfl  
tyeglvdq  
>tr|E5QQM5|E5QQM5\_STAAG  
mknk liigrylpinsfvhhdpraklmfvflfi iliffchsp ltylwmfalilffmrlakiqlwfligklt piff flift  
lmmhifl tkgyv l vewhg  
itietngileglyislr ligivmiatiml stspid l tdaferllapl kmfklpvhq lsmimsialrfiptlmdeldkii  
laqksrgseissgniatr i  
ksfipllvp l f isafqraeelavamevrgydanvkrtsyrqlkwqlrdt lslimiipiaailfv lkysgv  
>tr|E5QQM6|E5QQM6\_STAAG  
mri lveiayqgnnflgfgiqqngrtvqqqfekllqrihkrhvrihpsrtdrgvhaiqqyfhdtdlnipmsqwqyamnr  
tlpddiyvnnvvtvdddfh  
crydcvgkryrykvyaqqrdrpfqsglktfi pep l d ldkm nraaqfigthdftg fcsqkteveskvrtlyqseivktdd  
gfdyivtgs gfl ynmvrvl  
vaf lievgkrhevsdvpkllesknrknvpftapaeglylekiyldene llkdfgndikihrkksl  
>tr|E5QQM9|E5QQM9\_STAAG  
mtsskyieylqteveggll drkrasinpkdvaqhisafanaeggk l v igiedngeisgfnhskakkkevyieapfehlyr  
ipkytyeieivkkrdgtmd  
eilifdi epsyda iitlkddsvylrindksrklthnqitnleydrgrrrfeelveyssi edvneel vdefkqllntnvd  
nekllkargfmregkl tva  
glllfsnninvy lpgari rfmryegtkeesgrlnivkditfdkalpvair rearafintqlreytflgkegrfv t lpeyp  
efawfegminsivhrrydn

Tsompanidou\_et\_al\_Supplemental\_FASTA\_File

qgdh irikmfddrleisspgalpasvtlenikeerysrnpklaaaaltqykwvresnegvgri fdemkqyfl ddpvysepn  
nssvqlalknni iarkkre  
tgrvsniitpel felseqqelivrhl ynqgel taskiani iqrsvptarkrl keleemni isthgsskndpkrtyyllg  
fe  
>tr|E5QQN1|E5QQN1\_STAAH  
mtdkkytaadmvidtlknngveyvfgipgakidylfnaliddgpe livrheqnaammaqgigr l t g k p g v v l v t s g p g v  
snlttglltatsegdpvla  
l g g q v k r n d l l r l t h q s i d n a a l k y s s k y s e e v q d p e s l s e v m t n a i r i a t s g k n g a s f i s i p q d v i s s p v e s k a i s l c  
qkpnlgvpseqdindviea  
iknasfpvllagmrssadetnairklvertnlpvvetfqgagvisrelenhffgrvglfrnqvgdellrksdlvvtigy  
dpeyeasnwnkeletqii  
nidevqaeitnymqpkkeligniaktiemisekvdepfinqqhldeleqlrthideetgikatheegilhpveiiismqk  
vltdttvtvdvgshyiwmt  
arnfrsynprhl1fsngmqtlgvalpwaisaalvrpntqvvsvagdgglfssqdetavrknlniiqliwndgkynmve  
fqeemkykrssgvdfgpvd  
fvkyaesfgakglritnqeeleaaikegyetdgpvlidipvnykdniklstnmlpdvfn  
>tr|E5QQN3|E5QQN3\_STAAH  
mklksfvttalalgl1stvgaalpsheasadsnngykemtmdgyhtvpytisvdgitalhrtyfvfpenkkvlyqeidsk  
vknqlasqrgvttekinna  
qtatytl1ndgnkkvvn1kknndaknsidpstikqiqivvk  
>tr|E5QQN6|E5QQN6\_STAAH  
mtyrmkkwqklstittlmagvitl nggef rsidkhqia vadtnvqttdyekl rniwldvnygydkydenndpdmkkkfeat  
eneae kllkemktesdrky  
lwesskdldtksadmtrtyrneki seamkhkntklktenktkvkdalewlhknaygkepdkkvadltsnfknktsrnt  
nl n w w d y e i g t p r a l n t l  
illqedftdeekkkytapikt fapdsdilssvgksepakgnlvdiskvkllesieedkdmkksidsfntvftyagn  
satgkerngfykdgsyidh  
qdvpvtgagvvllegisqmpmiketpfndsnqndttlkswid dgfmpliykgemmdlsrgraisrenetshsasatvm  
ksllr1sdtmdkstkakyk  
kivktsvesdssykqtdylssysdi skmkslmenstistngltqqlkiyndmrvtyhngkl dfafgl smtsknvayes  
ingenlkgwhtgagmsyly  
nsdvkhyrdnfwatamkr1agtttl dneepkstdvkkssktfvggtkfddqhasigmdfenqdkltakksyfilndki  
vflgtgikstdssknpvtt  
ienrkandyklykddtqttnsdnqetns1flestnstqnnigyhf1neskitvkkeshgtkwsdinksqkdiqktdeyye  
vtqkhsntdskyavvlypg  
lskdvfkaskkvttvkkqedd fhvkdnesvwaginysdsaktfeinntkvevkakgmfiltkkddntyecs fynpestn  
svsdieskismtgysink  
ntstsnesgvrfe ltk  
>tr|E5QQN7|E5QQN7\_STAAH  
mktkevvalmni sqdtlryyevgvi ppvnr dengyriyndndlnwiylvknlnragvsies liefcr laqlpkneniqa  
qqkqilnkqleelnenlkt  
ihdardllqyki dnydnhi akinasdnhddnverlwerk  
>tr|E5QQN9|E5QQN9\_STAAH  
mtyipfsiitlitgimhmtmyfvkfecrkmp1fmtiifti  
>tr|E5QQP0|E5QQP0\_STAAH  
mcfdiinnfdikklnfrkvknaih1slsgdkyqfledgktinntyflavydnainifed1fspdsinlvhvvyvynepyk  
rtnvikkfts1tidelyyf  
keykkeddnilceefsykcsikdi kykllkai snqdfkg1vpninqndnyseyi inntknliyhlyddrglwlafnn  
nedarysekyndlilefd  
ned1  
>tr|E5QQP1|E5QQP1\_STAAH  
mfnlkhdletlkhidssnritffftgagvsvasgvpdfrsmgg1fdeiskdgl speylsr dyled dpegfinfchkrll  
fvdtmpnivhdwiaklern  
qqs1gvi tqnidglhsdagsqhvde1hgtlnrfycnachksymksdvidrtlkhdncggairpdivlygemldqptiir  
alnki edadt1vvl gsslv  
vqpaaglisnfgdnliiinkdrtpydnatlvihddmvsvksl mte  
>tr|E5QQP2|E5QQP2\_STAAH  
mthrlnkgnftlnkherldeiaklvnkkg tirtneivegl nvsdmtvrrdlielenkgiltkihgarsnstfykeis  
hkehtrqiaekrfiarka  
asliedgdt1ffgpgttve1laeevnhtl tiitnc1pvykillekqtahfrvyliggemrhiteafvgemanamleklr  
fsmffssnavnkgavmts  
t1deaytqqlalnsi ekyllidhtkvgkedftsfcqlnel tavvmdyedeekvetiktyievvd  
>tr|E5QQP5|E5QQP5\_STAAH  
mitl1tnpsvdisypltal kl d d v n r v q e v s k t a g g k l n v t r v l a q v g e p v l a s g f i g g e l g q f i a k k l d h a g i k h a f  
ynikgetrnciailheggg  
teileggpeidnqeaagfikhfeq1lekveavaisgslpkglnqdyyaqiiercqnkgvpvildcsgatlqtvlenpykp  
tvikpnise1yqllnqpld  
esles1kqavsqplfegiewiivslgaqgafakhnhtfyrvnipkivslnpvsgdstvagitsailnhendhdllkkan

Tsompanidou\_et\_al\_Supplemental\_FASTA\_File

tlgmlnageagtgyvnl  
yddlfnqievlev  
>tr|E5QQP6|E5QQP6\_STAAH  
mksnqkiasieqlsnnegiisalafdqrgalkrmmakhqteeptvaieqlkvlvaeeltqyassilldpeyglpasda  
rnkdcglllayektgydvn  
akgrlpdc1vewsakr1keqqanavkfllyydvdadeeiniqkkayierigsecvaedipfflevltyddnipdngsvef  
akvkprkvneamklfsepr  
fnvdvlkvevpnmkyvegfaegevvytkeeaqhfkdqdashlpyiylsagvsaelqetlkfaheagakfngvlcgr  
atwsgavqvyiegedaar  
ewlrrtgfkniiddlnkvlkdtatswkqrk  
>tr|E5QQP8|E5QQP8\_STAAH  
mtmmqk1iaiekqkpfeklsrniylrairdgfisampvilfssiflliaypnifgfkwdkgmeailmkpnytmglv  
af1vagttaksltdsfnrk  
lestnqinfistmlaamcgflflasdpakdggflsafmgtkglltaflsafvtvivynfcvkrnitikmpkevppnisqv  
fkdlipfsaviiilyaldl  
virnsfksnvaegilk1fep1ftaadgwigftiifgafalfwfvghgpsivepaiaaityanieanfkl1lagehadki  
itsgtqmfivtfggtgat1  
vvpfmmwmtkskrnkaigrasvptffgvnepilfgaplvlnpvffipflapivnwi1k1fvevlgmnsfsvnlpwt  
tppglgiimgtfgflwsfv  
lailiivdiiyppflkvydseildeegrkesndlkekvaanfdtkkadsilaasgvsddaakasniteqtnvlvlc  
agggtsgllana1nkaaee  
yhpvkaaaggygahmdimkeyq1i1lapqvasnyedikqdt1rgik1aktqgaeyik1trdgqaaldfvqqqfen  
>tr|E5QQP9|E5QQP9\_STAAH  
mkt1pedfifggataaygaegatntdgkrvawdtyleenywyaepasdfynrypdlelsekfgvngirisiawsri  
fpngygevpnkgyeyhkl  
faechrhvepfv1lhhfdtpevlhkdgdflnrktidyfvdyaecfkefpevkywttfneigpigdgqylvgkfpngik  
ydfekvfqshhnmvavar  
avklfkdggyqgeigvhalptkypfdpsnpedvraaeledi1hnkfil1datylgeysretmegvqhilsvnggklnitd  
edyaildaakdlndflgin  
yymdwmrgydgeseithnatgdkggsqylkgvgqrefdvdpvrtddwmiypqglydqimrvvkdyppyhkiyiteng  
lykdefiesektvhddar  
idyvrqhl1nviadaikdganvkgfyiws1mdv1fswsngyekryglfyvdfetqerypkksaywykel1aetkeik  
>tr|E5QQQ0|E5QQQ0\_STAAH  
mgvksvkkifvist1lavaiiigtii1tvv1fsqrqaqt1fkiqqqfvkkip1t1flhgfggsansekfmvkqaekrgv1k  
diitayvskdgavt1fkgk1  
skdavnpi1vkielennrgy1dknaawfknv1tk1qseynfdkfnfvghsmgn1tfaqymtygndks1pqlnkqvniag  
t1fngv1nmnedvneitvd1k  
dgkpsr1mngpyq1rv1kdiykgkiev1niygd1kdgthsdgrvsns1sks1ky1l1gns1pksyreskyegesahsq1h  
enenvanelidflwkk  
>tr|E5QQQ1|E5QQQ1\_STAAH  
mmqkq11fnkipegmpqedt1fkiedit1pkl1esdgvl1vt1yi1svdpymrg1rmtkadsy1vqp1feigkpi1vsh1vakvid  
st1adykkgd1v1v1gm1pwr  
i1nhvqadq1tkvpttdv1p1d1yl1sv1gmpgqtayh1l1digqpkdgd1tvv1saasgavgs1vvg1iakikgcrv1vgiagg  
dkkvny1tet1gfdagidy  
kkedfaes1aqavpdgi1dvyfenvggtvgdevfkh1nrfarvpvcgais1synhpeadig1priqgt1ikkqvm1rgflvse  
fanafkeaseq1latwvqeg  
kiqsqvtiedgfenaprafkn1ftgdnf1gkqv1kvt1e  
>tr|E5QQQ2|E5QQQ2\_STAAH  
mkm1gfekpfk1leegn1fkvyeqrkptpenddi1lvknsi1svnpvdtkqrqmevtqapr1v1gfd1agtvea1gpnvt1fs  
pgdv1fyagspnrqgsnat  
yqlvseai1vakaphnisaneavs1p1tg1tayetffdt1fki1shnpsenigk1sv1ingaggvgsiatqiakrygl1tvitt  
asrqettewcekmgadiv1  
nhked1vrqfkekeip1vdyifctyntd1lyntmiel1kplghittiva1fnedqdl1nalk1ksit1fthefmfarpih1rtp  
dmikqheyl1editkniesg  
hyqptttqv1feg1spenlyqah1l1lekqsmigkl1vini  
>tr|E5QQQ4|E5QQQ4\_STAAH  
mkr1knf1lg1l1ivv1vgf1l1fmyiqdgriteyqdy1fqfewqpl1lis1laall1il1ig1il1v1fsi1fkp1thr1kpglykdf1d  
dghvyvsrkavektafdt1v  
akydqv1rqpnv1vak1ynkknksy1diktdffv1pnnv1qv1s1teai1radikknveh1ftempvr1kle1vnvr1dq1ts1gpr1v1  
>tr|E5QQQ7|E5QQQ7\_STAAH  
mnl1ni1fkeq1tkfnkeegety1fl1qqhnsdwan1fkemil1qgrdkvtqr1lvt1smhren1vkartqskkil1srd1im1ldi  
st1thi1lei1qfpqakqt1lya  
pitgeha1fdri1dvegp1fyikdnitnmi1trvh1hpneilec1ilieapdl1knaasdq1fqdl1insatnmt1famsyqal1smqhd  
st1pl1fni1iensed1syl1rse  
gavi1egh1pl1hpgak1l1rkg1nal1qt1flyse1fnq1pik1kiv1li1hsk1srt1ms1skdy1dtt1vhq1l1fpd1lik1qlene1ft1pn1fn  
fndy1hi1mi1vhpw1gl1ddv1lh  
sdy1qaevd1keli1ieakht1dy1yag1sfr1tl1vpk1pams1phik1l1stn1vh1it1geir1tl1seq1tthng1pl1mtr1il1ndi1lek1dvi  
fksyast1i1devagih1fy1n



Tsompanidou\_et\_al\_Supplemental\_FASTA\_File

eqdeadyqterseqlgtlfrkniyqmipqevtpmipsslvatypfnnespivtlikryqsaaslsdfessakswietysk  
allglviplvtkygialea  
h1qnaiatfrkdgl1dtmyirdfeglridkaqlnemgystshfheksriltdsktsvfnkafystvqnhlge1iltiska  
sndsnlerhmwyivrsvld  
nifdqlvsthksnqvnennrineikdtmfapfidykcvttmlrledeahhytyikvnnplyrenn  
>tr|E5QQQ9|E5QQQ9\_STAAH  
mylewakadrniqyrvinaiikeriypeqtfsqkeslieiqyhmhvtievvrksaleryeftgditylnkgets1im  
tleglldvlnhdfdipise  
r1ree1ihsrds1vetykqmsrhrqt1isqsfkfsr1pqdinffswlqhvksdktd1tyses1vpeghp1thp1tktk1p  
1tmeevrayapefekeip1  
qimmiiekdhvctaidgndqfiideiipeyynqirvflks1glksedyrailvhpwqydh1gkyfeawiakkil1iptpf  
t1l1skatl1sfrtms1idkp  
y1hvk1pvdaqatsavrtvstvtvdgpk1syalqnm1nqyppgfkvamepfgeyanvdkdrarqlaci1rqkpeidgkgat  
vvsas1vnknpidqkvid  
sylew1nqg1tkes1ttfierysqal1ip1liafiqnygia1eahmqntvvn1gphfdiqflvr1d1ggsrid1et1qhrvs  
diki1tnds1iads1davia  
kfqhavi1nqmae1ihhf1nqydcveeae1fnivqqv1vaha1npt1lphanelkdi1lfgpt1tvka11nmrmenkvkqy1ni  
el1dnp1ikkev  
>tr|E5QQR0|E5QQR0\_STAAH  
mahvni1niskikynakvlqtvfqskniqftpvikciagdr1ives1kalginhvaesr1dniismadqyl1tyt1l1rtpak  
keis1dmi1ekvdmsiqtels  
ti1h1hinevaev1gk1k1k1l1mvdwkdgregv1tydv1dyikei1ih1knihfvglafnfmcfksdapsddd1fminrfvsa  
vere1gyr1ki1sggnssm  
1pql1ynd1gkine1riget1lfrgvdt1tt1nqaiamlyqda1tle1te1ileikprvntq1thesfiqai1vdigyl1dtkvdnis  
pmdq1h1n1lgassd1h1m1d  
1ngqghyqvgdhisfs1nyea1shsmymkn1hkvyiddskid1l1qnfdvks1pamvnyq  
>tr|E5QQR1|E5QQR1\_STAAH  
myhgyi1feliq1ltpfsmtvis1liq1l1piav1l1cde1l1h1i  
>tr|E5QQR3|E5QQR3\_STAAH  
maikel1ssqsaidhkrkr1rt1t1ymvsvcf1ficvyl1nmaigsskinfsdivhyvtg1h1tdtkatf1l1hnvrmp1rmiag1f  
iggalavsg1l1mqam1tr1p  
1aspki1fgvssgasfviv1lvti1ips1leyys1ylgvigafigg1l1tvyt1lsgatk1gmt1pik1alagmai1h1ffssmtegi1i  
i1nensneqvmf1w1lvs1s  
smkwde1l1tilpw1ligal1iatv1figrql1time1lgddiak1glgn1inkvrii1g1l1vi1iltgmsvsiag1pigfv1glivphi  
vkryvskny1vmi1p1l1t1fi  
gad1l1l1sdv1sr1litypes1pvgivtsfvga1y1fl1fitikgvkri  
>tr|E5QQR5|E5QQR5\_STAAH  
m1dsfsrkeiv1igr1kfi1tms1ligi1l1flvp1pveqdgqk1q1t1lpva1flagv1kdv1l1ggvmp1flivti1t1lsgit1licst  
i1lkdk1k1p1dg1l1hna1fnvr  
igw1i1r1lavv1fawmt1flrigskviysdetg1l1fss1l1pt1lav1flfaa1fl1p1l1meyg1l1em1l1gpi1frpvmr1p1ft1  
pgrstvdn1as1figdgtvg  
v1litsrqygegyysrreatv1sttfsvvsitfaivvaetv1hmqnqffafy1svivsclvaavim1priw1p1nkipdeyake  
v1pesarteal1pegk1tal1h  
gfdtatevg1ikappiv1dffksg1lktvvd1mwfv1ilpvvmsigtiat1i1anyt1l1fvilgkpfvp1fle1mhipeaaqasqi  
i1igfadm1flps1li1egvqn  
di1trfvigalsisq1liyl1sevgg1vilgskipvsigk1l1fmi1flirti1t1l1piis1mah1l1l  
>tr|E5QQR8|E5QQR8\_STAAH  
m1ldknq1lakyqdh1lceyekimsnnekealeekvas1ld1fdiaklyndlyinkktiddvsavsevkydiks1qmsd1deikr  
leeqg1qaik1egqfav1l1m  
aggq1tr1gyk1gpkgsfeiegvs1felqakqlkelhrqtg1hkiqwyimtsdinheetlayfeshnyfygdqesihffkq  
ni1valseagq1l1nqqgri  
metp1ngnggv1fks1ldkagyleems1ngvkiy1fl1n1idnv1lvk1v1dp1l1fagftvehdyditskti1qpkp1gesvgr1vnvdc  
kdtv1leyse1ldpevanqfn  
nanigihafk1lgfi1navnre1lpyh1aikn1kq1ldenfgvieqpt1kfel1fyfdi1ftygtsfv1l1qvpreee1fsp1knke  
gkds1vatated1l1rrmg1li  
>tr|E5QQS0|E5QQS0\_STAAH  
mr1lksiv1tvia1l1ilimfaai1essi1is1alptikq1d1nagn1is1l1iftayfia1lvianpivgell1trfkiiyiaia1gl1t1  
ftvgs1msg1l1sthfsm1lvi  
srvi1qgfgsgvmms1sqivpk1afeiplrykimg1ivgsvwg1ssi1igp1l1gggilefatwhw1lfyini1piaiaia1ilv1vw  
t1fhfpeeetvaks1fdtkg  
i1t1fyi1fig1limfall1nqgh1ly1ni1igfv1lailvalr1fnvekkvssp1l1pvaefnrmit1lvfi1td1l1tavclmgfn1lyi  
pvyl1qeql1gl1splqsg1lvi  
fp1lsvawi1t1nfn1l1h1hieak1srkviy1l1ssft1l1l1ssii1afgik1lpiliacv1l1l1sg1l1sfgyiytkdsvivqeetspi  
qmkk1mms1fyg1l1tkn1lgasi  
gstim1gy1yal1ksg1l1fgan1l1hni1lgvvs1l1svgl1ivvw1l1fyreaasqtke  
>tr|E5QQS1|E5QQS1\_STAAH  
mvr1rtivmny1lkhkfy1n1l1ttiiv1l1fi1v1l1sgaif1l1t1l1fg1l1ygl1sriliy1fr1l1gdftynrsm1ydn1l1lyg1syi1ifgyf  
ivfaveh1l1m1dyfrk1mlpen

Tsompanidou\_et\_al\_Supplemental\_FASTA\_File

ayfrgatfhli symvattlfyfiihlnvyvini dfwvimviigflyvcklqfypesknlnrk  
>tr|E5QQS2|E5QQS2\_STAAH  
mmakveltttrrrnfivavmlisafvailnqtllntalpsimrelninestsqwlvtgfmvngvmipltaylmdriktrp  
lylaamgtflvgsivaama  
pnfgvmlarv iqamgagvmp lmqftlftlfskehrgfamglaglv iqfapaigptvtgliidqaswrvpfiiivgial  
vafifglisissynevkyt  
klkdrsvmystigfglmlyafssagdlgftspv vigamiissiiylfirrqfnisnallnsvfkntfalctissmii  
mmsmvgpalliplyvqns1  
alsallsglvimpgaiingims vftgkyfydygprplyt gftiltittimlclflhtdtsytylivvyairmfsvsllmm  
pinttginslkneeishgt  
aimnfgvrvmagslgtal mvtlmsfgaki fsstspshltateikqqsiaigvd isfafvavlvmaayvia lfi repkeies  
nrk f  
>tr|E5QQS3|E5QQS3\_STAAH  
mltvdqvk eligeikdpii dvp lketegivevsikeekehsvkvamaqlggapqldlq mavvnlkengaktvgirfet  
lpeekvnqfkpkeenpkpt  
iegllsqnnpvefiaiasgkgvgkstvavn lavalaregkkvgldvadiygfsvpdmngidekpgingkevipverhgv  
kvismaffveenapviwrg  
pmlgkmltnfftevrwgdi eyli ldlppgtgdvaldvhtmlps skeiivttphptaafvaaragamakhtdhsilgvien  
msyfesketgnkeyvfgkg  
ggtklade lntqllge lpleqswnpkdfapsiyqsddrlgkiyssiaqkviaatnk  
>tr|E5QQS4|E5QQS4\_STAAH  
mkkeatckhecfsklltl nykvdkilksktammflkknfksvkl tieitikti  
>tr|E5QQS5|E5QQS5\_STAAH  
mtkkkgidi igvpstfgqrklgvd lgp tair yagliprlkql dldvndkgdikvsavdiekfseqngl rnydei idvtq  
kl nkevsasiennrflvl  
ggdhsiaigsvsaiskhynnlgviwydahgdlnipeespsgnihgmp lri l tgegpkel lelnsvikpenivligmrdl  
dkgerqfikdhniktftms  
didklgikevientiey lksrnavdgvhsl dvaldpl etpgtgrvlgg ltyreshfalellhqsqsvtsmdlvevnp l  
idhnhntaeqsvslvg tff  
getll  
>tr|E5QQS7|E5QQS7\_STAAH  
ml eskwglrfiafl lalfff lsvnnvfgni fntgnlgqksskti qdvpveilyntkd lhltkapetvntisgpqskiik  
ienpedlrvvidl snakag  
kyqekyqvkgladdihysvkpk lani tlenkvtkm tvqp dvsqsdidplykitkqevspqtvk itggeeqlndiaylka  
tftknkkingdtk diaevt  
afdkkl nkl nvs iqpnevnlqv kvepfskkvkvvkqkgs laddkelssidledkeieifgsrddlq nisevdaevldg  
isestektvkinlpehvs k  
aepsetkayinvk  
>tr|E5QQS9|E5QQS9\_STAAH  
mnlfrqqkfsirkfnvgifsal iatvtfis inpttasaae  
>tr|E5QQT0|E5QQT0\_STAAH  
mfdknpqnyqargnvaa lgrvnandstdhgnfngi sktvkvkpdseli infttmqtnskqgatnlvikdakkntelatv  
nvaktgtahlfkvp tadar  
ldlefipdntavadasrittnkdgykyysfidnvg l fsgshlyvknrdl apkatnkeytinteignngnfgaslkadqf  
kyevtlp qgvtyvnds ltt  
tfpngnedstvlknmtvnydqanankv tfts qgvttargthtkev lfpdks lkl sykvvnanidtpknidfnekl tyrtas  
dvvinnaqpevtl tadpfs  
vavemnkda lqqvnsqvddshyttasiaeynk l kqqadtil nedanhvetanrasqadidglv tklqaalidnqaaise  
ldakaqekvtaaqskkvt  
qdevaalvtkinndknaiaei nkqттаqgvtt ekdngiavleqdvitptv kppakqdi iqavttrkqqikksnaslqde  
kdvandkigkietkaikdi  
daattnaqveaiktkai ndinqtapattakaaaleefdevvqaqidqapl npdttneevaeai erinaakvsgvkaieat  
ttaqdl drvkneeifkien  
itdstqt kmdaynev kqaatar kaqnatvsnatdeeva eadaavdaaqtegl hdiqv vkskqevadtkakvldkinaiqt  
qarvkpaadrevdnayntr  
kqei qnsntstteekeaytql dakkqeartnl daantnsavttakdngiaa inqvqaattkksdakaeiaqkaserkta  
ieamndstteeqqaakdkv  
dqavvnanadi naaanndv dnakttneatiaaitpdanvk hqakqai adkvqaqetaid anngatteektaakqvqte  
kttadtaidgahsnaevea  
aknaeia kiei qpat ttkddakqai atkanerkaai aqtqei taeiaaanavdnaveannhietansqnev dqakt  
tgeasidqvtptv nk kata  
rneitti lnnklqai qatpdatdeekqaeteantenakanqaitaattnaevdeaktnaeaa inavtpkvmkkqaakde  
idqlqaagtavinndqnat  
neekeaa iqq l atavtdaknni taatdnngvdtakdagknsiqstqpatavksnaknev dqavttqnqaidnttgattee  
knaakdlvskakekayqdi  
lnaqttn dvtqikd qavadi qgitadttikdvakdelatkakeqkali aqtadatteekeqanqqvdaqltqgnqni ena  
ksiddvntakdnai qaidp  
iqastdvktnaraellnemqnkitei lndntttneekgkdi epvraayee gl n ninaat ttdvttakdtavqvqq lha

Tsompanidou\_et\_al\_Supplemental\_FASTA\_File

npvkkpagkteIdqaaadk  
ktqieqtpnasqgeindakqevaaaInqaktndqsstneyvdnavkegkakinavktfseykkdalakiadaynakvne  
adnsnastsseiaekqkl  
aelkqtadqnvngatskddievqihndldnindytipgkkesattdlyayadqkknniladtnatqdekqqaikqvdaqn  
vqtalesinnvgdndsdd  
altqgkatidavqvdatvfkpanqaidakaqetkesidqsdqltaektaalatikqitdqakqgitdatttaevekaka  
qgleafdniqidstekqka  
ieeletaIdqjeagvndadatteekeaftnaledilskatedisdqttnaeiatvknsaleqlkaqrinpvvkknalea  
irevvnkqieiienadada  
sakeiartdIgrfydrfadkldktqtntevdelqnvtipaieaivpqkdpnandtnsgsdnndatansnanatpentgqp  
nvtestdnanadtssttt  
nhndaatggttatstdnsatngntsdksevestnngttkdsatetdnatpaesarannsttatnenaptgstatvpttna  
stgaassadskdnasvnds  
kqnaevnnsaesqstngkvaqpkksenkakdekgrdstnqsmvesttetlpsaditepkvpsntekdkkesttnqtdagq  
lksentvasneadksegnv  
dtdvsnkpstskpseakdkatstedsqkadmatsdkkdnqaaigatadvnkatqndganaspatsvngsnsanqdmIkv  
tntdkhqakatsaqqgken  
kakqqaktIpdgmsnhdIpyvelalgamaflirrftkkdqtee  
>tr|E5QQT2|E5QQT2\_STAAH  
msel fsndni flnvvnvsqneaiekagkalvdsgavtdayi qamkdreqvstfmgnglaiphgtdeaktviahsgltll  
qipegvdwdgevvkvvvgi  
agkdgehldllskiaitfseegnvdri vqaksaeikqvfeeada  
>tr|E5QQT3|E5QQT3\_STAAH  
medtamllstrekemiaIlikyhgyiti hdiaaqlavssrtihrelkgveayltsfsltlerankkgIritgadsdInd  
lkqsiaghqtidIsvveeq  
viiiyaliqakepvkqslaqeigsvqtlakmldleldlnkyqlslsrkrgegiylvgteskkreflsqlmvnnlnst  
svsvienhfvfhslnqih  
kdfvdleri fnverllmdylsalpyqltessyltlvhivlsisrikngeyvalnddi ysvqntfehkvaseIadklgq  
iydvtfnlaeiafitihlr  
gakrknIndtslnnrceenikafvkkvemisgmtfadldtlvdgltlhlnpainrlqanietynpltdmikfkyprlfe  
nvrIalndcwpdlifpese  
iafi vlhf ggsiknqgnrflni lvvcisgmgtsrllstrleqvseieritqasvsdlksldlsqydgiistvnldidsp  
yltvnpllpdsdisyvagf  
Intkstfgetrdkssnmidkddvhi etkdidgntsfeneqtsyltsvfekhl sdekseqlmhmrsgltll dsvkivste  
vkqwqtiadylygcdvin  
dptsfaelleqrIidnpgwi lspyvaiphIrdnmikhpmilitvleepItlpsiqndnqtikymismfipdndfmasli  
sdIseflslklesidtfme  
npqel etllrnkflerikkqfi  
>tr|E5QQT4|E5QQT4\_STAAH  
msqteekkgigrrvqafgsflssmimpnigafiawgfiaaifidngwfpnkdlatlagpmityliplliafsggrliydl  
rggiaaatatmgvivalpd  
tpmllgamimgplvgwlmkktdqIqprtpqgfemlfnnfsagilgfimtiagfkilaplmkfimhilsvavealvhahl  
lpIvsilvepakivflnna  
inhgvftplgadqaakagqsilytiesnpgpglgillaymifgkgtakatsyagaihffggiheiyfpyvlmrpllfia  
vilggmtgvatyqatgfgf  
kspaspgsfivycInaprgelhmllgvflatlvsvvaalimkftkepkqdleaataqmettkgkssvasklvssdkn  
vnteenasgnvsetssldd  
dpealldnyntedvdahnynninhvifacdagmgssamgasmIrnkfkaginditvtntainqlpkdaqIvitqkkltd  
raikqtpnaihsvdnfln  
spryeellnllkddqa  
>tr|E5QQT6|E5QQT6\_STAAH  
mkgasymrkyekianingmfnleqqi ihsqdmahfrseffynhehreneyalIyyknsienpivdgacyilalpe  
ifnsvdvfeseIpfswvyd  
engitetmksI sipIqylvaalevtadvnifkpsgftmgmnnwniaqmri fwqytairkeal  
>tr|E5QQT7|E5QQT7\_STAAH  
mfskvidpemledcfyIrkkvfveeqvpeeseideyeseihligydnqpvatarirpinettvkiervavikshrgq  
gmgkmlmqaveslakdegf  
yvatmnaqchaipfyeslnfkmrngnifleegiehiemtktltsln  
>tr|E5QQT8|E5QQT8\_STAAH  
mlgvinrmakkncklpsmvaltlvgavtahqvaaettqdqttknvl dsnkvkatteqakaevknptqnisgtqvyq  
dpai vqpkaaanktgnaqvn  
qkvdtqvngdtratqsttsnvnkpvtkstnttapktnnvtSagyslvddeddnSenqinpeliksaakpaaletqyka  
aapkatpvapakteatpk  
vttfSasaqprSaaaapktslpkypkvvnssindyirknllkapkieedytsyfkyayrngvrpegivvhdtandrst  
ingeisymknyqnafvha  
fvdgdri ietaptdylswgvagvgnprfinveivhthdyasfarsmnyadyaatqlqyyglkpsaeydngntvwthya  
vskyIlggtdhadphgylrs  
hnysydqlydlinekylikmgkvapwgtqstttpttspkpstpskpststgkl tvaanngvaqikptnsglyttvydkt

Tsompanidou\_et\_al\_Supplemental\_FASTA\_File

gkatneqvktfavsktat1  
gnqkfy1vqdynsgnkfgwkegdvvyntakspvvnqsysikpgtklytvpwgtskqvagsvsgsgnqtfkaskqqqid  
ksiylygsvngksgwvksa  
ylvdtakptpttpkpstpttnkltvsslngvaqinaknnglfttvydktgkptkevqktfavtkeaslggnkfy1vkd  
ynsptligwvkqgdviynn  
akspvnmqtytvkpgtklysvpwgtykqeagavsgtgnqtfkatkqqqidksiylygtvngksgwiskaylavpaapk  
avaqpktavkayavtkpqt  
tqtvskiaqvknntgirasvyektakngakyadrtfyvterahgnetyvllnntshniplgwfsvkdlnvqnlgkev  
ttqkytvnrnsnglsmvpw  
gtnqviltgnniagqtfnatkqvsvgkdvlygtinnrtgwvnskdltaptavkpttsaakdynytyvikngngyyyvt  
pnsdtakyslkafneqpf  
vveqvingqtwyygklsngklawikstdlakeelikynqigmtlnqvaqiqaglykpvqrvpgkwtandfndvkhamd  
tkrlaqdpalkyqflrldg  
pqnisiidkinqflkgkglenggaafnkaaomyginevylisshalletgngtsqlakgadvvnnkvvtnsntkyhvfgi  
aaydndplregikyakqag  
wdtvskaivggakfignsyvkagqntlykmrwnpahpgthqyatdvdwaninakiikgyydkigevgkyfdipqyk  
>tr|E5QQU1|E5QQU1\_STAAH  
mklslnsnskf1rapsirqfsnrnmnlddcvnlitigqpdfmpdvkkayidainndktsyshnkgllretraisqyfkn  
ryhfsydpeeiiivtngase  
aidttlrsiiepgdeiipgpiyagipliedlggkpiyidttatqfkitpdalshispkttkavllnyptnptgvvlkr  
nevlnivnlkkyipifis  
deiyaentfsgkhvsfaefedirqliligglskshsatgirigflgpqylidklftmhayncicanvpaqiacitaln  
egleapkyrneayverrn  
lvseltklgfeitaqpegafyifpnikhitdddfefcvdllesthlavpgssftefgkgfvrisyayemdv1kegmkr1  
akylntk  
>tr|E5QQU2|E5QQU2\_STAAH  
mnadilfec1sfeeqlsvsilkafdriilsevfkggeynsvvftvsleyylkhiyekklv1  
>tr|E5QQU3|E5QQU3\_STAAH  
mkgkflkvsslfvatl1ttatlvsspaana1sskamdnhpqqtqtdkqtpkiqkgnlklpleqreranvilpnndrhqit  
dtnghyapvtyiqveapt  
gtfiagvvgkdtlltnkhvvdathgdphalkafpsainqdnypnggftaeqitkysgedlaivkfspneqkhigev  
vkpatmsnaetqvnqit  
vtgypgdkpvatmweskgkitylkgeamqydlsttgngsgspvfneknavigihwggvvpqfngavfinenvrnlkqni  
edinfaandhpnnpdnpdn  
pnnpdnpnnpdnpnnpdnpdpnnpdpnnpdpnnpdpnnpdpnnpdpnnpdpnnpdpnnpdpnnpdpnnpdpnnpdpn  
>tr|E5QQU4|E5QQU4\_STAAH  
mnsscktrvfnisiiimvsmilislgafannkakadshskqleinvksdkvpqkvkdlaqqqfagyakaldkqsnaktg  
kyelgeafkiykfngedn  
syyypvikdgiyvtltlspknkddlnkskedmnysvkisinfiaklddqikdksnitvltdekgyfeedgkvr1vkat  
plannikekesaktvspq1  
kqelkttvtptkveeneaiqedqvqyentlnkfki reqqfdnswcagfsmal1natkntdtyahdimrtlypevseqd  
lpncatfnpnmi eygksgg  
rdihyqegvpsynqvdq1tkdnvgimilaqsvsqnpndphlghalavvgnakindqekliwynpwtel1siqdadsslh  
1sfnrdynwygsmigy  
>tr|E5QQU8|E5QQU8\_STAAH  
mqhqevdqiltystiydlpiladplshlrkfdhpnvictydl1frsgld1kvdvfvirvgkpvisklnqwlkktdafqil  
vqndkidvfpiapdisye  
isandffrslmedttvnrsvwlekwqriekkgrkeikcy1eqatdesafvgelikktsekda1fisnsmpirvdnlln  
knidvyanrgangidgivs  
talqmavhkrvtlligdl1sfyhdmgllmskl1nniqmnivllnndgggifsylpqkesatdyferlfgtptgldfeytak  
lyqfdfrfnnvsefknt  
llsetstiyel1tnrednfrkqhilyqklsemihdt1  
>tr|E5QQU9|E5QQU9\_STAAH  
mgnhkaal1tkqvftfase1yaygrevvispgsrstplalafeahpniktwhpdersaaffavgligserpvailcts  
gtaanytpaiaesqisri  
plivltsdrphe1rsvgapqainqvmfnnyvsyefdmpiaddsketidaiyyqmiasqlygphkgpihfnl1pfrdp1  
tpdlnatel1tsemki1ph  
yqksidasalrhilnkkkv  
>tr|E5QQV3|E5QQV3\_STAAH  
mkilklervlfttn1sriikedlqmkvnkaiyvival1gg1gihkfyadkfgqglfhl1ffwtgiptiisiihaiivi  
ftkkadkdgyiifpkn  
>tr|E5QQV4|E5QQV4\_STAAH  
mnrnivklvfm1ilvvavagcgkdteekttemttikdelgtekiiknprkrivvleysfadylaaldmkpvgiaddgstk  
nitksvrkigayesvgsr  
ppnmevisklkpdliiadvsrhkkiksel1skiptimlvsgtdynanieafktvakavgekegekrlekhnkilaei  
rkkieqstlksafafgjsr  
agmfinnedtfmgqfl1kmgipevtkdktahvgerkggyiylnee1anipkvmlatngktdknrtkfidpavwks  
1kavdknvdydvrnkwlq

Tsompanidou\_et\_al\_Supplemental\_FASTA\_File

srgiasesmaedlekiakak  
>tr|E5QQV5|E5QQV5\_STAAH  
myvgdmmlgmllirwmlatsflvghtlkfvdldgtihflgslglpptiavlmsigevvgglaliigfltpyvnyfyic  
vmlgsiftlkltrgyvsgy  
efeihivmlacissyswkkwlqfy  
>tr|E5QQV6|E5QQV6\_STAAH  
mkkifmmvhelvdkggmtssmfnskefydadipadivtfdyknydeiikalkkqgkmdrtrtkmyvfyfkyqisnk  
hfksnklllykhiselknt  
ieieeskgisryfdittgtyiayirksksekvidffkdnkrierfsfidnkvhmketfnvdkvcyqvfydekgypyisr  
ninanngavgktyvlnkk  
efknnlalcvyyleklikdskdsimicdpggsfpmfntnhknaqkygvihvnhhenfddtgafkkseyiienanking  
vivlteaqrldilnqfdve  
niftisnfvkihnaphkfhqtekiavghisrmvptkridllievaelvkkdnvkvfhiygegsvkdkiakmiedknlernv  
flkgytttpqkclfdkfv  
vstsqyegglsmieamiskrpvafdi kygpsdfiednkngylienhndmadkilklvndvlaeefgskareniie  
kystesilekwlnlfn  
>tr|E5QQV7|E5QQV7\_STAAH  
mvaeykiyfvkyfikrcamekgyfnydnanvlkldtnqlnenikviddikneyeqieptieieengntklklngyfiassii  
splnlklnnlyveefyh  
tynelivkytevke  
>tr|E5QQV8|E5QQV8\_STAAH  
malpmiwyvasalwffpgaimillslvivficyiktqnqlhllllvlniilffflpllls  
>tr|E5QQV9|E5QQV9\_STAAH  
mielkdltiqgnthilklklkfqcgsyaligksgcgkstllntiaglektgkqyvyfngqlaqfksnfyrdklgylf  
qnyglidnltnenldigl  
aykkiskkeqelkiryieqfqlsnslkrkvhtlsggeqqrvalirmmlkdpivmladeptgalpdktgqmiiqslfdli  
denkvliilathdmainqc  
deidleqyrkvasm  
>tr|E5QQW0|E5QQW0\_STAAH  
mkyiaiallglivsitiiaftiiahpildrfnpflkteysyakvpkgtqyvnitaysergekldykltfngfspartyve  
ikhkgqyvisityvekkddt  
pkevrqe  
>tr|E5QQW1|E5QQW1\_STAAH  
mkwfkliildvtifiliaillfvytykeneeilpdtkypiavtwdnkkskneykrinqfaknenvaiykstsnytnknv  
dkdiyvnfnskattitpfn  
akynihylsddellkkdikgsyfvdkndvdkfinflkeygvtaesykidymmiavgvikqmnivvplssllyvyfiyy  
ifekninfkayaikyngf  
tlrkii fenfskkctywvtliitqillttsvlwilnytgnldlflrlvlslfilitisvinlwtflmlnlnianmik  
gkqhfktrfintvcksvl  
lvliasvmientsvikdlnkiketekywnvlddytiefapyhetkqslidnmvrseqlvkaseaenailfkpkgdsvd  
ndnfspdegnvlvnnqfw  
siyhkqfqpdpiknqknnvevipqkfhamrneinqayhsfwefvqknknesklsiqfinkndyri-ftdardsrhls  
fieapiivnvqasdlskdf  
yyamisggylfknydalvkniekyhldeisgitnykdsvmemyhennlklvlnfsqiiiailliiilfdvkyfyefq  
hrkllvikklygystlran  
yqyllinnivvfigiltvnlshyimmifatiivvqillqicslyhgrfrfnevikef  
>tr|E5QQW3|E5QQW3\_STAAH  
mtvaevgnivefmdglrgrvekindsvldlntimenfndldlpektvinhkrykive  
>tr|E5QQW4|E5QQW4\_STAAH  
mkfissnnitdptlnlameeyvlknlpaeesyflfyinrpsiivgknqntieevnqtyidahnidvrrisgggavyhdt  
gnlnfsfitdddgnsfhnf  
qkftepivqalqslgvnaeltgrndiqvgqakisgnamvkvkrmfshgtlmlnsdldevqnalvnpakikskgiksvr  
krvaniqeflndpleieef  
kkiiiktifgeteveeykltdedwenieklsndkyrtwewnygrnpkynfereekfekgfvqikfdvkrkiehaki fgd  
ffgvgdvtdlenalvgclh  
dfehieealseydlhyfgdirhelirlms  
>tr|E5QQW5|E5QQW5\_STAAH  
mkyntnvkhttleafvttvndlgieliinea lrevrkrqlieliddalvnkdeaa fnqymaeyknleaffge  
>tr|E5QQW9|E5QQW9\_STAAH  
mewtlvdigkhhvipksqyrrkrreffhnedreenlnghqdkqnidnttskkadqihkdsidkherfkns lsshleqrn  
rdvnenkaeesksnqgsk  
aynkdhyltdvskkqns lsdvdqdekskyeqnteatlstnstdkvestdmrklssdknkvgeehqhv lskpsehdk  
tridfessrtddssmqte  
kikkdssdgnkssnlksevisdksnsvpil sesddevnnqkpltlpeeqlkrqqsneqtktytygdseqndksnhend  
lshhttpsiddkdyvmred  
hivddnppndintpslskidddrkldekihvedkhkqnadssetvgysqssashrstekrnmaindhdklngqkntkt  
sannqkkatsklngkrat  
nnnysailkkfwmmypkvlvimgiilivilnai fnnvnknrdmndndadaqkytttmknannavksvvtvenetskd

Tsompanidou\_et\_al\_Supplemental\_FASTA\_File

sslpkdkasqdevgsgvvv  
kksqdtlyivtnahvvgdkenqkitfsnksvvgkvlgkdkwsdlavvkatssdssvkeiaigdsnnlvlgepilvvgnp  
lgvdfkgtvtégiisglr  
nvpidfkdndkydmkafqidavnpngsggavvnrregkligvvaakismpnvenmsfaipvnevqkivkeletkgkid  
ypdvgykmkniaslnsfer  
qavklgkvkngvvvdqvdnngladqsglkkgdviteIdgkllreddlrfqrqiifshkddlksitakiyrdgkekeinikl  
k  
>tr|E5QQX4|E5QQX4\_STAAH  
mvtqnkkiilitgsfgnghmqvtqsiVnqlndmnlDhlsviehdlfmeahpiltsickkwyinsfkyfrnmykgfyysrp  
dkldkcfykyglnklnl  
likekpdliiltfptpvmvltEqfninipvatvmtDyrIhknwitpystryvatketkqdfidvgidpstvkvtpgipi  
dnkfetpinqkqwlidnnl  
dpdkqtilmsagafvsgkfgdtmitdiIaksanaqvvmicgkskelkrsItakfksnenvliIgytkhmnewmassqlmi  
tkpggititegfarcmi  
flnpaggelenaIyfeekgfgkiadtpeeaikivasItngneqltnmistmeqdkikyatticqdlldIghssqpqe  
iygkvpIyarffvk  
>tr|E5QQX5|E5QQX5\_STAAH  
mmIgiavspiwimIssveedkrqkmgvyfswllglIvgmvfmnlIikvhptrfafmmslvvIawilyyfvdkltn  
yntrpvkaqlrqivdvtkr  
hlllfpgiIlgaaiaalvpilptyatkvinvtieytvaiiIggigcavsmIflsklidnrsrnfmygvilsgfilymi  
IiftIsmivnihiwviaI  
aigImygiIlpawntfmarfiksdeqeetwgvfnsiqgfgsmigplfgglitqftnnInntfyfsaIiflvIavfygsyf  
ianrekak  
>tr|E5QQX7|E5QQX7\_STAAH  
mdisInfnhyidIkkSiknlclmkkfepyvtnenydfiempIvvdgnyvllkiyqekdaIikIhyqevInsrksviqes  
divrisrsIinealdins  
ikyksdtfgltiIsdadnyttIrtiIlaqqvsieqankIflIlfintygeifeInnkeytflnwdkiIfsriykeqkvIvgt  
tnnrkqaiitIaelhikng  
IrenvlqvissikgIgswtvqmfmIqfphvafenipvadigIhraieknhdIphksidkskgesyfqnmksidvfkywy  
Iymve  
>tr|E5QQX8|E5QQX8\_STAAH  
mnkIiytsygdniIIdsfikIvidfkyipinptksIgyyistsihdndkgeclrdclslemicdelwvfidnkyip  
egvrIeiaswIkyksspvk  
yIsipsIlenssIndIldfddsniIkekeiseIvpkkseIrpvcinilpehhkyidwikyhIlynkfvpldylsikp  
yiyfdniehykselIIne  
rcnnisvmpyyvsedfnIIsfseckipkyikkdwaittmenkn  
>tr|E5QQX9|E5QQX9\_STAAH  
mIefkagkinkhvIysdiInrdvtIsiylpesynqlvkynvilcfDglDflrfgriqrtyeslikeariddaiivgfhye  
dvdkrreefhpggsrshlt  
iqsvgkeilpfdistfstIkvgnarIlgvdsIagsiaIItaltypitfsrvamIspshsdekvldkInqcankeqItiwhv  
igIdekdfItpngkradf  
ItpnrelaeqIkkynityyydefegghqwkdwkplIsdiIlyffsnqspdqIye  
>tr|E5QQY2|E5QQY2\_STAAH  
menyIifhItdffmhkkIaskavstfeaivsyiIkrhpqn  
>tr|E5QQY5|E5QQY5\_STAAH  
msmntdekervqeelydetIldqylenddidqfrdefIalhtyeqseyfedttDenrqiIqylspeevanffdqldidd  
deyellfdkmnatyashiI  
eemsydnadIIneltkpkvasIItImnkddaneikaIlyhedtaggimtteylslkahtpvkealllvkaqapdaeti  
yIifvdddgklvgvIsI  
dIivaendayiedImnervisvnnvaddqedvaqvmrdydfmavpvidyqdhllgiitiddIldvmddeasedysrlagvs  
didstndsIiktalkrIpw  
liiltflgmvtatIgrfektIenvallaafipiIsgmsgngstqslavsvrnttgeineqskfriaIreagsgvlsgv  
vcstIltfiivaIyhpI  
alivagsIltcamvtgfvgsmpIImnkInidpavasgpfittindiismIlyfgIatsfmayli  
>tr|E5QQZ2|E5QQZ2\_STAAH  
mageIrimenksredinIspvskieIysffdpfssdcfkIsailskIrieynqyirirhInpsIkvltkcqaqstsndf  
nialaykaaelqgrIraer  
fihlmqneiIpkrdiitesmicdcIqnagidIlevfkddlqskItesIkidIhiaremeieqapsIvffsedvheegIkv  
eglypyhiytyiInelmgk  
pieknIppkIetyiqqqIvtmeeIltiyewpekIlnkelkklaiqqkieklkypdgdfwkskmpkisk  
>tr|E5QQZ3|E5QQZ3\_STAAH  
msqqlsreeqerkypeytwldIttiIkddeafeaafkevenelgkeeqfkghigdsaelynaleledtIgtklekyvyva  
hIkgdqdtndkytgmesr  
ahqIliikfssawsflvpeIltqidedkiqsfvnsydkIqkfafdIklInekrphildaetekIItaqaalstpsnvygmf  
snadIvfedaidkdenahp  
ItqgtfikylesddrklresafnvykaygahnntIgatIagevknvfnarthnyktarekaIsnnhipenvydnIvkt  
vhkyIplIhrytelrkelI  
gIddIkmydlytpIikdikfempyeeakewmIkaIepmgeeyInvvkeglInnrwvdvyenkgrsggyssgahltnpfil

Tsompanidou\_et\_al\_Supplemental\_FASTA\_File

lnwsntisdlytlvhfegh  
sahsyfsrkfqsnsdytifaevastcnealldsymdkhllddekrllllnqelerfratlfqrqtmfaefehkihaiee  
agepltptrmneeyaklnk  
lyfgdsvetdediskewsriphfymnyvyqyatgysaaqslshqiltegpavdryineflkkgsnypieilknagvd  
mttpepieqacevfeqkln  
afeklmka  
>tr|E5QQZ4|E5QQZ4\_STAAH  
mlvalneekervlatta1rktqyfcpcvgkqvilkrqlkvishfahkhlaeqkcfnesikhyksklilaqmiqqgckv  
eiepf1keikqipdilin  
kyvieleqyspiypkqilqrteglkkmgkyswllndvdychnkvkfnhfqsmfinpitrlhtfnlekkqiimfqiqyl  
gghkyvaekknakiselfn  
eapcdyhavyklskfainqyikycrwqnsvlptlsamyqlqltdhevvhnygyifpeqiyienhpiewqlqvdlwlkng  
ksklvsdnlnyfk1kkfiv  
alesktaiieklinnylnissdrndvqilf  
>tr|E5QQZ8|E5QQZ8\_STAAH  
mnenskalryrdlveekiipeikedgdsdltieeidligshldkeiedlnhsiqnedctqirkqtrkrkteikkfkkkfd  
yserkskyeeqksilkdrn  
sfsktdhdafmrmedhmkngqlkprynlqiatnsqfvlsydlfnptdtrtlipfltmiantfgylpeyivadagygs  
eqnymaiiddfnktp1ity  
gmfikdktrkfkdsdi fktqnwkyde1ndeficpnnkriglkryayrndrygfkrdfklyecddcsacs1rqcckpnsks  
nkkimknynewyfkaginq  
klsepetkkiysqrkidvepvfgfmkailgftrmsvrginkvkre1gfv1malnirkivarravyqihlkkadfyqiin  
rnqlfyia  
>tr|E5QQZ9|E5QQZ9\_STAAH  
myknynmtqltlpietsvripqndisryvneifetipdsefdefrhrgatsyhpkmmlkiilyaytqsvfsgrriekll  
hdsirmmwlaqdqtpsykt  
inrfrvnpntdaliselfiqfhsqclkn1iddksifidgtkveasanrytfvkkksi  
>tr|E5QR00|E5QR00\_STAAH  
mktlkgalfmsikpkvdi1dv1lymfqeyekgvsfyli1dt  
>tr|E5QR01|E5QR01\_STAAH  
myppykykthgiet11tqkqynhyskelklkvvneylnsqstqdiaikynirsstqvkwnikmytvgeiknqsptg  
vyimkarkttfeervtive  
yylnhkqsyrevaehfni sygqi yqvwkyqahgknglvdgrgkgpkssmmtpeeqkeaeiqalkaqr1lemendv1kk  
fqaleremiqrenksrhtk  
rskr  
>tr|E5QR05|E5QR05\_STAAH  
mgialalrpslivadepvsaldivsvqsqvl1llkd1leqfnlsylfiahd1svvkhisdvigmylghiveiasdkei  
yepkhpytkalissipqi  
dklnknri1lkgelpspnppqgcpfhtrcpiaqdmckksmpelkdignehqvacyfvdvkgd1nd  
>tr|E5QR06|E5QR06\_STAAH  
menilevnqvkkyki1ktgl1qktqyvavddvsfsikkgtfglvgesgckstlgkviirledatsgsiivngeditr  
1qgkklrksrqyqmi1fqd  
pyas1nqmvmvgdi1sepi1nykk1pkeeikkfyiy  
>tr|E5QR08|E5QR08\_STAAH  
mekgdi1dvtndatgamakdakssnag1kvl1saps1dygl1gfvshdydkkanktgkvrpkayedkelrkamlyaidrekwi  
kaffngyaseinsfvpsmh  
wiaadpke1ndykypkakkil1dk1gykdrdgdgfredpkgnkfeinfkhygsnptfeprtaaikdfwekvglktnvk  
1vefgkyne1lanaskdme  
vyfrswagtdpdpd1yhtdrpqnemrtv1pkdqyl1dda1dfdkvgidekkrdiykvkqymndelpgl1pmfagksi  
ti1vndkvrn1dieigtqds  
lyn1tkea  
>tr|E5QR09|E5QR09\_STAAH  
mkiddwi1ysi1ev1ankdyegayypsveni1qgakdyhegkadhing1kkiddytmqvtfdkkqenyl1tgfitgpl1skniy  
qmyqlki  
>tr|E5QR11|E5QR11\_STAAH  
mgk1ikyis111iv1v1sacgkssnkdegvkdak1teaskhkggt1nval1tappsgvys11nsthadavvegyfnen1  
1t1vd1si  
>tr|E5QR13|E5QR13\_STAAH  
mkndev11s1kn1kqyfnagknevraienisfeiykget1glvgesgcksttgksiik1nditsgeilyegididqir  
krkd11kfnkqi1qmi1fqdp  
yas1npr1kvmdivaegidih1latdkrdkrkryvd11etvgl1skehanryphesggqrqrigiaralavepefiiade  
pisa1dvs1qagvvn111k  
1qrekgit1f1iahd1smvki1sdriavmhfgkiveigpaddiyqpl1hdytks11saipqdpesersrkrfsyidea  
nnh1rql1hei1rpqhf1fst  
eeear1rkn11vtqd  
>tr|E5QR14|E5QR14\_STAAH  
meenvmcgv1gy1gydnake111kg1lek1eyrgydsagi1avvndnttvfkekgriae1rkvadssdfdgpvigightrw  
athgvpnhenshphqssng

Tsompanidou\_et\_al\_Supplemental\_FASTA\_File

rftlvhngvienyeelkgeylqgvsfisetdtevivqlveyfsnqglsteeaftkvvsllhgsyalglldaedkdtiyva  
knksplllgvgegfnyias  
dalamlqvtseykeihdheivivkkdeviikdadgnvverdsyiaeidasdaekgyvahymлкеiheqpavmriiqeyq  
daegnlikdqdiindvkea  
driyviaagtsyhaglvgkeflekwagvptevhvasefvynmp11seklpfvyisqsgetadsravlvetnklghkslti  
tnvagstlsreadhtllh  
agpe1avastkaytagiavlslsqivakehgreaddllrelakvttaeiaivddapimeqiatdflettrnaffigrt  
idyvnslegalkeisyi  
qaegfagge1khtialieegtpvvglatqekvnlsirgnvkevvargahpciismeglekegdyviphvhelltp1vs  
vvtlqlisyaa1hrdlvd  
dkprnlaksvtve  
>tr|E5QR16|E5QR16\_STAAH  
megnmdnvkai1fldmdgt1lhenngastytkdvirn1rekgykvflatgrshseihqlvpedfavngiissngtigevdg  
eiifkhg1slaqvqqi1n1  
akrqqiyyevfpfegnrvslkedetwmrdmirsqdpingvshsewssrqdalagkidwvtkfpegeyskiylfssnleki  
tafrdelkqn hvqlqisvs  
nssrfnaetmayqtdkgtgikemihfginqketlvigdsndramfefghytmknarpeiqa1tsdvtaytneedga  
akylakhflad  
>tr|E5QR22|E5QR22\_STAAH  
mrtskkyngtttsefyc1lnhnggatmp1flqpi1k1k1wggqr1sefgyqlndttgecwcvsahpngtseiingpyqg  
qtl1driwsehrelfgdfps  
kdfp11tkivdare1sihvhdnsyafehengqygksecwyiidaeedaeivigtlaesreevanhvqhgtiesilryi  
kvkpgfeyfipagtvhtis  
sg1layetmqssdi1tyrlydfnrqdnqyngpr1niekal1dviqynap1pn1l1peseiienhkcthivsndfftlvkweis  
gt1nymkprefclvtvleg  
egqmi1vdgeifk1ttgtnfiltsed1dsvfegdf1mi1syv  
>tr|E5QR25|E5QR25\_STAAH  
mp1vydgcnciycynyviw1iqhd1prnyqftt1kgevgqqffkqhpeaanknsvilqkgdriyfesqaiik1litalpnr  
tk11gvglw1vpkpvrnfg  
yrmfadnrnrnmwkt1whqpn1dyeksff1ddnakv1td  
>tr|E5QR28|E5QR28\_STAAH  
mnsak1idht11kpestrtqidq1ideakaynfksvcvnpthvkyaaer1adsgvlvctvigfplgasttatka1feteda  
iqngadeidmvinigalkd  
grfddvqqdieavvkaakghtvkvi1etv1ldhdeivkase1tkaagadfvktstg1faggataedvklm1kdtvgadvev  
kasggvrn1edfnkmveag  
atr1gasagvqimqgleadsdy  
>tr|E5QR29|E5QR29\_STAAH  
m1cpk1fkkrmikmrmidi1ekkrdght1tteeinffidgyvkgdipdyqass1amaiyf1qdmndderaaltmamvnsdg  
mid1sdi1k1gvkvdkhstgg  
vgdtt1v1lap1vaavdvpvakmsgrg1ghtggtidk1eaidgfhveideatfvklvnenkvavvgqsgn1tpadk1lya  
1rdvtgtvnsi1piassim  
skkiaagadaiv1dvktgsgafmkt1edaealahamvrignvgrntmai1sdmnp1lgraignale1qea1dt1kgqgp  
kd1telv1t1lgsqmvlan  
kaet1leearallieaidsgaa1ekfktfiknqggdetvidhper1pqaqyqieykakksyvtelvsndigvasm1lgag  
r1tkeddid1avgiv1nkk  
igdkveeges11tihsnrqdvddvkk1dssitiadyvvspt1ihkiite  
>tr|E5QR30|E5QR30\_STAAH  
mni1ry11g1gfs1igv1hft1rerqfrni1pkc1p1rktav1vtgifeilfg1allikrpsqcl1kntin1fl1lavfpani  
ymavk1p1l1gdkq1ptwq1  
yl1r1pmqfv1mg1ikk1  
>tr|E5QR31|E5QR31\_STAAH  
mtkmnvesfn1dhtkvvapfir1lagtmeg1ngdvihkydirfkqpnkehmdmpg1hs1eh1maenirnhskvvd1spmg  
cqtgfyvsf1nhdnyddv1  
niveat1ndv1natevpacnevqcgwaashs1egaktiaqaf1dkrnewhdvfgtgk  
>tr|E5QR33|E5QR33\_STAAH  
mtnngnepn1t1sd1ydkdvvytsrpsyi1snw1kpdehqsnf1tgre1lianq1pvivheasatk1hq1f1qvigkevp  
nsiytfnnqqsyen1ikq1  
ahkenkkyf1qy1ihdeti1nqqyya1dkt1fva1nnkaripewtngk1f1pkrkvkieqfeneiknwe1pfv1kpgddl1p  
taggygvm1cyhad1lqka  
itrikqataetns1ieeqkieekanycvqfayses1giqylgaatq1tdkygfyngenttnvpehvieagrqimensvn  
qgffgvagfd11vdeddnv  
yaid1nfrqngstsm11lane1nsgyqkfysyhskgdnthffnti1kyvkegs1yp1syddgdwygedkvksrf1gciwhg  
dsketv1enera1flae1eh  
y  
>tr|E5QR38|E5QR38\_STAAH  
mtkfi1fvtggvss1lgk1g1tass1gr11kdr1gnvt1iqkfdpy1nvdpgtmspyqhgevf1tddgaetd1dlghyerfid  
in1nkfsnvtagkvysv1  
kkerrgdy1ggtvqviphitneiker11lage1stnadvvite1ggttdgies1pfi1eairq1rsd1grenvmyvhct11p



Tsompanidou\_et\_al\_Supplemental\_FASTA\_File

yikaagemktkptqhsvke  
lrglgiqpdliivrteyemtqdlkdkialfcdinkesviecrdadslyeiplqlsqnmddivikrlqlnakyetql dew  
kqlldivnndgkitiglv  
gkyvslqdaylsveslkhagypfakdidi rwidssvtdenaayladvdgilvpggfgfrasegkisaikyarennvp  
ffgiclgmqlatvefsrnv  
lgleghsaeldpatpypi idllpeakdiedl ggtlrlglypcsi kegtlaqdv ygkaeieerhrhryefnndyreqlea  
ngmvisgtspdgrlvemve  
iptndffiacqfhpeflsrpnrphpi fksfieaslkyqqnk  
>tr|E5QR41|E5QR41\_STAAH  
maqeviki rggrrl ngevnisgaknsavai ipatllaqghvkleglpqisdvktlvslledlnikaslngtelevdttei  
qnaalpnkveslrasyym  
mgamlgrfkkcviglpggcplgprpidqhikgfka lgaidessttsmkieake lkgahifldmvsvgatinimlaavya  
tgqtvienaakepevvda  
nfltsmganikgagstikingvkelhgseyqipdrieagtymciaaacgenvilnnivpkhvetltakfse lgvnvdv  
rderirinnnapyrfdik  
tlvypgfatdlqqpitpllfmangpsfvtdtiyperfkhveelkrmganievdegatatikpstlhgaevyasdlragacl  
iiaagliaegvttiyinvkhi  
yrgytdiveh lkalgadiwtetv  
>tr|E5QR44|E5QR44\_STAAH  
mgvnympere rtsqyesfhelyknyttkel tqkaktlkltnyskl nkelvlaimaemkdgnny megilddi qpdgy  
gflrtvnyskgekdiyisa  
sqirrfekrgdkvtgkvrkpkdnekyygllqvdfvndhnaeevkk rphfqaltplypderiketetqnystrimdlvt  
piglgqrglivappkagkt  
sllkeianaistnkpdaklfillvgerpeevtdlersveaaevvhstfdepp ehvkvaelllerakrlveigedviilm  
dsitr laraynlvippsgr  
tlsggl dpaslhkpkaffgaarnieaggs ltilatalvdtgsrmdmiyee fkgtg nmelhldrklserri fpaidigrs  
strkeellisksel dtlwq  
l rnlftdstdfterfirk lkrsknnedffkqlqksaestktgrpii  
>tr|E5QR46|E5QR46\_STAAH  
mavykyarqi ykiihvqyrynyekdiyeylkydiikrlcfekggtlnv  
>tr|E5QR49|E5QR49\_STAAH  
mvnykek ldeahltqqkgfeqtraewl mldvfqwtrtdfvvmhddmpkamimkfdlalqrmllgepiqi yivgfasfyg  
rtfdvnsnc liprpeteev  
mlhflqqleddat ivdigtgsvla itlkcekpdl nviatdisleam marnaekhsqi qfltgda lkp likegikln  
glisnppyidekdmvtmsp  
tvtrfepqal fadnhgyaiesiiedlphvmekgspv vfeigynqgealksi ilnkfpdkkidi ikdinghdrivsfkw  
>tr|E5QR50|E5QR50\_STAAH  
minkkgvikl dtkiwdvreyne dlqqypkineikdivl ngglig lptetvyg laanatdeavakiyeakgrpsdnpliv  
hihskgqlkdftytldprv  
eklmqafwpgpisfilplkpgylcrkvsggl ssvavrmpshsvgrqllqi inep laapsanl sgrpspttfnhvyqdlng  
ridgivaqeqseeglestv  
ldcts fpykiarpgsitaamiteil pnsiahad yndteqpi apgmkykhyspntpltiitdieski gndgkdwssiafiv  
psnkva fipseaqiqlcq  
ddndvkqashnl ydv lshl denenisaa iygfelndntea imnrm lkaagnhiikgel  
>tr|E5QR52|E5QR52\_STAAH  
mkdltml lhelkdmsffnkgdic ligcstsevig ekigtvgsmevaetifnal dvvsketgvtfafggcehinraitiek  
sqfnpl tmeevsvvpdvha  
ggs latyafqhm kdpivvehitvpcgidigqtligmhikhvcvprt svkqvqgaivtiatsrpkkiggerakyq  
>tr|E5QR55|E5QR55\_STAAH  
mkkimti fgt rpeaikmaplvka leqekml epivvtaqhrem ldsvlstfeikpydlnimsgqtlseitsksitqle  
qviqlekpdmvlvhgdmt  
tfagglaafynqvpi ghveagl rsydkyspfpeevnrqlvgv ladh faptknaashllnegkysesvvtgntaidamk  
ytvdnyksnimkyhdkk  
filmtahrrenl gqpmeni fkvrrl ideytdlalvypmhknpkvr dvahkilgghdrieliel dvidfhn fakqsyfi  
ltdsggi qeeapsfnkpvl  
vlrsvterpegvdagtlkvvgtheqdv yaakel idderlyhqmseasny pygdg faserivnhikyyl nlitekpsdfn  
>tr|E5QR56|E5QR56\_STAAH  
msgtvfmidishteaykmsrfyni fkyiqyylyll iilgglyl fthafilgliigtgsaintvifesy lakakrpd  
mhistgnm wrylvaiiacm  
iwyfnkshvsii giiiglmisyvvviirpllkvsk  
>tr|E5QR60|E5QR60\_STAAH  
mvkvankyakal fdvsl dtnnletineel tvineavkdkieql kmvdsnptqtaeqrrelingvftdinpyiknmmyvla  
dnrhisl iadvfkafqtly  
nghynqdfatiestyelsqeelvkivklvtqqtkl skvidtkinpdliggfrvkvgttvldgsvrndlvqlqrkfrvn  
>tr|E5QR63|E5QR63\_STAAH  
mgigrvtqvmgpvidvrfehkevpkinna lvidvpkeegtiqltlevalqlgddvrtiamdstdgvrqrgmdvkdgtkei  
svpvgdetlgrvfnlget  
idlkeeisdsvr rdpihrqapafdelstevqiletgikvvdllapyikggkig lfggagvgktvliqelinniaaqehggi

Tsompanidou\_et\_al\_Supplemental\_FASTA\_File

svfagvgertregndlyfe  
msdsgvikkamvfgqmnpeppgarmrvalsgltmaeyfrdeqqgdvllfidnifrftqagsevsallgrmpsavgyqptl  
atemgqlqeritsttkgs  
tsiqavfvpaddytdpapatafahldattnlerkltemgiypavdplastsralepsivgqehyevardvqstlqkyrel  
qdiailgmdeidsedkqt  
verarriqfflsgnfhvaeqftgqkgsyvpvktvanfkdiidgkydhipedafrlvgsmddiviakakdmgev  
>tr|E5QR65|E5QR65\_STAAH  
mtgpphkeigfpistdnaswgrgpntkaggksayinvqvgvgnikkyfffrn  
>tr|E5QR67|E5QR67\_STAAH  
mdkivikgnkltegvkvegaknavlpiiltasllasdkpsklvnvpalsdvetinnvlttlnadvtykkdenavvvdatk  
tlnaeapyeyvskmrasil  
vmgpllarlghaivalpggcaigsrpieqihkgfealgaeihlengniyanakdglkgtsihldfsvgatqniimaasl  
akgkltlienaakepeivdl  
anyinemggritgagdtitingveslhgvehaiipdrieagtliaagaitrgdifvrgaikemaslvykleemgvele  
yqedgirvraegdlqpvd  
ktlphpgfptdmqsmmalla1tanghkvvtetvfenrfmhvaeafkrmaninvegrsaklegksqlggaqvkatdlraaa  
alilagl vadgktsvtelt  
hldrgyvdlhgklkqlgadierind  
>tr|E5QR70|E5QR70\_STAAH  
m1nkivivgrltkdaqifekedrkiatfcvathrnykdengeivcdylfckafgklasnierytnqgtlvgitgqmrsk  
ydkdqthfvteilyetik  
fmspksqneilsdsildidsqnidnhdlllei  
>tr|E5QR74|E5QR74\_STAAH  
mnylnnirienpltiacytndvknftangllsigaspamseapeeaeefykvaqallinigtltaqneqdiiaiaqtane  
aglpivfdpvavgastyrk  
qfcklllksaksvikgnaseilaiddatmkgtddanldavtiakkayaiyktaivitgkedvivqgdkaivlang  
pllarvtgagcllggiag  
flfretediealieavsvfniaaevaenencggpgtfspllldtlyhlnettyqqririqeve  
>tr|E5QR76|E5QR76\_STAAH  
mkkkallplflgimvflagcdyskpekrgffyntfvdpmknvldwlgnnllndnyglaiiilvlviriillpflmsnyk  
nshmmrqknesckars  
>tr|E5QR77|E5QR77\_STAAH  
mkvakpevekiqekvkrartqeeqmaanqelmqvykkydmnpiksm1gclpmlilq1piimglyfvlkdq1vdglfkyphf  
lwfldlgrpdiwitiiagvl  
yfiqayvssktmpdeqrqmgymmmvispimiwi1ssasalglywsvsaaflvvqthfaniyyekvakkevqpfieaye  
rehnggsnkkgkntqvvs  
kkkk  
>tr|E5QR78|E5QR78\_STAAH  
mmwrcgvmggiargidamp1qfydms1grcnvyavvtllfhtvtcicellwkccdiycytdeslcqddiamknsnsvin  
hflhgeislilfqiktavg  
>tr|E5QR79|E5QR79\_STAAH  
mrsvt1mqgsdiisaakkyimesihqndftghdiahvyrvtalaksiaenegvndtlvielac1lhdtvdekvvthankyv  
elksflssl1stedqehi  
lfiinnmsyrngkndhvt1slegqivrdadrldaigaigvartfqfaghfgepmwteqms1dkinddlveqlppsaikhf  
fekllkleslmhtdtakmi  
akerhd1fmmmylkqfltewnyhd  
>tr|E5QR80|E5QR80\_STAAH  
miellsialkhsni1nsifigafin1l1faftiifmerrsanisaw1lv1v1pl1fgfily1llgrq1rdq1fkidk  
edkkg1elivdeqlaalkn  
enfsnsnyqivfkemiqm1lynnaaflttnd1kvytdgqekfddliqdirnatdyihfyyiiqndelgrtilnelgk  
kaeqgvkvi1yddmgsrg  
1rkkgl1hpfrnkgghaeaffpsklplin1rmnrrnrkivvidgqigvvgfngvdeylgskkkfgywrtdh1rivgdav  
nalq1rfildwnsqatrhd  
isyddryfpdvnsqgtigvqiassgpdeeweqikyglkmissakksiyiqspyfipdqaf1dsikiaalggvdvnmip  
nkpdp1fvfwat1knaas1  
ldagvkvfhydngflhsktlvideiasvgtanmdhrsft1nfevnafiydqqiakk1kqafiddlavsseltkaryakr  
slw1kfk1egisq1lspi1  
>tr|E5QR81|E5QR81\_STAAH  
mgysivrvnegvnamteqdnahhseqikt1ksr1nrieqqvrainrmi1eedvycddvltqiratr1salnsvatk1leq  
hmkscimknvngqaeam  
eel1vtfql1kd  
>tr|E5QR82|E5QR82\_STAAH  
mihqntiytagieteeqvsq1terisnmigvhqviiniidgqvtvayetpan1nsiekeiydegykivf  
>tr|E5QR84|E5QR84\_STAAH  
mar1lreqcqs1tgaptqk1tysq1ttmcr1glw1rrhprk1akpfntkycinreqq  
>tr|E5QR85|E5QR85\_STAAH  
mka1lgf1rmsvrg1nkvkrelgfv1malnirkiaaqravhykihikkanfyqiinrn  
>tr|E5QR87|E5QR87\_STAAH

Tsompanidou\_et\_al\_Supplemental\_FASTA\_File

millrfkdanksfnnwtksiliiyikvanpdisleenemtkenicivfggksaehevsiltaqvnlnaidkdkyhvdiiyi  
tndgdwrkqnnitteikst  
delhengealeisqllkesssgppydavfp1lhgpngedgtiqglfevlvpyvngvlsaassmdklvmkqlfehrgl  
pqlpyisflrseyekyehn  
ilk1vndklnypvfvkpanlgssigiskcsneaelkegikeafqfdrklvieggvnareievavlgndypeatwpgdevk  
dvafydykskykdgvqlq  
ipadl dedvqltlnrmaleafkatdcsglvradffvtednqiynetnampgftafsmypklwenmglsypelitk1iel  
akerhqdkqknkykid  
>tr|E5QR88|E5QR88\_STAAH  
minvtl1kqigswipceiedqflnqeingvtidsraisknmlfipfegenvdghrfvskalqdgagaafyqkgtpidenvs  
gpiiwvedt1talqqlaqa  
ylrhvnpkviavtgsngktttkdmiesvlhtefkvkktqgnynneig1pltilelndnteisilemgmsgfheief1sn1  
aqpdiaivt1nigesmqdl  
gsregiakakseitig1kndgtf1ydgdep1lkphvkevenakcisigvatdna1vccvddrdttgisftinnkehyd1p  
1lgkhnmknatia1avghe  
lg1tyntiyqn1knvs1tgmrmeght1enditv1ndaynasptsmaaidt1st1tgrri1ilgdvlelgenskemhigv  
gnyleekh1dvlytfgnea  
ky1ydsqgqhvekaqhfnskddm1gv1tsd1kahdrv1vkgsrgmk1leevnal1s  
>tr|E5QR89|E5QR89\_STAAH  
mrnkqvkrrri1lqnfke1g1sdntvqsl1esmgfkeptpiqkdsipyalqgidilgqaqtgtgktgafgipliekvvgkqg  
vqsl1ilaptr1elamqvaeq  
1refsrqgqvvtv1fggmpierqika1kkgpqivvgtpgrvidh1nr1rt1ktgd1ht1il1deademnm1gfiddmrfim  
dkipavqrqtm1fsatmpk  
a1qalvqqf1mkspk1ikt1mnmsdpqieefytivkelekfdtftn1fldvhqpe1aivfgrtkrrvdel1tsaliskgyka  
eg1hgdi1tqakr1lev1kkf  
kndqini1vatdvaarg1disgvshvynfdipqdtesythrigrtgragkegiavtfvnp1emdyirqiedangrkmsal  
rpphrkevlqareddikek  
venwmskesesr1kriste1lneyndvd1vaal1qel1veandevvq1tfekp1srkgrngkpsgrnrnskrngpkf1ds  
kskrskgysskkk1stkkf1d  
rkekssggsr1pmkg1rtfadhqk  
>tr|E5QR91|E5QR91\_STAAH  
myaeinfi1afnceeydi1aievkmsntes1nigkkrgs1tiyigyspgvgktfem1snaiel1fqsndik1lgyiephqr  
detna1aeqlpk1iatnftk  
hgshhfqy1ldvdr1ieesptiv1idelahntis1rdrhkrymdiee1lnhg1dvht1lniqhies1ssqielmtgvhvke  
rvpdyfimsadv1levvdi1s  
peql1kr1kagkvkdr1ldvafsnfftyah1sel1rt1t1rtvad1msdkekvrhnhkts1kphiava1sgsiyneavik  
eafhiaqkehakftaiyid  
vfeksrqykdskqvqh1mlaks1gakvkvvsqtval1gl1dewcknqdvtk1liigqhirnkrrdffnkplidh1msfeh  
sykieivpikq1pvelkmm  
kspyrpkgrf1aidm1kmi1liq1icvmmglwi1yqldkhessti1lmi1fligi1llsiwtrsyi1igflaai1nvfvfnyff  
teprytfevyrfdypitfi  
vsiltsiltsal1kqikfqa1ytkkqlyrtd1lfqfndsikq1tytven1linagyqin1llqqsitiyvinqskviktip  
1qnhidnktq1heqal1swv  
iknerqagatt1dtpginkw1lipigtspikgila1dyqssqvinpydasilesmlnel1slavenvt1llkqtresmlqaer  
q1thsnf1rsishdi1rtp1  
ttimgn1d1lvshskdms1iekeq1lvhsfquesqy1yl1vt1n1sl1tk1qssnvqik1lqpy1lvselveeidmilerrh1k  
kritvsssvd1lqfihidsk  
1ilqalfn1lienavkht1stdtkin1siryasdeqiefavidegpggisieeqqkiefepfytgsnkyfkd1nqkesmg1gly1  
vt1ilhkhqsn1lqykpnq  
hgsifyfnidtdfnegdi  
>tr|E5QR95|E5QR95\_STAAH  
m1kkw1gmali1tpm1tfi1iwvfnsh1tiity1n1ilfyvs1liifisif1illvqegifdatsygfrr1kyqmssskkkksis  
ddpffn1p1qevkkrallcfy  
mdnt1i1inkyfi1fyyddcavah1sikkqkkssvtkt1llkifiim1qis  
>tr|E5QR96|E5QR96\_STAAH  
msqni1rvvitgmga1sp1gndvkt1tweena1kgvngidkitridte1pysvhl1agel1knfniedhidk1kearrm1drftqyai  
vaareavkdaq1ldinenta  
drigw1gsg1gmetfeiahkq1mdkgprrvspffvpm1lipmatgqvsid1gakgpngatvtacatgtnsigeafkiv  
qrgdadami1tggteapith  
ma1agfsasra1stnddi1etacrp1fgegrdgfvmgegagilvies1esaqarganiyaeivgygttgdayhitapapege  
ggsramqaam1ddagi1epkd  
vqy1nahgt1stpvgd1nevkaikntfgeaakh1kvsstksmtgh1llgatggieaifsa1sikdykvaptihavtpdped  
ldivpneaqd1ldityamsn  
s1lgf1gghnav1lvfkkfea  
>tr|E5QR99|E5QR99\_STAAH  
mk1ksfi1vt1al1gmia1ttgatvasnevsaaekdk1patqkakemqnvpytiavdgimafnqsy1n1lpkdsq1syld1gn  
kvka1lydergvtpeki1rn  
aksavyti1twkdgs1kevd1kkdsytan1l1f1dsnsikqidi1nvtkk

Tsompanidou\_et\_al\_Supplemental\_FASTA\_File

>tr|E5QRA0|E5QRA0\_STAAH  
mk1ktefkgnnipyeyaagadvdsingnpiksfpevtelpegtkylawslidydaipvcgfawihwsvanvsvsgnsi  
sikadlsrtkgdyvqgkns  
ftsgllaedfseienhyvgptppdkdhqyeltyvaldhslnlknngfylneflkevnqhkidqtsinligrki  
>tr|E5QRA1|E5QRA1\_STAAH  
mnlilgiylrifsrayfypfllyfvlvqgysiiqlleilmasygiaaflyslykekcfcicnlkdsnklvseifkii  
glllllyqnqylilvvaqi  
llglsysmmtgvdtaikrniunekyvqnksnsymflsllisgiigsylyginikwpiimtgifsiliiiiirctlvnr  
elnligetkgkikkflpee  
kfwilhysflralilgffigfipiniyndlklennlqfisvltcytvmgylssryltyklynkfvseiclvifliiytyqs  
fiavtismi flgissgltr  
pqtinklssssnlrvmlnyaetlyfifniaflimggyltygtiqylilfiallifiyliiifyftrreqhetkn  
>tr|E5QRA3|E5QRA3\_STAAH  
mvlkllpisdliheklfnfsnkyiikdkcdilkkdkkqvdicfedatrtsreklkeymeiiskyqrvrtvtfadvgc  
stpleygdifnyfvkkysn  
iifsa hchndlglatantlaailngakqietftlgigeragnapieeiitiltkkqiesteftlpdvkytsiniskildf  
qisenkpiigenifkhesg  
ihqdgtkknimnyqylvpsdlglknsqvvpfpisnisskilhnkfsivnteeidenisfyklvnkfspevapedtvd  
lqiikrrskdgnfk  
>tr|E5QRA4|E5QRA4\_STAAH  
miriqdntirdmqqsnrksliikkevlkqinklninsvevgmcttiedefnihqfrdilspekelvvltrlnekeikk  
>tr|E5QRA6|E5QRA6\_STAAH  
mqldqlyklevklmdinkmtyavqsalqqavel sqqhklnieieailsaalneseslyksileranievdqlnkayedk  
lntyasvegdnigqgyis  
qqanqlitkaesykeyedeyismehilrsamdidqttkhyinnkvevikeiikkvrggnhvtsqnpevnyealakygrd  
lveevrggkmdpvigrdee  
irntirilrsktknnpvligeppvgktaiveglaqrivkkdvpe lldktvfeldlsalvagakyrgefearlkavlkv  
kesdgrilfideihmlvg  
agktgdagdmmlkpm large lhcigattlneyreyiekdsalerrfqkvavsepdvdtisilrglkeryevyhgvr  
qdralvaae lsdryitdr  
flpdkaidlvdqacatirtemgsnpteldqvnrrvmqlieesal knesdnaskqr lqelqee lanekekqaalqsrves  
ekelianlqekraqldesr  
qaledagtnnnlekaaelqygtipqlelelrelednfqdeqgedsdrmi revvtdeei gdivsqwtgipvsklvetek  
llhlsdilhkrrvvgdkav  
dlvsdavvrraragikdnpnrpigsflflgptgvgkte laks laas lfdsekhiridmseymekhavsrligappgyighd  
eggqlteavrrnpysvill  
devekahtdvfnvlqildegrltdskgrsvdfknti iimtsnigsqvl lenvketgeitestekavmtslnayfkpeil  
nrmddivlfkplsidmsm  
ivdkiltqlnirllqrisievsddakawlgqea yepqygarplkrfvqrqietplarmmikegfpeggtikvlnsdnn  
ltnvekihe  
>tr|E5QRB0|E5QRB0\_STAAH  
mpkivvvgavaggatcasqirrlkdesdiiifekdrdmsfanca lpyvigevedrkyalaytpekfydrkqitvkythe  
viainderqtvsvlrnrkt  
eqfeesydklilspgasanslgfesditftlnledtdaidqfikanqvdklvvgagyvslevlenlyerglhptlihr  
sdkinklmdadmngpilde  
ldkreipyr lneeidaingneitfksgkvehydmiievggthpnskfiesnikldrkgfipvndkfetvnpniyvigdi  
atshyrhvd l pasvplawg  
ahraasivaeqiagnctie fkgflgnnivkffdytfasvgvkpnelkqfdykmvevtqgahanyypgnsp lhrvyydts  
nrqilraavgkegadrki  
dvlsmammnqltvdeltefevayappyspkdlinmigyak  
>tr|E5QRB1|E5QRB1\_STAAH  
myknymtqlt lpietsvripqndi sryvneivetipdsefdefrhrgatsyhpkmmlkiilyaytqsvfsgrriekll  
hdsirmmwlaqntpsykt  
inrfrvnpntdaliesslfiqfhsqclqnliddnsifidgakveananrytfvwkksiqnheskl nenskal yrdlveek  
iipeikedgdsdl tieeid  
ligshldkeiedlnhsiqnedctqirkqtrkkriteikkfkkkfdyserkskyeeqksilkd rnsfsktdhd atfmr mke  
dhmkngqlkpgynlqiatn  
sqfvlsyd lfnptdtrt l ipfltmiantfgylpeyivadagygseqnymaiiddfnktp litygmfikdktrkfsaif  
ntqnwkydelndeficpnn  
krigfkryaylndrygfkrdfklyecddysacs l rqqcmkpnsksnkksmkynweyfkaqinqklsepetkkiysqrki  
dvepvfgfmkailgftms  
vrginkvkre l gfv lmalnir kivar ravvyqihlkk l isik  
>tr|E5QRB3|E5QRB3\_STAAH  
mkflsfkyndktsygvkvkredavwdltqvfadfaegd fhpktllag lqqnhtldf qeqvrkavvaaeds gkaedykisf  
ndief lppvtpnnviafg  
rnykdhanelnheverlyvftkaass l tgdnatiphkdi tdql dyegelg ivigksgekipkala ldyvygyti indit  
drkaqseqdqaf l sksltg  
gcpmpgyivtkdelplpenvni vt kvnei r qdgntgemil kidelieeiskyvalhpgdiiatgtpagvgagmqqpkfl

qpgdevkvtidnigtltty  
 iak  
 >tr|E5QRB4|E5QRB4\_STAAH  
 mtipekpggviwtdaqwgsiyetgqdvlvaaaagsgktavlveri iqkilrdgidvdrlvvtftnl saremkhrvdqri  
 geasiadpanahlkngrik  
 ihqaqistlhfclkiqghydvlnidpnfrtsseaenillleqtidevieqhydil dpafielteqlssdrsddqfrmi  
 ikqlyffsvanpnptnwl d  
 qlvtpyeeeagqaqliqltdl skvfi taayda lnkaydl fsmmdgvdkhlaviederrl mgrvleggfidisy l t ghef  
 garl p nvtakeanemmv  
 daledaklqykykslidkvksdyfsreaddlkadmql aprvky larivkdv m sefnrkk rsknildfsdyehfalqil  
 tnedgspseiaesy r qhf h  
 eilvdeyqdt nrvqeki l sciktgdehngnl fmvgdvkqsiykrqadpsl fi ekyqrftldgdgtgrridlsqnfrsrk  
 evl sttnyi fkhmmdeqvg  
 evrydeaaqlyygapdesdhpvn l kv l veadqehsd l t gse qeah fiveqvkdilehqkvfdmktgsyrsatykdivil  
 ersfgqarnlqqafknedi  
 pfhvnsregyfeqtevr l v l sflraidnplqdiy l vgl m rsviyqfkedelaqir ilspnddyfyqsivnyindeaada i  
 lvdklkmflsdiqsyqqys  
 kdhpvyqlidkfyndhyviqyfsgliggrgrranlyglfnkaiefenssfrglyqfirfideli ergkdfgeenvvgpnd  
 nvvrmmtihsskglefpfv  
 iysglskdfnkrdlkqpvilnqqfglgmdyfdvdkemafpslasvaykavaekelvseemrlvyvaltrakeqlyligrv  
 knksllleleqlsige hi  
 avnerl t spnpfhl iysilskhqsasipddlkfekdiaqiedssrpnvnisiyfedvstetildndeysv nqletmqn  
 gnedvkaqikhqldyqypy  
 vndtkkpskqsvselkrqyeteesgtsyervr qy r i g f s t y e r p k f l s e q g k r k a n e i g t l m h t v m q h l p f k k e r i s e v e  
 lhqyidg lidkhiieadtk  
 kdirmdeimtfinselys i i a e a e q v y r e l p f v n q a l v d q l p q g d e d v s i i q g m i d l i f v k d g v h y f v d y k t d a f n r r r  
 gmtdeeigtqlknkykiqm  
 kyyqntlqt ilnkevkglyffkfgt l q l  
 >tr|E5QRB5|E5QRB5\_STAAH  
 mtlhaylgragt gkstkmlteikqk m k a d p l g d p i l i a p t q s t f q l e q a f v n d p e l n g s l r t e v l h f e r l s h r i f q e v g  
 syseqklskaatemmiyni  
 vqeqqkylklyqsqakygfsek l t e q i q d f k k y a v t p e h l e s f i a d k n m q t r t k n k l e d i a l i y r e f e q r i q n e f i t g e  
 dalqyfidcmpksew l k r a  
 diyidgfhnfstieyliikglikyaksvtiilttdgnhdqfslfrkpsevlrhieeisnelnisierqyfnqlyrfnnqd  
 lkhleqefdalqinrvacc  
 ghinilesatmreeineiarriivdi rdkqlryqdiailyrdesyayl f d s i l p l y n i p y n i d t k r s m t h p m e m i r s l  
 ieviqsnwqinpm l r l l k t  
 dvl t t s y l k s a y l v d l n e n f v l e r g i y g k r w l d d e l f n v e h f s k m g r k a h k l t e d e r n t f e q v v k l k k d v i d k i l h f e k q  
 msqaatvkdfatafyesme  
 yfelpnqlmterdel d l n g n h e k a e e i d q i w n g l i q i l d d l v l v f g d e p m s m e r f l e v f d i g l e q l e f v m i p q t l d q v s i  
 g t m d l a k v d n k q h v y l v g m  
 ndgtmpqpvtass l t d e e k k y f e q q a n v e l s p t s d i l q m d e a f v c y v a m t r a k n v t f s y s l m g s s g d d k e i s p f l n q i  
 q s l f n q l e i t n i p q y h e v n  
 plslmqhakqtki t l f e a l r a w l d d e i v a d s w l d a y q v i r d s d h l s q g l d y l m s a l t f d n e t v k l g e t l s k d l y g k e i n a  
 svsrfeqyqqcpfkhyash  
 glklnertkyelqnfldgdi f h s v l k y i s e r i n g d f k q l d l k k i r q l t n e a l e e i l p k v q f n l l n s s a y y r y l s r r i g a i  
 v e t t l s a l k y q g t y s k f m p  
 khfetsfrkrprtndeli a q t l t t t q g i p i n i r g q i d r i d t y t k n d t s f v n i i d y k s s e g s a t l d l t k v y y g m q m q m m t y  
 mdvlnknkqrlgltdivkp  
 gg l l y f h v h e p r i k f k s w a d e d e d k l e q d l i k k f k l s g l v n a d q t v i d a l d i r l e p k f t s d i v p v g l n k d g s l s k r g s q v  
 adeatiy k f i q h n k e n f i e  
 tasnimdghte vap l k y k q l p c a f c s y q s v c h v d g m i d s k r y r t v d e t i n p i e a i q n i n i n d e f g g e q  
 >tr|E5QRB6|E5QRB6\_STAAH  
 msklkkel lewiisiavafvil fivgkfivtpytikgesmdptlkdgervavniigyktgglekgnvvvfhanknddyvk  
 rvi g v p g d k v e y k n d t l y v  
 ngkkqdepylnynlkhkqgdyitgtfqvkd l p n a n p k s n v i p k g y l v l g d n r e v s k d s r a f g l i d e d q i v g k v s f r f w p  
 fsefkynfnpentkn  
 >tr|E5QRB8|E5QRB8\_STAAH  
 msfhqveewfeifrqfgy l p g f i l l y i r a i p v f p l a l y i l i n i q a y g p i l g i l i s w l g l i s g t f t v y l i c k r l v d t e r m  
 qrikqrtavqrlisfidrq  
 glip l f i l l c f p t p n t l i n f v a s l s h i r p k y y f i v l a s s k l v s t i i l g y l g k e i t t i l t h p l r g i l m l v v l i v f w i v g k  
 kleqhfmgskke  
 >tr|E5QRC1|E5QRC1\_STAAH  
 meaiamsnkawggrfevqpeewvddf nasitfdqtlidqdiegsiahatmlanqgiisqqdseqiiqglksiqhdyhqdq  
 iqfsasledihlnieheli  
 krigdagglhtgrsrdqvatdmhlytkkqvqdiialiks l q s v i d i a s n n v d t i m p g y t h l q r a q p i s f a h h i m t y f  
 wmlqrdqqr f e d s l k r i d i  
 nplgaaalsgttypidrhettallnfgslyensldavsdrdyi etlhnisl tmvhl srfaeeiifwstdeakfitl sda

Tsompanidou\_et\_al\_Supplemental\_FASTA\_File

fstgssimpqkknpdmael  
irgkvgrttghlmsmlmtlkglpalaynkdmqedkeglfdavhtikgslrifegmiqtminkerlnqtvkedfsnatela  
dylvtknipfrtaheivgk  
ivleciqqghy1ldvplstyqqhssidadiydy1qpenc1krrqsygstgqssvkqqldvakq11sq  
>tr|E5QRC2|E5QRC2\_STAAH  
mtnssksftkfmaasavftmgflsvptagaeqtnhiankpqa1qwhnt1tnerfttiahrgasgyapehtfqaydkshne  
lkasyieidlqrtdghlv  
amhdenvnrttngghkvedyt1delkq1dagswfnkkykpyarasyknakvpt1de1lerygnanyyietkspdvypgm  
eeq11as1kkhh11nknk1  
knghvmiqsfsdes1kkihraqnhvp1vk1vdkgelqqfndqr1keirsyaig1gpdytd1teqnthh1kd1gfvhpyt  
vnekadm1r1nkygvdgvf  
tnfadkykev1k  
>tr|E5QRC4|E5QRC4\_STAAH  
mmkrqdmmtksek1ieltnhygahny1p1piviseaegvwvkdpengkydm1saysavnqghrhpki1qa1kdqadkvt  
1vsrafhsdn1gwyekic  
klagkdka1pmntgaeaveta1kaarrwaydvkgiepnkaeiafngnfhgtrmapvs1sseayqrgygp1ldgfrkvd  
fgdvda1kaa1nkntaav1  
vepiqqeaginippegy1kai1relcdehnlfiadeiqag1grsgk1fatdwdnvkpdvyl1gka1gggvfp1svvladk  
ev1dvftpgshgstfggnp  
1acaasiaaldvived1pgrs1elgdyfkeq1kqidhpsikevrgr1figvelnesarpycea1keeg11ckethdtv  
irfapliitkeeld1ale  
kirhvfq  
>tr|E5QRC5|E5QRC5\_STAAH  
mkskyep1fdkvvl1pngvelrnrflap1thi1ssndgt1sdiel1pyiekrsqdv1gitsnaasnvsvdgkafpgqpsiah  
dsdieglkr1atamknga  
ka1vqihhggaqalpel1tpdgdvvasp1s1ksfgqkqehsaremtneeieqaikdfgeat1raieagfdgveihganhy  
1ihqfvspynr1rdvwan  
qykfp1avi1eev1kakevygnkdfivgyr1speaespgitmeiteelvnk1shmpid1yihvsmmdthataregkyagge  
r1plihkw1ng1rmp1ig1g  
siftaddal1davenvgd1vaigre111dyqfveki1kdgredei1nyfdperednh11tpn1whqfnegfyp1prkdk  
>tr|E5QRD0|E5QRD0\_STAAH  
ms11hiavi1p1lifa1i1p1lyrffkrih1gwfv1pvpivi1fiym1t1iktmsgntvmkt1nwmphfgmnfd1y1dglg  
11fs11isgigs1lv1ysi  
gylskseq1gnfycy111fmgam1gvv1sdnvi1y1l1fwel1tsfss11isfwrerqasiygaqks1i1tvfgg1s11gg  
i11la1iptqsf1siqymi1q  
aseiqnspff1fam1imigaftksaqfpfyi1wpdameaptv1say1hsatmvkagly1liarmtpifaasqgwiwtvt1  
vg1it1fw1s1natkqdd1  
kgi1afstvsq1gmimam1gigaisyhyqgddskiyaaaftaa1fhlinhatfkga1fmitgavdhstgtrdvkklgg11  
t1mpisftitvital1smag  
vppfng1f1skes1flettftaskan1fsvdt1gy1l1fpi1igivgsvftfvysik1fimhiffgqykeq1pkkahevsilm11  
spailat1vivfg1l1fpgi1  
tnsi1epatss1nhtv1ddvef1hm1fhg1tpaf1st1viy1ilg1llivtfsywk11lqrqpgk1l1tnywynrsanvipnys  
ekmtnsyv1tdysrnn1lvii  
fga1111tfvtv1fsvpf1n1fkdvsp1irifevcivil11saaf1il1faksr1l1fsi1m1savgyavsv1l1fiffkapd1alt  
qfvves1stal1f1lcfyh1  
pn1nrynekrsf1qltna1iaggvg1svii1igliaygnrhfesiskfyqehvyd1ahgknmvn1v1ldvfrgmdt1fessv1  
giag1lavyt1mik1rkk1rqt  
qgnevk1nhe  
>tr|E5QRD7|E5QRD7\_STAAH  
mhwti1gggi1qgtaiaqk11ssgl1ttdr1tiidphetf1cqr1fnsy1tnriempyl1rspiv1hvhvpqp1f1lkqfakqhqytn  
afygyq1rpe1l1tmfmd1hia  
haskyq1ledc1vgg1vqt1dkqedkwhik1ledgqi1ttcdcvia1igstn1ipfmpd1ilkdkqnvni1fekeh1dqvvdykt  
dhivgsg1taah1a1k11n  
hdddki1hlw1nkdi1ehdfdadpgw1gpknmss1fstksmpernaivq1rerhkg1smphely1r1lkkhikngrinvhkt1p  
itq1sdgl1intendsvpyq  
qimvatg1feqdfmsq1likq1liqnydapi1necnypviseklewipn1lyvagcfad1el1gp1fgrnm1ggrkaae1ieqaf1  
klqqysa  
>tr|E5QRD9|E5QRD9\_STAAH  
mikggchminavviavi1miv1clcr1nvvis1fisa1vgg1isgmsiekvin1vfgknivdgaeva1sya11ggfaalis  
ysg1tdylvgki1ina1hae  
nsrwsrvkvvti1ia1lamsimqn1lipvhia1fipivip1l1s1fnd1lkidrr1ligli1igfg1lcfpyv1l1pygfgqifq  
qi1qsgfakan1hpiefnmi  
wkam1ipsmgyivg1lig1lyvrkpreyetrk1idsdnvtelkpyiliv1tivailat1flvqtftds1mifgalagvlvffi  
sraynwe1ldakfvegiki  
mayigvvi1tangfagvmnatg1dide1lvt1tsitgdnk1l1fsi1mmyvig1livt1lgigssfatipias1l1fipfgasig1  
dtmalialigtasalgdsg  
spadst1lgptag1invdgghd1h1rdtcv1pn1f1fynip1lmi1fgtiaamv1  
>tr|E5QRE0|E5QRE0\_STAAH

Tsompanidou\_et\_al\_Supplemental\_FASTA\_File

mnfklntisneintliigipehlnqlerisfnhiditeslerlkhqhiigskvgkiyttafdvqdqtyrlitvlglnlk  
trsyqdmkiwghlfgyik  
sehiedtyllmdfsiskydqldsvlmacgiqseratyefdhyksskkapfktlnliseslieldfihegisigqsinla  
rdfsmpnpvltptfaed  
ivnhfknkvvkvekdtydlvsegfgllqavgkgskhkprlvltityngkdkdeapiaivgkgitydsggysiktngmat  
mkydmcgaanvvgiieaas  
rlqlpvniavglacaenmineasmkpddvftalsgetvevmntdaegrlladavyyanqyqpsvimdfatltgaaival  
gddkaafesnskivilndi  
lqisskvdemvfelpitaterasikhdsiadlvnhtngqgkalfaasfvthfsgqtphihfdiagpattnkasyngpkgp  
tgfmipativqwlkqq  
>tr|E5QRE5|E5QRE5\_STAAH  
mgdkymehvsivvygadvicascvnaptskdiydlqpllkrkypnisfkytyiditkdnldtdhldqfierieqdel  
yplitmndeyvadgyiqt  
qitrfdqklvne  
>tr|E5QRF3|E5QRF3\_STAAH  
mkqykaylidldgtmymgtdeidgakqfidylvkgiphlyvtvnstktpeqvtekremhidakpeevvtsalatadyi  
seqspgasvymlgsglnt  
alteaaglvikndehvdyvvgildeqvtyeklaiatlgvrngatfistnpsipkerfllpgngaitsvsvstgvsppf  
igkpepiimvkaileigld  
ksevamvgdlytdimsginvgmtihvqtvstledvqnknvptysfkdlnaiaelek  
>tr|E5QRF5|E5QRF5\_STAAH  
midmylyddneesqvqfvqfvehsrydlmlvhtnrhygktlvlnmqtnkfgiigtddlkeegyiahilgvnaeegdeit  
eylnevih  
>tr|E5QRF7|E5QRF7\_STAAH  
mndimfkdtnrrvcvumatkneeilrkpdwlkiklntnenytlkmmreknltvceekcpnihecwgarrtatfm  
ilgavctracrvcavktgl  
pnelldnepervaesvelmnlkhvvtavardldragsnvyaetvrkvrernpfttieilpsdmggdydaletmasrp  
dinhnietvrrltprvra  
ratydrtleflrrskelqpdipkssimvglgetieeyetmddlrandvdiltigqylqpsrkhlkvqkytplefgkl  
rkvamdkgfkhcqagplvr  
ssyhadeqvneaakekqrqgeaqlns  
>tr|E5QRF8|E5QRF8\_STAAH  
mrltiyhtndihshlheyerikaymaeqrprlnhpslyvdldghvdl sapiteatlgkknvallneakcdvatignegm  
tishealnhlydeakfivt  
csnvidesghlppnivssyikdidgkivilfaatapftpfyraldwivtdpldsikeeiehqrgkfdvlivlshcgiffd  
etlcqelpeidvifgsht  
hyfehgeinngvmaagkygnylgevnltfeahkvvhtakiipletlpevksfeeegktlmsnpviahpvlkrsmn  
hiteaayllaqsvceytha  
qcaiinagllvkdivkdevteydihqmlphpinmvrvrllsgvklkeilaksnkqeymyehaaglgfrgnifggyilynl  
yihstgryylngeeieddk  
eyvlgtdimytfgryfptlkelpkeylmpelrdifkekllay  
>tr|E5QRF9|E5QRF9\_STAAH  
mlltitllvligglsaiigsivgiggiiivptmvylgvehgllhnittqiaigtssvilvtglssslgylktkqvdk  
ngsiflfgllpgsllgsfi  
sryltesfnlyfgiflivaillmvrnkikpftfdkpkkyektyvdakgktyhysvpllafittfligiltglfgigg  
galmtplmlivfrfpphva  
vgtsmmmiffssvmssighiaqghvawgyaailiissyfgakigvknqsiksdtvvtllrtvmlimgiyliirali  
>tr|E5QRG0|E5QRG0\_STAAH  
mmtlviminigtgwgdhyslyedlerqtdklktyaghfpvveldatyyaiqpernilkwiketpdtfevvhqalt  
lhadyktfadtrqelfdqf  
knmllep1htqkklamvlvqfppwfdcaqnikiilyvrqllqafpmcvefrhqswwsfdafkeqtlafltehqiihavvde  
pqvkdgsplvnritneia  
fvyhgrnhygwtkkdmsdqewrdvrylydyneqelidlaqqaqilaqkakkvyvifnnsqgghaannaktyqrlniey  
eglapqqlklf  
>tr|E5QRG1|E5QRG1\_STAAH  
mwnknrltqm1sieypiiqagmagsttpklvasvsnsnglgtigagyfntqqldeidyvrqltsnsfgvvnfvpsqqsy  
tssqienmnawlkyrral  
hleppvkiiteqqfkchidtiikkqvpccftfgipnesiikrlkeanikligtatsvdeaiianekagmdaivaqgsea  
gghrgsflkpknglpmvgt  
islvpqiavvsvipviaagimdgrgvlasivlgaegvqmgtafltsqdsnasellrdaiinsketdtvvtkafsgklar  
ginnrfieemsqyegdipd  
ypiqneltsisirkaaanigdkelthmwsqsprlatthpantimsniinqinqimqyk  
>tr|E5QRG2|E5QRG2\_STAAH  
miaiilifisffffsgsetaltaanktkfkteadkdkkagvikllekpsefittiliginnvanillptlvtimalrw  
gisvgiasavltvviilis  
evipksvaatfpdkitrlvypiiicvivrpitlllnk1tdsinrslskgppqehqfskeefktmlaiaghegalneie  
tsrlegvinfenlvkdvd  
tprinvtafasnatyeevyetvmnkpytrypyegdiidnigvfhskyllawsnkkedqitnysakplfvnehnkaewv

Tsompanidou\_et\_al\_Supplemental\_FASTA\_File

1rkmtisrkhlaivldefg  
gteaivshedlieellgmeiedemdkkekeklsqqqifqqrknrvsi  
>tr|E5QRG3|E5QRG3\_STAAH  
myfvlaiftlissvslgysiqacasshninayyalrsrslplflllaifslvihsaiflitisiamilvqfldaivgykksk  
dvfkygplatsvvnliil  
ivflf  
>tr|E5QRG4|E5QRG4\_STAAH  
mpqsciyvvalssindyflhqsknrtdinkykaylsirfsytkkatvmwlfvifsikmvsitvfd  
>tr|E5QRG5|E5QRG5\_STAAH  
makkspdvgdykygfhddvsi frsergltenivreismknepewml dfrlkslklfykmpmpqwggdlselnfddity  
yvkpseqaerswdevpee  
krtfdklgipeaeqkylagvsaqyesevvyhnmekeleekgiifktdtsalqeneelfkkyfasvvpaadnkfaalnsav  
wsggsfiyvpknikldtp  
qayfrinsenmggfertliiadegasvhyvegctapvyttsslshavveiivhkdhavrytti qnwannvynlvtkrtfv  
yengnmewvdgnlsgklm  
kypncvllgegagstlsiafagkgqvdaqakmihkapntsstivsksis knggkviyrgivhfrkagarsniecdt  
lildnestsdtipynefv  
dqislheakvskvseeqlfylmsrgiseeatemivmgfiepfkelpmeyavemnrlikfemegsig  
>tr|E5QRG9|E5QRG9\_STAAH  
mastleikdlhvsiedkeilkgnvltintdeihaimgpngtgkstlssaimghpsyevtkgevlldgvnilelevderak  
agflamqypseitgvtna  
dfmrsainakreegqeinlmqfikkldknmdfldidkdmaqrylnegfsggekkrneilqlmmlepkaifal deidsglidi  
dal kvvskginqmrgenfg  
almithyqrllnyi tpdkvhvmagkvvksggpelakrleegyewvkeefgsae  
>tr|E5QRH0|E5QRH0\_STAAH  
mqfkwini lkgfamgtsdlvpgvsggtiallgiynqfiasisgifsrrfwpsftflipiiigml lamgslsnlfnyll  
sqhhiptmfffggliigiv  
pyllkisnyktsfttkhymmviagia ilivitlmnsdkhagetl tlstgliikyfiagmcassamllpgisgsfmllvf  
gygtvmlaisevkl nfa  
glp illavfgvlagfiisskiiqyflthhklmtfaligfvvgs l fvfpglptnivmwfvslvvfiigfivsltlgri  
taene  
>tr|E5QRH2|E5QRH2\_STAAH  
mllcckevmamlivlllvialvlylfyalirsekf  
>tr|E5QRH3|E5QRH3\_STAAH  
meiilfltmvmiayvfglyrvalvqssrvdliftrfenmcfkiigtdlehmsaktyvkhflafngfmgvitfvlliv  
qqwflnphnlngsidla  
fntaisfltnslqhyngevgtyltqmivmtylmftssasgyavciamlrrltgltniignfyqdivrfivrllplsc  
lisisllmtggvptlhanl  
mirtlsghiqhiafgpiaslesikhltngggflagnsatpfenpniwsnfiemgsmmlpmsmlflfgrmlsrhgkrvh  
rhalilfvamffifiailt  
ltmwseyrgnpi lanlgi hganmegkevrfgaglsalftvittafttgsvnmhds ltpgglgpmvlmm lnvvfggegv  
glmnliiyvlltvficslm  
vgktpeylmpigaremkcivlvflihpililvsa lafmipgasesitnpsfhgisqvmymtsaaanngsfeglkdd  
ttfwnistgiimllsryip  
iilqlmissslvnkksyhdkhtiaidkpyfgvslivfivllsgltfipvlllgpigeftlk  
>tr|E5QRH4|E5QRH4\_STAAH  
mekmhvknkyfnqtmviealkmsfyklnpkqliknipimfvvegmlltlilicfpdifgtsylsrgylitifiillitil  
fanfseafaegrkaqads  
lrqaqsnl tarlieengayrivnate l kagqnrvengetipadgvinglatvdesaitgesapvikesggdfdgvig  
tlvtsdwleirvseagts  
fldkmialvegaernktpneialftllttltiiflvvltlypiasyhlilpiamlialtvclipttiggllsaigiag  
mdrvtqfnvlaksgravev  
cgdvdmil dktgtitygnriaseflpvnqqmmeklivaaymssi yddtpegksivrlakqmyinelpkdidgtykpfta  
etrmsgiitneisvfkgap  
nsmilvkqqgniplnie sicmdvsskggtpliviennvmlgviylkdvikdglverfaelrkmgietvmctgdnalta  
atiakeagvdrfvaeckpe  
dkikvikdeqakghivamtgdgtndapalaqaniglamngstisakeaanlidl dsnptk lievvkigkqllmtrgal tt  
fsl andvakyfailpalmm  
stipemtslnimhlsspksaisalifnalii valipiamkgvkvkgsidri finnmliygg livpflgiklidmiv  
qffv  
>tr|E5QRH5|E5QRH5\_STAAH  
mntirnsicltiitmvlcgflplaitligqiffyqqangslitydnrivgskligqhw tetryfhgrpsavdynmpek  
lykngvssggsnesngte  
liarvkhhvkdnsnvtidaatssgsgldphitvena l kqapriadarhistrsradliqhrkqrgvltndyvvnlelni  
aldkmd  
>tr|E5QRH6|E5QRH6\_STAAH  
msdytklkspsksallyyitnglefilsvavyvifyfiwlr fewpqliyilfv lctltvlkliikplwqyhcrfyqvd  
qlsvqyrtsfliyeetsr



Tsompanidou\_et\_al\_Supplemental\_FASTA\_File

ierlqylsiksnpiskvlNlykvfmgtaghtiylpmmshddvkieartmsnlrgvesdv  
>tr|E5QRH7|E5QRH7\_STAAH  
msepqklhpi syfngi inaikqni vffifvifq lkd fdytn pesylwigivfvfflisyisqivgimntrywiednyfi  
lttgifnkkrlknkriq  
svdmtqgvnqmiggvd lqikt psdgiv lsvi skkqgeyleryidqlqtelktevaqksstekndncnhdiegnvediae  
grldevqntdsm l nqknkr  
ipiyqmnfkes lfmamts gaigvtlaalvpiygavre lipwsklnheisqwqvivsisvliiillvliaayiigtitmi  
rfygfsvmleneq lkieyg  
lfnkmkvtvptkr lqavverqsyirr lfygtaihfiitsdfenkkiedddndsggvpilpfikrdkayqiiqn lvpdl sy  
qqvnegmplsgfhrhflip  
siviamagigcyfwnql lllftiitvviigl fvikgylvkhagfkmtd eqit iqnfvllk rniyyfkaqhiigfdtwq  
htllkrnl n n f s f i v a k g  
vgaqsinlkyasskdvqi lkswylrgende  
>tr|E5QRH8|E5QRH8\_STAAH  
mmsdyk fmsphakkvmr l sav lfwipiafvlliafnlnw lfwelndnyisivssviiillvai ft lviapvyrykhcry  
afekhh lrvnrgi lfldek  
vipyfriqnididvgpimrryr lat l tlytaggqaeielid rsearr lkrwl nnerhiennknee  
>tr|E5QRI0|E5QRI0\_STAAH  
mgi tgg snmsdkyysaymvd lnavasnfkvfst lhp nktvmavvkanayglsvkvarhl mengatffavat ldeaie  
lrmhg itaki l vlgvlpak  
didkai qhrval tvpskqwl keaikni sgeqekklwl hik ldtgmgr l gik dtktyqevie i iqyqeq l v f e g v f t h f a c  
adepgdm tteqyhrfkd m v  
neaikpeyihc qnsags l l m d c q f c n a i r p g i s l y g y p s e y v q q k v h l k p s v q l i a n v v q t k t l q a g e s v s y g a t y t  
atdpttia l l p i g y a d g y l  
rimqgsfvnvnghqcevigrvcmdqti vkvpdqvkagds vilidnhrespqsvevaaekqhtinyevlcnlsrrlpriyh  
dgdqrfvtne l l k  
>tr|E5QRI2|E5QRI2\_STAAH  
mirrgdvylad l spvqgseggvrpvvii qndtgnkysptvivaaitgrinkakiphveiekkkykl dkdsvilleqir  
tldkkr l ke l t y l s d d k m  
kevdnal mis l g lnavvhqkn  
>tr|E5QRI7|E5QRI7\_STAAH  
mdnqlinsi iekyqfskkqieav l t l l e e k n t v p f i a r y r k e q t g g l d e v q i k q i d d e y q y m v n l q k r k e e v i k n i e q q g  
l l t e e l k k d i l k q n k l q r v  
edlyrpfkqkkktrateakrkglep laiwmkarkhevsieekaqqfineevqsvenairgaqdiiaeqisdnpkyrtkil  
kdmyhggv l t t s k k k n a e d  
ekgifemyyaysepi krianhrvlavn rgekekv lsvkfe fdt tavedfiarqein hnnvnr syile aikd slkr livps  
iereihad l tekaenhaid  
vfenl r n l l l q p p m k g k q i l g v d p a f r t g c k l a v i n p f g t f i a k g v i y p h p p v a k e a a e k d f v q m v k a y d v q l i a i g n  
gtasreteqfvad l i k k h q  
l p v q f i i v n e a g a s v y s a s e i a r d e f p d f q v e e r s a v s i g r r v q d p l s e l v k i d p k s i g v g y q h d v n q a l e n a l t f v v  
etavnqvgvdvntass l l  
qyvsg l s s q i a k n i a y r e n g a i k h n k e l s k i k r l g a k t f e q s i g f l r i v d g s e p l d n t s i h p e s y k v t y q l l d k l g f g  
gnd l g s d a l k a k l n s l d m d  
elaie l q v g v p t l e d i i k s l k a p n r d p r e f e t p i l k s d v l s i e d l k e g m k l s g t v r n v d f g a f v d i g v k q d g l v h v s k  
l s k k f v k n p m d i v s v g d i v  
dvwihsidknkdkvsltmidphe  
>tr|E5QRJ1|E5QRJ1\_STAAH  
mverrtd l k i f i g t m l t f l f v c s l i v c r f f a y k i y f p t d a e n k s e i p n h m q e n k h e k e n t h n i n n g s e a n e n f n n k n r  
ieniedkqkaya lmsiprh  
nlpesekai yd kvistai qni nngvgneedfr lkeiydgiqsvqpq  
>tr|E5QRJ5|E5QRJ5\_STAAH  
mtynivalpgdgigpeilngslslleii snkynfnyqie hheffggasidtfgepltektlnackradai l l g a i g g p k w t  
dpnnrpeqg l l k l r k s l n l  
fanirpttvk gass l s p l k a e r v e g t d l v i v r e l t s g i y f g e p r y f n n h e a l d s l t y t r e e i e r i v h v a f k l a a s r r g k  
l t s v d k e n v l a s s k l w r k v  
vnevsqlypevtvnh l l v d a c s m h l i t n p k q f d v i v c e n l f g d i l s d e a s v i p g s l g l s p s a s f s n d g p r l y e p i h g s a p  
diagknvanpfgmilslam  
clres l n q p d a a d e l e q h i y n m i e h g q t t a d l g g k l n t t d i f e i l s q k l n h  
>tr|E5QRJ9|E5QRJ9\_STAAH  
mvkmsktqhevqnidplkmaes l e p e q l n e k t l n d m r s g s e v l v e a l l k e n v d y l f g y p g g a v l p l y d t f y d g k i k h i l  
arheggavhaaegy arvsg  
ktgvvvvtsgpgatnvmgti tdahcdslplvftgqv atpgigkdafqeadil smtspitkqnyqvrvedipkivheaf  
hvansgrk g p v v i d f p k d m  
gvlatnvd l c d e i n i p g y e v v t e p e n k d i d t f i s l l k e a k k p v v l a g a g i n q s k s n q l l t q f v n k h q i p t v t t l l g l g a v  
pyedt l f l g m g m h g s y a s  
nmaltecd l l i n l g s r f d d r l a s k p d a f a p n a k i v h v d i d p s e i n k v i h v d l g i i a d c k r f l e c l n d k n v k t i e h s d w k  
hcqnnkqkhp fklgeedqv  
fckpqqtieyigkitngeaivttvdvgqhqm waaqfypfknhgqwtsgglgtmgfgipssigaklanpdktvvcfvvgdg

Tsompanidou\_et\_al\_Supplemental\_FASTA\_File

fqmntnqemallpeyglvdk  
ivlinngtlgmvkqwqdkffnqrfshsvfngqpdfmkmaeaygvkgflidkpeqleeqldtafayqgpaliievrisptea  
vnpmpvpsgksnhemeg1  
>tr|E5QRK1|E5QRK1\_STAAH  
mihcsivsnfifnlyivtnfnlnflslkqiissklivrkfkifvdilkqi  
>tr|E5QRK2|E5QRK2\_STAAH  
mnekhniGESTliKinnldemNQfamflveq1ksgdlillngdlgagkttltqfigkalgvrrtinsptfniiksyrqkn  
1k1hhmdcyr1edsdedlg  
fdeffedqaitviewsqf1kd11path1sinistisensrqielfaqgehyeqikeaiihfaah  
>tr|E5QRK5|E5QRK5\_STAAH  
mtkdililavetscdetsvsvikngrdilntvlsqieshkrfggvpevasrhvegitttinea1vdadismedidai  
avtepgg1igalligvnaa  
kalafaydkplipvhhiaghiyanhieep1tfplialivsgghtelvmkdhltfevigetrddavgeaydkvartigln  
ypggpvdrlaagedtys  
fprwldkdsydfsfsglksavinqlhnqrqknipiieanvatsfqnsvvev1tfkaiqackeygvqrlivagvasnkg  
1rqs1adqckvndiq1tip  
spk1ctdnaamigvaghlyqqgrfad1alnghsnidleesae  
>tr|E5QRK6|E5QRK6\_STAAH  
mstnqtflifviaiiltsvigivgrymsrqr1lksmetlwqtisplesfirpnshfdyeyklykdkfeshslvddkts  
dlnmnaifhkmnynltaig  
emklyaclrgmlsitnks1lslfndnaefrknvtyh1aligktvytpfdqitpvkrhnilflcpflpvisfavifinsq  
vgi1lflmsclfnii1sat  
1krtyeddlksifyasv1kqgytiskikhapqpevnfkqfrtarhltsvlaevndedigamviklvkli1fml1dyvl1fhs  
iqksytthinelkncfdyi  
aelndhyalamyrrtlecytepqiddsndg1vfselthpliadavandfslsqnilltgsnasgkstfmsiainiilas  
aiqtvtaskfvyppg1vft  
smanaddv1sgdsyfmaelksikriveipdnqkiycfideifkgtntteriaasesv1sflheksnfrviaathdielae  
1lkqryenyhfnevienn  
ihfdykikpgkantrnaie1l1kitsfpakiyerakdnvsng  
>tr|E5QRK7|E5QRK7\_STAAH  
m1l1q1nh1isksfdgedi1fndvdfevktgerigivgrngagkst1mk1iagvenydsng1skikn1klgy1tqqmt1nsn  
atvfeemskpfehikrme  
1ikeetdw1skhandydsdytkthmsryes1snqfeq1egyqyeskiktv1hgl1nfseedfnkpin1dfsggqktr1slaq  
m1l1nepd1l1l1deptnh1d  
1ettkw1edy1ryfkgai1vi1shdry1fdkivtqi1ydv1al1gdvkryvgnyee1fiqrd1yyqkrmqeyesqqaeikr1et  
fveknitrastsgmaksrr  
kilekmeridkpm1daksani1qfgdrntgndvmhvk1leigyqta1tkpisievskgdhia1igp1ngigk1st1iktian  
qqka1ngdi1tfgan1qigy  
ydkqkaefksskti1dyvwdqypl1mekdi1rav1grf1fvqddvki1ind1sggekar1qla1l1ml1qrdnvl1l1deptnh  
1didskem1ehalqhfegt  
i1fvs1hdry1fin1q1ankvfd1t1idggkmy1lgdyqyy1ekveeae1kahqeeqsvnvqaheksmeqssyhnqkeqrreqr  
k1erq1isecene1ietlett  
i1lqideq1tqpevynnpqkane1ai1qkq1dseq1lehamskwee1lqq1  
>tr|E5QRK9|E5QRK9\_STAAH  
mwm1fsg1l1vgg1l1gfvmqrtrfcl1tggfrdm1yvqknnkmfya1l1iaitvqsig1l1l1ttt1gilq1pahsfpilgtvigs  
f1fgig1v1laggcatgtwy  
rageg1igs1wial1vlyavtaaitktg1lkpvm1dkin1qptvn1sdmsq1ttgipf1wgl1vvil1ti1tiflvvrt1lnk1kvrva  
vp1k1kqrytgi1ryyl1fekr  
yhp1f1aa1aig1l1al1awpmsastgrndg1l1gittpsan1vhfl1itgetkfidwg1vfl1vlg1ifigsya1aargarefkwrlp  
dk1it1rnsa1ig1cmg1fga  
svaggcs1gng1vetatmtwqgwia1asmi1vgvwtmshfi1fvrpm1kkvqqqsakvqqqtqiv  
>tr|E5QRL0|E5QRL0\_STAAH  
migkge1ami1helgtvgm1vcppf1leaqkmat1qsgde1k1idfdctqateaipnwaaengypvtneyeqidnaswtitvq  
kv  
>tr|E5QRL3|E5QRL3\_STAAH  
mni1mte1wtr1eeryq1riedv1tdtyfkt1kq1vdqskfrq1qfhi1qpetg1l1ndp1ngli1fykg1kyv1shqwf1lgavh1g1kyw  
ynytsdd1l1nfkaegp1ln  
pdtkydshg1vysg1safeyngh1lymytgnhrdn1h1wqrhasqmiar1kedgsvekfpkpvisqqpegytshfrdpkvfkyg  
ekyya1igaq1nndqqr1l  
lyntedi1nwhylge1nte1lddfgymwecpdy1fvdnqdv1ilicp1ggi1epkcdq1fnni1yqsgy1ilgkfdiek1tyehenf  
vel1dngfd1fyapqt1f1dek  
grrv1lgwmg1lpe1ieyptdnegwahc1tiprv1lveng1qlk1rpy1palek1lrh1nketalgyankftrk1lhpyegkqyeli  
idi1l1dn1datevyfel1r1tsk  
tsst1liaynkrenki1l1drsdg1l1ptnveg1ttr1stilet1plk1ql1qifvd1tssie1ifcndgerv1ltsrif1pteda1lgikt  
stesgqy1lqftkyd1lkde  
hk  
>tr|E5QRL6|E5QRL6\_STAAH  
mea1lndyn1yv1fvivqvs1lmffisafisg1rykksdyiyi1g1iv1ssvyffdkigs1slv1vitifii1iflyfki1rlysvf

Tsompanidou\_et\_al\_Supplemental\_FASTA\_File

lvmtqiiilycanfvyiii  
fsyitishsvfivlpiflvvyvsisyalayilnrilkringtylslnkkfltvitvivitfsllfaysqidasdasti  
kqysllflgiiillsilif  
issqftlkemkykrnqeeietyyeytltkieainnemrkfrhdyvnilttseyireddmtglrdyfnknivpmkdnlqmn  
alklmgienlkvreikgl  
takilraqemnipisieipdevtrinlnmidlsrsigiildnaieasseiddpiirvafiesensvtfivmncaddipr  
ihelfqesfstkgegrgl  
lstlkeiadrnadnvlldtiengffiqkveinn  
>tr|E5QRL8|E5QRL8\_STAAH  
mikdctksynnseesgvklnyfdnkidqfatylqkrnlnldhiqlqvrllgmqlaknigklivmytlayilnififtlit  
nisfyliirryahgahapss  
fwcyiesitlfivlpllvlfhinetlmmflallsvgvvikiyapaatkkkkiparlvkqkryfsiistilfiitlfvke  
pytqfiqlgiiqaitllp  
iyyked  
>tr|E5QRM0|E5QRM0\_STAAH  
mimglflkdkkamftdnameerrsiynlkdsisisddelesmiahavkhvpsffnsqstrivlllndnnkfwdntkail  
kevmgenrdfepeteqidn  
fkhsygtilyenqdvvsqleqmpnyydnfaiwstqtnamhqfaiwatalatkgigaslqhynplvdemtsnefnipksw  
kllaqmpfgdi reaagekt  
fnpvedrfvikk  
>tr|E5QRM1|E5QRM1\_STAAH  
msyhwfkkmlstsmllsssslglathtveakdnlgekpntlnhnvtspvsvnsemnnetgtphesnqagnegtgs  
nsrdanpdsnnvkpdsnnq  
npspdkpdpnnpnpgpnpkdpdpkpkpnpkpkpdpdpkpkpnpdpkpkpdpdpkpkpnpdpkpkpdpn  
pnpkdpnkpnpnpspn  
qpqdsnqsgsknggtwnpnasdgsnqqwqpngnqgnsqntgndfvsqrflalangaykynpyilnqinqlgkeygev  
tdeiyiirkqnfsgnay  
lnglqqsnryfrfyfnpkseryyrnldeqvialitgeigsmpdlkkpedkpskqrsfephekddftvvkkqednkks  
astayskswlaivcsmmvv  
fsimlflfvkrnkknknesqrr  
>tr|E5QRM2|E5QRM2\_STAAH  
mtrlwaslltviiylsqflpllivkklpfvqysgieltkaviyiqvlvfliaattiilinlkiknptklelevkepky  
iipwallgfalvmiyqmvv  
sivytqifgtqtspterliviarkiplfiffvsivgplleeyvfrkvi fgelfnaikgnrivafaiattvsslifala  
hndykfipiyfgmgvifs  
ayvwtkr lavpiihmlqngfvvfqllnpealkkateqanfiyhi fip  
>tr|E5QRM4|E5QRM4\_STAAH  
mvkqlkfse darqamrgvdqlanavkvtigpkgrnvl dkeftaplitndgvtiakeieledpyenmgaklvqevant  
neiaggdtttatvlagami  
qeglnkvtsganpvglrqgidkavkvaveal hensqkvenkneiaqvgaisaadeeigryiseamekvngdgvitieesn  
glntellevvegmqfdrqyq  
spymvtdsdkmvae lerpylvtdkkissfqdilplleqvvsnrp ilivadevegda ltnivlnrmrgtftavavkapg  
fgdrkamledlailtgaq  
vitddlglldkdatidmgtaskvevtdknttvvdgdgdensidarvsq lksqieetesdfdreklqerlaklaggvavi  
kygaasetelkerklried  
alnstraaveegivagggtalvnvyqkvseieagdi etgvnivlkal tapvrqiaenag legsviverlknaepgvgn  
aatnewvnmlevgividptk  
vtrsalqhaasvaamfltteavvasipeknndqpnmggmpgmm  
>tr|E5QRM8|E5QRM8\_STAAH  
mklssdiintdfevttlsylqkliivmmnlnmkiskseiarhmgvdravdkysnvdlyfinssikittllnq  
>tr|E5QRM9|E5QRM9\_STAAH  
mnkvhkp lyfym lffsttiigalllylpftgkkipisfldal fiassaftvtglspvdigsqfnilgeivillliqigg  
givtvlltlvflnrkism  
knrf limvtnidepggviklikhlaiyslvteligmiclc lsfipkfgigkglflslftsvsafnnagfalfknnlidy  
sndpiviitisi liifggi  
ghfvvidfinckklskls lshklvl ttttsiliiigaitfflleqfntmqnmglve kignsffqsittrtagfnsidiasi  
nkstalmmlmfiggapl  
saaggikittfavafivlnyirkennsvfnkeisdkyiklsivtinisflfisiitfilsiinpnislikllfevsva  
fgtvgl smntteyhgik  
iiii fvm lcgkvglltllrtfippkspknyrytkgqiy  
>tr|E5QRN0|E5QRN0\_STAAH  
mqvggaptqriskrnstnsvswggaptkrnwi pnfnrqcnl smtnqrysfsftspiqwkyac  
>tr|E5QRN1|E5QRN1\_STAAH  
mttfsekekiql ladivelqtenneidvcnylkd lfdkydikseilkvnehranfvaeigsgspilalsghmdvvdagn  
qdnwtyppfql tekddkly  
grgttdmkgglmalvia l ielkeqnqlpggtirllatageekeqegaklladkgylddvdglmiaeptgsgiyahkgsm  
sckvtatgkavhssvfig  
dnaidtllefynqfkekyaelkkn dtkheldvapmfksligkdi seedanyasgl tavcsi inggkqfnsvpdeaslefn

Tsompanidou\_et\_al\_Supplemental\_FASTA\_File

vrpvpeydnfdiesffqni  
innvdsnklsldipsnhrpvtSDKNSKlittikdvassyvdKddifvsalvgatdassflgdnkdnvdlaifgpgnplma  
hqideyiekdmylkyidif  
keasiqylkek  
>tr|E5QRN2|E5QRN2\_STAAH  
mlsaanteansankdsqdtkkehvdkaqqkekrvndkdkntpgpddigkngkvtkrtvseydketnilqnlqfdfid  
ptydknvl1vkkqgsihsn  
lkfeshrnetnaswlkypseyhvdqvrnpkteildqlpknkistakvdstfsyslggkfdstkgigrtssnsysksis  
ynqnydtiasgknrrhv  
hwsvvandlkygneiknrndefllyrnrtrstvenpelsfaskyrpalvrsgfnpefltyisneksnektrfevtytrn  
qdi1knkpgihygqpileq  
nkdgqrfivvyevdwnkntkvvvekydqnkpykeg  
>tr|E5QRN4|E5QRN4\_STAAH  
miqfqdnvlhwggykradligqssyiknndvvi fneafdnasdkllsnvkkeypyqtpvlgrsqsgwdktegssystva  
edggvaiivskypikekiqh  
vfksgcgfdndsngfvytkiekngknvhvigthtqsedsrccagghdrkieraqmkeisdfvkkknipkdetvyiggdln  
vngkteefkdm1knlnvnd  
vlyaghnstwdpqsnsiakynypngkpehldyiftdkdhkqpkqlvnevvtepkpvdvafpyyyvyndfsdhypikay  
sk  
>tr|E5QRN6|E5QRN6\_STAAH  
midilykvhevisqdriirehvninnikfnkypnvkdtdvpfividdiddipttytdgdecaysyivqidvfvkyndey  
nariirnkiisnriqllws  
elkmgnvsngkpeyieefktyrssrvyegifykeen  
>tr|E5QRN7|E5QRN7\_STAAH  
mavkhasapkayinigtgfkaltkegae1kysditktkg1qkigvtggelktayadggpiesgntdgegkis1qmhaf  
pkeirkiivfnedydedgy  
eekqgkqnyvavwfrqerrdgtfrtvllpkvmftnPKIdgetaekdwdfssseevegealfplvdkksvrkyifdsanm  
tnhdgdgekgeeflkkil  
geeytgnvtedseetl  
>tr|E5QRP1|E5QRP1\_STAAH  
mgerikgl sigld1daanlnrsfaeikrnfktlnsd1kl1tgnnfkyteksthsyqrike1dgtitgykknvddlakqyg  
kvsqeegensaeaqlrqe  
ynkqaneln1flekelektttefeefkkaqveaqrmaesgwgktskvfesmgpk1tkmgdglksigkglmigvtapvlgia  
aasgkafaevdkgldvtq  
atgatggekkl1qnsfkdvynfpadaetvggvlgevnr1gftgkelesatesflkfshitgsdgvqavqlitramgda  
gieadeyqsvldmvakaq  
asgisvdtladsitkygapmramgfemkesialfsqweksgvnteiafsglkkaisnwgkagkdpreefkktlaeiertp  
diasatslaieafgakagp  
dladaikggrfsyqeflktiedsqgtvnqtfdksesgserfkvamnk1klvgadvwasiesafapvmeelikk1svavdw  
fss1sdgskrsivi fggia  
aatgpvfglgafistignavtlapllasivkagglisflstkvpilgtvftaltgpigivlgvlaglavafaiaykks  
etfrnfvngainsvkqtfS  
nfiqfiqpfidsvknvfkqavsaidvfakdiwsqingffnengisivqalqnicnfikaifevifnfvikpimfaiwqvm  
qfiwpavkalivstwenik  
gviqgalniilgfikffss1ftgnwrgvwdgivi mlkgtvqliwnliqlwfvvgkilgvvryfggl1kg1sgiwgvikgi  
ftks1saiwnatksifgfl  
ynsvksiftmknwlnstwssirtntigkaqslfsgvkskftnlwnatkeifsnlnrwnmsniwnsikdntvgiasrlwsk  
vrgiftnmrdglqsiiski  
kshiggmvdaikkg1nk1ldglnwvggk1gmdkipk1htgtehttttr1vkngkiardtfatvgdkgrngngpngfrnem  
iefpngkrvitpntdtay  
1pkgskvynqaqtysmlngt1prfslgtmwkdiksgassafnwtkdqigkgtkwlgdkvgdvlfdienpgkllnyileaf  
gidfns1tkgmgiagditk  
aawskikksatdwikenleamgggd1vggildpdki nyhygrtaaytaatgrpfhegvdfpfvyqevrtpmgrl1trmpf  
msggygnyvkitsgvidml  
fah1knfksppsgtmvkpgdvvg1tgntgfstgph1hfemrrngrhfnpepylrnakkgr1sigggdatsgsgatyas  
rvirqaqsilggrykgwi  
hdqmmrvakresnyqsnavnnwdinaqrqdpsrglfqiigstfranakrgytynnpvhqgisamqyivrryggwgfkra  
gdyayatggkvfdgwynlg  
edghpewi1ptdparrndamki1hyaaaevrgkkasknkrpsqlsd1ngfddps1llkmiqqqqqialllkiaqsndvi  
adkdyqpiideyafdkvn  
asiekrerqestkvkfrkggiaiq  
>tr|E5QRP3|E5QRP3\_STAAH  
mihvldfndkiidflstddpslvraihkrvndnsemlellisseraekfrerhrviirdsnkqwrefiinwvqdtmdgy  
teieciasy1adittakpy  
apgkfekkttsealkdvl1sdtgwevseqteydg1rttswtsyqtryev1kqlcttykmvldfyielssntvkgyrvlkk  
kns1fkgeieygd1vg1  
trki1dmeiktaliavgpendkgr1elvvtddeaqsqfn1pmryiwgiyepqsddqnmnetr1sslakte1nkrksavm  
syeitstdlevtypheiiS

Tsompanidou\_et\_al\_Supplemental\_FASTA\_File

igdtvrvkhrdfnpplyveaeviaeeyniisenstytfgqpkfkeselreefnkrlnlihqklnndnisnintivkdvvd  
geleyferkihksdtpven  
pvndtlwydtsnpdvavlrirywngriewatpndveklggitrekaifselnnifinlsiqhasllseate1lnseylvdn  
dlkadlqasldavidvynq  
iknnlesmtpetatigr1vdtkt1fleyrkk1qdvtydvedvkiaisdrfk1lqsqytdekykealeiiaatkfgltvned  
lqlvgepnvksaieaare  
stkeqlrdyvktedyktdkgdgiwer1dtaeaertt1kgeikdkvt1neyrngleeqkqytdq1sdl1snpeikasieqa  
nqeaqea1ksyidaqdn1k  
ekesqayadgkiseeeqraiqdaqakleeakqnaelkarnaekkanaytdnkvestdaqrtr1trygsqiiqngkeik1  
rttkeefnatnr1l1sn1ln  
eivqnvtdgttiryddngvaqalnvvgprgir1nadkidingnrein1liqnmrdkvdktdivns1lnsregldinvnrig  
ikggnnrnyvqiand1e1  
gg1vqrtwkgkrstddiftr1kdgh1rfrnntaggslymshfgistyidgegedggssgtiqwwdktysdsgmngitins  
yggvvaltsdnrvvlesy  
assnikskqapvlypntdkvpg1nrfaft1snadnayssdgyimfsgdenydygag1rfskernkg1vqivngryatgg  
dtteagykgf1nm1krrdg  
nryihqstd1lsvgsddagdriasnsiyrrtysaaan1hitsagtigrstsarky1ksienqydrdeq1ehskailn1  
pirtwsdkaeseilare1r  
edrkl1sedtykl1dryvg1iaeven1glkefvtyddkgeiegiaydr1wihlipvikeqql1rikkleesknaq  
>tr|E5QRP5|E5QRP5\_STAAH  
mrvvgvpnteadekpaynnvqvggagpqrhrefqkeilqtmqvgvg  
>tr|E5QRP8|E5QRP8\_STAAH  
mkk1l1kt1iasalv1ttvgsgfhssnyngin1nvakaaettdgq1wknvrda1keani1dktdnenvkvtykl1pngge  
nsiegta1n1e1sn1snkp  
intdsvkrid1srinpngrfdandawkk1tdk1kekqivkngdtvtihsdkndppisakvgddyndhkq1m1fkdid  
nitin  
>tr|E5QRP9|E5QRP9\_STAAH  
msrrtn1ndnts1fktkktr1lytcn1kdfkkgfkk1d1cili1llvi1fcfveiiky1kdsn1dv1kkfvp1ll1tyys  
itigft1ss1tfmagniek  
ykskakk1fkni1tfcisyivis1itiivyl1s1flvmhyfnfegtkywik1ftyis1il1piisiyifikit1liyl1s1  
n1smnnek  
>tr|E5QRQ0|E5QRQ0\_STAAH  
mkyinkfneenpna1fiden1nk1ymie1lep1p1fleki1sk1ttvksikinskti1iedekdn1fd1kq1ndknnvgey  
qteik1tkfknk1tne1k  
nfiy1laks1kyedi1avegnvs1nypk1itedst1rdfyvknev1dkgf1pkeq1l1fni1qrvi1eedq1lndnsqykeik  
gvk1  
>tr|E5QRQ1|E5QRQ1\_STAAH  
mkevkgkvnkdikiki1kitt1piefekdekntahvgdffdfnrfnycikekm1sekdr1ktykktesfyieny1nedfsd  
dfavgn1fis1khg1fisdn1  
n1te1fkvtrqnek1d1aiknks1f1idkks1gyfyivndel1hvinfer1nryffikn1ke  
>tr|E5QRQ2|E5QRQ2\_STAAH  
mse1takqarf1vney1rt1nvtqsaikagysansahvtgcr1llkkphikqyiqeqkdk1idenv1take1llhv1tnaavg  
detetkev1vkrgeykenp  
qsgkvq1lvyneh1vevpikpsdr1kardm1gkyk1lftdkhd1ngvp1ifin1gewdgddee1dkavknvsnanpht  
vi1ddi1pled  
>tr|E5QRQ3|E5QRQ3\_STAAH  
mdkkqikg1ivcdy1hkrtrsdv1iddintdeffsigdensnewmaddniddhivknh1emivdrvatdkefyifds1liqg  
rsyqdisg1dcseqsvr1  
wyet1ldkivevie  
>tr|E5QRQ4|E5QRQ4\_STAAH  
mk1l1ktknc1lyyrngdnk1seyq1l1tqfnpafinkkikmcefqiesmyhmsastttcdeimgvsvsypiek1viki1iet  
kag1qnyknrs1innma1lk  
kv1nhytekeqkqv1kymrsngrykpynvier1qvd1yqasikqrserqkqrntaienskiarvnayhqsshvkvv  
>tr|E5QRQ5|E5QRQ5\_STAAH  
metkye1nntkkvanafg1needtn1l1navd1diknmqeisse1qqseqskqk1lgtt1qn1lakqnr1iik  
>tr|E5QRQ8|E5QRQ8\_STAAH  
mn1letivnqfetragt1l1ryytg1lehskvqccfk1yndpfdmayvmmsk1fghvyikdkvrqsfelaspkhtegli  
rsieg1hyvgye1hdgkh1s  
isdmmash1fedeyfmyglq1tyaesnnsdvfey1engfdtdt1legiqssntdvianiemyqlatginepatelveg1kl  
vtefvqdenatqedyta1e  
rk1nd1kasyysisk  
>tr|E5QRQ9|E5QRQ9\_STAAH  
mdkeq1lkyiydyvkeykeipi1yqled1fkelnhdyigrtsithdkdenivfswgnkitmfalie1vkseq1dlvyrgs  
fvmry1ldgrv1pn1plaic  
ypedggqtdvpswvpmv1rinkeekik  
>tr|E5QRR0|E5QRR0\_STAAH  
metgksdv1dki1ekinkkdsalqei1pkgyeiehhqcgvalyq1lipskkegepdkkvfitstipqiterfediesnevsf  
nm1fydnktpvniavsae

Tsompanidou\_et\_al\_Supplemental\_FASTA\_File

isdsrqllklnvkkldvtsststklvdyinvskrynpplnkvatrlghvkgfyipyqevmkdsnvklfsndkgfqkli  
dsfrskgtlqgyskkvfaq  
ikdlpmvmvmlyaslgsvllrefglqpfiveisgststgkftlnlvssvwtgtsdlittwsstqnsiesmasflnsfpmf  
kddtrnthpkfvtsatynf  
ssgesksrsnlnltnakkewrnlistgessianmadekagvsarvvtlqppypdnfdftldksfrenygtlglafi  
kqyeskkdvyykafesyqr  
yfnqkgsneimqrlgrafallqvtgevlndidgfehdhfkieqaydsmvknkntidkpkqlleeellqyl danrnniagd  
gyssvknkdikaiyrdy  
cilgetvkekltlqltittgwdkkylikgekdr1kqkvkhtvkyrgfairrevlee1gfdfsnsynpnsdy  
>tr|E5QRR1|E5QRR1\_STAAH  
mqkmneikleydthsvvhyesldsrsfksfskpkwsklinklsvpieanykyargvavygdikngandhgeiikkhrnd  
vnyvyrdivl dydeindl  
kqlheaisalsnvawfwhtsyshrteqarirlyiplnerisaddyrkyskvlankighkvdegsyqpsrcfalpviqkg  
hifikrvndcpiidvdmle  
qwskeleqsnasnpygytrrdsaywrelsfgttegrnna1aslvghllrcrvndyivysyallwgqfackppmkeqei  
natfqsilnkhynn  
>tr|E5QRR2|E5QRR2\_STAAH  
mnweirn1mcnieivkekledvatthtwfvderfrkrs1ktkeeavnnyglaynehrhneqvte1m1tylkel dglmnkf  
heiekas1qadqsesna  
>tr|E5QRR3|E5QRR3\_STAAH  
mkiqkkyqlskvvkvl evvlyeksstyddisyl nedtafyeya1klvhnglfnl1aeldfedeaf1ildevtmt1sdvmk  
etqhvryrsvidekgehkh  
ttdrkghvigml ewaldyivgnieeel  
>tr|E5QRR4|E5QRR4\_STAAH  
mrkqvii1ktvvgwynikdtqhn1m1nippkvfeqcfpdvskdvqvaclemd1skiteiknkkkvg  
>tr|E5QRR5|E5QRR5\_STAAH  
mdvggkamkmyltyiclvs11ti111aisnmyvafsvygmmtvygfn1tgeittcen  
>tr|E5QRR6|E5QRR6\_STAAH  
martklkdiptkenti sepqvvvkl fakpna1asifgisysstnril1kewekdpkgvddlyys1sstmtvisiprfee  
ymkkrhkkwm  
>tr|E5QRR7|E5QRR7\_STAAH  
miakvny1kr1iafeg1s1kdfaseievsnf1nsivngkrttsptkankiakr1nvdikdifi fieekeevk  
>tr|E5QRR8|E5QRR8\_STAAH  
mqqns1edfsn1knfrkaed1t1dt1sky1gvsdvysk1engkrfpskn1fwyvl1fmdqsmhddiek11t1fsenk  
k  
>tr|E5QRR9|E5QRR9\_STAAH  
mrteydefvkk1rekqkkhsskiqrkeik1tmnefnqyqieeidepyfd1kw11nqseyk1fysgidnkns1gfnevlse  
sdckm1seivnsviqriyn  
denqk  
>tr|E5QRS0|E5QRS0\_STAAH  
m1fgginevtqnk1tfidifmfafis1ivfsivk1fknh1dyksnksntnhknisnskttqfntvqsndhirknith  
dielnntkkvkqvsitnn  
knt1nkdvk1nenvnngd1vidvkdnnnyhyd1nandil1h1nknrevgkevknhy1lenqinvdeilnkli  
n1dyldiksnfdvs1fy1k  
vpe1kei1reyk1k1sgnkpeli eriktnidenaik1pqvyvptskgnkiigetey1lhfynspiis1gsahkmakev1n  
iddk1eyiyf1lqqnqs  
nnsdhr1ani1ns1vlyyktknkdvirkytnyatylsvtqgihsaaflysseeniidr1fiyfnyyleyyenm1fidn  
vsrr1fkn1fyediks1fed  
tdknfcdeicell1faqiynnrnit1n1lptinyv1lekikkeneirmtkydf  
>tr|E5QRS1|E5QRS1\_STAAH  
mtfrr1thmwyekftnkhetkyryykykdp1tnkwrrvsv1nknngksqkeaqrr1nerieak1ndntptt1ks1tf  
hvacdewfqn1yiktsqskr  
ttikt1sk1nt1kkfvdedit1syaqqvfdemskgyvyqvnkdalsifknvfeytrriy1k1qdl1ef1kdit1n  
kriksydevkarnkyle1  
neiqsi1k1dinmkaqkmhsgihkrfyl1fvalmtefqa1ngmrigem1aiknedidfdnks1ningtihwfhdesggfgvk  
dttktessyrtig1ssrsc  
eilkkailenk1k1skwngdy1nrrnfvt1nhkgnpmqterfnkilresakdvgiekeisshilrhshis11sqgvs1kai  
mdrvghsdhrt1siyshv  
teqmdkdmnk1eqvklg  
>tr|E5QRS2|E5QRS2\_STAAH  
mkk1fg1i1v1tfavv1aacngsgskgsddkkitvgaspaphae1lekak1lekkgyeldiktindyttpnk1ldkgei  
danyfghtpy1ntekkdkg  
yk1vsagnvh1epmavyskkyks1kelpkgatvyvfnpaeqgrf1kffvdaglikikkgvkiedakfsditenkkdikf  
nnkqsae1f1pk1yqnedad  
avi1nsnfaieqk1nppkds1avesakdnpyan1iavkeghqddkkikaliev1qskdiqdfinekyngavipvk  
>tr|E5QRS5|E5QRS5\_STAAH  
mns1dikdvttfyedkhl1ygytptcgtckvserm1ditneil1q1p1lkid1nfypqfckdmqimstpi111mnkdke  
vkriyafqsvtd11en1k

Tsompanidou\_et\_al\_Supplemental\_FASTA\_File

>tr|E5QRS6|E5QRS6\_STAAH  
mmmai vnkviivegksdkrvqqviaepvniicthtgmsidklldmieslydkqvfvladndegdrirnwfkryl sese  
hifidktycqvancpkqyl  
ahvlskhgftckketpflpninnerlvlvne  
>tr|E5QRS7|E5QRS7\_STAAH  
mkenllgtiwniatfyysrmmkimnlailkikiggvmlniqdvshlskkeqkaynr fvesvengnlpvlpciemdlke  
mgeetlnqskiggmpflks  
fkdipldennvpmvllaqinlndlpeqqel fvpnegilqfwissedqmygmsenlkgnninsrlvyikepitdlsldkiq  
ahlksldadnedipfsgaf  
siefrlskqtitctdykydeddla lwnkvnpsfal ksmfggydelmepvcntftakepfnlggypyfdqidprtndqel  
kmydrvllqidstrdgss  
iivgdlgiani lvkstdleamkfdmymysw dcs  
>tr|E5QRS8|E5QRS8\_STAAH  
maypnelkyskehewkvegnvatigiteyaqselgdvfvvelpetddeinegdtfgsvsvktvsel yapisgkvvevn  
eel edspfvnespyekaw  
mvkveisdesqlealltaekysemige  
>tr|E5QRT2|E5QRT2\_STAAH  
mthvevvatiapqlyieetliqkinhridaidvlelridqienvtvdqvaem itklkvmqdsfkllvtyr tklqgggyqf  
tndsylnlisdlaningid  
midiewqadidiekhqriithlqqynkeviishhnfestppldelqfi ffkmqkfnpeyvklavmphnkndvlnllqams  
tfsdtmdckvvgismsklg  
lisrtaqgvfggaltygcigepqapggidvtdlkaqv tly  
>tr|E5QRT3|E5QRT3\_STAAH  
mai hyetkatnvggrkghvytddra ldi divppaqadgkatnpeqlfaagyascfngafd lilkqnkvrdahpevtlvr  
leddpdespklsvsidat  
iknvisqeeaekeylqmahefcypyskatqgninvdlnvnvvd  
>tr|E5QRT5|E5QRT5\_STAAH  
mvtaiihgfilaig l ilplgaqnvfi fnqganqkyryvlpai itaglsdslliiiavvgvsiiimslpilqaiiyivgl  
iflmy mawtiwhdkpstdg  
eaqimspmkqvsfal svsl nphaildtigvigssaalysgsnkiaftiacisvswlwffllailgkmvgsidktgkllt  
iinkissiiiiivalmilq  
kllqllf  
>tr|E5QRT8|E5QRT8\_STAAH  
mkgas lmtfynfim gfnqndntpfgilaehvsedka fprleerhqvirayvmsnytdhqliett nraislyman  
>tr|E5QRU2|E5QRU2\_STAAH  
mnel tkeqkytiakfyklyiersnnetetvanffgdakdarenyfcdrdyqdf l tncqil iqnyltgevl ddninyis  
ilnktfiefeqnfg  
>tr|E5QRU3|E5QRU3\_STAAH  
msewhinnqstkpfligqaekqlsivkplngsfqil teidldngnvsnidhsl lvsvdpkaleisifdav n  
>tr|E5QRU5|E5QRU5\_STAAH  
mteyllsagimaisvilligmaisnvskeqykrffffatsclvltlvassl sssanasqtdngvn rsgsedptvysa  
tstkk lhkepatlikaidg  
dtvk lmykgqpm tfrllvdt petkhpkkgvkeygpeasaf tkmvenakkievefdkgqrtdkygrgl ayiyadgkmvn  
ealvrqglakvayvykpnn  
theqllrkseaqakkeklniwsednadsgq  
>tr|E5QRU6|E5QRU6\_STAAH  
mkrkvllvltmgvlcatqlwqt nna kalvtesgvndtkqftevtseekvikdaiskvn esfiyypqndlkglggehndyek  
itystssnnvlelsmssky  
vggksgamvgyseiysshftdrdkrairrdhvk eaqnlindykytqi yed fakatakvstlsqshqnylnkqidkvnnki  
ektekr  
>tr|E5QRU8|E5QRU8\_STAAH  
mknkllvls lgalcvsqiwes nrasavvsgeenpykseslklngkrsttitsdkyeenldmlissl sfadyekyeepyk  
eavkkyqqk fmaeddal k  
ffseekkiknrntntsnylgltheryesiy nslknhreefskeieein knpvlkeynnee qtkadtelntlenqvlmig  
ytfyhsnknevedlynkl d  
milgykdeerkkkratnqrmfnkkedletideffgeigqqrptsiptlapkeeketniknanklksdteaakndeakr  
slnthhksvsqevseqqk  
adyerkaerkarfl dkkqknktpvvsleydfekhrvdnendkqlvvsepskkpttpptytettq lpmptverqtqqq  
ivykapkplaglngeshdf  
tthqspttsnhthnlieieetsal pgrktgslv glsqidssh ltere krvikrehvreaqklvdnykdthsykdrlna  
qqkvntlsaghqkrfnkqi  
nkvyngk  
>tr|E5QRU9|E5QRU9\_STAAH  
mmkkqekharkksigvaslvgtligfgllsskeadasensmtqtentsnesksndpssvnaapkt dntnvsdsnttt  
ntnsdetnvaqnpaqqett  
qsastnatteetpvtgevttatnqantpattqssntnaeesvnqtsnettsndtntvssvnsqpnstnaenvsttqdis  
teatpsnnesapqstdasn  
kdvvnqavntsaprmrafs laavaadapaagkdi tnqltnvtvgi dsgdtvyphqagyvklnygfsvpneavqgd t fkit

Tsompanidou\_et\_al\_Supplemental\_FASTA\_File

vpkelNlngvtstakvpppi  
magdqvl angvidsgnvi yftdyvntkddvkatltmpayidpenvtktgnvtlatgigstt tanktvlvdyekeygkfyn  
lsikgtidqdktnntyrg  
tiyvnpsgdnviapvltnlpntdsnalidaqntsikvykvdnasdlsesyvnpdnfedvtdsvnitfpnpnqykvf  
ntpddqittpyiuvvnghi  
dpnsgdlaalrstlygynsniwrsmswdneva fngsgsgdgidkpvvpeqpdepgeiepipedsdsdpgsdsgdsdgs  
dsnsdsgsdsgsdstsdsg  
sdsasdsdsasdsdsasdsstsdstsdstsdssasdsdsdsdsdsdsdsdsdsdsdsdsdsdsdsdsdsdsds  
sdsdsdsdsdsdsds  
vsdsdsdsdsdesdsdsdsdsdsdsdsdsdsdsdsdsdsdsdsdsdsdsdsdsdsdsdsdsdsdsdsdsdsdsds  
dsdsdsdsdsdsdsdsd  
sdsdsdsdsdsdsdsdl dsdsdsdsdsdsdsdsdsdsdsdsdsdsdl dsdsdsdsdsdsdsdsasdsdsdsdsdsdsesd  
sdsdsdsdsdsdsasdsds  
dsdsasdsdsdsstsdsgsdndsdsesdsnsdsdsgsnvvpnspsksgtnasnkneakeskeplpdtgsedeantsliw  
gllaslgsl lllfrrkkkik  
irnk  
>tr|E5QRV1|E5QRV1\_STAAH  
miniisaigstfimalfyfsvsvqlyqmki sflpalgnqilleregdqlnimsateehhkhdyiklynlgggaak  
kiaievl l gndkviqkkyv  
nilpskegym ls inkvyeelertiengyeadlnvrmttyyhvshkqqevilkqgidrftynkeiydlqfi  
>tr|E5QRV2|E5QRV2\_STAAH  
mivkkl l kaikqnflyeqsnitfkmi l fgykr lskmifqfeinhmflreg  
>tr|E5QRV6|E5QRV6\_STAAH  
mnlkqsieeiinqpeyepmsvsdfqdalglssadsfrdlikvlveleqsgliersktdryqkkhsskgqsklikgtlsqn  
kkgf afl rpkdedmedi fi  
pptkinraldgdtviveihqskgehkgkiegevsiekhsvtqvvgtysearhfgfvipddkrimqdi fipkgqslgavd  
ghkvlvqitkyadgsdnpe  
ghisailghkndpgvdi lsiyqhgieiefpdeveeaeavpdhienteikgrhd l rdel titidgadaklddaivs k  
Langhtqltvsiadvsyvv  
tedsal dkeaydratsvylvdrvipmiphrlsngicslnphvdr l t lscrmeidangrvvkheifdsvihsdyrmydav  
nqii tekdpni regykeit  
pml d laqd l snrl iqmrkrgeidfdiseakvlvnedgiptdvqlrqrgegerliesfmlianetvaehfskldvpfiyr  
vheqksdr l r gffdfitn  
fgimikgtgedihpttlqkvqeevegrpeqmvis tmm l rsmqqahyddvnlghfg l saeyythftspirrypd l tvhr l i  
rkyliek smdnkevkrwed  
klpelaehtskrerraieserdtde l kkaeymiqhigdefegivssvanfgmfie l pntiegmvhianmtddyrfeerq  
maligerqakvfrigidtvk  
vkvthvdvder l idfqi vgmplpkndrsqrpargkti qaktrgks l dksksddkghkkkgkqrkgkqrkndksngskhk  
pfykdksvkkkarrkkk  
>tr|E5QRV7|E5QRV7\_STAAH  
mqik l pkpfff eegkrav l llhgftgnssdvraq l r f l qkkgytsyapqyeghaappeeilqsspfvwfkda l dgydylv  
eqgydeivvag l slggdfa  
lk l s l nrdvkgiv tmcapmggktegai yeg fleyarnfkkyegkdqetidkemhhfkptet l kel seal d tikdqvdev l  
dpilv i qaendnmidpqa  
nyiyehvdsdekdi kwysqsghviti dkekeqvfd di yqfl es l dwse  
>tr|E5QRV9|E5QRV9\_STAAH  
mrskqmadrt nkeiktgrfiatasiafsil liihyfs l d natak all n l tnqntsdkaidyilnsfrftgimiyilayla  
gfitfwnrhtyvwfmfav  
yvsns l ft l in l si tiqai kaahgay l t l pilivi igsva la i ymlvvsikrkstfnr  
>tr|E5QRW7|E5QRW7\_STAAH  
mcktlhdtnegkn l t p f s s g p v r l s c g s f l f i s y s r y t s i q s i n f l n k f k n r  
>tr|E5QRW8|E5QRW8\_STAAH  
mimkqyl i t g g t m v g s q l v n e i k k s d s h i t i l t r h d q i s n k k i s y n w a k s g w e h k v p q n i d v v i n l a g a t l n k r w t p  
eyqatlm l sr i g s t q a l y e  
l f k s r n k a p k v l f n a s a t g y y p p d l f m s y t e v y k t l p f d f l s d i v y q w e r f a q q f e q l g t r v v i g r f g i l s n e g g a l q t  
m k l p y e y i g g k l g s g q w  
y s w i h i n d l i q a i l f l i n n e s a s g p f n l t a p i p e r q n l f g y t l a r a m h k p h e t w v p s l a m r l i l q m s t v l d t q k v l p n  
k i q a l g f q f k y s n l k m a l e  
d l i s k  
>tr|E5QRX4|E5QRX4\_STAAH  
mkmqdti f l k g m r f y g y h g a l s a e n e i g q i f k v d v t l k v d l s e a g r t d n v i d t v h y g e v f e e v k s i m e g k a v n l l e h l a e  
r i a n r i n s q y n r v m e t k v r  
i t k e n p p i p g h y d g v g i e i v r e n k  
>tr|E5QRX5|E5QRX5\_STAAH  
mtkktimgi l n v t p d s f s d g g k f n n v e s a v t r v k a m m d e g a d i i d v g g v s t r p g h e m i t v e e l n r v l p v v e a i v g f d v k  
i s v d t f r s e v a e a c l k l g v  
d i i n d q w a g l y d h r m f q v v a k y d a e i v l m h n g n g n r d e p v v e e m l t s l l a q a h q a k i a g i p s n k i w l d p g i g f a k t r n e e  
a e v m a r l d e l v a t e y p v l l



Tsompanidou\_et\_al\_Supplemental\_FASTA\_File

atsrkrftkemmgdydttperdevtaattaygimkgvravrvhvelnaklakgidflkenenarhnfs  
>tr|E5QRX8|E5QRX8\_STAAH  
mterksasnk1fsilvrrpntenfekkyrqcelgwddeinflkislshshygttn  
>tr|E5QRY6|E5QRY6\_STAAH  
mkhkeafngvvvltaalivikilsavyripyqnilgdtglyayqqvypivalgmilsmnaipsaitqignikyhsdeayak  
avayiq1vgml1fiaifvf  
anniahmmgdshltpmiqaaslsfifigmlgv1rgyyqsanmtvpaisqvieqvrvgiivtivifvdrngwtiyeagt  
iailastigflgssiy1va  
hrpfkfkmvntakivwkqfalsvlifaisqlivilwqvidsvtiikslqairvpfdvaitekgvydrgasfiqmg1ivt  
ttfsfalip11sdaikmn  
qvlmryanaslkitilistaagiglin1p1mngvffktnd1t1t1svymitvicvslimdmallqaqhavrpi1v1gm  
taglvikfilniil1r1sg  
iigasistvvsliifgti1hiavtrkyhlhamrrffinvv1gmvfmsivvqcv1nivtthgritgliellcaavlgial  
ffyi1frfv1tykeltylp  
fgsklyqikkgr  
>tr|E5QRY7|E5QRY7\_STAAH  
mti1t1ikednhfqd1nqvfgqant1vtgl1spsakvtmiaekyaqsnq111itn1lyqadk1etd11qfvdaelyky  
pvqdimteefstqspq1ms  
erirt1talagqkg1fivp1ng1kkw1tpvemwqnhqmt1rvgedidvdqf1nk1vnmgykresvvshigefslrggi  
difpligepiriel1fdtei  
dsirdfdvetqrskdnieevdittasdyiiteevish1keelktayentrpkidksvrnd1ketyesfkl1festyfdhqi  
1rr1vafmyetpstiidyf  
qkdai1avdefnriketees1tvesdsf1snviesngngfigqsfiykddfet1iegypvtyfsl1fattmpik1nhiikfs  
ckpvqqfygqydimrsefq  
ryvnqnyhi1v1vetetkvermqam1semhipsitk1hrsmssgqaviiegs1segfel1pdmgl1v1itere1fkskqkkq  
rkrtkaisnaekiksygd1  
nvgdy1vhvhgvgry1gvet1evgqi1hrdyik1qykgtqd1fvpvdqmdqvqkyvasedktpk1nk1ggsewkktkakv  
qqsvediaeel1d1ykere  
maegyqygedtaeqttfel1dpyel1tpdqaksid1ekddmqksrpm1dr11cgdvgygktevavraafkavmegkqvaf1v  
ptt1laqqhyet1iermqd  
fpveiq1msrfr1tpkeikqtkegl1ktgfvd1vvgthk11skdiqkd1g11ivdee1qf1vrhkerikt1khnvdv1t1t  
atp1prt1hmsm1gvr1ds  
vietppenrfpvqyv1leqnmsfikealere1srdgqvfy1ynkvqsiyekreq1qm1mpdaniavahgqmterd1leetm  
1sfinneydi1v1t1t1iet  
gvdvpnant1i1edadrfg1lsqlyq1rgrvgrssrigyay1f1hpankv1tetaedr1qaikeftel1gsgfkiamrd1nir  
gagn1lgkqqhgfi1dtvgf  
d1ysqm1eeavnekrigikepesevpevevd1n1day1p1teyiane1qakieiykk1rktetfdqi1dikdel1drfndypv  
evar11diveikvhal1hsg  
it1likdkgki1dih1svkatenidgev1fkatqpl1grtmkv1gvqnnam1tit1tkqnq1w1ds1k1flvkcieesmrisdea  
>tr|E5QRY9|E5QRY9\_STAAH  
mrmass1ksii1rqgkqtrsd1kq1lrksgkvpavvygyg1tknsvk1vdevfikvi1revgrngvie1lgvgs1tikvmvadyq  
fdp1knqi1thid1f1ainms  
eertvevpvq1vg1eavgakeggvveqpl1fn1evtatpdnipeaievdite1ninds1tvadvkv1tgdfkiendsaesvvt  
v1v1apteeptee1e1eamege  
qqteepe1v1geskedeektee  
>tr|E5QRZ1|E5QRZ1\_STAAH  
mgwfk1khehewri1rr1leendktm1st1neik1gqktqeqvnik1dkt1dai1qkereideknkkendkn1rdmkmw1v1glv  
gt1fgs1li1a11rm1mgi  
>tr|E5QRZ2|E5QRZ2\_STAAH  
mval1ks1err1lmitistm1qf1gl1flialig1lvik1lielsnk  
>tr|E5QS03|E5QS03\_STAAH  
ms1lqps1f1ksdyic1qly1qh1lytqktftqykfd1iin1n1v1nqfciyfvvsyikg1vimmvkk1tsnt1kkaatl1alan1  
11galt1dnsakaeskkdd  
td1k1lvshnvym1st1v1ypnr11t  
>tr|E5QS04|E5QS04\_STAAH  
mkfks1litt1tal1g1v1lastganfntneasaakq1dkssss1lhgyskiq1ipytitvngtsqnilss1tfnknqqis1ykd  
ienkvks1v1yfnrgis1did  
1r1l1skqaky1tv1hfngtkrvvd1kagihtad1intsdikaisv1nvdtkkqvkdkeakanvqvp1tytitvngtsqnilsn1t  
f1kknqqi1sykd1ennvksv  
1ksnr1g1tdvd1r1l1skqakftv1fnkngtkkvid1kagiytan1intgdiknin1invetkkqakdkeakannqv1pysin1n  
gt1t1niqsn1lafsnkpwt1n  
ykn1takvks1v1ksdrgvserd1khakkayty1vyfknngkrvih1nsniytan1vhakdikkievtvktgskanaeryvp  
yt1avngt1stp1n1sd1kfk  
gdsrvs1ysdi1tkkvks1v1kydrigere1kyakkaty1tv1hfngtkkvin1nksiq1n11fvkdikkidvdvktgskak  
adsy1vpyti1avngt1stp1a  
sk1k1l1snk1q1igyqd1nk1kvks1v1khdrg1indiel1kfakqaky1tv1hfngtkqvvd1ksdi1ftr1n1fsvkdikkididvk  
qhtksnka1nkvaniatkv  
kfpv1tingfs1nvvsnefa1f1hphkit1tnd1nak1r1al1asdqgi1tkhdig1sertvykvy1fdgssk1fvd1kaakqdskv

Tsompanidou\_et\_al\_Supplemental\_FASTA\_File

fkatdikkvdieikf  
>tr|E5QS07|E5QS07\_STAAH  
mtvffievdnarlngrvisfystasntipsvisedwlimkhaylqncvycvicytegrgtlmkiilknsdfpiyeqi  
kqqvkqnilkghvapgeh  
psmrelakdlqvs littkrayedlekdgfvttirgkgtfvkeqdssilkekqfftienlvkelvneaqaiemsleelqdi  
ltfiyeeess  
>tr|E5QS09|E5QS09\_STAAH  
mkallirnflrrytllyvllllylpyfymldstkffylqsfisptiliwil daghlfrlnrrlgndsyyfymslp  
vskkqllnanyitcivltl  
vgtlvislyayeadviepnsiyfstayafvisnflsipaafsqtelrrrvkvpvygiyvftiilvpflfsiaivlvnyfv  
lsqssfpdlysyilnigfl  
iisivilivnyfkqlnkintrkfkgsr  
>tr|E5QS12|E5QS12\_STAAH  
m1kevftmtnletyfknsqplneyidgmktndtvlisiyqsfelpeddsrikkikemnyskvlvitedwcgdammnlpil  
khisealnlevrvfhrdd  
tklidqyltngksraipifvflndqfeqetvwgpranevqkfvtadvradklpskdhpdyadlekethlvisnrykt dasf  
wkavynsilnklenk  
>tr|E5QS15|E5QS15\_STAAH  
mkkfffigllvfvvftaatiwfsydknkygkqydktkddafdnvsinldstelrikrgnqfrvkydgdndiliniv  
dtklksdkrsktrgyaid  
mnpfhenkktltiempdkmikrlnissgagsvrisdvd lentsiqsingevviksnldaldsktnsptyisksniks  
nikvvigmlqidksqikqs  
iflndhgdiefknmpskvdakastkqgdirfkydskpedtilklnpgtgdsvknktfingkvgsdsvldefytidgnik  
ve  
>tr|E5QS16|E5QS16\_STAAH  
mtfnihtitiylqyittkkkgaddmqvtsdimtfrgshfelgvktgkwlqptp11knrekewkkrvprfdidvnytyqi  
fqtyapqiweelmglqsil  
kmptrqiilnfhgyrftdlkesgctvfqgkdfmvrnnydyhpatydgryllyqptdsglaqigpvsrvtgrmdgmnesglt  
mgynfmhrkkpangfvcym  
igrliencrvteaiallkeiphrssfsyilmkslnhaivevtpresidvrydnicthfeilthenrnytkeskerla  
rtisqtdndldmttafk1f  
nnpqyeiysklfkswsgtihtsmypetltayftlgenappeiidfkswldgqdlnihftgnidtdltfank  
>tr|E5QS21|E5QS21\_STAAH  
m1kvenramnrhvnniynfnhnekgrkktkiytqhrkyfkkm  
>tr|E5QS24|E5QS24\_STAAH  
myinmkdygltginktkdtraiqra1nhgrckpttvypkgydickpltiyngtllldnetilrrchsgpl1knghrf  
gfyrgynghshihikggkf  
dmngvsypynntamcihgaediqligvtiknvsvghaidacginglyikncsfegfdysgerfyseaiqlidiqvpgafr  
kfgttdgtitknviedcy  
fgpse1pemgswnraigshasrhnrnyenini rnnifediqgyaltplkykdafiinnkfinceggiry1gvrdgknaad  
vmtgkdlgsqaginmniig  
nefkgmskda1hvrnyynnvhkhdv1ivgntfnstqsihledidtvflspeagiqvttinvdeikk  
>tr|E5QS25|E5QS25\_STAAH  
mrgkfmayfnhqsmiskrylfffsksskkkpfstgqlig1ilgp11fl1t11ffhpqdlpwkgvyv1aitlwiatwwit  
eai1paats11piv11plg  
hil1tpeqvsseygndiif1flggfilaiamerwnl1trvaltiinligastskillgfmvatgflsmfvsntaavmimip  
ig1aiikeahdl1qeaantq  
tsiqkfekslv1aigyagtigg1gt1igtppliilkqymqhfghaisfakwmivgiptviv11gitwlylryvafrhdl  
kylpggqtl1kqk1delgk  
mkyeekvvqti1fvlas11witref11kkwevtssvadgtiaifisillfiipakntekhrriidwevakelpwgv1ilfg  
gg1al1akgiseg1akwlg  
eq1ks1ngvspiliviviti1fv1fltevtstataatmilpilat1svavgvhp11mapaamaancaymlpvgtppnaii  
fgsgkis1kqmasvgfwn  
1isaii1ilvvy1impiv1gidinqpl1k  
>tr|E5QS28|E5QS28\_STAAH  
mikckkifrsigei1ryq1ledds1m1hndlyqinmaesywndnihekmafvdlyfrkmpfnsgyavfnglkrvidfiehf  
gfsesdley1ksigykddf  
1sy1kd1kftgs1rsmqege1cfgnep11rveapli1qa1ietil1n1vnfht1littkasrirqiasndklmefgtrraq  
e1daalwgaraay1ggf1ds  
tsnvrak1lfg1pvsghahafvqtygdeyvafkkyarhkncvflvdtfht1ksgvpnaikvakelgdkinfvgir1ds  
gd1ay1lskearrm1deagf  
tetki1asnd1deetits1kaqgakvds1wgvgtk1itgydqp1algavyklv1a1enedgsysdriks1snaekvt1tpgkkn  
vyri1nkt1gkaegdyit1  
enenpydeq1k1fhpvytyk1mfiks1feaid1h1hniyeng1lv1yqiptedesrdy1laq1lqsiwdenkr1f1npqey1pvd  
1skacwdnkhkri1fevaeh  
vkemeedne  
>tr|E5QS29|E5QS29\_STAAH  
m1rrwkk1mskl1qdvivqemkvkkridsaeieal1kqfiks1yvqshs1fiks1vl1gis1ggqdst1vgk1vqmsvnel1reeg

Tsompanidou\_et\_al\_Supplemental\_FASTA\_File

idctfiavklpygvqkdad  
eveqalqfi epdeivtvnikpavdqsvqs lkeagiv l tdfqkgnekarermkvqfsiasnrqg ivvgt dhsaenitgfyt  
kygdgaadiapi fglnkrq  
grqllaylgapkql yektptad ledkppql pdedalgvtyeaidny legkpvtpreekvienhyirnahkrelaytrytw  
pks  
>tr|E5QS33|E5QS33\_STAAH  
mkrnfpkliaslifs l sitpianaesnsnikakdkrhvqv nvedksvptdvrnlaqkdylsyvts l dkiynkekasyl  
gepfkiykfnkksdgnnyf  
pvlntegnidyivtispkvtdkssssskytinvs flskalneykdqqitiltnskgyyvvtqnhkaklv l ktrledkk  
akktesiptgnvtqlkqk  
asvtmptsqfksnnytyneqyvnl enfkiretqgnngwcagytsa llnatyntnkyhaeavmrf l hpnlqqqqf qftg  
ltpremiyfgqtggrspql  
lnrmtynevdl tknknkia ilgsrvesrngmhaghama vvnak l nngqeviiwnpwdngfmtqdaknnvipvsngd  
hyqwysiygy  
>tr|E5QS36|E5QS36\_STAAH  
mydikwrhifkl dpakhisddd l daicmsqtdaimiggtddvtednvihlmsrvrryplplvleisniesvmpgdfyf  
vptvlnstdvafhngt l le  
alktyghsidfeevi fegyvvcnadskvakhtkandt l ttedleayaqmvnhlyrlpvmieysgiygdvskvqavseh l  
tetqlfygggisseqgate  
maaiadtiivgdiiykdikka l ktkvikessk  
>tr|E5QS40|E5QS40\_STAAH  
mltmgtalsqqvdanwqtiyimiavyflilivigfygykqatgn l seym l ggrsigpyital sagasdmsgwmimglpgsv  
ystgl samwitig l tlgay  
inyfvvaprlrvytelardait l pdffknrlndknnv l kiisgliivfflythsgfvsggklfesafgl dyhfglilv  
afivi fytffggy l avsit  
dffqgvim l iamvmvpi vammn l ngwgt fhdvaamkptn l n l fkg l sfigiisl fswglgyfgqphiivrfmsikshkm l  
pkarr l giswmavgl l gav  
avgl tgi afvpayhik l edpet l fivmsqvl fhp l vggfl laailaa imstissq l lvtsssl tedfyklvrgeekakth  
qkefvmvgr l svlavai va  
iaia wnpndtil n l vgnawagfgas fsp l vl falywkg l tragavsgmvsgalvviw iawikplahineifglyeiipg  
fivsvivtyvsk l tkkpg  
afvetd l nkvrdivrek  
>tr|E5QS42|E5QS42\_STAAH  
msiryvesven l l tikdkkikpsdvvkdiydaieetdptiksflaldkenaikkaqel delqakdqmdgklfgipmgikd  
niitng l ettcaskml egf  
vpiyestvmek l hnenav l igk l n mdefamggstetsyfkktvnpfdhkavpggssggsaaavaag l vpfs l gsd tgg si  
rqaaycgvvmkptygrv  
srfglvafass l d qigpltrnvkdnaiv l eaisgadandstsapvddvdf tseigkdikglkvalpkeylgegvaddvke  
avqnavet l kslgavveev  
slpntkfgipsyvi asseasn l s rfdgirygyhskeahsl eelykmsrsefgkevkrri l fgtfalssgyydayykk  
sqkvrtilknfdkvfeny  
dvvvgtapttafn l geeiddp l tmyand l l ttpvnlaglpgisvpcgqsngripiglqfigkpfdektlyrvayqyetqy  
nlhdvyekl  
>tr|E5QS47|E5QS47\_STAAH  
mhkid l ttnnfqmrri l l qlvialfvilftykwalgv tavvdqni i n l vygfagfi l l l l helihral f l l fkkdsk  
pmfnikkdril fqtadacf  
nkwwqfsiim l sp l i l l sag l l i l ikvfgys l i f m f smhtaycfidil l val t i s s s fkyvqqdedsiylyhqkptq  
>tr|E5QS52|E5QS52\_STAAH  
mhel t i y h f m s d k l n l y s d i g n i a l r q r a k k r n i k v n v e i n e t e g i t f d e c d i f f i g g s d r e q a l a t k e l s k i k t p l  
keai edgmpgl t i c g g y q f  
lgkkyi tpdgteleg l gi l d f y t e s k t n r l t g d i v i e s d t f g t i v g f e n h g g r t y h n f g t l g h v t f g y g n n d k d k k e g i h  
ykn l l g t y l h g p i l p k n y e  
itdy l l e k a c e r k g i p f e p k e i d n e a e k q a k q v l i d r a n r q k k s r  
>tr|E5QS53|E5QS53\_STAAH  
mqhekmndern l tmkptkvl k d a s y l h s k t s i t f i l k d v i e e d n k i y y f d t s a t f e d q e i k f e f a l f d s d m d n l k y i e  
y d n p v t e i y f i e p d l h f t i  
idfnqellciyidfdsg l r h s n m v t e s g v s l r i n v t k s g f t k f i n e l v s l h  
>tr|E5QS54|E5QS54\_STAAH  
mngqwkhligartiktgiaif l tavfcma l d l t p i y a i l t a v v t i e p t a k a s l i k g y r r l p a t v i g a g f a v l f t y l f g d  
qspftyal satftil fctk  
lk l q v g t n v a v l t s l a m i p g i h d a y i f n l s r t l t a i i g l v t s g l i n f m v f p p k y y g q v e e k l s k t d a l m y k l f y n r c q e  
i i l s r l q s d k s e k a y k n i f  
n l n n q v e t l i s y q r d e l s y h k k k e c d w k l l n q l t k r a y t n r l f i t h l s n i i y l p k n t r v n f s g d e k m a l l k i s s i k d i f  
y d g s f k r e d d s v e t l r s t i  
kaleisgengikshilyev l miyr l l dsrya  
>tr|E5QS55|E5QS55\_STAAH  
mgrgpnteadeksaydnvqvggaptqkl tksqltimcr l agpqhrefqkrnstgnaswgr l rnnflyhtms h s l s k i l k  
>tr|E5QS57|E5QS57\_STAAH

Tsompanidou\_et\_al\_Supplemental\_FASTA\_File

mivmnyveryieqflratvrnnikhylmldekknlddymhyllitkkeqslsklidslmltlenkyidiveafqiqcare  
innqeienikselnkveay  
yaqietqigqtstekiaktektsylinymnava  
>tr|E5QS61|E5QS61\_STAAH  
mskkdhssskylnsvkeageeskkknksnpkidvdrtyiepqfqskkpkkddqvfflsrlnkpakykkdsnflysiyr  
igkddasglaaqmtyhfv  
amfpmllflltllpffnikqsqitnmlsnapaetstliksvigditqnssgllsiglilaiwsasngmtaimnsfnvay  
dvedsrngivlkllsvvft  
vvmgvfvvalalptlgsvishf1fgplgfdeqkwifnlirivlpiiiifivfivlysvapnvtklksvlpjavfts  
iwlagsfgfgwyisnfgny  
sktygsiagiillllwlyitsfiiivgaeinaiihqrsvikgktpaeaalehddnknhynentryeydedtstnsthq  
hydehpsdtypeddknikd  
kivdklkkd  
>tr|E5QS63|E5QS63\_STAAH  
mvdvafvclgnicrspmaeamrqr1kdrniqdikvhsrgtgswnlgepphegtqkilnkhnipfdgmiselfeatddfd  
yivamdqsnvdniskinpn  
lkgqlfkllfefsmeesdvpdpuytnnfegvydmvlsscdnlidyivkdanlkeg  
>tr|E5QS64|E5QS64\_STAAH  
mamtneekvlareklnivnqglldpekyknaneeltdiydfvqsrerlspsevtaiadalqqlrhd  
>tr|E5QS65|E5QS65\_STAAH  
mgiltnykek1qqyael1vkvgmrvqpkqpvfirssvetlelthliveayrcgasdvrsvsdptlkr1kfenesvehf  
anheiksydvearmdyvkr  
gaanla1isedpdlmdgidsqklqafqqnarafkgymesvqknqfpwvvaafpskawakrvype1sveeayikfidevf  
divridgndpvenwrqhia  
nlsyvaqklqqknyhalhyvsegtdltvglaknhiwedatsyvngeqafianipteevftapdrnrvdgyvtnklplsy  
ngtiidqfklmfkdgeiid  
fsaekgeavlkdlintdegsrrlgevalvpddspisnrntifyntlfdenaachlaigsayafniqqgtemtveekiasg  
lndsnvhvdfmigssdlti  
ygifedgske1vfengnwastf  
>tr|E5QS66|E5QS66\_STAAH  
mtnqdrpmsmseskynrqvfpqdtnhhhtmfgg1manideiaaitamkhagaqvvtastdsvdf1kpiktgdilqy  
vamvsyagtssmevvvir  
iddvfnkhdl1aalsyltfvalddegkpkhvpvpeddvkwfydtapqrvrrkarrieskqtieylaqvqhir  
>tr|E5QS67|E5QS67\_STAAH  
mnqierkfkmtmsvklkqpvsihndpweayndvkehqgl1l1sni eftttnlcnmrshcavgyt1qtvdpepldmdliy  
rr1deipnlrtmsitggep  
mfskksirnvkpl1kyahnrgiytmnsn1l1pqdryldiaeyidvmhishnwgttdefanvgfgamkkqplkalkl  
yeqm1snact1seqgmfv  
aetmlnqstlphl1rkihqevvhdmkcsrheihpmyadfasq1nvl1taemkktihdil1dfrdediwm1fgt1pvpfcl  
ddedqkl1sr1rtaknvt  
rnpdgrsr1nvnvftgnv1vtdfgdetgtisniqkdk1tdvfdkw1ssdlaks1nchcsefsc1gpnvl1vknmyypnm  
fkdnerrhmhkqpgi1qf  
>tr|E5QS69|E5QS69\_STAAH  
mtkkvai1lanefedieysspkealenagfntv1vigtansevfgkhgekvtvdv1giaeakpedyda1lipggfspdhl  
gdtegrgygtfakyytkndv  
ptfai1chgpqil1dtd1kg1rt1tav1nvrkd1snagahvdesvvdn1vtsrvpdd1ddfnreivkqlq  
>tr|E5QS72|E5QS72\_STAAH  
mqvgvgpqrh1refrkei1qamrvvgwaptqkl1tfrq1timck1grndkei1f1  
>tr|E5QS76|E5QS76\_STAAH  
mgg1vfnyidpvafn1gp1svrwygii1avgil1gyfvaqralvkag1hkdt1vdi1fysal1fgfiaariy1f1qwp1y  
aenpgei1kiwhggia1hg  
g1iggf1agv1vckvkn1npf1qigdivapsi1laqg1grwgn1fmneahggpvsraf1eq1h1lpnf1ienmyingqyyhp  
t1f1yes1wdv1agf1i1lvni  
rk1h1k1get1ff1y1twys1grff1ieg1rtds1mltsn1rvaq1vs1ill1l1s1l1s1l1y1rri1kynp1lyskv1galp1wptrk  
vk  
>tr|E5QS77|E5QS77\_STAAH  
mlttek1vet1k1ld1i1ageeg1skpiknadi1srp1gemagyfshyas1dri1q1l1gttel1sfyn1lpdkdragrmr1l1crpe  
tpai1ivtr1gl1q1ppeel1vea  
ake1n1tp1livak1datt1s1msr1ttf1leha1aktts1hg1v1vdv1yvgv1litgdsg1gksetale1lvkrghr1vaddn1vei  
rqinkdel1gkppk1lieh1  
lei1rg1gi1nvm1t1fgags1l1tekrir1n1n1enwnk1q1lydrvg1l1neet1s1ildteitkqy1  
>tr|E5QS78|E5QS78\_STAAH  
mkeps1vvk1garahn1k1didiel1pkn1livmt1g1sgsgkss1afdtiyaegqrryves1saya1rq1fgmqdkp1dvdtieg  
l1spais1dqk1ttsknprst  
vatvteiydy1r1lyarv1gk1p1c1pnh1nie1esqt1vq1m1vdrime1eartki1q1llapviah1rkg1shek1lied1gkkg1yvr1  
ridge1vdvndvpt1dknk  
nht1evvdr1vvkd1g1etr1lads1ieta1el1seg1l1tvdividged1k1fseshac1picg1fsige1lepr1m1fsfnsp1fgacpt  
cdg1gqk1l1tvdiv1v1vpdk

Tsompanidou\_et\_al\_Supplemental\_FASTA\_File

dktlnegai epwiptssdfyptllkrvcevykinmdkpfkklterqrdillgsgdkeieftftqrggtrkrmtvfevgv  
vpnisrrfhespseytrem  
mskymtel petchgkrlsreal svyvglnigeveysisqal nnykninlseqdqai anqilkeiisrltflnnvgle  
yltlnrasgtlsggeagri  
rlatqigsrltgvlvldepsigl hqrdndrlintlkemrdl gntlivvehdddtmraadyldigpgagehggqivssg  
tpqkvmkdkksltgqylsg  
kkrievpeyrrpasdrkisirgarsnllkgvdvdiplsimtvvtgvs gsgksslnevlykslaqkinkskvkpglydki  
egidqldkiididqspigr  
tprsnpatygtgvfddirdvfaqtneakirgyqkgrfsfnvkgrceackgdgiikiemhflpdvyvpcevdgkrynret  
levtykgkniadilemtve  
eatqffenipkikrklqtlvdvlglyvtl gqqattlsggeaqrvklaselhkrstgksiyildepttghvddisrllkv  
lnrlvengdtvviiehnld  
viktadyiidl gpegsggggtivatgtpediaqtksytkylkevl erdkqntedk  
>tr|E5QS79|E5QS79\_STAAH  
msgninntl keeayvtmvehypfkisdfepqgdppaieivegikagkrhqtllgatgtgkftmsnvikevgkptli  
iahnktlagqlysefkeff  
penrveyfvsyddyyqpeayvpstdtfiekdasindeidqlrhsatsalferddviiiasvsciylgnpeeykdllvsv  
rvgmendrse llrkldvdvq  
ytrndidfqrgrtfrvrgdvveifpaskeelcirveffgdeidrirevnyltgevlkerehfai fashfvtreeklkvai  
eriekeleerlkelrdenk  
lleaqrleqrtnydl emmremgfcsgienysvhl tlrplgstpytll dyfgddwlvmi deshvtlpqvrngmyngdrarkq  
vlvdhgfrlpsal dnrplk  
feefeektkqlvyvsatpgpyeiehtdkmveqii rptglldpkievrptenqidll seiqtrvernervlvttl tkkms  
edl ttmkeagikvnylsh  
eiktlerieiidlrmgtydviginnlregidipevslvildadkegflrsnrsligtigraarndkgevimyadkmt  
dsmkyaidetqrrreiqmk  
hnekhgipktinkkihdli satvendenndkaqtvipkmtkkerqktidniekemkqaakldfekate lrdmlfelk  
aeg  
>tr|E5QS82|E5QS82\_STAAH  
mkkslavtvssv lafla llnnaahaqqhgtqvktpvqhnyvsnvqaqtqspttytvvagdslykia lehhltlnqlysynp  
gvtplifpgdvislvpqnk  
vkqtktvksprkasqakkvvqqpvqqaskkvvkvqapqktvaktvnavkpaqvqksvptvpvahnyknsvanrgnlya  
ygnctyyafnrraqlgrsi  
gslwgnannwnyaakvagfkvdktpevgai fqaagpyghvgvvesvnpngtitvsemnyagfnvksrtllnpgkynyi  
h  
>tr|E5QS83|E5QS83\_STAAH  
mterkcacnk lfsilvrgpnkenfekfyrqckl gcpqqreigfpistdnaswggttikkyffyrn  
>tr|E5QS84|E5QS84\_STAAH  
mmaepnfwdnqtkaqdi idknnal kai vngyktl qaevdmdatwdll qeefdgemkedleqevinfkakvdeyelqlll  
dgphdannail e lhpagg  
tesqdwanml frmyqrycekkgfkvvetvdy lpgdeagiksvtll ikghnaygy lkaekgvhr lvr is pfdssgrhrt sfa  
scdvi pfdnndeieiein p  
ddi tvdtfrasgaggqhinktesairi thhpsgivi vnnqnersqiknreaamkmlsklyqlkleeqaremaeirgeqke  
igwgsqirsyvfhpsvmv  
dhrtneetgkvдавmdgdigpfiesylrqtmshd  
>tr|E5QS85|E5QS85\_STAAH  
mgflskil dgnnkeikqlgkladkvia leektail tdeei rnktkqfqteladidnvkkqndyldkilpeaya l vregsk  
rvfnmtpykvqimggiaih  
kgdiaemrtgegkltatmptylnal agrgvhvitvneyl ssvqseemaelynflgl tvgl nlnsktteekreayaqdit  
ystnne l gfdylrdnmvny  
sedrvmrplhfai idevdsilideartplii sgeaekstsl ytanvfakmlkqdedykydektksvhl teqqadkaerm  
fkvenlydvqnvdivshin  
talrahvtl qrdvdyvvdgevlivdqftgrtmpgrrfsegl hqai eakegvqiqnesktmasitfqnyfrmynk lagmt  
gtakteeeefrninyntvt  
qiptnkpvrndksdli yisqkgfdavvedvvekhkagqpvllgtvavetseyisnllkkrgirhdvlnaknhereaei  
vagagkgavtia tnmagr  
gtdiklgegveelgg lavigterhesriddqlrgsrgrgdkgdsrfylslqdelmirfgserlqkmsr lgl ddstpi  
eskmvs ravesaqkrvegn  
nfdarkrileydevl r kqreii ynernsi ideedssqvvdamlrstl qrsinyyintaddepeyqpfidyindiflqegd  
iteddikgkdaedifevvw  
akieaayqsqkdi leeqmnefermi llrsidshwtdhidtdmlrqgihlrsyaqqnplrdyqneghel fdimmqnieed  
tckfilksvvqedniere  
kttefgeakhvsaedgkekvpkpkpivkgdqvrnddcpcgsgkkfkncgk  
>tr|E5QS88|E5QS88\_STAAH  
mdnvtrykitesqsssqayyhl s felseqqsyasehivrairmrqtill yavtgagktemmfqgiyarrqgdniaivs  
prdvvveiskrikdafln  
edidilhqqssqqfeghfvtvhqlyrfkqhfdtifi devdafpl smdkslqqaalkssskehatiymtatppkqllse  
ipleniiklparfhkkslp

Tsompanidou\_et\_al\_Supplemental\_FASTA\_File

vpkyryfkl nnnkiqkmlryrlqdqinnqrytlvffnietmiktfsiykqkikltyvhsedvfrfekveqlrngqydv  
iftttlgergftmanldv  
vidahqytqeaaliqagrgrklecptgkvlffhegvsmmiqakkeiqkmnklalkrgwide  
>tr|E5QS90|E5QS90\_STAAH  
mtqniitvkkehiienvisksrfiahikpvqnedekafiaaikknikmpliivlhilldlk  
>tr|E5QS91|E5QS91\_STAAH  
mniqkanddgeptgtagvpmldilkkldvhnacvvvtryfggiklggggliraysgavrdviydirvelreavpcivtl  
nydqtgkfeyelasthfm  
rnqytdkvsyyidvvsdyefinflnqmtagnfdl teetpkqlpfdipte  
>tr|E5QS95|E5QS95\_STAAH  
mlfyflfhftisfistvlfisii fnapkrllvacgfvgaiawtiyqltvdlefkgvgasflgsllglmshtmsrsykrpvi  
ifivpgiipvpqgaayqa  
trflvsndytsavntflevtlisgaiafgilvseilylytrikqlygkikgkykksynmnrv  
>tr|E5QS98|E5QS98\_STAAH  
mnrvaiklssidqfeqvieenkyvfvlkhsetcpisanaydqfnkflyerdmdgyylivqqrldsdiakktvkhesp  
qafyfvngemvwnrdhgdi  
nvsslaqaee  
>tr|E5QS99|E5QS99\_STAAH  
mnlrsaimkkiviiavlaifvvisacgnkekeaqhftkqfkdvkqkelqhvmdnihlkeidhlsktdtdknske  
fkaldvknhlipkfeay  
yksaknlpdtkmkkllkkeymtlanekkdaiyqlkkfiglcnqsikynedi dytkqfeknrykveseikladnkseat  
nlttklehnnkalrdtakk  
nlddskenevkgainhimpieqitdinqtnisdkhvnarknaiemyyslqnyyntrietikvseklskvdvdklpk  
kgidithgdkafekklek  
eek  
>tr|E5QSA0|E5QSA0\_STAAH  
mysnvqpfinsdltncfqsqyteiesllfnlldspvkytkhiggnthfkystepildilvgvenlhdsitldekrlnyvg  
fyrllhkyknkvmmakfnn  
fheklqqvrllhiqmntqtfesylaldrllstndeia lqfntkkhqi lqhslltirqyemqkqyfeflckky  
>tr|E5QSA1|E5QSA1\_STAAH  
mpyfi fililil sfqfsqmfnkigiilydikdmrkdvlrsdk  
>tr|E5QSA2|E5QSA2\_STAAH  
minkdiyqalqqlipneki kvdeplkrytytkgnadfyitptknvevqavvyayqneipvtylgnsgniiireggir  
givisllsl dhievsddai  
tagsgaaidvsrvaradyaltg lefacgipgsiggavymnagayggevkdci dya lcvneqgs lvklttkeleldyrnsi  
iqkehllvleaafllapgk  
mteiqakmddlterreskqpleypscgsvfqrppghfagkliqdsnlqghriggvevstkhagfmvndngtatdyenli  
hyvqktvkekfgielnrev  
riigehpkes  
>tr|E5QSA6|E5QSA6\_STAAH  
mrrnnkkimllia vtfllismlylvfgidfdifeyqfssrlrkfilililvgaaatsvifqaitnrrlltpsimgldavy  
lfikvlpvflfgiqsvvvt  
nyvlnfilitimvl falilfqgikighfsiyfilligvllgtffrsitgfiqlimdpesflaiqssmfanfnsnsl  
vtfsavllvii lvitifll  
pyldvlllgraeainlgisyekltrillvsvlsvstalgvpitflgl lltnlahelmkyehkyiliaticlswisl  
fsaqwvvenvfeattemsi  
lidliggsyfiy llvrrrnaq  
>tr|E5QSA7|E5QSA7\_STAAH  
miiiiiklgenfvmkylkgkil llllll llltiislfigvselsikdifhlsdsqqnilfssriprtmsiliagsslala  
glimqmmqnkfvspntag  
tmewaklgiliallffptghillklvfavicsisgtflfvkiidfikvkdvifvpllgimmggivasfttfislrtnavq  
signwlngnfaittsgrye  
ilylsipllal tylfanhftivmgkdfntnlglsyeklinialfitatitalvvvtvgtlpflglvipniisiyrgdh  
knaiphtmmgai fvlfsd  
ivgrivvypyeinigtigvgtiiflillmkgrknyaq  
>tr|E5QSB0|E5QSB0\_STAAH  
mkkegdpmkiiyfsftgnvrrfirkrtelentleitaencmepvhpfii vtgtigfgevpepvqsfl evnhqyirgvaas  
gnrnwglnfakagrtisee  
ynvp llmkfelhgknkdviefnkvgnfnenhgrevqsy  
>tr|E5QSB1|E5QSB1\_STAAH  
mclmynethnivlkrkrhnilcfvckcfiyeetfksnl tqkfnsyyq  
>tr|E5QSB2|E5QSB2\_STAAH  
mnpkvkgiia ilisaigfsmvffr lagdlpvfqkslarnlvamfiplffiykyhqpmfgklssqpllltrstlgligv  
llniyai dhmvlsdadsllm  
klnpftwtil lsvflhekvrkyqitamiiailgmllivkpefssmipslaglfsgifaasaytcvralstreapytivf  
yflsvivlipftaytye  
pmsqtqvl yllgaglaavvgqigvtlaysfaakdisiftyasiiftailgfilfgespdfyatlgvviigasyymfek  
arrdakvikk

Tsompanidou\_et\_al\_Supplemental\_FASTA\_File

>tr|E5QSB3|E5QSB3\_STAAH  
mahgrqqdelqditllgnqndntynfdyrpdvlesfdnkhqgrdyfvkfncefts1cpitgqpdfatiyisyipnvkmve  
skslklylfsfrnhgdfhe  
dcmniimndlielmdphyievwgkftprggisidpytnygrpnksyemaehr1mnhdlypekidnr  
>tr|E5QSB4|E5QSB4\_STAAH  
mifltywcvfhlayiigyikitfytkvhqknistrikqhfyrnllhfnvnkyifilslincarliteysqyfyffvicei  
fs  
>tr|E5QSB7|E5QSB7\_STAAH  
mrnkmsleafhvankmhi1gpqqrefrkeilqtmqvgagpqhkeilfl  
>tr|E5QSB9|E5QSB9\_STAAH  
mkivalhfrnieryneykffkivsnkskevfvimkeq1nqlsayqpg1spralkekyiegdyklasnenlygppskvke  
aisahlde1yypetgspt  
lkaaiskhlnvdqsrlfgagldevilmisrav1tpgdtvtseatfgqyyhnaivesanviqvp1kdggfdldgilkev  
nddts1vwlcnpnntgty  
fnhes1dsf1sqvshvpvlideayfefvtaedypdt1alqqkydnaf1l1rtfskayglag1rvgyvbasehaiekwnii  
rppfnvtriseyaavaale  
dqy1kevthknsvererfyqlpqsehf1psqtnfi1fvktrkvnelyeallnvgcitrpfptgvritigfkeqngkmlv  
1snfkye  
>tr|E5QSC3|E5QSC3\_STAAH  
mgmeaykiehlnksyadkiifdn1d1sisegekiglvgingtgkst11kviggiddftanvmhpnqyri1ryssqkdln  
edmtvfdavlssdt11ri  
ikqyeqavqayaddqsk1fkrmdaqaamdqhdawdynaeikt1sklgihdttkyikelsggqqkrvvlaktlieqpd  
1111deptnh1dfes1sw1  
inyvkqyph1v1fvthdryflnevstriel1nrgklasypgnyesyiemraerelt1kqkqkqralykeelawmragak  
arttkqar1nrfd1ene  
vnqykddkge1n1aysr1gkqvfeled1skaindkv1feh1teiqkgerigvvgpngagktt1n1lsgedqqfegk1  
ktgqtvkvayfkqtdet1d  
rdirmidylreeseiakekdgtsvsitq11erf1fpsathgkkvyk1sggeqkrly11r11vhqpnv1111deptnd1dte  
t111edyihtfggtvitv  
shdryflnkvaqsywfi1hdgqmekiigtfedyesykks1dknkst1kqhskssttvrkng1sykekleyeq1mkrieqa  
evrmeeidv1m1easadyg  
kikelneekeq1eiqyd1ditrwsleeikeq  
>tr|E5QSC4|E5QSC4\_STAAH  
mlisn1fkyfrkiy1nnggnheftkkk1s1faff11tvitit1ktyfsyyvdfs1gvkglvqn1111mpys1valv1  
svf1ffkgkka1fwfm1igg  
f11t11yanvvyfrffsdf1t1fst1nqvgnvsmggavsasfkwydfvyfidt1vyl1filifk1kwdtka1fskk1fvpv  
vmaasval1f1n1afaetd  
rpe11trtfdhky1lvky1gpynftvydgvktiennqkka1asedd1tkv1nytkqrqtepnpeyygvakkkni1kihles  
fqtflinkkvngkevtpf1  
nk1ssgkeqftyf1pnffhqtgqgktsdseftmdns1ygl1pqgsafs1kgdntyqs1paildqkqgyksdvmhgdtyk1fwn  
rdqvykhfgidkfydatyy  
dmsdknvn1gl1kdk1ffkdsanyqakmkspfysh1it1tnhypft1dekdatieksntgdatvdgyiqtary1dealee  
yind1kkkglydnsvimiy  
gdhygisenhnamek11gekitpakftd1nrtgfwiki1pgksgginneyagqvdmpt11hlagidtkny1mfgtd1fs  
kghnqvvpfrngdfitkdy  
kyvngkiysknne1ittqpadfeknkqvekd1emsdnv1ngd1rfryknpdfkkvnpskykyetgpkansk  
>tr|E5QSC7|E5QSC7\_STAAH  
miivyi11111vyvnyr1vnr11senriyvvr1iatittvisfilvya1ihelmpfvvramd1lyhq  
>tr|E5QSC8|E5QSC8\_STAAH  
mq1fetmkidnghipri1tyhtnrikcsser1nfk1fdehawrne1ndvttkyhngqyr1kiv1haesefetivsp1pekss  
ftakfqv1pkavnptfinn  
ktterkh1ahnhetd1111tsedgkv1efdignivieedgkwytpsykddf1kgcmrdy1idsdk1vekd1fnkneli1yky  
hneirif1ins1revadv  
h1c1  
>tr|E5QSD3|E5QSD3\_STAAH  
makipv1eifgptiqgegrvi1grk1tmfvrtagcdyrcswcdsaftwdgsakgdik1m1taeeiydelkriggd1fnhvtis  
ggnpal1kgiqe1vd1fqd  
kg1fsaletqgskfqpwm1tqidd1tis1pkppsstmpd1kk1deviaqcvpss1n1kvvvfddkdydfakmi1hhryp1dip  
fylqvgnp1y1sdsvdnhte  
k11eryeq1vd1vmqsdmnhvyv1pq1ht11wsnkkgv  
>tr|E5QSD5|E5QSD5\_STAAH  
mntkyflaagai1tt1al1gacgnsnsdqgknkteqtktsedsnvktdkth1t1gtfsskngetvegkaeikngk1m1tny  
ksskqpd1yvy1tkngdik  
ngke1amvdydkekqtf1d1knvd1skydevtiyckkahvifggak1k  
>tr|E5QSD9|E5QSD9\_STAAH  
mki1rvvipc1fnegevi1tqthqql1te1sqdssvkgydynm1fiddgstddtidemqhl1atidrhvsf1sfsrnf1gkeam  
1agyqhs1tefdavim1dcd  
1qhppeyi1pkmvegfmegy1dqv1akrdrsgenfsrkt1sh1lyk1vnc1fveevqfddgv1gdf1r11sqravksias1leeyn

Tsompanidou\_et\_al\_Supplemental\_FASTA\_File

rfskglfewigyntkvfty  
qnvarqgeskwsfkklnfygidglisfnskplrmmylglfifsisvlyiylfinimisgvnipgyfstiaailllgg  
iqllisigvveyigriyye  
vkarpyiiqatnlssiendekdthkvysk  
>tr|E5QSE1|E5QSE1\_STAAH  
mifillialttvfgsefalvkiratrieqladegnkpakivkkmianldyylsacqlgitvtslglglwgeptfekll  
hpifeainlptaltttisf  
avsfiiivtylhvvlgelapksiaiqhteklalvyarplfyfgnimkpliwlmngsarviirmfgvnpdaqtdamseeik  
iinsynggeinqtelay  
mqnifsderhakdimvprtqmitlnepfnvdelldtikehqftrypitddgdgdhikgfinvkeflteyasgtikian  
yihelpmissettris dali  
rmqrehvhmsliideyggtagiltmedileevgeirdefdddevndivkidnktfqvngrvllddlteefgiefddsed  
idtigglwlsrntnlqkdd  
yvdtttdrwwvseidnhqiwwmlnyefneprptigqsdedekse  
>tr|E5QSE3|E5QSE3\_STAAH  
mkimrvtelktktiamdmandkngvideivnqlkdgklsdiasfkeaihnesqsttgigegiaiphakvaavkspa  
iafgkskvgvdyqslmqp  
ahlfmfaapeggaqthldalaklsgilmdenvrekllhasspeevlaiidhaddeatkeeeaeaeaqvataeqsskqs  
nepylvavtactptgiahty  
mardalkkqadkmgikikvetngssgiknhlteqdiknatgiivaadvhvetdrfdgknvvevpvadgikrpeelinkal  
dtsrpkpfvardgqrkgnsn  
dsqeklspgkafykhlmngvsnmlplvisggilmaivflfgansfdpksseyna faeqlnwignksafaliipilsgfia  
rsiadkpgfasglvggm la  
isggsfgiggiaagflagyltqgvkvmtrklpqa leglkptliypllvtatgllmiyvfnppaswlnhllldglnnls  
snivllglviggammaidmg  
gpfnkaayvfatgalieгнаapitaamiggmipplaiatamlifrrkftkeqrgsiipnyvmgmsfitegaipfaaadpl  
rvipsmmigsgiggialg  
lgsritaphggiivivgdgahllqtliavvgtlvsaliyglkpklteteieasksmde  
>tr|E5QSE5|E5QSE5\_STAAH  
mmiitekrrhelileelshkdflltqlqidrtgcsastirrdlsklqqlgkqrvhggamlkenrmveanlteklatnlde  
kkmiakiaangindnecldf  
idagsstlelikyiqakdiivvtnglthveallkkgiktimgqvkentlatigssameilrrycfdkafigmngldie  
lgltpdegealvkqtams  
lanqsfvlidhskfnkvyfarvpllesttiitsekalnqeslkeykqkyhfiggtl  
>tr|E5QSE6|E5QSE6\_STAAH  
maknkktnamrmldrakikyevshefveehlsqgevaeliqanvktvftlvenakhehfvfvipvsetldmkkaaam  
vgekkqlmpldnlnkvtg  
yirggcspvgmktlftvvdksenyshisvsgglrtmqitiavedlititkgkigavihe  
>tr|E5QSF1|E5QSF1\_STAAH  
mfmrhaiilaagkgtrmkkskkykvlhevagkpmvehvlesvkgsgvdqvvtivghgaesvkgghlgerslysfqeeqlgt  
ahavqmakshledkegtti  
vvcgdtplitketletiahhedanaqatvlsasiqqpygygrivrnasgrleriveekdatqaekdineissgifafnn  
ktlfekltqvkndnaqgey  
ylpdvlsliindggivevyrtndveeimgvndrvmlsqaenamqrrtnhyhmlngvtiidpdstyigpdvtigsdtviep  
gvringrteigedvviggy  
seinnstiengaciqqsvndasvgantkvgpfaqlrpgaqlgadkvgnfveikkadlkdgakvshlsyigdavigert  
nigcgtitvnydgenkft  
ivgkdsfvgcnvnlvapvtigddvlvaagstitddvpndslavararqttkegyrk  
>tr|E5QSF8|E5QSF8\_STAAH  
mneevkmldnkdiatpsrtralldkygnfkkslgqnflidvniinniidasdidaqtgvieigpgmgslteqlarhkr  
vrafeidqrlipvln dtls  
pydntvinedilkanikeavenhlqdcekimvvanlpyyittpillnlmqddipidgyvmmqkevgerlnaeigskay  
gslsivvqyytetskvltv  
pksvfmpppnvdsvvklmqrtelvtvdneeaffklakaafaqrrktinnnyqnyfdgkqhkeviiqwleqagidpr  
rgetlsiqdfaklyeekkk  
fpqlen  
>tr|E5QSG3|E5QSG3\_STAAH  
mavlylvgtipignladi tyravdv lkrvdmia cedtrvtsklcnhydiptplksyehnkdkqtafiieql elgl dvalv  
sdaglp lisdpgyelvva  
reanikvetvpgpnagltalmsglpsyvytflgflprkekeksavleqrmhenstliiyesphrvtdtltkia kidatr  
qvs lgre ltkkfeqivtdd  
vtqlqaliqqgdvplkgefvi liegakanneiswfdlsinehvdhyiqtsqm kpkqaikkvaerqlktnevnyihqi  
n  
>tr|E5QSG5|E5QSG5\_STAAH  
mlkenerfdqlikenfsiiqnddvsfstadallghftkprtkdivldlcsngviplllfakhprhiegveiqktlvdm  
arrtfqfndvdeyltmhmm  
dlknvtkvfkpsqytlvtcnpypyfkenqqhqhqkeahkiarheimctledcmiaarhllkeggrlnmvhradr lmdvlfe  
mrkvniepkkvvfiyskvg



Tsompanidou\_et\_al\_Supplemental\_FASTA\_File

ksaqtivvegrkgnqgleimlpfyinedgnyseemkevhyg  
>tr|E5QSG7|E5QSG7\_STAAH  
mpnvigvqfkgakleyytpndiqvelddwvveskrgieigivknpImdiaeedvvlPlkniiriaddkdidkfcner  
daenalilckdivreggld  
mrlvnceytlDKskvifnftaddridfrklvkiLaqhlktrielrqigvrdeakllggigpcgrslccstflgdfepvsi  
kmakdqnlslNptkisgac  
grlmcclyendyyeevraqlpdigeaietpdngkvvalnildismqvklegheqpleykleei etmh  
>tr|E5QSG8|E5QSG8\_STAAH  
mdeqqqltnayhsnklsHaylfegddaqtmkqvainfaklilcqtDsqcetkvstynhpdfmyisttenaikkeqveqlv  
rhmqplpiestnkvyiied  
fekltvqgensilkfleppdntiaillstkpeqildtihsrqhvfykpidkekfinrlveqDmskpvaemistytqi  
dnalaalneefdllaIrksv  
irwcellltnkpmaligiidllkqaknkqlsItiaavngffedihtkvNvedkqiysdlkndidqyaqklsfnqlilm  
fdqlteahkklNqvnptl  
vfeqivikgvs  
>tr|E5QSH2|E5QSH2\_STAAH  
mvmvcwwhglpgftegwwilkkqivgcdllllivmiriessk  
>tr|E5QSH5|E5QSH5\_STAAH  
mnyqalrmyrpgsfedvvgqehvktlrnaiskekqshayifsgprgtgktsiakvfakainclnstDgepcnechick  
gitqgtnsdvieidaasn  
gvdei rnrldkvkyapseskykvyiidevhlmttgafnalIktleppahafilattephkipptiisraqrfdfkais  
ldqiverlkfvadaqqiec  
edealafiakaseggmrdaIsimdqaiafgdgtltlqdaInvtgsvhdealdhlfddivqgdvqasfkkyhqfitegkev  
nrIindmiyfvrDtimnkt  
sekdteyralmnleldmlyqmidiIndtlvsirfsvnqnvhfevllvklaeqikgppqviaNvaepaqiasspntdvllq  
rmeqlleqelktlkaqgvs  
aptqksskkpargiksknafsmqqiakvldkankadikllkdhwqevihaknndkkslvsllqNsepvaasedhvlvk  
feeeihceivnkDdekrss  
iesvvcniVnkNkvvgvpsdqwrvtelqnrknegddmpkqqaqqtDiaqakdlfgeetvhvidee  
>tr|E5QSH6|E5QSH6\_STAAH  
mqiyIstltelDydklsInsieesfddnpetswqarakvklrkspcynfeleviaknenndvvghvllievemnsddkty  
yglaiaslsvnpelrgqkl  
grglvqaveerakaqeystvvvdhcfdyfeklgyqnaaehdiklesgdapllvkiyldnltDaphgivkfpehfy  
>tr|E5QSH8|E5QSH8\_STAAH  
mlkeidwrksvvyqiypksfndttgngigdingiiekldyikllgvdyiwltpvyespmndngydisnyleinedfgtmd  
dferlinvahekqikvmlD  
ivinhtstehewfkaarkskdnpyrDyffkasedgpptnwhskfggnawkydsetdeyylhlfDvsqadlnwdnpevrq  
slyriVnhwidfgvdgfrf  
dvinliskgefksdkigkefytdgprvhelhelnrqtfgntDmmtvgemssttiencikytqperqelnsVfnfhhlk  
vdyvdgekwtNakldfhkl  
keilmqwgqrgiydgggwai fwcNhdqprvvsrfgddtseemriqsakmlaialhmIqgtpyiyqgeeigmtDphftsia  
qyrDvesinayhqllsegh  
aeadvIaIlgqksrdnsrtpmqwsddvnagftagkpwiDisenyhqvnvrqalqkdsifytyqkIqlrhthdiitygd  
ivprfmdhdhlfvyerhyk  
nqqwlvianfsasavdlpegIacegrvviqtgtvenntisgfgaivietna  
>tr|E5QSI0|E5QSI0\_STAAH  
mpkqrllrtspnkdkIqpcviqkpnvlsismpyhfySqkydpfkdk  
>tr|E5QSI1|E5QSI1\_STAAH  
mgefkgfmkydkyIgeIsIvdrIkhkayqqrftkedasiqgarcmdcgtpfcqtgqygreTigcpignyipeWndfv  
yhqdfktayerIsetnfp  
dftgrvcPapcesacvkinresiaikgiertiidea fengwvapkvsrrrdekvaivgsgpagltaaeelnllgyqvt  
iyeraesggllmygipnm  
klDkdvvrrrikImeeagI fVngvevgvdiDkatIeseydaiilctgaqkgrdlplegrmgdgiHfamyIteqtqlln  
geidditi takdknviig  
agdtgadcvataIrencksivqfnkytkIpeaitftenaswplampvfkmdyahqeyeakfgkepraygvqtmyrdvddk  
ghirglytqiIeggengmv  
mkegperfwpadlvllsigfegteptvnafniktdrnrivaddtnyqtNnekvfaagdarrrgqslvwwaIkegrgvaka  
vdqylaskvcv  
>tr|E5QSI2|E5QSI2\_STAAH  
mhneklikglydyreehdacgigfyamdnkrshdiidkslemIrrldhrgvggadgitgdgagimteipaffkqhvtD  
fdipgegeyavglffsker  
ilgsehevfkkyfegeglsilgyrnvpnkdaiaKhvadtmpviqqvfidi rdi edvekhlfIarkqlefystqcdleI  
yftsI srktivykgwIrsd  
qikkyfytDlSddlyqsklgIvhsrfstntfswkrahpnrmlhngointikgnvnmraraqhklIetIfgedqhkVfqi  
vdedgsdsaiVdnalefls  
lamepekaamllipepwlYneandanvrafyefysylmepwdgptmisfcngdklgaItdrnglrpgrytitkdnfivfs  
segvvdvpesnvafkgql  
npgklllvdfkqnkvienndlkgaIageIpykawiDnhkvdfdfeniyyqdsqwkdetlflkIqrqfaytkeeiHkyiqel

Tsompanidou\_et\_al\_Supplemental\_FASTA\_File

vegkkdpi gamgydapiav  
lnerpeslfnyfkqlfaqvtntppidayrekivtseisylggegmlapdetvldriqlkrpvl neshlaaidqehfklty  
lstvyegnledalevlgre  
avdavkqgaqilvl ddsdglvdgngfampmlai shvhqllikadlr mstslvaksetrevhvacllayganaivpyla  
qrtveqltlt eglggtvvd  
nvktytdvlsegvikvmakmgistvqsyqgaqifeaigls hdivdryftgtqsklsgisidqidaenkerqqsddnylas  
gstfqrqqgqh hafnpes  
ifllqhackendyaqfkayseavnknrt dhirhll efkactpididqvepvsdivkrfntgamsygsisaeahetlaqam  
nqlggksnsgeggedakry  
evqv dgsnkvsai kqvasgrfgvtsdylqhakeiqikvaqgakpgeggqlpgtkvypwiaktrgstpgiglisppphdi  
ysiedlaqlihdlknankd  
adiavklvsktgvgtiasgvakafadkivisgydggtgaspktsiqhagvpweiglaethqtlklndlrsrvkletdgkl  
ltgkdvayacalgaeefgf  
ataplvvlgcimrvchkdctcpvgvatqnkd lralyrgkahvvnfmhfi aqelreilaslg lkrvedlvgrtdllqrs  
tlkanskaasidvekl lcp  
fdgpntkeiqqn hlehgf dlnlyevtkpyiaegrrytsftvneqr dvgvitgseiskqygeaglpentinvytng  
agqslaayapkg lmi hhtg  
dandyvkg lsggtv i vkapfeerqnei agnvsfygatggkafingsagerfcir nsgvdvvvegigdhgleymtgghv  
inlgdvgnfgqgm sggia  
yvip sdveafvennql dtsf tkikhqee kafikq m leehvshtnstraihvlkhfriedvvvkvipkdyqlmmqkih  
hkslh dnedeam laafydd  
sktidakhkpavvy  
>tr|E5QSI3|E5QSI3\_STAAH  
meikqlryfi evakrehiseta lelniaqsaisrqitlleqelnsvl fkkqgrnitltsegkllfnealriehldstie  
qfshgltknksiyigyne  
sdvshmlpliqtfhlqndthvipn llehdtiinsv lgnidigfteltpeirkhkqlhmlplfeehylyapsddpitm  
athppliqfehshiy lcp  
faesvkkqlrki tksdvytissqplaqyl lrqkegyiissqnihl peskscidikldhtelkrticaitkepytksdigi  
lltliqq lmtktstfh  
>tr|E5QSI6|E5QSI6\_STAAH  
mtnndtiml rhyvpq dymleaqf lsesdlkfvtpeenitaamsdnery pivvmdgrqcvaftlhr gkgvapfsdnqd  
avffrsfsvdqryrkrig  
kvvmeklasfitstfqdineiv ltvntdnphama l yrqgyqymgds mfvgrpvhimaltik  
>tr|E5QSI7|E5QSI7\_STAAH  
mikvc lveetadki llvqvrnreky yfpggkieegespvhal l revkeelnl tltmdeieyigtivgpaypqqdm ltel  
ngfral tki dwenvtinne  
itdirwidkdndali apavkwietydgkhk  
>tr|E5QSI9|E5QSI9\_STAAH  
mssninllyi iksyndvfvinsdkknvrkvmqeedfkvqkkviaa igtsaisavaatqanaatthtvkpgesvwaisnk  
ygisiaklkslnnltsnli  
fnpqvlkvsgssnsts nssrpstnsgggsyytvqagds lsl iaskygttyqimr l ng l nfffiyppgklkvsgtassn  
sts nssrpstnsgggsyyt  
vqagds lsl iaskygttyqimr l ng l nfffiyppgklkvtnastnsgsttttrgyntpvfnhq nlytwgqctyhvfn  
r raeigkgistyw nannw  
dnaaaadgytidnrptvgsiaqtdvgyyghvmfvervndgsilvsemnysaapgil tyrtvpayqvnyryih  
>tr|E5QSJ0|E5QSJ0\_STAAH  
mkilkgidrmkr liglvivalvl laacgsndkkvtigvasndtkawekvkelakkddidveikhfsdynlpnkalndgd  
idmna fqhfafl dqykkah  
kgtkisa l sttvlaplgvysdkikdvkkvkdgakv vipndvsnqaralk l leaagliklkkdfglagtvkditsnpkhk  
itavdaqqtara lsdvdia  
vinngvatkagkdpkndpif l eksdsd avkpyinivavndkd ldnktyakivelyhskeaqa lqedvkdgekpvn lskd  
eikaietslak  
>tr|E5QSJ1|E5QSJ1\_STAAH  
mfgsd ldsaql lqalyetlymvsial flgavigiplgvll vitrkqgiw pnvihqvl npiinilrslpfiilliaivpf  
tklvgt sigttaivpl t  
vyvapyiar lvens l levdegieaakamgasplqiiry flipealgs l v laittaiigligstamagavggggigdlal  
vygyqrfdtviiitvivil  
vvivqviqt lgnvlarfirrh  
>tr|E5QSJ2|E5QSJ2\_STAAH  
mmiefrqvsksfhkkqtidalkdvsftvnrndi fgvigysgagk stlvrlvnhleasngqvivdghditnysdkmmrd  
ikkdigmifghfn llnsat  
vfknvamp l lskkskteikqrvt emlefvgl s dkkdqfpdelsggqkqvai aralvtnpkillcdeatsaldpattas  
iltllknvngtfgit immi  
themrvikdi cnrvavmekgqvvetgtvkevfsy pkttiaqnfvstviqt epspslirr lndkqv gdfkdykifveetqm  
tqpiindliqicgrevkil  
fssmseiqgntvcymw l rfnmdqqfdgta inqyfkekn iqfeevh  
>tr|E5QSJ3|E5QSJ3\_STAAH  
mimnkktkl ihgghttddytgavttpiyqtstyl qddigdlrqgyeysrtanptrssvesvias lengkhgfafssgvaa

Tsompanidou\_et\_al\_Supplemental\_FASTA\_File

isavvmlldkgdhiilnsd  
vyggyraltkvfrfgevdfvdtthtdsivqairsttkmlfietspnlrvtdikksaeiakehglisvvdntfml  
yqnpdlgidivlshatk  
ylgghsdvvalvatsddklaerlafisnstggilgpqdsyllvrgiktglrmeqinrsvieiikmlqahpavqqvfhp  
sieshlnhdvhmaqadght  
gviafevknatesakqlikatsyytlaeslgaveslisvpalmthasipadirakegitdglvrisvgiedtedlvddlqk  
aldtl  
>tr|E5QJ4|E5QJ4\_STAAH  
mkkgfihligmsdegasmitydligntplvllhysddkvkiyakleqwnpggsvkdrlgkylvemaiqegrvrageqtiv  
eatagntgiglaiaanrh  
lkckifapygfseekinimialgadvsrtsqsegmhaqlaarsyaekygavymnqfesehnpdyfhtlgepeltalq  
idyfvagigsgtytgstar  
ylkqhvhvqcyavepegsvlnggpahadtegegsekwpiflerslvdgiftikdqafrnkslakheglvgsssgaal  
qgalnkaqlsegtivvvf  
pdgsdrymskeifnyeendye  
>tr|E5QJ6|E5QJ6\_STAAH  
mriktpspsylkgtnghailhsftgtrndvkhlaaelndqgfscypnypghl11kdfitynvddwveevkayqf  
vnegyesisatgvs1gg1m  
tlk1aqhplkriavmsapkeksddglieh1vyysqrmsn1lnldqqassaqlaaidyegeitkfqhfiddimtn1nv  
kipan1lfggkdapsyets  
ahfiyeh1gsvdkelng1kdshh1mthgegrdileeni1rffnalt  
>tr|E5QJ7|E5QJ7\_STAAH  
mdnicmkm1rgdckm1dkk1tspkmtvplflialivfigmfysvvt1qew1knidmgs1twftdyfgepqrqyvnn1f  
nyymtfsaeigdvkgvvl1  
siivtiilfikqrh1avwfvtylvsgvimnk1ikdvt1rprpynh1avdtgfsfpgshnast1lyfal1m1i1i1svaakt  
mtkv1salvmgilw1silf  
crlyfhahyfsdviggtslaiiwwal1mvyp1finhrrqrv  
>tr|E5QJ8|E5QJ8\_STAAH  
mls1ismchkfhftdnikiikfillcilqikhciieiticyf1qfstiyiytegvgrinrvifvyial1i1tlvrfftpi  
hpsfsn1iywifvlyfipi  
ilcvigfkaek1iatmvi1pnflgilyrlyayvth1lfm  
>tr|E5QSK0|E5QSK0\_STAAH  
mkgmttq1n1nsvienakrvitplspisifaarnpwegleadt1fedvakw1rdvrdvdi1fpnk1iesavargel1desvf  
nq1vtdm1lehhynipqhy  
inlyidn1kt1kdvpasymhnsnv1dvad11lek1skrdmaesyhydv1rpsmdai1deqgepl1seqvnrqmikwtklyid  
qf1sswtmpkreqsfy1haw  
1h1aqhdhs1ftkagrqv1kg1pndpkmt1esv1nhfsiaqedyqayvegh11alp1gwagily1yrsqqhhfeqh11tdyla  
ir1lvveq11vgdefksv1tk  
dcesrsenw1fk1qtvaswcy1sdmpsdv11qhdvneiq1tfihfaatmknv1fkn1lw1iawemtyesq1kqkikaghesvag  
aldv1nqv1ntendnangsh  
svs1natqav1dennse1nqvgtstkaqiafcidvrsepfrrhieaagpfetigiagffgl1piqkdavdeqfkhdslpvmv  
ppayrikefadrydm1nvr  
qqqtms1smfyt1fklmknvmpsl11pelsgpf1s1stivnsimprksras1qkikqkw1kkpetk1tidrefdrtsd1p  
vgfteqeqidfalqalk1m  
d1teafapfv1laghashshn1nphhas1ecgacggassgfna11lamicnrpnvrqglkqagvyipettvfaaaehhtst  
dt1lawvyvpdt1salalda  
yes1ndvmp1misehanrer1dk1ptigrvnhpveeaqr1fasdwsevrpewglaknasfiigrq1tkgidlegrtflhny  
dwrkdkdgk11nti1sgpa  
1vaqwin1qy1astvaphfygsgnkatq1vtvsgvgmqgnasdlmyglswqsvmaadr1tm1yhs1pir11vvvqapdfvvar  
11annehfarkvsnhw1rl  
msvnee1grfkswi  
>tr|E5QSK1|E5QSK1\_STAAH  
mlsfq11fs1fvial1ialisg11flapvmpmryik1hlyilvmpvlfavigffgihgqhvlgpfkidr1sw1lagfvma  
lgfi1qk1fsmry1lgdhhy  
rhyfp1ftait1sfas1awmsed1rlmalcwgmt11clt1l1mnvr1fwkvpresak1ssmtflcgw1lafvgaivsiyiatg  
ewrvpqhiahtws11tnv  
11v1lavmipaaqfpfhrw1iesvtapt1psaimhagivnaggv1l1trfapifdngfals111il1ssisv11lgsgislvq  
dykrq1vgstmsqmgfmlv  
qcalgvysaai1h1l1hgi1fkatl1lqsgsivkrfnipkqasakdaygwivm1grv1aiivaf1fwmssdrsayev1sali  
laws11vsw1nqm1vafskgr  
mar1vgm1lisivtfiyi1ithnyfydv1qnitthatt1p1tisvii1svvilifgs11siwvarhrysktfavlyvw1vnl1g  
earskaieshpny1kky1  
>tr|E5QSK3|E5QSK3\_STAAH  
makipvtv1sgylsgktt11nhil1qnreg1riavivndm1sevnidkd1vadggg1srtdek1lvelsngcicct1rdd11  
kever1lvkkggidqivies  
tgi1sepvpvaqtfsyidde1gid1taicr1dtmvtvvdanrfvhd1nsed11mdrdqsvdetdersiad11idqvefcdv  
11inkid1liseelak1lek  
v1salqptaki1ktt1nsevd1kev1ntqrfd1fekasesagwikel1esgghashtpeteeygissfv1ykr1r1p1fhakrfnd

Tsompanidou\_et\_al\_Supplemental\_FASTA\_File

wlesmpnvvvrskgiwvwa  
qynhvac11sqagsscnihpvtwyvasmseaaqtqilaerqdvaaewdpeygdrtqfviigtlddegaitkelclvn  
aqeidadwqqfedpyqwqi  
rpar  
>tr|E5QSK4|E5QSK4\_STAAH  
mlfvilvlyiigiafi11svfgskteglstkhtlytigsaiitiaifisigyaiqyltaalygl  
>tr|E5QSK7|E5QSK7\_STAAH  
mayeienannh1skmaikeqldrsaergmfpnleyvdsytds1tgvttasflnkdtkvltgmtgtniqgeafkklke  
gefsrqvtnaletvkdgy  
adiki1lyspasdqnyryantqefinkikskydidfitghslggrdavvlmgmsngipnivfynpapisitslnpnsdpdgr  
lleyknykgnitrfaen  
dalten1kkykhyvffgndkvfknkgghemegflteeeqkaikke1kk1kgyaennksfvkhsnaisklasiellran  
mmtanggg1sssqqkvl ds  
1tal1iaqfsq1iddein1kmynekkkkfkgkwedaqkagkavged1svnev1naldegqvnessmvrepeqmisa  
erq1stigs1svsnyimrvr  
1sineivdkdqvl1asqigg11  
>tr|E5QSK8|E5QSK8\_STAAH  
mkysnvynkaercemeyikkialymsv1111iifiggcgm1kdeqkkeeqtntkdskeeqikksfakt1dmpiknled  
lydkegyrdgefekgdkgm  
wlyssivsefkges1ksrgmi1kl1drnkrtakgsy1irel1kedknhdvqknekypvklvnnkiiptedvkned1krei  
enfklfsqygefks1ntr  
itnisynpnapsyaeyk1nddn1kq1knrfn1ksnknk11fkgagnikgssvgykeiqi1fnrnkeesvscidsie  
fkpsegdyne  
>tr|E5QSK9|E5QSK9\_STAAH  
mksikrig1c1s11111i1fvtscdgdnk1tgdskeeqikksfakt1emypiknledlydkegyrdgefkkgekgtwvirs  
emkiq1kgen1esrgv1e  
inrnr1takgny1vrevvedsdgmthnhtkrypvkmennki1p1kq1vdek1vkeieefkffvqygnfkelenykdgevt  
ynpeapiysaqyq1knsdy  
nveq1rkryniptqkap1111kgsgn1kgssvgyknieftvenkgeniyftdsvy1npsedkyny  
>tr|E5QSL0|E5QSL0\_STAAH  
mmry1nr1v1y1i1vm1svfi1igcdkssdtsekpkskskaeqikksfekt1dmpiknledlydkegsrdgefkkgdkgi  
wtiytdfaksnkqgg1sne  
gm1v1y1drnr1takghyfvktfyekdkfprkkykvemknnki111dkvedp1kkrienf1kffgqyan1kelknyngd  
vsinenvpsydakfkmsnk  
denvkq1rsryniptdkapv1kmhidgn1kgssvgykkleidfskgeksd1svids1nfqpakvnedde  
>tr|E5QSL1|E5QSL1\_STAAH  
mgy1krfaly1svmi1mfaiagcgknetkegsketqikksfakt1dmpiknledlydkegyrdgefekgdkgmwtiyt  
dfaksnkpgel1ddegm1n  
1drnr1takgy1fvkkfyekdkfdrknykvemknnki111dkvndpn1kerienfki1fgqyanfkd1lenyngdvsinw  
npsydveykmsnkdenk  
q1rsryniptdkapm1kmhidgd1kgssvgykr1eidfskedrd1svidy1sykpak  
>tr|E5QSL2|E5QSL2\_STAAH  
mkykterremgniks1falyis1111ivvagcgksdtkedskeeqikksfakt1dmpiknledlydkegyrdgefkk  
gdkgtwt11tsfksnkpg  
eiddegm1v1y1nrnr1tkkatgy1fvnkiyddi1sknqnekkyrvelknnkiv11dnvedek1kqkienf1kffsqyadfdk1k  
nyqds1ttnenipsyeae  
yk1nnsdenkk1rdiyp1ttkkapi1kl1hidgd1kgssvgyk  
>tr|E5QSL4|E5QSL4\_STAAH  
mrenfk1rk1m1kvgl1svai1tmly1imtngqaeaseanekpstnqeskvvsqteqnsketktvesnknfvk1dtikpqaqi  
tgtt1pnhyv11tvdgksa  
dsvenggl1gfveandkgefeyp1nrnr1kivhnqei1evssspdl1gedeedeeveeastdkagveeesteakvtyt1pryk  
ayeipkeq1kekdgghqvf  
iepi1tegs1i1kghtsvkgkval1sinnkfi1feesvkggvskedtkassdgiwmpiddkgyfnfdk1ktrfdn1elkegn  
dis1tfapddeedalkp1i  
fktkvts1edi1kaetkydhtk1nk1kv1dnvked1hvdei1ygs1yhtdkgk1ldkeg1tkvikg1tkfanavkvdsel  
geaq1f1pd1qvnekgefsf  
dshgagf1r1qngel1nftvvd1pitgd11snefskeidi1eetpeqkadrefdek1entpayyk1ygdki1vgfdtndfpit  
wfypl1gek1kvert1tpk1lek  
>tr|E5QSL5|E5QSL5\_STAAH  
mk1kn1akas1algi1ttgmi1ttaqpvkaseqsr1svtsndtqel1kky1sgtgynfqnvsygrekdkmni1dgtq1nv  
t11gt1dker1fkdydydyeg  
1dvfvvregsgkqaeni1siggi1tktnkndykdfvnnvgleitkptghntatraqaetyrinkeeis1keldfk1rkhl1en  
helyktepkdgk1iritmkg  
ggytfe1nk1k1qphrmgdvidgrniekievdly  
>tr|E5QSL8|E5QSL8\_STAAH  
mk1talakvt1algi1ttgt1tteahshakqnqksvnkhdkal1hryytgnfkemkninal1rhgknn1rfkyrgmntqv  
11pgdeyrkyqqr1rhtgl1d  
vffvqer1rdkhdisytvggvtkntkts1gfvstpr1nvtkekgeda1fvkgypydikkeeis1keldfk1rkhl1iekyglyk

Tsompanidou\_et\_al\_Supplemental\_FASTA\_File

tlskdgrikislkdgfsyn  
ldlrk1kfkfhmgevidskqikdievn1k  
>tr|E5QSM2|E5QSM2\_STAAH  
mskntnlssvevqgksflfnehgyflnlnidndsniwkqgli  
>tr|E5QSM3|E5QSM3\_STAAH  
mkmtqiakts1als1l1ttgasivttqsanaevasalkteqaikskiqvttspstkvkatqptpsvtttppspnvqpqs  
pqptpsvttppspnvqpqs  
pqptpnpttphssnvetkqpspttkqaakeinpkkyd1rtyytkpslefekqfgfmlkpwttrfvmvipdwfiykial  
vgkddkkykdgpydnidvf  
ivlednkyqlkkysvggitktnskkvdhkaelsitkkdekkgishddseykitkeeislkeldfklrkqlieqhnlygni  
gsgtivistknggkytfe1  
hkk1qehrmadvidgtsierievnlkss  
>tr|E5QSM4|E5QSM4\_STAAH  
mkirtiakasia1glvttgasivttqsanaevasalkagqlakinvstsa1t1taqavnaeqnhtanpeqaaksntenvs  
ts1stqteqtpksniqkat  
qpapsgttqslpnaqqstqptpsvttppssnvetpptspttkqaakeinpkfkg1rsyytksslefknelgiikkwt  
tirfminivpdyfiykialv  
gkddkkygegvrhvdvfv1leqnkygvdkysvggitkanrkkvdyktgisitkedkkgtishdvseykitkeeislkel  
dfklrkqlieqhnlygnig  
sgtivistknggkytfe1hkk1qehrmadvidgtnidrievnlkss  
>tr|E5QSM5|E5QSM5\_STAAH  
mkrsdrysnsehfehmkhephyntyypvgk1pkkkkskrillkilltiliialfigimylstrdnvdelrkiens  
sfvsadnmpyvkqafism  
ederfynhhgfd1kgttral1fstisdrdvqggstitqqvvknyfydnrsftrkvkelfvahrvekqynkneilsfyl1n  
iyfgdnqyt1legaanhyfg  
ttvknsttmsh1tv1qsailaskvnapsvyninmsenftqrvst1ekmkqqnyinetqyqqamsq1nr  
>tr|E5QSM6|E5QSM6\_STAAH  
mpk1tkievqkknkerfn1fldeqfemgidid1vkfn1kkgqqlaadmaeiqkydhyrignkaiqylsykkktekev  
iqylqkeeiseqaisevie  
ycyreklihdqyaes1kntmirtdkqpk1yqqklyqlgiepniemftelyreqqelddi1qiaekisktkkqpnkv  
kekvmqsl1kqgfemetih  
av1nemdf1qdeav1dd11qrd1ekiynkrkkytqqk1isktieglmrkgykydkikakleesgiadgteie  
>tr|E5QSM8|E5QSM8\_STAAH  
mgssiv1k11kvthyrnkqk1kwylpfgydaqid1nnis1h1yqgealgi1gepesskamvgq11agaikpdkgkvvc  
ted1fygyiedqsl1hqtv  
eaytaqlvqlfpyeinhhkaeqi1qyahlgdytkpvnhiskaayaq111siarssksni11nhvidyltpqfmerai1e  
1ndyienn1t1visgddi  
dk1sqvsnyiawfshgq1rmegs1kqvipsfkeherd1s1nskeeienfd1dwkknrtripemtynfkrverynhakpp  
kflvrft1asgti1glal  
mm11ifnig1i1s1tdftnratmqnenkdp1ygeklaygiafngsvd1qgdqvtipkysvvtitgensknyrvtadnkty  
yvsdk1leyfnpag1yqth  
sfkklapfmsnysnyayfnsq1hkkhssvikt1vpdddnr1vasvtqppi11fndnnqlygfvypivdkkelkdkfn  
innniw1tkvngycian1  
kedkwiyie1  
>tr|E5QSM9|E5QSM9\_STAAH  
m1dnii1lyfkn1phtkryvter1kqswksfliv1aac1iliiaset1fsfsh1tdvkevrw1fr1ialivfav1mftiyi  
syhhymndf1vtklfnisa  
atp1vimsi1sfim1v1l1tmisa1vkpvnfetsyialfyfivmatifvg1isvtfg1ir1ll1tekini1fygicvl1cfl1v1  
pi1fi1pn1nh1vfin1hil1m1  
npmyyivngiaqsii1fg1ssmenipyhfyf1fl1cliaavn1v1larytthaiynktskvtqtdnqddvskdstdeadts  
>tr|E5QSN0|E5QSN0\_STAAH  
mdtathiaigvg1talatqdpamastfgatatt1ivgs1ipdgd1v1k1kdnatyishrgithsipftilwpilitfli  
ftffsgt1n1fhvwmwaq1a  
v1lhv1vdi1fnsygtqalrpi1nkwiq1svintfdpi1ftv1lcigiv1wvvg1hplavffpiialliiymirfkmravi  
kqa1kaiqqehhp1kvfv  
aptikf1mewrvaigtadahdyvgkaygrnv1v1fsdkverq1st1dsi1lwkvkgnkdi1rtf1nfssiy1rwq1tt1ladgsteir  
li1d1ry1kndhys1vaiah  
vtkdnv1dhsy1gwvftedk1qrk1yak  
>tr|E5QSN4|E5QSN4\_STAAH  
mntn1rys1n1kgas1fl1rlgari1fktgiai1lamsias1lpddvg1kalagvsavvamqpsiyrsfktvsdqalgniig  
ai1svtmvti1fsdnfiimg  
vtviv1liai1lfkfn1lahvatlasvta1iimgqhtgsfyitafyrfv1vmigviss1lvnfv1flppk1fetkiyyns1niss  
di1fmwfk1v1lndt1tefn1i  
kqds1h1kqrvek1eki1ydyseerpi1tkkhi1hqnrk1kil1frevv1qttrqayev1n1ksryqnd1y1l1nnn1fl1qik1d  
1ds1tafheq1las1skka  
rynvthvdyel1dnpqk1d1l1stf1qhel1nhpyqteysfanvmqivaieeyrh1hle1ldris1fftyhrs1dadieivee  
dfd1  
>tr|E5QSN6|E5QSN6\_STAAH

Tsompanidou\_et\_al\_Supplemental\_FASTA\_File

m1qkgeqfpi fkl enqdggtvitndt1kgkkaivyfyprndtptctteacdfrndlemfndldvavygisgdskkkhqnfiekhglnfd11vdedfklak  
etgvyy1kksfgkesmgivrttffiideqgkvl dviekvkvtqieelkn1lg  
>tr|E5QSN7|E5QSN7\_STAAH  
mkvvglnrmrevetelqqrfsdvdfkfykkaseipesd1anldilvgydggineaf1rrcpnlkwiawfatgvnt1pldy  
iadhgilltnkgvqakql  
seyilafilddykkm1sydnqrqhiydskitgkr1sgqtv1flgtgaiatrtaklakafnm1ig1sksgqnkdefdei  
ytieslest1pnadivina  
1petqeti11kktf  
>tr|E5QSN8|E5QSN8\_STAAH  
mkdealfinigrsivkealliev1ksrvirhayldvfenep1kpnhelyeldnvtitahitgndyeakyd1ldifknn1  
vnf1nkng1ienevdakkg  
y  
>tr|E5QSP1|E5QSP1\_STAAH  
mkclirfilv1g11issamvyinpaayaedqkwekikergelrvgl1sadyapmefhtvngkteyagvdi1lakkiakd  
nn1k1kivnmsf1d11gal  
ktgkidii1sgmtstperkkqvdfdsymmtknim1vkdkvndykdkdfnkkvgaqkgteqekiaqteienasits1  
sr1pdvilal1ksgkvegvv  
vekpvaeay1kqnpk1gisnvkfneekdtviavpkdspk11sqinktikevdkglidkymtnaanamnddsqfiskyg  
sff1kgik1tilis1igva  
1gsilgafvalm1skiki1swiasiyieilrgt1pm1vqv1vffgitaalg1disalvcgtialvinssayiaei1rag  
inavdkgqmeaars1g1ny  
rqtmksvimpqaikn11palgnefv1tikessivstigveimfnaqvvgisfdpft11vaaalyfv1tfv1trimm  
iegr1nasd  
>tr|E5QSP5|E5QSP5\_STAAH  
mqtkrsveimamnfkvfdnsq1vaeyaadi1rkqfnnppttiagfhl1dtdqapvl1delkniekhavdfsqin1ldyddk  
ksyfealgvpagqvyp1ay  
ekdaie11adki1ktenkgk11t1qvvs1deqgk1nvs1rqg1meareif1vvtgankrdvveklyqengktsfepad1ka  
hrm1vnv11dkeaaag1ped  
vkayf1srfa  
>tr|E5QSP7|E5QSP7\_STAAH  
mk1eeiyifm1gkywiq11iatviis1isikafplaigaly1piifkvik1q1n1skgliddvnaqtfiksnqsgivisv  
ic111itgilyyt1dgfy  
s1tg1gt1valnpyttivsav1y1l1taiatveatktkyrn  
>tr|E5QSQ0|E5QSQ0\_STAAH  
mnwsd1meqrtr1al1keiaef1neetemysmtqgalky1iegsnfttgwiffinsvgehelvshvalpqs1tadhchyi  
kdgscwcvkafnqrr1mka  
sn1vncsrin1askafpsqndni1thhatvp1ksgqe1qf1nvaspnteisysded1ellesvaf1q1gsaikriy1tdrek  
eaakinernr1ard1hdsv  
nq1m1fsvk11tahaaygm1snesiakqafktieetsqnavnemrali1wq1kpvg1eggl1hal1taysk1mhiq1lnv1veg1i  
d1sneieeniyra1qecin  
nvkkhadtnkmd11t1kq1mndi1y1dvi1dygg1feidnvqiasshginnikqrvk11rgkvtfhsqptkgtq1qftipik  
>tr|E5QSQ3|E5QSQ3\_STAAH  
mna1fii1fmivvgai1gg1t1nvai1rm1fhp1fkpyy1fkfrvpftpg1ipkrreeiatkigqvieeh11tet1linek1k  
seqsqqaiesmi1qq1qk1  
tkdq1sikq1tsqid1dleq1vtngnqyiasq1lnnytkhqntias11pnq1vt1fdqhdnat11l1cdrarny1ssa  
kgtq1d1nd1dtffnek1gk  
1ig1m1qm1f1m1kesi1adri1qel1ir1tshpkarav1ts1itneyq1tfk1dks1nk11d1tsq1fne1iaen1smyvttyaskqan  
kpvt11mpq1fdv1lesq1s  
sklan11ieq1s1ih1st1imkkvd1rg1lieeq1ntfd1dyek1lieianek1klims1g1filggi1gffqglvaifv  
>tr|E5QSR0|E5QSR0\_STAAH  
mnpkqyfsihkyd1renhykqr1tvignqt1firaikkr  
>tr|E5QSR4|E5QSR4\_STAAH  
mrnqatt1fnkr1hal1rkeknnyknfifnghfmv11l1llgafifgygew1khiptn1nfs1liaaviva1tsifp1mrp11  
keadki111pfe1k1hmsq1fm  
rhailysyfariliq1liivivm1f1fynin1qhnvafyicfgvsalifpyvg1r1r1wqwyqsg1ktwqvn1isfiifal1ty  
y1111apkwyt1fvmvalpv  
lieflvkkypg1f1ypwek1miaiehrh1mnykfvm1mftdvk1h1kesavr1rsy1d111pv1pkgnkfn1snamy1fl1firsf  
igrd1afn1i1fr1viiav1  
1m1vw1syplvtai1ig1lfvyi11l1qma1qfysq1qay1g1wpq1vwp1pedk1vikgyeq1flyr1mf1victv1faltfiikhmt1f  
yv1l1fyivg11t1irs1iik  
k1kyqet11rd  
>tr|E5QSR6|E5QSR6\_STAAH  
mvh1knnti1k1mikgeet1h1tpvw1mrq1agsq1peyrk1kekys1fdi1thqpe1cayvth1pvdnyhtdaailykd1mtp  
1kpigvdveiksgigpvi1h  
npikti1qdvек1sq1dperdvpyv1dtik11teek1nvpl1ig1ftgapft1asymieggpsknynftkammyrdeatwfa1  
mnh1ldvs1vkyvtaqveag  
aeliqi1fdsw1galnvedyrryikphmi1r1isevkekhdpv1ilfgvgash1inewnd1pidv1gl1dwrtsin1qaqq1g1v

Tsompanidou\_et\_al\_Supplemental\_FASTA\_File

tktlqgnldpsillapwnv  
ieerlkpildqgmengkhfnlghgvfpevqpetlrvkvsfvhtytqr  
>tr|E5QSR7|E5QSR7\_STAAH  
mtkkmgllvmaygtpykesdiepyytdirhgrkpseeelqdlkdryefigglspagttddqadalvsaln kayadvfk  
lylgllkhispfiedaveqm  
hkdgitteaitvvlaphyssfsvgsydkradeeaaqygiqlthvkhyeqpkfieywtknvnetlaqipeehkdtvlvvs  
ahslpkglieknndpypqe  
lehtallikeqsniehiaigwqsegntgtpwlgpdvqdltrdlyekhkyknfiytpvgfvcehlevlyndyeckvvcdd  
iganyyrpkmpnthplfig  
aivdeiksif  
>tr|E5QSR8|E5QSR8\_STAAH  
mtksvaiigagitglssayflkqdpnidvtifeasnrpggkqsyrdgymielgpesylgrktimtelakdigleqdi  
vtnttgqsyifaknklypi  
pggsimgiptdikpfttklispfgklragfdl fkkptmqmgndisvgafrarl gnevlenlieplmggiygt didkls  
lmstfnpnfkekeefgsli  
kgmkdeknkrllkqrqlypgapkqgfkqfkhglssfiealeqdvknkgvtiryntsvddiitsqkqykvysnqqedvfdg  
vlttphqvflnwfgqdp  
fdyfkmdsttvatvvlafdekdientydgtgfviartsdtditactwtsskwpfttpegkvlirayvgkpgdttvddht  
ddelevsvrrdl sqmmtfk  
gdpeftivnrllpkssmpqyhvghiqqirqiqahikqtyprrlvtgasfeavglpdcitqgkvaeeviael  
>tr|E5QSR9|E5QSR9\_STAAH  
mssfgyhsiaakpsssiqfheipaesimiytlpplynlkmthfhtl skgvaptptpsnn  
>tr|E5QSS0|E5QSS0\_STAAH  
mkgenemtdviihsmhgnsrnhwyqwehnltegydvtlfnfespeantvdqwieamtkqinvrkkdyfvthglgsi  
tal kyiemidqpiegffsi  
agfkedaenidldl snvtidydnikkvdfnyglsskndkyvsyketqrlmnalegnlrivedgghfleedgfetfta  
lqdrmqdymtr  
>tr|E5QSS1|E5QSS1\_STAAH  
mqsrariyflilfivslfetkifqfmtlnflayipfelslllrlfkpnkkyewplfiysfifvlllntfymvtdl  
ihlnqfqnfyaglnlgew  
kyftylllgvflavyvmiliyfeiltltshrwlnrlivvvlmflngfgiyigrflrlhsvyffneplhvlnhilesltlk  
tamfvcfmvmmqaaillfg  
kgvrlnk  
>tr|E5QSS3|E5QSS3\_STAAH  
maiavllnrmfrmhnpifeyiyqqkedi dacyfiipeedmssasdlkaqfyrgtlqrfyqslhaekltpyvmsyddiis  
fckennisevviagdmsy  
hleeydilhqrslnfeariavtlirgnhyfkasktmnqqgepykvftsfskkwrpylrhrdvyhydlsfedfviaspdd  
lvddiafgssqieqkw  
qhflddiqnyesgrdylpevltsqslvalayglldiiefndllarydedeanyeafirelifrefyyvltmqypetsy  
qafkskyrqikwsqneadf  
nawcegqtgfpidaaimeltqtgfmhnrmmvvsqfltkdlfidwtwgekffrkhli dydaasnihgwwsastgt dav  
pyfrmfnpirqserfdpka  
lyiktylpinfidakylhdtqrnesnl felgie lgrhyprqmvdhqekrtqvlaafka ld  
>tr|E5QSS4|E5QSS4\_STAAH  
mfikiviiklrlnkgvtvmsevkkvkkheqqkkekktkkqykpfiwmsfiilivlllpapsslpmakavla ilafavi  
mwvteavsy pvsatliigl  
milll gfspvqnlgek lgnpksgsavlagsdl lgtnahslafsgfatsava lvaalflaaamqetnlhkr lallvlsi  
vgnktrnivigaiivsi  
affvpsataragavvpillgmiaafkvsksklasl iitsvqavsiwnigiktaaaqnivainfinhqlgfdvswgewf  
lyaapwsivmsialy fimi  
kvmppeinti eggkdlikeelhk lgpvsarewrlivismllllfwstekvlhpidsasitiialgvmlmpkigvmtwkhv  
enkipwgtiivfgvgislg  
nvllktgaaqwl sdqtfvgvlglkhlpiatialitlfnilihlgfasatslssalipvfisltstlhlgdqsigfvliqq  
fvisfgfl lpsapqnm la  
ygtgtftvkdf lktgip lti vgi lvi v f s m t y w k w l g l l  
>tr|E5QSS6|E5QSS6\_STAAH  
meqiminhyvhfsrlvqgfwranewkmtakelnyfine lvergittmdhadiygdyqces lfgnal d l s p e l r n k i q i v t  
kcg i i l p s k q f d f t n g h r y  
dlsskhi vksveqslinlnvdyldsllihrsp lmdpeqvada ltklvkqgk lksfgvsnfnhsyqllnqyimkerlhi  
singlel spyhvdslqdg t  
m d s m y q n h v q i m a w s p f a g g k i f d k e d i k a q r i m k v i q s i a d k y g v s d t a v m i a w l v k i p h r i m p i l g t s q l k r i d q a i e  
glqlnlddqswfdiytaii  
gq dip  
>tr|E5QSS9|E5QSS9\_STAAH  
mktrlkfqvdkd lllai vvgvcgs lvalamfflsgymvtqsalgaplyalmilvvtvklfgflraitryverlishkatf  
tmlrdi rvqffgklvnpv  
nyrk lssdl srmisrvealqniylrvyppvvg lta lvtvivilafisighallimvsm lftllivpwlsskkartl  
kkhaaneqarf lnhfydyk

Tsompanidou\_et\_al\_Supplemental\_FASTA\_File

agmdelrrfnqinhyrnnlmaklnhfdklqlkeqrfltiydfilniamlsifgslvlgliqinagqlniymtsivlmv  
l1lfeqavpmtnvayykad  
tdqalhdinevisvpstngnkrlnkydatniyevkdasfkywnqptyvlsdinfvnrgekiaivgpsgsgkstllqim  
aglyqldsgsirfenmdmf  
eiddkdkfealnvl1qsqq1fdgtirqn1ftdekdeavqai1fkq1dlehlalerqidldght1sgeiqrlaiarm1lkd  
tastwildepttaldkqns  
1kvmdlieahaetlivathd1t1srfetiivmingkivekgyqq1lanqgalwnmiqyna  
>tr|E5QST1|E5QST1\_STAAH  
mfiielikgiilgivegltefapvsstghmilvddmw1ksseflgsqsaftfkiviqlgsvfaaawvfrerfleilhighk  
hkhvegdnqqrskpr1  
n1lhv1vgmvpagilgl1fddfielh1svptvmig1fvgaiymi1adkysakvknqptvdqisyfqa1fvigisqavamw  
pgfsrsgstistgvlmkl1n  
hkaasdtf1mavpim1laasgl1l1khyqdiadi1pfiylgl1aaftvgliaktflhlinkiklipfaiyrivlvifi  
ail1yfgfgigkgi  
>tr|E5QST2|E5QST2\_STAAH  
myhrvckinkvimearsmdkkkvikfminvlpivlpliverkrikqhpvdqkvtdatskvasktsaa1sntasdvkeyv  
gdkkqdfenkrelkkfare  
hdpayiekkgek1akqnrkdadmki1lqkniekrhkeeqkareknei1qrikdmkksqkyevkag1tpnk1dektekkgd  
klaeknrkeiakmnkl1qk  
niekrhkeeqkrqgeadkariksfkkykdyvaksasqknentea  
>tr|E5QST5|E5QST5\_STAAH  
miyceter1ilrdwhedd1lpfqkmnanydvrkyfpl1syrse1dmrtmdavikdygig1favedkeshqwigfig1n  
yipetsdypfkel1plyeig  
wr1lpefwgkglategakat1klaeqhqi1dvysftaeankasqrvmekigmtvydhfel1pn1skyh1lkrqvryyin1r  
k  
>tr|E5QST7|E5QST7\_STAAH  
mkl1iisimai1ml1tgcgksqekat1lekdi1dn1qkenkel1dkkkek1qqekek1adkqkd1lekvkd1kpskednkddk  
kdedknkdkdeasqdkqs  
kdqtkssdkdnhkkptstdkdqkandkhqs  
>tr|E5QSU1|E5QSU1\_STAAH  
mtiv1wl1iiaafmlafvglikpi1psvl1wv1gfl1yqfgfhnqhl1swfvysmall1til1l1cadflankyfvnrfggs  
kfgeyaaligv1gcfvlp  
pfgi1i1pfi1lvfiveliqgysferavkvsigsivaf1tssiaqas1ghks1kkq  
>tr|E5QSU4|E5QSU4\_STAAH  
mtvkvki1dkrhwr1idreytevkvnrrfkgi1glvtmkkvr1p1evtvvgqni1vaddnykw1qil1pekkrysitvm  
fdnkg1npleyyfdi1nikni  
tqkgnartvd1cl1dv1alpsgeye1vdedd1mfaleseqitkqfheaymiahqimaelendfkgfqqkimycfnkinak  
aqk1hqkppqktnfeksq  
ikpkqynqtknhgqkkn  
>tr|E5QSU5|E5QSU5\_STAAH  
mksaeqwidel1q1eshpeggyfretirev1kdgrrapfssiyf1l1tddnishf1ridadevwy1hagds1tihminpdge  
yttat1gtdiqngdvl1qya  
vpkgti1fassi1sntys1vgmcqpa1fefkqfel1fkqsel1tqyph1ksviekyalk  
>tr|E5QSU6|E5QSU6\_STAAH  
mgrkwnnikkagkdkntsriyakfgkeiyvaaksgepnpesnqal1rl1vleraktysvpnhiekaidkakgagdenfd  
hl1ryegfgpsgsm1l1vda1  
tnnvnrtasdvraafgknggnmgvsgsvaymf1dhvatf1giegksvdeile1t1meqdv1dvnd1vidng1t1vyaepdqfav  
vqda1raagveefkvaefe  
m1pqt1die1seadqvtfek1ida1led1edvqnvfhnvd1k  
>tr|E5QSU7|E5QSU7\_STAAH  
mrktmaekfki1imteal1yiwgcni1ntek1et1l1gfykqykal1seyidkkyk1sl1nd1lav1d1tmkhckdekvlmqsf  
l1ktamde1n1sr1tk1l1vsi  
rr1ieker1skvrsskderkiy1l1nddi1skfna1fedveqf1ni  
>tr|E5QSU8|E5QSU8\_STAAH  
maksclh1l1tnneyatt1rcqdgiv1fwpidgeie1lqkfrkskii1eddiyi1nh1dvfsiknnkktim1yl1ssdwfael1gf  
tffnyhytak1likssyn1k  
c1l1k1l1tyry1dnq1ndav1rkl1qdi1kii1akeasmdk1kiaqnyryayyg1rd1eleyiqnvnr1t1lksvadk1fv  
sksn1ssqfhl1mgmgfkk  
yid1tkigksie1l1ttdstisniseh1gfssstysk1mfksymdi1tpneyrn1skfnksim1npeplvggmaeqevkevi  
1nyidhyknh1tdvihide  
dkfeipk1fqtviqintytemk1lv1leg1fkt1l1nknsqvffimp1ilkskntmseeekfti1ktiiesn1kiafnind  
iettyyveefm1nvi1rqls  
pneinhnn1yevhfvd1sl1meirtiyrm1kl1hnm1lnvkl1gnitc1fdkpsvfks1v1sqikr1k1f1ds1liidnan1ss  
p1lmg1esde1l1l1kni1lhfk  
n1lkqvine1ldieqek1l1f1nvenhk1l1nkerd1snsap1iykt1salyhnfdgfg1nif1dnhqtfnamhlydkngfkt  
l1gl1lekfi1eyvskpkyen  
sys1fdieny1c1l1vydwr1viesetimsnfedsqy1infknni1ndkyliviet1densgnih1liskel1rdkyewnp  
l1skidnyl1kpaieikehn



Tsompanidou\_et\_al\_Supplemental\_FASTA\_File

fsnnslninvtfnalyiikgnntliciakfnlhllviltty  
>tr|E5QSU9|E5QSU9\_STAAH  
mthkttveggiilsqntnhsyyhqnaqaiskvwlyfmyywiifgigcylgqflplswrqplsfglliiilatlvfera  
rrfgliishiyavviglls  
yatfttylqnlqpdifyknialaifafiafgiigyffvgdassigkylfvtlitliiasligiflqnpifytiitvvsll  
lfllytlydfnrllkrgdys  
premgfnlfinllniikdiylanmfr  
>tr|E5QSV0|E5QSV0\_STAAH  
mkklafaitatsgaaafllthhdaastqhtvqsgeslwsiaqkyntsvesikqnnqldnnlvfpgqvisvggsdaqnts  
tspqagsasshtvqagesl  
nianrygvsvdqlmaannlrgylimpnqtllqipngsggttptattgsngnassfnhqnllytagqctwyvfdrraqags  
pistywsdakywasnaand  
gyqvnntpsvgsimqstpgpyghvayvervngdgsiliseznytygpynmnyrtipasevssyafih  
>tr|E5QSV3|E5QSV3\_STAAH  
msfneiifknfrqnlshyaiylfslitsvllffsfvalkythsinitetypiikegsqvgysylffiiivaflllyanvlfl  
krrsselalyqtlglskfn  
iiyilmfeqllifsitailgitigifgskillmivftllgikekvpifsfraffetllligvayfltaaqlilvlkqs  
iselskhqakqmnhkit  
feevilgilgiliisgyyyslrvhydaigvlmfilfatvigaylffkssvslvfkiiksfkkgvisvndvmfsssim  
yriqknafsltmiaisai  
tlsvlcfaaistratlsseikytsphdvtikdqkanqlaselnnrkiphfnykevihtklykddlfdikakepynvtit  
sdkiyiptdlkrggadlfv  
aegaikdlvkhkhkgkavigtckhhvdiklrkdinkiyfmdvdllggptfvlnqdqyqeirkytkpkhivsqfgfdlkhk  
kemlalekatnkvdksiet  
rseaississltgillfvtsflgisfliavcciiyqidetedelenysilrklgftqkdmakglkfkiafnfglplvi  
alshayfts laymklmgtt  
nqipifivmglyicmyaifamtaynhskrtirhsi  
>tr|E5QSV5|E5QSV5\_STAAH  
mnnlkwvvyflksrkniwifwiflflnilmlgislidydfpidslfyivslnlsltflilflilffkevlyrhfekdeiee  
ikhkdlactpqrhtvdyll  
yrqilahkdkvvdqqlqnmheqtitefvhdiktptamkllidqeenqerkqallfewsrinmldtqlyitrlesqrk  
dmffdyvslkrmvideiq  
trhisqvkigifdldfkvdnhvytdikwcrmiirqilsnalkysenyndistelidqhvaliikdhgrgiskdkmpri  
ergftstannrnettssgm  
lylvsvkdqllgillqvtstigkttvklifplqneivermsevtnlsf  
>tr|E5QSV7|E5QSV7\_STAAH  
mkpkvllaggtgyigkylseviendaelfaiskypdnkktddvemtwiqcdifhyeqvvaamnqidiavffidptknsak  
itqssardltilaadnfr  
aaainqvkkviyipsrydnetierlgaygttvettlsvfkrslvnvelqvsydvdrstmkvvlpkgwtlknvnhfia  
wmgytkgtfvktekshdqf  
kiyiknkvrplavfkivetadgiitlillsgslvkkytvnqgklefrlikessvyihlydyiprlfwpiyyfiqapmqk  
mmihgfevdcrikdfqsrll  
ksgenmkytk  
>tr|E5QSW0|E5QSW0\_STAAH  
mnkdnkwtmitalfiavisvllaflhfkqhydqttnenhankdkiniknknvriyqnltynrvyvpsklidiitpvdmsna  
klpvifwmhgggyiagdkq  
yknpllakiaeqgyivvnvnyalapqkyptliqmnqatqfikenkmnlpidfnqvviggsagaqlasqftaiqtannq  
lramkfdqsfkpsqikga  
ilfggfynmqtvretfprqilfmksytgeedweksfkniismstvkqstknypptflsvgdsdpfesqniefskklqel  
kvpvdtlfydgthhllhqy  
qfhlnkpesidnikkvllflsrntsssgiqteekpqiensnelplnpln  
>tr|E5QSW1|E5QSW1\_STAAH  
mmmnkeatkigfayvgivvgagfstgqevmqfftkyglwaylgviisgfilafigrqvakigtafeatnhestlqyvffe  
kfskvfdyiliffllfgiav  
tmiagatfeesyntptwlgalimtlaiyvtllldfnkivralgvvtpflivlvliagvylfkghvs laevnqvpea  
siwkgiifgtiyyglafsv  
gfstivaiggdtekrvtsgagamyggiityvllalinalqseyptiknasiptlannihpliatvlsvimlavmynt  
ilglmysfaarftepskk  
yhfivimmvagyllsvfgfaelinklytimgyvglfivvaviikyfrknadkkhia  
>tr|E5QSW3|E5QSW3\_STAAH  
mkimpkiilvshskeiangtksllkqmagdvdiipigglpdgsigtsfdiiealtkldddalcfydigsemnldmaie  
mydgnhhvlkvdapivegs  
fiaavklsiggsiddalaeikqsf  
>tr|E5QSW4|E5QSW4\_STAAH  
maqmkvndmkarllnleetfkkheselteleidraigdghgvnmvrgfssllkdkliddssmqslfkstgmalmsnvggasgp  
lygfsfvkmsavakddmdn  
qdfiklqafaeavesrgkvtlnektmydvvaraeklkngetlftndlqqladntkdmvatkgraayfgeeskyidpg  
aqsmvyilnaligdedna

Tsompanidou\_et\_al\_Supplemental\_FASTA\_File

>tr|E5QSW5|E5QSW5\_STAAH  
mmkklinkketfldmiegmliahpelldiantvivkkakkeqgvaivsggsghepahagfvaegmldaavcgevftsp  
tpdkileaikavdtgdgv  
lvvknyagdvmnfemagelaemeginvetvivrddiavtnevqrrgvagtvfvhklagylaekghslteiksveallpe  
iksigmaiepplvpttgky  
gfdieddkmeigigihgekghreevkdidhivgtlldeleykevtanevivmvmngmgtplseInivtkyiqnlaartv  
nvakwfvgdymtsldmqgf  
sitiivpnkpeyleafapttsqyfk  
>tr|E5QSW6|E5QSW6\_STAAH  
missnnkrrqwialavfsillflgctwsitsgeynipverffktligqgdaidelilldfrlprmmittelagaalsiga  
ivqsvtknpiapgilgin  
agggfaialfiaigkinadnfvyvlpilisilggitaaliifisfnknegvtpasmvligvglqatalyggstitimskfdd  
kqsdfiaawfagniwgdew  
pfviaflpwvliiipyllfksntlni ihtgdniarglgvrlsrerlilffiamlssaavavagsisfiglmphiakri  
vgprhqlflpiailvgac  
lviadtigkiilqpggvpagivvaiigapyflylmyktnv  
>tr|E5QSW7|E5QSW7\_STAAH  
mikrtinmtrenptplkflsyiiglsmillitlfistligdakiqastieaifnynpsnqqniineiriprniaavi  
vgialavsgaiiqgvtrng  
ladpallignsgasfalalyavlpntsflilmfagflgailggaivlmigrsrrdgnpmriilagaavsamltalsqg  
ialafrlnqvtvfwtaggy  
sgttwshlkwaiplisialiiltiskqltilnlgelakglqnvtmirgicliamilagiavaiagqvaavfvglmvph  
iarfligtadyakilpltal  
lggilvlvadmiarylgeapvgaiisfigvpyflylvkkggrsi  
>tr|E5QSW0|E5QSW0\_STAAH  
mflliniiglivflgiavlfsrdkniqwqsigilvvlnlflawffiyfdwgqkavrgaangiawvvsahagtgfafas  
ltnvkmmdmavaalfpill  
ivplfdilmyfnlpkiiiggigwllakvtrqpkfesffgiemmflgntealavsseqlkrnemrvltiammsmssvsga  
ivgayvqmvpgelvltaip  
lnivnaiivscllnpsvveekediyslknneverqpfssflgdsvlaagklvliiaafvisfaladlfrfinlitgl  
iggwigikgsfglnqilgv  
fmypfalllglpydeawlvaqqmakkivtnefvvmgeiskdiasytpphravittflisfanfstigmiigtlkgivdkk  
tsdfvskyvpmmlsgilv  
slltaafvglfaw  
>tr|E5QSW2|E5QSW2\_STAAH  
mknlisiiiiicltlsimtpyaqaansdvtpvqaanqygyaglsaayeptsavnvsqtgqlllyqynidtkwnpasmtklm  
tmyltleavnkqglslldt  
vtmtkeyimstlpeisntklypgqvwtiadllqitvsnsnaaalilakkvskntsdfvdlmnkakaigmknthfvnp  
tgaensrlrtfaptkykdq  
ertvtardyaieldlhviketpkildfstkqlaptthavtytfnfslegakmslpgtdglktgssdtanyntittkrk  
frinqvimgagdyknlgge  
kqrnmngnalmersfdqkyvkiiskgeqringkkyvendlydvlpsdfskkyklvvedgkvhadyprefinkdygpp  
tvehqpiiqkantvaksm  
weehplftiiggaclvaglalivhmiinrlfrkrk  
>tr|E5QSW5|E5QSW5\_STAAH  
mnvlikkfyhlvvriiskmitpqqvidkphivfmmtpedikpiikalnnslyqktvlttpkqapylselddvvnviemtn  
rtlvykqikalksaqmiid  
nyllllggynktsnqhvqtwhasgalknfgltdhqvdvsdkamvqqyrkvyqatdfylvgeqmsqcfkqslgateeqm  
lyfglprinkyttadrtv  
kaelkdkygitnklaalyvptyredkadnraidkayfeklpgytlinklhpsiehsdiddvssidtsilmmsdiisdy  
sslpieaslldiptifyvy  
degtydkvrglnqfykaipdsykyvteedlimtiqekelhlspfkdwkyntdkslhqlteyidkmvtk  
>tr|E5QSW6|E5QSW6\_STAAH  
mwfngmsaigtvkehvknyflylqrlaqfvkiihnsnylgvawelinpvmqimvywmvfglgirsnapihgvpfvywll  
vgismwffinqgilegtka  
itqkfnqvskmfnlpsiiptyivtsrfyghlgllllviacmftgiypsihiqlliyvpfcffltasvlltstlgvlv  
rdtqmlmqailrllyfysp  
ilwlpknhgisgliheimkynpvyfiaesyraailyhewyfmhkwlmlynfgivaiiffaigaylmkyrdqfadfl  
>tr|E5QSW7|E5QSW7\_STAAH  
mnkeglqmnsvniknvtkeyiryrtkermkdaliphkknktffaaldidiskayegdviglvgingsgkstlsniiggs  
lspvtgkvdvrngevsiai  
saglsqqltgieniefkmlcmgfrkeikamtpkiefselgefiyqpvkkyssgmraklgfsinitvnpdilvideals  
vgdqtfaqkcldkiyefke  
qnktiffvshnlqvrqfctkiawieggklkdygelddvlpkyeaflnfdkkkskaeqkefrnkldesrfvik  
>tr|E5QSY1|E5QSY1\_STAAH  
mletkdlnlflgnkhvlnknlslipvrgeiigimgpngagkssliksligefnatgkllhnkpiqqqlqhityipqkah  
idldfpi sveqvilsgcyk  
eigwfrprnksardklkqllsdleleslrhrqiselsggqlqrvlvaralmsesevyfldepfvgidfsseklimtkien

Tsompanidou\_et\_al\_Supplemental\_FASTA\_File

lkqggklliliihhdlskak  
qyfdriillnqtlryfgeeseamsvtrlnetfmsstdcsdpsqrsnitc  
>tr|E5QSY4|E5QSY4\_STAAH  
mnipsdeqieyymgipieksfnlmsdfklnkdeltelmtlfrenyketeahlkiydgmqeqkltlhqnhklfvvsskkt  
nvlernlslkgvdlfvev  
igsdkvtnykpspdgiyilqkydlhnkdtiyvgdavfdikmaknanidscavtwgshsievlntenpnfiinnvkelnf  
ee  
>tr|E5QSY5|E5QSY5\_STAAH  
msnikivtligfftmfivgvsdlivvgmlnemskefhvsnaligqlvtlyavafsiliplltkvtsqindkllvsclil  
fiifsmlettvmtnyfflci  
vriifmagiaslitvklmstganivpveykasvianiyvgfsaanilgipigtliashynwkipfyiaaitflcllgiml  
fipnksghysinnhskyqlv  
nfrgtlimlglfllimmsnmlftyieplvkskghsiwivslclffsggiagvlgsklgnnltekkgyriagniiivyii  
simsilltgqnvillisi  
ftwnlfhwgtnptvqyalnkflkgdpsqilsydisilnlgiglgsliggilfsidnqfnlsivvamilamvssillktav  
htekn  
>tr|E5QSZ0|E5QSZ0\_STAAH  
mmisnllilpmlpflcalilvflknndriskylylgtmtittislmliiyqrhrpitldfggwtapfgiqflgdsls  
limvttasfvitlimaygf  
grgehkanryhlpsfilflsvgvigsfltsdlfnlyvmfeimllasfvlitlqgsveqlraaiyvvlniigswflfllgi  
glllyktvgtlnfshiamrl  
ndmgdnrtvtmsilflvafsaakavlfmwlpkayavltelaalfaalmtkvgayalirfftllfdqhnghihp11vt  
maaitmviagaigviaykdi  
kkiaayqviiisigfiilglgtntfagingaifylvndivvktllffiiigslyvitgyrqyqylnglakkeppfgvafiim  
ifaiggvppfsgfpgkvl  
fqaalngnyiglaalmiitsliamyslfrilfymyfgdkdgeevhfkkipqyrkgilsilvvviaigiaapvllkitnd  
ateIntndqlyqklvnphl  
kgee  
>tr|E5QSZ2|E5QSZ2\_STAAH  
mkendvvlrtvklvffilltfgfyvffaghnppgggfigglifssafilmlafnveevleslpidfrilmiigalvss  
itaimptffgkpf1sqyet  
tltlpiighihvttitlfe1g1lfsvvgvivotmlslsggrs  
>tr|E5QSZ3|E5QSZ3\_STAAH  
mslvyliaailvimamilltskrramakyagyialtapviasiyfl1qvpsvikqhy1svsipwmtsl1dinvd1rldg1s  
lmfsl1iisligiavffyat  
qylssrkdnlprfylyl1l1mfsm1g1v1adntilmyvfwel1tsvssfl1isywynngdsqfgamqsfmitvfggl1allv  
gfimlyimtgtnnite1lg  
qadhiknal1fipmi1mf1l1gaf1ksaq1pf1hiw1pramaapt1vsay1hsat1mvkagif1ll1rft1ll1g1snmyiyivt  
fvg1it1ml1fgs1tal1kqwd  
1kg1layst1sq1gm1mam1vg1gggyaq1hq1dai1siy1v1faal1fh1lm1hai1fkcal1fm1gv1ild1heagsrd1ril1sg  
mrq1l1fk1m1lv1mm1aa1sm  
agvp1fl1ng1l1skem1f1dal1tqt1g1sq1f1s1ism1iiv1cm1g1via1sift1ftya1ym1kev1fw1tky1dsk1v1ftk1k1i1hep1w1fs  
lps1il1mv1lp1v1ff1vp1ni  
fgk1gi1v1pa1l1rg1vs1gn1hq1id1p1v1ph1vs1qw1h1gn1ip1ll1ti1i1ll1gsv1aik1vd1wk1kv1ftg1kir1q1is1v1sk1gy1em1vyr1qf  
ek1ft1tk1rf1kr1vm1qdr1n1qy  
i1imt1gi1fm1vi1gy1gir1ig1lp1kv1hq1lh1v1se1fg1ple1vil1aiv1tvi1ig1sl1if1ir1qr1l1tm1il1ng1vig1fv1t1ff1iam1kap  
d1al1t1ql1v1vet1t1t1l1fiv  
sfs1rl1pn1v1pr1sk1vn1k1kre1i1kis1vs1l1m1mal1iv1vs1l1fia1qq1ad1gl1asi1nfy1l1rad1kl1tg1g1kn1iv1nail1gd1f1ral1dt1l1fe  
gl1v1li1it1gl1iy1t1l1ny1qd  
rrg1qdere  
>tr|E5QSZ4|E5QSZ4\_STAAH  
mnkvevikcnddinkmydal1karsdrdy1ffk1lai1hsg1mk1itel1tit1ved1tkr1lie1kgt1sel1ckahy1h1lik1irl1pet  
1snell1hyien1ks1l1snedv  
1fgs1l1rtn1qv1l1srq1ay1ri1h1qaa1kagi1env1gt1t1l1rkt1fay1hay1q1gip1ip1vi1qky1l1gh1qs1a1iet1l1n1fig1l1ene1ce1hs  
iy1is1ql  
>tr|E5QSZ5|E5QSZ5\_STAAH  
mvnkqn1nvdspil1ikyq1tt1kl1h1an1l1ss1l1ek1ht1its1k1ss1ny1q1fn1qed1t1f1mt1kt1el1sf1k1ss1ld1kp1v1kl1ql1p1ql1n  
nivteqvardsmnalvdln  
ilksnsgaitkvhsaqi1dkttt1v1feakk  
>tr|E5QSZ6|E5QSZ6\_STAAH  
mlipiqtsvnsr1slytkspfytsf1sfsvgtic1li1lni1finpdv1fsl1hffsnqt1fnytw1fv1ggl1lgv1yl1tgn1ll1lp  
klgat1t1v1iat1vag1i1mg  
vi1dt1fg1l1fgat1ih1dfn1l1ka1ig1v1ll1i1ig1iv1mq1fn1knn1ll1td1qy1ll1fw1ll1g1f1ig1ff1ppi1q1tt1ins1ll1ash1ths  
pafas1l1vs1ft1igs1t1l1li  
tai1fn1r1sl1kl1tsh1lk1fg1kl1pi1y1ft1gg1il1g1maf1v1ts1ni1l1mph1l1gaa1t1t1l1ig1mf1g1q1il1mg1il1id1h1fal1fg1sp1k1iam1ts  
rkt1ig1ll1ci1l1t1gi1fl1r1f  
>tr|E5QSZ9|E5QSZ9\_STAAH  
mfh1fk1gv1l1pm1r1nd1ki1l1eni1edy1fn1h1kg1l1sph1l1iddi1kek1vit1dik1n1sek1kd1q1dy1ey1kr1k1spa1qi1il1mi1qr1n1fal1qm

Tsompanidou\_et\_al\_Supplemental\_FASTA\_File

npviffiinfilisylydk  
qyvqfqaigtmslfyclyvfpmtivvyrvsqknylrsnkiemvmgtiiaaislllilqafnitwgvipitnfhghqfff  
figiilviagifykrlefs  
gigllfcqktvdamihnpgsaqtfsliiwillvvlviyftirlssrtrl  
>tr|E5QT02|E5QT02\_STAAH  
mkfkaiakaslaigm latgvitsniqsvqaktevkqqseadlklyyngpsfeykkvtgygfiegkdrfidfiyngqynki  
slvgsdkkyneevnpdid  
vfvvregngrqadnhsiggvtknrgvvydyihspileikkgnepqnslyqiykenislkel dyr l reraikqhglysn  
glkqgqiti tmkdgkshiti  
dlsqklekermgdsidgrqiqkilvemk  
>tr|E5QT03|E5QT03\_STAAH  
mnimltgatghlgthtnqaianhidhfhighvrnvekvpedwrgkvsvrql dyfnqesmvkafkgidtvvfipsi ihpsf  
kripevenlvyaakqsgva  
hiifigyadqhnnpfhmspyfgyasrlatsgidytyvrnamymdp lkpyl pelmmhkliypagdrinyitrndiar  
gviaaiiknpdtwgryls  
gysydmkelaaileasgteikyepvsletfaemydepkgfgall asmydagargll d qesnefqqlvndqpqt l qsf l q  
eni  
>tr|E5QT04|E5QT04\_STAAH  
mniistilii fvaleffiyimyletiattsrtksetfnisvdklkdkninvllknqgvnyngligvlliyglfissnpkeic  
aailvyiigvaiygg lssn  
isiffkqgtlpv lal ismlw  
>tr|E5QT05|E5QT05\_STAAH  
mvpeekgsitl skdaati fatakfkpfqnriknnpqktnpflklhenkks  
>tr|E5QT06|E5QT06\_STAAH  
myiygsnkidcetiyeiknfltsnirv dletel fkd t l led sn l sdyiknqlptiwrd  
>tr|E5QT07|E5QT07\_STAAH  
mskninqansk lntsnkklkqaysksdknlkviymphwlefysiaihsdvtsnkkryyksysrgtvvyvklgsnigsef  
sgnhfcvil dndkdkgket  
vtivplsskgnknylkl nesvlnl ttt d l kkt dyryq  
>tr|E5QT08|E5QT08\_STAAH  
migvyskhkgkdyvnisa itti skrriskindsptgti iseddmneiekqlkikffsn  
>tr|E5QT09|E5QT09\_STAAH  
mhnknefnkklkdfigsdkrma lvkgyiney k l t t v l r a l n n s d y t k g t i h r s i g n l k q i v d n r i i p k n i t q n t i f k l s  
nl t l e v n l y e r n t i y h g d f  
aiyypvesalii etdtp r l i n h i n n p v q k i f i i t t n d w s f n t l e l e k i v d e t i i y d l k q e d p k y e i l y k n k h g l p y  
>tr|E5QT14|E5QT14\_STAAH  
mnkqifkgattmadi tvvndtgel y n v i n q k k s e g y l e s e l t i i s k s k l h l n d l h d s e i s l i s t s g t f s d k m t k l l t g e d  
gehavl s r y n l a p d e l e k y  
kq l i l d d k m l v v g v r d h s s h q e v l e n n s a y e e v d i t h f a e a s k g p k a  
>tr|E5QT16|E5QT16\_STAAH  
mltkefaqrvelsekqvrkivqh leergyqlskteyrgreatdfkeediel fkd i adkvkqt nsydlafdelekekdf l q  
vivknddknlptnqnvag l  
vedlrlei qkmreerhl l g q m n n q v h q q q e l k e l q n q l t t k i d s n s e l k a i q t s q e a i q e a q a s q a k v l a e s s n k v e n  
ntatdekaeskdkvagn  
tstdakt d t k a e n a g d g t a t k v d k e d q i s a t e a i e k a s v e q s k n d k a a e t s n k e a t v d a e a q h d a e q q v a e a h a e a s k q a  
tsndsleakaendstasqs  
emsepkpqeekkgffar lfn l  
>tr|E5QT18|E5QT18\_STAAH  
mavlvndeshkgtl i f t f t n a f l l k q k y l f t v a f e l p p a h t n p q k m l i l i r k n f l q r v c s k r l f k v d h l l s f l n k y e v  
snfyqtaiatsrfkdtfvf  
sylvshdstryisfpnihhffpvkiisiinavmttyliyci  
>tr|E5QT22|E5QT22\_STAAH  
mlnadlkqqlkqll elmegnevfas lgsddkskel kel l t e i s d m s p r l s l s e k s l k r t p s f s v n r p g e e t g v t f a g i p  
lghefnslvlalqvsgra  
pkekqsii dqikn legsfhfetfisl t c q k c p d v v q a l n l m s v i n p n i t h s m i d g a v f r e e s e n i m a v p a v f l n g e e f g n  
grmtiqdilsklgstadas  
efenkepydvli vggg pasgsaa i y t a r k g l r t g i v a d r i g g q v n d t a g i e n f i t v k e t t g s e f s s n l a a h i d q y d i d a m  
tgi ratdiektdeaikvt l  
engavlesktv i a t g a g w r k l n i p g e e q l i n k g v a f c p h c d g p l f e n k d v a v i g g g n s g v e a a i d l a g i v n h v t l f e f a  
selkadnvlqdr l r s l s n v  
dikt n a k t t e v g e n h v t g i r y e d m s t g e e h l l n l d g i f v q i g l l p n t s w l k d a v e l n e r g e i v i d r n n n t n v p g i f a a g  
dvt dq n k n q i i s m g a n  
aalnafdyiirn  
>tr|E5QT24|E5QT24\_STAAH  
mkkrl l l s t f l a s t l i l t g c a s d q s d n e d h h t s t g i h a p k s a k k l e t k d i f n s d k k n s d i s d a e m k q a i e k y l s v n s d i l  
dnkyimqhk l d k q i d s q t k  
vte k q a e t l s h l s n l a v k n d l h f k k f v t e n n i p k e y k k p v e l m m n y f k a l n s t i a n v n e d i e k l s y q p q n k i n v v d v p t k  
yagdv n k k q d k i k d f l k s

Tsompanidou\_et\_al\_Supplemental\_FASTA\_File

kgiksdvidk  
>tr|E5QT27|E5QT27\_STAAH  
mfgfigmlivggli gwaagaimgk dipggilgniiagi igswvgklfgqwgpe lgsiyilpaligsii fiaivtlilra  
vrkk  
>tr|E5QT28|E5QT28\_STAAH  
mmhilynlrtkhnleide laaqlnekygtkyeahqiwewenhhhepkfkdamhladffdvpyemfleskvkeyqk hlee  
vdirmdk  
>tr|E5QT29|E5QT29\_STAAH  
mk1kslavlsmsavvl tacgndtpkdetkstesntnqdtnttkdvia lkdvktspedavkkaeetykgqklkgisfensn  
gewaykvtqqksgeesevl  
vddknkkvinkktekedtvnendnfkysda idykkaikegqkfedgdikewsl ekddgklvynid lkkgnkkqevtv dak  
ngkvlkseqdq  
>tr|E5QT31|E5QT31\_STAAH  
mqfqiangmrige ll aikreninyedkt ldidgtinwitd  
>tr|E5QT32|E5QT32\_STAAH  
mndkfinigyiftnaaggpid lnkinnii kggaketteissikkpatthtlhshistlaqlgin lkamqehvghsdyk  
ki  
>tr|E5QT37|E5QT37\_STAAH  
mwsirlinlktkqgii fi thnke lyhapllftiii qttlhiifdinsfeifydifkntlhksehmfyndcevrnefky  
>tr|E5QT39|E5QT39\_STAAH  
maltagivglpnvgkst lfnaitkagalaanypfatidpnvgivevparllkleemvqpkktlpttfeftdiagivkga  
skgeg lgnkflshirevda  
icqvvrafdddnvthvagr vdpiddievinmelv ladlesvekr lprieklarqkdkaemevrilttikealengkpar  
sidfneedqkwvnaqallt  
skmlyianvgede igddndkvkai reyaqedsevivisakieeeeiat lddedkemfled lgieepgl drlirttyel  
lglstyftagvqevrawtf  
kqgmtapqcagi ihtdfergf i raevtsyddyvqyggesgakeagrqr legkeyimqgdgdivhfrfv  
>tr|E5QT40|E5QT40\_STAAH  
mdqvmssiiss lfepltkietyesvatklamiiyiivalivikil dkmiaqgfkiqnkskkgkkrsktlislvqnvvy  
iwwfi vttliskfgisve  
gviasagvvg lavgfgagtivkdvitgffii fenqfdvgdyvkinnggttvaegt vksiglrstrintisgeltipnss  
mgeitnysitngtaivkip  
vsvdenidnvekklnklfts lrskyylfvsdpv vigidafedtrvil rvsayetipgegfsgariirkevqkmflqegikt  
ppimtpfnhsengv  
>tr|E5QT41|E5QT41\_STAAH  
mselksedqritktkdeqikqidi sdi kpnpyqprktfdenhlndladsikqygilqpivlrktvqgyyivvgerrfra  
skia glkyvsaiikdl tde  
dmme lavienlqredlnaieeasyr lmt dlkitqqevakr lsksrpyianmlrl lhlpkkiadmvdgrltsahgrtl  
laikdeqqmlrlakrvvke  
kwsvrylenhfnelknvssksetkdvdi tkpkfikqqrql reqygakvd isikksvgkisfefesqddfvr iikqlnrk  
ygk  
>tr|E5QT42|E5QT42\_STAAH  
mkdtqlaqt l tddstg aianpihl staykhpkl gsgtgydytrtknptrstfetc faklehgi asfatssgmsaiqlic  
nlfkphdeilvsfdlyggt  
frl fefyeqqydikfyvdf tdyeqvekeitdktval fiepispqmi aidvkpyyqlckakgl lsiidntfltpylstp  
laegadivlshatkyiggh  
ndvlagvvtvkdes laqklfd fhnmtgat l spidsy lllrglktlhl rieraqsnarklaekcqs lqaidevlysgqtgm  
lsrlnkaysvakllenld  
icifveslggtetlvtfpytqthvdmpdaekdkrgideylirlslgvenyedierdi iqaldkaqigeiv  
>tr|E5QT43|E5QT43\_STAAH  
mtlsketevi fdwrrgveyhsanpplydsstfhqts lggdvkydyarsgnpnrelleeklarleqqkfafafasgiaais  
avlltfksgdhvilpddvy  
ggtfrlteqilnrfniefttvdttkleqie gaisntkliyietspnpcfk itdikavskiaekhellvavdntf mtp lg  
qsp lllgadivihsatkfl  
sghsdliagavitnneamsealyliqngtgm lsaqdswtlakh lktfpirfkqsvenaqkivsfl ikqdeisevyypgl  
tathleqaknggavigfrl  
adeskaqqfvda ltlplsvslggvetilshpatmshaalpeevr qergitfglfrlsvgl edpdeliadi kyalkeafn  
eai phtler  
>tr|E5QT44|E5QT44\_STAAH  
mrqflthlkdnvlvadgaigtilysegl dtcpeaynlshpdkverihrsyieagadvitntyanfeklkrfgledkvk  
aihqaavriakkaankdty  
ilgtvvggrgikqedis lqtilyhteiqidtlieegvdallfetyydl eeltnvisrtrkkydipiiaqltasntnylvn  
ggaineglkqlvqcganiv  
glnchhgp hmqesfthielpehaylscypnas lldiensefkysdnaqyfgvaqnliregvr liggccgttpehikfi  
kesigt lkpvnkkvipip  
tkalfnpsqnkvrgsltskvrqerptv ieldtpkhldtrffeniaklekanvdavtladnslatvrisniaaaslikqy  
ynieplvhitcrdrnl igl  
qshllgsligvneilaitgdpskvghlpgatnvydvnskgl telalrfnqgintdgda lkk rthfniagafnpvrkl d

Tsompanidou\_et\_al\_Supplemental\_FASTA\_File

gavkrlekkiessgmsyfit  
qpvysekiieiyhatkhlnkpffigimpiasyknaflhnevpgikmsdeilqqfeavkddkaktrelslklskdlidt  
vhefnglyiitpfqnv  
slelaaysksitahkeail  
>tr|E5QT46|E5QT46\_STAAH  
mtqyp1wqq1nt1kqatwvd1thtfdpeiprfsefekgevst1ftvkdhgfyvqrwnivtqygthidapihfvenkryle  
did1kelv1pliv1dfste  
vanndfivtrahieawekehgtiepgtfvalrtdwskrwpnietfenkdangqqhapgwgl1dalkclieerrveavghe  
tfdtasvdvknkd1vge  
ryilgdkyqve11tn1dq1ptrgaiiyaispkpkdapgfvpvrafaiapsnd  
>tr|E5QT47|E5QT47\_STAAH  
mtrvvl1aayrtpigvfggafkdvpaydlgatliehiiketglnpseineviigvnlqagqqnpariaamkglpetvp  
aftvnkvcsqglksiq1ay  
qsi1vtgendiv1lagmenmsqspmlvnnsrfgfkmghqsmvdsmydgltdvfnqyhmgitaen1veqygisreeqdtfa  
vnsqqkavraqqngedfse  
ivpvsipqrkgepi1vvtkdegvrenvsvek1sr1rpafkkdgtvtagnasgindgaamm1vmsedkake1nieplavldg  
fgshgvdpaimgiapvdav  
ekal1krskel1sdi1dvfelneafaaqslavdre1klppekvnvkggaialghpigasgarv1vt11hq1ndevetg1ts1  
ciggqai1aavvsyk  
>tr|E5QT48|E5QT48\_STAAH  
mvna1tpkhlaekragfhe1ffdl1fyvaiqiahvil1ttqngisad1ffkyivms1fl1wlmwshqtf1ftrf1gqvtfk  
dvsfmmf1nmf1imv1f1s1  
ypdfekt1ffp1f1cvai1m1sig1qy11h1irtg1dygd1krt1cqafat1vaf1vis1f1s1f1s1v1p1qsi1hyip1g1f1g1v1fi1ast  
gl1pf1q1ky1v1l1sp1vn1mh1  
verf1s1l1t1i1i1f1ge1v1g1lass1fs1id1h1fs1y1i1f1q1mi1l1s1f1g1vy1i1te1ny1i1nh1k1l1ss1ig1f1r1s1y1th1l1i1n1a1l1g1vi  
naa1iv1fs1n1nk1nd1l1fe1n  
mmy1sv1li1fy1ig1w1l1tpy1fh1ne1l1tn1aky1is1ys1gl1v1ms1y1vs1l1fk1gh1dh1vm1i1sv1sv1at1fc1im1li1yf1kn1qr1rn1k1he  
>tr|E5QT49|E5QT49\_STAAH  
mkgm1f1ss1fy1atr1k1q1ty1iy1f1v1ai1a1a1gy1fav1f1np1m1ss1am1ag1vm1it1pit1dn1ik1hek1ds1r1w1my1yv1st1p1v1kr1s1dy1ik1sy  
faf1yl1il1fg1as1m1ig1lv1vt  
t1vt1q1sv1m1g1im1sg1ms1fg1i1g1ays1i1f1p1l1t1fk1fg1a1ens1vm1ic1as1i1l1l1s1fv1ff1fi1gm1v1sg1as1ale1fek1ist1ggw  
l1v1iy1av1ig1iv1its1v1sy1  
ss1ki1fn1k1ge1  
>tr|E5QT50|E5QT50\_STAAH  
mdmt1t1l1n1l1drv1nk1qy1k1ss1df1k1q1das1t1ist1net1vg1lig1kng1sg1kst1lin1il1vgn1rh1kdng1sit1ff1ge1ha1idd1vey1ke  
h1gv1vf1dd1l1rv1pn1k1l1tik1d  
idk1vf1q1si1ym1t1wn1sq1k1ff1d1li1ky1fe1l1p1qt1k1ikt1fs1rg1m1rk1ial1tia1sh1dv1k1l1il1de1at1ag1md1vs1g1ree1vm1ell1ed1f  
va1gg1g1il1is1sh1ised1ie1q  
l1ad1k1lv1fm1kd1gr1mi1l1te1q1k1d1l1la1q1y1iv1t1ted1kd1ve1ip1kh1li1as1r1sk1gy1q1il1vk1dya1e1ena1ep1l1kh1idd1at1ki1im  
r1ge1v  
>tr|E5QT56|E5QT56\_STAAH  
mkh1yl1tk1i1ati1it1vm1v1fs1fg1l1ks1qaa1eq1s1sd1v1sv1td1aks1als1nns1isk1dn1l1ka1ie1qv1vs1av1k1k1s1led1n1seg  
nav1ks1nvr1k1led1ak1and1q  
kdt1s1q1l1t1ks1li1aye1ek1l1ask1dags1k1k1l1q1q1vd1ak1da1amt1ka1ik1dk1nae1les1l1nns1l1nqi1w1ts1net1vir1ny1dan1qyg  
q1eva1l1q1l1ria1ih1k1sp1d  
tak1v1sh1aw1t1t1f1ks1nid1h1v1dk1k1sg1ts1and1qy1hvs1q1l1nde1le1ka1ika1id1nn1q1s1dada1al1th1fie1iw1py1ve1g1qi1qt1kd1galy  
tk1ied1ki1py1y1qsv1l1de1hnk  
ah1vk1d1gl1vd1inn1qi1kev1gh1sys1f1vd1mi1if1l1reg1lev1l1iv1mt1l1tm1tr1nv1k1k1k1gt1as1vig1gai1ag1lv1s1iv1l1ait1fv  
et1l1g1n1sg1ml1res1me1ag1gi  
vav1l1mf1ig1v1wm1h1kr1sn1ak1r1wnd1mi1kn1my1tn1ais1gn1lv1l1at1ig1lis1v1l1reg1ve1i1f1ym1gm1ig1elat1k1df1vig1iala  
i1v1il1iv1fal1l1fr1f1iv1r1ip  
i1fy1if1rv1l1s1ifi1f1img1f1km1g1v1si1q1k1l1q1l1gam1pr1h1vie1gf1pt1in1w1lg1f1yp1sy1ep1liv1qa1ay1im1v1vail1fk1fk1  
>tr|E5QT58|E5QT58\_STAAH  
mkk1l1t1l1l1ast1l1ia1ac1gn1dds1k1k1k1d1sk1k1d1dg1v1kae1l1k1qat1kay1dy1t1de1q1ne1f1l1k1gte1kf1vk1ai1en1nd1ma1q1aka  
l1yp1k1vr1my1er1sep1vae1af  
gd1l1dp1ki1dar1lad1m1ke1k1ke1kew1sg1yh1ki1eka1y1ed1k1id1dv1tk1k1da1q1l1k1dake1l1hak1adt1dit1pk1l1m1l1q1gs1vd1l1n  
ev1ats1ki1t1ge1ee1i1ys1ht1d1  
ydf1kan1ve1ga1ki1y1d1fk1pi1lek1dk1k1s1ddi1qm1n1fd1kv1n1l1dky1kd1nng1yes1fek1v1sk1k1dr1ka1fad1avn1al1ge1pl1sk  
mav1ite  
>tr|E5QT60|E5QT60\_STAAH  
mss1as1f1ns1il1al1f1cri1f1ky1k1fg1mv1nk1v1vik1l1sc1vig1ik1g1inq1sn1rh1nay1c1rg1pn1ien1fek1k1fy1k1ck1lag1pq1h1ref1r1ke  
i1l1qt1mq1v1ge1g1qq1i  
>tr|E5QT62|E5QT62\_STAAH  
mqad1vi1fi1gf1pi1f1q1as1ip1gs1l1kn1v1fd1l1pv1na1fh1dk1vig1l1vat1ag1ss1k1hy1lip1em1h1k1pi1l1sym1ka1ht1mq1ty1v1fie1ek1df  
sn1qq1iv1nd1dv1fr1l1ka1la1q  
stm1rt1ak1v1qq1v1le1een1q1y1df  
>tr|E5QT63|E5QT63\_STAAH  
mn1iv1l1sg1st1vg1sk1tria1m1dd1l1kne1l1vine1gh1q1ia1l1md1l1rd1le1

Tsompanidou\_et\_al\_Supplemental\_FASTA\_File

>tr|E5QT64|E5QT64\_STAAH  
mnlkvsytkykgeclmaklemknptlefglyslgdhllnfpkgekvseyqrineieaskladeagidvfavgeshqe  
hfttqahtvvlgaiaqatk  
hikvsssttiisatdpvrvfedfatldlishgraeivagrasrtgvfdlfgydldkydelfeeklglllelnkteritws  
gkyrpeelnmki fprpidn  
t1piwrvagppasakagkqgvpmittlggpamnfkgsidayrqaateagfdaspslpvstaslyfakttdamre  
fyphlntgmsfirgvgypk  
qqfanssdyrealmgvspqqiiekilyqhelyghqrfmaqldfggvpfenvmknieligndiipaikkhlsk  
>tr|E5QT65|E5QT65\_STAAH  
maynylfyiswykiytnrrdsrnivghhhi smytkdakrnkdfytnvlgrlrveksvndnpsmyhlfygdevgtagtil  
sffeipnaghkqpgteti  
rfsllvpnqvalhyfekrlennigkserlyylgqegvvfkdeddleillvndsfevphqwqhnayseipqayqilgigp  
velrvrnaartveflenvl  
gyrkrdnksfdvltlapgglysdvfvieqqgqrerprgyihhiavntpqmndldaiykkllqqppqsngiidryffksl  
yvrhnsimyfateapgft  
idtpveqlgsqnlndpflaereqiesklhei  
>tr|E5QT70|E5QT70\_STAAH  
mlsyrqieilylliehqtfipintianqlgvsprtiqydiaieqyaetyhyqvsrnkaagikvttanttilnelehlnt  
nqihfskderlthialklf  
ettdpvstklqadvnvsrrtiaddikmiqaqldqyhlklnyvhnkgfniigeedhyrkayahfihqymkqaapfi eadi  
fnsesialvrraiiktlns  
enyhlvqsaidgliyhiriaiqrlnenfsfdipineidkwrhtnqyaiaskmienlerscnvtfpeseiifitlhlhgsk  
mtehtassitfeyhdlsqn  
ihelitcvsqelgidmskdnklhtslfthikpaihrikydmlqpnplrqevmrrypqieavskhispieqdaairfnd  
eltyitihfassivervath  
kqsmikvvl1l1cgsgigtsqllksklnhlypefhiwdaysiyqlesrllqdnidyvistvpceisavpvihvdpfinqqs  
rqklnqiindsreqrvmkm  
atdgksladllpehriinkqplsiesaitvavqplindgivnsnytaailkqleqfgsymvisphialihagtdyvqng  
vgfaltyftegiifgskan  
dpvhlvitlatdhpnahlkalgqlseclsndfcrqdfldgni flikqhialtmkvev  
>tr|E5QT72|E5QT72\_STAAH  
minmki1vvcghglgssfmvemnaqealrqlnapdsdievhsdimtaspemadlficgrdlaenaerlgdvlvldnildk  
aelqqklsek1qqlnmi  
>tr|E5QT73|E5QT73\_STAAH  
mqailnfi vdi1sqpailvaliafiglivqkkpaatitsgtiktigflilsagadvvrslepfgkifqhafgvqgivp  
nneavslalkdfgttaal  
imvcgmivniliarftnlkyifltghhtfymaafilai1tvshikgwltivigalvlglimavlpallqptmrkitgndq  
valghfgsisyfaagavqg  
lfkgkstksteeikfpkglslrestisisitmallyfiac1fagvsyvhesisdgqnfivfsligqvtfaagvfiiltgv  
rli1laeivpafkgiseklv  
pnskpaldcpivfpyaqa navligffvsfitgvigmfllf1fggvvilpgvvahfflgataaafgnarggikgavagaaln  
gilitflpl1flpl1gelg  
gaattfsdtdflavgivfgnavkymglfgailfiiivgataillkgrqkppq  
>tr|E5QT74|E5QT74\_STAAH  
mnnkv1vtgggtgfvgmriisr1leqgyevqttirdl1skadkviktmqdnqisterl1mfvead1sqdehweamkdckyv1  
svaspvffgktddaevmak  
paiegiqril1raaghagvkrvmtanfgavfgsnkdknsitneshwtne depglsvyekskllaekaawdfvenenttve  
fatinpvai fgpsldahvs  
gsfhllenn1ngsmkrvpqip1nvvdvrdvae1hilamtneqasgrfiatadgqid1leiaklikekrpeiaqkvatkk  
1pdfilslgakfnhqakeg  
kllldmnrnvsnerakt1lgwepiatqeeailaidsmakfhli  
>tr|E5QT75|E5QT75\_STAAH  
myli epi rngeyitdgaialamqvynqni fldedil fpyycdpkveigrfntaievnqdyidkhsi qvrrrdtgggav  
yvdkgavnmccileqdt si  
ygdfrfyqpaikalhtlgardviqsgrndlt1ngkkvsgaamt1mnriyggys11ldvnyeamdkv1kpnrkkiaskg  
iksvrarvghlrealdeky  
rditiefkn1mvtqilgiddikeakryelsdadwesieelaskkyknwdwnyngkspsyeynrser1ssgtvditisveq  
nrriadcrifgdffgggdik  
dveqalqgtkmtredlthqlkqldivyyfgnvtveslvemils  
>tr|E5QT80|E5QT80\_STAAH  
mkegykkskamlnv111iin1iaicsvnayaneenkiedlckkssvddialhnikdymtnrftinestvlttekfl  
did1lfknftwldgksaef  
kd1kvefsseis keyfgktvdiygvykakahchgehqvktactyggvtphennkl1sepkeigvavykdnvnvntfivtt d  
kkkvtaqeldikvrtkl1nn  
vyklydrmts dvqgyikfhshsehkesfyydlfyikgnlpdqylqiyndnktidssdyhidvylft  
>tr|E5QT85|E5QT85\_STAAH  
mkk1stvi111ileivfhni nyansqdpkide1nkvsdyksnkgmtgmnm1lymsppvegrgvinsrqflshdlifpie  
yksyevkte1entelann

Tsompanidou\_et\_al\_Supplemental\_FASTA\_File

ykgkkvdi fgvpfyftciipksepdi nqnfggccmyggltfnssenerdklitvqvtdnrqslgftittknmvtiqel  
dykarhwltkekklyefdg  
safesgyikfteknnts f w d l f p k k e l v p f v p y k f l n i y g d n k v v d s k s i k m e v f l n t h  
>tr|E5QT86|E5QT86\_STAAH  
mkiydltl t t k s n v t n r f y e e v f e f l y d r e i r g l a q v s v s g e s g l k y s i d y i v s e t k s q e k l v n f t n l d f n k i t n e a y  
i y r d i k p n r p s r n k l e p i m  
l i i v n d v y h p i n e r a g t v a e h e n l e i l k w s n k s k i e t l t s  
>tr|E5QT87|E5QT87\_STAAH  
magyllkti e e r m n e y f n w l k q n y i f k e l d s s t e i t t p f k n h l n d f i r i y a d t l p n n e i c l s d n g l t i n e l e m l g i d i n t  
k t r t k l i q n i l n q f n l k l v  
d k e i t a d v k n  
>tr|E5QT88|E5QT88\_STAAH  
m i r f d v n g s d h a n s p n n e r i p t p h i h y t e e y n g g i a i p l k d i e d l e l t d e i e s l d f f m k y t n i k h d n v i e p r l l  
>tr|E5QT89|E5QT89\_STAAH  
m k n l k k d l i s s i e e g t k e l e h i t s y l n d e l f k y d i e l t y p f d l v e d s s q i n t y i k k l q m k e k e l l n l e e v k i f n v s t e n  
k r h q n a q a k q i r l f n a e t  
s q l i n k v n s k n i e s m q n k i f k s y e g i n k i f e t d n v r i p e t l l d i k l e m l d l m h k y q v k i e d e k i i r r e e r a r l k e i e q a e  
k e m e k k l k e l d k d i r h h n n  
e i k k l t m y l n n t d l q e k e l y i e k i r e l d q s l k n l n s e r e n v e d r k d n a q s g f v y i i s n i g s f g e n v y k i g v t r r l e p m d  
r i n e l s s a s v p f e f d v h a l  
i f s e n a f e l e n k l h e y f k k y k v n k v n g r k e f f k v n e i k d k v l s e h n s t v q f i d e p k a i q y r e t l r l t s l  
>tr|E5QT90|E5QT90\_STAAH  
m k k e i l k k q w v l w t i l v t s f f s i g t p g i a i i p f s l s i y a l s k l i l v n k f v e p d l v t l q n l k e k i k v s t l k i k k s s v k y k n  
>tr|E5QT93|E5QT93\_STAAH  
m i g r i v t c i h n l n s n e l v g i h f a s d v k d d d n r n a y g v y f t p e i k k f i a e n i d k  
>tr|E5QT94|E5QT94\_STAAH  
m n k n l v i k s m a a l a i l t s v t g i s a a v v e e t q q i a k a e k h v t q v k d t n v f p y h g v v a f k d a t g f v i g k n t i i t n k h v s k d h  
k v g d r i t a h p n g d k g n g g i  
y k i k s i s d y p g n e d i s v m n i e e q a v e r g s n g f n d n v q a f k f a k d a k v d d k i k v i g y p l p a q n s f k q f e s t g t i k r i k d  
n i l n f d a y i e p g n s g s p v l  
n s n n e v i g v y g g i g k v g s e y n g a v y f t p q i k d f i q k h i e q  
>tr|E5QT95|E5QT95\_STAAH  
m n k q r s t k m n k n i i k s i a a l t i l t s v t g v s t t m v e g i q t a k a e h n v t k i t n t s i s p y k g i l r v g a a t g f v v g k n t i l t  
n r h v v k d v q v g s t v l a h p n  
g e n d t g g y y k v k k v i p y a g s a d l a i v e v e e d s v y p k n k k f s e n t e i l t l a s e a k a n e r v a i v g y p a p y k n k h h m y q s t g t  
v l s i n g d k l v s d a f a e g g n  
s g s p v f n n k n e v g v l y s g d q i g h s k k e s y s v l t p e i k k f i a d n t e k  
>tr|E5QT96|E5QT96\_STAAH  
m n k n i i k s i a a l t i l t s v t g v g t t i v e g i q t a k a e h n v k v q v n t n i s p y k g i v r i g s a t g f v v g k n t i l t n k h v l p g v  
q v g s t i l a h p n g e n d t g g y  
y k v k k i i p y a g s e d l a i v q v e e d s v y p k n k k f s e n t e v l k f a s g a q v n d r l s i v g y p n p y k n k h h m f e s t g k i l s i d g n q  
m t s d a f a e g g n s g s p v f n s  
n h e v i a i a y a v d v k n d a t k k s y l v y f t p e i k k f i a d n t e k  
>tr|E5QT97|E5QT97\_STAAH  
m n k n i i k s i a a l t i l t s v t g v g t t m v e g i q t a k a e h n v k l i k n t n v a p y n g i v s i g s g t g f i v g k n t i v t n k h v v a g m  
e i g e h i i a h p n g e y n n g g f  
y k v k k i v r y a g k e d i a l h v e d k a f h p k n r n f k d y t g i l k i a s e a k e n e r i s i v g y p e p y i n k f q m y e s t g k v l s v k g n m  
i i s d a f v e p g n s g s a v f n s  
k y e v v g v h f g g n p a n k s t k g y g v y f s p e i k k f i a d n l d k  
>tr|E5QT98|E5QT98\_STAAH  
m n k n i i k s i a a l t i l t s v t g v g t t m v e g v q t a k a e n s v k q i t n t n v a p y s g v t w m g a g t g f v v g n h t i i t n k h v t y h m  
k v g d e i k a h p n g f y n n g g g  
l y k v t k i v d y p g k e d i a v v q v e e k s t q p k r k f k d f t s k f n i a s e a k e n e p i s v i g y p n p n g n k l q m y e s t g k v l s v n g n  
i v s s d a i i q p g s s g s p i l n  
s k y e a i g v i y a g n k p s g e s t r a f a v y f s p e i k k f i a d n l d k  
>tr|E5QT99|E5QT99\_STAAH  
m i l k a f e s y n i s k k i f n n n c a a k t q n f h n q h q n s k h r n k t k c y n s i t q r d k l l m q r r r n h m s i t e k q r q q q a e l h k k l w  
s i a n d l r g n m d a s e f r n y i  
l g l i f y c f l s e k a e q e y a d a l s g e d i t y q e a w a d e e y r e d l k v e l i d q v g y f i e p q d l f s a m i h e i e t q d f d i e h l a t a i  
r k v e t s t l g e e s e n d f i g l  
f s d m d l s s t r l g n n v k e t a l i s k v m v n l d d l p f v h s d m e i d m l g d a y e f l i g r f a a t a g k k a g e f y t p q q v s k i l a k i v  
t d g k d k l r h v y d p t c g s g s  
l l l r v g k e t q v y r y f g g e r n n t t y n l a r m m l l h d v r y e n f d i r n d d t l e n p a f l g n t f d a v i a n p p y s a k w t a d s k f e n  
d e r f s g y g k l a p k s k a d f a  
f i q h m v h y l d d e g t m a v l p h g v l f r g a a e g i r r y l i e e k n y l e a v i g l p a n i f y g t s i p t c i l v f k k c r q q d d n v l f i  
d a s n d f e k g k n q n h l s d a q  
v e r i i d t y k r k k t i d k y s y a t l q e i a d n d y n l n i p r y v d t f e e e a p i d l d q v q d l k n i d k e i a e i e q e i n a y l k e l g v  
l k d e



Tsompanidou\_et\_al\_Supplemental\_FASTA\_File

>tr|E5QTA0|E5QTA0\_STAAH  
msntqtknvpelrfpgfegeweeklglldikvnsdkykhlekdgdivvygtggymtsvseplseidavgigrkgtinkpy  
llepawtvdtlfyctpkk  
etdillfilsfrkinwkvydestgvpslskqtinkinrfvpsneqqkigeffikldr  
>tr|E5QTA1|E5QTA1\_STAAH  
mqkifsqelrfkdengndypnweekkiediasqvygggtpntkikefwngdipwiqssdvkvdnlilrqcnkfishnsie  
lssaklipansiaivtrvg  
vgklclvefdyatsqdfslsslkydklyslslytmkkisanlqgtsikgitkkelldsiikiphnlleqqkigdlfy  
kidkyisfnkckieilksl  
kqglkqkifi  
>tr|E5QTA2|E5QTA2\_STAAH  
meklneaiknyidsdelfalfidgqwgvgktyyiknilkefddkieiryislyglqnlyeiksiiisklintstknlrk  
vlksmknfqvpylmmnf  
sdnilryiddnsllkiknslmknksalliidvermsdkvsfeeflgfirndlidylckvlfignldeInkkadhkn  
sekiisrilkfpnnrevam  
divksnlpklfvknistkelngfli  
>tr|E5QTA3|E5QTA3\_STAAH  
mrtlnlvsnfkliinkmqdeikyksdfkitlyislfislfilynefrsgnlgesekldqftyndfnnlntktsialf  
kylknelanyvffdiel  
knlllygifdesiflknitnnfkeedakadlnvlkeffklselelekeiqaeiikdknnenfnykvkaylsllnlkg  
knlylidgikiseledelev  
dnydlhqnnlvgdtnrldlvsfsneqlyeeikslkdrlinkrttImtsiyngyletilngdftnrktlkeayigmkdi  
dtieiyynnlnkvsnelks  
snekiinlsafikdnhcnddniqleyiigemkklkdgtkdrvtqmcfsmlidtlkdi  
>tr|E5QTA4|E5QTA4\_STAAH  
msskdakksqearlqglkqemrstdnmvsnaknvalkftlneiinetinssqslegtfegkaseaaqsinklnn  
nenlkqkfetlntlking  
>tr|E5QTA5|E5QTA5\_STAAH  
msyenldkdqdydfllgqdykviokrddtqngfrayvfapvikgvdksqlligyagtdpyslndirtldqlpihhntnnl  
kinnyhkdlnkstiikkyn  
tikdkndlfsfsslnnkalfgdlwaakfaptqmdesdaftesvkkkypdseihiplghslgaflaqynlikhnlngttf  
aapnyhsftgdfkkdln  
gvydskirnihfddpinnlfffnprigknitsmphydgitnlpligqhtlksyndfdadgnvkempelqfnddqsln  
nrfqlfdpfgiksrfdsi  
kidssilnrtsendfdpfailnkdklfsndldiegfnkqkedlsidlnpfddeIndedeplipkrgdsklkaekki  
svkktkssksngkviq  
pdevrniastirdrlflytqiitaldeyreetmsganrildkyqselsgshefitpndleqymeilsvessgnfkfyn  
sglmdlialqaldqnkkl  
qfaeklefaankfeekdleesdvglfs  
>tr|E5QTA6|E5QTA6\_STAAH  
mirktkviliiiliiailmmfaymshkqkknispfkkkelicflnit  
>tr|E5QTA7|E5QTA7\_STAAH  
mkvtdfhktpmggyfivgyinddkkykfqasidsgsnnyqknigyhddklglfkfedpkyklsvdeiekehldkney  
eadpplfffsqpie  
>tr|E5QTA8|E5QTA8\_STAAH  
mnkkslmiviiilililggi flkmkydekkydeqkeritiumkhvkgkyknisftnckenpmdgysisgyinndrklsf  
tagirsiddfqfdtdisyt  
delgrkfiknpksvseikkeIntsnk  
>tr|E5QTA9|E5QTA9\_STAAH  
mtnkmmkwqlstittlmtgviaIngefrnvdkhqiavadtnvqtpdyeklkktwldvnygydqydennqdmkkkfdak  
ekeakkllddmktdtnrty  
lwsgaenletnsshmtktyrneikiaeamqhknvltktenklkikealdwmhknvygknpsqkvedltnkrkgqttpkn  
nslnwwdyeigtpralnt  
lllmdmltkdemknyskpiastyapssdkilssvgesedakgnlvdiskvllsvieedvdmllkksidsfnkvftyvq  
dsatgkgrngfykdgsyid  
hqdvpytgaygvlllegisqmpmikespfkttqdnatlnwiddegfmpliykgemmdlsrgraisrenetshtasatvm  
ksllrldntmddstkttryk  
qivktsvnsdssynqnylnsysdiakmklmndstiskndltqqllkiyndmdrvtyhknldfafglsmtskniaryen  
ingenlkgwhtgagsyly  
nsdvkhyrdnfwatadmtclpgtttlndmpstntkndksfvvggklnnkyasigmdfenqdkltakksyfilndkivfl  
tgikstdssknsvtsven  
rkangyklfkddieittsdvnaqethsvflsndtkknigyhfldkpkitvkkeshgkwseinksqkddkdeyevt  
qthntsdskeyayvlypgls  
ksdfksknnnsvivkqdedfhvikdndgvfagvnysdntksfdingitvelkekgmfvikkddkaykcsfynpetnta  
snieskifikygitnksv  
tnsndagvnfelk  
>tr|E5QTB0|E5QTB0\_STAAH  
mkkryvfvvvvailigliiayahnkqkktitlrhkksg

Tsompanidou\_et\_al\_Supplemental\_FASTA\_File

>tr|E5QTB1|E5QTB1\_STAAH  
mkvtdfhktpmggyfiigyinddkkykfqasidpgsdnqyqkdigyhedklgklfkekdpykylsvdeiekehldkney  
eaesplfffsgrle  
>tr|E5QTB2|E5QTB2\_STAAH  
mkkkyililliviligllviaythnkktkdhietqekrinlyfkylnnysmkvtsfkktpmggyivdgyvnhnknyd  
fkvlisvtdnhqfedsigy  
ddktfgklfkekdhknelkpkdiikkehdkseyaepplfffsgrle  
>tr|E5QTB3|E5QTB3\_STAAH  
mnkkyiliiivsviligmivisyahnkqkktitlkhkkre  
>tr|E5QTB4|E5QTB4\_STAAH  
mdsyfiggyinnnkdyefqafinvggrkqfqrdirgydeeklgklkqevktwktvdqiiknehldkseyaepplfffs  
gsld  
>tr|E5QTB5|E5QTB5\_STAAH  
mgvkmkkryvfvvvallivliayaafhkskkehietqekridlyfkhlnhyksmkitkfqkspvnayfikgyinnd  
kqyfqayintgdegnqfn  
ssigykeekigrllkekdkdrltvdeiekehldkneyeaepplfffsgrle  
>tr|E5QTB6|E5QTB6\_STAAH  
mtaidkvyvedvleddi1nllkpyiqgkekelysitdnfaidlkvta1ldlkiqyedldddvsyidertiyvknhss  
nrkrftiaheighflhnhk  
nkikyrrnsyaydeemieervandfsanlmpkkqmealvykykenninltsglisereelinyiaiklevskiaag  
irlynlgldk  
>tr|E5QTB7|E5QTB7\_STAAH  
mntkylylnfdkiyeekdffnvlhvdinlkiseikesnevlvsidsitckklnhypklesyrdsiylnerlnnyfnfng  
kkewklfylykeliqtfei  
lyddtsitnyyrgqandwpmkagllrndiiddlkefeniyedmaykypdlieytclnkkeykaedfkkrenmaylqhy  
glrttliditenpfiallf  
ltsnsqvfnnatldmyinpkihseqnlfsvrkmi sknkriaaqkgaffnfekllifqneqvnrdkinkiplvrklklnf  
sydykek1krelnqtqsaf  
qklkitreeklknhksrikedlkri rnltmktehmdseksndykeleylikri lkdesvikidkemedlkkklylda  
rlkkeeiltseylrpeick  
elrek1kqyhyveselfpdvyrhigyiqsnflsnqtnnrtinknnisenlvdllk1ken  
>tr|E5QTB8|E5QTB8\_STAAH  
mdidfilsklqvfhfikfekrfiemekneytakynesqlldatysqavayllnkygavtddyykesytrflngeiksi  
skgkytraseglychhise  
dkfqnlSDLrfisefkysynyqkknenvycdliehlilhaiitkesngqfgvaglcqmikptvidwyigeynpkpwamqa  
tkaraylpgilveklliki  
ddmlkgieiydflesr  
>tr|E5QTB9|E5QTB9\_STAAH  
mitfeniqqlekyt1mtmhglfnqklglgisidnahtlftpymmetlslgvpdiidlihkgteledfsafnlsiddt  
vtvc1qrtee1lkqyknve  
fndkilinwrimqek  
>tr|E5QTC0|E5QTC0\_STAAH  
mkfkaivaitslsl1tacganqhksnsksndtnkktqtdnttqsntekqmtppqaedivrndykarganenqtlnyk  
tnlersneheyvehlvrd  
avgtp1krcaivnrhngtini fddmsekdkfeafkkrspkynpgmndqaemdnese diqhhdidnka iqndlpdqk  
vddkndknvknkeekhdnr  
ennsaetkvk  
>tr|E5QTC2|E5QTC2\_STAAH  
mki tykyrgd1plntennknqnsaknserrgm1kgcggclisfiilillacsmmfsnndnstsngssktqltqkded  
ksenmpeekssetdkdlq  
steevpanentennqheideitttdqsddeintpnvaeesqddlkddlkekqpps dhhqstqpktpstetnkqqs fan  
ckqlrqvypngvtadhpay  
rphldrkdkracepdky  
>tr|E5QTC3|E5QTC3\_STAAH  
mkkf1kfkmgkic1mlylliflsscgtnnkivqrfeiqqhneii griyfsadyahirgiekgtvkyfvdkvgs krylfi  
eyipdnvlnckpdfwktlk  
ykkdkvtyyvylienlde1fh1salqdmnhrpidiaddvatmdksphqndritlknkn  
>tr|E5QTC4|E5QTC4\_STAAH  
mdfwlykqaqqnghhiatdgqesytyqnllyceasllakrlkayqqsrvglyidnsiqsiilihacwlanieiamintrl  
tpnemtnqmrsvdqlifc  
tlp1elrgfqivslddiefagtdittngll dntmgiqydsnetvvpkdspsnilntsfnllddiasimftsgttgpqkav  
pqtfrnhyasaigckeslg  
fdrdtnw1svlpiyhisglsvll raviegftvrvdkfnaeqil tmiknerithislvpqtlnwlmqqglhepydlqkil  
lggaklsasmeta1qynl  
piynsfgmtetcsqfltatpem1harpdvtgmpsanvdvki knpnkkghgelmikganvmngylyptdlgtgfengyfnt  
gdiaeidhegyvmyidrrk  
dliisggenipyqietvakqfpgiidavcvghpddtwgqvplyfvsesni skaqliaylsqhlakykvpkhfekvdtl  
pytstgklqrnklyrg

Tsompanidou\_et\_al\_Supplemental\_FASTA\_File

>tr|E5QTC5|E5QTC5\_STAAH  
milylihqvnykeiscieddmlkltalhfykysepfsqivtpkvtlthrdclfielnddkgnayfgecnafqtdwydh  
etiasvkhvieqwfednrr  
ksfetyeaalklvsd lentpaarativmalyqmfvhllsfsvaygatasglsnkqleslkatkptriklkwtpqimhqir  
vlreldfhfglvidanesl  
nrqdfqtqlllareqvyieepftdismlddvvdgtippialdekatslsainliklynkvvvllkpfrlggidkvqta  
idtlkshgvkvvvvgmyey  
glsryftamlarkgdyppgdvtpagygyfeqdvvahsgilkegrlefrpplvditqlqpy  
>tr|E5QTC7|E5QTC7\_STAAH  
mpptivinyiniqcrdvrmrvkfrdkdnrqvnlftkkdnei adgnhvlaiptfknqllftkhnrgiefpggkregess  
aeaitrelyeetgakvkn  
hyaqytiethdqtfdvkdvyfieveslvsknyletagpvlncindielaqrsfllqdstilkcvervqslgyfyqt  
>tr|E5QTD0|E5QTD0\_STAAH  
mdvlgllsilivrrsfssqrenfrninlkeqtmnnkrlftsesvtteghpdkiadqvsdaildailkddpnarvacet  
tvttgmaliageisttvyv  
dipkvvretikeigytrakygydyetmailtaideqspdiaagvdkaleyrdkseeieatgagdqglmfgyatnetet  
ymplaiyishqlakr1sdv  
rkdgtlnylrpdgkvqvtveydendnpvridtivistqhadvtleqiqedikahviyptvpenlineqtkfyinptgrf  
viggpqqdagltgrkiivd  
tygyarhgggcfsqkdpkvdrsaayaaryvaknivaagladqcevqlayaigvaepvsiaidtfgtgkvsegqlveav  
rkhdflrpagikmldlkq  
piykqtaayghfgrtdvlfpwekldkveelkdavk  
>tr|E5QTD2|E5QTD2\_STAAH  
mevktfyngntmpqiglgtrvendencmesvkyai eqgyrsidtakvygnee qvgagiraglestgiaredlfit skly  
fedfgrenvaaayea1sr  
lg1kyldlylvhwpgtneavmvdwtkgmedlyknnkvknigvsnfepheallaqvsikpvinqveyhpyltqhk1kly  
laaqhivmeswsp1mnaqi  
lndetikdiage1gkspaqvvlrwnvqhgvtipksvtpnrisenfridfelsdeqmtridglnqdkrigpdpktfeg  
>tr|E5QTD7|E5QTD7\_STAAH  
mfsrnnni fvddlsvtkdnyliavlkml iiflvinygtdisydheyvglf iillgvllkvlninllsfkk1kfphmlyi  
ifgfllmygl dylydtfap  
ptlneilideesadapyhia1lstaippiteeiicrgliirilfrnhlflgfvstvfftlihesntligylpyfyagl  
ifgytylktkrlevpilih  
finnllam  
>tr|E5QTD8|E5QTD8\_STAAH  
mqkfkdlfyddlsvargnyfltl1safflitiilligfvvsdthilygvfivligivllrlfkinllsfkk1tmsqviyii  
ggalliygl dhlylhfdv  
ptneqeldrelqhmplmysivtiaipaiveeivfrgmiirvvrkhlflgvlvsslvfaslhesdtwigylpylysgvi  
fgliy1ktkrlevvlihf  
innlsslililiwg  
>tr|E5QTD9|E5QTD9\_STAAH  
mnkasfdkkvkkqlwflnknekqaldqr1ssitdkdnvnfnkpitfantylrenvfrsketksysifvtlvmmfayval  
lg1flglitslsgvqffv  
npkvelsttvviltiigailmlvsiylikittsyftkkllehkfnsh  
>tr|E5QTE0|E5QTE0\_STAAH  
mqdistkh1lyiqtatsnhletkcvflyheynlefpitkaipyaklhftsasilidaaksilninklvpiylnpktlfl  
pikqkrapiqtyinahyii  
gmtemgnstmlhfknkgtlevdepmsliskkyeslalkhfientndy  
>tr|E5QTE1|E5QTE1\_STAAH  
msckystpfqsvnnkmvrinemhiersksinhfnqhdtslflkktlaftln  
>tr|E5QTE2|E5QTE2\_STAAH  
mndfskyfils1sgnicytynlendylkfnvynkhhkiihhllkkynisyndeyyqlllikmwqlsqiykpssnqsls  
sflfmrlnfyliidlfrqqk  
r1ndiilcenhsplteqptyfneydlrlqdvcallnhrerqwlmlylegykqyeiadims1ststiklikasvkrkcqr  
ffk  
>tr|E5QTE5|E5QTE5\_STAAH  
mlmmtlatfiflv11fv1wqpkgldigftalagafiavitgvvsfsdvfevtgviwnatltfsvvilislildkvglf  
ewsaihm1haskgsglkmf  
vyiillgavvaaffandgaaliltpivlamvknigfskraifpfiiasgfiadttslplivsnlvniisadyfnisfsqy  
l1srmiipn1fs11as11v1  
wlyfrkajpksfdanh1kkpidaindlklfki swivlvillfgy1iseftkipvsiftgiafiflilarksnavnkqv  
ikgapwniv1fsigmyivv  
fg1rnagit1ilakileyisnyglfstilgmgfisaf1ssimnmptvlidaiaigqsnvhgmlkegliyanvigsdlgp  
kitpigs1at11w1hvl1tq  
kdvki swgtyfktgiiitipvlfft11g1y1t1ilf  
>tr|E5QTE7|E5QTE7\_STAAH  
msqfmdyaiqlanmvqqgtgvnppvgavvkegrivgigahlrkgdkhaevqaldmaqqnaegatiyitlepcshfgstp  
pcvnkiidckiakvvyatk

Tsompanidou\_et\_al\_Supplemental\_FASTA\_File

dnsldthgdetirdhgievecvdderasqlyqdfkacakqlpqi tvkvsasldgkqandngqsqwitnkevkdvyklr  
hrhdavltgrhtvelddpg  
yttriqdgknpi kvilsksgnihfnqaiyqdestpiwiytenpnlttnqthieiiylkscdlttilhnykrgvgtllve  
agptttseflqsnyidkfi  
lyyapkligsgnyqfyqndvieipdanqfeivhsellnqnvkltrkk  
>tr|E5QTE8|E5QTE8\_STAAH  
mftgiveeigvkvsvqirgsvrtieieahkitadmhigdsisvngacltvidfnqtsftvqvikgtenktyladvkrqse  
vnleramsgngrfgghfv  
ghvdelgtvskinetanakiitiqcsqhinkqlvkqgsitvdgvsitvfdkhdnsfdihlipetrrstilsskklgdkvh  
letdvlfkyveni lnkdkd  
qlsvdklrafgf  
>tr|E5QTE9|E5QTE9\_STAAH  
mqfdnidsal mal kngetiivvddenrenegdlvavtewmndntinmakearglicapvskdiaqrldlvqmvdndsdi  
fgtqftvsidhvdtttgis  
ayertltakklidpsseakdfnrpghlfp lvaqdkgvlarnghteaavdlakltgakpagviceimnddgtmakgqdlqk  
fkekhlkmitiddlieyr  
kklepejefkakvkmpdfgtfdmygfkatytddeeivvltkgairqhenvr lhsac l tgdifhsqr cdcgaql essmkyi  
nehggmi iylpqegrig  
lnklrayelieqgydtvtanlal gfded l rdyhiaaqilkyfniehinllsnpskfeglkqygidiaerievivpetvh  
nhdymetkkikmghli  
>tr|E5QTF0|E5QTF0\_STAAH  
mnfegkl igkelkvaivvsr fndfitgrllegakdtlirhdvnednidvafvpgafeiplvakklassgnydavitlgcv  
irgatshfdyvcnevakgv  
skvnnqtnvpvifgiltesieqaveragtkagnkgaeaavsaiemanllksika  
>tr|E5QTF1|E5QTF1\_STAAH  
mallknffiglsnnsflnnaakkvgprlgankvvagntipelintieyln dkniavtdnlgefvgtveeshakeqilt  
imdalhqhgvykahmsvkl  
qlgaefdlelayqn lreillkantynmhinidtekyas lqqivqvlr l kgef rnvgtviqaylydshe lvdkyqdlr l  
rlvkgaykenesiafqske  
dvdanyikiieqrllnarnftsia thdhriinhvkqfmkenhie kdr mefq mlygfrselaeianegynftiyvpygdd  
wfayfmrrlaerpqnlsla  
akefvkpaglkrvgiiaalgatvmlclstikk lcrk  
>tr|E5QTF3|E5QTF3\_STAAH  
mhklahisfgivgmfvntcmvakyviinwemysmkkvndtvfgilqlletllgdinsifseieseykmsreeililltlw  
qkgsmtlkemdrfvevkpy  
krtrtynn lvelewi ykerpvdvertviihfnek lqqekvellnfisdaiasratamqnslnaiav  
>tr|E5QTF4|E5QTF4\_STAAH  
mdlft rkdgtshystlgegypivlihtv ldnysvfnklaaelaksfvvlidlrghgysdkprhieikdfsedive l lk  
ylyieevafvchemggiig  
adivrypeftss lmlvnptsiege lpeer lfrkyahii r nwdpekqdkflnkrkyrprk mnrflkhvdtneistkee  
iqavkevfk nadisqtyrn  
vvvptkiiagefgerttrleakevadliqnadfevyqessafpveeqerfvedtasfinkhhdekhv  
>tr|E5QTF6|E5QTF6\_STAAH  
mnviiderkenamtfnkvl lswivil iittsiylfwqlgdindvfnqsilinvr lprllealltgmiltvaglifqtvln  
naladsftlg lasgatfgs  
glalflglttlwipvftsitflitlitv l vitsv l sqgypvri l lsglmigal fns llyflillkprklntianylfgg  
fgdaey snvsiiatfiia  
lfgifiilnqlklqlgelksqslg l n vqiityialciasmitainvayvgiigfigmvipqlirkwqwkqslgrqlaln  
iviggqimvmadfigshil  
spvqipasiialigipvl fym l isqskrlh  
>tr|E5QTF7|E5QTF7\_STAAH  
mkksliafili fmlvlsgcgmkdndkqgsddngsskspyhrivslmpsn teilyelglgkyivgvstvdypkdvkkgkk  
qfdalnlnkeellkakpdl  
ilahesqkatankvlsslekqikvvyvkdasidetyntfkqigklthhekqaeqlveetkdnidkvidsipahhkksk  
vfievsskpeiytagkhtf  
fndmlek l eaqnvsdingwnpvtkesi ikknpdilisteaktrsdymdi ikkr ggnkinavkntrievngdevs rpg  
prideglkelrdaiyrk  
>tr|E5QTF9|E5QTF9\_STAAH  
mniidqvqkt lveeiaasinkagladeipdiki evpkdtkngdyatni amvltkiakrnpreiaqaivdn l dtekahvkq  
idiaggfifnfyldnqylt  
aiipeaiekgdqfghvneskqnv lleyvsanptgd l higharnaavgdalanil taagynvtreyyindagnqitnlar  
sietrffea l gdn sysmpe  
dgyngkdiieigkdl aekhpeikdyseear l kefrkl gveyemak l kndlaefnthfdnw fsetslyekgeilevlakmk  
elgytyeadgatw l rttfd  
kddkdrv l i kndgtytyflpdiayhfdkvkr gndilid l fgadhgyinrlkasletfgvdsnrleiqimqmvr l mengk  
evkmskrtgnait l reimsh  
evgvdaryfl t mrspsdfdfdme lakeqsqdnpvyya qyaharicsil kqakeqgievaaandfttitnekaie l lkk  
vadfeptiesaaehrsahr

Tsompanidou\_et\_al\_Supplemental\_FASTA\_File

itnyiqdlashfhkfynaekvltddiectkahvami eavritlknalamvgvsapesm  
>tr|E5QTG0|E5QTG0\_STAAH  
mssklgkkvsihtkqv1kqhnekekfefttegtwqqrqsnfiryveqiedatvntikvddsvklirkgdinmnlhfve  
gqttttfydisagriplev  
ktlri1hfvsgdggklkihyelyqdnemgisyqeyinykeige  
>tr|E5QTG3|E5QTG3\_STAAH  
mtnayvd1klvekvfkdpihryihvedqliwdliktkefqr1rrirqlgtlylsfhtaehsrfgshlgvyevrrlide  
sfighdawnkdrplalca  
allhd1ghgpfshsfeki fntdheaytqaiitgdtevnalrvkspefprevaevinkthhnlvismissqidadrmdy  
lqrdyftgvsygaafdmer  
ilr1mrpskdevlikesgmhavenfimsryqmywqi yfhpsvrggevl1nnc1krakqlynegyefklhphdfipffet  
vtieqyveldeavvtyyle  
kwtkeddailsd1asrfindr1fkyipfdgsiitiselqelfeagginpdyfvseafsd1pydydrpgsnrkpihl1rq  
dgki re1snqslvihsitg  
inrqdyklyypremvakikdkktireaienline1n  
>tr|E5QTG6|E5QTG6\_STAAH  
mkqfvnlgksdvevfpi algtnavgghnlypn1deeqgkdvrqainhgin1ldtayiygpersee1vgevkeypreqi  
kiatkgshefdenqevhq  
nqpeylkqqvens1kr1qt dyidlyyihfpddntpkdavaalqelkeqgkikaigvsnft1dq1keankdgyvdvqle  
yn1lhreneav1qycvdhq  
itfipyfpl asgilagkydentkfsdhrtrrdfkpgvfeenvrvkalesiaaahqtsianivlafyltrpaidviipg  
akraeqvienikaadiv1s  
ddeiqyidel fpied  
>tr|E5QTG7|E5QTG7\_STAAH  
met1l1ceviaiyknpyriikyndeylmvni1nwlvlfipl1nwltpkryikisqeelen1ntf1kpaknafwpalgss  
v1fsvtfrkymp1fnvr1e  
ktiviai1ffvvlgi1ffyl1nrr1alsvftmneksqkmi1l1pn1khffffiifaylyfggfsftlyalitidvqni  
ifi1cwgavtmffffinivp  
igikkahvil1lks  
>tr|E5QTG8|E5QTG8\_STAAH  
m1n1l1knvfwpvagssa1lgvalrkyth1ldvqldkklviaiccitfigilifyvr1likss1niyntknkrskiflipt  
1knvcft1fgyi1fgg1tm  
1f1dal1smyqni1vyfawiavmmgff1vnialiidknihvilk  
>tr|E5QTH0|E5QTH0\_STAAH  
m1l1ceskvinknpyrvikygydeylmid1vstwl1fl1pminw1ipkkyvki skkefdd1nivkpvknafwpvagstil  
fgvtfrkyips1niqlen  
mviviccaiflgv1ilf1flnrk1r1eiynnssskgi1l1fpl1knfcftifyy1f1fgg1simal1sm1l1t1npqniigfi  
gw1vmtagff1lnmssiid  
kkiyv1sktntvek  
>tr|E5QTH1|E5QTH1\_STAAH  
mpmsidmy1drsnqassvgn1sqtmsnydalekai1tqfinddal1kgkaytsakqffstvl1pl1stsmkt1sd1tkqac  
dnfvsrytsevd1s1lkes  
e1eedirs1sqitryen1nn1kkhasdnqqaissnqqi1irt1gqqkheleek1rk1refnqkspeifkeveefqkivq  
qg1tqaqnfwnfstnqfni  
psgkel1dwakashekylkvamgkieqkaeket1nkadfavikayakehpeddipksimkyindnkdsikrdig1ditst1  
leqgginaskfgvfintag  
gvkpgapgnsv1evkrtsgnvfiengskfakggkylgkgvagvgf1gmyddmanddktvgealshnal1ttgigigagag  
mtat1alfasnpvgwavig  
gfvfgsvstml1vdayqnnkagikdkadwvghk1ddgidv1k1stekavdsvgeatksisnh1n1pmk1sw  
>tr|E5QTH5|E5QTH5\_STAAH  
mkntfl1cdecqavn1rt1qkk1ek1dpdaeivigcqsycpgprkrtfafvnrplaa1teeliekvsqq1kkprdee  
eer1rkrheerkrreeq  
rk1kek1ekrkaq  
>tr|E5QTI0|E5QTI0\_STAAH  
mad1lnv1kdk1sgknvki1v1pegederv1taatq1qatdyvtpiv1gdetkvqslaql1n1disnielinpatse1kae  
1vqsfverrkgateeqaq  
e1lnnvnyfgtm1vyagkadg1vsgaahstgdtvrpalqi1k1tkpgvsrtsgiffm1kgdeqyifgdcainpeldsqgla  
e1avesaksa1sfgmdpkv  
am1sfstkg1saksddvtkvqevk1laqqkaeeek1eai1idgef1qfdaai1vpgvaekkapgak1qgdanvfvps1eagni  
gykiaqr1gg1ydvagpvlq  
g1nspvnd1srgcsiedvyn1sfitaqa1q  
>tr|E5QTI1|E5QTI1\_STAAH  
msqaaet1dgwys1hl1fyavdwas1r1vpkderdal1vtefqsflentatvrssksqgdaiynitgqkad1llwfl1rpmk  
s1nhienefnklriadfl1  
ptysyvsviel1sn1lagksdedpyenphikar1ype1phsdyicfypmknrrnetynwym1tmeerqk1mydhgmigrky  
agk1kqfi1tgsvgfddfew  
gv1l1fsddv1qfkk1vyemrfdettarygef1sffvgh1intnefnqffais  
>tr|E5QTI2|E5QTI2\_STAAH

Tsompanidou\_et\_al\_Supplemental\_FASTA\_File

mivvkv1prktrrvhfamskvyfviditlahiykfkhtdfnylnphvlcireytedkrkipslnr  
>tr|E5QTJ0|E5QTJ0\_STAAH  
miyrqyqhegapvyeiitktfqhvsikcddsfsdteifkllsllqddidhmkvs  
>tr|E5QTJ3|E5QTJ3\_STAAH  
mnynmnqavivaakrtafgkyggtlkhlepeql1kplfqhfkekyepeviskidvvlgnvvgnggniarkalleaglkds  
isgvtidrccsglesvqy  
acrmiqagagkvviaggvestsrapwkikrphsvyetalpefyerasfapemsdpsmiqgaenvakmygvsrelqdefay  
rshqltaenvknngnisqei  
lpitvkgelfntdeslkshipkdnfgrfkpvikggtvtaanscmkndgavllimekdmayelgfdhgllfkdgvtvgvd  
snlpgigpvpaisnllkrn  
qltienievieineafsaqvaccqaalni sntqlniwggalasghpygasgaqlvtrlfymfdkesmiasmgiggllgna  
alftrf  
>tr|E5QTJ4|E5QTJ4\_STAAH  
mdvileqlethtqnkpn dialhiddetitysqlnaritsaveslqkyslnpvvainmkspvqsiicylalhrlhkvpmmm  
egkwqstihrqlikeygik  
dvigdtclmqnidspmfidstqlqhypnllhigftsgttglpkayrdedswlasfevneumlknenaiaapgpshsll  
tlyallfalssgrtfiggt  
tfhperllnqcrkissykvamflvptmikslllvynnehtiqsffssgdllhssifkkiknqandinlieffgtsetsfi  
synlnqqapvesvgvlfpn  
velkttndhngigticvksnmmfsgyvseqcinn dewfvtdngyvkeqylyltgrqhdml iiggqniypahverlltq  
sssidaeaiigipnerfgq  
igvllysgdvtlthknvkqflnkkvkryeipsmihhvekmyytasgkiarekmmssmylrgel  
>tr|E5QTJ5|E5QTJ5\_STAAH  
mdfnkeninmvdakkaktvvatgignamewfdgvyayttayiganffspvesadirqmltfaalafiafllrpiggvfvf  
giigdkygrkvvltstii  
mafstl1igllpsydqiglwapi111larvlqgfstggeyagamtyvaesspdkrrnslgsgleigtlsgyiaasimial  
l1tffltdeqmasfgwrifp  
llglf1glfglylrrkleespvfendvatqperdninflqiirfyykdivcfvavvffnvtnymvtaylptyleqviki  
datttsvli1tcvmaimipi  
almfglk1adkigekkvfligtggl1fsiafml1hsqsfvvivi1g1gffl1styeatmpgs1ptmfyshiryrtlsv  
tfnisvsi1fggtplvatw  
lvaktgdp1apayl1ta1svigflvitfl1stags1kgsypndneqdrayyaehpkealwwvkerkd  
>tr|E5QTJ6|E5QTJ6\_STAAH  
mlilkfenyifdfdg1adtkkcevatqsafkacgl1tepsaqdishymgipieesflkladrpldeatlaklidtfrht  
yqsiekdyiyefagi1tea1  
tslynqgkkl1fvvsskksdvlern1saiglnh1iteavgsdqsaykpnpegihtivqryn1nsqqtvyigdstfdvema  
qhagvpsaavtwgahdars  
llhsnpdfi1indpseintvl  
>tr|E5QTJ7|E5QTJ7\_STAAH  
makfsdyql1idelkmt1shveadefstfaskilhaehifvagkgrsgfvansfamrlnq1gkqahvvgesttpaiksnd  
vfvii1sgsgsteh1r1lad  
kaksvgadiv1ittnkdsaignlagtniv1pagtkydehgsaqplgs1feqasqlfl1dsvvmgl1mtemnvseqtmqqnha  
nle  
>tr|E5QTJ8|E5QTJ8\_STAAH  
melqlaid1lnkedaaelankvkdydviveigtpiiyneglpavkhmadnisnkvvladmkimdaadyevsqaikfgadv  
itilgvaedasikaaieea  
hknnkqllvdm1avqd1ekrake1demgadyiavhtgydl1aegqspl1rtvksviknskavaggikpdtikeivae  
spdlv1vgggianadpve  
aakqcraaie1egk  
>tr|E5QTJ9|E5QTJ9\_STAAH  
mkvln1ngskkqasfyvace1ykemafnqhck1glatggtmtd1yeqlvkl1nknq1nvdnvtfn1deyvgl1tashpqsy  
hyymddm1fkqpyf1nrkn  
ih1p1ngdaydmnaeastyndv1eqqqr1diqilgigenghigfnepgtpf1dsvthivd1testikansryfeneddv1pkq  
aismglan1lqakri1lla  
fgekkraaith1lnqe1svdvp1at1lhkhp1nveiy1l1ddeacpknvaki1hdemd  
>tr|E5QTK0|E5QTK0\_STAAH  
ml1epikeqev1d1lasfehkpvy1lhvettngayan1hfdqrvfnagtfl1rniqvt1ythaq1lkggnkepyrig1kl1snggw  
yvqgl1thfeinehdef1lia  
gfnyegq1aaalqi1serpfn1  
>tr|E5QTK1|E5QTK1\_STAAH  
m1derhvl1vifph1pddet1fssag1las1yiqkgt1pvt1yac1tl1gqm1grn1gnpp1fatres1psirere1leackvigit1d1  
rkmg1rdktvefep1yehid  
gmiks1liddt1nps1liisfy1pgyav1hpdheatadav1rtver1ipkeerpr1tl1vafsn1dateal1gepdiqnditdfkelki  
kafeahasqtgpf1lkq1las  
peidgkqhsf1tvepywty1hfs  
>tr|E5QTK2|E5QTK2\_STAAH  
mtefd1streg1rwkhfgsvd1p1egtkpttknemtd1qsthkdf1feieevgikn1lyvpvlvdqyqtagtfsfsts1tkde  
kginmsriiesvekh1ydn1g

Tsompanidou\_et\_al\_Supplemental\_FASTA\_File

ielefntlyqvlctlqtnmkqnaagvdivsgkwffdryspntnikavgnadvtyglaidgdkvtrkelteatvttlcps  
keiseysahnqrgvvtvkt  
yinkdqdivddyknildameanassilypilkrpdekrvterayenprfvedlirliaadlvefdwlegfdiecrnees  
ihqhdafaklkyrk  
>tr|E5QTK3|E5QTK3\_STAAH  
mfiykttnfyinyngssysvkyqyiivelriliydsqgsnekiykrdiql  
>tr|E5QTK4|E5QTK4\_STAAH  
mnyfvgnslgvnlgtiekainrlnl fkemgrpaqcvflswrylyrnaqnyitssdyinmydffqeatylernepfawl  
sywtdechytlkhvenshd  
fryidqerflmyahfqdpkyri ldvnhfidsqrrkvkrdfydvrgrflscsri lvdkqqt lceffynpegdtklekyfsyk  
dgkpevqkiivvyankqyf  
fnnetelgaffikqlyqhd lffsdrnyvtafi nltpesipvvavlhsthiknidal dsspfnvykamfenlsryrai  
ivsteqqkl dvekri nhti  
pvvni pvysetidtpvqtdlqhsvklisvayrspekqlhqqlvkr lvpvypkvelhmygfgseskklneliqkygle  
nhvylrgflsnldqesda  
ylslitsnmegfslalleslahgvpvisydikygpgelitsdfngylitkndedal fdkvkyvidhpevqqr lskgslak  
aqyskaslikqwdqfvr l  
i  
>tr|E5QTK5|E5QTK5\_STAAH  
mnyilgtileskitgvekaqinrlklfkqhgi sskcvyvkwnpysytyakqhqiend lftmydyfqakainykktkqvni  
qwekscrytlkfvensnd  
vriydeeqfimyahfl dkqyhl nvyvnyfdhkrkvrkrel ydgrgflscsri lgegqriv lenyytpngeivi qkyfddi  
kgknt ltkvlnedqhqf  
fdtedel vqyflhq lcknndqi il drphelgnviaglnqsipvivvlhsth lsgtgndiknfyk tvfnnl trykaivvst  
ekqcqdisgyienkipvin  
ipvgvyanlkyqfdinqdknhi isiar lvenkqithqievikqlv tkhpkqi lniyghgnglseyrqlvegyhlsehvk  
fhgfkthineeiakaelml  
stskmegfglajles lsvgtpvisydvdygpse liqdgfngylvppgdinqmvekvdqllnnsqmmqqsinsiesaqy  
nattistkwqkiln  
>tr|E5QTK6|E5QTK6\_STAAH  
minrdnkka itkkgm isnrlnkfsirkytvgtasilvgttlifglngqeakaaentstenakqdeasasdnkevseten  
nstqkndlnpikketntd  
shqeakeaptsstqgqnnattstetkqniekenvpstdktatedtsvileekkapnntndvttkptstseiqtpt  
tpqestniensqpqptpsk  
vndqvt dai npepvnskeelknpek lkelvrndsntdrstkpvataptsvapkrvnakirfavaqpaavasnvnnd l  
itv tkqmi tegi kddgviq  
ahdgehi iyt sdfkidnavkagdtmtvkydkhtipsdi tddftpvditdpsgeviakgtfdlntkkitykftdyvdryen  
vnaklelnsyidkkevnpne  
tnlnl t fatadketsknkvveyqkpi vkdesniqsi fshldttkheveqtiyvnplkl nakntnvtiksggvadngdyt  
gdgstiidsnteikvykva  
sqqlpqsni kydsqyedvtnsvtinknygtmanifgdidsayivkvvskytpgaeddlavqqgvrmtttknynys  
yagyntilsttdsggggdg  
tvkpeeklyki gdyvwedvdkdgvqgtdskekmanvltl typdgttksvrtdanghyefgg lkdgetytkfetpagy  
lptkengttdekdsgngs  
vtvkingkddms ldtgfykepkynlgdyvwedtnkdgiqdanepgikdvkvtlkdstgkvigttttdasgkykftdlng  
nytvefetpagytpvknt  
taedkdsngl tttgvikdadnwt lds gfyktpkyslgdyvwydsnkdgkqdstekgikdvtvtlqnekgevigttkten  
gkyrfdnl ds gkykvi fek  
pagl tqtgtntteddkdaggevdv tithddft l dngyfeedtsdsdsdsdsdsdsdsdsdsdsdsdsdsdsdsdsdsds  
dsdsdsdsdsdsdsdsdsdsdsdsdsdsdsdsdsdsdsdsdsdsdsdsdsdsdsdsdsdsdsdsdsdsdsdsdsdsdsdsds  
dsdsdsdsdsdsdsdsdsdsdsdsdsdsdsdsdsdsdsdsdsdsdsdsdsdsdsdsdsdsdsdsdsdsdsdsdsdsdsdsds  
dsdsdsdsdsdsdsdsdsdsdsdsdsdsdsdsdsdsdsdsdsdsdsdsdsdsdsdsdsdsdsdsdsdsdsdsdsdsdsdsds  
agkhtpvkpm satkdhhnkakal petgsennsnnat l fgg l faa l gsl l l fgrkkqk  
>tr|E5QTK7|E5QTK7\_STAAH  
mlnrenktamtrkgmvsnrlnkfsirkytvgtasilvgttlifgigsqeakaaevtnkemkedatsvndqvskkvdgtgq  
lnndgntskvdteqlkden  
inkvanqkevtrvensval eknnnsqpsenglqtsdvkktdnnatsddqvttvnsqqlntdnttanatmssapinvs  
kddlkinseevrnveekrd  
ntdnanssel ikpkstapkr l ntrmrmaavqpsstdsknvn l itsnttl tvvdadknnkivpaqdy l alksqikvddkv  
ksgdyftikysdtvqvygl  
npediknigdikdpngetiatakhtann litytftdyvdrfnsvqmginysiy madtipvskndvefnvtigndttk  
ttaniqypdyvsrdnnsig  
saftetvshagnaedpgyykqtvyvnpseks ltnaklkveayhkdydpnvqginkdvtkikiyqapkyvlnkgydvntn  
qlidvteqfkdkitygand  
svnvdfgsinnsyvmdtkfeyttsesptlvqmat ltsdgnrsvstgnal gftnnqsggagqevyki gnyvwedtnkng  
vqdlgevgvkgvtvaydn  
ktnkevgrtitddkgygilpnlpngdyrvefsnlpqgyevtpskqgnne ldsngvssvitvngkdn l sadlgiykpkn  
lgdyvwedtnkngiqdqe

Tsompanidou\_et\_al\_Supplemental\_FASTA\_File

kgisgvtvtlkdengnvlktvttadagkykftdlngnykvefttpegytpttvtsgsdiiekdsngl tttgvingadnmt  
ldsgfyktpkynlgnvyve  
dtnkdgkqdstekgisgvtvtlknengevlqtktkdkgkyqftglengtykvefetpsgytptqvsgtdegidsngts  
ttgvikdkdndtidsgfyk  
ptynlgyvvedtnkdgkqdssekisgvtvtlknengevlqtktkdkgkyqftglengtykvefetpsgytptqvsg  
tdegidsngtsttgvikdk  
dndtidsgfykptynlgyvvedtnkngvqdkdekisgvtvtlkdendkvlktvttedengkyqftdlngtykvefetp  
sgytpsvttgndtekdsn  
gl tttgvikdadnmtldsgfyktpkyslgyvvydsnkdgkqdstekgikdvkvtllnekgevigttktedengkyrfdnl  
dsgkykvi fekpagltqtg  
tntteddkdadggevdtitdhddftldngyfeedtsdsdsdsdsdsdsesdsdsdsdsdsdsdsdsdsdsdsdsds  
sdsdsdsdsdsdsdsdsds  
dsdsesdsdsesdsdsdsdsdsdsdsdsdsdsdsdsdsdsdsdsdsdsdsdsdsdsdsdsdsdsdsdsdsdsdsds  
dsdsdsdsdsdsdsdsds  
sesdsdsdsdsdsdsdsdsdsdsdsdsdsdsdsdsdsdsdagkhtpvkpmstatkdhnkakalpetgsenngsnnatlfggl  
faalgslllfgrrkkqnk  
>tr|E5QTK8|E5QTK8\_STAAH  
mnkktatnrkgmipnrlnkfsirkysvgtasilvgttlifglsgheakaaehtngelnqskneatapsenkttekvdsr  
qqnveqsttsnqpkvnes  
dntsvketteepqnttstqptkknndatankdnlaaqnistqandvsatpkkttikprtlnrmavntvaapqqgtvndk  
vhfsnidiaidkghvnstt  
gktefwatssdvllkanytidssvkegdtftfkyggyfrpgsvrlpsqtqnllynaqgniaakgiydstnttttytftny  
vdqytnvsgsfeqvafakr  
enattdktaykmevtlgnvdyseeiivdygnkkaqplisstnyinnedlsrmtvyvnpkntytketfvstltgykfnp  
daknfkiyevtdqnfvd  
ftpdtskliidvtdkfkitysndnktatvdlmngqtnsnkqyiqqvaypdntstdngkidytldtdkkykswnsysvsn  
gsstangdqkynlgyvww  
edtnkdgkqdanekgikgyvvi lkdsgnkelrtdttedengkyqftglngtykvefstlagypttvnagtddavdsdgl  
ttgvikdadnmtldsgfy  
ktpkyslgyvvydsnkdgkqdstekgikgvkvtlqnekgevigttedengkyrfdnl dsgkykvi fekpagltqtgtn  
ttdedkdadggevdtitd  
hddftldngyfeetsdsdsdsdsdsdsdsdsdsdsdsdsdsdsdsdsdsdsdsdsdsdsdsdsdsdsdsdsdsdsds  
dsdsdsdsdsdsesdsdsd  
sdsdsdsdsdsdsdsdsdsdsdsdsdsdsdsgkhtpvkpmstatkdhnkakalpetgsenngsnnatlfgglfaalgslllf  
grkkqnk  
>tr|E5QTK9|E5QTK9\_STAAH  
mnkfnkkegsnmkgl iigsaqvnshtsalarylaehfkthdieaeifdlaekplnqldfsgttsideikqnmkdlike  
kamaadflilgtprnyhgsy  
sgilknal dhlndmyfkmkpvglignsggisvsseplshlrivrsllgiavptqiathdsdfaknedgsyylndsefqlr  
arlfvdqivsfnnspeyh  
lk  
>tr|E5QTL1|E5QTL1\_STAAH  
mndiyfmtlaieeakkaaqgvepigaiitkdevarahnretlqqptahaehiaieraakvlgswrledctlyvtl  
epcvmcagtivmsriprvv  
ygaddpkggcsgslmnllqsnfnhraivdkgvlkeacstllttffknlrankkstn  
>tr|E5QTL2|E5QTL2\_STAAH  
msilftgdnmnikafiaiegpigvgksslaklslqtlfdyeekeiitenpflsdfyediskwsfqtemfflcnrykqfqd  
vtqlnqgvvsdyhiknki  
fakntlssvefqqkfskiydl tedmimpnmiifldadldvlksriakrnrsfehqi edeyllklkkdyreyyeslqsngs  
nvli dttsidflkneqdy  
edilhiilpmigditne  
>tr|E5QTL4|E5QTL4\_STAAH  
mewilfdkdgltiefdrswekigvrfrvqsll etfpvhnkeaalrqlgvikesidpksvmgsgslqqiiqafndvtgqdt  
dwskstsqklvderipein  
wvegvealidlkakgyqlgivtsdtkkgeqflahtnatslfdliisteadayekpnpkvlspifeqynvdpqkvaivg  
dtandmktasnanl gmaig  
vltgiatkeelheadiilnsaadi leali  
>tr|E5QTL5|E5QTL5\_STAAH  
msqavkielretlkekpdtstqlgfgkyftdymlsydydadkgwhdiki vpygpieispaaqgvhygqsvfeglkaykkdg  
evalfrpdenfkrlnnsla  
rtempqvneglleglkqlvdlerewpegegqsl yirpfvfategvlvgashqyklililspsgayygetlkptkiy  
vedeyvravrggvfakva  
gnyaasllaqtnanklgydqvllwdgveqkyieevgsmniffvengkvitpelngsilpgitrksiielaknlgyeveer  
rvidel fesydkgeltev  
fsggtaavispgtlyredreivnnetgeitqklydyvtgiqngtledkngwrvvvpy  
>tr|E5QTL6|E5QTL6\_STAAH  
mkmmimsscdglwlyrrdkgdismkkimitgalgqigte lvkcreiygtdnvl atdi repeat spvqngpfeildvtdr  
drmfelvrdfeadslmhma



Tsompanidou\_et\_al\_Supplemental\_FASTA\_File

all sataeknpi lawdlnmglmnaleartynlhfft pssigafgdstpknvtpqvtiqqpttmygvnkvagellcqyy  
ftrfgvdtrsvrfrpglish  
vkepgggttdyaveiyfkavreghytsfidkgtymdmmymddaidaiiklmeaddakletrngynlsamsfdpemvkeai  
qeyypdfkleydvdpriqg  
ianswpdsidtsrgewgfdpkydlvsmtklmlaieqkdtvknnn  
>tr|E5QTL7|E5QTL7\_STAAH  
mmsysigidygtasgrvflinttngqvsvkfvkpythgvi egeInglkiphtyalqnsndyleimeegisyivreskidp  
vni vgi g idftsstii ftd  
enlnpvhnlkqfknnphayvklwkhhgaykeaklyqtaiennkwlghygyvnssewmi pkimevmnrapeimektayi  
meagdwi vnklnknvrsn  
cglgfka fweeetgfhydldfkvdpklskviqdkvsapvvnigeavgl ddkmaqklglskdtmvsppi idahasllgig  
sekdkemtvmgtstchl m  
lnekqhqvpgisgsvkgaipelfayeagqsavgdlfeyvakqapsyvdeaanrnmv felmnekikhqmpgesglial  
dwhngnrsvl sdsnl tgc i  
fgltlqt khedi yrayleatafgtkmimqqyqdwhmevekvfacggipkknvmm diyanvlnkkli vmdseyapaigaa  
ilgavsggahnsindavda  
mkepi lyeinpeaekvqryetlfkaykalhdihgykkanimkdiqslrveg  
>tr|E5QTL8|E5QTL8\_STAAH  
msqdvnl skqtpdkaednaffpspyslsqytapktfdgvehkgaykdgkwvlmiaaeryvllengkmfstgnhpv  
emllplhhmeagfdvdva  
tlsgypaklel wamptedeavistynkleklkpkkladviknelgpdsdylsvfipggahaavvgisesedvqqtldwa  
lendrfivtlchgpaa lls  
aglnrekspl egysvcvfpsldeganieigy l pgrlkwlvadlltkqglkvvnddm tgrtlkdrklltgdsplasnelg  
klavnemlnaiqnk  
>tr|E5QTM2|E5QTM2\_STAAH  
mlraspylsylfsniwkekkymarefsl ektrnigimahidagktttterilytgrihki gethegasqmdwmeqeqd  
rgitit saattaaweghrv  
ni idtpghvdf tveverslrvldgavtv ldaqsgvepqtetvwrqattygvprivfnkmdklganfeysvstlhdrlqa  
naapiqlpi gaedefea i  
dlvemkcfkytndlgteieeieipedhl draeearaslieavaetsdelmekylgdeeisvselkeairqattnefypv  
l cgtafknkgvqlmldavi  
dylpspldvkpiighrasnpeeevi akaddsaefaalafkvmtdpyvgkl tffrvysgtmtsgsyvknstkgkrervgrl  
lqmhansrqi idtvysgdi  
aaavglkdtgtgd tlcgekndi i lesme fpepvi hlsvepkskadqdkmtqalvkl qeedptfhahtdeetgqv i igmg  
elhldilvdrmkkefnvec  
nvgapmvsyretfkssaqvqgkfsrqsggrgqygdvhi eftpnetgagfefenaivggvvpreyipsveaglkdamengv  
lagyp lidvakalydgsyha  
dvssemafkiaas lalkeaaakkcdpvi lepmmkvti empeeymgdimgdvtsrrgrv dgmep rgnaaqvvayvplsemf  
gyatslrsntqgrgtytmy  
fdhyaevpksiaedi ikknkge  
>tr|E5QTM5|E5QTM5\_STAAH  
mfvnvnlkvdasrtledkllskekvarfnkqhfvg lketlkal kkdqvtsliiaedvevylmtrvlsqinqknipvsff  
kskhalgkhvginvativ  
alik  
>tr|E5QTM6|E5QTM6\_STAAH  
midvnnfhymkiglaspekirs wsfgevkkpetinyrtl kpekdg l fcerifgptkdwecscgkykrvrykgmvcdrcgv  
evtkskvr rermghielaa  
pvshiywfk gipsrmgl lldmspraleeviyfasyvvvdpgptglekktll seaefrdyydkypgqfvakmgaegikdl  
eedldeekll rdelesa  
tgqrltraikrlevvesfrnsgnkpswmi ldlvli p ipeirpmvql dggrfatsdlndlyrrvinrnnrlkrll dl gagg  
iivqnekrm l qeavdalid  
ngrrgpvtgpgnrplkslshmlkgkqgrfrqnl l gkrvdysgrsviavgpsl kmyqcg l pkemal el fkp fvmkelvqr  
eiatniknaks skiermdde  
vwdvleevi rehpllnraptlhr lgiqafeptlvegrairl hplvttaynadfdgdq mavhvp l skeaqae arm lmlaa  
qnilnpkdgkpvtpsqdm  
vlgnyytl lerkdavantgai fntnevl kayangfvhlhtrigvhassfnptfteeqnkki latsvgkiifneiipdsf  
ayneptqenlerktpnry  
fidpttl gegg l keyfenee liepfnkkl fgniaevfnrfsitdtsmml drmkdl gfkfsskagitvgvadivvlpdq  
qil dehek lvdritkqfnr  
gli teeerynavvei wtdakdqiqgel mqsldktnpi fmsdsgargnasnftqlagmrgl maaps gkiie l pitssfre  
gl tvleyfisthgarkgla  
dtalktadsgyl trrlvdvaqdvivreedcgt drgllvsdikegtemiepfieriegrysketirhpetdeviirpdeli  
tpeiakki tdagieqmyir  
saftcnarhgvcekcygknlatgekvevgeavgtiaaqsigepgtqltmrtfhtggvagsditqgl priqei fearn pkg  
qaviteiegvediklakd  
rqqeivvkganetryslasgtsriiveigqpvqrgevl tegsiepknylsvaglnatesy llkevqkvymqgveiddkh  
vevmvrqmlrkvr iieagd  
tkllpgslvdi hnftdanrea fkhkrpatakpvllgitkas letesflsaasf qettrv l tdaaikgrddllglkenv

Tsompanidou\_et\_al\_Supplemental\_FASTA\_File

igklipagtgmrrysdvk  
yektakpvaevesqteve  
>tr|E5QTM7|E5QTM7\_STAAH  
magqvvyqgrhrkrnyarisevlelplnieiqtkseywflregliemfrdispiedftgnlslefvdyrlegepydlee  
sknrdatyaaplrvkvrli  
iketgevkeqevfmgdfplmtdtgtfvingaervivsqlvrpsvyfnekidkngrenydatiipnrgawleyetdakdv  
vyvridrtrklpltvllra  
lgfssdgeivdlldgneylrntlekdgtenteqalleiyerlrpgepptvenaksllysrffdpkrydlasvgyrktkk  
lh1khr1fnqklaepivnt  
etgeivveegtvlrrkideimdvlesnansevfe1hgsvidepveiqsikvyvpnddegrtttvginafpdsevkcitp  
adiiasmsyffnllsgigy  
tdidh1gnrr1rsvge1lnqfriglsmervvrermsiqdtesitpqqlinirpviasikeffgssqlsqfmdqanpl  
aelthkrr1salpgggltr  
eraqmevrdrvhyshygrmcpietpegpnig1ins1ssyarvnefgfietyrkvldthaitdqidy1tadeedsyvvaq  
ansk1dengrfmddevvcr  
frgnntvmakemdydvspkqvvsaaatacipflenddsnralmganmqrqavplmnppeapfvgtgmehvaardsgaait  
akhrgrvehvesneilvrr  
1veengvehegeldryplakfkrsnsgtcynqrpiivaagdvefneiladgpsmelgemalgrnvvvgfwtwdgynyeda  
vimserlvkddvytsihie  
eyeseardtklgpeitrdipnvsesalknlddrgivyigaevkdgdilvgkvtpkgvteltaerllhaifgekarevr  
dts1rvphgaggivldvkv  
fnreegddt1spgvnqlvrviyivqkrkihvgdkmcrhgnkgviskiivpeedmpylpdgrpidim1nplgvpsrmnigqv  
le1h1gmaakn1gihvasp  
vfdgandddvstieeagmardgktvlydgrtgepfdnrisvgvmym1klahmvddklharstgpyslvtqqplggkaqf  
ggqrfgemevwaleaygaa  
yt1qe1ltyksddtvgrvktyeaivkgenisrpsvpesfrvlmkelqslglvdkvmdeqdneiemtdvdddvdvverkvdl  
qqndapetqkevtd  
>tr|E5QTM9|E5QTM9\_STAAH  
manheqi1etikemsvle1nd1vkaieeefgvtaaapvavagaaggadaaaektefdveltsagsskikvvkavkeatgl  
glkdakelvdgapkvikea  
1pkeeak1keqleevgatvelk  
>tr|E5QTN5|E5QTN5\_STAAH  
mqsgkqlddmhkengksgtvtekgdm1qsskhqstqnskiirtqndnqvkdserqgskqshqnnatnkterqndqiqnt  
hhaerngsqsttsqsndvd  
ksqpsipaqvipnhdkaaptstppsndktapkstkeqdattdkhpqqdthqpahqiidakqddnvhsnqkpvvgdl  
skhidgqnspekptdkntd  
nkqlikdalqapktrsttnaadakkvrplkanqvqplnkypvvfvhgflglvgdnapa1ypnywggnykvielrkqg  
ynvhqasvsafgsnydrav  
elyyyikgrrvdygaahaakygherygkykgimpnwepgkvh1vghsmggqtirlmeefl1rngnkeeiayhkahggei  
splftgghnmvasittla  
tphngsqaadkfngteavrkimfalnrfgmnyksnid1gl1tqwgfkqlpnesyidyikrvskskiwtssdnaaydl1ng  
saklnmmtsmnpnitytgy  
tgvsstgplgyenpd1gtff1mdttsriighdareewrkndgvvpviss1hpsnqpfvntndepatrrgiwkvkpiiq  
gwdhvdfigvdf1dfkrkg  
aelanfytgiind1l1rveateskg1kas  
>tr|E5QTN6|E5QTN6\_STAAH  
mih1ikgkmmhhtvlcih1nkvalmnyhsnaqpsawrfvyslvgilcffiipftingntifvdhvh1airsiigplm  
pyvalimiligtalpvrr  
tfm1tsitnlvit1fkvagamigimyvfkfgpsilfkanygpflfeklmp1silipvgaialsl1lvgygl1efvgvymep  
imrpi1fktpgksaidavas  
fvgsys1g11itnrvykqgmynkreatiatgfstvsatfmi1iakt1gl1m1phwnlyfwitlvitfvvtaitawlp1pitn  
esteyngqegeqevaieg  
sr1ktayaeamkqnaltps1lvknvwdn1kdglemtvgilpsilsigflglivanytpfidw1gyifypfiyifpiadqav  
lakasa1sivemf1ps1lv  
tkaamstkfvvgvsvsai1ffsalvpcilateikipvkwlii1wflrvalsl1litipvallifg  
>tr|E5QTN8|E5QTN8\_STAAH  
mkfenrvqryqhlftktdkrivnyirngysdafstinslahaigtspatmtrfshkl1dyenfqdlkfniqqemtetvie  
nspi1qrihkyhqqi1qqt  
gefidndi1qtfidklqssrhilfag1gssgl1satefyymirmglkgnvttdsh1mkisas1lshsdmfiamsngnts  
elisaaevakshgayvvai  
tnfegsk1tdcad1vl1tdqsrndhqfintqiat1flidivsyh1lentn1sqtyqhtksi1ldnk  
>tr|E5QTP1|E5QTP1\_STAAH  
mkevgfgt1nvwaviy1lam1ligvyftkrasqstnsfftasgr1pswvvgfsiyatt1saitfmstpekaf1tdwsi  
agniaivaiip1liiyfyvp  
ffkklkvtsayeylearfgpsirvigs1lfvvyh1grvaiviylpt1aitsvsdmnpyivas1vg1lcilytflggfegv  
vwsdf1ggv1llggalvi1  
ilgvni1kggfgtvfadaiehkklisadnwklntaaaapii1flgni1fnlyqytasqdvvyryqasds1ketnks1wtn  
gilal1sap1fygmgtmly

Tsompanidou\_et\_al\_Supplemental\_FASTA\_File

sfaheavlpkgfntssvvyfifltempfvaglliaaifaaqstisslsnsisacisidikqrffgkgserhevnfar  
fiiiiagi fgfgmslylia  
snsndldwlfifvtglfgvplagvfavgiftkrntftgvicglilgiifayvnygvkgnsfpfvstisftvafvfayil  
sfivpskhkkditgtl tife  
kdkpstyisktatkk  
>tr|E5QTP2|E5QTP2\_STAAH  
mnilfaitgiafalvfavflfsydrknidfkktlimifiqvlivi fmmnttigltitlta lgsffeglinvskaginfvfgd  
iqnkngrftfflnvllplvf  
isvligifnyikvlpfiikyvgiainkitrmgrlesyfaistamfgqpevytltikdiipklsraklytiatsgmsavsma  
mlgsymqmiepkfvvtavm  
lnifsalii asvinpyksddtdveidnltkstetktlngktgkpkkvaaffqmigdsamdgfkiavvvavmllafis lmea  
inimfgsvgl nfkqligyv  
fapiaflmgipwseavpagslmatk l itnefvamldfknvlgdvsartqgiisvylvsfanfgtvgiivgsikgisdkqg  
ekvasfamrlllgst lasi  
isgsiiglv  
>tr|E5QTP4|E5QTP4\_STAAH  
mrrdvmsdsekeilkrikdnpi fsqrelaeaiglsrpsvaniisg liqkeyvmgkayvlnedypivcigaanvdrkfyvh  
kd lvaetsnpvtstrsigg  
varniaenlgrlgetvaf l sasgdsewemikrlstpfmnl dhvqqfenastgsy taliskegdmtyg l admevfdyitp  
eflikrshllkkakciivd  
lnlgkealnflcayttkhqiklvittvsspkmkmpdshaidwiitnkdetetylnlkiestddlkiakrawndlgvkn  
vivotngvkeliyrsgeeei  
iks vmpsnsvkdvtgagdsfcaavvyswlngmstediliagmvnaktietkytvrqnldqqlyhdmedyknkgftkvy  
>tr|E5QTP5|E5QTP5\_STAAH  
mvmdlligt l flvlviflftlykapngmramgalanaaiatflveafnkyvggevf gikfleelgdaagg l ggvaaag  
ltaiaigvspvyaalviaaa  
cggmdllpgffagymigyvmkytekyvpdgvdlgsivilaplarliavlltpvvnstlirigdiiqsstntnpiimgii  
l ggiitvvgtap l ssmalt  
allgl tgvpmagamaafssa fmgnt l fhr l kl gdrkstiavsieplsqadivsanpipiyitnffggaiag l iiamsgl  
indatgtatpiagflvmfg  
fnhpm t i v i y g v m a i v g a l a g y l g s i v f k k y p i v t k q d m i n r g a v d a  
>tr|E5QTP6|E5QTP6\_STAAH  
mlkfenvtksfdggnrnieavkdt nfeinkgdivalvgpsgsgkstfltmagalqtptsghilinnqdittmkqkalakv  
rmseigfilqatnlvpfl t  
vkqqftllkkknkvnmsnedyqq l msq l g l t s l l n k l p s e i s g g q k r v a i a k a l y t n p s i i l a d e p t a a l d t e n a i e v i  
kilrdqakkrkkaciivth  
derlkaycdrsyhmkdgvlnenetve  
>tr|E5QTQ0|E5QTQ0\_STAAH  
mlghtagqnmwigm l g f a l t g i l l p f i t v i v v a f y d e g v e s v g n r i h p w f g f i f a v v i y m s i g a f y g i p r a a n v a y e i g t  
rhilpvhnqwtliifaaif  
fai vywislnpski v d n l g k l l t p l l l m v a l l s i a v i f n p e s v l s a p k d y i t h p f i s g s l e g y f t m d l v a a l a f s v v i  
vngykfkgltdrmkilkyv  
cfs gliaail l g m i y f a l a y v g a s t a p g n f k d g t d i l t y n s l r v f g s f g n l v f g m t v i l a c l t t c i g l v n a c a t f t k k h v  
pkfsyki falvfsiigflf  
ttlglemilkiavplltl iypvsialvlisfanmfstfrfswayrlatvitliisilqilnsfnllhgvilkwfmm l pla  
didlawlvpfmlfaiigfi  
idvfirrpkgatt  
>tr|E5QTQ1|E5QTQ1\_STAAH  
mknedvivkekhikwdki fygddwvnnvetirtkdilqsvylkryllrammagfiigiitvfv lsvkathepdlppgiv  
nmasaitfsfalvlliftn  
selltsnfmyftvgylykvikptrvlkifllcfagnilgaailfsfmrfsnvmtpdmlnqlsaviehktlstgfvsilmk  
aifanffinislviamqid  
dvlakmfvmfmgvtifafmg yehvvynsclfmggliyqvdtlhfi paisniaaafignyigg l iig lfyay lndhhqfy  
knn  
>tr|E5QTQ2|E5QTQ2\_STAAH  
meksikimtiigivvgglatvfl l l m v l a a s g v m t t d v s t t v n g e v d p v d a e t a a a i f t v l f l f l f i f g i i s i l g a i g  
mfkasknkkmsgilliga  
visgnitfalwlvsgiklltnkpkdeisdls  
>tr|E5QTQ3|E5QTQ3\_STAAH  
mksikkdikvykeqnmnkiaskvntikt dikqedsnthvykngkvivigiqlykdrekmyyfayeikdgkaeinrei  
dpikymkdhdadyedenve  
vekk  
>tr|E5QTQ4|E5QTQ4\_STAAH  
mtfeek l sqmyneianeisgmipvewekvytiaylddeggevvfnytkpgsdelnyytdisrdynisekifddlwmnlyy  
l f m n l r d l f k  
>tr|E5QTQ5|E5QTQ5\_STAAH  
mk l k y r g d n m t f e e k q s e m y n k i a n e i s g m i p v e w e k v y t i a y v n d r g g e v v f n y t k p g s d e l n y y t n i s r d y n v s e e i f  
ddlwmnlyylfkn l r n l f k

Tsompanidou\_et\_al\_Supplemental\_FASTA\_File

teghewpwtscfdftsegklnvsfgyvdwiklsjgplarenymykkfvgvipemeyemeevkiqeyikeqeeaei  
>tr|E5QTQ6|E5QTQ6\_STAAH  
mlkskkklnyrgdnmtfeeklsemynkianeivgmipvewekvytiayvndrggevvfnytkpgsdelnyymnistrdynv  
seeifddlwmelyrsfkk  
rnifkeeghepwtscfdftnegklnvsfdyid  
>tr|E5QTQ7|E5QTQ7\_STAAH  
mtfeeklsemyneianeicgmipvewekvytiayvndrggevvfnytkpgsdelnyysdipkdcnvskdifknsfwkvyr  
mfdelretfkeeghepwtscfdftnegklnvsfdyidwansfegpmgrehyymykkfwiwpekeyainwvekikdyvkeqeeaei  
>tr|E5QTQ9|E5QTQ9\_STAAH  
meklikvtsligiisqsfllfliflilflisatgiiqpelttvtngqetiispetaqatfvtfailfvsvlvsdlgiiia  
mklfvnknkasgilyiiga  
visanlltfivwligsvslrynkgkevs  
>tr|E5QTR2|E5QTR2\_STAAH  
mklkllkksnni1kskkk1kyrgdnmtfeeklnemyneianeisgmipvewekvytiayvndrggevfnytkpgsdeln  
yytnistrdynvseeifddl  
wmnlyy1fknln1fkteehepwtscfdftnegklnvsfdyidwintefdq1grenymykkfvgvipemeyemeeikei  
eqyiksqs  
>tr|E5QTR3|E5QTR3\_STAAH  
mkl1nrgdnmtfeeklsemyneiankissmipvewekvytmayiddgggevvfnytkinsdelnyytdipkeynisvqvf  
ddlwmldylfeelrn1fk  
eeghepwtscfdftregklnvsfdyidwinsefgqigrnykyrkfgilpeteyeinkvkeieqyikeqeeaei  
>tr|E5QTR7|E5QTR7\_STAAH  
mdkngysyimknvayktyfdvtmddyedilkdfnla1skgk1tgp1tfavtqid1qkrnid1f1svgkcfksneel  
syrtfclndm1hgritsn  
nfitdeialledmnefasdn1tftspyyhtmrksfsgeqgwidvkakvyend  
>tr|E5QTR8|E5QTR8\_STAAH  
mevgmlimpfcvkitfeidkndwn1aldtvneffmdkdiyptgpiifqrelag1geykytaya1ndelqdiplniky  
idcl1evgpt1stkcfeeee  
feraykeieyvanenniki1nqpyyhmvdvfyggtafeiyaqvd1desevyg  
>tr|E5QTR9|E5QTR9\_STAAH  
mkiqei1vgnikrayltp1iifv1lfs1ffd1imyfygn1qgk1piyl1dvflifaavv1lmyfqeksgevkveksnviry  
1tl1nvvagysmv1lvasiy  
vfgvagygfdfvnyw1gi1l1m1fvswfal1fyknefdsenpnkavnviai1k1safgg1fyirtvvpntadeekfit1  
siliniavd1l1l1vrsyfn1  
alyksvkkdiengvdd  
>tr|E5QTS0|E5QTS0\_STAAH  
mgykvdmsevhnmqksidss1saintkvst1ssin1intefegqtassvknysktfhl1qsikkietinkdfksdiak  
sirkfqsevdnnasai1de  
deikkykkdiddal1kdvfksskdangaisdvsd1ttakkikten1ankmgdfnkdidqtver1ttfdannsidgdktdn1  
itelsgvnsyvknmkpnra  
risstsgkiegaiarhktsee1vrwqtymet1senlyktpgl1skaasdi1tqagreyyaikavngnsal1rgykeyl1ktrd  
ink1inkmknq1krmslv  
1ntdrgniki1knvkmasefarnnpfkkgn1vnwmskvqyqsvsaqi1kkg1qdknfkytfgdakkffdtadmkaavt  
efkntfvpqni1retffk1e  
n1tsktal1kknmskfwneid1kkg1ekf1dfankni1gk1gk1l1k1ggka1kpl1gfitaitdn1gkkswqek1vgmgvd1  
saigasaaagaavgtai1p  
pvvgtvagalaagaavgi1aldykipyl1dksatel1akdgin1ginkvksfgkvtsgfktvfg  
>tr|E5QTS3|E5QTS3\_STAAH  
mhk1liikynk1kml1n1rdgktyt1sederadit1ks1lgevi1h1eqn1qgtwqanhts1inkvl1vrkgd1ddit1qlytea  
dyasfayps1qdtmt1g1sn  
ayddmviqsl1mna1i1kdfqsiqetqyvri1vhdkntdv1yinel1qeql1tnkayigdh1yvegiw1levqadgl1nvl1sqntv  
ass1l1rl1tqemphaqaddy  
ntyhrspri1h1reptdd1kierpp1qi1knntvi1wrsi1ppl1vmial1tvvif1lvrpigiyl1mmigmstvtivfgittyf  
sekkkynkdvekrekyka  
yl1dnkskeinkai1kaqrfs1nyhyptvaeik1divetkapriyektshhhd1flhyk1lgianveksfk1dyqeeefnqrde  
1fddtkelyefytdveqap  
l1nd1nhgpiay1garh1l1lee1ekm1liq1stfhsyhd1ef1fvtredevet1kwarw1lphmt1lrgqnr1rgfvynqrtrd  
qiltsiysmikeri1qavre  
rsrsneqi1iftq1l1fvitdms1li1dhvileynqdl1seygis1l1fvedvies1pehvd1ti1diksrtegelitkekelv  
q1kftpenid1nvdkeyiar  
r1lan1li1hveh1knaipds1t1flemynvkevdq1ldvnrwrq1netyktmavp1l1gvr1gkddi1sl1n1l1hekahgphgl1vagtt  
gsgksei1qsy1l1slainf  
h1phevaf1l1idykggman1fkdl1vh1lvgtitn1dgdeamra1tsikae1l1rkrqr1l1fgeh1dvn1hin1qyhk1l1fkegvatep  
m1ph1fi1sdefae1k1seqp  
dfmkelv1starigr1s1gih1l1latqkpsgvddq1i1wsn1skf1k1al1kvqdr1qdsne1l1ktpdaadit1l1pgray1l1qvgnei  
y1l1fqsawsgatydi1egdk  
l1vedkti1ymi1ndyq1l1qainkd1sg1ledeetkenqte1leavidhiesit1tr1leieevkrpw1l1ppl1penvyqed1vetdf

Tsompanidou\_et\_al\_Supplemental\_FASTA\_File

rk1wsddakeveltlglkd  
vpeeqyggpmvlqllkaghialigspgygrttflhniifdvarhhrpdqahmylfdfgtnglmpvtdiphvadyftvdqe  
dkiakairkihdiiserkr  
llsqervvnieqynketgnsipnvfliidnydtkespfmeeyeemmskvtreglalgvyiilsgsrssaiksaiftnik  
trvalylfenneltniigs  
ykkgvkdvkgrvainddnftqfqi aqpfelaegqtyneriknevaqmkefyvgdypkhipmmpdkvfmedi reaydleki  
iheehklplgl dfedvelv  
sldltsssi vtaikptemekmndvimsslsvysknqfvilvdaednmsqysedvtsysapsdlsnir l gfkqeiarkn  
geksieeckivfinnikrf  
nqltgmtedeirvlfnegqkvni iiasglysdtigaf dreskmmvrtinqalishkiseqefirvkdrfgepelkvgem  
yyinngeyqkiklmeg  
>tr|E5QTS6|E5QTS6\_STAAH  
mlmnsvia l tfl tassnngglndivq qeeekrinndlnqydttlfnkds kavndaivkqkkerqqqikndmfqnqashst  
rlnetkkvlfsksnlekt  
esdkspyiqnkqekki fpyilmsvgaf l tlgfvifsihkgrtrtknesarksni  
>tr|E5QTS8|E5QTS8\_STAAH  
mslksfdk l kifr rflvmamikmspeeiraksqsygggsdqir qil s dltraqgeiaanwegqafsrfeeqfqq l spkve  
kfaqlleeikqqln stada  
vqe qdqqlsnnfg l q  
>tr|E5QTS9|E5QTS9\_STAAH  
mvi mkktil l tmttl t l fmspn saqaytndsktleakkahpnaqfkvnkdtgaytytydksnapnnnhqnqsr tndnh  
qhanqrdlnnnqyhsslsg  
qythindaidshtppqtspnpltpaipnvednddelnna fskdnkglitgidldelydelqiaefndkaktadgkplal  
gngkiidqplitsknnlyt  
agqctwyvfdkrakdghtistfwgdaknwaggassngfkvdrhptrgsilqtvn gpfghvayvekvnidgsil isemwi  
geyivssrtisasevssyn  
yih  
>tr|E5QTT3|E5QTT3\_STAAH  
mieinnl skryrnkqi fnhl tmsfesnr l tvllgdngagkstllrmi agiekandgtinyfgekwnqrqi qnhigyvpqd  
ialfehmtvaenikffks l  
cknpindttineylqq l nfd dtsakvst l sggnrkinilvgllgpprilildeptvgidlksrhdiqllnimkskli  
iltthhldevealaddik l  
igqd l fyqhvl edkqwaytyy  
>tr|E5QTT4|E5QTT4\_STAAH  
medvlymkk l taaaiatmgfatftmahqadaaettntqqahtqmstqsqdv sygytytid sngdyhhtpdgnwnqamfdn  
keysytfvdaqghkhyfyn  
cypknanangsgqtyvnqatagdnndytasqsq qhinqygyqsnvgpdasyshsnnnqaynshngngkvnypngtsnqn  
ggsaskatasghakdasw l  
tsrkqlqpygyhg gahygvdyampenspvys l tdgtvvqagwsnygggnqvtikeansnyqwymhnnr l tvsagdkv  
kagdqiaysgstgnstaph  
vhfqrmsggignqyavdptsylqsr  
>tr|E5QTT8|E5QTT8\_STAAH  
mfivmkn tkvii l knkifvfeksikkhnkmmyi elcd  
>tr|E5QTU1|E5QTU1\_STAAH  
mkksavlnehitkaiatighfd l l t indagmpipndhrridlavtknlprfidvlatvleemeiqkiylaeeikehnptq  
lqqikqlisseieii fiph  
eemksnlahplnkgnirtgettpysnialesnvtf  
>tr|E5QTU3|E5QTU3\_STAAH  
mskeaghtflaklgktr l rpggkeatdw l iqqgafsqdkqvlvacnmcttsiylahtygchiqqvdinkkalekaqeni  
saaglesyiqvqqanavkl  
pfdnqfdi v l neamltm l piaikeka l reyyrv l kpggillthdivivneshathvks l saainvvnspqtklgwld l  
yhqagfnhvhyhtgpm l m  
tpkg l iydegivgtikiinna l kkenrpfckmftmtkl rkdmyitfvakkeh  
>tr|E5QTU4|E5QTU4\_STAAH  
mvgpkvlywrapnieaggntaynnrvgrpptqrnwntnfnrqcklagpqh refrkeilqamqvgegqk  
>tr|E5QTU6|E5QTU6\_STAAH  
mishifpfyyqvegvi l mgnkykdyaqdil tavggenivnvsydtvrmtihmhhaipstanevtqidgvasvdenetql  
vivfneevkyvyqq l ql l m  
ddakhqedtnhdavdtqeteqkaqakvttpilvkapiagrri l l kevrdsifrekmvgeglaikaheeskviapfng l vs  
mivptkhavgiqsedgvdi  
vihigvntvdlegkgfecfvkqndrveagqtl l qfdqqyiqqqgynadvivvisnsad l gkveltmneiittedvifkif  
kn  
>tr|E5QTV2|E5QTV2\_STAAH  
mls l tml l l lervgl i i l layvlmni pyfkn l mnr rrtwkarwqlciifslfalmsnl t gividhqhslsgsvyfr l dddv  
slantrv l t igvag l vggp  
fvglfv gvisg l frvymggadaqvy l issifigiagyfg l qa rkrkrypsiaksamigivmemiqmlsiltfshdkaya  
vdlis l ia l pmiivnsvgt  
aifmsi i ist l kqeeqmkavqthdv l qlm nqt l pyfkegl nresaqqiami i kn l mkvsavaitskneilshvgagsdh

Tsompanidou\_et\_al\_Supplemental\_FASTA\_File

iptneiltslskdvlksgk  
lkevhtkeeigcshpncplraaiviplmehgsivgtlkmyftnpndltfverqlaeglani fssqielgeaetqskllkd  
aeikslqagvsphfffnsl  
ntisalvrinsekarelllelsyffranlqgskqhtitldkelsqvraylsleqarypgrfnininvedkyrnvlvppfl  
iqilvenaikhaftnrkqg  
ndidvsviketathvriivqdnnggiskdkmllgetsvsesgtgsalenlnlrlkglfgksaalqfestssgttfwcv  
lpyerqeee  
>tr|E5QTV4|E5QTV4\_STAAH  
mmkfsvivptynsekyitellnslakqdfpktefevvvddcstdqtlqivekyrnklnlkvsqletnsggpgkprnval  
kqaegefvlfvdsddyink  
etlkdaaafidehhsdvllikmkgvngrgvpqsmfketapevtllnsriiytlspktkiyrta llknddiyfeelksaed  
qlftmkaylnanrisvlsd  
kayyyatkregehmsayvspedfyevmrliaveilnadleeahkdqilaeflnrhfsfsrtngfslkvkledqpqwina  
lqdfiqavpervdalvmsk  
lrlpllhyaarakdidnyrtveesyrgqyyrfdivdglkniqfnegepyfegidiakpkvkmatafkfdnhkivteltnef  
migeqhydvrlklhsrnkk  
htmyvplsvnankqyrfnimledikaylpkekiwdflevqigtevfevrvgnrnkyaytaetsalihlnndfyr ltpy  
ftkdfnnislyftaitltd  
sismklkgknkiiltglrdryvfeegmasvvlkddmvmgmlsqtsenevqillskdikkrdfknivklntahityplnk  
>tr|E5QW0|E5QW0\_STAAH  
mtktkqaihidniywervqlyieghsegvdltsqqfvlrnl tetktleanemkidgntflcrfnvailddgyylpmdkyl  
fvyhdqleyigqlnpnid  
qayaa neeqieeynelttqngkanyv laneakvfrkggvsqhtvytipeiasdvnefvfdidilpqeksgviatsah  
wlhkqghkasfesrslfk  
aifnitklhkrsktilftsdsrpnlsgnfkyvydellrqkvdfdydiktvfkanitdrkwrkfrlpyllgkadyif  
vdfhpliytvrfrpsqei  
iqvwhavgaftkvgsrtgkkggpfidslnhrsyt kayvssetdipfyaeafgi reenvvptgvprtdvl fdeayatqik  
qemeneplikgkklifa  
ptfrngghtahypffkidferlarycekhnnavl fkmhpfvknrl nisrehrqyfidvsdyrevndilfvtdllisdys  
sliyeyavfkpmyaf  
ledyittrdfyepyesfvpgkivqsfdalmdaldnedyevkvvpfldkhfkyqdgrrsserlvkd lfr  
>tr|E5QW1|E5QW1\_STAAH  
minqvyqlvaprqfdvtynnvdiygnhvi vrp ly lsicaadqryytgrrdenvl rkk l pmslvheavgevvf dskgvfek  
gtkvvmvpntptekhdiva  
enylassyfrssgydgfmqdyvmmahdrivlpndidlstisytelvsvsyhaiqrferksiplktsfgiwgdgnlgyit  
aillrklypeakiyvfgkt  
dyklshfsfvddiftvnqipddlkidhafecvvgkgsqvalqqivehispegsiallgvselpvevntrlvlekgltlig  
ssrsgskdfeqvvdlyrky  
pdiveklal klgheinvctmqdivqafemd l stswgktvlkwti  
>tr|E5QW2|E5QW2\_STAAH  
mednmiyagilaggi srmgvnlpkqfldidnkpilihtiekfilvsefneiiatpaqwishtqdilkkynitdqrk  
vvagtdrnetimniidhi  
rntqgindddivthdavrpf l tqriikenievaakygavdtvieaidtivismkdkqnihsipvrnemyqqqtpqsfnik  
llqdsyralssaakeilsd  
ackiivesghavklvrgelynikvttpyd lkvanaiiqgdiadd  
>tr|E5QW3|E5QW3\_STAAH  
mkl erilpfskllikqhitpesivvdatcgngndtlflaeqvpvghvygfdiqdla l entrdkvkdfnhvslvkdgheni  
ehindahkghidaaifnl  
gylpkgdksivtkpdttiqainal slmstegiivlviyghsegqlekqalldylstleqkhaqvlkyqflnqrnhapf  
icalekis  
>tr|E5QW5|E5QW5\_STAAH  
mni pksvwwlvigmalnitgssflwplntiymkqelgksltvaglv l minsfgmvignllggs l fdkl ggyktiligtft  
clcsttllnffhgwpyav  
wlvmlgfgggmiipaiyamagavwpnggrqtfnaiylaqnigvavgaamggfvaefsfnyiflanlimyvvalvavtqf  
nieinakvkyphlditgk  
knkarfislvl icamfaicwvayiqwestiasftqsini smaqsylvwt ingimilvaqplikpilyllkgnllkqmfvq  
iiifmlsffvtsfaenfti  
fvvgmiiltfgemfvwpavptianqlapdgkqqyqgfvnfaatvgkafgpfllggvlvdafnmrmmfismmvllvfallil  
lmvfkenntqpkkida  
>tr|E5QW6|E5QW6\_STAAH  
mlnyhnqiekkwqdywdenktfktdnl gqkkfyaldmfypsgaglhvghpegytatdiisrykrmqgynvlhpmgwd  
afglpaeqyaldtgndpre  
ftkknigtfrkqike l gfsydwdrevnttdpeyykwtqwi fiqlynkglayvdevavnwcpalgtvl sneev idgvserg  
ghpvyrkpmkqvw l kitey  
adql ladldldwpes l kdmqrnwigrsegakvsfdvdnsegkvevfttrpdtiygasflvl spehalvdsittdeyk dq  
vkayqteaskksdlerd l  
akdksvftgayainplsgekvqiwi adyv l stygtgaimavpahddr dyefakkfdlpiievi eggnev eaaytgegkh  
insgel dgleneaaitkai

Tsompanidou\_et\_al\_Supplemental\_FASTA\_File

qllkkgagekkvnyklrdwlfsrqrywgepivihwedgtmttvpheelplllpetdeikpsgtgesplanidsfvnv  
dektgmkgrrretntmpqwa  
gscwyylryidpknemladpekikhwlvpdlyiggvehavhlllyarfwhkvllydlgivptkepfqklfnqgmilgegn  
ekmskskgvniipddivqs  
hgadt1rllyemfmgpldaaiawsekgldgsrrfldrvwr1mvnedgtlsskivttknksldkvyntvkkvtedfetlgf  
ntaisqlmvfinecykvd  
vykpyiegfvkmlapiaphigee1wsklgheesityqpwpptydeallvdeveivvqvngklrakikiakdtskeemqei  
alsndnvkasiegkdimkv  
iavpqklvniwak  
>tr|E5QW8|E5QW8\_STAAH  
mnl1kknkysirkykvgifstligtvll1snpngaqa1ttdhvqggsnqa1pgnsqntnadtnrdivndsqntpnahat  
dntstnqaltnhqndvan  
qvgpapiqpsaspaqnnnsnanstatepaantnnnlasnntlnvpntdnndsarhltlkeiqedvrhssdkpelvai  
aeasnrpkkrsrraapt  
pnatpadptagnsapvai tapytpddpnannigqnapnevsfddnri rpstnrsvptvtvvdnlpgytl inggkvgy  
fshamvrtsmfdsgdakny  
qaggnvialgri rgn dtndhgd fngiektltvnpnselife fntmttknyqgmtnli iknadnytvigekvvaygpiwr1  
1kvpensh1kiqfvpknd  
aitdargiyqlrdgykydfvdsig1hsgshvyverrtmeptatnkeftvtts1knngnfgasfntddfvykiqlpegv  
eyvnns1tknfpsgnsgvd  
indmnytydaanriitiktstgggtgnsparlmpdkild1kyklrvnnvptprtvtfndt1tyktysqdfinspaeshtvs  
tnpytidiimnkda1gaev  
drriqqadytfasldifnd1krraqt1ldenrnnvp1nkrvsqadidslanqmqht1irsvdaenavnrvkddmed1vnq  
ndeltdeekqaa1qvieeh  
kneiignigdqtdddgvtrikdqgiqt1sgdtatsvvpknakqairdkaakqrei inhtpdatqdeiqda1nqlttddetd  
aidnvtnattnadvetakn  
ngintigavapqvthkqaardainqatatrqqi1nsnreatqeeknaa1nel1tqatnha1eqinqatndddvtakgdg1  
nainpiapvtvkvqaarda  
vshdaqhi1aeinanpdatqeerqaa1ekvnaavavantni1nantnadveqvktnaiqqi1qai1epatkvktdaknaidq  
saetqhnai1fnndatlee  
qaaqql1dqavatakninaadtnevaqakdqgtqni1vviqpatqvktarnavnekareaitninatpgatrekqe  
ainrvnt1knralndigvt  
stamvnsi1rdavnq1gavqphvttkqtatgv1td1atakkqei1nqntnatteekqva1nqvddq1latainninqadn  
aevdqaaql1gtkainai1qp  
nivkkpaa1aqtnqhsak1veinatpdatddeknai1nt1nqdrqqaiesikqantnaevdqaatvaenni1davqvddv  
knkqreiks11k  
>tr|E5QW9|E5QW9\_STAAH  
mnqaatngvsaiki1iqpetkikpaarekinqkanelraqinqdkeataerqaa1dkind1vakamtnitndrtnqqvnd  
stnqalddialvtpdhivr  
aardavkqqyeakkheieqaehatdeekqva1nqlannekralqinqai1andvkrvesngiat1kgvephivvkpea  
qeaikasadnqvesikdtp  
hattdeldeanqqi1ndt1kqqqqdi1dnttqdaavndvrnqtikaieqikpkvrrkraaldnidesnnnql1dairnt1dtt  
qdernvai1aalkivnaik  
ndiaqnktnaevdqteadgnnikv1lpkvqvkpaarqsvsakaeaqna1idqsd1steer1aakhlveqa1nqaidqi  
nhadktaqvnqnsidaqni  
iskikpattvkatalqqiqniatnkin1likanneatdeeqnaaivqvekelikakqqi1agavtnadvay11hdgkneire  
iepvinkkatareq1tt1f  
ndkkqae1anvqatveernsilaqlqniydaigqiddrsnaqvdkttat1n1qtihd1dvhpikkpdaektindd1arv  
th1vqnyrkvsdrnkada1  
kaita1klqmdeelktartnadvdav1krfnva1lgi1eavitekens11ridniaqqtyakfkaiatpeqlakvkalidq  
yvadgnrmvdedat1ndik  
khtqfi1idei1aik1paevikaspkvgpapkvctpikkedkqevrkvvkel1pntgseemd1plkelal1itgaallarr  
skkekes  
>tr|E5QTX0|E5QTX0\_STAAH  
myqtii1gggpgslmaavaaseqndv11iekkkg1grkl1kissgggrcnvtnr1pyaei1knipngkfl1yspfsifdne  
si1dffesrgvkl1keedhg  
rmfpvsnkaqdvvd1vt1ienqhv1ikeeeavsrievntdqftvhtqnnsyeshs1v1atggtsvpqtgstgdgykfa  
qd1ghtitel1fptevpits  
aepfiks1nrlkg1slkdvelsv1kkngkkri1shqmdm1fthfgi1sgpaa1rcsqfvykeqknqktqhismaidt1fpe1nh  
eqlkqh1ts11s1dtpdkii  
kns1hg1ieery11fm1leqaeidenttshh1snqql1nd1vnmfkg1fvkvngt1pidkafvtgggvs1keiqpktmmsk1  
vpg1fl1cgevl1dihgytgg  
ynitsa1vtghvag1yaghysasme  
>tr|E5QTX2|E5QTX2\_STAAH  
mri1dkfl1anmgvgt1rnevkq11kkg1lvnvneqv1kispkthiependki1svrgelieyvenvyim1nkpkyisatedhhs  
ktvid1ipeyqh1ni1fpvg  
r1dkdtegl11i1tdngdfnhe1mspnhvskkyevisanp1teedi1qafkegit1sdgkvkpailtyidnqtshvtiyeg  
kyhqvkrmfhsiqnev1h1

Tsompanidou\_et\_al\_Supplemental\_FASTA\_File

rrikiadlel dsnl dsgeyrll tendfdklnyk  
>tr|E5QTX6|E5QTX6\_STAAH  
mdeleqfyqlgwtdsaggasgeaymaeqdgqklflkrnsnpfiaalsaezivpklvwtkrietgevvtaqhwkngrels  
snemqtrvahllkkihns  
rplismlkrmemepitpeimlnkinaslsrevlthhivrksltyleehipslsdrffftvvhgdvnhnnwllsdrdelflv  
dwegamiadpaidigmll  
nyvpqqqwsewletygvqeslnlnkrmkwytviqsiglvqwyeeqkrykdmntwlkflnevmsnmfi  
>tr|E5QTX8|E5QTX8\_STAAH  
mlivitnierigdvmkigdisihylnggntkmdggamfgvvpkplwskqyananernqinlpthpiliqtaqynliidagi  
gngklsek  
>tr|E5QTX9|E5QTX9\_STAAH  
manyntpkdi dyvlnthmhfdhaaglt dqaghaifenaihvvqqdewhefiapnirskstywdknkgdysnklilfekh  
fepvpgikmqhsgghsfgh  
tjitiesgqdkavhmgdifttahknplwvtayddypmqsi rekermipyfiqqywflyfyhdenyfavkysddgesida  
yilretlvdnn  
>tr|E5QTY1|E5QTY1\_STAAH  
mninkvtlqriqtletlhgapgfeevknymtqqmapyvdefienrmggffgvkksknpnakrvmiaahmdeigfmitn  
itkngmiqftnlggvandi  
wqqrllvknrngdkii gvsnipkhfrtgsegapeikdltldigaqnedevrergidigtivphtpftqlsehrysak  
awdnrygcvlaieilellk  
dielddlyvganvqeevlgakasaemipdvafvvdcs pandvkg nqplsgelgkgtlirikdgtmilkpafrdy11  
klveahdiehqqymspggt  
dggeihkanigiptavigvcaryihstdsvfdirdyfaarsllseaicnldnnqietlqyk  
>tr|E5QTY4|E5QTY4\_STAAH  
mnlfynpkyvgdvaflqiepevegelnyknkgnvveitnegnvvgynifeitnegnvvgynifeiskditi etghikltd  
elvnvfgkri seagfdyk1  
nadlspkfvvgyvetkdkhpadklsvl nvnvndt1qivc gapnveagqkvvakvgavmpsgmvikdaelrgvassgm  
icsmkelnlnapeekgim  
vlnsyeigqaffe  
>tr|E5QTY6|E5QTY6\_STAAH  
mskefyimthyhfvigksgmssl aqimhdlghevqgsdienyvftevalrnkgikilpfdannikedmvviqgnafass  
heivrahq1kl dvvsynd  
flgqi idqytsvavtgahgktsttglshvmngdkktsfligdgtgmglpesdyfafeaceyrrhflsykpdyaaimnid  
fdhpdyfkdi ndvdfafge  
mahnvkkgi iawgddeh1rkieadvpiyyygkesddiyaqniqitdkgtafdvvydgef ydhflspqygdhtvlnalav  
iaisylekl dvtnikeale  
tfggvkr rfnetti anqivddyahpreisatietarkkyphkevavfqphtfsrtqaf1nefaeslskadrvflcei  
fgsirentgal tiqdlidk  
iegaslinedsinvleqfdnavil fmgagdiqklqnayldklgmknaf  
>tr|E5QTY8|E5QTY8\_STAAH  
mtqqqnnkrtlknkhtyqneplnrkdfvvsfitgalvgsalglyfknkvyqkaddlkvkeqelsqkfeerktqleetva  
ftkervegflnksknegaa  
lkaqqaai keeasannl sdsqeaqei qeakreaqtetdksaavsneeskasa lkaqqaai keeasannl sdsqeaqai  
qeakkeaqae tdk sadvsn  
eeskastlnvskeesqaer1anaakqkqakltpgskesqlteal faekpvakndlkeip1lvtkkndvsetvntdnkdtv  
kqkeakfengvitrkadek  
tpnntavdkksgkqskkttps nkrnaskastnktsgqkkqhnkkasqgakkqssssnsttkt nqknskatnakssnaskk  
snakvekaskiekrtfnd  
>tr|E5QTZ0|E5QTZ0\_STAAH  
mtvtiydvarearvsmatvsrvvngnqnvkaetknkvnevikrlnyrpnavarglaskttvtvgviipdisniyysqlar  
glediatmykyhsii snsd  
ndpekekeifnnllskqvdgii flgg titeemkelinqssvpvvs gtngdahiasvni dft eaakeitgk liekgaks  
falvggehskkaqedvlag  
ltevlnkns1qlgdtlncs gaesykegvkafakmkg nlpdailcis deeaigimhsamdagikvpeelqiisfntr1ve  
mvrpqlssviqplydigav  
gmrlltkymndekieepnvvlphrieyrgttk  
>tr|E5QTZ4|E5QTZ4\_STAAH  
mhklnkkgrkklth1sdl dianqstlqpi kdiasvgi sedalepyghyakidinkitprenkgkvvlvtamsptpage  
gkstvvtgladafhelkn  
vmvalrepalgptfgikggatgggyaqvlpmedi nlfngdfhaittanna1safidnhihqgnelgidqrriewkrvld  
mdralrhvvnvg1ggptng  
vpredgfni tvaseimai1c1srsikldkdisritigytrdrkpvtvadlkvqgalamilkdaikpnlvqsiegtpalv  
hgppfanjahgcn silate  
tardladi vvt eagfgsd1gaekfmdikareagfdpaavvvvatira lkmhggvakndlkeenveavkagivnlerhvnn  
ikkfgvpepvvainafihdt  
daeveykswakennvria1tevweggkggvd1anevlevidqpn sfp1ylele1pleqkiekivteiygskvtfssk  
aqkqlkqfkengwdnypvc  
maktqysfsddqt1l gapsgfeitireleaktgagfiva1tgaimtmgplpkkpaa1nmdvtd dghaig1f



Tsompanidou\_et\_al\_Supplemental\_FASTA\_File

>tr|E5QTZ5|E5QTZ5\_STAAH  
mnkhhpk1rsfysirkstlqvasvivstlflitsqhqaqaentntsdki senqnnatttqppkdnqtqpatqptnta  
ktpyaadeslkdaiknpav  
enkehdiqpreqvnfqlldknnetqyyhffsikdpadvyytkkkaeveldintastwkkfevyennqklpvr1vsyspvp  
edhayirfpvsdgtqelki  
vsstqiddgaetnydytklvfakpiyndpslvksdntdavatndqsssdasnqtntntsnqntsttntndqpqatnms  
qpaqpkasansdqassqpa  
hetnsndntdatnassnqngnqyppadeslqdaiknpaiidkehtadhwrpidfqmknkgerqfyhyastvepatv  
iftktgpiiie1glktastw  
kkfevyegdkklpvelvsydsdkdyairfpvsnngarevki vssieygenfhedydylmvfaqpitnnpddyvdeety  
lqkl1lapyhkaktlerqvy  
elkl1qdklpekykaeykkkl1dqtrveladqvksavtefenvtptndqltdvqeahfvvfeseensesvmdgfvhepfyt  
atlngqkyvmmktkddsyw  
kd1ivegkrvttsvskdpknnsrtlifpyvpdkaiynaivkvvvanigyegqyhrivnqdiktddtsqntieplnvq  
tgqedkvatdtaenssta  
tnpkdasdkadviepesdvkdadssvdkdvqndvdhl1sdmsdnt1dkydfkemdtqiakdtdkgv dns1gmtsnvtd  
kdsnknegkviqlahntdk  
nhtgkaakldgvrqynntdkvtdkktteh1psdihtkvtktkeagtpskenk1sqskmlpktgettssqswg1y  
allgm1al1fipkfrkesk  
>tr|E5QTZ9|E5QTZ9\_STAAH  
mysviski1nfilvkmsklyvigkdnipkdkyvtcthesynevimgmalypnqihymakkel1fknkwigkflts1n  
afpvdrenpgpst1krpin  
11kdnktvgifptgsrtsqegap1krgastiam1skspilpvayvgptkihg1itgqayinigkpidind1pkdlkrner  
idyitkeietrtaklqel  
heivks1  
>tr|E5QU01|E5QU01\_STAAH  
mgivkkl1fdvdgvflseercfdvsal1tveyl1mdkcy1glhshidwet1tdndiqdirnri1fqkdkilnk1ks1g1nsn  
wdm1fivfsh1lidi1kk1  
shdeieafmyrdepvelk1qnistniadrfl1neq1p1q1f1dnvkvgknniyaa1eefattel1hvsdan1fslkga1wt1  
aqevyqewylgsklyeeve  
kkiarttftkgyiyqei1l1rpvdevkv11nd1kgagfelgiatgrpytetvvpfen1g1l1pyfeadfiatasdv1eaenm  
ypqarpl1gkpn1pfsy1aa1  
ngnkrdkyesy1nkqdn1vnkddv1fivgds1ad11saqki1gat1figt1sg1kgkdaage1eahhadyvinh1gel1rgv1d  
n1  
>tr|E5QU02|E5QU02\_STAAH  
mkqfnv1vadpiskdgi1kal1dheqfnvdiqtgl1seealiki1psyhalivrsqttvteni1naads1kviaragvgvdn  
inidaat1kgilvinapdg  
ntisatehs1am11smarnipqahqs1tnkewrn1afkgte1yhkt1g1vigagrig1gvakraqs1fgmkil1afdpy1tye  
kaks1sitkatvdeiaqhs  
dfvt1h1tp1tk1g1inadffakakps1qi1nvarggi1ideka1ikal1degqisraa1idvfehepatdsp1vahdk1iv  
tph1gastveaqekva1sv  
snei1ei1lidgtvthavn1apkm1sniddtvks1fin1sqtvgel1aiql1mynapssikitygg1dasidss1l1trti1thi  
1kddl1gpevn1inal1n1  
qqvt1niennkaetgfsny1level1snds1svkvgasvftgfg1privrinn1fsvd1kpnqyqivsyhndtpgmvgktga1  
1gkyniniasmt1grteag  
gdal1mi1svdqpvsn1ni1del1kqvgeynqi1fttel1tvqs  
>tr|E5QU03|E5QU03\_STAAH  
myyhqpl1l1tpgtpvpda1mreiqapmvghrskdfediaqafqglkpi1fgsqndv1il1tssgtsv1leasml1nivped  
hfvv1vsgafgnrfkqiaq  
tyyknvhi1ydv1tweavdvkdfinyl1st1nvevkavfsqycetsttvl1hpihel1gnainqfnsniyfvvdgvscigavdv  
dinkdkidv1vsgsqkaim  
lppgl1afvayshraker1fkev1t1pkfy1d1nky1issqadnstpftpnvs1l1frgvn1ayvetvkaegfnhviarhyairna1  
rsa1ka1d1t1l1vndkdas  
ptvtaf1kpntndevki1kdel1knrfk1itiaggqgh1kgqil1righmgki1spfdil1svvsalei1l1tehrkvnyigkgisk  
yme1vi1heai  
>tr|E5QU04|E5QU04\_STAAH  
minyski1kl1sqlywr1kq1hqhdfkvktswqggrrnvnvqgdil1senisipas1ggvgig1tnpdem1vsaasscyi1s1  
aat1lerakftdisieqqsi  
gtac1l1ngkfsm1skivhhphiq1psdqiaq1lekr1pk1litiadnncmi1snavrnnvdikiy1pii1qak  
>tr|E5QU06|E5QU06\_STAAH  
marfrgsnwkk1srr1gis1sgtge1ekrpyapqghgnqrkk1seygl1ql1rekql1rylygmterqfrntfdiagkkfg  
vhgenfmi1lasr1davvy  
slglar1trrrqarq1vnhghi1vdgkrvdi1psysvkpsqtisv1reksqk1niivesveinnfvpeyl1nfdads1tgtfvr1  
perse1l1paeineq1liveyy  
sr  
>tr|E5QU08|E5QU08\_STAAH  
mvlyi1l1aiiv1i1liavgl1fy1lrsnrqi1iekaierkneiet1l1pfdqn1laq1sk1n1l1kgetkkydamkkdinvestnky  
1apveekihnae1l1dkfs

Tsompanidou\_et\_al\_Supplemental\_FASTA\_File

fnasqceiddanelmidsyeqsyqqledvneiaalykndelydkckvdyremkrdvlanhqfgeaasllleteiekfep  
rleqyevlkadgnyvqahn  
hiaalneqmkqlrsymeeipeli retqkelpgqfdlkygcrdlkvegydl dhvkvdstlqslktefsfveplisrlele  
eandklanindklldmydl  
iehevkaakndveetkdiitdnlfkakdmnytqteteiyvrenyyinesdaqsvrqfeneiqslisvyddilkemsksavr  
yseqdnlyledhvtvin  
dkqeklnqhlqiredeaeaednllrvqskkeevyrrllasnltsvperfiimkneidhevrdrvneqfserpihvkqlkd  
kvskiiviqmntfedeadv  
lnavyaekliqygnryrkdysnvdkslneaelfknnrykraieiaeqalesvepgvtkhieevikq  
>tr|E5QU09|E5QU09\_STAAH  
minerevfiliyldnaattkafeevldtyl kvnqsmypnspkaglqadqllqqakvqindmvtntmydvvftsgat  
esnnialkgvayrkfdtar  
eitsvlehpsvlevvryleeregfkvyvdvtdgtdlqhfndlmsdkvglvtcmvnnvtgqi qpipqmaeviknyp  
kahfhdavqafgkisrmdf  
nnvdsislshkfnlkgqgvllvnhiqniepiiqgggqeygvrsgtvnlpndiamvkammanenlealnafvtelnd  
vrqflsqyqgyvinsstsg  
spfvlnisfpgvkgevlvnafskydimisttsacsskrnlnevlaamgl sdxsiegsirlsfgatttkediarfkeifi  
iieeikelk  
>tr|E5QU10|E5QU10\_STAAH  
mkydhllvrygeltlkgsnrkkfvnqlrnnvkslkgldgfvvkgkrdrmyielehadineitnr lskifgiksispv  
kveksieamsaatikfaqq  
feenstfkidvkradknfpmdtyelqrelggvtlqkienvsnvkrpdheirvevrl daiymyeevvpqsgglpvgtgk  
tllmlsggidspvagmevm  
rrgvtieaihfhspftsdakekvieltrilaervgpi klhipftelqkqvnkvvhprrymtstrmmrvadklvhq  
igayainngenlgvasqt  
lshmyainnvstpvrlrpllydkeeiiikskeigtetsiqpfedccti ftkpnpvtepnfdkvvqyesvdfdeeminr  
avenietleitsdyktike  
qqtnglindfl  
>tr|E5QU12|E5QU12\_STAAH  
mqevkymteitfkggpihlkgqqinegdfapdfvtlndlnqvtladyagkkklisvpsidtgvcdqqrkfnseaske  
egivltisadlpfaqrwc  
asagldnvitlsdhrdl sfgenygvmeelrllaravfvl dadnkvvkykeivsegtdf pfdadaa laaykni  
>tr|E5QU13|E5QU13\_STAAH  
mgtfywrgtnmaeqqtimerl fhsldekaktlnnengqsfi enlglameqvytnergll eqstlqdrkafqfayls lmq  
eeki qanhqitpdsigli  
gflverfmmnqeel hlvdi asgtghlsatvkevlpeiamhhlievdpvl srsvhlanfleipfdvypqdaimpllee  
adivigdfpvgyypiders  
rdflqfeghsyshyllieqainvlkdagyaflvvp sniftgehvqlekyiatetemqaflnlpptlfknekarksil  
ilqkkksgetkpvevllan  
ipdfknpsqfgfmetlnqwm dtnrpkk  
>tr|E5QU16|E5QU16\_STAAH  
mimevdgmki gipreiknnenrvgl spsgvhalvesghtvlvetnagsgsffedvdykeagaeivaeqakvwdvdmvikv  
kepleseyyfkeglvlft  
ylhlaneekltqalidrkvisiayetvqlpdrslpllspmsevagrmsaqvgaeflqlnggmgi lllggvpgvpkgkvti  
igggqagtnaakialglga  
dvtildvnpkrlqqlddlfggrvhtimsnplnie lyvkqsdvlvigavlipgakapr lvtedmikqmknsvi idiaidqg  
giffettdkitthdptyik  
hgvyhyavanmpgavprtstla lnnatlpyalmlankgyrea fksnqplslglntykghvtnkgvaeafemeyksveeal  
hl  
>tr|E5QU17|E5QU17\_STAAH  
mlrsvykmtkiskide lnnqqadaawittp lnyyftgyrsepherl fallikdgdqvlfcpkmeveevkaspftgei  
vgyl dtenpfslypqtink  
lliesehl tvarqqlisgfnvnsfgdvl tikqlrniksedeinkirkaaeladkcieigvsylkesvtere vvnhieq  
tikqygvnemsfdtmvlfg  
dhaasphgtppgdrllksneyvlf dlgvieyhycsdmtrtikfgepsqaqeiynivleatsaiqaikpgiplkdidhia  
rniisekgygyfphrlgh  
glglqehyqdvstnsnlleagm vitiepgiyvpgvagvrieddilvtnegyevlthyek  
>tr|E5QU21|E5QU21\_STAAH  
mlkl snfsskgrmkmi stmeimkci edndtiihrhvrpdpdaygsq lglkyyiqqkfpqkqv favgeaesslsfigel  
dniddktyqdalvivcdta  
napridderystgrklidihhpavdqygdinlvntnasstsei ydlis hfndeaivnk diasvlylgivgd tgrflfn  
ntsehtmeiagklighdid  
hnalnkmmekdpkmlpfqgyvlqhfel mddgfcqvkit edvleqfgiqpneasqfvntiadikglkiwfvavdegseir  
crlrskgqliindiaqdfg  
ggghpnasgvsvns wdefeqlaka lrtkl n  
>tr|E5QU26|E5QU26\_STAAH  
mkkia vltsggdspgmnaavravrtaiy neievgyvyhyqgl lnddihklelsgv gdti qrggtfl ysarcpefkeqe  
vrkvaie nlrkgiegllv

Tsompanidou\_et\_al\_Supplemental\_FASTA\_File

iggdgsyrqaqriseeckiqtigipgtidndingtdftigfdtaIntiiglvdkirdtasshartfiieamgrdcgdla  
lwaglsvgaetivvpevkt  
dikeiadkieqgikrgkhsivlvaegcmtaqdcqkelsqfinvdrsvlghvqrggsptgadrvasrlggyavdlm  
qgetakvgiknnkivats  
fdeifdgkdhkfdyslyelanklsi  
>tr|E5QU28|E5QU28\_STAAH  
maeklqrelsrnhiqliaiggaigtglflgagqtialtgpsilltyiigfmlfmfmgrlgeiinqntefksfadvtnty  
igpfagfvtgwtwfcwii  
tgmaevtavakyvswfpeipnwisalfcvllmsfnllsarlfgelefwsiiikiatiiglivvgfvmilfayktqfgh  
asftnlvehgvfpgkasgf  
fmsfqmalfsfvgiemigttagetkdpvktipkainspirilifyvgalavimsiipwqqvdpdnspfvklfaligipf  
aaglinfvvltaaasscns  
gifsnsrmlfglssqqqappnfsktnkygvphvaifassallvaallnyifpdatkvftyvttistvflfvwgliaa  
yinsyrknpdhhkkyatkl  
fggkymgylifvffifvfgllfinvetraiyfipiwillgfmlyrykriaaksnn  
>tr|E5QU33|E5QU33\_STAAH  
mktiqhkttlilialllytftmgillplmhddlqwfnsyntdilkvfngfngryignifeiavhsvlrlwlysglis  
mgiwimihitrckawtsy  
yllafslmlilpsaiyadytwfagfynyatstlislfiyyicinaiykeqpvsvtvlfyvlsffgqlfmenvtlfhc  
iililaflyeftanrtly  
kllfsfmiatigtiimfsnpnyrkilfegseyqqvsnnqgifskaemistslpygvifsqviilsmiaaliiyllrsd  
rylhltilkrrimigfit  
lplyllyfynqflnkntdiglvgfaniivcgyfafsifvgiylsindrktqitlyslisicvsastlvivtpiepgnf  
liyvtihviiililkefr  
kyksinvnfikgaslvaviylsafiyvhyehkrvqllkqkikhprqevytveslpfehymhhpspinknyqewfnny  
eelpkmtkvkyipfgsdds  
>tr|E5QU34|E5QU34\_STAAH  
mnklvlidgnslsfracyalpplsnkagihnavygfamllekilkeekpnhflvafdagkttfrhekyseykgrqktp  
pelseqfpyirqlldayhi  
kryeldnyeaddigtlskeadkagfqtiiitgdrdlqtlatdnvtiyytkkgvtdvdhytpdfiaekyngltpnqiidm  
kglmgtdsdnpgvavge  
ktaikllnqfdtvegyvehldeisgkklkeklnskedalmskelatinvdspevkleedlmthqdeqqekielfkkle  
fkqlladidqsasgedaie  
ktfeietsfdndvftsikeatihfeldggnylrnnilkfslftgekhivinaddiinayaelvswlenpntkkvvydakkt  
yvashrlgidiqnisfdim  
lasyiidpsrtisdvqsvslygqsfvkddvsyggkfkfvpeddvlmpyvasitdaiyfakpnmdkqleeynqvella  
dlelslakilsemeeigiy  
tdvhdleemekeiqekldvliarnihaagedfninspkqlgvvlfetlqlpvikkktgystavdvleqlqgehpiidiyi  
leyrqlsklqstyvegllqk  
visddqrihtrfnqtlagtgrlssvdpnlqnipvrleegrkirkafkptsksdsvilsadysqielrvlahitqdesmkea  
fingddihtatamkvfge  
adqydsImrrqakavnfgivygisdyglsgslgitrkkakafidylasfpgvkqymsdivkdakalgfvetllhrrryi  
pditsrnfnlrgfaertam  
ntpiqgsaadiiklamvkaqmkettyqaklllqvhdelifevpksevdsfsefveeimenalqldvplkvdsyगत  
yda  
>tr|E5QU39|E5QU39\_STAAH  
mgrqafefglrpkdqfkmqhfldntnhlevlnrlytplitgtqavglyhfmtqfvkeshnetlilshyifmnelkinlle  
frqqmdllleaigllkafvk  
hdeqetqfvyqliqppsahlfndpmlsiflysevehrrhelkkyfeyqqidlsefkqvtrqftdvfkvpstkididts  
dipinepyqgidlsnesfd  
femlrqmlgkhfisdvtdkdrilitqlatlyglatadgmkhvilnsitsgqqslsfeemrkqarsyylmehenqmpklqv  
kspatssstaksteanpkp  
qsdewfelleqtspidmlaswsesepitseqtlveelierekmsfgvinillqfvmikedmklpkayileiasnwkkkgi  
ktakeaynyakkvnqpkne  
gssgnyqkrqsyggqnrnskektpkwlenrdkpseqdsakdnsvddqqlqdrqafldklskkweedsq  
>tr|E5QU40|E5QU40\_STAAH  
mgggqsimkqfksiiintsqdfekriekikkevindpdvkqfleahraeltnamidedlnvlqeykdqqkhydghkfadcp  
nfvkghvpeyvdnriki  
rylqcpckikydeerfaelitshmqrdtlnaklkdiymnhrdrldvamaaddictaitngeqvkglylygpfgtgksf  
ylpefirtlkggfkdgfekkllhrvreanilmlddigaeevtpwvrdevigpllhymvhelptffssnfdyselehlla  
mtrdgeektkaariervk  
slstpyflsgenfrnn  
>tr|E5QU44|E5QU44\_STAAH  
mrkiplnceacgnrnyvnpkqegtatriltkkycpknahtihkesk  
>tr|E5QU45|E5QU45\_STAAH  
mkydlttqdstikrnnaindkdfeklvmdlqplliirriktfgfnhydledlyqeilirmyrsvqtfdfsaeqpfntyvqc  
litsvkydylrkylatnkr

Tsompanidou\_et\_al\_Supplemental\_FASTA\_File

mdnlineyrvtypcaikrydvennylnklaikelirqfkylsafekdvmylmceykpriaqlmhvkekviynaiqrck  
nkikryfkm  
>tr|E5QU46|E5QU46\_STAAH  
mkeryliidgynmigspstlsaiakenlearmqlidtianynavisdeicvfdaydqsgvereymyhgvtiftkeke  
tadsfieryvvelydkhtk  
hitvvtmdmseqhaifgsgayrissremwrldkeneidvskslddisenkprtriplsseilaefekirrhghkk  
>tr|E5QU47|E5QU47\_STAAH  
medtvivgrhavreaaitghpinkiliqegikkqqineilknakdqkiivqtpksklfdlanaphqgvaaliapyeyad  
fdqflkqqkekeglstvl  
ldgledphnlgsilrtadatgvdgviipkrrsvtlqtvakastgaiehpvirvtnlaktidelkdngfwvagteanna  
tdyrnleadmslaivigse  
ggqmsrllvsdkcdfyikipmvghvnslnasvaaslmmyevfrkrhdvgei  
>tr|E5QU49|E5QU49\_STAAH  
mitlyntltrqkevfkpiepgkvmyvcgptvynyihignarpainydvrryfeygynveyvsnftdvddklikrsqe  
lnqtvpeiaekyiaafhed  
vgalnvrkatsnprvmdhmdidiqfikldvdqgyayesggdvfrtrkfegyglshqsiddlkvgaridagehkedald  
ftlwkkakpgeiswdspfg  
egrpghwiesvmafhelgatidihaggsdlqfpheneiaqseahnhapfanywmhngfinidnekmskslgnfilvhd  
iikevdpdvlrffmismvlyer  
rspinylnelvesarsglerirnsyqlieraqiatnienqtyidqidailnrfetvmnddfntanaitawydaklan  
kyvlenttstevdikfkav  
yqifsdvlgvplkskkadelldedvekliernearknkdfaradeirdmlksqniiledtpqgvfrkrg  
>tr|E5QU50|E5QU50\_STAAH  
mylrsseiieemillkrmrddikmvfeqdpaarstlevittyaglhavwshliahklynqkkyvsaraisqisrfftgie  
ihpgakigkrllfidhgmvgv  
vigetctigdnvtiyqgvtlggtgkergkrhpdigdnliaagakvlgnikinsvngansvvlqsvpsystvvgipgh  
ivkqdgvrvgktfdhrhlp  
dpiyeqikhlerqlekrngeiqddyii  
>tr|E5QU51|E5QU51\_STAAH  
mielrkyiievpaklnikksttniqivllealphgstlnlanyinkiagasklsrksqlnahhshyifnsfyegafinf  
yvvltatvshlrinlitn  
psfyikysihivvic  
>tr|E5QU52|E5QU52\_STAAH  
mkkmsdri rvryapsptgylhignarta lnly yakhyngdfviriedtdkkrnledgetsqfdnlkwlgldwdesvdkd  
ngygyprqserqhiyqpli  
dqllaedkaykcymteeleaereaqiargempryggqhahlteeqrqqfeagrpsirfrvpqntysfddmvkgnis  
fdsngigdwvkvkkgdgipt  
ynfavaiddhymeisdvirgddhisntpkqimiyeafgwepprfghmslivneerkklskrdqgilqfieqyrdlgylpe  
alnfiallgwspegeeei  
fskeefikifdekrllskspaffdkqklawvnnqymkqkdtetvfqlalphlikanlipevpseedlswgrklialyqkem  
syageivplsemffkempa  
lgeeeqqvungeqvpeilmthlfsklealepfeaaekktikevqketgikgkqlfmpirvavtgqmhgpepntievlgk  
ekvlnrllkqyk  
>tr|E5QU54|E5QU54\_STAAH  
makkkvifecmacgyqspkwmgkpcncgawnqmeieivekaanpkhgvtkelvgkvqklnsikhettprvltdsaefnrv  
lgggivsgslvliggdpgi  
gkstlllqicaslsqkkklyitgeeslsqtklraerldedsselqvlaetdleviyqtvkeeqpdlvvdsiqtiyhpe  
issapgsvsqvrestqslm  
niakqmniatfivghvtkeggiagprllehmvdvlyfegdeharyilravknrfgstnemgiefmkqsglkgvnpse  
mflerstnvpgstivatm  
egtrpllievqalvtpttfnprmatgidhnrllsllmavlekkenyllqqqdayikvaggvkltepavdlsvivatass  
fkdkavdglncyigevglt  
gevrsvsrieqrqvqaaklgfkrviiipknniggwtypegigvigtvthealsfalhs  
>tr|E5QU56|E5QU56\_STAAH  
mmthnihdnisqwmksneetpivmssriarnlenhvhlmyatendgrvinevqdalpnfelmrldqmdqqskmkmv  
akhlispelikqpaaavl  
nddeslsvmineedhiriqamgtddtlqalynqassideldrslldisydeqlgylttcptnigtgmasvmlhlpgl  
mkrmtriaqtinrfgytir  
giygegsqvyghtyqvsngltilgkseleietlevvnqiiheekqirqltdynqletqdrvfrslgilqncrmitmee  
asyrlsevlgidlnyiel  
qnfkfneilmvaiqspflldeeddksvkekradilrehik  
>tr|E5QU64|E5QU64\_STAAH  
mkmkerinmvesmltfmlgplrqitdfymehllvsnsiviagyfatgikkkkvvn  
>tr|E5QU65|E5QU65\_STAAH  
mfvvkalvktreghgnlelldkevatplddkvkikvhyagicgtdihtyeghykvnfpvtlghefsgeivevgadvkdfk  
vgdrvtsettfyvcnecey  
ceskdynlcntrkigtvgdgaftnyviareeslhipdevsyaamteplacahgvskiqvnsgdvavvmgppigil  
lvaqvlkskgatvvvtgld

Tsompanidou\_et\_al\_Supplemental\_FASTA\_File

ndkvrldkaeahmdyvvnlqqtldlkyngitdgygadvvvecsgavpaarqgldilrkkgfysqigifkdaeitfdme  
kviqkeitvvgvsrsqkpad  
weps1qlmadglvnaealvtkiydiskwdeayqhlksgegikallkplldenegen  
>tr|E5QU69|E5QU69\_STAAH  
mlkgsnmgndnqgilreivlnptihgkelesifglrrqlgyriqkinlwleqegypklertsqgnfivsseimtlfkr  
dvseqqmlngnnvifsiet  
rryylmlmlfskenamslnhfsidlqvsntvihdinhvkeqledhglslkysrkhgyeivgdefevrrffiklidqrln  
hdi tksev lka nlt fedj  
ayqdkkikqveqflksrfidkslsslpyvlcvirriqsghvinlninyqylrdtkeyqateimtqhepdlpeaklyl  
tlhl1stsvqwtldgesdn  
isnl tmaidqmi h hfeqit finiedkeklsqll1hltpafyrikynltdrdelinplqnyqslf hmvkqscqslteyf  
gkslpdneiayltmlfggs  
lrrqdenfdgkikaiivctqgtsvsqmmlyelrnl fpeiifldaislr tfenytl dydivfspmfv lthkklfitkvals  
enegrklrkevmyinkes  
adidkeinklmalier tttvnditelrdgledfianysistingsivtqnktldladliparhvkrihhvenideaiaak  
asdvlanhfidikeyhem  
qqafddsymvimqniaiphaysekhvhktamsmlilqepiymdgtaihiivpiaavdkvthlral1qlrdvaqndaik  
riiqsrknsdvneilkys  
nkearengwdsn  
>tr|E5QU72|E5QU72\_STAAH  
matmygvrsdiaafifnvafetlssctvvsqiasarqss  
>tr|E5QU76|E5QU76\_STAAH  
mltefhkkgv h kmtdigriydnkndtdairilvdrvwprgiskrtanldywlkdia pstelrqwfqhdpklygafkey  
ekelr dnetqkeafeklka  
ivnqh hv l l l ysakdtkhngavvlqqllnt  
>tr|E5QU77|E5QU77\_STAAH  
mkfkr latif savlvsgcgs m hssgkdl nislp l ktsi apyetdvpvkigaaesl fktndqgkiekvlvksyhpndt  
tldielkdnikfngqgklt  
aekvksslensmkksdlvkyslpi ssitakgqklitiktssaypelvselanp fmai ytdaksdvnqtpvgtgpyqikdy  
kqsrkisl snfkdywqgkp  
kl dhitvtyqedgnnrvrnlesqkdlitdvpvnkvqdiennqnlkvskesgfrtsllmynhtnkkmtksvreal dhiid  
rqiadh iyqgyakpat sp  
fndkipyikepkltkqnieqaktllakdgytkehplkiklitydgrpel skiaqvlqsdakkanieidiks vddiegylk  
drsawdatmysfgtiprgd  
tgyffngaykkdgainkgdynnnvddlinqlnhtvdvkerhnisndiiklssrdvpsnyiayndqivaanskvknkyvt  
pegiylydyrttier  
>tr|E5QU78|E5QU78\_STAAH  
meglnhqrntekeettqtqsvapntgeegmssastqstktsdihnesidkqmeakahetaqntdlknearslfdnatksi  
grlagndeslnlnlkdmfs  
evfkphtkneadeifjagtaktpaicdi seewgkpwlfsvrfiaftvtfiglwmaafnntnaipglifigaltvpls  
glfffy esnafknisi fev  
imffiggyfslstmlvlyrfvvsdqferfgsltffdaflvglveetgkafiivyfvnklktnkilnglligaaigagf  
avfesagyl nfa lgenvp  
lldivftrawtaighhlvwsaivgaaivi akeqhgfefkdidkrflifflsavglhgiwdtsltilgsdtlkifilivi  
vwilvfilmgaglkqvnll  
qkefkeqqkkvde  
>tr|E5QU79|E5QU79\_STAAH  
mravnvlqhtp negvgyigewakerghevyiyhpy mndgvlplaeetdmlvilggpmnpddempwiqserqlilvlmaqnk  
piygacfgaqqiskalgya  
vlkspvkevgwddvyleseiipnipsr lka lwhhedmfqipqqaellfsgnhi rnqgf iidhhviglqfhfepgpddvre  
ivln daqyinhsilegsae  
dila fevpkqnrqai frildfitqa  
>tr|E5QU80|E5QU80\_STAAH  
mevtcl kqitwhdlqhi ikdddviglpalavanlpaevl ravlaqhdtyhtpndltfilandihs lgvaplddfierm  
ikrvimsiltassktaqam  
knndieayflpggi iathyrqsnqllpgv itkig lntavdprygggkvnt rttddlvs lvtiddetylhyt fpsvdval  
rgtyadqqgniyltqesy l  
secyhvalnakanhgkvi vqkdlvddyqlk pnev vipgnlvdyvyvtedeknhrqviqshylpalsgeeridgipepal  
pfnsrk l ilrraaqfltyg  
dtisigyginne lsnllheecvehdvqpidvgi fggfvgsrehfgmynadvrmphdrawdfi yngvsvaylsfaevd  
qygnvnvsyfndrlngcgg  
fiditqsvnkiifsgt fvagshvschnqrlnietegqnqkfvsvshidfnaqysqsleqevyfvtdravfeltnqglkl  
iei apgl dlhkdi lnqmaf  
kpiadh lklidtsiykek wgelkqsihkv  
>tr|E5QU81|E5QU81\_STAAH  
mipaftkkngenlnqfikiyeseakggi lmnfdwiktrsd fdddkpavidhakqtswtyqqlnaradnmahyltsqgvkk  
gdvigifapndiaildllf  
acfktagvflplnwrlnpkeiaaivedaqkl1l1fyaekhlssltdidqnl1hmdidvaqydeivnpdyhqpfqatpvepq

Tsompanidou\_et\_al\_Supplemental\_FASTA\_File

dlaaliytsgttgspkgvm  
fsyesfvhnganleltykfnsnyitivstpmfhvlgfndtvlpvlmmsggtlilqryfngeelndmiaqyhptfiimiptm  
yystlrasnfnpenfkamd  
yiqggsqplpsiqaaqygininingyglteaplvlvntpenskrkpmsigkavmfvdarilddngeevptgeigelai  
kaknvtppywnkpaetaka  
fhgrylltgdlakmddgdifiidrkkeliitggenvlpsevenalaehplvdrcvvvgydhpkygesiaaaailredep  
hyaieldqhmrsrlagykv  
prmyvpvthmplnstgkpkdlairqmmndkvsqt1  
>tr|E5QU82|E5QU82\_STAAH  
mtfeketylktlfpedvlsiakgltdgeveflqqvdsllleskyreninqhwidatvpedyfdlgeInyfnnp1lykdrp  
nakmpsq1fqffmsyllar  
fdislattlgvhqglghntfyfggskeqiakyvpklqshelrtcfaltepehgsdvagglletvaerqgdtwvingekkw  
ggahvsdvpvfvavketyg  
kphcfvvrpeqgdvdiendkia1rivpnalikltnkvdeadrlnqitsfkdiakilystragvaymatggmagafra  
tldyvterkqfgkpiiskyq  
liqeklammggnlaqamatcaqlanmqahgeydevatstakmmnalrlretvamgrgitggngiladdydiarffsdaea  
iytyegtheinalvigr1  
tgdsafv  
>tr|E5QU83|E5QU83\_STAAH  
mtinkitvlgagtmgaqlaalfvnaglkvkl1divvdkndpnliakksydkitdkkrp1lfdlnlshltygnfddd1vn  
ddadlyieavkedi eikha  
vwqlvlqhakedal fatntsgipinaiaqafnekdqerffglhffnpprimklveliptshtkesiildvknfaqnvlgk  
gvivvndvpgfvanrvgtq  
tmndimyraeqhkl1svdvaltgqairpktgtyalsdlvgldiavsvikgmqqvpeetpyfhdvkivntlyengalgr  
ktkqgfykkdketkarlv  
dvekqdyvrvpsqpqlpi1nefnkd1vhn1dvi fnaqdeaglflwetlrnnfyysainvpkatddfrdidralvwgfnwk1  
gpfqlwdamgyervktrme  
delgd1pqw1sdldggfykqdetieyatpvshfvkdelwdkgdak1svthndq1llklqsknnvitdefndalvdaid1l  
enehytsmviyadgnnfsv  
gan1flmkkahedglvddvvaqsidklhysfnrlkys1kpvvtavqgralgggcelvlyspivvaasetyig1veagvg1  
lpsggglaemadri1rtsh  
kfdkqasmtkv1tniafakvstnafearrygylrdtdtiifntaqrvevalkrakyeaetnyipnprhqyialgedfka  
liqgg1daqrhghfisdhd  
yhiainiatilsggd1prntfinqryiqslekigfid1llkskksyeriahmlktgkplrn  
>tr|E5QU84|E5QU84\_STAAH  
mitmqeayivaygrsaakakqgal fherpddvaakvlqgv1kridgkfnknmi edvivgtafpeg1qqniartialrt  
g1sdtvpgqtvnrncssgl  
qtiaiaanqimaggdi1vaggvelmsavpmggneptnpt1qyddigasympgltaenvasqfdvsredqdayavrshq  
raydaqrdrgrfkdeiipi  
vnsveytnvgpkvhtni1fdqdefirpdtmealak1rtvfkadgtvtagtsap1sdgagfvv1msgdkvkelgvtpiarf  
vgykavgvdpkimgiipay  
a1pev1slsn1svedid1ie1neafasqtiasikevgldisrtnvnggaialghplgatgam1tar1lnemgrpdsryg  
mvtmcigvgmgaai1feyv  
r  
>tr|E5QU85|E5QU85\_STAAH  
mkkqiislgalavass1ftwdnkadaivtkdyskesrvnenskydtpipdwylgsilnr1gdqiyyakeltnkyeygeke  
ykqaidklmtrvlgedhy1  
lekkaqyeaykkwfekhksenphss1kkikfddfdlyrltkkeynelhqs1keavdefnsevkniqskqkd1lpydeat  
enrvtngiydfvceid1ly  
aayfnhsqyghnake1rakldiildakdpvritneri1rkemdd1nsiiddffmdtnmnrplnitkfnpihdytnkpe  
nrndfdklvketreavana  
deswkttrtvknygesetkspvvkeekvveepqlpkvgnqqedkitvgtteeapl1iaqplvkippqgtiqgeivkgpeylt  
menktlqgeivqgpdfptm  
eqnrps1sdnytqpttpnpi1kgiegnstkleikpqqtest1kgtqgessdi evkppatetteashyparpqfnktpkyv  
kyrdagtgi1reyndgtfgy  
earprfnkpsetnaynvttnqdgvtvsygarptqnpsetnaynvtthangqvsygarptykppsetnaynvttnqdgvtvs  
ygarptqnpsetnaynvt  
thangqvsygarptqnpsetnaynvtthangqvsygarptqnpsetnaynvtthadgtatygprvtk  
>tr|E5QU87|E5QU87\_STAAH  
mknikm1nikamrsvimkriskdwavfk1lyqnkgrfsinal1lqlimifissty1l1lfnmm1kvagqsq1tinnwm  
eivshpasvill1iifilsv  
afliyvefsl1lvymvyagfdrqiitfksifknafvnrkligvpviffviylmlmpian1glssvltkniyipkfltee  
lmkttkgi1iygtfmiavf  
ilnflki1ft1pl1t1lnrqs1fknmr1swqitkrnkfr1vieivile1ligailt1iisgatylaicvdeegdkflvssil  
fvvlksslffyy1ftk1sl  
isvlv1h1kqenv1dqpg1efkyppkrksrffi1smv1avtcfi gynmy1lynntintnisiighrgfedkgvenfips  
1kaaakanveyveltdtmt  
kdkqfvvshdn1lkr1ltgvnkni1sesnfkdvvg1kmrqngheak1vsl1defietakqsnvkl1velkphgkepadytqrv

Tsompanidou\_et\_al\_Supplemental\_FASTA\_File

idilkkhgvehqyrvm5ld  
ydvmtklkkeepylkcyiip1qfghfketsldffviedfsysprlvnqahsenkevvtwttingeedltkylqtnvdgii  
tdppladqikeekkdety  
fdrsrilfe  
>tr|E5QU90|E5QU90\_STAAH  
meafsmletnknhatawqgfkngwrnrhvdvrefiqlnytllyegndsflagpteatsklweqvmqlskeererggmwdmd  
tkvastitshdagylkdld  
etivgvqtekpfrsmqpfggi rmakaaceaygyeldeeteki ftdyrkthnqgvfdaysremIncrkagvitglpdayg  
rgriigdyrrvalygvdf1  
meekmhdfntmstemsedvir1ree1seqyra1kelkelgqkygfdlsrpaenfkeavqwlylaylaa1keqngaams1g  
rtstfldiyaerdlkagvi  
tesevqeiidhfimklrivkfartpdyne1fsgdptwvtesiggvgidgrplvtknsfrflhs1dn1gpapepn1tv1ws  
vr1pdn1fktycakmsikts  
siqyenddimresygddygiaccvsam1igkqmffgaran1akt1lya1nggkdeksgaqvgpnfeginsevleydevf  
kkfdqmmdw1agvyins1n  
vihymhdkysyeriemalhdteivrtmatgiaglsvaads1saikyaqvkpirneegl1vdf1eiegdfpkygnnddrvdd  
iavdlverfmtklrshkty  
rdsehtmsv1titsnvvygkktgntpdgrkagepfapganpmhgrdqgals1ssvakipydcckdgisntfsivpks1  
gkepedqnrnltsm1dgya  
mqcghh1nin1vfnret1idamehpeeypl1tirvsgyavnfik1ltreqlldvisrtfhesm  
>tr|E5QU91|E5QU91\_STAAH  
minfelisc1rqkgkrqpketrgrkfnigrpisqrpk1ekkrntfghweadtivssrgsksgciatfaerksryyyv1m  
pdrssnsmeta1n1ikh1  
pkgavktitvdrgekfcyqni1enqfn1vnyfadpysawqrgtntentng1lreffpktd1akvnqeqlnya1ldsinyrp  
rk1nwkfp1yev1cde1lh  
1n  
>tr|E5QU92|E5QU92\_STAAH  
msynh1t1terarievlr1genys1rsiark1krsvstylt  
>tr|E5QU95|E5QU95\_STAAH  
mfkvvicdderiireglkqii1pwgdyhfntiytakdgveals1iqhqpelvitdirmp1rkngvd1lndiahl1dcnvii1  
ssyddfeymkagiqhhv1d  
y1lkpvdhaql1ev1lgr1vrt1leqqsqngrslapchdafqpl1kveyddyv1nqivdqik1qsytktvtvsd1iqhidvs  
esyamrtfkdhvgitivdy  
1nryrilqslq1ldrhykhyei1adkvfseymf1syhfky1qm1sp1sdyckqak  
>tr|E5QU96|E5QU96\_STAAH  
mievt1em1ffdi1hki1pnk1gip1svqrklw1rnfmqaffv1ffvymamyl1rn1nfkaaqp1f1keeigl1st1elgyigl1afs  
ityglgk1t1lgyfvdgrnt  
kriis1f1i1sai1tv1imgfvl1syfgsvmg1l1iv1wg1ngvfqsvggpasystisrwapr1tkrgrylgfwntshniggai  
aggvalwganv1ffhgnv1g  
mfifpsvial1ligiat1f1igkddpeel1gnraeei1weepvdkenidsqgmkweifkkyil1gnpviwilcvsnvfvyivr  
igidnwap1lyvseh1lfhsk  
gdavnti1fyfeigalvas1lwgyvsd1lkgrraivaigcmfmitfv1fytnatsvmmvnis1falgalifgpq1ligvs  
1tgfvpkna1svangmtgs  
fay1fgdsmakvg1laai1adptrng1nifgyt1sgwtdvf1vf1yval1fgm1llgiva1fyee1kirs1ki  
>tr|E5QU99|E5QU99\_STAAH  
mtklkvgv1vggiaaqdrhipal1klkdtvsl1vavqdi1ntvqmidvakr1fniphavetpsel1fk1vdavvictpnk1fhad  
1s1eal1nhgvh1lcekpma  
mtteecdrmi1eatnknck1l1tvayhyrhtdva1takkaiesgvvgkpl1varvqamrrrkvp1gwg1vftnkalqgggs1idy  
gch1ld1slw1l1gkdmvph  
evlgkty1nq1skqp1nq1ndwgtfdhtkfdvddhvtsymt1fanrasmqfecs1wsanikedkvhvs1sgedgg1n1fpfeiy  
epr1fgti1feskanvehned  
iagerqarn1fvnac1gieeivk1pearnvna1ieai1yrsd1dnksiq1  
>tr|E5QUA1|E5QUA1\_STAAH  
mrevykmtkkkni1kaigi1syfiammfvi1lypl1wtfgis1npgt1nyg1akmp1dnat1fknya1f1l1ddssqyl1twykn  
t1ivasana1fsv1fv1t1t  
ayafsr1yrfvgrkygl1itf1l1qmfpvl1mamvaiy1l1ntig1l1ds1fg1t1lvy1iggsip1mna1flvkgyfd1tipkel1des  
aki1dgaghmri1flqim1lp1  
akpilavva1fnfmgp1fmdfi1l1pkil1rspekft1lavgl1fnfindkyannftv1faagamiavpiaiv1fl1qrylvsg1  
ttgatkg  
>tr|E5QUA2|E5QUA2\_STAAH  
mtkrnpk1laal1svipgl1gqfynkrpikgtiffiffis1fsvfys1flnig1fwgl1ft1lgtvpk1l1ddsrv1laaggi1s1illv  
afaimlyvini1dayrnae  
rfnrneeikdpkarmvatwdktfpy1lispgt1f1l1fvv1fpl1fmfgvaftnyn1ynapprht1lewgl1dnfkt1ftig  
vwrktffsv1tw1lvt1v1v  
att1qialgl1flai1vnhp1vvgk1kfi1rtv1l1lpwavpsfv1til1fval1fndefgainndil1qp1lgvapaw1sdpf1wsk  
valigiqv1wlgfp1fv1alf  
tgv1qs1ssdwy1e1admdgasswqkfrnit1fphviyatap1l1imqyagn1fn1n1liyl1fnk1ggppv1sgq1nag1stdil1isw  
vyn1t1fefn1n1mgavvs1

Tsompanidou\_et\_al\_Supplemental\_FASTA\_File

igfivaiiafiqfrtstfkdogg  
>tr|E5QUA3|E5QUA3\_STAAH  
mskilkyitlavmllivtacgpnrskedidkaInkdnskdkpnqltmvvdgdkqmafykkitdqytkktgikvklvni  
qndq lenisldapagkqpd  
iff lahdntgsaylqglaaeiklskde lkgfnkqalkamnydnkqlalpaivettafynkklvknaptleeveanaak  
ltdskkkqygm lfdaknfy  
fnypflfgnddyifkkn greydihq lgnskhvvknaerlqkwydkgylpkaathdvmiglfkegkvgqfvtpgwniney  
qetfgkd lgvtt lptdggk  
pmkpf lgvrgwylseyshkywakd lmylitskdt lqkytdemseitgrvdkssnplkvfekqarhaempn ipemrq  
vwepmg nasifisngknk  
qal deatnditqnikil hpsqndkkgd  
>tr|E5QUA5|E5QUA5\_STAAH  
mdatmtkrpkrilat iiflsl lfti iyiddi qkwfnqytdkl tqnhkqgghskledffrgsr itetfgkyqhspfdgk  
ygidfalpkgtpkaptng  
kvtrifnne lggkvlqiaedngeyhqwy lhd kynvkv gdrvkagdi iaysgntgkqttgahl hfqrmkggvgnayaedp  
kpfidqlpdgerslyd l  
>tr|E5QUA6|E5QUA6\_STAAH  
milnfipsi iiii kkiteteenf qmakvlyitahpfnelvsn smaagkafietyqqqhpedevkhd l fetyipvidkdv  
l tggwkgmsnget l tdeq m  
kvsr lsdileef l sadkyvltpmwn lsfppv vkayidaisi agtkfkysaegpql l tdkkvlhiqsr ggyytegpaad  
femgdry lrtimtflgvps  
yet iieghnaephktee ikatsinnaek l attf  
>tr|E5QUA7|E5QUA7\_STAAH  
mvln lndkqtkskegl isvshplaa kigkdv l dqqgnamdavia iqlalnvvepfasgigggy llyeqstgsitafd  
aretapahvdkqfy l dds g  
eyksffdm tthgktvavpaipklfdyihkryak lsl edlinpaie laieghsanwatekysrqhar ltkyhetavfth  
engywregdwivqpelgkt  
fqil reqgfnafykgdi akqlvnnvkacggtit led lanydiqikap isatfkdydiysmgpsssggitviqilkllehv  
dlqsmgprsvdy lhhliqa  
mhlaysdraql addnfhevqvsl iddylkarsklid snkanidiehgvsdcishtdveenhtetthfcvidkegni  
asfttsigmiygsitipg  
ygvllnttdgfdvvtggni eia pykrplsnm aptivmhgkpi ltv gaggaisiasvaqtlinvlvfgmdiqqaid ep  
riysshpnriewepqfsq  
tilal iarghameh kpd ayigdv hglhvd l ntrdasggaddt regtvmggevl sirkqplpyrqmysnvrvyfvndvql  
plladqvrwmhdkyvwdes  
vvriifsevsahied lrsyenagenyidi twlarkkgyqvt l kddg lyl tddtytsvkrntnayrydrdsitr  
>tr|E5QUA8|E5QUA8\_STAAH  
mkkisi aiivlalv lsgcvptksevaqksskvevkerptihflgqasyendmnivkdqlenagfnvkmiqpdygsy  
rtqrqagnydiqid ddmvtv  
fgdpnyamtal fsstgsnsl lkd khvdql l nkastqneadvkqtykqiedevvfdkgymaplygskkn lvydnkvl dknsl  
vg l pnsraliwqqfdynns  
rerdrtrplvmtqqdgeipt l dpirsiapsvysinmmytr lll l dndh lttkgs lsr dyavnkdnkafyfl l rddyfa  
kvvngqarntgervsaedv  
kfs l drardkksvvnntynmhkhindikil kdedidql rkekdkddnsiydklikaynvks l ttdgqkvnnkdgiyqiv  
kittdqsmprevnyl thss  
agilskkfvnqvnqeypkgygdsstipansdgkna l yasgayimtqknayqatfqrnpgfnetekgsygpakiknitl kf  
ngdpnna lselrnhsidml  
advnqkhfdliksdn lsiirkngrksvflmlnikk gikfthpnlrqavvnaidqqdfikfyrgdkfkiaspitplvdtg  
neqrqdl ekvekainq  
>tr|E5QUB0|E5QUB0\_STAAH  
mm l clpihkcvnl fytfv yhsnl lkiilqgvisiitylesfkslyhkafykfv lsv lslplflyavikfffsakrknfy a  
nseiseieqalhgkykyl  
sqkssstqihkealki fktqssntnsknieqahfstyfenv lfhkfi iikvilalpmfilltiylqplvryiferivmav  
iviigvi vsvsilyfsp l  
daaysilgnatkaqihqfnvlhh l nepyfiqlwdtikgvftfd lgttykgndvvtkavgeripitiivavlalivalii  
aipigiisamkrnswldit  
lmialig l sipsfwqgl l filafslkl dilppsympehpisil l pvlvigt siaasitr mtrssvlevmrsdyvltaya  
kg l sttqvvikhil knaii  
pivtlvg l lvaellggsavteqvfn ingigryivqkqlip dipavm gggvyisivislanliidifyalidpk l rseine  
rk  
>tr|E5QUB1|E5QUB1\_STAAH  
msn l levns l nvqfn ydettvqavknvsfel rkkhilg ivgesgsgksitaksilgl l pdypdht l tgeiifngqsltn l  
stsalqqi rgkdis mifq d  
plssl npr l t i gkqitevl fqhkrvskseaksmtidilekvgikh atrqfdayphelsggm rqrvmiamalilkpqilia  
depttal dastqng l lqlm  
kslyeytetsi i fithd l gavyqfcd dvi vmkdgs vvesgtvesi fkspqhtytkrlidaipdihqtrpprplnndillk  
fdrsvdytspsgslyrav  
ndinl airkget l g ivgesgsgkst l aktvvg l kevsegfiwyne l plsl l fkdde l ksl r qei qmi f qdpfasinprfkv



Tsompanidou\_et\_al\_Supplemental\_FASTA\_File

idvikrpli ihgkvkdndd  
iiktivsllekvgl dqsflryphelsggqrqrvsiaralavepkvivcdeavsal dsvsiqkdiellkqlqldfgityl  
fithdmgvineicdrvam  
kngeivelnntediikhpgsdyakqlisevaviak  
>tr|E5QUB8|E5QUB8\_STAAH  
mtgfsvylgqpldeayikrmikqgyqmi ftsvqi peeddetkyhyftkl1n1lkheqvtylidanpsiltps fyehlryq  
daqfmiridhstsieaiea  
imagglkcclnasiisrelltslhqqlndftllsfchnyyprpdtglsvdlvnkkneliyqfnpkaqiygfivgsglrgp  
lhkg1ptieatrshspvva  
akllqetgvsevlvgdslieirqakqlidfcckhrhftlci eevfddttvtylfdmchkvrpdnpenvirsetsrqicphsi  
qpqfttqrrrigsvtdnl  
ngryqgemqivrqtlsahdsvnvvaqikedlpllsciepnndtfdqktreckk  
>tr|E5QUB9|E5QUB9\_STAAH  
mevgqvrkklfgqlqrigkalm1pvailpaaglllaigtamqgealqhy1pfiqnggvqtvaklmtgaggiifdn1pmif  
algvaiglaggdgvaaiiaa  
fvgyiimnktmgdflqvtpknigdpasgyasilgiptlqtgvfggiigalaawcynkfyinlpsylgffagkrfvpim  
mattsfilafp maliwpti  
qtglnafstgll dsntgvavflfgfikrllipfgl hhi fhapfwefgswknaagei ihgdqriefeqiregahltagkf  
mqgefpmmfglpaaal ai  
yhtakpenkkvagalmsgaaltsfltgiteplefsflfvapllffihavldglsfltl yll dlhlgytfsggfidyfllg  
ilpnktqwwlvipvglvya  
viyyfvfrflivklkyktpgredkqsqaatasatelpyavleamggkanikhldacitr1rvevndkskvdvpglkdga  
sgvlevgnmqai fgpksd  
qikhemqimngqvvenpttmeddkdetvvvaedksatselshivhapltgevtplsevpdqvfsekmmgdgiaikpsqg  
evrapfngkvqmi fptkha  
iglvdsoglellihigldtvklngegftlhveegqevkqgdllinfldyirnhaksditpiivtqgnitnldfkqgehg  
nlsfgdq1feak  
>tr|E5QUC0|E5QUC0\_STAAH  
msmkgdli ddfkiqn1rgertindaakhrnektgaspyegirtcl  
>tr|E5QUC1|E5QUC1\_STAAH  
mkqrigaylidaihragvdki fgvpgdflaflddiisnvnvdwvgtne1nasyaadgyar1nglaalvttfvgv gelsa  
vngiagsyaeripviaitg  
aptraveqagkyvhslgegtfddyrkmfahitvaqgyitpenaateiprlintaiaerrpvhlhlpidvaiseieiptp  
fevtaaktdastyiel1v  
sklhqskqpiiitgheinsfhlhqeledfvnqtqipvaqlslgkafneenpyymgiydgkiaedkir dyvdnsdlilni  
gakltdsatagfsyqfnid  
dvvm1nhhnikiddvndeislsl1qqltdi sytnnasfpayhrptsdytvgtepl tqqtyfkmmqnlkpn dviiad  
gqtsffgaydlalyksntf  
igqplwgsiygtlpatlgsq1adkdrn1lligdgs1qltvqai stmirqhikpvlfvinn dgytverlihgmyepynei  
hmwdykalpavfggknevi  
hdvesskd1qevfntinghpdmhfvevkmsvedapkkliidiakafsqnk  
>tr|E5QUC5|E5QUC5\_STAAH  
mmikvgivggsygaie1rl1qthphvtiahiyshskvdep1kl1tfphlqhmqhfeal tvdnndcdviffatpapvsk  
tcipplvekgihvid1sga  
friknreiyeayketaaaqddlnhaiysisewqsl dnnngtklisnpgcfptatllalhp1isekivd1ssiiidaktgv  
sgagrs1sqrvhfsemnen  
1sayaignhkhkpeieqylsiiagqdvsviftphlvpmtrgilstiyvkl sseyttesl hklmtsyyanqpfvri rdigt  
fpttkevlgsnycdigi yv  
dettqtailvsvidnlvkgasgqaiqn1ni lydfevttglkqspvyp  
>tr|E5QUC6|E5QUC6\_STAAH  
mkhqettsqhnfsiikhgdiskpqgftaggmhig1rankkdfgwiysssl assaavytlnqfkaapl ivtedtlqsksg  
klqalvvn sanansctgqg  
giddaqqtqwvaqqlqi psehvastgvi geylpmdki ktgtehindanfatpgafneailltdtctkhiavslnidg  
kti tiggsakgsgmi hpnm  
atmlafittdasiesntlhq1lksstdhtfnmi tvdgd tstdmvlvmanqqvehqilnqdhppqwetfvdafnfvctfla  
kaiardgegatklisvnvs  
gaksisdarkigktivssnlvksaifgedanfgriitaigysgeidpnctyvq1nqipvvdkgmav1fdeqamsnt1th  
envtidvqlglgnaaatay  
gcd1sydyvrinasyr t  
>tr|E5QUC8|E5QUC8\_STAAH  
mtkrqmgifiyagi iggl1sgivklgwevmfprrtpernatnppqellq1lgfssefthqtytfsnmqlpwvsfivhfsf  
siviaiicy1lvkkyayla  
mgqgavfgiaiw1fhl1impimhtvpavwdqpfqehl seffghivwmmtielvrqhfvyryk1n  
>tr|E5QUD0|E5QUD0\_STAAH  
mkeglfmimgnlrfqqeyfryknntestthrnaywvklaknieatkmmyalstivqqhasirhffdvttddn1tmilhe  
flpfielikvqvpsssan ydl  
eaffkqelstyhfnsp1fkfk1fqfadaayi1ldfhvsi fddsqidi fidd1cnayrgntvintrqahaln rnddkdn  
qdashi aldsnyfrlenns

Tsompanidou\_et\_al\_Supplemental\_FASTA\_File

dihidsylpikhpfeqalyqtylidmtdmsidmaslavsvylanhimsqqhdvtlgihvpslhpndlhgnivpltltidak  
dvcqrfttdfnksvlqms  
qlqaksslsletifhcyhqmmsccndvi edvhqihdahtsladieifphqhgfkiiynsaaydlisietlsdlvrniyl  
qitkengnkrttvdelnlm  
terdiqlyddinls lpeiddaqtvtlfeqqveatpnyvavqfdgvfityqtl narandlaqrlnrqygvepndrvavia  
eksiemivamigvlkagga  
yvpidpnypsdrqeyilkdatpkvityqvvyengkrdinhidlnkiawknidnlskntledhayviytsgttgpnkgt  
liphrgivr1vhqnhyvp1  
nekttilsgtiafdaatfeiygallnggklivakteqllnpialeqlinendvntmwltsslnfqiaserievlpky  
lliggevl nakwvdllngr  
pkhpqiingyptenttfttynipnkvpnrpignkpi1gthvyimqgerrcgvigpge1ctsgfglaagylnqpe1tad  
kfkidsniqlmyrsgdiv  
rllpdgnidylyrkdkqvki rgfrielsevehaleriqqinkavvivqnhdqdyivayyeamhtlshnkiksqrmtlp  
eymipvnfmhieqipitin  
gkldkka1pimdyvtddayvapstdehllcqi fadilhvngvghdnffelggshlkatlvvnrieastgkrlqigd11  
qkptvfe1aqaiakvqeqn  
yevi1peaivkddyv1ssaqrmyllwksnhkdtvynipflwr1sse1nvaqlrqavqhl1arheilrtqyivddevrqr  
ivadvvadfkevnthtfde  
qeimrqfvapfnlekpsqirvryirsp1hayl1fidthhi indgmsniqlmndlnalyqhk111p1k1qykdysewmshrd  
mtkhrqywl1sqfkdevpi1  
slptdyvrpn1kttngamsftmnqmrq11lkyvekhqitdfmffmsvmt11sryarkddvsvmsarmhkgteqm  
lgmfantlvyrqgplsdkm  
wtqflqevkems1eayahqeypfec1vnd1dqshdasrnp1fdvmlvlqnnetnhahfghsklthiqksvtakfd1sfi  
ieedcddyti1neyntdly  
hsetvrhmgncmimidiylkhqdtlqirdipngteellnwvnthvndrmlnvpgnksii1syfdevvsrqgnhvalvmnd  
lmtyet1lhnyvdaiahl  
1sngvgkgqrvallitersfemiaamlatvkgasyipididfpkkrqgaildakvtavmsygei1ett1pviqlenakg  
fveskeneqydd1hgqde  
ntam1dnemyaiytsgttgmpkgvairqrn11nlvhawstelq1gdnevflqhanivfdasvmeiycc11nghtlvipdr  
eervnpeqlqqlinkhrvt  
vasiplqmcsvmedfyielitggatstasfvkyiekhcgtyfnaygpsestvitsywshqcgdlipetipigkplsn1q  
vyimsdgl1l1c1gmpg1c  
iagds1aigynrpe1madkwqnpf1gkgklyhsgdlarytsdqieflgridkqvkvngyrieldienailairgisd  
cvvtvshfdthd1lnayyv  
geqqmeqdlkqylndh1pkymipktityidcip1ttndkvdtr1pnp1spiqqs1kvsepsneieqtfdvdfgevlkqn  
dvgvdddffe1ggns1eam  
lvvsh1krfghh1smq1lyqyktvrqi vnymhqns1valpdn1selqivmsryn1gileds1shrp1gkt11tgatg  
flgay1iealqgyshriyc  
firadnee1awyklmtn1ndyfseetvemmlsni1evivgdfecmddv1penmdti1hagartdhfgdddefekv1vqgt  
vdvir1laqqhhar1iyvst  
isvgytfd1dtedvtfseadvkygq11tspytrskfyse1kv1eavkng1dgrivrvgn1tspyng1rwhmrniktrfsm  
vmnd11q1dc1gvs1aemp  
vdfs1vdttarqivalaqvntpqi1y1hv1spnkmpvks11ecvkckei1elvsdesfnei1kqk1dmyetig1t1svdreqq1  
amidk1k1t1kimdhi1sekw  
ptitnnw1yh1wagy1kti1fnk  
>tr|E5QUD2|E5QUD2\_STAAH  
mlfanfa1n1ti1qgggmsnsavffv1flkqatcntyfkevkiyh1gemdmkival1fpeavegqdnq11ntkka1glk1tf  
leergqefi1ladnged1d  
kh1pmdvi1sapfypaymtreriekapn1kla1itagvgsdhvd1laasehni1gvvevtgsntvs1vaehavmd1111rn  
yeeghrqsvegewn1sqvg  
nhahe1lqk1t1gi1fgfgr1gq1vaer1apfnvt1qhydpinqqdhk1skfvsfde1lvstsdaitihap1tpetdn1fdkd  
v1sr1mk1khsy1lvntargki  
vnrdalvealaseh1lqgyagdvwpqpapadh1pwr1t1m1prnam1tv1hysgmt1lea1kriedgvkdilerffn1hepfqdkdi1  
vasgriasksy1tak  
>tr|E5QUD4|E5QUD4\_STAAH  
mmmt1et1like1q1dph1vevdegtyyprt1fiq1l1fdgyfgeat1rknaevi1eavsqscl1ttgfc1lwc1lafstylenat  
qph1nnd1lqq11l1sge1lg  
atg1sn1pmks1fnd1lek1n1lehtyv1dgq1lvvsgrmpavsn1qedhyfga1skhessdefvm1filranqdg1t1vektn1flg  
vngs1atyq1t1lnq1vavpgs  
qi1thdakqfaat1rpqfiayq1ipig1l1sikss1elidaf1snaqngin1qyleydv1egfkkryr1q1reeyyailddgn1ts  
h1nelis1kkdigy111dv  
nqasv1vnggs1rayt1p1spqvrk1keg1fffa1l1tpt1rh1lgk1lea1lkg  
>tr|E5QUD6|E5QUD6\_STAAH  
mkr1si1ivi1gi1fi1tgc1dwqraskepsnnaqhqqviki1gyl1pithsan1mmtk11sqhnhpkyk1el1vkfnnwpd1md  
alnsgridgast1lielamk  
skqkgsni1kavalghhegn1vimgqkgmh1nefnngddyh1fgi1phrysthy111lea1req1kik1pghfsyhemspaempa  
al1sehritgysvaepfgal  
gek1lgkgt1khgddv1pdayccv1vl1rge11dqhkavaqafvqdykks1gfk1mndrkqsvdimthhfkqsrdv1tqsaaw

Tsompanidou\_et\_al\_Supplemental\_FASTA\_File

tsygdltikpsgyqeittl  
vkqhhfnppayddfvpepslykeasrs  
>tr|E5QUD7|E5QUD7\_STAAH  
mvgikrglvmikiqqqlqhhfghshkvihnfnldiskgeivtfigksgcgkstlInniggfihpssgrviidneikqqpspd  
clmlfqhnl1pwktindn  
irigfqqkisdeenaqlklvdlegrgkhfpeqlsggmqrvalcrahvhkpnvilmdeplgaldaftryklqdqvlvqk  
hktestiilvthdidea  
lsdrivllgegcniisqyeitashprsrndshllkirneimetfalnhhqvepeyyl  
>tr|E5QUE0|E5QUE0\_STAAH  
mngkkantinrykyfhvdhkiqqsskktlwasliitl1ftviefvgglvsns1allsdsfhlmsdvlalglsm1aiyf  
askkptarytfgylrfeil  
aaf1ng1alivisiwilyeaivriypqpiesgimfmiasigllvniiltvilvrs1kqedniniqsalwhfmgdl1nsi  
gvivavvliyftgwriidp  
iisivisliilrggykitrnawli1mesvpqhltdtdqiadiknidgildvheflwsittehys1sahvvd1dkkyegdd  
yqaidqvss1lkekygiah  
st1qien1q1np1depyfdk1t  
>tr|E5QUE4|E5QUE4\_STAAH  
mlganfvkilevstiakdqtqindkirake1rlisqdgeqigvkskrea1emaervd1dlvvvapnakppvarimdygkf  
kfeqqkkekemkkkqkiin  
vkeir1sptieehdfqtklkngrkfltkgdckvsi1rfrgraitheigqrvlekyadeckdiatveqkpkmdgrqm1im  
1aptaek  
>tr|E5QUE7|E5QUE7\_STAAH  
mskfdeqii1vpreii1fnnekntfngflnknklegqni1falsqyevkrrgdmeedpsyq1isyc1lenehgeilvyer  
1sgggear1hgqssigvgg  
hmdvppgaes1nev1rvnaqre1eeevgl1seqdsqnmeyig1finddnevgkvhigvfvkitvstndveaketdt1rikw  
vekgniesyddfetwsali  
1qd1  
>tr|E5QUE8|E5QUE8\_STAAH  
msdii1qfpnsskk1ykdkraeqdqnyd1myeyivqyerqfelteeiammckrm1yetgsfle1reetiv1lktgiqqyd  
almiyyvks1igleqyfea  
vevihqi1devkdhktrmalhp1kefaksk1iedekrltqsltdfdt1smreqth1ilklidnghfqfqtelyilksnm  
ysyn1is1mieylrfanc1t  
qel1tekygmd1tfvpan1kgleht1lkekvipnvm1et1negal1haeeah1imnhs1imiypidiet1fetnkwinaye  
cyfknml1g1kcel1qs1daf  
nfiqq1d1nnns  
>tr|E5QUF1|E5QUF1\_STAAH  
mkvnpnni1eli1savkedqypete1seval1sgrsnvgkstf1nsmigrknmartsqqpgktqt1nfynideq1ifvdvpg  
gyakvsktqrekfgkmi1e  
eyitkren1q1lvi1q1vd1rhdptqddi1mynylkhfdipt1victkedk1pkgvqk1hikniktq1dmdpddt1vsysi  
qnnkqqqiwn1iepyis  
>tr|E5QUF2|E5QUF2\_STAAH  
mgafqmhfia1sinhrtadval1reqvafrrdal1riahed1yetksilenvil1stcnrtevyavvdqihtgryyiq1rflar  
afgfevddikamsevkvgd  
eaveh1l1rvts1g1dsiv1getq1lgqirdaff1aqstgtt1gtifnh1lfkqaitfakrahnetdiadnavsvsyaavelak  
kvfgk1k1skqai1igagem  
sel1l1n1lgsgitd1tvvnrtienam1laakhqkyde1ss1pn1lesadivis1tsaqsyi1tnemieriaenrkqds  
1vlidiavprdi1epgisai  
tnifnydvdd1kg1lvdan1rerq1laaati1seqipaeihahnewvsm1gvvpviral1rekamaiqaetm1dsidrk1pgl1se  
rerk1iskhtks1iinqm1k  
dpikqake1ssdkksnek1elfqni1fdieakcpheqakqqkeskvkeisarri1fsfe  
>tr|E5QUF3|E5QUF3\_STAAH  
mqen1firfnei1llyl1isi1cyfydfvqkshkirs1lgiy1lgivv1lqtis1sifi1iqtkhip1lgs1sdvfy1tsw1li  
isis1l1n1likv1lnfsvff  
lnlig1t1l1gmnt1fqph1thytnkvqkiavvd1ll1vhig1lav1syvffalafvnallyimqyrn1kekrfdqkyfrigsva  
t1esivfyst1sgwi1lif  
si1lgtqwgvisvgeri1fidpkvil1ssiitvlygsy1llrinkw1nsryli1yyni1l1fcl1nmin1lffathfvn  
>tr|E5QUF4|E5QUF4\_STAAH  
mrkl1vgsrrsk1altqsqqfidk1kavepn1eieikeivtkgdrivdkq1skvggkglfvkeiqhel1feknidmaihs1  
kdvpv1pegl1t1l1gcipdr  
el1pfdai1skth1p1sq1lpegsi1igtss1lrrgaq1l1skypn1eikwirgnidtr1lek1qtedydai1laag1lrrmgwsd  
di1vtsy1ldr1dt1l1paiggg  
al1gi1ecrs1dde1ll1t1l1skvhndevakcvtaert1flaemd1gscqvp1iagyatis1dqkeieftg1limtpdgkerfeytmng  
tdpve1lgk1kvsnk1keqga  
yei1kr1neqh  
>tr|E5QUF8|E5QUF8\_STAAH  
miyrrn1fiv1v1sffis1illysshv1l1p1f1m1fg1pi1asi1icvk1vfk1ldikwp1f1l1sel1giv1l1gvq1ig1st1ftknv1mdikd  
nw1lsi1iv1s1is1illialvm  
afi1fk1kiar1intetai1svipga1tqm1lvmaeqdkran1lv1s1tqtsri1fvv1vpfi1syffhdgnmhangk1tkvlp

Tsompanidou\_et\_al\_Supplemental\_FASTA\_File

lsgvlnigqivilaiifi  
vylimskikfptfqllaplivlivwnfstgltftldhwllnmaqliymirigvqiahllsdlkgrlaiaitiqnimliig  
alimvyiihffdnnpinel  
flgaapggvnqivlvalatgadvamitsyhifriffilfiapginnyflkyrsnkred  
>tr|E5QUF9|E5QUF9\_STAAH  
midkissqicggknmnecafgtkdpvyl dyhdhvwgqplydskaifkllaesqhaglswltilkkkeayeeafydfepk  
vaqmtahdidrlmtfpniv  
hhrkkleai vnaqagylkieqafgsfskflwsyvngkpkdlqyehasdritvddtatqlskdlkqygfklpgvtfvsvfl  
eaaglydahlkdcpskprh  
n  
>tr|E5QUG0|E5QUG0\_STAAH  
memkpkypdpreveagryeewvknkyfkpsedksketyticippnvtgkhlhghawdttlqdiitrmkrmqgydtlylpg  
mdhagiatqakveaklneq  
gitrydlgrekflqadwkeeyasfiraqwaklglgldysrerftldeglskavkkvfdlynkgiyrgeriinwdpk  
artalsdievihedvqgaf  
yhfkyypadgegfiieattrpetmldtaivvnpnderykdvigktvilpivgrelpiladeyvdiidfgsgamkvtpahd  
pndfeigqrhqleniivmd  
engkmnkagkyegmdrfdcrkqlvedlkeqdlviki edhvsvghsersgavvepylstqwfvrmedlakrsldnqkt  
dridfypqrfehtfnqwm  
nirdwtisrqlwwghqipawyhetgeiyvgeeaptdienwqqdedvldtwfssalwpfstlgwpdlesedfkryyptna  
lvtgydiiffwvarmi fgg  
leftdrppndvllhglvraedgrkmskslgnvdpmdvideygadslryflatgsspghdlrystekvesvwnfinkiw  
ngarfslnmngedfkvedi  
dlsnsladkwiltrlnetiatvtdlskyefgevgrtlynfiwddfcwyiemskipmngndeeqkvtrsvlsytl  
nimrmlhpfmpfvtekiwq  
slphegetivkaswpevreslifeeskqtmqqlveiiksvrqsrvvntplskeipiliqakdkei ettsqnkdylikf  
cnpstlnistdveipekam  
tsvviagkvvlp leglidmdkeisrlekelaklqsel drvdkksnenfvskapekvineekrkqdyqekydgvkarie  
qlka  
>tr|E5QUG4|E5QUG4\_STAAH  
mtlfiigvlpvmvytmqlniknepvtrnllitlaltstlgilvta lagvivtkqafplsvaigsiitgivwgl lsgs  
yalirflsnafgrk  
>tr|E5QUH0|E5QUH0\_STAAH  
mitvdi tvndegkvtdvmdghadhgeyghdivcagasavlfgsvnaiigtserpdinyddngghfhirs vdtndeaq  
lilqtmlvs lqti eeyne  
nirlnyk  
>tr|E5QUH2|E5QUH2\_STAAH  
mfvdqvkislkagdgngitayrrekyvpfggpaggdggkgasvfevdeg lrtlldfryqrhfkaskgengqssnmhgk  
naedlvkvppgtiiknve  
tdevladlvedgqravvakggrrgrnsrfatprnpapdfsekgepgeel dvslelklladvglvgfsvgkstllsivs  
kakpkigayhfttikpnl  
vvstpdqrsfvmadlpgllegasdgvglg hqflrhvertkvi vhmidsmsgsegrepiedykvinqelaayeqrledrpqi  
vankmdl pesqdnllfk  
eeigedvpvipvstitrndidqll yaia dkleeykdvdftveeesvginrvlykhtpsqdkftisrdddgayvvsnai  
ermfkmtdfnsdpavrrfa  
rqmrsmgid dal rergckngdivrilggefefve  
>tr|E5QUH4|E5QUH4\_STAAH  
myayvkgklthlypthvvvetagvgyeiqtpnsyrfqkhl dhevlihtslivredaqllygfsseeekdmflslikvtgi  
gpkasalailatstpnvkr  
aienendtyl tkfpgigkktarqivldlkgkvki teedsdsl lqvdatsteqdqfvqeamlalealgyskrelakvektl  
nknkyds vdeavkagllv  
vs  
>tr|E5QUH6|E5QUH6\_STAAH  
mrrennvnieefdydlpesli aqtp lkdrdhsrllvmdretgemkhlhfkdiieyfrpgdtlv lndtrvmparlfglkee  
tgakvemlmltqiegn dwe  
vllkpakrikvgnkl nfgngkiaecikemdqgrimrlhyegilqerl delgemplpyikerl ddpdryqtvakesg  
saaaptaglhftdel ltei  
knkgvniafvtlhvgltfrpvs vddvndhemhseyyqmtqetadllndtkskghriisvgttstrtletirrdhdkfve  
tsgwtnfiyppgdfkaid  
gqitnfhlpkstlvm lvsafstrenvlnayktavnleyrffsfgdamlii  
>tr|E5QUI0|E5QUI0\_STAAH  
mikpkykwkltkpaeyisdeltsklkltpivkkilesksii deqai esis dtdinhdalqlsdmtktierikraiande  
kilvygdydadgvststl  
vtlql lgaqvgwhipnrftegygpnelaf rnahdegitliitv dngiqghneikmvqdlgvdivvtdhheigstlpeay  
aivhpmhpsfnypfqqlcg  
agvayklaqalienvpdyfkaivaigtiadlvsltdenrslvkqglkv lndqcptsvkallkeagyndnideetigfiig  
prlnavgrl ddasl acell  
mtddeeeaaflaeqveqfnrerkdivatiteamamaemkvkngdlflllakenwhegvlgivaskivetfalptlilni

Tsompanidou\_et\_al\_Supplemental\_FASTA\_File

dreqnhakgsarsidqvs  
feilsahqeliakfgghhmaagmtmdienieslaeglnkwmkelskttsl dpvkpvdvlltenditiknirdmnr l r p f g  
tdfsrpi femdd l svsvk  
aigqqknhlkl t l gesniaa l f w q n g h l e p e l q d e q p i n i l g s v q i n e w n g n q s p q l i i q d i a m n e q q i l d y r s k r k s l p  
ftendenivvli h p k s d k v  
naneyyygkeikqtdkvvlrdlptsmedl snslqqlqfsqlyivlqhnhsiyfdgipnmdvfkkykalitkqetniqk  
egml l c q h l s v k p d t l k f m  
lkvfl d l k f v t q e d g l i r i n q p d k r s i d s s k v y q l r q q r m d v e k q l l y q d f s e i k n w i k s q l s  
>tr|E5QUI2|E5QUI2\_STAAH  
mngvyhimneypysadevlhkaksylsadeyeyvlksyhiayeahkgqfrknglpyimhpiqvagiltemrldgptiva  
gflhdviedtpytfedvke  
mfneevari v d g v t k l k k v k y r s k e e q q a e n h r k l f i a i a k d v r v i l v k l a d r l h n m r t l k a m p r e k q i r i s r e t l e i y a  
plahr l g i n t i k w e l e d t a  
lryidnvqyfrivnlmkkkrereayietaidrirtemdrniegdingrpkhisyirkmmkqkkqfdqifdl lairvi  
vnsindcyailglvhtlwk  
pmpgrfkdyiampkqlyqslhttvgpngdp lei q i r t f d m h e i a e h g v a a h w a y k e g k k v s e k d q t y q n k l n w l k e l a  
eadhtssdaqefmetlkyd  
lqsdkyaftpasdvie l p y g a v p i d f a y a i h s e v g n k m i g a k v n g k i v p i d y i l q t g d i v e i r t s k h s y g p s r d w l k i v  
kssakgkiksffkkqdrs  
sniegrmmveaeikeqgfrvediltekniquvnekynfanedd l f a a v g f g v t s l q i v n k l t e r q r i l d k q r a l n e a q  
evtkslpikdnii t d s g y  
veg l e n v l i k l s k c c n p i p g d d i v g y i t k g h g i k v h r t d c p n i k n e t e r l i n v e w v k s k d a t q y q v d l e v t a y d r n g l l  
nev l q a v s s t a g n l i k v s g  
rsdidknai inisvmvknvndvyrvvekikqlgdvytvtrvwn  
>tr|E5QUI3|E5QUI3\_STAAH  
melevqnmkvvvrkveasvtdntlnnqikkgyc l l v g i g q d s t e q d a d v i a k k i a n a r l f e d d n k l n f n i q m n g e i l  
svsqftlyadvkkgnrpgf  
snsknpdqavkiyeyfnda l r a y g l t v k t g e f g t h m n v n i n d g p v t i i y e s q d g k i q  
>tr|E5QUI4|E5QUI4\_STAAH  
mkkieawl skkg l k n k r t l i v v i a f v l f i i f l f l l l n s n s e d s g n i t i t e n a e l r t g p n a a y p v i y k v e k g d h f k k i g k v  
gkwievedtssnek g w i a g  
whn l d i v a d n t k e k n p l q g k t i v l d p g h g s d q g a s s n t k y k s l e k d y t l k t a k e l q r t l e k e g a t v k m t r t d d t y v s l  
enrdikgday l s i h n d a l e  
ssnangmtvywyhdnqraladt l d a t i q k k g l l s n r g s r q e n y q v l r q t k v p a v l l e l g y i s n p t d e t m i k d q l h r q i l e  
qaivdg l k i y f s a  
>tr|E5QUI8|E5QUI8\_STAAH  
mstep lasrmpknideiisqhlvgprgi irrmvdtkkltsmi f y g p p g i g k t s i a k a i s g s t q y k f r q l n a v t n t k k d  
mqlvveakmsqgvi l l l d  
eihrldkakqdf l l p h l e n g k i v l i g a t t s n p y h a i n p a i r s r a q i f e l y p l n d e d v r q a l t r a i e d e e n g l k t y q p k i d  
edamtyfstqsgdvrsal  
na l e l a v l s a d n d k d g y r h v t l q d a k d c l q k g a f v s d k d g d m h y d v m s a f q k s i r g s d v n a a l h y l a r l i e a g d l p t i v r  
r l l v i s y e d i g l a s p n a g g  
rtlaaiesaelglpearip l s q a v i e l c l s p k s n s a m s a i d a l s d i r n g h v g q i p n h l k d g h y q g a k d l g r s i g y k y p  
hqyngyvsqy l p d k l k n  
kiyyepkttskserqlkeiynn l l k q r p  
>tr|E5QUJ1|E5QUJ1\_STAAH  
msfidkakkdavekfksndeqvknvkdkiney t g p n n e e k k e n e d k e k  
>tr|E5QUJ2|E5QUJ2\_STAAH  
msnli fi w l f d w y t s y i k k r k d d i k m a i k y s a l n l v p i r e g e d e r t a i n d m v k l a q h l d e l s y e r y w i a e h n a p n l v s s  
atalliqhtlehtkhirvg  
sggim l p n h a p l i v a e q f g t m a t l f p n r v d l g l g r a p g t d m m t a s a l r r d q h d g v y k f p e e v s l l q q y f g p a h q q a y v r a  
ypavgnvplyilgsstds  
ahlaarkglpyvfaghfapqmqkeaei eykt l f e p s d v l d e p y v i v c l n t i v a e n d d e a q y l a s s m a q m v s i t r g r m q p  
vqppthe l q n i l t p r e y a m  
amerqkis l i g s e n t v q q k i q d f m e t y g e v n e i m a i s y i y d k m q l d s y r r f k n v i n q l n e k n t l  
>tr|E5QUJ5|E5QUJ5\_STAAH  
midqqt i y q y i q n g k i e e a l q a l f g n i e e d p t i i e n y i n a g i v l a d a n e i e k a e r f f q k a l t i d p k n g v v f y n l a n v y y n  
q q r y q e s i k l y q q a l q t e i  
eqvdcn y m i g m a f n q l e s f k l a l p y l m t a a e l d k d k d a e v q f y g l v l c q l e m f n e a i t q l k h v l t i d k n h v d a r y n l g l  
al f m k n e n i d e a i t h f k e a  
vtidpkhl l s q h a l k t f t k m k e e e  
>tr|E5QUJ6|E5QUJ6\_STAAH  
msdpt l f d y s m i k g t v e a i l f q n s d n f y t v l k v d t i e t n e d f d t m p t v v g f l p n i v e g d v y t f k g q v d h p r y g k l k a e  
t f e k e m p q t k e a i i s y l s s  
d l f k g y g k k t a q n i v n t l g d n a i n d i l d d h s v l e k v s g l s k k k q k q i a e q i s a n q e s e k i m i r l h d l g f g p k l s m a i y q f  
ylgd l t i l d r n p y q l i y d  
ikgigfnkadqlarnigayndner l k a a l l y t l e e c i k q g h t y l p i n v v i d l t v d v l n y q d e e v i e p e k l d e m l q y l n  
eekr l i i d n e q v a i p s l y y

Tsompanidou\_et\_al\_Supplemental\_FASTA\_File

seiksvqnlfrikthtnklteieqsdlqmhigeiedanqvnyasqkealqtainskvmlltggpgtgkttvikgively  
aeihglsldyddyvnddyp  
vvlaaptgraskrlqestgleamtihrligwnqdtkpedileneinarliiidemsmvdtwlfhqflsavpldaqlifvg  
dedqlpsvpggqvfdlie  
skaiprvnltevyrqdgssielahrmklgqkiditqrfhdrsfincqanqiptvvekvtvsvankgytmdiqvlapm  
ykgnagikrlnqvlqdi  
pkkkdtreiefgdvvrkqdkvlqlvnrpdnifngdigvivgfwakenalnkdvlvdfegneitftkqdmmlthay  
ctsihksqgsefpivimpi  
vkqyfrmlqrpi lytglttraktslvllgdseafdiglktngqarltqlctllknyfnsededmlentatndtgasqttid  
dqveapmssnaseevtsds  
tktdtnvlteatmfkidpminmgeitpydfier  
>tr|E5QUJ7|E5QUJ7\_STAAH  
mmkklkaseirqkyldffvekghmvepsaplvpiddtllwinsgvatlkkyfdgretpkkprivnsqkairtndienvg  
ftarhhtffemlgnfsig  
yfkqeaiefawefltsdkwmgmepdklyvtihpedmeayniwhkdigleesriiriegnfdigegpsgpnteifydrge  
aygqddpaeemyppgener  
ylewnlvfsefnhkhdsytplnknidtgmglermasvsqnrtnyedtlfmpimneiekvsgkqylvneeqdvafkv  
iadhirtiafaidsgalpa  
negrgyvlrrllravrfsqtlginepfmyklvdivadimepyypnvkekadfikrvikseerfhetledglailneli  
kkakattneingkdafkly  
dygfpieleeivagaglkvdmttfesemqqrdrarqarqnsqsmqvqsevlknitsastfvgydtataqttlthliy  
ngeevsqveagetvyfmlt  
etpfyavsggqvadtgivyndnfeivsevtkapngqnlhkgvvqfgqvnvgatvsaevnqndrrrdiqkhsathllhaa  
lksvlgdhvnqagslvead  
rlrfdshfgpmtndeidqverlvneeiwkgidvniqemdivsakemgamaifgekygdvrvvnmmapfsielcggihvr  
ntseiglfkivsesgtgag  
vrriealtgkaaflyledi qekfntmksqlkvksdnqvvdktlqlqdeekallkqlqrdkeitslkmgniedqveeing  
ykvlvtevdvpnakairst  
mddfksklqdtiilasnvdksmvatvpksltnnvkagdlkqmapivggkgggrpdmaqqgggtqpeniskslsfikd  
yiknl  
>tr|E5QUK0|E5QUK0\_STAAH  
mtehnhsqleinnneeelltlfdeegnevlyrkvlefyhpefkkeyvilaegaqsdeddmielvpminepdesgdgkkl  
vpietdeewdmieevvnte  
mee  
>tr|E5QUK1|E5QUK1\_STAAH  
mddlnkkyli dlhghqns siev lrefaevnevpi vdr l t dl ik ql ir mn nv kn ile ig ta ig y ss m q fa si s dd ih vt t  
iernetmiqyakqlathh  
fenqvriiegnaleqfenvndkvymifidaakaqskkf feiytp l l kh q gl vit dnv ly h g fvs dig iv r sr nvr q m vk  
kvqdynewlikppgyttfnf  
lniddglaisikge  
>tr|E5QUK6|E5QUK6\_STAAH  
mqykggfrvdvr finegtimiyfenkiseetyrntamvrwirekeileiqdivpsyravliy fdeqaitpsklienlel  
nkfneknvhavnqtnsiik  
ipvqygytgyppdieevakhnritveqvi ekhtskpyliym l g f m p g f p y l g g l d e q l h t p r r n q p r l k i h a g s v g i a n n q  
tglypsdspggwqiigrtp  
lkvfsserepmsmyeagewiqfyaideqefiqierdisdgnfnvddwvvienvn  
>tr|E5QUK7|E5QUK7\_STAAH  
msikilqpglfstvqdlgrkgyehigfsgagamdqfsfkvaqslinndgpaieytligptiqfntqntfvitggsvnasl  
nktismnsvilaekgdil  
kigaitkgarylftghtinvppiaesyathtrssiggfkgkrl landvitvkinndfkenigktihlqddllpenniih  
ilqgpqfeafseearakiv  
nhpyliteqsdmgyrlegdsvapinqadiisevalgsqvvpndgqpiillndkqtiggytkiatvckfdlplklaqmkp  
qdtiqfkwisfqaevdknr  
eqmslfneilkshqktpifdtsslrhtskklatilkgdl  
>tr|E5QUK9|E5QUK9\_STAAH  
mlrclianrgeiavriiracreygi etvavyakgdeqslvhvhladqaicigeayal dsylnidriisaaqitganaihpq  
ygflsestkfaqtveeggi  
afigptkktmemmgdkitarqtvhhagvpvipgsndavnhvseieklakdigypvrikaasgggkggirivkkaedleka  
fkeaksegkkyfddrvyv  
eafipvakhvevqvmgdgdnyvhlgerdcsvqrknqlieespcaalteerrqqicndavkvaraanyrsagtieflvt  
dnahyfiemnariquehtv  
temraerdlvaaqlyllehnlpfsqndiqfnghvieurinaenpekkf qptpgkvta l h l p q g f n v r v d s l l y h g y q v s  
pyydslvakvivkshdras  
aidklratldemvidgfsttadflyavlnyplyrdgdakdvdkflekhqivkgvel  
>tr|E5QUL1|E5QUL1\_STAAH  
mgrnlklkhresdfektknhrlllgsvflmatsaigpafltqtavftsqflasfafaillsi idigaqiniwrlvvt  
glrgqei snkvvpplgtvi  
siliafgglafnignia g a g l g l n a i f g l d v k w g a a i t a i f a i l i f v s k s g q k i m d v v s m i l g i v m i l v v a y v m f v s n p p

Tsompanidou\_et\_al\_Supplemental\_FASTA\_File

ygdafvhtfapehpmklv  
piitlvvggtvggyitfagahriLdsgikgkqylpfvnqsaiagilttgimrtllflavlgvvvtgvtlssenppasvfeh  
aigpigkni fgivlfaaam  
ssvigsaytsatflktlhkslkersnlvivfivistmiflfigkpsllliagaingwilpitlgailiaskkksivgd  
ykhpnwmfifgivaavlvti  
ltgifs fkevlqlf  
>tr|E5QUL2|E5QUL2\_STAAH  
mgyrtlksifhehneskmkeeyikrfnsLasfntniniipmengkknvndleypffmvtknlskkqelisinsrkidra  
nslpyaareqyfnllide  
lqstneienvfstkqeiahalnqasdfkfrglvdqykeielnkkikvdnvrdiraiydklvsneineqdkldgelfrk  
nfvghdgstnkyihvglg  
petkiveyigemltflkyfdapqpfkimashymfeyihpfydgngvrgrfiiakllsdydnytaltsyvinrnkskyy  
kafmtasnhlncgdltfe  
dtmlelliaggerildelipkmdatekltlyltsykkidyeflyllsmdklfgnkrnrllidlenilgvgrvkinnti  
kkfgnylvkiksrtiyei  
sdeflnsiik  
>tr|E5QUL3|E5QUL3\_STAAH  
mgefeykyltgfilillegiftnsasaiaysdlhhksklskrllynakvsfanptdenkktndrllkhdllfhdmfln  
dawkkdlkvefenealskk  
finknidvyagsysyechggetnktqcsyggvtlsdnkyddyknipcnlwidghqteieltavkttk  
>tr|E5QUL4|E5QUL4\_STAAH  
myeqggdivkgyvkyhnddeknveydfynlgeyghvklmyadnktinsdklhldiyflks  
>tr|E5QUL5|E5QUL5\_STAAH  
maennqslvtkiatygsfiaiasfvilfisisflkfsfnieftatimnicrytlilgfilmslpdvvdknikiifdafi  
iivfiffll  
>tr|E5QUL7|E5QUL7\_STAAH  
mglvrkffmpnsyvqsi fqidldklvdkgvkgiitdldntlvgdvkeptervkawfkeanekgititivsnnesrvas  
fsqhl didfi fkarkpmgk  
afdkaiktmnirpdqtvvigdqltdvfggnrrglytimvvpvkrtgdgfitkfnrlierrllrhfskkyitween  
>tr|E5QUL8|E5QUL8\_STAAH  
msdlkicgcaplqsedknkpgfvpehnmfgddvicrrcfrlknvevqdvgl esedflklsgladkkgivvvvdf  
dfegsfinavkrivgnkki  
ilaankldllpkqinkrrvkewlkrarkygleaddvvlisaekgwiddllssianirenevdyivgttnvgkstlink  
lieasvgekdvvttsrfpg  
ttldmidipldetsfmydtpgi iqdhqmthlvsekelkiimpkkeikqrvyqlneaqtlffgglaridyvsggkrlpicf  
fsndlnihrtktekandlw  
rnqlgdlltpgnpqnfdlnevavrletgkekrdvmisglgfitigpgakvivrvpknvdvvlrnsil  
>tr|E5QUL9|E5QUL9\_STAAH  
mkfavignpishslspmhranfnslgl ddt yea lnipiedfhl likei iskkeldgfnitiphkeriipyldhvdeqain  
agavntvl ikdgkwiynt  
dqigvykghsvypdenayililgaggaskgiayelakfvkpkltvanrtmarfeswnlninqisladaekylaefdiv  
inntpagmagnnesiinlk  
hlspntlmsdiviipyktpileeaerkgnhinyngldmfvyqgaesfkiwtnkdadinsmktavlqqkge  
>tr|E5QUM0|E5QUM0\_STAAH  
maenrlqlkgsaetierfynrqgi etiegfqmfvktlntkdtdevkiltiwesedsfnwlnsdvfkeahknvrllk  
sdddqqspilsnkvfkyd  
igyhyk  
>tr|E5QUM3|E5QUM3\_STAAH  
mrkniliitgvhyignalkdklieqghqvdqinvrnqlwkstsfkydvl ihtaalvhnnspqarl sdymqvmlltkql  
aqkakaedvkqfi fmstma  
vygkegqvgsdqidqtqpmnptnygiskfaeqalqelisdsfkvaivrppmiygahcpenfqlmqslskrlpiipni  
nqrsalyikhltafidql  
islevtgvypqdsfyfdtssvmyeirrqshrktllinmpsmlnkyfnklsvfrklfgnltyyntlyennnalevipgkm  
slviadimdetttkdka  
>tr|E5QUM8|E5QUM8\_STAAH  
mnkiyntsylvialmfpcmlgdgkplflapisygvglfifsfnnpnfkfskivydvlgflrlvfpamivffqdsti  
dnlplggdyfnqaviymv  
efiigsflililsklfkhevsnrsftlsgssiyivfglvicgifvafpevrknisfliiktdamgrgteatsglvlf  
vmlfqlalallfliayas  
ykkykenpkiiyvilplaigilnislivgerrsyqlytmvavltvsvllfskhkriniiiisvgifvialmtlykelyv  
fnyssyealnstsvsnlk  
ivdtlqsyfygpsniaasidylnyngsfkqylfdntravfgfnffvdkkqlitsqlfnqliygsqktghlissagygi  
iyfgplffylnljianiffa  
flseyiirkshslevifigtyiymrlitsifshptplitlismilvvyviaaiipgiikkftkkvgie  
>tr|E5QUM9|E5QUM9\_STAAH  
mtmriailgatnikhmsllshylnhidlninevdi iytdkydieeniqqinnykykvdkedwtfikkaiayrfrpya  
mkilkenhydfviwgsyt  
ghlfksflekyhknkfilnirdyffennklykymkkivdasrltllssegflkflpksekyriiysynmsiiresnvt

Tsompanidou\_et\_al\_Supplemental\_FASTA\_File

efkkrwpinigfignvrfrn  
eingklike landsrfhmgyfgtgseklevfarenfinitfsggfleetpkylnaidilnnlfgnknialdtalsirm  
yyalflnkpiittddtfta  
teankfglgfsvnpenlkgigde lmdwynnlvmdinhkreayrndviennkqfyqeigrifne  
>tr|E5QUN1|E5QUN1\_STAAH  
mnivitgakgfvgnlkadltsttdhhi fevhrqtkeeelesa llkadfvvhlagvnrpehdkefslgnvsyl dhvldil  
trntkkpai llsssiqatq  
dnpysesklqgeqllreyaeygntvyiywrpnlfgkwckpnynsviatfcykiarnee iqvnnrnel tlnyvddivae  
ikraiegnptiengvptvp  
nvfkvtlgeivdllykfkqsrldrtlpkl dnlfekdlstylyslpstdfsypllmnvddrgsftefiktpdrgqsvni  
skpgitkgnhwhhtknekf  
lvvsqgvi rfrhvdneiieyyvsgdlevvdi pvygthni enlgtdmvtimwvnmfdpnqpdylllev  
>tr|E5QUN2|E5QUN2\_STAAH  
mtlvkkklltmpmakreimfddkillitggtsfgnavmkrflsdnikeirifsrdekkqddirkkynnskllkfyigdv  
rdsqsvetamrdvdyvfha  
aalkqvpsceffpveavktnigtenvlqsaihqnkvkviclstdkaaypinamgiskammekvfvaksrnirseqtlic  
gtrygnvmasrgsviplfi  
dkikagepltitdpdmtrflmsledavelvvhafkhaetgdimvqkapsstvgdlata lllfeadnaie iigtrhgekk  
aetlltreeya qcedmgdy  
frvpadsrdlnysnyvetgnek itqsyeynsdnthiltveeikeklltle yvrnelndykasmr  
>tr|E5QUN3|E5QUN3\_STAAH  
mikklf1nechnkiinrkdglgykqmqrgfmahlsvklrl1lilalidslivtfsvfvsyylepyfktysvkl1lilaaisl  
fishhisafifnmyhrawe  
yasvselilivkavtisivitmfvvtivtgnrpffrlylitwmmhliliggrlwfriyrkylggksfnkkptlvvgagq  
agsmlirqmlksdemklep  
vlavddehkrniti tegvkvqgiadipelvrkykikkiiiaiptigqerlkeinnichmdgvel lkmpaniedvmsge l  
evnqlkkvevedllgrdpv  
eldmdmsnelnktiltvgaggsigseicrqvcnfyperii llghgensiylinrelrnrfgknvdivpiiadvqnrar  
mfeimemykpyavyhaaah  
khvplmednpeeavrnni lgtkntaeaaknaevkkfvmi stdkavnppnvmgaskriaemiiqslndethrtnfvavrfg  
nvlgsrgsviplfksqiee  
ggpvtvthpemttryfmtipeasrlvlqagalaeggevfvl dmgepvkivdlarnliklsgkkeddiritftgirpgekmy  
eelmnkdeihpeqvfekiy  
rgkvqhmkcneveaiiqdivndfskekiinyangkkgdnyvr  
>tr|E5QUN6|E5QUN6\_STAAH  
mestleltkikevlqknlkilii lpl1lfliaivtffvlspkyqantqilvnqtkgdnpqfmaqevqsniqlvntykei  
vksprildevskdlnkys  
psklssmltitngentqliniqvksghkqdseki ansfakvtskqipkimsvdnvsilskadgtavkvapktvvnliga l  
flglvvaliyiffkvidk  
rikdeedvekelglpvlgsiqkfn  
>tr|E5QUN7|E5QUN7\_STAAH  
mltipekenrgskeqevaimidaladkgkka lealskksqeeinhivhqmslaavdqhmvlaklaheetgrgiyedkaik  
nlyaseyiwnsikdnktvg  
iigedkekglyvaepigvicgvtpttntptsttikami aiktgnpii fafhpsaqesskraaevvleaamkagapkdii  
qwi evpsieatkqlmnhkg  
ialvlatggsgmvksaystgkpalvgpgnvp syiektahikravndi igsktdngmicaseqvvidkeiykdvtnef  
kahqayfvkkdelqr lena  
imneqktsikpdivgksaveiaelagipvpentkliiaeisgvgl dyp lsreklspv lalvkaqstkqafqicedtlhfg  
glghtavihtedetlqkdf  
glrmkacr vlvntpsavggigdmynelips ltlgcsygrnsishnvsatdl lniktiakrrntqifkvpaqiyfeena  
ims lttmdkiekvmivcdp  
gmvefgytktv envl rqrteqpqiki fsevepnpstntvykglemmvdfqpd tialgggsamdaakamwmffehpetsf  
fgakqkfl digkrtykigm  
penatficip tsgtgsevt p favitdsetnvkyp ladfaltpdvai idpqfvmsvpksvtadtgmdvl thamesyvsvm  
asytrglslqaiklftfey  
lksvekgdkvsrekmhnastlagmafanaflgiahsiahkiggeygi phgranail lphii rynakdpqkhal fpyef  
fradtdyadiakflglkgn  
ttealveslakavyelgqsvgiemnlksqgvsee lnesidmaelafedqcttanpkealiseikdiiqtsydykq  
>tr|E5QUN9|E5QUN9\_STAAH  
minletikqevresivkigifagykydvnernervekkrmvisdayvytkshienqvakhlenfvkyikenagpswkylkfi  
fnkdeeknnimfilknedy  
fdeknsvgkslvadknqkskny legliaknsginfdtvgedfki rhqmtadsilfnikegsnrndinsyfl iityridke  
skqlaai kqwl pnpetnsa  
imvddltp lldkviveredyhidee lev lkn dgelefidvehafgisidedndmieser  
>tr|E5QUP1|E5QUP1\_STAAH  
mkniyksltvsai vatvlsalpqslai thesqptkqqqtvl fdrshgqtagaadwvsdgafsdya dsiaqkgydvkaid  
ghsniteaslksskifvip  
eanipfkeseqaai vnyvkqggnvvfis dhynadrnl nrisdsseamngyrrgayedmskgmnaeeksstamqgvkssdw l



Tsompanidou\_et\_al\_Supplemental\_FASTA\_File

stnfgvrfrynalgdInts  
nivsskesfgitegvksvsmhagstlaintpekakgivytpqelpakskwshavdqgiyngggkaegpyvai skvgkga  
afigdsslvedsspkyvre  
dngekkktydgfkeqngkllnntawmskdndgkslkasgltdtktkllldferperstepekepwsqppsgykywdpt  
tfkagsygsekgadppnt  
pddhtppnqtekvsfdipqnvsvnepfevtihlkgfeanqtlenlrvgiykeggrqigqfsskdndynppgystlptvka  
dengnatikvnakvlesme  
gskirklgdktlittdfk  
>tr|E5QUP2|E5QUP2\_STAAH  
mknfkcflvmlavivfaaacgnssslndqknasndsdsksqgykpkeltvqfvpsqmagtleakakplekllskelgip  
vkvsstnyntiveamksk  
kvdvflpptytlahdqkaadlllqaqrfgvkedgsaske lvsykseilvkkdskikslkdllkgkkialqdvststagy  
tflamlkneaginatkdmd  
kivnvkghdqavisllngdvdaavfndarntvkkdqpnvfkdrilklqtqipndtisvrpmdkdfqeklkafidia  
kskeghkii sevshgyt  
etkdsnfdivreyeklvkdmk  
>tr|E5QUP4|E5QUP4\_STAAH  
mpletptkydslkkkvsllktsftfmlivliiwsfiytgfnfgdlmigipqigdlfkqmippdfeylqqittplmdtir  
maivstvlgsivsipl  
casnivhqkwisipsrfilnivrtiplllaaifvavfgigqipgilalfilticiigkll yesletidpgpmeamtavg  
ankikwivfgvppaissf  
msyvlyafevni rasavlglvaggiglyfydqtglfqypktatiilftlvivvvidyistkvrahla  
>tr|E5QUP9|E5QUP9\_STAAH  
mvrqidkllkyweeyfmkstphikpmndveiaetvllpgdpl rakfiaetylddveqfntvrnmfgftgtykgkkvsvm  
gsgmgpsigiysyeliht  
fgckkllirvgscgamgenidlydvivaqgastdsnyvqqyqlpghfapiasyqllekavetardkgvrhhvgnvlsdifi  
ynadttaserwmmrgilgv  
emesaalymnaiyagvealgvftvsdhlhetsttpeereraftdmieialslv  
>tr|E5QUQ3|E5QUQ3\_STAAH  
mkrwkgivmksdslkeniyyqglyqlirtmtplitiipiisrafgpsvgvsvsfnivqyflmiasvgvqlyfnrviaks  
vndkrqlsqqfwdifvskl  
flaltvfamymvvtifidyyli flllqgiyiigaaldiswfyagtekfkipslnivasvivilsvvifvkdqsdlsly  
vftiaivtvlnglplfiyl  
kryisfvsvnwihvwlfrsslayllpngqllnlytsiscvvlglvgtyqqvgifsnafniltvaiimintfdlvmpirit  
kmcicqshsltktlannm  
iqllitipmvfgliaimpsfylwffgeefastvplmtilailvliiplnmlisrqyllivnkirlynasitigavmnlvl  
clvliyfygiygaaiarli  
tefflliwrfiditkinvklnivstiqcviaavmmfivlgvnhylpptyatllliaigivvylllmmtmknqyvwiil  
rhlrhkti  
>tr|E5QUQ5|E5QUQ5\_STAAH  
mkiicyitkadnggaqthliqlanhfcvhhdvyyvgnhgpmieqldarvnviiiehlvgpidfkqdilavkvl aqlfsk  
ikpdvihlhsskagtvgr  
akfiskskdrvftahgwaftegvkpkkflylviek lmsritdsiicvsdfdkqlalkyrfnrklklttihngiadvpa  
vkqtlksqshnnigevgm  
lpnkqdlqindstkhqfvmiarfaypklpqnlaaieilklnshhahftfigdgptlndcqqqvqaglendvtf lgnv  
inashllsqydtfiliskh  
eglpisiiamatglpviashvggise lvtngicivnnqpetiakvleni  
>tr|E5QUQ9|E5QUQ9\_STAAH  
meknveksfikiglyfqiayivlmaitelcgfvicyglifglfyllsgsradylivtivisaisifviilsivpvivlas  
dlfkerisngvilivlaii  
alvlcnfvsaillwfvsaibilgrkklvstsdtttiqsksgnanqashkdtckkeldsqdmmehpefnpttknle glnee  
vhkdeattkvdsdntepi  
eskdhvskkd  
>tr|E5QUR4|E5QUR4\_STAAH  
mqnkelighaayaaierilneyfreenlyqvppqnhqwsiq lsel etltgqfaywsamghmyhpevwlidgskkltty  
keaiarilghmagsadnqt  
avqqhmaqimsdidsihrtarylqsntidyaedryivseqslylghpfhptpkasgfseadlekyapechtsfqlyhl  
avhqdvlltryvegkedqv  
ekvlyqladidiseipkdfillpihpyqinl rhpqymqysegglikdlgvsgdsvyptssvrtvfskalniylklpih  
vkitnfi rtdleqierti  
daaqviasvkdevetphk lmfegyralpnp lqgtvepemdllt nsamivregipnyhadkdi hvlasl fetmpdspt  
sklsqvieqsglapeawle  
cyl drtllpi lklfsntgisleahvqntlielkdgipevcyvrdlegiclsrtiatekqlvpnvvaasspvvyahdeawh  
rlkyvvnhlghlvstig  
katrnevvlwklvahrlmtwkkeyannavfidcedlyqtptiaakanlmsklndcganpiythipnpi chnkevscyces  
nns  
>tr|E5QUR9|E5QUR9\_STAAH  
mnkvikmlvvtlafllvlagcsgnsnkqssdkdkettsikhmgtteikgkpkrvvtlyqgatdvavslgvkpv gaves

Tsompanidou\_et\_al\_Supplemental\_FASTA\_File

wtqpkpfeyikndlkdtki  
vgqepapnleeisklkpdlivaskvrnekvydqlskiaptvsttdtvfkfdttklmgkalgkekeaedllkkyddkvaaf  
qkdakakykdawplkasvv  
nfradhtriyaggyageilndlgfkrnkdlqkqvndgkdiqltskesiplmnadhi fvvksdpnakdaalvkktesewt  
sskewknlavknnqvsdd  
ldeitwnlaggyksslkliiddlyeklniekqsk  
>tr|E5QUS0|E5QUS0\_STAAH  
mllkpkyyqivjaglc laivails lmigntlvspgtvialfnfdsendlhdvvtgarasrtiaalltgaalavsgllmqal  
ltnpiaspplfgvnagav  
ffvifsitfqi qsfkmi vviaflgai vvtlvvalgmfrqtlfsphrvilagaaiam lftaftqgilimnetdlqglf  
wlsqsvslrniwdipwiiip  
lvllililifafmaahinilmstddiatglgniklikwmiimlismlagisvavagsivfvglivpniskrllppnyky  
ipftaltgailmiisdiva  
riiikplelpigvvtavigavliylmkkgrqr  
>tr|E5QUS2|E5QUS2\_STAAH  
mhiqgdrtmkynnhdkirdfiiieaymfrfkkkvkpevdmtikefilltylfhqgentlpfkki vsdlykqsdlvqhk  
vlvkhshyiskvrskidern  
tyisiseeqrekaervtlfdqikqfnladqsesqmi pkdskeflnlmytmyfknikkhltsfveftilaiitsqn  
knivllkdlietihhkypq  
tvralnnlkkqgylikerstederkilihmndaqqdhaeqllaqvnqlladknhlhlvfe  
>tr|E5QUS3|E5QUS3\_STAAH  
mmtlqihgtginlkkknisyirklgvgiasvtlgtllisggvtpaanaaqhdeaqqnafyqvlmpnl nadqrngfiqs  
kddpsqsanvlgeaqkln  
sqapkadaqqnkfnkdqqsafyeilnmpnlneeqrngfiqs kddpsqstnvlgeakklnesqapkadnnfnkeqqnafy  
eilnmpnlneeqrngfiqs  
lkddpsqsanllaekkl nesqapkadnkfnkeqqnafyeilhlplneeqrngfiqs kddpsqsanllaekklndaq  
apkadnkfnkeqqnafyei  
lhplneeqrngfiqs kddpsvskeilaekklndaqapkeednnkpgkedgnkpgkednkkpgkedgnkpgkednkk  
pgkedgnkpgkedgnkpgk  
edgnkpgkedgnghvvpkgdvtvndi akangttadki aadnk ladknmi kpgqelvvdkkqpanhadankaqaalpetgee  
npfigttvfgglslalgaal  
llagrrrel  
>tr|E5QUS6|E5QUS6\_STAAH  
mdmysygyneafarpkkpenvenksayligsglaslaacflirdgqmegskihileelpkaggsldgenmplkgyvvr  
ggremenhfeclwdlfrsi  
psleidhasvdefywlakedpnysrcrviekqqrvtgdgftlktakeildlcltneedl ddkitdvfsdfffns  
nfwi ywktmfafepwhsam  
emrrylmrfvhhiggladfsalkftkynqyeslvlpmveylkshgqvfe ydvkvdikvdttsqkiareilidrngnae  
sikltindlvfvtngsite  
sstygndtpapptdelggswtlwknlarqspefgnpdkfcqnikpkkswfsatsttnkdiidtiesickrdplagktv  
tggitindsawqisftin  
rqqqfkdpkneistwiyalydvngdyikkpitemcsgneicqewlyhlgvptdkiedlakhasntipvmpyitsyfnt  
raigdrplvvhqsqnlaf  
ignfaeterdtvftteysvrtameavyqllnidrgipevinstfdlrvlmdavye lndhqdlreitkdkmqklalagfl  
kkikgtyiesllkehkl  
>tr|E5QUS7|E5QUS7\_STAAH  
memsvtevfisflgglgiflyglkimgdglqasagdrldilnkftsnplvgviagivvtiliqsssgttvitiglvtag  
fmltkqagvimganigtt  
vtafiigidlgeyampilalgaflifffkrskinnigrilfgfgslffglefmgdavkplasl d gfkqlmldmstnpila  
vivgagltalvqssatig  
ilqefyqqdlislnaai pvlldgnigt titailaslagsiaakraalvhvifnligviiftifl pvvihlisllqdvwhl  
kpamtia vshgfnitnt  
iqlpfvaglawi vtlvpgkdiaddykpqhlnkdlyvhagvalqetqkelqnvqgivilsmfedireitkddkklkkle  
qkhqavetindsirnylv  
istkai tkadverlavmfdvnr silkvaelteeyvaqlkrqhdediritedaqrmdklfnhvaesfdkaidml dvydkt  
kkdeiversresfniehk  
rkghikrlnrgecttkggll yidmigvlerigyhsrnvsealvg lnddvptdeeiattei  
>tr|E5QUT1|E5QUT1\_STAAH  
mmkrlnklvlginllflvisitagcmgkeaeiksfektlsympiknledlydkegyrddqfdkndkgtwivrssmsiq  
pngkdmnvkgmvl ymnrns  
rttngyyvvdvierdkgihrdnekkypvkmvdkniiptkdikdenikkeienfkffaagygsfdl skykdgd isynpev  
psysakyqltnddynvkq  
rkrydipntkapklllkgtnlgkssvgykdi eftfvekkgeniyfsdslhlepse  
>tr|E5QUT2|E5QUT2\_STAAH  
mkkciktfls iilvmmggwyhsahalsl skspenwmskl deskhlteimpgshdsgsftltdpvksvwaktqdkdy  
l tqmksgrvffdirgrad  
nmi svhgmvy l hhelgkfl ddakyyl saypnetivmsmkdydsdkvktkfeefreyyynpqqyqlfytg snanpt  
lketkgkivlfnrmggyti

Tsompanidou\_et\_al\_Supplemental\_FASTA\_File

ksgygadtsgiqwadnatfetkinngslnlqvqdeykdydkkveavknllakaktdsnkdnvyvnflsvasggsafnst  
nyashinpeiaktikang  
kartgwliivdyagypwpgydivseidsnk  
>tr|E5QUT4|E5QUT4\_STAAH  
msqlldntlsawllieslspgevnftaedilsaenfknqakqaqlsfdeyfeiwnderfiiseekseigeiifkfyrc  
fryneinlkiqdidysd  
ihnpngthcygytfnidkhgqvivdsihipmimsalkeieknknanieekfndsvekfvqkvkeiladepinefklkmd  
iaydeyfsvlnskkgdifa  
hyvaiyvkdsdlppqefnsffisdielkarkspnqtliidyiegvieskrievdenkemfdkflhpsrldgrwpsqtefr  
lslmqqlavnqitsgneri  
ssvngppgtgkttllkdi fahlvvergkelaklnpkdafvktktthetddkyvllkesiakykmvassnngavenisk  
dlpkieeii rnpckckfpk  
yeqnyanlahelkdfaeiaedligesawglfsgvfgkstinqvlshmlkqdandigfakllqnennrmsynelmsewqs  
hrafleelrhvemlkees  
iraydvykncesyskvehelnskkmnvkeklnhleiqiscdnkeiedlldrinyntkqletlneliksirdsnkgfvnkl  
kaifnseederykkhnaek  
qqllgqqielekckkiknedlvsklkekeklikqltkvqlqldelnsqqlqleayrieskitipekdfwsdnyderqvt  
nlwtsdelqyrramflra  
milhkl111jannttiyyaindfksrrklidanpdkvhnawnvmhli fvpvsttfasfksmyggipkdfidylfideagga  
ipqaavgal frskkvavg  
dpiqiepvvtleshlidnrknyvpeylvskeasvqsvadnanqygfwksdatdsnqktwigiplwvhrclkmftia  
nqiyannkmvlp snitng  
ktgwydvkgnsvqkqfvkehgekvlellandwfeaikegknepsfvispfsavqkqvkrilkkqlptridierktinqw  
vdksigtvhtfqgkeaqv  
yfvigtndtqdgavnwscekpnllnvavtrakkefyvigdmqriqskpfyetikernvk  
>tr|E5QUT5|E5QUT5\_STAAH  
mayttiglsiyglslvlvhttkiymdeggvryyygsfvmkqaggyaylalavlstllivakkatknkkietvdntnit  
er  
>tr|E5QUT6|E5QUT6\_STAAH  
mlislvipvfallviggiiwmiiegivhis kknkaidnffnkvnkvsetykfattflflilatagisqfylyyivseflf  
llviftfgiagiiflmpyg  
lcf1plykqkrktdi  
>tr|E5QUT7|E5QUT7\_STAAH  
mikhtegaitmatekdvndflnhvnsnavktrkmmgeyivydgvvigglydnrl1vkatsarhqfdnalvspypg  
akemilipdfaeatnitnl  
fecikndlkn  
>tr|E5QUT8|E5QUT8\_STAAH  
mkenfwselprpffi lapmedvtdivfrhvvsearpdvffteftntesfchpegihsvrgrltsedeqpmvahiwgdk  
peqfretsiaqlakmgfkgi  
dlnmgcpvanakkkgksglilrpdvaeiiqatkagglpvsvktrlgyyeidewkdwlkhvfeqidianlsihlrtrkem  
skvdahwelieaiknlrde  
iapntlltingdipdrktglelaekygidgvmigrigifhnpfafekprehtckelldl1rlhslfnkyekdeirqfs  
lrrffkiyvrgirgaelr  
hqlmntqsiaraaldefeaqmdedvklel  
>tr|E5QUU1|E5QUU1\_STAAH  
mnhqhgdfyemnnfnvyfeykgftvnivsstihthgdgkslkgshvslipidgvdvvtgadfgdlpfsvmpivpkdn  
spvihdmngdfhaiyvndy  
lfyvrkmgkdndnldhtmkwn  
>tr|E5QUU2|E5QUU2\_STAAH  
mknaimevvyinfegleqylngdntryntlsletlnyylkqyvltpvfknmdvqngmkvsaevkdi  
>tr|E5QUU3|E5QUU3\_STAAH  
mrnyafnidlkqrnrviavvmigafvgvlntlmttilpeimkdfvssstaqlttifmlvngimipitaflierftl  
rslffnatcflmigsfcm  
lginfpmlllgrsiqalgagilmp1tqtllfimfppekrgmamgmglvigfapaigptaagwfvnifdwrylflvllli  
gmidfvgylslpnlitel  
kpnldklsvilstvsfggllygfstagnlgwshpmvyitii aavilvtvfifrqklespllefrvfykndfsvamiliv  
lmfmlfignltlpiymqt  
mmkwspllesglllpgglimgl1spvtgklfdkiggrilsimgl1timigallmaqfsqnttqlyviisfsvtmlgnami  
mtpmttqalna1prqyah  
gtamnntirqvsaaigtgilvtlmtglgtsslsgsqglihglditfyvaliafigttaaiffirkh  
>tr|E5QUU5|E5QUU5\_STAAH  
mtifnggdmtetkaidthahlwnedyldklglkgsqgtevakginqsaskedlekrfkmmddagvdlqisatpqpqw  
gtkeeahqsaeindlyer  
lvqqypdrflaygavslpyvdqaeieaqa1lkkdefvgiaiptivkdkvsvadkqfepffaamnelnatiyihptgcgaq  
splvndyglewvigaples  
tfitlqlikneipqkypnikfhisllggalpffmtrikdnyedwnafnidpyevlnrqfwydtanfhepslinsietfgk  
dkfmmgsdfpyfqdekytr  
gvdyiknsnidpdingilrgnaiefyqieenhnh

Tsompanidou\_et\_al\_Supplemental\_FASTA\_File

>tr|E5QUU6|E5QUU6\_STAAH  
msfsnkiasaaiidrfvhskvfkigtgsnr1kdyktekslni  
>tr|E5QUU8|E5QUU8\_STAAH  
minikniyym1syaftv1nkkgqyklateqfenifdlysaillikgissqlnsglhheyieqtdslkvirgkvdvknsiqg  
lgv1sgrinci ydefslnt  
ymnkilkttmkcliktdisrknkiklrl1vhfnvdtldyrniqwysfdrnnqtykmlisicylifqgviqteskgqn  
dlmvfvdqqisrlyekfi  
leyykefpe1vvtssniqsw1dnddnvm1pvmrsdim1rykdkcliidakfyknt1hnyydtkkihstnlyqiftyvk  
nqqln1kkkaiqvsgm1ly  
aktdeniv1ndkfhmmsgsqiiktld1ncnftiikns  
>tr|E5QUU9|E5QUU9\_STAAH  
mkc1dktwvsyykeladkltdyqnkryelieivkevykktgikfptlasdnv1mdidpftifalfnkmsmretnkvkilt  
elase1nikskipsvfdsi  
ptvnn1natyynfkdygkndndietlwtlftaalnfanypsednk1kfihsfdknitktgngnskitsglywiapetfanf  
dsrsiwyifdytklpekeli  
neqlkpekeltgrhyle1inm1kqv1kcqeveindfid1syeswhysemineanrnkfsdnikeivvsendniiqnrsrt  
tkvipygkqef1devfide  
sdydr1vq1lrrkrnvi1qgppgvgtflakrlaysligskckerikliqfhsysyedfimgyrptssgfelttgtyd  
fckkadkdrdneym1iide  
inrgn1skifgel1miesdkrdeeli1lysgerfsvprniyivgmmntadrs1aildya1rrrfafynmqapafhttkfk  
k1lkainntelesvincie  
glnkeivqddm1nggfvihsyfsniiec1dkde1sniefeiipmleeywfdpskinvwseklrnsinnd  
>tr|E5QUV0|E5QUV0\_STAAH  
mltgkqkrylrs1ahnidpifqigkgginenmikqiddtlenrelikvhv1qnnfddkelaet1sgathselvqvigsm  
iviyreskenkeie1p  
>tr|E5QUV1|E5QUV1\_STAAH  
mkri1vlyggqfnpihtahmivasevfhelqpedfyflpsfmsplkkhhdfidvqhr1tmiqmvidelgfgdicddeikrg  
ggsytydtikafkeqhkds  
elyfvigtqynq1ekwyqiey1kemvtfvvnrknsqnvengmiaiqiprvdisstmirqrvskgksiqlvpksven  
yikgeglyeh  
>tr|E5QUV2|E5QUV2\_STAAH  
mniekkr1akeklpekrynhs1rvaetaik1aeiydgdtskvelagv1hdfckyddl1gkmyqivrqyelgnd11sygse  
ilhgpvcaaimhehygind  
eev1maikyhttgrqmtktek1ifiadyiepgrtipgvddirdmaynqgs1dktiyeiskrtvl1fliqkditvynktid  
c1nyynsderikdd  
>tr|E5QUV4|E5QUV4\_STAAH  
msqyaems1vydq1tdqpyekwfeivknhckdesni1digcgtgs1tvq1lea1gnvtgmd1svdm1tvaqaaksanvwl  
egdmtsfd1qqqfdiitf  
cdslny1qdetavietfinvyrh1adsgvfi1dvhtvykmm11fnnqsyiddkgdi1lawdavqgd1plsvyhdmtffir  
hedetysrfdeshfqrtd  
ekty1sw1tqvgfkhvetftdfnidehndaer1ffiakk  
>tr|E5QUV5|E5QUV5\_STAAH  
mvllyqf11rykdf1aqwklyi1sav1imv1igfi1fwrqddytsrdfenkdtvlkqstsenss1sk1edvqvkdgdnsk  
nkgpvyvdi1kgavkhpvy  
kmtskdrvd11dkaq11ddadvsqin1sek1tdqkmi1fiphkgqknvepqfgansvhvknngntntkvn1ntasvselm  
svpgvgakanaiveyrnq  
qgafqeidd1kkvkgfgsktfdk1nsyftt  
>tr|E5QUV6|E5QUV6\_STAAH  
mnilerikweeyfmaqsh11alrstcqr1svgativkdnri1aggyngsvagevhc1degcliedghcirtihaemna11  
qcakqgvstegatiyvthf  
p1nctks1iqagikriyyaedyhneyatk11kqsgiefkkipfspeyvaeyl1tkg  
>tr|E5QUV7|E5QUV7\_STAAH  
mlyvalsmivglwsskv1stf1fi11lyiayrknkivyapis1fliifsswylhysqqai1fnyinyiernsqfneraq  
v1qiqrggsdytkgr1slk  
neiyppf11tnknfd1kkiesrncivkgqfkvndnkfv1kl1qsivvqsclesnrsn1iekhkqfimmriydsgikfpdr  
imalitgdvkeineqfker  
vkeigiyh11avsgshiaaivfliyqplkr1n1plfvikgitiiv1al1faqytnyapsavraimtt1v11itnqikikg  
iq11afafiimfi1nplvv  
ydgfqsfi1sffim11fp1lqq1sk1qs1fiitfiaqlasfivaipnfhq1qvwgflsn1lifvpyysi1lfp1silff  
itshfi1v1tp1ny1vd1s  
fnfhdw11d1ftrikqshfsvpkfn1dwi1fi1fi1svy1f1w1lakrky1lvt1wti1i1t1l1itfptnshhkitm1nvqg  
gds1lyeggknqnv1idtg  
gkviddtkqpsysiskyh11pt1nergineley11lthphndhigeleyi1shikikhiviynkgysnt1m1l1sk1shk  
ynik1mdvrqvssfk1gds  
sf1ffdsfipnsrdkneys1itmi1tyqnkv11mgdasknnes111kkyn1peidi1kvghhgsktssskefiemikpki  
s1issgknnmyh1pn1ievv  
kr1qr1rs1rynsqngqvtid1ddn1kvdsnsygnasg1  
>tr|E5QUV8|E5QUV8\_STAAH

Tsompanidou\_et\_al\_Supplemental\_FASTA\_File

msdnivaiygdvpe1vekgsaeiisqflksdrddfnfvkynlyeteiapiveetltlpffsddkailvknayiftgeksp  
kdmahndq1iefiekydg  
enlivfeiyqnk1derkk1tktlkhar1kkieqmseeekkwiskl1nenfkdirda1d1fieltginfnivsqeiek  
lilflgdrptinkqdvngi  
inrs1eqnvfl1teyigkrkkeqaih1vkd1itmkeepik1lalitsnyrlfyqckilsqkgysgqqiaktigvhpvrk  
1alggvrhyq1dgl1niid  
acaetdyk1kssymdkq1ile1fils1  
>tr|E5QUW2|E5QUW2\_STAAH  
mitdrq1silnaivedyvdffgppvgsktlierhlnvspatirnemq1ledlnyiektshssgrspsqlgfryyvnr1le  
qtshqktnklrrlnq1lve  
ngydvssaltyfadelsnisqyttlvvphnkqdiinnvhliranpn1vimvivfssghvehvhlasdipfsndklntis  
nfvtnkltefnq1qddiv  
sfvqseeeifinkl1ntmnnhisnqnsiymggkvklidalnesnvssiqipilqyiesnriaellqdispninvkign  
eids1sdisivtsqyhfd  
et1kgq1avigptamhyqnv1q1lnriw  
>tr|E5QUW4|E5QUW4\_STAAH  
mikwrnfimski1gid1gtnscvtv1egdepkviqpegsrttspvafkngetzvgevavrqaitnptvqsikrhmg  
tdykvdi1egksytpqeis  
milqn1kntaesylgekvdavitvpayfndaerqatkdagkiagleverineptaaalayg1dktdkdekv1vfd1gg  
gtfdvs1ile1gdgvfev1s  
tagdn1l1ggddfdqvi1dylvaefkkengvd1sqdkmalqr1kdaaekakkd1sgvsqtqis1lpfisagengp1hle1vn1  
trskfeelsds1irrtmep  
trqamkdag1tnsdidev1lvggstripavqeavkkeigkepnkgvnpdevvamgaai1qggvitgdvkdv1l1dvtp1s1  
gie1l1ggrmnt1ierntti  
ptsksqi1ystavdnqpsvdvhv1qgerpmaadnkt1grfq1tdippaergkpqi1evtfdidkngivnv1takd1gtnkeqr  
itiqsss1sdeei1drmvk  
daevnaeadkkrreevd1rneeds1vfqvekt1td1genigeedkksaeekkdal1kta1legqdi1edikskke1ekviqe  
1sakvyeqaaqqqqqagga  
nagqndstvedaefkevkd1ddk  
>tr|E5QUW5|E5QUW5\_STAAH  
makrdyyev1giskdaskdeikkayrk1skkyhpdinkeegadekfkeiseayev1sddnkrasydqfghdgpqgfgggg  
fngsdfggfsgfsggggged  
ifssffgggrqrdpn1apqkgdd1qytm1t1feeavfgttkeisirkdvtcetchgdgkpgtskktcsycngaghvaveq  
ntilgrvrteqvcpkngs  
gqefeeactchkgktenktvk1evkvpegvdneqqir1agegspgvnggpagd1yvfvrvkps1etfkr1dgd1diy1k1nv  
sfpqaal1gdeikipt1lne  
vm1tipagtq1gkqfr1kekgiknvhygygd1yvdi1kvvtptk1tdrqkelmkefaqlngee1ndqpsnfkdrakrffk  
ge  
>tr|E5QUW7|E5QUW7\_STAAH  
mnnvqryfidqnadvsgrffitkkedi1h1tnvmrydvgski1l1tfn1dq1tvy1lceiaditsdkia1vd1kekqn1tel1pv  
dvticsg1likadkyew1l1q  
kate1gassfiavsmersivk1neakvakkierwqkiikeaaeqsyrlvipsiqfesnlklicdtidnydyiliaheea  
kdge1snfkq1lqfkaq  
kv1mifgpegg1seneis1fsntstvg1gpril1raetap1yalsaisyeke1mg  
>tr|E5QUW8|E5QUW8\_STAAH  
mstvafht1gckvnhyeteaiwq1fkeanyervdfeanadvfintctvtntgdkksrq1irrairqnpdavicvtgcya  
qtssaeime1pgdv1vvg1t  
qdrhk1l1gyidefrkerqpingvgnimknrkye1ldvpyftdrtras1k1qegcnnfctfciipwarg1mrsrdpekvve  
qatq1vnsgykeiv1tgi1h  
tgyygd1kdyn1aq1l1rd1leting1eririssieasq1tdevidv1lerstkvvrh1hiplqsgsd1v1lkrmr1rkytmdr  
fser1tk1lhka1lp1lavts  
dvi1gfp1geteeefqetydfivkhkfse1hvfypsprigtpaar1mddqideeiknervhklit1snq1lgklyaskfdqdv  
1evipeeg1dtegt1vgya  
dny1mkvq1fegdes1ligqivkkitqanyp1negqai1kvvd1fatnksdrev1v  
>tr|E5QUX3|E5QUX3\_STAAH  
mpgi1qi1ddm1nqsa1lignndeh1kaieesfdvvi1hargqevavkgtkienvekaesv1in1l1kvid1gnnit1kdveaa  
ikmahnt1iqh1l1d1lydee  
itkda1fgkt1raktmgqriyvnamknnd1lvfg1gpagt1gktflavvyaakq1l1rkg1tvkriv1l1trpaveages1gfl1pgd1  
kekvdpy1l1rplyd1g1lytv1  
greqterfi1er1gi1e1iap1laymrgr1ledafv1l1deaqnt1thaqmk1mfl1tr1l1gfgskmvvtgd1qtqid1l1pkgvks1g1lea  
vsr1l1hvk1gis1l1kl1dqsd  
vvrh1pl1vski1iehyegen  
>tr|E5QUX8|E5QUX8\_STAAH  
mrqkgi1i1kavdygesdki1iti1neygakvpl1marrakkvktg1l1qaqtq1l1fvyg1fi1ynkwrgmgt1nsvdvisqhyk1q  
mdlyvssyas1laetiers  
mdegdvapynyq1l1qf1vlekie1sgtsaq1l1msvv1ml1kcmkr1fgftas1fnrcavsgndtqad1l1igys1fkydgais1rqaask  
dvhav1ilsnkt1y1l1ldv1lq  
kl1pidkmns1nihqei1demsdi1l1mlyreyagm1ffksqk1l1nq1l1kr1leq

Tsompanidou\_et\_al\_Supplemental\_FASTA\_File

>tr|E5QUX9|E5QUX9\_STAAH  
makdmdti vslakhrgrfvfpgsdiygglsntwdygp lgv elknnvkkawwqkfitqspfnvgidaailmpkvweasghl  
nfnfdpmidnkdski ryradk  
k l i e d y m q d v k g d e n f i a d g l s f e q m k k i i d d e g i v c p v s k t a n w t e i r q f n l m f k t f q g v t e d s t n e i f l r p e t a q g i  
f v n y k n v q r s m r k k l p f g i  
g g i g k s f r n e i t p g n f i f r t r e f e q m e l e f f c k p g e e i e w q n y w k t f a s d w l t s l n m s s e n m r l r d h d e d e l s h y s n a t t  
d i e y k f p f g w g e l w g i a s r  
t d f d l r k h g e h s g e d f r y h d p e t n e k y i p y c i e p s l g a d r v t l a f l c d a y d e e g v e g s k d a r t v l h f h p a l a p y k a a i l p  
l s k k l s g e a i k i f e q l s s k  
f s i d f d e s q s i g k r y r r q d e i g t p y c v t f d f d s l e d n q v t v r d r d s m e q v r m p i s e l e a f l t e k t k f  
>tr|E5QUY2|E5QUY2\_STAAH  
m r i d q s i n e i k d k t d i l d l v s e y v k l e k r g r n y i g l c p f h d e k t p s f t v s e d k q i c h c f g c k k g g n v f q f t q e i k d i s f  
v e a v k e l g d r v n v a d i e a  
t q s n s n v q i a s d d l q m i e m h e l i q e f y y a l t k t v e g e q a l t y l q e r g f t d a l i k e r g i g f a p d s s h f c h d f l q k k y d i  
e l a y e a g l l s r n e e n f s y y  
d r f r n r i m f p l k n a q g r i v g s g r t y t g q e p k y l n s p e t p i f q k r k l l y n l d k a r k s i r k l d e i v l l e g f m d v i k s d t a g  
l k n v v a t m g t q l s d e h i t f  
i r k l t s n i l m f d g d f a g s e a t l k t g q h l l q q g l n v f v i q l p s g m d p e y i g k y g n d a f t a f v k n d k k s f a h y k v s i l k d  
e i a h n d l s y e r y l k e l s h d  
e i s l m k s s i l q q k a l n d v a p f f n v s p e q l a n e i q f n q a p a n y y p e d e y g g y i e p e p i g m a q f d n l s r q e a e r a f l k h l m r  
d k d t f l n y y e s v d k n d f t n  
q h f k y v f e v l h d f y a e n d q n i s d a v q y v n s n e l r e t l i s l e q y s l n d e p y e n e i d d y v n v i n e n g q e t i e s l n h k l r e a  
t r i g d v e l q k y y l q q i v a k  
n k e r m  
>tr|E5QUY4|E5QUY4\_STAAH  
m i s l n n r l t t v s r f l k q g t i a d i g s d h a y l p i y a i q n h l c e c g i a g e v i q g p f q a a v k n v a a n q l v d r i d v r l g d g l s v i  
h p e d v i d n i t i c g m g g p l i  
a k i l k d g q d k l s q h p r l i l q s n i q t e n l r q t l q q l n y e i d e i i m e e k g h i y e i v v a e y s t q l i e l s s d e l k f g p k l l n n  
k n e y f i k k w q r e l e a l y h i  
k s k l n t e q h r q r l a q i n d e i a v i e r v l  
>tr|E5QUY5|E5QUY5\_STAAH  
m k i a d l m t l l d h v p f r t a e s w d n v g l l i g d e d v e v t g v l t a l d c t l e v v n e a i e k g y n t i i s h h p l i f k g v t s l k a n g y  
g l i i r k l i q h d i n l i a m h t  
n l d v n p h g v n m m l a k a m g l k n i s i n n q a d v y y k v q t y i p k d n v g p f k d k l s e n g l a q e g n y e y c f f e s e g r g q f k p v g e  
a n p t i g q i d k i e y v d e v k i  
e f m i d a c q k s w a e q l i k q y h p y e t p v f d f i e i e q t s l y g l g v m a e v d n q m t l e d f a a n i k s k l n i p s v r f v g e s n q k i k r  
i a i i g g s g i g y e y q a v q q g  
a d v f v t g d i k h d a l d a k i h g v n l i d i n h y s e y v m k e g l k t l l m n w f n t e k i n i d v e a s t i n t d p f e y i  
>tr|E5QUY7|E5QUY7\_STAAH  
m l l g s h v s m s g k k m l e g s a i e a h e y g e t t f m i y t g a p q n t r r k s i e d l n i t k g h e v m e k y g l s n i v v h a p y i i n i a n t t k  
p e t f n l g v d f l q q e i e r t q  
a i g a k d i v l h p g a h v g a g v d a g i n k i e g l n e v l t n d n n v r i a l e t m a g k g t e i g r s f e e l a r i i d g v h n n e r l s v c f d t  
c h t h d a g y n v k e d f d g v l n  
e f d k i i g v d r i k v v h v n d s k n d r g a q k d r h e n i g f g y i g f d a l n y i v h h d s f k d i p k i l e t p y v g e d k k n k k p p y k l e i e  
m l k q q h f d p e l k n k v m q q  
>tr|E5QUZ2|E5QUZ2\_STAAH  
m l k r l k e k s n d e i v q n t i n k r i n f i f g v i v f i f a v l v l r l g y l q i a q g s h y k q i i k n d e n i t v n e s v p r g r i l d r n g k v l  
v d n a s k m a i t y t r g r k t t q  
s e m l d t a e k l s k l i k m d t k k i t e r d k k d f w i q l h p k k a k a m m t k e q a m l a d g s i k d q y d k q l l s k i g k s q l d e l s s k d l  
q v l a i f r e m n a g t v l d p q m  
i k n e d v s e k e y a a v s q q l s k l p g v n t s m d w d r k y p y g d t l r g i f g d v s t p a e g i p k e l t e h y l s k g y s r n d r v g k s y l e y  
q y e d v l r g k k k e m k y t t d k  
s g k v t s s e v l n p g a r g q d l k l t i d i d l q e v e a l l d k q i k k l r s q g a k d m d n a m m v v q n p k n g d i l a l a g k q i n k s g k m t  
d y d i g t f t s q f a v g s s v k g  
g t l l a g y q n k a i k v g e t m v d e p l h f q g g l t k r s y f n k n g h v s i n d k q a l m h s s n v y m f k t a l k l a g d p y y s g m a l p s d i s  
s p a q k l r r g l n q v g l g v k t  
g i d l p n e t k g q i e p l t n n p g n y l d l s i g q y d t y t p l q l s q y v s t i a n d g y r i q p h i g l t i h e s t n k d d v g p l k k k i n g t v  
l n k v n n t e k e i k q i q e g f k  
m a f n d k d g t g y v s f k d t v v p t a g t g t a e v f a n g e p r v n s t y i g y a p i d d p k l a f s i v y t n q p v p p p w l t g g d l g r d v i n  
y y f k q l g k d d k n k d k d k  
>tr|E5QUZ4|E5QUZ4\_STAAH  
m t c i v i n d i i e l n k v g d n v t k n e i r k y i l h k m k t f n k a e k r k a d t w l r n q f f a t e e y k e a n a i a l v l s f n h e v d t f s i i e  
q a l m d h k r i f v p k m d y l n h  
q m t f k e i f n l k d i d v d k k g i y y p t s k g e t t n n l d l i v v p g v g f q d d g y r i g y g g g y d r f l a n y q t k t i s l l y d f q i t s f  
e p e s f d q p v d k l i i y q s a  
>tr|E5QUZ5|E5QUZ5\_STAAH  
m n i d k q f w k t i y y w i r y l n f d i v s r e k d d q e i w l a h k r k n k  
>tr|E5QUZ6|E5QUZ6\_STAAH

Tsompanidou\_et\_al\_Supplemental\_FASTA\_File

mlehkdeianfisisfepqsfefyfteseefseeqlnevspirikfnvirhtkdlikhmpniflarlisedndkktymfykr  
kvltndnfldkymqkfsfat  
ytiifvnlwlcmllylnnfsdvkllldvgglvhfnvvhgwyrivtsmflhfsfehilmnmlslfifgkiveaigswr  
mltvyfiaglfgnfvsfsf  
ntttisvgasgaifgligsifammyvsktfnckmlgqllialvilvgvslfmsninivahiggfigglitligyyykvn  
rnifwilligmlvifialq  
iriftikedniynklikddmts gnydnaqnvkqtinknyaddqtyylsgmimatinsksegmtewerglrmfpksglln  
felajanrslnndekalky  
vrkalnadpkntdyinlekeltsnesknk  
>tr|E5QV03|E5QV03\_STAAH  
mfkflkktqaftliemlvllliisllliliiipniakqtahiqstgcnqavkmvnsqieayalkhnrnpssiedliadgfi  
keeqktcksgetitisnge  
avan  
>tr|E5QV04|E5QV04\_STAAH  
mekqlqirkqsafmlemlvmmllisifllltltskglslnrviddeaniislitelnyiksqaianqgyinrvfyensd  
tikviennkirflklkvkg  
iinvakvdiafdkkninkfgsitidnnsiyriifhiekgriryekl  
>tr|E5QV06|E5QV06\_STAAH  
milskvtnkfvlfqkipllikrhvysinvkafsliemlvammvisitllivpdlirlsktfliesrelttvdfeffsrdi  
ledfkgvdrndieirqqri  
ilhkgemieykinlkkikvndrgnitminnviaftaniyyksiikititvkvgtlqtktiyv  
>tr|E5QV08|E5QV08\_STAAH  
mssdlkqtplyqnyvdrgakivefggwampvqfssikeehnavryeiglfdvshngeievtgkdasqfvqyllsndtdnl  
ttskalytalceeggid  
dlviykladdnyllvnaantekdfnwilkhkekfdveqvnsvnyqqlaiqgpkardlinqlvdedvtemkmfefkqgv  
klfgaivilsqsgytgedg  
feicynidtekiwdglleynvmpcglgardtlrleaglpvhgqdltesitpyeggiafaskplidadfigksvlkdqke  
ngaprvtglellekgiar  
tgyevmdlgniiqevtsqtspssgksialamikrdefemgrellvqvrkrqlkakivkknqidk  
>tr|E5QV09|E5QV09\_STAAH  
mshryipltekdkqemlqtigaksigelfgdvpsdillnrlniaeseaettllrrlnriasknitkethstflgagvyd  
hyapsvvdamisrsefyta  
ytpyqpeisqgelqaifefqtliteltdmdvanssmydgmstfaeacilafsqtkknkivvskglhyqalqvlyhtyatr  
kefevveidldgtvtdlkk  
leaavddtaavavqypnfygsiedlekihsfiedkkaifivyanplaalglltppgsfgadivvgdtqpfqipaafggph  
cgyfattkklmrkvpgrlv  
gqtqdddegnrgfvltlgareqhirrdkatsnicsnqalnalassiamsalqkqiydiavqniehanyakqfikkqfev  
ldgtsfnfvvkdtkpiqq  
vneelvkyniiggfdlgvvsddfknhmliavtelrtkdeidtfvekageind  
>tr|E5QV10|E5QV10\_STAAH  
mtsksspifersregryayslpsidiktnsvesllddkfirknkaefpevaeldlvrhytelnsknfgvndngfyplgsc  
tmkynpkinekvaripgfs  
eshplqdedqvqgsleiyslqeelekitgmdevtlqpaagahgewtalimifkayhenngeghrdevivpdsahgtnpas  
asfagfksvtvksnergev  
diddlkrvvnentaaimltnpntlgifeknimeireivhnaggllydganlnaimdkvrpgdmgfdavhlnlhktftgp  
hggggpgsgpvgvkelas  
yilpkpmvikdgdkfyndiknsigrvkpfyngfyilraytyirtmgatglekveaavlnanyikarlsehfeipykq  
yckhefvlsgrvqkefgvr  
tldmakrllldfghpptyfplnveegmmieptetesketldyfidtlisiaeeakndpdkvleapyttvidrleataa  
rkpilkfenlkqek  
>tr|E5QV12|E5QV12\_STAAH  
mtetwnfintgskdpyynmamdealnfvsvrgeidpvirfytnpatlsigyfqrqlkeididkvkekgflvrrqtggr  
gvldhkeltysvivpeshp  
nmpstvtteayrvissqlllegfknlgfdtyfavpktpeerqklkqprssvcfdapswyelvvvegrkiagsaqtrqkgvilq  
hgsilqdididelndmfiy  
knerlklmkeafvekavaindisdehitismeeafekgfkkglniekpleltevqlaeveeltekysdewmfrk  
>tr|E5QV13|E5QV13\_STAAH  
mqnhdrsllmrniifylvliiaaiglvmlndafisivrmvsvfaviagiilyffilteqdrkyrkamrkykrnqrr  
k  
>tr|E5QV20|E5QV20\_STAAH  
msrkesrvqafqtlfqlemkdsdltineaifkddnpdldefihwlvsgvkdhepvldetispylkdwtiarllktdr  
iilrmatyeilhsdtpakv  
vmneaveltkqfsdddhykfingvlsniknie  
>tr|E5QV21|E5QV21\_STAAH  
msdylsvsaltkyikyqfdqdpqlqsvlikgelnsfkkhssghlyfnvkdkesvisammfkgasklnfepkegdevlle  
arvsvferrgnyqiyvnmk  
qldgignlyqklealkkklteegcfdkankksipkfpkkiavltastgaairdihstinsrflaeqiqistlvqgekak  
ddiiekiyadslgvdtii

Tsompanidou\_et\_al\_Supplemental\_FASTA\_File

vgrgggsiedlwnfnneeavvraiyntkptisavghetdftlsdfaadi raatptqaaviatpdqyellqqiqqyqftlt  
rfikkhlegqrkhvehlss  
yykfkqptllydqqiqrddlekr1kqqiqatfeqqrhr1m1lqqryn1ka1lssvnqeqqn1qltnqlvk1lnskils  
ykndlknkvenlnnlspnt  
tm1rgyaivnkkdevitstkd1tendq1t1tmkdglvdakvtkvrcnd  
>tr|E5QV23|E5QV23\_STAAH  
mtnlpmnkli devnne1svainksvmntqleesmlysl naggkri rpvl1111t1ds1nteyselgmksaiale mihtysli  
hddl pamdnddyrrgkltn  
hkvygewtailagdal1tkafelissddr1tdevkikvlqr1siasghvigmvggm1dmqsegqpidletlemihkktg  
alltfavmsaadianvdda  
tkeh1esysyhl gmmfqi kdd1l dcygdeak1gkkvgsd1ennkstyvs1lgkdgaedk1tyhrdaavdelmqideqfnt  
kh1leivdlfysrdh  
>tr|E5QV25|E5QV25\_STAAH  
mlqt1sikqfaiieeleiqfsdgl tv1sgetgsgksiiidaigql igmrassdfvrhgekkaviegifdideskdaihil  
knmdidvdedf1lvkreif  
ssgks1ckinnqtvt1qd1rkvmqe1ldihgghetqsl1kqkch1t1ldnyaesryqd1ldkyhqtfnqykkqeled1  
esadqallqr1d1mkfgle  
el1seahlkegeieql eidikriqnsek1slal1nahmt1t denaitdrlyelsnh1ltindivpnkydk1kedidqfyi  
ledakhelydemantefde  
qvlneyesrn1lnn1krkygkdiseliayqek1nneinkienyeqstsq1reeinalynqvievqgalskqrrivare1  
rdhivseiqlnqmkanle  
isfkkleepnidgiefveflispnkgeplks1nkiasggelsrim1alksifvksrgqtailfdevdsgvsgqaaqkmae  
kmrdiaeyiqvicishlpq  
vasmsdh1l1isksskddrtttqvqeligddkvdeiarmi sgasvdt1trenaremiqhnqrhr  
>tr|E5QV26|E5QV26\_STAAH  
msekqyd1v1ggtagyvaairasq1gkkvaiverq1lggtclhkgciptks1lksaevfqtvkqaamfgvdvkdanvn  
fenmlarked1inqmyqgv  
kh1mqhnhidiyngtgr1l gtsifspqsgtisveyedges1lpnqfvliatgsspaelp1fsfdhdkilssddilslkt  
1pssvgi1gggvi gmfas  
1mid1gvdvtvieageri1ptesqasq1l kks1sargvkfyegik1sendinvnedgvtfeissdi kvdkv1l sigrk  
pntsdiglntkik1stsg  
hil1nefqqtcdkhiyaagdcigklq1lahvgskegvavdhmfegnpipvnynmmpkciysqpeiasig1nieqakaegm  
kvksfkvpfkaigkavids  
hdanegysemvidqsteeivginmigphvtelineas1lqfmngsale1gl1tthahpsisevlmel1glkaesraihv  
>tr|E5QV27|E5QV27\_STAAH  
midyks1gl1seed1kviykwmd1grkider1w1l1nragkipfvsvsgggqeatqigmaya1eegditapyrd1lafvtymg  
isaydtfl1safgkddvns  
ggkqmpshfssrakni1s qsspvatqiphavgaala1kmdgkcki1atatsvgegssnqgdfhegl1nfagvhl1pfcvii  
nkyaisvpds1qyaaek1s  
dra1gy1hgqvdgndp1amykamkeardra1sgqgst1ieavtsrmtahssdddqyrtkeerea1kkadcnkfkke  
11sagiiddaw1aeieaeh  
kdiinkatkaaedapypsveeayafvyeegsln  
>tr|E5QV28|E5QV28\_STAAH  
mak1sy1eairaqd1ala1qqnkdvfi1gedvgkkgvfgttqglqqygedrvidt1plaesnivgtaigaamvgkrpia  
iqfadfilpatnqi1seaa  
kmryrsnndwqcpl1tirapfgggvhggl1yhsqsiesifasspg1t1vipstpydakgl1lssiesndpvlyfehkkayrf  
1keevpeeytvp1lgkad  
kreged1tvfcyglmvnyc1qaadi1aadginvevd1rtvyp1ldketi1drakhtgkv1lvtedn1legsimsevsaiia  
eh1fd1dapimr1lapdv  
psmpfspv1leneimnpeki1nkmrelaef  
>tr|E5QV29|E5QV29\_STAAH  
mlh1il1qsveykneidkikskil1neede1vkks1ml1tifvl1sesyvss1lvsnlperden1idkayekiiqqyisknirt  
rng1rkelvknfyntd1pai  
phtkl1rdalaeinkvd1knrrfkydn1srgnrneni1eivsidei1neleewfl1lefp  
>tr|E5QV30|E5QV30\_STAAH  
mlittkth1rsanmsynh1t1lterariel1rqenys1rsiark1krsvstisre1srnn1nqsyqaetaqknyetrklc  
grptrftpelgnii kyylk  
mplvs  
>tr|E5QV32|E5QV32\_STAAH  
mdnsfles1keilepyddiesnkdgfvfggyidwpsfvdyedf1qveevms1lgl1dipfgsskn1pfefyeilkvinqiek  
lyeai1cdeaiiikedeeis  
tedfidsimdykvqiptvdr1kssitel1fekyeipqgiqyeydegmpesskyws1lemdedlyfikeinfnc  
>tr|E5QV33|E5QV33\_STAAH  
mkdsfsfrvkeiatii1neiaysvnryhaqr1likdiisigikpiiedilkgd  
>tr|E5QV34|E5QV34\_STAAH  
mgnv1ki1rstyyds1krkdnki1tkdds1nveravini1fnankvfatriknh1ndkghtvsrrkigrimkyn1lsvyt  
kakyknhpketnek1liknh  
1nrafnreqpmet1vsd1tyvkvagtwhyic1fid1fnreivgysagknkdan1lsvkaisrinh1leqik1fhtdrqkef



Tsompanidou\_et\_al\_Supplemental\_FASTA\_File

dnhlidevletfkikrsls  
tkgcpydnavaeatmkamktefvkqmqlenleqktefdyvnwynnfrphsslqyltpvafknlhmktv  
>tr|E5QV35|E5QV35\_STAAH  
mtrerrlfssefklqmvrlengkprneiireydltpsplgkwikqyqntgtfnhqdnlsdeekeliklrkevqhlkmen  
dilkaalimgrk  
>tr|E5QV36|E5QV36\_STAAH  
mlelitdfskksfknysmkeelkfnainiygvnrgktslargikeieennpdslyfytdyihelllledsnkfkvg  
katfgtknveienkiiklk  
nevvdmttkkllvekrklrelineihksrkgnlkipkssnksieeviaiyecknlkdakkiehniesirnfvetl  
ynkynsiyevmipslkiet  
ydvdrltkilqnytdikipsfevidwlrnglelhvvesickfcgnlnynlikeieiyllnekkkdfdyldveksi  
eqlsdnyeqlsnidifvn  
elgvqksveeslgdsideikrilkqklngmendlkfpsddyitlislseieeekkkkiklkelnkkteninvivtg  
sisleilenqsi reelssi  
qyeeneckkqeqleeeinakisklhenqsdyndfkiyngvfesinlhirksdettqnylyhdlenisl nikdisege  
knliafffyfel fedekg  
etiksniikliiddpinsfdeanrfyvelikkvlskfnqififthswndfcdityrlkgedhnfyevykdhgtsfle  
kfkvktpykklfqiye  
srksqkdiveedcyyyhsinsirrvfeeflsfklknsdlaqksnqpeieevyrkmtgnemsnnkkiklgsfltiinvlsh  
kpyraidvigsakflmryi  
edvgkahydamkd  
>tr|E5QV37|E5QV37\_STAAH  
mkkstlidkfldllssrsslreiqnfnidadimrdssinqkyngqrkslaweyistlnledeaefskllnvletylfqwn  
lyiheidedeeinrliki  
nvlgykynketgkitknesevnlstikslaikfdieyvlkecnriekealtdpedaitsaksinvestlkyildsegekfn  
nnetlrglykkvsnimnl  
pgghnentfkti lsgminvingldevrneygdahgskknyrpetrhafainaartiteflasykk  
>tr|E5QV38|E5QV38\_STAAH  
mhfglyptpikrlqnylltpekwmqstgyfysespeyivyknedi eekenynflvspfyaynqinsntlysyefkyhs  
tvlyacrcisldsgiytpp  
vpksgeinfnmhrddtiyyryfi eetmlynihlfmykgdsmeekfamekflcvlykneeekelfenyilhnwdkvnqs  
inennkrvfgtehlsqkk  
editkkvktvkvldkkl enfrkiig  
>tr|E5QV39|E5QV39\_STAAH  
mlkhkiinliqekregsywdfkaeyhkdkaelldhiiclsnllnqeyalilgvadnghilgvagdsnrknqeelisfit  
gkkfaagrhpki slmtfey  
eekeidviiinpkgyvpyylekaetdqsksktkqsmqvafilelkikipq  
>tr|E5QV40|E5QV40\_STAAH  
mnkrdiynekfqnaldvdiilnidkinvkevfdscravdqdnkkdtlnrspkdfsinisdivrysilcmenlnsdkieen  
inmiknhsseln dsdmfiq  
eknnfttnfnkfcnalginianfksgksyvfkpslflvlydilsnsvylhffkngindkdidssnrikenlyyfinhei  
tdqrdehaltnyylyflv  
dsnieigiksiiikiftekigtskdklqileyyld eiddlnteistkiadahvknstnflenekvsinsnlakyithrtd  
rasapknmlslilnsdlv  
spkdleekelkypkkitkehdklikeinkaldyindnnttpsdyfytst  
>tr|E5QV41|E5QV41\_STAAH  
myfnqsdkfeqlkkkiligisfnlpegeeftfhdlnsravnqcskavqqnvgrwfayfvkqaprvpfiigkdthghlvy  
ktgpnphynsntskggdc  
>tr|E5QV42|E5QV42\_STAAH  
msytlfeigpfa ldsfgwketkppkkdgdrekvvimaspiivnarfsdpvtgvekliitnngkkdifesdilttrnlps  
likygysinekhirslysa  
lqlmrdrpllselyegvgilet pfgylisldkvl nsvqfnqsspsypivdsaydltpkgtdfnwfnmyidevkglllel  
avifgisalvtsflkhkhe  
iefagilfsftgqsstgkstaalavsvagnptknetlfrswnatrnalegylsnnygvpivfde lsstlrdttgllly  
siaegqgrqrsnvhgevt  
pknwgtsvistseysifndsaqndglrvrtieineqfttnatnadnikkavalnyghvlpvlakylinredeviqwfyke  
vdwfeaklkdetnntgirm  
fkryavittsakilgrvlstdidianirdyfidyhtvtvsladkaidviiqfvaqnrngkfsdegalknmfenyglis  
lkddhievkiiianvfkqml  
nnhqfqdvnnvna lrdkgfiladrgrqttrsvkdnsqkqslvfylkldekfasilgltkdksliqnwtpandkaa  
kel fksanegigpsgvhed  
f  
>tr|E5QV43|E5QV43\_STAAH  
mkggadmkgvlygrqstmkqqs laaqqaieaiaekhhqhinfysdkqsgkrkdnrsgyrqmtqliqqgqcdilccyr  
nrlnrnlnkalkliklqct  
yrvhilsvhdgyfdmdqafdrkl nifislaelesdnigeqvrnglqekakqgrlitthapfydyhngtfinqnespt  
kvafnyyikghgykkiag  
lledntyinrppyqvrniiinpnycgrvnnqygqfdnmfpsi vstsiyeqaqrllrlqkqtqtps dnlkqkikpcpcn

Tsompanidou\_et\_al\_Supplemental\_FASTA\_File

atltnttirkknhtlryyv  
cpknmasrfvcdfkgniaqtledkvlevcrdfyqnqriytkikgaidkrikqrniekhiltqeqlieklaaggiidae  
tfregtqslrqpprttsi  
nghqihqhtiqniqkrftlnilypyietihitkdknligiyfkneplnivnqamqssia  
>tr|E5QV44|E5QV44\_STAAH  
mkkgcniqq|ktrkrgiyvrvstemqstegysidgqinqikeycdfhhfevkdiyadrgisgksmnrpelqrmldkake  
gnidcvmvyktnrlarnts  
dlkivedlhhkqnveffs|sermevntssgklmlqilasfsefernnivenvfmqtrraqegyyqgnlplgydkipdsk  
helminqheanivkyifec  
yakghgyrkiana|nhkgyvtkkgkpfssityilanpfyigkiqfakykdwsekrkrglndkpviaegkhspiinqd  
wdkvqmrkkqvsqkpvvhg  
kgtnl|tgi|hpcqcgapmaasntnt|kdgtkkri ryyscsnfrnkgskvcansvradviedyvmkqileivksdki  
qrvvthvnqenqvdaalh  
hdiaykqqydevqikinn|iktiednpd|tsvirpsiqykekq|nditnqinq|knqqnedkt|fdateiskllqhih  
dikhiexrlkaly|svd  
ridikkdgnhkkqfyvt|kl|nnei|kq|fnkq|devh|stss|fl|pqt|ly|ti  
>tr|E5QV49|E5QV49\_STAAH  
myvvyrashetakeal|gdkel|raiahel|tktvkdnmsvdwskrdsakakmrvqvr|l|kkygyppd|qkmaveqvveqae  
lmasqq  
>tr|E5QV50|E5QV50\_STAAH  
mlssflmlsiiss|lticv|flvrml|ykytqnimshkiw|ll|vl|st|lip|lip|fykisnftfskdmnrnsdttssvsh  
mldgqqssvtkd|ainvq  
fetsnitymi|liwvfgs|l|cl|fymikafraqidvikss|lessylner|l|kvcqskmqfykhitisyssnidnmpvfglv  
ksqiv|lptvvvetmndkei  
eyi|lhelshvksd|l|fnqlyvfkmi|fwfn|paly|sktmndncekvcd|rv|l|k|l|nr|he|h|ry|ges|l|k|s|l|k|sqh  
innvaaqyl|l|gf|ns|niker  
vkiyalysmpkprnrkrivayivcsissft  
>tr|E5QV58|E5QV58\_STAAH  
mrhni|fynrrefqmi|dnfmqvl|k|likekrt|n|v|k|s|d|w|k|g|d|ly|kt|l|v|h|d|k|l|p|k|q|l|k|v|h|e|k|y|s|v|g|k|v|a|t|g|n|y|s|k|v  
pwisiydenitketkgyy  
lvy|l|fh|pegegiy|l|s|l|ngg|w|s|k|s|d|m|f|p|r|d|k|n|a|a|q|r|a|l|t|l|s|s|e|l|n|k|y|t|s|n|e|f|n|t|g|r|f|y|a|e|n|d|s|s|y|d|l|k|n|d|y|p|s|g|y|s  
hgsirfkyyd|l|negf|teed  
mledlkkf|l|e|l|f|n|e|l|a|s|k|v|t|k|t|s|y|d|l|v|n|s|i|d|e|i|q|e|d|s|e|i|e|e|i|r|t|a|q|k|d|k|t|l|k|e|v|e|a|p|k|g|i|p|k|y|k|g|v|s|k|t|t|k|n|d|s|e|i|e  
ksnken|l|t|g|k|v|g|e|k|l|a|l|n  
yfne|l|id|n|k|i|d|e|d|k|k|e|q|f|r|n|i|l|n|d|n|p|g|s|h|g|h|g|y|d|l|v|a|f|d|p|t|n|t|d|k|a|v|e|k|f|i|e|k|t|s|t|s|s|i|e|e|p|f|f|m|s|l|n|e|m|f|a|m|k|e|y|k  
qkylilri|fnvsgkep|qfy  
fidpyanysefkdvdd|l|idkvfnveai|qykvfgek  
>tr|E5QV61|E5QV61\_STAAH  
mtvnggnemka|l|l|l|k|t|s|v|l|v|l|l|f|s|a|m|g|l|w|q|v|s|s|a|e|q|h|t|p|m|k|a|h|a|v|t|t|i|d|k|a|t|t|d|k|q|v|p|p|t|k|e|a|h|h|y|g|e|e|a|t|n|v|s|a  
saqgtaddt|n|n|k|v|t|s|n|a|p|s  
nkpstavst|t|v|n|e|r|d|v|t|t|q|q|a|s|t|q|k|p|t|r|t|a|t|f|k|l|s|n|a|k|t|a|s|l|s|p|r|m|f|a|t|n|p|q|t|t|t|h|k|i|l|h|t|n|d|i|h|g|r|l|a|e|e|k|g|r|v|i|g|m  
akl|k|t|y|k|e|q|e|k|p|d|m|l|d|a|g  
dafqgl|p|l|s|n|q|s|k|e|e|m|a|k|a|m|n|a|v|g|y|d|a|m|a|v|g|h|e|f|d|f|g|y|d|l|k|k|l|e|g|m|l|d|f|m|l|s|t|n|v|y|k|d|g|k|r|a|f|k|p|s|t|iv|t|k|n|g|i|r|y  
gi|g|v|t|t|p|e|t|k|t|k|t|p|e|g|i  
kgvefrdp|l|q|s|v|t|a|e|m|r|i|y|k|d|v|t|f|v|i|s|h|l|g|i|d|p|s|t|q|e|t|w|r|g|d|y|l|v|k|l|s|q|n|p|q|l|k|k|r|i|t|v|i|d|g|h|s|h|t|v|l|q|n|g|q|i|y|n|n  
dalaqtg|t|a|l|a|n|i|g|k|i|t|f|n  
yrngevsn|k|p|s|i|n|v|k|d|v|e|n|t|p|n|k|a|l|e|a|q|i|n|a|d|q|t|f|r|a|q|t|a|e|v|i|p|n|n|i|d|f|k|g|e|r|d|d|v|r|t|r|e|t|n|l|g|n|i|a|d|a|m|e|a|y  
gvknf|s|k|k|t|d|f|a|v|t|n|g|g|i  
rasiakgv|t|ry|d|l|s|v|l|p|f|n|t|a|q|i|d|v|k|g|s|d|w|t|a|f|e|h|s|l|g|a|p|t|t|q|k|d|g|k|t|v|l|t|a|n|g|l|h|i|s|d|i|r|v|y|d|m|n|k|p|s|g|k  
rinaiq|l|n|k|e|t|g|k|f|e|i|d  
lkrvyhvt|mndftasggdgysmfggpreegi|s|l|d|q|v|l|a|s|y|l|k|t|a|n|l|a|k|y|d|t|t|e|p|q|r|m|l|g|k|p|a|v|s|e|q|p|a|k|g|q|s|s|k|g|s|e|s  
gkdaq|p|j|k|d|k|v|m|p|a|k|q|p  
apskv|l|l|p|h|r|g|t|v|s|s|g|r|e|g|s|d|r|a|l|e|g|t|a|v|s|s|k|g|k|l|a|s|m|s|a|p|k|g|s|t|h|e|k|q|l|p|k|t|g|t|d|q|s|s|p|a|m|f|v|l|v|a|g|i|g|l|i|a|t  
vrrrkas  
>tr|E5QV62|E5QV62\_STAAH  
msvlasgstgnatfvenekgs|l|l|vdv|g|l|t|g|k|k|m|e|l|f|s|q|id|r|n|i|q|d|l|n|g|i|l|v|t|h|i|h|i|k|g|l|g|v|l|a|r|k|y|q|l|p|i|y|a|n|e|k|t  
wqai|e|k|k|d|s|r|i|p|m|d|q|k|f|i|f  
npyetks|a|g|f|d|v|e|s|f|n|v|s|h|d|i|d|p|q|f|y|i|f|h|n|n|y|k|k|f|i|l|t|d|t|g|y|v|s|r|m|k|g|m|i|r|g|s|d|a|f|i|f|e|s|h|d|v|m|l|r|m|c|r|y|p|w|k|t  
kqri|l|g|m|h|v|s|n|e|d|a|g|h|a  
mtdvi|t|g|n|t|k|r|i|y|l|s|h|l|s|q|d|n|m|k|d|l|a|r|m|s|v|g|q|v|l|n|e|h|i|d|t|e|k|e|v|l|l|c|d|t|d|k|i|a|p|t|i|y|i|t|i  
>tr|E5QV64|E5QV64\_STAAH  
mnnehi|k|s|v|i|l|a|l|l|v|l|m|s|v|l|t|y|m|v|w|n|f|s|p|i|a|n|v|d|n|t|d|s|k|s|e|t|k|p|l|t|t|p|t|a|k|m|d|t|t|i|t|p|f|q|i|h|s|k|n|h|p|e|g|t|i|a|t  
vsnv|n|k|l|t|k|p|l|k|n|k|e|v|k|s|v  
ehvrrdh|n|m|p|d|l|s|s|d|f|l|f|d|f|t|y|d|l|p|l|s|t|y|l|g|q|v|l|m|n|a|k|v|p|h|f|n|f|r|l|v|i|d|h|d|a|d|n|i|v|l|y|i|a|i|s|k|r|h|d|y|v|k|l|t|t|t  
tkndh|f|l|d|a|l|a|t|v|k|k|m|g|p  
ytdi|t|n|k|d|t|d|r|t|h|v|f|a|p|s|k|p|e|k|l|k|t|y|r|m|v|f|n|t|i|s|v|e|k|m|a|i|l|f|d|d|s|t|iv|r|s|s|k|g|v|t|t|y|n|n|t|g|v|a|n|d|k|n|e|y|h|y  
kn|l|s|e|d|e|a|s|s|k|m|e|e|t|i|p|g  
tfd|f|i|n|g|h|g|f|l|n|e|d|f|r|l|f|s|t|n|n|q|s|g|e|l|t|y|q|r|f|l|n|g|y|p|t|f|n|k|e|g|a|n|q|i|q|v|t|w|g|e|n|v|v|f|d|y|r|r|s|l|l|r|t|d|v|v|l|n|s|e|d|n|k|s|l|p

Tsompanidou\_et\_al\_Supplemental\_FASTA\_File

klesvrsslannsdinfek  
vtniaigyemqndpnhhievqinseivprwyveydgewyvndgrle  
>tr|E5QV65|E5QV65\_STAAH  
mkwlkqlqslhtklvivyvlliiigmqiiglyftnnlekelldnfkknitqyakqleisiekvydekgsvnaqkdinqll  
seyanrqeigeirfidkdg  
iiiattkqsnrslinqkandssvqkalslgqsnhdhilkdygggkdrvwvynipkvdkkvigniyieskindvynqlnn  
inqifivgtaisllitvil  
gffiartitkpitdmrnqtvemsrgnytqrvkyngdeigelalafnnlskrvqeaqantesekrrldsvithmsdgiia  
tdrrgririvndmalkmlg  
makediigymlsvlsledefkleeiqenndsflldlneeegliarvnfstivqetgfvtygiavlhdvteqqqvererr  
efvanvshelrtpstms  
yiealeegawkdeelapqflsvtreetermirvndllqlskmdnesdqinkeiidfnmfinkiinrhemstkdttfird  
ipkktiftfedpdkmtqvf  
dnvitnamkysrgdkrvefhvkqnplynrmtirikngigipinkvdki drfyrvdkartrkmggtglglaiskeivea  
hngriwansvegqtsifi  
tlpcevi edgdwde  
>tr|E5QV70|E5QV70\_STAAH  
mnrggimnrqstkkallipfvimiitavlmgvwifnslialiasivlvvmiivsvlfrqalmkmdsyvdglisaqist  
tnnkaikhlpigiivlden  
dhiewvnmfmdhmeanvisesvnevpnilkqldrvksveieynqyhfvrysendhclyffditeqvqtneelyenskp  
iatlflndydeitqnmnd  
tqrseinsmvtrvisrwateyniffkryssdqfvaylnqkiladleeskfdilsqpreksvgyraqtllsigvgegtenl  
idlgelsqsgldlalgrgg  
dqvaiksingnvrfygktdpmekrtrvrarvishalkdilaegdkviimghkrpdl daigaaigvsrfammnleayiv  
lnetdidptlrrvmneidk  
kpelrerfitsddawdmstkttvividthkpelvldenvlnkanrkvidhrrgesfisnplliymepyasstaelvt  
elleyqpteqrtrlestv  
myagiivdtrnftl rtsrtdaasy lrahgadtltqhf lkddvdtyinrselirtvkvedngiaiahgsddkiyhpvt  
vaqaadellsllegieasyv  
varrednligisarslgsvnvqltmealgggghltnaatqlkgvtveeai aqlqqait eqlsrseda  
>tr|E5QV71|E5QV71\_STAAH  
mlisikevkiiaivknmgvayvfskiqpkatmiatitlvfalalylvpglglifalfatipgivilwnksiqsfgisali  
tviittvlgntfvlsaiil  
vliasliigqllkertskerilyvttvamslisliafmlqtfgrippsasivkpfkqtlheaitmsgadanmtqileeg  
frgatvqlpgfiiitfli  
vlinlivtfpilrkfkia tpvf kplfawqmsgillwiyiiviicllftgqpsvfqsillnfqlvlslvmyiqglsvihff  
gkaglpnavtilllvgit  
iltptthivglgvidlslnlkrimknnsk  
>tr|E5QV74|E5QV74\_STAAH  
mkkeviemtthlsfrggvqeciptllgyagvgisfgivassqnfsileiillclviyagaaqfimcalfiagtpisaivl  
tvfivnsrmflsmlapn  
fktygfwnrvglslvtdetfgvaitpylkgeaindrwmhgl nitayl fwvipcvagal fgeyisnpqalgl dfaitamf  
iflalaqfesitksrlriy  
ivliiavivmmllslsmfmpsy lailiaatisaalgvmmr  
>tr|E5QV77|E5QV77\_STAAH  
mggyitmetl nsinipkrkedshkgdygkilliggsanlggaimlaaracvfsgslitvathptnhsalhsrceamvi  
dindtkmltkmiemtdsil  
igpglgvdfkgnaiftllniqphqnlivgdaitifsklkpqlptcrviftphlkewerlsgipieeqtyernreavd  
rlgatvvlkhhgteifkld  
edfkl tigsamatggmgdtlagmitsfvqqfdnlkeavmsatythsfigenlakdmyvppsrlineipyamkql es  
>tr|E5QV78|E5QV78\_STAAH  
maelpqsrinernitsemresfldyamsvivaralpdrv dglkpvhrrilyglneqgmtpdkssyksarivgdvmgkyhp  
hgdssiyeamvrmaqdfsy  
ryplvdgqgnfgsmgdgaaamrytearmtkitlellrdinkdtidfidnydgnerepsvlparfpnllangasgiavgm  
atnippnl telingvls  
sknpdisiaelmedi epdfptaglllgksgirrayetgrsiqmrsvieergggrqrivvteipfqvnkarmiekia  
elvrddkidgtdlrdets  
lrtgvrvidvrkdanasvllnlykqtplqtsfgvnmialvngprkllnlkealvhylehqktvrrrtqynlrkakdr  
ahileglrialdhideiis  
tiresetdkvameslqrrfk lsekqaqaildmrlrrltglerdkieaeynellnyiseleailadeevllqlvrdeltei  
drfgddrrrteiqggfed  
lededlipeequivitlshnnyikrlpvstyraqnrggrgvqgmntleedfvsqvtlsthdhvllfftnkgrvyklkyev  
pelsrqskgipvnaiele  
ndeistmavkdlesednflvfatkrvvrksalsnfsrinrngkiaisfredde liavrltsgqedilig tshas lir  
fpestl rplgrtatgvkgi  
tlregdevvgl dvahansvdevlvvtengygkrtpvndyrlnsrggkiktatiterngnvvcittvtgeedlmivtnag  
viirldvadisqngraaqq  
vrlirlgddqfvstvakvkedadeenedeqstvsedgteqqreavvndetpgnaihtevidsevndedgrievrqdfmdr

Tsompanidou\_et\_al\_Supplemental\_FASTA\_File

veediqqssdddee  
>tr|E5QV87|E5QV87\_STAAH  
mvqeydvivigaghagveaglasarrgaktlmltinldniafmpcnpvsggpakgivrreidalggqmaktidkthiqmr  
mlntgkgrpavralraqadk  
vlyqqemkrviedeenlhimgmvdeliiednevkgrvtrnigteylskaviittgtflrgeiilgnmkysgpnhlpsi  
tldnrlrelgfdivrftkg  
tpprvnskti dyskteiqpgddvgrafs fetteyildqlpcwltytnaethkviddnhlhsamysgmikgtgprycpsie  
dkfvrfrndkprhqlflepe  
grntnevyvqglstslpehvqrqml etipglekadmmragyaieydaivptqlwptletkmiknlytagqingtsgyeea  
aggglmaginaagkvlntg  
ekilsrdayigvliddlvtkgtnepyrlltsraeyrlllrhdnadlrltdmgyelgmiseeryarfnekrqqidaaikr  
lmdirikpnehtqaiieqh  
ggsrlkdgilaidllrrpemydiileileehqlnadveeqveiqtkyegyinks lqqvekvrmeekkipedldyski  
dslateareklsevkplni  
aqasrisgvnpadisilliyieqgklqrvsd  
>tr|E5QV88|E5QV88\_STAAH  
mtvewlaeqlkehnieltetqkqfqtyyrllvewnekmltsitdehdvylkhfydsiapsfydfnqpsicdv gaga  
gfpsiplkimfpqlkvktiv  
dlnkriqflnylaseqlqdvsvfihdraetfgkgvyresydviaravarlsvlselclplvkkggfvalksskgeee  
leakfaisvlggnvteth  
tfe lpedagerqmfiidkkrtppkkyprkpgtpnktpllek  
>tr|E5QV89|E5QV89\_STAAH  
mkkpfsklfglknkddiighieenrnsnvesiqierivpnryqprqvfepnkikelaesihegllqpiivrpieedmf  
iagerrfraislnlpgq  
dviirdmdeetavvalieniqrenlsvveeaeaykllleigdttselaks lgsqsfianklrlklapkvllrlreg  
kiterharavlsldsege  
alieqviaqklnvkqtedrvrqtgpekvaqnlrfeqdvtdardevgksiqaiqqtg l hvehkdkdhedyyeikiri yk  
r  
>tr|E5QV90|E5QV90\_STAAH  
mterkcacnk lfsikvrgpntenfekkfyrqcelgcgsqhrefrneilqamrvvgvgrnkfceniisvplpnlswiyl  
nplllvyesimka l  
>tr|E5QV92|E5QV92\_STAAH  
mkltlmkffvvgfavllsyivsvtlpwkefggi fatfpavflvsmfitgmqygdkvavhvsvrgavfgmtgvlvcilvtwm  
mlhmthmw lisiivgflsw  
fisavci feavefiaqkrlekhswkagksnsk  
>tr|E5QV95|E5QV95\_STAAH  
msrnlhl sigvai fiisfsfyl nqpnwawssl nicindsksnvkva ildtgintrin nfvtkrynainnhnqit  
tdsnhatqvasiitygeh k  
ekligisksvsydvkvl ddnlkgdidi niikgitwsikndvni ihmsfgfqrynkelhdaiknaknkgiilvaaagnmd  
dysdyparfnevysitaid  
knnkpf iyaptkkidfkapgvdytkgskdel ltvngtsfaaayftayltnnlefrndlphilkeypi k  
>tr|E5QV96|E5QV96\_STAAH  
mknkiiifl aiitftygnfaeasv vikeaninnsn skintnkineniysknrrnyidnnfkskdlniesslehd lntd  
kitvdaslkdny nkl dkt  
ydvkflrivnendfkaeftdqtgekiiydtnevkasiapvvavlv gfiakqglkkaiqkygktvvtsmirtspqva aqa  
akklgysatkvhshgk kvf  
kknskgrpqiysvdkdghrggawkgassiknl gskktrsgtydanlkrig d  
>tr|E5QV97|E5QV97\_STAAH  
meikmi in letqqihfdleheipyfqspek nrirldidvlnkkqisni in vifnnqsktkctflseylypvkfrektrig  
rffnitnwye eih sadeky  
viatiknikndlidyslyikkglvepfivfyngeni fysisnavidiisvskdtlgyiksefndhcasp y  
>tr|E5QV98|E5QV98\_STAAH  
mitlrs lgrkatdienal nsmfsalps hifksitfdcgkefsnwkticnchdisiffadpsmpaqrglnehngilrrs  
gldekl dfnlvtddhiisv  
aqkinhrprkslg yrtplevfmsfikddklssl i  
>tr|E5QV99|E5QV99\_STAAH  
msaleyyqeyqrksncgrhrivlpee qsydi renavdg  
>tr|E5QVA1|E5QVA1\_STAAH  
mtfnhivlkn lrgnlkhyamyls lffsivlyfsfttlqftkgvnnddsm aiikkgalvgsiflfiiviflmyanhlfv  
krrtrefalfqligltrqn  
ilkm lal eqmivfiitgvvgvlcgiagaql llsivsklmsl sinlsihfepmalvltilmliiayililfqsslflkrrs  
ilsmmkdsvkt dvttakvt  
vievisgvl giamialgyymatemfgtfkal tmtamspfiilfltvvgaylffrsvslifktlkkskngrvsitdvvft  
ssimyrmkknamsltiiai  
isavtvvlcfaalsksntdqt ltsmapndfnvasqdaqfesk lsqqhifsknyyetitv dnvkdqv itlengsdg  
rtnsil santk lgnnaii  
ntksl pnvinihlndlvvkgtknetfrvtqedkdkvypnl nsfnspviev spekyqqlktqnnvhtfygydikqtsqk  
kkaqaiakqfgdkii tydd

Tsompanidou\_et\_al\_Supplemental\_FASTA\_File

mkkevdatngilifvtsf1glaf1vaagciiyikqmdetedelsnfrilkrigfthtdmlkglllkitfnfglpllvail  
havfaaiafmlmgnisfm  
pviiiviyvtliiyivfaliafvhsnklikkti  
>tr|E5QVA3|E5QVA3\_STAAH  
mivmeknggikwsslimgvllmlavviftfpiefyaitwliglflvlingviqivryrrkaka1vggnqnwilmgivid  
ilfglivifnvgassaffi  
ymfafwfi fssiag1ftfsgsgsklisvifnllgivfgvillfnplmgivfistmiaiafvfvgviyvvdala  
>tr|E5QVA7|E5QVA7\_STAAH  
mie1mdmnd1ymngvveqarneiesagyeqlttaedvdkvlkqdgttlvmnsvcgcaggiarpaashalhydvlpdr1  
vtvfagqdkeatqrareyf  
egyapsspsfalvkdgnitemierhqi eghdvmvinq1qt1fnkyceer  
>tr|E5QVA9|E5QVA9\_STAAH  
mtqfts1inlcnvncn1lihqflpfgvlenfdkrgsimineqrllntflelvqidsetgnestiqpilkekfislgldv  
kedaakhpklgannlvct  
mkstieegevpklyltshmdtvvpainvkpivkddgyiysdgtt1lgaddkaglaamlevlqvikeqqiphgqi qfvitv  
geesgligake1nse1lda  
dfgyaidasadvgttvvgaptqm1isaki fgktahastpkegvsainiaakaisrmklgqvdeittanigkfhggsatni  
vadevileaearshdperi  
ktqvkhmtdvfettase1ggkavvtveqsyppgkindnetvvkiaquesarn1glsantiisgggsdgsiintfgipsvil  
ggyekihttnerpiks1  
n11asqv1eikiivarqsk  
>tr|E5QVB0|E5QVB0\_STAAH  
mtqqigviglavmgkn1awniesrgysvsvfnrsektd1mveeskgnihptysleefvnslekprkillmvqagkatd  
atids11p11ddgdilidg  
gntnyqdtirrnkalaqsa1nfigmgvsgeigaltgps1mpggqeeaynkvadildaiiakakdgascvtyigpngagh  
yvkmvhngieyadmqliae  
syammke1lgmshediaqtfkdownagelesy1ieitgdimk1denkealvekiltdtagqkgtgkwtsinalelgip1ti  
itesvfarfissikeervn  
askelngpkasfdgdkkdf1ekirka1ymkskicsyaagfaqmrkasednewn1klgdlamiwregciiraqflqkikday  
dnpng1qn111dpyfkniv  
teyqdalrdvatgvqngvptpgfss1inydsyraad1panliqaardyfgahtyerkdkegvfhtqwiee  
>tr|E5QVB1|E5QVB1\_STAAH  
mkkrdmsyasv1fnknftfyligiafnsnisafttfvfp1mil1ktgsafqvgivsalsfipyailglpagalidrlnk  
ktimkadiir1isylsip  
v1sfynm1sifqiyyvai1sgiglvfhsisevsiipsivkeedlasansiyiatqnvseflgpiigg1lytymgysilif  
idsmtf11sffs1ilikie  
tksi1nqek1sgknflsdvkvgfdy11snstirvmavvs1n1iispyiyivmfvkedmnqssqalglvlgiss1gal  
igs1sasf11k1fnfgk1i  
vii1fl1dti1fr1mlpfstyifilip11gltymtqsilniaiit1rqkkcsehm1grvnsvfktmvfafraig1flgg11  
enkggfyal1tisav1fip1  
v1y11knrfykvee  
>tr|E5QVB2|E5QVB2\_STAAH  
mksnqnicvigaanidkqly1kxelvnkssnpvssisvsggvarnlaynig1snkkt11t11gndkeadyilneankf  
id1khikiienmtgmfts  
vidyngem1cgfadmdiy1lvnky1nekieviknadcvvdsnipkesiqyliqlcgksnipigiipasikkvrn1kn  
lakidyli1fnkkeaeafwn  
vs1ntksdykk1kq1sktseiknivi1tngnddi1fytngel1sifknvqqssni1ndtgagdvfsasvfhyw1enyevdny1  
ema1fnacstvstiyntsm  
in  
>tr|E5QVB3|E5QVB3\_STAAH  
mek1nqvm1yvddvekaka1fwte1lefvvvsetplaedyvavevsptkdaets1timakefiekyspevn1gtps1mfke  
knfdalysk1nd1gl1tghd  
ivemngqr1vfnfdqggnyfavsd  
>tr|E5QVB5|E5QVB5\_STAAH  
mnkqwwkeavayqvyprs1fnds1hdg1gd1pgmi1dk1dy1kd1gi1dvi1w1spmfkspnddngydi1sdyqe1mdefgtmed  
fdr11kgvhdrgmk1i1ld1  
vvnhtsdehpw1fiesksskdnprkrdwy1wqdpkpdgsepnnwes1fngstweydanteqyyf1lfskkqpd1nwg1npevr  
davfemmnwwfdkgidgfr  
vdai1thikktfeag1lpypegktyapa1fdvdmnqpgi1qtw1qemkdrs1skydimtvgeangvspddaddwvgeengkfn  
mifqfeh1glwnsgdshfd  
vnsyksv1nrwqkq1enkgnaw1fienhdqprrvstwgddd1kywesatshaavy1lqqgtpfiyqqge1gmtnypfesi  
etfndvavkndyqi1vkaqg  
gdvdal1lakydenrdns1rtpmqwdd1nggftngepwpfnvnpnyktinvaqq1lededsv1qfykd1li1l1rksndvyvyg  
qfd1ldaensqv1faytrt1  
nekqvlivgn1tnheael1tvpfdi1shgevk1fnydakvn1kq11pyeacvie1n  
>tr|E5QVB7|E5QVB7\_STAAH  
mstknkhipc1iti1fgatgd1shrkl1fpsi1fhlyqqdn1dehia1igigrdi1tnddfrnqvks1iqkhvkdtnkida1fm  
ehvfyrhdvsneesyqe1

Tsompanidou\_et\_al\_Supplemental\_FASTA\_File

ldfsnel dsqfelkgnrlfylvlamapqffgvisdylkssgltdtkgfrlviekpfgsdllksaealnqirksfkeeeiyr  
idhylgkdmvqnjevlfra  
namfep1wnnkyisniqvtseilgvedrggyessgalkdmvqnhmlqmvallameapislnsedi raekvkvlkslrh  
fqsedvkknfvrqgyegey  
idgkqvktyrdedrvaddsntptfvsqgltidnfrwagvpfyirtgkrmskti qvvvefkevpmnlyyetdklll dsnll  
viniqpnegvslhlnakkn  
tqgi etepvqlsysmsaqdkmntvdayenllfdclkgdatnfthweelkstwkvfdaiqdewnmvdpefpnyesgtngpl  
esd111ardgnhwddiq  
>tr|E5QVB9|E5QVB9\_STAAH  
mklvfygagnmagai ftgi nssnldandiylnksneqalkafaeklgvnysyddatllkdadyvflgtkphdfdalat  
rikphitkdnfcisimagi  
pidyikqql ecqnpvarimpntnaqvghsvtgisfsnfdpkskdeindlvkafgsvievsedhlhqvtaitgsgpafly  
hvfegyvkgatklglekeq  
veesirnl iigt skmiersdl smaqlrknit skggttqagldt lsqyd lvsifedc lnaavdrsiel sniedq  
>tr|E5QVC0|E5QVC0\_STAAH  
mkgqhfi vtggtsgl glsivrkl lenkvhtllvrddvkatri fdqelgktinvipcd lndlksiqalqfednt lfdgfi  
ysaglg yfksisdhsfsem  
ietyqlnlisfnvlytv lrpyltsnahivgissqaafstqanaahygaskagfya lma nrlrespnlhimtvnvgp idtp  
fhqkadpsmkyakkmkim  
ldanqlaediiygiktkql einrpkw mha l kmyqi aprffercfpl fknka  
>tr|E5QVC1|E5QVC1\_STAAH  
mamncqsesvvr lcvryaeqlsvfeeftvldil sdisvdqisdstlyytcekfkl l vlgqnvlgvqv itnndeltcevky  
rkmf  
>tr|E5QVC3|E5QVC3\_STAAH  
mdlnektidrtviyngki vdviehtvt l pnetstrelvyhngavavcaltpkkevvlvkqyrkpv ekplleipagkled  
dedrveaakreleeetgyi  
akelthvvdmygspgfcdeqlsiyftdnveegtvlhdedefvevikvpienvksmlmnkeiedaktialqhlllnynhs  
k  
>tr|E5QVC6|E5QVC6\_STAAH  
mqqalinfyqfhtkqhyflchdi ledawkaennyskdavvsllifatacyhyrrnllkgayksfnkskei iqnakdrd  
alylnlndyql liekqiak  
lnaakpfssvilp itp dferi ikany pdydynhetatdpfivdhmrrdrseviaakeeaiqlrkhrn  
>tr|E5QVC7|E5QVC7\_STAAH  
mtqyevdimyevkl dafngpldl lllhliqkfeidiy dipmqa lteqymqyvhamkql einiaseylvlase llmikskml  
lpqstsdi dddd predlv  
grlieyqnykeytai lndmkeerd fyftkrptelshletdeswdpnhtidltelivayqrvknrvelntpsveirketf  
tiqqateqvtsr lkdkdhf  
nffs lftfsepi eqvthflailemskagi inieqqrnfediniirgvnyhfg  
>tr|E5QVD1|E5QVD1\_STAAH  
mmsrlnsvviklwl tiilivttv lillisialitfmqyyftqetenairedarrisslveqshnkeeaikysqtlienpgg  
lmiinnkhrqstaslnik  
kqmlnevvnndhfdvfdkgksvtrnvtikekgssqtyillgyptkaqknshskysgvfiykdllksiedtnnaitiitii  
tavifltittvafflssr  
itkplrrlrdqatrvsegdysykp svttkdeigqlsqafnqmsteieehvda l stsknirdslinsmvegvl ginesrqi  
ilsnkmandimdnidedak  
afllrqiedtfkskqtemrdlemntrffvvttsyidkieggksgvvvtvr dmtnehl dmqkkdfianvshe l rtpisl  
lqgytesivdgivtepdei  
keslai v ldeskr lnr l vne llnvarmdaeglsvnkevqpiaalldkmkiky rqqaddlglnmtfnyckkrvwytdm d r m  
dqvltnlidnasrytkpgd  
eiaitcdenesedi lyikdtgtgi apehlqqvfdrfykvdaartrgkqgtglglfickmiiehggsidvkselgkgttf  
iiklpkpe  
>tr|E5QVD2|E5QVD2\_STAAH  
mkkfigsvlattlilggcstmenesskdtntetksvpeemeaskyvgqgfppaekdaiefakkkhdkiakrgeqffmdn  
fglkvkatnvvgsdgdev  
fvhcddhdivfnasipfksiesdsslrsedkgddmstlvgtvlsgfeyrahkqel ds ltevlkeykskykytgytena  
imktqnsgrneyyyltai  
pytldeykkyfqplikeddktfsdgmknkkqlkdksrpyvvtlfstkdnytkdntidemidfsevlkkkniphdlv  
slqitdkyinsarpsyskk  
dsievgvfnhekn  
>tr|E5QVD3|E5QVD3\_STAAH  
mkkindr llaelsgywayqldkryvirvnnkyrliedysdnpsksfggdakvfe l vnsnel t g q q a i i f g g t n n n  
ksigsnpfrgkvaddwie  
nikl mndknkstsll eqn nayiksyeklk d adt l k s s d f l r k y k n p s t y k n t i k s d g g n s q g g a s a n h q g m i n p n k n  
ivstnpam l p k s i w e n f k s  
qnfenmi nyhskfdi lswl qdpfatptlgkrvnletgvptmdglv nshlgykrkl npryntykd lavykiksvkdtmikn  
gkvvkktieidinmdrip  
inwvtgdsiartgktpiklnlenlsalnlvtgetsmltdcvnylnesynisqvenanfgerkhklkqdfkkivevdi  
legmsreltslkkdafsai

Tsompanidou\_et\_al\_Supplemental\_FASTA\_File

dnvknlnvgiafifssvavlifelniteemledlekkqlrgieslhdslndvikemfknldhdfedgvteemkhlInvvn  
nninfvkkqndvygeqitd  
iknimshqdatvmdgnlsinysgehmisgqvqssnyltrkmtilknhidnavnkisdyvqeyannyfepvlnyilevihs  
vetavrhiyeissliykv  
mkikikamginvdeidknlevlksklknldflnlnktaspilenhlddivrnmkplivnqifepshyddifnsrkalt  
vfssv  
>tr|E5QVD4|E5QVD4\_STAAH  
mwiekfknknnetkyryyekydkpytdkwkrvsvlnkntkqsqkeamfrleekikeklnkssselktltfhalldewl  
eyhiktsgsklttlnniki  
riknikrycsenlllnkldtkymqifinklsdiysqnqvtrqlgdmkgaikyavkfynypneylltnvkipkrrktied  
ekdeskmynylemnqvlqi  
rdhilndnklnkrnriliasilevqaltgmrigelqalqekdidllnktinitgtihrikyeegfykdttktis  
sinsrtveifkkiilenkm  
lkrwnssyvdrqfifttkgnplcnnqiagvlkttkalmnkvtthtfrhthitllvemnvsalkaimkrvghvdekt  
iriythvtekmdreltqkl  
enips  
>tr|E5QVD5|E5QVD5\_STAAH  
mtqflgallltgvlgyipykyltmiglvseknkiintpvlifsietcliwfytfiifnvdlnklsllqlltgkaniw  
fliifvltvlfvfnplivkf  
iwlinetrkfmnlcislldkrdklfnngkpvfivikdfenriieegeltynsagsdfdleverqdfkvsdlpsnd  
elyikhtlvdlkqkikldl  
ylmney  
>tr|E5QVD8|E5QVD8\_STAAH  
myqmglyeetliqhdyeireadvlpndlgvwlgdliikrglsdrekagilfeelahnklygdiadyskfnnrkfen  
yarrhgfi savplreivea  
ynygvrnllyelseylqlseeyileaeqykkiygigthygeysitfeplrvfkykei  
>tr|E5QVE0|E5QVE0\_STAAH  
mpidakllkskmalkehniktiseeigvnrtdlsmihgrtkpsypvingiyfaleltpqeardiiffnedlrkkkvlt  
>tr|E5QVE1|E5QVE1\_STAAH  
mqalqiveqnethyvsrevaemigrhdnlvrldikgyikvledssklsshnffestyvnsqnkvqpcylltkkgdiv  
ankmtgskgiltatyvda  
fhkmdeyikqqaqlnvpqtpmqalemmfkaqkdqeqfnkqmqqeitgirhivgi etknwrndtnkmlsai aqhlgggamh  
qkvkseaykaleekgrcnl  
kirmqnrkgkmlangatktqinklskldvitdeprlveiyisviksmaikygvdisqfei  
>tr|E5QVE6|E5QVE6\_STAAH  
meqqmkksegldiriprvfrrdhapvesltenerlrkeilesikkgyysyleinkvfya ldrelqyrannski  
>tr|E5QVE8|E5QVE8\_STAAH  
msdyksylvavlcftvlai vimpflyfttawsia gfasiatfifykeyfyge  
>tr|E5QVE9|E5QVE9\_STAAH  
mtlqqkilshfatydnfnssddvvevf giskthakstlsrlkkkgkieleswgiwrvvepqhlhtvverkkeileeqfell  
arlneqsddpreieerikl  
mirlanqf  
>tr|E5QVF0|E5QVF0\_STAAH  
mavledi feelkllnkslrvln telstvdssivqekvkeampkeetaql esieevketsadl tkdyvlsvgkeflkkad  
tsdkkefrnklnelgadkl  
stikeehyekivdfmkarina  
>tr|E5QVF1|E5QVF1\_STAAH  
mkl dhsnrahaklsasgakwlnpcpsikasegi adkssvfaeegtfa helselyfslkyegltqfefnkafqnykrnqy  
yee lreyveeyvanveek  
yNeal srdddvia l fetkl dl gkyvpesfgtgdvii fsggvlei idlkygkievsaidnpqlrl yglgayellsmydi  
htvrmtii qpridnfstee  
lpirllqwgtdfvkpl arlayngegef kagshcrfckikhscrtraeymqnvpqkpphllsdeeiaellyklpdikkwa  
devehya ldqakgndknyp  
gwk lvegrsrmm tdtkatlek lveagykpeditetkllsitlekligkka fskitegfiekpqqkltlatesdkrpai  
kqaeddfdkl  
>tr|E5QVF3|E5QVF3\_STAAH  
mkfmmidietyssndiskcgaykyteaedfeiliiaysidggaisaidmtkvdnepfhadyetfkialfdpavkkyafna  
nfertclakhfnkqmppee  
wictmvnsmriglpasldkvgevlrlqsqdkagknli ryfsipckptkvnggrtrnlpehdlekwaqfidycirdveve  
maiankikdfpvtaieqy  
wvfdqhindrgiklslsmlganvldkqskee llkqakhitglenpsptqllawl kdeqgl dipnlqkktvqeylkeat  
gkakkml eirlqmsktsvk  
kynkmhdmmsdervrgl fqfygagtrwagrgvqlqnltkhyis dteleiardlikeqrfdldlllnvhppqdllsqlv  
rttftaeegnelavsd fsa  
iearvia wyaqewrldvfnthgkiyeasasmfnvpvesitkgdplrqkgvselalgyqggagal kamgalemgieen  
elqglvdswrnanpnivnf  
wkaccqaaitvksrkththglrfymkkgflmie lpsgralaypkalvgenswgsqvvefmgldlnrkwsklkyggkl  
venivqatardllaisiar

Tsompanidou\_et\_al\_Supplemental\_FASTA\_File

lea1gfki vghv hdeviveiprgsnlkeietimkpvdwakgl nlnsdgftspfy mkd  
>tr|E5QVF4|E5QVF4\_STAAH  
mtikeleekfnisryfvvkhdrdwetgeiigtyivldeyadhidi eveevi  
>tr|E5QVF5|E5QVF5\_STAAH  
mqqqayinatidiri pteveyqh fddvdkeketlsdyl nnpneileydnl kirnvveve  
>tr|E5QVF6|E5QVF6\_STAAH  
msivkingkpykftehene likngltpgm vakrvrggwal leal hapygmr laeykeivl skimeresvmarqrrkeae  
lrrkkphlfnvpqkhsrdp  
ywf dvtynqm fkkwseaq  
>tr|E5QVF7|E5QVF7\_STAAH  
msiisnrkvdmetqdnvkqpahytygdieiidfieqvtaqyppqlafaignaikylsraplknghedlakakfyvqraf  
dlwd  
>tr|E5QVF8|E5QVF8\_STAAH  
mtmidnvckeylnqffgskrylyqdnervahihvngtyyfhghivpgwqgvkktfdtaeetyikqhgleyeeqkqlt  
lf  
>tr|E5QVF9|E5QVF9\_STAAH  
mnnreqiersvisasayngndtegl1keiedvykkaqafdeileglpnamqysl kedigldeavgimtgqvvykyeeeqe  
ne  
>tr|E5QVG0|E5QVG0\_STAAH  
mnn1lqvkl1sknarnpernhktdagydi fsaetvvl epqekaviktdvavsipegyvglltsrsgvsskthlvietgki  
dagyhgnlginikndnetl  
esedmsnfgrspagidgkyarl pvt dki l cmngsyvinkgdklaqlvivpiwtpelkqveefesvsergakgfgsgv  
>tr|E5QVG1|E5QVG1\_STAAH  
mtqylvtffkdstgrkthitkaksnrftvieaqskeeakekveetyng  
>tr|E5QVG2|E5QVG2\_STAAH  
makr1khdiyralgeyi inrsi1lneeqlk vakeykipilmkmyrkvskekrkrkiki fikkipeyilsfiyalmywati  
pfdyignkaddlrvsygnn  
rgynrfskarke1neyaynevlprleeketddmteihqrf1kdkgivelikk  
>tr|E5QVG3|E5QVG3\_STAAH  
mikqilr1lfl1lameylgkyvteqvyimmtanddveapsdfekiraevsw  
>tr|E5QVG4|E5QVG4\_STAAH  
mfsnstggvnmwivisiv1sif1l1l1ssishkmtiealey mnayl fkqlvkngvegledyeneverirkrfks  
>tr|E5QVG5|E5QVG5\_STAAH  
mldkvtqietikydrdvsysyaasr1sthwt nhn mawsdfmqklaqtvrtkedl teynkmskseqadikdvvggfvgy1k  
egkr ragqvmnrsm1tdi  
dyaaqdmt dilsmfydfayc1ysthkhreispr1r1v1plkrvnadeyeaigrkvadivgmdyfdtttyqphr1mywps  
tsndaeffftyed1p1ldp  
dkilneyvdwtdt1ewptssreesktr1adkqgdpeekpgivgafcraytieaie t fipdlyekhstnrytyhegsta  
gg1vlyennkfayshhntd  
pvs gmlvnsfd1vr1hlygaqdedtktdi pvnrlpsykamqraqndeivkkqlindkmt damqdfdeiensddawsetl  
eitskgtfkasipniei1  
rndpn1kgkiafneftkqieclgkvpwntnfktrqwgdgddss1rsyiekiy di hsgktdaiisvamqnayhpvr dy1  
nkiswdghkrlek1fikyl  
gvedtevrntttkka1tagiarvmepgckfdym1tlygpqgvgsa1lkk1ggawfsd1svvtgkeayealqgvw1mem  
aelaatrkaeveaikhfis  
kqvdrfrvayghyiedfprqci figttnkvdf1rdetgrrfwpmtnpervevnwsk1tkeeidqi waeakyyeeggee  
1flnpeleemrsiqskht  
eespytgiideylntpipsnwed1tiferrfyqgdvdm1ptgnvdyierdkvcalevfvecfgkdkgdsrgsmeirkis  
nvlrqlndnwsyvegknsgk  
irfgkdygvqiayvrdes1ed1i  
>tr|E5QVG6|E5QVG6\_STAAH  
mkest1ekylvkeitk1nglclkw vapgtrgvpdrii1mp egktyfvemkqekgk1hplqkyvhrqfenrdhkvyv1wnk  
eqvntfirmvggtfgd  
>tr|E5QVG7|E5QVG7\_STAAH  
mehlaidfkphsyqkyaidkvidnekygl1dmglgktvst1tafse1q1ldtkm1viapkvakdtwvdevdkwnh1n  
h1kvs1v1gtpkernaal1n  
teadiyvtnkentkw1cdqykkewpfdmvide1stfkspsqrfsikkk1plinrfigl1tgtpspns1qdlwaqvyli  
drgerlessfsryreryfk  
pthqvsehi1fnwelrdgseekiyeriedic1smkakdf1nmp eridtkqtvalsdkerkvyeeleknyil eseeegtva  
qngas1sqk1l1q1sngavy  
tddedvr1ihdkk1dkleeieesqqp1l1fynfkhdkerilqrfkeattledsnykerwnsgdik1liah pasaghl  
n1lqqgghii1vwfg1tws1e  
lyqqanar1yrqqnhtti1hhiitdntidqrvyka1qnkeltqeelmkaikariakhk  
>tr|E5QVG8|E5QVG8\_STAAH  
mgkasydikpgtfkyieseylnqenkeinr1rmeilnptkel dtnivygp1kqgepirttelmatr1l1tnkm1rnlee  
mveaveseylklpedhkkv  
ir1kywnkdkk1k1eqigdachmhrntvttirknfvkavayahagik  
>tr|E5QVH1|E5QVH1\_STAAH



Tsompanidou\_et\_al\_Supplemental\_FASTA\_File

mtikvlnepspkllttwyaeqvttgkiktskyvkkecerhlrylenggkwvdeealahrpirfiekfckpskgskrqlvl  
qpwhfiigs1fgwvhet  
klrrfrealifmgrkngktttisgvanygvsqdgengaeihllanvmkqarilfdeskamikaspilsrefrplrdeihy  
dktiskimpqasdsdkldg  
lnthmgi fdeihfekdyklisviknsraarlqplliyittagylgdp1vdmvemgrdilgdviedertfyylasldddd  
dmndssnwikanpnlgsi  
dleemkeewekakrtpaergdfitkrfni fanndemsfidyqtlqknndvia1ddlegrpctigydlsetedftaacatf  
aldngkvav1shwipkhh  
veysneki pyreweedgl1tvqdkpyidyqdvlnwiikmnehvvekitydranafkl1nqelknygfeteetrqgal1s  
palkdlkemfldgkii fnn  
nplmkwyinnvq1kl1drngw1pskqsryrkidgfaaf1ntytdimnkvsdsgegniefisikdimr  
>tr|E5QVH4|E5QVH4\_STAAH  
mrnfkndnel1ggemptlyelkqslgmigqqlknkndelsqkatdpnidmeyikqletekag1qrrfniverqvadiee  
kekavkdkgeayqslsdn  
ekmvkakaefyrhailpnefekpsmeaqr1lhalptgndsggdk1l1pkl1skeivsepfaknqlrekar1tnikgleipr  
vsyt1dddfitdvetake  
lkakgdtvkttnkfkvfaaisdtvihgsdvd1vnwvenalqsglaakerkda1avspksglehmsfyngsvkevegadm  
yda1naladlhedyrdna  
tiymryadyvki1sv1sngtt1ffdtpaekvf1gkpvvftdaavkpv1vgdfnyfginydgttytdkdvkkgeylfv1taw  
yqqr1ldsafriakaken  
tgp1ps  
>tr|E5QVI1|E5QVI1\_STAAH  
mikfeikdrktgktesytkedvtmgeaekcyeyel1vnqenkkeapnatkmrkerq1lvd1fkdeg1teedv1nkmstk  
tytkalqdi freingedee  
dsetepeemgktee  
>tr|E5QVI3|E5QVI3\_STAAH  
mearkevmnekvegmt1el1dh1gvqegmkg1krq1gvvnsemkan1safdkseksmekyqarikg1ndr1kvqkkmy  
sqvedelkqvnanyqkaks  
svkdvekay1kl1veankkek1al1dkska1kssnte1kkaenqyrtnqrkqdayqk1kq1rdaeq1knsnqattaq1k  
rasdavqkqsakhkalveq  
ykqegnqvqk1kvqnd1ksndkiessyaktntk1kqtekefnd1nntikhsanvakaetavnkekaal1n1ersidk  
asemktfnkeqmi1aqshf  
gk1asqadvmskkfss1gdkmts1grtmtmgvstpit1gl1gaa1ktsadfeqmsrvgai1qasskd1ksmsnqavdlga  
ktsksanevakgmee1aal  
gfnakqtmeampgvi1saaeasgaemattatvmasain1sfg1kasdanhvad1larsandsaadi1qymgdal1kyagtpaka  
1gvsiedtsaaievl1sng  
legsagtal1rasfir1anpskstakemk1gih1sdakgefvgmgel1rqfdnmkgmtreqklatvativgteaasgf  
1alieagpdkinnysks1k  
n1sngeskkad1mkdn1kga1eq1ggafes1aievgkd1tpmiragaeg1tk1vdgft1lpgwvrkasvg1aifgasigp  
av1lagg1l1ravgsaakgy  
as1nrriaenti1sntnskamks1gl1qt1fl1g1sttgktskgfkg1agam1fn1kpinvl1knsak1ail1pfk1l1kng1gla  
aks1favsggarfagvalk  
f1tgpi1gati1aitiaykvftaydrvevfrnging1getikffggki1ggavrkl1gefkn1yl1sigksfkekfskdmkd  
gyks1sddd1l1kvgnkfk  
gfmqtmgtaskkasdtvkv1lgkvsketekalekyvhyseennrimekvr1nsgqitedkakk1l1kiead1snn1iaeie  
krnkkelektqelidkysa  
fdeqekqnil1trtkeknd1rikkeqel1nqike1keka1sdgqisenerkeiek1enqrrditvke1sktekeqerilvr  
mqrnrnaysideaskaie  
aekarkarkkevdkqyeddv1aiknsvn1sksekdk1l1aiadqrhkdevrkakskkdavdvvkkqnkdidkemd1ssgr  
vykntekwwng1kswwsnf  
redqkkksdkyakeqetarrnren1kkwfgnawdgvtktgeafskmgrnanhfggemkkmwsgikgipsk1ssswssa  
kssvyhtkaiant1stgkwf  
gkawqsvksttgsi1nqt1kqkysdasdkawahsksi1wrgt1skwfsnaysakgw1tdmanksrskwdnis1stawsnaksv  
wkgtskwfsnsy1kgwt  
gdmysrahdrfdai1ssawsnaksvfngfrkw1srtyewirdigkdmgraaad1gknvankaiggl1nsmigginkiskai  
tdkn1kpipt1stgtlag  
kgvatd1nsgal1tqptfav1ndrgsgnapgggvqevihradgtfhapqgrdvvp1lgvgdsvinandt1kl1qrmgvl1pkfh  
ggtkkkdw1dq1kgni1gk  
agefgatakntahni1kkgaeemveaagdk1kdgasw1gdki1gdvwdyvqhp1gk1vnkvmsgl1nifggganatvkiakga  
ys1l1kkk1l1dkvkswfedf  
gggdgsyl1feypiwqrfgrytgg1nfn1dgrhygi1dfgmp1gtvnyavk1ggi1advwt1dygggnsi1qiktganewnwymh  
1skq1larqgqri1kagq1g  
ksgatgnfvrgah1hfq1mqgshp1gndtakdpekwl1ks1kgsgvrsgsgvnaasawagdirraakrmgvnvtsgdvgni  
is1liqhesggnag1tqsss  
1rdin1lqgnpakg1l1qyipqt1frhyavrg1hnni1ysgyd1l1affn1rywrsqfn1prggwsp1sgpryangg1itkhq1a  
evgegdqkqemvip1trrk  
aiq1leqvmri1igmdgkpn1itvndt1stvek1l1kqi1vm1sdkgk1l1tdali1qt1vssq1dnn1gsndair1glek1l1skqsg  
hranannymgg1tn

Tsompanidou\_et\_al\_Supplemental\_FASTA\_File

>tr|E5QVI4|E5QVI4\_STAAH  
mqsfvkiidgykeevitdfnqlifldaraespntndnsvtngvdgilpgaisfapfslvlrfgygdidvidlnlfehfw  
rsvfnrrhpyyvitqmpg  
vkyavntanvtsnlkdgsssteievslnvfkgyesvnwtdseflfdsnwmfengipldftpkythtsnqftiwngsttdi  
nprfkhdllkilinlnasgg  
felvnyttgdi fkyknsidkntdfvldgvyayrdinrvgidtnrgiitlapgknefkikgdfsdiktffkfpfiyr  
>tr|E5QVI5|E5QVI5\_STAAH  
mdyhdhlsvmdfnelicenlldvdygsfkeyyelnearyitftvyrthnsfvfdllicenfiyhgekytikqtapkve  
gdkvfi evtayhimyefqn  
hsvesnkl ddssetgktpeysldeylrygfanqktsvkmyki igdfkrkipidelgnknngleyckeavdlfgciipn  
dteicfyspetfyqrsekv  
iryqyntdvtvsatvstlel rtaikvfgkkytaeekknynpirttidikysngfikegyrtatigskatinfdckygnetv  
rftikkgsgggiyikli dg  
kqikqiscfaksqsetidliknidkgkhvlemi flgedpknridissnkakpcmyvgtekstvl nliadnsgrnqyka  
ivdyvadsakqfgi riant  
qtnedietqdkll efakkqindtpkte ldvnyigyeki eprdsvffvhelmgyntelkvvkl drshpfvna ldevsfsne  
ikdmvqi qqa l nrrvi agd  
nrynyqanrinhlytstlnspfetmdigsvli  
>tr|E5QVI6|E5QVI6\_STAAH  
mtl pki gkpatralnsqgiytledvsqytksslmemhgvgpkaisileqalfqhqlhfktevhsslpfl l tgdvpcnhap  
krqqmidfivataaldiel  
lrs lvttefiwsvpghfdiygpqil iqel snhykeiaslniqsi ithgyfgsmhgsqil ktgkeihfahffefenhkkda  
kl skvtsyivvg  
>tr|E5QVI7|E5QVI7\_STAAH  
mnte ykk g i f l a s a y i l w g i l p i y w q f v d a i g a f e i l a f r i i f s v i f m i f i l a v g q k r n a f q r d m n q l l a k p i q l l a i  
v v a g y v i t l n w g t f i w a v t  
n g h v l q t s l g y i n p l v s i l l a l i f l k e r f n k f e w l a i l f a f i g v l y m t l k i g e f p i v s i i l a l s f g t y g l l k k v v h i d a  
i s s i t i e c i v t a p a g l i y v  
i y l w q q h q m s f g l n m s s f w l l f s g a i t a i p l i l f s a g a k r i p l s l i g f i q y v g p t i m f v l g i f v f k e p f s i d q l i t f i f i  
w t g i v l y s l s q y i k l k k h p  
v a k t l  
>tr|E5QVI8|E5QVI8\_STAAH  
m i f s q n l f r r p t p a r l t r i e k s l l q a h f r s v n y c q n i v e h r t l i y v p a c f  
>tr|E5QVJ0|E5QVJ0\_STAAH  
m n k n v l k f m v f i m l n i i t p l f n k n e a f a a r d i s s t n v t d l t v s p s k i e d g g k t t v k m t f d d k n g k i q n g d t i k v a w p t s  
g t v k i e g y s k t v s l t v k g e  
q v g q a v i t p d g a t i t f n d k v e k l s d v s g f a e f e v q g r n l t q t n t s d d k v a t i t s g n k s t n v t v h k s e a g t s s v f y k t g d  
m l p e d t t h r w f l n i n n e k  
r y v s k d i t i k d q i q g g q l d l s t l n i n v t g t h s n y s g p n a i t d f e k a f p g s k i t v d n t k n t i d v t i p q g y g s l n s f s i n  
y k t k i t n e q q k e f v n n s q a  
w y q e h g k e e v n g k a f n h t v h n i n a n a g i e g t v k g e l k v l k q d k d t k a p i a n v k f k l s k k d g s v v k d n q k e i e i k t d a n g i  
a n i k a l p s g d y i l k e i e a p  
a p y t f d k d e y p f t m k d t d n g y f t t i e n a k e i e k t k d v s a q k w e g t q k v k p t i y f k l y q d d n q n t t p v d k a e i k k l e  
d g t t k v t w s n l p e n d k n g k  
t i k y l v k e v n a g g k d t t p e g y t k k e d g l v v t n t e k p i e t t s i s g e k v w d d k d n q d g r p e k v s v n l l a n g e k v e t v d v t s  
e t n w k y e f k d l p k y d e g k k  
i e y t v t e d h v k d y t t d i n g t t i t n k y t p g e t s a t v t k n w d d n n q d g r p t e i k v e l y q d g k a t g k t a t l n e s n n w t h t w  
t g l d e k a g q q v k y t v e e l  
t k v k g y t t h v d n d m g n l i v t n k y t p e t t s i s g e k v w d d k d n q d g r p e k v s v n l l a n g e k v k t l d v t s e t n w k y e f k d l  
p k y d e g k k i e y t v t e d h v k  
d y t t d i n g t t i t n k y t p g e t s a t v t k n w d d n n q d g r p t e i k v e l y q d g k a t g k t a t l n e s n n w t h t w t g l d e k a g q q  
v k y t v e e l t k v k g y t t h v d  
n n d m g n l i v t n k y t p e k p n k p i y e k p k d k t p p t k p d h s n k v k p t p p d k p s k v d k d d q p k d n k t k p e n l k e l p k t g m k i  
i t s w i t w v f i g i l g l y l i l  
r k r f n s  
>tr|E5QVJ1|E5QVJ1\_STAAH  
m g a e l i m t t k t v f d v i d m g l g y l v n v y d t w k v e k v l d d y h k p f s n t i h w q f g h v l t i f e s a l a v a g k e n i d l n i y r p l f g  
n g s s p d e w k d e v p s i e t i l  
e s l q t l p e r a r n l t e d d l a i e l k q p i v g c n n l e e l l v l n a i h i p l h a g k i e e m s r i l k n f k  
>tr|E5QVJ3|E5QVJ3\_STAAH  
m n y q v l l y k y t t i d d p e q f a q d h l a f c k a h h l k g r i l v s t e g i n g t l s g t k e e t e q y m a h m h a d e r f k d m v f k i d e a e g  
h a f k k m h v r p r k e i v a l d l  
e e d v d p r h t t g g y l s p v e f r k a l e d d d t v i i d a r n d y e f d l g h f r g a i r p n i t r f r d l p d w i k e n k a l f a d k k v v t y c t g  
g i r c e k f s g w l l k e g f e d v  
a q l h g g i a t y g k d p e t k g y w d g k m y v f d d r i s v d i n q v k k t i i g k d w f d g k p c e r y i n c a n p e c n k q i l v s e e n e a k y l  
g a c s y d c a k h e r n r y v q a n  
n i s g n e w q q r l t n f d d l h q h a  
>tr|E5QVJ7|E5QVJ7\_STAAH

Tsompanidou\_et\_al\_Supplemental\_FASTA\_File

mkmkkqdisvktvvaigigaavfvlgrfvviptgfpntnietsyafalalisaifgpfaglmgtlghaikdfttygsaw  
wswvicsgiiigclgywigl  
klnlssgrfsrksmiyfntgqiianiicwaliaptldilinynepankvvtqgvisavl niisvigiigtillkayassqik  
kgslrke  
>tr|E5QVJ9|E5QVJ9\_STAAH  
mnqyntigfhpgrnsrihqlnatvkl1f1lvvsisamvtydtrylilisvssillfkyahiewkqrvfvkfilfftilni  
iavyifdpeygvkinygrt  
elingigrftltsqelfylfnlilkyistvplaliflfttnpshfaaslnqlgvnykisyavslalryipdiqetyfnis  
qaqgargydnskkakftsr  
vkgikrivlplifssieridistamelrqfgqkrtrwyvkkqlkddyvvlcltllllmlvvtlfflnnsryfnpwh  
>tr|E5QVK0|E5QVK0\_STAAH  
minterlnlmpssshlidlynicspqnianiytpkglhnskldtqrwiekwqnhwqyqfyfvlvkkidcsvigicgye  
yrqlkqetvlnlfyklhps  
feggyaceaitainfvnyidqktvkvirtknknrsinlaerlnfkrddtmddiinqqdivfyk  
>tr|E5QVK1|E5QVK1\_STAAH  
mhkkylllfflllsvallyscskqnekaqnksvnpneyamhkskmdewetyhgqvyhvfyhplidtpkvaftgdthqak  
gnndwmitvsefkkslnel  
yknnyii vnphdvydlsshvkakkvklpkgkpliisiddmnyssymrhgyadrldknkhvsettdskghatysd  
dndivpnlkfvkehpdfs  
lgekgvvaltgyeglygrtne1tskdytknkkaeevramkrdgsfashsyghinfektsldgikrdtkrwkdeve  
pivgktdmfvfphgtqdrh  
tqaydyldvdkagfkfiagvgpnnftdisatnvyqdrvaiddgl1f1efkyklkpfnpenvyskqdrqffkgnrdyee  
>tr|E5QVK2|E5QVK2\_STAAH  
milntvlkvkggrvnnseqlialkesetaflkyfnkadyelvdflsvleklwdkqlnhedlqqmgernfwqhehqiya1rn  
dftdqllryysmyptaaik  
vaytgliiirneaavqvglenyapslanvqqs1klfiqfiqq1rdnvhfvlghyqllda1ldkslqtpdilsmieern  
lsglvtylstehpivqilk  
entqqqlnvlheyipndhpalvelkiwerwlhtqgykdihl ditaqpprsyytglfiqchfaenesrvltggyykg sieg  
fglgl1  
>tr|E5QVK3|E5QVK3\_STAAH  
mlriaiakgrlmdslinyldaieftt1setlknrerqllsvdniecilvkgsvpiyveqqiadigivgsdilderhyn  
vnnlnmpfgachfavaak  
pettnyrkiatsyvhtaetyfkskgidvelikngsvelacvdmvdgividvqtgttlkanglvekqhisdinarl1tn  
kaayfkksqlieqfirsle  
vsiana  
>tr|E5QVK4|E5QVK4\_STAAH  
mpmlnaqqflnqfsleapldeslypiirdicqevkvhdka1kmyntfdhtktdhleisheqikaafdtldektkqalq  
qsyerikayqesikqmnqg  
leesvecyeyihplesvgiyvpggkasypstvlmtatlaqvagveni vvtppqngvsqevlaacyitqvnqvfvqgga  
qsiiaaltyg tetipkvdk  
vgpgnqfvayakylfgqvgidqiaqpteialiidtdadldaivydvfaqaehdelartyvisedaqvlkdesriakal  
pnvdrydivsksianghyl  
ihasnfdeachvmntiaphasiqtvnpqpyiekvkvgalfighyspevigdyvagpshv1ptnr tarftnglsvndfl  
trntvihl sktdfdqiads  
aqhiahealy nhqqsilirqs  
>tr|E5QVL1|E5QVL1\_STAAH  
mmksqnkysirkfsvgassiliat1l1f1sdgqaqaakqvnmgnsqedtvtasigdqqtrenanyqrengvdeqqhten  
l1tknlhndktiseenhrkt  
ddlnkdq1kddkkslnknkniqrtdtknnanprdvngl1eqa1ndgkqskvasqqqskeadnsqdlnannnlpsqsrk  
vpslnksdqtsqreivne  
teiekvqpqqknqandkitdhnfnneqevkpqkdektlsvsdlnknqkspveptkdndknglnllkssavatlpnkgtk  
eltakakgdqtnkvakqgg  
yknqdpivlvhgfngftddinpsvlahywggnkmnirqdleengykayeasifagsnydravelyyyikgrvdygaah  
aakygherygktyegiykd  
wkpgqkvhlvghsmggqti rqllellrngsreeieyqkkggeisp1fkgndnmissittlgtphngthasdlagneal  
vrqivfdigkmfgnknsrv  
dfglaqwg1kqkpnesyidyvkrvkqsn1wkskdngfyd1tregatdlnrktslnpnivykytgeathkalnsdrqkad  
lnmffpfvigtgnligkate  
kewrendglsvsissqhpfnqaytnatdkiqkgiwqvtptkhdwdhvdvfgqdssdtvrtree1qdfwhh1addlvktek  
vtdtkqa  
>tr|E5QVL2|E5QVL2\_STAAH  
magppqreigfnpstgnaswrgpnkekl dsqflqtmqvgwdeinfakisflshshwhlrslnvql eymynnikhavkrs  
qs1qtdfahrvfl1  
>tr|E5QVL4|E5QVL4\_STAAH  
maerkrikyrkliilvl siliiilpvstldghhi anaddppkklkykensa1alnyhrvrkanflnfiyffssskeik  
nysvsqsqfesqikw1ksh  
dakfl1lkefl1yqkkgkfpkrsvwinfdmdetiyanaypilkykipatgfii tghvgeenfhnldmiskkelkemyk  
tg1wefeththdmhnl skn

Tsompanidou\_et\_al\_Supplemental\_FASTA\_File

nksklmkaseatiikdlnksekyltknfkksqktiaypyglmnddklpvikaglkgygfsleekavtpnsndyyiprili  
sddafehlikrwdgfhkd  
>tr|E5QVL5|E5QVL5\_STAAH  
mvkprgreyptlksslriretaliaiscvfwyiclvvllvyigti feihdesintirvalnienteildifetmgifai  
iifvflqlay  
>tr|E5QVL8|E5QVL8\_STAAH  
mntmidyveetmkekfdlvkllnlkknkllllilpaiclvvsaaltffvmpdkytastqilvnmksssdlafqnvqss  
lqsvntyteiksprildk  
vsrefdgqystaelnsflkvtntnsqiiitvsvttgnksesdkivnriskvfahdmpkimsvdnvtlssahdnvkvsp  
ivsvnlvisiivgivilai  
iiflkelldkriktekdvessqlglpilgsiqkf  
>tr|E5QVL9|E5QVL9\_STAAH  
mfanpdsavqsivitseappagkstiaanlavayaqagyktlivdgdmrkptqhyifnlpneglslllnwstyqdsii  
steiedldvltsgpipnp  
selitsrafanlydtllmynfviidtpvntvtdaqfkskftgnvvyvnsennkdevkkgkeli eatgakllgvvln  
rmpkdkasyyayygtdes  
>tr|E5QVM4|E5QVM4\_STAAH  
mlhkrfi feetgkmi kqpfkksnigrnkmlryvtnlklakelyqaskplqedkgmielfehtfglqkelvkyvgia  
eattaalysasfinknir  
laslstigil saaykhfeaggkkaqahaldllglatlslltdfscnk  
>tr|E5QVM5|E5QVM5\_STAAH  
mrtnnhi thldaielssgwnynsklvagkna llsdslldikvlssnakgdadmletehavinamsqnegksvdalkns  
taslknnl tklkeqldktt  
h  
>tr|E5QVM6|E5QVM6\_STAAH  
mmykryepeieqarl kfkseveknngyyamnek lqkkqefngvtkqflnfntdsiddldkfkkefkpvmhlkgdalinqqllq  
slinkypqi qknmksefia  
yydkgenretvanyvwnlqksindvmqsypstkfvyqkddvpsmvdgnr lksdtnvisieggkynenk  
>tr|E5QVM7|E5QVM7\_STAAH  
mrkimrillctsiisgcsfisknqt kdi pktivsvknydgkyigehkkrnevflkhhkgeaikkykdyvkdftgydckin  
lveaytnksgfsekr  
>tr|E5QVM9|E5QVM9\_STAAH  
mskrqkefhds lanektrvrlyksgknwvksigikeiemfkimglpfishslvsqdnqsiskkitgyglkttaviggaftv  
nmldhqqafaasadapl tse  
lntqsetvgnqsttieaststtdstsvtknssseqtsnsdtvsseksentsttntstsnqqekltstsestspknttss  
sdtksvtsissstdqqtnts  
tnqstasnttsqsttpasanl nktsttststapikl rtfslamstfasaattsavtantitvknknlkqymttsgnaty  
dqstgivitl tqdaysqkga  
itlgtbridsnksfhfsgkvnlgnyegngnggdgigfafspgvlgetgln gaavgigglsnafgfkldtyhntskpnaaa  
kanadpsnvaggafgafv  
ttdsygvattytssaadnaaklvqptnntfqdfdi nngdtkvmtvtyagqtwrnisdwi aksgttnfslsmtastg  
gatnlqqvqfgtfeytesa  
vtqvryvdvtgkdiippktysgnvdqvvtidnqsa l takgynytsvdssyastyndtnktvkmtnagqsvtyyftdvk  
aptvtvgnqtievgktmnp  
ivltttdngtgvtnvtglpsgl sydsatnsiigtptkigqstvtvst dqannksttftinvvdtaptvtpigdqs  
sevyspispikiatqdnsg  
navtntvtglpsgl tfdstnttisgtptnigtstitivstdasgnkttttfkyevtrnsmsdsvstsgstqqsqsvstsk  
adsqsaststsgsivvsts  
astskstsvslsdsvskslstsesnsvsststslvnsqsvsssmgsksvskstslsdsisnssstekseslststsdsl  
lrtstslsdsvsmstsgsl  
sksqslststsdasstsvsdstnsistse lsdststsdsvsgslsiatsqsvstsssdsmstsemidsmstsgsl  
aasdkmsvssmstsgs  
gstsesl sdlstsdskslslstsqsgststststssvrtsestsgstsgmsasqfdstsisstsfdsstsdksasta  
seseisqsvststsgsvst  
stslstnsertstsmstslstsesdstdststsdslseaisgsestsisl senstsdseksasaflesl sest  
sestseslsgstsdstsl  
dsnesgststslsnstssstsisstisgsastsayksdsvstslstststslsdstslstslsdasgsksnslsasms  
tdsistrkeslststsl  
sgstsesesgstssesksdstsm lsmqsisgsts vstsesl sdststslslsasmqsgvdsnsasqsaststst  
sedsqstssytsqstsq  
estststslsdstsmstsqsgststslsgsesedsqsisstasdstseststslsdststsnstsestskai st  
asasesdstdstslsdsgst  
srstasgsastststsdrrstaststsmrtstl dsqmsl stststsvsdstslsdsvsdstsdstststsgmsasi  
slsdstststasevmas  
idsqsmesvndsesvsesnesedskmsgstsvsdsgslsvstslrksevsessslsgsqmsdsvstsdssslsvs  
tsqrssesvsesl sds  
stsgstststsgl stsslngsesvessslsysismststsdslsgsislsgstslstsdslsdskslssqsm  
sgseststsvsdqsst

Tsompanidou\_et\_al\_Supplemental\_FASTA\_File

nsqfidsmsisasesdsvsstsdssisrsnststslstsdsmgsvsststslsdsisgtsvsdsststseslsdsma  
qsststasgslststst  
smsaskstsqstsvstslstsdslststsisisgsgsaveseststsdstslsdeslstdsdstststsgstsgstst  
stseslsmgsdtsvsds  
tsmsedstsvmsqdkdstslsdsesvststsmstlstdststseslstdsmgsqsisdststsmstsmststst  
msgststsesnsmhpsdm  
smhthststsrssseattstsesqstlsatsevtkhngtpaqsekrldptgdsikqngllggvmtllvglgmkrkkkk  
dendqddsqa

>tr|E5QVN0|E5QVN0\_STAAH

mlkllqqeykiiykriyltcfilfiyilgtnisivsnydmqvkhesffkiaismggdvntlniftlglgpwltsmiil  
mlisyrnmdkymkqtslek  
hykeriltlilsviqsyfviheyvskervhqdnilytililvtgkllvwladknsrygiagmpivmvsiiksmmhqkm  
eyidashiviallitlvi  
tlfillfielvevripyidlmvnsatnmrsylswkvpagsitlmsisafvflksgihfilsmfnkdvsddmpmmtfds  
pigisvylviqmllygfis  
rflintkqkskdfksgnyfsgvkgpdkdterylnyqarrvcwfgsalvtviigislyftlflvphlsteiyfsvqlivlvy  
isinaetirtylyfdkyk  
pflnqyw

>tr|E5QVN2|E5QVN2\_STAAH

mmpkrfrvlqigddlepi fqhkkgvswdyfdiglfefdsogyveaieaiveaegrdfiyiqapyseltlnllqmisepey  
ntyvdesfwsveyeqden  
qkyvvpplhyrneernnkleavsfsggygdkvspkialvhpnfkgdvvyqgnseltsgefgekfkpiaswqnnlvdyk  
dkviiqwpfdidgaveiq  
ytfriqtgadgalieqiiitddmldspieiptkpfdayisvtvkargngtvhlgpikrwsrlmdgqflgggrfvdqsq  
rgefiiyfhpgdmkpplnv  
yfsgrtaegfegyymkrmapfligdprveggfgyisseyeqgiinvieetleklnfkshelilsglsmgsfgaly  
ygaqlnpqaiivgkplvni  
gtiaehmrllrpeefgtaidvlsnegdtsqasiqalnkqfwqtfqkkslsqtvfaiaymqhddydpahafqellpvltah  
qarvmnrsipgrhnddspt  
iaswfvnfyiniiledkfgvqhaekqni

>tr|E5QVN3|E5QVN3\_STAAH

mihlplqvglifttlfwktslgefmlknktfkvtwnyisqttfmygskvsfsngevtfinplmpsglpihewlmlkqf  
sqyksapslpirrggqhyk  
lhfdfdatpagsvyfiinfynkngtklsteivksnsitiqypdeayaykikmnaastslifrcilitemthqdnleyks  
mrvtkigddqygndrinvi  
iaepsdayptisndflksfghvwlverwmdniegnikqlkndlqsqdtlkainlisygsksnvfatyvaqhlcdkvyrt  
sheddlkewftehvpgh  
elkdtnevvyfkeeqdnhlnymrlnmpvrfldyldvsklnggevnet

>tr|E5QVN5|E5QVN5\_STAAH

mtiyninfgigwassgveyaqayrakllrrtnqdtkfvlfdi qseniqtltnqigfedqeviwlyqyfsdisiapttyt  
lddiereighdisfrerng  
kivrlyfngkssfvtyclneqkdivdraefvinsmlvrkdfysytrifseyyapadnkaklymrqfyngensityneyi  
gdssiyvfedavlynkte  
fiayflqrlnlrrddivildrasdiggavlqhkgsdkvgvihadhysnmseqhilwnnyeyqfskakyidffitatt  
diqnhmvrqfegyggyrp  
rvyti pvgisidal syptlsrkpyamisarslanekhidwlvkavivakrqvpeltdicgegsektlrkiidthraqdy  
irllghvkldeiytdyelf  
lsastsegfgltlmeavgsnglmiglnvnygnptfirdgengylvpfdtdedsdvdvaklahavmyfngpqtphyis  
yevaqqfntqdiilkwetl  
vqevlhd

>tr|E5QVN7|E5QVN7\_STAAH

mlmakyrgkpfqlyvklscstmmatsiiltnilpydaqavsekdeiskekllskqdlldkvdkanrqieqlkqlsaska  
hykaqlneaktasqideii  
kraneldskdnkgsqiemngqsdiskldqllkdlnvsskvdrgqqsdeddlnamkndmsqtattkhgekddkndeamv  
nkaledldhlsqqihksed  
savsttdnnhevaktpnndgshvlnkflsneenqshsnrltdklqgsdkinhamiekaklaksnastqhytyhklntlqs  
ldqriantqlpknqksdlm  
sevnktkeriksqrniileeartddkhatqrilesifnkdeadkilkdirvdgktdqqiadqitrhidqlsltsddl  
ltslidqsqksllisqil  
qtkl gkaeadklakdwtnglsnrqivdqlkkhfastgdtssddilkailnnakdkkqaietilatrierqaklladli  
tkietdqnkifnlvksaln  
gkaddllnlqkrlnqtkkdi dyvlspivnrpslldrlnkngkttldnklnlmmnqgsnlldsipdiptpkpektlrlgk  
ngllsgllnadgnvslpka  
getikehwlpisvimgangvimiwlrrnklnka

>tr|E5QVN8|E5QVN8\_STAAH

mkmsrktallvlmdqegiassvprikniikanqraieaarqhripvifirlvldkhfndvssnkvfstikaqgyaitea  
dastriledlapledepi  
skrrfsaftgsylevylrandinhvlvtgvstsgavlstalessvdkdyitvledavgdrsdhdfieeqilsrscdie

Tsompanidou\_et\_al\_Supplemental\_FASTA\_File

sveswkss1

>tr|E5QVP7|E5QVP7\_STAAH  
mnlffntrrvttkgvynmkkskrleivstivkkhkkykkeqisiyieeyfgvrysattiakdlkelniyrvpidcetiwy  
kainnqtegemrefkhyk

ehev1ssiingayiiivktspgfaqqinyfidqlnieeilgtvsgndttliltasndmaeyvyaklfk  
>tr|E5QVP8|E5QVP8\_STAAH  
mnnknlfcitctqvssyyltcvrvflwkerihshsfdciknfiqhvfvvfe

>tr|E5QVP9|E5QVP9\_STAAH  
mtdgpikvnseigalktvllkrpgkelenlvpyldgllfddiptylevaqkehdfhaqv1reegvevlyleklaesien  
pqvrsefidv1aeskkti  
lgheeeikalfatlsnqelvdkimsgvrkeeinpkcth1veyddkypfyldpmpnlyftrdpqasighgitinrmfwa  
rrresi fi qyivkhhprfk  
danipiw1drdcpfni eggdelvlskevlaigvsertsaqai ek larri fenpqatfk kvvaieiptsr t f m h l d t v f t m  
idydkftih sai l k a e g n m  
nifii eyddv nkdis ik q s s h l k d t l e d v l g i d d i q f i p t g n g d v i d g a r e q w n d g s n t l c i r p g v v v t y d r n y v s n d l l  
r q k g i k v i e i s g s e l v r g r  
g p r c m s q p l f r e d i

>tr|E5QVQ0|E5QVQ0\_STAAH  
mteiqkpydlkgrsllkesdftkaefeglidfaitlkeykkngikhhylsgkniallfeknstrtraaftvasidlgahp  
eflgkndiq1lgkkesvedt  
akvlgrmfdgiefrgfsqqavedlakfsgvpvwngltdwhptqmladfmtikenfgyleginltyvgdgrnniahs1mv  
agam1gvnvrictpkslnp  
kdayvdiakekasqyggsvmidniaeaventdaiytdvwsmsgeese feqrinllkdyqvnqqlfdltgkdstiflhc1  
pafhdntlygqei yeky  
laemevtdqi frsehskvfdqaenrmhtikavmaat1gs

>tr|E5QVQ1|E5QVQ1\_STAAH  
mnesgdnk1sksslglvigmiggafnismdmggkagglaiiigwiitaigmis1afvfqn1tnerpel d g g i y s a q  
agfgdfvgf1sawgywfsa  
flgnvayatllmsavgnffpifkggnt1psiiivasllwgvhflilkgvetaafinsivtvaklipillviicmiafnf  
dtfktgffgmtsegv1pfs  
wastmsqvks1mlvtvwwfigiegavifssraknkdkdvsatviglisvl1iif11tvlaagvilqnhisq1dspsmaq  
lasivggwgstlvniiglii  
svlgawlgwtllagelpfivakdglfpkwfakenkngapvnallitnilvqlflism1ftqsayqfafslassailypym  
fsafyqvkyt1ehrqqatt

kqwtig1iasiyaiwliyaaginyll1tm1lyipa11vysivqknnqtr1iksdiy1fmiiivlaviglik1lmgtinvf  
>tr|E5QVQ2|E5QVQ2\_STAAH  
mffkrsdknmkekivialggnaiqtkeataeaqqtairramqn1kplfdsparivishgngp1qig1liqqaksnsdttp  
ampldtcgamsqgmigyl  
eteinri1temnsdrvtg1vtrvevdkddprfdnptkpig1p1fytkeeveelqkeqpgsvfkedagrgyrkvvasp1pqs  
ilehqlirt1adgkniv1a  
cgggg1pvikkk1pmkv1kr1

>tr|E5QVQ3|E5QVQ3\_STAAH  
miltnenvfinfnepnqqididvatlkkyaaqgkfaegsm1pkieaairfvesgenkkvii1tnleqayealignkgt  
hihm

>tr|E5QVQ5|E5QVQ5\_STAAH  
mkkridylsnkqnkysirrfvtg1ttsv1vgatilfgignhaqaseqsndttqssknasadseknntietpqlnttand  
tsdisantnsanvdstakt  
mstqtsntttt1epastnetpqtai kdqataakmqdqtvpqeansqvdnkttdanniatnse1kn1pqt1dlpqsspqt1  
snaqgtskpsvrtravrsl  
avaepvvnadagktnvndkvtasdfklektafdpnqsgntfmaanfkvtgqvksgdyftaklpdsvtgngdvdsnsnn  
tmpiadikstngdvvakat  
ydi1lkttytfvftdyvndkeningqfslp1ftdrakapksgydaniniademfdnkitynysspiagidkpngani1ssq  
igvdtasgqntykqtvfv  
npkqrvl1gntwvyikgyqdkieessgkvsatdtklri fevndtskl1dsyyadpnds1lkevtgefkdki1sykydnvasi  
nfgdinktyvv1veghydn  
tgknlktqviqeni1dpatgkdysi fgwnnenvvrygggsadgdsavnvdptpgppvdpepepeptpdpepspepepept  
pdpepspepdpsdsdsds  
gsdsdsgdsdsdsdsdsdsdsdsdsdsdsdsdsdsdsdsdsdsdsdsdsdsdsdsdsdsdsdsdsdsdsdsdsdsdsds  
dsdsdsdsdsnsdsesdsd  
sdsdsdsdsdsdsdsdsdsdsdsdsdsdsdsdsdsdsdsdsdsdsdsdsdsdsdsdsdsdsdsdsdsdsdsdsdsds  
sdsdsdsdsdsdsdsdsdsdsdsdsdsdsdsdsdsdsdsdsdsdsdsdsdsdsdsdsdsdsdsdsdsdsdsdsdsdsds  
dsdsdsesdsesdsdsesdsdsdsdsdsdsdsdsdsdsdsdsdsdsdsdsdsdsdsdsdsdsdsdsdsdsdsdsdsdsds  
sdsdsdsdsdsdsdsdsdsdsdsdsdsdsdsdsdsdsdsdsdsdsdsdsdsdsdsdsdsdsdsdsdsdsdsdsdsds  
snpkgevnhsnkaskqht  
dalpetgdksentnat1fdamva11gs111frkrkqdhkeka

>tr|E5QVQ6|E5QVQ6\_STAAH  
mayis1nyhsptigmhqn1tvl1pedqsf1fnndttakplkt1m1lhg1ssdetty1mrytsieryanehklavim1pvdhs  
ayanmayghsydyi1levy  
dyvhqi1fplskkrdndfiaghsmgygtikfaltqgdkfakavpl savfeaqn1md1ewndfskeaiign1ssvkgtehd

Tsompanidou\_et\_al\_Supplemental\_FASTA\_File

pyy1ldkavaedkqipk11  
imcgkqdflyqdnldfidylsrknvpyqfedgpgdhdyaywdqaikraitwmvnd  
>tr|E5QVQ8|E5QVQ8\_STAAH  
mlsvkkatkfavanliivstvfssvtpaiagsdksskdesfavngtnkpnkni flvgdgmgpsfntayryyknphakem  
tptafdsylkgtnrtynd  
pkqnitdsaaagtassghktyngaigvdsnkqkvkvtlerakekgkstglvstaeltdatpaayaahvtsrddkneiak  
qfykdkingkhkvdvllgg  
gaky1gksngnl dkkfkdkdydlatnskel sksdkdkvlglfadknmplaidaskdepsladmqqsalsklernkkgffl  
mvegasidsahsnditgv  
msemegfeka fddai qyakkkhkd1lvvatadhstggltigkdkgyewnpqpi ksmkhsgsymtekmakgedpekvinegy  
gfefsqddmkkvkkenkl  
kr11kkekdeksadvektka1qhaiqkpvndksytgwtsghtgedvntyaygprsesfsgnientesakiifdfk  
>tr|E5QVR1|E5QVR1\_STAAH  
milslqrkmsdikyrnmamtf1ksitqeiaivivifalglmfylh1pleaylla1gvi111111ifigiky1sfvktis  
qqqien1enalyq1kneq  
ieykndvesyfltwvhqmktpitaaq11lerdepnvvrvrqeviqidnyts1alsylk11netsdisvtkisinnirp  
iimkysiqfidqtkihye  
pchhev1tdvrwts1mieqlinna1kyargkdiwiefdeqfnqlyvkdnigigisead1pkifdkgysgyngqrqsnsigi  
glfivkqisththnpvsvv  
skqnegttftiqfpde  
>tr|E5QVR4|E5QVR4\_STAAH  
mrgynerycswntaiqcdfnkvrvkdkdgsdr1snnsni iyrvfekcitlynvysrckralilsehskknifnik  
kav  
>tr|E5QVR7|E5QVR7\_STAAH  
menlylikdlgalgrdyrakeiqnlqrieqfalgtteflkhqtaktiqhfaeqiyyngrsaavnks1qsqinalvva  
prnsaneivqarvnvge  
tfdtlkeh1ddwetktqinkeetirelnkktqeildieyrfepdkqef1fvte1ap1tnavmqsfwfdnrtgivyntqar  
nngym1sr1rpnqgfidds  
livggghgthngryidde1wiysfilngnnt1vrkytpnveisygkygmqdvftghpekpyitpvinekenkilyr  
ierprsqwelensmyiei  
rs1ddvdknidkvlhki sipmr1tnetqpmqgvtfdekylywytgdsnpnrrny1tafd1etgeeayqvnadyggt1dsf  
pgefaeaeglqiyydkdsg  
kkalm1gvtvggdgnrthri fmigqrgileilhsrgvpfimsdtggrvklpmpdk1kn1gm1tepglylytdhtvqi  
ddfp1prewrdagwflvkv  
ppqtggdviqil trnsyarnmmtferv1sgrtgdisdwnyvpknsgkwervpsfitkmsdinivgmsfylltddtkrftd  
fpterkgvagwnlyveasn  
tggfvhr1vrnsvtasaei11knydsktssgpwt1hegriis  
>tr|E5QVS2|E5QVS2\_STAAH  
mlrhwlfilekrskmqdakvitryiv1ila1vnqflankgispipvddetissii1tvvalytkdnptsqegkwanqk  
1kkykaenkyrkatgqapi  
kevmtptnmndtnd1g  
>tr|E5QVS3|E5QVS3\_STAAH  
mli1tknqaekwfdns1gkqfnpd1fygfqcydyanmffm1atger1qglyaynipfdnkarikeygqiiknydsflpqk1  
divvfpskygggaghveiv  
esan1ntftsfgqnwngkwtngvaqpgwgpvtrhvhyddpmyfir1nfpdkvsvgdkaksvikqatakkqavikpk  
kim1vaghyndpgavng  
tnerdfirkyitpniakylrhaghevalyggssqsqmdmyqdtaygvnvgnkdyglywvksqgydivleih1daagesas  
gghvi1ssqfnadtidsi  
qdvikn1gqirgvtprnd1lnvnsaeininyr1selgfitnkkdmdwiknydlyskliagaihgpigg1vagnvkt  
sahnqknppvpagyt1dkn  
nvpykkeagnytvanvkgnnvrdgystnsritgv1pnnatikydgaycingyrwityiansgqrryiatgevdkagnris  
sfkfsav  
>tr|E5QVS4|E5QVS4\_STAAH  
mvkkr11aat1slgiitpiatsfheskadnnienigdaevvkrtdtssdkwgtqniqfdfvdkkynkdal1lkmqg  
finskttyynykntdhika  
mrwpfqynig1ktnpdnvd1iny1lpknk1dsvnvsqt1gyniggnfnsgpstggngsfnysktisynqqnyisevehqns  
ksvqwgikansf1ts1gkm  
sghdpn1fvgykpsqnprdyfvpdne1pp1vhsgfnpsfiatvsheksgsdtefeitygrnmvdthatrrtthygnsy  
1egsr1hna1vnrnytvky  
evnwkttheikvkghn  
>tr|E5QVS6|E5QVS6\_STAAH  
mf11ntqahar1dqmaqfevvcng1nenegqaiqtmdqsas1irsni1qvkeqleklavy  
>tr|E5QVS7|E5QVS7\_STAAH  
m1kkak11iat111sgcsttnnesnketksvpeemeaskyvgqgfppaekdaiefakkkhdkiakrgeqffmdnfs1k  
vkatnvvsgdgvveyvhc  
ddhd1vfnas1pfdks1idsds1rsedkgddmst1vgtv1sgfeyraqekeydnlykffkdnkkyqytgftkkainkt  
qngyenyfyivanipt1  
qeyrkyeplikknn1nfkkv

Tsompanidou\_et\_al\_Supplemental\_FASTA\_File

>tr|E5QVS8|E5QVS8\_STAAH  
mkearkgvgykaieivhttlfskssnfskdkklldvidlsestkkhlhlfentkiflqlakstistnrvnysdnesirie  
ve  
>tr|E5QVS9|E5QVS9\_STAAH  
mfkrtklililialllsgcsttnnesnnetksvpeemeaskyvgqgfqppaekdaiefakkkhrkefekvgeqffkdnfglk  
vkatnvvgkddgvevyvhc  
edhgi vfnaslplykdaihkgmsrnsndngddmsmmvgivlsgfeyraqkekydnlykffkenekkyqytgftkeaint  
qnvgyqneyfyitylsrnl  
keyrkyeplihknkelkegmerarke lnytantntvatlfstndernrkekinavidlsekiektkmpikntittql  
gnkligttkkarfddkkvvs  
fgafede  
>tr|E5QVT0|E5QVT0\_STAAH  
mnkindrdl telssyrvyqdinkndftvnekrfkqadvfedlyrek l  
>tr|E5QVT1|E5QVT1\_STAAH  
mlkkaklilimati lsgcsamenesskdtntetksvpeemeaskyegqgfqppaekdaiefakkkhdkia krgeqffmdn  
fglkvkatnvvgsdgvev  
fvhcdhddivfnasipfdksiidsnsslrsedkgddmstlvgtvlsgfeyraqkekydnlykffkdnkkyqytgftkea  
inktqnsyenyfyitti  
pynl teyrdyfep llnksdsefskel snvkkqlkdksklsvtttlfskkknytkksnsenvikmaeeikkekeipngidl  
sikfsdnkintvkpnyngk  
stseygvfd  
>tr|E5QVT5|E5QVT5\_STAAH  
mlhdi lrnkfgfenfkpgqaeiiesimsqhtlgilptgsgkslcyqiptylsgkptliisplislmdqvmqlkingek  
rvtcihsgmdeiekkhnik  
clrh srffl spefl lqpsnfl ismidfgmivldeahclsewydfrphyaligkvtkhfkeavvialtatapphlqdd  
ltemleiqfnvikttnrnp  
nisfkhlnfhddedki ewllpflqqsgptiiyvsskkmc lnlaqliyds gflgtiyhgdmnyqerhtvqqqlnndipii  
vatsafmginkkdi rti  
hfh l stspnsyiqeigragrde lsa islfqpd dkiyletllfadmi teedvqnfeige flapdkqdvlttlhsfysig  
alkqvfkksfkrkqlgffr  
migyclldqcrkyll effgeyppaqdrccndsnitdia ilnkkkvirsigfdeklqn lflr  
>tr|E5QVT6|E5QVT6\_STAAH  
mamsnnfkddfeknrqsidtshqhdtedvekdqsel ehqdtienteqqfpprnaqrkr rrdlatnhnkqvhnesqtse  
dnvqneagtiddrvvessh  
stesqepshqdstp qheegyynkna famdkshpepi edndkhetikeaen tehs tvsdkseaeqsqqpkpyfatganqa  
ntskdkhddvtvkqdkdes  
kdhhs gkkgaagagtagvagaagamgvs kakkhsndaqnsngkvnstedkasedkskehngkkgaagagtagla  
ggaasnsasaaskphasn  
asqnn dehdhdrdkerkkggmakvllp liaavliigal aifggmaln nhngtkenkiantnkn nadeskdkdtskdas  
kdkskstdskskddqda  
tkdesdndqnnanqannqanqqanqnnqqqqqrqggqrhtvngqenlyriai qyygsgspenvekirranglsg  
nnirngqqivip  
>tr|E5QVT7|E5QVT7\_STAAH  
mg lkeagtmqkvesi iiggpcgl saaeqkrkgidtliekgnvvesiynphtqtfsssdksl sigdvpfiveeskpr  
rnqalvyyrevvkhg lkv  
nafeevl tvkkmnkftit ttkdvycrfltiatgyyqhntlevegadlpkvfhyfkeahpyfdqdvviiggknsaida  
alelekaganvtvlyrggd  
yspsikpwi lpnftalvnhekidmefnanvtqitedtvtyevngesktihndyvfamigyhpdyeflksvgiqintnefg  
tapmynketyetniencyi  
agviaagndanti fiengkfhggiaqsm lakkqtples  
>tr|E5QVT8|E5QVT8\_STAAH  
mkyrrkymkhllv ihtggtis msdqsnkvvtndinpislhqdvinqyaqidelnpfnvpsphmtiqhvkqlkdiileav  
tnkydydgfvithgdtlee  
taflldilgieqpvtgamr ssneigsdglynyisairvasdekarhkgvmvfvndeih tarnvtkthtsntntfqsp  
nhgplgvltkdrvqfhmp  
yrqqa lenvnekl nvp lvkaymgmpgdi fsfysregidgmviealgggnmppsalegiqqlvslnipivlvrsfngivs  
ptyaydgggyqlaqqgfif  
snglngpkarlkllvalsnldkaeiksyfe l  
>tr|E5QVU0|E5QVU0\_STAAH  
msvtnlriakeadlvtknvlcnnsrkmhyirssyysnvkvaylrgflfyksikfyyniscreq  
>tr|E5QVU1|E5QVU1\_STAAH  
mteefnesmindi kegdkvtgevqqvedkqvvhinggfngi ipisqlsthhidspsevvegdeveayvtkvefdeen  
etgayilsrrql eteksys  
ylqekl dneiieakvtevkvkgglvvdvqrgfv paslistdfiedsvfdgqtirikveeldpennrvilsrkaveqee  
ndakkdqlqlslnegdvid  
gkvarl tqfgafidiggvdglvhvsel shehvqtpeevvsigqdvkviks idrdterislsikdtlptpfenikgqfhe  
nddiegvvvr lanfgafve  
iapgvqglvhiseiahkhigt pgevl epqqvvnk ilgideenervs lsikatlpnedvvesdpsttkayleseeednpt



Tsompanidou\_et\_al\_Supplemental\_FASTA\_File

igdmigdklkn1k1  
>tr|E5QVU4|E5QVU4\_STAAH  
mnktdlinavaeqadltkkeagsavdavfesiqnslakgekvqligfgnfevreraarkgrnpqtgkeidipaskvpafk  
agkalkdavk  
>tr|E5QVU5|E5QVU5\_STAAH  
mettvsklerqieerlkgvseyesininhr1gklldsydidvakvac1tidtsmrh1dditynh1skhsiligdlisah  
fytllaeindlsfqneisk  
aiveinelksslhha1ndyeisqaivkietlfp1yt1shfginideseiny1fedmsdyypsyfkkynqsevkhylhd  
iqksylksrgn  
>tr|E5QVU6|E5QVU6\_STAAH  
madnkankeqvhrvfqniskkydr1nniisfeqhkvwrkrvmkdmgvrkgtkaldvccgtgdwtialskavgstgevtgi  
dfsenn1evgkektasmen  
vklvhgdame1pfednsfdyvtigfg1rnvpdy1valkemnr1vkpggmvv1letsqpt1pvf1kqmyalyfkfvmpifgk  
1fakskeeyew1qqstfnf  
pgkeelkrmf1eadf1nrvrsftggvaamh1gykekdntkgd  
>tr|E5QVU7|E5QVU7\_STAAH  
maikkki1pkvinvalnmneikkveqr1ekaikskdsv1eqas1h11ssggkrvrpafv11ssqfgkdeqtseqtyqv  
avale1ihmat1vhddvid  
ksdkrrgk1tiskkw1dttailtgnf11a1g1eh1mavkdnrvhqlisesivdvcrge1fqf1q1d1fnsq1ti1ny1rrin  
rktal1liq1stevgait1sq  
sdketvrk1kmi1ghy1gmsfqi1ddv1dftsaek1gkpvgsd11nghit1p1illemrknpdfk1kieq1rrdserkefe  
eci1qi1rksds1ideakevs  
skylska1n1ise1pdghpks111s1tkkmsrnt  
>tr|E5QVV1|E5QVV1\_STAAH  
mnevneqi1di1sg1pkge1evpgdksmthraim1as1aegvstiyk11gedcrrtmd1fr11gvdikeyedk1lvnsp  
gykafk1tphq1v1ytgns1gt  
ttr11ag11sg1giesv1sgdvsigkrpmdrv1r1p1ksmaniegednytp1iikpsvikginykmevasaqvksailf  
as1fskeati1ike1dvsrn  
htetmfr1hfn1pieaeg1sittipeairykpadf1hvp1gdissaa1ffivaal1tpgsdvtihnv1ginptrs1giidivekm  
ggn1q1fnqt1tgaep1tasi  
riqytpm1qpikiege1vpkaide1pvial1ctqavgtstikdaeelkvketnridttadm1n11g1felqptndg1lihp  
sefktnatvds1tdhri1gm  
m1avas11ssep1vki1qfdavnvs1fpgf1pk1k11eneg  
>tr|E5QVV2|E5QVV2\_STAAH  
mediy1k1iddin1qk1en1dsrvneaittdnda1filget1ynfg1mpqg1levfrv1lyhkypdesel1liyfieglmsen  
qtdealeylsyvepspek1  
mlead1yqqin1mmeva1dk1qea1elepndpi1hfalaem1lydggyl1ratseyetv1etgeyqvn1gnv1f1srmadcs1q  
sgnysdair1lydein1edem  
tsedy1kka1sydkndi1qeaikimtt11skdpdyiqgy1ylqs1yeneknypdaietgkeglr1sqfykelmyttgcle  
iehgdanegv111kqalev  
dnayqep1111sd1yrneedyeaiie11tyvdeed1dptfiwh1lafaygqeerdkeaqhffelayptmktnidfmsdyyf  
yli1ei1gqmeqaiti1nq11  
elepsnenwhde1sr1qs  
>tr|E5QVV3|E5QVV3\_STAAH  
mtnyqdyn1kmgylmset1nqikesfi1y11f1qyrfksria1v1v1nyikvneaklanihfvdtkinhhet1eiaevgsha  
saiqf1tkhnik1m1ntneif  
dyianhngafdi1qihfanvskreqr1dd1livaq1tespsyqty1hd1nsmairhkhallidy11hnid1siqmnekqrf  
yq1tqi1nt1k1vknkhqf  
ed1ladd  
>tr|E5QVV4|E5QVV4\_STAAH  
mtink1wqyt1yqrs1w1mm1licni1l1gm1ygyiwygeq1shtpwqfki1fvpsptail1flvisis1liliqkqnsiidala  
fvt1fkygiwavi1m1n1lfi  
ieggdi1tvng1i1mfshsimavqaiyf1yprfkrsmigisvamt1wv1f1ndyidyf1h1qfpyydfitthvwqigv1scc1sv  
fg111yie1nk11kck  
>tr|E5QVV6|E5QVV6\_STAAH  
mqykenvemksmvemqrevdeyigqfktgyfspanlar1teevgelareinhtygekkkkdseeantikaelgdnlfv1  
1clansmgidmtesfnetm  
ekfntrdknr1fkrk  
>tr|E5QVV7|E5QVV7\_STAAH  
mgkrmkig1tcypsmggsgiiate1lgik1aerghev1fitsnipf1rikrp1nmi1fhqvevnqyavfqyppydit1stki  
aevikeyd1d11hmhyavp  
haicg1laremsgkdi1kimtt1hgtditv1lygdhs1lqgaikf1gieksdivtsvsks1laqethei1ietnkei1piynfvre  
nefptkhntalksqfgiap  
dekvl1ihvsnfrqvkridti1etfakvrekipsk1l11l1gdgpe1vpmrqktkelnveedv1f1lgkqdcvsefyq1sdlv1  
11sekesfg1t11eamktg  
vvpignag1gikevikhgetgfvdv1gd1sdsasdyair1ledkvlynk1qknmladiaerfgselitdqeyyyyqkm1ne  
hnskge  
>tr|E5QVV8|E5QVV8\_STAAH

Tsompanidou\_et\_al\_Supplemental\_FASTA\_File

msitkvkasnmkds1feqarpileqiqdngfeayyvgsrvdyvmgrnihdidittsatpdeiesifshtipvgkehgt  
invvfnendenyevttfraee  
dyvdhrrpsgvtfvrdlyedlqrrdftmnaiamdtanklydyfdgqqdinnriirtvgiaerfqedalrmirc1rfqsq  
lsfdiatetfeamrtqmad  
ikflsierivjeltklmginveksfnh1ks1kafnympyfehldmnqinvtepidlelliaivsvkfdinys1kplk1s  
nrqvkdingyiqimnalps  
iitkeqlkmfvdydtn1iknvmvaadv1kandiqqheplivn1qtidetlhr1pmhnrkdmmvnggv1mah1naksgpw  
1kd11rqieiaivtgkvsn  
eetei1kwvdnhvki  
>tr|E5QVW0|E5QVW0\_STAAH  
mgmatyavvd1ettgnqldfdidiqigitfvrrnqiidyshmirtnleippfiqaltsieenmlqqapyfnqvaeeyd  
kikdcifvahnvdf1nfi  
kkafkdcniqyrpkvidtleifkiafptdkysylselaeahgitlanahradedaattaklmilafekfeklpldtlkq  
lyy1skq1kydlydi1fem  
vrqydakpldkseykfeqiiyrkqvdfkkpttnyngs1kslyskavdq1gltyrpqqlyaetil1dq1mhsekamieas1  
gsgks1ay1laa1myniet  
gkhvmitstntk11qsq1lekdi1pamnealnfkina11ksksdyis1glisq1lkddtsnyevn11kmq11i1witetpsg  
di1qe1n1kggkmyfdqi  
etyvparhdvhyynfikrnanqiqigitnhah1ihsdvensiyqlfddcivdeahr1pdya1nqvtnel1syadikyql1  
igknenek11kaidq1lekq  
r1lek1diapidi1fg1kasrneihelneq1fstifti1ndsdyddi1hrfhnvftfetkdi1kd1hai1dk1nkt1eif  
ngishktvks1rkq1ly1k  
dkfknieqs1kaghtsfisikn1sqkstir1lyvkdyavkdvltkqv1lekfk1l1fisgt1kfns1fda1fkq1fnkdvhfn  
tfevnts1qsakntsvfip  
sdvasyqykni1deyvasivsyi1eyttitsskcl1v1fts1kmmhmvqdm1nel1pefedyvvl1tqqnqnykivqqfnfd  
kai11gtstffefgdfqan  
gikcvmiak1p1f1mnkhnakyw1mdseftstfkeyv1pdavtrfrqgl1r1n1endrgiivsfddr1insnyknffeql  
enyrqkkgdiqqfgk11rq  
iqkkkk  
>tr|E5QVW1|E5QVW1\_STAAH  
mvmkttikqakdh1nqdv1tigaw1tnkrssgiaf1ql1rdgtgfmqgvvkvseveevfklakeitqesslyvtgtited  
nrsl1gyemqvksie1vise  
ahdyp1tpknhgtefl1mdhrh1wl1rskkqhavmki1rneviratyeffnkdgftkvdppil1tasapegtse1fhtkyfdq  
af1sqsgqly1leaamahg  
kvfsfgptfraeksktrrh1iefwmi1egemaftnhaes1e1ieqyvthvkvsvlenckle1kmlerdtsk1ekvatpfpr  
isyddaie1flkaegfddie  
wgedfgaphetaianhyd1pvfi1tnyptkikpfymqpnpenetvl1cad1iapegygei1ggsservddle1leqrvkehg  
l1deaysy1dl1rrygsvp  
hcgfg1gl1ertvaw1sgvehvretapfpr11nr1yp  
>tr|E5QVW2|E5QVW2\_STAAH  
mdkyq1karpvv1rre11dhysd1gl1deqd1v1ll1k1iyasetsnkqpsie11qkgstmqprditmviqn1iqre11le1q  
vqkdeegrfteym1ldpff  
ek1sh11kqqsmetkeqnskekfkq1frv1edtfarp1spyeiet1nqwidvdkhdtai1qaal1deans1nk1sfkyedr  
i11nwkknnvktid1dsrki  
rekfnkpkmthtvktvpkfdw1ngen1dgk  
>tr|E5QVW4|E5QVW4\_STAAH  
mtnitkevfdn1eqkidvfaknkt1gsseakpy1deyhski1idyfkqvnditgnidfdn1nqypvvpmmfkerydymier  
kyhfmgyrqmktfktelik  
mnasyqtr1knkqv  
>tr|E5QVW5|E5QVW5\_STAAH  
mtenkgs1sqpkngnnggksn1skknrvkrti1ki1igfmi1affv111lgill1fayyawkapafteak1qdpipakiydk  
nge1vkt1dnggrhehv1  
kdvpksmkdavl1atednr1fyehgal1dykr1fga1gkn1tggf1gsegast1tqqvkdaf1sqhks1grkaqey1syr1e  
qeyskddi1fqv1nki1yys  
dgv1tgikaakyyfnkd1kd1n1laeeay1ag1pqvpnnyniydhpkaaedrkn1tv1yl1mhyhkritdkwedakkid1ka  
n11vnrtaeerqni1dtnqds  
eynsvnfvkse1mnnkafkden1gnv1lqsgiki1ytnmdkdvqkt1qndvdngsfyknkdqqvgat1l1dsktgg1va1sg  
grfdkdvvrn1nqatdp1hpt  
gss1kp1f1aygpai1enmkwatnha1qdessy1qvdgstfrnydtkshgtvsiyda1rqsfnipalkawqsvkqnagn1dapk  
kfaak1gl1nyegdigpsev  
1ggsasefsptq1asafaa1ianggtynnahsi1qkvvtrdgetieydh1tshkamsdyt1aymlaem1kgtfkpygsayghv  
sgvnmgaktgtgtygaety  
sqyn1pdnaakdvwi1ngft1pqtmsvwm1gfskvkqygensfvghsqqeypqflyenvmskissrdgedfkrpssvsgsip  
sinvsqsdnnt1trsthg  
gsdtsanssgtag1snnt1rsqqs  
>tr|E5QVW7|E5QVW7\_STAAH  
m11inrgvfd1ndfi1r1kvfssyni1hdki1ly1yrk1fd11d1tdntfenk1nqi1  
>tr|E5QVW8|E5QVW8\_STAAH

Tsompanidou\_et\_al\_Supplemental\_FASTA\_File

mtntvycdklknvggvlmndvvesliyevnmqnfenvksqqqdhdfyqtvkpytehidsllneiklhrefiievpy  
srkfellianieqlsvech  
fkrtsrk1fiek1ksvqyd1qni1dgvtkegy  
>tr|E5QVX0|E5QVX0\_STAAH  
mtysglkikvsnevekmsdvs1kl1sakdiyekdfektmargyrreevdaflddiadyqkmadmnevklseenhk1kk  
e1eelr1rvatsrpqdnks  
fssnntttntssnndi1krisn1ekavfgk  
>tr|E5QVX3|E5QVX3\_STAAH  
mgqrnkfckni1svplpsvrffefedkkasktykkit1llpnyvidafy  
>tr|E5QVX4|E5QVX4\_STAAH  
mkntfnplqrlhfyaaifiapl1it1tisgigy1ffpevenniykneffgdsdvkthqt1ndavhqverqyegffvskvs  
i1depynkrit1sdmagnq  
ryvfl1dhnnqfvadqnakhtysnmrsihss1ftenti1nylveltacwtifm1sgty1likkhlisnkskalhwqkwh  
amigiiiaipvfv1v1tg1  
pwsqfmgskiaqmmtdng1gqgelainppksd1nelwpatrknkqpassekgsghgnaampqtk1dyqisidkveq  
aqksqgikpfs1vypsdki  
gtfivsntsnsgvtg1dvspykeqt1yfdqysgk1gtikyddygiakwftwgiplhegh1fgivnki1n1fvcia1lv  
a1gmfvswinrtkntavk  
vphrvkkpasis1iic1iv1g1lmp1fg1s1ilvfielilyikdrakq  
>tr|E5QVX5|E5QVX5\_STAAH  
mfyqaamikfkhtmrar1qrp1fkwtsilyefv1tskhfyvnekpkvkt  
>tr|E5QVX6|E5QVX6\_STAAH  
minkeq1d1lyk1kkeveksrneal1htinqvikkvylqytcsvfghfsagkst1in1lieqdi1psspvpttsntaiv  
svsdnhdi1an1pnqtyak  
1snydevremnrqnvdesveinfqsakfengft1qdtpgvdsnvashqsitesqymytsnmi1fytdynhvqseln1fkfm  
khindvgipvvfiinqidk  
hqddel1sfatfksrveksiadwdik1ertfyvskfdhsenelgalsty1vs1dqhretiedytsrtveyiteaq1dyiqs  
eiqev1ed1gieeae1feqa  
f1nsqhqai1seeaq1lnnpdelmaf1knkrkni1enayimphnmrem1rsy1lesmsqdfnvgg1fnkkkkk1lq1qqqr1  
1tatdalqehvnq1rqpm  
redmsfvtrfinkkeasdkv1nqhydvkpmieg1yqpqtsisntyv1tfsdevvkaikkyveqqstpi1fkei1envqad  
e1pteesdd1keyqrytel  
nelrqs1ttknyrhyyih1des1dk1vdrrqettyqvadnakdnrdnq1lnqntattnmsidiqakal1disdvp1fkrtk  
qdihet1tridnk1ikigv  
fgtfsagkss1inal1gehilvsspnpttaatteisygdesyit1ksqsq1l1deinavveyqdisfstiedfinsdlek1  
ksh1nknq1lafvhavekhy  
nlyvsm1engekha1nqqe1kkwsaedeyatfvktvhialmhdw1kgki1vds1glhsnqrhtneteqi1tssd1ilyv  
syfnhs1ftdndkafi1ehmk  
dmnq1nenqafk1mvinaad1aesqdd1eavetyvsdal1rqvhlqsd1favssrna1qaedkgidq1kqsiqqfvdesks  
i1leqqmihq1lqqmdhsyve  
mitetfnkad1srrqhr1tvkydkqr1qhqlidat1qhtdneveeqvyh1nar1klq1l1ddiksvfnsqmtqnsdfnee  
kkvstkvyl1dqihqr1f1e  
qs1iterikkyfknq1teq1apivqq1ad1hvivnpqfnfesanieq1l1hidfndm1nalpkq1tkrkil1npgqrdih  
esicqst1g1l1ppqmg1l1r  
qq1elyvkq1maveaesqfesfeaniqtq1ind1laf1d1dt1l1nq1kdkhq1l1ktily  
>tr|E5QVX8|E5QVX8\_STAAH  
mk1ftnergvl1qml1vavvkel1qgegrvactpenvrk1tdaghkviveknagigsgfsndmyekegakivtheqawead1  
vikvkepheseyqyfkknq  
iiwgfl1hasskeivemkvegvtaisgetiikngkael1apmsaiagqrsaimgayyseaqhggqgt1vtgvhenvdip  
gstyvi1fgggvaatnaavn  
algnakvi1ie1lnddriky1legmyaekdv1tvk1stpen1aeqikkadvfistil1pgakppk1vtremvksmkkgsvli  
diaidqgg1tietirpttis  
dpvyeeegvi1hygvpnqpgavprtstmal1aagnidyileicdkgleqaikdneal1stgvniyqgqvtng1latshd1dyk  
e1lnvie  
>tr|E5QVY1|E5QVY1\_STAAH  
mekpsretfegnkl1ligiv1svitfw1lfaqs1vnvvpiledsfntdigtvniavsital1fsgmfvvgaggladkygrik  
l1tnigi1iln1lgs1liis  
nipl1li1igr1iqg1saacimpat1siiksyiygkdrqral1sywsigswggsgvcsffggavat1lgwrwifilsiiis1  
ialf1likgtpetksksis1  
nkfdikg1v1l1vim1l1sn1ilitkgselgvts1l1fitil1aiavs1fl1fiv1lekratnplidfk1fkskaytgatasnfl  
l1ngvagt1livantfvqrg1  
gyss1qags1sity1lvm1limi1rvgek1l1qtfgckkpm1l1igtav1l1vgeclis1t1fl1peilyvicci1gy1l1ffgl1giy  
atpstdtaianap1ekvgv  
aagi1ykmasa1l1ggafgva1l1sgavyaivs1nmtnid1tgamia1l1w1nagmgil1sfvi1l1l1vpkqndtq1  
>tr|E5QVY2|E5QVY2\_STAAH  
mnyrdki1qkfs1irkytvgtfstviat1vfl1g1ntsqaqaaetnqpasal1kqkqngdtqtenrehevqnsqngqs1sapi  
eneqpnntqtnhvdasavq  
ssttehdqpv1sqneqakkdtaaatptqsakaaskheqsesraankkendnkathvesheanvvtasdsdsgnvqhdrne

Tsompanidou\_et\_al\_Supplemental\_FASTA\_File

lqaffdanyhdyrfidren  
adsgtfnyvkgi fdkintllgsndpinnkdlqlaykeleqavalirtmpqrqqtsrressriqtrsiesraaeprsvsdyq  
nanssyyvenandgsgypv  
gtyinasskgapynlpttpwntlkasdaeia litakqtgdgyqwwikfnkghaphenmiywfalpagqtpvgrtefvvtv  
nadgtnvqwsngagagank  
plpemwpygvndsrswdyki rnrsgqviydwptvhinslkdlarasdyfseagatpatkafgrqtfeyingerptespgv  
pkvytfigkgdasytisfk  
tqgptidklyyaaggraleyngl fmysqlyvestqdyqqrlngrlqvvrtyrigttkrvevsqgnvqtkkvlestnlni  
ddfmdp1syvktpsnkvl  
gfyptsantnafprggvnp1neyqlsq1ftddklqqaartgspir1migfdypdafgngetlvpn1tvlpei qhnikff  
knddgqni adkpaskqagh  
pvfyvyagnqgnasvnl ggsvtsiqplrinltsnenftdkdwqitgiprtlhienstnrtnnarernielvgnllpgdyf  
gtirfgrkeqlfeirvkph  
tpri ttaeelrgtalqkvpvvtvdip1dpsalvy1viptsqtrdggseadqipsgytkiatgtpdgvhstitirpedyv  
vfippvgnqirali fyinnv  
vasnmsnavtilpddipptinnpvglnakyyrgdevsftmgvsdrhsgl ksttittlpsgwtsnl tksdkkngslaisgr  
vsmnqaynsditfkvsatd  
nvnnttndsqs khvtvhvgki sddahpivlg nsekvvvvnpta1tgdekqrittaf mknqnirgylassnpvtvdnhgn  
vtlqyrdgsstt1datnm  
tyepvvpkpeyqtanaaktatvtiakgqsf nigdikqyft1sngqaipsssftnitsdrtip taqevsqmnagtqlyhiva  
tnayhkdtedfyitlkiid  
vkqpegdqrvmrmystyditdeiskvkqafinanrdaisfaegdisvtntpnsgsvstivninkgrl tksfts nlnnmn  
flrwvfpqdytvtwtnak  
ianrptdgg1swsddhksli yrydatlgtqittndil1lkattvpgl rnniagnekaqaeaggrpnkyttgysqsnt  
sdgqrqft1ngqviqimdi  
inpsngfggqpvtnsnvransstvs vnesaangagaftidhvknstthnaadavykaqly1spygpkqyvehlnqn  
tdntneainiyfvpd1vn  
ptisvgnytqhvtgetftntitandnfgvqsvtvpttsqltgvtdnnhqhvsatapnvtsttnktinlvatdtsngta  
ttsfnvtikplrdkyrvgt  
sstaanpvriani snnatvsqadqtai inslftsnapnrnyatasaneitsktvsnvsvrtgnnaqvttvtvyqdgttst  
vtvpkhvip eivahshyt  
vqgdfptgngasadyfk1sngsaipdatitwvsgqapknnttigqdi nvtahilidgettpitktatykvrvtpkq  
vfetargvlypgvsdmyda  
kqyvkvnnsws tnaqhmnfqftnsygpskdvvgistrdirvtydnhq tqiikilskvkpdpbridgnsvtykag1tnqq  
ikinnv1ssssik1fkadn  
tpl tittnttygsgntavvtvsdalpncei karssismnntyttqdehgraidvtrnesvdsndsasvhvtpqlqatteg  
avfikggdgdfghverfi  
qnpvhgatvawhndpdtwkn tvgnthktavvt1pngqgtrnvevpkvypvanakapsrdvkgqnl tngtdainyitfdp  
ntntngi taawanrqppnn  
qqagvqh1nvdvtypgi saakrvpvtvnyqfefpqtstttvggtlasgtqasgyahi qnatglptd gftykwnaatg  
tndanwaamnkpn taqvin  
akydviynghtfatslpakfvvkdvq pakptvtetaagviti apganqtvnthagnvttiyadklvikrngnvttftrhn  
ntspwvkeasaanvagiag  
tnngitvaagtfnpadti qavatqgsgetisdeqrsddftv vapqpnqattkiwqng hvditpnnpsghlinptqamdia  
ytekvgngaehsktlnavr  
gqnnqwti ankpdvvtl dahtgkvtfnantikpsaititpkagtghsasnps1tapaahvntteivkdygsnvtaa  
einnavqvankrtatikng  
tamptnlaggstt1pvtvtyndssteevqesiftkadkrelitaknhl ddpvstdgkkpgtitqynnai hnaqqqinta  
kteaqqvinderatpqqvn  
aalskvqaaqtkineakal1qnkednsq1vtsknlqssvnqvpsttgmtqqsidynakkreaeseitaaqrvidngda  
taqqisdekhvrdnal1ta1  
nqakqnl1adthe1eqavhqlnrtg tttgkkpasitaynnsiralqsd1tsaknsanai iqkpirsvqevqta1tnvnrv  
ndr1tqainqlvpladnsa  
1rtaktkldeeinksvtt dgmtqssi qayenakragqtestnaqnvinnngdatdqqiaaektkveekynglkqaiag1tp  
d1aplqaaktqlqndidqp  
tsttgmtsasvaafndkl saartkiqei drvlashpdvati rqnvtaanatkdaldqarng1tvdkaplenaknqlqqs i  
dtqtsttgmtqdsinayna  
kl1taarnkiqqinqlagsptvdqintntsaanqaksdl1dharqaltpdkap1qtaktqleqsinqptdttgmttas1na  
ynqklqaarqkl1teinqvl  
ngnptvqni ndkvaeanqakdq1ntarqgl1ldrqpaf1tlhgasnl1nqaqqnftqqinaapnhaaletiksnitalnn  
amt1k1kdsvadnnsiksgq  
nytdattankqaydnavnakgvi gettnptmdvntvnqkaetvsktga1dgqqnl1rakteatnait hasd1nqtqkn  
al1tqqvnaqnvqavndik  
qttqslntamtgl1krgvahnqvvsdnyvnadtnkkndynnaynhandi ingnaqhpvi tpsdvnnal1snvtskeqal1n  
geak1naakqeanta1lgq1  
nn1lnaqrqnl1qsqingahqietvntikqnat1nsamgn1rqavadkeqvkrtedyadadtakqaynsavssaeti in  
qtnptmsvndvnsatsav  
ttnkna1ngdek1aqsktdaasaidal1ph1lnnaqkadvkski naasni agvntvkqqgtd1ntamgn1qgaineqtt1n

Tsompanidou\_et\_al\_Supplemental\_FASTA\_File

sqnyqdatpskktaytnav  
qaakdiInksngqkktkdqvteamnqvnsaknnldgtrlldqakqtakqqlnmthlittaqkthltnqinsgttvagvht  
aqsnantldqamntlrsi  
ankdatkasedyvdanndkqtaynnavaaaetiinansnpempstittqaeqvnsktaInngenlataklnaktylnt  
ltsitdaqknnlissjissa  
trvssvdtvkqnaqhlldqamaslqnginnesqvkssekyrdadtnkqqeydnaitaakailnkqhgpnataqnaaveaalqr  
vktaknalngdakliaaqn  
aakqhlgtlthittaqrndltnqisqatnlagvesvkqsansldgamgnlqtaindksqtlasqnfldadeqkrnaynqa  
vsnaetilnkqtgpnakt  
aveqalnnvnsakhalngtqnlInnakqaaitaingasdlngqhkdaalkaqangaqrvsnaqdvqrnateIntamgqlqha  
iadkttlasskfvnadst  
kqnyyttkvtnaehiisgtptvvtptsevtaaanqvnsakqelngderlrvakqnantaidaltqIntppkaklkeqvqg  
anrledvqsvqtngqslnn  
amkglrdsianettvkasnytdaspnnqstynsavsnakgiinqtnptmdasaitqattqvnnaknglIngaenlrnaq  
ntakqnlntlshltnnqks  
aissqidraghvsevtaknaateIntqmgnleqaihdqntvkqgvnftdaddakrdaytnavsraetilnkqtgqantpk  
qdveaaiqsvtzaknalng  
dqvntaknaakhalnntsinnaqkrdlttkiddqattvsgveavsntgtqIntamanlqngindkntlasenyhdads  
dkktaytqavtnaenilnk  
nsgsnldkaavenalsqvtnakgalngnhnleqaksnanttinglqhlittaqkdklkqqvqqaqnvagvdtvkssantln  
gamgtlrnsiqdnaatkng  
qnyldatesnktynnavdsangvinatsnpnmdanainqiatqvtstknaldgthnltaqqtatnaidgdtnlnkaqk  
dalkaqvtsaqrvanvtsi  
qqtaneIntaigqlqhgiddentkqtqkyrdaeqskktaydqavaaakailnkqtgsnsdkaavdraqqvtskdaln  
gdaklaeakaaakqnlgtl  
nhiinaqrtdlegqinqattvdgvntvknantldgamnslqgsindkdatlInqnyldadeskrnaytqavtaaeqiln  
kqtggntskadvnalnav  
trakaalngadnlrnaktsatntinglphltqllqkdnlkqveqqaqnvagvngvdkkgntIntamgalrtsiqndnttkt  
sqnyldasdiinknyntav  
nnangvinatnnpnmdanaingmanqvnttkaalngvqnlraqktnatntinnahdlngkqkdaalktqvnaqrvsdann  
vqhtateIngamtvlkaai  
adkertkasgnyvnadqkrqaydskvtnaeniingtpnatlvtndvnsatsqvnaaktaIngdnnlrvakehanntidg  
laqlnnaqkaklkeqvqsa  
ttldgvqtvknssqtlntamkglrdsianeatikagqnytdaspnnrneydsavtaakaiinqtsnptmepntittqatsq  
vtkeqalngaqnlaqakt  
taknnlnntsinnaqkdaltrsidgattvagvnetvkateInnamhslnqngindetqtkqtqkyldaepskksaydqa  
vnaakailtkasgqnvdka  
aveqalqnvstktalngdaklneakaaakqtlgtlthiinaqrtaIdneitqatnvegvntvkakaqqlldgamgqlets  
irdkdtllqsqnyqdadda  
krtaysqavnaaatilnktsggntpkadveramqavtqantaIngiqlerakqaantaaitnasdlntkqkealkaavts  
agrsvangvehtateInt  
amtaIkraiadkadtkasgnyvnadankrqaydekvtaaeivsgtptptltpsdvtnaatqvtnaktqIngnhnlevak  
qantaIdgltsIngpqka  
klkeqvqgattlInpvqtvrdnaqtlntamkglrdsianeatikaeqnytdaspnnrseydsavtaakaiigqtsptmna  
qeqinqakdqvtakqqaInq  
qenltnaqtakqhlnglsltnaakdaakrqieqathvsevtqaqnnadaIntamtnlknqidqntikqgvnftdade  
akrnaytnavtqaeqilnk  
vqgpntakdnvesalqnvqrakndlIngnqvnakttaknalnntsinnaqkealksqidsattvagvqvnsataseIn  
tamsnlqngindeaatkaa  
qkytdadsdkqtayndavtaaktlldktagtndnkaaveqalqrvntaktaIngdarlnqakntakqqlatmshltdaqk  
anltsqiergttvagvqgi  
qanagtlneamnlrqsiasdatkasedyhdantdlqayndavtnaegii satnnpempdttinqkasqvnsaksaIn  
gdeklaaakqtaksdiqrl  
tdlnnaqrtaanaevdqapnlaavtaaknkatsIntamgnlkhalaeakdntkrsvnytdadqpkqaydtavtqaeaitn  
angsnanetqvqaaInqln  
qakndlIngdnkvaqaketakraIasynlInnaqstaatsqidnattvagvtaaqntaneIntamgqlqngindqntvkqg  
vnftdadqgkdaytnavt  
naqgilDKahgqnmTKaqveaalnqvttaknalngdanvrqaksdakanlgtlthlnnaqkqdltsqieqattvngvngv  
kTKaqdlDgamqrlQsaia  
nkDqtkasenyidaptnktafdnaitqaesylnkdhgankdkqaveqaiqsvtstenaIngdanlqrakteatqaidnl  
thlntppktaIkqqvnaaq  
rvsgvtdlknSatslnnamdqlkqaiadhdtivaggnytaspdkqgaytdaynaaknivngspnvtnaadvtaatqrv  
nnaetgIngdtnlatakqg  
akdalrQmthlSdaqkqSivtqidnatqvtgvqsvkdnatnldnamnlrnsiankdevkasqpyvdadrkqnayntav  
tsaenii natsqptlDpsa  
vtqaanqvntnktalngaqnlankqettaninqlshlnnaqkqdlntqvtnapnistvsqvkTkaeqldqamerlingi  
qdkdqvkqsvnftdadpek  
qtaynnavtaaeiniqangtnanqsqveaalstvttkqalngdrkvtdaknnanqtlstldnlnnaqkgavtgninqa

Tsompanidou\_et\_al\_Supplemental\_FASTA\_File

htvaevtqaiqtageInta  
mgnlkslnkdttlgsqnfadadpekknayneavrnaeniInkstgtnvskdqveaamqvnttkaalngtqnlekakq  
hantaiddg1sh1tnaqkea  
lkqlvqqstttvaeaggneqkannvdaamdklrqsiadnattkpkly  
>tr|E5QVY3|E5QVY3\_STAAH  
mrqqnqnytdsspkkdaynavttaqgiidqttsptldptvinqaagqvsttknalngnenleakqqatqslgsldnl  
nnaqqavtdqingahtid  
eangikqnaqnlntamgnlkqaiadkdatkatvnftdadqakqqayntavtneaeniiskanggnatqteveqaiqqvnaa  
kqalngnanvqhakdeata  
linsndlnqaqkda1kqqvqnattvagvnnvkqtaqelnnamtqlkqgiadkeqtkadgnfvnadpdkqnaykqavaka  
eal1sgtpdvvtptseita  
alnkvtqaknd1ngntnlattkqnvqhaidq1pnl1nqaqrdeyskqitqatlvpnvnaiqqaatt1ndamtqlkqgiank  
aqikgsenyhdadtqkta  
ydnvtaeael1kqtnptmdpntiqqa1tkvndtnqalngnqkladakqaaktn1gtldh1ndaqkqal1ttqveqapdi  
atvnnvkqnaqnl1namtn  
lsnalqdktet1nsiftdadqakdaytnavahaegilskangsnasqteveqamqrvneakqalngndnvqrakdaak  
qvitnand1nqaqkda1kq  
qvdaaqtvanvntikqtaqdl1nqamtqlkqgiadkdqtkangfnvadtdkqnaynavahaeeqivsgtpnanvdpqqa  
qalqqvtqakgd1ngnhnl  
qvakdnantaidq1pnl1nqtqkta1kdqvshaelvtgvnaikqnadal1namgt1kqqiqansqvpqsvdftqadqdkqq  
aynnaanqaqqiangtptp  
v1tpdavitqavttmqakda1ngdek1aqakqdaianldt1rd1nqpqrda1rnhinqaqalatveqtkqnaqvntams  
n1kqgiankdtkasenyh  
dadadkqtaytnavsqaegiinqttnpml1pdditra1tqvtdakng1ngeaklatekqnakdavnamt1ndaqkqal1k  
gq1dqspeiaivngvkqta  
ts1dhamdqlsqa1ndkaqtladgny1nadpdkqnaykqavakaeal1nkqsgtnevqaqvesitnevnaakqalngndn  
lanakqqakqqlan1th1n  
daqkqsfesqitqap1vtdvttinqkaqaldhame11rnsvadnqatlasedyhdataqrqndynqavtatnniinqtts  
ptmnpdevnrattqvntk  
valdgden1vaakqqannr1dqldh1nnaqqqqlqsqitqssdiaavngkhqtaes1ntamgn1inaiadhqteveqlgnf  
vnadtdkqtayttavneae  
aminkqtgqnanqteveqaitkvqttlqalngdhn1qvakanatqaidal1ts1ndpqkta1kdqvtaatlvtavhqi eqn  
ant1nqamhg1resi qdna  
atkanskyinedqseqnydqavqaanniineqtat1dnna1nqaattvnttkaalhgdkvlqndkdhakqtvsqlth1n  
naqkhmedt1idsettrta  
vnhd1teaqaldq1mda1lqssiadkdatrassayvnaepnkkqsydeavqnaesi1ag1nnp1inkgnvtsatqavtssk  
nal1dgver1aqdkqtagns  
1nh1dq1tpaqqaalenqinnattrdkvaei1aqaqal1neamka1kesikdqpqteasskfinedaqqkdaytqavqhak  
d1inktt1dpt1aksiidqa  
tqavtdaknn1hgdqkl1dqdkqrattet1nn1sn1ntpqrqal1enqinnaatrgevaqkl1teaeal1nqameal1rsiqdq  
qteagskfinedkpkqday  
qaavqnakdl1nqtnnpt1dkaqveql1tqavnqakdn1hgdqkl1addkqhavtd1nq1ng1nnpqrqalesqinnatrd  
evaq1laeakaldqamqal  
rsiqdqqttesgskfinedkpkqdayqaavqnakdl1nqtnnpt1dksqveql1tqavttakdn1hgdqkl1ardqqqavt  
tvnal1pnl1nhaqqqal1tda  
inaaptrtevaqhvqtate1dhamet1knkvdqvntdkaqpnysteaddkkaevdqal1qaaesi1tdptngsnankdavidq  
al1tk1qekvne1ngnerva  
eaktqakqtd1dq1th1nadqiatkqnidqatk1qpiaelvdqatq1nqsmdq1qqavnehanveqtvdytqad1dkqna  
ykqaiadaenv1kqnanq  
qvdaal1qnl1nakqalngdervalaktngkhdieqlna1nnaqqdgfkggridqsnd1nq1qqivdeakal1rvmdq1sqe  
itgnegrtkgstnyvndt  
qvkkvydeavdkakqaldkstgqnl1taeqvik1ndavtaakka1ngeek1nrrksea1qrldq1th1nnaqrqal1aiqqin  
naet1nkasrainratk1d  
namgavqqyideqhl1gvisstnyinaddn1kanydnaianaahe1dkvqgnaiakaeaeql1kqni1daqnalngdqnl1an  
akdkanafvns1ng1nqqq  
qhlahna1nndatvsvdtdi1vnnqidl1ndamet1kh1vdnei1pnaeqtvnyqnaednaktnfddakrlant11nsdntv  
ndingaiqtvnda1qn1ng  
dqr1dqakdkaiqsinqal1ank1keieasnatdqdkliaknkaeelans1inninkatsnqdvsvqvtagnhaieqvhan  
e1pkaki1dankdvdkqvqa  
l1deidrnpnl1tdkekqal1kdrinqi1lqqghnginnamtkeeiehakaql1aqal1qdik1lvkakedaknaika1lanakrd  
qinsnpdl1tleqkaka1ke  
ideaeakra1eni1naqtkdq1nqg1n1g1lddi1rnthvvevdaqpavneifdatpeqil1vngelivhrddi1iteqdilahi  
n1ldq1taei1dtpstati  
sds1takvevt1ldgskvi1vnpvkvvekel1tvvkqqaiesienaaqqkineinnhat1tpeqkeaaiaevnk1kqqaie  
qinnaadvhtveevqheq  
ahieqfnpdqft1dqaksnaiksisda1qhmideinaskdl1tdkekqea1sk1nq1kdqsiqai1qraqsideiaqqleqf  
ka1lkaanpfake1knrkk  
aa1skikdi1stdkidri1rstigtaeerqaamnrineiv1etikdinnaqtpqqveaal1ngiarilavqivtsdhsksps

Tsompanidou\_et\_al\_Supplemental\_FASTA\_File

snsdqqsnshlhvgygtvn  
hpfnsppighkkldqddeidp1hmrhfgvrignviknalgvvgisgllasfwffiakrrrkedeeeleirdnskdkkk  
gsiegtkhlp11fakrrrk  
edeedvevntentdekvlgdnehspliakrlkdkdgnvettsieskdedvplllakkknqkdnqskgkksaskkpskk  
vaakkkkkkkkiknnlfl  
r  
>tr|E5QVY4|E5QVY4\_STAAH  
makinfdaatkgnpgistcaivikedeqhytythelgemdnhtaewaaciya leharelvsnallytdskliadsvnag  
yvkna kfkpyfdqleifeq  
dfd11fvkwipreqnkeanqhaqqa lykfikknk  
>tr|E5QVY5|E5QVY5\_STAAH  
myneilglvtfiatfvlmv1myrffgkqgliawvaigtiiani qvikiveifgisatlgnvmfasiylatdilndiygr  
vakravwlgfssstlimiiv  
mq1shfipapedmaqalhai fdvvprialgsivayiigqidvfifslikkvfssdktf firaygstflssiidtaif  
vaiafigslpgtvvfeifi  
ttyv1klastvfnvpfygiaksfyrkgkidkl dqy  
>tr|E5QVY6|E5QVY6\_STAAH  
mqyfevikevsri1tyseqnalakiddl mntycnqcpiktr1rklegktkahhfcinecsigkeikqlgnelq  
>tr|E5QVY8|E5QVY8\_STAAH  
meilrieptpsptmkvvl sytre dkl sntykkveenqprfinql1sidgitsifhvmnflavdkapakdwedilpdika  
afsgesqvl esgkdpqidn  
hfgeikaelltfkgipyqikltsadqelreqlpqtyvdhmtqaqtkhdnivfmrkwldlg nrygnieevmdgvleevlat  
ypesq1pv1vkhaleen  
tnnyhfyrhvs1deyhatdnw ktr1rmlnhfpkptfediplld1alsdekvsrrqaivllgmieskeilpylykglrdk  
spavrrtagdcisdlgype  
alpemv111ddpqkiwrwraamfi fdegnaeqlpalkahindnafevklqiemaisriengdealgsvwkqmntrti  
>tr|E5QVY9|E5QVY9\_STAAH  
mee1nmnaydaymkeiaqqmrgeltqngfts1etseevseymnqvnaddttfvinstcgcaaglarpaavavatqnehr  
ptntvtvfagqdkeatm  
refiqqvpsspsyal fkg rd1vyfmprefiegrdindiamd1kdafdenck  
>tr|E5QVZ2|E5QVZ2\_STAAH  
mtkqiivtdstsd1skeyleannihvip1sltiegasyvdqvditsee finhiendedvktsqpaigefisayeelgkdg  
seiisihlssglsgtfnta  
ygasqmvdanvtv1dsksisfglyqi qhlvelvkegvstseivkkl nh1renik1fvvigq1nqlikggrisktkglig  
nlmki kpig1ddgr1elv  
hnartqns siqylkkeiaefig dheiksvgvahanvieyvdklk kvfneafhdnydinvttpvisahtggaiglvvlk  
k  
>tr|E5QVZ3|E5QVZ3\_STAAH  
mtkeyatlaggcfwcmvkpftsypgi ksvvsgysgghadnptyeqvctnqtghveavqitfdpevtsfenildiykftfd  
ptddqgqffdr gesyqpvi  
fyhdkhqqkaae fkkqqlneqgi fkkpvi tpi kpyknfypaedyhdyykknpvhyyyqrgsgrkafieshwgnqna  
>tr|E5QVZ5|E5QVZ5\_STAAH  
mk1ntsnspftekqvteinnl1qt1tesqqw1sgf11ansndttsdsnqqq1etevwqqsqisee qetsttym1qnkep  
hieanqrhvtvlygsesgn  
amrlaeifser1sdighqvvlmsmdeydttniaqledlfiitsthegeppdnawdffeflednapnl nhvrysvla1g  
dqtyeffcagkdvdalle  
n1gaerickrvdcdidyedaekwmadi iniidttsegiqsesvisesiksakekkysksnpyqaevlanin1ngtdsnk  
etrhiefl1ddfsesyepg  
dcivalpqn dpelveklism1gwdpqspvpindhgdtpiaea1tshfeftkl1lp11knadiyfdnee1seriqdeswa  
heyvinrdfidlitdfpti  
elqpenmyqi1rk1ppreysissfmatpdevhitvgtvryqahgrerkgvcsvhfaerikpgdivpiylkknpnfkfpm  
kq dipvimigpgtgiapfr  
aylqereelgmtgktw1ffgdqhrssdflyeeieewlengnltrvd1afsr dqehkeyvqhrimeeserfnewieqgaa  
iyicgdekcmakdvhaik  
dvlvkerhisqeeati1rqmkqrqyqrdvy  
>tr|E5QVZ6|E5QVZ6\_STAAH  
msmplmid1tnknvvi vgggtvasrraqt1sqyvehmtvisptitek1qnmvdkgvviwkgefepsdivdaylviaatn  
eprvneavkqa1pehalfn  
nvgdasngnvfpsalhrdkl1tisvstdgaspkl1tksimaelea1yppsissyidflytcrqkik1lditynekqql1sq  
ivsqeylnhdkaqflaw1  
dvrq  
>tr|E5QVZ7|E5QVZ7\_STAAH  
megennmnsdnmwl1vmgl1iiiisvgl1iakkinpvvgmtiipclgamilgysvtd1vgffakgl dqvinvvimfifai  
iffgimndsg1fkplvkr1  
ilmtrgnviivcamtaligtiaqldgagvvtfl1sipallplyka1nmnyll11111alsaa immvpwggpmarvaav1  
kaksvnelwfglipiqig  
filvm1favylgfkqkriikkaierne1pqtqdidvhk1vevyerdqdvrfpvkgrartkpwikwntaltlavilamli  
niappafamigvslalvi

Tsompanidou\_et\_al\_Supplemental\_FASTA\_File

nfksvdeqmerlrahapnalmaavviaagmflgvlnetgmlkaiatnlikvipaevgpylhiivgl1gvp1d11tstda  
yyfavlpiveqtagqfgvp  
svstaysmvigniiigtfvspfspalwlaiglaeanmgyikyaffwiwgfaivm1viamlmgivti  
>tr|E5QW00|E5QW00\_STAAH  
maiieylynfsrnkqnfnsakttvlsydltnltnftrmafknityl1tniy11  
>tr|E5QW06|E5QW06\_STAAH  
mlnndhgiedtkimgdacphlygiliftpkpyllkrsqtmivinkygnelvidik  
>tr|E5QW07|E5QW07\_STAAH  
mtkninemkafimniydeyrsyvieelddcltiqknndtayydvleaindlsndtlcvlnhlyinegqeetfeqkflqrn  
khlqnvdfgkalf1r1rprt  
agrhyiit1wenrqafyhwqnsaeykthkhrgtsgkadvkiinre1synirieladm1  
>tr|E5QW08|E5QW08\_STAAH  
myerk1vmqksalfapekyniiseiekyshipdkkailyhntegedisvtyqq1ieqsnkvgnvlashglskgdkvlimm  
prsiatyelyiaalklga  
iipcsem1rtkd1qyri1thgeinavialepftvefekikedyal1tkfviagqkdgwisleaekenasnklemadttrddm  
ailsytsgttgnpkavthc  
hgwgfah1qmapkhwlcineddlwataapgwqkwvswpflsvlgsgatafvfngrfspetyel1lqkyqinvlcctpte  
yrmaklqn1ndydlthlh  
savsageplnrevveqfkkyfn1tvr1dgygqtest1ligflkdtpprigrismgkigpssvtvvddegnsvpantkgniav  
pld1pal1fkgyykeper1a  
kaqtgkyyitgd1ahvdddgyfwfegrrddi1ssgytigpfevedal1thpavkecavvakphdirgnivkafvilqdh  
tagddr1vke1qqfvknev  
apykypreiefvdd1pktnsgr1rve1rdaeiekwqqkdsnq  
>tr|E5QW13|E5QW13\_STAAH  
mskahq1iqedehy1faksgrikyyp1vidhgygat1vdi1egktyid11ssassqnvghaprevteai1kaqvdkfihytpa  
ymyheplvrlakk1ceiap  
gdfekrv1tfg1tgsdandgi1kfaraytgrpyi1sftnayhgstf1g1smsais1nmrkhygp11ngfyhipfpdkyrgm  
yepqansveey1apl1kem  
fakyvpadevacivietiqg1dgg1lepvp1gyfealenicrengiliavddi1qqgfgrt1gtwssvshfnftpd1itfgks1  
aggmpmsai1vgrkeimnc1  
eapah1fttganpvsceaalatiqmi1edqs11qasaekgeyvrkrmdqvwskynsvgdvrgk1sigidivsdkn1ktrd  
asaa1kicnycfehgvvii  
avagnv1rfqpp1vityeql1dta1ntiedal1ta1eagn1dqydisgqgw  
>tr|E5QW16|E5QW16\_STAAH  
mtnvlyghgt1gt1mag1legtatine11lehgn1giat1tgsdgevi1fdgkayhanehkefielkgdekvp1yasitn1fk  
askt1fp1qq1sqddv1faqi  
knem1sen1fsavki1ygt1fkhmhvrmmpaqpp1ytr1idsarrqpeekrqdirgai1vgfftpel1fhgvsagfhi1hfadd  
eraygghv1dfevddv1vve  
iqnfet1fqh1fpvnnem1fvkaki1dykdvaeei1reae  
>tr|E5QW19|E5QW19\_STAAH  
mr1itmtk1i1ttvkemqhi1vkaakrsgtt1gfiptmga1hdgh1tmvresvstnditvsvfvnpl1qfgpnedfdayprq  
idkd1el1vsevgadiv1fhp  
avedm1ypge1gidvkvgl1adv1legakrpg1hfdgvvtvvnk1fni1vmpdyay1fgkkdaqq1aiveqmvkdfnhavei1igi  
divreadg1lakssrnvy1t  
equerqeavh1sksl1laqaly1qddgerqskvi1dkvtqy1eshisgrieevavysypq1veqheitgrifis1lavkfskar  
lidni1igae  
>tr|E5QW21|E5QW21\_STAAH  
mfddfwkqrqvp1sqikt1p1ltcaswstqg1hnrgsfegfkqaaseekw1yvhrkewesyyaren1erqksffdfyl1ke  
enndwkdtph1y1evrdqf  
ykge1fksasa1fp1pnte1ytp1ly1naenht1nhaki1ssahvaqynsedkrqdv1sfkyt1fdkdte1lvgnm1kl1wvsttdsd  
dmd1fagi1kk1dr1rgnevn  
fpdfnhi1engqvatgw1rvshre1dqekstia1qpwhkhetel1k1sqdeivpveie11lpsgt1fkqget1levv1kgseivi  
gnst1pgmk1trye1heetv1nk  
gmhmi1ytg1skydsq1li1pivn  
>tr|E5QW22|E5QW22\_STAAH  
mahnvyl1fn1gdtnkqkkvi1tmnq1l1gnpk1tvthvnev1kaginhi1vds1vqygnqemimekdvtvemr1dgekly1inif  
rpnkdgk1fpvmsad1tygk  
dnkpk1itnmgal1wpt1gai1ptss1f1tepes1pdpg1fwvpndy1vvkval1rgsdkskgv1spwskreaedy1yev1ewaanqsw  
sngni1gtngvsyl1avt1qww  
vas1lnpph1kam1pweg1ndmyreva1fhggi1tdtg1fyr1fwtqgi1farwtdn1pnied1li1qaq  
>tr|E5QW26|E5QW26\_STAAH  
mtketdnkktvatsdnkdtqqnqpede1rqg1ngyrktd1d1lei1eqel1remmkigenetkndy1kkfkv1s1list1i1ivi  
1ai1rfv1hkmm  
>tr|E5QW28|E5QW28\_STAAH  
megvc1mneqwl1eh1pl1kdi1kei1spvsggdv1neayrvet1dtdt1ff11vqrg1rkes1fyaae1i1ag1neferagitaprviasg  
evngday1lvmty1leegasg  
sqrg1lq1lvaq1l1hsqqeegk1fgfs1pyeggdi1sfdnhw1dwdcti1fvdkrmdh1kde11nrg1lwdandikvydkvr1rqi  
vae1ekh1qskps1l1hgdlw



Tsompanidou\_et\_al\_Supplemental\_FASTA\_File

ggnymflqdgrrpalfdpaplygdrefdigittvfggftsefydaynkhyplakgasyrlefyrllyllmvhllkfgemyrd  
svthsmdkilqdttd  
>tr|E5QW29|E5QW29\_STAAH  
mmstvqsdi fktnsassiksavetcnnvskpdkdesttvsgnnaahsviddlisknqsvaeairtasdniqkvgeafdq  
tdvmigneigkn  
>tr|E5QW31|E5QW31\_STAAH  
metigsi iylkegsqklmi inrgpiveienqkymfdysackypigvvedeiyyfneenidsvifkgysdqdevrfqelfd  
nmkqnl dseiqrgevtpp  
>tr|E5QW33|E5QW33\_STAAH  
mlevkydmrtghytpipnephylvishadkl tatekaklrllliikqkl dislaesvsspiasehvieql tlfqherrhl  
rpkisatflawllifl mfa  
lpigiyqfswdfqnyvsawiey ltqtllnhdilqhilfgdygvlslgtyslvaalpvvilislstavidqtgfkswm  
iwaiepsmlriglqgndiv  
pillefgcnaaaaisqaahchtctktqcmsl isfgsscsyqigatlsifsvagkswlfmpylilvllggilhnriwlkkn  
dqqlsvplpydrqlhmpni  
rqmllqmwqniqmfi vqalpifitictivsilsltpilnvl sqiftpilsllgissel spgil fsmirkdgmllfnlhqg  
allqgmtatqllllvffss  
tftacsvtmtllkhlggqsal kligkqmvtslslvigvgiivki vlii  
>tr|E5QW35|E5QW35\_STAAH  
metlelqgaklryhqvggppvl ifipgangtgdi flplaeqlkdhtvavdrdygeselaep lpsasnpdsdyrvkr  
daqdiaelaks l sdepyvi  
lgsssgsivamhvlkdypevkkiafheppintflpdstywkdknddivhqil teglekgmtfgetlniapidakmmsq  
padteegrieqykrmfws  
kfeirqythsditl ddfstkysdkitllngtdsrgsfpqdvnyfinketgipivdipgghlgyiqpegfadvllnmwg  
>tr|E5QW36|E5QW36\_STAAH  
mqnmeanqmkstfeehyvi ediqetmna isadpkgvpmkvm leglekgtfnadelshderiqfmnqdvqiqvl  
syngspsnlvgkaie l c  
qkandqlanyiaqypnr fvgfatlpinepetaareferc indlgfkgalimgraqdglfdqkydiifktaenlgvpiyl  
hpavnsdiyqsykgnyp  
evtaatfacfgygwhidvgihaihvlsgifdrypkl nmiighwgefipfflermdeal faehlnhpvsyyfknnfyitp  
sgmltkpqfdlvkkeagid  
rilyaadyppyiepek lgvflde lgtdeekesi ytngakllglssn  
>tr|E5QW39|E5QW39\_STAAH  
mslnkeqrritaeelqahfeest lsvqmi agklvnttedvekal amkaplgifshqlqr fihlvwdvrdvindnikengq  
tpepytyl kgekedywflr  
>tr|E5QW41|E5QW41\_STAAH  
miglkskti isnewgaimiqsmwfnlhvqdleksaqfykal gfkirnpqml dkmvgiqigqttvilienkhfqnvssqs  
lntepnevms lgvntnee  
vdq lvnkvkeaggtvvgteptvsqgygamfkdldghhfnflvc  
>tr|E5QW43|E5QW43\_STAAH  
msetdepqgfehthnrlninqnsqslmtfitsklsklkqhiii argnkridyr lsynfyttydnveikkidceytyam  
ajailirhtmsfdnahffa  
qlrhpvl  
>tr|E5QW44|E5QW44\_STAAH  
mlkqqlgseqmtesksidprivrtkql lvdaf lki srekk lsqitvkditdiatlnratfyahftdkedlldytlsvti  
lkdln dnl sisnvinekv l  
rnfisiasyikdaaksce lnseafc nka hqrinneledi faimlensypehqrdiivnsgsflaagisglalhwfntsq  
etadvfidrnl pflinhia  
hf  
>tr|E5QW45|E5QW45\_STAAH  
myihkwkddimtsikti tpkdfi frvlsgvaigivaglvpnailgeifkyfmdyhpifktllgvvva iqftvpaligalv  
amkfdl splaiavvasaay  
vgsaaqfkngawmitgigdlintmitaaiavl filli qhrvgsmalivfptvvggisgaigililpytkmittaignmv  
ngftelqpi vmsilismvf  
sliiisp l stvaiafaigigtlaagsasigisateavli igtskvr lgvplsvffggvkmmipnmvkypilmlpil tta  
ivsglvsalvgihgtkesa  
gfgfigmvgpinafkfmevdsawlsvllivva fvpvftawladiiyrkvfrlytndi f kfmg  
>tr|E5QW47|E5QW47\_STAAH  
mdtkdfkrlekmysprylpgldglrafavigi iihlnaqw lsgglgvdtffvisgylitslliseyyrtqkidllefw  
krrlkr lipavfl icvv l  
tftli fkpeli iqmkrdaiaaifvsnwyyisqnvdyfnqfaieplkh lws laieeqfyllfplvitfl lhrfkprni iq  
tlfivslis lglmivi hfi  
tgdnsvvyfgdtr lqtlll gci lafiwppfal kdiskkivsl diigisgfav lmtlffivgdqdwiynggfyyisf  
atlfiaiaavhpsl fakf  
lsmkp lli igkrsyslylwhypii vfvnsyyvqqqipyvyiieilltalmaeisyrfietpirkkgfkafaf l pkkksq  
fartv l vlll ipsiiv l s  
gqfda l gkqhaekkekktefktkkkvkdkqedkqtanskedikssplligdsvmvdignvftkkipnaqidgkv g  
rqlvdatpivksykydyak

Tsompanidou\_et\_al\_Supplemental\_FASTA\_File

kgqkvvvelgtngafstkqdlne11dsfgkadiylvsirvrprdyegrinkliyeaaekrsnhlvdykasaghpeyfyad  
gihleyagskaldlivkt  
methatnkk  
>tr|E5QW51|E5QW51\_STAAH  
mkwlsriltvivotmsmacgali fnrrhq1kaktlnfnhkal tiiiparneekrigh11hsiiqqvvpdvivmndgstde  
tacvarsygatvvvdvdda  
dgkwygkshacyqgvthactnriafvdadvtf1rkdavealinqyqlqgekgllsvqpyhitkrfyegfsaifnlmtvvg  
mnvfstl d dgrtnqhafgp  
vtltnkedyyatggghksanrhiiegfa1gsaytsqslpvtvyegfpfvafmryqegfqs1qegwtkhlstgaggtkpkim  
aai1v1w1fgsiasilglcl  
s1kyrqmsvgkmltvylsyttqfiylhrrvvgqfsn1lmvchp11fmfftkifiqswkqthrygvvewkgrqysiskeq  
>tr|E5QW54|E5QW54\_STAAH  
misnk1anipdsyfghtmgrkiehgp1p1inmavgipdgptpqqiidhfqkaltipenkygafhgkeafkqai1vdfyqr  
qynvtl d kedevci1ygtk  
ng1lavptcvinpgdyv11pdpgytdylagv1ladgkvp1n1lepphylp d wskvdskiidk1kliyltynpntgst  
kevfdeaiakfkdttdtkiv  
hdfaygafgfdaknpsilasengkdvaieiy1skgynmsgfrvgfavgnkdmia1kkyqthtnagmfga1qdaaiya1  
nhyddfleeqsnvfkarrd  
rfeam1tkad1pffhakggiyv1etppgydseqfeqflvkeksilvapgkpf gengnryvris1al d dqq1deaa1rlt  
elaylye  
>tr|E5QW55|E5QW55\_STAAH  
mnnkvkgdvkmtkikimsvrredmpyikawaekhhvevditkealtd d nvegvagydg1s1sqqip1sehvykr1nelgi  
kqiaqrsagfdtyd1elan  
kyn1ivsnvpsyspsniaefavnqainvvrhfnq1qtkvrehdfrwept1lksik1kvavigtgrigrvvadifangy  
qsdvvaydpfnakiatyv  
dykdtieavegadivt1hvpatkynhylfnael fkhfkkdavfncargslvdtka11dal d ngvikgaal d tyeferk  
1fspdqrqkt1ndp1les1  
idredv11tphiafyteaaven1ivda1dat1dv1qtgdtr1rvn  
>tr|E5QW56|E5QW56\_STAAH  
mnamsqei1nvegm scghcksavesa1nnidgvtsaevn1engqvsvqyddskvavsqmkdaiedqgydvv  
>tr|E5QW57|E5QW57\_STAAH  
m d sqf1qtmqvgvgrnkfyeni1svp1pryt nspseknyicswsedptvnr diiepits1sqnhqri1hy  
>tr|E5QW58|E5QW58\_STAAH  
mantkk1t1d1tgmtcaacsnr1iekk1nk1ddvnaqvn1ttekatveynpdqhdvqefinti qh1gygvavetvelditg  
mtcaacs1riekv1nkmdg  
vqnatvnl1tteqakvdyyeetdadk1vtriqk1gydasikdnrdqtsrkaealqhklikliisav1s1p1l1m1mfvhl  
f1nmhipal1f1tnp1wfqf1la  
tpvqfi1gwqfyvgykn1rngganmdv1lavgt1saayfysiyemvrw1ngsttqphlyfetsavlit1l1fgkyleara  
ksq1tna1gell1s1lqakea  
ri1kdgnevmp1p1nev1hvgdt1ivkpgkipvdgki1kgmtaidesm1tgesipveknvddt1vigstmnkngt1mtatk  
vggd1alan1ikvveeaqs  
skapiqr1adi1sgyfvpi1vvgia11t1fiw1t1vtpgt1fepalvasisv1viacpca1glatpts1imvgt1graaengil  
fkggefverthq1d1t1v1d  
ktgt1tngcpvvt1dyhgd1dt1q1l1ataek1dsehp1aeav1nyakekq1t1t1t1t1t1f1kavp1ghgieat1dh1h1lvgnrk  
1madnd1s1lpkhis1dd1th  
yerdgktam1iavn1s1tgi1iavad1tkdhakdaikq1lhdmg1ievam1tgd1nkntaqaiakqvgid1tviad1ilpeekaaq  
itk1lqqgk1kvamvgdgvn  
dapa1lvkad1gia1igtg1tevaieaad1tilggd1m1lipkaiyaskatir1nir1qnl1fwafgyniagipiaa1g1lapwvag  
aama1lssv1vtna1rlkk  
mr1eprrkda  
>tr|E5QW61|E5QW61\_STAAH  
mvvefknepgydfsvqenvdmfkka1kdveke1gqdipl1vingeki1fkddkiks1npadtsq1vianaskatkqdvadafk  
aaneaykswktwsandreae  
1m1rvsai1rrrkaeiaaimvyeagkpwdeavgdaaegidfi1eyyarsmmd1aagkpv1dregehnyfyksigtgvtip  
pwnfpfaimagtt1lapvva  
gntv1lkpaedtpyiayk1mei1eag1pkgvnfvpgdpkeigdy1vdhkdthfvtftgsratgtriyersavvqegqn  
f1krviaemggkdaivvde  
nidtdmaaeai1vtsafg1fsgqkcsacsraivhkdv1dev1eksik1tkel1t1gntvdntymgpvinkkqfdkiknyieig  
keegk1leqgggtd1dskgyf  
vepti1sg1kskdrimqee1ifgpvvgfvkvndfdeaieavandtdygl1tgavitn1nrehwikavnefdvgn1y1nrgctsa  
vgyhpf1gg1fkmsgtdakt  
gspdy1l1hf1leqkvvsemf  
>tr|E5QW62|E5QW62\_STAAH  
mgiv1aiwsfkq1sqsh1dsgfmfff1vyvlyi1syfnsdkhdknkr  
>tr|E5QW63|E5QW63\_STAAH  
mketd1rviktka1lss1lq1leqq1fqt1tvnqi1cdna1vhr1t1fykhfydkyd1ley1fnq1tkdyfardisdr1nh  
pfq1tmsdt1innked1reia  
efqeadaefnkvl1knvcikimhndiknrdridiysdipdn1ifiyids1iegfi1hwikdekidwppedidni1fhkvini

Tsompanidou\_et\_al\_Supplemental\_FASTA\_File

kik

>tr|E5QW64|E5QW64\_STAAH  
makf1ykmgtfiakykwsaviawivivaailiplatnapkfdndikmtglesldtnkkiekhfnqdsekaqirrvvfkttk  
ddgivqpsitkdkktldd  
ikkddkhdikisdpyenkqinkdkttafaditydvsqtslkdgsrdnvkshlkdldrnhnvqtelgtgtmtstevggense  
lvgiivafvllitfgsvi  
aaglpiaisaliglasvgviiislltyafdipnvtltlavmiglavgidyalfilfryrqvmktetdyikgiglavgtagasa  
vifagvtvviavcglslvg  
idflavmgfasaisvifavfsaltl1palisifhkhikvnlqsnfkdidtpwskfitgnalaavllgllilvaaaipd  
shmr1gipddgvkpadstg  
kkaydiisdkggegfnqgipmlinvkdkkddpqq1qqd1qsvykdikdkknvdivtppqmskdndyalmvvipkqgpnae  
stndlvhd1rdynkdaqdk  
ygfkteisgqsvinidmskklneaip1fatvivv1affllmivfrsilip1kavlgfv1slmat1gfttfvmqdgfmkg1  
fgiettgpm1af1pvitig  
ilfglamdyevflmsriheysktgndysikvglkesgpvivaalimfsvffafvfqedvmiksmgmalafgv1fdaf  
vvrmm1ipaltklfgkgsww  
ylpawlnriiprvdieghalekyktvesqeseakdskeydttkfvypqgatnsvkshqdvhgqddarsiv1ddktmal1yq  
evkqqsass1f1yda1mdy  
qnkhq1n1skqqatnieq1nkniek1nq11ekn1rnks

>tr|E5QW68|E5QW68\_STAAH  
mfmmnnffnsdfdsilrrmmqdmqnsnqtsnkkyyingkevspe1aqftqqgnhsaeqsaqafqqaalrqqgqsgng  
ny1eqigrnt1qear1g11  
dpvigrdkeiqetaev1srrtknnpilvgeagvgktaivegl1aqaivegnvpaaikdeii1sidiss1eagtqyrgafee  
niqk1vegvkssqnav1ff  
deihqi1gsgatgdsdsgk1sdi1kpa1srgeisi1gattqdeyrnimkdaaltrrfnev1vnepsakdtveilk1gir  
ekfethhqvk1pddv1kac  
vd1siqy1pqr11pdka1dv1ditaah1saqspaidkvtttekrisel1ehdkrkavsaeeykkaddiqeikslqdk1ens  
ngehtavatvhd1sd1tigr  
1tgipvsqmdandier1knissr1rski1gqdkavemvsrairrrnragfddgnrpigs1f1vfgptgvgk1telakq1aid1  
f1gnkeal1r1dmseysdtt  
avskmig1ttagyvgyddnsnt1tekvrrnpysv1lfdeiekanpq1ilt11lqvmddgn1tdgqgnvinfknti1i1ctsna  
fgfngndteek1dmhemkk  
ffrpef1nr1fngivef1h1ldkda1lqdivn111ddvqvt1dkkgitmdvsqdakdw1ieegydeelgarplrriveqqvrd  
kitdy1ldhtdvkhv1div  
edne1vvk1gk

>tr|E5QW69|E5QW69\_STAAH  
mnsmmmkkecvfmvykssyds1pvg1relvsdgvsl1tav1fenqqddgtreents1aifkeatqwl1dayfkgdnpeitip1  
kptgshfqqcvwne1rqip  
ygt1t1tygaiakkv1gk11dkpkmsaqavggavgsnplsiivpchr1vvgktgsl1tgfggtinnkik11lelenidmsklyvp  
khstkp  
>tr|E5QW70|E5QW70\_STAAH  
mt1gidkinfyv1pkyvdmak1aearqvdpnk1flig1gqtemavspvnqdivsmganaakdi1t1dedkkk1gmvivates  
avdaakaavqih1n1l1giq  
pfarcfemkeacyaatp1aiq1lakdy1atrpnkv1lviatdtarygl1nsggeptqgagavamvishnpsilal1nedavayt  
edvydfwrptghkyp1vdg  
al1skday1rs1fqqswneyakrqgk1ladfas1cfhvpftkmgkalesi1idnadettqer1rsgyedavdynryvgniyt  
gs1yl1slis11enrd1qag  
eti1gl1fsygs1gsvgefysat1vegykdh1dqaahka11n1nrtevsvdayetffkrfddvdfdeqqdavhedrhifyl1sni  
ennvreyhrpe

>tr|E5QW71|E5QW71\_STAAH  
mqs1dknfrh1srqqk1qq1vd1kqwl1seeqfn11lnhpl1ideevans1ienviaqgalpvg11pniivddkayvvpmmve  
epsvvaasygak1vnqtg  
g1fktvsserimig1q1vfdgvd1dtek1sadikalekqihq1adeaypsikargggyqriaidt1fpeqq11slkvfvdtkda  
m1ganm1nt1leaitaf1kn  
efpqsdi1ms11snhata1svvkqgeidvkd1largertgeevakrmerasv1laqvdihraathnkgvmngihavvlatgn  
dtrgaeasahayaskdgqy  
rgiatwryd1qerqr1lig1tievpmt1aivggg1tkv1piakasle11nvesaqelghvvaavgl1a1nfaacra1vsegiqqg  
hms1lqy1ks1aiivg1akgde  
iaqvaeal1kqep1rantqvaeril1qd1rsqq

>tr|E5QW78|E5QW78\_STAAH  
mddkqhttsd1deraenatsnqddq1t1nsskrv1h1krwqf1sil1ig1t1i1itavitvayif1inqk1sg1n1ktdqan1nkie  
nvyk11n1sdy1kkqnsdk1  
skaa1dgmvk1el1kdp1ysey1tkeq1tk1fnegvsgdfvg1igaemqk1kndq1imv1tspmk1gspaerag1rpkdv1tkvngk1si  
kgka1ldevvkd1vrgkente  
vt1tvqrg1seekdv1kikrekihvsveykkk1gkvgit1nk1fqndts1del1kdav1kahkdgl1kkiv1d1r1nppgg1l1dea  
vkmanif1dkg1ktv1k1ek  
gk1dteai1qtsnda1lkeak1mdis1ilvnegsasasevftga1kdy1nkakvygskt1fgkgv1vq1t1refkdgs11kytemkw1  
tpdg1hy1hgk1gk1p1dvtid

Tsompanidou\_et\_al\_Supplemental\_FASTA\_File

tpkyqslnvipntktfkvgdddkniktikiglsalgykvdnestqfdqalenlvkafqqanklevtgefknketnkftel  
lvekankhddvldklnil  
k  
>tr|E5QW83|E5QW83\_STAAH  
mtqilivedeqnlvrfllelthenynvdteydgqgdldkalshyddliildlmlpsingleicrkiqqstpiiita  
ksdydkvagldygaddy  
vkpfdieellarirailrrqpqkdiidvngitidknafkvtvngaeieltkteydllyllaenknhvmqreqilnhvwy  
nsevetnvvdvyirylnk  
lkpydrdkmievtrgvgyvir  
>tr|E5QW84|E5QW84\_STAAH  
mtkrklrnnwiivttmitfvtilfcliiiffkdtlnhseiddaerssddinnlfhskpvkdisaldlnaslngfgeii  
iydehnnklfetsndntvr  
vepgyehryfdrviknvikalii  
>tr|E5QW85|E5QW85\_STAAH  
mlihslenydnivkslyiialafgviatiitatisyvfstqitkplvslnkmieirrdgfnklqlntnyeednlan  
fnemmsqieesfnqqrqfv  
edashelrtpiqiighlnliqrwgkdpavleeslnisieemriiklveelleltkgdvndisseaqtvhindeirsr  
ihslkqlhpdqyfdtdlts  
knleikmkphqfeqlflifidnaikydvknkkikvkrlnkqkiiieitdhgigipeedqdfifdrfyrvdksrsrsqg  
nglglsliaqkiiqlnggsi  
kikseinkgttfkiiif  
>tr|E5QW86|E5QW86\_STAAH  
mggefhrndkepliicfivvlsgstemifsqnlfrprtptcivcrnwesnfsllgpltrieksslqahfrsvnysqynfv  
khrtiliyvpaslklii  
>tr|E5QW88|E5QW88\_STAAH  
mpevkvpelaesitegtiaewlnlgdsvekgeaileletdkvnvevseeagvlseqlasegdtvevgqaiavigegsg  
naskensndntppqndett  
nnkkeettksadkaevnqtdndnqrvnatpsarryarengvnlaevspktdvvrkedidkkqqapastqttqqapak  
eekkyngyptkpvirekms  
rrkkaakkllevsnntamlttfnevdmtnvmeirkrkkeqfmdhdgkglgfmfftkasvaalkypevnaeidgdm  
itkqyydigvavstddgl  
vpfvrdcdkknfaeiaeanlavkarekklglldmvsngftitnggfigsmstpiingnqaailgmhsiiitpiaidq  
dtienrpmmyialsydhri  
idgkeavgflktikelienpedlles  
>tr|E5QW89|E5QW89\_STAAH  
mikiyniivkikievaimglrsitlgttnieqtkhfmdvilglnceellensirfgdadispgrlqfiqvpseqlee  
shfviglrtpdsgleey  
aeilsskdipttvtvkelngnkyfslednngihfsiysnennygvlgmpsfesavnpqhqvqglgpvilkvnhvditgqi  
ltnifglevfaeyqpfdna  
dyhvqvfkiqgtgglggeihlmpvetemtpaygavdqvefetkdvdffnqaksrldeveipyqtlegddiesiritensg  
lsfiftlqk  
>tr|E5QW92|E5QW92\_STAAH  
msdrfikfndeqldakqvmmlqdlarlllneqtqvkiqkfpypnpvqnlitswfwshrpshiemaglktdvmlaaygy  
hmdvqvivnevvdktfk  
pkfyqqlfklledmrvlnsikverpstaklidlrldtrisytesqikvyrtktqytdllflylehaflsqdffdipsihs  
dlddilvnmflylpnffqn  
qnsednmylaqrmyqvddilikedmlneyyylpktlyntlaspefedlkrtdasqvvgddtsedddnesekadsksads  
eskggylemelhegqns  
tlndearegdtdmtdmktkkgksndtlnreegdavgqsqafqldgvnknveikwqipeiepqyvleyqeskqdvqy  
eikdliqiikktiereqrd  
arfnltkgrlqkdlinwfiddqykyfkkqdlksfdatftllidasasmhdkmaetkkgvvlfhetlkalnikheilsf  
sedafdsddhvqpnine  
inydystfekdgprima lepqddnrdgvairvaserlmrrnqhqqflivfsdgepsafnysqdgii dtyeavemsrkfgi  
evfnvflsqdpi tedveqt  
ihniygqyafvegvahlpghlsp11kk111ks1  
>tr|E5QW93|E5QW93\_STAAH  
mnkntwvigftlfamffgagnlifppnlgldsgqffwpailafvltgiglp11gviwaldkegyigalnkipkfsilf  
liiyltigplfaiprtas  
tsfemtipihsnsialfiftiifivvlyiclnpsklidrigsl1tp111itilamiikgyldfsgnsagkgnealy  
hsnfssfaegtqgyltmd  
aiaaiafsmivnavklgtiktqnqifkqtltagliaaialifiyislyighmpvsdmklnelkshdrnigtyllttm  
astgfgsfgkylgiiva  
ac1ttacglivavseyfhrivpkvsyafvlvfilmsfianqglnavismsipvlsvyppvaitvlliliakfiptkr  
itqqipviivfilsifsvi  
sklgwlkinfieslplrayslewfpvaiiatilgylvgifvkqdpikyqqe  
>tr|E5QW95|E5QW95\_STAAH  
mtvrynishifgvlvgipvaf1tsifgiaaldvsflidmsigivglmtylpiqkltsrkylnieigltrkdyryirnl  
hthqklrgilkyvnirsi

Tsompanidou\_et\_al\_Supplemental\_FASTA\_File

kdfraqndiyqisrsiyttvrqrpasfykvegffyshidnalnlvdaytrlakmpkksineqqkleqtritldevkrtli  
adlkrlneddyerldieme  
lnklhgkhhqd  
>tr|E5QW97|E5QW97\_STAAH  
mwtvtkirydegwwlfsdwpeneivekyqqdfddmfkhyqqliqckvqfdnyvtgkyniyvfynncdmnycedcedl  
qifysfivlqnnevyk1p  
iid  
>tr|E5QW99|E5QW99\_STAAH  
mkyliislvannllvfgvlsaiglninilaammivlvipimisgivffktnidktyiffniifidfyuyiyvhlmtlpkf  
nnyiktemmelehidvilit  
skdfgfdeilfftllyllilivlyy1kkq1knkt  
>tr|E5QWA0|E5QWA0\_STAAH  
mtvkynqngeltdmgis1kmiagsfgtptivydelqireqmrryhrafkdsglkynisyaskaftclqmvklvaeedlq1  
dvvsegelytalhaepsf  
rihfghnktkheiryalennigyfvidsleeielidryandtvqvv1rvnpgveahthefiqtggedskfglsiqygl  
ikainkvqqsky1klkgvh  
chigsqiegteafietakiv1rwlkeqdiqvel1n1gggfgikyvegdesfpiesgikditdaikseikvlgidapeigi  
epgrsivgeagvtlyevgt  
ikeipeinkyvsidgmsdhirtaltdakyqallvnrneeaddsvtiagklcesgdiikdaklpssvkrzydylailstg  
ayhysmasnynqmqkpsvf  
flkdgkarevikrqs1rq1iindtk  
>tr|E5QWA1|E5QWA1\_STAAH  
mtatwsvnkklf1qna1tvknnqplmavvknnayhyd1efavtqfihagidtfstts1reaiqirqlapdatiflmanvy  
efd1vrehqihmtlpslty  
yynhkndl1agihvh1efen1lhrsgfd1neikev1kdhhnqnakmiisglwthfgyadefdvsvdynversqwmeivea  
11segyqfd1ihaqsasf  
yregq11lphhtharvgialygsrpyss1nqheivqs1tvkahviqvrevqagdygysfafevtknntklavvdigygd  
gilrtrakhealingkryp  
ira1mshmfvevdgnvhaqdevilyndirideytfkgvganseqlsamhds1kkeyisndc  
>tr|E5QWA2|E5QWA2\_STAAH  
mne1efvtkhrh1hqhpe1slhefettayikaf1ds1nikydcpletgviaylegngshtiayradidalpileendvp  
yrsqsdhvmhacghdght  
almlfvqrckdmqdag1lqnvvf1fqpaetgganrl1kagafdkypieavfghvnpfadegiavirdeetasate  
yrff1tg1sshvadkeqgh  
scgealghv1tqisq1qqfh1ng1krnivhighfkageaintvpsngylegtirtydidd1tivknqmhkiaesvkl1fn  
vdcevkaegyptinspk  
l1rtqiedal1kad1nvdykptpf1fgedfsfygq1lapayfvfigtrnedkgfvtglhtsy1nfdekvl1nvvnfyen11  
nnykev  
>tr|E5QWA4|E5QWA4\_STAAH  
mk11ligygamnqrvar1aekgheivgviientpkattpyqqyqhiadvkdadvaidsnpl1fp11deafhlplvvat  
tgekek11nk1del1sknmp  
vffsanmsygvhal1tki1aaavp11ddfdielteahhnkkvdapsgtleklydvivs1kenvtpvydrhelnekrppqi  
gihsirggtivgehev1fa  
gtdetiqt1thraqskdifangaiqaer1vnpngfytdn1  
>tr|E5QWA8|E5QWA8\_STAAH  
mkkrrkcm1qvtdvs1rfgdrkl1fedvnikftegncygligangagkstf1kilsgeldsqtghvs1gkner1lavlkqdh  
yayederv1dvvikgher1  
yevmkekdeiymkpdfsdedgiraalegefaemngwnaadaan11sgl1gidpt1hdkkmaelennqkikv11aqs1fg  
epdv111deptngldipai  
swledflinfdntvivshdrhf1nnvcthiad1dfgkikvyvnydfwyqssqlaqkmaqeqnkkkeekmkelqdfiar  
fsanaskskqatsrkkqle  
kie1ddiqssrrypfvkftpereignd11ivqn1sktidgekv1dnvsftmnpndkail1gidseiakt11kilageme  
pdegskwgvtt1syfpk  
dnseffegvnm1vdw1lrgyapedeqtet1rgf1grm1fsgeevkkkasv1sggekvrcm1skmm1ssanv111deptn  
h1d1esitavndg1ksfkg  
siiftsydfefintianrvid1nkqggvskeipyeeylqeigv1k  
>tr|E5QWA9|E5QWA9\_STAAH  
maldkdivgsief1evvg1qgsty11kgpngenvk1nqsemndd1levgeeysf1iypnrsgel1fatqnpditkdkyd  
fakv1ktdrdgaridvg1p  
rev1vpwed1pkvks1wpqpgdh11vt1ridrenhmygr1asesvvenmftpvhddn1knevieakpyrv1rigsf11se  
sgykifvheserkaepr1g  
esvqvri1ghndkge1ngsf1p1aher1dddgqvi1fd11eydge1pfdwksspea1kevfnmskgsfkraighlykqki  
inietgk1t1tkkgsr1e  
ske  
>tr|E5QWB0|E5QWB0\_STAAH  
mkkwqfvgttalgat11lgacggnggsgnsd1kgeakgdgsstvapivek1nekwaqhdhsdakisagqagtgagfqkfi  
agdidfadasrp1kdeekq  
k1qdknikykefki1aqdgvtvavnkendfvde1dkqql1kaiysgkaktkwkdvnskwpdkkinavspnsshgtydffenev

Tsompanidou\_et\_al\_Supplemental\_FASTA\_File

mnkedikaeknadtnaivs  
svtknkegigyfgynfyvqndklkevki kdengkateptkkti qdnsyalsrplfiyvneka lkdnkvmsefikfvled  
kgkaeeggyvaapektyk  
sqlddlkafidknqksddkksddkksedkk  
>tr|E5QWB1|E5QWB1\_STAAH  
mvhhyftnl iilgvi erglimtsstnvkalieknkkkgkhdnk iipvilaa isaisil tltlgilitllletitfftrip  
iteflfsttwnptgsdpkf  
giwaliigt lkitviati favpvg lgaaiylseyasdrarri ikpileilagiptivfgffaltfvtpvlrsfipglgef  
naispglvvgimivplits  
lsedamasvpnki regayglgatklevatkvvlpaatsgivasivl aisraigetmivslaagssptasls ltsstiqmt  
gyiveiatgd atfgsn iyy  
siyavgtl fiftlimn llsqwiskrfreey  
>tr|E5QWB3|E5QWB3\_STAAH  
maqtlagt kqisqsh tfdvsqshhkt pddt nshsviystqnl dlwygenhalqn inldiyenqitai igpsgcgkstyik  
tlnrmvelvptvktagi l  
yrdqdi fdqyskeql rtnv gmvfqppnpfpksiyd nitygpkihgiknkv ldeiveks lrgaaiwdelkdr lhtnays  
lsggqqrvci arc laiep  
evilmdeptsal dpistlrveel vqelkekyti imvthnmqqaarvsdktaff lngyvneyddtdki fsnpsnkktedyi  
sgrfg  
>tr|E5QWB5|E5QWB5\_STAAH  
mnvlyqrsdym sqglpl redvpi setwdl tdlfkddqyyesidalvqqanqfhhtyatt lnsieqintalaelenilia  
ldr lsnayaelr lsvdtsni  
eaqvl sakl sttygkivsq lsfveseilelpee ilqqlekscopyhyikqlikqkpfqlsasveqllail sptlnspyd l  
ygttkml d itfdfsfeh dgt  
typvdyat fendyednkdpfrrksfksfsdgi rkyqhtta atynmqvqqekiead lrgfesvidy llhsqevtrdmfdr  
qidmimrd lapvmqkyak l  
lqrihg ldnmrfed lki svdpdyepe isiedsknyi fga lsvlgddytnml reaydqrwid faqnkgkdtgafcaspyft  
hsyvfi swtgkmaeafv la  
helghagh ftlaqkhqpy lseasmyfveapst lnem lmany lfnksdnprfkrwvigsil srtyyhnmvth lleaayqr  
evyrkvdqges lnapt lne  
imlnvykqffgdavd mtegae ltwmrqphyymglysytsag l tigtvvsqkiknegqpavdaw letlkkggsvspvela  
niagvdi tteqplkstiqy  
isd l vdevek l tdeieqann  
>tr|E5QWB6|E5QWB6\_STAAH  
mmnt lfdmpny lwi t lmi ll tiffcclvlnkwfvsavitfvilgvlaffipnfqdkikyqpl lgyaaflaimsllisfl l  
wyftrnrwrkerkarklekq  
iekygyegael rrkdkk  
>tr|E5QWB7|E5QWB7\_STAAH  
mfiiksilyrliqmi vvlfvist lafilmk l spgnpvdki lhl dvaqvst eqinatkdkg l g lnds llvqwwhwmnh llhf  
nlgksfeskepvtqilfny  
apitll isfstlvvsl cisiplgiaaakrfhkl sdkvirvist lsislpaffigi illfivtn lmnidsvilsqfilpvl  
tllslgm cayiir lvrslly  
illksni vqasrl rgnmny ilihdl lkptilpiipl l gis l gsl iggtv vien lfdipgigy llmsiksrdypviqgc  
vlfigffvviintiadll t  
llldpkqr lqlgnpkntntpl isessdrha  
>tr|E5QWB8|E5QWB8\_STAAH  
mhki fskn nli fvfvgaf i fvmiv lqffvssenatkvnl sqtfe pisw lhl lgtddygrdl ftriiigarst lfvvtl t l  
iaivvigvt lglfagykkq  
wierlv lrfidv glsipefi imialasffqps lwn lvisitvikwmnytr lrsivnsemnkpyikmaql fhvpirtili  
rh ltpkiipaii vlmvdf  
gkiilyiss l sfiglgaqpp tpewgamlqqgrdfisshpim liapasviaitilifn l tgdalrdr llkqrgeynesh  
>tr|E5QWB9|E5QWB9\_STAAH  
mslidiqnl tikntsekslikgid lkiynqqinaligesgagksliakalley l pfdl tctydsyqfdgenvsrlsqyyg  
htigyiyqnyaes fndhtk  
lgkqltaiyrkhyksckeeal skidka lswvn lskdilnkysfqlsggqlervyiasv lmlkpklii adepvas l daln  
gnqvm d llqhi v lehgt l  
fiithn lshv lkycqiyv lkegqi ierninhfkyehl hpyter l ikyrtqlkrdyd  
>tr|E5QWC0|E5QWC0\_STAAH  
mielkhv tfgynkkqmv lqdin itipdgenvgil gesgcgkst las l vlg lfkpvkgeiyl sdnavlpi fqhpltsfnpd  
wtiets lkealyyrg l t d  
ntaqdql l iqlstfelnaql ltk l psevsggql qrfnmrs l laqprvicdeitsn l dviaeqnvinilkaqtitnl n  
hfivishd lsvlqr lvnri  
iv lkdgmivddftieel fnvdrhpytkelvqafsy  
>tr|E5QWC1|E5QWC1\_STAAH  
mgll diasirsi ergfnnyqsecvin lksfsetqheaevkgsngkvyr cyidmehprkskcncpladgrrvickhmiall  
ftaspeaankhi imlneve  
edyhl rrmwids l kemindmsee l rday l nmliehgemaelfgl deedefy  
>tr|E5QWC2|E5QWC2\_STAAH

Tsompanidou\_et\_al\_Supplemental\_FASTA\_File

misqqsmisvikihtdtyhhiikiiqkyeldyidddwnyaaqldaenaiferldphklascidvanidtpikiillni  
eptqittilidelnkyhqel  
emihhsneyniditaqninkytalqyifdadvkyaifgndhndivmlqhasngyiyigpseaythailklldkvkhidnna  
aickvksyk  
>tr|E5QWC4|E5QWC4\_STAAH  
mqrgnrktantemklinerqigvmimkftnltakefgaftdsmpyshftqtvghyelklaegyethlvigiknnnneviaa  
c1ltavpvmkvfkyfysnr  
gpvidyengelvhfffne1skyvkkhrclylhidpylpyqylnhdgeitgnagndwffdkmsnlgfhtgfhkgfdpvlq  
iryhsvld1kdktaddiik  
nmdglrkrntkkvkkngvkvrylsee1pifrsfmedtsekafadrddkfyynrlkyykervlplayinfdeyikeln  
eerdilnkdlnkalkdiek  
rpenkkahnkrndlqqqldaneqkieegkr1qeehgne1pisagfffinpfevvyaggtstnfrhfagsyavqweminy  
alnngidrynyfygvsqkft  
edaedagvkvfkkgynaeyieyvgdfikpinkpyaaytalckvkdrif  
>tr|E5QWC5|E5QWC5\_STAAH  
mtklfilyimgnkdlienatllsengadiieigvpfsdpvadgpvimeagqqaikqgitidyifeqlekhgnqikcqvyl  
mtyyniichygeqaffekc  
rdtgvygliipdlpfelsqr1kqpfshygvkiislvamttddkrikdivsyaegfiyvtmnattgqngafhpelkrkie  
sikaianvpvavfgirsp  
qhvadikevadvigseivkrfksntreeiikylqsiqqtlnn  
>tr|E5QWC7|E5QWC7\_STAAH  
mmklkfcgftsikdvtaasq1pidaigfihyeksrhqtitqikk1asavpdhidkvcvvnvndlttiehvlntpinti  
qlhgtesidfiqeikkkys  
sikitkalaadeniqninkygfvdlfiidtpsvsyggtgqtydwtilknikdipyliagginteniqtvnqfklshqg  
fdlasgievngrkdiekmt  
aivnivkgdrene  
>tr|E5QWC8|E5QWC8\_STAAH  
mnmtilleeiveykqll1qngyyqdk1nt1ksvniqnkksfinaiekepklaiiaeikskstpvnd1perdlssqisdye  
qyanavsiltdkyfggs  
ferlqalttkttlpvlckdfiidplqidvakqagasmillivnilsdq1kdllynyaisqnlv1vevhdrheleraaykv  
nakligvnrdr1krfvtv  
ehtntilenkkpnhyiiesgihdvsdvrkilhsigidlligealmrcdn1seflpqlkmqkvks  
>tr|E5QWC9|E5QWC9\_STAAH  
mktmtlltriqtesillesdikelidilispisigtdikye1lssysereiqqeltyivrs1intmyphqpcyeggmvc  
gtgdknsfnisttvafv  
vasagvkvikhgnksvtsnsgstd11nqmdiqttsvddtpkq1dekn1vfigatesypimkymqpvrmigmkptiln1vg  
plnpyhltyqmvgrfdpt  
kl1kvaktikdlgrraiv1hgangmdeat1sgdn1iyeltdedgeikny1lnatdyglkyaqnsdfkqgspeen1ait1n  
ilngkdqssrrdv1lnag  
1slyvaekvdsiaegielast1idngealkkyhqmrge  
>tr|E5QWD3|E5QWD3\_STAAH  
mttv1fvglg1iggs1asniqyhnptni1aydadtsq1dkaksiginek1nyseaikkadviiyatpvaitnkylse  
lihmpkpgv1vsdtgstk  
amiqqhecs11knhil1vsghpmagshksqvl1nakkhlfenayyil1vneprneqaant1kellsptlakfivttae  
yvtsvvsh1phivasslvh  
vsqknsqehh1vnl1aaggfrdi1triassnaqmwkdi1l1snktyilemirq1ksqf1qder1liesndsek1l1sffa  
eaks  
yrdalp1kq1gg1ntayd1  
yvdi1pdesgm1skvtyil1slh1nisis1n1rilevrediygalkisfknptdrergm1alsdfdcyiq  
>tr|E5QWD6|E5QWD6\_STAAH  
myknymtq1t1pietsvripndi1sryveivetipdsefdefrhrgttsyhpkm1kiilyaytqsvfsgrriek11  
hds1rmmw1laqngtpsykt  
infrvnpntd1alies1fiqfhsq1kqnl1iddnsifidg1tkveananryt1fvkksiqnhesk1nenska1yrd1veek  
i1peikedgds1dtieeid  
ligsh1dkeied1nhsiqnedctq1rkqtrkkel1r1rsskrnlmi1pekevnmknkrfl1kieiafl1klimm11  
>tr|E5QWD7|E5QWD7\_STAAH  
mknng1kpgyn1qiatsqf1vsydl1fnptdtr1lipfl1tmiqntfgy1peyivadagyseqnymai1ddfnkptlit  
ygm1fidk1trk1fksd1fnt  
qnwkyde1ndeficpnnkrig1fkryayr1ndryg1fkrdfk1yecddcsacs1rqcmkpnksknk1kimkynwey1fkaqin  
qk1sepetk1k1ysqrk1div  
epvfgfmkai1g1ftrmsvrginkv1kre1l1gfv1maln1rkivarravyqih1kkadfyqi1inrn1q1fyia  
>tr|E5QWD9|E5QWD9\_STAAH  
mskm1intay1faggc1fwcmtk1pfd1fdgiekv1tsgym1gghien1ptyeqvks1gtsgh1etveiqy1dval1fsyn1l1e1ffs  
vid1p1dtgg1yq1dr1gp1yq  
tai1fy1tndh1qelaetyieq1kntinadkai1atki1lpasq1fykaedy1hd1fykkn1peryaeeq1kirqeyknkq  
>tr|E5QWE0|E5QWE0\_STAAH  
mnqevknk1ifs1ikitfata1f1fvvit1lyrel1sgin1fkdt1lvefskin1rms1vl1l1figg1gas1vil1smyd1vil1sral1km  
dis1gk1vl1rvsyi1inalna  
iv1gfgg1fig1agvram1vykny1thd1kkk1lvhf1sil1ilism1l1t1g1s1l1s1l1iv1fhv1das1l1lnk1itw1rvw1lyav1l1pl1f

Tsompanidou\_et\_al\_Supplemental\_FASTA\_File

iiysmvrppdknrryvgly  
ctlvscvewlaaavvlyfcgvivdvhsfmsfiaifiaalsglvsfipggfgafdllvlllgfktlgvpeekvllmllly  
rfayfvpviiailissfe  
fgtsakkyiegskyfipakdvtsflmsyqkdiakipslsailvfftsmiffvnnltivydalydgnhltyyllaiht  
saclllllnvvgiykqsrr  
aiiyamisiilliivatlfityasyilitwlviiifallivafrrarrlkrpirmrnlvamllfsifilyinhifiagtfyal  
dvytiemhtsvlkyfwt  
iliiavvgaiawlfdyqfsvkrissnieeceeiidqyggnylshliysgdkqfftndknaflmyrykasslvvlgdpi  
gdenafdelleafynyaey  
lgydvi fyqvt dqhmplyhnfgnqffklgeeaidltqfstsgkkrrgfratlnkfdelnisfeieppfstefinelqh  
vsdlwldnrqemhfsvgqf  
netylskapigvmrnenneviafcsImptyfndaisvdli rwlpe ldlplmdglylhmllwskeqgytkfnmgmatlsnv  
gqlhysylrerlagrvfeh  
fnglyrfqglrrykskynpweprflvyrkdnslweslskvmrvirk  
>tr|E5QWE3|E5QWE3\_STAAH  
mimgeyivtkltnnnvvctnndqeviligkigfnkkegmtlndqtiti ekiykleseqqkahykslveiaddnvlqvi  
idslnfisntamnvdsqgl  
vvsldthiifaykrkqnqvsnpfvmetmqlysdaihiakqvldqlnaaldvhfpedeigfialhiasntedlsmhemt  
linnvikkidiesdlt  
tvdkeslqyqrfirhvqflirrlrkeyihaqddfvmiknhypicyntaykiltmiqkqfdvniseseiyltlhihhf  
eerinqs  
>tr|E5QWE4|E5QWE4\_STAAH  
mhdscrgcegfilkd fdlipgwfkefvhvgtdliwsqyliglltagffftisskfvqlrmlpemfralverpetledg  
kkgispfqafaisagsrv  
tgniaqvataivlgpgavfwmvviafigaasafieatlaqvykvhdkggfrgppayyitkgl nqkwlgivfailitit  
fafvntvqsntiaeslnt  
qynispvitgilaivtaiiifggvrsiatlsslivpimaiiyigmvlvillfnldqivpmigtiksafgieqvtggav  
gaavlggikrglfsneagm  
gsapnaataavphpvkqglislgvffdtm lvctataimillysglkfgdnappgvavtqsalnehlgsaggifltiav  
tlfafssvvgnyyqgsni  
eflstnrvi lfi frcfvvvlfvfgavvtetvntadl fmg lmaivniisiiglsnvafalmkdyqkqkkegknpvfkpe  
nleinlfgisawgankykn  
sdk  
>tr|E5QWE5|E5QWE5\_STAAH  
mseiidslslevdldgrfgrskyi iqeralpdvrdglkpvrriilyamyssgnthdknfrksaktvgdvigqyhphgds  
svyeamvr lsqdwl rhv  
iemhngngsidndppaamryteaklsllae llrdinketvsfisnyddttlepmvlpsrfpnllvngstgisagyatdi  
pphnl aeviqatlk yidnp  
ditvnqlmkyikgpdfptggiiqgidgikkayesgkgrivrskveetl rngrkqliiteipyevnksslvkridelra  
dkkvdgivevrdetdrtgl  
riaie lkkdvnsesiknylyknsdlqisynfnmvaisdgrpk lmgirqiidsylnhqievvanrtkfeldnaekrmhive  
glikal sildkvielirss  
knkrdakenlievyefteeqaeavmlqlyrlntdivalegehkelealikqlrhildnhdallnvikeelneikkkfk  
serls lieaeieeikidke  
vmvpseevil smtrhgyikrtsirsynasgvediglkdgdsllkhqevntqdtvlvftnkgrylfipvhkladi rkwelg  
qhsqivpieedevvinvf  
nekdfntdafyvfatqngmikstvp lfktrfnkpliatkvkenddlisvmrfekdqlititnkgsmltyntsel sdt  
glraagvksinlkaedfv  
mtegsendtilmatqrglkriskilqvakraqgitllkelknphrivaahvvtgehsqytiysksneehglindi  
hkseytngsfivtdddf  
evidmyis  
>tr|E5QWE7|E5QWE7\_STAAH  
mmiivmlllsy ligafpsgfvigklffkkdi r qfgsgntgatnsfrvlgrpagflvtfl difkgf itvffplwlpvhadg  
pittfftn glivgl failg  
hvyppylkf qggkavatsagvlgvnpillilailiiffivlki fkyvs lasivaaiccvigsl iiqdyillvsvflvsii  
liihrsnriarifrgeepk  
ikwm  
>tr|E5QWE8|E5QWE8\_STAAH  
mqieltdaavtwfknelelpennkvlvffvryggefqlkqgfspaftvepkedvdigyeyyddlnvvvaekdlwyfedd  
hiivnvvdhedeisyskk  
>tr|E5QWE9|E5QWE9\_STAAH  
misyiteiaryaetdkmgv iyhgnyatwfevarldyisklgfsyadmekqgis pvt dlnvnykksifypekvkvktw  
ekysrlrsvykyeifnek  
elattgstelicikedtfkpirldryfpdwheayskvqalnnegkiveimdgidsl  
>tr|E5QWF0|E5QWF0\_STAAH  
maanfkeqskkhfdl ngqsytyydlkaveeqgikvsklpysirvlllesllrqeddfvitddhikal sqfgkdgnegevp  
fkpsrvilqdfgtgpavvd  
laslrkamddvggdtkinpevpvdlvi dhsqvdsyanpealer nmkleferyeryqflnwatkafdynavppatgi



Tsompanidou\_et\_al\_Supplemental\_FASTA\_File

vhqvnleylasvvhvrdvd  
gektafptdlvgtdshttingigvlgwgvvggieaeagmlgqpsyfpipevigvrlvnslpqgatatdla lrvtqelrkk  
gvvgkfveffgpgvqhlp  
adratianmapeygatcgffpvddeslkymkltrgsdehialvkeylkqnhmffdvekedpnytdviel d l stveaslg  
pkrpqdlifl s dmkssfen  
svtapagnqghlkdsefdkkaeinfkdgskatmktgdiaiaaitsctntsnpvmlgaglvakkavekglkvpeyvks  
lapgskvvtgylrgaglpq  
ylddlgnlvgygcttcignsgplpeiekaiaadedllvtsvlsgrnrfegrihplvkanylasplvvayalagtvdid  
lqnepigkngdgedvylkd  
iwpsikevsdtdsvvtpe l fieeynnvynne l wneidvtdqplydfdpnstyiqnpsffqgl skepgt ivplnglrv  
gkfgdsvtt dhis pagaig  
k dtpagky l qdhqvpi refnsygsrrgnhev mvr gtfaniriknqlapgteggfttywptnevmpifdaamkykedgtgl  
vvlagndygmgsrdwaak  
gtnllgvktviaqsyerihrsnlvmmgvlp l e f k k gesads l g l d g tee isvni denvqphdyvkv takkqdgdlvefda  
mvr f ds l v emdyyrhggi l  
qmv l rnk l aq  
>tr|E5QWF1|E5QWF1\_STAAH  
mnssspenpngkyspvfiysai vvaivvllgaf l peqfnvtnnikmwitek l gwyylil ttiivffciflifspigkl  
klgkpnkpefnti swfam  
l fsagmgiglvfygaaepmahfatp p t adp k t teaytea l r s t f f h w g f h a v a y g v v a l a l a y s q f r k g e p g l l s r t l r  
p l l g d k v e g p i g i f i d v l s  
v f a t i v g v a v s l g m g a l q i n g g l h y l f n v p n n t f v q a i i i v v t i l f i a s a w s g l s k g i q y l s n l n i g l g t i l m v a a l i v  
g p t v l i l n m l t s s t g s l l n  
t f l f n s f d t a a l n p k r e w m s s w t l y w g w w l s w s p f v g v f i a r v s k g r s i r e f i s g v l l v p a i v s f w f s v f g v l g i e t  
g k k y k e i f d m t p e t q l f g v  
f n h v p f g i v l s l i a l l l i a s f f i t s a d s a t f v l g m q t t f g s l n p s s m v k v w g i s q a l i a f v l l l a g g g n g a e a l n a i q s  
a a i s a f p f s f v v i l m m v s  
f y k d a n g e r k f l g l t l t p n k h r l q e y i k s q q e d y e s d i l e k r q s r r n i e k k d n  
>tr|E5QWF3|E5QWF3\_STAAH  
m h k v q l i i k l l l q l g i i v i t y i g t e i q k i f h l p l a g s i v g l f l f y l l l q f k i v p l t w v e d g a n f l l k t m v f f f i p s v v g  
i m d v a s e i t l n y i l f f a v i  
i i g t c i v a l s s g y i a e k m s v k h k q r k g i d a y e  
>tr|E5QWF4|E5QWF4\_STAAH  
m l m n d y v q a l l m i l l t v v l y y f a k r l q q k y p n p f l n p a l i a s l g i i f v l l i f g i s y n g y m k g g s w i n h i l n a t v v c l a y p  
l y k n r e k i k d n v s i i f a s v  
l t g y m l n f m l v f l t l k a f g y s k d v i v t l l p r s i t a a v g i e v s h e l g g t d t m t v l f i i t t g l i g s i l g s m l l r f g r f e s s i  
a k g l t y g n a s h a f g t a k a l  
e m d i e s g a f s s i g m i l t a v i s s v l i p v l i i l f y  
>tr|E5QWF5|E5QWF5\_STAAH  
m a k i k a n e a l v k a l q a w d i d h l y g i p g d s i d a v v d s l r t v r d q f k f y h r h e e v a s l a a a g y t k l t g k i g v a l s i g g p g l  
i h l l n g m y d a k m d n v p q l i  
l s g q t n s t a l g t k a f e t n l q k l c e d v a v y n h q i e k g d n v f e i v n e a i r t a y e q k g v a v v i c p n d l l t e k i k d t t n k p v d  
t s r p t v v s p k y k d i k k a v k  
l i n k s k k p v m l i g v g a k h a k d e l r e f i e m a k i p v i h s l p a k t i l p d d h p y s i g n l g k i g t k t s y q t m q e a d l l i m v g t n y  
p y v d y l p k k n i k a i q i d t n  
p k n i g h r f n i n v g i v g d s k i a l h q l t e n i k h v a e r p f l n k t l e r k a v w d k w m e q d k n n s k p l r p e r l m a s i n k f i k d d a  
v i s a d v g t a t v w s t r y l n l  
g v n n k f i i s s w l g t m g c g l p g a m a s k i a y p n r q a i a i a g d g a f q m v m q d f a t a v q y d l p l t v f v l n n k q l a f i k y e q q a a  
g e l e y a v d f s d m d h a k f a e  
a a g g k g y t i k s a s e v d a i v e e a l a q d v p t i v d v y d p n a a p l p g k i v n e a l g y g k w a f r s i t e d k h l d l d q i p p i s v a a  
k r f l  
>tr|E5QWF6|E5QWF6\_STAAH  
m p a f l y m e a e i e i g d v y m f k k l f g q l q r i g k a l m l p v a i l p a a g i l l a f g n a m h n e q l v e i a p w l k n d i i v m i s s v m e a a  
g q v v f d n l p l l f a v g t a l g  
l a g g d g v a a l a a l v g y l i m n a t m g k v l h i t i d d i f s y a k g a k e l s q a a k e p a h a l v l g i p t l q t g v f g g i i m g a l a a w c y  
n k f y n i t l p p f l g f f a g k r  
f v p i v t s v v a i a t g v v l s f a w p p i q d g l n s l s n f l l n k n l t l t t f i f g i e r s l i p f g l h h i f y s p f w f e f g s y t n h a g e  
l v r g d q r i w m a q l k d g v p f  
t a g a f t t g k y p f m m f g l p a a a f a i y k n a r p e r k k i v g g l m l s a g l t a f l t g i t e p l e f s f l f v a p v l y g i h v l l a g t s f l  
v m h l l g v k i g m t f s g g f i d  
y i l y g l l n w d r s h a l l i v i p v g i v y a i v y y f l f d f a i r k f k l k t p g r e d e e t e i r n s s v a k l p f d v l d a m g g k e n i k h l d a  
c i t r l r v e v v d k s k v d v a g  
i k a l g a s g v l e v g n n m q a i f g p k s d q i k h d m a k i m s g e i t k p s e t t v t e e m s d e p v h v e a l g t t d i y a p g v g q i i p l s e v  
p d q v f a g k m m g d g v g f i p e  
k g e i v a p f d g t v k t i f p t k h a i g l e s e s g v e v l i h i g i d t v k l n g e g f e s l i n v d e k v t q g q p l m k v n l a y l k a h a p s i v  
t p m i i t n l e n k e l v i e d v q  
d a d p g k l i m t v k  
>tr|E5QWF8|E5QWF8\_STAAH

Tsompanidou\_et\_al\_Supplemental\_FASTA\_File

mfemvkqlnsveafrefihqyplavvhvmdqscsvchavlpqiedlmqsyvnpvlavinqsqveaiagelniftvpvdl  
fmngkemhrqgrfidmqr  
ehh1kqmndsvnndvdeheyrk  
>tr|E5QWF9|E5QWF9\_STAAH  
mrkkwstlafgflvaayahirikekrsvksymleqgir1srakrrfmykeeamkalekmapqtageyegthyqfkmppv  
dkhygstvytvndkqdkh  
rvvlyahggawfqdplkihfevide1aetlnakvimpvypki phqdyqatyvlfeklyhd1lnqvadskqivvmgdsagg  
qialsfagllkekhivqpg  
hivlispvldatmqhpeipdyllkdpvmgvngsvflaeqwagdtpldnykvspingldglgritltvgtkevlypdaln  
lsqllsakgiehdfipgyy  
qfhiypvfpiperrrflyqvknii  
>tr|E5QWG0|E5QWG0\_STAAH  
mllvlsfkgvrylvnnhsalrlkgiilaivgac1wlggtsdf1fkykninvdwyvtarlvsvgvfl1imykmmpkrs  
ifsvfqdrmlgkllifsi  
lgm1vvqyaymasintgnaaiat1lqyiapvyi1wfvirgvakt1lfdv1aiimt1lgtf1lltngsfsnlvvnps1f  
wgilagvalafytiypsd1  
lnrfgsilivgwam1isgvamn1rhpiwhiditkwdisi1lflifgiigtalafyffids1qyisakett1fgtvepvv  
aviass1wlhvafkpfqiv  
giilimil1ll1slkrqpet1de  
>tr|E5QWG2|E5QWG2\_STAAH  
mdillgvgt1vlv1vmt1flkyapygkq1qalsgaacat1lppaf1syaiggvfdik1lqdig1lags1sgiavgilt  
c1nlgvapvfavivgl1h  
dfk1lpafiaaygvaf1kwiiekkvpeg1dlivvilfapaaifglasiitpgviat1kqigsavtavgdnnpyalavilg  
1vipvtgmt1lssm1ts1  
lgltgvpmaigaltctgssfvn1lfrk1nigppskafavciep1tqid1iaqpvqlygtnaligvvnacivtfsglvi  
gvkmatpiagav1lfgfn  
navtsivtiatviivsv1layiigt1linkfn1mninfkmpskknhikesv  
>tr|E5QWG7|E5QWG7\_STAAH  
mnlshfeiafiyakhit1dik1lftshqtqkks1nqdcf1lnihp1sqwii  
>tr|E5QWG8|E5QWG8\_STAAH  
mtnfiachemdimkttkramrriimvkaiavdmdgt1lfskkydk1rfeanftelrnrditfiaasgnqyak1ksifgd  
rdmyfisengaviykgne1  
ynyksfnrqvfqgvvdy1nmnqsidq1vicg1ksay1lkhkseafkedtrfyhqlkeids1qq1peddyvkiafninre  
thpndeavatqfsndik1  
vssghdsidiimpnmtkgqal1kr1ldkwgmssse1mafgdandkdmlafakhsyvmenshdeelfniasavapsndkqg  
vltieqev1kk  
>tr|E5QWG9|E5QWG9\_STAAH  
mpigih1rgrkvfkimncfilyicikidlikirfilssiqmilvrlfyygiia  
>tr|E5QWH0|E5QWH0\_STAAH  
mmw1aqnqtpsytinrfrvnpntdaliess1fiqfhsq1kqn1iddnsifidvqk  
>tr|E5QWH1|E5QWH1\_STAAH  
myknylniq1t1pietsvripqidisryvneivetipnsefdefrhrgatsyhpkim  
>tr|E5QWH3|E5QWH3\_STAAH  
msnmnqtimdafhfrhatkqfdpqqkkskedfetilesgr1spss1glepwkfvviqdqalrdelkahswgaakqldtas  
hfv1ifarknvt1rsrpyvq  
hm1rdikkyeaqt1paveqkfdafqadfhisdndqalydwsskqtyialgnmmttaallgidscpmegfsltdvt1lan  
kgildteqfg1svmvafgy  
rqdppknktrqayedv1ewvgpke  
>tr|E5QWH7|E5QWH7\_STAAH  
mtnnhe1lgihhvtamtdaernykfftevlgmrlvkktnqddiytyhtffaddvgsagtdmtffdfpni1tkgqagtns  
itrpsfrvpnddalmyeq  
rfdefgvkhegiq1fgkkl1pfeevdgqvyq1l1sdelnegvapgvpwkngpvvdkaigyglpieikvsyfd1dknile  
tvymttiahednial1ev  
geggnggqvil1kddkgpaarqgygevhvsfrvkdhdai1eawatkykevginnsgivnrfyfealyarvghilieistd  
gpgfmedepyet1leg1s1  
ppf1enkreyiesevrpfntkrqhd  
>tr|E5QWH8|E5QWH8\_STAAH  
mehifregngapt1l1l1hgtggdefd1l1p1geal1enyh1l1sirgqvsengmnryfkr1legvydeed1afrgqelltf  
ikeaaerydfdiekav1vg  
fsgnsniain1mlrseapfkka1lyap1ypiev1rstkkl1sdsv1l1smgkhdpi1v1laaseqvin1fktrgaqveevvn  
gheitetg1tagqqilek  
>tr|E5QWI0|E5QWI0\_STAAH  
mtqitere1kkkyld1l1sqhfdtpek1lateiin1lesile1lpgktehfvsd1hgeyefqhv1rnsgnvrakindifkdk  
1stke1nd1talvyypedk  
lqlikcdfqnyqg1lnwyyittiehl1q1likycsskytrsk1rralpeqyvfive1llyknefknkksyyet1vnqvie1  
kqadd1iig1laysvqr1lv  
dh1hvgdiydrpqpdkimdt1inyhs1diqwnhdv1wv1gayagskvclan1l1ricarydn1divedaygin1rpl1t  
laekyydadn1pafkpkkrp

Tsompanidou\_et\_al\_Supplemental\_FASTA\_File

dkherltqreesqtkihqaiamiqfkleipvikrrpnfemderlvlekvnydtneitvygktyplkdtcfqtvnrndpa  
kllpeeeevmnl11lsfqg  
seklrrhmsflmrkgslylpcngnllihgciipvdengemesfeidgqtysgqelldvfeyhvrksfdekentddlstdlv  
wylwtgkysslfqkramtt  
feryfiadkashkeeknpyyhlredvnmvrkmlsdfglpdegriinghtpvkeingedpikadgkmlvidggfskayqs  
ttgiagytllynsfgmqlv  
ahqqfnakekilsegidelsikrivdkelqrkkirntnkgkelqaqidilkmlmhdryld  
>tr|E5QWI1|E5QWI1\_STAAH  
mmnimlqtvekgfskstk1elhelfigniayisiflilvvfifkknk  
>tr|E5QWI2|E5QWI2\_STAAH  
mgtlikqecfk1fkkkstfiapivfllmvaaggyiatkyneiftpqesftsayingfswfaflliiqastiismefhygti  
knlllyreysrttmivskii  
tlfiisliyfvitiiiasivigs1ffndlnifessgnqlsllnqlllvs1gtfvgwlv1s1t1llssatnstgvaiavgi  
vfilqvlf  
>tr|E5QWI4|E5QWI4\_STAAH  
mtfntkfgykkiiddiinkinngilspgdklysrklakyyvvnkstvialdilksysiltdiekkgiyvsqykwnsyi  
tnnihwqdyignsfsknq  
yyiqkineiefntdivrlgtgelsplipnhifkkitndieeslqtnyeepkgnlklrieivkymkrrgvdcninnici  
tsgavqglkljadgllipq  
skiiietpsyinsirtwhnirakiip1sinyikqninnifklnsdyrshifyciptlhnptqntyskeekqkiidqchke  
gipivedsiysdlwfsponq  
qismkalknsdnvlylgs1sktvsplrigwiadekvihhladlkmqndygassisqyiattwlsnyhedhlyklkiel  
klrksifiks1kklh1skfg  
ywnepggsfyiwfk1svpnik11fneaikenilihgeiydinsksyirfsysyidkeeidqslkklseiinrirt  
>tr|E5QWI6|E5QWI6\_STAAH  
minalpvvitaglctdfl1i1avlgvsl1lmslpvlqlfiyivglffllymawslwkekpntlenyepmstkkqigfais  
vs1lnphaimdtvgvigss  
asvysglekilfciatimvswlwf11ailgkvlgsidrtgkyilflnkissiiiiavsivivknilkli1  
>tr|E5QWI9|E5QWI9\_STAAH  
miipaiigylcgnfqqgl1vatgtlahiyvfkgsrsklrvii1cnlafaicmilgt1tattplvfgmtllivtvpfyi  
ftalkiagpsstffivtfs  
lpinlpiapeealrgfai1vggvlatmmv1itil1sknkaeeqaiqndfklisk11hayndksafsqvaktavdsfkas  
dkllitsnsssdklsgrfq  
kll11lhtsaggyisellelnakqirp1pdeliemmdhiitqrddrnknvrywrkevvtveefqnlfnhilkidemvhane  
ariayaemrklp1yskriy  
qnl1ldsivfrnt1ryaa1mmiaifialmfdfekaywip1sahtvllgtstihaiergmarglgtilglv1svillfsi  
ptpvavilmgiaalfteal  
vganytiavvfitiqvilmnglasqnl1tiafprvidvamgiviaiig1fvlgqrtasallpyvmaevvrkeatl1fhy1  
fsenqykddvyqkntamnl  
svk1nnmtqvynaangel1fsdktliqnyyps1faleeisfmlnramanedrltineqlmgeylatfeniakhlelntele  
ikilpdlpqyni1qsammn  
iqhngfrerdknv  
>tr|E5QWJ0|E5QWJ0\_STAAH  
mfhfiimvynmyni1levkempftmkgypekwekefevikrqkaieianamlkegylekdvpiaakkakdwyralskee  
ikaleeenfvqfhtatmek  
pevdseyattdneehiqeqsnqdkysfdsesignqsggvrrqrep1mdgphpkvvesfkdv  
>tr|E5QWJ1|E5QWJ1\_STAAH  
myvdrkpslyledfrhdfkns1skfengdeafdt1lgfvel1dhiyssalkeistk1silddnfnhiykhnpihhmerrvk  
emrsliek1nrkg1qisae  
takehildiag1rvvcny1ddiylieem1lkqedvqlikrkdyiqhpkengyrs1hivvsipvflaervevlpveiqirt  
igmdmwas1ehkiryknka  
etekyrd11kecateiteven1lqqihseite  
>tr|E5QWJ3|E5QWJ3\_STAAH  
mscnegvallmygypekwl1egmttgeg1aael1rgivnghiaegt11tenqmakqfnvsrspirdafk11qqnqliqler  
mgahv1pfgeqekkemyd1  
r1ml1esfafsrvknqer1pivkemkkq1lemkvavkfedesftkhdfefhet1likasnhqyl1nsfwh1kpvmmalv1t  
smrqrmqqnpqdferihhn  
hqvf1daveqydsqil1keafh1nfddvgkdi1egfwn  
>tr|E5QWJ4|E5QWJ4\_STAAH  
mkymigvdi1gttstksv1ydengt1fikhqigyd1htpnvdvseen1del1fdav1mtikyimreskvnqddikfvsfsaq  
mhs1iamdqghqr1tnnit  
wadnraakyatvinevhdgnaiyqrtgtpihpmsplaki1fwmkhewqdvfqrtakfadiktyifyh1fdryiidysmasa  
tgmfn1et1dwdvgale11  
gi1seem1pel1vpttyvmkgmkeryat1mg1nedtpfvigasdgv1sn1lgvnsvgkgevavtigts1gairtvidkprtdyk  
grifcyv1tedhyv1ggpv  
nnggv11rw1rdel1asevetakr1gvdpydv1tqiakrvkpgadg1ifhpy1lageraplwnanargsffgl1t1shkkeh  
miraa1egv1yn1lytvyla  
1ievmmnetpkmi1katggfaksevrqmm1sdi1fdtel1vvpesyessc1gacv1glkavgdiedfsivssmvgatn1nhtpie

Tsompanidou\_et\_al\_Supplemental\_FASTA\_File

envavyqelvsifinlsrs  
ltenyeqiadfqrkhmaenktq  
>tr|E5QWJ5|E5QWJ5\_STAAH  
mfneiwplisvvlgiilvlviigfkIntfislitsmitalmIgipltkimetiiekmgstlghialiflgailgkll  
adgggatriadtliqkfgg  
khvqwam1vaafivgialffevglvlliplvftvakranvsvlklglpmvta1svthgflpphpgpvviakelkanvgdv  
llygmiaaipvtliagpif  
nkvaqkmipsaytregdisalgaqkeftdqempgfgmslltatlpvilmlvstitq1vtghdkptnlfesiiymigtagt  
amliav1faivtmglmrkr  
kmnhimesvtnaiypigmm1liiggggtfkqvlidggvgntiakmfegtemspillawivaavlrialgsatvaaisttg  
ivlp1lqssdvnvalvvl  
igagsvilshvndagfwmfkeyfgltvketfltwslletiiisvgiifilfis1fv  
>tr|E5QWJ6|E5QWJ6\_STAAH  
mkgvsrhvfvriqvaiimkr1vccfk1ndefn1knkykkykpcvtrvsddltdiykyisnnkiin  
>tr|E5QWJ7|E5QWJ7\_STAAH  
mhlkgdiivknnlrygirkhklgaasv1gtmivvgmgqdkeaaaseqktttveengnsatdnkvsetqttttntntide  
tqsysatateqpsnatqvt  
teeapkavqapqtaqpanvetvkeevvkeeanpvkettqsqdnsgdqrqvd1tpkkatqnqvaetqvevaqprtalesk  
prvtrstdvaeakeasdak  
vetgtdvtskvtvedeskieapkgnnvphegqrvv1kyklkfqdg1ktgdyfdft1snvnthgvattrkvpdikngs1  
vmakgqvlndgri1ryftd  
yikdkvnvtanle1n1fidpktvqsngqqtitsk1ngketsgtmqitykdgvknqytnvngsietfdkeknkfthvayik  
pingnnsdsvtvtgmltqg  
snengtqpnvkiyeyvgvenglpqsvyantvdstq1kdvtnqmgdk1kvqngsys1nfdk1dktyvihytgdy1ngtse  
vnfrtq1tgypenryktyy  
yynngyt1twdng1v1ysnkangdgkygpi1vdsnnfefsedsngs1sgqydakqiieteenqdntpldidyhtaidgeg  
gyvdgyietieetdssaid  
idyhtavdseaghvggytesseesn1p1dfeesthenskhhadvveyeedtnpgggqvtttesn1vefdeestkgivtgvs  
dhtvedtkeytttesn1ie  
1vdelpeehgqaqgp1eeitennhishsg1gtenghnygvieeieenshvdikselgyeggqnsngqsfeedteedkp  
kyeggni1vdi1dfdsvpqi  
qqnngnsfeedteedkkyeggni1di1dfdsvpqihgfnkhneiieedtnkdkpnyqfghnsvdfeedt1pkvsgq  
negqqtieedttptpevp  
sepetptptpevpsepetptptpevpsepetptptpevpsepetptptpevpsepetptptpevpsepetptptpevp  
pevppep1gkpvppakdepk  
kpskpveggkvvtpvie1nekvkavaptkqkqskksel1petggeestnkgm1fgglfsi1glal1rrnkknhka  
>tr|E5QWJ8|E5QWJ8\_STAAH  
myalvycfk1defefn1kskykkyk1visrsv1yaiymcvpnkkipihkvnnn1nfl1trff1111kteqyria1fie  
1knk  
>tr|E5QWJ9|E5QWJ9\_STAAH  
mksn1rygirkhklgaasv1gtmivvgmgqkeaaaseqnttveesgssateskasetqttttntntidetqsysats  
teqpsqstqvtteeaptv  
qapkvetemk1qed1psekvadkktgtqvdtaqpsnvseikprmkrsadvaevaekvveakatgtdvtskvkvtes  
1eghnkdsn1vnpnaqrv  
t1kykwkfgegi1kagdyfdft1sdnvethgist1rkvpeiknstedkvmaigeviaerki1ryftdyidnkkl1taels1  
n1fidptvtkqgkqkvev  
t1gdktieked1ky1ldgvkdrmgvtvngrid1nkadgk1shfayvkpnnqs1ssvtvtgqvtsgykqnankptvkvyk  
higsdelaesvyak1ddvn  
k1fedvtekn1sytsnggyt1n1sd1dnsndyvikyegeydnakd1nfrth1sgyhknyppyyppysyypvq1twngva  
fysnnaqgdgkdkpndpi  
dksep1e1dikseppevekhe1tgtieesndskpidfeyhtavegaeghaegiveteedsihvdfeesthenskhhadvve  
yeedtnpgggqvtttesn1v  
efdeestkgivtgavs1dhtvedtkeytttesn1ielvdelpeehgqaqgpveeieitennhishsg1gtenghnygviee  
ieenshvdikselgyeggq  
nsgnqsfeedteedkkyeggni1di1dfdsvpqihgfnkhneiieedtnkdkpnyqfghnsvdfeedt1pkvsgqneg  
qqtieedttptpevp  
sepgtptptpevpseptptpevppep1gkpvppakeepkpskpveggkvvtpvie1nekvkavaptkqkqskkselpe  
tgggeestnkgm1fgglfsi  
1glal1rrnkknhka  
>tr|E5QWK1|E5QWK1\_STAAH  
mtvni1v1fsivfcismv1lgiyvaitkdf1lisfinqttiadhktqiayifal1cis1sav1lmsailcfeydfial1sflf  
1tia1111ialfyvcfykit  
kyp  
>tr|E5QWK3|E5QWK3\_STAAH  
mdkelwi1krands1vkhfyeeqsdieqregfeskl1tfgtagirgkfg1gegr1nkftiek1alglary1naqtnnptivi  
hydirh1stefa1ianv1  
anhqi1vy1pdykt1tpe1sfavrn1nttagimitashn1pkdyngikvysdgaq1stdaselvsryieevgdplq1dip  
iskqnts1yikpfpksvtdd

Tsompanidou\_et\_al\_Supplemental\_FASTA\_File

ymkhiqnmigiypksdlqvvfts1hgtsvpivpe11kslnfnqfn1veaqckpdpnfssvqsanpedhrafdqavelank  
shad11istdpdadrlgia  
erdahghityfngnqigall1nyriqtsqlrhr1miqsisvseltks1arynnveykevltgfkfiageirqlddhqnm  
ifafeesygf1sepfvrkd  
davqivpliikyase1klygk1kdeleqiyqtvgrhedt1fshtleglegkkkiesimthfrsnppqeiqglkvaied  
y1tsevyq1dkdttsqids  
pksnvirv1fdegfia1rpsgtepk1lyvs1kcpdfddvaqkinamifs  
>tr|E5QWK7|E5QWK7\_STAAH  
mmihskk1t1gic1v11i1ilivgyvimtkinsrsaikdtfnqt1klyptkn1ddfydkegfrdqefdkgdkgtwiisse  
mniqlkges1ksrgmi1ym  
nrntkrttgyffvsetkgktyekekkypvmehnqi1ptkpiqddk1kkeienfkffvqygnfk1indykngdisynpnv  
psysekyq1rnddynvq1  
rkrydiptkqapk11kgdgd1kgssvgskeleftfvenkkktsif1liv1isn11nrvrn1e  
>tr|E5QWK8|E5QWK8\_STAAH  
mmiqskk1t1gic1v11i1ilivgyvimtktngrnaikdtfnqt1klyptkn1dgfydkegfrdqefkkgdkgtwivnse  
mviepgkdmtrgm1y1  
nrnrtrtkgyy1fise1mtdsng1rpkddekrypvmehnk1iptkpl1pndk1kkeien1kffvqygnfk1indykdgd1sy  
n1n1vpsysakyq11rnddyn  
vq1rkrydiptkqapk111kgdgd1kgssvgsknief1fvenkeeni1yftdsvqytps1ed1tryesn  
>tr|E5QWK9|E5QWK9\_STAAH  
mskeh1hfi1fsd11nfyi1nyf1ifqnsdkfvkci1tnpfi1lei1hvi1d1  
>tr|E5QWL2|E5QWL2\_STAAH  
mtv1tdkiavvtgagsg1geai1at11heegakv1lagrnkdk1qnavn1laqds1kvvptdvtkkeevdelikmaqq1tfg  
g1divinsagq1m1sskitd  
yqvdewsd1m1dvn1kg1ty1takaa1ptm1eqssgh1inias1sgfevtks1stiysatkaavht1itqglekelaktgkv1t  
s1spgmvd1tai1tatyn1ptd  
rkk1lepqdiaeav1ya1tqpkhvnvnei1tvrp1  
>tr|E5QWL3|E5QWL3\_STAAH  
mtkkhvfi1igv1ilciciv1atviy1lvkydekekqks1iyykeq1erit1y1khntkep1tiksvh1fts1ktgpmgd1vie  
gy1nenkkad1fvaygs1peh  
hyqfggs1likskn1st11kpahqtkspde1ikkeleskkndr  
>tr|E5QWL5|E5QWL5\_STAAH  
mhfts1ktgpmgd1vieg1y1nehkkad1fvaygs1peen1yqftg1tgsnev1gk1knaen1kspek1ikee1nkkkntkq  
>tr|E5QWL7|E5QWL7\_STAAH  
mskkhvfi1igv1ilciciv1atvihfkmkydekekqkai1yykeq1ar1it1y1khntkep1tiksvh1ftk1letspmg1savi  
gy1nenkkdd1fvayas1pen  
nfqfvgd1i1skn1se1i1k1ktkspde1ikee1dkkegr  
>tr|E5QWM0|E5QWM0\_STAAH  
mkr1lenkvavvtgastg1g1gasai1a1aqegay1lavdiaeav1setvdk1iksngdkakay1vdiaseqqid1nfase1reqi  
ghvd1v1fnnagvdnaagri  
heyptdvydk1m1nvd1mrgt1f1mtkmm1p1mmtkggs1ivnt1ssfsgqaad1yrsgynaakgav1nftksiaieygrdgira  
naiapgt1ietp1vdk1tgt  
sedkegkafrenqkwmtpl1gr1gkpeevgk1lvf1asdess1fitget1iridggvmaytwpgem1sddswkrt1e  
>tr|E5QWM1|E5QWM1\_STAAH  
mni1rhirnatavieyggkrv1idp1m1sdkgafepfnsprqden1pl1velplaidi1innid1vil1th1hidhfdpkaie  
v1pkdikiytqneadasev  
egydf1tnsv1fndvthige1ieliktdaqhghgei1kmtghvhg1vlkhsept1y1laadt1vwfdgvekt1kahhpdi1v1  
ngganqffeggpl1vmd1ehd  
v1kvaht1s1laqivvv1nmeavn1hwh1sree1nefinsnd1gnrvvv1pndge11t1fek  
>tr|E5QWM2|E5QWM2\_STAAH  
mnrqvief1skynpsgnmt1ilvshkhdasey1asianq1lmaathvcceqvgfiestqndd1gndf1h1vmsgnefcgnatmsyi  
hh1qesh11kdqgfkvkvs  
gcsd1vqcaihdcqy1evqmpqahr1vpttinmg1nshwkaie1iyetyvhyvipvsqvtteiqh1vetyvreqqwnhkyk  
tv1gmm1fdeqrqf1qpliy  
ipeiqs1liwenscgs1gtas1gvfnnyqrndackdftvhqpggs1ilvtskrchq1lgyqtsikgqvttvatgkayie  
>tr|E5QWM3|E5QWM3\_STAAH  
mnnfnneik1il1qqylekfeahyerv1qddqyiev1et1mddysefi1npiyeeqfnawrdveekaql1kslqyitaqcv  
kqvevirarr11dgqastt  
gyfdnieh1cideefgqcsiasndk111vgsgaypmt1liqvaketgasvigididp1qavd1grrivn1lapned1titdqk  
vse1kdikdvthi1fssti  
p1kys1ile1yd11tenvvamrfgdgikafnyps1qetaedkwqcnkhmrpqqi1fdialykkaaikvgitdv  
>tr|E5QWM6|E5QWM6\_STAAH  
mfkfi1kria1mfp1mivvsf1mtf11ty1tenpavtilhaqgtpnvtpe1liaetnekygfndp1liqyknw11eamqfn  
fgtsy1itgd1pvaer1gpaf  
mnt1kl1tm1ssvm1m1tsi1ilgvvsal1kr1gkftdr1airsvaff1talpsywias1iliiyvs1k1n1ilptsg1ltgpesy1il  
p1vitiayagi1yfrn1vrr  
smveq1ned1y1yl1rasgvksit1m1hvl1rna1qvavsifc1msipm1mg1lvvieyifawpg1lgq1slkailehdfpviq  
ayv1livav1fivfnt1ladi

Tsompanidou\_et\_al\_Supplemental\_FASTA\_File

inallnprlregar  
>tr|E5QWM8|E5QWM8\_STAAH  
mtlltvkhlititdtwtddplvsdvnftltkgetlgvigsgsgksitcksivglnerlrvtgditfdgksmlslsetql  
kkyrgkdiamvmqggsraf  
dpstvtgkqmfetmkvhtsmstqeiektlieymdylslkdpkriksypymlsggmqlrmlialalalkpkliiadeptt  
aldtitydvleafidikk  
hfdcamifishdltvinkiadrvvmmkngqliehgtresvlhhpehvytkyllstkkkindhfkvmrgdvhd  
>tr|E5QWN1|E5QWN1\_STAAH  
msntnkhyieeeyateqsrffkrdigfilyiflvnilpiiivlftfglvavftqqapwgfsfpismnisyllaviisla  
ifrrmhedafovpmirmqiv  
asakykwhilisftlsivlfl1lnhfai falnvsftvfdiyplireygsisliaifsltiilntlicqlifrhiliqel  
srliplkitivlsviletl  
yyyyintwwefipalilassatylylksnrnfmvsyfyqlavilvlhifm  
>tr|E5QWN2|E5QWN2\_STAAH  
mfyfvrciiniekffgggvmftlvmqfivniiiigfl1tmvigliwlikdkrqsqhsvlrnypllariryisekmg  
pelrqylfsgdnegkpfsr  
ndykni vlagkynsrmtsfgttkdyqdgfyiqntmfpqrneisvdnttllstfiykianerlfsreeryvptkidpyyl  
sddhaiklgehkhpfik  
rivgqsgmsygalgnaitalskglakagtwmntgegglseyhkngngdiifqigpglfgvrdkegnfseglfkevaqlt  
nvrafeklagqaktrggh  
meakvneeiaikrnvepyktinspryefihnaedlirfvdqlqqlgqkpvqfki vsvskvseietlvrtmveldkypsf  
itidggeggtgatfqlq  
gvglplftal pivsgmlkeygirdkvklaasgklvtpdkiaialglgadfvniargmmisvgcimsqqchmntcpvgvat  
tdakkekali vgekqyrvt  
nyvtsl heglfniaaavgvsspteitadhivyrkvdgelqtihdyklklis  
>tr|E5QWN4|E5QWN4\_STAAH  
meavmki ihtadwhlgklingkqlledqayildmfvekmkeeepdiiviagdlydttyspkdaimlleqaigklnlelri  
piimisgnhdgkerllyga  
swfennqlfirtdftsinspieingvnfytlpyatvsemkhyfeddtiethqqgitrcietiapeidegainilishltv  
qgktsdserpligtves  
vqkgvfdi fdyvmlghlhhpfsieddkikysgsllysfseagqakgyrrvtindgiindvfiplkplrqlleisgeynd  
vinekvhvkndnylhfk  
knmshitdpmmslkqiyntlaltnetfsyneennaieisekddmsiemfynhitdke lsdidsnkiknilenelrked  
>tr|E5QWN5|E5QWN5\_STAAH  
mlylifsii valfmgltvivi rmkaqnyvpnekkivlppffmatgalmyvvyprlftgsemleafiigllfstvliwtsr  
fevkgteiymkrskafpvi  
lisllvrtvmkifisneidpge lggmfflla fcmi vprvamlykykkllkktlin  
>tr|E5QWN6|E5QWN6\_STAAH  
mnlvkfsrikkagetmatwlaifivaalilgliggfl1arkymmdylkknppineemlrmmmmqmgqktfseen  
>tr|E5QWN7|E5QWN7\_STAAH  
mfnekdlavdtlra lsditiekansghpglpmaapmaytlwtrhlnfnpqskdyfnrdrfvlsaghgsallysllhvs  
gsleleelkqfrwgsktp  
ghpeyrhtdgvevtgplggfamsvglalaedhlagkfnkegyvvdhytyvlasdgd lmegisheaasfaghnl skl  
vlydsndisl dgelnkaf  
sentkarfeaygwnyl lvkdgnleeidkai taksqegptiievkttigfgspnkagtngvhgaplgederkltfenyg  
ldpekrfnvseevyeifqn  
tmlkranedesqwnsllekyaetype laeefklaisgklpkykdelprfefghngasradsgtviqaisktvpsffggs  
adlagsnksnvndatdyss  
etpegknwfgvrefamgaavngmaahggllhpygatffvdsylkpalrlssimglnatfifthdsiavgedgpthe pie  
qlaglraipnmnvi rpadg  
netrvaveval esestpts lvt rqnlpvl dvpedvveegvrkgaytvygsetpefl l lasgsevslaveaakdlekgg  
ksrvvsmprwnafeqqse  
eykesvipssvtkrvai emasplgwhkyvgtagkviaidgfgasapgd lvvekygftkenilnqvmsl  
>tr|E5QWN9|E5QWN9\_STAAH  
mfvki l tqnissdklliqtnvl gvkmmfynkyknvstyiii flvssaafai fl sanvsahservyemtdhqikntink  
ayehkdptnseqrldgvf  
alin  
>tr|E5QWP0|E5QWP0\_STAAH  
mreltkrqseiynyikqvvtkgyppsvreigeavglasstvhghlsrleekgyirrdptkpraeivsdqtdninme  
etihvpvigkvtagvpita  
venieyfp lpehlstshnsdifi lnvvgdsmieagildgdkvivrstiaengdiivamteedeatvkrfykekividy  
nlkivqwsqftstmll  
>tr|E5QWP1|E5QWP1\_STAAH  
mdtpkkqqafanni qmmsksdvektlnkpkrvtfneygkwytyydgdyntfimsyikdkvnalytnqniitskkskik  
yntpksvvrqr lgepetei  
vkgvrveqnnkeydvfhknhiyttvfydkhrrnntvavlqvsdamenrlkeqygapsksladsfelqnfdlvnaerkqh  
qlstlkyskqnssetarkhs  
kdmaknhyfdhtnlkgqspfdrlkkdgiafnsagenlaygqvssiyahqglmsisghrknilndtfkilvgvdfndekq

Tsompanidou\_et\_al\_Supplemental\_FASTA\_File

pfwtenytd  
>tr|E5QWP2|E5QWP2\_STAAH  
mkifdyediqlipnkcivesrsecdttiqfgpkkfkfllpvpanmqtmneklakwfaendfyimhrfdeearipfikhm  
qnsqglfasisvsgvkaefdfieklaqeklipeyitidiahghsdsvinmikhikthipdsfviagnvgtpegvrelenagadatkvigigprvcitkik  
tgfgtgwqlaalnicska  
arkpliadggrthgdiaksirfgasmvmigsfafaheesppetveldgkqykeyfgsasefqkgehknvegkkmfvvehk  
gsltdtlkemqqdlqssis  
yaggkd1ks1rtvdyvivrnrsifngdrd  
>tr|E5QWP5|E5QWP5\_STAAH  
mtmsrqdkkltgfvghpvsdrensmtagprgplmqdiyfleqmsqfdrevipermmhakgsagfgtftvtkdiikytna  
kifseigkqtemfarfstv  
agergaadaerdirgfalkfyteegnwdlvgnntpvfffrdpklfvslnravkrdrptnrmrdannwdfwtglpealhqv  
tilmsdrqipkdlrhmhgf  
gshmysmyndsgervvwkfhfrtqqgienltdavaaeiatdrdssqrdlfeaiekgydkwtmyiqvmteeqaknhkdn  
pfdltkvwyhdeypievgefelelnrnpdnyfmdveqaafaptniipgldfspdkmlqgrlfsygdaryrllgvnhwqipvnqpkvgvienicpfsrdgq  
mrvvdnnqgggthyyppnh  
gkfdsqpeykkppfptdgygyeynqrqddnyfeqpgklfrlqsedakeriftntanamegvtddvkrhrhirhcykadpe  
ykgvakalgidinsidle  
tendetyenfek  
>tr|E5QWP6|E5QWP6\_STAAH  
mednkmnrslnsrhismiaiggaigtglfvatgnisqagpggailaylvigvmlyflmasigelatfypvsgsfssyst  
rfidsslgtmgwlywalw  
slvtsvdvivasnlyfwdtffkffhpitwslifitillllnifsvksfgetefwlslikvltiivfvi fgflmifgilgg  
haygfenytkgqapfvvgi  
sgflgvllvagfsvggtevvavtagesddpkksmpkaikqvfwrillfyvlsiavigaiipytdpsllrasssisqspft  
ivfdrvgiafaasvnavi  
ltsllsaansgyttgrmlyslssdkkapkflsklnkttklplrallltavyviviianfnnavfnlleigsmiiv  
vwgssiwsqirlrqaikkq  
gqdpnkvlpykapfypilgpiiviatllfllfggsveyilkdqlnafknflpliilaliyfihkiihktkfvlketinlk  
phdydnqk  
>tr|E5QWP9|E5QWP9\_STAAH  
mikiasiiikelynmsnvleltipastanlgvgfdsigma1dkflh1svketsgkweyifhddaskqlptdetnfiyh  
vaqqaakysvdlnplcie  
mrsdiplarglgssasalvgaiyianyfgdiqlskhevlqlateieghpdnvaptiyygliagyndvktetsvahidip  
dvdviviityelkteasr  
ralpklthseavkssaisntmicalaqhnyelagklmqdggfhepyrqhliaefdevktiasqhnayatvisgagptil  
ifsrkensgelvralnrv  
vtchselvdinvsgvkerivyq  
>tr|E5QWQ0|E5QWQ0\_STAAH  
mrrwqglveefkahlpnventpkltnegntplihcenmseilgidlyvkyeganptgsfkdrgmvmavtkakeqgkiv  
icastgntsasayaara  
glkaiivipegkia1gk1sqavmygaeivsiegnfdealeivkeiakseielvnsvnpfriegqktgsfeivqqldgea  
pdilaipvgnagnitaywk  
gfkeyheakgsq1pkmfgfqaegaspiqvknviknpetiatairignpaswdkatnalkesnglidsvtddeileayqlm  
ttkegvfsepasnasiagl  
iklhrqgklpqqkvvailtnglkdptaisllndpikplpndkdsiidyikgal  
>tr|E5QWQ1|E5QWQ1\_STAAH  
mkklniallglgtvsgvviieenrqqiqdtlnkdivikhilvrdskskrplnisqyhltedvneilnddsldiivevm  
ggiptvdwlrta1knkkh  
vitankd1lavh1k1ledlaengvalkfeasvaggipivnainnglnanniskfmgilngtsnfilskmtkeqttfea  
ldeakrlgfaeadptdve  
gvdaarkvvi1tsylsfnqvik1ndvkrri1sgvtltdinvadqlgykikligkiyengkvnasveptlidkkhqlaave  
deynaiyvigdavgd1mfy  
gkgagslatgsavvsd1lnvalffesd1htlpphfelktktremmsdaeinikeksnffvvnvhvksienfenelka  
ilpffhrs1rvanydnqaya  
avivgllesspeel1tkhgyevdkvypveg  
>tr|E5QWQ2|E5QWQ2\_STAAH  
mqfsdfler1actmkvskfgssvsnatqikkvlnivnsdperkivivsapgkrhdndikttdllirlyekvinhl1dyhd  
kkreii1gryddivkelqmd  
esilrtidvtlehyng1knepkr1lda1lscgedfnaqlialynnsqgiptkyispekeg1fvtdvpqeaqildsayse  
ikk1rdydek1iipgffgv  
shegyivtfprggsditgaiissgvratiyenftdvsgiykanpniikdpelieeityremrelsyagfsvfhdalqpl  
ykdr1pvvikt1nrpqdkg  
tfivhdreinaknvisgisckdkdftvinikylmnrqvgftrkilgvlednnisfdhmpsgidtisivmrskqiqnketk  
vlneir1qkcdvde1siehd  
lailmivgegmknkvigtankithalaeskin1kminqgaseismmfghivddaekav1stye1fcyhgv1kn1cdkn

Tsompanidou\_et\_al\_Supplemental\_FASTA\_File

>tr|E5QWQ3|E5QWQ3\_STAAH  
mnmnakeqlvdnlmktssqflfkfhgevamqlfndelklpsiveicverkrldivkvpqsyallyidkqdqaiaked  
lslskiakvyvqydnttim  
sifvydvndewifrlpnriripksniyfhslnwdvdyikpeivlmydlmqhhqyhhsnykrvidalsyyqffilkfvv  
geqrikdaigrinn  
>tr|E5QWQ4|E5QWQ4\_STAAH  
mytklkkskrigekmsfyvvliaaigilvlinqrysnskidtevyarkqlikknkalsaeaelrsqmlssnndvgh  
hayknakrelrkildsyle  
ngklkyydiivtsnlatkhpffeyarsfdfiivsdiglinvdvkswgektfyhfdvpdehdtemsniekvvghyisqq  
yhdqfnssrksiytftetv  
qpnrviydfydydpyqlaannakaldhieqfnfkvqstgviyfsdgtvniigseerdkyvdtvstkslrriseai  
elshplnkeqvnqitaif  
k  
>tr|E5QWQ5|E5QWQ5\_STAAH  
minrnekrevgkmsknsklamivvaiiivgvlafqfmnhkgpffkgtndhetvqdlngdkvhvqrvvdgdtfianqngk  
eikvriligvdtpetvknpt  
pvqpfqkeasnyskktlnqdvyleydekdrygrtlayvwi skdrmykelvekglarekyfspngkyrnvfi eaqnk  
akqqklniwsk  
>tr|E5QWQ7|E5QWQ7\_STAAH  
misliiaedqnmrlqamvqliklhgdfeladvngldaikiieahhpdvildiemsgmtglevlseirkkhlrikvii  
vttkrpgyfe kavandvd  
ayvkersieelvetiykyngkkeysaslmstfftdknp ltpkeqivlreinglsskeiseklfldgtvrnytsvri  
dklfadnrfdawkkaneqg  
wi  
>tr|E5QWR0|E5QWR0\_STAAH  
mvhliqisninksfkknrvlknisfdiekgtctaligkngagkstlvdilsnkiiaddgvildkdkllqsenrsimfqkt  
mfpdqlkvigiklyqsfy  
enpltdviieltkfnsglnqfanklsggqrrlldfvisligppqllldeptsnm diemreyfwsiaaklkeenrtil  
ytshyieevermsdkiiil  
engeiklndstshirtnqgsqitlsdeykrklpkdkdlviqknhngtikitsvndtilylqqhlnlddieiqkvisi  
vdsyfnkkqrgsnydtkl  
lenri  
>tr|E5QWR1|E5QWR1\_STAAH  
mkhffasklp1lnfrmnrrnhrkiiiiidgqlgyvggfnigdeylglgklywrwthlriqgdavdalqlrfildwnsqah  
rpqfeydvkyfppkngplg  
nspiqiaasgpasdwhqieygytkmimsakksvylqspyfipdnyinaikiaaksgvdvhlmpckpdhplvywatfsn  
asdllsgvkiytyengfi  
hskmcliddeivsvgtanmdfrsfe lnfevna fvydenlakdlrvayehditksqkteesy anrplsvkfkeslaklvs  
pil  
>tr|E5QWR2|E5QWR2\_STAAH  
mqfsfsndlgtlftiilaigfiinlvlafiiiflernrrtasstwawlfvlvflpligfilylffgrtvsarklnknngn  
vltfdgllkqqiesfdkg  
nygtdnkqvqkhd1vrm1mdqdgfltennkvdhfidgndlydqvlkdiknakeyihleyytfaldglgkrihaleek  
lkqglevki lyddvgsknv  
kmanfdhfkslggeveaffcv  
>tr|E5QWR4|E5QWR4\_STAAH  
mlilvlgnvvisfendylegahekv1kr1vdtnlvqasgygfdqftaqaielikdtidcpnatirflvggtqtnqvvin  
smlesyegvisadtghvav  
heggaieysghkvi tipskegvsasdvetyetfksdfkdhmvfpgmviyshpteygtlyskseleelckvckqyqlp  
lfmdgarlyglmsdqsdm  
tikdiakycdvfyiggtkigalceai vftknnepkqfttrikhhgallakgrlgtiqflelftdnlyfnisrhaieman  
kmdgfiinkgyrlyfidspt  
nqqffilsnekieleqkvkfavwekyddqhrvrfatswatteenlnkllleli  
>tr|E5QWR8|E5QWR8\_STAAH  
mlhnyppgsgfseydlftffkhsiksmtivtnkeqvkfikt sdrfqqkivskfctkyfthiniindsyiekllklysi  
nmikykv  
>tr|E5QWR9|E5QWR9\_STAAH  
mennesitdvtqneeqlndsdeqsqqnektfsqeevsqlikeriarerksderikdakenndsnevayllkggkvtkv  
dgnqnsvsfvpq  
>tr|E5QWS1|E5QWS1\_STAAH  
mipgvnappihpwcrrsttvpdvgnwrkffkeregkyrvegsfiesgalnksdeygikrnrhaqiyynsvrnqenr  
>tr|E5QWS3|E5QWS3\_STAAH  
mstgnlilnderfdlkdiiinfnqiiigkihignvyietikgkvhysktgahivpyidk  
>tr|E5QWS4|E5QWS4\_STAAH  
mipgvnappmhpwcrrsttvpdvgnwrkffkeregkyqvevkeaklqekaknqmkiemiesdkiki  
>tr|E5QWS5|E5QWS5\_STAAH  
meknesitdvtqneeqlndsdeqsqqnektfsqeevsqlikeriarerksderiknakenndsnevayllkgakvtkv  
ygdqnsvsfvpgekate1l



Tsompanidou\_et\_al\_Supplemental\_FASTA\_File

fdskpnsivmlnhhpgqsgfslndlavftinnsiktmtivtnkgrikfisktehfkekvmkkmianllieksldvistkd  
ierllkelyndnii  
>tr|E5QWS6|E5QWS6\_STAAH  
mlkdvyrknvvtlkndek1kgfvidfenplesdsgnycmdletd1gfyfidesdikdiqite  
>tr|E5QWS7|E5QWS7\_STAAH  
mipgvnappmhpwcrsttvphvgnwrkffkeregkyqvevkeaklqekaknqmkiemiesgkikieinrekqnrhslghk  
lylknkiyalqnderfpsy  
tilsieelndllkkysmtgkilvdkfgfnrkeiinfektigkayaggkyintaygkihysktgshivpfvskek  
>tr|E5QWS9|E5QWS9\_STAAH  
mkkrrqqnkasklds fkeinnkkielgytamai fkyemekkyegkynileeycknkiqnetkkitff  
>tr|E5QWT0|E5QWT0\_STAAH  
mslryewkstiittnipfsswgesfsnkivsaaidrlvhskvfkitgesyrldkyktekslnirqs  
>tr|E5QWT2|E5QWT2\_STAAH  
msynhl1lterariev1rgenyslrsiarklkrsvstisreisrnnlnqsyqaetaqknyetkrklcgrprftpelgni  
ikyylkchwspeqivgrll  
qnqicfktiyrwinsnmifelisclrqgkrqpketrqkfnigrpisqrpkiekkrrntfghweadtivssrgskgci  
atfaerksryyycv1mpdr  
ssnsmetainnlikh1pkgavktitvdrgekfscyqni enqfninvyfadpysawqrgtntngllrefspkktldakv  
nqeqlnyal dsinyrprkc  
lnwkfppevlcdellhln  
>tr|E5QWT4|E5QWT4\_STAAH  
mifkinrfekytlfhesfwyiy1kml1qsympkcf1tklihqv  
>tr|E5QWT5|E5QWT5\_STAAH  
mnei et iiseiek1ltnntpysisknsgvprqtvtldkvgntkikdakfkiiklyeyqkssennsec  
>tr|E5QWT6|E5QWT6\_STAAH  
mnqfkeiyntikk1lndksisnyrinqdtgvsyggiselrsgkrkvnn1lletaeklynyqkqleimied  
>tr|E5QWT8|E5QWT8\_STAAH  
mpkrtftkddirkfaeeenvrylr1qftdiltgiknvepvvsqlekv1dnemfdgssiegfvriesdmylhpdltdtw  
ifpwtaggkvarlicdvy  
ktdgtpfegdpranlkrvlkemed1gftdfnl gpepeff1fk1dekgeptle1nddgyfd1apt1gencrrdivlele  
dmgfdieashhevapgghe  
idfkyadvatacdniqtfk1lvvktiarkhn1hatfmpkplfgvngsmhfnvs1fkgenaffdpntemgl tetayqfta  
gvlknargftavcnp1vns  
ykr1vpgyeapcyiawsgknrsplirvpssrg1strievrsvdpaanpymalaail eagldgiknk1kvpepvnqniyem  
nreereavgid1pstlyt  
alkamrenevikkalgnhiynqfinsksiewdyirtqvsewerdqymkqy  
>tr|E5QWU0|E5QWU0\_STAAH  
mkdiskivadvestlapyfkeieetayinqekvlnafhvkatesdlqgstgygyddfgrdhleeiyaqafkaedaivrp  
qiisgthaitialqsl1kh  
gdeliyitgspyd1levigvngngies1mehgvsykdiakkegkidiesvldgisertkviaiqrskgydqrpsiplne  
ieqvitr1kevhpnilifv  
dncygefverrepi ecgadliagsliknpgglakiggyiagrkdliercgyrltapgigkeagaslnallemyqgffla  
phvvsqslkgalfts1fle  
kmmnttpkyekrtdliqtvkfktkeqmisfcqsiqhaspinahfspepsympgyeddvimaagtfiqgssielsadgp  
irppyeayvqgg1tyehvk  
iavtravmq1keggl1  
>tr|E5QWU1|E5QWU1\_STAAH  
maqqqihdtkn1lekav1vgvhaqddkqfnfestmeelsslsetcqlvlgqitqnrdrvdrrkyvvgkkieeiqafief  
kdidv1tndel1ttagks  
1nealgvkiidrtq1ileifalrarskegk1qvelaqldy1lpr1qghgks1sr1gggigtrgpgetklemdrrhirtrm  
neik1qlrtveehreryrn  
krnqnqvfqvalvgytnagksswfnv1aneetyekdq1fat1dpktrqiqindgfn1iisdvtvgfiqklptt1iaafkst  
1eakgad1lvhvvdssh  
eyrtqydtvnd1ikq1dmshisqivi fnkkd1cdhasnrpasd1pnvfvs skndgk1lvkt1fideikrqltyydeaia  
tnnadrlyf1kqht1vte1  
kydeienvyrikgfkk  
>tr|E5QWU5|E5QWU5\_STAAH  
msnq1lyqtayym1htsq1knikk1nhampillvsgyddp1gdygkig1klaniyrkagiknvkvnlyhhrhev1fekd  
hdkiwed1fkw1nqfykk  
>tr|E5QWU6|E5QWU6\_STAAH  
mmtekqfk1tvqdn1ievkvnftdvdskgi1hi fhgmaehmerydk1alah1skhgfdvirhnrhghginidestrghyd  
dmkrvi1gdafevaqtvrng  
vdkpyi1ighsmgsvar1fvetyppqyvdg1lsgtgmyplwkg1ptkv1qlitkiygaekrvewvnq1vsnsfnkkyv  
hyhkvig1fviq1k  
>tr|E5QWU7|E5QWU7\_STAAH  
mwdks1vftffr1rfgma1stfkrehikn1rnde1d1vi1gggitgagialdasergmkvalvemqdfaagtssrstkl  
vhgglry1kqf1gvvaet  
gkerai1vyengphvttpewm1lpmhkggtfgkfsts1glmydr1lagvkkserkkmlskket1akeplvkkeg1kgggy

Tsompanidou\_et\_al\_Supplemental\_FASTA\_File

veyrtddarltievmkraa  
ekgaeiinytksehftydknqqvngvndkltnenytikakkvvnaagpwddvrsdyarnkkrlrtkgvhvvidqs  
kfp1ggavyfdtekdgrmi  
faipregkayvgtttdfydnikssplttqedrlylidainymfsvnvtddiestwagirplyeegkdpseisrkei  
wegkslltiaggkltgyr  
hmaqdi vdlvskrlkkdygltfspcntkglaissgdvvggsknfda fveqkvdvakgfgidedvarrlaskygsnvdeln  
iaqtsqyhdsklpleiyye  
lvysiqqemvykpnfdlvrsgkmyfnikdvldykdsiidimadmldyspaqieayteeveqaikeaqhggnqpavke  
>tr|E5QWU8|E5QWU8\_STAAH  
mekyilsidqgttssrailfnqkgeiagvaqrefkqyfpqsgwvehdaneiwtsvlavmtevinendvradqiagigitn  
qrettvwdkhtgrpiya  
iwwqsrtqsiscelkqggyeqtfrdktgllldpyfagtkvkwilndvegarekaengdlifgtidtwlvwklsgkaahi  
tdysnasrllmfnihdlew  
ddelelltvpknmlpevkpssevygktidyhfygqevpiagvagdqqaalfgqacfergdvkntygtggfmlmntgdka  
vksesgllttiaygidgkv  
nyalegsifvsgsaiqwlrdglrminsapqsesyatrvdstegvyvvpafvlgtpywdseargai fgltrgtekehfir  
atleslcyqtrdvmeamsk  
dsgidvqslrvdggavknfifmqfadi vntsverpei qetta lgaaylaglavgfweskd diaknwkleekfdpkmd eg  
ereklyrgwkkaveatqvf  
kte  
>tr|E5QWU9|E5QWU9\_STAAH  
mnvylaeflgtaililfgggvcavnllrksaangadwivitagwglavtmgvvavggfsgahlnpavslalaldgsfdws  
lvpgyivaqmlgaivgati  
vwlmlylphwkateegaklgvfstapaiknyfanflseigtma ltlgilfigvniadglnplivgalivaigls lsgga  
tgyainpardlgpriahai  
lpiagkgsnwsyai vpi l gpiaggllgavvyavfykhtfnigcaiaivvviitlilgyilnksskkgdiesiy  
>tr|E5QWV0|E5QWV0\_STAAH  
mhflqintsitlmi livlevliilfnyslydtlnslhipyengffnmlyd  
>tr|E5QWV2|E5QWV2\_STAAH  
maenqndeiviked synp fvtktsesli addressgynntrekdedyfkqqe ilqemdqt fdsnddt svqnyenkasddy  
ydvndikgtkskdpkrrip  
ymeivgqvhgtyiiaqnefmgymidqhaaakerikyeyfrdkigevtneiqdlli pltfhfskdeqlvidqyknelqqvgi  
mlehfgghdyivssypvwf  
pkdeveei ikdmielileekkvdi kklredva immssckksikanhy lqkhemsdlidqlreaedpftcphgrpiifnfsk  
yeleklfkrvm  
>tr|E5QWV3|E5QWV3\_STAAH  
mgkikelqtslankiaagevverpssvkel lenaidagateisievesgvqsirvvdngsgieaedlglvfhrhatsk  
ldqdedl fhir tlgfrgea  
lasissvakvtlktctdnangneiyvengeilnhkpakakkgt dilveslfyntparlkyikslytelgkitdivnrmam  
shpdirialisdgktmlst  
ngsgrtnevmaei ygmkvardlvhisgdtsdyhi egfvakpehsrsnkhyisifingryiknfm lnkailegyhtlltig  
rfpicyniemdpi lvdvn  
vhptklevr lsk eeql yqlivskiqeafkdrilipknldyvpkkikyihsnkksnlndktqrinkrrrfhlkkvtv  
shlwqki ktmr  
>tr|E5QWV4|E5QWV4\_STAAH  
msnvtpmmqy l k ikseyqdc l l ffr l gdfyemfyedakeasrvleitlkrdakkenpipmcgvpyhsadsyidtlvnn  
gykvaiceqmedpkqtkgm  
vrrevvri vtpgtvmeqggvddkqnyil sfvmnqpeialsy cdvstgelkvthfndeatlneittinpevvindnis  
dh1krqinmvtetitvret  
l sseiysvntekhlmyqatqllldyihhtqkrdlshiedavqyaa idymkmdfyakrnleltesirlkskkgtl lwlmd  
etktpmgarrlkwidrpl  
iskeqiearldivdefshafierdtl rtylnqvydierlvgrvsygnvnardliqlkhsiseipnikallnsmnqdtlvq  
vnql ep lddll di leqslv  
eepisvkdgg l fkvgnmq l deyleaskngktwlaelqakerqrtgikslkisfnkvfygfieitranlnqfepsefgy  
mrkqtl snaerfi tdelke  
kedi ilgaedkaieleyqlfvqlreevkyterlqhaki isel dclqsfaeiaqkynytrpsfsenk tlelvesrhpvv  
ervmdydyvpnn crl dne  
tfiy litgpnmsgksty mrvai isimaqmgayvpckeav l pifdqiftrigaaddlvsgkstfmvemleaqkaltate  
dsli ifdei grgtstydg l  
alaaqamieyvaetshaktlfsthyhel ttdqalpslknvhvaaneykgel iflhkvkd gavdds ygiqvakladlpek v  
israqvil sefeasagkks  
sisnlkmvenepingensnl sveettdt l sqkdfeqasfd l fendqeseielqiknl nlnsmtpiealvkl selqnq l k  
>tr|E5QWV8|E5QWV8\_STAAH  
mkdtlmsiqi ipktpdndvipyvdeaiki idesglhfrvgpl ettvqgnmneclililqslnermvelecpsiisqvkfy  
hvpdgitietl tekyde  
>tr|E5QWV0|E5QWV0\_STAAH  
mkpqlswkvggqqgegestgeifatamnrkgylygyrhfssrikgghtnki rvsttpvhaisddldiliafdqetid  
vnhhemreds iiladakak

Tsompanidou\_et\_al\_Supplemental\_FASTA\_File

pvkpegchaqlielpftatakelgtal mknmvaigatsal mnlntntfeelitnmfsskkgdkvvevniqalnegyqlmqsr  
rlseidgdfelestdalp  
lymigndaiglgaiagsqfmaaypitpasevmeymi aniskvngaviqtedeiaavtmaiganyggvraftasagpgls  
lmeaiglsgmtetplvii  
ntqrggpstgltkqeqsdlmqmiygthgdi pki vvaptdaedafyltmeafnl aeqyqcpvivilsdqlslsgkqtvek  
dynrieikrgei iqsdi er  
eeddkgyfkryal tsnngvsprpi pgvkggi hhitgvehneegkpsesasnrqqmekrmrkieqlliespveanlqheda  
dilyigfistkgai qegsn  
rlnqqgikvntiqirqlhpfptsvi qdavnkakkvvvvehnyqqqlasiikmnvnihdkienytkydgtpflpheieekg  
kiiateikemv  
>tr|E5QWW1|E5QWW1\_STAAH  
mrifigdivgkigrdaietyipqlkqkykptvtivnaenaahgkgleteiykqllrngvdfmtmgnttygqreiydfid  
eakrlvrpanfpdeapgg  
mrfikindiklavlnlqgrafmpdidpffkkaqlvkeaeqtpfifvdfhaettsekyamghldgrasavvgththiq  
taderilpkgtgyitdvgm  
tgfydgilginktevierfitslpqrhvvpnegrsvlsgvvidl dkegkthierilinddhpfstf  
>tr|E5QWW3|E5QWW3\_STAAH  
mklcsli vvalvcvia ltsacgkeqtkyegdvsgkhvlt sitykddkvlkqstintikyddl gmdkdeakkl fakesi  
fkdlkgvkykvdykdkkai  
ehldidytevdmkklnkr lgvstkenkdisfeklekqlkhrglkekdkmddk  
>tr|E5QWW4|E5QWW4\_STAAH  
miitsptearkd fydqllknvnnnhepiyisgnaennavigledwksiqetiylestgtmdkvrerekdssggttniddi  
dwdnl  
>tr|E5QWW5|E5QWW5\_STAAH  
msnytvkiknsaksdllkikhshylkksfleivetl kndpykitqsfeklepky lerysrrinhqhrivytdvdrnkevli  
lsawshyd  
>tr|E5QWW6|E5QWW6\_STAAH  
mnmnqsvkl1kh ltdvngi agyemqvkeamrnyiepvsdqie dnlggi fgknaengqysimisghmdevgfmvtkid  
khgfisftpvggwwnqvm  
sqkvtttdsgkei rgi igskpphvl tpeerkkpmeiknmfidigvsskeeeagvevgnmvtpysefevl tndkylta  
kafdnrygcalavevlkr  
kdeniginlysgatvqeevgl rgakvaantikpdlaiavdvgi aydtpgmsgqtsdskl gggpvvimmdatsiahqglrk  
hikdvakkhnievqwdttp  
gggdagsihvanegiptmtigtvl rymhsnsvlnvddyensvrlvteivrs lndetyknimw  
>tr|E5QWW7|E5QWW7\_STAAH  
mirggvnmll eikdlvyeasdrvilnhinlkvdkgetia igpsgsgkstfqklicnlisptsgtlyfkgkpyddyepi  
lrrhisy lmqsd l fgeti  
ednmifps larndkfdkkrakql ikdvglghyqlsskiehmsggerqriaiarqlmytpdilll destsaldinnkie  
nii fkladqgvaimwiths  
ddqsmrhfqkritivdgqisntee lnqhe  
>tr|E5QWW8|E5QWW8\_STAAH  
msntalgl talllvipiisyekeglhiikdlivatlravvql iilglfllyhifkindkllvlcvfvii vnaswntisrs  
spvhhvfllisfvavfgt  
alplvgtiatgaiqftanevipigglanngliainlayqnl drafvqdgtniesklslaattklaskgairesirlaiv  
ptidsvktgy lvsipgmmt  
gliiggvpplqaikfql lvvfihttatimsaliaty lsygqffnarhq lvarntdvkses  
>tr|E5QWW9|E5QWW9\_STAAH  
mnignfversfkmsimr lftfilsifivgmvemmvagimnlmsqdlhvseavvgqlvtmyaltfaicgpilvkltnrfss  
rvllwtllifiingnia  
vapnfsilvvgrii ssaal iivkvla itamlsapknrgkmiglvytgfsganvfgvpigtvlgd lvgwrytflfliiv  
siivgflmmiylpkdqei q  
rgpvnheapshenhvtskilrpaevakyl iitflvliansvtfvfinplil snghdmsfvslallvngiagvigtslggi  
fsdkitskrwl misvsi fi  
vmmllmnlilpgsglllaglfiwnimqwstnpavqsgviqhvegdt sqvmswnmssl nagigvggi igglvmthsvsqai  
tytsaiigs lglivvftlk  
nnhyaktfkss  
>tr|E5QWX0|E5QWX0\_STAAH  
mki nttggqihgitqgdldifl gipyaeppvhdnr fkhstlktqwsepidateiqippqpdkl edffssqsatftehe  
dcl ylni wkhndqskkp v  
iiyfyggsfenghgtael yqpalvqndi ivitcnyrlgalgyl dwsyfnkgfhsnngl sdqinvikvwhqfiesfggd  
annitlmqqsagsmsiwtl  
lkipdiepyfhkvvl lsgalrldtlesarnkaqhfkml dyldtdvkslstddilm maklkqsrgpskgldli yapi  
ktdyiqnnypttkpifacy  
tkdegdiyitseqkkl spqrfidime lndiplkyedvqtakqslait hcyfkqpmkqflqq lni qdsnaqlwlaefawh  
dtssahyrsayhil dmfvw  
fgnlqilaahqypttah l kflsrqmndlan faksgkmpwpmynherryrtyq  
>tr|E5QWX1|E5QWX1\_STAAH  
mikdkqlhnekinlsqvl lglsglsgwlf gaweassiagpaaiiswvlgflvigtiaynieigtmfpqsggmsnya

Tsompanidou\_et\_al\_Supplemental\_FASTA\_File

qythgsllgfiaawanwvs  
lvtiipieavsavqymsswpwhwakpmkhlmengsistyglavyliivifsllywsvklltsftslisvflkgvpmllt  
iimlmlsgfdtsnyghsas  
tfmpygsapi faattasgi ifsfnsfqtinmgseiknpekniargiaislisavlyiilqstfitsmpqsmllqhsqwn  
ginfnspfadlaillginw  
laillyieafvspfgtgvsfvavtgrvlrameknghipkflgkmnekyhiprvaiifnaiismimvtlfrdwgtlaavis  
tatlvayltgpttvialrk  
mgptmtrpfrakilkvmaplsfvlaslaiywamwpttaeviliilglpiyffeyermnrntkkqiggsliwivylivl  
sllsfigskefkglnmiyh  
pfdfiiviiivalifyyigtstssfesvyfratrntkmreslnneskssy  
>tr|E5QWX2|E5QWX2\_STAAH  
mevmtmsekqsneqveaflnkesqwqeeyky|ralifneteleeaykwmhpcytlnknvvlhghfknyvallfhkgail  
edkyhtliqqtekvqaarq  
lrfenleeiqarreeikyiaeaikaekagkkvemkkteeyvipkeleakfeempqllessfykltprghqyiyhigqak  
rsetrqkrvekyinqileg  
kgmhdk  
>tr|E5QWX3|E5QWX3\_STAAH  
mriirhifyeegemimlsikhltkisygnkkavddisldiqsgefiatfigtsgsgkttalrminrmieategqieidgkd  
vrsmnpvelrrnigyviqq  
iglmthmtikenivlpkllkwtkeekdkrakeliklvdipesflerypaelsggqqqrigvvrалаaeqdiilmdepfg  
aldpitrtdlqdlvktlqr  
klgkftifvthdmdeaikladkicimsegkvvqfdtpdnllrhpfandfvrdfiqnrliqdrpndktvegvmikpitia  
eatlndavhimrqrkdvti  
fvvdrdnhllgflidiedinqgirghkslretmqhiyvtqidsklqdsrvtilkrnvrnvpvddqqrllvglitranvvd  
ivydtiwgdsedtvqaeyv  
gedtasskvheqhttnkvrdigddks  
>tr|E5QWX4|E5QWX4\_STAAH  
mjeflnehgvqlmsktlehfyisivalllaiivavpigillsktkrtaniiltvagvlqtiptlavlaaimipifvgktp  
aivalfiyvllpilnntvl  
gvqnidsnikeagksmgmtqfqlmkdvelplalplilggirlssvyviswatlasvygaggldgdfifnglnlydplmivt  
atvlvtalalgvdallaiv  
ekwvvpkgllkvsq  
>tr|E5QWX8|E5QWX8\_STAAH  
mkiaiaagsgalgsfgaklfqagydvtildgytshveavkqghlnitingeafelnipmyhndqpdesydvvflfpls  
mqllkevmeamkphidneti  
vvtmnglkheeiaqyvaqsqivrgvttwttaglespgshllgsgpveigelvdegkenvikvadllneaelngviskd  
lyqsiwkkicvngtanals  
tvlecnmaslnessyakliyktqeiwhvatidnhvlnvdevfeylvdlnekvgahypsmyqdlivnnrkteidyinga  
vatlgkqrhieapvnrfit  
dlihtkesqrhaqd  
>tr|E5QWY1|E5QWY1\_STAAH  
mfngqfkrliigqpknrelkdekiskfkglaillssdalssvaygpeqilitsvvgavatwytlpiagavllillaalims  
yrqiiyaypkgggymvsk  
tnlgekwltaggsllvdyiltvavsisssgadafvaafpslyghkvliacllvlfililnlrgltesatvlsypvylfii  
glvilifigtfrvatgdiq  
phmhasvgtavpgvtlflllkafssgassltgveaisnavtnfrepssannavktliamgsilafllvgivglayvygimp  
qtettvlsqlamqifgdna  
afyfvqattvmilvlaantgftafpmlaasmkdkymprmftrvgrdlgysnsiilglvailiivfdgmedliplya  
vgvfipftlaqfgmviwki  
herpknwlsksvnlggivtfivfmillitkfsqwpiliflpfvviffllinkhyrdiaeqlrstdidvhnevvdnrl  
aivpitsittavdksiyya  
qmlanndviavhsfgdedekafqekwrhfpdvrilvhseysriirpisrfidkinrkandqnymitvvipefitkkr  
whnllhnqtslrmklyliy  
qknvncvctipfkllk  
>tr|E5QWY2|E5QWY2\_STAAH  
malleafliififaviissvinrfrpqiaptafiaialgvvifiipiqvdfqfnsevfmfaviaplffvegthvsrthlley  
rkpillsmalvfatvvgv  
gyfihwiwpaalpmpaafaiiaailcptdavavsaitrgkllpkgsmtilegesllndaagiisfkiavtalvtgtfslfqa  
ieqfiistilgvligaiig  
fvvvriridltankglkdntltfiqlltpfvvyflaeevhasgiaavviaglhglerdriliraqtelqmyhqiwnft  
syalngfvfvvlgfmiptv  
vidifqtepdnfsflivitiliaiaiyacrffwvyfwykdffyfpkniqsyldeehdshetppsrvyrafimtmcgihgti  
slsmaltlfpfiitggqafe  
yrndllfiasfmvlislliaqvllpitpsaedttfkgmtyqsakifivqkviqhfknescdkdndtnyrpvlngyygel  
lfllnsepdnqntkelkr  
ediakvietstlerlidkqktyqdiinnyrnivel tethrtasfvekfankffkmlwlrllkamkhykalneskkqefens  
fkdvqkimrivnhniilrl  
keeqnstnvlvslvinhyddmsrslkwraqrrkerqensnqipqamfhnkalealyqrhlldelirknkinnivaaq

Tsompanidou\_et\_al\_Supplemental\_FASTA\_File

ireninyneivls1qskd  
>tr|E5QWY4|E5QWY4\_STAAH  
mskegmgmkiqtiadlhidrhkkttsedylealveivkyknldilliagdisnhyqlthqfitq1tkqldipvkfvpgnh  
dlwevesmttqdiwnnyks  
msqclvgkpfivneewaiightgwysfaaqrfs1delqrgkhygatwqdkeriswgtsdqnlskiaaeqvkkdllevg  
nrrvilvthvthpdfivp  
mphrifdfynafigtsdfnplyamfdipysimghvhfrksvmdgrcy1cpc1gyprqwrseidiyqeinetiqliiei  
>tr|E5QWY5|E5QWY5\_STAAH  
mnrkilpvkpsqlfpipvmgcegvsaamm1qynnqhipateimrhwphthpnnphkgyvghh1fiklgnyhqti1pday  
vpflqkynpni1vdgtgks1  
ed1kgiidggqpvliyhnt1gskp11rvfrfdnkpakqvsniht11igyddyuyyidplwshirrg1vlpaiipnrkq  
iikirkekmeysfnspgrk  
ciyvqphsytienqkqkht  
>tr|E5QWY6|E5QWY6\_STAAH  
meyqlqqlas11vgiketyengraqqhiagfwqrcyqegviad1qlknngdlagilglcipeldgkmsytiavtgdns  
adikeydvi1lasskymvf  
eaqgavpkavqqkmeevhhyihqyqadtvsapffelyqgdgttsekyiteiwmpvkg  
>tr|E5QWY7|E5QWY7\_STAAH  
mqssktktkhsf111it1gvmtafgp1tidmyvps1pkvqgdfg1sttseiql1tsftmig1alggfifgplsdafgrkr  
iavs11iifilasg1smfv  
dq1plf1t1rfiqg1tggviviakasagdkfsgnalakflasl1mvngiitilaplagg1alsvatwrsiftit1tival  
i1ligvasq1pktpkelk  
qvnfssvikdfgs11kkpafii1pml1qg1tyvml1fsyssaspfitqklynmtppqfsimfavngv1iivsqvvt11vek  
1hrhilliit1iqvvgva  
lii1t1t1fh1plw11iaff1nvc1pvt1sig1p1gft1mameertggsgnass11gl1fq1ilggavap1vg1kgefntspymi  
iifitail1vs1qi1y1fkm  
ikkqhva  
>tr|E5QWY9|E5QWY9\_STAAH  
mstmqlkiviapdsfkesmtaqqvgniikqaf1tnvygk1lhydi1p1madggegttdal1mhatgatkytvi1vnd1l1m1rpi  
eacyaradkq1ai1iema  
asgl11lekeern1ytssygtgelikdal1nhgakti1lgiggsatndgg1tgm1salgvkftdvngd11qmhgdn1ahia  
qidi1n1dsr1kevtfkva  
cdvsnp11gengaty1ygpqkgadakmi1pk1dfamshyhdki1mctgksvni1pgsgaaggmga11lafcett1tkgidv  
vfditdfhqrikdad1vit  
gegrmdyqti1fgktpvgvalaakqyhipviaicgs1genyqhvydfgidsaysi1sspst1edvlq1nseqn11ntatdia  
r11klq  
>tr|E5QWZ0|E5QWZ0\_STAAH  
mk1tqthaei1kfi1vggint1nyyvy1111k11hieymishitgfi1vafvisy1lncyfvyrvkptwrk1fisfpitqi  
vnis1qtvl1lyfvsw1n1  
paeiapfag1iitipitf1l1skwi1kdsn  
>tr|E5QWZ1|E5QWZ1\_STAAH  
mnnqtnwiki1sgfasdskwkim1s1lls1isvfsg1lpywavfki1l1mminnaytinsimvyifivliayisqvccfga  
stm1shitaye1l1seirkk  
1aqk1mr1pl1gvveskkigek1kni1fvdkvetiel1plahmi1pevign111saaiflyim1lidwrmasa11lvtipisifafk  
kvmsgfnetyaeqmksnny  
mnsaivefiegieviktfnqsqssykykdavdnykiht1nwfkn1twgymn1gasv1pstf1gilpvgymlisinq1nya  
eff1ci1v1s1gvvapiknf  
tnyvnh1ksiqyaltevnq1slee1v1stfk1kppqhyeiafn1nvgfsynkdkdd1vfk1sftvpennfiaivgasgsg  
kstiak1lisrywdvt1sgei  
tiggidikdiesq1nd1vgfvqdnf11n1t1fkenik1gnpeatdeavekaak1aqchefiek1pdgydtnvgtvgdk1  
sggekqrvtiarmi1kdap  
iiv1deatayvdpdneqk1qea1nvl1tqdk1liviahr1sti1qhadqiiv1lgkqqilekgsh111k1ngnykkmwdthm  
htkdwgintghn  
>tr|E5QWZ2|E5QWZ2\_STAAH  
mfqitfki1nwi1rpykarmi1gfsmsf1nai1fia1piflvaki1fnnv1shkpiymkdi1nvvi1imv1l1vigrfitayfks  
kshesiayemsaker1dig  
dk1knvr1gyfnshhsne1ttiv1td1t1f1enfamk1mvdvvngyilitv1l1s1llvswqvs11lacigv11sffaiq11  
erksrqnapayhvnqnlv  
ekv1levirg1qivksfakents1ksfnqavngskrintkiemqfipfn11h1s1l1kvvsimiv1vac11lymnhsid1pt1  
imisifsfvifdsvenins  
aahv1emi1dmtid1diek1knapel1dengkn1tikneniafqnvnfsyddkqviknvnfeiptqtstaiigpsgsgkst1c  
h111rfydidg1niridgv  
dikdmt1st1mski1savfqkvy1fndtienn1l1fgdp1gatkeei1raakqacchdfims1pegyqtm1nekgsn1sggek  
qrisarai1kdapii1id  
eatasidpeneqliqtaine1skgktviti1ahk1etiknadqiiv1negei1iqgshdeli1rkpgmyqdfiri1ksksagw  
k1  
>tr|E5QWZ4|E5QWZ4\_STAAH  
mnytqqlkqkdseyvwhpftqmgvyskeeaiiiekkgksylydtngnkyldgyaslwnvvhghnny1nkvikkq1nki1a

Tsompanidou\_et\_al\_Supplemental\_FASTA\_File

hstllgssnipsielaekl  
ieitpsnlrkvfysdtgsaveiaikmayqywkndrekyakknkfitlnhgyhgdttigavsvggiktfhki fkdli fen  
iqvespsfyrnsydenem  
mtailtnieqilierndeiafilepli qqatglfvhpkqglkeveklckkydvllidcevavgfgrtgkmfacnhedvq  
pdimclgkai tggylplaa  
tltsqkiynaf lsdshgvntffhghy tgnqivctvalenirlyekrkllsqiettsstlekqlhalkhrnrvgdvrgg  
lmfgev lvtkdsktplei  
ekverivrncenglmirnlenvitfvpl smsnkevktmvrifkkavhnildrkc  
>tr|E5QWZ5|E5QWZ5\_STAAH  
mnlakrilqgeqltketv lkiyedtnidtdllneayilrkhyfgkkvklmilmaksgicpencgycgqsreikqkqry  
alipeeqiidgakvahdnh  
igticyimsgrgspdkevdisntvrtiks qhpqlkicac lgltndeqakllksagvdrynhnintsenyhdnvtthsy  
kdrtdtielmkanispcsf  
gvicmgesnqidvmafalkemdadsipin flhpikg tkfgs mddltpmkcl rivalfrlinptkeiriaggrevnlrs  
lqplal kaansifvgdyl i  
tggqpnl dydmindlgfeidydtcenkenkndvsran  
>tr|E5QWZ6|E5QWZ6\_STAAH  
mmfqqeidlqqkgl yrs lksvgyidrqi evenkrctnytsndylglgqiafdkddfesfmrkysyhlsssr ligsst  
vyeeiesmlagwlgysact  
ilnsgydanlal fni fktncv v fsdqenhasiidgiklsglekviykhldiadlekrlaeypnqniqkiiisdsvfstn  
gdvvdigqlvs lkhkynat  
lildvshsfgienysnyggidiltss lskacgayggvilssndvkdmlinhgrplyssslpiynlyfikrnieklinad  
drtrkl nslskyfnqklka  
lnvny nssns pikfie fddieaaenihqtllkhhvftsylryptv tkpmlrislsyfhteqididrlfeilhqed  
>tr|E5QWZ7|E5QWZ7\_STAAH  
mkfcikkievimysikmrssnqdi hisgaeticefdkieqtvqr fynkgffhengqpdflnikiqkimepikqikalqi  
ieddkanlqhl tqkcgvte  
qalnqqmtyiknetvytgaiilsaisgr ldsfghrgirathfsfedinnkgdlnervt dalaiascinahpyvkge lcv  
sddl tyttgyfasakigyh  
rlfdikpvntryggriifvddridlnhyis fl estpkqvvyetv  
>tr|E5QWZ8|E5QWZ8\_STAAH  
mkryrgfsmtskditqisviaailtilav lkip siipgl dfqlsapaa l l ilaffgikkyflggllssllllvfgvfnp i  
nviisii frviaiavyll  
kinvslslvasvlgs lvsrlilsvilnlpvwwvllnaipgviftlivaiplylilrkr mavllr  
>tr|E5QX01|E5QX01\_STAAH  
mnlklnrkkvismikniltatlav gliaplanpfieiskaenki edigggaeiikrtqditskr l aitqniqdfdvkdk  
kynkdalv vkmqgfissrt  
tysdlkkyppyikrmiwpfynislktdksnvdlinylpknkidsadvsqklgyniggnfqsapsigsgsfnysktisyn  
qknyvtevesqnskgykwg  
vkansfvtpngqvsaydqyl faqdptgpaardyfvpdnqlppliqsgfnpsfittlshkqgkdksefeitygrnmdaty  
ayvtrhr l avdrkhdafkn  
rnvtvkyevnwkthevki ksitpk  
>tr|E5QX02|E5QX02\_STAAH  
mknkyiskllvgaatitlatmi sng eakasentqqtstkhqttqnyvtdqqafyqvlh lkgiteeqrnqyikt l reh p  
eraqevf ses lkdsknpdr  
rvaqqnafynvlkndnlteqeknyiaqikenpdrsqqwvesvqsskakerqni enadkaikdfqdnkaphdksaayea  
nsk lpkdlrdknnrfvekv  
siekaivrhdervksanda isklnekdsienrrlaqrevnk apmdvqkh lqql dalvaqkdaekkvapkv eapq i qspq  
iekpk aespkv evpqiqsp  
kvevpqskllgyyqslkdsfnygykyltdtyksykeydytakyyynkyyqykg lidktvlttigsgygsyikplevskes  
gnlaksyaqvrnyvtesin  
tgkvl ya fyqkpelvktai kaqetattfkna l tgi fksfwk  
>tr|E5QX04|E5QX04\_STAAH  
mpklilcrhgqsewnaknlftgwedvnlseqgineatragekvrennididvaftslltral dtthyilteskqqwipvy  
kswr lnerhygg lqglndk  
darkefgee qvhiwrrsydvkppaete eqreayladrrynh ldkrmpyses lkd tlrvvipfwdhisqylldgqtvlv  
sahgsira l iky ledvsd  
ediinyeiktgap lvyeltd dlevidkyyl  
>tr|E5QX05|E5QX05\_STAAH  
mskkqkl tmiitmlmggffgl netllvta lpsimkdfeisytqvqwl ttaflltngiviplsalviqryttrqvflvgi  
siff lgtllgg l sphfatl  
lvari iqal gagi mmp l mmttildvfqphergkymg ifglviglapaigptlsgylveyfnwrs lfhvvpiaaavtflig  
fktiknvgttikvpidfjs  
vifsvlgfgg llygtssisekgfdnpivlvsmiggivlvalfv l rqr l stpllnfavfknkqftvgi iimgvtmvmmig  
setilsi fvnllhrsald  
sgl tllpgai vmafmsmts galyekfgprklalvgmaivvittayfvvmeqststimlatvyairmvgialglipvmtht  
mqglkpe m nahgssmtntv  
qqiagsigtaal itilshasknfsptmsdyngmnkiemmnqiki dtmlhgyhagflfallitvisffcsfmlqgkkkev d

Tsompanidou\_et\_al\_Supplemental\_FASTA\_File

shq  
>tr|E5QX08|E5QX08\_STAAH  
miq1nnihksfndvevikgidlsvgkgevvtligrsgsgkttllrminaleiptegtvfvngktytskdkksqievrkqs  
gmvfqsynlfphkta lenv  
meglitvkk1kkaeareksle1lekvg1thvkdqrphalsggqqrvaiaralampkvm1fdeptsaldpelvndv1kv  
ikdlanegmtmvivthemr  
farevsnnivfihgavigegapeei fnnpktee1krflnvinee  
>tr|E5QX09|E5QX09\_STAAH  
mnfv11tsdefnafttkhfshytqsaihynhrvd1kgdvh1vgvkddngqviagc11teart1kffkyfythrgpvmdyt  
nqslvafffkaltsylkkq  
nclyv1vdpylien1rnadgeivksydnrafvrtmdt1gykhqgfpvgydsmqsirw1sv1d1kdktedq11kemdyqtr  
rnkktydigvktkt1tid  
etqtf1d1fhmaeekhgfkfrelpyfeemqklyddham1klayid1ney1kt1q1kqq1taelsgveealeespnskkn  
kkr1tq1legq1nsnrkid  
ntieqieqdgav1n1asal1fiynehevylssgsnpkynaymgayh1qwemikfakahhidrynfygitgdfsesaedyg  
vqfkkqfnahveeyigdf  
ikpikpilyk1qty1khkrr  
>tr|E5QX10|E5QX10\_STAAH  
mkvswk1ivgvgal1krfvatv1111v1f1sgcgndkyvkeideavkiqnqkqeq1akkngdrvdhferkdaniyvvdkk  
i11aykpl1snddevhyya  
ydfsdkrvsykqdfdsrryyqqhdadyheenmtn  
>tr|E5QX13|E5QX13\_STAAH  
mvr1nitfspqafedykyfqndkkmvkkineliks1drngal1kgigkpek1ksn1tgyysrrinhehr1vytvddnhik  
iasckyh  
>tr|E5QX14|E5QX14\_STAAH  
mkkk1gm111vpavt1s1aacgnddgkdkdgvtk1ttvyp1qsfaeqiggkhvkvs1ypagtd1hsyeptqkdil1sas  
ksd1fmytgd1dpvakkv  
astikdkdkk1s1ledk1dkak11tdqhegheheghdhgkeehhhggypdphw1dpkinqtfakeikdelvkkdpkh  
kddyeknyk1ndd1kkid  
ndmkqvtkdkqgnavf1shesigyladrygfvqkq1qnmnaedpsqkel1tkivkeirdsnakyilyednvankvtet1rk  
etdakp1kfynmes1nek  
qkkdn1tyq1smksni1enigka1dsgvkvdkaeskhdka1sdgyfkdeqvkdre1sdyagewqsvypylkdgt1devm  
ehkaendpkksakd1kay  
dkgyktdi1tnid1kneit1ftkdgtkhtgkyeyngkkt1kypkgnrgvr1fmf1k1vdgndkd1pkfi1qfsdhni1apkaah  
fhi1fmgndnd11kemdwn  
ptyypsk1nkdqi1keemlah  
>tr|E5QX15|E5QX15\_STAAH  
mtikvednk1i1fsrtieapiekv1dayttka1fekwfhpkdastkv1frnavsggdafyaiktptmtsyt1aeyktvkrp  
yli1eyids1fatpggakdtk  
mpsmki1tsfsefn1ttktvtstsvfptkeaaqqv1imgveqgmnt1dq1dallk  
>tr|E5QX16|E5QX16\_STAAH  
maqryikv1il1yif1t1l1ssitvtskcvpnkvvr1ilrtvvyg1fayg1hyfsn1kknk  
>tr|E5QX17|E5QX17\_STAAH  
mi1vnggsaviknktvedtystkai1vds1sssvqm1qvmvqqt1pgrym1ksmmag11siv1tv1fmgiktqfasthvdg  
1in1lmgai1afsl1gl1v1v1  
tne11tsnfmy1ftvgwyk1vvs1nkmmw1llyc1f1gni1ggfv1ff1mkyahvmt1pemtqal1talvqkktvdstwl1nif  
tkg1f1cnffin1igif1ismq  
fkgl1tkaffi1acgvi1fvymgyehv1fnag1yagmvffn1davsw1hvl1knivfa1lgn1fvggg1fvgl1vya1f1ngkrn  
r1leqq  
>tr|E5QX18|E5QX18\_STAAH  
mw1qmantt1rlanendava1hq1lmheaftpl1relgidwpsvnan1davkenidknttfvmtiddei1stivrypwgsv  
ks1sgypfvwwfatnpeye  
gkyg1s1l1tyveetf1rdt1kaaavt1gtsar1hpw1l1kiyekrgyeiysehenddg1lgvimrkv1liperfdetilgq  
ppf  
>tr|E5QX19|E5QX19\_STAAH  
mi1wyt1rvkg1vnvngni1vahgmrrgrnqaleafise1lvkddihhyhia1f1esehq1detvmtt1iqsgvkq1kivp1  
11fsamhy1kdipnivhem  
kr1rypdi1kve1sep1gthp1l1mtei1mqridevr1demqqvgvvv1vahgningkftkaheel1qtcvqh1qinkptyartly  
ge1s1fih1d1lediarqyqk1  
iv1vp1f1lydgr1vnkvkq1mndmvintdih1t1ps1inf1dp1lkqi1indr1les1nds1nenika1l1tks  
>tr|E5QX23|E5QX23\_STAAH  
mgk1fg1n1ffk1ptek1fngnws1ilesks1rewekmyrerwshdkevr1tthgvnctgscswkv1fvkngvitwenq1tdypscgp  
dmpeyep1rgc1prgas1fswy  
eysp1r1iky1py1rgk1wd1lwtea1leenngnrvaawas1ivenedk1akqykqargmgghvrsnwkdvt1d1iaaq1lytikky  
gp1driag1ft1pamsm1sy  
aagar1f1n1l1ggem1s1fydwyad1ppaspqi1wgeqtdvp1essdwynasy1imwgsnvpl1trtpdah1f1mte1vrykgtkvis  
vap1dyaenvk1fadnw1lapn  
pgsdaa1iaqamthv1lqehyvnqpnerf1nyakqytdmpfi1m1dedengy1kagr1flrasd1l1gqtteq1sewkpvi1hd1tis

Tsompanidou\_et\_al\_Supplemental\_FASTA\_File

dslvvpngtmgrweegkk  
wnlkletdgskintplsmteggyletiqfpyfddgdgi fnrpiptqvltlangdkvriatidlmasqygvrfdhk  
lesngyddaeskytpawqe  
aisgvkqsvviqvakefaqaaidtegrsmiimgaginhwfnstiyrsilnlvmlcgcqgvngggwahyvgqekcrpieg  
wstvafakdwggpprlqng  
tswfyfatdqwkyyesnvdrksp laktee lkhqhpady nlaarl gwlp sypqfnknsllfaeakdegidsneailqr  
aidevkskqtqfaiedpd  
kknhpkslfiwrslissakgqeyfmkhllgtksllatpnedekpeeitwreettgkl dlvsldfrmtatplysdiv  
lpaatwyekhdlsstdmhp  
yvhpfnpaidplwesrsdwdiyktlakafsemakdy lpgtfdkvttplshdtkqeistpygvvkdwskgeieavpgrtm  
pnfaiverdytkiydyvt  
lgpvlekqkvghvsgvseqyee lksmlgtwsdtnddsvranrprid tarnvadailnissatngklsqksyedleeq  
tgmplkdisseraakifsf  
lnitsqpreviptavfpgsknqgrryspfttnverlvprftltgrqsyyvdhevqqfgeslpyvktlppmvfgnrddk  
ikgtdalvlryltphgkw  
nihsmqdnkhlmltfrggptvwi snedaekhdidndwlevynrngvvtaravishrmpkgtmfmyhaqdkhiqtpgse  
itdtrggshnaptrihlqp  
tqlvggyaqisyhfnygpgignrdlyvavrkmkevnwled  
>tr|E5QX24|E5QX24\_STAAH  
mki kaqvamvlnldkcigchtcsvtckntwtrnrgaeylwfnnvetkpgvgypkrwedqehykggwlnrkgklelksgs  
riskialgkifynpdmpli  
kdyepwnynehlttaksgnhspvarayseitgdnieiewgnweddlagghvtgpkdpniqkieedikfqedetfmy  
lprlcehlnpscvascsp  
gamykrdedgvlvdqdacrgwrycmtgcpykkyvfnwktkaekctfcfprieagmptvcsetctgrmrylgvll ydad  
rvheaasavdekdlyekql  
diflnpfdeeviaqaekdgi sydwieaaqnspiyklaieyklafplhpefrt mpmvwyccplspimsyfe gkntnqnpda  
ifpai eemrlpieylani f  
tagdtkpvkealqrmammrsymrsqvtqqpfdtsrlerlg lterqtkdmyrlglakyedrfviptshketyldtyhaqg  
stgynyggehfqdncegcg  
vavgs gktgqei ynenfyggi frd  
>tr|E5QX25|E5QX25\_STAAH  
megfsvinfdnfkkyqesfgya aqqlcfpekltfhpktfeetiskdhpgyddliafrnvmmtfslseikaiytdtfdtk  
kaplymtynkfdtqkergq  
mlaklkvlyemfglemvdnel sdylpmlqlqvaewrndpraeeniqliimiedgtyvmanalgednnpayviqalr  
ktlkcltspkgvkhha  
>tr|E5QX30|E5QX30\_STAAH  
maytytlkdi eieitgvtkrthyydeigllvpnkndknyrvykqddleklqk ililksfdfdiakikqyisydneqlrk  
lseqvskldkksdlqlir  
rsvcefikghslidtsilnkslqtqydeasikyghtkayqsfinrqdnlsqdirqkl tmi fnqfnqmslshy piqdcn  
diveewksfmntiadfdde  
tlccia ktyendtrfkdyfn sydnqlasyiseavnyflsnenkkdnf  
>tr|E5QX31|E5QX31\_STAAH  
mykiniirsd fvykni lktplndrdsiftkeilv pfkkkfevqqipihndakqtmsaiql dafqkspkdlrmsdqmsiq  
ylnndfwsncekylkva id  
qfanyssqvsnyhftvllgdsqkplmylnknrggdggipgyimiy lvpststinsmksliahevnhmryqyidwdgg  
slieliiaeglaenyvesl  
ygkahigpwtntnwsrdnvkikntiynhlhkhifesmpflygddinklqgrsivglshaagyacgyhlvkyflqktni  
pievattlpaqkiinevnd  
fwhthtl  
>tr|E5QX32|E5QX32\_STAAH  
mgsgtemi fsknlfrppapar ltri eksllqayfrsvnycqynfvehgtliyfggslnnidl  
>tr|E5QX33|E5QX33\_STAAH  
milvkvrmytkggfqltltlslvvgfmawsiiaplmpfikqdvntegqisiilaipvilgsvlrvpfgyltnivga  
kwvfftsfi vllfpiffis  
qaqtpgm lmasgfflgvggai fsvgvtsvpkyfpkekvglangiygmgnigtavssflappiagi igwqttvrsyliia  
lfalimfi fgdtqerkiv  
plmaqmtl sknyklyylywyfitfgafvafgflpnylvnhfgidkvdagirs gvfialatflrpiggilgdkfnavk  
vlmidfvimiigavilgis  
dhialftvgcltisi cagigngli fklvpsyfsneagsangivsmmgglggffpplvityvanltgsshlaflavfgc  
ialftmrhlyqkeygslkh  
s  
>tr|E5QX34|E5QX34\_STAAH  
mevmilnfnqfenqnfngnpsdt fkd l gkvfnfyfttps fvt niyetdelyyleaelagankedisidfnnnvltiqat  
rsakykskliildernfes  
lirgfdfeavdkqnitafenglltitl pkikpsndttsstsisipis  
>tr|E5QX40|E5QX40\_STAAH  
mnfkdyftsiklvnainllstkhsttvselagfnshntfanqfknylhfspkqfrslvskiteppqihfqdnvsqft  
elistidltaqlatnttdi



Tsompanidou\_et\_al\_Supplemental\_FASTA\_File

hiddfnpkdrsqravfvrfsfnelfqfi fneyydingfehlpkpvvfiddihdieisqtynl lnrckfeklfeknigla  
iaikstqqfetmkqililtf  
lqgnqdyktskklvkfm lvfcsnsmtaeeihlchlkiknknkeikysvtvdgfl etystveqvydvmqrlkfhyfydie  
nktathlitknghyhtd  
thfeqykkfildsgisstqfvynn lsvsgfkytndgknpqilsdivyhliallrygggisyaqllddhsnyislynkygsp  
lplmhllykmfrpfvnedie  
itnnyvl srkdnyhfllfnkindrymsdvkqdfi fhnelppqds lmiiktlnhehgsiqhllptsdqlyviekeildeid  
ktnypkte lavgeetgrtf  
elklnhdevkyicfkps  
>tr|E5QX41|E5QX41\_STAAH  
mtcqlkihtl stipsrninimvl fsltskl nitin getkdvsnii lnhgdiyninhgeni elmipvfyfyqqddd  
ffngyl drhl lqssnyiks  
liadlistptss lmgknigqs iidl lkeafiridhey lpnial snpvfidcvnyihdnidah lslkdiamhc nisesy  
csnhivl iflfdi  
>tr|E5QX42|E5QX42\_STAAH  
mltifi llllycarwiktsvflgvffnffyfs lppfqkystiigilsmilkismfyi  
>tr|E5QX50|E5QX50\_STAAH  
mrckkgnfqdaaeafellkkqf igefiss lnspeyanqytklyfegsvfdm ldivenit ldsinetsslylnldqqvds  
rleikk  
>tr|E5QX51|E5QX51\_STAAH  
mkeryyelidervfeqelenglr lfiipkpgfqktfvtyttqf gslndqfklpgdqfvtvpdg vahflehk lfekeeed  
lftafaeenaqanaftsfd  
rtsylfsatdniennikr lltmvetpyftketvdkek gii aaeikmyqeqpgyk lmfnt lramyqqhp irvdiagsvesi  
yditkddlylcyetfyhps  
nmvlfvvgdvdp eaicrivkqhedar nkvnqpkierglvdepedvkeafvtesmkispr lmlgfkknplqeapqkyvqr  
dl emslffeli fgeetdfy  
qnllneglid ddfgyqfvleptysfsivtsateepdk lknny  
>tr|E5QX53|E5QX53\_STAAH  
mtrckkmsemnavynvkqyi lnlikqnkleygdq lpsnl siarelnvktddvyeaiqal iteqvikdnfeegtsvks lpp  
ffyp lnelisigqmi knag  
fecgteyl nfd eqpatm ldan llsveegypvti erl rtad gepvvc ldkia kkel tcteyqmsngsil saikeqsnhn  
icyadteieavnyepri se  
vl naspheg lillki thynesdepi lyls lnymkns l vqfkitrki  
>tr|E5QX54|E5QX54\_STAAH  
mrqlaqakkkstakkttskkrtnsrkkkndnpiryvia ilvvvlmvlgvfqlgiigr lidsffnylfgysryl tyilvl  
latgfi tyskripktrrta  
gsivlqial lfvsqlvfhfngikaerepv lsvyqsyqhshf pnfggvlgfy ll elsvplislfgvc iitilllcssv  
illtnhghrdvakvaleni  
kawfgsfnekmsernqekql kreekar lkeeqkarqneqqikdvsdftevpqerdipiyghtenesksqsqpsrkkrvf  
daenssnnivnhhqadqqe  
qlieqthnsvesentieeagevtnvsyvpp ltl nqpakqkatskaevqrkgqvlent lkd fgvnakvtqikigpavtq  
yeiqpaqgvkvs kivanlhn  
dialalaakdvrieapipgrsavgievpnekis lvs lkevldek fpsnklevg lgrdisgd pitvplneph llvagst  
sgksvcing iitillna  
kphevk lmlidpk mvelnyngiph llipvvt nphkaa qalekivaemerrydl fqsstrnikgynelirkqnqeldek  
qpelpyivv ideladlmm  
vagkevenai qritqmaraa gihlivatqrpsvdvitgi iknripsria favssqtdsrtiigtggaek llgkgdml yvg  
ngdssqtriqqaf lsdqev  
qdvvnyvveqqqanvkemepdapvdksemseda l ydeay lfvveqqkasts llqrqfrigynrasr l mddlernqvig  
pqkgs kprqv lidln dev  
>tr|E5QX55|E5QX55\_STAAH  
mnsefi ygrvtnl ggkils llikkknkdi riip lggvgeiaknmyivevddem fml dag lmfpedem lgidivipdisyv l  
enkek lkgif lthghehai  
gavsyvleql dapvygsk lti alikenmkarnidkkvryy tvnnds imrfkvn isffnt thsipds lgvcihtsygaiv  
ytgef kfdqslhghyapdi  
krmaei geegvfl isdsteaekpgyntpenviehhmydafakvrgr livscyasnfiriqqvlniasklnrkvsflgrs  
lessfn iarkmgyfdipkd  
llipitevdnypknev iiatgmqgepveal sqmaqkhkimnieegds vflaitasanmevii antlnelvragehiip  
nnkkihasshgcmee lkmml  
inimkpeyfi pvqgefkmqia hak laeagvapeki flvekgdvinyngkdmil nekvnsgnilidgigigdvgniv lrd  
rhllaedgifi avvtldpk  
nrriaagpei qsr gfvvresed llreaekv reiveag lqekriewseikqn mrdqisk llfestkr rmpii pvisei  
>tr|E5QX61|E5QX61\_STAAH  
mniirsdym skqriyeyake ln lkskei ide lksmnievsnhmqal eddqika ldkkfkeqkndnkqstqnnhqksnq  
nqnkgqkd nknqgqnnk  
gnkgnkknrrnnkknknknkpqsqaapke ipskvtyqegitvgef adkl nvessei ikkl fl lligivaninqsl nqetie  
liaddygveveevvinee  
dlsiy fedekddpeaier pavvtimghvdhgktt ll dsirhtkv tageaggi tqhigayqi endgkkit fl dtpghaaft

Tsompanidou\_et\_al\_Supplemental\_FASTA\_File

tmrargaqvtditilvva  
ddgvmpqtieainhakeaeavpiivavnkidkptsnpdrvmqelteyglipedwggetifvplsalsgdgiddllemiglv  
aevqelkanpknravgtvi  
eaeldkstrgpsasllvqngtlvngdaiivgntygriamvndlgqriktagpstpveitgindvpqagdrfvvvsdekqa  
rrigesrheasivqqrqes  
knvsldnlfemkqgemkdlnviikgdvqgsvealaaslmkidvegenvriihtavgainesdvtlanasngiigfnvr  
pdsgakraaeavndmrh  
rvinyvieeiesamkglldpfeeqvigqaevrqtfkvskvgtiagcyvtegitrnagvriirdgivyegeldtlkrf  
kddakevakgyecgitien  
yndlkegdvieafemveikr  
>tr|E5QX62|E5QX62\_STAAH  
msidqilnflglamragkvktgesvivneikkgnlklvivandasntaklitdkcksykvprkfgnrnelgialgkge  
rvnvgitdpgfakkllsmi  
deyhke  
>tr|E5QX66|E5QX66\_STAAH  
mamteqqkfkvladqikisnqldaeiInsgeltridvsnkrtwefhitlpqflahedyllfinaieqefkdianvtcrf  
tvtngtngdehaikyfghc  
idqtaispkvkgqlkqkklimgskvlkvmvsndiernhfdkacngslikafnrcgfdidkiifetndndqeqnlasleah  
iqeedeqsarlateklem  
kaekakqddnesavdkcigkpiqienikpiesieeykvaiegvidinlkelksgrhiveikvtdytdslvlkmft  
rknkddlehfkalsvgkwv  
raqgrieedtfrdlvmmmsdieeikkatkkdkaekrvefhlhtamsqmdgipnigayvkaadwghpaiavtdhnvvq  
afpdahaaekhgikmiyg  
megmlvddgvpiaykpqdvvlkdatyvfvdtvettglnqydkieelaavkvhngeiidkferfsnpherlsetiinlthi  
tdmldapeieevltefk  
ewvgdaifvahnasfdmgfidtgyerlgfpgstngvidtlelrsinteykghlflakkygvelqhhraiyydeata  
yifikmvqqmkelgvlhnh  
einkklsnedaykrarpshvtlivnqqglnlfnkivsaslvykyfyrtpriprslldeyregllvgtacdegelftavmq  
kdqsqvekiakyydfieiq  
ppalyqdlidreliardtelleiyqrlihagdtagipviatgnahylfehddgiarkiliasqpgnlnrstlpeahfrtt  
demlnefhflgeekaeiv  
vkntheladriervvpikdeleytprmeganeeiirelsyanarklygedlpqividrlekelksiingfaviylisqrlv  
kkslddgylvgsrgsvgs  
fvatmteitevnplpphycpncktseffndgsvgsfdlpdkctcetcgaplikegqddipfetflgfgkdkvpdidlnfs  
geyqpnahnytkvlfgedk  
vfragtigtaektafygyvkgylndqgihkrgaeidrllvkgctgvkrttgqhpoggiivvpdydiydftpiqypaddqns  
awmthfdhfsihdnvkl  
dilghddptmirmlqdlsgidpkipvddkevmqifstpeslgvtedeilcktgtfvpefgtgfvrqmledtkpttfse  
lvqisglshgtdvwlgnag  
eliktgicdlssvigcrddimvylmyaglepsmafkimsvrkgkgletemietmkenevdpwyldsclickymfpkaha  
aayvlmavriayfkvhhl  
yyyasyftirasdfdlitmikdktisrntvkdmysrymdlkkekdvltvleimnemahrgyrmqpisleksqafefiie  
getlippfivpplgenva  
krivearddgpflskedlnkkaglsqkieyldeigslnlpdkaqlsifdm  
>tr|E5QX67|E5QX67\_STAAH  
mkqskvfiptrmdvpseaeaqrhl1lkaglikqstsgiyssylplatrvlnnitaivrqemeridsveilmpalqqaelw  
eesgrwgaygpeimrldr  
hgrqfalgptheelvtisvrnelksyqlpmtlfqijskfrdekrprfgllrgrefimkdaysfhadeasldqtyqdmq  
aysrifervginarpvvd  
sgaiggshthefmlsaigedtiyvskesdyaaniekaevvyepnhkhttvqpiekietpvnktaqeladflgrpvdeiv  
ktmikvdgeyimvlvrgh  
heindiklksyfgtdnieilatqdeivnlvganpgslgpvidkeikiyadnfvqdlnnlvvganedgyhlinvvnvgrdfnv  
deygdfrrfilegeklsdgs  
gvahfaegievqqvfkltgkysesmnatfldnqgkaqplimgcygigisrtlsaveqnhddngivwpksvtpfdlhlis  
inpkddqreladalyaef  
ntkfdvlyddrgeragvknadlignlprlvvgkrasegivevkerltgdseevhiddlmtvitnkydnlk  
>tr|E5QX68|E5QX68\_STAAH  
msylvtiiafiivfgvltvheyghmffakragimcpefaigmgpkifsfrknetlytirllpvgyvrmagdgleppv  
epgmrvkiklneeneithi  
ilddhkhfqgieaievkkcdfkddlfiagitaydnerhhfkarksffvengslvqiaprdrqfahkkpwpkfltlfagp  
lfnfialvlvfiglayyqg  
tptstveqvadkypaqgaglkqgdkiqvigkykisefddvdkaIdkvkdnkttvkferdgktsveltpkkterkltkvs  
setkyvlgfqpasehtlfk  
pivygfsfligstyifsavvgmlasiftggfsfdmlngpvgiyhvndsvvkagiisligytaalssvnlgimnlipipal  
dggriilfviyeaifrkpvn  
kkaettiaigaifmvvimiIvtwndirryfl  
>tr|E5QX70|E5QX70\_STAAH  
mnlpvnflktflpeliekvkvvetigftdklpkstieainnakektanntgklifainyggraelvhsiknmfdeIhqq

Tsompanidou\_et\_al\_Supplemental\_FASTA\_File

glnsdiidetyinnhlmk  
dypdpelliirtsgeqrisnflwqvsysefi fnqklwpdfdedelikikiyqsrqrrfgglsee  
>tr|E5QX71|E5QX71\_STAAH  
mtemir1ggktmfkklinkkntinnynee1dssnipehiaaimdgngrwakkrmkmprikghyegmqtikllg  
>tr|E5QX73|E5QX73\_STAAH  
mssl1vyvtyihdredkkmaqiskykrvvlklsgealagekgfginpviiksvaeqvaevakmdceiavivgggniwrkg  
tgsdlgmrdgtadymgm1a  
vmnalalqdsleqlcdtrv1tsiemkvaepyirrrairhlekkrvvifaagignpyfstdttaalraaeveadvilm  
gknnvdgvysadpkvkd  
vkyehlthiqmlgeg1qvmstassfcmndnpi1tvfsimeegnikravmgekigtlik  
>tr|E5QX76|E5QX76\_STAAH  
ms11sktre1nt11qkhkgiavfdkvaqtissvtvtvfvivrrgkilgss1nel1ksqriiqmleerhipseyter1m  
evkqtesnididnvl1vfp  
penrelfidsrtt1fpi1ggger1gt1v1grvhddfnd1v1lgeyaatvigmeilrekhsvekeardkaaitmains1  
sysekaiehifeelggt  
g1liaskvadrvgitrsvivna1rk1esagviesrslgmkgtfikvkkekfldeleksk  
>tr|E5QX77|E5QX77\_STAAH  
mklmdtagir1tpkeivsk1neyivgqndakrkvaialrnyrrs1ldeeskqeispknilmigptgvgkteiarmakv  
vgapfikveatkftevgv  
grdvesmvr1vdsvr1vkaqkks1vqdeatakanek1vk11vpsmkkkasqtnples1fggaipnfgqnnedeepp  
teeiktkrseikrqleegk  
leekvrikveqdpgalgm1gt1nqnmqemmnq1mpkkkverevavetarkiladsyadelidresanqealelaeqmg  
iifideidkvatnnhnsq  
dvsrqgvrdilpi1legsviqtkygtvntehm1figagafhvskspsd1pelqgrfpirvels1avedfvriltepk1s  
likqyeal1qteevtnft  
deair1aeiayqvnqtdnigarr1htilekml1ed1sfeapsmpnavvditpqyvdk1ksistnkd1safil  
>tr|E5QX80|E5QX80\_STAAH  
mtqtvnviaglagseaayqlaergikvniemrpvkqtpahhtdkfaelvcns1rgnal1ngvgvlkeemrr1nsiii  
eaadkarvpagga1avdrh  
dfsgyitet1knhenitvneeinaipdgytiatgpl1ttet1aqeivditgkdqlyfydaaapiiekesidmdkvy1ks  
rydkgeaay1ncpmtedef  
nrfdav1eaeaapvnsfekeyfegcmpfevmaergrk11fgpmkpvgl1edpktgkrpyavvql1rqddaagtlynivg  
fqth1kwgaqkeviki1ipg  
lenvdivrygvmhrntfinspdv1nekyel1sqniqfagqmtgvegyvesaasgl1vaginlahkilgkgevvp1retmi  
gsmayyishaknnknfqp  
nanfg11ps1etrikkkeryeaqanraldylenfkkt1  
>tr|E5QX82|E5QX82\_STAAH  
mir1f11k1lywahfstkqihqf1maypni1keggrkksyl1cevnreenvh11rkyafik1dhndi1kelqklkvsyi  
tymdteypv11keiyqfp1  
11fyrgnik1innmhh1avvgardstsytqqs1ef11sndkskyl1tivsg1laqadamahqialkyn1ptiav1afghqt  
hypkst1al1rnkieeig1v  
iseypphtpiakyrfernrri1sg1skgv1iteakeqsgshiti1dfaleqnrnvyl1pgsmfnpmtkgn11riqegakvv  
1nandifedyyi  
>tr|E5QX83|E5QX83\_STAAH  
maeekhgfhf1mned1yfkrmqei1ydkkam1kiacid1neyqdk1kiq11k1enemmtvnra1nenpnskknksk1nq1nmq  
1ssinnriskteel1ledg  
pv1d1aaa1fictddevyyl1ssgsnpkynqymgayh1qwhmikyakshn1nrynfygitgvfsdeaddfgvqqfkkgfna  
hveel1gdfikpvrpi1yk  
fak1iykv  
>tr|E5QX84|E5QX84\_STAAH  
mkfst1seeftnytkkhfkhytqsie1lynynkinheahivgvkndkneviaac11tear1fkfykyfyshrgp11dyf  
dak1vcyffke1skfiyk  
rgvfi1vdpyl1en1rdangri1knynnsiv1kmlgkigyl1hgqyttgysnksqi1rvis1d1kdkdenq11kemeyqtr  
rnkr11r1v1r1kiy11k  
kqidfincfkwl1kknmvfis  
>tr|E5QX85|E5QX85\_STAAH  
mnkqskvrys1rkvsig1ilsig1mfl1algmsnkayadeidkskdftrgyeqnvfaksel1nanknttkdkikneavvkt  
sdt1sk1dnksaisngnei  
nqdmki1sntpknsnggn1lvnnneptkeiki1an1leaqs1nqkkvnkgtnnyfgyys1freapktqi1ytkkgdt1saial  
kykttvsn1qntnnianpn  
1ifigk1kvpmtpl1vepkptvpsnksnsnst1nylkt1enrgwdfdgsgyqcfd1vnvywnh1yghg1kgygakd  
ipyannfnseaki1yhntpt  
fkaepgd1v1v1sgr1fggyghtaiv1ngdydgk1mkfqs1dqwnnggw1kaevahkvvhnyendmi1firpfkra  
>tr|E5QX86|E5QX86\_STAAH  
msvfidkntkvmvggigtsta1fhtkqmdygtki1vagvtpgkqgvvegvpv1ntveeaknetgatvsviyvpapfaad  
sileaadad1dmvicit  
ipv1dmvkvkryl1qgrktr1vgpncpgvitadeckigimpgyihkkghvgvsrs1gt1tyeavhql1teegigqttavgig  
gdpvngtnfidv1kafned

Tsompanidou\_et\_al\_Supplemental\_FASTA\_File

detkavvmigeiggtaeaeewikanmtkpvvgfiggqtappgkrmhagaiisggkgtaeekiktlnscgvktaatps  
eigstlieaakeagiye11  
ltvnk  
>tr|E5QX88|E5QX88\_STAAH  
mtltikevtqlinavntieelenhecflderkgvqnaiarrkalekeqalkekyvemtyfeneiltenpnaiicgidev  
grgplagpvvacatilnsn  
hnylglddskkvpvtrlelnealknevtafaygiataeeidefniykatqiamqraidglsvqpthllidamtldnalp  
qvslikgdarsvsiaaasi  
makvfrddymtqlskdypeygfeknagygkqhllaiddigimkehrksfepiks11  
>tr|E5QX89|E5QX89\_STAAH  
mviqwypghmakakrevseqlkkvdvvelvdaripysrnpmidevinqkprvvilnkkdmsnlnemskweqffidkgy  
ypvsvdakhgkn1kkveaa  
aikataekferakaglkprairamivgipnvgkstlinklakrsiaqtgnkpgvtkqqwikvgnalqlltdpgilwpk  
fedeevgkklstgaidks  
ivhldevaiygnflinqndlarlkahykievpedaeiawfdaigkkrglirrgneidyevieliiydirnakignycf  
difkdmteelandann  
>tr|E5QX90|E5QX90\_STAAH  
mkvednvv1kkwlinsvkvqflvitfmsviltlilfsthiyeyivngtvfsgsgdgrqmpfqmylyeh1ssfslydas  
fglggdymkg1syyys1sp  
lmwlnflfikigetvgifnpttihfwptnqlimamvraaitfvvtyflfkilhfkrstnmiatilygmstvviiyfnftws  
fygnllyllpls1glery  
fqqrkigi fivaialt1fsnfyfsyyqaiiigcylyr1iftykydivsrtqklicvisatv1svlssvfglftgisaf1  
endrknnpnvdipltp1d  
yhyffsdgffitisi1tiva1lsfklyrfyfyr1faivtw1lfig1sqyfdsafngfsfperrwvylalsssalcg1  
fiqhlstlnmkyylirtip  
vsiaallyv11sptplalivgiilqmvlavilkfslwrykkltvailvlivmiqqivildnknmaikpyqqs1sslkq  
hdyhsnyvnq1kkinkna  
tgpfnridymsdya1nspfiyhngislyssi fngdilkydkt1qinmpidknstyr11gnrqnl1slwnvndrivnh  
ddn1pygfk1nsehkdnkv  
rwihsntihypsah1tnkvfsnelksp1dkeqam1qgivsntkdvntfhkanknl1sdstik1nsaawqsptkh11q  
vkqnggl1tvq1pksvsnq  
fkdl1femd1e11spdkahdvkneytqernk1tykyrrfvtpvtirikasdrir1slpkgyrvnlkgygedytt1kd  
asns1eavkvrktkqgyti  
tknknssgyiv1ptaynqgmkatsgdqs1kveqngvmtgikapknitkiq1sytppyy11lititifiic1s1iftrwa  
rqk  
>tr|E5QX96|E5QX96\_STAAH  
mgqnd1vkt1rmny1fdyqs11tnkqrny1e1fyledys1seiadtfnvsrqavydnirrtgd1vedyekklelyqkfe  
qrreiydemkkl1snpeqi  
qryiqq1ed1e  
>tr|E5QX97|E5QX97\_STAAH  
msffkr1kdkfatnkendevks1teeqqdk1edthsegstqdvnd1aenaevkkkprk1seaddddglisiedfeeie  
aqkmgakfkag1eksrqnf  
qeqln1liarykvded1fealeem1itadvgfntvmt1tee1rmeaqrrniqdted1revivekiveiyhqedd1nseam  
n1edgr1nvi1mvgvngvg  
kttt1gk1ayrykmegkkvm1aagdt1fragaidq1kvwgervgvdivsqsegsdpaavmydainaaknkgvdilicdtag  
r1qnkt1n1mqelekvkrvi  
nravpdaphea11c1dattgqna1sqarnfkevtntg1v1tk1dgtakggiv1airnelhipvkyvg1geq1dd1qpfn  
pesyvyg1fadmieqnee1  
ttvendq1vteekddnhgak  
>tr|E5QX98|E5QX98\_STAAH  
mvy1ksidaigfksfadqtnvqfdkgvtaivgpnsgsksnitdaikw1lgeqsaks1rgskmedi1fsgaehrkaqnyae  
vq1r1dnhskk1svdenev  
ivtrr1lyrsgeseyy1nndrar1kdiad1f1dsg1gkeaysi1sqgrvde1lnakpidrrqi1eesagv1kykkraes1  
nk1dqtedn1trvedi1yd  
legrvep1keeaa1akeykt1shqmksdivvtvhd1dqytdnrq1dqr1nd1qgqqankeadq1r1sqqi1qqykgkrh  
q1dndves1nyq1vkatea  
fekytq1n1v1verkknqsetnaryeeeqen1iellenisseiseaqdtyks1kskqkelnavireleeq1lyvsdeahde  
k1ee1kneyt1mseqsdv  
nndir1flkhtieenevkk1sr1dsr1vevfeq1kdi1qgq1kttkkeyqqt1nkel1savdke1kniekd1tdtkkaqneyeek  
1yqayrytekmktrids1a  
tqeeytyffngvkh1lkaknkelkghgavaei1dvpsk1tqaietalgas1qhvividsekdgrqai1q1kern1grat  
f1p1nvi1qsravatdiksi  
akeangfisiaseavkvapeyqni1gn11gnti1ivdh1khanelaraikyrriv1tlegdivnpggsmtgggarksksi1  
sqkdel1tmrhq1ledy1rq  
tesfeqqfkelkiksdq1selyfeksqkhnt1keqvhhfemel1dr1ttqetqikndheefefekndgytsdksrq1lsek  
ethlesikas1kr1ede1t  
rytk1skegkes1tk1tqqt1hqkqsd1lavvkeriktqq1tidr1nnsq1qtkhq1ndvkeki1affnsdevmgeqafqnik  
dqingqqetr1r1sdel1dk

Tsompanidou\_et\_al\_Supplemental\_FASTA\_File

lkqgrielnegidaqeatlvchqdi laienhyqdikaeqskldvlihhaidhlndeyqltverakseysdesidalrk  
kvklmkmsidelgpvnlna  
ieqfeelnerytflseqrtdlrkaketleqii semdqevertfketfhaiqghftamfkqlfgggdaeqlteadyltag  
idivvqppgkklqhlsls  
ggeraltai all failkvrsapfvildevaaldeanviriyakylne lsdetqfivithrkgtmefadrlygvmtmesgv  
tklsvsnlntiddvlkeep  
>tr|E5QXA1|E5QXA1\_STAAH  
mvectcnifelklidavvdwssngempdlvnfageil snqdmvpeflpkkq  
>tr|E5QXA3|E5QXA3\_STAAH  
msktaiifpgggaqkvqgmaqdlynnndqateiltsaantldfdiletmftdeegklgetentqpal lthssallaalknl  
npdftmghslgeysslva  
dvl sfedavkivrkrqqlmaqafpsgvgsmaavlgldfdkvdicks lssddkii epanincpgqivvsghkalidelve  
kgkslgakrvmp lavsgpf  
hsslmkvi eedfssyinqfewrdakflvvqnvnaqgetdkeviksnmvkqlyspvqfinstewlidqgvdhfieigpgkv  
lsglikkinrdvkltsiq  
ledvkgwnend  
>tr|E5QXA4|E5QXA4\_STAAH  
misedkimvklaidmmggdnapdivleavqkavedfkdl eilfgdekkylnheriefrhcsekiemedepvraikrk  
dssmvkmaeavksgeadgc  
vsagntgalmsagl fivgrigvarpalvvtlptidgkgfvfldvganadakpehl lqyaqlgdiyaqkirgidnpkis l  
lnigtapakgns ltkksye  
llnqdhslnfvgnieaktlmdgdtdvvvtdgytgnmvlnklegtaksigkmlkdtimsstknkiagailkkdl aefakkm  
dyseyggsvl lglegtvvk  
ahgssnakafysairqakiageqni vqtmketvgesne  
>tr|E5QXA6|E5QXA6\_STAAH  
makvnli espysllqlkgigpkkiev lqqlnihtvedlvlylptriedntvidlnqaedqsnvtieqqvytapvvaaffgr  
nkskltvhlmvnniavkci  
ffngpylkkkie l nqitvkvkgnrvkqeitgnrvflnsqgtqtqenadvql epvyrikegikqkqirdqirqa lndvti  
hewltdelrekykletldf  
tlnthhpkskedllrarrtyafteflfelrmqwl nrl eks sdeai eidydl dqvksfidrlp fel teaqkssvneifr  
dlkapi rmhrllqgdvgs  
ktvvaai cmyal ktagyqsalmvpte ilaeqhaes lialfgdsmnval l tgsvkgkkrkilleqlenrtidcligthali  
qddvifhnvglvitdeqhr  
fgvnqrqllrekgamtnvlfmtatpirtlaisvfgemdsvsikqlpkgrkpiittwakhegydkvlmqmtselkkgrqa  
yvicpliesehledvqnv  
valyeslqqyygvsrvgl lhgklsadekdevmqkfsnheidvlvsttvvegvnvpnatfmmiyadrfglstlhqlrgr  
vgrsdqqsycvliaspkte  
tgiertimtqttdgfel serdl emrgpgdffgvkqsglpdf lvanlvedyrmlevardeaaeliqsgvffentyqhlrh  
fveenllhrsfd  
>tr|E5QXA7|E5QXA7\_STAAH  
miskingklfadmiqqagnl snadlvdslnvypvpdgdgtgmnlmtmtsgreevenl sknigelgktfsgkllmgar  
ngsgvilsq lfrgfccknie  
seseinskl laesfqagvetaykavmkpvegtiltvakdaaqaiekanntedcielmeyii vkaneslentpnllavlk  
evgvvdsggkgl lcvyegf  
lkal kgekeveakvak ldkdefvhdehdfhg vintedi iygyctemmvrfgknkkafdeqefrqdmsqfgdsllvindeei  
vkvhvhteypgkvfnygq  
ygelikl kvenmreqhrevi rkeqhtakpkmetvetaitiismgegiseifk smgathi isggqtmnpstedivkvieqs  
kckraii l pnnkni l mase  
qaasivdaeviptksipggi sal fcydvdatleenkaqmadsvnnvks gsl tyavrdtkidgveikkdafmgliedki  
vssqsdqlttvtellneml  
addseil tvi igqdaeqavtdnminw ieeqypdvevevheggqpiyqyffsve  
>tr|E5QXB0|E5QXB0\_STAAH  
mymhinllcsdrhl p qdiwaksnegkwggvdrgalillkhqiipffsvgd f dsvskeerqllteqlqikpvqaekadtdl  
alavdkavalg f dsitiyg  
atggrldhffgaiql lllkkayykhdvhievidqqnie l lpgqhtvekdk syp yisfipmtddvelslagfkynlarqm  
lnigstltisneieslqak  
vtvhdgllilqirstdln  
>tr|E5QXB2|E5QXB2\_STAAH  
mktgrivksisgyvqvdngerfntkprglfrkkkfspvvgdivefdvqvinegyihqvyerknelkrppvsnidtlviv  
msavepnfstqlldrflvi  
ahsyqlnari lvtkkdktpiekqfeinel lkiyenigyete fignddrkkiveawsaglivlsgqsgvgkstflnhyrp  
elnletndiskslnrgkht  
trhvelferqngyi adtpgfsal d f d h i d k d e i k d y f l e l n r y e t c k f r n c h i k e p n c n v k h q l e i g n i a q f r y d h y l  
qlfneisnrkvry  
>tr|E5QXB6|E5QXB6\_STAAH  
mienvrslafdtiqdlnegayslnrinev l sene l n v m d k a l f t e i v y g t v k r k y t l d f y l r p f v k t k i k a w v r q l l w m  
siyqvyldkvpnhaiine  
aveiakerggyhngnvngilrtmmrsdlpdfnei adpkkrmaieysmpkwiidhwathygleetetilqsflettsttv

Tsompanidou\_et\_al\_Supplemental\_FASTA\_File

ranltraslddiiekldqde  
gydvekdhdhlypcyhiggppihsrsfdkgfvsiqdkssmfvahimnvdhrhdhvl dacsapggkachiaevlmpgqvda  
sdihdhkidlinfnikklr  
ltnikafqhdatkpydktydkilvdapcsglgvmrhkpeikytqskqhieslvdqlleilenvknnvkiggeiystcti  
eglenenviytflknnknf  
efepfghpitgelvktlqimpqdfnsdgffitkirkdn  
>tr|E5QXB9|E5QXB9\_STAAH  
mignaetrmfelkvgiikreanviisnstggkemqvnkviyillaflgsfghkfyagknmqgilhlicwtgiphila  
jisavitvfkpadeqgnvt  
l  
>tr|E5QXC0|E5QXC0\_STAAH  
mkktlgl11im11vvagcsfggnhk1sskseeekqetvkkeseekdpdleefeeiekkmgikdassldkldplmte  
ksftnskigqgwkydylm  
gkveladyrftkdksgssikdvdaaffkgkkgikrkiethddvkqvywyvdpdgkkignsntpvfyaeimtkykdglv  
yasvepgsyvihkddaiky  
ddysklkklsqltkldhpkpvpysvaqiksfgvpltsvsfmgthgskdtkdevmpalayftfspknyedksnpdpkvlnlv  
gmdflnassdfgnahfvvl  
skyikeyesnyetasdds1k  
>tr|E5QXC1|E5QXC1\_STAAH  
miakviadvasksvdykfydiipeqlesviqpgvrvi vpfprtiiqgyvmevtaepdaqldvsklkkievkdiqpelts  
elialewmgsthvikris  
mlevmlpsaikakykafkmdkdi evpstl1kfdkhgyyyykdaqnndiq11mk11kddiveertiltqnitkktkra  
vrvi egyhpdevlaklekv  
ikqydlaylseeqhkti fltdiedmgfskssldglikkyvekydavverdpfkdrvfeqeskqqltedqykayaika  
kivsqqetf11hgvtgsg  
ktevylgtiedvlsgkqamm1vpeialtpqmv1rfkrrfgddvav1hsg1sngerydewqkirdgrarvsvgarssvfa  
pfknlgliiideehestyk  
qedypryhareiaqwrseyhhcpvilgsatpclesyaraekgvyl1slpnrvnqqa1peidivdmree1segnrsmfsk  
dlreaiqlr1drqevvl  
1nrrgyasfm1crdcgyvpqcpncdi sltyhktt11kchycgyqetppnqcpncesehirvgtgtqkvee11qqefed  
ariirmvdttsskgahek  
11tefekngdi11gtqmiakgl dypnitlvglv nadtm1n1p dfrasertyq11tqvagrgrhekagqviiqtynpdh  
ysilvdqkndyltfyrgem  
eyrk1gkypppyyl1nftishkemkkvmeasqvhki11qhltekalvlgpspaalarinnefrqilvkyksep11qa  
iqflddyhekfikekla  
kidi dpqmmm  
>tr|E5QXC3|E5QXC3\_STAAH  
mkerghieqlwreekyhvl1hsqqsyqmirnal kkn1slhqvqqmida11iepsigsvcnafdhmwyfkkcaneerq  
qsk11kadfingkidtqt1  
lgflaelankydvqyl1qsrv1ntkrkr  
>tr|E5QXC7|E5QXC7\_STAAH  
mni fkn11wiapiatmi1vifslafypaynpkpkdlpigilnedkgtti qdkvnigkkledk11dsdsnikwkvvd  
sekdlkd1kdqkifgvai  
idkdfskdamsktkvvmsdskeemqqkvasgeippqvqqmkqkmgngqqvevkqakfktivsegsslqgsqiasavltg  
mgdninaqitkqsl et1ts  
qnvkvnaadinglnpvkvdnek1nkvdhqaggnapflmfm piwidsivts11ffafrtsnnivvqhriiasigqmif  
avvaafagsfyiyfmggi  
qgfdfdhpnriai fvala1lgfvgl1lgvmvwlmgmsipiffilmffsmqlvtl pkqmlpesyqkyvydwnpfthyatsv  
relly1nhhie1nstmmmf  
igfmi fgavss1isai vrkhstkrtevps  
>tr|E5QXC9|E5QXC9\_STAAH  
mkemni eshrhimkdvti igggpsgl yasfyaglrdmsvr lidvqselggkmriypeki iwdiggi apkpcheil kdti  
kqglyfkpevh1nervvdi  
rkkserhfeveteageiytskavii aigagi inpkqldvkveryqltnlhyvvqsyr rfdkdv1isggngtal dwahd  
iakiaksvtvyrkedvsg  
heamktlvtd1nvlcpktriky1vgnddethisevle hvesgdthavkfddvi ishgfdr cnt11setsskl dmhddc  
rvkgfgntttsipgiyacg  
divyhdaksh1iasafsdganaan laktyiqpdanaegyvs shhev fkeantivnkhl y  
>tr|E5QXD1|E5QXD1\_STAAH  
mavflkekkrgci vvtetfkafvidkdesgkvtp t fklsttdl pkgdvlikvhysginykda latqdhnavvksypmip  
gidlagtiveapgfekg  
eqvitsydlgvshyggfseyarvksewivklpdt1tleesmiygtagytagl aierlekvgmnie dgpvlvrgasggvg  
tlav1mlnelgykviastg  
kqdvsnq11elgakevidr1pvdedhkkpl asstwqacvpvggeginyvtr1nhsgsiavi gmtagntytnsvfphil  
rgvni1gidsvftamklrq  
rvwrrlakdlkpen1heikv itfde1peqlnkvikhenkgrividfgvdk  
>tr|E5QXD3|E5QXD3\_STAAH  
mkklvtg11als1flaacgqdsdqkdsnekkddakteqqdkkqmih1kirk tikmivkt

Tsompanidou\_et\_al\_Supplemental\_FASTA\_File

>tr|E5QXD4|E5QXD4\_STAAH  
marqiypfngnksqalqqlpnfqtaInaanneankfngghkvyndysieehngnykyvfsfdpvnngkysivtvdytgg  
amvtdpnyqq  
>tr|E5QXD5|E5QXD5\_STAAH  
meviamikqinvsnmqkfesqlmkaqsegythavpyaneimiyyqsmldavqlypksivvdytvdggykndchyfgqssin  
iadwaqnnnyypnliyaiq  
qtlldlihyysvetifdla11t11kgd1sidghvvdffkaplatsasiwetiktiedfdmmsqfylikmayidhhpipfrn  
lfiedseqlnwpdswlyst  
kfm1pkwlykiakqradnkqlqnlglytkqpnv1kdhivfigdhyqyignsky1ftyfvkhnpmacyfvtdrrgphfi  
spkseka delinsarvv1v  
endipet1qpngtliq1hgqtpimq1f1dskepiknietpfrakrynrlqfdyvihsaddishfyqtafshqanvla  
ygnpkhgy11qkrnesttq  
qqyksfk1ndqkp1lyapig1vsaaq1p1sda1fkayhv1vqgvdetm1peealvapkylsaqd1ilmsdvvitdysn  
iifdamaidktvalytpnh  
sqyiesqgvnediwrh1skiwyt1drq11inn1isqaipvikypqi1qqkeq1les1sq1l1skmts1nk  
>tr|E5QXD7|E5QXD7\_STAAH  
msyfsnvp1f1lkr1gtv1f1m1tt1q1h1sk1td1v1l1igg1ims1at1gt11l1k1e1s1pek1nik1v1fek1la1q1p1ge1ess1nv1wn1n1agt1gh1sa  
1l1ce1l1ny1t1ke1g1kd1gt1vd1c1sk  
aikineqyq1skqfway1vktgq1dnprfiqavphmsfvigednvafiksrvat1kknv1fekm1lsqdeemkswvp1  
miegrksdepiatlydetg  
tdvnfgal1tak1fdn1e1arg1ve1iyk1q1n1v1d1k1k1q1k1sg1aw1lvkvd1let1net1t1yes1dfv1fi1g1agg1as1p1l1q1kt1g1ik1qs  
khiggf1p1vs1gl1f1r1ct1n1q1e  
vidrhhakvygkaavgappmsvph1dtrfvdgkrs11fgpfagf1spk1f1ktg1sh1md1lik1svk1pn1iv1tm1s1ag1ik1em1st  
kylvsq1ml1s1nder1m1dd1l1r  
vffpnaknedwevitagqr1v1q1v1k1d1e1d1sk1gn1q1fg1te1v1ts1dd1gt1la1al1g1asp1g1ast1av1d1im1fd1vl1q1rc1yr1de1fk1g1we  
pkikemvpsfgyr1tdhed  
lyhkineevtkylqvk  
>tr|E5QXD8|E5QXD8\_STAAH  
mkilaivrrv1kem1rdkrt1la1m1flap1il1it1lmyfi1fng1dend1kig1id1ts1v1ss1nit1k1q1p1ss1d1ikt1qt1fh1shen1iks  
kiennh1dgy1yqen1t1y  
viytnedpnksnmikmqm1g1kai1qqd1kiss1ikh1liekapptmkep1nkq1dik1ish1s1y1gns1dsty1fdk1mf1ilm1g1ff1v1f1f  
v1l1sg1ial1l1rer1tt1gt1e  
rv1l1st1s1irr1se1iv1lg1y1l1gy1g1ifai1qt1liiv1lfsi1y1lln1in1l1ags1lwy1vil1inic1l1ait1als1mg1if1ist1fan1se1f1q1mi1q  
fi1p1lv1av1p1qv1ff1sg1if1p1e  
nmpdw1gn1gy1f1p1ry1ag1da1l1tnv1mik1gg1ws1ni1w1fd1l1il1mi1fi1iv1fi1il1niv1gl1kry1rqv  
>tr|E5QXD9|E5QXD9\_STAAH  
my1l1nf1gg1v1ime1ati1ak1dkv1v1k1tyn1khh1v1ne1isms1ink1ge1ll1g1ip1sg1sg1k1tt1tik1l1lg1mek1id1sg1sae1ifah1kmp1n  
rka1nr1l1gym1g1q1td1alyen  
l1t1ahen1efy1gr1l1sg1l1kgn1l1kdni1ekh1iv1vn1leq1aln1kk1va1q1f1sg1gm1krr1l1slait1laep1eli1ildept1vg1id1p1k1r  
qqi1w1qq1fk1q1mt1kd1g1ks1v1i  
t1th1vm1dea1erc1dk1vg1l1vd1gri1f1aid1t1pt1nl1k1q1rf1nv1dt1e1av1fik1ae1ev1c1qs  
>tr|E5QXE0|E5QXE0\_STAAH  
mfr1k1k1v1gh1md1q1ta1ft1ds1rv1tk1tin1ri1hd1gm1vn1l1kt1kay1nd1it1vk1dice1ks1is1rt1tfy1thy1k1t1k1dd1fi1ys1l1nt1l1kea  
kkk1f1l1k1set1l1t1q1a1ff1k1m  
iy1fw1l1seg1q1l1m1l1g1des1ay1k1lhq1vik1ks1l1q1rie1inf1vp1v1nt1k1ml1t1t1ke1y1f1l1i1f1mc1nai1ig1vl1qd1w1vk1rgy1kes1p  
ke1vae1im1ki1fen1a1fr  
>tr|E5QXE1|E5QXE1\_STAAH  
mkn1k1ns1l1fis1li1ig1l1s1l1ff1sm1l1fad1g1ky1p1ln1p1q1st1ig1ily1th1ft1ett1vml1isi1il1w1l1lig1vv1ff1lg1dfi1fky1tdw  
g1it1kat1iv1hf1itt1y1vg1fl1p  
l1ail1ag1w1fp1l1tiny1li1ift1i1fiv1vyt1li1wi1q1ff1kn1kny1v1dt1ine1ql1k1q1k1  
>tr|E5QXE3|E5QXE3\_STAAH  
mfkt1y1aria1i1ys1it1vil1fsa1lis1fv1l1tnvy1yh1n1l1kas1ndak1im1kt1l1kear1qye1qs1akp1thi1qy1fkh1lg1qm1ny1q1im1ti  
dh1kgh1kt1fy1ge1pf1red1t1s  
qna1inn1v1ln1nk1dy1hg1ik1dk1pf1al1fv1tg1ff1dn1v1td1nt1vg1inf1kt1nd1gs1iav1fmr1pd1iget1f1se1fr1t1flav1ll1m1ll1f1is1is  
l1vi1ast1ys1i1ir1pv1k1k1l1a  
ter1l1dg1df1et1pik1q1tr1k1de1igt1q1yh1f1nk1m1res1lg1v1dq1mr1qh1fv1qn1vs1he1ikt1pl1thi1h1l1sel1q1ts1d1kt1lr1qqy1i  
ndiy1t1tt1q1l1sg1l1tte1l1l1  
l1sel1dn1h1gh1l1f1dd1ki1qv1dq1lik1di1r1he1q1fa1ade1ks1li1lad1les1id1fl1gn1qr1ll1h1qa1ls1n1llina1iky1td1vg1g1aid1ia  
l1qh1sh1nn1i1ft1is1nd1gs1pi  
sp1qae1ar1l1fer1fy1k1v1sk1hd1ns1ng1lg1ait1ks1i1el1hg1ti1q1ft1qs1nay1vt1t1ft1it1l1pn1sh1  
>tr|E5QXE4|E5QXE4\_STAAH  
mkki1ref1iv1mv1qc1lv1v1ddd1pri1lnyi1ash1q1te1hida1ft1qps1gea1al1l1ek1qr1v1dia1v1v1dim1md1g1md1gf1ql1cnt1l1k1ndy  
dip1vim1l1tarda1l1sd1kera  
fi1sg1t1ddy1vt1kp1f1ev1kel1if1rir1av1l1rryn1ins1n1sem1t1ign1l1tn1qs1yle1l1qvs1nkt1mt1lp1nke1f1q1ll1fm1laarp1k1q1ift  
req1i1eki1w1gy1dy1egd1ert  
vdv1h1k1r1l1qr1l1k1l1nat1l1t1iet1vrg1gy1k1ven1hv  
>tr|E5QXE5|E5QXE5\_STAAH  
mkl1ai1ke1im1fy1k1fry1l1it1li1l1l1sim1v1f1is1g1la1q1lg1ren1is1l1feh1fd1ndey1v1v1q1km1kep1q1ieks1ql1sdt1qqn1q1ikk

Tsompanidou\_et\_al\_Supplemental\_FASTA\_File

vihqesykmniqt1kl1snk  
eqdvi tmdvdkqqr1q1kkgdypknahevaindklaadnirvgdr1hfknstsyrvsgilndtmyshssiv11ndngfn  
a1nkvn tafypvkn1tqqq  
rde1nk1ndvqvnek1tdniasyqaeqap1nmmsv1faitaiv1saffyvmtiqkisqigilkaigiktrh11salv  
lqilt1tiigvgiaviiiv  
gl1sfmmpvtmpfyt1tqni11mvgifilvailgas1sfik1fkvdpieaigga  
>tr|E5QXE6|E5QXE6\_STAAH  
malvvkdivknfgeglsetkv1kginfeveqgefvi1ngasgsgktt11tilgg11sqtsgtv1yndaplfdkqhrsdl  
r1edigfifqssh1vpylk  
vieq1tlvgqeagmtkqgsskraiql1knig1edr1nvyphq1sggekqrva1mrafmnnpki1ladeptas1dadratk  
vvemirqqikeqqmigi  
thdr1feyadrvie1edgkitd  
>tr|E5QXE7|E5QXE7\_STAAH  
m11n111ifilivicpl1nytl1n1tscyilvvisif1sliysimtyt1fwsmfvtfiiisiim1fkhry1fshtsr1  
fik11sfsykvlytsa1  
1fistiqspivkg1smwla1lc1s111tfcylvwtvsyrnrnsynkevdiiv1lgagiftefvtpmlaar1draldiyqq  
qasatk1ivsgggpdepi  
pealamqry1iahgvktd1lmeshsintytnflyskqi1nlyheavkivcvtsqfhlral1raqlg1sidvgvsht  
pyhff1hvl1kdy1gvmymq  
yr111tlyc1ssw1fc1yaafiyns  
>tr|E5QXE9|E5QXE9\_STAAH  
mlyvyhknyfi1lp11fykypkntiqeminft1ely1it1fmkvl1sq1  
>tr|E5QXF2|E5QXF2\_STAAH  
myknhmtq1t1pietsvripqndisryvneivetipdseldefrhrhgatsyhpkmmlki1lyayel1nvpsafly  
>tr|E5QXF6|E5QXF6\_STAAH  
mtnpqr1epfdetfqpn1hrkrygkkrs1vsmi1qiiv1lta1agysmwkqpi1fnivftkesv1fdgik1nfneti  
gk1mhq1n1n1gn1nd1lqqg  
idr1ilv1fngffil1civ1vit1it1ivf1nrtv1kvvn1lv1tim1vit1lyfsyi1kalaeiada1kky11nvppdqvit  
eada1hngi11l1gcsig11  
vis1ffrn1rmp1k  
>tr|E5QXF9|E5QXF9\_STAAH  
mivtkemvii1tq1f1t1tq1vtsefidhnnhmdanyni1fsdvnr1fn1shg1s1keren1ayt1ft1lehtty1sels1  
gdvftvt1y1ydydykr1h  
1f1t1tkedgt1astnevmmmg1nqhtrrsdafpesfstqiahyyknqptit1wpeqlghkiaiphkgalk  
>tr|E5QXG4|E5QXG4\_STAAH  
minereitmeq1pqvgfmsfv1fwknyvn1fkgrsr1rseywym1wh1il1mpavcv1iis1fiffisiaadnealivms  
ilmi1ltsvyt1fvs1latf  
ipn1alcvrr1fhd1sr1tm1fpmimtvfsi1fyiv1lqi1dsydsdft1mpmg1n11lv1lyfvylg1t1vimiv1lcf1dsk  
pankygespky1pssi1knqs  
vtsetpkkagt1setp1kt1peet1dnq1  
>tr|E5QXG5|E5QXG5\_STAAH  
mg1viehvtkr1f1gkmtavndms1le1esgk1lg1f1grngagk1tt1f1m1lg1septe1ghityngk1ldktmyn1rigyl1pee  
g1lhgk1tvee1ky1lat1  
kgmskteiqqi1syw1erfditenrkkrids1skgnqqki1q1lasm1hkpe1l1ildepfsg1dpvnve1lkeavkd1ndw  
gstivys1shr1mehvee1lcd  
dvcil1dkgq1lvsgdinhvrasngnk1kviesett1pd1thirgi1hsenmkqgl1q1t1enedvakdiyv1vahggyvkr  
fqvveps1qdi1fiekv1ggk  
da  
>tr|E5QXG6|E5QXG6\_STAAH  
mhkfwatft1tyikk1kaksfvi1fmii1aal1mig1snidki1nmfddgpdki1gvaapneqiykv1fkqqant1fhsdak1ftk  
vsiedae1evk1khk1ldkay  
iikvnqr1t1l1ggti1isekrvshedsqkvqal1taiqtnmvage1ninked1qkl1qaqskv1dnkvis1ndevdkv1segqk1if  
nyal1aygi1f1mffiv1ny  
asqjame1asektsrviemi1tsispiqhi1fak1ilgii1avavtqi1iliv1mavici1fafd1kd1l1qgfnvemnq1swqii  
ivgi1ssivgimayv1laa  
ilgs1tsried1nqslmp1t1l1gmiafyia1ftin1p1dgr1al1t1syip1flapf1qlv1vraqtsg1ql1hevil1ss1isivm  
vavli1wia1ktyk1dsv1tf  
erg1fns1mkrv1fkk  
>tr|E5QXG9|E5QXG9\_STAAH  
mivevehqrqgd1iki1dndetki1ftnygarv1swkyhdn1iv1gnvveade1fyhsnp1fkfgasigrysgridnak1fk1  
qgkeyq1lek1ngeh1h1gg  
chg1dnk1ld1fyei1rneiaqikvi1fktv1ksaddh1fpgdidvti1thiydadhqwsieyeavasedt1fsptnhvyfn1nrd  
nnvvdnh1rissnq1dmyv1  
derniv1tgdi1ld1hev1fednk1k1sdi1ftsqaq1sqmtr1fgg1dhpftv1geh1kmyvenhefm1levdt1dmp1hvff1ftfn  
qp1dewdsp1fni1ykph1sgft  
letq1l1pndi1nygekapsi1kagev1fns1kts1frieek1vend  
>tr|E5QXH1|E5QXH1\_STAAH  
mkdvka1k1mt1ndv1lsq1ngdmt1lgigtg1stme1l1lpqmaql1kergynit1gvctsnkia1flakelgikice1ndvdhi



Tsompanidou\_et\_al\_Supplemental\_FASTA\_File

dlaidgadevdp5lniikg  
gggalfrrekvidemasrfvvvvdetkmvqylgetfklpvevdkfnwyhilrkiesyadikverrvnedvafitdngnyil  
dcklpgkidpykfheylih  
ltgvfetgyfldmadqvivgtqegvki lek  
>tr|E5QXH7|E5QXH7\_STAAH  
mndliinhiaeliilprstdkplkgkeldeInvvknngtvvikdgvkivyagthtdatetidaskgvvspalvdahtlht  
fggsrehemslkrqgksyl  
eillemgggilstvnatretseddlfkkaehd11tmikhgvlavesksygl drene1kqlkvsnr1aekydldmkhtflg  
phavpkeassneafleemi  
allpevkhyadfadi fctetgvftieqsqhymqakeagfkvki hadeidplgg1elaideqaisadh1vasssdkgek1r  
nsdtvav11pattfylvge  
dyadargm1dnngai1atdynpgssvtnniqlvmaiaalk1k1spnevwnavtvnaakaidinagtintgdkanlviwd  
apnhey1pyhfgi nhaekv  
ikdgvkivdnt1sfkv  
>tr|E5QXH8|E5QXH8\_STAAH  
mg1kdqavawrryfhqfpe1sdkefkttqkikdilteynirild1platglvaevggglsciavradaidapiqelveqd  
fksenegvmharghdihma  
silatavklkeiegtlgrvkfifqpaee1ghgafkiiethalqdvqavlgfhndpsrpvgtfaiktgait savdrfefh  
ikgvvgghaakpeqcndpvi  
v1aqlinsiqsivsrn1safdeavvtigqiscngtwnviadhayvqgtvrsfdpvvrklvetrlqdiadglaqaynmkin  
1nyth1pgavmdealthk  
a1avaqhvgykvemmegpl1tgedfsgysqhfpsvfaligshseydlhhpqqpderilekvpeyfvfvr11he  
>tr|E5QXH9|E5QXH9\_STAAH  
maaqp1rtkfkttdeyqeqevpg1qsempapdcgetsyqgnr1qgykmlvtggdsai graaaiayakegadvainyl  
pse  
>tr|E5QXI0|E5QXI0\_STAAH  
mieesgqkav1ipgdi rdeqfnydlveqayqqlgg1dnvtlvaghqqyhddihgftteaftetfetnvyp1fwtvqkale  
ylkpgasitttssvggynp  
spilhdyaaskaai1s1tksfsee1gpkgirvncvapppfwsplqisggppskiptfgqktp1gragqpvelcgyv11  
aseessyttgqvfgvsggv  
qid  
>tr|E5QXI2|E5QXI2\_STAAH  
mktstffivcekevf1igkqvkrmevhkksnawalp111fval1lgvgiitgdftsmp1nvaititvival1mnrkesfa  
kkvevftkgaghsni11mm  
1ifilagafsntaekmggvkstvn1g1slipen1iivglfvicmfvsismgtsvgtvaa1apvgygfaqatdvptal ama  
tvvggamfgdnlsmisdt  
iaavrtqhtkmdkfrvnfkiv1pgailt1iilyfltngis1nhaknydyn1ikvpyilvlv1allgvnviivliggt1  
lagiiglidgsfswmg1ld  
avskgiismediamialligglvgiiqhnggiel1qfvrskvkskrgae1gias1svsvadiatanntisi1msgplakn  
iadeydvsrksasil dif  
ggcfqgl1pyspqiisaagvagi splm1fpysiyip11lgvcglvailfnfpk1kknts qemk  
>tr|E5QXI3|E5QXI3\_STAAH  
makfnvenehveieklykfspe1vyeawtkkd11kqwfmsartnkeieadvkeggyrivdqqrngkvnviegiyes  
1vmdeyvkmtigmpg1set  
qdvieefferetgggtqm1fyys1vekerrftnleykqkkkeyhdsmvhgfe1mfdkmyhvietstqq  
>tr|E5QXI5|E5QXI5\_STAAH  
mnaikrfgsamivpvlmfaffgivilgfatlfnkptimgsladqhtfwkfwsviesggwif1thmevvfvvg1plslakk  
apghaalaa1mgylmfntf  
ina1ltqwphtfganlekvenvpg1ksiagiatldtnilgiiisai1twhnryyskr1pemvgvfqgl1tfvvtisff  
vm1plaa1tcviwptvqhg  
igsmqhfiiasgyigvwy1yhflerv1iptglh1hfiyapievgpvvnhglkaew1qhlnefaksskpl1keqfpygfm1qg  
ngkvfgclgialamyattp  
kenrkvaallipatl1tavvgitelleft1lfiapylfv1havlaasmdt1myafgvvgnmgggl1dfistnw1plgke  
hwgtyvaqvvg1ifvaiy  
ff1frf11kfdip1pgrkkteevk1fskqdyknkkgdndvpkrastgneyedkaay1dglggkenikdvtnc1tr1r  
1tvydeskvedteyft1hq  
mahglvksgksiqvvvgmtvpqvreafeqmvedqssedk  
>tr|E5QXI6|E5QXI6\_STAAH  
myssggphml1dkfetyi1niag1ndr1trkkl1sk1cksvqfcdalqfsinkqfnqyvleis1pkqq1pyfis1sfhqy  
sifqvlspkkine11dsdn  
lyqsakrfdin1dglqdafikdkvidimnmfnhtdityt1nkshahi1ctpei fak11hti atrnidilsanyr1ssms  
karis  
>tr|E5QXI7|E5QXI7\_STAAH  
mfisdkifaikrew1nn1nfqksncn1tg1mvi1ffni1idedv1tmfqk1sifatks1lvwm1vaavigfifpqhvat1gk  
wvpy11g1vm1gmgl1tip  
ndfkmvfkapravi1gvclqfsimpt1afi1aksfhlppdiavgvilvgccpggtssnvmsylakanvalsvsittvst1  
lapfvtpal1y1fanewle  
vsf1sm1wsvvqvvlipialgivilqi1nrkiaekastalpi1svvais1il1aivvggskhqil1ttg1l1fl1vml1hnlvg

Tsompanidou\_et\_al\_Supplemental\_FASTA\_File

ytigywlar11kl1drqdk  
avsi evgmqns glavslaa lhfnpiaavpgavfsfihnitgpilakywskk1  
>tr|E5QXI9|E5QXI9\_STAAH  
mmgyiilfflagpvilgvgnlvigpifnkqtpfrvqvrsvfvgsmyililaiigyf111lqgk1  
>tr|E5QXJ1|E5QXJ1\_STAAH  
mlkqilpratkisvifavaffiinyigmekpdilylvgrtiiatlafilicltvfsiinsperkiklgttlpialiiigii  
fgaifltvqigvitgliig  
viatfiweliieknkggrss  
>tr|E5QXJ2|E5QXJ2\_STAAH  
mennelqrglsarqiqmia lggtingvlfmgatstikwtgpsvilayliagiflflimramgemiylnpttgsfatfasd  
yihpaagymtawsni fqi  
vvgmseviavgeymkfwfpe lptwipgvia i111maanlfsvkafgefefwfalikkvttiilmiiagfgliffgfgnggh  
avgisnlwtnggfmpngiv  
gfffalshivsyggveligitagetkdpqknivkavngviwri lifylgai fvi svypwnqlgdigspfvatfakigi  
tfaaglinfvvltaa msgc  
nsgifsasrmiytlahkgempki ftkimrngvplytvvavslgiligallnvilplyidgaksifvyvysasilpgmipw  
fmilfshl rfrklhp eeve  
ghpfkmpggavsnyltilflilvlvgmvfnvetrisvligvifltivtiyyfiryknknnvak  
>tr|E5QXJ7|E5QXJ7\_STAAH  
mvdemtdktlqqidkliswklqidn vipqlimemttetkrhrfdlvtndkqi qqqfqqflathfpehqllaeeks nem  
itneinhlwimdpidgtan  
lvkqqedyci ilayfyegkpm lsvydyphkklykairgegafcn gfkmepps lkledaiisfnaqvmnl dtvqdl fda  
sfsyrlvgacgl dsmrvak  
gqfgahintnkpwdi aaqflfae llnlkm tldgkaidh lkgapfiisnkachetvki lnanggyqkyr  
>tr|E5QXJ8|E5QXJ8\_STAAH  
myvaaki fitygnkihnp ldrnhsel rdkkvs lndgdpftial fgvsdadrkkkggersdsimilsinpktkkteivsi  
prtraeivgrgtteki ah  
ayayggpn mavks lek lmnvpi dhyatidmdg lnmidsiggvdvvsndtftvdgvrftkgqqthvngdqalkfirsrke  
egaggdfgrqqrqqivlea  
mankiaspssithfns lmeiqnnvkt dltlgl dntirsnykdandtinkhqlsggggiqsdglyy fipseqskaestkl  
lkdnl e  
>tr|E5QXJ9|E5QXJ9\_STAAH  
mqehl vvtldgkdy lvepgtn llefiks qdtfvpsicynesmgpiqtcdtctveidgkierscstvidrpmvntvndv  
kdaqkealdri lekhmlyc  
tvcdynngdcei hntmdawglqh qtyeykekyekdygpfyrydpnqci lcgrcveacqdievnetiridwdrehprviw  
dndvpinesscvscgqcat  
vcpcnammevnmegnagymtdtepgs laamid ltkkaepgygp lfa isdseaemrkerikkktvctycgvgsfewtk  
dreilkvqps hdsbankia  
tcvkgk fswghinsdqr ltkplvrkng efhevewde alnvi adnftsikekhgpda lsfisskatneesy lmqklarqv  
igt nndncsryc qapatk  
glfrtvghgds gsidlekaamsvl igtntaeahpviasrmkraqlfgqkihvfdirkhemaeradr fyqpkpgtdla  
wlsavtky iidhd lhdka f  
ieewvedfdeyyks letftmafaeeatgipea elikfaecakaesvvicwamgitqqdigdsstaisnlllvtgnyrr  
pgtgaypl rghn nvqgcsd  
mgsmpdki tgyqsie addi rakfekeygvkl npkagkdnhemvegi hdgqihslylygedtgivdsninfvqaafekldf  
mvvqdefl tftatyadvl  
paspslekdg tftnterriqrlyqa lkp lgdskpdwki fqaiank lsfdwnykhpseimdeiar ltplyagvsyerlegf  
nslqwpvhpdgtdepi ly  
egfnfdngkak lfp lsfnyfkqdevydi hvnng rll ehfhegnmtyqtpmlkykvprafveispelaedrgihegaevk  
lissetgeavl qvhvtdrvk  
gkeiyi plnndamengdl gain llnsdvdqytdtpsykrts crmevitkr gkspln pnnfrvnkkrhpqysvqvqkkwe  
rpdvfpgnqvdk  
>tr|E5QXK0|E5QXK0\_STAAH  
maerisski rrl ekseeqikles lnevteaia ankdsilkaiklik tlddak lldalngavrgrqvi inkfavelnkdiy  
tgllsnmasmvfl lge lnv  
sdlsdf lnkvnkg l hvanqaspnaktsvrs l lgv lkd ddmnrs ltymlnm lkgmsred  
>tr|E5QXK4|E5QXK4\_STAAH  
maydgl ftkkmves lqfl ttgrvhkin qpdndtilmvvrqnrqn hqlls ihpnfsrlql ttkkydnpfnppmfarvfrk  
hleggiesikqigndrri  
eidiskdeigntiyrtvileimgkhsn l ilvdenrki iegfkh ltpntnhyrtvmpgfnyeapptqhkmnpyditgaev  
lkyidfnagniakql nqf  
egfsp l itneivnrrqfmsst lpeafdevmaetkl ptpfi hknhetgkedfyfik l nqfnddtvtyds lndll drfyd  
argerervkqrand l vrvf  
qqqlhkyqnlak l ieeeyeqsknk dteqlygelitaniyrikqgdkevta lnyytneevvip l nptkspsanaqyyykqy  
nrmktrere lqh qig ltkd  
nidyfstieqql hhisvhdideirde laeggfmkqrknqtkkkkaqiql qhyvstdgddiyvgknnkqndyltnkkakkt  
htwlhtkdipgshvvi fnd  
apsdtti keaamlagyfskagnsgqipvdytliknvhkpsgakpgfvtydnqktlyatpdyehiqkmkqs

Tsompanidou\_et\_al\_Supplemental\_FASTA\_File

>tr|E5QXL6|E5QXL6\_STAAH  
mhkkyfigtsiliavfvvifdqvtkyiattmkigdsfeviphflnitshrnngaawgilsgkmtffffiitiialvy  
ffikdaqnlfmqvaisll  
fagalgnfidrvltgevdfidtnifgydfpifniadsslitigviliiiallkdtstnkkekev  
>tr|E5QXL9|E5QXL9\_STAAH  
mkkmdyketllmpktdfpmrgglpnkepqiqekwdaedqyhka lekngnetfilhdgppyangnlhmghalnkiikdfi  
vryktmqgfyapyvpgwdt  
hglpieqaltkkgvdrkkmstaefrekckefaleqielqkkdfrrlgvrgdfndpyitlkpeyaaqirifgemadkgli  
ykgkpvypwspssesslae  
aeieyhdkrsasiyva fnvkdkgvvdadakfi iwtttpwtipsnvaitvhpelkygqynvgekyiaeaalsdavaea  
dwdkasiklekeytgkele  
yvvaqhpfl dreslvingdhvtt dagtgcvhtapghgeddyivgqye l pvispidkqvfteggqfegmfydkankav  
tdlltekga llkldfiths  
yphdwrkkpvi fratpwwfasiskvrqdi ldai entnfkvnwgktriy nmvrdrgevwisrqrwgvplpvfyangei  
imtketvnhvadlfaehgs  
niwfereakdlpegfthpgspngtftketdimdvwfdsgsshrgvletrpelsfpadmylegsdqyrgwfnssittsva  
trgvspykflshgfvmdg  
egkmskslgnvvpdqvvkqkgadiarlwsstydyladvrisdeilkqtsdvyrkirntlrfmlgnindfnpdtdsipe  
sellevdryllnr1refta  
stinnyenfdylniygevf nve lsnfyldygkdi lyieqrdshirrmqtvlyqilvdmtkllapilvhtaeevsh  
tphvkeesvhladm pkvve  
vdqalldkwrtfmlrddvnraletarnekvigksleakvtiasndkfnasefltsfdalhqlfivsqkvvdklldqat  
ayehgdivehadgekcer  
cwnysedlgavdelthlcpccqvvkslv  
>tr|E5QXM1|E5QXM1\_STAAH  
mvfynffkvvini diyghfrqeeeyelidqltdkcdqaeqhyapvlthfl dprgqyilevicgsyedlnvsfyggpnaerk  
raispnyyepkesdfdl  
lmeidyepkfvtkhqhiltlmslgiereqvgdiivneriqfvltsrlesfimlelqrikgasvklytipvtmdiqsne  
nwki esatvsslrldvvik  
emirksrtiakqli ekkrvknhtivdsadfqlqandl isiqgfgrahitdlggkttkdkthityrtlfk  
>tr|E5QXM5|E5QXM5\_STAAH  
mndnfkkqphhliyeelggitlgittrgdgl sdykpnafnmaryiddcpynitqhqlqlaeiafdrknwvfpiqthe  
nkvacitkddigtndlt  
dalhgidamytydsnvl tmcycadvpyfystkhhfialahagwrgtyteivkev lkhvnfdlkd lhvvigpstssye  
inddiknfetlpidany  
ietrgrdrhgidlkkanaallnnygvpeniyttayatsehlelffsyrl ekgqtgrmlafiqgq  
>tr|E5QXM7|E5QXM7\_STAAH  
meehyvsvdigsssvktivgekfhnginvi gttgtytsigkngliddfdiarqaikdtikkasi asgvdikevflklpi  
igtevydesneidfyedte  
ingshiekvlegirekndvqetevinvfpirfivdkenevdpkeliarhslkveagviaiqksilinmikcveacgvdv  
ldvysdaynygsiltatek  
elgacvidigedvtqvafyerge lvdadsiemagr ditddiaqglntsyetaekvkqhgyghafydsasdqdif tveqvds  
detvqytqkdl sdfiearv  
eeiffefvdlqdlgltkvnggfivtggsanllgvkellsdmvsekvrihtpsqmgirkpefssaistissiafde lld  
yvtinyhdneeteedvidv  
kdkdnesk lggfdwfkrrtknk dthenevssdeei yqsednhqehkqnhehvqdkdkeeskfkklmkslfe  
>tr|E5QXM8|E5QXM8\_STAAH  
mddktkndqqesnedkdelel ftrnts krrrqrkrskathfsnqnkddtsqqad fdeeiylinkdfk keqgneenndsas  
shandniddstnsiene  
dyrynqetddqnesngi avdneqhsapneqnsdsndeetvtkkerkskv tqlkpltlekrkvrrkrqkriqysviti l  
vllia vil iymfsp lskia  
hvingn nhvstskinkvlgvkndsrmytfskknaindleedpliksveihkqlpntlnv diteneialvkykgkylpl  
lengkllkgsndvkindap  
vmdgfkgtkeddmikal semtpevrryiaevtyapsknkqsriel ftt dglqvigdistiskmkyppqmsqslsr dssg  
klktrgyidlsv gasfipy  
rgntstqsesdknvtkssqeenakeelqsvlnkinkqsskn  
>tr|E5QXM9|E5QXM9\_STAAH  
mlnytglenknvlvvg laksgyeaakllsklganvtvndgkdl sqdahakdlesmgisvsvsgshpltlldknp iivknp  
ipytvsiideavkrglki l  
tevelsylviseapiiavtngtktvtsligdmfkksrltgrlsgnigyvaskvaqevkptdy lvtelssfqllgiekyk  
phiaiitniysahldyhen  
lennyqnakkqiyknqteedylicnyhqrviesee l kaktlyfstqqevdgiyikd gfvvykvriintedlvlpgehnl  
enilaavlacilagvpika  
iidslttfsgiehr lqyvgt nrtnkyndskantlatqfalnsfnqpi iwlcggl drgnefdelipymenvramvfgq  
tkakfaklgnsqgksviea  
nnvedavdkvqdi epndvllspacaswdqystfeergekfierfrah lpsy  
>tr|E5QXN0|E5QXN0\_STAAH  
mifvya llalvitfvlpvliptlkrmkfgqsi reegpqshmkktgtptmggl tfl lsvitslvaiifvdqanpiilll

Tsompanidou\_et\_al\_Supplemental\_FASTA\_File

fvtigfgligfiddyivv  
kknnqgltskqkflaigigiaiffvlsvfhlvnfstsihipftnvaiplsfayvifivfwqvgfsnavnltdgldglat  
glsigftmyaimgsvlge  
taigifciimlfallglfipyninpakvfmgtgslalggi fatismnqelsfifiglvfvietsvmlqvasfklgtgk  
rifkmspihhhfeligwse  
wkvvtvfwavglisgliglwigvh  
>tr|E5QXN1|E5QXN1\_STAAH  
mitghsnqgdvmkanekylvknaqqpergkiydrngkvlaedveryklvavidkkasanskprhvvdkketakklstv  
idmkpeeiekr1sqkkafq  
iefgrkgtntltyqdklkiekmnlpgisllpeterfypngnfashligraknpdtgelkgalgvekidfsylsgskgs1r  
yihdiwgyiapntkkekqp  
krqddvhltdisniqvveealdgmveryqpkdlfavvmdaktgeilaysqrptfnpetgkdfgkkwandlyqntyepgs  
tfksyglaaaiqegafdpd  
kkyksghrdimgsrisdwnrvwggeipmslgftysstlmmhlqdlvgadmkswyerfgfgkstkgmfdgeapqigws  
nelqaktssfgqstvtvpv  
qmlqaqsaffndgnmlkpwfvnsvnpvskrqfykgqkqiagkpitkdaekvekqldlvnnskshaanyridgyeveg  
ktgtaqvaapngggvkvkqp  
npyfvsfmgdapkknkpvivyagmslaqkndqeayelgvskafkpimentlkylnvgkskddtsnaeyskvpdvegqdkq  
kaidnvsakslepvtigsg  
tqikaqsikagnkvlphskvll1tdgd1tmpdmsgwtkedviafenlnikvnlkgsfvshqsiskgqkltekdkidve  
fssenvdsntnsdsnsd  
dkkksdsktdkdkd  
>tr|E5QXN2|E5QXN2\_STAAH  
mavekvyqpydeqvynsipkqppqtkpekktvsrkvvvqltkfekvlyitlitviamlsiymlslkmdayntrgkiadld  
ykidkqssensalqseikk  
nssyeriyekakkqgmslendnvkvrsngeakn  
>tr|E5QXN5|E5QXN5\_STAAH  
mdckvvslnekdqfipkikssdpvigtlfqydaaqqisfekrsmkenngreaalanvireyndlklsseseqlniqhlan  
gskvviqggqaglfggply  
tfhki fsiitlskeldthkqqvvpvfwagedhdhfdenvhtfvynenhs1hkvyhtmempettvsryypdkaelkqt  
lktmfihmketvhtqglle  
icdriidqydswtmfkallhetfkaygvlfidaqfep1rkmeapmfkklkhhqllddafratqkrtqnqglkamiqtd  
tnvhlflhdenmrglvsvyd  
gkhfrlnktdkkyikeeiiniaenqpe1fsnvvtrplmeewlfnvafigppseikywaekdvfelfdvempivmvr1  
ritylndriekl1skynip  
lekvlvdgvegerskfi reqasdqfi ekvegmieqrrlyqdlldevagnqnninlvknneihiqqdyllkryllnie  
rendismkqfreigetlhp  
mglqeriwnplqilndfgtdvfkpstypp1sytfdril1k  
>tr|E5QXN7|E5QXN7\_STAAH  
mgk1gyknilidfdtdivdfydaeewafyymanvfnhkatkddfltfkkinhqhweafqkn1tksev1serfvnyfkhh  
qmevdghradv1frnglae  
akvkyfdqtleivelskrhnlyivtngvtetqkrrlnqtplhkyikkifiseetgyqkpnpeffnyvndigederqhs  
iivgds1tsdilgginagi  
atcwf1nfrgfdhnp1ipdyeinswkqlneivr  
>tr|E5QXN9|E5QXN9\_STAAH  
mrnqik1l1dsd1sslhiskqtgvpqstihrmrknrs1dnms1knael1ykfangifsdenyee  
>tr|E5QXP0|E5QXP0\_STAAH  
mr1qkap1vtsg1vlgl1gn1kdl1sl1naicgifa1liwih1lctmlkyfnnveq1nsp1vssvfttffmsgflg  
tly1ntffsn1tfinn1it  
piwilclvgimhmhiisiky1kdfs1envypswtvlfigiaia1gl1tapvsygyffig1ltviygvatciv1pivfkr1k  
afplqtsikpntsticapf  
s1vaaayviaf1pkanafivi1ll1laqifyfyi1i1q1pk1l1kepfspv1saft1pl1visata1kns1pvl1mp1viwkg1l  
fievf1shc1nst  
>tr|E5QXP2|E5QXP2\_STAAH  
m1kddd1sahft1rkk1i1t1fv1pfp1m1vwg1vmt1qg1wfp1masa1fli1fti1imfi1agt1gk1sg1gek1gtv1daf1vng1ass1  
vg1sv1li1gl1argin1vl1ne  
gm1sdt1lh1f1sss1lvq1hmsg1pl1fi1v1l1fi1ffc1lg1fiv1psss1glav1smp1if1apl1adt1vg1ipr1fv1vtty1q1fgq1yam1fl1  
apt1gl1vmat1qm1lnm1rysh  
w1fr1fv1vp1vaf1v1li1fgg1v1lit1qv1liys  
>tr|E5QXP3|E5QXP3\_STAAH  
mentinesekkrfklkmpgafm1l1f1ltv1v1atw1ipagaysk1syepssqelkivnphnqvkkvpgtqqel1dkmgv  
kiki1eq1fks1gaink1pvs1ip  
nty1er1lk1qh1pag1pe1qit1ssm1vegt1ieav1dim1vf1lv1lg1lig1vv1qas1gs1fes1gl1a1tkk1tk1ghe1fm1liv1fvs1ilmi1gg  
t1l1cg1iee1eav1fyp1il1vpi  
fia1lg1yds1ivs1vg1aif1lass1vg1st1f1stin1p1fsv1vias1naag1tt1fd1gly1wr1ig1aciv1gai1fvis1yly1wyck1k1rs  
>tr|E5QXP4|E5QXP4\_STAAH  
mmaki1vva1lg1na1lg1ksp1qe1kl1vk1nt1aks1lv1g1lit1k1ghe1v1ish1ng1p1qv1gs1in1gl1nyaa1ehn1q1g1p1af1p1faec1g1ams  
qay1gy1ql1qes1l1qne1l1hsi

Tsompanidou\_et\_al\_Supplemental\_FASTA\_File

gmdkqvvtlvtqvevendpafnnpkpiqlfynkeaeqi qkekgtftvedagrgyrrvvpsspqisielestlik  
ndtlviaaggggipvireq  
hdgfgkidavidkdktsallganiqcdqliiltaidyvinfntenqpplkttnvdelkryidenqfakgsmkpieaai  
sfiennpkgsvlitslne1  
daalegkvgtvikk  
>tr|E5QXP6|E5QXP6\_STAAH  
mgnsrkgdyhmkknitknivlsta1111gttstqppkepifsseakaynisenetninelikyqtphlsfsgkwlwqn  
pngtihatlqtwwywhiq  
vfgpeswgninq1rdkyvdfgkdedtiegywydetftggvtpaatssdkpyklflkykdkqqtmgglefyqgnkp  
itlkeldfvrvtliknkk  
lyngfknqgirittggghytid1skk1kltdtnryvknprhaeievileksh  
>tr|E5QXP7|E5QXP7\_STAAH  
migtatsqspshpismsseakaynisetnvneltkyytqrhltsfnkwlwqkdngtihatllqlswfshiqvfgpesw  
gninq1rnkyvdfalkdy  
etwrtym1aqdftggvtpvakpsdkhyklnvtykdkagtfigeyqfytgknkpvltlkevdfriqrtilknkklyngdyn  
kghikitggsnytid1sk  
r1kstdanryvknqptahieillekss  
>tr|E5QXP8|E5QXP8\_STAAH  
mitqkgevrnrkcmkkl1lmtt1111gttatqtsnsp1nvstdakayhigqdetninelikyqtqlpltsfnrwllyqd  
dgniyvefkryswsahir1  
wgaeswgnvnlrdryvdfglkdedtsqlwwvyrtdftggvtpaaspsdkpys1fvqykdklqtiigahkmyqgnkpi1  
t1keidfraretliknki1  
yhenrkgk1kitgggndftid1skr1hsd1anvyvknppkitvevlid  
>tr|E5QXP9|E5QXP9\_STAAH  
myknymtqlt1pietsvripqndisryvneivetipdsefdefrhrgatsyhpkmmlkiilyaytqsvfsgrriek11  
hdsir1mwlaqdtqpsykt  
inrfrvnpntdalis1fiqfhsq1kqn1iddksifidgtkveasanrytfvkkssiqnysklnenskalyrdlveei  
iipeikedgdsd1tieeid  
ligsh1dkeied1nhsiqnedctqirkqtrkrteikkfkkkfdyserkskyeeqksilkdrensfsktdhdafmrmke  
dhmknqqlkpryn1qiatn  
sqfvl1sydl1fqnpdtrt1ipfl1tmiqntfgy1peyvadagyqseqnymaiiddfnktp1itygmfikdktrkfkdsif  
ktgnwkydelndeficpnn  
krig1kryayrndrygfkrdfklyecddcsacs1rqqcmkpnsksnk1kimkynweyfkaqinq1sepetkkiysqrki  
dvepvfgfmkailgftms  
vrginkvkre1gfv1malnirkivarravyqih1kkadfyqiinrnq1fyia  
>tr|E5QXQ0|E5QXQ0\_STAAH  
mklfyiaf1i1wlni1f1gnev1ht1tv1itt1yivnrkrvknndrve  
>tr|E5QXQ1|E5QXQ1\_STAAH  
mmkmktrivssvt1111gsilmpvanaadsd1niktgttdigsnttvktgd1vtydkengmhkkvfysfiddknhnk  
ilvirtkgtiagqrvyse  
eganksg1awpsafkvq1q1pdnevaqisdyypnsidtkemst1tygfngnvtgddsgkigg1iganvsight1kyvq  
pdfktil1esptdkkvqkwv  
ifnmvngnwgpydrdswnpvynq1f1mkt1rngsmkaaen1dpnkass1lssg1spdfatvitmdrkatkqqtndiviy  
ervrdyq1hwtstnwkgt  
ntkdkwtdr1sseryki1dwekeemtn  
>tr|E5QXQ3|E5QXQ3\_STAAH  
minfg1iivp11ttndadfvwtss1iyml1t1l1l1ivyiktkd1sl1q1tifilsval1llycap1llyfyv  
>tr|E5QXQ6|E5QXQ6\_STAAH  
mknk1iak1l1aiaaig1itt1astadasegygprekkpvsinhiveyndgtfkyqsrpkfnttpkyikfrhdynive  
yndgtfeygarpqfnkpaa  
kteatikkeqk1l1qaqnl1vrefekthtvsahrkaqkavn1vsfeynvkkmilqeridqvlkqglvr  
>tr|E5QXQ8|E5QXQ8\_STAAH  
mkkavvkmr1nggpkdfy1fd1trp1leenrknip1vkngeidsiywdq  
>tr|E5QXQ9|E5QXQ9\_STAAH  
mknfigks1l1saa1st1vstfageshaqtkaeyneyqtnfkkqvnkkvvdqkavn1fkrtrtvathrkaqravnl1  
hfqhsyekkk1qrqid1v1  
kynt1k  
>tr|E5QXR0|E5QXR0\_STAAH  
mkri1v1fgkvi1vdcpiw1npvdy1lksv1lksik1rfqevrkfeilvkimnrihi  
>tr|E5QXR1|E5QXR1\_STAAH  
mskwivsdnhtesgi1yqiyeahpdadmy1h1gdsefeyddtel1s1frrvkgncdfypefeneavakcndvrafythgh  
lyqvnrtry1laeqare1g  
cvfayghthvakyeyingvhvinpgsisqsrssmeesyaev1iddqtlqgtvnfknrqhetishtf  
>tr|E5QXR9|E5QXR9\_STAAH  
mrqkt1dv1efdkik1svanet1sd1glekvnqmpatn1fetv1fmeete1iaqiynkhr1ps1sg1skvsafihradi  
gg1nvsel1nikr1iqvq  
nqfktfyng1veedegvyp1l1ddkmnq1p1v1td1fq1inetcdtyd1lydnasyelqgirskisstnq1rirqnl1drivks  
qanqk1l1sdaivtrnern

Tsompanidou\_et\_al\_Supplemental\_FASTA\_File

vipvkaeyrqdfngivhdgsasgqtliepsvsvemnnqisrlrhdeaiakeriltqltgyvaadkdallvaeqvmgqld  
fliakarysrsikgtkpi  
keertvylpkayhplnretvantiefmedietviitgpntggktvtlktlglivmaqsglliptldgsqsvfknvy  
cdigdeqsieqslstfssh  
mtniveilknadkhs lvlfedelgagtdpsegaalamsil dhvrkigslvmatthypelkaysynregvmnasvefdvdtl  
sptykllmgvpgsrnafdi  
skklglslniinkaktmigtdekeinemieslernykrvetqrleldr lvkeaeqvhdlskqyqqfnyeksliedake  
kangkikaatkeaddiikd  
lrqlreqkgadvkeheli dkkkrlddhyeaksikqnvqkqkydkivagdevkvl sygqkgevl eivndkeavqmgikm  
klpiedlekkqkekvpktk  
mvrqrnrqtikteldlrgyredalie ldyldqavl snyeqvyi ihgkgtgalqkgvqqhlkhhksvsdfrggmpsegg  
fgvtvatlk  
>tr|E5QXS0|E5QXS0\_STAAH  
mtkkdvikllleqiatymelkgentfkisayrkaaqslelderpldeisdvte lkgigkvaevindyretgesqylqq lq  
eevpeglipllkiqglgsk  
kiaklykelnivdkaslvacengkvselsgfakkteqnileavkqlgakkdrypidqmrrlnqeidiyidtl nyidqys  
sagsfrrfkemskldfii  
stdnpkavqqlln ipnkveavngtkvslelayddetigvdfrieprafyhtlqhftgskehni rirlakardev  
seygieqadgtliqydsea  
kiyehfnvnfippamredgsefdkdl sniitlddingdihmhttsfdgafsi rdmveaniakgykfmvitdhsqsl rvan  
glqverllrqneeikal d  
eyseidiysgtemdi lpdgsldyddeilaql dyvigaihqsfnqseeqimerlanacrnpvyvrhiahptgriigrdgyk  
pnieqlmalaeentvlei  
nanphrldlsadivrky pnvkl tintdahhtnhldf mnygvataqkgfvtkdrvinal srea fkd fienniklk  
>tr|E5QXS3|E5QXS3\_STAAH  
mii fandneii tkgtqmanivfk lsdkdittlmsrisfdtenlpqgmkarakyqntt vniyqsgkvmf qgnhaeavsee  
llpqhsq lntnktkkknta  
nssl eqtlmydqfncigsdeagsdyfgpl tvcaafvtkehvpilktlgvddskltdtkivela eqlvtfiphslltlh  
nekyniqqagwtqvk mka  
vlhneai knvlekidssqldyividqfakrevyshyal sdiplpkktkfetkgeskslai avasiisryafitymdqisk  
ninmtipkgagakvdviaa  
kii knygisrlsiskkhfknrekaqkilkp l  
>tr|E5QXS8|E5QXS8\_STAAH  
mrmkrfltivqillvvi iifgckivqtyiedkqeranyeklqqkf qmlmskhqahvrpqfeslekinkdivgwiklsgt  
slnyvpvlgktnhdylnld  
ferehrrkgsi fmdfrnelki lnhntilyghhvgdntmfdvledylkqsfyekhkiefdnkygkyqlqvfsayktttkd  
nyirtdfenddyqqflde  
tkrksvinsdvnvtvkdkimtlstcedaysettkrivvakiikvs  
>tr|E5QXT0|E5QXT0\_STAAH  
mkknflkr lristlllivi lvvsvllivnetklfkndvnysfdeavsmqqgkivqtkeedgkfveanneiakamtishk  
dndmkymdi tekvpmsese  
vnqllkgkgl enrgkvfleaqekyevnviylvshalvetgngklelakgikdgkkryynffgigafdssavrs gksyae  
keqwtspdkailggakfir  
neyfennq lnyqmrwnpenpaqhgyasdi rwadkiaklmdksyqfgikkddir qtyyk  
>tr|E5QXT1|E5QXT1\_STAAH  
mrllqqa ffnssqppqrefrkeilqamrvgvwvptkrnwipnfy rcklagpqqreigfpistdnaswggttk  
>tr|E5QXT3|E5QXT3\_STAAH  
mekvyvagaipevgllqehfevemyegkglvdkdtlikgvkdata lislstnvdkdvidagkdlkii anygagfnni  
dieyareksidvntpkas  
tnatadltiglv lavarrivegdqlsr ttgfdgwaplffrgrevsgktigiiglgeigsavarrarafmdvlytgpnrk  
eekereigakyvdltdllk  
nadfitinaaynpkmhh lidteqfkmmkstaylinasrgpivheqalvqalkneiegaal dvyefepditddlkslnnv  
vltphignatfeardmmsk  
ivanaaisavqgekpqfvvn  
>tr|E5QXT4|E5QXT4\_STAAH  
mkqvtittsifnlntmihivkl nsstyviknfelsfigealfllffiatylyifppifiilifsil ltlklryli  
>tr|E5QXT6|E5QXT6\_STAAH  
mttemndvtnhpnrksndenimamliy llslftsiiigpliiwllkkdesk lvdragknylntisyi iisvllvitfi  
gvfliatdidfiiiigfii  
tfigilsifafsilsvftiiacvkyngqeyvip ltirfi  
>tr|E5QXT7|E5QXT7\_STAAH  
mkiaivgsgngavtaavdmvskghdvklycrnqsis kfqnaiekggfdfnegderfvkftdisddmeyvlkdaeivqvi  
ipssyieyyadvmaehvtd  
nqliffnmaaamsi rfmnvledrhietkpqlaeantlytgtrvdfenaavdl slnvrri ffstydrsc lndcydkvssi  
ydhlvkeesliktnlengn  
pevhpgptllnvgridyagefalykegitkhtvrllhaielerlnlgrrlg felstakesriergylerdkedep lnr lf  
ntspv fsqjppghvesry  
l tediayglvlwsslgrvidvptpnidaviviastilerdffeegltvesigldklldlekylk

Tsompanidou\_et\_al\_Supplemental\_FASTA\_File

>tr|E5QXT8|E5QXT8\_STAAH  
mmtrkptflesistmivmvvtgfvffdiqvl1iiasayaawiakrvgltwqdetgiaerIntampailiilavg  
iivgswmfsgtvpaliyyg  
ldllnpsyflisaffisavtsvatgtawgsastagialisgnqlsispgmaagaiagavfgdkmsplsdttlnlaalvt  
kvnikhihsmmwttipas  
iigllvwfiagfqfkgshndkqiqtllselaqiyqiniwvwp1iviivc1lfkmatvpamlissfsaiivgtfnhhfkm  
tdgfkatfsgfndsmihqs  
hissvkslllegggmsmtqilvtifcgyafagivekagclevllttiskgihsvgllicitviccialvfaagvasivi  
imvgvlmkdlfekyqvsrs  
vlsrtledsstmvlplipwgtsgiyytnqlhsvsvgeffiwtpcylcaiiiaiyygtgigikkssnsr1t  
>tr|E5QXT9|E5QXT9\_STAAH  
mswhvmtklienlksifvstl1tkn1smysrfdapkgfcvngcm1filyrvnrignrsfeiftnpif  
>tr|E5QXU0|E5QXU0\_STAAH  
mkkiaatatiatagfatiaiasgnqahaseqdnynpndptsysytytidaqgnhytwkgnwhpsqlnqdngyssyyy  
ngynnsynnyngysynn  
ysrynnysnnnqsynnyntnsyrtgg1gasystssnqvtttmapssngrsissgytsgrnlytsgqctyyvfd  
rvggkigstwgnaswana  
aaragytnvntpkagai1mqt1qgayghvayvesvnsngsvrvsemnygyggvvt1rtisasqaagynfih  
>tr|E5QXU1|E5QXU1\_STAAH  
mtdnys1hifksmkmsvkean1kiiyw1qgtgvvsin1qydvkrndvtvim1ndlyqidghddsvccvvevsaktflk  
fmnanymmrk1l1tnevas  
tfri1kyl1yskikqppynandkiinymcvelms1ntydgshrlvaeevhdy1tnhhkkinrkdvinqvsitnkalsd  
mfkatpysnfiqylnhir1  
ehclidi1tskkpieeiasshgfnhysrfih1fketygdtpk1irkrnsptshsinhsq1veidknie1fdtdnqsss  
mreidipfeptkrsqmyqp  
kniiy1kgsnfywmdyytikqiiqr1gvnpen1hiivtidtsnel1ieqit1llqkivnynv1v1frikheykelltster  
gkieklvati1fntfesnr  
ckiaflind1nttaiqklkr1idnyigvfe1iyhlepnelntrydkeidh1idyfilp1rqieqvsiarskiicdvdlin  
ennd1kekitmsdinkvte  
11tnytkfrg1imhmsiiseaskein1tr1sififiin1nq1rgivi1yqndtmivtkfkhevqcvic1paallnensda  
ir1sckgl1qqfshaktkqi  
v1sidkdnhtsengv1vndimqqhsywanfierniydhs1mvssnsivh1kyhlei  
>tr|E5QXU8|E5QXU8\_STAAH  
miveeiqgnian1nssekqkhvekvy1ensd1vkriqrvvtdhgteigir1kqid1qygdi1yaddhmi1vvdvnsed1  
1viqprt1qemgdiahq1g  
nrh1paqftetem1vqydy1ved11ks1gipyvredrkvnkafrhighshd  
>tr|E5QXU9|E5QXU9\_STAAH  
msfkmtqnqyts1ygpvtvgsir1l1gdtn1faiekyavygeeatfggksirdgmaqnprvtrddv1vad1visnavii  
dydkv1kadigi1kngyifa  
ignagnpd1mdnvdii1igsttdi1aaegkivtaggidthvhfinpeqaeva1esgitthigggtgasegskattvtppgw  
hihrm1leaag1pinvgft  
gkgqatnpt1lieqinaga1glkvhedwgatpsa1shaldvade1fdvqialhad1t1neagfmedtmaavkdrvlhmyhte  
gagghapd1lik1saafpni  
1psstnpt1pythntvdeh1dmvmithh1naaipediafadsriker1taaedv1qdmgvfsmis1sdsqamgrvgevit  
twqvahr1mkeqrgp1ldgdy  
ehndn1rikryiakytinpaithgiseyvgsiepgk1adiv1wdpiffgvkpelv1vkgg1insavngdangsiptsepmk  
yrkmyggygn1t1tsmtf  
vsktayenginra1n1krmvrvpkni1rqlskadmknnsatpk1dvdppqtevyv1dgekitsnaatel1ptqryflf  
>tr|E5QXV0|E5QXV0\_STAAH  
mipgei1tksteveinnhhpetvi1eventgdrpi1qvghfhfyanaa1dferemaygkhl1dipagaavr1fepgdkkevq  
1veyagrki1fgfrgm1vng  
pidesrvyrptdendeyagvfgdngtenv1nkkggkrs  
>tr|E5QXV2|E5QXV2\_STAAH  
mskhsrkryg1lkmidv1lknisqvv1isnkwtgl1filigl1fvadwtv1glaamigsi1ayafaryinyseaeindglagf  
npv1taialti1flksgld  
ivi1tmiat1l1tpvaaavrev1rpykvpml1tmpfvi1vtwfti1l1sgqvkv1dts1klmpqni1etvnfsnndrihvi1qslf  
egfsqvfi1easviggvcil  
igiliasrkaal1lavias1l1sfii1val1lgnyddin1qgl1fgynfv1lmaialgyt1fktainpyist1flgv1l1tvv1qlgtt  
t1lepfg1pal1tpfiivt  
wi1lfagikhdkvda  
>tr|E5QXV3|E5QXV3\_STAAH  
mvi1qsfl1ge1dgata1sigwhsvvgqi1yeqkl1wsqdm1eqfaveinnga1vnrvavseamgspr1grgpst1hvkadd  
gy1l1ngv1ktytsmskal1th  
iivaayiee1ksv1gff1vdrn1pgveiadnwdv1gmratshd1l1ndvkvp1kl1vetekskasngwilhipscylgia  
qaarnyav1dfai1qhspsni  
egtia1l1ptvqqn1l1kmet1l1carqfl1wstakgyqy1taesqir1natsaskvmvmnqglevid1lamrivgaks1emnrp  
1qryrdmr1ragl1hnpmed  
aaytniaksit1dtf

Tsompanidou\_et\_al\_Supplemental\_FASTA\_File

>tr|E5QXV5|E5QXV5\_STAAH  
megisgnayq|kkrfrkrittocydfveryittfykniillmenem  
>tr|E5QXV9|E5QXV9\_STAAH  
mnkdvs|ggpivryedgk|fnttdqyvtefpl|timvngeefatvicsptnleelvigflasegailkrdelksvliddsk  
gfahvelnkd|gdrfgyst  
krmi|ascgksrefyf|qndaavaktsmskit|ltpqqi|inmmtr|qsashiyqetgg|lhaaisdgl|tffvhrqdigrhna  
ldklygfc|qrhitvr|dkv  
lifsgrisse|likaakigvgv|lksapttlavt|landlnitavgfirnggfniyshperiidseq  
>tr|E5QXW1|E5QXW1\_STAAH  
mpdltpfwis|rvavistiivt|ilgifiskwlyrrkgswwk|vlesllilpivlpptv|lgfilliifsprgpigqffanv|  
hlpvvft|tgaviasv|ivs  
fplmyqhtv|qgfrgidtk|mintartmgasetki|flklil|plakrsilagimmsfara|lgef|gatlmvagyipnktnt|pl  
eiyflveq|greneaw|lwwl  
vlvafsi|vvistin|lnkdkykev|d  
>tr|E5QXW4|E5QXW4\_STAAH  
mdkkvkq|kecnimgeh|qnvkl|nrtvkaav|ltsdtrnfdtdk|ggqcvl|ql|lqvdnvevsdahytivkdekva|ittqvkkw  
leedvdv|ii|ttgg|tgiagr  
dvtieavk|pl|tkeieg|felfry|lsyvedvg|trall|sravagt|vndkl|ifsipgstgavk|lalek|likpelnh|lihel|t  
k  
>tr|E5QXW6|E5QXW6\_STAAH  
mvvekrnp|ipvkeai|qri|vnqqstmpait|valeks|lnhila|edivatyd|iprfdkspydg|fairsvdsqgasqgn|riefk  
vidhigag|svsd|klvgdhe  
avrimtga|qipngadavv|mfteq|tiedtft|irkpfsk|nenis|l|kgeett|tgdv|l|kkgqvinpgai|avl|atygyaevk|v  
ikqpsvav|iatgse|ll|dvn  
dvledgk|irnsngpmi|ralaek|lg|levgiykt|qqdd|l|dsgiqvvkeamek|hdivitt|ggvsvgd|fdyl|pei|ykavkaev|l  
fnkvamr|p|gs|vttvafadg  
kylfg|l|sgnpsacft|gfe|l|fvk|pavk|hmcga|levfp|qi|ikat|l|medft|kanp|ftr|firakat|l|tsagat|vvp|sgf|nksga  
vvaiahanc|mvm|l|pggsrg  
fkaghtv|di|l|tesda|eeee|lll  
>tr|E5QXW7|E5QXW7\_STAAH  
milqi|vgyk|sgk|ttl|mrh|ivs|flkshgyt|vat|ikh|hg|kedi|q|l|qdsd|vdh|mkh|feagad|qsiv|qgf|qy|qqt|vtr|vdn  
qnl|tqi|ieks|vt|id|tniv|l  
vegfkna|dfek|vvvyr|neee|l|qvl|qq|l|tnvcys|inv|rehed|ftafeq|w|l|nk|ik|ndc|dt|q|l|t  
>tr|E5QXX2|E5QXX2\_STAAH  
mpnliem|iv|lni|ftn|wrg|pni|egdeksay|nnv|qvg|gapt  
>tr|E5QXX3|E5QXX3\_STAAH  
mqvgerg|pniens|kkk|fyr|qck|lagp|qhref|qkei|l|qtm|qvge|qrnk|fyeni|isip|ll|ritt  
>tr|E5QXX5|E5QXX5\_STAAH  
mtnqgs|lnkspi|ftksft|inff|vnfivyl|cm|yll|vviagysk|qafdas|slag|lvvg|lfivgs|ligr|fatgk|fvn|qigp  
krllfi|glial|itq|llyf  
idgs|laf|l|fvrl|ngiatavv|ttatg|tiaay|vtpvnr|ksegis|l|fs|l|slv|l|gtaig|pflgm|llitkyaid|llfi|icvil  
gilgvi|isl|fikv|dfev|tn  
sktetn|vidk|prfsih|qf|akeaipvavim|l|ligvtyasi|l|tyl|qafai|erh|l|vtaasy|fficyai|asl|trpi|agr|lmd  
dkneni|ivypafim|l|l|sf  
vc|l|issy|qsw|l|llagac|l|g|ygn|l|ssam|qsi|aikv|sp|pikygiatst|fyv|gl|dagv|gfgps|flg|l|fthm|fsy|seif|gf  
maalai|itml|vyfl|ihgrh  
vtrnamn  
>tr|E5QXX9|E5QXX9\_STAAH  
mikkllq|fslgnk|faifl|mvvlv|l|ggvyasak|l|kle|l|l|pnv|qnpvisv|ttsmp|gatp|qstq|deisskidn|qvrslayvk  
nvktqsi|qnasi|vtveyen  
ntdmka|eeq|l|kkeid|kik|fkdev|gqpe|l|rrnsmda|fpvlays|fsnkend|l|kkv|tkvl|neq|lipkl|qtvdg|vqnaq|l|ngq  
tnreit|l|kfkqne|lekyg|l  
taddveny|l|ktat|trtp|l|gl|fqfgd|kdsiv|vdg|qyqsvd|afkn|inip|l|t|lagg|qgqs|qsqs|dnk|qnsams|dvn|qasp|qq  
n|sktsas|nnisgm|ptak|lg  
dladi|tv|gdvrts|isk|tngk|davn|l|qitka|qdantv|qvakdv|qrkid|t|fvdenk|dfnv|tk|tmd|takpveks|lytm|vekas  
l|gtivai|iv|ll|fl|nr|irt  
taisi|isip|l|sl|malial|k|l|sdvs|lni|l|t|l|galtva|igrvidds|ivv|veniyr|l|tdsee|q|l|ngenli|isattev|fkpi  
msst|lvti|ivfl|plv|fvs|g  
svgem|frp|fal|aif|sl|las|l|lvs|it|lpalaat|l|fkkgv|krrnk|qh|qeg|lgv|stty|kkv|l|hws|lnhk|wivi|il|st|lil  
vttiv|fggpr|l|gts|fis|ag  
ddkfla|itytpk|pgeteqav|lnhakdveky|l|kqk|khv|kti|qysv|ggss|pvd|ptgstns|maimveyd|ndtpn|fdveadkvi  
khadg|fkhp|gewkn|qd|lgt  
gagnks|vevt|vk|gpsmda|ikst|vkdi|eqkm|kqv|kglanv|ksdl|sqtyd|qyei|kvdqn|kaaeng|isasqlamh|nen|lpek  
tv|t|vkeng|ktv|dvk|vkqn  
kqtdws|edk|l|nni|t|l|kkpt|gg|tik|l|gdiat|l|v|k|t|t|t|psk|l|t|q|e|q|g|dyatt|vsakv|tnk|dv|gg|t|tr|qvms|kinn|l|dkp|nnv  
kvniggas|ddinnam|tqla  
faml|aai|ivyl|ilv|itf|kglap|ftil|fs|l|pftv|igv|ia|allit|getis|vps|ligm|l|ligiv|vt|naiv|lidr|vinneq  
qgmemkeal|ieagg|tr|ip



Tsompanidou\_et\_al\_Supplemental\_FASTA\_File

ilmtaiatigalvp11fgqdssiliskglaatvigglisst11t1lvvvpviyeilftlkkrftr  
>tr|E5QXY0|E5QXY0\_STAAH  
mnp1krrgsyhmqfyli11ailylivsfisifkmevftrilriimgv111fvla1ttmsfpkenwwvfiv1111vgne  
vtgfkmlkkdlkgvni1n1  
ms1fifviyfil1t1v1f  
>tr|E5QXY2|E5QXY2\_STAAH  
mkegitvteqftmi11lia1gyf1krinyikatdsqvial1v1nvt1ps1vivn1nsaelk1s1silpilmiygivakm  
iavwffrkydnhmrgsvgm  
mtgamni1gfayplievipktg1iyfgmadiggafvmfgityfvgsyfsegsdqdfkylgkkl1qsvplvtyivmfil  
nishih1phvaidffsils  
hanmp1smi11gvm1nft1erkyipatikylc1hyglalvag11vhv11pvsddmiktt11vtwmfpvgvaiisyyiqfk  
yrt1pfigmtt1n1tiisi  
iilyvyqavfv  
>tr|E5QXY3|E5QXY3\_STAAH  
mqf1df1ia11pal1fwgsvv1invfvgggpyngirgtt1galiv1gl1itg1akfn1nptviivglisgalwafgqanq1  
ksis1igvsntmpvstgmq  
1vgtt1fsvif1gewssmtqiifgliami11vtgvalts1kaknerqsdnpefkkamgilivstvgv1v1gdi1fgvg  
gtdal1ffqsvgmaiggf1  
smnhkts1ksta1n11pgviwig1n1fmfysqpkvgvatsf1s1q11lvivst1ggifilgerkdr1r1qmtgiwv1g1i1ivi  
aai1gn1k  
>tr|E5QXY4|E5QXY4\_STAAH  
mlis11tfisve1lynksnkkygndmsivqlyditqiksfihsnyesasylyk1pqqyneidv1itdaiespgv1fsik  
endsik1i1sfaydknf  
kvigp1vadny11svetfet1fktmts1npddavfn1fsfeegi1qykp1mkviqasynftdyiear1r1leedmhqpn1i  
pyhkgfyrafsk1h1ttf1k  
yqaqsp1di1ds1ddhh11f1fvseg11kgyly1eidsqqsiaei1kyfsshvdyr1k1giafella1ya1qafdn1dirkv  
yfk1rnkkn1k1ierfng1g  
fhinyey1k1k1fesrn1vkdqtipe  
>tr|E5QXZ2|E5QXZ2\_STAAH  
maikkyk1p1tngrrn1mts1dfaei1tkttpeks11kp1pkagrnn1qgk1t1vrhhggghkrqyr1vidfkrnk1dginakvds  
iqydpnr1san1alvvyadg  
ekryi1iapkg1evgqivesgaeadi1kvgnal1p1qni1pvgtv1vhnie1kpgk1gq1arsagasaq1v1gkegkyv1ir1rsg  
evrmi1stcratig1qvgn1  
qhelv1nvgkagr1r1wk1gir1p1t1vrgsvmnpnd1h1phgggegrap1igrps1pmspwgkpt1gk1k1trrgk1k1ssdk1ivrg1rkkk  
>tr|E5QXZ3|E5QXZ3\_STAAH  
mcg1k1lhahn1k1ggagmars1ikk1gp1fvdeh1mkkveaqeg1sekk1qviktwsr1rsti1fpn1fight1favydgrkhv1pvyvte  
dmvghk1lgefap1tr1tfkgh  
vaddk1trr  
>tr|E5QXZ4|E5QXZ4\_STAAH  
meakavart1riapr1kvr1v1ld1irgknae1aia1k1l1tnkass1piekv1msalanaehnydmnt1delv1vkeayanegp  
t1krfr1praq1grasainkr  
tshiti1v1sdg1keea  
>tr|E5QY12|E5QY12\_STAAH  
mkn1il1kvfntmi1al1i1i1iatfsntanaads1gt1nyevykyntndtsiandyfnk1pakyik1kngklyvqitvnhshwitg  
msieg1hkeri1skntakde  
rtsefevsk1ngkidgkidvyidekvngk1pfkydh1hynityk1fngpsdvaganap1gkddknsasgsdkgsdgattgqses  
nssnk1dkvenp1qtnagtpa  
yiyai1pvas1al1iait1fvrk1ksknve  
>tr|E5QY13|E5QY13\_STAAH  
mtkhy1n1skyqse1r1ssamk1itmtg1asi1l1gs1lvyigadsq1vnaateatnatn1nqstqvsqatsqpin1fvqk1dgsse  
kshmd1dymq1hpgk1vikqnn  
kyyf1qav1lnnas1fwkeyk1fynannqelattv1vnddkkadtr1invavep1gyks1ttkvhi1vvpqin1ynhryt1th1efeka  
ipt1l1adaak1pnnvk1pvqpk  
paqpk1t1pteqt1kp1vqpkvekvk1pavtapsk1nenrqt1tkvs1seatk1dqs1qtsartv1kttq1taqd1qnkvqtp1vkdvatak  
sesn1nqavsd1nksq1tnkv  
tkqne1vhk1gqpsk1dskake1l1pktg1tsvdn1fistvafat1al1gs1s1111fkrkesk  
>tr|E5QY14|E5QY14\_STAAH  
mnkq1k1efks1fys1rkss1lgvasvai1st1111msngeakaae1etgv1nteaqpk1teavaspt1ttt1tekapeak1pvanavs  
vsnke1v1vapt1tetke1keav  
kavke1v1kapke1keek1paakadn1ntyp1lnqel1reai1kn1paik1dkdhsapns1rpid1femk1k1dgtq1qfyhyass1vkparv  
ift1dsk1pei1el1g1sq1qfw  
rkfev1yeg1dk1l1pik1l1vsydtv1kdyayir1fsvsng1tkavkiv1ssthf1n1keekydyt1lme1faqi1yns1adk1fkteedyka  
ek1l1apyk1kakt1lerq1vye  
1nk1iqd1k1pek1kaeyk1kk1leetkka1ldeq1ksaitef1qn1vqptnek1mtd1ldtky1vvyes1vennes1mmdt1fvkhp1iktg  
m1ngk1kym1vmet1tnddy1wk  
dfm1veg1qr1vrti1skdakn1tr1ti1fpyveg1k1lydai1kv1hvk1tidydg1qyh1rivd1keaf1tkanad1k1tnk1keeq1dnsak  
kett1pamp1sk1pt1pp1vke  
sqk1qds1qk1ddnk1qsps1vekend1assesg1k1dkmp1v1tkpakaev1ess1t1ptk1v1st1qn1vak1ptt1asset1k1dv1vqts1ags

Tsompanidou\_et\_al\_Supplemental\_FASTA\_File

seakdsap1qkaniktnd  
ghtqsnknktqenakslpqtgeesnkdm1plmalialssivafvlprkrkn  
>tr|E5QY17|E5QY17\_STAAH  
mfcyninneyrkdelqmksvgliteynpfnhghqyhinqskltnadvtiaimgnfvmrgepaiynkftrakmalstad  
lvielpatas1ssgdhfae  
lavkvadymvdtiafgsennniktlkqlahsineieqsessfsqkvkegksypriisellehealaspnnilgisylka  
iakhakninaisikrenaq  
hhdsl1qhkhkfasgtsirtsiiisqddhwhhvvpkdiqhlvytphitlnqifpylkyqiiamtteslknityvttegfenrl  
ksyineatdfhhfvkslkt  
krytythigrllmnl1nikptdvtrnihavkvlamndrgrqylkh1ktvfperqyitninksnahyftneikathiyana  
isgqqtdfntpvigqyr  
>tr|E5QY25|E5QY25\_STAAH  
mknmgvpilptisttcivisa1iaigwrliwkreidkhhknvmlaaavfaltffliyasrtifigntafggpasikkyt  
iflffhinlatiggilglv  
qiitafkdkynvhrkfgpfasviwfctaitgvavyllyvlypggettslikatfgh  
>tr|E5QY26|E5QY26\_STAAH  
mskehtlsqnirvnfkelqqiikmg1vqgnlipafagawlavvmtnhsflssipqillm1l1gstlimggacalnnyydaq  
didrimpskqnrptvnri  
tdqnll11sfgmm1vgeic1fl1nipsgvlg1mgivgyvsyysiwskrhttwntvigsfpgavppligwaieggis1ta  
ialflvfcwqpihfyal  
ikrkdeyalanipmlpsvkgfkrtrvsmfiwlii11pvp111inlgvvfvlat11n1lgwialglttfkksdqtkwatq  
mfiysl1nylvi1ffvlaviv  
s11t1i  
>tr|E5QY27|E5QY27\_STAAH  
myklfgkkn1kwlgvat1mmtfvqlgga1vtktgsadgcgsswplchgalipeffpidtielshravsals11mvlwl  
vitawkhi1gyikeikplsi  
isvgf111qaligaaaviwqndyv1alhf1gis1isfssvflit1i1fsidqkyeadelyikkplr1rtwlm1aii1y1cgv  
ytgalvrhadas1ayggwp  
lpfhd1vphseqdwwqlthrimafivfti1mityihavknyppnrtvhygytaafilvilqvitgalsimtnvniialf  
halfitylfgmttyfimlm  
1rsvrsdkq  
>tr|E5QY28|E5QY28\_STAAH  
mdaihpgygf1senegfarrcaee1kfigphlehl1dmfgdkvkarttaikadlpvipgtdgpiksyelakefaeeagfp  
lmikatsggggkgmrvire  
eseledafhrakseaksfgnsevyieryidnpkhi1evqivigdehgnivhl1ferdcsvqrrhqkvvevapsvgl1sst1rq  
ricdaaiqlmini1kynvnaq  
tveflvsgdefffi1evnprvqvehtitemvtgidivktqilvaagad1fgee1nmpqqkditt1gyaiqcritt1edplnd  
fmpdtgti1ayr1ssggfgv  
rldagdgfggae1spyyds11vk1sthai1sfkqaee1kmvrs1remr1rgvkt1n1pfl1nmknk1kftsgdyttkfi1eetp  
el1fdi1qps1ldrgtk1leyi  
gnvt1ngf1pnvekrpkpdyelasiptvssskiasfsgtkq11devgpk1gvaewkkqddv11tdtt1frdahq11latrvr  
tkdmini1asktadv1fdkgf  
slemwggatfdvayn1flkenpwer1er1rkaipnvl1fqm11rasnavgykny1pdn1v1hkf1vqesakagid1vfri1f1ds1nw  
vdqmkvaneav1qeagkise  
gticytgd11npersniyt1leyvklake1eregf1hilaikdmag11lkpaayel1igelkaavd1pih1lthtdts1gng11  
tykqaidagvdi1dtavas  
msg1tsqpsans1lyalngfprh1rtdiegm1s1shywstvrty1sdfesdikspnteiyqhempggqysn1sqqaks1g  
lgerfdevkdmyrrvn1flf  
gdi1kvtpssk1v1gdma1ymvqnd1deqsvitdgyk1dfpesvvs1ffkgeig1qpvn1gnkd1qavilkgqeal1tarpgy  
1epvdfekvrel1eeeqq  
pvteqdi1isyv1ypkvyeqyiqtrnqygn1s11ldtptfff1gmrngetveieidkgr1liiketise1pdengnr1tiyyam  
nggarriy1ikden1vhtnan  
vkpkadksnpshigaqmpgs1vtevk1svgetvkanq11liteamkmetti1qapfdgvikqvtvnngdtiatgd11ieiek  
atd  
>tr|E5QY29|E5QY29\_STAAH  
mteymknfrs1lryigktskfidyp11lvtyiv1slig1lvmvysasmvpatkgt1tggidvp1gtyfynr1qayvimsfiiv  
ffiaf1lmvkl1snikvqk  
gmii1t1vs1111t1v1gkding1skswin1gfmn1qasellkia1i1lyipfmi1skmprv1skpk1l1spiv1al1gctflv  
flqkdv1gqt111i1i1lvai  
ifysg1g1vknvl1rfgipav1gl1v1v1via1magw1psyltarfst1tdpfqfesgtgyhisn11aignggv1fgk1gns  
amk1gyl1pephtdfi1faii  
ceel1g1l1gg11v1tleffiv1yrafqfanktssy1fyk1vcvgiaty1fgsqt1fvn1g1gisatip1ltgv1pl1pfi1sfg1ssm1s  
1siamg111ivgk1k1vdq  
qrkkq1qkvd1rrqfn  
>tr|E5QY30|E5QY30\_STAAH  
makq1ttm1knaal1k1tkdade1l1h1ikvq1dn1t1p1sc1p1yeev1dtq1m1fg1lqevdfavk1gl1vdredgk1qim1r1leke  
1sk1heaft1v  
>tr|E5QY31|E5QY31\_STAAH

Tsompanidou\_et\_al\_Supplemental\_FASTA\_File

mlytligsgkmiqikgavkfpitldsttwifddrkvsiedlekvgvfdgskpidfednhewnrailegqtnpptlnseiky  
kkramlegsfvinnmtpffk  
hsephdsattir1snehdh1dipid1lpylffqfakdgrlysdngvdsfiynqedgysyrinhvthievi  
>tr|E5QY32|E5QY32\_STAAH  
mqciicdakvfidentteskr1knnpi rtfmcddcksrldtpkqraqhpyld  
>tr|E5QY33|E5QY33\_STAAH  
mtnkredvrniaiahvdhgkttlvdellkqsgifrenehvdramsndierergitilakntavdykgtlinildtpg  
hadfggeverimkmdgvv  
lvdayegtmpqtrfv1kka1eqnlkpvvvnkiddpsarpegvdevldlfielendeqlfpvvyasavngtasldp  
ekqddnlqsllyetiidyvp  
apidnsdeplqfvalldyndyvrigrigrvfrgkrmrvgdvnslikldgtvknfrvtkifgyfglkrleieeaqagdli  
vsgmedinvgetvtphdhq  
ealpv1rideptlemtfkvnnsfagregdfvtarqierlnqql etdvs1kvsntdspdtwvavrgelhl silienmr  
regyelqvskpqviikeid  
gvmcepfervqcevpqenagavieslgarkgemvdmtdngltr1ifnvpargmigyttfmsmtrgygiinhftfeefr  
prikaqiggrngalismsd  
qgsastyailgledrgvnfmepegtevyegmivgehnrendltnitkktkhqtnvrsatkdqtqtmmrpril1tlealqfi  
nddelvevtpesir1rkk  
lnknvrekeakrikqmmqene  
>tr|E5QY35|E5QY35\_STAAH  
mlgddvmalygfaqqliqeaqirikqlmeqnl1tietksnpndlvtvndkatedfifdtiletynhqvlgeeghghdidt  
skgtvwwvdp1dgtlnfvh  
qqenfaisigiyidgkpyagfyvdmadvlyhakvgegayrgsq1kplndsn1rqsii ginpnwltkpv1geifkdvvn  
isrsaraygsaaleivsva  
tgn1eaymtr1qpwdfagg1v1nevdlg1asn1lgepl1tisgpn1ilvgnrgvhreilgvylephrdaliqlheqrfr  
ksk  
>tr|E5QY37|E5QY37\_STAAH  
mnnkrhstneqls1deinntikfdhrssnkqkflsflgpgllvavgymdpgnwitsmqggaqygyt1lfviliss1sam1  
lqsmtr1g1atgmdlaqm  
trhylsrpiaiifw1iaelaiatdiaevigsaialn1fn1plivgalitvldvfl1l1fimkygfrkieaivgtl1ftv  
lfi1fevy1sspq1nav1  
ngfiphse1itnngi1ya1lgiigatimphn1ylhssivqsrtysrhneekaqaikfatidsniqls1afvnc1ll1vl  
gas1ffnsnaddlggyd1  
yhal1ktepv1gatmgaimst1fava1lasgqnstigt1agqivmegflr1hipnw1rr1itrs1lavipv1vcl1ifkgn  
aak1eq1lvfsqv1ls1a1  
pfc1l1pl1qlatsnk1dmgpfynktwvni1swt1lii1silnv1livqt1felqg  
>tr|E5QY39|E5QY39\_STAAH  
mtgeqftq1krpvsr1tekv1glcwvm1lv1tvitmfialvsfsn1tsian1ent1nna1fiq1llagngynttqfviw  
lqngi1wai1ivfy1vc1lis  
fla1ismn1rilsgfl1isaiv1tip1vl1livt1iip1ilff1iamm1fir1kdkvemvapqyye1yngpi1dyre1pvyerp  
qpkddy1dvpkyeke1dks  
ntvydq1erdkydqfpraveseynhdertee1psv1srqak1yqk1steelgi1eddg1yae1pevd1pkel1kaqq1kreae  
ikakk1kekr1kayn1qrmker  
rknqpsavsqr1rm1feerr1qiyndi1seerns1sevk1dkkeq  
>tr|E5QY41|E5QY41\_STAAH  
mnhmkwygklyig1l1ail1yipi1ff1mfys1fnsagn1vihfeh1tlehyqsl1fqn1dh1msv1fnti1avalla1asist1vig1t  
fgai1ai1y1rnkk1fkvt1l1  
t1nnv1mvss1dv1igas1fl1mftt1igh1ftg1lg1gfwt1vl1shia1fcip1vvi1vlpq1lyem1n1n1naard1gate1pq1l  
snii1pn1il1psi1gg1ffma  
l1tys1l1ddft1vs1ffvt1gng1fs1vs1vevy1amark1gis1meina1st1l1fav1vl1gil1gy1liq1yv1nkk1lik1rgvk  
>tr|E5QY44|E5QY44\_STAAH  
mnign1k1kn1rr1ikn1tqe1laert1d1skgy1isq1ieseh1asps1met1f1ni1ev1lgtt1pse1ffk1dsenek1vlyk1keeq1viy  
dey1degy1lnw1lvs1ks1ney  
dme1pl1l1t1kpg1asy1kn1fn1ps1es1dt1fiyc1msg1qit1ln1gke1vy1qa1eed1vly1fkard1nhr1l1snes1nnet1ril1ivat1asy1l  
>tr|E5QY45|E5QY45\_STAAH  
meg1stmey1epi1d1dws1neemi1lv1nff1nh1vke1yyes1gvt1ag1dfmd1ay1krf1kei1vpaka1eek1qif1nt1fek1ss1gyn1syk1av  
qdv1k1th1see1qrvt1akk  
>tr|E5QY47|E5QY47\_STAAH  
mafefr1lpdi1gegi1hegei1vkw1fvk1agdt1e1edd1v1aev1qnd1ks1vvei1pspv1sgt1veev1mveegt1vav1vgd1v1k1dap1d  
aed1mq1fkgh1ddd1sss1keep  
akee1apa1eq1ap1vat1qt1ee1vden1rt1vkamp1svr1kyare1kgv1nikav1sgsg1kng1rit1ked1vday1l1ngg1apt1as1nes1a1sat1n  
eev1adt1pa1apa1avs1leg1df  
pette1kipam1rra1iakam1vnsk1htaph1vt1mde1idv1qal1wdhr1k1k1fkei1aae1qg1tk1l1t1fl1py1v1ka1lvs1alk1kypa1l1nts  
fnee1age1ivh1khy1wn1gia  
adtdrg1ll1vp1vkh1adr1ks1ifq1sde1inelav1kard1gk1ltad1emk1gat1ct1is1nigs1agg1q1wft1pv1nh1pe1vail1g1ig1ria  
qkpi1vk1dgei1va1p1vl1als  
l1sfd1hr1qi1d1gat1gq1nam1h1kr1l1nnp1e1ll1meg  
>tr|E5QY50|E5QY50\_STAAH

Tsompanidou\_et\_al\_Supplemental\_FASTA\_File

mevqymkfgktiavvllassvllagcttdkkeikaylkqvdkikddeepiktvgkkaieledkkkkkltedvnskdavrgk  
avkdliknaddrlkefeke  
edaikkseqdfkkakshvndndvkrkevqllddvlkeykllhsdyakaykkavnsektlfkylngndatqqgvneksk  
aieqnykkakevsdkytkv  
lnkvgkekqdvdfk  
>tr|E5QY51|E5QY51\_STAAH  
myeylnnlfvtvqlkqikirkvqymltmkdiirdghptlrqkaaelelpltkeeetliamreflvnsqdeeiakryglr  
sgvglaapqiniskrmiav  
lipddgsyksydymlnvpkiavshsvqeylptgegcslvddnvaglvhrhnririkakdiegndiqlrlkgyaivfqhe  
idhngvmfydhidkdhpl  
qphtdavev  
>tr|E5QY54|E5QY54\_STAAH  
mterkcacnklfslvrgpnkeadeksaynnvqvgdgpqhrefrkeilqamqvgvgrnkf  
>tr|E5QY58|E5QY58\_STAAH  
mseiiyytqndcppctfvknylnrqi dfeerniknqyrnemidfdafstpfllngnmpyhvdldelinkvlniqd  
>tr|E5QY59|E5QY59\_STAAH  
mskllkgiaasdgvaiaakayllvepdltdfknekvtvegevakfnaieaskveltkirnaevqlgadkaafdahll  
vlddpeiiqqi qdkiknen  
anaasaltdvttqfvtfesmdneymkeraadirvskrvlshilgvelpnpsmidesvvivgndltpsdaqlnkefvq  
gfatniggrtshsaimrs  
leipaivgtkstqevkqgdmiivdglngdvi vnpstedeliayqdkreryfadkkelqklrdadtvtvdgvhelaanig  
tpndlpvgviengaqqigly  
rteflymgrdqmpteeeeqfeaykevleamdgrvvvrtldiggdke lsylnlpeempflgyrairlclaqqdifrpqlr  
allrasvygklnimfpmva  
tinefreakailleekenkneghdisddielgimveipataaladvfakevdfsigtndliqytlaadrmservsyly  
qpynpsilrlvkqvieash  
kegkwgtmcgemagdetaiplllglgldefsmsatsilkarrqinglsknetelanravdcatqeevie lvnyvk  
>tr|E5QY62|E5QY62\_STAAH  
mkiatlnkgketkyfngypliceediysqdhkegdi fqi vtdksqyvatayvgrqhkglgwvlytdkaqevntaffvk  
fntalaerdyfndigtna  
frlfnaegdvggltdnydghlliqwyskgykfykyaileavrkvfdyksiye kvrfdkseysggfvegdapefpivie  
enftfynvldedglmtgif  
ldqkevrrkklrdqakerhvl nlf sytgafsviaaseassttsvdlanrsrlteenfglnaidpksqiyvmdtfdyk  
yaarhghsydtividpssf  
arnkkrtfsvqkdydklitgalnllsseglllctnasvypkqfkntiktleesgvdyeltevnglpkdfkthphykp  
skylkavfvnirh  
>tr|E5QY63|E5QY63\_STAAH  
mdnfstifalklciqfsilnshylnqsnlvtkkvl sinfidlylskleiylytsv hikmfnr  
>tr|E5QY64|E5QY64\_STAAH  
msflrkhaeiifsyiligivslftgllilnlprikqlnggkvdthvhnweflnaffseiikvmsrfignf pivsaivi  
iifgilvmlightllrtik  
ydydisifflyigimiyfiitlilm tqvygffavifiipftihigyivykdelnqenvknhymwiivsygisylitqialy  
gridaneiesidilsvnaf  
fii mwl lggmaiwnflflrralpltkqelgeeepe lsrtskgnvtntqkihklqldktt eyarktrrsvldkirakrd  
kfkkkvndiidiqeddipd  
wmrkpkwvkpmyvelfcgvviflftflefnnrnalfvsgdwklsqtqyviewvtllillfiiiyatmltfhlkgkfyy  
lqlfmg silffklltefin  
imihglllsvfitptllmllaiisyslqlrerp  
>tr|E5QY67|E5QY67\_STAAH  
mlkvsdlrlkypsgqrki fhdlnitidkkelvllgpsgcgkstllnvlsgivpnlielpmkydelivdplsgvifqdpd  
sqfcmkvyeelafvlenr  
qvpredmdaliinalnmvnl nvtptyikdlsggmkkqlaivetilqqsktlf ldeptamldvqatedlwtklielwedq  
tvvivehkvkhiwnhvdrv  
ilm dyngni iadecpeii lqkyvhlseygvwhprawefapsrvdfpttshllqfkngriirgkstllsfsdleiglge  
witiitgangsgkttllesl  
mqlikyqgdvyfenhltkikhaakhmylvynpelqfitnsvydeinihfhnlskdqsddetiqlllkll dlenvkdhp  
yelsigqkrrlsvatalss  
kadiifldeptfgldshntfqlklfqkrinlgqsivmthddeierypsrrlkisdgalldcdgdtnv  
>tr|E5QY68|E5QY68\_STAAH  
myeqwkvrsfvddvniitklflgii lfffii fvhndfml yitilmvlflmfngtqfkitaitisigfallssl fm  
ilyngshtilkfgfihit  
teslvrglhvs lrtiaisffgilia ltsqvvmifyslmqhlkvkskvayafmaairmipmissliqlrrslkmryqm id  
aanyrglkrfkhliiplls  
qnirkahqlsvameskgfrdgprrtyyynvpfsykdvifiivliaiilayycsitlpitgidvrlgrvg  
>tr|E5QY69|E5QY69\_STAAH  
mnlvigaggrehalayklnqsnlvkqvfvipgneamtpiaevhteisesdhqgildfakqqnvdwv vigeqplidgla  
dilrangfkvf gpnkqaaq  
iegsklfakkimekyniptadykeverkkdal tyiencefpvvvkkdglagkgviiadtieaarsaieimygdeeeegt v

Tsompanidou\_et\_al\_Supplemental\_FASTA\_File

vfetflegeefs lmtfvng  
elavpfdciaqdhkrafhddegpntggmgaycpvphisddvklktnetiaqpiakamlnegyqffgvlyigailtkdgpk  
viefnarfgdpeaqvllsr  
mesdlmqhiidldegkrtefkwkneai vgvmlaskgypdayekghkvsqgfdlnenyfvsglkkqddtfvtsggrvilaig  
kgdnhvdaqrdvdayekvsqi  
qsdhlfyrhdianka lq lk  
>tr|E5QY70|E5QY70\_STAAH  
myvmkkailsvsnktgivefakal tq lnyelystggtkri ldeanvpvrsvsdlthfpeimdgrvktlhpavhggiladr  
nkpqhlne lseqhidlidm  
vvvnlypfqqtvanpdvtmdeaienidiggptmlraaknykhvttivhpadyqevltrlrnds ldesyrqslmikvfeh  
taeydeavrrffkgdketl  
rygenpqsayfvrtsnakhtiagakqlhgkqlsynnikdadat lalvkkfdtpaavavkhmnpvcgvigdtleaqafha  
yeadsqsi fggivalnrap  
tpelaeqlhsiflevi iapkf tdealn ilkqkknvrll eidmtidsneeefvsvsgylvqdkdnyvvpkeemkvvteva  
ptdeqweaml lgwkvvpsv  
ksnai ilsnkqtvgigagqmrvgaakialeraieindhvalvsdgffpmgdtvelaaqhgikaiiqpggsikdqsid  
mankhgiamvvtgtrhfkh  
>tr|E5QY73|E5QY73\_STAAH  
mfnysglneecgvfgiwnhpeaaqltymglhs lqhrqgegagivvsdqnelkgergl l l teaikddqmerlkgqhaig  
hryatsgnkgieniqpfl  
yhyfmsvgichngnlinaks l rqnlekqgai fhsssdtevimhli rrskaptfeealkes l rkikggftfailtkdaly  
gavdpnairplvvgkmdg  
tyilasetcaidvlgaefvqdi hageyv vindkgitvksythttta isameyiyfarpdstiagknvhavrkasgkmla  
qespvkadmvi gvpnssl  
aasgyaeeig l pyemglvknqyvartfiqptqel reqqvrkl savkdivdgkniilvddsivrgttirrivkmlkdsga  
nkvhvriaspfemfpsfyg  
idvsttae l isakspeeikdyigads lay lsvdgliesig l dydapysglcvesftgdypaglydyeanykah l shrqk  
qyisknkhyfdsegnlv  
>tr|E5QY75|E5QY75\_STAAH  
mhmkmfavlvfpgsncdrdmfnaaiksgveaeyvdyretslsgfdgvlipggfsfgdy l rsgamasvapvisevkr laae  
gkpvlgvcngfqi l teig l  
lpgal l hndsh l fisrnee l eivnnqtaftnl yeqqekviypvahgeghyctdeiyqkl kannqi ilkyvnnpngsydd  
iagivnekgnvcgmmphpe  
ralet l l gtdsgvkl feamvkswreqhv  
>tr|E5QY77|E5QY77\_STAAH  
mtllyegkakarifstngene l rveykdevtagngakddtmaggr l n n qitsi i fky l qengieshfikql seteq l vkp  
vkiiplevvvrniagsit  
krlgfengev freplveffyknda l ndpl itddhik l l niatdkdiet l ktkaleinqvlkql mhamnlklvdfkiefgk  
tetgqil l adeis pdtcri  
wdkatnanfdkdvyrrntgs l ietyqi f l nk l ed l k  
>tr|E5QY78|E5QY78\_STAAH  
mnfnklkfgatigi igggqlgkmmaqsaqkmgkvav l dpaedcpcryvahefiqakyddeka l nqlgqkcdvityefen  
isagqlkl l cekynipqgy  
qaiql l qdr l tekets l ksagtkvvpfivsvkeskdidkaiet l gypfivktrfggydgkqv l innekd l qegiklietse  
cvaeky l nikkevsl tvtr  
gnnnqityfplqenehrnqil fktivparidkiaeakeqvnkiiqsihfigtftveffidsnnqlyvneiaprphnsghy  
sieacdysqfdthilavtg  
qslpnsie l l kpavmmnl l gkd l d l l enefnehpewhlhiygkserkdsrkmghmtvl tndvnqteqdm yak fegsn  
>tr|E5QY80|E5QY80\_STAAH  
mtiggevmvaki l dgkqi akdyrqglqnqvealkekgftpk lsvilvngd gasqsyvrskkkaekigmiseivhleet  
ateeev l nelnr l nndsv  
sgilvqvp l pkqvseqkileainpdkdvdfhpinigklyideqtfvpctplgimeilkhadidlegknnavvigrshivg  
qpvskl l l qknasvti l hs  
rskdmasy l kdadviv savgkpg l vtkdvvkegavi idvgntpdengk l kgdvdydavkeiagaitpvpggvgl titmv  
lnnt l laekmrrgids  
>tr|E5QY81|E5QY81\_STAAH  
mqvgvwaptqriskrnstgnaswgvgpnteadeksaynnvqvgdgpqhreigfpistdnasqrvpntea vtndkillhnk  
slv llyfcl pflivmmhn  
nlssncrikly l isnyp  
>tr|E5QY85|E5QY85\_STAAH  
mshdtntidsrthege l nklgfwi fitaefal fgt l fat l l l tqhggydagkmttel felplvl imtfall fssytcgia  
iyymrqekqklmmfwm iit  
l l l glvfvfgfeiyefahyasegnptigsywssffillgthgchvs l givwaic l l liqirhgl dkynapkl fivsl ywh  
fldvwwvfi ftavymigmv  
ysg  
>tr|E5QY86|E5QY86\_STAAH  
mstikhhtvgfiasiv l l lavyvtlyts l tfhak l tiifgfafi qag l ql l mfmh l tegkdgr l qtfkvifalvit l cf  
vvgtywvmqggshsl

Tsompanidou\_et\_al\_Supplemental\_FASTA\_File

>tr|E5QY87|E5QY87\_STAAH  
mkfnkvklvihacvllfiisiglvfhrlqtktnsiepihketklsdnakylvdrnkgkgepskakevynskdpkykkid  
rylqnsifngsvavyengk  
lkmskgygyqdfekgikntpntmfligsaqkfstglllkqleehkinindpvsykipwfktskpipkdlmlhqsglyk  
yksenkdykndqavraiqk  
rgidpkkykkhmyndgnylvlakvieevtgksyaenytkigdpklqhsafydeksfrkyfakgysynstglsflkpnv  
leqyygagniymtptdmgk  
litqigqyk1fspkitnpl1hefgtkqypdeyrygyfvkptlnr1nggffgqvftvyyndkyvvv1alnvkgnnevrikh  
iyndilkqnkpyntkgviv  
q  
>tr|E5QY88|E5QY88\_STAAH  
mnkflkyflll1alvlivvpivfatllfktsqdafessqdsknanrqsnlrdnkvnpeeqpisilflgiddndgrkkgq  
daehrsrdamillttfnqsk  
hqirm1siprdtisyipkvgyydkithahayggpiaamdsveatmvpvdyvrvnmkafveavnelggiyydvpyd1ne  
pntddtgkikikkgyqkln  
gdealavartrrhdsdlkrqqrqmelikilfqkaqevdsidkldnviqivgknakhnltnseikalakmyltnveikta  
qlkgkddmlngiyyhpsv  
esiqkylanllrkdl1elispindknfdlqrvinhygslip1tp1dss1lrkeqndttdkdkssntddsnnnsnnsvnnq  
qqpatdqnl1nqnggtqqt  
pqasnngvvn  
>tr|E5R5H4|E5R5H4\_STAAG  
mmeftikrddyfi1q1ndt1kai sprtt1piltgikidakeheviltsgdseisieitipktvdgedivnissetgsvlpg  
rffvdiikk1pgkdvk1st  
neqfqt1itshsefn1sgldpdqyp1lpqvsrdaiqlsvkvlknviaqtnfavstsetrpvl1tgvnwliqenelicta  
tdshrlavrkl1qledvsen  
knviipgk1aelnkimsneedidiffasnqvlfkvgvnf1sr1leghypdtr1fpenyeiklsidngefyhaidra  
sllareggnnvik1stgdd  
vvelsstspeigtvkeevdandveggs1kisfnskymmdalkaidndeveveffgtmkpfilpkpgdsvtqlilpirty  
>tr|E5R5I0|E5R5I0\_STAAG  
mtlyldget1tiediksflqqskieiddalervkksravverieneetvygittgfglfsdvidptqynelqvnli  
rshacgl1gepfskevalvm  
m1lr1nt1lkghsgat1elvrqlqffineriipiipqqs1gasgd1aplsh1alaligegkvlyrreksd1dvlre1n  
rqplnlqakegl1alingtq  
amtaggvisyiead1gyqsew1aal1thqslngi1dayrhdvhsrvnfqeqinvaarmrdwlegst1ttrqae1rvqday  
t1rcipqihgasfqvfnyv  
kqql1efemnaandnplifeanetfvissgnfhgqpi1afaldh1klgvselanvserrler1vnpq1ngd1paf1spepg  
1qsgamimqyaaas1vsen  
kt1ahpasvds1tssanqedhvsmsgt1aarhgyqi1enarrv1aiecvialqaaelkgvegl1spktrrkyeefrsivpsi  
thdrqf1hkdieavaqylkq  
siyqttach  
>tr|E5R5I5|E5R5I5\_STAAG  
mfskiqpkati1atit1lvfalaly1vpglgl1alfatipgivilwnksiqsfqvsalitviittvl1gntfv1sailvl  
iasliigq1lkertskerm  
lyyttvams1is1iafml1qtfgrippsasivkpfkqt1heaitmsgadanmtqileegfrqatvqlpgfiiittflivl  
in1ivt1fpvlrkfk1atpv  
fkpl1fawqmsgi1lwiyiiviic1lftgqpsvfqsil1nfqlv1slvmyiqgl1svihffgkakgl1navt1llliigt1l  
tptthivgl1gvid1sl1n1  
krimknnsk  
>tr|E5R5I9|E5R5I9\_STAAG  
mssivvvg1tqwgdegkgt1df1laeqsdv1arfsggnaghtiqfggetykl1h1vpsgifykdklavigngvvdpv1all  
kel1dgl1nerg1ptsnl1ris  
nraqv1lpyh1aqdeyeer1rgdnkigt1tkkig1payvdkvqrigirmad1leketfer1lksnieykqayfkgmfnetc  
psfddi1feyyaagqr1ke  
fvtdtski1ldafvadekv1fegaqgvml1dihgtypfv1tssnpiagnvtvg1vgptfvskvigvckaytsrv1gdgpf  
te1fdedghhi1revgre1y  
tttgrpr1rv1gwfds1v1r1hsrrvsgit1d1sinsidv1t1g1dvtvki1ctaye1ldgkeiteypan1dq1krckpi1fe1pgwt  
edvtsvrt1le1penarky  
1erise1cnvqis1ifsv1gpdreqtn1l1kelw  
>tr|E5R5J6|E5R5J6\_STAAG  
msfgppncyq1ssypqvin1ft1fp1iipi1favfdi1ft1fmpnf  
>tr|E5R5K1|E5R5K1\_STAAG  
mlkeihkk1n1ddteegdi1htdddekadedgfsi1iamwnwerknyfike  
>tr|E5R5K2|E5R5K2\_STAAG  
mkhgi1qsqkvvaevik1qkptvrw1f1t1tvknvydgee1nks1sdmaagf1rmmqykkin1knlvgf1mratevt1nknkds  
ynqhmh1v1vcveptyfknt  
enyv1nqkqwi1qfwkkamk1ldydpnvkqami1rpknkyksdi1qsaidetakypvkdt1dfmt1ddeekn1  
>tr|E5R5K5|E5R5K5\_STAAG  
mki1vheikeri1dkygdvkaigvygsl1grqtdgpysdi1emmcvm1steeafshewtt1g1ewkvevn1fdsee1l1ldyasqv

Tsompanidou\_et\_al\_Supplemental\_FASTA\_File

esdwp1thgqffsilpiyd  
sggylekvyqtaksveaqtfhdaicaliveelfeyagkwrnirvqgpttflpsltvqvamagamliglhhricytsasv  
l1eavkqsd1psgydh1cq  
fvmmsgqlsdsek1leslenfwngiqewterhgyivdvskripf  
>tr|E5R5K7|E5R5K7\_STAAG  
msee11lyvsvlinvtsinklflyeetntvfrcitssinenmdciinhspnellmflydleqrfnfinrlnlkepknr  
htyptlnsvyielnplqls  
edtyfssinvaelinrqsirknlfk  
>tr|E5R5L1|E5R5L1\_STAAG  
migsgifhnpfafekeprehtske1ld1lr1h1s1fnkyekdeirqfks1rrffkiyvrgiralanfdin  
>tr|E5R5L2|E5R5L2\_STAAG  
mdiivnivim1ligvfggfigslvgvggaiiypaillpp1fgapaysayasgltsqvffst1sgslkarkktefspq  
lvlymgggmiigsm1gaf1  
an1fdatfvntvyiialla1alt1mfikvkpssekssfnykyl1viig1figiisgivgaggafiiipillv1fk1pmntvv  
ansivafissigafvik1  
iqgyi1plydal1fiigsii1fapig1k1skkvpni1qkwiisilivfaivq1l1  
>tr|E5R5M1|E5R5M1\_STAAG  
mekfnwilnaisgsqtdknettee1kgakfiilyaysmlv1la1visnifihilepk1sittqiiiv1liliealig1rf  
1kaydvkrqkdkenkknsk  
dfvk1ksilvailfts1altagtvadiygf1d1gntrsd1livsiggiifglvcytmedkk  
>tr|E5R5M2|E5R5M2\_STAAG  
mkkcikt1f1si1lvmmggwyhsahasds1skspenwmsk1deskh1teinmpgshdsgsft1tdpvksvkwaktqgkdy1  
tqmksgvrffdirgrasad  
nmisvhgmvly1helgk1f1ddakyylsaypnetivmskkdydsdskvktkfeiefreyynnpqyqnl1fytgshanpt  
1ketkgkiv1fnrmggyi  
ksygdatsgiqadnatfekinngs1n1kvqdeykdydkveavk1lakaktdsnkdnvyvnl1svasggsafnst  
ynyashinpeiaktikeng  
kartgw1ivdyagypwpgydivseiidskn  
>tr|E5R5M3|E5R5M3\_STAAG  
mkr1nklv1gii1f1f1visitacgigkeaevkksfekt1smypik1nedlydegyrddqfdkndkgtwinsemviqp  
nnedmvakgm1ymnrntk  
ttngyyvvdvtkdedegkphdnekrypvmvdnki1iptkeikdknikkeienfkffvqygnfkdl1skykdgdisynpevp  
sysakyqvtnddynvkqlr  
krydiptnkapk111kgtgn1kgssvgykdi1eftfvekkgeniyfsd1h1lepsedk  
>tr|E5R5M6|E5R5M6\_STAAG  
mkr1nklv1gisf1f1visitacgmgkeaeikksfektmsypik1nedlydegyrddqfdkndkgtwivnsqmaiqn  
kgepmkskgmv1ymnrnt  
ttngyyvvnvikgedkgkhqdnkrypvmvdnki1iltkeikdenikieienfkffvqygnfkdl1enykdgdisynpevp  
sysakyql1tnddynvkqlr  
krydiptnkapk111kgtgn1kgssvgykdi1eftfvekkeeniyfsdgl1fkpsedk  
>tr|E5R5N4|E5R5N4\_STAAG  
maiqynvnrvtiiksel1leaegfiytkvsgtyvndylneahitknwsemmlwssqrsqytvqlinkietddsyihis  
kgelgis1mphiqlkkams  
ntashied1sfgynggyk1r1diivermskqginvgrenvmitsgalhaiq1l1sig1flgqda1iisntpsiyhstnvf  
eq1nfrhidvpynginein  
tiidrfinfknaikayieprfnntgrs1tneqkknii1tyserhni1ieddi1frdi1fsdptpaiktydklgkvihi1ssf  
sktiapai1riqwi1vaseki  
ieqladvrmq1dygss1l1sqmvvyem1knksydkh1vk1ryv1kdkrd1fml1n1n1fkdiahwevp1sggyf1w1vfkid  
idiky1fyell1skekilin  
pgy1ygskeks1r1sfafesnenikha1ykytyvk1v  
>tr|E5R5N7|E5R5N7\_STAAG  
mkkkn1y1s1r1k1gvgiasvt1gt1l1isggvtpaanaaqhdeaqqnafyqvl1nmpn1nadqrngfiqs1kddpsqsanv1g  
eaqk1ndsqa1pkadaq1qnn  
fnkdqqsafyei1nmpn1neaqrngfiqs1kddpsqstnv1geakk1nesqa1pkadnnfnkeqqnafyei1nmpn1nee  
rngfiqs1kddpsqsan1l  
seakk1nesqa1pkadnkfnkeqqnafyei1h1pn1neeqrngfiqs1kddpsqsan1laeakk1ndaqapkadnkfnkeq  
qnafyei1h1pn1teeqrn  
gfiqs1kddpsvskei1aeakk1ndaqapkeednkkpgkedgnkpgkedgnkpgkednkkpgkedgnkpgkednkkpgke  
dgnkpgkednkkpgkedgn  
kpgkedgnkpgkedgnvkvpgdtvndiakangttadkiaadnk1adknmi1kpgqel1vdkkqpanhadankaqa1pe  
tgeenpfi1gtt1vfgg1s1la  
1ga1lagrrre1  
>tr|E5R5P7|E5R5P7\_STAAG  
mykasyqdgvghftieghdseyrftaekthsfdriritspiervvgdeadttdytq1l1reavftfpkndekleqfivel  
1qtelkdtqsmqyresnpp  
atpetfndyefyameghqyhsykr1gft1sdn1kfgp1d1fvpvkl1q1w1aidkdkvettvsrnvvvnem1rqvgdkty  
ehfvqqieasgkhvndvem  
ipvhpwqfehviqvd1aeer1ngtv1w1lgesdelyhpqqsi1rtmspidttky1kvpis1tntstkrv1aphtienaaqi

Tsompanidou\_et\_al\_Supplemental\_FASTA\_File

tdw1kqiqqqdmylkdelk  
tvflgevlgqsyIntqlspkqtqvygalgviwreniyhmlideedaipfnalyasdkdglpfiekwikqygseawtkqf  
lavairpmihmlyyhgiaf  
eshaqnmmlhengwptrialkdfhdgvrfrkrehlseaashltlkpmpeahkkvnsnsfiетdderlvrdflhdafffin  
iaeilfjekygidqrq  
wqwvkdiieayqeafpelnyqhfdlfeptiqveklttrllsdse1rihhvtnplvggindattiset  
>tr|E5R5Q3|E5R5Q3\_STAAG  
m1nsfdaayhs1ceevleigntnrndrntgtiskfghqlrfdlskgfp11ttkkvsfklvate11wfikgdtniqy11ky  
nniwnewafenyiksdey  
ngpdmtdfghra1sdpefneqykeqmkgfkqri1eddtfakqfgd1gnvygkqwrwdvdkdgnhfdqlktvieqikhnpd  
srrhivsawnpteidtma1  
ppchtmfgyvvdgk1scqlyqrsadiflgvpfniasya11thliakecglevgefvtfgdahiyshidaiqtqlare  
sfnppt1kinsdksifdin  
yedleivdyeshpaikapiav  
>tr|E5R5Q9|E5R5Q9\_STAAG  
mnyrdkiqkfsirkyvtgftstviatlvlfgfntsqahaaetnpasvkvkqqsneqtenresqvqnsqnsqnsq1s  
atheneqpnnsqan1vnqk  
vaqssttndeqpasqnvntkkdsataattqpdkeskhkqnesqsankngndnraahvenheanvvtasdsdngnvqhd  
rne1qaffdanyhdyrfid  
renadsgtfnyvkgifdkint1lgsndpinnkdlqlaykeleqavalirtmpqrqtsrrsnriqtrsvesraaeprsvs  
dyqnanssyvenandgsq  
ypvgtyinasskgapyn1pttpwnt1kasdskeialmtakqtgdgyqvwikfnkghaphqnmifwaf1padqvpvgrtdf  
vtvnsdgtvqwsghagag  
ankplqqmweygvndpdrshdfk1rnrsqviyswptvhvysled1srasdyfseagatpatkafgrqnfeyingqkpa  
spgvpkvytf1ggdasyt  
isfktgqptvnllyaaagraleynqlfmysqlyvestqdhqqr1ng1rqvnrtyrigttkrvevsqgnvqtkkvest  
n1nidfvddplsyvktps  
nkvlgyfptnantnafrpggvqelneyqlsq1ftdqklqeaartrnpir1m1gfdydpdgygnset1vpvn1tv1pei  
ikffknddtqniaekpfsk  
qaghpvyfyvagnqgnasvnlggsvtsiqplrin1tsnenftdkdwqitgiprt1hienstnrtnnarernielvgn1lp  
gdyfgtirfgrkeqlfeir  
vkphtptitttaeq1rgtalqkvpvn1sgipldpsalvy1vaptnqtnggseadqipsgytilatgtpdgvhntvtirp  
qdyvvi1ppvgkqiravvy  
ynkvasnmsnavtilpddipptinnpvginakyrgdevnftmgvsdrhsgiknttitt1psgwtsn1tksdnkngsla  
itgrvsmnqafnsditfkv  
satdnvnttndsqskhvsihvgkisedahpiv1gntekvvvnptavsndekqsiitafmnknqinirgylastdpvtvd  
nngnvt1hyrdgsst1da  
tnvmtypvkvseyqtanaaktatvtiakgqsfniqdkyft1sngqai1ngtftnitsdrtiptaevsqmnagtqly  
hivasnayhkdtedfyis1  
kivdvkqpegdqrvyrtstydl1tdeiskvkqafinanrdvitlaegdisvtntpanganvstitvinkgr1tksfan1  
anmnfl1rwnfpqdyvtvtw  
tnakianrptdgg1swsddhks1iyrydat1gtqittndil1tm1kattvpg1rnnitgnekaqaeaggrpnyr1ttgysq  
snattdgqrqft1ngqviq  
ild1inpsngyggpvtnsntrahsnstvvvnepaangagaftidhvksnsthnasdavykaqly1tpygpkyveh  
1nqntgnttdainiyfvs  
dlvnpt1svgnytnhqvfsgftntitandnfgvqsvtvpntsqitgtvdnnhqhvsatapnvtatsktin1latdts  
gntattsfnvtvkl1rdky  
rvgtss1taanpvriani1snnatvsqadqtti1ns1tftsnapnrnyatasaneitsktvsnvsrtgnnanvtvtvthqdg  
ttstvtvpvkhvipeivah  
shyvtgqgdfpagnssaadyfk1sngsai1pdati1twsgqapnkdntrigeditvtahilidgettpitktatykvvt  
vpkhv1fetargv1lypgvsd  
mydakqyvkpvnns1wstnaqhmnfqfvgygpnkdvvgistr1irvtydnrqtedit1l1skvkpdp1ridansvtykag1  
tnqeikvnnv1nssvklf  
kadntp1nvtni1thsgfsvsvvtvsda1pnggikakssi1smnvtyttqdehgqvv1vtrnesvdsndsasvtvtpqlqa  
ttegavf1kggdgd1fghv  
erfi1qnp1phgatvawhds1pdtwkn1tvgnthktavvt1psgqgtr1nevvpkvypvanakapsrdvkgqnl1thgtnaidyi  
tfdpntntngi1taawanrq  
qpnnqagvqhl1nvdvtypgi1saakrvpvtvnyqfefpqttyttvtggt1asgtqasgyahmqnasgl1ptdgytykwnr  
dtgtndanwaam1kpnta  
qvnakydvi1nghtfats1pakfvkdvqpakptvtetaagaiti1apganqtvnthagnvttyadkl1vikr1ngnvvt1f  
trnntspwvkeas1advnt  
g1vgtnngi1tvaagtfn1padti1qvvatqgsgeti1sdeqrsddftv1vapqpnqattkiwqnghidit1pnpsgh1nptqa  
mdia1ytekvgngaehskti  
nvvr1gqnnqwti1ankpdyvt1daqtgkvtfnant1ikpnssit1tpkagtghsvssnpst1tapaahvntteivkdygsn  
vtaaei1navqvankrtat  
ikngt1amptn1aggstt1ipvtvtyndgsteevqesi1ftkadkrelitaknh1ddpvstegkkpgtit1qynnamhnaqqq  
intakteaqv1inneratp  
qqvsda1tkvraaqtkidqaka11qnkednsq1vtsknn1qssvnpv1sttagmtqqs1dynakkreaeteitaaqrvid



ngdataqqisdekhrvdna  
ltaInqakhdltadthaleqavqqInrtgtttgkkpasitaynnsiralqsdItsaknsanaiiqkpirtvqevqsalt  
vnrverltqainqlvpla  
dnsalrtaktkldeeinksvttgdmqtssiqayenakragqtettnaqnvinngdatdqgiaaektkveekynslkqai  
gltpdlaplqtaktqlnd  
idqptsttgmtsasvaafndklsaartkiqeidrvlashpdvati rqnvtanaaktaIdqarngltvdkaplenaknql  
qhsidqtsttgmtqdsin  
aynakltaarnkvqqinqvlagspvtdqintntsaanqaksdlharqaltvdkaplnaktqleqsinqptdttgmmta  
slnaynqklqaarqkltei  
ngvIngnptvqni ndkvaeanqakdqIntarqgltdrqpalttlhgasnInqaqqnftqqinaaqnhaaletiksnit  
aIntamtklkdsvadnti  
ksqnytdatpankqaydnavaakgvi gettnptmdvntvnqaasvstkdaIdgqqnlqrakteatnaithasdInq  
aqknaItqqvnsaqnvqav  
ndikqttqslntamtgIkrvvanhnqvvsdnyvnaadtntkndynnaynhandiingnaqhpvitypsdvnaIsnvtske  
halngeaklnaakqeanta  
lghInnlInnvqrqnlqsqingahqidavntikqnatlnsamgnlrvavadkdvkrteyadadtakqnaynsavssae  
tiinqtanptmsvddvna  
tsavttksalngeklvqsktdaaraidalplhInnaqkadvkskinaasniagvntvkqqgtdIntamgnlqgaindeq  
ttlnsqnyqdatpskktay  
tnavqaakdiInksngqktdkqvteamnqvnsaknldgtrlldqakqtakqqlnmthlttaqktnltinqinsgttva  
gvhtvqsnantldqamntI  
rqsianndatkasedyvdanndkqtaynnavaaaeti inansnpempstittkaeqvnsstktaIngdenlatakqna  
yIntltsitdaqknnlIsq  
issatrsvgvtvkqnaqhlDqamanlqnginnesqvssekyrdadtntkqeydnaitaakailnkstgpntaqnavea  
alqrvntakdalngdakli  
aaqnaakqhlgtlthittaqrndltinqisqatnlagvesvkqsansldgamgnlqtaindksgtlasqnfldadeqkrna  
ynqaisaaetiInkqtgpn  
taktaveqalnvnnsakhalngtqnlnnakqaaaitaingasdlngkqkdaIkaqangaqrvsnandvqrnateIntamgq  
lghaiadkntlasskyvn  
adstkqayttkvtnaehi isgtptvttptsevtaaanqvnsakqelngderlrvakqnantaidaltqIntppkakIke  
qvgqanrledvqsvqtngq  
slnnamkgIrysi anettvkasqnytdaspnnqstynsavsnakgiinqtnptmdtsaitqattqvnnaknglIngaenl  
rnaqntakqnlntIshltn  
nqksai ssqidraghvsevtaaknaateInaqmgnleqaihdqntvkqgvnftdadkkrdaytnavsraetiInktqga  
ntskqdveaaiqnvt sakn  
alnqdqrvtnaknaaknalnntsinnaqkrdlttkiddqattvagveavsntgtqIntamanlqngindkantlasenyh  
dadsdkktaytqavnaen  
ilnknsqslDkaavenalsqvtnakgalngnhleqaksnanttinglqhlIttaqkdklkqqvqqaqnvagvdtvkssa  
ntIngamgtlrnsiqdnta  
tkngqnyldaternktnynnavdsangvinatsnpnmdanainqiatqvtstknaldgthnlItqakqtatnaidgatln  
kaqkdaIkaqvt saqrvan  
vtsiqqtaneIntamgqlqhgiddentkqtqkyrdaeqskktaydqavaaakailnkqtgsnsdkaavdraIqqvtstk  
dalngdaklaeakaarqn  
lgtlnhithnaqrtalegqinqattvdgvntvktantldgamnsIqgaindkdatlrnqnyldadeskrnaytqavtaae  
gilnkqtggntskadvdna  
InavtrakaalngaenlnaktsatntinglplntqIqkdnIkhqveqaqnvvgvngvdkgntIntamgalrtsiqdn  
ttktsqnyldasdsnkny  
ntavnangvinatnnpnmdanaIndmanqvnttkaalngaqlaqaktnatntinnaqdlngkqkdaIktqvnaqrvs  
dannvghtateIngamtaI  
kaaiadkertkasgnyvadqekrqaydskvtnaeniingtpnatItvndvnsaasqvnaaktaIngdnnlrvakehann  
tidglaqlInnvqkakIkeq  
vqsattldgvqtkvnsqtIntamkgIrdsi aneatikagqnytdaspnnrneydsavtaakaiinqtsnptmepntitq  
atsqvttkehalngaqla  
qaktaknnlnntsinnaqkdaItrnidgattvagvnetakateInnamhsIqngindetqtkqtqkyldaepskksa  
ydaqvnaakailtkasqgn  
vdkaaveqalqnvstktalngdakIneakaaakqtlgtlthiInnaqrnaIdneitqatnvegvntvkakaqqlDgamgq  
letsirdkdtlIqsqnyqd  
addakrtaysqavnaaatiInktaggntpkadveramqavtqantaIngiqlerakqaantaitnasdIntkqkealka  
qvt saqrvaangvehtat  
eIntamtaIkraiadkadt kasgnyvadankrqaydekvtaaeHivsgtptptltpsdvtnaatqvtnaktqIngnhnl  
evakqnantaIdgltsInq  
ppkakIkeqvgqattlPnvqtvrdnaqIntamkgIrdsi aneatikagqnytdasqkqndynnavtaakaiigqttsp  
smiaqei nqakdqvtakqg  
alnqgenl rtaqtnakqhlnglsltnaqkdaakrqie gathvnevtqaqnnadaIntamtnlknqidqntikqgvnft  
dadeakrnaytnavtqaeq  
ilnkagqpn takdgvetalqnvqrakneIngnqvanakttaknalnntsinnaqkaalksqie gattvagvqvstma  
selntamsnlrgi ndeaa  
tkaaqkyteadrkqtayndavtaaktlldktagsndnkvaveqalqrvntaktaIngdarIneakntakqqlatmshlt

naqkanlteqiergttvag  
vqgiqanagtlngamqnlrqsiasdatkssedyqdanadlnqayndavtนาegi isatnnpempndtinqkasqvnsak  
salngdeklaaakqtaksd  
igrldlnnaqrtaanaevdqapnlaavtaankatslntamgnlkhalaeakdntrsvnytdadqpkqqaydtavtqae  
aitnangsnanetqvqaa  
nqlnqakndlngdnkvaqaketakra lasyslnnaqstaatsqidnattvadvtaaqtanelntamgqlngindqnt  
vkqqvntdadqgkkdayt  
navtnaggi ldkangqnmkkaqveaalnqvttaknalngdanvrqaksdakanlgtlthlnnaqkqdltsqiegattvng  
vnsvktkaqldgamqrle  
saiankdqtkasenyidaptkktafdnaitqaesylnkdhgtnkdkqaveqaiqsvtstena lngdanlqcakteatqa  
idnltqlntpqkta lkqyv  
naaqrvsgvtdl knsatslnnamdq lkqai gdhdtivaggnyt naspdkqgaytdaynaaknivngspvitnaadvtaa  
tqrvnaetslngdtnlat  
akqqakdalr qmthlsdaqqsitgqidatqvtgvsvkdnatnldnamq l rnsi ankdevkasqpyvdadtdkqnay  
ntavtsaeniinatsqptl  
dpsavtqaanqvntnkta lngaqnlan kqettaninrlshlnnaqkqdlntqvtnapnistvnqvktkaeqldqamerl  
ingiqdkdqvkqsvnftda  
dpekqtaynavtaeeniinqangtnanqsqveaalstvtttkqalngdrkvtdaknnanqtlstldnlnnaqkgavtgn  
inqahtvaevtqaiqtage  
lntamgnl kns lndkdttlgsqnfadadpekknayneavrnaeni l nkstgtnvpkdqveaamnqvnttkaalngtqnle  
kakqhantaidg lshltna  
qkealqqlvqqstvaeaqqneqkannvdaamdklrqsia dnattkqnqnytdaspnkkdaynavttaaggi idqttpps  
ldptvinqaagqvstskna  
lngnenleaakqqatqslgsldnlnnaqkqavtnqinqahtvdeanqikqnaqnlntamgnlkqai adkdatkatvnftd  
adqakqqayntavtnaeni  
iskanggnatqteveqaiqqvnaakqalngnanvqhakdeatalinnsndlnqaqkda lkqyvqnattvagvnnvkqtaq  
elnnamtq lkqgi adkeqt  
kadgnfvnadsdkqnaynqavakaeal isgtpdvvtvpse itaalnkvtqakndlngntnlatakqnvqhaidq l pnl nq  
aqrdeyskqitqatlvpnv  
naiqqaattlndamtq lkqgi ankaqikgsenyhdadtdkqtaydnvtaeellkqttntpmdpntiqqal tkvndtnq  
alngngkl adakqdaktl  
gtldhlnndaqkqal ttqveqapdiatvnnvkqnaqnl nnamtnlnnalqdktetlnsinftdadqakddytnavshaeg  
ilskangsnasqteveqam  
qrvneakqalngndnvqrakdaakqvintandlnqaqkda lkqyvdaaqtvanvntikqtaqdl nqamtq lkqgi adkq  
tkangnfvnadtdkqnayn  
navahaeqi isgtpnanvdpqqvaqalqqvnqakgd lngnhnlqvakdnantaidq l pnl nqpqkta lkdvshaelvtg  
vnaikqnadal nnamgtlk  
qqiqansqvpqs vdf tqadqkqqaynnaanqaqqi angtpvpl apdtv tkavttmnqakda lngdek laqakqda lan  
ldt lrdlnqpprda l nq  
nqaqalatvegtkqnaqvntamgnlkqgi ankdtv kasenyhdadvdkqtaytnavsqaegi inqttntpln pdditra  
ltqvtdakns lngaeklat  
ekqnakdavsgmthlnndaqkqal kqgidqspeiatvnqvktatsldqamdqlsqaindkdqil adgnylnadpdkqnay  
kqavakaeal lnkqsqgne  
vqaqvesitnevnaakqalngndnlanakqqakqqlanlthlnndaqkqs fesqitqaplvtdvttinqkaqtl dhame ll  
rnsvadnqtt lasedyhda  
taqrqndynkavtaanni inqtsptmnpddvngattqvntkvaldgdenlaaakqqannrldqldhlnnaqkqqlsq  
itqssdiaavnghkqtaes  
lntamgnlinaidhqaveqrngfinadtdkqtayntavneaaamin kqtgqnanqteveqaitkvqttlqalngdhnlq  
vaktnatqaidal tslndp  
qkta lkdvtaatlvtavhqi eqnantlnqamhgl rqsia dnatkanskyinedqpeqqnydqavqaanni ineqtatl  
dnnainqvaatvnttkaal  
hgdvklqndkdhakqtvsq lahlnnaqkhmedtl idsettrtavkqdltevqal dqlmdalqqsi adkdatrassayvna  
epnkkqaydeavqnaesi  
agl nnpnti kgnvssatqavisskna l dgver laqdkqtagnslnhldq ltpaqqqal enqinnattrdkvaei iaqqa  
lneamka lkesikdqpqte  
asskfinedaqakdaytqavqhakdl inktt dptlaksi idqatqavtdaknnlhgdqklaqdkqratetlnnl snl ntp  
qrqal enqinnaatrgeva  
qkl teaqal nqameal rnsiqdqqtesgskfinedkpkqdayqaavqnakdl inqtgnptldkaqveql thafkqakdn  
lhgdqkl adkqhavtdln  
q lnglnnpqrqalesqinnaatrgevaqklaeakal ddamqal rnsiqdqqteagskfinedkpkqdayqaavqnakdl  
inqtgnptldksqveqltq  
avttakdnlhgdqklardqqavttvna l pnl nhaqqqt l tda inaaptrtevaqhvqtatel dhame tlknkvdvntd  
kaqpnysteastdkkeavdq  
alqaaqsi tdp tngsnankdaveqal tk l qekvne lngnervaeaktqakqtidq l thlnadqiatakqnidqatk l qpi  
aelvdqatql ngsmdqlq  
avnehanvegtidytqadsdkkaykqai adaenvl kqnankqqvdqal qni lnakqalngderval aktngkhdidq ln  
al nnaqqdg fkgri dqsnd  
lnqiqi vdeakal nramdq l sqe itgnegrtkgstnyvnadtqvkvvydeavdkakqal dkssgnl taeqvik l ndav

Tsompanidou\_et\_al\_Supplemental\_FASTA\_File

taakkaIngeerInnrkae  
alqrlldqlthlnnaqrqlaiqqinnaetlnkasrainratklndamgavqqyideqhlgvisstnyinaddnlkanydna  
ianaaheldkvqgnaiaka  
eaeqlkqniidaqnalngdqnlanakdkanafvnsInglngqqqqlahkainnadtvsdvtdivnnqidlndametlkh  
vdneipnaeqtvnyqnadd  
naktnddakraantlInsdntvndingaiqavndaihnIngdqrlqdakdkaiqsinqalanklkeieasnatdqdkl  
iaknkaeelansiinnink  
atsnqavsqvqtagnhaieqvhaneipkaki dankdvdkqvqalideidrnpnltdkekqalkdrinqilqqghndinna  
lkeeeieqakaqlaqaalqd  
ikdlvkakedakqdvdkqvqalideidqnpnltdkekqalkdrinqilqqghnginnamtkeeeieqakaqlaqaalkeikd  
lvkakenakqdvdkqvqal  
ideidqnpnltdkekqalkdrinqilqqghndinnamtkeeeieqakaqlaqaalqdikdlvkakedaknaikalanakrdq  
insnpdltpqkakaakei  
deaekralqnvnaqtidqlnrglnlgllddirnthvwevdeqpavneifeatpeqilvngelivhrddiiteqdilahin  
lidqlsaevitdpstatis  
dsltakvevtlIdgskvinnvpkvvekeIsvvkqqaiesienaaqqkideinnsvtltleqkeaaiaevnkIkqqaidh  
vnnapdvhsveeiqqqeqa  
yieqfnpeqftieqaksnaiksiedaiqhmi deikartdltdkekqeaiklnqlkeqaiqaiqraqsiseiteqleqfk  
aqmkaanptakeIakrkqe  
aisrikdfsnekinsirneigtadekqaamnqineivletirdinnahtlqqveaalngiarisavqivisdrakqss  
stgnesnshltigygtanh  
pfnstighkkkldedddidplhmrfhsnnfgnviknaigvvgisgllasfwffiakrrrkedeeeeeieirdnnksike  
tlddtkhlp1lfakrrrke  
deedvtveekdsInngesldkvkhtpfflpkrrrkedeedvevtntdekvlkdnehsp1lfakrrkdeedvettsi  
eskdedvp1llakknqkd  
nqskdkksaskntskkvaakkkkkkskknk  
>tr|E5R5R5|E5R5R5\_STAAG  
minkeqldllykIkkeveksrnealhtinqvikkvylqqytcsfvghfsagkstlinllieqdilpsspvpttsntaiv  
svsdnhdiianlpnqtyak  
lsnydevremrnqnvdesveinfqsakfengftlqdtpgvdsnvashqsieqymysnmi fytvdynhvqselnfkfm  
khindvgipvvfiinqidk  
hqddelsfstfksrveksiadwgiklertfyvskfdhpenelevlssylisldqhretiedytsrtveyiteaqldyiqs  
eiqevledlgeeeafeqa  
flnsqqhqaiseeaqlnnpdelmaflnkrknienayimphnmremIrsylesmsqdfvnggffnkklklqiaqqqr  
ltatdalqehvnqqrpm  
redmsfvtrfinkkeasdkvlngydvkpmiedlyqpqtsisntyvltfsdevvkaikkyveqqstpifkeienvqad  
elpteessddlkeyqrytel  
nelrqs1ttknyrhyihdesldkligrqettyqvatdntqdnrndnqqlnqntattnmsidiqkaldiiisdvplfkrtk  
qdihetltridnklikigv  
fgtfsagksslina1lgehilvsspnpttaatteisygdesyitlksqsqlldeinavveyqdisfstieefinwdlek  
kshlnknqlafiqavekhy  
klyvnm1engekhaingqelkkwsaedeyatfvktvhialmhdwlkgkiivds1glhsnnqrhtneteqiltssdlilyv  
syfnhsftdndkafiehm  
dmnqlnenqafkmvinaadlaesqddleavetyvsdalrqlvlsd1favssryalqaedkgidqlkqsiqqfvdesks  
ileqqmihq1qqmdrsyve  
mitefetnkadisrrqqrldtydkqrlqhq1idat1qhtdneveeqvyhlnar1klq1l1ddvksvfnsqmtqnsdfnee  
kkvstkvyl1dqihqr1fle  
qs1iterikkyfnkqltkq1apivqqladlhv1vnpqfnfesanieqpl1hidfndmlnalpkqltkrkilnpgqrdih  
esicqst1gl1lqqmg1lr  
qqlelyvkqmakeaesqfesfeaniqtqind1lafld1tt1lnqlkdkhqqlktily  
>tr|E5R5R7|E5R5R7\_STAAG  
mgkkmg1gl1sialvvig1avvc1mifssqktyfygmnsktnaekvvsekdg1vkhnikvepsndf1pkpkkgdfvklvskd  
dgktfykqei1vkhddvphg  
1mmki1hdmhmn  
>tr|E5R5R8|E5R5R8\_STAAG  
mfq1lavcpmg1eavvareiqelgyetnvengri1ffegdasai1vkan1wl1rtadriki1vgrfnattfde1feqtka1pw  
esi1dkegnfpvqgrsvks  
t1hsvpdcqaitkkaiver1rraynekgl1nesgakypvevailkdnv1l1tidtsgsg1nrrgyrlaqgeapiketlaas  
1irlanwkgdtp1idpfcg  
sgtiaieacliaqniapgnrefvseqwnimpanyddyrddeadkmadydkeievyasdi1pemveiakrnaeevgsdi  
ikfsvkdvnt1tidteepv  
alignppygerigdreveemyryig1mkqhpfl1styil1tsnefeylvnrkatkrkl1fngyiectyyqywgkktekg  
tien  
>tr|E5R5S9|E5R5S9\_STAAG  
mgmatyavvd1ettgnq1ldfddi1iqigitfvrrnqi1dtyhsmirtnleippfiqal1tsieenmlqqapyfnqvaqeyd  
k1kdc1fvahnvdf1lnfi  
kka1fkdncniqyrpkkv1dt1eifkia1fptdksyql1se1laehgitlanahradedaattak1milafekfek1pl1dt1kq  
lyylskq1klydy1ffem

Tsompanidou\_et\_al\_Supplemental\_FASTA\_File

vrqydakpldksyekfeqiyirkqvdfkktptnyngslkslyskavdqgltyrppqlylaetildqlmhsekamieasl  
gsgkslayllaalmyriet  
gkhvmistntkllqsqlllekdpamnealnfkinalliksksdyislglsqilkdtsnyevnilkmqlliwitetpsg  
diqelnlkggqkmyfdqki  
etyvparhdvhyynfikrnaqniqigitnahlihsdvensiyqlfddcivdeahrldpyalnqvtnelsyadikyqlgl  
igknenekllkaidqlekq  
rilekldiapidifglkasmneihelneqlfstiftiindsdvyddihrfhnvftfetkdiikdlhaiidklnktleif  
ngishktvkslrkqlllylk  
dkfknieqslkaghtsfisiknlsqkstirlyvkdyavkdvltkqvlefkfslifisgtlkfnhsfeafkqlfnkdvhn  
tfevntslqsakntsvfip  
sdvasyqknidehyvasivsyiieytiitsskclvlftsykmmhmvqdmnelpefedyvvl tqqqnqnykivqqfnnfd  
kailigtstffegfdfqan  
gikcvmiaklpfmmkhnakywlmdeftstfkeyvlpdavtrfrqglgrlirndrgiivsfdrlinsnyknffeql  
enyrqkkgdqqfgkllrq  
iqkkkk  
>tr|E5R5T2|E5R5T2\_STAAG  
mgsngiiatelgiklaerghevhitnsipfrirkpnpmi fhqvevnqyavfqyppyditlstkiaevikedyldllhm  
hyavphaicgilaemsgk  
dikimttlhgtditvlygdhslqgaikfgieksdivtsvskslaqetheiietnkeiipiynfvrenefptkhtalksq  
fgiapdekvlihvsnfrqv  
kridtietfakvrekipskllilgdgpevpnrqltkelnevedvlflgkqdcvsefyqlsdvlvlllsekessfgltlle  
amktgvvpigsnaggikev  
ikhgetgfvdvgdcdsasdyairlledkalyntlqkmladiaerfgselitdqeyyyyqkmlnehnkskge  
>tr|E5R5T7|E5R5T7\_STAAG  
mediykliddinlqklenl dsrvneaittdnddal filgetlynfglmpqglevfrvlyhkypdeselliyfieglmsen  
qtdealeylysyvepspek  
mleadlyqqinmmevai dklqeaalelepndpiihfalaemlydygqylratseyetvletgeyqvnqvnlfsmadcsiq  
sgnysdairlydeinedem  
tsedyllkai sydknditqeaikimttl skdpdyiqgylylslyeneknypdaietgkeglrlsqfykelmyttgcle  
iehgdanegvllkqalev  
dnayqepllil sdlyrneedyeaie llyvdeedldptfmwhlafaygqeerdkeaqhffelayptmktnidfmsdyf  
ylieigqkeqaitilnql  
elepsnenwhde lsr lqs  
>tr|E5R5T9|E5R5T9\_STAAG  
mklqttypsnnypi fvehgaidhistryidqfdqsfilidhvnyqfadkfddilsyenvhkvii pagekktkfeqqetl  
eyilshhvtrntaiiavvg  
gatgdfagfaatllrgvhfiqvpttilahdssvggkvginsqgknligafyrptaviyldflktlpfeqilsgyaev  
ykhallngesttqeieqhf  
kdreilqslngmdkyiakgi etkldivvadekeqgvrkflnlghtfghaveynhkihahghavmigiiyqfivanilfnsn  
hdighyinyl tklygplet  
itdidfeti yqym lsdkndkqgvqmvlikhfgdivvqh idqttlqhaceqlktyfk  
>tr|E5R5V5|E5R5V5\_STAAG  
makyti vdm d tciacgacgaaapdi ydyddegiafvil ddnqgtaevpeelyedmedaidgcptdsikiadesfdgdalk  
fe  
>tr|E5R5V7|E5R5V7\_STAAG  
mllkakliliaalv lsgcstieneskdrntetntetksvpeemeaskyvgqgfqppaekdaiefakkkhdkkiakrgeqf  
fmdnfglkvkatnvvvgsgd  
gvevyvhcddhdvfnasipfdksiidssslrsedkgddmstlvgtvlsgefyrakheelndltevlkeykskykytgy  
tenaimktqnsgrneyyy  
ltaipytldeykryfqplikeddksfrdgmrskkqlkdksrpyvvtlfstkdnftkdntidemidfsevlkkkniph  
dlnvslqisnkyintkrpn  
yskkevievgvfnhekantnd  
>tr|E5R5W0|E5R5W0\_STAAG  
menesskdtntetksvpeemeaskyvgqgfqppaekdaiefakkrkefekvgeqffkdnfglkvkatnvvvgkddgvevy  
vhcedhgivfnaslpkyd  
aihqkgsmrsndngddmsmmvgtvlsgefyrakkeydnylykflkenekkyqytgftkeaintqnvgyqneyfyityls  
rnlkeyrkyypelnhkkdk  
efkegmqrarke lnytantdvstlfstkknftkdntvddviel snklkdkpnmpqksqvtiqlgkpsintkkpfyddin  
pieg  
>tr|E5R5W1|E5R5W1\_STAAG  
midvesfvsglgflristikyitnlyknikfdkviyliikig  
>tr|E5R5W2|E5R5W2\_STAAG  
mttvlllsialitfmgyftqetenairredarrisslveqshnkeeaikysqtlienpggلميinnkhrqstaslnik  
kqmlnevvndhfddvfdk  
gksvtrrvti kekgssqytillygyptkaqknshskysgvfiykdlsiedtnnaitiitiitavifltittvfafflssr  
itykplrllrdqatrvsegd  
ysykpsvttkdeigq lsfafnqksteiehvda l stsknirdslinsmveglginesrqii lsnkmandimnidedak  
afllrqiedtfkskqtemr

Tsompanidou\_et\_al\_Supplemental\_FASTA\_File

dlemnarffvvttsyidkieqggksgvvvtvrmdtnehnldqmkkdfiavshelrtpisllqgytesivdgvtepedi  
keslavvldeskrlnrlnv  
e1lnvarmdaeglsvnkevqpiaa1ldkmkikyrrqaddlglnmtfnyckkrvwsydmrmdqvltnlidnasrytkpgd  
eiaitcdenesedilyikd  
tgtgiapehlqqvfdrfykvdaartrgkqgtglglfickmii eehggsidvkselgkgttffiiklpke  
>tr|E5R5X1|E5R5X1\_STAAG  
mqknilksgialselglgcmstgtdlkkaeqidcavengityfdtadmydkginesvvgkallkyqrrddifigtkvgn  
r1tkdgsttwdpsksyike  
avkgs1kr1gidhidlyqlhggtiddpldetisafdelkqegii raygissirpnvidyylkhsqietimsqfnlidnrrp  
eslldaihnnndkv1largp  
vskgl1tsnsvnvlndkfkdgifdysdelgetiasikeiesnlsaltfsyltshdvlgsiivgassvdqlkenienyht  
kvgldqiktaranvkdley  
tnh1v  
>tr|E5R5X6|E5R5X6\_STAAG  
mstknkhipclitifgatgdlshrklfpsi fhlyqqndldehiaii gigrditnddfrnqvksisqkhvkdtnkidafm  
ehvfyhrhdvsneesyqe1  
ldfsneldsqfelkgnr1fylamapqffgvisdy1kssgltdtkgfr1viekpfgsdlksaea1nnqirksfkeeeiyr  
idhylgkdmvqnievlrfa  
namfep1wnkyisniqvtssielgvedrggyessgalkdmvqnhmlqmva1lameapis1nsediraekvkv1ks1rh  
fqsedvkknfvrqygegy  
idgkqv kayrddrvaddsntptfvsykltidnfrwagvpfyirtgkrmskti qvvvefkevpmllyetdk11dsn11  
viniqpnegvslhlnakkn  
tqgi etepvqlsysmsaqdkmntvdayen11 fdc1kgdatnfthweelkstwkv daiqdewnmvdpkfpyesgtngpl  
esd11lardgnhwwddiq  
>tr|E5R5Z0|E5R5Z0\_STAAG  
mrkgyypikraid1v1siv11fltfpimfi faiaividspgnpiysqvrvgkmgk1ikiy1l rsmcknaekngaqwaddk  
ddritnvgkfirkrtridel  
pq1invvkgemsfigprperpefvelfssevigfeqrclvtpgltglaqi qggyd1tpqqk1kydmkyihkgs1mmelyi  
sirt1mvvitgegsr  
>tr|E5R5Z2|E5R5Z2\_STAAG  
menqhnsk11t11liglavfiqqssviagvnvsiadfit11ilvy11ffanh11kanhflqffii1lytyrmiit1c11ff  
dd1ifitvkevl astvkya  
fvviyfy1gmi1fk1gnsk kvitvtsy1issvtigqfci1aglnksp11mk11yfdeirskgl1mndpnyfamtqiit1vla  
ykyihnyi1fklacg11w  
s1tttgsktafi11iv1aiyffikk1fsrnsvsvmlvim11l1cftfyniny11fqlsd1davps1drmasifeegfa  
s1ndsgsersvwinai1v  
ikyt1gfgvg1vdyvhigsqingi11vahnty1qi faewg1lfgal1fi1fmly11fel1frfnisgknvtaivvmltmiy  
fltsvfnsryvaf11gi1  
vfi1vqyekmerdrnee  
>tr|E5R606|E5R606\_STAAG  
msniafyvsvdhgyifptdftrsnyqppmgivtsescyrtrqav  
>tr|E5R607|E5R607\_STAAG  
m1lanhvieqdrdqdsfkidngdflqgspfcny1iahsgssqplvdfynqmafdfgt1gnhefnyglpy1kdt1rr1n  
yp1caniyendst1tdng  
vqyfvgdqdtvgvigt1tqfiphweqpehiqs1tfhsafet1qqh1pemkrhadi1vvcyhggfekd1engtptev1tge  
negyam1leafskdidi1fit  
ghqhrqiaerfkqtavi1qpgtrgttvkv1stdeyenvsvescellpviddstftideddqlrkqledw1dyeitt1p  
ydm1inhafearvaphpft  
nfmnyal1eksadvacta1fdsasgfkqvvtmrdivinnypfntfklavsgak1keaiersaeyfdvqndevsvsadf  
1gpkpqhfnydi1yggvsyt  
ihvgrpkkqrsvsnmmiqghavdlkqytyicvnyravgggqydmfi1dapvvkdi1qvegaq11idflsn11mripqvvd  
kvek  
>tr|E5R610|E5R610\_STAAG  
m1tipekenrgskeqevaimida1adkgkka1eal1skksqeeidhivhqms1aavdqhmvlak1aheetgrgiyedkaik  
n1lyaseyiwnsikdnktvg  
i1gedkekg1tyvaepmgvicgvtpttntptsttikami1aiktgnpi1ifa1hpsaqesskraaevv1eaamkagapkdi1  
qwi1evpsieatkq1lmnhkg  
ia1v1atggsgmvksaystgkpa1lgvpgnvp1syiektahikravndi1gsktfdngmicaseqvvidkeiykdvtnef  
kahqayfvkkdelqrlena  
imneqktgikpdivgksaveiaelagipvpentk1i1ae1sgvgsdyp1srek1spv1alvkaqstkqafqicedt1hfg  
glghtavihtedet1qkdf  
gl1rmkacr1vntpsavggigdmynelips1t1lgcgsygrnsi1shnvsatd11niktiakrrntqi1fkvpaqiyfeena  
i1ms1ttmdkiekvm1vcdp  
gmvefgytktvnvl1qrteppqiki1fsevepnpstntvykglemmvdfqpdti1algggsamdaakamwmmffehpetsf  
fgakqkfl1digkrtykigm  
penatfi1cip1tsgtgssevtpfav1tdsetnvkyp1ladfal1tpdva1idpqfvm1svpksvtadtgm1v1thamesyvsvm  
asdytrgl1s1qaik1tfev  
1kssvekgdksrekmhnast1agmafanafl1giahsia1hki1ggygiphgranai11phi1rynakdpqkhal1fkyef

Tsompanidou\_et\_al\_Supplemental\_FASTA\_File

fradtdyadiakflglkgn  
ttealveslakavyelggsvgiemnlksqgvseeelnesidrmaelafedqcttanpkealiseikdiiqtsydykq  
>tr|E5R616|E5R616\_STAAG  
mnivitgakgfvgnlkadltsttdhhi fevhrqtkeeelesa1lkadfivhlagvnrpehdkefslgnvsyl dhvldil  
trntkkpail lssiqatq  
dnpysesklqgeql lreyaeyngtvviyrwpl fgkwckpnynsviatfcykiarneeiqvndrnvel tlnyvddivae  
ikraiegtptiengvptvp  
nvfkvtlgeivdllykfkqsrldrtlplkldnl fekdlystysylpstdfsyp1lmnvddrgsftefiktpdrqqvsvni  
skpgitkgnhwhhtknekf  
lvvsgkgvirfrhvnndeiieyyvsgdklevvdipvgythnienlgtdmvtimwvnmfdpnqpdyflv  
>tr|E5R617|E5R617\_STAAG  
mek1klmtivgtrpeiri1sstikacdqyfnqilvhtgqnydytlnqiffddlelrqpdhyleavgsnlgetmgniiakt  
ydvllreqpdallilgdtm  
sclaavsakr1kipvfhmeagnrcfdqnvpeeinrkivdhsdvn1pytehsrry1ldegfnkani fvtgspmtveieah  
rdkinhsdvl nklgllepqq  
yilvsahreendi nek nfkslmna indi akkykmpviysthprswkkieeskfefdp1vkqlkpfgffdynalqkdafv  
lsdsgt1seessilkfpgv  
lirtsterpevl dkgtviggitynnliqsvelaremqnnepmidaidykdtvstkvvkiiqsykdiinrntwrk  
>tr|E5R622|E5R622\_STAAG  
mydiapdnaiktgatrgpsmidk1mryinrhvyknaenvivlgtemkny1lnhqisknadnihvipnwydmrqlqdnriy  
ndtfkayreydkillysg  
nmgqlqmetl isflklnkdqqt1tilcghgkfkadvktaiedhrienvkmfeflgtgdyadvlkiadvciaslikegv  
glgvpsknygylaakkplv  
limdkqsdivqhvveydagiqidngdahaiynfinthsskelhemgerahqlfkdkytreintmkyynllk  
>tr|E5R626|E5R626\_STAAG  
mkkimvifgtrpeaikmap1vkeidhngnfeanivitaqhrdmlsdvlsifdiqadhdlnimqdqqt1adltanalakld  
siineeqpdmilvhgdttt  
tfvgs1aafyhqipvghvltiv  
>tr|E5R631|E5R631\_STAAG  
mnqknpkdtqnfitskhhvkei1nhtniskqdnvieigsgkghftkelvkmsrsvtaieidgg1cqvtkeavnpsenikv  
iqtdilkfsfphinykiy  
gnipynistdivkri t fseakysylivekgfakrlqnlqralg1llmvemdikmlkkvpplyfhpkpvsdsvlivlerh  
qpliskkykkyrsfvykw  
vnreyrvlftknqfrqal khanvtinklskeqflsifnsyklfh  
>tr|E5R633|E5R633\_STAAG  
mvsniaelnfaptviaakn1lfenkdkerifitgntvidalsttvqndfvsti inkhkgkkvilltahrrenigepmhqi  
fkavrd1adeykdvfiyp  
mhrnpkvraiaekylsgrnrielielpdaiefhnftnqsy1v1tdsggiqeeaptfgkpv1vlnrhterpegveagtsrv  
igtodydnivrvnkqliedd  
eayqrmqannpygdgqasrriceaieyyfglrsdkpdefvplrhk  
>tr|E5R644|E5R644\_STAAG  
mykeidvnemes1vgakfvklftdid1nddevisi fvfdksie  
>tr|E5R647|E5R647\_STAAG  
mimgn1rfqqeyfrikntestthrnaywvklaknveatkmya1stivqqhasirhffdvttddn1tmilheflpfie  
ikqvpssanydleaffkq  
elstyhfn dsp1fkvklqfadaayil1dfhvsifddsqidi fldd1cnayrgntvintrqhahinrnddkdnqdashi  
aldsnyfr1ennsdihids  
yfpikhpfeqalyqtyliddmstidmaslavsvylanhimsqqhdvtlgi hvpsl pndlhgnivpl tltidakdvqcrf  
ttdfnkcvlqnm sqlqcak  
ssl1letifhcyhmmsscndviedvhqihdahtsladieifphqhgfkiiynsaaydl1sietl sdlvrniylqiteen  
gnkrttvde1nlmterdiq  
lyddin1slpeiddaqtvt1feqqveatpnhvavqfdgvfityqtlnarandlahrlrnqygvpe ndr vaviaeksiem  
iamigv1kaggayvp1dp  
nypsdreqey1kdatpkvvi tyqalyengkqninhidlnkiawknidnlskntledhayviytsgttgnpkgtliphrg  
ivr1vhrnhyvp1neetti  
llsgtiafdaatfeiygalnggk1livakkeq1lnpiaveq1inendvntmw1tss1fnqiaseriev1vplkylligge  
vlnakwvd1lnqkpkhpqi  
ingygptenttfttynipnkvpnr1pvgkpi1gthvyimqgerrcgv1pge1ctsgfglaagyl nqpe1tadkfikds  
ninqlmyrsgdivr1l1pdg  
nidylrkdkqvki r gfr1elsevhaleri qginkavvivqnhdqdyivayyeamhtlshnkiksqlrmt1peymipv  
nfmhieqipi1tingkl dkk  
alpimdyvtd1dayvapstdteh1lcqifadilhv nqv gi hdnffelggsh1katlvvnri eastgkr1qigdl1qkptvf  
elaqai akvqeqnyevipe  
aivkddyv1ssaqrmy1lwksnhkdtvynvpflwr1ssg1nvaqlqqavqhliarheilrtqyivvddevrqrivadvv  
adfeevnthftdeqeimrq  
fvapfnlekpsqirvryirsp1hay1fidthhi indgmsniqlmnd1nalyqhkl1l1plklqkydysewmshrdmtkhrq  
ywl1sqfkdevai1sl1ptdy  
vrpni1kttngammsftmqqmrq1l1qkyvekhqitdfmffmsvmt1lsryarkddv1vsvmsarmhkgteqmlgmfan

Tsompanidou\_et\_al\_Supplemental\_FASTA\_File

t1vyrgqpspdkmwtqf1q  
evkemsleayahqeypfec1vnd1dqshdasrnp1fdvml1vlnnetnhaifghsk1thi1qpksvtakfd1sfiieedr  
dyt1nieyntd1yhsetvr  
hmgncmimidy1lkhqdt1qicdipngtee1lnwvnthvndrm1nvpgnks1isyfnevvsrqgnhvalvmd1tmtye  
t1rnyvdai1ahm11sngvg  
ngqrval1ftersfemiaam1atvkvgyasypidid1fpnkrqgail1edakvtavmsygvie1tt1pviqlenakgfveske  
neqydd1hgnqlentam1d  
nemyaiytsgtt1gmpkgvai1qrn11n1vhawstel1q1gdnev1lqhanivfdasvmeiycc11nght1vipdreervnp  
eq1qq1inkhrvtvasi1p1  
qmcsimedfyiek1itggatstasfvkyiekhcgtyfnaygpsestvitsywshhcgdlipetipigkpl1sniqvyimsd  
g11cgigmpgelciagds1  
aigyinrpe1madkwqnnp1fgkgklyhsgdlarytsdgqief1gridkqvkvngyrield1eivnilairgisdcvvtvs  
hfdthd1lnayyvgeqqve  
qd1kqy1ndq1pkymipkt1ithidcmpl1tndkvdttr1pnp1spiqqs1kvysepsneieqt1fdv1fgev1kqndvgvdd  
dffe1ggns1eam1lvsh1  
krfghhismqt1yqyktvrqivnmyqngqslvalpnd1selqkivmsryn1gileds1shrp1ngt11tgatgflgay1  
iealqgyshriycfiradn  
eeiawyk1mtn1ndyfseetvemmlsni1evivgdfecmddv1penmdti1hagartdhfgdddefekv1nvqgtvdvir1  
aqghhar1iyvstisvgt1  
fd1dtedvtfseadvykq11tspytrskfyse1kv1eavng1dgrivrvgn1tspyngrwhmrniktrfsmvmd11  
q1dcigv1smaempvdfsfv  
dttarqiva1aqvntpqiiyhv1spnkmpvks11ecvkrkeielvsdesfneilqkqdm1yetig1t1svdreqq1lamidtt  
1tkimnhisekwptitnn  
wlyhwaqyik1tfnk  
>tr|E5R648|E5R648\_STAAG  
mtvfvmq1lqsn1ksieel1sqs1rwsykkprt1vnyrynqdk1mhr1l1gdilvqygiqhd1t1l1phewhyhisprgkadi1vqh  
nrdgqpi1yvs1syspyiv  
cvvdkepvdidi1ekisqr1dwr1t1vtcfstneahqics1ndfyqiwtqkesftk1igeglikg1ldiydmtqshfyqsrev  
kfkqfi1fdqfmvqvcf1ge  
apwgykkvsvf1q11ss  
>tr|E5R652|E5R652\_STAAG  
mitvgiv1vgsgygaie1ir1l1qthphvtiahiyshskvdepl1k1tfph1qhimqhf1eal1tdvndcdviffatpapvskt  
cip1lvekgihvid1sgaf  
riknrei1yeyyketaaqdd1nha1yis1ewqsfdnngtk1isnpgcfptat11a1hplisekivd1ssiiidaktgvs  
gagr1sqr1vhfsemnen1  
sayai1gnhkhkpeieqyls1iagqdvsvi1ftph1vpmt1rgil1stiyvkfsseyttes1hk1m1tsy1yanqp1fvri1rdigt1f  
pttke1v1gsnycdigi1yv1d  
ettqtai1lvsvid1lvk1gasgqaiqn1ni1ydfevttg1nqspvyp  
>tr|E5R656|E5R656\_STAAG  
mkqrigay1ida1fhragvdk1fgvpgdfn1af1ddi1isn1pndv1wvntne1nasyaadgyar1nglaal1vtt1fgvgelsa  
vng1agsyaer1pvia1itg  
aptraveqagkyvh1s1lgegt1ddy1rkmfahitvaqgyitpenatteipr1intaiaerrpv1hl1pidvaiseieiptp  
fevtatkdtdastyiel1a  
tk1lhqakqpii1itgheins1fhl1hqe1ledfvnqtqipvaq1sl1gk1gafneenpyymgiydgkiaedkir1dyvndsd1il1ni  
gak1ltdsatagfsyqfnid  
dvvm1nhhnikiddvtnde1s1ps1l1kq1sni1sytnsat1fpayhrptspdytvgt1ep1tq1qy1fkm1mqn1flk1pndv1iad  
qgts1ffgayd1al1ykn1ntf  
igqpl1wgs1gyt1pat1lgsq1ladkdrn11l1igdgsl1q1tvqai1stm1rqhikpvl1fv1nndgyt1ver1ihgmyepynei  
hmwdyka1lpav1fggk1nvei  
hdvesskd1lqdt1fna1nghp1dvm1hfvevkmsvedapkk1lidiakafsqqnk  
>tr|E5R657|E5R657\_STAAG  
mrkkl1fgq1lqrigka1mlpvai1paag11la1igtaiqgealqhy1lpfi1qnggvqnvak1lmtaagsi1ifen1pmi1fal1gva  
ig1laggd1gvaai1aafvgyi  
imnkt1mgd1flqvt1pknvt1dpasgyas1lgipt1qtgv1fggi1igalaawcynkfynin1psyl1gffagkr1fvpimmatts  
fi1lafpma1liwpti1qsg1n  
afstg1l1dsnt1gvav1f1fgf1ikr11ip1fg1l1hhi1fhap1fwef1gswknaagei1hgdqri1fieqiregah1tagk1fmqgef  
pvmm1fg1paa1laiyhtak  
penkk1vvag1mgsaal1ts1f1tgite1p1efs1fl1fvap1l1ffi1hav1ldg1s1fl1t1y1l1dv1h1gyt1fsgg1fidy1v1l1gv1lpnk  
tqww1lvip1vg1lvavi1yyf  
vfr1f1iv1kl1kyt1p1gredk1qsqav1tasate1pyav1eamggkani1kh1ldacitr1rvevndk1skvd1vp1g1kdl1gasg1ve  
vgnnmqai1fgpksdqikhe  
mqqimngq1vven1ptt1meddk1detv1vvaedksatse1shivhap1t1gevt1p1sevpd1qv1fsek1m1gd1giaikpsqge1vrap  
fngk1iqmi1fptkha1ig1lvs  
dsg1le1l1ih1g1ld1tvk1l1ngegft1hveeg1qevkqgd11in1fd1dyir1nhaksdi1tpi1vtqgnit1n1dfkqge1hgnis1fg  
dq1l1feak  
>tr|E5R677|E5R677\_STAAG  
mpkksvrhiki1rei1sneqietqde1lvkr1ndyd1nvtqatvsrdike1lq1likvpipsgqyvys1pndrk1fhp1lek1lgry  
l1m1dsfvni1dgt1dn1l1v1kt

Tsompanidou\_et\_al\_Supplemental\_FASTA\_File

lpnagsigaildqinweevlgticgddtcliicrskeasdeiksrifnll  
>tr|E5R681|E5R681\_STAAG  
msrkesrvqafqtlfqlemkdsdltimeaisfikddnpdldefihwlvsgvkdhepvldetispylkdwtiarllktdr  
iilrmatyeilhsdtpakv  
vmneaveltkqfsdddhykfingvlsnikk  
>tr|E5R695|E5R695\_STAAG  
mlvammvisiillivpdlirlsktfliesrelttvdfeffsrdiledfkgvdkndieirqqriilhkgemieyklinnk  
iikvvndrgnitminnvta  
ftaniyyksiikitiitvkvgnlqtktiyv  
>tr|E5R6A4|E5R6A4\_STAAG  
mnidkqfwktyywierylndivnrekddqeiwlahkrkkqvvi fkqhikstqeirfdkakvlehkdeianfisfepqsf  
efyyftesefseeqlnevs  
pirikfnvirhtkdlikhmpniflarlisedndkktymfykrkvldnfldkymqkfspatytiifvnvliwlc milyln  
nfsdvkllldvggllvhfnvv  
hgewyriivtsmflhfsfehilmmllsflifgkiveaigswrmltvyfiaglfgnfvsfntttisv gasgafgligs  
ifammyvsktfnkmlgqll  
liaivilvgvslfmsnini vahiggfiggllitligyyykvrnri fwilligmlvifialqiriftikedniynklikdd  
mtsgnydnaqni vkqtink  
nyaddqyy lsgminatinsksegmtewerglrmfpksgllnfelaianslnddekalkyvrkalnadpkntdyinlek  
elksnesknk  
>tr|E5R6A7|E5R6A7\_STAAG  
mlkrlekeksndeivqntinkrinfigvivfiavlvrlrgylqiaaggshykqiikndenitvnesvprgrildrngkv  
vdnaskmaitytrgrkttq  
semldtaeklsklikmdtkkiterdkkdfwiqlhpkkakammtkeqamladgsikdqdydkqllskigksqldelsskd  
qvlai fremnagtvldpqm  
iknedvsekeyaavsqqllsklpgvntsmdwdrkypygdtrgi fgdvstpaegipkeltehylskgysrndrvgksyley  
qyedvrgkkkemkyttk  
sgkvtssvlnpgargqdlklitididlqkevealldkqikk lrsqgakmdnammvvqnpkngdilalagkinksgkmt  
dydigtftsqfavgs svkg  
gtllagyqnkai kvgetmvdplhfqggltrksyfnknghvsindkqalmhssnvymfktalklagdpyysgmalpsdis  
spaklrrglngvlgvkt  
gidl pnetrgqiepltnnpgnyldlsigqydytqlsqyvstian dgyriqphiglthestnkdevgplkkkingtv  
lnkvnntekeikqieqgfk  
mafndkdgtgyvsfkdtvvtagktgtaevfqngeprvsstyigyapidpkla fsivyt nqpvpppwltggdlgrdvin  
yyfkqlgkddknkdkk  
>tr|E5R6B1|E5R6B1\_STAAG  
mrgentmtpvfelknvnyyydhkkvleninikinkgef laivgpngagkstllklilgllplqsgeifvegidfknkks  
iklsyvsqkanafnsgfpa  
svkevvlsglktkrifqtfnskdnekvikvlerlnisdlihkniaelsggqqrvmiaral isepavlvlddeptngida  
khvsefyntldqkqegit  
iilvthdigvadtatevtclnkhlfhgttdefksldeveiskiyghpvrfdhqnreccn  
>tr|E5R6B2|E5R6B2\_STAAG  
mlgshvsmgkmllegsaieayeygett fmiytgapqntrrksiedlnitkghevmekeyl snivvhapyiini anttk  
petfnlgvdfllqgeiertq  
aigakdivlhpahvgagvdaginkieglnevltndnnvrialetmagkgteigrsfeelariidgvhnerlsvcfdt  
chthdagynvkedfdgvln  
efdkiigvdri kvvhvnds kndrga qkdrhenigfgyigfda lnyivhdsfk dipkilet pyvgedkknkkt pykleie  
mlkqqqf dpe lknkvmmq  
>tr|E5R6B9|E5R6B9\_STAAG  
mnltratlrpdlaillmsgfl earprvgyysgkskgkffnek lrfevkdym sqpv lrenttvydaictifledvstl  
fiinedndfvgvcsrkdl  
rasmigadihtvpisvnmtrmpnvtyleese lviyaadrmiekeidsipivrkkdnqyevigriskttiakllvalyke  
>tr|E5R6C1|E5R6C1\_STAAG  
mrqkgiikavdygesdkiti lnehgakvplmarrakkvktglqaqtqlfv yg lfiynqwrngmtlnsvdvisqhyklq  
mdlyvssyaslaeti ers  
mdegdiapynyqllqfvleki esgtsaq lmsvvvmlkcmkrfgftasfnrcavsgndtqadligysfkfdgaisrqeask  
dvhavilsnktlylldvlg  
klpidkmnslnihqei idemsdiilmlyreyagmffksqkllinqlkrleq  
>tr|E5R6D2|E5R6D2\_STAAG  
mqryfidqnadvsqrffitkkedihhitnvmrydvgskiiltfndqtvylceiaditsdkia vdlkekqnintel pvdvt  
icsglikadkyewllqkat  
elgassfiavsmersivklneakvvkkierwqkiikeaaeqsyr lvipsiqfesnlklicdtidnydyiliayeeekdg  
el snfkqtlqqfkaqdkvl  
mifgpeggl seneis lfsntstvglgprilraetaplyalsaisykelmg  
>tr|E5R6E2|E5R6E2\_STAAG  
mlstflflllyityrknkivyapislflifsswylhysqqai fnyinyiernsqfnera qviqirggsdtykgrls  
kneiypffltdkknfdlkk  
iesrncivkgqfkvnenkfvtklqsvvqsclesnrsliekhkqfimmriyds gikfpdrimalitgdvkeineqfke



Tsompanidou\_et\_al\_Supplemental\_FASTA\_File

rvkeigiylhllavsgshia  
aivfliyqplkrlnlplfvkigitiivltlyaqytnyapsavraimttlvllitkqikikgiqllafafiimfilnplv  
vydigfqsfsiisffimll  
fpflqqlsklqslfiitfiaqlasfivaipnfhqqlwvqfslsnlifvpyysiilfpilsilffitshfivgltpnlvdl  
sfnfhdwllldftrikqsh  
fsvpkfndwifiiifiisvyyifwllakrkyilvtfwtiiltilitfptnshhkitmlnvqggsilyeggknqnlid  
ggkviddtkqpsysiskyh  
ilptlnergineleylilthphndhigeveyiishikikhiviynkgysntlmllsklshkyniklmdvrqvssfklgd  
ssflffdsfipnsrdkney  
siitmityqnkkvllmgdasknnesllkkynlpeidilkvghhgsktssskefiemikpkisliissgknmyhlpniev  
vkr1q1rsriynsqngq  
vtidlddn1kvdsnsygnasgl  
>tr|E5R6F2|E5R6F2\_STAAG  
maviviigvsvftilyfSpldaaysilgqnatkaqihqfnvlhhlnepyfiqlwdtikgvftfdlgttykgnevvtk  
vgeripitiiavlaiva  
liiaipigisamkrnswlditlmialiglsipsfwqglfilafslklldilppsympehpisilpvlvigtsiaasi  
trmtrssvlevmrsdyvlt  
ayakglsttqvvikhilknaipivtlvgllvae11ggsavteqvfningigryivqqlipdipavmggvvyisivisl  
anliidifyalidpk1rse  
inerk  
>tr|E5R6F5|E5R6F5\_STAAG  
mvinlndkqtkskeglisvshplaakigkdvldqggnamdaviaiqlalnvvepfasgigggylllyeqstgsitafd  
aretapehvdkqfyldds  
eyksffdmthgktvavpaipklfdyihkryaklsledlinpaielaieghaanwatekysrqqharlkyhetaqvft  
enqywregdwivqpelgkt  
fqi1reqgfnafykgdiakqlvnvkcacggtiiledlanydiqikapisatfkdydiysmgpsssggitviqilkllehv  
dlpsmgprsvdyllhliqa  
mhlaysdragyladdnfhevqvslidddy1karstlinskanidiehgvsdcishtdveenhtetthfcvidkegni  
asfttsigmiygsigitipg  
ygvllnttmdgfdvvdggni1neiapykrplsnmaptivmhgkpi1ltvgappaisiasvaqtlinvlvfgmdiqqaidep  
riysshpnriewepqfsay  
tilaliarghamehkpdaiygdvhglqvdlntrdasggaddtregtviaggdvl1sirkqplpspkidyndthrvyfdmq1  
plyaeqvrwmhdkyvwdes  
virii1pevsvhiedlrsyeiagknyidiawlarkkgyqv1tkddsly1tdetyhsvkantnayrydrdsitr  
>tr|E5R6H5|E5R6H5\_STAAG  
mkkqiis1galavass1ftwdnkadaivtkdyskesrvnekskkgatvsdyyywkiids1leaqftgaid11ledykygdp1  
ykeakdr1mtrvlgedqyl  
1kkki1deyelykkwykssnkn1tm1tfhkyn1yn1tmneyndifns1kdavyqfnkevkeiehk1nvd1kqfdkdgedkat  
keyvdlvseid1lvvtyya  
dkdygehake1rakld1ilgtdnphkitnerikkemidd1nsi1ddffmetkqnrpsitkydptkhnfkeksenkpnf  
dk1veetkkavkeadeswk  
nktvkkyeetv1kspvvkeekveepqlpkvgnqevkttagkaeettqpvaqplvkipqetiygetvkgpeyptment  
lqgeivqgpdf1tmeqnrp  
s1sdyntqpttpnpi1leglegsssk1eikpqgtest1kgi1qgessdi1evkqatetteasqygp1rpfktpkyvkyrda  
gtgi1reyndgtfgyearpr  
fnkpsetnaynvt1nqdg1tvsygarptqknpsetnaynvtthangqvsygarptqkktkqknci1qrntckwssi1wrsp  
dtkkakqknci  
>tr|E5R6I0|E5R6I0\_STAAG  
mkqitwhdlqhi1kdgdvig1palavan1paev1rav1aqhdyhtpkdl1t1landihs1gaapdl1ddfiermikrvi  
ms1ltassktaqamknndi  
eayf1pqqi1athyrqsnq1lpgvitkig1ntavdprygggvntrptdd1vslvtindetylhyt1fsvdvallrgtya  
dqggniy1l1tqey1lsecyh  
valnakanhgkvi1vqvka1vddyq1kpnevvi1pgn1vdyvyvtedeknhrqviqshyl1palsgeeridgipepal1pfnr  
klil1rraaqf1tygdtisi  
gyginne1sn1l1heecvehdvqpi1dvgi1fggfvsrehfgmynadvrmphdrawdfiyngvsvay1sfaevdqygnv  
nvsyfndr1ngcggfidit  
qsvnkii1fsgtfvagshvschnqr1nietegqkqfvsdvshidfnaqysq1leqevyfvtdravfel1nqglklieiap  
gl1dhkdi1nqmafkipi1a  
dh1klidtsiykekwwg1kqsihkv  
>tr|E5R6I8|E5R6I8\_STAAG  
mks1fekaqqf1gksfml1pai1paag11lgigga1snpntvkaypildit1lqni1ft1msaagsivfqnl1pvi1faigvai  
gl1srskgtag1aa1l1gf1  
imnatmng1l1t1gt1akdq1aqngqgmvl1gi1qtvetgvfggi1tgimtail1hnykhkv1lppy1lgffggsrfvpivtaf  
aa1f1glv1mffiwpsiqag  
iyhvggfvtktgaigt1fyvgfi1r1l1gp1gl1hhi1f1p1fwqta1l1ggt1evkgh1vqgtqni1ffa1lgdpdvtkyysgvsr  
fmsgrfi1tmmf1glcgaala  
iyhtakpehkkvvgg1ml1saalts1l1tgi1tepl1efs1l1fvapilyvi1haffdg1lafmmadi1fni1tigqtfsggf1d1l1f  
gv1lqgnsktnylyvipigi

Tsompanidou\_et\_al\_Supplemental\_FASTA\_File

vwfclyyivfrflitkfnfktgredkaaaqveateraqtivaglggkdnieivdcatrlrvtlnqndkvdkvlllest  
gaggviiqqgtgvqviygph  
vtvikneieellgd  
>tr|E5R6J7|E5R6J7\_STAAG  
miyagilaggigrmgnvplpkqfldidnkpilhtiekfilvsefneiiatpaqwishtqdilkkyinitdqrkvvag  
gtdrnetimniidhirnvn  
ginnddivthdavrpf1tqrikenievaakygavdtvieaidtivmskdkqnihsipvrnemyqqgtpqsfnikllqd  
syralssseqkeilsdacki  
ivesghavklvrgelynikvttpydlkvanaiiqgdiadd  
>tr|E5R6J8|E5R6J8\_STAAG  
minqvyqlvaprqfdvtynnvdiygnhvivrplylsicaadqryytgrrdenvlrrklpmslvheavgevvfddskgvfek  
gtkvvmvptpteqhhiia  
enylassyfrssgydgfmqdyvmmahdrivlpndidlstisyte1vsvsyhaiqrferksiplknsfgiwdgnlgyit  
aillrklypeakiyvfgkt  
dyk1shfsfvddiftvnqipddlki dhafecvggkgsqvalqqivehispegsiallgvselpvevntrlvlekgltlig  
ssrsgskdfeqvvdlyrky  
pdivekla11kgheinvtmqdivqafemd1stswgktvlkwti  
>tr|E5R6K2|E5R6K2\_STAAG  
minqvyqlvaprqfevtynnvdiysdyvivrplymsicaadqryytgsrdenvlsqklpmslihegvgevvfddskgvfnk  
gtkvvmvptptekddvia  
enylkssyfrssghdgmqdfvllnhdravlpddid1siisyte1vtvslhairrefekksisnktfgiwdgnlgyit  
aillrklypeskiyvfgkt  
dyk1shfsfvddvffinkipegltdhafecvgrgsqsainqmidyispegsiallgvsefpvevntrlvlekgltlig  
ssrsgskdfeqvvdlyiqy  
pdivdkla11kggeyeiatind1teafead1stswgktvlkwim  
>tr|E5R6L0|E5R6L0\_STAAG  
mlkyehiakqlnafihqsnfkpgdklpnvtqlkeryqvskestiikalglleqdgliyqaqsgsiyvrniadanrinvfkt  
ngfskslgehrmtskvlvf  
kematppksvqdelqlnaddtvyylerlrfvdddvlciaysyihkeivrylnddiakgsifdylesnmklrigfsdiffn  
vdk1tsseas11qlstgep  
clryhqtftytmgtgkpfdsdivfhyrhaqfyipskk  
>tr|E5R6M0|E5R6M0\_STAAG  
mnntqssprsniiiaim1saltyw1faqsfinigplvgqyqtspavln1sis1tsfatgimvaagdiadkigqlrmt  
mgliismfas11liisdit  
a11iigrilqgl1saai11pstvgvlnnqfkgehlrrtisylmistvggiglagviggliafnfgwqmnfiisiviafia  
111kgtpkvsqshrhpf  
dykmsifavmigsft111tqfegqwfstfsfic1sifiittlifiierrhevpfidfsvlnrpfifaflnnfvlns  
glgvtvffiyagthlg1s  
aaqsglvtlpyaivavamirlgek1lrfggk1mliigplfpvigitismtqlsasqyviaviigfvicaignglvatp  
gltiaifsmpekvglatg  
lykmsgtl1ggafgialsttvfsm1qlnyapsvaatvtfivsvilmilgslsaymiipktvks  
>tr|E5R6N2|E5R6N2\_STAAG  
mg1vrkffmpnsyvqsfid1dk1vdkgvkgiitd1dnt1vgwvdvkeptervkawfkeanekgititvsnnesrvas  
fsqh1didfifkarkpmgk  
afdkaikmni1rpdqtvv1gdqmltdvfggnrrglytimvvpvkrtgdgfitkvnrlie11rhfskkyitween  
>tr|E5R6N6|E5R6N6\_STAAG  
mgefeykyltgfilil1legiftnsasaiaysd1hhkskfdskrlsnakmsfinptqlenktndr11khd11fhdmfvn  
vaskkdfkvefenealskk  
finknidiyagsysyechgatnktqcsyggvt1sdnnk  
>tr|E5R6N7|E5R6N7\_STAAG  
mgyrtlksifhenneskmkeeytkrfnslasfntniniipmengkknvndleyplffmvtknlskkqelisinsrkidral  
nslpyaareqyfd11ide  
lqstneienvfstkqeiahalnqaseflkfrglvdqykeielnkkikvdnvrdiraidk1vsneineqdkldgelfrk  
nfvghdgstnkyihvg1q  
petkiveyigem1tflkyfdapqpfkimashylfeyihpfydgngvrgrfiiak11sdydnytal1tfsyvinrnkskyy  
kafmtasnh1ncgd1tefi  
dtmle11iagqeril1delipkmdatek1tly1tshyqidyefly11smdk1fgnkrnr1t1idlenilgvgrvkinnti  
kkydnylvk1ksrptiyei  
sdef1nsiik  
>tr|E5R6P1|E5R6P1\_STAAG  
mniekieqik1vkendvkkfkyknfedeieidftdsnh1aahsnqsnqsmnnd1taskandnsdvstndyhdikspmv  
gtff1lqdske1tepi1vng  
dkvknkgdi1gyveamkv1nevttvdageiteivadhgtnveydqvlvrik  
>tr|E5R6Q8|E5R6Q8\_STAAG  
msfmdkakdavekfknsdneqvknvkdki1neytgsnneekkenedkek  
>tr|E5R6R7|E5R6R7\_STAAG  
mnneypysadev1hkaksylsadeyeyv1ksyhiayeahkgqfrknglpyimhpiqvagiltemrldgptivagflhdvi  
edtpytfedvkemfneeva

Tsompanidou\_et\_al\_Supplemental\_FASTA\_File

rivdgvtklkkvkysrseeqqaenhrklfiaiakdvrvilvkladrlhnmrtlkamprekqirisretleiyaplahrlg  
intikweledtalryidnv  
qyfrivnlmkkkrereayietaidrirtemdrniegdingrpkhisyirkmmkqkqfdqifdllaivivnsindc  
yailglvhtlwkmpmgrfk  
dyiampkqnlyqslhttvgpngdpleiqrtdfmdheiaehgvaahwaykegkkvsekdtqyqklnwlkelaeadtss  
daqefmetlkydlqsdkvy  
aftpasdvieipygavpidfayaihsevgnkmigakvngkivpidyilqtgdiveirtsksygsprdwlkivksssakg  
kiksffkkqdrssniekgr  
mmveveikeqgfrvediltekniqvvnkyfaneddifaavgfggvtslqivnklterqrildkqralneaqevtkslp  
ikdniiatdsgvyveglenv  
liklskccnpiaggdivgyitkghgikvhrtdcpnikneterlinvewvkskdatqkyqvdlvtyvdrngllnevlgav  
sstagnlikvsgrsdiidkn  
aiinisvmvknvndvyrvvekikqldvytvtrvwh  
>tr|E5R6S1|E5R6S1\_STAAG  
mqfslliyivvifavmyflmirpqqkrakqhrelinni qsgqrittiggikgtvkavdettvvitvnghteltfekpai  
kqvdp  
>tr|E5R6S6|E5R6S6\_STAAG  
mdnkdykkfyli redvlpesvvtlkikdalksdptlsiydavkqfdlsrsafykyretifpvddkml dhreftlilyvt  
divgm larvldvisklels  
vltihqsi pmeekatitlslnaksketsvedvigalrnldyvskevelismm  
>tr|E5R6S8|E5R6S8\_STAAG  
mlklnlqffaskkgvsstkngrdseskrlgakradgqfvttggsilyrqrgrtkihpgenvgrggddtlfakidgvkferk  
grdkkqvsvyavae  
>tr|E5R6T6|E5R6T6\_STAAG  
mkikemtsemprerllshgakslnstellaailntgrkgfssididnellksasnlnelkssindlikvkgiglqkai  
tlkaafelgermgrraenn  
rikitqpsdvadymiptmkdl tqehfvilln sknviketcvfkgtl nssivhpreifsiavrenanaiavhnhpsgd  
vtpsqedii ttmr lkecg l  
ilgidlldhii igdnrftslveagyfdend  
>tr|E5R6U1|E5R6U1\_STAAG  
mlvmaeqdkranllvvs lqtqsriifvvvlpfisyffhdgnmhangkltkvlplsqvlnigqivilaiaifivylimsk  
ikfptfql laplivlvwn  
fstgl tftldhwllnmaqlyimrigvqiahllsd lkgrlaiaitinqimligalimvyiihffdnnpinel flgaapg  
gvnqivlvalatgadvami  
tsyhifriiffilfi apginyflkyrsnkred  
>tr|E5R6U6|E5R6U6\_STAAG  
mrklvvgrrsklal tqsqfinklkavepnleieikeivtkgdrivdkqlskvggkglfvkeiqhel feknidmaihsl  
kdvpvipegl tlgcipdr  
elpfdayiskthtqlsq lpegsiigtsslrrgaqilskypnleikwirgnidtrlek lqtedydaiilaag lrrmgwsd  
divtsyl drdtllpaiggg  
algiecrsdeell tllskvhndevakcvtaertflaemdgsqvpia gyatisdqkeieftglimtpdgkerfeytmng  
tdpvelgktvsnk lkeqga  
yeiikr lneqh  
>tr|E5R6U8|E5R6U8\_STAAG  
mhfia isinhrtadvalreqvafreddalriahedlyetksilenvilstcnrtevyavvdqihtgryyiqrflarafgfe  
addikamsevkvgdeaveh  
llrvtsgl dsivlgetqilgqirdafflaqstgtgtifnhl fkgaitfakrahnetdiadnavsvsyaavelakkvfgk  
lkskqai iigagemse lsl  
lnllgsgitditi vvnrtienamklaakhqvkydelsslpllesadivisstsasqsyiitnemieriaenrkqds lvid  
iavprdiepgisaitnifn  
ydvdldkglvdanlrerqlaaatiseqipaeihahnewism lgvvpviralrekamaiqaetmidsidrk lpglsererki  
iskhtksiinqm lkdpiq  
akelssdkksnek lelfqni fdi eaecpheqakqqkeskvkeisarri fsfe  
>tr|E5R6V8|E5R6V8\_STAAG  
mamikmspeei raksqsygggsdqir qil sd ltraqgeiaanwegqafsrfeeqfqq l spkvekfaqlleeikqq l nsta  
davqeqdqql snnfg lq  
>tr|E5R6W7|E5R6W7\_STAAG  
msgk isvkaetia hvvkeles isqkydeiaq nfgkiaqlnyssekaahsmengyssa atvisglkgplst lgggvmsa  
qkffeadehwg tefak lyy  
nieg  
>tr|E5R6X3|E5R6X3\_STAAG  
mtfeek l sqmynei anki ssmipvewekvytmayiddeggevfyytepgsnel yyytsvlnkydisesefmdsayelyk  
qfqnlrni fkeegyepwts  
cefdftkegelkvsfdyidwintefdq lgrqnyymkkfgvipemeyemeevkeieqyikeqeeaeq  
>tr|E5R6X9|E5R6X9\_STAAG  
meksikimti igivigglatv fsl lmv laasgvmttdvsttvngevdpvdaetaaaiftvl flsl flifigiisiilgtig  
mfkasknkkmgsi lliiga  
visgniitfalwlvsgik l ltnkpkdeids l s

Tsompanidou\_et\_al\_Supplemental\_FASTA\_File

>tr|E5R6Y4|E5R6Y4\_STAAG  
mlkfenvtksfdkgdnrnieavkdtfnfeinkgdialvgpsgsgkstfltmagalqtptsghilinnqdittmkqkalakv  
rmseigfilqatnlvpflv  
vkqfftllkkknknvmsnedyqqllmsqlgltsllnklpseisggqqrvaiaakalytnpsiiladeptaaldtenaievi  
kilrdqakkrkkaciivth  
derlkaycdrsyhmkgdvlntenetve  
>tr|E5R6Y6|E5R6Y6\_STAAG  
msdsekeilkrikdnpfisqrelaeaiglsrpsvaniisgqlikeyvmgkayvlnedypivcigaanvdrkfyvhkd1va  
etsnpytstrsiggvani  
aenlgrlgetvaf1sasgqdwemikr1stpfmnlhdvqqfenastgsyataliskegdmtygladmevfdyitpeflik  
rshllkkakciivdlnlgk  
ealnflcayttkhqiklvittvsspkmnmpdshaidwiitnkdetetylnlkiestddl1kiaakrwndlgvknvivtn  
gvkeliyrsgeeeiiksvm  
psnsvkdvtgagdsfcaavvswl1ngmstediliagmvnaktietkytvrqnl1dqqqlyhdmedykngkftkvy  
>tr|E5R6Y7|E5R6Y7\_STAAG  
manlqkyieysrevqqarennpivallestiishgmpypqnvemattveqii1rnngaipatiaiidgkikiglesedlei  
latskdvakvsrrdlaevv  
amkcvgattvattm1caamagiqffvtggiggvkhgahtmdisadlee1sktnvtvicagaksil1d1pktmeyletkqv  
pvigyqtnelpafftresg  
vkl1tssvetperladihl1tkqq1n1leggi1vanpipyehalskayieaiineavveaenqgikgkdatpfl1gkivektn  
gkslaanik1vennaalga  
kiavavnk11  
>tr|E5R6Z0|E5R6Z0\_STAAG  
mnkd1kglyaa11vpfdengqvneqglkqiaqnaietee1dglyvngssgenfl1nteqqkqvfvakeavgdvkliaq  
vgs1d1neaie1gkyate1  
gyda1savtppfypftfee1rdyyfdieatqnmmi1yaipdl1tgvnisieqfse1fnhektivgkytapnff1lerirk  
afpdkl11sgfdemlvqat  
isgvdgaigstynvngrrarki1fd1larqqg1qea1y1qhd1sndi1etv1smgiypt1kei1lhrdidag1pkrpfpkpfne  
ahrqt1dq1iakyd1  
>tr|E5R6Z8|E5R6Z8\_STAAG  
mvklsv1dya1idegkdaqalqdsvt1ak1adr1gfkriwftehhnvpafacsspellmmht1aqt1n1h1rvsggvm1p  
hyrpykiaehfrmmaalyp  
nr1d1lg1gnnpgttmvkqal1dginptydsydesi11rdy1tikdkpsaht1gvqphidhfpemw11sssatsakiaae1  
gig1svgtf11pdina1iha  
akdn1diykhfqa1stikmdakvm1svf1vad1nea1vaa1qha1dvw11gk1qfaefehfsvd1taqkyk1lndrdkemi  
qvhqari1agtqeqvkaq1  
ddf1atfevdev1vap1ipgieqrckt1k11aeiy1  
>tr|E5R701|E5R701\_STAAG  
mqsskwnams11mdekt1kqae1v1rta1deada1ivig1gagms1sdgft1yverf1tenf1pdf1iek1y1rff1dm1qas1l1hpygs  
wqeywafesr1f1t1ny1ldq  
pvqqsyl1als1vegkqyhi1tt1nad1nafda1e1ydm1thvf1hi1qgey1il1qqcsq1hchaq1tyr1ndd1l1rkmvvaqqd1ml1pw  
em1prc1pkcdap1mev1nkrk  
aevgm1vedaefha1qlr1ynaf1eqh1qddkv1ly1eig1gyt1tpq1fvk1hpf1qrm1trk1nenai1ymt1mnk1kay1rip1nsiq1erti  
h1tedi1st1ittal1rnd1st  
tqnn1niget1edv1nrtd  
>tr|E5R704|E5R704\_STAAG  
mqailn1fivdi1sqpai1valia1fig1livqkkpaat1tsgt1ikt1ilg1fl1sagad1vvrs1lep1fgk1ifqha1fgvqg1ivp  
nnea1vsl1alkdfgt1taal1  
imvcgm1ivn1liar1ftn1kyi1fl1tg1h1t1f1y1ma1af1ai1iltv1shikgw1ltiv1gal1vl1glimav1pall1qptmrk1itgndq  
valgh1f1gs1isyfaagav1gq  
l1fk1g1ks1stee1ik1fpk1gl1s1fl1rest1isi1sit1mally1fiac1lfag1sv1y1hesi1sdgqn1fiv1fs1liqgvt1faagv1fi1ltgv  
r1li1ae1ivp1afk1gise1klv  
pnskp1aldcp1ivf1pyaqnav1lig1ffvs1fitg1vig1m1fil1fl1fggv1vil1pgv1vah1ff1lgataav1fgn1argg1ikgavagaal1n  
gilit1fl1pl1fl1pf1lge1lg  
gaatt1fs1dtd1fl1tv1g1iv1fgnav1kym1l1fgail1fi1ivgata1ill1kgrqk1pqq  
>tr|E5R712|E5R712\_STAAG  
mni1vgh1h1sm1ytk1dakr1nkdf1ytn1vl1gl1r1veksv1nqdn1psmy1h1fygdev1gtag1til1sffe1iphag1hkqpgt1eti1yrf  
s11vpnqaal1hyfekr1ldn  
ngitser1lyl1ggqev1fkdedd1lei1llvnds1fev1phq1wq1hnayse1ipqayq1ilg1igpvel1rvrnaartve1flenv1lgy  
rkrdnks1fdv1tlapq1ly  
sdfv1ieq1qqrer1pgr1gyih1hia1ntp1qmsd1dai1ykk1lqqqt1qsngi1dryffks1lyyrhns1ime1fateap1gftid  
tpleq1lgsq1ln1pdf1leae  
reqiesk1l1hei  
>tr|E5R713|E5R713\_STAAG  
mak1lemn1kntple1fg1lys1lgdh1ln1p1fk1gekvs1yeqr1inei1eask1ladet1gidv1fav1gesh1qehftt1qahtv1vl1gai1aq  
atkhik1vss1st1i1sat1p  
vrv1fed1fat1d1ish1gra1eiv1gras1rtg1fd1l1fyd1l1kdyde1l1feek1lg1l1le1lnk1ter1itw1sgkyr1pel1nmk1if1prp  
idn1il1piw1rav1ggppas1ai

Tsompanidou\_et\_al\_Supplemental\_FASTA\_File

kagkqgvpmmitlggpamnfksidayrqaateagfdashkslpvstaslfytaettqdamrefyphlntgmsfirvgv  
ypkqqfanssdyrealmgv  
spqqiiekilyqhelyghqrfmaqldfggvpfenvmknieligneiipaikkhlk  
>tr|E5R719|E5R719\_STAAG  
mtnyeqvndstqfsrrtflkmlgiggagvaigasgvgsmsfksmfntpedpekdayefygvqpgittptqktcnfval  
dlkskdrdaikamfkkwv  
madrmmgdgtvgktsnnpmpvdtgesiglgaskltitfgiskslmkkiglskipdafkdiphfpndqliddysgdi  
miqacsndsqs fhavn  
vrpfrdivkvrwaqsgfisakgketprnlmafkdgtinprksnqlkdyvfiddgwakhgtycvvriqihietwdrtale  
eqeatfgrkrhsgapltgg  
kefdeidlakdshgeyi idkdahtlakeantsilrrafnyvdgtdrdtgnfetgllfiafqkatkqfididqnnlgsnd  
klneyithrgsasflvlp  
vskggylgetlfd  
>tr|E5R721|E5R721\_STAAG  
mfyqlwafiapglhnerqfiykysffsvllfcagvafafyvgfpriiqfalklsltlnispvigfkaylvelirwlftf  
gillfqlpilfiglakfgli  
ditslkhyrkyiyfacfvlasiiappdltlnilltllplillfefsmlfvkftcrkppth  
>tr|E5R722|E5R722\_STAAG  
mtgemkqnamkniityiwiisvnenackdtcarviymngvihqndetyttmtvtndnsilkr  
>tr|E5R740|E5R740\_STAAG  
mgrqafefglrpkdqfkvmqhfdlntnhlevlnrlytplitgtqavglyhfmtqfvkdshnetlilshyifmnelkinlle  
frqqmdlleaigllkafvk  
hdeqetqfvyqliqppsahlfndpmlsilysevehrrfhekkfyeyqqidlsefkqvtrqftdvfkvpstkididts  
dipinepygidlsnesfd  
femlrqmlgkhfisdqivtkdakrlitqlatlygltagdkhvilnsitsgqqlsfeemrkqarsyylmehenqmpklqv  
kspatssstgkssevnkp  
qs dewfelletqspi dmlaswsesepisqktmveelie rekmsfgvinillqfvmkedmklpkayileiasnwkkkgi  
k takeaynyakkvnqpkne  
gssgnyqkrqsygqrnriskektpkwlenrdkpseedsakdnsvddqleqdrqafldklskkweedsr  
>tr|E5R744|E5R744\_STAAG  
mpelepehvkrgiepyvinqiehvifsdkvi egkaqgketiikgieltdftlsegytitnverrskyivfqldnkre  
qrlishlmgaggffivde  
ledimipnyrkwhwhvifelsndkkliysdirrfgeirvasvasypsflieapepftnealtylnrihqqs nknkpiq  
vildhkviagcgniyacea  
lfragvlpdkkvkdlthqqqemvyvrevleegikhggsisdyrhadgktgemqlhlnvyrqpvckvcgsqietkia  
trnshycpvcqk  
>tr|E5R747|E5R747\_STAAG  
mllissiliisfvltlgiihasityvlsekheqalatdarsyylvqdneidkvkeivkqqnidllitkhdkkvfssgkl  
kaipnsdsyiqkrdvi fn  
kkvngyhvwikgynnditemhwtlwyli lctlvliclyfasrsfkrtilrpiqevtyatqllangyyhirvpesnvve  
tkalfvstndlarlqkln  
neqqiqsnrlkttienipsailmidrngkivvankayyeqfnishnieqvgyhgyvnteieqlilesfkvekpiyeqlev  
ainqvhakyfdiscvpi l  
rsqkslqgilvvhmditnlkqlenlrrefvanvshe lkt pitsikgfaetlidgakndaesldmflniilkesnrieslv  
tdlldlshieghteltdy  
mnlldlrriidnmmqtanqknisihtdiekdvivkaqeskiaqv itnlltnainysyedgdinvrvyrdfrvifevqd  
fgigikledqqriferfyr  
vdkarsrdsggtglslitkhiveahqgnievnsqvgkgstfkvilkyke  
>tr|E5R749|E5R749\_STAAG  
mtaekitqgteglvnpnepipfiigdigpdiwkaasrvidaavekayngekriewkevlagqkafdttgewlpqetld  
tikeyliavkgpltpigg  
girslnvalrqeldlftclrpvrwfkvpspvkrpqdvdmvifrentediyagiefkegttevkvidflqnemgatnir  
fpetsgigikpvskegter  
lvraaiqyaiddnrksvtlvhkgnimkftegsfkqwydlalselfgdqvftwqqydeivenegrdaanaaqekaekegi  
iikdsiadi flqqil trpa  
ehdvvatmnlngdyisda laaqvggigi apganinyetghaifeathgtapkyagl nkvnpssvilssvlml ehlgwqea  
adkitdsiedtiaskvvtv  
dfar lmdgaeevstsafadeliknlk  
>tr|E5R756|E5R756\_STAAG  
megkavl fksfagingvpialnttdteeiiktvllepnygginledisaprcfeierlkketnipvfhddqhgtaivt  
maglnalrvvnkdiakik  
vvlngagaagiavkllaygvrnmvmcdsrgaifegrsygmnpkdvvakwtknkdi egsleevvkdadvfigvsvana  
lsqdmvksmadnpiifama  
npnpeipddakaagarvvtgrsdypnqinnv lafpgifrgaleveathineemkkaaveaiadlidssel nedycipg  
pfdkrvapsvarnvakaam  
esgvarievdpqdvydktmkltdlq  
>tr|E5R757|E5R757\_STAAG  
mslrdealemhkrnqgklevkpnkvtnkeelslayspgvaepckdiyedkrkvydytikgkymitqlkeiqqlllmeq

Tsompanidou\_et\_al\_Supplemental\_FASTA\_File

ry  
>tr|E5R758|E5R758\_STAAG  
mvaylnihtayd1lnsslkiedavr1avsenvdalaitdtnvlygfpkfydaciannikpifgmtiyvtnglntvetvvl  
aknndg1kdlyqlssei km  
nsmenvsfellqqfssn1iifknvadehrdivqvfdshedtyldhqsvlvqgikhvwiqnvcyqtrqdadttisalaair  
dnak1d1hdqedfgahf1  
tekeikqlindneyltqvdivaqknaelkyhqs1lpqyqtpndesakky1wrv1vtqlkkle1nydvylertkyeykvi  
tnmgfedyflivsdlihya  
ktndvmvgpgrgssags1vsy1lgittidpikfn1lferflnpervtmpdididfedtrrerviyyvqekygelhvsgiv  
tfgh1laravardvgrimg  
fdevt1neiss1iphklgit1deayqidfdkfvhrnrherwfsickleglprhtsthaagiiindhplyeyap1tkg  
dtg11tqwtmteaerig11  
kidflglrn1siihq1liqvkkd1ginidiekpiddqkvfellsqgdttg1fqlsdgvrsv1kk1kpehfe divavts  
lyrpgpmeeiptyitrhd  
pskvqylhphlep1lkntygviiyqeqimqiaastfanfsygead1lrramskknravleserqhfiegakqngyhedisk  
qifd1ilkfadygfpraha  
vsyskiayimsflkvhypnyfyani1snvigsekktaqmieeakkqgit1lpnineshwfykpsqegiy1sigtikvgv  
yqsvk1vder1yqngkfkf  
ffdfarr1pkrvkr1leal1lvga1fdafgktrst1lqaidqvl1dgd1nieqdgfl1fd1ltpkqmyedkeelpdalisq  
yekey1gfyvsqhpvdkkf  
vakqyl1fkl1snaqnykpi1lvqfdkvkqirtkngqnmafvt1ndgiel1dgvi1fnqfkyeellshnd1fivsgkfdh  
rkqqrq1liineiqtlatfe  
eqklafakq1i1rnksqidmfeemikatkenandv1sfydetikqmt1lgyinqkdsfnnfiqsfnpsdir1i  
>tr|E5R770|E5R770\_STAAG  
mkvdh1lvrygel1lkg1snrkkfvnq1rnnvnks1kg1dgvfvvkgkrdrmyielehdadineityr1skifgiksispv1  
kvektieamsaaikfaqq  
feenstfki1dvkradknfpmdtyelqrelggvt1kqienvs1vkrpdheirvevr1daiymyeevvpvgsgg1pvgtggk  
t1l1m1sggidspvagmevm  
rrgyt1eai1fhsp1pftsdqakekviel1trilaervgpik1hivpftel1qkrvnkvvhprytmtstrmmmrvadk1vhq  
igalaivngen1gqvasqt  
l1hsm1yainnv1tstpv1rpl1tydkee1i1kskeigt1fetsiqpfedcct1ftpknpvtepn1fekvvqyesv1fdfeeminr  
aveniet1leitsdyktike  
qqtnq1lindf1  
>tr|E5R772|E5R772\_STAAG  
m1fs1l1i1iktth1lit1fikq1l1f1fivpfiyppkkr1s  
>tr|E5R779|E5R779\_STAAG  
mkqfnv1vadpiskdgika1ldheqfnvdiqtgl1sealiki1psyhalivrsqttvteni1naads1kviaragvgvnd  
ininaat1kgilvinapdg  
ntisatehslam1lsmarnipqahqs1tnkewrn1nafkgte1lyhkt1lgvigagr1glgvakraqs1fgmkilafdpyltde  
kaks1sitkatvdeiaqhs  
dfvt1h1tp1tktkg1inadffakakps1qiinvarggi1idekalikaldegqisraaidvfehepatdsp1vahdkii1g  
tph1gastveaqekvaisv  
snei1ei1lidgtvthavn1pkmd1sniddtvksfin1sqtvgelaiq1lmy1napssikityggd1asidss1l1trtiithi  
1kdd1gpevni1nal1n  
qqqv1t1niennkaetgfsny1level1snds1svkvgasvftgfgprivrinnfsvd1kpnqyqivsyhndtpdmvgtgal  
1gkyni1niasmt1grteag  
gdal1milsvdqpvsnni1delkqvgeynqif1t1tel1tvqs  
>tr|E5R781|E5R781\_STAAG  
mykffqn1grs1mlpvailpaai1iagignt1nalhatpkiamffttvgttileqlgilfaigvaigmakndgavalaa  
t1gyf1vtv1l1spmk1lap1  
1gm1kase1nsafekmnn1gnvfv1g1v1g1iaayaynkfsetelplalsffsgkr1vpimtafyctflv1vill1flwpllysw  
ivkfges1vg1gsfgafiy  
gvann1li1ptg1l1hhal1nsvf1wfdt1g1indigk1fqsgkdaikgitgryqagffpimmfgipaaalamyhtakttqkkqvyg  
wfl1assvaaffvgvtepie  
fafmfvapi1lyvhal1tg1sl1fiat1fhwtags1fsaglidyv1sl1n1pvsnhp1ml1lvqgvffilyyvi1frvviqvf  
n1nt1igr1gene1lvdptv1k  
dni1ap1gendik1qskyh1qhaiqi1leg1ggqenivn1tncatr1rl1el1kdt1siidqqkiknagavgv1t1vngk1hstq1v1vgth  
vqqvadeiekh1  
>tr|E5R782|E5R782\_STAAG  
mysviski1nfil1vkmsks1lyvigkdn1pkdskyvvtcthesynevim1gmalypnqihymakkel1fknkwigkfl1ts1n  
afpvdrenpgpst1krpin  
1l1kdnktvgi1fptgs1rtsqegap1lkr1gastiam1skspilpvayvgptkihg1l1tgqayin1igkpidind1pkd1krner  
idyitkeietrtaklqqel  
heivks1  
>tr|E5R790|E5R790\_STAAG  
mqqhssktayvysdk1l1qyr1fhdqhpfnqmr1kl1tte1ll1nan1l1speqivq1priatgdel1m1ihkydyveaikhashgi  
i1sedeakkyg1ndeengqf  
khmhrhsat1vggal1t1lad1imsgkv1ngch1ggg1l1haaq1pgrasgfc1yndiaitaqylakeynqrv1liidtdahhgdg

Tsompanidou\_et\_al\_Supplemental\_FASTA\_File

tqwsfyadnhvttysihet  
gkflfpgsghytergediyghtvnp1epytedasflecfltvpevvksfkpdiilsvngvdihyrdplthlnctlhs  
lyeipyfvkyladsytngk  
vimfggggyniwrvvprawshvflslidqpiqsgylplewinkwkhyssellpkrwedrlndytyvprtkeiseknkla  
lhaswyestrq  
>tr|E5R7B1|E5R7B1\_STAAG  
mnl1kknkysirkykvgifstligtvll1snpngaqa1ttddnvsdtnqatpvnsqdtvnannrglansaqntpnqsat  
tnqstnqalvnhnngsian  
qatptsvqsstpsaqnnhdtgnttatetvsnannkdvsnttl1nvpnktnengsgghl1lkeiqedvrhssdkpelva  
iaeqasnrpkrsrraapa  
dpnatpadpaaaaagnggapvaitapytpttdpnannagqnapnevlsfddngirpstrsvpsvtvvdnlpgftlingg  
kvgvfshamvrtsmfdsqg  
aknyqaqgnvialgrikgnndndhgdngieksltvnpnselifeftmttknyqgvtnliiknadndtviaeksvaygp  
iwr1fkvpenvsh1kiqfv  
pkndaitdargiyqlrdgykydfvdsig1hsgshvyverrtmeptatnkeftvtts1knngnfgasfntddfvykvql  
pegveyvnns1tkdfpssn  
sgvdmndfnvtydaanrvit1kstggsgnspar1mpdkil1dkylrvnnvptprtvtfndt1tyktytqdfinspaes  
htvstnpytidi1mknkda1  
qaevdrr1qqadytfas1d1fnd1krraqt1ldenrnnvp1nkrvsqadids1tnqmght1irsvdaenavnkvdqmed  
1vnqndel1tdeekqaaiqv  
ieehknei1gnigdq1ttdgvtrikdqgiqt1sgdtatpvvkpnakkairdkatkqre1inatpdatedeiqda1nqlat  
detda1dnvtnattnadve  
iaknngint1gavvpqvthkqaardainqatatkrqq1insreatqeeknaalnel1tqatnhaleqinqattnadvdnak  
gdg1nainpiapvtvkkqa  
ardavshdaqh1ae1nanpd1atqeerqaaidkvnaavtaant1n1n1antnadveqvktnaiqqiqaitpatkvktdakn  
aidksaetqhnt1fnnda  
t1leeqqaqq1ldqavatakninaad1nqevaqaakdqgtqni1vviqpatqvkt1darnavndkareait1n1natpgatre  
ekqea1nrvt1knra1td  
igvtsttamvns1rddavnq1gavqphvttkqtatgv1nd1latakqeinqntnatteekqvalnqvdqelatainniq  
ad1naevdqaaq1lgtkain  
aiqpni1vkkpaa1aqinqhynak1ae1inatpdatndeknaaint1nqdrqqaiesikqantnaevdqaatvaennidavq  
vdvkkqaardki1taevak  
rieavkqtpnatdeekqaavnqinq1kdqainqinqnqndqvdt1tnqavnai1dnveavvikptaiadi1ekavkekqq  
qidns1dst1dnekevasqa  
lakekeka1aa1dqatnsqvnqaatngvsaiki1iqpetkvkpaarekinqkanelrakinqdkeataerqvaldkine  
fvnqamtdi1tnnrtnqqvd  
d1ttsqal1dsialvapehivraardavkqqyeakkqei1eqaehatdeekqvalnq1lanekla1lqinqavtndvkrve  
tngiat1kgvqphivikpe  
aqqaikataenqvesik1dtp1hatvde1deanql1sdt1kqaqqeientnqdaavtdvrnqtikaieqikpkvrrkraald  
sieennkq1ldairnt1ldt  
tqderdva1dt1nki1vntikndiaqnknaevdr1tetdgn1dikvilpkvqvkaaparqsvgvkaeaqnalidqsd1stee  
er1aakh1veqalngaidq  
inhadktaqvnqds1daqni1iskipattvkatalqqiqniatknin1likanneatdeeqniaiaqvekelikakqqias  
avtnadvay1l1hdekneir  
eiepv1nrkasareq1tt1fndkkqaeianiqatveernsil1aq1lqniydaigq1dqdrsn1aqvdktas1n1lqtih1ld  
vhp1kkpdaekt1ind1lar  
vtalvqnyrkvsnrnkada1kai1talk1qmdeek1tartnadvdav1krfnval1sdieavitekens1l1ridniaqqtya  
kfkai1atpeqlakvkv1id  
qyvadgnrmi1dedat1ndikqhtqfivdeilaik1paeatkvspkeiqpapkvctpi1kkeethesr1kvekel1pntg1segm  
d1pl1kefalitga1larr  
rtknekes  
>tr|E5R7B4|E5R7B4\_STAAG  
malnitgssflwplntiymkqelgksltvaglv1mnsfgmvign1lggs1fdk1lgyktiligtftclcstt1lnffhg  
wpwyavw1vm1gfgggmi1  
paiyamagavwpnggrqtfnaiylaqni1gvavgaamggfvaefsfnyiflan1imyvvfalvavtqfnieinakvkypth  
lditgkknkarfis1vl1c  
amfaicwvayiqwestiasftqsini1smaqsv1wt1ngimilvaqpl1kpvly1l1kgn1kkqmfvgi1i1fm1sffvtsf  
aenft1fvvgmi1l1tfgem  
fvwpavptianqlapdgkqgqyqgvnsaatvgkafgpf1ggv1vdafnmrmmfigmm1ll1vfa1ill1mvfkenntqpkk  
ida  
>tr|E5R7C0|E5R7C0\_STAAG  
mnl1nidwskdfqefqei1nsgihpewlycakanlv1lep1aytgegkqffstqdi1yaski1pff  
>tr|E5R7C5|E5R7C5\_STAAG  
mvkamvqfqiandmrige1l1aikrvninyedk1ldidgkvnwitek  
>tr|E5R7D4|E5R7D4\_STAAG  
mylsqtnqyendie1ekekyvnei1m1l1rtiptskli1qipimqlfidnailnivqndal1liekatharnh1rl1wslqghrdip  
n  
>tr|E5R7F2|E5R7F2\_STAAG

Tsompanidou\_et\_al\_Supplemental\_FASTA\_File

mkfkaiakaslaigm latgvitsnvqsvqaktevkqqsese lkhyykpv lerknvtgykytekgkdyidvividnqysqi  
slvgsdkdkfkdgdsnid  
vfilregdsrqatnysiggvktksqpfidyih tpileikk gkeepqsslyqiykedislkel dylrl reraikqhglysn  
glkqggititmkdgkshti  
dlsqklekermgdsidgrqiqkilvemk  
>tr|E5R7F3|E5R7F3\_STAAG  
mkmkniakislll gilatgvntttekpvhaekkpivisenskk lkayytqpsieyk nvtgyisfiqpsikfmniidgnsv  
nnlaligkdkqhyhtgvhr  
nl nifyvnedkrfegakysiggitsandkavdliaearvikadhigeydydffpfkidkeams lkeidfk l rky lidnyg  
lygemstgkitvkkkygk  
ytfeldkklqedrmsdvinvt didrieikvrka  
>tr|E5R7G9|E5R7G9\_STAAG  
miiqpkgk sltsrgmi lymnrnrtrtttgyfsieeidsrks lderetekkyvkminnkiipteeikdek l kkeienfkff  
vqygsfkgienyengdisy  
nseapiysakyklknddynvkelrkryniptekapkl llkgs gdlkgssvgykeiefifienkkeniyfsdgl n lipsd  
>tr|E5R7H0|E5R7H0\_STAAG  
mvlsifii gcgkgneikedakeeqikks fakt l dmpikn ledlydkegyrdgefkkgdkgmwtiytdfaksnrpgv l dn  
egmvln l drnrtrtakgyyf  
vdtiydnhensysknyrvemknnki i ll dkvedqklkerienfkffggyad fks lksynhgdvs insnvpsydakfkmsn  
kdenvkqlrsryniptdka  
pilkmhidgd lkgssvgykkleidfskeense lsvds l nfpaknk dde  
>tr|E5R7H2|E5R7H2\_STAAG  
mgy lkrvlviyimvsvfi igcdkssdtaenpegskea qikksfsk t l dmpikn lenlydkegyrdgefkkgdkgw  
tistdfaksnkqgemnseg  
mv lhfnrnrtrtatgyytrvrttydevdklarekkyrvefknnkiv l l dkveden l kqkienfkffggyad fkd l knykngr  
issnenvpyyeaykrnns  
dgnvkl l reky pitkqspi lklhidgdikgssvgykqiey tfskekd detfmsdfl nfgpshsk  
>tr|E5R7H3|E5R7H3\_STAAG  
mgyfkrvvlviyimvsvfi igcnkssdtsekpkedsketqikks fakt l dmpikn ledlydkegyrdgefkkgdkgmw  
tiytdfaksnkqgg l sneg  
mvlyl drnrtrtakghyfvktfynkgkfpdrknykvemknnki i ll dkvedin l kkrienfkffggyan l kelknysngdv  
sinenvpsydakfkmsnkd  
envkqlrsryniptdkapvlkmhidgd lkgssvgykkleidfskgeksd lsvids l nfpakvdedde  
>tr|E5R7H5|E5R7H5\_STAAG  
mkeeqkkeantnktdskeekikks fakt l dmpikn lee lydkegyrdgefekgdkgmwtiytdfaksnkpgel snegmv  
lyl drnrtrtakgyyfvrtf  
yrkdk l pdrknykvemknnki i ll dkvedpn l kkrienfkffggyan l kelknysngdvs inenvpsydvkykmsnkd  
envkqlrsryniptdkapvlk  
mhidgn lkgssvgrkleidfskrensh lsvids l dyqpakvdeder  
>tr|E5R7H7|E5R7H7\_STAAG  
mfnginnkne leesyese k kriene l hnl nelrh rtrkenersydvfy l khemnyse daqrkmtrnieaye qe inei r  
kqewkleeyked l kksyek  
qldk lsd  
>tr|E5R7I0|E5R7I0\_STAAG  
makipvtv lsgylsgsktt llnhilqnregriavi vndmsevni dkd l vadggg lsrtdelvelsngcicct l rdd l l  
kever l vkkggidqivies  
tgiseppvaqtfsyidde lgid ltaic r l dtmvtv danrfvhd insed l l mdrdqsvdetdersiad l lidqvefcdv  
l iinkid liseeelaklek  
vl salqpiakiikttnsevd l kev l ntqrfd fekasesagwikel esgghashtpeteeygissfykr r l pfhakrfnd  
wlesisnvvrskgi v l a  
qynhvac l l sqagsscihpvtywvasmse aqqtqilaerqdvaaewdpeygd rhtqfvi igteldeek l tkel d a clvn  
aqeidadwqqfedpyqwqi  
rpar  
>tr|E5R7I4|E5R7I4\_STAAG  
mlcilqikhciieit ifcyfqfstiyiytegvrrinrvifvyial iit lvrfftpihpsfsnliywi fvl yfipiilcv  
igfkaekliatmviipnfl  
gilyrlyayvth l fm  
>tr|E5R7I7|E5R7I7\_STAAG  
mmkrqqsqwsstgf l lasagsa ig l gamwkfpymagi ygggaflamflifti fvg l pllimeftvgkmgrtyttqiysk  
l t gkkwlni igwngn l avf  
il f gfy sviggwivi y igqvlwqlvi fqrinh l qemnfeavi snpwl tv l gqgi f i fatmiivm l gvekg l ekaskvmmp  
llfvfl i i i v i k s l t l d g a  
legvkfilqprvseitadgil falgqsfft l slgttgmitasyaskdmtikssaisivvmni fsv l ag l a i f p a l h s f  
gyepqegpg l l fkv l p m v f  
sqm h l g t l f y l g f l v l f l f a a l t s s i s l l e l n i s n f t k n d n t k r k k v a v i g s i l v f i i s i p a t l s f g i l k d v r f g a g t i f  
dnmdfivsvnlmp l galgt  
tlvigq l l d k k l l q q y f g k d r f r l f n g w y y l i k y a m p v v i i l v f i v q l f s  
>tr|E5R7J8|E5R7J8\_STAAG



Tsompanidou\_et\_al\_Supplemental\_FASTA\_File

mwkweaendakgvvviahnilehtgryayvitmlrrngyhvimgdllpgqgqtsrankgqienfqtyheslldwlkianey  
kiptyvlgvglgglilnl  
lekvelpiegmmlispmlelqkngknrkdklvsnigkiskdtrfngvvepkdltrnleiveetvndgmlkkatyhwyt  
inetmktmahihdiqmp  
tllmygtdkldivtraidefkeyqtpelyfkawqgyfhevhnepervedmryiltflnsvntmgfiveddeivei  
>tr|E5R7K0|E5R7K0\_STAAG  
mnfegkligkdlkfaivsrfrndfitgrllegakdtlirhdvnednidvafvpgafeiplvakklassgnydaiitlgcv  
irgatshydyvcnevagv  
skvndqtnvpvifgilttesieqaveragtkagnkgaeaavsaiemanllksika  
>tr|E5R7K2|E5R7K2\_STAAG  
mftgiveeigvkvsvqirqsrvrtieieahkitadmhigdsisvngacltvidfdqtsftvqvikstenktyladvkrqse  
vnleramsngngrfgghfv  
ghvdelgtvskinetanakiitiqcsqhinnqlvkqgsitvdgvsitvfdkhdnsfdihlipetrrstilsskklgdkvh  
letdvlfkyvenilnkdkd  
qlsvdklrafgf  
>tr|E5R7K3|E5R7K3\_STAAG  
msqfmdyaiqlanmvqgqgtgnppvgavvvnegrivgigahlrkgdkhaevqaldmvqnaegatiyitlepcshfgstp  
pcvnkiidckiakvvyatk  
dnltdthgdetlrahgievecvdderasqlyqdffkakakqlpqiitvksasldgkqandngqsqwitnkevkdvyklr  
hrhdavltgrrtvelddpq  
yttriqdgnpikvilsksgnihfnqqiyqdestpiwiytenpnltsnqthieiiylkscdlttilhnykrvgvtllve  
agptttseflqsnyidefi  
lyyapkliggsgnyqfyqndvieipdanqfeivhseilnqnvkltrkk  
>tr|E5R7K5|E5R7K5\_STAAG  
mmtlatlilflvtllfvlwqpkgligitaltgafiavitgvvsfsvdfevtgivwnatltfvsvilislildkvglfew  
saihm1haskgnglkmfvy  
iillgaivaaffandgaaliltpivlamvknigfskraifpfiasgfiadttslplivsnlvniisadyfhvgfvryfs  
rmiipnlfslasiivlw  
yfrkaipktfddnnikhpkdaindlklfkiswivlvillfgyliseftkipvsiftgiafi1mlarksnavnkqvik  
gapwnivlfsigmyivvfg  
lnragitlilakileyisnyglfstilgmgfisaf1ssimnmptvlidaiaigqsnvhgmlkegliyanvigsd1gpk  
tpiglatl1wlvhvtqkd  
vkiwgyfktgiiitipvlfitliglyltliif  
>tr|E5R7L1|E5R7L1\_STAAG  
mqkfkdfyddlsvtrgnyfltlmaaffitiilfigivsevhllysm1ivlvglillrlfkinlfsfkkltlsqviyii  
ggalliygldnlylyfhdv  
panelqleqeirntpfyisiftvtiipaiveeivfrgmiirvifrkhlf1gl1vsslvfaslhesdtwigylpylysgli  
fgliyiktrlevvifmhf  
lnn1la11fiwg  
>tr|E5R7L2|E5R7L2\_STAAG  
maklnvevfadgadieemkaayknkqvdfgttntpslmakagvtdykafaeeavkeipdasisevfaddletmekeai1  
kqygenfvkisivntkge  
stiplikklsadnvrlnvtavytieqvkeiteavtegvptyvsvfagriadtgvdp1plmkeavkvthskdgvkllwasc  
relfnviqadeigadiitc  
padvvkkvntnlgrdine1svdtvkgfakdiqssglsil  
>tr|E5R7L6|E5R7L6\_STAAG  
mwlaqdqtpsyktinrfrvnpntdaliselfiqfhsqclqknlidnnsifidgt  
>tr|E5R7L9|E5R7L9\_STAAG  
mdlsspvvigliiavvialiffvlf1valgskkkvkrqteekyeqqeqnikksheea1ekeriqnkktitkqqedynhmv  
stkdreida1klfsknhse  
yvtdmrligirerlvkekripedmhimaniflpkgdfnnierishlv1trtglyiidsqllkghvyngisggqfkdlpp  
meqvfdtldlksrpqti  
mdqndkrs1sfvnysdqieaikqlaedlqkelgakytptsilyfnpknegdvtisynqnsavkvlvgaeqldeffnkf  
vfhgriqynvedlqqmmdk  
iesfn  
>tr|E5R7M8|E5R7M8\_STAAG  
mntennknqnsvknsergmlkgcggclisfilliillsacsmmfnsndnstsngssktqltqkdenkedkpeekset  
atdedlqsteevpanente  
nnqheideittkqdsdeintpnaedksqddlkddlkekqssnhqstqpktpstetnrqqsfanckqlrqvypngv  
tadhpayrphldrkdndra  
cepdkn  
>tr|E5R7P2|E5R7P2\_STAAG  
mvkkyfrsqr1acfdm1fahvvlflhlynntqfnkmsnq  
>tr|E5R7P8|E5R7P8\_STAAG  
mlaat1svgliaplaspiquesrantnienigdgaevikrtedvsskkwgvtnvqfdfvkdkkynkdalivkmqgfinsr  
tsfsdvkgsyeltkrmiw  
pfqynig1ttkdpnvs1nlylpknkiettdvgqtlgyniggnfqsapsiggnsgfnysktisytqksyvsevdqnsksv  
kwgvkanefvtpdgkksah

Tsompanidou\_et\_al\_Supplemental\_FASTA\_File

drylfvqspngptgsareyfapdnqlpplvqsgfnpsfittlshkgsdsdtsefeisygrnldityatlfprtgiyaerk  
hnafvnrnfvrvevwnkt  
heikvkghn  
>tr|E5R7P9|E5R7P9\_STAAG  
mttfdakklkkeyldwynqilefsnl snsvkidtpfkdnslndlkiyalqdqsrmitltdgytifglengvsinkf  
kkrkki feehlsaygikyn  
dktheifvgtfnknfnkskhnllqclifvndmyllsnpsqni ftedvankldehniyygrdipiigssgvvhndffis  
akknqkekfinvfnspns  
miikskitdamqakkikrhrqnefifilndskkeinehknllhenyistidyseldekiglli  
>tr|E5R7Q2|E5R7Q2\_STAAG  
mktieermneyfnwlkqnyifkeldssteittpfknhlndfiriyadtlnneiclsddgl tinel emlgidintktrtk  
liqnilnqfnlklvdkeit  
advknesfaqskhnliqqilkiydltl tksnvtni fyeevfeflydqkirglaqvsvs gesglkysidyivsetksqpe  
klnvftnnldfnkitney  
iyrdikpnrpsrnklepimliivndvdhpineraqtvaehenleilkwsnkskietlts  
>tr|E5R7Q5|E5R7Q5\_STAAG  
mpesgkkyfptkyllyndnktvesksinvevhltkk  
>tr|E5R7Q7|E5R7Q7\_STAAG  
mkkfkysfilvfilfnikdltyaaggdivgnlrfnytkhdyidlkvtdknlpianqlfstgtndlisesnndeisk  
fkglklidifgidynpcks  
kymyggatlsqylnsarkipinlwngkhktistdkiatnklvtaqeidvklrrylqeeyniyghntgkkeygyks  
kfygfnngkvlfhlnnek  
sfsydlfytdglpvsflkiyednkiiesekfhldevisyvsd  
>tr|E5R7R0|E5R7R0\_STAAG  
mtdviihsmhgnsrnhwyqwl ehnl tlegydvtlfnfespeaktvdqwieamtqinvrkkdtyfvthglgsitalkyi  
emidpiefgffsiagfkd  
aenidldidlsnvtidydnikkkvdfnyglsskndkyvsyketqrlmnalegnlrivedggghfleedgftftalqdrmq  
dymtr  
>tr|E5R7R6|E5R7R6\_STAAG  
mtvkveqltgygkrpvikdinfelnkgeivgligngagksttikhmlgltpmegslsisdininddieayrrkl syi  
pespviyeeltleehiemt  
amaydidrdeamnrampllktfrlene lkvfpshfsgmkqkvmiicafivnpelyiidepfllgldplgiqsmldlmvek  
knegrtvlmsthilataer  
ycdrfiildegevvafgdlea lrrqqtglhnqtlldiyihvtqggdvha  
>tr|E5R7R7|E5R7R7\_STAAG  
msetifgkiltgeipsfkvyeddyvafldisqvtkghtllipkkasani fetdeetmkhigaa lpkvanaikrafnpdg  
lniinqngefadqsvfhih  
fhlipryendidgfykwethedilndakqgiaeqiqaqf  
>tr|E5R7S2|E5R7S2\_STAAG  
mhneklikglydyrehdacgigfyanmdnkrshdiidkslem lrrldhrggvgadgitgdgagimteipaffkqhvt  
fdipgegeyavglffsker  
ilgseheavfkkyfegeglsilgyrnvpvnkdaiakhvadtmpviqqvfidirgiedvekrflarkqlfystqcdlel  
yfts lsrktivykgwlr  
qikklytdl sddlyqsklglvhsrfstntfpswkrahpnrm lnhngeintikgnvnmraraqhkl ietl fgedqhkvfqi  
vdedgsdsaidnalefls  
lamepekaamllipepwl yneandanvrafyefysylmepwdgptm isfcngdkl galtdrngl rpgrytitkdnfivfs  
sevgvvdvpesnvafkgql  
npgklll vdfkqnkvienndlkga iage lpykawi dnhkvdfdfeni qyqdsqwkdetl flk lqrqfaytkeehkyiqel  
vegkdpigamgydapiav  
lnerpeslfnyfkql faqvtppidayreknvtse lsy lgggnllapdetvldriqlkrpvl neshlaaidqehfklty  
lstvyegdledalealgre  
avnavkqgaqilvl ddsglvdsngfampml laishvhqll ikad lrmstslvaksetrevhvac llayganai vpyla  
qrtveqlt lteglqgtvvd  
nvktytdvl segvikmakmgistvqsyqgaqifeaig lshdvidryftgtqsklsgisidqidaenkarqqsddnylas  
gstfqwrqqghhafnps  
ifllqhackendyaqfkayseavnkrtdhirllefkactpididqvepvsdivkrfntgamsygsisaeahetlaqam  
nqlggksnsgeggedakry  
evqvdgsnkvsaikvasgrfgvtsdylqhakeiqikvaqgakpgeggqlpgtkvypwiaktrgstpgiglisppphdi  
ysiedlaqlihdlnkankd  
adiavklvsktgvgti asvakafadkivisgydggtagspktsiqhagvpweigl aethqtlklndlrsrvkletdgkl  
ltgkdvayacalgaeeffg  
ataplvlvgcimmrvchkdtcpvgvatqnkd lralyrgkahhvvnmfhiaqelreilaslg lkrvedlvgrtdllqrss  
tlkanskaasidvekl lcp  
fdgpntkeiqqhnlehgf dlnlyevtkpyiaegrrytsftvneqrdvgvitgseiskqygeaglpentinvytng  
agqslaayapkg lmi hhtg  
dandyvgk lsggtv ivkapfeerqnei agnvsfygatggkafingsagerfcirns gvdvvvegigdhgleymtgghv  
inlgdvgnfngqmggia  
yvipsdveafvennqldt lsftkikhqeekafikqmleehvshtnstraihvlkhfdriedvvkvipkdyqlmmqkihl

Tsompanidou\_et\_al\_Supplemental\_FASTA\_File

hkslhndedeamlaafydd  
sktidakhkpavvy  
>tr|E5R7S4|E5R7S4\_STAAG  
mavkredvkai vsaiggkenleaathcvtrlr1vlkdeskvdkdalsnna1vkqgfkadhqyqivigpggtvdevykqfid  
etgaaeaskdeakqaaakk  
gnpvqrlikllgdifipilpaivtagllmginnlltmkg1fgpkaliemyqqiadisniinviastafiflpaligwssm  
rvfggspilgivilglimh  
pqlvsqydlakgniptwnlfgleikq1nyqqqvlpvliaayvlakiekgl1nkvvhdsikmlvvgpvallvtgflafiig  
pvalligtgitsgvtffq  
hagwlggaiygllyaplvitglhmf1lavdfq1mgssl1ggtylwpivaisnicqgsaafgawfvykrkrkmvkeeglalts  
cisgm1gvtepamfgvnlp  
1kypfiaaistscvlgavgmnnvlgkvgvggvpafisiqkefwpylivtaiaivpciltivmshfskqakeived  
>tr|E5R7S5|E5R7S5\_STAAG  
mskeidwrksvvyqiypksfndttgngigdingiiekldyikllgvdyiwltpvyespmndngydisnyleinaefgtmd  
dfeklikvahqkdlkvmld  
ivinhtstehewfkearkskdnpyrdyffrasedgpptnwhskfggnawkydsetdeyylh1fdvsqadlnwdnpevrq  
slyrivnhwidfgvdgfrf  
dvinliskgefkdskigkefytdgprvheflhel1nrqtfngtdmmtvgemssttiencikytqperqelnsvfnfhhlk  
vdyvdgekwnakldfhk1  
keilmqwrqgiydggnai fwcnhdqprvvsrfgddtseemriqsakmlaialhmlqgtpyiyqgeeigmtphftsia  
qyrdesinayhql1segh  
aeadv1a1lgqksrdnsrtpmqwsddvnagftagkpwidi senyhqvnvrqalqnkesifytyqk1liqrhthdiitygd  
ivprfmdhdh1fvyerhyk  
nqqlvianfsasavdlpeg1aregcvviqtgtventtisgfgaivietna  
>tr|E5R7T2|E5R7T2\_STAAG  
mkqip1nkles1nqeeais1hvpghknmtigh1sq1smtmdkteipgl1dlhpeevilesmkqvekhsdydayflvngt  
tsgilsviqsfsqkkgdi1  
marnvhksvlhaldisqgeghfiethqsp1tnhynkvn1sr1nndghklav1typnyygetfnveeviks1hq1nipvli  
deahgahfg1qgfpdst1n  
yqadyvvqsfhkt1pal1tmgsvlyihknapyretiey1syfqtsspsylimas1esaaefyktydstvffdkraq1iec  
lekkgfem1qvddp1k11i  
kyegftghdiqwfmnahiy1eladdyqalailp1whhddty1fd111rkiedmi1pkksvskvktq11ttegnykpr  
feyvtwcd1kkakgkvlar  
hivpyppgipii1fkretitenmielvneyletgmivegiknnkilvede  
>tr|E5R7T4|E5R7T4\_STAAG  
mkmiaiavdqdsqeladq1vknnfratk1attggflragntt1cgvnddrvdeilsvinqtcgnreq1vspitpmggs  
adsyipvevevggatvf  
vmpvda1fhqf  
>tr|E5R7T7|E5R7T7\_STAAG  
mdrneifekimrlemvnlqsketse1kahave1veevalq1lendn1kkv1gndeptt1dtanskpakavkkp1pskdn  
1ailygegfhickgel1fgk  
hrhgedc1fc1ev1sd  
>tr|E5R7U1|E5R7U1\_STAAG  
maketfyt1tpiypsgnlhighaystvagdviarykrmqgydvryltgtdehgqkiqekaqkagkteieyldemiagik  
qlwakleisnddf1rttee  
rhkhvveqvfer1lkqgdiylgeyegwysvpdetyytesqlvdpqyengkiiggkspdsghelve1kreesyffniskytd  
r1lefydqnpdfiqppsrk  
neminnfi1kpglad1avsrt1fnwgvhvpsnpkhvvyvwidalvnyisalgy1sddes1fnrywpadihlmakeivrfhs  
iiwpi1lmal1d1p1pkkvf  
ahgwi1mkdgkmsksksnvvdn1lidrygl1datryylmrelpfgsdgvftpeafvertnfd1and1gn1vnr1tismvnk  
yfdgel1payqgp1hel1dee  
meama1etvksytesmes1qfsval1stvwkfi1srtnkyid1ettpw1lakddsqkdm1gnvmah1veniryaav1l1rpfl1t  
hapkeifeq1ni1nnpqfme  
fss1legygvl1tesimvtgqpkpi1fpr1dseaeiayikesmqppateeekeepskpqi1dikdfdkveikaatiidaehvk  
ksk11k1iqvd1dseqrqi  
vsgiakfyt1pddi1gkkvavvtn1kpak1mgqksegmi1saekdgvl1t1v1psaipngavik  
>tr|E5R7U7|E5R7U7\_STAAG  
mtqylmnhpk1lip1tffvkkfkqakssi1sedvqi1kntfkek1gtvittagasggvtykpmmiskeatevnev1t1l  
eeker1lpggy1fl1sd1vg  
nps1lnkvgl1iasiyemek1davvtiatkgislanavanil1npvvirkdnkvtegstvsinyvsgssrkietmvl1sk  
rt1aensv1lvdd1f1mrag  
gsingvm1lmnefkahvkgvsv1veskevkqr1iedyts1vk1sdvdeynqefnvepgns1skfs  
>tr|E5R7U9|E5R7U9\_STAAG  
mkvtdvr1rki1qtdgrmkalvsit1deafvihd1rviegns1flvampskrt1pdgefr1diahpinsdmr1qei1qdavmkvy  
detdevvpdknatsedsee  
a  
>tr|E5R7V6|E5R7V6\_STAAG  
mahtitivgl1gnygid1l1p1giyk1f1ktqdkvyart1dhpvies1qdel1t1fqsfdhvyeahdqfedvyndivaq1veaan

Tsompanidou\_et\_al\_Supplemental\_FASTA\_File

ekdivyavpghprvaettt  
vklalalaktndtidvklvgkgsfiddvfeavnvdpdngftlldatslqevilnvrthtltitqvysamvaanlkitlmetry  
pdyypvqvivtgarsdgadn  
vvtcplyeldhdenafnnltsvfvpkiiestylyhdfdfatevidtlvdedkqcpwdkvqthetlkrylleetfelfea  
dneddwhmieelgdillqv  
llhtsigkkegyidikevitslnakmirrhphifgdanaetidllkeiwskakdaegkqprvkfekvfaehffnlyektk  
dksfdeaslkwlekesn  
t

>tr|E5R7W3|E5R7W3\_STAAG  
mthdyivkalfdgeirayaalttetvqeaqrhytwptasaamgrtmtatammgamlkgdqklvtvtdgqgpigriiad  
anakgevravdhpqthfp  
lneqgklvrrravgtngsiivvkdvgmkdyfsgaspivsgelgedfyyyatseqtpssvglvlnpdntikaaggfi  
qmpgakdetiskleka  
emtpvsklieggltepglneilgedhvqilekmpvqfecncshekflnaikglgeaeiqnmikedhgaeavchfcgny  
kyteeelnvlllesla

>tr|E5R7X5|E5R7X5\_STAAG  
mthnihdnisqwmksneetpivmssrirlarnlenhvhlmyatendgfrvinevqdalpnfelmrldqmdqskmkmva  
khlispelikqpaavln  
ddeslsvmineedhriqamgtddtlqalynqassideldrslldisydeqlgylltccptnigtgmasvmlhlpgl  
sim  
krmtriaqtinrfgytirg  
iyeggsqvygthyqvsngltlgkseleietltevvnqiihdekqirqltdynqletqdrvfslgilqncrmitmea  
syrsevkligidlnyielq  
nfkfnelmvaiqspfldeeddksvkekradilrehik

>tr|E5R7X8|E5R7X8\_STAAG  
mniivklmviillyliigsalgiiipeiandlglnssflknhyvdgiigsifmflifgvfirrvtnaikglehfimrsa  
veilfatigliigllism  
vsfilesignsifnhfipviitillcyfgfqfglkkrdemlmlpeniarsmsqhtksatpkidtsaiidgrilevirc  
gfidgnilipqgvineqlq  
vadsndsvkrekgkrgldilnelydldyptkvihptkthsdidtmllklakqyhasiittdfnlkvchvhgikalnvnd  
lseaikpnvhqgdqllhll  
tkmgkepgqavgylddgtmvvvdnknligshvnlevvsllqtssgrivfakkiedtvs

>tr|E5R7Z2|E5R7Z2\_STAAG  
mlgkywiglliatviislsikafplaigalylpvifkviklqlnlskgliddvnaqtfiksnqsgivisvicllitgi  
lytldgfyasltgvlgtl  
valnpyttivsavlyiltaiatveatkkyrn

>tr|E5R7Z4|E5R7Z4\_STAAG  
mamnfkvdnsqivaeyaadiirkqfnnnpttiagfhldtdqapvdelkknvekhavdfsqinildyddkksyfealgv  
pagqvyptiayekdaielia  
dkiktkenkgkltlqvvsiddegklnvsirgqlmeareiflvvtgankrdvveklyqengktsfepadlkahrnvild  
keaaaglpedvkayftsr  
a

>tr|E5R7Z5|E5R7Z5\_STAAG  
mthnivlyqpeipantgniartcagtnthlhlikplgfrtdkmlkragldywefvnityhdsieaffeatngeyyltk  
fgkktysdfdfshdkdfy  
fifgkettgldpwwkekyqdtalrimsehirslnlsntaalliyealrqdfpgln

>tr|E5R7Z7|E5R7Z7\_STAAG  
mikinnlnkvfgdnevldkinleinqgevvaiigpsgskstllrcmllvptkgqvi fegndltekgqvdklrqkmg  
mvfqfnlfpkkvvdni  
lapkllkkndelkhealslldkvglkekadvypnqlsggkqrvaialamhpdvildfdeptsalpvevgdvkvm  
kdlakegmtmvvthengf  
akdvsdkvifmadgvvvesgtpveifeqqhertqnflarvl

>tr|E5R7Z8|E5R7Z8\_STAAG  
mkclirfilvlgllissamyinptahaeqdtwekikergelrvgl sadyapmefhtvngkteyagvdidlakkiakd  
nllklkivnmsfslgal  
ktgkidiisgmtstperkkqvd fsdsymmtnimlvkkdkvneykdikdfnkkvgaqkgteqekiaqteienasitsl  
srldpvilalksgkvegav  
vekpvaeaylkqnpklgisnkvfneekdtviavpkdspkllsqinktikevkdnlgidkymtnaanamnddsfgiskyg  
sfflkgikitiisligva  
lgsilgvfvalmklskikiiswiasiyieilrgtpmlvqvfvffgitaalgldisalvcgtialvinssayiaeiirag  
inavdkgqmeaarslglny  
rqtmksvimpqaiknlpalgnfvtlkessivstigveimfnaqvvgisfdpftpllvaaalyfvltfvltrimm  
iegrlnasd

>tr|E5R816|E5R816\_STAAG  
mneqqtieqikarlnkfi edihvnpdevrvedidewiglldqleekvklvsk

>tr|E5R825|E5R825\_STAAG  
mnhyirtigsmllivysmlaafldkvfvniyfqgmfytqifgipvflflnliiillciivgsvlaykinqqndwikt  
qiersmegetvgindqnie  
iysetldlyhtlvplnqelhlklrktqnlnenynindvkvkkieederqrlarelhdsvsqqlfaasmmlsaiketkle

Tsompanidou\_et\_al\_Supplemental\_FASTA\_File

ppldqqipilekmvqdsq  
emralllhrlrplglkdkslgegikdlvidlqkkvpmkvvheiqdfkvpkgiedhlfrtqeaistlrhsngtkvtvelf  
nkddylllriqdnkgfnv  
dekleqsyglnmreraleigatfhivslpdsgrievkaplnkedsydd  
>tr|E5R830|E5R830\_STAAG  
msdrirvryapsptgylhignartaifnylyakhngdfviriedtdkkrnledgetsqfdnlkwlglwdesvdkdngy  
gpyrqserqhiyqplidq  
laedkaykcymteeeleaereaqiargempryggqhahlteeqrqqfeagrqsirfrvpqnqtysfddmvkgnisfds  
ngigdwvivkkdgiptynf  
avaiddhymqisdvirgddhisntpkqimiyeafgwepprfghmslivneerkklskrdqilqfieqyrdlgylpealf  
nfiallgwspegeeeifsk  
eefikiifdekrllskspaffdkqklawvnnqymkqkdtetvfqlalplikanlipvpseedlswgrkllalyqkemsya  
geivplsemffkempalge  
eeqqvinqevpelmthlfsklealepfeaaeikktikevqketgikgkqlfmpirvavtqgmhgpelpntievlgkev  
lnrlkqyk  
>tr|E5R838|E5R838\_STAAG  
makkesffkgvksemektswptkeelfkytvivvstviiflvffyalldigitalknllfg  
>tr|E5R850|E5R850\_STAAG  
marefslktrnigimahidagktttterilytgrihkigethegasqmdwmeqeqdrgititsaattaaweghrvni  
dtpghvdfteverslrvl  
dgavtvldaqsgvepqtetvwrqattygvprivfvnkmklganfeysvstlhdrlqanaapiqlpigaedefeaidlv  
emkcfskytndlgteieeie  
ipedhlraearaslieavaetsdelmekylgdeeeisvselkeairqattnefypvlcgtafknkgvqlmldavidyl  
pspldvkpiighrasnpee  
eviakaddsaefaalafkvmtdpvvgkltffrvysgtmtsgsyvknstkgkrervgrllqmhansrqedtvysgdi  
vglkdtgtgdtlceknid  
ilesmeffepvihlsvepkskadqdkmtqalvklqeedptfhahtdeetgqviiggmgelhlldilvdrmkkefnvecnvg  
apmvsyretfkssaqvqgk  
fsrqsggrggygdvyieftpnetgagfefenaivggvvpreyipsveaglkdamengvlagypolidvaklydgsyhdvd  
ssemafkiaaslalkeak  
kcdpvi lepmmkvtiempeymgdimgdvtsrrgrvdmepgrnaqvvnayvplsemfgyatslrsntqgrgtytmyfdh  
yaevpksiaediikkknkge  
>tr|E5R864|E5R864\_STAAG  
mnnkktatnrkgmipnrlnkfsirkysvgtasilvgttlifglsgheakaaehtngelnqsknettapsenktekvsr  
qlkndtqtatadqpkvtms  
dsatvketssnmqspqnatasqsttqtsnvtndkssttysnetdksnltqaknvsttpktttikqralnrmavntvaap  
qgtnvndkvhftnidiai  
dkghvnkttgntefwatssdvllkanytidsvkegdtftfkyggyfrpgsvrlpsqtqnlinaqgniiakgiydsktn  
tttytftnyvdqytnvsgs  
feqvafakrenattdktaykmevtlgnntyskdviddygnqkqqqlisstnyinnedlsrnmtyvvnqpkkytketfvt  
nltgykfnpdaknfkiyev  
tdqnqfvdstpdtsklkdvtgqfdviysndnktatvdllngqsssdkqyiiqqvaypndsstdngkidytletqngkss  
wsnsysnvngsstangdqk  
kynlgdywedtnkdgkqdanekgikgyvivilkdsngkeldrtttdengkyqftglngtysvefstpagytpptanagt  
ddavdsdgltttgvikdad  
nmtldsgfyktpkyslgdyvwydsndgkqdstekgikgvktlqnekgevigttdengkyrfdnlsgkykvi fekp  
agltqtgtntteddkdadg  
gevdtvitdhdfllngyieetsdsdsdsdsdsdsdsdsdsdsdsdsdsdsdsdsdsdsdsdsdsdsdsdsdsdsdsdsds  
dsdsdsdsdsdsdsdsdsdsdsdsdsdsdsdsdsdsdsdsdsdsdsdsdsdsdsdsdsdsdsdsdsdsdsdsdsdsdsds  
dsdsdsdsdsdsdsdsdsdsdsdsdsdsdsdsdsdsdsdsdsdsdsdsdsdsdsdsdsdsdsdsdsdsdsdsdsdsdsds  
dsdsdsdagkhtptkpmst  
vkdqhtakalpetgsennsnngtlfgglfaaigslfgrkkqnk  
>tr|E5R873|E5R873\_STAAG  
melqlaidllnkedaalankvkdyvdiveigtpiiyneglpavkhmadnisnvkvladmkimdaadyevsqaikfgadv  
itilgvaedasikaaveea  
hknnkqllvdmiavqdlekrakeldemgadyiavhtgydlqaegqspleslrvksviknskavaggikpdtikdivae  
spdlvivgggianaddpve  
aakqcraaiegk  
>tr|E5R889|E5R889\_STAAG  
msqaaetldgwyslhlfyavdwaslripkderdalvtefsflentatvrssksqdqaiynitgqkadlllwlfrpemk  
slnhienefnkliadfli  
ptysyvsvielesnylagksdedpyenphikarlypelphsdyicyfpmnkrrnetynwymltmeerqklmydhgmigrky  
agkikqfigsvgfdffew  
gvtlfsddvlqfkkivyemrfdettarygefsgffvghlintnefdqffais  
>tr|E5R892|E5R892\_STAAG  
mtrkygestgkiiigeahvtfgepaiavpfngkikvliealesgnysiksdydgmlydapdhllkslvnrfvelnn  
iteplavtiqtnlppsrgl  
gssaavavafvrasdyflgksltkeeliekanwaeqiahgkpsgidtqtivsgkpvwfkghaetlktlslldgymvvidt

Tsompanidou\_et\_al\_Supplemental\_FASTA\_File

gvkgstrqavedvhklced  
pqymshvkhighklvlrasdviehhnfealadi fnechadlkal tvshdkieqlmkigkengaiagkltgagrsgsmllla  
kd1ptaknivkavekagaa  
htwienlgg  
>tr|E5R896|E5R896\_STAAG  
mktydlivigfgkagktlakyaaastgqhavieqsskmyggctcinigcipskltlvhdglegksfeasynrknadvnalnn  
knyhlladdnnidvldfka  
qfksntevnlldqhgdivsitaphi iintgatsiipnikgl dqakhvfdstgllnisiyqpkhlvivgggyialefasmf  
anlgskvvtlergesfmpr  
edqdvvahajtdlenkgialhtnvettelssddhhttvrtvngnfeadavllaigrkpnatalalentdielgdrgeikvn  
aqlqtsvphiyaagdvkkg  
lqftyislddyriiksalygnqsrtdnrgsvpytvfidpplsrvgltskeaaaqhydytehql1vsaiprhkinndprg  
l fkvvinnenmilgatly  
gkqseeliniklaidqniptyvlrdniythptmaesfndlnf  
>tr|E5R8A9|E5R8A9\_STAAG  
mniidqvkqtveeiaasinkagladeipdikevpkdtkngdyatniamvltkiakrnpreiaqai vdnldtekahvkq  
idiagpgfinfyldnqylt  
aiipeaiekgdqfghvneskgqnvll eyvsanptgdhigharnaavgdalaniltaagynvtreyyindagnqitnar  
sietrffea1gdnsysmpe  
dgyngkdiieigkdlaekhpeikdyseearlkefrklgveyemaklkndlaefnthfdnwfsetslyekggilevlakmk  
elgytyeadgatwlrttdf  
kddkdrvlikndgtytyf1pdiayahfdkvkrngndilid1fgadhgyinrlkasletfgvdsnrleiqimqmvr1mengk  
evkmskrtgnaitlreimd  
evgydaaryfltmrspdshfdfdmelakeqsqdnpvyyaqaaharicsilkakeqgievtaandfttitnekaie1lkk  
vadfeptiesaaehrsahr  
itnyi qdlaahfhkfynaekvltddi ektkahvami eavritl knalamvgvsapesm  
>tr|E5R8C7|E5R8C7\_STAAG  
mydikwrhifk1dpakhisddd1daicmsqtdaimiggtddvtednvihlmsriryplplvleisniesvmpgdfyf  
vptvlnstdvafhngt1le  
alktyghsidfeevi fegyvvcnadskvakhtkantdlttedleayaqmvnhmyrlpvmyieysgiygdvskvqavseh1  
tetq1fygggisseqqate  
maaiadtiivgdiiykdikka1ktvkikessk  
>tr|E5R8E3|E5R8E3\_STAAG  
mtngyigsytkkngkgiyrfelnenqsrid1leigfeleasty1vrnevlyginkegeqcgvas1kiddngelh1l1nkc  
lsskagtgcysis sedkry  
lfeavygagii rmyelnthtgeiirliqelahdfptgtherqdhphahyinqtpdgkyvavtdlgadrivtykfddngfe  
fykes1fkdsdgrhiefh  
dngkfayvvhel1sntvsvaeyndgkfeelerh1tipenfdgdtklaavr1shdqqlf1vsnrghdsiaifkvl dngqhle  
lvtitesggqfprdfnias  
sdd1lvcaheggdsvvtv ferskekgkitl cdntrvasegvcvif  
>tr|E5R8E6|E5R8E6\_STAAG  
mqqv1sdimtfrgshfelgvtkgkw1qtp1lknrekewkkvrprfdidvnyeti qifqtyapqiweelmg1qsilkmptr  
qi1l1fghyrftdlkesgc  
tvfqqkdfmvrnydyhpatydgry1lyqptdsglaqigpvsrvtgrmdgmnesgl1tmgynfmrkpkpangfvcymigr1i  
lencrnvteaiq1lkeiph  
rssfsyilmdkslnhaivevtpsr1dvrydnictnhfeil thenrnytkeskerlart1sqtdnd1dmttafk1fnppqy  
eiysklfkswsgtihtsm  
qpet1tayftlgenappei1dfkswldgqdl1n1thftgnidtd1tfank  
>tr|E5R8F8|E5R8F8\_STAAG  
mkfpvtinkfenivsnfvfynaskitind1sik1ksamandqgitkhdiglaeravykvyfknsgskyvd1kteykder  
vfkatdikkvdielkf  
>tr|E5R8F9|E5R8F9\_STAAG  
mkfkslitt1algv1astganfntneasaakpldkssst1hhghsniqipytitvngtsqnilss1tfknqn1sykd  
ienkvksvlyfnrgisidid  
lrlskqaeytvhfkngrvid1ksgiytad1intsdikaisvndtkkqpkdkakanvqvytitvngtsqnilsn1tf  
nknqn1sykd1egkvksv1  
esnrgitdvd1rlskqakytvfnkngtkkvid1ksgiytan1inssdiks1n1vndtkk1hienakrnyqvpsin1ngt  
stn1sn1sfnkpwn1nyk  
n1tsq1ksv1khdrg1seqd1kyakkaytyvfknngkri1qln1sknytan1vhakdvkrieitvktgk1kadryvpyt  
iavn1gstpi1sk1k1snk  
q1isyky1ndkvksv1ksergis1d1l1kfakqakytvyfknngkqvvn1ksdi1ftpn1fsakdik1didv1kqytk1skkn  
k  
>tr|E5R8G0|E5R8G0\_STAAG  
mvkktksns1kkvat1alan111vga1tdnsakaeskkddtd1klvshnvym1stvlypnwr1lt  
>tr|E5R8G1|E5R8G1\_STAAG  
mkfkttkceksn1fkrsqeinnresekglwgisml111f111l1fgitacsss1hfin  
>tr|E5R8G4|E5R8G4\_STAAG  
mkkklattv1alsf1tagi1sthhsakaftfepfptneeiesnkkml1ek1kaykesfkngslptt1gk1der1rnylekg

Tsompanidou\_et\_al\_Supplemental\_FASTA\_File

tkntaqfekmviltenkgy  
ytvylntplaedrknevlkmyktyffkkgeskssyvingpgktneyay  
>tr|E5R8H0|E5R8H0\_STAAG  
mitspfvncsekseeingkd1qkkse1qgta1sn1rqtyyhngsaiienkesndqf1kntil1fndfftghqwynd11vd1  
gskdtaniykgkkvdlygv  
yygyqctggtpfktacmyggvt1hdnnq1eekkvpin1widgkqntvp1gtvktknkevtvqel1d1qsrhylhetynly  
ntdafngkiqrgliefhps  
sgdsvgyd1fgaggydpdtq1riyrdnktiksknmhidiyltt  
>tr|E5R8H3|E5R8H3\_STAAG  
mndsnqglqanpgytihy1sqeitr1tqenam1kayiqeqneksksaeae  
>tr|E5R8H6|E5R8H6\_STAAG  
mgerikg1sig1d1daan1nrsfaeikrnfkt1nsd1k1tgnnfkyteksthsykrike1dgtitgykknvdd1akqyg  
kvsqeqgensaeaq1rqe  
ynkqane1nfllekttefeefkkaqveaqmaesgwgktskvfesmgpk1tkmgdglksigkglmigvtapvlgia  
aasgkafaevdkg1dvtq  
atgatgglkklqnsfkdvynfpedaetvggv1gevnr1gftgkelesates1k1fshitsgdgvqavqlitramgda  
gieadeyqsv1dmvakaag  
asgisvdt1ladsitkygapmramgfemkesialfsqweksgvnteiafsglkkaisnwgkagkdpreefkktlaeiertp  
diasats1aieafgakagp  
d1adaikggrfsyqeflktiedsqgtvnqtfdkesgserfkvamnk1k1vgadvwasiesafapvmeelikk1svavdw  
fss1sdgskrsivifggia  
aaigp1v1fg1gafistvgnavt1ap1lasiakagglis1flstkvpilgtvftaltgpigiv1gvlaglavafaiaykks  
etfrnfvngaiesvkqtf  
nfiqfiqp1fidsvknifkqaisaivdfakdiwsqingffnengisivqalqnicnfikaife1ilnfvikpimfaiwqvm  
qfiwpavkalivstwenik  
gviqgaini1ilgiikvfss1ftgnwrgvwdgivmi1kgtvq1iwn1iqlwfvkgilgvvryfgg1lkg1itiiwvaiigv  
fkks1saiwnatksifgfl  
fnsvksi1ftnmknw1sstwnniksntvgkahl1ftgvrskftslwnatkdifik1rnwmsniwnsikdntvagiagr1wdr  
vrnifgsmrdg1kxiigki  
kdhi1ggmvdavkrg1nk1ieg1nwvggk1gmdkpk1htgtehtttr1lvkngkiardt1fatvgdkgrngngp1ngfrnem  
iefp1ngkrv1tpntdtay  
1pkgs1kvyngaqtysm1ngt1prfsigtmwkdiksgassafnwtkdqigkgtkw1gdkvgdvl1dfienpgk1l1nyileaf  
gidfns1tkmg1giagditk  
aawsk1kksatdwiken1eamgggd1vgg1ldpdkinyhygrtaaytaatgrp1fhegvdfpfvyqevrtpm1grr1trmpf  
msggy1gnyvkitsgvidm1  
fah1knf1sksp1sgtmvkpgdvvg1tgntgf1stgph1hfemrrngrh1fdpepy1rnakkkgr1siggggat1sgsgatyas  
rv1rqaq1silgg1rykgewi  
hdqmm1rvakresnyqsnavnw1dinaqrgdpsrg1fqi1gstfranakrgyt1fnnpvhqgisamqyiv1r1rygdgfkra  
gdyayatggk1vfdgwyn1g  
edghpew1v1ptdpar1ndamkm1hyaaaevrgknasknrpsq1ssvngfddps1l1kmi1eqqqq1a1l1k1iaqsndvi  
adkdyq1pi1deyafdkkvn  
asiek1rerqestkvk1frk1ggiaiq  
>tr|E5R8H7|E5R8H7\_STAAG  
mmd1liengkdanev1kmp1fhyv1siyqknndiseekaealidaf  
>tr|E5R8I2|E5R8I2\_STAAG  
msvk1vgdka1ere1lekrfgikemkvqdkaliagakviveevkkq1kpskdtgalinevsfsk1pewingkr1titvhwrg  
skdryk1v1h1eyghvqk  
tgk1fikp1kamggvnr1arqgqnyfet1kre1kk1  
>tr|E5R8J9|E5R8J9\_STAAG  
mlipi1qtsvnsr1slytkspfytsf1sfsvgtic1li1lni1inpevftihfynnqsfnytwvvgg1l1gvs1ftgn1l1l1p  
klgat1tviatvagg1img  
vi1dtfg1fgat1ihdfn1ikaigv1l1ivg1vimnqfnkn1l1tdqy1l1fw1l1gfi1fgffppi1qttinsalashths  
pafas1vsftigs1t1l1l1  
tai1fnss1k1ktsh1kfgk1kpiyftgg1lgmafvtani1ilmphmgaalt1ligmfq1ilmgilidhfg1lfgspkiamts  
rktig1l1c1iltg1i1l1r1f  
>tr|E5R8L7|E5R8L7\_STAAG  
mtveers1ntakvdi1gvd1fdnttm1qmveniktffanqstnn1fivtanpeivnyatthqayle1inqasyivadgtgvv  
kashr1kq1plahrip1gie1  
mdec1k1ahvnhqkv1flgatnevveaaqyalq1qrypni1sfahhhgyid1ledetvvkrik1fkpdyi1fvgm1gfpkqeewi  
mthenq1festvmm1gvgs1  
evfagakkrapyi1frk1lniewiyralidwkrigr1ksipi1fmykiakakr1kikkak  
>tr|E5R8M0|E5R8M0\_STAAG  
mitp1qv1dkphiv1fmm1tpedikpiika1nssyqktv1t1tpkqapy1sel1sddvdviemtr1rtlvkqika1k1saqm1ii  
dny1l1l1ggynk1tsnq1hiv  
qtwhasga1knfg1ltdhqvdvsdkamvqy1rkvyqatdfy1lgceqmsqcfkqslgateeqm1lyfg1l1rinky1ytadtrat  
vkae1kdkygi1tnk1lv1yv  
ptyredk1adnraidkayfek1lpgyt1ink1l1hpsieds1diddvssid1tst1mlmsdi1i1sdyss1l1pieas1l1dipti1fyv  
ydegtydkvrg1lnqfykai

Tsompanidou\_et\_al\_Supplemental\_FASTA\_File

pdsykyteedlimtikekehllsplfkdwkhyntdkslhqlteyidkmvtk  
>tr|E5R8M1|E5R8M1\_STAAG  
mr1tiiptcneatirqlisieskehyrilcidggstdqtipmierlqrelkhisliqlnasiatcinkglmdikmt  
dphdsdafmvinptsivlp  
gklr1taafknndnidmwiggraynyhgewklsadefikdnrivt1teqpdl1smmsfdgklfsakfaelqcdetlan  
tynhailvkamqkatdih1  
vsqmivgdndidthatsndedfnryieimkirqrvmem111peqr11ysdmvdri1fnns1kyymnehpavthttiqlv  
kdyimsmqhsdyvsqnmfd  
iintvefigenwdreiyelwrqtliqvginrptykkfliqlkgrkfahrtksmlkr  
>tr|E5R8M2|E5R8M2\_STAAG  
mkrvitygtydl1hyghie11rraremgdy1ivalstdefnqikhkksydyeqrkmmlesiryvdlvipekgwgqkded  
vekfvdvfvmgdwegef  
df1kdkceviy1krtegi1sttkikqelygkdak  
>tr|E5R8N9|E5R8N9\_STAAG  
mq11veddnt1fqelkkelgqwdfnvagi edfgkvmdtfesfnpeivildvqlpkydgfywcrkmrevsnvpilflsr  
dnpmdqvmsemelgaddymq  
kpfytnvliak1qaiyrrvyeftaekrt1twqdavvd1skdsiqkgddtif1sktemiileilitkknqivsrdtiita  
1wddeafvsdnt1tvvnvr  
1rkk1seismdsaietkvgkgymahe  
>tr|E5R8P0|E5R8P0\_STAAG  
mn1kwwayflksrmnwi fwi1fln11mlgisli dydfpids1fyivs1n1s1tmiflil1tyfkevlykhfdkdeiee  
ikhkd1aetpqrhtvdy1  
yrqisahkekvvqq1qlnmheqtitefvhdiktptv1tamk11idqeknqerkqallyewsrinsmldtqlyitrlesqrk  
dmyfdyvs1krmvideiq1  
trhisqvkigfdvdfkvdyvytdtkwcrmi1rqilsnalkysenfnieigte1ndqhvsllyikdygrgiskkdmpri1f  
ergftstanrnettssgm  
ly1vnsvkdg1gih1qvtstvgkgttvr1if1p1qneivermsevtn1sf  
>tr|E5R8P2|E5R8P2\_STAAG  
mtfnei1fknfrqn1shyay1fslitsv1lyfsfvalkyahk1nmtesy1piieksqvg1syflffiiia1f1lyanv1fi  
krrsyelalyqt1gl1skfn  
iiy11mleq11fi1tai1gii1g1fgsk111mivft11gikekvpi1fslravfet11m1igvay1f1tsaqn1filvfkqs  
isqmsknnqvkethnk1t  
feev1g1lgiv1ittgy1s1n1vqyydsig1lmfill1stvigay1ffkssvs1vfkmvkkfrkgvisvndvmfsssim  
yrikknafs1tvmai1sai  
tvs1l1cfaaisras1sseikytaphdvtikdqkanqlase1nnqki1phfnykevihtklykdn1fdvakepynvtit  
sdyipntd1lkrqgad1fv  
aegsikd1vkhhkkgkai1gtkkhhvnik1rkdinkiyf1mtdvd1lggptfv1ndkdyqe1rkytkakhivsqfgfd1khhk  
kdala1ekvkknkvdksiki  
rseai1ss1stg11fvts1flgit1f1iavccii1y1kqidetedelenysil1rk1gftqkdmarg1kfkimfnfg1plvi  
alshayfts1aym1lmg1t  
nq1pvf1vmg1ly1cmyavfavtayn1skrti1r1hsi  
>tr|E5R8Q7|E5R8Q7\_STAAG  
micsr1ehtndki1yienegq1iafiwghfsnek1smvniel1lyepqfrk1giatq1kia1ekwaktm1nakris1stihkn  
n1pmis1nkdl1gyqvshvk  
mykdid  
>tr|E5R8Q8|E5R8Q8\_STAAG  
mkk1i1isimavm1fl1tgcgksqekat1lekdi1dn1qkenek1kdkkek1qqekek1adkqkd1ekevkd1kpskednkddk  
kdedknkdkdkdeasqdk  
qskdqtkssdkdnhkkptstdkdqkandkhqs  
>tr|E5R8R3|E5R8R3\_STAAG  
mdkkkvikfminv1piv1vp1iverkrikqhpdvqvkdatskvasktsaaisntasdvkeyvgdkkqdfenkre1kkfa  
rehdpayiekkgek1akqn  
rkdadkmki1qkniekrhkeeqkareknei1qri1kdmkksqyee1kag1tpnk1dektekkgd1laeknrkeiakmkk1  
qkniekrhkeeqkrqgead  
kari1ksfkkykdyvaksasqqnken1tea  
>tr|E5R8R5|E5R8R5\_STAAG  
mkk1t1i1fqyki1fpv1mfl1vstg1gilvitqniliadflaki1rhqfqglwiv1fillgv111ratvqflnqwl1gdt1a  
fkvkhm1rqrviyknngph  
igeqmt1l1teni1dg1lapfyksyl1pqvfksmmvpl1ii1iamffihfntalim1litapfi1p1fyi1fg1ktrdeskdqmtyl  
nqfsqrflniakglvt1kl1  
fnrteqtekh1yddstqfr1tmr1lrsaf1sg1m1lefism1lgig1valeat1sl1vvfhnidfktaaiailapefynai  
kd1ggafhtgkqsegasdv  
vfefleqpnynef1lkyeenqkpfi1q1tdisfryddsdr1v1nd1n1lei1fgkdqialvgpsgagk1st1th1iagvyqpt  
igt1stnqr1d1nig1lsq  
pyi1fsasi1keni1tmfkdienntieev1devg1ldkvqsftkginti1igeggem1sggqmri1elcr1llvmkpd1vifdep  
atg1diqtehm1iqnvl1fqh  
fkdt1mi1viahrdnti1rh1qrr1lyienr1liaddrnisvni1engdd1  
>tr|E5R8R9|E5R8R9\_STAAG



Tsompanidou\_et\_al\_Supplemental\_FASTA\_File

meqiminhvhsr1vqgfwranewkmtakelnfyfnelvergittmdhadiygdyqceslfgnaldlspelrnkiqivt  
kcgilpskqfdftng hry  
dlsskhivksveqslinlnvdyldsllihrsp1mdpeqvada1tklvkqgk1ksfgvsfnhsqyqllnqyimkerlhi  
singlelspyhvds1qdg  
mdsmynhvqimawspfggk1fdkedikaqrimkvvqsiadkygvsdtavmiawlkiphsimpilgtsqlkridqae  
glq1n1ddqswfdiytai  
gq dip  
>tr|E5R8S3|E5R8S3\_STAAG  
mwitmtivfail11vcisinsdhareiqalrymndy11devvktkgyngeeyrielkrinndikk  
>tr|E5R8S6|E5R8S6\_STAAG  
msdmleifligfgvylfyriaiiflkskktihniyem1mlatifmistiykhqkthiliaflvmffmsklkqvqgsye  
e  
>tr|E5R8S8|E5R8S8\_STAAG  
mnnreqieqsv1sasayngndtegl1keiedvykkarafdeildgmtnaiqhsvkegie1deavgimagqviykyeeegg  
k  
>tr|E5R8S9|E5R8S9\_STAAG  
mtynarkey1nqffgskrylyqdnervahihvngtyyfhghivpgwqsvkktfdtaeeleyikqhgleyeeqkqltlf  
>tr|E5R8T0|E5R8T0\_STAAG  
msvisnrkvdmeiqdnvkqpahytygdieidfieqvtaqyppqlafaignaikylsrap1knghedlakakfyvqraf  
dlweq  
>tr|E5R8T7|E5R8T7\_STAAG  
mtne111knnkmgdnl1srvt1eaaggdlqfpanyspenamksamlq1qelkgskkdgykpa1efatstsianalmdmv  
qgl1npaknggyf1mygdkv  
qfqrshg1mavtkrvagaeinaevifegdevkyktnkivelehtqsfgnrntqniigayatvfvkdesrnyteimt  
feeieawkqsqmvngvf  
kedgthrrfpqemakktvinrackilnstdas11snqikeseqrqrkevl1daevenanqeqldfepvf1eeaqyte1  
enekpidvsdfeeikepat  
ekeseepf  
>tr|E5R8T8|E5R8T8\_STAAG  
mkink1tisnfagi1keekfnfdgkdakiygnnatgktttatalqwl1fdkgldgstksfnvp1nekneenyeliptvfa  
efeidgk1ttfkeshpky  
tingk1trkeysrsrtkkqyindesikvkdykaridelidedvfk1itnpqafn11dwkkrrs11feiakpindedvikt  
nddfkel1nn1gdheietk  
kkil1tdkikqinkdikdipiringtqqnkqdvpefdndrhtiikqeiqleneridiqngaeen1rnqladkqselkri  
eannsassenkih1altne1  
hvengtvan1ktr1kqnkq1theenrrnq11enhkg1ksd1lekaknqkfeyl1ddnvcscgqql1paeqvsevreka1qk  
fnankskeletiqtsinhi  
isegk1k1kpi1ek1eddnn1q1kineaeersariqnkink1kithvdvtqtdeykavm1eineinqrsnirk1tiqkv  
sgiddk1seltqekseiev  
sisieksnkh1ddvise1rneedr11dekekysd1yil1keftttkvkm1teninnefdiaefk1fnt1vngel1eetcst  
tvngveydsg1nnsarinv  
gl1di1nt1skhfkv1tapi1fidnaesvte1iktesqqiqlivneqdkk1rmeti  
>tr|E5R8U1|E5R8U1\_STAAG  
mph1lnvtvp1pethv1itkdeyee1iays1dpvwnmsd1kkk1kiasdetikdr11fhpr1lekel1raqg1vhy1pdenfn  
rwrfnarrmhkfvdehfne  
iykgghnk  
>tr|E5R8U9|E5R8U9\_STAAG  
mikk1ftk1khv1lvi1edenhnhsdavfgks11lsiyvgvknk1tsksgkfiyl1drskrivrqsditkiesanendvdfyn  
11kkekeivysknivdkyn  
1anyi1y1yevstke  
>tr|E5R8V4|E5R8V4\_STAAG  
mynpwwgqykrad1igqssy1knndvvi1neafdngasdk11snvkeypyqtpv1grsqsgwdktegssystvaedggva  
ivskypikek1qhvfksgc  
gfdndsngfvytkiekngkni1hvigt1tsedsr1cagahdrki1raeqmkeisdfvkkknipkdetvyiggd1nvnkgtp  
efkdm1kn1nvndv1yagh  
nstwdpqsnsiakynypngkpeh1dy1ftdkdhkqpkq1vnevvt1ekpkpvdvafpyyyv1yndfsdhypikaysk  
>tr|E5R8W6|E5R8W6\_STAAG  
mnyfdnkidqfatylqkrn1ldhiqflqvr1gmqiivgnffk1ilvtysisif1svflftlvth1sym1irynahgahaks  
silcyiqsil1tfv1vpyfl  
inidinf1ty11alsiig1isvviyapaatkkq1pipik1lvkrkky1siimy11vl1il1sliihp1fyaqf1m1lgilvesit11  
p1ffpked  
>tr|E5R8W8|E5R8W8\_STAAG  
mii1sfv1fatfaffy1ystnt1ssngds1lipyalvfigliifisv1ilims1ft1kemkykrnqeeietyyeyt1kieai  
n1nemrkfrhdyvni1lt1s  
eyireddm1gl1rayfnknivpmkdn1qmnaik1ngien1kvreikgl1itakilraqem1nipsisieipdevssin1nmid1  
rsig1iildnaieasteid  
dpi1rvafiesensvt1fivmncaddiprieh1lfqesfstkgegrgl1gl1st1kei1adnadn11ldtiengffiqkveii  
nn

Tsompanidou\_et\_al\_Supplemental\_FASTA\_File

>tr|E5R8X3|E5R8X3\_STAAG  
mnlndtifmflctllwvltmptglslyfgyglvqsknalntvmqsmiaivltvfwitvgtisfgngnlwfgnweytflnh  
vgfatgedisphipfalfm  
lfqmmfctiaisilsgsiaekmkfipyllfvviwtaLvyspvahvwgggwinklgvldfaggtvvhitsgvsglvlaime  
igkgnkhsestphnliitl  
iggifvwigwygfnvgsaftfdniamlafntntvisasagaigwllileyifkkttsllglllGalaglvvitpaagyvtyl  
satimaliggiCCyiviny  
ikvklkyhdaldafgihgvggiigavltavfqsakkanpdiengfiytdihiilvqilcvtavvifsivmtfiiakvikl  
itplsVteqetnigldkiv  
hgehayfegeInrfnkhiry  
>tr|E5R8X6|E5R8X6\_STAAG  
msdqvkiratlkrlplyrfsvslkskgidrvnskaisdalqidsatirrdfsyfgelgkkgygynidslldffkseIs  
esdmikiaivgvgnlgkal  
ltnyfsihddmtiteafdkedvigqkignvkvndelittlkkeeidvviIttpervaqkvadelvqagvkgilnftp  
grintpsdvqhqidlgie  
lqsllffmknyse  
>tr|E5R8X8|E5R8X8\_STAAG  
mstnqtflifviaiilltsvigivgrymsrqrlksmetlwqtispleafirpnshfdyeyklykekfeshslvddktws  
dlnmnaifhkmylnltaig  
emklyaclrgmlsitnksllslfndnaefrknvtyhlaIigktvyptfpdqitpvkrqnilflcpflpvisfavifinsq  
vgillflmsclfniiIsat  
lkrtyeddlksiyasvnlkqgytiskikhapqpevnfkqfrtarhltsvlaevndedigamviklvklifmldyvlfs  
iqksytthmnelkncfdyi  
aelndhyalamyrrtlecytepqiddtndgivfsethpliadavandfslsqnilItgsnasgkstfmsiainiilas  
aiqtvtaskfvypgqivft  
smanaddvlsqdsyfmaelksikriveipdnkiycfideifkgtntteriaasesvlsflheksnfrviaathdielae  
llkqryenyhfnevienn  
ihfdykipgkantrnaieIlkitsfpakiyerakdnvsng  
>tr|E5R8Z2|E5R8Z2\_STAAG  
mvenlseekfgrtfrhcaYfnkrlrttgryllkshdieinpkqyehygedavvkiilhelchylhhiagkyqhkdqdf  
krlsqvgaprfcnsiesy  
qqranyeyyctkchakyiriRkvdtnrmrcghcngklrmkrqlk  
>tr|E5R904|E5R904\_STAAG  
miytvtfnpsidyviftndfkidglnratatykfaggkginvsrvlktldvestalGfaggfpgkfiidtlnnsaiqsnf  
ievdedtrinvkltgqet  
einapghitstqfeqlqqiknttsedivivagsvpssipsdayaqiaqitaqtgaklvvdaekelaesvlpfhplfik  
pnkdelevmfnttvsndt  
vikygrllvdkgasvsvlsgdgaiyidkeisikavnppqkvvntvgsgdstvagmvagiasglTiekafqqavacgta  
tafdedlatrdaiekiksQ  
vtisvldge  
>tr|E5R916|E5R916\_STAAG  
mlqqiypstthpyqfelnkdfnfsaahhipceagiqnvhghtyfvnlTivgdklDdtgflvnfshlkkmiHgkfdhqI  
lnnlpafknkipsteivae  
tiyqivkenlaslehqpkciqvfvretptsyvfrpkeqv  
>tr|E5R926|E5R926\_STAAG  
mikfkntkrygkhvavdnisfninegeffvlIgpsgcgtttlkminrlIhIsegyiyfkdkpisdyvyemrwdigyv  
lqqialfphmtikeniaqv  
pqmkkwekdidkrvdelldmvglepekyknrkpdelsggqrqrvgviralaaadppvilmdpfsaldpisreklqddli  
elqtkikktiiFvthdiqe  
amklgdkiClIneghieqidtepgfknnpqsefvkqfmgshleddapcveenaiirdldimkpiDevtsmsaypivydq  
pievlyqhlSeservimq  
edsvgyvidrkdfkylsqkkevaqhd  
>tr|E5R927|E5R927\_STAAG  
mtnffdilserkgqlfstmiehiqisfiaIliataiavplgilltkktiseivmniaailqtipsIallglmiplfgig  
rvpaiaalvyaIlpilrn  
tytgikevdpslieakgigmkpfrrltkvelpiampvimagvrtamvliigtatlaaligagglgdIillgidrnasI  
illgaipaallaiifdlI  
rfmaklsykkllmtlgivmiiIlaiaipmfaqgdkitlagklgsepsiiTnmykilieetkntvevkdmgmktafIf  
nalksddidgyleftgtvl  
gelTkepIkskeekkyeqakqslekkyqmtmlkpmkynntyaIavkrdfakqhniirtigdlnkvkdqlkpgftlefndr  
pdgykavqkaynlndnir  
tmepklryqaInkgninIIdaystdaeIkqydmvvlkddkhvfppyqgaplfkesflkkhpeikkplnklenkIsdedmq  
mmnykvtknedpytvakd  
ylkakglik  
>tr|E5R932|E5R932\_STAAG  
mahgrqdelqdiIlgndntynfdyrpdvlesfdnkhqgrdyfvkfnCpeftsIcpitgqpdfatiyisyipnvkmve  
skslklylfsfrnhgdfhe  
dcmniimndIielmdphyievwgkftprggisiDpytnygrpnskykkmaehrImnhdlIypekidnr

Tsompanidou\_et\_al\_Supplemental\_FASTA\_File

>tr|E5R935|E5R935\_STAAG  
mktmeekkyhnieInnevtkrredgffslekdqeaLvayleevkdktiiffdteierlrylvnddfyfnvfdiyseadlie  
itdyaksisfnfasymsas  
kffkdyaalktndksqyledynqhvaivalylangnkaqakqfismaveqryqpatptflnagrarrgelvscflledds  
lnsinfidstakqlskigg  
gvainlsklrargeaikgikgvakgvlpiaksleggfsyadqlgqrpqagavylnifhydveefldtkkvnadedlrlst  
istglivpskffdlakegk  
dfymfaphtvkeeygvtliddidlekyyddmvanpnvekkknaremInliaqtqlqsgypylmfkdnanrvhpsnigqi  
kmsnlctEIFlqetsiin  
dygiedeikrdiscnlgslnivnmesgkfrdsvhsgmdaltvsvdvaniqnapgvrkanselhsvglgvmnlhgyLakn  
kigyeseekdfaniffmm  
mnfysiersmeiakergikyqdfeksdyangkyfefyttqefepqfekvreldgmaiptsedwkkllqqdveqyglyhay  
rlaiaptqsisyvqnatss  
vmpivdqiertrygnaetfypmpflspqtmwyyksafntdqmkliIdliatiqthidqgistilyvnseistrelarlyvy  
ahykglslyytrnkllsv  
eectscsi

>tr|E5R937|E5R937\_STAAG  
mkyllkgnillllllllitiislfigvselikdlhltesqrnilfssriprtmsiliagsslalaglimqmmqnfvs  
pttagtmewaklgiliall  
ffptghillklvfavicsicgtflfvkiidfikvkdvifvpllgimmggivasfttfislrtnavqsign

>tr|E5R938|E5R938\_STAAG  
mgkdfntnnglsyeklinialfitatitalvvvtvgtlpflglvipniisiyrgdhlnaiphmtmlgaifvlfsvdivgr  
ivvypyeinigltigvfgt  
iiflillmkrknyaqg

>tr|E5R944|E5R944\_STAAG  
mkkiviiavlaifvvisacgnkeaqhqftkqfkdvEqkkelqhvmdnihlkeidhlsktdtdknskefkalqedv  
knhlipkfeayksaknlp  
ddtmkvkklkkeymtlanekkdaiyqlkkgfiglcnqsikynedildytqfeknrykveseikladnkseatnlttkleh  
nkaIrdtaknlddsken  
evkgainkhimpiekqitdinqtnisdkhvnarknaiemyyslqnyyntrietikvsekskvdvdklpkkgidithg  
dkafekkleleek

>tr|E5R946|E5R946\_STAAG  
mkvlvamdefhgiissyqanryveeavasqietadvvqvpIngrhellsvflwqsgqkyripvhadamnevegyvqgt  
dtgmtviEgnlflkgkkipi  
vertsyglgemikhaldndakhvvislggidsfdagagmlqalgaqfyddegrrvdmrqgagvikyirrmDmsnlhpkme  
tariqvmSdfssrlygkqs  
eimqtydahqlhnhqaaeidniwyfseIfkseIkiagpverggaggiaavlnglyqaeiltshalvdqlthlenlve  
qadliifgeglndqllle  
ttlriaelchkhqkvaiaicataekfdlfesqgvtamfntfidmpetytdfkmglqirhytvqslkllkthfnvev

>tr|E5R947|E5R947\_STAAG  
mknqlidrtryttidtsdpksttptstekqwdllhllekelqqglpdlengylfatlesnidadvptvgflahvd  
tspdfnasnvkpgqienyD  
gkpyklgntkrvlDpkvfeInslvghtlmvtdgtsllgaddkagiveimeaicylqehpeikhgtirigftpdeeigr  
phkfdvdrfnadfaytmdg  
sqygelqyesfnaaeavitChgvnvhpgsaknamvnairlgeqfdsllpdsevpertegyegfyhlmnfegtvekatlqy  
iirdhdkkqfelrkkriIe  
irddinahfenypkvdiSdqyfnmaekilplphiidipkrvfakldipantepirggtDgsqslsfmgIptpniftgcn  
fhgpyeyasidvmekavqV  
igivediaenh

>tr|E5R951|E5R951\_STAAG  
mvtlllvavtmivslmitpiviaiskrlnlvdkpnfrkvhtkpiSvmggvtllfsfligiwighpieteikpliigaim  
yvlglvddiydlkpyikla  
gqiaaalvvafygvtdifislpmgttihfgflsipitviwivaitnainlidgldglasgvsaignlitigfiaailqanif  
itmiccVllgsligflfyn  
fhpakiflgdsgalmigfiigflslngfknitiialffpivilavpfidtlfamirrvkkgqhimqadkshlhhkllalg  
ythrqtVllisisilfsI  
ssiiIyvspplgvvlmfvliifsieliveftglidnnyrpilnlisrksshked

>tr|E5R954|E5R954\_STAAG  
mdnvtrykitesqsssqayyhlsfelseqqsyasehivrairmrqtillYavtgagktemmfqgiqyarrqedniaivs  
prdvvveiskrikdafln  
edidilhqqssqfeghfVvctvhqlyrfkqhfdtifiDevdafplsmdkslqqaIkssskvehatIymtatppkqllse  
ipheniikIparfhkkslp  
vpkyryfklnnnkiqkmlyrilqdqinnqrytlVffnnietmiktfsvykqkitkltyvhsedvfrfekveqlrnghfdv  
iftttIlergftmanldvV  
vidahqytqEalIqiagrVgrklecpagkvIffhegvsmmniqakkeiqrmnklaIkrwide

>tr|E5R955|E5R955\_STAAG  
mncIscgaklyenitiynlfkkpnrldrckenwdnikldikarrcsrclkhlnqdeayclDckflsahfnlmeqlycq  
fqydgImkemihqykflkd

Tsompanidou\_et\_al\_Supplemental\_FASTA\_File

yy|cellahlieipqtsydyivpipsspahd|srtfnpveavl|kagfirfdk|ilkmsnrpkqsh|tkker|ladenpf|id  
teld|ngkei|lvddi|ytt  
gl|tihragck|lyakn|rkfkvfafar  
>tr|E5R962|E5R962\_STAAG  
mvehypfk|ihdsfepkgdqpqaikeivdgikagkrhqt|l|gatgtgk|ftmsnvikevgkpt|liahnkt|lagqlysefk  
effpenrveyfv|syydyq  
peayvp|stdt|fiekdas|indeidq|lrsatsa|lferddv|ii|asvsci|yglgnpeeyk|dlvsvrv|gmendr|sellrklv  
dvqytrnd|idfqr|grtfrvr  
gdvvei|fpaskee|l|cirveffg|deidri|revny|l|tgevl|kerehfai|fpashfv|treek|lkvaierie|keleer|lkelrd  
enk|leaq|rleqr|tnydl  
mmremg|fcsgien|svhl|tlrplg|stpyt|l|dyfgddw|lvmideshvt|lpqvr|gmyngdrarkqvl|vdhgfr|lpsal|dnr  
plkfeef|eekt|kqlvyvsa  
tpgpye|iehtd|kmveq|i|rptg|l|dpkievr|ptenq|idd|l|seiqr|trvernerv|lvt|l|tkkmsed|l|tymkeag|ikvny  
l|hseikt|lerie|i|ird|lrm  
gtydv|ivgin|l|regid|ipevs|lvvil|dadkeg|flrsnr|sliqt|igraar|ndkgev|imyadk|mtsdm|kyaidet|qrrei  
qm|khnek|hgit|pkt|inkki  
hd|l|satv|enden|ndkaq|t|vipk|mtk|kerq|ktid|niekem|kaak|dl|fekate|lrdm|fel|kaeg  
>tr|E5R966|E5R966\_STAAG  
m|ldi|fype|l|itigs|nsvig|ynvt|l|thea|l|vdef|rygp|vtigs|nt|l|iganat|l|pgit|igdnv|kvaag|tvvsk|dip|dnf  
aygn|pmy|ikmirr  
>tr|E5R981|E5R981\_STAAG  
msphak|kvmr|l|sav|fwip|ialv|lliafn|lnwl|fweil|dnnsiv|ssvii|llvavft|l|viap|vyryk|hcrya|fekhh|l  
rvr|ngil|fldek|vipy|fri  
qnidi|dv|gpi|mr|yrlat|l|tlytag|gqaei|elid|rsear|l|krwl|nner|h|lenn|knee  
>tr|E5R983|E5R983\_STAAG  
msdytk|l|tkspk|sall|yyi|tng|lefi|lsvavy|vifyfiw|lrfew|phy|llyi|llvl|gal|st|kl|fik|plwqy|hcr|fykvd  
qlsvq|rtsff|iykeets|r  
ier|lqy|l|siks|npiskv|lnlyk|vgf|mtag|tiy|l|pmmsh|ddvki|ieart|msn|lrgves|dv  
>tr|E5R9A2|E5R9A2\_STAAG  
mikpk|ialti|agt|dpt|ggagv|mad|lksf|hscg|vygm|gvvts|ivaqnt|lgvq|hih|nlhqw|vdeq|ldsv|fndt|lpha|iktg  
m|jatad|tmet|ir|hylm|qhe  
sipyv|idpvm|laks|gds|lmdnd|tkqn|lqht|l|lp|adv|vtpn|l|peae|itg|l|tid|seekim|qagri|fineig|skgii|kkg  
hsndt|diak|dy|lft|negv|g  
tfener|fktk|hthg|tgct|fsav|itae|lakgrp|l|feav|hakk|f|simsi|qyt|peigr|grgp|vnhfay|l|kkeg|lddel|sk  
>tr|E5R9A5|E5R9A5\_STAAG  
mkk|t|l|lass|lavg|l|giv|agnag|heah|eas|ad|l|nkas|laqma|qsnd|qt|l|nqk|pieag|aynyt|fdyeg|ftyh|fesdg|thfaw  
nyhat|gangan|msa|qapat  
nnvep|savqan|qvqs|qeveap|qnaqt|qqp|qasts|nnsq|vtat|ptes|kaseg|ssv|vnah|lkqia|qres|ggnih|avn|ptsg  
aagky|qflq|stwd|svapak  
ykgv|spanapes|vqdaa|avk|lynt|ggag|hwta  
>tr|E5R9A9|E5R9A9\_STAAG  
mdki|vikgn|k|l|tgev|kveg|aknav|l|piltas|l|lasdk|pskl|vnvpal|sdvet|inn|l|tt|lnadv|tykk|denavv|vdatk  
l|l|neeap|yeyv|skmrasi|l  
vmgp|l|lar|lghai|valpgg|caigsr|pieq|hikg|feal|gaeih|lengni|yanakd|l|kgtsih|ldf|psv|gatqni|imaas|l  
akgk|t|liena|akepe|ivd|l  
anyin|emg|grit|gag|tdt|iting|ves|lhgve|hai|idrie|agt|l|liagait|rgdi|fvrgai|kehmas|lvykle|emgve|ld  
yqed|girvrae|gelq|pvdi  
kt|lph|p|g|f|p|tdm|q|s|q|mma|l|l|tangh|kvvt|etv|fenr|fmhvae|fkr|man|invegr|sak|legks|qlqga|qvkat|dlraaa  
alilag|lvadg|ktsv|telt  
hl|drgy|vd|lhgk|lk|lgad|ierind  
>tr|E5R9C6|E5R9C6\_STAAG  
mnyke|k|l|deai|h|l|tqqk|gfeq|traew|l|l|dvf|qwtr|tdf|vvhm|hdd|mpkam|imk|fd|al|qrm|l|l|gepi|qyiv|gfas|fygr  
tfdv|nsn|cl|ipr|petee|vm  
lhf|lqq|led|dat|ivd|igt|gsv|l|ait|l|kcek|pd|l|nviat|dis|leam|narn|naekh|qsqi|qfl|tgdal|kplike|gik|l|ng  
l|isnpp|i|dekdm|vtmspt  
vtrfep|hqal|fadnh|gyai|yes|i|igd|lphv|mekg|spv|feigyn|qgeal|ksi|ilnk|fpdk|kidi|ikding|h|driv|s|fkw  
>tr|E5R9C8|E5R9C8\_STAAG  
myety|hs|gwi|eci|t|gsmf|sgk|see|l|irr|l|rgiyak|qvkv|vfkpa|iddry|hkek|vshng|naieain|iskaseim|thn|lt  
nvdv|igidev|qff|ddeivs  
ivek|l|sadghr|vivag|l|dmd|frg|epfep|mpkl|mvaseq|vtkl|qavcav|cgss|srtqr|lingk|pakidd|piilv|ganesy  
ep|rcrah|hivaps|dnkee  
l  
>tr|E5R9D2|E5R9D2\_STAAG  
mkrd|l|ktit|pra|sl|k|l|se|laqwe|l|vekqi|istspv|qiiy|v|l|tek|gka|laea|l|hpie|awaq|syvd|l|tdq|rtak  
>tr|E5R9D5|E5R9D5\_STAAG  
mskil|ntq|l|igi|fnr|lek|q|slei|qmaaq|l|iqai|ggegyv|yvkgyd|l|qffes|filhs|derl|kssrkl|daikdf|keidst  
drv|l|fap|fynd|qval|diq  
klid|l|didv|l|isnkp|ktdd|f|pdh|lvhfid|l|stpr|piv|ytedy|dkiv|qphaia|l|nyvvy|diytq|miemtr|dle|l

Tsompanidou\_et\_al\_Supplemental\_FASTA\_File

>tr|E5R9E9|E5R9E9\_STAAG  
mpivvydgnciycynyviwliqhd1prnyqfatlkgevgqqffkqhpeaanknsvilqkgdriyfesqaiiklitalpnr  
tkllgvglwlvpkpvrnfg  
yrmfannrnrnmwktthqpnndyksffliddnakvkltd  
>tr|E5R9F5|E5R9F5\_STAAG  
mkdl1qaqqk1ipdlidkmykrfsilttisknqpvgrrslsehmdmtervlrsetdm1kkqdl1kvkptgmeitaegeq1  
isqlkgyfdiyaddr1se  
giknkfqjkevhhvpgdadnsqsvkte1grqagq1legilqedaivavtggstmacvseaih11pynvffvpargglgen  
vffqantiaasmaqqaggy  
yttmyvpdnysettynt111epsvintldkikqanvilhgigdalcmahrrrspekvieqlqhhqavgeafgyyfdtqqg  
ivhkvtig1qledleskd  
fifavaggkskgeaikayltiapkntvlitdeaaakiile  
>tr|E5R9G8|E5R9G8\_STAAG  
mgillast11gacghhqsakkesashkkkndnee1nee1kefkskknmdikikgdtivsdkfeakikepfiinekde  
kkkyiafkeimeitakkddkd  
1npssishdyinitqddkntvnlrdgy11sdkkykdwtehnqdqikkgktaqamfiyelrgdgnin1lvhkysedktvd  
sksfkfsk1ktedfshrae  
treevekkekefeeykkeqerekekekqkdddhs1dev  
>tr|E5R9G9|E5R9G9\_STAAG  
mvkk11kaiqnfl1yeqsnitfkmivfgykr1skml1fqfeinhin1lweg  
>tr|E5R9H2|E5R9H2\_STAAG  
mnmkkkekhairkksigvasv1vgt1igfg11sskeadasensvtqsdsasnesksndsssvsaapktddtnvsdtkts  
ntnngetsvaqnpaqqett  
qssstnatteetpvtgeat1111nqantpattqssntnaeelvnqtsnettsndntvssvnsqpnstnaenvsttqds  
teatpsnnesapqntdasn  
kdvvsqavnps1prmrfs1aavaadapaagtditnq1tdvkv1ds1g1tvyphqagyvkl1nygfsvpnsavkgdtfkit  
vpkel1n1ngvtstakvppi  
magdqv1angvidsdgnviyftdyvdkenvtanitmpayidpenvtktgnvt1ttgigtntasktv1idyekyqqfhn  
1sikgtidq1dktntnyrq  
tiyvnpsgdnv1pal1tgn1ipntksnalidakntdikvyrvdnand1sesyvnpsdfedvtnqvrisfpanqykvef  
ptdddq1t1py1vvvng1i  
dpastgd1a1rstfygydsnf1wrmswdneva1fngsgsgdgidkpvvpeqpdepgeiepipedsdsdpgsdsgsdns  
dsgsdsgsdstsdsdgsda  
sdsdsasdsdsasdsdsasdsdsasdsdsasdsdsasdsdsasdsdsasdsdsasdsdsasdsdsasdsdsasdsds  
sdsdsdsdsdsdsdsdsds  
sdsdsdsdsdsdsdsdsdsdsdsdsdsdsdsdsdsdsdsdsdsdsdsdsdsdsdsdsdsdsdsdsdsdsdsdsds  
sdsdsdsdsdsdsdsdsdsdsdsdsdsdsdsdsdsdsdsdsdsdsdsdsdsdsdsdsdsdsdsdsdsdsdsdsds  
sdsdsasdsdsdsgsdssdsdsdsdsdsdsdsdsdsdsdsdsdsdsdsdsdsdsdsdsdsdsdsdsdsdsdsdsdsds  
sedeants1iwg11as1gs  
111frrkknkdkk  
>tr|E5R9H4|E5R9H4\_STAAG  
mkkk11v1tmst1fatq1l1nsnhakasvtesvdkkfvvpesginkiiipaydefknspkvnvsn1tdknfvvsedk1nki  
vdssaaskivdknfavpes  
k1gn1vpeykei1nrvvatnnpasqqvdkhfvakgpevnrfitqknvnhfittqthykkvitsyksthvhkhvnhakd  
sinkhfi1vkpsespry1thp  
sqsl1i1kh1favpgyhahkfvtppghasikinhf1cvvpqinsfkvippyghnshrmhvpsfqnttathqnakvnkaydyk  
yfsykvvkgvkkysfsq  
sngy1gkps1ni1knvnyqavpsysp1thyvpefkgs1paprv  
>tr|E5R9H5|E5R9H5\_STAAG  
mkrkv1v1tmgvi1catq1whsnhana1vtesvetnfvvksdnkni1qthteitteekfsiveksq1nkl1kalsndnyie  
yd1htnqtg1kkgw1lygys  
eidsshftdrdrvi1rrdhvkeaqsl1indykdtqsyed1akatakvt1sqshqny1nkqidkvnnkiektekr  
>tr|E5R9H7|E5R9H7\_STAAG  
mngt1vk1fnaekgfgf1eredgsdvfvhfsaiaedyks1leegqkvefdivegdrgeqaanvki  
>tr|E5R9J0|E5R9J0\_STAAG  
mqaisnesfks1insdtpv1vkfeagwcpdcramd1widpiveqy1ndyqwytvnrde1edv1vvenvmgips11vfkng  
dkia1h1saiakspeqves  
f1aetfk  
>tr|E5R9J4|E5R9J4\_STAAG  
m1ni1qdvsh1skkeqkaynrfvesveng1pv1pciemd1kemqet1sqskiggmp1f1ksfkdipl1dennvpmv11aqi  
n1nd1peqqe1fpvnegi1  
qfwi1ssedqmygmsen1kgnninsr1vyikepitd1sleniqvhlks1dadnedipfsgafsiefr1skqtitctdykd  
edv1a1wnkvnp1sfalksm  
fggyde1mepvcntftakepfnq1ggypyfdq1dpr1ndqe1kmydrv11qidstrdg1nssi1wgdl1gianilvkstdle  
amk1fddymyswdcs  
>tr|E5R9J7|E5R9J7\_STAAG  
mie1kevkeyr1tknkev1avdhvn1siragsiyg1vigfsgagkst1irmfnh1eaptsgevi1idgdhigq1skng1rak  
rqkvsmi1fqhfn11wsrtv

Tsompanidou\_et\_al\_Supplemental\_FASTA\_File

lknimfpleiagvprrrakqkalelvelvglkgrekaypselsggqkqrvgiaralandptvllcdeatsaldpqttdel  
ldlllki reqnltivlit  
hemhvirricdevavmesgkvi ehgpvtqvfenpghtvtrkfvkedlnddfetslteleplekdayivr lvfagstttep  
ivsslstaydikinilean  
ikntkngtvgflvlhipyissvdfgkfeke llerqvkmvlrhg  
>tr|E5R9J8|E5R9J8\_STAAG  
mpniqwpevwtavetlymtvvstifafilglilglvllflsakgksigarlfysivsfivnlfraipfiililllipfts  
lilgtisgptgalpaliig  
aapfyarllleiafkeidkgvieaawsmgantwivirkvllpeampalvsgitvtaialvgstavagvigagglgnlaylt  
gftrnqndvilvstvfilil  
ivfiigfigdwltnklidr  
>tr|E5R9K1|E5R9K1\_STAAG  
mqqfkwinilkgfamgtsdlvpgvsggtialllgiynqfiasisgifsrrfwsftflipiiigml lamgslsnlfnyll  
sqhhiptmfffglgiigiv  
pyllkisyktsfttkhymmviagia ilivitlmngdkhagetl tlstgliikyfiagmcassamllpgisgsfmllvf  
gyvgtvm laisevkvlnft  
glpillaavgfgvlagfiisskiiqyflthhklmtfaliigfvvgslfavfpglptnivmwfvslvvfiigfivsltlgri  
taene  
>tr|E5R9K4|E5R9K4\_STAAG  
maehsfdvnevikdfpildqkvngkr layldstatsqtpmqvlnvledyykrynsnvhrghvtlgs latdgyenaretvr  
rfinakyfeeii ftrgtta  
sinlvahsygdanveegdeivvtemehhanivpwqqlakrknatlkfipmtadgelnie dikqtindktkivaiahisnv  
lgtindvktiaeahqhga  
iisvdgaqaaphmklmdqemnadfysfsgkhmlgptgigvlfgkrellqkmpiefggmidfvskydatwadlptkfea  
gtpliaqaiglaeairyle  
rigfdaihkyeqeltiyayeqmsaiegieiygppkdragvitfnlqdvhphdvatavdtegvavraghhcaqplmkwln  
vsstarasfyiyntkedid  
qlinalkqtkeffsyef  
>tr|E5R9L5|E5R9L5\_STAAG  
mcndtlellrikenikiyinqeidvii kggkatvnavltykpsacyccgvknegqihkhgkrvslitllktqgyntyln  
lakqrfkcl ecngtftakt  
sivdescfirsrvtkvieveatkvkteidtaedncispstvsrirtkaanslrikpfnc lpehiamdefksvknvtgms  
fifidndthdvidilenrt  
trflrayferfdlnrqvktvtidmyepyvrlfrdlfpnaaiifdrfhivqhl nrelnkyrvqvmneyrnkkgnpytif  
knnwkvllmdtsktifsky  
rwnksfkaykrssdivefmlskddilrrsyelvglrkdrlrcnwpkfinrlnsvsksvskgvkwvvykrkhqrmrn  
tiyypafnngaiegincki  
klirikrisfgyrnfnnfkarimmi fslykgekkkttkpnnglaa  
>tr|E5R9N1|E5R9N1\_STAAG  
mnfklnntlsneintliigipehlnqlerisfnhiditeslerlkhqhiigskvgkiyttafdvqdqtyrlitvlglnlk  
arsyqdm lkiwghlfqyik  
sehiedtyllm dsfiskydqldsvlmacgiqseratyefdhkysskkapfktnlnliseslieldfihegisigqslnla  
rdfsnmppnvltpqtfaed  
ivnhfkntkvkvdvkdtydlvsegfgllqavgkgskhkprlv tityngkdkdvapia lvgkgitydsggysiktngmat  
mkfdmccaanvvgiieaas  
rlqlpvni vglacaenmineasmkpddvftalsgetvevmntdaegr l vladavyyanqyqpsvimdfatltgaaival  
gddkaaa fesnsvilndi  
lqisskvdemvfel pitaterasinh sdiadlvnhtngqgkal faasflthfsgqtphihfdiagpattnkasyngpkgp  
tgfmipitvqwlkqg  
>tr|E5R9N2|E5R9N2\_STAAG  
minavviavilmi vlc lcrlnvvisl fisa lvgglisgmsiekvinvf gknivdgaevalsyallggfaalisysgitdy  
lvgkii naihaensrwsrv  
kvkvi iiallamsimsqnlipvhiafipivipp lls lfn dlkidr rligliigfglcfpyvllpygfgqifqqiiqsgf  
akanhpiefnmiwkamlip  
smgyivglliglyvyrkpreyetrkisdsvntelkpyilivtivailatflvqtftds mifgalagvlvffisraynwy  
eldakfvegikimayigvv  
iltangfagvmnatgdidelvktltsitgdnklfsiimmyviglivtlgigssfati piaslfipfgasigldtmalia  
lgtasalgdsgspasdst  
lgptaglnvdgqhdhirdtcvpnlfyniplmifgtiaamv l  
>tr|E5R9N3|E5R9N3\_STAAG  
mthlletfemsihdqedglvvi smpvtdkvkqpfgy l hggasialgetacs lgsanlidttkfiplglemnanhihsakd  
grvtaaaei ihrgksthvw  
dikikndkeqli vmrgtvaikplk  
>tr|E5R9N8|E5R9N8\_STAAG  
mskssdal fns l tqsfe l iegvyne l vtdnlkivmykprkestsgrinrrfk  
>tr|E5R9P6|E5R9P6\_STAAG  
mnlfrqqkfsirkfnvgi fsal iatvtfi stnpttasaaeqnqpaqnqpaqpadantqpnanagaqanpaaqpanqggqa  
npagga aqpagqgnqadpn

Tsompanidou\_et\_al\_Supplemental\_FASTA\_File

naaqaqpgnqaapanqagqgnnqatpnnnatpanqtqpanapaaaqpaapvaanaqtqdpnasntgegsinttltfddpa  
istdenrqdptvtvtdkvn  
gyslningkiqfvnselrnsdmfdknpqnyqakgnvaaigrvnandstdhgnfnngitktvvnkpdseliinfmqtms  
kqgatnlvikdakntela  
tvnvaktgtahlfkvptdadrldlqfipdntavadasrittnkdgykyysfidnvglfsgshlyvknrdlapkatnkey  
tinteignngnfgaslkad  
qfkyevtlpqgvtyvndsllttfpngnedstvlknmtvnydqtankvtftsqqvttargthtkevlfpdkslklsykvv  
anidtpknidfnekltyrt  
asdvinnnaqpevtltadpfsvavemkdaalqqvnsqvdnshyttasiaeynkllkqqadtilnedanhvetanrasqad  
idglvtklqaalidnqaa  
aeldtkaqekvtaaqqskkvtqdevaalvtkinndknaiaieinkqitsqqvttedkngiavleqdvitptvkkpqqadi  
iqavttrkqgikknsalq  
dekdvandkigkietkaikdidaattnaqveaiktkaindingttattakaaaleefdevvqaqidqaplnpdttnnev  
aeaierinaakvsgvkaie  
atttaqdlervkneeifkieni tdstqtkmdaykevrqaatarakaqnatvsnatdeevaanaavdaaqteglhdiqvkv  
sqqevadtkakvldkinai  
qtqakvkpaadtevenaynrkqeiqnsnastteekeaaaytel dakkqearntldaantnsdvttakdngiaainqvqaa  
ttkksdakaieiaqkaserk  
taieamndstteeqqaakdkvdqavvtanadidnatantdvdnaktneatiaaitpdanvkpaakqaiadkvqaqetai  
danngstteekeakqqvq  
tektaadaaidaahsnveveaaknaeiaeieaiqpatttkdnakqaiatkanerktaiaaqtqdi taeeiaaanadvnav  
tqansnieaansqndvdqa  
kttgetsidqvtptvkkatarneitailnklqeiqatpdatdeekqaadaeantengkanqaisaattnaqvdeakan  
aeaainavtpkvkkqaak  
deidqlqatqtnvinndqnatneekeaiqqalatavtdaknnitaatddngvdtakdagknsiqstqpatavksnaknev  
dqavttqngaidnttgatt  
eeknaakdlvlkakekayqdilnaqttndvtqikdqavadiqqitadttikdvakdelatkanieqkaliaqtadattek  
eqanqqvdaqltqgnqnie  
naqsiddvntakdnaiqaidpiqastdvktnaraelltemqnkiteilnnetneekgndigpvraayeeglnninaat  
ttgdvttakdtavqkvqal  
hanpvkkpagkkel dqaadkkqtieqtpnasqqeindakqevdte lnaqktnvdsstneyvnavkegkakinavktf  
seykkdalakiedaynakv  
neadnsnastsseiaekqklaelkqtadqnvqatskddievqihndldniindytiptgkkesattdlyayadqknni  
sadtnatqdekqqaikqv  
qnvqta leningvndngvdadal tggkaa idtiqvdatvkpanqaeakaedtkesidhsdqltaektealamikqit  
dqakqgitdatttaeveka  
kaggleafdniqidstekqkaieeleta l dqi eagvvnvdatteekeaftnaledilskatedisdqttnaeiatvkns  
aleqlkaqrinpvvkkna  
eai revvnkqie iiknadadasakei artdlgryfdrfadkl dktqtntevaelqnvtipaieaivpqn dpdandtngt  
dnndatansnanatpentg  
qpnvsettdngkadaspttpnnsdaatgettvtsatddakdkpqaannssadastnsptmdndvtskpevestnngttdk  
pvtetdnatpaesttnns  
ttatnenaptgstatapttasteaassadskdnasvndskqnaevnnsaesqstngkvaqpkksenkakaekdgrdstnq  
smvesttetlpsaditepn  
vpsntskdeestnqtdagqlksetnvasneadkspkskadtevsnpkstsasseakdkmtstnvsqkddtatadntdq  
ksvgpvannakdmqndt  
qksvgsaannkatqndganaspatsngshsmhqdmlnvtkpeenkanaksdqgkvnpkqqaktlpdtgmshnddly  
aelal gagmaflirkftkk  
dqqtee

>tr|E5R9P9|E5R9P9\_STAAG  
milnl tatsklfdiviqwgvlalivi fqpeirraleqlgrgsflkrytsntyskdeekliqsvskavqymakrrigaliv  
feketglqdyietgiamds  
nisqellinvfipntplhdgami iqgtkiaaaasy lplsdspkiskslgrhraavgisevsdaftvivseetgdisvtf  
dgklrrdisnei feella  
hwfgtrfqkkgvk

>tr|E5R9Q1|E5R9Q1\_STAAG  
mltvdqvkelvgeikdpidvplketegivevsikeekehsvklamaqlggapqldlqmavvna lkengaktvgirfet  
lpeekvnqfkpkeenkpkt  
iegllsqnnpvefiaiasgkggvgkstvavn lava laregkkgvlvdadiygfsvpdmngidekpgikgkevipverhgv  
kvismaffveenapviwrg  
pmlgkmltnfftevkwgdi eyliildlppgtgdialdvhtmlpsскеiivttphptaafvaaragamakhtdhsilgvien  
msyfesketgnkeyvfgk  
ggtklade lntqllge lpeqpswnpkdfapsiyqsddrlgkiyssiaqkviaatnk

>tr|E5R9Q3|E5R9Q3\_STAAG  
mnylkhkfylnl ttmivlfi fvlsgaifl tflgfylyglsriliyfrlgdftynrsmynllyygsy iifgyfiifaveh  
lmdyfrkmlpenayfrgat  
fhli sytvattl fyfi ihlnvyinidfwimviigflyvcklqfypesklnnrk

>tr|E5R9R1|E5R9R1\_STAAG

Tsompanidou\_et\_al\_Supplemental\_FASTA\_File

maikeissqsaidhkrkrtrtltlyivslcflficylnmaigsskinfsdiihyvtghtdtkatflhnvrmpmiaglf  
iggallavsgllmqamtrnp  
laspkifgvssgasffivfvtiipsleyyalylgvigafiggltvytlsgatkgmtpiklalagmaihtffssmtegi  
ilnensneqvfwlvgsls  
smkwdeiltlplwiagalvtfiqrqltimeigddiakglgninkvriiigllviiltgmsvsvagpigfvglivphi  
vkryvsknylvmipltfii  
gadllllsdvlsrlitypespvgivtsfvgaalyflfitikgvkri  
>tr|E5R9R5|E5R9R5\_STAAG  
mwagaiadkydkgrllritissflvtailcvltsyftaipisviiiyatlrtilsavetplrqailpdlstkisttqav  
sfhsfiinicrsigpaig  
vilavyhapttflaqaicyfiaallcplphfkvtkipedatrymplkviidyfklhmegrqifitsllimatgfsyttll  
pvltnkvfpgkseifgiam  
tmcaiggiaatlvlpkvlkyigmvnmmylsslfgiallgvfvhnivimficitliglfsqwarttrvyfqnnvkdyer  
gkvlslimmrdgmipglsl  
lmsicadvfgivrtfsmgisticitmvfyfinrklkkleeshngis  
>tr|E5R9R9|E5R9R9\_STAAG  
mkrlnknfilgllivvvgfllfmyiqdgriteyqdyflqfewfqp11islaalliliglilvfsifkpthrkpglykdfd  
dghvyvsrkavektafdtv  
akydqvrqpnvaklynkkinlistlkltsyqimfkfnl  
>tr|E5R9S4|E5R9S4\_STAAG  
mktlpedfifggataayqaegatntdgkgrvawdtyleenywytaepasdfynrypvdllesekfgvngirisiawsri  
fpngygevpnkgevyhkl  
faechkrhvepfvtlhhfdtpevlhkdgdflnrktidyfvdyaecfkefpevkywttfneigpigdgqylvgkfppgik  
ydfekvfqshhnmvabar  
avklfkdggyqgeigvhalptkypfdpsnpedvraaelediinhkfildatylgkysretmegvqhilsvnggklnitd  
edyaildaakdlndflgin  
yymdwmrgydgeseithnatgdkggsyqylkgvgqrefdvdpvrtddwmiypqglydqimrvvkdyponykhkiyiteng  
lykdefjesektvhddar  
idyvrqhlvniadaikdganvkgfyiwslmdvfwswngyekryglfyvdfetqerypkksaywykelatkeik  
>tr|E5R9S5|E5R9S5\_STAAG  
mqkliaqiekpffeklsrniylrairdgfisampvilfssiflliaypnifgfkwdkgmeailmkpynytmglvaf  
vagttaksltdsfnrklles  
tnqinfistmlaamcgflflasdpaqdgglfasfmgtkglltaflsafvtvivynfcvkrnitikmpkevppnisqvfkd  
lipfsaviiilyaldlvir  
nsfksnvaegiklfeplftaadgwigvtiifgafalfwfvghgsivepaiaaityanieanfkl1lqagehadkiits  
gtqmfiivtfggatlvvp  
fmfmwmtkskrnkaigrasvvpvtpffgvnepilfgaplvlnpvffipfvlapivnwifklfvevlgmnsfsvnlpwttpg  
plgiiimgtgfglwsfvlai  
tlivvdiitypflkvydseildeegrkesnsdlkekvaanfdtkkadsilaasgvsddaakasniteqtnvlvlcagg  
gtsgllana1nkaaeeyhv  
pvkaaaggygahmdimkeyqliilapqvasnyedikqdttrlgiklaktqgaeyikltrdgqaaldfvqqqfen  
>tr|E5R9T6|E5R9T6\_STAAG  
midrlyastffvdcltvdshlyltnfenlnhyliilliahaqhkketcq  
>tr|E5R9T8|E5R9T8\_STAAG  
mctqnddtmeqiwdkanqfgvavtwkdnsiigfvmrplinydaiknettlyavpttdcyevfwggdnelynyhylylh  
qryaidlvikenhktyknq  
gkvntdyfcfgkdiapangtvekvvngvqdnsigstnesqflgnyivikhaeneysliah1qqysiivnegqnvkygdf  
lgkvgnsgnstephihfqv  
mndknieacts1k1rflnnlelikgdvvcglqge  
>tr|E5R9U0|E5R9U0\_STAAG  
mklksfvat1algl1stvgaalpsheasadsnngykel1mdgkhtvpytisvdgitalhrtyfvfpenkkvlyqeidsk  
vknelasqrgvttekinna  
qtatytl1ndgnkkvvn1lknndaknsidpstikqiqivvk  
>tr|E5R9U3|E5R9U3\_STAAG  
msiygkisfikmidfkkgs1qkkfnevlgniessnmyrdnidfdielhwin  
>tr|E5R9U4|E5R9U4\_STAAG  
mekieneivnktylainslee1rnmigiksdyfyklyvndhfynvikipkrkkdeyrelmipnmal1kniqrwil1dnvly  
rrqvhkcatgfvprksivn  
naiphvgqkyil1kmdienffpsitfkqvrkifsemgykfelatalan1ctvnnql1pggaptspyianiifynidkri1fsy  
cqknn1rytryaddit1sg  
snkvsfskeiireivnqynfrinesktimfkpgdrk11vl  
>tr|E5R9U6|E5R9U6\_STAAG  
mkqnvefnqavikfnkrnkinkssndeyikfnrnkfgkfl1sqsf1n1snnvikqeikiikdeyyyydqentkkylikf1cq  
d1iehikehrnqindchft  
ni1lnkdaekt1nss1lts1fl1tannipn1ssnfskaveyyfaknkeiygdgyekyldeyfrnvl1geksyl1liddfsgt  
gks1sdf1daikkyil1tk  
1e1i1fc1hitedaekk  
>tr|E5R9U7|E5R9U7\_STAAG



Tsompanidou\_et\_al\_Supplemental\_FASTA\_File

msrhhdindlkyfnsvdwiissifinkeemrgle  
>tr|E5R9U8|E5R9U8\_STAAG  
mmnnsnykr1kanley1kminqh1ddvidfinttchs  
>tr|E5R9V0|E5R9V0\_STAAG  
mkgyqqmcpkgtrietktghqaqfdwkeginfktndnqivslnigvlllsysrfvimkvtmknssdvlfnlftqafelm  
>tr|E5R9W0|E5R9W0\_STAAG  
mgttllthaanlfliimgglkhgtvpiyeavksyvdpipqaliltaiviafattaflvlafartykelgtdnvesmkgv  
pedd  
>tr|E5R9W1|E5R9W1\_STAAG  
mnrqqndlilqfaaviffmvmvfgfsflaghytpgggfvvgllfasslviitiafdietmrkifpldfkiligiglvf  
ciatpiaswflgknffthv  
tfdiplfilepvhmttavffdfgvlcavvgtvmtiisigene  
>tr|E5R9W6|E5R9W6\_STAAG  
mkskyep1fdkvelpngvelrnrflaplthissddgtisdvelpyiekrsqdvgitinaasnsdvdkafpgqpsiah  
dsdieglkr1atamknga  
kalvqi1hggaqalpelipdgdvvapspis1ksfgqkqehsaremtneeieqaikdfgeattraieagfdgveihganhy  
lihqvspynrrndvwan  
qykfpvavieev1kakeaygnkdfivgyrlspeaespgitmeiteelnkishmpidiyhvsmdthattregkyagqe  
r1plihkwingrmp1igig  
siftadealdavenvgvd1vaigre11ldyqfvekikdgredeiinyfdperednhh1tpnlwhqfnegfyplprkdk  
>tr|E5R9W7|E5R9W7\_STAAG  
mtksekiieltnhygahny1plpivi1seaegvwwkpegnkymdm1saysavnqghrhpkiiqal1kdqadkv1vsrafh  
sdn1gweyeki1cklagkdk  
alpmtgaeaveta1kaarrraydvkgepnkaeiafngnfhgrtmapvs1sseayqrgygp11dgfrkvdfgdvda1  
kaainentaav1vepigge  
aginippegy1kai1relcdehnlfiadeiqag1grsgklfatdwdnvpdvylgkalgggvfpi1svladkevl1dvft  
pgshgstfggnplacaasi  
saldvidded1pgrsle1gdyfkeq1kqidhpsikevrgrglfigvelnesarpycea1keeg11ckethdtvirfapp1  
iitkeeld1aleki1rhvfq  
>tr|E5R9X2|E5R9X2\_STAAG  
mthiq1dfskt1effgehelkqqqei1vksihkti1hegtgagsdf1gwvd1pvd1dydkeefsriveaskrikensdvl1vvg  
igsgylgaraaiem1tssf  
rnsneypei1fvgnh1sstytke1vdyladkdfsvnvi1sksgtttepavafr1fkq1veerygkeeaqkri1fattdkekg  
alkq1atnetyet1fivpdd  
vggrysv1tavgl1piatagini1eammi1gaakaree1ssdk1ledni1ayqyati1rni1yakgyttem1inyepsmqyfnew  
wkq1fgesegkdfkgyips  
sanytd1hs1ggqvqegrrf1fetvkvnhpkyditi1ekdsdd1dg1nylagkti1devntkafegt11ahtdggvpmnv  
vnipq1deetfgyvvyffe  
1acamsgyq1gvnpfnqpgveaykqnmfal1gkpgfed1kke1eer1  
>tr|E5R9X6|E5R9X6\_STAAG  
mt1hay1gragt1gsktm1teikqkmdapl1gdpi1liaptqstf1leaqfndpe1ngs1rtevl1hfer1shrifqevg  
syseqk1skaatemmi1nyi  
vqeqqkyl1klyqsqakyygfsek1teqi1qdfkkyavtpeh1ehfi1adknmqrtrtkn1ledialiyrefeqri1qnefitge  
ds1qyf1dcmpk1sew1kra  
diy1dgfhnfstiey1li1kg1likyaksvti1l1ttdgnhdqfs1lfrkpsevl1rhiee1anel1nisierqyf1nqlyrfnnq  
1kh1leqefdv1qinrvacq  
ghini1esatmree1nei1arri1vdi1rdkq1lryqdia1lyrdesyay1lfdsil1plynipynidtkrsmthhpvmemirs1  
1evi1qsnwqvnpm1rl1kt  
dvl1tasy1ksay1ld1lenfv1lrgiygkrw1dde1fnvehf1skmgrkahl1tedernt1feqv1k1kkdvidk1lhfeq  
msqaetv1kdfataf1yesme  
yfel1pnq1l1mterde1d1ngnhekaee1dqiwngli1qil1dd1vl1vfgdepmsmer1levfdigleq1efvmipqt1dqvsi  
gtmd1akvdnkqhvyl1vgm  
ndgtmpqpvtass1l1tdeekkyfeqqanvel1sptsdi1qmdeafvcy1vamtrakgdvtfsys1mgssgd1keisp1lnqi  
qs1fnq1lei1tnipqy1hevn  
pls1mqh1akqt1ki1l1feal1raw1ddei1vadsw1dayqv1rdsdh1nqgl1dylmsal1tdnetvkl1get1skdlygkeina  
svsr1fegyq1qcpfkhyash  
g1k1lnertkye1qnfd1gdi1fhsv1kyi1seringdfkq1dl1kki1rq1tnealee1l1pkvqfn1l1nssayry1srrigai  
vett1sal1kyggtysk1fmp  
khfets1frrkpr1tndeli1aqt1tttqgipini1rgqidridtytkndtsfvni1dykssegsat1d1tkvyygm1qm1qmmty  
mdiv1qnqr1gl1tdivkp  
gg1ly1fhv1heprik1fkswd1dedk1leq1likkfk1sg1lvnadqt1vidaldir1lep1kftsdivpvg1lnkdgs1skrgsqv  
adeati1ykfi1qhnken1fie  
tasni1mdg1tevap1kykqk1l1pcafc1syqs1vchvdgm1diskryrt1vdetin1pieai1qnin1indefgge  
>tr|E5R9X9|E5R9X9\_STAAG  
ml1hl1h1sw1lai1lfiatyl1nisknqgspffkpl1hmi1l1rl1fm1l1tl1isgfwili1qs1fmngganh1l1tl1kml1cgvavv  
g1mevs1jakr1krheqshkm  
fwitmal1i1itmv1lgv1l1pl1gpisk1lfgig  
>tr|E5R9Y3|E5R9Y3\_STAAG

Tsompanidou\_et\_al\_Supplemental\_FASTA\_File

mpgl dg lra iavlg i i y h l n k q w l t g g f l g v d t f f v i s g y l i t s l l l k e y d d t g i k l k s f w i r r l k r l l p a v i v l l m v  
v g t a t l l l k s d n i i r v k h d  
i i a a i f y v s n w w y i a k d v n y f e q f s f m p l k h l w s l a i e e q f y i f f p v i l v t l l l t i k k r y k i g f i f w g v s i i s l g l m m f i  
y s i n g d h s r v y f g t d t r l q  
t l l l g v i l a f l w p p f k l k n d p p k v v k y v i d s i g s l s f i v l i l l f f i i n d e t n w i y d g g f y l i s i l t l f i i a s v v h p s t w i  
a k i f s n p v l v f i g k r s y s l  
y l w h f a v i s f v h s y y v d g q i p v y v y f i d i s l t i i f a e l s y r f i e t p f r k e g i k a l n w r p s y i p q f i r m a i v v t l l i p f m l  
i l v g a f n k y g k d i i g e k a n  
s f d t t i e d n y l m r i a p i d n i h i d g l v s e k k k e s s d v y n n i k p l l i g d s v m v d i g e s f k s s v p k s r i d g k v g r q l y q t l p l  
v k a n y s q y k k s s d q v v l e l  
g t n g d f t v k q l d d l l n q f g k a k i y l v n t r v p r i y e a n v r l l a d a a k r k s n v t l i d w n k r s q g h s e y f a p d g v h l e y k g v  
l a l k d e i l k a l k k k  
>tr|E5RA00|E5RA00\_STAAG  
m g k l i k y i s i l l i v v l v l s a c g k s s n k d e g v k d a t k t e t s k h k g g t l n v a l t a p p s g v y s s l l n s t h a d s v v e g y f n e s l  
l a t d k k i r p k a y i a s w k d i  
e p a k k i e f k i k k g i k w h d g n e l k i d d w i s y i e v l a n k d y e g a y p s v e n i q g a k d y h e g k t d h i s g l k k i d d y t m q v t f d  
k k q e n y l t g f i t g h l l s k k  
y l s d v p i k d l a k s d k i r k y p i g i g p y k v k i v p g e a v q l v k f d d y w q g k p a l d k i n l k v i d q a q i i k a m e k g d i d v a n d a  
t g a m a k d a k s s n a g l k v l s  
a p s l d y g l i g f v s h d y d k k a n k t g k v r p k y e d k e l r k a m l y a i d r e k w i k a f f n g y a s e i n s f v p s m h w i a a n p k d l n d y  
k y d p e k a k k i l d k l g y k d r  
d g d g f r e d p k g n k f e i n f k h y s g s n p t f e p r t a a i k d f w e k v g l k t n v k l v e f g k y n e d l a n a s k d m e v y f r s w a g g t d p  
d p s d l y h t d r p q n e m r t v l  
p k s d q y l d d a l d f e k v g i d e k k r k d i y v k w q k y m n d e l p g l p m f q g k s i t i v n d k v r n l d i e i g t d q s l y n l t k e a  
>tr|E5RA07|E5RA07\_STAAG  
m r i e r v d d t t v k l f i t y s d i e a r g f s r e d l w t n r k r g e e f f w s m m d e i n e e d f v v e g p l w i q v h a f e k g v e t i s k s k n  
e d m m n m s d d d a t d q f d e q v  
q e l l a q t l e g e d q l e e l f e q r t k e k e a g s k r q k s s a r k n t r t i i v k f n d l e d v i n y a y h s n p i t t e f e d l l y m v d g t y y  
y a v h f d s h v d q e v i n d s y s  
q l l e f a y p t d r t e v y l n d y a k i i m s h n v t a q v r r y f p e t t e  
>tr|E5RA16|E5RA16\_STAAG  
m k f k y h i s q q e t v k a f l a r h d f s k k t v s a i k n g a l i v n d e p v t v r k q l m p n d i l e i h l p r e i p s v n l i p y a r k l e v l y e  
d a f i i i v t k p n n q n c t p s r  
e h l h e s l i e q v l y h c q e h g e n i n p h i v t r l d h n t t g i v i f a k y g h i h h l f s k v n l k k i y t c l v y g k t h t s g i e a n i r r s  
k d s i i t r e v a s d g y a k t s  
y e v i n q n d k y s l c k v h l h t g r t h q i r v h f q h i g h p i v g d s l y d g f h d k i h g q v l q c t q i y f v h p i n k n n i y i t i d y k q l l  
k l f n q l  
>tr|E5RA24|E5RA24\_STAAG  
m m l g i a v s p i w w i m l s s v e e d k r g k m g y v y f s w l l g l l v g m v f m n l l i k v h p t r f a f m m s l v v l i a w i l y y f v d v k l t n  
y n t r p v k a g l r q i v d v t k r  
h l l l f p g i l l g g a a i a a l v p i l p t y a t k v i n v s t i e y t v a i i g g i g c a v s m l f l s k l i d n r s r n f m y g v i l s g f i l y m i  
l i f t l s m i v n i h i w w i a l  
a i g l m y g i l l p a w n t f m a r f i k s d e q e e t w g v f n s i q g f g s m i g p l f g g l i t q f t n d l n n t f y f s a l i f l v l a v f y g s y f  
i a n r e k a k  
>tr|E5RA25|E5RA25\_STAAG  
m i t k g d a g n q i t k n k l v n a k i n p v v k t i f v p n f f s k n p i t k f v d a s a i k c i e n a r d v i a t a m d v t v g k k l i  
>tr|E5RA30|E5RA30\_STAAG  
m d p s l i l p y l w l v l v l v f l e g l l a a d n a i v m a v m v k h l p p e q r k k a l f y g l l g a f v f r f l a l f l i s i i a n f w f i q a a g a v  
y l i y m s i k n l w q f f k h p e i  
e s p e a g d d h h y d e s g e e i k a s n k s f w g t v l k i e f a d i a f a i d s m l a a l a i a v t l p k v g i h f g g m d l g q f v m f l g g m i g v  
i l m r y a a t w f v e l l n k y p g  
l e g a a f a i v g w v g v k l v m v l a h p d i a v l p e h f p h g v l w q s i f w t v l i g l v i i g w l g s v v k n k k s h k  
>tr|E5RA31|E5RA31\_STAAG  
m d i g k k h v i p k s q y r r k r r e f f h n e d r e e n l n q h q d k q n i d n t t s k k a d k q i h k d s i d k h e r f k n s l s s h l e q r n r d v n e  
n k a e e s k s n q d s k s a y n r d  
h y l t d d v s k k q n s l d s v d q d t e k s y e q n s e a t l s t k s t d k v e s t e m r k l s s d k n k v g h e e q h v l s k p s e h d k e t r i d s  
e s s r t d s d s s m q t e k i k d  
s s d g n k s s n l k s e v i s d k s n t v p k l s e s d d e v n n q p l t l p e e q k l k r q s q n e q t k t y t y g d s e q n d k s n h e n d l s h h t  
p s i s d d k d n v m r e n h i v d d  
n p d n d i n t l s l s k i d d d r k l d e k i h v e d k h k q n a d s s e t v g y q s q s t a s h r s t e k r n i s i n d h d k l n g q k t n t k t s a n n  
q k k a t s k l n k g r a t n n n y s  
d i l k k f w m m y w p k l v i l m g i i l i v i l n a i f n n v n k n d r m n d n d a d a q y t t t m k n a n t v k s v t v e n e t s k d s s l p k  
d k a s q d e v g s g v y k k s g d  
t l y i v t n a h v v g d e n q k i t f s n n k s v v g k v l g k d k w s d l a v v k a t s s d s s v k e i a i g d s n n l v l g e p i l v v g n p l g v d f  
k g t v t e g i i s g l n r n y p i d  
f d k d n k y d m l m k a f i d a s v n p g n s g g a v n r e g k l i g v v a a k i s m p n v e n m s f a i p v n e v q k i v k d l e t k g k i d y p d v g  
v k m k n i a s l n s f e r q a v k l  
p g k v k n g v v v d q v d n n g l a d q s g l k k g d v i t e l d g k l l e d d l r f r q i i f s h k d d l k s i t a k i y r d g k e k e i n i k l k

Tsompanidou\_et\_al\_Supplemental\_FASTA\_File

>tr|E5RA33|E5RA33\_STAAG  
mekneninveilttsdmhshflngdygsniyragyvniqiraqhrvilldsggslagslaayyaivapykrhpmiklm  
nrmhydasgvspsefkfgl  
sfltrsiarfpwlsanieynvtkepyfstpycikhfgdlikiaivgvtaglmeneysemeqdvsiektlvaskrwi ry  
iheveepdfli viyhggln  
kisnstknkkassneaklmeelgvidlmitahqhqtivgqdhetyyvqagqdalevhlsinfkkrtttydvesidskv  
idlneyeedqellldltfyd  
rkavaywsqeijsdkglm1svnglqdlvcqthpfsqllhdaiqlafdnditcvhvpnmgekglsgqirnedlyhayppd  
kpmdmatisggnikdi1eys  
yshldfvneqls1tiidetlctmwqgfnyeidmnpqegqrvmldqidltsyrvtmtdycyrnyknylknaiihesydet  
mstliaeklrpnyriscs  
dnfvvknr  
>tr|E5RA43|E5RA43\_STAAG  
makqdvielegtvldtlpnamfkvelengheilavhsgkirmnyirilpgdkvtvemspydltrgrityryk  
>tr|E5RA60|E5RA60\_STAAG  
meakavartiriaprkvrlvldlirgknaaeaiaiklntnkasspviekvlmsalanaehnydmntdelvvkeayanegp  
tlkrfrpraggrasainkr  
tshiti vvsdgkeakea  
>tr|E5RA67|E5RA67\_STAAG  
mknqpkls1aligifli1ceffyqipflgatfilsfgwqpllnallyliltiillvnrqnairpiaaiirifgivgsfla  
iipflgilihwi1fflmi1  
fv1vv1sptyipknarviytqykdghre  
>tr|E5RA73|E5RA73\_STAAG  
mteqftmiillialgyflkrinfikatdsqvialvlvntlpslvivnlnsaelklsfsilpilmiygivakmiavwff  
rkydnhmrgsvgmtgamn  
iglfayplieviwpktgliyfgmadiggafvmfgytyfvgsyfsqsdqdfkylgkllqsvplvtyivmfilninh  
lphvaidffsilshanmp1  
smillgvm1nftlerkyipatikylclhyglalvagllvhvllpsvddmikttllvtwmfpvgvaiisgyiqfkyrtlpf  
igmttntiisiiilyvy  
qavfv  
>tr|E5RA82|E5RA82\_STAAG  
mveqikdklgrpirdlrlsvtdrcnfrcdycmpkevfgddfvflpknelltdemariakvyaelgvkkiritggeplmr  
rdldvliaklnqidgiedi  
glttnglllkkhgklydaglrrinvsldaiddtlfqsinnrnkattileqidyatsiglnvknvviqkginddqiip  
mleyfkdkhieirfiefmd  
vgndngwdfskvvtkdemlmi eqhfeidpvepyfgevakyrrhkdnvqfglitsvsqsfcstctrarlssdgkfygc  
lfatvdgfnvkafirsgvt  
deekqfkalwqirddrysdertaqtvanrqrkkinmnyigg  
>tr|E5RA86|E5RA86\_STAAG  
milqivgykkskgtlrmhivsflkthgytvatikhhghakediqlqdsdvdmkhfeagadqsivqgfqyqqvtvrvdn  
qnl1tqiieksvtidtniv1  
vegfkna defkvvyrdeee1qv1qq1snvcysinvrehedftafeqwllnkikndcdtqlt  
>tr|E5RA88|E5RA88\_STAAG  
mtefthinqqghakmvdvsdkqitkrtavahssitvnetifkqisnntntkgnvln1taqiagimaakntstiipmchp1p  
l1tgidvhfswdetnaplyt  
lniqttvsttktgvemeal1taasatal1tydm1tkavdkgmii1getylesksggksgdfqrgsgq  
>tr|E5RA90|E5RA90\_STAAG  
msqerysrqil1fkqigeigqskinqkaliigmgalgthvaeglvragiakliivdrdyiefsnlqrqtlfteedalkmm  
pkvvaakkhllalrsdvdi  
dgciahvdyf1lethgqdvdiidatdnfetrqlindfaykhripwiyygvvqstyteaafipgktpcfnclvpqlpaln  
l1tcdvtgviqpavtmats1  
qlrdamkv1teqipidtkitygdiwegshysfgfsmqrsdcttcgdvpsypylnkneqryatl1cgrdtvqyenasithdi  
lvqflkqhqlnyrsnsymv  
mfefkghrivafkggrfl1hgmtrtsdathl1mnl1fg  
>tr|E5RA95|E5RA95\_STAAG  
masismsdiycngti1fenddeqliyl1tpsfpqrytsntwiykktp1qerw1kdl1erqql1htnqgsnyha1fsfpeneq1d  
nhwmamfkdm1felgime1  
yaiesdalan1prnsdveiavvdeshiday1kvayqfs1pfgkdyadaheemvrehyqkdvikr1vay1lnnepigvvdvi  
esenyiel1dgfgv1eqfrh  
qgigstiqs1igeya1sknhkpi1lvtgedtakdmyakqgyvyqsfcyqil1kedign  
>tr|E5RA96|E5RA96\_STAAG  
mttkqlvytal1mtaiia1l1gmvpvip1lpfssvip1lqnigiflagvilgrkygt1svivf1ll1vvag1pl1sggrggigv  
fagpsagf1ll1ypvafmi  
gairdrfineinfwil1fvgil1vfgvia1ldvig1limgmiinipftkaisisl1ay1pgdil1kaivas1l1gta1l1nhsqfrq  
img1k  
>tr|E5RAA4|E5RAA4\_STAAG  
miveeiqgnian1snsekqkhvekvy1lensd1vkrihrvvdhgteigir1kqpid1qygdi1yaddhmiivdvnsed1  
lviqprt1qemgdi1ahql

Tsompanidou\_et\_al\_Supplemental\_FASTA\_File

nrhlpaqftetemlvqydyivedllkslgi pyvredrkvnkafhighshd  
>tr|E5RAA7|E5RAA7\_STAAG  
mdeqgwtgqldltvffdgnrsvsrdiffekalkvirpvylnqstiptfyivnvggylgdryrmvnvednakvtltyq  
gatkiyktpsnhvegyqtfnlkdnayleyvadpiayenakfyqhntfnlnssslfytdiltpgysktgeafkyqymhlineiyiedelvtynlln  
pnkqsineigyemehshyg  
sayfihedvqkldsvyetissyntfdrvaisqlpthgfavrifayrtqiiekilgtiqsyiaenydrklldflrky  
>tr|E5RAB3|E5RAB3\_STAAG  
mmkrkptflesistmivmvivvvtgfvffdipiqlliivsayatwiakrvgltwqdlekgiaerlntampailiilavg  
iivgswmfsgtvpaliyyg  
ldlnpsyflisaffisavtsvatgtawgsastagialisgnqlgippgmaagaiagavfgdkm脾sldttnlaalvt  
kvnifkhihsmmwttipas  
iigllvwfiagfqfkgshndkqiqtllselaqiyqiniwvpliviivcllfkmatvpamvissfsaiivgtfnhhfkm  
tdgfkatfsgfndsmihqs  
hi:ssvksllleqgmmsmtqilvtifcgyafagivekagclevllttiskgihsvglitviccialvfaagvasivi  
imvgvlmkdlfkeyqvsrs  
vlsrtledsstmvlplipwgtsgiytnqlhvsvgeffmwtpcylcaiaiiygtgigikkssnrlt  
>tr|E5RAB8|E5RAB8\_STAAG  
mnkiskaltwfiijsfiihlilfimwgehqeuylytgimliagisyvfyqrdieskrlltsigvgiitailimlqlf  
s litsnlsysslikelart  
gvnwkwqmlvtllfvipchelymrtvlqkelthfsipkwiailitaicssslfiyldnwwivtfifvaqvilslsyeytr  
riattsvaivaiilllif  
na  
>tr|E5RAC2|E5RAC2\_STAAG  
malpmiwytasalwffpgaimillslvivficyiktqnqlhlllivlniillffslpllls  
>tr|E5RAC4|E5RAC4\_STAAG  
mklgmllirwmlatsflvhgtlkfvdldgtihflgslglpptiavlmsigevigglaliigfltpyvvnfyicvmlgsif  
tlkltrgyvsgyefeiihi  
vmnlacissywkkwlqfy  
>tr|E5RAC5|E5RAC5\_STAAG  
mnrnivklvfmlllvavagcgqkdteektentiikedelgtekikknprvvvleysfadylaaldmkpvgiaddgstk  
nitksvrkigayesvgsr  
pqpnmevisklkpdliiadvsrhkkikselkiaptimlvsgtdynanieafktvakavgekegekrlekhdilaai  
rkkieqstlksafafgjsr  
agmfinnedtfmgqflikmgipevtkdkthvgerkggpyiylneelaninpkvmilatdgktdknrtkfidpavwks  
lkavkdnkvydvdrnkwlk  
srgiasesmaedlekiakak  
>tr|E5RAC6|E5RAC6\_STAAG  
mrqfikrtvkti lvgyvikfirnkls gksshptdnkhs  
>tr|E5RAD0|E5RAD0\_STAAG  
mrln dnrtsyfygaiqlfknnsknkqsfkdwelkhnitfihpqsekhlrvvggfqfsshksddewrefglnhfvlp  
evlistdnngtfltytvr  
esftvealndlfnnidvdeqigeitrediykddwrqlvveaiesinneekivlarrlikfdkdisipyilkq  
ayskeksnyi fllesqdsi  
ffsqtpeqlikvnnkilstkavagtikrsqdededtknveafldknkniehrfvvdsilhdikpyitelhydtkpilk  
ndhlyhlyteikaplkdds  
yislihdhhtpalggypkefamdfieqkefgtrglygapvgidiyddcefivairsmlikkaatl fagcgivkdsdp  
dse laetnlfkftpmnal g  
vdmngks  
>tr|E5RAE4|E5RAE4\_STAAG  
mkfnkvklvihacvllfiisialifhrlqtktshidpihketklsdnekyldvrnkek vapsklkevynskdpkykkid  
kylqsslfnngsvaiyeng  
lkmskgygyqdfekgikntpntmfligsaqkfstglllkqleehkinindpvskylpwfktskipikdlmlhqsglyk  
yksskdyknl dqavkaiqr  
rgidpkkykkhmyndgnylvlakvieevtgksyaenytkigdpklqhtafydeqpfkylakgyaynstglsflrpn  
ldqyygagnlymtptdmgk  
litqiqqyklfspkitnplhefgtkypdeyrygyakptlnrlnggffgqvftvyyndkyvvvialnvkgnnevrikh  
iyndilkqnkpyntkgv  
q  
>tr|E5RAE5|E5RAE5\_STAAG  
mkhtvgfiasivltllavyvtlytsltfhakltiifgfafvqagllmfmhlt egkdgrlqtfkvifalvitlcfvvg  
ywmqgghssh  
>tr|E5RAF2|E5RAF2\_STAAG  
mkvavimgssdwkimqescnldyfeipyekqvvsahrtpkmmvqfasearerginiiiagaggaahlp gmvastt  
vigvpietkslksidsls  
ivqmpggipvattaigaagaknagilaarmlsi qnpslveklnqyessliqkvedmqnelq  
>tr|E5RAH8|E5RAH8\_STAAG  
mltmkdiirdghptlrqkaaelelpltkheetliamreflvnsqdeekryglrsgvglaapqiniskrmia vlipdd

Tsompanidou\_et\_al\_Supplemental\_FASTA\_File

gsgksydym1vnpkivshs  
vqea1ptgegc1svddnvaglvrhnririkakdiegndiqlrlkgypaivfqheidhngvmfydhidknhplqphtd  
avev  
>tr|E5RAH9|E5RAH9\_STAAG  
mkfgktiavvlassvllagcttdkkeikaylkqvdkikdeepiktvgkkiaeldekkkk1tedvnskdtavrgkavkd1  
iknaddr1kefefekeedaik  
kseqdfkkakshvdnidndvkrkevq1ddv1kekyk1hgeyakaykkavnsekt1fkylnqndatqqgvnekskaieqn  
ykk1kevsdkytkvlnkvg  
kekqvdvqfk  
>tr|E5RAI5|E5RAI5\_STAAG  
mnignkiknlrriknlrqee1aertd1skgyisqiesehaspsmetf1niiev1gttpseffkdsenekvlykkeeqviy  
deydegy1lnw1vsksney  
dmepl11tlkpgasyknfnpsedtfiycmsgqit1nlgkeiyqaqeedvlyfkardnhr1snesnnetrilivatasy1  
>tr|E5RAK0|E5RAK0\_STAAG  
mqehl1vvt1dgkdy1vepgtn1lefiksqdtfvpsicynesmgpiqtcdtctveidgkierscstvidrmtvntvndv  
kdaqkealdri1ekhm1yc  
tvcdynngdceihntmdawglqhqttyeykekpyekdygpfrydpnqci1cgrcveacqdievnetiridwdrehprviw  
dndvpinesscvscgqcat  
vcpcnammevnmegnagymtdtepgslaamid1tkkaepgygplfaisdseaemrkerikkttktvctycvgvcsfevwtk  
dreilkvqpshdspankia  
tcvkgkfswhinsdqr1tkplvrkngefheveudealnv1adnftsikekygpda1sfisskatneesy1mqklarqv  
igt1nvdnscryc1qapatk  
glfrtvghggdsgsiedlekaamsv1igtntaeahpviasrmkraqlfgqkihvfdirkhemaeradr1fyqpkpgtdla  
w1savtky1idhd1hdkaf  
idewddfddeyyks1etftmafaeeatgipeselikfaecakaesvvicwamgitqqdigdsstaisn111vtgnyrr  
pgtgaypl1rghn1vqgcsd  
mgsmpdkitgyqsieaddirakfekeygvk1n1pkagkdnhemvegihdgevh1slylygedtgivdsn1nfvqaafek1df  
mvvqdef1tftatyadv1  
pasp1lekdgtftnterriqrlyqaleplgdskpdwki1fqaiar1lgfdwnykhpseimdevar1tplyagvsydr1legf  
ns1qwvpvqpdgtdepi1y1  
egfnfdngkak1fpl1sfdnyfkqdeiydi1hvnngr1lehfhegnmt1yqtpmi1kykvprafveispelaedrgihegaevk  
1isetgeav1qvhvtdrvk  
gkeiy1pl1ndamengd1gain11t1nsdvdytdt1psykrtscr1levitkrkgspl1n1pnnfrvknkrh1p1qysvqvqkkwe  
rsdyvfpgnqvdk  
>tr|E5RAK5|E5RAK5\_STAAG  
minetkymrqitn1liq1id1tikyntl1mtdwniq1thiykfnqivtne1nk1kfgfetsyi1nenqvsy1e1it1lnkrpl1r  
qvd1ygnkiq1y1nfyhtels  
nal1fvikfah  
>tr|E5RAK7|E5RAK7\_STAAG  
menne1qrg1sarq1qmi1algg1tigvg1fmgatstikwtgpsvilayliagi1fl1imramgemiy1npttgsfatfasd  
yihpaagyntawsn1f1qwi  
vvgm1sevi1avgeymk1fwfpe1lptwipgvia1111maan1fsvkafgefefwfal1kvvti1ilmi1agfg1liffgfgnggh  
avgn1lwtnggfmpngiv  
gfffa1sivigsyqgveligitagetkdpqknivkavngviwri1l1fy1lgai1fvivsvypwn1lgdigspfvatfakigi  
tfaag1in1fv1taamsgc  
nsg1fsasrmiyt1lahkgempki1ftkimrngvplytvvavslgiligal1nvilplyidgaksifvyvysasilpgmipw  
fm1lfsh1rfrk1l1hpeele  
ghp1fkmpggavt1ny1t1fl1il1v1gm1fvnvetrisv1ligvif1t1vitiyyf1irynk1n1nvkak  
>tr|E5RAL2|E5RAL2\_STAAG  
m1vaav1gfi1fpqhvat1gkwvpy1l1g1vm1gm1gt1titpndfkm1vfkapravi1gvc1lqfsimpt1afiiaksf1h1ppdi  
avgv1lvgccpggtssnm  
sylakanva1svsittvst1lapfvtpaliy1fanew1evsfl1sm1lwsvvqv1lipialg1v1lqi1nrkiaekastalpi  
isvva1s1l1ai1vvggskh  
q1l1ttg1l1f1l1v1l1h1nv1lyt1igyw1ar1l1k1drq1dqkavsi1evgm1qns1glav1s1aal1hfn1piaavpgav1fs1fihnitg  
pi1akywskk1  
>tr|E5RAL7|E5RAL7\_STAAG  
mevhkksnawa1fp1l1fva1fl1gvgi1tgdf1tsmp1nvaititviva1l1mnrkesfakkvevftkgaghsni1lmm1if  
i1lagaf1sntaekmggk1st  
vn1gl1slipen1i1vg1l1fvi1cmfvs1smgtsvgtvaai1apvgygfaqatdvptalamatvvggamfgdn1smisdttaa  
vrtqhtk1mkdk1frv1nfki1v  
lpgai1l1t1i1ly1fl1ng1s1nhaknydyn1likv1pyi1lv1l1a1l1gvnvi1v1liggt1lagi1glidgsfgwm1g1ldavs  
kg1is1mediami1al1gg1l  
vgi1qhnggi1ew1l1qfvrskvkskrgael1gias1lsv1adiatan1tisi1img1plakni1adeydvdsrksasil1dfggc  
fqg1l1pysp1qvi1saagvag  
isp1lm1fpys1y1pi1lgvc1glia1l1fn1fpk1l1knts1qemkh  
>tr|E5RAM4|E5RAM4\_STAAG  
mki1iq1ley1fl1ai1vkyns1ftkaa1q1fl1hisqps1tatikkmead1gyd1l1ftr1stk1dikitekgi1qfyryase1lvqqyrstme  
kmyd1svt1se1prikigt1le

Tsompanidou\_et\_al\_Supplemental\_FASTA\_File

stnqwianlirkhhsdypeqqyrlyeihdkhqsieqllnfnihlaitnekihethedirsiplyeesyillapketfknqnw  
vdvenlplilpnknsqvrk  
hlddyfnrnrnrpnvvtvdrfesavgfvlglgyaiiprfyyqsfhtsnleykkirpnlgrkiyinyhkkkrkhseqvht  
fvqqcqdylygllea  
>tr|E5RAN4|E5RAN4\_STAAG  
mglviehvtkrfgkmtavndislelesgkmlgflgrngagktttfrmilglsepteghityngkkldktmynrigylpee  
rglhgkltveeelkylat  
kgmskteiqqqisywlerfditenrkkridslskgnqqkiqlasmhkpellildepfsgldpvneellkeavkdlnw  
gstivysshmehveelcd  
dvcildkqqlvvsqgdihrasngnkvviesettlpldlnirgihsenmkqglqtienedvakdiyqvahqgyvkr  
fqvvepslqdifiekvggk  
da  
>tr|E5RAP0|E5RAP0\_STAAG  
mviikqlfthtqtvtsefidhnnmhdanyniifsdvvnrfnyshglslkerenlaytlflehttylseislgdvftv  
tlyidydykrhlfltl  
kedgtlastnevmmmginqhtrrsdafpesfstqiahyyknqptitwpeqlghkiaiphkgalk  
>tr|E5RAP2|E5RAP2\_STAAG  
mfkndqverffykreienrkkhkqpstlnvkanleklslddmqvfrfnfrhqiddkilyihggfnaqpspfhwrllk  
itlstlyevvlpipyktp  
fhiddtfqairvydqlvsevgqnvvmgdgsggalalsfvqslldnqqplpnklylispildatlnskdisdali  
eqd  
avlsqfgvneimkkwangl  
pltdkrispingtieglppvymfgggremthpdmklfeqmmqlqhhyiefydydkmvdhdfpiypirqshkaikqiaksid  
edvtqnn  
>tr|E5RAP6|E5RAP6\_STAAG  
mkrqakieiqnalvdmaeypfqeistkmi caycniirstfydykdkfdltdtinskhekfqfllsalhnnfenikqd  
klklykffiiakylkne  
qffkdilvtypmktlfidyinlardyyqqimndystvtvkqlyvtyiiggqagvfinwlsngcnespeevadillanti  
klqjq  
>tr|E5RAP8|E5RAP8\_STAAG  
mkscpkcgqqaqddvqictqcgkhfdrsqaalyrkstdediqtnnikmrkmpwaigffililililffllrnfnsp  
eaqt  
kilvnaienndkqkvatll  
stkdnkvdeekvyinyikdevglkqfvsdlkntvhklnsktsvasyiqtrsgqnilrvskngtryiffdnmsftapt  
kqpi vkpkektkyefksgg  
kkkmviaeankvtpignfipgyripamkstengdfagylkfdfrqnssetvdvtedfeeanitvtlkgdtklndsskkv  
tindremafsssktygppy  
qnkditisasgakgkftttqktikasdkynteitlnfedsedi edyvekkekeenslnkklieffagyslannaafnq  
sdfdfvssyikkgsfydd  
vkkrvskgs1mmi sspqiidaekhgdkitatvrlnengkqvdekeyeleqgsqdrqliktsek  
>tr|E5RAQ4|E5RAQ4\_STAAG  
mfkltlyariaiysitvilfsalifvltnvyhyhnlkasndakimktlkearqyqsakpthiqyfkhlgqmnyqimtv  
dqkgkhtfygepfredtl  
qnainnvlnnkdyhgidkpfalfvtgffdnvtdntvginfktdgsviavfmrpdigetfsefrtflavllmlll  
fisis  
lviastysii rpvkklk  
terlidgdfetpikqtrkdeigtlyhfknmreslgvqdqmrqhfqvnsheiktpthihhlse  
lqqtsdktlrqqyi  
ndiytittqlsglttel  
lseidnhqhllddkiqvdqlikdiirheqfaadeksliiladlesinflgnqrllhqa  
slnllinaikytdvggaidia  
lqshhniiftisndgspi  
spqaearlferfykvskhdsnglglaitksiielhgtiqftsneyvtftitlpnsh  
>tr|E5RAQ8|E5RAQ8\_STAAG  
mlvntfnpfdnlllssliaaipvlflcltvfkmkgyaaitlvvtlliaipffklpv  
giasgavvegffqgiipigy  
ivmmavllkyitvesgqfl  
tiqdsitnisqdqriqvl ligfafnaflegaagfgvpiaicallltqlgfnplkaam  
lclvanaasgafgaigipvgvve  
tlklpgdsvlgvsqsatl  
tlainfiipflifiidgfrgvetlpailvvsitytltqgl tvfsgpeladiipp  
lltmalavfskkfqpkiyrv  
nkdeiepakahsakavl  
awspfi vltvimiwsapffknlflpnga  
lsslvfknlpgtisevthkplvltlni  
iqgtgtailtiitilmskkvn  
fkdavr lfgvtfkelwlpv  
lticfilaiskittyggl saamgqgi  
akagnvfpvlsailgwigvfmtgsvvnns  
lfapiqasvaqqigtsgsllvan  
tvggvaaklispqsiat  
aavkqvgekese lkm tlkysvc  
llificiwtfilsll  
>tr|E5RAR0|E5RAR0\_STAAG  
mkr lvtgllalslflaacgqdsdqkds  
nekkddakteqqdkktdnsskdkkdnk  
dskdvnkdnkdn sandnqqqsns  
natnndqngt nnnqssnq  
kssyvapygqnaapvarqiypfngnkt  
qalqplnftalnaanankfgsnkvyndys  
iehnngnykyvfgfdpn  
angkysivtvdytgqamvt  
dpnyqq  
>tr|E5RAR1|E5RAR1\_STAAG  
magiikeiseqnaselvelatrtfydtfgs  
yddkdfdqffkdnytvекftqei  
nhvdsfhyfyqedganvgyikmnins

Tsompanidou\_et\_al\_Supplemental\_FASTA\_File

aqteemgetylevqriyfl  
kdfqgggrgsqlielaekiaqehnkhiwlgvwehnpraqafykrhgfkvvgehhfqtgdvtdtdlimekel  
>tr|E5RAR2|E5RAR2\_STAAG  
mietfkafvidkdesgkvtptfkqlsptdlpkgdvlkvhysginykdaalatqdhnavksympigdidlagtiveseap  
gfeqgeqvivtsydlgvsh  
yggfseyarvksewiiklpdtltleesmiygtagyttaglaierlekvgmniegdpvlvrgasggvgtlavlmnelgykv  
iastgkqdvdsqlllelgak  
evidr1pveddhkklasstwqacvdpvggeginyvtrlnhsgsiavigmtagntytnsvfphilrgvnildidsvfta  
mklrqrwrrlakdlkpen  
lhekqvittfde1peqlnkvinhenkgrividfgvdk  
>tr|E5RAR6|E5RAR6\_STAAG  
miig1fsqffyre1tkaydfgttqlslvhthtlilgmfmflillpleklfklssyylfnwffyvynigvigtigmvvtk  
gffqvtgksyspeafagfa  
gightgmlagllllffllrqailkeprdesfkk  
>tr|E5RAS1|E5RAS1\_STAAG  
mkerghieqlwreekyhvllhsqqsyqminalktdlslhqvqqmiddalliepsigsvcnafdhmwyfkkcaneerker  
qskllkadfingkidtqt1  
ldflaelankydvyllqsrvlntkrkr  
>tr|E5RAS8|E5RAS8\_STAAG  
miqikgavkfpitldsttwifddrkvsiedlekvgfdgskpidfednhewnrailegqtnpntlseikykkramlegsf  
vinmtpffkhsephdsatt  
irlsnehdhldipidllpylfflfakdgkrlysdngvdsfiynqedgysyrinhvthievi  
>tr|E5RAT5|E5RAT5\_STAAG  
mkkliirvvgvlf1vgf1iylyfysprlkfdvlenpnkgnkvrseqvnksnhaenpkpkegvgtwvgkdikvltskfgq  
adrvyprfdgyknyvfkd  
nsyivstkreivsvyatgekvnvslkigqhsaeifnhtsinpepsfkvdgkkyefelsdedlktqtlikygdiaqv  
ysdqskkvlsvrfltkem  
ladiepyqlnsnstseehnrpveqnpnqlislyevtnemrklkglkplkinsdlahiasnnyeatsngsdsvefteda  
lrgqldknhvtykttaqnv  
gyafndvptlihswwnsdihrsrllnskydemggdvmdyysliflek  
>tr|E5RAU5|E5RAU5\_STAAG  
mnkqkqefksfysirksslqvasvaistllllmsngeaqaaaetggnteaqpkteavasptttsekapetkpvnavs  
vsnekeaptsetkeakev  
kevkapketkavkpaakatnntypilnqelreaiknpaikdkhsapnsrpidfemkkengeqqfyhyassvkparvift  
dskpeielglqsgqfwrkf  
evyegdkk1piklvsydtvkdyairfsvsngtkavkivssthfnkeekydytlmefaqpinyadsdkfkteedykaek1  
lapykkaktlerqvyelk  
iqdklpek1kaeykkkledtkkaldeqvksaitefqnvqptnekmtldqtkyvvyesvennesmmdtfvkhpiktgmln  
gkkymvmettnddywkdfm  
vegqrvrtiskdankntrtiifpyvegktydaivkvhvktidydgqyhvriidkeafkntdksnkkeqqdnsakkea  
tpatpskptpspvekesqk  
qdsqkddnkqlpsvekendassesgkdktpatkptkgevevssttpkvvsttqnvakpttasskttkdvvqtsagssea  
kdsaplqkanikntndgth  
qsqnnkntqenkakslpqtgeesnkdm1plmal1alssivafvlprkrkn  
>tr|E5RAU9|E5RAU9\_STAAG  
mtldkldlpivgkptsyktl1pnrykdvpeligqpmepnveavkklkpthvlsvstikdemqpfykqlnmkgyfydfds1kg  
mqksitqlgdqfnrkaqak  
elndhlnsvkqkienkaakqkhhpkvli1mgvpgsy1vatdksyigdlvkiaggenvikvkdryissntenllninpdi  
ilrlphgmpeevkkmfqqe  
fkqndiwkhfkavknnhvyd1eavpfgitanvdadkamtqlydlfykdkk  
>tr|E5RAV6|E5RAV6\_STAAG  
manivfk1sdkdittlmsritfdten1pqgmkarakyqnttvniyqsgkvmfqgnhaeavskellpqhsq1ntnktkkkn  
manssleqtlmydqfncig  
sdeagsgdyfgpltvcaafvtkehvpilktlgvddskk1tdtkivelaeq1vafiphs11tlhndkyniqqakgwtqvkm  
kavlhneaiknvlekidss  
qldyividqfakrevyshyalsdip1pkktkfetkgeskslaiavasiiisryafitymdqiskyinmtipkgagakvdvi  
aakiikkygl1srldtiskk  
hfknrkaqk1kpl  
>tr|E5RAV8|E5RAV8\_STAAG  
mvidfiiiii1ffvyfvigfrrgfwlsmihlsativslwiasqfyksiverlivfipykttafnttfafhfnhlqnrfea  
ivaf1mit1fckfi1ylii  
vtfdkiiayqnihi1fsramgmivgvfmitiiv1hftlyllalypnealqhq1kisivshslifhipylsaftin1  
>tr|E5RAW5|E5RAW5\_STAAG  
mteqsvkntpqhetqskpkqktvliikrqdtsdskpyeetfeipyrenlnviac1meirrnvpnikgekttpvwdmnc  
1eevcgacsmvingrarqs  
csaivdqleqpirlepmtfpvirld1qvdrsrmdnlkrmkawipidgtydlgpgprmppekkrqtayelskmtcgvc1e  
vcpnvtennkfvgaqaisq  
vr1fn1hptgsmtkderlnal1mgtgg1qqcgnsqncvnacpkgipl1tsiaamnrett1fhmfksffgsdheve

Tsompanidou\_et\_al\_Supplemental\_FASTA\_File

>tr|E5RAX6|E5RAX6\_STAAG  
mqvgvgppqreigspitdnaswrgpnieklhdqfqqtmqvggapt  
>tr|E5RAY7|E5RAY7\_STAAG  
mentinesekkrfklmpgafmlfliltvaviatwvipagaysklsyepssqelkivnphnqvkkvpgtqqeldkmgv  
kikieqfks gainkpvsi  
ntyertkqhpapeqitssmvegtieavdimvfilvlggligvvqasgsfesgllaalktkghefmlivfvsilmiigg  
tlcgieeeeavafyplvpi  
fialgydsivsvgaiflassvgstfstinpfsvviasnaagttftdglywrigacivgai fvisylywyckkikndpkas  
ysyedkdafeqqswlkd  
dsahftlrkkiiltlflvlpfpimvwgvmqtqgwwfpvmasafliftiimfiagtgksglgekgtvdafvngasslvgs  
iiglarginlvlnegmisd  
tilhfssslvqhmsgplfiivllfiffclgfivpssglavlsmplafpladtvgiprfvivottyqfgqyamflaptgl  
vmatlqmlnmryshwfrfv  
wpvavfvlifggvliitqvliys  
>tr|E5RB05|E5RB05\_STAAG  
mkkkknaikviiifislivavaffffglktyqghkniqlidsyleeknlkdkiksekteysakkglyfyevtfkdepgvt  
yvvqpi stnkglfvegfdt  
etkkslktakhkyfnqnykpsk  
>tr|E5RB16|E5RB16\_STAAG  
mwfnnvetkpgvgypkrwedqehykggwlnrkgklelksgriskialgkifynpdmpdikdyepwnynyehlttaks  
gkhsparayseitgdnie  
iewgpnweddlagghvtgpkdpniqkieedikqfdetfmylprlcehlnpscvascpsgamykrdedgivilvdqac  
rgwrycmtgcpykkvyfwn  
ktnkaekctfcfprieagmptvcsetctgrmrylgvllydadrvehaasavdekglyekqldiflnpfdeeviaqaekdg  
igydwieaaqnspiyklai  
eyklafplhpefrtmpmwycpplspimsyefgknttqnpdai fpaieemrpieylaniftagdtepvkgalqrmammr  
symrsqvtqppfdtsrlr  
lgitertkdmrllglakyedrfviptshketyldtyhaagstgynygghefgdncegcgvavgsqgtgqeiynenyfyg  
gfrd  
>tr|E5RB17|E5RB17\_STAAG  
mgkfglnffkptekfngnwsilesksrewekmyrerwshdkevrthgvnctgscswkvfvkngvitwenqtdypscgp  
dmpyeprgcprgasfswy  
eysplrikypyrkglwdlwtealeenygnrvaawasivenedkakqykqargmgghvrsnwkdvteiaaqllytikky  
gpdriagftpipamsisy  
aagarfinllggemlsfydwyadlppaspqi wgeqtdvpessdwynasyiimwgsnvltrtpdahfmevrykgtkvis  
vapdyaenvkfadnwlapn  
pgsdaai aqamthvilqehyvnpnerfi nyakqytdmpfliml dedenykagrflrasdlgqtteqgewkpvihdais  
dsvvpngtmgqrweegkk  
wnkletedgskintplismaeggyeletiqfpyfdsdgdgfnrpiptqrvtlangdkvriatidflmasqygvrrfdhk  
leskgyddaeskytpawqe  
aisgvkqsvviqvakefaqaaidtegrsmiimgaginhwfnstiyrsilnlvmlcgcqgvngggwahyvgqekcrpieg  
wstvfakdwgpprlng  
tswfyfatdqwkyeasvdrksp laktedlkqhpadyvlnaarlgwlpsypqfnknsllfaeakdegiesneailkr  
ainevkskqtqfaiedpd  
kknhpkslfiwrsnlissakgqeyfmkhl lgtksgl latpnedekpeeitwreettgkl dlvsldfrmtatplysdiv  
lpaatwyekhdlsstdmhp  
yvhfnpaidplwesrsdwdiyktlakafsemakdylpgtfdkvttplshdtkqeistpygvkdwskgeieavpgrtm  
pnfaiverdytkiydykvt  
lgpvlekkgvaghvsvfseqyee lksmlgtwsdntdsvranrprid tarnvadail sissatngklsqksyedleeq  
tgmpkldisseraaekisf  
lnitsqpreviptavfpgsnkqgrryspftt nierlvpfrtltgrqsyvdehvfqqfgeslpyvktlppmvfgnrdkk  
ikggtalvlyltpgkw  
nihsmqdnkhmltlfrggptvwi snedaekhdiqndwlevynrngvvtaravishrmpkgtmfmyhaqdkhiqtgse  
itdtrggshnaptrihlkp  
tqlvggyaqisyhfnyygpignrdlyvavrkmkevnwled  
>tr|E5RB39|E5RB39\_STAAG  
minkniltatlavgliaplanpfi eskaenkiedigggaeiikrtqditskr laitqniqdfvkdckynkdalvkmq  
gfissrttysdlkkykpyik  
rmiwpfqynislktkdsnvdlinylpknkidsadvsqklygniggnfqsapsigsgsfnysktisynqknyvtevesqn  
skgvkwgvkansfvtpngq  
vsaydqylfaqdp tgaardyfvpdnqlppliqsgfnpsfittlshergkgdksefeitygrnmdatyayvtrhrfavdr  
khdafknrvtkyevnw  
thevkiksi tpk  
>tr|E5RB42|E5RB42\_STAAG  
mtskditqisviaailtilavlkipsiipgl dfqlsapaallilaffgikkyflgllssvlllifgvfnpinviisiif  
rviajavvyllkinvlslv  
lssvlgslvsrlllsiinlpwvvlinaipgviftlivaiplyltrlkrmavllr  
>tr|E5RB44|E5RB44\_STAAG



Tsompanidou\_et\_al\_Supplemental\_FASTA\_File

mfqeqid1lqqkgllyrs1ksvgyidrqyievenkrctnytsndylglgqiafdkddferfmrkysyhlsssr1lsgssta  
yeeietmlagwlgysacti  
lnsgydan1alfnifkntncvvsdqenhasiidgiklsglekviykhldiadlekrlekypnqnipkiiisdsvfstng  
dvvdigq1vs1khkynat1  
ildvshsfgienysnyggvdi1tss1skacgayggvilssndvkdmlinhgrpliyssslpiynlyfikrnieklinadd  
rrtklns1skyfngk1ka1  
nvnyssnsplikfiefddeaaenihqt1lkhvftsylryptvtkpm1ris1syfhteqdidr1feilhqed  
>tr|E5RB48|E5RB48\_STAAG  
mfqitfki1nwi1rpykarmi1gfsmsf1naifialpi1flaakifnnvlshkpiymkdi1nvviimv1l1vigrfitayfks  
kshesiayemsaker1dig  
dk1knvr1gyfnshhsne1ttivtt1t1f1enfamkmvdivvngyilitv1l1s1lvswqvs1lacigv1l1sffaiq1l  
erksrqnapayhvnqqlv  
ekvlevirgiqvksfakents1ksfnqavneskrintkiemqyipfn1l1h1s1lkvvsimiv1vac1lymnhsid1pt1  
imisifsvifdsvenins  
aahv1lemidmtiddiekiknapel1dengkn1tikneniafqnvnfsyddkqviknvnfeiptqtstai1gpsgsgk1c  
h1l1rfydiddgniridgv  
dikdmt1st1mskisavfqkvy1fndtiennil1fgnpgatkee1iraakqacchdfims1pegyqtm1nekgsn1sggek  
grisiarailkdapii1ld  
eatasidpeneqliqtaine1skgktvitiakh1etiknadqiiv1negei1qkgshdelirkpgmyqdfirikksagw  
k1  
>tr|E5RB49|E5RB49\_STAAG  
mnnqtnwikil1sgfasdskwkim1s1lls1isv1fsg1vpywavfki1l1m1n1n1ay1t1ins1im1vy1if1ial1ity1is1qv1cc1fg1a  
stm1sh1t1aye1il1se1ir1kk  
1aqk1mr1rl1gvveskkigek1kni1fvdkvetiel1plahmipevign1l1saa1fly1im1lidwrmasa1l1vtipis1if1afk  
kvm1sgfnetyaeqmsk1sny  
mnsaivefiegieviktfnqsqssykykdavdnykiht1nwfkn1twgymn1gasv1p1st1f1gil1pvgmy1l1sin1q1nya  
eff1civ1s1lgv1vapiknf  
tnyvnh1ksiqyal1tevnq1s1lee1vl1stk1fkkpqhyeiafnnvgfsynkdkdd1vfkh1sftvpennftaivgasgsg  
kstiak1isrywdvtsgei  
tiggini1kdi1esq1lnd1vgfvqdnf1l1n1t1fkenik1gnpeatdeavekaak1aqche1fiekl1pdgydtnvgtvgdk1  
sggekqrvtiarm1ldkap  
iiv1deatayvdpneqki1qea1nv1tqdk1liviahr1stiqhadqiiv1lgkq1ilekgshh1l1k1ngnykkmwdthm  
htkdwgi1ntghn  
>tr|E5RB57|E5RB57\_STAAG  
mark1hre1lnnrhiq1iaiggaigtg1f1lgsgqtis1tgs1l1ftymi1igv1lafmralge1l1sntrfns1fdianey  
1gp1fg1fv1gwtyw1lcwi1v  
ssmsd1tamgy1fafwypqvpnw1tv1fiv1l1is1fn1l1gar1fge1lef1wfsi1kvvti1amv1vg1vl1iff1sfk1thygh  
asftn1shggm1fpggtf1g  
f1msfqiavys1figie1ligvtagetkdpekt1pkainnvp1rill1fyigg1l1vmsvipwndidpnssp1fvk1ft1ligvp  
faagvvn1fv1l1taa1satn  
sg1ysns1ril1fg1sqg1lgpkv1nkt1nshgvp1yl1silv1ssial1lia1l1nyif1pna1ql1fiyv1tt1stvl1fl1vwami1iv  
ay1lmy1lkkhpeahk1nsk1fk  
liggkpiay1il1aff1ffv1f1l1ffs1detraai1yisp1fw1f1l1ff1fykkyk1t1naek1layeqr1qndsgh1frydnq  
>tr|E5RB67|E5RB67\_STAAG  
m1sik1h1tkiysgnk1kavddis1ldiqsge1fia1figtsgsgk1t1alrminrmi1eat1egqie1idgkdv1rsmnp1vel1rn1igy  
vi1qqig1l1m1phmt1ikeniv1  
vpk1l1kw1tkeek1drake1lik1vd1pes1flery1pael1sggqq1rigv1ralaaeqdi1ilmdep1fgaldpitrd1t1qdlvk  
t1qrk1lgkt1fiv1thdm1de  
aik1ladkicim1segkvv1gfdtpdn1l1rh1pand1fvrd1fignr1liqdrpndktvegvmikpitiqadat1ndavhim1rqkr  
vdtifv1vdsnnh1lgf1ldi  
edinqqi1rg1hks1lrdtmq1hiytv1qidsk1lqdsvr1tilkrnvrnpv1vddkqrl1vg1litr1anv1vdivydtiw1gdsedavq  
tehvged1tv1ssk1mheq1htt  
nvkvr1dig1ddks  
>tr|E5RB76|E5RB76\_STAAG  
mi1itsp1tearkdfyq1l1knvnnn1hepiyi1sgnaennavi1igledwksiqetiyle1stgtmdkvr1erekd1nsgttn1iddi  
dwdn1  
>tr|E5RB90|E5RB90\_STAAG  
mdyket1l1mpk1tdf1p1mrgg1lpnkepq1iekwdaedqyhka1eknkgnet1filhdgpp1yangn1lmghalnk1ilkdfivry  
ktm1ggfy1apyv1pgwd1thg1l  
pieqal1tkkgvdrk1kmstaefrekckefaleqielqkdkfrr1lgvr1gdfndpyit1lkpey1eaaqiri1fgemadk1glykg  
kkpvyw1sp1ssess1laeaei  
eyhdkrsasiyv1afdv1kddkgvvdadakfi1wt1t1tpwt1psnva1tvhpe1lkygqynv1ngekyi1iaeal1sdavaeal1dwd  
kasiklekey1tgke1leyvv  
aqhpf1ldres1lv1ingdhv1tt1dagtgc1vhtapghgeddyiv1gqkye1lpvispid1dkgv1fteegg1qfegm1fydkankav1td1  
l1tekga1l1k1ldfi1thsyph  
dwr1t1kkpvi1fratp1qwfasi1skvrqdi1ldai1ent1fkvnwgk1triy1nmvrdrgewvis1qr1vwgvp1lpvfy1aengei1imt  
ketvnhvad1faehgsniw  
fereakd1l1pegf1thpgspngt1ftketdimdv1wfdsg1sshrgv1etrpels1fpadmy1legsdqyrgwfn1ssittsvatrg

Tsompanidou\_et\_al\_Supplemental\_FASTA\_File

vspykflshgfvmdgegek  
kmskslgnvlpdqvvkqkgadiarlwsstydladvrisdeilkqtsdvyrkirntlrfmlgnindfnpdttdsipesel  
levdryllnr1reftasti  
nnyenfdylniyqevqnfine1snfyldygkdilyieqrdsHIRSMQTVLYQILVDMTKLLAPILVHTAEVWSHTPH  
vkeesvh1adipkvvevdq  
alldkwrtfmlrddvnr1etarnekvigksleakvtiasndkfnasefltsfda1hq1fivsqkvvdklDDQATAYE  
hgdiviehadgekercwn  
ysedlgavde1th1cprcqqvkslv  
>tr|E5RB97|E5RB97\_STAAG  
mmk1ikngkv1qngelqqadilidgkvikqiapaiEPSNGVDIIDAKGHFVSPGFVDVHVH1REPGGEYKETIETGKAA  
arggfttvcmpntrpvpd  
svehfea1qk1iddnaqvrv1pyasittrqlgkelvdfpalvkegafaftddgvgvqtasmyegmieaakvnkaivahc  
ednsliyggamhegkrske  
lgipgipnicessqiardv11aeaagchyhvchvstkesvrvidakragihvtaevtph111teddipgnnaiykmp  
plrstedrealleg1ldgt  
idciatdhaphardekaqpmekapfgivgsetafpllythfvkngdwtlqq1vdyltikpcetfnleygtlkengyadlt  
iid1dseqeikgedf1ska  
dntpfigykvynpil1tmvegevkfegdk  
>tr|E5RB99|E5RB99\_STAAG  
mpkrndikt11vigsgpi1igqaaefdyagtqac1alkeegyrvilvnsnpatimtdkeiadkvyieplthdfiariirk  
eqpdal1pt1ggq1nma  
iq1hesgv1qdnnvq11gte1tsiqqaedremf1mnd1nvpvpsedivntveqafkfeqvgyp1ivrpaftmggtgg  
gichndee1heivsnghy  
spatqc1leksiafkeieyevmrkdndai1vvcnmenidpvgihtgdsivvapsq1sdveyqm1rdvslkviralgie  
ggcnvq1al1dphsfdyyii  
evnprvsrsalaskatgpiaklaakiavgl1dem1npi1tgtsyaafept1dyviskiprfpfdkfeqgerelgtqmk  
atgevmaigrtyees11ka  
irsleygvhh1gl1ngesfd1dyikerishqdder1ffigeairrgttleeihmtqidyff1hkfqniidiehqlkehq  
gdley1kyakdygfsdkti  
ahrfrnmtteevyq1rmendi1kpyk1mvd1tcaae1fes1tppyygytyetenesisvtdkekilv1gsgpirigqgvefdyatv  
havwaiqkageyai1vnnn  
petvstdfs1sd1kyfep1teedvmni1inlekpkgvvvqfggq1ain1adklakhgvkilgtslen1nraedrkefeall  
rkinvpqpgqksatspeea  
1anaaeigyvvvrpsv1lggrameivdndkeleny1mtqavkaspehp1vdry1tgkeievdaicdgetviipgimehi  
eragvhs1gdsiavppqt1  
tedelat1edytik1akg1niig1iniqfviahdgvv1levnprsr1tvp1f1skitdipmaqlamraige1k1tdmgyqe  
gvqpyaegv1fvkapv1fsfn  
k1knvdi11g1pemk1stgev1mgkdt1leka1fkg1tgsgvevkdhgtv1mtvsdkdkeevk1laqr1nevgyk1ilatsgta  
nk1aeydi1paevvgkigge  
nd11tri1ngdvq1ivint1mtkg1kever1dgfqi1rrttvengip1c1ts1dtana1tnvies1mtftmrqm  
>tr|E5RBA1|E5RBA1\_STAAG  
makeiaks11dieavt1spnd1ytwssgikspiycdnrv1t1gyp1lrgairdgl1inlikehfpevevisgtatagiphaa  
fiaek1k1lpmnyvrssnks  
hgkqnqiegaksegkvvvied1istggssvtavea1kqagaev1gvvaif1tyglkkad1tfsniq1lpfy1tsdynelie  
vaenegkissediqt1lvev  
rdn1a  
>tr|E5RBA4|E5RBA4\_STAAG  
mrs1krsiv1f1nnvss1fk1qi1fv1lkmsetk1mct  
>tr|E5RBB7|E5RBB7\_STAAG  
migki1ineryki1vd1l1gggm1stvy1laed1ilnikvaikai1fipprekeet1krferevh1nssq1shqni1vsmidvdeed  
dcyylvmeyie1gpt1seyi  
eshgp1svd1ainft1nqi1ldgik1hahdmr1ivhrd1ikpqn1ilidsnkt1kifdfgiakal1sets1tqtnhv1lgtvqyfspe  
qakgeatdectdiysigiv  
lyem1vg1eppfn1getavsiaikhiqds1vpnv1ttdvrkdipqslsnvilratekdkanrykti1qemkdd1sgvlhenrane  
dvyel1dkmkti1avplk1ked  
1akhi1sehksnqpk1rettqvpi1vngt1ahhq1fqk1peg1tvyepkpkkk1strkiv1l1s1l1f1s1l1mia1lvs1fvamam1fgnkye  
etp1dvigksv1keaeqi1fnk  
nn1k1gk1isrsysdkypenei1ikt1pnt1gervergdsvdv1iskgpek1vkm1pnvig1pkeea1qk1ks1glkdv1tiekvy  
nnqap1kgyi1anqsv1tante  
iaihdsnik1lyes1gik1qv1yed1fehks1fsk1akaleekg1fkves1keey1sddi1degdvis1qspk1gsv1deg1stis1fvvsk  
gkksd1ssdv1k1tttes1vdvp  
ytgkndksqkvkvyi1kdk1ndg1stekgs1fdits1dqridi1pl1riekg1ktasyi1vkvdg1ktvae1kevsy1ddi  
>tr|E5RBC8|E5RBC8\_STAAG  
m1ksa1vtg1asrg1grs1ial1q1laeegyn1avny1agskekaeavveeikakgvds1fai1anvadadev1kamikevvs1qf1gs  
1dvl1vnnagi1trdn1l1mrm  
keqewddv1dtn1kgv1fnc1iqkatp1qm1rqrsgai1in1ssv1gav1gnpp1gany1vatkagvig1tksaare1lasrgitvna  
vapgf1ivsd1mtda1s1delk  
eqm1tqi1plarf1gq1dtdiantvaf1lasdkakyit1gqti1hvnggmym

Tsompanidou\_et\_al\_Supplemental\_FASTA\_File

>tr|E5RBE3|E5RBE3\_STAAG  
msvfidkntkvmvggitgsta1fhtkqmdygtkivagvtpgkqvgvvegvpvntveeaknetgatvsviyvpapfaad  
sileaadad1dmviciteh  
ipvlmdvkvkrylqgrktr1vgpncpgvitadeckigimpgyihkkghvgvsrsgt1tyeavhqlteegigqttavgig  
gdpvngtnfidv1kafned  
detkavvmigeiggtaeeeaewikanmtkpvvgfiggqtappgkrmghagaiisggkgtaeekikt1nscgvktaatps  
eigstlieaakeagiyes1  
1tvnk  
>tr|E5RBE5|E5RBE5\_STAAG  
mkfstlseeftnytkkhfkhytqsie1lynrnkinheahivgvkndkneviaac11tear1fkfykyfyshrgp1ldyf  
dak1vcyffkelskfiykn  
rgvfi1vdp1lien1rdangriiknynnsivvkm1gkigy1hqgyttgysnksqirwisv1d1kdkdenq1lkemeyqtr  
rnikktieigvkved1sie  
etnrfyk1fgmaeekhgfhfmedyfkrmqei ydkkam1kiac1n1neyqdk1kiq11kienemtvnra1nenpnskkn  
ksk1nq1nmq1ssinris  
ktee1iledgpv1d1aaal1fictddevy1ssgsnpkynqymgayh1qwhmiyakshninrynfygitgvfsneaddfg  
vqqfkkqfnahvee1igdf  
ikpvrp1lykfak1iykv  
>tr|E5RBE6|E5RBE6\_STAAG  
mhh1avvgardstsyttqqs1ef11sndkskyl1tivsg1aagadamahqialkyn1ptiav1afghqthypkst1alrnki  
eekgl1viseypphtpiaky  
rfpernr1isgl1skgv1iteakeqsgsh1tidfa1eqnrnvyl1pgsmfnpmtkgn11riqegakv1nand1fedyyi  
>tr|E5RBF3|E5RBF3\_STAAG  
mavismkq1leagvfhghqtrrnwpmkky1fterngiyi1d1qktvkkvdeayn1fkqvsedggq1fvgtkkqaqesv  
kseaeragqfyinqrw1gg  
11tnyktiskrikri1seiekmeedg1fev1pkkevve1kkeydr1ikf1ggi1rdmksmpqa1fvvdprkernia1eark1  
nipivgi1vdtncdpdeidy  
vipandda1ravk11takmada1legqqgvsneevaaeqnid1dekekseeteete  
>tr|E5RBF6|E5RBF6\_STAAG  
msdi1netksrmqksies1srelanisagrans11ngvtvdyggaptvqq1lasinvpear11vispydktsvadi1eka  
iaan1gvnptsngeviri  
avpa1teerrkervkdvkki1geakvsrni1rrdmndq1lkdekngd1tedel1rsgtedvqkatdnsikeidqmiadkek  
dimsv  
>tr|E5RBF9|E5RBF9\_STAAG  
msylvti1afi1ivfgv1vtvheyghmffakragimcpefaigmgpk1fsfrknetlytir11pvgygyvmagdg1leppv  
epgmnvkik1neeneithi  
i1ddhhkfqqiea1evkkcdfkdd1fiegi1taydnerhhfk1arksffvengs1vqiaprdrqfahkkpwpkfl1tfagp  
1fnfi1alv1figlayyqg  
tptstveqvadkypaqgag1qkgdkivqigkykisefddvdka1dkvkdnkttvkferdgktsveltpkkterk1tkvs  
setkyv1gfgpaseht1fk  
pi1vygfes1fkgst1iftavvgm1asiftggfsfdm1ngpvgiyh1nvds1vkagi1s1ligyta11svn1gimn1lipa1  
dggri1lfviyea1frkpv1  
kkaetti1aigai1fmvimi1vtwndi1riryf1  
>tr|E5RBG5|E5RBG5\_STAAG  
mrk1tkmsam1lasg11tgcggnkg1leekkenq1tyttvkdigdmnphvyggsmsaesmiyep1vrntkdgikp1lak  
kwdvsedgktytfh1rddv  
kfhdt1fdadavkkn1davqqnkk1hsw1kist1idnvkvkdkytve1n1keayqpa1aelamprpyvfvspkdfkngt  
tkdgvk1fdgtgpfk1geh  
kkdesadfnkndqywgek1sk1nkqvakvmpagetaf1smkkgetnfaftddrgtds1dkds1kq1kdtgdyqvkrsqpmn  
tkm1lvnsgkkdnavsdt  
vrqai1ghmvrndki1akei1dgqekpatq1faknvt1d1fndmptkryd1lkaes11deagwkkgkdsdvrqkdgn1emam  
yydkgsssqkeaqe1lqae  
fkkmgi1k1ningetsdkiaer1rtsgdyd1mfntwg11lydpqstiaafkakngyesatsgienkdkiy1nsiddafkiqng  
kersdaykni1kqiddegi  
fipi1shsmtv1vapkd1ekvsftqsqye1lpfnemqyk  
>tr|E5RBI2|E5RBI2\_STAAG  
mnk1tkyq1nsdniks1nseetsa1ssisye1enannd1nnsa1iq1tqie1ilksqnsf1pkn1sy1ksytdp1ktgtttsaf1n  
kdtgkv1t1gmtgt1nvhkda  
i1kqtfgvpsyqgy1daset1kdigadvnig1hsvtdk1dph1ykn1tqdfi1kn1kkdy1didi1tghs1ggrd1amilgmsndi  
khivvynpap1aikdvsg1  
yadqe1lkk1iekydghiv1rfvsdede1dagvrnh1lyetageki1v1kngeghams1gilmsrtqai1ilae1nkvkgyqden  
nka1ksvrkqtrhr1lhkve  
t1ranwi1q1ttggs1sssqqq1leal1ta1tiaeg1nq1lvneesq1h1kkmyhamahkfgdnwkk1aqevg1neigek1tseevi  
de1rk1ggayesk1letd1pkr  
ki1ddk1kk1ndvykncngyi1akikqsiea1ivsndq1masq1dgmm  
>tr|E5RBI5|E5RBI5\_STAAG  
mi1hsrk1r1w1y1lv1lavfi1gacgm1kkeesskdkqikenfnk1t1slyptk1nedfydkegfrdeefekgdkgtwi1hskm  
tietngknmesrg1lvlyvd

Tsompanidou\_et\_al\_Supplemental\_FASTA\_File

rnrtrttkgefivrelwedkkgysrskekeypvkmehnkiiptkpiaddklrkeiedfkffvqygdfkdindykdgdisy  
pnvpsysakyqlsnndynv  
kqlrkrydiptkkapkllkgdglkgssighknlefiienkeenyftdsinfkpte  
>tr|E5RBI8|E5RBI8\_STAAG  
mdkelwierandslvkhfyeeqqsdieqregfesklftfgtagirgkfglgegrlnkftieklaalglarylnaqtnsptivi  
hydirhlstefaqiianvl  
anhqitvylpdykttpelsfavrnlnntagimitashnpkdyngikvygsdgaqlstdaselasryieevgdplqidip  
iskqntsyikpfpksvtd  
ymkhiqnmi gyipksdlqvfts lhgtsvpivpe llslnfnqfnlvdaqckpdpnfssvqsanpedhhaafdqavelank  
shadllistdpdadr lgia  
erdahghityfngnqigallnyriqqtsqlrhr lmiqsivssel tkslarynnvkykevltgfkfiaqeirqlddhqnm  
ifafeesygf lsepfvrk  
davqivpllikyaselklygk lkdleiqyqtvgrhedtlfshtleglegkkkiesimthfrsnppqeiqglkvkaied  
yltseyvhlkdtttsqins  
sksnvirvlfdegfialrpsgtepki lyvslkcpdffdvaqkinamifs  
>tr|E5RBJ0|E5RBJ0\_STAAG  
mlylevlknrnftyllignflrrscfv lfs lqiifwtveltnqsslklsmmvmsqtlpfiifgiffgaysdkhkkkily  
lsdlilsliiiiip lla it  
snlnyltlltistaitiincytdpafra ilpeiideeh latsnalidslrgsniilpaligvivilvgnvgvfficsil  
lflgfifnallkytnnmi  
drhskedfsetweflkskeipfi i i i i qfacilintglwrvalplfisnilkegvgyglatsclgiasllmslinglls  
ekrlifkfsigvlvwgigl  
siinvfsvailiyigatlvg lqgsieg ltrsvaiqiktphlmgkvfsisstsnyaadtls  
>tr|E5RBJ1|E5RBJ1\_STAAG  
mrddkkgpvkrvdf lsnklnkysirkftvgtasilgslmylgtqqeaaennienpttlkdnvqskevkieevtnkdt  
apggveaksevtsnkdtie  
heasvkaediskkedtpkevanvaevqpkssvthnaepkvrkarsvdeg sfditrdsknvvestpitiqqkehfe gygs  
vdiqkkptdlgvsevrfn  
vgnengligalqlknkidfskdfnfkvr vannhsnttgadwgwflfskgnaeeyl tnggilgdkg lvnsggfkid tgy  
iytssmdktekqagqgyrg  
yga fvkndssgnsqmgenidksktnflnyadn stntsdgkfhgqr lndviltvystgkmaeyagktwetsitdlgl  
knqaynflitssqrwglng  
ginangwmrtdlkgseftftpeapktitelekkveeipfkkerkfnpdlapgtekv tregqkgektittptlknpl tgei  
iskgeskeetkdpinel t  
eygpetiapghrdefdpklptgekeevpgkpgi knpetgdvvrppvdsvtkygpvkgdsivekeeipfeker kfnpdlap  
gtekv tregqkgektittpt  
tlknpl tgeiiskgeskeetkdpvneltefggekippghkdi fdpnlptdqtekvpgkpgi knpdtgkvieepvddvik  
hpkgtgtpetktveipfet  
krefnpklqpgeervkqegqpgsktittptvnl tgekvgegqpteeitkqpvd kivefggekpkdpkpenpekpsrp  
thpsgpvnppngl skdra  
kpnpgv hsmkndkvkkskiakesvanqekkraelpktglestqkglifssiigiaglml larrkn  
>tr|E5RBJ4|E5RBJ4\_STAAG  
mpkemlpidkptiqyiveaaragiediiivtgrh kraiedhfsdqelemlkekgksellekvqstelani fyvrq  
kekg lghaissarqfign  
epfavllgddivesevpavkqlidvyeetghsvigvqevpeadthrygiidpl tkngrqyevkkfvekpaqgtapsn lai  
mgryvltpeifdy lktqke  
gagneiqltdaiermndnqvaydfegerydvgek lgvkttieyalkddsmreeltrfikalg l  
>tr|E5RBJ5|E5RBJ5\_STAAG  
mivvgmgqekeaaaseqnntveesgssateskasetqtttnvntidetqsysatsteqpskstqvtteeapttvqapk  
vetemksqedlpsekvadk  
ettgtqvdi aqpsnvsei kprmkrsadv tavsekevaeekatgt dvtnkvevtessleg hnkdsni vnphnaqrvtlky  
kwkfggikagdyfdftls  
dnvethgistlrvpei ksstedkvmangqvinerti rytftdyinnkkl taelnl n lfidpttvtkqgsqkvevt lgg  
nkvskefdiky ldgvkdrn  
gvtvngridtl nkeegkfshfayvkpnnqsltsvtvtgqvts gykqsannptvkvykhigsdelaesvyak lddtskfed  
vteknlsytsnggytln l  
gdlnskdyvikiyegedydnakdl nfrthlsgyhkypppypppyppvql twngvafysnnakgdgkdkpndpiiekse  
pidldikseppvekhe l t g  
tieesndskpidfeyhtavegaeghaegiieteedsihvdfesthenskhhadvveyeedtnpgggqvttesn lvefde  
estkgivtgavs dhtved  
tkeyttesnlie l vde lpeehgqaqgpi eeitennhishsg lgtenghnygvideieenshvdikselgyeggqnsn  
qsfeedteedkpkyeagg n  
ivdidfsvpqi hgqnnqns feedteedkpkyeaggni ididfsvpqi hgfnkneiieedtnkdkpnyqfgghnsvd  
feedtlpkvsgqnegqati  
eedtptptptpevpsepptptptpevpsepgeptppkpevpsepptpvptpevpsepqkpvppakeepkpkpskpv eq  
gkvvtpvieinekvkavap  
tkqkqskksel petggestnkgl fgg lfsilglvl lrrnkknka  
>tr|E5RBJ6|E5RBJ6\_STAAG

Tsompanidou\_et\_al\_Supplemental\_FASTA\_File

mi vvgmgqdkeaaaseqktttveengnsatdnktsetqttatvnhi eetqsynatvteqpsnatqvtteeapkavqapq  
taqpanvetvkeeeekpqvk  
ettqpqdnsgnrqvdltpkkvtqnqgtetqvevaqprtaseskprvtrsadvaeakeasdvsevkgt dvtskvtvesgs  
ieapqgnkvephagqrvtl  
kyklkfadglkrgdyfdftl snnvntygvstarkvpeikngsvvmatgeilngnriyrtftneiehkvevtanleinlfi  
dpktvqsngqekitsklng  
eetektipvynpgvsnsytnvngsietfnkesnkfthiayikpmngnqsnsvtvtgtl tegsnlaggqptvkvyeylgk  
kdelpqsvyantsdtnkfk  
dvtkemngklsvqdngsyslnldkl dktyvihtygeylqgsdqvnrte lygyperayksyyvygyr ltwdnglvlysn  
kadngkngqi iqndnfey  
kedtakgtmsggydakqieteenqdnptldidyhtaidgeggvydgyietieetdssaididyhtavdseaghvgyte  
sseenspidfeesthensk  
hhadvveyeedtnpgggqvttenslvefdeestkgivtgavs dhtti edtkeyttesnlielvdelp eehgqaagpieei  
tennhhi shsglgtenghg  
nygvieieenshvdikselgyeggqnsngqsfeedteedkpkyeqgnivdidfsvpqihgqkngdqsfeedtekdkp  
kyehggnii didfsvpqi  
hgfnkhneiieedtnkdkpnyqfgghnsvdfeedtlpkvsgqnegqqtieedtptptptpevpsepetpmpptpevpse  
petptptptpevpsepetpt  
pptpevpsepetptptpevpsepetptptptpevpsepetptptptpevpsepetptptptpevpsepetpmpptpevpse  
aqskkselpetggestnk  
gm lfgglfsilgla lrrnkknka  
>tr|E5RBJ9|E5RBJ9\_STAAG  
mkymigvdi gttstksvlydengafimkhqigydlhtpnvdvseenpdel fdavlm tikyimreskvnqddikfvsf saq  
mhsliamdqqhqr ltnnit  
wadnraakyatvinevhdgnaiyqrtgtpihpmsplvki fwmkhewqdvfqrtakfadiktyifyhlf dtyiidysmasa  
tgmfnletldwdvgalell  
giskemfpe l vpttyvmkgmkeryatlmgl nedtpfvigasdgvl snlgvnsvgkgevavtigts gairtvidkprtdyk  
grifcyv l tedhyviggpv  
nnggv l rwlrdellasevetakrlgvdpdv l tqiakrvkpgadg l i fhyplagerap l wnanargsffgl t lshkkeh  
miraalegv l nlytvyla  
lievmnetpnmikatggfaksevwrqmsdi fdte l vvpesyessclgacvlg l kavgdiedfsivssmvgatnnhtpfe  
envavyqelvsifinlrs  
l tenyeqi adfqrqhmaentq  
>tr|E5RBK4|E5RBK4\_STAAG  
mm lgt l taktp l vfgmt l l i vtvipfyi ftalki agpsstffivtfs l pinl piapeeal yrgfailvggilatmmvlit  
ivf sknkaeeqai qndfkl  
isk l lhtyndkaaf l qvaktavdsfkasdk l l itstssndk l srrfqk l l l l lhtsaqqiysellelnakqirplp delie  
mmdhii aql d n sden vryw  
rkev tvteefqn l fnhi l kidemvhaneariayeadmrkplyskriyqnl t l dsivfrnt l r ytaim miaifialmfdfe  
kaywip l sahtillgtsti  
haiergmarg lgt l gvl lsvillfsiptpvavilmgiaalftealvganyaiavvfitiqvil mnglasqnl tiniaf  
prvidvaig l viaig lfv  
l qrtasv l l pnvmaevvrkeatl fhy l fsenqykdnyvqkntamnlsvk l nmtqvynaangel fsdktliqnyyps l f  
al e eisfml nramaned l  
tineqlmgeylatfeniakhle l nteleiki l pdlpqnyiqsammniqhngfrerdknv  
>tr|E5RBL7|E5RBL7\_STAAG  
mtkimffgtrdyekema l nwgkknnevttskellssatvdqlkdydgvttmqfgklendvypklesygikqiaqrtagf  
dmydl d l akknivisnvp  
syspetiaeysvsialqlvrrfpdierrvqthdftwqaeimskpvknmtvaiigtgrigaatakiyagfgatitaydayp  
nkd l d f l tykdsvkeaid  
adiis l hvpankesyhlfdkamfdhvkkga ilvnaargavintpdliaavndgt l l gaaidtyeneaayftndwtkn did  
dkt l l l e l i eherilvtphi  
affsdeavqnlvegg l naal svintgtcetr l n  
>tr|E5RBL8|E5RBL8\_STAAG  
mvkaiavdmdgtfl dskktydkprfeaf tel rnr dit fiaasgnqyak lksifgdrdmyfisengaviykgnelynyks  
fnrqvfqgvvdy l nmnqsi  
dq l v i c g l ksay i l khtseafkedtrfyqh l keids l q l peddyvkiafninrethpnvdeevatqfsndiklvssgh  
dsidiimpnmtkggal krl  
l dkwemspselmafgdannkdmlafakhsyvmenshdeelfniasavapsndkqgv l tieqev l nk  
>tr|E5RBM5|E5RBM5\_STAAG  
mdil l gvgt l v l v l v i m t l f l kyapygkq l qalsgaacatfl p q a f l syaigvfdikfl q digdlags l sgiavgilt  
c l n l g v a p v f a v i g l v l h  
d f k l l p a f i a a y c v a f l i k w i e k k v e g l d l i v v i l f a p a i a f g l a s i i t p g v l a t l k q i g s a v t a v g d n n p y a l a v i l g  
l v i p v t g m t p l s s m v l t s l  
l g l t g v p m a i g a l t c t g s s f v n l i l f r k l n i g g p s k a f a v c i e p l t q i d l i a q y p v q l y g t n a l i g v n a c i v t f s g l v i  
g v k g m a t p i a g a i v l f g f n  
navtsivtiatviivsv l v l a y i i g t l i n k f n l m n i n f k m p s k k n h i k e s v  
>tr|E5RBM6|E5RBM6\_STAAG

Tsompanidou\_et\_al\_Supplemental\_FASTA\_File

mqlshsvkvaisiylalifitftsylviilytsmtghdvshfvldsqqshhgs1tqkhlslpeisfk  
>tr|E5RBM7|E5RBM7\_STAAG  
mannhsalr1kgiilaivgac1wlggtvsdf1fkykninvdwyvtar1vsvgvfl1imykmmpkrsifsvfqdrmlg  
kllifsilgmlvvqayma  
sintgnaaiat1lqyiapvyiiwfvirgvak1t1fdv1aiimt1lgtf1lltngsfsn1vvnpsal1fwgilagvalafy  
tiypsd1lnrfgsilivgw  
amlisgvamnlrhpiwhiditkwdisiilflifgiiggtalafyffids1qyisakett1fgtvepvvaviass1wlhva  
fkpfqivgijilimilil11  
s1krqpealde  
>tr|E5RBM8|E5RBM8\_STAAG  
mrkkwst1afgflvaayahiri1kekrsvksym1eggir1srakrrfmykeeamka1ekmapqtageyegtnyqfkmptv  
dkhygstvynvndkqdkhq  
rvvlyahggawfqdplkihfevide1aet1nakvimpvypki1phqdyqatyv1feklyhd1lnqvadskqivvmgdsagg  
qialsfag1l1kekhivqpg  
hiv1ispv1datmqhpeipdy1kkdpmvgvdgsvflaeqwagdtpl1dnykvsping1d1d1grit1tvgtkevlypdal1  
1sq11sakgiehdfipgyy  
qfhiypvfpiperrrflyqvknii1  
>tr|E5RBN0|E5RBN0\_STAAG  
mttegl1vaekeievngydidamgvvsni1vyirwfe1rtafinqhmnystminqgis1ilmkteaeykvpvtihdkpvg  
riylvkaskmkwvfqfeiv  
sahcvh1cigtqtggfyr1sdkki1tvpqvfdilatk  
>tr|E5RBP0|E5RBP0\_STAAG  
meyksy1dpsvgr1el1sdgvs1tav1fenqqgdgtreents1aifreatqwl1dayfkgdnpeitiplkptgshfqqcw  
nelr1qvpygt1t1tygai1k  
kvgkv1dkpkmsaqavggavgsnpl1siivpchr1vvgktgs1tgfggtinnkik1l1elenidmsklyipkhstkp  
>tr|E5RBP6|E5RBP6\_STAAG  
mskqri1yeyake1n1kskei1idelksmni1evsnhmqa1eddqika1dkkf1kkeqkndnkqstqnnhqsnqnqkqgqk  
dnkknqqnknkgnkgnkkn  
nrrnkknknknkpnqpaapkei1pskvtyqegitvgefadk1nvessei1kk1fl1givaninqs1nqetieliaddygv  
eveeev1need1siyfed  
ekddpeai1erpavvtimghvdhgktt1ldsirhtkvtageaggitqhi1gayqiendgkkitf1dtpghaafttmargaq  
vtdit1ilvvaaddgvmpqt  
ieainhakeaevpi1ivavni1dkptsnpdrvmqel1teygl1pedwggeti1fvpl1salsgdgidd1lemigl1vaevqelka  
npknravgtvieael1dksr  
gpsas1lvqngt1lvgdai1vvgntygri1ramvnd1lgriktagpstpveitgindvpqagdrfvv1fsdekqarrigesrh  
essiv1vqqrqesknvs1dn1  
feqmkggemkd1nvi1ikgdvqgsvealaas1mkidveg1vnvri1ihtavgainesdvt1anasngi1igfnvrpdsgakra  
aeaenvdmr1lhrviynvie  
eiesamkg1ldpefee1vqgaevrqt1fkvskvgti1agcyvtegitr1nagvri1rdg1vqyegel1d1lkrfkddakeva  
kgyecgi1tienyndl1kegd  
vieafemveikr  
>tr|E5RBQ6|E5RBQ6\_STAAG  
mkeryye1idervfeqeleng1rl1fi1pkpgf1qktfvtyttqf1gs1dnqf1kpl1gqdf1vtvpdgvah1lehk1fekeeed  
1ftafaednaqanaftsf1d  
rtsyl1fsatdniennikr1l1tmvetpyftketvdkekgi1aeekmyqe1ppgyk1mfnt1lramyqrhpirvdiagsvesi  
ydi1tkdd1ly1cyetfyhps  
nmv1lvvgdvnpeei1cri1vkqhedarnkvnqpkiergl1vdepedvkeafvtesmki1qspr1ml1gfkknpl1qea1pqyvqr  
d1ems1ffe1l1fgeetdfy  
qn1lneg1iddt1fgyqf1vleptysfsivtsateepdk1kk1ll1del1rdkkgn1fqdaef1llkkqf1igefiss1nspeyi  
anqytk1lyfegvs1fdm1d  
ivenit1ldsinetss1ly1n1ldqqvdsr1leikk  
>tr|E5RBS2|E5RBS2\_STAAG  
mfyedakeasrv1leit1tkrdakkenpi1mcgvpyhsadsy1d1lvnngykvai1ceqmedpkqtkgmvrrevvri1vtpgt  
vmeqggvddkqnni1l1sfv  
mqpeia1sycdvstgelkvthfnde1at1l1neittin1pnev1indnis1dn1lkrqin1mvtet1tvret1ssei1ysvnqteh  
k1lmyqatq1l1ldyihhtqk  
rd1shiedv1vqyaa1idymkmdfyakrn1el1tesir1lkskkgt1l1w1mdetktpmgarr1kqw1drpliskeqiear1div  
def1sahf1erdt1l1rtylnq  
vydier1lvgrvsygnv1nard1li1q1khsiseipnikal1nsmnqnt1lvqvnq1lep1dd1ld1ileq1s1veppisvkdggl1f  
kvgfntq1deyleaskngk  
tw1aelqakerq1rtgik1slkisfnkvfgyfieitran1qn1fepse1fgymrkq1t1snaer1fitdel1keked1il1gaedkai  
e1eyq1lfvq1lreevkkyte  
r1lqqqaki1isel1d1qsfae1iaqkynytrpsfsenk1tel1vesrhpvvervm1dyndyvpnnr1ldnetfiy1litgpnmsg  
kstymr1qvai1simaqmg1a  
yvpckeav1lpi1fdqi1ftrigaadd1vsgk1stfmvem1leaqka1ltyateds1li1fdeigr1gtstydg1lalaqami1eyvaet  
shakt1l1fsthyhel1tt1ldq  
a1ps1knvhvaaneykge1l1f1hk1vkd1gavdds1ygi1qvak1lad1l1pekvis1raqvil1sefeasagk1kssin1lkmvenepe  
in1qen1n1sveettdt1lsq

Tsompanidou\_et\_al\_Supplemental\_FASTA\_File

kdfeqasfdlfendqeseielqiknlinsnmpiealvklseiqnqk  
>tr|E5RBS3|E5RBS3\_STAAG  
mgkikelqtslankiaagevverpssvvelenaidagateisievesgvqsirvvdngsgieaedlgvlfhrhatsk  
ldqdedlfhirltgrgea  
lasissvakvtlktctdnangneiyvengeilnhkpakakkgtidiveslfyntparlkyikslytelgkitdivnrmam  
shpdirialisdgktmlst  
ngsgrtnevmaei ygmkvardlvhisgdtsdyhiegvakpehsrsnkhyisifingryiknfmInkailegyhtlltig  
rfpicyiniemdpi lvdvn  
vhptklevr1skeeqlivskiqeafkdrilipknnldyvpkkikyihsnkksnlndktqritkrfhlkkvtv  
shlwqkiktmr  
>tr|E5RBS4|E5RBS4\_STAAG  
maenqndeivikedsynpfvktkselitddessgynntrekdedyfkqqeilqemdqtfdsnedavqnyenkasddy  
ydvndikgtkskdpkrrrip  
ymeivgqvhgtyiiaqnefgmymidqhaaerikyeyfrdkigevtnevqdl lip1t fhfskdeqlvidqyknelqqvgi  
mlehfghdyivssypvwf  
pkdeveei kdmie lileekkvdklredvaimmsckksikanhy1qkhemsdlidqlreaedpftcphgrpiifnsk  
yelek1fkrvm  
>tr|E5RBS6|E5RBS6\_STAAG  
milivlevlimfnyslydtlntllhipyengffimlyd  
>tr|E5RBT4|E5RBT4\_STAAG  
maqqahttknk1ekav1vgvhaqddkqfnfestmeelsslsetcqlvlgqitqnrdrvrkyvvgkkieeiqafief  
kdidvvi tndelttagks  
lnealgvkiidrtq1ileifalrarskegk1qvelaqldyl1prlqghgks1sr1gggigtrgpgetklemdrrhirtrm  
neikhqlrtveehreryrn  
krnqnqvfvqvalvgytnagksswfnv1aneetyekdq1fat1dpktrqiqindgfnliisdtvgfiqk1ptt1iaafkst  
leakgad1lvhvvdsshp  
eyrtqydtvnd1kqldmshisqivi fnkkd1cdhasnrpasd1pnvfvsckndgk1lvkt1fideikrqltyydetia  
tnnadrlyflkqhtlvte1  
kydeienvyrikgfkk  
>tr|E5RBT8|E5RBT8\_STAAG  
mnqfkeiyntiek1lndksisnyrinqdtgvsyggiselrsgkrkvnn1tletaeklynyqkqleimiey  
>tr|E5RBU3|E5RBU3\_STAAG  
mlfslfvekeesqkly1kelgeddeykyvakidsktsklchslngkifivkdmipgvnappmhpwcrsttvphvgw  
>tr|E5RBU8|E5RBU8\_STAAG  
mrytfsnd1gt1ftiilaigfiinlv1afiiiflernrrtasstwaw1fv1fv1pligfily1ffgrtvsark1nkngn  
v1tdfdg1lkqgiesfdkq  
nygtndkqvqkhhdlvrmlmdqdgfltennkvdhfidgndlydqvlkdiknakeyihleyytfaldglgkri1haleek  
1kqglvki1yddvgsknv  
kmanfdhfs1ggeveaffask1p1l1nfrmnrrnrhrkiividgq1gyvggfnigdeylg1gk1gywrwth1riqqdavda  
1q1rfildwnsqahrp1qfe  
ydvkyf1pkngp1gnspi1qiaasgpasdwhqieygytkmimsaksvylqspyfipdnsyinaikiaaksgvdvhlmpc  
kpdhplvywatfsnasd1l  
ssgkiytyengfihskmcliddeivsvgtanmdfrsfe1nfevna1fyden1akd1rvayehditkskq1tkesyarnp  
1svkfkes1aklvspi1  
>tr|E5RBV1|E5RBV1\_STAAG  
m1dnfkkmknrqyqkeiaeknrhint1iaeqrhrigqdlhdt1ghvfas1slkselayklidtdvekvkaellaink1s  
res1nkvreiiddvklpsf  
ieeidsirkv1kdadidftfenkelaqv1sptkqsm1vmitreainnvikhanaskvhgk1ktvnnhkl1lmieddgk1  
dsdcevksisqrvqhlngt  
1avdstngtki1ieistggia  
>tr|E5RBX0|E5RBX0\_STAAG  
mmfynkyknvsty1iiflvssaafai1l1sanvsahseqvyemtdhqiknntinkayehkdptngeqrdgkvfal1n  
>tr|E5RBX7|E5RBX7\_STAAG  
mgiv1aiwsykq1sqsh1dsgfi1ffivylcisyfnndkhdknkr  
>tr|E5RBY6|E5RBY6\_STAAG  
mtmmdm1fkychkimkkhsksfyaf1l1pedqrkavwaiyavcrkiddsidvygdiq1flnqikediqsiekypye1hhf  
qsdrrimma1qhvaqhkni  
afqs1fyn1idtvkydqhftmfetdael1fgycygvagtvgel1tpil1sdhethqtydvarr1ges1qlinil1rdvgedfdn  
ervyfskq1rlkqyevdiae  
vyqngvnnhyd1weyyadiaekdfqdvmdqikvfsieaqpielaariyieildevrqanyt1hervfvdkrkkak1fh  
e1nskyhri  
>tr|E5RBZ2|E5RBZ2\_STAAG  
maini1eynr1sykeeliefi1siqnefnikidrdqdp1leniehny1nsggqfw1ainnhqnivgtig1irl1dnmsa1  
kkmfvdkgyrn1kigk1l  
dkvimtckeqnidgiylgtidkfi1saqyfysnngfreikrgd1pssfpl1dvdnrfy1rn1kd  
>tr|E5RBZ4|E5RBZ4\_STAAG  
mkk1ti1mass1ava1gvtgyaagtghqahaevnvdqah1vd1ahnhqd1lnaapikd1gaydihfvkd1gfqyn1ftsng1ttw  
swsyeaangqtagf1snvag

Tsompanidou\_et\_al\_Supplemental\_FASTA\_File

adyttsynqgsdvqsvsynaqsnsnveavsaptyhnyststtssvrlnsgntagatgssaaqimaqrtgvsastwaa  
iaresngqvnaynpsgasg  
lfqtmqwgptntvdqqinaavkaykaqglgawgf  
>tr|E5RBZ6|E5RBZ6\_STAAG  
mknsisqsefldkeignfsnllqytfilssflksintieerhsnayqkgtlfvrsvstltyhqhn  
>tr|E5RBZ8|E5RBZ8\_STAAG  
msetdepgqferthnlninqsslgvvtyitnklkstkqhiiaargkkridyrlnsynfyttydnveikkidceytyam  
pialirhtmsfdnahffa  
qlrhpvl  
>tr|E5RC00|E5RC00\_STAAG  
miqsmwfnlhvqdleksaqfykalgfkirnpqmldkmvgiqigqttvilienkhfqnsqqsln tepnev mislgvntn  
eevdqlvkvkeaggavvq  
eptvsqgfygamfkldghhfnflvc  
>tr|E5RC07|E5RC07\_STAAG  
mkiiviiggflggkttvlnhllaeslkeslkpavimnefgkmsvdgalvsediplseltegciccamkadvseqlhqlyl  
keqpddivfiecsgiaepvs  
vldacltpilapfttithmigvidasmykhiksfpkdiqglfyeqlaycsvgfvnkidsadvettskllkdlevinpead  
iqvgmhgsvtlpi svrqmt  
atsdnkheslhktinhqfvqspvtctkaefikrlaclpshiyrlkgfntfedtthtyliqftqgqyeltpvafskkvp  
lviqkgiskedyqcleq  
>tr|E5RC11|E5RC11\_STAAG  
msnklgdinkmitakhkqmdlydekrevkalidesdelnhsieqlqyhlgdryhssnmasrmeqfrdefhfakrrstea  
lyeqqqiqhgrkaeeem  
idlemrrnveietvtkeenkwkq  
>tr|E5RC12|E5RC12\_STAAG  
mstvqsdifktnsassisavetcnvskpdkdesttvsgnnaahsviddlisknqsvaeairnasdsiqkvgeefnqt  
dvmigneigkn  
>tr|E5RC18|E5RC18\_STAAG  
mtidrriksqvamrnafielhghqleeitvqqiadladvnrstfythydykdllekledqqleeirdfihdeklnga  
vklstdnihqimtvlidmi  
ekdiafyqlmfrmgkdsniheklydlmchlqryknendqingipfsyfmsyvsagalslirhwvedpnridkvdlmhf  
ntivnqgpatiikniq  
>tr|E5RC20|E5RC20\_STAAG  
mkkvisl fva ilsvl iftdnanaennpegvnensn lipvrqpdanyppgvsdiarvkkldnlidgtkdpdvikqlkddn  
evpnavkakdskivsdcr  
hllkhpndlidgtkdpvinqlknangtsnnsavnpsikandihtksnkmaqqsihl dsksksvhkqqlkelpktgvn  
nesntaimalfiglllv  
slvtrfiklnshq  
>tr|E5RC29|E5RC29\_STAAG  
mskahqliqedehyfaksgrikyypvlidhgygatlvdiegktyidllssassqnvghaprevteaikaqvdkfihytpa  
ymyheplvr lakk lcelap  
gdfekrvtfgl tgsdandgiikfaraytgrpyiisftnayhgstfgslmsaislnmrkhygp llnfyhipfpdkyrgm  
yeqqansveeylaplpek  
fakyvpadevacivietiqgdggllepvpgyfealekicrehgiliavddiqqgfgrtgtwssvshfnftpdlitfgksl  
aggmpmsaivgrkeimnc  
eapahlftganpvsceaalat iqmiedqslqasaekgeyvkrmdqvwskynsvgdvrgkgl sigidivsdkklktrd  
asaalkicnycfehgvvii  
avagnvlrfqpplvityeqldtalntiedaltaleagnldqydisggw  
>tr|E5RC34|E5RC34\_STAAG  
mniydeyrsylieelddcltiqknndtayydvleaindlnsdslcvlnhlyinegqeetfeqkflqrnkhlknvdgfkal  
rflrpntagrhyyiitlwe  
nrqafyhwqnsaeykthkhrgtsgadvkiinrelsynirieladm  
>tr|E5RC44|E5RC44\_STAAG  
mnmplmidltnknvvi vggvvasrraqtlnqyveymtvisptiteklnmvdngvviwkekefepsdivdaylviaatn  
eprvneavkqalpehalfn  
nvgdasngnvfpsalhrdkltisvstdgaspltksimaealealypssysyidflytcrqkikvlditynekqqlsq  
ivsqeylnhdkqaqflaw  
dvr  
>tr|E5RC45|E5RC45\_STAAG  
mklntsnspftekqvteinnllqtltesqqwls gflansndttsdsnqqqletevwqqsqiseeqatsttymlnkep  
hieanqrhvtvlygsesg  
amrlaeifserlsdighqvvlmsmdeydttniaqledlfiitsthegeppdnawdffeflednapnl nhvrysvlalg  
dqtyeffcagkdvdalle  
nlgaeickrvdcdidyedaekwmadiinmidttsegiqsesvisesiksakekkyskl npyqaevlaninlngtdsnk  
etrhiefllddfesesyepg  
dcivalpqn dpelvelkislmgwdpqspvpindr gdtvpivealtshfeftkltlplknadiyfdneelseriqdeswa  
reyvinrdfidliidftpti  
elqpenmyqilrklppreysi sssfmatpdevhitvgtvryqahgrerkgvsvhfaerikpgdivpiylkknpnfkfpm



Tsompanidou\_et\_al\_Supplemental\_FASTA\_File

kqdi pvimigpgtgiapfr  
aylqereelgmtgkwlffgdqhrssdflyeeieewlengnltrvdlafsrdaqehkeyvqhrimeeserfnewieqgaa  
iyicgdekcmakdvhqaik  
dvlvkerhisqeeaelllrqmkqqqryqrdvy  
>tr|E5RC64|E5RC64\_STAAG  
mseiiqd1s1edvlgdrfgryskyiiqeralpdvrdglkpvqrrilyamyssgnthdknfrksaktvgdvigqyhphgdy  
svyeamvr1sqdwklrhv1  
iemhgnngsidndppaamryteak1s1lae1lrdinketvsfipnyddttlepmvlpsrfpnllvngstgisagyatdi  
pph1aeviqat1kyidnp  
ditvnq1mkyikgpdfptggiqgidgikkayesgkgrivrskveet1rngrkqliiteipyevnksslvkridelra  
dkkvdgivevrddtrtg1  
riaie1kkdvnsesiknylyknsdlqisynfnmvaisdgrpk1mgirqiidsylnhqievvanrtkfeldnaekrmhive  
glikalsildkvielriss  
knkrdaken1ievfefteeqaeavmlqlyrlntdivalegehkelealikqlrhildnhdallnvikeelneikkkfk  
ser1s1ieaeieeikidke  
vmvpseevilsmtrhgyikrtsirsfnasgvedig1kdgds1lkhqevntqdtvlvftnkgrylfipvhkladirwkelg  
qhvsiqvpeeedevvinvf  
nekdfntdafyvfatqngmikstvp1fktrfnkpliatkvkenddlisvmrfekdq1itvitnkgs1tyntselst  
glraagvksin1kaedfvv  
mtegsendti1matrgs1krisfki1qvakraqgit1lkelkknphrivaahvvtgehsqytlksksneehglindi  
hkseqytngsfivtdddf  
evidmyis  
>tr|E5RC74|E5RC74\_STAAG  
mepilemikt1tginspsgdteeaiqfvekyakdlgyqttltnkgallitvpgkndevqrcitahvdt1gamvkeikedg  
rlaie1iggftynaiegey  
cqiktdagqiygttic1hetsvhvyrnnheiprdqkhmeiridevtseedtks1gisvgdfvsfdprtvtitssgfiksr  
h1ddkasvami1q1lkk1k  
eeqi1lphttqfyisneeigygnasidskikeyialdmgalgdgqasdeytsicakdasgpyhkq1kshlvnlckin  
nipykvdiypygsdasaa  
11lvrisdmvylalalnh1mqwnehil1lkrqrnyymhiayhq1skq1v1tnvnd1cnimnyknn  
>tr|E5RC88|E5RC88\_STAAG  
ms1idiqnl1tikntcekylikgid1kifsqqinaligesgagksliakalley1pfd1sctydsyqfdgenisr1sqyyg  
htigyisqnyaesfndhtk  
lgkq1taiyrkhyksskeea1skidka1swvn1qskdi1nkysf1sggq1ervyiasv1mlepklia1depvast1da1n  
gnqvm1l1qhiv1ehggt1  
fiithn1shv1kycqiyv1kegqi1ernin1hfkyeh1hpyter1ikyrtq1krdyd  
>tr|E5RC90|E5RC90\_STAAG  
mfiiksm1yr1mqmi1v1fvist1t1filmk1spgnpvdki1h1dvaqv1steqinatkd1gl1nds11vqwwhwmh11hf  
n1gksfeskepvtq1lfny  
apit11isfst1lvslcisip1g1iaakrfhkwt1dkvirvist1sis1paffigi11lfivtn1mnidsv1lsqfilpvi  
t1s1gm1cayii1r1lvrn1l  
m1lqsnivqasr1rgm1neryi1ihd11kpti1piip11gis1gsl1ggtv1vien1fdip1gigy11lms1iksrdyp1viqgc  
v1figffv1iint1iad1lt  
11ldpkqr1q1gnpknktntpl1isessdrha  
>tr|E5RC98|E5RC98\_STAAG  
msvrginkv1kre1gfv1maln1rki1aaqravhyki1hik1kanfhqi1inrnq1fyia  
>tr|E5RCA2|E5RCA2\_STAAG  
mtklavvgat1vgtkm1et1nrkn1pfde1v1fssarsagqev1fektey1tvqel1tdaraseh1fdyv1msaggg1tsehf  
ap1fekagai1vidnssqwr  
maedi1d1ivpevnept1ftrg1ianpnc1stiqsvp1kv1qday1lkrvay1t1yqav1sgsm1kgk1d1aegvngkapeayp  
hpiy1nnv1phidv1flengy  
tkeeq1midetrki1napd1lkv1tatcarvpv1qdshsveidvt1dkettaedika1fdqddrv1v1dnpenneyp1mainst  
nkdev1fvgr1rrds1lent  
fhv1wctsdn11kgaa1navq1leqvmr1kgan  
>tr|E5RCA4|E5RCA4\_STAAG  
mk1ill1igygam1qrvar1aekgheiv1gvi1entpkatt1pyqyqhi1advkdadva1dfsn1n11fp11deefh1p1lvvat  
tgeke1k1lnk1de1sqnmp  
v1ffsanmsy1gvhaltki1laaav1p1ddfdie1l1teahh1kkvdaps1gt1leklydviv1skenvtpvydrhelnekrqpqi  
gihs1irggt1vgehev1lfa  
gtdeti1qi1thraqskdi1fangai1qaaer1vnkpn1gfy1tfdn1  
>tr|E5RCB1|E5RCB1\_STAAG  
mwtv1tki1radyegw1l1fsdwp1enivekyqy1qdf1ddmfkhyq1q1lnqckv1qfdnyvtgkyni1yafynn1cdmnyced1  
qi1fysfi1v1qnnevy1k1p  
iid  
>tr|E5RCC9|E5RCC9\_STAAG  
mfkk1l1fgk1kevqkdi1aiyap1tgeyvki1edipdpv1faqmm1gegfgin1ptegev1vspiagr1v1dnv1fptkha1g1lkadng  
1e1lvhig1ldtv1q1ddegf  
ev1lvssgdev1nv1gdp1v1r1fn1efinn1naks1vispi1itntd1qaasini1ydenavikgetk1vidvtm

Tsompanidou\_et\_al\_Supplemental\_FASTA\_File

```
>tr|E5RCD1|E5RCD1_STAAG  
mtkeyatlaggcfwcmvkpftsypgiksvsvsgysgghvndnptyeqvctnktghveavqitfdpevtsfenildiyfktfd  
ptddqgqffdragesyqpv  
fyhdehqkkaefkqkqglnegqifkpkpviptikpyknfypaedyhqdykknpvhyqqyqrgsgrkafieshwgnqna  
>tr|E5RCD5|E5RCD5_STAAG  
mkkridylsnkqnkysirrftvgttsviviगतिलfgighnhaqaseqsndttqssknasadsseknmietspqlnttand  
tsdisantnsanvdsttkp  
mstqtsnttttepastnetpqpataiknqataakmqdqtvpqeansqvdnktndansiatnselknsqtlldlpqsspqti  
snaqgtskpsvrtravrs  
avaepvvnaadakgtvndkvtasnfklekttfdpnqsgntfmaanftvtdkvksdyftaklpdsltgngdvdsnsnn  
tmpiadikstngdvakat  
yditkttytftvftdyvnnkeningqfsllpftdrakapksgydaniniademfnkitynysspiagidkpnganisq  
iigvdtasgqntykqtvf  
nkpqrvtlntwvyikgyqkieessgkvsatdtklri fevndtskl sdsyyadpndsnlkevtdqfknriyyehpnvasi  
kfgditktyvvlvegnydn  
tgknlktqviqenvdpvtnrdisifgwnnenvvrygggsadgdsavnpkdptgppvdpepspdpepeptpdpepspdpe  
pepspdpdpsdsdsdsdsgs  
dsdsdgsdsdsesdsdsdsdsdsdsdsdsdsdsdsdsdsdsdsdsdsdsdsdsdsdsdsdsdsdsdsdsdsdsdsdsdsds  
esdsdsdsdsdsdsdsdsd  
sdsdsdsdsdsdsdsdsdsdsdsdsdsdsdsdsdsdsdsdsdsdsdsdsdsdsdsdsdsdsdsdsdsdsdsdsdsdsdsdsds  
sdsdsdsdsdsdsdsdsds  
rvtpnnqkapsnpkgevnhsnkvsqkhtdalpetgdksentnatlfgamma11gs111frkrkqdhkeka  
>tr|E5RCD9|E5RCD9_STAAG  
mteiqkpydlkgrsllkesdftkaefeglidfaitlkeykknghyhsghnia11feknstrtraaftvasidlgahp  
eflgkndiq1gkkesvedt  
akvlgrmfdgiefrgfsqqavedlakfsgvpvwngltdwhptqmladfmtikenfgyleginltyvgdgrnniahslmv  
agamlgvnrictpkslnp  
keayvdiakekasgyggsimtdniaeaventdaiytdvwmgeesefefqrinllkdyqvnqqmfdltgkdstiflhc1  
pafhdntlygqeiyekeyg  
laemevtdqifrsehskvfdqaenrmhtikavmaatlg  
>tr|E5RCE0|E5RCE0_STAAG  
mtdgpi kvnsei galktvllkrpgkelenlvpdyldgl11fddipylevaqkehdfhaqvlreegvevlyleklaaesien  
pqvrsefidvllaeskkti  
lgheeeikt1fatlsnqelvdkimsgvrkeeinpkcth1veyddkypfyldpmpnlyftrdpqasighgitinrmfwa  
rresifiqyivkhhrfk  
danipiwlrdcpfnieggdelvlskdvlaignsertsaqaiek1arri fenpqatfkkvvaieiptsrftmhl dtvftm  
idydkftmhsa1lkaegnm  
nifiieyddvndiaikqssh1kdtledvlgididiqfiptgngdivdgareqwndgsntlcirpgvvvtydrnyvsndll  
rqkgikvieisgselvrgr  
ggprcmsqplfredi  
>tr|E5RCE5|E5RCE5_STAAG  
mldrhlkllqffiknpskhissneiaehvnvsnrvtvrndihvinsnfmddiivsiskgyqlntsqtletiterythiq  
sykeklllsmayqlmhnk  
sqt1q1leqdyllsktvln dyfvriqqwcqkfnivltikkkqgivvdgtnditnaihlnqlssghvhvedlilnelpd  
shqrmishijetlgqhsi  
ettdiq1q1lilh1liikrkqslseltdlnhdaklisqscikqinerlgydlnekvinmfsffiayhfnkl digierif  
iqsyidrlielmqqrhvp  
fnedsilqqnlynhfskaylritqniylnnplvieikklypfvntlfeaidklaidtdiemsedeiafltihfqaai er  
rktq1nvviaacyyglgvs  
nfl etkinllsee1svintiklesithyfdnvdllitthdipkqtlnilpkhlttikvap1fseddrhkirhvvkqkqn  
pvqahhhmtdvnlvnte  
qksrhtvqifeeaqkilqahhaivegyiesalereksstyignfmaiphgdpekvlqshvlifrtkdvfpwrqhdvklv  
fflaishkdkaftkqmmq1  
ian1dddsvnh1cs1ddhs1kqqlfey1qe  
>tr|E5RCF1|E5RCF1_STAAG  
mnggsdidsk1dq11kd1nevssnvdrqqsgedd1namkndmsqtattkygekddkndeamnkaledldhlnqqihks  
kda1kdaskdpavsttdsn  
hevaktppndgshvlnkflsneenqshsnq1tdklqgsdkinhamiek1aksnastqhytyhklntlqsl dqriantq  
1pknqksdlmsevntker  
iksqrniileelartddkkyatqsillesi fnkdeadkilkdirdvgktdqqiadqitrhidqlslttsddlltslidqsq  
dks11isqilqtklgkaea  
dklakdwtnkgl snrqivdq1kkhfastgdtssddilkailnna kkkqaietilatrierqkak1ladlitki etdqnk  
ifnlvksalngkadd1ln1  
qkr1nqtkkdidiylspivnrps1ldrlnkngkttldlnk1an1lmnqgsn1ldsipdiptpkpektltlgkgngllsglln  
adgnvslpkagetikehw1  
pisvimgamv1miw1srrnk1knka  
>tr|E5RCF6|E5RCF6_STAAG  
mprkfrvlqigggdlepifqhkkgvswdyfdig1fefdsyveaieaiveaegrfdfiyiqapyselt1nllqmisepyn
```

Tsompanidou\_et\_al\_Supplemental\_FASTA\_File

tyvdesfwsveyeqdenvg  
kyvvqplhynrieernnkleavsfsgygdkvspkla1vhpnfkvdvvyqgnsetl1sgefkgfkipiaswqnnlvdykd  
kviqiwpefdiddgavelqy  
tfrliqtgadgalieqii1tddm1dsp1eipakpfdaysvtvkargngtvh1gpihkrwsr1dmgqf11ggsrfvdsqr  
qefiyyfhhpgdmkpp1nvy  
fsgyrtaegfegyymmkrmapf11igdprveggsfyigsseyeqgiinvidetlek1nfkshel11sg1smgsfgalyy  
gaqlnpqaiivgkplvnig  
tiaehmr11rpeefgaldv1vsnegdtsqasika1nqkfwqtfqkks1sqtvfaiaymqhddyphafqellpv1tahq  
arvmnr1pgrhnddspti  
aswfvnfyi1ledkfgrvqhaekqni  
>tr|E5RCF8|E5RCF8\_STAAG  
m1kr1qqyeykiiykrmlytcfi1fiyilgtnisivsnydmqvkhesffkiaismggdvnt1nift1glvpw1tsmi1  
mlisyrrndkymkqtslek  
hykeri1t11svigisyfviheyvskervhqdnily1t11lvtgtm11v1adknsrygiagppivmvsiiksmmhqkm  
eyidashiviallii1lvii  
t1fi11fj1el1evripyid1m1nvsatnmksy1swkvpagsit1mmsisafv1ksgihf11smfnksisddmpm1t1f1ds  
pvg1svy1viqm11gyf1s  
r1f1intkqkkskdf1ksgnyfsgvkgkptery1nyqarrvcwfgsalvtviigi1plyft1fvph1steiyfsvq1liv1vy  
is1niaet1rty1yfdkyk  
p1f1nqyw  
>tr|E5RCF9|E5RCF9\_STAAG  
mskrqkafhds1anektrvr1y1ksgknwvks1gikeiemfkimglp1fishs1vsqdnqs1skkmtgyglkttaviggafv  
nm1hdqqafaasdap1tse  
1ntqsetvgnqnstt1eaststads1svtknsssvqtsnsdtvsseksekv1tstt1nsts1nqqek1tstsests1sknttss  
sdtksvastss1teq1pints  
tnqstasnt1sqtstpsv1n1ktsttststapvklrtf1srlamstfasaattt1avtanti1tvnkdn1kqymtts1gnaty  
dqstg1vt1tqdaysqkga  
i1t1gtridsnks1fhfsgkvn1gnkyeghgnggd1g1fafspgvlgetg1ngaavgigg1sna1fgfk1dtyhntskpnsaa  
kanadpsnvagggafgafv  
ttdsygvattytss1stadnaak1nvqptnnt1fqdfdi1nyngdtkvm1tvkyagqtwtrni1sdwiaksgttnfs1smtastg  
gatn1qqvqfgt1feytesa  
vtqrvyvdvt1tgkdi1ppktysgnvdqvvtidnqqsal1takgyny1svdssyastyndtnktvkmt1nagqsvtyyftdvk  
aptvtvgnqti1evgk1tmnp  
vv1t1ttdngt1gtvntvtg1lpsg1sydsatnsi1igtptk1iqgstvtv1vst1dqannk1st1tft1navdttaptvt1pidqs  
sevyspi1spiki1atqdnsg  
navtntvtg1lpsg1t1fdstnnt1sgtptnigtst1sivst1dasgnk1t1t1t1fkyevtrnsms1svstsgst1qqsqsvstsk  
adsq1sast1stsgs1ivvsts  
ast1sk1stsvs1sdsvsasks1stsesnsvs1ststs1vnsqsvs1ssmgs1svsksts1sdsisn1stekses1stst1sds  
1rtst1s1sds1smst1sgs1  
sksq1s1st1sgs1st1sas1sdst1sna1st1st1sesast1sds1s1ns1iansq1sast1sk1sds1qst1s1s1st1sds1sk1sm1t  
ses1sdst1st1sgsv1sgs1s  
iaasqsvst1st1sdsm1tseiv1sds1st1sgs1sas1sks1msv1ssm1st1sqsg1st1ses1sds1qst1sds1sk1s1s1st1sqsg  
t1st1st1sas1vrt1sesq1t  
sgms1sas1qsdms1st1fsd1st1sds1kast1sesi1sq1sast1st1sgsv1st1st1st1nsert1st1svd1st1st1ses1di  
se1st1st1sds1ise1is1ases  
ts1s1lesn1st1sds1es1q1s1af1ses1se1st1se1st1ses1v1ss1st1se1st1s1sd1st1ses1g1st1st1s1n1st1sg1s1as1st1st1s1s  
est1st1fk1sev1st1s1sm1t  
st1s1n1st1s1st1s1sd1st1sds1k1sds1st1sm1st1sds1st1sk1sds1st1st1sg1st1ses1ed1st1ss1es1k1sds1t1ms1is1ms1q  
st1sg1st1st1st1s1sd1st1  
ts1s1l1sasm1q1sgv1ds1ns1as1qs1asn1st1st1st1ses1ds1qst1sty1ts1qst1sq1se1st1st1st1s1sd1st1s1sk1st1sqsg1st1sas  
1sg1ses1eds1qs1st1sase  
st1ses1ast1s1sd1st1st1n1sg1sast1st1s1ns1as1ases1ds1st1s1asm1qs1ses1ds1qst1sas1sds1st1st1sn1rm1t  
ias1st1sv1st1ses1g1st1ses  
t1sed1st1st1s1ds1qst1sr1st1sas1g1sast1st1st1sdr1st1sast1st1sm1rt1st1sds1q1sm1st1st1st1sm1d1st1s1dsv1ds  
t1sd1st1sast1sg1ms1v1s1s1  
sd1st1st1st1sase1vms1asi1sds1q1sm1ses1vnd1ses1v1ses1ns1es1d1sk1sm1sg1st1sv1sd1sg1sv1st1s1rk1ses1v1ses1s1sg1sq  
sm1sdsv1st1sd1ss1sv1st1  
1rs1ses1v1ses1s1sd1sk1st1sg1st1st1st1sg1st1st1s1sg1ses1v1ses1st1s1d1s1ism1sd1st1st1sds1s1sg1s1s1sg1st1s  
t1sd1s1sd1sk1s1ss1q1sm1sg  
se1st1st1sv1ds1q1ss1st1ns1q1fd1ms1is1ases1d1sm1st1sds1n1is1gn1st1st1st1s1st1sds1m1sg1sv1st1st1s1d1s1ig1st1sv  
sd1ss1st1st1st1s1d1sm1sq  
q1st1st1sas1g1s1st1s1t1sm1ms1ast1ss1q1st1sv1st1st1sds1s1d1st1s1s1is1sg1st1ves1est1sds1st1s1d1ses1st1sds  
d1st1st1st1sd1st1sg1st1st1s1  
ses1st1sg1st1sv1sd1st1sm1sed1st1sv1ms1qd1k1sds1st1s1d1ses1v1st1st1st1st1sd1st1st1ses1st1sm1sg1sq1s1d1st  
st1sm1sg1st1st1ses1n1mh1ps  
d1sm1mh1th1st1st1sr1sse1att1st1ses1q1st1sat1sev1tk1hng1tpaq1sekr1pdt1gds1ik1qng11ggvmt11vg1gl1mkrk  
kkk1dend1qdds1qa  
>tr|E5RCG0|E5RCG0\_STAAG

Tsompanidou\_et\_al\_Supplemental\_FASTA\_File

mnyspkqgvvrshglphdpfksstvrprigwistvskdgdknlapysyqnltdwppmvmfaanqsvlgdherkdtvknae  
etgwfvwmatydlreavn  
lsskalppeedefeyagvtkeacieapgyrvkespvhfeceyvqtiiriptgdpvstvddivigrvaqvhiddkviindngkl  
diksikiplarlgyydytvv  
neifemkapaaskeeagleggrnfdnqsdekr  
>tr|E5RCG2|E5RCG2\_STAAG  
mrtnnhitldaielssgwnynsklvtgkna11sds11rdikvlssnakgdadiletelravinsqnegksvdalkns  
tts1knn1tk1keqldktt  
h  
>tr|E5RCG6|E5RCG6\_STAAG  
mvlrkvimqdlldqialenigfspeeaatrealklrieqiqetfivaekndevigyingpvikeryisddlfnvsinns  
eggyisvlg1vvapnyggq  
giagr11nyfetlaknhhrhgvltcreslisfyekygyrnegvseschggikwynlvknikkddev  
>tr|E5RCH2|E5RCH2\_STAAG  
mkyrklii11v1s1i11p1v1st1dghhianadddspk1kykensa1alnyhrvrkanflnfiyffssskeiknysvsqs  
qfesqikw1kshdakfl1l  
kef1yykkkgkfpkrswinfdmdetiyeapilkykipatgfii1tghvgeenfh1dmiskkelkemyktglwele  
ththd1h1sknksk1mk  
aseatiikd1nkseky1tknfkksqktiaypyglmddk1pvikkag1kygfsleekavtpnsndyyiprilisddafeh  
likrwdgfhkd  
>tr|E5RCI2|E5RCI2\_STAAG  
mlnaqqf1nqfsleapldeslypiirdicqevkvhgdkalkmyn1tfdhtktdhleisheqikaafdtldektkqalqqs  
yerikayqesikqtnqgle  
esvecyey1ypplesvgi1yvpggkasypstvlmtatlaqvagveni1vv1tppqngvsqevlaacyitqvnqvfqvggaqs  
iaa1tygtet1pkvdkivg  
pgnqfvayakky1fgqvg1dqagpteialiidtdad1daivdvfaqaehdelartyvige1daqv1kdl1esriakalpn  
vdrydivsksianghyli1h  
asnfd1eachvmt1apehasiqtvpnpqyiekvkvvgalfighyspevigdyvagpshv1ptnr1tarftng1svndfltr  
ntvih1skdtfeq1adsaq  
hiahvealynhqqs1l1rqs  
>tr|E5RCI6|E5RCI6\_STAAG  
minter1n1mpsssh1ielynicshpqaniytpkg1hnsk1dtqrwiekwqnhwqyqfyfvlvkkidcsvigicgye  
yrq1kqetv1n1fyklhps  
fegqgyaceait1nfvnyidqetvkvirtnkcnqrsinlaer1kfkrdkamddiinqqnivyfky  
>tr|E5RCI7|E5RCI7\_STAAG  
mnqyntigfhpqnsrihq1natvkl1f1l1vvs1samvtydtryl1ilisass1l1fkyahiewkqvr1fvkfilfftilni  
iavyifdpeygvkiyng1rt  
elvngigrft1tsqel1f1n1l1kyistvplal1f1fttnpshfaas1nq1lgvnykisyavslalryipdiqetyfnis  
qaqqargydnsk1kakftsr  
vkgikriv1pl1f1ssierid1stamelrqfgqykr1rtwyvkkq1k1kddyv1l1cl1l1llm1vvt1ff1nnsryfnpwh  
>tr|E5RCJ1|E5RCJ1\_STAAG  
mtnftfdgahss1efqikh1mvskvkg1sfdqfdvavegd1ndfst1katati1pssintkneardnh1ksgdffgtdefd  
kitfetksvtenrvvgd1t  
ikgitneetfd1efngvskn1pmdgsqvtgvi1vtgtinrenyginfnqal1etggvml1gkdvkfeasaef1sise  
>tr|E5RCJ4|E5RCJ4\_STAAG  
mhilvtgfapfdnqin1psweavtq1ledi1gthtidk1kl1ptsfkkvdni1inkt1asnhydv1laigqaggrnaitperv  
ainiddaripnddfqpi1d  
qaihl1dgapayf1sn1pvkamtqsi1nqgl1p1gal1nsagtyvcnhv1lyh1ly1qdkhyph1r1fgfihvpyipeqvigk1pdt  
psmplekivag1taieai  
snde1ria1gtte  
>tr|E5RCK3|E5RCK3\_STAAG  
mekgnngikwss1imgv1l1mlav1ftfp1ienfyaitw1ig1flv1ingviq1iyrrkaka1vggnqnwil1fmgivd1lf  
gl1iv1fngv1gassaff1ymf  
afwfi1fss1ag1ftftgsgs1kl1isv1fn1lgivfgv1ll1fn1mgivfistmiaia1fv1fgvivyvdala  
>tr|Q2FDA2|Q2FDA2\_STAAG3  
mneyriqklyryic1efknqrq1ligkrqeevaf1d1svtagh1sriengkkprialht1flvmseyygvdfhkvvknaeekm  
el1degi  
>tr|Q2FDA3|Q2FDA3\_STAAG3  
mdk1ketkh1l1k1kedypq1fd1lenvprg1tktahireal1ryieeigenppipskehtapl1kehtepikrnkesfkdam  
erkdq1kqaempk1eekde  
emvdis1idd1  
>tr|Q2FDA4|Q2FDA4\_STAAG3  
msnvyvma1dfng1fvkgk1indekfv1ipsri1grktnennq1kgfvdnk1dvsefi1ingnndev1l1fgnd1dkttntgkdt  
astndryd1iks1fkd1vecs  
ig1larevpeevvnv1iatgmp1sneigt1dkqakfek1l1nksr1lieidgi1aktinvkgvkivaqpmgt1l1d1nmengkvfk  
afte1gkysv1dfgsgt1i  
dtyqnmkrveesfv1nkgtidfykriashvskksegasitprmi1ekgleykqck1nqktvidfkdefykeqds1lievm  
snfeitvgn1insidri1vt

Tsompanidou\_et\_al\_Supplemental\_FASTA\_File

ggganihfdslshyysdvfekaddsqsfnvrgyeklge1lknkveqesk  
>tr|Q2FDA5|Q2FDA5\_STAA3  
mnl snekviikliknmevlfmadiqkml eqkek lqeki kekkkeyekfgrwffnkfkvnrsadakkii knllniedtk  
ehnlerneiieetksnee  
nkeineinhni  
>tr|Q2FDA6|Q2FDA6\_STAA3  
mamyhfqnkfvs kangqsataksaynsasrikdfknefkdysnkqcdyseillpnnaddkfkdreylwnkvhdvenrkn  
sqvareiiiglpnefdpns  
nie lakefaeslsnegmivdlnihkineenphahl1ctlrgldknnefepkrkgndyirdwntkekhnewrkrwenvqnk  
hleknqfsvrvsadsyknq  
nidleptkkegwarkfedetgkksisikhnesikkrrnqqkidkmfnevddmkshklnafsymnksdstt1knmakd1ki  
yvtpinmykenerlyd1kq  
knfinh  
>tr|Q2FDA7|Q2FDA7\_STAA3  
mayskgykkkkidsiieelnkl ddfkndktykefldttakfhysinniiliagqnpeatavagykawknkfdrrvq  
kgaksmniiapivqkrnve  
ikddngnivr dngnnpkterkp vitgyrahnvfdvadtkgkpl itakdliktefensndykdl ynefkdyinee1tpsve  
ekhf1ddpt1sngakgyys  
pksdeivisdd1sydmrftliheyahsq1hnddigktqisehsrslkeieaessayvvanyygl dtsdyslgy1sgwgh  
nisdde1kahiknihsfak  
ttieeins1pefsqyidkklesemnkdykd1stmidtn1kngfdkitiikgn1vndyglneisensyenddfkvnidyk  
gfntnnsqdaqakielinkh  
dds1nr dynftqtynrrvinn tttifvqddnedknkkyiherdidgnileekhlspqdeivs fenfvnksveeng1kd  
tlrqfvsngv1mgyelnv d  
nidntnetyfsmknqngqrsnmtaklehdtnenvyidfkiknsagiknisytesneefnkdeqnkeienkqeeei di  
>tr|Q2FDA8|Q2FDA8\_STAA3  
mrftprg1lnntdye1nsefyypasdkqmdqrdmtnksivgn1vyrnnfynevytqpvyd1ddsnekyqtphii sidd  
sefdyn1tn1ddyftkda  
nkgyek1vnaikseeityf dsdinevddftqqdeysndwytntfvd1vlsmkgysyhvepnresviedshii tendityn  
vsynpekhhlyi ndfpaip  
ieendnr1lndn1tqdmektydninynfsyndfktleddsyiyid1tdykdnegkfvkn1iedippneiikdr1kqnin  
1fderanyalavyrrd1e  
dfsdrnn1ds1dkvkd1ktfydteinikgn1ninndiekka1nnqlafnlynep1nmmfrdnvlyevykei ydekipl s  
iedrkevky1ddarnnfs  
nnfyeyttkssi1aens1tv1dkakyd1efapvsnhlykerenfyegmkqat1plh nitkeqykerendieii ghfkny  
intelhgtssefkpnfvn  
ds1enetnsiafedi ngseethsnii nsiknelkqerdn1em  
>tr|Q2FDA9|Q2FDA9\_STAA3  
mevvr1nqn1fnklrgnei ssnkngsrpyyysfkrnnnrvcipfrtnaqkvpnkykinlggeqpdkpnsaid1tksivis  
ndey1nrrskakipqvnv  
f1kqqa paieqkydtsndyikakas1skip1vkystmqyf hkelniqdsidnqqtknainel isngksnkynklqssl p  
nek1n1lddyetyl yefks1  
tdypakinsndidnpfleveknkhft1saltiknepekhvkdf1nydieneknkdid1d1  
>tr|Q2FDB0|Q2FDB0\_STAA3  
mrinfidny1tktiyna1leri itimanigy arvstrdqsl d1qida1snfgcekifsekvsgkrvnrte1dkcl dy1re  
gdt1viy1kl dr1grttkq1  
id1aqw1ennnielqi idmnintkdpmgkmfftmsafae1lean11sertkkglesar argnmgrkampqekkeyikh1  
ydtkeytgqei akktvsvr  
dtvyri1refkk  
>tr|Q2FDB1|Q2FDB1\_STAA3  
mki1nnpnmpepykyetdyrniprey1nhipkgrg1vkwnafk tipqqyeileqhi edqnkinm pl1sddqlqeinekvs  
skiskn1td1dywk dgyi  
ysiqcyinkidefngfmi itnsnsnklkip1ssivsvq  
>tr|Q2FDB3|Q2FDB3\_STAA3  
mgn1dfdhgyrk11p1kdfkhfikhsdsktrnhfigmafnnktdvfsrnfsmkmini fpknefyihiiqqfpendspsym  
vyntditafiqf1vgrse  
nky1leni1rdygv1ievealhsfkkmgam1vsqlek1sdl1fipi yldtn1kde1lyyqdl gffdttkkgnhgepl1vy  
kpn1letnkkekpikslfk  
kvfnin  
>tr|Q2FDB4|Q2FDB4\_STAA3  
mnyfrykqfnkdvi tvavgyy1rya1syrdiseil rergvnhstiyrvvqeyapilyqi wkkkkkayykwridetyi  
kikgkwsylyraidaeght  
ldiwlrkqrdnhsayafikr1kqfgkpkqv itdqapstkvaiakvikafklkpdchctsky1nnlieqdh rhikvrktr  
yqsintaknt1kgieciya  
lykknrrs1qiygfspcheisim1as  
>tr|Q2FDB5|Q2FDB5\_STAA3  
mkvtntirfeeekkn1idnvnt1eeykdvidselrtirntnh1vmrn1vl1qs  
>tr|Q2FDB6|Q2FDB6\_STAA3

Tsompanidou\_et\_al\_Supplemental\_FASTA\_File

minkviysgriatd1klrkskneksyvfniavprqfdndrtdfincvvgkqaeslvdyqskgnliiegstetykkdn  
inmsrc1vektifleskke  
nkkhdvseddaispaedsndksisddd1pf  
>tr|Q2FDB7|Q2FDB7\_STAA3  
mdwikdaikeltegiadgmmnfiqf1ytlfyep1kffiw1ldkilidpnsissdyisnasvlnslitsiaicvfafkm  
vqvmkqnaegnaespgyyv  
aql1pss1lvav1pwlvdimtk1sysatrafldvqksyletikewss1kkgqdgfkelgsmgtmagsqimfilfilli  
lvftvvfiqfvsriadlv  
imkvvap1vav1ladennyigvwre1laisiq1plqvftffggin1ffgakldvgt11lgigffiiitvkspsfirsmv  
ystgsgrmatgmagsgak1  
1vrkm1sk  
>tr|Q2FDB8|Q2FDB8\_STAA3  
mtl1lgeleskatsinkn1viqdfdtkcpnrni fvggggsyksagyvipnvivknqqsivvtdpsgevyektsnikrm  
qgfdvrvvnfknflasdrq  
nffdyidkdsdcsivaeliiksagdskindvwykasvg1lns11lyakyefepkrtigniikfiqnnkpnqdeegsve  
ldkrfnelksdhparesye  
fgfavsegrtrasiiltfvad1rnyidneirsytsdsdfd1rdvgrlktiivm1pvlngtvqsls1ffsqmfqqlyr1  
gdengar1pvpvdf1ldew  
pnigai pdyeetlatcrkygisittivqsisqavdkynkdkanaighavilclgnvnndtakyikeelgnatvefets  
segssgkdsrskssknv  
sytrallnedeismqqdkailitknrnpkiikk1ayfkmfplntetyiapqneykrknqsmidkhnrlreewdkkqe  
knkqqk1eeykeeqrke1  
ekeqqpqqeekvkeskdkndqedkkdeqqkindskkafyek1kqkqak  
>tr|Q2FDB9|Q2FDB9\_STAA3  
mkkgi filtgi iw1v1iy1aqi laya1nt1sntsnkqkifsd1sq1fippakhpistiigfvskntvffvigviatic  
iyilik1feskdgnknq  
dykiakhgshgsakfaedse1fseghykkmkenditnyvyn1dks1ieersdke  
>tr|Q2FDC0|Q2FDC0\_STAA3  
mnt1l1cekpsqamd1stvfakkkqngymeisdeq1nvsqfltwavgh1velkep qeydekyknfstyp1llekddf qf  
kvsdktkdqfnnikk1fke  
nkideviiatdparegeniayki1nq1kvtdkvtikr1w1tskvessirkafkn1pketygyfkegrare1sdw1vgi  
n1srhftkisrelngdgv1  
higrvsspt1nmvynrennikgfkqkkykvsatinkdeqevkte1knkfdse delheflfenditdtqkg1vtdieke  
igytmppkfyd1salqedm  
ndkykisakrt1eiaqt1yekklityprtdsryitedekem1lenidylkeitkin1nne1tns1inpskiedhyaili  
tgndfnkvdlkeeeinvyk  
s1lqnvamnfmdkeqyettieiaavk1mfevkgki1qdnqfka1lnkqktseetipnfekneevdiel1lekettppk  
rytekt1lkamanpietle  
deglkst1kevg1gtpatradien1kknkyiqvqknkiyitkngilac1l1legh1l1skpd1tgqweky1ngiskgekd  
dds1fintinemikktinee  
vknkesiqvakekvstnniakcpacdnqylidrkgfygcteynngceftipk1leksipptvka1ceskttk1kgf  
ksksgksfdck1iltken  
k1qfsfd  
>tr|Q2FDC1|Q2FDC1\_STAA3  
mkk1l1tivilft1vlagcggnqseknekhneektvdtteerndmikglieygyenddykgykhmkd1lsek1qkqaelq  
nqsaqtkgvkketkdik1y  
qdvnddeliysik1s1tnkkeksdysmrygkieleegkqkidnveeltqrnlvsmnqe  
>tr|Q2FDC2|Q2FDC2\_STAA3  
mwsaiakgitm1mkkka1skilkpviaivigff1l1fimiay1vgsftkeinesgeqmkkaestatgactggsvdgsgi  
safeknaggalegkqkdm  
vkiakknk1ppk1fiaivasesewrganatkqkn1simgagplqvpsieegldkgakn1ydl1yiseg1tpekigpk  
yapvgasndpdd1nswvp  
tvk1k1mksfgk1eakcstessggsgdkgfdkgef1pkpdkskyngqsywpwgqctwyvhqrrkeigkpvpltwnggdwg  
dnakaqgwevgs1kagag  
asv1kpgnfgapppyghimfvekvkkgg1vseanvkg1gvissrefskaetqrmqfiydk  
>tr|Q2FDC3|Q2FDC3\_STAA3  
mki1rnfnegt1vgknhh1leyi1invd1chis1deideiryd1tepnelffevd1lqkegdyfhi1yntdneyns1sakesk  
a1k1s1mdyv1kvdp1kdn  
itvmhpan1ffkniedik1gfkghel1pkpkin1leqk1l1mst1sqytdkyyrnkfev1skekddffhkvnnaetfe  
k1keivrhe1nqvqtdy1l  
neekrkrretrkkyi1n1l1gfvgiaivis1isfmi1ngkqel1skiaqadkqeqrskvyen1yngnvdqavkgmkrdds  
fnkkdiekt1kkekyee1  
ielsskntpyvieq1ykegkqnki1relafnfend1t1slekk1ldkdgtafsvgstgkyeeqskrl1al1asakegyvesak  
d1nk1k1dneveee1k1kae  
ikq1keekdstkdkkkkei1qkdi1eelekk  
>tr|Q2FDC4|Q2FDC4\_STAA3  
maf1kkkkqeqvtnkihnesfq1tevl1tdsvdsiypfswiekkshietgenyikn1lvvdypqsvkgay1sn1lkkng  
niqitkfirpaniermidh

Tsompanidou\_et\_al\_Supplemental\_FASTA\_File

lnnsiknktaeqmrttdpkrnatikreieskkqldkfldektgfmymyitlmgdsyekiqalekdvkrtrlrtrlkt  
hptnamresfhtvlpnr  
nflsaftqnmtdataghffmddseiidltpntsvfginkntdsvavdfnnkektlnknmtiigtsgvgkstlnmrm  
ldnikksirqfiidpedef  
syitkyggvtvnistssnikinpfeifseevfekedtdnettsdvltennehesqidtlvrskigklktffrvlkdei  
sqteisvlsstlrqlyqdk  
gfkgnaklsdfksedyptlteleynklkdldpekyevlkdltliiedytmehgtttifdgytnikldneivtfnlklpte  
kdvqsaaylnifsfwdei  
tkdrttetvlnmtdelhf1atneysldfyyqaykrikygggaiastqqikdilrtsqeigsaienshtkfffmgmdnvgv  
ddvvdklglkfsdqeshl  
tkkkkgealllygtqrafiridldretrlnwkelyetiyeepadvepnyveqlgltdidlaeleeelrqaeiye  
>tr|Q2FDC5|Q2FDC5\_STAA3  
mmmmfkkknkqnneqqfeinryikgdgrnqsiquedsliagfykdyvvtkdgyisggnitgvntelltkfeqndlle  
eyssfnisilydepikti  
tepvniqnyikhlyrqvllmknknkprrgqliaqrilflqeklakgemstkkhyiffsekitentvaqldhavnrlh  
ekinlnkealqqafshygl  
etrpiyqteylngfyaldykgyndyhln  
>tr|Q2FDC6|Q2FDC6\_STAA3  
msveqevkdimldmgeekkvkeniprvdasykiflnlmgkelaivfvpflfltiafgvtflmgllnltgfmfviv  
glifgltiygl1tirpist  
kenirmidtikqsqrfsrrqkvyfykskeglgdddv  
>tr|Q2FDC7|Q2FDC7\_STAA3  
mikkfslttvyvaf1siv1snit1gaenpgpkieqglqqvqftlgtlivavgicagwivlklpgiddpmvknemfrgv  
gmvlagvavgaalvwlvpw  
vynlfg  
>tr|Q2FDC8|Q2FDC8\_STAA3  
mdnitfrkrieeyrkrseieqkkyesklnyqsrfgvkdddevstfnikgiatdkkenklvmaedredkqkvlllyankdndmy  
ylngstykeavqntfgne  
tnyemvdel1fiynsknqa1tnydq1deyhnrqkqlqyntkleqerkqr1tdtnkvsenakedlalslgl1tata1kgnin  
isnvekvtdnesmvtiene  
ingkeh1isdfkdsfiekakekltvspsmrlgfeefknasgqiamgfteffgarydestlendpkvvatekgysvsvfd  
kdgknkdltsadtfeavk  
1skemkhds1srseielngelekkki  
>tr|Q2FDC9|Q2FDC9\_STAA3  
mnneensvffgkkkkvslh11vdpdmkdeikiyaqekdfdnvsqagreilkkgleqiksnk  
>tr|Q2FDD0|Q2FDD0\_STAA3  
mnyfrykqfnkdv1tvavgylryal1syrdiseilrgrgvnhstvyrvwqeyapilyqiwkkkkkkayykwridetyi  
kikgkwsyl1raidaeght  
ldiwl1rkqrdnhsayafikr1kqfgkpkqv1tdqapstkvamakvikafklkpdchctskylnnlieqdhrikvrktr  
yqsintaknt1kgieciya  
lykknrrs1qiygfspcheisimlas  
>tr|Q2FDD1|Q2FDD1\_STAA3  
mneknihsqnfitskhndkimtnir1nehdni1feigsgkghftel1vqrcnfvtaiidhklckttenk1vdhdfqv  
1nkdi1qf1kfpknqsykif  
gnipynistdi1rkivfdsiadeiyliveyefakr1lntrks1alf1maevdisilsmvpreyfhpkpkvnsslir1nrk  
ksr1shkdkqkynyfvkmw  
vnkeyk1ftknqfnns1khagidd1nnisfeqfls1fnsyk1fnk  
>tr|Q2FDD2|Q2FDD2\_STAA3  
mkerygtvykgsqr1ideesgevievdklyrkqtsgnfvkayivqlismldmiggkklivnyildnvhl1sntmiattr  
e1akatgts1qtvitlki  
leegni1krktgvl1npe1l1mrgddqkqy111efgnfeqeanekqenas1dyysfdk  
>tr|Q2FDD4|Q2FDD4\_STAA3  
myndyskl1pikniqk1fpiaggyvnl1sfvdasnkkyflklqpntksnffdyelsslkeltdknipvpqiinkgeldnn  
sf111efienghaypesyr  
k1gkivanmhknins1n1fgfshnfgsvak1n1  
>tr|Q2FDD5|Q2FDD5\_STAA3  
mtkky1ntqneisafwntqk1fkksidnrkgqesfvfydgpptangl1phaghv1grvikd1var1lktmqgfyverkagwd  
thgl1pve1evekkigikgk  
qd1ekygenf1necksvfnyekewrdfsdk1gywvdm1dspyit1lennyiesvwnil1stfhkkg1lykghkvtpycthd  
qta1s1shevaqgyknvkd1  
savvkf1n1nskdyf1swt1t1pwt1panvalainkd1nyskirveneyyilatd1insiitekyye1id1t1fsgsn1in1k  
y1ppfesdgl1vnayyvvdg  
efvt1n1seg1g1vhi1apahgeddyq1v1erd1df1n1vit1regvyndrfpel1vgnkaknsdieiik1l1skkq1lykkqkyeh  
nyphcwr1cgn1liyyameg  
wfikt1tn1fknei1innnni1ewfpshikegrmg1n1enmvdwn1grnrywg1tp1nvwicnd1cnheyapssik1dqns1ink  
idiedie1hrpyvndit1sc  
pkcngkmsrveev1dvwf1dsg1smpfaqhhypfdnqk1fnqhf1pad1faegvd1qtr1gwf1ys1l1vist1ilkgk1ssy1kral1s1  
ghild1sngk1mksk1sgnvi

Tsompanidou\_et\_al\_Supplemental\_FASTA\_File

nptelinkygadsrlwalisdsapwnkrfsenivaqtkskfidlndniykfynmyknidhynpneitksrntldnwal  
srntlikesniyvnydf  
tsaarlineyntntisnwyirrsrgrfweqgisndkkdayntlyeilttlsrlvapfvpfisekihynltgksvhlqdypp  
ykesfingaledemhtvik  
ivelsruqarknadlkikqplskmvikpnsqnlslfnpnyysiikdelniknieltdnindyityelklnfssvpgklgnk  
tkniqt lidslseydkksl  
iesnfnkslssdaeltkddfiikt1pkdsyqlsedndcvilldkn1speliregharelirliqq1rkkkn1pinqridi  
yigtgelllesiktknmf  
kenlliknihlnvideyentihfnkeikisll  
>tr|Q2FDD7|Q2FDD7\_STAA3  
mskqffteenykerfyqlpkvfftnpnykd1sndakiayailrdrlqlsiknwidtegniyyfiytvadlevilncgnk  
kitkikke1envd1liqkr  
qglnkpn1ly1lkpaitkndiyeidkaenevealqkkevskghvqkqkqkdsrnrkrtrlemskghtndtdfidtdfidt  
esdmnmndtnqhsnhsn  
hfsnihkeslkyielqelpeliksiynnfsyeevksiksvilkakksfnkydtfymledideell1vlkrfkgylvkk  
qekvanmegylmrsiael  
eemhstimirrknmenp1s1fn  
>tr|Q2FDD8|Q2FDD8\_STAA3  
myknnhanhsnl1enhd1dnfsktgysnsr1dahtvcisdpk1sfdamtivgn1nrDNAqalskfmsvepqirlwdilqt  
kfkakalqekvyieydkvk  
adswdrnmriiefnpnk1trdemiwlkqniisymeddgftr1dlafdfedd1sdyamsdkavkk1fygrngkpetkyf  
gvrdsnr1riyknkkkerk  
dnadaevmseh1wrveielkrdmvdywndcfsdlhilqpdwktiqrtadraivfml1sdeeewgklhrnsrtkyknlke  
ispvdltdlmsk1kanek  
qlqkqidfwqhefkfwk  
>tr|Q2FDE0|Q2FDE0\_STAA3  
mfslykkfkg1fysvlfwlcilsffsvlnemvlnvslpdianhfnttpgitnwvntaymltfsigtavygklsdyinikk  
lliiigis1sc1gsliafig  
hnhffilifgr1vqgvgsaafps1imvvvarnitrrkkqgkafgfigsivalgeglgpsiigiiyahyihwsyllilpmi  
vtipflikvmvpgkstknt  
ldivgvlmsisiicfmlfttnynwftlilftiffvifikhisrvsnpfnpk1gknipfmlglfsgglifsvagfism  
vpymmktiyhvnvatigns  
vifpgtmsvifgyfgglvdrkgs1fvfilgslsisisfltiaffvefsmw1ttfmfifvmggl1sftktviskivss1  
seevasgms1nftsf1s  
egtgiaivgg1slqlinrk1vlefinyssgvysnilvamailiilc1l1tiivfkrskkqfe  
>tr|Q2FDE1|Q2FDE1\_STAA3  
mnkfffyf1i11svf1ifnfvns1fdnppdflesfiyslvftliylgleghkkke  
>tr|Q2FDE2|Q2FDE2\_STAA3  
mnaiqnsis1rki1lvvs1silt1smv1dfnfkeaaqknkniadknvet1nekeiekelkyiygkii1ldkdgtakdvn  
lenaksrygyvpegfqlk  
ndienkkktssi1spravggnykngdcfysevl1nsyge1ltgnii1tavfedvkaknlkgvakk1akigikgnlagiaatm  
vskdvqcn1kyg1l  
>tr|Q2FDE3|Q2FDE3\_STAA3  
mikffkkgvfi1nkn1v1degyviatilnvff1lglifishlenlyilipyvilmginaiy1lvkvnmfkkn  
>tr|Q2FDE4|Q2FDE4\_STAA3  
mgsvkk1vtgfaeifvceit1ylfsgylrfkslyif1s  
>tr|Q2FDE5|Q2FDE5\_STAA3  
mqynttr1itenqdnk1tkdmtksgkqrpwrekki1dnvsyadileilkikafnvkqcg1ilef1kptdegy1klhktwfc  
ksk1cpvcnwrramknsyq  
aqkviiekvikepkarw1f1t1stknaidgdt1eqslkhl1tkafdr1srykkvkqnlvgfmrstevtvnkndgsynqhmh  
v1lcvenayfrkkenyitq  
eewvnlwqralqvdypvanvkaikpnrkgdkdiesaiketskysvkssdf1tddeknqeivsd1ekglyrkrmlsygg  
1lkqkhki1n1ddvedgn1  
inasdedkttdееekahsitaiwnfekqny1rh  
>tr|Q2FDF1|Q2FDF1\_STAA3  
mkkpfsk1fg1knkddiighieedrnsvesiqierivpnryqprqvfe1nkikelaesihehgl1qpivvrpieedmfе  
iiagerrfrais1n1pqa  
dviirdmddeetavvalieniqren1svveeaeayk1leigdt1tselakslgksqsfiank1r1llklapkv1l1r1reg  
kiterharav1s1sdsege  
alieqviaqk1nvkqtedrvrqtgpekvaqnl1rfaqdv1tardevgksiqaiq1tg1hvehkdkdhedyeyekiri1yk  
r  
>tr|Q2FDF3|Q2FDF3\_STAA3  
mk1t1mkffvgg1fav11syivsvt1pwkefggi1fatfpav1vsmfitgmqygdkvavhvsvrgavfgmtgvlvcilvtwm  
mlhmt1hmw1isivvgf1sw  
fisavci1feavefiaqkr1lekhs1wkagksnsk  
>tr|Q2FDF9|Q2FDF9\_STAA3  
mkfrelvkqsyed1kn1vtvwy1nvia1tilv1v1ssfttpmigi1pag1l1ggay1lkrreekgk  
>tr|Q2FDG9|Q2FDG9\_STAA3



Tsompanidou\_et\_al\_Supplemental\_FASTA\_File

msvsdqimkgllgdailglaaqgetygyeimtklknqefpeisegsiypvlmrlnkkgvdttikssnggprrkyytit  
dsglkelkvfkskwqvlnk  
gminlfggendvk  
>tr|Q2FDH7|Q2FDH7\_STAA3  
mtepiisfkdfsfgyhsqatptlqninvdiypgekvlvvgasgsgkstfancinglipfktkgnitgelyinnqdatvsc  
lhdsrvvgvtlkdtdgqf  
igltaaedmafllenncveqddmknsvsyaekvgmiehlnhrpqdlsggqkqrvsllgghlhrtpilildeplanlpa  
tghetlrl1nniheetkst  
miivehrleeslddtfdrvllfkdgkianttspdllkssklkeagireplyctalkyaevdvesidnlanlrdvcmh  
vkfkvkkwidetsanndnk  
yksep1le1nevcvqdsdysnsvlnnvqlnvyrrmlsivghngagkstlakaicgfliditgningfncrgfnqlsisers  
efvgymqnpnhmiseskmi  
ydevalglrargmkesdikirvenvlkicglyafnwpiaalsyqqkkrvtiasvllnpeiildeptagqdfyhynei  
msflie1nrggkttiimith  
dmhllseyssrtvvlsgqvvadtptvlvlnkdkiceiaslrqtslfemaeyigisepqklvqlfinhdkvrrq  
>tr|Q2FDH8|Q2FDH8\_STAA3  
mnqyntigfhpqnsrihqlnatvkl1fl1vvsisamvtydtrylilisassillvkyahiewkqrvfvkfilfftilni  
iavyifdpeygvkiynqrt  
elvngigrftltsqelfylfnlilkyistvplaliflfttnpshfaaslnqlgvnykisyavslalryipdiqetyfnis  
qaqgargydnsskkakftsr  
vkgikrivlplifssieridistamelrqfgqkrtrwyvkkqlkddyvvlcltlllmlvvtlffl1nnsryfnpwh  
>tr|Q2FDI0|Q2FDI0\_STAA3  
mhkkyll1ffl1lsvallyscskqnekaqnksvnpneyakhkskmdewtyhgqvyhvfyhplidtpkvaftgdthqak  
gnndwmitvsefkks1nel  
yknnyii1vphdvydlsshvkvakkiklpgkklpiisiddmnyssymrhhgyadr1vldknkhvsettdkkghatysd  
nddivp1lnkfvkehpdfs  
l1ngekgvvaltgyegvlgyrtnel1tskdytknkkaeevramkrdgsfashsyghinfektslegikrdtkrkwdeve  
pivgktdmfvfphgagdrh  
tqaydy1vdeaefkfiagvgpnnftdisatnvyqdrvaidglnl1fefkyklkpf1npenvyskqdr1ryfkgnrdyee  
>tr|Q2FDI3|Q2FDI3\_STAA3  
mlnaqqf1nqfsleapldeslypiirdicqevkvhgdkalkmynl1tdhtktdhleisheqikaafdtldektkqalqqs  
yerikayqesikqtnqgle  
esvecyeyihplesvgiyvpggkasypstvlmtatlaqvagveni1vvtpqpngvsqevlaacyitqvdqvfvvggaqs  
iaalygtetipkvdkivg  
pgnqfvayakky1fgqvgidqdiagpteialiidetadldaivydvfaqaehdelartyaisedaqvlkdesriakalpn  
vdrydivsksianghyl1h  
asnfdeachvmntiapehasiqtvnpqpyiekvkvgalfighyspevigdyvagpshv1ptnrtarftnglsvndfltr  
ntvih1skdtfeqiadsaq  
hiahvealynhqqsil1rqs  
>tr|Q2FDK4|Q2FDK4\_STAA3  
mnyspkqgvrrshglphdpfksstvrpigiwistvskdgkdn1apysqynl1twppmvmafaansvlgdherkdtvkae  
etgwf1vnmtydl1reavn  
l1sskalppeedefnadvtkkekcieapgyrvkespvhfeceyvqti1riptgdpvstvd1vigrvaqvhiddkvil1dngkl  
diksikpiar1gydytvv  
neifemkapaaskeelagleg1rnfdnqsdeki  
>tr|Q2FDK6|Q2FDK6\_STAA3  
mlk1l1qqyeykiiykrml1ytcfilfiyil1gtnisivs1yndmqvkhessffkiaisnmggdvnt1niftl1gl1gpwl1tsmi1l  
mlisyrnm1dkymkqtslek  
hykeri1t1l1sviqsyfviheyvskervhqdn1y1t1l1v1tgm1l1v1ladknsrygiagpmpivmvs1i1ksmmhqkm  
eyidashiviall1il1vii  
t1f1l1f1j1el1evripyid1l1mvsatnmksyl1swkvpagsit1l1mmsisafv1l1ksgihf1l1smfnksisddmp1l1t1f1ds  
pvg1svy1v1q1m1l1gy1f1s  
r1f1l1nt1k1q1ks1k1d1f1k1sg1ny1f1sg1vk1pg1kd1tery1l1ny1q1arr1vc1w1fg1al1vt1v1i1gi1ply1ft1f1v1ph1ste1iy1f1sv1ql1v1lv1y  
is1iniaet1ir1ty1ly1fd1ky1k  
p1f1l1n1q1yw  
>tr|Q2FDK8|Q2FDK8\_STAA3  
mprkfrv1l1q1iggdd1epi1fqhkk1gvs1wdy1fdig1l1fef1dsgy1vea1iea1ivea1egr1fd1fiy1iq1apy1set1t1n1l1qm1isep1yn  
ty1v1des1f1ws1veye1qdenv1q  
ky1vv1qp1l1h1yr1nie1ern1k1leav1sf1sg1y1gd1kv1sp1k1al1vh1pn1fk1gd1vvy1q1gn1sel1t1s1gef1g1ke1fk1pi1as1w1qn1l1vy1dk1d  
kvi1qi1w1pe1fd1id1gave1l1qy  
t1fr1l1iq1tg1ad1gal1ieq1v1l1td1dm1dsp1le1ip1ak1p1f1day1sv1tk1arg1ng1tv1h1l1g1pi1h1kr1ws1r1l1dm1g1q1f1l1g1gs1rf1v1ds1qr  
qef1iy1y1fh1pg1dm1kpp1l1nv1y  
f1sg1yr1tae1gf1egy1ym1k1rm1nap1f1l1ig1d1pr1ve1g1gs1fy1is1seye1q1gi1n1vid1et1lek1l1nf1k1shel1il1sg1l1sm1gs1fg1aly1y  
ga1ql1np1qai1iv1g1kpl1v1n1ig  
tiaehm1r1l1r1pee1fg1tal1dv1l1vs1neg1d1ts1qasi1qal1nq1k1fw1qt1fq1kks1l1sq1tv1fai1ay1mq1h1ddy1d1pha1fqe1ll1pv1l1tah1q  
ar1vm1rs1ip1gr1h1nds1pti  
as1w1fv1nf1yn1ii1led1k1f1gr1v1q1haek1qni  
>tr|Q2FDL5|Q2FDL5\_STAA3

Tsompanidou\_et\_al\_Supplemental\_FASTA\_File

mpknkiliy1l1stt1v1p1t1vsptayadtpqkdtktaktstshdskksnddetskdttskdiddkadknntsnqdnndkkfkt  
iddstsdnsniidfiykn1  
pqtning11tknkyddnys1t1liqn1fn1nsdisdyeqprngekstndsnksndnsikndtdtqsskqdkadnqkapks  
nntktpstsnkqpnspkptq  
pnqsnspasddkanqkssskdnqmsdsaldsil dqysedakkaqkdyasqskdkneksntknpqlptqdelkhkskp  
aqsfndvngkdtratslf  
etdpsisnndsgqfnvvdskdtrqfvksiakdahrigqdndiyasvmiaqailesdsgrsalakspnhn1fgikgafeg  
nsvpfntleadnglysin  
agfrkypstkes1kdysd1ikngidgnrtiykptwkseadsykdats1sktyatdpnyakk1nsiikhyqltqfdderm  
pdlkkyersikdyddsde  
fkpfrevsdsmpyphgqctwyvynrmkqfgtsisgd1gdahnwnnraqyrdyqvshptkrhaavvfeagqfgadqhyghv  
afvekvnsdgsivisesnv  
kg1giishrtinaaaae1syitgk  
>tr|Q2FDL8|Q2FDL8\_STAA3  
mkivaitscpngiahtymaqek1eqvakemgvdikvetqggvgaenv1ttqdieeadgviaadkqvdl1srfvgkrline  
nvregihnprg1iqriinq  
dapiyqsetnyhskdrqksksgiqmvyqhlmgvsvfmpfivvgg1liaialt1ggettskg1vipddsfwksienigs1  
afkfmvpilagiavsiad  
kpg1vpgm1ggaiaadgsfygsdagagf1ggivagflagiakwikdikvpkamapimp1iiipi1ssvvvg1lififlig  
apisnifealttwlksmqg  
ani1ilamiigamiafdmgppvkvaf1fgsaliaegnyavmgmvavavctppig1glatfvqkykfnhseremgasft  
mg1fgitega1pfaaqdp1  
riipaniigamiasviaaigvgdrvahggpivav1ggidhvlwfi1favivgs1vtmtt1l1lkrntpviavdapaqhtq  
1hdtitqhtdevdndvt  
akhsh1nkpsvhfdqqtmi1tdhdmsrneaidm1ihk1kicryvehtsh1kna1leremgsttaigmvaiphaksdvk  
qpi1vavmknnhgvkwds1d  
gs1pqlif1iavpnnsqdt1h1k1lqr1ska1lmdetrqslinanstteiy1nlmki  
>tr|Q2FDM2|Q2FDM2\_STAA3  
mrkfsryaftsmalt11st1spaalaidsknkpansdikfevtqksdavka1kelpksevkniyqdyavtdvktddkg  
fthyt1qpsvdgvhapdke  
vkvhadksqkv1ingdtdakkvkptnkvt1skddaadkafkavki1dknkakn1kdkvikenkveidgdsnkyyynveli  
tvtpeishwkvkidaqtge  
ilekmnlvkeaaetgkgkv1gdtkdininsidggf1led1thqgk1safsfn1dqtgqat1itnedenfvkdeqragvda  
nyyakqtydykdtfgres  
ydnqgs1ivs1thvnnyggqdnr1naawigdkmiygdgdgrtfts1sgandvvahe1thgvtqetanleykdqsgalnes  
fsdvfyfvdde1f1lmged  
vytpgkegdal1rsmsnpeqfgqpahmkdyvftekdnngvhtnsgipnkaaynvi1qaigkskseqiyyra1tey1tsnsnf  
kdckdalyqaakd1ydeqt  
aeqvyeawnevgve  
>tr|Q2FDM6|Q2FDM6\_STAA3  
mnesgdnk1skss1ig1v1gsm1iggafn1msdmggkagglaii1igwi1taigmis1lafvfqn1tnerpe1dgg1ysyaq  
agfgdfvgf1sawgywfsa  
f1lgnvayat1lmsavgnffpi1fkggnt1psvivas1llwgvhf1ilkgvetaafinsivtvaklip1llviicmiiafnf  
dtfktgffsmtsegl1pfs  
wastmsqvkstml1vtvwvfi1giegavifssraknkkdvgsatvig1isvliiyf1lltvlaqgvilqnhisqldsp1smaqv  
lativggwgst1lvnig1ii  
sv1gaw1gwt1lage1lpfivakdgl1pkwfakenkngapvna1litn1lvqlf1ism1lftqsayqfaf1lassailypym  
fsafyqvkyt1lehrqgatt  
kqwtig1iasiyaiw1iyaaginy1lltm1lyipal1vytivqknqtr1iksdyilfmi1ivlavig1lik1lmg1tinvf  
>tr|Q2FDN3|Q2FDN3\_STAA3  
mlsvkkatkfavan1iivstvfssvtpai1aqsdksskdesfavgn1tknpknvif1vgdgm1gpsfntayryy1kndphakem  
tptafdsy1kgtnrty1snd  
pkqnitdsaa1gtafssghktyngaigvdsnkqkvktv1erakekgk1stgl1vstaeltdatpaayaahvts1rddkneiak  
qfykdkingkhkvdv1l1gg  
gakyfgksngn1dkkfk1kdyd1atnske1sksdkdv1gl1fadknmp1aidaskdeps1admqqsa1sk1ernkkgff1  
mvegas1dksahs1nditgv  
msemegfeka1fdda1iyakkkh1kdt1lvvatadhstgg1tigkdkgyewnpqpi1ksmkhsgsymtekmakgedpekvinegy  
gfe1fsqddmkkvkkenk1  
kr1l1kke1deksa1evetq1tkalqhai1qkpvn1dksytgwtsd1g1tgedvntya1ygp1rsesfsgn1ientesaki1ifdfk  
>tr|Q2FDP3|Q2FDP3\_STAA3  
mq1ieea1tg1iskd1pai1vnenankds1t1fstmr1d1tagiv1sksyalnh1l1pkhvadahqrg1dihfhd1dyhpfqpl1nc  
cl1daknm1lhngfe1ignan  
v1tspks1igtasa1qlvq1ianvsss1yggctvdrvd1ellsty1arhnee1qhrniakqfvkese1dryvd1qqv1tkdindaies  
1eye1int1lytsng1qtpfv1t  
1gfg1lgt1dhl1srki1ggai1ntrikg1lgkdr1ttai1fpl1v1fsi1kkg1tnf1spqdpny1dikqla1lkc1stkrmy1pdilnydklv  
e1l1gd1fkapm1gcrs1flpsw  
kdaeghfenngrcn1lgv1t1n1lprma1lesagn1mtk1fwei1fyeridv1hdal1lyrin1rk1davp1nnapilyksgafnyk1lk  
etddvae1lfnkrati1smg

Tsompanidou\_et\_al\_Supplemental\_FASTA\_File

yiglyetatvfygpdwetsqeakftleilkemkryqtktwelydiwfsiystpsesltdrfcrldqerfgdikditdkg  
yyqnsfhydvrvkdvtpfek  
ldfekdyppyasggfihycepklqhn1ka1eavwdysydkvgy1gtnipidhcyecdygdfeatekgfkcpcngndnp  
ktvdvkrctgy1gnpvqr  
pvikgrhkeicarvkhmkapke  
>tr|Q2FDP6|Q2FDP6\_STAA3  
mtngfknkqsklhdslesitknlyatptselpfdnrflfksfilkretgniviyhsgl1gdsqqdias1ggvskvlmhd  
hesiggsngveapyfihen  
dvaal1khk1svqkqfsnrvm1dkd1levipapghtpgttl1flwddghhrylftgdficfegkrwrtvilgssdreksiql  
emykel1dfdv1vpwvtikd  
ep1vyfveneyekreqiqni1drvregens  
>tr|Q2FDP7|Q2FDP7\_STAA3  
mtrsqnkqq11eqakdivinsigqtm1ygtnrsvgnlygtmvfegsmt1demrhqlqmskpsmsagvkk1qefdivkq  
ftrgrkqhfi1aekdfif  
frnfft1kfqreidinveavkdaqai1ns1lessd1teaetqeaqk1ksq1ldhthvyew1eq1teaiesgeifkyfpi  
eqpsdsen  
>tr|Q2FDQ8|Q2FDQ8\_STAA3  
mtnvlyqht1gt1mag11legtatine1lehgn1giat1tgsdgevi1ldgkayhanehkefielkgdekvpysitnfk  
asktfpl1q1sqddvfaq  
knem1sen1fsavkiygtfkhmhvrmmpaqpppytr1idsarrqpeekrqdirgaivgfftpe1fhgvsagfhihfadd  
eraygghv1dfevddvvve  
iqnfet1fqhfpvnnetfvkaki1dykdvaei1reae  
>tr|Q2FDQ9|Q2FDQ9\_STAA3  
mlsvai1gggavgtti1ayelq1s1pht1ligrhaktityytvphapaqdivvkgyedvtntfdviiiavkthql1daviph  
1thlahedt1i1laqngy  
q1ehis1fknvcqavvy1sgkkgdvvthfrdyql1riqdnal1trqfrdl1vqdsqidiv1leaniqqaiwyk11vnl1ginsit  
algrqtva1imhpeir1lc  
rq111dgcrva1aeg11nfseqvt1d1mtiyqgypdemgtsmyydia1hqpp1eveai1qgfiyrrareh1ldtpyl1dtiysf  
1rayqnm  
>tr|Q2FDS4|Q2FDS4\_STAA3  
mrtghytp1nephyl1vishadk1tatekak1rl1iikqk1dis1laesvvsspiasehvieq1tl1fqherrh1rpkisat  
flaw1li1fl1mfalpigay  
qfsdwf1qnqyvsawieyl1tqt1l1nhdi1qhil1fgdygv1sl1gtys1l1vwalpvvil1s1stai1d1q1t1g1k1swmiwaieps  
mlwig1l1qgndiv1pl1legfg  
cnaaa1sqaahqcht1ctk1tqcms1is1fgsscsy1q1gat1s1fsvagksw1fmpyl1il1v1l1ggi1lhriw1lkkndq1l1svp  
1pydrq1l1hmpni1rqm1l1qm  
wqni1qmfi1vqal1pifit1ic1l1vs1il1s1ltpi1l1v1sqift1p1il1s1l1gisse1l1spg1il1fsmi1rkdgm1l1fn1l1hqga1l1qgmt  
atq1l1111v1ffs1stftacs1v  
tmtm1l1kh1l1ggqsa1l1k1igk1qm1vts1l1s1l1vig1vgi1ivkivm1li  
>tr|Q2FDS5|Q2FDS5\_STAA3  
mki1vi1ggf1gggkttv1nh1laes1kes1kpavimnef1gkmsvdga1vsedip1sel1tegciccamkad1vseq1hqly1  
keqpd1v1fiecs1giae1pvs  
v1dac1l1tpi1lapft1ti1hm1g1idas1myk1h1ks1f1pkdi1qgl1fyeq1layc1sv1fvnk1ids1adv1ttsk1l1kd1levin1pead  
iqv1gm1h1gs1vt1l1pis1vrqmt  
atsdn1kh1ks1lhqmi1nh1qfv1qspvk1ctkaef1ikr1lac1lpshiy1rl1kgf1mt1fed1tahty1li1qft1qg1yelt1pva1f1skk1vpey  
1v1lig1kg1iskedy1cleq  
>tr|Q2FDS7|Q2FDS7\_STAA3  
mks1it1feehy1vied1iqket1mna1s1adp1kgv1pmkvm1leg1ekkt1gft1nadel1shhder1iqf1mnnq1dvqi1qv1syng1spsn  
1vgqka1iel1cqkand1qlan  
yi1aqy1pnr1fvg1fat1l1pinepeaa1areferc1ind1lgf1kga1im1gra1qd1g1fd1dq1kydi1ifk1taen1dvpi1yl1hpav1nsdi  
yqsy1ykg1nype1vta1at1fac  
fgy1gwh1idvg1ihai1hl1v1l1s1g1fdry1pk1nmi1ighw1gef1ipff1ler1mde1al1faeh1nhps1vyf1knnfy1itps1gm1tkpqf  
d1vk1kevg1idri1lyaad1yp  
yiepe1kgv1f1del1gl1tdee1keki1sytn1gak1l1gl1spnn  
>tr|Q2FDT5|Q2FDT5\_STAA3  
mmes1sid1p1rivrtk1q1l1vdaf1l1kis1rekk1sqit1vkd1tdiat1lnrat1fyah1ftd1ked1l1dyt1svt1ilk1d1ndn1sis  
nvine1kvl1rni1fisi1asyi  
kdaaks1cel1nse1afc1nkah1qrinne1ledi1faim1ensy1peh1qrdi1ivns1as1flaag1sg1al1h1wfnts1qet1adv1fidr1l  
p1fli1hh1iahf  
>tr|Q2FDT6|Q2FDT6\_STAA3  
mkns1isq1nse1fsd1keign1fsni1l1qyt1fi1ss1flks1intieer1hsnay1qkgt1fvrs1vsal1tyhqh  
>tr|Q2FDV5|Q2FDV5\_STAA3  
mgtfi1akh1kws1aviaw1ivivaail1ip1latnapk1fdndikmt1gles1dtnk1kiek1hnq1dsekaq1rvv1fkt1tkddg1ivqp  
n1tkdi1kkt1ddi1k1kddk1h  
idki1sdpyen1kvis1kdk1tta1fadi1tydvs1qts1l1k1dgs1rdnv1ksh1l1kd1l1rdnhv1qtel1t1gt1gmt1stev1gg1nse1l1vgi1iva  
fv1l1it1fgsv1iaag1l1pi  
salig1las1vgi1is1l1tyaf1dipnvt1l1lavm1ig1lav1gidya1l1fil1fry1rqvm1ktet1dyik1gig1laigt1agsav1vfagvt  
vviavc1gl1sl1vgid1flavm

Tsompanidou\_et\_al\_Supplemental\_FASTA\_File

gfasaisvvfavl saltl palisi fhkrikvnlqskfkdidtpwskfitgnalaavllgllilvaaaipvshmrngi  
pddgvkpadstqkkaydi  
sdfgegfngqipmlinvkdkkddpqqglqddlqsvykdikdkknvdivtppqmskdndyalmvvipkqgpnaestndlvh  
dlrdyhkdaqdkygfktei  
sgqsvinidmskklneaiplfasvivvaffllmivfrsilipkavlglvslmatlgttlvmqdgfmkgllfgi ettg  
pmlaf1pvitigilfglam  
dyevf1msriheeysktgndysikvglkesgpvivaalimfsvffafvfqedvmiksmgmala fgvlfdafvvrmmli  
paltklfgkgsywlpawl  
riiprvdieghalekyktvesqeseakdskeydttkfvyppgatnvskhqadahgqddahsivl ddktmalyqevkqqa  
sslflydali dyqnkhqln  
skkqatnieqlnknienqllnknlnks  
>tr|Q2FDX2|Q2FDX2\_STAA3  
mllvlsfkgvrylannhsalrlkgiilaivgac1wlggtvsdf1fkykninvdwyvtarlvsvglfllimykmmpkrs  
ifsvfqdrmlgkllifsi  
lglm1vvqaymasintgnaaiatlqyiapvyiivfvirgvakltlfdv1aimtllgtfllltngsfslvvnpsalf  
wgilagvalafytiypsd1  
lnrfgsilivgwamlisgvamn1rhpiwhiditkwdisiilflifgiigtalafyffidslqyisakettlfgtvepvv  
aviass1wlhvafkpfqiv  
giilimilil1l1slkrqpet1de  
>tr|Q2FDY1|Q2FDY1\_STAA3  
mciifnft1lfnllkarflimtkimffgtrdyekemalnwgkknvevttskellssatvdqlkdydgvttmqfgklen  
dvyplesygikqiaqrta  
gfdmydl1lakkhnivisnvpsyspetiaeysvsialqlvrrfpdierrvqahdftwqaeimskpvknmtvaiigtgrig  
aatakiyagfgatitayda  
ypnkldf1tykdsvkeaikdadiis1hvpankesyhlfdkamfdhvkkgailvnaargavintpd1iaavndgtllgaa  
idtyeneayftndwtnd  
iddkt1le1ieherilvtphiaffsdeavqnlvegglnaalsvintgtcetrln  
>tr|Q2FDY4|Q2FDY4\_STAA3  
msn1eikqgenkfyigddenna1aeityrfvdneinidhtgvsdelggqvgvkkllkavveharenlkiiascsfakh  
ml ekedsyqdvylg  
>tr|Q2FDY7|Q2FDY7\_STAA3  
mehifregngaptl1l1hgtggdefdl1plgealenyh1l1sirgqvsengmryfkr1gegyvede1lafrgqelltf  
ikeaaerydfdiekavlg  
fsgnsniain1mlrseapfkka1lyaplypvevtstkdl1sdvsv1lsmgkhdpi vplaaseqvin1fntrgaqveevwk  
ghe1tetgltagqqilgk  
>tr|Q2FDY8|Q2FDY8\_STAA3  
mhtghh1ksrnhsdsinyflypsiarfgdi1l1tmfmlslaiimtaggastihqsfn1pywlsalilvafilatlflkldr  
liavlgvtpfliaivimi  
avyyfttsh1dftaanndaqihkqks1spgwwfdainyas1qiaaafs1svmgskvkyrdstlygglligglitfl1mm  
in1glisqfdkikhvd1pt  
1k1atqmspsigi1msvimilviyntvvg1myafasrfsvpfsr1ryfiiitmavityistfigfisligkvfpimglfg  
fillipvlykglikritgk  
shid  
>tr|Q2FDZ1|Q2FDZ1\_STAA3  
mdv1tieh1tkkignkti1edvsfk1krqgivlgv gangagktt1mkvilgyssfqsgnfnvinskdsksnigalienpg  
iypfmsgyen1k1lneskn  
tqdidkivs1q1hmdeyihkkaktys1gmkqk1giaiaf1nkpqfiildepmg1dpkavrdvrelivqkaqegvtfliss  
h1selvki1tnsil1inkg  
kivtetsee1kqfknd1env1leii1eredqa  
>tr|Q2FDZ7|Q2FDZ7\_STAA3  
mfnmfhfi1mvvynmyni1levkempftmkgypekwekfevikrqkaieianam1kegylekdvpiaakkakdwyrals  
keeikal eenfvqfhtat  
mektevdseyattdneehiqeqsnqdkisyfdesignqsgvrqrep1mdgphpkvvesfkdv  
>tr|Q2FE01|Q2FE01\_STAA3  
mkymigvdi1gttstksvlydengt1fimkhqigydl1htpnvdvseenpdel1davlmtikyvmreskvnkddikfvsfsaq  
mhs1iamdqhqrl1tnnit  
wadnraakyatvinevhdgnaiyqrtgtpihpmsplaki1fwmkhewqdvfqrtakfadiktyifyl1fdtyiidysmasa  
tgmfn1et1dwdveale1l  
g1skem1pel1vpttyvmkgmkeryat1mg1nkdtppfvi gasdgv1sn1lgvnsvgkgevavtigts1gairtvidkprtdyk  
grifcyv1tedhyv1ggpv  
nnggv1rwl1rdel1asevetakr1gvdpydv1tqiakrvkpgadgli1fhpylageraplwnanargsffgl1lshkkeh  
miraa1egv1lyn1lytvyla  
li evmnetpkmi1katggfaksevwrqmsdi1fdtelvvpesyessc1gacv1glkavgdiedfsivssmgvatnhtpie  
envtvyqeivsi1fin1srs  
1tenyeqi1adfqrqhiaenktg  
>tr|Q2FE06|Q2FE06\_STAA3  
mdyqtfekvknkfinveayi1ff1tqe1kqy1ks1le1l1layfyyknehsis1kei1gdilykqsdvkniks1skkgfi  
nksr1neaderri1fvs1tpi

Tsompanidou\_et\_al\_Supplemental\_FASTA\_File

qrkkiacvine1dkiikgfnkerdyikyqwapkyskeffilfmnimyskdf1kyrfn1tfl1d1silyvisrknailnk  
dlfesirfmyppqivrsvnr  
lnnkgmlikershaderivlikinkiyntiksifttdskilkprkfff  
>tr|Q2FE08|Q2FE08\_STAA3  
mrddkkgpvnrkvdflsnklnkysirkftvtgasiligs1mylgtqqeaaenienptt1kdnvqskevkieevtnkdt  
apggveaksevtsnkdtie  
hepsvkaediskkedtpkevadvavqpkssvthnaetpkvrkarsvdegfsditrdsknvestpitiqgkehfeigygs  
vdiqkkptdlgvsevtrfn  
vgnesngligalq1knkidfskdfnfkvr vannhsnttgadwgwflfsknaeeyltnnggilgdkg1vnsggfkidty  
iytssmdktekqagqgyrg  
ygafvkn2ssgnsmvgenidksktnflnyadnsts2dgkfhgqr1ndviltyvastgkmraeyagktwetsitdlgls  
knqaynflitssqrw1ng  
ginangwmrtd1kgsefttpeapktitelekk1krfhsrknvnliri  
>tr|Q2FE09|Q2FE09\_STAA3  
mieepvddvikhgpkgtgtpetktveipfetkrefnplqpgeervkqegqpgsktittpitvnl1tgekvgegqpteit  
kqpvdkivefggekpkdpk  
gpenpekpsrpthpsgvnppng1skdrakpnpvhsmdkndkvkkskiakesvanqekkraelpktglestqkg1ifs  
siigiag1ml1arrkn  
>tr|Q2FE31|Q2FE31\_STAA3  
mvgrastsekskrlyqaykkakqfevkiqneahq1legkfeinrlykdvknvgeyetvvmactadayydt1qq1slet1  
qsvkhvilisptfgsqmiv  
eqfmskfnkdiervisfstylgdtrivdkeapnhv1ttgvkkklymgsthsnstmcqrisalaeqliqlevvesplhaet  
rnsslyvhpp1f1mndfs1k  
aifegtdvpyvyk1fpegpimt1irem1mwkemmvilqafrvpsvnl1qfmvkenypvrpet1degdiehfeilpdi  
lqey1lyvrytailidpfs  
qpdenghyfdfsavp1fkvykneqdvvqiprmpsedyyrtamiqhigkmlgikt1midqfl1tryeascqaykdmhqdh1  
ssqfntn1fegdkalvtkf  
leinrt1s  
>tr|Q2FE38|Q2FE38\_STAA3  
msntnkhyyeeyateqsrffkrdigfilyiflvn1lpiiiv1tfg1vavftqqapwgfsfpismnisyllaviisla  
if1r1mheda1fipm1rsqiv  
asakykwhi1isft1svv1f111nhfnifalnvdsftvfdiyp1likgygs1litifs1ti1lntlicqlifrhiliqel  
sr1ip1k1it1iv1s1i1let1  
fyppyintwwefipalilagsatyly1ksyrnfmvsyfyqlavilvlhifm  
>tr|Q2FE44|Q2FE44\_STAA3  
m1leikdlvykasdri1dhis1kvdkgesiaigp1sgsgkstf1qkqicn1fsptsgelyfkgkpyndydpeelrqrisy  
1mqsd1fgetiednmi1fp  
s1arndk1fdrkrakq1ikdvglghyq1ssevenmsggerqriaiarq1mytpdi1111destsal1dvnnekienii1f1kla  
dggvaimwi1thsd1d1qsmrh  
f1qk1rit1iv1d1g1q1isntee1n1qhe  
>tr|Q2FE50|Q2FE50\_STAA3  
m1sikh1tkiysgnk1kavdd1s1ldiqsgefi1afigtsgsgkttalrminrmi1eat1egqieidgkdvrsmpvelr1rnigy  
v1ggig1lphmt1ikeniv1  
vpk1l1kw1t1keek1drakel1ik1vd1pes1flerypaeisggqqri1gvvralaeqdi1ilmdepfgaldpitr1dt1qdlvk  
t1qrk1lgkt1fi1fvthd1mde  
aik1ladkic1imsegk1v1vqfdtpd1n1l1rh1pand1f1vrd1figqr1liqdr1pndkt1vegvmik1pit1iqaeat1ndavh1mrqkr  
vdai1fvvds1nh1l1gf1ldi  
ed1inqgi1rghks1rdtmq1hiytv1qidsk1qds1vrtilkrnvr1nvpv1vddqqr1lvglitr1anv1vdivydtiw1gdsed1tvq  
tehvged1tassk1vheq1htt  
nvkvr1dig1d1d1ks  
>tr|Q2FE54|Q2FE54\_STAA3  
mdtskqf1rgdnr111lgiv1lgvitf1w1faqs1vn1lvpl1qstys1sdvgt1niav1s1sal1fag1fiv1gag1vadk1fgrvkit  
yvgl1ilnv1gs1l1i1it1pl  
pa1fli1igri1qg1saac1impst1lainey1igtr1rqralsyws1igs1wgsgict1lfggl1maty1igwrs1ifvvs1illt1lla  
my1likh1apet1kaep1kgmk  
aeakk1fdv1gl1vilv1vtm1s1lnv1itqt1shf1glv1spl1il1gliv1vfics1lv1gvfyen1kikh1plv1dfs1ifknrgys1gatis  
nfl1ngv1agga1livinty1  
qqg1l1gf1nss1qtgy1s1tly1litv1lsmirv1geki1sqhg1pkr1p1ll1gsg1ftv1ig1l1ll1stfl1pev1wyi1issiv1gy1ll1fgtg  
l1glyatp1st1dtavas1apdd  
ksgvas1gvyk1mass1lgnaf1gvavsg1tv1vlaan1ln1n1lgg1ftg1mmf1nallaiv1af1vil1l1vpkn1qtn1  
>tr|Q2FE56|Q2FE56\_STAA3  
mski1fv1tgat1g1igik1lvqr1keeg1hevag1fttseng1qqklaavn1vkay1igdi1lkadt1dqalad1fkpei1inqit1d1kn  
vdmaant1kvr1iegsk1nid  
aak1kh1dv1k1kvi1aqs1afmy1ep1geg1laneets1ldfnst1gdrk1vtvd1gv1gleet1arm1dey1v1lrfgw1lygp1gtwy1gk1dgm  
iyng1fmd1gqvt1l1sdg1vtsf  
vh1ddavets1iqai1hfeng1iynv1addap1vk1gsefae1y1keq1lgvep1nidi1qpaq1pfer1gvsnek1fkaq1ggt1iyq1twk1dg  
mnp1ik  
>tr|Q2FE57|Q2FE57\_STAA3

Tsompanidou\_et\_al\_Supplemental\_FASTA\_File

mttkklyflsisiilvaisaiyitlnsntktrltnsqqqidtiiehdllqkghipgasilivkngkvflnkggyqdv  
dkkvkaspttkyeiasntk  
aftglai1k1aqegrlnlndavskhvphfkmnyngqnetitikqllaqtsgpsditsedsvtsknnrlnvtraimgde  
lhhkpgfeefeysnmyd11  
glijqnvtkqsytkyitnswlklplhmthtsfkqtnykskhdaigyelqgstpvvskpefnlwdtpsaymmtstedlehwi  
kfqlnppdkykslvqqshk  
nlststigeplanayasgwftnndehlvfhsgtldnfssfillnkpqnygivlanlnseyvpklvehlntqivnhkryst  
vasmlnqykdfnvtvlm  
ttlillafifsayrawqmrhgqillrrskriavlswlslcicialalilyalpylilgsnwsfvltwlpieiklalitt  
lialfstlivillflhtki  
tkt  
>tr|Q2FE62|Q2FE62\_STAA3  
mm1qynnqhipateimrhwpthpnnphkgyvghhlfiklgnyhqti fpeayvpflqkynpnivdgtgksledlkgiidqg  
qpvllyhtnlqskplrvf  
rfdnkpakqvsnihtvlligydyyyyyidplwshirrgvlvpaipnrkqiikirkekmeysfnspgrkciyvqphsyt  
ienqqqkht  
>tr|Q2FE63|Q2FE63\_STAA3  
meyqlqqlasltlvgiketyengraqqhiagfwqrcyqegviadlqlknngdlagilglcipeldgkmsymiavtgdns  
adikeydvtlasskymvf  
eaqgavpkavqqkmeevhhyihqyqadtvsapffelyqgdttsekyiteiwpvkg  
>tr|Q2FE83|Q2FE83\_STAA3  
mtalpsimkdfeystqvqwltaflltngivip1salviqryttrqvflvgisiff1gtllggl sphfatllvariqa  
lgagimpm1mmttildvfg  
phergkymgifglviglapaigptlsgylveyfnwrs1fhvvapiaavtfligftikvgttikvpidfisvifsvlgf  
gglllygtssisekgfdnpi  
vlvsmiggvvlvalfv1rqyr1stp1lnfavfknkqftvgi1imgvtmvsimgsetilpifvqnl1hrsaldsgltllpg  
aivmafmsmtsgalyekfg  
prnlalvgmaivvittayfvvmdeqtstimlatvyairmvgia1glipvmthtmnqlkpemnahgssmtntvqqiagsig  
taaliti1shasknfsptm  
sdyngmki1dmmnqikvdtm1hgyhagflfallitvvsffcsfm1qgkkkevdsrq  
>tr|Q2FE88|Q2FE88\_STAA3  
matvll111vfi1sgcgnkdyvkeideavkiqnqkqeq1akkngdrvdhferkdaniyvvdkdi11laykplsndevhy  
aydfsdkrvsykqdfdsrr  
yyqhdadyheenmtn  
>tr|Q2FE90|Q2FE90\_STAA3  
mi1knysyarqnlka1mtkvnddsvmtvtstddknvimsesdynammetlylqqnpnaehlaqsiadlergkttkd  
idv  
>tr|Q2FE95|Q2FE95\_STAA3  
mtktmir1laseqdaek1lqqlmheaftplrelgidwpsvnan1davkenidknttfvmtiddeiistitvrypwgsvksis  
gypfvwwfatnpeyegky  
gsqlltyveeaf1rdt1ksaavt1gtsar1hpwllkiyekrgyeiysehenddg1gvimrkvliperfdetilgppf  
>tr|Q2FE97|Q2FE97\_STAA3  
makq1vmignmagirtieeilerandlyditvigkepypnynrim1snilqkmtveetimpyewyeehgielitnd  
pvievdranqsvttangie  
vsydkli1fatgskafvipvgst1psvigwrt1ddteqmmniaktkkaivigg1lglecarg1ldqgmevtvl1hlaew  
lmemq1drkagnm1kadle  
kqgm1femqantte1geddvegk1ladgreipad1vmmavgirpytevakesg1dvnrgivvndvmqtsdsnvayavgec  
aehngkvylvap1yeqgk  
v1adh1tnketngykgstfts1kvsgcd1ysagqivenaeikgieifnsvdnykki1fdgnvvgavlygdidgdrf  
ynmmkkgstedyt1vs11  
tkggeeas1siadmaddeticgcnvgdktivnaitengfttveevtaktkagnscgkckppiaqilqht1gddfvaakp  
ag1cgctd1trdqivtqir  
akg1ktskevrvh1nfnknkggcpkcrpainy1nmvypdhederesrfaneryhaniqndgtfsvipqmrvgvtdadq1  
ir1gevakkyhvp1vkvtg  
sqrvg1ygvkkee1pniwed1gmrsasaygkkrsvkscvgkefc1rfgtqytr1gir1ektfeyid1tphk1kmgvsgcp  
rscvesgvkdfgi1sveng  
fqiyiggnggtevekaef1ttvetedevik1cga1mqyyretgiyaertapw1rr1gfenvev1ldperqnelferimd  
akkaveapweaitsnaqa  
rri1fevekv  
>tr|Q2FE99|Q2FE99\_STAA3  
msveeygvyl1gagpnpnyl1tkkaer1ireadvilydr1vnp1lilyan1tte1idvgkkpyakh1qqekindcivea  
arrynkvv1lkggdpai1fg  
rvqeavdt1nehhi1afeivpgvtsasaavatmqgt1tmrtvaksvtfstghfdseenevdvns1vnggt1aiymgvkr1  
gki1itqi1qytdidypia1  
vfqascfnefvvkg1r1sni1sk1qhysieakpgici1gevvdytentpksydpmkqfyvvsghda1ml1cehlydegyg  
c1lnpndtsngtyhssqyd  
yydafikqgenvty1stdradantv1ch  
>tr|Q2FEA1|Q2FEA1\_STAA3

Tsompanidou\_et\_al\_Supplemental\_FASTA\_File

mwfnvetkpgvgyprkredqehykggwvlnrkgklelksgriskialgkifynpdmplikdyepwnynehlttaks  
 gkhsparayseitgdnie  
 iewgpnweddlagghvtgpkdpniqkieedikfqedetfmylprlcehcInpscvascpsgamykrdedgvlvdqdac  
 rgwrycmtgcpykkvfyw  
 ktnkaekctfcfprieagmptvcsetctgrmrylgvllydadrvehaasavdekdliekqldiflnpfdeeviaqaekdg  
 igydwieaaqnspiyklai  
 eyklafplhpefrtppmvwycpplspimsyfegknttqnpdai fpaieemrlpieylani ftagdtepvkgalqrmammr  
 symrsqvtqqpfdtsrler  
 lgitertkdmrllglakyedrfviptshketyldtyhaqgstgynyggehfgdncegcgvavsgktgqeiynefyg  
 gifrd  
 >tr|Q2FEA2|Q2FEA2\_STAA3  
 megfsvinfdfkkyqesfgymaqqcfpekltfhpkftfeetiskdhpayedlvafnrvmmtfslseikaiytdtdfdtk  
 kaplymtynkfdtqkergq  
 mlaklkvlyemfglemvdnel sdylpmlqflqvaewrndpraeeniqliimiedgtyvmanalgednnpayvialr  
 ktlk1cltspkqvkha  
 >tr|Q2FEA4|Q2FEA4\_STAA3  
 mtpelaiiedrrfgetldkirkeegydfaaiafyesnkpsspikwhyvsgnknnrfkliilrkgrlagtvmktgkrmvia  
 nvglalgpEEKidyPillS  
 esltavlavplwyknqvygvllfgqrdgrlpkifdnddiqrkfgifnddk  
 >tr|Q2FEA8|Q2FEA8\_STAA3  
 mpylygddinklqgrpivglshaagyacgyhlvkyflqktnipievattlpaqkiinevtefwtht1  
 >tr|Q2FEB1|Q2FEB1\_STAA3  
 milnfnqfenqfnanpsdtfkdlgkqvfnfstpsfvtniyetdelyyleaelagvnkedisidfnntltiqatrsa  
 kykseqlildernfeslmr  
 qdfdvadkqhitasfenglltitlPkikpsnettsstsis  
 >tr|Q2FEB8|Q2FEB8\_STAA3  
 mkerqyieqlwreekyhvllhsqqsyqmri nalktdlslhqvqqmidvalliepsigsvcnafdhmwyllkkcaneerq  
 qskllkadfingkidtqt1  
 ldf1aelankydvyllqsrvlntkrkr  
 >tr|Q2FEC6|Q2FEC6\_STAA3  
 mlkvhysginykda latqdhnavksypmipgidlagtiseapgfekgeqvivtsydlgvshyggfseyarvksewi  
 iklpdtltleesmygtag  
 ytaglaierlekvgmiedgpvlvrgasggvgtlavlmInelgykviastgkqdvdsqlllelgakevdrpveddhkkp  
 lasstqwacvdvpggegin  
 yvtrlnhsgsiavigmtagntytnsvfphilrgvnilgidsvftamklrqrvrrlakdlmpenlheikqvifdelpe  
 qlnkvikhenkgrivdfg  
 vdk  
 >tr|Q2FED0|Q2FED0\_STAA3  
 mlvntfnpfdnllssliaaipivlfl1cltvfkmkgiYaaittlvvtlliaipffklpvgiAsgavvegffqgiipigy  
 iVmmavllYkitvesgqfl  
 tiqdsitnisqdriqvlligfafnaflegaagfgvpiaica1lltqlgfnplkaamlclvanaasgafgaigipvgvve  
 tklpgdvsvlvgvsat1  
 tlaiinfiiipflifiidgrgvetlpailvsitytftqgl1tvfsgpeladiipp1ltmlalavfskkfqpkiyrv  
 nkdeeiepakahsakavlh  
 awspfiVltviVmiwsapffknlf1pnga1sslvfknlpgtisevthkplvltlniigqtgtail1tiitilmskkvn  
 fkdagr1fgvtfkelwlpv  
 lticfilaiskittygglsaamgqgiakagnvfpvlspilgwigvfmtgsvvnns1fapiqasvaqqigtsgsllsan  
 tvggvaaklispqsiat  
 aavkqvgkesellkmtlkysvc11ificiwtfils11  
 >tr|Q2FED1|Q2FED1\_STAA3  
 msyfsnvp1filkrgtvfmtdqsktdviliggimsatlg1lkelSpeknikvfeklaqpgessnvwnnagtghsa  
 lcelnytkegkdgtvdcsk  
 aikineyqiskqfwaylvktgqldnpdrfiqavphmsfvigednvafiksrvatlkksilfekmksqdeemkswp1  
 miegrksdepialtydetg  
 tdvnfgaltaklfdnleqrgvgiqyqnvl dikkqksgwlvkvkdl etnettYesdfvfigaggaslp1lqktgikqs  
 khiggfpvsglflrctnqe  
 vidrhhakvygkaavgappmsvphldtrfvdgkrsllfgpfagfspkflktgshmdliksvkpnivtm1sagikemslt  
 ky1vsq1mlsndermddl  
 vffpnaknedwevitagrvqvikdtedskgnlqfgtevi tsddgtlaallgaspgastavdimfdvlqrcyrdefkgwe  
 pkikemvpsfgyr1tdhed  
 lyhkineevtkylqvk  
 >tr|Q2FED2|Q2FED2\_STAA3  
 mkn1kns1fisliig1s1s1ffsm1fadgkyyp1npqstigilythftettvmlisiilwlligvvfflgdfifkytdw  
 sitkatimhfittvygflp  
 lamlagwfp1tvhyliiftiifivvyvliwiiqffknknyvdtinkqlkq1k  
 >tr|Q2FED8|Q2FED8\_STAA3  
 miqntfgy1peyivadacyseqnymaiiddfnktp1ityvmfikdktrkfsdifntqnwkydelndeficpnkkrigf  
 kryayhndrygfkrdfkly

Tsomanidou\_et\_al\_Supplemental\_FASTA\_File

ecneliyiikyiskklisik  
>tr|Q2FEE0|Q2FEE0\_STAA3  
mvkhlqdhiqf1eqfinnvnaltakmlkdlnqeyeis1eqsnv1gmlnkepl1tiseitqrqgvnkaavsrrikk1idak1  
vklkpnlnidqrlkfit1  
tdkgray1kerna1mtdiaqdi1ndlnsedienvrqv1levinhriktyshk  
>tr|Q2FEF9|Q2FEF9\_STAA3  
misiha1stgkiqdl1pysskrpmrsa1dktki1sqt1w1sstgftgdeqaykdhggphkavc1gfskhnya1lyqddl1pt1pt  
hamfgen1tfdyl1desdvy  
fgnqyr1geali1evsei1repcwkiqakynipdl1vkrmstsgktgyfrv1lkqgyvspndq1lyliqeapiehr1svqq1nd  
lyndrqndq1m1ryal1nnp  
flsptrrdk1kqkmyrnt1k  
>tr|Q2FEH2|Q2FEH2\_STAA3  
mfldehin1rnfdk1ndnd1lhahfinthidecknmkiqdl1aqfthasnat1hrftrkl1gfdgysdfksyl1kfesnkthq1  
pnsidsfkqeidstfsyl  
ervdyq11tkkmhtast1ylygtgraql1nvaseaqril1l1nhhviv1lhdhe1kmi1nksepnd1ffi1s1sgethe1l  
evtn11ql1rqkyf1svttm  
kdnt1laqkany1nvys1sntf1y1ldgtdyssf1syhi1ffet1vrkyney1l1hndisn  
>tr|Q2FEH9|Q2FEH9\_STAA3  
minms1nv1teidsqypymtknekkiakfi1nspqkvikmrsqdlas1l1distssvirfskkitdgghfd1kiniskyvpk  
assiy1nve1mn1nestes1r  
tkl1htrt1tral1nhanelndktidqi1chcl1krsetifiy1gfgasfvvatdlyqk1srig1niql1vqethifatl1athns  
ndsv1li1tnngt1qsemqsm  
vkviddyhipi1i1tit1strdn1pvaqasniv1tygktdenemhmgatts1faqmftidilyryvalnyhas1dfitqskma  
l1dnyrkhl1snifkh  
>tr|Q2FEI4|Q2FEI4\_STAA3  
ms1pkki1flwvfgil1vilaivavyvaakifitgk1hnp1drnhsel1rdk1kvs1ndgd1pftial1fgvds1dadrkkk1ggg  
ersdsimil1sinpktkkte  
ivs1prdtraeiv1vgrgtteki1ahayayggpn1mavks1lek1mnvpidhyatidmdgl1hnmidsiggvdvsndtftvdgvr  
ftk1ggq1thvngd1qalkfir  
srkeegaggd1fgrqqqqiv1leamankiaspssithfns1lmeiqnnvkt1d1t1gd1ntirsnykdandtinkhql1sggq  
g1qsdg1lyfip1seqskae  
stk1lkdn1e  
>tr|Q2FEJ1|Q2FEJ1\_STAA3  
mttem1ndv1tnhqpnrks1ndenimam1iy1l1s1f1tsi1igpliiw1l1kkdesk1vdragkny1nytisyi1iwsiv1lvvitli  
gvfi1atd1idfi1ii1igfi  
tfigilsifafsil1sfvfti1acvkyngqeyi1ipt1irfi  
>tr|Q2FEJ7|Q2FEJ7\_STAA3  
mi1d1nvpnd1fptekkgpsv1gi1eyqvqgene1fegafiatner1im1nvdmg1qfyrsisyne1ekidydgq1timfkf  
ni1gnvpm1hdiksanvem1fv  
eyvkqhm1v  
>tr|Q2FEL9|Q2FEL9\_STAA3  
myvek1rnp1pvkeaiqrivnqqsmpaitv1aleks1nhilaedivatydip1rfdkspyd1gfairs1vdsqgasgqnri1efk  
vidhigagsv1sdl1vgdhe  
avrimtgagi1pn1gadavvmfeqtie1ledtfti1rkpf1skneni1slkgeetktgdv1lkk1gqvinpgai1avl1atygyaevkv  
ikqpsvaviatgse1l1dvn  
dvl1edgki1rnsngpmi1ralaek1gl1evgiyktqkdd1d1sgiqv1vkeamekhdivit1tg1vsvgd1fdyl1pei1ykavkaev1  
fnkvamrpgsvtt1vafvdg  
kyl1fg1sgnpsacftgfe1fvk1pavkhmcgale1vfpqi1kat1medftkanpf1trfirakat1tsagatvvp1sgfnksga  
vva1ahancmvm1pggsrg  
fkaghtvdi1l1tesdaae1ee1l1l1  
>tr|Q2FEN2|Q2FEN2\_STAA3  
mi1l1lialgyflkrin1fikatdsqviat1vl1nvt1pslvivn1nsaelk1sfsilpilmi1ygivakmiavw1frkydnh  
mrgsvgm1mtgamni1gl1fay  
pli1ev1w1p1ktgl1iyfvmad1igga1fvmfgi1tyfvgsy1f1seg1sdq1fdkyl1gkkl1qsv1lvtyivmfiln1shih1lphvai  
d1ffs1ilshannp1smi1llg  
vm1nft1lerkyipati1kyl1c1l1hyglalvag1llvyv1l1psddmiktt1llvtwmfpvgvai1s1ygiqfkyrt1l1figm1tt  
l1ti1i1s1i1i1lyvyqavfv  
>tr|Q2FEN6|Q2FEN6\_STAA3  
mdqgai1fvata1aafvgs1fmgl1iakypialapgm1glnaffa1ftv1l1tmgipwqvgl1tgvl1fsgiffail1vtvgfrevi1  
nai1pyqm1k1mavsagi1gl1fi  
tfv1gl1qssgi1ivk1nest1lvt1gh1tdppv1l1aifgivitvilyaik1lpgsifigmi1itaivgmftgli1qmpsgiv1gkips  
ieptfga1feafk1dpsq1l1  
tiq1flivi1l1t1fl1fidfd1tagt1lavatqagimkdn1l1pragral1fsds1lativgsvfgtttttsyi1estsg1vagartg  
fas1ivtgcc1f1l1al1ffsp1  
iavvtsav1t1pa1lvvvgv1maanfaeinwks1fevavpafit1im1p1s1ysiat1giacgfi1fypitmi1skkhkev1hpimy  
v1lmv1filyfi1fvhg  
>tr|Q2FET4|Q2FET4\_STAA3  
mfsp1sds1in1vhvvy1vysepykkt1nvikk1fts1l1tidely1fkeyk1ek1ddn1l1ceefsykcsik1dikiy1kkl1kain1sqdf



Tsompanidou\_et\_al\_Supplemental\_FASTA\_File

kglvpninqndnyseiyii  
nntknliyhlyddrglwlafnnedyarysekyndlisefdnedi  
>tr|Q2FEU4|Q2FEU4\_STAA3  
mkki fviittllavaiiigsiimvvsqrqaqt fkiqqqfvkkip tlf lfhgfggsansekfmvkqaekrgvtkdi ita  
yvskdgavt fkgklrkdav  
npivkie lennrggyldknaawfknv ltklqseynfdkfnfvghsmgnl tfaqymtygndkslpqlnkqvni agt fngv  
lnmnedvnei tvdkdgkps  
rmngpyqglrvlkd iykgkievlniygd lkdgthsdgrvsns sskslkyllgnspksyreskyegepaqhsq lhenenv  
anelidflwkk  
>tr|Q2FEU8|Q2FEU8\_STAA3  
mslgvkr lknfilgllivvvgfllfmyiqdgriteyqdyflqfewfqp llislaallil iglilv fsifkpthrkpgly  
kdfddghvyv srkavekta  
fdtvakydqvrqpnv vaklynkknksyidikt dffvpnnvqvsl teairsdiknveyftempvrklevnvrdqktsgp  
rvl  
>tr|Q2FEV1|Q2FEV1\_STAA3  
mnlnli fkeqt lknkee qetylflqqhnsdwani fkemilqgrdkvtqr lvt smhrenlvkartqskkil srdlimldi  
stthileiqfpqakqtlya  
pitgehafdridvegpfyikdditntitrvhhpneilec ilieapdlknaasdqfqqdlinsatnmtfaisyqalsmqhd  
saplfniensedsylrse  
gavieghplhpgaklrkgl nalqt flyssefnq piklivlihs klsrtmslskdydtvhqlfpdlikqleneftpkfn  
fndyhimivhpgl dddvln  
sdyqaevdke lieakht ldyaglsfrt lvpkypamsphiklstnvhitgeirtlseqtthngplmtrilndilekdvi  
fksyastiidevagihfyn  
eqdeadyqterseq lgtlfrkniyqmipqevt plipsslvatypfnnespivtlikryqsaaslsdfessakswvetysk  
allglviplvtkygi alea  
hlqnaiatfrkdglldtmyirdfeglridkaqlnemgystshfheksrilt dsktsvf nkafystvqnhlgeliltiska  
sndsnlerhmwyivrdvld  
nifdqlvlsthksnqvnenrineikdtmfapfidykcvt tmlre deahhytyikvnnplyrenn  
>tr|Q2FEV6|Q2FEV6\_STAA3  
maikeissqsaidhkrkr rrttlyivslcflficylnmaigsskinfsdiihyvtghtdtkatfl lhnvrmp rmiaglf  
iggalavsgllmqamtrnp  
laspkifgvssgasffivftiipa leyyalylvigafiggltvyt lsgatkgmt piklalagmai hffssmtegi i  
ilnensneqv mfwlvgs l  
smkwdeilt lwpwiagalv ti figrqltime lggdiakglgninkvri igllviiltgmsvsvagpigfvglivphi  
vkryvsknylvmipltfii  
gadllllsdvlsrlitypespvgivtsfv galyflfitikgvkri  
>tr|Q2FEV8|Q2FEV8\_STAA3  
msligillflvpipveqdgqkq tlpvaf lagv lkdvlggvmpflivtiitlsgitlicstilkd klpdglmna fnv  
rigwlilrilavvfawmtf  
lrigskviysdetgglfssllptlvavflfaal flpllmeygllem lgpifrpvmrplftlpgrstvdn lasfigdgtv  
gvlit srqygegyysrrea  
tvisttfsvvsitfaivvaetv hmqnqffafylsvivsc lvaavipriwplnkipdeyakev pesartealpegkta lr  
hgfdtatevgikagpvidf  
fksglktvidmwfvlpvvmsigtiatiianypffvilgkpfvpflelmqipeaaqasqtii igfadmflpsiliegvq  
nditr fvigalsisqliyl  
sevggilgskipvsigklfmi flirtiitlpiisl mahlll  
>tr|Q2FEW0|Q2FEW0\_STAA3  
mtgkthascgmlvgalttgyfqt d fssvtviilatlasllpdichtqskigr rfkvisffvr lifghrtfthsilfia i  
iafl lqiigt pnyyaaai  
iglvshvildmi tpkgvklfyp lpfnvktpiqfktgg lvdslatalmvgtvyvlfqpfindi isnwntkfl  
>tr|Q2FEW2|Q2FEW2\_STAA3  
mskstksndtivetfkdiip lsfgeeignaashgvaalltllvlpyaavhsyiahgt lasvsmsiyvisifmmfissti  
yhsmqnetphkyilriidh  
smiyvaisgtytpilltvvgwigwtvfillwgttlwgilyksiavkv nqklslivylvmgwvgiillpiifirtswifi  
lfi flggvsytigawfyag  
knrpyfhmiwhifiviasllh liailyfm  
>tr|Q2FEW3|Q2FEW3\_STAA3  
mr lksii tvialilimfmsaie ssiisla lptikqdl nagnlisli ftayfialvianpivgellsrfkiiyvaiaglll  
fsigsfmcglstnftml i  
srviqgfgsgvlmslsqipklafeiplrykimgivgsvwgissig plgggilefatwhwlfy inipiaiaia ilviw  
tfhfpeetvaksfdtkg  
l tlfyvfiglimfallnqqllllnflsfilavvamclfkvekhvsspflpvvefnrsitlvfitd lltaiclmgnfyi  
pvy lqeqlg l splqsglvi  
fplsvawitlnfnlhrieaklsrkviylsftlllvssiiisfgiklpv liafvli laglsfgyiytkdsvivqeetspl  
qmkkmmsfygltknl gasi  
gstimgylyaiqsgifgpnlhvnlsavavisiglivlvvffkeqssqske  
>tr|Q2FEW5|Q2FEW5\_STAA3  
makvel ttrrrnfivavmlisafvailnqtllntalpsimrelninestsqvlvtgfm lvnvgmip l taylor mdrktrpl

Tsompanidou\_et\_al\_Supplemental\_FASTA\_File

ylaamgtfllgsivaalap  
nfgvmlarviamgagvlpmlmqftlftlfskehrfamglaglvifapagptatgliidqaswrvpfiilgiaail  
afvfglvsissynekytk  
ldkrsvmystigfglmlyafssagdlgftspivigalilsmviiylfirrqfnitnallnlrvfknrtfalctissmim  
msmvgpalliplyvqnsls  
lsallsglvimpgaiingimsvftgkfydkygprplytgftiltittimlclhtdtsytylivvyairmfsvsllmmp  
inttginslrneeishgta  
imnfgvrvmagslgtalmvtlmsfgakiflstpsphltateikqqsiaigvdisfafvavlmaayvialfirepkeiesn  
rrkf  
>tr|Q2FEW6|Q2FEW6\_STAA3  
mp1ketegivevsikeehsvsklamaqlggapqldlq mavna1kengaktvgirfetlpeekvnqf kpkkeenpkkti  
egllsqnnpvefiaiasgk  
ggvgkstvavn1avalaregkkvgldvadiygfsvpdmngidekpgikgkevipverhgvkvismaffveenapviwrgp  
mlgkmltnfftevkwgdie  
yl1ldlppgtgdvaldvhtmlps skeiivttphptaafvaaragamakhtdhsilgvienmsyfesketgnkeyvfgkgg  
gk1adelntqllgelp1e  
qpswnpkdfapsiyqsddr1gkiyssiaqkviaatnk  
>tr|Q2FEW8|Q2FEW8\_STAA3  
mkttkaidiigapstfgqrklgvd1gptairyaglisrlkqldldvydkgdikvpavniekf hseqkglrnydeiidvng  
k1nkevsasiennrfplvl  
ggdhsiavgsvsaiskhynnlgviwydahgdlnipeespsgnihgmp1riltgegpkel1elnsvikpenivligmrd1  
dkgerqfikdhniktftms  
didk1gikevientieylksrnavdgvh1slvdaldp1etpgtgrvlgg1syreshfalellhqshlissmdlvevnp1  
idsnnhtaeqavslvgtff  
get11  
>tr|Q2FEX2|Q2FEX2\_STAA3  
mnlfrqqkfsirkfnvgifsaliatvtfstnpttasaaeqnqpaqnpaqpapadantqpnanagaqanptaqpaapanqg  
qpavqpanqggqanpagga  
aqpntqpagqgnqadpnaaaqapgnqatpanqagqgnqatpnnnatpanqtqpanapaaaqpaapvaanaqtqdpnas  
ntgegsintt1tfdpais  
tdenrgdptvtvtdkvnngs1innkgigfvnse1rrsdmfdknpnyqakgnvaalgrvnandstdhgnfngisktvnv  
kpdseliinfntmqtnskq  
gatnlvikdakkntelatvnavktgtah1fkvptdadr1dlqfipdntavadasrittnkdgykyysfidnvg1fsgsh1  
yvknrldlapkatnnkeyti  
nteignngnfgas1kadqfkyevtlpqgvtyvnns1tttfpngnedstvlknmtvnydqanankvtftsqqvttargthtk  
ev1fpdks1kl1sykvnvan  
idtpknidfnekl1tyrtasdvinnaqpevt1tadpfsvavemnkda1qqvnsqvdnshyttasiaeynklkqqadtil  
nedanhvktanrasqadi  
glvtkl1qaalidnqaaiaeldtkaqekvtaaqskkvtqdevaalvtkinndknaiaieinkqtaaqgvtttekdnngiavl  
eqdvitptvkpqakqdiq  
avttrkqqikksnas1qdekdvandkigkietkaikdidaattnaqveaiktaikaindqttattakaaa1eefdevvq  
aqidqap1npttneevae  
aierinaakvsgvkaieatttaqdlervkneeiskienitdstqtkmdaynevkqaatarakaqnatvsnatneevaeada  
avdaaqkqglhdiqvksk  
qevadtkskv1dkinaiqtkavkpaadtevenayntrkqeiqnsnastteekqaayteltdkkqeartnl1daantndv  
ttakdnsiaainqvqaatt  
kksdakaieiaqkaserktaieamndstteeqqaakdkvdqavvtanadidnaaanndvndaktneatiaaitpdanvkp  
aakqaiadkvqaqetaidg  
nngstteekaaak  
>tr|Q2FEX3|Q2FEX3\_STAA3  
mtqansnieaansqndvdqakttgensidqvtptvnkkatarneitailnklqeiqatpdatdeekqaadaeantengk  
anqaisaattnaqvdeaka  
naeaa1navtpkvvkkqaakdeidqlqatqtnvinndqnatteekaa1qqlatavtdaknnitaatddngvdqakdagk  
nsiqstqpatavksnaknd  
vdqavttqnqaidnttgatteeeknaakdlvlkakekayqdi1naqttndvtqikdqavadiqgitadttikdvakdelat  
kaneqkaliagtadattee  
keqanqqvdaqltqgnqnienaqsiddvntakdnaiqaidpiqastdvktnaraelltemqnkiteilnnettneekgn  
digpvraayeeglnniinaa  
tttgdvttakdtavqkvqqlhanpvkkpagkkel1dqaadkktqieqtpnasqqeindakqevdte1nqaktvndqsstn  
eyvdnavkegkakinavkt  
fseykkdalakiedaynakvneadnsnastsseiaekqklaelkqtadqvnqatskddievqihnd1dnindytiptg  
kkesattdlyayadqkkn  
isadtnatqdekqqaikqvdaqvqtalesinnvgdngvdvda1tqgkaa1daiqvdatvkpkanqai evkaedtkesidq  
sdqltaeektealamikqi  
tdqakqgitdatttaevakakaqgleafdniqidstekqkaieel1etal1dqi eagvvnadatteekaeftnaledilsk  
atedisdttnaeiatvkn  
salleqlkaqrinpevkknaleairevvnkqieii knadadasakeiartdlgryfdrfadkl dktqtnaevaelqnvtip  
aieaivpqn dpdandtng

Tsompanidou\_et\_al\_Supplemental\_FASTA\_File

idnndatansnanatpentgqpnvsettangkadaspttpnnsdaatgettatsatddandkppannnssvdastnsptm  
dndvtskpevestnngtt  
kpvtdnatapeesttinnstttatnenaptgstatapttasteaassadskdnasvndskqnaevnnsaesqstndkva  
qpksekakaekdgsdstn  
qsmvesttetlpsaditepnvpsntskdkeesttnqtdagqlksetnvasneadkspkskadtevsnpkptsasseakekm  
tstnvsqkddtatadndt  
qksvgsaannkatqndganaspatsvngsnsanqdmInvtntddhqaktksaqqgkvnkakqqaktl pdtgmshndd lpy  
aela1gagmafli rrrftkk  
dqqtee  
>tr|Q2FEX5|Q2FEX5\_STAA3  
mse1fsndniflnvnvnsqneaiekagkalvdsgavtdaiyamkdreqvstfmenglaiphgtdeaktviahsglt11  
qipegvdwdgevvkvvvvgi  
agkdgehd11skiaitfseeenvdrivqaksaeikqvfeeada  
>tr|Q2FEX6|Q2FEX6\_STAA3  
m11strekemiallikyhgqyitihdiaaqlavssrtihrelkgveayltsfsltlerankkg1riagtdsd1ndlkqsi  
aqhqtid1sveeqkviiy  
al1qakepvkqyslageigvsvqt1akm1dd1eld1nkyql1srkrgegiylvgteskkref1sq1mvnn1nstsvysv  
ienhfvfhs1nqihkdfvd  
lerifnver11mdylsalpyqltessyl1tvhiv1sisrikngeyvalnddiydvqntfehkvase1adklgqi ydv  
fnqaeiaf1t1h1rgakrk  
n1ndts1nncen1k1kafv1nk1vemi1sgmtfad1dt1vdgl1t1h1npain1rqanietyn1tdmikfkypr1fenvr1a  
1ndcwpd1ifpeseiafiv  
1hfggs1knqgnr1f1n1lvvc1ssgm1gtsr11str1dqvfseieritqasvsd1ks1d1sqydg1i1stvn1did1spyl1tn  
p11pds1s1yvag1f1ntks  
tfqethdk1ssnm1dkdd1vhvetkdvdgnts1feneqtsyl1tsvfekhl1sdekseq11hhmrsg1t11dsvkiv1stevkqwq  
tyiadyl1yqcdv1ndptsf  
aell1eqr1idnpgwi1spypvaiph1rdnmikhpmlitvleep1t1psiqndnqtikymismfisdndfmas1vsd1se  
f1s1k1les1dtfmenpge1  
et11rnk1f1erikkqfi  
>tr|Q2FEY1|Q2FEY1\_STAA3  
msvnard11v1htnvr1vg1ee1fankc1anndvqimnsikk1ieaell1ttndfevsiykktrpelqsilksfgikttg  
nkpdl1kridndfhiinn1  
d1pyvyiptkkgeei1kkteyltsfiqsygeis1erayylvenyidencddkvaeyk1fefqrkydng1efdfnhgynfel  
nm1idhykrdvkdydnark  
ysniyl1yfg1rdflkk1msnysyyskgnid1nei1qnd1nrf1nssasgmyer1iyen1snimfel1kkdtqdyd1e  
eq1iekf1inyv1svnkkes  
rsnt1ie1skil1engytidkeefk1keddy1skyiftdidylkk1leskinva1dir1sgeih1vl1dds1d1il1iqnqkygne  
f  
>tr|Q2FEY5|Q2FEY5\_STAA3  
mni1v1ganggv1s1lvqqlakenvpftagvrqsdl1nalksqgmka1lvdvendsiet1tetf1kpfdkvi1fsvgsgnt  
gadkt1i1vd1dgavksmia  
skeanikhyvm1styd1srrqafddsgd1kpytiakhyaddy1rrsg1nytilhpgal1naagsgkieaaqyfdgkgeipr  
edvatv1keiv1tsnhfnh1q  
efqi1sgdqdikdal1tqfenetd  
>tr|Q2FEZ1|Q2FEZ1\_STAA3  
mtkg1tph1qngvkiaktv1mpgdpl1rakiyadn1f1enveqfndvrnmfgytgytkgevsvmgsgmgipsigiysely  
nffdvdt1i1rigscgal1e  
nvnlydv1iaqaastnsnyvdqynipghfapiadfelvtkaknvadqigatthvgvnl1ssdtfynadptfndawkkmgil  
gimesag1ylnaihagkk  
al1g1ftvsd1hil1rdeattpeerqnsftqmm1eialeia  
>tr|Q2FEZ2|Q2FEZ2\_STAA3  
mnsak1idht1lkpestr1tqidqi1deakayh1fksvcvnpthvkyaer1adsevl1vctvigfpl1gasttatka1feteda  
iqngadeidmvinigalkd  
grfddvqqd1eavvkaakghtvkvi1etv1ldhdeivkase1tktagadfvktstg1faggataedvkl1mkdtvgadvev  
kasggvrn1edf1nkmveag  
atr1gasagvqimqgleadsy  
>tr|Q2FF11|Q2FF11\_STAA3  
m1dvf1qwr1tdf1vvhm1hddmpkamimkfd1al1qrm1l1gepiqiyvgfasfygrtfdvnsncl1ip1peteevm1hfl1qqle  
ddat1vd1igtgsgv1ait1  
kcekpd1nviatdis1eamnmarnaekhsqi1qf1tgdal1kpl1negik1nglisnppyidekdmvtmsptvtrfephq  
al1fadnhgyaiyes1ied1  
phvmekgspvvfeigynqgeal1ksii1nkfpdkkidi1kdingh1drivsfkw  
>tr|Q2FF23|Q2FF23\_STAA3  
mmmv1sssk1rraekntkqftpymdkmqda1tavagassntnhpml1rprkitrsgyl1vitsdkgl1agaysanv1kk1itdi  
eakhqds1seys1iv1lgqqg  
vdf1lknrgydieysqvdvpdqpsfksvqal1anhaidlyseeide1lniyyshyvs1lenkptsrqv1plsqedsskghgh  
l1ssyefepdkes1lsv1lp  
qyves1iygti1dakasehatrmtamknatdnatel1idd1s1eynrarqaeitqqiteivggsaale

Tsompanidou\_et\_al\_Supplemental\_FASTA\_File

>tr|Q2FF30|Q2FF30\_STAA3  
mInkiivigr1tkdaqifekedrkiatfcvathrnykdengeivcdylfckafgklasniekytnqgtlvgitgqmrsk  
ydkdgqthfvtelyvetik  
fmspksqneilsdsi  
>tr|Q2FF33|Q2FF33\_STAA3  
mikpkialtiagtdptggagvmad1ksfhscgvygmgvvtsivaqntlvgqhinh1nhqwvdeqldsvfndtlphaiktg  
miatadtmetirhylmqhe  
sipyvidpvm1aksgds1mdndtkqn1qht1lpladvvtpnlpeaeitgltidseekimqagrifineigskgviikg  
hsndtdiakdy1ftnegvq  
tfenerfktkthtgtgctfsavitaelakgrp1feavhkakkfismsiytpeigrgrgpvnhfayl1kkeglddelsk  
>tr|Q2FF38|Q2FF38\_STAA3  
mifk11hdtinkiyyfki1fdgrfqmie11sia1khsni11nsifigafin11faftiifmerrsansiaw11vlvfl  
plfgfily111grq1qrdq  
ifk1dkedkkg1elivdeq1aa1knenfsnsnyqivkfkemiq11lynnaaf1ttnd1kiytdgqekfddliqdirnat  
dyihfgyy1i1qndelgrti  
1nelgkkaeggvevki1yddmgsrg1rkkgl1rpf1rnkkgghaeaffpsk1plin1rmn1rnhrkivvidgqigyvggfnvg  
deylgkskkfgywrth1r  
ivgdavnalq1r1fildwnsqatr1dhisyddryfpdvnsqgtigvqiassgpdeweikygy1kmissakksiyiqspyf  
ipdqaf1dsik1aa1ggvd  
vni1mipkpdhpfvfwat1knaas1ldagvkvfhydngflhskt1viddeiasvgtanmdhrsft1nfevnafiydqgia  
kklkqafidd1avssel1tk  
aryakrslwikfkegisq11spi1  
>tr|Q2FF49|Q2FF49\_STAA3  
msfyk1nlkq1ikn1pimfvvevgmi1tlilicfpdifgtsylsrgylitifi11lilitilfanseafaegr1kaqadslr  
qaqsn1tar1ieengayri  
vnate1kagqni1rvengetipadgvvinglatvdesaitgesapvikesggdfdgviggtlvtsdwleirveseagtsfl  
dkmialvegaernktpnei  
alft11tt1ti1flvvivt1ypiasylh1ilpiam1ialtvc1lipttigg11saigiagmdrvtqfnvlaksgravevcg  
dvdvmi1dktgtitygnri  
asef1pvnqmq1lek1ivaaymssi1yddtpegksivr1akqmyine1pkdidgtykpftaetrmsgiitneisvfkgapns  
min1lvkqqgnip1nies1  
cmdvsskggtpliviennvlgviy1kdvikdglverftele1rkmgietvmctgdna1taatiakeagvdrfvaeckpedk  
ikvikdeqakghivamtgd  
g1ndapalaqaniglamnsgtisakeaan1id1dsnptk1ievkigkq11mtrgal1tts1landvakyfailpalmmst  
ipemts1nimh1sspksai  
isali1fna1iivalipi1amkgvkvkgy1sidri1fnm1iyglgg1ivpflgik1idmivqffv  
>tr|Q2FF51|Q2FF51\_STAA3  
msdytk11tkspksa11yyi1tng1efi1svavyvifyfiw1rfewphy11lyi11vlgal1st1klf1kplwqyhcrfykvd  
q1svqyrtsffiykeetsr  
ier1qy1siksnpiskv1nlykvgf1mtaghtiy1pmmshddvki1eertmsn1rgvesdv  
>tr|Q2FF61|Q2FF61\_STAA3  
mdnq11nsi1iekyqfskkqieav1t1leekntvpfiaryrkeqtgg1devqikq1iddeyqymvn1qkrkeeviknieqqg  
11tee1kkdi1kqn1k1qr  
ed1y1rpfkqkkktrateakrkg1lep1aiwmkarkhevsieekaqqf1ineevqsvedaikgaqdi1aeqisdn1pkyrtki1  
kdmyhqgv1ttskkknaed  
ekgi1femyyaysepikrianh1rvlavnrgekekv1svkfe1fdttsvedfiarqein1hnnvnr1syileaikds1kr1ivps  
iereihad1tekaenhaid  
v1fsen1rn111qppmkgkq1lgvdpafrtgck1lavinpfgt1fiakgviyphppvs1kkeaekdfvqmvkaydvq1iaign  
g1sareteqf1vad1ikkhq  
1pvqfi1ivneagasvysasei1arde1pdfqveersavsigr1rvqdp1selvki1dpsigvgqyqhdvnqkalenaltfvv  
etavnqvgvdvntass11  
qyvsg1ssqiakni1ayreengaikhnel1skikr1lgaktfeqsigf1rivdgsep1dntsihpesykvtyq11dklgfg  
gnd1g1sdal1kak1ns1ldmd  
elaie1lqvgvpt1edi1ks1kapnrdprdefetp1ksdv1sied1lqegm1ksgtvrnv1vdfgafvdigvkqdg1vhvsk  
1skkf1vkn1pmd1ivsvgdiv  
dvwi1ysidknkdkvs1tmi1dphe  
>tr|Q2FF74|Q2FF74\_STAA3  
mdqqskeq1ni1remtkedvpqvf1lerrsfndsswtidafyheieqnnfakyfv1lefeqqi1igylglwividqaqittva  
iddnyrgygl1qgm11kygi  
nyashtcdvms1levrvnnkvaqhvyen1gfqyggkrknnygegedamvmvvn1nd  
>tr|Q2FF77|Q2FF77\_STAA3  
mi11lq1nh1sksfdgedi1ftdvdfevktgerigivgrngagk1st1mk1iagvenyds1gnvskikn1klgy1ltqgmt1nsn  
atvfeemskpfehikr1mes  
1likeetdc1skhandyds1tykthmsryes1snqfeq1legyqyeskikt1vlyg1nfseedfnkp1ndfsggqktr1slaq  
m11nepd1111de1p1nh1d  
1ettkw1ledy1ryfkgai1v1ishdry1fdkivtqi1ydvalgdvkryvgnyee1fiqrd1lyyqkrmqeyesqqaeikr1let  
fvekn1trastsgmaksrr  
ki1lekmeridkpm1daksaniqfg1drntgndvmhvkn1leigyq1taikpmsievs1kgdhia1igp1ngigk1st1liktian

Tsompanidou\_et\_al\_Supplemental\_FASTA\_File

qqkalingditfganlqigy  
ydkqkaefkssktildyvwdqypImnekdiravlgfllfvqddvkkiiindlsggekarllla11mlqrdnvlildeptnh  
ldidskemleqalqhfegt  
ilfvshdryfinglankvfdltidggkmylgdyqyyiekveeaea1kahqeeqsvnvqahkksmeqssyhqkeqrreqr  
k1erqiseceneietlett  
ilqideqltqpevynnpqkanelaiqkqadseqklehamskweelqqk1  
>tr|Q2FF79|Q2FF79\_STAA3  
mwmifsglijvggllgfvmqtrtrfcltggfrdmyvqknnkmfyalliaitiqsiglliltatdilqipahsfpilgtiigs  
fifgigivlaggcatgtwy  
ragegligswialvlyavtaaitktgilkpvmkinqptvnvndmsqttgipfwglvvlitititilvvrtnlnkkvrva  
vpklkqrytgiiryylfekr  
yhpfiaaivigliallawpmsastgrndglgittpsanlvhflitgetkfidwgvlvlgifigsyiaargsrefkwr1p  
dkitirnsaiggi cmgfga  
svaggcsignglvetatmtwqgwialasmi vgvwtmshfivrpmkkvhqqsakvkqqtqiv  
>tr|Q2FF83|Q2FF83\_STAA3  
mtewtreeryqriedvdteyfk1kqqvdqskfrqqfhiqpetgl1ndpngliyfykgkyyvshqwfplgavhglkywyny  
tsddlinfkaegpilnptd  
kydshgvysgsafeynghlymytgnhrdnhwqrhasqmiarlkedgsvekfpkpvisqqpegytshfrdpkvfkydeky  
yaiigaqnnndqqr11lyn  
tediinwhy1geintelddfgymwecpdyfnvdnqdvilicpqgiepkgdqfkniyqsgyilgkfdieklyehenfvel  
dngfdyapqtf1dekgr  
v1igwmg1peiyeptdnegwahcltiprvlnvengqlkqrpypaleklrhketalgyankftrklhpyegkqyelidi  
lndatevyfelrtsktss  
tliaynkrenkitlrdsgl1ptnvegtrstildtp1kqlqifvdtssieifcndgervltsrifptedalgi ktste  
sgqvy1qftkydlkdehk  
>tr|Q2FF86|Q2FF86\_STAA3  
milmf tipaiisgikyskldyffiiivist1s1flfkmfdsasliiltsfiiimyfvkikwysillimtsqiilycanomy  
iviyayitkisdsifvifp  
sffvvyvtisilfsyiinrvlkkistpylilnkgflivistillltslfffysqinsdeakvirqysfifigitifl1si  
1tfvisqfllkemkykrng  
eeietyyeytlkieainnrmkrfrhdyvnilttseyireddmpglrdyfnknivpmkdn1qmaik1ngien1kvreik  
glitakilraqemfpi1si  
eipdevssin1nmid1srsgii1dnaieasteiddpiirvafiesensvtfivmncaddiprihel1fesfstkgegr  
glglst1kei1adnadv11  
dtiengffiqkveiinn  
>tr|Q2FF92|Q2FF92\_STAA3  
msyhwfkkml1sts1il1ssslglathtveakdn1ngekpttn1nhnitspsvnsenmnnnetgtphesnqtgnegtgsn  
srdanpdsnnvkpdsnnqn  
pstdskpdpnnqnp1pnpkdpdpdpkpkdpdpdpkpkpdpdpdpkpkpdpdpkpkpdpdpkpkpdpdpkpkpdp  
pkpdpnkpn1pnp1pdpdpq  
gdsnhsggsknggtwnpnasdg1nqgqwpngnqgnsqntgndfvsqrflal1angaykynpyilnqink1gkdygevt  
ediy1n1irkqfnsgnay1n  
glqqqsn1yfrf1qyfn1k1seryyrn1deqvlal1itgeigsmpd1kkpedkpskqrsfephekddftvkkqednkksas  
taysksw1aivcsmmv1fs  
im1f1fvkrnk1kknknesqrr  
>tr|Q2FF97|Q2FF97\_STAA3  
msi1tr1fnnsdfek1nq1cklydd1gyptnend1kkr1kkitnhd1yfl1111ikenki1g1sgmckmmfyeknaeymri  
lafvihsefrkkgygr11  
adseefskr1nckait1nsgnrner1sahk1ysdngyvsntsgftkq1  
>tr|Q2FFA0|Q2FFA0\_STAA3  
mkq1vgipesm1lip1iarakeyenekpi1kda1skkifdg1ddmyknvtcddmsqigisirtviidcvtkr1likdnkdi  
vvnigcgl1dtrfqrfnkek  
iswid1dvpesie1rktffkesnsykmi1sksm1dyswidvkn1yffnksn1lfi1iegvl1myfdesvmtq1l1dti1kkm  
gdhn1tfaiefc1sktiann  
tkrhqsvsk1ssqp1vfykygnd1kk1nei1pnt1rvi1hey1nyfdyyknr1wgl1fgycrf1pyl1kkr1lnnkiv1lmykvpkr  
qrh  
>tr|Q2FFA1|Q2FFA1\_STAA3  
mttfsekekiq1ladivelqtenneidvcny1td1fdkydikse1l1kvnehranivae1igngs1il1alsghmdvvdagn  
qdnwsyppfq1tekdgkly  
grgttdmkgg1malv1s1ielkeqne1phgtir1latageekeqegak1ladkgy1ddvds1liaeptgsgiyahkgs  
sckvtatgkavh1ssv1fig  
dnaid1t1lefyn1fkekyse1kq1qdtkhe1dvapmfks1ligkeiseedanyasgl1tavcs1inggkqfnsvpdeas1efn  
vrpvpeydn1dfiesffqni  
indvdsnk1s1ldipsnhrpvtsdknsl1ittikdvassyveqdei1fvsalvgatdass1fgdnkdnvd1aifgpgnplma  
hqideyiekdmylkyidif  
keasiqylkek  
>tr|Q2FFA5|Q2FFA5\_STAA3  
mktrcydgk1kwqyefkyegkryrkkgfrtkreansag1dk1nelrsgfnidnyit1leeyfenwiktykqpvvkentyrhy

Tsompanidou\_et\_al\_Supplemental\_FASTA\_File

rna1qhiqkhhkigmelsk  
inrqvyqkfndyskehaketirktngairsaldda1ydgli fknpaykvnykagkptksekekfisvteyeilkdhvrk  
krtrssal fimi ctgcrv  
sgarnikiehqvntifiderktdtspryisiaksdmkhimdvistfaisydyifkeagsiinlhainnalksacrv  
nnisiitshalrthcsyl  
lakgvsihyiskrlghkniaittsvyshl1eekfneedkkttkilesm  
>tr|Q2FFA6|Q2FFA6\_STAA3  
mthniekrinklktsgnpkfkkl dsdihy1lkrfegeknhkgfypkfkqgeivfvdgfinvnkefsnshfaivmnkndsn  
tedivnvip1sskenkky1  
kmnfdlkweyy1rlf1n1isaqnnsailkevfdkkyqknntefitkdyfsefidsleienklnkidrnninnivsaikv  
kk1kgnsyacin sfqisk  
frikvlpkiknpvidssdim1linrinnilqipdir  
>tr|Q2FFA9|Q2FFA9\_STAA3  
mrnflmflaiiif1s1f1l1tsffliirnfhiiivkffyeknvfvndntkisyyirftkggdmktlkelrtdygl tqkel  
gd1fkvssrtiqnmekdst  
nikds1l skymsafnvkyddif1gneyenfvftndkkksii1afkekqts  
>tr|Q2FFB2|Q2FFB2\_STAA3  
mismhkr1ltqyl dkeivts1d1h1ngevikvqehmkaesktlhiipkdrvvs1dhvlyfdinvkgeknndspyps  
>tr|Q2FFB3|Q2FFB3\_STAA3  
mphilnvtvpipethvliitkdeydeligys1dpvwnmsd1kkklkiasdetikdr1lfhprfekelraqgivhypdesfn  
rwrfnarkmknfvdehfn  
iykerik  
>tr|Q2FFB6|Q2FFB6\_STAA3  
mrkdmkinkl t1snfagi keekfnfdgkdakiygnnatgktttatalqwl1fdkgldgstksfnvpplnekneenyelip  
tvfaefeidgki ttfkkes  
hpkytingktrkeysrstrtkqyindesikvkdykaridelidedvflitnpqafn1ldwkkrrs1lfei akpinded  
viktnddfkelnni1gdhe  
ietkkk1ltdkikqinkdikdipiringtqqnkqdvpefdndryaiikqeieqleneridiqngkeein1rnqladkqse  
lkrinednnsasnenkiha1  
tne1hvengtvan1ktr1kqnkqitheenrrnq1lenhkg1ksd1lekaknqkfeyl ddnvcscgqklpveqvdmarek  
alqkfnaskskeletiqts  
inhiisegkiki1iek1ledn1n1qikineaeersariqnkinklktthvdvtqtdeykavmleineinqrsnirkti  
qdkvsgiddkise1tqeks  
eievsrsieksnkh1ddvise1rneedr1ldekekysdlyilkeftttkvkm1teninnefeiaefklfntlvngelee  
tcsttvngveydsgl1nns  
rinvg1diint1skhfkv1tapi fidnaesvteliktesqqiqlivneqdkklrmeti  
>tr|Q2FFB7|Q2FFB7\_STAA3  
mtennk1qti eqq1vqeknvsdn1nkvr1lesqgn1elpndyspsnamqaw1qisqdnk1mscndtskana1ldmvtq  
g1npaknqcyfi pygnkmq  
lqrsyhgnvmm1krdagaqdvvaqviykgdtfkqemgetgrikaikheqdfnidkeni igayctivfndgrndyievmt  
ieqikqawmqssmikdeka  
lqnskthnnfkeemaktvinraakryintstdsn1fkyaqeseqrqrkevl daevenanqeqldfeqpvl eeaqyte1  
endkpidvsdfeeikepat  
ekeseeeepf  
>tr|Q2FFB9|Q2FFB9\_STAA3  
m1nrtilvgr1trdpe1rttqngvnvasft1avnrtftnaqgereadfiniivfkkqaenvnky1skgs1agvdgr1qtr  
nyenkegqrvyvteviads  
iqf1lepksndtqqd1yqqvqqrqgsqysnnkpvkdn1pfanangpielndd1lpf  
>tr|Q2FFC2|Q2FFC2\_STAA3  
meieikfnefnapmgsprprfstkgryahptymptkytehkky1qnqmpk1n1ena1kie1efyftppkswskkkktqai  
gq1kvtkpidn1mktv1d  
acnny1wkddnqiteitsskrygiepkiiirieei  
>tr|Q2FFC3|Q2FFC3\_STAA3  
mdkmarkari vtindkpyrftksemelieshgitagmvskrvkdgwelheamdapegtr1seyrekktierleqarlerk  
lerkrkkeaelrrkkph1f  
nvpqkhprgryacy1mendi fvkvvk  
>tr|Q2FFC4|Q2FFC4\_STAA3  
mtdnarkey1nqffgskry1yqdnervahihvngtyyfhghivpgwqgvkktfdtaeeletyikqqgleyeeqkq1t1f  
>tr|Q2FFC8|Q2FFC8\_STAA3  
mtn1lqvkl1senarmpernhktdaydi fsaetv1lepqekaviktdvavsipegyvg1ltsrgvsskth1vietgki  
dayhgn1ginikndnet1  
esedmsn1fgrspagidgyar1pvtdki1cmngsyvinkgdklaqlvivpiwtpelkqveefesvsergakgfgsgv  
>tr|Q2FFD3|Q2FFD3\_STAA3  
mreyel1eshepdnagagksn1pgnpiercaikkfsdnrynt1rnivngvdr1idesdedt1el1rfrywdcpigcyewe  
diahyfgtskts1lrrna  
lidklakyigyv  
>tr|Q2FFD5|Q2FFD5\_STAA3  
mgnggegl dfai1lkihvyppsynhfkagdemeei vden1vlkeker1qvlykdipsnk1kvvdg1liiqaarlrvml dymw

Tsompanidou\_et\_al\_Supplemental\_FASTA\_File

edikekgdyd1ftqsekap  
pyererpvak1fnardaayqkiikq1sd1lpeekedtetsddy1  
>tr|Q2FFE3|Q2FFE3\_STAA3  
mvvkqasapkayfnitg1gfakltkegakleysditktrglqkigvetggd1ktayadggpiesgntdgegkis1qmhaf  
pkeirkivfneeydeygyv  
ketqgkqnyvaiwfrqerrdgtfrtv1lpkvmftnPKidgetaekdwdfssevegealfplidnkksvrkyifdsanm  
tnhsgngekgeeaf1kki1  
geeytgnvtednget1  
>tr|Q2FFE4|Q2FFE4\_STAA3  
mkyttddqtnivsinsdgqvtaeaqgiatvkayvgnmsdtitinvea  
>tr|Q2FFE5|Q2FFE5\_STAA3  
mak1krni1q1vedpkaneik1qty1tphfisfeivyeamd1iddiedenstmkpreiadr1mdmvvkiydnqfavkd1k  
ermhapdgmnalreqvvfi  
tggqteetrnf1qnmk  
>tr|Q2FFE7|Q2FFE7\_STAA3  
mgerikg1sig1d1daan1nrsfaeikrnfkt1nsd1k1tgnnfkytekstsdysqrikelDgtitgykknvdd1akqyd  
kvsqeggensagaqklrqe  
ynkqanelny1ere1qktsaeefeekkaqveaqrmaesgwgktskvfesmgpk1tkmgdglksigkgmmigvtapvlgia  
aasgkafaevdkgl1dtvtq  
atgatgse1kkl1qnsfkdvynfpadaetvggvlgevntr1gftgkelenatesflkfshitgsdgvqavqlitramgda  
gieaseyqsv1dmvakaag  
asgisvdt1ladsitkygapmramgfemkesialfsqweksgvnteiafsglkkaisnwgkagknpreefkkt1laeiektp  
diasatilaieafgakagp  
d1adaikggrfsyqeflktiedsqgtvnqtfdksesgserfkvamnk1k1vgadvwasiesafapvmeelikk1svavdw  
fsn1sdgskrsivi1fggia  
aaigppvfg1gafistignavtv1ap1lagiakadglisflstkvpilgtvftaltgpigivlgvlaglavafaiyaks  
etfrnfvdai1esvkqtf  
nfiqfiqpfidsvknvfkqavsaidvfakdiwsqingffnengisivqalqnicnfikvifefilnfvikpimfaiwqvm  
qfiwpavkalivstwenik  
gviqgt1ni1gl1kffss1ftgdwrgvwdaiimilkgvvqliwnliq1wfvvgkilgvvryfgg1kglitgiwdviksi  
fsks1saiwnatksifgl  
fnsvksiftnmknw1sntwssirtntigkaqslfsgvkskftslwnatkdifsn1rnwmaniwnsikdntvgiasrlwsk  
vrgiftnmrdgl1qsi1ski  
kshiggmvdai1kkg1nk1ieg1nwvggk1gmdk1pk1htgtehttttr1vkngkiardt1fatvgdkgrngngpgrnei  
iefpngkrvitpntdttay  
1pkgskvyngtqtysm1ngt1prfs1gtmwkdiksgassafnwtkdqigkgtkwlgdkvgdvl1dfmenpgk11nyileaf  
gidfns1tkgmgiagditk  
aawskikksatdwiken1eamgggd1vgg1ldpdki1nyhygrtaaytaatgrp1fhegvdfpfvyqevrtpmgrp1trmpf  
msggygnyvkitsgvidm1  
fah1knfksppsgtmvkpgdvvg1tgntgfstgph1hfemrrngrhfdpepy1rnakkkgr1siggggat1sgsgatyas  
rvirqaqsi1ggrykgwi  
hdqmmrvakresnyqsnavnwdinaqrgdpsrg1fqi1gstfranakrgytnfnnpvhqgisamqyivrrygwdgfkra  
gdyayatggkvfdgwynlg  
edghpewi1ptdparndamk1lhyaaaevrgrkasknkrpsql1ssvngfddps111kmi1eqqqqia111kiaqsndvi  
adkdyqpi1ideyafdkkvn  
asiekrrerqestkvkfrkggiaiq  
>tr|Q2FFE9|Q2FFE9\_STAA3  
mihv1dfndki1idf1stddps1vraihkrnvndnsem1ellisseraekfrerhrvi1irdsnkqwrefi1nwvqdtmdgy  
teieciasy1adittakpy  
apgkfekt1tseal1kdv1sdtgwevseqteydg1rttswtsyqtryev1kq1cttykmv1dfyielssntvkgryv1kk  
kns1fkgkeieygd1vg1  
trkidmsei1ktaliavgpendkgr1el1vvtdd1eaqsqfn1pmryiwgiyepqsddqnmnetr1sslakte1nkrksavm  
syeitstd1levtyphieis  
igdtvr1vkh1rfdnpp1yveaeviaeeyni1isenstytfgqpkfkeselreefnkr1n1ihqk1ndnisnintivkdvd  
geleyferki1hksdtpen  
pvndt1wydtsn1pdvav1rrywngrwieatpndvek1ggitreka1fse1nnifin1siqhas11seate11nsey1vdn  
d1kad1qas1davidvynq  
ikn1lesmtpetati1gr1vdtkt1fl1eyrkk1qdvytdvedvki1aisdrfk11qsqytdekykealei1atkfg1tvned  
1q1vgepn1vksaieaare  
stkeq1r1dyvkt1sdykt1dkdgi1ver1dtaeaert1kgeikdkvt1neyrng1leeqkqytd1dq1sd1snpeikasieqa  
nqeaqea1ksyidaqdn1k  
ekesqayadgki1seeqrai1qdaqak1leakqnael1karnaekkanaytdnk1vkest1daqrrt1trygsqii1qngkeik1  
rttkeefnatnr1t1sn1n  
eivqnvtdgt1t1ryddngvaqa1nvvgprgir1nadkidingnrein1liqnmrdkvdktdivns1n1sreg1dinvrig  
ikggnnnryvqi1qndsie1  
ggivqr1twkgkr1stddi1ftr1kdgh1rfrnntaggs1ymshfgist1yidgedgedgssgti1qwwdktyds1sgmngitins  
yggvval1tsdnrvv1esy  
assnikskqapvy1ypntdkvpg1nrfaft1snadnayssdgyimfsgsdenydygag1rfskernkg1lvqivngryatgg

Tsompanidou\_et\_al\_Supplemental\_FASTA\_File

dtteagygkfnmlkrrdg  
nryihqstdllsvgsddagdriasnsiyrrtysaaanlhitsagtigrstsarkyklisienqydrdeqlehskailln  
pirtwfdkaeseilarel  
edrklsedytkldryvgliaeevenlgkfevtyddkgeiegiaydrwlwihlipvikeqqlrikkleeskng  
>tr|Q2FFI1|Q2FFI1\_STAA3  
mlfkeaqaflenmykechyetqiinkrldieleiketgtythteeeliygakmawrnsnrcigrfwdslnvidardvt  
deasflssityhitgatne  
gklkpyitiyapkdgpkifnqli ryagydnsgdpaekvtrlanhlgwkgkgtndvlpliyqlpnesvkfyeyptsli  
kevpiehnhyplrklnlk  
wyavpiisnmdlkiggi vyptapfngwymvteigvrnfiddyrynll ekvadafefdtlknsfnkdralvelnyavyhs  
fkkegvsivdh1taakqfe  
lferneaqgrqvtgkswlapp1spt1tsnyhhgydntvkdpnffykkesnanqcpfh  
>tr|Q2FFI6|Q2FFI6\_STAA3  
mkrnfpk1ials1s1s1svtpianaesnsnikakdkkhvqvnvedksvptdvrnlaqkdy1syvts1dkiynekasyt1  
gepfkiykfnkksdgnyyf  
pvlntegnidyi vtispkitkysssskytinvspflskvl nqykqqitiltnskgyyvvtqnhkaklv1ktrledkk  
lkktesiptgnvtqlkqk  
asvtmptsqfksnnytyneqyinklenfki retqgnngwcagytmse1lnatyntnkyhaeavmrf1hpn1qgqrfqftg  
1tpremiyfgqtqgrspq1  
lnrmttynevdl1tknknkiav1gsrvesrngmhaghamavvgnak1dngqeviiwnpwdngfmtqdaknnpvsvngd  
hyrwyssiygy  
>tr|Q2FFL3|Q2FFL3\_STAA3  
menkfvpg1ligaviggaisladkstrqalvqsvkdakngnrtrkpskvsikdevlywkdvveirrnpelerslkda  
ketfvnrknqr  
>tr|Q2FFN5|Q2FFN5\_STAA3  
mtkpk1ketsapmndt1el1rikdenikyinqeidviikgkatvnavltykpsacyccgvknegqihkhgkrvsrit  
1lktggyntylnlakqrfk  
clecngtftaktsivdescfisrcvtqkvieeatkvkteidtaedncispstvsrirtkaans1rikpfnclpehiamde  
fksvknvtgsmsfifidnd  
thdvidilenrttrflrayferfd1knrqvktvtidmyepyvr1frdlfpnaaiifdrfhivqhl1nre1nkyrvqmne  
yrnkkgpdytiknwnkv1  
1mdtskti1fskyrwnksfkaykrssdivefm1skddilrshyelvqglrkd1rlcnwpkfinr1nsvskksvskgvkav  
kyyrkhqrm1rntiyyapf  
nngaieginnkik1ikrisfgyrnfnnfkarimmi1fslykgekkkttkpnnglaa  
>tr|Q2FFN9|Q2FFN9\_STAA3  
mdtkqlkqdi1dyaytigi1dsigfttadpfdelkqkleayhangyasgfeesdia1rtepk1slptarsiaiaavgypnk  
1kgapksvrgdrrglfara  
swgqdyhtimrkr1dm1aafieskvpdveiksmvdtgvl1sdravaerag1gfvgrngfv1npklgtwtylgem1vsipfe  
pddp11dscgdct1cvdrc  
ptsalvgngq1nsqkcis1ftqtkgympdqyryki1gnrlygcdtcqqvcpknginteqqdi1lepeilkpr1vp1l1rms  
nkefkqtygh1agawrgkk  
piqrna11alahfnevdaipe1kkvattderpl1rataywaigqilgeardfinanydgedaevqnemikg1dtrre  
>tr|Q2FFR4|Q2FFR4\_STAA3  
mtksvaiigagigt1ssayflkqddpnidvtifeasnrggk1qsyrdgymielgpesylgrktimtelakdigleqdi  
vtnttgqsy1faknklypi  
pggsimgiptdikpvttk1isp1gk1ragfd1lkkptqmqdgd1svgaffrar1gnevlen1ieplmggiygtidk1s  
1mstfnpfkekeefgs1i  
kgmkdeknr1kqrq1ypgapkqfkqfkhgl1ssfiealeqdvknkgvtiryntsvddi1tsqkqykyvndqleevydg  
1v1t1p1hqvf1n1wfgqdp1a  
fdyfk1mdsttvatv1lafdekdi1enthdgtgfvi1artsdt1tactwt1skkwpfttpegkvl1rayvgkpgd1tvddht  
dne1vsivrrd1sqmmtfk  
gdpeftivnr1pk1smpqyhvghiqq1rqi1qahikqtypr1rvtgasfeavglpdc1tqgkvaeeviae1  
>tr|Q2FFS1|Q2FFS1\_STAA3  
mntiyepssicm1rtp11sveffn1f1nteqikysdlq1naqmkesi1tttfnlyct1qe1nfdgdnkkvrdakes1lky  
1irmstrptpfg11sgin1  
ghfvneptr1kvgnsi1qkyvkvdgewlyk1vsyiesideyyqn1kviwnskahi1ndriy1neqsaiy1lnnk1dtsfsik  
nse1lvfiktvt1nnn1tf  
sn1aekinqefe1nditkvkvyih1n1vskei1y1st1irpp1sysdn1ny1lnk1sl1hnddfvkk1reiqk1l1layekteig  
fgeelykdi1hhmkal1fk  
kny1qidtkidm1ny1lhqdiatniseaay1l1w1l1srn1nigftd1kvl1hnr1fi1kygfeq1vn1kd1sdi1tgfgtt1fq  
ee1tdgn1ni1vm1kqkfl1ha  
1rnndeivinekdves1indneinhyhampsadvyaely1grfynqynelivi1spltasfnagatfgrfhh1ldtetlak  
lehekghyyqkmi1cddnve  
mi1sinnipkyprnhv1l1nhdsyey1s1n1lgssnsyskye1t1ddi1yvgatfnk1ly1yssq1nkrv1fesn1myn1flkecn  
lyr1l1re1smesvkci1epm  
ndvsidsfsyspri1ryknv1lkpaywkinemv1lp1pkneewdqf1kyqeqfnipniv1lv1ygdnk1l1l1n1slanhry1l  
mkeykhhkrvr1vesf1pq  
skndhvyeivtpiykksyrgpeieipkykntdi1eydkdwfa1hi1hidkpsqdtfi1dn1ypfvkh1kdkgdidqyflmr



Tsompanidou\_et\_al\_Supplemental\_FASTA\_File

yikqgdilklrlfrndeny  
aeysiilknwlpvhrqttevsdyefvsyepfeffryggkntineieaffeydtnlavniendfkfdrpyivaisimylfe  
mfsisneermeivnnyvpt  
sfkskdi rpfknelvticnpannfeymakhysgiyri lkdgnqilsklneglkktlttkrsriigslihmrcnri fgidk  
dqetfvlsivkeivktqkh  
wcgdknd  
>tr|Q2FFS7|Q2FFS7\_STAA3  
miinelkscklkfskqaltfvpiivtilfilfinwylnvnlwngrqislf tasfnaitslisinvyqvinfeenighfn  
hilgkanrlnwlnasmift  
ytitaicillasinllwhshdmkitl mfigvs lffnvii llll ffsifikdvmaivvgvlmfi fnvyfglevlgdhsfw  
ylpityatryvymfi egsi  
pvtltlaiyiiitlllavllfkgnkwsgrtikd  
>tr|Q2FFS8|Q2FFS8\_STAA3  
mntkflgkltlvasalvtltlgtglhssylgldtnkvvtakaeekmtdgqlwkkvkds lhdtdiilsneyetinvtylls  
ngysssvsapgnddgghlt  
qsidfkglkqidltkenyddfnkkl dakntwnsl tek lkg lgl lqngqkvsisyssdssspvsgkvgegvts ggentl tk  
rfinkitid  
>tr|Q2FFT5|Q2FFT5\_STAA3  
mil kafesy nisis kffnncatktqnfhqhpnqhrnitkcynksitqrkl lmqrrrhmsitekqrqqaelhkkllw  
siandlrgnmdasefrnyi  
lglifyrflsekae qeyada lsgedit yqea wadeeyredlkaelidqvgyfiepqdlfsami reietqdfdiehlatai  
rkvetstlgeesendfigl  
fsdmdl sstrlgnnvkerta liskvmvnl ddpfvhsdmeidmlgdayefligrfaatagkkagefytpqqvskilakiv  
tdgkdkl rhvydptcgs  
lllrvgketqvryfygqernnttynlarmnmlhdvryenfdi rnddtlenpaf lgn tfdavianppysakwtadskfen  
derfsgyglapkskadfa  
fiqhmvhyl ddegtmavvlphgvlfrgaaegvirrylieeknyleaviglpani fygtsiptcilvfkkrqddnvlfi  
dasndfekgknqnhlsdaq  
veri idtykrketidkysysatlqei adndynlnipryvdtfeeapidldqvqqdlknidkeiaeieqeinaylkelgv  
lkde  
>tr|Q2FFT6|Q2FFT6\_STAA3  
msntqkknvpe lrfpgfegeweeklgnl ttkigsgktpkggsenytnkgipflrsqnrngklnlndlvyskdidem  
knsrtyygdvllnitgasi  
grtainsivethanlnghvciir l kkeyy nffgqyllsrkgkrki flaqsggsreglnfkeianlki ftptifeeqki  
gkffskldrqi eleeqkle  
llqqkkkgymkif tqlrfkdengeeypewenkfikdifi fennrrkpitsslrekglypyygatgi idyvkdy lfnne  
erlligedgakwgqfetss  
fianggyvvn nhavvksndhn lffmnylnfkel rafvtgnapaklthanlcninlkipclteqdkvsallksidnkmn  
nqmnriellkerkgllqk  
mfi  
>tr|Q2FFU1|Q2FFU1\_STAA3  
mftpivlnlndvgsiflvrvgnqlkvi ekvhyedileskivr l fqa fikdkmdql fitsehfaididkl l fqlnlvry  
ikmegntsgylsgrtiyin  
nhsinntrf siare lgrylfkntdlmrdsndslknlhemiyesdvnqfsvdl lmpkkqiealvynfyevnninlssgl  
sekernkllnlistklevs  
kvaaglrl ynlgih  
>tr|Q2FFU4|Q2FFU4\_STAA3  
mtpqeaedivrndykargvneyqtl nyktnlersneheyvehlvr davgtp lkrcaivnrhngti inifddmsekdkee  
feafkkrspkynpgmnnhd  
etdgesedi qhhdidnnkai qndi pdqkvddkndknavnkeekhdngannseetkvk  
>tr|Q2FFU5|Q2FFU5\_STAA3  
mkfkai vai t lsl l tacganqh kenssksndtnkktqtdnttqsntek  
>tr|Q2FFU8|Q2FFU8\_STAA3  
mkiclmlylliflsscstnnkivgqrfeiqhnetigsiyfsadyahirgiekgtakyfidkvgskrylfi eyipdnvl n  
ckpdfwktlkykkdkvtyy  
vyl ienlddevfhlsalqdmnripidi addvatmgksphqndrmtlklkn  
>tr|Q2FFV0|Q2FFV0\_STAA3  
mkltalhfkysep fksqivtpkv t lthrdclfieliddkgnayfgecnafqtdwydhetiasvkhvieqwfednrnksf  
etyeaalklvds lentpaa  
rati vma lyqm fhlpsfsvaygatasg lsnkqles lkatkprik lkwtpqimhqirvlrel dfhfqlvidanesldrq  
dftglql lareqvlyieep  
fkdismldevadgtippialdekatslldiinlielynvkvvvlkpfrlggidkvqtaidtlkshgakvvigmyeygls  
ryftam larkgdypgdvtp  
agy yfeqdvvahsgilkegrlefrpplvditqlqpy  
>tr|Q2FFV2|Q2FFV2\_STAA3  
mrvkfrdkdnrqvnl t fkkdnei adgnhv laiptfknqllftkhn lrgiefpggkregessaeavtrelyeetgavkn  
iyiaqytiethdqtdfvk  
dvyfievelsvskndyletagpvl fncindiel aqrsfllddstilkcvervqslgyfyqt

Tsompanidou\_et\_al\_Supplemental\_FASTA\_File

>tr|Q2FFV3|Q2FFV3\_STAA3  
mpieyfthqfeeitylsddlqvkaImmtphevnrivvylrggkgqvgvrgrlmqfsdsqtlvigpyyrgnngsegkd  
efyrgdlnvdtqllrllhd  
kyphafihmvgfsrgglqgl1tfdq1pvtsytiwggvsdidlmyeervdlrgmlrrmighpkkdraayearqaipninen  
sppilivhggkdqqvgihh  
ayyladqlelkgathetfyqmaeghvprppamvetltyikefmnqvshs  
>tr|Q2FFW0|Q2FFW0\_STAA3  
maklnievfadgadiemkaayknkqvdgfttnpslmakagvtdykafaeavkeipdasisfevfaddletmekeaa1  
kqygenfvkipivntkge  
stiplikklsadnvrlnvtavytieqvkeiteavtegvptyvsvfagriadtgvdp1plmkeavkvthskdgvkllwasc  
relfnviqadeigadiitc  
padvvkkvntnlgrdine1svdtvkgfakdiqssglsil  
>tr|Q2FFW1|Q2FFW1\_STAA3  
mqkfkdfyddlsvtrgnyfltlmaaffitiilfigivsevhllysm1ivlvgl1llr1fkinlfsfkk1t1sqviyii  
ggalliygldnlylyfhdv  
paneqqleqairntpfyisiftvtiipaiveeivfrgmiiirvifrkh1flglivsslvfaslhesdtwiglypylysgli  
fgliyiktkrlevvifmfh  
lnnllallfiwr  
>tr|Q2FFW8|Q2FFW8\_STAA3  
miy1tsrryvmtykelatflkv1sdssrleild1lscgelcaddllahfqfsqptlsyhmka1vktnlvtrkignkh1  
yq1nhnifesvinnlsvkh  
tsnqrcichn1ktgce  
>tr|Q2FFX1|Q2FFX1\_STAA3  
mftgiveeigvkvsvqirqsvrtieieahkitadmhigdsisvngac1tvidfnqtsftvqvikgtenktyladvkrqse  
vnleramsngngrfgghfv1  
ghvde1gtvskinetanak1itiqcsqhinnq1vkqgsitvdgvs1tvfdkhdnsfdihlipetrst1lsskklgdkvh  
1etdv1fkyvenilnkdkd  
q1svdk1rafgf  
>tr|Q2FFY8|Q2FFY8\_STAA3  
mekifl1ngefvspseakvsyndrgyvfgdgiyeyirvyngklftvtehyerflrsaneigldlnysveelie1srklvdm  
nqietgaiyiqatrgvaer  
nhsfptpevepaiwaytkysdrpydh1engvngvtvedirwlrcdiks1n1lgnv1akeyavkynaveaiqhrgetvteg  
sssnyaikgdgyiythpin  
nyilngitrivikkaedynipfkeetftvdf1knadev1vsstsaevtpvik1dgepvndgkvgpitrqlqegfkyie  
shsi  
>tr|Q2FFY9|Q2FFY9\_STAA3  
maeqdgk1flkrnsnpfiaa1saegivpk1vwtkrietgevttaqhwkngrelssnemkqtrvah1lkkihnsrpl1sm  
1krmemepitpeimlnkin  
as1srev1thhivrks1tyleehips1dsrfft1vhgdvnhnnw11sdrde1flvdwegamiadpaidigm1lynypqq  
qwsew1etygvqes1n1nk  
rmkwytv1qsig1vqwyeekrykdmntw1kfl1nevmsnmfi  
>tr|Q2FFZ4|Q2FFZ4\_STAA3  
mkqlseqqfes1kqgatvfeftagwcpdcrviepd1pelearypmfdvsvdrdkfmdiciengimgipsflvykge1  
1gsyigkerksieqidaf1  
aqyv  
>tr|Q2FG00|Q2FG00\_STAA3  
mtqqqndkrt1knkhtyqneplnrkdfvvsfitgalvgsalglyfknkvyqkadd1kvkeqelsqkfeerktqleetva  
ytkervegflnkskneqaa  
1kaqqaaikeasann1sdtsqeaqeiqeaqkaeaetdksaavsneepkava1kaqqaaikeasann1sdtsqeaqev  
qeaqkaqkaekdsdt1tkd  
asaakvevskpesqaer1anaakqkqak1tpgskesqltealfaekpvaknd1keipqlvtkkndvsetetvni1dnkdtv  
kqkeakfengv1trkadek  
ttntavdkksgkqskkttpsnkrnaskastnktsgqkkqhnkssqgakkqsssskstqknnqtsnknskttnakssna  
sktpnakvekakskiekrt  
fnd  
>tr|Q2FG02|Q2FG02\_STAA3  
mtvtiydvarearvsmatvsrvvngnqnvaetknkvnevikr1nyrpnavarglaskkttvtgviipdisniyysqlar  
g1ediatmykyhs1i1snsd  
ndpekekeifnn1l1skqvdiifl1ggtiteemkelinqssvpvvvsgtngkdahiasvni1dfteaakeitgeliekgaks  
falvggehskkagedv1leg  
1tevl1knq1l1q1gdt1ncsgaesyekegvkafakmgn1pdailcisdeeaigimhsamdagikvpeelqiisfntr1ve  
mvrpq1lssviqpl1ydidgav  
gmr1l1tkymndekieepnv1lphrieyrgttk  
>tr|Q2FG12|Q2FG12\_STAA3  
mykffqnlgrslmlpvailpaaiiagignt1nalhatpkiamffttvgttileqlgilfaigvaigmakndgvvalaa  
1lgyflvtv1lspmk1lap1  
1gmkase1nsafekmngnfvigivigliaayaynkfsetelplalsffsgkr1vpimtafyctflv1illflwpl1lysw  
ivkfgesivglsgfafi

Tsompanidou\_et\_al\_Supplemental\_FASTA\_File

gvannrlliptglhhalnsvwfwdtigitndigkfqsgkdaikgitgryqagffpimmfgipaaaalamyhtakttqkkqvyg  
wflassvaaffvgvtepie  
fafmfvapi1yvvhalltgls1fiaatfhwtagsfsaglidvls1inpvshplm1lvqgvffilyyvi1frvviqvf  
n1ntigrgene1vdptvkv  
dniapgendiksgkyhghaiqi1leglggqenivn1tncatr1r1elkdtssi1dkqkiknagavgtvngkhstqvivgth  
vqqvadeiekh1  
>tr|Q2FG21|Q2FG21\_STAA3  
mim1fs1l1iliktth1itfifkq1l1fi1fivpfiyppykkearqrivg  
>tr|Q2FG35|Q2FG35\_STAA3  
mvay1nihtayd1l1nss1kiedavr1lavsenvdala1tdtnvlygfpkfydaciannikpifgmtiyvtng1ntvetv1  
aknndg1kdlyq1s1seikm  
na1ehvsfel1krfsnmi1i1fkkvgdqhrdivqv1fethndtymdh1sisiqgrkhvwiqnv1cyqtrqdad1tisalaair  
dntk1dl1hdqedfgahf1  
tekeinq1dinqey1tqvdivaqkdaelkyhqs1lpqy1etpndesakylwrv1vtq1kk1elnydv1yer1kyeykvi  
tnmgfedy1flivsd1ihya  
ktndvmvgpgrgssags1vsy1lgittidpikfn1l1ferf1npervtmpdididfedtrrervi1qyvqekygelhvs1giv  
tfgh1laravardvgrimg  
fdevt1neiss1iphk1lgit1deayqiddfkkfvhrnrherwfs1ckkleg1prhtsthaagi1indhplyeyap1tkg  
dtg1l1tqwtmtearig1l  
kidf1gl1rn1s1ihq1ltqvk1d1ginidiek1p1fddqkvfel1sqgd1t1g1f1q1lesdgvrsv1kk1kpeh1fedivavts  
1yrpg1mee1pty1trrh1d  
pskvqy1lph1lep1l1kntygv1iyqeqimq1astfanfsygead1l1rramskknrav1leserqhfiegakngyhedisk  
qi1fd1l1k1fadygf1praha  
vsyskiayims1flkvhypnyfyani1snvigsekktaqmi1e1eakkqgit1l1ppn1neshwfykpsqegiyl1sigtikvgv  
yqsvkvi1deryqngkfk1d  
ffdfarr1ipkrvkrk1l1lea1ilvgafdafgktrst1l1qaidqvl1dgd1nieqdg1fdil1tpkqmyedkeel1pdal1sq  
yekey1gfyvsqhpvdkkf  
vakqy1l1tik1snagnykpi1lvqfdkvkqi1rtkngqnmafvt1ndgiet1dgvi1fpnqfkkyeel1shnd1fivsgkfdh  
rkqqrq1linei1qtlatfe  
eqk1lafakqi1i1rnksqi1dmfeemi1katkenandv1lsfydetik1qmtt1gyinqkds1mfnnfi1qsfnpsdir1i  
>tr|Q2FG46|Q2FG46\_STAA3  
mkt1q1hkt1t1l1ia1il1fytfmg1il1p1mhdd1l1qwf1snyntd1l1kv1gfas1ngry1igni1fei1avh1vsw1rwl1sygl1s  
mgi1wm1m1hitrckawtsy  
y1l1laf1s1ml1il1psaiyadtygw1fagfynyatst1l1s1lfi1i1yycinai1y1kekqpvsvt1l1fyv1l1cffgq1l1fmenvt1l1fhc  
i1il1il1af1lyeftanrt1ny  
k1l1l1fs1fm1iatigt1im1fsn1pnyrki1l1feg1seyqqvs1n1nqgi1fskfaem1sts1pygv1ifsqi1i1l1smiaa1li1y1l1l1rsd  
ryvhl1til1krri1migifit  
l1ply1l1fynq1l1l1nkntdig1lv1gfvn1viv1vcgy1fafsi1fvgi1yl1sindrktqit1lys1l1iaicvsast1lviv1t1piep1gnf  
l1ivyt1ihv1i1l1i1l1l1kefr  
kyks1invn1fikgas1lv1aviy1l1safi1yvhyehkrvq1l1kqk1kdhprqevytves1lpfehymh1hpspinknyqewfny  
eel1pkmtkvkyi1pfgsdds  
>tr|Q2FG90|Q2FG90\_STAA3  
maatyksviknvn1gl1d1gggfev1lyqvd1p1nk1gdki1dkka1l1qstaqt1enrvn1lgv1sepki1qveepnr1rvq1lagvtd  
qneark1il1ssqan1t1irda  
edkvk1sgsdi1kqgsakqefkqetnqptvt1fkvkd1knk1fk1kvtee1skkr1d1nmv1vwd1fdk1kgdsy1kkea1qkkn1pkfisa  
asvdqp1nsdsve1sggfk  
gqevy1kkakqiae1l1nags1lpvd1l1kei1ysnsvga1qfgqda1ldktv1fas1figvali1yl1fm1lgfyr1l1pgl1vai1al1t1tyi1l  
t1l1vafn1fisgv1l1l1pglaa  
l1v1lgv1mavdani1myer1kde1l1rigrt1kqafskankss1fl1t1idsn1l1ttviaaav1l1fffgessv1kgfatm1l1l1gilmi  
fvtav1fl1srfl1s1l1v1ssn  
i1fknqfw1l1fgv1kkn1rhd1inegvdvhd1l1kts1fekwn1fvklakpligvs1ilivv1vg1lvily1f1k1n1lgid1fssgtrvdfqs  
kqait1qk1veqv1vkdsg1k  
adqi1q1ngkdnkvatv1qfkdd1l1traqdnk1sdnikskf1gdtpqintv1spi1gqelaknam1l1aliyasig1i1iyv1s1rfew  
rmgl1ssv1al1hdvfi1va  
i1fs1l1frievd1l1fiaav1t1ivgys1ndt1vt1fdrvren1l1qkvk1vitteq1iddivnrs1irqt1mrsintv1l1tvivvvai  
l1ffgapt1fnft1al1fig1l  
i1sgvf1ssi1fiav1plwg1imkk1rq1kks1pkhk1lvvy1kekks1ndekilv  
>tr|Q2FG91|Q2FG91\_STAA3  
mikpkykw1l1tkpaeyi1sdel1tsk1k1l1tpivk1k1lesks1ideqai1esi1s1dtdinhdal1q1sdmkt1tierikraiande  
k1l1vygdydadgv1tatt1l  
vit1q1l1l1gaqvgwhipnr1f1tegygpne1laf1rna1hdegit1l1itvdngi1qghneikmvqdl1gvdv1v1tdh1heigst1l1peay  
aivh1pmhps1fnypf1qql1cg  
agvay1klaqali1envpdyfka1l1vaigtiad1l1vs1l1tdenrs1lvkqgl1kv1ndqc1pts1vka1l1l1keagynd1ideetigfi1g  
pr1navgr1ddas1lace1l  
mtdveeeaa1fla1eqvehfn1rer1kdivati1teama1maetkvkkgdl1f1l1l1akenwhegv1lgivaskivetfal1pt1l1l1ni  
dreqnhakgsars1idq1vsm  
fei1sahqeli1akf1gghh1maagmt1mdienies1laeg1lnkwm1kel1sktts1dpvkqvdv1l1tendit1iknirdmnr1l1rpf1g  
tdfsrpi1femdd1l1svssvk

Tsompanidou\_et\_al\_Supplemental\_FASTA\_File

aigqqknhlkltlgesniaalfwqnghlepeleqdeqpinilgsvqinewngnqspqiiiqdiamneqqildyrskrkslp  
ftendenivvlihpksdkv  
naneyyygeeiqqtdkvv1rdlptsmedlsnslqq1qfsqlyivlqhnhsiyfdgipnmdifkkykalitkqetniqk  
egmllcqhlsvkpdtlkfm  
lkvflldlkfvtgedgliringqpdkrsidsskvyqlrqqrmvkekqlllyqdfseiknwiksqs  
>tr|Q2FG99|Q2FG99\_STAA3  
mvdtkkltsmifypggigktsiakaisgstqykfrqlnavtntkkdmqlvveakmsgqvillldeihrlkakqdfll  
phlengkivligattsnpy  
hainpairsraqifelyplndedvrqaltraieddenglkyqpkidedamtyfstqsqgdvrsalnalelavlsadndk  
dgyrhvtlqdakdclqkga  
fvsdkdgmhydmsafqksirgsdvnaalhyllarlieagdlptivrrllvisyediglaspnagqrtlaaiesaelgl  
pearip1sqavielc1spk  
snsamsaisalsdirnghvgqipnhlkdghyqgakdlgrsigykyphqyvngyvsqqylpdklknkiyyepktskseq  
qlkeiynnllkqrp  
>tr|Q2FGA6|Q2FGA6\_STAA3  
midqqtiiyqyiqngkieealqalfgnieenptiienyinagivladaneiekaerffqkaltidpknvffnlanvyyn  
qqryqeaiklyqqa1qtei  
eqvdcnymigmafnglesfk1alpylmtaaeldkdkdaevqfyglvlcqlmfneaitqlkhvltidknhvdarynlg1  
alfmknediideaithfkea  
vtidpkhllsqhalktftkmeeee  
>tr|Q2FGB8|Q2FGB8\_STAA3  
mdqfsfkvaqslinndgpaieytligptiqfntqntfvtggsinaslnnktismnsvilaekgdilkigaitkgargyl  
tfghsinvpsiaesyatht  
rssiggfkgkrl1addvitvkinndfkenigktihlqddlpeniihilqgpqfeafseearakivnhpyliteqsdm  
gyrlegdsvapinqadiis  
epvalgsqvvpndgqpi1l1ndkqtiggytkiatvckfdlpklaqmkpdtiqfkwisfqaevdknreqmslfneilksh  
qktpifdtsslrhtskkla  
tilkgdl  
>tr|Q2FGD3|Q2FGD3\_STAA3  
msqyaemslvydqltgdqpyekwfeivknhckdesnildigcgtgsltvqlealgnvtgmdlsvdm1tvaaksanvnl  
egdmtsfdlqqqfdiitif  
cdslnylqdetavietfivnyhh1tdsgvfidvhtvykmm1fnnqsyiddkgdiflawdavqgd1plsvyhdmtffir  
hedetysrfdeshfartfd  
ektylswlaqvgfkhvetftdfnidhnedaelffiak  
>tr|Q2FGD6|Q2FGD6\_STAA3  
mlfvalsmivglwnsskvlstflf1llyityrknkivyapislflifisawylhysqqafnyinyiernsqfneraq  
viqirggsdtykgrlsk  
neiyppfltdkknfdlkkiesrncivkgqfkvndnkfvtklqsvvqsclesnrsnliekhkqfimmriydsigkfpdr  
imalitgdvkeveqfker  
vkeiviyhllavsgshiaavfliyqplkrlnlplfvikgitiivlalfaqytnyapsavraimttlv1vitkqikiks  
iqllafafiiimfilnpllv  
ydgfgqsfiiisffimllfpflqq1sklqslfiitfiaqlasfivaipsfhqlqwgflsnlifvpyysiilfp1silff  
itshfivgltp1nyld1s  
fnfhdl1dlftrikqshfsvpkfnvifivfiisvyyifwllakrkyilvtfwtiiltl1itfptnshhkitmlnvqg  
gdsilyeggknqnv1dtg  
gkvidtkqpsysiskyhilptlnergineleylilthphndhigeveyiishikikhiviynkgysntlmllsklshk  
yniklmdvrqvssfk1gds  
sflffdsfipnsrdkneysiitmiyqnkkvllmgdasknneslllkkynlpeidilkvghhgsktssskefiemikpki  
slissgknmyh1pniev  
krlqrisriynsqngqvtid1ddnlkvdsssygnasgl  
>tr|Q2FGE0|Q2FGE0\_STAA3  
mtvqsayihpfcvrietycdfnkyfiqnpvdeyldalitemstakyrilktmyvgggtptalsinqlerllkairdtf  
titgeytfanpdeltek  
vqllkeygvkrismgvqtkpellsvlgrthntediysvlnakntgiksisldlmyhlpkqtiedfeqslldaldmdiq  
hissyglilepqtqfynmy  
rkgllklpnedlgadmyql1mskieqspfhqyeisnfa1dghesehkvwyfneeyyfgagasgyvdgvrytninpvnh  
yikainkeskailvsnkps  
ltermeeemflglrlnegvsssrfkfkfdqsiesvfgqtinnlkekelivekndvialtnrgkvignevfeaf1ind  
>tr|Q2FGG1|Q2FGG1\_STAA3  
mridqsiineikdktid1dvseyvlekrgrnyig1cpfhdektpsftvsedkqichcfckkgnvfqftqeikdisf  
veavkelgdrvnvavdiea  
tqsnsnvqiasddlqmiemheliqefyyaaltktvegeqaltylqergftdalikergigfapds1shfchdf1qkkgydi  
elayeagllsrneenfsy  
drfnrimfp1knaqgrivgysgrtytgqepkylnspetpifqkrkllnldkarksirk1deivllegfmdviksdtg  
lknvatmgtqlsdehtf  
irk1tsniltmfdgd1fageat1ktgnl1qqglnvfiqlpsgmpdpeyigkygndaftafvknkksfahykvsilkd  
eiahd1syerylkelshd  
islmkssilqqkalndvapffnvspeqlaneiqfnqapanyyepedeygyiepepigmaqfdnl1srqekaeraflklhlmr

Tsompanidou\_et\_al\_Supplemental\_FASTA\_File

dkdtf1nyyesvdkdnftn  
qhfkyvfevlhdfyaendqynisdavqyvnsnelretlisleqynlndepyeneiddyvnvinekgqetieslnhklrea  
trigdvlelqkyylqqivak  
nkerm  
>tr|Q2FGI0|Q2FGI0\_STAA3  
mk1qcintfklhskkrq1skaqqid11sn1cn1lkygftlyqsqf1nlqmtkyknq1ggttilseisngapcnqils1ig  
ysdtivmqvylaerfgni  
dvleetvnykmvnrkseqr1lktlqyp1ilvsifiामीi1n1ltpvqqf1lytsmniqlssfqk1sffits1ptiivv  
mliivsm1aiimkliynn1  
nm1nkinfvmk1plisgyfqlfktyfvtne1vlfykngit1qsivdvyinhssdpfrqf1gkylltysemgyglpqilek  
1kcfkpq1ikfvlqgekrq  
k1eve1klysqi1vkqiedkaikqtqf1qpilf1ilglfivaiylvim1pmfqqmsik  
>tr|Q2FGJ5|Q2FGJ5\_STAA3  
mddyatadrlyrytssn1sepi1nyvasrinwgdkvs1mtlakeiqskfndsvkentvkgprkiyad1c1l1cms1seag  
hgrm1qvn1edciyigdid  
v  
>tr|Q2FGL6|Q2FGL6\_STAA3  
midyks1glseed1kviykwmd1grkider1w1l1nragkipfvsvsgqqeatqigmaya1eegditapyrd1afvtymg  
isaydtf1safgkddvns  
ggkqmpshfssrakni1sqsspvatqiphavgaal1kmdgk1kiatavvegssnqgd1fhegl1nfagvhk1p1fvcviin  
nkyai1svpds1qyaaek1s  
dra1gygi1hgeqvdgndp1amykamkeardra1sgqgst1ieavtsrmtahssdddqyr1tkeeret1kkadcnkfkke  
11sagiiddaw1aeieaeh  
kdiinkatkaaedapypsveeayafvyeegs1n  
>tr|Q2FGN2|Q2FGN2\_STAA3  
mgkni1ksgis1se1glgcm1sgtd1kkaeqi1dcavengityfdtadmydkinesvvgkallkyqrrddi1figtkvgn  
r1tkdgsttwdpsksyike  
avkgs1kr1gidhid1yqlhggtiddp1detisafdelkqegi1raygissirpnvidyylkhsqietimsqfnlidnpr  
es11daihndvkv1argp  
vskg11tsnsvn1dnkfkdg1fdyshdelgetiasikeiesn1saltfsyltshdvlgsiivgassvdq1kenienyht  
kvs1dqiktara1rvkdley  
tnh1v  
>tr|Q2FGP1|Q2FGP1\_STAA3  
mr1n1mmsr1nsvvik1w1ti1livttv1l1l1sialitfmqyftqetenairredarriss1veqshnkeeaikysq1li  
enpgg1miinnkhrqstas  
1sn1kkqm1nevvnndhfdvdfdkgsvtrnvtikekgssqti1llyptkaqknshskysgvfiykdlksiedtnnait  
i1tiitavi1fl1titvaf  
f1ssritkpl1rr1rdqatrvsegdysykpsvttkdeigq1sqafnqmsteiehvda1stsknirds1nismveglgin  
esrq1i1snkmandimdni  
dedakaf11rqiedtfk1skqtemrd1emnarffvvttsyidkieqggksgvvvtvrdmtnehn1dqmkkdfianvshe1r  
tpis1lqgytesivdgivt  
epdeikes1aiyv1deskr1nr1vne11nvarmdaeg1svnkevqpiaa11dkmkikyqqadd1gl1nmtfnyckkrwsy  
dmdrmdqvl1tn1idnasry  
tkpgdeia1tcdenesedi1yikdtgtgi1apeh1qqvdrfykvdaartrgkqgtgl1gfickmiiehggsidvkselg  
kgttfiik1pkpe  
>tr|Q2FGP5|Q2FGP5\_STAA3  
mkkvi1g111vst1a1tacgekekpkkeenksqtqnhkds1kpk1tqekmkkvedknppnnsiqnnsnnqnsqnnq1nnn  
sdpsnntpaninendsqnt  
n1ndeyvsvpgwtkdeqakafeeykkgkeeeearagasavpganin  
>tr|Q2FGP8|Q2FGP8\_STAA3  
mddmpeq1svrkwr1vrd1kqgevadilgvnaktvghwekddtn1snvtvya1aklydievdqikv  
>tr|Q2FGQ1|Q2FGQ1\_STAA3  
mpki1vpptpentyrgeekfvk1lyatptqihq1fgvcrstvywn1kyyrkdn1gvenlyidysptgtliniskleeyli  
rkhhkwy  
>tr|Q2FGQ2|Q2FGQ2\_STAA3  
mp1lyfttaws1agfasiatfiyykeyfyee  
>tr|Q2FGQ6|Q2FGQ6\_STAA3  
mk1dhsnrhak1sasgqwlncppsikasegiadkstvfaeegtfahe1selyfs1kyegltqfefnkafqnykrnqy  
yseelreyveeyvanveek  
ynea1srdndvialfetk1dlgkyvpesfgtdvii1fsggvlei1dkykggievsaidnpq1rlyglgaye11s1mydi  
htirmti1qpridnfstee  
1pisr11qwgadfvkplarla1yngggefkgshcrfckinhscrtraeymqnvpqkpph11sdeeiaellyk1pdikkwa  
deveqya1nqakendknyp  
gwk1vegrsrmi1tdtkam1lek1veagykpeditetk11sitn1lek1ligkka1fskitegfiekpqqk1t1atesdkrpa1  
kqsaeddfdk1  
>tr|Q2FGR5|Q2FGR5\_STAA3  
mtqyl1vttfkdstgrkhthi1tkaksnrftvveaeskeeaerkyeaqvkrdavikvgq1fenirecgk  
>tr|Q2FGR6|Q2FGR6\_STAA3

Tsompanidou\_et\_al\_Supplemental\_FASTA\_File

mtevkiktisdrvytttdlasddyinlvmnlviedflpvkdvfnnevwwkrdeiesftfikeandd  
>tr|Q2FGR7|Q2FGR7\_STAA3  
minipkmkfpkkyteikiikyknkapeekakieddfikeikdkdsefysptmanmneyelramlrmmpsli dtgddndd  
>tr|Q2FGS1|Q2FGS1\_STAA3  
mldkvtqietikydrdvsysyaasrlstywtnhnmawsdfmqklaqtvrtkedl teynkmskseqadikdvvggfvgyglk  
egkrragqvmnrsm l t d i  
dyaaqdmt d i l s m f y d f a y c l y s t h k h r e i s p r l r l v i p l k r n v n a d e y e a i g r k v a d i v g m d y f d d t t y q p h r l m y w p s  
tsndaeffftyedlp l l d p  
dkilneyvdwtdtlewptsskeesktkr l a d k q g d p e e k p g i v g a f c r a y t i e e a i s t f i p d l y e k h s t n r y t y h e g s t a  
gg l v l y e n n k f a y s h h n t d  
pvsgmlvnsfdlvrihlygaqedakt d t p v n r l p s y k a m q r a q n d e v v k k q l i n d k m s d a m q d f d e i v n s d d a w s e t l  
e i t s k g t f k a s i p n i e i i l  
r n d p n l k g k i a f n e f t k q i e c l g k v p w n t n f k t r q w q d g d d s s l r s y i e k i y d i h h s g k t k d a i i s v a m q n a y h p v r d y l  
n k i s w d g h k r l e k l f i k y l  
g v e d t e v n r t t t k k a l t a g i a r v m e p g c k f d y m l t l y g p q g v g s a l l k k l g g a w f s d s l v s v t g k e a y e a l q g v w l m e m  
a e l a a t r k a e v e a i k h f i s  
k q v d r f r v a y g h y i e d f p r q c i f i g t t n k v d f l r d e t g g r r f w p m t v n p e r v e v n w s k l t k e e i d q i w a e a k y y y e q g e e  
l f l n p e l e e m r s i q s k h t  
e e s p y t g i i d e y l n t p i p s n w d d l t i f e r r r f y q g d v d m l p t g n v d y v e r n k v c a l e v f v e c f g k d k g d s r g s m e i r k i s  
n i l r q l d n w s v y d g n k s g k  
i r f g k d y g v q i a y v r d e s l e d l i  
>tr|Q2FGS2|Q2FGS2\_STAA3  
mkestlkylvkeisklnglclkwvapgtrgvpdriiimpgektyfvemkqekgklhplqkyvhrqfenrdhkvyvlwnk  
eqvntfirmvggtfgd  
>tr|Q2FGS3|Q2FGS3\_STAA3  
mglgktvstltafse l q l l d t k k m l v i a p k v a k d t w d e v d k w n h l n h l k v s l v l g t p k e r n d a l n t e a d i y v t n k e n t  
k w l c d q y k k e w p f d m v v i d  
e l s t f k s p k s q r f k s i k k k l p l i n r f i g l t g t p s p n s l q d l w a q v y l i d r g e r l e s s f s r y r e r y f k p t h q v s e h i f k w e  
l r d g s e e k i y k q i e d i c l s  
m k a k d y l d m p d r v d t k q t v l s e k e r k v y e e l e k n y i l e s e e e g t v v a q n g a s l s q k l l q l s n g a v y t d e e d v r l i h d k k  
l d k l e e i e e s q g g p i l l f  
y n f k h d k e r i l q r f k e a t t l d d s n y k e r w n s g d i k l l i a h p a s a g h l n l q q g g h i i v w f g l t w s l e l y q q a n a r l y r q g  
q n h t t i h h i m t d n t i d q r  
v y k a l q n k e l t q e e l m k a i k a r i a k h k  
>tr|Q2FGT0|Q2FGT0\_STAA3  
mptlyelkqslgmigqqlknkndelsqkatdpnidmedikqletekaglqrrfniverqvqdieekakvkdkgayqs  
l s d n e k m v k a k a e f y r h a i  
l p n e f e k p s m e a q r l l h a l p t g n d s g g d k l l p k t l s k e i v s e p f a k n q l r e k a r l t n i k g l e i p r v s y t l d d d d f i t d v e  
t a k e l k a k g d t v k f t t n k f  
k v f a a i s d t v i h g s d v d l v n w v e n a l q s g l a a k e r k d a l a v s p k s g l e h m s f y n g s v k e v e g a d m y d a i n a l a d l h e d y  
r d n a t i y m r y a d y v k i i s v  
l s n g t t n f f d t p a e k v f g k p v v f t d a a v k p i v g d f n y f g i n y d g t t y d t d k d v k k g e y l f v l t a w y d q q r t l d s a f r i a k  
a k e n t g p l p s  
>tr|Q2FGT5|Q2FGT5\_STAA3  
mktklkykgddvaseqgegkvsvtlnleadttypkgtyqvaweengkesskvdvpqfkt n p i l v s g v s f t p e t k s i m  
v n t d d n v e p n i a p s t a t n k  
i l k y t s e h p e f v t v d e n t g a i h g v a e g t s v i t a m s t d g s d k s g q i s v t v t n g  
>tr|Q2FGU2|Q2FGU2\_STAA3  
menlylikdlgalagrdrakeiqnlqrieqfalgtteflkhqkaktmqhfaeqiyyngrsaavnkslqsqinalvva  
p n n s a n e i v q a r v n v n g e  
t f d t l k e h l d d w e t k t q i n k e e t i r e l n k t k q e i l d i e y r f e p d k q e f l f v t e l a p l t n a v m q s f w f d n r t g i v y m t q a r  
n n g y m l s r l r p n g q f i d s s  
l i v g g g h g t h n g y r y i d d e l w i y s f i l n g n n e n t l v r f k y t p n v e i s y g k y m q d v f t g h p e k p y i t p v i n e k e n k i l y r  
i e r p r s q w e l e n s m n y i e i  
r s l d d v d k n i d k v l h k i s i p m r l t n e t q p m q g v t f d e k y l y w y t g d s n p n n r n y l t a f d l e t g e e a y q v n a d y g g t l d s f  
p g e f a e a e g l q i y y d k d s g  
k k a l m l g v t v g g d g n r t h r i f m i g q r g i l e i l h s r g v p f i m s d t g g r v k p l p m r p d k l n l g m l t e p g l y y l y d h t v q i  
d d f p l p r e w r d a g w f l e v k  
p p q t g g d v i q i l t r n s y a r n m m t f e r v l s g r t g d i s d w n y v p k n s g k w e r v p s f i t k m s d i n i v g m s f y l t t d d t k r f t d  
f p t e r k g v a g w n l y e a s n  
t g g f v h r l v r n s v t a s a e i l l k n y d s k t s s g p w t l h e g r i i s  
>tr|Q2FGU3|Q2FGU3\_STAA3  
msnleksvainlentahyenislnditftrtgesdssvllfnii knqplllseenikariairgkgvmvva pleildp f k  
g i l k f q l p n d v i k r d g s y q  
a q v s v a e l g n s d v v v e r t i t f n v e k s l f s k i p s e t k l h y i v e f q e l e k t i m d r a k a m d e a i k n g e d y a s l i e k a k e g l  
s d i q i a k s s i d e l k q l a n  
s r i s d l e n k a q a y s r t f d e q k r y m d e k h e a f k q s v n s g g l v t s g s t s n w q k a k i t k d d g k i m q i t g f d f n n e p e q r i g d s t  
q f i y v s q a i n y p r d v s t n g

Tsompanidou\_et\_al\_Supplemental\_FASTA\_File

tveylvvtsdykrmtyrpnngtnkvfvrkeagswsewselaindyntpfetvqsaqskanmaesnaklyaddkfnkrysv  
ifdgtangvgstlylnesl  
dqfllifdygtfpggdftefgspfggkislpsnlpdgdngggvyefgltkssrtsltisndvyfdlgsqrgsganan  
rgtinkiigvrk  
>tr|Q2FGU8|Q2FGU8\_STAA3  
mlitknqaekwfdnslgkqfnpdlfygfqcydyanmffmlatgerlqglyaynipfdnkakiekygqiiknydsflpqkl  
divvfpskygggaghveiv  
esanlntftsfgqnwngkwtngvaqpgwgpvetrvhvydnpmyfirlnfpnnlsvgnkakgiikqattkveavikpk  
kimlvaghgyndpgavng  
tnerdfirkyitpniakylrhaghevalyggssqsqmdytaygvnvgnkdkdyglywvksqgydivleihldaagesas  
gghviissqfnadtidsi  
qdviknllgqirgvtprndllnvnsaeininyrlselgfitnkndmdwiknydlyskliagaihgkpigvvasvka  
pvkneknppvpagytldkn  
npykkegnytvavkgnvrddgystnsritgvlpnnttitydgaycingyrwityiansgqrryiatgevdiaagnris  
sfkfsav  
>tr|Q2FGV2|Q2FGV2\_STAA3  
mfkrtklilialllsgcsttnnesnketksvpeemeaskyvgqgfqppaekdvvefakkkdkiakrgeqffmdnfglk  
vkatnvvsgkgvefvhc  
ddhdvfnasipfdksiesdsslrsedkgddmstlvgtvlsgefeyrtqekydnykffkdneekyqytgftkeainkt  
qnvgykneyfyityssrsl  
keyrkyypelihkndkefkegmeqarkevnyaantdtvtlfstkenftkdntvddvielsdklynfknkpekstitiqi  
gkptintkkafyddndpie  
ygvyrkde  
>tr|Q2FGV3|Q2FGV3\_STAA3  
mneskkdtntetntetksvpeemeaskyvgqgfqppaekdaiefvkkhrkefekvgeqffkdnfglkvkatnvvgkddg  
vevyvhcedhgi vfnaslp  
lykdaihqkgsrmsndngddmsmmvgtvlsgefeyraqekydnykflkenekyqytgftkeainktqnvgyqneyfyi  
tylsrnlkeyrkyypelih  
kndkefkegmqrarkeinytantntvatlfstndernrkekinvidlsekiertkmpikntittqlgnkligtkkarf  
ddkkvvsfgafede  
>tr|Q2FGV6|Q2FGV6\_STAA3  
mtiftqlsdrikkaiskinqannipnarkspmyhspit  
>tr|Q2FGW4|Q2FGW4\_STAA3  
myraltykylklnktedfaklvdqttldltykadkgqcvi ldnedvtdflrnnvdtqhvsvaskepvrsvavkkqkela  
aekgimdgrdigtvvlpd  
adlkvymiasveeraerrykdnqlrgiesnfedlkrdieardqydmreispkrkaddavtldttgksieevtdeilamv  
sqik  
>tr|Q2FGX2|Q2FGX2\_STAA3  
mnneikkveqrlekaikskdsvleqaslhlssggkrvrpafvilssqfgkdeqtseqtyqvavalelihmatlvhddvi  
dksdkrrgkl tj skkwqdt  
tailtgnflalglehlmavkdnrvhqlisesivdvcrgelfqfqdqfnsqqtiiinyllrrinrktalliqistevgait  
qsdketvrklmighyigm  
sfqiiddvldftstekkigkpvgsdlnghitlpillemrknpdfklkieqlrrdserkefeciqiirksdsideakav  
sskylskalnli selpdgh  
pksllsltkkmsrnt  
>tr|Q2FGY9|Q2FGY9\_STAA3  
mtnitkevfdnlqeaidlfaknktlgsseakpyldeyhskiidfykqvnditgnidfdklnqypvpmnfkerydymier  
kyhfmgyrqmktfktelik  
mnasyqtrlnkqk  
>tr|Q2FGZ2|Q2FGZ2\_STAA3  
mndvvesliyevnmqanfenvksqqqdhdfyqtvkpytehidsilneiklhrefiievpmnsrkfellianieqlsve  
chfkrtsrklfieklskvsq  
ydlqnildgvtkegtg  
>tr|Q2FGZ7|Q2FGZ7\_STAA3  
mkntfnplqrhfyaaifiaplilitltsigigylffpevenniykneffgdsdvkthqtlnlavhqvqqyegffvskvs  
ildepynkritlsmagnq  
ryvfl dhnnqfvadqnakhtysnmrsihsslftentiinylveltacwmifmilsytyllikkhlisnkskalrwqkw  
amigvii aipvfvlvltgl  
pwsqfmgskia gmmtdnga lggelainppksdlnelpwatrknkqpassekgsghgnaampqtkldyqisidkvveq  
aqkagikkpfsivypsdn  
gtfivstnsqvtgl dsvpykeqlyfdqysgkklgtikyddygi akwftwgiplheghlfgilnkiinlvciallv  
aigmgfvswikrtkntaik  
vphrvkkpasisliiclivglmpifglslilvfielilyikdrakq  
>tr|Q2FGZ8|Q2FGZ8\_STAA3  
minkeqldllykllkeveksrnealhtinqvikkvylqytcsvfghfsagkstlinllieqdilpsspvttsntaiv  
svsdnhdianlnpntyak  
lsnydevremnrqnvdesveinfqsakfengftlqdtpgvdsnvashqsieqymytsnmi fytdynhvqselnfkfm  
khindvgipvvfiinqidk

Tsompanidou\_et\_al\_Supplemental\_FASTA\_File

hqddelsfstfksrveksiadwgiklertfyvskfdhpenellevlssylisldqhretiedytsrtveyiteaqldyiqs  
eiqevledlgiieaeafeqa  
flnsqhqai seeaqllnnpdelmaflnkrkni lenayimphnmrem lrsylesmsqdfnvvgffnkkkkklqiqqqr1  
1tatdalqehvnqqi rqp  
redmsfvtrfinkkeasdkvl nqhydvkpe mieglyqpqtsisntyvltfsdevvkaikkyveqqstpi fkeienvqad  
elpteesddlkeyqrytel  
nelrqs1ttknyrhyyihl desldk1igrqettyqv atdnaqdnrdnqqlnqntattnmsidiqka ldiisdvplfkrtk  
qdihetl1tridnklikigv  
fgtfsagksslinallgehilvsspnpttaatteisygdesyitlksqsqlldeinavveyqdm systiedfinsdlekl  
kshlnknqlafiqavekhy  
klyvnm1engekhainqqelkkwsaedeyatfvktvhialmhdw1kgkiivds1glhsnnqrhtneteqiltssdil1yv  
syfnhsftdndkafiehm  
dmnqlnenqal kmvinaadlaesqddleavetyvsdalr qvhlqsdifavssrnalqaedkgidqlkqsiqqfvdesks  
ileqqmihq1lqqmdrsyve  
mitefetnkadisrrqqr1tdykdqrlqhqlidat1qhtdneveeqvyhlnar1klq11ddvksvfnsqmtqnsdfnee  
kkvstrvyldqihqr1fle  
qs1iterikkyfnkqlteqiapivqqlad1hviinpqfnfesanieqpl1hidfndm1nalpkqltkrkilnpngqrdih  
esicqstle1lqqmg11r  
qqlelyvkqmakeaesqfesfeaniqtqind1lafdl1dt1linqlkdkhqqlktily  
>tr|Q2FGZ9|Q2FGZ9\_STAA3  
mpnk111vdgma11frhfyats1hkqfmynsqgeptngiqgfvrhifsaieirpthvavcwmdmgqstfrndmfdgykqn  
rsappeelipqfdyvkeis  
eqfgfvnigvknyeaddvigtlaqqystdndvyiitgdkd11qcindnvevwl1kkgfniynryt1hrfneeyalepqq1  
idikafmgdtadgyagvk  
igehtai1k1iqqygsvenvenidalsagqrnkindn1dely1skrlaeihtqvpidsealfekmsfatt1nhilsicne  
helhvsqkyissfh  
>tr|Q2FH05|Q2FH05\_STAA3  
makinfdaatkgnpgistcaivikedeqhytythelgemdnhtaewaaciya1eharel1nvqnal1lytdskliadsieag  
yvknanfkpyfdqieiefek  
dfd11fvkwipreqnkeanqhaqqa1y1k1kknk  
>tr|Q2FH44|Q2FH44\_STAA3  
mtklavvgatglvgtkm1et1nrknipfelv1fssarsagqevfqqktytvqeltdarasehfdyv1msagggtsehf  
aplfeqagavi1dnssqwr  
maedid1ivpevneptftrgii anpcnstiqsvvp1kv1qdayglkrvayttyqavsgsgmkgkkl1aegvngkapeayp  
hpiynnvlphidvflengy  
tkeeqkmidetrki1napd1kvtatcarvpvqdshsveidvt1dkettaedikal1fdqddrvv1vdnpenneypmainst  
nkdevfvgrirrds1lent  
fhwctsdn11kgaa1navqvl eqvmr1kgan  
>tr|Q2FH53|Q2FH53\_STAA3  
msqglplredvpvsetwd1vd1fkddqyyesidalvqqanqfhhtyatt1nsieqintalaelenilialdr1snyael  
r1svdtsnieaqv1sak1s  
ttygkivsq1sfvsei1elpeeilqqleescpyqhyikql1kqkpfq1sasveqvlatspt1nspydlygttkm1dit  
fdfsfehdgtt1pvdya1tfe  
ndyednkdp1frksfksfsdgi rkyqhttaatynmqvqqeki ead1rgfesvidy11hsqevtrdmfdrqidmimrdla  
pvmqkyak11qrihglndm  
rfed1k1svdpdyepeisiedsknyi fga1sv1gddytnm1reaydqrwidfaqnkgkdtgafcaspyfthsyvfi swtg  
kmaeafv1ahe1ghaghft  
1aqkhqpy1eseasmyfveapstmnem1many1fntsdnprfkrwvigsilsrtyyhnmvth1leaayqrevyhkvdqge  
s1napt1neim1nvykqff  
gdavdmtegae1twmrqphyymglysytsag1tigtvvsqik1negqpavdawlet1kkgsvspvelaniagvditte  
qplkstiqy1sd1vdevek  
1tdeieqann  
>tr|Q2FH62|Q2FH62\_STAA3  
mkl1nerqigvm1mkftn1takefgaftdsmpyshftqtvghyelklaegyeth1vgiknnnneviaac11tavpvmkvf  
kyfysnrgpvidyenqelv  
hfffne1skyykkhrc1y1hi dpylpyqy1nhdgeitgnagn dwffdkmsn1gfehtgfhkgfdpv1qiryhsv1d1kdk  
taddi1knmdgl1rkrntkk  
vknqvkvrfl1see1pi frs1fmedtseska1fadrddkfyynr1kyykdrv1vplayinfdeyikelneerdilnkdlnk  
al1kdi1ekrpenkkahnkrd  
n1qqql1daneqkieegkr1qeehgne1pi sagfffinpfevvyaggt1snafrh1fagsyavqweminyalnhgidrynfy  
gvsqkftedaedagvkvfk  
kgynaiei1eyvgdfikp1nkpvyaa1y1tal1kkvkdrif  
>tr|Q2FH69|Q2FH69\_STAA3  
mdi fykkikanvtpel1aq1hskki1ilestnqqqtkgrysvvifdiygt1t1dndv1svst1kesyqiterpyhy1t1tki  
nedyhni1gdeq1ks1l1pfi  
gyvgtc1sfd1vrhef1k1sq1q1ledhkqh1dvr1ymveqvyv1fdhykde1y1iatnq1fsnstks1denrviksied1tkiq  
p1fmp1tq1df1d1fktkei1qsni  
seerfiemi1qyfkeki1tegd1mf1qv1vps1riykyahasq1h1nq1sfq1yq1n1krq1nps1pymy11nidq1py1vg1ss1pes1fvs



Tsompanidou\_et\_al\_Supplemental\_FASTA\_File

vkdqivttntpiagtiqrge  
ttqidnenmkqlndpkecsehrmlvdigrndihrvskigtskitelmviekyehvmhivsevtgkinqnlspmtvianl  
lptgtvsgapklraieriy  
eqyphkrgvysggvgyincnhdalfalairtmmideqyinveagcgvyvdsipekelnetklkaksllvsvp  
>tr|Q2FH80|Q2FH80\_STAA3  
mseiiqd1s1edvlgdrfgryskyi iqeralpdvrdg1kpvqrrilyamyssgnthdknfrksaktvgdvigqyhphgdy  
svyeamvr1sqdwklrhv1  
iemhgngsidndppaamryteak1s1lae11rdinketvsfipnyddttlepmvlpsrfpn11vngstgisagyatdi  
pph1aeviqat1kyidnp  
ditvnq1mkyikgpdfptggiqqidgikkayesgkgrivrskveet1rngrkqliiteipyevnksslvkridelra  
dkkvdgivevrddtrtg1  
riaie1kkdvnsesiknylyknsdlqisynfnmvaisdgrpk1mgirqiidsylnhqievvanrtkfeldnaekrmhive  
glikalsildkvielirss  
knkrdaken1evyefteeqaeaivm1qlyr1tntdivalegehkelealikqlrhildnhdallnvikeelneikkkfk  
ser1s1ieaeieeikidke  
vmvpseevilsmtrhgyikrtsirsfnasgvedig1kdgds11khqevntqdtvlvftnkgrylfipvhkladirwkelg  
qhvsi1vpiieedevvinvf  
nekdfntdafyvfatqngmikstvp1fktrfnkpliatkvkenddlisvmrfekdq1itvitnkgs1tyntselst  
glraagvksin1kaedfv  
mtegsendti1matqrs1krisfki1qvakraqgit11kelkknphrivaahvvtgehsqy1lyksneehglindi  
hkseytngsfivtdddf  
evidmyis  
>tr|Q2FH81|Q2FH81\_STAA3  
mamnkqnnysdds1qv1leg1eavrkrgpmyigstdkrg1lhl1vyeivdsvdev1ngygnidvtinkdgsisiednrg  
mptgi1hkskgtptve1ftv  
lhaggkfgggk1sg1hgvasvna1sew1eveihrdgnyhqs1fknggspssg1vkkkgkktktgkvtfkpddtif  
kastsfnfdv1ser1qesa  
f11kn1ki1t1nd1rsgkerqehyhyeegi1kefvsyvnegkev1hdvatfsgeangi1evdvafqyndqyses1svfnnvr  
tkdgg1thevgfktamtrvf  
ndyarrine1ktdknd1gndi1reg1tavsvripee11qfegqtksk1gtsearsavdsvvadk1pfyleekgq1sksl  
vkkai1kaqqareaarkare  
darsgkknkrkdt11sgk1tpaqsntekne1yl1vegdsaggsak1grdrkfqai1pl1rgkvintekar1edi1fkneein  
ti1ht1gagvgtdfkieds  
nynrv1imtdatdgahiqv111t1fffkymkp1vqagrvia1pplyk1ekgkgtkrveyawtdee1nk1qkelgkgt  
1qryk1gemneq1wett  
mnpetr11irvqvedevr1sskrvt11mgdkvqprrewi1ekhvefgmqedqsi1dnsevqvlendqfdeei  
>tr|Q2FH92|Q2FH92\_STAA3  
mayt1wtrh1nfnpqskdyfnrdrfv1saghgsa11ys11hvsgs1e1ee1kqfrqwgsktpghpeyrhtdgvevtgpl  
gggfamsvgl1a1aedh1ag  
kfnkegynvvdhytyv1asgd1megi1sheaasfaghnk1sk1lv1ydsndi1s1dgelnkafsentkarfeaygwny11v  
kdgnd1eeidkai1ttaksq  
egpti1ievktt1fgfspnkagtngvhgap1geverk1tfenygl1dpekrfnvseevyei1fntml1kranedesqwns11e  
kyaetypelaefk1aisg  
k1pknykde1prfelghngasradsgtvi1qaisktvpsffggsad1agsnksnvndatdyssetpegknvwfgvrefamg  
aavngmaahgg1l1hpygatf  
fvfsdy1kpa1r1ssimg1natfi1fthds1avgedgpthepieq1lag1raipnmn1virpadgnetrvawe1alesestpt  
s1v1trqn1pv1dvpedv  
eegvrkgaytvygseetpef111asgsevs1aveaakd1ekqgksvr1vvsmpnwnafeqqseeykesvipssvtrkvaie  
masp1gwhkyvgtagkvia  
idgfgasapgd1vvekygftkeni1nqvms1  
>tr|Q2FHA2|Q2FHA2\_STAA3  
mtnykvvv1dmdt11nsdnvi1seetany1tai1qdegyyv1lasgrptegmiptard1k1lpehhsy1is1yngsktinmtn  
eevevsks1gkqdfdeivd  
ycrdrgffv1tyhdgqi1ydeheymnieae1tg1pmkrvddikayi1qgdvpkvmgvdyanitearid1ngvfndnvda  
ttskpff1efmakdvskg  
aikalchk1gysvdqvia1fgdsmdksmfevag1aiamgnasde1kqyanevt1dhnengiphalk11  
>tr|Q2FHA4|Q2FHA4\_STAA3  
mrrwqg1veefkah1pvnentpk1t1negntp1ihcenmski1gidlyvkyeganptgs1fkdrgmvmavtkakeqgkiv  
icastgntsasaayaara  
glkai1vvipegkia1gk1sqavmygaeivsiegndfdealeivkeiakseielvnsvpnfriegqktgsfeivqq1dgea  
pdilaipvgnagnitaywk  
gfkeyheakgsq1pkmfgfqaegaspi1vqnkviknpetiatair1gnpaswdkatnal1kesnglidsvtddeileayq1m  
ttkegvfsepasasiag1  
ik1hrqgk1pqqkvvai1tgng1kdpdta1s11dnpik1lpndkdsi1dyikga1  
>tr|Q2FHA7|Q2FHA7\_STAA3  
mnaeq1vdn1mktssq1fkfhgevamq1f1ndelk1psiveicverkr1sdivkvi1pqsya1lyidkqdqaiaked1s1  
skiakvyvqyddttsim1sif  
vydvvdewi1fr1dpni1ripksni1yfs1nwdvdyikeiv1myd1mqhhqyhhsnykrvidal1syyqff1ikfvvgeq

Tsompanidou\_et\_al\_Supplemental\_FASTA\_File

rikdaiqrinn  
>tr|Q2FHB1|Q2FHB1\_STAA3  
mtsliiaedqnmrlrqamvqliklhgdfeladtdngldamklieeynpnvvfldiempgmtglevlaeirkkhlnikvii  
vttfkrpgyfeakavndvd  
ayvlkersieelvetinkvngekeysatlmstffvdknpltpkeqivlreingnlsseiseklfldgtvrnytsvii  
dklfadnrfdawkkaneqg  
wi  
>tr|Q2FHB3|Q2FHB3\_STAA3  
milsylkiefkvimrkkttliisilfpvifyilftsilelpedvvpkyfykeymysmtvysllsfslltflpldiinekqne  
wrqrlmvtptfttsyyisk  
vvtmqlqafaiailvifmvghfykgvamsavqwlesgiflwlgasllitfgilfsllndiqktsalanivtiglavlgglw  
fpintfnpwlqhvahlps  
yhlrklgvdiasnhhinlisfaiillyalgsiavycishfkrae  
>tr|Q2FHB4|Q2FHB4\_STAA3  
miklqiqisninksfnkrvcvknisfdieqgkcialigkngagkstlidilignvnansgeifdkdksenrsimfqkt  
mfpdqkqvieinlygsfy  
enplpleeieietkfdssqlnqfvnklsggqarlldfvlsligqpqlilldeptstmdieireyfwsiienlkednrtil  
ytshyieevermsdkiiil  
engeiilndstshirtnqgsqitlsdeyirkklkdkddlviqknhngtikiitsnvndtilylqqlhinlddieiqkvs  
vdsyfnnkkqrgsnydtkl  
lenri  
>tr|Q2FHB9|Q2FHB9\_STAA3  
misngkmtmklmnnvkqkrhilctneynnkknssllpsytiidsnesekmtkfeidipvlfddegnfrikqvidykii  
gksyvnkyietklgkvhy  
sktgfhvvpvyikke  
>tr|Q2FHC1|Q2FHC1\_STAA3  
mlghhlynenkkraillnkkllpsytilsidllnellrekmstgnllsderfdlkeiinfniigkihienvyietrkkg  
vhysktgahivpyidk  
>tr|Q2FHC2|Q2FHC2\_STAA3  
mipgvnappmhpwcrsttvphvgnwrkffkeregkyqvevkea  
>tr|Q2FHC3|Q2FHC3\_STAA3  
milkikeindksvtykyfnpndenikpgi iqmdidslevinaeksslekntrdnyfihaidriyintskglfpeselva  
wg  
>tr|Q2FHD2|Q2FHD2\_STAA3  
mkdiskivadvestlapyfkeieetayinqekvlnafhvkatesdlqgstgygyddfgrdhleeiyaqafkaedaivrp  
qiisgthaitialqslkh  
gdeliyitgspydlllevigvnggieslmehgvsykdiakkegidiesvldgvsertkviaiqrskgydqrpsiplde  
iekvitrlnkvhpnilifv  
dncygefverrepiiegadliagsliknpggglakiggyiagrkdliercgyrltapgigkeagaslnallemygqffla  
phvvsqslkgalftsflf  
kmmnttpkyyekrtdliqtvkfetkeqmisfcqsiqhaspinahfspepsympgyeddvimaagtfigssiel sadgp  
irppyeayvqgglyehvk  
iavtravnqlkeggli  
>tr|Q2FHE1|Q2FHE1\_STAA3  
mnqvnnnilpai rnikdlekliktdykmcvlldmhighiksime llkqnhiectihidlikglshdefasefiiqqykp  
givstkskvikkakslnt  
tifrviidsqalkrsidlikkvepdfvevlpgvaskaihihqetntqviagglintidevneavkngakyvttsydkl  
w  
>tr|Q2FHF0|Q2FHF0\_STAA3  
mrifigdivgkigrdaieytipqlkqkykptvtivnaenaahgkgltekiyqllrngvdfmtmgnhtyqgreiydfid  
eakrlvrpanfpdeapgig  
mrfiqindiklavlnqgrafmpdidpffkadqlvkeaeqtpfivdfhaettsekyamghldgrasavvghththiq  
taderilpkgtgyitdvgm  
tgfydgilginktevierfitslpqrhvvpnegrsvlsqvidldkegkthierilinddhpfstf  
>tr|Q2FHF3|Q2FHF3\_STAA3  
mklgdnigrvsttstgsvtldnalgvggypkgriieiygpeessgkttvalhaiaevqsnggvaafidaehaldpeyaqa  
lgvdiidnlylsqpdhgegg  
leiaefvrsgavdivvdsvaaltpkaeiegemgdthvglarlmsqalrklskaisnttaifinqirekvgmfgn  
pettpggralkfyssvrle  
vrraeqlkqgqei vgnrtkikvvknkvappfrvaevdimygggiskegelidlgvendi vdksgawysyngermggken  
vkmylkenpqikeeidrkl  
reklgisdgdveetedapkslfdee  
>tr|Q2FHG2|Q2FHG2\_STAA3  
mvlgvfqlgiigrldsfnylfgysryltyilvllatgfityskripktrrtagsivlqiallfsqvlvfhfnsgikae  
repvlsyvyqsyqshshfn  
fgggvlgfyllslvplislfgvciitillcssvilltnhqhrevakvalenikawfgsfnekmsernqekqlkreeka  
klkeeqkarqneapqikdv  
sdftevpqerdipi yghtenesksqspkrkrvfdaenssnivnhhqadqqeqlteqthnsvesentieeagevtnvs

Tsompanidou\_et\_al\_Supplemental\_FASTA\_File

yvvppl1l1ngpakqkats  
kaevqrkgv1entlkdfgvnakvtqikigpavtqyeiqpaqgvkvsivnlhndialalaakdvrieapipgrsavgie  
vpnekis1vs1kev1dekf  
psnnklevglrdisgdpi1vplneph11vagstgsgksvcingiitsillnakphevklmlidpkmvelnvyngiph1  
lipvvt1nphkaaaleki1v  
aemerrydlfghsstrnikgyne1irkqnqeldekqpe1pyivvivedladlmmvagkevenaiqritqmaraagih1iv  
atqrpsvdvitgiiknrip  
sriafavssqtdsrtiigtgaek11gkgdm1yvngdssqtri1qgaf1sdqevqdvnyvveqqqanyvkemepdapvd  
ksemkseda1ydeay1fvv  
eqqkasts11qrqfrigynrasr1mdd1ernqvigp1qksgkprqv1id1nndev  
>tr|Q2FHH6|Q2FHH6\_STAA3  
mcpefaigm1gpk1fsfrknetlytir11pvgyvrmagdg1eppvepgm1vki1k1neeneithi1l1ddhhkfqieaie  
vkkcdfkdd1fiegi1tayd  
nerhfk1arksffvengs1vqiaprdrqfahkkpwpkfl1fagp1fnfilalv1figlayyqgtptstveqvadkypa  
qqag1kqgdki1vqigkyki  
sefddvdka1dkvdknttvkferd1gktsveltpkktekk1tkvssetkyv1gfgpaseht1fkpivfgfksfligsty  
iftavvgmlas1ftggfsf  
dm1ngpvgi1yhvds1v1kagi1s1ligyta11svnl1gim1lipa1ldggr1lfviyea1frkpv1nkaetta1iaigaim  
v1im1lvtw1ndi1rry1f1  
>tr|Q2FHK3|Q2FHK3\_STAA3  
msffkr1kdkfatnkeneevks1teeqqdk1ledthsegstq1dand1aenaevkkkprk1sead1dddglisiedfeeie  
aqkmgakfkag1eksrqnf  
qeqln1liaryrk1vdedffea1eem1itadv1g1fntvmt1tee1rmeaqr1rni1q1dted1revivekiveiyhqeddnseam  
n1ledgr1nvi1mvgvngv  
ktt1gk1ayrykmegkkvm1aagdt1fraga1dq1kvwger1vgvdvis1qsegs1dpaavmy1dainaaknkgvd1ilic1dtag  
r1qnktn1mqe1ekvkrvi  
nravpdaphea11c1dattgqna1sqarnfkevt1nvtg1v1tk1ldgtakggiv1lairnelhipvkyvg1geq1dd1qpfn  
pesyvyg1fadmieqnee1  
ttvendq1vteekddnhgsk  
>tr|Q2FHK4|Q2FHK4\_STAA3  
mvy1ksida1g1fksfadqtnvq1fdkgvta1vgp1ngsgksnitdaikw1lgeqsaks1rgskmedi1fsgaehrkaqnyae  
vq1r1dnhskk1svdenev  
ivtrr1lyrsgeseyy1nndrar1kdiad1f1dsg1lgkeaysi1sqgrvde1lnakpidrrqi1eesagv1kykkraes1  
nk1dqtedn1trved1ilyd  
legrvep1keeaa1akeykt1shqmksd1vvtvhd1dqy1tndnrq1dqr1nd1lqqqan1keadkqr1sqqi1qykgkrh  
q1dndves1nyq1lvkatea  
fekytgq1n1veerkknqsetnaryeeeqen1mellenisneiseaqdtyks1k1skqkelnavireleeq1yvsdeahde  
k1leeikneyyt1mseqsdv  
nndir1flkhtieeneakksr1dsr1vevfeq1kdi1qqqikt1tkkeyq1tnkelsavdkeikniekd1tdtkkaqneyeek  
lyqayrytekmktrids1a  
tqeeeytyffngvkh1lkaknkelkgygavaei1dvpsk1tqaieta1gas1qhvividsekdgrqai1q1kern1grat  
flp1nvi1qsr1vatdiksi  
akeangfisiaseavkvapeyqni1gn1l1gnti1ivdh1khanelaraikyrriv1tlegdivnpggsmtgggarksksil  
sqkde1ttmrhq1ledy1lrq  
tesfeqqfkelkiksdq1selyfeksqkhnt1keqvhhfemeldr1ttqetqikndheefekndgytsdksrq1tsek  
etylesikas1kr1ledeie  
rytk1skegkesvtktq1t1hqkqsd1lavvkeriktq1qt1dr1nnq1nq1tkhq1kdvkeiaffnsdevmgeqafqnik  
dq1ngq1qet1r1r1sde1ldk  
lkqqr1e1neq1daeqak1qvchqdi1aienhyqdikaeqsk1dvl1ihhaidh1ndeyq1tverakseytsdesida1rk  
kvk1mkmside1lgpvn1na  
ieqfeel1neryt1f1segrtd1rkaket1eqi1semdqevterfketfhaiqghftavfkq1fgggdae1qlteady1tag  
idi1v1vqppgk1q1h1s1l1s  
ggera1ta1a11fai1kvrsapfvi1deveaa1deanvi1ryaky1nel1sdetqfivi1thrkg1tmefadr1lygv1tmqesgv  
tk1lsvsn1nt1iddv1keeq  
>tr|Q2FHK8|Q2FHK8\_STAA3  
mskta1i1fpgqgaqkv1gmaqd1fnndqate1ltsaant1dfdi1letmftdeegk1getentqpa1l1thssa1laa1kn1  
npdftmghs1geysslva  
dv1s1fedavki1vrkrgq1maqafptgvg1smaav1gl1dfdkvdeicks1ssddki1epanincpgqivvsghkalide1ve  
kgks1gagrvmplavsgpf  
hss1mkvi1eedfssyinqfewrdakfpv1vqnvnaqgetdkeviksnmvkq1lyspvqf1instew1idqgvdhfieigpgkv  
1sg1lik1kinrdvkltsiq1t  
ledvkgwnend  
>tr|Q2FHL7|Q2FHL7\_STAA3  
mks1sgvyqdv1ngerfntkprg1frkkkfspvvgdivefevq1inegyihq1vferene1krppvsnid1tlvivmsavep  
nfstq1l1drf1lviahsg1l  
nari1vtkkdktpiekqfe1ne1lkiyenigyete1fignddrkkiveawpag1liv1sgqsgvgk1stfl1nhyrpe1n1let  
ndisks1nrgkhttrhve1  
ferqngyi1adtpgfsa1ldfdh1dkdeikdyf1el1nrygetckfrncnhikepncnvkhq1leigniaqfrydhylq1lfnei

Tsompanidou\_et\_al\_Supplemental\_FASTA\_File

snrkvry  
>tr|Q2FHM1|Q2FHM1\_STAA3  
mienvrslafdtiqdilinegaysnlrineslenselnamdkalfteivgytvkrkytldfylvkpfvktkikawvrqllwm  
siyqyvylkvpnhaiine  
avejakerggyhngnvngilrtmmrsdlpdfnei adpkkрмаieysmpkwiidhwathygleetetilsflettsttv  
ranltraslddiiekldqe  
gydvekdhdlypchlhiggppiihsrsfdkgfvsiqdkssmfvahimnvdrhdhvl dacsapggkachiaevlmpegqvda  
sdihdkidlinfnikklr  
ltnikafqydatkpydktydkilvdapcsglgvmrhkpeikytqskqhieslvelqlleilenvknnvkiggeiistcti  
eglenenviytflknnknf  
efepfqhpitgelvktlqimpqdfnsdgffitikirkdn  
>tr|Q2FHM5|Q2FHM5\_STAA3  
mkktlgclllimllvavagsfggnhklskkseeskqetvkkeseekdpdlekyeeiekkmkgikdapsldkl dplmte  
ksftnskigigwkdylm  
gkveladyrftkdksgssikdvda ffgkkgikrkviethdvkvdywyvdpdgkkgignstpvfyaeimtkykdglv  
yasvepgsyvihkddaiky  
ddysklklsqtkldhpkpvpysvaqiksfgvpltsvsmfhgskdtkdevlpalayftfspknyedksnpdpkvlnlv  
hmdflnassdfgnahfvvl  
skyikeyesnyetasdds1k  
>tr|Q2FHN0|Q2FHN0\_STAA3  
maydglftkkmveslqflttgrvhkinqpdndtilmvvrqnrqnqlllsihpnfsrlqlttkkydnpfnppmfarvfrk  
hleggiiesikqigndrri  
eidiskdeigdtiyrtilvimgkhsnlilvdenrkiegfkhltpntnhyrtvmpgfnyeapptqhkinpyditgaev  
lkyidfnagniakqllngf  
egfspelitneivsrqqfittstlpeafdevmaetklpptpifhknhetgkedfyfiklnqfnddtvtydslnldrfdy  
argerervkgrandlrvfv  
qqlykyqnlaklieeyeqsknkdeqlygelitaniyrikqgdekvta lnyytneevviplnptkspsanaqyykqy  
nrmktrere1qhqiqltkd  
nidystieqqllhishvhideirde laeqgfmkqrknqt kkkkaqiqlqhyvstdgddiyvgknnkqndyltnkkakkt  
htwlhtkdipgshvvi fnd  
apsdtlikeaamlagyfskagnsgqipvdytliknvhkpsgakpgfvtydnqklyatpdyeliqkmkqs  
>tr|Q2FHN3|Q2FHN3\_STAA3  
makeiaksll dieavtlspndlytwssgikspiycdnrvtlgylvrgairdglinlikehfpevevisgtatagiphaa  
fiaeklk1pmyvrssnks  
hgkqngiegaksegkkvvviedlistggssvtavealklagaevlgvvaiftyglkkaddtfsniqlpfytl sdynelie  
vaenegkissediqt1vew  
rdnla  
>tr|Q2FHP1|Q2FHP1\_STAA3  
metyefnitdkeqtmrvdkllpe1nndwsrnqidwikaglvvandkvvksnykvk1ndhivvtekeveadilpenln  
ldiyyedddvavvykpkgm  
vvhpspghytntl vnglmyqiknlsgingeirpgivhrimdtsgllmvakndiahrglveqlmdksvkrkyialvhgni  
phdygtidapigrnkndrq  
smavddgkeavthfnvlfhkdyt1vecqletgrthqirvhmkyigfplvgdpkygpkktldiggqal hagligfehvp  
tseyierhaelpqdfedll  
dtirkrda  
>tr|Q2FHP6|Q2FHP6\_STAA3  
mvfynffkvvinidiyqhfrqeeyelidqltdkcdqaeqhyapvlthfl dprgqyilevicgsyedlnvsfyggpnaerk  
raispnyepkesdfelt  
lmeidypekfvtkhqhigt1mslgiereqvgdiivneriqfv1tsrlesfimlelqrikgasvklytipvtdmiqsne  
nwknesatvsslrldvvik  
emirksrtiakqliekkrvknhtivdsadfqlqandlisiqgfgrahitd1ggkttkdkthityrt1fk  
>tr|Q2FHR8|Q2FHR8\_STAA3  
mknlnrsf1t1ldfsr qevf1t1sedlkrakyigtekpm1knkniallfekdsttrcafevaahdqganvtylgpt  
gsqmgkettkdtarvlgg  
mydgieyrgfsqrtvetlaeysgvpwngltdedhptqvladfltakevlkkdyadinftyvgdgrnnvanalmqgaaim  
gmnfh1vcpe1nptdel1  
nrckniaaenggnilitddidqgvkgsdviytdvwwsmgepdevwkerlellkpyqvnkeimdktnpnvifehclpsfh  
nadt1kigqqifekygi rem  
evtdevfeskasvfvqeaenrmhtikavmvat1gef  
>tr|Q2FHR9|Q2FHR9\_STAA3  
mknimnk1vlstall1lettstqlpktpisfsseakaynisenetnelikyytqphfslsgkwlwqkpngsihat1q  
twvwyshiqvfgseswgni  
nqlrnkyvdi fgtkdedtvegywydetftggvtpaatssdkpyrlflkysdkqqtii gghfykgnkpv1tlkeldfri  
rqtliknkklyngefnkgg  
ikitadgnnytid1skk1kltdtnryvknprnaeievileksn  
>tr|Q2FHU4|Q2FHU4\_STAA3  
meqitsaqnnrikqank1kkkrerdktglaliegvlhieayqsgivitqlfaieparldqqiiaayaqevfeinmkvaes  
1sgtvtppqgfaiiekphy

Tsompanidou\_et\_al\_Supplemental\_FASTA\_File

diskaqqvllidrvqdpnlgltlirtadaagmdavimekgtdpyqdkvlrasqgsvfhlpvmtqldtfitqfngpvvg  
talenavaykevtssdsfa  
lllgnegevnpellahttnliipiygkaeslnvaiagsillyh1kg  
>tr|Q2FHX9|Q2FHX9\_STAA3  
mkwygklyigillaiilyipiffllmfysfnsagnmihfehftlehyqslfqnhdhmsvifntiavallaasistvigtfga  
iaiyylrnkkfkvtlltln  
nvlmvssdvvigasflimfttighftglglgfwvlishiafcipivviivlpqlyemnnmlnaardlgatepqllsni  
iipnilpsiiggffmalty  
slddftvsffvtgnfsvlsvevyamarkgismeinastllfavivlgilgyyliqyvinkkklikrgvk  
>tr|Q2FHY4|Q2FHY4\_STAA3  
mvvgdfpietdtivigagpggyvaaairaaqlgqkvativeknglgvcvngcipskallhashrfveaqhsenlgviaes  
vslnfqkvqefkssvvnkl  
tggvegllkgnkvnivkgeayfvdnnslrvmdeksaqtynfkngiiatgsrpieipnfkfgkrvidstgalnlqevpgkl  
vvvggyigselgtafanf  
gsevtlllegakdlggfekqmtqpvkkgmkekgeivteamaksaetdngkvktyeakgeektieadyvlvtvgrpnt  
delgleelgvkfadrglle  
vdkqsrtsisniyaigdivpglplahkasyeakvaaeaiddqaaevdyigmpavcftpeelatvgyseaquakeglaiika  
skfpyaangralsladdtng  
fvkllitlkeddtligagvvtgasdiiselglai eagmnaedialtihahtl gemtmeaaekaigypihm  
>tr|Q2FHY5|Q2FHY5\_STAA3  
mafefrlpdiagegeihegeivkwfvkagdtieeddvlavqndksvveipspvsgtveevmveegtavvgdvivkidapd  
aedmqfkgdhddssskkeep  
akeeapaeqapvatqteevdenrtvkampsvrkyarekgvnikavsgsgkngritkedvdayl nggaptasnesaasats  
eevaetpaapaavtlegdf  
petteki pamrraiakamvnskhtaphvtl mdeidvqalwdhrkkfkeiaaeqgkltflpyvvalvsalkkypalnts  
fneeageivhkhynigia  
adtdrgllvpvkhadrksifqisdeinelavkardgkltademkgatctisnigsaggqwfptvinhpevailgigria  
qkpi vkdgeivaapvials  
lsfdhrqidgatgqnamnhikrllnnpelllmeg  
>tr|Q2FHZ9|Q2FHZ9\_STAA3  
mkiatlnkgketkyfngypliceediysqdh1kegdi fqivtdksqyvatayvgrqhkglgwvlytdkaqqintaffvkl  
fntal aerdyfndgtna  
frlfnagdgvggltidnydghlliqwyskgykfykyaileavrkvfdyksiyeavrfdseysggfvegdapefpivie  
enftfynvdl edglmtgif  
ldqkevrkklrdqakerhvl nlsytgafsaiaaseasstsvdlanrsrslteenfglnaidpksqiyvmdtfdfyk  
yaarhghsydtividpsf  
arnkkrtsfvqkdyd klingalnilssegtlllctnasvplkqfkntiktleesgvdyeltevnglpkdfkthphykp  
skylkavfvnirh  
>tr|Q2FI00|Q2FI00\_STAA3  
msflrkhaeiifsyligivslftgllilnlprikqlnggkvdthvhnweflnaffseiikvmsrfigdfpivsaivi  
iifgilvmlightllrtik  
ydydisiffllvigimyfiitlilm tqvygffavifiipftihigyivykdelnqenvknhfmwiivsygisylitqialy  
gridaneiesidilsvnaf  
fiimwllgqmaiwnflflrralpltkqelgeeepe lsrtskgnvtntqkih1kqlqdktteyarktrrsvldkirakrd  
kfkkkvndiidiqeddipd  
wmrkpkwvkpmyvelfcgvviflftflefnnrnalfvsgdwklsqtqyviewvtllillfiiiayiattlthlkgkfyy  
lqlfmgslffklltefin  
imihglllsvfitptlllmlaiisyslqlrerp  
>tr|Q2FI03|Q2FI03\_STAA3  
myeqwkvrsfvddvniitklflgii lfffii fvhnfdfmlyitilmvlflmfngtqfkitaifitisigfallsslfm  
ilyngshtilkfgfihit  
teslvrglhvs1rtiaisffgilia ltsqvvmifyslmqhlkvkskvayafmaairmipmissliqlrrslkmryqmid  
aanyrglkrfkhl iiplls  
qnrkahqlsvameskgfrdgprrtyyynvpfsykdiifiivliaiitmayycsitlpitgiddvrlgrvg  
>tr|Q2FI04|Q2FI04\_STAA3  
mnvlvigaggrehalayklnqsnlvkqvfvipgneamtpiaevhteisesdhqaildfakrqnvdivvipeqplidgla  
dilrangfkvfgpnkqaaq  
iegsklfakkimekyniptadykeverkkdal tyience l pvvkkdglagkgviiadtieaarsaieimygdeeeegt  
vfetflegeefs lmtfvng  
dlavpfdciaqdhkrafhddegpntggmgaycpvphisddvkl tnetiaapiakamlnegyqffgvlyigailtkdgp  
viefnarfgdpeaqvllsr  
mesdlmqhiiddegkrtefkwnesivgvmlaskgypdayekghkvsqgdlnenyfvsgllkkqgdftvtsggrvilaig  
kgdnvqdaqrd aykkvsqi  
qsdhlfyrhdianka1q1k  
>tr|Q2FI08|Q2FI08\_STAA3  
mfnysglneecgvfiwnhpeaaqltymglhslqhrqgegagivvsdqnelkgerglgl1teaikddqmerlkgqhaig  
hvyatsgnkgeniqpfl  
yhfydmsvgichngnlinaks1rqnl ekqgai fhsssdtevimhli rrskaptfeealkes1rkvkggftfailtkdaly

Tsompanidou\_et\_al\_Supplemental\_FASTA\_File

gavdpnairplvvgkmdg  
tyilasetcaidvlgaeqvdi hageyv vindkgitvksythttta isameyiyfarpdstiagknvhavrkasgkkl a  
gespvnadmvi gvpnssl  
aasgyaeeiglp yemglvknqyvartfiqptqelreqgvrvkl savkdivdgknii lvddsivrgttirrivkmlkdsga  
nkvhvriaspfmpsfyg  
idvsttael isakspeeikdyigadslaylsvdgliesigldydapysglcvesftgdypaglydyeanykahls hrqk  
qyisknkhff dsegnlnv  
>tr|Q2FI35|Q2FI35\_STAA3  
mrln drn rtsyfygaiqlfk nnsknkqsi fkdwekl khn itfihpqsekhlrvvggfqfsshksddewrefgl nhfvlp  
evlistdnngtfl tytvkr  
esftvealnd lmdlfn nisdidvdeqiggitrnediykddwrqlvveaiesinneekivlarr rlikfdkdisipyilkq  
ayskeksnyi fllesqdsi  
ffsqtpeql ikvnkni l st kavagtikrsqdededtknveaf lkd nkn liehrfvvdsilhdikpyitelhydtkpkilk  
ndhlyhlyteikcl kdds  
yislidnl htpalggypkefamdfieqkefgtrglygapvg yidiyddcefivairsmlikkaatl fagcgivkdsdp  
dse laetnlkftpmnna l g  
vdmngks  
>tr|Q2FI41|Q2FI41\_STAA3  
mkki fmmvhel dvnkgmtssmf nrskefydadipadiv tfdykgydei ikalkkqgkmdrrtkmynvfeyfkqisnk  
hfsknkll ykhiserlknt  
ieieeskgisryfdittgtyiayir ksksekvidffkdnkrierfsfidnkvhm ketfnv dnkvcyqvfydekgyp yisr  
ninann gavgktyvlnkk  
efknnlal cvyylekl ikdskdsimi cdgpgsfpkmfntnhknaqkygvihvnhhen fddtgafkkseyiienanking  
vivl teaqrldi lnqfdve  
niftisnfvki hnapkhfktekivghisrmvptkridllievae lvvkkdn avkfhiygegsvkdkiakmiedknlernv  
flkgytttpqkcl edfk1v  
vstsqyegqgl smieami skrpvafdi kygpsdfiednkngyli enhnindmadkilqlv nndvlaaefgskarenie  
kystesilekwln lfn s  
>tr|Q2FI53|Q2FI53\_STAA3  
mekneninvei lttsdmshflngdygsniyragtyvnqvraqnhrvill dsggs lagslaayyaivapykrhpmiklm  
nrmhydasgvspsefkfgl  
sfltrsia larfpwlsani eynvtkepyfstpy cik hfgdlkiaivgtadgl meneysemeqdv siektlvaskr wiry  
iheveepdfli viyhggln  
kisnstknkkassneaekl mee l gvidlmitahqhqtivgqdhetyyvqagq dake lvhlsinfkkr ttttydvesidskv  
idlneyeedqell dltfyd  
rkavaywsqei isdkglmlsvngl qdlvcqthpfsqllhdaih lafnditcvhvp mngckglsgqirnedlyhayppd  
kpm dmtisggnikdi leys  
yshldfvneqls ltiidetlctmwqgfnye idmnqepgqrvml dqidl tksyrvtmt dycyrnyknylnkai ihesydet  
mstliaeklr d pnyriscs  
dnfivknr  
>tr|Q2FI74|Q2FI74\_STAA3  
mtt tpydi gkealydmi hyfyt lvekderlnhl fpgd faetsrkqkqfl tqflggpn iytee hghpmlrkrhidftite  
ferdawlenmqtainraaf  
pqvgdy lferlrl tanhmvns  
>tr|Q2FI77|Q2FI77\_STAA3  
minnk yvieleqspipykqilqrtegl kkmgykvswllndvdychnkvkfnhfqsmfinp ftrklhtfnlekkqimmfqq  
iqylgghkyvaekrnakis  
elfneapcdyhavykl skfainqyikyrcwqns vlep t l samyqlqltdqevvhnygyifpeqiyiknhpiewqlqvdlw  
lkngksklvndlnyfk1k  
kfival esktaiieklinnylnicsdkgndvqilf  
>tr|Q2FI78|Q2FI78\_STAA3  
mlvalneekervlatta l rktqyfc pvcgkqvilkr glkvishfahkh laeqkcfnetikhyksklilaqmiqqgckv  
ei epf  
>tr|Q2FI83|Q2FI83\_STAA3  
miklilkr lgl mipllil isivvflai iqpgdpfsdlngkikqea ina qreklglndsiphqyirwvnhvihgd lges  
ikykrpvidvieeripnti  
llgamslii tyiisfal gitsgrysysltdytvqifnylmlaipsfiagvfai fiffselqwf pfggsvdinlkegtfey  
ymskiyhtflpaf tlglls  
tagyiqylr ndi enskkdyvltarskg lsmnki ynkhilrns lipiitflgadivsilggaviteti fsyngigklfle  
svigqdyplm matalffsf  
lgllgnl isditygfidprirn  
>tr|Q2FI85|Q2FI85\_STAA3  
mnnvll evkdlets lkinnewlatvenis fel skgevl givgesgcgsilsksiikllpekiskl sngevi fdgkridt  
lnekqlpdirgndiami f q  
epmtal npvftiknql ves ikshkki skkeanklakdllkkvgiarqdeilnsyphqlsggmqrvmiamaiscspklli  
adepttal dvtiqaqildl  
lkelqketqmaimmi thdlsvvaefcdkvlvmyagqivefggikeil hnpkhp ytkllstipkl keeqkrletiegivp  
siqafhvnkcrfanrcnk

Tsompanidou\_et\_al\_Supplemental\_FASTA\_File

ldicnngspkmhvcedvivrchlykneykei  
>tr|Q2FI95|Q2FI95\_STAA3  
mk1ksfivtvtlalmiattgatvagnevsaaekdklpatqkakemqnvpytiavdgimafnqsylnlpkdsq1syldlgn  
kvkallydergvtpekirn  
aksavytiwkdgskkevdlkkdsytan1fdsnsikqidinvtkk  
>tr|Q2FI99|Q2FI99\_STAA3  
miriqdntirdgmqgsnvrksliikkevlkqinklninsvevgmcttiedefnihqfrdilspekelvvltrlnekeikk  
ivk1kihn1vvk1llpisd  
lhikeklnfsnkyi1qkikdcldi1kkdkkgvdi1cfedgtrtsrek1keymeiiskyqrvrtvtfadvvcstpleygdif  
nyfvkkysnii1fsahchnd  
lglatantlaai1ngakqietf1rigeragnapieei1tiltkkiesteft1pdvyktsiniskildfqisenkpiig  
enifkhesgihqdgtkkni  
nmyqylvpsd1gl1knsqvvpisnissk1lnhkfsivnteeidenisfyklvnkfspevapedtvd1l1qiikrrskd  
gnfk  
>tr|Q2FIA1|Q2FIA1\_STAA3  
mdinkmtyavqsalqqavelsqqhklqnieieailsaalneseslyksileranievdq1nkayedk1ntyasvegdniq  
ygqyisqqanq1itkaesy  
mkeyedeyismehi1rsamdidqtkkhyinnkvevikei1kkvrggnhvtsqnpevnyealakygrdlveevrqgkmdpv  
igrdeei1rntiri1srktg  
nnpv1igepgvktaiveglagrivkkdvpe1ldktvfeld1salvagakyrgefeer1kavlkevesdgriilfide  
ihmlvgagkt1dgamdagnm  
1kpm1arge1hcigatt1neyreyiekdsalerrfqkvavsepdvdtisilrg1keryevyhgvr1qdralvaae1sd  
ryitdrf1pdkaid1vdqa  
catirtemgsnptel1dqvnrrvmq1eieesalknesdnaskqr1qelqee1lanekekqaalqsrvesekiekian1qekra  
q1desrqa1edaqtnn1le  
kaae1qygtip1leke1re1ednfqdeqgedtdrmi1revvtdee1gdivsqwtgipvsk1veterek1l1h1sdil1hkrvv  
gqdkavd1vsdavvrag  
ikdpnrpigsf1fl1gptgvkte1aks1aas1fdsekhmiridmseymekhavsrligappgyighdeggq1teavrrnp  
ysv111devekahtdvfnv  
1lqil1degr1tdskgrsvdfknti1i1m1tsnigsq11envketgeit1estekavmts1nayfkpeil1nrmddiv1fkpl1s  
iddmsmivdkil1tq1nir1  
1eqrisievsddakaw1ggayepqygarp1krfvqrqietp1larmmikeg1peggttikvn1nsdn1l1tfnveki1e  
>tr|Q2FIB1|Q2FIB1\_STAA3  
mkkvvkylis1il1ai1iv1fvqtfv1vghvipnndmspt1nkgrvivnkikvtfnq1nngdi1tyrrgneiytsriiak  
pgqsm1frqgq1yrddrpv  
dasyaknrki1kdfs1rn1fke1ldgdi1ppnnfv11ndqdnkhdsrqf1g1idkkdi1gnvs1ryppfskwtvqfks  
>tr|Q2FIE0|Q2FIE0\_STAA3  
mk1kp1p1i1isgavfiv1f1l1paswftg1lvnektvednrts1tdqvlkg1tliqdklyesnkyypiygsse1gkddpfnp  
aia1lnkhnankkaf1l1gag  
gstd1inave1asqydk1kgkk1t1fi1spqwf1tnhg1ltnqnf1darmsqtqinqm1fqknmste1lkrryaqr1l1qfphvhn  
key1ksyaknpketkdsy1  
sgfkenq1likiea1ks1famdksp1ehvkpatkpdaswdemkqkave1gkad1ttsnkfgi1rdqywk1iqeskrkvr1rdye  
fnvnspe1fqd1le1lvktmr  
aagadvqyvs1psngwydhigi1dkerrqavykkihst1vvdnggki1ydmtdkeyekyvis1davhigwkgwvymdeqiakh  
mkgeppqevdkpkn  
>tr|Q2FIG3|Q2FIG3\_STAA3  
mnk1l1tk1t1iasa1lv1ttvgsgf1hssnyngi1nvakaeq1ttdne1lwknvrda1keani1dktdnenvkvtyk1langge  
nsieg1tan1ne1l1snsnkp  
insdsvksid1srknpngdrfdandawkk1tdk1kekqivkdgtvt1hskdekdpkisakvgevyndnkr1ml1fkdid  
kitin  
>tr|Q2FIG5|Q2FIG5\_STAA3  
mhynpkvinskikamrsqies1yh1nmnhvitndndm1vsvsyp1dk1lvlyiieekdkleyymktaqdr1n1lfkniikny  
seneqqdvmrym1l1ssgkvk  
negvier1kvdiykesrkrqerqngree1hrie1fnkhleqvkkels  
>tr|Q2FIG6|Q2FIG6\_STAA3  
mnevngssntwvgt1tkq1lvssennfniqel1parkevfkel1vncel1pqs1revititddehvesips1tyikdklatn  
gie1s1ngsskyfdrregh  
iytevsdsvvhgsdr1ldd1l1keifinecvayett1l1dknssg1lidkgnqd1s1ynqgikevsnts1ydgikqamkdi  
pqtfr1rnvsivmtehhdk  
like1aqmg1gg1agdl1sn1fnvtnvv1tddahdvfgdfghaiyakyepimynkkkqal1kgyqfal1nyvfdikiipe1  
l1r1vnik  
>tr|Q2FIG9|Q2FIG9\_STAA3  
maikkkdri1igvke1eipge1kl1vpnw1lwraewnekqqnfgkvpsingyrasttnkktwcd1fesvsieyevdeqysgi  
gfv1sdgn1fvc1ldidnai  
dkkgqinse1al1kmmq1ltycekspsgtg1hcf1fgkl1pdnrkkkrtd1dielydsarf1mtvtgctigqsdi1cdnqev1nt  
1vdey1fken1panevvree  
sntniq1sdedi1inimkksqkdkid1l1qgtyesyfesseavqs1l1hyla1fytgknkqmeri1fnynn1tdkweskr  
gnttwgq1el1dkai1knqkt

Tsompanidou\_et\_al\_Supplemental\_FASTA\_File

iytksjdefnvi pggskdvkqlnqlgheertkmeenwi eegkrgrkpttis pikcayilnehltfilfddeentklamy  
qfdegiytqnttiikrvis  
yl epkhnsnkadeviyhltmvdikektnspylipvkngvfnrktkql esftpdyiftskidtsyvrqdivpeingwnid  
rwi eei acndnqvkvllwq  
vindsmgnytrkkaiffvgdgngkgtfqellsnvigysniaslknvnefderfklsvlegktavigddvpvgvyvddss  
nfksvvtgdpvlvefknkp  
lyratfkctviqstngmpkfkdktggtlrrllivpfnanfngikenfkikediyknqqvleyvlykainldfetfdipda  
skkmlevfkedndpvvgfk  
vnmfdqwtirkvpkyivyafykeycdengynalssnkfykqfehylenewktdaqqrydneelakriynfndrnyiepi  
esgknyksyekvklkai  
>tr|Q2FIH0|Q2FIH0\_STAA3  
mnweiknlmcdlki lkekfedlkdnhgshfedlyl hepntlnkddaikegfsyherrihndqmfdalekassfadqsq  
na  
>tr|Q2FIH1|Q2FIH1\_STAA3  
meikqkyqlskvvkilevvlyeedkfqsdkdyhyqdkalyeyalklvhnglfnilaeldfedeaflildevtmtlsdmk  
etqhvryrsvidekgehkh  
ttdrkgghvigmlewaldyivgnievel  
>tr|Q2FIH2|Q2FIH2\_STAA3  
mrkqvii tktvvgwynikdtqhnlm lnippkvfeqyfpdvskdvqvaclemdlskiteiknkkkvg  
>tr|Q2FIH3|Q2FIH3\_STAA3  
msrtklhdvpakentitepkqvvnplfakpnalasilgisysvnrilkewekdskgvddlyyslssstmivisiprfee  
ymkarhkkwm  
>tr|Q2FIH4|Q2FIH4\_STAA3  
mraeriacgitqdemahkmgwkttrtpyakrengivdiganefikmakilgyetnlnidiffntnvpgerknilkggelnv  
>tr|Q2FIH6|Q2FIH6\_STAA3  
mylyekmvienkeipiddgkslgnfeglydngvilinklnsetrkaevlyeelahhkltygnildqskwinrkfenyarr  
hgfi savplreiveaynyg  
vrnlyelseylqlsekyileaeiqykkiygigthygeysitfep lrvfkykei  
>tr|Q2FIH8|Q2FIH8\_STAA3  
mkkli viiliniitlsvnsasagdigidlnrfytkkdfvdldkvdndtpianqlqfsnvsydli seskdfnkfsnf  
kgkkl dvfgisyngqcnk  
yiyggvtatneyldkprnipiniwingnhktistnkvtknkfvtaqidvklrkylqeeyniyghngtkkgeeyghksk  
fysgfnigkvtfhl nndt  
fsydlfytgddglpksflkiyednktvesekfhl dvidisyketi  
>tr|Q2FIH9|Q2FIH9\_STAA3  
mwlekfkknketkyryyeykykdp ltakwrrvsvlnkngkqsqkeaqrl lnerieeklnkkttlksltfhvacdewf  
qnyiktsgskrttiktl  
klnlkkfvdedilinkitlsyaqqvfdemskgyvyqvnkdalsifknvfeytrriyqlqdl eflkditlnkriksyde  
vkakrnkylelneiesiik  
dintkaqkmhsgihkrfyl fvalmtefqalngmrigemlaiqnedidfdnkslningtihwfhdessgfgvkdttkess  
yrtiglsrsceilkai  
enkkdskwndgyl nrfvftnhkgnpmqterfnkilreaakdvgidkevsshilrhshislssqqgvs lkaimdrvghsd  
hrttl siyshvteqmdkdm  
mnlleqvklg  
>tr|Q2FII1|Q2FII1\_STAA3  
mgksfsei inemipniqwpewtaivetlymtvvstifafilglilglvlfls akgksigarlfysivsfivnl frai  
pfii lllllipftslligt  
isgptgal paligaapfyarlveiafkeidkgvieaawsmgantwtvirkvllpeampalvsgitvtaialvgstavag  
vigagglgnlayltgfrn  
qndvllvstvfiliivfiiqfigdwltnkl dkr  
>tr|Q2FII5|Q2FII5\_STAA3  
mlni qdvshl skkeqkaynr fvesvengl pvlpci emdlkemqetlnqskiggmpflkyfkdipl dennvpmvllaqi  
nlddlpeqqelfpvkegi  
qfwissedqmygmsenlkgnninsrlvyikepitdlsleniqahlskladnedipfsgafsiefrlskqtitctdykyd  
edvialwnkvnpsfalksm  
fggydelmepvcntftakepfnglggypfdqiprtn dqelkmydrvllqidstrdgns siiwgdlgianilvkstdle  
amkfddymyswdcs  
>tr|Q2FIK3|Q2FIK3\_STAA3  
mkrkvlvltmgvicatqlwhsnhanalvtesgandtkqfteivseekvitvehaqinifqsnsnsnlmefniltmggksg  
amvgyseidsshftdrdr  
virrdhvkeaqslvenykdtqsadarmkakqkvntl skphqnyfnkqidkvynglqr  
>tr|Q2FIK6|Q2FIK6\_STAA3  
mnmkkkekhairkksigvaslvgtligfgllsskeadasensvtqsdsasnesksndsssvsaapktddtnvsdtkts  
ntnngetsvaqnpaqqett  
qssstnatteetpvtgeatntntnqantpattqssntnaeelvnqtsnettsndntvssvnsqpnstnaenvsttqds  
teatpsnnesapqstdasn  
kdvvngavntsapmrafs laavaadapaagtditnqltnvtvgidsgttvyphqagyvklnygfsvpnsavkgdtfkit  
vpkelnlngvtstakvppi



Tsompanidou\_et\_al\_Supplemental\_FASTA\_File

magdqvl angvi dsdgnvi yftdyvntkddvkatl tmpayidpenvkktgnvtlatgigsttanktvlvdyekygfyn  
l s i k g t i d q i d k t n n t y r q  
t i y v n p s g d n v i a p v l t g n l k p n t s n a l i d q q n t s i k v y k v d n a a d l s e s y f v n p e n f e d v t n s v n i t f p n p n q y k v e f  
n t p d d q i t t p y i v v v n g h i  
d p n s k g d l a l r s t l y g y n s n i i w r s m s w d n e v a f n n g s g s g d g i d k p v v p e q p d e p g e i e p i p e d s d s d p g s d s g s d s n s  
d s g s d s g s d s t s d s g s d s a  
s d s d s a s d s d s a s d s d s a s d s d s a s d s d s d n d s d s d s d s d s d s d s d s d s d s d s d s d s d s d s d s d s d s d s d s d s d s d s d s  
s d s d s d s d s d s d s d s d s  
d s d s d s d s d s d s d s d s d s d s d s d s d s d s d s d s d s d s d s d s d s d s d s d s d s d s d s d s d s d s d s d s a s d s d s  
d s d s d s d s d s d s d s d s d  
s d s d s d s d s d s d s e s d s d s e s d s d s d s d s d s d s d s d s d s d s d s a s d s d s g s d s d s s s d s d s e s d s n s d s e s g s n n v v  
p p n s p k n g t n a s n k n e a k d  
s k e p l p d t g s e d e a n t s l i w g l l a s i g s l l l f r r k k e n k d k k  
>tr|Q2FIK7|Q2FIK7\_STAA3  
m q i r q i h q h d f a q v d q l i r t a f e n s e h y g n e s e l v d q i r l s d t y d n t l e l v a v l q n e v v g h g l l s e v y l d n e a q r e i g l  
v l a p v s v d i h h q n k g i g k r  
l i q a l e r e a i l k g y n f i s v l g w p t y y a n l y q r a s m y d i y p p y d g i p d e a f l i k e l k v n s l a g k t g t i n y t s a f e k i  
>tr|Q2FIK8|Q2FIK8\_STAA3  
m i n i s a i g s i g t f i m a l f y f v s v s v q l y m k i s f l p a l g f n q i l l e r e e d q l n i m s a t e e h h k d y i k l y n l g g g a a k  
k i a i e v l l g k d k v i q k k y v  
h i l p s k e g y m l p i n k n v y e e l e r t i e n n g h e a d l n v r m t y y h n v s r k q  
>tr|Q2FIL4|Q2FIL4\_STAA3  
m q i k l p k p f f f e e g k r a v l l l h g f t g n s s d v r q l g r f l q k k g y t s y a p q y e g h a a p p d e i l k s s p f w f k d a l d g y d y l v  
e g y d e i v v a g l s l g g d f a  
l k l s l n r d v k g i v t m c a p m g g k t e g a i y e g f l e y a r n f k k y e g k d q e t i d n e m d h f k p t e t l k e l s e a l d t i k e q v d e v l  
d p i l v i q a e n d n m i d p q s a  
n y i y d h v s d d k n i k w y s e s g h v i t i d k e k e q v f e d i y q f l e s l d w s e  
>tr|Q2FIM1|Q2FIM1\_STAA3  
m a v k v a i n g f g r i g r l a f r r i q e v e g l e v v a v n d l t d d d m l a h l l k y d t m q r f t g e v e v v d g g f r v n g k e v k s f s e p d a  
s k l p w k d l n i d v v l e c t g f  
y t d k d k a q a h i e a g a k k v l i s a p a t g d l k t i v f n t h q e l d g s e t v v s g a s c t t n s l a p v a k v l n d d f g l v e g l m t t i h a  
y t g d n t q d a p h r k g d k r r  
a r a a a e n i i p n s t g a a k a i g k v i p e i d g k l d g g a q r v p a t g s l t e l t v v l e k q d v t v e q v n e a m k n a s n e s f g y t e d e i  
v s s d v v g m t y g s l f d a t q t  
r v m s v g d r q l v k v a a w y d n e m s y t a q l v r t l a y l a e l s k  
>tr|Q2FIM9|Q2FIM9\_STAA3  
m t e i d f d i a i g a g p a g m t a a v y a s r a n l k t v m i e r g i p g g m a n t e e v e n f p g f e m i t g p d l s t k m f e h a k k f g a v y q y  
g d i k s v e d k g e y k v i n f g n  
k e l t a k a v i i a t g a e y k k i g v p g e q e l g g r g v s y c a v c d g a f f k n k r l f v i g g g d s a v e e g t f l t k f a d k v t i v h r r d e l  
r a q r i l q d r a f k n d k i d f i  
w s h t l k s i n e k d g k v g s v t l t s t k d g s e e t h e a d g v f i y i g m k p l t a p f k d l g i t n d v g y i v t k d d m t t s v p g i f a a g d v  
r d k g l r q i v t a t g d g s i a a  
q s a a e y i e h l n d q a  
>tr|Q2FIN0|Q2FIN0\_STAA3  
m a q k n n n v i p m t f d d a f y r k m a k q k f k q r e y k r a a e y f e k v l e l s p d d m e i q i d y a q c l v q l g i a k k a e h l f y d n i i y n r  
h l e d s f y e l s q l n i e v n e p  
n k a f l f g i n y v i v s d d q d y r d e l d q m f d v k y q s e e q i e l e a q l f v v q i l f q y l f s q g r l k d a k n y v l h q p q e v q d h r v v r  
n l l a m c y l y l g e y d t a k a l  
y e a l l q e d s t d i a l c h y t l l l y n t k e n e q y q k y l k i l n k v v p m n d d e s f k l g i v l s y l k y r a s q q l l y p l y k k g k f l s  
i q m y n a l a y n y y l g e e d e  
s h y y w d k l k q i s k v e i g h a p w v i e n s k e v f d q h i l p l l q s d d s h y r l y g i f l l d q l n g k e i v m t e s i w q v l e n l n n y e k l  
y l t y l v q g l t l n k l d f i h r  
g l l t l y h n e l f v s e n d v m v a w i n q g e l i a e k v d l t d v e p y i g a f i y l y f k n q p r n v t k k q i t t w l g i t q y k l n k m i e f l  
l s i  
>tr|Q2FIN7|Q2FIN7\_STAA3  
m k k s l t v t v s s v l a f l a l n n a a h a q q h g t q v k t p v q h n y v s n v q a q t s p t t y t v v a g d s l y k i a l e h h l t l n q l y s y n p  
g v t p l i f p g d v i s l v p q n k  
v k q t k a v k s p v r k a s q a k k v v k q p v q q a s k k v v k q a p k a v t k t v n v a y k p a q v q s v p t v p a h n y n k s v a n r g n l y a  
y g n c t y y a f d r r a q l g r s i  
g s l w g n a n n w n y a a k v a g f k v d k t p e v g a i f q t a a g p y g h v g v v e s v n p n g t i t v s e m n y a g f n v k s r t i l n p g k y n i  
h  
>tr|Q2FIP4|Q2FIP4\_STAA3  
m v t l l l v a v t m i v s l t i t p i v i a i s k r l n l v d k p n f r k v h t k p i s v m g g t v i l f s f l i g i w i g h p i e t e i k p l i i g a i m  
y v l g l v d d i y d l k p y i k l a  
g q i a a l v v a f y g v t i d f i s l p m g t t i h f g l s i p i t v i w i v a i t n a i n l i d g l d g l a s g v s a i g l i t i g f i a i l q a n i f  
i t m i c c v l l g s l i g l f y n  
f h p a k i f l g d s g a l m i g f i i g f l s l l g f k n i t i a l f f p i v i l a v p f i d t l f a m i r r v k k g q h i m q a d k s h l h k l l a l g  
y t h r q t v l l i y s i s i l f s l

Tsompanidou\_et\_al\_Supplemental\_FASTA\_File

ssiilyvspplgvvlmfvliifsieliveftgldnnyrpilnlisrksshkee  
>tr|Q2FIP9|Q2FIP9\_STAA3  
mkvlvamdefhgiissyqanryveeavasqietadvvqvpifngrhellsvflwqsgqkyripvhdadmnevegvygqt  
dtgmtviengflflkgkkpi  
vertsylgemikhaldndakhvvislggidsfdagagmlqalgaqfyddegrrvdmrqqagvikyirrdmsnlhpkme  
tariqvmsdfssrlygkqs  
eimqtydayqlnhnqaaeidnliwyfseifksekiaigpverggagggiaavlnglyqaeiltshalvdqlthlenlve  
qadliifgeglndqllle  
ttt1riaelchkhqkvaiaicataekfdlfesqgvntamfntfidmpetytdfkmglqirhytvqslkllkthfnvev  
>tr|Q2FIQ5|Q2FIQ5\_STAA3  
miqvenlktinnqmi ledisi diekgkltsligpngagkstllsaicrlirfengevki dgqlmsdykndlskkisil  
kqtnhtemnitveqlvnfg  
rfpyskgrl tkedhdvnda1dl1qlqdirnrnikslsggqrqrayiamtiaqdteyilldeplnndmkhavqimqtlk  
mlahkmkaivivlhdinf  
ascysdqivalknqqlvksdlkdnvqssvlsdlydmniqiehirnqriclyfkd  
>tr|Q2FIR3|Q2FIR3\_STAA3  
mtqqnshgnqidipqtgffghprglgv1ffvefwerfsyymrallifymfavtdnglgidkttamsimsvygslim  
tsipggwiadritgtrgat  
lgavfiiighicls1pfa1ig1ftsmffiiigsglmpknisnivgrlypendrrmdagfvifymsvnmgallspiilqh  
fvnknfhggfliaavgma  
lg1wvyv1fnrkn1gsvgmkptn1tpaekkkyligsvv1aiv1iivigaltns1sfn1vsntv1vl1gialpiiyft1  
i1rskdvt1dtersrvkafi  
p1filgm1fwai1qeggsn1niygieh1sdm1n1fgw1ktn1fgea1fqs1n1p1f1ll1api1s1llw1q1k1g1tk1q1ps1lp1vk1fa  
i1gt1f1ag1asy1il1ig1iv1gya  
sgssn1fs1vn1w1il1sy1i1cv1ige1cl1spt1gns1aav1k1ap1ka1fna1qm1ms1i1w1ltn1sa1qa1ing1t1vk1lie1pl1g1qt1ny1fi1fl1g  
v1vai1vt1iv1l1ais1pli1k  
amkgir  
>tr|Q2FIR5|Q2FIR5\_STAA3  
mtagpghreigtptstdnaswggpghkeilfl  
>tr|Q2FIR6|Q2FIR6\_STAA3  
mtrksiaidmdevladt1gei1dav1n1frad1gik1mea1ngqk1khvipehdglitevlresgffrh1kvmpyaqevvkk1  
tehdvvyiataamdvp1tsf  
sdkyew1leffp1f1dp1qh1fv1fc1gr1kn1iv1kady1lid1dn1pr1q1lei1ft1gt1p1m1ft1av1hn1indr1ferv1nsw1kd1ve1qy1f1d1nie  
k  
>tr|Q2FIU4|Q2FIU4\_STAA3  
mtvkn1fl1gfvavi1tvcl1g1l1lat1neda1ak1vh1kt1int1nain1vsted1tykk1md1ilnihtakasevnen1vkk1qnhf  
khrvn1anks1ns1fneqecq1v  
iadryadkhi1ndnygl1er1sk1tnhg1ny1vys1nd1nst1sk1qhs1is1nqgi1itk  
>tr|Q2FIV1|Q2FIV1\_STAA3  
meqiminhyvhfsrlvqgfwranewkmtake1nyfine1vergittmdhadiygdyqces1fgna1dl1spe1rnkiqivt  
kcg1i1l1psk1q1fd1ft1ng1hry  
d1l1ssk1h1vks1veq1s1in1nvdy1ds1l1ih1rps1l1md1peq1vada1tk1lvk1qg1k1s1fgv1sn1fn1hs1qy1q1l1nqy1im1ker1hi  
sin1q1le1sp1yh1vds1ldq1d  
mdsm1yq1nh1vq1imaw1sp1f1agg1k1fd1ked1ikaq1rim1kv1vq1si1ad1ky1gv1sd1tav1mia1w1lvk1iph1r1m1il1g1ts1ql1k1rid1qa1ie  
g1l1q1n1ld1dq1sw1fd1iy1tai1  
vq1dip  
>tr|Q2FIW2|Q2FIW2\_STAA3  
mkk1li1simavm1fl1tgc1g1sqek1at1ek1di1dn1qken1kel1dkk1kek1lqqe1kek1adk1qd1le1kev1kd1kps1ked1nk1ddk  
k1ded1kn1kd1kd1k1dke1as1q1dk  
qsk1dq1tk1ss1dk1dn1hk1k1pts1ad1kd1q1kand1kh1qs  
>tr|Q2FIW3|Q2FIW3\_STAA3  
mrt1nk1deh1ny1ik1q1ian1i1het1l1sq1ves1ny1k1ct1k1s1ial1ry1em1ics1r1leht1nd1ki1y1ien1eg1q1ia1fi1w1gh1fs1nek1sm1vn  
i1elly1vep1q1fr1k1lg1iat1q1l  
kia1lek1w1akt1mn1ak1ris1nt1ih1knn1l1pm1is1lnk1dl1gy1qv1sh1vk1my1k1did  
>tr|Q2FIW8|Q2FIW8\_STAA3  
mkv1ky1id1kr1h1wrr1id1rey1te1vk1vnn1rf1kg1ig1lvt1mkk1vr1d1ple1vt1v1v1g1ni1iv1add1ny1kw1l1q1il1pek1k1rys1it1vm1fd  
n1kgn1ple1yy1fd1in1k1nit1q  
kgn1art1vd1cl1dv1al1ps1ge1ye1l1v1ded1l1mf1ale1seq1it1kk1q1fhe1ay1mia1hq1imae1lend1fkg1f1qk1kim1yc1fn1kin1aka1q  
knh1q1kp1qn1k1tn1ieks1q1ik  
pk1q1yn1qt1kn1hq1q1k1kn  
>tr|Q2FIX2|Q2FIX2\_STAA3  
maks1cl1hil1tn1ney1at1tr1cq1dg1iv1fwp1idge1iel1q1k1fr1ks1ki1ed1di1y1inh1ld1v1fs1ik1nn1k1tim1yl1ss1dw1fa1el1gf  
t1ff1ny1hy1tak1lik1ss1yn1lk  
c1l1l1k1l1ty1ry1ld1nq1pl1nd1ad1irk1l1qdi1iki1ake1asm1dk1kia1qn1qy1ry1ay1y1gd1r1de1ley1iy1qn1vn1qr1l1t1ks1vad1kl1fv  
sk1sn1l1ss1q1fh1l1mg1mg1f1k1k  
yid1t1k1ig1ks1ie1l1t1td1st1is1nise1h1gf1sss1st1ys1k1mf1ks1ym1dit1p1ney1rn1sk1yn1k1cl1ml1k1pe1lv1g1km1v1qev1ke1i1  
l1ny1ie1hy1knh1l1td1v1ih1ide  
dk1fet1pk1l1fq1t1vi1q1int1y1tem1k1lv1f1leg1i1f1kt1l1nk1ns1qv1ff1imps1il1ks1k1nt1m1se1ek1ft1i1kti1ies1dl1kia1fn1inn

Tsompanidou\_et\_al\_Supplemental\_FASTA\_File

iettyfveefmsvfrqis  
pnelshnnnyevhfvfdlsmeirtiyrmilklhnmInvklglNitclfekpsvfkslvsqikrIkfdsliidnanlss  
pylmgese111kni1hfk  
nlkqvinediegekliFlnvenhk1lnkerd1snsapliyktlsalyhndgfglnifdnhqafnamhlydkngfkt  
lg1lekfiyevskpkyen  
syysifdienyyc1viydwrviesetimsnfedsqvyinfnknv1ndkylivietldkivatlii  
>tr|Q2FIX3|Q2FIX3\_STAA3  
msqntnhsyyhqnhqagsiskvlyfmyywiifgigcylgqflplswrqplsfglliiilatlvferarrfgliishiya  
vvig11syatfttylqnl  
pdifyknialaifafiafgiigyffvgdassigkylfvtlitliiasligiflqnpifytiitvvs111fllytlydfnr  
lkrgdyspremgfnlfinl  
lniikdilylanmfr  
>tr|Q2FIX8|Q2FIX8\_STAA3  
mailvkltkiygtkkmaevlrdinmsieeefiaimgpsgsktt1lnv1ssidyisqgsitlkgkklklsnkels  
dirkhdigfiqeyn11ht  
ltvkenimlp1tvqkldekhl1nryekvaealnidisdskypselsggqrqrtsaarafitlpsiiifadeptgaldkst  
qd1lkr1trmneafkstii  
mvthdpvaasyanrvvm1kdqgifte1yqgddkhtffkeiirvqsvlggvnyd1  
>tr|Q2FIY5|Q2FIY5\_STAA3  
mmmkeatkigfayvgivvgagfstgqevmqfftkyglwaylgviisgfilafigrqvakigtafeatnhestlqyvfge  
kfskvfdyiliff1fgiav  
tmiagagatfeesyntptwlgalimt1aiyt111dfnkivralgivtpflivlvliagvy1fkghvs1aevnqvpea  
siwkgiwfgtiygg1afsv  
gfstivaiggdtekrvtsgagamyggiyvt1lalinalqseyptiknasipt1tlannihpliatv1svimlavmynt  
1lg1mysfaarftepyskn  
yhi1i1immvagy11sfvgfaelinklytimgyvglfivvaviikyfkrknadkkhia  
>tr|Q2FIZ0|Q2FIZ0\_STAA3  
missnnkrrq1ialavfs111flgctwsitsgeynipverffktligqgdaidkl111dfr1prmm1tilagaalsiga  
ivqsvtknpiapgilgin  
agggfai1fiaigkinadnfvyv1plisilggittaliifisfnknegvtpasmvligv1qatalygsitimskfdd  
kqsdfiaawfagniwgdew  
pfviaf1pwv11iipy11fksnt1niihtgdniarglgvrlsrer1ilffiamv1ssaavavagsisfig1mgphiakri  
vgprhq1flpia1lvga1  
lviadtigkiv1lpggvpagivvaiigapyf1y1myktnv  
>tr|Q2FIZ4|Q2FIZ4\_STAA3  
mfl1iniig1ivf1giav1fsrdrkniqwqsigilv1n1flawffiyfdwgqkavrgaangiawvvsahagtgfafas  
1tnvkmm1mavaal1fp11  
ivp1fdi1myfni1l1pk1igigw1lakvtrqpkfesffgiem1flgntea1avsseq1krmnemrv1tiaamsmssvsga  
ivgayvqmvpge1v1taip  
lnivnaiivsc1lnpvsveekedi1ys1knneverqpffs1fgdsv1aagk1v1ii1afvisfvalad1l1drfin1itg1  
iagwig1kgsfg1nq1lgv  
fmyppa111glpydeaw1vaqqmakki1vtnefvumgeiskdiasytpphravittflisfanfstigmigt1kgivdkk  
tsdfvskyvpmm11sgilv  
s11taafv1glfaw  
>tr|Q2FIZ8|Q2FIZ8\_STAA3  
mrft1i1iptcneatirq11sieskehyrilcidggstdqt1pmier1qrelkhisliqlqnasiatcinkglmdikmt  
dphdsdafmvikptsiv1p  
gkldr1taafknndnidmviqgraynyhgewk1ksadefikdnriv1lteqpd11smmsfdgk1fsakfaelqcdetlan  
tynhai1vkamqkatdih1  
vsqmi1vgdndid1thatsneedfnryiteimk1rqrvem111peqr11ysdmvdrilfnns1kyymnehpavthttiqlv  
kdyimsmqhsdyvsqnmfd  
iintvefigenwdreiyelwrqt1iqvginrptykkf1liqlkgrkfahrtksmlkr  
>tr|Q2FIZ9|Q2FIZ9\_STAA3  
mnv1ikkfyh1lvvri1skmitpqvidkphivfmm1tpedikpiika1nnsyqktv1t1tpkqapylsel1sddvdviemtn  
rt1vkqika1ksaqmi1id  
nyy111ggynktsnqihvqtwhasgal1knfg1tdhqvdvsdkamvqqyrkvyqatdfy1vgceqmsqcfkqslgateeqm  
lyfg1prinkyytadtratv  
kaelkdkygitnk1v1yvptyredkadnraidkayfek1pgyt1ink1hpsiedsdiddvssid1tst1mlmsdii1sdy  
ss1pieas11diptifyy  
degtydqvr1nqfyka1pdsykyvteed1imtiqekel11sp1fkdwkyntdks1hq1teyidkmvtk  
>tr|Q2FJ07|Q2FJ07\_STAA3  
mkk1vp111a1111vaacgtggkqssdk1ngk1kvvt1nsilydmaknvggdndihsivpvqdpheyevkpkdkk1t  
dadv1lyng1n1etgngwf  
eka1eqags1kdkkvi1avskdvkpiy1ngeegnkdqphaw1s1dngikyvk1tiq1t1f1dndkkhkadyekqgnkyia  
q1ek1nnds1kdkfndipke  
qram1tsegafkyfskqygitpyiwe1ntekqgtpeqmrqai1fvk1kh1k11vetsvd1kkames1seetkkdi1fgev  
ytds1gkegtkgdsy1kmm  
ksnietvhgsmk

Tsompanidou\_et\_al\_Supplemental\_FASTA\_File

>tr|Q2FJ08|Q2FJ08\_STAA3  
milssfvhtfipkvplafiqiflglmlfipipvqfnfdselfmvtmiaplffvegvnsvrvhlrkyikpvmmmalglvi  
ttvigvglfihwiwpdipi  
gaafaiaailcptdavavqaitkgkvlpkgamtilegesllndaagisfkiavglvtgafslvdavqlfliasiggav  
vglligmalvrfrlrlmrr  
gyeninmftiiqltpfvtyliaelfhasgiaavvaglvhgferdrimqvrtqlqmsynhtwnilgyvlnghfvfsilgf  
lypeviikiiktephnlif  
ligitivvalavylfrfvwvlypyfylaipfqkmmtkndddnpttekppkrslyalimtlcgvhgtislaialtly  
flaghhaftyrdllfias  
gmviislvaqvlplltkpkpaktvignmsfkvariyleqvidylnqkstfetsfkygnvikeyhdklafktvekde  
nskelerlqkiafnvetkt  
leslvdegqitnsvenymryaertqvyrqaslirmivllrgallkrrvqtrvnsasslsvtdnlmelnkinklvhynv  
vsrllskettkdntlevgm  
cdgylmrienltpsnffnsedtitkiklnalreqrirlrelidtdvsegtalklreainydemvividsm  
>tr|Q2FJ16|Q2FJ16\_STAA3  
mnkveaikfnddivkmyealkikserdyllfklaishglkvsellltitvsqvrliiekctlsemckahfhslikirlpet  
lskellqyiedrslsnedv  
lfqslrtnqvlsrqayriihqasieagidnvglltrktfayhayqkgpipviqkylghqsaietlnfiglenecehs  
iyislql  
>tr|Q2FJ21|Q2FJ21\_STAA3  
mnkvtinpqiqlyqiegkdpillhgldgnlagfedlqhqlassykvltydlrghgkssksesydlndhvedlkilme  
klniheahilghdlggvva  
klftdkyayrvkslttiaskkddlihsftqlliqyddiagfnkseyillfsklfrnqektmkwyqkqriysikseds  
avairsllhkdepmyllk  
rtcvtllingehdpikdknhfkleahflnvtkkifehsgaphieepeafmnyllkflksvs  
>tr|Q2FJ28|Q2FJ28\_STAA3  
mlgtdekyklyehlgpqqfwpadndiemmlgailvqnrwrnaeiaInqikehthfnphilelpietlqslhssgyf  
kskslltiklltwlarhhf  
nyqeinerykglrkelllskigsetadvllvyifgriefipdsytrkiydklgyentknydqllkvvllpnhftnqda  
nefhalldvfgkhyfrdkd  
iknydflepyfkk  
>tr|Q2FJ30|Q2FJ30\_STAA3  
mlkqhnekekfefttegtwqqrqsnfiryveqiedatvntikvddsvklirkgdinmlhfvegqttttfydisagri  
plevktlrihlhvsgdggk  
lkihyelyqdnemgsyqyeinykeige  
>tr|Q2FJ32|Q2FJ32\_STAA3  
mevislsekkgfnfnikndpldghkgtnigsislndiapvfidvankeafidiggmharakvekgvkwitdkaavegde  
akeywlcvwtterneqppy  
yagltacyllvnkairrgyksmphevnmmdksmkhhiidqigdenkailkdfllmndegmwkhsdalahqafn  
>tr|Q2FJ38|Q2FJ38\_STAA3  
mlceskvinknpkyrvikygdeylmidlvstwlflflpminwllpkkyvkiskkefddlnivkpvnkafwpvagstilf  
gytfrkyipslniqleknn  
viviccai flglilflflnrklrleiynnsskgiilfplknfcftifyyflfggl simalsmltlnpqnii gfig  
wlvmtagffllnmssiidk  
kiyvlskntvek  
>tr|Q2FJ48|Q2FJ48\_STAA3  
mhvlaflltkhhsekfnsslaelctlnpvqlrrvtqlvdllkmidtirgkdggylandqsadvs latlykhfvlekehht  
rlftgdegshcqiarniat  
tmshyggdeqniifnyngktikdviediqkedlcheni  
>tr|Q2FJ69|Q2FJ69\_STAA3  
mtlshveadefstfaskilhaehifvaggrsgfvansfamrlnqlgkqhavvgesttpaiksndvfviisgsgstehlr  
lladkaksvgadivlittn  
kdsaignlagtnivlpagtkydeqgsaqplgs lfeqasqlfl dsvvmgl mtemnvteqtmqqnhanle  
>tr|Q2FJ72|Q2FJ72\_STAA3  
mllepikqevidllasfehkpvylhvettngayanhdqrvfnagtflrniqitythaqlkgnkepyriglkl snggwv  
yvqglthfevnehdeflia  
gfnjegqlaaalqiserpfnl  
>tr|Q2FJ90|Q2FJ90\_STAA3  
mvqslhefleeniylkenglyneidtiegangpeikingksyi nssnylglatnedlksaakaaidthvggagavrt  
ingtldlhdeleetlakfk  
gteaaiayqsgfncnmaaisavmnkdail sdelnhasiidgcr lskakiirvnhsdmdll rakakeavesgqynkvmi  
tdgvfsmgdvaklpeive  
iaefgllyvddahgsgvmkgagtvkhfglqdkidfqigtlskaigvvggyvagtkelidwllkaqsrpflfsts lapg  
dtkaitavkklmdstelh  
dklwnnaqylknglslgydtgesetpiti pviigdekttefskr l kdegvyksivfptvprgtgrvrnmptaahtkdm  
ldeaiaayekvgkemkli  
>tr|Q2FJB4|Q2FJB4\_STAA3  
macgyqspkwmgkpcncgawnqmeei vekaanpkhgvktkelagkvqklnsikhettprvltdsaefnrvlgggivsgsl

Tsompanidou\_et\_al\_Supplemental\_FASTA\_File

vliggdpgigkstlllqic  
aslsqkkkvllyitgeeslsqtklraerldedsseqlvlaetdleviyqtvkeeqpdlvvdsiqtiyhpeissapgsvsq  
vrestqslmniakqmniat  
fivghvtkegqiagprllehmvdvtlyfegdehhayrilravknrfgstnemgiefmkqsglkgvnpsemfleerstnv  
pgstivatmegtrplliev  
qalvtpttfnprmatgidhnrslmavlekkenyllqqdayikvaggvkltepavdlsvivatassfkdkaavgld  
cyigevgltgevrrvsrie  
qrvqeaaklgfkrviipknniggwtypegigvigtvthevlsfalhs  
>tr|Q2FJC2|Q2FJC2\_STAA3  
mkntlyhqlyeklkkqieggfkegdkfyskrqlskhlsisqttvehayqllldegyisrprsgyfvseiesltilnng  
pipslfdddykpkasdea  
ydyafnldeidtkhfpielefrkyskdlydtnlnqlrrghfgehlrlrfqlafylftnrgvicdpnqiiigssteqlvng  
ldllytstfiiekpsypp  
iknildkkqveyeievdnginvdeviksqnivyitpshqfptgyvmdlkkrtqliwagekeerfiieddydefry  
fgkpiipaiqgglvsrgekvi  
yistfsksifpscravaymvlpysimkkyhsqnhiegntvpvhmqnliatfissggferhlnkmrriyrkltiyilkrkpk  
ykeqldiqgaetgmhftit  
vkngrtlqecldrknkvklklyvynfdddqdykktpkfilgfggidddalkphvdaliksliik  
>tr|Q2FJD1|Q2FJD1\_STAA3  
mnmhndlkevllteediqnickegaqltkdyqgkplvcvgilkgsamfmsdlikridthlsidfmdvssyhggttest  
gevqiikdlgssienkdvl  
iiediletgttllksitelqsrkvnslivtlldkpnrrkadieakyvgkkipdefvvgylldyrelyrnlpyigtlkpe  
vysn  
>tr|Q2FJE6|Q2FJE6\_STAA3  
mrykrserivfmtqylmnhpnlipltffvkkfkqakssisedvqiikntfqkekltgtvittagasggvtykpmmskea  
tevnvevitlleekerllp  
ggylfslsvgnpsllnkvgkliasimeekldavvtiatkgislanavanilnlpvvuirkdnkvtegstvsinyvsgs  
srkietmvlskrtlaensn  
vlvddfmraggsingvmlmnefkahvkgvsvlveskevkqrliedytslvklsdvdeynqefnvepgnslskfs  
>tr|Q2FJF0|Q2FJF0\_STAA3  
mkinefivvegrddtervkravecdtietngsaineqtlevirnaqqsrqgvltdpdpfgdkirstitehvkgvkhayi  
drekankkkgkigvehael  
idikealmhvsspfdeayesidksvlielglivgkdarrreilsrklrighsngkqllkklnafgyteadvrqaled  
>tr|Q2FJF6|Q2FJF6\_STAA3  
mrlemvvnq1sketsekalaveveenaqlendnlkkvlgndepttdtanskpakavkkplpskdnlailygegfh  
ickgelgkhrhgedclfc  
levlsd  
>tr|Q2FJG1|Q2FJG1\_STAA3  
mkqpinlklelnqeeaislhvpgghknmtighlsq1smtmdkteipglldlhpeevilesmkqvekhdsydayflvngt  
tsgilsviqsfsqkkgdil  
marvnhksvlhaldisqgegfhiehqsp1tnhynkvnlsrlnndghklavltypnyygetfnveevikflhqlnipvli  
deahgahfglqgfpdstln  
yqadyvvsfkhktlpalmgsvlyihknapyretieylsyftsspsylimaslesaaefyktydstvffdkraqlic  
lekkgfemlqvddplklli  
kyegftghdiqnwfmnahiyeladdyqalailplwhhddtylfdsl1rkiedmilpkksvskvktqllttegnykpr  
feyvtwcdlkkakgkvlar  
hivpyppgipiiikgetitenmielvneyletgmivegiknnkilvede  
>tr|Q2FJG4|Q2FJG4\_STAA3  
myrpgsfedvvgqehvktlrnaiskekqshayifsgprgtgktsiakvfakainc1nstdgepcnechickgitqgtns  
dviidaasnngvdei rni  
rdkvkyapseskykvyiidevhlmttgafnal1ktleppahafilattephkipptiisraqrfdfkaisldqiverl  
kfvadaqqiecedelafi  
akasegmrda1simdqaiafgdgtl1lqdalnvtgsvhdealdhlfddivqgdvqasfkkyhqfitegkevnrlindmi  
yfvrdt1mktsekdteyr  
almlle1dmlyqmidlindtlvsirfsvnqnvhfevllvklaeqikgppqviaanvaepaqiasspntdvllqrmeqlqe  
lktlkaqgvsvapvqkssk  
kpargiqksknafsmqgiakvldkankadikllkdhwqevihaknndkks1vs11qnsepvaasedhvlvkfeei hce  
ivnkdekrssiesvvcni  
vnknkvvgvpsdqwrvrteylqnrknegddmpkqqaqtdiaqkacd1fgeetvhvidee  
>tr|Q2FJG7|Q2FJG7\_STAA3  
mskeidwrksvvyqiypksfndttngigdingiiekldyikllgvdyiwltpvyespmndngydisnyleinedfgtmd  
dfeklikvahqkd1kvmld  
ivinhtstehewfkearkskdnpyrdyffrssedgpptnwykfggnawkydsetdeyylhlfdvsqadlnwdnpevrq  
slyrivnhwidfgvdgfrf  
dvinliskgefksdkigkefytdgprvheflhelnrqtfngntdmmtigemssttiencikytqperqelnsvfnfhhlk  
vdyvdgekwnakldfhkl  
keilmqwgrgiydggwnaifwcnhdqprvvsrfgddtseemriqsakmlaialhmlqgtpyiyqgeeigmtphftsia  
qyrdvesinayhqllsegh

Tsompanidou\_et\_al\_Supplemental\_FASTA\_File

aeadv1ai1ggksrdnsrtpmqwsddvnagftagkpwidi senyhqvnvrqalqnkesifytyqkliqlrhthdiitygd  
ivprfmdhdhlfvyerhyk  
nqqlvianfsasavdlpeglaregcvvigtgtvenntisgfgaivietna  
>tr|Q2FJG9|Q2FJG9\_STAA3  
mgefkgfmkydky1ge1slvdr1khhkayqqrftkedasiqgarcmdcgtpfqctgqqygreitigcpignyipewndlv  
yhqdfktayer1setnfp  
dftgrvcpapcesacvmkinresiaikgiertiideafengwvapkvsrrrdekvaivgsgpaglaaaeelnllyqvt  
iyeraesggllmcgipnm  
klkdvvrriklmeeagitfingvevgvdidkatleseydaiilctgaqkgrdlplegrmgdihfandy1teqtqlln  
geiddititakdknviig  
agdtgadcvatalrencksivqfnkytklpeaitftenaswplampvfkmadyahqeyeakfgkepraygvqtmrydvddk  
ghirglytqileggengmv  
mkegperfwpadlvllsigfegteptvpnafniktdrnrivadtdnyqtnnekvfaagdarrgqslvvwaikegrgvaka  
vdqylaskvcv  
>tr|Q2FJH1|Q2FJH1\_STAA3  
meikqlryfi evakrehiseta1elniaqsaisrqitlleqelnvs1fkkqgrnitltsegkllfnealriehldstie  
qfshgltknksiyigyde  
sdvshml1pliqtfhlqndthvips1lehdtiinsvlngnidigfteltpeirkhkqlhmlplfeehyhyapsddpitm  
athppliqfehshiyclap  
faetvkkqlrkitksdvytissqplaqyl1rqkegyiissqnihlpeskswidikldhtelkrticaitkepytksdigi  
lltliqqlmtktstfh  
>tr|Q2FJH2|Q2FJH2\_STAA3  
mkyrn1ftkpfni1glfciafigailftfnnenfynkpigqi1dvkhsstptkdaqnrdikyknqlkvkilngqfag  
ettinhgvyksqadseaf  
rthekvllhisnkpsdayiekkrdtltviitglflltvl1vgrkvg1qsilsl1nsiailiaiyihqhsnin1flm  
tiamicstilt1llvtgwh  
mrtliitiastigtflsiglteliymadgkgikyetmfnsl1ppkdi1flav1lgs1lgaimdvaitiasgmheilqrtp  
hismrrwalagnigqdim  
gtmtni1lfsy1sgalpmf1l1fnknavtytisnmwsl1araltggigivltipitilfmeifetlrrakq  
>tr|Q2FJI6|Q2FJI6\_STAA3  
midkkl1tspkmtvp1f1ialivfigmfysvvtngew1knidmgs1twftdyfgepqrqyvnn1fnyymtfsaeigdvkgv  
vlisiivti1fikqrhla  
vwfvty1vsgvimnklikdvt1rprpynh1avdtgfsfpsghsnast1lyfal1mii1slaaktitkvl1salvmgilw1s  
ilfcrlyfhahyfsdving  
ts1aiiwwal1mvpyf1nhrrqrv  
>tr|Q2FJJ2|Q2FJJ2\_STAA3  
msal1yngdkdisherescinmlfvilvlyvtgiaf1llsvfgskteglstkhtlytigsaitiaifisigyaiqylt  
aalygl  
>tr|Q2FJL2|Q2FJL2\_STAA3  
mkftviakafilgilttsvmitenqsvnakgkyekmnrlydtnklhqyysgpsyeltnvsgqsqgyydsnv1lfnqqnq  
kfqvfl1gkdenkykekth  
gl1dvfapelvd1dgr1fsvsgvtkknvksifel1rtpn1lvkkiddkdgfsidefffiqkeevs1keldfkirk1likk  
ykyegsadmkgriivnmkd  
enkyeid1sk1dfermadvinseqiknievnlk  
>tr|Q2FJL4|Q2FJL4\_STAA3  
mk1ktlakat1vlgl1atgvittesqtvkaaestgqghnyks1kyyskpsielknldglyrqkvtdkgvyvwkdrkdyf  
vgllgkdi ekypqgehdkq  
daf1vieeetvngrysig1sktnskefskevdkvtrkidessekskdkfkitkeis1keldfklrkk1meeekly  
gavnrrkgki1vkmmedkf  
ytfel1tkk1qphrmgdtidgtkikeinveleyk  
>tr|Q2FJM2|Q2FJM2\_STAA3  
mvpeekgsit1skeaaifaiakfkpfknriknnpqktnpf1klhenkks  
>tr|Q2FJM4|Q2FJM4\_STAA3  
mhnnnefnkkl1kdfigsdkrma1vkgyvneyk1ttvl1ralnnsdytkgtihtrsign1kqidnriipknitqntifkls  
n1tlevn1yerntiyhgdf  
aiyypvesal1ietdtp1rlnhinnpvqkifiittndwsfntlelekivdeti1ydlkqedpkqeyilyknkhgk1py  
>tr|Q2FJM7|Q2FJM7\_STAA3  
mkn1ilsvqhl1amyagai1vp1ivgts1kftpeqia1y1vtvdi1fmcgvat1lqankvtgtglpivlgctftavapmili  
gqtkgidvlygs1fl1sgil  
vii1apffsh1vkffppvvtgsvvtiigin1mpvamny1aggqgakdygdvkn1llglmtlii1ll1qrfttgfiksi1  
lig1v1gtigag1lgmvd1  
nqvnhagw1gipvpfrfsgfsfdvtst1vffivai1vsl1estgyvhal1seitgkkl1erkdfrkgytaeglaiv1gsifns  
fpytaysqnvgl1v1sgak  
knnviygmvv1l1icgci1pk1galani1p1v1lggami1amfgmvmaygvsilghidfnqn1l1i1avsvglgtgisavp  
qafkg1geqfaw1tqngiv  
lga1sai1l1nfffn1gikykqteenvk  
>tr|Q2FJN5|Q2FJN5\_STAA3  
m1nad1kqqlkq1le1elmegnvefvas1gsddkskel1d1l1teitdmspr1sl1seks1krtpsfsvnrpgeetgvtfagip

Tsompanidou\_et\_al\_Supplemental\_FASTA\_File

lghefnslvlailqvsgra  
pkekqsiiqqikklegsfrhfetfislctqkcpdvqalnmsvinpnithsmidgavfreesenimavpavflngeefgn  
grmtiqdilsklgstadas  
efenkeydvliivggppasgsaaiytarkglrtgivadriggqvndtagienfitvketgsefssnlaahidqydidam  
tgiratdiectdeaikvtl  
engavlesktviiatgagwrklnipgeeqlinkgvafcpdgpflenkdvavigggngsveaaidlagivnhvtlfeffa  
selkadnvlqdrllrslnsv  
diktnakttevvgedhvtgiryedmntgeehlndgifvqigllpntswlndavelnergeividrnntnvpgifaag  
dvtqkknkqiiiiismgagan  
aalnafdyiirn  
>tr|Q2FJN9|Q2FJN9\_STAA3  
mtiylvrhgesksnydnkhfrsyfcgqldvpltdtgtsaddlcydfkekqikhvyvsdlrtqqtfehifpydiasttt  
pllrrerslgvfegeykdei  
sanpkyekyfnkdfkfrhsfsqkapegesyedvyqrvehfmnhvnedtqkddivivahqvvirclmvyfnkvsraea  
vdlkvenckpyiie  
>tr|Q2FJP0|Q2FJP0\_STAA3  
mfgfigmlivggligwaagaimgkdipggilgniiagiigswvggklfgqwgpeigsiiylpaligsiiliaivtlilra  
mrk  
>tr|Q2FJP3|Q2FJP3\_STAA3  
mktilkttitylvtiigayaalfilktidshgitedqfnplvkkddsylvkttvstrmddqlrsysqsvfnkegketqlmy  
tatfdvkphrylki thkgh  
hvetfeevekeevpkkaldklsr  
>tr|Q2FJQ2|Q2FJQ2\_STAA3  
mnqvmniisslfepltkietyeniatkiamiviyaivalivikilnkmiieqgfkinqkskksnkkrsktlislvqnvvky  
iwwfivittliskfgisve  
gviiasagvvlavgfgaqtivkdvitgffiiifesqfdvgyvkinnggttvaegtvksiglrstrintisgeltlilpnss  
mgeitnysitngtaivkip  
vsveenidnvdkklnklftsrlskyyflvsdpvividaidetrvilrisaetipgegafagariirkevqkmflqegikt  
ppimtaynhsevg  
>tr|Q2FJQ6|Q2FJQ6\_STAA3  
msqfltlqkdnvlvadgaigtilysegldtcpeaynlshpdkverihrsyieagadvitntyanfeklkrfgledkvk  
aihqaavriakkaankdty  
ilgtvggfrgikqedislqtilyhteiqidtlieegvdallfetyydlleltnvisrtrkkydipiiaqltasntnylvn  
ggaineglkqlvqcganiv  
glnchhgphhmgesfthielpehaflscypnaslldiensefkysdnaqyfgvaqnliregvrlliggccgttpehikfi  
kesigtlkpvndkkvipip  
tkalfnpsqnkvrqsltskvrqertviieltdpkhltdtrffeniakldkanvdavtladnslatvrisniaaaslikqy  
ynieplvhitcrdrnligl  
qshllgsligvneilaigtgpskvghlpgatnyvdvnskgltelalrfnqgintdgdalkkrthfniagafnpnrkly  
gavkrlekkiesgmsyfit  
qpvysekiieiyhatkhlnkpffigimpiasyknaflhnevpgikmsdeilqqfeavkddaktrelslklskldit  
vheyfnglyiitpfqnv  
slelaaysksitahkeail  
>tr|Q2FJR8|Q2FJR8\_STAA3  
mlitaamvcsfgllksqaeeqqsidsvysvitdaksalsnnsisndnkqkaieqvvsavkklslensednsnavksdvrkl  
edakandnqkdtlsqtkts  
liayeeklaskdagskikllqqvdakdaamtkaikdknaeleslnnslnqiwtsnetvirnydanqygqieva11qlr  
iaihksp1dtakvshawtt  
fksnidhvdksntsandqyghvsq1nda1ekaikaiddnqlsdaaalthfietwpyvegqitkdgaltykiedkipyy  
qsvldehnhkavkdglvd1  
nnqikevghsysfvdmii flreglevllivmtl1tmtrnvkdkkgtasviggaiaglvlsiilaifvetlgnsgilr  
esmeaglgivavilmfivg  
vwmhkrsnakrwndmi knmyana isngnlvllatiglisvlregvevii fymgmigelatkdfiigialaiviliifa11  
frfivklipifyi frvlsi  
fifimgfkm1gvsiklql1gamprhviegfptinwlgfpsyep1iaqgayimvvailifkfk  
>tr|Q2FJS1|Q2FJS1\_STAA3  
mfgmkvneqitlki leahdtealfnlvnrsrns1rewlpwvdateqpsdtrafikrgllqfadngngfcgiwyegt1gv  
iglheinmhrktslgyy1  
dkefeghgmtqavealikycfeeldlnrieisaavneksraiperlgtfregmlrdnellngiysssyiys11kseyd  
qk  
>tr|Q2FJS2|Q2FJS2\_STAA3  
mssasfnsilalfcri fkykfgmnnkvviklscvignldinqsnrhynaywrgpnkeadeksaynnvqvgdgpqhreigs  
vistdnaswrgpnienfek  
kfykqcklagpqrfrkeilqamqvgegqqi  
>tr|Q2FJT5|Q2FJT5\_STAA3  
mnnkvlatgggtfvgmriisrlleggydvqttirdl skadkviktmqdnqisterl mfveadlsqdehwdeamkdckv1  
svaspvffgktddaevmak  
paiegiqri1raeahagvkrvmtanfgavgsnkdksitneshwtnepeg1svyeks11aekaawdfvenenttve

Tsompanidou\_et\_al\_Supplemental\_FASTA\_File

fatinpvai fgpsldahvs  
gsfhll enllngsmkrvpqipInvvdvrdvaeIhIamtneqangkrfiatadgqinlleiaklikekrpeiaqkvstkk  
lpdfilslgakfnhqakeg  
kllldmnrnvsneraktllgwepiatqeeailaavdsmakyhli  
>tr|Q2FJT6|Q2FJT6\_STAA3  
mylliepirngeyitdgaialamqvynqhi fldedil fpyycdpkveigrfntaievnqdyidkhsi qvvrdrtdgggav  
yvdkgavnmccl legdtsi  
ygdfrfyqpaikalhtl gatdvqsgrndltlngkkvsgaamtImnrnyggysllldvnyeamdkvIkprnkkiaskg  
iksvrarvghlrealdeky  
rditieefknlmvtqilgiddikeakryeltdadweaideladkkyknwdwnyngkspsyeynrserlssgtvditisveq  
nriadcriygdffgggdik  
dveea lqgtkmtredlthqlkqldivyyfsnvtvealvdmils  
>tr|Q2FJU0|Q2FJU0\_STAA3  
mVKlsvldyalidegkdaqkalqdsvtlakladrlgfkriwftehnvpafacsspellmmhtlaqtnhirvsggvmIp  
hyrpykiaehfrmmaaly  
nrldlgignnpgttmvkqaldginptydsydesislrdyltikdkpsahlgvqphidhfpemwllssatsakiaael  
giglsvgtfllpdinaiha  
akndidiykkhfqastikmdakvasfvivadneaevaalqhalvdwllgkIqfaefedfsvdtaqkykIIndrdkemi  
qahqariiagtqekvkaql  
ddfiatfevdevlvaplipgieqrcktlkllaeiyI  
>tr|Q2FJU2|Q2FJU2\_STAA3  
myrykpllsqsihlnpgiki snrfvlspmtvntstkegyitkedlayaarrsnsagmqvtgaayiepygqlfeygnidhd  
acipgltnmastmkqhsI  
aiqlahagrfsnqailnfgkvygspmtlhspiehdviamshenkinsiiqqyrdatlraikagfdgveisiaqrlliq  
ffstfsnkrtdhygadsIk  
nsarlclvmravgevidkeapdnfilgfratpeetrsgdlgytidefnqlinwvmdvsdiqylaiaswgrhiyqntsrt  
pgdhfgrpvni vyeIag  
ripIiasgginspesal dalqhadvmgms spfvtepdfvhklaeqrphdinlefsmadledlaiphaafkdivkmmdyge  
glkkhtrdalrql eqnyhd  
sss  
>tr|Q2FJU5|Q2FJU5\_STAA3  
mnqyhsnaqqpsawrffvyslvgilcffi pftingntifvdhvhIairsiigplmpyvalimiligtalpivrtrfmts  
itnlvitlfkvagamigim  
yvfkiGPSilfkanygpflfeklmpslsilipvgaialsllvgygllfvgvymepimrpi fktpgksavdavasfvgsy  
slgllitnrvykqgmykr  
eatiatgfstvsatfmiivaktlgImphwnlyfwitlvitfvvtaitawlpPisnesteynggegeqevaiegsrlkt  
ayaeamkqnal tpslvknv  
wdnlkdglentvgilpsil sigflglivanytpfidwlgylfypfiyifpiadqallakasaisivemflpsllvtkaam  
stkfvvgvsvsaiiffsa  
lvpcilateikipvwklliiwflrvalsllitipvallifg  
>tr|Q2FJU8|Q2FJU8\_STAA3  
myyiaidiggtqiksavidkqlnmfdyqqistpdnkseItdkveyivtgymkqyqliqpvigissagvvdeqkgeivya  
gptipnykgtnfkrllksI  
spyvkvkndvnaallgelklhgyqaerifcmtlgtgiggayknnqghidngelhkanevgyllyrptenttfeqraatsa  
lkkrmiaaggftrsthvpvl  
feaaeegddiakqilnewaedvaegiaaqiqvmydpglliligggiseqgdnlIkyiepkvahylpkdyvyapiqttsknd  
aalycIq  
>tr|Q2FJV3|Q2FJV3\_STAA3  
msdsekeilkrIkdnpfIsqrelaeaigI srpsvani isglIqkeyvmgkayvl nedypivcigaanvdrkfvyhknIva  
etsnptstrsiggvani  
aenlgrlgetvafIsagqdsewemikrlstpfmnl dhvqqfenastgsy taliskegdmtygladmevfdyitpeflik  
rshllkkakciivdlnlgk  
eaInflcayttkhqiklvittvsspkmknmpdsIhaidwiitnkdetetylnlkiestddlki aakrwndlgvknvivtn  
gvkeliyrsgeeeiiksvm  
psnsvkdvtgagdsfcaavvswlngmstediliagmvnaktietkytvrqnl dqqqlyhdmedykngkftkvy  
>tr|Q2FJV4|Q2FJV4\_STAA3  
mdlligtlfllvlviftlftykapngmramgalanaaiatflveafnkyvggevfGikfleelgdaaggIggvaaaglt  
alaigvspvyaIviaaacg  
gmdllpgffagymigyvmkytekyvpdgvdligsivilaplarIiavltpvvnstlirigdiisstntnpiimgiIlg  
giitvvgtapIssmaltaI  
lgltgvpmaigamaafssafmngtlfhrklIgdRkstiavsieplsqadivsanpiiyitnffggaiagIliamsglin  
datgtatpiagflvmfgfn  
hpttivygvmaivgalagylgsivfkypivtkqdmInrgavda  
>tr|Q2FJV6|Q2FJV6\_STAA3  
mflawnei rrnklkfgliigvltmisyllflIsglanglinmkegidkwqadaivlnkdanqtVqqsvfnkkdienkyk  
kqatlkqtgeivsnghqkd  
nvlvfgvekssflvpsIlegkatkdnevIadetlnkngfkigdtlsIsqdekIhivgftesakynassviftndatia  
kinprltgdkinavvrdrtd



Tsompanidou\_et\_al\_Supplemental\_FASTA\_File

nwkdkklngelavsindefienlpgykpnltlnfmslflvisatvigiflyvmtlqktslfgilkaqgftngylanvv  
isqtvilalfgtafglllt  
gvtgaf1pdavpvkfdvltllvfaivlmivsvlgs1fsiltirkidplkaig  
>tr|Q2FJV8|Q2FJV8\_STAA3  
mlfslffgagnlifppmlghtagqnmwigmlgfaltgillpfitvivvafydegvesvgnrihpwfgfifavviymsiga  
fygipraanvayeigtrhi  
lpvhngwtliifaaffaiwywislnpskivdnlgklltp1lllmvallsiavifnpsalsapkdkyithpfisgsleg  
yftmdlvaalafsvvimg  
ykfkg1tdrmkilkvvcfsgliaaillgmifyalayvgastapgnfkdgtdiltynslrlfsgfnglvfgmtvilactt  
ciglvnacatftkkhvpkf  
sykifalifsiigflftt1g1emilkiavplltliypvsialvlisfanmfstfrfswayrlatvitliisilqilnsfn  
llhgvilksfmm1pladid  
law1vpfmlfaiigfiidvfiirrpqatt  
>tr|Q2FJV9|Q2FJV9\_STAA3  
mmagfiigiitvfvlsvkathepd1ppgivnmasaitfsfalvlllftnse1ltsnfmyftvglyykvikptrvlkifll  
cfagnilgaailfsfmrfs  
nvmtpdmlnqlsaviekt1stgfvsilmkai fanffinislviamqidv1akmfvmfvgvtifafmgvehvvynsclf  
mggllyqvdtlhfipaisn  
iaaafignyigggl1ig1fyay1ndhhqfyknn  
>tr|Q2FJW0|Q2FJW0\_STAA3  
meksikimtiigivvgglatvfl1lmv1aasgvmttdvsttvngevdpvdaetaaaitv1flslfifigiisiilgaig  
mfkasknkkmsgill1iga  
visgniitfalw1isgik1ltnnkpksdeisdls  
>tr|Q2FJW5|Q2FJW5\_STAA3  
mtfeek1sqmynkiaseisgmipveweqvftiayvtdqagevi fnytkpgsdelnyysdipkdcnvskdifknsfwkvyr  
mfde1retfkeeelepwt  
cefdftdrgklnvsfdyidwvnsfegpmgrehyymykkfgiwpekeyainwvekikdyvkeqdeael  
>tr|Q2FJW7|Q2FJW7\_STAA3  
mttkenid1rkpgaqalslas1fmlfsc1tfffgl1dierfnylkitiie1liiiiis1lqwirfidfekesaqkykk  
iyarflviinvl1ttitavf  
atcnlyyfvavqnyhd1fnywlmgtisiiisy1llviggmft1lklpkvtrwggkthfg1lltalsafiyieriey  
ilvnpvveskfvmvsiii  
iactqfvafqfimqysrfyife1nteddd  
>tr|Q2FJW9|Q2FJW9\_STAA3  
meevkyslii1nsdelnyytdipkeynisvqvfd1lwm1dyl1feelrnl1fkeeglepwtscfdftregklkvsfdyid  
winsefgqvgrqnyykyrk  
fgilpeteyeinkvkeieqyikeqdeael  
>tr|Q2FJX0|Q2FJX0\_STAA3  
mipvewekvyviayvddgggqvifyytkprndelyyysivedynvleeifdd1lwmelyrsfklrni1fkeeslepwtsc  
efdf1tkedklkvsfdyidw  
kntefdq1ggenyynyrkfgiipemeyemeevkqieqyikeqeeaeq  
>tr|Q2FJX5|Q2FJX5\_STAA3  
mtfeek1skiyneianeissmipvewekvytmayiddgggeffnytkpgsdd1nyytnipkeynisvqvfd1lwm1dyl  
1feelrd1fkeedlepwt  
cefdftregelkvsfdyidwinsefgqigrqnyykyrkfgilpeteyeinkvkeieqyikelee  
>tr|Q2FJZ0|Q2FJZ0\_STAA3  
mskklkiipiiiv1ll1iggiawgvyaaffantpknty1kseqqtakmykdyfndrfenevkfkekmdnsflsslelsad  
asdeivkg1gipksvvnas  
kikmsyghdpkkeksminleptiadsal1gkfq1aadkdkhyfesplfkgkysvnnsd1l1stysk1tgedeetakengitn  
qqln1nt1fnnaqaqqsdy  
skiaekyse1ivdk1ddd1fdkgkkeeikvngedykvrpvt1t1sradtkkitlavleeakkdkdkl1meeqgatkdf  
kdikkaiddvketkkdefa  
kiqskiytektivkreititdkennktkiigtnt1eddk1kl1dya1dfd1dqkytyaeakytikgvsskekdnyndkye  
fgkktedydeskik1dngek  
vgtkrqdkgkitvaldkysdeneftfennidsvknntqkst1nigikyaeepinfilksstklkadidfdsgakdfn  
s1sskdrek1ekeiekngg  
kmfesilkkask  
>tr|Q2FJZ6|Q2FJZ6\_STAA3  
mnntqssprsniiiaim1saltyw1faqsfinigplvgqyqtspavln1sis1tsfatgimvaagdiadkigqlrmt  
mgliismfas1ll1isdit  
all1igri1qg1saail1p1stvgv1nnqfkgehlrraisylm1stvggiglagviggl1asnfgwqtnfiisiviafia  
1llkg1tpekvsqshrhpf  
dykgmsifavmigsft1ll1tqgfeqgwfstfsiic1sifiitt1fiiierrehvpfidfsvlnrnpfigaf1nnfvlns  
glgvtvffiyaqth1gl1s  
aaqsg1vt1pyaivavami1r1gekat1rfggk1m1iig1lp1pvigitiismtq1llasqyviaviigfvicainglvatp  
gl1tiaifsmpekvglatg  
lykmsgt1ggafgialsttvsmlq1nyapsvaatvtfivsv1ml1g1s1saymiipktvks  
>tr|Q2FK02|Q2FK02\_STAA3

Tsompanidou\_et\_al\_Supplemental\_FASTA\_File

mtnkvvilgstnvdqfltvryaqpgetlhveeaqkafgggknganqaiatarmaqadttfkitgtdgvadfiledfkvah  
idtsyiktaeaktgqafi  
tvnaegqntiyvygganmtmpedvinakdaiinadvvvaqlvpiipaiisafeiakahgvttvlnpapakalpnells  
idiivpneteaelsgikv  
tneqsmkdnanyflsigiktvlitlgkqgyfatknqsqhieaykvnaidttaagdtfigafvsrlnksqdnladaidfg  
nkassltvqkhgaqasip  
leevnqv  
>tr|Q2FK22|Q2FK22\_STAA3  
mka|vktreghgnlelldkevatplddkvkikvhyagicgtidhtyeghykvnfpvtlghefsgeivevgadvkdfkvgd  
rvtsettfyvcneceycks  
kdynlcnhrkgigtqvdgaftnyviareeslhhipdevsyqsaamteplacayhgvskiqvnsqdvavvmgpgpigllva  
qvlkskgatvvvtgldndk  
vrldkaeahmdyvvnllqtdlktyingitdgygadvvvecsgavpaarqgldilrkkgfysqigifkdaeipfdmekvi  
qkeittvgsrsqkpadwep  
slqlmadglvnaealvtkiydi skwdeayqhlksgegikvllktldldenegen  
>tr|Q2FK23|Q2FK23\_STAA3  
msyftdfvrgfldlgatvilpvvifllglffrqkigaafsrsltigvafvgiflvidllvknlgpaaqamvknlgvslnv  
idvgwpatssiawassvaa  
fiip|lgiivnvllvtkvtktmvdiwnfwyhtftaamvyavsgsiwqallaavifqiiclkvadwtapmmseffdlpgv  
siatgstisyaggiylkl  
lqkvp|gnklldadpetiqkrfgafgesifvgllglgigvlagykpgdiinlmsmaavmvlmprmvkilme|mpvses  
artwlnkrfgereiyigld  
aavalghpavistalilvpi tvllavilpgnqvlpfgdlatipfvafivgaargniihsvivgtimiaaislyiatdvap  
iftdmakgtvqmpkgsse  
issidqggnivnylifklfslfn  
>tr|Q2FK30|Q2FK30\_STAA3  
mlteqekdiikqtpvllekegteitsifypkmfkahep|lnmfnqtnqkrmgqssalaaqavmaaavnidnlsvikpvimp  
vaykhcalqvyaehypivg  
knllkaiqdv|tleendpviqawakaygviadvfiqiekeiydqmmwigf|kpfkitnikqesediksftveteeydfsef  
tpgqyitvdvssdklpyra  
krhysiv|sgeknhlftgvkrdrvttehegevestilhdeikegdminlaapvggfv|lenttepqlflgsgigvtp|lvamyea  
asakgldtqmvqvaeneqh  
lpfkdnfnsiashhdnaklythlkdkqgyigaeelqvflankpei|yicggtkflqsmiealkslnydmrvhyetfipr|  
svav  
>tr|Q2FK33|Q2FK33\_STAA3  
mkfkr|latifsav|vlsgcgsms|hssgkdl|nis|plk|tk|si|apyet|dvp|vk|igaa|es|l|f|k|t|nd|q|g|k|e|k|a|l|v|k|s|y|h|q|p|n|d|t|  
t|l|d|e|l|k|d|n|k|f|q|n|g|q|k|l|t|  
aekvkss|lensm|kksd|lvkys|lpissitakgq|l|tik|t|nsay|p|lvsel|anp|fmai|y|td|aks|dvn|q|tpv|gt|gpy|q|k|d|y|  
kqsrkis|snf|kdy|wqgk|p|  
kl|dhi|t|v|ty|q|ed|gn|rvrn|les|q|k|d|l|it|d|vp|vn|kv|q|di|enn|qn|l|k|v|s|k|es|g|f|r|t|s|l|l|my|n|ht|nk|k|mt|k|s|v|re|al|d|hi|id|  
r|q|g|a|d|h|i|y|q|y|a|k|p|a|t|s|p|  
fndk|p|y|i|k|e|p|l|t|k|q|n|e|q|a|k|m|l|a|k|d|g|y|t|k|e|h|p|l|k|l|k|i|t|y|d|g|r|p|e|l|s|k|i|a|q|v|l|q|s|d|a|k|k|a|n|i|e|i|d|i|k|s|v|d|d|i|e|g|y|l|k|  
d|rs|a|w|d|a|t|m|y|s|f|g|t|p|r|g|d|  
t|g|y|f|f|n|q|a|y|k|k|d|g|a|i|n|k|g|d|y|n|n|s|n|v|d|l|i|n|q|l|n|h|t|v|d|v|k|e|r|h|n|i|s|n|d|i|k|l|s|r|d|v|p|n|s|i|a|y|n|d|q|i|v|a|n|s|k|v|k|n|y|k|v|t|  
p|e|g|i|y|l|i|d|y|r|t|t|i|e|r|  
>tr|Q2FK34|Q2FK34\_STAA3  
mssastqst|k|t|s|d|h|n|e|s|i|d|k|q|me|a|k|h|e|t|a|q|n|t|d|l|k|n|e|a|r|s|l|f|d|n|a|t|k|s|i|g|r|l|a|g|n|d|e|s|l|n|l|n|k|d|m|l|s|e|v|f|k|p|h|t|k|n|e|  
a|d|e|i|f|i|a|g|t|a|k|t|t|p|a|i|c|d|i|  
s|e|e|w|g|k|p|w|l|f|s|r|v|i|a|f|t|v|t|f|i|g|l|w|v|ma|i|f|n|n|t|n|i|p|g|i|f|i|g|a|l|t|v|p|l|s|g|l|f|f|f|y|e|s|n|a|f|k|n|i|s|i|f|e|v|i|i|m|f|f|i|g|g|v|f|  
s|l|l|s|m|v|l|r|f|v|v|f|s|d|q|f|e|  
r|f|g|s|l|t|f|f|d|a|f|l|v|g|l|v|e|e|t|g|k|a|i|i|v|y|f|v|n|k|l|k|t|n|k|i|n|g|l|i|g|a|i|g|a|g|f|a|v|f|e|s|a|g|i|l|n|f|a|l|g|e|n|v|p|l|l|d|i|v|f|t|r|a|w|  
t|i|g|g|h|l|v|w|s|i|v|g|a|i|v|i|  
a|k|e|q|h|g|f|e|f|k|d|i|f|d|k|r|f|i|f|f|s|a|v|l|h|g|i|w|d|t|s|l|t|v|l|g|s|d|l|k|i|f|i|l|i|v|i|v|w|i|l|v|i|l|m|g|a|g|l|k|q|v|n|l|l|q|e|f|k|e|q|q|k|k|  
v|d|e|  
>tr|Q2FK35|Q2FK35\_STAA3  
mevtc|l|k|q|i|t|w|h|d|l|q|i|i|k|d|g|d|v|i|g|l|p|a|l|a|v|a|n|p|a|e|v|l|r|a|v|a|q|h|d|t|y|h|t|p|n|d|l|t|f|i|l|a|n|d|i|h|s|l|g|a|a|p|l|d|d|f|i|e|r|r|m|  
i|k|r|v|i|m|s|i|l|t|a|s|s|k|t|a|q|a|m|  
k|n|n|d|i|e|a|y|f|l|p|q|g|i|a|t|y|r|q|s|n|q|l|l|p|g|v|i|t|k|i|g|l|n|t|a|v|d|p|r|y|g|g|k|v|n|t|r|t|t|d|l|v|s|l|v|t|i|n|d|e|t|y|l|h|y|t|f|p|s|v|d|v|a|l|l|  
r|g|t|y|a|d|q|q|g|n|i|y|l|t|q|e|a|y|l|  
s|e|c|y|h|v|a|l|n|a|k|a|h|g|k|v|i|v|q|k|a|l|v|d|d|y|q|l|k|p|n|e|v|i|p|g|n|l|v|d|y|v|y|v|t|e|d|e|k|h|r|q|v|i|q|s|h|y|l|p|a|l|s|g|e|i|r|i|d|i|g|i|p|e|p|a|l|  
p|f|n|r|k|i|l|i|r|r|a|a|q|f|l|t|y|g|  
d|i|s|i|g|y|i|n|n|e|l|s|n|l|h|e|e|c|v|h|d|v|q|i|l|d|v|i|f|g|g|f|v|g|r|e|h|f|g|m|n|y|n|a|d|r|m|p|h|d|r|a|w|d|f|i|y|n|g|v|s|v|a|y|l|s|f|a|e|v|d|  
q|y|g|n|v|n|s|y|f|n|d|r|l|n|g|c|g|g|  
f|i|d|i|t|q|s|v|n|k|i|i|f|s|g|t|f|v|a|g|s|h|v|s|c|h|n|q|r|l|i|e|t|e|g|q|n|q|k|f|v|s|d|v|s|h|i|d|f|n|a|q|y|s|q|s|l|e|q|i|y|f|v|t|d|r|a|v|f|e|l|t|n|q|g|l|k|l|  
i|e|i|a|p|g|l|d|h|k|d|i|n|q|ma|f|  
k|i|i|a|d|h|l|k|i|d|t|s|i|y|k|e|k|w|g|q|l|k|s|i|h|k|v|  
>tr|Q2FK38|Q2FK38\_STAA3  
mtinkvtvlgagtmgaqlaalvfnaglkvklldivvdkndpnliakksydkitdkkrplldlndlnashltygnfdddln

Tsompanidou\_et\_al\_Supplemental\_FASTA\_File

ddadlyieavkedieikha  
vwqqvlqhakedal fatntsgipinai aqafnekdqerffglhffnpprimklveliptshtkesiildvknfaqnvlgk  
gviivndvpgfvanrvgtq  
tmndimyraeqhki si vdvaltggaigrpktgtyalsdlvgldiavsvikgmqqvpeetpyfhdkivntlfdngalgr  
ktkqgfykkdketkarlv  
dvekqdyvpvsqpqlpilinefnkdlvhnl d t i f n a q d e a g l f l w e t l r n n f y s a i n v p k a t d d f r d i d r a l v w g f n w k l  
gpfqlwdamgyervktrme  
delgdlpqwisdlggfykqdetieyatpi shfvkdelwdkgdaklsvthddqlllklqsknnvitdefndalvdaidl  
endhytsmviyadgnnfsv  
ganlf1mkkahedglvddvvaqsidklhysfnrlkyslkpvtavqgralgggcelvlyspivvaasetyiglv e a g v g l  
lpsggglaemadri lr tsh  
kfdkqtsmtkvlniafakvstnafearrygylrdtdtiifntaqrvevalkrakyeaetnyipnprhqiya l g e d f k a  
liqqqldaqrrghfisdh  
yhiainiatilaggdlprntfinqryiqslekigfidllskksyeriahmlktgkplrn  
>tr|Q2FK40|Q2FK40\_STAA3  
mkkqiislgalavasslftwdnkadaivtkdysgksqvnagskngtldisrylnsalyyledyiyiaiglt nkyeygdni  
ykeakdrll ekvl redqyl  
lerkksyedykqwanykknprtdlkmanfhkynleelsmkeynelqdal kra l d d f h r e v k d i k d k n s d l k t f n a a e  
edkatkevdydlvseidtlv  
vsyygdkdygehakel rakldlilgdtdnphkitnerikkemiddlnsiiddffmetkqnrpk sitkynptthnyktnsd  
nkpnfdklveetkkavkea  
ddswwkkkvkygetetkspvvkeekvveepqapkvdnqqevkttagkaeettqpvaplvkipqgtitgeivkgpeypt  
menktvqgeivqgpdlm  
eqsgpsl snnytnppltnpi leglegssskleikpqgtestlkgtqgessdi evk p q a t e t t e a s q y g p r p q f n k t p k y v  
kyrdagtgi reyndgtfgy  
earprfnkpsetnaynvtthangqvsygarptqnkpsktnaynvtthngqvsygarptqnkpsktnaynvtthangqvs  
ygarptykkpsktnaynvt  
thadgtatygprvtk  
>tr|Q2FK42|Q2FK42\_STAA3  
mkriskdwavfkll yqnkgrfsinalllqlimifisstyil l l f n m m l k v a g q s q l t i n n w t e i v s h p a s v i l l i i f i l  
svafliyvefsllyvmvya  
gfdriitfksifknafvnrkligvpviffviymlmipianlglssvltkniyipkflteelmkttkgiiygtfmia  
vfilnflkliftlpltilnr  
qslfknmr lswqitkrnkfrlvieivileliigailtliisgatylaicvdeegdkflvssilfvvlksalffyy l f t k l  
slisvlvlh1kqenvldqp  
glefkyppkrksrffismlavtcfigynmyllynntintnisiighrgfedkgvensipslkaaakanveyvel d t i  
mtkdkqfvvshdnllkr1t  
gvknisesnfvkdivglmrqngheakfvsldefietakqsnvkl l v e l k p h g k e p a d y t q r v i d i l k k h g v e h q y r v m s  
ldydvmtklkkeapy1kcg  
y i i p l q f g h f k e t s l d f f v i e d f s y s p r l v n q a h l e n k e v y t w t i n g e e d l t k y l q t n v d g i i t d d p a l a d q i k e e k k d e  
tyfdrsi r i l f e  
>tr|Q2FK61|Q2FK61\_STAA3  
mkkiiisiaiivlalvsgcvptksevaqksskevgerptihflgqasyendmnivkdqlenagfnvkmiqpdygsy  
rtqrqagnydiqidwmtv  
fgdpnyamta lfsstgsnslldkdhvdqllnkastqneadvkqtykqiedevvfdkgymaplygskknlyvdnkvldkns  
vglpnsraliwqqfdynns  
rerdrplvmtqqdgeiptldpirsiapsvysinmmytrllll d e n d h l t t k g s l s h d y a v n k d n k a f y f l l r d d d y f a  
kvvngqarntgervsaedv  
kfsldrardkksvpnnnmhkhindikilkdedidqlrkekdkddksiydklikayvnslttddgqkvnkdgiyqiv  
kittdqsmprevnylthss  
agilskkfvnqvnqeypkgygdsstipansdgknalyasgayimtqknayqatfqrnpgfnetekgsygpakiknitlkf  
ngdpnna l s e l r n h s i d m l  
advnqkhfdliksdknlsii rkngkrksvflmlnikkgi fkthpnlrqavvnaidqdqfikfyrgdkfkiaspitplvdtg  
neqrqdlekeveainq  
>tr|Q2FK66|Q2FK66\_STAA3  
myypylrgkqnel faillekg ligdci qpi iepikytttfnktlqycgekafsinlvvnsk l t e e e i s n e t v a h l t e i  
itknksv1qkayl g p s d e g  
ndrlkqqfssnslailtsvddwemfgdknl emvfvppdrhikrklrni pnk gi i m d p f n k l s r n v d y l d n d d e f y s d d h  
lyykedgyvafsdysvigg  
eyvdggfsp laiaihivyfdeanelrvkhfvdsdnndrsnpgkkffavdklvtwsknldiknrsyalgqfeelnenny  
pglglkr1simhhleimn  
rylesqnenm  
>tr|Q2FK68|Q2FK68\_STAA3  
mayqseyalenemmqleqlgyervtirndkqlldnfrtilnerhadklegnpltdkefqrlltmidgksifesarilrd  
klplrrddeseiylsfltd  
kswcknkfqvtnqvsvedtykarydvtilinglplvqvelkrrgidineafnqvkyrkqnytglfryiqmfiiisngvet  
ryfsnndsel1kshmfyws  
dkqnnrintlqsfaesfmrpcqlakmi srymi inetdri1mamrpyqvyavealiqqatetgnngyvwhttgsgktltsf

Tsompanidou\_et\_al\_Supplemental\_FASTA\_File

kasqilsqqddikkviflv  
drkdldsqtееееfnkfakgavdktfntsqlvrqIndkslplivtti qmkakaiqgnaplleqyktnkvvfiidechrsqf  
gdmhr1vkqhfknaqyfgf  
tgtrpfpenssqdgrttadi fgrc1htylirdaih dgnvlgfsvdyintfknalkaednsmveaidteevwladkrvel  
vtrhiinnhdkytrnrqys  
siftvqsihalikyeyetfkrlnkkleqpltiagiftfkpeddrdgevpyhsrekleimisdynkkfetnfstdttneyf  
nhisknvkkgvkdskidil  
ivvnmfltgfdskvlnltyvdknlmyhdliqaysrtrnrvekeskpfgkivnyrdlkketdda1rvfsqtndtdtilmsy  
eeykkefmdayrelkmi vp  
tphmyddiqdeee1krfveayr1lakiilr1kafdefeftideigmdeqenedyksylavydqvrataeknkvsilnd  
idfeiemmrndtinvnyim  
nilrqid1edkaeqrrnqeqirri1dhaddpt1rlkrdli refidnvvpslnkdddidqeyvnfesikkeae fkgfager  
sideqalktisndyqysgv  
vnph1lkkmigd1pl1kekrkarkaiesfvaettekygv  
>tr|Q2FK69|Q2FK69\_STAA3  
mtnilyrldkqlsdfkttekiadyilknphkiidmtvndladvtvstasivrfsrkmthqgfqelkiaisrylpedia  
tnphlelienesvetlknk  
miaratntmrfvatnimdaqidaicdvlnartiflfgfgassltigdlfqklsriglnvr1lheth1lvstfathddrd  
cmifvtngqshselqsiaq  
vathysipiitistannpvaqiadyaliygrtdenemrmaatts1faqlftvdilyrfvalnyhaildcitqskmald  
nyrkhlaticfkh  
>tr|Q2FK74|Q2FK74\_STAA3  
mkqrigaylidaihragvdkifgvpqdfn1aflddiisnpnvdwvgntnelnasyaadgyarlnglaalvttfvgvelsa  
vngiagsyaeripviaitg  
aptraveqggkyvhsl1gegtfddyrkmfahitvaaggyitpenatteiprlintaiaerrpvhlhlpidvaiseieiptp  
fevtatkytdastyiel1a  
tklhqakqpiiitgheinsfhlhqeledfvnqtqipvaqlslgkafneenpyymgiydgkiaedkirdyvndsdilni  
gakltdsatagfsyqfnid  
dvvm1nhhnikiddvtndeis1ps1lkqlsni sytnnatfpayhrptsdytvgtepl1tqqtyfkmmqnlkpnndviad  
qgtsffgayd1alyknntf  
igqplwgsigytlpatlgsq1adkdrn111igdgslq1tvqaistmirqhikpvlfvinn dgytverlihgmyepeyeni  
hmdykalpavfgknvei  
hdvesskd1qdtfnainghpdmhfvevkmavedapkk1idiakafsqqnk  
>tr|Q2FK85|Q2FK85\_STAA3  
mkivalfpeaveggenq1ntkka1g1ktfleerghefiiladngedldkhlpdmdviisapfypaymtreriekapnlk  
1aitagvgsdhvdl1aase  
hnigvvevtgsntvsvaehavmd1111rnyeehrqsvegewn1sqvgnhahe1qhktigifgfgriqqlvaerlapfn  
vt1qhydpinqdhlksf  
vsfdel1vtsdaitihap1tpetdn1fdkdvl1srmmkhsylvntargkivnrda1vealaseh1qgyagdvwypqapad  
hpwr1mp1namtvhysgmt  
1eaqkriedgvkdi1erfffnhepfqdkdiivasgriasksytak  
>tr|Q2FK90|Q2FK90\_STAA3  
mikiqqlqhhfgshkvihnfn1diskgeivtfigksgcgkst11niiggfihpssgrviidneikqqpspdc1mlfqhhn  
11pwktindnirig1qqki  
sdeeinaq1klvd1edrgkhfpeq1sggmqqrvalcrahvhkpnvismdeplgaldaftryklqdq1vqlkhktqsti1l  
vthdidea1y1sdriv1lg  
egcniisqyeitashprs1rndsh11kirneimetfalnhh1qvepeyy1  
>tr|Q2FK91|Q2FK91\_STAA3  
mt1f11eann1dfastkee1eakaas1stkti1pt1lievqaten1thgyfiveandeaekqflteadis1qlvkevrlvg  
kd1devkngdahvdy1vtw  
ni1pegi1tmdqylarkkknsvhyeevpevefkrtyvcedmskci1clyn1apdeeavrrarkavdtpidgiekl  
>tr|Q2FKA4|Q2FKA4\_STAA3  
mri1nivssni1vqdrvl1kqietikgvtddyki1vgmnsqatnkr1en1dcnyr11gskvdpkn1sklikrirfatgvi  
reikaykpdvihandfdv1  
1mvy1sn1ykan1vydaheiyaknafinkvpl1skfvesiekhivkhrvafvtvshaakeyyqskgyk1keanvitnapi  
1ndsrefkeienfkeivyg  
qqivmdrgyee1fi1assafkqnapsfi1irgfgpheelikelisynpenir1dkpvevkelvdklaesnvgv1ltpkpsin  
feytvsnk1fecihag1lpv  
i1spvkehiy1nekykfgiv1kevtp1lei1ekavr1rdnhd1fnh1lrqnaikaski1nwqieser1velykf  
>tr|Q2FKA6|Q2FKA6\_STAA3  
mek1k1mtivgtrpei1r1sstikacd1yfnqilvhtgqnydyt1nq1ffdd1el1rqpdhyleavgsn1getmgni1akt  
ydv11reqpdal11lgdtn  
sc1laavsakr1kipvf1hmeagnrcfdqnvpeeinrkivd1hvsdvn1pytehsr1y11deg1nkani1fvtgspmt1evieah  
rdk1inhsv1nk1lg1lepqq  
y1lvsahreen1dneknfks1mna1ndiakkykmpvi1ysthprswk1kieesk1fedp1lvk1q1kpf1gff1dynam1qkda1fv  
1sdsgt1seess1k1fpgv  
1irtsterpe1vdkg1tv1vggitynn1iqsvelaremqnnepmi1daidyk1dntvstkvk1i1qsykdi1inrntwrk  
>tr|Q2FKA8|Q2FKA8\_STAA3

Tsompanidou\_et\_al\_Supplemental\_FASTA\_File

mfddklllittggtgsfgnavmkqfldsnikeirifsrdekkqddirkkynnskikfyigdvrdsqsvetamrdvyyvfha  
aalqvpseffpveavkt  
nigtenvlqsaihqnkvkviclstdkaaypinamgiskammekvfvaksrnirseqtlicgtrygnvmasrgsviplfi  
dkikagepltitdpdmtrf  
lmsledavelvvhafkhaetgdimvqkapsstvgdlatallelfadnaieiegtrhgkkaetlltreeyaqedmgdy  
frvpadsrdlnysnyvetg  
nekitqsyeynsdnthiltveeikeklltleivrnelndykasmr  
>tr|Q2FKB2|Q2FKB2\_STAA3  
mltipekenrgskeqevaimidaladkgkkaalealskksqeeidhivhqsmlaavdqhmvlaklaheetgrgiyedkaik  
nlyaseyiwnsikdnktvg  
iigedkekgltyvaepigvicgvtpttntptsttikamiaiktgnpiiiafahpsaqesskraevvleamkagapkdii  
qwievpsieatkqlmnhkg  
ialvlatgsgmvsaystgkpalvgpgnvpysiektahikravndiigsktfdngmicaseqvvidkeiykdvtnef  
kahqayfvkkdelqrlena  
imneqktgikpdivgksaveiaelagipvpentklliaeisgvgsdypisreklspvialvkaqstkqafqicedtlhfg  
glghtavihetedelqkdf  
glrmkacrylvntpsavggigdmynelipsltlgcgsygrnsishnvsatdlniktiakrrntqifkvpaqiyfeena  
imslttmkdiekvmivcdp  
gmvefgytktvnvlrqkteqpqikifsevepnpstntvykglemmvdfqpdtialgggsamdaakamwmffehpetsf  
fgakqkfldigkrtykigm  
penatficipstsgtsevtpfavitdsetnvkypfadfaltpdvaiidpqqfvmvsvkvtadtgmdivlthamesyvsvm  
asdytrglsqaiiktfev  
lkssvekgdksrekhnastlagmafanaflgiahsiahkiggeygiphgranailphiirynakdpqkhalfpkyef  
fradtdyadiakflglkgn  
ttealveslakavyelgqsvgiemnlksqgvseeelnesidrmaelafedqcttanpkealiseikdiiqtsydykq  
>tr|Q2FKB4|Q2FKB4\_STAA3  
msniafyvsvdhgyifptdftsrnqyqpmglllanhvieqdrdqyqsfkidngdflqgspfcnyliahsgssqplvdf  
ynrmafdfgtlgnhefnvg  
lpylkdtrrlnypvlcaniyendstldngvkyfvvgdqtvgviglttqfiphweqpehiqsltfhsafeilqqylpem  
krhadiiivcyhggfekdl  
esgtptevlngeneyaml eafskdidi fitghqhrqiaerfkqtaviqpgtrgttvgrrvlstdeyenlsvescellpv  
iddstftideddqlrkql  
edwldyeittlpydmtinhafearvaphpftnfmnyalleksadvactal fdsasgfkqvvtmrdvinnyppntfkvl  
avsgaklkeaiersaeyfd  
vkndevsvsadflepqpqhfnfydiyggsytihvgrpkkqrvsnmmiqghavdlkqytyicvnyravggggydmyidap  
vvdkiqvegaqlidflsn  
nnlmripqvvdfkvek  
>tr|Q2FKC1|Q2FKC1\_STAA3  
mkfeyidhtllkpestrtqidqideakaynfksvcvnpthvkyaerladsevlctvigfplgasttatkafeteda  
iqngadeidmvinigalkd  
grfddvqqdieavvkaakghtvkviievtlldhdeivkasekttagadfvktstgfaggataedvklmkdtvgadvev  
kasggvrnledfnkmveag  
atrigasagvqimqgleadsdy  
>tr|Q2FKC4|Q2FKC4\_STAA3  
mevvyvtqtgpkfltiyntykeiqigkypsghalpτεkelcarfdvsrmtlrqaiklaedgivestrqkghfvipqtn  
aqhassmqdfkhpldqill  
arvsmssinyrvdleseytnhlfanhpsaviameyyqkkdnshkqadafcftfiplnvidtfkvntqneddmktfveqt  
iysnayqsdlkmsitkaph  
fknhshvfdgdthcwl iietlyaqtpypiminkwyipqeiseltltriqrdsy  
>tr|Q2FKC9|Q2FKC9\_STAA3  
mkiicyitkadnggaqthliqlanhfcvhndvyvivgnhgpmieqldarvnniiehlvgpidfkqdilavkvlalqfisk  
ikpdvihlhsskagtvgr  
akfiskskdrivftahgwaftegvkpkkflylviekmlslitdsiicvsdfdkqlalkyrfnrklklttihngiadvpa  
vkqtlksqshnnigevvgm  
lpnkqdlqinaptkhqfvmiarfaypklpqnliaaieilklnhshahftfigdgptlndcqqqvqaglenevtflgnv  
inashllsqydtfliskh  
eglpisiiamatglpviashvggiseivadngicmmnnpetiakvlekylidscyikmsnqsrkrylecftteekmike  
vedvyngkstq  
>tr|Q2FKD1|Q2FKD1\_STAA3  
medlervlitggagfigshlvddlqqdydvyl dnyrtgkreniksladdhvfeldireydaveqimktyqfdyvihlaa  
lsvaesvekpilsqein  
vatlrllleikkynnhikrfifassaavygdldlpksdqslilplspyaikkygerttlnycslyniptavvkffnvf  
gprqdpksqysgviskmfd  
sfehnpftffgdglqtrdfvyvydvvsr limehkdaighgynigtgtftnllevyriigelygksvehefkarkgd  
ikhshyadisnlkalgvfpk  
ytvetglkdyfnfevndieevtakevems  
>tr|Q2FKD5|Q2FKD5\_STAA3  
mnhihehlkvpvdkidlhetfep1rlektkssieaddfirhpi1vtamqhgrymvidgvhrytslkalgckkvvpqeih

Tsompanidou\_et\_al\_Supplemental\_FASTA\_File

etqysistwqhkvfpfgvww  
etlqqehr1pwttettrqepfi tmchgdtteqyl ytkdlgeahfqvwekvvasysgccsveriaaggtypclsqqdv1mkyq  
p1sykeieavvhkgetvpa  
gvtrfnisgrclnlqvp1a1lkqdddveqlrnwkqfladkfamrcytekvy1veq  
>tr|Q2FKE6|Q2FKE6\_STAA3  
mtekinkkdnyh1ifalif1aivsvvsmmigssfiplqrvlmyfinpndsmdqftlevlrlprit1ailagaalgmsglm  
lqnv1knpiaspdiigitg  
gas1savvfi affsh1tj1lp1fav1ggavammillvfqtkgqirpttliiigismqtlfialvqgllittkqlsaaka  
ytwlvgslygatfkdtiil  
gmvilavvp11flvipkmsi1lddpvaiglg1hvqrmkliq1itstilvsmaislvgnigfvgliaphiaktivrgsya  
kkl1msamigaisiviad1  
igr1fl1pkevpagvfi aafgapffiy1111tvkkl  
>tr|Q2FKE8|Q2FKE8\_STAA3  
mkkkn1ysi1rk1gvgiasvt1gt11isggvtpaanaaqhdeaqqnafyqvl nmpnl nadqrngfiqs1kddpsqsanvl g  
eaqk1ndsqaapkadaqqn  
fnkdqqsafyei1nmpnl neaqrngfiqs1kddpsqstnvlgeakk1nesqaapkadnnfnkeqqnafyei1nmpnl neeq  
rngfiqs1kddpsqsan1  
seakk1nesqaapkadnkfnkeqqnafyei1h1pn1neeqrngfiqs1kddpsqsan11aeakk1ndaqapkadnkfnkeq  
qnafyei1h1pn1teegrn  
gfiqs1kddpsvskei1aeakk1ndaqapkeednnkpgkednnkpgkednnkpgkednnkpgkedgnkpgkednkkpgke  
dgnkpgkednkkpgkedgn  
kpgkedgnkpgkedngv1vvpkgdtvndiakangttadkiaadnk1adknmi kpgqelvdkkqpanhadankaqa1pe  
tgeenpfigttvfgg1sla  
lgaal1agrrre1  
>tr|Q2FKF2|Q2FKF2\_STAA3  
mkl1qdt1f1sylvfti1lwg1safpmikia1ndfsaes1safr1l1ati1llpfv1iikk1lptpelrdipvifilgfcgfvi  
yhta1nfgeal1sagisgi  
lvsttpifssalay1flkehfskwnw1sslvafigisiisiskddyttinvlgvfi1llasfseslyftfqqkyiekgyf  
iaftlytimasspfm1ifi  
pei1ndihgatftsivsvly1aifptiipyv1layivksvgvsdatmslyltpivs1llsy1ll1delptt1aiiggi1t  
lgs1snffqnt  
>tr|Q2FKF5|Q2FKF5\_STAA3  
mnetyrngnk1ilg1vlgvitfw1faqs1vnvvpnlqqsfgtdmgtisiavs1tal1fsgmfvvgaggladkigrvkmtni  
g1ll1siigsal1i1tn1pa  
11ilgrviqqvsaacimpst1aimktyyqgaerqra1s1ywsigswggsgics1fggavattmgwrwififsiivav1sm1  
likgtpetksei1tnthkfd  
vag1iv1vmm11s1nvvitkgaalgyts1wffgl1aivivaffi1f1nvekkvdnplidfk1fenkpytgatisnfl1ngv  
agt1ivantfvqg1lyta  
lqagylsity1imv1lmi1rvgek1l1qkmgskrpm1lgtfivvigialis1vflpg1fyviscvvgylc1fg1glgiyatps  
tdta1snap1dkvgvasgi  
ykmass1ggafgva1sgavyagavaatsihtgamia1wvnlmgimafia1lfaipnddkrvkdak  
>tr|Q2FKG7|Q2FKG7\_STAA3  
mhamqyhvklpsdynmei1rdvr1ngykt dgfkn1iikay1isq1ttncitntysply1wrssegmtefi1ngfydnvi  
ssfgwq1nigviysm1it  
dsvkhs1yaleeyidi1fpt1slkeieikk1lfrifdnavaeii1ynpdkwkvkysfien1pks1n1pnikiydvl1yisq  
>tr|Q2FKH0|Q2FKH0\_STAA3  
mtd1l1kiknfr1ff1aei1safvgistvganwylidktndsq1llgim1alnv1sgflasp1iggladkynrrni1lity  
1lqvily1l1vialvmigt  
ety1vigfai1vngiwtgmatsrs1lvkqil1kpdqytdans1leis1qtgmfiaggl1sgilykingft1liamtimmfli  
sifm1lfr1hvdkpthseee  
stns1l1qey1l1gw1kfl1kdnmmi1fifgvisi1pmvftmi1fnis1lpgyvynv1kl1ssvqfgfsdmlygiggl1caglisails  
kkistkvl1f1lyfilvin  
sal1fiw1nsafyl1figsfil1gysissiriymntaimntvsdkyvgrsftiwtss1ll1qs1liapflgrwineindkfgfy  
i1il1s1l1ifvt1ll1vnkt  
gkikyahkee  
>tr|Q2FKH1|Q2FKH1\_STAA3  
matkkdvhd1flnhvnsnavkrkmmgeyi1ydgvvigglydnr1lvkatksaqq1qdnt1vspypgskemil1ldft  
eatn1td1fktiknd1kk  
>tr|Q2FKH8|Q2FKH8\_STAA3  
mskvdahwel1eakn1rdei1apnt1l1t1nddipdrktgle1aekygidgimigrigifhnpftfekeprehtske1ld1l  
r1h1s1lfnkyekdei1rqfk  
s1lrrffkiyvrgi1rgase1lrhq1mntqsi1aevra1l1defeaqmdedvkie1  
>tr|Q2FKH9|Q2FKH9\_STAA3  
mkin1yksi1ynf1qetntn1flen1les1nddnye1l1ndke1v1sdsne1kl1iskvyi1rkdkk1ldwq1ll1knvy1ldteedn  
1fsesghhfdai1flkedt  
t1qnnvyi1ipfgayhd1inn1idydfgidfaeraiknedivnknvffqnr1keivnyrrnsvdvyrpsesyisvqghp  
qnpqi1fgktmtcgts1slr  
v1pnrkqqfidk1svi1keina1in1pqkisefprivt1kd1nkiev1ldt1ll1k1s1nssttenisid1srfl1elsm1ll

Tsompanidou\_et\_al\_Supplemental\_FASTA\_File

lddmldvniyiyinsfkn  
tletfdatdpevdyiteigdyllkydvsindvrievindlghsnmllktilhaevemedgkkyllqngkwgyfnreff  
d1lndh1neieryntlt  
tglvfkegeegyikeivgrlpeeylm1hkkfikpinknfivkngieladlyniknelftikrgints1s1syleqni  
ainalkypesynfeeliea  
ipdnseni fndiqrstnfsiwilpissidnmpikdmvhtsnvinknfqltnlgsvllknklvewslylkdqrinpiim  
etptedrn  
>tr|Q2FKI5|Q2FKI5\_STAA3  
mkkyqtyiaigsllslmvv1ityglmqdtqhl npl espngqhwlgtdqlgrdf1vr1ivgs1vt1s1tgvillsvcmgl  
ifgl1agierrwldqiimf  
vadml1aipsfialvils1vsnsmig1ilaltigwigrylryfrnltrdiqkrpfvqyar1sgnstfkttvthviph11  
ssifa1vtadfgkmm1sis  
glaf1gl1gikpptpelgt1fdgksyfn gapw1fffpgv1lggfallcqiinkkitq  
>tr|Q2FKI6|Q2FKI6\_STAA3  
mlkrtikfilylivssfiifilvektsgnpailylqrhgytsitqdnieaaqhqlglgqhvllryidwvghaltgnlgyg  
fstneavtamimeai vpt1  
vliivsscimlpfgyivgyfvgrphtryangirgfaqvmtsmpeywlailfiyy1lvrwq1lpfvgsdswqhfvlpi ft  
ivviegchillmtahlitq  
tldqdayqlaqlrhfslkariivqikeifaplmtisinsiihligkavilevifsmgigkllinainqr dypli qgivi  
fiivfimlmylgdvii1k  
nep1rrrhtqqsgnekrgtm  
>tr|Q2FKI7|Q2FKI7\_STAA3  
mrkcvlmtvaasat1lagcngqkedkdvtvs1pteakadkl daqgydaampvysavydalvkydkdkgikagladkws  
vdesgkvyefh1kknvkfs  
dgsal dakdvkfsidrakamnkdstvet1kk1dkvvvknhevqir1kspnsqvl nel tqvr1rimspshsvedgkvngk  
fekaigtgafvvdktgkek  
ttmkpnkyfdnghpvnyh1afqti edgdsrnsavqsgsvdi sgga1gm1sdeqikqdkknknl tiedrpstvshfmafnp  
kndvlnqr tireaisksid  
akdi agksvng1fqknvqfvtknnqpphdydmkaaer1lksegyhknddgifekngkplsfnlviqtaefpnwkdaekv  
qrqlkqagik1nvkt1dsq  
syydt1wtkkdyd1ifyrtydsalmpynfissvfknndgpgv1addet1tkql ddfpstvs kedqqcsfddi fkhfnqq  
ygyvpiaypnetfvvsdkv  
kqfkfsg1tdapi dyka1kvne  
>tr|Q2FKI8|Q2FKI8\_STAA3  
mardhqeawertikm1dtsdiegktildvgnqggflrqlydttpfkkgvgidlar1slekaet1kgqrp1tyy1tdkpp  
etkhvfdtavstsvlylie  
dipqhakdlkev1kpggvyyasfad1tnpsrqfmddtinqgatpsqns1khivdsfvdagfevavmkehvpdvid1t  
hysdfylspndylqtlyee  
sflikasvkegtek  
>tr|Q2FKJ0|Q2FKJ0\_STAA3  
mhyikfieskndtklymkvndiqdakaniiiahgvaehldrydeitay1neagfsvirydqrghrsegkrafysnsnei  
vedldaiinyvksnfegkv  
y1ighsmggyvtlygtkhnptvngiitsgaltrynklfgnpdrnispdtyienn1segvcsdl evmeky1ddlnakq  
ismglv1fsm1dgvry1kdn  
aqqftdni1ilhgkedglvsyvds1qlyqeigsahks1hiydrleheifnessynrtifneview1ete1tyn  
>tr|Q2FKJ1|Q2FKJ1\_STAA3  
mqqnlyfaiiikliafv1vfpgl1tlw1lav1sdtgaailvilns1rl1kk  
>tr|Q2FKJ3|Q2FKJ3\_STAA3  
mkkekr1n1il1tvigqgnfkqqivdymarhfgvyys1ttisrd1qeleiykipvenkkyiykkinqtntl sakqlei  
fsdeiefitlnnyvlikt  
spgfaqsisyidqlmqkeilgiiggndt1miltsneiaefvcyqlfp  
>tr|Q2FKJ5|Q2FKJ5\_STAA3  
mdenk1gkts1ig1v1gsmiggafniisdmggqagglaiigwiitaigmis1afvfqnl tnerpd1dggisyaaqtgf  
gdfigfssawgywfaaf1g  
nvayat1lmsavgnffp1fkggnt1psiiiasillwgvhflilrgvetaafinsivtvaklipiflviicmivvfnfstf  
ksgfygmtsgsvgvfswgd  
tmaqvkstm1vtvwwftgiegavv1sgrakskdvgtatvig1isvlviyflmtv1aagviqqnqisklanpsmaqvl eh  
ivghwgs1vni1gli1sv1  
gawlgwt1lage1pfivakdglfpkwfakenknkapvnaliitnilvqlflism1ftdsayqfafsl assailipy1tsa  
fyqvkytiqnkskan1kqw  
iigiasiytiw1vyaagldy111tm1lyipgl1vsvyqrdnkh1tkldyt1fifiivlaiigivrlitgnisvf  
>tr|Q2FKJ9|Q2FKJ9\_STAA3  
mdqlkvkysik111kvlnipkstyrrwnkthkndtvtqkvielckanhytygyrkitalinqcytspinhkrvqrmmqk  
hh1ncrvrpkkmtkigkpy  
yktdn1lqrqfkascpmev1ttditylpfghsmly1ssimdiyngeivaykiddkqds1vndtlnqidipegcilhsdq  
gsvytsyayyqlceekgi  
rsmrkgtpadnapiesfhs1ksetfyinne1nshnidivekyiknnnnnnnnriqqklylspvkyrelia  
>tr|Q2FKK0|Q2FKK0\_STAA3

Tsompanidou\_et\_al\_Supplemental\_FASTA\_File

mktttqelkqymtrlfqlsnnetwecetleaaenilpkrfindsplahlilettyyennehelsiypflmysnqlis  
igyldhfdmdfllyltdtkn  
tiiderhllkeggnnhe  
>tr|Q2FKK2|Q2FKK2\_STAA3  
mkinryitrqiseqlsldlqilwnmvkdrdnqntdylihfklqeddnmlsithegeqpaykleyhytnyiknqnalpk  
kvyvireddvdafyyvmll  
peey  
>tr|Q2FKK4|Q2FKK4\_STAA3  
mgakkpykesplkieyleldnpsehevlikihaaglchsdlsvingnrprplmalgheasgevikvgkavtrvsegdh  
vvctfipscgkpcpckegr  
palcengaisnekgemleggmrlsndegkvyhhlgisgfaeysvsvsensivkidkkipferaaafgcaitgigavvnta  
qirsgsnvavvglggigln  
aigaklaganeialdinedkfelakqfgatatfnssdkdideqikeyipggveyafetagvvpamkvayqitkrngtt  
vtglnpknkdfsfpqvtl  
aaeertikgsyvgscvpdrdiprfvnlqnqgrlnidslisevitldeinegfdrlsngevgriimkmh  
>tr|Q2FKK6|Q2FKK6\_STAA3  
mklraleysdllfvhelneysimsyweeppyeslrelqhlfdkhlldeserrfivedenqvgivelveinyihncei  
qiikpefsqkyakfafa  
kaiiyafnlnmhkiylyvdadnkkaihiesqgfkteglleqfytkgkykdayfmsllkseyil  
>tr|Q2FKK8|Q2FKK8\_STAA3  
mhkndnsyvlalsylsiffapvilplfwiladeptsehggkafinhimtwsvlfigrlafifskevfdkpldhqllif  
silliiitiiiffliaililyi  
lninrgikiillkk  
>tr|Q2FKL1|Q2FKL1\_STAA3  
msiseyknryleslyntfkteleenertryfiltdnytnsdtekeftwdvqnnkiregdlfifrrptnlsqiaqqfyff  
gagkiekierknnvatayi  
skpllfvdrvlkdnieklkweferikeeweqfffknkisnitkndflklslsrnvveiesnyinndislftkqmadma  
trikkniyyvgnheafvqa  
kgsahfefskrikqnyrcaitgiktkdflvvtthiipwhenefirldpsngiclsflakafkkgfiftsnsyrvvlsk  
eaekdaalyeelkiyenqk  
ielpdcqkpnlkyldwhrehi fkn  
>tr|Q2FKL2|Q2FKL2\_STAA3  
mkfteveviehlvkaykeagkptyphenlyrgrnhsisgigedllgaylisrlegvqifidqplsmidkslstrypdlli  
cedneiknilevkmldlgyq  
rkdfidyckrkeewisnivgkqcvlsrkredkipmniaddikfhvviysenngpkrfdeeimpivnetcphievyvltsg  
qhpnlvvnlegininkde  
feilvna  
>tr|Q2FKL4|Q2FKL4\_STAA3  
miidpicdlssyirvadeesltithaethihanfvsgirdvaiklnasiyvsgeyddmlgyknmpnhthfvqhnddiyv  
gniklvlhtpghtpesis  
flttdegagaqvpmgflfsgdfifvgdigrpdlllekavkveglsieigakqmfksiesikldpdyiqiwpghgagspcgksl  
gaipstlgyekqtnwafs  
enneatfidklisdqpphhfaqmkinqfgmlyqpytvpstnrldfdrskeayhgghiegtinipydknfinq  
igwylnyngleinligdyhl  
vskathnilynlldmimcldisyhlkfkhnlfivkt  
>tr|Q2FKL5|Q2FKL5\_STAA3  
mphgklltdltpfnrndviyvdcsqgirssiaigilehkyghniinvnegykdiyls  
>tr|Q2FKM0|Q2FKM0\_STAA3  
mkqvigylrstmkqqsiaaqkaieaiaekhhqhinfysdkqsgkrndrsgyrqitqliqqgqcdilccyrlnrlhrn  
lknaikliklcqtyhvhl  
svhdgyfdmdqafdrklknifislaelesdnigeqvrnglqekakqgrlitthapfgyeyhngtffiinqnesptvkavfn  
yyikghgykkiaqllleadn  
tyinrqpyqvrniinpnycgrvnnqygqfdnmfpsi vstsiyeaqrlrlqkqtkqtpsdlkqkikpcpcnatltnm  
tirrknhtlryyvcpknmn  
asrfvcdfkginaqtledkvlevcrdfyqnqriytkiksaidkrikqrniekhhtltqeqlieklaaggiidaetfreet  
qslrqppqrtsinghqi  
hiiqniiqkrftlnlpyietihitkdknligiyfkneplnivnqtmqssia  
>tr|Q2FKM1|Q2FKM1\_STAA3  
mqqltkrvgiyrvstemqstegysidgqinqikeycdfhhfevkdiyadrgisgksmnrpelqrmldakegnidcvm  
vyktnrlarntsdllkive  
dlhkqnveffslermevntssgklmlqilasfsefernnivenvfmgqtrraqegyyqgnlplgydkipdskhelminq  
heanivkyifecyakghgy  
rkiana lnhkgvytkkqkpsfissityilanpfyigkiqfakykdwsekrkrglndkpviaegkhspiinqdlwdkvqmr  
kkqvsqkppqvhgkgtllt  
giihpcqcgapmaasntntlkdgtkkri ryyscsnfrnkgskvcsansvradviedyvmqileivksdkviqrvvthv  
nqenqvdgaalhhdiaykq  
qqydevqikinnliktiendpdltsvirpsiqkyekqlditnqinqlnqqnedktldakeiskllqhihdikiek  
srlkalylsvidridikk



Tsompanidou\_et\_al\_Supplemental\_FASTA\_File

gnhkkqfyvtlklneikqlfnkqldevhlstsslflpqtlylti  
>tr|Q2FKM3|Q2FKM3\_STAA3  
milyaytqsvfsgrkiekmlndsirmmwlsqnqkpsyktinqfrvnpkvdaalleslfiqfysqcvkqnliddkaifidgt  
kiesanrytffvkkxiqn  
heskmnedskalyhelvtnkipeikedhdnelteeidligshldkeiedlnghinnektktrkqirllrtrkikkykk  
qindyferkyryefqksi  
kdrnsysktdydatfmrmedhmkngqlkpgynlqiatnsqfvlsynvyqnpdtrtmipflnsiqetyghlpeyvada  
gygsesnykaiiddfnrt  
litygmfikdtkkyksdinfntqnwnydeindeficpnkrngfkryayrhdkygykrdfklyecddcsecpknqcmnf  
nsktnkkimkynweyfs  
qinkklsepetkniysqrkidvepvfgfmkailgftmsvrglnkvkreigfvlmalnirkvvaqraennqkiykdnfy  
iisjeivffhlsknfmsrt  
hyd1ffyc  
>tr|Q2FKM4|Q2FKM4\_STAA3  
mgdke1raiahelkttkvkdmsvdwskrdsakamrvqvrllkkygyppdlqkmaveqvveqaelmasqq  
>tr|Q2FKN5|Q2FKN5\_STAA3  
mnwkltktlfifvfilvniivlsiyvknvrshinevesnnevnfqeeikvptsilnksvkgikleqitgrskdfsska  
kgdsdltsdggkllnani  
sqsvkvsdnnlkdldkdyvnrkrfkgaeyqlseissdsvkyeqtyddfpilnnskamlfniednkatsyqsmddikpt  
dgadkkhqvigvrkaieal  
yynryllkgdevinarlgysvvnentvqllqpnweikvkhgdgkdtntyyveatnnpkiinh  
>tr|Q2FUP5|Q2FUP5\_STAA8  
mqyitryqknddgtysvvatgveleqshidllengyp1kaevvpdnkklisqrkki famcrdielhwgepvestrkll  
qteleimkgyeeislrdcs  
mkvarelieliiafmfhhqipmsvetskllsedkallywatinrncvicgkphadlahyeavgrgmnrnkmnhydkhvla  
lcrghhneghaigvksfdd  
kyhlhdswikvderlnkmlkgenngrsivdkt  
>tr|Q2FUP6|Q2FUP6\_STAA8  
mgevswiklkgmfddskikyiealperdtiitiwkl1t1sgkyneqgyiml senlpyneemlanefnrpinsirlaiq  
tfetlgmi ekvngvikvtn  
wekhqslsdkakhkeknlrqryrekqkkl1eakrnvtvtl rndteeeereeeekyknkeereavfssikyia  
nlddkltpnqmeqlgfai  
digtnafevkvgyeytkskahggylikvlnwakenvtkedaenkiaprknrtddviaqmeke1sdd  
>tr|Q2FUP7|Q2FUP7\_STAA8  
mnyggf eiestiatllkqpdvleki rvkdymftnekfktffnyvmdvgkidhqeiy1katkdkefldadtitklynsdf  
igygferyqqel1esyql  
nkanelvtefkqptnqnfnlidelkdlktitnkkedgkfkveefveelysdspkkqiktgyklmdykigg1epsqli  
viaarpsvgktgfalnmml  
niaqngyktffslettgtsvlkrm1stigtie1tkikeirnltpdd1tkltnamdkimklgidisdksnitppdvraqa  
mrhsdrqqvifidylqlmd  
tdakvdrvravekisrdlkiianetgaiiv11sq1nrgvesrqdkrpm1sdmkesggi eadaslam1lyrddyynrdedd  
sitgksivecniaknkdge  
tgiefeyyktqrfft  
>tr|Q2FUP8|Q2FUP8\_STAA8  
mnimqfksllksmyetkqsdpivanvyietgwavnrlldnel spfddydrvekkimneinwkkthikec  
>tr|Q2FUP9|Q2FUP9\_STAA8  
mpmsktqaleiikkvryvynidfdkpk1emwldvlsqngdyqptvkavdyinsnppppnlpaimrkepkkvsiepvdn  
etathqwmqndpeyvrr  
kia1dkfmlklaefggene  
>tr|Q2FUQ9|Q2FUQ9\_STAA8  
mqkhtevfy mngtvkwfnaekgfgfi eqenggdvvhfsgiasdgyktleegqkvtf eitegqrgdqavnvqvt  
>tr|Q2FUR0|Q2FUR0\_STAA8  
mpiigvnelntitsivkamtlyqvtkffkssydcftnslnfmiqsl1fyksl dcqikldkfiifdethkyfqwsit  
>tr|Q2FUR1|Q2FUR1\_STAA8  
mh1filsshi fksitfdcgkefsnwkticnchdisiffadpqtspqrglnehsgii rrsqldkeldfnlvtddhiisva  
qkinhhprks1gyrtp1ev  
fmsfi eddklvq1n1ti  
>tr|Q2FUR4|Q2FUR4\_STAA8  
mpiigvnelntitsivkamtlyqvtkffkssydcftnslnfmiqsl1flnqlivilhclkskylmkhllivsvkwfs  
>tr|Q2FUR5|Q2FUR5\_STAA8  
mtfnhivfkn1rqnlkhyamylfslffsivlyfsftlqftkgvnnddsmaiikkgalvgsiflfiiviflmyanhlfv  
krtrrefalfq1lig1trqn  
ilkmlaleqmivflitgvvgvlcgiagaqll1sivsklmsl sinlsihfepmalvltifmliiayv1ilfqsalfkrss  
ilsmmkdsikt dattakvt  
taevisgvlgiamia1gyymatemfgtfkal tmtamspfi1fltvvgaylffrsvslifktlkkskngrvsitdvvft  
ssimyrmkknams1tia  
isavtv1lcfaa1sknsidq1t1tsmapnefnvatqdaqfetklsqqqitfsknayetitvdnvdqv1t1engsdsg  
rtnsilsannk1tgnnai

Tsompanidou\_et\_al\_Supplemental\_FASTA\_File

tntksl pniini hlnkd lvvkg tknet frvtqedkgkvyp lnl snspviev spekyqql ktqnnvhtfygydikqtsqk  
ekaqaia kqfgdkvityde  
mkkevdatngilifvtsflglaf lvaagciiyikqmdetedel snfrilkrigfthtdmlkglllkitfnfglplliai l  
havfaaiafmlmgnisfm  
pvivvivytl iyitfaliafihsnklikkti  
>tr|Q2FUR7|Q2FUR7\_STAA8  
mekgnqgikwsslimgvllmlavviftfpiefyaitwliglflvlingviqivyrrkaka lvggnqnwilfmgivdilf  
gllvifnvgassaffiyf  
afwffissisglftfsgsgslklisvifnllgivfgvillfnplmgivfistmiaiafvfvgviyvvdala  
>tr|Q2FUR8|Q2FUR8\_STAA8  
mniaklenylqidssrynrsiealnnyatrfmltvpfenidvqnskipisinalfnkivhdkrggfcye lntffkayl  
qqkgfnpe lmsatihtpgg  
grslngshaslvsvindvfyvtdvgfgdlplhaipitssehtqpitdisgtfraifnedkdiyvqkfendhwhtkyea  
efkpkqiedfnsnieyngt  
hpsdsvqhl lltmpqsfgratmsenhl tlrngssekfdvtdknykhflekyfglnvtinriekq  
>tr|Q2FUS1|Q2FUS1\_STAA8  
mnseykkgifla lsayilwgilpiywqfvdaigafeilafriifsaifmifilavgqkqrnafqrdmnl lkgpiqllai  
vvagyvitlnwgtfiwv  
nghvlqtslgyyinplvsl laliflkerfnkfewlailfafigvlymtlkigefpivsiilalsfgtygl lkkvvhida  
issitieci vtapagliy  
iy l wqhqmsfglnmssfwllfsgaitaip l l f s a g a k r i p l s l i g f i q y v g p t i m f v l g i f v f k e p f s i d q l i t f i f i  
wtgivilyslsqyiklkkhp  
vaktl  
>tr|Q2FUS2|Q2FUS2\_STAA8  
mentvkyrkfilpivvgll iwaltpfkpdavdptawymfaifvatiacitqmpigavsiigftimvlvgivdmktava  
fgnnsiwl iamaffisrg  
fvktglgrrialhfvlfgkktlg l aysivgvdlilapatpsntaraggimfpiikslsesfgskpkdgsarkmgaf l v f  
tefqgnlitaamfltamag  
nplagnlasstsnvhitwmnwflaalvpglvslivvpfiikyiyptvketpnakswaenelatmgkia laekfmigifv  
valtlwivgsfihidatlt  
afia l a l l l t g v l t w g d i n e t g a w n t l v w f s v l v m a d q l n k l g f i p w l s k s i a t s l g g l s w p i v l v i l i l f y f y s h y  
l f a s t a h i s a m y a a l l g v  
aiaagapplf salmlgffgnllastthyssgpafilfssgyvtqkrwmtmlilgfvyfiwiglslwmkvigif  
>tr|Q2FUT2|Q2FUT2\_STAA8  
mtepiisfkdfs qyhsqatptlqninvdiypgeklvvgasgsgkstfancinglipfktkgnitgelyinnqdatvsc  
lhdrrsnvgtvlqdtgqf  
ig l t a a e d m a f l l e n n c v e q d d m k k n v s y a e k v g m i e h l n h r p q d l s g g q k r v s l g g i l i h r t p i l i l d e p l a n l d p a  
tghetlrl l n n i h e e t k s t  
mivehrlees l d d t f d r v l l f k d g k i a n t t p s d l l k s s k l e a g i r e p l y c t a l k y a e v d v e s i d n l a n l r d v c m s e h  
vkfkvkkwidetsanndnk  
yksep l l e l n e v c v q s d y s n s v l n n v q l n v y r k e m l s i v g h n g a g k s t l a k a i c g f l d i t g n i q f c n r g f n q l s i s e r s  
efvgymqnpnhmiskmi  
ydevalglrargmkdeskirkv envl kicglyafrnwpiaalsygqkkrvtiasvlvlnpeiildeptagqdfyhynei  
msflie l n r g k t i i m i t h  
dmhlseyssrtvvl skgqvadtptvlv lndkkiceiaslrqtslfemaeyigisepqklvqlfinhdrkvrrq  
>tr|Q2FUT4|Q2FUT4\_STAA8  
minterlnlmpssshlielynicshpqaniytpkglnskldtqrwiekrnhwqqyqfyfvlvkkidcsvigicgye  
yrqlkqetvlnlfyklhps  
feggyacea itatnfvnyidgetvkvirtnkcnrsinlaerlkfkrddtmd diinqgdivfyk  
>tr|Q2FUU3|Q2FUU3\_STAA8  
mikkriipcldvkdgrvvkgiqfkg l r d i g n p v d l a m y n e a g a d e l v f l d i s k t e e g h s l m l e v i e q t a s r l f i p l t v g  
ggis l d d i t q l l n h g a d k  
vslnssal knpqlikqasdkfgrqci ciaidsyddperkahyccttgkkmtnikvydvwqqveqlgagellvtsmghdg  
mkqgfdiehlankslvni  
piiasgggnaqhve lfdqtdvsaglaasilhdrettvqsikevirqggyskmtkykidfskglvpailqdnqtkqv l  
mlgymnqea fdk tiedgvv  
cfysrskqr lwtkgetsqhtqrvkdi hvdcdndtilidvipngptchtgsqscfntevpfsvq t l a q t v q d s a q s n n e k s  
ytkyl l t e g i e k i t k k y g e  
eafevvi e a i k g d k k a f v s e a d e l y h l f v l m h a l g v d f s e i e a e l a r r h h k r n n f k g e r q n i e q w  
>tr|Q2FUU4|Q2FUU4\_STAA8  
mtflfgaryiciysintknvkttmiligsndkhns lafspffpfit sl y r f i y f s t s l t v t s i p e l l n l l f i i i f d f v l  
>tr|Q2FUV1|Q2FUV1\_STAA8  
mkekfdlvkl l n i l k n i k l l l i l p a i c l v s a a l t f f v m p d k y t a s t q i l v n m k k s s s d l a f q n v q s s l q s v n t y t e i i  
ksprildkvsrefdgqyst  
aelnsflkvtnqtnsqiitvsvttgnksesdkivnki skvfahdmpkimsvdnvt ilssahdnvkvspivsvnlvisii  
vgivlailiiflkelldkr  
ikteedvesqlglpilgsiqkf  
>tr|Q2FUV8|Q2FUV8\_STAA8

Tsompanidou\_et\_al\_Supplemental\_FASTA\_File

mrtndh1td1daie1ssgwnynsk1etgkna11sds11rdikv1ssnakgdadiletelravinsmsqnegksvdalkns  
tas1knn1tk1keqldktt  
h  
>tr|Q2FUW5|Q2FUW5\_STAA8  
m1knktfkvtwnyisqttfmygskvsfsngevtfinplmpsglpihewlmlkqfskyksapslpilrrgqhyklhfdfa  
tpagsvyfiii fynkngtk  
lsteivksnsiti qypdeayaykimmnaasts1ifrc1titemthqydleyksmrvtkigddqygndminvii aepsdt  
yptisndf1kl1fghvwlve  
rwmddniegnikq1knd1qsqdt1kain1isygksnvfatyvaqhl gckvyrtsheddd1kgwl tehvpgnhelkdtv  
evyfkeeqdkh1nysr1m  
npvrf1dy1dvsk1nggevnet  
>tr|Q2FUX0|Q2FUX0\_STAA8  
mkivaitscpngiahtymaqekleqvakemgvdikvetqggvgaenvl1ttqdieeadgvii aadkqvdl srfvgkrline  
nvregihnprgl1qriinq  
dapiyqsetnyhskdrksgkngiqmvyqhl mngvsfmpfvvglliaialtl ggettskglvipddsfwksienigs1  
afkfmvpil agyiavsia d  
kpg1vpmmiggaiaadgsfygsdagagfl ggivagfl agyia kwidikvpkamapimpii iipiissvvvg1ififlig  
apisnifealttwlksmqg  
aniii lamigamiafdmggpvnkvafl fgsaliaegnyavmgmavavctppigl glatfvqkykfnhseremgkasft  
mgl fgi tegaipfaaqdp1  
riipaniigamiasviaaiggvdrvahggpivavlggidhvlwfi favivgs1vtmtv111krntpviavdapaqhtq  
lhdtditqhdtevdndvt  
akhsh1nkpsvhfdqqtmi itdhmsrneaidmli hklkicryvehtsh1kna ileremesttaigmvnaiphaksdvk  
qpivavmknngvkwds1d  
gs1pqli fliavpnnsqdt1k1lqr1ska1mdetrqslinanstteiy11lmki  
>tr|Q2FUX4|Q2FUX4\_STAA8  
maalt11st1spaal aidsknkpansdikfevtqksdavka1kel pksenvkniyqdyavtdvktkkgfthyt1qpsvd  
gvhapdkevkvhadkskv  
vl ingtdakkvkptnkvt1skddaadkafkavkidknkkn1kdkvikenkveidgdsnkyyvnel itvtpeishkv  
kidaqtgeilekmlvkea  
aetgkgkvlgdtkdininsidggfsl ed1thqgk1safs fndqtgqatl itnedenfvkdeqragvdanyyakqtydy  
kdtfgresydnqgs1vs1  
thvnyggqdrrnaawigdkmiygdgdgrtfts1sgandvvahe1thgvtqetanleykdqsgal nesfsdvfyfvdd  
edflmgedyt1pgkegdal  
rsmsnpeqfgqpahmkdyvftekdnngvhtnsgipnkaaynviqai gkskseqiyyral teyltsnsnfkdckdalyqaa  
kdlydeqtaeqvyeanvev  
gve  
>tr|Q2FUX6|Q2FUX6\_STAA8  
myqmnnkn1fritctqvsyqil tcvrvflwkerihshsidc1knfiqhvfmgife  
>tr|Q2FUY5|Q2FUY5\_STAA8  
mlgawl trswyfl nakykppntvknitanffii qtpf  
>tr|Q2FUY7|Q2FUY7\_STAA8  
minngdnitsii fppqii fnsifshasil t1sitnchiysffvilnhsyifl tktt  
>tr|Q2FUZ0|Q2FUZ0\_STAA8  
mtflksitqeiaivivifal fglmfyl yhlpleay11algvil111111ifigikylsvfktisqqqqienlenalyq1kne  
qieykndvesyfl twvhqm  
ktpitaag111erdepnvvrnrqeviqidnyts1alsylk11netsdisvtkisinni irpiimkysiqfidqtkihy  
epchhev1tdvrwts1mie  
q1inna1kyargkdiwiefdeqsqnl hvkdngigisead1pki fdkgysgyngqrqsns1sigl fivkqisthtnhpvs  
vskqnegttftiqfpde  
>tr|Q2FUZ2|Q2FUZ2\_STAA8  
mk1r11whivrrqfitqr1vi ipfilavsv1fmieytl vsig1nsyikqkndflvpfi iianffmaltfififyanhfm  
msqrrkefsifmtlgmtkk  
smr1ivvmetil qfvii svsiaggy1lgai fflfiqkimgsevat1ryppfdsvamfitlii iavlmgm11ifn1fsin  
fqrpi tyqhrsds1svr  
lryvlivigsaa1lygyfial qdttfgaffkiwivig1viigtyaffvgisei iisilqqvskvyyp1ryffvvv1gmrv  
r1kmnavs1atit11ctf1  
ivt1tmt11t1yrdmnhitk1itndyd1sfsdnsksqierqqtienikrdiqgsvnakdfkvyettl fras1eknrayyk  
1kqasddipidfignegai  
fsrqsvmi taftaqdynryhqnl h1dnqsigmitnvpifkkqskvg1nnevfkvq1daha1n1mmiqdsmvlivkdnn  
q1k1kvkgfyahqknstis  
infnvfgktk1ttsq1k1skkydas1nsksem1mvwdr1tgglifvggvsv1vlvigif1mmykqvseayanqhnydi  
mkk1gl dngriaki1trnqm  
tfl faipitvali ht1issnivytl1nmiginhhi fltsyvlavii isflymamykitsyiyakvihqqrn  
>tr|Q2FUZ3|Q2FUZ3\_STAA8  
mpfiifnhiif1idisihi flivy1di iicywkiyetn1th1fqylndtmhdf11  
>tr|Q2FUZ4|Q2FUZ4\_STAA8  
mngilik1niggqyylqtrml snvdnaektisrnsi

Tsompanidou\_et\_al\_Supplemental\_FASTA\_File

>tr|Q2FUZ5|Q2FUZ5\_STAA8  
mimrgyngrycswtntaiqcdfnkvrvqkdkgsdrlnsninsniyrvlekcitynvcsrckralilsehskknif  
nikkav  
>tr|Q2FUZ8|Q2FUZ8\_STAA8  
mklnstnsnpftekqvteinnlqtltessqqwlsqfllansndttsdsnqqqletevwqqsqiseeqatsttymlnkep  
hieanqrhvtvlygsesgn  
amrlaeifserlsdighqvvlmsmdeydttniaqledlfiitsthegeppdnawdffeflednapnlhvrysvlalg  
dqtyeffcqagkdvdvllle  
nlgaeirickrvdcdiyeeadaekwmadiiniidttsegiqsesvisesiksakekkysksnpyqaevlaninlngtdsnk  
etrhiefllddfesesyepg  
dcivalpqnpelevklistmngwdpqspvpindhgdtpivealtshfeftkltpllknadiyfdneelseriqdeswa  
reyvinrdfidlitdfpti  
elqpenmyqilrklppreysissfmatpdevhitvgtvryqahgrerkgvcsvhfaerikpgdivpiylkknpnfkfpm  
kdipvimigpgtgiapfr  
aylqereelqmtgkwlffgdqhrssdflyeeieewlengnltrvdlafsrdehkeyvqhrimeeskrfnewieqgaa  
iyicgdekcmakdvhaik  
dvlvkerhisqeeaelllrqmkqqqryqrdvy  
>tr|Q2FV03|Q2FV03\_STAA8  
milldikgggyiakiesnsvfdgegvrcsvyvsqpcfnvcgycynkasqkfrygekytdeilaieldcdhdhyisglsll  
gpepfcnliditlnlvkafr  
arfgntktiwwtgflveylandcterrellsyidvlvdglfiqhlfkpdlpykgslnqriidvqqsisharmieyivs  
>tr|Q2FV04|Q2FV04\_STAA8  
mieydltilipi1kvaypffkkverekwyfsgkev  
>tr|Q2FV06|Q2FV06\_STAA8  
mdwtftigtvavllfavipmmafpkasediitginsaisdsigsiylfmglaifcfvmyiafgygnvtlgkasdkpefn  
tftwaam1fcagigsdily  
wgviwafyyqppngaksmdealaqyatqygmfhwgpiawaiyvlpalpigy1vfvkkqpyviksqacrpi1kqtdkf  
vgkvvdilfi1fgllggaat  
slalgvplisagierltgldgknmilrsail1titvifaissytlkkgiqlsdinvwlsfvllafifiigptvfimet  
tvtfgnmlrdffhmatwl  
epfggikgrketnfpqdwitfywswlvypfiglfiariskgrrlkevvlgtiigt1gcvlffgifynyavylqisgq  
fnvtqylnthgteatiiev  
vhhlpfplmivlflvsaf1flattfdsgsyilaaasqkkvgeplranrlfwafalc1lpfslmlvggeralevlktas  
ilasvplivifi1mmisfl  
iilgrdrik1etraek1keverrs1rivqvseeeqddn1  
>tr|Q2FV15|Q2FV15\_STAA8  
maysilnlysiligykckinhkkdiqylhprktlqlplilkiiln1aligiviivlthtefqlnagdsnvfl1nwdirgl  
tsyisflilvalvsklil  
ifitrrqrts  
>tr|Q2FV20|Q2FV20\_STAA8  
mlsvaiigpgavgttiayelqqs1phttligrhaktityyvtphapaqdivvkgyedvtntfdviiiavkthqldaviph  
lthlahedtliilaqngyg  
qlehisfknvcavvy1sgkkgdvvtfrdyqlriqdnaltrqfrdlvqdsqidivleaniqqaiwykllvnlginsit  
algrqtvaimehnpeirtlc  
rqllldgcrvaqaeglnfseqtvdtimtiyqgydemgtsmyydiahqppleveiaggfiyrrarehildtpyltdiysf  
lrayqqnm  
>tr|Q2FV29|Q2FV29\_STAA8  
mtketdnkktvatsdnkdtqqnqpederqngyrktdldleieqelremmktgenetkndykkfkvflistlvivi  
laiirfvhkmm  
>tr|Q2FV33|Q2FV33\_STAA8  
msnk1deinkiitakheqmdlydekrevkalidesdalnhsidqlyqhlgeryyssnmasrmeqfrdefhfakrrstea  
lyeqqqiqhgi1rkveem  
idlemrrnveietvtkeenkwkq  
>tr|Q2FV36|Q2FV36\_STAA8  
mrtghytpipnephylvishadkl1tatekaklrll1ikqkldislaesvsspiasehvieqltlfqherrhlrpkisat  
flawllif1mfalpigiy  
qfsdwfnqyvsawieyltqttllnhdilqhilfgdygvlslgtyslvwalpvvilis1staiidqtglkswmiwaieps  
mlwiglqgndivpllegfg  
cnaaaisqaahqchtctktqcms1isfgsscsyiqigatlsifsvagkswl1fmpylilvl1ggilhkgyg  
>tr|Q2FV37|Q2FV37\_STAA8  
mkkndqqlsvplpydrqlhmpnirqmllqmwqniqmfvqalpifitictivsilsltpilnvl1sqiftpil1lgisse  
lspgillfsmirkdgmllfn  
lhqgal1qgmatqll11vffsstftacsvtmtmllkhlggsalkligkqmvts1slvigvgiivkivml1i  
>tr|Q2FV40|Q2FV40\_STAA8  
mksitfeehyviEDIketmna1sdpkgvpmkvm1leglekktgftnadelshhderiqfmmnqdvqiqvlsyngngspn  
lygqkaie1c1qkandqlan  
yiaqypnr1vfgfat1p1nepeaaarefercind1gfkgalimgraqdgl1dqdkydiifktaenldvpiylhpapvnsdi  
yqsyykgnypevtaatfac

Tsompanidou\_et\_al\_Supplemental\_FASTA\_File

fgygwhidvgihtihlvlsigifdrypklmii ghwgefipfflermdealfahlnhpvsyffknnfyitpsgmltkpqf  
dlvkkevgidrilyaady  
yiepeklgvfldegltdееkekisytngakllglspnn  
>tr|Q2FV48|Q2FV48\_STAA8  
mmesksidprivrtkqlvdafklsrekklsqitvkditdiatlnratfyahfadkedlldytlsvtilkdlndnlisis  
nvinekvlnifisiasyi  
kdaaksce1nseafcnkahqrinneledi faimlensypehqrdiivnsasflaagisglalhwfntsqetadvfidrn1  
pflihhihf  
>tr|Q2FV49|Q2FV49\_STAA8  
mlqytfilssflksintieerhsnayqkgtlfvrsvsaltyhqhn  
>tr|Q2FV50|Q2FV50\_STAA8  
mdfknedkikvycnmfeklpiylsknsefcdilffivlsyr  
>tr|Q2FV53|Q2FV53\_STAA8  
mainiieynrsykeeliefilsiqknefnikidrddqpdleniehnylnnggqfwlainnhqnvgtigilirldnmsal  
kkmfvdkgyrnlkigkkl1  
dkvimtckeqnidgiylgtidkfishaqyfysnndfreikrgd1pssfpldvdnrfyyrn1kd  
>tr|Q2FV61|Q2FV61\_STAA8  
misnklani pdsyfktmgrkiehgp1p1n mavgipdgptpqqiidhfqkaltipenqkygafhgkeafkqaidvfyqr  
qynvtldkedevci1ygtk  
nglvavptcvinpgdyvl1pdpgytdylagvlladgkpvpl1lepshylpdwskvdsqi idktkliyl1typnntgstat  
kevfdeaiakfkgtdtkiv  
hdfaygafgfdaknpsilasengkdvaieiy1skgynmsgfrvgfavgnkdmiaqalkkyqthtnagmfgalqdaaiya1  
nhyddfleeqsnvfktrrd  
rfeamlakad1p1fvhakggiyvw1etppgydseqfeqflvqeksi1lvapgkpfngengnryvrisla1ddqkldeaa1rlt  
elaylye  
>tr|Q2FV62|Q2FV62\_STAA8  
mtkikimsvrdedmpyikawaekhhvevdi tkealtddnvegvygdg1s1sqqip1sehvykr1nelgikqiaqrsagf  
dtydle1ankynfivsnvp  
syspnsiaefavnqainvvrhfnqitkvrehdfrweptilsksid1kvavigtgrigrvadi fangyqsdvvyaydpf  
pnakiatyvdykdtieav  
egadivtlhvpatkynhyl1fnael fkhfkkgavfncargslvdtka1l1dalngvikgaal dtyeferkl1fpsdqrgkt  
1ndp1les1idredv1tp  
hiafyteaavkn1ivda1dat1dv1qtgdtr1rvn  
>tr|Q2FV68|Q2FV68\_STAA8  
mryvisiimgivlaiwsfkqlsqsh1dsgfiffivylciscfnsdkhdknkr  
>tr|Q2FV69|Q2FV69\_STAA8  
mketd1rviktka1sss1lq1leqq1fqtitvnqicdnavhrttfykhfydkyd1ley1fnq1tkdyfardisdr1nh  
pftmsdtinnked1reia  
efqeadaefnkvl1nvcikimhndiknrdrididsdipdn1ifiyids1iegfi hwikdekidwppedidni fhr1ini  
kik  
>tr|Q2FV70|Q2FV70\_STAA8  
mgtfiakhkwsaviawivivaailip1atnapkfdndikmtgles1dtnkki ekhfnqsekaqirvvfkttkddgivqp  
nitkdikkt1ddikkdkh  
idkisdpyenkqiskdkttafaditydvsqts1kdgsrdnvksh1kd1rdnhvqtel1tgtgmtstevggnselvgiiva  
fvv1l1itfgsviaaglpi  
saliglasvgiis1ltyafdi pvt1t1lavmig1avgidya1filfryrqvmttetdyikgiglaigtagsavvfagvt  
vviavcgl1svgidflavm  
gfasaisvvfav1sal1l1palisi fhkrikvnlqskfkdidtpwskfitgnalaav1lgl1ilvaaaipvshmr1gi  
pddgvkpadstqkkaydi  
sdfgegfnq1pml1invdkkddpqlqdd1qsvykdi dkknvd1vtpqmskdndya1mvvipkqgpnaestnd1vh  
d1rdyhkdaqdkygfktei  
sgqsvinidmskkl1neaip1fasvivv1aff1lmivfrsilip1kav1gfv1s1mat1gftt1vmqdgfmkg1fgi ettg  
pmlaf1pvtigilfglam  
dyevf1msriheeysktgndysikvg1kesgpvivaalimfsvffafvfqedvmiksmgmalafgv1fdafvvrmmli  
pal1tk1fgkgsyw1paw1n  
riiprvdi eghalekyktvesqeseakdskeydt1tkvypqgatnvskhqda hqddahsiv1ddktmalyqevkqqa  
ss1flyda1idyqnkhq1n  
skqatnieq1nkniek1nq1lekn1rnks  
>tr|Q2FV75|Q2FV75\_STAA8  
meyksyyspvr1el1sdgvs1tav1fenqqgdgtreents1aifreatqwl dayfkgdnpeitiplkptgshfqcw  
nel1rqvpygt1t1tygaiak  
kvgk11nkpksaqavggavgsnplsiivpchrvgktgsl1tgfggtinnkik1lelenidmsklyvpkfstkp  
>tr|Q2FV77|Q2FV77\_STAA8  
mqn1dknfrh1srkek1qq1vdkqwl seeqfdi1lnhplideevans1ienviaqgalpvg1l1pniivddkayvvpmmve  
epsvvaasygak1vngtg  
gftkvsserimigqivfdgvdtek1sadi kaleqihkiadeaysikarggyqria idt1fpeqq1l1slkvfdtkda  
mgnm1nti1lea1taflkn  
efpqsdilmsil snhasvkvqgeidvkd1argertgeevakrmerasv1aqvdihraathnkgvmngihavvlatgn

Tsompanidou\_et\_al\_Supplemental\_FASTA\_File

dtrgaeasahayasrdggy  
rgiatwrydqdrqrllgltievpmtilavgggktvlpiakaslellnvesaqelghvvaavglagnfaacralvsegiqqg  
hmslqykslaiivgagde  
iakvaealkkeprantgaeihilqeirqq  
>tr|Q2FV79|Q2FV79\_STAA8  
mtdkngghgiaitgiilfvinalqinndlpisissklkkyihkpd  
>tr|Q2FV80|Q2FV80\_STAA8  
mlnikaikpsekigikvlshqfkqvsktqlnyffn  
>tr|Q2FV83|Q2FV83\_STAA8  
mtnasksllyiaqptiskaidienemgtpfdrskrhliltadagqifyekskeivalydylpsemerlngletghinmgm  
savmmkilinilgafhqg  
ypnvtynlienggktieqqiindevdigvttlpvdhhi fdyttldkedlrlivsrehrlakyetvklledlagedfilfnk  
dfylnkii enaknvgfvp  
ntvaqisqwhviedlvtne lgisilptsiseqlngdvkllriedahvhwelgvvkkdkqlshattkwiefkdrlg  
>tr|Q2FV91|Q2FV91\_STAA8  
mrylannhsarlrgiilaivgacwlggvtvsdflfkykninvdwyvtarlvsqvfllimykmmqpkrsifsvfqdr  
mlgkllifsilgmllvqya  
ymasintgnaaiatllqyiapvyiiwfvirgvakltlfdv laiimtl lgtfllltngsfsnlvvnpasl fwgilagval  
afytiypsdllnrfgsili  
vgwamlisgvamnlrhpwhiditkwdisiilflifgiiggtalafyffidslqyisakettlfgtvepvvaviasslw  
hvfakpqiivgiilimili  
llslkrqpetlde  
>tr|Q2FV93|Q2FV93\_STAA8  
mtlflkyapygkqglqalsgaacatflppaflysaiggvfdikflqdigdlagslsgiavgiltclnlgvapvfavivgl  
vlhdfkllpafiaaygvaf  
likwiekkvpegldlivvilfapafiafglasiiptgvlatlqigsavtavgdnpyalavilglvipvtgmpplssmvl  
tsllgltgvpmaigaltct  
gssfvnlilfrklniggpskafavciepl tqidliaqpvqlygtnaligvvnacivtfsglvigvkgmatpiagai vlf  
gfnnavtsivtiatviivs  
ivlayigtlinkfnlmninfkmpskknhikesv  
>tr|Q2FV96|Q2FV96\_STAA8  
mikkkhlsgslvpdrclfiiseeverfmenay  
>tr|Q2FVA2|Q2FVA2\_STAA8  
mvkaiavdmdgtfldskktydklrfeafitelrnrditfiaasgnqyaklksifgdrdmyfisengaviyngnelynyks  
fnrqvfgqvdylnmkqsi  
dqlvicglsayilkhtseafkedtrfyyhqlkeidslqqlpeddyvki afninrethpvnveevatqfsndiklvssgh  
dsidiimpnmtkqgalkrl  
ldkwempselmafgdannkdmlafakhsyvmenshdeelfniasavapsndkqgvltiieqevlkk  
>tr|Q2FVA3|Q2FVA3\_STAA8  
malnwgkknnevttskellssatvdqlkdydgvttmqfgklendvypklesygikqiaqtagfdmydlldakkhnivi  
snvpsyspetiaeysvsia  
lqlvrrfpdierrvqahdftwqaeimskpvknmtvaiigtgrigaatakiyagfgatitaydaypnkldfltykdsvke  
aikdadiislvpankesy  
hlfkamfdhvkkgailvnaargavintpdliaavndgtllgaaidtyeneaayftndwtnkdiddktllelieherilv  
tphiaffsdeavqnlvegg  
lnaalsvintgtcetrln  
>tr|Q2FVA8|Q2FVA8\_STAA8  
mrlvkktnqddiytyhtffaddvgsagtdmtffdfpnitkgqagtnsitrpsfrvpnddal tyyeqrfdefgvkhegiq  
elfgkklvlpfeevdgqvyq  
lisdelnegvapgvpkngpvvdkaiyglpieikvsydfdfkniletvygmttiahednvallevgeggnggqvilik  
ddkgsaarqgygevhhsf  
rvkdhdai eawatkykevginnsgivnrifyealyarvghilieistdggpmedepyetlgegslppflenkreyies  
evrpfntkrqhg  
>tr|Q2FVB1|Q2FVB1\_STAA8  
mhvsctylvvlclrigyantminrrpsyteknpltiassegigvsm lipvnciittlqqknakstnklmk  
>tr|Q2FVB5|Q2FVB5\_STAA8  
mkrevilkqqfii erenadkrrqykeneeldslstqfhielidnndkvnkflsem lnvskpaitksikkllakdlv  
veshnefnkrevnysltqk  
gkkl syihdelheksvkkyeevlvfdddemavieflnrsieelkkedgln  
>tr|Q2FVB6|Q2FVB6\_STAA8  
minsirlyilgflaffasliqniytpiiprlyddfqvplfwinatvggfifivavmqivlgrsidsrskkvlltglgi  
viissficavthnfilfai  
srlfqaigcgiipvtl tllaklstdnraqamanyqiflscapalapilgstlgarwdyigifslvisivlfliff  
idipnvekgivkltekiee  
kyltdkvfitlvtlgliffityfsilvlylptllnntydigvgisgvflpitsvilgslfykrfskkyneimilrvtit  
gfai ftllfgwlnesnvii  
lsviifilgtcvgipallstii skrfehikgkvlgvfnfvryigmtvgalligiisqplvafyfttitimliviflyik  
ivdfqlkyak

Tsompanidou\_et\_al\_Supplemental\_FASTA\_File

>tr|Q2FVB7|Q2FVB7\_STAA8  
mpnk1kkavnfhnrwnds1lfvyrnlkfmplc  
>tr|Q2FVC3|Q2FVC3\_STAA8  
msr1lndfnqslhkgfidkhisshkgnypk1lvnnknekv1stide1qkctfyfsvafitesglas1kaq1ld1snkg  
vkgk1ltsnylgfnspkmy  
ge1l1knvevrltdiagfhakgyifehkdyssmviqssn1tsnalkvnyehv1lstmknqdlvdsvksefd1lwqkst  
plteqwinsykesfeysrl  
ek1aeveqtm1ladkvkksveivpn1mqaealrs1kairdkakdkaliisatgtgktilcaldvrevnpnkflfivhne  
g1lnrakeefkkv1piknd  
sdfg1l1tgkhrvdakylfatiqt1srddnfnkqfdenefdyivfdeahrsaastyqrvfnfypkpkfmlgmtatpersdel  
sifelldyniayeirlqaa  
1esdi1cpfhyfgvtdyvhqgikeddvtklryltsdervnyi1qktdyygysgeilqglifvsskkeydladklsskgi  
ksvaltgddsvnyrqivie  
k1kegkinyi1tvd1nfnegidipevnqvm1rptessii1fiqqlgrglrksskeyvtvidfignyktny1lipialsgdq  
sqnkdnkfl1tnnsing  
vstinfeevakkqiynsl1davslnqk1l1kayeevenrlghmp1lmdfiqqhsidpsvifskfsnyyeflvrykkidtl  
l1teneskn1vffsrqiagg  
1krids1vlee1l1kneltydelknkmlnevkditeddidts1r1ldfsfynagi ekiygs1pierner1r1sdaftna1  
snqtfnmfled1ielskyn  
nekyqkgkng1l1ynkysredfski1fnwnkngssvimgymiksqempifitydkhedisdstkyedef1sqdelkwftks  
nrt1leskevki1shrakg  
ikmy1fvqkkdddgiyfyy1lgtagi1egsekqdkmpngsnvvtmd1aldkavrddi1yryltn  
>tr|Q2FVC7|Q2FVC7\_STAA8  
myhamahkfgdnwkkqaevgneigek1tseevide1rkggayesk1etdpkrkiddkik1lndvykncngy1akikqsie  
aivsndqmlasq1dgm  
>tr|Q2FVD3|Q2FVD3\_STAA8  
mly1l1italnvi1nk1kmdksni1sfiysrhdri1yvn1vgnrfknni1smtkatsn1grgf  
>tr|Q2FVD7|Q2FVD7\_STAA8  
mini1lvnki1fffdiyhq1l1kcggi1yls1hiydttkht1tkkiyfn1lgqgkaaksvy1rstkykgykvvr  
>tr|Q2FVE6|Q2FVE6\_STAA8  
mvgrastsekskr1yqaykkeqfevki1qeahq1legkfeinr1lykdvknvkgeyetvmmactadayydt1qq1slet1  
qsvkhv1l1sptfgsqmiv  
eqfmskfnkdi1ev1sfstylgdtrivdkeapnhv1l1tgvk1k1ymgsth1sn1tmcqr1s1alaeq1k1q1levvesp1haet  
rnss1lvh1pp1f1mndfs1k  
a1fegtdvpvyvyk1fpeppi1mt1l1remr1mwkemmvi1l1qafrvpsv1n1l1qfmvkenypvrpet1degdiehfeilpdi  
l1qey1l1yvrytai1lidpfs  
qpdenghy1fd1savp1fkqvykneqdvvqi1prmpsedyrtami1q1higkml1giktpmidqf1l1tryeascqaykdmhqdqh1  
sqfntn1l1fegdkalvtkf  
l1einrt1s  
>tr|Q2FVE7|Q2FVE7\_STAA8  
mrk1l1tkmsam1l1asgl1l1tgcggnkg1leekkenq1l1tyttvk1digdmnphvyggsmsaesmiyep1vrntkdgikp1lak  
kwdvsedgktyt1fh1rddv  
k1fh1dgt1p1fdavkkn1davqenkk1hsw1k1ist1l1dnvkvdkytve1n1l1keayqpalae1lamprpyvfvs1pkdfkngt  
tkdgvk1k1fdgt1p1fk1geh  
kkdesadfnkndqy1g1eksk1lnkvqakvmpagetaf1smk1getn1faftddrgtds1ldkds1kq1k1dtdgyqvkrsqpmn  
tkm1lvns1gk1k1dnv1s1dkt  
vrqai1ghm1vnr1dki1akei1ldgqekpatq1l1faknvt1d1nfdm1ptrkyd1l1kkaes1l1deagwkk1gk1ds1dvrqkdgk1nemam  
yydkg1ss1s1k1e1qae1l1qae  
f1k1k1mg1k1l1n1ng1ets1dk1a1er1rts1gd1y1d1m1fn1qt1wg1l1y1dp1q1st1ia1af1k1e1k1ng1yes1ats1g1ien1k1dki1y1ns1idda1fk1iqng  
kers1day1kni1l1k1q1id1degi  
f1pi1sh1gs1mt1v1vap1kd1lek1vs1ft1qs1qye1l1pf1nem1qyk  
>tr|Q2FVF0|Q2FVF0\_STAA8  
mt1l1tvk1h1l1ti1tdt1wtd1q1l1vs1dvn1ft1tk1get1l1gv1iges1g1sg1ks1it1cks1i1g1n1per1l1gvt1gei1fdgts1ml1s1ses1q1  
kkyrgk1di1am1vm1q1q1s1raf  
dpst1t1vg1k1mf1et1mk1v1ht1s1m1st1qe1iekt1l1ey1mdy1s1l1k1dp1kri1l1ks1yp1m1sg1gm1l1qr1l1mia1l1al1k1pk1li1ade1ptt  
al1dt1t1gy1dv1lea1fid1k1k  
h1fd1cam1i1fi1sh1d1l1tv1nki1adr1v1vm1k1ng1q1l1ieq1gt1res1v1lh1p1eh1vy1tky1l1st1k1k1k1ind1h1fk1h1vm1rg1dv1hd  
>tr|Q2FVF1|Q2FVF1\_STAA8  
miki1k1dve1ks1y1qs1ah1v1f1k1rr1r1tpi1v1k1g1vs1fec1pig1atia1i1ges1g1sg1kst1l1sr1mil1gi1ek1pd1k1gc1vt1l1nd1q1pm1h1k1k1k1v1rr  
hq1g1av1f1q1dy1t1ss1l1hp1f1qt  
vre1l1fe1vm1cq1d1g1q1pk1ev1mev1qait1l1ee1vg1l1skay1md1kyp1nm1l1sg1ea1qr1vai1ara1icin1pky1il1f1dea1iss1ld1ms1iq  
tq1ild1l1ih1l1re1tr1q1l1syi  
fi1th1di1qa1aty1l1cd1q1l1i1fk1ng1kie1eq1ipt1sa1lh1ks1dn1ay1tre1lie1k1q1l1sf  
>tr|Q2FVF6|Q2FVF6\_STAA8  
mm1l1fk1n1lf1vi1ff1ed1ms1ff1k1ri1ph1k1l1ki1fk1pend1k1av1gn1vc1stad1ff1si1gg1m1le1ek1nks1  
>tr|Q2FVG2|Q2FVG2\_STAA8  
mm1vagi1mn1ms1qd1lv1h1se1av1vg1l1vt1mya1l1t1fa1ic1gp1il1vk1l1tr1f1ss1rp1l1wt1l1li1fi1ig1ng1i1av1ap1n1fs1il1v1vg1ri  
i1ss1aaa1li1iv1k1v1l1ait1am

Tsompanidou\_et\_al\_Supplemental\_FASTA\_File

lsapknrgkmiglvvtgfgsganvfgvpgigtvlgdvwgrytflfliivsiivgflmmiylpkdqeiqrpgvnhetpshen  
hvtskilrpaevakylit  
flvliansvtfvfinplilnsghdmsfvsalavnngiagvigtslggifsdkitskrwlmsvsifivmmllmnlilpgs  
glllaglfiwnimqwestnp  
avqsqviqhvegtdsqvmswnmsslagnigvggiigglvmthsvsqaitytsaigaiglivvftlknhyaktfkss  
>tr|Q2FVH7|Q2FVH7\_STAA8  
mpneyfiipvl1nklikevylplf1tpymligv  
>tr|Q2FVI9|Q2FVI9\_STAA8  
mfnl1nimtsaisgclvaffahwlrtrnkkgdgk  
>tr|Q2FVJ4|Q2FVJ4\_STAA8  
mqlliltdifyriavyicpns1rs1shfnskvkilpkfivilrs1nscflekhap  
>tr|Q2FVK3|Q2FVK3\_STAA8  
minkil1tatlavglapl1anpfi1skaenkiedigggaeiikrtqdit1skrlaitqniqdfvkdckynkdalv1vkmq  
gfissrttysdlkkyipyik  
rmiwfpqynisl1tktdsnvd1n1y1pknkidsadvsqklgyniggnfqsapsigsgsfnysktisynqknyvtevesqn  
skgvkwgkanskfvtpngq  
vsaydqylfaqdptgpaardyfvpdnq1ppliqsgfnpsfitt1shergkgdksefeitygrnmdatyayvtrhr1avdr  
khdafknrvntvkyevnw  
thevkiksitpk  
>tr|Q2FVK4|Q2FVK4\_STAA8  
mmenekrtvdsienqrfflitvcyeny1kndvklekiflidyfndnk11nvfliddavs  
>tr|Q2FVK9|Q2FVK9\_STAA8  
mk1d1qtarrn1nspniktrkra1kiikqhktrak  
>tr|Q2FVL0|Q2FVL0\_STAA8  
mengynyrisknvcrl1dgegeal1nveetki1nddyyyadgwi1fwik  
>tr|Q2FVL2|Q2FVL2\_STAA8  
mkr11fvmiafvf1laacgnsskdkaskdsktinvgttegyapfsfhdkdgl1tgydivikavakeeg1klkfnets  
wdsmfag1dagrfdviang  
vginpdrekkykfskpytfssav1virenekdikdfddvkgk1aqtftsnygklakdkgaditkvdgfnqsm111skr  
vdgtfnds1sylvdykkqkq  
nakikaikgnaeqsrsafafskkaddetvqkfn1g1kkieengelakigkkwfgqdvsksk  
>tr|Q2FVL5|Q2FVL5\_STAA8  
mnfv11tsdefnafttkhfshytqsai1hynhrvd1kgdvh1vgvkddngqviagc11teart1kffkyfythrgpvmdyt  
nqslvafffkalt1sylvk1k  
nc1yvl1vpyli1en1rnadageivksydnrafvrtmdk1gykhqgfpvgysmsqirw1sv1d1kdktedq11kemdyqtr  
rn1kktydigvktkt1tid  
etqtf1d1fhmaeekhgfkfrel1pyfeemqklyddham1klayid1ney1kt1q1kqq1tael1sgveealeespnskkn  
ktkrtg1leqq1n1snkrki1d  
ntieqieqdgav1n1lasal1fynehevy1ssgsnpkynaymgayh1qwemikfakahhidrynfyigtgdfssessedyg  
vqqfkkgnahveeyigdf  
ikpikp11ykvqty1nhkrr  
>tr|Q2FVL6|Q2FVL6\_STAA8  
matv1111v1f1sgcndkyvkeideavki1nqkqeq1akkngdrvdhferkdaniyvvdki11laykpl1snddevhy  
yaydfsdkrvsvykqdfdsr  
ryyqhdadyheenmtn  
>tr|Q2FVM0|Q2FVM0\_STAA8  
msveeykvyl1gagpnpny1tkkaer1ireadvilydr1vnp11lqyan1tteidvgkkpyakhiqqekindcivea  
arrynkvvrl1kggdpai1fg  
rvgeevdi1nehiafeivpgvtsasaavatmqtgl1tmrtvaksvtfstghfdseenev1vns1vnggt1aiymgvkr1  
gki1tqi1qytdi1dypiai  
vfqascfn1evvkg1r1sni1sk1qhysieakpgici1gevvdytentpksydpmkqfyvsvsgskhdal1ml1cehlydegyg  
c11npndtsngtyhssqyd  
yydafikqenvty1stdradantv1ch  
>tr|Q2FVM4|Q2FVM4\_STAA8  
m1nqfl1wv1fpyl1v1vfvaghiaryrydkfswtaksseli1erkr1mwgs11fhl1giipvffghvvg11lipkpwmdavgv  
sehlyhigavyigsifgii  
tligmf11tarrvtks1irr1ssasdi1fvn11111v1fmgcyat1vtniqhpdfnyrts1siwfrq1fml1kpdas1msgv  
piafkmh111gftimacwp  
ftr1vhvsvpl1tyinrry1iyrnkv  
>tr|Q2FVN5|Q2FVN5\_STAA8  
mal1fkrkis1pmqvvia1v1lgvvvg11lygqenvanyikpfgdvf1n1likmivipv1fcs1als1snvgesktvgrygwk  
tilyfei1ttiaig1giif  
gn1fkpgag1dptk1pkgd1skystahaaeqstyg1nhfidt1vhi1iptnffea1nkge11pi1ffavffgl1glaavgk  
aepvkef1sgs1eavfwm1i  
nk1klapl1gvfafi1ctt1itfgasa11p11k1v1vvvfamvffvfail1glvawmcginimni1irilksel1lafstsss  
eav1pvmmkkmenf1gspke  
itsfvip1gytfn1dgsalyq1siaa1fvaqmygmh1t1l1seqiv1m1t1l1mitskgmaavpgtsiv1v11tt1gamgl1paqgl  
aliigvdri1dmvrtcvnv



Tsompanidou\_et\_al\_Supplemental\_FASTA\_File

ignalstiviakwenyvdkakggeylksi  
>tr|Q2FVN7|Q2FVN7\_STAA8  
msnsgaiqaienvlvtskvgvlstaynnkpnrymvfyndgltlytktnihsakvkeikdnpaayvllgyndttnrsfve  
meatieivtegevidwlwe  
tqdkdffsskedpelcvlrvvpqsiklmdksldtpikidl  
>tr|Q2FVN9|Q2FVN9\_STAA8  
mliihifslirpgshlfhfivpgsknicntllsfyintytfidsafifiailhaciltliiggnfmkergyieqlwree  
kyhvllhsqqshqmirnal  
ktdslshqvqmidvalliepsigsvcnafdhmwgyllkcaneerqqskllkadfingkidtqtlldfaelankydvq  
yllqsrvlntkrkr  
>tr|Q2FVP0|Q2FVP0\_STAA8  
mnykqsaeelnaiggeenldamahcatrlrlvln deslvneea lnmdvkvgtfstggqyqiiigsge  
>tr|Q2FVP1|Q2FVP1\_STAA8  
mglvqgnkvfselektgkeasttsevkaqsaknmpqrfrvkmldsfvpiipaivagglmglnniltakdlffsgks  
lidvysqfaglaeminvfa  
napftllpiligfsaakrfggnpflgaaigmilvhpslmsaydfpkaveagkaipywdfglhinvgvyqqvlpmlvaa  
yilasiekglrkviptvld  
nlltpllsifitaflltfsfvgpitrqlgywlsdgltwlyefggaigglifgllyapivitgmhhsfiavettliadatkt  
ggsfifpiatmsnvaqgga  
aiaaffiikqnkkkqvvasaagisa lligitepamfgvnlklyrpfigaivsgigsayiaffkvkaialgtaglpgfisi  
npvhagwlyhfvgmtisfi  
iaitvtlilskrkankevve  
>tr|Q2FVP3|Q2FVP3\_STAA8  
mkedrri rtkkssikqaftkllqekdlekitirdittradinrgtlyhyedkymlladmedeyisel ttytqfdllrgs  
siediantfvnnilknifq  
hihdnlefyhtilqlertsqlelkinehiknmqryisinhsigvpeymfyfsvsgatisiikywvmdkqpisvdelak  
hvhniifngplrimaenrl  
hksnldsllt  
>tr|Q2FVP4|Q2FVP4\_STAA8  
mni fknkllwiapiatmiilvifslafypaynpkpkdlpigilnedkgtti qdknvni gkkledkll dsdsnikwkvvd  
sekdlekdldkqkifgvai  
idkdfskdamsktqkvvmskkeemqqkvasgeippqvqqmkqkmgnqqvevkqakktivsegsslqgsqiasavltg  
mgdninaqitkqsl etlts  
qnvkvnaadingltnpvkvdneklnkvkdhqaggnapflmfmpiwigsivtsillffafrtsnnivvqhriiasigqmif  
avvaafagsfvyiyfmqgv  
qrfdfdhpnriai fva failgfvglilgvmvwlgmksvpi ffil mffsmqlvtl pkqml pesyqkyvydwnpfthyatsv  
rellylnhhie lnstmwfmf  
igfmi fgavsslvsai vrkhstkrtevps  
>tr|Q2FVP9|Q2FVP9\_STAA8  
mspktreaaekglpna lftvtlydkdr ligmrvigdggtvfqivdiavlksyqqggygslimehimqyikgvavestyv  
sli adypadklytkfgfip  
tepdsggmyiky  
>tr|Q2FVQ0|Q2FVQ0\_STAA8  
mlikvhysginykda latqdhnavvksypmipgidlagtiveseapgfekgeqvivtsydlgvshyggfseyarvksewi  
ikl pdtl tleesmygtag  
ytaglaierlekvgmnie dgpvlvrgasggvgtlavlm lnelgykviastgkqdvdsqll elgakevidrlpveddhkkp  
lasstwqacvdpvggegin  
yvtkrlnhsgsiti vigm tagntytnsvfphilrgvnilgidsvftamklrqrwrrlakdlmpenl heikqv itfdelpe  
qlnkvikhenkgrividfg  
vdk  
>tr|Q2FVQ3|Q2FVQ3\_STAA8  
mikqinvsnmqkfesqlmkaqsegythvpyaneimi yqsmldavqlypksivvdytv dgqykndchyfgqssini adwa  
qnnnyypnliyaiqqtdl  
ihyysvetifdla lltllkgdlsidghvfdkapiatsasiwetiktiedfdmmsqfylnkmayidhhpipfrnlfied  
seqlnspdnwlystkfmlp  
kwlykiakqradnkqlqnfglytkqpnvlkdhivfigdhhqyignsky lftyfvkhnpm tacyfvtd drrgphfispkse  
kadelinsarvvivendip  
etlqpngtliqlhqqtpimqlfldskepiknietpfyrakrynrlqfdyvihsaddishfyqtafpshqanvlaygnpk  
hqyllqksnesttqqqyk  
sfkindqkpvll yapiglvsaqqplpsdal fkayhvvvqgvdeailpeevalvapkylsaqdli lmsdvvitdysniifda  
maidktvalytpnhsyie  
sqgvnediwrhlskiwytdrql linnlisqaipvikypqihkeqpl esisqllilskmtsng  
>tr|Q2FVQ5|Q2FVQ5\_STAA8  
mttqhsktdivl igggimsat lgtll kel speknikvfeklaqgeessnvwnnagtghsalcelnytkegkdgtvdcsk  
aikineqyqiskqfwaylv  
ktgqlndpdrfiqavphmsfvigednvafiksrvatlkksilfekmksqdeemkswvplmiegrksdepialtydetg  
tdvnfgal taklfdnleqr  
gvgiqykqnvldikkqksgvwlkvkdl etnetttyesdfvfigaggaslp llqktgikqskhiggfpvsglflrctnqe

Tsompanidou\_et\_al\_Supplemental\_FASTA\_File

vidrhhakvygkaavgapp  
msvphldtrfvdgkrsllfpgfagfspkflktgshmdliksvkpnivtmIsagikemsltkylvsqImIsndermddlr  
vffpnaknedwevitagqr  
vqvikdtedskgnlqfgtevitssddgtlaa11gaspgastavdimfdvlqrcyrdefkgwepkikemvpsfgyr1tdhed  
lyhkineevtkylqvk  
>tr|Q2FVR5|Q2FVR5\_STAA8  
mvkh1qdhiqfleqfinnvna1takm1kd1qneyeis1eqsnv1gm1nkepl1tiseitqrqgvnkaavsrrikk1ida  
>tr|Q2FVR6|Q2FVR6\_STAA8  
mkf1t1tdkgray1kerna1mtdiaqdi1tnd1nsedienvrqlvinhriktysnhk  
>tr|Q2FVR8|Q2FVR8\_STAA8  
ma1kiryqttyepfkvvddikeipkdativwydfdepneqenewfkahfnfd1evddaingmprakyksykydyqylvfh  
simgsnyspialnifiqdn  
vlvtyhhqtles1nkvykyymnt1dae1dcadvil1ldmmvdkyfnfvya1edsvyh1fedrhvddrfnkvmmdsvfklr  
sdlikvkrvl1fpmqelidt  
mkqngd1i1dnkhs1lyiqhiddhlikqrni1rtaqemtnei1renfesys1frmsimqvl1lsvvifsp1t1fiagi1ygm1  
fvnmpal1h1hygyyic1lav  
mfviavv1i1ffrrkkwf  
>tr|Q2FVS8|Q2FVS8\_STAA8  
mnf1skqkgin1hivci1v1sitt1daidsffm1lyiffisncil1mms1hlirflit1yskfrqit  
>tr|Q2FVS9|Q2FVS9\_STAA8  
misiha1stgki1qd1pysskrpmsa1dktki1sqt1w1sst1gft1gdeqaykdhggphkavcgfskhnya1yqdd1pt1pt  
hamfgen1t1fdy1desdv  
fgnqyr1gea1ievsei1repywki1qakynipd1lvkrmst1sgkt1gyfrvl1kqgyvspndq1lyliqea1iehr1svqq1nd  
lyyndrqnqdm1rya1lnnp  
f1sptrrdk1qkmyrnt1k  
>tr|Q2FVT7|Q2FVT7\_STAA8  
mg1kdqavtwrry1fhqfpe1sdkefkttqkikdi1lteh1iril1d1platg1vaevgg1sciavradida1piqel1veqd  
fksenegvmhacghdihma  
silatavk1keiegt1tgrvkfi1fqsae1lghgafkiietha1kdqvav1gfhndpsrsvgt1faiktgait1savdrfefh  
ikgvgg1haakpeqcndpvi  
vlaql1nsiqsivsrn1sa1fdeavvtigq1scgntwnviadhayvqgtvrsfdpvvrk1vetr1lqdiadg1aqaynmkin  
l1nyth1pgavmndeal1thk  
a1avaq1hvg1ykv1gmmegp1t1gedfsgysqhfpsvfa1ligshseyd1lhhp1qykpderi1ekvpey1fvefvkr1l1he  
>tr|Q2FVT8|Q2FVT8\_STAA8  
maa1qdprtk1fk1tdyekqeqevpg1qsemtpapdc1getsyqghr1lqgyki1vtgg1sai1graa1i1ayakegadva1ny1  
pseeqda1qevr1qvieesg  
kav1ipgdi1rdeqfnyd1veqayqqlgg1dnvt1vag1hqqy1hddi1hgft1teaft1tetfetnvyp1fwtvqka1ey1kpgas  
i1ttt1sv1g1ynps1pi1l1dy  
aaskaai1s1tksf1see1l1gpki1rvncv1app1fwsp1lq1sgg1qp1skipt1fgqk1t1l1grag1qp1ve1cgty1v1l1ase1ssy  
ttg1qv1fgv1sgg1v1qid  
>tr|Q2FVU0|Q2FVU0\_STAA8  
mfewp1pap1fvkt1st1f1lands1frinnat1tvivi1at1fngi1evk1spvi1ptk1n1nat1nnk1g1nna1qa1ll1f1l1ct1sil1ft1c1fpi  
k1nts1fsq1tmk1kev1fmc1ftc  
l1sn1hy1gy1wn1whi1rdvaeas  
>tr|Q2FVU1|Q2FVU1\_STAA8  
mp1lnv1ait1it1viva1l1mnrkes1fakk1vev1ftk1gaghs1niv1l1mml1if1ilag1afs1nta1ekm1gg1vk1stvn1gl1slipen1liiv  
gl1fvi1cm1fvs1ism1gts1vgt  
vaa1iap1vgy1gfa1qat1dvpt1alamat1vvg1am1fgdn1lsmi1sdt1tia1avrt1qht1k1m1kdk1frvn1fkiv1lpg1ail1ti1i1ly1ft  
ngi1lnh1ak1ny1dyn1likvv  
py1il1vl1al1lgvn1vi1v1liggt1l1lagi1gl1ids1fgwm1gl1davs1k1gi1s1medi1am1ial1liggl1vg1ii1qh1nggi1ew1l1q  
fvr1sk1vk1skrgae1lgias1  
vsvadi1atan1nt1isi1msgp1lakni1adey1dvds1rksasi1ldi1fggc1fqg1l1pysp1qvis1aag1vagis1plm1lf1pys1yp1il  
lgvc1glia1il1fn1fpk1l1kkn  
tsqemkh  
>tr|Q2FVU7|Q2FVU7\_STAA8  
myravi1fdfdgti1idteqhl1fnvink1lemhnadpi1sidfyr1ssig1gaat1ldh1lika1igsenkdklyeeh1ltstt1p  
mi1dtiks1lma1fl1kqrhipm  
a1iat1ssv1kae1impt1fka1lg1ddy1evv1gred1veqv1kdpely1savqql1nympt1qclai1eds1vngataa1iaag1ldivn  
tnkmts1aqdf1snvdyvakd  
idydq1ivar1fftk  
>tr|Q2FVV3|Q2FVV3\_STAA8  
mc1dsry1kyqit1idfi1tkqn1wsyvscncecikynty1nwny1kqispcy1ifkrv1l1ffif1hcy1ilscli1idf1wry1fyminet  
kymrqq1itn1liq1id1t1iky  
nt1lmt1dwni1qthi1yfnq1ivtne1lnk1fkg1fetsy1i1nenqvsy1yei1it1lnkr1plr1qvdy1gnki1qyl1nfyht1elsna1lfa  
ikfah  
>tr|Q2FVV4|Q2FVV4\_STAA8  
menek1kkyt1fkdi1awrd1li1ipi1g1vifya1l1tiaay1ipil1fgyye1idsn1l1fvat1itqal1ayt1ig1igafyl1fh1lkvmps  
r1rag1fay1ikkyw1l1rl1sit

Tsompanidou\_et\_al\_Supplemental\_FASTA\_File

yiialililytyeymtqflpkhlqysetanelelnkmfevpaflpvafllivivgpiveeivfrhiligelgkknfiams  
ivsvflfafihtvdakspk  
efgpylilsiiivftyksgnlgstiahianfvsvvisiya  
>tr|Q2FVW2|Q2FVW2\_STAA8  
mqggkgivqtkeedgkfveanneiakamti shkdndmkymditekvpmsesevnlkgkgilenrgkvfleaqekeyev  
nviylvshalvetgngkse  
lakgikdggkryynffgigafdssavrsngksyaeeqwtspdkaiiggakfirneyfennqlnlyqmrwnpenpaqhya  
sdirwadkiaklmdksykq  
fgikkddirqttyk  
>tr|Q2FVW6|Q2FVW6\_STAA8  
mlknisqvvlisnkwgtlfi liglfvadwtiglaaivgsiiaytfarfinyseaeindglagfnpltaialtifl dks  
gldivitmiatlltlpvaa  
avrevl rpykvpmltmpfvitwftillsgqvkfvdtslklmpqni etvnfsnndrihfislfegfsqvfi easviggv  
ciligili asrkatllavi  
asllsfiivalggnyddinglfgynfv lmaialgytftainpyistflgvlltvvqlgtttllepfglpaltl pfi  
ivtwillfagikhdkvda  
>tr|Q2FVW7|Q2FVW7\_STAA8  
mndmdnsflitteiqrkwi ekfkvir dtkakae yndqhsqfpykniewlikegygkltl pkayggegati edmvilqsf  
lge ldgatal sigwhvs v  
gqiyeqk lwsqdmleqfaveinngalvnravseaemgsprtrgprsthavkaddgylngvktysmskal thiivaayi  
eelsvgfflvdrnlpgve  
iadnwdvl gmrateshdli lndvkvp lkh lvetekskapngwilhipscylgiaqaarnyavnfaiqhspnsiegtiatl  
ptvqqnlgkm  
>tr|Q2FVW8|Q2FVW8\_STAA8  
mnqglevidlamrivgakslemnrplqryyrdmraglhnppmedaaytniaksitdtf  
>tr|Q2FVX1|Q2FVX1\_STAA8  
mttkqlvytalmtaiailglvpviplpfssvpivlqnigiflagailgrkygtlsvivflllvvaglp llsggrggigv  
fagpsagflllypvvafmi  
gairdrfineinfwilfvgilvfgvia ldivgtlimgmii nipftkaisisl aylpgdilkaivasligtallnhsqfrq  
imgik  
>tr|Q2FVY2|Q2FVY2\_STAA8  
mkqfeivtepiqteqyreftineyqgavvftghvrewtkgvkteyleyeyipmaekklaqigdeinekwpgtitsivh  
rigplqisdia vliavssp  
hrkdayraneyai erikeivpiwkkeiwedgskwqghqkgyeekree  
>tr|Q2FVY3|Q2FVY3\_STAA8  
mkvlyfaeikdi lqkagedivleqaltvqqfedllferypqi nkkfqvavneefvqksdfiqpndtvalippvsgg  
>tr|Q2FVY6|Q2FVY6\_STAA8  
mpdliemi vfkvftswrgpnteadrksaynnvqvggapt  
>tr|Q2FVY7|Q2FVY7\_STAA8  
mcklagpqhrefgkeilqtmqvgergpntegdeksaynnvqvggapt  
>tr|Q2FVZ0|Q2FVZ0\_STAA8  
mtnqgslnkspif tksftinflvnfivylcmyllvviagyskqafdasdslaglvvglfivgsligrfatgkfvnqigp  
krllfiglialitqllf  
idgslafli fvr lingiatavvttatgtiaayvtpvnrkse gis lfs lslvl gtaigpflgmllitkyaidllfiicvil  
gilgllis lfikvdfevtn  
nktetnvidkprfsihqfi akeaipvavimlligvtyasilt ylaqafalerhlvtaasyfficyaiaslitrpiagr lmd  
dkneniivypafiml lsf  
vclissyqswlillagac lglgygnlssamsia ikvspikygiatstfyvgldagvgfgpsflglfthmfyseyfgf  
maalaiitm lvyflihgrh  
vtrnamn  
>tr|Q2FVZ8|Q2FVZ8\_STAA8  
miillialgyflkrinfikatdsqviatlvl nvtlpslvivnlnsaelklsfsilpilmiygivakmiavwffrkydnh  
mrgsvgmtgamniglfay  
plievipwptglijyvmadiggafvmfgityfvgsyfsegdqdfkylgkllqsvplvtyivmfilnishihlphvai  
dffsilshanmp lsmillg  
vmlnftlerkyipatikylclhyglalvagllvyvllpsddmikttllvtwmfpvgvaiisyyiqfkyrtlpfigmttn  
ltiisiiilyvyqavfv  
>tr|Q2FW01|Q2FW01\_STAA8  
msivqlyditiqksfi ehsnyesasylyklpqyneydvlitdaiespgvfsikendsikailsfaydknkfkvigpfv  
adnyvlsvdtfetl fkaty  
snqpdavfnfsfeegi qykp lmkviqasynftdyieartrleedmhqpnii pyhkgfyrafsklhtttfkyqaqspq  
diidslddhhhlflfvseg  
llkgylyleidsqqsia eikyfsshvdyrlkgiafellayalqyafdnfdirkvyfki rnkknklierfnglghinyey  
ikfkfesrnvkdqtipe  
>tr|Q2FW40|Q2FW40\_STAA8  
miflnlllknlhryllflhli fhiffiiiytr ltsrircisnydsni fflfff  
>tr|Q2FW42|Q2FW42\_STAA8  
mkhpkkgvldtviyntditvtnipknvnyivngkpaiewiidqynvsidkksgilddpnefsedpnyilnllsvitvs

Tsompanidou\_et\_al\_Supplemental\_FASTA\_File

mktlglidklpdfevld  
>tr|Q2FW43|Q2FW43\_STAA8  
mdllqiekkgnlktvqlmhdekgsasgeskvnme fgkqsavkqifdsllgmsasasasingnitgervaktilentl  
iydfldtvefrkkktiidi  
segfklniqqdtmyfatitpiasmfegskhldeeeIsfdvskmneairsikgyfeligrnnervfrfniesfknyr  
iqd1kfmltlysvlvgei  
skenlnydkefdlnqgakpsgigkfkgisirs  
>tr|Q2FW44|Q2FW44\_STAA8  
meleslre1aseatkedkyqvydvilagvk  
>tr|Q2FW47|Q2FW47\_STAA8  
mkdsifwkafipvyfivamlvfllfrfyiktdnfsiyImSifliclgtasiinyktr  
>tr|Q2FW48|Q2FW48\_STAA8  
mcvvimrdvqli dvedcydi fgmwclvngg1klsfygg1kmlfyvg1efvvlwrykkpqqdldltvtytfhtyir1vl  
>tr|Q2FW49|Q2FW49\_STAA8  
mtdkkytaadmvidtlknngveyvfgipgakidylnaliddgpelivtrheqnaammaqgigr1tgkpgvvlvtsgpgv  
sn1ttg11tatsegdpv1a  
lggqvrnd11rlthqsidnaal1kysskyseevqdpes1sevmtnairiatsgkngasfisipqdvisspveskaislc  
qktn1gvpseqdindviea  
iknasfpv1lagmrssaeetnairk1vertnlpvvetfqgagvisrelenhffgrvglfrnqvgdellrksdlvvtigy  
dpeyeasnwnkeletqi  
nidevqaeitnymqpkkeligniaktiemi sekvdepfinqqh1deleqlrthideetgikatheegilhpveiiesm qk  
vltdttvtvdvgshyiw  
arnfrsynprh11fsngmqt1gvalpwaisaalvrpntqvsvvagdgglfssqdetavrkn1niiq1iwndgkynmve  
fqeemkykrssgvdfgvpd  
fvkyaesfgakglrvtnqee1eaaikegyetdgpvlidipvnykdnik1stnmlpdvfn  
>tr|Q2FW55|Q2FW55\_STAA8  
mrkiwvidclyastffvdc1tvdshlyt1tnfeklnhyliiifiahaqhkctc  
>tr|Q2FW68|Q2FW68\_STAA8  
mknng1kpgyn1qiatsqfvl1sydlfnqptdtr1ipfl1tmiqntfgylpeyivadagyseqnymaiiddfnktp1it  
ygmfikdktrkfsdi fnt  
>tr|Q2FW69|Q2FW69\_STAA8  
myknylniq1t1pietsvripqidisryvneivetipdsefdkfrhrgatsyhpkm1kitlyaytqsvfsgriek11  
hdsirmmwlaqngtpsykt  
inrirvpntdalies1fiqfhsqclqn1idgtkveananryt1fwkksiqnhesklnensktlyrd1veekiipeike  
dgdsd1tieeid1igsh1d  
keieglnhsienedstqir1kqtrkkelr1rsskin1miipkekinmknkrflkieiaflklimmq11  
>tr|Q2FW70|Q2FW70\_STAA8  
mn1n1ifkeqt1kfnkeeqety1flqqhnsdwani1fkemilqgrdkvtqrlvtsmhren1vkartqskkil1srd1im1di  
stthileiqfpqakqtlya  
pitgehafdridvegpfiykddi1ntitrvhphneileciliieapdl1knaasdqfqqd1insatnmtfaisyqalsmqhd  
sap1fniiensedsylrse  
qaviqghp1hpgak1rkglnalqtflyssefnqpi1kivlihsks1rtsms1skdydtvhq1fpd1likqleneftpkfn  
fndyhimivhpwgl1ddvlh  
sdyqaevdke1iieakht1dyag1sfrt1vpkypamsphik1stnvhitgeirt1seqtthngpl1mtril1ndilekdvi  
fksyastiidevagihfyn  
eqdeadyqterseq1gt1frkniyqmipqevt1lipss1vatypfnnespivt1ikryqsaas1sdfessakswvetysk  
all1g1viplvtkygialea  
hlqnaiatfrkdgl1dtmyirdfeg1ridkaq1nemvystshfheksr1ltdsktsvf1nkafystvqnh1gel1iltiska  
sndsnlerhmwyivrdvld  
nifdq1vl1sthksnqvneneikdtmfapfidykcvtmrl1deahhytyikvnnplyrenn  
>tr|Q2FW71|Q2FW71\_STAA8  
mtkyffssfl1flgnwigqig1nwfvl1tthynavylg1vnfcr1vpil11svwagaiadkydkgr11ritissflvta  
ilcvl1tysftaipisvii  
yat1rgil1savetp1rqail1pd1sdi1sttqavs1fhsfi1nicrsigpaiagvilavyhaptt1laqaicyfiav11clp  
1hfkvtkipedasrymp1k  
viidyfkl1hmegrqifits11imatgfsytt11pvl1tnkvfpgkseifgiamtmaiggiiat11lvpkvlkyigmvnmmy  
1ssfl1fgiallgvvfhniv  
imficial1ig1fsqwartt1rvyfqn1vkdyergkv1siimmdrgmipl1gs11msicadvfgivrtf1simgisticitmv  
fyfinrkl1kleeshgi  
s  
>tr|Q2FW78|Q2FW78\_STAA8  
mpflivtiit1sgii1ticstil1kdk1kpdgl1mna1fnvrigw1il1rilavvfawmtfl1rigskviysdetg11fss11  
ptlvavfl1faal1flp11me  
ygl1em1gpi1frpvmrpl1ft1pgrstvdn1asfigdgtvgvl1itsr1yqygegyysrreatvistt1fsvvsit1faivvaetv  
hm1qnqffafyl1svivsc1v  
aavimpriwpl1nk1pdeyakevpesarteal1pegkta1rhgfdtatevgikapgv1dffksgl1ktvidmwfvil1pvvmsi  
gtiatianytppffv1lgk  
pfvpfl1elmqipeaaqasqti1igfadmfl1psilieg1vqndit1rfviga1sisq1liyl1sevgg1vilgskipvsigkl1fmi

flirtiitlpiislmahll  
l

>tr|Q2FW86|Q2FW86\_STAA8  
mplketegivevsikeekehsvklamaqlggapqldlq mavvna lkengaktvgirfetlpeekvnqf kpkkeenpkpti  
egllsqnnpvefiaiasgk  
ggvgkstvavnlavalaaregkkgvlvdadiygfsvpdmmgidekpgikgkevipverhgvkvismaffveenapviwrgp  
mlgkmltnfftevkwgdie  
yliildlppgtgdvaldvhtmlpsskeiivttphptaafvaaragamakhtdhsilgvienmsyfesketgnkeyvfgkkg  
gtk1adelntqllgelp

>tr|Q2FW87|Q2FW87\_STAA8  
mlsnkrvekeagcehkkflkl1l1tlnskvdmiksskttqlflkknfksvkltieitikti

>tr|Q2FW88|Q2FW88\_STAA8  
mgysqavrqrtiltpslvgsnpaspairaissvgrasdf

>tr|Q2FW95|Q2FW95\_STAA8  
mnlfrqqkfsirkfnvgifsaliatvtfistnpttasaaeqnqpaqnpaqpapadantqpnanagaqanptaappaapanqg  
qpavqpanqggqanpagga  
aqpntqpaggdqdapnnaaqaqpgnqatpanqagqgnqatpnnnatpanqtqpanapaaaqaapvaanaqtqdpnas  
ntgegsinttltfddpais  
tdenrqdptvtvtdkvnngslingkigfvnse1rrsdmfdknpqnyqakgnvaalgrvnandstdhgnfngisktvnv  
kpdseliinfmqtmskq  
gatnlvikdakkntelatvnavktgtahlfkvptdadrldlqfipdntavadasrittnkdgykyysfidnvglfsghl  
yvknrldlapkatnnkeyti  
nteignngnfgaslkadqfkyevtlpqgvtyvnns1tttfpngnedstvlknmtvnydqanankvtftsqqvttargthtk  
evlfpdkslklsykvvnvan  
idtpknidfnekltyrtasdvinnaqpevtltadpfsvavemnkda1qqvnsqvdnshyttasiaeynklkqqadtil  
nedanhvktanrasqadid  
glvtklqaalidnqaaiaeldtkaqekvtaaqqskvtqdevaalvtkinndknaiaieinkqттаqgvtttekdnngiavl  
eqdvi tptvkkpqqakqdiq  
avttrkqkiksna1qdekdvandkigkietkaikdidaattnaqveaiktaikaindqttattakaaa1eefdevvq  
aqidqaplnpdttneevae  
aierinaakvsgvkaieatttaqdlervkneeiskienitdstqtkmdaynevkqaatarkaqaatvsnatneevaeada  
avdaaqkqglhdiqvvsksk  
qevadtkskvlkdnaiqtqakvkpaadtevenayntrkqeiqnsnastteekqaaytel dtkkqearnldaantndv  
ttakdn1aaingvqaatt  
kksdakaieiaqkaserktaieamndstteeqqaakdkvdqavvtanadidnaaanndvndaktneatiaaitpdanvkp  
aakqaiadvqqaetaidg  
nngstteekaaakqqvqtektadaa1dahtnaeveaakkaaiakieaiqpatttkdnakeaiatkanerktaiaqtqd  
itaeeiaaanadvndnavtq  
ansnieaansqndvdqakttgensidqvtpvkkatarneita1lnklqeiqatpdatdeekqaadaeantengkanq  
aisaattnaqvdeakanae  
aainavtpkvkkqaakdeidqlqatqtnvinndqnatteekeaa1qqlatavtdaknnitaatddngvdqakdagknsi  
qstqpatavksnakndvdq  
avttqnqaidnttgatteeknaakdlvlkakekayqdi1naqttndvtqikdqavadiqgitadttikdvakdelatkan  
eqkali1aqtadatteekeq  
anqqvdaq1tqgnqnienaqsiddvntakdnaiqaidpiqastdvktnarae1ltemqnkiteilnnettneekgndig  
pvraayee1lnninaattt  
gdvttakdtavkvqqlhanpvkkpagkkel dqaadkktqieqtpnasqqeindakqevdte1nqaktvndqsstneyv  
dnavkegkakinavktfse  
ykkdala1kiedaynakvneadnsnastsseiaekqklaelkqtadqvnqatskddievqihnd1dnindytiptgkke  
satt1lyayadkknnsa  
dtnatqdekqqaikqvdnvqtales1nngvdngdvdal1tqgkaa1daiqvdatvkpkanqai evkaedtkesidqsdq  
ltaektea1amikqitdq  
akqg1tdatttaevekakaqgleafdniqidstekqkaieeleta1dqieagvvnadatteekeaftnaledilskate  
disdqttnaeia1tvknsal  
eq1kaqrinpevkna1eai revvnkqie1iknadadasakeiartdlgryfdrfadkl dktqtnaevaelqnvtipaie  
aivpqpndpdandtngidn  
ndatansnanatpentgqpnvsettangkadaspttpnnsdaatgettatsatddandkppqannssvdastnsptmdnd  
vtskpevestnngttdkp  
tetdnatpaesttnn1sttatnenaptgstatapttasteaassadskdnasvndskqnaevnnsaesqstndkvaqpk  
senkakaekdgsdstnqsm  
vesttet1psadi tepnvn1skdkeesttnqtdagqlksetnvasneadkspskadtevsnpkstsasseakekmtst  
nvsqkddtatadntdqks  
vgsaannkatqndganaspatsvngsnsanqdm1nvtntddhqaktksaqqgkvnkakqqakt1pdtgmshndd1pyael  
al gagmafli rrrftkkdq  
tee

>tr|Q2FW98|Q2FW98\_STAA8  
ml1strekemiallikyhgqyitihdiaqqlavssrtihrelkgveayltsfsl1lerankkg1riagtdsd1ndlkqsi  
aqhqtid1sveeqviii

Tsompanidou\_et\_al\_Supplemental\_FASTA\_File

aliqakepvkqyslageigvsvqtlakmlddleldlnkyqlslsrkrgegiylvgteskkreflsqlmvnnlnstsvysv  
ienhfvfhslnqihkdfvd  
lerifnverllmdylsalpyqltessyltltvhivlsisrikngesvalnddiydsqvntfehkvaseadklgqi ydvt  
fnqaeiafitihlrgakrk  
nlnstlnnrceenkikafvkvemisgmtfadldtlvdglthlnpainerlqanietynpltdmikfkyprlfenvrla  
lndcwpdli fpeseiafiv  
lhfggsiknqgnrflni lvcssgmgtstrllstrleqv fseieritqasvsdlksldlsqydgii stvnldidspyltvn  
pllpdsdisyvaqflntks  
tfgethdkssnmidkddvhvetkdvdgnts feneqtsyltsvfekhl sdekseqllhmrsgltll dsvkivstevkqwa  
tyiadylygcdvindptsf  
aell eqrlidnpgwil spypvaiph lrdnmikhpmilitvleep ltlpsiqndnqtikymismfisdndfmaslvsdlse  
flslklesidtfmenpge  
etllrnkflerikkqfi  
>tr|Q2FWA3|Q2FWA3\_STAA8  
mifilytla fivclptlsc l vffitlvlnviftkkktlkyklkltlfihfvll  
>tr|Q2FWA4|Q2FWA4\_STAA8  
mfifkttskshfhnnvkslecikipinknr  
>tr|Q2FWA5|Q2FWA5\_STAA8  
msvnardllv lhtnvrlygeeifankclanndvqimnsikk lieaelltttndfevsyikktrpelqsilksfgikttg  
nkpdlirikridnfhiinnl  
dlpyvyipikkgeeilkkteyltsfiqsygeisleraylvenyidencddkvaeykfeqrkydngedfdnhgynfel  
nm lidhykrdvkdydnark  
ysniylyfglrdflkk lmsnysyydskgnidln ei qndlnrf inssasgmyerli ynenl snimfel fkkdtqdsdle  
eq liekfinyvsvnvkkes  
rsntlielskilengytidkeefk keddy lskyiftdidylkkleskinva idirsgeihlvlddsldilinqkygne  
f  
>tr|Q2FWA7|Q2FWA7\_STAA8  
mlllertsmsdfemlmvvtiiglvlistqdhkk  
>tr|Q2FWB2|Q2FWB2\_STAA8  
mrtkskyngtttsefyc llnhnggatmp lflqpil ktklwggqr lsefgyql dndttggmlvcvstskwyerdy  
>tr|Q2FWB3|Q2FWB3\_STAA8  
miqlgecwcvsahpngtseiingpyqgqtdriwsehrelfgdfpskdfpltkivdareslsihvhpdnsyayehengq  
ygksecwyiidaeedaeiv  
igtlaesreevanhvqhg tiesilryikvkpgefyfipagtvhtissgilayetmqssdi tyryldfnrqdnqydrpln  
ieka ldiviqynapl pni l p  
eseiienhkcthivsndfftlvkweisgtlnymkprefclvtvlegegqmidgeifklttgtnfilt sedlsvfegdf  
tlmisyv  
>tr|Q2FWB5|Q2FWB5\_STAA8  
mtaetnyfwlncgynrwnhnep lvgqta lfesgahfnpsqgfracfkakvgdqvi fyqvqtdtgllgcgeiisvetgaqn  
kivrqfrfneqlkpl tady  
lkrsealefrismketlfnqitaeefd l isglgkgeiki pryfflaeteefepgnqytiythtyngikrnyghfytqle  
egdniifynrtknqsvvgi  
gevskhihekppipgrntstvievsyekditpitl stlnkhpklknlyflqenakqaiasmsqaqydaiiemsdnnglks  
pfemvqkpdml esekeea l  
kpfillvdrkeeglkaandllqkananp vittg hpdfsedmlygkylpnetgalyyregfitq lmpkkdk sylvidnfn  
ridtdifqtyinvlegyev  
tlpryngdnmi kwsrqkdsfyyfnpnwhivgitydsleeikekyseqflkytrivkvkhd  
>tr|Q2FWC0|Q2FWC0\_STAA8  
msiilifiilflkslggsicafsspf lkaqakiiiasyrfhf  
>tr|Q2FWC8|Q2FWC8\_STAA8  
mtkkqvii vi inkfdaiafqhckriainvlqtwt lsiyyf lgilkyrivs  
>tr|Q2FWD7|Q2FWD7\_STAA8  
mperertspqyesfhelyknyttkeltqkaktl klt nysklnkkelv laimea qmekdgnymegilddi qpdgygf lrt  
vnyskgekdiyiasqirr  
feikrgdkvtgkvrkpkdnekyygllqvdfvndhnaeevkk rphfqa ltplypderikleteiqnystrimdlvtpiglg  
qrglivappkagktsllke  
ianaistnkpdaklfillvgerpeevtd lersveaaevvhstfdeppehhvkae lllerakrlveigedviilmdsitr  
laraynlvippsgrtlsgg  
ldpaslhkpkaffgaarnieaggs ltilatalvdtgsrmdmiyeefkgtgnmelhldrklserri fpaidigrsstrke  
ellisksel d l wqlrnlf  
tdstdfterfirk lkrsknnedffkqlqksaeestktgrpii  
>tr|Q2FWE2|Q2FWE2\_STAA8  
mhsfllyiminkkgvikldtkiwdvreynedlqqypkineikdivl ngglig lptetvyglaanatdeeavakiyeakgr  
psdnplivhihskgg lkd f  
tytldprveklmqafwpgpisfilplklgy lcrkvsgglssvavrmpshsvgrqllqi inep laapsanl sgrpspttfn  
hvyqdlngridgivaegs  
eeglestvl d ctsfpykiarpgsitaamiteilpsniahad yndteqpi apgmkykhyspntpltiitdieski gndgkd  
wssiafivpsnkva fipse

Tsompanidou\_et\_al\_Supplemental\_FASTA\_File

aqfiqlcqddndvkgashnlydvlhslndeneni saayi ygfelndnteamrmlkaagnhiikgcel  
>tr|Q2FWF2|Q2FWF2\_STAA8  
mlkskfpsplstvdissfpeiyyisfyqdi1  
>tr|Q2FWF4|Q2FWF4\_STAA8  
mdkivikggkltgevkvegaknavlpil tasllasdkpsklvnpalsdvetinnvlttlnadvtykkdenavvdatk  
tln eeapyeyvskmrasi1  
vmgp1larlghaivalpggcaigstpieqhikgfealgaeihlengniyanakdglkgtsihldfsvgatqniimaas1  
akgk1lienaakepeivdl  
anyinemggritgagtdtitingveslhgvehaiipdrieagtlliagaitrgdifvrgaikemaslvykleemgveld  
yqedgirvraege1qpvd1  
ktlphpgfptdmqsqmmal1ltanghkvtetvfenrfmhvae fkrmaninvegrsaklegksqlggaqvkatdlraaa  
alilaglvadgktsvtelt  
hldrgyvd1hgklkq1gadierind  
>tr|Q2FWF6|Q2FWF6\_STAA8  
mtln1lnnskiiniklmgcgnmktfkavrfqivnehgriieyeledgviinkeesgtgw1leivisnehyetfkeyqdne  
q1ldirvvitrpandpal1f  
estvksiknfttmsivfechiytlrqyaes1leqliddgl1sgeelkksfnrmmskpk1kdeklee  
>tr|Q2FWG9|Q2FWG9\_STAA8  
mteqdnahhseqiktlnksrlnriegqvrainrmieedvycddvltqiratsalnsvaik1leqhmkscimknvnqgaq  
eamee11vtfklidk  
>tr|Q2FWI9|Q2FWI9\_STAA8  
mey1kpkklktsfynkkyeyhnwylks1firkffvqnleiviiiik1l1sfisifylslkntynrrl1flvsyciqp  
>tr|Q2FWJ0|Q2FWJ0\_STAA8  
mnhnypc1s1cfvrevrrqliveefkqhykglides1tcqdkvelikkcekytdevirkdvlpedivdihknyilt1nlt  
redvfk1dvlqeiw1  
>tr|Q2FWJ1|Q2FWJ1\_STAA8  
msykkfgysyrdyqrlvdk1qvhdkeidl asslqqtmlktdipqfdisiqigvisvaaqkvsgdyfnlidhndgtmsfava  
dvi gkgipaalamsmikfg  
mdsyghsq1psdglkrlnrvvekni nqnmfvmtfyg1yeemnh1lycssaghepgyiyraekee feeisvrgrvl gissq  
tryqqeipiyl ddi1i1  
tdgvtearnsegtfidkqk1leyikkhkhmhpqdivqiiyaik1lqnpnkddmti1iikrvn  
>tr|Q2FWJ7|Q2FWJ7\_STAA8  
mtni fkhni innv1knedvlnayirgrggmada1g  
>tr|Q2FWK6|Q2FWK6\_STAA8  
msktqhevqnidplkmaes1epeqlnekt1ndmrsgsev1veal1kenvdylfgyppgav1plydtfydgkikhil arh  
eggavhaaegy arvsgktg  
vvvtsgpgatnvmgtid ahcdslp1vvftgqvatpgigkdafqeadil smtspitkqnyqvrvedipkivheafhva  
nsgrkgpvvi d fpkdmgv1  
atnvd1cdeinipgyevvtepenkdidt fis1l1keakkpv1lagaginqsksnq11tqfvnkhqiptvt11glgavpye  
dt1flgmggmhgsyasna  
1tecd11in1gsrfd1askpdafapnakivhvdidpseinkvihvd1giiadckrflec1ndknvetiehsdvwkhcq  
nnkqkhpfk1geedqvfc  
pqqtieyigkitngeaivttdivgqhmwaaqfypfknhgqvwtsgg1gtmgfipssigaklanpdktvvcfvgdggfqm  
tnqemal1peyglvdkiv1  
inngt1gmvkqwdkffnqrfshsvfngqpdfmkaeaygvkgflidkpeqleeqldaafayqgpali evrispteavtp  
mvpsgksnhemeg1  
>tr|Q2FWK8|Q2FWK8\_STAA8  
miihcsivsnfifnlyivtnfn1nfl1skqiiysklivrkfki fvdilkqi  
>tr|Q2FWL1|Q2FWL1\_STAA8  
mpqvfd1errsfndsswtidafyheieqnnfakyfv1efeqqi igylglwividqaqittvaiddnyrgyglgqm11kyg  
inyashtcdvms1evrvnn  
kvaqhvyen1gfqyggkrknyygedamvmvvn1nd  
>tr|Q2FWL4|Q2FWL4\_STAA8  
miktmsienmrtyqqravn1wi kgvdnviycgyqvgkqkind  
>tr|Q2FWL5|Q2FWL5\_STAA8  
mi11q1nhisksfdgedi ftdvdfevktgerigivgrngagkstmkii agvenydsngvskikn1klgy1tqqmt1nsn  
atvfeemskpfehikrmes  
likeetdw1skhandydsdytkthmsryes1snqfeq1egyqyeskiktvl ygl1nfseedfnkpindfsggqktr1slaq  
m11nepd1111deptnh1d  
lettkwledyl ryfkgai viishdryf1dkivtqi ydvalgdvkryvgyeefiqqrdlyyqkrmqeyesqqaeikrlet  
fveknittrastsgmaksrr  
kilekmeridkpm1daksaniqfgfdrntgndvmhvkn1eigyqtaitkpm sievskgdhiaaigp ngigk stliktian  
qqkalngdi tfgan1qigy  
ydgkqae fksk1tdyvw dyp1mnekdi rav1grf1fvqddvki ind1sggekar1qla11mlqrdnvl1ldeptnh  
1didskem1legalqhfegt  
ilfvshdryfing1ankvfd1tidggkmy1gdyqyyiekveeaeal kahqeeqsvnvqahkksmeqssyhnqkeqrreqr  
k1erqiseceneietlett  
ilqideq1tqpevynnpqkanelai qkq dseq1lehamskweelqkk1

Tsompanidou\_et\_al\_Supplemental\_FASTA\_File

>tr|Q2FWL7|Q2FWL7\_STAA8  
myvqknnkmfyalljaitisiglliltatdilqipahsfpilgtiigsfifgigivlaggcatgtwyragegligswia  
lvlyavtaaitktgilkpv  
mdkingqptnvnstdmsqttgipfwglvvlitititflvrtlnkkvrvavpklkqrytgiiryylfekryhpfiaaivigl  
iallawpmsastgrndglg  
ittpsantlvhflitgetkfidwgvflvlgifigsyiaargsrefkwrldpkitirnsaiggicmgfgasvaggcsingl  
vetatmtwggwialasmiv  
gvwtmshfifvrpmkkvhqqsakvkqqtqiv  
>tr|Q2FWL8|Q2FWL8\_STAA8  
mihelgtvgmvpfpplieaqkkmatlqsgdelkidfdctgateaipnwaaengypvtneyeqidnaswtititqkv  
>tr|Q2FWM3|Q2FWM3\_STAA8  
mhciagflil1tkl1nmtrelkndvtslqipipitt  
>tr|Q2FWM4|Q2FWM4\_STAA8  
meialatdnpyevleqaknmndigcyflidiqlstidingiklgseirkhdpgvniifvtshseltylftvykvaamdffk  
ddpaelrtriidclataht  
rlqllskdsvetielkrsgnsyvyqyddimffesstksrhliahldnrqiefygnlkelsqlddrffrchnsfvnrhn  
iesidskerivyfknkeh  
yasvrnvkki  
>tr|Q2FWM5|Q2FWM5\_STAA8  
milmtipaiisgikyskldyffiiivistlsflfkmfdsasliiltsfiiimyfvkikwysillimtsqiilycanymy  
iviyaitkisdsvifvfp  
sffvvyvtisilfsyinnrvlkkistpylilnkgflivistilllftslfffysqinsdeakvirqysfifigitiflsl  
lftvisqfl1kemkykrng  
eeietyyeytlkieainnemrkfrhdyvnilttlseyireddmpglrdyfnknivpmkdnlqmaiklngienlkvreik  
glitakilragemnipisi  
eipdevssinlmidlrsigilnaieasteiddpiirvafiesensvtfivmncaddiprihelfqesfstkgegr  
glglstlkeiadnadnvl  
dtiengffiqkveiinn  
>tr|Q2FWN1|Q2FWN1\_STAA8  
msyhwfkkml1stsililssslglathtveakdnlgekpptnlhnhitspsvnsemnnetgtphesnqtgnegtgsn  
srdanpdsnnvkpdsnnqn  
pstskpdpnqnsspnkpdnpdpnpkpkpdpdpkpkpnpdpkpdnpdpkpkpnpdpkpkpnpdpkpkpdpkpkp  
pnpkpdnpkpnpspdpd  
qpgdshsggsknggtwnpnasdgsnqqwqpnngnqnsqntgndfvsqrflalangaykynpyilnqinklgkdygev  
tdediyiirkqnfsgnay  
lnglqqsqnyfrfqyfnplkseryyrnldeqvlalitgeigsmpdlkkpedkpdskqrsfephekddftvvkkqednkks  
astayskswlaivcsmmvv  
fsimlflfvkrnkknknesqrr  
>tr|Q2FWN8|Q2FWN8\_STAA8  
mttfsekekiqladivelqtenneidvcnyltdlfdkydikseilkvnehranivaeigngsplalsghmdvvdagn  
qdnwsyppfqktekdglly  
grgttdmkgglmalvvslielkeqnelphgtirllatageekeqegaklladkgylddvdgliiaeptgsgiyahkgs  
sckvtatgkavhssvfig  
dnaidtllfeynlfkekyseilkqadtkehdvapmfksligkeiseedanyasgltavcsiiinggkqfnsvpdeaslefn  
vrpvpeydnfdiesffqni  
indvsnklsldipsnhrpvtstdknskliittikdvassyveqdeifvsalvgatdassflgdnkdnvdlaiifgpgnplma  
hqideyiekdmylkyidif  
keasiqylkek  
>tr|Q2FWP2|Q2FWP2\_STAA8  
mktrcydgkkwyefkhegkryrkkgrfrtkreansagldklnelrsgfnidnyitlaeyfenwiktykqpvvkentyrhy  
rnalqhiqkhkigkmeisk  
inrqvyqkfindsayhaketirktngairsalddalydglifknpaykvnykagkptksekekfisvteyeilkdhvrk  
krtrsslalfimictgcrv  
sgarnikiehinqvntifiderktdtspryisiaksdmhimdvistfaisydgyifkeagsiinlqainnalksacrv  
npiitshalrhthcsyl  
lakgvsihyiskrlghkniaittsvyshlleekfneedkkttkilesm  
>tr|Q2FWP5|Q2FWP5\_STAA8  
mqnkketivyevltsgnqpfye1pkdlssharkylefisksldgdktkeds1  
>tr|Q2FWP6|Q2FWP6\_STAA8  
mrekvsnr1khimk1rn1kqvdi1nkskpyqk1gis1skst1sqy1ndvqspdqdry1l1skt1nvgeaw1mgydvdsy  
rvpdeerqdetimskinni  
fsqltpprgenvlnyaneqleeqnkvtsidgykesk1vsyiacgatgagigeelyddilheevffkedetpsnadfcilv  
ngdsmepmlkggtyafikk  
edsikdgtialvvlldgvslikrvdicedyinlvslnpkyddikvasfsdikvmgkvvl  
>tr|Q2FWP9|Q2FWP9\_STAA8  
mdiaiciaifsflltalyyldymkdsinidviptrsfnylvdskssynditfinftkfpisvidvefdiknkveqkt  
fkpirydknysipftlgp  
yesvectflleeypvievdvtikvttknkiyikpviesrtehresepqvtelstankvsal1snpkdgl1kkflyh1kp



Tsompanidou\_et\_al\_Supplemental\_FASTA\_File

>tr|Q2FWQ0|Q2FWQ0\_STAA8  
mqalktksnigemfnigekegeiaisarelykalevkkrfmsawaeinlkhfkenrdftsvltstvvngavrqlledya1  
tldvakhvammsgtekgfd  
freyfiqvekawnspeimim  
>tr|Q2FWQ1|Q2FWQ1\_STAA8  
mfewlrrngflikrkgvndymptqysmerelfeiketsithsdgthsisktpkvtgkqqyfvnkflgekqts  
>tr|Q2FWQ2|Q2FWQ2\_STAA8  
mqaqnkkviyyydeagnrrpvniqyndgydlmidprfiemtlerhphlknfyglidgkefkld  
>tr|Q2FWQ8|Q2FWQ8\_STAA8  
mkqvtvtylikhdenlfitnrptevndtvkystdmrdarefdglktdvidmskhkaikktvtetieyekvehd  
>tr|Q2FWQ9|Q2FWQ9\_STAA8  
mtektndvdiltqlgvkdiskqnankfykfaiykgfgtgkttfltkdnalvldinedgttvtedgavvqiknykhfsa  
vikmlpkieqlrengkqi  
dvvvietiqkldrtdmddgkllkptfndwgecatrivsiyryisklqehyqfhlaisgheginkdkddegstintpi  
tieaqdqikkavistsdv1  
armtieheqgdekaygyvlnaepsnlfetkirhssnikinnkrfinpsindvvqairngn  
>tr|Q2FWR1|Q2FWR1\_STAA8  
mqyitryqkndngtysvvatgveleqshidllengypkaevevdpnkksieqrkkifamcrdielhwegepvesirkll  
qteleimkgyeeislrds  
mkvarelieliiafmfhhqipmsietskllsedkallywatinnrcvicgkphadlahyeavgrgmnrnkmmhynkhvla  
lcrehnhqghaigvksfdd  
kyhlhdswikvderlnkmlkgekke  
>tr|Q2FWR3|Q2FWR3\_STAA8  
matfrvykesgnfvthkdfihdsni swkakgillyllsrpdnwqiyeteleqhstdglsglksgikeleeigyiqrsrk  
rdksgrlngyeylvyeqph  
hifsnvgktvngktngktvngkshttnnnstndltnnnntnnegsilsgnptvssipykeiieylnkkagkhfkht  
aktkdfikarwnqdfried  
fkkvidiktaewlntdsdkylrpetlfgskfegylnqkiqptgtdqlermkydesywd  
>tr|Q2FWR5|Q2FWR5\_STAA8  
mvtkeflkiklscsmyaqklikeaqgdenklydlfiqklaerhtrpavvey  
>tr|Q2FWR6|Q2FWR6\_STAA8  
mpkekylyredgtedikvikykdndvnevysltgahfsdekkimtdrdlkrfkgahgllyeqelglqatifdi  
>tr|Q2FWR7|Q2FWR7\_STAA8  
mskynakkveykgivfdskeveyyqylesnmngtnydrielqpkfelqpkfgkqrpiytiadflswekglvevidvkg  
katevanikakifryqyrd  
vnltwickapkytgqewmvyedlvkvrkrkremk  
>tr|Q2FWR8|Q2FWR8\_STAA8  
mqqqayinatidiripteveyhhfddvdekdmlakrlddnpedllkydnitirhayieve  
>tr|Q2FWR9|Q2FWR9\_STAA8  
makaarivrihdkpyrfskfemeli eshgitagmvskrvkdgwelheamdapegtrlseyrektierleqarlerkler  
krkreaelrrkkphlfnvp  
qkhsrdpywfdntynqmfkqwqev  
>tr|Q2FWS0|Q2FWS0\_STAA8  
mpktdsackeylnqffgskrylyqdnervahihvngtyyfhghivpgwqgvkktfdtteeletyikqhgleyeeqkqlt  
lf  
>tr|Q2FWS1|Q2FWS1\_STAA8  
mmpkfrawkdkkkvmsfideidfnsgyilistgyksfnevkllqytgfkdvhgveiyegdivqdsysgevsfiefkegaf  
yitfsnvteliseندي  
ignifeneellevmr  
>tr|Q2FWS2|Q2FWS2\_STAA8  
mtvtlsdeqyknlctklnllgkfhkaikerdeykkqdelivdigklrernkelenmwrtnkellgryehycfkfrel  
hpeskanrigalyiggkst  
adiimsrmeeldgtnefyeflgmeedtne  
>tr|Q2FWS3|Q2FWS3\_STAA8  
mnreqieqsvisasayngndtegl1keiedvykkaqafdeilegmtnaiqhsvkegieldeaigimvsqviyeykee  
neki  
>tr|Q2FWS4|Q2FWS4\_STAA8  
mnrtrnwrkkfnnqitytgmeieaeaealeaeafeahdiarmevpfdcdefeinveveqene  
>tr|Q2FWS5|Q2FWS5\_STAA8  
mnntltdlqellqikefddriptlnlrdskiyvveffewfntletfknwkkkpgkpldvqldeladmlafglsian  
qvgvsseeikeaiesfkn  
tefhkmfnfkdefaqdavvstpqiifkefypdqlaivividiaynlisidqlidaykkkmkrnherqdgtagkgyv  
>tr|Q2FWS7|Q2FWS7\_STAA8  
mtqylvttfkdssglphehftaardnqftvveaeskeakekyeaqvkrdaviklgqlfenirecgk  
>tr|Q2FWS9|Q2FWS9\_STAA8  
myfryrrlycllcssstcsylsfhvflscytcntsdninyflislfirfnsilyssnplyplvlttssr  
>tr|Q2FWT0|Q2FWT0\_STAA8  
mynrkeiremidnykwmkniidskvydnestsiaqgyqsampkagttsnkvlkvinknalrkydylikkiafidey

Tsomanidou\_et\_al\_Supplemental\_FASTA\_File

eeyitnekdyhilqmlkqr  
eshnrimsildigrndfysrvkdivnilynqqetdssdtsysdtsysdtsysd  
>tr|Q2FWT1|Q2FWT1\_STAA8  
meiskyqeiatrthndeInlneyitcyglgtqstgnvtdlikqhmfcnpidkgiminelsealnwanltnvlginld  
ejaghsvntilmkpnqti  
nldngikrgdkvlfqgskyldvgsignlllIsndkddrqvtvqdvkkvde  
>tr|Q2FWT2|Q2FWT2\_STAA8  
mkrcghptcnvlinhnesycdkhkqyanenyndlrrndpeylrfyksktwqnmrrivllehdficvscgnqatmvdhiv  
ptkidwarrldksnlqplc  
dachnqktkedlkky  
>tr|Q2FWT3|Q2FWT3\_STAA8  
magrpkkllsnsnknytkeeiekerqeaqlnkfskidtepphfldeiakqeylriiphmqelpisnldkaqlaqycsfy  
sdfvkalileredliled  
dkgnqkvnfpafnikekagirlqqtantlgltdsrIrimvpdekedddpymefvsd  
>tr|Q2FWT5|Q2FWT5\_STAA8  
mkaknsdfkggdkmdlNkinvffnflvanlvsilflglfvvnsvyvakfggnigllcigitlvisilInhesnqers  
>tr|Q2FWT6|Q2FWT6\_STAA8  
mqItaeelkllkkhckidhnseddllEiyswafreiasavtdkpskyidwfkshplfaraiyplasyyfenriayldrd  
lsIaphmvIstvhklrgsf  
eqflesendei  
>tr|Q2FWT9|Q2FWT9\_STAA8  
minvtklirnaiiannitdevnvfnytidhdhfehtdkpiiriypIpfnpdyaddneisreyhyqidvwsqdepneqa  
ekiveIlkvinfqcyrep  
lyesdvmsfrhii rakgsilsmkleen  
>tr|Q2FWU2|Q2FWU2\_STAA8  
miekgmdaekvanmpihffldiveskietkrtaksfkdif  
>tr|Q2FWU3|Q2FWU3\_STAA8  
mpnpiGnmvikvdldgsgfnrgvtglNrqmkmsrelsanlsqfsrydnslekskikveglskkqkvqaqitkelkdsyd  
klsketgensaktqaaaak  
yneyaklnqyereInqatqelkdmqreqkaIntamgIgtfnfnfgpklqeignsmknvgrnmtmyvtapvvagfavaa  
kkgiefddsmrkvkatsga  
tgeefeaIkkkaremgattksasdsaealnymalagwdsqmmegIsgvmdlaasgeeleavsdIvtdgltafglkak  
dsghfadiIaqtsskantd  
vrglgeafkyvapvagalygtiedtsiaigImsnagikgekagtalrtmftnlssptramgnemerlgisitdsngkmip  
mrklldqIrekfkhlskdq  
qassaati fgkeamsgalaiinasdedyqkItksidsstgaskrmatdmesglggklrtIrsqleelaltiydriepalk  
iivsafsKvvtwvtklpts  
IqlavvgfI faavlgplvfmgfI fIsvmgnamtvlgpllinvknagglfafIrtkiaslvklfpilgvsissltIpitI  
ivgalvgigIafyqaykrs  
etfrnIvnqaisgvanaFkaakIalqgffdI fkgdskgavtleki fppetvagiqnvntirttffkvvdaivgfakeig  
aqIasfwkengseitqalq  
niagfikatfefifnfiikpimfaiwqvmqfiwpavkalivstwenikgviqgainiilgiikvfssIftgnwrgvwdgi  
vmIkgtvqIiwnIqIwlf  
vgkiIgvvryfgllkgIisgiwgvikgIftksIsaiwnatksifgflynsvksiftmknwIstwnniksntvgkaks  
IftgvrskftsIwnatkdi  
ftklrnwmsniwnsikdntvgiagrIwdkvrni fgnmrdglksiigkikhiggmvdaiKkgInkliiegInwvggklgmd  
eiprlhtgtehttttrlv  
kngkiardtfatvgdkgrngpngfrnemiefpngkrvitpstdttayIpkgsKvyngaqtysmlngtlprfhfgttmwk  
dikssassafnwtkdqigk  
gIkwIgdKvgdvmfdI dnpkllnyvlqafgvdfssltkgmgIagdi tkaawskikksaikwledafaesgdggvl dmsk  
IrylyghaaytretgrpI  
heglfdIyIepvpstingraqvmpvhnggygkwkivkgaIeviyahlskykvktgqqvrvgqtvgisgntgfstgphI  
hyemrwngrrhdpIplwrk  
nngggkstpgngaanarraiKaaqniIggrykaswInemmrvasresnytanavnwdsnaragipsrgmfqmidpsf  
rayaksgynnplnphqai  
samryivgkwvprtgsWraafkragdyayatggkvynghylgeegypewiIptdpsraneahklIalalaandidnrsknk  
rpnnlnpsisnsdtnyih  
tIenklDavincIvsIvesnqviadkdyepvinkyvfevvnnsidkrerhestrvrfrrggtii  
>tr|Q2FWU4|Q2FWU4\_STAA8  
mqdtIqIdnktIgwIvvrqgfepIpsfnfvtekenvkgragsivknryIIndiefdlpliirneklspggeKthddIealv  
kffniKdltpkklkfsqn  
wywfayfdgplklpknprgsvkftikvvltdpykysvtgnkntaisdqsvsvnsgtadtplivearaikpssyfmitknd  
edyfmgddevtkevkdym  
ppvyhsefrdfkgwtkmi tedipsndlggkvggdfvisnlgegykatnfpdakgwgagtkrgIpkamtdfqitykcive  
qkgkgagrtahIydsdgk  
llasiGyenkyhdrkighiIvvtlynqkgdpkIydyqnkpimynI drivvymrlrrvgnkfsiktwkfdhikpdrkpi  
dmdekewidggkfyqrpas  
iiaIysakyngykwmemngIgsfnteiIpkpkgardviIqkgdlvki dmqaksvvi neepmlseksfgsnynfvdsGyse

liiqpenvfddttvkwdry  
1  
>tr|Q2FWU5|Q2FWU5\_STAA8  
mihvldfndkiidflstdpslvraihkrnvdnsemlellisseraekfrerhrviirdsnkqwrefiinwvqdtmdgy  
teieciasyladittakpy  
apgkfekkttsealkdvlstdtgwevseqteydg|rttswtsyqtryevlkqlcttykmaldfyielssntvkgrvvlkk  
knslfkgkeieygdvlg|  
trkidmseiktaliavgpendkgkrlelvvtddeaqsqfnlptryiwgiyepqsddqnmnetrlrslakteInkrksavm  
syetstdlevtypheiiis  
igdtvrvkhrdfnpplyveaeviaeeyniisenstytfgqpkfekeselreefnkrlniihqklnndnisnintivkdvd  
geleyferkihknndtpen  
pvndm1wydtsnppvavlrrywngrwieatpndveklggitrekaIfselnnifinlsiqhasllseateInseylvnd  
dlkadlqasldavidvynq  
iknnlesmpetatigrldvtqalfleyrkk|qdvtydvedvkiaisdrfkllqsqytdkykealeiiaatkfg|tvned  
lqlvgepnvksaieaare  
stkeqlrdyvktedyktdkgd giver|dtaeaerttlkgeikdkvt|neyrngleeqkqytddq|sdl|snpeikasieqa  
nqeaqea|ksyidaqdn|k  
ekesqayadgkiseeqraiqdaqakleakqnaelkarnaekkanaytdnkvestdaqr|trygsqiiqngkeik|  
rttkeefnatnr|l|sn|n  
eivqnvtdg|tti|ryddngvaqalnv|gprgir|n|adkidingnrein|l|liqnmrdkvdktdivns|n|sreg|ldin|vnr|ig  
ikggnnryvqi|ndsie|l  
ggivq|rtwk|gkr|stddi|f|tr|k|dgh|l|r|fr|nt|taggs|lymsh|fg|isty|idge|ged|gg|ssgt|iqww|dk|tys|dsg|mng|it|ins  
yggvvaltsdnrvvlesy  
assnikskqapvlypntdkvp|l|nrfa|t|l|snad|nays|sdgy|imf|gs|deny|dygagi|rf|skern|kg|lvq|ivng|ryat|gg  
dt|ieag|yg|k|f|nm|l|krr|dg  
nryihqstd|l|svgs|dd|agdri|asn|iyrr|tysaaan|l|hits|agt|igr|stsarky|k|sien|qy|ndr|deq|lehs|kail|n|l  
pirtwfdkaeseilare|l|r  
edrkl|sed|tyk|l|dry|v|gl|iae|even|gl|ke|fv|ty|dd|kge|iegi|aydr|l|wih|lip|vike|qq|l|rikk|lees|knag  
>tr|Q2FWU6|Q2FWU6\_STAA8  
mqdnkqglqanpeyti|hy|lsqe|imr|l|tqen|am|kay|iqen|ken|qcaeee  
>tr|Q2FWU9|Q2FWU9\_STAA8  
mdrwwlseykevvp|mv|val|ks|lerr|l|mit|istm|l|qfg|l|flial|ig|lvik|liels|nkk  
>tr|Q2FWV0|Q2FWV0\_STAA8  
mifilwcvnlyiekgqhaqtcypnepvkk|tva|ild  
>tr|Q2FWV3|Q2FWV3\_STAA8  
mlkrs|l|fl|tv|l|l|l|fsf|ssit|nevs|asss|fdk|gky|k|gdd|asy|fept|gpy|l|mv|nv|t|g|v|d|g|k|g|ne|l|s|p|hy|ve|f|p|k|p|g|t  
t|l|t|ke|ie|yy|vewa|l|data  
ykefrvvel|dps|aki|ev|ty|y|dn|k|k|ke|et|ks|f|p|ite|kg|fv|vp|d|se|hik|n|p|g|f|n|l|t|k|vi|ie|k  
>tr|Q2FWV4|Q2FWV4\_STAA8  
mpagy|t|l|dk|nn|v|py|k|ket|gy|yt|van|v|k|gn|n|v|rd|g|yst|ns|rit|g|v|l|p|nat|iky|dg|ay|cing|yr|w|ity|ians|g|rry|iat|g  
evdkagnrissfgkfsav  
>tr|Q2FWX3|Q2FWX3\_STAA8  
myeyeryfeq|l|ngv|dege|il|k|k|l|kdp|q|d|va|et|kars|vidya|eskpt|fenis|ravaas|l|s|g|il|s|if|vil|ip|vs|iv|g|l  
fv|al|fl|is|l|l|l|l|fc|pi|il  
lasaisrgivds|snv|ffais|ysg|lg|lvfi|iv|fk|iley|yr|l|il|ky|l|l|wy|ikt|v|k|g|svr|k  
>tr|Q2FWY5|Q2FWY5\_STAA8  
mvdfl|l|fv|l|fl|h|da|avy|vs|l|p|lv|q|ai|an|vt|fy|fs|f  
>tr|Q2FWZ5|Q2FWZ5\_STAA8  
mdyffaqvemrdn|pk|l|kg|kp|vi|vgg|kass|rgv|vst|asye|arky|g|vhs|amp|ms|qah|k|l|cp|ngy|fv|tsn|fgay|ret|saq|ims  
ifrsytdkvepms|l|deay|l  
ditelvrp|d|l|pask|iaqy|irk|di|eqth|l|tas|agvs|ynk|flak|lasgmn|k|p|d|gmt|vidy|qnv|hd|il|mt|l|dig|df|p|g|v|g|ka  
skkvmhdngi|f|ng|rd|lyek  
tefelir|l|fg|kr|gr|g|l|nk|argi|dh|sev|k|ss|rvr|k|sv|g|t|ert|fat|dvnd|dee|il|rk|v|el|s|g|k|taer|l|nk|l|q|ks|akt|vtv  
kiktyqfet|l|sk|qms|l|rds  
vsseediyniay|l|lynd|l|kdp|dv|pir|l|ig|vtv|gn|leq|sty|kn|mt|iy|dfi  
>tr|Q2FWZ9|Q2FWZ9\_STAA8  
mrqwtaih|l|ak|l|ark|as|rav|g|krg|td|l|pg|qi|ark|vd|td|il|rk|laeq|vdd|iv|fis|gtng|ktt|tsn|light|l|kanni|qi|ihn  
neganmaagi|t|f|afim|qst  
pktkiavie|degs|iprv|l|kev|tps|mmv|ftn|ffrd|qmdr|fge|idimv|nnia|et|isn|kgik|l|l|nadd|pfvsr|l|kias|dti  
vyygm|kaha|he|feq|stmne  
srycpncgr|l|lydy|ihyn|q|ighy|c|q|c|g|k|req|akye|iss|fdv|ap|fly|l|ni|ndeky|dmki|agd|fnayna|laay|tv|l|re|l  
g|l|neq|ti|kng|fety|ts|dng  
rmqyfkkerkeamin|l|akn|pagmn|as|l|svge|q|le|gek|vyvis|l|ndna|adgr|dts|wi|y|dad|fek|l|sk|qq|ie|ai|ivt|g|trae  
elqlrlk|l|ae|ve|vp|i|iver  
diy|kata|kt|mdy|kg|ftv|aipny|ts|lapm|leq|l|nrs|fegg|qs  
>tr|Q2FX02|Q2FX02\_STAA8  
mkptkvi|l|kdasy|l|hsk|ts|it|fil|kdv|vieed|nk|iy|y|f|dts|at|fed|qevk|fefa|l|f|ds|dm|dn|l|kh|md|c|dn|pv|te|iy|fie|p  
dlhfti|id|fn|qe|ll|ci|yid

Tsompanidou\_et\_al\_Supplemental\_FASTA\_File

fdsgl r hsnmatesgislrinvaksdf tkfinelaslh  
>tr|Q2FX04|Q2FX04\_STAA8  
mqvggaptqkltkstlmcrlagpqrhgrestistgnaswggttkyfffitlclthfpy  
>tr|Q2FX05|Q2FX05\_STAA8  
mivkteeelqalkeigyicakvrntmqaatkpgittkelndniakelfeeygaisapihdenfpgqtcisvneevahgips  
krviregdlnidvsalkn  
gyyadtgisfvvgesddpmkqkvcdvatmafenaikvkvpgtkl snigkavhntarqndlkviknltghgvglslheapa  
hvl nyfdpkdktlltegmv  
laiepfissnasfvtegnwafetsdksfvaqiehtvivtkdgpil ttkiee  
>tr|Q2FX06|Q2FX06\_STAA8  
mnyveryieqflratvrnnikhylmldek mknlddymrylitkkeklsklidslmltlenkyidiaeafiqicareinn  
geienikselnkveayyaq  
ietqiqtstekiatektsylinymnava  
>tr|Q2FX16|Q2FX16\_STAA8  
mrrnkpkisinqndpweayndvkehqgl tlnsieftttlnlcnmrshcavgytlqtvdpepldmdliyrndeipnlrtms  
itggepmfsskksirnvkpv  
llkyahrgiytqmnsnltpqdryldiaeyidvmhishnwgttdefanvgfgamkkqpplkaklklyeqmisanrtlse  
qgmfvsaetmlnqstlphl  
rkiahqevvhdmkcsrheihmpyadfasqlnvl tlaemkktihdil dfrdediwm lfgtlpvfpc lkddedqkllsrln  
aknvttrndpdgrsrlnvn  
vftgnvivotdfgdetgtisniqkdkltdvfdkwlssdlakslnchcsefsc lgpnlvknmyypnmdfdknerhmkhqqp  
iiqf  
>tr|Q2FX17|Q2FX17\_STAA8  
mpvykddntgkwyfsirykdvgygnkrkmkrgerkkdaklaesefiqnvkygysdnqpfeyiffdrlnkenlsarsiek  
rtteynthikerfgnipig  
kitttgctafnyllndaglsvdyarsvwagfkavinyakkhykllydptlsvtpiprtpkqakfitreefdekveqitn  
dtsrqltrllfysglrige  
alalqwkdydkikgeidvknkinlsnrkieynlkesskgiipvpnliremknmynesskrykyfdenyfi fgglepir  
yvtysyhfksvfpnlkih  
lrhsyasylinngvdmylmlmrhsnitetiqtyslytdkkhqamsifd  
>tr|Q2FX18|Q2FX18\_STAA8  
mtfknnhfnelvltnediri lknvledavsvydeysvcneesdfayc llrdlytl ds laissnv  
>tr|Q2FX19|Q2FX19\_STAA8  
meekqylwryndiekrmnelhkkykelvdi ffgdvidkntgyfpyfsgikysyadlnisfyrgliyihggsegmqakkin  
isvddvlkrtersfeklse  
yikstfi fekvihdfqmfnl sdlasiynddai ahyyfethsdlylsdkstkiyrtpnsllenandl paslrkytqlletv  
ndkdfethiveaydcfms  
kr latslllgralelmcrlilnkfdkdiikqtpdykrnirtflnemndlieehlkhsvkaaiehrnsimhgikieeyn  
siiqtlfdeiaklsnyks  
lnkq  
>tr|Q2FX20|Q2FX20\_STAA8  
mesyeeiehihintgrkkl tgeqieeakafidsqgfkdmireakesrqrvmeskitdrtkm  
>tr|Q2FX21|Q2FX21\_STAA8  
mkitnckikketiyyevl tsgnqpfye lpkdlsshnarkylefisksidgkln  
>tr|Q2FX22|Q2FX22\_STAA8  
mdkkelakfignkiryrtkl nltqdqlgek lntkkatisnyetgyrtpkqddlfeiahilnisiddl fptrnkkndit  
siynkltpprqenvlnyan  
eqldeqnkvtsideykeslvsyiacgatgagigeelyddilheevffkedetpsnadfcilvngdsmepmlkqgyafi  
kkedsikdgtialvldgv  
slkrvdicedyinlvslnpkyddikvasfsnikvmgkvvl  
>tr|Q2FX23|Q2FX23\_STAA8  
mqwnliklrkerkctgedlanllnistegyr lkelgkhqfkndemfi adffdenigidiflptkytkrkqts  
>tr|Q2FX25|Q2FX25\_STAA8  
mqalqtfnfkelpvrtveienepfyvgkdiaeilgyarsdnairnhvdsedklthqfsasqnrnmiiinesglyslifd  
askqskneki retarkfkr  
wvtsdvlpairkhgiyatdnvieqtlkdpdyiitv lteykekeqnl llqqeigelpkadyvdeilkstgtlattqiaa  
dygisaqklnklhearlq  
rkvnkqwllysehmgsytdsdtitivrsgredtv lqtrwtqkgrlkiheimtefyeanlgga  
>tr|Q2FX27|Q2FX27\_STAA8  
mna lyktllttmavvtwkvwkierntkrpvinnrdfskestaetierhsdpdsgikllkafsdftkqaekqkptlgevy  
rnrkpelptvtldenglfi  
ndfrvpyvleegvnnkksmnlkyvsldffaksiiadnyeadnpenqqlf  
>tr|Q2FX28|Q2FX28\_STAA8  
mqiitkqitqrinsyfkkgkdmknslqake lavilsvskskagqiirelnkeledegyiairgripvqlarkkfyhdll  
sdqrimeelkkene  
>tr|Q2FX29|Q2FX29\_STAA8  
msniyksylvavlcftv lai v lmpflyfttawsiagfasiatfifykeyfyee  
>tr|Q2FX31|Q2FX31\_STAA8

Tsompanidou\_et\_al\_Supplemental\_FASTA\_File

mnykttktrrtkktrrttrtmykigeiknkkiisfngfefkvsvmkrhdgisiqikdmnvpklsfhvidlselyiatda  
mrdvinewienntdeqdkl  
inlvmkw  
>tr|Q2FX32|Q2FX32\_STAA8  
mndlqereletfeqddrfkvtdl dsanwvfkkl daittkeneindlankeierinewkdkeveklqsgkeylqslvieyy  
riqkeqdsfkln tpygkv  
tarkgskviqvsneqevikql egrgfdnykvtkklsqsdikkdfnvtengt lidangevlegasivekptsytkvge  
>tr|Q2FX33|Q2FX33\_STAA8  
mtektngdvdi l tqlgvkdisqnankfykfaiykgfgtgkttfltkdnalvl dinedgttvtedgavvqiknykhfsa  
vikmlpkjieql rengkqi  
dvvietiqkl rdi tmdidmgskkptfndwgecatrivsiyryisklqehyqfhlaisgheginkdkddegstintpi  
tieaqdqikkavisqsdvl  
armtieehedggektygyvl naepsnl fetkirhssnikinnkrfinpsindvvqairngn  
>tr|Q2FX34|Q2FX34\_STAA8  
mkggdf l gageftvkvanvefndrenryftivfennegkqykhnfvpffqdyqekqyie l lsr l gik l n l p d l t f d t d  
qlinkigtiv l knkfneeq  
gkyfvr l syvkwnkddevvnkpepkt demkqkeqqangqtpmsqqsnpfanangpieindd l p f  
>tr|Q2FX37|Q2FX37\_STAA8  
mqqqayinatidiri pteveyqhyddvdkekdtl akr l d d n p d e l l k y d n i t i r h a y i e v e  
>tr|Q2FX38|Q2FX38\_STAA8  
mklnevfatnl rvimardnsvqd l hnetgvsrstisgykngkaemvnlvl dkladalgvnvsel ftrnhnthkl edwi  
kkskcieve  
>tr|Q2FX39|Q2FX39\_STAA8  
msivkingkpykftehenelikng l tpgmvakrvrggwal leal hapygmr laeykeivl skimereskeremarqrrk  
eaelrkkkph l fnvpqkhs  
rdpywfdttynqm fkkwqea  
>tr|Q2FX40|Q2FX40\_STAA8  
mpktdsackey l nqffgskry l yqdnervahihvvnngtyyfhghivpgwqgvkktfdtae l etyikqhg l eyeeqql t  
l f  
>tr|Q2FX41|Q2FX41\_STAA8  
mnnreqieqsvi sasayngndtegl l keiedvykraqafdeilegmtnaiqhsvkegie l deavgimagqvvykyeeeqg  
k  
>tr|Q2FX42|Q2FX42\_STAA8  
msnksnseiikrv l etsksdiniw dvl sefdseqeeei l d fidenieefeif l n t a l i h i v e r l k l r i a f a t a r e e q e n d  
>tr|Q2FX43|Q2FX43\_STAA8  
mlqlgrsrkmtnt l qvr l l senarmpernhktdagydi fsaetv l epqekaviktdvavsipegyvg l l t s r g v s s k t  
h l v i e t g k i d a g y h g n l g i  
nikndaiasngyitpgvfdikegid l sdairqygytiqinegdklaqlvivpiwtpelkqveefesvsergekfgfsgsv  
>tr|Q2FX44|Q2FX44\_STAA8  
msyit l v p i l v f i v i f n n l n r y m v l y k e l d l f t c r i g m l l v l i v i d f a k q k n m l a t l s v l i l l f v e k l r i i q r s d k  
k  
>tr|Q2FX45|Q2FX45\_STAA8  
mtqylvtffkdstgqphehfttardnqtftvveaeskeeaerkyeaqvki rrdgdakengnd  
>tr|Q2FX46|Q2FX46\_STAA8  
mpkktvtidvden l l vvasneise l l yeydse l msadedgdnr d i k e r d a l k q a i q i d k l t w g v  
>tr|Q2FX47|Q2FX47\_STAA8  
mgclvvvkei l r l l f l l a m y e l g k y v t e q v y i m m t a n d d v e a p s d f a k l s d q s d l m r a e v s e  
>tr|Q2FX48|Q2FX48\_STAA8  
mmwliiaii l l v i l l f g v m l q a e q l k g d v k v e r e i e i l r s r l r h f e d  
>tr|Q2FX49|Q2FX49\_STAA8  
mtkkkyglklstvrkl edelcdypnyhkqled l rseimtpwiptdtniggefvpnsntsktemavtnylcsirrgkilefk  
saierii ntssrkerefiq  
eyyfnkkelvkvcvdi h i s d r t a h r i k r k i i s r l a e e l g e d  
>tr|Q2FX50|Q2FX50\_STAA8  
mnekqkrfadeyimngcngkkaaitagyskkaes l a s r l l r n v n v s e y i k e r l e q i q e e r l m s i t e a l a l s a s i a r g e p  
qeayskkydh l ndevekev  
tyt i t p t f e e r q r s i d h i l k v h g a y i d k k e i t q k n i e i n i g e y d d e s  
>tr|Q2FX51|Q2FX51\_STAA8  
mtkvkl nfnkpsnvfnrni fei l t n y d n f t e v h y g g g s s g k s h g v i q k v v l k a l q d w k y p r i l w l r k v q s t i k d s l f e d  
vkdc l i n f g i w d m c l w n k t  
dnkvelpngavfl fkg l d n p e k i k s i k g i s d i v m e e a s e f t l n d y t q l t l r l r e r k h v n k q i f l m f n p v s k l n w v y k y f f  
ehgepmenvmi r g s s y r d n  
kfl demtrqn l e l l a n r n p a y y k i a l g e f a t l d k l v f p k y e k r l i n k d e l r h l p s y f g l d f g y v n d p s a f i h s k i d v k k  
kkl yiieeyvkqgm l n d e i  
anvikqlgyakeeitadsaeqksiae l r n l g l k r i l p t k k g k g s v v q g l q f l m q f e i i v d e r c f k t i e e f d n y t w q k d k d  
tgeytnepvdtynhcids l  
rysverfyrpvrkrtn l sskvdtikslgl  
>tr|Q2FX52|Q2FX52\_STAA8

Tsompanidou\_et\_al\_Supplemental\_FASTA\_File

m1kvnefetdtdlrgninylnfndeanvvytydgtesdl1qnvnevskyiehhmdyqrprl1kvl1sdyeygktnlveltrr  
keeymadnrvahdyasyis  
dfingyflgnpiqyqdddkdvlevieafndlndveshnrs1gld1siygykayelmirnqddetrlyksdamstfviydnt  
iernsiagvryl1rtkpidk  
tdedevftvd1ftshgvyryltsrtn1gk1tprengfeshsfermpitefsnnerkgydyekvitlidlydnaesdtany  
msd1ndam11kgn1n1dp  
vevrkqkeanv1fleptvyadsegretegsvdggyiykqydvqgteaykdr1nsdihmftntpmkddnfsqtqsgeamk  
yklfglegrtktkeglftk  
glrrrak11eti1kntwsidankdfntvryvyrn1pkslieelkayidsggkisqttlms1fsffqdpellevkkieede  
kesikkaqkgiykdprdin  
ddeqdddtkdtvdkke  
>tr|Q2FX53|Q2FX53\_STAA8  
mpnkntqeyweergkaienelkrdktaeeierilnmmikriekeinafivkygdfagvtlqeaqkiidefdvkafqee  
akr1venkefsdraneelk  
kynstkmyvsreqm1kiqiefliayataqtelmsreyfestayrvfsdqagilgegvvakevidtividtqfhgvvser1  
wtnteamkqeveeianvv  
irgrhpnayvkdmrkhlnkfegtarqktaaiks1lytesarvhaqssidsmkeispegyymiakidnr1ttkvcg1nge  
ifkvdakigvnyfpmhin  
crsdcallpksmwpkpkpkrktkyfggkvksgd  
>tr|Q2FX54|Q2FX54\_STAA8  
msntdkylrdiare1kgrkelqkrnetviidan1ds1rsavladkekskyneplf  
>tr|Q2FX55|Q2FX55\_STAA8  
meen1kfn1qffadqsddepdggdggkgnpdkkendegteitftpeqqkvdeiler1rrvahekkkadeyakekaaea  
keaklakm1kdkdeyer  
eqmekeleqlrseq1nemrsearkm1seavdssdevn1vvt1taeqtk1nveafsnvkkavneavkvnarqsp1tg  
gdsfnhstknkpqlaeia  
rqkriikn  
>tr|Q2FX56|Q2FX56\_STAA8  
meqtqk1k1n1qhfasn1vkpvfn1pndvmmhekkdgt11ndfttpilqevmenskimq1gkyepmegtekkftfwadkp  
gaywvgegqkietskatwv  
natmrafk1gvi1pvtkeflnytyqqfeemkpmiaefykykfdagilnqgnpfgksiaqsiektknvikgdf1qdn1  
id1eal1eddeleanafis  
ktqnrsl1rki1vdpetkeriydrnsds1dglpvn1kssn1krgel1tgdfdkliygipq1ieykidetaqlstvknedg  
tpvn1feqdmvalratmhv  
alhiaddkafak1vpadkrtdsvpgev  
>tr|Q2FX57|Q2FX57\_STAA8  
mpei1g1vkvdft1lednrhvy1mkg1hvyprkgynptderikalasvenkrnkqmiyivndk1tkkelveiasvag1qvde  
kqtkaeiinafes1e  
>tr|Q2FX60|Q2FX60\_STAA8  
mnidgl1dal1nqfhd1mkt1n1dddvdi1qenakeyvvrak1karevmnkg1ywtgn1srni1rykktgd1qyt1tshaaysg  
fl1efgtrymeaepfmwpvy  
evirkstveel1kalfe  
>tr|Q2FX61|Q2FX61\_STAA8  
mtpn1q1ynkayet1qgygfpvi1srkemqei1pypffvikmpesnrskyt1f1dsysgdtn1vidi1wsvsdd1ghhdglvkr  
cidd1tpsvktndydfeee  
dtnitq1vdd1tnqe11htsvt1syktf  
>tr|Q2FX62|Q2FX62\_STAA8  
manmksndri11frkagekvdatkmlf1teygl1sheadt1dted1mdgsyntggsvestm1sgtakm1fygddfadeiedav  
vdrvl1yeawevesripgkn  
gdsakfkakyf1qgfh1kfelkaeangi1deyeyegvng1rfqrgfat1peavtkk1katgyrf1hdttkadal1tged1taip  
qpkvdsppvaprev  
>tr|Q2FX63|Q2FX63\_STAA8  
mnveingks1e1sfgfkf1reidnr1gl1kveqas1ggqvsml1pvglesgnpvvige1v1iaatsh1kkqaitinnideald  
eiaenig1leefgsd11tel  
gkrp1mtrn1levveteekpaea  
>tr|Q2FX64|Q2FX64\_STAA8  
mst1g1td1nvi1eqmt1teynrmyakeyem1tqeferyk1afairdaatknvgtenkpk1eeyvfnandv1pyeeniq  
r1negkdi1rfsser1deyep  
qneffkvi1aefnkq  
>tr|Q2FX65|Q2FX65\_STAA8  
mtey1katieasvak1fkrq1dsavksv1rfrvadqtkdve1nandkn1qktikvakks1dafsnknvkak1das1qd1  
qqkvlesn1fel1dk1nskev  
tpevk1qkqk1k1kdi1aeteak1selekkrvni1dvnadn1skfnrv1kvskas1ealnrskakai1dvdngvanskikrtke  
elks1pnktrsr1ldvdtgl  
siptiyafkks1dal1pnkkttkvdvdtng1kkayay1ikandn1fqrqmg1n1anmfrvfgtvg1snmvgg11tssfs1ilipv  
iasvvpv1fall1naikv1t  
ggv1al1ggavai1agafvafgamaisaikm1ndgt1qassatneykka1dgvksawtdi1kqnqsai1fttlang1ntvkt  
amqsl1qpf1fsgisrgmee

Tsompanidou\_et\_al\_Supplemental\_FASTA\_File

sqsvlkwaenssvasrffnmmttgvsvfknllsaaggfgdglvvnftqlaplfqwsadwldrllgqsfswansaagens  
itrfeietyktnlpiignif  
knvfvginlmmnafsgsstgifsleqmtakfrewseqvgqsqgkdfvsiqtngplimqligniarglva fatamapi  
asavlravaitgwianlf  
eahpataqlvgviiitlvgafrflipiilavsnfmgggligriialvskfgllragltilkgafmllkgplkiisvifqll  
fgkiglrnaitglvtvfg  
ilggpitiivigviaaliaifvllwnknegfrnfiinawnaiktfmvvnwvnlkavasvwnailtattavsnvynfimi  
vwnqivaylqglwngiiai  
attvwnllvtiittvfttimtivmtiwtaiwftlstiwnitiatiwllvtvittvfttimtiaitiwnaiwftlqt  
lwntjivtvatkvnaitta  
istalqaawsfisiwntiwsflsgilttiwnkvvsiftqvvtisdkmsqawnfivtkgmqvwstittstlinfvnrvvq  
gfvnvnkvsqgmtnavnk  
vksfvddfsagadmigrimrgigimardlaekaasvakgalnaakralgihsprefmdvgymsmlgfvkgidnhsskv  
irrvsnvadkvvdafqptl  
napdissitgnlslnggninaqvqhtsietspnmktvkvefdvndaaltsivngrnakrnseyyl  
>tr|Q2FX66|Q2FX66\_STAA8  
mdieltkkdgtviklseygfivndividsmqintkyqdkenmgrilmgsnyisrdivvpcfckvknrsdiaymrmlys  
ltdiepmyleirrrkeel  
nyrftqptsdddyvklkdnfpdyeyrhdqqiyvngkqykvi fngvinpkqkgnkvsfelkfettel pygesigtslele  
enkkvglwsfdfnidwhag  
gdkrkytfenlsgktvyyhgsapndqfnmykkitiilgedtesfvwnlthaeimkiegiklkagdrivydsfrvykngve  
istetniaqpkfkygankf  
efnqtvgkvqfdlkfyk  
>tr|Q2FX68|Q2FX68\_STAA8  
msnklitdlrvfdyryvdeneynfklisdmldfnfsleyhrnkev fahdgeqikyehlnvtsnvdsfltylngrfsm  
vlghngdginvkdarvnd  
tgyghktlqdrlyhdystldvftkkvekavdehykeyrateyrfepkeqepetitlspytnavmqsfwdprtkiymt  
qarpghymlsrlkpnqgf  
idrllvknghgthnayryidge lwiysavldsnknkfvrfaqrtgeitygnemqdvmpnifndrytsaiynpvenlmi  
frreykpterqlknslnfv  
evrsaddidkgidkvlqmdipmeytsdtqpmqitydagilywtgdsntanpnylqgfdiktellfkrridiggvnn  
nfgdfqeaegldmyydl  
tgrkalligvtigpnnrhhsisyigqrgvnqflkniapqvsmtsggrvklpiqnpaylsditevghyyiytdtqna  
ldfplpkafrdagwfldv  
pghyngalrqvltrnstgrnmkfervidifnknngawnfcpqnagywehipksitklsdlkivglfdyitteesrft  
dfpkdfkgiagwilevksn  
tpgnttqvlrrnnfhsahqflvrnfgtggvgkwslfegkvve  
>tr|Q2FX69|Q2FX69\_STAA8  
mvvdnfskddnlielqttsqynpvidtnisfyesdrgtgvl favtknnrplsissehvktsivlktddynvdrgayisd  
elativdaingrlgyvipne  
flkhsghvhaqffttqngsnvvverqfsfniendlvsgfdgitklyviksiqdtieavgkdfnqlkqnmadtqtliakv  
ndsatkgiqqieikqneai  
qaitatqtsatqavtaefdkivekeqai fervneveqqingadlvkgnsttnwqskltddygkaiesyeqsidsvl sav  
ntsriihitnatdapekt  
igtlekpgqgdvddgssfdestytskskvlvvyvvdnntaratwypddsndeytkykygtwypfykndgnltkqfve  
etsnna lnqakqyvddkfg  
ttswqghkmtangqsiqvnlnnaqgdlyltagnyatrvpdlpgsvesyegylsvfvkddtnklfnftpynskkiytr  
sitngrleqqwtvpnehks  
tvlfddgangvgttinlpepytnysillvsgtyppgvi egfgl talpnaiqlskanvdsdgnnggiyecllsktsstl  
ridndvyfdl gkts gsgan  
ankvtitkimgw  
>tr|Q2FX73|Q2FX73\_STAA8  
mglnpknrkptasevvealyiakniaidvpgsgmgaqcwldpnylldkywgfrtwgnadamaqksnyrgrdfkii rn  
tkdfypqpgdgwvwtggwa  
ghvniivgpctkdywygvdqnywttnatgsppykikhshydgpggvkyfvrppyhpdkttpakpeddsddnekknkv  
piwkdvttikytissgevn  
ypeyiyhfivegnrrlekpgkimi rnaqtmssveslynsrkykqdvvephfyvdrhniwaprravfevpnepdyividv  
cedysasknefi fneiham  
vvavdnmakyeiplsienlvkdds iwrsml ehvwnmimngvppkdkeyalekallnifknrekllnsitkptvtsrik  
vmvdknadianvrdsst  
angsaskppqii tetspytfkqaldkqmarginpkksnawganatraqtssamnvkriwesntqcyqm lnlgkyqgvsv  
salnkilkgkgtlnngka  
faeackkhneiyli ahaflesgygtsnfangkdgvyfygigaydnnpnyamt farnkgwtspakaimggasfvrkdy  
inkgqntlyri rwnpknpa  
thqyatai ewcqhqastiaklykqiglkgyiftrdkyk  
>tr|Q2FX74|Q2FX74\_STAA8  
mykikdvetri kndgvdldigcrfytedentasi rigindkqgridlkahgltprlhl fmedgsifknepliiddvkv  
fltykipkvikhagyvrc

Tsompanidou\_et\_al\_Supplemental\_FASTA\_File

klflekeeeekihvanfnsfnivdsgiesavakeidvklvddaitrilkdnatdllskdfkekikdkdvisyieknesrfkga  
kgdkgeppgpgakgeagkk  
geqgpgkngtvvsinpdtkmwqidgkdttdikaepellkinianveglenk1qevetikdttlndsktytdtkiaelvd  
sapesmntlrelaeaiqnn  
sisesvlqqigskvntedfeefkqt1ndlyapknhhnderyv1ssqafatkqqadnlyqlksasqptvkiwtgteneyny  
yqkdpntlylikg  
>tr|Q2FX75|Q2FX75\_STAA8  
megnfnkvkffiyeeeytkvyagniqvkkpssfviklpknkypdsieestakwtngvepnksyqvtienvrsgimr  
isqtnlgssdlgisgvnsg  
vasknifsnpsgmlyvtisdvysgsptltie  
>tr|Q2FX76|Q2FX76\_STAA8  
mdinwk1rfknkavltglvga111fikqvtdlfgld1stq1nqasaiigailt1ltgigvitdptskgvsdssiaqtyqa  
prdskeeqqvtwkssqds  
sltpelsakapkeydtsqpfdasndvgfdvneyhhggdnaskin  
>tr|Q2FX77|Q2FX77\_STAA8  
mqakl1tknefielwtseggkqfnvd1wygfcfdyanagwkv1fg111kglgakdipfannfdglatvyqntpdf1aqqg  
dmvfvgsnygagyghvaw  
ieatldy1iiveqnl1gggwtgdieqpgwgwekvtrrqhaydfpmwfi1rpnfksetaprsvqsptqapketakppkav  
elkiikdvkgydlpkrge  
npgkivihndagskgataeayrng1vnap1sr1eagiahsvsgntvwqal1desqvgwhtanqignkyyygievcqsmga  
dnatflkneqatfgecar1  
lkkwglpanrntir1hneftstscphrsv1htgfdpvtrg11pedkr1q1kdyfikqiraymdgkipvatvsnessass  
ntvkpvasawkrnkgytgy  
meesarftngnqpi1vrkvqpf1scpvgyqfpggydytevm1qdghvwvygtwegqryyl1pirtwngsappnqilgd1  
wgeis  
>tr|Q2FX80|Q2FX80\_STAA8  
mdvdmmsdyk1k1ieliksdi1gyqihkqtgvaqyvisql1rqgkrevdn1t1ntteklysyarqv1  
>tr|Q2FX81|Q2FX81\_STAA8  
mrfafffi1f1fsv1qqngikngiicsyfsfty  
>tr|Q2FX82|Q2FX82\_STAA8  
mavstgiepa1scvtgrrvnryttrp1vkrkrdsnprepl1sprf1srpipsag1gysski1wt1qdsn1rpngyep1a1  
tn  
>tr|Q2FX83|Q2FX83\_STAA8  
melqsialptel1nhknvmmavstgiepa1scvtgrrvnryttrpikycgrr1  
>tr|Q2FX88|Q2FX88\_STAA8  
mgi1rdtkq1kqdi1dyaytigidsigfttadpfdelkqkleayhangyasgfeesdia1rtepk1slptarsiaiaiv  
gpnk1kgapksvrgdrgr  
1faraswgqdyhtimrkr1dm1aafieskvpdveiksmvdtgvl1sdravaerag1gfvgrngfv1npk1gtwtylgemlv  
sipfepddp11dscgdcti  
cvdrcts1alvgngq1nsqkcis1fl1tqtkgymdpqyryki1gnrlygdc1tcqqvcpkng1inte1qddi1lepe1lkpr1vp  
11rmsnkefkqtyghlaga  
wrgkkip1qrna11alahfnevdaipe1kkvattderpl1rataywaigqil1geardfinanydqedaevqnemikgldt  
rre  
>tr|Q2FX89|Q2FX89\_STAA8  
mtnhivlyqpeipantgniartcagtnth1h1likplgfrtdkml1kragldywefvnityhdsieaffevtngeyy1l1tk  
fgkktysdfdfshhdkdfy  
fi1fgkettgl1pdwvkekyqdtal1ripsehirs1n1nsntaalliyel1rqqdfpg1n  
>tr|Q2FX91|Q2FX91\_STAA8  
mskdkdpk1nyheeensmvtdef1kelgkemeq1sdqndqeknseedsq  
>tr|Q2FX92|Q2FX92\_STAA8  
msgvinyqfr1ngv1fkiel1iyyyvwytnqcfmlykvi1lavvdcspqhrfgmsasisck1velqhsigigfpistdia  
nwngpqtqk1vesqk1it  
ck1arpqseigf1istdian  
>tr|Q2FX93|Q2FX93\_STAA8  
m1gkywiq11iatviis1isikafplaigaly1pvi1fkviklq1n1skgliddvnaqt1fiksnqsgivisviccl1litai  
lyt1ldgyas1tgvlgt1  
valnpyttivsav1yi1taiatveatktyrn  
>tr|Q2FX94|Q2FX94\_STAA8  
msvriehdtfgeievpadkywgaqterskrnfpvgkempievvygfaql1kraaiaanfd1gk1seakkdaivyacdqi1  
sgel1dehfp1vwwqtgsqt  
qsnm1vnevsvyanmy1kdhqsdes1hpnddvnsqssndt1fptamhvalyqevetklepalk11rnt1kekedkfdsi  
ikigrth1qdatpik1gqe  
isgwrym1drctem1seskhi1n1aiggtavgtginahpefgdkvahyisentgypfvssenkfhal1tahdevvq1hgt  
1ka1agd1mki1andvrwla  
sgpraglaeis1penepgss1impkvnp1tqcem1tmvavqvmgnd1tvvgf1assqgnfel1nvykpvimhnt1qsiy1ladg  
metfnncavgiepeeni  
dny1nqs1m1vta1nphigyekaaq1akkahkegl1t1kesai1tgyvteeqfeawikpedmvdph  
>tr|Q2FXA2|Q2FXA2\_STAA8



Tsompanidou\_et\_al\_Supplemental\_FASTA\_File

mikcqfydiy1lki rtnerydndkndfnlgglyga  
>tr|Q2FXA4|Q2FXA4\_STAA8  
mtkkmg1lvmaygtpykesdiepyytdirhgkrpsee1qdlkdryefigg1splagttddqadalvsaln kayadvefk  
lylg1khispfiedaveqm  
hndgiteaitvvlaphyssfsvgsydkradeeaakygiqlthvkhyeqpkfieywtknvnetlaqipeehkdtvlvvs  
ahslpkgliekndpypqe  
lehtallikeqsniehiaigwqsegntgtpwlgpdvqdltrdlyekhkyknfiytpvgfvcehlevlyndyeckvvcdd  
iganyyrpkmpnthplfig  
a1ideiksf  
>tr|Q2FXA6|Q2FXA6\_STAA8  
mlyrkvtflkvychhfniiqkqlnlclcfnftkii paesiyiyl1pplyn1kmtifhqt1skgvaptptpsnn  
>tr|Q2FXA7|Q2FXA7\_STAA8  
mtdviivhsmhgnsrnhywqwehnl1legydvt1fnfespeaktvdqwieamtqinvrkkdtyfvthglgsitalkyi  
emidp1iegffsiagfkd  
aenid1did1snvtidydnikkkvdfyglsskndkyvsyketqrlmna1egn1qivedgghfleedgfetftalqdrmq  
dymtr  
>tr|Q2FXA9|Q2FXA9\_STAA8  
mvvyash1sfl1fsnkkv1kinaytgtdmak1dlnsl1ddekhl1line1kypethidvne1ktivaserinerqe1isfk1  
giky11tikrgniekdrfs  
isi1fkdyht1vriddingthdnpdgtiapkshihyndkydkkdrfayein1kdfpdiynlynvymfleynn1kde  
>tr|Q2FXB0|Q2FXB0\_STAA8  
msvgliaplaspiquesrantnienigdgaevikrtedvsskkwgtqnvqfdvkdkkynkda1ivkmqgfinsr1tsfsd  
vkgsgyel1tkrmiw1pfqyn  
ig1ttkdpnvs1iny1lpknki1ettdvgq1lgyn1ggfn1qsaps1ggngs1fnysk1tisytqksyvsevd1kqnsksvkwgk  
anefv1tpdgkksahdry1f  
vqspng1tgsareyfapdnq1pp1vqsgfn1psfitt1shekgs1sd1sefeisygrn1dityat1fprtgiyaer1khnav  
nrnf1vryevnw1ktheikv  
kghn  
>tr|Q2FXC1|Q2FXC1\_STAA8  
m1skhfilyqk1kdmhghvsetnpy1lneiesn1knvftnrnysiqgkiaksdprn1nrkkfhnsi1fni  
>tr|Q2FXC6|Q2FXC6\_STAA8  
m1i1i1i1sknh1smygwmiy1sk1sainflisgek  
>tr|Q2FXC9|Q2FXC9\_STAA8  
mhylicikanqr1iftnsivdwfy1cmneq1fdiikn1dfesi  
>tr|Q2FXD0|Q2FXD0\_STAA8  
m1lkafesyn1sikffnncatktqn1fhhqhpnyqhrn1tkcynksitqr1k1l1mqrrrn1hmsitekqrqqqae1hkk1w  
siand1rgnmdasefrny1  
gl1fyrf1sekaeqyada1sgedit1yqea1wadeeyred1kaelidqvgfy1epqd1fsamireietqdfdiehlatai  
rkvetst1geesendfig1  
fsdmd1sstr1gnnvkerta1iskvmvn1dd1p1fvhsdmeidm1lgdayef1igrfaatagkkagefytpqqvskilakiv  
tdgkdk1rhvydptcgs1g  
l1rvgketqvyryfgqernnttyn1armm1l1hdvryenfeirnddt1enpaf1gntfdavianppysakwtadskfen  
derfsgyglapkskadfa  
fiqhm1vhy1ddeg1tmav1lphgv1lfrgaagvi1rry1lieekny1leav1glpanifygtsiptcilvfk1kcrqqddnvlfi  
dasndf1ekgnqnh1sdaq  
veri1dykrkatidkysysat1qeiadndyn1nipyvdt1feeapid1dqvqqd1knidkeiaeieqeinay1kelgv  
1kde  
>tr|Q2FXD1|Q2FXD1\_STAA8  
msntqtknvpel1rfpgfegeweek1gn1ttk1gsgktpkggsenytnkgip1lrsqnrngk1n1nd1vyiskdiddem  
knsrtyygdv1l1nitgasi  
grtainsivethan1nqhvc1i1r1kkeyy1nffgqy1l1srkgkrki1flaqsgsreg1nfkeian1kiftptifeeqki  
gkffsk1ldrqi1leeqkle  
1lqqkkgymk1iftqel1rfkdengeeypewenkfikdifiennrrkpitss1rekglyppygatgiidyvkdy1fnne  
er1l1gedgawgqfetss  
fiangqy1vnnhahv1vksndhn1ffmny1nfkel1rafvtgnapak1than1cnin1kipcl1teqdkvsal1ksidnkmn  
nqmn1rie1l1kerkk1l1qk  
mfi  
>tr|Q2FXD3|Q2FXD3\_STAA8  
mivi1i1i1i1l1ggi1flkmkydekkydeqkeritiymkynvkgykni1sfanfkenpmdgysisgyinndkkl1sftagirs  
vddf1qfdtdisytde1lgrk  
fnkn1pksvse1ikkeqnts1nk  
>tr|Q2FXD6|Q2FXD6\_STAA8  
mckv1i1l1rstyydsikrkdnk1tkddsniehavini1fnsnrkvfgtrrikn1hndkgl1tvsqkigrs  
>tr|Q2FXD7|Q2FXD7\_STAA8  
msnqn1fde1ekkgyl1edi1ftkeeikkykaedq1ragktqyvetgkdtat1yl1ssaytktiaal1gagaisvisal1tgg1  
vgagvgg1flgsiaasn1dt  
skgiy1k1l1tkkyaagey1v1tgekwyq  
>tr|Q2FXE3|Q2FXE3\_STAA8

Tsompanidou\_et\_al\_Supplemental\_FASTA\_File

maiddfnktpilitygmfi kdktrkfsdi fdtqnwkydelndeficpnknkrigfkryayrndrygfkrdfklyecddcs  
acslrqcmkpnksnkki  
mknynewyfkvqinqk1sepetkkiysqrkidvepvfgfmkailgltrtsvrginkvkre1gfv1malnirkiaaqravh  
ykihikkadfyqiinrnq1  
fyia  
>tr|Q2FXF6|Q2FXF6\_STAA8  
mmttlaliflvt11fv1wqpkgldigitaltgafiavitgvvsfsdvfevtgivwnatltfsvvilislildkvglfew  
saihm1hasknglkmfvy  
iillgaivaaffandgaaliltpivlamvknigfskraifpfiasgfiadttslplivsnlvniisadyfhvgfvryfs  
rmiipn1fsl1asiivlw1  
yfrkaipktfddnnikhpkdaind1klfkiswivlvillfgy1iskftkipvsiftgiaaf1mlarksnavn1kqv1k  
gapwniv1fsigmyivvfg  
1rnagit1ilakileyisnyglfstilgmgfisaf1ssimnmptvlidaiaigqsnvhgmlkegliyanvigsd1gpk1  
tpigs1at11wlhvl1tqkd  
vki1swgtyfktgiiitipvlfit1ligly1tliif  
>tr|Q2FXF8|Q2FXF8\_STAA8  
mrvaiigmgtagvs1relvkhpkfnq1didlyddkvmggqvpfnqds1sellinmpskkms1n1ddetefwkwykqqt  
fnfdepaylprfvfghymk  
sylsmftkkypnistnyknvqeyt1snidetn1tyyictt1nsgqswqaydyvfltcgtfayhdpy1n1kgkkgyiatpyp  
tynt1devnelddiaigt  
glas1dvrvyvaahpk1lpi1tmsrsah1psvrgtmi1dvtfky1tkdk1ndikkhhfgnap1dt1vs1fl1kecaeydidf  
kk1vhrrtgnhiad1kyd1  
arptemgi1fqsme1h1ken1nwiwns1siedqhfnqkyskmiq1n1snpmprtaeli1elienks1l1kkd1ledvkhdg  
k1lyfsyknqesvdi1ynv  
inatgaksh1nel1dqqd1l1rn1enrqivqahpmggiqi1petnqvisprfgt1tnmiaigqmtngvnk1rngvkmiveq  
vahtvsq1lyda1lesneqq  
rsdnq  
>tr|Q2FXF9|Q2FXF9\_STAA8  
mvqgq1gvnppvgavvvkegrivgigah1rkgdkhaevqal1dmaqnaegatiyit1lepcshfgstppcvnki1idckiak  
vvyatk1dns1dthgdet1r  
ahgi1evcvdderasq1lyqdf1kakakq1pqi1tvkvsas1dgkqandngqsqwi1tnkevkdvyk1rhrhdav1tgrtv  
e1ddpqy1ttri1qdgnk1pik  
vil1sksgni1hfnqgi1yqdestpiwi1ytenp1n1ttnqthie1iy1lkscd1t1l1hny1krgvgt11veagptt1tsef1qsn  
yidefi1lyyap1k1ligsgn  
yqfyq1tndvie1ipdanqfeivhse1lnqnvk1t1rkk  
>tr|Q2FXG6|Q2FXG6\_STAA8  
myknymt1pty1ttnr1nfvripqndi1sryvneivet1pdsefdefrhhrgatsyhpkm1lki1lyaytqsvfsg1rriek1l  
hdsi1rmw1laqd1t1sykt  
inr1frvnp1tdalies1fiqfysq1kqn1iddnsi1fidg1tkveasanryt1vrkkvfkit1rn  
>tr|Q2FXH4|Q2FXH4\_STAA8  
mn1l1kknkys1rkykvgi1fst1igtv1l1snpngaqa1ttdnnvqs1dtnqatpvnsqdkdvannrg1ansaantp1nqsat  
tnqatnqa1lvnhnngsivn  
qatp1svqs1stpsaqnnh1tdgnttatetvsnannndvsnntal1nvptk1tnengsggh1t1keiqedvrhssnkpelva  
iaepasnrpk1r1srraapa  
dpnat1padpaaaavngggapvai1tapyt1ttdpnannagqnapnev1sfdngirp1stnrsvptvnvnn1lpgft1lingg  
kvgvf1shamv1rtsm1fdsgd  
nknyqagq1nvia1lgrihgt1dndhgd1fngieka1l1tvnp1selife1ntmttkngq1gatnvi1knad1ndtiaektveggp  
t1r1l1fkvp1dnvrn1k1qfv  
pknda1tdargiyq1kdg1ykyysfvdsig1hsgshvferr1tmdptatnkeftvtts1knngnsgas1d1tndfvyqvq1  
pegveyvns1tkdfpsnn  
sgvdvndm1nvydaanrvit1kstgggtanspar1mpdkil1d1ryk1rvnnvptprtvt1fnet1tyktytqdfinsaaes  
htvstnpy1tidi1imkda1  
qaevd1rriqqadyt1fas1ldi1fng1krraqt1ldenrnnv1nkrvsqayids1tnqmqt1l1rsvdaenavnkkvdqmed  
1vnqndel1tdeekqaa1iq  
ieehknei1igni1gd1ttdgvt1rikdqqi1qt1sgdtatpvvkpnakkairdkatkqreii1natpdatedeiqda1nq1lat  
detda1dnvt1natnadve  
taknngi1ntigavvpq1vthkkaarda1nqatatk1rq1insreatqee1knaal1neltqatn1haleqinqattnanv1dnak  
gdg1nainpi1apvtv1kqa  
ardavshdaq1qhaei1nanpdatqeerqaa1dkvnaavtaantni1nantnadveq1vktnaiqgiqaitpatkvktdakn  
aidksaetq1hnti1fnnda  
t1leeqqaq1l1dqavata1kqinaad1tnqeva1qakdqgtqni1vviqpatqvkt1dtrnv1vndkareaitninattgat1re  
ekqea1nrvt1knra1ld  
igvtst1tamvnsi1rddavnq1igavqphvtkkqtatgv1nd1latakkqei1nqntnatteekqva1nqv1dqelatain1nq  
ad1tnaevdqaq1lgtkain  
aiqpni1vkkpaa1laqinqhynak1laei1natpdatndeknaa1int1nqdrqqaiesikqantnaevdqaatvaenni1davq  
dv1vkkqaardki1taevak  
ri1eavkq1tpnatdeekqaavnq1nq1kdqainq1nqntndqv1dtt1nqavnai1dnveaevvik1kaiadi1ekavkekq1q  
qidns1ldst1dnekevasqa

Tsompanidou\_et\_al\_Supplemental\_FASTA\_File

lakekelaaidqaqtnsqvnqaatngvsaikiiqpetkvkpaarekinqkanelrakinqdkeataerqvaldkine  
fvnqamtditnnrtngqvd  
dttsgaldsialvtpdhivraaardavkqqyeakkreieqaehatdeekqvalnqlannekralqnidqaiandvkrve  
tngiatlkgvqphivikpe  
aqqaikasaenqvesikdtpatvdeideanqlisdtlkqaqqeientnqdaavtdvrnqtikaieqikpkvrrkraald  
sieennknqldairntldt  
tqderdvaiddlnkivntikndiaqnktnaevdrtetdgdndnikvilpkvqvkaaparqsvgvkaeaqnalidqsdlstee  
erlaakhlveqalnqaidq  
inhadktaqvnqdsinagniiskikpattvkatalqqiqniatnkinlikanneatdeeqniaiaaqvekelikakqqias  
avtnadvayllhdekneir  
eiepvnrkasareqltflndkkqaeianiqatveernsilqalqniydaigqidqdrsnaqvdktaslnlqtihld  
vhpikpdaektindlar  
vtalvqnyrkvsnrnkadalakaitalklqmdeeltartnadvdavlkrfnvalsdieavitekensllridniaqqtya  
kfkaiatpeqlakvklid  
qyvadgnrmi dedatldikqhtqfivdeilaiklpaeatkvspkeiqpapkvctpikeethesrkvekelpntgsegm  
dlplkefalitgaallarr  
rtknekes  
>tr|Q2FXI4|Q2FXI4\_STAA8  
mtklkyiipiiavaiviistisiiqfinrkrynrvkvlnevksyfmnvkgsyivyepfvhpetdkyrlvyqggittikn  
qnihydfyadaytgevin  
iver  
>tr|Q2FXJ1|Q2FXJ1\_STAA8  
mlltptirlylidnnyqyqlvlivahpn  
>tr|Q2FXJ3|Q2FXJ3\_STAA8  
mkii111flifgfivvvtksehqltlfsi  
>tr|Q2FXJ8|Q2FXJ8\_STAA8  
mykffqnlgrslmpvailpaaaiagigntlnalhatpkiamffttvgttileqlgilfaigvaigmakndgavala  
tlgyflvtvvlspmklapl  
lgmkaseinsafekmngnvfvgivigliaayaynkfsetelplalsffsgkrlvpimtafyctflvillflwpllysw  
ivkfgesivglsgfafi  
gvannl1iptglhhalnsvfwfdtigindigkfqsgkdaikgitgryqagffpimmfgipaaalamyhtakttqkkqvyg  
wflassvaaffvgvtepie  
fafmfvvpilyvvaltglslfiaatfhwtagsfsaglidvlslnpvsnhplmllvqgvffilyyvi frvviqvf  
n1ntigrgene1vdptvvk  
dniapgendikqskyhghaiqileglggqenivnltnca trlrlelkdtsiidkqkiknagavgvtnvngkhstqvivgth  
vqqvadeiekh1  
>tr|Q2FXJ9|Q2FXJ9\_STAA8  
mkkilfdvdgvflseercfdvsaltvye1lmdkcy1glhshidwet1tdndiqdirnrifqkdki1nk1ks1gl1nsnwdm  
1fivfsh1idi1kklshd  
eieafmyqdepvelklnqistnladcfn1neqlplqfl1dnvkvgknniyaa1eefatte1hvsdat1fslkga1wt1aqe  
vyqewylgsklyedvekki  
arttftkgyiyqei1lrvpdevkv11nd1kgagfelgiatgrpytetvvpfen1gl1pyfeadfiatasdv1eaenmypyq  
arplgkpnpsyaalygn  
nrkyesyinkqdnivnkddvfi vgdslad11saqkigatfigt1t1g1kgkdaage1eahhadyvinhl1gelrgv1dn1  
>tr|Q2FXK0|Q2FXK0\_STAA8  
mkplvqsfttsyavkqqsnyk1sstplsspk  
>tr|Q2FXL0|Q2FXL0\_STAA8  
mfiliyldnaattkafeevldty1kvnqsmynpnspkag1qanq11qqaktqinaminsktnydvvtsgatesn1a  
1kgiayrkfdtakeiitsv  
1ehpsv1evvry1eahegfkvyvdvkkdgsin1ehfkelmsdkvg1vtcmynvntvgqi1qipqmakviknypkahfv  
davqafgkismld1n1dsi  
s1sghk1fng1kgggv1lvnhiqnvptvhgggqeygvrsgtvn1pndiamvkamkianenfealnafvte1nndvrqfln  
kyhgvyinsstsgspfvln  
isfpgvkgevlvnafskydimisttsacs1skrnk1nev1aamg1sdksiegs1r1sfgatttkediarfkeifiiyeei  
ke11k  
>tr|Q2FXL8|Q2FXL8\_STAA8  
mndid1ihym1l1mnipayvflac1l1hiafr1g  
>tr|Q2FXM5|Q2FXM5\_STAA8  
ms1rdea1emhkrnggk1evkpnkvtnkeels1ayspgvaepckdiyedkrkvydytikntvavitdgtav1gl1gnig  
peasipvmegkavl1fksfa  
gingvpialnttdteei1ktvkl1lepnygg1n1edisaprcfeieer1k1ketn1pvf1hddqhgtaivt1ag1vna1rvvn  
kdiaki1kv1ngagaagia  
ivk11yaygvnrnmymcdsrgaifegrsygmnpkdvvakwt1kdkiegs1eevkdadv1figsvana1sqdmvksmadn  
piifamanpnpei1pddak  
aagarvvtgrsdypnq1n1v1afpgi1frga1eveathi1neemkkaaveaiad1idss1nedycipgpfdkrvapsvar  
nvakaamesgvari1evdpq  
dvydktmk1td1q  
>tr|Q2FXM8|Q2FXM8\_STAA8

Tsompanidou\_et\_al\_Supplemental\_FASTA\_File

mnaavravvrtaiyneiavygyhgqglnddihklelgsvgdtiqrqggtflysarcpefkeqevrkvaieinlrkrgie  
glvviaggdsyrqaqrise  
eckeigtigipgtidndingtdftigfdtalntiiglvdkirdtasshartfiieamgrdcgdlaalwaglsvgaetivvp  
evktdikeiadkieggikr  
gkkhsivlvaegcmtagdcqkelsqyinvdnrvsvlghvqrggsptgadrvlasrlggyavdlmqgetakgvgiknki  
vatsfdeifdgkdhkfdys  
lyelanklsi  
>tr|Q2FXN3|Q2FXN3\_STAA8  
mhpmtalrtslyiahfdpdaenesdenryeramriqakvaslvtafarvrqdkp1kpnpdlsyaanf1ym1rgelptd  
ieveafnkali1hadhel  
asaftarcavssldmysgivaavgs1kglphgganeqvm1seigsienvdayldekfankdkvmgfhvrykdgdp  
akylremsrqitkdagree  
lfemsvkmekrmaeekglipnvdfysasvyhcmephd1ftpi favrsagwiahileqykdnrimprakyigetnrky  
ipleerk  
>tr|Q2FXN5|Q2FXN5\_STAA8  
mlrlnvrh1lpt1fatwyasltyniyiitelfikitsyt1slhifyitlthinkillifpsiiemtysgttk  
>tr|Q2FXN7|Q2FXN7\_STAA8  
mkfhhr1ml1issiliisfv1lgiihasityvlsekheqalatdarsyiy1vqdneidkvkkivkqgnid1litkhdkk  
vfssgk1kaipnsdsyiqk  
rdvfi1nkkvngyhwi1kgynditemhwt1wky1l1tclv1liclyfasrsfkr1lirpiqevtyatq1langyyhirv  
pesnvetka1fvstnd1a  
rr1qk1nneqk1qsnr1kttienipsa1lmidrngkivvankayeqfnishnieqvygyhvnteieql1lesfkvekp  
iyeq1levainqvhakyfdi  
scvpi1trsqks1lqgi1lvvmhdi1n1kq1len1rrefvanvshelktpitsikgfaet1idgakndaes1dmf1ni1ilkes  
nries1vtd1ld1shieqh  
te1tdtdymn1sd1trri1dnmm1tanqanqni1sihtdiekdvivaqaeskiaqv1tn1ltnain1syedgdinrvyrddfr  
vifevqdfgigikledqqr  
iferfyrvdkarsrdsggtgl1sitkhiveahqgnievnsqvgkgstfkvilkdyke  
>tr|Q2FXP0|Q2FXP0\_STAA8  
mpelpevehvkrgepyvinqkiehvi1fsdkviegkaqgketi1kgiel1dtfkt1segytitnverrskyivfq1dnkre  
qrtl1sh1lmgaggffivde  
ledimipnyrkwhwhvifelsndkkl1ysdi1rrfgei1rvasvasyps1fleiaepf1sneal1tyy1nr1hqqs1nknk1pikq  
v1ldhkvi1agcgniyacea  
l1fragv1pdkkvkd1thqqqem1vfyvrev1leegikyggts1sdyrhadgktgemq1h1nvykqpvckvcgsqietkia  
trnshycpvcqk  
>tr|Q2FXP1|Q2FXP1\_STAA8  
mpkvi1gtggiasgkstvsel1svfgfkvvdadkaareavkkgsg1aqvrevfgdea1dengemnr1rymgdl1vfnhpek  
r1elnai1hpi1vrdimeee  
kqey1kqgynvimdip1lfenelenavdevwvvytsesiqmdr1mqrn1sl1edakarvysqisidkksr1madhvidn1g  
dk1el1kqn1er1leeegy1  
ekpnygeed  
>tr|Q2FXP8|Q2FXP8\_STAA8  
mskvqnesnvvkrg1kdrhismia1ggcigtgl1fvtsggaihdaga1galigyai1gimvff1m1ts1lgematy1lpvsgs  
fstyatrfvdps1l1gfa1gw  
nywfnwvvtvaaditiaaqviqywtpl1qgipawawsa1flvi1f1s1n1svrvygeseyw1al1ikvvtv1vfi1aig1l1ti  
vgimghvvgfeifnkgeg  
p1l1gn1l1ggs1l1sil1gvf1i1agfs1fgtel1igitagesenperavpkaikqvfwr1l1fy1il1aif1vig1m1lipyd1sal1mg  
gsdnvatspft1vfk1nagf  
afaasf1mnavi1l1tsv1sagnsgmyastrm1ysmskdk1afeafgktnkngvpym1l1vtai1vvi1fv1qs1tkgayeyi  
vaasgl1tgfiawvgiavsh  
yrfrrafdkqnydksk1kytak1l1fpfgp1fagf1civvi1gqdvdfiktgdfnfsrflitymgipvflaffiyhkl1rykt  
kkip1eqvd1rqdvsmdei  
kg  
>tr|Q2FXQ2|Q2FXQ2\_STAA8  
mafcy1knkkemtms1fykcyf1kas1alvt  
>tr|Q2FXQ5|Q2FXQ5\_STAA8  
mqnntqhf1n1v1tkkvd1qi1ykr1cdfnvc1ignrmi  
>tr|Q2FXS0|Q2FXS0\_STAA8  
m1si1dgyf1nnp1l1l1gkinngk1n1intyd1lehk  
>tr|Q2FXS3|Q2FXS3\_STAA8  
mt1fi1igv1vp1mvytmq1lniknepv1tkrn1l1it1al1st1gilv1tal1agv1v1tkqafp1l1sva1igsiftg1v1wg1l1sgs  
yal1rf1sna1fgrk  
>tr|Q2FXU6|Q2FXU6\_STAA8  
mgfi1afnkc1f1vef1wennqsdnakyki1syyv1myksv1kev  
>tr|Q2FXU8|Q2FXU8\_STAA8  
mrpkni1dei1sqgh1vgprgi1rrmvdtkk1tsmi1fygppgigktsiakaisgstqykfrq1navtntkkdmq1lvveak  
m1sgqvi1l1l1dei1hr1ldkak  
qdf1l1ph1engki1v1ligatts1npyhai1npairsraqi1felyp1ndedvrqal1traieddeng1ktyqpkid1edamtyfst

Tsompanidou\_et\_al\_Supplemental\_FASTA\_File

qsqgdvrsalnalelavls  
adndkdgyrhvtlqdakdc1qkgafvsdkdgdmdhydvmhsafqksirgsdvnaalhyllarlieagdlptivrrllvisyed  
iglaspnagqrtlaaies  
erlg1pearip1sqavie1c1spksnsamsaidsalsdirnghvgqipnh1kdghyqgakdlgrsigykyphqyvngyvs  
qqy1pdk1knkiyyepktt  
skseqq1keiynn1lkqrp  
>tr|Q2FXU9|Q2FXU9\_STAA8  
mplgptkccwemissiffgrildangsvltfvtpflyl1nsknakmgisifeliseviq  
>tr|Q2FXV0|Q2FXV0\_STAA8  
mkistkgrygl1lmislakkeggcislksiaenn1sdlyleqlvgplrnagl1rsvrgakggyqlrvpaeisagdi  
r1legp1tfvesiesepa  
qktmdshercsercfr  
>tr|Q2FXV3|Q2FXV3\_STAA8  
maikysaln1vpi regedeqta1nmmvnl aqh1del syerywiaehnapn1vssata1liqht1ehtkhirvsggim1  
pnhap1ivaefgtmat1f  
pnrvd1gl1gragtdmmtasa1rrdqhdgvykfpeevs1lqqyfgpahqqayvraypavgnvplyilgsstsdahlaar  
kg1pyvfaghfapqmqkea  
ieiykt1fepsdv1depyivc1ntivaenddeaqyl assmaqvmvsitrgrmqpvqppthelqniltpreyamamerqk  
is1igsentvqqkiqdfme  
tyevneimaisiydkdmq1dsyrrfknvinqineknt1  
>tr|Q2FXW8|Q2FXW8\_STAA8  
miyfenkiseetyrnvtamvrwirekeileiqdivpsyravliyfd eqaitssklienlelnkfneknvHAVNqtnriik  
ipvqyggtypdieevakh  
nritveqviekhtskpyliym1gfmppgpylggldeqlhtprnrqprlkihagsvgiannqtglypsdspggwqiigrtp  
1kvfsserepmsmyeagew  
iqfyaidqkfiqierdisdgnfnvddwvvienv  
>tr|Q2FXX0|Q2FXX0\_STAA8  
mniekieqik1vkendvkkfkyknfedeieidftdsnhlaahsnqsnqsmnnd1taskandnsdvstndyhdikspmi  
gtff1qdske1tepivnvq  
dkvnkgdi1gyveamkv1nevtt dvageiteivadhgtvneydqvlvrik  
>tr|Q2FXX4|Q2FXX4\_STAA8  
mgyrt1ksi1fhehneskmkeeyikrfns1asfntnini1pmengkkvnd1eyp1ffmvtkn1skkqelisinsrkidra1  
ns1pyaareqyfnd1lide  
1qstneienvfstkqeiaha1nqasef1kfrglvdqykeie1nkkikvdnvrdiraiydk1vsneineqdkldgel1frk  
nfvghdgstnkyihvg1q  
petkivefigem1t1fkyfdapqpfkimashylfeyihpfydgngvrgrfiiak1l1sdydnyta1tfsyvinrnkskyy  
kafmtash1ncgd1tefi  
dtm1e1li1aggr1l1delipkmdatek1t1y1tshyqidyefly1l1smdk1fgnkrnr1t1id1lenilgvgrvkinnti  
kkydny1vk1ksrptiyei  
sdef1nsiik  
>tr|Q2FXY4|Q2FXY4\_STAA8  
m1stf1f1l1lyityrknkiyapis1f1i1fsawyl1hsqqai1fnyinyiernsqfneraqviiq1rqsdytkgr1s1  
kneiyppf1tdkknfd1kk  
iesrncivkgqfkvndnkfv1kl1qsivvqsc1lesnrsn1iekhkqfimmriydsigikfpdrimalitgdvkeveqfke  
rvkeigiyh1lavsgshia  
aivf1iyqp1kr1n1pl1fvikgitiiv1al1faqytnyapsavrai1mtt1vl1vitkqikikgiq1lafafiimfilnplv  
vydigfqsfiisffim1l  
fpflqq1sk1qsl1fi1t1fi1aq1as1fiva1ps1fhq1q1wv1g1sn1if1vpyysi1l1f1s1il1ff1t1sh1fiv1g1tp1ny1vd1  
sfnfhdw1l1d1f1trikqsh  
fsvpkfndwi1fivfi1svyiy1fw1lakrkyilvtfwti1il1t1l1it1fptnshhkitm1nv1gqgdsilyeggknqnv1id1t  
ggkviddtkqpsysiskyh  
i1pt1nergineley1l1thphndhigeveyi1shikikhiviynkgysnt1m1l1sk1shkynik1mdvrqvssfk1gd  
ss1ff1fd1s1f1pns1rdkney  
si1tmi1tyqnkv1l1mgdasknnes1l1kkyn1peidi1kvghhgsktsssk1efiemikpkis1l1ssgknmyh1pniev  
vkr1qr1rs1riynsqngq  
vtid1ddn1kvd1ssygnasg1  
>tr|Q2FXY9|Q2FXY9\_STAA8  
mtvqsayih1pfcvric1tycdfnkyfiqnpvdey1dalitemstakyrilktmyvgggtptalsinq1er1l1kairdtf  
titgeytfepndeltkek  
vq1lekygvkri1smgvtfkpe1l1sv1grthntedi1ytsv1naknagiksis1d1myh1pkqtiedfeqs1d1aldmdiq  
hissygl1ilep1ktqfynmy  
rkg1l1k1laned1gadmyq1l1mskieqspfhqyei1snfal1dghesehknvywfneeyy1fgagasyvdgvrytninpnvnh  
yikainkeskai1vsnkps  
1termeeem1gl1r1negvsssr1fkkkfdqsiesvfgqtinn1kekelivekndvia1tnrgkvignevfeaf1ind  
>tr|Q2FY05|Q2FY05\_STAA8  
miai1wpit1l1tnvdfptfg1pi1etnpd1c1sviysks1fpenpngs1nsatvi1itisp1  
>tr|Q2FY14|Q2FY14\_STAA8  
mkiad1mt1l1dhv1pfstaeswdnvg1l1igdedvevtgvl1ta1dct1levvneaiekgynti1shhpl1fk1gvts1lkangy

Tsompanidou\_et\_al\_Supplemental\_FASTA\_File

gliirkliqhhdinliamht  
nldvnpvgvnmmlakamglknisiinnqqdvvykvqtyipkdnvgpfdklsenglaqegnyeycffesegrqqfkpvge  
anptiqgdkieyvdevki  
efmidayqksraeqlikqyhyetpvfdfieikqtslyglvmaevdnqmtledfaadiksklnipsvrfvgesnqkikr  
iaiggsgigeyqavqqg  
advfvtgdikhhdaldakihgvnldinhyseyvmkeglkallmwfntekinldveastintdpfyi  
>tr|Q2FY17|Q2FY17\_STAA8  
mrgentmtpvfelknvnyyydhkkvleninikinkgefiaivgpngagkstllklilglplqsgeifvegidfknkks  
iklsyvsqkanafnsgfpa  
svkevvlsglktktrlfqtfnskdnekvikvlerlnisdlihkniaelsggqqqrvmiaralispavlvlddeptngida  
khvsefyntldqkqegit  
iilvthdigvadtatevaclnkhlfhgttdefksldeveiskiyghpvrfdvqhnrccn  
>tr|Q2FY24|Q2FY24\_STAA8  
mndkqfwkttiyywirylnfdivsrekddqeiwlakrkkqvviqkqhkstqeirfdkakvlehkdeianfisfepqsf  
efyyfsefseeqnevs  
pirikfnvirhtkdlikhmpniflarlisedndkktymfykrkvltndfndkymqkfspatytiifvnvliwlcmiyl  
nfsdvklldvvglvhfsvv  
hgewyriivtsmfllhfsfehilmmllsflifgkiveaigswrmltvyfiaglfgnfvsfsntttisvgasgai  
ifammyvsktfnkmlgq  
liaivilvgvslfmsninivahiggfigllitligyyy  
>tr|Q2FY25|Q2FY25\_STAA8  
mnrnifwlligmlvifialqiriftikedniynklikddmtsgnydnaqniakqtinknyaddqyyisgmimatinsk  
segmtewerglrmfpksgl  
lnfelaianslnndekalkyvrkalnadpkntdyinlekeltsneskn  
>tr|Q2FY26|Q2FY26\_STAA8  
msrkinnfydvqqllksygfliyfknpedmyemiqqeisslyqyellskeylkctliinqrreqk  
>tr|Q2FY30|Q2FY30\_STAA8  
mkilfgeiinkaiemkasdvhfipvknevsikfrindnleqyeqignsiyqkllvymkfqagldvstqqvaqsgrysylf  
nklyflristlplsiggas  
cvirivpqqfppqkstykfndfkhlmkkqglllfsqptgsgkstlmyqmvsyankaalnlnvisiedpvemqipg  
vndkaginyvnsfkailrc  
dpdviligeirdkdvakivqaslsghlvlttlhatdckgailrllemgisvqeliqatnliinqrlvttikqqrqlvce  
ilsqqqlryffshhslps  
sfknledklddmtkagvicettmhkyi  
>tr|Q2FY31|Q2FY31\_STAA8  
mmltaiyfsiftfyisqyslklklynietydyinlilkegkthes  
>tr|Q2FY40|Q2FY40\_STAA8  
msritqvhrilegkhlidaiiilsdynrrylsgftgtsgaliiskdkqylitdfryidqatkqapnyeiinrkstiigeik  
ellhgenfenvgfehhvs  
ydtylelnksrislisisntvdkiirdvdadeialiqkaanivdetyeyilvtvkagmtekelkaileskml  
elgadgps  
fdtivasghrgalphpvas  
dkiekgdmjtdfgayngycsditrtfaigepdklkeiyqivlesqmkaieirpgmtgaeadaisrnyleskgygk  
efghslghgigleihegpm  
lartiqdklqvnncvtvepgvyiegllgiriieddilengcqvftkctkdilivlt  
>tr|Q2FY50|Q2FY50\_STAA8  
mlqtlsikqfaiieeleiqfsdglvtlsgtsgsksiiidaigqligmrassdfvrhgekkaviegidideskdaihil  
knmdidvdedflvkreif  
ssgkslckinnqvtvlqdlrkvmqellidhgqhetqslkqkyhltdlnyaesryqdldkyhqtfnqkakkqeled  
esadqallqrlldlmkfgle  
elseahlkegeiegleidikriqnseklsalnnaymtldenaitdrlyelsnhlltindivpnkydklkedidqfyi  
ledakhelydemantefde  
qvlneyesrmlnlnlkrkygkdiseiyaqeklnneinkienyeqstsqllreeinalynqvievqgalskqrrivare  
rdhivseiqnlqmkanle  
isfkkleepnidgieveflispnkgeplkslnkiasggelsrmlalksifvksrgqtailfdevdsgvsgqaaqkmae  
kmrdiaeyiqvicishlpq  
vasmsdhllisksskddrtttqvqelisddkvdeiarmi sgasvdtltrenaremiqhnqrr  
>tr|Q2FY53|Q2FY53\_STAA8  
maklsyleairqaqdlalqqnkdvfilgedvgrkggvfgttqglqqkygedrvidtplaesnivgtaigaamvgkrpia  
iqfadfilpatnqiiseaa  
kmryrsnndwqcpitirapfggvhgglyhsqsiesifasspgltivipstpydakglllssiesndpvlyfehkkayrf  
lkeevpeeytvpigkad  
kregedltvfcyglmvnycqaadi laadginvevdlrtvypldketiidrakhtgkvlvtednlegsimsesaiia  
ehclfdldapimr laadv  
psmpfsvpleneimmnpekilnkmrelaef  
>tr|Q2FY54|Q2FY54\_STAA8  
meitmpklgesvhegtieqvlsvgdhideyeplicevitdkvtaevpstisgtiteilveagqtvaiddtiickietadek  
tnetteiqakvdehtqks  
tkkasatveqtstakqnrnngfrspvvfklasehdidlsqvvsgsfegrvtkkdimsvienggttaqsdkqvqtks

Tsompanidou\_et\_al\_Supplemental\_FASTA\_File

vdtssnqssednsenstip  
vngvrkaiagnmvsvteiphawmmievdatnlvnrnhyknsfknkegynltffaffvkavadaikayp11nsswqgne  
ivlhkdinisiavadenk1  
yvpvikhadeksikgiareintlatakarnkqltaedmqggtftvntgtfgsvssmgiinhpqaailqvesivkkpvin  
dmiairnmvnlcjsidhri  
ldglqtgkfmhikqrieqytlentniy  
>tr|Q2FY56|Q2FY56\_STAA8  
mlklmpykigfrtiktagvmtlgviiskllgldnyassailvvlcikhtkvhs1qaiisrlvscflvlflgsaifs11gq  
spivlgiiv11fipltvvl  
kvqegvitscvil1hvfnaksidahlivnet1111lig1siaftmnlmmpsldkqldeykckieqqiadi1fskysyiceky  
edtiaiefev111nikkak  
siafrdvknhfvrnensyhyfdmreeqvel1mrmpkpliesichkdp11ndvas11keigl1vnnsndytamr1hnyetr  
1klde1plptthkalsra  
siiqilneleeylqiksqqfslkmhseva  
>tr|Q2FY57|Q2FY57\_STAA8  
mqr11snmghtdglffk11hya1fsmnqia1  
>tr|Q2FY59|Q2FY59\_STAA8  
mineqr11ntffelvqidsetgnestiqpilkekfiagl1dvkedaakhpklgann1vctmnstieegevpkly1tshm  
dttvvpainvkpivkddgy1  
ysdgttilgaddkag1samlev1qvikeqqiphgqi1qfvitvgeesgligake1nse11dadfgya1dasadvgttvga  
ptqmlisakifgktahast  
pkegvsainiaaka1srmlkgvdeittanigkfhggsatnivadevileaearshdperiktqvkhmtdvfettase1g  
gkavvtveqsyppgfk1indn  
eavvkiagesarn1gl1santi1sggsgdsi1ntfgipsvil1gvgyeki1htnermpiks1n11asqv1e1ikivarhsk  
>tr|Q2FY61|Q2FY61\_STAA8  
mek1nqvm1yvddvekakafwtet1efvvvsetplaedyvavevsptkdaets1timakefiexspevnl1gtps1mfke  
knfdalysk1nd1gl1tghd  
ivemngqrvfn1fdgggnyfavsd  
>tr|Q2FY62|Q2FY62\_STAA8  
mvnvyli1fkmakvti1ql1vtkqsili1fiqt1fili1fg1n1fsmkv1fl1sfyaivctn11t1flesv1kl1vlysgwkrfpmqk1  
tggd  
>tr|Q2FY68|Q2FY68\_STAA8  
maqai1ftgi1nssn1dandiyl1tnksneqal1kafaek1gvnysyddat11kdadyv1fl1gtkphdfdalatrikphitkdn  
cfisimagipidyikqql  
cqnpvarimpntnaqvghsvtgi1sfsn1fdpkskdeind1vkafgsvievsedh1hqvtaitgsgpaflyhvfeqyvkg  
tk1glekeqveesi1rn1ii  
gtskmiersd1smaql1rkn1tskggttag1d1tsqyd1vsi1fedc1naavdrsielsniedq  
>tr|Q2FY82|Q2FY82\_STAA8  
mnkindrd1tel1ssywvyqni1dikkefkvngkrfkqvd1synddknsn1ngaadikiye11ddkskptgqqt1iyqgtsne  
ainpnp1kssgfgddw1q  
nak1mndndestdy1kqtdq1snqykik1ledadr1nsdf1lkyrmessn1fknktivadgg1nseggagakyqgkhpnek  
vvatdsamipyaaawqkfar  
prfdnmis1fn1nd11tw1lqdpfikdmpgkrvni1ndgvpr1d1lidshvgykrk1nrkdntydtvpl1ikiksvkdteikn  
gkkvkktini1tdmdgrip  
invwtgdsiarsgrgt1lik1n1en1da1sklitgetsgmlaevif1nesfnisenenkn1fadrkkq1segfkdkin1fq  
leemert1iskins1leeva  
detiesi1savkh11pfdal1dalkerine1l1fgiksfiekvydsidne1leifkni1dhdf1rdgvseemkh1kvkqnidq  
iknqndiygrq1adi1rs1gen  
kqgdati1dgnf1ncsgenmvqgl1vipsny1lgrkmki1ldhiddgikki1advqgiydeyaskivdviky1intipkir  
kn1rhaiem1nvkkkefl1s  
lipnvtcny1kkt1lee1dnt1lgkwpf1nd1kavsp1ldnh1ddivknmklivqmi1fepshyddmfnsrka1tpvfssv  
1  
>tr|Q2FY83|Q2FY83\_STAA8  
mwiek1fknknnetkyryykykdp1ytdkwkrvsv1nkntkqsqkeamfr1leekikek1nnkssselkt1tfhall1dew1  
eyhiktsgsk1tt1nniki  
riknikrycsen111nk1ldtkymqi1fink1sdiysqnqvtrq1lgdmkgaikyavkfynypney11tnvkipkrrktied1  
ekdeskmynylemnqvlqi  
rdhilndnk1lqkrnr1liasilevqaltgmrigelqalqekdid11nktinitgtihrikyekgfygdttktisskrsi  
sinsrtveifk1iilenkm  
lkrwnssyvdr1gf1fttkkgnp1cnnqi1agvlkkttkalnmkkvtthtfrhthit11vemnsv1kaimkrvghvdekt1  
iriythvtekmdrel1tqk1  
enips  
>tr|Q2FY88|Q2FY88\_STAA8  
mkkydiav1dfetmnehm1nspeavsv1ikd1sivkvyssy1nppnryn1knaki1hkipedvil1kapkypdiyqeily1  
1keshli1ahnal1fd1sv1  
kntnnyd1lvpnp1fmyvds1nifrsfhai1ssfk1en1lcslydidke1l1hsakfdv1al1skml1islaknnqhsy1v1klihy  
mpkqyir1fskysnsptk1f  
dsgfqki1hmkise1inkievesvipi1kdknv1vftgn1fdtekqdl1mil1trkkgayir1sdvtaktdi1lvegvqddkykdvng

Tsompanidou\_et\_al\_Supplemental\_FASTA\_File

lvskqrkareyvgngakiq  
flneedlinlike  
>tr|Q2FY90|Q2FY90\_STAA8  
mflaiiiflslfilltsffliirnfhivkffttkkyt|mltirkfriilglrkavtt  
>tr|Q2FY92|Q2FY92\_STAA8  
mniqeatkiatkn|vsmtrkdwkeshrtilptndsflqciisnsdgnlirywqpsaddlmandwevinptrdqellkq  
l  
>tr|Q2FY93|Q2FY93\_STAA8  
mp|tsdefdt|tkdqyil|svlykdy|lcvkl|gsik|l|tcn|nfgsak|dhtkyf|qkl|hfedv|kyd|lnk|knsg|flngvyas  
ntiyhvt|s|dktv|vyfene  
fknn|ks|iids|sias|iipgl  
>tr|Q2FY96|Q2FY96\_STAA8  
msdtyksy|lav|l|cftv|lav|l|mp|lyftt|aws|ia|gfas|ivt|f|fykey|fyee  
>tr|Q2FY97|Q2FY97\_STAA8  
mt|lqk|ilsh|faty|dnf|nsdd|vvet|fgi|skthak|st|l|sk|l|kkk|gki|ames|wg|vrv|ies|q|hl|sv|verk|kei|lee|q|fel|l  
ar|l|neq|sdd|pre|ieer|ik|l  
mir|lanqf  
>tr|Q2FY98|Q2FY98\_STAA8  
mav|legi|fee|k|l|nkn|lrv|l|tel|stvd|ssiv|qekv|keap|mpke|eta|ql|es|ieev|kets|ad|l|tkdy|vl|svg|kef|l|kkad  
tsdkkefrnk|l|nelg|adk|l  
stikeehyeki|vdf|mnarina  
>tr|Q2FY99|Q2FY99\_STAA8  
mk|l|dhs|nrahak|lsas|gakw|l|ncpps|ikase|giad|kssv|faegt|fahel|sely|fsl|kyeg|l|tqfe|fnka|fqny|krnqy  
ysee|l|rey|veey|van|veek  
ynea|l|srdd|via|l|fetk|ld|l|gkyv|pes|fgt|gdvi|ifsgg|vlei|id|l|kygk|giev|said|npq|l|rygl|gaye|ll|sl|vydi  
htvrmt|i|qprid|nfstee  
l|pisr|llq|wgt|dfv|kpl|ar|layn|gege|fkag|shcr|fck|ikhs|crtrae|ymqn|vpq|kpph|lls|dee|iae|llyk|l|pdikk|wa  
devekyaleqakendktyp  
gwk|lvt|grs|rrvi|tdk|avrdr|lveagy|kpedi|tetk|lls|itn|lek|ligk|kafsk|iaeg|fi|ekp|qgk|l|t|ates|dkr|pai  
kqsaeddfdk|l  
>tr|Q2FYA1|Q2FYA1\_STAA8  
mni|diety|ssndi|skcgay|kytea|edfe|i|i|aysid|ggais|aidm|tkvd|nep|fhadyet|fkial|fdpav|kkyaf|nanfe  
rtc|lakh|fnk|mppeewi|c  
tmv|nsm|rigl|pas|ldkv|gev|l|r|l|sqk|dkag|kn|l|iryf|sip|ckp|tkvng|grtrn|l|pehd|lek|wq|fidyc|irdvevema|l  
anki|kdfp|vtai|eqty|wvf  
dqh|indr|gik|l|sks|l|l|ganv|ldk|qskee|l|kqak|hit|gl|enp|nspt|q|llaw|l|kde|qg|ldip|n|l|qkktv|qey|l|keat|gka  
kkm|leir|l|qmsk|t|svk|kyn  
kmh|dm|mc|sd|derv|rgl|fgy|gagt|grwag|rgv|ql|n|l|tkhy|id|te|lei|ard|like|qr|fdd|ld|ll|nvhp|qd|ll|sq|l|vrtt  
ftaeegnelavsd|fsaiea  
rviawyakeqwr|ldv|fnthg|kiyeas|qmfn|vpves|itk|gdp|l|r|qkg|kvse|l|algy|qgg|gaga|l|kamga|l|emgi|eene|l|q  
glv|dswr|nan|pn|ivn|fwka  
cqeaa|intv|ksr|kthh|thgl|r|fym|kkg|flmie|lps|gral|aypka|l|vgens|wgs|qvve|fmg|ld|nrk|wsk|l|ktyg|gk|lven  
ivgatard|l|laisiar|lea  
l|gfk|ivgh|vhde|vive|iprg|sng|l|kei|etim|nkp|vdwak|gl|n|l|nsd|gft|spf|ymkd  
>tr|Q2FYA3|Q2FYA3\_STAA8  
marrkvi|rvrik|gk|l|mt|l|rev|seky|hi|spell|ryryk|hkm|rgde|l|l|cgrk|dsk|skeev|eym|ksq|ikdeek|grek|irkkai  
l|nryq|rnvrae|yeqer|kr  
l|rpw|lyd|gtp|qkhs|rdpyw|fdvtyn|qm|fkkw|sea  
>tr|Q2FYA4|Q2FYA4\_STAA8  
msv|isnr|kvd|mnea|qd|nvk|qpahy|tygdi|ei|id|fie|qvt|aqypp|qla|fai|gnaik|ymsrap|l|knghed|lakak|fyv|qraf  
dlweg  
>tr|Q2FYA5|Q2FYA5\_STAA8  
matqrqveyvms|l|qeq|le|led|cekyt|deqv|kamsh|kevs|nvi|enykasi|snee|lydec|msf|gl|pnc  
>tr|Q2FYA6|Q2FYA6\_STAA8  
mtdsarkey|l|nqffg|skry|lyq|dnervah|ihv|vng|tyy|f|ghiv|pgw|qg|vkk|t|fdtae|l|etyi|k|sd|leyee|qk|l|tlf  
>tr|Q2FYA7|Q2FYA7\_STAA8  
mkiki|ekem|n|pel|iqaw|wdn|pkl|sgnkr|fys|ndver|nccvt|fdv|dsil|cnvt|gyvs|indk|ftv|qeei  
>tr|Q2FYB0|Q2FYB0\_STAA8  
mtft|l|sdeq|ykn|l|ctns|nk|l|ldk|l|hka|l|kdreey|kkqr|del|igdi|ak|l|rdcn|ke|l|ekkasaw|drycks|vekd|l|inef|gnd  
dervk|f|gme|l|nki|fmedd  
tne  
>tr|Q2FYB1|Q2FYB1\_STAA8  
mnreki|eqsvi|sasay|ngnd|teg|l|l|kei|edvyk|kaqaf|deile|gmtnai|qhsv|kegiel|deavg|imagq|vvykyee  
>tr|Q2FYB2|Q2FYB2\_STAA8  
mtnt|l|qvkl|l|sknar|mp|ernh|ktd|agydi|fsaetv|l|epqekav|iktdv|avsipegyv|gl|l|tsrsgv|ssktyl|vietgki  
dagyhgn|l|ginik|ndeerd  
gipfl|yddi|dae|ledgl|isil|dikgnyv|qdgrg|irrvyq|inkgdk|laql|vivpi|wtpel|kqveefesv|sergak|gfgsgg  
v



Tsompanidou\_et\_al\_Supplemental\_FASTA\_File

>tr|Q2FYB3|Q2FYB3\_STAA8  
mtqylvttkfdstgrphehitvardnqtftvieaeskeeaerkyeaqvkirrdgdakengnd  
>tr|Q2FYB5|Q2FYB5\_STAA8  
mgclvvvkei1r1l1fl1amyelgkyvteqvyimmtanddveapsdfekiraevsw  
>tr|Q2FYB6|Q2FYB6\_STAA8  
mwivisiv1sif1l1l1ssishkmtiealeyman1fkqlvkngngvegledyeneverirkrfks  
>tr|Q2FYB7|Q2FYB7\_STAA8  
m1dkvtqietikydrdvsysyaasr1sthwtnhnmawsdmqlaqtvrkted1teynkmskseqadikdvvgfvggy1k  
egkrragqvmnrsm1t1di  
dyaaqdmtdi1smfydfayc1ysthkhreispr1r1vip1krvnadeyeyaigrkvadivgmdyfdtttyqphr1mywps  
tsndaeffftyed1p1ldp  
dkilneyvdwtdt1lewptssreesktr1adkqgdpeekpgivgafcraytieeaietfipdlyekhstnrytyhegsta  
gg1vlyennkfayshhntd  
pvsqmlvnsfd1vrih1ygaqdeetktdtpvnr1psykamqraqndevvkkqlindkmsdamqdfdeiensddawset1  
e1tskgtfkasipniei1  
rndpn1kgkiafneftkqieclgkvpwntnfktrqwqgdgddss1rsyiekiydhhsqgktdaiisvamqayhpvr1dyl  
nkiswdghkrlek1fikyl  
gvedtevrntttkka1tagiarvmepgckfdym1tlygpqvgvksa1lkk1ggawfsds1svvtgkeayea1qgvw1mem  
aelaatrkaeveaikhfis  
kqdrfrvayghyiedfprqci1figttknvdf1rdetgrrfwpmtnpervevnwsk1tkdeidqiwaeg  
>tr|Q2FYB8|Q2FYB8\_STAA8  
mr1tkfgqkakhyyeqged1flnpe1eemrsiqskhteespytgi1dey1ntpipsnwdd1tifer1rfyqgdvdmlpt  
gkcr1r  
>tr|Q2FYB9|Q2FYB9\_STAA8  
mneddfikvm1icyqqanvdyvkrnkvc1evfvecfgkdkgdsrgsmeirkisn1l1rql1dnwsvydgnksgk1rfgkdy  
gvq1ayvrdes1ed1i  
>tr|Q2FYC0|Q2FYC0\_STAA8  
mnlmqhwkqtg1nptarkergvvsfvasm1hhqk  
>tr|Q2FYC2|Q2FYC2\_STAA8  
meh1aidfkphsyqkyaidkvidnekygl1fdmg1gktvst1tafse1q1ldtkkm1viapkqvaktwvdevdkwnh1n  
h1kvs1v1gtpkernda1n  
teadiyvtknentkw1cdqykkewpfdmvvide1stfkspsqrfksikkk1p1inrfig1tgtpspns1qdlwaqvy1i  
drger1essfsryreryfk  
pthqvsehvf1nwe1rdgseekiyeriedic1smkakdy1dmpdrvdtkqtvv1sekerkvyaekny1ileseeegtva  
qngas1sq1l1q1sngavy  
tddedvr1ihdkk1dklee1ieesqgpi1lfynfkhdkeril1qrfkeattledsnykerwnsgdik1liahpasagh1  
n1qqggh1i1vwfg1tws1e  
lyqqanar1yrqgnhtti1hhimtdntidqrvykalnkel1tqeel1mkaikariakhk  
>tr|Q2FYC3|Q2FYC3\_STAA8  
mgkasydikpgt1fkyiese1yn1qenke1nr1me1lnptkel1dtnivyg1p1qkgepvrttel1matr1l1tnkm1rn1lee  
mveavesey1k1pedhk1kv  
ir1kywnrdk1kieq1gdachmhrntvt1tirknfvkavayhagik  
>tr|Q2FYC4|Q2FYC4\_STAA8  
mtkhnniykhgrksyqydwfyhskawkk1reia1drdnh1cqmc1redivtdanivhhi1yvdedfnka1d1dn1msvcy  
schnkihandndksn1kki  
rv1ki  
>tr|Q2FYC6|Q2FYC6\_STAA8  
mtikv1nepspk1l1ttwyaevqtqgkiktskyvkkecerh1rylenggwv1fdeela1hrpirfiekfckpskgskrq1v1  
qpwhfi1igs1fgvwhket  
k1rrfkeal1ifmgrkngktt1sgvanyavs1qdgengaeih1lanvmkqaril1fdeskamikaspk1renfrp1rdeihy  
datiskimpqasdsdk1dg  
l1nthmg1fdei1hefkdyk1isviknsraar1qp1li1yittagyq1dgp1vnmveagrtd1dri1edertfyyl1as1dddd  
d1indsnwi1kanpn1lgvsi  
d1laemkeewekar1tpdergdfitkrfni1fanndems1fidipt1lqknndi1is1delegrpctigydl1setedftaacatf  
a1dngkvav1thswipkhk  
veysneki1pyi1weedg1l1tiqdnpy1dyqdv1nwi1ikmneh1yvveki1tydranafk1nqel1knygfeteetrqgal1ts  
palkd1kemf1dgki1ifnn  
np1mkwy1innvq1k1ldrngw1pskqsryrkidgfaaf1ntytdimnkvv1sdkgegniefisikdimr  
>tr|Q2FYC8|Q2FYC8\_STAA8  
mnekvegml1el1k1dh1gvqegmkg1krq1gvvnsemkan1safdkseksmekyqarikg1ndr1kvqkkmysqvedelk  
qnanyqkaks1svkdveka  
yl1klveankkek1al1dkskeal1kssnte1lkaenqykrtnqrkqdayqk1kq1rdaeqk1knsnqattaq1k1krasdavqk  
qsakhka1veqykqegnvq  
qk1kvqnd1sksndki1essyaktntk1kqtekefnd1nntiknhsanvakaetaavnkekaa1nn1ersidkassemt1f  
nkeqmi1aqshfgk1lasgad  
vmskkf1ss1gdkmts1grtmtmgv1stpit1gl1gaal1ktsad1fegqmsrv1gai1aqasskd1ksmsnqavdl1gaktksane  
vakgmee1aal1gfnakqtm  
eampgvisaaeasgaemattatvmasa1nsfg1kasdanhvad1larsandsaadi1qymgdal1kyagtpakal1gvsiedt

Tsompanidou\_et\_al\_Supplemental\_FASTA\_File

saaievl snsglegsqaqt  
alrasfir lanpskstakemkklgihlsdakgefvgmgelirqfqdnmkgmtreqklatvativgteasgflalieagp  
dkinsyskslknsgesk  
aadlmkdnlkga leqlggafes laievgkdltpmiragaegltkldvgfthlpgwvrkasvglai fgasigpavlaggl  
iravgsaakgyaslnrria  
entilsntnskamkslgltflgsttgktskgfkglagamlnfkpinvlknsaklailpfkllknglglaakslfavs  
ggarfagvalkflltgpiga  
titaitiaykvfktaydrvwfrnginglgetikffggkiiggavrklgefknylgsigksfkekfskdmkdgykslsdd  
dllkvgvnkfkgfmqtmgt  
askkasdtvkvlgkgvsketeka lekyvhyseenrimekvrlnsgqitedkakkllkieadlsnnliaeiekrnkkele  
ktqelidkysafdeqekqn  
iltrtkekndlrkkeqelnkikelekealsdgqisenerkeieklenqrrditvkelesktekeqerilvrnqrnray  
sideaskaikaekarkar  
kkevdkqyeddvaiaknnvnlsksekdlaiadqrhkdevrkakskkdavdvvkkqnkdidkemdlsgrvykntekw  
wnglkswwsnfredqkkks  
dkyakeqeetarrrnrenikkwfgnawdgvtktgeafskmgrnanhfggemkkmwsgikgipsklswwssakssvyght  
kaianstgkwfgkawqsvk  
sttgsinyntkqkysdasdkawahsksiwrgtskwfsnayksakgwli dmanksrskwdnisstawsnaksvwkgtskwf  
snsykslkgwtgdmysrah  
drfdai sssawsnaksvfngfrkwlsktydwirdigkdmgraaadlgknvankaiggl nsmigginkiskaitdknlikp  
iptlstgtlagkvatdns  
gal tqptfavlnrdrgsgnapgggvqei ihradgtfhapqgrdvvpvlvgvdsvinandtllklqrmgvlpkfhggtkkkkw  
meqvtentl gkkagdfgska  
kntahnikkgaeemveaagdkikdgaswlgdki gdvwdyvqhpqglvnkvmsglninfggganattvkiakgaysllkkkl  
vdkvkswfedfggggdsy  
lfdhpiwqrfgsytggl nfngrhygidfgmptgtniyavkggi adkvwt dyggnsiqiktganewnymhlskqlarq  
gqrikagqligksgatgnf  
vrgahlhfqlmggshpndtakdpekwlkslkgsgvrsgsgvnaasawagdirraakrmgvnvt sadvgniisliqhes  
ggnagitqsssrdinvlq  
gnpakgllyqyiptfrhyavrgnhniysgydqlaffnnywrsqfnprggwspsgpryangglitkhqlaevgegdkq  
emviplrrkraiqlteqv  
mriigm dgkpnitvndtstvekllkqivmlsdkgnlt daliqtvsqdnnlgsndairglekilskqsghrananny  
mggltn  
>tr|Q2FYD0|Q2FYD0\_STAA8  
mdyhdhlsvmdfnelicenlldvdygsfkeyyelnearyitftvyrthnsfvfdlllicenfiiyhgekytikqtapkve  
gdkvfi evtayhimyefqn  
hsvesnkldddssetgktpaysldeylrygfanqktsvkmtyki igdfkrkipidelgnkngleyckeavdlfgciipn  
dteicfyspetfyqrsekv  
iryqyntdtvsatvstlel rtaikvfgkkytaeekknynpirtt dikysngfikegtyrtatigskatinfdckygnetv  
rftikkgsqggiyklildg  
kqikqiscfaksvqsetidliknidkgkhvlemi flgedpknr idissnkakpcmyvgtekstvl niadnsgnrnyka  
ivdyvadsakqfgyryant  
qtnedietqdkllefakkqindtpkte ldvnyigyekieprdsvffvhelmgyntelkvvkl drshpfvnaidevsfsne  
ikdmvqiqa lnrrviaqd  
nrynyqanrinhl yststlnspfetmdigsvli  
>tr|Q2FYD1|Q2FYD1\_STAA8  
mateevkikal lendkqy fpathwkaingipyagssdidglpqdgiisvndknkldnlkigeagiiqnsivqkspngklw  
kitvddsgklgtvlfy  
>tr|Q2FYD3|Q2FYD3\_STAA8  
msnleksvainl entahygnisnlditf rtgesdssvllfnitknnqplllseenikariairgkgvmv vapleildpfk  
gilkfqlpndvikrdgsyq  
aqsvaelngsdvvvvertitfnveksl fsmipsetklhyivef qelektimdrakamdeaikngedyasliekakekg  
sdiqiaksssideklq lan  
shisdlenkaqaysrtfdeqkrymdekheafkqsvnsgglvtsgstsnwqkakitkddgkimqitgfdfnpeqrigdst  
qfiyvsqainyprgvstng  
tveylvvt sdykrmtyrp ngtnkvfvkrkeagswsewselaindyntpfetvqsaqskanmaesnaklyaddkfnkrysv  
ifdgtangvgstlylnesl  
dqfllif ygtfpggdftefgspfggkisl npsnlpdgdngggvyefgltkssrtsltisndvyfdlgsqrgsganan  
rgtinkiigvrk  
>tr|Q2FYD8|Q2FYD8\_STAA8  
mlitknqaekwfdns lgkqfnpdlyfgfqc ydyanmffmiatgerlqglyaynipfdnkariekygqiiknydsflpqkl  
divvfpskygggaghveiv  
esanlntftsfgqnwngkwtngvaqpgwgpvtrhvhyddpmyfirlnfpdkvsvgdkaksvikqatakkqavikpk  
kimlvaghgyndpgavng  
tnerdfirkyitpnia kylrhaghevalyggssqsqdm yqdtaygvnvgnnkdyglywvksghydivleihldaagesas  
gghviissqfnadtidsi  
qdviknnlqqirgvtprndllnvnsaeininyrlselgfitknkmdwiknydlyskliagaihgpigglvagnvkt  
sahnqknppvpagytl dkn

Tsompanidou\_et\_al\_Supplemental\_FASTA\_File

nvpykktgyytvanvkgnnvrdgystnsritgvlpnnatikydgaycingyrwityiansgqrryiatgevdkagnris  
sfgkfsti  
>tr|Q2FYD9|Q2FYD9\_STAA8  
mmcytcinylhlsiftqachwvffltiesivfillpvvymtlafpynslrgafyviltfi  
>tr|Q2FYE0|Q2FYE0\_STAA8  
mkgdiyipiissilsggisyyaatvvhkfnkrykrkekavemadefskliskrsfdigeinkkilenvglqdkinlenk  
mnlfsdnhelrtvftdkei  
akyhtykvntefikillrtfknenykeec1railefdnkktikenigdkqwtfstgekeiviksndvlqgintlikk  
ynethiycmnlleyfsmhf  
tnniadsntvyqslhqiylktiilslyidisstnkighekfyvnliiefynewnnkkikfkkktekrinkrnnsflkteklk  
>tr|Q2FYE1|Q2FYE1\_STAA8  
mfffrgekranylknkgkhawktqrfnaktvdmtrflyvciqrriiyspsphyddmfilntqaharlqmaqqfevcngl  
nenegqaiqtmdqsaslr  
snliqvkeqleklavy  
>tr|Q2FYE3|Q2FYE3\_STAA8  
mneskkdtntetntetntetkvspeemeaskyvgggfqppeakdaiefvkkhrkefekvgeqffkdnfglkvkatnvvg  
kddgvevyvhcedhgivfn  
aslplykdaiahqgsmrsndngddmsmmvgtvlsgfeyraqekydnylkflkenekqyqygtgftkeaintqnvgyqne  
yfyitylsrnlkeyrkyye  
plihkndkefkegmqrarke1nytantntvatlfstndernrkekinvidlsekiertkmpikntittqlgnkligtk  
karfddkkvvsfgafede  
>tr|Q2FYF0|Q2FYF0\_STAA8  
mlhdi1rnkfgfesfkpggqeiiesimsqhtlgi1ptgsgkslcyqiptylsgkptliisplislmdqvmqlkingek  
rvtcihsgmdeiekkhnik  
clrhstrfiflspel1qpsnflismidfgmivldeach1sewydfrphyaligkvtkhfkeavv1altatapphlqdd  
ltemlaiqfnvikttnrnp  
nisfkhlnfhddedkiel1pflqqsgptiiyvsskkmc1nlaqliydsgfltgihgdmnyqerhtvqqqlnndipii  
vatsafmginkkdiirti  
hfh1stspnsyiqeigragrde1sqais1fqpddkiylet1lfadmitteedvqnfeige1lapdkqav1ttlqsfysig  
alkqifkqsfkrkqlgffr  
migyckldqcrkyl1effgeyppaqdrccndnsnitdia1lnkkkvirsigfdeklqn1flr  
>tr|Q2FYF2|Q2FYF2\_STAA8  
mlfnkvl1sri1ayqfn1nshqkdktpqstn1trknk  
>tr|Q2FYF4|Q2FYF4\_STAA8  
mkh11vihtggtismsqdsnkvvtdinpi1smhqdvinqyaqide1nfnvpsphmtiqhvkqlkdi1leavtnkyydg  
fvithgt1leetaf1ld1  
ilgieqpvt1gamr1sne1gsdgl1nyisairvasdekarhkgvmv1fnde1htarv1tkhtsntnt1fqsphngplgv  
1tkdrvqfhhmpyrqqa1e  
nvndk1nvp1vkaymgmpgdi1fsfysregidgmvieal1gqgnipp1alegiqq1vsl1nipiv1vsrsfngivsptyaydg  
ggyl1aqg1fifsn1ngp  
kar1k11val1sn1ldkae1ksyfe1  
>tr|Q2FYF6|Q2FYF6\_STAA8  
mqr1thiqnecadnd1k1kgdfysmmnesc1fifgks  
>tr|Q2FYF7|Q2FYF7\_STAA8  
mtksasfai1frvt1if1pfvkc1fmvmny1fwnsnsp11flftf  
>tr|Q2FYF8|Q2FYF8\_STAA8  
msvt1niakead1vtknv1cnnsrkmyir1ssy1snkvay1rgfl1fyksikfyyniscreq  
>tr|Q2FYF9|Q2FYF9\_STAA8  
mteefnesm1ndikegdkvtgevvqvedkqvvhingkgfngi1p1sq1sthidspsev1kegdeveayvtkvefdeen  
etgayi1srrq1leteksys  
ylqek1dnnei1eakvtevvk1ggl1vvdvqrgfvpas1istdfiedfsvfdgqtirikve1dpennrvilsrkaveqee  
ndakkd1l1qsl1negdvid  
gkvar1tqfgafid1ggvdgl1vhvse1shevqtpeevsigqdvkviksidrderis1sikdt1ptpfenikgqfhe  
ndiegvvvr1anfgafve  
iapgvqgl1vhiseiahk1hgt1pgevl1epgqqv1nki1lgideener1v1sikat1pnedvvesdpsttkay1leneednpt  
igdmigdk1kn1k1  
>tr|Q2FYG3|Q2FYG3\_STAA8  
mdsysdtpfn1ssic1sn11tvvsmstphdi1tihi1nck1k1sfeal1l1i1fkf1k1ltviyav1fili1itftsft1  
fi1f1nnv1kyys1rhgy1l1sk  
fnann  
>tr|Q2FYG4|Q2FYG4\_STAA8  
mettvsk1lerqieer1kgvseyesin1nhr1lgk1ld1y1dipdvakvacl1tidtsmrh1dditynh1skhsil1igdlisah  
fyt11ae1nd1sfqne1isk  
aiveine1k1ss1hhqa1ndyeisqai1vkiet1fpyit1shfginidesei1ny1fedmsdy1psyf1kkynqsev1khy1hd  
iqksyl1ksrgn  
>tr|Q2FYG5|Q2FYG5\_STAA8  
mkdmgv1rkgtka1ldvccgtgdwtia1skavgptgevtgidfsen1levgkektasmenvk1vhgdame1lpfednsfdyvt  
igfg1rnvpdy1val1kenn

Tsompanidou\_et\_al\_Supplemental\_FASTA\_File

rvlkgpgmvvcletsqptlpvfkqmyalyfkfvmplfgklfakskeeyewlqqstfnfpgkeelkrmfeeagfinvrvs  
ftggvaamhlygekedntk  
gd  
>tr|Q2FYH2|Q2FYH2\_STAA8  
mpqglevfrvlyhkydpdeselliyfiieglsenqtdealeylysyvepspekmlleadlyqqinmmevaiddklqeaalelep  
ndpiihfalaemlyydgqy  
lratseyetvletgeyqngvnlfsmadcslqsgnysdairlydeinedemtsedylkkaisydnditqeaikimttl  
lskdpdyiggylylqsllye  
neknypdaietgkeglrlsqfykelmyttgcleiehgdanegvlllkqalevdnayeplllilsdlyrneedyeaieell  
tyvdeedldptfmwhlafa  
yggeerdkeaqhffelayptmktnidfmsdyfyflieigqkeqaitilnqlllepsnenwhdelsslqs  
>tr|Q2FYI1|Q2FYI1\_STAA8  
mlciinnvyyqtcvkvfmynpngkpyrknsaidggkktaaafsniygggrgmslekdihsntfyllksdiavihkkptpvq  
ivnvnypkrskavineayf  
rtpsttdyngvygyyidfeaketknktsfplnnihdhqvehmknayqqkgivflmirfktldevyllpskfevfwkry  
kdnikksitvdeirkngyh  
ipyqyqprldylkavdklildesedrv  
>tr|Q2FYI2|Q2FYI2\_STAA8  
mlisrgvfdlndfir1kvfssynnihdkilyrklfldl1ldtdntfekivksnyiec  
>tr|Q2FYI8|Q2FYI8\_STAA8  
mesfyflsvrffefedkkaskthkkit1llqnyvidafllihmhvvnfh  
>tr|Q2FYJ8|Q2FYJ8\_STAA8  
mitmahv1mpgfpfvaaskfiifainllsiqylvkvttitviqnm1gnplknthhlnk  
>tr|Q2FYK0|Q2FYK0\_STAA8  
myneilglvtfiatfvlmvmyrffgkqgliawvaigtianiqviktveifgisat1gnvmfasiylatdilndiygrr  
vakravw1gfsstlimiiv  
mq1slhfipapedmaqkalhai fdvvprialgsivayigqhidvfifslikkvfssdktfiraygstflssiidtal f  
vaiafigs1pgtvvfeifi  
ttyv1klastvfnvpgfyiaksfyrkgkidkldqgy  
>tr|Q2FYK1|Q2FYK1\_STAA8  
mqyfevikevsriltfseqnalakiddlmtycnqcpiktrlrklegtkahhfcinecsigkeikqlgnelq  
>tr|Q2FYK7|Q2FYK7\_STAA8  
mtkqiivtdstsdlskeyleannihvip1sltiiegasyvdqvditseeфинhiendedvksqpaigefisayeelgkdg  
seisihlssglsgtynta  
ygasqmvdanvtvidsksisfglgyqihlvelvkegvstseivkklnhlreniklfvviq1nqlikggrisktkglig  
nlmkikpigtlldgrlelv  
hnartqnssiqylkkaiefidheiksigvahanvievdklkkvfneafhvnydinvttpvisahtggaiglvvlk  
k  
>tr|Q2FYL2|Q2FYL2\_STAA8  
mlvaisarsssdedvcc1ssivslpyyv1ctfkfcvvnhinlckiahhis1  
>tr|Q2FYL4|Q2FYL4\_STAA8  
mir1gkmsdlqilnlveeakelmkehdneqwdqyp1lehfeediakdylyvleendkiygfivvdqdaewyddidwp  
vnregafv1hr1tgskeyk  
gaate1fnvyidvkvargaevilttdtfa1nkpaqglfakfgfhkveq1meyppydkgepfyayykn1ke  
>tr|Q2FYL8|Q2FYL8\_STAA8  
ml1psskshiemmcemfklrsfcenkdnysfyneksvydn  
>tr|Q2FYM6|Q2FYM6\_STAA8  
malnirkiaaqravhykihiikkadfyqinnrnqlfyia  
>tr|Q2FYN1|Q2FYN1\_STAA8  
mlir1lqk1hanftqiffaiwnh1lnlyysavitklqynnkysfnqllvynilhyfvkq  
>tr|Q2FYP4|Q2FYP4\_STAA8  
mkyikaqinqk1sepetkkyishrkiyvepvfgfmkailgftmrvrginkvkre1gfv1malnirkiaaqravhykihi  
kkadfhqiinnrnqlfyia  
>tr|Q2FYQ4|Q2FYQ4\_STAA8  
mkntamra1nfavkiknnirqlyaqnr1lsytavtiiskemeysaivvfvltflyftwlt  
>tr|Q2FYT2|Q2FYT2\_STAA8  
mvgiishvselknrip1vlevksdqysstrfkrn  
>tr|Q2FYT5|Q2FYT5\_STAA8  
mgtivivi1rmkaqnyvnekkiv1ppffmatgalmyvvyfr1tgsemleafiig1lfstvl1wtsrfevkgteiykrs  
kafpvil1s1liirtvmki  
fisneidpge1ggmff1lafcmivpwaamlykykk1kktlin  
>tr|Q2FYT7|Q2FYT7\_STAA8  
mn1vkfsr1kkagetmatw1aiifivaal1lg1iggf1larkymdy1kknppineem1rmmmmqmgqkpsqkkinqmnt  
mmknmdqnmksakk  
>tr|Q2FYU0|Q2FYU0\_STAA8  
mfynkyknvsty1iiflvssaafai1lsanisahseqvyemtdhqiknntinkayehkdptnseqrldgkvfaln  
>tr|Q2FYU2|Q2FYU2\_STAA8  
mdtpkqqafanniqmnmksdvekt1nkpkrvtfneygtkwytyyddynnfimisykdkvna1ytnqniitskskik

Tsompanidou\_et\_al\_Supplemental\_FASTA\_File

yntpksvvrqr1gepetei  
vkgrvryeqnkeydvfhknhiyttvfydkhrrnntav1qvsdamenr1keqygapsks1adsfelqnfdlvnaerkqh  
q1st1kyskqnssetarkhs  
kdmannhyfdhtn1kgqspfdrlkkgdgitfnsagenlaygqvssiyahqglmsisghrkn1lndtfkilvgvdfndekq  
pfwtenytg  
>tr|Q2FYU8|Q2FYU8\_STAA8  
mednkmrslnsrhismiaiggaigtglfvatgnisqagpggailaylvigvmlyflmssigelatfypvsgsfssyst  
rfidsslgtmgwlywalw  
slvtsvdvivasnlyfwdtkffhpitwslifitil111nifsvksfgetefwlslikvltiivfvi fgflmifgilgg  
htygfenytkggapfvvggi  
sgflgv11vagfsvggtevvavtagesddpkksmpkaikqvfwri1lfyvlsiavigaiipytdps11rasssisqspft  
ivfdrvgiafaasvnavi  
1ts11saansgyvttgrmlyslssdkkapqflsklnkttklplral1ttyavvviviiyanfnfnalleiigsmiiv  
vvgssiwsiqlrqaikkq  
gqdpnkvlpykapfyp1gpiivitt11f11fggsveyilkdqwlnafknflpliialiyfihkiihktkfvkletink  
phdydnqk  
>tr|Q2FYU9|Q2FYU9\_STAA8  
mlpffilidihivynidnnnfsgvkfnwdtnkfi  
>tr|Q2FYW4|Q2FYW4\_STAA8  
mrftfsndlgtlftiilaigfiinlvafiiiflernrrtasstwawlfvlfv1pligfilylffgrtvsarklnknngn  
v1tdfdg11kqqiesfdkg  
nygtdnkqvqkhhdlvrml1mdqdgfltennkvdhfidgndlydqvlkdiknakeyihleyytfaldglgkrihalaleek  
1kqglevki1yddvgsknv  
kmanfdhfs1ggeveaffasklp11nfrmnrrnrhrkiividgqlgyvggfni gdeylglgklygwrwth1riqgdavda  
qlrfildwnsqahrpqqe  
ydvkyfppkngplgnspiqiaasgpasdwhqieygytkmimsaksvylqspyfipdnsyinaikiaaksgvdvhlmpc  
kpdhplvywatfsnasd11  
ssgvkiytyengfihskmcliddeivsvgtanmdfrsfelnfevnavfydenlakdlrvayehditkskqltkesyarnp  
1svkfkeslaklvspi1  
>tr|Q2FYX4|Q2FYX4\_STAA8  
menndsnevay11kdgkftkvyvvnqdsvsfvpg  
>tr|Q2FYX5|Q2FYX5\_STAA8  
mkvifycpraddilkasmeqstykrryiswktmiamak  
>tr|Q2FYY4|Q2FYY4\_STAA8  
mtkimnqfkeiyntiek11ndksisnyrinqtdtdvsyggiselrsgkrkvnn1tletaeklynyqkqleimied  
>tr|Q2FYZ3|Q2FYZ3\_STAA8  
mtekgfkl1tvqndtnievknvftdvdskgi1hihfgmaehmerydklahalskhgfdvirhnrghginidestrghydd  
mkrv1gdafevaqtvrngv  
dkpyi1ighsmgsviar1fvetyppqvdgl1lsgtgmyslwkg1ptvkv1qlitkiygaekrvewvnqlvsnsfnkkip  
1rtqsdw1ssnpijvdfni  
kdpysgfnvsng11yqtayym1htsq1knmkm1nhamp111vsgyddplgdygkig1klaniyrkagiknvkvnlyhhr  
hev1fekdhkiwed1fkv  
1nqfykk  
>tr|Q2FZ04|Q2FZ04\_STAA8  
matfkdfrrnvpknwcpqgdfsvqaa1qkaaanig1epeevai1tgigcsgr1sgyinsygvhsihgralplaqgvkma  
nkdl1tviassggdgdyaig  
mghtihalrrnmnmtiyvmdnqiyltkgqtspsavgvfvtkttpkgnieknavle1vlssgatfvaqgfssdiklgtk  
1iedainhdgfsfvnvsp  
cvtynkintydwfkeh1tsvddienydstkqlatktviehes1vtgivyqdketpsyesqikelddtplakrdikited  
tfnal1teqfi  
>tr|Q2FZ15|Q2FZ15\_STAA8  
mkeryyelidervfeqe1eng1r1fi1pkpgfqktfvtyttqfsg1dnqfklpgdqfvtvpdgvahflekl1fekeed  
1ftafaednaqanaftsf  
rtsylfsatdniennikr11tmvetpyftketvdkekgi1aeeikmyqeppgyklmfnt1ramyqqhpirvdiagsvesi  
ydi1tkddly1cyetfhyhs  
nmvlfvvgdvdpai1crivkqhedarnkvnpki1erg1vdepedvkeafvtesmkiqspr1mlgfknp1qeapqyvqr  
d1ems1ffeli1fgeetdfy  
qn11neg1iddtfgyqfv1eptysfsivtsateepdk1kk111delrdkkgnfqdaefel1kkqfigefiss1nspeyi  
anqytklyfegvsvfdm1d  
ivenit1dsinetssly1n1dqvdsl1eikk  
>tr|Q2FZ17|Q2FZ17\_STAA8  
msemnavynvkqy1n1likqnkleygdq1psn1siare1nvktddvyeaiqal1iteqvikdnfeegtsvks1ppffyp1n  
el1sigqmiknagfecgte  
y1nfdeqpatm1dan11sveegypvtier1rtadgepvvyc1dkiakkel1cteyqmsngsil1saikeqsnhnicyadt  
eieavnyepriev1nasp  
hegl11k1thynesdep1lys1nymkns1vqfkitrki  
>tr|Q2FZ18|Q2FZ18\_STAA8  
mvlgvfqlgiigr1idsffny1fgysryltyilv1latgfityskripktrrtagsiv1qial11fvsq1vfhfnsgikae

Tsompanidou\_et\_al\_Supplemental\_FASTA\_File

repvlsvyqsyqshshfnp  
fgggvlgfylllelsvplislfgvciitillcssvilltnhqhrevakvalenikawfgsfnekmsernqekqlkreeka  
r1keeqkarqneqppikdv  
sdftevpqerdi piyhtenesksqsqpsrkkrvfdaessninvnhhqadqqeqlteqthnsvesentieeagevtnvs  
yvvppltllnqpakgkats  
kaevqrkgvvlentlkdfgvnakvtqikigpavtqyeiqpaqgvkvsivnlhndialalaakdvrieapipgrsavgie  
vpnekislvslkevldekf  
psnnklevglgrdisgdpitvplnephllvagstgsgksvcingiitsillnakphevklmlidpkmvelnyngiphl  
lipvvtnpkhkaaqalekiv  
aemerrydlfqsstrnikgynelirkqnqeldekqpelpyivvivedeladlmmvagkevenaiqritqmaraagihliv  
atqrpsvdvitiiknrip  
sriafavssqtdsrtingtggaekllgkgdmlvyngdssqtriqgafldsdevqdvnyvveqqqanyvkemepdapvd  
ksemksedalydeaylfvv  
eqqkastsllqrqfrigynrasrlmddlernqvigpqgskprqvlidlnnev  
>tr|Q2FZ26|Q2FZ26\_STAA8  
mavvnemtllmimlksflyfclifnqidish  
>tr|Q2FZ33|Q2FZ33\_STAA8  
mnreenvhl1rkyyafikldhndiikelqklkvsyitymdseypvllkeiyqfplllfykgniklinmhlavvgards  
tsytqqsleflsndksky  
ltivsglaqadamahqialkynlptiavlafghqthypkstlalnkieekglviseypphtpiakyrfernriisgl  
skgvllteakeqsgshiti  
dfaleqnrnvylpgsmfnpmtkgnllriqegakvvlmandifedyyi  
>tr|Q2FZ39|Q2FZ39\_STAA8  
mviqwypghmakakrevseqllkvdvfelvdaripysrnpmidevinqkprvvlknkdmnlnemskweqffidkgy  
ypvsvdakhgknlkkveaa  
aikataekferkakglkprairamivgipnvgkstlinklakrsiaqtgnkpgvtkqqwikvgnalqlltdtpgilwpk  
fedeevgkklstgaidks  
ivhldevaiyglfnliqndlarlkshynievpadaeiawfdaigkkrglirrgneidyevieliiydirnakignycf  
difkdmteelandann  
>tr|Q2FZ41|Q2FZ41\_STAA8  
mfaqngyinknl1saieklvdllnicvatlflscpsrenntynakysncyk  
>tr|Q2FZ67|Q2FZ67\_STAA8  
mjenvrslafdtiqdlnegaysnlrinevlsenelnamdka1fteivgytvkrkytldfylvkpfvktkikawvrqllwm  
siyqyvyldkvpnhaiine  
aveiakerggyhngnvngilrtmmrsdlpdfnei adpkkrmaieysmpkwiidhwathygleetekilqsfllettsttv  
ranltrasl ddi eklqde  
gydvekdhdlyclhiggppihsrsfdkgfvsiqdkssmfvahimnvdrhdhvl dacsapggkachiaevlmpegqvda  
sdihdhkidlinfnikkllr  
ltnikafqhdatkpydktydki lvdapcsglgvmrhkpeikytqskqhieslvelqleilenvknnvkiggeiystcti  
eqlenenviytflknnknf  
efepfghpitgelvktlqimpqdfnsdgffitkirkdn  
>tr|Q2FZ80|Q2FZ80\_STAA8  
msftrmsvrginkvkrrelgfvmainirkiaaqravhykihikkadfyqi inrnqlftlpkn1msqpps  
>tr|Q2FZ88|Q2FZ88\_STAA8  
maryiddrpyntghqlqlaeeiafdrknwvfpitqthenkvacitkddigtnidltaldalhgidamytydsnvlltmcya  
dcvpyfyfystkhhfialah  
agwrgtyteivkevlkhvnfdlkd1hvvigpstsssyieinddiknfetlpidsanyietrgrdrhgidlkkanaalliy  
ygvpeniyttayatseh1  
elffsyrlekggtgrmlafiqgq  
>tr|Q2FZ94|Q2FZ94\_STAA8  
makqkikikknkigavllvgllffilvlrisyimitghsngqdlvmkanekylvknaqqpergkiydrngkvlaedv  
eryklvavidkkasansk  
prhvvdketakklstvinmkpeiekr1sqkkafqiefgrkgtnltyqdklkiekmnlpgisllpeterfypngnfash  
ligraqknpdtgelkgalg  
veki fdsylsgskgs1ryihdiwgyiapntkkeqkprgddvhl tidsniqvveealdgmveryqpkdl favvmdaktg  
eilaysqrptfnpetgkdf  
gkkwandlyqntyepgstfksyglaaaiqegafdpdkkyksghrdimgsrisdwnrvwggeipmsl gftysntlmmhlq  
dlvgadmkswyerfgfgk  
stkgmf dgeapggi gwsnelqqktssfgqsttvtpvqmlqaqsaffndgnmlkpwfvnsvenpvskrqfykgqkqiagkp  
itkdaekveqldlvvns  
kkschaanyridgyevegktgtaqaapnggyvkgpnyfvsfmgdapkknkvi vyagmslaqkndqeayelgvskafk  
pimentlkylnvgkskddt  
snaeskvdpvegqdkqka idnvsakslepvtigsgtqikaqsikagnkvlphskvllltdgdltmpdmsgwtkedviaf  
enltnikvnlksgsfvshq  
siskgqkltekdkidvefssenvdsnstnsdsnsddkkksdsktdkksd  
>tr|Q2FZA7|Q2FZA7\_STAA8  
mthl tkvldtltgicvvllfskyfvayanmvfdwnl rwyll eniphlpilfilmfifgvpsemikdrqrknngv  
>tr|Q2FZA8|Q2FZA8\_STAA8

Tsompanidou\_et\_al\_Supplemental\_FASTA\_File

milfilvaviatwvipagaysklsyepssqelkivnphnqvkkvpgtqqeldkmgvkikieqfksgainkpvsipty  
erlkqhpapeqitssmve  
gtieavdimvfi1vlggliivvqasgsfesglla1tkktkghefmlivfvsilmiiggtlciieeavafypilvpifia  
lgydsivsvgai flassvg  
stfstinpfsvviasnaagttftdglywrigacivgai fvislywyckkikndpkasysyedkdafeqqswvlkdddsa  
hftlrkkiilt1fvlpfp1  
mvwgvmtqgwwfpmasafliftiimfiagtgksglgekgtvdafvngasslvgsliiglarginl1vlnegmisdti1  
hfssslvqhmsgplfijv1  
lfiifc1gfivpsssglav1smpi fapladvgi prfvivttyqfgqyam1flaptglvmatlqmlnmryshwfrfvvpv  
vafvli fggvli tqvliy  
S  
>tr|Q2FZB3|Q2FZB3\_STAA8  
msknitkniilttt1111gtvlpqnqkpvfsfyseakaysigqdetninelikyqtphfsfsnkwlyqydnngniyvelk  
rywsahis1wgaeswgn1  
nq1kdryvdvfg1kdkdtdqlwswyretftggvtpaakpsdktynlfvqykdklqtiigahkiyqgnkpvltlkeidfra  
realiknkilynenrnkgk  
lkitgggnnytid1skrlhsd1anvyvknpnkitvdv1fd  
>tr|Q2FZB4|Q2FZB4\_STAA8  
mliqerglkmte1nniins1qslfesesyki sknsgvpyqtvd1rngktkledarftriiklysyvslkeh  
>tr|Q2FZB5|Q2FZB5\_STAA8  
mysffkytlatandkep1hnks1v1yhfy1t11leekvyvcrchtntknn  
>tr|Q2FZB6|Q2FZB6\_STAA8  
mgwgptqk1aksqhtkmck1agpqqreigspiptnnaswrgpqrswrkvs1qkcaswrgpnieklepqflqtmqvgvgh  
r  
>tr|Q2FZC1|Q2FZC1\_STAA8  
m1ktvkstr11gikkhte1nsctpnvrkqc  
>tr|Q2FZD6|Q2FZD6\_STAA8  
mtqfknkvns1ndq1ftivgednpehi ryvah1vddkikelgykaag1dtsrkailtavnimhekv1leekstfett  
sqiaaa  
>tr|Q2FZE1|Q2FZE1\_STAA8  
mv1lafvt1hdtdgrffnehkhannk11khs1i  
>tr|Q2FZE4|Q2FZE4\_STAA8  
mvnrifissi fskncdcwts1fryycahvvrk1vggnyrv1ipfstvigaw111vad11grviqppleipanailmiv  
ggpm1iylicsqsrnri  
>tr|Q2FZF2|Q2FZF2\_STAA8  
mrttfvfssfrsss1fwychdiss1dykrkilnsv1linniisl1k11ialyhiivvifealdq1vvilnh1vlav  
>tr|Q2FZF6|Q2FZF6\_STAA8  
mdkvkeg1fns1ydvsg1gld1fagsgalgiea1srgmdkvi fvdqnfkavkviksnlan1dleaqsevyknadralka  
lskrdiqfdvif1dppynk  
glidka1klisefn11kengi ivcefsnheeidyqpfm1kryhygltdt11lekge  
>tr|Q2FZF9|Q2FZF9\_STAA8  
mkkvnrni1nav1vgagf1ss1lminknkvitkkqt1paffkgnapyi fahrggma1rpeqtqlafdyakqlgvdgfetd  
vr1tkdqqlivfhd1atvd1r  
ttngsgkvsah1laelkk1daayhfkding1tpyrghahtailtfdel1kqypdmyinvd1kdapesyegsiapqimfdt  
iaenqafdrv1vtsfykeq  
ivrfnkiaggsvaigasqqevteaf1kyh11ggryyqplaqt1fmpthfkgid1tssrfikw1ndmniipgyygvnsin1  
md1lykgahtivtdrpd1  
aqqfkt1pnk  
>tr|Q2FZG1|Q2FZG1\_STAA8  
m1tskfgqadrvypfrdgyknyvfkdksyiyvstkreivsvyatgekvnvsp1kigqhsaeifnhtsinpepsfkvdg  
kkyefel1sded1ktqt1ik  
ygd1yaqvysdqskkvlsvrfltkem1adiepyqlnsnstseehnk1rpevqnpnq1islyevtnemrklkg1kplkins  
d1ahiasn1lyeatsngsd  
sveftedalrgq1dknhvtykttaqnvgyafndvpt1ihswmnsdihrsr11nskydemggdvmrduysliflek  
>tr|Q2FZH2|Q2FZH2\_STAA8  
miyafigitv1w1flf1cy1iiasidfgagffal1hsk1tgdekkinh1isry1npvwevtnvffvffvfgvfgffpesiky  
lgtv111pgsialimis1r  
nsfyafenygqdtklawmimygvs1lipas1staltiteggyinvrnvid1dwvq111spfawsvflaiisvlyiss  
gf1tyyakandepayn1t  
rqwhif1gppmi1ic1fvf1s1riqnsehfysavfdywmf1gis1flfalas11tffk1khglafvfvilqmmfaffgyg  
isk1py11ypfvkitdayv  
npemgwt1vivf1lg11111ps1i111r1fvfdkeyvegkks  
>tr|Q2FZH7|Q2FZH7\_STAA8  
mgfknn1tsn1tnkignsvfkienvdkgampttiqelrerrqraeavkrks1msstmsvvpipgl1dfgvdl1klmkdii  
edvkn1ygl1dhkqvns1gd  
dvkerimsaaa1qgsqf1gkrisnaf1kivi rdvakrtaakqtkwfpvvgqavsasisyfmnkigkdhiqkcenviknv  
m  
>tr|Q2FZI1|Q2FZI1\_STAA8

Tsompanidou\_et\_al\_Supplemental\_FASTA\_File

mkrdtyqsylfnseepvhnglriivyekeegymrraha  
>tr|Q2FZJ4|Q2FZJ4\_STAA8  
mnfnk1kfgatigiiggq1gkmmaqsaqkmgykvvv1dpsedcpcryvahefiqakyddeka1nq1gqkcdvityefen  
isaqqlk11cekynipqgy  
qaiq11qdr1teket1ksagtkvvpfivskestdidkaiet1gypfivktrfgydgkgqvl1nnekdlqegfklietse  
cvaekylnikkevs1tvtr  
gnnqitffp1qenehrnqilfktivparidktaeakeqvnkiiqsihfigtftveffidsnnqlyvneiaprphnsghy  
sieacdysqfdthilavtg  
qslpnsiellkpavmmn11gkd1d11enefnehpewh1hiygkserkdsrkmgmtv1tndvnqteqdmakfegsn  
>tr|Q2FZK9|Q2FZK9\_STAA8  
mykq1lek1it1tnd1n1vnr1rfgqrditseq1ell1rilfn1ydr1sqyd1tmkisreqsivsrwik1vlkgyitsqqs  
sed1rckel1itdqart1i  
sqinnarceliearcqclseveln1nq11dk1nqrris1  
>tr|Q2FZL1|Q2FZL1\_STAA8  
mkl1s1nsnsky1rapsirqfsnrmmn1ddcvn1tigppdfmpdvkkayidainndktsyshnkg11etrea1sqyfkn  
ryhfsydpee1ivtngase  
aidtt1rsiiepgdei1ipgpiyagyipliev1ggkpiyidttatqfkitpdalshispkktav11nyptnptgv1kr  
nev1nivn1vkkyplfiis  
de1yaentfsgkhvsfaefedirdq1iligg1skshsatgirig11gpqylidk1tfmhayncifanvpaqiacitaln  
eg1eap1kymneayverrny  
1vsel1tk1gfeitaqpegafyifpsikhitdddfefcvd11lesth1aivpgssftefgkgfvrisayemdv1kegmkr1  
akylntk  
>tr|Q2FZL8|Q2FZL8\_STAA8  
mr1ndnrtsyfygaiq1fknnsknkqsi1fkdwel1khnitfihpqsekh1rvvggfqfsshksddewrefg1nhfv1p  
ev1listdnngt1f1tytvkr  
esftvea1nd1md1fn1nsid1vdeqigeitrnediykddwrq1lvvaiesinneekiv1arr1rikfdkdisipyilkq  
ayskeknsyi1f1lesqdsi  
ffsqtpeq1likvnnki1stkavagtikrsqdededtknveaf1kdnkn1iehrfvvdsilhdikpyitelhydtkpkilk  
ndh1yh1lyteikaplkdss  
yis1idn1hptpa1ggypkefamdfieqkefgtrglygapvgyidiyddcefivairsm1ikkaqat1fagcgivkdsdp  
dse1aetn1kftpmnalg  
vdmngks  
>tr|Q2FZM4|Q2FZM4\_STAA8  
mttikdelgtekikknprvvv1eysfady1aal1dmkpvgiaddgstknitksvrkdigayesvgsrppqnmevisklkp  
d1i1iadv1rhkkikselk  
iaptim1vsgtdynanieafktvakavgekegekr1lekhdki1aeirkkieqst1ksafafgisragmfinnedtfmg  
qf1ikmg1qpevtkdktth  
vgerkggpyi1lnee1lan1pkvmi1atdgktdknrtkfidpavwks1kavkdnkvydvdrnkwlksrgiiasemaed  
lekiaekak  
>tr|Q2FZM6|Q2FZM6\_STAA8  
mfntnhknaqkygvi1hvnhenfddtgafkkskyi1enankingv1v1teaqr1d1lnqfdveniftisnfvkihnapk  
hfqteki1vghisrmvptkr  
id11ievae1lvkkdnkvfhiygegsvkdkiakmi1edkn1ernv1fkgyt1tpqk1edfkl1vvsts1qyegqg1smiea  
miskrpv1vafdi1kygsdf  
iednkngy1ienh1ndmadki1q1lvnndv1aaefgskareni1iekystesilekw1n1fn1s  
>tr|Q2FZM7|Q2FZM7\_STAA8  
mkk1im1vhe1ldv1nkgg1mtssmfnrskefydadipadiv1tdfydkgyde1ika1kkqgkmdr1tkmynv1feyfkqisnk  
hfksn1k1lykhiser1knt  
ieieesk1gisryfd1itgtiyayirksksekvidffkdnkrierfsfidnkvhmketfnvdknkvcyqvfydekgyypisr  
ninann1gav1gktyv1vnkk  
efknn1alcvy1lek1ikdskdsimicdgpgsfpkv  
>tr|Q2FZN1|Q2FZN1\_STAA8  
mkfi1ai11g1il1siti1afti1hhp1ldr1fnp1f1kteysyakvpkg1tqyvni1taysergek1dyk1tfn1g1f1s1rtyve  
ikhkgqyvisityvekedt  
pkevrqe  
>tr|Q2FZN2|Q2FZN2\_STAA8  
mkwfk1il1dvti1filia1il1fvtykenee1lpdtkypia1vtdwnk1kyskneiykridq1faknenvaiyk1stsnytnknv  
dkdi1yvfnkskaat1tpfn  
akyni1hyl1sdev1kkdi1kgsyfvkdknfdvskfin1flkeygvtaesyki1dhmmi1avgvikqmniv1v1ss1l1ivyfiyy  
ifeknin1fkayaiky1ngf  
t1rki1ifenfskktywvt1iitq1il1ttsv1wi1nytgn1dl1filriv1l1scl1filit1svin1wt1fl1m1ln1nianmik  
gkqh1fktir1fintvcksil  
1v1lianv1mient1svik1d1nkiketekywnv1ddyti1efapyhetkqsl1idnmvrseq1lvkaseaennail1fkpkgdsvd  
ndn1fspdeg1n1v1n1nq1w  
siyyk1qf1qdp1ipknqkn1vev1ipqk1fhamrne1nqayhswf1efvqknknknk1siqfinkndcri1fsdardsrh1s  
fieapi1ivn1vqas1d1sndf  
yyami1sggy1fknyda1lvkniekyh1dge1isgitnyk1dsvmemyhenn1k1tv1n1fsqii1ai1il1il1il1fdvky1yfeq  
hrk1l1vik1lygyst1ran



Tsompanidou\_et\_al\_Supplemental\_FASTA\_File

yqyllinnivvifigiltvnlhshyimm1fatilvvqillqicslyyhgrfrnevikef  
>tr|Q2FZN3|Q2FZN3\_STAA8  
mkfaankltl1tfrkfcinnekeiwikeevf1  
>tr|Q2FZN9|Q2FZN9\_STAA8  
mvirpafdddqrngsejirfdktrinqpfovkiiersckfygntylgkkaetnritgisskppillt1fptyffpth  
sdrqneniwlmmhyiesik  
elknrkckvtfinnesiilhvsvhslwhqynnsifyyymvdkqsrmsknpdqpidynkatlnvfealtrysl1fedk  
>tr|Q2FZP5|Q2FZP5\_STAA8  
mallinkrfidegktidvylfealnqiiiaipdwfwsyqamamt1deetcfeailmq1fvfkeeeeaesiasq1tdwiet  
ykkek  
>tr|Q2FZQ1|Q2FZQ1\_STAA8  
mieklvtflnevvsckplvygllitgvlftlrmrffqvrhfkemirlmfqgekspngissfqaiamslagrvgtgnivgv  
staifigggavfwmwita  
flgassafiestlqqifkrvenneyrggpaiyieygiggkfgkiygiifaivtiisvgl1llpgvqsnaiaasmhnaihvp  
qwmggivvivilg1iifgg  
vriianvatavvpmayiyilmaviiiciniqevpalfalifksafglqsafggivgamieigvkrnglysneagqgtgph  
aaaaevshpskqglvgaf  
svyidtlfvctataliil1sgtynvtdgtvnangtphlikdggivyentatgkdysgtamyaqagidkafhgsgyqfdptf  
sgvgsyfiafalfffafstt  
ilsyyitettvayl1trnqnqvssifiniarviilfatfygavktadvawafgdlvgvlmawl1iaaiwilhkpavnal  
kdyeiqkkr1ngynavyq  
pdpnk1pnavfwlkyper1kqarakk  
>tr|Q2FZR2|Q2FZR2\_STAA8  
mgk1ikyisil1ivvl1sacgkssnkdegvkdattetskhkggtlnvaltappsgvys1lnsthadsvvegyfnes1  
latdkkirpkayiaswkdi  
epakkiefkikkgikwhdgne1kiddwiysiev1ankdyegayypsveni1qgakyhegktdhisglkiddytmqvtfd  
kkqenyltgfitgpl1skk  
ylsdvpikdlaksdkirkypigipykvkkipgeavqlvkfddywqgkpaldkinlkvidqaqiiikamekgdidvanda  
tgamakdakssnag1kv1s  
apsldygligfvshdydkkanktgkvrpkayedkelrkamlyaidrekwikaffngyaseinsfvpsmhwiaanpkd1ndy  
kydpekakki1dk1gykdr  
dgdgfredpkgnkfeifkhnsnptfeprrtaaikdfwekvglktnvklvefgkyndlanaskdmevyfrswaggtdp  
dpsdlyhtdrpqnemrtv1  
pkdqylddaldfekvgidekkrkdiyvkwqkymndelpglpmfqqksitivndkvrn1dieigtdqslyn1tkea  
>tr|Q2FZR3|Q2FZR3\_STAA8  
mtrkfrtlililialiatialsgcanddgysdkgqvfrkilssdlts1dts1itdeissevtaqtfeglytlgkgdkpvlgv  
akafpekskdgk1kvk1r  
sdakwsngdkvtaqdfvyawrktvdpktgsefayimgdiknasdistgkkpveqlgikalndet1qielekpvpyinq1l  
alntfapqnekvakkygkn  
ygtaadravynpfovdkvedkt1l1sknqyywdkknvkl1dkvnykvikdlqagaslydtesvddavitadqvnkykdn  
kg1nfv1ttgtffvkmnek  
qypdfknkn1rlaiqaiddkgyvdsvkngsipsdt1takgiakapngkdyastmnsplkynpkearahwdkakke1gk  
nevtfsmntedtpdakisa  
eyiksvekn1pgvt1kikq1p1fkqrvs1elsnfeas1sgwsadydpmayletmttgsaqnntdwnkeydq1l1kvar  
tk1alqpneryen1kkaee  
mflgdapvapiyqkgvah1tnpqvkg1iyhkfgpnns1khvyidksidketgk1k1k  
>tr|Q2FZR4|Q2FZR4\_STAA8  
mkndev11sikn1kgyfnagknevraienisfdiykget1glvgesgcksttgksii1k1nditsgeilyegididqir  
krkd11kfnk1qimifqdp  
yas1npr1kvmdivaegidihhlatdkrdkrkrvyd1letv1skehanryphefsggqrqrigiaralavepefiade  
pisa1dvs1qaqvn111k  
1qrergi1flfiahd1smvkiysdriavmhfgkiveigpaeeiyqnp1hdytks11saipqdpesersrkrfsyiddea  
nnh1rqlhei1rpnhf1fst  
eeeeaq1renk1vtqn  
>tr|Q2FZS8|Q2FZS8\_STAA8  
mdinkmtyavqsal1qqavel1sqhkl1qnieeailsaalneses1yksilervnievdq1nkayedk1ntyasvegdniq  
ygqy1sqanq1itkaesy  
mkeyedeyismeh1rsamdidqtkkhyinnkvevikei1kkvrggnhvtsqnpevnyealakygrdlveevrqqkmpdv  
igrdeeri1ntir1srktk  
nnpv1igepvgktaiveglagrivkkdvpe1ldktvfeld1salvagakyrgefeer1kav1kevkesdgri1lfide  
ihm1vgagktdgamdagnm  
1kpm1arge1hcigatt1neyreyiekdsalerrfqkvavsepdvdtisilrg1keryevyhgvr1qdralvaaael1sd  
ry1tdr1fpdkaid1vdqa  
cat1rtemgsnpteldqvnrrvmq1leieesal1knesdnaskqr1qe1qee1lanekekqaal1qsrvesekedian1qekra  
q1desrqa1edagt1nn1le  
kaaelqygtipq1le1re1lednfqdegedtdrmi1revvtdee1gidivsqwtgipvsk1veterek11h1sd1l1hkrvv  
gdkavdl1vsdav1rarag  
ikdpnrpigsf1fl1gptgvgkte1aks1laas1fdsekhmir1dmseymekhavsrl1igappgyighdeggq1teavrrnp

Tsompanidou\_et\_al\_Supplemental\_FASTA\_File

ysvilldevekahtdvfnv  
llqildegr1tdskgrsvdfknti i imtsnigsqvl lenvketgeitstekavmtslnayfkpeilnrmddivl fkp1s  
iddmsmivdkil1tqlnir1  
leqrisievsddakawlggeayepqygarplkrfvqrqietplarmmikegpeggttikvnlnsdnnl1tfnvekihe  
>tr|Q2FZT0|Q2FZT0\_STAA8  
myidpelgidivnlglvykvnvdddegvctvdmtltsmgcpmpgqi idqvktvlaeipeiqdtevnivwspwtkdmmsry  
akialgvs  
>tr|Q2FZT7|Q2FZT7\_STAA8  
mdptlkdgervavni vgyktgg1ekgnvvvf hanknddyvkrvi gvpdkveykndtlyvngkkqdepylnynlkhkqgd  
yitgtfqvkd1pnanpksn  
vipkgkylv1gdhrevskdsrafglidedqivgkvsfrfwpfsefkhfnfentkn  
>tr|Q2FZU4|Q2FZU4\_STAA8  
mqvgveprhreissistdnaswrgpnteageksaynsqvvgvgrnkfceni isvplpkrqq  
>tr|Q2FZU8|Q2FZU8\_STAA8  
mrvtgiqpygafvetpnhteglihiseimddyvhn1kkfl1segqivkakil siddegkln1slkndyfknyerkkekqs  
vldeiretekygftlker  
lpiwikskrai rnd  
>tr|Q2FZV4|Q2FZV4\_STAA8  
mthlletfemsi dhqedglvvismpvtdkvkqpfgy1hggasialgetacs1gsanlidttkfiplglemnanhihsakd  
grvtataei ihrgksthv  
dikikndkeq1itvmrgtvaikplk  
>tr|Q2FZW7|Q2FZW7\_STAA8  
mnglykgvftknfkrncmkskskqppnkyveafkpyl1t1lylai fitlyliygsgdthnnfiyef  
>tr|Q2FZW9|Q2FZW9\_STAA8  
mwqks1vpmpkdqfvta1rdadacfit1seqidaeilaqspnlkvianmavgydnidvesatannvvvntntpnvltetta  
elgft1mlai arriveaek  
yveadawqswgpy1lsgkdvfnstigi ymgdigkafarr1qgfntni lyhnrsrhkdaeadfnatvysfet1laesdfi  
ictapl tkethhkfnaeaf  
eqmkndai finigrqivdeta lidaldnkeilacglv1lanepidhthplmgrdnv1itphigsasvttrdnmiqlcin  
nieavmtngvphptpn  
>tr|Q2FZX1|Q2FZX1\_STAA8  
myfvdkdk1tqklaylqaltddyheskhnhyaferiaqmlie ssvdignmiidafilrdpgnykdvidilel envitket  
qqainktvgi rkqftydyt  
aldiki impmfdalpyykqfitevti fhqenvpvtafgkgenq  
>tr|Q2FZX5|Q2FZX5\_STAA8  
mrltiyhtndihsh1heyerikaymaehrpr1nhpslyvd1gdhvd1sapiteatlgkknval1neakcdvatignnmg  
tisyealnhlydeakfivt  
csnvidesgh1pnnivssyikdidgvkil fvaatapftpfyralnwivtdplesikeeielqrgkfdvliv1shcgiffd  
etlcqelpeidvifgsht  
hyfehgeinngv1maaagkygny1gevn1tfeahkvvhtaki iplet1pevetsfeeegktlmsnsviqhpvvlkrsmn  
hiteaay1laqsvceytha  
qcaiinag1lvkdivkdevtey dihqmlphpinmvrvr1fgvklkei iaksnkqeymyehaaglgfrgni fgyi1ynlg  
yihstgryylngeedk  
eyv1gtidmytfgryfpt1kel pkeylmpef1rdifkek1ley  
>tr|Q2FZY1|Q2FZY1\_STAA8  
myfvlaifti isasvlgysiqacasshninayyal srs1plf1laifslvihsaiflitisiamilvqfl daivgykse  
dvfkygplatsvvn1i1l  
ivf1f  
>tr|Q2FZY2|Q2FZY2\_STAA8  
mmvdkattqihdcgirv1vfi kliesyikys1dnsilvr1rfvv  
>tr|Q2FZZ0|Q2FZZ0\_STAA8  
mkk1fg1ilv1tfavv1aacgnksgsddkkitvgaspaphaeilekakpllekkgyeldiktindyttpnk1ldkgei  
danyfghtpylntekkdkg  
yki vsagdv1lep mavyskkyks1kel pkgatvyvsnpaeqgrflkffvdaglikikkgvkiedakfsditenkkdikf  
nnkqsaef1pkinyqedad  
avi insnfaieq1l npkkdsi avesakdnpyanli avkeghqddkkikaliev1qskdiqdfinekyngavipak  
>tr|Q2FZZ5|Q2FZZ5\_STAA8  
mlgprglahyck1tyhq1l cwgpaiiekfvigv1fsfg  
>tr|Q2G005|Q2G005\_STAA8  
ms1hfai1fw1alif1vaatfi1v1mkktskeskkesy1sftvilyifgfai1iyt1figv1  
>tr|Q2G013|Q2G013\_STAA8  
mdd1iwsfpl1dnerfdnpeykeamkkyqqr1maeadeal kffseekkikngntdn1dy1glsheryesvnt1kkqsee  
flkeiedikdnpelkdfn  
eee1kcd1e1nk1lenq1lm1gktyqnyrddves1ysk1dlimgykdeerankavnkrmlenk kedlet1ideffsdi  
dktrpnnipv1ledekqee  
nhknmaqlksdteaaksdeskrskrs1ntqnhkpasqevseqqaeydkraerkar1dnqkikktpvvs1eydfe  
hkqridnendkklvvsapt  
kkptspttytettqvpmptverqtqqqi iynapq1ag1ngeshdfttthqspttsnhthnnvvefeetsalprksgs

Tsompanidou\_et\_al\_Supplemental\_FASTA\_File

lvgsiqidsshlterekrv  
ikrehvreaqklvdnykdhshykdrinaqqkvntlsegkqrfrnkqinkvyngk  
>tr|Q2G014|Q2G014\_STAA8  
mknkllvlslgaicvsqiwesnravasvgeknpyvssr  
>tr|Q2G018|Q2G018\_STAA8  
mmvkkllkaikqnflyeqsnitfkmivfgykriskmlfqfeinhinflweg  
>tr|Q2G026|Q2G026\_STAA8  
miyylysiyngqfmhtflivlliidcialitvllqegkssglskaisggaeflgkqkqrgvdlflnrltiilsilff  
vlmicisylgm  
>tr|Q2G040|Q2G040\_STAA8  
mkmrllqaffnssqgpqhrefrkeilqamrvgvwaptqriskrnstgnaswgvpgntenfekkfyrqcelgcgpqhreig  
fpistdnaswrgpnteade  
ksaynnvqvggaptqkltksqltimcklagpqrhrswrkvsllq  
>tr|Q2G042|Q2G042\_STAA8  
maqknnvipmtfddafyrkmakqkfkqreykraaeefekvlelspddleiqidyaqclvqlgiakkaehlfydniinyr  
hledsfyelsqlnievnep  
nkafllfginyvisddqdyrdeldqmfvdvkyqseeqieleaqlfvvqilfqylfsqgrlkdaknyvlhqpqevqdhrrvr  
nllamcylylgeydtakal  
yeallqedstiyaichytlllyntkeneqyqylikilnkvvpmnddesfklgivilsylykqyrasqlllyplykkgkfls  
iqmynalaynyyylgeede  
shyywdkllkqiskveighapwvienskevfdqhilpllsddshyrlygiffldqngkeivmtesiwqvlennnyekl  
yltylvqgltnkldfihhr  
glltlyhnelfvsendvmvawinqgeliiaekvldtdvepyigafiylyfknqprnvtkkqittwlgitqykinmiefl  
lsi  
>tr|Q2G047|Q2G047\_STAA8  
mideshvtlpqvrmyngdrarkqvlvdhgfrlpsaldnrplkfeefektkqlvyvsatpgpyeiehtdkmveqiiirpt  
glldpkievrptengiddl  
lseiqtrvernervlvtlltkkmsedltytmkeagikvnylhseiktlerieirdlrmgtydvivginllregidipev  
silvviildadkegflrsnrs  
liqtiagraarndkgevimyadkmtsdmkyaidetqrrreiqmknkehgitpktinkkihdlisatvendenndkaqtvi  
pkkmtkkerqktidnieke  
mkqaakdldefekatelrdmlfelkaeg  
>tr|Q2G048|Q2G048\_STAA8  
mprtgcgnvtcdssiiitkegankrgnssrltqsfhffmfepifspvnaInqpi  
>tr|Q2G049|Q2G049\_STAA8  
mfviwshrtgfmshqlltfadsefsskrrqrkeiflirmeqilpwqnmveviepfypkagnrrpypletmlrihcmqh  
wynlsdgamealayeiasm  
rlfarlsldsaldpdrttimnfrhllleqhqlarqlfktinrwlaeagvmttqgtlvdatiieapsstknkeqqrdepemhqt  
kkgnqwhfgmkahigvdak  
sglthsllvttaanehdlnqlgnllhgeeqfvsadagyqgapqreeaevdvdwliaerpgkvrtlkqhprknktainiey  
mkasirarvehpfriikrq  
fgfvkarykgllkndnqlamlftlanlfradqmirqwersh  
>tr|Q2G050|Q2G050\_STAA8  
mvehypfkisdfepqgdqpaikveigikagkrhqtllgatgtgkftmsnvikevgkptliiahnktlagqlysefk  
effpenrveyfvyydyq  
peayvpstdtfeikdasindeidqlrhsatsalferddviiiasvsciylgnpeeykdllvsvrvgmendrseilrlklv  
dvqytrndidfqrgrtfrvr  
gdvveifpaskeelcirveffgdeidrirevnyltgevlkerehfaifpashfvtreeklkvaieriekeleerlkelrd  
enkllleaqrlleqrtnydlle  
mmremgfcsgienysvhltrpulgstpytllldyfgddwlgkvrtsp  
>tr|Q2G052|Q2G052\_STAA8  
mdatwdllqeeefdeemkedleqevinfkakvdeyelqllldgphdannailelhpgaggesqdwanmlfrmyqrycekk  
gfkvetvdylpgdeagiks  
vtllikghnaygyllkaekgvhrlvrispfdssgrrhtsfascdvipdfnndeieieinpdditvdtfrasgaggqhinkt  
esaiirithhpsgivvnnqn  
ersqiknreaamkmlksklyqlkleeqaremaei rgeqkeigwgsqirsyvfhpysmvkdhrteetgkvдавmdgdigp  
fiesylrqtmsld  
>tr|Q2G057|Q2G057\_STAA8  
mlyavtgagktemmfqgiqyariqgdniavsprdvvveiskrikdaflnedidilhqqsraqqfeghfvvctvhqlyrf  
kqhfdtifi devdafplsm  
dknlqgal kssskvehatiymtatppkqllseipheniiklparfhkkslpvpyryfkl nkkkiqkmlryrlqdqinnq  
rytlvffnietmiktfsv  
ykqkiktlyvhshedvfrfekveqlrnghfdviftttilergftmanldvvvidahqytqealiquagrvgkrlcptgk  
vlffhegvsmmmiqakkei  
qrmnkllalrgwide  
>tr|Q2G058|Q2G058\_STAA8  
mkiavmtdstyslsqlidkyniqiaplsvtfedgkiipeekvrkkraiqtlekkvldivkdfevtlfvingdhfedg  
qalykklqddcpsayqvay

Tsompanidou\_et\_al\_Supplemental\_FASTA\_File

sefgpvvaahlgsgglggyvgrkirlt  
>tr|Q2G059|Q2G059\_STAA8  
mtgnii tvkkehi ienvisksr fiahikpvq nedeakafiaa ikkehkdathncsayt igpemni qkanddgeptgtagv  
pml dilkkldvhnacvvvt  
ryfggikl ggggliraysgavrdviy digrvel reavpcivt lnydqtgk ffeylasthfmlrnqtytdkvsyyidvvks  
dyeafin flnqmtagnfdl  
teetpkql pfdipte  
>tr|Q2G073|Q2G073\_STAA8  
mrnnkkimll iavtll ismlyl fvgidfeifeyqfssrlrkfil iilvgaa iatsv vifqaitnrl ltpsimgldavy  
lfikvlpv flfgiqsvvvt  
nvylnfil tlimvlfalifqg i fhighfsiy filligvllgtffrsitgfiql imdpesflaiqssmfanfnasnl  
vtfsavll vilviti lll  
pyldvlll graeainlgisyek ltrillv ivsvlsvst alvgpitflgl ltvnlahel mktyehkyiliaticl swisl  
fsaqwvvesv feattemsi  
lidliggsyfiy llvrrrnaq  
>tr|Q2G075|Q2G075\_STAA8  
mfyftl skqnthsek l nfslian inkidtkl ferllklwskn atinekyyy  
>tr|Q2G078|Q2G078\_STAA8  
msymektktll nlrtrwv l mktmeek kynhiel nnevtkr redgffs lekdqealvay leevkdktiffdteierlryl  
vndfyfnvfdiyseadli  
eitdyaks ipfnfasymsask ffkdyal ktn dksqyle dynqhvaivaly langnkaqakqf isamveqryqpatptfln  
agrarrgelvscfllevdd  
slnsinfidstakql skiggvainl skl rargeaikgikgvakgvlpi aksleggfsyadqlgqrp gagavylni fhyd  
veefldtkkvnadedlrls  
tistg l i vpskffdlakegkdfymfaphtvkeeygvt lddidleky yddmvanpnvekkknaremln liaqtqlsgyp  
ylmfkdnanrvhpsnigq  
ikmsnlctei fq lqetsi indygie deikrdi scnlgslnivnm esgkfrdsvhsgmdal tvvsdvan iqnapgv rkan  
selhsvglgvmnlhgy lak  
nkigyeseekdfani fmmnfysiersmeiakergikyqdfeksdyangkyfefyttqefepqfekvrelfdgmaipt  
sedwkk lqqdveqyglyha  
yrlaiaptqsisyvqnatssvmpivdqierrtygnaetfypmpflspqtmwyyksafntdqmklidliatiqthidqgis  
tilynseistrelarlyv  
yahykg lkslyytrnkllsveectscsi  
>tr|Q2G080|Q2G080\_STAA8  
mfip lffiykyhqp mfg r lssqpl ltrstlg ligvllniyaidhmvl sdadslmk lnpfwtil lsisvflhekv rkyqit  
amiai lgmllivkpefss  
smips lagl fsgifaasaytcvral streapytivfyfslfsvivlipftaytyepmsqm qilyllgaglaaavgqigvt  
laysfaaakdisiftyasi  
iftailgf ilfgespdfyatlg yvviigas yymfekarrdakiikk  
>tr|Q2G083|Q2G083\_STAA8  
mvineidfyrv greniviavynehikfl filis  
>tr|Q2G085|Q2G085\_STAA8  
mtagp qhreigfpistdnaswggp qhkeifl  
>tr|Q2G091|Q2G091\_STAA8  
mgmeaykiehlnksyadkti fdnldl sisegekiglv gingtgstllkviggidddftanvmhpnqyri ryssqkdln  
edmtvfdav lssdttlr i  
ikqyeqavqayaddqsdkl fkrmda qdamdqhdawdynaeikti lsklgihdttkyikelsggqqkrvvlakt lieqpd  
lllldeptnh ldfesiswl  
inyvkqyphvtl fvthdryflnevstri elnrgklasy pgnyesyiemraerevtlqkqqkqralykeelawmragak  
arttkq qar inr fndlene  
vnqqykddkge lnlaysrlgkqvfe ledl skaindkvlfeh lteiqgerigvvgp ngagkttllnilsgedqqfegkl  
ktgqtvkvayfkqtdetld  
rdirmidy lreesei akekdgtsvsitql llerflf psathgkkvyk lsggeqkrlyllrllvhqpnvllldeptnd lde  
ttiledy ihtfggtvitv  
shdryflnkvaqsywfihdgqmekiigt fedesykks ldknkstlkqqskssttv rkngl sykekleyeq lmkrieqa  
evrmeeidv lmi easadyg  
kikelneekeqleiqydl ditr wseleeikeqq  
>tr|Q2G092|Q2G092\_STAA8  
mfnficfhth l pssveistylngfytl ytf lkskeidtvkchnli yccfnyk  
>tr|Q2G096|Q2G096\_STAA8  
miivyivllllivynyr lvnrl lsenriyvvrliatittvisfilvya lihelmpfvvr amd lmyhq  
>tr|Q2G098|Q2G098\_STAA8  
mrieynyryyl teneykqyhiqlkgfikkyvatkladvgevi hfaqaqqrqgryvslylsyeaakyfnhamcths lakdd  
iyaaays fekaesinstye  
hqtsyvs kyhfs fvessevm mtni kr vqqaivegetyqvnytar l tdniiyypistlyer l tqfsngnyta llqtdei qva  
sispel ffgkqgqfnvndv  
iiskp mkgtmprgkteaedqyykt lqtsskdraenmivd l l rndigrisqsgsikvykl ffeiyayktvfqmtsmvsgt  
lknntdl tqilts l fpcgs

Tsompanidou\_et\_al\_Supplemental\_FASTA\_File

itgapk1ntmkyikqllessprgiycgaig111pteddkmifnirptieykygqaiyvgagitidskpkdevnefyakt  
kilem1  
>tr|Q2G0A2|Q2G0A2\_STAA8  
mnkqifvlyfni fliflgiglvipvlpvylkd1gltgsd1gllvaafalsqmiispfpggtladk1gkkl1icig1ilfsv  
sefmfavghnfsvlmlsr  
iggmsagmvmppgtgliadisphqkaknfgymsaiinsgfilgpgiggfmaevshrmppyfaga1gilafimsivlihd  
pkksttsqfkllepqltk  
inwkvfi1tpvilt1vl1sfg1safet1ys1ytadkvnyspkdisiaitggg1fgal1fqi1yffdk1fkyfse1tfiaws1ly  
svv1l111vfandywsim1  
isfvvfigfdmirpaitnyfsniagerqgfagg1nstftsmgnfigpliagal1fdv1hieapiy1maigvslagvvivliek  
qhrak1keqnm  
>tr|Q2G0A5|Q2G0A5\_STAA8  
mfygcchassnsi1wkr1safeqv1tiniiv1livsiivfql1ighiwhdig1s1ylrs1illmml1pfg1lgvfiqqvsy1yerqypk  
wvppqnikvr1kyi1latf  
1eyv1ly1t1ftdi1r  
>tr|Q2G0A6|Q2G0A6\_STAA8  
maiav11nrmf1rmehnp1feyiyqqkedi1dacyfi1peedmssas1d1kaqfyr1gt1qr1fyqs1haek1t1pyvmsy1ddi1s  
fckenni1sevv1tagd1msy  
hleeydi1hqr1s1fneari1avt1irgnhyfkasktmnqqgepynv1fts1fykkwrpy1rhrdvy1hyd1ksfenfviaspdd  
1vfd1diagss1ieq1kw  
qh1fd1dq1dqnyes1grdy1lpevt1sq1svalay1g1ldi1ei1fnd1lary1dede1anyeaf1irelif1refy1v1mtqyp1etsy  
qafk1pk1yrq1kwsq1neadf  
nawce1gt1gfpi1daa1ime1tqt1gfmhnr1mrmvvsq1f1tkd1fidwt1wge1kffrkh1idyda1asni1hg1wqws1ast1gtdav  
pyfr1mf1npi1rqser1fdaka  
lyik1ty1pi1fnq1idaky1lhd1tqrnes1lfeqqi1elgshy1prqm1vdh1qekrt1qv1at1fka1d  
>tr|Q2G0C3|Q2G0C3\_STAA8  
mti1l1w1l1iaaf1mlaf1vg1likpi1psv1vlw1vgf1li1yq1fgf1hnq1h1sw1fvys1mall1til1ilcad1flank1yfvnr1f1ggs  
kfg1eya1alig1vvig1cfv1p  
pfg1i1i1pfi1lvfi1veli1qgys1ferav1kvs1igs1iva1ft1ssia1qai1imfi1miv1wff1ida1llin  
>tr|Q2G0C4|Q2G0C4\_STAA8  
mdmfaa1l1qik1nyk1l1fan1mf1l1gmgi1avt1vpy1vl1fat1kd1gmt1tnqy1g1ll1asa1isq1ftvns1iar1fsd1thh1fnrki  
i1i1al1lmg1alg1fsi1yffv  
dti1w1fi1l1yai1fqg1l1fap1amp1q1yasares1inv1ssk1draq1fant1vl1rsm1fsl1gfl1fgp1f1iga1q1lig1lky1ag1l1fggti  
si1il1ft1vl1qv1ffy1kd1ni  
khp1ist1q1qhveki1apnm1fkdk1t1l1l1pfi1afi1ll1hig1qwm1ytm1nmp1fvtd1ylkene1qhv1gyl1asl1cag1lev1pfi1il1gv1  
ssr1l1qtr1t1li1ygai1fgg1  
fyfs1ig1vfkn1fym1lag1qv1f1aif1lav1lg1ig1isy1fdi1lpdf1pgy1ast1f1snam1vig1q1ggn1l1ggam1shw1vgl1env1ff  
vsaa1sm1gm1li1ff1tknq  
kitked1vist  
>tr|Q2G0C5|Q2G0C5\_STAA8  
mvanaptake1plink1kgdkgi1qlvanapta  
>tr|Q2G0E4|Q2G0E4\_STAA8  
mv1m1t1s1fp1ft1l1fqit1scsi1yil1fl1ns1fqin1lyh1vht1vfr1qfsck1l1fsgsk1qis1  
>tr|Q2G0F3|Q2G0F3\_STAA8  
md1l1ftr1kd1gts1ihyst1l1gegyp1iv1iht1v1dnys1vfnklael1aks1fqv1lid1l1rgh1gys1dkpr1hie1ikdf1sdd1ive1llk  
ylyieev1afvchem1ggi1g  
adi1svry1pft1ss1l1t1vn1pts1iege1l1peer1l1frky1ahi1rnw1dek1qdk1flnkr1kyr1prkmnr1l1khv1dt1ne1ist1kee  
iqav1kev1fknadi1sq1tyrn  
vvv1ptki1i1age1fgert1r1eakevad1iqnad1fevy1qessa1pf1veeqer1fved1taaf1inkh1hdek1hv  
>tr|Q2G0G3|Q2G0G3\_STAA8  
mt1nay1vd1kl1veek1vfkdp1ihry1ihved1qliwd1l1ikt1kef1qr1l1rri1rq1gt1yl1sfhta1ehsr1fghs1lgvye1ivrr1lide  
sf1igh1daw1dnk1drp1al1ca  
al1l1hd1l1ghp1fsh1sfeki1fntd1heay1tqai1itgd1tevn1avl1rkvape1fprevaev1inkth1hkl1vis1miss1qidadr1m1dy  
l1qrd1ay1ftg1vsy1gaf1dmer  
il1r1l1mrpsk1dev1likes1gm1havent1fims1ryq1myw1qi1yfhpvs1rgge1v1l1nnc1l1krak1q1lyneg1yefk1l1hph1dfip1ff1eet  
vtieq1yvel1deav1vty1yle  
kwt1ked1dai1sd1las1rfin1rd1l1fky1ipfd1gsi1it1isel1qel1feagg1in1pdy1fvse1afsd1l1pydy1drpgs1nrkpi1h1l1rq  
dgt1ire1isn1qsl1vi1hsit1g  
in1rqdy1kly1yprem1vaki1dkkti1reai1en1line1n  
>tr|Q2G0G8|Q2G0G8\_STAA8  
mtk1kf1myy1kl1trw1knd1glag1ftags1isai1lv1wtn1qkne1fgik1dkndwi1ghk1ldvg1idaveksaektvdgvenvmvklq  
kvf1li1  
>tr|Q2G0H0|Q2G0H0\_STAA8  
mid1l1v1st1w1al1ff1pmi1nw1lipkky1vkisekdf1et1niv1ktak1ins1fwpvag1stvl1fgvm1l1rry1sh1fivkyeys1ivilic  
ci1i1l1gi1f1ff1ly1ngk1lk  
lqi1y1nen1knks1nkii1f1pt1ks1l1c1siv1lyi1ylggs1fft1iyml1t1iev1qni1il1fit1lfvif1l1ff1l1flnmcs1lydnk1vhv  
l1fksng1iekf  
>tr|Q2G0H2|Q2G0H2\_STAA8

Tsompanidou\_et\_al\_Supplemental\_FASTA\_File

mttesqniifl twvii tmffflvnmasignknvhviline  
>tr|Q2G0H3|Q2G0H3\_STAA8  
mlcesrqiyknkpyrvirynneyfmvdlvstwityffpminwflpkkyakiseneferlnivepvknnvfwpvagssvlf  
giilrkygnffnvqfekql  
aitvffimligmliyfylnkkltlki fntnvnknrvvliptfkqglivfayff  
>tr|Q2G0H5|Q2G0H5\_STAA8  
mlceskiinknkyriikyndeylmidiistwislffpfinwfpkryvkisreefenlnivkpakknvfwpvagistlf  
avtlrkythlltdqldrkl  
viaicctfigiltfyvrlikksslniyntknkrskii liptlknfcltlfryaffilwtvifsyallsmsyqniivyfa  
witaimgffrseysfnyr  
>tr|Q2G0H7|Q2G0H7\_STAA8  
mlcesrvinqnkyriikyndeylmidiistwislffpfinwfpkryvkisreefeslnivkpaknntfwpvagfavll  
ttl rkyiyllnihlekei  
viltccmllgvfalviyintklklhifdknksnekii liptfkniclslfayilfgglstmal smlvtsppqniiefll  
aligmtacffllnmssvld  
kkihvilktnk  
>tr|Q2G0H8|Q2G0H8\_STAA8  
mvdvirtslyvffpfinwfpkrcakisreeyeklntvkvknknfwpvvggtillgatsrkyihllniqlkrsvific  
fvvflcili fvl nrlkl  
lkvfdnkkeeqkii l vptlknvliiygylliggmsilalsmlltlenqnlitfiawgmglmlfflmitlivnktvkvi  
kr  
>tr|Q2G0I0|Q2G0I0\_STAA8  
mlidlvstwlvyffpfinwfpkryaklsekelenlnvdkqnknni fwpvtgssflfvvilrkyvhtfevqldnkilisl  
cfgfigiaafyiylnkkll  
klkiyddnldnenrvilvptfkdgsvifvtylllgcsilfliwlm tikpqnllvfimwiiitiffllismgsisnkkvy  
aklkkq  
>tr|Q2G0I1|Q2G0I1\_STAA8  
msidmyldrnrqassvgnlsqtmnsnydalekaitqfinddalkgkaytsakqffstvliplstsmktlsdltkqacdn  
fvsrytsevdslkesel  
eedirs lsqqitryenlnnnlkkhasdnqqaissnqqiirtlgqqkheleeklrklrefnqkspeifkeveefqkivqqg  
ltqaqnfwnfstnqfnips  
gkeldwakashelylkvamgkiehkaeketlnkadfavikayakehpeddipksilkyindnkdsikrdiglditstlle  
qdginaskfgvfintaggy  
kgpagpnsfvevkrtsgnvfiengskfakggkylgkgvagvgfigimyddlanddktfgealshngmtlaagsagtavga  
glatfvlgspvgwvllag  
lamstvfa lgtldliygqniifglkdkvdwvghkidnsidvkkttksmdsvgnavseakniisnhinpmkwaw  
>tr|Q2G0I4|Q2G0I4\_STAA8  
mkytdliivigfgkagktlakaastgqhavieqspkmyggctcinigcipsktlvhdglegksfeasynrknadvnalnn  
knyhlladdnnidvldfka  
qfksntevnlldqhddivdsitaphiintgatsvipnikgl dqakhvfdstgllnisiyqpkhlvivgggyialefasmf  
anlgskvvtl lergesfmp  
edqdvaygjt dlenkgialhtnvetelssdnhhttvhtnvgnftheadavllaigrkpntdlaentdielgdrgeikvn  
ahlqttvphiyaagdvkgg  
lqftyislddyriiksalyngqsrtdnrgsvpytvfidpplsrgvlt skeaaaqhydytehql lvsaiprhkinndprg  
l fkvvinnenmllgatly  
gkqsee lniiklaidqniptyvlrdniythptmaesfndlnf  
>tr|Q2G0J2|Q2G0J2\_STAA8  
mtriakklgyesnsfvntviqftl hsesfpri fritsrtdnl ikisqankisrqitneisl aeaktqlekiyvakrd  
sslpfkgfaamiamsfly  
lqgrlndvltailagslylvteildrklhaqfipefigslvigiiavightliptgdlatiiaavmpivpgvli tna  
iqdlfgghmlmfttksl ea  
lvtafgigagvgsllilv  
>tr|Q2G0K0|Q2G0K0\_STAA8  
mefneiwinelyalvnddnpihneivpgqlvsqmm l mamsletnqcqinyvki pilineniefieqheheiiainddgeik  
ikislstkk  
>tr|Q2G0L6|Q2G0L6\_STAA8  
mlsllklkqylqntflskiclidlvsclyllsfyysfnntplkyqnliniifciykflhyyrninfnkvyfnyfslf  
ynvic  
>tr|Q2G0M3|Q2G0M3\_STAA8  
mesrctkili kieynhenmqkl imtkipfneahgnklslqc lllsiegdflyyyi  
>tr|Q2G0P7|Q2G0P7\_STAA8  
mvcqtcaeghhpwnqaneqpeyqehqdnfeeafvkvqilqlhatkhginfqevafkeekrcpschmtlkdiahvkgf gca  
ncyatfkddi idivrrvqg  
gqfehvgktphsshkka lkrkieekneylkk lieiqdfeeaaivrdeika lkaesevqhdda  
>tr|Q2G0Q4|Q2G0Q4\_STAA8  
mvndkvlets kemyveqkcli fyktlkenv  
>tr|Q2G0Q6|Q2G0Q6\_STAA8  
mqdtiflkgmrfygygha lsaeneigqifkvdvtlkvdlaeagrtdnvidtvhygeveevksimegkavnll ehlaeri

Tsompanidou\_et\_al\_Supplemental\_FASTA\_File

anrinsqynrvmetkvrit  
kenppipghydgvgieivrenk  
>tr|Q2G0Q7|Q2G0Q7\_STAA8  
mtkktimgilnvtppsfsdggkfnvesainrvkamidegadiidvggvstrpghemvsleemnrslpvveaivgfdvk  
isvdtfrsevaeacklglv  
dmindqwaglydhrmfqivakydaeiilmhngngrdepvveemltsllaahqakiagipsnkiwldpgigfaktrnee  
aevmarldeivateypvll  
atsrkrftkemmgdydttvverdevtaattaygimkgvravrnhvelnaklakgidflkenenarhnls  
>tr|Q2G0R7|Q2G0R7\_STAA8  
mkhkeafngvvvltaalivikilsavyripyqnilgdtglyayqqvypivalgmilsmnaipsaitqignikyhsdeayak  
avayiqlvgilffiaifvf  
anniahmmgdhltpmiqaaslsfifigmlglvrgyyqsannmtvpaisqvieqvrvgiivtivifvdrgrwtiyeagt  
iailastigflgssiyiva  
hrpfkfkmvnntakiwkvqfalsvli faisqliviwqvidsvtiikslqairvpfdvaitekgyvdrgasfiqmglivt  
ttsfalipllsdaikmnn  
qvlmnyanaslkitilistaagiglinllplmngvffktndltltsvymitvicvslimmdmallqaahavrpifvgm  
taglvikfilniilirlsq  
iigasistvvsliifgtiiahavtrkyhlyamrrffinvvlgmvfmsivvqcvlnivtthgritgliellcaavlgiaial  
ffyifrfnvltykeltylp  
fgsklyqikkgr  
>tr|Q2G0S1|Q2G0S1\_STAA8  
mtlmpfsfppfi faqnehltypstssllasvylfv  
>tr|Q2G0T2|Q2G0T2\_STAA8  
mnwieldlwlwcvgainlinavndyaneill  
>tr|Q2G0T7|Q2G0T7\_STAA8  
mktigrriirgtclwvaflyvkfddseldvqfe  
>tr|Q2G0T9|Q2G0T9\_STAA8  
mskeidwrksvvyqiykpsfndttgngigdingiiekldyikllgvdyiwltpvyespmndngydisnyleinedfgtmd  
dfeklikvahqkdlkvml  
ivinhtstehewfkearkskdnpyrdyffrssedgpptnwhskfggnawkydsetdeyylhlfvdsqadlnwdnpevrq  
slyriivhwidfgvdgfrf  
dvinliskgefkdskigkefytdgprvheflhelnrqtfngtdmmtigemssttiencikytqperqelnsvfnfhhlk  
vdyvdgekwnakldfhkl  
keilmqwrqgiydggnwai fwcndhqprrvsrfgddtseemriqsakmlaialhmlqgtpyiyqgeeigmtphftsia  
qyrdvesinayhqllsegh  
eadviallgksrdnsrtpmqwsddvnagftagkpwidi senyhqvnvrqalqnkesifytyqkliqlrhthdiitygd  
ivprfmdhdhlfvyerhyk  
nqqlvianfsasavdlpeglaregcvviqtgtvenntisgfgaivietna  
>tr|Q2G0V5|Q2G0V5\_STAA8  
mkrqqsqwsstgfilasagsaiglgamwfkpymagiyyggaf lamfliftifvglpllimeftvgkmgrtyttqiyskl  
tgkklwlniigwngnlavfi  
lfgfysviggwiviyigvwlqvlvifqrinhlqemnfavispnlvtvlgqgiffatmiivmlgvekglekaskvmmpl  
lfvfliviviksltdgvl  
egvkfilqprvseitadgilfalgsfftlslgttgmitasyaskdmtikssaisivmni fvsvlaglaifpalhsfg  
yepqegpgllfkvlpmvfs  
qmhlgtllylglvlflfaaltssisllelnvsnftkndntkrkkvavigsilvfiisipatlsfgilkdvrfgagtifd  
nmdfivsnvmlgalgtt  
lvvgqlldkllqqyfgkdrfrl fsgwylykiampvviilvfivqlfs  
>tr|Q2G0X4|Q2G0X4\_STAA8  
mklkniakasialgilttgmittaqpvkastlevrsqatqdlseyynrpfeytnqsgykeegkvftfnyqlidvtlt  
gnekqnfgedisnvdivv  
rensdrgntasiggitkngsnyidkvkdvnlitknidsvtstststytinkeeislkeldfklrkhlidkhnlykt  
epkdskiritmkggfytf  
elnkklqthrmgdvidgrniekievn  
>tr|Q2G0X6|Q2G0X6\_STAA8  
mdasefrnyilgliyfrflsekaeqeyada lsgedityqeawadeeyredlkaelidqvygfiopedlfsamireietqd  
fdiehlatairkvetstlg  
eesendfiglfsdmdlssrlgnnvkertaliskvmvnlldlpfvhsdmeidmlgdayefligrfaatagkkagefytpq  
qvskilakivtdgkdklrh  
vydptcgsllrvgketqvryfgqernntynlarmnllhdvryenfdirnddtenpafngntfdavianppysa  
kwtadskfenderfsgytk  
lapkskadfafi qhmvhyllddegtmavvlphgvlfrgaaegvirrylieeknyleavignpanifygtsiptcilvfkkc  
rqddnvlfidasnfdkq  
knqnl sdaqveriidtykrketidkysysatlqeiadndynlnipryvdtfeeapidldqvqqdlknidkeiaieieq  
inaylkelgvlkde  
>tr|Q2G0X7|Q2G0X7\_STAA8  
mkmrtiaktslalgllttgaitvttqsvkaekiqstkvdkvptlkaerlaminitagansattqaantrqertpklekap  
ntneektsaskiekisqpk

Tsompanidou\_et\_al\_Supplemental\_FASTA\_File

geeqktlnisatpapkqegsqttesttpkktvtpstntppmqstksdtpqsptikqaqtdmtpkyedlrayytkps  
fefekqfgfmlkpwttvrf  
mnvipnrfiykiaivgkdekkykdgpydnidvfivlednkyqlkkysvggitktnskkvnhkvelsitkkdnqgmisrdv  
seymitkeeislkeldfkl  
rkqliekhnlygnmgsqtivikmnggkytfehhkqlqehrmadvidgtnidnievnik  
>tr|Q2G0Y2|Q2G0Y2\_STAA8  
mfscnlrngfvfcglfllflnglnfaianmiaasfdkvi epfssgtmiitpcaigfkyykiillykiycvnsflllpnn  
mfgsvm  
>tr|Q2G0Z3|Q2G0Z3\_STAA8  
mqlnvnmkfdwrhkgickqivlnsvvigggk  
>tr|Q2G0Z8|Q2G0Z8\_STAA8  
minliyttrcaimlkvctsrkqinmkndiekeyvneiimllrtiptsklvqipmqlfidkailnnvqndalliekatha  
rnhlrlwslqghrdipn  
>tr|Q2G0Z9|Q2G0Z9\_STAA8  
mkkrl11stflastliltgcasdqsdnedhhtstgihapksakletkdfinsdkknsdisdaemkqaiekylsvnsdil  
dnkyimqhkldkqidsqtk  
vtekqaetlshlslavkndlhfkfvtennipkeykpvellmnyfkaInstianvdedieklsyqpqnkinvvdvptk  
yagdvnkkqdkikdfllks  
kgiksdvidk  
>tr|Q2G100|Q2G100\_STAA8  
mkvritfiilailstivclflaamhptgpntvtfeqpylftlniimvlvalpslvlaiydmsfrissailqflgaisw  
fflslilsltqftpftlas  
fitsiilftstiitlaiggksvekndsp  
>tr|Q2G107|Q2G107\_STAA8  
mfkkydsknsivlksilslgiyggfgyipkadastqnsqvdkqlqkveevpnsekalvkklydryskdtingksn  
ksrnwvyserplnenqvri  
hlegtytvagrvytpkrnitlnkevvtlkel dhii rfahisyglymgehlpkgnivintkdggkytleshkelqkdrenv  
kintadiknvtfklvksvn  
dieqv  
>tr|Q2G108|Q2G108\_STAA8  
mvkamvqfqiandmrigeilaikrvninyedktldidgkvnwitekrrhese  
>tr|Q2G114|Q2G114\_STAA8  
mnlndwskdfqefqeiInsgihpewlycakanlvlepaytgegkqffstqdiinaskiipff  
>tr|Q2G120|Q2G120\_STAA8  
mtlsketevidwrrrgveyhsanpplydsstfhqtslggdvkydyarsgnpnrelleeklarleqqkfafafasgiaais  
avlltfksgdhvlpddvy  
ggtfrlteqilnrfnieftvttdttkleqiegaiqsntkliyietsnpcfkidikavskiaekhellvavdntfmpplg  
qsp11lgadivihsatkfl  
sghsdliagavitnneaidsalyliqngtgnmlsaqdswtlakhltfpirfkqsvenaqkivsflikqdeisevyypgl  
ttahleqaknggavigfrl  
adeskaqqfvda11plvsvs1ggvetilshpatmshaalpeevrgergitfglfrlsvgl edpdeliadikeyalkeafn  
esiph tier  
>tr|Q2G125|Q2G125\_STAA8  
mlllir1sschi11miyti11lir1lmnyatniqfmkpiatyvtfsl1ci  
>tr|Q2G127|Q2G127\_STAA8  
miimitntfilitgtpslvvisiialii fgpkk1pqfgraigstlkefksatedldkeshdtpskeskqqreq  
>tr|Q2G133|Q2G133\_STAA8  
mssasfnsilalfcri fkykfgmnnkvviklscvignldinqsnrhynaywrgpnkeadeksacnnvqvgdgpqhreigs  
vistdnaswrgpnienfek  
kfykqcklqkdnkfkicvtlicyynndlqnymkne  
>tr|Q2G146|Q2G146\_STAA8  
mnkv1vtggtgfvgmriisrlleggydvqttirdl skadkvikmqdngisterl mfveadlsqdehwdeamkdckyv1  
svaspvffgktdaevmak  
paiegiqrilraeahagkrvmtanfgavgsnkdksitneshwtne depglsvyekskllaekaawdfvenenttve  
fatinpvai fgpsldahvs  
gsfh11en11ngsmkrvpqip1nvvdvrdvae1hilamtneqangkrfiatadgqin11leiaklikekrpeiaqkvsttk  
lpdfi1slgakfnhqakeg  
k11dmnrnvsnerakt1lgwepiatqeeailaavdsmakyhli  
>tr|Q2G147|Q2G147\_STAA8  
myli epi r ngeyitdgaialamqvyvnhifl dedil fpyycdpkveigrfntaievnqdyidkhsi qvrrrdtgggav  
yvdkgavnmccl1eqdtsi  
ygdfrfyqpai kahl1gatdvvsgrnd11ngkkvsgaamt1mnriyggys111dvnyeamdkvlkpnrkkiaskg  
iksvrarvghlrealdeky  
rditiefkn1mvtqilgiddikeakryeltdadweaide1adkkyknwdwnyngkspsyeynrserlssgtvditisveq  
nriadcriygdffgggdk  
dveea1ggtkmtred1thqlkqldivvyfgnvtvealvdmi1s  
>tr|Q2G151|Q2G151\_STAA8  
mvklsvldyalidegkdaqkalqdsvtlakladrlgfkriwftehnvpafacsspellmmhtlaqtnhivrgsggvmlp



Tsompanidou\_et\_al\_Supplemental\_FASTA\_File

hyrpykiaehfrmmaaly  
nridlgignnpgttmvkqaldginptydsydesislrdyltikdkpsahlgvqphidhfpemwllssatsakiaael  
giglsvgtfllpdinaht  
akdnidiykkhfqastikmdakvmasvfvivadneaevaalqhalvdwllgkfqafefdfpsvdtaqkyklndrdkemi  
qahqariagtgqekvkaql  
ddfiaatfevdevlvaplipgieqrcktlkllaeyl  
>tr|Q2G152|Q2G152\_STAA8  
mesifkiklmngicrsenmnmkkknkgeki  
>tr|Q2G154|Q2G154\_STAA8  
mteikdkvjtkdafalpytiikaknqptkgaiivyihggglmfgkandlspqyidiltehydliqlsyrllpevsldciie  
dvyasfdaiqsqysncpif  
tfgrrssgaylslliarardridgvidfygysrintepfkttnsyakiqaqsvnetmiaqltsptpvvdqiaqrflivyva  
rgtgkwinminiadytnsk  
yniapdelktlppvfiahcngdydvpveesehimnhvphstfervnknehdfdrpndeaitiyrkvvdflnaitmm  
>tr|Q2G161|Q2G161\_STAA8  
mkevgfgtlnwvaviyillamlfigvyftkrasqstnsfftasgrlpswvvgfsiyattlsaitfmstpekafldwsyi  
agniaivaiiplliyfyvp  
ffkklkvtsayeylearfgpsirvigsllfvvyhlgrvaiyilptlraitsvdmnpyivaslvgllicilytflggfegv  
vwsdfiqgvilggalvi  
ilgvvnikggfgtvdafaihekklisadnwklntaaaaipiiflgnifnlyqytasqdvvqryqasdslnketnkslwn  
gilalisaplfygmgtmly  
sfytheavlpkgfntssvvyfiltempfvaglliaaifaaqstisslnsisacisidikqrfggkserhevfar  
fiiiagi fgfgmslylia  
snsndlwdlflfvgtlfgvplagvfavgi ftkrtntfgvicglilgiifayvyngvgkgnspfyvstisftvafvfayil  
sfivpskhkkditgltife  
kdkpstyisktatkk  
>tr|Q2G165|Q2G165\_STAA8  
mramgalanaaiatflveafnkyvggevfqikfleelgdaagglggvaaagltalaigvspvyaalviaaacggmdllpgf  
fagymigyvmkytekyvpd  
gvdligsivilaplarliavlltpvvnstlirigdiqsstntnpiimgiilggiitvvgtaplssmaltallgltgvpm  
aigamaafssa fmgntlfh  
rllkldrktstiavsieplsqadivsanpipiyitnffggaiagliamsglindatgtatpiagflvmfgfnhpttivy  
gvvmaivgalagylgsivf  
kkypivtkqdmnrgavda  
>tr|Q2G166|Q2G166\_STAA8  
mariplgalyvnnvkitktnknkvpinksitidphydnfifnphi  
>tr|Q2G169|Q2G169\_STAA8  
mhfsppydlnivyilrctyvvlrsvmlyihlsfiipeflilkanlwkmqlivvyfctvhlklrinlktptytfkym  
>tr|Q2G172|Q2G172\_STAA8  
mkekhhikwdki fygddvnnvetirtkdilqsvylkryllrammagfiigiitvfvlsvkathepdlppgivnmasait  
fsfalvllftnse lltsn  
fmyftvglyykvkptrvlkifllcfagnilgaailfsfmrfsnvmtpdm lnqlsaviehktlstgfvsilmkai fanff  
inislviamqiddvlakmf  
vmmfgvtifafmgvehvvynsclfmggliyqvdtlhfpaisniaaafignyiggliiglfyaylndhhqfyknn  
>tr|Q2G177|Q2G177\_STAA8  
mttkenidtlrkpqaqalslaslfmifsc ltf ffgldyerfpnylkittieliisllqwirfidfekesaqkykk  
iyarfliivnlttitavf  
atcnlyyfvavqnhydlnfywlmgtisiiisylllviggmftllklpkvtrwggkthfgllltalssfiyiekiiey  
ilvnpnvveskfiiivsmly  
iagafvafqfimqysrfyifelnteddd  
>tr|Q2G182|Q2G182\_STAA8  
mggykqikadggkvdqakqlaaktakdieacqkqtqqlaeyiegsdwegqfankvkdvllimakfqeelvqpmadhqkai  
dnlsqlakdydtsikqgl  
drvnp  
>tr|Q2G183|Q2G183\_STAA8  
mnfndietmvkskfkdkkhaeeiaheievrsgylrkaeqykrlefnlsfalddiestakdvqtakssankdsvtvkga  
pntlyiekrnlmkqkleml  
gedidknkeslqakei agekaseyfnkamn  
>tr|Q2G184|Q2G184\_STAA8  
mhkliikynqklmnlrdgktytisederatllkslgevihleqnnqgtwqanhtsinkvlvrkgdldditlqlytea  
dyasfaypsiqdtmtigpn  
ayddmviqslmnaaiikdfqsiquesqyvrivhdkntdvynyelqeqltnkayigdhiyvegiwlevqadglvlsqntv  
asslirltgemphaqaddy  
ntyhrsprhrehptddikierppqpiqknntviwrsiippvmialtvviflvrpigiylmmigmstvtivfgittyf  
sekkkynkdvekrekdyka  
yldnkskeinkaikaqrfslnhyptvaeikdivetkapriyektshhdflyhklgianveksfkldyqeeefnqrde  
lfdakeleyfytdveqap  
lindlnhgpiayigarhllilelekmliaqlstfhsyhdleflvtredevetlkwarwlphtlrgqningrvynqrtrd

Tsompanidou\_et\_al\_Supplemental\_FASTA\_File

qiltsiysmikeriqavre  
rsrsneqii ftpqlvfvitdmsliidhvileyvndlseygisli fvedvieslpehvdtti diksrtegelitkekelv  
qlkftpenidnvdkeyiar  
rlanlihvehl knaipdsitflemynvkevdlvvnwrwrqnetyktmavplgvrgkddilslnlhekahgphglvagtt  
gsgkseiqsyils lainf  
hphevafllidykgggmanl fkdvlh lvgtitnldgdeamraltsikaelrkrqrlfgehvdnhinqyhlkfkegiatep  
mphlfiisdefaelkseqp  
dfmkelvstarigrslgihlilatqkpsgvddqiwsnskfklalkvqdrqdsneilktpdaaditl pgraylvqgnei  
yelfqsawsgatydiegdk  
levedktiymindyggllqainkdls g ledeetkenqteleavidhiesittrleieevkrpwlpplpenvyqedlvetdf  
rkllwsddakeveltlglkd  
vpeeqyggpmvlqlkkaghialigspgygrttflhniifdvarhhrpdqahmylfdfgtnglmpvtdiphvadyftvdqe  
dkiakairifndeidrrkk  
ilsqyrvtiseyrkl tgetiphvfili dnfdavkdspfqevfenmmikmtreglaldmqvtltasranamktpmyinmk  
triamflydksevsnvvgq  
qkfavkdvvgrallssddnvsfhigqpfkhdetksyndqindevsamtefykgetpndipmmpdeikyedyreslnlpdi  
vangalpigldyegvtlqk  
ikltepamissenpreiahiaeimkeidilnekyaicia dssgef kayrhqvanfaeredikaihq lmi edlkqremd  
gpfekdslyi indfktfid  
ctyipeddvvkklitkgpelglnilfvghkelidaydkqidvarkminqfsigirisdqffkfrfiqrepvikeneaym  
vanqayqki r wfk  
>tr|Q2G186|Q2G186\_STAA8  
msffqfikgderkmnqhkvtfdfntynygytdlavpaylpiknlialvldslidisi fdvntqikvmtkgqllvendrli  
dyqiadgdilkl  
>tr|Q2G187|Q2G187\_STAA8  
mlmnsvia lftltassnnglnidvqqeekrinndlnqydtlfnkds kavndaiakqkkerqqqikndmfqnqashst  
rlnetkkvlfsksnlekt  
esdkspyi qnkqekki fpyilmsvgaf ltlgfvi fsihkgrtrtknesarksni  
>tr|Q2G190|Q2G190\_STAA8  
mkktiltmttl tlfsm spnsaqaytndsktle eakkahpnaqfkvnkdtgaytytydknntpn nhqnqsrtn dnhqha  
nqrdlnnnyhssls gqyt  
hindaidsh tppqtspnpltpaipnvednddelnna fskdnkglitgidlde l ydelqiaefndkaktadgkplalng  
kiidqplitsknnlytagg  
ctwyvfdkrakdghtistfwgdaknwaggassngfkvdhrp trgsilqtvnppfghvayvekvnidgsil isemnwigey  
ivssrtisasevssynih  
>tr|Q2G196|Q2G196\_STAA8  
mieinnl skryrnkqifnhl tms fdsnr l tvllgdngagkstllrmi agiekandgtinyfgekwnqrqiqnhigyvpqd  
ialfehmtvaenikffksl  
cknpindttineylqqlnfd dtsakvstls ggnkrkinilvgllgpprilildeptvgidlksrh dihqllnimkskli  
iltthhldevealaddikl  
igqdpfyqhv ledkqwtyty  
>tr|Q2G198|Q2G198\_STAA8  
mctgftiqtl nngvlgrtmdydypldgspavtprnyrwsctgttgqtqygfigtgtdmegfiygdgvnehgvaistqy  
frgyssygsthkadamnit  
qneiytwilgyttsiedmkqqasqihvvavylndigevpplhyhvsdatghtvevsfkegevvikdnpigvlt nhpdlnw  
hysnlrqy inispyatan  
llegvtieplgneagtfglpggftsterfvrmafmkaniaqndkemdlnnafy lldavnipigivrphdadnhytmyqt  
vinlttrtlykyysnel  
valkltddlinrkdm t i f kpekhitirk lndnq  
>tr|Q2G199|Q2G199\_STAA8  
mnntqssprsniiiaimlsalyw lfaqsfinigplvgqyqtspavlnlsls ltsfatgimvaagdiadkigqlrmt  
mgliismfasllliisdit  
alligrilqglsaailp stvgvl n nqfkgehlrraisylmistvggiglagviggl iasnf gwqtnfiisiviafiai  
lllkgtp ekvsqhsrhpf  
dykmsifavmigsftllltqgfeqgwfstfsiiclsifiittliffiierhevpidfsvlnrpfifaflnnfvlns  
glgvtvffiyagthlgls  
aaqsglvtlpyaivavamirlgekatlrfggklmliigplfpvigitismtqllasqyviaviigfvicaignglvatp  
gltiaifsmpekvglatg  
lykmsgtlggsfgialsttvfsmqlnyapsvaatvtfivsvilmilgslsaymiipktvks  
>tr|Q2G1A4|Q2G1A4\_STAA8  
msivalliglp ligwffftvaskfggkpvhqiigatvgtlifail lavtssgfptgtnllfallsgagwfgqiitf  
kafelvgssrampvttafq  
llgaslwgvfalgnwpgighkiigftalv viligarmtwserkeasnaknlrravlll igefgywlysaapqatsidg  
ltaflpqamgmvivaviyg  
fmmkaenpfrnkitw lqiisgffffafgaltylisaqpnmnglatgfilsqtsvvlaltlgtiyflkqhkt skemvitiig  
lvilvaasvtvfik  
>tr|Q2G1A7|Q2G1A7\_STAA8  
miiiiiniaylyaiiwlkr lqkivtsfitkhestsiglvenyf

Tsompanidou\_et\_al\_Supplemental\_FASTA\_File

>tr|Q2G1A8|Q2G1A8\_STAA8  
mskeaghtflaklgktrlprggkeatdwliqqgafsqdkqvlevacnmcttsiyIahtygchiqqvdinkkalekaqeni  
saaglesyiqvqqanavkl  
pfdnqfdiivlneamltmIpiakekaIreyrvlKpggillthdivivneshathvvksIsaainvvnspqtklgwldl  
ynqagfnhvhyhtgpmslm  
tpkgliydegivgtikiinnaIkkenrpfckmfktmtklrkdmnyitfvakkeh  
>tr|Q2G1B7|Q2G1B7\_STAA8  
mmkfsvivptynsekyitelnsIakqdfpktefevvvddcstdqtlqivekyrnklnIkvsqlenstggpgkprnval  
kqaegfvlfvdsddyink  
etlkdaaafidehhsdvlIkmkgvngrgvppsmfketapevtllnsriiytlsptkiyrtaIkkndiyfpeelksaed  
qlftmkaylnanrisvlsd  
kayyyatkreghmssayvspedfyevmrliaveilnadleeahnqilaeflnrhfsfsrtngfslkvkledqpqwina  
lgdfiqavpervdalvmsk  
lrplIhyarakdidnyrtveesyrggqyyrfdiVdglniqfnegepyfkgidiakpkvmtafkfdnhkivteltnef  
migeqhydvrIkIhsrnkk  
htmyvplsvnankqyrfnimledikaylpkekiwvdflevqigtevfevrvgnrnkyaytaetsalihlnndfyrItpy  
ftkdfnnislyftaitltd  
sisIkIkgknkiiltglrdryvfeegmasvvlkddmvmgmlsqtsenevqillskdikkrdfknivklntahityplnk  
>tr|Q2G1C2|Q2G1C2\_STAA8  
mkidgntficrfnvaiIddgyylpmdkyIvfyhdqleyigqInpniIdqayaaIneeqieeynelttqngkvnyllayda  
kvfrkggvsqhtvytipe  
iasdvnefvfdieitlpqeksgviatsahwlhkqghkasfesrsflkafnitklIhikrsktilftsdsrpnlsgnfk  
yydeIlrqkvdfdydikt  
vfkenitdrkwrkfrIpyllgkadyifvddfhplytvrfrpsqeiIqvwhavgafktvgfsrtgkkggpfidslnhr  
sytkayvssetdipfyaea  
fgireenvvptgvprtdvlfedayatqikemedelpiikgkvilfaptfrngnghtahypffkidferIarycekhna  
vvlfkmpfvknrlnisre  
hrqyfidvsdhrevndilfvtdllisdyssliyeyavfkkpmiIyafldedyittrdfyepfesfvpgkivqsfdalmda  
Ildneyevkvvpfldkhf  
kyqmgrsserlvkdIfr  
>tr|Q2G1C3|Q2G1C3\_STAA8  
myrIlfshlllmflfrlnsseqivlmInrhIhyvlqyitehvpicyqyvllvsflsllfphrfikssisilffpkmsi  
npftlgrylasyih  
>tr|Q2G1C4|Q2G1C4\_STAA8  
minqvyqlvaprqfdvtynnvdiygnhvivrpIyIsicaadqryytgrrdenvlrkklpmslvheavgevvfdskgvfek  
gtkvvmvnpntpteqhhia  
enylassyfrssgydgfmqdyvvhmahdriVplpndidIstisytelvsvsyhaiqrferksiplktsfgiwdgnlyit  
aillrkIypeaktyvfgkt  
dykIshfsfvddiftvnqipddlkiIhdafecvggkgsqvalqqivehispegsiallgvselpvevnrIvlekglIlig  
ssrsgskdfeqvvdIyrky  
pdivekIaIkgheinvctmqdivqafemdIstswgktvlkwti  
>tr|Q2G1C9|Q2G1C9\_STAA8  
mtinkvtvlIagtmgaqlaaIfvnagIkvklldivvdkndpniIakksydkitdkkrpIIfdlnIashItygnfdddIvn  
ddadlyieavkedieikha  
vwqqvlqhakedaIlatntsgipinaIaqafnekdqerffglhffnpprimklveliptshtkesiIldvknfaqvnlgk  
gviVvndvpgfvanrvgtq  
tmndimyraeqhkiIsvdvaltgqaigrpktgtyalsdlvgldiavsvikgmqqvpeetpyfhdvkivntIldngalgr  
ktkqgyfkkdketkarIvy  
dvekdyyvpsqpqlpInefnkdlvhnldtiIfaqdeaglflwetlrnnfyysainvpkatddfrdidraIvwgfnwkI  
gpfqIwdamgyervktrme  
delgdIppqwsldggfykqdetieyatpishfvkdelwdkgdakIsvthddqlllklqsknnvitdefndalvdaidll  
endhytsmviyadgnnfsv  
ganIflmkkahedglvddvvaqsidklhysfnrlkysIkpvtavqgralgggcelvlyspivvaasetyigIveagvgI  
IpsgggIaemadrlrtsh  
kfddkqasmtkvltniafakvstnafearryglrdtdtiIftaqrvevalkrakyeaetnyipnprhqyialgedfka  
Iiqggldaqrrghfisdh  
yhaIlniatilaggdlprntfinqryiqslekigfidllkskksyeriahmlktgkplrn  
>tr|Q2G1D0|Q2G1D0\_STAA8  
mqeayiIvaygrsaakakqgalIherpddvaakvlqgvIkridgkfnknmiedvivgtafpegIqqniartialragls  
dtpvgqtvnrycssglqti  
aiaanqImagqgdIlvagveImsavpmggneptnptIqyddiIgasypmgIlaenvasqfdvsredqdayavrshqray  
daqrdgrfkdeIipiQvns  
veytnagpkvhtniIddqdefirpdtmealakIrtvfkadgtmtagtsapIldgagfvvlmsgdkvkelgvtpiarfvvgf  
kavgvdpkimgiIppayaip  
evlsIlnIsvedidIleinafasqtiasikevgldisrtnvnggaiIghplgatgamItarllnemgrpdsrygmvt  
mcigvgmgaaIfeivr  
>tr|Q2G1D1|Q2G1D1\_STAA8  
mieqkkwfnmgmvvisvlefniytsfnhcfkfyekpfdliifanaslnsdscslk

Tsompanidou\_et\_al\_Supplemental\_FASTA\_File

>tr|Q2G1D3|Q2G1D3\_STAA8  
mkkqiislgalavasslftwdnkadaivtkdysgksqvnagskngtldisrylnsalyyledyiyiaigltnkyeygdni  
ykeakdrlllekvlredqyl  
lerkksqyedykqwyanykknprtdlkmanfhkynleelsmkeynelqdalakraalddfhrevkdikdknsdlktfnaae  
edkatkevylvseidtlv  
vsyygdkdygehakelrakldlilgdtdnphkitnerikkemiddlnsiidffmetkqnrpkstkyntptthnyktnsd  
nkpnfdklveetkkavkea  
ddswwkkvtvkkyygetetkspvveekkeekveepqapkvdnqqevkttagkaeettqpvaqplvkipqgtitgeivkgpeypt  
menktvqgeivqgpdf1tm  
eqsgpslsnnytnppltnpilleglegssskleikpqgtestlkgqtgessdi evkppatetteasqygprpqfnktpkyv  
kyrdagtgi reyndgtfgy  
earprfnkpssetnaynvtthangqvsygarptykkpsetnaynvtthangqvsygarptqnkpsktnaynvtthngqvs  
ygarptqnkpsktnaynvt  
thangqvsygarptykkpsetnaynvtthadgtatygprvtk  
>tr|Q2G1D6|Q2G1D6\_STAA8  
mrqllqwlkedvfvsyadkecdvllkvqfyhhladvewviicylhmnm1fkfllt1sneky  
>tr|Q2G1D9|Q2G1D9\_STAA8  
mkskiyil1lfliflsacanthrsesdknltvspyqsnlirpilnefekqehvkieikhgstqvl1snlhnedfserg  
dvfmggv1setidhpedfv  
pyqdtstvqqledyrsnnkyvtsfl1mptvivvnsdlqgdikirgyqdllqpilkgkiaysnpnttttgyqhmraiyismh  
hrvsdvhqfqnhamqlskt  
skvi edvakgkyaglsyeqdartwknkgypvsivypiegtmlnvdgialvknahphpkrkklvqyltsrsvqqr1vae  
daksi rkdvseqsdqsien  
lknip1ipksklpdi phhkfl emiq  
>tr|Q2G1E6|Q2G1E6\_STAA8  
mtikvgiigcggiangkhmps1qkvenvemiafcdvdi skaasaaeygtdnakvyddykallkddtidvihvctpnsh  
ceitvaglhagkhvmcekp  
makttaeaqkmi dtakstgkklitigyqnrfradsqflhqaargd1gdiyfgkahairravptwgvfl deeaqgggpli  
digthald1tlwmmdnyep  
esvmgstfhl1nkqhhaanawgswnpdefvtedsafgfikmkgatitilesawainslevdeakcs1sgtkagadmkg1  
rihgedmgtlytkhvelen  
kgvdfyegnevdeaeekawi davvndtepvvkpeqamvvtkileaiyqsaksgkaiyfe  
>tr|Q2G1F1|Q2G1F1\_STAA8  
mtkrpkri1atiif1s1lfti1yiddiqkwnfytdk1tqnkhqgghskwedffrgsr1tetfgyqhsfpdghkygid  
falpkgt1kap1tngkvtr  
ifnne1ggkv1qiaedngeyhqwy1h1dkynvkv1gdrvkagdi1aysgntgi1ttgah1hfqrmkggvgnayaedpkpfi  
dq1pdgerslyd1  
>tr|Q2G1F5|Q2G1F5\_STAA8  
mkk1isiaiiv1alv1sgcgvptk1sevaqk1skvevkerptih1fgqasyendmnivkdq1enagfnvkmni1qpdysy  
rtqrqagny1di1iddwmtv  
fgd1pnyamta1fsstg1s1l1kdkhvdq1lnkastqneadvk1q1tykq1iedevvfdkgymap1ygs1kkn1vydnk1vdkns  
vg1pnsraliwqqfdynns  
rerdrtr1vmtqqd1geipt1dpirsiapsvysinmmytr1ll1dendh1ttkgs1shdyavnkdnkafy1l1rddyfa  
kvvngqarntgervsaedv  
kfs1ldrardk1svpnnntynmhkhindiki1kdedidq1rkekdkddksiydk1likaynks1l1tdgqkvnnkdgiyqiv  
ki1ttdq1smprevny1thss  
agi1skkf1v1q1v1nqey1pkgy1gds1stipansdgkna1yasgayim1tqknayqatf1qnrng1fnetekgsygpakikni1tkf  
ngdpnna1selrnh1sidm1  
advnqkhfd1lik1sdkn1si1irkngrksv1flm1nikk1g1fkthpn1rqavvnaidq1dq1fikfyrgdkfkiaspit1vdtg  
neqrq1d1lekveka1ng  
>tr|Q2G1F6|Q2G1F6\_STAA8  
maqln1skias1klfasyaiaty1ilv1ltsa1nl1fkgyvadtfyiaet1l1iv1l1ti1li1il1tteqt1khh1dlwrrivev1l  
l1mt1l1tgnvft1l1mfvs1r  
ryqrtsq1ih1syngwes1fir1ktrrhria1ig1l1il1vym1l1sivs1qft1dtt1latknqfn1l1hgps1laypfgt1ddfgrd1  
ftrv1vgtk1l1tfs1isi1sv  
viavi1fgv1l1gti1agyfn1hidn1imr1ldv1vfaips1l1lavai1asfgasipn1li1alsignips1fartmrasv1leikrm  
eyvdaar1tgentw1ni1wr  
yil1pna1iapmiv1rfs1nigvvv1l1tss1s1fl1gl1gvap1dvaewgn1l1rtgsn1lethsn1laivpgvc1imfvv1lafn1figda  
vrda1dpri1h  
>tr|Q2G1F9|Q2G1F9\_STAA8  
mki1cek1fn1nteivei1iand1nskfdncdi1dnn1lgvki1fdttk1dik1le1lirdy1lrpale1lydisin1lpdt1fsp1kegk1i  
eia1kddws1ifnveeaq1s  
ci1lne1fkdden1drrv1led1vgaki1indkkytnkn1li1vanndwdg1fces1kyknrfhk1nmin1len1aff1ditt1nyysi  
eef1rer1fep1lyrs1rivk1fi  
tek1sel1msp1kg1fatagr1lnskw1sv1ly1l1stkeq1sv1ieevk1pkhndi1iyig1kv1l1qknvt1kek1kian1l1tn1l1tsna1kag  
dg1frky1fvny1qt1l1kk1hk  
gi1tnps1deq1di1lpf1qylady1rs1kydg1imyes1l1qdg1tn1fv1ff1dqs1l1fecvnyerkrvs1dvkyt1l1tk1s  
>tr|Q2G1G7|Q2G1G7\_STAA8

Tsompanidou\_et\_al\_Supplemental\_FASTA\_File

mylgqpldeayi krmikqgyqmi ftsvqi peeddetkyhyftkl nllkheqvtylidansil tpsfydhlrqydaqfm  
iridhstsieaeaimagg  
lkcclnasiisrelltshqqndftllsfchnyyprpdtglsvdlvnkkneliyqfnpkaqiygfivgsdlrgplhkgll  
ptieatrhshpvvaakllq  
etgvsevlvgdsliemrqakqlidfckhrhftlcieevfdttvtylfdmchkvrdpnpenvirsetsrqicphsiqqft  
tqrrigsvtvdnlngryq  
gemqivrqtlsahdnvnnvvaqikedlp1lsci epndtfdqktreckk  
>tr|Q2G1G9|Q2G1G9\_STAA8  
mm1qntiakkkqarhlmkvyapvyskhylasnn  
>tr|Q2G1H1|Q2G1H1\_STAA8  
mdyapytaenvvqnanklidvfrknggfiafvrvnfydgkdvlqpnvmislpkegddysrfhlldkrdddavidkrhf  
safvgtdldlqlrrrgidt  
ivlggvathigvdttdardayqlnynqffvtdmmsaqnetlhqfpidnvfplmgqtittndf1n1n  
>tr|Q2G1H7|Q2G1H7\_STAA8  
mgifiyagiiggllsgivklgwevmfpprtpernatnppqellqqlgfssefthqytftsnmelpwvsfivhfsfsivia  
iicyilvkkyaylamggga  
vfgiaiwvlfhliimpimhtvpavwdqpfqehlseffghivmmtielvrqhfvyrykln  
>tr|Q2G1H9|Q2G1H9\_STAA8  
mimgnlrfqqeyfriyknntestthrnaywvklaknveatkmyalstivqqhasirhffdvttddnltmilheflpfie  
ikqvpssanydleaaffkq  
elstyhfndsp1fkvklfqfadaayi1ldfhvsi fddsqidifldd1cnayrgntvintrqhahinrnddkdnqdashi  
aldsnyfrlennsdihids  
yfpikhpfeqalyqtylidmstidmaslavsvylanhimsqqhdvtlgi hvpslhpndlhgnivpltltidakdvcqrf  
ttdfnkcvlqnmsqlqcak  
ss1sletifhcyhmmssccndviedvhqihahtsladieifphqhgfkiiynsaaydl1sietlslvrniylqiteen  
gnkrttvde1n1mterdiq  
lyddin1slpeiddaqtvtlfeqqveatpnhvavqfdgvfityqtl narandlahrlrnqygvpepndrvaviaeksiem  
iamigv1kaggayvpdp  
nypsdreqeyikdvtpkvvi tyqalyengkqinhidlnkiawknidn1skcntledhayviytsgettgnpkgtliphrq  
ivr1vhqnhvyp1neetti  
llsgtiafdaatfeiygalnggk1ivakkeqllnpiaveq1inendvntmw1tss1fnqiaseriev1vp1kylligge  
v1nakwvd1lnqpkhpqi  
ingygptenttfttynipnkvpnrpigi kpi1gthvyimqgerrcgvipge1ctsgfglaagylnqpe1tadkfikds  
ninqlmyrsgdivr1lpdg  
nidylrkdqkqkigrfrie1sevehaleriqqinkavvivqnhdqdyivayyeamht1shnkiksqrmt1peymipv  
nfmhieqipitingkl dkk  
alpimdyvtdayvapstdeh1lcqifadi1hvnqvgihdnffelggsh1katlvvnri eastgkr1qigd11kqptvf  
elaqaiakvqeqnyevipe  
tivkddyv1ssaqrmy1lwksnhkdtvynvpflwr1sse1nvaqlrqavqrliarheilrtqyivddevrqrivadva  
vdfeevntthftdeqeimrq  
fvapfn1lekpsqirvryirsp1hay1fidthhi1ndgmsniqlmnd1nalyqk111p1klqykdysewmshrdmtkhrq  
ywlsgfkdevpi1slptdy  
vrpniktngammsftmqmrq1lqkyvekhqitdfmffmsvmt11sryarkddvvvgsvmsarmhkgteqmlgmfan  
tlvyrgqpspdkmw1qf1q  
evkems1eayahqeypfec1vnd1dqshdasrnp1fdvml1v1qnnetnhahfghsk1thiqpksvtakfd1sfiieedr  
dytinieyntdlyhsetvr  
hmgncqmimidy1khqdt1qicdipngtee1lnwvnthvndrm1nvpgnksii syfnevvsrqghvalvmd1tmtye  
tlrnyvdaiahm1l1nsgvg  
ngqrvalftersfemiaamlatvkv gasyipididfpnkrqgailadakvtavmsygei ettlpviqlenakgfveske  
neqydd1hgnqlentam1d  
nemyaiytsgettgm1pkgvairqrn1ln1vhawstelq1gdnevflqhanivfdasvmeiyc11nght1vipdreervp  
eq1q1inkhrvtvasip1  
qmcsvmedfyiek1itggatstasfvkyiekhcgtyfnaygpsestvitsywshhcgdlipetipigkpl1niqvyimsd  
g11c1g1mpge1ciagds1  
aigyinrpe1madkwqnpf1gk1lyhsgd1arytsdgqief1gridkqkvngyrieldienailairgisdcvvtvs  
hfdthd1lnayyvgeqqve  
qd1kqylndq1pkymipkti1thidcmp1ttndkvdttr1pnpspiqqsnkvysepsneieqtfdvdfgev1kqndvgvdd  
dffelggns1eam1vvsh1  
krfghh1smq1lyqyktvrqivnymyqnqqs1valpdn1selqivmsryn1gileds1shrp1gnt11tgatgflgay1  
iev1qgyshriy1cfiradn  
eeiawyklmtn1ndyfseetveim1snievivgdfecmddv1penmdti1hagartdhfgdddefekvnnvqgtvdvir1  
aqghhar1iyvstisvgy  
fdidtedvtfseadvkqg11tspytrskfyse1kv1eavngldgrivrvgn1tnpyngwrhmrniktrfsmvmd11  
q1dc1gvsmaempvdfsfv  
dttarqivalaqvntpqi1yhl1spnkmpvks11ecvkrkeielvsdesfneilqkqdm1yetig1tsvdreqqlamidtt  
t1k1imnhisekwpt1tnn  
wlyhwaqy1kti1fnk  
>tr|Q2G1I5|Q2G1I5\_STAA8

Tsompanidou\_et\_al\_Supplemental\_FASTA\_File

mkr1siiviigifiiitgcdwqrtskrsknaqnvqivikigylpithsanlmmtkkllsqynhpkyklelvkfnwpdlmd  
alnsgridgastlielam  
skqkgsnikavalghhegnvimgqkgmh1nefnngddyhfgiphrysthylllee1rkqlkikpghfsyhemspaempa  
alsehritgysvaepfgal  
gek1gkgkt1khgddvipdayccv1v1rge1ldqhkdvafvqdykksqfkmndrkqsvdimthhfkqsrdv1tqsaaw  
tsygd1tikpsgyqeitt1  
vkqhh1fnppayddfvepslykeasrs  
>tr|Q2G1I9|Q2G1I9\_STAA8  
mngkkantinrykyfhvnhqkiqqsskktlwasliit11ftviefvvg1vsns1a11sdsfhlmsdv1alglsm1aiyf  
askkptarytfgylrfeil  
aaf1nglalivisiwilyeaivriiypqpiesgimfmiiasig11vniiltv1lvrslkqedniniqsalwhfmgdl1nsi  
gvivavvliyftgwriidp  
iisivisliilrggykitrnawli1mesvpqhl1tdqimadiknidgildvhefhlwsittehys1sahvv1dkkyegdd  
yqaidqvss11kekygiah  
st1qien1q1np1depyfdk1t  
>tr|Q2G1J3|Q2G1J3\_STAA8  
mkkimvifgtrpeaikmap1vkeidhngnfeanivitaqhrdml1dsv1sifdiqadhd1nimqdqqt1ag1tana1ak1d  
siineeqpdm1lvhgdttt  
tfvgs1aafyhq1pvghveag1rthqkyspfpeel1rvmsvniael1nfaptviaakn11fenkdkerifitgntvidals  
ttvqndfvsti1khkgk  
vv11tahrrenigepmhi1kavrd1adeykdvvfiypmhrnlkvraiaeky1sgrnrielielp1daiefhnftnqsy1v  
1tdsggiqeeaptfgkpv1  
v1rnhterpegveagtsrvigtodydnivrvnk11ieddeayqrmsqannpygdgqasrriceaieyyf1rtdkpd1efv  
1rhk  
>tr|Q2G1J7|Q2G1J7\_STAA8  
msekkililc1qyfpeyvssat1ptq1aed1ianhinvdvmc1gpyeysnhkqvsktemhrgir1r1kysrfnkskvg  
riinffs1fskfvini1pkm  
1kydq1lvysnppi1p1ipdv1hr11kkkysfvvydiapdnaiktgat1rpgsmidk1mryinrhvyknaenviv1gtemk  
ny11nhqisknadnihvip  
nwydmrqlqdnriyndt1fkayreqydk11ysgnmg1q1dmet1is1f1k1nk1dq1sqt1t1ilc1ghgk1fadv1kta1iedhri  
envk1mfef1tgtdyadv1k  
iadvci1as1ikegvg1gvpsknygy1aakka1v1imdk1sdi1vq1hveqydagi1q1dngd1hai1yn1finth1sskel1hemge  
rahq1fkdkyt1reintmky  
yn11k  
>tr|Q2G1K4|Q2G1K4\_STAA8  
mfddki11itgg1tgs1fgnavmkq1f1dsni1keiri1fsrdekkqddi1rkynns1k1fyig1dvr1ds1qs1vetam1rdv1dy1v1fha  
aal1kq1vps1ceff1pveavkt  
ni1igt1env1l1qsai1h1qv1k1vic11std1ka1ay1pin1argi1skammek1vf1aks1rni1r1seq1t1ic1g1try1gnv1mas1rgsv1p1fi  
dk1ikage1p1t1it1dp1dm1trf  
1ms1led1ave1lv1vhaf1khaet1g1im1vq1kaps1stv1gd1ata11el1fead1na1e1i1g1tr1hgekk1aet11tre1ya1qced1mg1dy  
fr1vp1ads1rd1nys1nyvetg  
nek1it1qs1yey1ns1dn1th1lt1vee1ikek111t1leyvr1nel1ndy1kas1mr  
>tr|Q2G1K5|Q2G1K5\_STAA8  
mah1svk1r1l1i1al1ids1livt1fs1vf1syy1ilepy1fkt1ysv1k1l1il1aais1lf1ish1isaf1if1nmy1hrawe1yasv1sel1ili  
vkav1tts1ivi1tmvv1t1vt  
gnr1p1f1r1ly1lit1wmm1h1il1iggs1r1fw1riy1rky1lgg1ks1fnk1kpt1lv1vg1ag1qags1ml1ir1qm1ks1dem1klep1lav1dd1deh  
rni1tite1gv1kv1g1ki1adi1p  
el1vr1ky1k1k1i1ia1pt1ig1ger1ke1inni1ch1md1gve11kmp1nied1vm1sge1levn1q1kk1ve1ved11gr1dp1vel1dmd1mis1ne  
1tnk1til1vt1gag1gs1ig1sei  
cr1qc1nf1yper1i11lgh1gensi1yin1rel1nr1f1g1kn1v1div1pi1adv1qn1r1arm1fe1imety1kpy1avy1haa1hkh1vp1med1np  
ee1avr1nn1ilgt1knt1ae1aak  
naev1kk1fv1mi1std1kav1npp1nvm1gask1ria1emi1qs1ndeth1r1tn1fv1avr1fgn1v1lgs1rgsv1p1lfs1qie1egg1pvt1v1t1hpe  
m1try1f1mt1ipe1as1r1vl1qag  
al1aeg1gev1fv1dm1ge1pv1ki1vd1arn1lik1sgk1ked1dir1ity1t1gir1p1ge1km1fee1lmnk1dev1hpe1qv1fek1iyrg1kv1qh1m1kc1n  
eve1ai1qd1iv1nd1fs1kek1i  
nyang1k1gd1ny1vr  
>tr|Q2G1K8|Q2G1K8\_STAA8  
mest1le1tk1ikev1lqkn1k1il1il1p1l1fl1i1sa1vt1ff1vl1spky1qant1qil1vn1qt1kg1dn1pq1f1ma1qev1qs1ni1q1lv1nty1kei  
vk1spr1ildev1sk1d1ndk1ys  
ps1k1ss1ml1ti1ngent1q1lini1qv1ks1ghk1qd1seki1ans1fak1v1tsk1qip1kims1v1dn1vs1ilsk1ad1gt1av1kv1ap1kt1v1vn1lig1af  
f1gl1v1val1iy1iffk1v1fdk  
rik1deed1ve1kel1gl1pv1lgs1iq1kfn  
>tr|Q2G1L1|Q2G1L1\_STAA8  
mf1i1i1k1di1sv1f1l1nnk1lkrey1kim1iki1rggn1mkr1dffek1ws1fil1n1il1fca1fl1vl1mfyk1dvd1iy1ifct1l1is1l1  
p1l1ni1kry1kk1tdn  
>tr|Q2G1L3|Q2G1L3\_STAA8  
msnaer1shf1m1st1npe1ir1lwd1ilq1tn1fkaka1k1ek1vy1iey1dk1ikat1wn1rr1smr1ve1fn1pnk1sh1dev1lw1kqni1isyl1dd  
vs1f1tr1ld1af1df1ef1d1ndy

Tsompanidou\_et\_al\_Supplemental\_FASTA\_File

ya1sdsksvkktyfygrnvkpetkyfgvrnsdrfiriynknknvkmqmkliqhfgygwkln  
>tr|Q2G1M0|Q2G1M0\_STAA8  
mhq1kallv1thprykytsqkhhyliylnknsqsyli1f1  
>tr|Q2G1M3|Q2G1M3\_STAA8  
mssiigkiaiwigivaqiyfsvfvrmisiniaggsdyetifllglilalftv1ptiftaiymesysviggalfivyaii  
alclynflssi1wliggi1  
liwnkyskdestdenekvdiestenqfeskdkitke  
>tr|Q2G1M4|Q2G1M4\_STAA8  
mqntkmenfnikyiskvlhtilfyifaintlnhhislnitvkl111hqvyffsiashigklic  
>tr|Q2G1M8|Q2G1M8\_STAA8  
mivvqtlfihyqiifvitriryrvnqtilnrvktrvmhqlvssliyenivvykasyqdgvgfhtieghdseyrftaekt  
hsfdritspiervvge  
adtttdytq11revvftfpkndekleqfive11qtelkdtqsmqyresnppatpetfndyefyameghqyhsyksrlgf  
t1sdn1kfgpdpfnvklq  
w1aidkdkvettvsrnvvnem1rqvvgdktyehfvqqieasgkhvndvemipvhpwqfehviqvdlaeer1ngtv1wlg  
esde1yhpqqsirtmspid  
ttkyylkvpisintstkrv1aphtienaaqitdwlkqiqqdmy1kdelktvflgevlqgsy1ntq1spykqtqvyga1  
gv1wreniyhmlideedai  
pfnalysdkdgvpfienwikyqgseawtkqflavairpmihmlyyhgiafeshaqnm1ihengwptrialkdfhdgvr  
fkreh1seaash1tkpmp  
eahkkvnsnsfietdder1vrdf1hdafffiniaei1lfiekqygiide1qwqwvkgiieayqea1felnyqhf1fep  
tiqvek1ttrr11sdse1r  
ihhvtnp1gvvgindattiset  
>tr|Q2G1N6|Q2G1N6\_STAA8  
migssfip1qrv1myfinpndsmdqftlev1r1pr1t1ailagaalmsg1mlqnv1knpiaspdiigitggas1savvf  
iaffsh1ti111plfav1g  
gavamm111vfqtkgqirptt1iigismq1fia1vqg11ittkq1saakaytw1vgslygatfkd1i1gmvilavvp  
11f1vipkmsi1ddpva  
ig1ghvqrmk1i1q1itstilvsmais1vgnigfvgliaphiaktivrgsyakk11msamigaisiviad1igr1flpk  
evpagv1aafgapffiy1  
11tvkk1  
>tr|Q2G1N9|Q2G1N9\_STAA8  
mt11tvnpfdnvg1salvaavpi1f11c1tvfkmkgi1yaalt1lvvt1ivalfvfelparvsagaitegvvagifpigy  
iv1mavwlykvsiktggfs  
iiqdsiasisvdqri111igfcfnaf1legaagfgvpiaicav11iq1gfep1kaam1cliangaagafgaig1pvsiiid  
tfn1sggvtt1dvarysa1  
t1pi1nfi1p1fv1v1fdgmk1gike1lpv1iltvsgtytg1q111ti1fhgpe1adi1ps1atmv1lafvcrkfkpkni1fr1  
easehkiqkrtpkeivfaw  
spfv1ltafv1vwsapffkk1fqpggales1vik1pipntvsd1spkgialr1d1ligatgtail1tviitilitklkws  
agallveaikelw1pilti  
saila1akvmt1ygg1tvaigqgiakagai1p1fspv1gwigvfmtgsvvnnt1fapiqatvaqqistsgs11vaantag  
gvaak1ispqsiataav  
kkvgeesal1kmt1kysi1fvaficvwtf1ilt1if  
>tr|Q2G1P5|Q2G1P5\_STAA8  
mnetyr1ggkn1i1lgiv1gvitfw1faqs1vnnv1p1nqqsfgtdmgtis1iavs1tal1fsgmfvvgaggladkigrvkmtni  
g111si1gsal1iitn1pa  
11i1lgrv1iqgvsaa1cimpst1aimktyyqgaerqra1s1yws1sigswggsgics1lfggavattmgwrwif1f1siivav1sm1  
likgtpetksei1tnthkfd  
vag1iv1lvml1s1nvitkgaa1gyts1wffgliaivivaffi1f1nvekkvdn1lidfk1fenkpytgatisn1flngf  
agtlivantfvqq1gyta  
1qagy1sity1imv11mirvgek11qkmgskrpm11gtfivvigialis1vflpg1fyviscvvgylc1fgl1g1iyatps  
tdta1snap1dkvgvasgi  
ykmass1ggafgva1sgavyagavaatsi1htgamia1wvnlmgimafia1ilfaipnddkrvkdak  
>tr|Q2G1P7|Q2G1P7\_STAA8  
msdfkr1ns1m1gfvikgeahiydenmtqcns1gdi1fi1nhrd1yr1f1lqqdgi1cyiqf1qmky1adk1fddvhc1lyfh1t  
datttknihq1rnimar1v  
sth1rhnel1sk1teqq1viq11mhmi1hyvprtyhsnqsi1nddkvnqvc1diel1hfhed1s1sel1seyvgwsesh1skkf  
tes1gv1ghf1nttr1ieh  
ak1d1tyt1deti1tdia1lqngf1ssaas1fart1fkh1fth1qtpk1qyrgdrpaitenqqsahdyhdre1i111ndyieemnhfi  
ediekmykeia1fqptnhq  
1nqfnhi1qvgy1rn11ntqyqsq11tchhdfqvnev1aydvipyimkk1napftydaeisni1fydid1c1ldf11dh1nfs  
1tmh1dqydsr1yidafki  
fihhval1hvshrk1dkfn1lyvt1lhts1liemidyfka1fpngglyih1dqaterh1p1l1kr1lephidhfvdansndavd  
fnkmnddefktasqmi1ink  
tny1id1mhrhr1krp1i11nwnt1tgdtfi1ngey1frggi1ieq11k1sskvegi1gyw1nyd1lvshcknerdymnsie  
1fhqyngkrpvyfta1lfn  
k1tsni1ysddt1vtgtdsn1fqi1lydak1hfnpy1al1dnqmmratemih1lna1leegmykikhft1dkengal1fn1w  
rkhh1tihgmdkdsidyvnr

Tsompanidou\_et\_al\_Supplemental\_FASTA\_File

msfpklevydiditdtlalnimitngihlievkryps  
>tr|Q2G1Q2|Q2G1Q2\_STAA8  
mkkcikt1f1s11vmsgwyhsahasds1skspenwmsk1ddgkhlteinipgshdsgsft1kdpvksvaktqdkdy1  
tqmksgrvffdi rgrasad  
nmisvhgmvylhhelgkflddakyy1saypnetivmsmkdydsdskvtktfeeifreyyynpqyqnl fytgsnanpt  
1ketkgkiv1fnrmggyti  
ksgygadtsqi wadnatfetkinngs1nlkvqdeykdydkkveavkn1lakaktdsnkdnvyvnflsvasggsafnst  
nyashinpeiaktikang  
kartgwli vdyagytwpgyddivseidsnk  
>tr|Q2G1Q3|Q2G1Q3\_STAA8  
mekfnw1lnaisgsqtdknettee1kgakfiilyaysmlv1lalvisnifihilepklsittqiivliliealig1rf  
1kaydvkrkdkenkksk  
dfvklksilvailfts1altagtvadiygf1d1gntrsdli vwsiggiifglvcytmedkr  
>tr|Q2G1Q5|Q2G1Q5\_STAA8  
mlis1vipvfallviggiiwmiiegivhisknkaidnffnqvnkvsetykfattflililatagisqfylyyivsalf  
wlviltfagiagiiflmpyg  
1cflpfykqkkkqtffkymvyttig1sic1g1slv1vhttkiymdeggvryyygsfvmkqaggyay1alav1st1liva  
kkatknkeietvdntnit  
er  
>tr|Q2G1Q6|Q2G1Q6\_STAA8  
mik1nfn1dei fivceeeasinkaaik1ryaqsnisqris1klene1gvv1lfrnqkgakat kageeflayskkv1rdtet  
iknkmknntmsilcse1lf  
ny1seseemmsnnsinfissgnirkaieknydkvisfikindsnyr1snvdtmkvtlysngsnydkeallinkdefcp  
1rkit1dnk1dsqrvmid  
s1aai1nlvkqgkga1l1pmtfenkrdivqdiskifevnyytnhimhh  
>tr|Q2G1R2|Q2G1R2\_STAA8  
meg1khs1ks1gwwd1ffaipi1l1fay1pnynfitiflniviiiffsig1liltthi1idkiksntk  
>tr|Q2G1R3|Q2G1R3\_STAA8  
medvtdivfrhvvsearpdvffteftntesfchpegihsvrgr1tfsedeqpmvahiwgdkpeqfretsiqlakmgfkg  
id1nmgcpvanvakkkggs  
gl1l1rpdvaei1iqatkagglpvsvktr1gyyeidewkdwlkhvfeq dian1sihl1rtrkems kvdahweliaikn1rd  
eiapnt1l1tingdipdrkt  
gle1aekygidgvmigrig1fhn1pfafekeprehtske1l1d1l1r1h1s1lfnkyekdeirqfks1lrrffkiyvrgirgase1  
rhq1mntqsi aearal1de  
fea qmdedvkie1  
>tr|Q2G1R6|Q2G1R6\_STAA8  
mffkqfydnh1sqasy1vgcqrtgeaii1dpvrd1skyie vadseg1titqatethihadfasgirdvavr1naniyvsg  
egeda1gyknmpsktqfvk  
hgdi1qvgnvkl1ev1lhtpghtpesi1f1l1td1l1ggssvpmg1fsgd1fivgdigrpd1l1eksvqikgsteisakqmyesv  
qnikn1pdyvqiwpghgag  
spcga1gaip1stigyekinwafneidetkfies1tsnqpapphfaqm kvnqfgm1lyqs ydvyps1dnkrvafdl  
rskeafhgghtkgtinipy  
knfn1nq1gwyl1dfekdidvgdkstvekakht1q1igfdkvagyr1pksgistqsvhsadmtgkeehv1dvrndeewnn  
gh1dqavniphgk1l1neni  
pfnkedkiyvhcqsgvrssiavgi1leskgfenvvni1regyqdfpes1k  
>tr|Q2G1S3|Q2G1S3\_STAA8  
mssi1vvvtqwgdegkgi1tdflaeqsdv1arfsggnaghtiqfggetykh1lvpsgifykdklavigngvvdpva1l  
kel1dgl1nergipstn1ris  
nraqv1l1pyh1aqdeyeer1rgdnkigt1tkgigpayvdkvqrigirmad1leketfer1l1ksnieykqayfkgmfnetc  
psfd1feeyyaagqr1ke  
fvtdtski1ddafvadekv1fegaqgm1didhgtypvtssnpiagnvtvg1vgptfvskvigvckaytsrvgdgppf  
tel1fdedghhi1revgreyy  
tttgrprrvgwfdsv1l1rhrsvrgitd1sinsidv1tg1dvtkictayeldgkeiteypan1dq1krckpife1pgwt  
edvtnvrt1lee1penarky  
lerise1cnvqis1fsvgpdretn1l1kelw  
>tr|Q2G1S4|Q2G1S4\_STAA8  
mdrmyeqnqmpnhneaeqsv1g1si1idpel1nttqev1l1pesfyrgahqhi1frammh1nednkeidvvt1mdq1stegt1  
neagppqylae1stnvp1tt  
rnvqyytdivskhal1krr1liqtadsian1dgyndele1dail1sdaerrile1sssresdgfkid1rdv1lgqvyetaeel1dqn  
sgqtpg1ptgyrd1dqmta  
gfnr1nd1i1laarp1svgktafa1niaqkvathedmytvgi1f1s1lemgad1latrmi1cssgnvdsnr1rtgtmteedwsrft  
i1avg1ksr1tki1fid1dtpgi  
rind1l1rskrr1kqehg1dmividy1q1iqgsgsrasdnrqqevseisrt1kalare1kcpvial1sq1srgveqrqdkrp  
mmsdi1resgsieqdadiva  
flyrddyynrggdeddddggfepq1tndengeieii1akqrn1gptgtvk1l1hfmkqynkftdidyahadmm  
>tr|Q2G1S7|Q2G1S7\_STAA8  
mfst1fhv1tkrt1rdykyq1fpqv1l1vf1l1fidt1l1fh1sntkkk1sn1l1ccl1tplypyfti1his1ny1l1masif1sif1  
psmts1mr1fvcn1fl1ssnv



Tsompanidou\_et\_al\_Supplemental\_FASTA\_File

>tr|Q2G1S8|Q2G1S8\_STAA8  
mkittiaktsialgllttgvttttqaanattlstkveapqstppstkieapqskpnattppstkeapqqtanattpp  
stkvttppstntppmqst  
ksdtpqspttkqvpteinpkfkdIrayytkpsIefkneigiIlkwwtIrfmrvpdyfykiaIvgkddkkygegvhrn  
vdvfvvleennynlekysv  
ggiIksnkkvdhkagvritkednkgtIshdvsefkitkeqisIkeldfklrkqlieknlygnvvgsgkivikmnggky  
tfeIhkkIqenrmadvidg  
tnidnievnik  
>tr|Q2G1T4|Q2G1T4\_STAA8  
mieiktItnndfneykrIvstvneeftqdshysqtmtdIihdiInqgspkcivfgcyenetIataaleqiryvgkehk  
sIikynfvtnndksinseI  
infiiynarqnyesIItsvsnigakvfysalgfdilgIefknaikigntfydehwlfydlink  
>tr|Q2G1U1|Q2G1U1\_STAA8  
maydglftkkmvesIqflttgrvhkinqpdndtilmvrqrnrqhqlIIsihpnfsrlqlttkkydnpfnppmfarvfrk  
hIeggiiiesikqigndrri  
eidIkskdeigdtIyrtvileimgkhsnIilvdenrkiiegfkhltpntnhyrtvmpgfnyeapptqhkinpyditgaev  
IkyidfnagniakqIlnqf  
egfsplitneivsrrqfmsstIpeafdevmaetklpptpifhknhetgkedfyfikInqfnddtvtydsIndlIdrfyd  
argerervkqrandIvrfv  
qqIhkyqnklakIieeyeqskndteqlygelitaniyrikqgdkevtaInyytneevvipInptkspsanaqyyykqy  
nrnktrereIqhqiIgtkd  
nidyfstieqqIhhIsvhdideirdeIaeqgfmkqrknqtkkkkaqiIqIqhyvstgdgdiyvgnknqndyItnkkakkt  
htwlhtkdiIpgshvviIend  
apsdtIikeaamlagyfskagnsqIpvdytIknvhkpsgkpgfvtydnqktIyatpdyeliqkmkqs  
>tr|Q2G1U7|Q2G1U7\_STAA8  
mveryikvliIlyifttIIsIsvtskcvpnkvirfilrtaigysvfayglhyfsnIkknk  
>tr|Q2G1U8|Q2G1U8\_STAA8  
mkkkIgmIllvpavtIslaacgnddgkdkgvtiktvtvplqsfaeqiggkhkvsvsiypagtdIhsyeptqkdIIsas  
ksdIImytgdnlI dpvakkv  
astIkdkkkIIsledkIdkakIItDqhegeheheghdhekeehhhhhggydphvwlDpkinqtfakeikdeIvkkDpk  
hkddyeknykkIIndIkkI  
dndmkqvtkdkqgnavfiIshesigyIadcygfvqkgIqnmnaedpsqkeltkivkeirdsnakyIlyednvankvtetir  
ketdakplkfynmesInke  
qqkkdniItyqslmksnienigkaIIdsgvkvdkaeskhdkaisdgyfkdeqvkdreIIsdyagewqsvyplkdgtIdev  
mehkaendpkksakdlkay  
ydkgyktdItnidIkgneItftkdgkktgkyeyngkktIkykgnrgvrfmfkIvdgndkdIpkfiqfsdhniapkae  
hfhiImgnndalIkemdn  
wptyypskInkdqikeemlah  
>tr|Q2G1V0|Q2G1V0\_STAA8  
mienkktvedtystgaIvdsIIsqvkmqvmvqqtPgrymlkammagfIIsivtvfmfgiktqfasthvdglInImgaia  
fsIglIilvvtItnseIItsn  
fmyftvgwykvsvvkkmtwiIlycflgniIggfvIffImkfahvmtpentqalIalvqkktvdstwlIniftkgifcnff  
inigiIIsmqfkggltkaf  
fiacgvvfvymgyehvvnagIyagmvffnlI davswIhvlknivfaIgnfvggifvglvyafIngrnrIleqq  
>tr|Q2G1V1|Q2G1V1\_STAA8  
mtktmirIaseqdaekIqqlmheaftplrelgidwpsinanIIdavkenidknttfvmtiddeiIstivrypwgsvksis  
gypfvwwfatnpeyegky  
gsqllItyveeafIrdtIksaavtIgtSarIhpwlIkiyekrgyeiysehendgdIgvimrkvIperfdetilgppf  
>tr|Q2G1V6|Q2G1V6\_STAA8  
mkgmfIIsfyatrktIyIyfivaiIaagyfavfnplmssamagvmlitpitdnIkehdswrmyyvstIpkrsdyiksy  
fafyIilfgasImiglvt  
tIvtqsvmIgiImsgImsfgiIgaysiIpltfkfgaensvImicasiIIsfvfffiygmvsGasalefekistegw  
Ivviayavigivitsvsym  
IsikiIfnkqel  
>tr|Q2G1V9|Q2G1V9\_STAA8  
mssknfelsIfigealfIffvatylfiIppifkiliIIsntinfkttIlnIIdpvfphynIhsstvpklyrlhqyaltsI  
ihkts  
>tr|Q2G1W6|Q2G1W6\_STAA8  
mmvqtIlgfagtkIrqykdiearihsdiIftavmmiasdlarmpirvtvngqinysdrivnlIntrpnpmyngyifkIvfvf  
vsalltshgyieitrdktg  
epmnlIfrktseielksdargrlyyfhqridsngnniernvkfedmlIIdikfysIdgingIIsIldtIIsrtiesdnngkdfI  
nnflrngthaggiIkmgv  
IIdnkardrareefhksfsgtkqagkvvvlDesmtdqIlevdtevlklIrenksstreiagvfgiplhkfgietansit  
danIdyIstIkpIytcvca  
eInfkfndeyvnrkfIdtteeIrvvdektqaeidkInidsgkmniDeirrdglapipggngsihrvdInhvnielvdey  
qmnksratdkkIkggeene  
>tr|Q2G1W7|Q2G1W7\_STAA8  
msketrvgniIevrsndnneviegyaIkfdtwsenIggfketisrralendIIsdvrcIvdhipsqiIgrtksgtlele

Tsompanidou\_et\_al\_Supplemental\_FASTA\_File

tddvg1kyrck1pnttfar  
dlyenmrvgninqcsfgfmlddkgdevrfdegeniykrtltaireltdsvvtypaykdtvdkpalrsietvkkeqrkke  
leir1kkhsi1nniw  
>tr|Q2G1W8|Q2G1W8\_STAA8  
mktkeelqseisdikrqidlkvkyatra1nnde1ekaekleqeitdlrsqiqekqeeldk1kekdgtsennqqsvevnea  
styrnqanindlgisiqnt  
kvtsqevrfdteyletrndiqggs1ktdsgfvvipeeivtdilk1kevefnldkyvtvkrvtngsgkypvvrqsevaa1e  
kveeleenpelavkppffgl  
aydinthrgyfrisreaiedakvnlqelklwmartiaatrnkaiidvitkgstgstssgfekegkklvkkaks1ddik  
dain1nvkpnvehnvaivs  
qtmfakldkmkdklgnyl1qpdvkektqqr1lgakieilpdevlqgkgnntliign1kdaiv1fdrsqyqaswtmymhfg  
ec1miavrqdcridyksa  
ivieyddsergegd1glea  
>tr|Q2G1X0|Q2G1X0\_STAA8  
mktrivssvt1111gsilmpvnaadsdiniktgttdigsnttvktgdlvtydkengmhkkvfysfidknhnk11v  
irtkgtiagqyrvyseega  
nksglawpsafkvqlq1pdnevaqisdyprnsidtkkeymstlygfnvntgddtgkigg1iganvsight1kyvqpdf  
ktilesptdkkvgwkvifn  
nmvqnqwgpydrdswnpvygnq1fmktrngsmkaadn1dpnkass1ssgfspdfatvitmdrkaskqqtndviyerv  
rddyqlhwtstnwkgntk  
dkwidrsserykideweemtn  
>tr|Q2G1X4|Q2G1X4\_STAA8  
mklfyivfl1i1w1n1flgnei1ht1tv1litt1yivnsrkigkndrve  
>tr|Q2G1Y2|Q2G1Y2\_STAA8  
mgsffnkiarkedpaiyqnkdgh1krt1rvrdflalvggtivstsift1pgivaaehagpavalsf1laaivag1vafty  
aemaaampfagsayswvvn  
1fgeffgwvawallae1yfiavafvasgfsan1rg1lvkpi1gelpaalsn1pfgtnggfidi1aaivill1tall1srgm1se  
aarmenilv1kv1ai1lf  
vivgl1ainvsnyvpfipehkv1atgdfggwqgiyagvsmiflayigf1dsiaansaealdp1qktm1prgil1s1svaiv1f  
iavalv1vgm1f1hysqyann  
aepvgwal1rqsghgvvaaivqaisvig1mftaligmm1agsr1l1ysfgrdg1l1pswvsh1ndkh1pnralv1ilti1gvl1g  
smfpfaflaql1sag1lva  
fmfvslamyrl1rkregkd1pipafk1l1p1ypv1pai1fv1l1v1fwgl1gfeak1y1liw1fiv1gi1ily1sygl1r1hsk1kndva  
eyh1pk  
>tr|Q2G1Y3|Q2G1Y3\_STAA8  
mtifilidsr1lfsc1yfi1ektshk1ssqt1finns1rc1flic1y1iaqi1n1l1skn1seks1qlyvty  
>tr|Q2G1Y8|Q2G1Y8\_STAA8  
mfimnmcg1kstrv1d1tysq1sfsry1ffv1npi1kvats1n1vk1i1igt1fdaptak1nntk1kttanientqk1fldff  
c1f1l1spp1fay1lfs1i  
>tr|Q2G202|Q2G202\_STAA8  
midyfy1t1vekder1nh1fpgd1faetsrkqkqf1tqf1l1ggpniyteehghp1l1rkrhidftiteferdawlenmq1tainr  
aafpqgv1gdy1fer1l1r1ta  
nhmvns  
>tr|Q2G207|Q2G207\_STAA8  
mqyialkhvyfyaenr1kyseserykkyigyfrvmkgvsrhvfvrv1vqaiimkr1vycfk1dndefn1knkykkykpcvt  
rvsdd1ntiyryisnki1  
n  
>tr|Q2G209|Q2G209\_STAA8  
m1lkteqyr1lafikfkk1mnf1afkgryysekqs  
>tr|Q2G211|Q2G211\_STAA8  
m1fplntc1pppi1krdi1et1tkdimams1mieskketvpist1ntptidittalvsvnvttrsavvgpl1n1nkqminaip  
kimse1l1i1i1cvivciiat  
ppi1s1l1hna  
>tr|Q2G216|Q2G216\_STAA8  
mhde1nasnvt1kikatms1l1tsyivaissvdisvs1nprailqfhf  
>tr|Q2G223|Q2G223\_STAA8  
ma1flqp1vfkdr1iwgghal1kafnydi1pnettgecwa1sahp1ngpnti1ngpykdm1ldqlwsq1hrel1fndsrdsfp1lt  
kv1dandk1svq1vh1pdddy  
al1khege1l1gktecwyi1ldaapgaei1ygvhahnkqt1ldmi1dnhef1ds1lfkripvkpgdfyyvpagtvhaigsgil1let  
qqs1d1ty1ry1dy1dr1rdq1n  
gq1lrd1h1leqskdvi1elgnhepnttpitthid1th1vt1qfvdnqyfavykwdihgd1l1kfnkphayc1lvti1idgtgt1tvnd  
khydi1qkgss1f1l1tted1  
ihfvgn1saivshpg  
>tr|Q2G231|Q2G231\_STAA8  
mhh1h1qinrhai1y1lndmhssivavhpf1t1ns1l1l1y1kkvakeq1l1tatiatmicdyf  
>tr|Q2G235|Q2G235\_STAA8  
m1hnd1lyqi1nmaesywndni1hekma1vfd1yfrkmpf1nsgyavfng1lkrvidfiehf1gfsesd1leylksigykddf1sy1lk  
d1l1kftgsi1rsmqege1l1c1fg

Tsompanidou\_et\_al\_Supplemental\_FASTA\_File

nep1lrveapliqaqlietillnivnfhtlittkasrirqiasndklmefgtrraqeidaalwgaraayiggfdstsnvr  
agklfgipvsghahafvq  
tygdeyvafkkyahrkncvflvdtfhtlksgvpnaikvake1gdkinfvgir1dsgdiaylskearrmldeagftetki  
iasnd1deetitslkagga  
kvdswwgvgtklitgydqpalgavyklvaienedgsysdriksnaekvttpgkknvyriinkktgkaegyitlenenp  
ydeqplklfhpvhtykmlf  
iksfeaidlhhniyengklvyqmpstedesreyla1glqsiwdenkrflnpqeypvdlskacwdnkhkri fevaehvkeme  
edne  
>tr|Q2G237|Q2G237\_STAA8  
mqnikkvytfvvsissfiylkiktlsyqfikteliessvftalyklpltryikltyih  
>tr|Q2G240|Q2G240\_STAA8  
mmiitekrlhelileelshkdf1tlqelidrtgcsastirrdlsklqqlgklqrvhggam1kenrmvean1teklatn1de  
kkmiakiaaangindneclf  
idagsstlelikyiqakdiivvtnglthveallkkgiktimgqvkenlatigssameilrrycfdkafigmngldie  
1gl1tpdeqea1vkqtams  
lanqsfvlidhskfnkvyfarvp1lesttiitsekalinqes1keyqqkyhfiggt1  
>tr|Q2G242|Q2G242\_STAA8  
mvi1i1y1i1igsalgi1i1ipeiand1glqnsf1knhyvdgi1gsifm1f1fgvf1rrvtnaikglehfimrrsaveilfa  
tig1i1g1i1svmvsvfile  
signsifnhfipviitil1cyfgf1g1lkkrdem1m1f1peniarsmsqhtksatpkiidtsaiidgrilevircgfidgn  
il1pggvine1qivadsnd  
svkrekgkrg1dilnelyd1dyptkvihtkthsdidtm1l1klakqyhasi1ttdfn1nkvcvhgikalnvnd1seaik  
pnvhggd1h1l1tkmgke  
pgqavgy1ddgtmvvdnkn1igshvn1levs11qtssgrivfakkiedtvs1  
>tr|Q2G244|Q2G244\_STAA8  
mmdtftnfysm1l1kkqpk1icfg1fynyacdgv1vsevcsamsy1ns1ps  
>tr|Q2G245|Q2G245\_STAA8  
mtqqqndkrt1knkhtyqnep1pnrkdfvsvfitgalvgsalglyfknkvyqkadd1kvkeqelsqkfeerktqleetva  
ytkervegf1nkskneqaa  
1kaqqaai1keasann1sdtsqeaqei1qeaqreaqeadksvavsnkeskava1kaqqaai1keasann1sdtsqeaqei  
qeaqeaqeaetdksaavsn  
eepkava1kaqqaai1keasann1sdtsqeaqevqeaqeaqeaetdksaavsnepkava1kaqqaai1keasann1sdi  
sqeaqevqeaqeaqeaekd  
sdt1tkdasaakvevskpesqaer1anaakqkqak1tpgskesq1teal1faekpvaknd1keipqlvtkkndvsetetvn  
idnkdtvkqkeakfengvi  
trkadektntntavdkksgkqskkttpsnkrnaskastnktsgqkkqhnkksqgakkqsssskstkqknnqtsnknsktt  
nakssnasktpnakvekak  
skiekrtfnd  
>tr|Q2G246|Q2G246\_STAA8  
mrsfhvfm1fets1dnnsdiahfk1kmekysiiik  
>tr|Q2G249|Q2G249\_STAA8  
mcrpfdppmtkts1cpwvmrwnswanpsedsifpcisnvmtdcglilasi1rwpfsftcsis1s1lifsgafssgtsm  
msi1lygpkrfysamacf  
qyfsfsfptakmvi1fmsfgppncyq1ssypqvin1ft1f1pliipiffavdiftfmpdf  
>tr|Q2G251|Q2G251\_STAA8  
mk1hwyiyyf1s1svil1fmiiyhylatsmtvdyeitvsiak111  
>tr|Q2G256|Q2G256\_STAA8  
mgrni1hdi1ttsatpdeiesifsh1tipvgkehgtinvvfn1denyevttfraeedyvdhrrpsgvtfvrldyed1qrrdf  
tmnaiamdtayklydyfdg  
qqdinnri1rtvgiaeerfqedalrmirclrfqsq1sfdiatetfeamriqmadikflsierivieltkl1mrginveksf  
nhlks1kafnypfyeh1d  
mqqinvtea1d1e1liaivsvkfdinys1kplk1snrqvkdinqiyiqimnalpsiitkeq1kmfvdydth1iknvmvaa  
dvlkandiqgheplivn1q  
tidet1hr1p1mhnrkdmvnggv1mah1naksgpw1kdvl1rqieiaivtgkvsneete1kwvdnhvki  
>tr|Q2G257|Q2G257\_STAA8  
mi1yfvil1mv1plwaghkvksnyekysqvrstsgktgreval1hangiydvevkggef1tdhydpkkkvsv1spany  
drpsvagtaiaahevghai  
qdhqgyw1fr1raalvpvan1gss1symi1m1gi1ltaigsafgsta1wigag1ms1lav1fsivt1pvefdassramkqi  
taln1vnekeykharkv1s  
aaamtyvaatavavaelvriliarssd  
>tr|Q2G258|Q2G258\_STAA8  
mskysqdv1q1lyknkpnys1gqsiaes1n1srtavkkvidq1k1legckidsvnhkgh1l1q1pdiwyqgi1dqytkssa  
1fd1fsevyds1dstq1laak  
ks1lvgnqss1ffi1sdeqtkgrgrfnrhws1skgq1lmsv1rpnvafsmiskfn1fia1girdaiqhfsqdevkvkwpn  
di1fidngkvcg1f1temvan  
ndgiea1icgig1n1tqqlenfdes1rhratsiq1hdknk1dryqfle1illqeiekrynq1f1t1pfseireeytaasniw  
nr1t1ftendkqfkgqaid  
1dydgy1ivrdeageshr1isadidf

Tsompanidou\_et\_al\_Supplemental\_FASTA\_File

>tr|Q2G259|Q2G259\_STAA8  
mnlalnsgpgrntvsaistsfiglmcgvdfikyssqylsdlslctmyiiiffksafkhyiltlirtfysysy  
>tr|Q2G260|Q2G260\_STAA8  
mkklatvgslivtstlvfssmpfqnahadttsmnvsnkqsqnvqnrhrypggvppqgmtqaqytelekalpqlsagsnmqd  
ynmkydatqniadkynvi  
ittnvgvfkphavrdmnghalpltkdgnfyqtnvdangvnhggsemvqntghmsqqghmnqntheptathatrsyaiik  
psndeskskyafikssnep  
k  
>tr|Q2G269|Q2G269\_STAA8  
mdglltkfikykrralnchnachlslnamsyhsnssyqptyidiilsyvvlihqqtqqr  
>tr|Q2G279|Q2G279\_STAA8  
mcllkqhmqcafnsitygdfqgielienvlnymv  
>tr|Q2G284|Q2G284\_STAA8  
mlrsvsdtnllggyekaisisdmeivflmyev  
>tr|Q2G288|Q2G288\_STAA8  
menqhnsklltlllglavfiqqssviagvnvsiadfitllilvylffanhllkanhflqffiiilytyrmiitlcllff  
ddlifitvkevlavtkya  
fvviyfyllgmii fklngskkvivtsyiissvtiglfciaglnkspllmklllyfdeirskglmndpnyfamtiitlvla  
ykyihnyi fkvlacgllw  
sltttgsktafiiilivlaiyffikklsrnavsvmsvimlillcftfyninyylfqlsldalpsldrmasifeegfa  
slndsgsersvwinaisv  
ikytllgfgvgldvyhigsqingillvahnty lqifaewgilfgalfiifmlyllfelrfrfnisgknvtaiivmltmiy  
fltvsvfnnsryvafilgii  
vfivqyekmerdrnee  
>tr|Q2G290|Q2G290\_STAA8  
mkiicyitkadnggaqthliqlanhfcvhdvvyvgnhgpmieqldarvnviiiehlvgpidfkqdilavkvlaqlfsk  
ikpdvihlhsskagtvgr  
akfiskskdtrivftahgwaftegvkpkkflylviekllmslitdsiicvsdfdkqlalkyrfnrlklttihngiadvpa  
vkqtlksqshnnigevvgm  
lpnkqdlqinaptkhqfvmiarfaypklpqnliaaieilklnsnhahftfigdgptlndcqqqvqaglendvtflgnv  
inashllsqydtfiliskh  
eglpisiieamatglpviashvggise l vadngicmmnnpetiakvleky lidsdyikmsnqsrkrylecftteekmike  
vedvnygkstg  
>tr|Q2G2A3|Q2G2A3\_STAA8  
mvvgdfprietdtivigagpggyvaa iraaqlgqkvativeknglgvc l nvgcipskallhashrfveaqhsenlgviaes  
vslnfqkvqefkssvvnkl  
tggvesllkgnkvni vkgeayfvdnns l rvmdeksaqty nfkna iatgsrpieipnfkfgkrvidstgalnlqevpgkl  
vvvggyigselgtafanf  
gsevtilegakd lggfekqmtqpvkkgmkekgveivteamaksaetdngkvtyeakgeektieadyvlvtvgrpnt  
delgleelgvkfadrglle  
vdkqsrtsisniyaigdivpglplahkasyeakvaaeidgqaaevdyigmpavcftpe latvgyseaqakeeglaika  
skfpyaangralslddtng  
fvklitlkeddtligaqvvgtgasdi iselglai eagmnaedialti hahptlgemtmeaaekaigypihm  
>tr|Q2G2A4|Q2G2A4\_STAA8  
mafe frlpdigegihegeivkwfvkagdtieeddvlaevqndksvveipspasgtveevmveegtavvgdvivkidapd  
aedmqfkg hdddssskeep  
akeeapaeqapvatqteevdenrtvkampsvrkyarekgvnikavsgsgkngritkedvdayl nggaptasnesaasats  
eevaetpaapaavtlegdf  
petteki pamrraiakamvnskhtaphvtl mdeidvqalwdhrkkfkeiaaeqgkltflpyvvalvsalkkypalnts  
fneeageivhkhynigia  
adtdrgllvpvvhadrksifqisdeinelavkardgkltademkgatctisnigsaggqwf tpinhpevailgigria  
qkpivkdgeivaapvalsl  
lsfdhrqidgatgqnamnhkrllnpe lllmeg  
>tr|Q2G2B3|Q2G2B3\_STAA8  
mlylevlknrflyllignflrrscfvlfslqi i wftveltnqsslklsmvmsqtlpfiifgiffgaysdkhkkkily  
lsdlilsliliiipllait  
snlnyltlltistaitiincytdpafra ilpeiideehlatsnalidslrgsniilpaligvivilvgnvgvfficsil  
lflgfifnallkytnnm  
drhskedfsetweflkskeipfiii qfacilintglwrvvlplfifsnilkegvgyglatsclgiasllmslimglls  
ekrlifkfsigvlvwigl  
siinvfsvaillygatllglgqsieg ltrsvaiqiktphlmgkvfsisstsnyaadtls lglisiiipllslsnifil  
ggviisilslaglkfvkks  
m  
>tr|Q2G2B4|Q2G2B4\_STAA8  
mlrs lckhyrilinaikvgiemkykislaynlaiiigslilcilisrgydiyvilipiltilaslinl fcdikkh  
>tr|Q2G2C1|Q2G2C1\_STAA8  
mkqtkllvanrgeiairifraae ldistvaiysnedksslhrykadesylvgsdl gpaesylnieriidvakqanvda  
ihpgygf lseneqfarrca

Tsompanidou\_et\_al\_Supplemental\_FASTA\_File

eegikfigphlehlmdfmgdkvkarttaikadlpvipgtdgpiksyelakefaeeagfplmikatsggggkgmrvireese  
ledafhrakseaksfmg  
evyiyridnphkhevqvgdehgnivhlferdcsvqrrhqkvvevapsvglsslrqricdaaiqlmenikyvnagtve  
flvsgdefffienvprvqv  
ehtitemvtgidiivktqilvaagadlfgeeinmpqqkdittlgyaiqcritteditndfmpdtgttiayrsggfgvrld  
agdgfggaeispyydsllv  
klsthaissfkqaekmvrslremrigrvktnipflinvmknkkftsgdyttkfiheetpelldiqpsldrgtktleiygnv  
tingfnpvekrpkpdyela  
sptvssskiasfsgtkqlldevgpkgaewvkkqddvlltdttfrdahqslatrvtkdmminiasktadvfdgfsle  
mwggatfdvaynflkenpw  
erlerlrkaipnvlfqmllrasnavgyknydpnvihkfvesakagidvfriidslnwvdqmkvaneavqeagkisegti  
cytgdiInpersniytley  
yvkLakeLeregfhiLaikdmagllkpaayeligelksavdlpihlhthdtsnglltykqidagvdiidtavasmsg  
ltsqpsanslyalngfpr  
hlrtidiegmeslshywstvrtyysdfesdikspnteyqhempggqysnlssqaksllgerfdevkmyrrvnflfgdi  
vkvtppskvvgdmalymvq  
ndldeqsvitdgyklfdpesvvsffkgeigqpvngfnkdlqavilkgqealtarpgeylepvdfekvrelleeeqqgpvt  
eqdiisyvlypkvyeqyq  
trnqygnlslldtptfffgmrngetveieidkgkrliekletisepdengnrtyyamngqarriyikdenvhtnanvkv  
kadsnpshigaqmpgsvt  
evkvsygetvkanqplliteamkmettiqapfdgvikqvtvnngdtiatgdllieiekatd  
>tr|Q2G2C4|Q2G2C4\_STAA8  
mgnvplpkqflididnkpilhtiekfilvsefneiiatpaqwishtqdilkkynitdqrkvvaggtdrnetimniidh  
irnvnginnddvivthdav  
rpflltqriikenievaakygavdtvieaidtivmskdkqnihsivrnemyqqtpqsfnikllqdsyralssseqkeils  
dackiivesghavklvrge  
lynikvttpydlkvanaiiqgdiadd  
>tr|Q2G2D8|Q2G2D8\_STAA8  
mkklyplllallllvaacgtggkqssdksngklkvvttsilydmaknvggdndvdihsivpvqgdphyevevkvkdkklt  
dadvilnyglnletngwv  
ekaleqagslkdkkviavskdvkpiylngeegnkdqphawlsldngikyvktiqtfidndkkhkadyekqgnkyia  
qleklnndskdskdkfndi  
pkeqramitsegafkyfskqygitpgyiweintekqgtpeqmrqaiiefvkkhklkhllvetsvdkkameslsetkkdif  
gevytdsigkegtkgdsy  
kmmksnietvhgsmk  
>tr|Q2G2E3|Q2G2E3\_STAA8  
mfcyykqhkgdnfsieevkniiadnemkvn  
>tr|Q2G2E6|Q2G2E6\_STAA8  
mmkypymlininlstitkndkrfnatddrini  
>tr|Q2G2F5|Q2G2F5\_STAA8  
mkkimtifgtrpeaikmaplvkaleqekmlpevivvtaqhremldsvlstfeikpydlnimksgqtlseitsksitqle  
qviqlekpdmvlvhgdtmt  
tfagglaafynqvpighveaglrsydksypfeevnrqlvgvldlhfaptknaashllsegkysesvvvtgntaidamk  
ytvdnyksnimdkyhdkk  
filmtahrrenigkpmenifkavrrlideytdlalvypmhknpkvrevaqkilgshdrielielpdvdfhfnfakksyfi  
ltdsggiqeeapsfnkpv  
vlrsvterpegveagtlkvigtntkqnyqaakelidderlyhqmseasnyygdgfaserivnhikyylnlitekpsdf  
>tr|Q2G2F7|Q2G2F7\_STAA8  
mnriddttrlyyhlvcmsgtvfmidihteaykmsrfynifkqfiqyfyliiilgglylythafilgliigtvsain  
tcifecylakakrpdmtmi  
stgnmwrylvaiiacmiwylnkahvsiiigiiiglmisyvvviiirpllkvsk  
>tr|Q2G2H0|Q2G2H0\_STAA8  
msepelrheiqlykekmrkaemngilneydvyskvivaesyldrkkieigkiyktldgsnyqfverlkgifawgfrf  
nsdepeeglpiallq  
>tr|Q2G2I3|Q2G2I3\_STAA8  
mndlthfnkrspifiiiIgsItaigalsidmflpglpdirhdfqttsnaqltlsmfmiglafgnlfagpisdstgrkpk  
liamiiftlaslgivfvh  
niwlmvalrfllqvgtgaaavisraiasdmysgneltkfmalmlvngiapvvaptiggiilnysvwrvmfviltifgv  
mvigsllkvpesltvtre  
sssglktmfknfkilktprfvlpmliqgmtfvilftyisaspfiiqkiygmtaiqfswmfagigitliissqltgyld  
fidsqklmrgmtmiqigv  
ilvtivllnhwnfwf  
>tr|Q2G2I4|Q2G2I4\_STAA8  
mlddyqiyvhivysvhhlllvvrtsgkisyfhlnsvgllyvyhknyfiilpllfykyypkntiqeminftlelylit  
lfmkvlsq  
>tr|Q2G2I5|Q2G2I5\_STAA8  
melvvaigfiiIiapvtgvatlgftiamdesssgrgssslnglvqflfggvasplvgvkgednpipyiiiiiatavil  
iilqiynmkvfktr

Tsompanidou\_et\_al\_Supplemental\_FASTA\_File

>tr|Q2G2I6|Q2G2I6\_STAA8  
mtyknkqlgttilseisngapcnqilsligysdtivmqvylaerfgniidvleetvnykmvnrkseql1ktlqyp1ilv  
sifiामीीलनltvipqfq  
qlytsmniqlsffqktsffitslptiivvmlivsvmlaimkliynnlnmlnkinfvmlplisgyfqlfktyfvtnel  
vlfykngitlqsivdvyin  
hssdpfrqflgkyllysemyglpqi lek1kcfkplikfv1qgekrklevelklysqilvkqiedkaikqtqflqpi  
lflilglfivaivlvimlp  
mfqmmqsik  
>tr|Q2G2I8|Q2G2I8\_STAA8  
mkkeefvmksykckgsflidsmagfl1iglit11lipmmnqmqsinhklqtidaskvilttvskinkeelkkgvtigky  
dikqsdqicaisknttsy  
qktciqy  
>tr|Q2G2I9|Q2G2I9\_STAA8  
mvisit11ivpd1irlsktfliesrd1ttvdfeffsrd1ddfdkgvdrndieirqhri1hkgeemeyklinnkiikvv  
ndrgnitminnvtaftani  
yyksiikititvkvgtvntqtktiyv  
>tr|Q2G2J1|Q2G2J1\_STAA8  
mtklienlksifvstl1tkn1smysrfdmpkfgcvngcm1filyrvnrigenrnfeiftnsiffieikkankalet1la  
>tr|Q2G2J2|Q2G2J2\_STAA8  
mkkiaatatiatagfatiaiasgnqahaseqdnnygnpndptsysytytidaqgnhytwkgnwhpsqlnqdngyysyyyy  
ngynynynngysynnys  
rynnysnnnqsynnynnsyntnsyrtgg1gasystssnnvqvtttmapssngrsissgytsgrnlytsgqctyyvfdrv  
ggkigstwgnaswananaa  
ragytnntpkagaimqttqgayghvayvesvnsngsvrvsemnygyggvvtvrtisasqaagynfih  
>tr|Q2G2J4|Q2G2J4\_STAA8  
mtdnys1hiyksmksvsvkean1kiiyw1qgtgvvsin1qydvkrndvtiim1ndlyqidgnddsccvvevsaktflk  
fmnanymrgkilnevas  
tfri1iky1iyskikqgsynandkiiynmcvelms1ntydgsrhlvaeevhdy1tnnhhkkirkdvinqsitnkalsd  
mfkatpysnfiqylnhir1  
ehclidi1tskkpieeiasshgfnhysrfih1fketygntpk1irkrysptshsinhsq1veidknie1fdtdnqssss  
mreidipfeptkrsqmygp  
kniiyikgsnfywmdyytikqiiqr1gvnpen1hiivtidtsnel1ieqit111qkivnynvvnvfrikheykelltsaer  
gkieklvati1nmtfesnr  
ckiaflind1nttaiqklkr1idnyigvfe1iyhlepkelntrydkeidh1idyfilp1rqieqvsiarskiicdvdlin  
enn11kekitmsdinkvse  
11tnytkfrgl1mhmsi1essskein1tr1sifi1iin1nq1rgiviyqndtmivtkfkhevqcvic1paallnensda  
ir1sckgl1qqfshaktkqi  
v1sidkdnhtsengv1vndimqghsywkanfierniydhs1mvssnsivh1kyhlei  
>tr|Q2G2J5|Q2G2J5\_STAA8  
mskfkvkr1tahim1kvindm1kysfh1t1tqvkl1n11vkydndsnsasids11kmkeiqskmallqmsyl1nhqw  
11kgrdardark1tisink  
mhidkieymnel1sdiyeryfgqy1fdscdyvsy11ssqell1n1kcy1nmcq1sleelyv1gil1nhkgq1tvkelqg  
efh1pifavspil1kclik  
gl1vkerce1derrv1tikrekfsvtm1iqacyn1lekgiqvk1nnk  
>tr|Q2G2J6|Q2G2J6\_STAA8  
mvg1sgleppts1r1sgvrsnq1syrpin1neq1fkteynmsryssasseedv1pnis1lerr  
>tr|Q2G2J7|Q2G2J7\_STAA8  
mkwkyhikr1skmi1nq1le11ktvdyr1ys1yknfftiartkfm1hetwkertpikkvevintdakkftvsdm1tvqkq  
ydv1neteeyyqi1dnsg1  
vggyktyfkev  
>tr|Q2G2K2|Q2G2K2\_STAA8  
mtk11kvykgddvaseqgegkvsvt1sn1leadt1tpkgtyqvaweengkesskvdvpqfkt1p1ilvsgvsftpetksim  
vntddnvepniapstatnk  
i1kytsehpefvtv1dentgaihgvaegtsvitatstdgsdksgqisvtvtng  
>tr|Q2G2L0|Q2G2L0\_STAA8  
m1teekedy1kai1tnngdknfvtnk1lsqfl1nikppsvsemvgr1lekagyvetkpykgvr1tedgl1tht1diikrhr11  
el1flie1ikynweevhgea  
ei1ehrisd1fver1ds11nfpetcphggviprneykeyitti1nyepgdivtikrvrdktd1liyl1sskdisignev  
eivskdemnkvi1ikr1ndn  
viivsyenamnmfaek  
>tr|Q2G2L4|Q2G2L4\_STAA8  
mts1ikinr1n1dfykgyr1q1lmiipaiigylcgnfqf1l1vatgt1lahiyvfkgyrsrsk1rtviicn1afaicmmlgt  
1t1aktpl1vfgmt11ivtvi  
pfy1ftalk1agpsstffivtfs1lpin1piapeea1yrgfailvggilatmmv1itivf1sknkaeeqaiqndfklisk11  
htyndksafl1qvaktavds  
fkasdk11itstssndk11rrf1qk1111htsaqgiyselle1nakqir1p1deliemdhiaq1dnseenvrywrkevt  
vteefqn1fnh11kidev  
haneariayeadm1rkplyskriyqn1t1dsivfrnt1rytaimmi1aifialm1fd1fekaywip1l1fctynit1rninytcnre

Tsompanidou\_et\_al\_Supplemental\_FASTA\_File

rygtrfryyfrcvstfshi  
vfvntntccsnfnghcsivy  
>tr|Q2G2L5|Q2G2L5\_STAA8  
milkkhtgyrysahtiilgtstihaiergmarglgtilglvlsvillfsiptpvavilmgiaalftealvganyaiavv  
fitiqvilmnglasqnlti  
niafprvidvamgiviaiiglfvlqgertasallpnmvmaevvrkeatlfhyllfsenqykddvyqkntamnlsvklInmtqv  
ynaangel fsdktliqnyy  
pslfaleeisfmlnramanedrltineqlmgeylai feniakhfelnteleikilpdlpqnyiqsamnniqhngfrerd  
knv  
>tr|Q2G2N0|Q2G2N0\_STAA8  
mfdfstlkrkfvgtgwwghniekavrdfln  
>tr|Q2G2P0|Q2G2P0\_STAA8  
mkwsdidfenntisitiktyynpnkkkyqilppktessigkivdpnvikvlrkykinvqnnwkelyndnhcnektin  
vdtmhvytyqhtqkylyal  
iqihtlriahrirrcth  
>tr|Q2G2P5|Q2G2P5\_STAA8  
mhssgkdl nislpkktksiapyetdvpvkigaaeslfktn dqgkiekalvksyhpndttldielkdnikfngqkltae  
kvksslensmkksdlvkys  
lpissitakgkltiktinsaypelvselanpfmai ydtdaksdvntqtpvgtgpyqikdyqsrkislnsfkdywqgkpk  
dhitvtyqedgnrvrnl  
sqkddl itdvpvkvqdiennqnlkvskesgfrtsllmynhtnkkmtksvreal dhiidrqqiadhiyqgyakpatspfn  
dkipyikepkltkqnieqa  
kml lakdgytkehplkiklitydgrpel skiaqvlqsdakkanieidiks vddiegylkdrsawdatmysfgtiprgdtg  
yffnqaykkdgainkgdyn  
nsnvddl inqlnhtvdvkerhnisndiiklssrdvpnsyia yndqivaanskvknkyvtpegiylidyr ttier  
>tr|Q2G2Q8|Q2G2Q8\_STAA8  
minwavkiiictknlglyqkwnmkwklkksnnlkskkllnrgdnmtfeekisklyneianeissmipvewekvytma  
yiddgggeffnytkpgsd  
dlnyytdipkeyni svqvfdlwm dlydlfeelrdlfkeeglepwtsc efdftsegklkvsfdyidwintefdqlgreny  
ymykkfgvlpemeyemeei  
keidqyikeqdeaei  
>tr|Q2G2Q9|Q2G2Q9\_STAA8  
mtfeeklsemyseianki ssmpveweqvyamayvtdqagevi fnytkpdsdelnyysdipkdcnvskdifknsfwkvyr  
mfdelretfkeeglepwtsc  
cefdfttrdgklnvsfdyidwintefdqlg rqnnymykkfgvipemeyemeevkeieqyikeqeeaeq  
>tr|Q2G2R5|Q2G2R5\_STAA8  
mnreevql l gfeivafagdar skfl eal taagagdfakadali eegnnciaeahra qtsllakeaaggddiaysvtmmhgq  
dhlm ttilkdlmkhllef  
ykrq  
>tr|Q2G2R6|Q2G2R6\_STAA8  
mkfkvnenetiadclsrkmqgympvkriekpvf qeqkdgtvevshqeivfv gkkiq  
>tr|Q2G2T2|Q2G2T2\_STAA8  
mgvayvfskiqpkatiatialvfvalaly lvpglglifalfatipgivilwnksiqsfgisalitviittvlngtflvlsa  
iilvl iasliigqllkert  
skerilyvttvamslisliafmllqtfgrippsasivkpfkqtlheaitmsgadanmtqileegfrqatvqlpgfiiit  
flivlinlivtfpilir kfk  
iatpvfklfawqmsgillwiyiiviicllftgqpsvfqsillnfqlvls l vmyiqglsvihffgkakglpnavtilllv  
igtilltptthivglgvid  
lslnlkrimknnsk  
>tr|Q2G2U0|Q2G2U0\_STAA8  
mseliinyngkvytedgkidngyihvkdqgivaige vddkaa idndttknkiqidakghvlp gfidihihggygqdamdg  
sydglyl senll segtts  
ylattmtqstdkidnaltniakyeaeqdvhnaaeivgihlegpfi senkvgaqhpqyvvrpfidkikhf qetanglikim  
tfapeiegabealetykdd  
iifsi ghtvatyeeaveavevergakhvthlynaatpfqhrepgvfgaawln dal htemivdgthshpasvaiayrmk gner  
fylitdamrakgmpegeyd  
lggqkv tvqsqqarlangalagsilkmnhglnrlisftgdtldhlwrvt slnqaialgid drkgsikvknkdadlvilddd  
mnvkstikqkvhtfs  
>tr|Q2G2U3|Q2G2U3\_STAA8  
msvvl tymvwnfspdianvdntdskksetkpl ttpmtakm dttitpfqiihskndhpegtiatvsnvkltkplknkev k  
svhvrrdhnlmipdlnsd  
filfdftydlplstylgqvl nmnavpnhfnfnr lvidhdaddnivlyaiskdrhdvkl ttttkndhfl dalaavkkdm  
qpytdiitnkdtidrtthv  
fapskpekltktyrmvntisvekmnail fddstivrssksgvtty nntgvanyndknekyhyknl sedeassskmeet i  
pgtfd f inghggflnedfr  
lfstnnqsgel tyqrf l ngyptfnkegsnqi qvtwgek gvfdyrrsll rtdvvl nsednkslpklesvrsslansdinf  
ekvtniaigyemqdnshn  
hie vqinse l vprwyveydgewyvyndgrle

Tsompanidou\_et\_al\_Supplemental\_FASTA\_File

>tr|Q2G2V0|Q2G2V0\_STAA8  
mnkveaikfnddivkmyealiki serdylffklaihsglkvselittitvsqvrliectlsemckahfhslikir|pet  
lskellqyiedrs|snev  
lfqslrtnqvlrsrqayrihqasieagidnvg|ttlrktfayhayqkgilipviqky|ghqsaiet|nfiglenecehs  
iyis|ql  
>tr|Q2G2V1|Q2G2V1\_STAA8  
mhqttklkhsanllsdllekhiaisnssnlyqfnqedi fmkttlelsfkssldkpvklqlpq|lnnvteqvardsmnalv  
dlniiksnsgtitkvhsaq  
iidkttvtl|fedkk  
>tr|Q2G2V5|Q2G2V5\_STAA8  
mkfrdkdnrqvnl|tfkkdnei adgnhv|laiptfknq|lftkhn|rgiefpggkregessaeavtrelyeetgakovkniy  
yiaqytiethdqt|dfvkdv  
yfievelvskndyletagpv|fncindielaqrsf|lqdstilkcvervqslgyfyt  
>tr|Q2G2V8|Q2G2V8\_STAA8  
mnafktskiyivank|plmtrnikisigkqyl|ddilivsdshriy|ttgq|lnimkkypprlyyh|lkhpvdyqfvs|  
>tr|Q2G2W2|Q2G2W2\_STAA8  
mtnpnqr|epfdetfqqpni|hrgekrygkkrslvsmiiqiiv|ilttiagysmwkqpi|fnivftkesvdfdgiknfneti  
gkmhqlnin|lgnind|lqgq  
idr|lilvngffil|civslvitil|tivfnrtvlkvvn|ilvltim|vitlyfsyiika|laqeiadvfkky|lnvppdqvit  
eadaihngi|illgcsig|l  
vis|lffrn|mpr|k  
>tr|Q2G2X1|Q2G2X1\_STAA8  
mkqvainfak|lilcqt|dsqetkvstynh|pdfmyisttenaikkeqveq|lvrhmq|lpiestnkvyiiedfek|ltvqgen  
sil|kfl|eppndtia|ill  
tkpeqil|dtihsrc|qhvyf|kpidkek|finr|lveqnm|skpvaemistytt|qidnamal|neefd|lla|lrvsvirw|cell|ltn  
kpmaligi|id|llkqakn|kk  
lqsl|tiaavng|ffedi|htkvn|vedkqiysd|lkn|didqyaq|ksfnq|lilmfdq|lteahk|lnqvn|npt|lvfeqivikgv  
s  
>tr|Q2G2X5|Q2G2X5\_STAA8  
msaigtv|fkehvknfy|liqr|laqf|qvki|inhsny|lgvawel|inpvmqimvywmv|fgl|girsnapihgvp|fvyw|llvgism  
wffin|qgileg|tkaitg|kf  
nqvskmn|fplsi|iptyiv|tsrfygh|lg|llll|viiacm|ftgiy|psihi|qlliyvp|fcffl|tasvt|lltst|lgvlvrd|tqm  
lmqail|ril|fyfspi|lw|p  
knhgis|glihem|mkynpvy|fiaesyraa|ilyhewy|fmdhwk|lm|ynfgivai|ffaigay|lhmkyrd|qfadf|  
>tr|Q2G2Y0|Q2G2Y0\_STAA8  
mklktlakat|alag|llttg|vitseggavqakek|qervq|hlydik|dlhrysses|fefsni|sgkvenyngsnvvr|fnqenq  
nhq|fl|lgk|dkeky|kegie  
gkdvfvv|kelid|pngr|lsvggv|tkknnks|setnth|lfnkv|yggnl|dasids|fsinkeevs|lkel|dfkir|qhlv|knygl  
ykgttkyg|kitin|kdgek  
qeidl|gdk|lqferm|gdv|lnskdinkievt|lkqi  
>tr|Q2G2Y4|Q2G2Y4\_STAA8  
mki|tykyrgd|plntennknq|nqsvknserrgm|lkgcggc|lisfilli|illsacsmm|fsnndstnnq|sstk|l|tqkden  
knedk|peeksetat|dedlq  
steevpanent|entn|heideit|tkdqs|ddd|intpna|edksq|ddl|kddl|kekq|qssnhq|stqpk|tspstetntq|qsfan  
ckq|lrq|vypngvt|adhpay  
rph|ldr|kdkr|acep|dky  
>tr|Q2YS65|Q2YS65\_STAAB  
mvstl|fpm|inw|lipkkyvki|sekdfet|lnivk|ptkintf|wpvagstvl|fgvml|rrysh|lfivkyeysivilicci|ilgi  
flffly|lqk|lklqiy|nen  
knksnkii|ifpt|ks|lcl|svlyiy|lgggs|lftiym|lltiev|qniil|fitl|fvil|ffl|flnmcslydnkv|hvl|fksnei  
ekf  
>tr|Q2YS66|Q2YS66\_STAAB  
mllcdvrv|iykn|pkkykvi|qhngey|llvd|lvsiw|lvyl|pcinw|fipkkyaiisee|efen|lnvvk|pnknnvfw|svigssil  
fgvt|lrkyihv|fdv|q|dkl  
vvmil|cala|licv|vyf|n|nrk|lklkv|fdtniekn|krvil|iptf|k|gcl|v|fyi|fags|fsift|lialmtie|pqniiif  
icwim|mtm|lff|lnmaa|ig  
nekv|hvi|ikny  
>tr|Q2YS67|Q2YS67\_STAAB  
mlceskqi|ykn|pkyrvi|rynney|fmvd|lvstwi|tyffpl|nwfmpkkyakisekefes|lnivk|pvknnvfw|pvagssvl|f  
giilrkygn|ffnv|qfekkv  
aitvffim|ligi|liyfy|lnkk|lklki|fntnvvn|knriv|liptf|kqgcliv|fyvl|flgsa|sift|laillt|tesqni|ifl  
twvii|tmfff|lvnmas|ign  
tnihv|l|rine  
>tr|Q2YS68|Q2YS68\_STAAB  
msigmyl|drs|rnqassvgn|l|sqtmnsnydalekai|tqfinda|lkgkaytsakqffstvl|ipl|stsmkt|l|sd|tkqacdn  
fvsrytsev|dsisl|kesel  
eedirs|lsq|itryen|lnnn|lkkhasdnqqa|issnq|iiqt|lgqqkheleek|lrkl|refnq|kspeifkeveefqkivqgg  
l|tqaqn|fwnfstnqfnips



Tsompanidou\_et\_al\_Supplemental\_FASTA\_File

gkel dwakasheky lkvamgkiehkaeket l nkadfavikayakehpeddipksimkyindnkdsikrdmglditstlle  
qgginaskfgvfintagv  
kqpagnsfvevkrtsgnvfiengskfakggkylgkgvagvgfal gmyddlanddktvgealshngmtlaagiggsaavg  
ataaialssnpgwtvlag  
lavsglafaadwayqtnklglkdktdwvghkidesievvgksadsrvntvgeatknighinsmkwaw  
>tr|Q2YS69|Q2YS69\_STAAB  
mnlfniavhvlfalkhsekfnsslael tclnqvqlrrvtqvlvd lkmintirgkdggylandrsadvs latlykhf  
vlekehtr lftgdegshc  
qiarniattmshyqqdeqni iinfykektikdviediqkedlcheni  
>tr|Q2YS70|Q2YS70\_STAAB  
mktydlivigfgkagkt lakyaastgqhavieqspkmyggct invgciasktlvhdglegksfeasynrknadvnalnn  
knyhl laddnndv ldfka  
qfksntevnlldqhgdiasitaphi iintgatsvipnikgl dqakhvfdstglln isyqpkhlvivgggyialefasmf  
anlgskvtvl ergesfmp  
edqdvvahaitlenk gialhtnvetelssddhhttvhtnvgnf eadavllaigrkpntd lalentdielgdrgeikvn  
ahlqttvphiyaagdvkkg  
lqftyislddyriiksslygnqsr ttnrgsvpytvfidpplsrvg ltskeaaaqhydytehql lvtaiprhkinndprg  
l fkvinnenmilgatly  
gkqseeliniki laidqni pytv lrdniythptmaesfnd lfnf  
>tr|Q2YS73|Q2YS73\_STAAB  
miksgkarahtnia likywgkkdeali ipmnsisvtlekfytetkvtfndql tqdqfwngekvsgeleki skyndiv  
rnr agidwyaieiesdnfvp  
taaglassasayaalaaacnqald lqls dkd lsr larigsgsasrsiyggfaewekgyndetsyavpl esnhfeddlami  
fvvinqhskkvpsrygmsl  
trntsrfyqywl dhided laeakaa iqd kdfkr lgevieengmr hatnlgstppfty lvqesydvma lvhecreagypc  
yftmdagpnvki lvekknk  
qqidkl lltqfdnnqi idsdia tgieie  
>tr|Q2YS76|Q2YS76\_STAAB  
mad llnv lkd klsgknvki vlpegederv ltaatqlqatdyvtpivlg detkvqslaql n ldisnielinpakselkae  
lvqs fverrk gkateeqaq  
el lnnvnyfgtm lvyagkadglvsgaahstgd tvrpalqi iktkpgvsrtsgiffmikgdeqyifgdca inpel dsqgla  
e iavesaksa lsf gmypkv  
am lsfstksaksddv tkvqevk laqqkaeek leai idgef qfdaa ivpgvaekkapgak lqgdanvf vfpsleagni  
gykiaqr lgg ydavgpv lq  
glnspvnd lsr gcsiedvyn lsi itaaqalq  
>tr|Q2YS78|Q2YS78\_STAAB  
mdinsee ykqev likdvmla aril lesgaegtrvedtm triakkl gysesnsfv tntviqft l hsesfpri fritsrdt  
nlikisqankisrqitnne  
islaeaktqlekiyv akrdssl p fkgfavamiamsflyl qggr lidv ltailags lgy lvteildrklhaqfipefigsl  
vigiiavight l iptgdla  
t i i aavmpivpgv l i t n a i q d l f g g h m l m f t t k s l e a l v t a f g i g a g v g s v l i l v  
>tr|Q2YS80|Q2YS80\_STAAB  
mekknkqidrgdlkqn lsekfwaiaygsc igwgafilpgdwikqsgpiaasigivigallmiliavsygalverfpvsg  
gafafsflsf gryvsffss  
wfltfgyvcvvalnatafsl lvkfl lpdv l nngklytiagwdvyitei iiatv lllvfm lvtirgasvsgslqyhfcvam  
vivvl l m f f g s f f g n n f a l  
enlqplae pskgw lvsivvsvapwayvgfdn ipqtaeefnfapnktfklivys llaas ltyvvmilytgwlstshqsl  
ngqlwl tgavtqtafygig  
lgvlaiaimmgif tglngflmsssr l l f s m g r s g i m p t m f s k l h s k y k t p y v a i i f l v s v l i a p w l g r t a l t w i d m s s  
t g v s i a y f i t c l s a a k l f s  
ynkqsntyapvyktfaiigsfv sfifla lllvpgspaaltapsyiallgwliig liffviry pklknmdndel sr l ilnr  
senevddmieepekektk  
>tr|Q2YS81|Q2YS81\_STAAB  
mnkpfiviegpigvgksslahkl sqt ldfyeekei itenpflsdfyediskwsfqtemfflcnrykqfqdv tqlnqgvvs  
dyhikhnkifaknt lssve  
fqkfskiydil tedmipnmi ifldad ldlv lksriakrnrsfeh qiedeyllklkkyreyyes lqsnsgnsv lidttsi  
df l k n e q d y e d i l h i i l p m  
igditne  
>tr|Q2YS82|Q2YS82\_STAAB  
mvnretliarieqel vqaeqahdhdfekhmyaihiltslyastsntphigeqqmnhrianhnmphsqitqpthqvtaa  
eieamggkvnth sah hnk  
sysqpsnqqqr latdddigngesifdf  
>tr|Q2YS84|Q2YS84\_STAAB  
mal kkv ltiagsdtsagagmqad lktf qel dtygmvaltaivtm dkd t wshdvtpl pmdvfekqleta l sigpdaiktgm  
l g t e e i k r a g e v y e a s n a  
qyfvvdpmvckgedev lnpngteamiky l l p k a t v v t p n l f e a g q l s g l g l n s i e n m k k a a t i i f d k g a k h v i i k g g k  
aldqdk sydl y y d g q t f y q  
l t t d m f q s y n h g a g c t f a a t t a y l a n g k s p e a v i s a k a f v a s a i k n g w k m n d f v g p v d h g a y n r i e h i d v e v t e v

Tsompanidou\_et\_al\_Supplemental\_FASTA\_File

>tr|Q2YS87|Q2YS87\_STAAB  
mqhyllsdnqrlnvsfskdsvaayyqcfngpyrkevpplmcaslwpkfdlfkkyanseliltksainqtqkievdtiyvg  
h1ediecrqirnitrytma  
l1tkndqhvitgtqtfieamk  
>tr|Q2YS88|Q2YS88\_STAAB  
mnqavivaakrtafgkyggtlkhiepeqlkplfqhfkekypeviskidvvlgnvvgnggniarka1leaglkdsipgv  
tidrhcqsglesvqyscrn  
iqagagkvyiagvestsrapwkikrphsvyetalpefyerassapemsdpsmiqgaenaakmydvsrelqdefayrshq  
ltaenvkngnisqeilpit  
vkgeifntdeslkskipkdnfgrfkpvikggtvtaanscmkndgavllimekdmayeldfhegl1fkdgvtvgvdsnfp  
gigpvpaisn11krnq1ti  
enievieineafsaqvaccqa1nisntq1niwgga1asghpygasgaqlvtr1fymfdketmiasmgiggglgnaalft  
rf  
>tr|Q2YS89|Q2YS89\_STAAB  
mnvileqlkihtqkpnidialhiddeiitysqlnaritsaveslqkyslnpvvainmkspvqsiicylalhr1hkvpmmm  
egkwqstihrq1iekgyik  
dviedtglmqsidsmpfidstqlqhypn1lhigftsgttglpkayrdedswlasfevnm1mlknenaiapgp1sys1  
tlyal1falssgrtfigqt  
tfhpek1lnqcrkissykvamflvptmiks1llvynnehtiqsffssgd1hssifkkiknqandinlieffgtsetsfi  
synlnqqapvesvg1f1pn  
velktnhdhngigticiksnmmfsgyvseqcinndewfvtnngyvkeqylyl1tgrqhdml1iggqniypahver11tq  
sssidaaiigipnkrfgq  
igv1lyfgdvt1thknvkqf1nkkvkryeipsmihhvekmyytasgkiarekmismylrge1  
>tr|Q2YS90|Q2YS90\_STAAB  
msnainiet1tfniientn1nr1gd1fvsviaivitsflyihivtsyliknmvlqyqiylg1kfdfyhr  
>tr|Q2YS91|Q2YS91\_STAAB  
mdfnkeninmvdakkaktvvtatgignamewfdgvyayttayiganffspvesadirqmltfvalaiaf11rpiggvfvf  
gigdkygrkvvtstii1  
mafst1tig1lpsydqiglwapi1111larvlqgfstggeyagamtyvaesspdkrns1gsgleigt1sgyiaasimav  
1tff1tdeqmasfgwr1p1f  
1lg1f1g1fg1yl1rrk1eesspvfendvatqperdn1flqi1rfyykdi1vcfvavffnvtnymvtay1ptyleqvik1  
dattsv1itcvmaimip1  
almfgkladkigekkv1igtggt1lfsiafml1hsqsfvivi1g1filgff11tyeatmpgs1ptmfyshiryrt1sv  
tfnisvsifggt1plvatw  
1vtktgdp1apay1lta1svig1flvit1fl1stags1kgsypndneqdrayyaehpkealwwvkerkd  
>tr|Q2YS92|Q2YS92\_STAAB  
mkfeny1fdfdgt1adtkkcevatqsa1fkacg1tepsaqni1thymgipiees1flkladrpldeaal1klid1frhtyqs  
iekdytyefagitea1ts1  
ynqgkkl1fvvsskksdvlern1saig1nh1iteavgsdqvrayskpnpegihtivqryn1nsqqtvyigdstfdvemaqha  
gvpsaavtwgahdars1lh  
snpdfi1ndpseintv1  
>tr|Q2YS93|Q2YS93\_STAAB  
makfsdyql1ilde1kmt1shveadefstfaski1haeh1fvagkgrsgfvansfamr1nq1lgkqahvvgesttpaiksnd  
vfvi1sgsgsteh1r1lad  
kaksvgadiv1ittnkdsaign1agtniv1pagtkydeqgsaqplgs1feqasq1fl1dsvvmg1mtemnvseqtmqqnha  
n1e  
>tr|Q2YS96|Q2YS96\_STAAB  
mepikeqevid1lasfehkpvy1lhvetngayan1hdqrvfnagt1l1rniqvtythaq1kgnkepyrig1kl1snggwvy  
vqgl1thfeinehdef1iag  
fnyegqlaat1qiserpfn1  
>tr|Q2YS99|Q2YS99\_STAAB  
mnyfvgnslgvn1tgiekai1nr1n1fkemgrpaqcvf1swnry1yrnaqnyitssdyinmydffqeaty1lernepfdw1  
sywtdechy1tkhvenshd  
frydqrflmyahfqdpkyri1dyvnhf1dsqrrkvkrdfydvr1gflscsri1lvd1kqqt1ceffynpegd1klekyfsyk  
dgkpevki1ivyankqyf  
fnnetelgaff1kq1lyqhg1d1ffsdrnvytapi1n1tpesipvvav1hsthi1knida1dsspfknvykamfen1sryrai  
ivsteqqk1dvekrinht1  
pvvni1pvgys1etidtpvt1dqrsvk1isvaryspek1lhqielikr1lvsyvpkiel1hmygfgfgskk1ndmdti1wia  
kscfl1tgvf1sn1ldqeysd  
ay1s1it1snmegfs1al1les1ahgvpvi1sydikygpnel1tpdfngy1itkndeda1fdkvyvidhpevqqr1skgs1a  
kaqqyskas1ikqwdqfvr  
1i  
>tr|Q2YSA0|Q2YSA0\_STAAB  
mnyilgti1leskitgvekaq1nr1kl1fkqhg1sskcvyvkwnpysytyakqhq1end1ftmydyfqai1nykktkqvni  
qywekscry1tkfvnsnd  
vriydeeqf1myah1fdkqyhg1nyvnyfdqrrkvkrelydgrg1fscsri1legqriv1lenyytpngeivi1qkyfddi  
kgent1tkvi1nedhqhf  
fdtedel1vqyf1hq1cknndqi1ldrphe1gnviag1nqsipvi1v1hsthsstgyg1ksfyk1tvfn1trykaivvst

Tsompanidou\_et\_al\_Supplemental\_FASTA\_File

ekqcqdisqyienkipvin  
ipvgvanlkyqfdinqdknhiisiarlvenkqikhqievikqlvtkhpniqlniyghnglseyrqlvedyhlsehvk  
fhgfkthineeiakaelml  
stskmegfglailleslsvgtpvvsydvdypseliqdgfngylvpqgdinqmvekveqllnntqklqqfsinsieyaqqf  
netnvtkwqniln  
>tr|Q2YSA1|Q2YSA1\_STAAB  
minrdnkkaikkgmnsrlnkfsirktyvtgasiivgttliifglngqeakaentstenakqddattsdnkevseten  
nstennstnpikkeetnd  
sqpeakeesttsstqqqnnvtattetkqniekenvpstdktatedtsvileekapnntnndvttkptstseiqtktpt  
tpqestniensqpqptpsk  
vndqvdatnpepvnvskeeiknpek1kelvrndsntdrstkpapatpsvapkrvnakmrfavaqpaavasnnvnd1  
itvtkqtiitegikddgviq  
ahdgehiytsdfkindsvkmgmtmtvkydkhtlpsdltddfspvdiidpsgeviakgtfdvntntitykftdyvdryen  
vnaklelnsyidkktpne  
aninltfgtadketskvnveyqkpvkdesniqisifshldttkheveqtiyvsp1kl1nakntnvtiksggvadngdyt  
gdgstiidsnteikvykva  
sgqqlpqsnkiydysyedvtnsvtinknygtmanifgdisayivkvvskytpgaeddlvqqgvrmtttknynys  
yagytntilsttdsgggdg  
takpeeklykigyvvedvdkdgvqgtdskekpmavltltypdgttksvrtddkghyefggldkgetytkfetpagy  
lptkengttidgekdsngss  
vtvkingkddmsldtgfykepkynlgdyvvedtnkdgiqdanepgikdvkvtlkdstgkviqtttdasgkykftldng  
nytvefetpagytpvtknt  
taedkdsngltttgvikdadnmtldsgfyktpkyslgdyvwydsnkdgkqdstekgikdvkvtlqnekgevigttkten  
gkyrfdnldsgkykvi fek  
pagltqgtntteddkdadggevdtitdhddftldngyfeedtsdsdsdsdsdsdsdsdsdsdsdsdsdsdsdsdsds  
dsdsdsdsdsdsdsdsdsdsdsdsdsdsdsdsdsdsdsdsdsdsdsdsdsdsdagkhtpvkpmsttkdhh  
nkakalpetgsenngsna  
tlfgglfaalgslllfgrrkkqnk  
>tr|Q2YSA3|Q2YSA3\_STAAB  
mikliaatdmgtllnvaheisqpnidaikyaqeggitvviatgrafyaeaqapvadtdltvpyiclngaevrdetfnvmst  
shlnkslvhkitnvlkdag  
iyyqvysraiytedpqrldiyidiaeragqhanverikngiqrridngtlkvvdnydaieinipgelimkilafdgnle  
kidkaskilaespnlaiss  
ssrgnieithsdaqgialetiaerlgiemkdvmaigdnldvsmlekvgyppvamengaeevkkiakyvtdtnensgvk  
aimkllreqqv  
>tr|Q2YSA4|Q2YSA4\_STAAB  
mkydlttqdstikrnnaindkdfeklvmdlqplliirriktfgfnhydledlyqeilirmyrsvqtfdfsgeqpftnyvqc  
litsvkydylrknlatnkr  
mdnlineyrvtypcaikrydvennylnklaikelirqfkylsafekdvmylmceqykpreiaqlmhvkekviynaiqrck  
nkikryfkmi  
>tr|Q2YSA5|Q2YSA5\_STAAB  
mnysipqnaiaitiagtvgvgkstltqaladklnfktsfenvehnpyldkfysdferwsfh1qiylf1aerfkeqkrmfey  
ggfvqdrsiyedvdi fak  
mheeeegtmskedfktysdlfnamvmtpyfppkdvmiylecnydevidriiergremeintdpeywkklfkryddwinsfn  
acpvvrinineydhkdpd  
slnpmidkiariiktyrqvdtr  
>tr|Q2YSA6|Q2YSA6\_STAAB  
mewilfdkdgtliefdrswekigvr1vqsllletfpvhnkeaalrqlgvikesidpksvmgsgslqqiiaqfndvtgqdt  
dwskstsqklvderipein  
wvegvealidlkakgyqlgivtsdtkkqveqflahtnatslfdliisteadayekpnpkvlsplfeqynvdpqkvaivg  
dtandmktasanlmaig  
vltgiatkeelheadiilnsaadiiealn  
>tr|Q2YSA7|Q2YSA7\_STAAB  
msqavkverretlkqkpnstsq1gfgkyftdym1sydydadkgwhdlkivpygpieispaaqgvhygqsvfeglkaykrdg  
kvalfrpeenfkrlnns1a  
r1empqvdeaelleglkqlvdi erdwipegegqsl1irp1fvfategalvgvashqy1l1i1l1spg1ayy1gget1kptkiy  
vedeyvravrgvgfakva  
gnyaasllaqtnanklgydqlwldgveqkyieevgsmniffvengkvitpelngsilpgitrksiielaknlgyeveer  
rside1fesydkgeltev  
fgsgtaavispvgtlryedreivinnnetgeitqklydyvtgiqngtledkngwrvvvpy  
>tr|Q2YSB1|Q2YSB1\_STAAB  
mvqslhefleeninylkenglyneidtiegangpeikingksyinlssnylglatnedlksvakaaidthvgagavrt  
ingtldlhdeleqtlakfk  
gteaaiayqsgfncnmaaisavmnkndailsdelnhasiidgcr1skakiirvnhsdmd1rakakeavesgqynkvmyi  
tdgvfsmgdgvalpeive  
iaefgl1tyvdahgsgvmgkagatvkhfglqdkidfqigtlskaigvvggyvagtkelidw1kaqsrp1l1f1st1l1ag  
dtkaitavkklmastelh

Tsompanidou\_et\_al\_Supplemental\_FASTA\_File

dklwdnaqylknglslklydgtgesetpivpiigdekttqefskrlkdegvyvksivfptvprgtgrvrnmptaahtkdm  
ldeaiatyekvgkemkli  
>tr|Q2YSB2|Q2YSB2\_STAAB  
mlawfglannkenktiqlrrylhqypeisfeefqthdyivnqlsqliedietpigrngikatfkglgkgptialradfda  
lpveelndvpyksknpqcm  
hacghdghtailtvaeildehkhlllegnvvlifqygeeimpqgsqemidagclvedvdrygthlwsgyptgtihsraga  
imaspdefsvtikgrgghg  
akphetidpivimaefilsaqkiisrtivpvkqavlsfgmiqagttadvipdqafckgtvrtfdsqnhvmdkmdkllq  
glaiandinydlnyikgy  
pvhnekayqviheatndihvrfnesdlmmigedfshylykvrpgaffltgcnkskgitaphhnpkfdidekslyavav  
flkiiieleqvfktn  
>tr|Q2YSB7|Q2YSB7\_STAAB  
medkllskekvarfnkqhfvgllketlkalkkdqvtsliiaedvevylmtrvlsqinqknipvsffkskhalgkhvginv  
nativalik  
>tr|Q2YSC0|Q2YSC0\_STAAB  
mshyydedpsvisneqriqyqlkhhkidlitdngvfskdkvdysdvlvqtfllkthppgskriadvvcgygpiglmia  
vsphhsitmlvnhralal  
veknkllngidnviokesdalsavedksfdfltnppi ragketvhrifeqalhrldsngelfvviqkkqgmpsakkrmn  
elfgnvevankdkgyyilr  
sika  
>tr|Q2YSC1|Q2YSC1\_STAAB  
lndlvkaieeffgvtaaapvavagaaggadaaaektefdveltsagsskikvvkavkeatglglkdakeivdgapkvike  
alpkkeaeklkeqleevga  
tvelk  
>tr|Q2YSC8|Q2YSC8\_STAAB  
mkeryliidgynmigsptlsaiakenleearmqli dai anynavisdeiicvfdaydqsgvereymyhgvtiftkeke  
tadsfieryvvelydkhtk  
hitvvtmdmseqhaifgsgayrissremwrldkeneidvskslldisenkprtriplsseilaefekirrghhkk  
>tr|Q2YSD0|Q2YSD0\_STAAB  
mdnqqdnhikllnpltlaymgdavlqyvrtiyivlklkskpnklhqmskkyvsaksqaqtleylmeqewftneemdilkr  
grnakshkakntdvqtyr  
kssaieavigflylekreerleaallnkiitivner  
>tr|Q2YSD2|Q2YSD2\_STAAB  
millkrmrddikmvfeqdpaarstlevittyaglhavwshliahklynqkyvaaraisqisrfftgieihpgakigr  
fidhgmvgvigetctigdn  
vtiyqgvtlggtgkergrhpdigdnviaagakvlnikinsvni gansvvlqsvpsystvvqipghivkqdgvrvgk  
tfnrhrlpdpieyqikhle  
rqllektrngeiqddyii  
>tr|Q2YSD4|Q2YSD4\_STAAB  
mnivklmviiyliigsalgiipeiandlglqnsflknryvdgiigsifmflifgvfirrvtnaikglehfimrrsa  
veilfatigliigllisvm  
vsfilesignsifnhfipvitiilcyfgfqfglkkrdemlmlpeniarsmsqhtksatpkiidtsaiidgrilevirc  
gfidgnillpggvinelqi  
vadsndsvkrekgkrgldilnelylldyptkvihtkshdidtmllklakqyhaniittdfnlnkvchvhgikalvnd  
lseaikpnvhqgdqhlhll  
tkmgkepgqavgylddgtmvvvdnaknligshvnlevvsllqtssgrivfakkiedtvs  
>tr|Q2YSE0|Q2YSE0\_STAAB  
mhiligiigiiiffllafllfssdrknirwkyvillaiqlifafillkttmgikviggisngfnylllkaadgvnfvfgg  
iqyidpkqppfffsvllpi  
vfiisaiigilqytkilplinvlgfliskingmgrlesynavaaaailgqsevvisikkqlpyipkqrlytltasamstvs  
asiigayftliepkyvvt  
vvlngfggfiiiasiiipykvneedkllveeteerqqsffemlgeyildgfkvavivgamligyiaiaiall ngivsnvfs  
tvsggaiswdfqtligfvf  
apfaflvgvpwqdvqagsvmatkllsnefvamqalglslsehakgvtsvflvsfanfssigiisgaikslndkkgdt  
varfglklifgatlvsvfis  
aviagffi  
>tr|Q2YSE2|Q2YSE2\_STAAB  
mdqteskevwpkckkagvimdvnaeqariaeeagavavmalervpsdiraaggvarmanpkiveevmnavsipvmakar  
ighitearvleamgvdyid  
esevlt padeeyhlrkdqftvpfvcgrnlgeaarri gegaamlrtkgepgtgniveavrhmrvnsevsrltvmnddei  
mtfakdigapyeilkqikd  
ngrlpvvnfaaggvatpdaalmmelgadgvfvgsgifksedpekfakaivqatthyqdyeligrlaselgtamkgldin  
qlsleermqergw  
>tr|Q2YSE3|Q2YSE3\_STAAB  
mkntlyhqlyekllkqiiegqfegdkfyskrqlskhlsisqttvehayqllldegyiysrprsgyyvseiesltlntq  
pihslfdddskpksdet  
dyafnldeidtkhfpielefrkyskldlydkthsnkllrhghfgehlhrfqlafylftnrgvicdpnqiiigssteqlvng  
lvdlltstfiiekpsypp

Tsompanidou\_et\_al\_Supplemental\_FASTA\_File

iknildkkqveyeqievednginvdeviksqnivyitpshqfptgyvmdlkkrtqliqwaqekeerfiieddydsefry  
fgkpiqggllysrgekvi  
yistfsksifpscrvaymvlpysimkkyhsqnhiengntvpvhmqnliamfissggferhlnkmrriyrklyilnrkpk  
ykeqldiqgaetgmhftit  
vkngrtlqecldrakvklklqvyvndddqdyknppkfilgfggidddalkphvdaliksliik  
>tr|Q2YSE4|Q2YSE4\_STAAB  
mnlkqsiieeingpeyepmsvsdfqdalglssadsfrdlikvlveleqsgliersktdryqkkskgsqlikgtlsqn  
kkgfalfpedkmedifi  
pptkinraldgdrtiveihqskgehkgkiegeevksiekhsvtqvvtgysqarhfgfviyddkrimqdifipkgqslgavd  
ghkvlvqitkyadgsdne  
ghisailghkndpgvdiilsiiyqhgieiefpdevlqaeatpdniedseikgrhdlrneititidgadaklddaisvkk  
langntqltvsiadvsyvv  
tegsaldkeaydratsvylvdrvipmiphrlsngicslnpnvdrletlscrmeiddsgrvvkheifdsvihsydrmydav  
nqiiitendptireqyneit  
pmlldlaqdlisnrliqmrkrgeidfdiseakvlvnedgiptdvqlrqrgegerliesfmlianetvaehfsklvdpfiyr  
vheqpsdr1rqffdfitn  
fgimikgtgedihpttlqkvqeevegrpeqmvisstmmlrsmqqaahyddvnlghfglsaeyythftspirrypdltvhrli  
rkyliksmdnkevkrwed  
klpelaehtskrerraieaerdtde1kkaeymiqhigdefegivssvanfgmfie1pntiegmvhianmtndyyrfeerq  
maligerqakvfrigdtvk  
vkvthvdvderlidfqi vgmplpkndrsqrpargktiaktrgksldksksddkghkkkgkqrkgknerkndksngskhk  
pfykdksvkkkarrkkk  
>tr|Q2YSE5|Q2YSE5\_STAAB  
mqikl1pkpffffeegkravlllhgftgnssdvrlgrflqkkgysytpqyeghaappeeilqsspfwfkda1dgydylv  
eqgydeivvagls1ggdfa  
1kls1nrdrvkgivtmcapmggktegaiyegfleyarnfkkyegkdketidnemhfkptetlkelsealdtikdqvdevf  
dpilviqaendnmi dpqsa  
nyiyehvdsdekdi kwysqsgvhvitidkekeqvfdidiyqflesldwse  
>tr|Q2YSE6|Q2YSE6\_STAAB  
mhtflivlliidcialitvvl1qegkssglsgaisggaeqlfgkqkqrgvd1flnr1tiilsilffvlmicisylm  
>tr|Q2YSE7|Q2YSE7\_STAAB  
madrtnkeiktgrfiatasivfsilliihyfvsldnataka1ln1tnqntsdkaidyilnsfrftgimiyilaylagfitf  
wnrhtyvwfmfavyvsns  
lftlinlsitiqaikaahgaylt1piliviigsialaiymlvvsirkkstfnr  
>tr|Q2YSE9|Q2YSE9\_STAAB  
makkptali1ldgfanresehnavklankpnfdryynkypttqieasglvdlvglepegqmgnsevghmnigagrivyqslt  
rinksiedgdfendvlnn  
aiahvshdsalhi fgllsdggvhshykhlfalle1akkqgvekvyvhafldgrdvdkksalkyieeteakfnelgigqf  
asvsgryyamdrkrwere  
ekaynai rnfdaptyatakegvdasyneg1tdefvvpfivenqndgvndgdavi fynfrpdraaq1seifanrafegfkv  
eqvkd1fyatftkyndnid  
at1vfekvdlnntigeiaqnnl1tqlriaetekyphvtyfmsggrneefkgerrlidspkvatydlkpemsayevkdal  
leelnkgdldliilfnfanp  
dmvghsgml1eptikaieavdec1gevvdki1dmdgyaiitadhgnsdqvl1dddqpmthtttnpvpvvtkegv1retg  
rlgd1apt1ld1lnveqpe  
dmtgeslikh  
>tr|Q2YSF5|Q2YSF5\_STAAB  
mcktl1hdtnegknl1tpfssgpvr1scgsflfisyshytsiqsinflnkfknt  
>tr|Q2YSF7|Q2YSF7\_STAAB  
mkgiell1nnpfl1ngtaftneerkqlgllegllpanvrtleqqaeqcyeqfkakqtdfekr1flmai fnrnr1fykltse  
hlvefmpiiydpvvaqsie  
qynenfsrpqdtvflsvdrdqdieqelnvangrdirlivvtdaegilgigdwgvdgvdiaigklivytaaaginpsqvl  
pvsldvgtneqllkddly  
lgnrhkrvddetyyafvdkfvsavrkeypnal1hwedfgrghaknildkyed1lptfnddiqgtgivt1agvlgalnisk  
idytnqtf1vyggtagmg  
itnilkdelikqgvseekanqfyimdkqgl1fdmdd1teaqqvfaknrnefsntvnwkn1kevienikptvligtstq  
tgaftedavkem1khterp  
mifp1snptklaetaqd1lkwtnkalaigtgipyndieyngvnysigqanna1mypyglglgliaskakkvnqqilsaas  
halggmvpdepgaav1pp  
vek1hqcsraiakavaqsv1dqg1naetididkaieaeiwyapeysyi  
>tr|Q2YSG3|Q2YSG3\_STAAB  
mqqa1fnssqgpqhrefrkeilqamrvgvwaptkrnwipnfyrccklaepqhreigfpi1stdnaswrgpntek1dsqflq  
tmqvgggaptqklaesqlt  
1mck1gwdneinfvki1sf1shshkvisli  
>tr|Q2YSG4|Q2YSG4\_STAAB  
mteidfdia1igagpagmtaavyasran1ktvmiergipggqmanteevenfpgfemigtgd1stkmfehakkfgavyqy  
gdiksvedkgeykvifnfgn  
kel1takaviiatgaeykkigvpgeqelggrgvsycavcdgaffknkr1fvigggdsaveegt1tkfadkitivhrred1

Tsompanidou\_et\_al\_Supplemental\_FASTA\_File

raqrilqdrafkndkidfi  
wshtlksinekdgkvgsvtlstkdgseethevdgvfiyigmkpltapfkdlgitndvgyivtkddmttsvpgifaagdv  
rdkglrqivtatgdgsiaa  
qsaaeyiehlndqa  
>tr|Q2YSG5|Q2YSG5\_STAAB  
maqknnnvpmtfddafyrkmanqkfkqreykraaeyfekvlelspddleiqidyaqlvqlgiakkaehlfydniinyr  
hledsfyelsqlnievnep  
nkaf1fginyvi vsddqeyrde1dqmfdvkyqseeqieleaqlfvvqilfqylfsqgrlkdtknyvlhqppqvqdhrrvr  
nllamcylylgeydtaka1  
yeallqedstdiyalchyt11lyntkeneqyqky1kilnkvpmmnddesfklgivilsy1kqyrasqqllyplykkgkfls  
iqmyalanyyyylgeede  
shyywdk1kqiskveighapwvienskevfdqhilpl1qsddshyrlygif1ldq1ngkeivmtesiwqvlennnyek1  
yltylvqgl1lnk1ldfihr  
g11tlyhnelvsend1mvawinqgeliiaekvd1tdvepyigafiylyfknqprnvtkkqiktwlgitqy1nkmief1  
1si  
>tr|Q2YSG6|Q2YSG6\_STAAB  
mrkflsktyhhtnplwhvyrlvkfsvkfvnviiefskfipsmvlkrihykq11ninignqssiaykvmlidifypeliti  
gsnsvigynvtillthealv  
defrygpvtigsnt1iganat1lpgitigdnvkvvagtvvskdipdngfaygnpmyikmirr  
>tr|Q2YSG9|Q2YSG9\_STAAB  
mkepsi1vkgarahan1kdidielpknlivmtglsgsgksslafdtiyaegqrryves1sayarqflgqmdkpdvdtieg  
1spaisidqkttsknprst  
vatvteiydyr1lyarvgkpycpnhnieiesqt1vqqmvdhimeletrtkiq1lapviahrkgshekliedigkkgyvr1  
ridgeivdvndvpt1dknk  
nht1evvdr1lvkdgietr1ladsieta1elsegqltvdvidged1kfseshacpicgfsigeleprmf1fnspfgacpt  
cdg1gqk1tvdvd1vvpdk  
dkt1negai1epwiptssdfypt11krvcevykinmdkpfk1lterqrn1llysgdkeieftftqrggtrkr1tmvfegv  
vpnisrrfhespseytrem  
mskymtel1petchgkrl1sreal1svyvg1nigevveysisqal1nyyknin1seqdqai1anqilkei1sr1tfl1nngle  
yl1nrasgt1sggeaqri  
r1atqigsr1tgvl1yvl1depsig1lhrdndr1int1kemrd1ngt1livvehdddtmraady1vdigpgagehggqivssg  
tpqkvmkdkks1tgqylsg  
kkrie1vpeyrrpasdrki1srgarsn1lkgvdvdipl1simtvvtgvsgsgkssl1nevlyks1laqkinkskvkpglydki  
egidq1dki1ididqspigr  
tprsnpaty1tgvfddi1rdvfaqtneakirgyqkgrfs1fnvkgrceackgdgi1k1emhfl1pdvyvpcevcdgkrynret  
levtykgkniadi1emtve  
eatqffenipk1krkl1qtl1vdvg1gyvt1gqqatt1sggeaqrvklase1lhrstgksiy1ildeptt1ghvddisr1l1kv  
1nr1lvengdtvvi1ehnl  
viktadyi1id1gpegsggggtivatgtpediaqtksy1tgky1lkevl1erdkqntedk  
>tr|Q2YSH0|Q2YSH0\_STAAB  
mtmvehypfk1hsdfepqgdqpa1keivegikagkrhqt1l1gatgtgkftmsn1vikevgkpt1i1ahnkt1lagqlyse  
fkeffpenrveyfv1sydy  
yqpeayvp1st1dfiekdas1indeidq1r1hsatsal1ferddvi1iasvsci1ygl1npeeykd1vsvrvgm1emdrse1l1rk  
1vdvqytrndi1dfargtfr  
vrgdvvei1fpaskee1c1rveffgdeidri1revny1l1tgev1kerehfai1fpashfv1treek1l1kvaierie1keleer1kel  
rdenk11leaqr1leqrtny1d  
1emmrem1gfcsgienysvhl1t1rpl1gstpyt11dyfgddw1l1imideshvt1p1qvrgmyngdrarkqvl1vdhgfr1lpsald  
nrpl1kfeefektkq1lvvy  
satpgpye1iehtdkmvegi1rptg1l1dpkievrptenqidd1l1seiqrvernerv1vtt1tkkmsed1t1tymkeagikv  
ny1hseikt1lerieii1rd1  
rmgt1ydvig1in1l1regidipevs1lvvil1dadkegfl1rsnr1liqt1graarndkgevimyadkmt1dsmkyaidetqrrr  
ei1qmkhnek1hgi1tpktink  
kihd1l1sanvendenndkaqtv1pkmtkkerqkti1dni1ekemkqaak1d1fekate1rdm1fel1kaeg  
>tr|Q2YSH2|Q2YSH2\_STAAB  
meevi1emgvh1qy1fkr1sdmer1l1r1pgk1fky1fehvaahs1fkvtkiaqylatveeyhgrkinwkslyekalnhd1faevft  
gdikt1pvkyasse1l1k1lfs  
qveemvet1f1eee1p1qyr1dvkqr1qegkdds1legqilsvadki1d1lyet1fgei1qkrnpeel1ffeiyems1let1iqfd  
h1lasvqdf1inni1pem1te  
nfi1rte1l1rettmn1l1nkrkeene  
>tr|Q2YSH3|Q2YSH3\_STAAB  
mkks1tvtvss1laf1al1nnaahaq1hgt1qvkt1pvq1hnyvs1nvqaqt1qsptty1tvvagds1ykialehh1t1lnq1lysynp  
gvt1pli1fpgdvi1slvpqnk  
vkqt1kvk1spvrkasqak1kvk1qp1vq1qask1kv1v1k1qap1qavak1v1vask1paq1v1qksvanrgn1yaygnctyyafdr1ra  
q1grs1igs1l1wgnannwnya  
akvag1fkvdkt1pevgai1f1qtaagpy1ghvgv1ves1vnpngt1itv1semnyag1fnvks1rti1l1npgkynyih  
>tr|Q2YSH4|Q2YSH4\_STAAB  
mtrfcrin1qinyi1emnp1leak1frtss1l1rswktd1qadah1klaq1lapt1kamet1l1pmyes1ffel1rerar1hleieneqnr1  
kfeiveq1l1hqt1fpg1lek1lf

Tsompanidou\_et\_al\_Supplemental\_FASTA\_File

ssrystialnjaerfthpdmarnmditlisyfnstdkglsmnkaenhahqlvniariesypnvdrhsflvekarllirh  
lkqsighlkqldeymiqla  
qqldcfehihsipgigklsamiigelgnitrfsnkqlnafvgidikryqsgstqsrdtinkrgnkarrllfwvmmni  
irgqhhdnhvnyyyklr  
kqphekahktaviacinrllktihylvnmqklydyqmsph  
>tr|Q2YSH8|Q2YSH8\_STAAB  
mmnnc1scgaklyenitiynlfkkpnr1cdrckenwdnikldikarrcsrckqlnqdeayclcdckflsahfnlmeqlyc  
qfgydglmkemihgykflk  
dyyllcellahlieipqtsydivpipsspahdlsrtfnpveavlakagirfdkilkmsnrpkqshltkkerladenpfi  
dte1d1ngkeillvddiyt  
tgltihragcklyaknirkfkvfafar  
>tr|Q2YSH9|Q2YSH9\_STAAB  
mdnvtrykitesqsssqayyhlsfelseqqsyasehivrairmrqtilliyavtgagktemmfqgiyarrqgdniav  
prdvvveiskrikdafln  
enidilhqqssqfeghfvvctvhqlyrfrkrhfdtifi devdafplsmdkslqqa1kssskvehatiymtatppkqlse  
ipheniiklpdrfhkkslp  
vpykyryfklnniqkmlryrlqdqinkqrytlvffnietmiktfsvykqkitklytvhsedvfrfekveqlrnghfdvi  
ftttilergftmanldvvv  
idahqytqealiquagrvgk1ecptgkvlffhegvsmmiqakkeiqkmnkla1krgwide  
>tr|Q2YSI0|Q2YSI0\_STAAB  
mkiavmtdstyslsqldikyniqiap1svtfddgkftesneiaieefynkmassqtipttsqpaigewitkyem1rdq  
gytdiivic1ssgisgsyq  
ssyqagemvegvnvhafdsklaamiegcyvlraiemveegyepqqiidd1tmrehtgaylivdd1kn1qksgritgaqa  
wvgt11kmpv1kfedgki  
ipeekvrtkkraiqtlekkvldivkdfevt1fvngdhfedgqalykk1qddcpsayqvaysefgpvvaahlgsgglg1  
gyvgrkir1t  
>tr|Q2YSI2|Q2YSI2\_STAAB  
mvt111lavtmivsltitpiviaiskr1n1vdkpnfrkvhtkpi1svmggtvilfsfligiwighpieteikpliigaim  
yv1glvddiydlkpyikla  
gqiaaalvvafygvtdifslpmgttihfgflsipitviwivaitnainlidgldglasgisaiglitigfiailqanif  
itmiccv11gsligflfyn  
fhpakif1gdsgalmigfiigfls11gfkntiia1ffpivilavpfid1famirrvkkgqhimqadkshlhhk11alg  
ythrqtvl1iysisilfs1  
ssiilyvspplgv1mfvlii1fsieliveftglidnnyrpiln1isrksshkee  
>tr|Q2YSI7|Q2YSI7\_STAAB  
mkv1vamdefhgi1ssyqanryveeavasqietadvvqvlfngrhell1dsvflwqsgqkyripvhdadmnevegvygq  
dtgmtviegn1flkgkkn  
vertsyglgemihaldndakhvvis1ggidsfdagagmlqalgaqfyddegrrvdmrqqagvikyirrm1dmsnlhpkme  
tariqmsdfssrlygkqs  
eimqtydahq1nhnqateidn1iwyfse1fkse1kiaigpverggaggiaav1nglyqaeiltshalvdq1thlen1ve  
qad1iifgegl1nendq11e  
tt11riaelchkhqkvaiaicataekfd1fesqgv1tamfntfidmpetytdfkmg1qirhytvqs1k11kthfnvev  
>tr|Q2YSI9|Q2YSI9\_STAAB  
mn11rsaimkkiviiav1ailfvvisacgnkekeaqhftkqfkdeqkqkelqhimdni1hkeidh1sktdtdknske  
fkt1qedvkn1lipkfeay  
yksakn1pddtmkvk1kkeymalanekkdaiyq1kkfig1cnqsikynedi1dytkqfeknrykveseik1adnkseaa  
n1ttklehnnkalrdtakk  
n1ddskenevkgai1knhimpiekqitdinqtnisdkhvnarknaiemyys1qnyy1nrietikvse1skvdvdk1pk  
kgid1thgdkafeks1kn  
>tr|Q2YSJ0|Q2YSJ0\_STAAB  
mysnvqpfinsd1tncfqsqyteies11fn11dspvkytkhiggthhfkystepildilvgven1hdits1dekr1nyvg  
fyr1hhkynkkvmmakfnn  
fhe1kqvr1hi1qmntqt1fesylaldy11stnddia1rfntkkhq1lqhs1tirqyemqkqy1fek1ckky1  
>tr|Q2YSJ3|Q2YSJ3\_STAAB  
mkk1v1y1v1lavm11a1acgnnsdkeqsksetkgsketvkiennyk1mrgekkgdsakvketvevpkn1knav1dyga  
1dvmkemg1sdvka1pnf  
lesfkddkytnign1kevnfdkiaatkpevi1fisgrtanqkn1defkkaapkakivvgadekn1ligsmkqntenigkiy  
dkev1kake1nk1dnkias  
mkdk1tnfnktvmy11vnege1stfgpkgrfgg1vydt1gfnavdkkvsnsnhgqnsneyv1nkenpdv1lamdrqgavs  
gk1stakqal1nnpv1knvka  
ikedkvyn1dpk1wyfaagsttttikqiee1dkvvk  
>tr|Q2YSJ4|Q2YSJ4\_STAAB  
m11iavt11ism1y1fvgidfeifeyqfssr1rkfili1ilvgaa1atsv1vfqaitn1r11t1psimg1davy1fikvlpv  
f1fgi1qsvwvtnv1nfi1  
t1itm1v1fal1l1fgg1fki1ghfsiyfi11ligv11gtffrsitgfiq1limdpes1flaiqssmfanfnasnsn1vtfsav11  
villait1111py1ldv111  
graeain1gisyek1tri11vivsv1svstalg1pitf1gl11tvn1lahe1mktyehkyi1liatic1swis1lsvqwwve  
nvfeattems1lidliggs

Tsompanidou\_et\_al\_Supplemental\_FASTA\_File

yfiy1lvrnrnaq  
>tr|Q2YSJ5|Q2YSJ5\_STAAB  
mkyllkgnilllllllitiislfigvseliskd1llh1tesqrnilfssriprtmsiliagsslalaglimqmmqnfvs  
pttagtmewaklgiliall  
ffptghillklvfavicsicgtflfvkiidfikvkdvippllgimmggivasfttfislrtnavqsigwnlgnfaiit  
sgryeilylslpllaaly  
ftnhftivgmgkdfntnlglseyklinialfitatitalvvvtvgtlpflglvipniisiyrgdh1knaiphtmm1gaif  
vlfsvdivgrivvyypeini  
gltigvfgtiifllllmkgrknyaqq  
>tr|Q2YSJ6|Q2YSJ6\_STAAB  
mlkvffvyv1thyeteseinvlrcm1filavvggastqklagtqltitcklagpqrhrswrkvs1q  
>tr|Q2YSJ8|Q2YSJ8\_STAAB  
meekkyhie1nnevtkrredgffs1ekdqealvayleevkdktiffdteierlrylvnddfyfnvfidiyseadlieitd  
yaksipfnfasymsaskff  
kdyalktndksqyledynqhvaivalylangnkaqakqf1samveqryqpatptflnagrarrgelvscfllevddslns  
infidstakqlskiggva  
inlsklrargeaikgikgvakgvlpiaksleggfsyadqlgrrpgagavylnifhydveefldtkkvnadedlrlstist  
glivpskffdlakegkdfy  
mfaphtvkeeygvtddidlekyddmvanpnvekkknarem1n1iaqtqlsgypylmfkdnanrvhpsnigqikms  
nlcteifglqetsiindy  
iedeigrdiscnlgslniwvmesgkfrdsvhsgmdaltvsvdvaniqnapgvrkanselhsvglgvmnlhgy1aknkig  
yeseekdfani1fmmmnf  
ysiersmeiakergikyqdfeksdyangkyfeyttqefepqfekvrelfdgmaiptsedwkl1qddveqyglyhayrla  
iaptqsi1syvqnatssvmp  
ivdqiertrygaetfypmpflspqtmwyyksafntdqmklidliatiqthidqg1stilyvnseistrelarlyvyahy  
kg1kslyytrnkllsveec  
tscsi  
>tr|Q2YSK0|Q2YSK0\_STAAB  
mc1mynethnivlvkqkrhnlcfvckcfiyeetfksnl1tkfnsyyqliviflenvl1skwki1ndvnttysdfytfnp  
ykl1fsqi  
>tr|Q2YSK3|Q2YSK3\_STAAB  
mifltywcvfhlaykigyik1fyikvhqkninrikqhfyrnllhfvnkyifilslinca1liteysqyfyfl  
>tr|Q2YSK6|Q2YSK6\_STAAB  
mtrksiaidmdevladt1geiidavnfradlgikmealngqklkhvipehdglitevlrepgffrh1kvmphaqevvkl  
tehydvsataamdvpstf  
sdyewl1effpfl1dpqhfvcgrknivkadylidnprql1eftgtpimftavhninddrfervnswkdveqyfl1nie  
k  
>tr|Q2YSK7|Q2YSK7\_STAAB  
miytvtfnpsidyviftndfkidglnratatykfaggkginvsrvlktldvestalgfaggfpgkfiintlnnsaiqsfn  
ievdedtrinvk1ktgget  
einapghitstqfeql1qqiknttsddivivagsvpspsidayaqiaqitaqtgaklvvdaekelaesv1pyhplfik  
pnkdelevmfnttvnsdad  
vikiygrl1vdkgaqsv1sggdgaiyidkeisikavnppgkvvntvsgdstvagmvagiasgl1tieka1qqavacgta  
tafdelatrdaiekiksq  
vtisvldge  
>tr|Q2YSK9|Q2YSK9\_STAAB  
mikfknvtkrygkhvavdnisfninegeffvl1gspgsgktttlkminrl1h1segyiyfkdkpisdypvyemrwdigv  
lqqa1l1fphmt1keniaqv  
pqmkkwkdkd1dkrvde1lemvg1epekyknrkpdelsggqrqrvgiralaadppvilmdpfsal1dpisrek1qddli  
el1qtikiktii1fvthdige  
amklgdki1lneghieqid1tepgfknnpqsefvkqfmgshleddapcveenaird1dimkpidvtsmsdypivynq  
qievlyqh1seservimq  
edsvgyvidrkdfkylsqkkevaqhd  
>tr|Q2YSL0|Q2YSL0\_STAAB  
mmqqt1shyfyetfrpgqeei1skvl1dhrnvl1gvl1ptgggsicyqvp1ll1ggttivispl1slmkdqvgqlkamgiq  
aaf1nss1tqkeqrieka  
l1sngeiqf1yvaperfenryflnm1qrikih1lavdeahciskwghdfrpsynvskvftl1pqdf1ial1tatatvevq  
qdirek1n1iaqtdiktst  
krrnli1fkvnptyqrqkfi1dyikthdedagi1ycstrkqveelqea1esqiesdiyhagl1snkereeaqndfl1dvrk  
vvvatnafgm1gidsnvr1f  
vihynmpgd1esyqqagrgrdg1kseci1l1ferdin1heyf1tvsqaddykdkmgekl1tkmiqytkkk1leativ  
hyfepnekleceqcsncv  
qqdksynmtqeamii1sciar1mqkesysvii1qv1rgestdyikykydqisthgl1mkgytt1selsh1idel1rfkgflne  
ndeilmcdtsik1ll1snev  
evfttpfrqkatgk1vintveggdrv1fsq1vevrkr1sdl1tiapvis1fsdyt1leefakrkpaskqdm1nidgvgsy1k1  
khycpafletiqnykakv  
>tr|Q2YSL1|Q2YSL1\_STAAB  
mgmeaykieh1nksyadkti1fdn1d1si1segekig1vgingtgkst1llkviggidd1ftanvmhpnqyri1ryssqkd1n



Tsompanidou\_et\_al\_Supplemental\_FASTA\_File

edmtvfdavlssdtttlri  
ikqyeqavqayaddqsdklfrmmdaqdamdqhdawdynaeiktisklgihttkyikelsggqqkrvvlaktliekpd  
llldeptnhldfeslswl  
inyvkqyphtvlfvthdryflnevstrieInrgklasyppnyesyiemraerevtlqkqqkqralykeelawmragak  
arttkqqarinrfdlene  
vnqqykddkgeInlaysrlgkqvfeledlskaIndkvlfehlteliiqgerigvvgpngagkttllnilsgedqqfegkl  
ktgqtvkvayfkqtdetld  
rdirmidyIreeseiakekdgtsvsitqlllerflfpsathgkkvyklsggeqkrlyllrllvhqpnvllldeptndldte  
tltiledyihftfggtvitv  
shdryflnkvaqsywfihdgqmekiigtfdyesykksldknkstlnqqskstttrkknklsykekleyeqlmkrieqa  
evrmeeidvlmieasadyg  
kikelneekeqleiqydliditrwseleeikeqq  
>tr|Q2YSL3|Q2YSL3\_STAAB  
msiieksglfssfgdfgrryehdgvipcgaldtlaheianrlvandkneatlemtnkmatirfteptliaIaggnvka  
yehmtispyklyllkkgd  
vlkfretsytssrvylavgggfeldawlgnsstdfnvkiggfkgtrldqgddekIkrdytarhhklfenlahtkqtdwgid  
gyalsfnymdvfhvknk  
gtedfkedaqrfvkhdykvtskanrmgmmlegekikafyedmpyqtvkkgtiqikrdgtpiillndhytlgsypqigt  
iasyhltklaqkpggsrlk  
fqfidiltaeknlvkysnwlnqlfhgieyrmqlemm  
>tr|Q2YSL5|Q2YSL5\_STAAB  
miivyivlllilvyvnyrlvnrllsenriyvvrliatittvisfilvyalirelmpfvvramdlmyhq  
>tr|Q2YSL6|Q2YSL6\_STAAB  
mqIfetmkiDnghiprltyhtnrikcsserlnfkfdehawrneIndvttkyhsqyrlkivlnaesefetivspIpekss  
ftakfqvlpkavnptfinn  
kterkhlahnhetdliilltsedgkvlfdignivieedgkwytpsikddflkgcmrdylidsdklvekdfnkneliiky  
hneirflinslrevadv  
hlcl  
>tr|Q2YSL7|Q2YSL7\_STAAB  
mitvrieynyrylteneykqyhiqlkgfikkyvatkladvgevihfaqaqqrqgryvslylsyeaakyfnhvmcthsIa  
kddiyavaysfekaesins  
tyehqtyyvskhhsfvesevmmtnikrvqqaivegetyqvnytarlkdniypistlyerltqfsngnytaIltqdei  
qvasispelffqkgqfnv  
dnviiSkpmkgtmprgkteaedqyyktIqtsskdraenvmivdlIrnDIGrisqsgsikvyklffieayktvfqmtsmv  
sgtIktntdlqtIltslfp  
cgsitgapklntmkyikqllessprgiycgaigllpteddkminipirtieykygqaiyvgagitidskpkdevnefy  
aktkilemI  
>tr|Q2YSL8|Q2YSL8\_STAAB  
milvidnndsftynliDYiktqtkltvqvvgidnlliedvinmkpnaivispggpnppdypilnevleqfyqrvpilgvc  
lgfqcivsyfggniihgyh  
pvhghttqlrhtnegifqglpnfnvmryhsIiadgatfpncIkitakndeaiimafehitfpvfgvqyhpesilseygy  
rqvelflskvgdycenri  
>tr|Q2YSM0|Q2YSM0\_STAAB  
mlqqiypstthpyqfelnkdfnfsaahhipceegicqnvhgtyfvnlIivgdklDdtgflvnfshlkklihgkfdhqI  
lnnlpafknkipsteivae  
tiyqivkenlaslehqpkciqvfvretptsyvvrpkeqv  
>tr|Q2YSM1|Q2YSM1\_STAAB  
makipvlei fgptiqgegrvirgrktmfvrtagcdyrcswcdsaftwdgsakgdikImtaeeiydelkriggdlfnhvtis  
gnpalikgiqelvdIfqd  
kgI fsaletqgskfqpwmtdlI tispkppsstmpdlklI devitqcvpslnlkvvvfddkdydfakmihhrypdiP  
fyIqvgnpylsdsvdnhte  
klleryeqIvdIvlqsndmnhvyvlpqlhtllwsnkkgv  
>tr|Q2YSM3|Q2YSM3\_STAAB  
mntkyflavgavasvlilgacgnsnsdqgknteqtktsedsnvktdkthklgtfsskngetvegkaeikngklmltny  
ksskqpdlyvyltkngdik  
ngkeiamvdydkekqtdflknvdlskydevtiyckkahvifggaklk  
>tr|Q2YSM7|Q2YSM7\_STAAB  
mki rvvipcfnegevitqthqqlteIlsqdssvkgydynmlfiddgstddtidemqhlaticdrhvsfisfsrnfqkeam  
iagyqystefdavimidcd  
lqhppeyipkmi egfmeqydvIakrdrsgenfsrktlshlyyklvncfveevqfddgvgdfrllsqravksiasleeyn  
rfskglfewigyntkvfty  
qnvarqgeskwsfkklnfygidglisfnsklrmmiylglifisvisvlyiiylfinimisgvnipgyfstiaailllgg  
iqIisigvveyigriyye  
vkarpkyiiqatnlssiendekdthkvysk  
>tr|Q2YSM8|Q2YSM8\_STAAB  
mlnei qilnngypmpsvglvyki sdedmtkvvnvaIdagYrafdtayfydneasIgralkdngvdredlfittklwndy  
qgyektfeYfnksienlqt  
dyldlflIhwpceadglflIetykameeIyeqqkvkaigvcnfnvhhllekImaqssikpmvnqievhyfnqqelqefcdr

Tsompanidou\_et\_al\_Supplemental\_FASTA\_File

hdikvtawmplmnrngll  
dpvivkiaekyhtpaqvvlrwhlahnriiipksqtpkriqenidildfnleltevaeidalnrnarqgknpddvkigd  
k  
>tr|Q2YSN0|Q2YSN0\_STAAB  
mseliinyngkvytedgkidngyihvkdgqivaigevndkaatdndttknivmdakghhvvpgfidihihggygqdamdg  
sydglkylsenllsegtt  
ylattmtqstdkidaliniakyeveqdvhnaaeivgihlegpfisenkvgaqhpqyvvrpfidkikhfqianglerlikim  
tfapevegabealetykdd  
iifsihtvatyeeaveavevergakhvthlynaatpfqhrepgvfgaawlnalhtemivdgthshpasvaiayrmkgn  
fylietdamrakgmpegeyd  
lggqkvtvqsqarlangalagsilkmnhglnrlisftgtdldhlwrvtslnqaiialgidrksikvknkdadlviided  
mnvkstikqkvhtfs  
>tr|Q2YSN1|Q2YSN1\_STAAB  
mrvtel1tkdtiamdmandkngvide1vnqldkagklsdvasfkeaihresqsttgigegiaiphakvaavkspaiaf  
gkskegvdyqslmqpah  
ffmiaapeggaqthldalaklsgilmdenvrekllhasspeevlaiidhaddeatkeeeaeaeaqvatevanqdtngsn  
epyvlavtactptgiahtym  
ardal1kkqadnmgikikvetngssgiknhlteqdiknatgiivaadvhvetdrfdgknvvevpvadgikrpeelinkald  
tsrkpfvvrdrqrgknsnd  
sqeklspgkafykhlmngvsnmlplvisggilmaivflfgansfnpsseynafaeqlwnigsksafaliipilsgfiar  
siadkpgfasglvgmlai  
sgsgf1ggiiagflagyltqgvkamtrklpqaaleglkptliyp11tvatgllmiyvfnppaswlnh11ldglnn1sgs  
niv11glvigammaidmgg  
pfnkaayvfatgaliegnaapitaamiggmipplaiatamlifrkftkeqrgsiipnyvmgmsfitegaipfaaadplr  
vipsmm1gsgiggaialgl  
gsritaphggiivivgtgdah11qtliavvgtlvsaliyglkplkteteieasksmde  
>tr|Q2YSN2|Q2YSN2\_STAAB  
mtiilwliiaafmlafvglikpvipsvlvlwvgfliyqfgfhnqhlswfvysmalltililcadflankyfvnrfggs  
kfgeyaaligvvgcfvlp  
pfgi11ipfilvfiaveliqgysferavkvsigsivaf1tssiaqaiimfimiwffidallin  
>tr|Q2YSN3|Q2YSN3\_STAAB  
miitekrhelileelshkdf11qelidrtgcsastirrd1sklq1gklqrvhggam1kenrmvean1teklatn1dek  
kliakiaangindnec1fi  
dagsstlelikiyakdiivvtng1thveal1kkgiktimlggqvkentlatigssameilrrycfdkafigmngldiel  
gl1tpdegealvkqtvms1  
anqsfvli1dhsfkfnkvyfarvp1lesttiitsekalinqes1keyqqkyhfiggt1  
>tr|Q2YSN4|Q2YSN4\_STAAB  
maknkktnamrml1drakikyevhsfevpeeh1sgqevseliqanvktvftklvlentkhehfvfvpvset1dmkkaa1  
vgekk1q1mp1dn1knvtg  
yirggcspvgmkt1fptvvdksenyshisvsgglrtmqitiavedlititegkigavihe  
>tr|Q2YSN5|Q2YSN5\_STAAB  
mtvkn1flgfvavil1vc1g11latneda1akvhktint1nainvstedtykkmdilnihtakasevnenvkkqnhf  
khrvnanksnsfneqefqv  
iadryadk1indnyglerisktnhgynyvysndn1stskqhsisnqgiitk  
>tr|Q2YSN6|Q2YSN6\_STAAB  
mnkqil1vlyfni1fl1flg1glvip1vpvylkd1gl1tgsd1gl1vaafalsqmiispfggtladk1gkkl1iyig1ilfsv  
sefmfaigqnf1ilmlsr  
iggmsagmvmpgvtgl1adispsshqaknfgymsai1nsgf1lpggigfmaevshrpmfyfagalgilafimsivlihd  
pkkvstngfql1epq11tk  
inwkvfi1tpv1tl1v1sfg1safet1ly1tadkvn1spkdisiaitggg1fgalfqiyffdkfmyfse1tfiawslly  
svv1l1llvfangywsim1  
isfvv1figfdm1rpa1tnyfsniagerqg1faggl1nstftsmgn1fig1p1iagal1fdv1hieapiymaigvslagviiv1iek  
qhrsk1keqnm  
>tr|Q2YSN7|Q2YSN7\_STAAB  
mk1qksnht11lv1ekgedi1ec1ttfaddq1l1ftsvsgigacddvilkffn1ttkqyeekhiteple1ts1lgnisr1  
dnghfah1hatfgtqsyqt  
ysgh1skaivsataeiv1tvtdmdiqrtfndsvgl1l1dpq  
>tr|Q2YSN8|Q2YSN8\_STAAB  
mnsryiariyfl1v1fias1fenkiyqf1mt1n1flayipfels111rlfkpnkkyewpl1fviysfifv111pntfymvtd1  
ih1nqfqnfyag1n1few  
kyfty111gvflaiyvm1liyfeilt1tshpw1nriiv1ilmf1ngf1iyigrfl1r1hsvyffnepirv1nhilks1tid  
taifvcfmvmmqaa1l1fg  
kgvr1kk  
>tr|Q2YSN9|Q2YSN9\_STAAB  
mtlditvfmis1iv1lqmi1gh1whdig1sytrs1llm1flplgisvfvqqmiyferqypkwdipqhikirlkyiyiitfle  
yv1lyftmftd1fr  
>tr|Q2YSP0|Q2YSP0\_STAAB  
mfmaiav1lnrmfrtehnpl1feyiyqqkddidacyfiaeedmstasdl1kaqfyr1g1qr1fyqs1haek1tpyvmsyddi

Tsompanidou\_et\_al\_Supplemental\_FASTA\_File

isfckennisevviagdim  
syhleeydi1hqrslfneariavt1irgnhyfkasktmnqqgepykvfts fykkwrpyl1rirdvyhydlnelidiviaap  
nn1kdvqigagssqaheqe  
kwqqflehdinqyengrey1peiltsq1sialayg1ldiiefnd1lsryeedesnyeafirelifrefyyv1mtqtypes  
ahqsfkpkyrhinwsenea  
dfkawcdgqgtgfpiidaamme1rqtgfmhnrmmvvsqfltkn1finwtwgedffrkyli dydsasvnhgwqwsastgtd  
avpyfrmfnp1rqserfdp  
kalyiktylpvlnqidakylhdthqnese1fkqgie1grhypkqivdhqekrsqvlafktld  
>tr|Q2YSP1|Q2YSP1\_STAAB  
mseekkvkherqknektkkqykpfiwmsfiiliv1llptps1pimakavla1lafavimwvteavsyvpsatliig  
1m1ll1gfsqvnlgek1g  
npksgsaaltgsd1lgtnhalslafsgfatsava1vaa1flaaamqetnlhkrlaliv1sivgnktrnivigaiivsiv  
laffvpsataragavvpi1  
lgmiaafkvsksk1as1liitsvqavsiwnigiktaaaqnvainfinhqlgfdvswgewflyaapwsivmsialyfim  
ikvmppeintieggkdlk  
eelhklg1pvsarewrlivism1ll1fwstekvlhpidasitiialgvmlmpkigvmtwkhenkipwg1tiivfgvgis1  
gnv1lktgaaqwsdqtfq  
v1glkh1piiatialit1fnihlgfasats1ssalipvfis1tst1h1gdqsigfvliqqfvisfg1l1pvsapqnm1  
aygtgtftvkdf1kagip1  
ti1vgyl1vivfsmt1ykw1g1l  
>tr|Q2YSP2|Q2YSP2\_STAAB  
mtnedkrfeql1rferkfivipyviyaviv1ll1nifysd1kitmt1fg1ffaynv1lfi1afikhykrt1ll1sl1l1tv1sg  
aaffgi1yvyginhf  
>tr|Q2YSP3|Q2YSP3\_STAAB  
meqiminhyvhfsr1vgqfwrane1wmtake1nyfine1lvergittmdhadiygdyqcet1fgna1d1spelnkiqivt  
kcgii1lpskqfdftnghry  
d1sskhivksveqsl1n1nvdy1ds1l1hrpsp1mdpeqvada1tk1lvkqgk1ksfgvsnfnhsqyq1lnqyimker1hi  
sinq1e1sphyvds1qdg1t  
mdsm1yqnhvqimawsp1faggktfdkedikaqrimkviqsiadkygvsdtavmiaw1vkiphrimpilgtsq1lkridqae  
glq1n1ddqswfdiytai  
gqdi1p  
>tr|Q2YSP4|Q2YSP4\_STAAB  
mknkdekirisiingf1lsgskt1l1thyise1lkndekikiimnefgtfdidsnsisneievhs1lingvcvcd1kqelv  
ye1kaia1kgdvnhi1ea  
tg1ahp1e1l1vacqdpqivnffekpiiygv1datrf1erhqtentvs1medq1k1sdmi1inkid1vtds1hek1dkq1  
smicasiptyk1tygqvs1  
eel1d1pgkdreiss1hhhhhg1ksmtytftgpidrql1fyqf1mkl1pesv1r1kgyvs1frdqpnaiyefqayg1l1pdygii  
gm1q1p1t1vi1iges1dtnh  
ir1nq1d1m1q1t  
>tr|Q2YSP6|Q2YSP6\_STAAB  
mktr1k1fqvkd1l1l1ai1vvgvcgs1valamff1lsgymvtqsalgap1yalmi1lvvtk1lfg1flraitryver1lshkatf  
tm1rd1rvqffgk1lvnvi1p  
nvyrk1ssd1l1srmis1reav1lqniy1rvyppvvg1l1talvtv1v1lafisigha1l1mvsm1ft1l1ivpw1sskkart1  
kkhaaneqarf1nhfydyk  
agmdel1rrfnq1nhyrdn1mak1nhfdk1ql1keqrf1tiydfil1niam1sifgsl1v1gl1iqinegq1n1iymtsiv1mv  
l1l1feqavpmt1nvayykad  
tdqa1hd1nevi1svpstngn1r1tdkydat1niyevkdas1fkywnq1tyv1s1dinfvnrgekia1vgpsgsgk1st1l1qim  
ag1yq1ldsgs1r1fenmdmf  
e1ddk1k1fes1lv1l1qsqq1fdgt1rqn1ftdekdeavqai1fkq1d1eh1alerq1d1dght1sggeiqr1aiarm1l1kd  
tastw1l1deptta1ldkqns  
1kvmd1ieahaet1livath1d1t1l1srfet1iivmingkivekgn1yq1l1anqgalwnmihyna  
>tr|Q2YSP7|Q2YSP7\_STAAB  
mkk1t1til1fqy1k1fpv1lmf1lvstg1gilvitq1niliad1flakii1rhq1fqglwiv1l1fillg1v1ll1ratvq1flnqwl1gdt1a  
fkvk1hm1lrqrv1yknng1hp  
igeqmt1l1teni1dg1lapfyksy1lpqv1fksmmv1pli1miamffihfnt1l1m1litapfi1l1fyi1ifgl1ktr1desk1dqmt1y1  
nqfsqr1fl1niak1glvt1kl1  
fnrteqtekh1yddstq1frt1tmr1l1rsaf1lsg1m1lefism1lgig1v1alevt1sl1vvfhnid1fktaai1ailapefynai  
kd1l1gga1fhtgk1qsegasdv  
vfe1leqpnnnef1l1kyeenqkpfi1q1tdis1frydds1dr1vl1nd1ln1lei1fkgdqialvgpsgagk1st1l1thliagvyhpt  
igt1stnqr1d1nig1ilsq1  
py1fsas1keni1tmfk1dienniveev1devg1l1dkvqs1ftkginti1ieggem1sggqmrrie1l1cr1l1vmkpd1l1vifdep  
atg1ldiqtehm1iqnvl1fqh  
fkdt1tm1viah1rdnt1rh1lqrr1lyienr1liaddrnisvnitengdd1  
>tr|Q2YSP9|Q2YSP9\_STAAB  
migsfyc1l1l1ktse1l1sds1l1ssfi1lmyhrvck1inkvimeersmdkkkvikfminv1lpiv1lvpliverkrikqhp1dvqk  
vtdatskvasktsaa1snt  
asdvkeyvgd1kkqdfenkrelkkfarehdpayiekkgeklakqnrkdadkmnki1lqkniekrhkeeqkarekneiqrikd  
mkksqkyeekag1ltpnk1d

Tsompanidou\_et\_al\_Supplemental\_FASTA\_File

ektekkgdklaeknrkeiakmnklqkniekrhkeeqkrqquadkariksfkkykdyvaksasqqnkennt  
>tr|Q2YSQ4|Q2YSQ4\_STAAB  
mklkllisimavmlfltgcgksqekatlekdidnqlkenkelkdkkek1qqekek1adkkkd1ekevkd1kpskednkddk  
kdedknkdkdeasqdkqs  
kdptkssdkdnhkkptstdkdqkandkhqs  
>tr|Q2YSQ5|Q2YSQ5\_STAAB  
mrtlnkdehnyikqianihetllsqaesnykctklisialryemiscrleytndkiyiyenegqliafiwghfsneksmvn  
iellyvepqfrklgiatql  
kialekwahtmnakrisstihksnlpmislndlgyqvshvmykdid  
>tr|Q2YSQ6|Q2YSQ6\_STAAB  
mkstaqltkennvkslrlnstdreifenymtymrsdfrvnphdte1inrilkqllsaeqhgllaldffnhdpkahaik  
lkampnetfkni fkyiygh  
ivlligivsf1kgflgffmeksgsnlyfvsfpfsvvvgffivflfiwfsfktiqlqcfnnsnwiwiftylaiillivgff  
yvffipqsl1afgpyiqvs  
nwwfiifsfivmpig1rierniskhshtfl  
>tr|Q2YSQ7|Q2YSQ7\_STAAB  
missnkrqwialavfsillflgctwsitsgeynipverffktligqgdaidelilldfrlprmmtilagvtlsisga  
ivqsvtknpiaepgilgin  
aggfaialfiaiginadnfvyv1plisilggitaaliifisfnknegvtpasmvligvqltalyggsitimskfdd  
kqsdfiaawfagniwgdew  
pfviaflpwvliiipyllfksntlniiehtgdniarglgrlsrerlilffiaavlssaavavagsisfiglmphiakri  
vgprhqlflpiailvgac1  
lviadtigkii1lpggvpagivvaiigapyf1ylmyktnv  
>tr|Q2YSQ8|Q2YSQ8\_STAAB  
mdmfaallqiknyklfvanmfl1gmgiavtvpvl1fatkd1gmttnqygl1lasaa1sqftvnsi1arfsdthhfnrki  
i1ilallmgs1gfsiyffv  
dtiwlfillyai1fggl1fapampqlyasaresinvssskdraqfantvlrsmfslgfl1fgpfigaqlig1kgyag1fggti  
si1lft1vl1qvffykdl1ni  
kqp1stqghvekiapnmfkdk1ll1pfiafillhigqwmymtmnmp1fvtdylkeneqhvgy1asl1cag1evpfmi1lgvl  
ssrlqtrt1liygai1fggl  
fyfsigvfknyfmm1agqvflaiflav1lgigisyfqd1ladfpgyast1fsnamvig1lggn1lggamshwv1genvff  
vsaasim1gm1li1fftknq  
kitkedvist  
>tr|Q2YSR0|Q2YSR0\_STAAB  
mkvkyidkrhwr1idreytekvnnr1fkgi1glvtmkkvr1d1evtvvgqni1vaddnykw1qil1pekkrys1tvmfd  
nkg1npleyyfdi1niknitq  
kgnartvd1cl1dv1alpsgeye1vdedd1mfaleseqitkkqfheaymiahqimaelendfkgfqqkimycfnkinakaq  
knhqkpqnkt1nfekskqik  
pkqynqt1knhqqqkkn  
>tr|Q2YSR1|Q2YSR1\_STAAB  
mksaeqwidel1q1eshseggfyretirev1kdgrrapfssiyf1l1tddnishf1ridadevwy1hagds1tihminpdge  
yttat1gtdi1ngdvl1qyv  
vpkg1ti1fassie1sntys1vgmcq1pafekqfel1fkqsel1tqyph1ksviekyalk  
>tr|Q2YSR4|Q2YSR4\_STAAB  
maksc1h1l1tnneyat1trcqdgiv1fw1pidgeiel1qkfrkski1ieddiyi1nh1ldv1fsiknnkktim1yl1ssdwfaelgf  
tffnyhytak1likssyn1k  
c1ll1k1tyry1dnq1l1ndadvr1k1qdi1k1i1akeasm1dkkiaqnyryayygd1rdeleyiyqvnqr1tl1ksvadk1fv  
sksn1ssqf1h1l1mgmgfkk  
yid1tkigksie1i1l1tdstisniseh1gfsss1stysk1mfksymdi1tpneyrn1skynk1cl1mkpes1vgkmvqevkei1  
1nyiehyknh1l1tdv1hide  
dkfetpk1l1fq1tviq1intytemk1lv1legi1fkt1lnknsqv1ffimps1ilkskntm1seekfai1kti1iesd1kiafnind  
iettyyveeaf1msv1frqis  
pne1snhnyev1hfvd1sl1meir1tiyrm1kl1hnm1lnv1kl1gnit1cl1fekpsv1fks1lvsqikr1lkf1ds1liidnan1ss  
py1lmggsde1ll1kni1lhfk  
n1kqv1ne1dieqek1li1flnvenh1k1lnkeq1d1snsap1iykt1salyhn1fagf1g1nifdnhka1fnamh1ydkngfkt1  
1gl1ilekfi1eyv1skpkyen  
syysifdi1enyyc1lvi1dwr1vieset1imsnfedsqvy1nfknnv1ndky1liviet1densgn1nh1liske1lrdkyewnps  
1l1skidny1kpaie1kehn  
fsdns1ninvt1fnaly1i1kigkk  
>tr|Q2YSR5|Q2YSR5\_STAAB  
msqntnhsy1hq1nqhaqs1skvw1lyfmyywi1fgigcy1lgqfl1pl1swrq1l1sfg1lii1lat1l1vferarr1fg1liishiya  
vvig1l1syat1ftty1lqnl1g  
pdi1fykn1ialaif1afia1ggi1gyffvgdassigky1l1fv1t1l1t1ias1ligi1flqnp1ifyti1itvvs1l1l1lyt1ydfnr  
1kr1gdhs1premg1n1fin1  
1ni1kdil1ylan1mfr1r  
>tr|Q2YSR6|Q2YSR6\_STAAB  
mkl1afaitatsgaa1fl1tq1hdaqastqhtvqsges1wsiaqkyntsvesik1qnnq1dnn1lvfpgqvi1svggsdaqnts1n  
tspqagsas1shtvqsges1

Tsompanidou\_et\_al\_Supplemental\_FASTA\_File

niasrygvsvdqLmaannlrgylimpnqtLqipngsgggtptattgsngnassfnhqnllytagqctwyvfdrraqags  
pistywsdakywagnaand  
gyqvnntpsvgsimqstpgpyghvayvervngdgsiliseznytygpynmnyrtipasevssyafih  
>tr|Q2YSR7|Q2YSR7\_STAAB  
msyiiiivtjiaavifslifdfingfhdtanavataustraltpktaailmaavmfigaltftgvagtikdivdpfkleng  
lvvllaailaaiwnlatw  
fygipsssshaligsiagaaiasegsfgvlhyqgftkiiivlivspiafcvglmysifkvifknanltranrnfrffq  
iftaalqsfshgtndaqks  
mgiitlailivanvqndgsvepqlwvkfacatamglgtaiggwkiiktvvgnimkirpangaaadlssaltifvasslhfp  
lstthvsssilvgasnr  
akgvkwstaqrmiitwvitlpisaflaaflyiilsfff  
>tr|Q2YSR9|Q2YSR9\_STAAB  
mtfneiiifknfrqnlshyaiylfslitsvlyfsfvalkyahklmtesypiikegsqvglyflffiiiafllyanvlf  
krseyalalyqtllglskfn  
iiyilmleqllifiiitailgiiigifgsklllmivftllgikekvpiifslravfetlmligvayfltsaqnfilvfkqs  
isqmsknnqvketnhnkit  
feevvlgilgivilittgyylslnivqyydsigtlmfillstvigaylffkssvslvfkmvkkfrkgvisvndvmfsssim  
yrikknafsltvmaaisai  
tvsvlcfaaisraslsseikyaphdvtikdqkanqlaselnnqkiphfnykevihklykdnlfdvkskqpyntit  
sdkiipstdlkrqqadlfv  
aegsikdlvkhkhkgkavigtkkhvniklrkdinkiyfmdvdlggptfvlndkdyqeirkytkakhivsqfgfdlkhk  
kdalalekankvdkset  
rseaiisslsgillfvtsflgitfliavcciiyikqidetedelenysilrklgftqkdmarglkfkimfnfglplvi  
alshayftslaymklmgtt  
nqipvfivmglyicmyavfavtaynhskrtirhsi  
>tr|Q2YSS5|Q2YSS5\_STAAB  
mtrsalpkfknkrvmvtgrihrvlfknyldrhtsfkpnvrillkdvivsgvsidhlwlyetnkyyalamelihqrvkfsa  
nvvlyykinrnnnlfvqdy  
gikrkgklvteeayiqnnqyqdkiyeklpnidfrledfysken  
>tr|Q2YSS6|Q2YSS6\_STAAB  
mknkdnkwtmitalfitvisvllaflhfkqhydqttnenhankdkiniknknvriyqnltynrvfpsklidiitpvdmsna  
klpvifwmhgggyiagdkq  
yknpllakiieqgyivvnvnyalapqkyptliqmnqatqfikenkmnlpidfnqviiggdsagaqlasqftaiqttnq  
lreamkfdqsfkpsqikga  
ilfggfymqtvretfpriqlfmksytgeedweksfkniqmstvkqstknypptflsvgdsdpfesqniefskklqel  
nvpvdtlfydgthhlhgy  
qfhlnkpesidnikkvllflsrntsssgiqteekpqiensnelplnpln  
>tr|Q2YSS7|Q2YSS7\_STAAB  
mmmnkeatkigfayvgivvgagfstgqevmqfftkyglwaylgviisgfilafigrqvakigtafeatnhestlqyvfe  
kfskvfdyiliffifgiav  
tmiagagatfeesyntptwlgalimtlaiyvtllldfnkivralgvvtpflivlvliagvylfkghvs laevnqvpea  
siwkgiwfgtiygglafov  
gfstivaigdttekrvtvsgagamyggiyvtvllaalinfalqseyptiknasiptlannihpliatvlsvimlavmynt  
ilglmysfaarftepskk  
yhiifiimmvagyllsvfgfaelinklytimgyvglfivvaviikyfrknadkkhia  
>tr|Q2YST0|Q2YST0\_STAAB  
mkvndmkarllnleefkhheseletldraigdgdhgvnmvrgfsslkdklddssmqslfkstgmalmsnvggasgplyg  
fsfvkmsavakddmhnqdf  
itliqafaavesrkvltnektmydvvaraaklkngetlftndlqqladntkdmvatkgraayfgeeskyidpgaqs  
mvyilntligdedna  
>tr|Q2YST1|Q2YST1\_STAAB  
mmkklinkketfltdmlegllivhpeIdliantvivkkakkekgvaivsggsghepahagfvaegmlatvcgevftsp  
tpdkileaikavndgdv  
lvvknyagdvmnfemaqelaemedinvetvivrdiavtneaqrrgvagtvfvhkfagylaekgyslteiksveallpe  
iksimgaiepplvpttgky  
gfdieddkmeigigihgekghreevkdihivgtlldeleykevtandvilmvngmggtplseInivtkyiqnlaartv  
nvakwfvgydymtsldmqgf  
sitivpnkpeyleafapttsqyfk  
>tr|Q2YST3|Q2YST3\_STAAB  
mtnrenptplkflsyiigllsmillitlflisiligdakiqastieaifnynpsnqqqniineiriprniaavivgmalav  
sgaiiqgvtrngladpali  
glngasfalalyavlntpsflilmfagflgailggavilmmgrsrrdgnpmriilagaavsamltalsqgialafrl  
nqtvtfwtaggvsqgtwsh  
lkwaipligivlfiiltiskqltilnlgelakglgnvntmirgicliiamilagiavaiagqvafvglmvpfiarflig  
tdyakilpltalggilvl  
vadmiarylgeapvgaiisfigvpcflylvkkggrti  
>tr|Q2YST4|Q2YST4\_STAAB  
mnrllhgqqvkiigygdntiinkldveipdgkvtisiqpnngcgkstllkalsrllavkegevflgdenihtqstkeiakia

Tsompanidou\_et\_al\_Supplemental\_FASTA\_File

ilpqspevadgltvge1vs  
ygrfphqkgfgrltaedkkeidwamevtgtdtfrhrsindlsggqrqrwiamalaqrtdiifldeptyldichqleil  
elvklngeegctivmv1h  
dinqairfsdhliakegdiaatgstedvltqeilekvfnidvvlskdpktgkpllvtydlcrrays  
>tr|Q2YST6|Q2YST6\_STAAB  
mflliniiglivflgiavlfsrdrkniqwqsigilvvlnlflawffiyfdwgqkavrgaangiawvvsahagtgfafas  
ltnvkmmdmavaalfp1l  
ivplfdilmyfnl1pkijggigwllakvtrqpkfesffgiemflgntealavsseq1krnmervltiammsmssvsga  
ivgayvqmvpgelvltaip  
lnivnaiivsc1lnpvsveekediys1knneverqpfssflgdsvlaagklvliiaafvisfvaladlfrfinlitgl  
iagwigikgsfglnqilgv  
fmyfall1glpydeawlvaqqmakivtnefvvmgeiskdiasytpphravittflisfanfstigmigt1kgiidkk  
tsdfvskyvpm1lsgilv  
s1ltaafvglfaw  
>tr|Q2YST7|Q2YST7\_STAAB  
mkrenplff1fk1swpvgpivaaitisslgs1sgllvplftgrivdkfsvshinwnlia1fggifvina1lsglgl1l  
skigekiyairsvlwehi  
iq1kmpffdknesgqlmsrltdtkvinefisqk1pn1lpsivtlvgs1iml1fildwkm1l1tfitipifvl1imiplgri  
mqkiststqseianfsg1l  
grv1temr1vkisnterle1dnahkn1neiyklglkqakiaavvqipisgim1l1tia1ilgfgaleiatgaitagtliam  
ifyviqlsmpl1n1st1vt  
dykkavgassriyeimqepieptealedsenvliddgvlsefhvdfkydvk1iddvsfqipqqqvsafvpgpsgsksti  
fnliermeyeiesgdikyl  
esvydip1skwrrikyvmqsnsmmsgtir1dnilyginrhvsdeelinylaklanchdfimqfdegydtlvgerglk1sgg  
qrqridiarsfvknpd1l  
ldeatan1dsese1kigealet1megrttiviahr1stikkagqiif1dkgvtgkgt1hse1mashakyknfvvsqk1td  
>tr|Q2YST8|Q2YST8\_STAAB  
mkn1isii1cl1tsimtpyaqaansdvtpvqaanqygyag1saayeptsavnvsqtgq1lyqynidtkwnpasmtklm  
tmy1l1leavnkgq1s1lddt  
vtmtnkeyimst1pel1sntklypgqvwtiad1lqitvsnssnaa1l1lakkvskntsdfvdlmnnkakaigmknthfvnp  
tgaensr1rtfaptkykdq  
ertvttardyai1dlhviketpkildftkqlaptthavtyytfnfs1legakms1pgtdglktgssdtanyntittkrk  
frinqvimgagdykn1dge  
kqrnmgnalmersfdqykyvki1skgeqringkkyvendlydvlpsdfskkdyk1vvedgkvhadyprefinkdygpp  
tvevhqpi1qkantvaksm  
waepl1fti1ggac1vvg1alivhmi1nr1frkrk  
>tr|Q2YST9|Q2YST9\_STAAB  
mkrvitygtyd1lhyghie1lrraremgyd1livalstdefnqikhkksydyeqrkmmlesiryvdlvipekgwgqkedd  
vekfdvdvfmghdwegef  
df1kdrceviy1krtegitstkikqelygkdak  
>tr|Q2YSU0|Q2YSU0\_STAAB  
mr1ti1iptcneati1rgllisieskehyrilcidggstdqtipmier1qrelkhisliqlqnasiatcinkglmdikmt  
dshdsdafmvinptsv1p  
gkldr1taafknndnidmviqgraynyhgewk1ksadefikdnrivt1teqpd1l1tmsfdgk1fsakfaelqcdetlan  
tynhav1vkamqkatdih1  
vsqmi1vgdndivphatsnnedfnryiteimkirqrvmem1l1lpeqr1l1ysdmvdri1fnns1kyymnehpavthttiqlv  
kdyimcmghsdyvsqnmfd  
iintvefigenwdreiyelwrqtl1iqvginrptykrf1liqlkgrkfahrtksmlkr  
>tr|Q2YSU1|Q2YSU1\_STAAB  
mnv1likkfyh1lvvri1skmstpqv1dkphivfmmtpedikpi1kalinssyqktv1t1tpkqapylsel1sddvdviemtn  
rtlvkqikalksaqmi1id  
nyy1l1l1ggynktsnqihvqtwhasgal1knfg1tdhqvdvsdkamvqyrkvyqatdfylvgceqmsqcfkqslgateeqm  
lyfg1lprinkyytadtratv  
kaelkdkygitnk1al1yvp1tyredkadnraidkayfek1lpgyt1ink1hpsiehsdiddvssid1st1mlmsdi1isdy  
ss1pieas1l1diptifvy  
degtydkvrg1nqfykaipdsykyvteed1imtiqekel1l1spl1fdwhkyntdks1hq1l1teyidkmv1tk  
>tr|Q2YSU4|Q2YSU4\_STAAB  
mtveersntakvdi1lgvdfndtt1mqmveniktffanqstn1l1fivtanpeivnyatthqayle1inqasyivadgtgvv  
kashr1kqplahripgie1  
mdelkiahvnhqkvf1l1gatnevveaaya1lqrypni1sfahhgyid1ledetvvkrie1fkpdy1fvgm1gfpkqewi  
mthenqf1k1stvm1mgvgs1  
evfagakkrapyi1frk1ni1ewi1yral1dwkrigr1ksipi1fmykiakakr1kikkak  
>tr|Q2YSU5|Q2YSU5\_STAAB  
mny1snffntti1q1ni1yi1vivatcyiti1hqyrhkpv1ny1ldv1lny1pv1l1thefghv1fnk1lagrakd1vivtsprer  
qqt1lqqgfaitqsrhlagg  
w1tt1ggyfmp1im1l1g1lasshyqipsff1fty1l1fiy1fl1l1tsrkgspivv1t1l1sim1ly1fil1kdenivei1q1llvtm  
syqy1lgv1l1gevl1qssw1t  
iak1l1tfqrpsqwdgsal1kel1shvpi1fiystiwi1fn1yavn1l1lkyth1in

Tsompanidou\_et\_al\_Supplemental\_FASTA\_File

>tr|Q2YSU6|Q2YSU6\_STAAB  
mlteekedylkailtnngdknfvtnkiIsqflnikppsvsemvgrlekagyveikpykgvrIteDglthtldiikrhrll  
elFlieilKynweevhqa  
eilehrisdIferldslInfpetcpHggviprnnneykekyittiInyepgdivtikrvrdktdlliyIsskdisignev  
eivskdemnkviikrndn  
viivsyenamnmfaek  
>tr|Q2YSU8|Q2YSU8\_STAAB  
mlfvehlftyqflnralitsiivgmvcgtvgsIvlrgIsImgdamshavIpgvalsflfgipmfigalitgmiasifi  
gyitsssktkpdaaigisf  
taflasgiiisIintttldlyhilfgnllaitnsaflttivigsivIliiifyrplmistfdptfstrmsglnttllhyf  
vmlIIsIvtvasiqtvgiI  
IvvalItpastafIIskkIysmmiasIIsvisivglyysiynipsgativIctfviyiitIfftkytnrkkrgsIt  
>tr|Q2YSV0|Q2YSV0\_STAAB  
meifetiliIivvviIssfvhtfipkvplafiqifIgmIIfitpipvqfnfdseIfmvtmiaplIIfvegvnvsrvhlrky  
ikpvmmmalglvittvigv  
glfihwiwpdlpigaafaiaailcptdavavqaitkgkvIpkgamtilegesIIndaagiIsfkiavgvlvtgafslvda  
vqlfIiasiggavvgllig  
malvrfrIltmrrgyenimftiiqlltpfvtyliaelFhasgiaavvagIvhgferdrimqvrtqlqmsynhtwnilg  
yvIngfvfsIglIvpevi  
ikiiktephnIIfIgitivvalavylfrfvvyvlypyfylaIsfpqkmmtknddnpttekppkrsIyalimtlcgvh  
gtisIaialtlpyflagh  
aftyrndllfiagmviIsIvvaqvlIplltkpkaktvignmsfkvariyleqvidyInqkstfetsfkygnvikeyhd  
kIafIktvekddenskele  
rlqkiafnvetkIlesIvdegqitnsvIenymryaertqvyrqasIirmivllrgallkrrvqtrvnsassIsvtdnlm  
elnkinkIvhynvvsrIsk  
ettndntIevgmvcDgyIrienItpsnffnsasedtitkikInalreqrriIrelidtddevsegtaIklreainydemv  
ivdsmt  
>tr|Q2YSV7|Q2YSV7\_STAAB  
mnkvevikfnddivkmyeaIkikserdyIffkIaihsIglkvseIItitvsqvrIiekctIsemrkahfhsIlikIklpet  
IskellqyiedrsIIsnev  
IfqslrtnqvlSrqqayriIhqasieagienvglttIrkIrfayhayqkgipipviqyIghqsaietInfigIenecehs  
iyisIqI  
>tr|Q2YSV8|Q2YSV8\_STAAB  
mllfyiigvlvgmIipiqtsvnrsIlytkspfytsfIsfsvgticIliIniiInpevftihfyInqsfnytvvgllg  
vsfltgnlIllpkIgatIt  
viatvagqiimgviIdtfgIlgatIhdfnIkaigvllliigivimnqfnknllItdqyIlfwlllgfifgffppiqt  
tinsalashthspafasIv  
sftigsitllIltaifnrsIkIktshIkfgIkIpiyftggilgmafvtaniIlmPhmgaaItIligmfgqilmgilidhf  
glfgspkiamtsrktigll  
ciltgiIllrIlf  
>tr|Q2YSW0|Q2YSW0\_STAAB  
mnkvtinpqIqItyqiekgdipiIlgIldgnIagfedIqhqlassykvItydlrghgkssksesydlndhvedIkilme  
klniheaIlgdIlgvva  
kIftdkyayrvksIttiaskkddIhsftqllIqyqddiagfnkseyaiIIfskIfrnqektmkwyqkqriysikseds  
avairsIilhKdepmyIkk  
rtcvptllingehdplIkdknhfkIeahfInatkkiFehsgHaphieepeafmnyyInflksvs  
>tr|Q2YSW1|Q2YSW1\_STAAB  
mrindkIlleniedyfnhkgIsphIiddikekvitdiknsekKdqyieykrkspaqiIlmiqrnlfalqmpviffiin  
filiSylydkqyvqfqaIt  
gmsIfycIvIpmIivvyIrvsqnyIrsnkiemimgtiiaisIlliIqafnitwgvipitnfgHqfffffigiIlviv  
giFykrIefsgigllfcqk  
tvdamIhnpsaqifslIiwiIlvvlviyftirIIsrtrI  
>tr|Q2YSW3|Q2YSW3\_STAAB  
mdIfttrkdgtSIhystIlegypivIihtvIdnysvfnkfaaelaksfqvvlidIrgHgysdkprhieikdfsddivellk  
ylyieevafvchemggiI  
adisvrypeftssImIvnptsiegeIpeerIfrkyahiInrdpekqdkflnkrkyrprkmnrflkhvdtneistkee  
iqavkevfnadisqytrn  
vvvptkiiagefgerttrIeakevadIiqnadfevyqessafpveeqerfvadtasfinkhhdekhv  
>tr|Q2YSW4|Q2YSW4\_STAAB  
mdInqikavvfdlegtlIrvksrekfIeeqerfhdyIvhvqladfkkafielddedndkpdlykeiikrfhvdrItw  
kdIIndfemhfryvfpvy  
dtlytlekIsqkgfqiIgiangskikqfrIhsIglmhvinyIstsetvgfrkphpkIfedmidqIglvIpeqimvvgda  
Indvaparamgmvsvwykq  
edaiepleeevdfittveeIltItpikndnkgenygsiy  
>tr|Q2YSW5|Q2YSW5\_STAAB  
mtfnkvllswmvliIttsiyIfwqIgdIndvfnqsilInvrIprllealltgmiIltvagIIfqtvInnaladsftIgl  
sgatfgsIalflglstIw  
ipvfsitfslitlitvlvitsvIsqgyprilIIsIgmigaIfnsllyflIllkprkIntianylfggfgdaeynsvisi

Tsompanidou\_et\_al\_Supplemental\_FASTA\_File

aitfiialfgifiilnqlk  
llqlgelksqslglnvqilityialcvasmitainvayvgiigfigmvipqlirkwqwkqslgrqlalniviggqimvmad  
figshilspvqipasiia  
ligipvlfymlisqskrlh  
>tr|Q2YSW6|Q2YSW6\_STAAB  
mkksliafilifmlvlsccgmkdndkqgsddngsskspsyhrivsmpsniteilyelglgkyivgvstvddypkdvkkgkk  
qfda1nlnkeellkakpd1  
ilahesqkatankvlsslekqgikvvyikdaqsidetynftkqigklthhdkqaeqlveetkdnidkvidsipahhkkk  
vfiesskpeiytagkhtf  
fndmlekleaqnvydingwnpvtkesiikknpdilisteaktrsdyndiikkrqgfnkinavkntrievngdevsrgp  
prideglkelrdaiyrk  
>tr|Q2YSW7|Q2YSW7\_STAAB  
mlgtdeylkllyrhmgpqnwppadndiemmlgailvqnrwrnaeialnqikehthfnphvlelpietlqslirpsgyf  
ksksltiktlltwlarhhf  
nygeinerykaelrkel1slkgigsetadvllvyifgriefipdsytrkiydklgyentksydqllkkvvtlphnftnqda  
nefhalldvfgkhyfrdkd  
iknydflepyfkk  
>tr|Q2YSW9|Q2YSW9\_STAAB  
msskl1dkkvsigtmqvlkqhnekekfefttegtwqqrqsnfiryveqiedatvntikvddsvklirkgeinmnlhfve  
gqttttfydisagrip1ev  
ktlri1hfvsgdggk1kihyelyqdnemgisyqeyinykeige  
>tr|Q2YSX1|Q2YSX1\_STAAB  
msekkgnfnfiikndpldghkgtnigsis1dniapvfidvankeafidiggmharakvekgvkwitdkaavkgdeakeyw  
lcwvterneqgpyyaglt  
acyllvnkairrgyksmphevnmmdksmkhhiidqigdenkailkdf1mnhdegmwmkssdalhqafn  
>tr|Q2YSX3|Q2YSX3\_STAAB  
mfkvrqatekdvvqirdvatkawfntylniyaattvnhlleasynehhlkkr1qeqlflvveegndivgfanfiiygeely  
lsahyvkpesqhtgygta1  
lneg1shfedkfevy1evdnkneeavayykeqgftilrsyepemygekldla1mykaf  
>tr|Q2YSX4|Q2YSX4\_STAAB  
mitvlfggsrpnngtaqltkfalqdlqywidvtqhqfkiprdvrhtaetitsyddylpildkilasdtiifaspvywy  
sisap1kafiehwset1qd  
krysnfkaqmaekdfvrilvvgdcpkikakpaitqmksldflgatlngyigtaekpgdimkdnyalaratewnsilq  
>tr|Q2YSX5|Q2YSX5\_STAAB  
mkqfvnlkgsdvevfpi1algtnavgghnlypn1deeqqkdvrqainhgin1ldtayiygpersee1vgevvkeypreqi  
kiatkgshfednqevhqnd  
nqpeylkqqvens1kr1qtidyidlyyihfpddntpkdavaalqelkeqgkikaigvsnftldqlkeankdgyidvvqle  
yn1lhreneav1qycvdhq  
itfipyfplvsg1lagkydentkfsdhrtrrdpfigvfeenvrvkaleslaaahqtsianivlafyltrpaidviipg  
akraeqvvenikaadiv1s  
ddeiqyidel1fpied  
>tr|Q2YSX6|Q2YSX6\_STAAB  
ml1ceskiinknpkyrvikyndeylmid1stwis1ffsfinwfipkrvcvkisreefen1nifkpakknvfwpvagisa1  
favt1rkyth1ldtqldkk  
lviaicctf1giltfyvr1ikkss1niyntknkrskiilipt1knvcft1lgyilfggl1tm1flnall1smsyqniivyf  
awiavimgff1vnialiid  
knihvilknq  
>tr|Q2YSX7|Q2YSX7\_STAAB  
mlceskvinknpkyrvikyndeylmid1vstwl1t1flpminw1ipkkyvkiskkefdd1nivkpvknkafwpvagstilf  
gvtfrkyips1niq1leknm  
viviccaif1glv1il1fl1nrk1r1eiyennsskgkiil1fsl1knfcft1fyf1lfggl1sim1sm1l1t1n1p1q1ni1g1f1g1  
w  
>tr|Q2YSY0|Q2YSY0\_STAAB  
mtknei1rky1lhkmknfnkaekrkadtwl1nqffateeykeanaialv1sfnhevdtfsiieqalmdhkri1fvpkmdyl1n  
hqmtfkeifn1kdidvdk  
giyystskgettnd1d1ivvpvgvfqndgyriygggydrflanyl1tktis1lydfqltsfepesfdqpvdkliiyqsa  
>tr|Q2YSY1|Q2YSY1\_STAAB  
mndkqfwktyywi1ry1nfd1vsrekddqe1wlahkrkkqv1fkqhkstqe1rfdkakv1lehkdeianf1s1fephsf  
efyyftesefpeeq1nevs  
pirikfnv1rhtkd1ikhmpni1flar1isedndkktymfykrkv1tdn1fdkymqkfspatyti1fvnvlw1lcmily1n  
nfsdvk1ldvvg1lvhfnv  
hgewyri1vtsmf1hfsfehl1mm1sl1fi1fgkivea1igswrml1tvyfiag1lfgnfvsl1sfn1tt1svgasg1a1f1gl1s  
ifammyvsktfnkml1gq1  
lia1vilvgvsl1fmsn1nivahigg1fig1l1it1ligy1y1kvrn1fiw1llig1m1vifial1qir1ift1kedni1ynk1likdd  
mtsgnydnaqni1vkqtink  
nyaddqtyy1sgmimat1nsksegmtewerg1rmf1pksg1lnfel1aianrs1nddekalkyvrka1nadpkntdyinlek  
el1tksnesknk  
>tr|Q2YSY3|Q2YSY3\_STAAB



Tsompanidou\_et\_al\_Supplemental\_FASTA\_File

mtkiilaadvgttcklgi ftpeleqlhkwsihtdtsdstgytllkgyidsfvekvnnennynfsnvlvgvigvpgpvdfe  
kgtvngavnlywpekvnr  
eifeqfvdcpyvvdndaniaalgekhkgagegaddvvaitlegtglgggiisngeivhghngsgaeighfradfdqrfkcn  
cgrsgcietvasatgvvn1  
vnfyypkltfrssilelikenkvtakavfdaakagdqfcifitekpanyigylcsii svtsnpyivlgggmstapili  
enikteyhn1tftpaqfet  
eivqaklgn dagitgaagliktyvldkegvk  
>tr|Q2YSY4|Q2YSY4\_STAAB  
maivdvvipvgtegpsvskyiadiqkklqgykamgkidfqltpmntliegelsdvlevvqvihelpfdkglsvrctnir  
idrrrdsrkmdkltsvq  
khlensgekl  
>tr|Q2YSY5|Q2YSY5\_STAAB  
mrissltlglvdtntyfiendkavilidpsgesekiikklnqinkplkailthahfdhigavddivdrfdvpvymheae  
fdflkdpvkngadkfkqyg  
lpiitskvtpeklnegsteiegfkfnvlhtpghspgslyvfdefavvgdtlfnngigrtdlykgdyetlvdsiqdkife  
ldgdplfpghgpyttvdd  
eqlnpflhg  
>tr|Q2YSZ0|Q2YSZ0\_STAAB  
mlsqkipllikrhvfsinvkafslievlvammvisitllivpdli rlsktfliesrelttvdfeffsrdiledfkgvdrn  
dieirqqrii1hkgeemie  
yklinnkiikvndrgnitmlnntaftaniyyksiikititvkvgtvntvqtktiyv  
>tr|Q2YSZ3|Q2YSZ3\_STAAB  
mcivshryipltekdkqemlqtigaksigelfgdvpsdillnrdlniaegeaettllrrlnriasknvtkethtsflgag  
vydhyapsvvdamisrsef  
ytaytpyqpeisqgelqai fefqtl iceltmdvanssmydgmtsfaeacilafsqtkknkivvskglhyqalqvlhtya  
ktrkefevveidldgtvtd  
lkkleaavddetaavavqypnfysiedlekihsfiedkka1fivyanplalgl1tppgsfgadivvgdtqpfqipaqqf  
gphcgfatkk1mrkvpq  
rlvgqtqdddegrgfvltlqareqhirrdkatsnicnqalnalassiamsalqkqgmydiavqniehanyakqqfikkg  
fevldgtsfnfvvkfdk  
iqqvneelvkyniiggfdlgvvsddfknhmliavtelrtkdeidtfvekagelnd  
>tr|Q2YSZ5|Q2YSZ5\_STAAB  
msaslyiaii1viaiiaymivqqi1nkravkel dqnefhngirkaqvidvrekvdydyghingsrni pmtmfrqrfqglr  
kdqpvylcdangiasyaa  
rilkkngytdiym1kgykkwtgkikskk  
>tr|Q2YSZ7|Q2YSZ7\_STAAB  
mrniifylvi1iaaiglvml dafisivrmlvsfaviagiilyffiltedqrkyrkairkykrnrk  
>tr|Q2YSZ8|Q2YSZ8\_STAAB  
mklvsivgatlllagcgsqnlapleekttdlrednhqlklidiqelnqqisdskskikglekdkenskktasntkiklm  
nvtstydkvakalksynd  
iekdvsknkgdknvqsklnqisndiqsahtsykdaidgls1sddgktsknidklnsdlnhafddikngyqnkdkkqltk  
gqal skvlnaks  
>tr|Q2YT02|Q2YT02\_STAAB  
mlkr1keksndeivqntinkrinfigvivfifavlvlrlgylqiaaggshykqiikndenitvnesvprgildrngkv1  
vdnaskmaitytrgrkttq  
semldtaek1sklikmdtkkiterdkdfwiqlhpkkakamtk eqamladgsikdqdydkqllskigksqldelsskd1  
qvlai fremnagtvldpqm  
iknedvsekeyaavsqq1sklpgvntsmwdrky pygdtrg ifgdvstpaegipkeltehylskgysrndrvgksyley  
qedv1rgkkkemkyttk  
sgkvtssvlnpgargqdlkltididlqkevealldkqikk1rsqgakmdnammvqnpkngdila lagkqinksgkmt  
dydigtftsqfavgssvkq  
gtllagyqnkaikvgetmvdelp1hfagg1tkrsyfnknghvsindkqalmhssnvymfktalklagdpyysgma1l1sdis  
spaklrrglngvlgvkt  
gidlpnetrggiepltnnpgnyld1siggydytptlq1sqyvstiannyriqphigl1tihestnkdevgplkkkingtv  
lnkvntekeikqieqgfk  
mafndkdgtgyvsfkdtvvp tagktgtaevfqngeprvnstyigyapidnplafsiyvt nqpvpwltggdlgrdvin  
yfkqlgkddknkdkk  
>tr|Q2YT03|Q2YT03\_STAAB  
mstvfah1lgckvnhyeteaiwqlfkeanyervdfeanadvfintctvtntgdksrqii rrairqnpdavicvtgcy  
qtssaeimeipgvdvvgt  
qdrhk1lgyidefrkerqpingvgnimknrkyeel dpyftrdras1kiqegcnfctfciipwargl mrsrdpekve  
qatqlvnsykeivltgih  
tgggqdlkdynlaql1rdlemingleririssieasq1tdevidvlerstkvvrhlhiplqsgsdv1krmrrkymdr  
fserl1tkl hkalpdlavts  
dvi vgfpgeteaefgetydfivkhkfse1hvfypsprigt paarmddqideeiknervhklit1snqlgklyaskfdqdv  
levipeegdtteglvgya  
dnymkvqfegdes1igqivkkitqanyp1negqaikvvdfatnksdrevlv  
>tr|Q2YT07|Q2YT07\_STAAB

Tsompanidou\_et\_al\_Supplemental\_FASTA\_File

msvgilifvisviisiittmrenshkdrnqkppqktstdnepkkgffeeiertfkeiseelneeeksskrkyddtlp  
plfdelpkeepkskpvvep  
mapkkqgetkpmtekpitvpaepveqkhrpsrqdnsgeirrqlekllrddiktirtdidrekekqiakmekrardiied  
kylsertkr1klkqllnsr  
nvekd1tksafqfdkdevingmiwseilakpkq1  
>tr|Q2YT10|Q2YT10\_STAAB  
mkrfkya1dglkiliqkdykfllhvfamivaivfglvlninriewifiliaialvltvealntaieyvvdltvveyrdla  
kyakdiaafsvlivsilaf  
iiglivflphfialf  
>tr|Q2YT11|Q2YT11\_STAAB  
msyqphyfgevvrkaqgesyspshfkgvaylktkdgrtfygtvnenasyp1sicaeras1vsaisqgyrpgdfesitvtv  
dadkpspcgacrqv1kel  
cdddmpvymtnhkgdmvmmmtvae1lpfgfsgkd1e  
>tr|Q2YT15|Q2YT15\_STAAB  
mnltrat1rpd1ailtmsgflearprvgyysgkskglfnek1rqfevkdymsqpvlrenttvydaictifledvst1  
fiinedndfvgvcsrkd11  
rasmigadihtvpisvnmtrmpnvtyleese1viyaadrmiekeidsipivrkkdnqkyevigriskttiakllvalyke  
>tr|Q2YT17|Q2YT17\_STAAB  
mridqsiinei kdktd1dlvseyvklegrnyig1cpfhdektpsftvsedkqichcfckkgnvfqftqeikdisf  
veavkelgdrvnvavdiea  
tqsnsnvqiasddlqmiemheliqefyya1tktvegeqal1y1qergftdalikergigfapdsshfchdf1qkkgydi  
elayeag11srneenfsy  
drfrnr1mfp1knaqgrivgysgrtytgqepky1nspetpifqkrk1lyn1dkarksirk1deiv1legfmdviksdtag  
1knvatmgtq1sdehitf  
irk1tsni1lmfdgdfageat1ktgqh11qqg1nvfviq1psgmpdeyigkygndaftafvkngkksfahykvsi1kd  
eiahd1syery1ke1shd  
is1mkssi1lqka1ndvapffnvspeqlaneiqfnqapanyyepedeygyiepepigmaqfdn1srqekaeraflkh1mr  
dkdtf1nyyesvdkdnftn  
qhfkyyfev1hd1fyandqynis1davqyvnsnelret1is1leqys1ndepyeneiddvynvinengqeties1nhk1rea  
trigdv1elqkyylqqivak  
nkerm  
>tr|Q2YT19|Q2YT19\_STAAB  
mis1nnr1ttvsrflkqgtiadigsdhay1piyaiqnh1cdygiageviqgp1faavknvaanq1vek1dvr1gdglsvi  
hpedvidniticmggpl1  
aki1kdqgdk1sqhpr1i1qsniqtes1rqt1qq1nye1ideiimeekghiyeivvaeystq1ielssdelkfgpk1lnn  
kneyfikkwqrelealyhi  
ksk1nteqhhqr1aqindeiavierv1  
>tr|Q2YT20|Q2YT20\_STAAB  
mkiad1mt1ldhhvpfrtaeswdnvg1ligdedvevtgv1tal1dct1levvneaiekgynti1shhplifkgvts1kangy  
g1i1rk1liqhdin1iamht  
n1dvnphgvnmmlakamg1knisi1nnqdvvykvqty1pkd1nvgp1fkdk1seng1aqegnyeycffe1sgrgq1fkpvge  
anpt1gq1dkieyvdevki  
efmi1dacqksraeq1ikqyhyetpvfd1eiekrt1sy1lgvmaevdnqmt1edfaad1fksk1nipsv1rfvgesnqkikr  
ia1i1gsg1gyeyqavqg  
advfvtgdi1khhdal1dahi1gvn1id1inhyseymkeg1kt1lmnw1ntekin1idveast1ntdpf1qy1  
>tr|Q2YT21|Q2YT21\_STAAB  
makhp1feqfn1less1idavkd1nfekpteiqnri1p1r1lkktn1lig1sqtgtgkshaf11p1mq1lidseikepqaivvap  
tre1aaq1lydaanh1sqf1k  
agvs1kvf1ggt1diekdr1cnaqp1li1igtpr1ind1aktgh1lvh1asy1lvidead1mid1gl1iedvdyiaar1edna  
n1avfsat1ipq1lqp1lnk  
ylshpeyvavdskkqknknieff1iptkgaakvekt1n1id1ilnpy1lcivfcnsrdnand1ars1neagikvgmihgg1t  
prerkqmqkri1rn1levqyv  
iasd1asrg1diegvshv1nfdvpndi1dffthrvgrtgrnykgvait1lyspdeehnis1iedrgfvfntvdikdgelke  
vkahnqrqarmrkdhd1tn  
qvknkvrsk1knkvkpgyk1kkfkqevemkrqerqkfskqqrqkrkqknkg  
>tr|Q2YT23|Q2YT23\_STAAB  
mrgentmtpvfe1knvnyyydhkkv1eninikinkgef1aivgpngagk1t1lk1ilg1lp1qsgeifvegidfknkts  
ik1syvsqk1ansfnsgfpa  
svkev1lsg1tktkr1lfgtfnskdnekvikv1er1nisd1ihkn1ae1sggqq1rimiara1l1sepav1vl1deptngida  
khvsefynt1dq1kqegit  
i1lvthdigv1vadtatevac1nkh1hfhg1ttdefks1deve1skiyghpvr1fdhqnreccn  
>tr|Q2YT27|Q2YT27\_STAAB  
mqryfi1dqnadvsgrff1tkkedihhi1tnvmrydvgski1iltfndqtvyl1ceiaditsdkiavd1kekqnintel1pvdvt  
icsg1likadkyew1lqkat  
elgassfi1avsmehsivk1neakvakkierwqkiikeaaeqsyr1lvipsiqfesn1klicdtidnydyiliayeeekdg  
el1snfkqt1qqfkaqdkv1  
mi1fgpegg1seneis1lfsntstvvg1lprilraeta1p1ya1saisyeke1mg  
>tr|Q2YT28|Q2YT28\_STAAB

Tsompanidou\_et\_al\_Supplemental\_FASTA\_File

maennqnslvtniatyvsfiaiasfvilfisiflksfnieftstimnicrytlilgfilmslpdvvdknikkiifdafi  
iivfiffll  
>tr|Q2YT31|Q2YT31\_STAAB  
msdilkcigcgaplqsedknkpgfvepnhmfrddvicrrcfrlknynvqdvglasedflklslgladkkgivvnnvdf  
dfegsfinavkriygnkki  
ilaankldl1pkqinkrrvkewlkrarkygleaddvvlisaekgwiddllssianirenevdyivgttnvgkstlink  
liedsvgekdvvttsrfpg  
ttldmidipldetsfmydtpgiiqdhqmthlvsekelkiimpkkeikqrvyqlneaqtlffgglaridyvsggkrplvcf  
fsndlnihrtktekandlw  
rnqldl1tppgnpqnfdlnevkvrltqgkekrdvmisglgfitigpgakvivrvpknvdlrnsil  
>tr|Q2YT33|Q2YT33\_STAAB  
mltgkqkrylrslahnidpifqigkgginenmikqiddtenrelikvhvlqnnfddkelaetlskatrselqvigsm  
iviyreskenkeielp  
>tr|Q2YT37|Q2YT37\_STAAB  
msqyaemslydq1tqdpqyekwfeivknhckdesnildigcgtgsltvqla1gnvtgmd1svdm1tvaaksanvww  
egdmtsfdlqqqfdiitif  
cdslnylqdetavietfinvyhhltdsgvfi fdvhtvykmm1fnnqsyiddkgdiflawdavqgd1plsvyhdmtffir  
hedekysrfdeshfartfd  
ektylswlaqvgfkhvetftdfnidhndaerlffiakk  
>tr|Q2YT38|Q2YT38\_STAAB  
myqfllrykdf1tqwklyiistvvlmvligfifwrqddytsrnfenkdtalkqstsensslskledvqvkdgdnyknkg  
pvyvdvkgavkhpnykmt  
skdrvvd1ldkaq1lddadvsqin1sekltdqkmi fiphkgqknvepqigvnsvhvkngdtntkinlntasvselmsvp  
gvqgakanaveyrnqqa  
fqiiddlkkvkgfgsktfdklksyfti  
>tr|Q2YT40|Q2YT40\_STAAB  
msdni vaiygdvpe1vekqsaeiisqflksdrddfnfvkynlyeteiapiveet1t1pffsddkailvknayiftgeksp  
kdmahnvdq1iefiekydg  
enlivfeiyqnk1derkk1tktlkkharlkkieqmseeikkwiqsklnenfkdikrdald1fieltginfnivsgeiek  
lilflgdrptinkqdvngi  
inrsleqnvf1lteyigkrkkeqaih1vkd1itmkeepik1lalitsnyrlfyqckilsqkgysgqqiaktigvhpvrk  
lalggvrhyq1del1niid  
acaetdyk1kssymdkq1ile1fils1  
>tr|Q2YT43|Q2YT43\_STAAB  
mgpqhreigfpi stdnaswggpqrscrkvs1qqcaswrgpnikkyfffrnqyflcms1thvilflstyylwlmckshyi  
inh  
>tr|Q2YT44|Q2YT44\_STAAB  
mtvqsayihpfcvrictycdfnkyfiqnqpvdeyldalitemstakyrnlktmyvgggtptalsinq1er1lkairdtf  
titgeytfepndeltkek  
vq1lekygvnrismgvqtfkpe1lsvlgrthntediysvlnaknagiksisldlmyhlpkqtiedfeqsldaldmeiq  
hissygl1lepktqfynmy  
rkg1lklpned1cadmyq1mmskieqspfhqyeisnfaldghesehnkvwywfneeyyfgagasgyvdgvrytninpvnh  
yikainkeskailvsnkps  
1termeeemf1glr1negvssrrfkkkfgqsiesvfgqtinnlkekklivekndaialtnrgkvignevfeaf1ind  
>tr|Q2YT50|Q2YT50\_STAAB  
mgryt1ksifehneskmkeeyikrfns1asfntniniipmengkknvndleyplffmvtkn1skkqelisinsrkidral  
ns1pyaareqyfn1l1ide  
lqstneienvfstkqeiaha1nnqaseflkfrglvdqykeielnkkikvdnvrdiraidk1vsneineqdkldgel1frk  
nfvghdgstnkylhvg1q  
petkiveyigem1tflkyfdapqpfkimashylfeyihpfdgngvrgrfiak1l1sdydnytal1tsyvinrnkskyy  
kafmtasnh1ncgd1tefi  
dtm1e1liagqerildelipkmdatek1tly1tshyqidyefly1l1smdk1fgnkrnr1t1idlenilgvgrvkinnti  
kkfgnylvk1kssptiyei  
sdef1nsiik  
>tr|Q2YT52|Q2YT52\_STAAB  
mstep1asrmrpknideiisqhlvgprgiirrmvdtkk1tsmi fypppgigktsiakaisgstqykfrq1navtntkkd  
mqfvveakmsgqv1l1ld  
eihr1dkakqdf1lph1engkivligattsnpyhainpairsraqifelyplndedvrqal1traiedeenglktyqpkid  
edamayfstqsqgdvrsal  
nale1sv1sadndkdgyrhvt1qdakdc1qkgafvsdkdgmhdvmsafqksirgsdvnaalhy1ar1ieagd1ptivr  
r1lvisyedig1aspnagg  
rtlaaiesael1s1pearip1sqavie1clspksnsamsaidsal1sdirnghvgqipnh1kdghyqgakd1grsigykyp  
hgyvngyvsqy1pdk1kn  
kiyyepkttskseqq1keiynn1lkarp  
>tr|Q2YT54|Q2YT54\_STAAB  
mgrfqniekhiqnlknfislylhff1fvirtci1y1fyifn1fii1aifkffycv1fsfihkthirssyi  
>tr|Q2YT55|Q2YT55\_STAAB  
maikysal1n1vp1qegedertaindmv1laqh1del1syerywiaehhnapn1vssatal1liqht1lehtkhirvsggim1

Tsompanidou\_et\_al\_Supplemental\_FASTA\_File

pnhaplivaeqfgtmatlf  
pnrvdlglgragpdtmmtasa1rrdqhdgvykfpeevsllqqyfgpahqqayvraypavgknvplyilgsstdsahlaar  
kg1pyvfaghfapqmqkea  
ieiyltlfepsdvldepyvivclntivaenddeaqyllassmaqvmvsitrgrmqpvqppthelqniltpreyamamerqk  
isligsentvqqkjqdfme  
tygevneimaisiydkdmqldsyrrfkvninqinektl  
>tr|Q2YT56|Q2YT56\_STAAB  
meiyadyaattpvkpevdammtyynshygnpssihakgrdarkyldesrrqiaqllgadtheiiftsgatesnntaikg  
ivkaneglgnhhiitskieh  
hsvlhvfeqleregfdvtyldvddtgaidldqleetitdktlvsimfvnnevgtvqqiydiqdiaetnayfhvdavqa  
ighldvkdfeideamsit  
ahkfggpkvggallvkdhvtldypqlggeqelkrragtenlaqivgmakalqlaeknrddnnihlmnlkeqflvklqera  
ipfelngsmtdatghivnl  
yfpfvevetmltldmaqiyvssgsactagstqpslvldamfedeersnhsirfsfnelttekeinaivaeihkiyfkfk  
ees  
>tr|Q2YT59|Q2YT59\_STAAB  
msdptlfdysmikgtveailfqnsdnfytlvkvdietnedfdtmptvvgflpnivegdvytfgkqvvdhprygkqlkae  
tfekempqtkeaiisylss  
dlfkgygkktaqnivntlgdnaindiiddhsvlekvsglskkkqkqiaeqisanqesekimirldlgfgpklsmaiyqf  
ylgdtltildrnpyqliyd  
ikgigfnkadqlarnigiayndnerlkaallytleecikqghtylinvvidltdvdlvnyqdeeviepekldeqlqyl  
eekrliidneqvaipslyy  
seiksvqnlfrikthtnkltieeqsdlqmhigeiedanqvnyasqkealqtainskvmltggpgtgkttvikgively  
aeihglsldyddyvnddyp  
vvlaaptgraskrlqestgleamtihrligwnqdtkpedileneinarliiidemsmvdtwlfhqflsavpldaqlifvg  
dedqlpsvpggqvfkdlie  
skaiprvnltevyrqdgssielahrmklgqkidiqrfdhri fincqanqiptvvekvvtsavnkgytmdiqvlapm  
yknagikrlnqvlqdi ln  
pkkkdtreiefgdvvrkqdkvlqlvnrpndnifngdigvivgfwakena1nkdvlvvdfegneitftkqdmme1thay  
ctsihksqgsefpivimpi  
vkqyfrmlqrpllytgltraktslvllgdpeafdiglktngqarlqlctllknyfnsedeemledtatndtgasqttid  
eqveapmssndseevtsds  
tktdtnvlteatmfkidpmi nmgeitpydfier  
>tr|Q2YT64|Q2YT64\_STAAB  
mddlnkkyliidlhqhqnssiev1refaevnevpidr1tldlikqlirmnnvknileigtaigyssmqfasisddihvtt  
iernetmiqyaknlvtyh  
fenqiriiegna1eqfenvndkvydmi fidaakaqskkfeyt1lkhqglvitdnvlyhgvsvdigivrsvnrqmvk  
kvqdynewlikqpgyrtnf  
lniddglaisikge  
>tr|Q2YT65|Q2YT65\_STAAB  
mtmtellvtpk1shmetlidlgadafvigeqkfglrlpgefnrqqmteavalahkndkkvyaavnglfhnyhldavedy  
inflheirvdriifgdvav  
vmyvkaqenpip1hwnaetlvtnhfqcnywgkrgasravlarelnldeiiinikensveievqvqgmtcmfqsksrmlgn  
yytfqdrqmkierrndeas  
lllydeerqnnypvyedyngthimspndiclieelapffeagidsfkidgilqteeyinvvteqyrqaidlynedpeiye  
dekfm1mdp1eeiqpdrhp  
fdegfllykqtvy  
>tr|Q2YT66|Q2YT66\_STAAB  
mktieeikstpkvtmkkpellapagnlek1kiavhygadavflggqeyglrsnadnftieeiaegvefanrygakiyvtt  
niahdenieglesylrn1  
ektgatgiivadplietckevapkleih1stqqs1snykaveyweegldrsvlaretgamemremkekvdieieafih  
gamciaysgrct1shmta  
rdsnrggccqscrwdyellvddngelldvfynqgevtpfamspkd1kliesipqmmdigvds1kiegrmksihiyatvvs  
vyrkvi1dayaadpndfkin  
pewlie1dkcanrdtaaaaffegtpgyeeqmfgqqskspfdfcglvldynedtkiatiqrrnnfkpgqeieffgpeiet  
ftqvveaiydeegns1daa  
rhp1qivqikvdrpiypnmmrkeig  
>tr|Q2YT69|Q2YT69\_STAAB  
mqykqgfrvdvrfineqtimiyfenkiseetyrnvtamvrwirekeileiqdivpsyravliyfdesitpsklienle1  
nkfneknvhavngtnriik  
ipvqyggtygpdi1eavkhnritveqviekhtnkpyliym1gfmppgfpylgg1deqlhtprnrqprlkihagsvgiannq  
tglypsdsppgwwqiigrtp  
lkvfsserepmsmyeagewiqfyaideqefiqierdisdgnfnvddwvvienvn  
>tr|Q2YT70|Q2YT70\_STAAB  
msikilqpg1fstvqdlgrngyehigfsgagamdqfsfkvaqslinndgpaieytligptiqfntqntfvitggsvna1  
nktismnsvil1aekgdil  
kigaitkgargyltfghtinvppiaesyathtrssiggfkgkrl1andvitvkinndfkenigkthlqdd1lpennih  
ilqgpqfeafsearakvv

Tsompanidou\_et\_al\_Supplemental\_FASTA\_File

nhpyfitegsdrmgylregdsvapinqadiisepvalgsqvvpndgqpiillndkqtiggytkiatvckfdlplklaqmkp  
qdtiqfkwisfgeavdknr  
eqmslfneilkshqktpifdtsslrhtsklatilkgd1  
>tr|Q2YT71|Q2YT71\_STAAB  
mniekieqiiiklvkendvkkkyknfedeieidftdtnhlaahnnqsnqsmnndltaskandnsdsvstndyhdikspmv  
gtfflqdskektepivkvq  
dkvknkgdiigyveamkvlnevttdvageiteivadhgtvneydqvlvrik  
>tr|Q2YT72|Q2YT72\_STAAB  
mlrclianrgeiavriiracreygietyvavyakgdeqslhvhladqaicigeanaldsylvnidriisaaqitganaihpg  
ygf1sestkfaqtveeggi  
afigptkkmteammgdkitarqtvvhagvppivpgsngavnhvseiekkladigypvikaasggggkgirivkkaedleka  
fkeaksegkkyfdddrvvy  
eafipvakhvevqvmgdgqnyvhlgerdcsvqrknqkleeppcaalteerrqqicndavkvaraanyrsvgtieflvt  
dnahyfiemnarigvehvt  
temraerd1vaaqlyl1lehnhlpfsqsdiqfnghvlearinaenpekkfptpgkvta1hlpqgfnvrvs1lypgyqvs  
pyyds1vakvivkshdras  
aidk1kat1demvidgfsttadflyavlnyplryrdgdakdvdikflekhqivkgve1  
>tr|Q2YT74|Q2YT74\_STAAB  
mgrnlk1kkesdfetknhkr1llgsvflmatsaigpaf1tqtavftsqqffasfafail1siidigaqiniwrlvvtg  
lrgqeisnkvvpglgtvis  
il1afgg1afnignigag1gnai1fgldvkwgaaitaifail1fvsksgqkimdvsmilgivmilvayvmfvsnppy  
gdafvhtfasehpmk1vlp  
iitlvvggtvgyitfagahri1dsgikgkqylpfnqsaiagil1ttgimrt1lflavlgvvvtgvt1ssenppasvfeha  
igpigknifgvlfaaams  
svigsaytsatflkt1hks1nersnlivivfivistmiflfigkpi1lliagaingwilpitlgailiaskkksivgdy  
khpnmfifg1vav1vti1  
tgifsfkev1qlf  
>tr|Q2YT76|Q2YT76\_STAAB  
mnyles1ywiherthkfgikpgvkrmewmlaqfnnpqnnikihvggtngkgstvayl1rtalvengyevgtftspfietyfn  
eris1ngvpisndaivelv  
srikpvsemmeretdlgvatefeiitamf1yfgethpvdfviveagl1gikndstnvtfpilsiltsigldhtdilggty  
ldi1ardkgaiikpnpvpiy  
avkneda1kyvreraieqhakpie1dreivvvsqndeftyrykdyeleti1sm1gehqkqnaalaitalielneqglie  
ldfnkmidg1esvrwtgri  
eqvhdkpl1i1dgahnsesidalidtikqyhdkekvdilfsaingkpinemvkh1s1iahtfyatefdfpkalrkeivg  
siendeiqlvddyvefikn  
yqgd1vitgsl1yfi1sevksk1dfeal  
>tr|Q2YT77|Q2YT77\_STAAB  
mvv1l1syscscisf1y1qf1s1ieetsfdyl1hrrskcdycnsslkwyelmp1isf1ll1kgrcncrkris1thflgetfal  
ipivfikydftynat1fi  
ttyvfl1iftmtdits1ml1dcr1ii1ycivs1s1si1ypvaf1i1sm1thify1l1frayigygdv1li1ictffvfpspih  
ylchfiyichwfcfnyh  
di  
>tr|Q2YT79|Q2YT79\_STAAB  
mt1fi1i1gvl1vpmvymq1lniknepvtkrn1lit1al1stvgil1vta1agv1v1tkqaf1l1sva1igs1ftg1v1wg1ll1sgs  
yal1rf1sna1fgrk  
>tr|Q2YT80|Q2YT80\_STAAB  
mr1ifsmikni1avia1ivi1yvia1kyap1f1keq1dwn1pvn1hdng1qtn1qvt1qpt1nda1qh1vy1vs1ge1kys1k1end1ik1nvp1s  
q1knv1fkm1dk1qef1mav1sg  
mnr1may1ndq1yi1g1rg1defi1lyk1fg1des1mrv1ynte1fem1qq1d1ne1lg1qn1ql1kpen1ayq  
>tr|Q2YT93|Q2YT93\_STAAB  
mkkssri1af1ll1v1l1fag1ma1aty1knv1ikvn1gl1d1l1qgg1fev1lyqvd1p1nkg1dk1dkka1l1qsta1qt1enrvn1lgv1se  
pk1iqve1pnr1rv1q1agvt  
dqneark1l1ssqan1l1r1daed1kv1l1sgs1dik1qgs1ak1qef1k1qet1n1qpt1vt1fkv1dkn1kf1kv1tee1isk1kr1dnv1mv1w1ldf  
kk1gds1yk1keaq1knp1k1fis  
aas1vd1qp1ns1ds1vei1sg1fg1kg1qeg1vkk1ak1qia1e1ln1ags1lpvd1l1kei1ys1nsv1ga1q1fg1qda1ldk1tf1as1fig1vali1yl1fm1  
gf1yr1lp1gl1vai1ial1t1ty1y  
l1t1va1fn1fis1gv1l1tp1gl1aa1lv1lgv1gm1av1dani1myer1ik1del1rig1rt1k1qaf1sk1ank1ss1fl1tif1ds1n1tt1via1aav1l1ff  
fg1ess1vk1gf1at1m1ll1gi1lm  
if1vt1av1f1sr1fl1s1l1vss1ni1fkn1qfw1l1fgv1kkn1kr1hd1ine1gv1dv1hd1l1kts1fek1wn1fv1kl1ak1pl1ig1vs1il1iv1v1gl1vily  
if1k1n1l1gid1f1ss1g1tr1v1dfq  
sk1qai1t1qq1ve1qv1k1d1sg1l1kad1qi1q1ng1kdn1kvat1v1qf1k1dd1l1tra1qd1n1ks1dn1k1sk1fg1d1tp1q1int1vspi1g1qel1aknam  
l1ali1yas1ig1iii1yvs1l1rfe  
wr1mg1l1ss1val1l1hd1vfi1ivai1f1s1l1fri1ev1d1l1fiaav1l1tiv1g1ys1ind1tiv1t1drv1ren1l1qkv1kv1itt1teq1idd1iv1nrs1ir  
qt1m1tr1s1int1v1l1tv1iv1v1va  
il1ff1g1apt1if1nft1al1fig1l1sg1vf1ss1ifi1av1p1wg1mm1kkr1q1l1kks1pk1h1lv1vy1kek1ks1ndek1ilv  
>tr|Q2YT94|Q2YT94\_STAAB  
mik1py1kw1k1lik1pte1y1s1del1ts1k1l1k1tpiv1k1k1les1ksi1de1qai1esi1s1dtd1inh1dal1q1l1sd1mt1kt1ier1ik1rai1ande

Tsompanidou\_et\_al\_Supplemental\_FASTA\_File

kilvygdydadgvtstti1  
vttlqllgaqvgwhipnrftegygpnelafnahdegitliitvdngiqghneikmvqdlgvdivtdhheigstlpeay  
aivhpmhpsfnypfqqlcg  
agvayklaqalientpdyfkaivaigtiadlvsltdenrslvkqglkvlnqdcptsvkallkeagyndnideetigfiig  
prlnavgrlddaslace11  
mtddeeeaaflaeqvehfnrerkdiratiteeamamaetkvkngdlflllakenwhegvlgivaskivetfalptlilni  
dreqnhakgsarsidqvs  
feilsahqeliakfgghmaagmtmdienieslaeglnkwmkelskttslpvpkpvdl1tenditiknirdmnr1rpfq  
tdfsrpi femddlsvsvk  
aigqqknhlkltlgesniaalfwqngllepeldqeqpinilgsvqinewngnqspqliiqdiamneqqildyrskrkslp  
ftendenivvlihpksdkv  
naneyyygeeiqqtdkvvlrdlptsmedlslslqqlqfsqlyivlqhnhsiyfdgipnmdvfkkykalitkqetniqk  
egml1cqh1svkpdtkfml  
1kvf1dl1nfvtdqgdglirinqqpdkrsidsskvyqlrqarmdvkq1lyqdfseikwiksq1s  
>tr|Q2YT96|Q2YT96\_STAAB  
mngvyhimnneypysadevlhkaksylsadeyeyvlksyhiayeahkgqfrknglpyimhpiqvagiltemrldgptiva  
gflhdviedtpytfedvke  
mfneevavivdgvtlkkvkysreeqqaenhrklfiaiakdvrvilvkladrlnhmrtlkamprekqirisretleiya  
plahr1gintikweledta  
lryidnvqyfrivnlmkkkrereayietaidrirtemdrniengdingrpkhiysiyrkmmkqkkqfdqifdl1airvi  
vnsindcyailglvhtlwk  
pmpgrfkdyiampkqnlqslhttvgpngdpleiqirtydmheiaehgvaahwaykegkkvsekdqtyqklnwlkela  
eadhtssdaqefmetlkyd  
1qsdkvyaftpasdvie1pygavpidfayaihsevgnkmgakvngkivpidyilqtgdiveirtsksygsrwdl1kiv  
kssakgkiksffkkqdrs  
sniekgrmmveaeikeqgrvedilteknivvnekynfaneddlfaavgfgvtslqivnk1terqril1dkqralneaq  
evtkslpikdnii1tdsgvy  
veg1env1lik1skccnpi1gddivgyitkghgikvhrtdcpnikneter1invewkskdatqkyqvdl1evtaydrng11  
nev1qavsstagn1ikvsg  
rsdidknai1nismvknvndvyrvvekikq1gdvytvtrvw  
>tr|Q2YTA1|Q2YTA1\_STAAB  
mpelpevehvkrgeipyvinqkiehvi1fsdkviegkdqgketiikgie1dtfkt1segytitnverrskyivfql1dnkre  
qrtl1sh1gmagvffivde  
ledimipnyrkwhwhvifelsndkk1iysdirrfgeir1nvasvasyps1fleiaepf1sneal1tyy1nr1hqqs1nknk1pik1q  
vil1dhkvi1agcgn1yacea  
1fragv1pdkkvkdl1thqqemvfyvrev1eegik1hggt1s1sdyrhadgktgemq1h1nvyk1pvck1vcgs1qietk1ia  
trnshycpvcqk  
>tr|Q2YTA3|Q2YTA3\_STAAB  
mstniaingmrigrmv1ria1qnkn1nvvainasyppetiah1inydtthgkyn1kvepieng1qvgdhkik1lvadrnp  
en1pwke1didia1datgk  
fnhgdkai1ahikagakkv11tgpskghvqm1vkvgnvddq1diaefdi1fsnascttncigpvakv1lnnqfgivng1mttv  
hai1tdqkni1dnphkdl1rr  
arscnesi1iptstgaak1kev1pe1legk1hgma1rvptknvslvd1vvd1lekvtaeevnqafenag1legi1ievehqpl  
vsdfntnpl1sai1dak1t  
mvmsgnk1kvk1iawydnewgysnr1vvdvaeqigal1tsketvsas  
>tr|Q2YTA5|Q2YTA5\_STAAB  
mgrqafefgl1rpkdqf1kv1mqhfd1ntnh1lev1nr1lytp1igtqavglyhfmtqfvkeshnet1ilshyif1mnelkin1le  
frqqmd1leag1llka1fvk  
hdeqetqfvqgl1iqpsah1ffndpml1siflysevehrr1fel1kkyfeyqqid1sefkqvtrqftdvfkvpstkididts  
dipinepyqgid1snesfd  
fvm1rqm1gkhfisqdivtkdakr1itq1lat1ygl1tadgmkhvil1nsit1sgq1sfeemrkqarsyyl1mehenqmpk1qv  
kspat1sstaks1sevn1pkp  
qsdewfel1eqtspi1dm1laswseseptisqktmveelierekmsfgvin1llqfvm1kedm1pkayileiasnwkkk1gi  
k1takeaynyakkvnqpkne  
gssgnyqkrqsygqnrri1skektpkw1enrdkpseedsakdnsvddq1leqdrqaf1dk1skkweedsq  
>tr|Q2YTA6|Q2YTA6\_STAAB  
mkqfks1intsqdfekriekikkev1ndpdkqf1leahrae1tnamided1nlv1qeykdqkghydgkhfadcpnfvkghv  
pelyvdn1rki1ryl1qpcp  
kikydeerfeaelitshhmqrtd1nak1kdiymnhrdr1dvamaaddictti1ngeqvkglylygpfgtgksfilgai1an  
q1k1skkvrst1iyl1pefir  
t1k1ggfkdg1sfekkl1hrv1reani1m1ddi1gae1vtpvvrdevigp1l1hyrmvhel1ptff1snfdyse1ehh1amtrdgee  
k1tkaari1ervks1stpyf  
1sgenfrnn  
>tr|Q2YTB2|Q2YTB2\_STAAB  
mskfdeqi1ivvprei1fnnekntfngf1nknkpegqni1fda1sqyevkr1rgdmeedpsykq1isyc11leneygei1lvyer  
1sgggear1hgqss1igvgg  
h1mndvp1gae1sinevl1rvnaqre1eeevgl1seqdsqnme1yig1finddn1evgkv1higv1vfk1itv1stndveaketd1trikw  
iekgniesyddfetwsali

Tsompanidou\_et\_al\_Supplemental\_FASTA\_File

lqd1  
>tr|Q2YTB3|Q2YTB3\_STAAB  
msdi iqfpnssklykdikraeqdnydlmyeyivqyerqfelteeiammkrmlyetgsflelreetivllktgiqeyd  
tlmiyyvksliglggyfea  
vevihqijdevkdhktrmalhplkefakskliedekrltqsltdfdtismreqthlilkidnghfqfqtetvlyilksnt  
ysynlislmiyrlfakct  
qeltiekymdvtfvpanlkglehttlkekvipnvmetlndgalhiaeeahhmnhsimiypidietlfetnkwinaye  
cyfknmlglkcelqsidaf  
nfiqqldlnns  
>tr|Q2YTC1|Q2YTC1\_STAAB  
mkfdrhrrl rssatmrdmvrnhvrkedliypi fvvekdvdvkeikslpgvyqisl nll eselketydl giraimffgvp  
nskddigtgayihdgviqq  
atriakkmyddlivadtc1ceytdhghcgviddthdvdndkslp1lvktaisqveagadiiapsnmmdgfvaeirrgl  
devgyynipimsygvkyas  
sffgpfprdaadsapsfgdrktyqmdpanrlea lrelesdlkegcdmmivkpa lsyldivrdvknhtnvpvaynvsgeys  
mtkaaaqngwideervvme  
qmvs mkragadmiityfakdicryldk  
>tr|Q2YTC3|Q2YTC3\_STAAB  
mtmiyrnnfivfvlsffisiilysshvllp fmfpgpiiasii cvkvfkl dikwpflselgivilgvqigstftknvmdi  
kdnwlsii vvsisillial  
vmafikkiarintetai lsvipgaltqmlvmaeqdkranllvsltqtsriifvvvlpfisyffhdgnmnangkltkv  
lp1sqvlnigqivilaiai  
fiyvlimskikfptfqllaplivlivwnfstgltftldhwllnmaqliymirigvqiahllsdlkgrlaiaitiqnimli  
igalimvyvihffdnnpin  
elflgaapggvnqivlvalatgadvamitsyhi friffilfi iapginyflkyrsnkred  
>tr|Q2YTC4|Q2YTC4\_STAAB  
mnecafgtkdpvyl dyhdhvwwqplydska lfkllalesqhagls wltilkkeayeeafydfepkvaqmtthdidr1m  
tfpni vhrkkleai vnqa  
qgylikieaygsfskflwsyngkpkdlqyenasdritvddtatqlskdlkqygfkflgpvtv fslaaglydahlkdc  
pskpkhn  
>tr|Q2YTC5|Q2YTC5\_STAAB  
mnklvlidgns lsfrafyalpl1snkagihtnavygfamll ekilkeekpnhf1vafdagkttfrhekyseykggrqktp  
pelseqfp yirqlldayhi  
kryeldnyeaddiigtlskeadkagfqtiiitgdrdl tqlatdnvtiyytkkgvtdvdhytpdfiaekyngltpnqi idm  
kg1mgdtsdnipgvagvge  
ktaikllnqfgtvegvyeh ldeisgkk1kek1qnskedalmskelatinvdspievkledtlmthqdeqqekiel fkkle  
fkqlladidqsdiedaie  
ktfeietsfdnvdfts1keaa ihfelhggnylrnnilkfslftgekhivinaddinnyaelvswlenpntkkvydakkt  
yvashrlgidiqnisdim  
lasyii dpsrtisdvqsvsl ygqsfvkddvs iygk gkkfkvpeddvlnpyvasitdaiyfakpnmkql eeynqvella  
dlelplakilsemeeigi y  
tdvhdleemekeiqekldvli rnihaagedfninspkqlgvvlfetlqlpvikkktgystavdvleqlqgehpiidi y  
leyrqlsklqstyveglqk  
visddqrihtrfnqtl aqtgrlssvdpnlqni pvrleegrkirka fptsksdsvilsadysqielrvlahitqdesmkea  
fingddihtatamkvf gve  
adqvdi lmrqakavnfgivygisdygl sqslgitrkkakafidylasfpgvkqymsdivkdakalgyvetllhrrryi  
pditsrnfnlrgfaertam  
ntpiqgsaadi iklamvkaqmkettyqaklllqvhdelifevpksevdsfsefvee imenalqldvplkvds sygatw  
ydak  
>tr|Q2YTC6|Q2YTC6\_STAAB  
mdlnl tmi iiii lfgfiaafidsvvgggglstpallaiglp psvalgtknklassfgslststikfirsgkvdlyvvaklf  
gfvflasacgayiatrvps  
qilkpliiialssvfi ftllkkdwgntrtftqftfkka ilfaalfiligfydgfvvggtgsfmlfvllvfgdf lsaagn  
akvlnfasnigalvl fmv1  
qqvdyvigli latsmiagsytgahfaikqgvgykvlfiiitaililknafdyiqqfv  
>tr|Q2YTC7|Q2YTC7\_STAAB  
mteitfkggpihlkgqqinegd fapdfvtl dndlnqvtladyagkkklisvpsidtgvcdqqrkfnseaskeegivlt  
isadlpfaqrwcasagld  
nvtl sdrdl sfgenygvmeelrllaravfvldadnkvyneivsegtdfpdfdaalaaykni  
>tr|Q2YTC8|Q2YTC8\_STAAB  
maeqtimerl fhtldekaktlnnengqsfi enlg lamdqvytnergll ekstlqdrkafqfaylslmqeeki qanhqi  
tpdsigligflverfmnn  
qee1hivdiasgaghl satvkevlpeiavmhhlievdvplsrsvhlanfleipfdvypqdaimplpleadivigdfpv  
gyypiderskefk1gfeeg  
hsyshyllieqaina lkdagyaflvpsniftgehvqlekyiatetemqaflnlpptlfknekarksililqkkksget  
kpvevllanipdfknpsqf  
qgfmdlnqwmtdnrpkk  
>tr|Q2YTD4|Q2YTD4\_STAAB

Tsompanidou\_et\_al\_Supplemental\_FASTA\_File

mtvvlvflvyslsnqqlvsnktiInqkhnqyhnvagvdygaptwkltkksayynvqvgvgnienfekkfyrqcklgwap  
twkltkksaynnvqvevgp  
nienfekkfyrqcklgwaptwklteksaynisri  
>tr|Q2YTD5|Q2YTD5\_STAAB  
mykni11gvdtglnknekalkevsklagegtvvtvlnaiseqdaqasikagvlnk1teerskr1kktrkaledygidydq  
iivrgnakee11khansgk  
yeivvlsnrkaedkkkfv1gsvshkvakratipvlivk  
>tr|Q2YTD7|Q2YTD7\_STAAB  
mist1neimkciendnti11hrhrpdpdaygsq1g1kyyiqqkfpqkqvfvavgeass1sfigeldnidktyqdalvi  
vcetanapridderystgs  
kikiidhhpavdqgdinlvntnasstsei1ydl1shfndeai1vknkdiavly1g1vgdtgrfl1fntsehtmeiagkli  
ghididhna11nkmmekdpk  
mlpfqgyvlqhfelmddgfcvqkitedv1eqfgiqpneasqfvntiadikg1kiwfvavdegseircr1rskgqliindi  
aqdfggghpnsasvsvns  
wdefeq1ata1rtk1n  
>tr|Q2YTD8|Q2YTD8\_STAAB  
mvaylnihtayd11nss1kiedavr1avsenvealaitdtnvlygfpkfydaciannikpifgmtiyvtng1ntietvvl  
akdnng1kdlyq1sskikm  
nsmenvsfe11qqfssn11i1fknvadehrdivqdfshedtyldhrsvlvqgikhvwiqnvcyqtrqdadtisalaair  
dntkl1d1ihdqedfgahf1  
tekeikq1dinqey1tqvdivaqknaelkyhqs11pqqytpndesakylwrv1vtq1kkle1nydvyl1er1kyeykvi  
tnmgfedy1livsd1ihya  
kmndvmvgpgrgssags1vsy11gittidpikfn11ferfl1npervtmpdididfedtrrerviyyvqkygelhvsgiv  
tfgh11aravardvgrimg  
fdevt1neiss1iphk1git1deayqiddfkkfvhrnrherwfsick1leg1prhtsthaagi1indhplyeyap1tkg  
dtg11tqwtmteaerig11  
kidf1g1rn1si1hqi1tqvkkd1ginidiek1pfdqkvfd11sqgdt1g1f1q1esdgvrsv1kk1kpehfe1divavts  
lyrpgpmee1pty1trrh1d  
pskvqy1hph1lepi1kntygv1iyqeqimq1astfanfsygead11rramskknrav1eserqhfiegakqngyhedisk  
qifd11lkfadygfpraha  
vsyskiayims1fkvhypnyfyani1snvigsekktaqmieeakkqsit1lppnineshwfykpsqegiylsigtikvgv  
yqsvkvi1vderyqngkfk1d  
ffdfarr1pkrvkr1k1lea11lvga1fda1fgktrst11qaidqv1dgd1nieqdg1f1d1ltpkqmyedkeel1pdal1sq  
yekey1gfyvsqhpvdkkf  
vakqy1ti1fk1snaqnnkpi1lvqfdkvkqi1rtkngqnmafvt1ndgi1et1dgvi1fpnqfkkyeal1shnd1fivsgkfd1  
rkqqrq11ineiqal1atfe  
eqk1afakqi11rnkshid1tfeemikatknandv1vsfydet1kqmt1lgy1nqkds1mfnn1fiqs1fnpsdir1i  
>tr|Q2YTE4|Q2YTE4\_STAAB  
maek1qrelsnrhiq1iaiggaigtg1flgagq1tialtgps11ltyi1igfml1mfmr1glgei1iqntefksfadvtnty  
igpfag1vtgwt1ywf1cwi1i  
tgmaev1tavakyvs1fwfpeipnw1salfcv11lmsfn11sar1fge1efwfsi1kiati1iglivvgfvmil1fafktqfgh  
asftn1lyehgi1fakgasgf  
fmsf1qmal1fsfvgiem1gvtagetkdpvktipkainsvpiri1l1fyvga1lavimsi1ipwqqvdpdnspfvkl1faligipf  
aag1l1nfvv1ltaaasscns  
g1fsnsrml1fg1ssqqqappnfsktnkygvphvai1fassal11vaal1nyifpdatkvft1yvt1tistv1fl1vwg1liia  
y1nysrknpd1hk1naty1k1l  
1ggkymgy1l1fvff1fvfg11finvd1traiy1fipi1wfm11lafmy1lrykriaaksnk  
>tr|Q2YTE6|Q2YTE6\_STAAB  
mtaek1itqgte1g1lvp1nepi1pfi1igdg1gpd1i1wkaasr1vidaavekayngekriewkev1agqka1fdttg1ew1p1qet1d  
t1key1liavkgp1l1t1p1igg  
g1rs1lnval1rqe1d1l1ftc1l1rpvrw1fkgvpspvk1rpd1vdm1vif1rentedi1yagi1efkegt1tevk1vid1l1qnem1gat1n1r  
f1p1ets1g1ig1k1pvs1keg1ter  
1araa1qya1idn1nrksvt1lvhkgnimk1ftegs1fkqwyd1al1tefgd1qvftw1qqyde1ivenegrdaanaaqekaek1egki  
i1kdsi1adi1flqq1l1trpa  
ehdv1vatm1n1ngdy1sda1laaqvgg1gi1apgan1nyetghai1feathgtapkyag1lnkvp1ssv1l1ssv1ml1eh1lgw1qea  
adki1tds1iedti1askv1vty  
dfar1mdgae1evst1ss1fade1lik1nk  
>tr|Q2YTE7|Q2YTE7\_STAAB  
msqkv1lvdd1ehs1vt11kyn1letagyevv1vafdg1dealekvene1qpd1i1ildvm1pkkd1gidvck1tvrtnk1n1vp1ilm1  
taknd1efdr1v1gle1lgadd  
ymtkp1fspre1vvarvka1l1rrsq1fvkevee1iddit1igs1ir1rpy1fevykhne1l1eltpke1fel1ly1lierqgr1vitre  
hm1ntvwny1efag1ds1rivd  
vhish1rdk1lednpk1kpq1lik1tvrg1lgyk1lerpkeq  
>tr|Q2YTE8|Q2YTE8\_STAAB  
mmk1fhh1rlm1l1iss1ili1is1fit1lg1ii1hasity1v1sekheqal1atdarsy1y1lvqdne1idkvkeivkqqnid1l1itkndk  
kvf1ssgk1kaipn1sds1fiq  
kkdv1fi1fnkkvng1yhwi1kgyndi1temhwt1lwky1l1itc1lv1lic1lyfas1rsfkr1tirpi1qevtyatq11langy1yhir  
vpesn1vvetka1lfvstnd1l



Tsompanidou\_et\_al\_Supplemental\_FASTA\_File

arrlqklnneqkiqsnrlkttienipsailmidrngkiyvankayyeqfnishnieqvgyhgynvnteieqlilesfkvek  
piyeqlevainqvhakyfd  
iscvpiltrsqsqqglvmmhditnlkqlenlrrefvanvshektpitsikgfaetlidgakndaesldmflniilke  
snrieslvtldlshieg  
hteldtdymnlsdltrriidnmmqtanqknisihtdiekdvivkaqeskiaqvntlnlnainysyedgdinrvvyrddf  
rvifevqdfgigikledqq  
riferfyrvdkarsrdsggtglgsitkhiveahqgnievnsqvkgstfkvilkyke  
>tr|Q2YTE9|Q2YTE9\_STAAB  
mktiq1hkttliliaillfytfmgillplmhddlqwfsnyntdilkvgfaslngryignifeiavhvswlrlwlsyglis  
mgiiwmimhitrckawtsy  
yllafslmlilpsaiyadtfgwfagfynyatstlislfiiyycinaiiyekekqpsvsvtlfyvlfcffgqlfmenvtlfhc  
iililaflyeftanrtlny  
kllfsfmiaatigtiimfsnpyrkiifegseyqqvsnnqgvfskfaemlstslpygvifsqviilsmiaaliy1llrsd  
ryvhltilkrriimigfit  
lplyyllfynqfllnkntdiglvqfanvivvcgyfafsifvgiylsindrktqitlyslliaicvsastlvivtpiepgnf  
livytihviiililkefr  
kyksinvnfikgaslvlamiy1safiyvhyehkrvqllkqkikhprqevytveslpfehymhhsppinknyqewfnny  
eelpkmtkvkyipfgsdds  
>tr|Q2YTF1|Q2YTF1\_STAAB  
msnklesyrsvdivslnhqildl1skrgelaqkigeeklkqgtriydpqrekemlndlidsnkgpfdntikqlfkeifka  
stdlqksenekhlvysrk1  
kpedtvtfdnggiigdgngksfvfgpcsvsfeqveavaknlhakgekfirggafkprtspydfqglgveglkilkykd  
kydlnvvseivnsndfeva  
deyldvfgiqarnmqnfe1lkeagrtkkp1llkrglsatieefvyaeyiasqgnqniilcergirtyekatrntldisa  
vpilkgqthlpvmvdvths  
tgrkdimlptakaa1avgadgmaevhpdpsvalsdagqmn1defqafydelkpladlynakk1k  
>tr|Q2YTF2|Q2YTF2\_STAAB  
mtvtiydvarearvsmatvsrvvngnqvkaetknkvnevikrlnyrpnavarglaskkttvtgviipdisniyysqlar  
glediatmykyhsii1snsd  
ndpekekeifnllskqvdiiflggiteemkelinqssvpvvsngkdahiasvniidfteaakeitgeliekgaks  
falvggehskkagedv1ag  
1tevlknnglqldt1ncsgaesykegvkafakmkg1pdailcisdeeaigimhsamdagikvpeelqiisfntr1ve  
mvrpqlssviqpldydigav  
gmr1l1tkymndekiiepnv1phrieyrgttk  
>tr|Q2YTF3|Q2YTF3\_STAAB  
mqhssktayvysdk1lqyrfhdqhpfnqmr1k1tte1llnan1l1speqivqpriatddelml1hkydyveaikhashgi  
isedeakkyg1ndeengqf  
khmhrhsativggalt1lad1msgkv1ngch1gggl1haaqgrasgfcyndiaitaqylakeynqrvi1idtdahhgdg  
tqwsfyadnhvitysihet  
gkfl1fpgsghytergedigyghtvnp1epytedasf1ecfk1tvepvvksfkpdi1lsvngvdihyrdplth1nct1hs  
lyeipyfvky1adtytngk  
vimfggggyniwrvvprawshvfls1idqpiqsgylplewinkwkhyssellpkrwedrlndytyvprtkeiseknkla  
1hiaswyest1q  
>tr|Q2YTF4|Q2YTF4\_STAAB  
mnh1ktyqsedyyi1hdkgfviiegpl1thed1kaltfdah1tafrdaedqyealleitt1pegriyvarqdelivgyvtfhy  
pdeierwstgn1pylielg  
aievsinfrql1glaekliqls1stpefediyivittteyywhwd1knsk1dvfdyck1mqrlmatggleifatddpeitshp  
anc1marigkni1leqqqa  
fddiry1mnrfff  
>tr|Q2YTF5|Q2YTF5\_STAAB  
mkvevykgagghn1kdyeetyntfdwkdveqafswsetgkmmayecidrhvdqglgdkialnykdehrkesytkdmq  
r1snkaanv1sehaevdkg  
drififmsrtpe1yfallgvlkigaivgplfeafmekavadrlenseakv1itnkallprvpvdk1pn1kkivvdedve  
dnyidfis1metasdefdi  
ewlksddg1l1hytsgstgqpkglhvqqam1vhyisgkyv1dlqeddvwyctadpgwvtgtsygi1fapw1ngatnciag  
grfl1peqwysmi1edfkvti  
wytaptal1rmlmsagddivekyd1ss1rs1svgepl1npevikwakkvygl1v1dtwmm1tetgghmivnyptmdvkl1gsm  
gkpl1pgi1qaa1iddagne1  
ppnr1mgn1aikkgwps1mmyriwknpekyksyfigdwvsgdsaykdedyfwf1qgrvddv1m1tagervgpf1evesk1veh  
eavaeagi1gkpd1pvrgei  
ika1fval1rkgyept1de1keer1fvkegl1sahvapreie1fkdk1pktrsgkim1rrv1kawe1n1dagd1stme  
>tr|Q2YTF9|Q2YTF9\_STAAB  
mnnv1lntfd1kdkni1fdgk1lekiygrkcf1fyak1iytpevc1ncnck1ningn1likngskts1ritmpk1seyptyi  
m1rkqr1fkck1tceryftae  
tpevd1kyc1fisk1trsav1nkaaei1rseksiakscsvsattvs1ri1deaaqsl1hqs1pysal1pehimm1defksvknvsgkm  
sfiyadaqth1i1dive1dr  
r1sel1kkyf1rfs1lkarkrvkts1idm1hegy1mt1likem1fnak1ivid1rfhiv1q1lnra1ngir1v1tmne1ratnq1plynr  
fkryak1l1kped1leafe

Tsompanidou\_et\_al\_Supplemental\_FASTA\_File

yhkvalfkerktqkgivkyllldqddsln dayqyinqlrfklkhdyyggfi helk hmp l sqthsvvqraiktlnkhvyfik  
ntfdyynl sngpleginnk  
iklikrtsfgygsynhlrnri l csklyapkskkekvc lva  
>tr|Q2YTG0|Q2YTG0\_STAAB  
mtnqdnqhqlnhriyhfeikiyakaikhvifvfi mfi fiaivaiaviamslyfhhl t ktsds l sddalikkvrqipgdell dh  
nnknll yeynhsqnsliig  
pktsspnvika l tssedt l fykh d g i l p k a i l r a m i q d i f n t n q s s g g s t i t q q l v k n q v l t n e k t y s r k a n e l r l a i r l  
ehllskdejiytylnivpf  
grdynganisgiasasys l f g i p p k d l s i a q s a y l i g l l q s p y g y t p y e k d g t l k s d k l k y s i q r q h y v l k r m l i e d q i  
tekeynda l k y d i k s h l l n  
rkk r  
>tr|Q2YTG2|Q2YTG2\_STAAB  
msdfnhtdhsttnhsqtpryrrpkfpwfkvtvialiagiigallvlgigkvlnstlnkdgstvqttnkgnqldgqsk  
kfgtvhemiks v s p t i v g v  
inmqkassvddllkgksskpseagvsgviyqinnnsayivttnhvidganeirvqlhkkqvkaklvgdavtdiavl k  
ientkgikaiqfansskvq  
tgdsfvamgnplglqfansvtsgii sasertid t e t t g g n t k v s v l q t d a a i n p g n s g g a l v d i n g n l v g i n s m k i a a t q  
vegigfaipsnevkv tieq  
lvkhgkidrpsigiglinlkdipeereqlhtdsedgiyvakadsdidlkkgditeidgkkikddvd l r s y l e n k k p g  
esvtvtvir d g k t k e v k v k  
lkqqkeqpkqr s r s e r q s p g g d r d f f r  
>tr|Q2YTG4|Q2YTG4\_STAAB  
mykffqn l g r s l m l p v a i l p a a a i a g i g n t l n a l h a a p k i a m f f t t v g t t i e q l g i l f a i g v a i g m a k k n d g a v a l a a  
algyflvtvvlspmklapl  
l g m k a s e i n s a f e k m n n g n v f v g i v i g l i a t y a y n k f s e t e l p l a l s f f s g k r l v p i m t a f y c t f l v v i l l f l w p l l y s w  
ivkfgesivglsgfagfvy  
gvannlliptglhhalnsvfwdtigitindigkfqsgkdaikgitgryqagffpimmfgipaaalamyhtakttqkkqvyg  
wflassvaaffvgvtepie  
fafmfvapi lyvvhalltg l s l f i a a t f h w t a g f s f s a g l i d y v l s l i n p v s n h p l m l l v q g v v f f i l y y v i f r v v i q v f  
n l n t i g r g e n e l v d p t v v k  
dniapgendikgskyhnhaiqileglggqenivnltncatrlrl elkdtsiidqqkiknagavgtvngkhstqvivgth  
vqvadeiekh l  
>tr|Q2YTG5|Q2YTG5\_STAAB  
mkkilfdvdgvflseercfdvsal t v y e l l m n k c y l g l h s h i d w e t l t d n d i q d i r n r i f q k d k i l n k l k s l g l n s n w d m  
l f i v f s i h l i d i l k k l s h d  
eieafmyqdepvelklqnistnladrfnlneqlplqlndnvkgknniyaaleefaitelhvdatlflslkgalwtlaqe  
vyqewylgsklyeevekki  
arttfktgyiyqeiilrpvdevkvllndlkagfelgiatgrpytetvvpfenlellpyfeadfiatasdvleamypq  
arplgkpnpsyaal y g n  
nrkkyesyinkqdnivnkddvfi v g d s l a d l l s a q k i g a t f i g t l t g l k g k d a a s e l e a h h a d y v i n h l g e l r g v l d n l  
>tr|Q2YTG6|Q2YTG6\_STAAB  
mkqfnvlvadpiskdgikalldheqfnvdiqtglseealikiipsyhalivrsqttvteniinaads l k v i a r a g v g v d n  
inidaatlkgilvinapdg  
ntisatehs lamllsmarnpqahqsltnkewrnafkgte lyhktlgvigagriglgvakraqsfgmkvlafdpyltde  
kaks l s i t k a t v d e i a g h s  
dfvtlhtpltpktkglinadffakakpslqi invarggi ideka l i k a l d e g q i s r a a i d v f e h e p a t d s p l v a h d k i i v  
tphlgastveaqekvaisv  
sneiieilidgtvthavnapkmdl sniddtvksfinlsqtvgelaiqlmynapssikityggdlasidsslltrtiithi  
lkddl g p e v n i a l m l l n  
qqqvtlniennkaetgfsnylevelsndsdsvkvgasvftgfgprivrinnfsvdlkpnqyqivsyhndtpgmvgktgal  
lgkyniniasmtlgrteag  
gdalmlsvdqpvsnniidelkqvgeynqif t t e l t v q s  
>tr|Q2YTG7|Q2YTG7\_STAAB  
myyhqpllltpgpthvpda imrei q a p m v g h r s k d f e d i a q q a f q g l k p i f g s q n d v l i l t s s g t s v l e a s m l n i v n p e d  
hfvvsvs g a f g n r f k q i a q  
tyyknvhidydtvgeavdvkdfinflstlnvevkavfsqycetsttv l h p i h e l g n a i n q f n s n i y f v v d g v s c i g a v d v  
dinkdkidvlvsqsqkaim  
lppglafvayshrakerfkevttpkfyldlnkyissqadnstpftpnvslfrgvnayvetvkaegfnhviarhyairnal  
rral kal d l t l l v n d k d a s  
ptvtafkpntndevki ikdelknrfkitiaggqhlkgqilrighmgkispfdilsvvsaleiiltehrkvnyigkgisk  
yevihea i  
>tr|Q2YTG8|Q2YTG8\_STAAB  
mhqhd f k v q t s w q g g r n n v g n v q g d i l s e n i s i p a s l g g v i g i t n p d e m l v s a a s s c y i i s l a a t l e r a k f t d i s i e q q s  
igtac l n n g k f s m s k i v h h  
phieipsdqiaql ekr l p k l i t i a d n n c m i s n a v r d n v d i k i y p i i q a k  
>tr|Q2YTG9|Q2YTG9\_STAAB  
mtlnklkdelqivshrglpsdfpentmvgvrevmglnvamleidvhltkdqhfvvihdetidrtsdgkgriadyt l s q l k  
sfdfgsykdvafkgeript

Tsompanidou\_et\_al\_Supplemental\_FASTA\_File

ldevlsclckfdkkl1ielkspnlypgieckllaflekkkkvdatqvviqsfdiecieklnltsiyelgvlskrkywyk  
kpnfskiaqiasyvnpny  
lvtrkfvdeahhhqlqvmptvknlktgekrlqmgvdglitdnpklfik  
>tr|Q2YTH1|Q2YTH1\_STAAB  
mttinptnytllkkqaasliedehmiaailsnmsailndnldqvnwvgfyllqnelilgpfqghpacvhipigkvcgt  
avserrtqvadvhgfegh  
iacdanskseivvpifkddkiigvldidapitdrfddndkehleaivkiiiekqla  
>tr|Q2YTH3|Q2YTH3\_STAAB  
mfiliyldnaattkafeevldtylknqsmypnspkagllqanqlqkakaqinaminsktnydvvtsgatesnnia  
lkgvayrkfdtakeiitsv  
lehpsvlevvryleahegfkvyvdvkkdgsinlehfkelmsdkvglvctmyvnnvtgqiipipqmaeviknypkahfv  
davqafgkismdlnvdsi  
slsghkfnglkgqgvllvnhiqnveptvhgggqeygvrsgtvnlpndiamvkamkianenlealnafvteInndvrqfln  
kyggvyinssasgspfvln  
isfpgvkevlvnafskydimisttsacsskrnlnevlaamglsdksiegsirlsfgatttkediarfkeifiiiyeei  
kellk  
>tr|Q2YTH4|Q2YTH4\_STAAB  
mtqqqnkrllknkhtyqneplnrkdfvvsfitgalvgsalglyfknkvyqkaddlkvkeqelsqkfeerktqleetva  
ftkesvegflnkfnegaa  
lkaqaaakeasannlsdtslnvskeesqaerlanaakqkqakltpgskesqltealfaekpvakndlkeipqlvtkkn  
dvsetetvntdnkdtvkqk  
eakfengvitrkadektnttavdkksgkqskkttnskrnaskastnktsgqkkqhnkksaqqakkqssssksiqknnq  
tsknskttnakssnaskt  
snakvekakskiekrtfnd  
>tr|Q2YTH6|Q2YTH6\_STAAB  
mklerrilpfskllkqhltipesivvdatcgngndtlflaeqvpeghvygfidiqlalentrdkvkdfnhvslidgheni  
ehhindahkghiaaifnl  
gylpkgdksivtkpdttiqainsllslmsiegiivlvihghsegqiekhalldylstldqkhaqvlyqqlnqrnhapf  
icaiekis  
>tr|Q2YTH8|Q2YTH8\_STAAB  
mnikpsvwwlvigmalnitgssflwplntiymkqelgksltvaglvminsfgmvignllggsldklggyktiligtft  
clcsttllnffhgwpyav  
wlvmlgfgggmiipajyamagavwpnggrqtfnaiylaqnigvavgaamggfvaefsfnyiflanlimyvvalvavtqf  
nieinakvkyphlditgk  
knkarfislvllicamfaicwvayiqwestiasftqsini smaqsylvwtngimilvaqplikpilyllkgnlkkqmfvg  
iiifmlsffvtsfaenfti  
fvvgmiiltfgemfvwpavptianqlapdgkqggyqgvnsaatvgkafgpfllggvlvdafnmhmfigmmlllvfalil  
lmvfkenntqpkkida  
>tr|Q2YTI0|Q2YTI0\_STAAB  
mksittde1knkllskpvqivdvrtdeetemyipnaklipmdtipdnlnsfknkneyyivcaggvrsakvveyleang  
idavnveggmhawgdegle  
iksi  
>tr|Q2YTI1|Q2YTI1\_STAAB  
myqtiiiggpsglmaavaaseqsnvlliekkkgllgrklkissgggrcnvtrlpyaeiiknipngkflyspfsifdne  
siidffesrgvklkeedhg  
rmfpvsnkaqdvdtlvttierqhvtikeeeavsrie vntdqtftvhtqsssyvshslviatggtsvpqtgstgdgykfa  
qd1ghtitel fptevpits  
aepfiksnrlkglslkdvelsvlkkngkkrishqmdmlfthfgisgpatlrcsqfvykeqknqktqhismaidafpelnh  
eqlkqhitsllsdtppkii  
knslhglieeryllfmleqagidenttshhlnsqqlndlvnmfkgfefkvngtlpidkafvtgggvs1keiqpktmmskl  
vpglflcgevlidihgytg  
ynitsalvtghvaglyaghysasme  
>tr|Q2YTI3|Q2YTI3\_STAAB  
mridkflamngvtrnevkl1kkg1vnvneqvikspkthiependmivrgelieyvenvyimlnpkgyisgtedhhs  
ktvidlipeyghlnifpv  
rldkdtegl1l1itndgdfnhe1mispnkvhskkyevi sanpiteddiqafkegvtlsdgkvkpailtyidnqtshvtiyeg  
kyhqvkrmfhsiqnevlh1  
rrikiad1el1dsn1dsgeyr11tendfdklnyk  
>tr|Q2YTI4|Q2YTI4\_STAAB  
makgnlfkailsiggavaavlvtrkdsrdk1kaeynkyqdpqsykdnakdkatqlgtianetikevktnpkeyanrlkn  
npkaffeeeksfteydnk  
tdesiekkgfedeggaapnnn1rivteed1kknkna1sdke  
>tr|Q2YTI6|Q2YTI6\_STAAB  
mekiflngefvspeakvsyndrgyvfvgdiyeyirvyngklftvtehyerflrsaneigldlnysveelie1srklvdm  
nqietgaiyiqatrgvaer  
nhsfptpevepaiyaytksydrpydh1engvngvtvedirwlr1cdiks1n1lgnvlakeyavkynaveaiqhrgetvteg  
ssnayaikdgviythpin  
nyilngitriivikkivkdynipfkeetftvdf1knadevsvsstaevtpvik1dgepvndgkvgpitrqlqegfkyie

Tsompanidou\_et\_al\_Supplemental\_FASTA\_File

shsi

>tr|Q2YTI7|Q2YTI7\_STAAB

meqfyqlgwtldsaggasgeaymaeqdgqklflkrnsnpfiaalsaeigivpklvwtkrietgevvtaqhwkngrelsne  
mkqtrvahllkkihnsrpl  
lsmllkrmemepitpeimlnkinaslsrevlthhivrksltyleehmpsldsrffttvvhgdvnhnnwllsdrdelflvdwe  
gamiadpaidigmllnyyv  
pq1qwsewletygvqeslnlnkrmkwytvigsiglvqwyeeqkrykdmntwlkflnevmsnmfi

>tr|Q2YTI9|Q2YTI9\_STAAB

mkigdisihylnngntkmdggamfgvvpkplwskqyananernqinlpthpiliqtaqynliidagigngklsekqlrnfg  
vdeeshiialanynltpk  
didyvlmthmhfdaaglt dqaghai fenaihvvqqdewhefiapnirskstywdknkgdysnkllifekhfepvpgikm  
qhsghsfghtiimiesqg  
dkavhmgdiftttahknplwvtayddypmqsi rekermipyfiqqqywflfyhdenyfavkysddgenidayilretlvd  
nn

>tr|Q2YTJ0|Q2YTJ0\_STAAB

mtklkyiipititvaiviistisiiqfinrkrynrvkvlnvksyfmnvkgsyivyepfvhpetdkyrlvyqggittikn  
qqnihydfyadaytgevin  
iver

>tr|Q2YTJ1|Q2YTJ1\_STAAB

mninkkvtlqriqtltelhgagpfeevknymtqqmapyvdefienrmggffgvkksknpnakrvmiaahmdeigfmitn  
itkngmiqftnlggvandi  
wqqr1viknrngdkii gvsni pkhfrtgsegapeikdltldigaqnedevrergidigtivphtpftqlsehrysak  
awdnrygcvlaieilellk  
dielvdlyvganvqeevlgakasaemipdvafvvdcs pandvkg nqplsgelgkgtlirikdgtmilkpafrdy11  
klveahdieyqymspggt  
dggeihkanigiptavigvcaryihstdsvfdirdyfaarsllseticlnlnqietlqyk

>tr|Q2YTJ4|Q2YTJ4\_STAAB

mnlfynpkyvgdvaflqi epvegelnyknkgnvveitnegnvvgynifeiskdiii eetghikltdelvnvfqkri seag  
fdykinadlspkfvvgyve  
tkdkhpdadk1svlnvngndtlqivcgapnveagqkvvakvgavmpsgmvikdaelrgvassgmicsmkelnlpnape  
ekgimvln dsyeigqaffe

>tr|Q2YTJ5|Q2YTJ5\_STAAB

mswfdklfgedndsnddlihrkkkgrqesqni dndhdsllpqndiysrprgkfrfpm svayenenveqsadti sdekeq  
yhrdyrkqshdsrsqkrhr  
rrrnqtteeqnyseqrgnski sqsikykdshyhtnkp gtyvsaingi ekethkskahnmysnntnhrakdstpdyhke  
sftksevp saifgtmkpkk  
lengripvskpsekvesdkqkydyvaktqtsqnkql eqekqndsvvkqgtaskssdenvssttksmpnyskvdntikie  
nyasqiveeirrerererkv  
lqkrrfkka lqqkreehknee qda iqraidemyakqaeryvgdsslnddsd1tdnsteasqlhtngieneavsndenkqp  
siqnedtddthvdespyny  
eevslnqvsttkqlsddevtvsdvtsqrqsalqhnevnnqdelknqsrli adseedgatnkeeysgsqiddaefyelnd  
tevedttsnsedntngda  
skmhvdapktqehavtesqvnndktvdneielapr hkkddqtnlsvns1ktndvndghvvadsnmneiekqnaeitenv  
qneaaeseqnveektienv  
npkkqtekvstl skrpfvfmtpsdkkrrmmdrkkhskvnpelkpvqskqsvseskpesqatpssgtdsqesntnayktn  
nmtsnvvennqlighaete  
ndyqnvqyseqkpsadstqteifeesqddnqleneqvhtstssvsevsditeeseatthlnntsgqqdnddqkdlqp  
sflnqnedtanenrprin  
pdvatnqavqtskpmi rkgpniklpsvsll eepqvi epdedwitdkkkelnda1fyfnvpaevqdvtegpsvtrfel sve  
kgvksritalqddikmal  
aakdiri eapipgtsrvgievnpnqpttvnlrsiiespsfknaeskltvamgyrinnepllmdiaktphaliagatgsgk  
svci nsilmsllyknhpee  
lrl11idpkmvelapynglphlvapvitdvkaatqslkwaveemerryklfahyhvrnitafnkapydermpkivivid  
eladlmmmapqeveqsar  
iaqkaracgihmlvatqrpsvntgl ikaniptriafmvsssvdsrtildsggaerllgygdmlylgsgmknpirvqgt  
fvsddeiddvdfikqgre  
pdylfeeke11kktqtqsqsqdel fddvcafvmneghistliqrhfqigynraariidqleqlgyvssangskprdvvyv  
teadlnke

>tr|Q2YTJ6|Q2YTJ6\_STAAB

mkfkdrilrttylqtvalrnkgikl pfgannikedmvviqgnafassheevrahqklldvvsyndflgqi idqytsva  
vtgahgktsttgllshvmn  
gdkktsfligdgmgplpesdyfafeaceyrhrhflsykpdya imtnidfdhpd yfkdi ndvfda fqmahnvkkgiawg  
ddehlckieadvpiyygff  
kdsddiyaqniqitdkgtafdvyvdgefydhflspqygdhtvlnalaviaisylekl dvtnikealetfggvkrfnet  
ianqvivddyahhpresa  
tietarkkyphkevavfqphtfsrtqaf1nefaeslskadr vflceifgsirentgalti qdli dkiegaslinedsin  
vleqfdnavvl fmgagdiq  
klqnayldklgmknaf

Tsompanidou\_et\_al\_Supplemental\_FASTA\_File

>tr|Q2YTJ8|Q2YTJ8\_STAAB  
mwkweaendakgvviahni lehtgryayvitmlrrngyhvimgd1pgggqtsrankgqienfqtyhes1ldwlkianey  
kiptyvlgaglgg1i1ln1  
lekvelpi egmm1ispml1qkngknrkdk1vsnigkiskdtrfngvvepkd1trnleiveetvndg1mlkkatyhwynt  
inetmktmahihdiqmp  
t1lmygtd1ivdtraidefkekyqtpe1yfkawqgyfhevhnepervmryiltf1nsvntmgfiveddeivei  
>tr|Q2YTJ9|Q2YTJ9\_STAAB  
mdfikirkrmpiesfthqfeeity1sdd1qvka1mmtphhevkrivvy1rggkgqvgrvragr1mqfsdsqtlvigpyyrg  
nngsegkdefyrgd1ndvt  
q11r11hdkypqafihmvgsrgg1qg11tfqd1pvnsyi1wggvsdid1myeervd1rgm1rrmighpkkdraayearq  
aipninensps1livhggk  
dqvg1hhay1adq1elkgathetfyqmaeghvprppamvetlayikefmnqvelhs  
>tr|Q2YTK2|Q2YTK2\_STAAB  
md1sspvvig1iavvialiffv1flvalgskkkvkrqteekyeqqenikkshaea1ekeriqnkktitkqqedynhm  
stkdreida1klfsknhse  
yvtdmr1g1rer1vkekrippedmhimani1f1pkdgnnieri1sh1v1trtglyiidsq11kghvyngisggqfkd1pp  
meqvfdt1d1dksrptiv  
mdqnddkrs1sfvnysdqieaikqlaed1qkelgakyaptsilyfnpknegdv1tisynqnsavkvlvgaeq1deffnkf  
vfhgriqynved1qqmmdk  
iesfn  
>tr|Q2YTK3|Q2YTK3\_STAAB  
mevktfyngntmpqig1gtfrvendencmesvkyaieqgyrsidtakvygnee1vgag1rag1estgiared1fitskly  
fedfgrenvaaayeas1sr  
1glky1d1ylvhwpgtneavmvd1twkgmed1yknkvkiy1gvsnfephe1a1laqvsikpvinqveyhpy1tqhklkly  
laaqhivmeswsp1mnaqi  
1neetikdiaqe1gkspaqv1rwnvqhgvvtipksvtpnr1senfqi1dfel1sdeqmtridg1nqdkrigpdpktfeg  
>tr|Q2YTK6|Q2YTK6\_STAAB  
msrskkyfy1ss1mi1sfffntnnc1sg1fnsfik1ilfcsvinsiv1l1siifadrsiks1kpdadwiriasks1pw  
i1iliv1lvh1fsivrtfgf  
i  
>tr|Q2YTK7|Q2YTK7\_STAAB  
mak1nvevfadgadiemkaayknkqv1dgftnps1makagvtdykafaeeavkeipdas1sfevfadd1etmekevail  
kqygenfvk1pivntkge  
stip1ikk1sadnvr1nvtavytieqveiteavtegvptyvsvfagriadtgvdp1p1mkeavkvthskdgvk1lwas  
relfnviqadeigadi1tc  
padv1kkvntn1grdine1svdtvkgfakdiqssg1si1  
>tr|Q2YTK9|Q2YTK9\_STAAB  
mqdnstky1ly1qtatsnh1etncv1lhcdy1ilkvpink1vsyyak1hl1ssqsv1ietakn1lnink1vpiyinakt1lf  
p1khkrapiqi1y1nahyiv  
gmtaienst1ihfqegi1q1evdepfs1svkkches1alkhfientisn  
>tr|Q2YTL2|Q2YTL2\_STAAB  
mnkhkks1fgi1glvvi1favvs1ffs1msidqi1ffkhvksdiki1ek1nvt1ndaakkq1nnytsqqvsnk1kndawrdas  
ateiksamds1gtfidnekq  
kyqf1d1s1kyqgidknrikrm1lvdrpt1lkhtdd1f1kaakdkhvnevy1lishal1etgavkse1angveidgkkyynfyg  
vgaldkdpiktgaeyakkh  
gwdtpeka1sggad1f1hkhf1sstdqnt1ysmrwnpknpgehqyatdikwaesnat1iadfyknmktegkyfkyfvykdd  
skh1nk  
>tr|Q2YTL4|Q2YTL4\_STAAB  
mmtt1lat1if1vt1lf1v1wqpkgl1digital1tgafiai1itgvvs1fsdvfevtg1vwnat1tfvsvil1sil1dkvg1few  
saihm1haskng1k1mfvy  
i1llcaivaaffandgaa1iltpiv1lamvkn1gfnkraifpfi1asgfiadtts1plivsn1vniisayy1fhvgfvryfs  
rmfipn1fs1llasiiv1wl  
yfrkaipktfddn1krpkda1nd1kl1fki1swiv1v1llfgy1iseftkipvs1iftgia1fi1flmlarksnavnikevik  
gapwniv1fs1gmyiv1vfg  
1rnagit1ilaki1leyisnygl1fstil1gm1gfisaf1ssimn1mptv1lidaia1gqsnvhgml1kegliyanvigsd1gpki  
tpigs1lat1l1w1hvt1qkd  
vki1swgtyfktgi1ftip1v1fit1ig1y1lt1iif  
>tr|Q2YTL6|Q2YTL6\_STAAB  
mrvai1igmgtagsv1rel1vkhpknq1ldid1yddkvn1mgqgv1fndssell1nmpskkms1n1ddetefwkwykqqt  
fnfdepay1prfvfghymk  
sylsmftkky1pni1stynkvqei1ytnsnidetn1tyyict1nsdqswqaydyv1f1tcgtfayhdpy1n1kgkkgyiatpyp  
tynt1devne1ddia1igt  
glas1dvryvaahpk1l1pimt1srtah1psvrgtmi1dvtfky1tkdk1ndik1khhf1gnap1dt1vs1fl1kecaeydidf  
kkl1vhrrtgnhi1ad1kyd1  
arptemgi1fqsmie1h1ken1nwiwns1siedqhqfnqkyskmiq1lnsn1pmp1prtae1li1eli1enks1l1kkd1edvkhdg  
klyyfsyknqesvd1y1nvv  
inatgaksh1nel1dqddq1likn1enrqivqahp1ggi1qi1petnqvis1prfgt1tnmia1igqmtngvkn1rngvkmiveq  
vahtvsq1lyda1lesneqqq

Tsompanidou\_et\_al\_Supplemental\_FASTA\_File

rsdnq

>tr|Q2YTL7|Q2YTL7\_STAAB

msqfmdyaiqlanmvqgqgtgvnppvgavvvkegrivgigahlrkgdkhaevqaldmaqqnaegatiyitlepcshfgstp  
pcvnkiiidckiakvvyatk  
dnlldthgddtldrhdgievecvdderasqlyqdfkakakqlpqiitvksasldgkqandngqsqwitnkevkdvyklr  
hrhdavltgrrtvelddpq  
yttliqdgknpi kvilsksgnihfnqqiyqdestpiwiytentpnttnqthieieiclkscdlttihnllykrvggtllve  
agptttseflqsnyidefi  
lyyapkligsgnyqfyqtdndvieipdanqfeivhse1lnqnvkltrrk

>tr|Q2YTL9|Q2YTL9\_STAAB

mqfdnidisalmlkngepiivvddenrenegd1vavtewmndntinmakearglicapvskdiaqrldlvqmvddnsdi  
fgtqftvsihdvdtttgis  
ayert1takklidpsseakdfnrpghlfp1vaqdkgvlarnghtevavdlakltgkpagviceimnddgtmakgqdlqk  
fkehqlkmitiddlieyr  
kk1epeiefkakvkmpdfgtfdmygfkatytddeeivvltkgairqhenvr1hsac1tgdi fhsqr cdcgaql essmkyi  
nehggmi iylpqegrigil  
lnk1rayeli eggydtvan1al gfded1rdyhaaqilkyfniehin1l snpskfeglkqygidiaerievivpetah  
nhdymetkkikmghli

>tr|Q2YTM1|Q2YTM1\_STAAB

mal1knffig1snnsflnnaakkvgpr1gankvvagntipelintiey1ndkniavtdnlgefvgtveeshakeqilt  
imdalhqhgvykahmsvkl s  
qlgaefd1elayqn1rei1lkantynnmhinidtekyas1qqivqvl dr1kgef rnvgtviqaylydshe1vdkyqdlr1  
r1vkgaykenesiafqske  
dvdanyikiieqr1lnarnftsia thdhriinhvkqftkenhiekd rme fqmlygfrselaeianegynftiyvpygdd  
wfayfmr1aerpqn1sla  
vkefvkpag1krvgiiaalgatvm1glstikk1crk

>tr|Q2YTM2|Q2YTM2\_STAAB

mpptivinyi niqcrdvmrvkfrdkdnrqviltfk dnevadgnhv1a iptfknq1lftkhn1rgiefpggkregess  
aeavtrelyeetgavkni  
hyaqytiethdqi dfvkdyfives1vskndyletagpvl fncindiel aqrsf1l1qdstilkvervqslgfyqt  
>tr|Q2YTM5|Q2YTM5\_STAAB  
mnkqrstkmkn1i1ksia vlt1tsitvgttvvegiqqtdkaehnvtkitntsispykgilrvgagtgfvvgkntilt  
nrhvakdvqvgstvlahpn  
gendtggyykvkkipytgsad1aivqveedsvypknkkfgenteilt1tsevkaneriaivgyppapyknkhmyqstgt  
v1singdk1vsdafaeggn  
sgspvfnsnheviaiayavdvkndatkk sylvyftseikkfiadntdk

>tr|Q2YTM6|Q2YTM6\_STAAB

mnkn1i1ksiaalt1tsmtgvgttmvegiqqtakaensvklitntnvapysgvtwmgagtgfvvgntiitnkhvtyhm  
kvgdeikahp ngfynggg  
lykvtki vdygked iavvqveeksmqpkgrkfkdf tskfniaseakenesis iigypnpgnklqmyestgkvlsvngn  
ivtsdavvqpgsgsp1n  
skreaigvi fagntpsgegkr gfavyfspeikkfiadnldk

>tr|Q2YTM7|Q2YTM7\_STAAB

msitekqrqqaelhkk1wsiand1rgnmdasefrnyilglifyrflsekaeqeyada1sgedityqeawadeeyredlk  
aelidqvgfyiep qdlfsa  
mi reietqdfdiehlatairkvetst1geesendfigl fsdmd1sstr1gnnvkertaliskvmvnl1ddlpfvhsdmeid  
mlgdayefligrfaatagk  
kagefytpqqvskilakivtdskdk1rhvydptcgsgs1llrvgketqvryfgqernnttylnarmm1lhdvryenfd  
irnddt1enpaf1ghtfda  
vianppysakwtadskfenderfsgyglapkskadfafiqhmvy1ddegtmavvlphgvlfrgasegvirrylieekn  
yleaviglpani fygtsip  
tcilvfkkcrqddnvlfidasndfekgnqnh1sdaqveriintykrketidkysysatlqeiadndyn1nipryvdtf  
eeeapid1dqvqqd1knid  
keiaeeqe inaylkelgvlkde

>tr|Q2YTM8|Q2YTM8\_STAAB

mnkkflmivfii1ilvglf1kikydekkyydeqkerit iymkhnvkgyknisftnfkensmdgysisgyinndkkl sf  
tagirsiddf qfdtdisyt  
delgrkl1knpsvseikkeqntsnk

>tr|Q2YTM9|Q2YTM9\_STAAB

mtyk mkkwq1st1tlmagvit1nngefrnvdkhqiavadtnvqtpdyek1kktw1dvnygndqydennqdmkkkfdak  
eneakk1ledmkt dnrty  
1wsgaen1etnsshmtktyrniekiaeamrhknts1ktdenkl1kidaikw1hhnvgykdpdkkvad1ttnrkekdssk  
nns1nwwdyeigtpraltn  
t1l1mdnm1tkdemknyskpisiyspssyki1ssvgesedaggn1vdiakvkfl esvieedvdmkksidsfnkvftyv  
qdsatgkarngfykdgsyi  
dhqdvpytgaygv1legi sqmmpmikespfkhtqdkat1snwid egfmp1iykgemmd1srgraisrenetshtasatv  
mks1l1r1sdtmdestktky  
kqivktsvksdssydsndt1nsysdikmkl1mndstisknd1tqq1kiyndmrvtyhnkeldfafgl smtskniarye

Tsompanidou\_et\_al\_Supplemental\_FASTA\_File

niningenlkgwhtgagmsyl  
ynsdvkhyrndfwatadmtrlpgtttlnmpstntkndksfvvggklnnkysigmdfenqdkltakksyfilndkivf  
igtgikstdssknpvtsve  
nrkangyklfkgdieittsdvnaqethsvflensdtkknigyhfldkpkitvkkeshgkwseinksqktddkkdeyyev  
tqthntsdskeyayvlypgl  
sksdffsknnnsvivkqdedfhvikdndgvfagvnydstksfdingtivelekegmfvikkkddntyecsfnypstns  
tsnkeskisvtgytitnqs  
vsnfkesdihfeltk  
>tr|Q2YTN0|Q2YTN0\_STAAB  
mkkryvfvvvvailigliiiayghnkqikyhyietqekridlyfkhlnnyknmkvadfhktpmggyfivgyinddkyk  
fqasidsqsdngyqkdigy  
hedk1gk1fkekdpkyk1svdeiiikkehlksdyeaepplfffsgrpe  
>tr|Q2YTN1|Q2YTN1\_STAAB  
mkkkniiiiiivvviiglvviacvthkhkdhietqekridlyfkynlnnyhsmkvtsfkknpmggyfikgfvnnkiiin  
1m1  
>tr|Q2YTN2|Q2YTN2\_STAAB  
mifsdtnkqfkgd1gykedkigelyrekdakdrlnvdeiekeyldkneyeaepplfffsgrle  
>tr|Q2YTN3|Q2YTN3\_STAAB  
mkkkniiiiiivvviiglvvacvthkhrkdhyietqekridlyfkynlnnyhglkitkfkgpmsysakgyinnkkyd  
fqafig1gdddknqfngdf  
eynqekigellkekdaqd1tvdeieiekeh1hkseyeaepplfffsgrle  
>tr|Q2YTN4|Q2YTN4\_STAAB  
mkkkyi1iivsviligmiviayvhnkktkdhyietqekrinlyfkynlnnyhys1kvtrfkkspsmsyfiggyinnkkye  
fqafinvgrkqfgrdigy  
deek1gk11keqeiknwktvdqiikkehlkdneyeaepplfsfsgsld  
>tr|Q2YTN5|Q2YTN5\_STAAB  
mekneytakynesq11datysqavay1lnkygavtdyykeksytrflngeiksiskgkytraseglychhisedkfqn  
1sd1rfisefkysynygk  
enlyycdliehlilhaiitkeshgqfgvag1cmikptvidwyigeynpkpwmaqatkaraylpgilvek1likiddm1k  
gieiydflesr  
>tr|Q2YTN6|Q2YTN6\_STAAB  
mitfeniqq1ekytlmtmhglfnq1klgiisidnaehtlftpymmet1sslgvkdidi1ihkgteledfaafn1siddt  
vtvclqrtee1lkqyknve  
fndkilinwrimqk  
>tr|Q2YTN7|Q2YTN7\_STAAB  
mkfkaivait1s1s11tacganqhksnsskndtnkktqtdnttqstntekqmpqeaedivrndykargvneyqtl1nyk  
tn1ersneheyyveh1vrd  
avgtplkrcaivnrhngt1vni1fddmsekdkееfakkrspkynpmsdqaemdnesediqhhdidnkaiqndtpdqk  
vddkndknavnkeekhdnr  
vnksaetk1k  
>tr|Q2YTN8|Q2YTN8\_STAAB  
msnqfkseeerrqweqf1afnqqnqqhqqyggkkskkgwfwg1g1v1fili1iigisactagvtgn1ggns1skeant  
hkigetvkn1dd1levtnsv  
etmksvgps1laptnakgi1fvvadvtiknkgkealtidssmf1k1sgdktfeadntgmsanqsdngsiensff1qrinpd  
staggk1vfdvsenianak  
dkk1leviss1fsvkkitfd1sdaktskakkdkqdtavavassnsdnvnyesattpattssadtdsedseksskdedkq  
nssksdkssveksesneet  
apvepmpqskpttseaspsqni1hnedsmydaste  
>tr|Q2YTN9|Q2YTN9\_STAAB  
mntgnknqnsakserrgm1kgcggclisfilli1illsacsmmf1skndnsts1nqssktq1tqkdedksenmpEEKSES  
etdkd1qsteevpanente  
nngheideit1tdqsddeintpnaeeesqdd1kdd1nekqpsdhhqstqpktspstetnkqqsfanckq1rqvypngv  
tadhpayrph1drdkkra  
cepdky  
>tr|Q2YTP1|Q2YTP1\_STAAB  
mkl1tal1hfykysep1fksqivtpkv1lthrdcl1fieliddkgnayfgecnafqtdwydhetiasvkhvieqwfednrnsf  
etyeaal1k1vdsmentpaa  
rativmal1yqmfhv1psfsvaygatasg1snkqles1katkptrik1kwtppimhqirv1rel1dfhfq1vidanes1drq  
dftq1q11lareh1vlyieep  
fkdisml1devdgtippialdekats1stiinlielynvkvv1kpl1rlggmdkvqtaida1kshgkvviggmyeyg1s  
ryftam1arkgdyppgdvtp  
agyyfeqdv1vaysg1lkegr1efrpp1vdi1tq1qpy  
>tr|Q2YTP3|Q2YTP3\_STAAB  
mr1fyiavi1i1t1l1clinnkyvnaevdkv1kkksdidssn1fn1tsyytditwq1desnkistdq11nnti1ilknidis  
v1ktss1kvefn1sad1anq  
fkgknidiy1gygnkcvglteektsc1nggv1ihdgn1deekvigv1vfdg1vqqegfviktkkakvtvqel1dtkvrf  
k1lenlyki1ynkdtgn1qg  
ciffhshnhq1dqsfyyd1yniksgvgaeffqfysdnrtvsssn1yhidv1flykd

Tsompanidou\_et\_al\_Supplemental\_FASTA\_File

>tr|Q2YTP4|Q2YTP4\_STAAB  
mkk1stviilileivfhnnyanalpdpkidelnkvsdyksnkgmtgmnmlymsppvegrgvinsrqflshdlnfpie  
yksyevktelelentalann  
ykgkkvdi fgvpyfytciipksepdinqnfggcmgygltfnssenerdklitvqvtidnrqslgftittknmvtiqkl  
dykarhwltkeksytslmv  
lhlnlni  
>tr|Q2YTP5|Q2YTP5\_STAAB  
mtlallrilftfhcisvklteyadyldiftrsvlknctflnnqkctllnyhfw  
>tr|Q2YTP6|Q2YTP6\_STAAB  
mneyfnwlkqnyi fkel dssteittpfknhlndfiriyadtlnneiclsddgl tnel emlgidintktrtkliqniln  
qfnlklvdkeitadvknes  
faqskhnl iggi lkiydl tlttksnvtni fyeevfeflydreirglaqvsvsgeglkysidyivsetkspeklvnftn  
nldfnkitneayiyrdikp  
nrpsrnklepimliivndvdpineraqtvaehenleilkwsnkskietlts  
>tr|Q2YTP8|Q2YTP8\_STAAB  
mstyrenyslrpiarklkqsastilraisrnnimlyqaetaqnyvttrklcgrptgftpelsniik  
>tr|Q2YTP9|Q2YTP9\_STAAB  
mkkeilkqwwiwtlvtssffsigtpgiaaipfslsiyalsklilvknfvdpdlvtlqnleknksinienqkikreiqe  
lknkkdlissieegtke  
ehvtsylndelkydieliypfdlvevdssqintyikkqlmqkekellnleevkifnvstenkrhqnaqakqiirlfnaet  
sqlinkvnsknieismqni  
fksyeginki fetdnhipealldiklemldlmmkyqikiedekiirreerarlkeieltekemekkkelldkdirhnn  
eikkltmylnntdlqveke  
lyiekireldqslkdlnserenvedrkdnaqsgfvyiisnigsfgenyvigvtrrlepmdrine lssasvpfedvhal  
ifsenafelenkleyfkk  
ykvkvngrkeffkvnineikdv1sehnstvqfidepkalqyretlrlts1  
>tr|Q2YTQ0|Q2YTQ0\_STAAB  
mikqvlrkslntvkehidsnfqknlifslvipflfvpyiidiilvhlsnnqeyfkllssishiflmffvtaislyail  
sipltsnscrkssfrkisk  
viyflvffylshhinidiskmdsswhfyalfcffiisykitekikvckwifneesndeglrtqklffittvifgt  
isifstianilvaikqfln  
>tr|Q2YTQ1|Q2YTQ1\_STAAB  
mhnynelevigfngiyhntykiydllkckysvisnsyltcfskfmq  
>tr|Q2YTQ2|Q2YTQ2\_STAAB  
msslnpiipcmkni lwnanl tmytfgcvcmsqfsls  
>tr|Q2YTQ3|Q2YTQ3\_STAAB  
mfkkkm1aatlsvgliaplaspigesarntnienigdgaevikrtegvsskkwgtqnvqfdvkdckynkdalivkmqg  
finsrtsfsvdkgsgyelt  
krmiwpfqyniglttkdpnvslnylnpkni ettdvgqtlgyniggnfqsapsiggnsgfnykskisyqksyvsevdq  
nksvkwgkkanefvtpdg  
kksahdryl fvspsngpsgsareyfapdnqlpplvqsgfnpsfittlshekgssdtsefeisygrnldityatlfprtgi  
yaerkhnafvnrnfvvrye  
vnwktheikvkghn  
>tr|Q2YTQ4|Q2YTQ4\_STAAB  
mkmkklvkssvassiallllntvdaaqhitpvsekkvddkitlykttatsdndklnisqiltnfikdkksydkdtlvlk  
aagninsgykkpnprdydy  
sqfywggkynsvssesndavnvdyapknqneefvqqtlgysyggdininnglsgglngsksfsetinykqesyrtti  
drktnhksigwgvahkim  
nngwgygrdsydytynel flggrqsssnagqnl pthqmpllargnfnpefivlshkqndtkkskikvtyqremdry  
tnqwnrlhwignnyknqnt  
vtftstyevdwqnhtvkligt dsketnpgv  
>tr|Q2YTQ5|Q2YTQ5\_STAAB  
mekvldldvqvkgnntndsagderitshflcsfgcgktgsfnfsc  
>tr|Q2YTQ6|Q2YTQ6\_STAAB  
mtcskrvniitkachylyvkieanyiiltlytgshenyittksitfhhqsqnal khstdnieg  
>tr|Q2YTQ7|Q2YTQ7\_STAAB  
menvldldvqvakndtsdsagderitsfigctpgcgktgsfnfsc  
>tr|Q2YTQ8|Q2YTQ8\_STAAB  
mntiyepssicmirtpllsveffnlffnteqikysdlqlnaqkesil tttfnlyrtlqeinfgdgnkkvrdakesllky  
lirmstrptpfgllsginl  
ghfvneptrlkvgnsiqkyvkvdgewlyklisyiesideyyqnvkviwnskahiindriylneqsaiyl nnnkdtsfsik  
nse llvfikivttnnntf  
snlaekingefeihdiskvkayihnlvskeiistirpplsndnlnyiltklslhndnfvkkireiqklilayekteig  
fgeklykdi iqhmka lfk  
knylqidtkidminnglhqdiatniseayllwllsrnnigftdlkvlnhrfikeygfeqlvvnkdllsditgfgtsiyn  
evkgdennivmlkqkflha  
l r n n d e i v i n e k d v e t l i n d n e i n h y a p m s a d v a e i y l g r f y n q h n e l i v i s p i t v s l n a g a t f g r f h h l i d t e t l a k  
lehekahyyqksmhddnve



Tsompanidou\_et\_al\_Supplemental\_FASTA\_File

fvsinnipkyprnhvltnhdsyeyslnlgssnsdskyeletlddiyvgatfnklylyssqlnkrvlfesnmynflkesn  
lyrllreismesvkciepm  
ndvsidsfsyspri ryknvilkpaykinemllp lpkneewdqfkyqeqfnipnivlvygdnklllnslanhryll  
mkeykkhkrvrivesflpq  
skndhvyeivtpiykkssyrgeieipkykntdi eydkgwfalhihidkpsqdtfiidnlypfvkhlkdkgidqyflmr  
yikqgdilkrlrnydeny  
nviysilkdwlsfirqttevsvdfeivsyepeffryggkntideiesffeydsnlavniidndfkferpfivaisimylfe  
mlsisneermeivnnyvpt  
sykskeirpfknelvticnpenfeniakhsdiyrikkdddqilsklnkgkqplatkrstriigslihmrcnri fgvdk  
dgerfvlsivkeivktqky  
wcdknd  
>tr|Q2YTQ9|Q2YTQ9\_STAAB  
mtdlnlilkkkfgeisevddfiskastedyfepvtlsygipglilfldayqkayntnteqivhkyimklapylqkhqyn  
hslfgglsgiafsmdiasq  
ngnyqniInnideivneienkmdqilqepInpInydtisglagigryllnrvdanatnvkaikriltyfkdiqysqns  
wvvpqesqflesdknyfte  
gninlglahgvlgpmslfalcvikgitienhqhilkmykfivdekfccndrwlqrydlisernhfnyirngwcygntgv  
mttlfligqalqddeiiqa  
skkvm1qvndkekn1isptichglssqilm1ttmnlhfesnvvsdyinelinklishykenh1vnfidinenqegvfks  
qkvgl1ege1gv1t1it1  
qntnilneknwt naf1is  
>tr|Q2YTR0|Q2YTR0\_STAAB  
mgknvlic1cgsvnsin1shyie1lkskfdevnviastngrkfingeilkqfcdnydefdnplnhvdiankhdkii1  
patsntinkiangicdn11  
1tichtafek1sifpnm1rmwenpvtqnnir1lkdygvsipyvni1sesyelasktfkknvapepykv1efi  
>tr|Q2YTR1|Q2YTR1\_STAAB  
mktikrvlnn1i1s1l1s1ftmstasaseeqysveykntatfnklvkna1nvynipe1hvaqikmtkthana1anyk  
ndikyinatcstc1tsekt  
idrtsnes1fsrqwdmnik1tngasydd1pkhantkia1idtgvmtqthdd1knnfstsknlvp1ngfrgtepetgdvr  
dvndrkghgtmvsgqtsan  
gr1igvapnknftmyrvfsgskte1l1wvskai1vqaandgnqvini1svgsy1tv1dkndhqtfrkdekveydalqkainyak  
kkks1ivvaaagndgidvnd  
kqkin1qreyqngvekvdpasmdnvv1vgstdqnsn1sefsnfgmnytdivapggsfay1nqf1gvdkwmnegymhkeni  
1ttanngr1y1qagts1at  
pkvsgv1a1i1dkyh1ekhpdkaie1llyqhgtsknnkpf1sryghgeidvka1nvt1nqkas  
>tr|Q2YTR2|Q2YTR2\_STAAB  
mak1vteniskrfknqdv1khinit1ennevyg1l1ngagktt1mkiicg1lqdsgei1l1dnqpmkrnd1hkvgslie  
tpttynh1saqdn1kivc1  
nesvdfseiknvl1n1n1vd1kkkkvkd1fslgmkqrl1giamalikkpeil1v1depsng1dpygiqel1re1l1k1l1teqgts  
i1isshil1seiql1adhig  
i1hegel1kyqqrnnkden1edi1ffkitkgdyk  
>tr|Q2YTR3|Q2YTR3\_STAAB  
mi1h1kiegikfkn1s1fsm1y1v1l1s1pl1v1f1c1fai1ft1v1faksng1tansv1s1pyit1l1fniw1pia1fipiv1l1cmacn1l1fkiem  
rnksfn1y1sn1n1ws1it1kei  
raki1f1l1s1a1f1vhc1fl1vyi1ayig1d1iin1ph1p1vnam1l1l1vt1il1fmyv1vs1pl1ip1l1n1f1l1tryf1gv1fvs1il1n1l1svic  
vif1t1k1s1l1fw1l1pwaimq  
ri1l1vt1g1il1png1lvvn1h1nskyfnd1nalyisi1i1si1il1failt1f1n1n1k1swr1k  
>tr|Q2YTR4|Q2YTR4\_STAAB  
mi1nelksck1k1f1skqal1tfvpi1vi1il1fil1fin1wyl1n1vnewn1grqis1l1ftas1fnait1s1l1is1invy1qvin1feenighfn  
hilgkanr1n1w1nas1mif1t  
ytitaic1il1las1in1l1whshdmkit1m1figvs1l1ffnvi1l1l1l1l1f1f1s1if1ikdvmaivvgv1mfi1fnvyf1glev1gdhswf  
ylpityatryvymfi1egsi  
pvt1t1lai1y1i1it1l1l1av1l1fk1gfnkwsgrtikd  
>tr|Q2YTR5|Q2YTR5\_STAAB  
mntk1f1gkt1vasa1v1l1tt1gt1hssy1gl1dtnkvvtakads1tdgq1wl1gvknplidaqi1sgnkdeevkvsyirnd  
gqns1vtaygns1nddfsst  
psnfsk1lke1d1l1kkn1vp1gndfnt1tvngdecwnk1tsk1lkek1gl1tdgqvt1incndksn1st1t1svsgkvgegi1ssgs1gt  
vftkrf1d1kitie  
>tr|Q2YTR6|Q2YTR6\_STAAB  
vni1lyfi1rtkkdm1hqhvnetnqyy1l1nei1esn1knvft1nrnysiqvkiaksdprn1n1srkks1i1q1sssi1nnt1l1vpni1  
ihtcfid  
>tr|Q2YTR7|Q2YTR7\_STAAB  
mk1lafafi1f1cvks1cs1l1fm1ngn1prpeq1nkaseftg1mdnmry1yddkhvsetnikaqekflqhd1l1fkingskidgsk  
i1l1ktefn1ks1l1s1dkyknkn  
vd1fgtnyynqcyfsadnme1ndgr1iektcm1yggvtehdgnq1dkn1l1tdnshn1likvyenernt1sfdistnkn1nit  
aqeidykvrny1l1khkn1y  
efnsspyetgyik1f1egnsh1s1fwydmmpesgekyf1ptky1l1iyndnktvesksinvevh1tkk  
>tr|Q2YTR8|Q2YTR8\_STAAB

Tsompanidou\_et\_al\_Supplemental\_FASTA\_File

mpeiigivkvdftdlednrhvyllkghvyprkgynptdervkslasvenkrneqmiyivndkltkkelveianlasldvde  
kqtkaeiisafeslv  
>tr|Q2YTR9|Q2YTR9\_STAAB  
mttlddvkkriglkddkqdeqlqeiikscesqllsmllpieveqiperfsymikevavkrynrigaegmtseavdgrnsy  
eLndfkeyeaiidnffnar  
trtkkgravff  
>tr|Q2YTS0|Q2YTS0\_STAAB  
mryedravfqleqiatynpkskntfi tydaipcninpi srarkql efgdvkndvsvlrvkesisyvshvlingiry  
kivdtrayrhetsyyieev  
n  
>tr|Q2YTS1|Q2YTS1\_STAAB  
mnidglgallnqfhdmknnieddvdi1ldkakeyvvraklkarevmnkgywtgnlsrni rykktgdlytitshaaysg  
flefgtrymeaepfmwpvy  
evirkstveelkalf  
>tr|Q2YTS2|Q2YTS2\_STAAB  
mtpnlqlynkayetlqgygfpvisrkemqei pypffvikmpesnrskytfdsysgdtnlvidiwsvsddlghhdelvkr  
ciddltpsvktnnydfed  
dtnitqlvddttngellhtsvtisyktf  
>tr|Q2YTS3|Q2YTS3\_STAAB  
manmksndrii1frkagekvdatkmlflteygl sheadtdtedtmdgsyntggsvestmsgtakmsygdafadeiedav  
vdrvl yeawevesripgkg  
gdatkfkakyfggfhnkfelkaeangideyeyeygvnrgfqrqfatlpeavtkk1kaagykfhdttkedaltgeeltaip  
qpkvdspssvpgv  
>tr|Q2YTS5|Q2YTS5\_STAAB  
mstlgi tdl nvi eqmtl teynyri yakeyeml tqeferyklafairdaatkngvtenkpkkeyvfnandvlypeeni q  
rlnegkdi rfsserdeyep  
qneffkviaefnkq  
>tr|Q2YTS6|Q2YTS6\_STAAB  
mteykikatieasvakfkqidsavksvqrfrvadqtkdvelnandknlqktikvakksldafsnkqakakldaniqdl  
qqkvl esnfeldklnska  
spevklqkqkltkdiaeaeaklselekkrvnidvnadnsknrvlkskssleafnrskakaiidvngvanskikrtke  
elksipnktrsrldvdtgl  
siptiyafkksldalpnkkttkvdvtnglkkayayikandnfqrqmglnanmfrvfgtvgvsnmvgglltssfsilipv  
iasvvpvfallnaikvl  
ggv1alggavai agagfvafgamaisaikm1ndgtlqassatneykka1dgvksawtdiikqnqsai fttl angln tvkt  
amqslqpfsgisrgmeea  
sqsvlkwagngsvasrffnmmttgvsfnkllsaaggfgdglvvnftqlapl fqw sadwldr1ggsfsn wansaagens  
itrfiytktnlpiignif  
knvfaginlnnafsgsstgifsleqmtakfrewseqvgqsqgfkdfvsyiqtnngplimqligniarglvafatamapi  
asavlravaitgwianlf  
eahpataqlvgvii1lvgaf rliapilatiflgvfgir1falvskfgllragltilkgafmllkplkiisvifqllf  
gkiglinnavtglvtvfgi  
lggpitiivigviaal1aifvllwnknegfrnfiinawnaiktfmvlnvwnvlkavasvwnailtaittavsnvynfimii  
wnqivaylqglwngiitia  
ttvwnllvtiittvfttmtivmtiwtaiwftl1stiwntiitiattiwnllvtvittvfttmtitmtiwnaiwftlqt1  
wntiivtattvwnaittai  
stalqaawsfisniwntiwsflsgilttiwnkvvsiftqvstisdkmsqawnfivtkgmqwvstitstlinfvnrviqg  
fvnvnkvsqgmtnavnki  
ksfigdfvsagadmigr1irgigmagqlvdaaknvakaldaaksa1ghspsrefmdvgmysmlgfvkgidnhsskvi  
rnvsnvadvkvdfqptln  
apdissitgnlnlgninaqvqhthsietspnmktvkveldinndaltsivngrnkrnseyyl  
>tr|Q2YTS8|Q2YTS8\_STAAB  
mtiivrpkgngapvpvettlvkknadgvl tfdilenkytyevinaigkrwivshvegendkkeyvitvidrksegdrq  
lvectareipidklmidri  
yvnvtgsftveryfnivfgtgmi fevegkvksskfenggedtrlemfkkglehfgleyki tydkkkdrykfv1tpfsn  
qkasyfisdevnanaikle  
edasdfatfirygnysgeetfehaglvmearsalaeiygdihaepfdgkvtdqetmnelqsr1kks1kqs1sldflv  
lresypeadpqpqdivqik  
stk1glndlvrihvkti rginnvivkqditlgef nreqrymkkvntaanyvsglndvnlnspskaeenlkskvasiaks  
tldlmsrtdliedkqqkvs  
sktvttsdgtivhfdvksnikdvktigtigdsvargshaktntfemlgkklkakttnl arggatmatvpigtdktensi  
yrqaeqirgdliivqgtd  
dwlhgywqgvpigskid1ktfygafcsaini ikennpqakilvmtatrqcpmdgtkirrkdtdknk1gl1tledyvnaqv  
lacselvpydayhtdyf  
kpynpaf rksmpdglhpnerghevimeyeliknyyqfyg  
>tr|Q2YTS9|Q2YTS9\_STAAB  
msnklitdl1srvdyryvdeneynfklisdmltdlnfsleyhrnkev fahdgeqikyehlqvtssvsdf1tylngrfsm  
ilghngdginevtdarvdn

Tsompanidou\_et\_al\_Supplemental\_FASTA\_File

tgyghktlqdrlyhdyskl daftkkvekavdehykeyrateyrfepkeqepfitdlspytnavmqs fwdpckti ymt  
qarpgnhym1sr1kpnqgf  
idrllvknngghgthnayryingelwiysavl dsnkknkfvr fkyrtgeitygnemqdvmpnvfndrytsai yn pvenlmi  
frreykaseqqaknalnfi  
evrsaddidkgidkvl yqmdipmeysstqpmqgi aydagvlywytgds npanpnylqgfdiktke llfkr ridiggvnn  
nfkgdfqeaegl dmyydl e  
tgrkalligvtigpgnrrhhsisigqrgvnqfl kniapqvsmt dsgrv kplpvqnpaylsdvteignyy lysqdtkna  
ldfplpkefrdagwffdv l  
pghyngavrqv ltrnstgrnm l kfervidi fnkknngswfnpq sagywehipksitk lsd lkivgl dfy itaeskrft  
dfpkdyk giagwv levksn  
tpgnttqv lrrnnfasahqflvrnfgtggngswsi ikgeevk  
>tr|Q2YTT0|Q2YTT0\_STAAB  
mvvdnfskddnl ielqttsqynpvidtnisfy esdrgtgvl nsvtknrrplsissehvktsivl ktddynvdr gayisd  
eltivdaingrlqyvipne  
flkhsqkvhagafftqngsnvverqfsfni endlvsgfdgitk lvyiksiqdtieavgkdfnqlkrnmatdqtliakv  
ndsatkgiqqieikqnea i  
qaitatqtsatqavtaefnkivekeqai farvneveqqingadlvkgn tttwqkskitddygai esseqsidsvlsav  
ntsriihitsatdapsfdk  
igtvdtpkedgidgds dipapntlgksgvlvyvvdstaratwypddsndeytky kiggtywpyfkndgd ltkrfve  
etsnna l nqakqyvddkfg  
ttswqhqhkmteangqsi qvnl nnaqgd lgnlsagnyyatrvpnlpsgaesyegylsvfvkdetnklfnftpsnskrvytr  
siingkl dsqwtvpnehkt  
svlfdgaasgvgttinl tepyt nysvllisgtyppggi etfgl talpnaiqlskanvvdtdgnggggiyec lltktsstl  
ridndvyfdlgkts gsgan  
ankvtinkimgwk  
>tr|Q2YTT1|Q2YTT1\_STAAB  
mki tvndknevi gyvntgg l rns l d v d d n n v p i k f k e e f e p r k f v t n g e i k y n n n f e k e d d s n t p s q q n a s d l s d e e l r  
rmvasmqmqmtq lnm ltmq  
l tqnak l tqql telktnktnteggr lndeddl snf  
>tr|Q2YTT2|Q2YTT2\_STAAB  
mfglfnkrfyeqnwriqr ledndktmfek ldkiehgqkaqekvsdk ldr t l demkrere ldkemkeknaknikd lktwvm  
gligt ilgs l i i a i l r t v f  
gi  
>tr|Q2YTT3|Q2YTT3\_STAAB  
mg l p n p k t r k p t a s e v v e w a l y m a k n r r v i d v d r a y g g q c w d v p n y i l e r y w g f r t w g n a n a m a q s n y r g r d f k i y r n t  
asftpkpgdwavwanrnpq  
hvai vvgpadkna fvsdqnywtanwsgsppyki khtyhdgpggvthfv rppyhpdktt papqpvpkpkddsddkeknk  
kvpwkdvktikyti ssqe  
vnypeyiyhfivegnrrlekpgkimi rnaqtmssvenlynsrkykqdv eyephfyvdrhniwaprravfevpnepdyivi  
dvcedysasknefi fneiy  
amgvavdmmveyeiplsienl kvddsiwrsm lehvnwmi dngvppkdkyealeka ll n i f k n r e k l l n s i t k p t v t k s r  
ikvmvdnknadianvrds  
ptanngsaskppqii tetspyt fkqal drqmsrgnpkkshtwganatraqtssamnvkriwesntqcyqm lnl gkyqgv  
svsslnkilkkggtlnngq  
kafaeackkhni neiyliahaflesgygtsnfasgkdgvnyfgigaydnnpnyamt farnkgwtspakaimggasfvrk  
dyinkgqntlyri rwnpkn  
pathyatai ewcqhqastiaklykqiglkgiyftrdkyk  
>tr|Q2YTT4|Q2YTT4\_STAAB  
mykiqdi etrinkktvdigdigcrfytedentayvrig indekgrinfkesnltpklhlfaedgsi fknepv liddnvkg  
fltykipknvikhvgmvrc  
klflendherihvanfhfyiidsgidnavqkesitlvedtvkri irtnasel l g d d f k e t l n t t a k q y i a d n a d k f k g e  
rgergekgeagergaggia  
gtsaditdaignfsnlkdvvn lplqpnfveevnlsttkgdmvtsivhapsqtfhvvpissralrvwfnknqkddyii  
freteigdyanenksigyq  
nl emvds smfntsyapnyyattvgat lkg t i i a d k i n f t s y c n n v g g i w e a i l d e g t i n e q r k t i s t y s s t n k v d n e q l l  
fdnl dykkhtlklvykgqd  
psypvssprgwl yfggarpqdvkgtinvfklvpvvtntvtslysysnkdvamqirgannstgeqfvpehngiatafknke  
akllgdnlkelpfitdrvyt  
diknsvlvqningrvdsddl vniitnhsikngaisvysvklfkn tyvktayagmvpyftknvniksslnntykpdig  
tyriekmpek lqaksyvl  
ndtndv itafefeniikt nrindnaikgdtwiehrnadmgki ynqqfkeetieagyewqfkl nyrtteipyantli  
>tr|Q2YTT5|Q2YTT5\_STAAB  
mdinwklrfknkav lglvga lllfikqid lfgldlstqlnqasaiigailtlltgigvitdptskgvadssiaqtyqa  
prdsseeqqvtwktsqdt  
sltpel sakvpkeydtsqpftdasnevgfdvneyhygggdnsktn  
>tr|Q2YTT6|Q2YTT6\_STAAB  
mqakl tkkefi ewlktsegkqynadgywgfqcdfyanagwka lfglllkgvgakdipannfdglatvyqntpdf laqpg  
dmvfvgsnygagyghvawv

Tsompanidou\_et\_al\_Supplemental\_FASTA\_File

ieatldyivveqnlgggwtgdvqqpgsgwekvtrrqhaydfpmwfi rpnfks etaprsvqsptqaskketakppkav  
elkiikdvvkgdylpkrgs  
nfnfvi hndagskgataeayrnglvnaplsrleagiahsvsgntvwqaldesqvgwhtanqignkygygievcqsmga  
dnatflkneqatfqecarl  
lkkwglpanrntirlhneftstscphrsvlhtgfdpvtrglpedkrlqkdyfikqiraymdgkipvatvsndssass  
ntvkpvasawkrnkgytty  
measarftngnqpi tvrkvgpflscpvgyqfpggycdyevmlqdghvwvygtwegqryylpirtwngsappnqilgd  
lweis  
>tr|Q2YTT7|Q2YTT7\_STAAB  
mwyfyifysrflsqveivssrqvlrylpi fyfiitcvysrnelyspaeaiyltvglgtgdiflvitryiyl dneillqs  
hlp  
>tr|Q2YTT8|Q2YTT8\_STAAB  
mlnvl111iyliaicsvnnayaneenpkiedlckkssvddialhnikdymtrftinespvlttekfl dfdl1fknftw  
ldgksaefkd1kvefssse  
iskeyfgktvdiygvykahchgehqvktactyggvtphenklnepkeigvavykdnvntfivtt dkkkvtaqeldi  
kvrtnlnnvyklydrmtsd  
vqkgyikfhshsehkesfydlyfikgnlpdqclqi yndnktidssdyhidvlyft  
>tr|Q2YTT9|Q2YTT9\_STAAB  
mkkfkysfi vvf1ffnvdy1syaqgdigvgnl rnfytkydyid1kgvtdkn1ptanql efstgpn dlisesnndeisk  
fkglklidifgidynpcks  
kymyggat1sgy1nsarkipinlwngkhktistdkiatnk1vtaqeidvklrlylqeeyniyghntgkkeygyks  
kfygfnkgkvlfh1ndek  
sfsydlfytdgvpvsflkiyednkiiesekfh1dveisyvdsn  
>tr|Q2YTU0|Q2YTU0\_STAAB  
meqtqklkl1n1qhfasnnpqvfnpdnvmhekkdgt11ndfttpilqevmenskimqlgkyepmegtekkftfwadkp  
gaywvgeggkietskatwv  
natmrafklgvlpvtkeflnytsqffeemkpmiaefykkfdeagilnqgnnpfgksiaqsiektnkvikgdf tqd  
idlea1leddeleanafis  
ktqnrsl1rki vdpetkeriydrnsdsldglpvvn1kssn1krge1itgdfdkliygipqlieykidetaqlstvknedg  
tpvn1feqdmvalratmhv  
alhiaddkafak1vpadakpssvpgv  
>tr|Q2YTU1|Q2YTU1\_STAAB  
mteqt1feqlnsknvndhte qngltylawyahqelkkipnytkvhfphpdintenyfvpylatpegyfvqsvtv  
kgstetewlpvldfrnks1  
akgsattfdinkaqrckfvkasa1hg1glyinygeel psasdn diteleerinqfvnlseqgrdatidktrw1kisni  
nk1sqkqiaeahqkl dag1  
kq1dseek  
>tr|Q2YTU2|Q2YTU2\_STAAB  
mlnrivlvgr1tkdpelrstpnngvngtftlavnrftnaqgereadfinvvfkkqaenvknyl skgslagvdgrlqtr  
nyenkdgqrvfvtevvads  
vqflepknnnqppnnnyhqqgtqtgnnpfdnteedfsdlpf  
>tr|Q2YTU3|Q2YTU3\_STAAB  
mpii tsy1tqddgtttvvisgvelgnket111dngfdvevdvni dpfk1tgkqrrki falvk diehtgqpm dymrhmf  
ieyvrtyygyderis1snc  
trtqasriieatldwtfyndip1syktsn11kqdksflywstvnrcvicgkphadlahyeavgrgmnr dkmnhydkhv1  
alcrehhneqhaigvksfd  
dkyq1hdsw1kvder1nkm1kgekk  
>tr|Q2YTU4|Q2YTU4\_STAAB  
mnl1iddypiqvlpklael1g1neav1qqihywl nnskhydgktwifnsypewqkqpfwsertikrtf gsl ekqn1  
1hvgnynkagfdrtkwysi  
nyet1nk1varpsgqngptmrtnw hdargqndptntidytetnk hretddvsksfkyisanleii qnplkaeqleheiks  
fkqdqfeivkvatdycken  
nkg1ny11tv1knwnkegvsdkesaenk1kprntkketddviaqmeke1sdn  
>tr|Q2YTU5|Q2YTU5\_STAAB  
mpmsktqalei ikkvyryvni dfdkpk1emwiv1sqngdyqptvkavdgyinsnppypnlpaimrkepkkvsiepvdn  
etathqwmqndpeyvrrq  
kia1dnfmnk1aefggdne  
>tr|Q2YTU6|Q2YTU6\_STAAB  
mnyggfeiesti1at1lkqpdvleki rvkdymftnekfktffnyvmdagkidhqeiy1katkdkgfl dadtitklynsdf  
igyggfferyqqel1lesyql  
nkanelvtefkqppnqnfn1idelkdlk t1tnkkedgkfkveefveelysdspkkqiktgyklmdykigg1epsqli  
viaarpsvgktgfalnmml  
niarngy ktsffs1ettgtsvlkrm1stigtie1tkikeirnltpdd1tk1tnamdkimklgidisdksnvtpqdvraqa  
mrysdeqqvifidylq1md  
tdakvdrrvavekisrd1kianetgaiiv11sq1nrgvesrqdkrpm1sdmkesggi eadaslam1lyrddyynr dedd  
gitgksivecniaknk dge  
tgiiefeyyktqrfft  
>tr|Q2YTU7|Q2YTU7\_STAAB

Tsompanidou\_et\_al\_Supplemental\_FASTA\_File

mnimqfksllrsmyeetkqndpivanvyietgwavnrlldnneispfdeydkvekkimneinwkkthikec  
>tr|Q2YTU8|Q2YTU8\_STAAB  
mpkekylyredgtedikvikiyidnvnevysltgahfsdekkimtdsdllkrfkgahglllyeqelglqatifdi  
>tr|Q2YTU9|Q2YTU9\_STAAB  
mskynakkveykgivfdskeveyyqylesnmngtnydrieiqpkfelqpkfgkqrpityiadfslwkegklvevidvkg  
katevanikakifryqyrd  
vnltwicakpytggewmvyedlvkvrkrkremk  
>tr|Q2YTV0|Q2YTV0\_STAAB  
mgsvviinnkpykfnnferelmskriginagivskrvrgcwefsealdapygmhkeyremkqmekvkqarlereiarqrr  
keaelrrkkphlfvnpqkh  
srdpywfdvtynqmfkkwsea  
>tr|Q2YTV1|Q2YTV1\_STAAB  
msiisnrkvdmmemqdnvkqpahytygdievidfieqvtaqyppqlafaignaikclsraplnghedlakakfyvqraf  
dlwe  
>tr|Q2YTV2|Q2YTV2\_STAAB  
mtmdnarkeylnqffgskrylyqднеqvahihvvnngtyyfhghivpgwqgvkktfdtaeeleiyykqhgleyeekqlt  
lf  
>tr|Q2YTV3|Q2YTV3\_STAAB  
mkvnyetgfglgvmdarlkmmrkqrdeykkqryeliedmaklrenkelekanawdrycksvetdlnghfnkriwqr  
>tr|Q2YTV4|Q2YTV4\_STAAB  
mnnrehiqsvisasayngndtegllekeiegykkaqafdeileglpdamqysleegiklnesvgimagqvvykyeeeqe  
neef  
>tr|Q2YTV5|Q2YTV5\_STAAB  
mtntlaidqlqellqikefddriptrnlndavasmiiefaewntleffknwkkqpgkpldtqldeiadylafslqltl  
tivdeedleettevmvdl  
enevtlplkshsvyfvhvmhtlteqfvkgidnsivqvlimpflyantytytidqlidaykkmkrnherqdgtaggyv  
>tr|Q2YTV6|Q2YTV6\_STAAB  
msyitlvllivfivi fnnlfnrymvlykeldlftcrigmllvlivivdfakqkmlatlsvvlillfveklriiqrsdk  
k  
>tr|Q2YTV7|Q2YTV7\_STAAB  
mtqylvttkfdstglphehitvardnqftvveaeskeeakkkyaqvkrdaikvsqlfenirecgk  
>tr|Q2YTV8|Q2YTV8\_STAAB  
mikqilrllflamyelgkyvteqvfimmtanddveapsdfaklsdqcdlmaevse  
>tr|Q2YTV9|Q2YTV9\_STAAB  
mslrkstqryleselsnyfydkdiarvrdevlnpwsqqdtniggdrvqsnsvsteikairvndrrlsqlarmksaiev  
vynhstvetqklmelyyfk  
kprtlnltgvaqeinvskestaydmrkdilvrladelgih  
>tr|Q2YTW0|Q2YTW0\_STAAB  
mvvnemnkltkqrlfaevytipgtecygnatksavhagysektaysqgqrmknveiqnyikevetklfdenimgkev  
lyrltrtargehseveaiv  
tktdykenpdtgkmlvydehiqlvsktpkisdqnralemgrhhlftdkqevdykipmfvdnipedd  
>tr|Q2YTW1|Q2YTW1\_STAAB  
myeldlknkiggykfwknsfyrvvkgsrgskskttainfiyrimkydwani lvrrfsntnkqstytdlkwatnq  
lgvahlfkfneslpeityk  
ptgqkilfrglldplkitsitvdtgilcwawfeeayqietfakfstvvesirgsydsppdfkqitvtfnpwserhwkfst  
ffdeetklnntfsdtttyr  
vnewldkvdieriedlyiknprrarivcdgdwgaeglvfdnfvkvtfdwrekfkrtqeahgmfdgftfdpttlintvv  
dlknkelwiydehsekaml  
tddiinmikrkygdahivadsaekrliteisrkgvpnikpsvkgantimqgvqfiqgfkvyvhpscvtieelntytdf  
qdsegnwinkpidknnhlm  
dalryslekyhiklkrkknaesktkvikslgl  
>tr|Q2YTW2|Q2YTW2\_STAAB  
mlkvnfetdtdlrenrylfndeanvvytydgesdlqnnevskyiehhmdyqrprlklvsdyegktnlveltrr  
keeymsdnrvahdyasyis  
dfingyflgnpiqyqdddvdleaeafndlndvshnrslgldlsiygkayelmirnqddetrlyksdamstfviydn  
vernsiagvrylrtkpidk  
tdedevftvdlftshgvryltsrtsglkltprengfeshsfermpitefsnnerkgdyekvitlidlydnaesdtany  
msdlnamllikgnlnldp  
vevrkqkeanvlfleptyvadsegretegsvdggyiykqydvqgteaykdrlnsdihmftntpmkddnfsgttsgeamk  
ykgfgleqrktkeglftk  
glrrraklletilkntrsdankdfntvryvynrlpkslieelkayidsggkissqtlmslfsffqdpelvkkieede  
kesikkaqkgiykdprdin  
ddeqddtkdtdvdkkegl  
>tr|Q2YTW3|Q2YTW3\_STAAB  
mkrdktkaeerilnmmikriekeinafiykygdfagvtlqeaqkidefdvkafqeeakrlvenkdfsdraneelkky  
ntkmyvsreqmlkiqief  
iayataqtelmsreyfestayrvfsdqagilgegqvakevidtividtdqfhgvvwserlwtnteamkqeveeianvvir  
grhpneyvkdmrkhlnkfe

Tsompanidou\_et\_al\_Supplemental\_FASTA\_File

gtarqktaaiks1lytesarvhaqssidsmkeispegyymiakidsrttkvckglngeifkvkdakigvnyfypmhincr  
sdcallpksmwpkpkpskkr  
kkyfggkvksd  
>tr|Q2YTW4|Q2YTW4\_STAAB  
mdiqeklk1klqffaeesdednge1kdnnddegdkdqdtktntseeiekr1qeeynkr1keelsrrmkqkekekqavde  
akr1akmnkdqiaeyereq  
mekeleqlrseqqlnemrsearem1seaevdssdevvn1vvtdaeqlnveafsnvkkavseavkvnarqsp1tggd  
sfhntaknktqn1aeiakq  
kriikn  
>tr|Q2YTW6|Q2YTW6\_STAAB  
mtksvaiigagitglssayflkqdpnidvtifeasnrpggkiqsyrkdgyimielgpesylgrktimtelakdigleqdi  
vtnttgqsyifaknklypi  
pggsimgiptdikpfvttklisp1gklragld11kkptqmqdgdsvgaffrarlgnevenlieplmggiygtddikls  
1mstfnpfkekeefgsli  
kqmkdekkr1kqrqlypgapkqfkgfkhglssfiealeqdvknkgvtiryntsvddiitsqkqyivysnqqedvfdg  
ilvttphqvflnwfgqdp  
fdyftmdsttvatv1afdekdientydgtgfviartsdtditactwtstkkwfttpegkvlirayvgkpgdvtvddht  
dnelvsivrrd1sqmmtfk  
gdpeftivnr1pkmpgyhvghiqqir1qahikqtyp1rvtgasfeavglpdcitqgkvaeeviael  
>tr|Q2YTW8|Q2YTW8\_STAAB  
mkryrffity111rkvvragrrstpgkcvgtvsrvripyl1fsyplnlvkqnvdltgicyit1sfdlyrrriltf  
pkrsqdm1ilyit1spkin1  
tfpsyfpmhral1fl1fvrfl1inenkhp  
>tr|Q2YTW9|Q2YTW9\_STAAB  
msvnkygkgwydfghegkrykkkgttkreavqaesiarnkvmkgfkindktsfiayndwikvnkegvitdkayatf  
knainqfktf1evenisn1  
v1sd1nttfyrkfkwygshstetvrkihnc1kqpidaiqeg1ihkdptykvvvkgtpaqreekfmsikdfin1ke  
yvsntpiqsy1fiyil1it  
ggrfgevqr1ctsd1dyknctih1pgtktetsdrtvdipqndmki1kntlaempis1ttq1fntgts1ithnavtkvmqr  
yclekrigkyt1hsirhth  
csy11hdvsiyyiskr1ghksiktmdvysh11deieqkekeka1dalenmtgt1n  
>tr|Q2YTX0|Q2YTX0\_STAAB  
mkr11ylilasalvlgacgsndgdkkeeskkttetkknkdkkketkdkaeakkenanqndnnnqvndnntvndhqqt  
napkqngtqnnptsnknn  
apvkdefssdtsynayqeakrateenkrqnggtagiggswavqdgqdynswkkaqndfdnfkrqseviqq  
>tr|Q2YTX1|Q2YTX1\_STAAB  
magdk1tfkei1tetkmfslsrkidmykkmttdekrki1ndfkegkeldiqlkyksenfkntneeyesksaks1ngggi  
keatdvttayqkqinpt  
1lkvyng1gtfttnvdqakfvfydtq1kqnfvsiaqrde1kqnnrieqnnevid11kqiankgv  
>tr|Q2YTX2|Q2YTX2\_STAAB  
m1lyryk1emrqt1mtkekdlky1mekksgsvkafseeiglayttvrsilergvfnakvenvikcnglnirpedimdik  
qtkpiepqi1pvkkipv  
vskisag1piyceen1vdyiyfsrdk1ndekeefglkvsgdsmk1fdgdvvvveksivengqlgvvmingyngtvkr  
iryngdqii1ipesnnpsh  
ypqvygkddevki1vgrvvasvkt  
>tr|Q2YTX3|Q2YTX3\_STAAB  
m1knfndirkdkkvs1vd1ad11evryqtvadkingvsdfkfgeallikntyfpeydieflfekekekqts  
>tr|Q2YTX4|Q2YTX4\_STAAB  
mqalqtfnfke1pvtveienepylvgkdiaeilgyaradnairnhvdsedk1thqfsasqnrnmiiinesglyslifd  
askqskneni1retarkfkr  
wvtsdv1pairkhgiyatdnvieqt1kdpdyiitv1teykekeqnl1lqqeigelkpkadyvdeilkstgtlattqiaa  
dygisak1nk11hear1q  
rkvnkqwl1ysehmgksytestiaivrsdgretdv1qtrwtqgrlkiheimtefyeanvta  
>tr|Q2YTX5|Q2YTX5\_STAAB  
mdn1n1tqrq1d1ikknqai1sk1pietyakvntmnd1rinqsk1sdwasymhrvtnhpmfkt1fseki1defissn  
sfpedevrkvsth1rnsfv  
dtvdvp1gktvdsahpidvntekynsvfnes1nhifispsakfikkgsvglvsaigtppvmvrtildqyvnyfmmf1nvi  
at11tlyvian1dden  
>tr|Q2YTX6|Q2YTX6\_STAAB  
mqalqtksnigemfnigekengeiaisarelykalevkkrf1sawaein1khfkenrdftsv1tstvvngavrql1edya1  
t1dvakhvammsgtekgfd  
freyfiqvekawnspeimqral1kianntinq1etkierdkpkivfadavattktsilv1gelakiikqnginigr1fe  
w1rqngfl1krkgvdymp  
tqysmerel1feiketsi1thsdgtsisktpkvtgkqgyfvnkfl1gekqtt  
>tr|Q2YTX7|Q2YTX7\_STAAB  
mntktwmtkd1etetsksrnl1kkn1levpykkeieefahypinrnde1yrfvsgkmmqf1edkfl1ilg  
>tr|Q2YTX8|Q2YTX8\_STAAB  
msktyksyliav1cftv1aiv1mpflyfttawsiagfasiatfi1fykeyfydnkge

Tsompanidou\_et\_al\_Supplemental\_FASTA\_File

>tr|Q2YTX9|Q2YTX9\_STAAB  
msdkd1meevdkrkkekltvreigy1lgsdtyfiklrngsrriidrkrdrinrylneydvnkipkysrdseqaaydk  
gykqal1kdl1eefvnnkkta  
tcdnk  
>tr|Q2YTY0|Q2YTY0\_STAAB  
mtkkykdmqtqeeikdl1sekteaelyelakeikgeskfdi1l1fssigvidgdylagsssvightfdlas1ldstksykdiv  
nvlqmcksqkflgiddske  
d  
>tr|Q2YTY1|Q2YTY1\_STAAB  
myyeigeiirknihvngfdkflf1lkgmgis1qvkdmnvpikhayvadend1dmasel1nqaidewieentdeqdrli  
n1vmkw  
>tr|Q2YTY2|Q2YTY2\_STAAB  
mtkkmgl1vmaygtpykesdiepyytdi rhgkrpseeelqdlkdryefigglsp1agttddqadalvsaln1kayadvefk  
lylglkhispfiedaveqm  
rndgiteaitvvlaphyssfsvgsydkradeeaakygiqlthvkhyeepkfieywtknvnetlaqipeehkdtvlvvs  
ahslpkgliekndpypqe  
lehtal1ikeqsniehiaigwqsegntgtpwl1gpdvqdl1trdlyekhkyknfiytpvgfvcehlevlyndyeckvvcdd  
iganyrpkmpnthplfig  
aivdeiksf  
>tr|Q2YTY3|Q2YTY3\_STAAB  
lki cevlmskdkdpk1nyheensmvtdefl1kdl1gkemeq1sdqndqeknseedsq  
>tr|Q2YTY4|Q2YTY4\_STAAB  
msevinyqfr1nvvli1fkiefliyyyvwytnqcfmlykvi1lavvcdpqtqqlryvs1l1phaswlatnteaggksasmni  
ikk1gnkmlpnf1fk1inp  
i  
>tr|Q2YTY7|Q2YTY7\_STAAB  
mkfk1ipenfnd1slrdi1fqqlkvpkkl1hh1nmskdi1tindkpar1mdkvhtddd1fvptideksnyvpsyryaqikyed  
ddmai1vmkpkgvkthpnd1  
kesnt1mnhviy1tvdsdyvepihr1dqetvg1livaknplmkkil1drml1ednditriykanvkal1plkpqtidmpigkd  
kfhskrrvsptggraith  
iltskmi ketvcqleik1dtgrthqirvhl1aeighpvigdp1ygdst1rqlelesykiefvhpl1tkevisvs1dd  
>tr|Q2YTY8|Q2YTY8\_STAAB  
meqrtr1al1keiaef1neetemysmtqgal1kyliegsnfttgwi1ffinsvgehel1vshval1pqs1tedhchyikdgcsw  
cvkafnqrr1mkasnivnc  
srin1askafpsqndni1thhatvp1ksgqeefgi1nvaspnteiysded1el1lesvafql1gsaikriyl1tdrekeakin  
ernr1ard1hdsvnqmlfs  
vkl1tahaaygmsnesiakqafktieetsqnavnemrali1wqlkpvgleqgli1haltaysklmhiql1nvnveg1id1snei  
eeniyral1qecinnvkkha  
dtnkmd1tl1kqmd1lyidvidyggqfeidnvqiasshginnikqrvk1l1rgkvtfhsqptkgtqi1qftipik  
>tr|Q2YTY9|Q2YTY9\_STAAB  
mnkvil1vddhyivrggl1rf1l1stieniev1qdfadgetfleyl1kehehpdiv1ld1l1vmpgmngieitvyikahypdikvl  
v1tsyvdehvisainkga  
dgyemkdvepqq1ietirrvmngekmihpkaqdvfetvsqkphytnk1skreiev1remvkgktnkeiaet1fvsektik  
thvshifsk1qvsdrtqaa  
iyamenkli  
>tr|Q2YTZ3|Q2YTZ3\_STAAB  
mvkfi1hcsdl1hdspfkkskshispkiefdvqksayesfknivdi1alqqdvdfviiagdl1fdsenrt1raeiflkqqfer1  
qneqi1fvyvchgnhdp1ss  
kissnwpdnvsvfsnkvetyeaitksgetiyihgfsyenrasyenki1deypssqgqk1ihigvl1hgtyskssvnerytef  
iled1n1sklyhywalghin  
erqq1sdmpvinysgn1qgrhfneqgekgc1liegdh1kl1ktkfyptqyirfeeatietdktksqglyeviqnfkeqvre  
egkafyr1tlvinsetlis  
pqdl1l1qveem1tdyeenenqfvyidelki1qyaqndespl1vnefsael1ldqtvfdkamsdly1npraskfl1ddygtfdht  
alvnraeei1kaemrgeqn  
dn  
>tr|Q2YTZ4|Q2YTZ4\_STAAB  
miiks1lei1gyggqfvqrkiefnknfteifgeneagksti1qafihsil1fgfptkkskepr1epr1gnqyggkl1vl1iddgl  
eieverikgsaqqdvkvy1  
pngavrddaw1qkk1nyi1skktyqgifsfdvlg1qdihrn1nekql1qdy1l1qaga1gstef1smrevinrkkde1ykksg  
knpi1nqqieql1kqlesqi  
reeak1letyhr1vddrdkssrr1en1khn1nq1skmheekqkeval1hdhsqewks1leqq1niepitfpekgvdryekar  
ahkqsl1erdig1rner1aq  
l1keeatq1lepvkgsdi1dafis1nqqenei1knkefel1taiekdi1ankqrdkdel1qanigwsethhdvs1seamksyvseqi  
knkqeqaay1kq1lers1lee  
nkiednavhse1ldsveeki1vpeetfekkkeysqqvieleken1ysk1kerfeieqqekqkrqk1l1rttf1ll1tlvgig1  
tafsfi1snm1lfgi1fav1  
tl1vfvi1gi1mskskevdyseaitdeieeikaql1aildenydl1dfdl1neqyri1rdhwqqa1knkdi1leekryiegr1nda  
kgrhdel1qstvenvkdely

Tsompanidou\_et\_al\_Supplemental\_FASTA\_File

lsskisndlivdsistmanikalqdhsdlnqqrqqlvqeldtfynhaeavtksqfvyfnklslfhdvqqwllksaedtne  
kwrinaentklvtneinh  
naqlennkeitalfdfinvgteedfyqhedyqytsnlsrfdlntkylenqnysyelssslsekttaqleedhllat  
qvdeyneqylemgaqisdl  
saqinhmetdtlanlrheyhslnqnlndiakdwaslsylqslvdehikqikdkrlppvineaveilkhltdgrytminy  
nedsitvkhvngglydpve  
lsqstkellyvalrislikvlrpyyppflivddafvhfdkkrtkmlnylrslsehyqvllyftcvkdnivpskevitlnk  
ieeggkr

>tr|Q2YTZ5|Q2YTZ5\_STAAB

mrnielnpgdsvdhfflvhkatqgvtaqgkdytmllhldksgeieakfwtatkndmatikpeeivhvkvgdiinyrgnkq  
mkvnqirlattedqkkteq  
fvdgaplspaeiqeeishylldienanlqritrhlkkyqerfytypaasshhnfasglsyhvltmlriaksicdiyp  
lnksllysgiihhdigkvr  
elsgpvatsytvegnlghisiasdevveatrelniegeeimllrhmilshhgkleygspklylkeaeilcyidnidar  
mnmfekaykktdkqgftdk  
ifglenrrfynpesld

>tr|Q2YTZ7|Q2YTZ7\_STAAB

mflckrqidinrvrgflpriafmsavatiimflvsyevmyflsntplsdhrhfliflllvfmytphksihllfflpyrksf  
kvhkltkrkwlifnytyvn  
qpvhkfyfcinlilpliiisamfvyltisfpqyghyfmflalnfgisitdillylkiifsnyygyieehstginilkki  
knpyhl

>tr|Q2YTZ8|Q2YTZ8\_STAAB

mc1qkfvlhststlvnqtilpiptfafqikqyvvpffiyinnssnmiicy

>tr|Q2YTZ9|Q2YTZ9\_STAAB

metkflnstlrsrsqflflvtaylffkikcqikemtleyryflsslfnynselmftnyrktlfvviifa

>tr|Q2YU00|Q2YU00\_STAAB

mkasrilfgigvgaagfvvalqgrddksvknntidrtaptgskselqrefetikqsfnidilnygvqtknesaefgssig  
geikslngfksdinpie  
rlqsyienlqnrgeidigneisk

>tr|Q2YU03|Q2YU03\_STAAB

mrnqattlfnkrhlalrkeknyynkfinghfmvflillgafifgygewlkhiptninfsliaavivaltsifpmp  
leadkifllpfekhmsqfm  
rhailysyfarilihliivivmfpfyninqhnavafyicfgvsalifpyvgrlrlwqwyqsglktwqvnllisfiifal  
yillapkwiyivfvmvalpv  
lieflvkkypgflpwekmaiehrhmnnykfvmnftdvkhlkesavrsvyldillpvpgkskfnsnamylflfirsf  
igrdafniiifrlviav  
lmwlsyplvtaiigclfyiillqmaqfysqqayglwpqvwvppeekvikgyeqflyrlmfvictvsvtfiikhmtlf  
yvllifyivglitirssik  
klkyqetllrd

>tr|Q2YU08|Q2YU08\_STAAB

mkclirfilvlgllissamgyinptahaeqdqtdwkikergelrvglisagyapmefhtvngkteyagvdiidlakkiakd  
nnlklkivnmsfslgall  
ktgkidiisgmtstlerkkqvdfsdsymmtknimlvkkdkvneykdikdfnkkvgaqgkteqekiaqteienasitsl  
srldpvilalksgkveaav  
vekpvaeaylkqnpklgisnkvfneekdtviavpkdspkllsqinktikevdkglidkymtnaanamnddsgfiskyg  
sfflkgikitilisliva  
lgsilgafvalmklskikiiswiasiyieilrgtqmlvqvfvffgitaalgldisalvcgtialvinssayiaeiirag  
inavdkgqmeaarslglny  
rqtmksvimpqaiknilpalgnefvlikessivstigveimfnaqvvgisfdpftpllvaaalyfvltfvltrimm  
iegrlnasd

>tr|Q2YU10|Q2YU10\_STAAB

mdtkqlkqdiidyaytigidsigfttadpfdelkqkleayhangyasgfeesdialrtepklsiptarsiaiaavgypnk  
lkgapksvrgdrgrlfara  
swgqdyhtimkrldmlaafieskvpdveiksmvdtgvlsdravaeraglgfvgrngfvnplkgtwtylgemlvsipfe  
pddplldscgdctivdrc  
ptsalvgngqlnsqkcsflqtqkgympdqyrykignrlygcdtcqqvcpknginieqddiilepeilkprlvpllrms  
nkefkqtyghlagawrgkk  
piqrnailalahfnevdaipelkkvattderpmirataywaigqilgeearfinanydgedaevqnemikgmdtrre

>tr|Q2YU15|Q2YU15\_STAAB

mgssivklkllkvthyyrnkqnkwylypfgyaedidlnnislhyygealgiigepesskasvgqllagaikpdkgkvv  
tedllyfyiedqslhqt  
eaytaqlvqlfpyeindhkaeqiqyahlgdyktkpvnhiskvayaqlllsiarssksniilnhvidyltpqfmerai  
lndyiennltivsigddi  
dkisqvsnyiawfshgqlrmegslkqvipsfkeherdrlslnskeeienfdldwkknrtripemtynfkrverynhaksp  
kflvrftlasgtlglal  
mmllifnngiisidftnratmqnenkdpygeklaygiafngsvdmqgdkqvtipkysvvtitgensknyrvtadnkty  
yvsdkklefypaglyqth  
sfkklapymksnysnyayfnsqllhkhssviktvpdddnrvasvtqqpiqlfndnnqlygfvypivdkkelkdkfn



Tsompanidou\_et\_al\_Supplemental\_FASTA\_File

innniwtkvngycianl  
kedkwiye1  
>tr|Q2YU16|Q2YU16\_STAAB  
mldniilyfknlphtkryvterlkqswksflivlavcliliasetlfsfshltdvkevrwlfriialivfavlmftiyi  
syhhymndflvtklfnisa  
atpvmimsilsfimlviltmisa1vkpvnfetsyialfyfivmatifvglisvtfglirlltekiniifygicvlcflvl  
piifipnphvfihlml  
npyyivngiaqsiifgissmenipyhfyfilflcliaavnflarytthaiynktskvtqtdnqqdvsndstdeedtss  
>tr|Q2YU17|Q2YU17\_STAAB  
mdtathiaigvgltalatqdpamastfgatattlivgslipdgdvtlklkdnatyishrgithsipftilwpilitfli  
ftffsgtnpfhvwmwqla  
vflhvfvdifnsygtqalrpitnkwiqlsvintfdpiiftvlcigivlvwiglhpfavffpiialliiyyimirfkmravi  
kqqaikaiqqehhpvkfvf  
aptikfmewrvaigtadahvygkaygmnvvfsdkverqtlstsdilwkvkgnkirtflnfssiyrwqttladgsteir  
lidlrylknhdysfvaiiah  
vtndnlidhsyigwvftedklqrklyak  
>tr|Q2YU18|Q2YU18\_STAAB  
myqssfkenlihwfdenqremprwrttnpyyiwlsevm1qqtqvktvidyyhrfverfptvevlsqasedevlkywegl  
gyysrarnfhataikevrkg  
yeglvpkdpdqfialkgvpytqaavmsiaynvplavtdgnvfrvwsrlnddyrdiklqstrksyeqellpyvttesgtf  
ngammelgalictpknp1c  
lfcvpqencvafdkgtfeklpvksknvskkviqsvflirnnqgqyl1qkrsek1lhgmwqfpmfeseharremtekigh  
diqpvtpife1khqfth1  
twkikvyavsgtinet1pddmiwfdlsdrdqytfvpvmskiyqfing  
>tr|Q2YU23|Q2YU23\_STAAB  
mlqkgeqfpifklenqdgvtindtlkgkktiifyprndtptctteacdfrdnlemfndldvavygisgskkkhqnfi  
ekhglnfdllvdedfklak  
etgvyqlkksfgkesmgivrttffiideggkvldiviekvkvtqieelkn1lg  
>tr|Q2YU24|Q2YU24\_STAAB  
mrvvglnrmrevetelqrrfsdvdfkfykkaseipesdladldilvgdyggineaf1rrcpnlkwiawfatgvnt1pldy  
isdhgi11ngkgvqakql  
seyilafi1ddykkmlsydnqrqhiydskitgkrlsgqtv1flgtgaiatrtaklakafnmnliglksqgnkhefdei  
ytieslest1pnadivina  
1petqetih11kknhfelmkdealfinigrsivkealliev1ksrvirhayldvfenep1kpnhelyeldnvtitahit  
gndyeakyd11di1knn1v  
nflnknglienevdakkg  
>tr|Q2YU28|Q2YU28\_STAAB  
mterkyacnklfsilvgpqhrevgfpi sadnaswrcpnieadflsaynnvqvgvgpstkriskgnstdnaswgrtk  
>tr|Q2YU30|Q2YU30\_STAAB  
mqaiakndiktgtvvd1theghgvk1drfpi fipqalineqieykiikvknfaigk11nintrsenrvappciyyerc  
ggcqlqhl1syesqlemkke  
qvin1lfrkaqfndskindvtgmdpwrnrnsqipvgkneqnevmgfyqrshdiidmescliqdsqhqvemnevksi  
ld1nvs1yqeqlkkg1mr  
h1vvrtyhtdemmiifvtngkksqknavvekil dafpnvtsikqnindshsnvimgrqsitlygkdtiidq1tdstfk  
isdqsfyqinseqteklyn  
kaieyaqltgnevldtycgigtiglymaphakhvygvevpsaiedaqknatinqcnnttfvcgkaeevilqwkaggik  
pdvvmvdprrkgcdefiq  
t11tlepkriyiscnpatqqrda11laekyqleevtpvdmfqtthvetvalfnlk  
>tr|Q2YU35|Q2YU35\_STAAB  
mrqwtaih1ak1arkasravgkrgrtd1pgqiarkvtdil1rk1aeqvddivfisgtngktttsnlight1kanniqi1hn  
neganmaagitsafimqst  
sktkiavieidegsiprv1kevtpsmmvftnffrdqmdrfgeidimvnniaetisnkgik11lnaddpfvsr1kiasdti  
vyygmkaahahefeqstme  
srycpncgr11qdyihynqighyhcqcgfkreqakyeissfdvapflhlnindekydmkiagdfnaynalaaytv1rel  
g1neqai1ngfetytsdng  
rmqyfkkerkeamin1aknpagmnas1svgeq1egekvvis1ndnaadgrdtswiydvdfe1skqqieaiivtgtrae  
elq1rlk1aevevpiiver  
diykataktmdykgftvai1pnyts1apm1eq1nrsfeggqs  
>tr|Q2YU37|Q2YU37\_STAAB  
mkptkvilrdasyvhsktsitf1kdvvieednkiiyf1dtsatfedqevkfefal1f1dsdmdn1khmeydnvteiyfiep  
dlhftiidfnqellciyid  
fdsg1r1hsmatesgis1rinvtksdfnkfinelas1h  
>tr|Q2YU41|Q2YU41\_STAAB  
mthkyistqm1iiftalmiianfyi1ffekigf11v11lgcv1vyvgylyfhkirg11afwigalliaft11snkytii  
1fvf1111ivrylihkfkp  
kkvatdevm1spsfikqkfwgeqrtpvyvykwedvqi1hgigdlhid1tkaanikenntivvrhilgkvqvilpvnyni  
n1hvaafygstyvneksyk  
vennnihieemmkpdnytvniyvstfigdveviyr

Tsompanidou\_et\_al\_Supplemental\_FASTA\_File

>tr|Q2YU43|Q2YU43\_STAAB  
mtikvlfvddhemvrigissy1stqsdi evvgegaskgaiakahlkpdllmdllmddmdgveattqikkdlpqikvl  
mltsfiedkevyraldagv  
dsyilkttsakdiadavrktsgesvfepevlvkmrnrmmkraelyemlteremei11liakgysnqeiasashitiktv  
kthvsnilsklevqdrta  
viyafqhnliq  
>tr|Q2YU44|Q2YU44\_STAAB  
mskkdhssskylnsvkeageeskkknksnpkldvdgtyiepqfqsckpkkedqvfflslrlnkpakykkdsnflslyliyr  
igkddasglaaqmyhfv  
amfpmllfl1t1lppfnikqsqitnm1snapaetstliksvigditqnssgllsiglilaiwsasngmtaimnsfnvay  
dvedsrngivlk1lsvvft  
vymgvfvva1alptlgsvishf1fgplgfdeqkwifnlirivlp1111fivfivlysvapnvkklksvlpjavfts  
iwlagsfgfgwyisnfgny  
sktygsiagi1111wlyitsfiiivgaeinaiihqrsvikgktpeeaalehddnknhynentryeydegtnathqrty  
hvdehpsdtypeddknikd  
kivdklkkd  
>tr|Q2YU48|Q2YU48\_STAAB  
mtnykek1qqyael1vkvgmnvqpkqvfirssvetlethliveayhcgasdvrvvysdptlkr1kfenesvehfanh  
eiksydvearmdyvkrkaa  
n1alisedpdlmdgidsq1qafqqnarafkgymesvqrnqfpwvvaafpskawakrvypelsveeayikfidvfdv  
ridgndpvenwrqian1s  
vyaqklqqknyhalhvysegtdltvg1aknhiwedatsyvnqkeqafianipteevftapdrnrvdgyvtnklplsyngt  
iidqfklmfkdgei1d1fsa  
ekgeavlkd1intdegrr1gevalvpddspisnrntifynt1fdenaachlaigsayafniqggtemtveekiasglnd  
snvhvdfmigssdl1tygi  
fedgske1vfengnwastf  
>tr|Q2YU49|Q2YU49\_STAAB  
mtnqdrpmksmseskyknrqvfpqdtnhhhtmfgg1manideiaaitamkhagaqvvtastdsdvdf1kpiktgeilqy  
vamvsyagtsmevvvqir  
iddvfnnkhdlaalsyltfvaldddgkpkhvpvypeddvekwyfdtapqrverrkarriskqtieylaqvqhir  
>tr|Q2YU50|Q2YU50\_STAAB  
mnsvk1kqpvsiyndpweayndvkehq1t1sni1eftt1n1cmrcshcavgyt1qtvdpepldmdliyr1r1deipn1rt  
ms1tggepmfsskks1rnvv  
kpl1kyahnrgiytqmnsn1t1pqdry1diaeyidvmhishnwg1tdefanvgfgamkkqpp1kak1klyeqm1sart1  
seqgmfvsaetm1nqst1p  
hlrkihqevihdmkcsrheihpmpadfasq1nvl1tlaemkkti1hd1l1dfrdediwm1fgt1pvfpc1kddedqk11sr1  
rtaknvttrndpdgrsr1n  
vnvftgnv1vtdfgdetgtisniqkdk1tdvfdkw1ssdlaks1nchcsefsc1gpnv1vknmyypnmdfdknerhmkq  
pq1iqf  
>tr|Q2YU52|Q2YU52\_STAAB  
mniieqkfydskaffntqqtks1sfrkeq1kk1skaiksyedilealytd1gknkveayateigitlksiknarke1kn  
wtktknvdtpl1y1fptksy  
ikkepygtv1i1apfnypq1v1fep1igaiagntaiikpseltpnvarvikr1inetfdanyieviaggi1etqt1ih1  
pfdyvfftsenvgkivvyq  
aasen1vpvt1emggksp1v1detanikvasericfgkftnagqtcvapy1lvhesvkdd1ital1skt1refygn1iqq  
spdygrivn1khyhr1ts1  
1nsaqmni1vfgghsdederyiept1ldhvtsd1aimqeeifgpil1pil1tyqs1deai1afihqrpkl1sly1fsedenatq  
rvine1sfggga1nd1lmh  
lanpk1pfggvgasgmrgyhgkysfdt1ftheksy1fkstr1esgvh1ppykgkfyikaffkn  
>tr|Q2YU54|Q2YU54\_STAAB  
mthral1vvdysydfiaddg1l1tcgkpgqni1edfivsrindfnnyqdhi1ff1md1hy1hdnhhesk1fpphni1vdtsg  
e1lygkvgk1y1etikaqpnv  
hfidktrydsffgtpl1ds1l1rersinqveivgvctdi1cv1htaisayn1gyk1svpaegvasfnqkghewalahfkn1lg  
aveeqhv  
>tr|Q2YU55|Q2YU55\_STAAB  
myinmkdyg1tg1nktkdtra1qralnhgrckpttvy1pkgydickpl1tygnt1l1ldnet1l1rrchsgp1l1knghrf  
gfyrgyngshihikggkf  
dmngisypnntamci1ghaedi1q1igvtiknvsgahidacginglyikncsfegfidysgerfyseai1q1ldiqvpgafp  
kfgtt1dgt1tknvi1edcy  
fgpse1pemgswnra1igshasrhnrnyeni1h1rnni1fedi1qya1tp1kykdafi1nnkfin1ceggy1ry1gvrdgknaad  
vmtgkdl1gsqaginmni1g  
nefkgmskda1hvrnynnvkhkdv1ivngt1fknstqs1ihled1dtv1flspeagi1qvttin1vdeikk  
>tr|Q2YU57|Q2YU57\_STAAB  
mq1ly1gpkgtfsy1lacrqyfseneat1fqpkns1l1fevikavadd1tsigv1piensi1egtin1vada1laqqdv1fahgeir  
1dinfa1lyngt1dsi1sdik  
kvys1apa1sqt1ny1ihqhfaydyvd1stiqs1l1tkiengvaai1ap1gsveaygft1pid1tni1edyphn1vtr1fl1viknqqf  
dq1nats1mf1it1p1mhdkpg  
1lasml1ntfal1fn1lswiesr1lktq1lgmyrffvqadsaittdikkvia1ilet1dfkvemigafn

Tsompanidou\_et\_al\_Supplemental\_FASTA\_File

>tr|Q2YU58|Q2YU58\_STAAB  
mlfkeaqaftenmykecheyetqiinkrldieleiketgtyhtteeeliygakmawrnsnrcigrfwdslnvidardvt  
deasflssityhitqatne  
gklkpyitiyapkgdgpki fnnqli ryagydcngdpaeketrlnahlgwkkgktnfdvlpliyqlpnesvkfyeyptsli  
kevpiehnhyplrklnlk  
wyavpiisnmdlkiggi vyptapfngwymvteigvrnfidryrnllenvadafedtlknnsfnkdralvelnyavyhs  
fkkegvsivdh1taakqfe  
lferneaqggrqvgtgkswlapp1spt1tsnyhhgydntvkdpnffyknesnanqcpfh  
>tr|Q2YU59|Q2YU59\_STAAB  
myqledds1mlhndlyqinmaesywndnihekmafvdlyfrkmpfnsgyavfnglkrvidfiehgfsesdleylksigy  
kddf1sy1kd1kftgsirs  
mqege1cfgnep1l1rveapliqaqlietillnivfhtlittkasrirqiasndklmefgtrraqeidaalwgaraayig  
gfdstsnvraklfgipvs  
gthahafvqtygdeyvafky aerhkncvflvdtfhtlksgvpnaikevake1gdkinfvgir1dsgdiaylskearmld  
eagftetkiiasnd1deet  
its1kaqgakvdswgvgtklitgydqpalgavyklvaienedgsysdriksnaekvtppgkknvyriinkktgkaegd  
yit1enenpydeqplklfh  
pvhtykmkfkksfeaidlhhniyengklvyqmpstedesreylaag1qsiwdenkrflnpqeypvd1skacwdnkhhkrife  
vaehv kemeedne  
>tr|Q2YU62|Q2YU62\_STAAB  
mkfkvnenetiadc1srkmqgympvkriekpvfqqkdgdtvevshqeiifvgkkiq  
>tr|Q2YU63|Q2YU63\_STAAB  
meqfel1fsidkfkcnseatyyl1niegewhpqdlndsp1kfilstsdssdyickyintehkq1tlynknssivieifip  
ndnk111timntealgtsr  
rmtfikhks  
>tr|Q2YU64|Q2YU64\_STAAB  
mkrnfpk1ia1s1ifs1svtpianaesnsnikakdkkhvqvnvedksvptdvrnlaqkdy1syvts1dkiynekasyt1  
gepfkiykfnkksdgnyyf  
pvlntegnidyi1vt1sqkvtkysss1skytinvspflskvl1nqykdaqit1ltnskgyyvvtqnhkak1vlktr1ledkk  
1kktesi1ptgnvtq1kqk  
asvtmptsqfksni1tyneqyvnk1enfki1retqgnngwcagytsa1lnatyntnkyhaeavmrflhpn1qgqrfqftg  
1tpremiyfgqtqgrspq1  
1nrm1tynevdl1tknngiav1gsrvesrngmhaghama1vgnak1dngqevi1iwnp1wdngf1mtq1dakn1v1pvsngd  
hyrwyssiygy  
>tr|Q2YU65|Q2YU65\_STAAB  
lyssqfnr1gykcn1fri1fsfyfi1fyinti1ygr1l1isnckcsqhf1n1ligiyndp1rl1yycil1vfl1pspt1snf1l1q1  
gqskalviqdn1hftspiv  
>tr|Q2YU69|Q2YU69\_STAAB  
mnt1l1nhm1teqseav1kttegp1l1imagagsk1trv1l1thriay1l1dekdvspynv1aitftnkaarem1kervq1k1vgdqa  
ev1wm1stf1hsmcvr1l1rrd  
adr1giern1fti1idptdqksvikdv1knenidskkfep1rmfigai1sn1kne1l1ktpadaq1keatdyhsqmvatvysgyqrq  
1srnealdfdd1imttin1  
fervpev1leyyqnfqy1h1vdeyqdt1nkaqyt1vk1l1askfkn1cvvgdsdqsiygwrgadiq1n1lsfekdypeanti1fl  
eqnyrstkt1inaanevik  
n1serk1pkg1wtantngeki1hyeamterdeae1fvireimk1hqrngkkyqdmailyrtnaqsrv1leetf1mksnmpytmvg  
gqkfydrkeikdl1sy1ri  
i1ansnddis1lqri1invpkr1gvgpssvekvqnyalqnni1smfda1lgeadfig1l1skkvtqec1l1fyeliq1slikeqefle1ih  
eivdev1lqksgyrem1lere  
nt1lesr1lenid1efmsvpkdyeentp1leeqs1l1nfl1td1sl1vadidead1tengvt1l1mtmsak1glefpiv1fimgmes1  
fphiraik1seddhemqeer  
ri1cyvai1traeev1yithatsrml1fgrpqs1nmpsrfl1keipes1l1enhssgkrqti1qp1kakpfakrgfsqrtt1stkkqvs  
ssdwnvgdkvmh1kawgegm  
vsnvnekngs1ie1ldi1fksqgpk1l1laqfapi1ekked  
>tr|Q2YU71|Q2YU71\_STAAB  
mkrt1v1l1itai1fi1aacgnhkddqagkdnqkhnssnqvkeiatdknvqgdnyrt1l1pfkesqarg1l1qdnmansyngg  
dfedg1l1n1skevfptdky  
lyqdgqf1ldkktinay1n1pkytkreidk1msekdkdkkanen1lg1npshegetdpekiaekspay1snileqdfygggdt  
kgkn1kgmt1g1lamnsvy  
ykkekdgptf1skk1ld1dsevkqgkqamasei1sr1rendd1kdipih1faiykqssedsitpgefitqataeksqtk1newh  
n1neksal1psstaadye  
n1nnn1fkqfnd1l1qsyf1snftqavgvkfvdkkpqr1lvvd1pidy1yqgaetig1itqyvteqankyfdkidnyeirikdgn  
qpral1sr1tkddkep1qvh  
ysn  
>tr|Q2YU72|Q2YU72\_STAAB  
menrvski1niekpi1igppmsg1l1nanfvasvseagg1g1l1gnageari1tnsp1fetaekmrsevk1kvk1l1tskpfasti  
mvsed1sytsy1lidml1iee  
n1sav1lingi1ldqti1fnk1lrennikii1frp1l1tptienaikseelgad1v1vatg1fdeggtvpeki1igtfsi1ipmiadaiki  
pv1aagg1gdvrgvraafc

Tsompanidou\_et\_al\_Supplemental\_FASTA\_File

lgaegvfvgsvlipftfenpaaenvkqyivdsnaedlilfrtipsyrsllpgklareleemdkngatneelakhmsggrnm  
rlgmIngdtengyvsvgtg  
ispinsirstksviddlmqdfn  
>tr|Q2YU73|Q2YU73\_STAAB  
mvkicndgfdenfieehrnlysiaytqnvlsgryknliiwyktegkrfgeikkffanisqgsltkqlkelesdgilnre  
vyaevpprvvysltdkqgd  
ilplidlmekygrmygd  
>tr|Q2YU77|Q2YU77\_STAAB  
mnkvhkpilyfyfmlffsttiiga11lylpftgkkipisfladalfiassaftvtglspvdigsqfnilgeivillliqigg1  
givvt11t1vflnrkism  
knrf1imvtwnidepggviklikhlayslvteligmiclclsfipkfgigkg1flslftsvsafnagfalfknnlidy  
ssdpiviittsiliiifggi  
ghfvvidfinckk1sk1slhsk1vl1ttsiliiigaitffl1eqfntmqhmg1vekignsffqsvttrtagfnsidias  
nkstalm1m1mfiggap1  
saaggikittfavafifvlnyihkennsvfnkeisdhkhk1svtinisflfisiitfilsiinpnislik1lfevvs  
fgtvg1smn1tteyhgitk  
iiiiivm1cgkvg11t11rtfippkspknyrytkgqiy1  
>tr|Q2YU78|Q2YU78\_STAAB  
mci1tfqfkgaptqriskrnstdnaswggastkrnwipnfnrqncicmtnqcysfsfvffysik  
>tr|Q2YU79|Q2YU79\_STAAB  
mfcndylgmsqnqevinvmdalkeygagaggsrniggshkyfk11eneiakwhkkdsalvfptgyssndas1qg11ri  
fpemivfssknhasiina  
1rsvknkieiefehnkvh1ne11nqydintpk1ivfesvysmdgdiapiveivelakeynsltfldevhaigmygeegr  
ysdvvgvqedidiiqstma  
kgigiiiggyitgdq11divirsyssgfittalppviaagcltsikivrsndk1reelqdktkylkekfkengiev1kqs  
kthilpviiigdskkceaa  
k111gkfnidyqainsptveigterfrinvtpnhtkeqmd11vssivvdf1nirsv  
>tr|Q2YU80|Q2YU80\_STAAB  
mny1mymfcmfiwgl1nfiavkiqgds1pleval1yrs1iafslfgvmfififk1k1nntnwftiigfg1cnftisy111  
yygtfyssaaivt1ifsmk  
a11tpifismvfkrisnriyiggrtrsrckcsn1is  
>tr|Q2YU81|Q2YU81\_STAAB  
msntigm1savi11iytsfkgyr5fple1nfwfg11ylsilasflawffylk1innigaavsgymvai1paiggiasv  
imgeth1sin1lvvgi1lac  
mgay1a1ykp1kps  
>tr|Q2YU82|Q2YU82\_STAAB  
mttfsenekig1ladivelqtenneidvcny1kdlfdkydikseilkvnehranivaeigngspl1v1sghmdvvdagn  
qdnwtyppfq1tekdgk1y  
grgttdmkgg1malvit1ielkeqng1pqqtir1latageekeqegak1ladkgy1ddvdgliaeptgsgiyahkgs  
sckvtaigkavhssvpfig  
dnaid11efynqfkekyse1kkhdtkhel1dvapmfks1igkeiseedanyasgl1tavcsiinggkqfnsvpdeas1efn  
vrpvpdyndfiesffqri  
innvsnk1sl1dipshrvtsdknsk1ittikdvassyvnkddi1fvsalvgatdass1fgdnkdnvd1aifgpgn1ma  
hqideyiekdmy1kyidif  
keasiqylkek  
>tr|Q2YU85|Q2YU85\_STAAB  
mvkktksns1kkvat1alan11lvga1tdnsakaeskkddtd1klvshnvym1stvl1pwnwgqykrad1igqssyiknd  
vvi1fneafdngasdk11sn  
vkkeypyqtpv1grsqsqwdktegssystvaedggvaivskypikekiqhvfksgcgfdndsngfiytkiekngknvhv  
igthtqsedsrccaghrk  
iraemkeisdfvkkknipkdetvyiggd1nvkngtpefkdm1k1nvndvlyaghnstwdpqnsiakynypngkpeh1  
dyiftkdhkqpkq1vnev  
vtekp1kpw1dya1fpyyyv1yndf1sdh1pikaysk  
>tr|Q2YU86|Q2YU86\_STAAB  
mkfks1itt1algv1astganfnneasaakp1dkssss1hhgyskvhvp1aitvngtsqnilss1tfnknqni1sykd  
1edrvksv1ksdrgis1id  
1r1skqakytyvfkngakrvid1kagiytad1intseikaininvdtkkqvedkkkdkanyqvpytitvngtsqnilsn1  
tfnknqni1sykd1legkvks  
vlesnrgi1dvd1r1skqakytyvfnkngtkkvid1kagiytan1inssdiksidi1ndtkkvenkakrnyqvpy1sin1n  
gtstpi1sk1k1sqel1is  
ky1ndkvksv1ksergis1d1k1fakqakytyvhfkngkkqvvn1ksdi1ftp1n1fsakdikkh  
>tr|Q2YU87|Q2YU87\_STAAB  
mnp1aqs1neg1qgsnatafam1sg1gqnmfypkgi1sqsaekst1tynatigmatnkdgk1mfass1damfnd1tpdeif  
pyappqgiee1rd1wqqkm  
1rdnpe1sidnmsr1pivtnal1tyg1slvgd1fvnqgd11lpehnwgn1k1vfntrngan1qtypi1fdkdghytt1ds1ve  
alqsynkdkvimi1nypnn  
ptgytphkevtt1vdaika1ladkgtkviavvddayg1fyedvytqsl1ftal1sn1nsnail1pvr1ldgatkeffawgfrv  
gfm1tfgtsdqttke1leak

Tsompanidou\_et\_al\_Supplemental\_FASTA\_File

vkgllirsnissgplptgsavkhvlnknkqfdkeieqniqtlkeryevtkevvyadqyhshwqaydfnsgyfmaikvhvdv  
peelrkhliekysigvial  
natdiriafscvekedi phvfdsiakaidl r  
>tr|Q2YU89|Q2YU89\_STAAB  
mkii lknnsdfpiyeqikqqvkqni lkg hvapgeh lpsmrelakdlqvs littk rayed lekdgfvttirgkgtfvkeqd  
ssilkekqfftienlvkel  
vneaqaiemsleelqdi ltfiyeegss  
>tr|Q2YU90|Q2YU90\_STAAB  
mnaie lsnvsyssidqfn lknisfkvpqgfvgtgfigrngagktti r lmdlyqqptgvirvleedmalnpielknrigfv  
yaenyfnerwttkglekmi  
apfyrkwdhqvfefylekfdlpinksiktfstgmkmlslavafshhaelyifdeptsgldplarnellei iqgelnden  
ktifmsthiisdlekiady  
iih lsggevilngskeql lqryqvvs gaied lddelas llifeehkrtgfigl tehaqv fkeilghkvnittpsienl mv  
ylekrkpk yhenik lmeeg  
f  
>tr|Q2YU94|Q2YU94\_STAAB  
mtnl etyfknsqplneyidgmktndiv lsiyqs fel peddsrikkikemny skvlvitedwcdammlpilkhiseal  
nl evrvfhrddtklidqy  
l tngksraipi fvf lndqfeqetvwgpranevqkfvt dvradklpskdhpdyad leketh lvisnryktdasfwkavyns  
ilnklenk  
>tr|Q2YU97|Q2YU97\_STAAB  
mkkfff igllvf vfftaati iwf sydknkyg tkqydktfkddafgnvs inldstel rikrgnqfrvkydgdndiliniv  
dkt lkvskrsktrgyaid  
mnpfhenkkt ltiempdkmikr lni ssgagsvrisdvd lentsiqsingevviksn lda ldskt nsttyisksnikns  
nikv vigtlqidksqikqs  
if lndhgdi efknmpskvdakastkqgdi rfkydskpedtilkn lnpgtgds vknkftngkvgksdnv lefytidgnik  
ve  
>tr|Q2YU98|Q2YU98\_STAAB  
mqqv isdimtfrgshfelgvktgkw lqtp llnkrekwkkrvprfdi dvnetyqifq tyapqiweelmg lqsilkmpr  
qilnfg h yrftdlkesgc  
tvfqqkdfmvrnydyhpatydgry llyqptdsg laqigpvsrvtgrmdgmnesgl tmgynfmhrkkpangfvcymigrli  
lencrnvteaiql lkeiph  
rssfsyilmdkslnhaivevtprsidvrydnictnhfeil thenrnytkeskerlartisqtdnd ldm ttafk lfnnpqy  
eiysklfkswsgtihtsm y  
hpetl tayftlgenappei idfkswldgqdl ni thftgnidtd ltfank  
>tr|Q2YUA0|Q2YUA0\_STAAB  
mtsyeetdyrnvpre ldn nimpgrgmikwapfat lpeqfeti qy i idqnkitrpvl sddqlaelnir l healqyaqp  
vevkfynnsfvdsrvltiy  
ridainyeidgyvynqqqrqkisifdi ldivllp  
>tr|Q2YUA1|Q2YUA1\_STAAB  
mneikleydthsvvhyes ldsrsfksf skpkwsklink lsvpieanykyargvavygdikngandhgei ikkhrndv n v  
vyrdvivil dydeindlkq l  
heaissvl snawfwhtsyshrteqarirlyiplnerisaddy rkyskvlankighkvdegsyqpsrcfalpviqkghif  
ikrvndcpi mdvdmleqwl  
keyeqsnvpsvgytrrdskywrelcftt egtrnna laslvghllrchvndyivysfallwgqfackppmkeqeinat  
fqsilnkhynn  
>tr|Q2YUA2|Q2YUA2\_STAAB  
metgksdvl dki einkkdsal qei ipkgyeiehhqcgvvlyql ipskkegepdkkvfitntipqiterfediesnevsf  
nmlfydnktpvniavsvee  
isdsrql lklvnkkldvtsststk lvdyni skrynpp lnvkvatr lghvkgyfiypyqevmkdsnvklfsndkgfqkli  
dsfrskgt lqgy skkvfaq  
ikdlpmvmvml yas lgsvl lrefglqpfive isgststgktft lnlvssvwtgtsdlittwsstqnsiesmasflnsflmf  
kddtrnthpkfvtsatynf  
ssgesksrsn inltnakkewrn ilistgessian madekagvsarvvt lqppypdnfdftt ldksfrenygtlg lafi  
kgyeskkdv yknafesyqr  
yfnqgsneimqr lgrafallqvtgevlndidgfehdfk iieqaydsmvknkktidkpkqlleellqyl danrnnivgd  
gydsvnygdvkavykhdf l  
ciknetvknklghemqti tgqwdkkylikdkkriqkqvkhksqrhlgyaikkeiieelgfdsvshnpytesy  
>tr|Q2YUA4|Q2YUA4\_STAAB  
mnl etivnqfetragt llyytgl lehskvqccfklyndpfdmvyvmmnsklfghvyikdckvrqs felaspkhtegli  
rsieghyvgyelhdgkqls  
isymmasql fedeyfmyg letyaesnnsdvfeylengfdtdt legiqssntdviani emlyqlatgin epapelvegkl l  
vtefvqdenatqedyka le  
rk lndlkasyys lsk  
>tr|Q2YUA5|Q2YUA5\_STAAB  
mapnkil rfytrysslkw lryrtlkkykt lilsyfmal kiirlykgisf snlkvyr l  
>tr|Q2YUA6|Q2YUA6\_STAAB  
marfvqgvqt lltliqakvcvfigl kvkfvrn l fal fyrt

Tsompanidou\_et\_al\_Supplemental\_FASTA\_File

>tr|Q2YUA7|Q2YUA7\_STAAB  
mqsiaeketyhlpteqlqvfivkntsnkyitkktiInqlgyeynssnerwlrrvinslvydygypigcsykpseryyyi  
itteqekqgamrsikklad  
gsmkryealkriev  
>tr|Q2YUA8|Q2YUA8\_STAAB  
mktesyfkeynqfvldqhkaieleqernaLeskikldkstyqqlimgdqqdkadnlyqatdadedkklkaInkrletkks  
vskevkyqktieIlkhqse  
lsslyesekesaiekllkavdayneiideiedindryedehqqyasvvsqeqlyddkearkaInghfkeniftsfingnd  
lpyehnnklflkc  
>tr|Q2YUB1|Q2YUB1\_STAAB  
mdkqqikdfvcyhertrsdvlidddintdeffsiadensnewmaddniddhivknhlemivdrvandkefyifdsliqg  
rsfkdisnvlecseqsvrl  
wyetlldkivevie  
>tr|Q2YUB2|Q2YUB2\_STAAB  
mlnceyillkyqinyfvflailllftfskivrqylcwnfklhsskgv  
>tr|Q2YUB3|Q2YUB3\_STAAB  
mrnliekkrlllelflvsfifitfgigsqffsnlayslnqgvltqtsfgigseyliipsvsnfafamgvplghifthrfgf  
krnylffvflflngsiml  
lsfdlvsIsiaktqsfstgvfftllpklfifprryrnvflmmvvvlgfanaIgglsqslsleldkwhwlfiiniis  
smclllgyflitkeeylr  
ktetyiskpvitllilstlaiafmsilthegwesvlwvaplavlfifinfilfnarsehpiiyfksllikkpfgaim  
aiashltilsgiajiniyi  
irilklpflislrfyvfffvgvltgvvkmffysvvgagilgtigatsilfvsvnwlvlgrrvnvsflylqgillgfgts  
mtlisgamatlldgdlsra  
sersqtmhilrnysaamfvpiiaymmkssvekgvqsidkeeiaststylekmqeiainsdhkifilmiilniimlassit  
qiflkgrritpl  
>tr|Q2YUB4|Q2YUB4\_STAAB  
mlekelelkkrlipllilyilivlkftlsiqfgafdyflpflgiltycqfgrqgvkllfkrpksnmflwtpIivfmc  
vligavtvligrslgintl  
aanggveki fnnhdIfskviffIawihligeelitaavclpflillki fpkkvaimiavlssltfgaihIptydwni  
yqslivisairlpftfmwf  
ksrsilggaiPhivldyiiiIatlltkfy  
>tr|Q2YUB5|Q2YUB5\_STAAB  
mlrinhlNrerkkgkcnslIisqiiynsitkyeslniy  
>tr|Q2YUB6|Q2YUB6\_STAAB  
mlkvii flillicilslivtnkkepflfvktlmygavfvflgyislasavillliisetfnisengsyffigliqillaaI  
iqpliklflckkrIpske  
isvlehyvqaviyfaiyqafvenlkvedidfkslhmi fldpaylniaflptliltwvtifnykml  
>tr|Q2YUB7|Q2YUB7\_STAAB  
mkkwmlfqagalyafafIvalnncvimmlelystflsslyre  
>tr|Q2YUB8|Q2YUB8\_STAAB  
matisittdyftkksaqklidameinennsnvnktnikatkiKstceienllkdyrsn  
>tr|Q2YUB9|Q2YUB9\_STAAB  
mtvkvisl selltgdkqevkrkipsvlnilnsfetisisgsesahdvdlflknksiafdrqnlsrthlvfsqfkskqilv  
gyftisnkpIvftkrmldk  
isntlkkklyqkgethsgndnliiqgyliaqigknyseealatksingndlltlayekvleganifggsyiwieyedvdr  
lrefyrkfgfteikdhtse  
nnlkmailki  
>tr|Q2YUC1|Q2YUC1\_STAAB  
mnweikdlmcdievmkqkindvatkhawfvdrfvkneletkrehinfsasylehriqnehtvellhvyIkefgeliqkf  
heiekassenfgeesddak  
klkite  
>tr|Q2YUC2|Q2YUC2\_STAAB  
mwmifsgIivggllgfvmqtrtrfcltggrfdmyvqknnkmfyalliaitiqsiglliltttgilqipahsfpilgtvigs  
fifgigivlagcatgtwy  
ragegligswialvlyavtaaitktgilkpvmkinqptninsdmsqttgipfwglvvlitititflvvtlnnkvrva  
vpklkqrytgi ryyI fekr  
yhpfaaiaigIiallawpmsastgrndglgittpsanlvhflitgetkfidwgvlvlgifigsyiaargsrefkwrI p  
dkitirnsaiggi cmgfga  
svaggcsinglvetatmtwqgwialasmi vgvwtmshfivrpmkkvqqqsakvqqqtqiv  
>tr|Q2YUC3|Q2YUC3\_STAAB  
mihelgtvgmvpfpIieaqkkmatlksgeIdkifdctqateaipnwaaengypvtnyelidnaswtitiqkv  
>tr|Q2YUC4|Q2YUC4\_STAAB  
mnIndtifmfIctllvwImtpglslfygglvqsknalntvmqsmpaivlvtfwitvgftisfgngnlwfgnweytfInh  
vgfatgedisphipfalIm  
lfqmmfctiaisilsgsiaekmkfipyllfvIwtaIvyspvahwwgdgwinklgvldfaggtvvhitsgvsglvIaim  
igkgnkhsestphniitl  
iggi fwigwygfnvgsaftfdniamlafntntvisasagaigwIleyifkkttsllglllgtlaglvvitpvagyvtyl

Tsompanidou\_et\_al\_Supplemental\_FASTA\_File

satimamiggiccyiviny  
ikvklkyhdtldafgihgvggiigavltaffqskkanpdiengfiytdihiilvqilcvtavvifsivmtfiiakvikl  
itplsveqetnigldkiv  
hgehayfegeInrfnkhi ry  
>tr|Q2YUC5|Q2YUC5\_STAAB  
mknisdiaklagvskstvsrflnngsvskktsekltkiaehdykpnqfaqsIrarqthligaiiprmnsyavdetikgl  
akqcqkyesqli lnytgln  
ieaeiqaletIarskvdgvlmatdi terhievin kmnpivivgqqheqlhsivhddykagqi igewigqqgyqqievf  
svsekdiavgihkrgrlId  
qlakyqikpnihetnftyveaqkdvavnl enveqv davvgatdtialaaykyysdkndvmkphqiygfggdpmtqlvps  
ikti hynyfeagqcameei  
qqm1kkqmpysvtvdvni  
>tr|Q2YUC6|Q2YUC6\_STAAB  
mtewtreeryqriedvdteyfkltkqqvdqskfrqqfhiqpetgl lndpngli fykgkyyvshqwflgavhglkywyny  
tsddl infkaegpiln pdt  
kydshgvysgsafeyngllymytgnhrdnhwqrhasqmiarl kedgsvekfpkpvisqqpegytshfrdpkvfkygeky  
yai igagannnqqgrlllyn  
tediinwhyIgeintelddfgymwecpdyfnvdnqdvilicpqqiepkgdqfkniyqsgyilgkfdieklyehenfvel  
dngfdfyapqtfldekgr  
vligwmgIpeieyptdnegwahcltiprvlnvengqlkqrpypaleklrhketalgyankftrklhpyegkqyeliidi  
lndatevyfelrtsktss  
tliaynkrenkitldrdsqglptndegttrstildtpIkqlqifvdtssieifcndgervltsrifptedal giktste  
sgqvy1qftkyd1kdehk  
>tr|Q2YUC7|Q2YUC7\_STAAB  
mrrlfsigealidfipnitnanlkdvqtfmkqidgapcnvactvqklgqqaymitqlgndafgdiiietissigvdvskv  
yrtneantalafvslteag  
erdfsyrkpsadmlfepsfvndi dvnendi vhfcsvdIvdspmrda hlyqIktl nngtvvf d p n v r l p l w d n a e d l r  
qtihtflplahi ikvsdee  
lefittcihdeneaiqslftgnvtvviytkgadgaavylkngi shyhsgykvkpvdttgagdafigavisrilatdvlnlt  
qlfenegeeilafsnrvaa  
ivttkygainslptlqeveqaf  
>tr|Q2YUC8|Q2YUC8\_STAAB  
mkificeddpkqrenmvtiiknyimieekpmeialatdnpyevleqaknmndigcyflidiqlstdingiklgseirkhdp  
vgniifvtshseltylftv  
ykvaamdfi fkdpaelrtriidcletahrql lskdsvetielkrsgnsyvyqyddimffesstksrliahlndnrq  
iefygnlkeIsqlddrffr  
chnsfvnrhniesidskerivyfknkercyasvrnvkki  
>tr|Q2YUC9|Q2YUC9\_STAAB  
metinniamatfqlviftvakfifsvkfnlrdyfiivgiiiptmflyfygsravliptfssiiiflffklkyyaivtil  
vtmiimylsnfatvgflft  
lrkytt dpail lplyil sfssvsllatyIvrislkklkksylslnrtymiiisfvlfatfaffyiystntssngdslipy  
alvfignliifisvvlims  
lftlkemkykrnqeeietyyeytIkieainnemrkfrhdyvnilttIseyireddmpglrdyfnknivpmkdnIqmnaik  
l ngienlkvreibglik  
ilraqemsipisieipdevthinl nmidlsrsigiil dnaieasteiddpiirvafiesensvtfivmncaddiprihe  
lfqesfstkgegrglst  
lkei adnadnvlldtiengffiqkveiinn  
>tr|Q2YUD2|Q2YUD2\_STAAB  
mkvqi yqlpii fgdssknetqitqwfeknmdevdvvl pemwnngydIkhlnekadnngqsfsfikhlaekykvdiva  
gsvsnirnnqifntafsvn  
ksgqlineydkvhIvpmIrehefltagenvaepfqIsdgtvytqlicydlrfpellryparsgakiafyvaqwpmsrlqh  
whsllkaraiennmfviqt  
nstgfdgnteyaghsivinpngdlvgeInesadiltvdlnI neveqqrenipvfksikldlyk  
>tr|Q2YUD3|Q2YUD3\_STAAB  
mphqIki fvesgnpnsIcsaplawvtiiekswIqahfwsinycqynfveprtIilcpglvfcvst  
>tr|Q2YUD4|Q2YUD4\_STAAB  
mgIfkkdkkamtdfnameerrsiynlkdsisisddelesmiahavkhvpsfnsqstrivlllndnnnkfwdntkailke  
vmgenrdfepteqkidnfk  
hsygtIlfyedqdvvsqIqeqmpnyydnfaiwstqtnamhqftiwtalatkigigasIqhynplvdemtsnefnipkswkI  
iaqmpfgdi reaagektfn  
pvedrfvik  
>tr|Q2YUD5|Q2YUD5\_STAAB  
msyhwfkkmlIstsilI lssslglathtveakdnIngekptnl nhnvtspsvnseinnetgtphesnqtgnegtdsn  
srdanpdsnnvkpdsnnqn  
pspds k p d p n n p n p g p n p k p d p n p k p k p d p n p k p k p d p n p k p k p d p n p k p k p n  
p d p k p d p k p k p n p n p k p d  
p n k p n p n p s p d p n p s d g s n q q w p n g n s q n p t g n d f v s q r f l a l a n g a y k y n p y i l  
n q i n q l g k e f g e v t d e d i y

Tsompanidou\_et\_al\_Supplemental\_FASTA\_File

niirkqnfsgnaylmgllqqqsnyfrfayfnplkseryrnldeqvlalitgeigsmpdlkkpedkpdskqrsfephekdd  
ftvkkqednkksastays  
kswlaivcsmmvifsimlflfvkrnkknknesqrr  
>tr|Q2YUD6|Q2YUD6\_STAAB  
mtrlwaslltviyilsqflpllvkklpfvqysgieltkavnyiqvlvfliaattiilinlkiknptklelevkepky  
iipwallgfalvmyqmvv  
siyytqifgtqtspterliviarki plffvsivgplleeyvfrkvi fgelfnaikgnrivafaiattvsslifala  
hndykfi piyfgmgvifsl  
ayvwtkr lavpiihmlqngfvvifqllnpealkkateqanfiyhffff  
>tr|Q2YUD9|Q2YUD9\_STAAB  
masyekrgstwryrislgkdvktgkykysinsgfkrksdakhaemverqlrtgeyiapststfqqvadewlsqyanevk  
vsvrarekaihaierfn  
nkpiqtinkheyqrfvndisagysknyvdsiitstnmi fkyaydmklirimpsedikrpkkktsveeledteihkkflek  
del fqllevaknhspqns  
fevctlaytgmragellaalkwsdidfenntiniktynpnknkqfqi ltpktessigkipvdphvikllknykvdvq  
dtwknglyvnnfvftdvn  
gypvikklqwikailkktidtnkqisthsfrhthcallieagvhikeiqerlrhkdinttmniyakitnsykkdasqk  
fsklmenvskdlf  
>tr|Q2YUE0|Q2YUE0\_STAAB  
mkfsemllkkyrtkenlsinklaklsgvsttyisklekndrsyptveifnlaygiimkikekydgiensddflypqieei  
issfatsedsnldenkt  
iiddfimferkekefnksfgdnkeiyenkialvsnsmykkt dypyfdlkwllsqnnfevfyrdrfitnfatiedskl  
ntksmyfy nildkedlkti  
qrlievyleskypkikdkdffvlatdkqnrikntidwynin  
>tr|Q2YUE1|Q2YUE1\_STAAB  
mlmgkerinasklsketgisrttiyglyhektespdtktvltl cdyfgitlneffgiekkev  
>tr|Q2YUE2|Q2YUE2\_STAAB  
mfniideneareilegairarveelakekyfmytel snylnlskptieellinngmkyymvgstyrfkksdvdfmeq  
l tahmniqnndfkqvnikk  
l leasq  
>tr|Q2YUE3|Q2YUE3\_STAAB  
mnneqkeviki dysslesvannksevyihefkcgekewtetvnrqhlqaiiewtlqqiennfefeene  
>tr|Q2YUE4|Q2YUE4\_STAAB  
mnkmnl tkqeyknienklnydhmvgkkrtkninkllqrehdrdasiikeyprlsdseisevidyrtykelviatet  
fvdfpinyedsnvcqfikt  
ediedlksaieemisfvenlek1  
>tr|Q2YUE6|Q2YUE6\_STAAB  
mdnqlinsiiekyqfskkqieavltl leekntvpfiaryrkeqtggldevqikqiddeyqymvnlqkrkeeviknieqqg  
llteelkkdil kqnlqrv  
edlyrpfkqkktrateakrkglep laiwmkarkhevsieekaqqfineevqsvedaikgaqdiiaeqisdnpkyrtkil  
kdmyhggl ttskkknaed  
ekgiefemyyeysepi krianhrvlavngekekvlsvkfefdttsvedfiarqeinhnvnrsyileaikdslkrlivps  
iereihadl tekaenhaid  
vfsenl rnl lppmkgkqilgvdpafrtgcklaainpfgt fiakgviyphpsvskkeaaekdfvqmvkaydvqliaign  
gtasreteqfvadlikkhq  
lpvqfiivneagasvysaseiardefpdfqveersavsigrvqdp lselvkidpksigvggyqhdvnqalena ltfvv  
etavnqvgvdintasssl  
qyvsglssqiakniayreengaikhnel skikrlgaktfeqsigflrivdgsep ldnstihpesykvtyklldklgfg  
gndlgsdal kaklnsl dmd  
elaielqvgvptledi kslkapnrdprdefetpilsdvlsiedlkegmklsgtvrnvdfgafvdigvkqdg lvhvst  
l skkfvnknpmdivsvgdv  
dwiysidknkdkvsltmidphe  
>tr|Q2YUE7|Q2YUE7\_STAAB  
mihmnndklqrmvenlseekfgrtfrhca yfnkr lrttgryllkshdieinpkqyehygedaivkiilhelchylhia  
gkyqghkdqdfkr lsqvg  
aprfnsiesyqqranyeyctkchakyrirkvdt nrmrcghcngklrmkrqlk  
>tr|Q2YUF5|Q2YUF5\_STAAB  
msktqhevqnidplkmaeslepeqlnekt lndmrsgsev lvevllkenvdy lfgypggav lplydtfydgkikhilarh  
eggavhaaegy arvsgktg  
vvvvtsgpgatnvmgtid ahcdslplvvftgqv atpgigkdafqeadil smtspitknyqvkrvedipkivheafhva  
nsgrkgpvv idfpkdmgv l  
atnvd l cdeinipgyevvtepenkdietfisl lkeakpvvlagaginqsksnqlltqfvnkhqiptvtllglgavpye  
dtlflmggmhgsyasna  
ltecdllinlgsrfdrr laskpdafapnakivhvdidpseinkvihvdlgiiadckrfleclndknvetiehsdwnhcq  
nnkqkhpflkgeedpvfck  
pqqtieyigkitngeaivtt dvgqhqmwaaqfypfknhgqwtsgglgtmgfgipssigaklanpdktvvcfvgdggfqm  
tnqemallpeyglvki v l  
inngt l gmvkqwqdkffnqrfshsvfngqpdfmkaeaygvkgflidkpeql eeql dvafayqgpali evrispteavn p



Tsompanidou\_et\_al\_Supplemental\_FASTA\_File

mvpsgksnhemeg1  
>tr|Q2YUF7|Q2YUF7\_STAAB  
mikinnldemngfamflveqksgdlillngdlgagkttltqfigkalgvrrtinsptfniiksyrgnklklhmdcyrl  
edsdedlgfdeffedqait  
viewsqfikd11pathlsinistisensrqielfaqgehyeqikeaiihefaah  
>tr|Q2YUF8|Q2YUF8\_STAAB  
mns1lidtsnqplsvalmqndevlaeitttdskqnhsvqlmpaisqlfeqskiakqldaiivaegpgsytg1rigvtvak  
tlayaldvkllygvsslka1  
aatidhtdk11vpvfdarrqavytgiqwgngqlvtiledqymsiealrafledlnqpfyigkdtvklpdelqgdgiaq  
lpnasvmyqlidkpsdvht  
ftpkyhklaeaernwinsqkn  
>tr|Q2YUG1|Q2YUG1\_STAAB  
mck1gwgpnieklehqflqtiavevgpntenfemkfyrqcklagpqhkslvvlylfc1tsliai  
>tr|Q2YUG2|Q2YUG2\_STAAB  
mstnqtflifviai11tsvigivgrymsrqr11ksmeilwqt1spleafirpnshfdyeyklykdkfeshslvddkts  
dlnmnaifhkmyln1tsig  
emklyaclrgmlsitnks11slfndnaefrknvtyh1aligktvyptfpdqitpvkrqnilflcpflpvisfavifinsq  
vg11flmsclfn11sat  
lkrtyeddlksifyasv1kqgytiskikhapqpevnfkqfrtarhltsvlaevndedigamviklvklifmldyvlfhs  
iqksytthmnelkncfdyi  
aeldnhyalamyr11tecytepqiddsndg1vselthpl1tdavandfslsqn11ltsnasgkstfmsiainiilas  
aiqtvtankfvypg1vft  
smanaddv1sgdsyfmaelksikriveipdnqkiycfideifkgtntteriaasesv1sflheksnfrviaathdielae  
11kqryenyhfnevienn  
ihfdykikpgkantrnaie11kitsfpakiyerakdnvsng  
>tr|Q2YUG3|Q2YUG3\_STAAB  
m11lq1nhisksfdged1ftdvdfevktgerigivgrngagkst1mk1iagvenydsngvskikn1k1gy1tqqmt1nsn  
atvfeemskpfehikrmes  
likeetdwl1skhandydsdytkthmsryes1snqfeq1egyqyeskiktvlhg1nfseedfnkpindfsggqktr1s1aq  
m11nepd1111deptnh1d  
lettkwledylryfkgai1v1ishdryf1dkivtqi1ydv1algvkryvgnyee1fiqrd1yyqkrmqeyesqqaeikr1et  
fveknit1rastsgmaksrr  
kilekmeridkpm1daksaniqfgfdrntgndvmhvkn1eigyqta1tkpisievskgdhia1igp1ngigk1st1iktian  
qqkalngdi1tfgan1q1gy  
ydgkqae1fkssk11dyvwdqyplmnekdirav1grf1fvqddvki1ind1sggekar1q1a11m1qrndv11ldeptnh  
1ldiskem1lega1qhfeft  
1lfvshdryf1ng1ankvfd1t1idggkmy1gdyqyy1ekveeae1kaqqeeqsvnvqaheksmeqssyhnqkeqrreqr  
k1erq1sece1e1et1lett  
1lq1deq1tqpevynnpqkane1aiqkq1dseq1lehamskwee1qqk1  
>tr|Q2YUG5|Q2YUG5\_STAAB  
mqqsdi1isaakkymes1hqndytghdi1ahvyrvtalaksiaenegvndt1vie1ac11hdtvdekvv1dankqyve1ksf1  
ss1s1stedqeh1lfi1nn  
msyrngkndhvt1slegqivrdadr1daigaigvartf1qfaghfgepmwtehms1dkindd1veq1ppsaikhffek11k  
1es1mhtdtakmiakerhd  
fmmmy1kqfftewnyhd  
>tr|Q2YUG6|Q2YUG6\_STAAB  
mie11sialkhsni11nsifigaf1n11fafti1fmerransiwaw11lv1fl1pl1fgfily111grq1qrdq1fkidk  
edkkg1e1ivdeq1laal1kn  
enfsnsnyqivkfkemiqm1lynnaaf1ttdnd1kiytdgqekfdd1iqdirnatdyihfgyy1i1qndelgrtilnelgk  
kaeqgvevki1yddmgsrg  
1rkkgl1rpfrnkgg1haeaffpsk1pl1in1rmmnrnrhkiv1vidgq1gyvggf1nigdey1gkskkfgywr1dth1rivgdav  
na1q1rf1ildwnsqatrdh  
isyddryfpdvnsdet1igvq1assgpdeeweq1kygy1kmissakksiy1qspyf1pdqaf1dsikiaalggvdvnmip  
nkpdp1fvfwat1knaas1  
1dagvkvfhydn1gflhskt1viddeiasvgtanmdhrsft1nfevna1fiy1dq1iak1kqaf1idd1av1sse1tkaryakr  
s1wikfkeg1sq11spi1  
>tr|Q2YUG7|Q2YUG7\_STAAB  
mteqdnahhseqikm1ksr1nrriegqvrainrmi1eedvycddv1tq1ratrsal1nsvatk11leqhmks1cimknv1nqgaq  
eeamee11vtf1qk1ikd  
>tr|Q2YUG8|Q2YUG8\_STAAB  
mihqntiytagi1eteeqvsq1terisnmigvhqvn1ni1dgqvtvsy1etpan1nsiekeiydegykivf  
>tr|Q2YUH0|Q2YUH0\_STAAB  
mnyssrqppdkhw1rkvdw1vatiav1aifsv11insamgggqysanfgirq1fy1ilgai1fagi1mfispkkikhyty  
1lyf1ic1111ig11lvipes  
pitpi1ngakswytfgp1siq1psefmki1il1al1arvvsrh1nqft1fnksfqs1111ffki1gvs1vps1il111qnd1g1tt  
1vlaai1agvm1lvsg1twr  
1lapi1fitg1vgatv1lg1yapal1ien11lgvq1lyqmgr1nsw1dpytyssgdgyh1tes1kaigsgq11lgkgy1nhgev  
y1penhtdf1fsvige1lg

Tsompanidou\_et\_al\_Supplemental\_FASTA\_File

figsvililiflflifhflrlatkiqdqfnkifivgfvtlvfhilqnigmtiqlpitgiplpfisyggsalwsmmtgi  
gvlslsiyyhepkryvdlyh  
pksn  
>tr|Q2YUH2|Q2YUH2\_STAAB  
minvtlkqigswipckiedqflnqeingvtidsraisknmlfipfkgenvdghrfvskalqdgagaafyqrgtpidenvs  
gpiiwvedtltalqqlaqa  
ylrhvnpkviavtgsngktttkdmiesvlhtefkvkktqgnynneiglpiltileldndteisilemgmsgfheiefnsl  
aqpdiaivtigneshmqdl  
gsregiakakseitiglkdngtfiydgdep1lkphvkevenakcisigvatdnalvcsvddrdttgisftinnkehyd1p  
ilgkhnmknatiaiavghe  
lgltynriyqnlknvsltgmrmeqhtlenditvindaynasptsmaaidt1ntltgririlgdlvelgenskemhigv  
gnyleekhdivlytfgnea  
kyiydsgqqhvekaqhfnskddmievltsdlkahdrv1vkgsrgmkleevvnalis  
>tr|Q2YUH5|Q2YUH5\_STAAB  
msnteslnigkkrsltiyigspvgktfemlsnaiefqsnvdikigyiephqrdeatnaeqlpkiatnftkhgshh  
fqyldvdriieesptivli  
delahntisrdrhekrymdieeilnhgidvhtlniqhieslssqielmtgvhkerpdyfimsadvlevvdispeqli  
krlkagkykrdr1dvafn  
nfftyah1selrt1l1rtvad1msdkekvrhnnkts1kphiaavaisgsiyneavikeafhiaqkehakftaiyidvfekn  
rqykdskqvhqhlmlaks  
lgakvkvyvsgtvalgl dewcknqdvtkliigqhirnkwrdfnkp1idh1msfesykieivpikqipvelkmnkspyr  
pkgkrfaidmlkmi1iqii  
cvmmg1wiyqldkhesstiilmifligi1llsiwtrsyiigflaaiinvfvfnyffteprytfeyvrfdyptifivsil  
siltsallkqikfqsitk  
kqlyrtd1lfqfndsikqytven1linagyqinql1qsitiyvinqskviktiplqnhidnttqqheqalswvikner  
qagattdtfpginkw1ipi  
gtspikgilai dyqssqvinpydasilesm1nel1lavenvt1l1kqtresmlqaerqlthsfn1rsishdirtp1tting  
nldilvshskdmsiiekeq  
1lvhsfquesqly1lvtni1sltk1qssnvqik1qpylvselveidmilerrh1kkritisssvd1qfihidsk1ilqa  
1fn1ienavkhtstdtkin  
lsiryasdeqiefavidegpgisleeqqkiefpytrsnkyfkdnqkesmg1glylvqtilhkhqsn1qykpnqphgsif  
yfnidtdfnegdi  
>tr|Q2YUH9|Q2YUH9\_STAAB  
msdytk1skspksal1yyi1ngief1svavyvifyfiw1rfewpqi1yil1vlgalst1kl1fikplwqyhrf1yqid  
q1svqyrtsf1iykeetsr  
ier1qy1siksnp1skv1n1ykvf1mtaghtiy1pmmshddvki1eartmsn1rgvesdv  
>tr|Q2YUI0|Q2YUI0\_STAAB  
msepqk1hpi1syfngi1naikqni1vff1fvi1fh1kdfdytnpesy1wigivfvff1isyisqivgimntrywiednyfi  
1ttgi1fnkkrke1n1kriq  
svdmtqgvnqi1ggvd1qiktpsdg1v1sviskqgeyleryid1qltelktemaqkssteqngnrnhdiegnvediae  
gr1devqnsdsk1nqknkr  
1piyqmnfkes1fmamtsgaigvt1aalvpiygavrelipwsk1nheisqwwqivsvsvlii1llvl1layi1rtiitmi  
rfygfsvmleneq1kieyq  
1fnkkkvtvptkr1qavvehqsyirr1fgytaihf1it1sdfenkkiedddndsgsvsil1pfikrdkayqi1qnlapdl1sy  
qqvnegmpfsgfhrhf1ip  
siiviamagigcyfwnq1ll1ftiitvvi1glfvikgylyvkhagfkmteeqitiqnfellkniyyfkaahiigfdtwq  
ht1lkrn1lnfsfivakg  
vtnesielkyasskdvqi1kawy1rgende  
>tr|Q2YUI1|Q2YUI1\_STAAB  
msdynfmsphakkvmr1sav1fwipialv1liafn1lnw1fweildnyisivssvii1llvavft1viapvyrykhc1rya  
fekhh1rvrngi1fl1dekv  
ipyfriqni1divgpimrryr1lat1tlytaggqaeielid1rsearr1krw1lnerh1lennknee  
>tr|Q2YUI3|Q2YUI3\_STAAB  
msdkyrsaymnd1navasnfvfst1hpnktvmavvkanaygl1svkvarh1mengatffavat1deaielrmhgita  
ki1vl1gv1pakdidkaiqh  
rva1tvpskqwl1keakni1sdeqek1lw1hik1ldtgmgr1gik1dtktyqevieii1qqyeql1vfegvfthfvcadepgdm1t  
teqyqrfdm1vneaikpey  
ihc1nsags1lmdc1qfca1irp1gis1lygyypseyvqqkvkvh1kpsvq1lianvvqtk1lqagesvsygatytatdpttia  
1lpig1yadgy1rimqgsfv  
nvng1hqcevvrvcmdq1tikvpdqvkagds1vil1dnhrespqsvevaaekqhtinyev1cn1srr1priyhdgdqrfvt  
ne1lk  
>tr|Q2YUI7|Q2YUI7\_STAAB  
mn1ni1etttqdkfyevkigge1dvytvp1eev1tpmrqdgtrdi1yvn1envsymdstgl1glfvgt1ka1nqndkelyi1  
gvsdrigr1feitglkdlm  
hvnegteve  
>tr|Q2YUJ3|Q2YUJ3\_STAAB  
mmk1k1mti1fgtrpea1kmap1vka1leqekm1epivvtaqhrem1dsv1stfeikpkyd1nimksgqt1seitsksitq1  
eqviq1lekpdmv1vhgdtm

Tsompanidou\_et\_al\_Supplemental\_FASTA\_File

ttfagglaafynqvpi ghveaglr sydkyspfpeevnrqlvgvladlh faptknaashllsegkysesvvtgntaidam  
kftvddnyksnimdkyhdk  
kfilmtahrrenigppmenifkavrrl ideytdlalvypmhknpkvrevaqkilgshdrielielpdvdfhnfakksyf  
iltdsggiqeeapsfnkpv  
lvlrsvterpegveagtlkvigtnkqnvyqaakelidderlyhqmseasnpygdg faserivnhikyynl itekpsdf  
>tr|Q2YUJ4|Q2YUJ4\_STAAB  
msrfynifkqfiqylyll iilgglylfthhafilgliigtgsaintvifesy lakakrpdthistgmmwrylvaiia  
cmiwyfnkahvsjigiig  
lmsyvvvii rp1lkvsk  
>tr|Q2YUK6|Q2YUK6\_STAAB  
mtlnlnnskiiniklm gcgmktfkavrfqivnehgriieyeledgviinkeesgtgw lleivisnehyetfkeyqdne  
qsl dirvvit r pandpal f  
estvksiknfttmsiv fechiytlrqyaeslleqliddglsgeelkksfnrmmqskpklkdekle  
>tr|Q2YUK7|Q2YUK7\_STAAB  
mlnkiivigrmtkdaqifekedrkiatfcvathrnykdengeivcdylfckafgklasniekytnqgtlvgitgqmrsk  
ydkdgqthfvte lyvetik  
fmspksqneilsdsildidsqnidnhdlei  
>tr|Q2YUK9|Q2YUK9\_STAAB  
mifsqnlfr rtpar l trieksllqahfrsvnycqynfvehrtliyvpaciiiyifeikktgtyrefpdi fsksylyny  
wlamhkwlmq  
>tr|Q2YUL4|Q2YUL4\_STAAB  
msnqqdvikelnqqvanwtvaytklnhfhwyvkgpnffslhvkfeelyneasqyvde laerilavggnpvgtltecleqs  
ivkeaakgysaeqmveels  
qdftniskql ekaieia gnagddvsedmfigmqt svdkhnwmfksyls  
>tr|Q2YUM0|Q2YUM0\_STAAB  
msekqqildyietnkysyieishriherpel gneeifasrtlidr lkehdfieietia ghatgfiatyds gldgpaigfl  
aeydalpglghacghniig  
tasvlgai glkqv idqigdkvvvl gcpaeeggengsakasyvkagvidq idialmihpgnetyktidtlavdvldvkfyg  
ksahasenadealnal dam  
isyfngvaqlrghikkdqrvhgvi ldggkaani ipdytharfyt ramtrkel dil tekvnqi argaaiqtgc dyefgpiq  
ngvnefiktpkl ddfaky  
aevgeavidddfygstdtgnvshvptihphikigsrnlvghthrfreaaasvhgdealikgakimalmg lelitnqd  
vyqdiieehahlkgngk  
>tr|Q2YUM1|Q2YUM1\_STAAB  
mtnngnepnl t lsdlykdvvysrpsyisnpwlpkdehqs nfltgrellianqlpvivheasatdklhq lfvigkyvp  
nsiytfnnqgsyenlikql  
ahkenkkyfyqyihdetilnqqyaldktlfvalnkaripewtngkflpkrkvkiehfeneiknwepfvikpgddl p  
taggygvmicyhdadlqka  
itrikeataetnsliieqkieekanycvqfanseslgiqylgaatq ltdkygfyngenttnvpehvieagr qimengvn  
qgffgvagfdllvdeddv  
yaidlnfrqngstsmll lane lnsyqkfysyhs kddnthffntilkyvkegilyp lsyysdwygedkvksrfgciwhg  
dsketv leneraflaeleh  
y  
>tr|Q2YUM4|Q2YUM4\_STAAB  
make lcfegitlkafdeqyrsa indfdlnerqqiysslpkevidda indadrmanvaindknevvgffvlhryyqhegyd  
tpenvvyirs l sinekygq  
fgygmkimmslpqyvqgvfpdfnhlylvvdaendawnlyeragfmhtatkeegpigkerlyyldl dskhvsslklees  
rsevtnvhiinlmi dgqkv  
gfialeqigermniaaievdksyrfngigssalrqlptylrknydnlnv itmilfgengfkplclnsnfveieqtddyv  
vfekylyny  
>tr|Q2YUM8|Q2YUM8\_STAAB  
mplvsmkemlidakengyavqqyninnleftqail easqeenapvilgvsegaarymsgfytikmveglmhdlnitipv  
aihldhgssfekckea ida  
gftsvmi dashspfeenvattkkvveyahekgvsveaelgtv gggqeddvvadgiyadpkecqelvektgidalapa lgs  
vhgpykgepklgfkemeei  
glstg lplvlhgggtgip tkdiqkaipfgtakinvntenqiasakavrdvl nndkevydprkylgpareaiketvkgkike  
fgtsnrak  
>tr|Q2YUN7|Q2YUN7\_STAAB  
mgtkiwdvreyne dlqqypkineikdivl ngglig lptetvyglaanatdeeavakiyeakgrpsdnp livhihskgqlk  
dftytldpsveklmkafwp  
gpisfilp lkpgy lcrkvsgglssav rmpshsvgrql lqineplaapsanl sgrpspttfnhvyqdl ngridgiva e  
qseeglestvldctsfpyk  
iarpgsitaami tdi lpsiahadyndteqpi apgmkykhysntpltiitdieskigndgdwssiafivpsnkva fip  
seaqfiqlc qddndvkqas  
hnlydv l hsl deneni saayiygfelndntea imnrm lkaagnhiikgcel  
>tr|Q2YUP0|Q2YUP0\_STAAB  
mmef tikrdyfi tq lndtlka isprttl piltgikidakehevil tgsdseisieitipktvngedivn isetgsvlpg  
rffvdiikk lpgkdvklst

Tsompanidou\_et\_al\_Supplemental\_FASTA\_File

neqfqtllitsghsefnlsgldpdqyp1lpqvsrddaiqlsvkvlknviaqtnfavstsetrpvlgtgvnwliqenelicta  
tdshrlavrklqledvsn  
knvii pgkalaelnkimsdneedidiffasnqvlfkvgvnfisirllleghypdtr1fpenyeiklsidngefyhaidra  
sllareggnnviklstgdd  
vvelsstspeigtvkeevdandveggs1kifsnskymmdalkaidndeveveffgtmkpfilkpkgddsvtqlilpirty  
>tr|Q2YUP2|Q2YUP2\_STAAB  
mvtalsdvnntdnygagqiqlvlegleavrkrpmyigstserglhhlvweivdnsidealagyanqieviekdnwikvt  
dnrgripvdiqekmgrpav  
evilvthaggkfggggykvsgglhvgvssvvnalsqdlevyvhrnetiyhqaykkgvpqfdlkevgttdktgtvirfka  
dgeiftettvnyetlqqr  
irelaflnkqiqitlnderdeenvredsyhyeggiksyvellnenkepihdepiyihqskddieveiaiqynsgyatnll  
tyannihtyeggthedgfk  
raltrvlnsyglsskimkeekdr1sgedtregrmtaiisikhgdpqfegqtktklgnsevrqvvdklfsehferflyenpq  
vartvvekgimaararvaa  
kkarevtrrksaldvaslpgkladcsskspeceiflvegdsaggstksgrdsrtqailplrgkilnvekarldrilnnn  
eirqmitafgtgigddfdl  
akaryhkivimtdadvdgahirtlll1tffyrfmrplieagyvyiaapplykltqgkqkyvyndrelDKlksklnptpkw  
siarykglgemnadqlwet  
tmnpehral1qvkleadaieadtqfemlmgdvvenrrqfiednavyanldf  
>tr|Q2YUP3|Q2YUP3\_STAAB  
mdivnivimlligvfggfisglvgvggaiiypailllpp1fgapaysayasgltsqvffstlsgslkarkktefespq  
lvymgggmiigsm1gaf1  
an1fdatfvntvyiia1la1t1mfikvkspekssfnkyl1viig1figiisgivgaggafiiipillvlflklpmntvv  
ansivafissigafvik1  
iqgyiplydalfl1igsii1fapig1k1skkvpnii1qkwiisilivfaiiq1l1  
>tr|Q2YUP4|Q2YUP4\_STAAB  
mqvgvwwptqrwnnnnfyrqcelgwddeinfgk1sflshshipdrktglelaekygidgvmidrgifhnpfafekepreh  
tskelld1lr1h1s1fnky  
ekdeirqfks1rrffkiyvrgirgase1rhqlmntqsiacara1ldefeaqmdedikie1  
>tr|Q2YUP5|Q2YUP5\_STAAB  
mrkifililit11fgysys1learaetqndpnise1nkssqytgshwniwylynsdpvnakkik1sdf1shdfivpinp  
ghdyvkte1kdstmassf  
dgkevdi1fgvnyfdqcyfsneniqcdsnqgggskktcmgygit1nenntnriqpi1vkvvyendsvt1sfdinidketvt  
iqeldykrnk1iskinly  
h1ggs1yetgyikfi1engnryywydmmpdpqftqskylmi1yrgnetvesakteievhl1tkk  
>tr|Q2YUP6|Q2YUP6\_STAAB  
md1nkfeelykgykdddvi1eqfaiyvvtdeekimkitdkk1tsedkqv1fkiatssyrfnvvkemydyylydfqii1kdyi  
knkrn1nnefksidfinly  
flhil1startfyqyten1fksigekefkewknnisniydnnsyrlcyqmsftqhhglaitnikeklvncngeeindy  
qlfidpsil1ntnynwnka  
fksd1enyngli1dfyqli1idydecikn11ysfiglinkyste1nqlmlkameiegepgipflrkakkkelresygnigf  
telkgskti1dvfnmmyd1  
dt  
>tr|Q2YUP8|Q2YUP8\_STAAB  
mkal11ktsv1v11fsamglwhvsnaaeqhtpmkahvvttdkattdkqvtptkeaaahygeeaatnvsasaqgtvdd  
innkvtsnapsnkpstavs  
atvnetrdvdtqgastqkptrtatykl1snaktas1sprmfaanapqttthkil1htndihgrlaeekgrvigmakl1ktvke  
qekpd1m1dagdafqgl1p1  
snqskgeemakamnalgydamavgnhefdfydq1kk1legm1dfpm1stnvykdgkcafkpstivtkngirygiigvttp  
etk1ktrpegikgvefrdp  
lqsvtaemmriykgvdtfvvish1g1dpstqetwrgdy1vkqlsqnpq1kkritvidghshtvl1ngqiyndal1aqtgt  
alanigkitfnyrngevsn  
ikps1invkdvenvtpnkala1eqinqadt1fraqtaevii1pnntid1fkgerrddvrtretn1gnaiadameaygvknfskk  
pdfavtnggg1rasia1kgk  
vtryd1isv1pfgntiaqi1dvkgsdvwtafehs1gapttqkdgktvl1tanggl1hisdsirvydmdkpsgkrinaiqil  
nketgkfenid1krvyhvt  
mndftasggdgyms1fggpreegis1dqvl1asy1ktan1akydttepqrm11gkpavseqpakgqgsgksesgkdtqpig  
kdkvmpakqpapskv11  
sthrgtvssg1regsg1rt1legtavssksgk1asmsapkssahkkq1pktgadqssspvamfvlvagigliatvrrrkas  
>tr|Q2YUP9|Q2YUP9\_STAAB  
msr1irmv1asgstgnatfvnekgs11vdvgt1gkkmee1fsqidrniqn1ngilvthehidhikgl1glarkyqlpi  
yanektwqai1ekdsripm  
dqkfi1fnpyetks1agfdves1fnvshda1dpqfyi1fhnykkfti1tdtgyvsdrmkgm1rgsdafi1fesnhdvdml1rmc  
rypwwtkqri1gdmghvsn  
edaghamtdvi1gntkriy1sh1sqdnm1kdlarmsvgqvl1nehdidtekev11cdtdkaiptpiyti  
>tr|Q2YUQ0|Q2YUQ0\_STAAB  
mnwkl1tk11fi1fvfi1lvni1v1sviyvknvrshinevesnnevn1fqeeikvpasi1nksvkgik1leqitgrskdfsska  
kgdsd1ttsdggk11nani

Tsompanidou\_et\_al\_Supplemental\_FASTA\_File

sqsvkvsdnnlkdldkdyvnrkrvfkgyeqlseisssgsvkyeqtdnfpilnnskamlfnfniednkatsyqsmddikpt  
dgadkkhqvigvrkaieal  
yynrylkkgdevinarlgyysvnetnvqlqpneikvkhdgkdknttyveatnnnpkiinh  
>tr|Q2YUQ1|Q2YUQ1\_STAAB  
migmnkehiksvjla1lvmsvvltymvwnfspdianvdntdskksetkplttptakmddttitpfqiihskndhpegt  
iatvsnvnltkplknkev  
ksvehvrrdhnlimpd1ssdft1fdftyd1plstylgqvlmnakvpnhfnfnr1vidhdaddnivlyaiskdrhdyvk1  
ttttkndhfla1aavkkd  
mppytdiitnkdtdrtthvfapskpek1ktyrmvfntisvekmna1lfdstivrssksgvttyntngvanykdknek  
yhyknlsedeassskmeet  
ipgtfdfinhgglndfr1fstnngsge1tyqrf1ngyptfnkegsnq1qvtwgekga1fdyrrs11rtdvvl1nsednk  
t1pk1esvrss1annsdin  
fekvtniaigyemqndsdhnhievqinse1vprwyveydgewyvyndgr1e  
>tr|Q2YUQ7|Q2YUQ7\_STAAB  
mnrqstkkallipfvimii1taiv1mgvwfifnslialiasivlvvmiivsivlfrqalmkmsyvdgl1saqisttnkai  
khlpgiiv1dendhiew  
nqfmdhmeanvisesvnevfpn1lkq1drvksveieynqyhfvrysendhclyff1diteqvqtnelyenskpiiat1f  
1dnydeitqnmndtqrse1  
nsmvtrvisrwateyni1ffkryssdqfvay1nqkiladleeskfdilsq1reksvgyraq1t1sigvgegten1id1gel  
sqsg1d1algrggdqvaik  
singnvrfygk1tdpmekrtrvarvishalkdilaegdkvi1mghkrp1daigaaigvsrfammn1eayiv1netdi  
dpt1rrvmne1dkkpe1re  
rfitddawdmmtskttv1vdthkpe1vl1denv1nkanrkvidhrrgesfisn1lvymepyassta1elvtelleyq  
pteqr1tr1lestvmyagi1  
vdrnft1rtgsrtfdaasy1rahgadt1tqhflkddvdtyinrse1irtvkvedngiaiahgsedkiyhpvtvaqaad  
e11s1legieasyvvarred  
nligisars1gsnvq1tmea1ggggh1tmaatq1kgvtveeai1aq1lqqaiteq1rseda  
>tr|Q2YUQ8|Q2YUQ8\_STAAB  
mlisikevki1aivknmgvayv1fskiqpkat1iatialvfalaly1vpglgl1fal1fatipg1vlnksiqsfgisali  
tvi1ttv1gntfv1sai1l  
vliasi1gq1l1kertskeri1lyvttvats1is1iafml1qtfgrippsasivkpfkq1l1heaitmsgadanmtq1leeg  
frqai1vq1pgfii1itf1i  
v1in1ivt1fp1l1rkfkiatp1vfkp1fawqmsg1llwiyi1ivi1ic1l1ftgqpsvfqs1llnfq1vl1slvmyiqg1svihff  
gkag1pnavt1ll1iigt  
i1tptthivg1lgvid1s1n1lkrimknnsk  
>tr|Q2YUQ9|Q2YUQ9\_STAAB  
mtnytvd1n1lgkfi1tesgevid1n1r1ryehvgyhgq1lvvchal1tgnh1tygtddypgwwre1idggyipihdyq1ft  
fdv1gspfg1ss1p1ndphf  
pkk1t1rd1vranergi1qalgydkini1iggs1ggmqame1lynqqfevdka1ilaatsrtssysrafneiarqai1hgg  
keg1s1iarq1gl1tyrsk  
syderft1pdevvayq1hgqgnk1fkeyfd1ncyl1t1ldv1dshnidrg1rdvthvfkn1etkvl1tmgfidd1lypddqvra1  
gerfkyhrh1ffvp1d1vghd  
gf1l1nfntwapn1lyh1f1n1lkhfkrk  
>tr|Q2YUR1|Q2YUR1\_STAAB  
mth1s1frgqv1qeci1pt1lg1yagvg1sfgiv1assqnfs1ilei1ll1clviyagaaq1fimcalliagtp1sai1v1tvfivns  
rmf1l1sms1apnfk1tygfw  
nrvg1gs1vtdet1fgvai1tpylkgea1ndrwmhgl1nitay1fwai1scvaga1l1fgey1snq1t1gl1dfaitam1f1flaiaq  
fes1tk1sr1riyiv1li1av  
ivmm1s1smfmp1syl1ailiaat1isaalgvmmer  
>tr|Q2YUR5|Q2YUR5\_STAAB  
mael1pqs1rinernitsemres1f1dyamsvivaral1pdvrdgl1kpvhrrilyg1neqg1mtpdk1sykksarivgdvmgkyhp  
hgd1ssi1yeamvr1maqdfsy  
ryp1vdgqgn1fgsm1gdgaaamrytearmtkit1el1rdinkdt1dfidnydgneresv1lparf1pn1langasgiavgm  
atn1pph1n1tel1ngv1s1l  
sknpd1sia1elmedi1egpdf1tag1l1lgksg1irrayetgrgsiqmrsraveerggrrqrivvteipfqvnkarmiekia  
elvr1dkkidg1td1rdets  
l1rtgvr1v1dvrk1danasv1lnnlykqtp1qtsfgvnmialvng1rpk1in1lkealvhy1lehqktvrrrtqyn1rkakdr  
ahileg1l1ria1ldh1de1i1s  
tires1tdkvames1lqgrfk1sekqaqai1dmr1rr1tg1lerdki1eayne1l1nyise1lea1ladeev1l1qlvr1del1tei  
rd1rfgd1err1tei1q1ggfed  
leded1ipe1eqivi1t1shnnyikr1lpvstyraqnrgg1rgvqgmnt1eedfvsq1lvt1sthdh1v1fft1nkgrvyk1kgyev  
pel1srq1skgip1vnaie1le  
ndev1stm1javk1desedn1lvfat1krgvvkr1salsnfsrinrngkia1isfreddeliav1r1tsggedi1ligtshas1ir  
fpest1r1p1gr1tatg1vkgi  
t1regdevv1gl1dvahansvdev1lv1tengy1krt1pvndyr1snrggk1giktatiterngnvvc1ittvtgeed1miv1tnag  
vi1r1ldvadi1sqngraagq  
vr1ir1gdd1qfv1stvakvkedadevnedeqstvsedg1teqqreav1vndetpgnaihtevidseendedgrievrqdfmdr  
veedi1qqssdedee

Tsompanidou\_et\_al\_Supplemental\_FASTA\_File

>tr|Q2YUR8|Q2YUR8\_STAAB  
mllkpkvqivjaglciaivailsimgntlvspgtvigaifnfdsendlhdvvtgarasrtiaalltgaalavsgllmqal  
ltnpiaspplfgvnagav  
ffvifsitfiqisfkmivviafngaiivvtlvvalgmfrqtlfsphrvilagaaiamlftaftqgilimnetdlqgllf  
wlsqsvslrniwdipwiiip  
lvllllilafismaahinilmstddiatglgqniklikwmiimlismlagisvavagsivfvglivpniskrllppnyky  
ipftalagailmiisdiva  
riikplelpvgvvtavigaivliyimkkgrqr1  
>tr|Q2YUR9|Q2YUR9\_STAAB  
mtekinkkdnhyhifaliflavsvvsmmigssfiplqrvlmyfinpndsidqftlevlrlpritlailagaalmsglm  
lqnvlnkpiaspdiigitg  
gasl savvfi affshltihllplfavlggavammillvfqtkgqirpttliigismqtlfialvqgllittkqlsaaka  
ytwlvgslygatfkdtiil  
gmvilavvplflvlviskmsilddpvaiglglvhvrmlkqliitstilvsmailsvgnigfvgliaphiaktivrgsya  
kklmsamigaisiviadl  
igrtlflpkevpagvfiaafgapffiylltvkk1  
>tr|Q2YUS0|Q2YUS0\_STAAB  
mkynnhdkirfdiieaymfrfkkkvkpevdmtikefilltylfhqqentlpfkkivsdlycyqsdlvqhiklvkhsyi  
skvrskiderntyisisee  
grekiaervtlfdqikqfnladqsesqmipkdskeflnlmytmyfkniikkhltsfveftilaiitsqnknivllkd  
lietihhkypqtvrallnll  
kkqgylkerstederkilihmndaqqdhaeqllaqvnqlladkdhllhlfve  
>tr|Q2YUS4|Q2YUS4\_STAAB  
mnklrdttflsylvftiilwgsafpmikiaIndfsaeslsafrlilatillpfviikkllptpelrdipvifilgfcgfv  
yhaalnfgeltisagisgi  
lvsttpifssalayiflkehfskwnwllsvafigisiisiskddyttinvlgvfiillafseslyftfqkkyiekygf  
iaftlytimasspfmliifi  
peiindihgatftsivsvlylaifptiipyvllayivksvgsdatmslyltpivsllyllldelpttlaiggllitl  
lgvslsnffqnt  
>tr|Q2YUS5|Q2YUS5\_STAAB  
myysygnyeafarppkpenvenksayligsglaslatacflirdgqmegskihileelpkaggsldgenmplkgyvvrgg  
remenhfecldwlfrrsips  
leidhasvldefywlakeepnysrcrviekqqr1vtdgdftltktaikeildlcltneedladdvitdvfsdfffnsnf  
wiywktmfafepwhsamem  
rrylmrfvhhiggadfsalkftkynqyeslvlpmveylkshgvqfeydvkvedikvdvttsqkiareilhrhgkaesi  
klindlvfvtngsites  
tygdndtpapptdelsgswtlwknlarqspefgnpdkfcqnipqkswfsatsttnkniiidtierickrdplagktvtg  
giitindsawqisftinrq  
qqfkdpkneistwiyalydvngdyikkpitemcsneicqewlyhlgvptdkiedlakhasntipvmpyitsyfentra  
igdrplvvphqsqnlafig  
nfaeterdtvftteysvrtameavyqllnidrgipevinstfdlrvlmdavyeIndhqdlrkitkdskmqklalagflkk  
ikgtyiesllkehkl1  
>tr|Q2YUS6|Q2YUS6\_STAAB  
memsvtevi ffsfllgglgifylglkimgdglqasagdrldilnkftsnvlgviagivvtiliqsssgttvitiglvtag  
fmtlkqaijgvimganigt  
vtafiigidlgeyampialagflifffkrskinnigrilfgfgslffglefmgdavnplasldefkqlmldmssnpila  
vivgagltalvqsssatig  
ilqefyqqdlislnaaiplvlgdnigttitailaslagsiaakraalvhvifnligviiftiflpvvihlisllqdvwhl  
kpmntiavshgfnitnt1  
iq1pfvaglawivtklvpgkdiaddykpqhlndlvvyhagvalqetqkelqnvqqivlsmfedireitkddkklkkle  
qkhqavetindsirnylv  
istkai tkadverlavmfdvnrslkvaelteeyvaqlkrqhdediritedaqrmdklfnhvaesfdkaidmldvydkt  
kkdeiversresfniehl  
rkghikrlnrgecttkgglyidmigvlerigyhsrvnsealvglnddvptdeeiattei  
>tr|Q2YUS7|Q2YUS7\_STAAB  
mnetyrngnkliigivlgvitfwlfaqlvnnvplnqsfadmgmtisiavsltal fsgmfvvgaggladkigrvkmtni  
glllsiiigsaliiiitnlpa  
llilgriiqgvsaacimpstlaiktyyegaerqral sywsigswggsgicslfggavattmgrpwiifsiivavlsml  
likgtpteksevtnthkfd  
vaglivlvvmlslnvvitkgaalgytslvffgliaivivaffiflvvekkvdnplidfk1fenkpytgatisnflngv  
agtli vantfvqqglgyta  
lqagylsitylimvllmirvgekllqkmgskrpmllgtfiviigialislvflpgifyviscvvgylcfglglgiyatps  
tdtaisnapldkvgvasgi  
ykmasslggafgva isgavyagavaatsihtgamialwvnlmgimafiaailfaipnddkrvkdak  
>tr|Q2YUS8|Q2YUS8\_STAAB  
mnqqli ealkskedkmi eirrylhqhpe lsfhedetaki aefykgkdvevetnvgrgikv tidsgkpgk tla iradfd  
alpitedtglsfasqngv  
mhacghdahtaymlvlaetlaemkdsftgkvvvi hqpae vppggakami engvldgvdhvlgvhvmstmktnvvyrtg

Tsompanidou\_et\_al\_Supplemental\_FASTA\_File

yvqtgraffk1kvqgkgh  
gssphmandai vagsyfvta1qtvvsrr1spfetgvvtigsfdgkqfnnvikdvveiegdvrgltdatkatiekeik1s  
kg1ealygvttctleynddy  
palyndpefteyvakt1kead1efgveicepqpssedfayyakerpsafiytgaavedgeiyphhhpkfniseks11isa  
eavgtvv1dy1kgdn  
>tr|Q2YUS9|Q2YUS9\_STAAB  
mqrdyli rvetesmsdfkr1ng1migfvikeahiydenmtqcnsdifiinhrdlyrfqlqqdgiicyiqfqmky1ad  
kfddvhc1lyfh1tdattsk  
nihq1rnimar1vsthirhnel skl1teqq1viq1lmhmihyvprtyhsnqsi1nddkvnqvcdyielhfhed1s1se1se  
yvgwsh1skkfaes1gv  
gfqh1nttrihak1d1tytdet1dia1qngfssaasfartfkhfthqtpkqyrgdrpaitenqqsaqhnyhdre1il  
11ndyieemnhfiediekv  
nyke1tfqptnhq1nqfnhi1qvgy1rn11ntqyqsq11tchhd1fyvnev1aydvmpy1mkk1napftydae1sn1fydi  
d1c1df11dh1nfs1tmh1d  
qydsr1y1dafki1fihhva1lvshrk1dkfn1hl1tt1hts1liemi1dyfka1fpggly1ih1dqaterh1p11kr1lephid  
hfvfdansndavdfnk1mnd  
defktssqmi1inktny1id1mhrhh1krp1i11nwnt1tgdt1fitngey1frggi1ieq11k1sskvegigyw1nyd1hvs  
hcknerdymns1iel1fhqyn  
gkrpvyfta11fnk1tsni1ysddtc1vtgtdsn1fq11lydak1hfnpy1aldnqmm1ratemih1nina1eegmyk1khf  
11dkengal1fn1wrkh1ht1  
hgm1kds1dyvnrms1fpk1levy1dmt1d1al1nikmi1tngih1lievkryps  
>tr|Q2YUT1|Q2YUT1\_STAAB  
mkkcikt1f1si11vmsg1yhsahasn1skspenwmsk1deskh1te1nmpgshds1gsft1tdpvksv1waktqdkdy1  
tqmks1gvr1ffdi1rgras1d  
nm1svh1gm1vy1h1helgk1f1ddakyy1saypnet1vmsmkk1dyds1skvtkt1fee1fresy1fnp1qyq1n1fy1tgs1nanpt  
1ketk1gki1v1fn1rmg1tyi  
ksgy1gad1tsg1qwad1nat1fetki1nngn1n1qv1qdey1kdy1dk1veavk1n1lak1ak1tdsn1kdn1yv1n1svas1ggs1afnst  
ynyash1npei1aktikang  
kartgw1i1vdy1agyp1wpgy1ddiv1se1idsnk  
>tr|Q2YUT2|Q2YUT2\_STAAB  
mkkfnnwi1nai1sgs1qtdk1nettee1kgakfi1lyays1ml1l1al1vis1nifih1ilepk1sitt1qii1v1l1il1ies1lig1rf  
1kgydvr1rgk1dkenk1knsk  
dfv1k1ksi1lvai1fts1lv1tagt1vadi1y1gft1d1gn1trsd1iv1ws1iggi1ifg1lvs1ytmeek1nnd1kelai1k1lap1f1ty1ick  
e1s  
>tr|Q2YUT3|Q2YUT3\_STAAB  
mkn1rnd1fi1ek1l1dra1qi1eegmr1v1dig1cat1gevt1q1iakrv1gange1vvg1dvnes1l1kian1ennq1ynnvsy1qys1diy1q1p  
etmgh1fda1ivgrr1v1m1lp  
daek1c1qt1k1si1lk1pegi1cfqes1dain1agigada1s1l1hsai1qwi1wet1vk1qegg1ni1hi1gq1n1yn1l1fnng1mhv1vdy1fae  
avi1qt1std1nd1law1ldi1m1  
prmkah1gvi1nd1dfs1def1ksn1ehea1innq1cafi1rdma1f1ig1ka  
>tr|Q2YUT4|Q2YUT4\_STAAB  
matek1dvn1d1f1nhvns1navk1trk1mmgey1i1ydg1vv1igg1ydn1r1lvk1atksar1hqf1qdnt1v1sp1y1pgv1kemv1i1ph1fv  
kvt1n1td1f1el1knd1kk  
>tr|Q2YUT5|Q2YUT5\_STAAB  
med1kqs1kg1gwy1d1fft1vpm1f11fv1y1lpnyn1fiti1finiv1i1ffsig1l1ltthi1idnik1knsk  
>tr|Q2YUT7|Q2YUT7\_STAAB  
mnkhy1qivi1igg1tag1tvas1r1l1rkn1qn1keki1aid1pad1hhy1qpl1wt1vg1agv1ss1kss1rk1dmes1vi1pegah1wik1qa  
vss1fq1pens1vi1gdnt1vv  
yydf1lv1vap1gl1q1nwss1ikg1ken1ig1kng1vcs1nsp1dy1vnet1wn1qi1sn1fk1qgnai1f1th1pnt1pik1cgg1ap1kimi1ylaedy1f  
rk1hki1rs1nan1vi1yat1p1kea  
1fdv1gkyn1kel1erive1ernit1vnyn1n1veid1gd1kk1vat1feh1iky1drkt1isy1dm1hvt1pp1mg1p1dv1vkest1sd1seg1vw  
dvn1pt1l1qh1ks1sys1nv1fal1g  
das1nv1pts1kt1gaa1i1rk1qapi1vann1l1qv1mn1qm1th1ydg1yts1cp1vt1gyn1r1l1laef1dyn1knt1ket1mp1fn1qak1err1smy  
i1fk1kd1l1pk1my1wym1kg1l  
i  
>tr|Q2YUT8|Q2YUT8\_STAAB  
mffk1qfy1dnh1sqasy1lvg1c1qrt1geai1i1dpvr1d1sky1iev1ad1seg1lt1it1qate1phi1had1fal1gird1vakra1nani1y1vsg  
egeda1l1gykn1mps1kt1q1fvk  
hgd1i1qvgn1k1lev1l1htp1ght1pesi1sf1l1td1l1gg1ss1vpm1gl1fsg1d1fi1fv1gd1igrp1d1lek1sv1q1ik1g1ste1sak1qmy1esv  
qn1kn1pdy1vq1i1wpg1hg1ag  
spc1gka1l1gai1pi1st1igyek1inn1waf1neid1etk1fies1ltsn1qp1app1h1fa1mq1vn1q1fdm1ly1qs1ydv1yps1dnk1rva1fd1  
rskeaf1hg1ght1kgt1in1ipy  
nkn1fin1qi1gwy1d1fek1did1ig1dk1st1vek1akht1l1q1ig1fdk1vagyr1l1pks1di1st1qs1vhs1aymt1g1keeh1v1dvr1nde1ewn1  
gh1y1qav1nia1hg1k1l1neni  
pf1nked1ki1yv1hc1qsg1vr1ssi1av1g1les1kg1fenv1vni1regy1qdf1pes1lk  
>tr|Q2YUT9|Q2YUT9\_STAAB  
mkqy1gek1fi1def1ska1ele1klak1qg1l1idvr1tee1ya1l1ghings1il1hpv1de1ies1fn1kekn1ktyy1vic1rsgn1rsan1sky1la  
kqgy1nvin1ldggy1kvy1eee

Tsompanidou\_et\_al\_Supplemental\_FASTA\_File

ndsytqtgeeyksieikadrkqfnryglqcpgpivkismemknievgdqievkvtddpfgpsdiksvwkqtrhtlvklenn  
nginaiiqkekakdlvny  
saggttivilfsgeldkavaliiangaraagkdvtiffwglnaalkaqtvnvkkqgiakmfdlmlpkknirmp1skmn  
mfglgnmmryvmrkknvd  
slptlinqaietnikliactmsmdvmgiqkeelrdeveyggvgtiyigatenahnlf  
>tr|Q2YUU1|Q2YUU1\_STAAB  
mnkinkillpffilvltisvttlpsqtrianaqsnlpskeeinktasiiikfiyeeastkdgnniididvqkiekkyh  
nskeleslkeentikstl  
tprsfddkkmcsiksavadqfgvgvksimeggfytymkkkaykeatklikfaigsniiglsafvayyggkcaahans  
>tr|Q2YUU2|Q2YUU2\_STAAB  
mnltskifilvylispisylisysiftlirkndilisiyqilpmlaiyy1vasviasiffekiikkiqdvneke  
>tr|Q2YUU5|Q2YUU5\_STAAB  
mimnveyskikkavpilflfvfslvidnsfk1isvaiaddlnisvttvswqatlaglvigigavvyaslsdaisirtlf  
iygviliiigsiiigyifh  
qfallvgriiqtaglaaetlyviyvakylskedqktylg1stssys1slvig1sggfistylhwtmflialivvft  
lpflfkllpenntnkahl  
dfvg1ilvatiattvmlfitnfnwlymigaliaiivfalyiknaqrplvnksffqnkryasflfivfvmyaiqlgyiftf  
pfimeqiyhlqldtts111  
vpgyivavivgalsgkigeylnskqaitailials1ilpafavgnhisifvismiffagsfalmyapllneaiktidl  
nmtgvaigfynliinvavs  
vgiaiaaaidfkalnfpnda1sshfgi1i1glmsivglvlfvilnrwtqsek  
>tr|Q2YUU8|Q2YUU8\_STAAB  
mkklatvgs1ivtst1vfssmpfqnahadttsmnvsnkqsqnvqnrpyggvvpqgmtqaqytelekalpqlsagsnmqd  
ynmkydatqniadkynvi  
ittnvgvfkphavrdmghalp1tkdgnfyqtnvdangvnhggsemvqnkthgmsqqghmnqnthmnqqphmqghmqss  
nqmmspkanmhsskhqin  
qsnkkvlpvagesmtssiltasiaa111vsglflafrrrstnk  
>tr|Q2YUV0|Q2YUV0\_STAAB  
mksds1keniyyqglyqlirtmtplitipiisrafgspgvgivsfsfnivqyflmiasvgvqlyfnrviaksvndkrqls  
qqfwdifvsk111sltvfa  
iyiavitiifidyy1if1lqgiyiigaaldiswfyagtekfkips1snivasgivilsvvifvkdqsd1slyvftiaivt  
vlnq1plfiylkryisfvs  
vnwihvwqlfrsslay1lpngq1nlytsiscvvlglvgtyqqvgtfsnafniltvaiimintfdlvmpitkmsiqksh  
sltk1lanmniqliltvp  
mvfgliaimpsfylwffgeefastvplmtlailvliiplnmlisrqyllivnkirlynasitigavmnlvclvliyfy  
giygaaiarliteff11w  
rfiditkinvklnivstiqcviaavmmfivlgvvnhy1pptyat111iaigivy111mmtmknqyvqilrhlrhkti  
>tr|Q2YUV1|Q2YUV1\_STAAB  
menqhnsk11111glavfiqqssviagvnvsiadfit111ilvyl1ffanh11kanhflqffii1lytyrmiit1cl1ff  
ddlifitvkevlastvkya  
fvviyfy1gmii1k1gnsk1kvitvsiyissvtig1fci1ag1nksp11mk1lyfdeirskglmndpnyfamtqiitlvla  
ykyvhnyvfkvlacg11w  
sltttgsktafi11v1aiyffikk1fsrnasvsvmlviml111cftfyniny1fqlsd1dalpsldrmasifeegfa  
s1ndsgsersvwinaisv  
ikytlgfgvg1vdyihigsqingi1lvahnty1qi1faewgilfgalfi1fmly11fel1frfnisgknvtaivvmltmiy  
fltvsvfnnsryvafilgi  
vfi1vyekmerdrnee  
>tr|Q2YUV2|Q2YUV2\_STAAB  
mki1y1ctkadnggaqth1iq1anhfcvhdvyvivgnhgmieqldarvnvii1ehlvgp1dfkqdilavkvlaqlfsk  
ikp1vih1hsskagtvgr1  
akfiskskdtrvvftahgwaftegvkpak1f1y1vieklmsritdsi1cvsd1fdkq1alkyrfnr1kl1ttihngiadvpa  
vkq1t1ksqshn1igevvgm  
1pnkq1d1qinaptkhqfvmiarfaypk1pqn1iaaie1kl1hnsnhahftf1gdgpt1ndcqqqvqag1endvt1lgnv  
inash11sqydtfiliskh  
eg1pisi1eamaig1pviashvggise1vtdngicmmnqpetiakvleky1idsdyikmsnqsrkry1ecfteekmike  
vedvyngk1stq  
>tr|Q2YUV3|Q2YUV3\_STAAB  
mkk1q1kkwkchkn1iedvhinknyyqrk1daleevrkgyypikratd1v1siv111f1t1fpim1fai1aividspgnpi  
ysqvr1v1gkmg1k1ikiy1klr  
smcknaekngaqwadkdddr1tnvgk1fir1ktridelpq1invvk1gems1figr1per1pefvel1fssevig1feqr1lvtpg1  
tg1aq1gg1y1d1tpq1k1k  
ydmkyihkgs1mmely1sirt1mvvitgegsr  
>tr|Q2YUV5|Q2YUV5\_STAAB  
mtnnkvalvtggaqg1gfk1aer1vedgfkvsvdfneegakaa1kl1ssdg1kai1kadvsnrddvfnavrqtaaqfg  
dfhvmvnnag1gpttp1dt  
iteeq1ktvygvn1vagi1qaaheq1kk1fnhggki1natsq1agvegnpg1slyc1stk1favrg1tqvaaq1d1asegitv  
nafapgi1vqtpm1mes1ava  
taeeagkpeawgweqfts1qialgrvsqpedvsnvsv1flagkdsdy1tgqti1vdggmrfr



Tsompanidou\_et\_al\_Supplemental\_FASTA\_File

>tr|Q2YUV6|Q2YUV6\_STAAB  
mrknieililiwmgiiyiaymaiaialliyiiftlffgslfgflylltgneigdllktptsfmi fatcliifsvlpvtlaf  
dlskrriikgiiilvyaii  
aallynfvsaillwfvaisl fir kkslsaentvavqshkgaskqkiryklyvksvstkhdsdsikvahtvgnkkliddkt  
idihldsseilkkistdan  
qashkdtckkel dsqdmehpefkntttknleglneeihkdeattkvsdntqppieskdhvskkd  
>tr|Q2YUV8|Q2YUV8\_STAAB  
mrivqpvieqlkaqshpvchiydvglehlqhittssl pncqmyyamkansertildtisqyvegfevasqgeiakgl  
afkpanhii fggpgktdee  
lryavsegvqrihvesmhelqrlnailededktqhillrvnlagpfpnatlhmagrptqfgiseddvddvieaalampki  
hldgfhfhsisnlnsdnlh  
vdvkllyfkkakawsekhrfp lkhnlgggigvnyadltsqfewdnfvenfktliveqemedvtlnfecgrfivahigyy  
vtevl dikkvhgawai lr  
ggtqgfrlpswghhpfdiirykdnypsfekvsisrqdttlvqglctpkdvfarevqidaistgdvivykyagaygws  
shhdfshphpefiyltqt  
kede  
>tr|Q2YUW0|Q2YUW0\_STAAB  
msqtilnrvktrvmhqlvssliyenivvyktsyqdgvdhftieggdseyrftaekthsfdri ritspiervvgdeadttt  
dytqllrevvftfpkndek  
leqfivel lqtelkdtqsmqyresnppatpetfndyefyameghqdyhpsyksrlgftlsdnlkfgpdfvpnvklqwlaid  
kdkvettvsrnvvnmelr  
qqvgdktyehfvqqieasghvndvemipi hpwqfehviqvdlaeerlngtv lwlgesde lyhpqqsirtmspidmtkyy  
lkvpisintstkrvlaph  
tienaaitdwlkqiqqdytlkdelktaflgevl gqsylntqlspykqtqvygalgviwreniyhmli deedaipfnal  
yasdkdgvpfienwikgyg  
seawtkqflavairpmihmlyyhgiafeshaqnmml ihengwptrialkdfhdgvrfrkrehl seaashltlkpmpeahkk  
vnsnsfietdderlvrdfl  
hdafffiniaei ilfi ekqy di ek lqkwvkgi ieayqea fpe lnyqhfdl feptiqvekl ttrllsdselrihhvt  
nplgvvggtdattiset  
>tr|Q2YUW1|Q2YUW1\_STAAB  
mqnkeliqhaayaai erilneyfrkenlyqvppqnhqwsiq lseletltgqfaywsamghhmyhsew lidgksskl tty  
keaiarilqhmaqsadnqt  
avqqhmagimsdidsi hrtarylqsntidyaedryivseqslylghp fhptpkasgfseadl ekya pechtsfq lhy l  
avhqdvll tryvegkedqv  
ekvlyql adidi seipkdfi llpihpyqinlvqqhpqylqyseqglidlgvsgdsvyptssvrtvfskalniylklpih  
vkitnfi rntndleqierti  
daaqviasvkdevetphfklmfeegyral pnp l gqtvepemdll tnsamivregipnyhadkdi hvasl fetmpdspt  
sklsqvieqsglapeawle  
cyl drtllpi lkl ysn tgis leahvqns lie lkdgipdv cvrd legic lsr tiatekql v pnvva asspvyahdeawh  
rfkyvvvnhlghlvstig  
katknevvlwql vahrlmtwkkeyannavfvdcvedlyqtptiaakanlmsklndcganpiythipn pichnkevsyces  
nns  
>tr|Q2YUW2|Q2YUW2\_STAAB  
minqtiwrsnfrilwlsqfiaia gltvlp lpiymaslnlsvveiq lws giaiaapavttmiaspiwglgdkisrkw  
mvlrallglavclflmalc  
ttplqfv lvrllqglfggvvdassafasaepaedrgkvlgrlqssvsagslvgpligsvtasilgfsallmsiavitfi  
vcifgalklietthmpksq  
ipninkgirrsfqcllctqqtcrfiivgvlanfamygmltal splassvnhtaidrsvigflqsafwtasil saplwgr  
fndksyvksvyifatiacg  
csailqglatnieflmaari lqgl tysal i qsvmfvvvnachqq lkg t fvg ttnsm lvi gqi iglsgaaitsy ttpatt  
fivmgivfavsslfl icst  
itnqindhtlmlwelkqksak  
>tr|Q2YUW3|Q2YUW3\_STAAB  
mqnhtavntaqtllirdlvdall fedia givsnseitkengqtiliykretqqikipvyfsalnmfryessqpitierrt  
skqpltaefwqtianmnc  
dlshewevarveeglttaatqlakqlsel dlashpfvmseqfasl kdrp fhp lakekrgl readyqvyqaelnqsfp lmv  
aavkkthmihgd tanidel  
esltapikeqatdm lndqgl sid dyv lfpvhpwqyqhil pnvfakeiseklvll pl kfgdyl ssssmrslidigapynh  
vkvpfamqslgalrltpt  
ymkngeqaeql l rqli ekde alakyvmvcdetawwsymgqndi fkdqlghl tvql rkyevlakndtqq lvsmaalaan  
drtlyqmi cgkdniskndv  
mtl fediarvflkv t lsfmqygalpelhgqni lls fedgrvqkcvl rdhdtvriykpwl tahqsl spkyvvredtpntli  
nedletffayfgtlavsvn  
lyaiidaiqdl fgvsehelmsllkqil knevat i swvtt dql avrhil fdkqtwp fqi llp llyqrdsgggsmpsgl tt  
vnpnmvtyd  
>tr|Q2YUW4|Q2YUW4\_STAAB  
mnremlylnrsdieqvgghnsqvyvdaltea l tahayndfvqplkpyl rqpenghi adrii ampshiggeha isgikwi  
gskhdnpskrnmerasgvi

Tsompanidou\_et\_al\_Supplemental\_FASTA\_File

ilndpetnypiavmeasliissmrtavsviaakhlakkgfdltiigcgligdkqlqsmleqfdhiervfydqfseaca  
rfvdrwqqqrpeinfiate  
nakeavsngvvtctvtdppyieydwlqkgafisnismdvhkevfkadkvvddwsqcnrekktinqlvlegkfske  
alhaelgqlvigdipgred  
ddeiillnpgmaiedissayfiyqqaqqnigttnly  
>tr|Q2YUW5|Q2YUW5\_STAAB  
mtqeiakynvhtkahkrklikrwlaiavvlaiiwafagvpslelksksleilksifsglfhpdisyiyipdgedllrgl  
letfaiavvgtfjiaaiici  
plaflgannmvklrpvsgvskfilsvirvfpeivmalifikavgpfsfgvialgihsvgmglkllaediegldfstves  
lkasgankiktlfavipq  
impafllsilyrfelnrsasilgligaggigtplifaiqtrswdrvgiiliglilmvaivdlisgsirkriv  
>tr|Q2YUW6|Q2YUW6\_STAAB  
mclnfrednvmkkimvifgtrpeaikmaplvkeidhngnfeanivitaqhrdmlsvlsifdiqadhdlnimqdqqtlag  
itanalakltdsiineeqp  
milvhgdttttffvgslaafyqipvgvheaglrrthqkyspfpeelnrvmsniaelnfaptviaaknllfenkdkesifi  
tgntvidalsttvqndfvs  
tvinkhkgkivilhtahrrenigepmhiikavrdladeykdvvfiypmhrnpkvraiaekylsgrnlielielpdaief  
hnftnqsyllvtdsggiqe  
eaptfgkpvllrnhnterpegveagtsrvigtvdydnivrvnkqlieddeayqrmsqannpygdgqasrriceaieyyfgl  
rsdkpdefvplrhk  
>tr|Q2YUW7|Q2YUW7\_STAAB  
mkltvvglygylptsimfakhgvdlgidinqtidklqsgqisieepglqevyeevlssgklkvsttpeasdvfiav  
ptpnddqyrscdislvmr  
altdsilpflekntiinvestiaptmddfvpkviengftigediylvhcpervlpgkileelvhnriiggvtkaciea  
gkrvyrtfvqgkmieta  
taemsklmentyrdivnialaneltkicsnlnivldviemankhprvnihqpgpgvgghclavdpyfiiakdpenakliq  
tgreinnsmpayvvdttkq  
iikalsgnkvtvfgltykgdvddirespafdiellnqepdievcaydphveldfvehdmshavkdaslvllisdhsefk  
nlsdshfdkmmkhkvi fdtk  
nvvkssfedvsyynygni fnfidk  
>tr|Q2YUW8|Q2YUW8\_STAAB  
mrknliitgvhgyigni lkdkli eqghqvdqinvrnqlwkstsfkdydvlhtaalvhnnspqarlsdymqvmlltkql  
aqkakaedvkqfi fmsma  
vygkegvgksdqidtdqtpmnpntnygiskfaeqalqelisdsfkvaivrppmiygahcpgnfqrmlqskrllipni  
nngrsaalyikhltafidql  
islevtgvyhpqdsfyfdtssvmyeirrqshrktvlinmpsmlnkyfnklsvfrklfgnltystlyennalevipgkm  
slviadimdetttkdka  
>tr|Q2YUX0|Q2YUX0\_STAAB  
msekkililcgyfypeyvssatlpqtlaedlianhinvdvmcwgpyeysnhkqvsktemhrgirirrlkysrfnnkskvg  
riinffsflskfviniipkm  
lkydqilvysnppilplipdvllhrllkkysfvvydiapdnaiktgatrpqsmidklmryinkhvyknaenvivlgtemk  
nylvnhqisknpdnhvip  
nwydmrqlqdnriyndtfkayreydkiiylsgnmqqlqmetlisflklndkdpqqttilcghgkkfadvktaiethri  
envkmfefltgtdyadvlk  
iadvciaslikevglgvpsknygylaakkplvlmdkqsdivqveqydagiqidngdahaiynfintsskelhemge  
rahqlfkdkytreintmky  
ynllk  
>tr|Q2YUX1|Q2YUX1\_STAAB  
mrlnkfigdsflmilssgiaqviliittpiitrlyspetefgeftifsniamilipiinarydllivntkndrsanilsqi  
sflisllilililipifais  
awlypnfildfiifiimflvsltniftnylnkerkykvlslinvfragsmallqiifglalagslgligfslsyiagi  
tlgyktfkhhfnivrdkee  
tkalflenkqlvystpsillnslsfsvvffigilytntevgiygmairvlqipvtiislglskifmqandyiehgn  
frnlllkfssilvsviil  
yvpilyfseeivniilghsvdaitvikiviplfvirlivstvsivivlqkqlelilqalfligttvtfviskmlnlt  
flnfvsintvvlivsymif  
fialyyfaknkqfkns  
>tr|Q2YUX2|Q2YUX2\_STAAB  
mivktfmskifrlmntp1llfykkeyltgyyfenkvagwlvawkavpfkllgints1pfpaditvrmhnpnnivfdknd  
ihifqspgtyfnnfsaviy  
igrvvyiapnvgiitanhniknlkshapedvki gnyswigmnsvilpgvelgehtivgagsvvtksfpegvvggnpa  
kvikki  
>tr|Q2YUX3|Q2YUX3\_STAAB  
mnkvynvtsyviaiilifpc1mlgdkp1llfapisyvgvklfifsnnpnfkfskivydvlgflrlvfiipsmivffqdsti  
dn1pllgayfnqaviymvsv  
efiigs1fili1sklfkhevsvrnsft1sgssiyyivfvlvicg1fvafpevrknisfliiktdamgrgteatsglvnlv  
vmlfqlalallf1iayas  
ykkykenpkiiyvvlplaigilnis1ivgerrsyqlytmvav1tvsv1lfskhkrrini1i1svg1fvla1mtlykelyv

Tsompanidou\_et\_al\_Supplemental\_FASTA\_File

fnyssysealnstsvsnlk  
ivdtlqsyfyggsniaasidylnyngsfkqylfdntravfgfnffvdkkqlitsqlfnqliygskqltghlissagygi  
iyfgplffynlianiiffa  
flseyiirkshslevifigtyiymrlitsifshptplitlismilvvyviaiipgiikkftkkvgie  
>tr|Q2YUX4|Q2YUX4\_STAAB  
mriailgatnikhmslshylshidlninevdiitydkydieehiqginnykykvdkedwtfikkaiayrfrpyamk  
ilkenhydfviwgsytgh  
lfksflekyknkfilnirdyffennklykymkkivdasrlttssegflkflpkseyriiysynmsiiresnvtgdf  
kkrwpinigfignvrfei  
ngklikeandsrfhmgyfgtgseklevfarenfinitfsggfdlketpkylnkidilnlnfngnqialdalsirmyy  
alflnkpiittddtftate  
ankfgldfsvnpenlkgigdeImdwynnldvmdinhkreayrndviennkqfyqeigrifne  
>tr|Q2YUX5|Q2YUX5\_STAAB  
meklklmtivgttrpeiriisstikacdqfnqilvhtgqnydytlnqiffddlelrqpdhyleavgsklgetmgniiakt  
ydvllreqpdalliigdt  
sclaavsakrkipvfhmeagnrcfdqnvpeeinrkivdhvsdvnlypytehsrylldegfnkanifvtgspmtveieah  
rdkinhsdvlngllepqq  
yilvsahreenidnekfnkslmnaindiakkykmpviysthprswkkieeskfedplvkqlkpfghfdynalqkdafvv  
lstdgtlseessilkfpgv  
lirtsterpevlkgtviviiggitynnliqsvelaremqnnepmidaidykdtnvstkvvkiiqsykdiinrntwrk  
>tr|Q2YUX6|Q2YUX6\_STAAB  
mnivitgakgfvgnlkadltsttdhhi fevhrqtkeeelesaalkadfvvhlagvnrpehdkefslgnvsyl dhvldil  
trnkkipailssiqatq  
dnpygesklqgeqllrqyaeeygntvyiyrwplfgkwckpnynsviatfcykiarneeiqvnnrdveltnyvddiaie  
ikraiegnptiengvptvp  
nvfkvtlgeivdllykfkqsrldrtlpkldnlfekdlystylsypstdfsypllmnvddrgsftefiktpdrgqvsvni  
skpgitkgnhwhhtknef  
lvvsgkgvifrhrvnddeieyyvsgdklevdipvgythnienlgtdmvtimvvnemfdpnqpdtyflv  
>tr|Q2YUX7|Q2YUX7\_STAAB  
mfdkiiilitggtsfgnavmkrfldsnikeirifsrdekkqddirkynnsklkyigdvrdvsqsvetamrdvdyvfha  
aalkqvpseffpveavkt  
niigtenvlqsaihqnkvkviclstdkaaypinamgiskammekvfvaksrnrseqltcgtrygnvmasrgsviplfi  
dkikagepltitdpdmtrf  
lmsledavelvvhafkhaetgdimvqkapsstvgdlatallelfadnaieiegtrhgkkaetlltreeyaqedmgdy  
frvpadsrdlnysnyvetg  
nekitqsyeynsdnthiltveeikeklltleivrnelndykasmr  
>tr|Q2YUX8|Q2YUX8\_STAAB  
mahlsvklrllilalidslivtfsvfyvsiylepyfktysvklililaaislfishhisafifnmyhraweyasvselili  
vkavttsivitmvvvtivt  
gnrpffrlylitwmmhliiliggsrlfwriyrkylggksfnkkptlvvgaggagsmlirqmksdemklepvlavdddehk  
rnititegvkvqgkiadip  
elvrkykikkiiiajptigqerlkeinni chmdgvelkmpniedvmsgelevnqlkkvevedllgrdpvelmdmi sne  
ltnktilvtgaggsigsei  
crqvcnfyperiilghgensiylinrelnrfrgknvdivpiiadvqnsarmfeimemykpyavyhaaahkhvplmednp  
eeavcnnilgtkntaeak  
naevkkfvmistdkavppnvmgaskriaemi qslndethrtnfvvrfgnvlgsgsviplfksqieeggpvvtvthe  
mtryfmtipeasrlvlqag  
alaeggefvldmgepvkivdlarnliklsgkkeddiritytgirpgekmfeelmnkdevhpeqvfekiyrgkvqhmkcn  
eveaiiqdivndfskekii  
nyangkkgdnyvr  
>tr|Q2YUX9|Q2YUX9\_STAAB  
midihhilpniddgptnetemldllkqattqgvteii vtshlhprytpiekvksclnhiesleevqalnlfyygqe  
iritdqilndidrvitgi  
ndsrylljefpsnevphytdqlffe lqskgfvpiiahpernkaisqnlidilydlinkgalsqvttaslagisgkkirkla  
iqmiennlthfigsdahnt  
eirpflmkdlfndkklrdyedmngfinsaklvvddkkipkrmpqqdykqrwfgl  
>tr|Q2YUY0|Q2YUY0\_STAAB  
mskkenttttlfvyekpkstisekfrgirsnimfskangevkrllvtsekpgagkstvsvnavityaqagyktlvidgdm  
rkptqnyifneqnnnglss  
liigrttmseaitsteidnldlltagvpppnpseligserfkelvdmfnkrydiiivdtpvntvtdaqlyaraikdsll  
vidsekndknevkkaktlm  
ekagsnilgvinlkakvdksssyhygyde  
>tr|Q2YUY1|Q2YUY1\_STAAB  
mestletkikevlqknkiliilplllfiisaivtffvlspsyqantqilvnqtkgdnppqmaeqvqsniqlvntykei  
fksprildevsklddkys  
psklssmlitngentqilniqvksghkqdseki ansfakvtskqipkimsvdnvsilskadgtavkvapktvvnligaf  
flglvvaliyiffkvi fdk  
rikdeedvekelgplvlgsiqkfn

Tsompanidou\_et\_al\_Supplemental\_FASTA\_File

>tr|Q2YUY2|Q2YUY2\_STAAB  
mltipekenrgskeqevaimidaladkgkkaalealskksqeeidhivhqmslaavdqhmvlaklaheetgrgiyedkaik  
nlyaseyiwnsikdnktvg  
iigedkekglyvaepigvicgvtpttntptsttikamiaiktgnpiifafhpsaqesskraaevvleamkagapkdi  
qwi evpsieatkqlmnhkg  
ialvlatgsgmvsaystgkpalvgpgnvpsyiektahikravndiigsktfngmicaseqvvidkeiykdvtnef  
kahqayfvkkdelqrlena  
imneqktgikpdivgksaveiaelsgipvpentklliaeisgvgsdypisreklsplvalvkaqstkqafqicedtlhfg  
glghtavihtedetlqkdf  
glrmkacrvtvntpsavggigdmynelipsltlgcgsygrnsishnvsatdlnniktiakrrntqifkvpaqiyeena  
ims1ttmdkiekvmivcdp  
gmvefgytktvnvlrqrteqpqikifsevepnpstntvykglemmvdfqpdtiaalggsamdaakamwmffehpetsf  
fgakqkfldigkrtykigm  
penatficipsttsgtgsevtpfavitdsetnvkypfadfaltpdvaiidpqqfvmvsvkvtadtgmdvltamesyvsvm  
asdytrgls1qaikltfey  
lksvekgdksrekmhnastlagmafanaflgiahsiahkiggeygiphgranailphiirynakdpqkhalfpkyef  
fradtdyadiakflglkgn  
ttealveslakavyelgqsvgiemnlksqgvseeelnesidrmaelafedqcttanpealipseikdiiqtsydykq  
>tr|Q2YUY3|Q2YUY3\_STAAB  
mfigknleyvrklna1srkelsekinvseqaiwqyetknmmpeinkiydmtsi fvkssyfi seqpeellinsvdkhsia  
fraknykvstkl1nkqyyq  
amylsnltnylfsfvkipdnii1slinnlddlnngnleslnkkesikeiakvvrakilqdesneallfmlekagiviyek  
rindsidaysfwskdqtpf  
iilgtknkvavrrnfdlahelghlv1hrhiqfdllspeeyktieheadifasefl1peeafkkdfdqmtkksnpdylav1  
kekwyvs1qaiamrayylg  
lmsstqyryfwaslnkkgykskep1ddviemsrpkmsn1lklyfdrniltpqk1lnylkvdetflnhlagin1klfkdy  
vnenreynitnlyk  
>tr|Q2YUY4|Q2YUY4\_STAAB  
msniafyvsvdvhygfptdftrnqyqpmgll1anhvieqdrdqyqsfkidngdf1qgspfcnyliahsgssqplvdf  
ynrmafdftlgnhefnvg  
lpylkd1lrrlnypvlcaniyendst1tdngvqyfvgdqvtvgvigt1tqfiphweqpeyiqs1tfhsafetlqqhlpem  
krhadii1vcyhggefd1  
esgtptevl1tgenegyamleafskeidifitghqhrqiaerfkdtaviqqgtrgktvgkv1stdeyen1svescellpv  
iddptftideddqhirkq1  
edw1dyeit1tpydm1lnhafearvaphpftnfmnyal1eksgadvacaal1fdsasgfkqvvtmrdvinnyfntfkvl  
avsgak1keaiersaeyfd  
vkndevsvradfl1epkqhfnydiyggsy1ihvgrpkkqrvsdmmiqghavd1kqytyicvnyravgggqydmidvp  
vkd1qvegaq11idfyqi  
ii  
>tr|Q2YUY5|Q2YUY5\_STAAB  
mkk1yks11tvsivavtvs1salpqs1aithesqptkqqrvt1fdrshgqtagaadwvsdgafsdysadiqkqgydvkaid  
ghsniteas1ksski1fvip  
eanipfkeseqaa1vnyvkqgnv1fisdhynadrn1nridsseamngyrrgayedmskgmnaeeksstamqgvkssdw1  
stnfgvrfrynalgd1nts  
nivsskesfgitegvksvsmhagst1aitnpekekgivtpeqlpakskwshavdqgiyngggkaegyva1skvgkga  
afigdss1vedsspkyvre  
dngekkktydgfkeqdngk1lnnitawmskndngks1kasg11tdtkk11dferperstepekepwsqpps gykwydpk  
tfkagsygsekgadppnt  
pddhtppnqnkv1sfdipqnvsvnepfevtih1kgfeanqt1en1rvgiykeggrqigqfsskndynppgyst1ptvka  
dengnatikvna1kvl1erme  
gsk1r1kl1gdk11ittdfk  
>tr|Q2YUY6|Q2YUY6\_STAAB  
mkkfkcl1fv1mlavi1vfaaacgnss1dnqknasnsdsksgykpkel1tvqfvpsqmagtleakakplek11skelgip  
kvsvstnyntiveamksk  
kvdvgf1pptayt1ahdqkaad111qaqrfgvkedgsaske1vdsykseilvkkdskiks1kd1kgkkialqdvststagy  
tflam1kneaginatkdm  
kivnvkghdqavis11ngdvdaavfndarntvkkdqpnvfkdril1k1tqaipndtisvrpdmkdfqek1kkafidia  
kskeghki1sevshgyt  
etkdsnfd1vreyek1vkdmk  
>tr|Q2YUY8|Q2YUY8\_STAAB  
mr1ilivig1iftt1giagav1p1lpttpf11lavfcfarssdrfynw1inqkiykeyvenfy1hrgyt1qqkikil1s1  
yivigf1siymvd1lavrig  
liimvi1qtav1ftfvkt1pksnkiee  
>tr|Q2YUZ0|Q2YUZ0\_STAAB  
mtgfsvy1gqpl1deayi1krmi1kqyqmi1ftsvqi1peeddetkyhyftk11n11kheqvty1idanps11tps1fyeh1rqy  
daqfmi1ridhst1ieaiea  
imaqg1kcc1nas1isre11ts1lhq11ndft11sfchnyprpdtg1svd1lvnkneliyqfnpkaqiyg1fivgsg1rgp  
1hkg1ptieatrhshpva

Tsompanidou\_et\_al\_Supplemental\_FASTA\_File

akllqetgvsevlvgdsliemrqakqlidfckhrhftlci eevfddttvtylfmdchkvrpdnpenvirsetsrqicphsi  
qpqfttqrrigsvtvdnl  
ngryqgemqivrqtlsahdnvvnvaqiikedlpllsaciepndtfdq  
>tr|Q2YUZ2|Q2YUZ2\_STAAB  
mkqrigaylidaihragvdki fgvpgdfnlaflddi snpndwvgtne lnasyaadgyar lnglaalvtffvgv gelsa  
vngiagsyaeripviaitg  
aptraveeagkyvhslgegtfddyrkmfahitvaqgyitpenatteiprlintaiaerrpvhlhlpidvaiseieiptp  
fevtvaktdasiiyella  
sklhqskqpiiitgheinsfhlhqeledfvnqtqipvaqlslgkafneenpyymgiydgkiaedkirdyvdnsdlilni  
gakltdsatagfsyqfnid  
dvvmnlhnhnikiddvtndeislpsllqqltdi sytnnasfpayhrptspdyvtgtesltqqtyfkmmqnfllkpnndviad  
qgtsffgaydlaalyknntf  
igqplwgsigytlpatlgsqladkdrnlll igdgsllqtvqaistmirqhikpvlfvinn dgytverlihgmyepynei  
hmdykalpavfggknevi  
hdvesskdldtfnainghpdmhfvevkmsvedapkkli diakafsqqn  
>tr|Q2YUZ3|Q2YUZ3\_STAAB  
minfnkta lvidlqegil kmdyapytaenvvqnank lidvfrkngfivfvrvkfydgkdalkpns mvsllpkegddys  
rfhhlldkrdgdfvdkrq  
fsvfvgtdldlqlrrrgidtivlggvathvgvdtardayqlnydqyfvtdmmsaqnetlhqfpidnlpimqgtvttsd  
ilniln  
>tr|Q2YUZ4|Q2YUZ4\_STAAB  
mkkkltfkenmfigsm lfglffgagnlifpihl gqaagsnvfianlgflitaiglpflgiaigiskts glfeiasrvnk  
tyayiftialylvigpffa  
lprlattsfeiafspflspkqitlylfi fsfvffviawffarkpsrileyigkflnpvflvlla lillfafihplggisd  
apisqyqsna lfnfgldg  
yntldalaslafgiiivatikklgienptdiaketiksgtisiimmgiytl laimgt lsighfkl senggialaqitqy  
ylgnygivilslivmvac l  
ktaiglitafsetfehlfpkmnylaiatvsvsifl fanvgltkii msvpvlmflyplai alivltl fsskfhhskiiy  
qctiffmiaalvdglkas  
pefisstsfstlinfsqy lplsdigmwvvlsligfiigfiykikhrkipqa  
>tr|Q2YUZ5|Q2YUZ5\_STAAB  
mnsiie ltdyysnnyaplk lvi tkgkgvkfwtdgkqidcisgfsvanqghchptivkamteqaskl siisrvlysdn  
lgkweekichlakdkvlp  
lmsgteaveaai kiarkwgsevkgi adgqveiamnnfnhgrt lgs lslshndaykagfhp llqgtttvdfgdieqltqa  
ispntaaiilepiqgeggy  
nippngyiqavrq lcdkhqil liadeiqvlg rrtgkw lameweqvvpdiyilgkalggglypvsavlann dvmrvltpgt  
hgstfggnplai aistaal  
dvlkdeql verserlgsfl lka llqlkhsikeirgrgl figielntdaapfv dhlirgilckdthrtiir lspplvid  
keeinqivaafqdvfkn  
>tr|Q2YUZ6|Q2YUZ6\_STAAB  
mkhqettsqhnfsi ikhgd istpqgftaggmhigl rankkdfgwiyss lassaavytlnqfkaapl ivtedtlqskg  
klqalvvn sanansctgqg  
giddaqqtqtwaaqqlqipseh vavastgvigeyl pmdkiktgehindanfttpgafnea illtdtctkhiavslnidg  
ktiitiggsakgsgmi hpnm  
atmlafitt dasiesntlhqllksstdhtfnmi tvdgd tstdmvlvmanqqvehqilnqdhppwetfvdafnfdctfla  
kaiardgegatklisvnvs  
gaksisdarkigktivssnlvksaifgedanfgri itaigysgceidp nctyvqlnqipvvdkgmavlfdeqamsntlth  
envtin vqlg lgnavatay  
gcdlsydyvrinasyr t  
>tr|Q2YUZ8|Q2YUZ8\_STAAB  
mtkrqmii fiyagi igglsgivkl gwevmfprrtpernatnppqellqqlgfssefthqyt tfsnmelpwvsfi vhl sf  
siviaiicyilvkkyayla  
mgqgavfgi viwvl fhliimpimhtvpavwdqpfqehisel fghvwmmtielvrqhfvyrykln  
>tr|Q2YUZ9|Q2YUZ9\_STAAB  
mtvfmqlqsnlksieel isqsrwsykkprt vnyrynqdklmhr lgdilvqygiqhdgtllphewhyi sprgkadivqh  
nrdgqpiyvs lsyspyiv  
cvvdkepvgidiekisqrldwrtlv tcfstneaqqics lndfyqiwtqkesftkl igeglikgl diydmtqsnfyqsrev  
kfkqfi fdqfmvqvcflgq  
apwgykkvsvfqllss  
>tr|Q2YV00|Q2YV00\_STAAB  
mkeglfmimgnlrfqqeyf riyknntestthrnaywvklaknveatkmyalstivqqhapir hffdvttddnl tmi lhe  
flpfieikqipssanydl  
eaffkqel styhndsp lfkfklqfadaayil ldfhvsifddsqidiflddlcnayrgntvinntrqhahl nrrnddkdn  
qdashialdsnyfrlenns  
dihiasylpikhpfdqalyqtyliddm tsidmaslavsvylanhimsqqhdvtl gihvpshlpndlhgnivpl tltidak  
dvcqrfttdfnkcvlnms  
qlqcaksslseti fhqymmpccndviedvhqihdahtsladieifphqhgfkiiynsaaydl lsietl sdlvrniyl  
qiteengnrkrttvdelnlm

Tsompanidou\_et\_al\_Supplemental\_FASTA\_File

terdiqlyddinls1peiiddaqtvtlfeqqveatpnhvavqfdgvfityqtlnarandlahrlnqygvpepndrvavia  
eksiemi iamigvlkagga  
yvpidtnypsdrqeyi1kdatpkvityqalyengkninhidlnkiawknidnlskcntledhayviytsgttgnpkgt  
liphrgrivr1vhqnhvpl  
neettillsgtiafdaatfeiygallnggk1vakkeqllnpivleqlinendvntmwltsslnfqiaserievlp1ky  
lliggevl1nakwvd1lnqr  
pkhpqiindygtenttftttnipnkvpnrripigkpi1gthvyimqgerrcgvigpge1ctsgfglaagyl1nqpe1tad  
kfikdsniq1myrsgdiv  
r1lpdgnidylyrkdkqvki1rgfrie1sevehaleri1qginkavvivqnhdqdyivayyeamht1shnkiksqrmt1p  
eymipvnfmhieqipitin  
gk1dkkalpimdyvtdtdayvapstdteh11cqi1fadi1hvnqvgihdnffelggsh1kat1vvnri eastgkrl1qigd11  
qkptvfe1aqai1akvqeqn  
yevipeai1vkddy11ssaqrmy11lwsn1kdtvynipflwr1sse1nvaql1rqavqh1iarheilrtqyivvddevrqr  
ivadvvadfeevnthftde  
qeimrqfvapfn1lekpsqirvryirsp1hay1fidthhi1ndgmsniq1mnd1nalyqhk111p1kl1qykdysewmshrd  
mtkhrqyw1skfkdevpi1  
s1p1tdyvrpnikt1ngammsftm1nq1trq11lqkyvekyqitdfmffm1svvmt11sryarkddvvvgsvmsarmhkgteqm  
1gmfant1vyrgqpspdkm  
wtqf1qevkems1eayahqeypfec1vnd1dqshdasrnp1fdvml1v1qnnetnhahfghsk1thi1qprsvtakfd1sfi  
ieedrddy11nieyntd1y  
hsetvrhmg1nqcmimidy11khqdt1qi1cdipngtee11nwnthvndrm1nvp1gnks11syfnevvsrqgnhvalvmd  
1tmtyet11rnyvdaiahm1  
1sngvngqrval1ftersfemiaam1atvkv1gasyipidid1fpkkrqgail1edakvtavmsygieiet11pviq1lenakg  
fveskeneqyddl1hgdq1e  
ntam1dnemai1ytsgttgm1pkgvairqrn11n1vhawstel1q1gdnev1lqhanivfdasvmeiycc11nght1vipdr  
eervnpaql1q11inkhrvt  
vasip1qmcsvmedfyiek1itggatstasfvkyiekhcgtyfnaygpsestvitsywshqcgvipetipigkpl1sn1qv  
yimsdgl1cg1gmpge1ci  
agds1aigy1nrpe1maekwrnnpfgk1glyhsgd1arytsd1gqief1gridkqvkvngyrie1ldeienailairgisdc  
vvtvshfdthdi1nayyvg  
eqqmeqd1kqyl1ndh1pkymipkti1thidcm1p1ttndkvd1tr1pnp1spi1qqs1nkvysepsneieqt1fdvdfgevl1kqnd  
vgvdd1fe1lg1gns1eam1  
vvsh1krfghhi1smqt1lyqyktvrqivnymhq1nqqs1val1pdn1sel1qni1vmtryn1g1iledn1shrpl1gnt11tgatgf  
lgay1iea1lqgyshriycf  
iradnee1awyk1mtn1ndyfseetvemm1sni1evivgd1fecmddv1lpenmdti1hagartdhfgdddefekv1vqgtv  
dvir1laqqhhar1iyvsti  
svgtyfdid1ted1vfseadvykgq11tspytrskfysel1kv1eavng1dgrivrvgn1tspyng1rwhmrniktrfsmv  
mnd11q1nci1gvs1aempv  
dfsfvd1tarqiva1aqi1ntpqi1iyh1v1spnkmpvks11lec1vkrkeielv1sdesfneil1qkqdm1yetig1t1svdreqqla  
midtk11tkimnh1sekwp  
titknw1yhwaqyik1tifnk  
>tr|Q2YV01|Q2YV01\_STAAB  
mkr1stt1kvrl1snffq1i1ittafipfia1y1tdm1nqsivgiy1lv1vil1kfp1si1sgyieiefpkks1v1iyq1tm  
vml1v1mg1fssn1lwqi1  
cfc1aya1fti1v1wg1qfpvmdt1imda1itedvehiy1kmsywitn1svaig1allg1glyghsm1il1flvaacif1iv1vi  
lyi1w1pedq1nqsvrtvana  
qtpfyq1qfhi1kv1psyksv1kdrnym1mi1sgfs1ilm1gef1stssyia1ir1kdqfetisigpyditgakmla1illmtntv  
cvi1v1tyfi1skvvl1kidfk  
ia1vfg11fyivgysgity1nqfs11il1fmmiatigeivyspifeeqrfki1ipedkrgtysafhalgihmsetlar1giv  
lgv1f1ts1lmg1lcmf11lv  
mgall1v1gv1frgrkkvsid  
>tr|Q2YV02|Q2YV02\_STAAB  
mvcqtvpffvif1kqatcntyfkevk1yhl1gemdmkiva1l1fpeavqgqdnq11ntkka1gl1ktfleerghefi1ladnge  
d1dkh1lpdm1dvi1sapfyp  
aymtreriekapn1klaitagvgsdhvd1aasehni1gvvevtgsntvs1vaehavmd11111rnyeehrqsvegewn1s  
qvg1nhahel1qhkti1g1fgf  
gr1gq1vaer1lapfnvt1qhydpinqqdhk1skfvsfdelv1stsdaitihap1tpetdn1fdkdv1sr1mkkhsylvntar  
gki1vnrda1vealapeh1q  
gyagd1vypq1papadh1pwr1t1mprnamtv1hysgmt1leaqkriedgvkd1ilerffnhepfqdkdiivasgriasksytak  
>tr|Q2YV03|Q2YV03\_STAAB  
mtid1thtkeqqfsn1lrsyrkeyv1gk1gpns1r1vsfkd1wai1ahmtg1v1skvesfy1ndkrnesm1hytrtekikqmyke  
idvn  
>tr|Q2YV04|Q2YV04\_STAAB  
mt1et1likeq1ldph1levdegtyyprt1fiq1l1fdvdyfgeat1rknaevieavsqsc1ttgfc1lwcq1lafstyl1enaagp  
h1nkd1lqqg11sgei1lgat  
g1snpmks1fnd1lek1n1lehtyvdgq1lv1vsgrmpavsn1qedhyfga1skhessdefvmf1lranqdg1it1vekt1nflgvn  
gsatyqit1nq1vvvpqsq1  
i1thdakqaati1rpqi1ayqipig1lgsikss1le1idaf1snaqngin1qyleydveafkkryrql1reeyya1ilddgn1tsh1

Tsompanidou\_et\_al\_Supplemental\_FASTA\_File

nelislkkdigy11ldvng  
asvvnngsraytpspqvrk1kegfffaaltptlrlhlgkleaelkg  
>tr|Q2YV05|Q2YV05\_STAAB  
mtrltinkii1piitfiiflgiwemviiighyqpvllpgpalvgksiwtfivtgeifqhlaislwrfvagfivalvvaip  
lgfllgrnrwllynaieplf  
qlirpispawapfvvlwfgidslpaiaiiiaaffpivfntikgvrdiepylkaa1nltgwplyrnilfpgafkqi  
magihmavgtswiflvsg  
migaqsglgflivdarnm1nedv1aaiffig1fgfiidrfsyieqfilrrfge  
>tr|Q2YV06|Q2YV06\_STAAB  
mkr1s1iiviigifiiitgcdwqrtskepsknakhqqvikigylpithsan1mmtkkl1sqnhhpkylelvkfnwpdlmd  
alnsgridgastlielamk  
skqkgsnikava1ghhegnvimgqkgm1nefnngddyhfgiphrysthyll1eelrkqlkiepghfsyhemspaempv  
alsehritgysvaepfgal  
gek1gkgt1khgddvipdayccvlv1rge1ldqhkdvafvqdykksfgkmdrksvdimthhfkqsrdrv1tqsaaw  
tsygd1tikpsgyqeitt1  
vkqhh1fnppayddfveslykeasrs  
>tr|Q2YV07|Q2YV07\_STAAB  
mikiqqlqhhfg1hkvihfn1diskeivtfigksgcgkst1lniiggfihpssgrviidneikqqpspdc1mlfqhhn  
11swktindnirigfqkqi  
sdeikaql1vd1egrghfpeqlsggmqrvalcrahvkpnilmdeplgaldaftryklqdlvqlkhktestiil  
vthdideaiylsdri1lg  
egcniisqyditashprsrndsh1lki1rndimetfalnhhqepeyy1  
>tr|Q2YV10|Q2YV10\_STAAB  
mngkkantinrykyfhhvnhkqiqsskktlwasliit1lftviefvgglvsns1allsdsfhlmsdv1alglsm1aiyf  
askkptarytfgylrfeil  
aaf1ng1alivisiwilyeavriiypqpiesgimfmiasig1lvniiltiilvrs1kqedniniqsalwhfmgdl1nsi  
gvivavvliyftgwriidp  
iisivislii1rggykitrnaw1ilmesvpqhl1tdqimadiknidgilvhefhlwsittehys1sahvv1dkkyegdd  
yqaidqvss11kekygiah  
st1qien1q1npldepyfdk1t  
>tr|Q2YV13|Q2YV13\_STAAB  
mmtikvgiigcggiangkhmps1qkvenvemtafcdvdi1skaacaakaygtdnakvyddyka1lkddtidvihvctpnds  
hceitvag1hagkhvckek  
pmakttaeaqkmidtakstgkkl1tigyqnrfrpdsqflyksaqrgd1gdiyfghairrravptwgv1ldeeaqgggp1  
idigthald1tlwmmndnye  
pesvmgstfhl1nkqhdanaanawgswnpdefvtvedsafgikmknati1lesawains1evdeakcs1sgtkagadmkg  
1rihgedmg1lytkhvele  
nkgvdfyegnevdeaeekawidavvndtepvvkpeqamvvtkileaiyqsaksgkaiyfe  
>tr|Q2YV14|Q2YV14\_STAAB  
mnl1csgsyk1atanmcl1kiggsgtemi1fsqn1frprtptcivcrnwesnfs11gprqlahyck1tfrq1lywganit1  
ys1er  
>tr|Q2YV15|Q2YV15\_STAAB  
mtkkknikaigiysfiammfvi1lypl1wtfgis1npgtnlygakmpdnatfknyaf11fdssqyltwykn1livts  
anal1svifvt1tayafsr  
yrfvgrkygl1tfl1lqmfpvlmamvaiy11ntig1lds1fg1t1lviggsipmnaflvkgyfdtipkel1desakidga  
ghmri1lqim1plakpila  
vval1fnfmgp1fmdfi1lpi11rspekft1avgl1fnfindkyannftvfaagaimiavpiaiv1fl1qrylvsg1ttgatg  
>tr|Q2YV16|Q2YV16\_STAAB  
mtrknpklaal1svipgl1qgfynkrpikgtiffiffisfivsvfysflnigfwglft1gtvpkl1ddsr1laaqgiis1llv  
afaimlyi1n1dayrnae  
rfnrneeikdpkarmvaiwdktfpy11ispgtf11ifvvvfl1ifmfgvaftnyn1ynapprht1ewvg1dnfkt1ftig  
vwrktffsvitwt1vwtlv  
att1qjalgl1flai1vnhp1vkvk1firtv11lpwavpsfvtilifval1fndefgainndilqpl1gvapaw1sdpfwak  
val1igiqw1lgfpfvfal1f  
tgv1qsi1ssdweaadmdgasswqkfrnitfphviyatap11imqyagnfnfn1liyl1fnkggppvsgq1nagstdil1sw  
vyn1tfe1fnnfnmgavvs1  
iigfivaivafiqfrrtstfkdegg1  
>tr|Q2YV17|Q2YV17\_STAAB  
mskilkcit1lavm11ivtacgpnrskedidka1nkdnskdkpnq1tmvvdgdqkmafyykmtdqytkktgikvklvni1g  
qndq1enis1dapagkqpd  
iff1ahdntgsay1qgladeik1skdelkgfnkqal1kamnydnkqal1paivetta1fynkkl1vknapt1leeveanaak  
1tdskkkqygm1fdaknfy  
fnyp1fgnddy1fkkngseydihq1gl1nshkvknaer1qkwydkgy1pkvathdvmig1fkegkvqqfvtgpnw1ney  
qetfgkd1gvtt1ptdggk  
pmkp1lgvrgwy1seyskhkywakd1mlyitskdt1lqkytdemseitgrvdkvssn1n1kvfekqarhaempn1pemrq  
vwepmgnasi1fi1sngknpk  
qa1deatnditqnikil1hpsqndkkgd

Tsompanidou\_et\_al\_Supplemental\_FASTA\_File

>tr|Q2YV18|Q2YV18\_STAAB  
maelklehikktydnntvkdfnlhitdkefivfvgpsgcgksttirmvaglesitsgdfyidgermndvepknr diam  
vfqnyalyphmtvfenfmaf  
glklrkvnkkeieqkvneaaeilglteylgrkpkalsggqrqrvalgrairvdakvflmdeplsnldaklrvqmrteilk  
lhkrlnntttiyvthdqtea  
lmasrivvldgdimgvgtpreiydapncifvaqfigspammlnatvemdgllkvgthhfklnhkkfeklnaagyl dke  
iilgiraediheepifigt  
spetqfesevvse1lgseimvstfggmeliskl dsrtqvmankitlafdmnkfhffdektgnriv  
>tr|Q2YV19|Q2YV19\_STAAB  
mtrkrpkri latiiiflsllfmiyiddi qkwfnqytdkltqn hkgkghskwedffrgsr itetfgyqhs pfdgkhygid  
falpigtpikaptngkvtr  
ifnne1ggkv1qvaedngeyhqwyhl dkyvkv gdrvkagdiiaysgntgkqttgahlhfqrmkggvgnayaedpkpfi  
dq1pdgerslyd1  
>tr|Q2YV21|Q2YV21\_STAAB  
mvnlnndkqtkskeglisvshplaakigkdvldqggnamdaviaiqlalnvvepfasgigggyll yyeqstgsitafd  
aretapahvdkqfylddsg  
eyksffdmthgktvavpaipklfdyihkryaklsledlinpaielaieghsanwatekysrqqharl tkyhetaqv fth  
engywregdwi vqpelgkt  
fqilreqgfnafykgdiakqlvnnvkacggtiale lanydiqikapisatfkdydiysmgpsssggitviqilkll ehi  
dlpsmgsrsvdyllhliqa  
mhlaysdraqyladdnfhevvpqslieddylkarsklidsnkanidiehgvsncishtdveentetthfcvidkegni  
asfttsigm iygggitipg  
ygvllnttmdgfdvaggineiapyrkl snmaptivmhgkpi ltvgapgaisiiasvaqtlinvlvfgm diqqaines  
riysshpnriewepqfsq  
tilalialarghamehkpdayigdvhglqvdsityeasggsddtregtvmggevlvirkqplpyrhmydndgfrvy lngiq1  
plyaeqvrwmhgtcwiees  
vvriifsevr ahiedlrsyeiagenyidivwlarknayqvalkddglylndeayhsvkrntnayrydrdsitr  
>tr|Q2YV22|Q2YV22\_STAAB  
mkriisiaiivlalv1sgcgvptksevaqksskvevkgerptihflgqasyendmnivkdqlenagfnvk mniqpdyggy  
rtqrqagnydigi ddmvntv  
fgdpnyamta1fsstgsnsllkdkhvdqllnkastqneadvkqtykqiedevvfdkgymaplygskknlv ydnkvl dkns  
vglpnsrali wqqfdynns  
rerdrtrplvmtqqdgeiptldpirsiapsvysimnmmytrllll dendhl ttkgslsr dyavnkdnkafyfl rdddyfa  
kvvngqarntgersaevd  
kfsldrardkksvppnnntymhkhindikilkdedidqlrkekdkddnsiydklikaynvksl ttdghkvnnkdgiyqiv  
kittdqsmprevnylthss  
agilskkfvnqvnqeypkgygdsstipansdgkna1yasgayimtqknayqatfqrnpgfneteigsygpakikniilkf  
ngdpnna1selrnhsidm1  
advnqkhfdliksdknlsirkngrksvflmlnikk gikfthpnlrqavvnaidqdqfikfyrgdkfkiaspitplvdtg  
nkqrqdlekekaing  
>tr|Q2YV23|Q2YV23\_STAAB  
mvklttkiaslklfasyaiatyilviltsalnlfkgyvadtfyiaetllivltiiliiiltteqtwkhhd1wrrivevll  
llmt1tgnvftllmfvsir  
ryqrtsqihsyngwesfirkttrhriaiigllilvfm1t1sivsqtfdttlatknqfnal1hgpsl1typfgtddfg rd1  
ftrvvvgtkl1tfsisiisv  
viavi1fgvllgtiggyfnhidnlimri1dvvfai pslllavaiiasfgasipnliia1signipsfartmrasvleikrm  
eyvdaaritgentwni1wr  
yilpnaiapmivrfslnigvvv1ttss1sf1glgvapdvawgnilrtgsnylethsnlaivpgicimfvv1afnfigda  
vrda1dprih  
>tr|Q2YV24|Q2YV24\_STAAB  
mnctfrlltsnkfdmmlc1pihkwn1fytfvyhsnllkiilqgviiiitylesfkslyhkafykfv1sv1slpiflyav  
ikfffsakrknfyannsei  
seieqalhqkykylsqkssstqihkealkifkaqssntnsknieqahfstyfenvlfhkfimikvilalpmfilltiylq  
plvryiferivmaviviig  
v1svftilyfsp1daaysilgqnatkaqihqfnvlhhl1nepyfiqlwdtikgvftfdlgttykgnevvtkavgeripit  
iivavlalivaliiaipig  
iisamkrnswlditlmialig1sipsfwqgl1filafslkl dilppsympehpsil1pvlvigtsiaasitr mtrssv  
levmrsdyv1tayakglst  
tqvvikhilknaiipivtlvgllvae1l1ggsavteqvfningigryivqkqlipdipavmggvvyisivislanliidif  
yalidpk1rseinerk  
>tr|Q2YV25|Q2YV25\_STAAB  
mlvlnnlqkkftnskml1nnvnakfrsgsincivgvngagktllniissilmp1tkgdvylnsesifenst1kkeifytp  
vnpffyen1sakdnlylic  
s1ynrkidqiti ektikdvgl1nied1nipvcnfssgm kqk1nfasm11vdsnv111depfnaldhvaqknftrilkglvs  
kekiiiftshlpntilels  
eniyl1kdgcftdkrkaqsfnttletw1lesqkevipyeek  
>tr|Q2YV26|Q2YV26\_STAAB  
mgclvyyl1nid1gkmi vaqd1nlqgiffhnl1yffsai1fgfl1t1gl1nigm11nsgm1gffia hgiysnqlksillv1



Tsompanidou\_et\_al\_Supplemental\_FASTA\_File

aphaifeilalliaastfs1  
gflsylyqrmvkknkiknkmfhnfvttitviviltiiasllevyvtin  
>tr|Q2YV27|Q2YV27\_STAAB  
mnnsifytylknfryfirrkfeivkrslnvttkilfliklifssl11fistimladyfsdyidfieyyfyasmfiyiv  
fipliprkl1linpmdkq1  
lyrss1revdifnliyasdv1kkfvgyfn1livgmaislyhispfiklvfcalihfstisyviqiiifinikvistkkl  
fsyhycvfnfmmgsivsvi  
gfvvsf11vn11ikpflvfstyvikskktfewysyfqdikseviinekvmlldyisphitfmrlnfnisfviiial  
fitlyyfnkigfwyrkedi  
yls1tninfs1pisikaittiqlkhwisnkeevnlhkpffiyisysiwfflglciyfsqmayqlanavifililntitrd  
sfsagtdfftkslrfdskr  
ksiglyrmsntdfkqiysdks1s1rfigfketilail1aiflnqdiylyiigfeiiiintviipn1s1lpsylsphfnh  
qhyselesfeeqifledtv  
fdkvknfl1ssyflilfvgy1sqnyidimifiiifnialilvslfirfskqkitkswrkrdly1  
>tr|Q2YV29|Q2YV29\_STAAB  
misftfkvdekikypfnqrdielvnqvdgvlaklkenkeegieatitnvqkksdifiikkqn1hsfkvgrgfdkedne  
lrkkivvinqvaktifnn  
naigkslyieggfevigtdklydsstvimpentfnymghlhqglptlqiiiedgynkktvkkves1lnkkgsqsv  
lgeytydteei1ksidki  
fdsityfvaavagis1fiagigvmnmyisvaerteeiairrafvksrdiel1fliesilicvtsgfiglilgvvfati  
idv1tpdyiksvs1ssvi  
iavsvis1ig11fgwiparaaskkelidiik  
>tr|Q2YV30|Q2YV30\_STAAB  
mielknvyrtfknqdknirvlkdnihinagefiaimgpsgsgkstlinilgfidreyhgeylfegndyqtqsdnqlani  
rnktvgfvfnfk1ihnt  
ilenismp1vytnm1tiernknkmtv1savgldgkgdftpsklsggqqrvaiaraiinnpkfiiadeptgaldsdtski  
imdi1fts1nrdnhtti1lv  
thdrkvaekadriihildgriqheevik  
>tr|Q2YV31|Q2YV31\_STAAB  
mrrkrkwlivicv11lv1itisqilkhfnygteskeayntyvtekerq1dl1gqkayprevktyyknnqvgytlgvqvadgq  
tvkkgdm1inykinskrq  
q1vdki1ndtqhiitevylnitkg1n1nreiqkklieyq1t1yeaqq1lyqydsqnrdsmyasfdgkimiknidnds1nqpi  
lyliskeshiktsvtefd1  
nkvvkkgdkvn1sitstgkkgegi1kqise1pisyee1slhendal1h1pesnndgel1tnsksisaspifksnnselsky  
gv1idd1s1piragys1ei  
kvp1nviki1pksv1tkgnnv1fvnksivekrnirikringdiivekglkpgdklikqpkst1mndgd1kveiss  
>tr|Q2YV33|Q2YV33\_STAAB  
mayqseyalenemmq1eq1gyeritirdnkq11dnfrsilnerhadk1legn1tdkefqr11tmidgksifsvr1lrd  
kl1pl1rddeseiyls1fldt  
kswcknkfqvtnqvsvedtykarydvtiling1plvqvelkrrgidineafnqvkrkrqnytg1fryiqmfiisngvet  
ryfsnndsel1kshmfyws  
dkqnnrint1qsfaesfmrpcqlakmi1srymi1inetdril1mamrpyqvyaves1iqqatetgdngyvwhttgsgk1tsf  
kasqil1sqddik1kvi1flv  
drkd1dsqt1eeefnkfakgavdk1fnts11rq1ndks1pliv1tti1qkmakaiqgnah11eqy1ktnkv1fiidechrsqf  
gdmhr1lvkqh1fknagy1fgf  
tgtprfpenssqdgrttadi1fgrc1lhtylirdaih1dgnv1fgfsvdyint1fknalka1aednsmveaidteevw1adkrvel  
vtrhi1innh1dkytrnrqys  
siftvqsi1halikyyet1fkr1nkk1eqpl1tvagi1ftfkpneddr1dgevpyhsrek1eimi1sdynkk1fetn1fst1dt1tneyf  
nhisknvkk1gkvk1dskidil  
ivvnm1fl1tg1f1dskv1nt1lyvdkn1myhd1liqaysr1nrvekesk1pfgkivnyrd1lkket1dda1rvfsq1tnd1td1tilmsy  
eeyk1kef1mday1relkm1vp  
tphm1vddi1qdeee1krfveayr1lakii1l1rkafdefeftide1igmdeqenedy1kskylav1ydq1vkrataekn1kvs1lnd  
idfeiemr1ndt1invnyim  
ni1lrqid1ledkae1qrrn1qe1qirri1dhaddpt1l1krd1lirefid1nv1ps1lnkddd1dqey1vn1fesikkeae1fkgfager  
s1deqal1kti1s1ndy1qysgv  
vnphh1lkk1mgd1pl1kekrkarkaies1fvaettekygv  
>tr|Q2YV34|Q2YV34\_STAAB  
mvlityqi1il1fliis1syy1l1nhymav1tvgn1fts1ifgmfaa1il1fmyc1llykspeyn1qhk1rfk1h1hitn1lii1afstf  
vlvhl1alk1l1ffs1  
>tr|Q2YV35|Q2YV35\_STAAB  
mtni1lyridk1q1sd1ftk1teki1iady1ilknphki1idmtvnd1adv1tnv1stasiv1rfs1rkmth1qgf1elkia1sryl1pedia  
tnph1le1lienesvet1knk  
miaratn1mr1fvatn1mda1idaicdv1knart1fl1fgfgass1tig1dlf1qk1srig1nvr1llheth1lvst1fat1hddrd  
cm1fvtn1qgsh1sel1qsiaq  
vathysipi1itis1tannpva1qiadya1iygrtdenemr1mvatts1lfaql1ftvd1ilyr1fvalnyhaildcit1qskmal1d  
nyrkhl1atid1fkh  
>tr|Q2YV36|Q2YV36\_STAAB  
mtkl1kv1g1v1g1g1a1qdrhipa1l1kl1kdtva1lvavq1d1ntvqmi1dvakr1fni1phavet1psel1fkl1vdav1vict1pnk1fhan

Tsompanidou\_et\_al\_Supplemental\_FASTA\_File

lsiealnghgvhvlcekpma  
mteecdrmieaankncklltvayhrhtdvtakkaiesgvvgkplvarvqamrrrkvpvgwvftnkalgqggsldy  
gchlldslwllgknmvp  
evlgktynglskqpnqindwgtfdhtkfdvddhvtsymtfanrasmqfecswsanikedkvhvslsgedgginlfpfeiy  
eprfgtifeskanvehned  
iagerqarnfvhaclgieeivvkpeearnvnalieaiyrslndksiq  
>tr|Q2YV37|Q2YV37\_STAAB  
mlgiggal snpnavkaypil diltlqni ftlmsaagsivfqnl pvi faigvaiglsrsdkgtaglaallgflimnatmnd  
llti tgtlakdqlaqnggg  
mvlgiqtvetgvfggi itgimtai lhnkykhkv lppy l gffggsrfvpivtafaaiflgvlmffiwpsiqagiyhvvgfv  
tktgaitgvfygfilrlg  
plghhifylpwwqtaggtlevkghlvqgtqni ffaqlgdpdvtkyysgvsrfmsgrfitmmfglcgaalaiyhtakpe  
hkkvvggmlmsaaltstfl  
giteplefsflfvapilyvihaffdglafmmadifnitigtfsggfidflfgvlqgnsctnylyvipigivwfclyyi  
vfrflitkfnktpgrek  
vaaqqveateraqtivaglggednieivdcatrlrvtlhqndkvdkvllestgakgviqqgtdvqviyghvhtviknei  
eelld  
>tr|Q2YV39|Q2YV39\_STAAB  
mlteqekdi ikqtpvlkekgteitstfypkmfkahepelnmfnqtnqkrmgqssalaqavmaaavnidnlsiikpvimp  
vaykhcalqvyahypivg  
enllkaiqdvgtleendpviqawakaygviadvfvqiekeiydqmwigfkpfkitnikqesediksftveteeydfsef  
tpgqyitvdvssdklpyra  
krhysivsgdknhltfgvkrdvttehegevestil hdeikegdtinlaapvggfv lenttepqlflgsgigvtp lvamyea  
asakgl dtqmvqvaeneq  
lpfkdnfnshhdnaklythlkdkqgyidaeelqvflankpeiycggtkflqsmiealkslnydmrvhyetfiprl  
svav  
>tr|Q2YV40|Q2YV40\_STAAB  
mklngryvkvfalyfvsivtaniivknnnliktliqtiagytfavglkyltkrrnk  
>tr|Q2YV41|Q2YV41\_STAAB  
mtvdigraydskdnadairilvdrvwprgiskrtanldywlkdiapstelrqwfqhdkplfggfkekyekelrdqdaqd  
afeklkdivnqhnhvllly  
aakdtkhngavvlqqllnt  
>tr|Q2YV42|Q2YV42\_STAAB  
mkfkrlatifsavlvs gcgsmhssgkdl nislpktskiapyetdvpvkigaaeslftndqgkiekvlvksyhpndt  
tldielkdnikfngqklt  
aekvksslessmkksdlvkyslpissitakgkltiktssaypelvselanpmai ytdaksdvnqtpvgtgpyqikdy  
kqsrkislsnfkdywqgk  
kl dhitvtyqedgnrvrnlesqkdlitdvpvnkvqdiennqnlkvskesgfrtsllmynhtnkkmtksvreal dhiid  
rqgiadhiyqgyakpatsp  
fndki pyikepkltkqnieqaktllakdgytkehplkiklitydgrpelskiaqvlqs dakkaneidiks vddiegylt  
drsawdatmysfgtiprgd  
tgyffnqaykkdga inkgeynnsnvddlinqlnhtvdvkerhnisndiiklssrdvpnsyia yndqivaanskvnykvt  
pegiylidyrttier  
>tr|Q2YV43|Q2YV43\_STAAB  
meglnhrrntekeetiqtqsvapntgeegmssaitqstkt sdihnesidkqmeakahetaqnadlknearslfdnatksi  
grlagndeslnlnlkdmfs  
evfkphtkneadeifiagtakttpaicdi seewgkplfsrvfi aftvtfiglwmaai fntnaipglifigaltvpls  
glfffyefnafknisifev  
iimffiggyvflstmvlyrfvvsdqferfgsl tffdafvlglveetgkaliivyfvnkltknilnglligaaigagf  
avfesagyl nfa lgenvp  
lldivftrawtaigghlvwsaivgaaifivkeqhgfefkdidkrflifflsavglhgiwdtsltilgsdtlki filivi  
vwilvfilmgaglkqvnll  
qkefkeqqkkvde  
>tr|Q2YV44|Q2YV44\_STAAB  
mmevtclqitwhdlqhi ikdgdvigl palavanlpaevl ravlaqhdyhtpndltfilandihs lgaapldd fierr  
mikrvimsiltassktaqa  
mknndieayflpggiitthyrqsnqllpgvitkig lntavdprygggvntrttddlvslvtindetylhyt fpsvdval  
lrgtyadqggniyltqey  
lsecyhvalntkanhgkviqvkalvddyqlkpnevvi pgnlvdyvyvtedeknhrqviqshylpalsgeeridgipepa  
lpfnrklilrraaqflty  
gdtisigyginne lsnllheecvehdvqpil dvgifggfvgsrehfgmynadvrmphdrawdfiyngvsvaylsfaev  
dqygnvnvsyfnrlngcg  
gfidi tqsvnkiifsgtfvagshvschnqrlnietegqnqkfvsdvshidfnaqysqsl equevyfvtdravfeltnhgk  
lieiapgl d l hkdilnqma  
fkpiadhklvdtisykekwwgqlkqsihkv  
>tr|Q2YV45|Q2YV45\_STAAB  
mnfdwiktrsd fddd kpavidhakqtswtyqqlnaradmahyltsqgvkkgdvigifapndiaildllfacfktgavfl  
plnwrlnpkeiaaivedaq

Tsompanidou\_et\_al\_Supplemental\_FASTA\_File

1kllfyaekh1sslididqnl1hmdi dvaqydeivnpdyhqpfaqtpvepqdlaaliytsgttgs pkgvmfsvyesfvhng  
anleltykfnsnyitivist  
pmfhv1gfn dtvlpvlmsggtlilqryfngeelndmiaqyhptfiimiptystlrasnfnpenfkamdyi iqggsqpl  
psiqaa fkyginiingy  
lteaplvlvntpenskrkpmsigkavmfvdarilddngeevptgeigelaikaknvtpgywnkpaetakafhgrylltgd  
lakmdddgdifiidrkkel  
iitggenvlpsevenalae hplvdrcvvvygdhpkysesiaaailredephyaeildqhmsrslagykvprmyvpvthm  
plnstgkpkdlairqmmnd  
kvsqt1

>tr|Q2YV46|Q2YV46\_STAAB

mtinkvtvl gagtmgaqlaal fvnag1kvk1ldivvdkndpnliakksydkitdkkrp1lfdlnl ashltygnfddd1vn  
ddadlyieavkedieikha  
vwqqvlqhakedal fatntsgipinaiaqafnekdqerffglhffnpprimklveliptshtkesiildvknfaqnvlgk  
gvi vndvpgfvanrvgtq  
tmndimyraeqhklsvdvdaltgqairpktgtyal sd1vgldi amsvikgmqqvpeetpyfhdkivntlfengalgr  
ktkqgykdketkarlv  
dvekdyvpsqpqlplinefnkdlvhnldvifnaqdeag1flwetlrnnfyysainvpkatddfrdidralvwgfnwk1  
gpfqlwdamgyervktrme  
delgd1pqw1sd1ggfykqgetieyatpvshfvkdelwdkcdak1svthddq1llklqsknnvitdefndalvdaidd1  
enehytsmviyadgnnfsv  
gan1flmkkahedglvddvvaqsidklhysfnrlkys1kpvvtavqgralggcelvlyspivvaasetyig1veavg1  
lpsgggl aemadrlrtsh  
kfdkqasmtkv1tniafakvstnafearrygl rdttdtiifntaqrvevalkrakyeaetnyipnprhqiya1gedfka  
ligqgl daqrrghfisdh  
yhi1niatilaggdlprntfinqryiqslekigfidllkskksyeriahmlktgkplrn

>tr|Q2YV47|Q2YV47\_STAAB

mitmqeayivaygrsaakakqgal fherpddvaakvlqgv1kridgkfnknmi edvivgtafpeg1qqniartialrt  
g1sdtvpgqtvnrycssg1  
qti1aianqimaggd1lvaggvelmsavpmggneptnpt1qyddigasympgltaenvasqfdvsredqdayavrshq  
raydaqrdrgrfkdeiipi  
vnsveytnarpkvhtni fdqdefirpdtmealak1rtvfkadttvtagsap1sdgagfvv1msgdkvkelgvtpiarf  
vgykavgvdpkimgiqpay  
a1pev1slsn1svedid1ielneafasqtiasikevg1disrtvnnggailghplgatgam1tar1lnemgrprdsryg  
mvtmcigvgmgaai feyv  
r

>tr|Q2YV48|Q2YV48\_STAAB

mkkqi1slgalavass1ftwdnkadaivtkdysgksqvnagskngtpisngyfwgkids1esqfskai1ieeyqygeke  
ykdakdkfmdri1sedqyl  
lekka1ykykewykhke inptypkmtfhefsvyn1tmeeyneisks1kdaeeefrknvsevqekev1kty sedee  
ekatkevdy1vaevdtiyy  
syfghdkhgqsakel rak1ld1iigeeknafritneriknemiydlnsiiddffmetnqn rpenitkfdwdkhdyrnklen  
kahfealveetkavkead  
aswkkktvknydesvtkadvvkeekveepqspkvdnqqddkatqpvaqplvkipqgtiygetvkgpeyptmenkt1qge  
ivqgpdfptmeqn rps1sd  
nytqps1tnpi1leglegssskleikpqgtest1kgiqgessdi evkppatetteasqygrppqfnktpkyvkyrdagtgi  
reyndgtfgyearprfnkp  
setnaynvttnqdgtsygarptqnkpsktnaynvtthangqvsygarptqnkpsktnaynvtthangqvsygarptykk  
psetnaynvtthangqvsy  
garptqnkpsktnaynvtthadgtatygsrvtk

>tr|Q2YV49|Q2YV49\_STAAB

mttqmki ktylvagikaal dttgik1asksettshtyqhqlvdqlheliantdlnk1syln1dayqkrdilaahyia k  
sairtkn1dqmtkakhr1k  
siydsisnplhsqnn

>tr|Q2YV50|Q2YV50\_STAAB

mkriskdiwavfk1lyqnkgrfsina1llqlimi fisstyl1llfnmmlkvagqsq1tinwteivshpasvillii fil  
svafliyvefsl1vymvya  
gfdriq1itfksifknafvnrk1ligvpviffviylmlmpian1glssv1tkniyipkflteelmkttkgiiygtfmia  
vfilnflk1ift1pl1tlnr  
qslfknmr1swq1tkrnkfr1vieivileliigailtliisgatylaicvdeegdkflvssilfvvlksslffyy1ftkl  
slisv1v1hlkqenv1dqp  
glefkyppkrksrffis1smv1avtcfigynmy1lynntintnisiighrgfedkgvensips1kaaakanveyveltdi  
mtkdkqfvvshdnd1kr1t  
gvnknisesnfdvvg1kmrqngheak1vs1defietakqsnvk1lvelkphgkeggdytqrvidilkkhgvehqyrvms  
1dydvmtk1kkeapy1kcg  
yi1plqfghfkets1dffviedfsyspr1vnqah1enkevytwtingeed1tkylqtnvdgiitddpaladqikeekdde  
tyfdrsir1lfe

>tr|Q2YV51|Q2YV51\_STAAB

mnykynsdrkesicnfksegayasfsieyrv1arrsrymrq1llqwlkedvfsvssyadkecdal1kvqfyhhladvewvi

Tsompanidou\_et\_al\_Supplemental\_FASTA\_File

icylhmmsl fkl11t1sn  
eky  
>tr|Q2YV54|Q2YV54\_STAAB  
mkskiyil1l1fliflsacanthrsesknvltvspyqsnlirpilnefekqehvkieikhestqvl1snlhnedfserg  
dvfmggv1setidhpedfi  
pyqdasvtqql edyrndkyvtsf11mptvivvnsdlqgditirgyqd11qpilkeiaysnpnttttgyqhmraismh  
hrvsdvhqf qdhamqlskt  
skviedvakgkyaglsyeqdartwknkgypvsivypiegtmlnv dgalvknahphpkrkklvqyltsrsvqqr1vaef  
daksirkdvseqsdqsien  
1knip1ipksklpdi phhkfl emiq  
>tr|Q2YV57|Q2YV57\_STAAB  
mnffdi hki p nkgi plsvqrklwl rnfmaqaffvffvymamylirnnfkaaqpflkeeigl stlelgyiglaf sityglg  
ktllgyfvdgrntkriisf  
11ilsaitv1imgfvlsyfgsvmgllivlwgln gvfqsvggpasystisrwaprtkrgrylgfwntshniggaiaggval  
wganvffhgnvigmfifps  
vialligiatlfigkddpeelgnwraeeiweepvdkenidsqgmtkweifkkyilgnpviwilcvsnvfvyivrigidnw  
aplyvseh1hfskgdavnt  
ifyfeigalvas11wgvyvd11kgrraivaigcmfmitfvvlfytnatsimmvnislfa1galifgpqlligvsltgfvp  
knaisvangmtgsfaylfg  
dsmakvglaaiadptrnglnifgyt1sgwtdvfivfyvalflgmillgivafyeekkirs1ki  
>tr|Q2YV60|Q2YV60\_STAAB  
mnrkiimdcdpghddaialilagaidsp1eila ittvagnqsvdknttnalnvldiigrqdiavakgadrplikpaafas  
eihgesgl dgpk1p stpsr  
qavampasdv1inkvmtsdtptivatgpltniatalirepriaehiesitlmgggtfgnwtptaefniwvdaeaakrvf  
esgitinvfgldvthqvla  
ddhvierfesinnpvaqfvve11qffkkykthfmdggpihdactily11qpelftmvpvni diehqspltygtmavdl  
nhvtgkpanayfatavdve  
evwnlidhklrtye  
>tr|Q2YV61|Q2YV61\_STAAB  
mlywrgpqtqklakiqltimcelagsqhreigtai srnnaswrgpnienfeki fyrqcr1grdrnkfceniifv11plsf  
lfqsrdivkilrknatn  
>tr|Q2YV62|Q2YV62\_STAAB  
mwgga1aanqfeggydkggkg1svdivmtsgahgkarqitesidpnhyypnhegidfyhrykedialfkemglkclrtsi  
awtrifpngdedvpneegl  
afydri fdeliaaggi epvvt1shfemphlakhyggfrnrevvdyfvhfarvvferykdkvtywmtfneinnqmdtsnpi  
flwtngvaltendnpeev  
lyqvahhellasalavr1lgeinpkfkigtmi shvpiypschpkdmmeaqianlrffffpdvqvr gyypsyakkmlark  
gydfgwqegdds11lqqgtv  
dya1fsyymstavkhvdttvennivnglnhsvenphiatsdwgwaidpdglrytmvnydryqlplfivkngfgavde  
vvdghihddyrieylka hi  
taateavdqgdvdligytpwgiidivsf ttgemkkrygliyvdrndghgtmer1kkdsfywyqqviasngdk1  
>tr|Q2YV63|Q2YV63\_STAAB  
msnkykdqaqdliavggvenivdvytdkci tihmqhtipstanevkqidvtsvaendvqlviklngnvdevyqq1qr  
likntnvekdantdninsq  
dtsytpqvkvttpi1vkapiagrri11kevrdsifrekmgveglaikaheeskviapfnglvsmivptkhavgiqsedgv  
divihigvntvdlegkgfk  
cfvkqndrveagqt11qfdqyiqeaggynsdvivi nsad1gkveltmneiittedvifkifkn  
>tr|Q2YV70|Q2YV70\_STAAB  
mmkfsv1vptynseyitelns1akqdfpktefevvvddcstdqtlqivekyrnk1n1kvsqletnsggpgkprnval  
kqaegefv1fvdsddyink  
etlkdaaafi dehhsdvl1ikmkgvngrgvpqsmfketapevt11nsriiytlsp tkiyrta11kyndiyfpeelksaed  
qlftmkay1nanrisv1sd  
kayyyatkreghmssayvspedfyevmriaveilnadleeahkdqilaeflnrhfsfsrtngfslkvkleeqpwina  
lgdfiqavpervdalvmsk  
1rp11harakdidnyrtveesyrgqyyrfdivdgklniqfnegepyfegidiakpkvkmatafkfdnhkivtel1nef  
migeghydvrlk1hsrnkk  
htmyvp1svnankqyrfnimledikay1pkekiwdflevqigtevfevrvgnrnkyaytaetsalih1nndfyr1tpy  
ftkdfnnislyftait1td  
sismlk1kgknki11tg1drgyvfeegmasv1kddmimgv1sqtseveve11skdikkrdfknivk1ntahmtys1k  
>tr|Q2YV74|Q2YV74\_STAAB  
miktik11iehsiyttfk11sk1pnkn1iyfesfhgkqysdnpkalyeyltehsdaq1iwgvkkgyehifqqhnpvyvt  
kfsmkwflamprakawmin  
trtpdwlyksprtty1qtwhgtp1kkigldi snvkm1gtntqnyqdgfkkesqrwdylvspnpystsi fqhafhvsrdki  
fetgyprndk1shkrndte  
yingiktr1n1pldkkvimyaptwrddaei regsyqfnvnfdiealrqa1dddyv111rmhy1lvvtridehddfkdvsd  
yed1sdly1isdalvt dys  
svmfdfgv1krpqi fyaydlkygde1rgfymdykkelppivenqta1ida1kqidetaneyieartvfyqkfcsl edg  
hasqricqti fk

Tsompanidou\_et\_al\_Supplemental\_FASTA\_File

>tr|Q2YV75|Q2YV75\_STAAB  
mtkktkqaihidniywervqlyieghsegvdltsqqfvlrnltetkleanemkidgntficrfnvailddgyylpmdkyl  
fvyhdqleyigqllnpiid  
qayaaaneeqieeynelettqngkanyvlaneakvfrkggvsqhtvytipeiasdvnefvfdieitlpqeksgviatsah  
wlhkqghkasfesrsflfk  
aifnltkllhikrsktilftsdsrpnlsngfkyvydelrqqvdfdydiqtvfkanitdrkwrkfrlpyllgkadyif  
vddfhpliytrfrpsqei  
iqvwhavgafktvgfstrgkkggpfidslnhrsytkaivssetdipfyaeafgi reenvvptgvprtdvlfdeayatqik  
qemedelpiikgkviifa  
ptfrngnhtahypffkidferlaryceknavvlfkmhpfvknrlnisrehrqyfidvsdhrevndilfvtdllisdys  
sliyeyavfkkpmi fyafd  
ledyitttrdfyepyesfvpgkivqsfdalmdaldnedyevkvvpfldkhfkyqdgrsserlvkdifrr  
>tr|Q2YV77|Q2YV77\_STAAB  
mkalklygvedlryedndkpviesandvkvratgicgsdtsrykkmgpyikgmpfghesfgvvdaisdvthvnggk  
vtgcpaipcyqceyclke  
yarckklfvigsyepgsfaeyvklpaqnvkvpdndvdi evamvepsavvahgfyksniqpgmtvavmgcgsigllaiqw  
arifgaahiaididahkl  
diakslgahqtinskeenlekfienhyanqidlaiesgakvtigqiltlppkkggevvllgipyddieidrvhfekilrn  
elticgswnc lssnfpge  
wtatllymktkdinvkpiishflplekqpetfdklvnkkerfdkvmftiy  
>tr|Q2YV78|Q2YV78\_STAAB  
mvesmltfmlgplrqitdfymehllvsnsivivgyfatgikkkkvvn  
>tr|Q2YV79|Q2YV79\_STAAB  
mkalvktreghgnlelldkevapl ddkvki kvhyagicgtdihtyeghykvnfvtlghefsgeivevgadvkdfkvgd  
rvtsettfyvcneceyces  
kdynlcnhrkgigtqvdgafntyviareeslhhipdevsyqsaamteplacahhgvskiqvnsqdvavvmgpgpigllva  
qmlkskgatvvvtgldndk  
vrlkdaeahmdyvvnllqtdlktyingitdgygadvvvecsgavpaarqgldilrkkgfysqigifkdaaipfdmekvi  
qkeitvvgrsqkpadwep  
slqlmadglvnaealvtkiydi skwdesyqhlksgegikallkplldenegen  
>tr|Q2YV80|Q2YV80\_STAAB  
msyftdfvrgfldlgatvilpvvifllglffrqkigaafrrsgltigvafvgiflvidllvknlgpaaqamvknlgvslnv  
idvgwpatssiawassvaa  
fiiplgii vnvllvtkvtkmndiwnfwhtftaamvyavsgsiwqallaavifqvicl kvadwtapmmseffdlpgv  
siatgstisyaggiylvlk  
lqrvpglnkl dadpetiqkrfgafgesifvglllgigvlagykpgdiinlgmsmaavmlmprmvkilmeqmpvses  
artwlnkrfgereiyigld  
aavalgphavistalilvpitvllavilpgnqvlpfgdlatipfvafivgaargniisvsvigtimiaislyiatdvap  
iftdmakgtvqmpkgsse  
issidqgnivnylifklfslfn  
>tr|Q2YV81|Q2YV81\_STAAB  
mkqvlvacgagiatstvvnaieemakehnikvdikqikitevgpyedtalvttamtkninsqlsthvis  
>tr|Q2YV83|Q2YV83\_STAAB  
mskeaghtflaklgktrlrpggkeatdwliqqgafsqdkqvlvacnmcttsiylahtygchiqqgdinkkalekaqeni  
saaglesyiqvqqanavkl  
pfdnqfdivlneamltmpliaikekalreyyrvlkpggillthdivivneshathvkslsaainvvnspqtklgwldl  
yyqagfnhvhyhtgpmslm  
tpkgliydegivgtikiinnaalkkenrpfckmftmtklrkdmnyitfvakkeh  
>tr|Q2YV84|Q2YV84\_STAAB  
mmkdvkridyfsyeeltl iggsklplvnfel dpsnfeekvaliekelvtendkltdagfkvatlvreyisaivnirin  
dmyfapfsyekheyilslr  
fknggfqiriinkdiawwsivqsypllmrqeksndwdfkqiedetl enldnesidtigrvleieiyhggdpqqslyniy  
eqndllliryplkdkvlv  
higvintfirelfgfdtdenhinkae  
>tr|Q2YV85|Q2YV85\_STAAB  
mggykgikadgkvvqakqlavktakdieacqkqtqqlaeyiegsdwegqfankvkdvl limakfqeelvqpmadhqkai  
dnlsqnlakydtsikqgl  
drvnp  
>tr|Q2YV87|Q2YV87\_STAAB  
mhkliikynqklmnlrdgktytisederaditlkslgevihleqnnqgtwqanhtsinkvlvrkcdl dditlqlytea  
dyasfacpsiqdtmtigpn  
ayddmviqslmnaaiikdfqsiquesqyvri vhdkntdvinyelqeqltnkayigdhivyegiwlevqadglvnlsvntv  
asslirltgemphaqaddy  
ntyhrspriihreptddikierpppiqknntviwrsiippvlmialtvviflvripigiyilmmigmstvtivfgittyf  
sekkkynkdvekrekdyka  
yldnkskeinkaikaqrfslnhyptvaeikdivetkapriyektshhhdflhyklgianveksfkldyqeeefnqrrede  
lfddakelyefytdveqap  
lindlnhgpiayigarhli leelekmliqlstfhshyhdleflvtredevetlkwarwlphmtlrdqningfvynqrtrd

Tsompanidou\_et\_al\_Supplemental\_FASTA\_File

qiltliysmveriqavre  
rsrsneqiiiftpqlvfvitdmsliidhvileyvndlseygisliifvedvieslpehvdttiidsrtegelitkekelv  
qlkftpenidndvkeyiar  
rlanlihvehlknaiptsitflemynvkevdlvvnvrwrqnetyktmavplgvrgrkddilslnlhekahghglvagtt  
gsgkseiqsyilsainf  
hphevafllidykgggmanlfdklvhlvgtitnldgdegmraltsikaelrkrqrlfgehvdnhinqyhlkfkgevatp  
mphlfiisdefaelkseqp  
dfmkelvstarigrslgihlilatqkpsgvddqiwsnskfklalkvqdrqdsneilktpdaaditlgraylqvgnnei  
yelfqsawsgatydiegdk  
levedktiymindyggllqainkdlsgledeetkenqteleavidhiesittrleieevkrpwlpplpenvyqedlvetdf  
rkllwsddakeveltlglkd  
vpeeqyggpmvlqlkkaghialigspgygrttflhniifdvarhhrpdqahmylfdfgtnglmpvtdiphvadyftvdqe  
dkiakairifndeidrrkk  
ilsqyrvtiseyrklgtetiphvfilidnfdavkdspfqevfenmmikmtreglaldmqvtltasranamktpmyinmk  
triamflydksevsnvvgq  
qkfavkdvvgrallssddnvsfhigqpfkhdetsyndqindevsamtefykgetpsdipmmpdeikyedyreslslpdi  
vangalpigldyegvtlqk  
ikltepamissenpreiahiaeimkeidilnekyaiciaadssgefkyarhqvanfseeredikaihqlmiedlkqremd  
gpfekyslyiindfktfid  
ctyipeddvvkklitkgpelglnilfvghkelidaydkqidvarkminqfsigirisdqffkfrfiqrepvikeneaym  
vanqayqkiwrfk  
>tr|Q2YV88|Q2YV88\_STAAB  
mvknhnkpknemqdmtpldaeeaatklrldmreipkssikpehfhlmyleqhsyfidaeltelrdsfqihydindnh  
tpfdniksftkneklyrll  
niknleevnrtrytflvlapdelfftrdglpiaktrglqnvvdplpvseaefttrykalvicafnekqsfdalvegnlelh  
kgtpfetkvieaatldllt  
afldeqyqkqeqdysqnyayvrkvghtvfkwwaigmttlsvlliaflaflyfsvmkhneriekgyqafvkddyttqvlnly  
ddldgkkldekaalyaks  
yiqtnkqglekdkkenlennvtpnsnkdyllwmeigqghldeainiatyldnditklalinklneiknngdlsndkrs  
eetkkyndklqdiidkekq  
vkdekakseeekakakdekllkqeenekqkeqakdkkekrqeaerkk  
>tr|Q2YV90|Q2YV90\_STAAB  
mkkknwiyalivtliiiiaivsmiffvqtkygdqsekgsqsvsnknknhiaivnedqpttyngkkvelgqafikrlane  
knykfetvtrnvaesglkn  
ggyqvmivipenfsklamqldaktpskislqyktavrqkeevakntekvsvnlndfnknlveiytltsiidnlhnaqknv  
gaimtrehgvnskfsnyll  
npindfpeftdtlvsisankditkwfqtynksllsandsdtrvntdynvstliekqnsldehntamdkmldyqsqk  
dsvelndnyinalkqmdsqi  
dqqssmqdtgkeeykqtvkenldklreiisqsespfskgmiedyrkqlteslqdelannkdldqalnsikmnaqfaenl  
ekqlhddivkepdtdttfi  
ynmskqdfiaaglnedeankeyaivkeakrykneynlkkplaehinltdydnqvaqdtsslindgvkvqrtetiksndin  
qltvatdphfnfegdikey  
gkkydikdqsvaldtsnkeykvevngvaklkkdaekdfldkktmhlqllfgqanrqdepndkkatsvvdvtlnhnlmgrl  
skdalsqqlsalsrfdahy  
kmytdtkgredkpfndkrliidmvdqvindmesfkddkvavlhqidsmeensdkliddilnnknttknkedisklidql  
envkktfaeepqepkiegq  
kndefntmssnldeksriseskqlsdtqesktiadsvsgqlnqlndnnvklhatgralgvrandlnrqmakndkend  
lfakefkklvqnskdgdrq  
nqal kafmsnpvqkknlenlannngtdvisptlflvllmyllsmitayifysyerakgqmnfikddyssknhlwnnvits  
gvigtglvegllivglam  
nkfhvlagyrakfilmvilmmvflinty11rqvksigmflmiaalglyfvamnllkaagqgvtnkisp1syidnmffn  
ylnaehpiglalviltvlv  
igfvlnmfikhfkkerli  
>tr|Q2YV92|Q2YV92\_STAAB  
miifilitifaiyyiamiaslfksegfsiigllldvvimgtlifyyfigarfvndlnsflmfmdtgsyifmyfaikclr  
vkpkvnyliakelgeske  
vieeqeldlqtskirgiyffiiisvmlitkrlmqpelqadaismnpvfiivgviiiliwlvldiyrkkygiffktiv  
plscydldyysnytfvnd  
fd  
>tr|Q2YV93|Q2YV93\_STAAB  
mvryltnlvivgytllp1llasiyfvagfgfdvfnwlgivmm1fislwlgflfyknefdsenpnkavnviaaiiklfa  
fgglfyistivpntadeek  
fiytsilnlasdallvrsyfnyalyksikkdienegktm  
>tr|Q2YV94|Q2YV94\_STAAB  
mskklkiippiiiv11l1iggiawgvyaaffantlknty1kseqqtakmykdyfndrfenevkfqekmknslsslelsad  
vsdeivkg1gipkvsvnas  
kikmsyghdpkkekaminleptiadsalqkflaadkdkhyfesplfkgkysvnnsd11styskltgedetakengitn  
qq1n1nt1fsntqaqqsdy

Tsompanidou\_et\_al\_Supplemental\_FASTA\_File

skiaekyselivdkldddndfdkgkkeeikvngkeykvrpvtltsradtkkitlavleeakkdkdklkklmeeqgatkdfd  
kdikkaiddvketkkdefa  
kiqskiytektehtivkreititdkennkktikgtntleddklklalyaldfdqkytyaeakytikgvsskekdnkysdkey  
fgkkteydeskilndqek  
vdgkrqdkgkitvaldkysdneftfennidsdvknntqkstlnigikyaeepinfilksstklkadidddsgakdfn  
slsskdreklekeiekngg  
kmfesilkkask  
>tr|Q2YV95|Q2YV95\_STAAB  
mktihlfriyhsfllkkwyliiyllfilaaallitlttiqhvteddnhfngivvdkdqssetklilnsigkgsnlgnvsi  
kayddkqahtllkqkqlqd  
yfvfdkgmtkafykqgelpisvytydqsmksvvlsqltdsvyqrlmrsiggilafqdltpkashsdsinvmtdllitgl  
nrsgafnlepilydtgsy  
yaitgflatififalslftvlkmnqdtvlkarlkmfhfskerlliralitwfytmlwsivgvvwmfsipntfelynwp  
tlaihlsyyvtflilwlll  
iellttgllnsiskvilaivilvsgltiptiflqhiangvfniqpfavvtnqllleilnnyilelhpshfysfiaallii  
nlavlvwryrq  
>tr|Q2YV96|Q2YV96\_STAAB  
mkpyiqllvfkqwlqyilvttivialvligmgyrvahdnfkpitiqdlqdttsksfvnkikqsdyvtikkvdedesy  
ieddvtkkeailsmqjpkq  
fsqklkenrketiqlygrddfiggiaveivssslyeqqipniyehledmkqhqsidainksykhhtpeskikfvsltk  
qaqhsisislifavilfvs  
avqvvlhyrlnqqaalqrlsqhlsrflklystyvmthtlllllavlavsllysqplslifylksllliliyemgivilf  
hiqtishrlfmi fiyalam  
givyltifm  
>tr|Q2YV97|Q2YV97\_STAAB  
mieinnlskryrnkqifnhlmsfnsrnlvllgdngagkstllrmiagiekandgtinyfgekwnqrqiqnhigyvpqd  
ialfehmtvaenikffksl  
cknpindttineylqqlnfdtsakvstlsggnkrkinilvgllgppqilildeptvgidlksrhdiqllnimkskli  
iltthhldevealaddikl  
igqdpfyqhvledkqwaytyy  
>tr|Q2YV98|Q2YV98\_STAAB  
mkltaaaiaatmgfatftmahqadaaettntqqahtqmstqsqdvsgtyytdsngdyhhtpdgnwnqamfdnkeysyt  
fvdaqghthyfyncypkna  
nangsgqtyvnpatagdnndytasqsqghinqygyqsnvgpdasyshsnnnqaynshngngkinypngtsnqnggsask  
atasghakdaswltsrkql  
qpygqyhgggahygvdyampenspvysltdgtvvqagwsnygggnqvtiqeansnyqwymhnnrltvsagdkvkagdq  
aysgstgnstaphvhfqrn  
sggignqyavdptsylqsr  
>tr|Q2YV99|Q2YV99\_STAAB  
mctgftiqtlnnqvlgrtmdydypldgspavtprnyrwrtsrtgttgqtqygfigtgtemegfiygdgvnehgvaistqy  
frgyssygsthkadamnit  
qneiytwilgyttsiedmkqasqihvvavylnidigevpplhyhvsdatgqsvevsfkegevvikdnpigvltnhpdlw  
hynlrgyinispyatak  
llegvtieplgneagtfglpggftsterfvrmafmkaniaqndkemdlnafyldavnipigivrphdadnhytmyqt  
vinlttrtlykyggsnei  
valkltddlinrkdmfikpekhitirklnndq  
>tr|Q2YVA0|Q2YVA0\_STAAB  
mktppsprsniiiaimlsaltywlfqsfinigplvgqyqtspavlnslsitsfatgimvatgdiadkigqlrmt  
mglisimfasllliisdit  
alligrilqglsaaillpstvgvlennqfkgdhlrraisylmistvggiglagviggliafnfgwqtnfiisiviafia  
lllkgtpkvsqshhrhpf  
dykmsifavmigsftllltqgfeqgwfstfsficlsifiittlifiierrhevpidfsvlsnrpfigaflnnfvlns  
glgvtvffiyaqthlgls  
aaqsglvtlpyaivavamirlgekatlrfggklmliigplfpvigitiismtslqpsqyiaavvigfvicainglvatp  
gltiaifsmpekvglatg  
lykmsgtlggafgialsttvfsmqlnyapskaatitfivsvlmlilglsaymiipktvks  
>tr|Q2YVA1|Q2YVA1\_STAAB  
mqfklkeeeiisflelkypekefeygrllvgqqkrddldvyyfgdtflmctiisfkteiketvelsytnrivlkdgw  
frkmrietmqkvlykgtsk  
lmldfdqkdnykyiqgkqrvi fenghfv  
>tr|Q2YVA2|Q2YVA2\_STAAB  
mkkvsi kvdareagvsvtvshilnhndsrfattiknvhavserlgyapnkhakqlrgskiqtigvilpsltnpffsa  
mqsihdhkpsdvdldfllts  
tatdlydnikhlidrgidgliaaqyisspdalnnylkhhvpyvvlqndhqgytdfvrtneyqggqlaaqhlieleghnn  
mmivapydmmanmltrvtg  
fvdtlranqlpepqi vhte lskrggl ti vddimvqsvtai faindlelaigilrgliehgisipkdisligyddidyaayv  
tpplttvaqpitdigktsl  
tlllqrqlhldksidmie lpttlkirattgyhlsn

Tsompanidou\_et\_al\_Supplemental\_FASTA\_File

>tr|Q2YVA3|Q2YVA3\_STAAB  
msivalliglgpligwgfptvaskfggkpvhqiigatvgtlifaiilavvtssgftgtnllfallsgagwfgqiitf  
kafelvgsrampvttafq  
llgaslwgvfalgnwpgighkiigftaliviligarmtwserkeasnaknlrravilllidgefywlysaapqatsidg  
ltaflpqamgmviaviyg  
fmmkaenpfrnkitwlqiisgffffafgaltylisaqpnmglatgfilsqtsvlatltgiyflnqhkskemvitiig  
lvilvaasvtvik  
>tr|Q2YVA5|Q2YVA5\_STAAB  
mtnkvvivgstnvdqfltveryaqigetlhveeaqkafggkganqaiatarmqadttfitkigtgdgvadfiledfkaah  
idtsyiktteaktgqafi  
tvnaegqntiyvygganmtmpedvinakdaiidadvvaqlvppipaiisafeiakahgvttvlnpapakalpnells  
idiivpneteaelisgikv  
tneqsmkdnanyflslgiktvlitlgkqgtyfatknqsqhieaykvnaidttaagdtfigafvsrlnksqdnladaidfg  
nkassltvkkhgaqasip  
leevnv  
>tr|Q2YVA6|Q2YVA6\_STAAB  
mtlsgkivskaetiahvvkelesisqkydeiaqnfgeiaqlnyyssekaahsmengyssaatvisglkglstlgggvmm  
saqkffeadehwaefakl  
yynieg  
>tr|Q2YVA7|Q2YVA7\_STAAB  
mhhtvlcihlnkgvalmnyhsnaqqpsawrffvyslvgilcffiipfkingntifvdhvlairsiigplmpyvalimi  
ligtalpivrrtmtsint  
lvitlflkvagaiigimvfkigpsilfkanygpflfeklmpplsilipvgaialsllvgygllfvgvymepimrpifkt  
pgksavdavasfvgsyslg  
lilitnrbynqgmykreatiiaatsfstvsatfmiivaktlglmpwhnlyfwitlvitfvvtaitawlpitnesteyng  
qegeqevaiegsrlktaya  
eamkqnaltpsivknvwdnlkdglemtvgilpsilsigflglivanytpfidwlygyifypfiyifpiadqavlakasa  
ivemflpsllvtkaamstk  
fvvgvsvsaiiffsalvpcilateikipvwklliiwflrvalsllitipvallifg  
>tr|Q2YVB0|Q2YVB0\_STAAB  
mkiffkinrngvskvyiiaidiggatqiksavidkqlnmfdyqqiptpdnksekitdkvyeivtgymkqyhliqpvigiss  
agvdeqkgeivyagptip  
nykgtnfkrllkslspyvkvkndvnaallgelklhqyqaerifcmtlgtgiggayknnqghidngelhkanevgyllryp  
tenttfeqraatsalkkrm  
idggftrsthvplfgaaegddiakqilnewaedvaegiaaiqvmydpgliliggiiseqgdnlkyiepkvahylpkd  
yyapiqttskndaalyg  
clq  
>tr|Q2YVB2|Q2YVB2\_STAAB  
mkevgfgtlnwvaviyillamlfigvyftkrasqstnsfftasgrlpswvvgfsiyattlsaitfmstpekafldwsi  
agniaivaiiplliyfyvp  
ffklkvtsayeylearfgpsirvigsllfvvyhlgrvaiviylptlraitsvdmnpyivaslvgllicilytflggfegv  
vwsdfiqgvilggalvi  
ilgvmnikggfgtvfadaiehkklisadnwklntaaaapiiflgnifnlyqytasqdvvqryqasdsiketnkslwn  
gilalialisaplfygmgtmly  
sfyaheavlpkgfntssvpyfiltempfvaglliaaifaaqstisslnsisacisidikqrrffgkgerhevfar  
fiiiiagifgfgmslylia  
snsndlwdlflfvgtlfgvplagvfavgifkrtntfgvicglilgiifayvyngvgkgnspfyvstisftvafvfayil  
sfivpskhkktigtife  
kdkpstyisktatk  
>tr|Q2YVB3|Q2YVB3\_STAAB  
mnilfaitgiafalvfalvflsfdkrnidfkktlimifiqvlivlmmnttigltitlalsffeglinvskaginfvfgd  
iqnkgftfflnvllplvf  
isvligifnyikvlpfiikyvgitinkitrmgrlesyfaistamfgqpevytikdiipklsraklytiatsgmsavsma  
mlgsymqmiepkfvvtavm  
lnifsaliiasvinpyksddtdveidnltkstetklingktgkpkkvaffqmigdsamdgfkiavvvavmllafislmea  
inimfgsvglnfkqligyv  
fapiaflmgipwseavpagslmatklnitnefvamldfknvlgdvsartqgiisvylvsfanfgtvgiivgsikgisdkqg  
ekvasfamrlllgstlasi  
isgsiiglvl  
>tr|Q2YVB4|Q2YVB4\_STAAB  
manlqkyieysrevqqarennpivallestiishgmpypqnvemattveqiirngaipatiaiegekikiglesedlei  
latnkdvakvsrrdlaeiv  
amkrigattvattmicaamagiqffvtggiggvkhgahtmdisadleeelsktnvtvicagaksildlptmeyletkgv  
pvigyqtneipafftresg  
vkltsvetperladihltkqqlnleggiivanpipyehtlskayieaiineavveaenqgikgkdatpflgkivektn  
gkslaaniklvannaalga  
kiavavnkll  
>tr|Q2YVB5|Q2YVB5\_STAAB



Tsompanidou\_et\_al\_Supplemental\_FASTA\_File

msdsekeilkrikdnfpisqrelaeaiglsrpsvaniisglikkeyvmgkayvlnedypivcigaanvdrkfyvhkd1va  
etsnptstrsiggvarni  
aenlgrlgetvaf1sasgqsewemikr1stpfmnl dhvqqfenastgsyataliskegdmtygladmevfdyitpeflik  
rshllkkakciivdlnlgk  
eaInflcayttkhqjklvittvsspkmkmpds1haidwiitnkdetetylnlkiestddlkiakrawndlgvknvvt  
gvkeliyrsgeeeiiksv  
psnsvkdvtagdsfcaavvswlmgmptediliagmvnakktietkytvrqnl dqqqlyhdmedykngkftkvy  
>tr|Q2YVB6|Q2YVB6\_STAAB  
mvmddl1igt1flflvlviftlftykapngmramgalanaaiatflveafnkyvggevfgiqfleelgdaagglggvaaag  
lta1aigvspvya1viaaa  
cggmdl1pgffagymigyvmkytekyvpdgvdligsivilaplarliavlltpvvnstlirigdiisstntnpiimgii  
lggitvvgtap1ssmalt  
allgltgvpmaigamaafssafmngtlfhr1klgdrkstiavsieplsqadivsanpipiyitnffggaiagliamsgl  
indatgtatpiagflvmfg  
fnhptt1viygvvmai vgalagylgsivfkky pivtkqdm inrgavda  
>tr|Q2YVB7|Q2YVB7\_STAAB  
mlkfenvtksfdggnrieavkdt nfeinkgdialvgpsgsgkstfltmagalqtptsgrilinndittmkqkalakv  
rmseigfilqatnlvpfl  
vkqqt1llkknknvmsnedyqq1msqlgt1llnk1pseisggqqrvaiaakalytnpsiiladeptaaldtenaievi  
k1lrdqakqrkkaciivth  
der1kaycdrsyhmkgvln1enetve  
>tr|Q2YVB8|Q2YVB8\_STAAB  
mflawnei rrrnk1kfgliigvltmisy11fl1sglanglinmkegidkwqadaivlnkdanqtvqqsvfnkkdienkyk  
kqat1kqtgeivsnghkd  
nvlvfgvekssflvpslieghkatkdnv1adet1knkgfkigdt1t1sqdek1hivgftesakynaspviftndata  
kinpr1tgdkinavvrtd  
nwkdkk1nqe1eavsin dfien1pgykpqn1t1nfmis1flvisatvigiflyvmt1qkts1fgilkaqgftngylanv  
isqt1ilalfgtafg1llt  
gvtgaf1pdavpvkfdv1t1lvfaivlmivsvlgs1fsiltirkidplkaig  
>tr|Q2YVB9|Q2YVB9\_STAAB  
mnki skyiaias1svavtvsapqtnstaiakssaevqqtqqasipasqvn1gnqnimavawyqnsaeakaly1qgyns  
aktq1dkeikknkgkhk1a  
iald1detv1dnspyqgyasi hnpkfpegwhewvqaakakpvygakeflkyadkkgvdiyyisdrdkekdlkatqkn1kq  
qgipqakksh1llkgkddk  
skesrrqivqkdhk1vm1fgdn1ldftdpkeataesrealiekhkddfgyk1iifpnpmysweatiy nnykasdkkd  
klrknaikqfdpktgevk  
>tr|Q2YVC0|Q2YVC0\_STAAB  
mkkqviiisglmlfs1ffgagn1ifppm1ghtagqnmwigmfgfaltgillpfitvivvafydegvesvgnrihpwfgfif  
avviymsgafygi praan  
vayeigtrh1lpvhnqwt1iifaaffaivywis1npskivdh1gk11tp1ll1mva11siavifnpsalsapkdkyit  
hpf1ags1legyftmd1vaa  
lafsvv1vngykfkg1tdrtki1kyvcfsgfiaa1llgm1yfalayvgastapgnfkdgtdiltynslrvfgsfgnlvfg  
mtvilac1ttcig1vnaca  
tftk1khp1kfsy1kifalv1fsiig1ftt1g1emilkiavp11tliypvsialvlisfanmfstfrfswayrlatvit1ii  
silqilnsfn1lhgvilkw  
fmm1pladid1law1vpfillaiigfiidv1rrpkqatt  
>tr|Q2YVC1|Q2YVC1\_STAAB  
mkekhi1kwdki1fygddvnnvvetirtdk1lqsvylkry1lrammagfiig1itvflsvkathepdlppg1vnmasa1t  
fsfalv1l1ftnsel1tsn  
fmyftv1lykvikp1trv1kif1l1cfagn1lgaailfsfmrfsnvmtpdm1nq1saviehkt1stgfv1ilmkaifanff  
inis1viamqiddv1akmf  
vmmfgvt1ifa1mg1yehvvyns1fmgg1iyqvdt1hfipaisniaaaf1gnyiggg1iig1fyay1ndhhqfykk  
>tr|Q2YVC2|Q2YVC2\_STAAB  
mtiig1ivvgglatv1fs1l1fmv1laasgvmttdvsttvngevdpvdaetaa1ftv1fl1fl1f1fgiisiilgaigmfkasknk  
kmsg1ll1igavisgn1it  
falw1lvsgik1l1tnkpkde1sd1s  
>tr|Q2YVC3|Q2YVC3\_STAAB  
mmkri1lvf1mlaiv1lagcsnkgekyqkdi1dkvykeqnmkiaskvqntiktdikkedsnthvykdgkvivigiqlykd  
rekmyyfayeikdgkaein  
reidpikymkdhkadyedenvevekd  
>tr|Q2YVC4|Q2YVC4\_STAAB  
mkl1nyrgdnmtfeek1sqmyneianeisgmipvewekvytiayl ddeggevvfnytkpgsdelnyytdisrdyniseeif  
dd1wmn1ly1f1m1rd1fk  
eed1epwtscefdftreg1n1kvsfdyidwik1gfgpsgkenylykkfgv1pemeyemeei1reveyvkeqe  
>tr|Q2YVC5|Q2YVC5\_STAAB  
mtfeek1sqmyneianeis1smipvewekvytmayiddggdevffnytkpgsdd1nyytdipkeynisvqvfd1lwm1lyd  
1fen1rn1fkkegl1dpwts  
cefdftreg1lnvsfdyidwintefdq1grenyymy1kfgv1pemeyemeevkeieqyikeqdeae1

Tsompanidou\_et\_al\_Supplemental\_FASTA\_File

>tr|Q2YVC6|Q2YVC6\_STAAB  
mtfeeklseyneianeisgmipvewgkvyamayiddeggevfyuytepgsnelyyysvlnkydisesefmdseyelyk  
qfqlrnfkkehpepwtscfdftregklnsfdyidwintefdqlgrenyymykkfgvlpemeyemeeikeieqyikeqdeael  
>tr|Q2YVC7|Q2YVC7\_STAAB  
mvsliiffigdsydltnfnvilymgslyawmafniwnrp111kyknitdsssgivnkseynaveslrinieiakykgi  
islivaiivltvltkstp  
qitaetrdlsisffilslfiiiifavwdliirvrkgtfafvvirpilfscwlfilmilsr11  
>tr|Q2YVC8|Q2YVC8\_STAAB  
mttkenidtlrkpgaqalslslflilfsc1tfffgllyerfpylkkittieliiivisllqwirfidfekesaqkykk  
iyarflviinvlttitvfvf  
alynlyyfaavqnhydlnfywlmgmisiiisy111viggmft11klpkvtrwagtkthfg111talssfiyiekieiey  
ilipnvveskfiiivsm1v  
iagafvafqfimqysrfyifelnteedd  
>tr|Q2YVC9|Q2YVC9\_STAAB  
mnfeeklsemynkianeisgmipvewekiyaivddqggevi fnytkpgseelnysdipkdcnvsndifmdlwmkvyr  
mfdelretfkkedlepwtscfdftregklnsfdyidwlnwntefdqlglenyymykkfgvipemeyemeeikqieqyikeqee  
>tr|Q2YVD0|Q2YVD0\_STAAB  
mlrgqeerkysirkysigvsvlaatmfivssheaqasektltsnaaaqketlnqpggegnaitshqmqsgkqlddmhke  
nksqgtvtegdtklqsskh  
qstqnskiirtqndnqvkdserqgskqshqnnatnkterqndqinqnthhaerngpqsttsqsndvdkspqspipaqkqip  
nhdkaaptsttppsndkta  
pkstkeqdattdkhpngqdtqphaqiidakqddnvhsdqkppvgdlskhdgqnspekptdkntdnkqlikda1qapk  
trstnaaadakkvrplka  
nqvqplnkypvvfvhgflglvgdnapalypnywggskfkvieelrkqgynvhqasvsafgsnydravelyyyikggrvdy  
gaahaakygherygkykg  
impnwepgkvhlvghsmggqtirlmeeflrngnkeeiayhkahggeisp1ftgghnmvasittlatphngsqaadkfg  
nteavrkimfalnrfgmk  
ysnidlgl1tqwgfkqlpnesyidyikrvskskiwtssdnaaydl1tdgsaklnmmtsmnpnityttytgvsstgplgye  
npdlgtfflmdttsriigh  
dareewrknkgvvpvisslhpsnqpfvntndepatrrgiwqvkpiiqgwdclvlktf  
>tr|Q2YVD1|Q2YVD1\_STAAB  
msldilsttrivkeqvndwteaitiasqpl1leqieieqgyvqamidsvnelgpyiviapeiaiaharpnndvhqvg1sl  
1klnghvafcdedhyasli  
fvlsaidnhsh1sv1qnlatvlgdnqtvqpl1tarnaqdiknilkeh  
>tr|Q2YVD4|Q2YVD4\_STAAB  
myliiepirngeyitdgaialamqvyvqniflde1lfpyycdpkveigrfantaievnqdyidkhsiqvrrdtgggav  
yvdkgavnmccilqgdtisi  
ygdfrfyqpaikalhtlgatdvqsgrnd1t1ngkkvsgaamt1mnriyggys111dvnyeamdvlkpnrkkiaskg  
iksvrarvghlrealdeky  
rditieefkn1mvtqilgiddikeakryelsdadwesieelaskkyknwdwnygkspkyeynrser1ssgtvditiseq  
nriadcridfgdffggd1k  
dveqalqgtkmtred1thq1kqldivvyfgnvtves1vemils  
>tr|Q2YVD5|Q2YVD5\_STAAB  
mmqsskcnams11mddk1kqae1rtaidadaivigigagmsasdgftyvgerftenfpdfiekyrffdm1qas1hpyg  
swqeywafesrfit1nyld  
qpvgqsy1alks1vedkqyhiittnadnafdaeydmthvfhiqgeyilqqsqqchaqtyrnddlirkmvvaqqdm1ip  
wemiprcpkcdapmevnr  
kaevgmvedae1haqlrynafleqhqddk1yleigigytppqfvkhpqrmtrknenalymtmnkkayripnsiqert  
ih1tddist1itaalrnc  
ttknnigetevl1nrt  
>tr|Q2YVD6|Q2YVD6\_STAAB  
metlksnkarleylindmrrerndndvmvmpssfed1welyrglanvrpalpvsdeylavqdam1sd1nrqhvtd1kd1k  
pikgdni1fwggditt1ki  
dai1naansrflgcmqanhdc1sni1htkagvqvr1dcaei1rqqrnegvgkakitrqyn1pakhi1htvqpqir1pv  
skmnr1lakcy1sc1k1a  
dqhs1nhvafcc1stgvfapqdeaae1avrtvesylketnst1kvvfnvftdkd1qlykeafnrdae  
>tr|Q2YVD8|Q2YVD8\_STAAB  
mvk1sv1dya1idegkdaqkalqdsvt1ak1adr1gfkriwftehnvpafacsspellmmht1aqt1n1rvsggvm1p  
hyrpykiaehfrmmaaly  
nr1d1gignp1g1tmvkqal1dginptydsydesi11r1dyit1kdkssaht1gvqphidhfpemw11ssatsakiaae1  
g1g1svgt1f1lpdina1ha  
akdn1diykhfrasm1kmdakvmasfvivadnaevaa1qha1dwl1gk1qfaefehfsvdtaqkyk1ndrdkevi  
qahqari1agtqeqvkaq1  
ddf1atfevde1vap1ipgieqrck1k1laei1y1  
>tr|Q2YVD9|Q2YVD9\_STAAB  
myrykpl1qsih1pngiki1snrfv1spmtinastkegyitkad1ayaarrnsagmqvtgaayiepygq1feygfnidhd

Tsompanidou\_et\_al\_Supplemental\_FASTA\_File

acipgltnmastmkqhgs1  
aiiqalahagrfsnqaiInfgkvygspmtlhspiehdviamshekusiqqyrdatlraikagfdgveisiaqrlligt  
ffstfsnkrtdhygads1k  
nrarlclevmraevidekeapdnfilgfratpeetrsgdlygtidefnqlidwvmdvsniqylaiaswgrhiyqntsrt  
pgehfrpvnqivyehlag  
rtpliasgginspesaldalqhadvmgmsspfvtepdfvhkltehrphdinlefsmadledlaipyaaafkdivkmmdyge  
glkkhtrdalrqlaqnyhd  
sss  
>tr|Q2YVE0|Q2YVE0\_STAAB  
mteikdkvjtkdafalpytiikaknqptkgaiivyihggglmfkgandlsplyidiltehydliqlsyrllpevsldciie  
dvyasfdaiqsqysncpif  
tfgrrssgaylslliartrdidgvidfygysrintesfkttsnyakiaqsvnetmiaqltsptpvvdqiaqrflivyva  
rgtgkwinninisdytdsk  
ynispne1ktlppfvahcngdydvpveesehimnhvphstfervnknehdfrprndeaitiyrkvvdflnaitmv  
>tr|Q2YVE1|Q2YVE1\_STAAB  
mmfitgvislsvviliasyfsfvlttliisedfsdrvtlkvafilpiilislraclenlrnsqklaktafkmattqyp  
svvtmfigmvkdhqagvhc  
fgestytyqnkenlilkdkinkswlnslknksliksegfknflnlaea  
>tr|Q2YVE2|Q2YVE2\_STAAB  
metkdls1kidatkievagiknkftaqcklaysfiatiatifatiysdgkqlvifsmllfvfpsfiesfgianenkvita  
ivkiykyiffivslflfi  
fvwyfydkdaynytkvigdillivisifinlvyslisylnrynehialaaieqstlekqkerlhfqdnikkahkkvy  
refvskqnkdkkqkdk  
>tr|Q2YVE3|Q2YVE3\_STAAB  
mhlkircdkfhnivqhfsvyivaslrtfdlllfdkdmhqlftssllaqachwacfrfmieskvlaipp  
>tr|Q2YVE4|Q2YVE4\_STAAB  
metkvitryivlilalvngflankgispipvdeesissilvtviaalytaykdnptsqegrwanqklkkykaenkyrkatg  
qapikevmtptnmndtnd1  
g  
>tr|Q2YVE5|Q2YVE5\_STAAB  
msntqkknvpe1rfpgfegeweeklgdvatfakgklgakkdvsqngvpiilygelytkygaiivskifsktdipenkli  
akkndvliipssgetaidia  
tasciylnkgvavggdini1tpqkqdrfislisinginknelksyaqgktvvhlynddiknlkivfpsefeeqvrigdff  
skldrqielleqklellqg  
qkkgymqkifsqelrfkdengeeypeweekqlgevaeiigggppstknklywngewfspiengkytyvysqkkitee  
glrkssakilpvgtlfts  
ragigktailakestnngqfqsivprkgvldsyyvytisnilkilaekvsagstfseiskqmeqlnlnipmikeqknis  
kffskfdnlieiqerklkl  
lkqqkqgl1qkmfi  
>tr|Q2YVE6|Q2YVE6\_STAAB  
mfgftkrhegdwr1trleendktmfekfdriedslraqekiydkldrnfelkhdkeedekneknaknirdikmwilgl  
igt1stfviailktifgi  
>tr|Q2YVE7|Q2YVE7\_STAAB  
mlklislftfedvktwyglkeytkediawyvdmdvidkeeyaiitgekypenles  
>tr|Q2YVE8|Q2YVE8\_STAAB  
mqilvnkrneiisyaviggfeegidienlpknfsqvrpkafkysngeivfnedyseekddthqqidneenstgasddil  
rkmvasmqkqvvgstklm  
qdnkqnalmaqivafnkleeikgetena  
>tr|Q2YVE9|Q2YVE9\_STAAB  
msnleksvni1entahyenisnlditfrtgesdssvllfnitknnqplflseenikarivirgkgvmvappleildpfk  
galkfqlpndvirkdgsyq  
aqsvaelngsdvvvvertitfnvekslfsmpsetklhyivefqeletimdrakamdeaikngedyasliekakekg1  
sdiqiakssside1kqlan  
sritdlenkaqtsrafdeqkrymdekheafkqsvnsgglvtsgstsnwqkskitkddgkitqitgfdfnpeqrvgdtt  
qfiyvsqainyprgvstng  
tveylvvtstykrmtyrpngtnkvfvkrkeagswsdwselaindynmpfetvqnaqskantaesnaklytddkfnkrysv  
ifdgtangvgstlnlnes1  
dqfllifdygtfpggdftefgnpfggkisl1npsnlpdgdngggvyefgltkssrtsltisndvyfdlgsqrgsganan  
rgtinkiigvrr  
>tr|Q2YVF0|Q2YVF0\_STAAB  
msdinivgmsfyltddtkrftdfpterkgvagwnlyveasntggfvhrlvnsvtasaeillknydsktssgpwtlheg  
riis  
>tr|Q2YVF1|Q2YVF1\_STAAB  
mdylkni fhdd1svnnqnyfkailksllivlffiaffssdyvtkgwqygfisl1lclclffskllkfnffnlk1inyk  
e1liifmslvlikvldyil  
sfwqsdvspndesi1qhfsgtpflll1aisiaivpaiveelifrgfl1rvffrkh1figtlvssflfai fhdgstvlidyip  
yfyfgvilsvsylitkrie  
vpil1hf1nnflal fyvvs

Tsompanidou\_et\_al\_Supplemental\_FASTA\_File

>tr|Q2YVF2|Q2YVF2\_STAAB  
mwmekfknknetsyryyekdpytdkwkrvsvalnkntkqaqkeamfrleekikeklhdksssilklttfhsll dewl  
eyhiktsqfvttdnkt  
rikniknssqnl1lnkidtkymqtfinelnsvysanqvrqqlghmkeaikyavkfynypnehilnsvtl pkksktied  
ekeeakmynylemeggiqi  
rdfilndnmqyrarilvagavevqaltgmrigelalqvkdvdlnkntidingtihrikcnagfghkdttktagsrki  
ainsrianv1kkimlenkk  
mqqwepsyvdrgfifftcggnpmqgsrinkrlssaeslninkkvttthlrhthisllaemnislkaimkrvghtdekt  
ikvythvtekmdreleqkl  
eklv  
>tr|Q2YVF3|Q2YVF3\_STAAB  
mlsyrqieilyl1iheqtfipintiakqlgvsprtqiayieqyaetyhyqvsrnkaagikvttanttilnelehl  
nqihfskderlthialklf  
ettdpystkqlagdvnsrriaddikmiqaqldqyhlklnyvhngkfnigeedhyrkayahfihqymkqatpfi  
eadifnsesialvrraiiktlns  
enyhlvqsaidgliyihiliaiqrlnenfsfdipineidkwrhtnqyaiaskmienlerscnvtfpeseiifitlhl  
lsgsk  
mtehtassitfeyhdlsq  
ihelitcvsqelgidmskdnklnhsliithikpaihrikfdmlqpnlrqevmhrypqiieavskhispieqda  
airfne  
eltyiaihfassiervath  
kqsmikvvl1csgigtsqllksklnhlypefhiwdaysiyqlesrllqdnidyvistvpceistvpvihvdpfi  
hqq  
rqklnqiindsreqrvmk  
atdgksladlpehriinkqplsiesaitvavqplindgivnsnytaailkqleqfgsymvisphialihagtdy  
vqng  
vgfvltfyfegiifgskan  
dpvhlvitlatdhpnahlkalglseclsndlyrqdflgdni f k ikqhialtmkev  
>tr|Q2YVF4|Q2YVF4\_STAAB  
mtqyp1wqglntlkqatwvd1thtdpeiprfsefekgevstlftvkdhgyvqrwnivtqygthidapihfven  
kryle  
didikelvlp1ivldfste  
vasnndfivtrahieawekehgtiepgtfvalrtdwskrpni etfenkdangqqhagpgwldalkylieerrveav  
ghe  
tfdtdasvdvknngdlvge  
ryilgqdkyqvel1tnldqlptrgaiiyaispkpkdapgfvpvrafai kpsnd  
>tr|Q2YVF6|Q2YVF6\_STAAB  
mvnaltpkhlaekragfhel ffdl ifvya iqkiahvilttqngsisadlffkyivmslflwlmwshqtfftnrfg  
qvtfk  
dvsfmmfmmfmmfmsl  
ypdfektffpfflcvaimylsiglqyl1hirtgldygdkrctqafatvafvisflsflslvlpqsihyipgflg  
vfiat  
glipfghl1v1spvnmh1  
verfsl1tiifgevlvlasssfidhfsyiyifqmilislfgvywiitenyinhklssigfrlsythllinalgvi  
naaivfsnknk1ndlfein  
mmyisvlifyig1w1tpyfhneltaknyissl gilvsvyisli fkg h d q v m i i s v s v a t f c i m l i y f k n q r l r s d e  
>tr|Q2YVF7|Q2YVF7\_STAAB  
mkgmflssfyatrktqyiyfivaiiaagyfavfnp1mssamagvmlitpitdnikhekdsrwmmyvstlpvkr  
sdyiksy  
fafylilfgas1miglvvt  
tvtqsvmigmglmsfgiigaysiifpltfkfgaensvimi fasilllfsfvfffiygmvs gasalefekistegw  
lvviayavigivitsvsi  
lsikifnkqel  
>tr|Q2YVF8|Q2YVF8\_STAAB  
mtt1n1drvnkqykssgfk1qdas1tiatnetvgligkngsgkstlinilvgnrhkdngsitffgeeyaagdvey  
kehi  
gvvfdlrvpnkltikdi  
kifqsiymtwnsqkffdlkyfelplqtktfstrgmrmkialtivlshdvkllildeatagmdvsgreemell  
edfva  
hggilisshisedieqla  
dklvfmdgrmlteqkdr1laqyivttededveiphkliasrlskgyqilvkdyaeienaep1khiddatkiimrg  
ev  
>tr|Q2YVF9|Q2YVF9\_STAAB  
mkvlryigy11gg1vggiiggi1gnfdglgien1tfatrnvvvisivatmiilieivlmnqrralkykr1vdeevd  
neetdqellanrhv1ngs  
ilsilqtvia11v11ifvvgqaeangilfflipffasgi fntqftlfnrrfddrmpkiadknytekrleildeger  
hiel  
ialfktyainlsililaiv  
viglysitginsfs111iaifiynafsy1lksrrfy  
>tr|Q2YVG0|Q2YVG0\_STAAB  
mnr1kelrardglngtqlakqagsvrtisliernnfmpsvltaikiarifnekvetifiieeda  
>tr|Q2YVG1|Q2YVG1\_STAAB  
maft1saiqqahqftgvdfpk1fkafkdmgmtynivniqdgatyeqhseddivtssvkstipvaqksiktmvq  
nvltr  
hqqgtdfetfcdemaeg  
iykwhidiqsgtctyidlkeqaiiselipq  
>tr|Q2YVG2|Q2YVG2\_STAAB  
miintfilgitgpts1vvisia1iifgpkk1pqfgraigstlkefsatedldkeshdtpskeskqreq  
>tr|Q2YVG3|Q2YVG3\_STAAB  
mvhfse1rhr1vki11sfvitvvyvssfwmtpfityitrahvslhafsftemi qiyvmiiffiafcfispvmfyqlw  
afiapglhnerqfiykys

Tsompanidou\_et\_al\_Supplemental\_FASTA\_File

ffsvllfcagvafafyvgfpmi iqfalkslstlnispvigfkaylielirwlftfgilfqilpilfmglakfglidtyslk  
hyrkyiyfacfvlasiiap  
pdiTnillt1plillfefsMFVkfTcrgepTq  
>tr|Q2YVG4|Q2YVG4\_STAAB  
mkhYlTKIamIitaalvcnfgllksqaeeqqsidsvysvitdaksalsnnsisndnkqkaieqvvsavkkllednseg  
navksnvrkledakvnddq  
kdtlsq1tksliayeeklaskdagskikllqqvdakdaamtkaikdknaeleslnnslnqiwtsnetvirnydanqg  
qievallqlriaihkspld  
takvshawttfksnidhvdkkggtsandqyhvsq1ndeLeKaikaIdnnq1sdadaalthvieiWpyvegqiqtkdgalY  
tkiedkipyysv1dehNk  
ahvkdglvdlnnqikevghsysfvdmiiflreglevllivmtlTtmtrnvkdkkgtasviggaiaglvlsiv1aitfv  
etlgnsgmlresmeaglg1  
vavilmfiVgvcMhkrSnakrwndmiKnmyanaIsngnlvllatlg1svlregveviifymgmigelatkdFvigiala  
ivilivfallrfivrlip  
ifyifrvlsififimgfkm1gvs1qk1q1lgamprhviegfptinwlgfypsyepliaqaayimvvailifkfkK  
>tr|Q2YVG6|Q2YVG6\_STAAB  
mfgmkvneqitlki1eahdtealfnlvnrsrns1rewlpwvdateqpsdtrafikrgllqfadngngfcgiwyegt1vgv  
ig1heinhmrkts1gyy1  
dkqfeghgimtqaveal1kycfdeidlnrieisaavnneksqaiperlGftregmlrdnellngiysssyiys1lkseyN  
eg  
>tr|Q2YVG7|Q2YVG7\_STAAB  
mssasfnsilalfcrifkykfvmnkmvfk1scvigikdinqsnrhynascwgpnienfekkfyrqcklgkdnkfk1qcv  
ilicyydn1qnymknk  
>tr|Q2YVG8|Q2YVG8\_STAAB  
maslknkhfmig1stfivalfsflaaklpildkvGaltiailiailyrhfrgypeqySSgitfsskyl1rfaiilyglk  
lnifdiigqsr1laidvg  
vvifsvmm1fvnk1lhgdknial1lgvgtgvcgaaiaavapifksrkkdtaisigialigtifsliytaiyaifsmt  
tnvygawsgvs1heiahv  
laggfGgsdalKial1gk1grvfl1lip1tiv1ilimrfssessskgrisyf1igfvimalvntyvtipsallnilnt  
vstic11mamvalgl1nvaf  
kd1knra1kp1mtiitsic1sslafivvhwlys  
>tr|Q2YVG9|Q2YVG9\_STAAB  
mniVllsgstvgSktriamdd1kyeleVineghqielmd1rdle1efsvgkny1dttgdvyk1tts1mqadviFigfpif  
qasipgalknvfd1lpvna  
frdkvig1vatagsskhy1ipemh1kpi1symkahtmqtyvfiEekdfsnqqivnddvfr1kalaqstmrtakvqqqvl  
eeennqydf  
>tr|Q2YVH0|Q2YVH0\_STAAB  
mak1emknTt1efg1ys1gdh11npfkgekvsyeqrineiieaskladeagidvfavgeshqehfttqahtvvlgaiaq  
atkHikvsssstiisatdp  
vrvfedfat1dl1shgraeivagrasrtg1fd1fgyd1kdyde1feeklg11le1nKteritwsgkyrpe1rnk1fprp  
idnt1piwravggppasai  
kagkqgvpmmit1lggpamnfkgsidayrqaateagfdaspks1pvstas1fytaettqdamrefyph1ntgmsfirvgv  
ypkqqfanspdyrealmvg  
ssqtiiekilyghelyghqrfmaqidfggvpfenvmkn1eligndiipaikkh1sk  
>tr|Q2YVH1|Q2YVH1\_STAAB  
mniVghh1smYtkdakrnkdfytnv1gl1r1veksvndpnsmyh1fygdevgtagtilsfFeipnaghkqpgtetiyrf  
s11vpnqaalhyfekr1en  
ngiksehly1ggqevvfkdedd1ei11vndsfevphqwhnayeipqayqilgigpvelrvrnaartveflenvlgy  
rkrdnkafdv1t1lapqgl  
sdfvviEqqqrerpprgyihhiavntpQmsd1daiykk1qqppqsngiidryffkslyyrhnsimYefateapgftid  
tpveqlgsq1n1pdf1eae  
reqiesk1hei  
>tr|Q2YVH2|Q2YVH2\_STAAB  
mnf1kpakhikp1penqidtykr1rfqvflg1figyagyyl1rknfslampalqeqgftkaelgfalsavsiaYgfskf  
fmgtvsdrsnar1flvlg1  
v1taiVn11mgfvpfftsGigimfv11flngwfqgmGwppsgrv1vhwfsvserskta1wnvahnvGGGimapiaawgi  
tttafinfgylkgfegvfi  
ypallal1iaaisv1irdtpqsqglppieiykndfatsdkkt1ete1ttkeilfkyvlnnkwwaiafaniFvyfvryg  
v1dwapvylseekhfd1ka  
sgwayf1yewagipgt1lgyisdk1fkgrrgpagfffm1gvtafvliyw1nppgnaw1dnvs1iaigfliygpm1ig1  
qaldyvpkkaagttagltg  
1fgylfgavmanivlgavvdkfgwdvgf11ltaiSVfam1sfiltnkvGqetvhh  
>tr|Q2YVH3|Q2YVH3\_STAAB  
myski11nyifseesdvkd1teekynqdealtfsfkeetyqsrlakktptkagyfvTcwtkdenncnqypskeafady  
1miivideelsgyf1fpre  
1liekGilttfehkgmafrvypkwcNq1nkraeqtqkwqckYffey  
>tr|Q2YVH6|Q2YVH6\_STAAB  
mhfhfvrc1tkyatf1ncqheyl1yfksyki1rhkhfdmqffglkyerdciStfl1rnrlq1qiggyvkv1

Tsompanidou\_et\_al\_Supplemental\_FASTA\_File

>tr|Q2YVH8|Q2YVH8\_STAAB  
mlnadlkqqlkqlllelmeqnefvaslgsddkskelkellteidsmsprlslsekslkrtpsfsvnrpgeetgvtfagip  
lghefnslvlailqvsgra  
pkekgsiidqiknlegs fhfetfislctqkcpdvvaqlnmsvinpnithsmidgavfleesenimavpavflngeefgn  
grmtiqdilsklgstadas  
efenkepydvliivggppasgsaaiytarkglrtgivadriggqvndtagienfitvkettgsefssnlaahidqydidam  
tgi ratdi ektdeai kvtl  
engail esktvi jatgagwrkl nipgeeql inkgvafcp hcdgpl fenkdvaviggngsgveaaidlagivnhvtl fefa  
selkadnvlqdr lrs lsnv  
diktnaktevvgedhvtgiryedmstgeehllnldgifvqigllpntswlkdavelnergeividrnntnvpgifaag  
dvt dqknkqiiismgagan  
aalnafdyiirn  
>tr|Q2YVH9|Q2YVH9\_STAAB  
minliytarcatmlkvctsrkqinmkndiekeyvneiimllrtiptskliqimqlfidnailnnvssdallienatha  
rnhlrlwslqghrdiph  
>tr|Q2YVI1|Q2YVI1\_STAAB  
mvmmkvritfii lailstivclflaamhptgpntvtfeqpylftlniiimvlvalpslvlaiydymssfrissailqflga  
iswfflslilsltqftpt  
lasfitsiiffvsaiitlaigdksvdkndsh  
>tr|Q2YVI2|Q2YVI2\_STAAB  
mtiylvrhgesksnydnkhfrsyfcgqldvpltdtgksadvl cdyfkekqiehvysdllrtqqtfehi fpydiasttt  
pllrerslgvfegeykdei  
sanpkykyfndpnfkdfhfsfskapegesyedvyqrvehfmnhvnedtqkddivivahqvvirclmvyfnnvsreea  
vdlkvenckpyiie  
>tr|Q2YVI3|Q2YVI3\_STAAB  
mfgfigmlivggli gwaagaimgkdi pggilgniiagivgswlggtllghwgpelgsiyilpaligsiilialvtlilra  
vrkk  
>tr|Q2YVI6|Q2YVI6\_STAAB  
mktilktitylaltiigayaaflilktidshg itdqfnplvkedvsyvkttevstrmddqlrsysqsafnkegketqlmy  
tatfdvkphrylki ahkgh  
hvetfeevekeevpkkalaklrr  
>tr|Q2YVI7|Q2YVI7\_STAAB  
mfkkydsknsivlksilslgi iyggftgiypkadastqnsqvdkqf qkveevpnsekalvkklydrys qntingksn  
karnwvyserplnenqvri  
hle gtyrvadrvytpkrnitlnkevvtlkel dhiirfahisyglymgehlpkgnivintknggkyl eshkelqknrenv  
eintddiknvtfelvksvn  
dieqv  
>tr|Q2YVI8|Q2YVI8\_STAAB  
hrhtkktyawndkfinigyiftnaadgpidsnkisniikggtiketteissikkpvtthtlhshisalaqlginlkamq  
ehvghsdykki  
>tr|Q2YVI9|Q2YVI9\_STAAB  
migelilekddtlaeikpmlnfdeqiaklkqmni ffniidtekaneilrknyffklayfrknfekknnggyfie faylsd  
latidmklrytmhlhltldi  
ehslkclvlklitennqedgckii defl cidksysnsnfdtnsrtp eevmetkiknkneifkhmknrgqlpeklnkyqqn  
ppawvciefmqlgqfvsvfl  
nfykkyndeelrvanilmplvknirnsahnqpii anlnydsrspqylfekgnnigisrnmfgiknfidtfatlelnhq  
vcsnaiiqaryhdldqlqk  
rykrnesyykna laikrffialdkiidfnrpkv  
>tr|Q2YVJ4|Q2YVJ4\_STAAB  
maltagivglpnvgkstlfnaitkagalaanypfatidpnvgivevparllkleemvqpkktlpttfeftdiagivkga  
skgeglgnkflshirevda  
icqvvr afaddnvthvagr vdpiddievinmelv ladlesvekr lprieklarqkdkaemevrilttikealengkpar  
sidfneedqkwvnaqllt  
skmlyianvgedeigdddndkvkai reyaqedsevvisakieeeeiatl ddedkemfledlgieepgl drliratye l  
lglstyftagvqevhawtf  
kqgmtapqcagi ihtdfergfiraevtsyddyvqyggesgakeagrqrlegkeyimqgddivhfrfv  
>tr|Q2YVJ5|Q2YVJ5\_STAAB  
maskygi ndivemkkqhacgtnrfkii rmgadiricencqrsimiprqtfdkklkkiivsqddtqr  
>tr|Q2YVJ6|Q2YVJ6\_STAAB  
mdqvmssiisslfepltkietyesiatklamiiyiivalivikildkmiaaggfkinqkskkgnkkrsktlislvqnvvky  
iwwfivittliskfgisve  
gviasagvvglaagfgagtivkdvitgffii fesqfdvgyvkinnggttvaegtvksiglrstrintisgeltilpnss  
mgeitnysitngtai vkip  
vsdenidnvekklnklfts lrskyy lfvsdpvmigidafedtrvilrsvaetipgegfs gariirkevqkmflqegikt  
ppqimtpfnhsengv  
>tr|Q2YVJ7|Q2YVJ7\_STAAB  
mselksedqriktkdeqikqidmsdikpnpyqprktfdenhlnldadsikqygilqpivlrktvqgyyivvgerrfra  
skiaglkvysaiikdl tde

Tsompanidou\_et\_al\_Supplemental\_FASTA\_File

dmmelavienlqredlnaieeasqyrlmtdlkitqvevakrlsksrpyianmlrllhlpkkiadmvdgrltsahgrtl  
laikdeqqmlrlakrvvke  
kwsvrylenhvnelknvssksetdkvdi tkpkfikqqrqlreyygakvdisikksvgkisfefesqddfvrriieqlnrk  
ygk  
>tr|Q2YVJ8|Q2YVJ8\_STAAB  
mcpilinkkscvknprhltsmlilyryngrtrrhllastlqghfqtrfqnl lsatkdslykqgvfyfplycvyvsln  
cykilislsqskkrfvnnys  
enfdlkvnlfvk1  
>tr|Q2YVJ9|Q2YVJ9\_STAAB  
mkdtqlaqitltddstgalanpihlstaykhpklgqstgfdytrtknptrstfetcfaklehgi asfatssgisaiqlc  
nlfkphdeilvsfdlyggt  
frlffqfyeggydikfkyvdfdyeqvekeitdksvalfiepisnpqmiadvkpyyqlckakslsiidntfltpylstp  
laegadivlshsatkyiggh  
ndvlagvvtvkdeslaqgldfhnmtgatlspidyslllrglktlhlrieraqsarklankcslqaidelysgqtm  
lsrlnkaysvaklllenlg  
icifaeslggtetlvtfpytqthvdmpdaekdkrgideylirlslgvenyediehdiiqaldkaqigeiv  
>tr|Q2YVK0|Q2YVK0\_STAAB  
mtlsketevidwrrrgveyhsanpplydsstfhqtslggdvkydyarsgnpnrelleeklarleqqkfafafasgiaais  
avlltfksgdhvilpddvy  
ggtfrlreqilnrfnieftvttdtkleqiegaiqsntkliyietsnpcfkitdikavskiaekhellvavdntfmpplg  
qsp11lgadivihsatkfl  
sghsdlagavittneaiealyliqngtgm1saqdswtlakhktfpirfkqsvenaqkivsflkqdeisevyypgl  
taahleqaknggavigfrl  
adeskaqqfvda1tlplsvslggvetilshpatmshaalpeevrgergitfglfrlsvgledpdeliadikyalkeafn  
esiph-tier  
>tr|Q2YVK1|Q2YVK1\_STAAB  
msqfltlqldnvlvadgaigtilysegltdcpeaynlshpdkverihrsyieagadvitntyanfeklkrfgledkvk  
aihqaavriakkaankdty  
ilgtvggfrgikqedislqtilyhteiqidtlieegvdallfetyydlleltnvisrtrkkynipiaaqltasntnyln  
ggaineglkqlvqcganiv  
glnchghpnhmgesfthielpehaylscypnasl1diensefkysdnaqyfgvaqnliregvr1iggccgttpehikfi  
kesiqtlkpvndkkvipip  
kkalfnpsqknvrgsltskvqerptviieltdtpkhltdtrffeniakldkanvdavt1adnslatvrisniaaaslikqy  
ynieplvhitcrdrnligl  
qshllg1slig1nei1aitgdpskvghlpgatnvydvnskgltelalrfnqgintdgdalkkrthfniagafnpvrkld  
gavkrlekkiesgmsyfit  
qpvskekieiyhatkhlnkpffigimpiasyknaflhnevpgikmsdeilqqfeavkddkaktrelslklskldit  
vheyfnglyiitpfqnvad  
slelaaylksitahkeail  
>tr|Q2YVK3|Q2YVK3\_STAAB  
mniativnqfetragtllryytgl1ehskvqpccklyndpfdmvyvmmsklfghvyikdckvrqsfelaspkhtegli  
rsieggyvghlhdgkqls  
isdvmasqlfedeyfmyglqtyaesnsvdfeylengfdtdtlegiqssntdvisniemlyqiatginepapelvegvr1  
vtefvqdekatqedykale  
rk1nd1ktsyyslsk  
>tr|Q2YVK4|Q2YVK4\_STAAB  
mdkeq1kkyidyvkeykeipiyqledl1fkemnhdyigrtsithdkdenvvfswgnkitmfalielvkseqldlvyrsg  
fvmryl1dgrvplplaic  
ypedggqtdvpswvpmv1rinkeekik  
>tr|Q2YVK5|Q2YVK5\_STAAB  
metgksdv1dkielkkdsalqeiipkgyeiehhqcgialnqlipskkegepdkkvfitstipqiterfediesnevsf  
nm1fydnktpvniavsae  
isdsrql1klvnkkl1dvtsststk1vdyinaskrynpl1nvkvatr1ghvkgyfiypyqevmkdsnvkl1fsndkgfqkli  
dsfrskgt1qgyskkvfaq  
ikd1pmvmvml1yas1gsv11refgl1qpfiveisgststgktft1nlvssvwtgtsdlittwsstqnsiesmasflnsfpmf  
kddtrnthpkfvtsatynf  
ssgesksrsn1nl1nakkewrn1listgessianmadekagvsarvvt1qdpypndf1dft1dksfrenygt1glafi  
kgyeskkdvynafesyqr  
yfnqkgsneimqrlgrafal1qvtgevlndidgfehdfk1ieqaydsmvknktidkpkql1eel1qyl1danrnniagd  
gyssvknkdikaiykrdy1  
cilgetvkek1thelqtitgqwdkkylikgekdr1kqkvkhtvkyrgfaikqevlkelgfdfsnsynpsny  
>tr|Q2YVK6|Q2YVK6\_STAAB  
mneikleydthsvvhyes1dsrsfksfskpkwsklink1svpieanykyargvavygdikngandhgeiikkhrndvvnv  
vyrdv1v1dydeind1kql  
heissal1snvawfwh1sfsh1teqar1rlyiplnerisandyrnytkvlankigrkvdegsyqpsrcfalpviqkghif  
ikrvndcpimdvml1eqwl  
keyeqsnaspnviaytrrdskywrelc1fgt1tegrnna1aslvg11rchvndyivysfallwgqfackppmkeqeinat  
fqsilnkhynn

Tsompanidou\_et\_al\_Supplemental\_FASTA\_File

>tr|Q2YVK7|Q2YVK7\_STAAB  
mnweikdvmcdievikekindvaikhgwfvedrfvkneletkrehinfsasylehriqnehtvellhvyлкеfgeliqkf  
heiekassenfgevssdaq  
klkite  
>tr|Q2YVK8|Q2YVK8\_STAAB  
meikqkyq1skvvki1evvlyeedkfqsdkdyhyqdkafyeyalklvhnglfni1aeldfedeafli1devtmt1sdvmk  
etqhvrysvidekgekh  
ttdrkghvigm1ewaldyivgnieeel  
>tr|Q2YVL0|Q2YVL0\_STAAB  
mkl1n1l1fit1ts1l1ti1l1l1aisnmyvafsvygmmtvygfnltgeittcenk  
>tr|Q2YVL1|Q2YVL1\_STAAB  
msq1l1seqasq1l1nsivdiaekia1ekvkqsrkryliqkevmeeynvthkvitewemmg1rkvkigktirydrqdienv  
ieqmkn  
>tr|Q2YVL2|Q2YVL2\_STAAB  
mftkkse1kqqf1kpktk1keer1krg1satylaqligidrrqyeskekg1fsfhdyeikiisefl1didkevffi  
>tr|Q2YVL3|Q2YVL3\_STAAB  
mael1pthygti1kt1rkymk1tqsk1sertgfsqntisnengnrnigvneieiygkglgipsyilhrisdefkekgysp  
t1ndfgkfdkmysvvnkay  
yndgdiyssydyetik1le1lkeskinvndidydv1klykqilstdteksiinyetlantrkssdkkrevtieeig  
efheky1k1l1ftn1lethnd  
rkka1aeiek1keesiylgek1r1vpnhhydaikgkpmklylyeypdr1ehqk1ilekdt  
>tr|Q2YVL4|Q2YVL4\_STAAB  
mikkkkkgdstaymfvalgt1pitgkqrtrrrgfkterekiaek1qtevsqngf1nndittfkevyelw1eqyqn  
tvrestygrv1t1fdtai1  
ehfqdvpik1t1vpycqvinkwnkkysdikairiytsnvfkyavslkiivdnpfahtkaprkeaqdastkyysdel  
kqf1t1fveddplyyai1frt  
1aftgfrgelmaltwndidftkqtisinktcarganyk1viqepktskshrtisiddktasv1kswrthqrves1kygh  
ntsdkhqhvftt1vrndkpl  
ypehcnka1d1iceknsfkrikvhgrhthcs1l1feag1siqevqdr1ghgdikt1tmdiyahvtekqrdrqvadkfakyin  
f  
>tr|Q2YVL7|Q2YVL7\_STAAB  
mkn1i1l1sagh1l1amyagai1vp1ivgts1kftseqiay1vtvdi1fmcgvatf1qankvtgtg1piv1lgctftavapmili  
ggtkgidvlygs1f1l1sgil  
vii1apffsh1vkffppvvtgsvvti1igin1mpvamny1aggqgakdygdvkn1l1gl1mt1lii1l1v1qrfttgfiksi1ai  
l1gl1v1gt1gag1l1gmvd1  
nqvnhagw1lg1pvp1frfsgfsfdvtst1vffivai1vs1li1estgyv1halseitgk1lerk1dfrkgytaeg1aiv1l1gsifns  
fpytaysqnv1gl1vs1l1sgak  
knnviygm1v1l1l1icgci1pk1galani1p1pv1lggami1amfgmvmaygvsil1ghid1fknqn1l1i1avsv1l1gtgisavp  
qafkg1geqfaw1tqngiv  
lga1sai1i1n1ff1ng1ikyqteenvk  
>tr|Q2YVL9|Q2YVL9\_STAAB  
madi1tvvndt1gelynv1nqkksegyl1eselti1isksk1h1nd1hdseis1lists1gts1sdrmtk1l1tgedgehav1sryn1  
apde1lekyq1l1l1ddkmlv  
vavrdksshqevqennsayeeidi1thfaeaskgpa  
>tr|Q2YVM1|Q2YVM1\_STAAB  
m1tkefaqrvel1sekqvrkivqhl1eergyq1skteyrgreatdfkeediel1fkdiadvkqtnsyd1lafdelekekdf1q  
vivknddkn1p1tnqnvag1  
ved1r1lei1qkmreerh1l1gmmnqv1hqqqel1kel1qnq1l1tkidsnses1kai1qtsqea1ieaqasqakalaestnkven  
navtedkadskskvagvy  
tstdakt1dtktenagdg1tatkvdkedqi1sateai1ekasveqskndkaaetsnkeatvdaeaqhdaeqqvaeahvdaskqa  
tsnds1leakaendstasqs  
emsep1kpqeekkgffar1fn1  
>tr|Q2YVM2|Q2YVM2\_STAAB  
mtnr1trahsysh1l1qtpf1l1kqky1ftvafel1ppahtnpqkml1l1irqn1fl1qrvcskr1fkvdh1l1sfl1fnkyevsnfyq  
taiatsr1fkdt1fvfsylis  
hdstryis1fpni1hhff1l1ksf1l1l1t1  
>tr|Q2YVM3|Q2YVM3\_STAAB  
mna1fl1t1ini1v1l1vifiv1l1hmmarkyis1fakrvftal1gigivfgv1l1hliyghsn1i1t1stsdwfnivgqgyvallqmi  
vmp1l1ifisiva1aftkiqig  
ekfakigg1l1ifi1l1igtvtiaaivgvvya1vfg1ldastin1l1gnaeqargseiakqakd1taht1pqqile1l1pknp1l1df  
tggratstia1v1fasfig  
fay1lrvar1kqpdhge1l1kraidaiys1vmaivtfv1r1l1tpygv1l1aimant1stsd1fgaiwt1lgk1fliasyaal1itmni1h  
li1l1s1l1gispi1ryvkk1t1  
evli1fa1t1srssaga1p1l1nvqtqtrr1gvpegianfaatfg1l1sigqngcagiypam1laimvapvanveid1qfivt1liav  
vi1ss1fgv1agvggatfas  
ilv1st1n1lpva1agv1isvep1idm1grtal1nvdsml1agtgtak1tkhwdkdtfesndnaaltsh  
>tr|Q2YVM5|Q2YVM5\_STAAB  
mesiaeketyh1l1p1tehl1qvfnvikntsnkyitk1ki1nq1lgyeynssnerw1rrvins1lvydygypigcsykpserygyi



Tsompanidou\_et\_al\_Supplemental\_FASTA\_File

itteqekqgamrsikk1ad  
gsmkryealkriev  
>tr|Q2YVM6|Q2YVM6\_STAAB  
mkmkniakislllgilatgvntttekpvhaekkpivisenskk1kayytqpsieyknvtgyisfiqpsikfmniidgnsv  
nnlaligkdkqhyhtgvhr  
nlnifyvnedkrfegakysiggitsandkavdliaearvikadhigeydydffpfkidkeams1keidfk1rkylidnyg  
lygemstgkitvkkkygk  
ytfeldkklgedrmsdvinvtidirveikvrka  
>tr|Q2YVM7|Q2YVM7\_STAAB  
mkfkaiakasalalmatgvitsnvqsvqaktevkqqesese1khyynkpfkerknvtgykytengkdymevatdhqyyqi  
sllgpdkdkfkegnpgld  
ifvvregrsrqaansyiggvktnsqpfidyihptileikkgkeepqsslyqiykedislke1dfk1rkqlisqsglysn  
glkqgqititmkdgshti  
dlsqklekermgesidgreiqkilveik  
>tr|Q2YVM8|Q2YVM8\_STAAB  
mltvinqflsyetllytlyhfyfkncktrfhkndtisaqyhvki1kdhgdthqlkrvitvfl1tiayvlyllytatin  
tdcifl  
>tr|Q2YVM9|Q2YVM9\_STAAB  
mniiltgatghlgthitnqaiianhidhfhigvrnvekvpedwrgkvsvrqldyfnqesmeafkgmdtvvfipsi1hpsf  
kripevenlvyakqsgva  
hiifigyadqhnnpfhmspyfgyaar1latsgidytyvrnamymdp1kpylpelmmkhk1iyagdrinyitrndiar  
gvai1knpdtwgkrylls  
gysdmkelaailseasgteikyepvs1etfaemydepkdfgallasma1dagarg1ldqesndf  
>tr|Q2YVN0|Q2YVN0\_STAAB  
mniistilii1fval1effyimy1etiattskktsetfninvdk1kgkninv11knqgvnyngligv1liyg1fistnpkeic  
aailvyiigvaiygg1ssn  
isiffkqgt1pvlal1sm1w  
>tr|Q2YVN1|Q2YVN1\_STAAB  
milisscligdnvrydggng1nvr1kk1idsgkai1hacpe11gg1liprepaei1ggdgfdvwndaakvvtisdkdvtd  
ykhgavt1k1lkyqcdt  
vilkanspcgsgeiydgnftgnkkkgvgvata11negikydentffdqnmietivhek  
>tr|Q2YVN2|Q2YVN2\_STAAB  
melsifyngqffvalveykmenkskfiqytfgnepddiev1dfihhq1lmkmi1ddvqti1vytkn1srkvnpr1qrqiake  
qkkskystqaia1ikke1e  
1kkkqkrknykekrda1fqrkrkreikkvkakekhkgh  
>tr|Q2YVN3|Q2YVN3\_STAAB  
mqcqs1pmgkyf1nk1la1fsfkfcv1fkntvmerc1gysvrsvktq1gw  
>tr|Q2YVN4|Q2YVN4\_STAAB  
mkakn1nhf1yis1d1rnaikdnt1fhnyisqetkkf1qts1npsiah1flkhkai1kmdqns1irty1iidks1dleimgyfc  
1kivnik1ekdvsgk1krk  
issdakng1efqal1itk1lgrsd1khhkhipgeivmdya1siaseiydrta1rhicvdwydnk1kefycnncg1fkiyqek  
itkkgk1isafyk1k  
>tr|Q2YVN5|Q2YVN5\_STAAB  
mat1kdvktgk1kei1pstakdkngknt1iyfekdgk1gflcaentkrtwsremrfwsgwrsdr1rhyfrscrcrsnsy  
yssnwnr  
>tr|Q2YVN6|Q2YVN6\_STAAB  
ml1lavai1fs1tiyfayimes11fgflqivts1vl1lics1vl1artsfivt1fliiv1sgifyfgand  
>tr|Q2YVN7|Q2YVN7\_STAAB  
m1edngdir1lyqsiee1asv1lqgsqfetkts1lifvqmd1rysvfekvqtdf1mky1lahknsdeikyid1likiienalpe  
dke1sinvinsi1iigsann  
yypilqs1vpeiqnsygitinknfninsidf  
>tr|Q2YVN8|Q2YVN8\_STAAB  
mkkrl1fviv1t1lfi1fssnhtv1lsgdvpgn1rnfytkyeyv1lnkvdknspeshr1leysykndt1yaefdneyitsd  
1kgknvdvfg1isykygsns  
rti1yggvtkaennk1dspriipin1liingkhqtvttsvstdkkmvtaqe1dvk1rkylqdefniyghndtgkgkeygts  
skfysgfdkgs1vvhmndg  
snfsyd1fytyg1lpesf1kiykdnktvdstqf1hdveiskr  
>tr|Q2YVN9|Q2YVN9\_STAAB  
mkeikmksr1fiscv1lifa1ilv1lftpnv1aesqpdp1tpdelhkaskftg1menmkv1yddryvsatkvs1vdkflahd  
liynisdkk1kn1ydkvkts  
l1ned1akkykdevvdvygnsnyvncyfsskdnvgkvtggktcm1yggitkhegnhfdngk1qnv1irvyenkrntisfev  
qtdkksvtage1dikarnf  
l1nkkn1yefnsspyetgyikfiennngntf1wydmmpagdkfdqsky1lmyndnktvdsksvkievhl1ttkng  
>tr|Q2YVP0|Q2YVP0\_STAAB  
mkqqm1skv1l1stv1vmgs1agss1vmddna1haeqsdnigk1nqknest1h1sfekgikgtvdkngk1t1sdgktskvm  
ptnakdkkgndv1vykkv  
rdgfdvqvik1ssqerkt1nwkcgl1gtvggagtg1lggasaasv1pg1gtvagai1ggvsggatgaaascfg  
>tr|Q2YVP1|Q2YVP1\_STAAB

Tsompanidou\_et\_al\_Supplemental\_FASTA\_File

mknvn1drtqahrlikvseeikdvgtqh1gl1ra1leias1pvpertkehttsngetktpdemtvrelrelkkq1kqrde  
enaqlsqsmkqagrseeia  
rkqykyglnnyiftikf  
>tr|Q2YVP2|Q2YVP2\_STAAB  
mnkkl1mkffivsp11latiatgftpvp1ssnqiiktakastndnikd1ldwysgsdaftnsevlndslgsmrikntdg  
sis1iifpspyysptfskg  
ekvd1ntkrtkksqhtsegtwihfqi sgvtntek1tpielplkvkvhgkdsp1kywpkfdkkqlaist1dfeirhq1tq  
ihg1yrssdktggywkitm  
ndgstyqsd1skkfeyntekppinideiktieaein  
>tr|Q2YVP3|Q2YVP3\_STAAB  
mse1takqarfvneryirt1nvtqsaikagysansahvtgr11kkphikqyiqeqdkidenv1take11hvltnaavg  
detetkevvrkrgeykenp  
qngkvq1vynehvelievpi kpsdr1kardm1gkyhk1ftdkhdngnvpminigewgddeeldkavkdvsnanpnht  
viiddipld  
>tr|Q2YVP4|Q2YVP4\_STAAB  
mdkqqikdfvcyhertrsdv1iddintdeffsiadensnewmaddnidhivknhlemivdrvandkefyifdsliqg  
rsyqdisg1dcseqsvrf  
wyet11dkivevie  
>tr|Q2YVP5|Q2YVP5\_STAAB  
miaypirvgsvyrgeqmk11ktncl1yrrngdnk1seyq11tqfnptfinkirmcefqiesmyhmsastttcdemmgvv  
svsy piek1viki1ietkar  
1qnyknrsisnmv11ktv1nhytekeqkkvkvymrsngrykpynvier1qvd1yqasikqrserqkqrniaienskiarv  
nayhqssykvv  
>tr|Q2YVP6|Q2YVP6\_STAAB  
mktkyel1nntkkvanafcl1needt11navd1diknmqeissel1qaeqskqkqygttlqn1akqnriik  
>tr|Q2YVP7|Q2YVP7\_STAAB  
mktesyfkaynfvl1dqhka1qeleqerna1eskik1dkstyq11mdgqddkadnlyqatdadedk1ka1nkr1etkks  
vskevkyqktie11khqse  
1ss1yesekqsaiek1kkavdaynei1deied1ndryedehqqyasvysqeq1yddkarka1nghfkeniftsfingnd  
1pyehnk1f1kc  
>tr|Q2YVP8|Q2YVP8\_STAAB  
mkmrtiakts1alg11ttgaitvttqsvkaekvpm1kaer1aminittgantattqaantrqertpk1ekapntneekts  
askieki1sqpkqeaqks1n  
isatpapkqeqsttttesttpkktvtppsintpqpmskstsdtpqsptikqaqtdmtpkyed1rayytkpsfefekqfg  
fm1kpwttrf1m1v1pnrf  
iykia1vgkdekkykdgpydni1dvfi1lednkyq1kkysvggikttnskkvdhkaelsitkkdnqgmisrdvseymitke  
eis1keldfk1rkq1iekh  
n1ygnmgsgtivtkmknngkytfe1hkk1qehrmadvi egtnidkievnik  
>tr|Q2YVP9|Q2YVP9\_STAAB  
m1sfq11fslfvialia1isgl11f1apvmpmryik1hlyilvmpv1favigffgihgqhv1gpfkidrlsw1lagfvma  
1gf1iqk1fsmry11gdhhy  
rhyfpl1ftait1sfas1awmsed1r1mal1cwgmt11cl1t11m1vnrfwkvpresak1ssmtf1cgw1afvgai1vsiyiatg  
ewrvpqh1ahptws11tnv  
11v1lavm1paaqfpfhrw1iesvtaptpvsaimhagivnaggv11trfapifdngfals1111l1ssisv11lgsgislvqv  
dykrq1vgstmsqmgfmlv  
qcalgvysaai1h1l1hgi1fkatl1f1qsgsivkrfnipkqasakdaygwi1m1grv1aiivaf1fwmssdrsayev1sali  
1aws11vsw1nqmvafskgr  
mar1vgm11isivtfiyi1ithnyfydv1qnitthattptisvi1svvilifgs11siwvarhryskafavlywlvnlg  
earskaieshpn1l1kky1  
>tr|Q2YVQ0|Q2YVQ0\_STAAB  
makipvtv1sgylgsgktt11nhilqnregriavivndm1sevnidkd1vadggg1srtdek1vel1sngcicct1rdd11  
kever1vkkggidqivies  
tgiseppvaqtfsyidde1gid1tai1cr1dtmvtvvdanrfvhd1nsed11mdrdqsvdetdersiad11idqvefcdv  
11inkid1iseeelaklek  
v1sal1qptaki1ktt1nsevd1kev1ntqrfd1fekasesagwikel1esgghashtpeteeygissfvykr1lpfhakrfnd  
w1esmpnnvvrskgi1vwla  
qynhvac11sqagssci1hpvtywvasm1seaqq1q1aerqdvaaewdpeygdrhtqfvi1igtd1deek1tkel1daci1vn  
aqei1daewqfedpyq1wqi  
rpar  
>tr|Q2YVQ1|Q2YVQ1\_STAAB  
m1fvil1vlyi1giafi11svfsgkteg1stkhtlyt1gisaivtiaifisigyaiqyl1taalyg1  
>tr|Q2YVQ2|Q2YVQ2\_STAAB  
mmfnq1innkne1eesynsekkriene1qn1nel1rhrarkenersydvfy1lkhemnysedaqrk1mtrnieaye1qeineii  
rkqewk1eeyked1kksye  
nq1dk1sd  
>tr|Q2YVQ3|Q2YVQ3\_STAAB  
mtkqfevdygk1nseteatsavsk1layevenannki1snrel1k1tkfev1l1krgk1f1psn1eyidsh1dkkygvtasaf1nk  
dtgkvvi1gmtgt1nfk1kea1

Tsompanidou\_et\_al\_Supplemental\_FASTA\_File

akrysgngdkqdkidsdetekdlisdfeigispssdkskhyeetqefikkiknydidfitghslggreavilgmsngip  
nivvynpapisifnlpnps  
pegkr11elyknykgnitrfaendeltenlkykhfmffgndivlknkgghsmdgflteqeqaikkekkvqgyveen  
nksfvknsnamsklasie  
llranmmtnggw1sssqkvleslta1tiaqsfngliedeinqikkmynekkkkfeknwedaqkagnavgkditvsevl  
ealnegqvnessmvgd1eq  
mis1nerqlsmiessisnyilrvrfsineivdkdqvlasqigg11  
>tr|Q2YVR2|Q2YVR2\_STAAB  
mkfkkv1vatamvgvlatgvgvgnqadakvysqnglv1hddanf1ehelsyidv11dknadqatkdn1rsyfadkg1hs  
indiinkakqdgfdvsyke  
hvk  
>tr|Q2YVR3|Q2YVR3\_STAAB  
mrenfk1rkmkvg1vsvai1tmlyim1nggaeasenqnal1snivdnqekqndvnqavqpqntnetskvp1anfvlndi  
kpgdtsiqgtt1pnqf11  
tidkkdvssvedsdsfvmsdkdgnfkyd1ngrkivhnqei1evsssdpn1gddeedeveetsteevgaeestdakaty  
itpryekaykipneq1nke  
nghhqvfi1epitegsgikghtsvkgkval1sinnkfinfeesvkggvskedtkassdgiwmtikdkgyfdfdktrfdn  
1elkknddis1tfvpddee  
dal1kpl1fktkvt1sledi1ekaetkydhtkvnkvkvl1dnvked1qvdeiygslyhtdkgk1il1dkegtkvikgk1tkfanav  
kvvysel1geaq1fpd1qvn  
ekgefsfdshgagfr1lqngkel1nfavdpitgk11snefvskedi1eetpeqkadrefdermentpayyklygdkivgfd  
tndfpi1twfyp1gekkver  
kap1lek  
>tr|Q2YVR4|Q2YVR4\_STAAB  
mk1kniakas1algi1ttgm1ttaqpvkadenssr1avtskdtqel1kkyysgtgynfqnvsyregnk1nidgpq1nv  
vt11gtdkerfkddedyeg  
1dvfvvregsgkhadni1siggitktnknykdpvqvn11tsksngqnttsvtseysinkeis1kel1dfk1rkq1lidk  
hd1lyktepkdsk1ritm1kd  
ggfytfe1nkk1qthrmgdvidgrniekievn1  
>tr|Q2YVR6|Q2YVR6\_STAAB  
mkftalakat1algi1ttgt1tteahsshakngesvnxhdkealryrytgktmel1knal1khgknn1rfkyrgmk1qv  
111gndknrfqrsykg1d  
vffvqekrdkhd1fytvsgvi1qtnktsgvvsapi1nvtkekgedafvkgypyyikkekit1kel1dfk1rkhl1iekyglyk  
tiskdgrvkis1kdgsfyn  
1d1rsk1kfkymggshr1kqtn  
>tr|Q2YVR7|Q2YVR7\_STAAB  
mkftalakat1algi1ttgvftaeskvahakvel1detqckyyin1mhqyysesfeptnisvksedyysnvl1nfkqrnk  
afkvf11gddknkykekth  
g1dvfavpel1id1kgyisvggitkknvrsvfgfvsnp1s1qvkkvdakngfsin1el1ffiqkeevs1kel1dfkirk11iek  
yr1lyk1tsdkgriv1nmkd  
ekkhed1seks1fermf1dvmsdkk1kievn1n  
>tr|Q2YVR8|Q2YVR8\_STAAB  
mkftaiakai1fv1g11ttgvt1stqsvnakgkyekmnr1ydtkn1hqyysgpsyel1tnvsqgsqdyetnvl1fnqqnq  
kfvf11gkdenkykekth  
g1dvfavpel1vd1dgr1fsvsgvtkknvksif1es1rtpn11vkkid1dkgfsid1efffiqkeevs1kel1dfkirk11ikk  
yk1yegs1dkgriv1nmkd  
enkyeid1s1k1dfes1madvis1seqiknievn1k  
>tr|Q2YVR9|Q2YVR9\_STAAB  
mk1kt1akat1algi1ttgvt1stqsvnakgkyekmnr1ydtkn1hqyysgpsyel1tnvsqgsqdyetnvl1fnqqnq  
nhq1f11gk1dkeeykegie  
gkdvfvvkel1idpnr1stvggvtkknqssetntp1lvnkvyggd1hasidsfsinkeevs1kel1dfkirkq1vekyg1  
yqgtskygkiti11ndgk1  
ev1d1gk1qfermgd1v1n1skdinkievt1kq1  
>tr|Q2YVS0|Q2YVS0\_STAAB  
mkmtaiakas1algi1atg1tst1hqtvnaseheakyenvtkd1fd1rdyysgaskel1kntgyryskggkhyli1fdkhq  
kfr1q1f1gk1dier1ktrk  
npg1di1fvvke1aenr1ngt1v1syggvtkknqgaydy1napkfvikkevdagvythvkrhyiykeeis1kel1dfk1rqy1i  
qnfd1lyk1fpk1dsk1kvim  
kdgg1ytfe1n1knyk1q1a  
>tr|Q2YVS2|Q2YVS2\_STAAB  
mqiy1st1tel1dyk1s1nsiees1fd1npetswqarakvkh1rkspcynfe1leviaknenndv1vghv11lievemnsddkty  
ygl1aias1svhpe1rgqk1  
grg1lvqaveerak1aqeystvvdhcf1dyfek1gyqnaaehdik1esgdap11vky1wdn1tdaphg1vkfpehfy  
>tr|Q2YVS3|Q2YVS3\_STAAB  
mkiyeal1kedi1ngq1yqygeq1pseh1vq1yqssretvrka1d11aldgmi1qihgkgs1viyqevte1fpfse1vsfke  
mqeemgvay1tevvvnev  
eahepvqhal1n1nses1ihivrr1r1nqhvki1dedy1f1ksivsd1gndvasdsiydylekvl1n1nisysksitfe  
pfdeqayq1fgdvsvaysa

Tsompanidou\_et\_al\_Supplemental\_FASTA\_File

tvrsivylentmpfqyniskhlanefkfnfdfsrrrtk  
>tr|Q2YVS4|Q2YVS4\_STAAB  
mskeidwrksvvyqiypksfndttgngigdingiiekldyikllgvdyiwltpvyespmndngydisnyleinedfgtmd  
dfeklikvahqkdlkvmld  
ivinhtstehewfkearkskdnsyrddyffrasedgpptnwykfggnawkydsetdeyylhlfdvsqadlnwdnpevrq  
slyrivnhwidfgvdgfrf  
dvinliskgefksdkigkefytdgprvheflhelnrqtfngtdmmtvgemssttiencikytqperqelnsvfnfhhlk  
vdyvdgekwnakldfhkl  
keilmqwrgiydgggnai fwcnhdqprvvsrfgddtseemriqsakmlaialhmlqgtpyiyqgeeigmtphftsia  
qyrvesinayhqllsegh  
eadv1a1lgqksrdnsrtpmqwsddvnagftagkpwidi senyhqvnvrqalqkdsifytyqkliqlrththdiitygd  
ivprfmdydhlfvyerhyk  
nqqwlvianfsasavdlpegasegrvviqtgtvenntisgfgaivietna  
>tr|Q2YVS5|Q2YVS5\_STAAB  
mavkredvkaivtaiggkenleaathcvtrlr1vlkdeskvdka1snkalvkqgfkadhqyqivigpgtvdevykqfid  
etgaqeaskdeakqaaqk  
gnpvqrlikllgdi fipilpaivtagllmginnlltmkglfgpkaliemypqiadisniinviastafiflpaligwssm  
rvfggsplglvlgli1mh  
pqlvsqydlakgniptwnlfgleikqlnyqqvlpvliaayvlakiekglnkvvhdsikmlvvgpvalvtgflafiig  
pvalligtgitsgvtfifq  
hagwlggaiygllyaplvitglhmf1avdq1mgsslgtlylpivaisnicqgsaafgawfvyrkrkmvkeeglalts  
gisgm1gvtepmfgvnlp  
lkypfiaaistscvlgavgmnnvlgkvvggvpafisiqkefwpylivtaiaivpciltivmshfskqkakeived  
>tr|Q2YVS6|Q2YVS6\_STAAB  
mgefkgfmkydkqylge1slvdr1khhkayqqrftkedasiqgarcmdcgtpfctgqqygreitgcpignyipewndlv  
yhqdfktayer1setnfp  
dftgrvcpapcesacvmkinresiaikgiertiidea fengwvapkvsrrrdekvaivgsgpagltaaeelnllgyqvt  
iyeraesgglmygipnm  
klkdvvrrik1meeagitfingvevgvidkatleseydaiilctgaqkgrdlplegrmgdihfamdylteqtqlln  
geiddititakdknviig  
agdtgadcvatalrencksvqfnkytklpeaitftenaswplampvfkm dyahqeyeakfgkepraygvqtmrydvddk  
ghirglytqi1eggenmv  
mkegperfwpadlvllsigfegteptvpnsfniktdrnrivadtdnyqtnekvfaagdarrgqslvwwaikegrgvaka  
vdqylaskvcv  
>tr|Q2YVS7|Q2YVS7\_STAAB  
mhneklikglydyreehdacgifyanmdnkrshdiidkslem1rrldhrgvggadgitgdgagimteipfaffkqhvt  
fdipgegeyavglffsker  
vlgseheavfkkyfegeglsilgyrnvpvnkdaiakhvadtmpviqqvfidi rdi edvekr1flarkqlefystqcnle1  
yfts1srktivkygw1rsd  
qikklytd1sddlyqsklg1vhsrfstntfswkrahpnrmlmhngeintikgnvnmraraqhkl1et1fgedqhkvfqi  
vdedgsdsai vdnalef1s  
lamepekaam11ipepwyneandanvrafyefysylmepwdgptm1sfcngdklga1tdrngl1rpgrytitkdnfivfs  
sevgvvdvpsnvafkqgl  
npgkll1vdfkqkviennd1kgaiage1pykawidnhkvdfdfeni qyqdsqwkdet1fkl1rqrfaytkeehkyiqel  
vegkdpigamgydapiav  
lnerpes1fnfykqlfaqvtnppi dayrekivtse1sy1gggn1lapdetv1driqlkrpvl neshlaaidqehfk1ty  
1stvyegd1eda1ea1gre  
avdavrqqaqi1vl1ddsg1vdgndfampm1laishvhqllikad1rmstslvaksetrevhhvac1layganai vpyla  
qrtveq1t1teglggtvvd  
nvktytdv1segv1kv makmgi stvqsyqgaqi feaig1shdvidryftgtqsk1sgisidqidaenkarqsdnylas  
gstfqrqqqh hafnpes  
if1lqhackendyaqfkayseavnkrtdhirh1lef kactpididqvepvsdivkrfntgamsygsisaeahet1aqam  
nq1ggksnsggedakry  
evqvdgsnkvsai kvasgrfgvtsdylqhakeiqikvaqqakpgeggqlpgtkvypwiaktrgstpgiglisppphdi  
ysied1aq1ihd1knankd  
adiavklvsktgvgti asgvakafadkivisgydggtgaspktsiqhagvpweiglaethqtlk1nd1rsrvk1etdgk1  
1tgkdvayacalgaeeffg  
atap1vvlgcimmrvchkdtpvgvatqnkdlralyrgkahhvvnmfhiaqelreilas1glkrved1vgrtd1lqrss  
tlkanskaasidaek1lcp  
fdgpntkeiqqn1lehgfd1tnlyevtkpyiaegr rrytgsftvnnedrvgvitgseiskqygeaglpentinvytng  
agqslaayapkg1mi hhtg  
dandyvgk1sggtv1vkapfeerqnei agnvsfygatggkafingsagerfcirns gvdvvvegigdhgleymtgghv  
in1gdvgknfgqgmssgia  
yvipdveafvennq1dt1sftkikhqeeafikqm1eehvshtnstraihvlkhfdriedvvkvipkdyq1mmqkihl  
hks1hdnedeam1aafydd  
sktidakhkpavvy  
>tr|Q2YVS8|Q2YVS8\_STAAB  
meikqlryfievakrehiseta1elniaqsaisrqit1leqelnsv1fkkqgrnim1tsegk1lfnealriieh1dstie

Tsompanidou\_et\_al\_Supplemental\_FASTA\_File

qfqshgltnksiyigyde  
sdvshml1pliqtfh1qndthvipn1ldhdtiinsvlngnidigfte1tpeirkhkqlhmlplfeehyhlyapsddpitm  
athppliqfehshiyclap  
faesvkkqlrkitksdvytissqslvqy1lrqkegyiissqnihlpeskswidikldhtelkrticaitkepytksdigi  
11tliqq1mktstfh  
>tr|Q2YVS9|Q2YVS9\_STAAB  
mflkyrn1ftkpfni1glfciafigailftfnnenfynkpigqi1dvkhsstptkdaqnrdtkyknqlkvkilngqf  
agetttinhgyvksqadse  
afrthekvllh1snkpsdayiiekkrdt1tviitglf11tv1lvgrkvg1qsilsl1nsiailiaiyihiqhsn1fl1  
1mtiamicstilt111vtg  
whmrt1itvastiiigtflsig1teliiymtdgkigiyetmfn1slppkdi1flav1lgs1lgaimdvaitiasgmheilqr  
tphismrrwalagrni1gd  
imgtmtni1lfsylsgalpmf1l1knantvtytismnwsleiaraltggigivltipitilfmeifes1rrakq  
>tr|Q2YVT1|Q2YVT1\_STAAB  
mtnndtim1rhypqdy1smleafq1sesd1kfvktpenitaamsdnerypi1vmdr1qcvafft1hrkgv1apfsdnqd  
avffrsfsvd1qyrnrgig  
kvvmek1asfitstf1q1dineiv1tvntdnphama1yrqqgyqymgds1mfvgrpvhimaltik  
>tr|Q2YVT2|Q2YVT2\_STAAB  
mskm1kcvcl1veetadki1lvqvrnreky1fpggkieegesqvh11revkeel1n1t1tmdeieyigtivgp1payppqdm1  
te1ngf1raltkidwenvti  
nneitdi1rwidkdnda1iapavkwi1etyggkhdk  
>tr|Q2YVT3|Q2YVT3\_STAAB  
makrsksq1r1ss11nvagfi1vddyngykyhaknk1lvyl1slgl1stvgtv1dfyisiksprkfk1kavavvt1itngarlft  
sir1kvkhey  
>tr|Q2YVT5|Q2YVT5\_STAAB  
mkr1lig1viva1v11aacginn1dkkv1tigvasndtkawekvkelakddidveikhfsdyn1pnka1ndgdidmna1fqhf  
af1dqy1kahkgtkisa1s  
ttv1ap1giysdki1kdvkkvkd1gakvvipndvsnqara1k11eaaglik1kkdf1glag1tkditsnpkh1kitavdaq1t  
ara1sdvdi1avinngvatk  
agkdpkndpi1fleksds1davkpyini1vavndkd1dnktyakivelyhskea1qal1qedvkd1gekpvn1skdeika1iets1  
ak  
>tr|Q2YVT6|Q2YVT6\_STAAB  
mfgsd1dsa1q11qal1yet1ymvsia1fl1gavigip1glv11vitrkqgi1wpnivi1hqvl1nplini1lrs1l1pfi111iaivpf  
tk1lvvg1tsig1ttat1ivpl1t  
vyvapyiar1lvens11levdegi1eaakamgas1plqi1ryfl1peal1gsl1vlaittai1g1lig1stamagav1gggig1dla1  
vygyqr1fdttvii1tvi1v1  
viivqvi1qt1gnv1larfirrh  
>tr|Q2YVT9|Q2YVT9\_STAAB  
msdegasmi1tyd1lign1tp1lv11lehysddkvkiyakieqwnpggsvkdr1lgky1lvemai1qegr1vragqtive1atagntgig  
laiaanryh1kck1ifapyg  
fseekinimi1al1gadvs1rtsq1segmhga1laarsyaekygavymnqfesehnpdtyfht1l1gpe1tsal1qqidyfvagigs  
ggtftgtary1lkqhhvqcy  
avepegs1v1nggpahadtegi1gsekwpif1ers1vdgi1ftikd1qdafrn1vks1lakheg11lv1gsssgaal1qga1n1lkaq1  
segti1vv1fpdgs1drymsk  
ei1fn1feendye  
>tr|Q2YVU0|Q2YVU0\_STAAB  
mmkrqqsq1wks1stgfi1lasagsa1igl1gamwk1fpy1magiyggga1flam1l1ifti1fvgl1pl1imeftv1gkmgrtyttqiysk  
1tgk1kw1ni1igwn1glavf  
il1fafys1vggwi1yiyig1v1wq1lvi1fqrinh1qem1leavis1npw1tv1lggig1fi1fatmi1ivm1lgvekg1lekaskvmmp  
1lfv1fl1ii1viks1t1ldga  
legvkfi1lqprvse1tadgi1fal1gqs1fft1sl1g1ttgm1ityasyaskdmtikssaisivmni1fsv1lag1laifpalhsf  
gyepqegp1gl1fkv1lpmvf  
sqmh1gt1lfyl1gfl1vl1fl1faaltssis11le1l1vsn1ftkndntkrkkvavigsilvfiisipatl1sfgilkdvrfgagtif  
dnmdfi1vsn1lmp1lga1gt  
t1lvvg1gl1dkk1l1qy1fgkdr1r1fsgwyy1likyampvvi1lvfivq1fs  
>tr|Q2YVU1|Q2YVU1\_STAAB  
mriktpspsyl1kgtngha1i111hsftg1tnrdvkh1laae1ndqg1fscyapnypgh1l1kdfmtynvddwveevkayqf1  
vnegyes1satgvs1lggl1m  
t1klaqhyp1lkriavmsapkeksddgli1eh1lvysqrmsni1n1ldqqassa1qlaa1ddyegeitkfqhfiddimtn1nvi  
kipani1l1fggk1dapsyets  
ahfiyeh1lgsvdke1ng1k1dshh1lmthgegrdi1leenvirffna1t  
>tr|Q2YVU2|Q2YVU2\_STAAB  
midkkl1tspkmtvp1fl1ia1livfi1gmfysvvt1nqew1knidmgs1twftdyfgepqrqyvnn1fnnymtfsaeigdvkgv  
v1l1siivti1l1fikqrh1a  
vwfviy1lvsgvimnkl1kdtv1rprpynh1lavdtgfs1fsgshsnast1lyfal1mii1isvaaktitkvl1salvmgilw1s  
il1fcr1lyfhahyfsdvigg  
ts1laii1wval1flm1vpyyfi1nhrrqrv  
>tr|Q2YVU3|Q2YVU3\_STAAB

Tsompanidou\_et\_al\_Supplemental\_FASTA\_File

mqikhciieiticyfgyfstiytegvgrinrvifvyialitlvrfftpihpsfsnliywifvlyfipiilcvigfk  
aekliatmviipnflgily  
rlyayvthilm  
>tr|Q2YVU5|Q2YVU5\_STAAB  
mnyqalymyrpqs fedvvgqhvtkl rnaiskekqshayifsgprgtgktsiakvfakainclnsadgepcnechick  
gitqgtnsdvieidaasn  
gvdei rnrdrkvkyapseskyvyiidevhl ttgafna llktleppahafilattephkipptiisraqrfdfkais  
ldqiverlkfvadaqqiec  
edaa lafiakasegmrda lsimdqaiafgdgtl tlqda l nvtgsvhdealdhl fddivqgdvqasfkkyhqfitegkev  
nr lindmiyfvrdtimkt  
sekdteyralmnlldmlyqm idl indtlvsirfsvnqnv hfevllvkl aeqikgppqvia nvaepaqi asspntdvl lq  
rmeql e qelktl kvqgvsv  
apvqksskkpargi qksknafsmqia kvldkankadikllkdhwqev idhaknndkks lvsllqnsepvaasedhvlvk  
feei hceivnkdkdekrss  
iesvvcninvknvkvvgvpsdqwrvrteyl qnrknegddmpkqqaqqt diaqkaldl fgeetvhvidee  
>tr|Q2YVU8|Q2YVU8\_STAAB  
mkiinttr lpeal gpyshatvvn gmvytsgqip l nvdgki isadvqaatkq vlenl kivleeagsd l nsvakati fikdm  
ndfqkinevysqy fnehkp  
arscvevar l pkdvkveielvskiel  
>tr|Q2YVV1|Q2YVV1\_STAAB  
mpksil diknsidchvgnriv l kangrkk tikrsgil ketypsv five l dqdkhn fersy tytdvl tenvqvs feedn  
hhesiar  
>tr|Q2YVV3|Q2YVV3\_STAAB  
mkinefi vvegrddtervkravecdtietngsaineqtlevi rnaqqsr gviv l tdpdfpgdkirstitehvkgvkhayi  
drekaknkkg eigvehad l  
idikeal mhvssp fgeayesidksv lie l glivgdarr rreil srkl righsngkql l kkl nafgyteadvraqaled  
>tr|Q2YVV4|Q2YVV4\_STAAB  
mlidthvhl ndeqydd l sevit rareagvdrmfvvgfnkstieramkl ideydflygi igwhpvda idftee hlewies  
laqhpkvig igemgl dyhw  
dkspadvqkev frkqial akr l klp iih nreatqdcid illehaeev ggimhsfsgspei adivtnkl nfyis l ggpv  
tfknakqpkevakhsier  
llvetdapy l sphpyrgkrneparvt l vaeqiael kgl syeevceqt tkaek l fnlns  
>tr|Q2YVV5|Q2YVV5\_STAAB  
maketfyi ttpiypsgnl highaystvagdvi arykrmqgydvry l tgtdehgqki qekaqkagkteiey l demiagik  
qlwak lei snddfirttee  
rhkhvveqvfer l lkqgd iyl geyegwysvpdetytesql vdpqyengki iggkspds ghevelvkeesyffniskytd  
rll efydqnpdfiqppsrk  
neminnfikpglad l avsrtsfnwgvhvpsnpkhvvywidal vnyiss l gyl sddes lfnkywpadihl makeivrfhs  
i iwpil l mald l plpkkvf  
ahgwi l mkgdkmskskgnvdpni l drygl datryyl mre l pfgsdgvftpeafvertnfd l and l gn l vnr tismink  
yfdgel payqgl heldee  
meamaletvksytesmes l qfsval stvwkfi srtnkyid ettpw l akddsqkdm l gnmahl veniryaav l l rpfl t  
hapkei feql ninnpqfme  
fss l eqygv l tesimvtgqpkp i fpr l dseaei ayikesmqppateeekeepskpqidikdfdkveikaatiidaehvk  
ksdkllki qvd l dsegrqi  
vsgiakfyt pddi igkkvavvtn l kpak l mgqksegmil saekdgv l t l vs l psai pngavik  
>tr|Q2YVV6|Q2YVV6\_STAAB  
mavly l vgtpi gn ladi tyravdv l krvdmiacedtrvtskl cnhydipt l ksyehnkdkqtafiieql elgl dvalv  
sdag l pl isdpgyelvva  
reanikvepvpgpnag l tal masgl psyvyt l fl gl prkeeksav l eqrmyenst liiyesphrvtd l ktiakidatr  
qvs l gre l tkk feqiv tdd  
vtqlqal iqqgdvpl kgefvi liegakanneiswfd l sinehdhyiqtsqm kpkqaikkvaerql ktnevnyihqi  
s  
>tr|Q2YVV8|Q2YVV8\_STAAB  
mlkenerfdql ikenfsi iqnddvfsfstda l l ghftkprtkdiv l d l csgngvip l l l fakhrriegveiqkt l vdm  
arrtfqfndvdeyl tmhnm  
dlknvtkvfkpsqy l vtcnppyfkenqqhqhqkeahkiarheimct l edcmiaarh l l kegr l nmvhradr l mdv l fe  
mrkvn iepkkvfiyskv g  
ksaqtivvegrkgnqgle imppfyi nedgnyseemkevyg  
>tr|Q2YVW0|Q2YVW0\_STAAB  
mpnvi gvqfkgag l eytpndiqvel ddwvveskrgie igivknpl mdfseedvvl pl kni iri addkdidkfcner  
daenal ilckdivreggl d  
mr l vnceyt l dkskvi fnftaddridfrklvki laql ktrielrqigvrdeak l l ggigpcgrs l ccstflgd fepvsi  
kmakdqnl sl nptk isgac  
gr l mcc l kyendyyeevraq l pdigeai etpdngkvvalni l di smqvk legheqpleykleetmh  
>tr|Q2YVW4|Q2YVW4\_STAAB  
mkqpi l nkles l nqeeais l hvpgkhnm tigh l sq l smtmdkteipgl d l lhpeevilesmkqvekhsdydgyfl vngt  
tsgilsviqsfsqkkgdil

Tsompanidou\_et\_al\_Supplemental\_FASTA\_File

marnvhksv1haldisqgeghfiethqsp1tnhynkvn1sr1nndghklav1typnyygetfnveeviks1hq1nipvli  
deahgahfglqgfpdstln  
yqadyvvqsfhkt1palmtgsvlyihknapykeniiey1syftsspsylimas1esaaqfyktydstvffdkraqliec  
lekkgfem1qvddp1kl1i  
kyegftghdiqnwfmnahiyle1addyqala1lp1whhddty1fds11rkiedmilpkksvsivkqtq11ttegnykpr  
feyvtwcd1kkakgkvlar  
hivpyppgipii1fkgetitenmie1vney1etvmivegiknnkilvede  
>tr|Q2YVW9|Q2YVW9\_STAAB  
miqay1gl1gsnigdresq1ndaiki1neydginvsni1spiyetapvygteqpnf1nlcveiqtt1tv1q1lecc1kteec  
1hrvrkerwgp1r1dvd1  
lygeemid1pk1svphprmmnerafv1ip1ndiaanvieprsk1kvkd1vfvdsvkryk  
>tr|Q2YVX0|Q2YVX0\_STAAB  
mqdti1flkgmrfygygha1saeneigqi1fkvdvt1kvd1teagrtdnvidtvhygeveevksimegkavn1lehaeri  
anrinsqynrvmetkvr1t  
kenppipghydgvgieivrenk  
>tr|Q2YVX1|Q2YVX1\_STAAB  
mtkktimgi1nvtppsfsdggkfnnvesavtrvkammdegadi1dvvgvstrpghemis1ee1nr1pvveaivgfdvk  
isvdtfrsevaeac1kl1gv  
diindqwag1ydh1rmf1qvvakydseiv1mhngn1nrdepvveem1ts1laqahqakiagipsnkiw1dp1gigfaktrnee  
aevmar1delvateypv11  
atsrkrftkemmg1ydt1pverdevtaattaygimkgvravrvhve1nak1akgidf1kenenarh1s  
>tr|Q2YVX2|Q2YVX2\_STAAB  
maqkpvdn1tqi1ggtpvkv1nr1vddnaadvvkl1eyqnp1gsvkdria1lamiekaeregkikpgdtiveptsgntgig  
1afvcaakgykavftmpet  
msqerrn11kaygae1v1tpgseamkgaikkake1keehgyfepqqfenpanpevhelttgpellqqfegktidaflagv  
gtggt1sgvgk1kkeypn  
ie1vai1epeaspv1sggepgphk1qglgagfipgt1nteiydsi1kvgndtamemsrrvakeegilagissgaaiyaa1q  
kake1gkgktvi1tv1psng  
ery1stpl1ysfdd  
>tr|Q2YVX4|Q2YVX4\_STAAB  
mqkafrn1vivi1igvi1fg1fsy1ngngnmpkq1tynqftek1ekgd1kt1ei1ppqnvymvsgtkndedysstil1yn  
neke1kqi1tdavkkqngvk  
1tikeekqsvfvs1st1lipvvvia1lfi1ff1sqaqggsggrmm1f1gskakmydnkrrv1rfsdvagadeekqelie  
ivdf1kdnkkfkemgsrip  
kgv11vgppgtgkt11aravageagapf1s1sgsdfvemfvvgasrvrd1fdnaknapci1fideidavgrqrgagvg  
gghdereg1nq11lvemd1g  
fgenegi1miaatnrpd1ldpa11rpgrfdrqi1qvrp1dvkgrea1lhvhaknkp1detvd1kaisrtpgfsgad1en1  
1neas1iavregkkki1dmr  
dieeatdrvi1agpakksrvi1skkernivahheaght1igmv1deaevvhkvtivprgqaggyamm1pkqdrf1mteqe11  
dkicg11gg1rvsed1infne  
vstgasndferatqi1arsmv1tygmsk1lgp1qfghsngqv1fgkdmqgepnys1s1qiaye1idkevqrivkeqyerckqi1  
1ehkeq1i1liaet11teet  
1vaeqi1s1fyegk1peid1ydaakv1vkd1edse1fndgkfgksyee1irkeq1edgqrdeskd1rkeekdi1aedk1eadksdek  
depahrqapniekpydpnh  
pdk  
>tr|Q2YVX6|Q2YVX6\_STAAB  
mq1nsngwhvddhi1vvavstgidsmc1lyq11ndykdsyrk1tcl1hvnhgvr1sasieearf1eayceghhid1hikk1d1  
shs1nrns1iqneari1kry  
ewf1demmnv1leadv11tah1lddq1letimyri1fngkstrnk1gfdel1skrkgyqi1yrp1lavskkeikqferyhipyfe  
desnkdnyvrndi1rnri1  
paidennq1kvsh11k1kqw1hdeqydi1qysakqfi1qefv1kfdeqsky1evsrqafnn1pns1kvv1dc1l1skyyel1fn  
isaktyeewf1kqfsskkaq  
fsin1tdkwii1qi1aygk1i1imaknngdy1frvqti1ekpgnyi1fnkyr1leihsn1pkc1f1p1tv1rtrqsgdtf1k1nghdgy  
kkvnr1fidckvqqv1rdq  
mpiv1dkqqr1i1avgd1lyqqqtikwii1skngde  
>tr|Q2YVX7|Q2YVX7\_STAAB  
msievgnk1kgkitgik1kfgafve1pegksg1vhisevadnyvenveeh1svgdevdvkv1siaddgkis1sikkakdrp  
rrqhtskpshkpvqkaed  
fekkl1snf1kdsedk1tsikrqt1esrrggkgsrr  
>tr|Q2YVX9|Q2YVX9\_STAAB  
mr1dky1kvsr1ikrr1lakevsdqgritingnvakagsdvkvedv1tirfgqk1vtvkvtal1nehaskdnakgmyeie  
erriea  
>tr|Q2YVY0|Q2YVY0\_STAAB  
mahtit1ivgl1ngyid1dp1gi1yfk1ktqdkvyart1dhpvies1qdel1tfsfdhvyethdqfedvyndivaq1veaan  
ekdivyavpghprvaettt  
vk11al1akdntdi1dvk1vgk1sfiddvfeavnvd1pndgft11dats1qevt1nvrtht1itqvysamvaan1kit1mery  
pdy1pvqi1vtgarsdgadn  
vvtcpl1yel1dhenafnn1tsvfvpki1t1tpty1yhd1fd1fatevidt1lvd1edk1gcpwdkvqthet1kry1leetfel1feai

Tsompanidou\_et\_al\_Supplemental\_FASTA\_File

dneddwhmieelgdillqv  
llhtsigkkeyidikevitslnakmirrhphifgdanaetidldkeiwsakdaegkqprvkfekvfaehflnlyektk  
dksfdeaalqwlgekgesn  
t  
>tr|Q2YVY1|Q2YVY1\_STAAB  
mkhkeafngvvvltaalivikilsavyripyqnilgdtglyayqqvypivalgmilsmnaipsaitqinigkyhsdeayak  
avayiqlvgilffiaifvf  
anniahmmgdshltpmiqvaslsfifigmlgvlrqyyqsannmtvpaisqvieqvrvgiivtigvfvdrgrwtiyeagt  
iailastigffgssiy1va  
hrpffkfmvntpkivwkqfalsvlifaisqlivilwqvidsvtiikslqairvpfdvaitekgvydrgasfiqmglivt  
ttfsfalipllseaikmn  
qvlmryanaslkitilistaagiglinlplmngvffkndltltsvymitvicvslimdmallqaqhavrpfivgm  
taglvikfilniilir1sg  
iigasiasvslifgtiiahavtrkyhlhamrrffinvlgmvfmsivvqcvlnivtthgritgliellcatvlgiaial  
ffyi frfnvlytykeltylp  
fgsklyqikkgr  
>tr|Q2YVY5|Q2YVY5\_STAAB  
mtikvednkii fsrtieapiekvfdaytikalfekwfhpkdastkvfrfnavsggdafyaiktptmtsytlaeyktvkrp  
ylieyidsfatpggakdtk  
mpsmkittsfefntmktvtstsvfptkeaaqvinmgveqgmntldqldallk  
>tr|Q2YVY7|Q2YVY7\_STAAB  
mmfqqeqidllqqkglyrslksvgyidrqiyevenkrctnytsndylglgqiafdkddferfmrkysyhlsssr1isgsst  
ayeeietmlagwlgysact  
ilnsgydanlalfnifkntncvvsdqnhasiidgiklsglekviykhldiadlekr1aecnqniqkiiisdsvfstn  
gdvvdigq1vs1khkynat  
lildvshsfgiensnyqgidiltsslkacgayggvilsndvkdmlinhgrplyssslpiynlyfikrnieklinad  
drtrtklnslskyfnq1qa  
lnvnynssnspikfieddieaaenihqtllkhhvftsylryptvtkpm1rislsyfhteqdvdrlfeilhqed  
>tr|Q2YVY9|Q2YVY9\_STAAB  
miskditqisviaailtilavlkipsiipglfdq1sapaa1l1affgikkyflggl1ssv111ifgvfnpinviisiif  
rviajavvyllkinvqslv  
lasvlgslvsr111svilnlpvwwv1lnaipgviftlivaiplyl1l1rkrmav11r  
>tr|Q2YVZ0|Q2YVZ0\_STAAB  
mkmnk1vkssvatsma111sstanaegkitpsvsvkkvddkvtlykttatadsdkfkisqiltfnfikdksydkdt1v1k  
atgninsgfvkpnndydf  
sklywgakynvsissqsndsnnvdyapknqneefqvqntlgytfggdisisnglsgglngntafsetinykqesyrtt1  
srntnyknvgwgveahkim  
nngwpgpygrdsfhptygne1flagrqsiaayagqnfiaqhqmp11srnfnpeflsvlshrqdgakn1klq  
>tr|Q2YVZ1|Q2YVZ1\_STAAB  
m1knkilatt1svs1laplanp1lenakaandtedigkgsdieiikrtedktsnkwgvtqniqfdfvdkdkynkna1ilk  
mqgfissrttyynykktnh  
ikamrwpfqynig1ktndkyvs1iny1pknkiestnvsqtlgyniggnfqsapslgngsfsysksisyttqnyvseveq  
qnsksv1wgvkansfates  
gqksafdsd1fvgykphskdprdyfvpdse1pp1vqsgfnpsfiatvshekgssdtsefeitygrnmdvthaikrsthyg  
nsyldghrvhna1fvnrny  
vkeyvnwktheikvkggn  
>tr|Q2YVZ2|Q2YVZ2\_STAAB  
m1knkilatt1avglmaplanpfi1skaenkiedigqgaeiikrtqditskr1aitqniqfdfvdkdkynkdalv1kmg  
gfissrttynd1kkypyik  
rmiwfpqynislktdksnvd1iny1pknki dsadvsqklgyniggnfqsapsigsgsfnsysktisynqnyvtevesqn  
skgvkwgkanskfvtpngq  
vsaydqylfaqdptgpatrdyfvpdnq1pp1iqsgfnpsfitt1shergkgdksefeitygrnmdatyayvtrhr1avdr  
khdafknrvtvkvevnwk  
thevkis1tpk  
>tr|Q2YVZ3|Q2YVZ3\_STAAB  
mmf1hyvmfkrfigrr1lysh1tmfcksysie11fnygacsgrgmdcaivcen1kl1klr  
>tr|Q2YVZ5|Q2YVZ5\_STAAB  
mshnen1klaqrgay1slivy11sivkyvtgfvfnsaavrada1nmtidiivslaviig1kisikpadrn1hpygh1kse  
niss11vsfvimfvgiqv  
iqnapr1fkeddvvpnaitiivslisglvmlivfavnqrlakrtkssslnsaakdn1sds1vsigtaig1iftqigfpiv  
diilat11g11ivytgfgi  
fkeai1fmsdgfnetkleayrndilevdevqevksikgryhgssvfidvtivvdan1slveahqicdnvehh1hkkgiss  
vyvhpepdh1  
>tr|Q2YVZ7|Q2YVZ7\_STAAB  
mskkqkl1tm1imlmggffgl1net11vta1psimkdf1eisyiqvqwl1ttaf11tngivip1salviqryttrqvflvgi  
siff1gt11gg1sphfat1  
1vari1qal1gagimmp1mmtti1dvfqp1hergkymg1fg1vlg1apaigpt1sgylveyfnwrs1fhvvapiaavtflig  
fktiknvgttikvpidfis



Tsompanidou\_et\_al\_Supplemental\_FASTA\_File

vi fsvlgfggll ygtssisekgfdnpivlvsmiggivlvalfvlrqyrilstp1lnfavfknkqftvgiimgvtmvsimg  
setilpifvqnlhrsal  
sgl1lpgaivmfmsmtsgalyekfgprklaivgmaivvittayfvvmedqtstimlatvyairmvgialglipvmtht  
mnglkpennahgssmtntv  
qqiagsigtaal itilshasknfsptmsdyngmnki dmmnqikvdtm1hgyhagflfallitvvsffcsfmlqgkkkev  
srq  
>tr|Q2YVZ8|Q2YVZ8\_STAAB  
mkr1lfvmiafvfi laacgnsskdkeankdsktinvgttegyapfsfhdkdgltygidvikavakeeglklkfnet  
wdsmfagldagrfdvianq  
vginpdrekkykfskpytfssavlvi renkkdikdfddvkqkvaqftsnnyglakdkgaditkvdgfnqsm d1l1skr  
vdgtfnds1slydykkqkp  
nakikai gnaeqrsafafskkvddetvqkfndglkkieengelakigkkwfgqdvsksk  
>tr|Q2YVZ9|Q2YVZ9\_STAAB  
mflnlnseqqhaldaakqafgpmleglvkysipitlvtfvlgliialftalmristskilrsisrvyvsiiirgtpmivq  
fiifgyipelgr1ltnad  
nqwtlapvvaaiig1slngayaseiirggiisipkgqteaaysigmtygqtiqriilpqairvsipalngtflslidk  
sllgfilvaemfrkaqeva  
sttyeyltiyv1valmywvvcfimsiiqqiyesyiergyrs  
>tr|Q2YW00|Q2YW00\_STAAB  
miqlnnihksfndvevikgid1sveqgevtligrsgsgktt1lrminaliptegtyvngktytskdkksqievrkqs  
gmvfqsynlfphtalenv  
megl1tvkk1kkdeargksle1lekvg1thvkdrpqa1sggqqrvaiaralampkvm1fdeptsaldpelvndvlkv  
ikd1dnegmtmvivthemr  
fakevsnnivfihegmigeqqapeemfnrpkteelrrflvinee  
>tr|Q2YW06|Q2YW06\_STAAB  
mnytqqlkqkdseyvwhpftqmgvyskeea1iekgkdsylydtngnyldgyas1wvnhghnnylnkvikkqlnkia  
hstllgssnipsielaek1  
ieitpsnlrkvfysdtgsasveiaikmayqywnidrekyaknkfit1nhgyhgdtigavsvggiktfhkifkdlif  
iqvespsfyrnydenem  
mtailtnieqilierndeiaqfilepli qgatglfvhpkqglkeveklckkydvllcdevavgfgrtgkmfacnhedvq  
pdimclgkai tggylplaa  
t1tsqkiynaf1sdshgvntffhghtytgnqivctvalenirlyekrkl1shiettsstlekqlhalkrhrnvgdvrg  
1mfgvelvtdkdkstplei  
ekverivrnckenglmirn1envitfvpvlsmnskevktmvrifkkavhnildrkc  
>tr|Q2YW07|Q2YW07\_STAAB  
m1sikhltkiysgnkkavddis1diqsgefi afigtsgsgkttalrminrmi eategqieidgkdvrsmnpvelrrsigy  
viqqig1m phmtikeniv1  
vpk1lkwtkeekdkrakel1k1vd1pesflerypaelsggqqrigvvralaaeqdiilmdepfgaldpitrtdlqdlvk  
tlqrklgktfifvthdmd  
aikladkicimsegkvvqfdtpdnlrhpandfvrdfiqnrpiqdrpndktvegvmikpitiqaeat1ndavhimrqr  
vdtifvdrdkh11gfl di  
edinqqi rghks1rdtmqqhiytvqidsk1qdsvrtilkrnvrnpvvdqkrlvlg1itranvdivydtiwgdsedtvq  
tehvgegtasskvheqntt  
nvkvr di gdds  
>tr|Q2YW09|Q2YW09\_STAAB  
mkeikyilvvlv1slv1sgcs1pglsgskstkndvkitalstsesqiishmlr1liehdthgkikptlvnnlgsstiqhn  
alingdanisgvryngtd1  
tgalkeapikdpkkamiatqqgfkkkfdqtfdds ygfantya fmvtketakkyhletvsdlakhskd1rlgmdsswmnrk  
gdgyegfkkegyfdfgtvr  
pmqig1vydalnsek1dvalgystdgriaaydlkv1kddkqffppyaasavatnellrqhpelkttinkltgkistsemq  
r1nyeadgkqkepavvae  
flkkyhyfdkqkgghk  
>tr|Q2YW10|Q2YW10\_STAAB  
megn1lqq1fnyyvtnfgy1wdlffkh1lmsvygvlfaaligi1lgillarytklsgfvitiani iqtvpviamla1ml  
vmglgsetvv1tvflya11  
piikntytgiasvdasikdagkgmtrnqvlrmielp1svsviiggirialvvaigvvavgsfigaptlgdivirgtna  
tdgttfilagaipiaiaia  
vidv1lrflekr1dpttrhrknqsnhrpqsinn  
>tr|Q2YW11|Q2YW11\_STAAB  
mdtskqfrgdnr11lgivlgvitfw1faqs1vnlvplqstysdvgtiniavslsal fagl fivgagdvadkfgrvkit  
ygl1lnvgs11iitpl  
pafliigriiqg1saacimpstlaine yigtrrqralsywsigswgsgictlfgglmatyigwrsifvvsilltlla  
mylikhapetkaepikgm  
aeakkfdvig1vlvvtm1slnviiqtshfglvsp1ilglivvficslvgfvyenkikhplvdfsifknrgysgatis  
nfl1ngvaggalivintyy  
qqqlgnssqtgyis1tyl1av1smirvgeki1sqhgprp111gsgftvig1l1sl1tflpemwyivssivgy1lfgtg  
1glyatpstdtavanapdd  
ksgvasgvykmass1gnafgvavsgtvyavlaan1n1n1ggftgmmfnallaivaf1v1111vpknqtn1

Tsompanidou\_et\_al\_Supplemental\_FASTA\_File

>tr|Q2YW12|Q2YW12\_STAAB  
mkiaiaagsalgsgfgaklfqagydvtdlidygtshveavkqhglntingefelnipmyhndqpdesydvvflfpk  
mq1kevmeamkphidneti  
vvtmnglkheeviagyvaqsivrgvttwttaglespgshllgsgpveigelvdegkenvikvadllneaelngviskd  
lygsiwkkicvngtanals  
tvlecmmaslnessyakcliyltqeivhvatidnvhlvndeifeylvdlnekvgahypsmyqdlivnnrkteidyinga  
vatlgkqrhieapvnrfit  
dlihtkesqrhaqd  
>tr|Q2YW13|Q2YW13\_STAAB  
mvqrallastgligiklvqr1keeghevagfttsengqqklaavnvkeyigdilnadtidqaladfkpeiinqitdlkn  
vdmaantkvriegsknlid  
aakkhdvkkviaqsiafmyepgeglayektaldfnstgdrkvtvdgvvgleetarmdeyvvlrlypggtwygkdgmiyn  
qfmdgqvtlsdgvtsvfh  
ddavetsiqaihfangiynvaddapvkgsefaewykeqlgvepnidiqpaqpfervsnekfkaagggtliyktwkdgmnp  
ik  
>tr|Q2YW14|Q2YW14\_STAAB  
mttkklyflsisiiilvaisaiyitlnsntktrltnsqqqidtiiehd1qkghipgasilivkngkvflnkgygyqdv  
dkkvkaspttkyeiasntk  
pftglailklaqegrlnlndavskhvphfkmnyngqnetitikqlaqtsgipsditsedvtknknrlnvtraimgde  
lhkpggeefeysnmydl1  
gliinqvntkqsytkyitnswlklplhmthtsfkqtnnkskndaigyelqgstpvvskpefnlwdtpsaimmstedlehw  
kfqlnppdkykslvqqshk  
nlststigeplanayasgwftnnderlvfhsgtldnfssfillnpkqnygivvlnlnseyvplvehlntqivnhkryst  
vasmlnqyknqfnivtvlm  
ttlillafifsayrawqmrhgkiilrksklttflswltlclciaialilyalpylilgsnwsfvltwlpieikltlttt  
fialfsmilitillvlhltt  
ikks  
>tr|Q2YW15|Q2YW15\_STAAB  
mfngfkrliigqpkknrelkdekiskfkglaillssdalssvaygpeqilitsvvgavatwyt1piagavllillaalims  
yrqiiyaypkgggaymvs  
tnlgekwl1laggsllvdyiltvavsisgadafvaafpslyghkvliac11vlfililnlrgltesatvlsypvylfii  
glvillifigtfrvatgdiq  
phmhasvgtavpgvtlfl1lkafssgassltgveaisnavtnfrepssannavktliamgsilafllvgivglayvygimp  
qtettvlsq1amqifgdna  
afyfvqattvmilvlaantgftafpmlaasmkdkymprmftrvgrdlgysnsiilglv1ailliivfdgmedliplya  
vgvfipftlsqfgmvi kw1  
herpknwlsksvnl1ggivtfivfiillitkfsqwpiliflpfvviff1kinkhyrdiaeq1rsdidvlnvdvdrnl  
aivpitsittavdksiyya  
qmlanndviavhsfgdedekafqekwkrhfpdvr1vilhseyrsiirpisrfidkinrkandqnymitvvipecitkkr  
whnllhnqtslrmklyliy  
qknvncvctipfk1kk  
>tr|Q2YW16|Q2YW16\_STAAB  
mallleafliifaviissvinnrfqiptafiqialgvvifiipi qvdfqfnsevfmfaviapl1fvegthvsrtk1ley  
rkp1llmsmalvfatvvgv  
gyfihwiwpa1pmpaafaiaailcptdavavsaitrgkllpkgsmtilegesllndaagiisfkiavtalvtgtfslfqa  
veqfiistilgligaiig  
fvvvririd1sankglkdnntltfiqlltpfvvyflaeevhasgiaavviag1ihglerdr1iraqtelqmyhqiwnf  
syalngfvfv1gfmipvtv  
vidifqtepdnfsflivitiliaiaiyacr1vwyfwykdfyfpkniqsyldeehdshetppsvryafimtmcgihgti  
slsmalt1pfiitkgqafe  
yrndllfiasfmvlis1ilaqiv1pl1t1psaedttfkgmtyqsakifivqkviqhfkneskkdkndtnyrpvlnqyygel  
lfl1nsepdnqtkelkr1  
ediakvietstlerlidkqkatyqdinnyrnivel1tethrtasfvekfaffkmlwlr1kamkhyka1nkeskkqefens  
fkdvqkimrjvnhni1lr1  
keeqnstn1levslvinhydmsrslkwraqrrkerqensnqipqamfhnk1ealy1qrh1ldelirknkinnivaag  
ireninyneiv1slqskh  
>tr|Q2YW17|Q2YW17\_STAAB  
markl1hre1nnrhiq1iaiggaigtglflgsgqtis1tgps1lftymiigv1lafmralge1llsntrfnsfvdianey  
1gpfggfvigwtywlcwiv  
ssmsdl1tamgyfafwypqvpnwitv1fiv1ilisfn1lgarl1gelef1wfsiikvvtiamvivglv1liffsfkthygh  
asftnl1shggmfpggtfg  
flmsfqiavysfigieligtvagetkdpekt1pkainnvpirillfyiggl1vmsvipwndidpnssp1fvklftligvp  
faagvvnfv1taasatn  
sg1ysnsr1lfg1sqggl1gpkvlnktnshgvpy1sm1vssialliaallnyifpnaiqlfiyvtt1stvl1lvwamiiv  
aylmylkkhpeahknskfk  
liggkpiayilaffffvfi1lffsyetraaiyispfwfi1lfffykkyktaeklayeqrqn1dsghfrydnq  
>tr|Q2YW18|Q2YW18\_STAAB  
mki1gtiad1hidrhkkt1sddy1ealveivkykn1dill1agdi1snhyql1thqfitq1tkq1ldipvkfvpgnhd1weves

Tsompanidou\_et\_al\_Supplemental\_FASTA\_File

mttqdiwnnyksmsqclvg  
kpfivneewavightgwydysfaaqrfsldelqkgkhygatwqdkeriswgisdqnlskiaaeqvkkdilevgnrrvilv  
thvthpdfi vpmphrifd  
fynafigtsdfnplyamfdipysimgvhfrksvmdngrcy lpcplgyprqrwsedyqeinetiqiiei  
>tr|Q2YW20|Q2YW20\_STAAB  
meyqlqq lasl tlv giketyengraqqhiagfwqrcyqegviadlqlknngdlagilglcipeldgkmsymiavagdns  
adikeydvitlasskymvf  
eaqgavpkavqqkmeevhhyihqyqadtvksapffelyqdgdtstseyitei wmpvkg  
>tr|Q2YW21|Q2YW21\_STAAB  
mqssktktkhfsf111itlgvmtafgpltidmyvpslpkvqgdfgsttseiqltIsftmiglalqgfifgplsdafgrkr  
iavsiliifilvsglsmfv  
dq lplfltlrfiqgl tgggviviakasagdkfsgnalakflasl mvvngiitilaplagglalsvatwrsiftiltival  
iiligvasqlpktskdelk  
qvnfssvtkdfgsllkpkafii pmlqgl tyvmlfssysaspfitqklynmtppqfsimfavngvgliivsqvvalvek  
lhrhilliilti iqvvgva  
liiltl tflhlpwlliafflnvcpvtsigplgftmameertggsgnassllglfqfilggavaplvglkgefntspymi  
iifitailvs lqiifykm  
ikkqhva  
>tr|Q2YW22|Q2YW22\_STAAB  
mkrtdkyrdsyqydnqnhrrqsedasyrqqyakgdpeehperyyngdrdyrreqileeneksrskkwyliiailli  
ivai fvtra llnndsdkvs  
ndpkvsqnykkqvenqdgqinqqvदनakeniknnqntdgiiknlqnqidnlkqqeqnkadskltqfydqinklteanna  
lknnasqgkiesmlndint  
kfdsikskleslfkddngan  
>tr|Q2YW23|Q2YW23\_STAAB  
mq lqkiviapdsfkesmtaqqvgnii kqaftnvvgntlhydiipmadggeggttdal mhatgatkytvivndplmrpieac  
yaradeqqiaiemaaasg  
ldllekeernplytssygtgelikda lnhgakti ilgiggsatndgggtgm lsalgvkftdvngdl lqmnganlahiaqid  
itn ldsr lkevtfkvacdv  
snpllgengatyiygpqk gadakmi pkldfamshyhdkimctgksvnqipgsgaaggmgaa llafcettl tkgidvdfd  
itdfhqkikdadliitgeg  
rmdyqtifgktpvgvalaakqyhtpviaicgs lgenyqhvydfgidsaysiisspstedvlqnseqnllntatdiaril  
klq  
>tr|Q2YW24|Q2YW24\_STAAB  
mkl tqthaei kfiivggintlnyyvvyllllkllhieymishitgfivafvisyylncyfvyrvkptwrkfisfpitqi  
vnvs lqtvllyvfvswlnl  
paeiapfagliiitipitfilskwi lksn  
>tr|Q2YW25|Q2YW25\_STAAB  
mspfl l lhrnqcaknatrqpliaevmm linklnirhtpplcvkvtpe mlgdhyiisfiyyisrninaqakcffsgr  
>tr|Q2YW26|Q2YW26\_STAAB  
mrawdinqsprlynvilrgpnteadeksaynnvqvgegpniekl dpqflqseflkeichksmrh  
>tr|Q2YW27|Q2YW27\_STAAB  
mlsillsiisvfsglvpywafkii lmmintytintimfyifisliayisqvccfgastmlshitayeilshirkklar  
klmhlp lgvveskkigek  
nijvdketielplahmipevignllsaaflyimlidwrmacallvtipialfafnklmsgfnetyakmqmsnymns  
aiveyiegieviktfnqsq  
ssykkqgdavndykihtlnwfkntwgymnl gasvrpstflgilpvgymlisinqlnyaefficivls lgvvapiknftny  
vnhlksiqaltevngyiaf  
lee lalssrfmepqsyeiafnvngfsytnkdervfknlsftvpenhftaivgesgsgkstiaklisrywdvttgeitig  
vnikniepkqlnelvgvy  
gqdnfllnltfkenik lgnpeasddavekaaklaqchefikk lpegydtnvsgvdklsggekqrvtiarmilkdapiiv  
ldeatayvdpdseqkigea  
lnv ltrnktliviahr l stiqhadqiiv lgnqqiilekgshqllllkleahyknmwmhmhtkdwgintesn  
>tr|Q2YW28|Q2YW28\_STAAB  
mri fitsntdv gktyvtkhlyhal ktrghrvci fkpqteerqdgtpdlevfknecdlsyditstlytfkqpvspflaf  
kmaqiflkkqr vldkvkv  
ldkefdfi liegaggiavpiyegtddfy mtkd lincadcvisvlpskl gaisdaivhqdyvnqnsasnf limnrytds  
yiekdnqmtigkl snktvy  
tfeehatyenfseaf lq l igvknelhttt  
>tr|Q2YW29|Q2YW29\_STAAB  
mndkqlhndkinlsqvl lglsglsgw lfgaweassia gpaaiiswvlglvigtia ynyieigtmfpqsggmsnya  
qythgsllgfiaawanvvs  
lvtiipieavsavqymsswpwhaepmkhlmengsistyg llavyliivifsl lnywsvkl ltsftslisvflgvpm l t  
iimlmlsgfdtsnyghsas  
tfmpygsapi faattasgi ifsfnsfqtii nmgseiknpekniargia islsisavlyiilqstfitsmpqsm lqhsqwn  
ginfnspfadlaillginw  
laillyieafvspfgtgsvfavtgrvlrameknghipkflgkmnekyhiprvaiifnaiismimv t lfrdwgtlaavis  
tatlvayltgsttvialrk

Tsompanidou\_et\_al\_Supplemental\_FASTA\_File

tgptmtrpfrakilkvmaplsfvlaslaiywamwpttaeviliilglpiyffeyermnrntkkqiggsliwivylivl  
silsfigskefkglnmihy  
pfdfiiviiivalifyyigtstssfesvyfrratrntkmreslnneskssh  
>tr|Q2YW30|Q2YW30\_STAAB  
mtskhqkgsivnrflnsvekignklpdpvsvfflmcvglaimtwislnvsvkhpqthqtiyikniishdgftmimnd  
tiknfsefpalglvlavmi  
gigvaektgyfdklmivsvnrprflilptiiligilgstagdaatillpplaamfikigyhpiagltmayasavggfa  
anivvgmqdalvysftepa  
trivdsiktvmwvfyiaasvvvllptillvttkliiprldqyddrlmhddeetsshitdkeahalkwanisfivti  
illiiitaiehsflrnakt  
gsllddaplingvgliilvvflvpglvvygilskeitntkdlgkmfgdavgsmtgfivivffaaqllaylkwsnlgiaav  
kgakllehgngivliilgii  
vlsamvnmlligsasakwglgpifvpmililgfhpaftqviyrvgsitnptipmmpylpllltyaqkydkrmklgalls  
slmpysialsvwtvfvii  
wflilgipvgpggpifvk  
>tr|Q2YW31|Q2YW31\_STAAB  
mkrlnkvavvtgastgiggasaialaqegaylavdiaeavsetvdkiksngdkakdyivdiaseqqidnfaseireqi  
ghvdvlfnagvdatgrl  
heyptdvydkimvdmrgtflmtkmmplmmtkgsivntssfsqqaadlyrsgynaakgavinftksiaieygrdgira  
naiapgtietplvdkltgt  
sedkegkafrenqkwmtpigrigkpeevgkllvflasdessfitgetiridggvmaytwpgemlsddswkrtle  
>tr|Q2YW32|Q2YW32\_STAAB  
mniirhinatavieyggkriidpmlsdkgafepfnsprqdenplvelplaidiinnidlvilthhidhfdpkaie  
vlpkdikiytqneadasev  
egydftnsvfndvthigeieliktdaqhgheilkmtghvhglvlkhsedptlylaadtvwfdgvektlkahhpdvvl  
ngganqffeggpvmdehd  
vlkiahtlplaqivvvhmevvnwhlsreelnefinsndlgnrvvvpndgeilltfek  
>tr|Q2YW34|Q2YW34\_STAAB  
mnfnneiklilqqylekfeahyervlqddqyiealetlmdysefilnpiyeqqfnawrdvekkaqlikslyitaqcv  
kqvevirarrlldgqastt  
gyfdniehcideefgqcsishdklllvsgaypmtliqvaketgasvigididppavdlgrrivnvlapnedititdqk  
vselkdikdvthiifssti  
plkysileelydlnenvvamrfgdgikaifnypsqaetaedkwqcvnkhrppqqifdialykkaaikvgitdv  
>tr|Q2YW35|Q2YW35\_STAAB  
mskllmigtgpvaiqlanicylksdyeidmvgrastsekskrlyqaykkeqfevkiqneahqhlegkfeinrlykdvkn  
vkgeyetvmmactadayy  
tlqqslsetlqsvkhvilisptfgsqmiveqfmskfsqdievisfstylgdtrivdkeapnhvlttgakkklymgsthsn  
stmcqrisalaeqkile  
vvesplhaetrnsslyvhppflmndfslkaifegtdvpvyvklfpegpitmtliremrlmwkemmaillqafrvpsvnl  
qfmvkenypvrpetldegd  
iehfeilpdiqeyllyvrytailidpfsqpdenghyfdfsavpfkqvykneqdvvqiprmpsedyyrtamiqhigkmlg  
iktpmidqfltryeascqa  
ykdmhqdqhlssqfntnlfeedkalvtfkleinrtls  
>tr|Q2YW36|Q2YW36\_STAAB  
mrkltkmsamllasgliltgcggnkgleekkenkqlyttvkdigdmnphvyggsmsaesmiyepvrntkdgikpllak  
kwdvsedgktytflrddv  
kfhdtgtpfdadavkknidavqenkkhswlkiistlidnvkvkdytvelnlkeayqpalaelamprpyvfvspkdfkngt  
tkdgvkkfdgtgpfklgeh  
kkdesadfnkndqywgeksklnkvqakvmpagetaflsmkkgetnfaftddrgtdsldkdsllkqlkdtgdyqvkrsqpmn  
tkmlvvnsqkksavsdk  
vrqaighmvrndkiakeildgqekpatqlfaknvtidnfdmptkydlkkaeslldeagwkkkgsdsvrqkdgnlemam  
yydkgsssqqeaeqlqae  
fkkmgiklningetsdkiaerrtsgdylmfnqtgwllypqstiaafkakngyesatsgienkdkiynsiddafkiqng  
kersdayknillkqvndegi  
fipishgsmtvvpkdllekvsftqsqyelpfnemqyk  
>tr|Q2YW37|Q2YW37\_STAAB  
mfkfifkrialmfpimivsfmftlltyitnenpavtilhaqgtpnvtpeliaetnekygfndpಲ್ಲಿiyknwlleamqfn  
fgtsyitgdpvaerigpaf  
mntlkltiissvmvmtsiilgvvsalkrgkftdairsvaffltaipsywiasiliiyvsvklnilptsgltgpesyil  
pvivitiayagiyrnvr  
smveqlnedvlylrasgvksitlmhvlrnalqvavsi fcmsipmimglvvieyifawpplgqlslkailehdfpviq  
ayvlivavlfivfntladi  
inalnprlregar  
>tr|Q2YW38|Q2YW38\_STAAB  
miilkrllqdkgavialgiivlyvflglatplvtfydpnhidtankfagsfqhllgtdhlgdilttrliyairpsllyv  
fvalfvsvlignilglfsg  
yfggfvdalimracdvlafpsyvvtlialialfgmgaeniimafiltrwawfcrvirtsvmqytasdhvrfaktigmndm  
kiihkhimpiltladiiais

Tsompanidou\_et\_al\_Supplemental\_FASTA\_File

sssmcsmilqisgfsflglgkaptawgmm1nearkvmfthpemmfpaggiaiviivmafnlfsdalqiaidprisskdk  
lrsvkkgvvqs  
>tr|Q2YW39|Q2YW39\_STAAB  
mtlltvkhlitdtwtddqplvsdvnftltkgetlgvigsgsgksitcksivglnperlrvtgditfdgkpm1slseaql  
kkrygkdiavmqggsraf  
dpsttvqkqmfetmkvhtsmstqeiektlieymdylslkdpkriksypym1sggm1qrlmialalalkpkliiadeptt  
aldtitqydvleafidikk  
hfdcamifishdltvinkiadcvvmkngqliehgtresvlhhpehvytkyl1stkkkindhfkvmrgdvhd  
>tr|Q2YW41|Q2YW41\_STAAB  
mkgamawpflrlyiltlmffsanailnvfip1rghd1gaantvigivmgaymltamvfrpwagqiiarvgpikvlriili  
inaialiiyfgftglegyf  
arvmqgvctaffsmlq1lgiidalpeehrsegvslyslfstipnligplvavgiwnannislfaiviifialtttffgyr  
vtfaeqepdtsdkiekmpf  
navtvfaqffknkelnsgimivasivfgavstfvplytvs1gfanagifltiqaiavvaarfylrkyipsdgmwhpky  
mvs1sl1viasfvafgp  
qvgaiifysailigmtqamvypt1tsylsv1pkvgrnm1lg1fiacadlgis1ggalmgpisd1vgfkwmylicgm1v  
ivimims11kkptprans  
1  
>tr|Q2YW42|Q2YW42\_STAAB  
msntnkhyieeeyateqsrffkrdigfiflyiflvnilpiiiv1ftfglvavftqqapwgfsfpismnisyllaviisla  
ifrrmheda1vpm1rsqiv  
asakykwhilisft1siv1f111nhfdifa1nvsdftvfdiyp1likeygsis1iaifsl1tiilntlicqlifrhiliqel  
sr1ip1nitiv1svilet1  
yyypyintwwefipalilassatylylksnrnfmvsyfyqlavilvlhifm  
>tr|Q2YW43|Q2YW43\_STAAB  
mtfl1vmqfivniivvgf11tvivigliwlikdkrqsqhsvlrnypl1ariryisekmgpelrqylfsgdnegkpf1rnd  
ykni1vlagkynsrmtsfgt  
tkgyqdgfyiqntmfpqrneisvdntt11stf1yikianer1fsreeyrvptkidpyylsddhaik1geh1khpfilkri  
agqsgmsygalgenaital  
skglakagtwmntgegg1seyh1kgngdiifqigpg1fgvrdkegnfseg1feevaqlsnvrafelk1laqgaktrgghme  
aekvnee1akirnvepykt  
inspnryefihnaed11rfvdq1qq1gqkpvgfkivsvskvseiet1vrtmveldkypsfitidggegg1gai1felqdg1v  
glplftal1pivsgm1lekyg  
irdkvk1laasg1vtpdkiaial1glgadfvniargmmisvgcimsqqchmntcpvgvattdakkekali1vgekqyrvtny  
vts1heglfniaavgvss  
pteitadhivyrkvdgelqti1hdyk1klis  
>tr|Q2YW44|Q2YW44\_STAAB  
mkk1cs1iivvalvcia1sacgkeqtktyegdvsgkhv1sitykddkvlkqstintikyddl1gmdkdeakkl1faksesi  
fkdlkgvkykvd1ydkkai  
eh1didyevdmkk1nkr1gvstkenkdisfeklekqlkhr1g1kekdkmddk  
>tr|Q2YW45|Q2YW45\_STAAB  
mm1fkn1nfdnffvnmsf1krishkilkiinpendkavgnvcstadff1siidgm1e  
>tr|Q2YW46|Q2YW46\_STAAB  
miitsptearkhfyq11knvnnnhepiyisgnaennaviig1ledwkniqetiylestg1mdkvrerekdssg1tniddi  
dwdn1  
>tr|Q2YW47|Q2YW47\_STAAB  
mnnyt1vki1knsak1dlk1k1k1hpy1lks1fleivet1kndpykitqs1fek1lepky1lerysrrinhqhrivytvddrnkevl1  
1sawshyd  
>tr|Q2YW48|Q2YW48\_STAAB  
mnq1vk11khl1tdvngiagyemqvkeamrsyiepsdqiedn1ggi1fgk1knaengqysim1sghmdevgfmv1tkidkhg  
fis1ft1pvggwwnqvm1sqk  
vtittdsgkei1rgi1gskpphv1tpeerkkpmeiknmfidigvsskeeaekagvevgnmvtpysefevlandky1takaf  
dnrygcalavev1kr1kde  
niginlysgatvqeev1rgakvaantikpd1aiavdvgiaydtpgmsgqtsdsk1ggg1pvimmdatsiahqglrk1k1k  
dvanrhnievqwdt1tpggg  
tdagsihvanegiptmt1gvt1rymhsnsv1nvddyensir1vteivrs1ndetyknimw  
>tr|Q2YW49|Q2YW49\_STAAB  
myfnfdinikki1frnema1nfskmgilyliw1lirailrgnk1h  
>tr|Q2YW50|Q2YW50\_STAAB  
mlleikdl1veasdrvi1nhin1kvdkgetia1igpsgsgkstfqiki1cn1ispts1g1lyfkdkpyddyepel1rrhis1y  
1mqqsdl1fgetiednmi1fp  
slarndkfdkkrakql1kdvg1ghyq1sskiehmsggerqriaiarq1mytpd11111destsal1dinnekienii1fkla  
dggvaimwi1thsd1qsmrh  
fqkritivdgqisnteel1nqhe  
>tr|Q2YW51|Q2YW51\_STAAB  
msntalgl1tal11vipi1iisykeglhi1kd1ivat1ravvq1iil1g1fl1hy1fkisdkw11vlcvfviivnaswntisrs  
spvmhhv1fis1fvai1fvgt  
al1plagtiatgaiqftanevipiggm1anngliainlayqnl1drafvqdgtniesk1sla1tpklaskgairesir1laiv

Tsompanidou\_et\_al\_Supplemental\_FASTA\_File

ptidsvktgylvsipgmmt  
gliiggvpplqaikfqlvfvfihttatimsaliatylysgqffnarhqlvarntdvkses  
>tr|Q2YW52|Q2YW52\_STAAB  
msimrlftfilsifivgmvemmvagimnlmsqdlhvseavvgqlvtmyaltfaicgpilvkltnrfssrpvllwtllifi  
igngiavapnfsilvvgr  
iissaaaaliivkvlaitamlsapknrkgmiglvtytgfsganvfgvpigvtigdlvgwrytflfliivsiivgflmviylp  
kdqeiqrgrpvnheapshen  
hvtskilrpaevakylitflvliansvtfvfinplilsnghdmsfvslallvngiagvigtslggifsdkitskrwlmi  
svsifivmmllmnlilpgs  
glllaglfiwnimqwtstpavqsgviqhvegdtsqvmsswnmsslmagigvggiiggvlmthvsvqaitytsaiigalgli  
vvftlknhyaktfkss  
>tr|Q2YW53|Q2YW53\_STAAB  
mkinttggqihgigtqgdldiflgi pyaepvhdnrfkhstlktqwsepidateiqpippqpdnkledffssqsttfehe  
dclylniwbkqhndqtkkp  
iifyggsfenghgtaelypahlvqndiivitcnyrlgalgylwdsyfnkdfhsnnglsdqinvikvwhqfiesfggd  
annitlmqqsagsmsiltl  
lkipdiepyfhkvvlsgalrldtlesarnkaqhfqkmmldyldtdvtslstddilmmaklkqsrqpskgldliyapi  
ktdiyqnnpyttkpifacn  
tkdegdiytseqkllssrfidimeldiplkyedvqtakqslaithecyfkqpmkqflqqlniqdsnaklwlafawh  
dtsahyrsayhildmfvw  
fgnlqilaahqypttahlkflsrqmndlanfaksgkmpwpmynherryrtyq  
>tr|Q2YW54|Q2YW54\_STAAB  
mpynykkqngelmsvmsqgekfihsqpvndelsaliklliskingchycvdihkkelkelgvtqmki devlsfrhldlft  
dqekvtlefaemlnsikdf  
kkfeiidrksfcdeeqiidlvfvnqingwnrlniisdkl  
>tr|Q2YW55|Q2YW55\_STAAB  
mfnmfrfiimvynmynilevkgmpftmkgypekwekfevikrqaieianamlekyglekdvvpiavkakdwyrals  
keeikalteenfvqfhtat  
mektevdseyattdneehiqeqsnqdkisyfdesiqnsggvrqrepmdgphpkvvesfkdv  
>tr|Q2YW56|Q2YW56\_STAAB  
myvdrkpslyledl rhdfkns lskfengdeafdtllgfvel dhiyssalkeistklsilddnfnhiykhnpihhmerrvk  
emrslielklnrkglqisae  
takehil diagirvvcnylddiylieemllkqedvqlikrkdyiqhpkyrslhivvsipvflaervevlpveiqirt  
igmdmwaslehki rykna  
etekyrdllkecateitevedklqei hseite  
>tr|Q2YW57|Q2YW57\_STAAB  
msnystgelaklcnvttrtiqyydrkgil kpgqftegkrrvyteqqrqtelil lllkd lgcalsdidmllkgegtlktln  
tlltmkpqeinqqvkqqa  
vlnkiknvqyyvnetstspithlkdiehvmsksaemksirrniiwisagiigi qyssiisailmknkwpflialpfmigy  
gigvtfyyqqkvaylcpnc  
qhifspslwavikakhtatrrfecpnchethycievpkahnstetleishiqhnn  
>tr|Q2YW59|Q2YW59\_STAAB  
mkymigvdigtstksvlydengt fikhqigydlhtpnvdvseenpeldavlm tikiyimreskvnqddikfvsfsaq  
mhsliamdqqhqrlnnit  
wadnraakyatvinevhdgnaiyqrtgtpihmpslaki fwmkhewqdvfqr ttkfadiktyifyhlfdryiidysmasa  
tgmfnletldwdvgalell  
gi seemlpe lvp ttyvmkgmkeryatlmgl nedtpfvigasdgvlnslgvnsvgkgevavtigts gairtvidkprt dyk  
grifcyvltedhyviggpv  
nnggvllrwlrdelasevetakrlgvdpdvltqiakrvkpgadgli fhpylageraplwnanargsffgl t lshkkeh  
miraalegvlynlytvyla  
lievmnetpkmi katggfaksevwrqmsdiftel vvpesyessclgacvlg lkavgdiedfsivssmvgatnhtpie  
envavyqelvsifinlsr  
ltenyeqi adfqrqhmaenktq  
>tr|Q2YW60|Q2YW60\_STAAB  
mfneiwp l isvvl givillvli igfk lntfisl iitsmital mlgip ltkimetvekgmgstlghialifglgailgkll  
adgggatriadtliqkfgg  
khvqwam lvaafivgial ffevgvlvlliplvftvakranvsvklglp mvtalsvthgflpphpgpvviakelkanvgdv  
llygmiaaipvtliagpif  
nkvaqkmipsaytregdisalgaqkefk dqempgfgmslltatlpvilmlvstitq lvtghdkptnliesiymigtagt  
amliavlfaivtmglmrkr  
kmnhimesvtnaiypigmmllii ggggtfkqvlidggvgntiakmfegtemspillawivaavlrialgsatvaaisttg  
ivlplllqssdvnlvlla  
igagsvilshvndagfwmfkeyfsltvketfltwslletii svsgii filfislfv  
>tr|Q2YW61|Q2YW61\_STAAB  
mknvyfyenrlkhseserykkyigyfsvmkgvsrhvfvrivqaiimkrlyvcfkldddefnlkntslv  
>tr|Q2YW64|Q2YW64\_STAAB  
mtvniivsfivfcismvilgiyvaitkdf t lisyinqttvadkhknqiaiyifal cislsavflmsaiicfeydfialaf l f  
ftialllialfyvcfykit

Tsompanidou\_et\_al\_Supplemental\_FASTA\_File

kyp  
>tr|Q2YW65|Q2YW65\_STAAB  
mkgskqillimgiislivlfiiftlfimaqyahyeqksdssnahtlnssaiieqhtmsnlasldlyapvrnitssrdiy  
piyfmtkd  
>tr|Q2YW67|Q2YW67\_STAAB  
mwsnlkdedkkyrklitnfaslseafsqkneskegeedivapivnskfqetvfqrafgaigediantsydasl11ddkh  
kylvgiksfgitsgdqkia  
qfkknsqfdnwgrilneiagnaqmvskeeaneineylykelaikiarlnariesskeqikgfkgtndtveavyhv1mp  
skkgkqpihvgetdykpi  
didnleiigattknptnfkftdnnheykytsadsqlymafnnrdiiveswdvnyindpfdlfeklneqvnqgvlekyk  
deektiswviydengni  
ptnsgfnafngsklg1strakrinkiydeykfkvneekikkvkk11eev11kkwstdeekeimmkirdel1sellveikn  
idlieevkliyrpiremy  
ipipnskkfhespddffhgidigrfkvnssk111pkedrtfklkflssgdvieayinqdagksiqsyknqqilgewilqgv  
fqlapreiltgdklndigi  
ngirlikfkggtiglefiwidienppndvigwvgk  
>tr|Q2YW68|Q2YW68\_STAAB  
mtdsvssndaskyslaaffsgvggie1gfhqtnkfrvyanefdknaqityennfnvslcdrdihdvtseipmsdviv  
ggfpcqafsiagyqkgfed  
ergdlffellrfinekspqai fienvknmvthdhgntfkvikealtlgyfikwkvlnakdygdipqnreriyivgfkcr  
kafd1fefpekidlktgik  
diinfeseideryyyrlnkqpfydelekemkdsnllyqwriryvranksqvvptltanmgtgghnvp1ikskfgirk1tp  
retfsvqgfesfk1pdm  
sngglykqagnsvvvpvkriaeniaes1dnse1pvfkldikskyv1lytkmigrfegesylngfdsendlnkfirkkh  
infi teeykkvmksnvgk  
eyyt1k  
>tr|Q2YW69|Q2YW69\_STAAB  
mslpeykiksdnikgnseetsavskisyeienannnglndesikrqikkaqnnrnfpen1syvrsytdpktgtttsaf1n  
kdtgkvt1gmtgtvnhkda  
ilkqtfgvpssqgyidaset1kdivadanig1rsvtdkdphfkgtdfikeikkdydidfitghslggrdtmilgmsndi  
khivvynpap1aikdvsg1  
yadee1kkl1erydghivrvsded1dagvrnhlyetagekiv1kngeghsmgflisgtqai11selnkvkgyqden  
nkalksvrkqtrnr1hkve  
t1ranwtqttgga1sssqkq11eal1altiaeg1nq1vneesqhlkkmymahkf1gdnwkaqkvgn1eigek1tsaevi  
de1rkggayesk1etdpkr  
kiddk1kkl1ndvykncngyiakikqsieaivsndqmlasqidgmm  
>tr|Q2YW70|Q2YW70\_STAAB  
mndafnq1de1rhqtrrkceqmydhf1ylkhkmnysgdamikmtr1iesfdremnqri1rhemk1edykdk1rrey1kqs  
driegde  
>tr|Q2YW71|Q2YW71\_STAAB  
mg1dfsg1pd1aa1eqmkekeqi1sevi1apehvrmmhdhqnk1ksdek11ldqmvshfkkfeadf1knaaqgawvknatde1  
kdisnd1ekiqdik1  
>tr|Q2YW72|Q2YW72\_STAAB  
mskeh1hfiifsy11nfyiinyf1ifqnsdkfvkcitn1fiyleihvild1  
>tr|Q2YW73|Q2YW73\_STAAB  
mrkeiealifsdvssydiyvntgvnqgligdikdgy1tidsmpyidaerlyhfamerks1vtn  
>tr|Q2YW74|Q2YW74\_STAAB  
mtyherv1alraeskrtafdfrfed1fskeew1smslaerqkaekaf1rheikk1ndvrmpfssahdaqvklynvvsyng  
ikrnfkqvenegf  
>tr|Q2YW75|Q2YW75\_STAAB  
mskkhvf1iigvilcivicivatviy1kvkydekekqkaiyykeqqueritly1khtntkepntiksvhfts1krgamgdavik  
gyinenkkadfvaygspeh  
nyqfggdmi1esek1se11kpanq1kspekikee1dkkegh  
>tr|Q2YW76|Q2YW76\_STAAB  
mccvik1ysnkfil1tm1ikr1lwykyfdkerrsrndif1tslikinr1nldfykgvrqgl1miipaiigylcgnfqfg11va  
tgtlahiyvfkqpsrsk1r  
tviicn1afai1cmm1gt1taktp1vfgmt11ivtvi1pfi1ftalki1agspsstffivt1fslpin1piapeeal1yrgfailv  
ggil1atmmv1it1ivfsknk  
aeeqai1qndfkl1isk11lhtyndksaf1kvaktavdsfkasdk11itstssndk1srrfqk1111htsaqgiyselle1na  
kqir1plde1iemmdhiia  
q1d1nsdenrvyrkevtvteefqn1fnh1k1idemvhaneariayeadm1rkplyskriyqn1t1dsivfrnt1rytaimm  
iaifialmfd1fekaywip1  
sahtil1gtstihai1ergmarg1gt1lgvl1svill1fsiptpvavil1mgiaalf1tealvganyaiavvfitiqvil1mg  
lasqn1tinia1prvidva  
mgiv1ai1gl1fv1lgqrtasa1vpnvmaevvrkeat1fhy1fsenykddvyqkntam1svk1n1nmtqvynaangel1sd  
kt1liqnyyps1faleeisf  
m1nramanedr1tineq1mgey1atfeniakh1ele1nte1leiki1lpv1pqnyiqsamni1qhngfrerdknv  
>tr|Q2YW77|Q2YW77\_STAAB

Tsompanidou\_et\_al\_Supplemental\_FASTA\_File

mllvlsfkgvrylvnnhsalrlkgiilaivgaclwlggtvsdfllfkykninvd  
>tr|Q2YW79|Q2YW79\_STAAB  
maksydyqsafdiigpvmgppssttagavkignsarailgdipknieihyyesfaqthqghgtdvaivggamgystfdn  
rikssleiaaddgikidii  
eeegdsigghpncayikssrndgcyieiiigisiggttikikgihinglevdlnhgplpilvvdgnmtkaqvnhfndindm  
klckdefikidedkclvv  
iplnkaisesilntikekysdvnvsyin  
>tr|Q2YW81|Q2YW81\_STAAB  
mircakkedlnailaiyndaiinttavytyepqtidervawfetkqrkhdpifvfeengsvlgfatfgsfrpwpaylyti  
ehsiyvdasarrkgiasql  
lhhliveakakgyralvavidasnkasiqlhqkfafkhagtltnvgfknqwlafyeldlqd  
>tr|Q2YW82|Q2YW82\_STAAB  
mkkwtnrlmtiagvvlilvayl fakphidnylhdkdkdeki eqydknvkeqaskdkkqqakpkipkdkskvgyieipd  
adikepvyppatpeqlnr  
gvsfaeenesl ddnisiaghtfidrsnyqftnlkaakkgsmvyfkgnetrkykmtsirdvkptdvevleqkgkdkql  
tlitcddynektgvwetrk  
ifvatevk  
>tr|Q2YW83|Q2YW83\_STAAB  
mklefkksisnkiiytlgvlfiflfllygfllpigidkvkslsysqffffssytvatqlgflfsvfayfinkeysnknil  
fykligdniftffykav  
lffecivfiilsitiisiiysdfshy11liilfslvilqyilvvgtismvspnilislgisivywigsvilvainknifg  
ivapfeasntmyravekil  
nnefticpteiintvsffvllfivntivlllsrkrwlkigm  
>tr|Q2YW84|Q2YW84\_STAAB  
mkl nnyl kvknqldncdlnfy lggqinhivgkngvgksllakdfllnnsnipkssisqnvtilssssnipnditkdfll  
sl1kskfknnrtfdkiy  
nilnieaipsnvlknlsdgqkqk1k1lslfledhdliildevtnaldkktvneiyeflndfiqshqtktiinithnlsd  
lsalpgkyfikdlqieey  
qskeevindyinl  
>tr|Q2YW85|Q2YW85\_STAAB  
mvkaiavdmdgtfldskkydkprfeafitelrnrditfiaasgnqyaklksifgdrdmyfisengaviykgnelynyks  
fnrqvfqqvdylnmqsi  
dqlvicglsayilkrtseafkedtrfyqh1keidslqqlpeddyvkiafninrethpnvdeevatqfsndiklvssgh  
dsidimpnmtkgqalkr1  
ldkwgmssselmafgdannkdmlafakhsyvmenshdeelfniasavapsndkqgvltiieqevlkk  
>tr|Q2YW86|Q2YW86\_STAAB  
myiifnfnthllfnllkarflimtkimffgtrdyekemalngwkknvevttskellssatvdqlkdydgvttmqfgklen  
dvyplkesygiqiaqrta  
gfdmydlldlakkhnivisnpsyspetiaeysvsialqlvrrfpdierrvqahdftwqaeimskpvknmtvaiigtgrig  
aatakiyagfgatitayda  
ypnkdlfltykdsvkeaikdadiislvpankesyhlfdkamfdhvkkgailvnaalsvintgtcetrln  
>tr|Q2YW88|Q2YW88\_STAAB  
mafhdktatqvtnie1nrvdlmrtfykn1glsvkssdnttv1svgtgvhtl1h1ledgrqtspreaglphiafll  
pttedlanf1yfvaknmg  
igagdh1vsealyfndpegngevyrdpssswewqngkvkmdtlevdsqtllthrtdegwqmpakgmighlhlkthd1  
daayhcyieqlgfqhvsdf  
pralfmstnhyhhaantwqsnaqarqnaqsylthvdiyppdasthtftapegfditvhsntdlvpek  
>tr|Q2YW90|Q2YW90\_STAAB  
mdrtkqslnvfvgmnraldtleqitkedvkrygl nit efavlellynkgppiqrirdrvliassisyvvsqledkgwi  
trekdddkrvymaclek  
gqsqmadifpnhaetl tkafdvltkdeltilqqafkkl saqstev  
>tr|Q2YW91|Q2YW91\_STAAB  
mtnnhellgihhvtamtddaernyfftevlgmrlvkktnqddiytyhtffaddvgsagtdmtffdfpnitkgqagtns  
itrpsfrvpnddaliiyey  
rfdefgvkhegiqelfgkklvlpfeevdgqvyqlisdelnegvapgpwknngvpvdkaiyglpieikvsyfddfknil  
tvygmttiahednvallev  
geggnggqvili kddkgpaarqgygevhvsfrvkdhdai eawatkykevginnsgivnrfyfealyarvghilieistd  
ppfmedepyetlgegls1  
ppflenkreysesvrpfntkrqhd  
>tr|Q2YW92|Q2YW92\_STAAB  
mehifregngaptlil1hgtggedfllplgealenyhllsirgqvsengmryfkrlegvydeedlafrgqelltf  
ikeaaerydfdiekavlg  
fsgnsniainlm1rseapfkka1lyaplypievrstknlsdsvsllsmgkhdpi vlvaseqvinlfktrgaqveevwn  
gheitetgltagqil dk  
>tr|Q2YW93|Q2YW93\_STAAB  
mri1kesiivafavgvvvgagfatgqei fqqftshgaysisgiivtgllitlggmivmhtghhlksrnhdsinyflyp  
siargfdiiltifmlslai  
imtaggastihqsfnlpywlsalilvafilat1flkfdrlia vlggvtpliaivimiavyyfttshldftaanndaqih



Tsompanidou\_et\_al\_Supplemental\_FASTA\_File

kqkslspgwwfdainyasl  
qiaaafsflsvmgskvkyrdstlyggliggliitflmminlglisqfdkikhvdlptlklatqispsigiimsvimilv  
iyntvvglmymasrfsvp  
fsrryfiititmavityistfigfisligkvfpimglfgfillipilykglkritgksnid  
>tr|Q2YW95|Q2YW95\_STAAB  
mgtlikqecfkfkfkkstfiapivfillmvaqgyiatkynkiftpquesftsayingfswfaflliiqastiismefhysti  
knllyreysrttmivskii  
tlfiiisliyfvitiasivigsllfndlnifessgnqlsllnqlllvsllgtfvgwlvlslltllssatnstgvaiavgi  
vfyfassilaviqtallek  
idwllkwnpinmmnimlqtvekgfksstkletlhelhfigniayisiflilvvfifkknkni  
>tr|Q2YW96|Q2YW96\_STAAB  
mdvltiehltkkgkntiledvsfklkrqivglvgangagkttlmkivilgyssfqsgnfnvinsmdsksnigaliengp  
iypfmsgyenlklineskn  
tgdidkivsqlihmnayihkaktyslgmkqklgiaiaflndpqfiildepmgldpkavrdvrelivqkaqegvtfliss  
hlseivkitnsilinkg  
kivtetseeelkqfkndndlenvllidiikedqa  
>tr|Q2YW97|Q2YW97\_STAAB  
mipcffkfiwhtlaeshlkpftlrdimkfsikvqfpqyvilqthltnpsiiqtiilnkqnfplphklfssl  
>tr|Q2YWA0|Q2YWA0\_STAAB  
mkenlekyirspligliisifliilyfliyrvegnfcviilycllplfvntslilyvsifryfkk  
>tr|Q2YWA1|Q2YWA1\_STAAB  
mykmmqpkrsifsvfqdrmlgkllifsilgmllvqayamasintgngaiatllyiapvyiiiwfvirgvakltlfdvl  
aiimtllgtfllltngsfs  
nlvvnpsalfwgilagvalafytiypsdllnrfgsilivrwalisgvamnlrhpwhiditkwdisiilflifgiiggt  
alafyffidslqyisaket  
tlfgtvepvvaviasslwlhvafkpfqivgiilimililflslkrqpetlde  
>tr|Q2YWA2|Q2YWA2\_STAAB  
mtkikimsvreedmpyikawaekhhvevditkealtddnvegvygdglslsqqiplsehvykrlnelgikqiaqrsagf  
dtydteleankynlivsnvp  
syspnsiaefavnqtiinvvrhfnqitkvrehdfrweptilsksidklkvavigtgrigrvvadifangyqsdvvaydpf  
pnakiatyvdykdtieeav  
egadivtlhvpatkynhlyfnaelfkfkkgavfvncargslvdtka1ldaldngvikgaaldtyeferklfpsdqrgkt  
lndplleslidredviltp  
hiafyteaavenlivdalatldvlqtgdtrlrvn  
>tr|Q2YWA5|Q2YWA5\_STAAB  
mlaekwydanfdqdlinerarakdicfelnhtrpsdtnkrkelidqlfqtttdnvsisipfdtdygnvklgknavntn  
cyfmdggqitigdnvfigp  
cfgytathplnfhrnegfekagpihigsntwfgghvvllpgvtigegsvigagsvvtkdipphslavgnpckvvrkid  
nevpsealndetly  
>tr|Q2YWA7|Q2YWA7\_STAAB  
mketdlrviktka1sssl1qllleqlfqtitvnqichnalvhrttfykhfydkyd1leylfnqltkayfatdisdrlnh  
pfqtindtinnkedlqkva  
dfqgedaefnkvlknvcikimddiknnsdridvdgdipnllfyiygsliegflywikdekidwpseeidkifhkvinik  
>tr|Q2YWA8|Q2YWA8\_STAAB  
makflykmgftiakhkwtliawviivaafipiatntpkfdndikmtglksldtnekiekyfnqdsekaqirvvfkttk  
ddgivqpsitkdkktldd  
ikkddkhidkisdpyenkqiskdkttafaditynvsqtslkddsrndnikshlkd1rdnhnvqtelgtgmtstevggse  
lvgiivafvllvifgsvi  
aaglpiaisaliglasvgiislltyvfdipnvtlavlavmiglavgidyalfilfryrqvmttetdyvkgiglavtagst  
vifagvtvviavcglslvg  
idflavmgfasaisvifavfsaltlpalisifhkrikvnlqsnfkdkdidtpwskfitgna1aavllg1ilvaaaipv  
shmr1gipddgvkpadstq  
kkaydiisdkgfgegfnqipmlinvkdkkddpqlqdlqsvykgikdkknvdivtppqmskndya1mvvipkqgpnae  
stndlvhd1rdyhkdaqdk  
ygfkteisgqsvinidmskklneaplfatvivv1affllmivfrsilip1kavlgfv1slmatlgfttfamqdgfmkg1  
fgiettgpm1af1pvitig  
ilfglamdyevflmsriheesktgdndysikvlgkesgpvivaalimfsvffafvfqedvmiksmgmalafgvlfdaf  
vvrmm1ipal1tk1fgkgs  
ylpawlnriiprvdi1ghalekyktvesqeseakdskeydttfkvyppgatnvskhqdvhgqddarsiv1ddktmalyq  
evkqqsass1flydalmdy  
qnkhq1n1skpamtneiq1lnkniek1nq1lekn1rnks  
>tr|Q2YWB0|Q2YWB0\_STAAB  
menycilgnpvgkts1fnaltgsyeyignwsgvtvekkvgklkenvgqlid1pgtyd1spiskdetvvtdy1lndsfs  
iinivdasqlkrnmgl1tvq  
l1elnqpiyig1nm1dvatkrigiki1dyhk1mk1ktpi1fpv1artgkgtkh1lgeikh1gegyqphfkinygekieetik  
nmcqi1mtetshdkygarf  
iai1qf1l1nmqiane1nsevvnl1ss1rdqvaeqveavsvrremerirnhyiet1l1qdvvt1pedkqyfssridkilth

Tsompanidou\_et\_al\_Supplemental\_FASTA\_File

kyigmpiflaimwli fqt  
ftwigtplsdqldafiggtftdsvktimnylgvipflqdlitdgiagvgsvlvfvppqvllfflislledsgymariav  
lmdrimesfglsgksfipm  
iigfgcnvpsimaarsienekerlttiliapfmscsarlpvyaifvgiffkenqslvvlslvylgiimaflvstvltktv  
lkndnaifive lptyrvps  
ikt1wrstwekakgfvrkagtfifggsvviwllsyigphginvni nqsflhmvg sffgmlvqllgfgtwaqatlvpgfl  
akevivssmaiiyssgdag  
lvnviqnqftp1sayafmi fillypcvstvvairketyswkwtalavayplviayvltfifyqvghlfv  
>tr|Q2YWB2|Q2YWB2\_STAAB  
mvyksyddspvgrlelvsdgvsliavlfenqddstreentslaifkeatqwl dayfkgdnpeitiplkptgshfqcvw  
nelrqipygtl ttygaiak  
kvgkvl dkakmsaqavggavgsnplsiivpchrvgktgsltgfggtinnkikllelenidmsklyvpkhstkp  
>tr|Q2YWB3|Q2YWB3\_STAAB  
mkaklwfllttlafliavtesigiaevkaktgtlitensnds1kehyaqkfevytnkevtgvgenyidtkvdtynvrtvl  
yntdylkqfknqdkvniwg  
tlyenqqskvyrgtvvkydpi skvtnlsyrmlfvnghqtkvnpdsll evknkqis1ketdfrikyllekehlysnyns  
geliemkngarhkidlgd  
ilsdsqektfdfdnishi diymk  
>tr|Q2YWB4|Q2YWB4\_STAAB  
mtigidkinfyvpkyvdmaklaearqvdpnkfligigqtemavspvnqdivsmganaakdiitdedkkkigmvivate  
avdaakaaavqihnl1giq  
pfarcfemkeacyaatpa iq lakdylatrpnekvliatdtarygl nsggeptqgagavamviahnsilalnedavayt  
edvydfwrptghkyp1vdg  
alskdayirsfqswneyakrqgksladfaslcfhvpftkmgkalesiidnadettqerl rsgyedavdynryvgni y  
gsl yslisl1enrd1qag  
eiiglfsygsvgefysatlvegykdh1dqaahkal1nrtevsvdayetffkrfddvdfdeqqdavhedrri fylsni  
ennvreyhrpe  
>tr|Q2YWB5|Q2YWB5\_STAAB  
mqsl dknfrhl srqqk1qq1vdkqwl seeqfnillnhplideevanslienviaqgalpvgllpniivddkayvvpmmve  
epsvvaasygaklvnqtg  
gftkvsserimigqivfdgvddteklsaeikalenqihkiadeaysikarggyqriaidtfpeqqllslkvfvdtkda  
mgnmlntileaitaf1kn  
efpqsdilmsil snhatasvvkvqgeidvkd1argertgeevakrmerasv1aqvdihraathnkgvmngihavvlatgn  
dtrgaeasahayaskdgy  
rgiatwrydqrqr1igtievpm1aivgggkvlpiakaslellnvdsaqelghvvaavgl aqnfacaalvsegiqqg  
hmslqykslaivvgakgde  
iaqvaaalkqep rantqvaerilqdlrsqq  
>tr|Q2YWB6|Q2YWB6\_STAAB  
meykkilir1liafav1fsadftyqsveqthqshaavnysknqctwwafkrraqvgkpvsnrwnagnaknwyynarkskya  
tgrtprkfavmqstaggiy  
hvaavveqykngsikvsey nfy rplky ntrilskaarnfnyiy  
>tr|Q2YWB9|Q2YWB9\_STAAB  
mndyvqallmi11tvvlyfakrlqqkypnpflnpalialgiifvllifgis yngymk gswinhilnatvvc1ayply  
knreki kdnvsii fassvlt  
gym1nfm1vfl1tkafgyskdvi vt11prsitaa vgievshe1ggtdtmtvffiittg1igsilgsm11rfgrfessiak  
g1tygnashafgtakalem  
diesgafssigmiltavissv1ipvl11lly  
>tr|Q2YWC0|Q2YWC0\_STAAB  
makikanealvkalqawdihlygipgdsidavvds1rtvrdqfkfyhrheevaslaaagytkltgkigvalsiggpgl  
ih11ngmydakmdnvpqli  
lsgqtnstalgtkafqetn1qklcedvavynhqiekgnvfeivneairtaye qkgvavvicpn11tekikdttnkpvd  
tsrpi vvspkykdikkavk  
linkskkpvm1igvgakhakdelrefiemakipvihs1pakti1pddhphysignlgkigtksyqtmqead11imvgtny  
pyvdy1pkknika iqidtn  
pkni ghrfninvgi vgdskialhq1tenikhvaerpflnktlerkavwdkwmeqdknnnsklrperlmasinkfikdda  
visadvgtatvwstryln1  
glnnkfi1ssw1gtmgcglpgamaskiaypnrqai aiagdgafqmvmqdfatavqyd1pl1tvfvlnnkqlafikyeqqaa  
geleyavdfsmdhakfae  
aaggkgytikasevdaiveealaqdvptivdvydpnaaplpgkivneea1gygkwafrsitedkyld1dqippisvaa  
krfl  
>tr|Q2YWC2|Q2YWC2\_STAAB  
mtegl1vaekeievngydidamgvvsni viyirw fed1rtafin qhmystminqgispi1mkteaeykvpvtihdkpvg  
riylvkaskmkwvfqfeiv  
sahgvhctgtqggfyr1sdkkitsvpqvfq dilatk  
>tr|Q2YWC4|Q2YWC4\_STAAB  
mrkkwst1afgflvaayahiri kekrsvksym1eggir1srakrrfmykeeamka1ekmapqtageyegtnyqfkmpvtv  
dkhygstvytvndkqdkhq  
rvvlyahggawfqdp1kihfe fide1aet1nakvimpvypki phqdyqatyvl fekl yhd11nqvadskqivvmgdsagg

Tsompanidou\_et\_al\_Supplemental\_FASTA\_File

qjalsfaqllkekhivqpp  
hivlispvldatmqhpeipdyllkkdpmvgvdgsvflaeqwagdtpldnykvspingdlgldgritltvgtkevlypdaIn  
lsqllsagkiehdfipgyy  
qfhiypvfpiperrrflyqvkniin  
>tr|Q2YWC5|Q2YWC5\_STAAB  
misnklaniipsyfghtmgrkiehgp1p1inmavgipdgptpqqiidhfqkaltipenqkygafhgkemfkqaivdfyqr  
qydvtdkedevci lygtk  
nglvavptcvinpgdyvllpdpgytdylagvlladgkpvplnlepphylpdwskvdsqikdtkliyltypnntgst  
kevfdeaiakfkdttdtkiv  
hdfaygafgfdaknpsilasengkdvaieiysskgymsgfrvgfavgnkdmiqalkkyqthtnagmfgalqdaaiya  
nhyddfleeqsnvfkarrd  
rfeamlakadlpfvhakggiyvwletppgydseqfeqlvkeksilvapgkpfngnryvrisalddqqldaairlt  
elaylye  
>tr|Q2YWC6|Q2YWC6\_STAAB  
mlevkydmrtghytpinephylvishadklatekaklrllikqkl dislaesvsspiasehvieqltlfqherrql  
rpkiatflawlliflmfa  
lpigiayqfswfqnqyvsawiey1tqt1lnhdilqhilfgdygvlslgtyslvwalpvvilislstavidqgtgkswm  
iwaiepsmlriglqgndiv  
pllegfgcnaaa isqaahghtctktqcmsl isfgsscsyqigat1svfsvagkswlfmpylilvllggilhnriwlkkn  
dqqlsvlpydrqlhmpni  
rqmllqmwqniqmfi vgalpifitictlsvils1tpilnvl sqiftplsl1gissel spgil fsmirkdgmllfnlhqg  
allqgmtatqllllvffss  
tftacsvtmtmllkhlggqsa1kligkqmvts1slvigvgiivkivmlii  
>tr|Q2YWC7|Q2YWC7\_STAAB  
mkiviiggf1gggkttvlnhllaeslkesl kpavimnefgkmsvdgalvsediplseltegciccamkadvselhqlyl  
keqpdivfiecsgiaepvs  
vldacltpilapftti thmigvidasmykhiksfpkdiqglfyeqlaycsvlfnkidsadvettskllkdlevinpead  
iqvgmhgsvtlpi svrqmt  
atsdnkhkslhqminhqfvqspvkctkaefikrlac1pshiyrlkgfmr fedtthtyliqftqgqyeltpvafskkvey  
1vl igk gskedyqcleq  
>tr|Q2YWC9|Q2YWC9\_STAAB  
mtkivlitggnglgyasaealkalgykvyigsrndvrgqqasqklgvhyvqldvtsdysvknaynmiaekegrldilin  
nagisgqfsapskl tprdv  
eevyktnvfgivrmmntfvp1lekseqpvvvvssglsgf gmvtnsetaeskvns1aycssksavtm1tvqyakglpnmq  
inaadpgatntdlvgdfsn  
nskhvsegikpiiq latigvdgptgtfingdgempw  
>tr|Q2YWD1|Q2YWD1\_STAAB  
mslnkeqrritaeelqahfeest1svqmi aeklnvttedvekal amkaplgi fshqlqr fihlvwdvrnvindnikengq  
tpesytylkgekeeywflr  
>tr|Q2YWD2|Q2YWD2\_STAAB  
mkdilvigatgkqgnavvkqll edgwyvsaltrnknrk1sdighph1sivegd1sdsvs1ql amkggsmaytvfsqslk  
mm1tkn  
>tr|Q2YWD3|Q2YWD3\_STAAB  
mkkieiaeqeniqhivystaggnrnrtpghfevlakienrlmesninatvikpsffmdnflriakvederitlpefinp  
nikftmissidiakiasyi  
fahpqsftqhsieigsdevt1seatifsevtgkstviegefsvgvaekqwl eekgyevdfelmaeinptr1slsdwlkv  
qdynk  
>tr|Q2YWD4|Q2YWD4\_STAAB  
miqsmwfn1hvdleksaqfykalgfk inrnpqml dkmvgiqigqttvilienkhfnvsqqs1ntepnevms1lgvntn  
eevdqlnkvkeaggtvvq  
eptvsqgfygamfkdldghhfnflvc  
>tr|Q2YWD6|Q2YWD6\_STAAB  
mtsifvfaylnntsgnm1frqmqiac1lanvrhsstvc1nntcrivdmrc1ntkiggidvsetdepqgfehthnilnin  
qnsks1mtf1tsklksklk  
qriiiaargkkridyr1synfyttydnveikkidceytyampiaailrhmsfdnthffaqlrhpvl  
>tr|Q2YWD8|Q2YWD8\_STAAB  
mtsikt1tpkdf1frv1sgvaigivag1vpdailgeifkyfmdyhipfkt1lgvvvaiqftvpaligalvamkfd1spla  
iavvasaayvgsgaaqfkn  
gawmitgigdlintmitaaia v1filli qhrvgsma1ivfptvvggisgaigvlilpytkmittaignmvngftelqpiv  
msilismvflis1isp1st  
vaiafaigt1laagsasigisateavliigt skvnr1gvplsvffggvkmmipnmvkypilmlpil ttaivsglvsa1v  
gihgtkesagfgfimgvpg  
inafkfmevdsawlsvllivva1fvvpvtawladiiyrkvfrlytndifkfmg  
>tr|Q2YWE0|Q2YWE0\_STAAB  
mainiieynrsykeelief1lsiqknefnidrndqpdeniehn1nsggqf1wainnhqni vgtig1irlndnmsa1  
kkmfvdegyrn1kigkkl1  
dkvimtcke qnidgiylgtidkfi saqfyfysnngfreikrgdlpssfpldvdnrfyynlkd  
>tr|Q2YWE1|Q2YWE1\_STAAB

Tsompanidou\_et\_al\_Supplemental\_FASTA\_File

mdtkdfkrlekmysprylpgldglrafavigiyyhlnaqwlsggflgvdttffvisgylitslliseyyrtqkidllfww  
krrlkrllipavlflicvvl  
tftliffkpeliiqmkrdaiaaifyvsnwyyisqnvdyfnqfaieplkhlsalaeefy11fplvitfllhrfkprniiq  
tlfivslislgmivihfi  
tgdnrsrvyfgdtrlqtlllgcilafiwppfalckdiskivvsldiigisgfavlm1ffivgdqdwiynggfyyisf  
atlfiaiaavhps1fakf  
lsmkplliigkrsyslylwhypiiivfvsyyvqqqipyvyiieilltalmaeisyrfietpirkkgfakaf1pkksq  
fartalvilllipsisivls  
gqfdalqkqheakktefkttkkkvkkdkqedkqtanskedikssplligdsvmvdignvftkkipnaqidgkvg  
rqlvdaapivksqykyak  
kgqkvvvelgtngafktkdqnelldsfkgkadiylvsirvrprdyegrinkliyeaaekrsnvhlvdwykaseghpeyfayd  
gihleyagskaltdlivkt  
tethatnkk  
>tr|Q2YWE2|Q2YWE2\_STAAB  
mltvqkkckhsnwytfnadllgtdyimitkstrylisvivcfvakl  
>tr|Q2YWE3|Q2YWE3\_STAAB  
mkkivtatiataglatiafaghdqaaeqnngngnsnaqsystytidaqgnyhytwtgnwnpsqltqnntyyynnynt  
ysynnesynnyynhsyqyn  
nytnnsqtatnnyyggsgasysttsnrvhvttaapssngrsisngyasgsnlytsgqctyyvfdrvggkigstwgnas  
nwasaaassgytvnntpka  
gaimqttqgyghvayvegvnsngsvrvsemnyghgagvvtstrisanqagsynfih  
>tr|Q2YWE9|Q2YWE9\_STAAB  
mqhkhvaiigagaagigmaitlkdfgitdviilekgtvghsfkhwpkstritpsftsngfgmpdmnaismdtspaftfn  
eeh1sgetyaeylqvvanh  
yelni1fentivtnisvddayytiatttetyhadyifvatgdynfpkkpfkygihyseiedfnfnngqyvvggnesgfd  
aayqlakngsdialytstt  
g1ndpdadpsvrlspytrqrlgnvikqgariemnvhytvkdnfnngqyhisfdsgqsvh1pheapilatgfdatknpi1vq  
qlfvttngdik1tthdest  
rypni1fmigatvendnaklcyiykfrarfavlahll1tqreglpakqevienyqknqmyl1ddysccevstc  
>tr|Q2YWF0|Q2YWF0\_STAAB  
myerk1vmqksvl1fapekyniiseiekys1hipdkkailyhntegedisvtyqq1ieqsnkvgnvlashgl1skgdkv1imm  
psiatyelyiaalklgva  
i1pcsem1rtkd1qyri1thgeinavia1epftvefekikeydalkfviagqkdgwisleaekenasnk1emadttrddm  
ail1sytsgtgnpkavthc  
hgwg1fah1qmapkhwl1cined1lwataapgwqkwvswpsfl1svlgsgatafvfngrf1spetyel1lkyqin1vcctpte  
yrmak1qn1ndyd1th1h  
savsagep1nrevveqfkkyfn1tvr1dgygqtest1ligfl1kdtpprigrismgkigpssvtvvddegnsvpantkgniav  
p1d1pal1fkgyykeperta  
kaqtgkyi1tgdlahvdddgyfwfegrrddi1ssgytigpfevedal1tnhpavkecavvakphdirgnivkafvil1qd1h  
taandt1vke1qqfvknev  
apykypreiefvdd1pktnsgkirrvel1rdaeiekwqqkdsnq  
>tr|Q2YWF1|Q2YWF1\_STAAB  
mh1rks1ql1pl1lkfil1nal1igivi1v1thtefql1nagdsnvfl1nwdirgl1tsyifsf1il1val1vskl1il1ifitrrqr  
ts  
>tr|Q2YWF2|Q2YWF2\_STAAB  
maksnskdiv1ligav1sttfgsm1keiepwnihvyer1drpaiessnernnagtghaal1celnytv1lqpdgsidieka  
kvineefeis1kqfwgh1lvk  
sgsienprefin1plphisyvrgknnvkfl1kdryeamkafpmdnieytedievmkkwipl1mmkgrednpgimaaskideg  
tdvnfgel1trkmaksieah  
pnatvqfnhevvdfeq1sngqwevtvkncl1tgekfkqvt1dyvfigaggaip1l1qktgipeskh1ggfpi1sgqfl1actnp  
qvieqhdakvygkeppgtp  
pmtvph1dtry1dgqr1t1l1fgpfanv1gpkfl1kngsn1dl1fksvktynit1l1aaavkn1pl1kysfdqvimtkegcmnh1  
rtfypearnedwq1lytagk  
rvqvik1dtp1ehgkfg1qfgtevvnsqdhtvia1l1gespgastsvsval1evl1ernfpeyktewap1k1kmpsyges1ied  
ek1mrki1rkqtskd1el1gy  
yen  
>tr|Q2YWF4|Q2YWF4\_STAAB  
mr1kvl1ihfiaa1fisfm1lwmtil1fdi1sdqsh1kd1ll1n1dfl1psdntpytleiich1l1l1gsviyfvfvl1l1fhtskr  
lyyl1cyipl1ff1fial1ypf  
lviaqrpi1fqfsvtel1igwiithiffms1malviprik  
>tr|Q2YWF5|Q2YWF5\_STAAB  
mgsffnki1arkedpai1qnkdgh1krt1rvrdfl1al1gvgtivstsi1ft1lpgivaaehagpavals1fl1aaivag1lvafty  
aemaaamp1fagsayswv1v  
l1fgeffgw1vawall1aeyfiavafvasgfsan1rg1lvkpi1gielpaal1sn1pfgtnggfidi1aaivill1tal1l1srgm1se  
aarmenil1vil1kvlai1lf  
vivgl1tainvsnyvpfi1pehkv1tat1gdfggwqgi1yagvsmi1flayig1f1dsiaansaeald1p1qktm1prg1il1gsl1svaiv1lf  
iava1lv1gm1f1hysq1yann  
aepvgwal1rqsghgvvaaivqaisvigmftal1igmm1l1agsr1l1ysfgrdg1l1psw1lsh1ndkh1l1pnral1vil1ti1gvl1ig

Tsompanidou\_et\_al\_Supplemental\_FASTA\_File

smfpfaflaqllisagtlva  
fmfvslamyrlrkregkdllpipafklplypvlpavtfvllvfwglgfeaklytlwifvigiilylsyglrshskndva  
eyhpk  
>tr|Q2YWF7|Q2YWF7\_STAAB  
mtnlvlyghgtlgtlmaglllegtatinelehgngiatltsdgevi fldgkayhanehkefielkgdekvpysitnfk  
asktfplqqlsqddvfaqi  
knemlsenlfsavkiygi fkhmhvrmmpaqppytr lidsarrqpeekrqdirgai vgfftpel fhgvsagfhihfadd  
eraygghvldfevddvvve  
iqnfetfqqhfpvnnetfvkakidykdvaeereae  
>tr|Q2YWF8|Q2YWF8\_STAAB  
mlsvai igpgavgttiayelqqs lphttligrhaktityy tvphapaqdivvkgyedvtntfdviiiavkthqldaviph  
lthlahedtliilaqngy  
qlehipfknvcavvyisgkkgdvvthfrdyqlriqdnaltrqlrdlvqesqidivleaniqqaiwykllvnlginsit  
algrqtva imhnpeirtlc  
rqllldgcrvaqaegl n fseqtdtiitiyqgypdemgtsmyydivhqpleveaiqgfyr rarehndtpyl dtiysf  
lrayqqnm  
>tr|Q2YWG2|Q2YWG2\_STAAB  
mnqyl lgnpkltvthvnevkaginhivvds vqygnqemimekdvtemrdgeklyinifrpnkdgkfpvmsadtygkdn  
kpkintmgalwptlgaip  
ssftpeespdpgfwvpndyvvvka lrgsdkskgv l spwskreaedyeviewaanqswsngnigtngvsylavtqwvva  
slnpplkampiweglndm  
yrevafhvgipdtgfyrfwtqgi farwtdnpi ealiqaqqehpl fddfwkqrqvp l sqiktp l l tctswstqgl hnrgrs  
feefkqaaseekwlyvhgr  
kewesyarenlerqks fdfyl keenndwkdtp hviyevrdqfykgefksasafpl pnteytplylnaentlnhvki s  
sahvaqdsedkrqdvsk  
ytfdkdte l vgnmlklwvsttdsdmd l fagikk l drrgnev n fpdfnhiengqvatgw lrvshrel dqekstiaqpw h  
khetelkl sqdeivpeie  
llpsgt l fkgget l evvkgseivignstpgmkt tryeheetv nkgmhmiy tggkydsqliipivn  
>tr|Q2YWG3|Q2YWG3\_STAAB  
mtidrri rksqvamrnafiel l hqhql eei tvqqi ad l advnrstfythydykdllekledqqleer gfi hdek l nga  
vklstdnihk imtvliemi  
ekdivfyql mfrmgkdsniheklydl imchl qryknendq ingipfsy fmsyvsvalslirhwvedpnridkvd l irhf  
ntivnggpati i kniq  
>tr|Q2YWG4|Q2YWG4\_STAAB  
mtal fpyiafenskeal tyeevf gatdvkr l evgee qashfgmt keeaqdatmhaefvlgvklcsdsfgradkinng  
isl lidydvnkedadkve  
afyeqikdhssieiel pfadqfwgkmg i ftdkygvrwmlhgqdytaiqq  
>tr|Q2YWG5|Q2YWG5\_STAAB  
minaepi i skmnqkinydkvlkk l igwarea irpki llhscapcstytlefltkyadiaiyfansnihpkney l rra  
kvqeqfvedfnrktganvk  
yieapyep hkfvmvkdkeladekegg l rctacfem r l divakaavehgydyfgsait l spknaqlinelgmdvqkiyd  
vnylpsdfkkskgyersie  
mcndyni frqcygcgvfaamqqgidfktvnkeakafleqypd  
>tr|Q2YWG7|Q2YWG7\_STAAB  
myklikpflfkiepekahgl tida l kt l qkfpvl fpvdk l ftyknpt l sqtiqngtydnpiglaagfdkscevpkaleh  
lgfgale l ggi t p k p p g n  
pqrprf r l l eddal inrmgf nni gmka l sh l rknayqvpvgi nvgv n k m t p y e a r y q d y i k v i d t f k h d v s f f t v n i s s  
pnten l q n f h d k d e f s m l c  
qa l t t f k k q h d v t v p i y l k l t s d m d f d g l k a l l p a i t e t f d g i l a n t t r q r d g l t s a n k v e e g g l s g r p l f e r n l k l i k  
y a y q q t n g e f l i i g t g g v f  
s t e d a i k m m r h g a s l i q i y s s l v i e g p g l t k k m n k g i a r y l k d h h f d n v s d i l g l d a  
>tr|Q2YWG8|Q2YWG8\_STAAB  
mneqwl eh l p l k d i k e i s r v s g g d v n e a y r v e t d t d t f f l l v q r g r k e s f y a a e i a g l n e f e r a g i t a p r v i a s g e v n g d  
a y l v m t y l e e g a s g s q r q l  
g q l v a q l h s q q e e g k f g f s l p y e g g d i s f d n h w q d d w c t i f v d k r m d h l k d e l l n r g l w d a n d i k v y d k v r r q i v a e l e  
k h q s k p s l l h g d l w g g n y m  
f l q d g r p a l f d p a p l y g d r e f d i g i t t v f g g t s e f y d a y n k h y p l a g a s y r l e f y r l y l l m v h l l k f g e m y r d s v a h s  
m d k i l q d t t g  
>tr|Q2YWG9|Q2YWG9\_STAAB  
mstvsdi f k t n s a s s i k s a v e t c n n v s k p d k e s t t v s g n n y a h s v i d d l i s k n q s v a e a i l t a s d n i q k v g e a f d q t  
d v m i g n e i g k n  
>tr|Q2YWH0|Q2YWH0\_STAAB  
msikldg j n k m j t a k h k q m d d l y d e k q e v k a l i d e s d a l n h s i e q l y q h l g e r y s s n m a s r m e q f r d e f h f a k r r s t e a  
l y e q q q i q h g i r k a e e m  
i d l e m r r n i e i e m v t k e e n k w k q  
>tr|Q2YWH1|Q2YWH1\_STAAB  
metigsiiylkegsqklmiinrgpiveienqkyifdysackypigvvedeiyyfneeni ds vi fkgysdqdevrfqel fd  
nmkqnl dseiqrgevtqq

Tsomanidou\_et\_al\_Supplemental\_FASTA\_File

>tr|Q2YWH2|Q2YWH2\_STAAB  
 mtti eclsqsfeltvaslslikkhtntfrnvdefstiaevflililkflkdrsilyks

>tr|Q2YWH3|Q2YWH3\_STAAB  
 mniydeyrsyvieeldcltiqknndtayydvleaindlsndtlcvlnhlyinegqeetfeqkflqrnkhlnkvdfgkalf  
 rflrprtagrhyiiitlwe  
 nrqafyhwnsaeykhthkhrgtstkgadvkiinrelysynirieladr

>tr|Q2YWH6|Q2YWH6\_STAAB  
 mkkridylsnkqnkysirrfvtgtsvvgatilfgighqaqaseqsndttqssknasasekntietpqlnttand  
 tsdisantsanvdstakp  
 mstqtsnttttepastnetpqtaikdqataakmqdqtpvqpeansqvdnktndansiatnselknpqslldlpqsspqti  
 snaqgtskpsvrtravrs  
 avaepvnaadagktnvndkvtakdfqlekttdpnqsgntfmaanftvtgqvksdyftaklpdsvtgngdvdsnsnn  
 tmpiadvndknevvakat  
 ydiltktytfvftdyndkqninqkfsiplftdrakapksgiydaniniademfnkitynyssiagidkpnganiissq  
 igvdtasgqntykqtvfv  
 npkqrvlgntwvviqyqdkieessgkvsatdtklri fevndtskl sdsyadpndsnlkevtgefnnri fyehpnvasi  
 nfgdinktyvviveghydn  
 tqknlktqviqenidpatgkdysi fgwnnenvvrygggsadgsavnpkdptgppvdpepepeptpdpepspdpept  
 pdpepspepdpsdsdsds  
 dsdsdsdsdsdsdsdsdsdsdsdsdsdsdsdsdsdsdsdsdsdsdsdsdsdsdsdsdsdsdsdsdsdsdsdsdsdsdsdsdsds  
 dsdsdsdsdsdsdsdsdsdsdsdsdsdsdsdsdsdsdsdsdsdsdsdsdsdsdsdsdsdsdsdsdsdsdsdsdsdsdsdsdsds  
 dsdsdsdsdsdsdsdsdsdsdsdsdsdsdsdsdsdsdsdsdsdsdsdsdsdsdsdsdsdsdsdsdsdsdsdsdsdsdsdsdsds  
 dsdsdsdsdsdsdsdsdsdsdsdsdsdsdsdsdsdsdsdsdsdsdsdsdsdsdsdsdsdsdsdsdsdsdsdsdsdsdsdsdsds  
 dsdsdsdsdsdsdsdsdsdsdsdsdsdsdsdsdsdsdsdsdsdsdsdsdsdsdsdsdsdsdsdsdsdsdsdsdsdsdsdsdsds  
 dsdsdsdsdsdsdsdsdsdsdsdsdsdsdsdsdsdsdsdsdsdsdsdsdsdsdsdsdsdsdsdsdsdsdsdsdsdsdsdsdsds  
 dsdsdsdsdsdsdsdsdsdsdsdsdsdsdsdsdsdsdsdsdsdsdsdsdsdsdsdsdsdsdsdsdsdsdsdsdsdsdsdsdsds

>tr|Q2YWH9|Q2YWH9\_STAAB  
 mlsvkkatkfavanliivstvfsvtpaiaqsdkskdesfavgn tknpknlvlgdgmgpsfntayryyknphakem  
 tpta fdsy lkgtnrtynd  
 pkqni tdsaa gta fssghktyngaigvdsnkqkvkvtvlkrakekgkstglvstaeltdatpaayaahvtsrddkneiak  
 qfykdkingkhkvdligg  
 gakyfgksngnl dkkfkkdgydlatnskelksdkdkvlglfadknmplaidaskdepsladmqqsalsklernkkgffl  
 mvegasi dksahsnditgv  
 msemegfeka fddai yakkkhkd tlvatadhstggl t igkdkgyewnpqpi ksmkhsgsymtekmakgedpekvinegy  
 gfe fsqddmkkvkkenkk  
 krllkkekeksaevetqtka lqh a i qkp vndksytgwtsdghtgedvntyaygprsesfsgnientesaki ifdfk

>tr|Q2YWI0|Q2YWI0\_STAAB  
 mlvm l splli i f fi v l s i l e e r k r t k k k q l e k e k a n t l n q n t n d t e s s n q e p s l q q a k e q k d d k g

>tr|Q2YWI2|Q2YWI2\_STAAB  
 mtf l k s i t q e i a i v i v i f a l g l m f y l y h l p l e a y l l a l g v i l l l l l i f i g i k y l s f v k t i s q q q q i e n l e n a l y q l k n e  
 q i e y k n d v e s y f l t w v h q m  
 k t p i t a a g l l l e r d e p n v n r r v r q e v i q i d n y t s l a s y l k l l n e t s d i s v t k i s i n n i i r p i i m k y s i q f i d q k t k i h y  
 e p c h e v l t d v r w t s l m i e  
 q l i n n a l k y a r g k d i w e f d e q s n q l y v k d n g i g i s e a d l p k i f d k g y s g y n g q r q s n s s g i g l f i v k q i s t h t n h p v s v  
 v s k q n e s t t f t i q f p d e

>tr|Q2YWI3|Q2YWI3\_STAAB  
 mllevkhvkkvygkgl natta lnqmn lsvgagefvaimgesgsgkstllnliasfdgl tegdi ivdgah lnmmknkska  
 yrqqmvgfvfyfnl lptm  
 tnkenimplil lagarkkdi eqrvhqltvql hlegflnkypseisggqkriaiaralvtkptill adeptgal dsktsk  
 almm l f q e i h q l e q t i l m v  
 thsnidasyaervi f i k d g r l y h e i y r g e e s q l a f q r i t d s l a l v n g g s v n i

>tr|Q2YWI4|Q2YWI4\_STAAB  
 mklrllwhimrrqfitqrlviipfilavsvlfm i e y t l v s i g l n s y i k q k n d f l v p f i i i a n f f m a l l t f i f i f y a n h f m  
 msqrrkefsifmtlgmtkk  
 smrlivvmetilqfiiisvsvsiaggyllgai fflfiqkimgsevatlryppfdsvamfitliiia v l m g m l l i f n l f s i n  
 fqrpi tyqhhsdssvisrw  
 lryvlivigsaalylygfialqddttfgaffkiwiviglvii igtyaffvgiseiiisilqqvskvyhpriyffvvgmrv  
 r l k m n a v s l a t i l l c t f l  
 ivtltmtl t t y r d m n h t i k l i t n d y d l s f s d n s k s q i e r q t i e n i k r d i g g s v n a k d f k v y e t t l f r a s l e k n r a y y k  
 lkqasddipidfignevs i  
 fskqsvmital tvqdynryhqnklhldnqsigmitnvpi fkkqskvg l nnevfkvkqldaha l n l m m i q d s m v l i v k d n n  
 qlqkvkgfyah eqknstis  
 infnvs g k t l t t s q i k l s k k y d a s i n s k s e m l m v w d r l t g g l i f v g g v s i v i v i g i f l m m y y k v s e a y a n q h n y d i  
 m k k l g l d n g r i a k i t r n q m  
 t f l f a i p m t v a l i h t l i s s n i v y t l l n m i g i n n h h i f l t s y v l a v i i s f l y m a m y k i t s y i y a k v i h q q r n

>tr|Q2YWI5|Q2YWI5\_STAAB  
 miimrgynerycswtntai qcdyfnkvrqvkdkgdksdr l s n n i n s n i i y r v l e k c i t l y n v c s r y k r a l i l s e h s k k n i f  
 nikkav

>tr|Q2YWI6|Q2YWI6\_STAAB  
 mnnrnvydievsdykg l t y k l e a f r g k v i l v n t a t e c i y s e q l k k l e t l f q k y k d r g f v v l s f p n n n f d n r q p g s n e e i

Tsompanidou\_et\_al\_Supplemental\_FASTA\_File

lkisrekfgvtfpvlakis  
vngndehplfthlkneqpgifgspikwnftkfiidrqnvnvnrflpmedpldisanieillqess  
>tr|Q2YWI7|Q2YWI7\_STAAB  
mklnstnsnpftekqvteinnllqtltessqqwlsqfllaksndttsdsnqqqltevwqqsqiseeqatsttymlnqkep  
hieanqrhvtllygsesgn  
amrlaeifserlsdighqvvmmsmdeydttniaqledlfiiitsthgegeppdnawdffefleddnapnlnhvrysvlalg  
dqtyeffcagkdvdalle  
nlgaerickrvdcdidyedaekwmadiiniidttsegiqsesvisesiksakekkysksnpyqaevlaninlngtdsnk  
etrhiefllddfsesyepg  
dcivalpqnpeleveklismlgwdpqspvpindhgdtpivealtshfeftkltpllknadiyfdneelseriqdeswa  
reyvinrdfidlitdfpti  
elqpndmyqilrklppreysi sssfmatpdevhitvgtvryqahgrerkgvcsvhfaerikpgdivpiylkknpnfkfpm  
kqipvimigpgtgiapfr  
aylqereelgmtgkwlffgdqhrssdflyeeieewlengnltrvdlafsrqehkeyvqhrimeeserfnewieggaa  
iyicgdekcmakdvhaik  
dvlvkerhisqeeaelllrqmkqqqryqrdvy  
>tr|Q2YWI8|Q2YWI8\_STAAB  
mmplmldltnknvvi vggvvasrraqtlsqyiehimvispeiteklnmvdkgvviwekefepsdivdaylviaatn  
eprvneavkqalpehalfn  
nvgdasngnvfpsalhrdkltisvstdgaspkltksimaealelyppsissyidflytcrqkikvl dmnhsekqllsq  
ivtkeflndtkqaqflawl  
dkq  
>tr|Q2YWI9|Q2YWI9\_STAAB  
mssdnmmltvmgliiisivgl liakkinpvvgmtiipclgamilgysvtdlvvffskgl dqvinvvimfifaiiffgim  
ndsglfkplvkrliimtrg  
nvivcantaligtiaqlfdgagavtflsipa llplykalmnkyllil lla saaimnvpggpmarvaavlkaksvn  
elwyglipiqiigfilvm  
favylgfkeqkrikkaierne lptqdidvhklvevyerdqdrfpvkgrartkp wikvntaltlavilamlniappe  
fafmigvsalvinfksvd  
eqmerlrahapnalmmaav iaagmflgvlnetgm lkaiatnl kvipaevgpylhiivgl lgvpldl ltstdayyfav  
piveqtagqfgvpsvstay  
smvigniigtvsvfspa lwaiglaeanmgyikyaffwiwgfai vmlviamlmgivti  
>tr|Q2YWJ2|Q2YWJ2\_STAAB  
mkkekvmwttfigtvavll favipmmafpkaskdiitginsaisdsigsiylfmg laifcfvmyiafgyknvtlgkas  
dkpefntftwaamlfcagi  
gsdilywgvieawafyyqvpngaksmsdealyatqygmfhwgpiawaiyvlpalp igylvfvkqkpvkyisqacrpilk  
gtdkfvgkvvdilfifgl  
l ggaatslalgvplisagierltgldgknmilrsail ltitvifaissyglkkgiqklsdinvwlsvllafifiigpt  
vfimettvtgfgnm lrdff  
hmatwlepfggikgrketnfpqdw ti fywswwlv yapfiglfiariskgrrlkevvlgti iygltgcvlffg ifgnyavy  
lqisqfntqylnthgte  
atii evvhlpfplmivlflvsaf lflattfdsgsyilaasqkkvgeplranrlfwafalc lllpfs lmlvggerale  
vltkasilasvplivifif  
mmisfl iilgrdrikletraeklkeverrs lrivqvseeeqddn l  
>tr|Q2YWJ3|Q2YWJ3\_STAAB  
mmyggammlsqnkqqleqakdivinsigqtm dlygtnsvgnlygtmvfegsmtldemrhqlqmskpsmsagvkk lqe  
fdivkqgftgrsrkqhfa  
ekdffiffrnfftkkfqreidinveavkdaqai npllessdlteaetqeaqkikaql dhthvyewleql teaiesgei  
fkyfpipeqpsden  
>tr|Q2YWJ4|Q2YWJ4\_STAAB  
mellkhl srqyidgewvesankntrdi inpynqevif tvsegtkedaerailaarrafesgewsqetaetr gkkvraia  
dkikehrealaretldtg  
ktleesyadmd dihnvmyfagladkdg gemi dspipdteski vkepvgtqitpwnypl lqaswkiapa latgcs lvm  
kpseitpltti rvfelmee  
vgfpgtinl ilgagsevdm sghekdvlvsftggietgk himknaannvtnia lelggknpni ifdadfelavdqal  
nggyfhagqvcsagsrilv  
qnsikdkfeqalidrvkkik lgnfgdadtemgpvistehrnkiesymdvakaegatiavggkrpdrdd lkdglffeptvi  
tncdtsmrivqeevfgpvv  
tvegfeteqea iqlandsiyglagavf sknigkaqr vankl lgtvwindfhpy faqapwgg ykqsgigrelgkegleey  
lvskhiltnnpqlvnwfs  
k  
>tr|Q2YWJ7|Q2YWJ7\_STAAB  
mlnndheiedtkivgdscphlyeilif tksy llkrsqtmivinkygnelvidik  
>tr|Q2YWJ8|Q2YWJ8\_STAAB  
melqqai anrrsvkkfkr dmhiddal lyqai ekatdapnhgmrepwrvvhv pkdr lgdmskdiskfafpnel dkqqchyd  
avtklggml lllilkt dprq  
rqndenyafagayaqlml llyeagigtcwksplyiydpkvrktlgikkdevlagflyltdleedmpkaprknrlitly  
>tr|Q2YWK1|Q2YWK1\_STAAB

Tsompanidou\_et\_al\_Supplemental\_FASTA\_File

mjeiktltndfneykr1vstvneeftqsdshysqtmtdtlihdilnqgspkcivfgcyenealiataaleqiryvgkehk  
slikynfvtnndksinse1  
infiinyarqnyes1ltsivsnnigakvfysalgfdilgfeaknaikigntfyfdehwlfydlink  
>tr|Q2YWK2|Q2YWK2\_STAAB  
mvtaiihgfilaislilplgaqnvfi fnqganqpkryrvlpaiitaglsdslliiiavvgvsiiims1pvlqaiiyivgl  
iflmyawtiwhdkpstdg  
eaqimspmkqvsfalvs1lnphaildtigvigssaalysgsnkiaftiacisvswlfffllailgkmvgsidktgkllt  
iinkissiiiiivalmilq  
k1iq1if  
>tr|Q2YWK4|Q2YWK4\_STAAB  
mfmdnhnqcnynpqnvs1dwecfiisksem1ldgvpnelintwldkdiitpfsirndeinfktdkiwdalihhnwysn  
>tr|Q2YWK5|Q2YWK5\_STAAB  
msimnnilsnainivitttffvifnilitynkdlddlcwl1pgiicgvilivsftiamitknwlseilffinivlvlyyi  
ypifysfig  
>tr|Q2YWK7|Q2YWK7\_STAAB  
mnyikrtiil1ilfvvvspinspktiadnkysieiqddkfqlqpgdiiitkgpvmwgffghcsiaiddktilqiegpgdkp  
ttqsfesfkynyasgkndw  
mkvyrcsygagkkaadwvknyentnhrylvtnlnskkftyctkiiyqaykfgvseksvksyglhiispyaikdnfid  
pyk1r1vkay  
>tr|Q2YWK8|Q2YWK8\_STAAB  
mneltkeqkytiakfyklyiersnngeteivanffgdakdarenyfcdryqdf1tncqilinqkyltgevladdniynis  
ilnktfiefeqnfg  
>tr|Q2YWL0|Q2YWL0\_STAAB  
msewhinnqstkpfligqaekqlsivkplpngsfqilteidlengnvsnidhs1lvsvd1kaleisifdavn  
>tr|Q2YWL2|Q2YWL2\_STAAB  
mteyllsagimaism1ligmaisnsvkgqyakrffffatsclv1tlvvvss1ssanasqtdngvnrsgsedptvysa  
tstkk1hkepatlikaidg  
dtyk1mykgqpm1fr111vdtpetkhpkkgyevkygpeasaf1tkkmenakkievefdkgqrdtkygrglayiyadgkmvn  
ka1vrqglakvayvykpn  
theq11rkseaqakkek1niwsednadsgq  
>tr|Q2YWL3|Q2YWL3\_STAAB  
mkrkv1v1tmgvicatq1whsnhana1vtesietnfgvkdsdnknl1qthteitteekfsiveksq1nk1ks1sndnyie  
yd1htngtgi1kgwlygys  
eidsshftdrdrkvi1rrdhvkeags1venykdtqsadarmkakqkvnt1skphqnyfnkqidkvynglqr  
>tr|Q2YWL5|Q2YWL5\_STAAB  
mknk11v1slgalcvsg1wesnrasavvsgeenpyvska1sikgqktnswnl1gqykdsl1rtvmtseinkndgydepeyk  
eamdtyrkk1fael1alnk  
f1deerkiessknnqvpnv1gl1thqrylaiheaikenkneferktqdiessrnpd1kkfdrdkdyevrvk1nelenk  
1mlghafpnqhearenlyn  
k1d1ivgrsddereerhpqndr1skervedlesiiideffveinenrplnivalvesneeniemakk1kadteeaktntak  
rskrs1ntqnyksasqevs  
eqqkaeyerkaeerkekflaknkdpvvs1iddedndndkqlvvsaptkkptsptsytetttqvpmp1tverqtqqqiiy  
ntpqlag1ngeshdfttt  
hqssttsnhthnvvfeetsa1pgrksgslvgisqidssh1terekrvikrehvreaqk1vdnykdthsykdr1naqqk  
vnt1seghqkrfnkqinkv  
yngk  
>tr|Q2YWL6|Q2YWL6\_STAAB  
masv1vg1ligfg1lsskeadasensvtqsdsasieikssdsssvnavp1ktdntnvsdtk1ttsntngetsvaqnpaqqe  
ttqsastnatteetpvtge  
ttatnqantpattqssntnaeelvnqtsnettsndtntvssvnsqpnstnaenvsttqdtsteatpsnesapqstdas  
nkdvvnqavntsaprmraf  
s1aavaadapaagkdi1tnq1tnvtvgidsgd1vypqhagyvkl1nygfsvpneavqgd1fk1itvpkel1ngvtstakvpp  
imagdqlangvidsfgnv  
iy1ftdyvntkenvtani1mpayidpenvtktgnvt1atgigsttanktv1vdyekygfyn1sikgidqidkntntyr  
qt1yvnpsgdnviapv1tg  
nlkpn1tdsnalidqnts1kvykvndvad1sesyfvnpenfedvtnsvnitfpn1pnqykefntpddqittpyivvvngh  
idpnskglalrstlygyn  
sn1iwrsmwdneafnngsgsgdgidkpvvpeqpedgeiepipensdsdpgsdsgsdnsdsdsgsdsgsdstsdsdsds  
asdsdsasdsdsasdsda  
sdsdsasdsdsasdsdsasdsdsdsdsdsdsdsdsdsdsdsdsdsdsdsdsdsdsdsdsdsdsdsdsdsdsdsdsdsds  
sdsdsdsdsasdsdsds  
dsasdsdsdsdsdsdsdsdsdsdsdsdsdsdsdsdsdsdsdsdsdsdsdsdsdsdsdsdsdsdsdsdsdsdsdsdsds  
asdsdtdsdsdsdnasdsd  
sdsdsasdsdsdsd1tgsdndsdsesdsnsdsdsgsnnnv1pns1pkngtnasnkneakdskep1pdtgsegeants1i  
wg1las1gs111frrkkn  
kdkk  
>tr|Q2YWL7|Q2YWL7\_STAAB  
mq1rqihqhd1faqvdl1rtafensehgygnese1vdqir1sdtydnn1el1vav1qnevvggh11sevy1dneaqreig1



Tsompanidou\_et\_al\_Supplemental\_FASTA\_File

vlapvsvdihhqngkigkr  
liqtlereaillkgyfnfsvlgwptyyanlgyqrasmydiypydgipneaflikeikvnslagktgtinytsafeki  
>tr|Q2YWL8|Q2YWL8\_STAAB  
miniisaigsigtfimalfyfvsvsqlyqmki sflpalgfnqilleregqlnimnsateehhkhdyiklynlgggaak  
kiaievllgndkviqkkyv  
nilpskegymlpinknvyeeletiekngyeadlnvrmttyyhnsrkrqqevilkqidirfntynnkeiydlqfi  
>tr|Q2YWL9|Q2YWL9\_STAAB  
mgillastlilgacghhqsakkestshkkkndneelneelkefkskknmdikikgdtivsdkfeakikepfinekde  
kkkyiafkmeitakkddkd  
lnpssishdyinitqddkntvnlrdgyllsdkkykdwtehnqdqikkgktaqamfiyelrgdgninlnvhkysedktvd  
sksfkfsklktedfshrae  
treevekkekefeeykkekerekekekqkdddhsgldev  
>tr|Q2YWM0|Q2YWM0\_STAAB  
mknkfsqf1ksersfsiflslsvliitgsivfnlckngetl1desvvs1aaftmliytsylqnkd1kltrkelemtree  
lkgtkevqekqkdmiksn  
emmketiisryfellrvkedtyklvedekafnlssyrkykltiinklirstnedvmneiledyiinniemsyddikeg  
rlniseyylnsilkkreng  
selneilktvfnnikpscnlelrsnqeklykthkiivdlikyideknrpkgfnskvksindlnlkslldifsdpvvkt  
ytlyelnylmllkeeklfy  
kcvnne1syee1lk  
>tr|Q2YWM1|Q2YWM1\_STAAB  
mykylrkisvatiasfv1vgpvystvesgkanaesakavdkemkqrekignalleidnskkdfkdpvsteklkgqvr  
kngvaergkatitakagak  
airatvknvgekawdklvakienttgk1vmfhyqsinkfcdiltgfegnlaegmatgltnnfgfnkqfayilarafiai  
v1  
>tr|Q2YWM2|Q2YWM2\_STAAB  
mvrlyenskprneiireydltpsalgkwikqhantgtfnhdnl1sdeekeliklrkevqhlkmendilkqaalilashpv  
ivddipld  
>tr|Q2YWM3|Q2YWM3\_STAAB  
mqaiknesfksvtnsdtpv1vkfeagwcpdcramdlw1d1piveqyndyqwytvnrdeledvvenevmgipsllvfkn  
dkiah1hsanakspeqves  
flaetfk  
>tr|Q2YWM4|Q2YWM4\_STAAB  
miai1ilifisffffgsetaltaanktkfktheadkgdkkakgiikllekpsefittilignnvanillptlvtimalrw  
gisvgiasavltvviilis  
evipksvaatfpdkitrlyvpiinicvivrpitlllnk1tds1nrs1skgppqehqfskeefktmlaiaghegalneie  
tsrlegvinfenlkvkdv  
ttr1nvtafasnvayeeyetvmnkpytrypvpyegdidniigvfhskyllawsnkkedqitnysakplfvnehkaew  
l1rkmtisrkhlaivldefg  
gteaivshedlieellgmeiedemdkkekek1sqqaiqfqrknrvsi  
>tr|Q2YWM5|Q2YWM5\_STAAB  
myfvlaitiisavslgysiqacasshninayyalrsrlplfl1aifslvihsaiflitisiamilvqfldaivgyksk  
dafktygplatsvvn1il1  
ivflf  
>tr|Q2YWM6|Q2YWM6\_STAAB  
mpqscicvvalstindyflhqsknrtdinkykaylsirfsytkkatvmw1fvifsikmisitvfd  
>tr|Q2YWM7|Q2YWM7\_STAAB  
mkiknivkssvatsitfim1sntvdaaqhitpvsekkvddkitlykttatsdsdkl1k1sqiltnfikdksydkdtl1k  
aagnysgytqptsdssin  
sqfywgakynvfssesksdsvnivdyapknqneefvqqt1gysyggdiniingltgg1ngsksfsetinykqesyrtti  
drkinhkl1gwgvahkim  
nngwpgygrdsdslygnel1ggrqssnanqnl1p1hqmpilargnfnpef1svlshkqkdvkkskikvtyqrqmdry  
enfwnlhwigyniknkr  
athtsiyeidwekhtvklvasqsse  
>tr|Q2YWM8|Q2YWM8\_STAAB  
mfkrkl1vt1slglivpiatpfqgskattnaedigd1aevikrtevdssrkwgvtqnvqfdfvkdkkynkdal1ikmqg  
finsrttfndvkqnrkr  
mvwpfqynig1tskdqntsl1nyl1pknki1etvdvgqtl1gyniggk1qsapsiggn1sfnysksikysqksyvseveqqss  
ktikwgvkansfviaghrw  
saydel1firnttrgnardyfvdne1pp1it1sgfnpsfiatvshekds1gdtsefeitygrnmdvtyatylpkqglype  
rkhn1efvnrnf1v1kyevnw  
ktheikvkghn  
>tr|Q2YWN1|Q2YWN1\_STAAB  
mmreefeeriknieeqdyrelft1mfytgl1rigeamalvwt1d1nyk1keis1inktmdtsnr1typrpktdssediv1pk  
finkmlterhqrekelny  
f1dersyfi1fggmapkhyshvqkfkafphynihalrshyasy1anngvdi1fv1qslmrhaqitetmgtyshlytqkkhd  
aiaifdk  
>tr|Q2YWN3|Q2YWN3\_STAAB

Tsompanidou\_et\_al\_Supplemental\_FASTA\_File

mnfnndqlyrsvimdhyknprnkglndngsmtvdmnptcgrlrltfdiedgiikdakfegegcsismasasmmtqav  
kgshlgeamqmsqeftkmm  
>tr|Q2YWN4|Q2YWN4\_STAAB  
maehsfdvnevikdfpildqkvngkrlayldstatsqtpvqvlnvledyykrynsnvhrghvtlgsldtgyenaretr  
rfinakyfeeifftrgtta  
sinlvahsygdanveegdeivvtemehhanivpwqqlakrknatlkfipmtadgelnieidikqtindkktivaiahisnv  
lgtindvktiaeiahqgha  
iisvdgaqaaphmklmqemnadfysfsgkmlgptgigvlfkgrellqkmpiefggmidfvskydatwadlptkfea  
gtpliaqaiglaeiryle  
rigfeaihkyeqeltiyayeqmsaiegieiygppkdragvitfnlqdvphphdvatavdtegvavraghhcaqplmkwln  
vsstarasfyiyntkedid  
qlinalkqtkeffsyef  
>tr|Q2YWN5|Q2YWN5\_STAAB  
mttdilniseeqldvyskahnepswmtehrkalkltetlempkpdktlkrwdfdsfkqhdvkgdvyqslsqlpesvre  
iidvdhsknlviqhnntia  
ytqvddnaskdgivkgladalnmhsdlvqkyfmdavtvdehritalhtalvnggvfyvvpknvvvehpvqyvvlhdde  
nasfynhviivteesaevt  
yvenylsnasgegnqlniiseviagansnitygsvdymdkgftghiiirrgiteadasinwalglmnegsqiidnttnlfg  
drstsslksvvtgqki  
nltskivqyketdgyilkhgvmekehassvfngigyikhggtksianqesrvlmlsehargdanpillideddvqaghaa  
svgrvdpdqlylmsrgis  
qreaerlvihgflpdpvre1piedvkrqlrevierkvs  
>tr|Q2YWN7|Q2YWN7\_STAAB  
mqqfkwinilkgfamgtsdlvpgvsggtiallgiynqfiasisnifsrfrwpsftflipiiigmlamgslsnlfnyll  
sqhhiptmffffggligif  
pyllkisnyktsfttkhymmviagiailivitlmngdkhagetlilstgliikyfiagmcassamllpgisgsmllvf  
gyygtvmlaisevklntfa  
glpillaavgfgvlagfiisskiiqyflthhklmtfaliigfvvgs1favfpglptnvmwivslvvfiigfivsltlgri  
taene  
>tr|Q2YWN9|Q2YWN9\_STAAB  
mrgpniddfekkfykqgelggrgpntenfkkkfykcklgladeinfakisflhsqep1hnksivilyyfsrtps  
>tr|Q2YWP1|Q2YWP1\_STAAB  
mgksfseiinemi1mpniqwpevtaivetlymtvstifafilglilglvllflsakgksigarlfysivsfivnlfrai  
pfiilililipfts1l1gt  
isgptgalpalvigaapfyarlveiafkeidkgvieaawsmgantwtvirkvllpeampalvsgitvtaialvgstavag  
vigagglgnlaylgtfrn  
qndvilvstvfiliivfiiqfigdwltnklidr  
>tr|Q2YWP3|Q2YWP3\_STAAB  
mnslidkdvtkfyedkhlifgytptcgtcklsermldianeilqlp1lkidlnfypqfckdmqimstpillmnkdke  
vkriyafksvtd1lenlk  
>tr|Q2YWP6|Q2YWP6\_STAAB  
mthlletfemsihdqedglvii1mpvtdkvkqpfgy1hggasialgetacs1gsanlidttkfiplglemnanhihsaid  
grvtataeiihgksthv  
dikikndkeqlitvmrgtvaikp1k  
>tr|Q2YWP7|Q2YWP7\_STAAB  
minavviavilmi1cl1cl1nvvvis1fisa1vgglisgmsiekvinvfgnivdgaevalsytl1ggfaalisysgitdy  
lvgkiiinahaensrsw  
kvkvtiia1lamsimsqnlipvhiafipivip1l1s1fnd1kidrr1ligliigfglcfpyv1lpygfgqifqqiiqsgf  
akanhsiefnmiwkamlip  
smgyivg1liglyvyrkpreyetrkisdsvntelkpyilivtivilatflvqtftdsmifgalagvlvffisraynwy  
eldakfvegikimayigv  
iltangfagvmatgdidelvktltsitgdnklfsiimmyviglivtlgigssfatipiaslfipfgasigldtmalia  
ligtasalgdsgspasdst  
lgptaglnvdgghdhirdtcvpnflfyniplmifgtiaamv1  
>tr|Q2YWP8|Q2YWP8\_STAAB  
mnfkl1nntisneintliigipehlnqlesisfnhiditeslerlkhqhiigskvgkiyttafdvqdqtyrlitvlglnlk  
trsyqdm1kiwghlfqyik  
sehiedtyllm1sfiskydq1sdvlmacgiqseratyefdhysksskapfktlnliseslieldfihegisigqsina  
rdfs1nmpn1ltpqtfaed  
ivnhfkntkvkvevkdtd1vsegfg1lqavgkgskhkprlv1tityngkdkdeapialvgkitydsggysikmknmat  
mkydmcgaanvvgiieaas  
rlqlpvni1vgv1acaenmineasmkpddvftalsgetvevmntdaegr1vladavyyanqyqpsvimdfat1tgaai1val  
gddkaafesnskvi1ndi  
1q1sskvdemvfelpitaterasikh1sdiad1vnhtngqgkalfaasfvthfsgqtphihfdiagpattnkasynp1kpg  
tgfm1ptivqwlkq  
>tr|Q2YWQ3|Q2YWQ3\_STAAB  
mehsvvvygadvicascvnaptskdiydw1qp1lkrkypnisfkytyiditkdnd1tdhd1qfierieqdel fypl1t

Tsompanidou\_et\_al\_Supplemental\_FASTA\_File

mndeyvadgyiqtkqitr  
idqelvne  
>tr|Q2YWQ7|Q2YWQ7\_STAAB  
mipygdftfflialiallpviihgflgkrsyinyngvvtafmivlifssdkhnllydqkylsvqlisfiiyvwwqvllimfy  
yhskpknnsfskfvvmv  
silplalvkvlqstwlqghqihfheshkiefvgflgisvtfksvqlimeirdgsikeikvwkliqfisffptisspid  
rykrfvkddkkipgtneyr  
elvlkaihmiimgflykyivayfintyaimplqlldhgfvnlwlymyayslylffdfagyslfaiafsyfngiktppnfd  
kpfkaknikdfwnrwhmtl  
sfwfrdcjymrslyfymrkkllksqfamsnvaflinffimgiwhgievyiyvgylyhaalfigygyerwrkkhprwqn  
gfttalsivitfhfvtfgf  
lifsqli  
>tr|Q2YWQ9|Q2YWQ9\_STAAB  
mkskskqppnkyveafkpylltlllylai fitlyliygsdthnnfiynef  
>tr|Q2YWR0|Q2YWR0\_STAAB  
mvkivvsrkkipdkfyqqlsklgdvvmwqkslvmpmkdqfvta lrdadacfitlseqidaeil aqspnlkvianmavgydn  
idiesatennvvvntnptnv  
ltettaelgftlm lai arriveaekyveadawqswgpyllsgkdvfnstigiymgdigkafarrlqgfntkilyhnrsr  
hkdaeadfnatyvsfetll  
aesdfiictapl tkethhfn aafeqmkdai finigrqivdeta lidal dnkeilacgl dvl anepidhthplmgrd  
nvlitphigsasvttrdnm  
iqlcinnieavmtnqvphptvn  
>tr|Q2YWR3|Q2YWR3\_STAAB  
midmylyddneesqvqfvqfgehrydlmlvntnrhygktlvlnmqtnkfgiigtddlkevgyiahilgvnaeegdeit  
eylnevih  
>tr|Q2YWR4|Q2YWR4\_STAAB  
mknlikvdqhyfeli enyrecfnee qfiarysdi ldkydyivgdygdqlrlkgfykdsnkkaemskrfsniqdyifeyc  
nfgcpyfvlrhl skqevkk  
lieevhpsdviddnklqdvkieptiqdteh  
>tr|Q2YWR6|Q2YWR6\_STAAB  
mrltiyhtndihshl heyerikaymaeqrprlnhpslyvdldghvdlsapitevtlgkknvallneakcdvatignegm  
tishaelnhlydeakfivt  
csnvidesghlpnnivssyikdidgkvl fvaatapftpfyraldwivtdplesikeeiehqrgkfdllivlshcgiffd  
etlcqelpeidvifgshth  
hyfehgeinngv lmaaagkygnylgevnltfeahkvvhtakiipletlpevktseegktlmsnpviqhpvvlkrsmnh  
iteaayllaqsvceythaq  
caiinagllvkdivkdevtey dihqmlphpinmvrvr lsgvklkei iaksnkqeymyehaaglgfrgni fgyilynlgy  
ihstgryylngeeieddke  
yvlgtidmytfgryfptlke l pkeylmpelrdi fkekll ey  
>tr|Q2YWR7|Q2YWR7\_STAAB  
mlltitllvligglsaiigsivgiggiiivptlvylgvehgllrnittqiaigtssvilivtglssslgylktkqvdk  
ngsiflfgllpgslgfsf  
sryltfesflfygfli fvaillmvrnkikpfkifdkpkyektyvdakgktyhysvpllafittfligiltglfgigg  
galmtplmlivfrfpphva  
vgtsmmmi ffssvmssighiaqghvawgyaailiissyfgakigvknqsiksdtvvtllrtvmlmgilyliirali  
>tr|Q2YWR8|Q2YWR8\_STAAB  
minigtgwgdhyslyedlerqtdklktyaghfpvvel datyyai qpernilkwiketpdtfefvkihqaltlhadykt  
fadsrqelfdqfknmi ep  
htqkklamvlvqfppwfdcnaqnikyilyvrqqqlqafpmcvefrhqswwsfafkeqtlafltehqi ihavvdepqvkds  
vplvnr itneiafvryhgr  
nhygwtkkdmsdqewrdvrylydyneqelidlaqkaqilaqkakkvyvifnnsngghaannaktyqrllnieyeglapqq  
lklf  
>tr|Q2YWS0|Q2YWS0\_STAAB  
mkkvvkyli slilalaiiivlvqtfvighvipnndmsptlnkgdrvivnkikvtnqlnngdiityrrgneiytsriiak  
pgqsmافرqqlyrddrpv  
dasyaknrkikdfslnrfkelgdgdi pppnfvvlndhgnnqhsrqfglvdkkdiignislryppfskwtiqfks  
>tr|Q2YWS2|Q2YWS2\_STAAB  
mlslyrkiqivliiitavvcfngllntnvtlktnini fvfsgilllaficsayvklnkfk  
>tr|Q2YWS6|Q2YWS6\_STAAB  
mtnssksftk fmaasavftmgflsvptagaeqtnqiankppai qwhntlmnerfttiahr gasgcapehtfqaydkshne  
lkasyieidlqrtdkghlv  
amhdetvnrtnghgkvedytl delkqldagswfnkkykyarasyknakiptldeilerygpnanyyietkspdvypgm  
eqllaslkkhllnnkl  
knghmqsfsdeslkkihrqkhvplvklvdkge lqqfndqr lkeirsyaiglgpdytdlteqnthhkl d l g f i v h p y t  
vnekadmrlrnkygvdgvf  
tnfadkykevik  
>tr|Q2YWS7|Q2YWS7\_STAAB  
mikyivdrli rnsqcwggppq lalsveigspislwgprrlflk

Tsompanidou\_et\_al\_Supplemental\_FASTA\_File

>tr|Q2YWS9|Q2YWS9\_STAAB  
mtksekiieltahyghnylplpiviseagvwwkdpegkymdmlsaysavnqghrhpkiiqalkdqadkvtlvsrafh  
sdnlgeyekickltgkdk  
alpmntgaeavetaikaarraydvkgepnkaeiafngnfhgtrmapvslsseaeayqrgygp1ldgfrkvdfrdvda1  
kaainentaav1vepigge  
aginippegylkaircldehnlfiadeiqaglgrsgklfatdwdnvkpdvylgkalgggvfpi svvladkevl dvft  
pgshgstfggnplacaasi  
aaldividedlpgsrlelgdyfkeqlkqidhpsikevrgrglfigvelnesarpycea1keegllckethdtvirfapp1  
iitkeeld1alekhrhvfq  
>tr|Q2YWT0|Q2YWT0\_STAAB  
mkskyep1fdkvelpngvelrnrflaplthissnddgtisdielpyiekrsqdvgitinaasnvsvdgkafpgqpsiah  
dsdieglkr1atamkknaga  
kalvqihhggaaqalpeltpdgdvvaspislksfgkqkqhsaremtneeieqaikdfgeattraieagfdgveihganhy  
lihqvsvpyynrrndvwan  
qykfpvavieevlkakeaygnkdfivgyrlspeaespgitmeiteelnkishmpidyihvsmmdthattregkyagqe  
r1plihkwingrmp1igig  
siftaddaldavenvgd1vaigre11ldyqfvekikdgredeiinyfdperednhh1tpnlwhqfnegfyplprkdk  
>tr|Q2YWU1|Q2YWU1\_STAAB  
mhwtiiggigqtaiaqk11ssglttldr1tiidphetfcqrfnsytnriempylrspivhhvhppqfhlkqfakqhqytn  
afygyprpel1mfmdhia  
haskqyqlעד1vqglvqtlkqkedkwhiklengqii1ttcdcviaigstnipfmpdilkdqnvnhifekehqvvydkt  
dhivgsgitaah1alk1ln  
hdddkihlwlnkdieihdfdadpgwlgpknmssflstksmpernaivqrerhkgsmphelylrlkkhikngrinvhkt  
itqisggvintendsvpyq  
qimvatgfeqdfmsqpl1kqliqnydapinecnypviseklewiplfvagcfad1elgpfgnrvmggrkaaerieqaf1  
klqqysa  
>tr|Q2YWU3|Q2YWU3\_STAAB  
mvidenkkqltstdfefkdkkinqeflnvknknfwdgwsq1rknklavigmiglimiilfalpapavsqhnsteqnvtd  
rn1pskip11ekvdylpfn  
gkdvngkdytykevgskdyylfgtdqlgrdlwsrtwegaris1figvvaaildifiqvlfgaisgyggkldtimqriiei  
iasipnliiv1l1fvli1fep  
siwtiilamsvtgwisrsvvrgef1kikn1efvqask1lgasn1rlifkhi1pnt1gaiivtsmftvpsaiffaflsf  
igigvpapqts1gslvndg  
ksm1liyphe1fipatils11ilffylfsdglrda1fdpkmrk  
>tr|Q2YWU4|Q2YWU4\_STAAB  
mikyflkri1fymais1vi1ttitff1mk1mpgspfn1dak1spdqyilnekyg1ndpisiqylnymknvftgdfgysfqy  
hnqpvwdiikpr1ipslem  
gitami1gvl1g1ilgvasaakntwidycat1isvlavsvps1vlav11qfvfavl1rwpfvagwegistvilpsfals  
aiviatvtryiraellev1  
ksdyillarakgvpnkrvlythalrna1ip1vtvlvpmmasil1tgt1tieni1fgvpg1gdqfvr1s1atndfpvimmatt1  
fssffivsi1vdmlyiii  
dpri1qggrrnngd  
>tr|Q2YWU5|Q2YWU5\_STAAB  
mtrk1kalilil1vatialsgcanddgiysdkgqvfrk1lssdl1ts1ltds1itdeissevtatqtfeglytlgkdkpvlgv  
akafpekskdgt1kvk1r  
sdakwsngdkvtaqdfvyawrktvdpktgsefayimgdiknasdistgkpkveq1gikalddet1qielekpvpyinq11  
alntfapqnekvakkygkn  
ygaadravynp1fkvdwkdqekt11sknqyywdkknvkl1dkvnykvik1dqagaslydtesvddai1tadqvnkykdn  
kg1nfvl1ttgtffvkmnek  
qypdfknkn1rlai1aqaidkkgvdsvkngsipsdt1takgiakapngkdyastmnspl1kynpkearahwdkakke1gk  
nel1tfsmntedtpdakisa  
eyiksvekn1pgvt1kikq1p1fkqrvs1el1snnfeas1sgwsadypdpmay1etmttgsaqnntdwnkeydq11kvar  
tk1al1qpneryen1kksee  
m1fgdapvap1yqkgvah1tnpqvkg1iyhkfgpnns1khvyidksidketgkkkk  
>tr|Q2YWU6|Q2YWU6\_STAAB  
mkndev11sikn1kgyfnagknevraienisfei1ykgkt1glvgesgcksttgksii1k1nditsgeilyegididqir  
krkd11kfnkk1qmi1fqdp  
yas1npr1kvmdivaegidihh1atdkrerkrvyd11etv1glskehanryphe1fsggqrqrigiaralavepefiide  
pisal1dvs1iqagvvn111k  
1qrekgit1fi1ah1smvki1sdriavmhfgkive1gpaddiyqypl1hdytks11saipqdpesersrkrfsyiddea  
nh1rq1he1rpqhfvfst  
eeeaar1rkn11vtqd  
>tr|Q2YWU8|Q2YWU8\_STAAB  
maenknn1s1ndhsnaamthtsdai1ssdfiire1d1nqepemqresknfwqdawaq1krnklavvgmig1iivifaf  
igpvin1kh1dyaegnvqhrn  
1pakipvl1dkvp11pfdgkdadgkdaykaanakenywf1gtdq1grdlwtrtwkgaqis1figvvaam1difi1gvvygais  
gffggrvdtimqri1levia  
sipn1ivv1l1fvli1fepsiwtiilamsitgw1gmsrvvrgef1k1knqefvmask1lgaskfklifkhi1pnt1gaiivt

Tsompanidou\_et\_al\_Supplemental\_FASTA\_File

smftvpsai ffeaf1sfig  
igvpapqts lgs l vndgram lliyphe l fipamils l l i l f f y l f s d g l r d a f d p k m r k  
>tr|Q2YWU9|Q2YWU9\_STAAB  
mgkyi fkrfiym l i s l f i i t i t f f l m k l i p g s p f n d a k l n a e q k e i l n e k y g l n d p v a t q y l h y l k n v v t g d f g n s f q y  
h n q p v w d l i k p r l l p s f e m  
g l t a m f i g v i l g l i l g v a a t k q n s w v d y t t t v i s v i a v s v p s f v l a v l l q y v f a v k l r w f p v a g w e g f s t a v l p s l a l s  
a a v l a t v a r y i r a e m i e v l  
s s d y i l l a r a k g n s t m r v l f g h a l r n a l i p i i t i i v p m l a s i l t g t l t i e n i f g v p g l g d q f v r s i t t n d f s v i m a i t l l  
f s t l f i v s i f i v d i l y g v i  
d p r i r v q g g k k  
>tr|Q2YWV0|Q2YWV0\_STAAB  
m l k k w l g m a l i t p m l t f i i w v f n s h t i i t y l n i l f y v s l i i f i s i f l i l l v q e g i f d a t s y g f r r l k y q m s s s k k k k s i s  
d d p f f n p q e v k k e h y f v s t  
w i i p l l l i n i l y f i m a i v l s l i l v  
>tr|Q2YWV1|Q2YWV1\_STAAB  
m n n v i l n t f d l k d k n i i f d g k l e k i e y k r k c f f y a k l i y t p e v c p n c n c k n i n g n l i k n g s k t s r i t m p k i s e y p t y i  
m l r k q r f k c k t c e r y f t a e  
t p e v d k y c f i s k k t r s a v l n k a a e i r s e k s i a k s c s v s a t t v s r i d e a a q s l h q s p y s a l p e h i m m d e f k s v k n v s g m  
s f i y a d a q t h h i i d i v e d r  
r l s e l k k y f y r f s l k a r k r v k t v s i d m h e g y m t l i k e m f p n a k i v i d r f h i v q l l n r a l n g i r v t v m n e l r a t n q p l y n k  
f k r y a k l l l k p e e d l e a f e  
y r k v a l f k e w k t q k g i v k y l l d q d d s l n d a y q y i n q l r f k l k h n d y g g f i e l k h m p l s q t h s v v q r a i k t l n k h v y f i k  
n t f d y y n l s n g p l e g i n n k  
i k l i k r t s f g y g s y n h l r n r i l l c s k l y a p k s k e v k q c l v a  
>tr|Q2YWV2|Q2YWV2\_STAAB  
m s q n k r v v i t g m g a l s p i g n d v k t t w e n a l k g v n g i d k i t r i d t e p y s v h l a g e l k n f n i e d h i d k k e a r r m d r f t q y a i  
v a a r e a v k d a q l d i n e n t a  
d r i g v w i g s g i g g m e t f e i a h k q l m d k g p r r v s p f f v p m l i p d m a t g q v s i d l g a k g p n g a t v t a c a t g t n s i g e a f k i v  
q r g d a d a m i t g g t e a p i t h  
m a i a g f s a s r a l s t n d d i e t a c r p f q e g r d g f v m g e g a g i l v i e s l e s a q a r g a n i y a e i v g y g t t g d a y h i t a p a p e g e  
g g s r a m q a a m d d a g i e p k d  
v q y l n a h g t s t p v g d l n e v k a i k n t f g e a a k h l k v s s t k s m t g h l l g a t g g i e a i f s a f s i k d s k v a p t i h a v t p d p e c d  
l d i v p n e a q d l d i t y a m s n  
s l g f g g h n a v l v f k k f e a  
>tr|Q2YWV5|Q2YWV5\_STAAB  
m k l k s f i t v t l a l g m i a t t g a t v a s n e v s a a e k d k l p a t q k a k e m q n v p y t i a v d g i m a f n q s y l n l p k d s q l s y l d l g n  
k v k a l l y d e r g v t p e k i r n  
a k s a v y t i t w k d g s k k e v d l k k d s y t a n l f d s n s i k q i d v n v k t k  
>tr|Q2YWV6|Q2YWV6\_STAAB  
m s d s i n g n p i k s f p f e v t e l p e g t k y l a w s l i d y d a i p v c g f a w i h w s v a n v g v s g n s i s i k a d l s r t k g d y v q g k n s f t  
s g l l a e d f s e i e n h y v g p t  
p p d k d h q y e l t v y a l d h s l n l k n g f y l n e f l k e v n q h k i d q t s i n l i g r k i  
>tr|Q2YWV7|Q2YWV7\_STAAB  
m n l d w y t f v i l a k t l n y r l a s e e i n l t i p s i h k q i k n l e q h l n v k l f e t y k n q i i l t e d g h t f l p i a q n f i e q y e s g i k  
h i q l k k t m f g s k l n v v v s s  
y i a t f i m p k f l k s f f n e h p f i d v s l q v k n e i e k d i n n h t y d i g i s r n q p k l r e v h s e k v c e g k i v l i a p n k e n y l l t e  
a s l f e k y k i i s d n h p e y w s  
s l k n n i l n i y e k a q f l s i n d v h t s i k l i e m n q g i s f l p i y i t t n s n y n i s v i n t k i l q a p i s f t y i y s k k e s p e i l a f i k  
s f k k y i a n e q l  
>tr|Q2YWV8|Q2YWV8\_STAAB  
m d i n k m t y a v q s a l q q a v e l s q q h k l q n i e i e a i l s a a l n e s e s l y k s i l e r a n i e v d q l n k a y e d k l n t y a s v e g d n i q  
y g q y i s q q a n q l i t k a e s y  
m k e y e d e y i s m e h i l r s a m d i d q t t k h y i n n k v e v i k e i i k k g r g g n h v t s q n p e v n y e a l a k y g r d l v e e v r q g k m d p v  
i g r d e e i r n t i r i l s r k t k  
n n p v l i g e p g v g k t a i v e g l a q r i v k k d v p e s l l d k t v f e l d l s a l v a g a k y r g e f e e r l k a v l k e v k e s d g r i i l f i d e  
i h m l v g a g k t d g a m d a g n m  
l k p m l a r g e l h c i g a t t l n e y r e y i e k d s a l e r r f q k v t v s e p d v e d t i s i l r g l k e r y e v y h g v r i q d r a l v a a a e l s d  
r y i t d r f l p d k a i d l v d q a  
c a t i r t e m s n p t e l d q v n r r v m q l e i e e s a l k n e s d n a s k q r l q e l q e l a n e k e q a a l q s r v e s e k e k i a n l q e k r a  
q l d e s r q a l e d a q t n n n l e  
k a a e l q y g t i p q l e k e l r e l e d n f q d e q g e d t d r m i r e v v t d e e i g d i v s q w t g i p v s k l v e t e r e k l l h l s d i l h k r v v  
g q d k a v d l v s d a v v r a g  
i k d p n r p i g s f l f l g p t g v g k t e l a k s l a a s l f d s e k h m i r i d m s e y m e k h a v s r l i g a p p g y i g h d e g g q l t e a v r n p  
y s v i l l d e v e k a h t d v f n v  
l l q i l d e g c l t d s k g r s v d f k n t i i m t s n i g s q v l l e n v k e t g e i t e p t e k a v m t s l n a y f k p e i l n r m d d i v l f k p l s  
i d d m s m i v d k i l t q l n i r l  
l e q r i s i e v s d d a k a w i g g e a y e p q y g a r p l k r f v q r q i e t p l a r m m i k e g f e g t t i k v n l n s d n n l t f n v e k i h e  
>tr|Q2YWV9|Q2YWV9\_STAAB

Tsompanidou\_et\_al\_Supplemental\_FASTA\_File

meea1kdsilgalemvidpelgidivnlglvykvnvdddegvctvdm1t5mgcpgmpqi1dqvktvlaeipeiqdtevni  
vwsppwtkdmmstryakial  
gvs  
>tr|Q2YWW5|Q2YWW5\_STAAB  
mrgidycihegeilaivgesgsgksvatkai tk1fqgengkitngnvkflgedlveknekelakirgkdiamifqdpmts  
lnptmkiqkqimeplmihk  
kmnrkdakgkavei1dlvgiknaelrfkdyphqfsggqrqrivigmalacepk1liadepttal dvtmqsqiidl mkilq  
kktntaiifi thd1gvvan  
iadkvsmycgei1etgkveel fyypkhpwtgwllasmtlesnksk1iaipgtpn1lkppigdafarrsaya1nvdf  
kyeapwfq1spthfvkswl  
ldsrapkvi ppetvkrkfkel synferp1kvegvsfneq  
>tr|Q2YWW9|Q2YWW9\_STAAB  
mlefkagkinkhvl ysd1lnrdvt1siyl pesynqlvkynvilcfdgl dflrfgriqrtyeslikeariddaiivgf hfe  
dvdkrreefhpqgsrsh1k  
iqsvgkei1pfidstfst1kvgnar1lvgdslagsial1tal tyttifsvam1spsdekvl dkl1nqcankeq1tiwhv  
igldekdf1tptngkradf  
1tpnrelaeqikkyntyydefegghqwkdwkpl1sdillyflskntddklye  
>tr|Q2YWX0|Q2YWX0\_STAAB  
mieklvtflnev vskplvyg1litgvlft1lrmrffqvrhfkemir1mfqgekspngissfqaiams1agrvgtgnivgv  
stai figpggavfwmwita  
flgassafiest1gqifkrvenneyrggpayyieygiggkfgkiygiifaivti1svgl11pgvqsnaia smhnaihvp  
qwlmgg1v1v1gl1iifgg  
vrsianvatavv pfmayiylmaviiiciniqevpal falifksafglqsafggivgamieigvkrglysneagqgtgph  
aaaaaevshpskqglvqaf  
svyid1l fvctatali1lsgtynvtdgtvnangtph1ikdggivyenaagkdysgtamyaqagidka fhgsgyqfdptf  
sgvgsyfiafalfffaf1t  
i1syyi1tetnvay1trnqnqnvssvfiniarviilfatfygavktadvawafgd1gvglmawl1niaiwi1hkpavna1  
kdyeiqkkr1ngnynavyq  
pdpnk1pnavfw1ktyper1kqarakk  
>tr|Q2YWX2|Q2YWX2\_STAAB  
m1n1enktyvimgi ankrsiaf gvak1dq1gak1vftyrkersrkelek1leq1nqpeahlyqidvqsdeevingfeqi  
kdvgnidgvvhsiafanm  
ed1rgrfsetsregfl1laqdissys1tivaheakkimpeggsivatty1ggefavqynvmgvakas1eanvky1al d1g  
sdnirvna1sagp1rt1sa  
kgvggfnti1keieerap1krnvdqvevgktaay11sd1ssgtgenihvdsgfhaik  
>tr|Q2YWX3|Q2YWX3\_STAAB  
mef1slv1v1laaf1tpi1vnr1nin1flpvvaelmgivignsflniverdsiln1l1st1gfi1flm1f1sg1eidfkafk  
kdkrarqgqnddessi1pgh  
1n1al1tvfafimi1s1layvfkwl1glvddv1lmvii1st1slgvvpt1kemnimrttigqfi11lvavl d1vtm1llt  
vygaingqgdstiwl1g1l  
vvftai1sy1lgvqfkrmsflqk1lmdgttqigiravfal1i11valaegvgaenilgaflagvvs11npdeemvek1dsf  
gygffipi1ffimvgvd1ni  
pslikepk11i1ipilvafi1sklipvmfirrwfdmktiasaf11tst1slviaaakiser1naisaetsgil1lsav  
itcvfvp1i1fkk1fpvpde  
fnrkievsligknq1tipiaqn1tsqlydvtlyyrkd1sdrqr1sdditmieiadyeqdvl1er1gl1fdrdivvcattndd  
inrkvak1akahqvervic  
r1esttdtelvdsgie1fssylsnk1llkglietpnm1n1l1snvetslyeiqm1nykyeniql1rnfpfggdi1fvri1r  
nnesivphgdtq1rygdr1  
ivtgakeyvde1kqelefyf  
>tr|Q2YWX5|Q2YWX5\_STAAB  
mkfkyhisqgetvktflarhdfskktvsaiknngalivndepvtvrkq1mpndileih1pqi1psvnliparklevlye  
dafi1i1vtk1lnnqctpsr  
ehphes1ieq1lyhcqehgeninphivtr1drnttgivi1fakyghihh1fskvn1kkiytclvygkthtsgieani1rs  
kdsi1trevasdgkyakts  
yevinqndkys1ckvh1htgrthqi1rvhfqhi1ghpivgds1ydgfhdkihgqvlqctqiyfvhpinkni1yiridyq1l  
k1fnq1  
>tr|Q2YWX9|Q2YWX9\_STAAB  
matnheiefkqmitasi1ynk1lqekyfkdsvl1fkqvnyy1idtpdfk1keh1rsal1rirvkdnyem1ktpakvg1lleynyi  
vdikpem1li1lndn1lppd  
irqiiveqfgvkdtt1silgal1t1tyrgetkykgd11vl1dkseyfd1tdye1efevkdynqglqkfqsl1ne1n1ehhq1  
nk1vq1r1f1k1k1ket1sn1n1  
>tr|Q2YWY2|Q2YWY2\_STAAB  
msqql1sreeqerkypeytdw1l1tti1fkdeafeaafkevenel1gkeeqfkghigdsael1yna1le1edt1g1tk1lekvyvya  
h1kq1d1q1d1t1nd1kyt1gmes1r  
ahq1li1k1f1ssaws1flvpai1lq1dedki1qs1fvnsydk1qk1fafd1k1linekrph1ildaetek11tea1qda1stpsnv1ygm1f  
snad1lv1feda1id1k1dgnahp  
1tqgtfi1ky1lesddr1kl1resafknvykaygahnnt1gat1agevknvfnarthnyktareka1snhi1penvydn1vkt  
vhky1lp1l1hryte1rke1l

Tsompanidou\_et\_al\_Supplemental\_FASTA\_File

glddlkmydlytptlikdikfempyeeakewmlkalpmpgeeylnvvkeglnnrvdvyenkgrsggyssgahltnpfil  
lnwsntisdlytlvhefgh  
sahsyfsrkfqsnsdytifaevastcnealldsymdkhllddekrllllnqelerfratlfraqtmfaefehkihtiee  
agepltptrmneeyaklnk  
lyfgdsvetdediskewsriphfymnyvyqyatgysaaqslshqiltegkpavdryineflkkgssnypieilknagvd  
mttpepieqacevfeqkln  
afeklmka

>tr|Q2YWY3|Q2YWY3\_STAAB  
mlvalneekervlatta|rktqcfcpcvckqvilkrglkvishfahkhlaeqkcfnesikhyksklilaqmiqqgqkv  
eiepf1keikqipdlinn  
kyvielqyspipykqilqrteglkkmgykvswwlndvdychnkvkfnhfqsmfinpitrlhtfnlekkqimmfqqiqyi  
gghkyvaekghakiselfn  
eapcdyhavyklskfainqiyikyrwqnsvlleptlsamyqlhltdqevvhnygyifpeqiyienhpiewqlqvdlwlkng  
ksklvsdnlnyfkllkffi  
alesktaiieklinnylnissdrndvqilf

>tr|Q2YWY7|Q2YWY7\_STAAB  
mkisklkylllnfifililsgcskegiysdkgqvfrkqipdmsltdtltidavsgdisnqvfeqlftldkndkakai  
ake1pkksnggklttfklr  
kdakwsngdpvtaydfvyawrk1vdpktgseyayimsdienadsinsgklpveklgikalskyeleiklkrpipyinell  
alsnfypqnekvakkygek  
yglkpnavyngpfkvdtrwaedkllsknfywdkknvklkvnykilkdqagaslfetgsvdtdliladqvkmmil  
vlyksv

>tr|Q2YWY8|Q2YWY8\_STAAB  
mnnnvlveiknltkifnknneikaidvsikinkgealgivgesgckstfgksii1llevpeetiffegkdinkitsrr  
dslnlnkriqmi fqdpyas  
lnprlkvmdivgegidihklaenkaernekiy1lelvglnehanryphfsgqrqrigiaralsvepdliiadepis  
alnvsiqagiiniikk1qk  
erntllfiahdlrvkyvsdriavmhkgkiveiasserlyqnp1hnytkslisaipqppqyerervreiykdsfdnns  
eylrgiekdhfvftsink  
aellrqrkl

>tr|Q2YWZ0|Q2YWZ0\_STAAB  
mevisklkpdliiadvrnhkkikselkiaptimlvsgtdynanieafktvakavgekegekrlekhdkilaeirkki  
eqstlksafafgisragmf  
innedtfmgqflikmg1qpevtkdktmhvgerkggpyiylneelaninpkvmlatdgdtkdnrtkfidpavwkslkav  
kdnkvydvdrnkwlksrgi  
iasesmaedlekiakak

>tr|Q2YWZ1|Q2YWZ1\_STAAB  
mnrnivklvfmli1lvvavagcgkdteektemttikdelgtekikknprvv1eysfadylaaldmkpvgiaddgssk  
nitksvrkigayesvgsr  
pqiwk

>tr|Q2YWZ2|Q2YWZ2\_STAAB  
mmklgmllirwmlatsflvhgtlkfvdldgtihflgslrlpptiavlmsigevvgglaliigfltpyvnyfyicvmlgsi  
ftlkltrgyvsgefeih  
ivmnlacissyswkkwlqfy

>tr|Q2YWZ3|Q2YWZ3\_STAAB  
mnyfrykqfnkdvitvavgyylryalsyrdiseilrergvnhstvyrvvqeyapilyqiwkkkhkkayykwridktyi  
kikgkwnylyraidaeght  
lhiwlrkqrdnhsayafikrlikqfgkpqmiitdqapstkvamtkivkfvkl1n1p1nchctskylnnlieqdhrrhiksrkis  
yqsintakntikgieciyg  
lykknrrslqiygfspcrvisimlas

>tr|Q2YWZ4|Q2YWZ4\_STAAB  
mkkvymmvhelvdkggmtssmfnsrefydanisadivtfdykgyndeii1kn1kkqgkmdsrktmynvfeyfkqisnsk  
hfksnr1lykhisdr1knt  
ieieeskgisrffditgttyaiyrksktekvidffkdnqrierfsfnnkvhmketfnidnkvcyqvfydekgyfyisr  
ninasngavgktylivckk  
efknnlalcvyyleklikdnknsimicdpggsfpmfntkhknaqkygvihvnhhenfddsgafkksekfienadning  
vivltdaqrldilqqfdvk  
niftisnfvkihkapkqftekivghisrmvptkridllidvae1lvkkdetvkfhiygegsvkekiakknidkklenhv  
llkgytttpqkclfdklv  
vstsqyegqglsmieamiskrpvafdi kygpsdfiednkngylienhnindmadkilqlvndv1aaefgskarenie  
kystesilekwln1fns

>tr|Q2YWZ7|Q2YWZ7\_STAAB  
mkk1n1kfqcgsyaligksgcgkst1lntiaglektgkqyvfnqgleqfksnfyrdklgs1fqnyglidnltvnenld  
iglaykkskkekeqk1r  
yieqfg1sns1krkvht1sggeqqrvalirmm1kdpivmladeptgalpdktgqmi1qslfd1vnenkv1l1athdmaia  
nqcdeiidleqyrketsm

>tr|Q2YWZ8|Q2YWZ8\_STAAB  
mkfiiailglivsitiafti1hhp1ldr1n1p1kteysyakvpkg1qyvni1taynergek1dyk1tfn1g1spsrtyve

Tsompanidou\_et\_al\_Supplemental\_FASTA\_File

ikhkgqyvisityvekedt  
pkevrqer  
>tr|Q2YWZ9|Q2YWZ9\_STAAB  
mkwfkfildvtifiliai1lfvytykeneei1pdtkypiavtwnkkyknkneykrinqfaknenvaiykstsnytnknv  
dkdiyvnkskattitpfn  
akynihylsddellkkdikgsyfvkdknfdvskfinflkeygvtaesykidhmmiavgvikqmnivvplssllyvyfiyy  
ifekninfkayaikylngh  
tlrkii fenfskkctywtliitqi11ttsvlwilnytcnldlfilrlvl1lsc1filitisvinlwtflml1lnianmik  
gkghfktirfintvcksi1  
lvliasvmientsvikdlnkiketekywnvlddytiefapyhetkqslidnmlrseq1vkaseaennailfkpkgdsvd  
ndnfspdegnvi1vnnqfw  
siyhkqfqpdi1knqknvevi1p1pkfhamrneinqayhswf1vqnknknk1siqfinkndyrifsf1dardsrhfs  
fieapi1v1nvqasdl1sndf  
yyami1sggeyl1fknydal1vkniekyh1dge1sgitnykdsvmemyhenn1kl1tv1nfsqii1ai1lii1il1fdvkyyfeq  
hrk11v1kk1ygst1ran  
yry11inni1vv1figi1ltnv1ylsryimmi1fatil1vvq11lqics1lyyhgr1rfevikef  
>tr|Q2YX03|Q2YX03\_STAAB  
mypo1ni1yvir1kgdmv1rpa1fddd1q1rngse1irfdk1tri1qnp1fkv1qki1ersck1fygntyl1gk1ksetn1rit1g1ssk1pp1l  
1tp1f1p1ty1ff1p1ths1drqne  
niw1nm1hy1ies1ikel1nrk1ck1vt1finnes1i1hvs1chs1lwh1qynns1if1yym1vd1kqsr1misknp1dqpid1ynkat1lv1fea  
1tr1ys1l1fedk  
>tr|Q2YX04|Q2YX04\_STAAB  
mmeknen1inve1l1ttsdm1hsh1flngdygsni1ragtyvn1qvr1aqnhrv1l1ldsggs1lags1laayyya1ivapykr1hpmik1  
mnr1m1hydas1gvsp1sef1kfg  
1s1fl1trs1ialar1fpw1lsan1iey1nvt1kepy1fstpy1cikh1fgd1kia1ivgt1adg1lmeney1semeq1dvsiekt1vaskr1wir  
yi1hevee1pds1livi1yhgg1  
nk1snst1knk1kass1neaek1mee1lgvid1lmitah1qhqt1ivgqdhetyy1vqag1qdake1lvh1sin1fkkr1ttty1dvesidk  
vid1lneyeed1qe1ld1l1tfy  
drkavay1wsqe1i1s1dkg1lm1svng1lqdlvc1qth1pfsq1llhdai1h1afdnd1itcv1hvp1mng1ekg1sgq1rned1lyhay1pyp  
dkpmd1mt1sgq1nikdi1ley  
sysh1ldf1vneq1sl1ti1idet1lctm1wqg1fnye1idm1nqep1gqrv1mdq1idl1tksyr1vtmt1dycyr1nykny1lknai1hesyde  
tm1st1liaek1lrdp1nyrisc  
sdf1v1vknr  
>tr|Q2YX05|Q2YX05\_STAAB  
ms1ifsq1flkr1ssp1qqg1iv1lyy1ivaiv1vaf1ll1n1lpyvh1kpg1vevnp1id1l1fvav1sgis1vtg1lspis1ivdt1yst1fgq1li1l  
vil1nigg1igv1maigt1mlwv  
vl1gkhi1g1rerq1lim1dnkn1tmsg1tvk1li1divks1ifv1ielvg1am1lafy1fyrd1npd1lkyaim1qgv1fvs1isatt1ngg1d  
1tgks1lipya1hdy1fvqai1v  
if1li1ilgs1ig1fpv1llevkay1qnrvt1nfr1fs1lftk1itt1styl1flfi1igv1lail1lfehnhaf1kgl1sw1hqs1l1fys1l1fqsatt  
rsag1qt1idvt1l1sdptni  
im1g1l1mf1ig1ssp1ss1vgg1g1rttt1fail1il1fl1nfs1n1adk1tsik1vyn1rev1him1di1qrs1fav1ftmat1ilt1flgm1li1sate  
ng1kl1t1fl1qv1ffev1msaf1gt  
cg1sl1gvt1sdi1sdisk1v1lvm1l1mfi1grv1glis1fi1imi1agr1rep1dk1fhy1pker1iqig  
>tr|Q2YX07|Q2YX07\_STAAB  
m1mdps1li1lpy1lw1lv1lv1f1leg1laadna1ivmav1mvk1hl1ppeqr1kka1l1fyg1ll1gaf1vfr1fla1fl1s1ian1fw1fi1qaag  
avy1li1y1ms1ikn1lwq1ffk1hp  
e1iespe1agdd1h1hydes1gee1ikas1nks1fwg1tv1kie1fadi1afaid1smla1alai1avt1pkv1gih1fgg1md1lgq1fv1vm1fl1ggmi  
gv1ilmrya1atw1fve1llnky  
pg1legaa1fai1vgw1vgk1lv1vmv1lahpdi1av1lpeh1fphg1vlwqsi1fwt1vl1gl1vi1igw1l1gsv1vknk1kshk  
>tr|Q2YX12|Q2YX12\_STAAB  
m1swg1vgpn1keade1ksay1nnv1qv1gd1gp1qqre1ig1fpist1dnas1rrg1pnte1avtm1iky1yyi1inh  
>tr|Q2YX18|Q2YX18\_STAAB  
mk1fnk1vkl1vihvc1l1f1i1is1iali1fhr1lqt1kths1epih1ketk1l1sdneky1l1vdrn1ek1vapsk1l1kevyn1skdp1kykkid  
kyl1qss1l1fng1svai1yeng1k  
l1kmsk1gy1gy1qdfek1gik1ntp1mfl1igs1aq1fstg1l1l1kq1leeh1kin1indp1vskyl1pwf1ktsk1pi1pkd1ml1hqsg1lyk  
yk1ssk1dykn1ldqav1kai1qk  
rg1idp1kky1kkh1mynd1gny1lv1lakvie1e1vtg1ksya1eny1t1kign1pl1k1qhta1fyde1qpf1kky1lakgy1aynstg1sl1r1pni  
ldq1yyg1agn1lymt1p1tdmg1k  
li1tq1iq1y1kl1fspki1tnp1l1hefg1tk1yp1dey1ryg1fyvk1pt1nr1l1ngg1ff1gq1vft1vy1ynd1ky1vv1al1nvk1gn1nev1rikh  
iyndi1lkq1nkpy1ntkg1v1v  
q  
>tr|Q2YX19|Q2YX19\_STAAB  
mnk1fl1ky1fl1i1l1al1vl1iv1vpiv1fat1l1fkts1qda1fess1qds1knan1rqsn1l1rdn1kvn1pee1qpis1il1fl1gid1dnd1gr1rkk1gq  
daeh1rs1dami1l1ttfn1qsk  
hq1irm1s1iprd1tis1y1pkv1gy1ydk1itha1ygg1pia1amds1veat1mnp1vdy1yvr1vmk1afve1avne1l1ggi1y1dvpy1d1ne  
pnt1ddt1gk1ik1kgy1qk1l1rg  
g1eal1avar1tr1hds1l1krq1rqme1lik1il1fqka1evds1dk1ldnvi1qiv1gkn1akh1l1t1nse1ikalakmy1l1tnd1ve1ikta  
q1lkg1kdd1m1l1ngi1yyy1hpsv



Tsompanidou\_et\_al\_Supplemental\_FASTA\_File

esiqkylanllrndlelspindknfdlqrvinhyslilp1t1p1dss1l1rkeqndttddkdkssntddsnnnnnnngvnnq  
qqpttgqntnqdggniqqt  
pqasnnqngvvn  
>tr|Q2YX21|Q2YX21\_STAAB  
mfskvnnqemledcfyirkkvfveeqgvpeeseideyeseihligyngqpvtarirpinettvkiervavtkshrgq  
gmgrmlmqaveslakdegf  
yvatmnaqchaipfyeslnfkmrgnifleegiehiemtktltsln  
>tr|Q2YX22|Q2YX22\_STAAB  
mlgvnrmakkfnyklpsmvalmlvgsavtahqvqaettqdqttknvldsnkvkatteqakaevknptqnisgtqvyq  
dpaiyvqptannktgnaqv  
sqkvdtavngdtranqtattntkpvakststtapktntvtnagyslvddeednsenqinpeliksaakpaaleqyk  
avapkaatttapkakteat  
pkvttfsasaqprsvaatpktslpykpvvnssindyirknllkapkieedytsyfpyayrngvrpegivvhdtandr  
stingeisymknyqnafv  
hafvdgdriietaptldylswvgavgnprfinveivhthdyasfarsmnyadyaatqlqyyglkpsaeydngntvwith  
yavsky1ggtdhadphyl  
rshnysydqlydlinekyl1kmgkvapwgtqstttpttspkstpstpstkglvtatnngvaqikptnsglyttvydktg  
katnevqktfavsktatlg  
nqkfy1vqdynsgnkfgwvkegdvvyntakspvvnqsysikpgtklytvpwgtskqvagsvsgsgnqtfkaskqqqidk  
siylgsvngksgwvskay  
1vdtakpttptpkpstpttnkl1tvss1ngvaqinaknglfttvdydktgkptkevqktfavtkeaslggnkfy1vkdy  
nsptligwvkqgdvinyina  
kspvnmqtytvkpgtklysvpwgtykqeagavsgtgnqtfkatkqqqidksiylygtvngksgwvskaylaepvapka  
vaqpktavkayavtkpqt  
qtvskiaqvkl1nntgirasvyektakngakyadrtfyvtkerahgnetyvllnntshnip1gwf1vkd1nvqn1gkevkt  
tqkytvnksnng1smvpwg  
tknqviltgnniaqgtfnatkqvsvgkdvylygtinnrtgwnakdl1taptavkpttsaakdynytyvikngngyyvtp  
nsdtakys1kafneqpfav  
vkeqvingqtwygk1sngk1awikstd1lake1ikynqrgmt1nqvaq1qag1qykpvqrvpgkwtandfndvkhamdt  
kr1aqdpal1kyqf1r1dq  
qnisidkinqf1kgkgv1nqgaafnkaaomyginevyl1shall1etgngtsqlakgadvvnnkvvtnsntkyh1nvgia  
ayndp1regikyakqagw  
dtvskai1vggk1fignsyvkagqntlykmrwnpahpgthqyatdvdwaninaki1kgyydkigevgkyfdipqyk  
>tr|Q2YX23|Q2YX23\_STAAB  
mkl1s1nsnsky1rapsirqfsnrmmn1ddcvn1tigqpdfmpdvkksyvdainndktsyshnkg11etrea1sqyfkn  
ryhfsydpeei1vtngase  
aidt1rsi1epgdei1ipgpiyagi1pliev1ggkpiyidttatqfkitpda1eshispkttkav11nyptnptgv1kr  
nev1nivn1kkyrifi1s  
deiyaentfsgkhvsfaefedirdq1l1iggl1skshsatgirig11gpqylidk11tfmhayncicanvpaqiacitaln  
egleapky1mneayverrn1y  
1vsel1tk1gfeitaqpegafyi1fpsi1khi1tdddf1efcvd11lest1laivpgss1ftefgkgfvri1syayemdv1kegmkr1  
aky1ntk  
>tr|Q2YX24|Q2YX24\_STAAB  
ml1tyncsskfkhsnni1spfi1liyl1wpnnyyskv1tyyykqil1s1rsqf1sy1lff  
>tr|Q2YX25|Q2YX25\_STAAB  
mkgkfl1kvss1fvat1ttat1vsspaana1sskamdnhtqqtqtdkqtpki1qkgn1kpl1eqrehanv1lpnndrhqit  
dt1ng1hyapvty1qveapt  
gtfi1asgvv1gkdt11tnkhvvdathgdphal1kafpsa1inqdnypnggftaeqitkysged1aivkfspneqkhi1gev  
vkpatmsnaetqvnqit  
vtgypgdkpvatmweskgki1tyl1kgeamqyd1sttgngsgspvfneknevigihwggvpnefngavfinenvrn1fkqni  
ed1nfanddqpnnpdpnnpn  
pdepnnpdpn1pdpngdnnsdnpdaa  
>tr|Q2YX26|Q2YX26\_STAAB  
mns1scksr1vfn1isi1imvsm1l1s1lgaft1nnkakadshskqle1invksdkvpqkvkd1laqqf1agyakal1dkqsnaktg  
kye1lgeafki1ykfngeedn  
syyypv1kddki1vyt1t1spknkdd1nkskedm1nysvki1snfi1akdl1dqikdknsni1tv1tdekgyf1eedgkvr1lkat  
p1pgnv1kekesaktvsak1  
kqe1kntvtptkveeneai1qedqvqyent1knfki1reqqfdnswcagf1smaal1natkntdtynahdimrt1ypevseqd  
1pncatf1pnqmi1eygksgg  
rdi1hyqegvpsyeqvdq1tkdnvgimi1laqsvsqnpndph1ghal1avvgnakindqekli1ywnp1wdtel1siqdadss11h  
1sfnr1dynwygsmi1gy  
>tr|Q2YX28|Q2YX28\_STAAB  
mtnrqwet1reyde1inyefyegi1akvt1nrpevrnaftpk1tvaemi1dafs1rarddqnvsviv1tgged1afcs1ggdqkkr  
ghggyvgedq1pr1nv1ld1  
qr1iri1pkpvi1amvkg1yavgggnv1nvvc1dti1aadnai1fgqtgpkvgs1fdagygs1ylarivghkkareiwyl1crqyn  
aqeal1dmgl1vntvvp1dkv  
edetvq1wckei1mkhsptal1rf1kaamnadtdg1lag1lqqmagdat1lyyttdeakegr1dafkekr1dpdfdqf1pkfp  
>tr|Q2YX29|Q2YX29\_STAAB

Tsompanidou\_et\_al\_Supplemental\_FASTA\_File

mthynnyeanvetnqv1vl1hgflsdsrtyhnhidkytnichvitidlpghgedqssmdetwnfdyittl1drildkykd  
ksitlfgysmggrvalyia  
inghipisn11lestspgikeeanglerrlvddarakvldiagielvndweklplfqsqlelpveiqhqirqqr1sqsp  
qkmakalrdygtgqmpnlw  
prlkeikvptli1ageydekfvqiakkmanlipnskcklisatghtihvedsdefdtmilgll1keeqnd  
>tr|Q2YX31|Q2YX31\_STAAB  
matgvleddivkeiydsskewvsvevkl1sqsl1dpstl1h1tdneagdrfymr1ndnrtsyfygkaiqlfknsknkksif  
kdwekl1khnitfihpqssek  
h1lrvggfgfsshksddewrefgl1nhfv1pevl1stdnngtfl1tytvkresftveel1nd1md1fnnsdidvdeqigei  
trnediykddwrqlvveai  
esinneekiv1larr1likfdkdisipyil1kqayskeknsyif1lesqdsifftsqtpeql1kvnnkil1stkavagtikrsq  
dededtknveaf1kdkn1  
iehrfvvdsil1hdikpyitel1hydtkmpki1kndhlyhlyteikap1kddsysis1idn1hptpalggypkefamdfieqke  
fgtrg1ygapvgyidiydd  
cefivairsm1likkaqat1fagcgvkdsdpdse1aetn1kftpmnna1gvdmngks  
>tr|Q2YX33|Q2YX33\_STAAB  
mirqarpedrfdiak1vymvddme1elvkhl1pkdl1v1daiekscvdatyrtfyqhil1vyevenkvagci1sysgenelk  
yekawk1ld1peeikqygt  
pl1pvkeakddeyyietiatfeayrgrgiatk1l1ts1lesnthvkwsl1ncdinneaalk1yqkvgfisdgqielykhmyhh  
1ivk  
>tr|Q2YX34|Q2YX34\_STAAB  
mkvavimgsssdwkimgescnm1dyfeipyekqvvsahrtpkmmvqfasearergidiiiagaggaah1pgmvas1ttlp  
vigvpietks1kgids11s  
ivqmpggipvattaigaagaknagi1aarm1siqnps1vek1nqyess1iqkvedmqnelq  
>tr|Q2YX37|Q2YX37\_STAAB  
miyafigitvl1w1l1fcyiii1asidfgagffal1hsk1tgdekkinh1isry1npvwevtvffvffvfgvfgffpesiky  
1gtv111pgsialimis1r  
nsfyafenygqdtk1awmimygvs1lipas1staltiteggyinvrnnvid1dwvq111spfawsv1fla1isvlyiss  
gfl1tyakkandepayn1t  
rqwhif1gppmii1c1fvf1s1riqnsehfysavfdywwmfais1lffal1s11tffkkkhglafvfvil1qmmfaffgyg  
isklpy1lypfvkitdayv  
npemgw1lvivfi1gl11111ps1i111r1fvfdkeyvegkks  
>tr|Q2YX38|Q2YX38\_STAAB  
mdtveisrfl1tam1lavhii1fatigvgmp1mfai1aef1gir1knd1qyiamakrwakaytitvavgvvtgti1gl1sl1w  
ptfmemgghvia1pl1fmet  
fafffeaif1sily1twdrfknkwthf1isipvi1ggsf1saffitsvnsf1mntpagfel1kngkmv1vqpieamfnpsfiv  
rsfhv1ttagmtmfvias  
iaafk111rn1rpkd1tyvhkka1kmsmi1vgffst11sm1agd1sak1f1hk1fqpek1aayewhfdtsshak1111fgv1dekt  
qqvkgaie1pg11s1fladn  
sfktkvqg1ndf1pks1l1hppmi1vhyff1dmvtmgi1cfvisgvv1t1mfkk1rk1fsthkwm1ygi11tgpasm1aiefgw  
f1temgrqpw1vrgymrva  
eaatqaggi1tfvti1lfgi1lyii1mytcayv1irmfknkpayedvnr1lakkqggeiek  
>tr|Q2YX39|Q2YX39\_STAAB  
mseii1vytqndc1ppctfvkny1nehqidfedrni1nqyrnemid1dfafstpf111ngn1pmyhvd1deinkv1ni1qd  
>tr|Q2YX40|Q2YX40\_STAAB  
msk1ikgiaasdgva1akay1l1vepd1tfdknekvt1dvegevakfnsaieaskveltkirnaevq1lgadkaaifdah11  
v1ddpel1iqpi1qdkiknen  
anaata1tdvt1qfvti1fesmdneymkeraadi1rdvskrv1shil1gvel1pnpsmidesv1v1vgn1d1tpsdaq1nkefvq  
gfatn1jgrtshsaimrs  
1eipai1vgtksit1qevkqgdmi1vdg1ngd1v1nptedeliayqdkreryfadkkelqkl1rdadtvtvdgvhaelaanig  
tpnd1pgvi1engaqqigly  
rtef1ymgrdqmp1teeeqfeaykev1eamngkrvvrt1diggdkelsy1n1lpeemp1flgyair1l1claqqdi1frpqlr  
allrasvygk1nimfpmva  
tinefreaka1l1leeken1kneghdisddiel1gimveipataaladvfakevdf1sigtnd1liqyt1laadrmservsyly  
qpynps1l1rvkkvieash  
kegkw1tgmcgemag1detaip111gl1gl1def1smsatsi1lkarrq1ng1sknemtelanravdcatqeevie1lvnnyvk  
>tr|Q2YX42|Q2YX42\_STAAB  
mgfkn1tsn1tnkignsvfkienekgamp1ttikel1nerrqraeavkrks1msstmsivpipgl1dfgvdl1klmkiidii  
edvni1ygl1dhkqvns1lgd  
dvker1vmsaaai1qgsqf1igkrissaf1kivi1rdvakrtaakqtkwfpvvgqavsasisy1fmnkigkdhi1qkcenviknv  
m  
>tr|Q2YX43|Q2YX43\_STAAB  
mkiat1nkgketkyfngyp1ieeediysqdh1kegdv1fqiv1tdksqyvatayvgrqhkgl1gw1ltydeaqeintaffvk1  
fktal1aerdy1fni1dgtna  
fr1fnaegdgvgg1ti1dnydgh1li1qwyskgykfykyaileavrkvfdyksi1yekvrfkdseysggfvegdapefpivie  
enftfynvd1edg1mtg1if  
1dqkev1rkk1rgyakerhv1n1lfsytgafsviaaseas1ts1svd1anrs1l1teenf1gl1naidpksqyiyvmdt1dfyk  
yaarhghsydti1vidpps1f

Tsompanidou\_et\_al\_Supplemental\_FASTA\_File

arnkkrtfsvqkdydklingalnlssegtlllctnasvypkqfkntikktleesgvdyeltevnglpkdfkthphykp  
skylkavfvnrh  
>tr|Q2YX44|Q2YX44\_STAAB  
milqmdnfstlalfalklciqfsilnshhlnqsnlvtkkvl sinfidlylnkleiyltysvhikmfnr  
>tr|Q2YX45|Q2YX45\_STAAB  
msflrkhteifsyiligivslftgliilinlprikqlnggkvdthvhnvweflnaffseikvmsrfignfpivsaivi  
iifgilvmlightllrtik  
ydydisiff1vigimyfiitlilmtqvygffavifiipftihigyivykdelnqenvknhfmwiivsygisylitqialy  
gridaneiesidilsvnaf  
fiimwllgqmaiwnflflrralpltkqelgeeepe1srtskgnvtntqtkihlkqlqdktteyarktrrsvldkirakrd  
kfkkkvndiidiqeddipd  
wmrkpkwvkmvvelfcgvviflftflefnnrnalfvsgdwklsqtqyviewvtllillfiiiayiattltfhlkgkfyf  
lqlfmgasilffklltefin  
imihglllsvfitptlllmlaiiisyslqlrerp  
>tr|Q2YX47|Q2YX47\_STAAB  
mlkvsdlrlkypsgqrki fhdlnitiqdkkevlllgpsgcgkstllnvlsgivpklielpmydelivdplsvfivfqdpd  
sqfcmkvyeelafvlenr  
qvpredmalina1nmvnl nitpetyikdlsggmkklaivetilqqsktfldeptamldvqatedlwtklielwedq  
tvvivehkvkhiwnhvdrv  
ilmdyngniadecepeilkyvhlseygvwhprawefapsrvdfpttnshllqfkgriirgkstllsfsdleiglge  
witiingangsgkttlesl  
mqlikyqgdvfyfenr1tkikhaakhmylvynpelqfitnsvydeinihfnhlskdqsddetiqlkllldenvkdqhp  
yelsigkrrlsvata1ss  
kadiifldeptfgldshntfqlklfqrinlgqsivmvthddeierypsr1kisdgalldcdgdtnv  
>tr|Q2YX48|Q2YX48\_STAAB  
myeqwkvvrqsfvddvniitklflgii1fffii fvhnfdfmlyitilmvlflmfngtqfkitaifitisiqfallssl1m  
ilyngshtilkgfghit  
teslvrglhvs1rtiaisffgilia1tsqvvmifyslmqhlkvkskvayafmaairmip1missliqlrks1kmryqm1d  
aanyrglqrfkhliip1ls  
qnirkahqlsvameskgfrdgprtyynvpfsykdiviivliaiitlayycsitlpitgiddvrlgrvg  
>tr|Q2YX49|Q2YX49\_STAAB  
mnv1vigaggrehalayklnqsnlvkqvfvipgneamtpiaevhteisesdhqgil dfakqnvdwv1igpeqplidgla  
dilrangfkvfgpnkqaaq  
iegsk1fakkimekyniptadykeverkkda1tyiencelpvvvkkdglagkgviiadtiearsaieimygdeeeegt  
vfetflegeefs1m1tfvng  
dlavpfdciaqdhkrafhdhegnptggmgaycpvphisddv1kl1tnetiaqpiakam1negyqffgvlyigailtkdgp  
viefnarfgdpeaqv11sr  
mesdlmqhiid1degnrtefkwnesivgvmlaskgypdayekghkvsqgd1nenyfvsglkkqgd1fvtsqgrv1aig  
rgdnvqdaqrd1ayekvsqi  
qsdl1fyrhdianka1qlk  
>tr|Q2YX51|Q2YX51\_STAAB  
mvkiaifasgsgsnfenivehvesgk1nienevtslytdhqnafcidrakkhdipvyinepkkfdskaayeqhlvtllned  
kewiilagymrligpd1l  
asfegkilni1hps1l1pkkygidaigqayhsgdtitgstvhvdsqmdtgeieqrqcdirpddskeqleekvkkleyely  
psviakivk  
>tr|Q2YX53|Q2YX53\_STAAB  
mfnysg1neecgvfgiwnhpeaaq1tymglhs1qhrqgegagivvsnqnelkgerglgllteaikddqmer1kgyqhaig  
hvryatsgnkgieniqpfl  
yhfydmsvgichngln1aks1lrqn1ekqgai fhsssdtevimh1irrskaptfeealkes1rkvkkgftfailtkdaly  
gavdpnairp1lvvgkmdg  
kyilasetcaidv1gaafvqdi hageyv1ndkgitvksythhtttaisameyiyfarpdstiagknvhavrkasgk1la  
qespnadm1vigpnss1s  
aasgyaeeig1pyemglvknqyvartfiqptqelreqgvrvk1savkdivdgkniilvddsivrgttirrivkmlkdsga  
nkvhvriaspemf1pfsfyg  
idvsttael1saskspeeikdyigadslay1svdgliesig1ldydapysglcvesftgdypaglydyeanykah1shrqk  
qyisknkhff1dsegn1lv  
>tr|Q2YX58|Q2YX58\_STAAB  
mnfnk1kfgatigi1gggq1gkmmaqsaqkmgkav1dpaedcpcryvaheflqakyddekalnqlgqkcdvityefen  
isaqqlk1lcekynipqgy  
qaiql1qdr1teket1ksagtkvvpfi svkestmdkaiet1gypfivktrfgydgkqvlinnekdlkegfkl1etse  
cvaekylnikkevs1tvtr  
gnnnqi tyfplqenehrnqi1fktivparidktaeakeqvnkiiqsihfigtftveffidsnnqlyvneiaprphnsgy  
sieacdysqfdth1lavtg  
qs1pnsie1lkpavmmn1lgkd1d1lenefnepewh1hiygkserkdsrkmgmtv1tndvyqteqdmakfegsn  
>tr|Q2YX61|Q2YX61\_STAAB  
mkqik1llvanrgeiairi fraaaeldistvaiysnedkss1hrykadesylvgsdlgpaesylnieri1dvakqanvda  
ihpgygf1seneqfarrca  
eegikf1gph1leh1dmfgdkvkarttaikad1pvi1pgtegpiksyelakefaeeagf1mikatsggggkgmrvireese

Tsompanidou\_et\_al\_Supplemental\_FASTA\_File

ledafhrakseaksfgns  
evyieridnphkievqvgidehgnivh1ferdcsvqrrhqkvvevapsvglsp1rqr1cdaaiqlmenikyvnagtve  
flvsgdefffi evnprvqv  
ehtitemvtgidi vktqi1vaagad1fgee1nmpqqkditt1gyaiqcritteap1ndfmpdtgttiayrssggfgvrld  
agdgfqqae1spyyd1lv  
klsthai1sfkqaee1kmvrs1remrirgvktnipflinvmknkkftsgdyttkfi eetpe1fdi qps1drgtktle yignv  
tingfpnvekrpkpdyela  
s1ptvssskiasfsgtkq1ldevgpkvaewvkkqddv1ltdttfrdahqs1latrvrtkminiasktadvfdkgfsl e  
mwggatfdvaynflkenpw  
er1er1rkaipnvl1fqm1lrasnavgyknydpnvihkfvqesakagidvfri1fids1nwvdqmkvaneavqeagkisegti  
cytgdi1npersniytley  
yvk1ake1eregfhi1aikdmag1lkpkaayel1igelkaavdl1pih1hthdtsng1l1tykqaidagvdi1dtavasmsg  
1tsqpsans1lyalngfpr  
hl1rdiegmes1shywstvrtysdfesdikspnteiyqhempggqysn1sqqaks1glgerfdevkdmvrrvn1lfgdi  
vk1vtpsskvvgdmalymvq  
nd1deqsvitdgyk1dfpesvvsffkgeigqpvngfnkd1qavilkgqealtarpgeylepvdfekvrelleeeqqgpvt  
eqdi1syvlypkvyeqyiq  
trnqygn1s1l1dtp1fff1gm1rnetveieidkgrliikletisepdengnr1tiyyamngqarriyikdenvhtnanvkp  
kadksnpshigaqmpgsvt  
evkvs1vgetvkanqpl1iteamkmettiqapfdgmikqvtvnngdtiatgd1lieiekatd  
>tr|Q2YX62|Q2YX62\_STAAB  
mknfrs1lry1gktskfidyp1lvtyiv1sl1iglvmvysasmvpatkgt1tggidvpqgyfynrqlayvimsfiivffia  
flm1nvk1l1sn1kvqkgmi  
tivs1l1l1t1v1gk1d1ngskswin1gfm1lqase1l1kia1i1y1p1f1isk1m1pr1v1sk1p1k1i1s1p1v1a1l1g1ct1f1v1f1qk  
dvgqt1l1i1i1l1vai1fys  
g1gvnk1v1rfg1ipav1lg1fl1vvfvia1magw1psyl1tarfst1tdpfqfesgtgyhisn1l1a1ignggvfgkg1gnsamk1  
gyl1pephtdf1faiicee1  
g1igg1l1vit1effiv1yrafqfanktssyfyk1vcvgiatyfgsqtfniggisatip1tgvp1lpfisfggssmis1sia  
mg1l1l1ivgkqi1kvdaqrk  
qqkvgi1rrqfn  
>tr|Q2YX64|Q2YX64\_STAAB  
miq1kgavkfpit1dsttwi1fddrkvsied1ekgvfdgskpidfednhewnrailegqtnppt1nseikykkramlegsf  
vinmtpffkhsephdsatt  
ir1snehdh1dipid1lpy1lffqfakdgkr1ysdngvdsfiynqedgysnrinhvthievi  
>tr|Q2YX65|Q2YX65\_STAAB  
mrqveci1cdakvfidertteskr1knnpirtfmcdcksr1dtpkqraqhyp1d  
>tr|Q2YX66|Q2YX66\_STAAB  
mtnkredvrni1ai1ahvdhgktt1lvdellkqsgifrenehderamdsndierergitilakntavdykgtrinildtpg  
hadfggeverimk1mvdgvv  
lvvd1yegtmpqtrfv1lka1eqn1kpvvvvnki1dkpsarpegvdev1dlfie1eandeq1efsvvyasavngtas1dp  
dkqddn1qs1yeti1dyvp  
ap1nnsdepl1qfqa1l1dyndyvgrig1grvfrgk1mrvgdns1lik1dgtvknfrvtkifgyfg1krleieeaqagd1ia  
vsgmedin1vgetvtphdq  
ea1lpv1l1ridept1emt1fkvnns1pfagregdfvtarqi1er1nq1letdvs1lksntdspdtwv1vagrge1h1s1ilienmr  
regye1qvs1kpv1i1keid  
gvmcep1fervqcev1penagavies1lgarkgemvdm1tttdng1l1r1ifnv1pargm1gyttefmsm1trgygi1ihtfeefr  
prika1qiggrrngal1ismd  
qgsastyai1gl1edrgvn1fme1pgtevyegmi1vgehnrend1l1vni1tktkhqtnvrsatkdqtqt1mnr1p1r1l1tlealqfi  
nddel1ve1tpe1sir1rkki  
l1knv1re1keak1rik1qmmqene  
>tr|Q2YX67|Q2YX67\_STAAB  
mal1y1g1fa1q1g1l1qe1ag1irik1qlmeqn1tietksnpnd1l1vtnvdkated1fd1tilet1ypnhqvl1geeghghdidtskgtw  
vidpidgt1nfvhqqenfa  
is1igiy1dgkpyagfv1ydv1madv1yhakvgegayrgsqpl1kp1nds1nrqsi1iginpnw1tkpilgeifkeivndsrsar  
aygsaa1eivsvatgn1lea  
ymtpr1l1qpwdfagg1lvi1yevngqasn1l1gepl1tisgpn1silvgnrg1lhqeisndylephrdaliqlheqrfkrksk  
>tr|Q2YX70|Q2YX70\_STAAB  
mnrkpel1imawiansis1iy1lvmg1syfs1ksgnasqree1akq1lsqnggkvs1dml1qttigal1ai1llistlygifat  
icikgrrk1s1i1l1fviai1i  
vs1maln1liaiv1wi1vmim1liskkesketthkddeyiyh  
>tr|Q2YX71|Q2YX71\_STAAB  
mtgeqftqi1krpvsr1tekv1glw1cwm1l1vl1vtvitmfialvsfsnntsianlent1lnnafi1q1llagngynttqfviw  
lqngiwai1y1y1fivc1llis  
fla1ismnir1l1sgfl1flisaivtip1vl1l1v1t1iip1ilff1iamm1fir1kdkvemvapqyye1yngpiydyrepvyerp  
qpkddy1y1vpkyekel1dks  
ntvydqer1d1kydqf1pkraveseynhderteeps1vsrqakykqksteelgi1eddg1y1a1epe1vdpkelkaqqkrekae  
ikakkk1ekr1kaynqr1mker  
rknqpsavsqrrm1nfeerrqi1ynndi1seerns1sev1kkeqe

Tsompanidou\_et\_al\_Supplemental\_FASTA\_File

>tr|Q2YX72|Q2YX72\_STAAB  
mkrflqligalvvgmlcltshwfskeqvhtnqkiyvynwgeyidpelikkfeketgiqvvyetfdsneametkirng  
gthydvafpseytvqklkr  
dhlllpidhnpvni knldsdymnmsfdkgnkyslpyffgtvgilynekepnesfswkslynpkfkni llvdgarei  
igmslnklgynlndrnshh  
lkeaerdltklapqvrvgvdeitmm lqqnegniavvwsgvaapl vqegdkynyvipkegsnlwfdnmvipktaqnkega  
ykmfnflldaknnkqntef  
vgyatpnkaarqllpkevkdhrfyptkkeqerleiykd lgpvlseynefnl fkmslk  
>tr|Q2YX73|Q2YX73\_STAAB  
mkwygklyigillai lyipiff lmfysfnsagnmihfehftlehyqslfqndhlmsvifntiavallaasistvigtfga  
iaiyylrnkkfkvtlltln  
nvlmvsdvvigasflimfttighftglglgfwtlvishiafcipivviivlpqlyemnnmlnaardlgatepqlsni  
ipnilpsiiggffmaltf  
slddftvsffvtgnqsvl svevyamarkgismeinaistllfavivlgilgyyliqyvinkkklikrvvk  
>tr|Q2YX75|Q2YX75\_STAAB  
mnignkiknlrriknltqeelakrtdl skgyisqiesehaspsmetflniievlgtttpeffkdsenenvlykkeeqv  
deydegyilnwlvsksney  
dmepllltlkpgasyknfnpsedtfiycmsgqitlnlgkeiyqaqeedvlyfkardnhrlnesnnetrilivatasyl  
>tr|Q2YX78|Q2YX78\_STAAB  
mafefrlpdigegeihegei kwfvkagdtieeddvlaevqndksvveipsvsgtveevmveegtavvgdvivkidapd  
aedmqfkg hdddssskegp  
akeeapaeqapvatqteevdenrtvkampsvrkyarekgvnikavsgsgkngrikkedvdayl nggaptasnesaasatn  
eevaetpaapaavslegdf  
petteki pamrraiakamvnskhtaphvtl mdeidvqalwdhrkkfkeiaaeqgkltflpyvvkalvsalkkypalnts  
fneeageivhkhynigia  
adtdrgllvpvkhadrksifqisdeinelavkardgkltademkgatctisnigsaggqwfptvinhpevailgigria  
qkpvkdgeivaapvlals  
lsfdhrqidgatgqnamnhikrllnnpelllmeg  
>tr|Q2YX79|Q2YX79\_STAAB  
maqmtmvqaindalktelkndqdvli fgedvgvnggvfriteg lqkefgedrvfdtplaesgigg lamglavegfrpvme  
vqflgfvfefdaiaggia  
rtfrsrggtktapvti rspfvggvhtpel hadnlegi laqspglkvvipsgpydakgllissirsndpvvylehmklrys  
freevpeeytidigkanv  
kkegndisiitygamvqesmkaaelekdgysveidlrvtvpidvdtivasvektgravvvqeaqrqagvgaavvaels  
eraillsleapigrvaaadt  
iypftqaenwlpnkndiekaketlef  
>tr|Q2YX80|Q2YX80\_STAAB  
mapklqaqfdavkvln dtqskfemvqil dengnvnedlvpdl tdeqlvelmermvwtrildqrsisl nrqrglgyapt  
agqeasqlasqyalekedy  
ilpgyrdvpqi iwhglplteaf lsrghfkgngqfpegvna lspqiiigaqyiaagvafalkkrkyavaitytdggss  
qgdfyeginfaaykapa  
fviqnnyaistprskqtaaela qkaiavgipgiqvdgmdalavyqatkeardravagegptlietmtyrygphtmagd  
dptryrtsdedaewekdp  
lvfrkflenkglwnedkenevierakadikaakeadntekqtvtslmeimyedmpqnlveqyeiyekeesk  
>tr|Q2YX81|Q2YX81\_STAAB  
mkfgktiavvl assvlagcttdkkeikaylkvdkikdeepiktvgkkiae ldekkkk ltedvnskdtavrgksvkd l  
iknaddr lkefekeedaim  
kseqdfkkakshvndi dndvkrkevq lddvlkekyklhgeyskayknavnsektlfkyl nqndatqqgvnekskaieqn  
ykk lkevsekytkvlnkvg  
kekqdvqfk  
>tr|Q2YX85|Q2YX85\_STAAB  
mkgftqmanivfk lsdkdittlmsrisfdtenlpqgmkarakyqnttvniyqsgkvmfqgnhaeavsee llpqhyqlntn  
ktkknmansfleqtlmyd  
qfncigsdeagsgdyfgpl tvcaafvtkehvpilktlgvddskk ldtkivelaeqlvtfiphslltlhnekyniqqakg  
wtqvkmkavlhneavknvl  
ekidssqldyividqfakrevyshyal sdip lpkktkfetkgeskslaiavasii sryafvtymdqiskninmtipkgag  
akvdviaaakiikkygisrl  
dtiskkhfknrekaqkilkp l  
>tr|Q2YX88|Q2YX88\_STAAB  
meqitsaqnnrikankllkkrrerdkig laliegvhlieayqsgivitqlfaieparldqqiiayaqevfeinmkvaes  
lsgtvtppqffaiiekpqy  
diskaqqvllidrvqdpnglgtlirtadaagmdavimekgtt dpqdkvlrasqgsvfhlpvmtqdl dtfitqfngpvvg  
talnavtykevtssdsfa  
lll gnegegvnpellahattqnliipiygkaeslnvaiagsillyhlg  
>tr|Q2YX90|Q2YX90\_STAAB  
mrmkrflti vqillvvi iifgykivqtyiedkqeranyeklqqkfqmlmskhqahvrpqfeslekinkdivgwiklsgt  
slnypvlqgktnhdylnld  
ferehrrkgsifmdfrnelknlnhntilyghhvgdntmfdvledylkqsfyekhkiefdnkygkyqlqvfsayktttkd

Tsompanidou\_et\_al\_Supplemental\_FASTA\_File

nyirtdfendqdyqqf1de  
tkrksvinsdvnvtvkdkimtlstcedaysettkrivvvakiikvs  
>tr|Q2YX93|Q2YX93\_STAAB  
mrnvkqittksiaiaislgiltyttmigsvladeikypsakfnqpeakdkteltssifdekikenkalellifnqenknv  
teeqqlvdekaqlisdmtg  
kiylqvk1qgqidkeqlvfqndkneefpfvikdekddtivrilieqhmdkinmhvktlvakkdldnkemvysihfkekvv  
qhddakevpskhqngennk  
dklkkdiddkksqksdikerrtslftekglndipvqkdkvqqdsnkkienerpkasgtlkvenspptvkkvendhkeqp  
khkdekskkkekvvvekek  
alpafnrdddsknssq1ssdike1depnhkkqyilfaagivlati1lisahlysrkrngqv  
>tr|Q2YX98|Q2YX98\_STAAB  
mkwsitqlrkyqgkpfefdqtsfndlkesldlidlspitiqqqltikstevvadihisgtytmpcartlvpvkvp1dvt  
ttevfdlegynqynddqqd  
vdehyhvikdgmvn1hdivediviiekpmrayseqsdqmltvnggwevidedq1ddlakqqeqddsersqvdpr1qklqq  
1ydkeq  
>tr|Q2YXA1|Q2YXA1\_STAAB  
mrviagkhkskalesmegrntrptmdkvkegifslydvsgigld1fagsgalgiealsrgmdkvi1vdqnfkavkviks  
nlan1d1etqsevyknnad  
ralka1skrdiqfdv1fdppynkg1idka1klisefn1lkengiivcefsnheeidyqpfnmikryhygltdt111ekg  
e  
>tr|Q2YXA2|Q2YXA2\_STAAB  
mkqtfi1lgeg1td1fefmtmieynhqriddkiyfyspqaenkkssvaiimnpttg1nfqafyiminaikeypypdsnkf  
qm1ndcaekfdipilgidv  
qppqafhd1sllyny1isvl1r1qkwipe1q  
>tr|Q2YXA4|Q2YXA4\_STAAB  
mkkvnrni1nav1vgagfvss1lminkkvitrkqt1paffkgnapy1fahrggalrpeqtqlafdyakqlgvdgfeta  
vr1tkdqqlivfhdatvdr  
ttngsgkvsah1aelkk1dagyhfkding1tpyrghahtailtfdellkqypdmyinvd1kdapesyegsiapqimfdi  
iaenqafdrv1vtsfykeq  
ivrfnkiaggsvaigasqqevteaf1kyh1lggryyqplaqtfqmpthfkgid1tssrfikw1ndmnvipgyygvnsid1  
md1lyqkgahtivtdrpd1  
aqqfkqti1pnk  
>tr|Q2YXA5|Q2YXA5\_STAAB  
mineas1ai1ddide1admi1vasdi1yasfeqakqalendeah1lyqs1f1kskeydevmrfgkyhpdykkvm1etrqrk  
rayem1dvamhykarema1  
qh1idevvtkiayavsehvkietgnpffqtshsgcatggscncs1  
>tr|Q2YXA6|Q2YXA6\_STAAB  
mkk1i1rvvgv1flvgf1iy1fyspr1kfdv1enpnkgkvrseqvnksnhaenpkpkegvgtwvkgdikv1tskfaq  
adr1vypfrdgyknyvfkd1k  
nsyyivstkre1ivsvyatgekvnvsp1kigqhsaeifnhtsinpepsfkvdgkkyefelsded1ktqt1ikygniyaqv  
ysdqskkv1svrfltkem  
1adi1epyq1n1snftsehnkrpveqnpnq1is1yevtnemr1k1g1k1p1kinsd1ahiasn1yeatsngsdsvefteda  
1rgq1dknhvt1ykttaqnv  
gyafndvpt1ihswmnsdihrsr1lnskydemggdvmr1dys1l1fle1k  
>tr|Q2YXA8|Q2YXA8\_STAAB  
mvidf1i1i1i1fv1yfv1vgfrr1gfw1smih1sativ1swiasqfyksiver1livfipypkttafnttfafhfnh1qnrfea  
ivaflmit1fckfily1i1i  
vtfdki1ayqni1h1fsramgmi1vgvmti1iv1nft1ly1l1alypnealqhq1kisivshs1l1hipylsaftin1  
>tr|Q2YXA9|Q2YXA9\_STAAB  
mnkni1tkni1l1tt1l1l1gtv1pqnqkpvfsfyseakaysigqdetnineliky1tqphfsfsnkwy1qydn1gny1velk  
rys1wsah1slwgaeswgn1  
nq1kdryvdvfg1kdkdtdq1lwsyretftggvtpaakpsdktyn1fvqykdklqti1gahkiyqgnkpi1l1tkeidfra  
real1knki1ynenrnkgk  
1ki1tgggnny1tid1skr1hsd1anvyvkn1pnki1tvdv1fd  
>tr|Q2YXB3|Q2YXB3\_STAAB  
mvfndwe1nv1vysgehevvaneks1fv1idefydvaiaiy1ldgk1kvahvnygsdftidvankvfelni1qnpnvdeh  
>tr|Q2YXB4|Q2YXB4\_STAAB  
myni1iv1iacmin1fgli1ivp1l1ttndadfvwtss1liym1l1tsi1iliv1yiktkdsiqltifi1lnial1iilycap1l1fiy  
vf  
>tr|Q2YXB5|Q2YXB5\_STAAB  
mnkh1nk1kapk1l1edyk1kvqqrksketdrgc1k1svim1liv1ffli1ifgivacstnvn1fffq  
>tr|Q2YXB6|Q2YXB6\_STAAB  
mgpv1sptft1fyad1f1psaf1frvppqial1sveigdl1sl1cwgptsiek1l1t1sv1s1fsq1l1piyh  
>tr|Q2YXB7|Q2YXB7\_STAAB  
mkf1kky1iltgt1al1l1sstai1atiegnkadass1dky1l1tesqfhd1kriaeelrt1l1nksnvya1laags1npyykr1timmn  
eyrakaal1rsnnfakmada  
kva1lek1y1keine1inr  
>tr|Q2YXB8|Q2YXB8\_STAAB

Tsompanidou\_et\_al\_Supplemental\_FASTA\_File

mknklijakslltiavigittttastadasegygprekkpvsinhniveyndgtfkyqsrpknfstpkyikfkhdynile  
fndgtfeygarpqfnkpa  
ktdatikkeqklliqanlvrefekthtsahrkaqkavnlvsfkykvkkmvlqeridnvlkqglvk  
>tr|Q2YXC1|Q2YXC1\_STAAB  
mknknfigksilgiaaisltvstfageshaqtknaetvkkyneyqtnfkkqvnkkvvdqakavnlfkrtrtvathrkaqra  
vnlifqhsyekkk1qrqi  
dlvlkyntlk  
>tr|Q2YXC2|Q2YXC2\_STAAB  
mkriwilgnvldgpiwlhvdylvksvllksiklrfqevrkfeilvkimrihi  
>tr|Q2YXD2|Q2YXD2\_STAAB  
mtkkdvikllleqiatymelkgentfkisayrkaaqslelderpldeisdvte1kgigkgvaevindyretgesqylqq1q  
eevpdglipllkiqglgsk  
kiaklykelnivdkaslvacengkvselsgfakkteqnilavkqlgakkdkypidqmrrlnqeidiyidtlnyidqys  
sagsfrfrkemskdldfi  
stdnkvavqqllnlpnkveavngtkvslelayddetigvdfrliepsafyhtlqhftgskehnrirqlakardev  
seygieqadgtliqydsea  
kiyehfnvnfippamreddgsefdkdl sniitl ddingdihmhttsydgafsi rdmveaniakgykfmvitdhsqslrvan  
glqverllrqneeikaldk  
eyseidiysgtemdilpdgsldyddeilaqldyvigaihqsfnqseeqimerlanacrnpvvrhiahptgriigrdgyk  
pnieqlmalaeetntvlei  
nanphrldlnadivrkypnvkl tintdahhtnlhdfmnygvataqkgfvtkdrvinalsreafkdfienniklkk  
>tr|Q2YXD3|Q2YXD3\_STAAB  
mnnnitiikkii1sttll11gtastqfpntpisssteakayyinqnetvneltkyysqqhl tfsnktlwqkdngtihatll  
qfswyshi qvygpeswgnl  
iq1rnknvdi fgikdgetidsfalsqetftggvtpaatsndkhyklvntykdqaetftggfpvyegnpvltlkeldfri  
rtllkskkllynsynkgq  
ikitgadnnytidlskr1pstdanryvkkpqnakievileksn  
>tr|Q2YXD4|Q2YXD4\_STAAB  
mrkvdn1qqistqindkseknnfstkpnviavtkyvtierakeayeagirhfngenrlegffqkkealpsdavihfigslq  
srkvkdvinvydyfhaldr  
lslakeinkraehkikcflqvnvsgeaskhgialedvdqfidlkkkydkveivglmtmapltddeayirs1fkqlrlkke  
eiqr1nleyapcdelsmgm  
sndyliavdegatfvrigtklvgeee  
>tr|Q2YXD5|Q2YXD5\_STAAB  
mndnfkkqphhliyeel1qqgit1gittrgdgl sdypknafmaryidrrpynitqhqlqlaeeiafdrknwvfpiqthe  
nkvacitkddigtnditlt  
dalhgidamytydsnl1tmcyadcvpvyfystkhhfialahagwrgtyteivkevlkhvnfdlkd1hvvigpstssye  
inddiknfetlpidnsany  
ietrgrdrhgidlkkanaal1nnygvpeniyttayatsehlelffsyrlkqgtgrmlafiqgq  
>tr|Q2YXD7|Q2YXD7\_STAAB  
meehyvvsidigsssvktivgekfhnginviigtgqytsgikngliddfdiarqaikdtikkasiasgvdikevflklpi  
igtevydesneidfeyede  
ingphiekvlegirekndyqetevinvfpirfivdkenevsdpkeliarhslkveagviaiqksilinmikveacgvdv  
ldvysdaynygsiltatek  
elgacvidigedvtqvafyergelvdadsiemagrditddiaqglntsyetaekvkqhgyghafydsasdqdifveqvds  
detvqytqkdl sdfiearv  
eeiffefvfdvlqdlgltkvnggfivtgganllgvkellsdmvsekvrihtpsqmgirkpefssaistissiafde1ld  
yvtinyhdneeteedvidv  
kdkdnesk1ggfdwfkrrktnkkdthenevestdeeiyqsednhqehkqnhehvqdkdkeeskfk1mks1fe  
>tr|Q2YXD8|Q2YXD8\_STAAB  
mddktkndqqesnedkdelelfttrntskrrqrkrskathfsnqnkddtsqqadfddeiylinkdfkkeqsneenndsas  
shandniddstsdnnene  
dysynqei ddqnesngi avdneqqsapkeqnsdsndeetvtkkerkskvtqlkpltleekrklrrkrqkriqysviti1  
vlliavil iymfsp1skia  
hvningnnhvstskinkvlgvkndsrmtyfskknaindleadpliksveihkqlpntlnvditeneialvkykgkylpl  
lengkl1kgsndvkindap  
vmdgfkgtkeddmikal semtpevrryiaevtyapsknkqsriel fttqglvqigdistiskkmkypqmsqslsrdsq  
klktrgyid1svgasfipy  
rgntstqsesdknvtkssqeenakeelqsvlnkinkqsskn  
>tr|Q2YXE2|Q2YXE2\_STAAB  
mkylnkeqfimavekvpydeqvynsipkqppqtkpeknvsrkvvvltkfekvlyitlitviamlsiymlslkmday  
dtrgkiadldykidkqsse  
nsalqseikknsyeryiekakkqgmslendnvkvvrsngeakn  
>tr|Q2YXE7|Q2YXE7\_STAAB  
mgynlidfdtdtvdfydaeeawfhymanvfnhkatkddfltfkkinhqhweafqqnkltksevlserfvnyfkhqme  
vdghradvlfrnglaeakv  
kyfdqtletivelksrhdllyivtngvtetqkrlnqtp1hkyikkifiseetgyqkpnpeffnyvndigederqhsiiv  
gds1tsdilgginagiatc

Tsompanidou\_et\_al\_Supplemental\_FASTA\_File

wfnfrgfdhnpigiipdyeinswkqIndiv  
>tr|Q2YXE8|Q2YXE8\_STAAB  
myfrglcggrfgdasyyiteiqnkkspvitelcflvmgikipinvlggirtprdrwlrrpllypaelpghv  
>tr|Q2YXE9|Q2YXE9\_STAAB  
mklqkaplvtsglvlgllgnlkdlsltlnavcgifafliwihllctmlkyfnnvkeqlnsplvssvfttffmsgflg  
ttylntffsnitfinnilit  
piwilclvgimthmii fsikylkdfs lanvypswtv lfigiaia gltapvsgyffigqltviygvfatcivlpivfkr lk  
afplqtsikpntsticapf  
slvaaayviafpkanafivii llllaqifyfyiiiqlpkllkepfpvsaftfplvisataknslpvlmpfviwkgll  
fievl latvivr vfigyl  
hffl kkenqdkflrnasq  
>tr|Q2YXF0|Q2YXF0\_STAAB  
mfsskyhlkfqsnti fayatkyllnntthipvsvsktfvkcvishplfmlfsqpyvscftktvskyiffttiniyhr  
sni tlktyfkni iik  
>tr|Q2YXF1|Q2YXF1\_STAAB  
mentinesekkrfk l kmpgafmi l filtvvaviatwvipagaysklsyepssqelkivnphnqvkkvlg tqqeldkmgv  
kikieqfks gainkpsip  
ntyerkqhpagpeqitssmvegtieavdimvfilvlggligvvqasgsfesglla ltkktkghefmlivfvsilmiigg  
tlcgieeeeavafyplvpi  
fia lgydsivsvgai flassvgstfstinpfsvviasnaagttfdglywrigacivgai fvisylywyckkikkdpkas  
ysyedkdafeqqwsvlkdd  
dsahftlrkki i ltlv l pfpimvvgvmtqgwwfpvmasaflifti iimfiagt gksglgekgtvdafvngasslvgs l  
iig larginlvlnegmisd  
tilhfssslvqhmsgplfiivllfi ffc l gfi v pssglavlsmpi fapladv giprfv ivttyqfgqyam lflaptgl  
vmatlqmlnmryshwfrfv  
wpvva fvlifgggvlitqvlis  
>tr|Q2YXF3|Q2YXF3\_STAAB  
mknlnrsfltlldfsrgevefltl sedlkrakyigtekpm lknkniallfekdsttrtrcafevaahdqganvtylgpt  
gsqmgk kettkdtarvlgg  
mydgieyrgfsqrtvetlaqysgvvwngltdedhptqvladfltakev lkkdyadinftyvgdgrnnvanalmqgaaim  
gmfnh lvcpkelnptdel  
nrckniasenggnilitddidqgvkgsdviytdvwsmgpepdevkerlellkpyqvnkemmdktgnpnvifehclpsfh  
nadt kigqqi fekygi rem  
evtdevfeskasv fgeaenrmhtikavmvalgef  
>tr|Q2YXF4|Q2YXF4\_STAAB  
mknknimklvlstalllgttstqlpktpisfsseakaynisenetneliky tqphfslsnkwlwqkpnghat lq  
twwyshiqvfgseswgni  
nqlrnkyvdi fgtkdedtvegywtydetftggvtpaatsfdkpyrlflkysdkqqtii gghefykgnkpvltlkeldfri  
rqtliknkkl yngefnkgg  
ik itadgnnytidl skklkltdtnryvknknaqievileksn  
>tr|Q2YXF6|Q2YXF6\_STAAB  
mjakv idvasksvdykfdyi ipeql esviqpgvrvi vpfprt i qgyvmevtaepdaqldvsklkkievkdiqpelts  
elialsewmgsthvikris  
mlevmlpsaikakyykkafmkddievpsallqkfdkhgyyykdaqknndiql lmkllkddiveektiltqnitkktkra  
vrvi egyhpdevlaklekv  
ikqydl yalseeqk tiftltdiedmgf skssldglikkgyvekydavverdpfkdrvfeqeskqqltedqykayeaika  
kivsqegetfllhgv tsgg  
ktevylqtiedvlsqgkqamm l vpeialtpqmv lrfkr rfgddvavlhsglssgerydewqkirdgrarvnvgarssvfa  
pfknlgliiideehestyk  
gedypryhareiaqrseyh hcpvilgsatpclesyaraekgyhllslpnrvnqqa lpeidivdmree lsegnrsmfsk  
dlreaiqlrldr qevvlf  
lnrrgyasfmlcrdcgyvpqcpncdisltyhktt dlkchycgyqetppnqcpncesehirqvgtgtqkveellqqefed  
ariirmdvdttskkahek  
lltefekngdillgtqmiakgl dypnitlvglvlnadtm lnlp dfrasertyqlltqvagragrhekagqviiqtynpdh  
ysildvqkndyltfyrqem  
eyrklgkypyyylinfti shkemkkvmeasqhvhk illqhltekalvlgspaal arinnefrf qilvkyksep gllqa  
iqflddyhekfikela l  
kidi dpqmm  
>tr|Q2YXF7|Q2YXF7\_STAAB  
mkkillavtggiaaykaidltskl tqsgyevrvm ltnhaqkfvtp l vfa isrnaytdt fieenpsei qhialgdwada  
iivapatantiak lsvgia  
ddlvtstllatetpkfiapamnvhmyenkrtqqnini lkedgyhfiepgsgflacgyvakgrmeep lqivsvidahfqn  
nrlanssfqdkralvtagp  
tievidpvr fvsnrssgkmg yaiaea lnrngai vtlvagptt ledpkdievihvqsaeemfeqvtsrfdeqdivvkaaav  
sdytpvdvlehmkkqdg d  
lsvsfkrtdkilylgehktsgyl igfaetedienyaqq l rkknadvi isnngvdmsigfssddnel tmhfknnekvn  
ikkgkvvlaaqi ldelet  
rwq



Tsompanidou\_et\_al\_Supplemental\_FASTA\_File

>tr|Q2YXG0|Q2YXG0\_STAAB  
maydglftkkmveslqflttgrvhkinqpdndtilmvvrqnrqnhqlllsihpnfsrlqlttkkydnpfnppmfarvfrk  
hleggiiesikqigndrri  
eidiskdeigdtiyrvtileimgkhsnliivdenrkieiegfkhltptnhyrtvmpgfnyeapptqhkmpyditgaev  
lkyidfnagnjakqllnqf  
egfsplitneivnrrqfmsstlpeafdevmaetklpptpifhknetgkedfyfiklnhfnddtvtydslnlldrifyd  
argerervkqrandlvrfv  
qqqlhkyqnklakliieeyeqskndteqlygelitaniyrikqgdkevtaInyytneevvipInptkspsanaqyyykqy  
nrmktrereiqhqiqltkd  
nidystieqqllhhisvhdideirdeiaeegfmkqrknqtkkkkeqiqqhyvstgdgdiyvgnknqndyltnkkakkt  
htwlhtkdipgshvifnd  
apsdttiikeaamlagyfskagnsgqipvdytliknvhkpsgakpgfvtydnqklyatpdyehiqkmkqs  
>tr|Q2YXG1|Q2YXG1\_STAAB  
mdipkiittflmfnnqaeavklytslfedseiltmakygengpgdpqtvqhsiftlngqvfaidansgtelpmnpaisl  
fvtkdtiemerlfnqld  
egailmpktnmpyrefawvqdkfgvsfqalape  
>tr|Q2YXG2|Q2YXG2\_STAAB  
mndktsndlygkikhcnefinhsndsnlssshdvdessstkqkhiknkttinhnndlfkhvkdiirkqgqi  
>tr|Q2YXG6|Q2YXG6\_STAAB  
mqskrylvledgsfyegyrfgsdnlvgeivfntamtgyqetisdlsytgqiitftyplignyginrddfeslvptlngi  
vveasahpsnfrqkklh  
dvlelhqipgisgdtrsitrkirqhgvlkagftdrkedidqlvkhllqqvelpkneveivstktpyvstgkdlsvlvdf  
gkkqnivrelnvrgcnvtv  
vpytttaeailamapdgvmlsngpgnpevvecapmiqgilgkipffgiclgqqlfalsqgarsfkmkfghrganhpvkn  
letgkvdi tsqnhgyaidi  
dslkrtldleithlaIndgtvegllkhtlpafsvqyhpeanpgpsdsnylfddfvamtnfkekerhina  
>tr|Q2YXG7|Q2YXG7\_STAAB  
mklknkvlgngelqqadilidgkvikqiaptiepsngvdiidakghfvspgfvdvvhvhlrepggeyketietgtkaa  
rggfttvcmpntrpvpds  
vehfealqkclidnaqrvrlypasittrqlgkelvdfpalvkegafaftddgvqvqtasmyegmieaakvnkaivahce  
dnllyggamhegkrskel  
gipgipnicsvqiarvllaeaagchvhvstkesvrvidakragihvtaevtphlllleddipgnnaiykmnpp  
lrstedreallegllldgti  
dciatdhaphardekaqpmekapfgivgsetafpllythfvkngdwtlqqldvdyltikpcetfnleygtlkengyadlti  
idl dseqeikgedflskad  
ntpfigykvygnpil tmvegevkfegdk  
>tr|Q2YXG8|Q2YXG8\_STAAB  
mnhllsmehlstqiykliqkasqfksgerqlpnfegkyvanlffenstrtkcsfemaelklglktisfetsassvskge  
slydtcktle sigcdllvi  
rhpfnnyeklaninipianagdgsgqhptqslldlmtiyeegyfeqnalicgdiknsrvarsnyhslkalganvmfn  
spnawiddsleapyvniidd  
vietvdivmlriqherhglaeetrfaaddyhqhglnevrynkiqehaivmhpahvi  
>tr|Q2YXG9|Q2YXG9\_STAAB  
mqndemfertvkvpldvnekpqaqafslqlhlfamfgatvlpvfltgllpisaa llasgigtlllyilitkaqipaylgs  
sfafitpiitglsthsldg  
mlvalfmsgvmyviigiliklsgtawlmklppvvvgpvimviglslaptavnmyenpgdmkgynisflivamitllv  
tivvqgffkgflslipvlv  
giivgymvai fmgivkfdaimsakwidfphiylpfdyvpshlglvlvmipivftvsehighqmvlnkivgrnffekp  
gldksiiigdgvsmtfasi  
ggppsttygenigvlatriysiyyiggaaviaivlafigkftalissiptpvmggvsillfgiiaasglrmveskvdf  
annrnlviasvllvvgign  
lvfnlkeiginlqiegmalaa lsgii lnllpkkekqnn  
>tr|Q2YXH1|Q2YXH1\_STAAB  
metyefnitdkeqtmrvdkllpe lnsdwsrnqidwikaglvvandkvksnykvkln dhivvtekevveadilpenln  
ldiyyedddvavykpkgm  
vvhpspghytntl vnglmyqiknlsgingeirpgivhridmtdsgllmvakndiahrelveqlmdksvkrkyialvhgni  
phdygtidapigrnkndrq  
smavvddgkeavthfnvlehfkdytlvecqletgrthqirvhmkyigfplvgdpkygpkktldiggqal hagligfehvp  
tgeyerhaelpqdfedll  
dtirkda  
>tr|Q2YXH5|Q2YXH5\_STAAB  
mpftpneiknefsrvkngleptevanfleqlsteierlkedkkqlekvieerdtniksyqdvhqsvsdaliqaqkagee  
tkqaekqaeaiakaeaq  
anqivgdavekarrlafqtedmkrqskvfrsrfm lveaqldllknedwdyllnydl daeqvtlenihhlhendlkpdev  
aanaqnasnts dnnqqs  
dsettkk  
>tr|Q2YXH9|Q2YXH9\_STAAB  
mafeg lserlqatmqmrgkgk lteadikimmrevr lalleadvnfkvvkefiktvseralgsdvmqsltpgqqvikivq

Tsompanidou\_et\_al\_Supplemental\_FASTA\_File

deltklmggentsinmsnk  
pptvmmvlgaggktttagkla1lmrkkyknpmlvaadiyrpaainqlqtvgkqidipvysegdqvkpqqivtnalkh  
akeehldfviiidtagr1hi  
dealmlnelkevkdiaipneiilvdsmtgqdavnvasesfddqldvtgvtltkldgdtrggaalsirsvtqkpikfvgmse  
kldglelfhpermasrilg  
mgdvlsliekaqqdvdeqakadlekkmressftlddfleqldqvknlgplddimkmiipgmnmkglldklnmsekqidhik  
aiiqsmtpaernnpdtlnv  
srkkriakgsgrslqevnr1mkqfndmkkmmkqftgggkkgkkrnqmnm1kgmnlpf  
>tr|Q2YXI2|Q2YXI2\_STAAB  
mvy1ksidaigfksfadqtnvqfdkgvtaivgpngsgksnitdaikwlvgeqsaks1rgskmediifsgaehrkaqnyae  
vqlrldnhskk1svdenev  
ivtrr1yrsgesyynndrar1kdiad1fldsglgkeaysiisqgrvdeilnakpidrrqiiesagvlkykkrkaes1  
nkldqtedn1trvedilyd  
legrvep1keeaiakeykt1shqmksdiivtvhdidqytdnrqldqr1nd1gqqantheadkqrlsqqiqqykgrh  
q1dndves1nyqlvkatea  
fekytgq1nvleerkknqsetnaryeeeqenliellenisneiseaqdtyks1kskqkelnavireleeqlyvsdeahde  
kleekneyyt1mseqsdv  
nndir1flkhtieeneakksr1dsr1levfeqlkdiqqikttkkeyqtnkelsavdkeikniekd1tdtkkaqneyeek  
lyqvyrynekmt1ridsla  
tqeeeytyffngvkhil1kaknkelkghgavaeiidvpskl1qaietalgas1qhvividsekdgrqaiqflkern1grat  
flplnviqsrvtadiksi  
akeangfisiaseavkvapeyqniign1lgntiivdh1khanelaraikyrtrivtlegdivnpggsmtgggarksksil  
sqkdel1tmrhq1ledylrq  
tesfeqqfkelkiksdq1selyfeksqkht1keqvhhfemel1dr1ttqetqikndheefekndgytsdksrqt1sek  
ethlesikas1kr1edeie  
rytk1skegkesvtktqqt1hqkqsd1avvkeriktqqtidr1nnsqqtqkhq1ndvkeiaffnsdevmgeqafqnik  
dqingqqetr1r1sdel1dk  
1kqqriv1neqidageat1qvchqdi1aienhyqdikaeqsk1dvl1hhaidh1ndeyq1tverakseytsdesidalrk  
kvk1mkmsidel1gpvn1na  
ieqfeelnerytfl1segrtd1rkaket1eqi1semdqevterfketfhaiqghftavfkq1fgggnaelq1teady1tag  
idivvqppgk1qh1s1ls  
ggeral1tai11fai1kvr1sapf1il1devea11deanvir1yaky1nel1sdetqfivi1thrkg1tme1fadr1ygvtm1qesgv  
tk1svsn1nt1iddv1keeq  
>tr|Q2YXI6|Q2YXI6\_STAAB  
msktaiifpgqgaqkvmaqd1lynnndqateil1tsaant1dfdiletmftdedgk1getentqpa11thssa11aalkn1  
npdftmghs1geysslva  
dvl1sfedavki1vrkrqql1maqafptgvgsmaav1gl1dfdkvneicks1ssddqi1epanincpgqivvsghkalidelve  
kgks1gakrvmp1tvsgpf  
hss1mkvieedfssyinqfewrdakfpvqvnaqgetdkevixnmvkqlyspvqfinstew1idqgvdhfieigpgkv  
1sg1ikk1nr1dvk1tsiq  
1edvkgwnend  
>tr|Q2YXI8|Q2YXI8\_STAAB  
mrget1k1kkdkrreairqqidsnpfitdhe1sdl1fvsiqtir1drty1nipe1rkrik1vaeknydqissieeqefig  
d1iqvnpnvkaqs1ldits  
dcvfhktgiarghv1faqans1cvalikqptv1thessi1qfiekv1ndtvraearvvnqtaknyyvevksyvkhalvfk  
gnfkmfydkrg  
>tr|Q2YXI9|Q2YXI9\_STAAB  
makvn1iespys1l1q1kgi1gpkkiev1qq1nihtved1vly1lptriedntvid1nqaedqsnvtieqqvytapvva1ffgr  
nksk1tvh1mvnni1avkci  
ffnqpylkkkie1nqti1tvkgkwnrikqeitgnrvffnsqgtqtqesadvqlepvyrikegikqkqirdqirqa1ndvti  
hew1tde1reky1let1df  
t1nt1hhpksked1l1rarrtyafte1fl1fel1rmqwl1nr1lekssdeaieidy1ldqvksfi1dr1lpfel1teaqkssvneifr  
d1kapi1rmhr1l1qgdvgs  
ktvvaai1cmya1ktagyqsa1mvpte1laeqhaes1ial1fgdsmnval1tgs1vkgkkrkilleq1engt1dcl1gthali  
qddvi1fhnv1glvi1tdeqhr  
fgvnqrq1l1rekgamtnv1fmtatpi1prt1aisvfgemdvssikq1pkgrkpi1ttwakheqydkv1mqmtsel1kkgrqa  
yv1cpl1iesseh1edvqnv  
valyes1lqqyygvsrvq1l1hgk1sadekdevmqkfsneidv1vsttvvegvnvpnat1fmmiydadrf1gst1hq1lgr  
vgrsdqqsycv1iaspkte  
tgermt1mtqttdgfe1serd1emrgpgdffgvkqsg1pdf1van1vedyrm1levardeaaeliqsgvffentyqhl1rr  
fveen1l1hrsfd  
>tr|Q2YXJ3|Q2YXJ3\_STAAB  
mhin1l1csdrh1lpqdicaksnegkwggvdrgal1llkhqi1pffsvgdfdsvskeerq1l1teql1qikpvqaekadtd1al  
avdkaval1gfsditi1ygat  
ggr1dhffgaiq1l1kkayykhdvhi1evi1dqqnki1ell1pkgqhtvekdksyqyis1fipmtddvel1slagfky1narqmln  
igst1tisneies1qakvt  
vhg1l1l1q1rskd1n  
>tr|Q2YXJ4|Q2YXJ4\_STAAB

Tsompanidou\_et\_al\_Supplemental\_FASTA\_File

mtklypsllsvdfldlqhelkrleeagv d g v h f d v m d g q f v p n i s i g l p i l d a v r k g t t l p i d v h l m i e n p e k y i a s f a e  
h g a d m i s i h v e s t p h i h r a  
i q m i k h l d k k a g v v i n p g t p i s q i e p i l d i v d y v l v m t v n p g f g g q s f i d q c v e k i a g l n a i k m e r q l n f d i e v d g g v n t  
d t a k v c v e n g a t m l v t g s f  
f f k q e d y k k v t q a l k g  
>tr|Q2YXJ6|Q2YXJ6\_STAAB  
m i g k i i n e r y k i v d k l g g g m s t v y l a e d t i l n i k v a i k a i f i p p r e k e e t l k r f e r e v h n s s q l s h q n i v s m i d v d e e d  
d c y y l v m e y i e g p t l s e y i  
e s h g p l s v d t a i n f t n q i l d g i k h a d m r i v h r d i k p q n i l i d s n k t l k i f d f g i a k a l s e t s l t q t n h v l g t v q y f s p e  
q a k g e a t d e c t d i y s i g i v  
l y e m l v g e p p f n g e t a v s i a i k h i q d s v p n v t t d v r k d i p q s l s n v i l r a t e k d k a n r y k t i e m k d d l s s v l h e n r a n e  
d v y e l d k m k t i a v p l k k e d  
l a k h i s e h k s n q p k r e t t q v p i v n g p a h h q q f q k p e g m l y e p k p k k k s t r k i v l l s l i f s l l m i a l v s f v a m a m f g n k y e  
e t p d v i g k s v k e a e q i f n k  
n n l k l g k i s r s y d k y p e n e i i k t t p n t g e r v e r g d s v d v i s k g p e k v k m p n v i g l p k e q a l q k l k s l g l k d v k i e k v y  
n n q a p k g y i a n q s v t a n t e  
i a i h d s n i k l y e s l g i k q v y v e d f e h k s f s k a k k a l e e k g f k v e s k e e y s d d i d e g d v i s q s p k g s v d e g s t i s f v v s k  
g k k s d s s d v k t t t e s v d v p  
y t g k n d k s q k v k y i k d k d n d g s t e k g s f d i t s d q r i d i p l r i e k g t a s y i v k v d g k t v a e k e v s y d d i  
>tr|Q2YXJ7|Q2YXJ7\_STAAB  
m l e a q f f t d t g q h r d k n e d a g g i f y n q t n q l l v l c d g m g g h k a g e v a s k f v t d e l k s r f e a e n l i e e h q a e n w l r n n i k  
d i n f q l y h y a q e n a e y k g m  
g t t c v c a l v f e k s v v i a n v g d s r a y v i n s r q i e q i t s d h s f v n h l v l t g q i t p e e a f t h p q r n i i t k v m g t d k r v s p d l f  
i k r l n f y d y l l l n s d g l t d  
y v k d n e i k r l l v k e g t i k d h g d q l m q l a l d n h s k d n v t f i l t a i e g d k v  
>tr|Q2YXJ9|Q2YXJ9\_STAAB  
m i e n v r s l a f d t i q d i l n e g a y s n l r i n e v l s e n e l n a m d k a l f t e i v y g t v k r k y t l d f y l k p f v k t k i k a w v r q l l w m  
s i y q y v y l d k v p n h a i n e  
a v e i a k e r g g y h n g n v v n g i l r t m m r s d l p d f n e i a d p k k r m a v e y s m p k w i i d h w a t h y g l e e t e t i l q s f l e t t s t t v  
r a n l t r a s l d d i e i k l q d e  
g y d v e k d h d l p y c l h i g g q p i h s r s f k d g f v s i q d k s s m f v a h i m n v d r h d h v l d a c s a p g g k a c h i a e v l m p e g q v g a  
s d i h d h k i d l i n f n i k k l r  
l t n i k a f q h d a t k p y d k t y d k i l v d a p c s g l g v m r h k p e i k y t q s k q h i e s l v d l q l e i l e n v k n n v k i g g e i i y s t c t i  
e q l e n e n v i y t f l k n n k n f  
e f e p f q h p i t g e l v k t l q i m p q d f n s d g f f i t k i k r k d n  
>tr|Q2YXK1|Q2YXK1\_STAAB  
m a i k k l v p a s h p i l t k k a q a v i k f d d s l k r l l q d l e d t m y a q e a a g l c a p q i n q s l q v a i i d m e m e g l l q l v n p k i i r q s  
n e t i t d l e g s i t l p d v y g e  
v t r s k m i v v e s y d v n g n k v e l t a h e d v a r m i l h i i d q m n g i p f t e r a d r i l t d k e v e a y f i n d  
>tr|Q2YXK6|Q2YXK6\_STAAB  
m s y l v t i i a f i i v f g v l v t v h e y g h m f f a k r a g i m c p e f a i g m g p k i f s f r k n e t l y t i r l l p v g g y v r m a g d g l e e p p v  
e p g m n v k i k l n e e n e i t h i  
i l d d h h k f q q i e a i e v k k c d f k d d l f i e g i t a y d n e r h h f k i a r k s f f v e n g s l v q i a p r d r q f a h k k p w p k f l t l f a g p  
l n f n i l a l v l f i g l a y y q g  
t p t s t v e q v a d k y p a q q a g l q k g d k i v q i g y k i f e f d d v d k a l d k v k d n k t t v k f e r d g k t k s v e l t p k k t e r k l t k v s  
s e t k y v l g f q p a s e h t l f k  
p i v y g f k n f l i g s t y i f s a v v g m l a s i f t g g f s f d m l n g p v g i y h n v d s v k a g i i s l i g y t a l l s v n l g i m n l i p i p a l  
d g g r i l f v i y e a i f r k p v n  
k k a e t t i i a i g a i f m v v i m i l v t w n d i r r y f l  
>tr|Q2YXK8|Q2YXK8\_STAAB  
m f k k l i n k k n t i n n y n e e l d s s n i p e h i a i i m d g n g r w a k k r k m p r i k g h y e g m q t i k k i t r v a s d i g v k y l t l y a f s t e  
n w s r p e s e v n y i m n l p v n f  
l k t f l s e l i e k n v k v e t i g f t d k l p k s t i e a i n n a k a k t a n t g l k l i f a i n y g g r a e l v h s i k n m f d e l h q q g l n s d i i  
d e t y i n n h l m t k d y p d p e l  
l i r t s g e q r i s n f l i w q v s y e f i f n q k l w p d f d e d e l i c k i y q s r q r r f g g l s e e  
>tr|Q2YXL9|Q2YXL9\_STAAB  
m l n h i l l k l i w s r f t t a q i h l l l k t f p s c c e v d e y e r m h i l e n f c k l l a d k k i d a k v n r y k e i s v d e i e t t i q k t q l n y i  
t c f d h n y p y l l k e t y n y p i  
i l f y k r n i n h l s y s h t l a v g s p l s g d y t l k a l n h l f a s f q q m s f c v v s g l a q g a d a m a h q i a l k y n l p t i a v l a f g h q t  
h y p k s t l a l r n k i e e k g l v  
i s e y p p h t p i a k y r f p e r n r i i s g l s k g v l i t e a k e q s g s h i t i d f a l e q n r n v y v l p g s m f n p m t k g n l l r i q e g a k v v  
l n a n d i f e d y y i  
>tr|Q2YXM3|Q2YXM3\_STAAB  
m v i q w y p g h m a k a k r e v s e q l k k v d v v f e l v d a r i p y s s r n p m i d e v i n q k p r v v i l n k k d m s n l n e m s k w e q f f i d k g y  
y p v s v d a k h g k n l k k v e a a  
a i k a t a e k f e r e k a g l k p r a i r a m i v g i p n v g k s t l i n k l a k r s i a q t g n k p g v t k q q w i k v g n a l q l l d t p g i l w p k  
f e d e e v g k k l s l t g a i k d s  
i v h l d e v a i y g l n f l i q n d l a r l k a h y k i e v p e d a e i a w f d a i g k k r g l i r c g n e i d y e a v i e l i y d i r n a k i g n y c f

Tsompanidou\_et\_al\_Supplemental\_FASTA\_File

dfkdmteelandann  
>tr|Q2YXM8|Q2YXM8\_STAAB  
mkyihrrhitmkpqlswkvggqgegestgeifatamnrkgylygyrhfssrikgghtnki rvsttpvhaisddldi  
liafdqetidvnhhemred  
siiladakakpvkpegchaqlieelpftatakelgtaImknmvaigatsalmnIntntfeelitnmfsskkgdkvvevniqa  
lnegyqlmqsrlpeidgdf  
elestdalplymigndaiglgaiagsqfmaaypitpasevmeymianiskvngaviqtedeiaavtmaiganyggvra  
ftasagpglslmmeaigls  
gmtetplviintqrggpstglptkqebsdImqmiygthgdi pki vvaptdaedafyltmeafnlaeqyqcpvivlsdlql  
slgkqtvekl dynrieikr  
gei iqsdiereeddkgyfkryal tsnvgsprpipgvkggi hitgvehneegkpsesasnrqqmekrmrkieql viesp  
veanlqhedadilyigfis  
tkgaiqegsnrlnqqgikvntiqirqlhpfptsviqdavnkakvvvvehnylgqlasiikmnvnihdkienytkydgtp  
flpheieekgkiateike  
mv  
>tr|Q2YXM9|Q2YXM9\_STAAB  
mrimfigdivgkigrdaieityipqlkqkykptvtivnaenaahgkgltekiyqllrngvdfmtmgnhtyqgreiydfid  
eakrlvrpanfpdeapgi  
mrfiqindiklavlnlqgrafmpdidpffkkaqlvkeaeqtpfi fvdphaettsekyamghldgrasavvgththiq  
taderilakgtgyitdvgm  
tgfydgilginktevierfitslpqrhvvpnegrsvlsgvvidlkegkthierilinddhpfstf  
>tr|Q2YXN3|Q2YXN3\_STAAB  
msiaiiavgse lllgqiantngqflskvfneigqsvlehkvigdnkkrlessvrhalekydtvil tgglgptkddltkht  
vaqivgkdlviddpslkyi  
esyfeeqqemtpnnkqalviegstvlanhhgmapgmmvnfenkqiillpgppkemqpmvknellshfinhnriihsel  
lrfagigeskvetvlidli  
dkqtnptiapl agshevyirltanadskeqaqslipvkqeildrigeyyysddt lieqavikkihepfviydgitnga  
lyhr1kevdlndvlkgmin  
hnenfvdinkpieqqlkdavqfvnklfnvpsai illeydgvvyigydnlefkteqfkmsksrnlknrsqnyalirlln  
wlrttn  
>tr|Q2YXN4|Q2YXN4\_STAAB  
mnipnqitvfrvvlipvfilfalvdfgfnvsflggyeirielisgfifilaslsdfvdgylarkwnlvtnmgkfldpl  
adkllvasalivlvqlgl  
nsvvaii iarefavtgrl1lqieqgfvsaaqglgkiktavtmvaitwlllgdplatliglslgqillyigii ftlsgl  
eyfykgrdvfkqk  
>tr|Q2YXN5|Q2YXN5\_STAAB  
mktlgealkgrrrl gmtlteleqrtgikremlvhiennefdqlpnknysegfirkyasvvnienpqliqahqdeipsnq  
aewdevitvfnnkdldyk  
skskepiqllvimgitvlitllwimlvlif  
>tr|Q2YXN7|Q2YXN7\_STAAB  
mkeryyelidervfeqelenglr1fiipkpgfqktfvtyttqfgsl dnqfklgqdfvtvpdgvahfleklfekeeed  
lftafaednaqanaftsfd  
rtsylfsatdniennikrlltmvetpyftketvdkegii aeekmyeqqpyklmfntlramyqqhpirvdiagsvesi  
yditkddlylcyetfhyhs  
nmvlfvvgdvnpeei crivkqhedarnkvnpki erglidedevkeafvtesmkiqsprlm1gfknp1qeapqkyvqr  
dl emslffelifgeetdfy  
qnllneglidntfgyqfvleptysfsivtsateepdklkkllldelrdkkgnfqdaae1llkkqfigefisslnspeyi  
anqytklyfegsvfdmld  
ivenitl dsinetsslylnldqqvdsrleikk  
>tr|Q2YXN9|Q2YXN9\_STAAB  
msemnavynvkqyilnlikqnkleygdlpsnl siarelnvktddvyeatqaliteqvikdnfeegtsvkslppfyyp1n  
elisiqqmiknagfecgte  
ylnfdeqpatmdanllsveegypvtierlrtadgepvvycldkiakkelcteyqmsngsil saikeqsnhnicyadt  
eieavnyepri sevl nasp  
heglillki thynesdepi lyslnymknslvqfkitrki  
>tr|Q2YXP0|Q2YXP0\_STAAB  
maqakkkstakkkttskkrtnsrkkkndnpiryviailvvvlm1gvfqlgiigr1idsffnylfgysryltyilvllat  
gfityskripktrrtagsi  
vlqiall fvsq1vfhfns1gikaerepvlshvyqsyqhshfnpfgggvlgfyll elsvglis1fgvciitilllcssvill  
tnhqhrdvakvalenikaw  
fgsfnekmserngekqlkreekar1keeqkarqneqpkidvsdftevpqerdipiyghtenesksqsqpsrkkrvfdae  
nssnnivnhnqadqqeqlt  
eqthnsvesentieeagevtvsvvpp1tllnqpakqatskaevqrkgqvlentlkd fgvnakvtqikigpavtqyei  
qpaqgvkvs1kivnlhndia  
lalaakdvrieapipgrsavgievpneki slvs1kev1dekfpsnklevglgrdisgdpitvplnemphllvagstgsg  
ksvcingii tsi1lnakph  
evklm1ldpkmvelnyngiph1lipvvt1nphkaaalekivaemerrydlf qhsstrnikgynelirkqnqeldekqpe  
lpyivv1vdelad1mmvag

Tsompanidou\_et\_al\_Supplemental\_FASTA\_File

kevenaiqritqmaraaqihlivatqrpsvdvitgiiknnipsriafavssqtdsrtiigtggaekllgkgdmlvyngnd  
ssqtriqqaf1sdqevqdv  
vnyvveqqganyvkemepdapvdksemkseda1ydeay1fvveqqkasts1lqrqfrigynrasrlmddlernqvigpqq  
gskprqvlidlnndev  
>tr|Q2YXP8|Q2YXP8\_STAAB  
msidqilnflglamragkvktgesvivneikkgnlklviiandasntaklitdkcksykvprkfgnrnelgialgkge  
rvnvgitdpgfakkllsmi  
deyhke  
>tr|Q2YXQ1|Q2YXQ1\_STAAB  
mantmnnskywlerpqnviqsdiqadaeatteieriilqmyaeiakellafyakyattagltmlevkknadafdvkafrh  
kakmyvrhkdfsreanrvl  
klynltmkisreqllkqqllelvrdaglnlqskledhlveavdreverqahilgehvkiddaevkavvnsnfgvtsqr  
lwndmelvqkevervtshv  
virglhpnefvsefkkqntstsynasrlvtesarvqtesqkiaylkd1gedgeykyvakidsktsklchs1ngkilkvk  
dmipgvnvppmhlwcrstt  
vphvgnwrdfkffkeregkyqveddttkdelqqakvlgkkiyitdqaidkvryvdipthtkeenqfiqeqhka1lkaken  
ndsnevac1lkdgkvtkiy  
gdqdsvsfapgekate1lfnspntiimlnhpgqssfs1tdlyllyi  
>tr|Q2YXQ2|Q2YXQ2\_STAAB  
msfssprniirgrgisprktfstlwqvlqslkcscgrfrfwllrylsffl1fptcfvsntffkttffvflhkk  
>tr|Q2YXQ3|Q2YXQ3\_STAAB  
mfkvnysilssyppdiy1hsnlavgvafeiigesykhneikfitqrrkilsfddeidnlelinmflgd1kcefeqtnqslk  
nykkkfvnnyfyfenieykm  
fslkevnffietykyv1h1glgkker1kktekel1ns  
>tr|Q2YXQ4|Q2YXQ4\_STAAB  
memkkmseykkkiieliesn1tgyeiskktgvsqyvlsq1rqgkrevdn1t1ntteklyeyankv1  
>tr|Q2YXQ7|Q2YXQ7\_STAAB  
mkdiskivadvest1apyfkeieetayinqekvlnafhvkatesdlqgstgygyddfgrdhleeiyaqafkaedaivrp  
qiisgthaitialqsl1kh  
gdeliyitgspdyt1levigvngngies1mehgvsykdiakkegkidiesvldgvserakviaiqrskgydqrpsiplde  
ieevitr1kevhpni1ifv  
dncygefverrepeicgdliagsliknpggglakiggyiagrkdliercgyrltapgigkeagaslnallemyqgffla  
phvvsqslkgalfts1fle  
kmmnttpkyekrtdliqtvkfktkeqmisfcqsiqhaspinahfspepsympgyegdvimaagtfiggssiel1sadgp  
irppyayvqgg1tyehvk  
iavtravkqlkeggli  
>tr|Q2YXQ8|Q2YXQ8\_STAAB  
maqqa1hdtknk1ekav1vgvhaqddkqfnfestmee1ss1setcqllevlgqitqnrdrvdrkyvvgkkieeiqafief  
kdidvvitndelttagks  
lnealgvkiidrtq1leifa1rarskegklqvelaqldyl1sr1qghgks1sr1gggigtrgpggetklemdrrhirtrm  
neikhq1rtveehreryrn  
krnqnqvfhvalvgytnagksswfnv1aneetyeknqlfat1dpktrqiqindgfnliisdtvgfiqklpttlivafkst  
leakgad1lvhvdsshp  
eyrtqydtvnd1ik1qldmnhisqivi fnkkd1cdhasnrpasd1pnvfvsdkndgk1lvkt1fideikrqltyydeaia  
tnnadrlyflkqhtlvte1  
kydeienvyrikgfknkrtkfk  
>tr|Q2YXQ9|Q2YXQ9\_STAAB  
metiydfvvetnkgvtykldeykgdvm1ivntasecgfts1qfeg1qsl1ykykdqgfvl1gfpncqfggqepgsgeaaq  
nck1nygvtfpmhqkidvk  
gehq1pl1fryl1taaqhgfl1nekikwnftkflvdregnvkrfapqkpvqiereiek1l  
>tr|Q2YXR1|Q2YXR1\_STAAB  
msfiyadaqthhiidivedrt1selkkyfyrfs1karkrvktvsidmhegymtlikemfpnakividrfhivq1lnra1n  
girvtvmnelratnqplyn  
rfkryak111kpeedleafeyrkvalfkewktqkgivky1ldqdds1ndayqyinq1rfklkhndyggfihelkhmplsq  
thsvvqraikt1nkhvyfi  
kntfdyyn1sngpleginnkik1ikrtsfgygsynh1nrn1llsklyapkskkekvc1va  
>tr|Q2YXR4|Q2YXR4\_STAAB  
mnekqfkl1tvqdn1evkvntdvdskgi1hi1fhgmaehmerydklahalshkgfdvirhnrghginidestrghydd  
mkrvigdafevaqtvrngv  
dkpyi1ighsmgsvar1fvetyppqyvdgl1sgtgmyplwkg1ptvkv1qlitkiygaekrvewvnlvsnsfnkkirp  
1rtqsdw1ssnptevdnfi  
kdpysgfnvsng1lyqtayym1htsq1knikvlnhamp1llvsgyddplgdygkig1klaniyrkagiknvkvnlyhhr  
hev1fekdhdkiwed1fkw  
1nqfykk  
>tr|Q2YXS3|Q2YXS3\_STAAB  
mennegnitdvtqneeql1dnsdeqsqqnektfsqeevsqlikeriarerksderikdakesneva  
>tr|Q2YXS5|Q2YXS5\_STAAB  
mfnekq1lavdt1ral1s1dtiekansghpg1pmgaapmayt1wtrh1nfnppskdyfnrdrfvl1saghsa1lly1lhvs

Tsompanidou\_et\_al\_Supplemental\_FASTA\_File

gsleleelkqfrqwgsktp  
ghpeyrhtdgvettgplggfamsvglalaerhlagkfnkegynvvdhytyvlasdgdImegisheaasfaghnlslk  
vlydsndisldgelnkaf  
sentkarfeaygwnylvkdgndleeidnaittaksqegptiievkttigfgspnkagtngvhgaplgederkltfenyg  
ldpekrfnvseevyeifqn  
tmlkranedesqwnsllekyatypeleaeefklaisgklpknykdelprfelghngasradsgtviqaisktvpsffggs  
adlagnksnvnatdys  
etpegknvfgvrefamgaavngmaahggllhpygatffvfsdylkpalrlssimglnatfifthdsiavgedgpthepie  
qlaglrainmnrvi rpadg  
netrvaveval esestpts lvtl rqnlpvl dvpedvveegvrkgaytvygseetpefl l l l asgsevs laveaakdlekgg  
ksrvvsmprwnafeqqse  
eykesvipssvtkrvai emasplgwhkyvgtageviaidgfgasapgdlvvekygftkenilnqvmcl  
>tr|Q2YXS7|Q2YXS7\_STAAB  
mmfynkyknvstyiii flvssaafai fl l sanvsahseqvyemt dhqikntinkayehkdptnser rdgkvfal in  
>tr|Q2YXT3|Q2YXT3\_STAAB  
mednkmnrslnsrhismiaiggaigtglfvatgnisqagpggailaylvigvmlyflmssigelatfypvsgsfssyst  
rfidssl gftmgwlywalw  
slvtsvdvtvasnlyfwdtfkffhpitwslifitil l l l l nifsvksfgetefwlslikvltiivfvi fgflmifgilgg  
haygfenytkggapfvvggi  
sgflgvllvagfsvggtevvavtagesddpkksmpkaikqvwrillfyvlsiavigaiipytdpsllrassisspft  
ivfdrvgiafaasvnavi  
ltsllsaansgyvtgrrmlylssdkkapqflsklnkttklplral l l l tyavvviviiyanfnsvfnllleigsmiiv  
vwgssiwsqir l rqaikkq  
ggdpnkvlpykapfyp l gpiivitt l l l f l l f ggsveyilkdqwnafknflplilal iyfihkiihk tkfvkletinlk  
phdydnqk  
>tr|Q2YXT5|Q2YXT5\_STAAB  
mtnykvvvl dmdt l l l nsdnvi seetany l taiqdegyvvl asgrptegmiptard l klpehshy iis yngsktinmtn  
eevevsksigkqdfdeivd  
ycrdrgffv l tyhdgqi iydeheymnieae l tglpmkrvddikayi qddvhkvmgvdyanitearid l ngvfndnvda  
ttskpf l l efmakdvskgn  
aikalchk l gysvdqviafgdsmndksmfevaglaiamgnasdelkqyadeit l dhnengiphalk l l  
>tr|Q2YXT9|Q2YXT9\_STAAB  
mkvskfggssvsnatqikv l nivnsdperkivivsapgrhndikttd l l l rlyekvinhl dyhdkkreii qryddiv  
kelqmdesil rtidvtleh  
ying l knepkr l l dal l scgedfnaqlialynnsqgiptkyi spkeagifvtdvpqeaqil dsayseikk l rdydek l i i  
pgffgvshegyi vtfprgg  
sdi t g a i s s g r a t i e n f t d v s g i y a n p n i i k n p e l i e e i t y e m r e l s y a g f s v f h d e a l q p l y k d r i p v v i k n t n  
r p q d k g t f i v h d r e i n a k n  
visgiscdknftvini kky l mnrqvgftrki l gvlednnisfdhmpsgidtisivmrskqiqnketkv l neirqkcdvde  
lsiehd l a i l m i v g e g m n k  
vigtankithal aeski n l k m i n q g a s e i s m m f g i h v d d a e k a v l s t y e f c y h g v a l k n l c d k n  
>tr|Q2YXU0|Q2YXU0\_STAAB  
mrvnemnakeql vdn l mktssq l f k f h g e v a m q l f l n d e l k l p s i v e i c v e r k r l s d i v k v i p q s y a l l y i d k q d q v i a k  
e d l s l s k i a k v y v q y d d t t  
imsi fvydvvdewi fr l dpniripksniy fhs l nwdvdyikpeiv l mydlmqhhqyhhsnykrvidal syyqffil kf  
vvgqrikdai qrtinn  
>tr|Q2YXU1|Q2YXU1\_STAAB  
msfyvvl i i i i v a l i g i l v l n q r y s n s k i d t e v y a r k q l i k k n k a l s a e n a e l r s q m l s s n n d i g h h a y k n a k r e l r k i l  
d s y l e n g k l k y d i i v t s n  
l a t k h p f f e y a r s f d f i i v s d i g l i n v d v k s w g e k t f y h f d v p d e h d t e m s n s n i e k v v g h y i s q q y h d q f n s r k s i y t  
f t e t v q p n r v i y d f y d y p  
y q l a a n n a k a l k d h i e q n f n k v q s t g v i y f s d g t v n i i q g s e e r d k y v d t v s t k s s l r r i i s e a i e l s k h p l n k e q v d q  
i t a i f k  
>tr|Q2YXU2|Q2YXU2\_STAAB  
mksnks lami v v a i i i v g v l a f q m n h t g p f k k g t n h e t v q d l n g k d k v h v r v d g d t f i a n g n g e i k v r l i g v d t p e  
t v k p n t p v q p f g k e a s n y s  
k k t l t n q d v y l e y d k e k q d r y g r t l a y v w i s k d r m y n k e l v e k g l a k e y f s p n g k y r n v f i e a q n k a k q q k l n i w s k  
>tr|Q2YXU3|Q2YXU3\_STAAB  
mnisnentvt l i a v i a i i i g v f l q i f f k l p l i v t a v l s i l l g i f v g f i v y l i v s f y n k r n n  
>tr|Q2YXU4|Q2YXU4\_STAAB  
mkfsfsnd l g t l f t i i l a i a f i i n l v l a f i i i f l e r n r r t a s s t w a l f v l f v l p l i g f i l y l f f g r t v s a r k l n k n g n  
v l t d f d a l l k q q i e s f d k g  
n y g t d n k q v q k h h d l v r m l m d q d g f l e n n k i d h f i d g n d l y d q v l q d i k n a k e y i h l e y t f a l d g l g q k i l k a l e e k  
l k q g l e v k v l y d d v g s k k v  
k m a n f d h f k s l g g e v e a f f a s k l p l l n f r m n n r n h r k i i v i d g q l g y v g g f n i g d e y l g l g k l g y w r d t h l r i q g d a v d a  
l q l r f i l d w n s q a h r p q f e  
y d e k y f p k k n k s f g n a p i q i a a s g p a s d w h q i e y g y t k m i t a k s v y l q s p y f i p d n s y i n a i k i a a k s g v d v h l m i p c  
e p d h p l v y w a t f s n a s d l l

Tsompanidou\_et\_al\_Supplemental\_FASTA\_File

ssgvkiytyengfihskmcliddeivsvgtanmdfrsfelnfevnafyvdenlakdlraayahditkskqlteesyanrp  
lsvkfkeslaklvspi  
>tr|Q2YXU5|Q2YXU5\_STAAB  
meqiklktftaetlellesnineflsseeaanlklvnitikeieertfpnneefnailtlnsvk  
>tr|Q2YXU6|Q2YXU6\_STAAB  
mlilvlgnvvisfendylegahekvlkrldvtnlvqasgygfdqftaqaiekikdtidcpnatirflvgtqtnqvvin  
smlesyegvisadtghvav  
heggaiaysghkvi tmspekegkvsasdvetyetfksdfkdhmvfpgmvyishpteygtlyskseleelckvckqyqlp  
lfmdgarlgyglmsdqsdm  
tikdiakycdvfyiggtkigalceai vftkknepkqfttrikhhgallakgrlpqiqlfelftdnlyfnisrhaieman  
kmdgdfinkgyrlyfidspt  
nqqffilsnekieleqkvkfawwekyddqhrvrfatswatteenlnkllleli  
>tr|Q2YXV0|Q2YXV0\_STAAB  
mktmtlltriktetillesdikelieilispsigtdikye llssysereiqqeltyivrs lintmyphqpcyegamcvc  
gtgdknsfnisttvafv  
vasagvkvikhgnksitsnsgstdllnqmkiqttdvddtpnqlnekdlvfigatesypimkymqvrkmigkptilnlvg  
plinpyhltygmvgvfdpt  
klklvaktikdlgrkrai v lhgangmdeat lsgdnliyel tedgeiknytlnatdyglkhapsdfkgspeenltisln  
ilngkdqssrrdvvvlnag  
lslyvaekvdtiaegielattlidngealkkyrmerge  
>tr|Q2YXV1|Q2YXV1\_STAAB  
milvvdnydsftynlvdivahtdvi vqypddnvl nqsvdavi ispgpghplddqqlmkiistyqdkpilgiclgaqal  
tcyyggevikgdkvmhgkv  
dtisitsnthkvlyqdvpeqfsimryhs lispdnfpealkitgrtddciaqsfekerphygiqyhpesfatdygvkiit  
nfinlvkkg  
>tr|Q2YXV2|Q2YXV2\_STAAB  
mdvfykkikanvtpevlaqlhskkii lestnqqtkgrysi vifdygtltl dndvlsvstlkesyqiterpyhlttki  
nedyhniqdnqlkplpfis  
gyvgtc sfdlvrhefplqsiql edhkqh dvrlymveqvvyvf dhykdesyiatnqfsnstksdlenrvnksiedltkig  
pfmptqdfdfktkeiqsni  
seerfiemi qyfkekieaegdmfvvpsriykyahhanqhl nqltfqlyqnlkrqnp spymylnidkpyivgsspesfvs  
vkdqivttnpiagtiqrge  
ttqidnenmkql lndpkecsehrmlvd lgrndihrvskigtskitklmvikeyehvmhivsevtgkinqn l spmtvianl  
lptgtvsgapklraieriy  
eqyphkrvysggvgyincn hnl dfa lairtmmideqyinveagcgvvydsipekelnetklkaksll evsp  
>tr|Q2YXV3|Q2YXV3\_STAAB  
mepilemiktltginspsgdteeai qfvekyakdlgyqtltlnkgallitvpgkndevqrcitahvdtlgamveikedg  
rlaie liggftynaiegey  
cqikt dagqiygtic lhetsvhvyrnnheiprdqkhmeiridevt tseedtkslgisv gdfvsfdprt vitssgfiks r  
hl ddkasvamilql lklk  
eeqii lpyttqfyis nneeigyganasi dskikeyialdmgalgdgqasdeytsicakdasgpyhkqlkshlvnlckin  
nipykvdiypygsdasaa  
lhagadi rhglfgagiesshamerthidsikatek llyayclspie  
>tr|Q2YXV5|Q2YXV5\_STAAB  
mynyhll edrdvlcidqksffasvsciekgl dpletklavvadtkr qgsvvlaatpk lkelgiktgsrlfeiphrndiyi  
inpsmrkyl nsvaiskia  
lryispedlhqysideffmdvtdsyhrfsstvhafcerlkreiyeetgiyctvgigsnml lskiamdveakhnqngiaew  
ryqdvptklwpiql rdfw  
ginrrteaklnkr giftdglakypykflkkefgilgvdmhlhangidqskvrekhkisnpsicksqilmrdyhfd eakv  
vmqeliedvasrvrarkkv  
artihfafgysdeggvhkqytlkdptnlekdiykvvmhfadklcnkqalyrtlsislsqfinederqlslfedeyqrkrd  
eclaktidqlhkygkgiv  
skavsfteagtkhgrlg lmaghkm  
>tr|Q2YXV7|Q2YXV7\_STAAB  
mintayfaggfwcmtkpfdfdi ekvtsgymgghienptyeqvks gtsghletveiqydvalfsynk lleiffsv id  
pldtggqyqdrpqqyqta i  
fyndhqkelaetyieqlkntinadkaiatki l pasqfykaedyhqdfykknperyaeeqkirqeyknnq  
>tr|Q2YXV8|Q2YXV8\_STAAB  
mnqevknkifsilkitfatalfi fvvitlyrelsgin fkd tlvefskinrmslvllfigggaslvilsmydvilsralkm  
dislgkvlrvsyina lna  
ivfgggfigagvramvyknythdkkklvhfislilism l tglslslsllivfhvfdaslildkitwvrwlyvvsfflplf  
iismvrppdknrvf gly  
ctlvscvewlaaavvlyfcgvivdahvsfmsfiaifiaa lsglvsfipggfgafdvlvllgftlgvpeekvllmllly  
rfayyfvpiiail lssfe  
fgtsakkyiegskyfipakdvtsflmsyqkdiakips lslailvfftsmiffvnnltivydal ydgnhltyyillaiht  
saclllllnvvgiykqsrr  
aifamisillitvatfftyasyilitwlaifvllivafrarrlkrpvrnrnivamllfslfilyvnhifiagtlyal  
diytiemhtsvlryyfwlt

Tsompanidou\_et\_al\_Supplemental\_FASTA\_File

iliiiaiiigmiawlfdyqfsvkrisskiedceeiinqyggnylshliysgdkqfftnenktafmyrykasslvvlgdipi  
gdenafdeleafynyaey  
lgydvi fyqvt dqhmplyhfnfnqffklgeeaidl tqfstsgkkrgrfratlnkfdelnisfeieppfstefinelqh  
vsdlwldnrqemhfsvgqf  
neeyl skapigvmrneeneviafcs lmpyfn dai svdlirwl pel dlp lmdglylhmllwskeqgytkfnmgmatlsnv  
gqlhysylrerlagrvfeh  
fnglyrfqglrrykskynpnwepflvyrkdnslweslskvmrvirhk  
>tr|Q2YXW1|Q2YXW1\_STAAB  
mkdfds lipgw fkefvhvgtdliwsqyligllltagffftisskfvqlrmlpemfralverpetledgkkgispfqafai  
sagsrvgtgniagvataiv  
lgpggavfwmwviafigaasafieatlaqvykvhdkggfrgpayyitkglnqkwlgivfailititfafvntvqsnt  
iaes lntgynispvitgii  
laivtaiiifggvrsiatlsslivpimaiiyigmvlvillfnldqivpmigtiiksafgieqvtggavgaavlqgikrgl  
fsneagmgsapnaataav  
phpvkqgliqslgffdtmlvctataimillysglkfgesapqgvavtqsalnehlgsaggifltiavtlfafssvvgny  
yygqsnief lstrnrvlfi  
frc lvvv lvmgavaktetvwn tad lfmglmaivniisiiglsnvafalmkdyqkqnkegknpvfkpenleinlfgisaw  
gankyksdkyf  
>tr|Q2YXW2|Q2YXW2\_STAAB  
mseiidlsledvlgdrfgryskyiiqeralpdvrdglkpvqrrilyamyssgnthdknfrksaktvgdvigqyphgds  
svyeamvrlsqdwklrhv  
iemhgngsindppaamryteaklsllaellrdinketvsfipnyddttlepmvlpsrfpnlvngstgisagyatdi  
pphlaeviqatlk yidnp  
ditvnqlmkyikgpdfptggiqgidgikkayesgkgrivrskveetlngrkqliiteipyevnksslvkridelra  
dkkvdgivevrdetdrtg  
riaie lkkdvnseiknylyknsdlqisynfnmvaisdgrpklmgirqiidsylnhqievvanrtkfeldnaekmhive  
glikal sildkvielirss  
knkrdakenlievyefteeqaeavmlqlyrlntdivalegehkelealikqlrhildnhdallnvikeelneikkkfk  
serls lieaeieeikidke  
vmpseevils mtrhgyikrtsirsfnasgvediglkdgdsllkhqevntqdtvlvftnkgrylfipvhkladirwkelg  
qhvsqivpieedevvinvf  
nekdfntdafyvfatngmikstvp lfktrfnkpliatkvkendnlisvmrfekdqlitititngmsltyntsel sdt  
glraagvksinlkaedfvv  
mtegsenttilmatqrgslkrisfki lqvakraqgitllkelkknphrivaahvvtgehsqytl ysk sneehglindi  
hkseytngsfivdtddfg  
evidmyis  
>tr|Q2YXW3|Q2YXW3\_STAAB  
mamnkqnysdds iqvlegleavrkprgmyigstdkrglhhlyveivdsvdevl ngygneidvtinkdgsisiednrg  
mptgihksgkptvevifv  
lhaggkfgqsgyktsgglhgvgasvvnal sewleveihrdgniyhqsfnkggspssglvkkkgkktktgkvtfkpddtif  
kastsfndvlserlqesa  
fllknlk itlndlrsgkerqehyheegi kefvgyvnegvelhdvatfsgeangievdfafqyndqysesilsvnnvr  
tkdggthevgfktamtrvf  
ndyarrine ltkdknldgndiregl tavvsiripeellqfegqtksklgtsearsavdsvvadklpfyleekgqlsksl  
vkkai kaqqareaarkare  
darsgkknkrkdtllsgkltpaqskntdknelylvegdsaggsaklgrdrkfqailplrgkvintekarledifkneein  
tiihtigagvgtdfkieds  
nynrvimtdadtdgahiqvlll tfffkymkplvqagrivialppl yklekgkgtkrveyawtdeelnklqkelgkgt  
lqrykglgempeqlwett  
mnpetrlirvqvedelrsskrvtlmgdkvqprrewiekhvefgmqedqsilndnevqlendqfdeeei  
>tr|Q2YXW6|Q2YXW6\_STAAB  
misyiteiearyaetdkmgv iyhgnyatwfevarldyisklgfsyadmekqgiispvtdlnvnykksifypekvvkvtw  
ekysrlrsvykyei fnekg  
elattgstelicikedtfkpirldryfpdwheayskvqtl nnegktveiiddidsl  
>tr|Q2YXW7|Q2YXW7\_STAAB  
maanfkeqskkhfdlngsytyydlkaveeqgikvsnlpsyrvllesllrqeddfvitddhikal sqfgkdgnegevp  
fkpsrvilqdfgvpavvd  
laslrkamddvggdi tkinpevpvd lvidhsvqdsyanpealer nmklefernyeryqflnwatkafdynavppatgi  
vhqvnleylasvvhvrddv  
gektafpdtlvgt dshttm ingivlgwvvggieaeagmlgqpsyfpiveigvrlvns lpggatatdla lrvtqelrkk  
gvvgkfveffgpgvqhlp  
adratianmapeygatcgffpvddes lkymltgrsdehialvkeylkqnhmffdvekedpnytdviel d l stveaslg  
pkrpqdlifl sdmkssfen  
svtapagnqghglk sefdkkae infkdgs katmktgdiaaait sctnts npyvmlgaglvakkavekg lkvpeyv kts  
lapgskvvtgylrdag lqp  
ylldlgfnlvgygcttcignsgpllpei ekaiadedllvtsvlsgnrnfe grihplvkany laspqlvvayalagtvdid  
lqnepigkngdedvylkd  
iwpsikevsdtdsvvtpelfieeynnvynnelwneidvtdqpl ydfdpnstyiqnpsffqgl skepgtivplnglrvm



Tsompanidou\_et\_al\_Supplemental\_FASTA\_File

gkfgdsvttddhispagai g  
kdtpagkylqdhqvpi refnsygsrrgnhevrvgtfaniriknqlapgteggfttywptnevmpifdaamkykedgtgl  
vvlagndygmssrdwaak  
gtnllgvktviagsyerihrsnlvmmgvlp leftkgesadslgldgteei svnidenvqphdyvkvttakkqdgdlvefda  
mvrfdslvemdyrhggil  
qmvlnrklaq  
>tr|Q2YXW8|Q2YXW8\_STAAB  
mnssspenpngkyspvfiysaivvai vllgaf lpeqfnyftnnikmwitek lgwyy lilttiivffciflifspigkl  
klgkpnkpefntiswfam  
lfsagmgiglvfygaaepmahfatpptadpkteaytea lrstffhwgfhawavygvvalalaysqfrkgepgllsrtlr  
pllgdkveggigifidvls  
vfativgvavslmgalqingglhy lfnvpntfvqaiiivvt ilfiasawsgl skgiqylsnlniglgtilmvaaliv  
gptvli nmltsstgsl n  
tflfnsfdtaalnpqkrewmsswtlyywgw lswspfvgvfiarvskgrsirefigsvllvpaisfvwfsvfgvlgiet  
gkhhkeifdmtpetqlfgv  
fnhvpfgivls liallliasffitsadsatfv lgmqtffgs lnpssmvkvvwgisqaliafvlllagggngaealnaiqs  
aaiisafpfsfvvilmvsv  
fykdanqerkflgl tltpnkhr lqeyiksqqedyes dilekrqsrriekkn  
>tr|Q2YXX5|Q2YXX5\_STAAB  
mtklavvgatglvgtkml etlnrknipfelvl fssarsagqevf qgktytvqeltdarasehfdyvlmsaggggtsehf  
aplfeagai vidnssqwr  
maedilivpevneptftrgii anpncstiqsvvp lkv lqdayglkrvayttyqavsgsgmkgkkl aeingkapeayp  
hpiynnv lphidvflengy  
tkeeqk midetrki lnpvdlkvatcarvpvqds hveidvt lekeatpedikal fdqddrvvlv dnpennepmainst  
nkdevfvgrir rddslent  
fhwctadnllkgaa lnavqvl eqvmr lkgan  
>tr|Q2YXX6|Q2YXX6\_STAAB  
mvtrsv lkgfgssvsdf tkikriaem l kervnqdeqlivvvsamgnttdqlmtvstl tktpkqqela lllttgeqqts  
ylsmv lndigvnakamtgy  
qagiktighh lkskiaqinsqtfeqafqendilvvagfqginehqel t lgrggsdttavala vnsqipceiytdvdgvy  
atdtrllpkakr ldivsye  
emmemsalgagv letrsvelaknyniplyl gk tlnvkgtwimsneeilekkavtgv aldkhmmhv tisy lpdnql lltq  
lftel eegavnvdmi sqiv  
nldglqlsftikdsdfhq ismilet lknqyeal aykinehyvkis ligsgmrdmsgvaskaf lliennipfyqtttsei  
sisyv iddfngqqaiekly  
dafni  
>tr|Q2YXY0|Q2YXY0\_STAAB  
mtsstnkv alieknnikkgkhndki ipvilaa isaisil t l gilit l lletitfftripite flfstwnptgsdpkfg  
iwal iigt lkitviatifa  
vpvlgaa iy lseyasdrarri ikpile ilagiptivfgffaltfvtpvl rsfipgl gefnaispglvvgimivplitsl  
sedamasvpnki regaygl  
gatklevatkvvl paatsgivasiv laisraigetmivslaagssptas lsl tssiqtmtygiveiatgdatfgsniyys  
iyavgt lfi ftlimnlls  
qwiskrfreey  
>tr|Q2YXY1|Q2YXY1\_STAAB  
mettdnrrqs lvdqq lvgkh lssrtvknkvfkl iflact l lglv liall tq tlikgvshln lqfftnfssstpsmagvk  
galigs lwlmsiip lsi i  
lgigkaiyleeyaknnkftqfvkisisn lagvpsvfvgl lgyt lfvvgagiealkmgnsilaaaltmt lllilpiivssq  
eairavpnsvreashglga  
nkwti rrvvlpaalpgi l tgfils lsr algetapl v ligiptillatprsil dqfsalpiqiftwakmpqee fqnvasa  
giivllvililmngvai l  
rnkfskkf  
>tr|Q2YXY4|Q2YXY4\_STAAB  
msqglpl redvpvsetwd lvd lfkddqyyesidalvqqanqfhhtyatt lnsieqintalaelenilialdr lsnayael  
rlsvdtsnieaqvlsakls  
ttygkivsq lsfveseile lpeeilqqleacpyqhyikql ikqkpfqlsasveqvl at l spt lns pydlygttkml dit  
fdsfehdc ttpvdyatfe  
ndyednkdperrks fksfsdgi rkyqhttaatynmqvqqekiead lrgfesvinyllhsqevtrdmfdrqididiimrdla  
pvmqkyakllqrihg ldnm  
rfedlki svdpdyepe isiedsknyi fgal svlgddytnml reaydqrwidfaqnkgkdtgafcaspyfthsyvfi swtg  
kmaefv lahelghaghft  
laqkhqpyl eseamyfeapstmnem lmany l fntsdnprfkrwvigsil srtyyhnmvthlleaayqrevyhkv dqqe  
slnapt lneim l nvykqff  
gdavdmtegae l twmrqphyym rlysytsag l tigtvvsqkiknegqpavdaw let lkkggsvspvelaniagvditte  
qplkstiqyisdlvdevek  
ltdeieqann  
>tr|Q2YXY6|Q2YXY6\_STAAB  
mralnfavki knnirql yaqnr llsytavti iskemeysaivvfv ltflyfrwl trfkilyfimillkn

Tsompanidou\_et\_al\_Supplemental\_FASTA\_File

>tr|Q2YXZ2|Q2YXZ2\_STAAB  
mrfvfdidgtlcfidgrlidqtiidtlqqlqghaghelifasarpirdllpvlpsvfqhqligangamisqqsnisvikpi  
htdtyhhiikiikyeldy  
iiddwnyaaqldaenaiferldphklak  
>tr|Q2YXZ3|Q2YXZ3\_STAAB  
mnrlekhakntfiilmimlfiwifmsfifqklfpfppsknlttyealkyythlkgyyglhdhiskgiayiacvliplnfff  
rfndikkdnnynniistlf  
lllyflvngisliiggftaefstisliskanihnnhefavnlfryviqeggisfstylvcnfciiwllfscsllkerkp  
vrcplliisciklilililf  
llsiilviygtqsaqilfvfidflnfvalilvylctnpnrsidkiacvk  
>tr|Q2YY07|Q2YY07\_STAAB  
mcglrsitlgttnieqtkhfmvdi lgnceellensirfgdadispgrlqfiqvpseqlleeshfvigilrtptdsglev  
yaelsskeipftttkelsn  
gnkyfsfednngihifsiennnygiglgmpsfesavnpqhqvqglgpvilkvnhvditgqiltnifglevfaeyqpdfn  
adyhvqvfkiqgtgglggei  
hlmpvetemtpeygavdqvefetkdadffnqaksrldeveipyqtlegddiesiritensglsfiftlqk  
>tr|Q2YY08|Q2YY08\_STAAB  
mlhetwkertpikkvevintdakkftvsdm ltvqkqydvineteeyyqidnsvlvggykytyfkev  
>tr|Q2YY10|Q2YY10\_STAAB  
msdrfikfndeqltdtkqvmmlqdlarlllknegtqvkiqkfpypnpvqnlitswfwshrpshiemaglktdvmlaaygy  
hmmvqvivnevvdktfk  
pkfyqqlfklledmrvlnsinverpstaklidrlrdtrisytesqikvyrtktqytdllflylehaflsqdffidipsihs  
dlddilvnmflylpnffqn  
qnsednmylaqrimyqvddilkedmlneyyylpktlyntlaspefedlkrtdasqvdgqddtsedddnqsekadsksads  
eskggaylemelehgqns  
tlgndearegdattddmtmmtkkkgksndtlnreegdavgqsqafqldgvnkveikcqi peiepqqvleyqeskqdvqy  
eikdliqikiiktiereqrd  
arfnltkgrlqkdlinwfiddqyklfykkqdlksfdatftllidasasmhdkaetkkgvvlfhetlkalnikheilsf  
sedafdsdehaqpnine  
inydystfekdgpriialepqqdnrdgvairvaserlmrrnqhqrflivfsgdgpasafnysqdgii dtyeavemsrkfgi  
evfnvflsqdpitevteq  
ihniygqyafvegvahlpgy1sp1lkk1llks1  
>tr|Q2YY18|Q2YY18\_STAAB  
mhpkyfqvddfkeiemfiqsnsfgmivtvdqgkpiathvplvl dkkgddyisghlaktnpqcntlkdnqnvl iyyqga  
hsyvssawyeken vptwny  
qavhlygessilsee lidlkrllvkyerhredpvlwdnisentkmqakgivgfvkikhieaaykmsqnrnekdynni  
iekledesnassvavaevm  
knihpys  
>tr|Q2YY19|Q2YY19\_STAAB  
mtvkynqngelamdgislktiaqsfgtptivydelqireqmrryhrafkds glkynisyaskaftciqmvklvaeedlql  
dvvsegeleyraleagfeps  
rihfhnkktkheiryalennigyfvidsleeielidryandtvqvv lrvnpgveahthefiqtggedskfglsiqygl  
kkainnvqqskyllkkgvh  
chigsqiegteafietakivlrlkeqgiqvelnlngggfgikyvegdesfpiesgikditdaikseikflgidapeigi  
epgrsivgeagvtlyevgt  
ikeipeinkyvsidggmsdhirtal ydakyqallvnrneeaddsvtiagklcesgdi iikdaklpssvkrgydylailstg  
ayhysmasnynqm kpsvf  
flkdgkarevikrqs lrl iindtk  
>tr|Q2YY20|Q2YY20\_STAAB  
mtatwsvnkkliflqnaivtknnp l mavvknnayhydlefavtqfihagidtfsttslreaiqirqlapdatifl mnavy  
efd l vrehqihmtlpslty  
yynhkndlagihvhlefenllhrsgfkdlneikev lkdhhqnqnakmiisglwthfgyadefdvsdynversqwmeivea  
llsegyqfdlihaqnsasf  
yregqillphtharvgialygsrpysslnqhdivqsltvkahviqvrevqagdycgysfafevtkdntklavvdigygd  
gilrtrakhealingkryp  
iralmshmfvevdgnvhaqdevilyndirideytfkgvganseqlsamnhdsllkeyisndc  
>tr|Q2YY23|Q2YY23\_STAAB  
mnyrdkiqkfsirkyvtgftstviatl vflgfnstsqahaaetnqpasvvkqkqqsneqtenresqvqnsqnsingqsls  
atheneqpnisqanlvdqk  
vaqsstndeqpasqnvntkkdsataattqpdkeeskhhkqnesqsankngndnraahvenheanvvtasdl sdnqnvqhd  
rnelqaffdanyhdyrfid  
renavsgtfnyvkgifdkintlgsndpinnkdlqlaykeleqavalirtmpqrqtsrrssriqtrsvearaaeprsvs  
dyqnanssyyvenandgsg  
gsvaklknkcltlcl  
>tr|Q2YY24|Q2YY24\_STAAB  
mnyfrykqfnkdvi tvavgylyryalsyrdiseilrergvnhstvyrvwqeyapilyqiwk kkkhkayykwridetyi  
kikakwnylyraidaeghs  
ldiwlrkqrdnhsayafikrlikqfgkpqmiitdqapstkvamtktivkvl n p nchctskylnnlieqdh rhiks rkis

Tsompanidou\_et\_al\_Supplemental\_FASTA\_File

yqsintakntikgieciyy  
lykknrrslqiyrfspcrvisimlas  
>tr|Q2YY25|Q2YY25\_STAAB  
mivgyarvssidqnlrqlenlktfgveki ftekqsgksvenrpfqeaInfvrmgdrfvvesidrInrnydevintvhy  
lkdkvqlmitslptmnev  
isnplldkfmkdliaqilamvseqerneskrqaqgikvakekgvykgrp11ysadakdpkriiykrvzemleggqti  
kiakevni trqtvyrikhd  
kg1sw  
>tr|Q2YY26|Q2YY26\_STAAB  
melndcinyllstsqnr1fkhfks11spynitpaeygalnc1ins1n1tpkaignt1nlepstisgvl dkmskklitrq  
tdnenrrtv1instnkakd  
1wpt1ekkeyq1nnhyfan1tneetvfvk11kinettf  
>tr|Q2YY27|Q2YY27\_STAAB  
mfnavvvrksasvsvyketvdesh1skgdv1kvvyssinykdm1alqykggvirdypmipgidfagivessndkfke  
gdv1vtgydvgtthggf  
seyaqvpgeviwplpqemsikesmvygtagftaalsifelekygmniksqpeilvsgatggvgsvaiqilrkigyenita  
ivrkekqieiakklgakqv  
iieddkplkkg1fdyfl dtvgsnvtlyglkr1nyqgvatvcgnvagnslnanilpfilrgikligidsvyvdhni red  
iwsklanewnigns1lyne  
igfeefyktdq11kgghlgrtilkv  
>tr|Q2YY28|Q2YY28\_STAAB  
m1sygg11kqkhki1n1ddaedgn1intsdedkttdeekahsitaiwnfekqny1rn  
>tr|Q2YY29|Q2YY29\_STAAB  
mysqlyvestqdhqqr1ng1rqvvrtyrigttrkrvevsqgnvqtckv1estn1nidfdvddplsvktpsnkv1gfypt  
nantnafrrpggaq1neyq  
1sq1ftdq1lqeaartrnpir1migfdypdt  
>tr|Q2YY30|Q2YY30\_STAAB  
m1ggsvtsiqplrin1tsnenftdkdwqitgiprt1hienstnrtnnsrernielvgn11pgdyfgtirfgrkeq1fei  
rvkphptiittaeqlrgt  
alqkvpvnisgip1dpsalvylvastnqttnggseadqipsgytilatgtpdgvhntitipkdyvvfippvgkqiravv  
yinkvvasnmsnavtilpd  
dipptinnpvginakyrgdevsftmgvsdrhsg1ksttitt1psgwtsn1tksdnkngslaitgrvsmnqafngditfk  
vsatdnvnttndsqs khv  
sihvgkis  
>tr|Q2YY31|Q2YY31\_STAAB  
mnknqni rgy1astdpvtvdnngnvt1hyrdgssttleatnvmtyepivkpeyqtnapktatvtiakqgsfnigdikqy  
ft1sngqpi ssgtftnits  
drtiptagevsqmnagtqlyhivasnayhkdtedfyis1kivdvkqpegdqrvyrtstydlttdeiskvkqafinakrdv  
itlaegdisvntnsanv  
stivninkgr1tksfasn1anmfl rwnvfpqdytvtwtnakianrptdgg1swsddhks1iyrydatlgtqittndil  
tm1katttvpgrn1itgn  
ekaqaeggrrpnryrttgysqanassdgtqyt1ngqviqildi1npsngyggqpvtnsntranhsnatvvvnepaanga  
caftidhvksnsthnsd  
avykaqly1tpygpkyveh1nqntgnttdainiyfvsd1vnptisvgnynthqvfsgetftntittndnfgvqsvtvp  
ntsqitgtvddnnhghvsat  
apnvtsttktin1latdtsngtattsfnvtvklrdkyrvgtssrvanpvrianisnna1sqadqttiinsstftsna  
pnryatasaneitsktvs  
nvsrtgnnanvtvtvyqgdtstvtvpkhvipeivahshyvtvqgdfpagnssadyfklngsaipdatitwvsgq  
apkdnrtrigedinvani  
lidgettptiktatykvrvtpkhvfetargvlypgvsdmydakqyvkpvnnswstnaqhmnfqfvgytgpnkdvvgist  
rlirvtydnrqteditils  
kvkpdpprieansvtykag1tnqeikvnnv1nsssvklfkadntplnvtnithgsgfssvvtvsdalpnggikakssism  
nnvtyttqdehgqvvtvtr  
nesidsndsasvtvtpqlqatsegavfikggdgd fghverfiqnp phgatvawhdsptwkntvgnthktavvt1psgq  
gtrn1levpvkvypanaka  
psrdvkqnl1ngtdamnyi1fdpntntngitaawanrqppnnqagvqhlndvdytpgisaakrvpvtvnyvqfefpqt  
tyttvvggtlangtqasgy  
ahmqnang1ptdgftykwnaatgtndanwaamkpnakvvnakydvinynghtfatslpakfvvknvqakptvtetaa  
gaiti apganqtvnthagn  
vtyadklvikrngnvttftrhnntspwvkeasaatvagitgtngitvaagtfnpadtiqvvatqgsgetvsdeqhsd  
dftv vapqpnqattkiwqn  
vhiditpnnpsgh1nptqamdiaytekvnggaehsktinvvrgqnnqwtiankpdvvt1daqtgkvtfnantikpnasai  
t1tpkagtghsasnps1  
tapathvntteivkdygsnvtaaeinnavqvankrtatikngtampnt1aggsttkrnksqmahqhlly  
>tr|Q2YY32|Q2YY32\_STAAB  
mtpdvtvqavttmnqakdalngdek1aqakqda1anldt1rd1nqpqrda1rnqinqaqa1atveqtknaqnvntamgn  
1kqgi ankdtvkasenyhd  
adadkqtaytnavsqaegi inqttntplnpeitra1tqvtdakng1ngeaklatekqnakdavnamt1ndaqkqalkg

Tsompanidou\_et\_al\_Supplemental\_FASTA\_File

qjdqspeiatvngvkqtat  
sldqamnlsgaindktqtladgnylnadpdkqnaykqavakaeallnkqsgtnevqaqvesitnevnaakqalngndnl  
anakqgvkqqlanlthlnd  
aqkqsvesqitqaldhameallrnsiadnqatlasedyhdataqrqndynqavtaakniinqttsptmpdevnrattqvn  
ntkvaldgdenlvaakqga  
nnrlnqlldhlnnaqkqqlqsqitqssdiatvngkhqtaeslntamgnlinaiadhqaveqrgnfinadtdkqtayttavn  
eaealinkqtgqnanqsev  
eqaitkvqttlqalngdhnlvaktnatqaidaltslnpdktaalkdqvtaatlvtavhqieqnantlnlamhglresiq  
dnaatkanskyinedqpeq  
qnydqavqaanniine  
>tr|Q2YY33|Q2YY33\_STAAB  
mnttkaalhgdvklqndkdhakqtvsqalahlnnaqkhmedtlidsettrtavkqylteaqaaldqlmntlqqsiadkdatr  
assayvnakpnkkqaydea  
vqnaesiiaaglnnptkgnvssatqavttskngldgverlaqdkqtagnslnhldqltpaqqqalenginnattrdkva  
eiaaqaqlneamkalke  
ikdqppteasskfinedqaqkdaytqavqhakdlinkttcptlvksvidqatqavndaknnlhgdqklaqdkqhavtdln  
qlnglnnpqrqalesqinn  
agtrdevaqlaeakaldqamqalrnsiqdqqqteaaskfinedkpkdayqtavqhakdlinqtgnptldksqveqlkq  
avttakdnlhgdqklardq  
qqavttvntlnlnhaqqqaltdainaaptrtevaqhvqtatelldhametlnkvqvntdkaqpnysteaddkkeavdq  
alqaaesitdptngsnank  
daveqaltklqekvneingnervaeaktqakqtidqlthlnaeqiatkqnidqatklqpiavldqatqlnqsmdqllqq  
avnehanveqtvdytqads  
dkqnaykqaiaaaenvlkqnankqvdqalqnilnakqalngdervalaktngkhdidqlnalnaqqdgfkgridsnd  
lnqiqivdeakalnramn  
qlsqeigtnegrtkgstnyvndatqvkqvydeavdkakqaldkstgqnltaeviklndavtaakkalngeerlnnrkse  
alqrlnglthlnnaqrqla  
iqqinnaetlnkasrainratkldnamgavhqyideqhlqvisstnyinaddnlkanydnaianaaheldkvqgnaiaka  
eaeqlkqniidaqnalngd  
qnlanakdkanalvnslnqlnqqqdlahkainnadtvsdvtdivnnqidlndametlnkhlvdneipnaeqtvnyqnadd  
naktfnfdakrlantlns  
dntnvdindngaiqavndaiqnlnqdqrlqdakdkaidsinqalqylkklkeiasnateqdkliaknaeelansiinnink  
atsnqgvsqvtagkqae  
qvhaneipkaidankdadkqvqalideidrnpltdkekqalkdrinqilqqghndinnamtkeeeieqakdrilaqalqd  
ikdlvkakedakqvdkrv  
qalideidqnpnltdkekqalkdrinqilqqghndinnamtkeeeieqakerlaqalqdikdlvkakedaknkikalanak  
rdqinsnpdltpqakal  
keideakraalnvenaqtidqlnrglnlgllddirnthvwevddqpavneiseatpeqllvngelivhrddiiteqdvla  
hinlidqltaevitdpsta  
tidslatakvevtlldgskvinvvpkvvekelsvvkqqaiesienaaqqkineinnsvtlteleqkaaiavnkklkqqa  
idhinnapdvhsveeiqqq  
eqahieqfnpeqftieqaksnaiksiedaiqqmideikartdltkekqaeiaklnqlkeqaiqaiqraqsideiteqle  
qfkaqmkaanplakelakr  
kqeaistrkdfsnkmsirnseigsadekqaamnrineivletirdinnahtlqqveaalngiarisavqivtsdrak  
qslsngnesnshltigygt  
anhpfnsttighkkkldedddiplnhrhfsnnfgnviknaigvvgisgllasfwffiakrrrkedeeeleirdnknks  
iketlddtkhlp11fakrh  
rkeeedvtveekdslnngesldkvkhtpfflprrrrkeeedevtntentdekvldknehsplliakrrkdkeedvett  
sieskdedvp11lakkknq  
kdnqskdkksaskntskkvtakkkkkkskknlf1  
>tr|Q2YY34|Q2YY34\_STAAB  
makinfdaatkgnpgistcaivikedeqhytythelgemdnhtaewaaciyaalgharelsvsnallytdskliadsieag  
yvknanfkpyfdqieifek  
sfdllfvkwipreqnkeanqhaqqa1ykl1kknk  
>tr|Q2YY35|Q2YY35\_STAAB  
myneilglvtfiatfvlmvlmyrffgkqgliawvaigtianiqviktveifgisatlgnvmfasiylatdilndiyarr  
vakravwlgfsstlimiiv  
mq1slhfipapedmaqkelhaifdvvprialgsivayiiqhidvfifslikkvfssdkdffiraygstflssiidtal  
vaiafigslpgtvvfeifi  
ttyv1klastvfnvpfgyiaksfyrkgkidklqgy  
>tr|Q2YY42|Q2YY42\_STAAB  
mtkqiivtdstsdlskeyleannihvip1sltiegasvvdqvditseeфинhiendedvktsqpaigefisayeelgkdg  
aeiisihlssglsgtfnta  
yqasqmvdanvtvidsksisfglgyqihlvelvkegvstseivkklnhlreniklfvviqqlnqlikggrisktkglig  
nlmkiikipigtlddgrlelm  
hnartqnssiqylkkaiefigdheiksvgvahanvievdklkkvfneafhvnydinvttpvisahtggaiglvvlk  
k  
>tr|Q2YY43|Q2YY43\_STAAB

Tsompanidou\_et\_al\_Supplemental\_FASTA\_File

mtkeyatlaggcfwcmvkpftsypgiksvvsgysggyvndpntyeqvctnqtghveaaqitfdpevtsfenildiyfktfd  
ptddqgqffdrgeyqpvi  
fyhdehqkkaefkkqqlneqgi fkkpvi tpikpyknfypaedyhqdykknvhyyyqrgsgrkafieshwgnqna  
>tr|Q2YY48|Q2YY48\_STAAB  
mkigitecypsmggsgiatelgiklaerghevfitsnipfrirkplnmi fhqvevnqyavfqypdyditlstkiaevi  
keydldllhmhyavphaic  
gilaremsgkdkimttlhgtdivlgydhs lqgaikfgieksdivtsvskslaqethei ietnkei ipiynfvrenepf  
tkhntklksqfgiapdekv  
lihvsnfrqvkriddietfakvrekipsklillgdgpe lvpmrqltkel nveedvlflgkqdcvsefyqlsdvlvllse  
kesfgltlleamktgvvpi  
gsnaggikevikhgetgfvdvgdcdsasdyairlledkvlynklqkmladiaerfgselitdqeyyyyqkmlnehnks  
kge  
>tr|Q2YY50|Q2YY50\_STAAB  
mskysqdvllqllknpnyisgqsiaeslnisrtavkkvidqlklegckidsvnhkghllqqlpdiwyqgiidqytkssa  
lfdsevydsidstqlaak  
kslvgnqssffil sdeqtkgrgrfnrhws sskgg lwmvsvl rpnvafsmiskfnlfial gir daiqhssqdevkvkwpn  
diyidngkvcgfltemvan  
ndgieaiicgiginltqql edfdesirhratsiq lhdknkldryqflerllqeiekrynqfltlpfseireeyaasniw  
nrtllftendkqfkgqaid  
ldydgylivrdeageshr lisadidf  
>tr|Q2YY53|Q2YY53\_STAAB  
mdkyqlkarpvvrrrelldhysdlgldeqdlvillk liyaset snkqpsie llqkgstmqprditmviqnliqrellelq  
vqkdeegrfteymndpff  
eklshil kqqsmetkeqnskekfkqlfrvledtfarplspyeietlnqwidvdkhdtaiqaaldeanslnklsfkymdr  
illnwkknnvktid dsrki  
rekfnkpkmthivktvpkfdwlngenldgk  
>tr|Q2YY54|Q2YY54\_STAAB  
mvskkkalemidvianmfpdaecelkhdnpfeltiavl lsaqctdvlnrvttel fkyktpedylavsdeelmndirsi  
glyrnkakknlcqs lid  
qfngeipqthkeles lagvgrktanvmsvafgepslavdthvervskrlginrwkdnvrqvedrlcsvipdrwrnshh  
qliffgryhclarkpkcgi  
cpilledcregqkrykaslkea  
>tr|Q2YY55|Q2YY55\_STAAB  
mtnitkevfdnlqe idvfaknktlgsseakpyldeyhskiidfykqvndiignidfenlnqypvvpmmnfkerydymier  
kyhfmgyrgmktfk telik  
mnasyqtrlnkqv  
>tr|Q2YY58|Q2YY58\_STAAB  
mndvvesli yevnmqanfenvksqqqdhd fyqtvkpytehidsllneiklhrefiievpmnsrkfellianieqlsve  
chfkrtsrklfielksvq  
ydlqnildgitkegtyg  
>tr|Q2YY61|Q2YY61\_STAAB  
mfqllavcpmg leavvareiqelgyetnvengriffegdasai vkanlwlrtadriki vgrfnattfdelfeqtkalp  
esiidkegnfpvqgrsvks  
tlhsvpdcqaitkkaiverlrraynekgwlnesgakypvevailkdnvlltidtsgsglnrrgyrlaqgeapiketlaas  
lirlanwkgdtp lidpfcg  
sgtiaieacliaqniapgf nrefvseqwnimpani yddyrdeadkmadydkeievyas didpemveiakrnaeevglsdi  
ikfsvkdvntlidteepv  
alignpppygerigdreveemyryigklmkqhpflstyiltsnefeylvdrkatkrklfngyiectyyqywskkterk  
tien  
>tr|Q2YY62|Q2YY62\_STAAB  
mgkkmglglsialvviglavvc lmfssqkttyfgymnsntnaekvvsekdg lvkhnkivepsndfktkkgdvklvskd  
dgktfykqei vkhddvphg  
lmmki hdmhmn  
>tr|Q2YY63|Q2YY63\_STAAB  
mkntfnplqr lhfyaafiapl liltisgigylffpevenniykneffgdsdvkthqt lndavhqverqyegffvskis  
ildepynkritl sdmagnq  
ryvfl dhnnqfvadqnakhtysnmrsihss lftenti inylveltacw tifmilsgtyllikkhlisnkskalrwqkwh  
amigvii aipvflvltgl  
pws gfmgski agmmdtngdlggel ainppksdl nelpwatrknkqpassek gssshh gnaampqtkl dyqisidkvveq  
aqkagikkpfsivypsdkh  
gtfivsnstns gvtgl dvspeykeq tlyfdqysgkklgtikyddygi akwftwgiplheghlfgilnki inlvciallv  
aigmgfvs wkrktntavk  
vphrvkkpasisliiclivgl lmp lfglsilvfielilyikdrakq  
>tr|Q2YY64|Q2YY64\_STAAB  
minkeqldllyklkveksrneal lhtinqvikkvylqqytcsfvghfsagkstlinllieq dilpsspvttsntaiv  
svsdnhdianlnpntyak  
lsnydevmnrqnvdesveinfqsakfengftlqdtpgvdsnvashqs iteqymytsnmi fytdynhvqselnfkfm  
khindvgipvvfiinqidk

Tsompanidou\_et\_al\_Supplemental\_FASTA\_File

hqddelsfstfksrveksiadwgiklertfyvskfahpenlealssylvsldqhretiedytsrtveyiteaqldyiqs  
eiqevledlgiieaeefeqa  
flnsqhqaisdeaqllnnpdelmafknkrknilenayimphnmremrsylesmsqdfnvvgllfnkkkkklqiqqqrll  
latdalqehvnqqirgpm  
redmsfvtrfinkkeasdkvlngqhydvkpeimeglyqpqtsisntyvltfsdevvkaikkyveqqstpifkeienvqad  
elpteessddlkeyqrytel  
nelrqslltknyrhyyihldesldklvdrqettyqvadnrdnrdnqqlnqntattnmsidiqkaldiidsvplfkrtk  
qdihetlridnklkigv  
fgtfsagksslinallgehilvsspnpttaatteisygdesyitlksqsqlldeinavveyqnisfstiedfinsdlekl  
klhlnknqlafvhavexhy  
nlyvnmleengekhainqqelkkwsaedeyatfvktvrvlmdhwlgkiivdsllghsnnqrhtneteqiltssdililyv  
syfnhsftdndkafiehm  
dmnqlnenqafkmvinaadlaesqddleavetyvsdalrqlvhlqsdifavssrnalqaedkgidqlkqsiqqfvdvesks  
ileqqmihqllqqmrsyve  
mitefetnkadisrrqqrlyvykdkqrlqhqllidatdqhtdneveeqvyhlnarlkllqllddvksvfnsqmtqnsdfnee  
kkvstrvyldqihqrflle  
qsliterikkyfnkqlteqiapivqqladlhvivnpqfnfesanieqpllhidfndmlnalpkqltkrkilnpngqrdih  
esicqstlglqqpmglr  
qqlelyvqmqaveaesqfesfeaniqtqindllafdldttlinqlkdkhqqlktily  
>tr|Q2YY68|Q2YY68\_STAAB  
msngkelqkhigffsafaimgtvigsgvffkisinvtvtgtagmalfvwflggitiicagltaaelaaiipetggltky  
ieytygdwgfllsgwaqsf  
iyfpanvaalsivfatqlinlflhsigslipiaiasalsivlinflgskaggilqsvtlviklipiivivifgifiqsgdi  
tflslipttgnsngfftai  
gsgllatmfaydgwihvgnvageknkprdlplaisvgigcimavylinatfltlpiellagnlnaasdtskilfgen  
ggkiiitigilivvygting  
ytmgtmrvpyamaerkllpfshlfakltksgapwfgaiiqliaiimmsmgafdtitnmlilvfgcsivchlv  
>tr|Q2YY69|Q2YY69\_STAAB  
miygyiwygeqlshpwwqfkifvpdsptailflvisisilirkqnsiidalafvtlfkygiwavimnilfiieggditi  
nglvlmfshsimavqaiyf  
yprfkrsmigiiivamtcvflndyidyfhlqfpyydfitthvwqigvlscclsvfglllyielnkllkck  
>tr|Q2YY70|Q2YY70\_STAAB  
mfknlhdhdfedgvtteemkhlvnnnninfvkkqndvygeqitdikniishqdatvmdgnlsinysgehmisgqvqssny  
lkrkmtilknhidnavnki  
sdyvqetyynnyfepvlnyilevihsvetavrhiyeissliykgmkikikamginvdeidkmllevlksklknldeflnn  
kiaspilenhliddivrmk  
plivnqifepshyddmfilntqaharlqmaqfevvcnglnenegqaiqtmdqsaslirsnliqvkeqleklavy  
>tr|Q2YY71|Q2YY71\_STAAB  
mfkrtklililiatillsgcsttnnesnnetklvpeemeaskyvgqgfppaekdaiefakkkhdkkiakrgeqffmdnfglk  
vkatnvgsgdgvfvhc  
ddhdvfnasipfdksiidssnslrsedkgddmstlvgtvlsgefeyraqekyklykffkdneekyqytgftkeainkt  
qnsyenyfyistipynl  
teyrnyfepllnksnsefskemsnvkkqlkdksksvtttlfsknknytkksnsenvikmaeeikkekdldptdidfsiqf  
sdnkintikpnyskknse  
ygvfdne  
>tr|Q2YY74|Q2YY74\_STAAB  
mqhiiktalqqtfnktnksiynilvgkkshqtffdacrqqqlslyhsllpkypsfelflenitefnaemeimlhpryt  
fesmgqtfqaiqllvqmts  
ntmqgdfvfpisqnnkiqetvkiynyikenklqidfenelnlfkaitlkgpcylhyylqgydepmytrqqvsliek  
sqqlfeyemnnlvtmmfe  
lesgeytiiskiimkptllnqyitytrllqytmediaaqqqvkiintiedhvieilikgymsnyddyveqedqlqflnf  
yqhrgerlkfykeqfdtl  
syfqlkvlivgfergdlnva  
>tr|Q2YY75|Q2YY75\_STAAB  
mlhdilrnkfgfesfkpgqgeiiesimsqhtlgiilptgsgkslcyqiptylsgkstliisplislmdqvmqlkingek  
rvtcihsgmdeiekkhnik  
clrhstrfiflspellqpsnflksmidfgmivldeahclsewgydfrphyaligkvtkhfkdavvaltatapphlqdd  
ltemlaiqfnvikttmnrp  
nisfkhlnfnddedkielwllpflqqsgptiiyvsskkvclnlaqliydtgfltgihgdmnyqerhtvqqqlnndipii  
vatsafgminkkdiirai  
hfhlstpsnyiqeigradgelsqaislfqpdskyiletllfadmitteedvqnfeige flapdkqdvlttlrsfysig  
alkqifkqsfkrkqlgffr  
migyckldqcrkylleffgeyppaqdrccndsnitdiailnkkkvirsigfdeklqnflr  
>tr|Q2YY77|Q2YY77\_STAAB  
mlfnsvannslctlnklskiyhkssstvlahqslncynslglkeatmqkvesiigggpcglsvaieqkrkgidtlie  
kgnvvesiynphtqtfss  
ssdklsgdvpfiiveskprnqalvyyrevvkhqllkvnafeevl tvkkmnkftitttkdvycrfltiatgyyqghn  
tlevegadlpkvfhyfkea

Tsompanidou\_et\_al\_Supplemental\_FASTA\_File

hpyfdqdvviiggknsaidalelekaganvtvlyrggdyspsikpwilpnftalvnhekidmefnanvtqitedtvtye  
vngeskthndyvfamigy  
hpdyeflksvgiqintnefgtapmynketyetnienyiaagviaagdanti fiengkfhggiaaqsmakkqtples  
>tr|Q2YY78|Q2YY78\_STAAB  
mkhl1vhtggtismsgdqsnkvvtndinpi smhqdvinqyaqidelnpfnvpsphmtiqhvkqkldiilevvtnkyydg  
fvithgttleetaflldl  
ilgieqpvvitgamrssneigsdglynyisairvasdekarhkgvivvfndeiharnvtkthtsntntfqspnhgplgv  
ltkdrvqfhhmpyrqqale  
tvneklnvp1vkaymgmpgdi fsfysregidgmviealggnippsalegiqq1vslnipivlvsrsfngivsptyaydg  
ggyqlaqqgfifsnlgnp  
karlk1lvalsnldkteiksyfel  
>tr|Q2YY80|Q2YY80\_STAAB  
msvtnlsiakeavlvtkndlcnsrkmhyirssyysnvkvaylrgflfyksikfyyniscreq  
>tr|Q2YY81|Q2YY81\_STAAB  
mteefnesmindikegdkvtgevqqvedkqvvhinggfngi ipisqlstrhidspsevkegdeveayvtkvefdeen  
etgayilsrrqleteksys  
ylqekldneiieakvtevvkglvvdvqgrgfvpaslistdfiedfsvfdgqtitrikveeldpennrvilsrkaveqee  
ndakkdql1qslnesdvid  
gkvarl1tqfgafidiggvdglvhvselshhvqtpeevvsigqdvkviksidrdrterislsikdtlptpfenikgqfhe  
ndviegvvrlanfgafve  
iapgvqglvhiseiahkhigtpeglepgqqvvnkiligideenervs1sikatlpnedvvesdpsttkaylesgeednpt  
igdmigdk1kn1k1  
>tr|Q2YY84|Q2YY84\_STAAB  
mettvsklerqieerlkgvseyesininhr1gk1ldsydipdvakvac1tidtsmrh1dditynh1skhsiligdlisah  
fyt1laeind1sfqneisk  
aiveine1kss1hhqa1ndyeisqaivkiet1fsyit1shfginideseiny1fedmsdyppsyfkkynqsevkhylhd  
iqksylksrgn  
>tr|Q2YY86|Q2YY86\_STAAB  
maklnmneikkveqr1ekaikskdsvleqas1h1l1ssggkrvrpafvil1ssqfgkdeqtseqtyqvavalelihma1lv  
hddvidksdkrrgk1tik  
kwdqttailtgnf1la1gl1eh1mavkdnrvhqlisesivdvcrgel1fqfdqfnsqqtii1ny1rrinrktalliq1stev  
gait1sqsdketvrk1kmig  
hyigmsfq1iddv1dftstekkl1gkpvgsd1l1nghit1p1l1emrknpdfk1kieq1rrdserkefdeciqi1rksdsid  
eaksvssky1skald1ise  
1pdghpks1l1s1tkkmsrnt  
>tr|Q2YY91|Q2YY91\_STAAB  
mediykliddin1qk1en1dsrvneaittdnda1filget1ynfg1ipqglevfrvlyhkydpdeselliyfieglmsen  
qtdealey1syvepspek1  
mleadlyqqinmmevai1k1qea1le1epndpi1hfalaemlydygqylratseyetv1etgeyqvnvnl1f1rmadcs1q  
sgnysdair1lydeinedem  
tsedy1kkaisyd1knditqesikimtt1l1skdpdyiqgyly1q1slyeneknypdaietgkegl1r1sqfykelmyttgcle  
iehgdanegv1l1kqalev  
dnayqep1l1s1d1yrneedyeai1e1l1tyvdeed1dptfmwh1afaygqeerdkeaqhffelayptmktnidfmsdyyf  
y1ietgqkeqait1lnq1l  
elepsnenwhde1sr1qs  
>tr|Q2YY92|Q2YY92\_STAAB  
mmsetlnqikesfiel1fqyrfsria1vwl1nyikvneak1anihfvdtkinhhet1eiaevgshasaiqftkrnik1m  
ntnei1fdyianhncafd1q  
ihfanvskregr1dd1ivaq1tespsyqty1hd1nsmairhkhallidy1l1h1nid1sl1qmnekqrfyq1l1tqilnt1kl1v  
nkh1nqfed1add  
>tr|Q2YY93|Q2YY93\_STAAB  
mkkindr1lae1sgywayqd1dkryvirvnnkyr1iedysdnpnsksfggdakvfelvnsnne1tgqqai1fqgtnnn  
ks1g1snp1frgkvaddw1e  
nik1mndknksts1legnnsyiksyek1kdadt1kssdf1rkykkn1pstyknktiksdggnsqggasanhqgl1npkn  
ivstnpam1pks1iwenfks  
qnfenmi1nyhskfd1lsw1qdpfatpt1lgrkvn1etgvptmdgl1vnsh1gykrk1npryntykd1avykiksvkdtmikn  
gkkvkk1tieid1nmd1drip  
inwvtgdsiartgkgtpik1n1en1sa1sn1vtgetsnm1tdcvny1nesynisqvenanfgerkhk1kqdfkkivevdi  
legmsreltsfkqdvfsai  
ddvkk1l1  
>tr|Q2YY94|Q2YY94\_STAAB  
mitfknn1lyn1yrqn1l1gg1nvagiwk1dnsff1gl1nsypimnyhyvtaqfnnfekn1f1sedf1kvnyh1sgygihyneala  
sflgesseryaft1lyqn1  
krki1iyashaq1seq1knsns1l1p1n1l1ntyfeek1skhyic1eddviq1wip1ks1lyhpdrdv1lip1qm1lv1fdk1tikd  
ekqftnsgvstgtashetf  
eks1tnsi1e1l1qidsyn1lwygci1egka1svniaek1newfkresivhk1f1dn1fdvs1fdis1fdkpihvvvcevksk1k  
d1s1pk1yvvgvqgdtn1leq  
ciyrs1lecvtv1eyt1mte1vwsnt1th1fkni1seni1kn1hpid1n1dd1nvmyak1ygl1n1fm1hkrk1it1fqnik1nak1n1he1ine

Tsompanidou\_et\_al\_Supplemental\_FASTA\_File

lkhlsyyacylditpvefy  
nknlvvrtfipelltiaalpsyppyhprykeiggiindiphpla  
>tr|Q2YY95|Q2YY95\_STAAB  
mifhilwhsliglmffltcfpgillicirkvpyfkyptefhkiylvliivliidmclflsytniylcvfviiitpviiyi  
teksllfnknldfynkns  
kfilsvliaypmleelnfryflynfsliyhyiqyilsvltfvfshflyqgkssiikiffatmqtliylcfrdifiiv  
hmi fnilvfssqmkkinys  
iitk  
>tr|Q2YY97|Q2YY97\_STAAB  
mqlvtkqsilifiqtfilifglnfsmkvlfisfyaivctnlltflesvtklvlyrgwkrfpiaqlrtggd  
>tr|Q2YY98|Q2YY98\_STAAB  
mvtikdvalkagvspstvsrvikgnqriseatiskvkvmeeInyfpntaartlitnqtykiglvkkgseepirlnpfyi  
nvlngisetcnqhggygtqt  
tvsnmndlmdevykmikgmvdafillyskendpikqmlidenmpfivigkptsdidhqfthidndnilasenltrhvi  
egvdelifitekgdfevs  
kdriqgfetiasqnkinyqietsnerevifnymqnlhtrlkdpnikqaiisldamhlailsvlyelnieipkdvmtat  
fndsylteiasppqtsidi  
kprmlgqgagaainilknkaqdvieividtelkirkstqr  
>tr|Q2YY99|Q2YY99\_STAAB  
mknqwwkeavayqvyprsfndshdgidlpgmi dkl dylkdldgidvwlspmfkspnddngydisdyqeimdefgtmed  
fdrllkgvhdrgmkliildl  
vvnhtsdehpwfiessskdnprkrdwyiwqdpkpdgsepnnwesi fngstweydanteqyyfhlfskkqpdlnwgnpevr  
davfemmnwvfdkgidgfr  
vdaitthikktfeagdlpvpegktyapafdvdmnqpgiqtwlqemkdrskskydimtvgeangvspddaddwvgeengkfn  
mifqfehlglnsgdshfd  
vnsykvlnrwqkqlenkgnawalfienhdqprrvstwgdddkywesatshaavyflqqgtpfiyqqgeigmtnypfesi  
etfndvavkndyqivkaqg  
gdvdallakykdenrdnsrtpmqwddtlnggftngepwpfvnpyktinvaqqledehsvlqfykgliqlrksndvvyvg  
qfdlvdaensqvaytrtl  
nekqvlivgnltnheaelivpfdvshgevklnfydakvnlkqlrpyeacvieIn  
>tr|Q2YYA0|Q2YYA0\_STAAB  
mdvikqiqaivyiedrlllepfnlqelsdyvglspyhldqsfkmivglspeayararkmtlaandvingatrlvdivkky  
hyansndfandfsdfhgvs  
piqastkkdelqigerlyiklstterapyprleetddislvgyarfidtkylshpfnvpdfledllidgkikelrrynd  
vspfel fviscplenglei  
fvgvpserypahlesrflpgkhcakfnlqgeidyatneawyyiesslqltlpyerndlyvevypldisfndpftkiqlwi  
pvkqspyded  
>tr|Q2YYA1|Q2YYA1\_STAAB  
mstknkhipclitifgatgdlskrklfpsi fhlyqqdnldehia iigigrnditnddfnrqvkssi qkhvkdtnkidafm  
ehvfyrhdvsneesyqel  
ldfsnel dsqfelkgnrlylamapqffgvisdylkssgltdtkgfrlviekpfgsdlsaeaInnqirksfkeeeiy  
idhylgkdmvqnivelfra  
namfeplnwnkyisniqvtssielgvedrggyessgal kdmvqnhmlqmvallameapislnsedi raekvkvlskrh  
fqsedvknfvrgyaegy  
idgkqv kayr dedrvaddsntptfvs gkl tidnfrwagvpfyirtgkrmskti qvvvefkevpmllyetdkll dsnll  
viniqpnegvslhlnakkn  
tqgi etepvql sysmsaqdkmntvdayenll fdc lkgdatnfthweelkstwkvfdaiqdewnmvdpefpnyesgtngpl  
esdl l lardgnhwwddiq  
>tr|Q2YYA4|Q2YYA4\_STAAB  
mkgqhfivtggtsglglsivrkllenkvhtllvrddvkaarifeqelgktinvipcdlnlksiqalqfedntlfdgfi  
ysaglgfyfksisdhsfsem  
ietyqlnlisfnvlypvlrpyltsnahivgissqaafstqanaahygaskagfyaImnalrlespnlnimtvnvgpidtp  
fhqkadpsmkyakkmgkim  
ldanqlaedi ygi ktkqle inrpkwmhhal kmyqi aprffercfplfkna  
>tr|Q2YYA5|Q2YYA5\_STAAB  
mncqsenvvr lcvryaeqlsvfeeftvl dilgdi svdqisdstlyytcekfklvlqgnvlvgqiitnndestcevkryk  
mf  
>tr|Q2YYA6|Q2YYA6\_STAAB  
mqknllksgialselglgcmslgtdlkkaeqi idcaiengityfadtadmydkginesvvgkallkyqrrdivigtkvgn  
rltkdgsttwdpsksyike  
avkgs lkr lgidhidlyqlhggtiddpldetisafdelkqegii raygissirpnvidyylkhsqietimsqfnlidnrv  
eslldaihndvkv largp  
vskgl ltsnsvnl dnfkdgfdyshdelgetiasikeiesnl saltfsyltshdvlgsiivgassvdqlkenienyht  
kvsldqikt aravkdley  
tnhlv  
>tr|Q2YYA9|Q2YYA9\_STAAB  
metiieeylrfiqiekglssntigayrrdlkkyqdy mtehhishidfidrqliqec lghlidqqqsaksia r f i s t i r s f  
hqfai reky aakdptvll d



Tsompanidou\_et\_al\_Supplemental\_FASTA\_File

spkydkklpdlvnldevlalletldlningyrdrtmllelyatgmrsvselihlelennvlimgfvrvfgkgdkerivpl  
gdavieylttyietirpql  
lkkvtvtevlflnmhgkplsrqaiwkmiqngvkanikktltphtlrsfathllengadlravqemlghsdisttqlyth  
vksqirkmyngfhpra  
>tr|Q2YYB0|Q2YYB0\_STAAB  
mqqalinfyyqfhtkqhyflchdiledswkaennyskdavvsllifatacyhyrrnllkgayksfnkskeiiqnakdrd  
alylnlndyqllieqqiak  
lnaakpfssvilpitpderiikanypdydynhetatdpfivdhhmrrdrseviaakeeaiqlrknrrn  
>tr|Q2YYB1|Q2YYB1\_STAAB  
mtqyevdimyevklafngpld111hliqkfeidiydimqalteqymqyvhamkqleiniaseylvlase11mikskml  
lpqstsdmdvdddpredlv  
grlieyqnykeytailndmkeerdfyftkrptd1shletdeswdpnhtid1telivayqrvknrvelntpkveirketf  
tiqqateqvtsr1kdkdhf  
nffs1ftfsepieqvthflailemskagiinieqqrnfedinivrgvnyhfr  
>tr|Q2YYB3|Q2YYB3\_STAAB  
mmsrlnsvviklwl1i1ivttv111sialitfmqyyftqetenairedarrisslveqshnkeeaikysqtlienpgg  
lmiinnkhrqstaslnik  
kqmlnevvndhfddvfdkgksvtrnvtikekgssty11lgyptkaqknshskysgvfiykdlksiedtnnaitiitii  
tavifltitvtvafflssr  
itkplrrlrdqatrsvsegdysykpsvttkdeigqlsqafnqmsteieehvdalstsknirdslinsmveglginesrqi  
ilsnkmandimndidedak  
afllrqiedtfkskqtemrdleinarffvvttsyidkiegggksgvvvtvrmdtnehnldqmkkdfianvshe1rtpis1  
lqgytesivdgivtepdei  
keslaivldeskrlnrlvnel1nvarmdaeglsvnkeiqpiaalldkmkikyqqaddlglnmtfnyckkrvwrydmdrm  
dqv1tnlidnasrytkpgd  
eiaitcaenesedi1yikdtgtgiapehlqqvdrfykvdaartrgkqgtglglfickmieehggsidvkselgkgttf  
iik1pkpe  
>tr|Q2YYB4|Q2YYB4\_STAAB  
menesskdntetkvspemeaskyvggqfppaekdaiefakkhkdkiakrgeqffmdnfglkvkatnvvgsgdgvvevf  
vhcddhdvfnasipfdks  
iiesdsslrsedkqddmstlvavlsgefeyrahkqelds1tevlkeykskykftgytenaimktqnsgrneyyyltaip  
ytldeykkyfqplikeddk  
tfrdgmkskkq1kdkrsryvvt1fstkdnytkdntidemidfsevlkkkniphdlnvs1qitdkyinsarpsyskkd  
sievgvfnhekn  
>tr|Q2YYB5|Q2YYB5\_STAAB  
mnqksnl1sinevkkqsklanmrvfvl1syangpfikafnfltn1ldityt1afydneniffniqhgetgcyec1er  
qlvskfpgkieny1vpdeq  
nggiyn1k1ysy11simineinnieiygdst1ignvlhfy1ptyeynfnfnkrqstcstcstinnvl1fkeqniksani1k  
rv1endn1  
>tr|Q2YYC0|Q2YYC0\_STAAB  
mtnlpmnk1idevnnel1svainksvmdtqleesml1ys1naggkri1rpv11111t1ds1nte1y1elgmksa1alemihtys1i  
hdd1pamdnddyrrgk1tn  
hkvygewtai1agdal1tkafel1ssddr1tdevkikvlqrl1siasghv1gmvggq1mdmqsegqpin1et1lemi1hktktg  
all1tfavmsaadi1anvdda  
tkeh1esysy1h1gmmfqi1kdd11dcygeak1gkkvgsd1lennkstyvs11lgkdgaedk1tyhrdaavde1mqideqfnt  
kh1lei1vdl1fysrdh  
>tr|Q2YYC2|Q2YYC2\_STAAB  
mlqt1sikqfai1eeleiqfsdgl1tv1sgetgsgksi1idaigq1ligrassdfvrhgekkavi1egifdideskdai1il  
enmdidvdedf11vkreif  
ssgks1ckinnqtvt1qd1lrkvmqel1dihgqhetqsl1kqkyh1t11dn1aesryqd11dkyhqt1fnykakkkeled1  
esadqal1qr1d1lmkfg1le  
el1seah1kegeieq1leidikriqnsek1slal1nahmt1tdenaitdr1yelsnh11tindivpnkydk1kedidqfyi1  
ledakhe1ydemantefde  
qvl1neyes1rmn11nn1krkygkdiseliayqek1nneinkienyeqstsq1reeinalynqviev1gqalskqrriare1  
rdhivseiqn1qmkanle  
isfkk1leepnidgiefvefl1spnkgeplks1lnkiasg1elsrim1alksifvksrgqtail1fdevdsgvsgqaaqkmae  
kmrdaeyiqvicish1pq  
vasmsdh1h11isksskddrtttqvqel1gddkvd1earm1sgasvtd1trenaremiqhnqrr  
>tr|Q2YYC3|Q2YYC3\_STAAB  
msekqyd1lv1gggtagyva1irasq1gkkvaiverq1l1ggct1lhkgciptks11ksaev1qtvkqaamfgvdvkdanvn  
fenmlarked1inqmyqgv  
khlmqhnqi1diyngtgr1l1gtsifspqsgtisveyedgeds11pnqfvliatgsspaelp1fsfdhdkil1ssddil1s1kt  
lpssigi1gggvigme1fas  
lmid1lgdvtvi1eageri1lpteskqasq1l1kks1sargvkfyegik1sendinvnedgvtfeissdi1kvdkv11sigrk  
pntsdig1lnntkik1stsg  
hil1tnefqtedkhiyaagdcigk1qlahvgskegvavdhmfegnpipvnyvmpkciysqpeiasig1nieqakaegm  
kvksfkvpfkaigkavid  
hdanegysemvidqsteeivginmigphvtelineas11qfmngsale1gl1tthahpsisevl1mel1glkaesrai1hv

Tsompanidou\_et\_al\_Supplemental\_FASTA\_File

>tr|Q2YYC4|Q2YYC4\_STAAB  
midykslg1seedlkviykwmldlgrkiderlwl1nragkipfvvsgqqeatqigmaya1eegditapyrdlafvtymg  
isaydtflsafgkddvns  
ggkqmpshfssraknlsqsspvatqiphavgaalalkmdgkkkiatatvgegssnqgdfheglnfagvkhlpfvcviin  
nkyaisvpdslqyaaekls  
dra1gygihgeqvdgndplamykamkeardraisgggstlieavtsrmtahssdddqyrkteerea1kkadcnekfkke  
llsadiiddawlaeieeah  
kdiinkatkaaedapypsveeayafvyeegsln  
>tr|Q2YYC5|Q2YYC5\_STAAB  
mdklsyleairqaqdlalqqnkdvfilgedvgkkggvfgttqglqqygedrvidtplaesnivgtaigaamvgkrpia  
iqfadfilpatnqiisea  
kmryrsnnewqcp1tirapfgggvhgglshsqsiesifasspgltivipstpydakgl11ssiesndpvlyfehkkayrf  
lkeevpeeytvp1gkadv  
kreged1tvfcyglmvnyc1qaadilaadginvevd1rtvyp1dketiidrakhtgkv11vtednlegsimsesaiia  
ehclfeldapimr1aapdv  
psmpfspv1eneimnpeki1nkmrelaef  
>tr|Q2YYC6|Q2YYC6\_STAAB  
meitmpklgesvhegtieqwlsvvgdhideyep1cevitdkvtaevpstisgtiteilveagqtvaiddtiickietadek  
tnetteeiqakvdehtqks  
tkkasstveqtstakqnprngrfspvfk1asehdidlsvvgsgfegrvtkkdlmsvienggitaqsdqvtqsts  
vdtssnqssednsenstip  
vngvrkaiagnmvsvteiphawmmievdatnlvnrnhyknnfknkegyn1tffaffvkavada1kayp11nsswqgne  
il1hkdnisiavadenkl  
yvpvikhadeksikgiareintlatakarnk1ttedmqggtftvntgtfgsvssmgiinhpqaailqvesivkkpvvin  
dmiairsmvnlcisi dhri  
ldglqtgkfmhikqrieqyt1entniy  
>tr|Q2YYC8|Q2YYC8\_STAAB  
mlk1npykigfrtiktagmt1gviisk11gl1dnyassailv1cikhtkvhslqaiisrlvscflv1flgsaifs11gq  
spiv1giiv11fip1tvv1  
kvqegvitscvil1hvfnaksidahlivnet1111ig1siaftm1mmps1dkq1deykckieqqiadi1fskysyiceky  
ed1viefeal11nikkak  
siafrdvknhfvrnensyhyfdmreeqve11mrmp1liesichkdp11ndvas11keigl1vnsndytamr1hnlyetr  
1klde1p1ptthka1nsra  
s1iqilneleey1qiks1qf1g1kmhseva  
>tr|Q2YYC9|Q2YYC9\_STAAB  
mtqfts1in1cnvncn1lfhqf1pfgv1enfdkrgsimineqr11ntflelvqidsetgnestiqpilkekfi1gl1dv  
kedaakhp1lgann1vct  
mnstieevpk1y1tshmdtvvpainvkpivkddgyiysdg1t1lgaddkaglaam1ev1qvikeqqiphgqi1qf1tv  
geesgl1gake1nse1lda  
dfgya1dasadvgttvvgaptqm1isaki1igktahastpkegvsainiaakaisrmk1gqvdeittanigkfhggsatni  
vadevileae1rshdperi  
ktqvkhmtdvfettase1ggkavvtveqsypgfk1indnetvkv1aqesarn1gl1santi1sgggsdgsi1ntfgipsv1  
gygek1httnerpik1s1  
n1lasqv1ei1kivarqsk  
>tr|Q2YYD1|Q2YYD1\_STAAB  
mn1ipys1shyfyikh1ivi11seqcpskisapaqlaes11timcrlg  
>tr|Q2YYD2|Q2YYD2\_STAAB  
mkiclyi1in1kvknpsva11inktkavs1ghnv1rqskkadfy  
>tr|Q2YYD3|Q2YYD3\_STAAB  
mmkinnhtingysd1nsseamqyaagccscscscscscscscsastaeq  
>tr|Q2YYD4|Q2YYD4\_STAAB  
mtikn1kvdinnrk1in1nntiniyskdkialigkndagkt1in11neikysgv1nrkikskdigivf1qenkygdli  
kvheliy1itayskrskqf  
kaftkafs1eh1inkfvkd1slgeqkr1tvgl1v1neqkklyi1fdeltsg1dyekrq11lqktkeitqnkavikithy1fge  
venwank1i1idkge1lly  
gsidqffskfyh1alie1enqeldyqvrvi1ekinadvyfntkivthnkeqmdvin1in1nerkiefkinmqniystylis  
tleei  
>tr|Q2YYD5|Q2YYD5\_STAAB  
mink11s1kmgfrvpi1svffs1ifpiimiivi11sygnfsigngrhfidkyfl1stsig11piafisfpiw1sesiene  
t1kr1kyfevniss1ivsn  
i1sycflaifsv1ini1igkvffs1t1pntqyfiafffqifyni1a11migtfla11irkskv11pfgm11fl1tymiig  
vfvqygel1pnv1keignwi  
pikyvtndfysiw1nermwdas1fl1k1nslyiivasv1s1fiykfkf  
>tr|Q2YYD6|Q2YYD6\_STAAB  
mm1krqemrvi1e1lagiv1sai1taiaistgyfi1nkkvmrilm  
>tr|Q2YYD7|Q2YYD7\_STAAB  
mi1nyq1kgmf1nqhs1fk1l1nddn1andnrn1nfaqi11gnqeses1ky11nvnhqr1sdfksm1aynetnyaalvnehqil  
neindedtr1pksdkkik

Tsompanidou\_et\_al\_Supplemental\_FASTA\_File

esfynvlnhrkstrkfts femackelstilkfsfgiaprkvveygdiktstrfyasagglypidiyifistm  
>tr|Q2YYD8|Q2YYD8\_STAAB  
magkdintddilegdnidiencnflvffgynfnssflkygelallnsleigcmshnfdlvitslgytgcpiagfknni  
eklleldhvnehi lftnic  
gke  
>tr|Q2YYD9|Q2YYD9\_STAAB  
mktfikpklfveennseyilkkgylhqhsiaidkeessknfivkftliaenqielnendviddfnklqtqnlhikki  
dtfnkicijtdkaakaffk  
dhlnqvdeiyefnevl  
>tr|Q2YYE0|Q2YYE0\_STAAB  
mpivvydgnciycynyvliqhdlnprnyqfatlkgeveqqffkqhpeaanknsvilqkgdriyfesqaiiqllitalpnr  
tkllgvglwlvpkpvrnfg  
yrmfannrnrnmwktwhqpnndyeksfflddnakvkltd  
>tr|Q2YYE1|Q2YYE1\_STAAB  
mnnvintfdlkdknii fdgkleikieygrkcffyyakliytpevcpcncckningnlikngsktsritmpkiseptyi  
mlrkqrfkcktceryftae  
tpevdkiyfciskitrsavlnkaaeirseksiakscsvsattvsrivslmkplnrfinrrilhflnis  
>tr|Q2YYE2|Q2YYE2\_STAAB  
mmdefksvknvsgkmsfiyadaqthhiidivedrtlslkkyfyrfslkarkrvktvsidmhegymlkemfnakivi  
drfhivqlnralngirvt  
vmnelratnqplnrfkryaklllkpeedleafeyrkvalfkewktqkgivkylldqddslndayqyinqlrfklkhndy  
ggfihelkhmp1sqthsuv  
qraiktlnkhvyfikntfdyyn1sngpleginnkiklikrtsfgygsynhlnrillcsllyapkskkevqclva  
>tr|Q2YYE5|Q2YYE5\_STAAB  
mleskwglrfiafl1alfff1svnnvfgnifntgnlgqkssktiqdvpveilyntkd1h1tkapetvntisgpqskiik  
ienpedlrvvid1snakag  
kyqekyqvgkladdihysvkpk1anitlenkvtkmtvqpdvsksidplfkitkqevspqtvkvtggeeqlndiaylka  
tfktnkkingdtkdvaevt  
afdcklnklnsviqpnevnlqvkvkpfskkvvnvkqkgs1addkelssidledkeieifgsrdd1qni sevdaevldg  
isestektvkinlpehvtk  
aqpsetkayinvk  
>tr|Q2YYE7|Q2YYE7\_STAAB  
mnlfrqqkfsirkfnvgifsaliatvtfistnpttasaaeqnqpaqnpaqpadvntqpanagaaqanptaqaapaanqg  
qpaaqpanqggqanpagga  
aqpntqpagqngadpnaaaqapgnqaapanqagqgnnatpnnnatpanqtqpanapaaaqaapvaanaqtqdpnas  
ntregsintt1tfdpais  
tdenrgdptvtvtdkvnngs1innkigfvnse1rrsdmfdknpnyqargnvaa1grvnandstdhgnfngisktvnv  
kpdseliinfmqtnskq  
gatnlvikdakkntelatvnavktgtah1fkvptdadrld1qfipdntavadasrittnkdgykyysfidnvg1fsgsh1  
yvknrldlapkatnnkefti  
ntevgnngfngas1kadqfkyevtlpqgvtyvnds1tttfpngnedstvlknmtvnydqtantnsdvttakdngiaainq  
vqavttkksdakaeiaqka  
serktaieamndstteeqqaakdkvdqavvtantdi naaantdvdnaktneatiaaitpdanvkptakqaiadkvqaq  
etaidanngatteeekatak  
qqvqtekatadtaidgahsnaeveaaknaeiakieiaiqpatttkddakqaittkanerktaiaqtqditaeieiaanadv  
dnvtqansnieaansqd  
vdqakttgetsidqvtptvnkkatarneitt1lnklqeiqatpdtvdeekqtadaeantengkanqaisaattnaqvde  
akaanaeaainavtskvvkk  
qaakdeidqlqvaqtsvinndqnatteekeaa1qqlatavtdaknitaatddngvdtakdagknsiqstqpatavksna  
knevdaqavttqnaidntt  
gatteeknaakdlvlkvkedayqdi1naqttnvdtqikdqavadvqgitadttikdvardelatkaneqkaliaqtadat  
teekeqengqydaq1tqgn  
qni enaqsiiddvntakdnaiqaidpiqastdvktnaraelltemqnkiteilsdntttneekgkdi epvratyeeglnni  
ntanttgdvttakdtavqk  
vqqlhanpvkkpagkta1dqaadrktqieqtpnasqqeindakqevdavl nqaktvndqsstneyvnavkegkakina  
vktfseykkdalakiaday  
nakvneednsnastsseiaekqklaelkqtadqnvqatskddievqihnd1dnindytiptgkktattdlyayadqk  
knnisadtnatqdekqgai  
kqvqnvqtalesinnvndsvdda1tqgkaaidtiqvdatvkvkpanqaeakaedtkesidhsdqltaektealami  
kqitdqakkgitdattdae  
vekakaqgleafdniidstekqkaiee1eaa1dqieagvndadatteekeaftnaledilskatedisdttnaeiat  
iknsaleqlkaqripvkv  
kntleairevvnkqieiknadadasakeiartd1gryfdrfadkl dktqtntevaelqnvtipaieaivpqnndpnandt  
nngtdnndatansnanatp  
entgqpnvtestdnanadtsstttnqndtttgettatsanssatndannkptannssvdastdnsatgngttkpeve  
stnngttkpatetdnatp  
aestttnnstttatnenvptgstatapttasteatssadskdnasvndskqnaevnnsaesqstngkvaqpkksenkakae  
kdgrdstnqsmvesttet1

Tsompanidou\_et\_al\_Supplemental\_FASTA\_File

psaditepkvssntsksdkeesttnqtdaeqhsndtnvtsnevvkspskadtdvsnpkpsstasseakdkmtstnvsqtddt  
atadntdqksvgsaank  
akdmqtdmkaplatvskgsnsanqdmInvtktenkanaksvqqgkvnkpkqqaktlpdtgmshnddIpyaelalagm  
afliirrfkdkdhqtee  
>tr|Q2YYF0|Q2YYF0\_STAAB  
mllstrekemiallikyhgqyitihdiaaqlavssrtihrelkgveayltsfsltlerankkgIriagensdIndlkqsi  
aqhqtidlsveeqkviivy  
aliqakepvkqyslageivsvqtIakmlddIelyInkyqlsIsrkrgegiyIvgteskkreflsqImvnnInstsvysv  
ienhfvfhsInqihkdfvd  
lerifnverllmdylsalpyqltessyltIthvhlvIsIrikngeyvalnddiydsvqntfhekvaseladklgqiYdvt  
fnqaeidfitihIrgakrk  
nIndstInnrceenkiakfvkkvemisgmtfadItdIvdglthInpainerIqanietynItdmikfkyprIfenvrIa  
IIndcwpdIIfpeseIafiv  
IhfggsiknqnrflniIvccssgmgtsrllstrIeqvfseieritqasvsdIksIdIsqydgIistvnIdidspyltn  
pIlpdsdiSyvaqfIntkS  
tfqethdkssnmidkddvhvetkdidgnstfeneqtsnltsvfekhlSdekseqImhhmrsgltIldsvkivstevkqWq  
tyiadylygcdaikdptsf  
aeIleqrIIdnpgwiIspypvaiphIrdnmikhpmIItvleepIalpsiqndnqtikymismfipdndfmasIvsdIse  
flsIklesIdtfmknpgel  
etIlnrkflerikkqfi  
>tr|Q2YYF1|Q2YYF1\_STAAB  
msqteekkgigrrvqafgsflssmimpnigafIawgfiaaifidngwIpnkdlatlagpmityIipIliafsggrIiydI  
rggiIaatatmgvIvalpd  
tpmIlgamimgplvgwImkktDqIiqprtsqgfemIfnfsagIlgfimtIvgfkvlapvmkfimyIIsvavesIvhahI  
lpvvsIlevakIflnna  
IhngvftplgtDqvakvggsIlytiesnpgpgIgilIaymiIfgktakatsygaIihffggiheiyfpyvlmrplIfia  
vIlggmtgvatyqatgfgf  
ktpaspgsfIvycInaprgelhmIlgvflsalvsfvvaalImkftrepkqDleataqmentkgkksvaskIvssdkn  
vnteenasgnvsetssdd  
dpealldnyntedvdahnynnIhviIfacdagmgssamgasmlrnkfkkgagIndItvtntainqlpkdaqlvitqkkltd  
raikqtpnaihisvndfln  
spryeelInnIkddqa  
>tr|Q2YYF2|Q2YYF2\_STAAB  
myngvvlfcyfhnkIilkiIkqffcftskyIychiddtlfnfvtiltkIIfvyie  
>tr|Q2YYF3|Q2YYF3\_STAAB  
mcgiVgyIgydnakeIllkgIekleyrgydsagiavvndnttvfkekgriaelrkvadsgdfdgpgvightrwathgvp  
nhenshpqssngrftlvh  
ngvIenyeeIkgeylqgvsfisetdtevivqlveyfsnqglsteaftkvvsllhgsyalglldaedkdtiyvaknkspl  
llgvgegfniyasdalaml  
qvtseykeihdheivIvkkdeviikdadgnvverdsyiaeidasdaekgyvahymIkeiheqpavmriIqeyqdaegnI  
kidqdiIndvkeadriyvi  
aagtsyhagIvgkefIekwagvptevhvasefvnmpIIseklIvfyIsqsetadsravIvetnklghksIItitnvags  
tIsreadhtIllhagpeia  
vastkaytagiavlsIIsqivakehgreaidIrelakvttaieaivddapimeqiatdfIettrnaffigrtidynvs  
legalkIkeisyIqaegfa  
ggeIkhgtialieegtpvvglatqekvnIirgnvkevvargahpciismegIekegdyviphvheIltplsvsvtlql  
Isyyaalhrdlvdkprnl  
aksvtve  
>tr|Q2YYF4|Q2YYF4\_STAAB  
mliqlDqvgmkgqktiIkniSwqinggdkiIylgIngagktllniInayepatnggvnlfgkmpskvgysaetvrqhi  
gfvshsllEkfgegervid  
vvisgafksIgyqdiddevrneahqlIklvgmsakaqyigylstgekqrvmiaraImgqpqvlIIdpvgagldfiare  
sllsIldsIsdsyptlami  
yvthfiEeitgnftkiIllkdgsvqqgliddIItsenmshffrkkvavqrwnnrfsmamle  
>tr|Q2YYF5|Q2YYF5\_STAAB  
mdnvkaiIldmgtIhennqastytkdvinrlrekgykvflatgrshseihqlvpedfavngiissngtIgevdgeiif  
khglsldqvkqiInIakrq  
qiyyevfpfegnrvsIkedetwmremirsqdpingvshsewssrqdalagkidwvnefpegeyskiylfssnlekitafr  
delkqnHvqlqIsvsnssr  
fnaetmayqtdkgtgIkemIehfginqeetIvigdsndramfefghytvamknarpeiqaItdsvtIaytneedgaakyl  
akhflad  
>tr|Q2YYF6|Q2YYF6\_STAAB  
mftyfksalKnakpqlIItIiyaliafaviavvylIlanfqlakyvqniaiysqfgqkppgdeylkviavlliaaivslfv  
lvqiIfigitnmkramshe  
kvkftdlfiakkgiyIksvligIvsiamiivslslltsllYklfsvpsemimsvqssyadsthligiaittqsiifv  
llikaiitwllvIpiInfm  
tsfvestndkvkthlangfkamkngqktffkffigilIlnliiIlfktpvgylisfntqslsqsvaeniIrvytvmtiil  
fivihaiIImgIvqyylkr

Tsompanidou\_et\_al\_Supplemental\_FASTA\_File

gqkiktckvktadkdkkvvtepkntkqvendkvttsvetkTekaqdsIndnttkq  
>tr|Q2YYF7|Q2YYF7\_STAAB  
mshshhhhdhshvtttnkklvlfisfliiglymfieiegllanslallsdgihmfsdtfslgvaliafiyaeknaiat  
ktfgykrfevlaalfngvt  
lfvisilivfeaikrffvpsevqskemliisiiglivnivvaaffmfkggdtsnlmrgaflhvigdlgsvgaitaail  
iwafgwtiadpiasilsv  
iilksawgitkssinilmegtpsdivdevittikkdsriqsvhdchvwtisndmnalschvvvdhtltmkecelleni  
ehd1lh1nihhmtiqletp  
nhkhdesmicsgthshshnhhahhhahvh  
>tr|Q2YYF9|Q2YYF9\_STAAB  
mnilviganggvgsllvqqlakenvaftagvrqsdlalksqgmkailldvendsietltetfkipdkvifsvgsgnt  
gadktiivldgavksmia  
skeanikhyvmvstydsrrqafddsgdlkpytiakhyaddyrrsglntytilhpgaltnaagsgkieaaqyfeqgeipr  
edvatv1keivtsnhfnh  
efqiisgeqdikdaltqfeiekd  
>tr|Q2YYG0|Q2YYG0\_STAAB  
mp1flqpi1ktklwggqr1svfgyqlndttgecwvsahpngtseiingpyqgqtdriwsehrelfgdfpskdfpllt  
kivdares1sihvhpdsy  
ayehengqygksecwyidaedaeiigtlaesreevanhvqhgtiesilryikvkpgefyfipagtvhtissgilaye  
tmqssdi1tyrlydfnrqdn  
qyndrplniekaldiviqnaplplnlpeseienhkcthivsndfftlvkweisgtlnymkprefclvtvlegegqmid  
geifk1ttgtnf1ltsed1  
dsvfegdf1misyv  
>tr|Q2YYG1|Q2YYG1\_STAAB  
mkqfl1yiv1vcgviag1gaf1hipqpsmtiprivailgiisam1tfkdkqisas1kfsallinv1plcgtfvasn  
>tr|Q2YYG4|Q2YYG4\_STAAB  
mnl1l1fkeqtlkfnkeegetylflqghndwani1fkemilqgrdkvtqrlvtsmhrenlvkartqskkil1srd1m1ldi  
sttqileipfpqakq1lya  
pitgehafdridvegpfyikdditntitrvhphneileciliieapdlknaasdqfqqdlinsatnmtfaisyqalsmqhd  
sap1fn1iensedsylrse  
qavieghplhpgak1rkg1nalqtflyssefnqplikivlihs1srtms1skdydttvhqlfpdlikqleneftpnfn  
fndyhimi1vhpwq1ddv1h  
sdyqaevdke1i1eakht1dyag1sfrt1vpkypamsphik1stnvhitgeirt1seqtthngplmtrilndilekdvi  
fksyasti1idevagi1hfn  
eqdeadyqterseq1gt1frkniyqmipqevtpmipsslvatypfnnespivtikryqsaas1sdfessakswvetysk  
allglv1plvtkygia1lea  
hlqnaia1tfrkdgl1dtmy1rdfeg1ridkaq1nemgystshfheksriltdsktsvf1nkafystvqnh1gel1iltiska  
sndsn1erhmwyiv1rdv1d  
nifdq1vl1sthksnqvn1enrineikdtmfapfidykcvtm1rledeahhytyikvnnplyrenn  
>tr|Q2YYG6|Q2YYG6\_STAAB  
mvy1ewakad1rni1qyrvinai1keriypeqtfisqkes1iei1qyhm1vltievvrksaleryeftgditylnkgets1ii  
t1leg1ldv1krdfdi1pise  
r1ree1ihsrds1vetyk1mshrqt1isqs1kfsr1lpqd1nffsw1lqhvkdsktd1tyses1vpeghp1thp1tktk1p  
1tmeevrayapefekei1p1  
qimmi1ekdhv1ctamd1gnd1qfi1idei1peynqirv1flks1glksedyrailvhpwqydh1tigkyfeawiakkil1iptpf  
t1l1skat1sfrtms1idkp  
yhv1kl1pvdaqatsavrtv1stvttdgpk1syalqnm1nqypgfkvamepfgeyanvdkdrarqlaci1rqpeidgkgat  
vvsas1vnkn1pidqkv1vid  
sylew1nqg1tkes1itf1erysqal1ip1liafi1qnygia1eahmqnttv1nlgphfdiqflvr1dlggsrid1let1qhrvs  
diki1tnds1liads1davia  
kfqhavi1qnqmae1ihhf1nqydcveeae1fnivqqv1vaha1npt1lphanelkdil1fgptitvka1llnmrmenkvkqyl1ni  
e1ldnp1ikkev  
>tr|Q2YYG7|Q2YYG7\_STAAB  
mahvni1nisk1ynakv1qtvfqsknmqftpvikciagdr1tives1kalginhvaesr1dniisiadqdltyt1l1rtpak  
keisdm1iekvdms1iqtel1s  
tihq1inevaev1lgk1khi1llmvdwkd1gregv1tydv1ldyikki1ihlknihfvglafnfmcfksdapsddd1fminrfvsa  
vereigyr1k1i1sggnssm  
lpq1l1ynd1lgkine1lriget1lfrgvd1tttnqai1amlyqda1tleae1ileikprvntqthesfiqai1vdigyl1dtkvdnis  
pmdq1hin1lgassd1h1m1ld  
1ngqghy1qv1gdhis1fsl1nyeal1shsmymkn1hkvy1iddskid1t1l1qnfdvks1pdmv1nqy  
>tr|Q2YYG9|Q2YYG9\_STAAB  
maike1ssqsaidhkrkr1rtt1tyivs1cfl1ficiy1lnmaigsskinfsdivhyvtg1tdtkatf1llh1nvrmp1rmiag1lf  
iggalavsg1lmqam1trnp  
laspk1fgvssgasffiv1fv1ti1ips1leyya1ylg1vigaf1iggl1tvyt1sgatkgm1tpik1alagmai1h1ffssmtegi1i  
i1lnensneqvm1fw1lvg1sls  
smkwe1ilt1ilpw1igal1vti1figr1ql1time1lgddiak1lgqn1inkvri1i1ig1llvi1iltgmsvsvagp1igfv1glivphi  
vkryvskny1vmi1pl1tf1ii  
gad1ll1l1sdv1sr1litypyes1pvgiv1tsfvga1lyfl1fitikgvkri

Tsompanidou\_et\_al\_Supplemental\_FASTA\_File

>tr|Q2YYH0|Q2YYH0\_STAAB  
mmttkiirryslitillivisifislcvgsvmihpidaikgiftqddfilneyriprtllgiiigsslgisgaiiqavirn  
plaspdvigiskgaslaav  
iimi fptapl fvl pignsflgafavslflsfliskydvkgsklaliglaigaiactaivqflirnpleankalvwtgsl  
yghdmsniytillpwfliti  
pitiillsyqldvlnlgdavatalglkvktikmillilavilagsaisvvggisflgliaphiarqlignkthviimsgl  
igaiilltfgdgltrgihpp  
ldipvgviiiaigapyflillrrmk  
>tr|Q2YYH1|Q2YYH1\_STAAB  
mdfsfrkeivigrkfitmsligillflvpiveqdgqkqttlvpavflagvlkdvlggvmpflivtiitlsgitlicst  
ilkdklkpdglmnafnvr  
igwllirilavvfawmtflrigskviysdetgllfssllptlvavflfaalflpllmeygllemgpifrpvmrplftl  
pgrstvdnlasfigdgtvg  
vlitsrqygegyysreatvisttfsvvsitfaivvaetvnmqnfafylsvivscivaavimpriwplnkipdeyake  
vpesartealpegkalarh  
gfdtatkgvikapgvldffksglktvvdmwfvlpvvmsigtiatiianytpffvilgkpfvfllelmqipeaaqasqti  
iigfadmfllpsiliegvan  
ditrfvigalsisqliylsevggvilgskipvsigklmfiflirtitlpiislmahlll  
>tr|Q2YYH3|Q2YYH3\_STAAB  
mtgkthascgmlvgaltpqyfqtdifssvtviilatlasllpdichtqskigrfkliisffvrlifgdrtfthsilfivi  
iaflqlqiqtppnyymvai  
iglvshvilndmi tpkgvklfyp lpfvkvtpiqfktggldvlslatalmvgtvvylfqpfindiisnwnkfl  
>tr|Q2YYH6|Q2YYH6\_STAAB  
mrllksitvialilimfmsaieissialptikqdlagnlisliftayfialvianpivgellersrfkiiyvaiaagl  
fsigsfmcglstnftmlii  
srviqfgsgvllmslsqivpklafeiplrykimgivgsvwgissiiigpliggilefatwhwlfiyinipliaiaailviw  
tfhfpkeetvakskfdtkg  
lflfyvfiglimfallnqgl111nflsfilavvairlfkvekhvsspflpvvefnrsitlvfitdllaiclmgnlyi  
pylqeqlglspqsglvi  
fplsvawitlnfnlhrieklsrkviylsftlllvssiiisfgiklplliafvllilaglsfgyiytkdsvivqeetspl  
qmkkmsfygltknlqasi  
gstimgylyaiqsigifgnlhvlsavavisiglivlwvffkeqssqske  
>tr|Q2YYH8|Q2YYH8\_STAAB  
mmakveltrrrnfivavmlisafvailnqtllntalpsimrelninestsqwlvtgfmvngvmpiltaylmdriktrp  
lylaamgtfligsivaala  
pnfgvmlarviamgagvlmpmqftlftlfskehrgfamglaglvifqfapaigptvtgllidqaswrvpfiiivgial  
vafvfglvsissyevkyt  
klkrsvmystigfglmlyafssagdlgftspvvigamiissiiylfirrqfnisnallnrvfknrtfalctissmii  
mmsmvgpalliplvqns  
slsallsglvimpgaiingimsvftgkydygprplytqftiltittimlclfhdtstytilivvyairmfsvsllmm  
pinttginslrneeshgt  
aimnfggrvmagslgtalmtlmsfgakiflstspshtsteikqqsiaigvdisfgfvavlvmiayviaifirepeeies  
nrrkf  
>tr|Q2YYH9|Q2YYH9\_STAAB  
mltvdqkeligeikdpidvplketegivevsikeekhvsvklamaqlggapqldlqmvvnlkengaktvgirfet  
lpeekvnqfkpeenkpkt  
iegllsqnnpvefiaiasgkggvgkstvavnlavaalaregkkgvlvdadiygfsvpdmngidekpgikgkevipverhgv  
kvismaffveenapviwrg  
pm1gkmltnfftevkwdieyilidlppgtgdvaldvhtmlpsскеiivttphptaafvaaragamakhtdhsilgvien  
msyfesketgnkeyvfgkg  
ggikladelntqllgeplleqpswnpkdfapsiyqsddrlgkiyssiaqkviaatnk  
>tr|Q2YYI0|Q2YYI0\_STAAB  
mannhnqngqdstqqvinflkvfkwrivgflaflliaillfltlgfwktiliivlcligvgigyikdrkqdfmflnrws  
>tr|Q2YYI1|Q2YYI1\_STAAB  
mfsqwrfeivvlwraenavlwrfqntvsikkpqqdldltvtytfthtyir  
>tr|Q2YYI2|Q2YYI2\_STAAB  
mtdkkytaadmvidtlknngveyvfgipgakidylfnaliddgpelivtrheqnaammaqgigr1tgkpgvvlvtsgpgv  
snlttglltatsegdpvla  
lggqvkrndllrlthqsidnaallkysskyseevqdpeslsevmtnairiaisgkngasfisipqdvisspveskaislc  
qkpnlgvpseqdindviae  
iknasfpvllagmrssadetnairklvertnlpvvetfqgagvisrelenhffgrvglfrnqvgedllrksdlvftigy  
dpiyeasnwnkeltdqii  
nidevqaeitnymqpkkeligniaktiemisdkvdepfinqqhdeleqlrahidqetgikatheegilhpveiesmqk  
vladetttvtdvgshyiw  
arnfrsynprhllfsngmqlgvalpwaisaalvrpntqvsvagdgglfssqldetavrknlniiqliwndgkynmve  
fqeemkykrssgvdgfpvd  
fvkyaesfgakglrvtnqeelevaikegyeadgpvlidipvnykdniklstmlpnvfn  
>tr|Q2YYI3|Q2YYI3\_STAAB

Tsompanidou\_et\_al\_Supplemental\_FASTA\_File

masvlyqhgltlgtlmgallkgtasinelqhgdlgiatltsnggevi fldgkayhanehkgfvelkgdeltpyatvtfkv  
adtsyekdkdsseavfaei  
kekmlsenlfsavkisglfkkmhvrmpaqeppytrlidsarrqpeqtetyvkgsvvgfftpelfhgigsagfhvhfand  
drnfgghvldfevedvkve  
iqnietfeqhfpigdedfinanidykdiadeireae  
>tr|Q2YYI4|Q2YYI4\_STAAB  
mklksfvatla lglstvgaalpsheasadsnngykemtmdgyhtvpytisvdgitalhrtyfvfaenkkvlyqeidsk  
vknelasqrgvttekinna  
qtatytltlndgnkkvvnllkndnaknsidpstikqivkv  
>tr|Q2YYI5|Q2YYI5\_STAAB  
mvtlisyndikllyrriimknvyfyi idgladweisnilaelnskrffkdaqtiniemvsnsktpittmgginikpecl  
ieeisiskdftflilpgsdt  
wndskhlpvikiavevlsnggyvaaicgatisladigilnayhtsndllylesfssnyhgqklyidqpsvshknlitas  
stgalmwtkdilhhldvfk  
hstldawfnfstgnskyfqlqqtlnkddn  
>tr|Q2YYI6|Q2YYI6\_STAAB  
mkisrlisiilinerkrisahel selmevsqrtyrdieainiagipvysipgvvggfeimenfkidkntftenesal  
lisnsnfpeklknndffnt  
nlkikslipkdklnsietqveqfqlsdnhwne lnrnideqlikfknaiqnqv lkikyinhlgknterevkpyqlilkagh  
wcyvycylrddfrllkln  
rvihlqeleskfikkmyidpllstnri fek lkm tiklrvesiverll d fcdydsfrqennryyvdfpfidnsyyfgli  
lsfgdkceviepteirnm  
kqtikkmadnyk  
>tr|Q2YYI7|Q2YYI7\_STAAB  
mtyrmkkwqklstittlmaggitfndsefrsvdkhqiavadtnvqtpnyekl kntwldvnygydkydesnmdmkkkfeat  
eekarkllsemktesdrky  
lwenskdldtksadmtrtyrnekieaeamkhpkttlkndenkkvkdalewlhknaygkepgkkvadlktnfksapqkn  
tnlnwwdyeigtpralnt  
lillkedftdeekkkytapikt fapksdeilssvgkaepakggnlvdisvkllesieedkdmknsidsfnkvftyvq  
dsatdkerngfykdgsyid  
hkdvpytgaygvvllegisqmpmiketpfndktqnttltswiddgfmpliykgemmdlsrgraisrenetshsasatv  
mksllrlsdamdestkaky  
kqivknsvksdssyqndt lssysdikmkslmtdstistngltqq lkiynamdrvtyhknldl d faglsmtsknvarye  
ningenlkgwhtgagmsyl  
ynsdvrhyrdnfwatadmkr ladt t leneepkgtdvkkssktfvvggkfd d qhasigmdfenqdkltakksyfilndk  
ivflgtgikttdssknvpt  
tienrkahtytltyddkqttnsnqetnsvflestnstqnnigyhflnkskitvkkeshgkwsdinksqkdtqktdeyy  
evtqkhsntddkyayvlyp  
gitkdnfkskasqvtvkkqddd fhvkdnesvwagvnysdstqtfdingtkvevkakgmfilkkkddntyecs fynpest  
nsasdi eskismtgysitn  
kntsntnesgvrfelk  
>tr|Q2YYI8|Q2YYI8\_STAAB  
mktkevvalknisqdtlryyekvgvppvnrdenyriyndsdlwiyvlvknlnragvsies liefcrlaqfpknieniqt  
qqkqilnk  
>tr|Q2YYI9|Q2YYI9\_STAAB  
mnhieiskdvkipvl gfgvfqipqeqtaeavkaikagy rhidtaqsyl netevgqgieasgidrselfittkwienvn  
yedtiksierslqrlnldy  
ldlvlihqpyndvygswralee lketgkikaigvsnfgvdrivdl gihnqiappvnqieinpfhqeeqvaalqqenvv  
eawapfaegknqlfqngll  
qaiadkynksiaqvilrc lverdivvlaksvnpermaqnl didfelteedkqiatleesnsqffshadpemikaltsr  
el dv  
>tr|Q2YYJ0|Q2YYJ0\_STAAB  
mcfdinndikklnfrkvknaihslsgdkyqfledgktinntyflavydnainifedlftpsdsinlvhvvyvysepyk  
ktnvikfksltidelyyf  
keykkekddnilceefsykcfikdikykllkdisnqdfkglvpninqndnyseiyn  
>tr|Q2YYJ1|Q2YYJ1\_STAAB  
mendletlkhidssnritfftgagvsvasgvpdfrsmggldfeiskdgl speyllsr dy led d pegfinfchkrllfvd  
tmpnivhdwialernqqs  
lgvitqnidglhsdagsqhvde l hgtlnrfycnachksytksdvidrtlkhdncggairpdivsygemldqptiiraln  
kiehadtlvvl gsslvvqp  
aaglisnfgkdnliiinkdrtpydsatlvihddmvsvksl mte  
>tr|Q2YYJ2|Q2YYJ2\_STAAB  
mnkherldejalkvknkgtirtneiveglvnsdmtvrrdlielenkgvltkihgarsnstlqykeishkekhrqiaek  
rfiakkaasliedgdtlff  
gpgttvellaeevnhhtlitiitnc lpykil lekqtahfrvyliggemrhiteafvgemanamleklrfskmffssnavn  
kgavmtstldeaytqqlal  
snsiekyllidhtkvgkedftsfcqlnel tavvmdyedeekvetiksyievvd  
>tr|Q2YYJ8|Q2YYJ8\_STAAB

Tsompanidou\_et\_al\_Supplemental\_FASTA\_File

mmqk liaqiek gkpf fekl srniyl raird gfi sampvil fssif lliayvpni fgfkwdkgmeailmkpnytmglvaf  
lvagttaksltdsfnrkle  
stnqinfistmlaamcgflflasd pakdggflssfmgtkglltaflsafvtvivynfcvkrnitikmpkevppnisqvfk  
dlipfsaviiiyla dlvi  
rnsfksnvaegilk lfeplftaadwigvtiifgafalfwfvghgpsivepaiaaityanieanfkl iqagehadkiit  
sgtqmfi vtf ggtgatlvv  
p f m f m w m t k s k r n k a i g r a s v v p t f f g v n e p i l f g a p l v l n p v f f i p f v l a p i v n w i f k l f v e v l g m n s f s v n l p w t t p  
g p l g i m g t g f g l w s f v l a  
i t l i v v d i i i y p p f l k v y d s e i l d e e e g r k e s n s d l e k k v a a n f d t k k a d s i l a a s g v s d d a a k a s n i t e q t n v l v l c a g  
g g t s g l l a n a l n k a a e e y h  
v p v k a a g g y g a h m d i m k e y q l i i l a p q v a s n y e d i k q d t d r l g i k l a k t q g a e y i k l t r d g q a a l d f v q q q f e n  
>tr|Q2YYK0|Q2YYK0\_STAAB  
m g v k s v k k i f v i s t t l l a v a i i g t i i t v v f s q r q a q t f k i q q q q f v k k p i p t l f l h g f g g s a n s e k f m v k q a e k r g v t k  
d i i t a y v s k d g a v t f k g k l  
s k d a v n p i v k i e l e n n r g y l d k n a a w f k n v l t k l q s e y n f d k f n f v g h s m g n l t f a q y m m t y g n d k s l l q l n k q v n i a g  
t f n g v l n m n e d v n e i t v d k  
d g k p s r m n q p y q q l r v l k d i y k g k g i e v l n i y g d l k d g t h s d g r v s n s s s k s l k y l l g n s p k s y r e s k y e g e s a q h s q l h  
e n e n v a n e l i d f l w k k  
>tr|Q2YYK1|Q2YYK1\_STAAB  
m q n k q i l f n k v p e g m p q e d t f k i e d i d t p k l e s d g v l v q t l y i s v d p y m r g r m t k a d s y v q p f e i g k p i v s h v v a k v i d s  
t l a d y k k g d v v g m l p w r i  
i n h v q a d q i t k v p t t d v p l d l y l s v l g m p g g t a y h g l l d i g q p k d g d t v v v s a a s g a v g s v v g q i a k i k g c r v v g i a g g d  
k k v n y l t e t l g f d a g i d y k  
k e d f a e a l a q a v p d g i d v y f e n v g g t v g d e v f k h l n r f a r v p v c g a i s s y n h p e a d i g p r i q g t l i k k q v m m r g f l v s e f  
a n a f k e a s e q l a t w v q e g k  
i q s q v t i e d g f e n a p r a f k n l f t g d n f g k v i k v s e l  
>tr|Q2YYK2|Q2YYK2\_STAAB  
m k m i g f e k s f k l e e g n l f k v y e q r k p t p e n d d i l v k v n s i s l n p v d t k q r q m e v t q a p r v l g f d a i g t v e a i g p d v t l f s  
p g d v v f y a g s p n r q g s n a t  
y q l v s e a i v a k a p h n i s a n e a v s l p l t g i t a y e t f f d t f k i s h n p s e n i g k s v l i i n g a g g v g s i a t q i a k r y g l t v i t t  
a s r q e t t e w c e k m g a d i v l  
n h k e d l v r q f k e k e i p l v d y i f c t y n t d l y n t m i e l i k p l g h i t t i v a f n e d q d l n a l k l k s i t f t h e f m f a r p i h r t p  
d m i k q h e y l e d i t k n i e s g  
h y q p t t t q v f e g l s p e n l y q a h q l l e k q s m i g k l v i n i  
>tr|Q2YYK3|Q2YYK3\_STAAB  
m k n k s v s l v f w i s l v i c t i f v a f g a i f p k q l e k l t q n i t t f i a l h f s w y l l l v l v i l f v c v y i l f s r y a n i t l g e e g e d  
p e f s l p s w f a m l f s a g m g i  
g l v f w t t a e p i s h a f k l t p i h k a g t q s a i n d a m q f s f f h w g i h a w a v y g i v a l v f a y f s f h k g y p g l v s a t l t p l l g e k a  
m r g p l g g a i d v l a v i a t v t  
g v a a t l g f g a l q i n e g l h f l f n v p s n f t m q v i l i v i a t i l f t w s a w s g i d k g i k t l s n i m l l a f v v l i g l f i v g p t l y i  
l n t f t n g l g n y i a n f f s m s  
l r i p s g g q k f q w l q n w t i f y a w w i s w a p f v g i f a r v s k g r t i k e f i l g v l f v p a l v c f i f f a v f g a s a i y l q d n h i a d  
i a k v a t e t a t f a t l q h y p l  
g f v l s l i t l l v i m i f f v t s a d s a t y v l g m l s s r g d i n p k s f v k v s w g i m a l f a i m i y t g g t q a i q n l l i a a l p f s v v  
i a m i w s l l k s l s e e k p r n  
s n k v l i k h r d p d i l e y r s s k h i d e n  
>tr|Q2YYK4|Q2YYK4\_STAAB  
m m g t y l i c f k l t l t k e v s l g v k r l k n f i l g l l i v v i v g f l l f m y i q d g r i t e y q d y f l q f e w f q p l l i s l a a l l i l i g l i  
l v f s i f k p t h r k p g l y k d f  
d d g h v y s r k a v e k t a f d t v a k y d q v r q p n v v a k l y n k k n k s y i d i k t d f f v p n n v q v q s l t e a i r a d i k k n v e y f t e m p  
v r k l e v n v r d q k t s g p r v l  
>tr|Q2YYK5|Q2YYK5\_STAAB  
m s e i v e f l s d g k l a s r l e i q e t m g l q k s y t s e l i s e l k k l e i g s e g r g p g t r y l i r d  
>tr|Q2YYN1|Q2YYN1\_STAAB  
m t n g g s l n k s p i f t k i f t i n f l v n f i v y l c m y l l l v i a g y s k a f n a s d s l a g l v v g l f i v g s l i g r f a t g k f v n q i g p  
k r l l f i g l i a l i i t q l l y f  
i d e s l a f l i f v r l i n g i a t a v t t a t g t i a a y v t p v n r k s e g t s l f s l s l v l g t a i g p f l g m l l i t k y a i n l l f i i c v i l  
g i l g l i i s l f i k v d f e v t n  
n k t e t n v i d k p r f s i h g f i a k e a i p v a v i m l l i g v t y a s i l t y l q a f a l e r h l v t a a s y f f i c y a i a s l i t r p i a g r l m d  
d e n i i v y p a f i m l f l s f v c  
l i s s y q s w l i l l a g a c l g l y g n l s s m q s i a i k v s p p i k y g i a t s t f  
>tr|Q2YYN2|Q2YYN2\_STAAB  
m l s q e f f n s f i t i y r p y l k l a e p i l e k h n i y y g q w l i l r d i a k y q p t t l i e i s h r a i e k p t a r k t l k a l i e n d l i t v e n  
s l e d k r q k f l t l t p k g h e l  
y e i v c l d v q k l q q a v a k t n i s q d q m q e t i n v m n q i h e i l l k e a h n d  
>tr|Q2YYN3|Q2YYN3\_STAAB  
m i l k f d h i i h y i d q l d r f s f p g d v i k l h s g y h h k y g t f n k l g y i n e n y i e l l d v e n n e k l k m a k t i e g g v a f a t q i v q  
e k y e q g f k n i c l r t n d i e a



Tsompanidou\_et\_al\_Supplemental\_FASTA\_File

vknklqseqvevvgpiqmerdthkdgkvkwqlllyimnqdddeikppffiqweesdsmrkklqkyfqkqfsietvivksk  
nrsqtvsnrllkwydmdiv  
endhytdlilknddiyfriedgkvskyhsviikdaqatspysifirgaiyrfeplv  
>tr|Q2YYN6|Q2YYN6\_STAAB  
mikkllqfslgnkftiflmvvlvlggyasaklklellpnvqnpvisvtttmpgstpqstqdeisskidnqvrslayvk  
nvktqsiqnasivtveyen  
ntdmkkaeeqlkkeidkikfkdevgqpeIrrnsmdafavlaysfsnkendlkvkvlneqlipklqtvdgvqnaqlngq  
tnreitlkfkqnelekygl  
taddvenylktatrtpIglfqfgdkdksivvdgqyqsvdafkninipIltlagggqqsqsqsdnkqnsamsdvnqaspq  
nskasasnnisgmptaklg  
yladitvgdvrtssktnqkdtvnIqitkaqdvntvqvakdvqrkidtfdvdenkdfnvtkmtaktakpvekslytmvekas  
IgtivaiivillflrnrIrt  
taisiiisiplsllmalialklsdvslniltIgalIvaigrviddsivvveniyrrItdseeqlkgenliisatteafkpi  
msstlvtiivflplvfvsq  
svgemfrpfalafslasllvsitlvpalaatlkkkqkrnkqhgegIgvsttykklhwslnhkwiviilstlil  
vatvfvfggprlgtsfisag  
ddkflaitytpkpgeteqavlnhakdvekylkqkhhvktiysvggssvpdptgstnsmaimveydndtpnfdeadvki  
khadgfkhpgewnqdlgt  
gagnksvevtvkgpsmdaikstvkdieqkmkqvgkIlanvksdlstqydqyeikvdqnkaaengisasqlamhlnenlpek  
tvttvkengktvdvkvkqn  
kqtdwsedklnnitlkptggtikIgdIatlvktttpsklIteqgdyattvsakvtnkdvggttrqvmkslnnldkpnv  
kvniggasddinnamtqla  
famlaaiivylilvitfkglapftilfslpftvigviallitgetisvpsIigmlIligivvtnaivlidrvinneq  
qgmemkealieaggtrirp  
IImtaiatigalvplfgqdssiliskglaatviggIisstlltIvvvpiyeilftlkkrtkr  
>tr|Q2YYN9|Q2YYN9\_STAAB  
mteqftmiillialgyflkrinfikatdsqviatlvlvntIpslvivnlnsaeklsfsilpilmiygivakmiavwff  
rkydnhmrgsvgmmtgamn  
iglIayplIeviwpktglIyfgmadigcafvmfgytyfvgysfsegsdqdfkyIlgkllqsvplvtyivmfilnshih  
lphvaidffsilshanmpI  
smillgvmInftlerkyipatikylclhyglalvagllvhvllpsvddmikttllvtwmfpvgvaiisgyiqfkyrtlpf  
Igmttnltiisiiilymy  
qavfv  
>tr|Q2YYP0|Q2YYP0\_STAAB  
mshslcsypldmygtylinyehqdfksianfkflkrminvmcycvlfIepciswdi  
>tr|Q2YYP2|Q2YYP2\_STAAB  
msivqlydiIqiksfiehsnyesasylyklpqyneydvlitdaiespgvfsikendsikailsfacdknkfkvigpfv  
adnyvlsvetfetlfkam  
snqpddavfnfsfeegiqqykpImkviqasynftdyieartrleedmhqpniiPyhkgfyrafsklhtttfkyqaqspq  
diidslddhhhlflfvseg  
llkylyleidsqqsiaekyfsshvdyrlkgiafellayaIqyafdnfdirkvyfkiIrnknklierfnglgfhinyey  
ikfkfesrnvkdqtipe  
>tr|Q2YYP3|Q2YYP3\_STAAB  
mknyfqfdkygtnfkreilggittflsmayIavnpqvlslagvkgvsddmkmdqgaifvatalaafvgsIvmgIiakyp  
ialapgmglIaffaftvvl  
tmgipwqvgIlgvlfsgiffailvtvgfreviinaipyqmkmavsagigIffitvglqssgiivkneIstvtIghltdpp  
vllaiIfigivitvilyaIkI  
pgsifigmiitavgmftglIqmpsgivgkipsieptfgavfeafkdpsqlltiqfliviltflfidffdtagtlvavat  
qagimkdnklpragralfs  
dslativgsvfgtttttsyiestsgvavgartgfasivtgccflIalffspliavvtsavttpalvvvgvlmaanfaein  
wksfevavpafitiimmpI  
sysiatgiacgfifypitmliskkhkevhpimyvImvlIilyfifvhg  
>tr|Q2YYP4|Q2YYP4\_STAAB  
mnmknqpklsIaligiflIiceffygipflgatfilsfgwqpllnallyliltiillvnrqnairpiaiipifgivgsf  
IaiiplIgilIhwiIfflm  
ilfvIvvlIasptyipknarviytqykdghre  
>tr|Q2YYQ4|Q2YYQ4\_STAAB  
msnkvrrieaereIsqIkhwlktthkisieefvvlfkvyeaekisgkelrdtlhfemIwdtskidviirkiykelisk  
Irtsetderqvfyfystsqk  
klldkitkeievIsvtn  
>tr|Q2YYQ9|Q2YYQ9\_STAAB  
mvdvllknIsqvvIIsnkwtglfIligIlfvanwtvglaamIgsiiayafaryinyseaeindglagfnplvtaialtifl  
dksgldivItmiatlltlp  
vaaavrevIrpkyvpmItmpfvivtwftIIsqkvkfvdtsIklmpqniIetvnfnsndrihfisIlfegfsqvfiIeasvi  
ggyciligiIiasrkaalI  
aviasllsfiivalIlgnyddinqglfgynfvImaialgytftainpyistflglvlltvvvlgtttllepfglpaltI  
pfiivtwillfagikhdkv  
da

Tsompanidou\_et\_al\_Supplemental\_FASTA\_File

>tr|Q2YYR0|Q2YYR0\_STAAB  
mlqahfcsvncqynfvehrtliypawyfygen  
>tr|Q2YYR1|Q2YYR1\_STAAB  
mndmdnsflitteigrkwi ekfkaigdtfkakseyndqhsqfpykniewlikegygkltlpkayggegati edmvilqsf  
lgeIdgataIsigwhvsvv  
gqiyeqk1wsqdm1eqfaveinnga1vnravseaemgspirggrpsthavkaddgyilngvktysmskalthiivaayi  
eelesvgff1vdrnlpgve  
iadnwdvlgmrateshd1lndvkvp1kh1vetekskapngwilhipscylgiaqaarnyavdfaiqhspsniegtiatl  
ptvqqn1gkmet111ctrq  
flwstakgyqqykddsqirnstssaskvmvmnqglevidlamrivgakslemnrplqryyrdmraglhnppmedaaytnia  
ksisntf  
>tr|Q2YYR3|Q2YYR3\_STAAB  
mtkkvyfnhdggvdd1vs1f111qmenvh1igvstigadcyleps1sasvkiinrfsnediqvapsyergknpfpkewrm  
haffmdalpi1nepvkhva  
snvsdkeafediqt1krqsekv11ftgpltdlaka1qkdssivqyiek1vwmggtf1skgnveepehdgsaewnaywd  
peavkivfdsdieidmval  
estnqvp1t1dvrqrwanerqytdf1gvsyaavpplthfitnstyflwdv1ttayignkd1vhsiekkvdvisygpsq  
gktfeckggrkinvinhvd  
nnaffnyi1alakkvn  
>tr|Q2YYR5|Q2YYR5\_STAAB  
masismsdiycngtifenddeqliy1tspfpqrytsntwiykktpteerw1kdlerrqqlhtnqgsnyhaafsfpeneqld  
nhwmamfkdmnfe1gime1  
yaiesdalan1prnsdveiaivdeshiday1kvayqfs1pfgkdyadahekvmrehyqkdvikr1vay1nnepigvvdvi  
esenyie1dgfgv1eqfrh  
qgigstiqs1igeya1sknhkpi1lvadgedtakmyakqgyvyqsfcyqil1kedign  
>tr|Q2YYR7|Q2YYR7\_STAAB  
mkmkr1favvi1l1vlagcsnsndnnetkkddadngkkqeiqvaaas1tdvtkk1asefkkehknadvkfnyggsgal  
rkqiesgapvdvfmstantk  
dvda1kdknkvhdtkyakns1vl1gdkdsnytsvkd1kdndk1al1gevktvpagkyakqy1dnn1l1fkeveski1vyakd  
vkqvl1nyvekgnakqgfvy  
ktdlykqnkk1dtvkive1kkpityeagatsdsk1akewmef1ksdkakeil1keyhfaa  
>tr|Q2YYR8|Q2YYR8\_STAAB  
mpd1tpfwis1rvavisti1l1v1g1fiskwlyrrkgswwk1les1111piv1pptv1gfilli1fsprgpiqgffanv1  
h1pvvft1tgaviasv1vs  
fp1myqhtvqgfrg1dtkmintartmgasetki1fk1l1p1akrsil1agimmsfara1gef1gat1mvagyipnktnt1p1  
ei1y1f1veqgreneaw1lw1  
v1vafsi1v1istin1lnkdkykev1d  
>tr|Q2YYR9|Q2YYR9\_STAAB  
mlkin1kyq1knt1iriniddtepk1yavrgpsgigkttv1nmiag1rkadeai1evngq11tdtaknvnvkiqqrri1gy  
1f1qdyq1f1pnm1tvykn1itf  
maepseh1dq1l1rt1nidh1mkqypmt1sggeaqrv1al1ar1stkp1d111depfss1ndttkdesit1vkri1fnewqip  
i1j1fv1thsnyea1eqmahe1i  
tig  
>tr|Q2YYS0|Q2YYS0\_STAAB  
msqerysrqj1fkqige1gqskinqkcali1igmga1gthvaeglvragiakli1ivdrdyie1fns1lqrqt1f1teeda1kmm  
pkvvaakkh11al1rsdvd1  
ddy1ahvdyf1f1etheqdv1dvi1datdnfetrq1l1ndfaykhr1pwi1yggvqv1styteaaf1pgktpcfnc1vpq1paln  
1tcd1tv1gvi1qpavtmats1  
q1rdamkvl1tehp1dtki1tygdiwegshysfgf1skm1qrsactt1cgdv1pspy1lnkneqryat1cgrdtv1qyenasithdi  
1vqf1kqh1lnyrsnsymv  
mfe1fkghr1vaf1kggrf1ihgm1trtsdath1m1n1l1fg  
>tr|Q2YYS1|Q2YYS1\_STAAB  
mgehqnvk1nrtvkaav1tvsdtrdf1tdk1ggqcvr1l1qaddvevsdahytivkdekva1tmqvkkw1kedidvi1ttg  
gtgiagr1dvtieavkp11t  
keie1gfge1fry1syvedvgtra11sravagtvnk1l1fsipgstgavk1al1ek1likpe1nh1lihel1tk  
>tr|Q2YYS3|Q2YYS3\_STAAB  
mvvekrnpipvkeaiqrivnqqssmpaitvaleks1nhilaedivatydiprfdkspydgfairsvdsqgasgnri1efk  
vidhi1gagsv1sd1k1vgghe  
avri1mtgag1p1ngadavvmfeqtie1ledtfti1rkpfskneni1skgeett1gdv1l1kkq1vinpgaiav1latygyaevkv  
ikqpsvaviatgse111dvn  
dv1ledgki1rnsngpmi1ra1laek1gl1evgiyktqdd1dsgiqv1vkeamekhd1vittggvsv1gdfdy1lpei1ykavkaev1  
fnkvamrpgsv1ttvafadg  
ky1lfg1sgnpsacftgfe1fvk1pavkhm1cga1evfpqi1kat1medftkanp1ftr1firakat1tsagatv1vpsgfnksga  
vva1ahan1cmvm1pggsrg  
fkaghtvdi1l1tesdaae1e111  
>tr|Q2YYS4|Q2YYS4\_STAAB  
mi1qi1vg1kks1gktt1mrhiv1s1fl1kshgyt1vatikhhgshkedi1q1d1sdvdh1mkh1feagadq1sivq1gf1yq1q1vt1rvdn  
qn1ltqi1eks1vtid1tniv1

Tsompanidou\_et\_al\_Supplemental\_FASTA\_File

vegfkndafekvvvyrneee1qv1qq1snvcysinvrehedftafeqwllnkikndcdtqlt  
>tr|Q2YYS5|Q2YYS5\_STAAB  
mkqfeivtepiqteqyreftineyqgavvftghvrewtkgvkteyleyeayipmaekk1aqigdeinekwpgtitsivh  
rigllqisdiaavliavssp  
hrkdayraneyaiერიკეივპივკეიედგსკვგჰკგნყეეაკრეე  
>tr|Q2YYS6|Q2YYS6\_STAAB  
mkvlyfaekdilqkagedimfeqaltvqqfedllferypqiinnkkfqvavneefvqksdfiqpndtvalippvsgg  
>tr|Q2YYT0|Q2YYT0\_STAAB  
mkrsskskms1pkki1wvfgilvilavavyvaakifitgnkihnp1drnhselrdkkvs1ndgdpftialfgvdsda  
drkkkgggersdsimilsi  
npkttkteivsiprdtraeivgrgttekvahayayggpnmavkslek1mnvpidhyatidmdglhnmidsiggvdvsnd  
tftvdgvrftkgqthvng  
dqalkfirsrkeegdgdfgrqqrqqivleamankiaspssithfnslmnei qnnvkt d1t1gd1ntirsnykdandt in  
khq1sgggg1qsdglyyfi  
pseqskaestk11kdnle  
>tr|Q2YYT2|Q2YYT2\_STAAB  
maerisskirrlekseeqikles1nevteaiaankdsilkaiklikv1ddakil dalngavrgrqviinkfavk1nkdiy  
tg11tnmasmvf11gelnv  
sd1sdf1nkvnkg1hvanqaspnaksirs11gv1kdddmnrs1tym1nmlkgsred  
>tr|Q2YYT4|Q2YYT4\_STAAB  
mknfk1rist111ivi1vvfav11ivnetk1fkndvnysfdeavsmqqgkivqtkeedgkfveanneiakamtishk  
dndmkymdi tekvpmsese  
vnq11kgkgi1enrgkvfleaqekyevnviylvshalvetgngkselakgikdgkkryynffgigafdssavrsgksyve  
keqwtspdkailggakfir  
neyfennq1nlyqmrwnpenpaqhgyasdi rwadkiak1mdksykqfgikkddirqtyyk  
>tr|Q2YYT5|Q2YYT5\_STAAB  
mlqahfhsvnyyqyniidprtliyvpsshiivtnvhyvneycc1nvhviyngadnt1ks1kmr  
>tr|Q2YYT6|Q2YYT6\_STAAB  
mki aiigagigg1taaa11qeqghtikvfeknesveigagigigdnv1kklgnhd1akgiknagqilstmtv1ddkdrp  
1ttvklksnt1nvt1prqt  
lidiiksyvkddai1fnhevthidnetdkvtihfaeqeseafd1cigadgiyskvrqsvnadskvlyqgytcfrgliddi  
d1khpdcakeygrkrgrvg  
ivp11nnqaywfitinskennhkyssfgkph1qayfnhypnevreil dkqsetgillhniyd1kplksfvygrtillgda  
ahattpnmgggagameda  
iv1vncfnaydfekalqrydkirvkh takvikrsrkigeiaqyrslvavrnr1mkmpnalaagqtkflykskek  
>tr|Q2YYT7|Q2YYT7\_STAAB  
mmdefksvknvsgkmsfiyadaqthhiidivedrr1selkkyfyrfs1karkrvktvsidmhegymtlikemfnakivi  
drfhivq11nralngirvt  
vmnelratnqplnrfkryak111kpeed1leafeyrkvalfkewktqkgivky11dqdds1ndayqyinq1rfk1khndy  
ggfihe1khmp1sgthsvv  
qraikt1nkhvyfikntfdyyn1sngpleginnkiklikrtsfgygsynh1nrri11csklyapkskkevqclva  
>tr|Q2YYU0|Q2YYU0\_STAAB  
mihivk1nsstyviknfeldsfigealf11ffvatylyifspifi11iffntinfktt1snlidpvfshynihsstvpk1  
yhlhkyt1ts1ihkts  
>tr|Q2YYU2|Q2YYU2\_STAAB  
mttemndi1thqpnrksndenimamliy11s1ftsiiigpli1w11kkdesk1vdragkny1nytisiy1iwsiv1vvitli  
gvfiatdinfi11igfii  
tfigilsifafsilsvftiiacvkyngqeyvip1tirfi  
>tr|Q2YYU4|Q2YYU4\_STAAB  
mpaili1lavgi1vgswwfsgtvpaliyygl11npsyflisaffisavtsvatgtawgsastagialisignqlgippg  
maagaiagavfgdkmsp1  
sdttn1aalvtkvnifkhihsmmwttipasiig11wvfiagfqfkghsndkqiqt11selaqiyqiniwvpliviivc  
11fkmatvpam1issfsai  
ivgtfnhhfkmtdgfkatfsgfndsmihqshissvks11eqggmmsmtqilvtifcgyafagivekagclev11ttisk  
gihsvgl1icitviccial  
vfaagvasivi1mvgv1mkd1fekyqvsrsv1sr1ledsstmv1plipwgtsgiytnq1hvsvgeffiwtvpcylcaii  
aiiygftgigikkssnsr1  
t  
>tr|Q2YYU5|Q2YYU5\_STAAB  
mkkia1at1atagfatiaiasgnqahaseqdnynpndptsysy1ty1idaqgnhytwkgnwhpsq1nqdngyysyyy  
ngynny1nyn1nyn1nyn1ngys  
ynkysr1nyn1sn1qsyn1nyn1nsyntnsyrtgg1gasystss1n1qv1tt1mapssn1rs1ssgytsg1n1lytsgqctyy  
vfdrvvgk1ig1stwg1nasnw  
anaaa1ragytv1nntpkagaimq1ttq1gayghvayvesvnsngsvrvsemnygygpgv1vtsrt1sasqassynfi1h  
>tr|Q2YYU6|Q2YYU6\_STAAB  
mqis111kfy1cvki1aknykt1tkhtrt1isv1fv1lv  
>tr|Q2YYU7|Q2YYU7\_STAAB  
mtdnys1hi1fks1mk1mssv1kean1ki1yw1lqgtgv1sin1lqydvkrndvtvim1ndlyq1dghd1svccv1vevsakt1fk

Tsompanidou\_et\_al\_Supplemental\_FASTA\_File

fmnanymmrkgiltnevas  
tfriilikylyyskikqqpnandkii nymcvelmslntyddsrhlvaeevhdyltnnhhkkinrkdvinqvsitnkalsd  
mfkatpysnfiqylnhir  
ehclidiltskkpieeiasshgfnhysrfihlfketygdtplirkrysptshsinhsqlevideknieifddtnqssss  
mreidipfeptkrsqmygp  
kniyikgsnfymdytikqiiqr lgvnpenlhiivtfdtsnel sieqmtlllkivnynvvnvfrikheykelltster  
gkieklvati fnmtesnr  
ckiaflindlnttaiqklkr lidnyigvfelyhlepnelntrydkeidhlidyfilplr qieqvsiarskiicdvdlin  
ennlkekitisdinkvte  
lltnytkfrglimhmsiiseaskeinlr lrsififiinilkqlrgiviyqndtmivtkfkhevqcviclpallnensda  
irlsckglqqfshaktkqi  
vlsidkdnhtsengvlnvdimqqhsywkafnierniydhs lmvssnsivhlkyhle  
>tr|Q2YYU8|Q2YYU8\_STAAB  
mskfkvkr l tahilmkvindmlkysfhltltqvkllnllvkydnsnsnsasidrllkmkeiqskmallqmlsylnnhqw  
llkgrdqrdrkltisink  
mhidkieymnne l sdyieryfgqytfdfscdyvsyllssqellrn lkcylnmcqlsleelyvlgilnlhkgqltvkelqg  
efhhpifavspilklilk  
glvkkercel derrivtikrekfsvtmliqacynylekgiqvklnnk  
>tr|Q2YYU9|Q2YYU9\_STAAB  
mildnvnndl fptekkgpsvlgieyqvqgknefegafiatserlimvdmngqfyrsisyneiekidydgqtimfkf  
nignvpmhdiksnaemfv  
eyvkqhmiv  
>tr|Q2YYV3|Q2YYV3\_STAAB  
mtdktlqqidkl icswlkqidnvipqlitemttetkrhrfdlvtnvdkqiqqqfqqflathfpehqllaeksdemitne  
inhlwimdpidgtanlvkq  
gedyci ilayfyegkpm lsvydyphkklykairgegafcn gikmepps lkledaiisfnaqvmnl dtvqdlfdasfsy  
rlvgacgl dsmrvakggfg  
ahintnpkpw diaaqflfaelnlkmttdlgkaidh lkgapfiisnkachetv l kilnanggyqkyr  
>tr|Q2YYV6|Q2YYV6\_STAAB  
mydlsvtseprikmg tlestnqwianlirkhhsdypeqyrlyeihdkhqsieql lnfnihlaitneki thedirsi ply  
eesyillapketfknqnv  
dvenlplilpnknsqvrkhlddyfnrrnirpnvvetdrfesavgfvhlglyaiiprfyyqs fhtsnleykkirpnlgr  
kiyinyhkkkrkhseqvhtf  
vqqcqdyl ygllea l  
>tr|Q2YYV7|Q2YYV7\_STAAB  
mrkiqakglsieckgweqea vlrmlynnldpevaerpedlvvyggigkaarnweafeaiektlrelesdetmlvqsgkp  
vavfktheeapr vli snsv  
lpewanwdhfneldkkg l imyqmtagswi yigsqgivyqgtyetfaelgnqhfngdlagvtvltaglgmggaqplait  
mnhgvvicvdv detrvdkr  
idtkycdvktad ldealklaeeakergegl siglvgnavdihqail ekgfkiiditdqtsahdp lnygvppqysveeakv  
lrekdpkkyvelsqasmak  
hvelmlfefqkrgavafdygnnirqva fnngvknafdfpgfvpayirplfcegkpprfaa lsgdpkdi eradeemrklfp  
enekllrwd llaeekisyq  
glpsriawlgygerakmg lalnrlvr dgeisapivigrdhldagsvaspnretesmkgdsdavgdwavlnalintaaggs  
wisfhggvgmgyslhag  
mvvadgseraerrlgrv l ttdpgmgvarhvdagydiaiaqtakek gihipmidkagdk  
>tr|Q2YYV9|Q2YYV9\_STAAB  
mg lkeqavawrryfhqfpe lsdkefkttqkikdilteynirildlplttglvaevgggpsciavr adidalpiqelveqd  
fksenegvmhacghdihma  
silatavklkeiegtlgrvkfiqpaeelghgafkiiethalqdvqavlgfhndpsrsvgtfaiktgait savdrfefh  
ikgvvgghaakpeqcndpvi  
vlaqlinsiqsivsrnl safdeavvtigqis cngntwnviadhayvqgtvrsfdpvvrklvetrlqdiadglaqaynmkin  
l nythlpgavmndea l thk  
aiavaqhvgykvenmeqpl t igedfsgyskhfpsvfaligshseydlhhpkyk pderiiekvpey fvefvkrllhe  
>tr|Q2YYW0|Q2YYW0\_STAAB  
maaqp rtkfktt dyekqevpg lqsempapdcgetsyqghqrlqgykmlvtggdsai graaaiayakegadvainyl  
pseeqda qevr qvieesgq  
kavlipgdird eqfnydlveqayqq lggldnvtlvaghqqyhddihgftteaf tetfetnvyp l fwtvqkaley l kpgas  
itttssvqgynpspi l hdy  
aaskaai sltksfsee l gpkgirvncvappgf wsp lqisggppskiptfgqktp lgragqpvelcgtyvllaseessy  
ttgqvfgvsggvqid  
>tr|Q2YYW1|Q2YYW1\_STAAB  
malivsrailflilalafgiatvfpeqklplyivftlvvvaivsnw l thqnvkknii kfnkyvayflafvsgllyigf  
viytl tigsydv l piifa  
isivlvqil enilgisikntrpsnkqlkviseqsaqqfkvisilivsvsivfifialmlkwwlllvisiivliiitvami  
vyekyyttdp  
>tr|Q2YYW2|Q2YYW2\_STAAB  
metsffivcekeaf ligkqvkrmevhkksnawalp lllfvalflvgvigitgdftsmp lnvaititvival l mnrkesfa

Tsompanidou\_et\_al\_Supplemental\_FASTA\_File

kkvevftkgaghsniilm  
lifilagafsntaekmggvkstvnlglsipenliivglfvicmfvsismgtsvgtvaaiapvgygfaqatdvpalam  
tvvgamfgdnlsmisdt  
iaavrtqhtkmdkfrvnfkivlpgailtiilyfltngislnhaknydynlikvvpvylvlvllalgvnviivliggtl  
lsgiglidgsfgwmgll  
avskgiismediaalligglvgiiqhnggiellqfvrvskvksrgaelgiaslvsvsdiatanntisiimgplakn  
iadeydvdsrksasilidf  
ggcfqglpyspqiisaagvagi splmlfpysiyipillgvcliaailfnfpklkkeh  
>tr|Q2YYW3|Q2YYW3\_STAAB  
makfnvenehveveieklykfspe lveawtkkdllkqwfmsartnkeieadvkeggkyrivdqqrngkvniegiyes  
lvmdeyvkmtigmpglset  
qdviefferetggtqmlfyysrlvekerrftnleykqkkkeydamvhgfe lmfdkmyhvietstqq  
>tr|Q2YYW4|Q2YYW4\_STAAB  
mfldehinnfdklndndlhiahfinthidecknmkiqdl aqfthasnatihrftrklgfdgysdfksylkfesnkthql  
pnsidsfkqeidstfsyl  
ervdyqlltekmtastiylgtgraq lnvaseaqrilltlhnhvivlhdehelkmi lmksepndlffii slsgethell  
evtnllqlrqkyfisvttm  
kdntlaqkanyvvyssntfylvtdgtdyssfisyhi ffetlv rkyneyllhndisn  
>tr|Q2YYW5|Q2YYW5\_STAAB  
mnaikrfgsamivpvlmfaffgivilgfatl fknptimgsladqhtfwkfwsviesggwif thmevvfvvg lplslakk  
apghaalaa lmgylmfntf  
inailltqwphftganlekgvenvpglksi agiatldtnilggiiisaiitwihnyyskr lpemvgvfqgltfvvtisff  
vmlplaa itcviwptvqh  
icsmqhfiiasgyigwlyhflervliptglh hfiyapievgpvvnhglkaewlqhlne fakstklkeqfpygfm lqg  
ngkvfgclgialamyattv  
kenrkkvaallipatl tavvvgitepleftflfi apylfvlhavlaasmdt lmyafgvvngm gglldfistnw lplgke  
hwgtyvaqvvg lli fva iy  
fflfrflil kfdip lpg rkktee evk lfskqdyknkk gds vdskrastgneyedkvayy l dglggkenikdvtncttr l r  
ltydeskvadteyftthq  
mahglvksgksi qvvvgmtvpqvreafeqm vddqssedk  
>tr|Q2YYW7|Q2YYW7\_STAAB  
mfqklskfatksflwmlvaavigfi fpqhvatlgkwvpyllgivmlgmgl titpndfkmvfkapravi igvclqfsimp  
tla fii aksfhlppdiavg  
vilvgccpggtssnvm sylakanvalsvsittvstllapfvtpaliylfanewlevsflsmlwsvvqvvlipialgivilq  
iinrki aekastalpiisv  
vaislilai vvggskhqi lttglliflvvilh nvlgytigywlarllkl drqdqkavsievgmqnsglavslaalhf npi  
aavpgavfsfihntgpil  
akywskkl  
>tr|Q2YYW8|Q2YYW8\_STAAB  
myravifdfdgtiidteqhlfnvinkhle mhnadpisi d fyrs siggaatldhdhlikaigsenkdklyeehhltsktlp  
midtikslmaf lqkrhipm  
aiatssvkaeimptfkalgl ddiyevvvgredveqv kdpelylsavqq lnymp tqclai edsvngataaiaagldviin  
tnkmts aqdfsnvdyvakd  
idydqivarfftk  
>tr|Q2YYX2|Q2YYX2\_STAAB  
menne lkr glsarqiqmialgg tigvgl fmgatstikwtgpsvilayliagi flflimramgemiylnpttgsfatfasd  
yihpatgymtawsni fqw  
vvgmseviavgeymkfwfpe lptwipgia illmaan lsvkafgefefw falikvvtiilm iagfgliffgfgnggh  
avgisnlwtnggfmpngiv  
gff falsivigsyqgveligitagetkdpqknivkavngviwri lifylgai fvi svypwnqlgdigspfvatfakigi  
tfaaglinfvv ltaamsgc  
nsgifsasrmiytlahkgempki ftkimrngvp lytvavslgiligalln vilplyidgaksifvyvysasilpg mipw  
fmilfshlrfrklhp eeve  
ghpfkmpggavsnyltilflilvlvgmvfnvetrisvligvifltivtiyyfirynknnvkak  
>tr|Q2YYX4|Q2YYX4\_STAAB  
minetkymrqqitnliqi idtikyntl mtdwniqthiykfnqivtne l nk fksfetsyiinenqvfyeyiitllnkrpl r  
qvdygnkiqyl nfyhtels  
nal faikfah  
>tr|Q2YYX5|Q2YYX5\_STAAB  
menekkytfdkiawrdll iipi igvlifa lniaayigpil fgyyeidsnmi fvatitqalaytigigafylfhlkvmps  
rlragfayikkywlr l sit  
yialil iyteymtqflpkhlqysetanelglnkmfevpallpvaflliviagpiveeivfrhiligelgkkfnfiams  
ivsvflfafihvtdaksp  
efgpylilsii l vfty lksgrnlgstialhiannfvsvvisiya  
>tr|Q2YYY0|Q2YYY0\_STAAB  
mdlthfnkrspifii l gstaiga l sidmflpglpdirhdfqttsnaqlt lsmfmiglafgnl fagpisdstgrkr l  
liamiiftlaslgivfvh  
niwlmvalrflqgv tggaaavisraiasdmysgneltkfmallmlvngiapvvaptiggiilnysvwrvmfviltifgfv

Tsompanidou\_et\_al\_Supplemental\_FASTA\_File

mvigsllkvpesltvtntre  
ssrglktmfknfkiillktprfvlpmligqmtfvilftyisaspfiiqkiygmtaiqfswmfagigitliissqltgyld  
fidsqklmrgmtmiqiigv  
ilvtivllnhwnfwilaigfiiliapvtgvatlgtiamdesssgrgssssllglvqflfggiasplvgvkgednpiypi  
iiiiataviliilqiynmk  
vfktnr  
>tr|Q2YYY1|Q2YYY1\_STAAB  
mkrqakieiqnalvdmaeypfqeistkmi caycnirstfydykdkfdlldtinskhekfqflsahhnfenikqd  
klkiykffiiiakyikhne  
qffkdilvtypmktlfidyinlardyyqqimndystvtvnkqlyvtyiiggqagvfinwlsngcnespeevadillanti  
klqng  
>tr|Q2YYY3|Q2YYY3\_STAAB  
mtttfiisyivlaliivgvinnllirsrrkakrqkqeqhfatrqsnskfkasldrtdqssqhtareearidnkdnqn  
qvsldthakgseqdggfn  
dnkdeafaaknpeseeykvnkikkekhnyifgegvsrgkilaallfgmfiailnqtllnvalpkintefnisastgqw  
lmtgfmvngilipitayl  
fnkysyrklflvalvftigslcaismnfpmvgrvlqagigavlmpgsviitityppekrgaamgtmgiamilapa  
igptlsgyivqnyhwnvmf  
ygmfiigiiaivgfvwfklyqytnpkadipgiiifstigfgallygfseagnkgwgsveietmfaigiifiilfvirel  
rmkapmlnlevlkfptftl  
ttvinmvmvmlsyggmllpiylqnlgfsaldsgllllpgslimgllgpfgaklldtiglkplaifigiavmtyatwelt  
klnmdtpymtimgiyvls  
fgmafimmpmvtaainalpgrlashgnafntmrqlagsigtailvtvmttqttqhlafgeeldktnpvvdhmrclas  
qyggqegamkvllqfvnk  
atvegindafivati fsiaalilclflqsnkkakataqkidadnsinhe  
>tr|Q2YYY4|Q2YYY4\_STAAB  
mtnpnqrlepfdetfqpnihrgkrygkkkrslvsmiiaivviltaiagysmwkqpi fnivftkesvdfdgiknfneti  
gkmhqlninlgnindlqgg  
idrliilvfnqffilcivslvitiiltivfnrtvlkvvnllvltimlvitlyfsyiika laqeiadaalkkyulnvppdqvit  
eadaihngiillgcsigll  
vislffrnrmprlk  
>tr|Q2YYY7|Q2YYY7\_STAAB  
mviikqlfthtqtvtsefidhnnhmdanyniifsdvnrfnysghslkerenlaytlflehttylselslsgdvftv  
tlyidydykrhlfltl  
kedgtlastnevmmginqhtrrsdafpesfstqiahyknqptitwpeqighkiaiphkgaik  
>tr|Q2YYY8|Q2YYY8\_STAAB  
maltiryqttypfkvddikeipkdativwydfdepeneqenewfkahfnfndlevddaingmprakyksykydyqyivfh  
simgsnyspialnifiqdn  
vlvtyhhqtleslnkvvykymntldaeldcadvivilldmmvdkyfnfvyaledsvyhfedrhdvdrfnkmvmdsvfklr  
sdlikvkrvlfpmqelidt  
mkqngdliidnkhslyiqhiddhlikqrniirtaqemtneirenfesysfrmsimqvltlsvvifspitfiagiymn  
fvnmpalhlygyyiclav  
mfviavvliiffrrkkwf  
>tr|Q2YYZ0|Q2YYZ0\_STAAB  
mielnaittlclacilyllgkaiavnvnflkricipaviggli failvaal dsfgmvkikldasfiqdfmlaffttig  
lgaslkflklggkvlllyf  
mfcaisvignivgvs lakvlnikpllgltagsmsmegghnaaaygktiqlgidsaltaalaaatlglvfggligppv  
vkflikrynlpqhsdvtf  
kdysqvaynehlskfnatevffiqftivvfcavgysfshlftaqtginvpiyvgs lfvavivrnisesfnfnivdiki  
tnqigdvalgifsals  
iqliieyklaipliiivlvqvvmlfavlilfrglgkdydaavmvggfighglgatpnamanldvitkkygns pkaylv  
ypivgaf lidligvivimg  
fiqwfs  
>tr|Q2YYZ1|Q2YYZ1\_STAAB  
mpsfidyheneiyllisqsvpstcgwvdcfslcpsyflihllflnlfliikynnriiny  
>tr|Q2YYZ3|Q2YYZ3\_STAAB  
methlksasltilkichtamfakrdsisanki fhnkvtylhfyns  
>tr|Q2YYZ4|Q2YYZ4\_STAAB  
meqlpqvgfmsfvlfwknyvnftgrsrrseywymmlwhlifilpaffvffmgavfvgigdeidakvlsmfvgmililti  
iymllyslatfipnalsv  
rrfhdisrtmvlpiimafsvfsivvqfiesyddndmfmpigivillvlylyfyglvtvmtivflcfds kpanyges  
pkypssikkqpvtssetpek  
agtsetpktpeetdnq  
>tr|Q2YYZ5|Q2YYZ5\_STAAB  
mglviehvtrfkgmtavndis lelesgkmlgflgrngagktttfmi lglsepteghityngkkl dktmynrigylpee  
rglhgkl tveee lkylatl  
kgmskteiqqqisywlerfditenrkkridslskgnqqkiql lasmlhkpellildepfsgldpvnvellkeavkdlnw  
gstivysshmehveelcd

Tsompanidou\_et\_al\_Supplemental\_FASTA\_File

dvcildkgqlvvsqgdi nhvrasngnkvviesettl pdlthirgi ihsemkqglq ltienedvakdiyqvahqgyvkr  
fqvvepslqdi fiekvggk  
da  
>tr|Q2YYZ6|Q2YYZ6\_STAAB  
mhkfwatfsltyikkikaksfvimiiiasmiglsnidkiikmfdgpdkgivaapneqiykvfkqanafhsdakfik  
vsiedaekevkkhkldkay  
iikvnrntlqgtiisekrvshedsqkvqalltaiqtnmvagelninkedlqklqaqskvdkvisndevdkvsegqkif  
nyalaygjiiflmffivlly  
asqjameiasektsrviemiitsispiqhi fakilgviavavtqiilivl mavicifafdlkdllqgfvemnlswqii  
ivgiissivgimayvllaa  
ilgsltsriedlnqslmpmtllgmiafyiaiftinnpdgrlalitsyipflapfqlvvraqtsglqinevilsslisivm  
vavliwiaiktykdsvltf  
erglfnsmkrvfkk  
>tr|Q2YYZ7|Q2YYZ7\_STAAB  
mmmkacysyffifsyrimskkvynmrvktnflkwecevrnrvnk  
>tr|Q2YYZ9|Q2YYZ9\_STAAB  
mivevehqrggdlikidndetkiiftnygarvsvskyhdnivilgnvveadefyhspnflkgasigrsgrihnaekfl  
kgkeyqleknghehlhgg  
chglndklfdyeirneiaqikvifktvlksaddhfpgdidvtithiydadhqwsieyeavasedtlfspthvyfnlnrd  
nrvdnhrissnqldmyvl  
ddrni vtgdildlhev fednkiklsdi ftsqhvqlsqmtrfggl dhpftvgehkmymvenhefml evdtdm phvffftfn  
qp dewdspfn iykphsgft  
letqflpndinlygekapsilkagevfnsksfrieekvend  
>tr|Q2YZ00|Q2YZ00\_STAAB  
misihaistgkiqdlpysskrpmrsaldtkisqttwlsstgftgdeqaykdhgghpkavcgfskhnyalykddlptlpt  
hamfgenl tfdyl desdvy  
fgnqyrlgealievsei repcwkiqakynipdlvkrmstsgktgyfrvlkqgyvpsdqlyliqeapiehr lsvqq lnd  
lyndrqndmlryal nnp  
flsptrrdklqkmyntkl  
>tr|Q2YZ02|Q2YZ02\_STAAB  
mlnlllilifilivicplifnytltnl tcyilvvisiflslisimtytfpwsmfvtfiiisiiml fkhrylfshtsr l  
fikkllsfsykfvlytsal  
lfistiqspivkgl smwla ilclslll t ficylvwtvsyrhrs ynkevdiivlgagiftefvtpmlaarldraldiyqq  
qasatkivsgggpdepi  
pealamryli ahgvktdil meshsintytnflyskqiinnlyheavkivcvtsqfhvlralrlaqlgl sidvgvsht  
pyhfflhvlikdylgvmyq  
yrlll tlyc ssswficlyaa fiyhs  
>tr|Q2YZ03|Q2YZ03\_STAAB  
msnsqaiqaienvlatskvgvlstaynnkpnrymvfyndgltlytktnihsakvkeikdnpaayvllgyndttnrsfve  
meatieivteqevldwle  
tqdk sffsskedpelcvlrvvpqsiklmdksldtpikinl  
>tr|Q2YZ04|Q2YZ04\_STAAB  
mtcqk ihhtl stipsrnimmvlfs ltskl nitin getkdvsnii lnhgdi yninhgeni elmpvfyfyqqddd  
ffngyl drhl lqssnyiks  
liadlistptsslmgnigqsiidtllkeafiridheylpnialsnpvfidcvnyihdnidahls lkdiamhcnisesy  
csnlfvrylsmnfkdyfts  
iklvnainlll stkhsittise lagfnshtnfanqfnylhfspkqfrslvskiteppqihfqdnvsqftelisiidlt  
aqlatnttdihiddfnpkd  
rsqrakvfrfsfnfnlqfifneyydingfehlpkpvvfididieisqtnynllnrcfeklfekniglaiaikstqqf  
etmkqlliltflqgnqdykt  
skklvkfmlvfcsnsmtaeeihlchl kknknkeikysvtvdgfl etystveqvydvmqr lkhyyfidiensktathli  
tknqhyhqt dth feqykkf  
ildsgisstqfvynn lsvsgfkytndgknpiqlsdivyhli allrygggisqyll ddsnyislynkygsp lplmhlykm  
frpfvnedieitnnyvl sr  
kdnyhfllfnkindrymsdvkqdfi fhnel p qds lmi iktlnhehgsiqhll p t s d q l v y i e k i l d e l d k t n y p k t e l  
avgeetgrt felkl nhdev  
kyicfkps  
>tr|Q2YZ05|Q2YZ05\_STAAB  
mltifi llllycaqiktsvflgvfinffysllpfqkystiigilsmilkipmfyi  
>tr|Q2YZ06|Q2YZ06\_STAAB  
mkerghieqlwreekyhvlhsqsyqmirnal ktdlslhqvqqmidtdlliepsigsvcnafdhmwyfkkfaneerq  
qskllkadfingkidtqt l  
ldflaelankydvqyl lqsri lntkrkr  
>tr|Q2YZ07|Q2YZ07\_STAAB  
mnykqsaedi lnaggeenldamahcatrlrlv lndeslvneea lnmdvvgkgtfstggqyqii igsgtvnkvfselek l  
tgkeasttsevkagsaknm  
nplqrfvkm lsdifvpiipavagglmglnnil takdlffsgks lidvysqfaglaeminvfanapftllpiligfsaa  
krfggnpflgaa l gmi lvh

Tsompanidou\_et\_al\_Supplemental\_FASTA\_File

pslmsaydfpkaveagkai pywvdfglhinqvgyqqvlpmlvaayilasiekglrkviptvldnlltpllsifitaflt  
fsfvgpitrqlgywlsdgl  
twlyefggaigglifgllyapivitgmhhsfiavettliadatktggsfifpiatmsnvaqggaiaaffiikqnkk1kg  
vasatgisallgitepamf  
gvnlklrypfigaivgsgigsayiaffkvkaialgtaglpgfisinpvhagwlhyfvgmtisfivaitvtlilskrkank  
evve  
>tr|Q2YZ09|Q2YZ09\_STAAB  
mkedrri rktkssikqafkllqekdlekitirdittradinrgtfylhyedkymlladmedeyiselttytqfdllrgs  
sieniantfvnnilknifq  
hihdnlefyhtiqlertsrlelkinehiknmqryisinhsggipemyfysyvgatisiikyvwmdkqpisvdelak  
hvhnivfngplrimaenrl  
hksnlds1s  
>tr|Q2YZ10|Q2YZ10\_STAAB  
mni fknkllwiapiatmiilvifslafypaynpkpkdlpigilnedkgtti qdkvnigkkledkllsdsnikkwkvd  
sekdlekdldkqkifgvai  
idkdfskdamsktqkvmsdskkeemqqkmgnqqvevkqakftivsegsslqgsqiasavltgmgdninaqitkqsl etl  
tsqnvkvnaadingltnpv  
kvdneklnkvkdhqaggnapflmfmpiwigsivtsillffafrtsnnivvqhriiasigqmi favvaafagsfvyiyfmq  
gvqgfdfdhpnriafval  
ailgfvgliilgmvwlgmksipiffilmffsmqlvtl pkqml pesyqkyvdwnpfthyatsvrellylnhhielnstmw  
mfigfmvfgavsslvsai v  
rkhstkrtevps  
>tr|Q2YZ11|Q2YZ11\_STAAB  
mrrll ysflyfymvigl fsgffyreltkaydftgttqlslvhthtlilgmfmfllillpleklflklssyylfnwffvyvynig  
vivotigmmvtkgffqvtgk  
syspeafagfagihtgm lagl1111ffl1rqailkeprdesfkk  
>tr|Q2YZ13|Q2YZ13\_STAAB  
mvkvtidyipscedyalrinagmspktreaaekglpna1ftvtlydkdr1igmgrvigdggtvfqivdiavlksyqghgy  
gsqimehimkyiknsvses  
ayvsli adypadklyakfgfmp tepdsggmyikf  
>tr|Q2YZ14|Q2YZ14\_STAAB  
mietfkafvidkdesgkvtptfkqlsttdl pkgdvl ikvhysginykda latqdhnavksypmipgidlagtiveseap  
gfekegeqvivtsydlgvsh  
yggfseyarvksewivklpdtltleesmiygtagytagliaerlekvgmniedgpvlvrgasggvgtlavlm1nelgykv  
1astgkqdvdsqll1elgak  
evidr1pveddhkkpl asstwqacvpvggeginyvtkrlnhsgsiavigmtagntytnsvfphilrgvnilgidsvfta  
mklrqrwrrlakdlkpen  
Theikqvitfde1peqlnkvikhenkgrividfgvdk  
>tr|Q2YZ15|Q2YZ15\_STAAB  
magiikeiskqdase1velatrtfydtfgsyddkdfdqffednytvекftqeinhvdsfhyfyqedganvgyikmnins  
aqteemgetylevqriyfl  
kdfqgggrgsqlielaekiaqehkhkiwlgvwehnpraqafykrhgfkeveghhfqtgdvtdtdlimkkel  
>tr|Q2YZ17|Q2YZ17\_STAAB  
mikqinvsnmqkfesqlmkaqsegythvvpvaneimi yqsmldavqlypksivvdytvdgqykndchyfgqssiniadwa  
qnnnyppnliyaiqgtldl  
ihyysvetifdla1l1tkgdlsidghvdfdkaplatsasiwetiktiedfdmmsqfynlkmayidhhpipfrnlfied  
seqlnspdnwlystkfm1p  
kwlykiakqradnkqlnlglytkqpnv1kdhivfigdhhqyignsky1ftyfvkhnpmacyfvtdddrrgphfispkse  
kadelinsarvv1vendip  
et1qpngtliqlhqqtpimqlfl1dskepiknietpfyrakrynrwlqfdyvihsaddishfyqtafpshqanvlaygnpk  
hqy11lqkrnesttqqqyk  
sfkindqkpvllyapig1vsaqq1pl1sda1fkayhvvvqgvdetmlpeea1vapky1saqd1ilmsdvitdysniifda  
maidktvalytpnhsqyie  
sqgvnediwrh1skiwyt drq11inn1isqaipvikypqihkeqplesisq1l1skm1snq  
>tr|Q2YZ18|Q2YZ18\_STAAB  
mkkitt1is1fckmlsitkcysqsm1mkqlhyfmer1vslc  
>tr|Q2YZ20|Q2YZ20\_STAAB  
msyfsnvp1f1lkrgtvfvmttqhskt dviliggimsat1gt1l1kelspek1kvfeklaqpgessnvwnnagtghsa  
1celnytkegkdgtvdcsk  
aikineqyqiskqfwaylvktgqldnpdrfiqavphmsfvigednvafiksvat1kksv1fekm1sqdeemkswvp1  
miegrksdepiv1tydetg  
tdvnfgal tak1fdnleqrgvgiqyqnv1dikkqksgawlvkvk1letnetttyesdfvfigaggas1p1l1qktgikqs  
khiggfpvsg1flrctnqe  
vidrhhakvygkaavgappmsvph1dtrfvdgkrs11fgpfagf1k1ktgshmd1iksvkpnnivtm1sagikem1st  
kylvsq1mlsndermdd1r  
vffpnaknedwevi tagrvqvikdtedskgn1qfgtevit1sddgtlaa11gaspgastavdimfdvlqrcyrdefkgwe  
pkikemvpsfgyr1tdhe  
lyhkineevtkylqvk



Tsompanidou\_et\_al\_Supplemental\_FASTA\_File

>tr|Q2YZ21|Q2YZ21\_STAAB  
mknlnkslflsliigltslffsmldfadgkyypInpqstigilythftettvmlisiilwlligvfflfgdfifkytdw  
gltkativhfittvygflp  
lailagwfpLtinyliiftiifivvytliwiiqffknknyvdtineqlkqk  
>tr|Q2YZ27|Q2YZ27\_STAAB  
mknkkfgfgfglglisliaimlivcivlvimmmtgkkdtyyigimkdnatiekmisekdesieknvklpsdadvsvkkgd  
fvivykladsdkivkvkv  
dhddvphglmmkihdmgkmhmkh  
>tr|Q2YZ28|Q2YZ28\_STAAB  
maqryikvlilyiftllssiivtscvnpkvvrflrtvvygifyaglhyfsnlkknk  
>tr|Q2YZ29|Q2YZ29\_STAAB  
miknktvedtystkaiivdsissvqmkqvmvqptpgrymlksmmagflsivtvmfmgiktqfasthvdglinlmgaiia  
fslglvlvvtlnselltsn  
fmyftvgwykykvsinkmmwillycflgnilggfvllfmlkyahvmtpentqaltaVqkktvdsswlniftkgifcnff  
inigiifismqfkggltkaf  
fiacgvivfvyngyehvvnaglyagmvffnldavswlhvlnknivfaflnfvvggifyglvyafIngrnrleqq  
>tr|Q2YZ30|Q2YZ30\_STAAB  
mgieomtnttirlanendaetlqqImykaftplrelgidwpsvnanldavkenidknttfvmtiddeiistitvrypwgsv  
ksisgypfvwwfatnpeye  
kggygsqlltyveeafldrtdlksaavtlgtsarlnpwlklyekrgyeiyrehendgdglvimrkvlipefdeitlqq  
ppf  
>tr|Q2YZ31|Q2YZ31\_STAAB  
mkglnvvnngniivahgmrygrnqaallafisevlkddihhydiftlesehdletvmttlvqsgvdhfkivpllisamh  
ylkdiptdivhemkrrypdi  
kvevsepLgthplmrrlieqricdalagdeqqvgvmvahgningkftkaheelqicaqlqiskptyartlygeisfth  
dlesiskryqkLivvplfl  
ydgrlvnkvkqmqmndmvintdihitpsinfdpilkqiindrleslndsnenikaqtktfkl  
>tr|Q2YZ32|Q2YZ32\_STAAB  
makqklvmignmagirtieeilerandlydikvigkepypnyrimlSnilqnkmtveetimpyewyeehgielitnd  
pvievdranqsvttangie  
vsydklifatgskafvipvgstlpsvigwrtiddteqmmniaktkkkaiviggllglecarglldqgmevtvlhlaew  
lmemqldrkagnmlkadle  
kqgmkfemqantteiligeddvvgkladgreipadlvvmavgirpytevakesglvnrngivvndvmqtsdsnvayavgec  
aehngkvyglvaplyeqgk  
vladhlnketngykgsttftsLkvsgcdlysagqivenaeikgieifnsvdnnykklfldgnvvgavlygdidgdsrf  
ynmmkkgstedytlvsl  
tkggeeaslsiadmaddetigcngvdkgtivnaikengfttvevtaktkagnscgkckpqiailqhtlgddfvaakp  
agicgctdltrdqivtqir  
akglktskevrvhlnfnknkggcpkcrpainnylnmvphdheaderesrfaneryhaniqndgtfsvipqmrvgvtdadql  
irlgevakkyhvpLvkvtg  
sqrvlygvkkeeLpniwedlgmrsasaygkkrsvkscvgefcfrfgtqytrlgirlektfeyidtpfkfmgvsgcp  
rscvesgvkdfgiisveng  
fqiyignggtevekaeflTtvetedeviklcalmqyyretgiyaertapwlrrlgfenvkevllnperqnelferimd  
akkaveapweaitsnaqa  
rkifevekv  
>tr|Q2YZ34|Q2YZ34\_STAAB  
msvdeykvyligagpnpnyltkkaerlireadvilydrlnplilqyanltteiidvgkkpyakhiaqekindcivea  
arrynkvvrlkggdpaifg  
rvgeevdtlnehhiafeivpgvtsasaavasmqtgltmrtvaksvtfstghfdseenevvnslvnggtlaiymgvkrL  
gkiiqtqiyytdidypiai  
vfqascfnefvkgkrlsnisklqhysieakpgiciigevvytentpkysdstkqfyvvsqskhdalmlceylydkgyg  
cLlnpndtsngtyhssqyd  
yydafikhqenvtyistdcadantvlch  
>tr|Q2YZ36|Q2YZ36\_STAAB  
mgkfglnffkptekfngnwsilesksrewekmyrerwshdkevrtthgvnctgscswkvfvkngvitwenqtdypscgp  
dmpyeprgcprgasfswy  
eysplrikypyrigklwdlwteaLeenngnrvaawasivenedkakqykqargmgghvrsnwkdvteiaaqllytikky  
gpdriagftpiamsisy  
aagarfinllggemlsfydwadlplaspqiweqtdvpessdwynasyiimwgsnvpltrtpdahfimtevyrgtkvis  
vapyaenvkfadnwlapn  
pgsdaaiagamthvilqehyvnpnerfinyakqytdmpfiimlledengyagrflrasdlgqtteqgewkpvihdais  
dsvvpngtmqgrweedkk  
wnlklatedgskinpLtsmetgyeletiifpyfdsdgdgfnrpiptqrvtlangdkvriatidflmasqygvrfrdhk  
leskyddaeskytpawqe  
aisgvkqsvviqvakefaqnaidtegrsmiimgaginhwfnstiyrsilnlvmlcgcqgvngggwghyvgqekcrpieg  
wstvfakdwggpprlqng  
tswfyfatdqwkyyeesvdrLkspLakteelkhqhpadynlAarlgwlpsypqfnknsllfaeakdegiesneailkr  
aieevkskqtqfaiedpdL

Tsompanidou\_et\_al\_Supplemental\_FASTA\_File

kknhpkslfiwrsnlissakgqeyfmkhllgtskglatpnedekpeeitwreettgkldlvvsldfrmtatplysdiv  
lpaatwyekhdlsstdmhp  
yvhpfnpaidplwesrsdndiyktlakafsemakdylpgtfdkdvttplshdtkqeistpygvvkdwskgeieavpgrtm  
pnfaiverdytkiydkyvt  
lgpvlekkgvgahgvsfgvseqyeeiksmllgtswdtnddsvrnrpridrtarnvadailssissatngklsqksyedleeq  
tgmp1kdisseraaekisf  
lnitsqpreviptavfpgsnkegrryspfttnierlvpfrtltgrqsyyvdhevffqfgeslpvykptlppmvfgnrddk  
ikggtdalv1ryltpgkw  
nihsmqdnkhmlt1frggptwisiwinedaekhdidndwlevynrngvvtaravishrmpkgtmfmyhaqdkhiqtpgse  
itdtrggshnaptrihlkp  
tqlvggyaqisyhfnygpignqrdlyvavrkmkevnwled  
>tr|Q2YZ37|Q2YZ37\_STAAB  
mkikaqvamvlnldkcigchtcsvtckntwtnrpgaeymwfnnvetkpgvgypkrwedqehykggwlnrkgllelksgs  
riskialgkifynpdmpl  
kdyepwnynyehlttaksgkhsparayseitgdnieiewgnweddlagghvtgpkdpniqkieedikqfdefmmy  
lprlcehclnpscvascsp  
gamykrdedgvlvdqdacrgwrycmtgcpykkyfnwktkaekctfcfprieagmptvcsetctgrmrylgvlllydad  
rvheaasavdekdliekql  
diflnpfdeeviaqaekdgidydwieaaqnspiyklaieyklaflhpefrtppvwyccplspimsyfegknttqnpda  
ifpaieemrlpieylanif  
tagdtesvkgalqrmammrsymrsqvtqppfdtsrlerlgerqtkdmyrllglakyedrfviptshketyldtyhaqg  
stgynyggehfngncegq  
vavsgktgqeiynenyfyggrfrd  
>tr|Q2YZ38|Q2YZ38\_STAAB  
minfdnfkkyqesfgymaqq1cfpekltfhpktfeetiskdhpayedlvafrnmmtfslseikaiytdtfdftkkaply  
mtynkfdtgkerqmlakl  
kvllyemfgleivdnelssdylplmlqflqvaewrndpraeeniqliimiiedgtyvmanalgednntyayviqalrktlk1  
cltspkgvkhha  
>tr|Q2YZ40|Q2YZ40\_STAAB  
mtpeaiiedrrfgetldkirkkeegydfaaiafyesnkpsspikwhyvsgnknnrfkliilrkgrglagtmktgkrmvia  
nvglalgpEEKidypills  
esltavlavplwyknkvygvllfgardgrp1pkifdnddiqrkfgifnddk  
>tr|Q2YZ43|Q2YZ43\_STAAB  
maytytlkdiieitgvtkrtlhyydeigllvpdkndknyrvyqqdlek1qkili1ksfdfdiakikqyisydneqlrk1  
lseqvskldkksid1q1ir  
lsvckfikghslidtsilnktlqsqydkeasikyghtkayqsfirrkds1qshdirhkltti1fnkfnhms1shyqi qdcs  
dlvfewkafmmtiadfdde  
tlcciaaktyeddrfkdyfnsydnqnlasyiseavnyflsnvksdnf  
>tr|Q2YZ44|Q2YZ44\_STAAB  
mykiniirsdsvykni1kaplnrdsiftkeilvpfkkkfeaqhipiyndakqtmanhflnafqipkdlrmsdqisiq  
ylnndfwsnceky1kvaid  
qfsnysipsqvsnyhftvl1gdsqkplmylnknrggdggipgyimiylvpstrtinsmkslithevnhmryqyidwdgg  
slieliiaeglaenyvesl  
ygkahi gpwvntnwsrdnvkikntiynhlhkhifesmplygddinklqgrpivglshtagyacgyhlvkyflqktni  
pievattlpaqkiinevte  
fwhtht1  
>tr|Q2YZ46|Q2YZ46\_STAAB  
milnfnqfenqffngnpsdtfdk1gkqvfnfstpsfvtniyetdelyyleaelagvnkedisidfnntltiqatrsa  
khkseqlildernfeslkr  
qfdfeavdkqhitasfenglltitl1pkikpsnettsstsisipi  
>tr|Q2YZ50|Q2YZ50\_STAAB  
mprkfrv1qiggddlepi1fqhkkgvswdyfdig1fefdsyveaieaiveaegrfdfiyiqapyselt1nllqmisepyn  
tyvdesfwsveyeqdenvq  
kyvvqplhrynieernnk1eavsfsgqygdkvspkla1vhpnfkgdvvyqgnsetl1sgefgkefkpiaswqnnlvdkd  
kviqiwpefd1dgavelqy  
tfrliqtgadgalieqi1ltddm1dsp1eiptkpfdayisvtvkargngtvhl1gpihkrwsr1dmgqfllggsrfvdsqr  
qefiyyfhpqdmkpp1nvy  
fsgyrtaegfegyymmkrmapfl1igdpveggsfyig1seyeqgiinvidetlek1nfkshel1lsg1smgsfgalyy  
gaqlnpqaiivgkplvniq  
tiaehmr1l1rpeefgta1dvlvsnegdtsqasiqal1nqkfwqt1qkks1sqtvfaiaymqhddyphafqellpv1tahq  
arvmnrsipgrhnddspti  
aswfvnfyini1ledkfgrvqhaekqni  
>tr|Q2YZ51|Q2YZ51\_STAAB  
mlknktfkvtwdyi1sqt1fmygskvsfsngevtfinplmpsglpihewlmlkqfskyksaps1pilrggqhyklhfdfa  
tpagsvyfiiifynkngtk  
lsteivksnsitiqypdeayaykikmnaasts1ifrc1titemthqddleyksmrvtki1gddqygndrinviiaepsda  
yptisndf1kpfghwv1ve  
rwmddnieeni1kqlknd1qsqdtikain1isygksnsvfatyvaqhl1dckvyrtshedd1kdwfkehvpgnhelkdtv

Tsompanidou\_et\_al\_Supplemental\_FASTA\_File

dvyfkeeqdnhlnymr1m  
npvrfldyldvsklnggevnet  
>tr|Q2YZ52|Q2YZ52\_STAAB  
mtiyinifgigwassgveyaqayrakllrrtnqdtkfvlfdiqseniqtltnigfedqeviwlyqyfsdisiapttyt  
lddierdlghdisfrkrng  
kivrlyfngkssfvtyclqneqkdivdraefvinsmlvrkdfysytrifseyyapadnkaklymrqfyndgfiayneyi  
dgdssi fvfedavlynkte  
fiayflqrlnlrrddivildrasdigqavlqhkqgskvgvvi hadhysnmseqhilwnnyeyqfskakyidffitat  
diqnhmvcrgqfeqyqgyrp  
rvyti pvg si da lsyptl srkpyami sasrlanekhidwlvkavivakrqvpeltdiygegsekrtrkiidthraqdy  
irllghvkldeiytdyelf  
lsastsegfgltlmeavgs glmiglnvnygnptfi rdgengylvpfdtdedsvddvvalahaivmyfngpqtphdis  
yevaqqfntqdiilkwetl  
vqevlhd  
>tr|Q2YZ53|Q2YZ53\_STAAB  
miklfdyfdhsrklyesfkaskleedltivlndngflpddvispyqffadnhntenmkprffnqvtpafweikgnns  
atindmgrlrgki fyqsge  
rprivsrvevfdqqrvrfdyyskngikfaqtvydlnrkailkkyntaegkeviyenfvtsd vil dwqksyffpskla  
svlffikql eitehhsdin  
slaipfsvlynlpnsngsdvlvwqeqcdgnvpqnmqlmckgdmkrhcni iipdkneyetm lni adakvsrilqggylyny  
rsnrntkeiviltnsdql  
rnkvlvetl pdkfhiaaitemsdklmqldqyanvhlypsinidrvnelyqlcdiyl dinegneil naveqafdyelli  
lgyrtahhakvtl sehlf  
ehndeitmeskdqlimleslkdqqqfrdallaqkahaheisreqfeqvfkqales  
>tr|Q2YZ54|Q2YZ54\_STAAB  
makyrgkpfqlyvklscstmmaisiiltnilpydaqaasendteiskeilskqdlldkvdkanrqieqlkqlsaskahy  
kaqlneaktalqideiikr  
aneldskdnkgsqielngesdiskldqllkdlnvsskvdggqsgeddlnamkndmsqtattkhgekddkndevmvd  
aledldhlnqqi rkskds  
kdpavsttdnnhevaktssndgshvvl nklflsneenqshsnrltdklqgsdkihamiekmaksnastqhytyhklntl  
qsl dqriantqlpkngksd  
lmsevnktkeriksqrniilee larnndkkyatqsil esi fnkdeadki lkdirdvgktdqqiadqitrhidqlslttsd  
dlltslidqsqksllisq  
ilqtklgkseadklakdwtnkglnsrqivdqllkkrfastgdtssddilkailnakkkkqaietilatrierqakllad  
litkietdqnkifnlvksa  
lngkaddllnlqkrlnqtkkdi dyvlspivnrpsll drlnkngktt dlnklanlmnqgsnll dsipdiptkpektltlg  
kngllsgllnadgnvslp  
kagetikehwlpisvimgv lmiwlsrrnklnka  
>tr|Q2YZ55|Q2YZ55\_STAAB  
msrktallvlmdqegiassvprikniikanqraieaarqhrpivifirlvldkhfddvsssnkvfstikaqgyaiteada  
striledlapledepiisk  
rrfsaftgsylevylrandinhvlvtgvstsgavlstalesvdkdyitvledavgdrsd khdfiieqilsrscdiesv  
eswkssl  
>tr|Q2YZ56|Q2YZ56\_STAAB  
mnesgdnklsksslglvigsmiggafnismdmggkagglaiiigwiitaigmislafvfqnltnerpel dggisyayq  
vgfgdfvgfisawgywfsa  
flgnvayatllmsavgnffpifkngntlpsiivaslllwgvhflilkgvetaafinsivtvaklipillviicmiafnf  
dtfktgffgmtsegvlpfs  
wastmsqvkstmlvtwvfigiegavifssraknkdkvgsatviglisvliiyfltlvlaqgvilqnhisqldspsmav  
lativggwgstlvniglii  
svlgawlgwtllage lpfivakdglfpkwfakenkngapvnallitnilvqlflismlftqsayqfafsl assailypym  
fsafyqvkytlehrqgatt  
kqwtigiasiyaiwliyaaginyllltmllyipallvysivqknnqirlikdyilfmiivlaviglikllmgtinvf  
>tr|Q2YZ57|Q2YZ57\_STAAB  
mpknkiliy11sttlv1ptlvspayadtpqkdtaktshskssnddetskdttskdidkadnntsnqdndkkfkt  
iddstsdnsniidfiykn1  
pqtninglltknkyddnyslttliqnlnfnlndisdyeqprngekstndsnknsansikndtdtqsskqdkadnqkaps  
nntkpstsnkqpnspkptq  
pnqnsqpasddkanqkssskdnqsmdsal dsildqysedakktqkdyasqskdkneksntknpqlptqdelkhksk  
aqsfndvnqkdratslf  
etdpsisnndsgqfnvvdskdtrqfvksiakdahrigqndiyasvmiaqail esdsgrsalakspnhnlfgikgafee  
nsvpfntleadgnqlysin  
agfrkypstkeslkdysdlikngidgnrtiykptwkseadsykdatshlsktyatdpnyakklnsiikhyqltqfdderm  
pdldkyersikdydssde  
fkpfrevsdsmpyphgqctwyvynrmkqfgtsisgldahnwnnraqyrdyqvsvytpkrhaavvfeagqfgadqhyghv  
afvekvnsdgsivisesv  
kg1giishrtinasaaeelsyitgk  
>tr|Q2YZ58|Q2YZ58\_STAAB

Tsompanidou\_et\_al\_Supplemental\_FASTA\_File

mknafklfkmdlkkvaktapwii laglaipsfyawfnlwamwdpygntghikvavvnedkgdtrgkknvngntmvnt  
lknksfdwqfvsrekadh  
eikmgkyfagiypskftheitgtlrkqpqkadvefknqkinavaskltdtgssvvvekaneqfnktvtralleanka  
gltieenvptinkinavy  
sadkalpkindfankivylnnhqadldkyandfrklgnykgdildaqqklnvngaipqlnekaklilalnnympkieka  
lnfaaddvpaqfkinggl  
niasqgidqangqlndakgfvtevrsrvgyqdairraqdlnrrnqqqipqnsaannetsnsapaagngvappsapsgd  
apnnvtqntapnsnnapv  
sttpqstsgkkdggfsfadi tttqvstanentqnitdkdvksmeaal tgsllslnnldtqakaaqdsqalnri sygila  
sdkpsdfresl dnvksgle  
yttqynqqfidt lkeieknevdl skeidkvkvannrineslrlnvqlsna lknngssgtaeatkll dqlskl dssl ssfr  
dyvkkdl nssl vsisqrim  
delnkgqta lsnvqsklntidqvinsgqailkngktridr lqtvlpsieqqyisavknaqanfpkvksdvakaanfvrnd  
lpgleqrlnatatsvkn  
ptllngydaqv gl lknqppakka lsdladfaqnklpdvekd lkkankifkkl dkdavdklidtlknd lkkqagiianp  
inkktvdvfpvdygsgmt  
pftyalsvwwgal mvsll tvdnkhkslesvlttrqvflgkagffimlgmlqalivsvgdllilkagvespvlflitif  
csiifnsivytcvslgnp  
gkaiavllvlqiaggggtfpittpqffqnispypftyaidslretvggivrepeilitkliiltlfgigffvvgllilkp  
vtdplmkrvsekvdqsvnt  
e

>tr|Q2YZ59|Q2YZ59\_STAAB  
malflqpvfkdriwggalkafnydipnettgecwaishpngpntiingpykdmtdqlwsqhrelfdndsrdspflit  
kvldandklsvqvhpdddy  
alkhegelgktecwyildaapgaeiigyvhahnkqtlidmidnehfds lfkripvkpgdfyyvpagtvhaigsgililet  
qssdttyriydydrdq  
gqlrdlhleqskdvie lgnhepnttpitthidthvtqfvdnqyfavykw dihgdlkfnkphayclvtiidgtgtlavsd  
khydiqkgssviltteaed  
ihfvgnisai vshpg

>tr|Q2YZ60|Q2YZ60\_STAAB  
mkivaitscpngiahtymaqekleqvakemgvdikvetqggvgaenvl ttdieeadgviaadkqvdlsrfvgrline  
nvregihnprgliqriinq  
dapiyqsetnyhskdrksgskiqmvyqhlmgvsvfmpfivvglliaialtlggetttkglvipddsfwksienigsl  
afkfmvpi lagyiavsiad  
kpglvpmmiggai aadgsfygsdagagflggivagflagyia kwidikvpkamapimpiiipiissvvvglififlig  
apisnifealtwlksmqg  
aniii lamigami afdmggpvnkvaflfgsaliaegnyavmgmvavavctppiglglatfvqkykfnhseremgkasft  
mglfgi tegai pfaaqdp  
riipaniigami asviaaigvgdrvahggpivavlggidhilwfi favivgslvtmitvlllkrntpviavdapaqhtq  
lhdtnitqhdtevdndnt  
akshpnpshvfdqqtmiitdydmsrneaidmlhklkicryvehtshlknaileremesttaigmnvaiphaksdvk  
qpivavmknnhgvkwseld  
gslpqli fliavpnnsqdtlklilqr lskalmndetrqslinanstteiy nllmki

>tr|Q2YZ61|Q2YZ61\_STAAB  
mldrhlkl lqffiknpskhissneiaehvnvsnrtrndihvinsnfmddiivsiskgyqlntsqtletiterythiq  
sykeklllsmayqlmhk  
sqtllqlegdyllsktv lndyfvriqqwcqkfni altikkkqgividgdnditnaiihlnqlssghvhvedlilnelpd  
shqrmishiqetlqqhsi  
ettdiqiqgllihlilirkkqslsel dtnhdskl ishscikqinerlgydlnekvinmfsffigyhfknldigierif  
iqsyidrlielmqqhihvp  
fnedsilqqnlynhfskaylritqniylnnp lvieikklypfvntlfeaidklaidtdiemsedeiafltihfqaai er  
rtktqlnvviacyyglgvs  
nfl etkinnlsee lsvintiklenithyfdndvllitthdipkqtl nilpkhl tiikvap lfseddrhki rhvvkqkqn  
pvqahhmmntvnflvnte  
qkprhtvqifeaqkilqahhaivegyiesalerekssstyignfmaiphgdpekvlqshvli frtkdvfpwrqhdvklv  
fflaishkdkaftkqmmql  
ianl dddsvnhlcs lddhs lkkql feylqe

>tr|Q2YZ62|Q2YZ62\_STAAB  
mkl lli tivii vligtlgfaiyaa inhstsssnqeqenkathkktdeendqqdsadkadknqngnvtndnqpslp  
snvpnnhstapsntqpaq  
kdsnsknna hgggsqstnnqnnqqntppanksntntpskqtpqvqspkn

>tr|Q2YZ64|Q2YZ64\_STAAB  
mrkfsryaftsmaavtllstlspaal aidsnnkpandsikfevtqksdavkal kelpsenvkniyqdyavtdvktddkg  
fthyt lqpsvdgvhpadke  
vkvhadksgkvvl ingtdakvkptnkvt lskddaadka fkvk idknkakan lkdkvikenkveidgdsnkyyvynveli  
vtpeishkwkidaqtge  
ilekmlvkeaaetgkgvlgdtkdininsidggfsl edlthqgkl safsfndqtgqatlitnedenfvkdeqragvda  
nyyakqtydykdtfgres

Tsompanidou\_et\_al\_Supplemental\_FASTA\_File

ydnqgspivslthvnnnyggqdnrnnawigdkmiygdgdgrtfts lsgandvvahe lthgvtqetanleykdqsgalnes  
fsdvfgyfvddedflmged  
vytpgkegdalrsmnspeqfgqpahmkdyvftekdnggvhtnsgipnkaaynviqai gkskseqiyyralteyltsnsnf  
kdckdalyqaakdlydeqt  
aeqvyeawnevgve  
>tr|Q2YZ67|Q2YZ67\_STAAB  
mteiqkpydlkgrsllkesdftkvefeglidfaitlkeykknngikhhy lsgkniallfeknstrtraaftvasidlgahp  
eflgkndiqlgkkesvedt  
akvlgrmfdgiefrgfsqqavedlakfsgvpvwngltdwhptqmladfmtikenfgyleginltyvgdgrnniahs lmv  
agamlgvnrictpkslnp  
keayvdiakekasqyggsvmidnaieaventdaiytdvwsmsgeese feqrinllkdyqvnqmqmfdltgkdstiflhc l  
pafhdntlygqeiyeqy  
laemevtdqif rsehskvfdqaenrmhtikavmaat lgs  
>tr|Q2YZ68|Q2YZ68\_STAAB  
mkyfipawyddqrwwqdtvpyyqtqnktefddmis lmgmhlennldyqlivlnhapnirtflhrydlyetkywsvfdei  
qgfshhapqainyhhlkwp  
ddvefvhtpyllkcvtseqtytni yfsqegysi wfeeferdqlqrryifddrgylsairyfdnqgeasyqeyltingdcv  
lyenfkngrvtvskryqhm  
yqteynnmaqli eekfqami aqihednhvivasdarhnrqianhipakllsysffknrnetvsdeeyqsivknahliv  
dsvqlerdli rhqekyqre  
ntmiritpfe trqspnissqlmetfigvwidgmsdadlqqmmqrlvdyiaqednyrlilltrhqn dipmw lreciasvne  
eyqakqnadvnvsalmtpe  
dqddiia vktihaehdvvealrtlr lvidmskepdl y lqisaisagipqingqtdyvsvdyngriintvdelldalnyy  
lfylknwnyayayslk lid  
ayaskniinq ldeliege dat  
>tr|Q2YZ72|Q2YZ72\_STAAB  
mtnykidfskglvpailqdnqtkqvlmlgymnqea fdkti edgvvcfysrskqrlwtkgetsghtqrvkdiyvdcdndti  
lidvipngptchtgsqscf  
ttevpfsvqtlaqtvd saqsnneksytkylltegiekitkkygeea fevvi eaikgdka fvfsevadelyhl fvlmhal  
gvdfseieaelarrhhkrn  
nfkgerqnieqw  
>tr|Q2YZ73|Q2YZ73\_STAAB  
mknlfneyffttsqataliifslpmtdlftknfllymllfiviigstffiere lskkyslqekakklclsl lpinii vvf  
iffvfil  
>tr|Q2YZ74|Q2YZ74\_STAAB  
mmksqnkysirkfsvgassiliatllflsggqaqatekqvmngnsqedtvtasigdqqtrenanyqrengvdeqqhten  
ltnlhdktiseanhrkt  
ddlnkdqllkddkkssl nknqirdttknnanpsdvnqgleqaindgkqskvasqqskqadnsqdsnannllpsqsr tk  
ealplnksnqtsqreivnk  
teiekvepqnnqandkitnynfnneqevkpqkdektlsvsdlnknqkspveptkdndknglnllkssavatlpnkgtk  
el takakgdqmnkvakqgq  
yknqdpivlvhgfnqftddinpsvlahywggnkmnir qdleengykayeasi safgsnydravelyyyikggrvdygaah  
aakygherygktyegiykd  
wkpqkvhlvghsmggqti rqllellrngnreeieyqkkhggeisplfkgndnmissittlgtphngthasdlagneal  
vrqjvfdigkmfgnknsrv  
dfglaqwgllkqkpnesyidyvrkvqsnlwkskdngfydltregatdlnrktslnpnivykytytgeathka lnsdrqkad  
lnmffpfvitgnligkate  
kewrendglvsvissqhpfnqaytnatdkiqkgiwqvtptkhdwhdvdvfgqdssdtvrtreelqdfwhhladdlvktek  
vtdtkqa  
>tr|Q2YZ75|Q2YZ75\_STAAB  
mrvgvwgpnieaggksaynnvhleymynnikhavkrqsqi qtdfahrvfl t  
>tr|Q2YZ76|Q2YZ76\_STAAB  
mkkirlelylraicaiiithlltqitlkenleggs l vlqfyirnivifgtpcfiilsqllttlnyqkvtyryl ttr  
vkiyipylmg lfy syse  
slltdssfnkqfienvllgwygyfivvimqffilsy iifkinynlfnskillllsfilqqs flyyftntafhd tvlhy  
yplsentii fwi fyfflg  
aymgnyervlnflerylvimivlavatyvfialangdywnvtsfsysltpynsimfivilgicthfktmlfntiqmis  
afsffiyllhpiildslfa  
ytnifedntmvflaisllfilglcigvgmilrefyifr fiigkqpyklninay  
>tr|Q2YZ77|Q2YZ77\_STAAB  
mkyrkliiivlsilii lpvstldghhianaddppkklkykensa lalnyhrvrkanflnnflyffssskeiknysvsqs  
qfesqikwlkshdakfltl  
keflyykkkgkfpkrsvwinfdmdeti yenaypilkykipatgf iitghvgeenfhnl dmiskkelkemyktglwefe  
ththdlnhlsknksklmk  
aseatiikdlnksekyltknfnkksqktiaypyglmnddklpvikkaglykygfsleekavtpnsndyyiprilisddafeh  
likrwdgfhkd  
>tr|Q2YZ78|Q2YZ78\_STAAB  
mvtqhgqaqteqipnakiakyvretaliaiscvfwiyclvllvyigti feihdesintirvalnienteildifetmg

Tsompanidou\_et\_al\_Supplemental\_FASTA\_File

ifaiiifvfftisiliqkw  
qrgres  
>tr|Q2YZ79|Q2YZ79\_STAAB  
mqffnflfypvfmsiywivgsiyfyftreiryslnkkpdinvdelegitfllacynesetedtlnsvlalkyekkeii  
iindgssdntaeliykike  
nndfi fvd1qenrgkana1nqgikqasydyvmcl dadtivdqapyymienfkhdpklgavtgnprirnkssilgkiqti  
eyasligcikshtlagav  
ntisgvft1fkksavvdvgywdtdmi tediavswklhlrgyrikyeplamcwm1vpetl gglwkqrvrwaqgghevllrd  
ffstmktkrfplyilmfeq  
iisilwvyivllylgy1fitanfl dytfmtyfsifl1ssftmtfinviqftval fidsryekknmaglifvswyptvyw  
iinaavvlvafpkalkrkk  
ggyatwsspdrngtqr  
>tr|Q2YZ80|Q2YZ80\_STAAB  
mkdkiiidnaitlfsekgydgtt1ddiaksvnikkaslyyhfdskksiyeqsvkccfdylnniimmnqnksnysidal yqf  
lfefidieeryi rmyvq1  
sntpeefsgniyqqiqdlnqslskeiakfydeskimtkedfqn1l1l1fleswylkasfsqkfgameesksqfkdevys1  
lniflkk  
>tr|Q2YZ82|Q2YZ82\_STAAB  
mtnkrrstsslivheqpkspisekfrgirsnimfanpdsavqsivitseatgagkstiaanlavayaqagyktlivdgm  
rkptqhyifnlpnneglss  
11lnwstyqdsiisteiqd1dvltsgpipnpse1itsrafanlydt1lmnyfviidtpvntvtdaqlf skftgnvvy  
vvnennkdevkkgkeli  
eatgak1lgv1nrmpkdkasayyaygtdes  
>tr|Q2YZ83|Q2YZ83\_STAAB  
midihhilvdiddgpkkieksiallkakdegvtsivatah1hprydntfqqvlvklaelrthpevqaldik1fpgqe  
iritdsilqgl1dngsiqgi  
nrskylliefptgevphytkqlf feiqsrgyipiiahpernrsiaknpeilyelvangalsqltssslvggfgkniqkls  
lqfiecnlahvasdahsc  
dqrpf1mqel fhnhk1kkysndieal1rnassvindnfvyldrptkpgkvksflkwf  
>tr|Q2YZ84|Q2YZ84\_STAAB  
mvlrkvimqdl dqiialenigfspeeaatpealk1rieiqetfivaekndevigyingpvikeryisddl fknvptnns  
eggyisvlg1lvapnyqgg  
giagr1lnyfenlaknghrhgv1t cres1isfyekygyrnegvseschggikwynlvknikkddev  
>tr|Q2YZ85|Q2YZ85\_STAAB  
mavvyvaggclwgveaffttipgi ihteagrangrsk1dspydgyaevklhfddrmltitdimnylfei idpysvnrq  
gndigekeyrtglyscvddh  
1iearqfierrkdrdq1avevlp1snyiksaeehqhlekypedmhmchiskd1lnkyk  
>tr|Q2YZ86|Q2YZ86\_STAAB  
mhtfdaqsltarenyk1l1gisiipriafvt1nqdasvnaapfsffnivnnhppmiaiavqraggkrkdal niertgd  
fvvhitdednvqdinetaa  
p1aygdse1srte1s11tsttiktpgikdakmrfeck1sqm11lgdvl dgadliigeivtyhiddsiyegdfkinphalq  
avsrlagndyaklgg1fti  
rrpek  
>tr|Q2YZ87|Q2YZ87\_STAAB  
milryatn1klakelygaskpk1qedkgmielfehtfglqkelvkyvgiaeattaalysasfinknisrlas1stigils  
vaaykhfeaghgkkgqaha  
1d11glat1s11dtfscnk  
>tr|Q2YZ88|Q2YZ88\_STAAB  
mmkkndh1td1daie1sswnynsk1vagkna11sds11rdikvlssnakddadml etel havinamsqnegksvdalkn  
stas1kn1tk1keq1dkt  
th  
>tr|Q2YZ89|Q2YZ89\_STAAB  
mrkimr11l1ctsiivsgcsfipknqtkdipktvsvkdydgqyigehkkrnevflkhhkdeaikkykdyvkdtdfydckin  
lveaytnksgfseksktgd  
1vvvgtvnydvpfqr1ifvesngvaittftpghvnetssaavaammykryepeierar1kfksevekngyytmneklqk  
kqefngvtkqf1nfntdsi  
ddldkfkkefkpvmh1kgdafnqq1qn1inkypqi qknmesefiayydkgenretvanyvwn1qkttndtmklypgnksi  
ifykdkvsasq1dehkr1q  
sdsqeisisggendekk  
>tr|Q2YZ90|Q2YZ90\_STAAB  
mggdvnt1nift1glgpw1tsmi1lm1isyrnmdkymkqtslekhykerilt1l1sviqsyfviheyvskqrvhqdniyl  
t1l1lvtgtm11vwladkn  
srygiagpmpivmvs1iiksmmhqkmeyidashiviall1ilviit1f11lfiellevripyid1mnvsatnmksylswkv  
npagsit1mms1safv1k  
sgihfilsifnks1sddmpm1kfdspvgisvylviqm11gyflsrflintkqkskdf1ksgnyfsgvkpgkdterylnyq  
arrvcwfgsalvtiigip  
lyft1fvph1sieiyfsvq1ivlvyisiniaetirtylyfdkyksflnyq  
>tr|Q2YZ92|Q2YZ92\_STAAB

Tsompanidou\_et\_al\_Supplemental\_FASTA\_File

mhayfqvs1rhksmfyalqsyigsgapiqrwnpfnfkqcelgrynemnfvkisflshslmnmci  
>tr|Q2YZ93|Q2YZ93\_STAAB  
m1mniaklenylqidssrynpsiealnnyatrfrm1tvpfenidvqnskpisinidalfnkivrdrkggfcye1ntffkt  
ylqqkgfnpe1msatihtp  
gggrs1ngshaslvvs1ndvfvytdvgfgd1plhaipitssehtqpitdisgtfrafinedkdiyfvqkfendhwhtky  
eaefkakciadfdknieyn  
qthpdsifvqh11itmpqsfgratmsenh1t1tkakdgiseklavtkdnykhf1ekyfg1nvtinriensdsk  
>tr|Q2YZ95|Q2YZ95\_STAAB  
mt1pkigkpatralnsqgiyt1eavsqytksslmemhgvpgkaisileqalfqhqlhfktevhs1pfl1tgdvscnhap  
krqgm1dfivataaldiel  
1rs1vttefiwsvpgrfdiygpqil1qe1shynqvas1nihssi1thgclgsmhgieilktgkeihfahffefenhkkda  
k1skvtsyivvg  
>tr|Q2YZ96|Q2YZ96\_STAAB  
mnteaykkgif1alsayilwgilpiywqfvdaigafeilafriifsvifmifilavgqkqrnafqrdmnl1drpiqllai  
vvygyvit1nwg1fiwv1t  
nghv1qts1gyyinplvs1lla1f1kerfnkfewlailf1figvlymt1kigefpivsiilalsfgtyg1lkkvvhida  
issitiecivtapag1iyv  
iy1wqhqmsfg1nmssfw1lfsgaitaip1ilfsagakripl1sligfiqyvgptimfv1g1fvfkeafsidq1itfifi  
wtg1v1yls1sqyik1kkhp  
vakt1  
>tr|Q2YZ97|Q2YZ97\_STAAB  
mentvkyrkf1ilpi1vg1liwaltpfkpdavdptawymfaifvatiacitqmpigavsiigftimvlvgivdmktava  
fgnnsiwl1iamaffisrg  
fvktglgrrialhfvl1fgkkt1glaysivgvd1ilapatpsntaraggimfpiikslsesfgskpkdgsarkmgaf1vf  
tefqgn1itaamfltamag  
nplagnlassisnvh1twmnwflaalvp1glvs1livvpfi1ykiyptvketpnakswaenelatmgkialaekfmigifv  
ial1twivgsfihidat1t  
afia1al111tgvt1wqdi1netgawnt1vwfsv1v1madq1n1kgfipw1sksiats1gg1swpiv1vil1ilfyfyshy  
1fasstahisamyaal1gv  
aiaagapplfsal1m1gffgn1lastthyssgpapil1fssgyvtqkrw1tmn1ilgfyfi1wig1gslwmkvigif  
>tr|Q2YZ98|Q2YZ98\_STAAB  
mcl1tvnnt1tdffic1kehffkfnkh1lyqfltasrkii1ilmis1i  
>tr|Q2YZ99|Q2YZ99\_STAAB  
mtktvfnvidmg1gy1vnvydawkvekv1ddyhkpfsntihwqfghv1tifesa1avaskenid1niyrpl1fgngsspd  
ewkdeipsigt1leqlt1  
perarn1tedd1aie1kqpi1vgcnn1ee1lv1naihipl1hagkieemsr1lkn1k  
>tr|Q2YZA0|Q2YZA0\_STAAB  
mkmsvsnqimkg1ldgail1gliaaqetygyeimtk1knqefpeisegsiypv1mr1nkkgyvdttikksnggprrkyy  
itesgl1kelkvfkskwqal  
nkgmin1fggendvk  
>tr|Q2YZA1|Q2YZA1\_STAAB  
m1skqsqdf1ek1rvel1frgkteevee1leeledh1tmaeknnedtssi1ntpiksmadq1speis1ttglykyitly  
fafalavi1ipmfl1d1gtf  
dvtiaf1llymasiv1lgvigm1ilrnt1lvrfgdqkityvinvtygiiv1flwmil1ggl1iikkyp1isffelsdkqsfiig  
itf1il1vigtc1likqkiy  
aliv1vis1psliariasifskpdtfn1svsili1niafi1ytfvnfrk1kked  
>tr|Q2YZA8|Q2YZA8\_STAAB  
mtepi1sfkdfs1fqyhsqatpt1qninvdiypgekv1vvgasgskstfancing1lipfktrgnitgelyinnqdatvgc  
1hersnvgtv1lqtdtdgqf  
ig1taaedmaf1lenncveqddmkknvsywaekvgmieh1nhrpqd1sggqkqrvs1ggil1hrtpil1ildeplan1dpa  
tghetmr1l1nniheetkst  
mi1vvehr1ees1ddtfdrv1l1fdkgkiianttpsd1l1kssk1keagireplycta1kyaevdvesidn1lan1revcmseh  
vkfkvkkiwdktssnndnk  
yksep1le1nev1cvqysdysnsv1nnvq1nvyrrermsivghngagk1stlakaicg1fditg1niqf1cnkgfnq1sisers  
efvgyvmqnpnhmi1sekmi  
ydeva1gl1rargmkesdiki1rvenv1kicg1yaf1rnwpiva1sygqkkrvtiasv1v1npei1il1deptagqdfyhynei  
msf1ie1nrqgk1ti1imith  
dmh1l1seyssrtv1l1skgqvaadt1tpv1v1l1ndkktceias1rqts1femaeyig1sepqk1vq1finhdkvrrq  
>tr|Q2YZA9|Q2YZA9\_STAAB  
mnqyntig1fhp1gnsr1hq1natvkl1fl1vvs1samvtydtry1l1isassil1fkyahiewkqrvfvkfil1fft1ilni  
iay1ifdpeygvkiynqrt  
elingigrft1tsqel1fy1fn1ilkyistvplal1fl1ttnpshfaas1nq1lgvnykisyavslalryipdiqetyfnis  
qaqgargydnsk1kakftsr  
vkgikriv1pl1ifssierid1stamel1rqfgqykr1rtwyvkkq1kkddyv1l1cl1t1l1ml1vvt1l1ffsnnsryfnpy  
>tr|Q2YZB0|Q2YZB0\_STAAB  
mvnter1n1mip1sssh1lielynicshp1qaniytpkg1hnsk1ldtqrwiekwrnhwqyqfyfv1vkkidc1svigicgye  
yr1kqetv1n1fyk1lhps  
fegqgyaceaitatnfvnyidqetvkvirtknknqrsinlaer1nfrkrdtmd1di1sqgdivfyk

Tsompanidou\_et\_al\_Supplemental\_FASTA\_File

>tr|Q2YZB1|Q2YZB1\_STAAB  
mhkkylllfflllsvallscsqnekaqnksvnpneyakhkskmdewtyhgqvyhvfyhplidtpkvaftgdthqak  
gnndwmitvsefkkslne  
yknyyivnphdvydlsshhvakkiklpgkklpilisiddmnyssymrhgyadrldknkhvsettdskghatysd  
dndivpilnkfvkehpdfs  
lgekgvvaltgyegvlgyrtneltskdytknkkaeevvrnkrdgwsfashsyghinfektsldgikrdtkrwkneve  
pivgktdmfvfphgaqdrh  
tqaydyldaeafkfiagvgpnnftdisatnvyqdrvaiddglnlfefkyklkpfnpenvyskqdrqffkgnrdyee  
>tr|Q2YZB5|Q2YZB5\_STAAB  
mekgnnggikwsslimgvllmlavviftfpiefyaitwliglflvlingviqivycrkakalvvgngnwlifmgivdilf  
glivifnvgasseffiyf  
afwfi fssia glftfsgsgslklisvifnllgivfgvillfnplmgivfistmiaiafvfvgviyvvdala  
>tr|Q2YZC1|Q2YZC1\_STAAB  
mkkpfsklfglnkddiighieedrnsvesiqierivpnryqprqvfeqnkikelaesihghllqpivvrpieedmf  
iagerrfraislnlppa  
dviirdmdeetavvalieniqrenlsveeaeaykllleigdttselakslgksqsfianklrllklapkvllrreg  
kiterharavlslnsege  
alieqviaqklnvkqtedrvrqtgpekvkaqnlrfaqdvtdardevgksiqaiqqtglhvehkdkdhedyeyikiri  
ykr  
>tr|Q2YZC2|Q2YZC2\_STAAB  
mfsigsailhfviggiavalasiadkvvgklggiaatmpavflaialaldhrgtqlvemsmnlstgaivgilscilt  
vfltslyinhkgyrkgaif  
tvvcwfvislaifsrhl  
>tr|Q2YZC4|Q2YZC4\_STAAB  
mnlskqikkyrerdgysqeylaeklyvsrqsiswendkslpdihnllmmcelfnvtlddlvgktpfvpdikvqrslnl  
wayvmlifmtlaailtgp  
ivywnwawgitymviygygyasmkiedfkvhkmdnydrivafmgkdpsevqttkarntmthalsiisvvgtlslif  
lsvylankf1  
>tr|Q2YZC6|Q2YZC6\_STAAB  
mkfrelvkqsyedlknltvtwynvialvmivivlsvttpiigipvgllggaylkrreekgk  
>tr|Q2YZC7|Q2YZC7\_STAAB  
mtfnhivfknlrqnlkhyamylfslffsivlyfsfttlqftkgvnnddsmaiikkgalvgsiflfiiviflmyanhlv  
krtrtrefalfglgltrqn  
ilkmlaleqmivflitgvvgvlcgiagaqlllsivsklmslslsihfepmalvtilmliayililfqsslflkrrs  
ilsmmkdsiktvtakvt  
taevisgvlgiamia lgyymatemfgtfkaltmamtspfiilfltvvgaylffrsvslifkflkkskngrvsitdvft  
ssimyrmkknamsltia  
isavtvtvlcfaalsksntdqltsmapnefnvasqdaqfesksqhitftknyyetitvnnvkdqvitlengsdsg  
rtnsilsantkltgnnai  
tntkslpnvinillnkdlvvgktnetfrvtqedkgkvypnlfnspvvevspekyqqktqnnvhtfygydikqtsqk  
ekaqaiakqfgdkvitydd  
mkkevdatnglilfvtsflglafvaagciiyikqmdetedelsnfrilkrigfthtdmlkglllkitfnfglplliai  
havfaaiafmlmgnisfm  
pviiivvytliiyafaliafvhsnklikkti  
>tr|Q2YZC8|Q2YZC8\_STAAB  
mtilsvqhvsktygkktfqalkdinfdiqgefvaimgpsgsgkttllnvlssidqissgsviangqelnlnqkalak  
frkeslgfifqdsilptl  
tvkenimlp1svqkmskatmeenykaittalgiydlgnkypselsggqqrtaaraafvhkppiiifadeptgaldsksan  
dl1qrleemknsfdttivm  
vthdpvaasfaervimlkdgqihqtlyqegrskqafyedi vhlqsvlggvsndi  
>tr|Q52K19|Q52K19\_STAAC  
mknsisqnsfldkeignfsnllqytilssflksintieerhsnayqkgtlfrsvsalythqhn  
>tr|Q52K22|Q52K22\_STAAC  
mkmkdsniisfiysrhdrilyvnlvgnrfknnismtkatsnigrf  
>tr|Q52K23|Q52K23\_STAAC  
mkaadfsvtannfilvvdaghrtsnikalri  
>tr|Q52K24|Q52K24\_STAAC  
mskayrlynniqddtkqpmahavgcffrcvchgqhdvqip1qawe  
>tr|Q52K28|Q52K28\_STAAC  
mltnrltsvnyvkkrliqniqri1skeglygemq  
>tr|Q52K29|Q52K29\_STAAC  
mhryfynekrysc1nknicafl1lenkiliaivnfcnvkqg  
>tr|Q52K30|Q52K30\_STAAC  
msek1qvkgqfngvtrqylnfrtdsiddlkdffkfkpvmh1kgdafnqqlslinkypqi1qnmksefiayydkeknre  
tvknyawnlqksindimqs  
ypstkfvqfykddvpsmvdgnr1ksdtnvisieggkydenk  
>tr|Q52K34|Q52K34\_STAAC  
mmymli1kicvqsvyigtiddk1ssdaqrrieherg



Tsompanidou\_et\_al\_Supplemental\_FASTA\_File

>tr|Q52K36|Q52K36\_STAAC  
milimykkyksnrhpyktsep1tkkhhkik1n1k  
>tr|Q52K37|Q52K37\_STAAC  
miemsrpkvkmns1lklyfdrn1ltpqk1lny1kvdetf1nhlagin1k1fkdyvnenreynitnlyk  
>tr|Q52K38|Q52K38\_STAAC  
mpknviyviresveafqk1frkvsikna1snkrccsci  
>tr|Q52K40|Q52K40\_STAAC  
mssansnaavplavtkfrsfsviiqqiya1tt1kktis1lss  
>tr|Q52K41|Q52K41\_STAAC  
meeglkniktwinhntiidtdkfvn1lmnydvie1sedkc  
>tr|Q52K43|Q52K43\_STAAC  
mskhvmnkeginnyiiinf1tkqqkps1slhksd1dgviv  
>tr|Q52K44|Q52K44\_STAAC  
mrifnkvhel1fnkvtfidriyniidesrcn  
>tr|Q52K45|Q52K45\_STAAC  
ms1ctqqk1nhelqakvavivkidgkqsp1f1lvvy  
>tr|Q52K46|Q52K46\_STAAC  
mrfyftn1krkhqaedrrk1likqkhqtkvr  
>tr|Q52K48|Q52K48\_STAAC  
maehvsedkafprleerhqvirayvmsnytdhqliettnraislyman  
>tr|Q52K49|Q52K49\_STAAC  
mqqyigs1lqel1fnii1eshkist1fnysk  
>tr|Q52K51|Q52K51\_STAAC  
mspfn1lirgsyavgalasnciplspfn1lirgsfavgalatnciplspfn1lirgsfavgalatnyvqfnriv  
>tr|Q52K52|Q52K52\_STAAC  
mm1q1f1mkia1ndfendksv1fi1knhfyemcv1sn  
>tr|Q52K56|Q52K56\_STAAC  
mfdenm1vkn1ddyfyigicneypdqdry1kqry1ihkly  
>tr|Q52K57|Q52K57\_STAAC  
mgsd1ivkvhicfvvktasgycylnkreaqaa  
>tr|Q52K61|Q52K61\_STAAC  
m1svksksknf1ykyki1scm1lydentfn1iksfskntp1linntyly1pkk  
>tr|Q52K62|Q52K62\_STAAC  
m1tsf1kffsikvidlgkq1pigniyhvtmg  
>tr|Q52K65|Q52K65\_STAAC  
mgfh1ttfvkkwiwssfgqvnv1ciyffkagedhfi  
>tr|Q52K66|Q52K66\_STAAC  
mhfl1intskt1miliv1ev1iilfdy1fdtycishmktaf1l1cymtksrek  
>tr|Q52K67|Q52K67\_STAAC  
midhemitsfehppinyin1vpfch1iitnsqil1kien1vnlarf  
>tr|Q52K70|Q52K70\_STAAC  
mkm1kpfakin1q1ntkellgepndmaemncsdpyd1iwlvpt  
>tr|Q52K72|Q52K72\_STAAC  
mksf1ysvahfipkdvik1naf1l1fincq1imkkgsqgyes  
>tr|Q52K76|Q52K76\_STAAC  
mpf1slav1litteiafpteifekyqrtlqikf  
>tr|Q52K77|Q52K77\_STAAC  
mikvsm1fd1ldhfkiarfscsatvcglwkiyh1l1l1t  
>tr|Q52K78|Q52K78\_STAAC  
mqgfkekhe1kka1lcqig1mrsisevkq1nia  
>tr|Q5HCI8|Q5HCI8\_STAAC  
mkffvggfav1l1syivsv1pwkefggi1fatfpav1l1vsmfitgmqygdkvavhvsrgavfgmtgvlvcilvtwmm1hmt  
hml1isi1vvgf1swf1sav  
cifeavefiaqkr1lekshwkagsnsk  
>tr|Q5HCI9|Q5HCI9\_STAAC  
mnl1skq1kkyrerdgysqeylaeklyvsrqsisnwendks1pdih1l1mmcel1fnvt1dd1lvkgtipfvpdikaqrs1n1  
wtyvm1ifmt1aai1mgp1  
vywnwtwgtvai1lgigfyasmkied1kkvhkmdnydriva1fmngkdpsevqttkarntmtnalsiisvigils1iif  
1svylankf1  
>tr|Q5HCJ3|Q5HCJ3\_STAAC  
miinletqqihfd1leheipyfqapeknrir1didv1nkkqisni1nvi1fnnqsktkctf1seylypvkfrektrigrffn  
itnwee1hstdekyviat  
ikniknd1idys1yikkgl1vepfivfyngeni1fyisnavidi1svskdt1dyiksefndhcasy  
>tr|Q5HCJ4|Q5HCJ4\_STAAC  
m1nsicisyrkhkefgh1egdtivgrrhgsai1t1vervskmi1t1rpl1grkatdiena1hsmfss1pshifksitfdc  
gk1efsnwkt1cnchdisif  
fadpgt1psqrg1nehngi1rrsg1dke1dfn1vtd1dhi1sva1qkinhrprks1gyrtp1levfmsfieddk1lvq1n1ti  
>tr|Q5HCK1|Q5HCK1\_STAAC

Tsompanidou\_et\_al\_Supplemental\_FASTA\_File

mtlpkigkpatralnsggiytleavsqytksslmemhgvpgkaisileqalfqhqlhfktevqsslpfkltgdvscnhap  
krqqmidfiyvtaaldiel  
lrslvttfeiwsvpgrfdiypqiliquelnshynqvaslnihssithgclgsmhgieilktgkeihfahffefenhkkda  
klskvtsyivvg  
>tr|Q5HCM8|Q5HCM8\_STAAC  
mtadffqlligs1frilke1fk  
>tr|Q5HCN6|Q5HCN6\_STAAC  
mv1rkvimqdlldqialenigfspeeaatrealklrieqiqetfivaekndevigyingpvikeryisddlfnvstnns  
eggyisvlg1lvvapnyqqg  
giagr1lnyfetlaknhhrhgvlttcrestisfyekygyrnegvseschggikwynlvknikkddev  
>tr|Q5HCP2|Q5HCP2\_STAAC  
mkm1kqyvfvfi1lkn1le1hiyytrfiakilv11  
>tr|Q5HCQ1|Q5HCQ1\_STAAC  
makyrgkpfqlyvk1scstmmatsiiltnilpydaqaasekdteitkeilskqd1ldkvdkairqieqlkqlsasseky  
kaqlneaktasqideiikr  
aneldskdnksshtemnggsdidsk1dq1ldk1nevssnvdrqgqsgeddlnamkndmsqtattkhgekddkndeamvnk  
aledldh1nqqihkskdas  
kdtse dpavsttdnnhevaktpnndgshv1nkflsneenqshsnr1tdklqgsdkinhamieklaksnastqhytyhk  
1nt1qsl dqriantq1pkn  
qksdlmsevntkeriksqrniileelartddkkyatqsillesi fnkdeavkilkdirvdgktdqqiadqitrhidqls1  
ttsddl1tslidqsqks1  
lisqilqt1gkaeadklakdwtnkg1snrqivdq1kkhfastgdtssddilka1lnnakdkkqaietilatrierqkak  
1ladlitki etdqnkifn1  
vksalngkadd1ln1qkr1nqtckdi dyilspivnrps1ldr1nkngktt1nk1lan1mnqgsd1ldsipdiptpkpekt  
1tlgkng1lsg1lnadgn  
vs1pkagetikehw1p1svivgamv1miw1srrnk1knka  
>tr|Q5HCQ3|Q5HCQ3\_STAAC  
mpknkiliy1l1st1v1pt1vsptayadtpqkdtakttsdskksnddetskdttskd1dkadknntsnqdnndkkfkt  
iddstsdnsniidfiykn1  
pqtning1l1tknyddnys1ttliqn1fn1nsdisdyeqprngekstndsnknsdnsikndtdtqsskqdkadnqkaps  
nntkpstsnkqpsnkptq  
pnqsnqpasddkanqkskdnqmsdsaldis1ldqysedakktqkdyasqskdkneksntknq1lptqdelkhksk  
aqsfndvngkdrats1f  
etdps1snndsgqfnvvdskdtrqfvksiakdahrigqndiyasvmiaqailesdsgrsalakspnhn1fgikgafeg  
nsvfnt1leadgn1lysin  
agfrkypstkes1kdysd1kngidgnrtiykptwkseadykdatsh1sktyatdpnyakk1nsiikhyq1tqfdderm  
p1dkyersikdyddsde  
fkpfrevsdsmpyphgqctwyvynrmkqfgts1sgd1gdahnwmpnraqyrdyqvsh1pkrhaavvfeagqfgadqhyghv  
afvekvnsdgsivisesnv  
kg1gi1shrtinaaaee1syitgk  
>tr|Q5HCQ6|Q5HCQ6\_STAAC  
mkivaitscpngiahtymaqek1eqvakemgvdikvetqggvgvaenv1ttqdieeadgviaadkqvdl1srfvgkrl1ne  
nvregihnrp1g1riinq  
dapiyqsetnyhskdrksgskiqmvyqhl1mngvsfmpfivvg1liaial1l1ggettskglvipddsfwksienigs1  
afkfmvpilagyiasiad  
kpg1vp1m1ggaiaadgsfygsdagagf1ggivagf1lagyiakwid1kvpkamapimp1iiipi1ssvvvg1lififlig  
ap1sn1fealt1w1ksmqg  
ani1ilami1gami1afdm1gppvkvaf1fgsaliaegnyavmgmavavctppig1glatfvqykfnhseremgkasft  
mg1fgitegaipfaagdpl  
ri1pani1gami1asviaa1ggvgdrvahggpivav1ggi1dhv1wfi1favivgs1vtmtt1l1l1krntpviavdapahtq  
1hdtditqhdtevdndvt  
akhsh1nkpsvfdqgtmi1tdhdmsrneaidm1ihk1kicryvehtsh1knaileremesttaigmvnaiphaksdvk  
qpivavmkn1hgvkwdsl1d  
gs1lpq1l1fliavp1nnsq1dth1k1l1qr1ska1mndetrqsl1inanstteiy1n1lmki  
>tr|Q5HCR8|Q5HCR8\_STAAC  
mayis1nyhsptigmhqn1l1v1lpedqsffnsdttvkl1kt1m1l1hg1ssdetty1mrytsieryanehklavimpnv1dhs  
ayanmayghsyydy1levy  
dyvhqi1fp1skkrd1nfi1aghsmggygtikfal1tqgdkfakavpl1savfeaqn1md1ewndfskeai1ign1ssvkgtehd  
py1l1dkavaedkq1pk1l1  
imc1gkqdf1yqdn1ldfi1dy1srinvpyqfedgpgdhdyaywdqaikraitw1m1vnd  
>tr|Q5HCS2|Q5HCS2\_STAAC  
mi1vm1sp1l1i1ffiv1s1leerkr1tkkkq1lekekant1nqntndtessnqeps1qqdkeqkdnkg  
>tr|Q5HCS5|Q5HCS5\_STAAC  
mham11evkhvkvkygk1natta1nqmn1svgagefvaimgesgsgkst1ln1iasfdg1tegd1ivdgah1nmknks  
kalyrqmvgfvf1qdfn1l1  
ptmt1nken1mmp1li1agakr1kdieqr1vhq1lavq1h1leg1fnkypse1sggqkriaia1aral1v1tkpt1l1l1adeptgal1dsk  
tska1mm1f1qei1h1q1leqti  
1mvthsnidasyaervi1fikdgr1lyheiyrgeesq1lafqqr1tds1al1vnggsvni

Tsompanidou\_et\_al\_Supplemental\_FASTA\_File

>tr|Q5HCS8|Q5HCS8\_STAAC  
mnnrnvydi evsdykgltykleafrgkvi lvntateciyseqlkkletlfqkykdrgefvl sfpnnfnrqpqsnee  
lki srekfgvtfpvlakis  
vngndehpl fthlknegpgi fgspikwnftkfi idrqgnvnrfl pmedpl distnieillqess  
>tr|Q5HCS9|Q5HCS9\_STAAC  
msvinaysnasllffiyllfimyqislsvk  
>tr|Q5HCT1|Q5HCT1\_STAAC  
mnmplmidltnknvvi vggvvasrraqtlnqyvehmtvisptiteklnqmvdnngvviwkekefepsdivdaylviaatn  
eprvneavkka lpehalfn  
nvgdasngnvvfpsalhrdkltisvstdgaspkltksimaelea lypssyssidflytcrqkikvlditynekqqlsq  
ivsveylnhdkqaqflaw  
dvr  
>tr|Q5HCT9|Q5HCT9\_STAAC  
mknvsiyktqtqelsfvssldfyltkhl tlm  
>tr|Q5HCU8|Q5HCU8\_STAAC  
mskahqliqedehyfaksgrikyyp lvidhgygatlvdiegktyidllssassqnvghaprevteaikaqvdkfihytpa  
ymyheplvrlakk lceiap  
gdfekrvtfgl tgsdandgiikfaraytgrpyiisftnayhgstfgslsmsaislnmrkhygp llnfyhipfpdkyrgm  
yeppqansveeyl aplkem  
fakyvpadevacivietiqdgggllepvpgyfealeki crehgiliavddiqqfgrtgtwssvshfnftpl itfgksl  
aggmpmsai vgrkeimnc l  
eapahlfttganpvsceaalatiqmiedqsl lqasaekgeyvkrmdqvwskynsvgdvrgkgl sigidivsdcklktrd  
asaa lki cnycfegvvii  
avagnlrfqpp lvi tyeql dta lntieda lta leagnldqydisggw  
>tr|Q5HCV6|Q5HCV6\_STAAC  
mnqhl lgnpkl tvthvnevkaginhivvdsvygnqemimekdgtvemrdgeklyini frpnkdgkfpvmsadtygkdn  
kpkitnmga l wptlgtipt  
ssftpeesdpdgfwv pndyvkvvalrgsdkskgvl spwskreaedyeviewaanqswsngnigtngvsyl avtqwvva  
sl npph lkami pweg lndm  
yrevafhggi pdtgfyrfwtqgi farwtdnpniedli qaqqehpl fddfkwqrqvp lsqiktp lltcaswstqgl hrgs  
fegfkqaaseekwlyvhgr  
kewesyarenlerqks fdfyl keenndwkdtp hviyevrdqfykgefksasafpl pnaeytply lnaenhtlnhakis  
sahvaqydsedkqqdvsfk  
ytfdkdte lvgnmnlklwvstksdmdml fagikk ldragnevnpdfnhiengqvatgw lrvshrel dqekssiaqpwh  
khetelkl sqdeivpveie  
llpsgtl fkggetlevvkgseivignstpgmktryeheetvknkmhmiytggkydsqliipivn  
>tr|Q5HCW1|Q5HCW1\_STAAC  
myk l ikpfl fkiepekahgl tidal kt lqkfpvl fpvdkl ftyknpt l sqtiqnty dnpig laagfdkscevpkaleh  
l gfgale l ggi tpkppgn  
ppqrmfr l leddal inrmgfnnigmka lsh l rknayqvpvgi vngvknmtpyearyqdyikvidt fkhdv sfftvniss  
pnten l qnfhdkdefsm l c  
qal tafkkqh dvtvpiyl k ltsdmdfdgl kallpaitetfdgi l anttrqrdgl tsankveegg l sgrpl fernlklk  
yayqqtngefliigtgvf  
stedai kmr hgas l iqiys l viepggl tkmknki ary l kdhhfdnvsdi iglda  
>tr|Q5HCW2|Q5HCW2\_STAAC  
msggdvneayrvetdt fflvqrgrkesfyaaeiagl neferagitaprvi asgevngdayl vmtyleegasgsqrql  
gglvaqlhsqqeegkfgf  
sl pyeggd isfdnhwqddwcti fvdkr l dh l kdel l nrglwdandikvydkvrrqivaelekhqskps l l hgd l wggny  
flgdgrpal fdpaplygdr  
efdigi ttvfggtsefydaynkhyp lakgasyr lefyrl yllmvh l lkfgemyrds vahsmkilqdtts  
>tr|Q5HCW5|Q5HCW5\_STAAC  
metigsi iy l kegsq l mi inrgpiveienqkymfdysackypigvvedeiyyfneenidsvi fkgysdqdevrfqel fe  
nmkqnl dseiqrgevtq  
>tr|Q5HCX1|Q5HCX1\_STAAC  
mlqt l k l evykkcfcnrckhaiqyggevekyyv  
>tr|Q5HCX8|Q5HCX8\_STAAC  
mtsifvfaylnntsgnm l frqqmicac l lanvrhssivcln niccivdmrc l ntkiggidvsetdepqgferthnilnin  
qsslgvvtyitnlk stlk  
qhii argkkridyrlsynfyttydnveikkidceytyampia ilirhtmsfdnahffaqlrhpvl  
>tr|Q5HCX9|Q5HCX9\_STAAC  
mlkqmlgseqmmesksidprivrtkql lvdaf l kisrekk l sqitvkdi tdiat l nratfyahftked l l dyt l svti  
lkd l ndn l sisnvinekv l  
rni fisisasyikdaaksce l nseafcukahqrinneledi faim l ensypehqr diivnsasflaagisglalhwfntsq  
etadvfidrnl pfl ihhia  
hf  
>tr|Q5HD09|Q5HD09\_STAAC  
mlvdi khmkyfi evvkqggmtnasksl yaaptiskaikdienemgtp l fdrskrh l l l t dagqif yekskeiva l ydy l  
psemer l ng l etghinmgm

Tsompanidou\_et\_al\_Supplemental\_FASTA\_File

savmmkilinilnlgafhqypnvtynlienggkctieqqiindevdigvttlpvdhhi fdyttldkedlrlivsrhrlak  
yevkledlagedfilfnk  
dfylnkii enaknvgfvntvaqisqwhviedlvtnelgisilptsiseqlngdvkllriedahvhwelgvvkkdkql  
shattkwiefldrlg  
>tr|Q5HD21|Q5HD21\_STAAC  
mfdsiretidyavenmsfadimvkeemelsgksrdevraqmkqnlvmrdavikgttgdgvesvtgytghdaaklr dyn  
ethhalsgyemi davkgai  
atnevnaamgiicatptagssgtipgal fklekthdlteeqmidflftsalfgrvannasvagatggcqaevgsasama  
aaaavai fggspeasgham  
alaisnllglvcdpvaglveipcvmrnaigsgnalisadlalagi esripvdevieamdkvgrnlpaslretglgglagt  
ptgeaikrki fgtaedmvk  
nn  
>tr|Q5HD50|Q5HD50\_STAAC  
mqyialkhvyfyaenrlkyseserykkyigyfrvmkgvsrhvfvrivqaiimkrlyvcfkldnd  
>tr|Q5HD52|Q5HD52\_STAAC  
myglvycfkldfdefnlkskykkykpvsrcsralyaiym  
>tr|Q5HD57|Q5HD57\_STAAC  
mrdkkqpvkrvdflnsklnkysirkftvgtasiligslymlygtqaeaaenienpttlkdnvqskevkieevtnkdt  
apqgveaksevtsnkdtie  
hepsvkaedisckedtpkevadvavqpkssvthnaetpkvrkarsvdegfdirtdsknvestpitiqqkehfe gygs  
vdiqkkptdlgvsevrfn  
vgnennglialqlknkidfskdfnfkvr vannhqsnttgadwgwflfskgnaeeyltnngilgdkglvnsggfkidtg y  
iytssmdktekqaggyrg  
ygafvkn dssgnsmvgenidksktnflnyadstntsdgkfhgqrlndviltyvastgkmraeyagktwetsitdlgl s  
knqaynflitssqrwlnq  
ginangwmrtdlkgseftftpeapktitelekveeipfkkerkfnpdlapgtekv tregqkgektittptlknpltgvi  
iskgepkeetkdpinel t  
eygpetiapghrdefdpklptgekeevpgkpgikn petgdvvrppvdsvtkygpvkgdsivekeeipfeker kfnpdlap  
gtekv tregqkgektittp  
tlknpltgviiskgepkeetkdpineltey gpetitpghrdefdpklptgekeevpgkpgikn petgdvvrppvdsvtk  
ygpvkgdsivekeeipfkk  
erkfnpdlapgtekv tregqkgektittptlknpl tgeiiskgeskeetkdpineltey gpetitpghrdefdpklptg  
ekeevpgkpgikn petgdv  
vrppvdsvtkygpvkgdsivekeeipfkkerkfnpdlapgtekv tregqkgektittptlknpl tgeiiskgeskeetk  
dpineltey gpetitpghr  
defdpklptgekeevpgkpgikn petgdvvrppvdsvtkygpvkgdsivekeeipfeker kfnpdlapgtekv tregqk  
ektittptlknpl tgeiis  
kgeskeetkdpineltefggekippghkdi fdpnlptdqtekvpgkpgikn pdtgkvi eepvddvikhgpktgtpetkt  
veipfetkrefnplqpg e  
ervkqegqpgsktittptivnpl tgekvgeqgpteeitkqpvdkivefggekpkdpkpenpekpsrpthsgpvnpnp  
glskdrakpngpvhsmdkn  
dkvkkskiakesvangekkraelpktglestqkglifssiigiaglmllarrkn  
>tr|Q5HD72|Q5HD72\_STAAC  
mddvrmpfssvhdaqvkllynvvsyngikrnfkqvenegf  
>tr|Q5HD74|Q5HD74\_STAAC  
mnkxhvfiigvilcivasviylkvkydekekqkaiyykeq qeritlylkhntkeptiktvhfts lkr gpmgdavie  
gyinenkeddfvaygspeh  
nyqfggslksknlstllkpvhqtkspdeikkeleskkndr  
>tr|Q5HD76|Q5HD76\_STAAC  
mskxhvfiigvilcictvstvmhfkmydekekqkaiyykeq qeritlylkhntketntiksvhftnletspmg s avie  
gyinenkeddf tayaspeh  
nyqfggamiksegvdkllkpaherkspekikeeldkkegh  
>tr|Q5HD77|Q5HD77\_STAAC  
mpynykkqngelmsvmsqgekfi hqspvndelsaliklliskingchycvdihkkelkelgvtqm kidevlsfrhldlft  
dqekvtlefaemlnsikdf  
kkfeiidr lksfydeeqiidlvfvnqingwnrlniisdr l  
>tr|Q5HD78|Q5HD78\_STAAC  
mtskhqkgsivnrflnsvekignklpdp svlfflmcvglaimtwis lfnvsvkhpqthqtiyikniishd gftmimnd  
tiknfsefalglvlavmi  
gigvaektgyfdklmivsvnr aprflilptiiligilgstagdaatiilpplaamfikigyhipiaglt mayasavggfa  
anivvgmqdalvysftepa  
trivdsikt nvamnyfiaasvvllptiillvttkliiprlgkydds l mhdheetsshitdkeahalkwanisfivti  
illii taipesflrnakt  
gsllddaplingvgliilvvflvpglv ygil skeikntkd l gkmfgdavgs mgtfivivffaaqllaylkwsnlgiaav  
kgakllehgngiviligii  
vlsamvnm ligasakwgilgpi fvpmliligfhpaf tqviyrvgsitn pitpmpylpllltyaqydkrmlgal ls  
slmpysialsiwvtfvii  
wflilgipvgpggpi fvk

Tsompanidou\_et\_al\_Supplemental\_FASTA\_File

>tr|Q5HD79|Q5HD79\_STAAC  
mlkekesfrllyqaireiadkigdnlensvslllldfdfehevfdelylvilkyIntvsienishsellnlientipe  
dreintfvknkiiigfann  
yfpelqvlaneiksdmasslkq  
>tr|Q5HD80|Q5HD80\_STAAC  
mnvvnqqlhs|vepreatlnkvygciliiqqpitkscfplcgl  
>tr|Q5HD84|Q5HD84\_STAAC  
mrkltkmsamlltsgliltgcggngkleekkenkqlyttvtkdigdmnphvyggsmsaesmiyep|vrntkdgikpllak  
kwdvsedgktytfhlrddv  
kfhgdtpfdadavkknidavqenkk|hswlki|stlidnvkvkdkytve|nlkeayqpalaelamprpyvfvs pkdfkngt  
tkdgvkkfdgtgpfklgeh  
kkdesadfnkndqywgexsklnkvqakvmpagetaflsmkkgetnfafddrgtdsldkds|kq|kdtgdyqvkrsqpmn  
tkmlvvnsgkkdnavsdt  
vrqai ghmvnrk|akei|ldggekpatq|faknvtidinfmptkydlkkaes|ldeagwkkgkdsdvrqkdgknlmam  
yydkgsssqkeqae|lqae  
fkkmgik|lningetsdk|aerrtsgdylmfnqtgw|lydpqstiaafkakngyesatsgienkdkkiysiddafkiqng  
kersdaykni|kqiddegi  
fipishgsm|tvvapkd|lekvsftqsqyel|pfnemqyk  
>tr|Q5HD85|Q5HD85\_STAAC  
mfkfilkria|lmfplmivvsf|mtfl|tyitnenpavtilhaqrtpnvt|peliaetnekygfndp|liiqyknw|leamqfn  
fgtsyitgd|pvaerigpaf  
mnt|kl|ti|issvmv|mitsi|ilgvvsal|krgkftd|rairs|vafvl|talpsywias|i|iyvsvk|lnilptsg|ltgpesyil  
pvivitiayagi|yfrnvr  
smveg|nedv|yl|rasgvksit|lm|hl|rnalqvavsi|fcm|sipmim|gglv|viefi|fawp|lgqls|lkailehdfpviq  
ayvlivav|lfivfnt|ladi  
inal|npr|lregar  
>tr|Q5HD89|Q5HD89\_STAAC  
mkgamawp|flrly|iltmffsanai|nvfipl|rghd|gatntvigivm|gaymltamvfrp|wagqiiarv|gpikvlr|fili  
inaia|i|iygft|glegyf  
arvmqgvct|affs|mlq|lgi|idalpeehr|segv|s|yls|fstipn|ligplvavgiwnann|islfaiv|i|fial|tttffgyr  
vtfae|qep|tds|dki|ekmpf  
navtvfa|qffkn|kel|nsg|iimivasiv|fgavstfv|plytvs|lgfanagi|fltiqaiavvaarfylrkyipsdgmwhpky  
mvs|v|s|llv|iasfv|vafgp  
qvgai|fygsai|ligmtqamv|ypt|tsyls|fv|pkvgrnm|llglfiacad|lgis|lga|lmgpis|dlvgfkwm|ylicmlv  
ivimims|flkkpt|prpass  
l  
>tr|Q5HD90|Q5HD90\_STAAC  
msntnkhyieeeyateqsrffkrdigfiflyifl|vn|ilpiiv|lftglvavftqqapwgfsfpismn|s|yllaviisla  
ifrlmhedafipm|rsqiv  
asakykwhi|l|sft|lsvl|fl|llnhfni|faln|vdsftv|fdiyp|likgygsi|sliaif|s|l|tiilnt|licqlifrhilqel  
sr|lip|k|it|iv|l|si|ilet  
fyppyintww|efipalilagsaty|ylksyrnfmv|syfyqlavilvlhifm  
>tr|Q5HD96|Q5HD96\_STAAC  
mnqsvk|llkh|ltdvngiagyemqveamrnyiepv|sdqi|iedn|lggifgkkaengqysim|isghmdevgfmvtkidkhg  
fisftpv|ggwwnqvm|lsqk  
vtitt|ds|gkeir|gi|gskpphvl|tpeerkkpmeiknmfidigvsskeeeagvevgnmvtpysefevlandky|takaf  
dnrygcalaievl|krlkde  
niginlysgatv|qeev|lrgakvaantikpd|laiavdvgiaydtpgmsgqtsdskl|ggp|v|immdatsiahqglrk|hk  
dvakehnievqwd|t|t|p|ggg  
tdagsihvanegiptmt|igt|lrymhsnsv|lvdd|yensi|rlvteivrs|lndesyknimw  
>tr|Q5HD98|Q5HD98\_STAAC  
msntalgl|tal|llvipi|isykeglhiikdlivat|ravvql|il|gl|fl|hyifkindkw|llilcvlviinaswntisra  
spvmhhvfwisflaifigt  
alplagtiatg|iqtanevipigglanngliainlayqnl|drafvqdgtnieskl|sla|atpklaskgairesirlaiv  
ptidsv|ktyglvsipg|mt  
gliiggvpp|lqaikfql|lvfihttatimsaliaty|sygqffnarhq|lvarntdvkses  
>tr|Q5HDA1|Q5HDA1\_STAAC  
mnkdkqlhndkin|lsq|lv|lgl|lgs|ligswlfgaweass|agpaai|swl|gl|fl|vigtiaynyieigtmfpqsggmsnya  
qythgs|llgf|aawanvws  
lvtiipi|eavsavqymsswpwhwakpmryl|mengsistyg|lavylivifsl|nywsvk|lltsfts|lisvfk|lgvpm|lt  
iim|l|sgf|dtsnyghsas  
tfmpygsapi|faattasgi|ifsfn|sfqti|inmgseiknpekniargia|sls|savlyi|ilqstf|tsmpqsm|lqhs|gwn  
ginfnspfad|laillginw  
laillyieafv|spf|gtgvsfvavtgrvlrameknghipkflgkmnekyhiprvaiifnaiismimvtlfrdwgtlaavis  
tatlvayltg|ptt|via|l|rk  
mgptmtrpfrak|ilkvmap|svlas|aiywamwpttaev|i|il|gl|piyff|yeyrnmwrntkkqiggs|lwiivylivl  
sil|s|figs|kef|k|l|nmi|hy  
pfd|fiv|i|i|ivali|fyigt|tss|fesvyfr|ratrintkmres|l|nesk|ssh

Tsompanidou\_et\_al\_Supplemental\_FASTA\_File

>tr|Q5HDA2|Q5HDA2\_STAAC  
mpkiqkiicdnytliiiiivkci fcknakafvklvfykiri yntmciekqngsddye  
>tr|Q5HDA3|Q5HDA3\_STAAC  
msekqsneqveaflnkesqwqeeykylralifneterleaykwmhpcytl nknkvvlhgfknvya llfhkgailedkyh  
tliqqtekvqaarqlrfen  
lteiqarteeikyylaeai kaekagkkvemkkteeyvipkeleakfeempql essfykltprqhqiyyihgqakrsetr  
qkrvekyinqilegkghmd  
k  
>tr|Q5HDA5|Q5HDA5\_STAAC  
mlsikhltkisygnkkavddisldiqsgefi afigtsgsgkttalrminrmieategqieidgkdvrsmnpvelrrnigy  
viqqiglmphmtikenivl  
vplllkwtkeekdkrakeliklvd lpesflerypaelsggqqrigvvralaaeqdiilmdepfgaldpitrtdlqdlvk  
tlqrklgktfi fvthdmd  
aikladkicimsegkvvqfdtpdnil rhpandfvrdfigqnrliqdrpndktvegvmikpitiqaeat lndavhimrqr  
vdtifvdsnnhllgfl di  
edinqgirghks lrdtmqghi ytvqidsklqdsvrtilkrnvrnvpvddqqr lvgli tranvvdivdydtiwgdsedtva  
tehvgedtasskvheqht  
nvkvr digdds  
>tr|Q5HDB0|Q5HDB0\_STAAC  
mkiaia gsgalgsfgakl fagydvtil dgytshveavkqhgl nitingeafelnipmyh fndqpdesiydvvflf pks  
mq lkevmmedmkphidneti  
vvctmnglkheeviaqyvaqsqivrgvttwtaglespgshllgsgpveigelvdegkenvikvadllneaelngviskd  
lyqsiwkkicvngtanals  
tvlecnmaslnessyakcli ykltqei v hvatidnvhl nvdvfeylvd lnekv gahypsmyqdlivnnrkteidyinga  
vatlgkqrhieapvnrfit  
dlihtkesqrhaqd  
>tr|Q5HDB3|Q5HDB3\_STAAC  
mfngfkrli igqpkknrelkdekiskfkg lailssdalssvaygpeqil itlsvvgavatwyt lpiagav lillaalims  
yrqiiyaypkkggaymvs k  
tnlgek wgl laggsllvdyiltvavsi ssgadafvaafpslyghkvliac llvlfililnlrgltesatvlsypvylfii  
glvllifigtfrvatgdiq  
phmhasvgtavpgvtlfl lka fssgassltgveaisnavtn frepsaknavktliamsilafllvgivglayvygilp  
qtettvlsq lamqifgdna  
afyfvqattvmi lvlaantgftafpm laasmskd kymprmftrvgrdl gysnsi ilglv laiilivfdgmedliplya  
vgvfipftlaqfgmvi kwi  
herpknwlsklsvnl lggivtfivfmi lltkfsqvwpi liflpfvviff lkinkhyrdiaeq lrsdidvlnvdvdrnl  
aivpitsittavdksiyya  
qmlann dviavhvsfgdedekafqekwkrhfpdvr lvi l hseyrsiirpisrfidkinrkandqnymittvvipefitkkr  
whnllhnqts lrmklyli y  
qknvnc tipfkllk  
>tr|Q5HDB4|Q5HDB4\_STAAC  
mallevflififaviissvinnrfpqi ptafiqialgvvifi ipiqvdfqfnsevfmfaviapl l fvegthvsrtklley  
rkpi llmsmalvfatvvgv  
gyfihwiwpa lmpaafai aailcptdavavsaitrgkl lpkgsmtilegesllndaagi isfkiavtalvtgtfslfqa  
veqfiistilgvl igaiig  
fvvvriridltankglkdntltfiqlltpfvvyflae evhasgiaavviag lighlerdr liraqtelqmnyhqiwntf  
syalngfvfvlgfmiptv  
vidifqtepdnfsflivitiliaiaiyacr fvwyfykdfyfpkniqsy ldeehdshetppsvryafimtmcgihgti  
slsmaltl pfiitkgqafe  
yrndllfiasfmvlisli laqivlpl itpsaedttfkgmtyqsaki fivqkviqhfkneskkdkndtnyrpvlnqyygel  
lfl lnsepdnqntkelkr l  
ediakvietstler lidkgkatyqdi nnyrnivel tethrtasfvekfanffkmlwlr lkamkhyka lneskkqefens  
fkdvqkimrivnhni lrl  
keeqnstnvl evslvinhydmsrslkwraqrrkerqensnqipqamfhnk lealylqrhll delirknkinnivaaq  
ireninyneivslsqkh  
>tr|Q5HDB6|Q5HDB6\_STAAC  
mkigtia dlhidrhnktsedy lealveivkykkldilliagdisnhyql thqfitq ltkql dipvkfvpgnhdlweves  
mttgdiwnnyksmsqlvg  
kpfivneewai ightgwydysfaaqrfs ldelqkgkhygatwqdkeriswgi sdqnl skiaaeqvkkdilevgnrrvilv  
thvthp dfivpmphri fd  
fynafigtsdfnplyamfdipysimgvhfrksviddgrcyl cplgyprqwr sediyqeineti qiiei  
>tr|Q5HDC5|Q5HDC5\_STAAC  
mfqitfki lnwirykarmil gfsmsflnai fialpiflaaki fnnvlshkpiymkdilnvvii mllvigrfitayfks  
kshesiayemsakerldig  
dklknvrlgyfnshhsnel ttivttldl tflenfamkmdvvvngyilitvlilsl llvswqvsllacigvllsffaiql l  
erksrqnapayhvnqqlv  
eklvivrigiqvksfakents lksfnqavneskrintkiemqyipfnllhllslkvvsimivlvac llymhsidlptl  
imisi fsfvi fdsvenins

Tsompanidou\_et\_al\_Supplemental\_FASTA\_File

aahvlemidmtiddieki knapel dengknltikneniafqvnvnsyddkqviknvnfeiptqtstaiigpsgsgkstlc  
hlllrfdyiddgniridgv  
dikdmtlstlmskisavfkyvlndtiennilfgnpgatkeeiratkqacchdfims1pegyqtm1nekgsn1sggek  
qrisiarailkdapiiild  
eatasidpeneqliqtaine1skgktvitiakhletiknadqiiv1negeiiqkgshdelirkpgmyqdfiriksksgaw  
k1  
>tr|Q5HDC6|Q5HDC6\_STAAC  
mrgfgvfrcsiyyvtynsideggaqrninglfhkmvklgclfikk  
>tr|Q5HDC7|Q5HDC7\_STAAC  
mri fitsntdvgtkyvtkhlyhal ktrghrvci fkpqf qteerqdgtpdlevfknecd1syditslytfkqpvsp1laf  
kmtdqiflnkqrvldkvkv  
1dkefdfiliegaggiavpiyegtddfymtkd1indcadcvsvlpsklgaisdaihqdvyvqnvsasnflimnrytds  
yiekdnqmtigklnktvy  
tfeehatyenfseaf1kq1igvknelhttt  
>tr|Q5HDC8|Q5HDC8\_STAAC  
mnytqqlkqkdseyvwhpftqmgvyskeeaiiekgkgslydtngnkyldgyas1wvnhghnnylnkvikkq1nkia  
hst1lgssnipsielaek1  
ieitpsn1rkvfysdtgsasveiaikmayqwkndrekyaknkfit1nhgyhgd1gavsvggiktfhki fkd1ifen  
iqvespsfyrnydenem  
mtailtnieqilierndeia gfilepli qgatglfvhpkglfkeveklckkydv1licdevavgfgrtgkmfacnhedvq  
pdimclgkai tggylplaa  
t1tskkiynaf1sdshgvntffhgtytgngivctvalenirlyekrk11shiettsst1ekq1hal krrhvnvgdvrgg  
1mfgvelvtdkdsktplei  
ekverivrnckeng1mirn1envitfvplsmnskevktmvrifkavhnildrk  
>tr|Q5HDD2|Q5HDD2\_STAAC  
mtdskditqisviaailtilav1kipsiipgl dfqlsapaallilaffgikkyflgg11ss1111vfgvfnpinviisiif  
rviaiaavy11kinv1slv  
lasv1gslvyr111si1n1pvwv11naipgvift1vaiply1t1rkrmav11r  
>tr|Q5HDD5|Q5HDD5\_STAAC  
mnqphnik1fyrt1n1i1tt1dfyknkvsnhsrytntneti  
>tr|Q5HDE1|Q5HDE1\_STAAC  
mggffgl1net11vta1psimkdfesytqvqwttaf11tngiviplsalviqryttrqvflvgisiff1gt11gg1sp  
hfat11variigalgagim  
m1mmtt1ldvfqphergkymg1fg1vig1lapaigpt1sgylveyfnwrs1fhvvpiaavt1ligfktiknvgttikvp  
idf1svifsv1gfgg1lyg  
tssisekgfdnpi1lvsm1ggv1valfv1rqyr1stpl1nfavfknkqftvgi1imgvtmvs1migset1ilpifvqn11h  
rsaldsg1t11pgai vmaf  
msmtsgalyekfgprn1alvgmaivvittayfvvmdeqtstimlatvyairmvgia1glipvmthtmnq1kpemnahgss  
mtntvqqiagsigtaalit  
ilshasknfsptmsdyngmnkidmmnqikvdtm1hgyhagflfallitvvsffcsfmlqgkkkevdsrq  
>tr|Q5HDE4|Q5HDE4\_STAAC  
miq1tnihksfndvevikgid1sveqgevvt1igrsgsgktt11rminaleiptegtvyvngktytskdkksqievrkqs  
gmvfqsyn1fphktalenv  
meg1itvkk1kkdeargks1el1ekvg1thvkdqrphalsggqqrvaiaralampkvm1fdeptsaldpelvndv1kv  
ikd1anegmtmvivthemr  
fakevsnnivfihegmigeqqapeemfnrpkteelrrf1vinee  
>tr|Q5HDE8|Q5HDE8\_STAAC  
mrsvsdtn1lgqyekaisidmieivflmyev  
>tr|Q5HDF7|Q5HDF7\_STAAC  
metkekikvttidel1tp1igkkvivkgevg1fltesgkiahni cphkqgp1segtvsgeyvfcplhdqid1ntgiv  
qepdegcvdvyevetdgn  
vyic1  
>tr|Q5HDH2|Q5HDH2\_STAAC  
mkkkkkgfg1gis1iaim1ivci1vimmmtggkkdtyygimkdnttiekmisekdesieknvklpsdsdvkvvkkgdfviv  
yk1adsdkivkvkvdhdd  
vphg1mmki hdmgkmhmkh  
>tr|Q5HDH3|Q5HDH3\_STAAC  
mqqfanavfi1hkin1krht1it1lnkvclknnt1qiel  
>tr|Q5HDI4|Q5HDI4\_STAAC  
mvkvtydiptcedyca1rinagmspktreaaekglpna1ftvtlydkdr1ligmrvigdggtvfqivdiavlksyqqggy  
gs1imehimqyikgvaves  
tyvs1iadypadk1ytkfgfiptepdsggmyiky  
>tr|Q5HDK0|Q5HDK0\_STAAC  
meykqhpfkvft1svnyfegivfcgkiyev1rfisfytfyk1  
>tr|Q5HDK2|Q5HDK2\_STAAC  
mkrqakieiqnalvd1maeypfeistkmi caycni rstfydykdkfd11dtinskhekfqf11salhhnfenikqd  
k1klykffiiiakyikhne  
qffkdilvtypmkt1fidyin1ardyyqqimndystvtvnkqlyvtyiiggqagvfinw1sngcnespeevadillanti

Tsompanidou\_et\_al\_Supplemental\_FASTA\_File

k1qn  
>tr|Q5HDK4|Q5HDK4\_STAAC  
mtttfiisyiialaliivgvlnflirsrkkgrqqkeqfttrqsnqskfksaldkttddqstqrmtheelrvdnqddhs  
qvslngytkgsekdeaft  
nnkdeevaaknpeseeykvnkikkeknfifgegvsrgkilaallfgmfiaalnqtllnvalpkintefnisastgqw  
lmtgfm1vngilipitayl  
fnkysyrklflvalv1ftigslicaismnpimmvgrvlqaigagv1mplgsiviitiyppekrgaamgtmgiamilapa  
igpt1sgyivqnyhwnvmf  
ygmfiigiia1ligfvwfklyqytnpkadipgiifstigfallygfseagnkgwgsveietmfaigiifiilfvirel  
rmkspm1nlevl1kftftl  
ttiinmvvm1slyggm1lpiylqn1rgfsaldsg1ll1pgslimg1lpgpfagk1ldtig1kplai1fgiavmtyatwelt  
k1nmdtpymtingiyv1rs  
fgmafimm1pmtaainalpgr1ashgnaf1ntmrqlagsigtailvtvmttqttqhl1safgeeldktnpvvdhmlrelas  
qyggqegamkv1l1qfvnk1  
atvegindafivatifsiaial1cl1fl1qsnkkakataqk1dadnsinhe  
>tr|Q5HDK6|Q5HDK6\_STAAC  
mnsvvnky1l1hnr1simfkn1dq1dverff1ykreienrkkhkqpst1nvkanlek1sl1ddmqvfrfnfrhqidkkilyihggf  
nalqpsf1hwr1l1dkit1s  
tlyevv1piy1ktp1efh1iddt1fai1qrvyd1qv1sevghqnv1v1mgd1gsggal1alsfvqs1l1dnqqp1pnk1ly1isp1lda  
t1snkdisd1alieq1dav1s  
qfgvneimkkwang1p1ltdkrispingtiegl1ppvymfgggremthpdmk1feqmm1lqhhqyiefydy1pkmvhd1fpiy1pi  
rqshkai1kqiaks1dedvt  
qnn  
>tr|Q5HDK7|Q5HDK7\_STAAC  
mtdalqqk1hie1ld1l1ddvkfelte1naqkglyingpanq1l1krghvmayvqqkqaidn1m1tiveqq1ledqhf1lehyd  
kfqnevahrnydktanfae  
l1sdiprqf1dnf1ldqfyqikgqyfiithint1ligdfhseah  
>tr|Q5HDL3|Q5HDL3\_STAAC  
meq1pqvgf1mksfv1fwknyvnf1kgrsrrseywmalwh1il1mpavcvliin1fl1ffisiaadnet1livmsilmi1lts  
vytfvys1latfipn1alcv  
rrfhdi1srtm1fpm1mtv1fsi1fyiv1lqi1dsydd1sdf1lmpmgl1n1ll1v1lyfvy1lgtivmiv1flcfdskpankyges  
pkypst1knqpvtsetpek  
actsetp1ktp1eetdnq1  
>tr|Q5HDL4|Q5HDL4\_STAAC  
mekty1vlmi1nmqkwhy1nfsiseilkinsf  
>tr|Q5HDM8|Q5HDM8\_STAAC  
mg1kdqavtwrry1fhqfpe1sdkefkttkikidiltehhir1ild1platglvaevggglsciavrada1dalpiqel1veqd  
fksenegvmhacghdihma  
silatavk1keiegt1tgrvkfifqsae1lghgafkiiethalkdvqav1lgfhndpsrsvgtfaiktgait1savdrfefh  
ikgvgghaakpeq1cndpvi  
v1laql1nsiqsivsrn1safdeavvtigqiscgntwnviadhayvqgtvrsfdpvvrk1vetr1lqdiadgl1aqaynmkin  
l1nyth1pgavmndeal1thk  
aiavaqhvgyk1vem1eqpl1tgedfsgysqhfpsv1faligshseyd1lhhp1qykpderilekvpeyfvefvkr1l1he  
>tr|Q5HDN2|Q5HDN2\_STAAC  
makfnveneh1eveie1klykfspe1lyeawtkkd1l1kqwf1mtsartnkeieadv1keggkyrivdqq1rngkvn1vegiyes  
lvmdeyvkmt1gmpgl1set  
qdvie1vefferet1ggtqm1fyys1lvekerrf1tnleykqkkkeyhdamvhgfe1lmdkmyh1vietstqq  
>tr|Q5HDP8|Q5HDP8\_STAAC  
mg1krsskskms1pkki1flwvf1gilv1ilavvyvaakifitgnki1hnp1drnhselrdkkvs1ndgdpftialfgvds  
dad1rkkk1gggersdsimil  
sinp1k1k1teivs1iprdtraeivgrgtteki1ahayayggpn1mavks1lek1mnvp1idhyatidmdgl1hnmids1ggvdvvs  
nd1ftvd1gvrftk1gqqt1hv  
ngdqal1kfi1rsrkeegaggdfgrqqrqqiv1leamankiaspssithfnsl1mnei1qnnvkt1d1t1l1gd1ntirsnykdandt  
inkh1q1sgqgg1qsdg1ly  
fipseqs1kaestk1l1kdn1le  
>tr|Q5HDQ1|Q5HDQ1\_STAAC  
mhinsrm1ktsavisnt1l1vig1vc1fmmk1vl1aitffavslsis1lvfnmmfrdrttmkvivasflivilaivvayfl  
l1sk  
>tr|Q5HDQ5|Q5HDQ5\_STAAC  
mkk1vtatt1tagigta1vgqayhadaaenytnynnynttqt1ttttttttttssishsgnlytagqctwyvydkvge  
igstwgannwaaa1aqgag  
ftvnh1tps1kgai1qssegp1fghvayvesvnsdgsvtisemnysggpfsvsrtisaseagnynyih  
>tr|Q5HDS6|Q5HDS6\_STAAC  
masi1msdi1ycngti1fenddeq1liy1ltpsfpqrysntwiykktp1qerw1kdl1erqhl1htnqgsnhyafsfpeneq1ld  
nhwmamf1kdm1felgime1  
yaiesda1lan1prnsdveia1vdeshiday1kvayqfs1l1pfgkdyadaheemvrehyqkdvikr1lvay1lnnepigvvdvi  
esenye1ldgfgv1leqfrh  
qgigsti1qsl1igeya1sknhkpiilvadgedtakmyakqgyvyqsfcyqil1kedign



Tsompanidou\_et\_al\_Supplemental\_FASTA\_File

>tr|Q5HDU1|Q5HDU1\_STAAC  
mfrfisfgqlvvysttfipkkdilqIngmecdinveklkiyyvilksgiemifs  
>tr|Q5HDZ2|Q5HDZ2\_STAAC  
mtnsikkiiyfdelsamdllqiekkgnlktkvqlmhdekgsasgeskvnmeffgkqsavkqifdsllgmsasasasaging  
nitgervaktilentliydf  
fldtvefrkkktiidiasegfklniqqdtmtyfatitpiasmfegskhldeelsfdvskmneairsikgyfeligrone  
nrvfrfniesfknyriqd  
lkfmltlysvlveiskenlnydkefdlnqgakpsgigkfgkirseatkedkyqvvdvilagvk  
>tr|Q5HDZ4|Q5HDZ4\_STAAC  
mnnsnflnveligtkiitmedfykmeeefflksklplylysfnyvdeytmklldrgrisislntktnkdcifdiskyihe  
nifrrdifelnidddd  
kykingynievylsgelektivkhlfenkfdveygyfifkkipifeivfssnyvkeefntkiesseyreslidsfneilmky  
leneinfkevkkkyidelf  
kklnvqkllihkkieslissyddkisdscmsyskvfeqykktlywikyitlkfinivii  
>tr|Q5HDZ6|Q5HDZ6\_STAAC  
mlryfwdvvsqwraveivlwaaenavlcra  
>tr|Q5HDZ8|Q5HDZ8\_STAAC  
mtnvlyqhgltgtlmagllkgtasinelqhgdligiatltsngdevifldgkayhanehkefvelkgdeltpyatvtfkv  
adtsyetkdkssaeavfaei  
kekmisenlfsavkisglfkkmhvrmpaqepypylidsarrqpeqtetyvkgsvvgfftpelfhgigsagfhvhfand  
drnfgghvldfevedvke  
iqnietfeqhfpikdftkanidykdiadeireae  
>tr|Q5HE05|Q5HE05\_STAAC  
mryihfsiitlitgimhitmyfvpfesrkmpfmitiifti  
>tr|Q5HE09|Q5HE09\_STAAC  
mfvyvynlnviklkafsqdfhnlnqinmshfkkgisklk  
>tr|Q5HE17|Q5HE17\_STAAC  
mkkifviiitllavaiigsiimvvsqrqaqtfkiiqqqfvkkipitlflhgfggsansekfmvkqaekrgvtkdita  
yvskdgavtfkgklrkdv  
npivkielenrqqylidknaawfknvltklqseynfdkfnfvghsmgnlftaqymmygndkslpqlnkqvniagtfnv  
lnmedvneitvdkgdkps  
rnnqpyqqlrvlkdiykgkgevlniygdldgthsdgrvsnskslkyllgnspskyreskyegepaqhsqllhenenf  
anelidflwkk  
>tr|Q5HE33|Q5HE33\_STAAC  
mtgkthalcgmvgalttqyfqtidifssvtviiatlasllpdichtqskigrfrkvisffvrllifghrtfthsilfiiai  
iaflilqiiqtpnyyaaai  
iglvshvilmditpkgvklfypfpnvktpiqfktgglvdlsalatalmvgtvvylfqpfindiisnwnktfl  
>tr|Q5HE51|Q5HE51\_STAAC  
megnidvkaifldmgtlhenngastytkdvinqlrekgykvflatgrshseihqlvpqdfavngiissngtigevdg  
eifkhglslaqvqqitnl  
akrqqiyyevfpfegnrsvlketetwrmrmi rsqdpingvshsewssrqdalagkidwvtfkpegeyskiylfssnleki  
tafryelkqnhvqlqisvs  
nssrfnaetmayqtdkgtgikemiahfgihqeeetlvigdsndramfefghytmknarpeiqaaltdvtaytneedga  
akylaehflae  
>tr|Q5HE65|Q5HE65\_STAAC  
mnilryllgigfsvigvlhfttrerqfrniipkcltlrktavltvgifeilfglallikrpsqclntinlfllavfpani  
ymavkklplgdqklptwql  
ylrlpmqfvlmglkkll  
>tr|Q5HE71|Q5HE71\_STAAC  
makefcfegitlkafdeqyrsaindfldnerqqiyslpekeiddaindriadrianvaindknevvgffvlhryyqhegyd  
tpenvvyirsisinekyqg  
fgygtkimmslpqyvqgvfpdfnhlylvdaendawnlyeragfmhtatkeegpigkerlyyldlaskhvsslklees  
rsevtvhiinlmidgqkv  
gfialeqigermniaaievdkysyrfngigssalrqlptylrknydnlnvitmilfgennfdkplclnsnfveieqtddyv  
vfekylny  
>tr|Q5HE77|Q5HE77\_STAAC  
mevcpyleetfkiigrswngliinylsrcndcsahfsmkrdlktitpralslklseiaqwelvekqiistspvqiyyvl  
tekgkalaeahpieawaq  
syvdltdqrtak  
>tr|Q5HE84|Q5HE84\_STAAC  
mikldtkiwdvreynedlqqypkineikdivlngglliglp tetvyglaanatdeavakiyeakgrpsdnplivhihskg  
qlkdftytl dprveklmq  
fwpgpisfllplklgykrkvsqgllssavrmshsvgrqllqiineplaapsanlsgrpspttfnhvyqdlngridgiv  
qaeqseeglestvl dcts  
pykiarpgsitaamiteilpnsiahadyndteqpiapgmkykhyssntpltiitdieskiyndgkdwssiafivpsnkva  
fipseaqfiqlcqdndvk  
qashnlvdvhsldeneni saaiyigfelndnteamnrmllkaagnhiikge  
>tr|Q5HEB0|Q5HEB0\_STAAC

Tsompanidou\_et\_al\_Supplemental\_FASTA\_File

mphsttssrivvpahqsnmastpnlsitp  
>tr|Q5HEB6|Q5HEB6\_STAAC  
mnyssrqppdkhwlrkvdwlvatiavlaisvllinsamgggqysanfgirqifyyilgai fagiimfispkkikhyty  
llyflicl1lligllvipes  
pitpiingakswytfqgisipqsefmkiililalarvvsrhnqftfnksfqsdl1lffkiigsvlpsil1llqndlgtt  
lvlaaiagvmlvsgitwr  
ilapifitgigvamtvilgilyapalienllgvqlyqmgrinswldpytyssgdgyhlteslkaigsgqllgkgynehgev  
yipenhtdfifsvigeelg  
figsvililiflflifhliirlaakiedqfnkifivgfvtl1lvfihlqnigmtiql1lpitgiplpfisyggsalwsmmtgi  
givlsiyhepkryvdlyh  
pksn  
>tr|Q5HEC1|Q5HEC1\_STAAC  
msnteslnigkkrsgltiyigyspgvgktfemlsnaielfqsnvdikigyiephqr detnala eqlpkittnftkhgshh  
fqyldvdrieesptivli  
delahtnisrdrhekrymdieeilnhgidvhttniqhieslssqielmtgvhvkervpdyfimsadvlevvdispeqli  
krlkagkvykkdrldvafs  
nfftyahlseirtl1rtvadlmsdkekvrhnhktslkphiavaisgsiyneavikeafhiaqkehakftaiyidvfekn  
rqyksqkqvhhmlaks  
lgakvkvyvsqtvalgl dewcknqdvtkliigqhirnkwrdfntplidhlmsfehkykieivpikqipvelkmnkspyr  
pkgkrfaidm1kmi1iqii  
cvmmg1wiyqldkhesstiilmifligiillsiwtrsfii glflaaiinvfvfnyffteprytfeyvrfdy pitfivsil  
siltsallkqikfqsyt  
kqlyrtdl1fqfndsikqytvtvenllinagyqinql1qqsitiyvinqskviktiplqnhidnttqqheqalswvikner  
qagattdtfpginkwlipi  
gtspikgilaidyqssqvinpydasilesmlnel slavenvtllkqtresmlqaerqlthsnflrsishdirtp1ttimg  
nldilvshskdmsviekeq  
llvhsfquesqylyllvtnils1tklqssnvqiklqpylvselveeidmilerrh1kkritvsssvnlqfihidsklilqa  
lfnlienavkhtstdtkin  
lsiryasyeqiefavidegggisleeqqkiefpytgsnkyfkdnqkesmg1glylvqtilhkhqsn1qykpnqphgsif  
yfniytdfnegdv  
>tr|Q5HEC6|Q5HEC6\_STAAC  
miderhhvdkiitwclfsnstfclikfldvplgrin  
>tr|Q5HEE9|Q5HEE9\_STAAC  
mnqfaiflveqlksgdli1l1ngdlgagktt1tqfigkalgvrrtinsptfniiksyr gkn1klhmdcyr1edsdedlgf  
deffedqaitvIEWSQFik  
d1lpathlsinistisentrqiel faqgehyeqikeaiihefaah  
>tr|Q5HEF0|Q5HEF0\_STAAC  
mns1lidtsnqplsva1mqndevlaeittskqnhsvqlmpaisqlfeqskiakqldaiivaegpgsytg1rigvtvak  
tlayaldvkl1ygvss1ka1  
aatidhtdk11vpvfdarrqavytgi1fqwngq1vtiledqymsiealrafledlnqpfiiygkdtvklqdelqgeviaq  
1pnasvmyq11dkpsdvht  
ftpkyhklaeaernw1nsqknn  
>tr|Q5HEF8|Q5HEF8\_STAAC  
mn1ndti1fmf1ct11vw1mtpg1s1fygg1veskna1ntvmqsm aiv1vtfvwitvgftisfgng1wfgnweytf1nh  
vgfatgedisph1pfa1fm  
1fqmmfctia1s1lsgs1aekmfipy11fvviwta1vyspvahvwgggwin1lgv1dfaggtvvh1tsgvsg1vlaim  
igkgnkhsestph1liit1  
iggi1fw1gwygfnvgsaftfdniam1aftntvisasagaigw1ileyifkktts1lg1llgalaglvvitpaagyvty1  
satimaliggi1ccyiviny  
ikvklkyhdal1dafgihvggigav1tavfqsakkanpdiengfiytdi1hi1lvqilcvtavvifsvimtfi1akvik1  
itp1svteqetnig1dkiv  
hgehayfege1nrfnkhiry  
>tr|Q5HEF9|Q5HEF9\_STAAC  
mkn1sdiak1agvskstvsr1f1nngsvskktsek1tr1iaehdyqpnqfaqs1rarqth1igaiiprmnsyavdetikg1  
akqcqkyesq111nytg1n  
ieae1qalet1arskvdgiv1matditerhievin1kmnvpivi1vgqqheq1hsivhddykagqi1gewigqqgyqqvevf  
svsekdiavgi1hrkr1gl1d  
q1lakyqikpni1hetnftyveaqkdvanv1enveqv1davgatd1ialaaykyysdkkdv1mkphqi1yfggdpm1tq1lvps  
iktihy1nyfeagqcamee1  
qqm1kkq1dmpysvtvdvni  
>tr|Q5HEG0|Q5HEG0\_STAAC  
mtewtgeeryqri1edv1dteyfk1l1kq1vdqsk1frq1qfhi1qpetg11ndp1ng1li1fykgky1vshq1wfp1gavh1g1kyw1ny  
tsdd1in1fkaegp11n1pdt  
kydshgvy1sgsafeyng1lymytgn1hrdn1hwqrhasqmi1arl1kedgsvek1f1pkpvi1sqpegytsh1frdpkv1fkydeky  
yai1gaqnd1qqgr11lyn  
tedi1nwhy1lge1nte1ddfgymwecpdy1fnvdn1qdv1ilicp1qgiepk1gdqfkn1iyqsgy1ilgkfdiekl1tyehen1fve1  
dngfd1fyap1qt1f1dekgr1r  
vl1gwm1g1peieyptd1negwah1cttprv1nveng1q1kqr1pypa1lek1lrh1nketa1gyank1ftr1kl1hpyegk1qyeli1idi

Tsompanidou\_et\_al\_Supplemental\_FASTA\_File

ldndatevyfelrtskts  
tliaynkrenkitldrdsdglptnvegtrstildtplkqlqifvdtssieifcndgervltsrifptedalgiiktste  
sgvylqftkyd1kdehk  
>tr|Q5HEG3|Q5HEG3\_STAAC  
mellnsynfvlfvltqmilmfipaisgikyskldyffiiivistlsflfkmfdsasliiltsfiiimyfvkikwysil  
limtsqiilycanymyivi  
yayitkisdsvifvipsffvvyvtisilfsyininrvlkkistpylilnkgflivistillltslfffysqinsdeakvi  
rqsyfiifigiti flsiltf  
visqfl1kemkykrnqeeietyyeytlkieainnemrkfrhdyvniltplseyireddmpglrdyfnknivpmkdn1qmn  
aiklنگienlkvreikgli  
takilraqemnipisiei pdevssinlnmidlrsigiildnaieasteiddpiirvafiesensvtfivmncaddipr  
ihelfqesfstkgegrgl  
lstlkei adnadnvlldtiengffiqkveinn  
>tr|Q5HEH4|Q5HEH4\_STAAC  
mfislaiwsinsmgkqcislnllsddtfavismvtlgtailggvapsiygiftspidkkssfraisdweeqrnnvk  
dlmmllpftllsilivifi  
fqfaysklfntiaiiifiiilvmmfflillicykitvkicryfske  
>tr|Q5HEH8|Q5HEH8\_STAAC  
mkqlvgipesmlipliarakeyenekpiikdalskkipdglddmyknvtcddmsqigisirtviidcvtkrlikdnkdl  
vvnigcgltdrfqrfnkek  
iswidldvpesieirktffkesnsykmi sksml dyswidvknkffnsksdilfiiegvlmyfdesvmtqlldtiikm  
gdhnltaiefcsktiann  
tkrhqsvsklssqpvfkygyndlkk1nei1pntirvihey nyfdyyknrwlfgycrfipy1kkrlnnkivlmykvpr  
qrh  
>tr|Q5HEI3|Q5HEI3\_STAAC  
mnp1aqs1neqlqgsnataftmlsd1gqnmfypkgil sqsaeaksttynatigmatnkdgkmfassldamfndltpdeif  
pyvppggee1rd1wqgkm  
1rdnpe1sidnms1pivtnal thg1slvgdlfvnqgdtil1pehnwgnylvfntrnganlqtypifdkdghytt1s1ve  
alqsynkdkvimi1nypnn  
ptgytphthkevttivdaikaladkgtkviavvddayyglfyedvytqslftalsn1nsnailpvrldgatkeffawgfrv  
gfmtfgtsdqttkeveleak  
vkg1irsni1ssgplptqsavkhv1knnkqfdkeieqniqt1keryevtkevyadqyhshwqaydfnsgyfmaikvhvd  
pe1rkhliekysigvia1  
natdriafscvekediphvfdsiakaidl1r  
>tr|Q5HEI4|Q5HEI4\_STAAC  
mmwwqegmmtlitggll1i1fr1wle1kwknk1  
>tr|Q5HEK3|Q5HEK3\_STAAC  
myinmkdygl1tginktkdtraiqra1nrgrckpttvyipkgtydickpl1tiyngt1ll1dnetil1rrchsgpl1kngrf  
gfyrgyngsh1hikggkf  
dmngvsypynntamcighaediqligvtiknvvsghaidacginglyikscsfegfidysgerfyseaiqlidiqvpgapf  
kfgtt1dgtitknv1iedcy  
fgpse1pemgswnraigshasrhnrnyenihi1rnnifediqgyaltplkykdafi1nnkfinceggi1rylgvrdgknaad  
vmtgkdl1gsqaginn1ig  
nefkgsmskda1hvrnynnvkhkdv1ivngtfnstqsih1leditvfl1speagiqvttin1vdeikk  
>tr|Q5HEK5|Q5HEK5\_STAAC  
mlgrvvtkripqhrvktitqtkesqprmdsyfnpw1tlyfi  
>tr|Q5HEL2|Q5HEL2\_STAAC  
meqiel1fsidkfkcnseakyy1ni1iegewhpqdl1ndsplkfil1stsd1sdyicky1ntehkq1tlynknssivieifip  
ndnkil1timntealgtsp  
rmtfikhks  
>tr|Q5HEM9|Q5HEM9\_STAAC  
mtknti1is1lenektqindsenesd1rkak  
>tr|Q5HEN1|Q5HEN1\_STAAC  
mrqwtaihlak1arkasravgrgtd1pgqiarkvtdil1rkl1aeqvddivfisgtngktttsnlight1kanniqi1hn  
neganmaagitsafimqst  
pktkiavieidegsiprv1kevtpsmmvftnffrdqmdrfgeidimvnniaetisnkgik1ll1naddpfvsr1kiasdti  
vyygmkaahahefeqstmne  
srycpncgr1l1qydyihynqighyhcqcgfkreqakye1ssfdvapfly1lnidekydmkiagdfnaynal1aaytv1rel  
gl1neqtkngfetytsdng  
rmqyfkkerkeamin1aknpagmnas1svgeq1egekvvis1ndnaadgrdtswiydadfel1skqqieai1vtgtrae  
elq1r1k1laevevpiiver  
diykataktmdykgftvaipnyts1apmleq1nrsfeggqs  
>tr|Q5HEP1|Q5HEP1\_STAAC  
mskkdhsssky1nsvkeaqeeskkknksnpkidvdrtyiepqfqsckpkddqvff1sr1nkpakykksnfl1sylimy  
igkddasgl1aaqmtyhfv1  
amfpm1l1f1l1t1l1pffniksqsitnm1snapaetst1k1svigditqns1sgg1l1sigl1l1aiwsasngmtaimnsfnvay  
dvedsrngiv1k1l1svvt  
vvmgvvfvval1lpt1gsvish1fgpl1gfdeqvkwifn1iriv1p1i1i1fi1fiv1ysvapnvk1k1ksv1pgavf1tsi

Tsompanidou\_et\_al\_Supplemental\_FASTA\_File

iwlagsfgfgwyisnfgny  
sktygsiagi i i l l l wlyitsfiiivgaeinaiihqrsvikgktpaeaalehddnknhynentryeydddsnathqrty  
hvdehpsdtypeddknkd  
kivdklkkd  
>tr|Q5HEP7|Q5HEP7\_STAAC  
mnsvklkqpvsiyndpweayndvkehqgltsnieftttnlcnmrcshcavgytltqvdepldmdliyrndeipnlrt  
msitggepmfsskksirnvv  
kpllkayahrgiytqmnsnltpqdryldiaeyidvmhishnwgttdefanvgfgamkkqplkaklklyeqmisnartl  
seqgmfvsaetmlnqstlp  
hlrkihqevvhdmkcsrheihpmypadfasqlnvltaemkktihdildfrdediwmfngtvpvfpclkkdedqkllsr  
rnaknvttrndpdgrsrln  
vnyftgnvvtfdgdetgtisniqkdkltdvfdkwlssdlakslnchcsefscfsgpnlvknmyypnmdfdknerhmhkq  
pqiiqf  
>tr|Q5HEQ4|Q5HEQ4\_STAAC  
mldniilyfknlphtkryvterlkqswksflivlaacliliiasetlfsfshltdvkevrwlfriivlivfavvmftiyi  
syhhymndflvtklfnisa  
atpvmimsilfmlviltmisaivkpvnfetsyialfyfivmatifvglisvtfglirlltekiniifygvclcflll  
piifipnphvfihilm  
npyyivngiaqsii fgissmenipyhfylflcliaavnvlarytthaiynktskvtqtdnqqdvsndstdeadtss  
>tr|Q5HEQ6|Q5HEQ6\_STAAC  
myqssfkenlihwfdenqremprwttnpyyiwlsevmlqqtqvktvidyyhrfverfptvevlsqasedevlkywegl  
gyysrarnfhataikevhdk  
yeglvpkdpdqfkaikgvgpytqaavmsiaynvp latvdgnvfrwvslnddyrdiklqstrksyeqellpyvtteagtf  
ngammelgalictpknpcl  
lfcvpqenceafdkgtfeklpvksknsvkkvieqsvflirnnqgqyllqkrsekllhgmwqfpmfeseharrkmtkigh  
diqpvetpifelkhqfthl  
twkikvyavsgainietlpddmiwfdlsdrdqytfpvpmskiyqfing  
>tr|Q5HER2|Q5HER2\_STAAC  
mkvvglnrmrevetelqrrfsdlfdkfykkaseipesdladldilvgydgginiaflrrcpnlkwiawfatgvntlpdy  
iadhgilltngkgvqakq  
seyilafilddykkmklsydnqrqhiydskitgkrlsgqtvflgtgaiatrtaklakafnmnliglksqgnkdefdei  
ytieslestlpadiiina  
lpetqetihllkkkhfelmkdealfinigrsivkeallievlskvrhayldvfenepkpnhelyeldnvtitahit  
gndyeakylldifknnlv  
nflnkgiienevdkkgy  
>tr|Q5HEV3|Q5HEV3\_STAAC  
mntiyepssicmirtpllsveffnflnteqikysdlqlnaqmesilttfnlyctlqeifdgdnkkrdakesllky  
lirmstrptpfgllsginl  
ghfvneptrlkvgnsiqkyvkvdgewlyklvsyiesideyyqnlkviwnskahiindriylneqsaiylnnnkdtfsfsik  
nsellvfiktvtvnnitf  
snlaekingefeinditkvkvyihnlvskeiistirpplsysdnlyilnklslhnddfvkkireiqklilayekteig  
fgeelykdiihmkalfkc  
knylqidtkidmnylhqdiatniseaayllwllsrnngftdlkvlhnrfikeygfeqlvnikdlisditgfgttifq  
eetdgnniivmlkqkflha  
lrrndeivinekdveslindneinyhapmsadvyaelylgrfynqynelivispltasfnagatfgrfhhlidtetlak  
lehekghyyqkmi cddnve  
misinnipkyprnhvlnthdsyeyslnlgssnsyskyeltlddiyvgatfnklylyssqlnkrvifesnmyfnlkecn  
lyrllreismesvkciem  
ndvsidsfsyspriyknvilkpaywkinemvlpkpneewdqfkyqeqfnipnivlvygdnklllnslanhryll  
mkeykhhkrvrllvesflpq  
skndhvyeivtpiykssyrgeieipkykntdieydkdwfalhihidkpsqdtfiidnlypfvkhlkdkgidqyflmr  
yikqgdilkrlfrndeny  
aeiysilknwlpvhrqttevsvdyefvsyepffryggkntineieaffeydtnlavniendfkfdrpyivaisimylfe  
mfsisneermeivnnyvpt  
sfkskdi rpfknelvticnpannfeymakhysgiyri lkdgnqilsklneglkktl ttkrsriigslihmrcrifgidk  
dqetfvlsivkeivktqkh  
wcgdknd  
>tr|Q5HEV7|Q5HEV7\_STAAC  
mihlkiegikfksnfsmyvllispvlfcfaiftvlfaksntgtansvspytllfniwpi afipivlcmacnslfkiem  
rnksfnnyl snnwsitkei  
rakifilsiaflvhcflviiayigdliinphpvnamlllvtilmyvvspliplnfltryfgvfvsilinlvsvic  
vflftlkslfwvlpwgimq  
riplitlglpnglvvnhsyfnldnalyisiivsiifavtflnnkkswrk  
>tr|Q5HEW9|Q5HEW9\_STAAC  
mkrstnqekfldtlirlntkieelgkini lnhiyseyffrdllnivygyslenhkkqknapafdli dntnkiii  
>tr|Q5HEX0|Q5HEX0\_STAAC  
meegyrlkfi fignqnnniknfnspnihil fskkdiiltqdlceeflnlninkqdhaie llkkel spllfedslylk  
eefineklefnisnlasry

Tsompanidou\_et\_al\_Supplemental\_FASTA\_File

tannvdvtinnkiiegisitnnfkytnisylkelkgyiendildkmkskyakniylnfkkiifsnleqsvnyyleleeeefe  
ekkkylseiyelideinid  
pyifltehnechniykiseneklelqtymskiekvllkyqtylketckeclyfpyllvqgeagigkshllahlskklrden  
hiyflfgqfftknedpwh  
qilndlevtnsvdnflrsisnkaketkkrafiidaalnegegkrwgnvfqsfinhikkysniaifisirtpfedvilpk  
naiqdnnivvfqhegfske  
enynpivsfcdfyglelpklpinpefnplflklmceycvnkfkefdqtisvaeiftnvlktvninlskedkfdfdkni  
nvqkvikglvelmdsef  
nqlnyeesyvtvnniakeyvqksnrflaalidenilikntgykgemiiyfsyermgdyflseyllekyrnvdkrdlvtkl  
qsdekvttryfqkeddlsyn  
rglinefikelanefnielfevfpqfknnynmiysfinslvwrkdgsiskhtkcyisdnvipydafrnnfldvllikmpq  
knhplniwalhklkqcnl  
gkrdfllwtqyisinnekvfeinwlfnsnykkideetaekymiiftwifsatnnkldrgtkslvklfktfptkiigllkl  
fennndpyiverlyasvlg  
atlrirdiceihieianiyeeifdkemvyphilmrdyarqtieyislskdisninlekirppyksnwykkeysnlidddy  
ikslknkldshlhfsidki  
knsmtteygrgtgaygdfgryvfygavrnwvkgfksdqdlsnialmri femgydaklhgefmdmwvnrndfnnsierisk  
kyqwiayyeilaklvdkfp  
dvqysglwddyirdidptllleidek  
>tr|Q5HEX2|Q5HEX2\_STAAC  
mnkkylmiviiilililgglflkmkydekkyydeqkeritiumkynvkgkyknisfanfkenpmdgysisgyinndkklsf  
tagirsyddfqfdtdisyt  
delgrkfnknpsvseikkeqtsnk  
>tr|Q5HEX8|Q5HEX8\_STAAC  
mkfkaivaitlslltacganqhksnsndtnkktqtdnttqsntekqmpqeaedivrndykargvneyqtlnyk  
tnlersnehyyvehlvrd  
avgtplkrcaivnrhngtini fddmsekdkfeafkkrspkynpgmnnhdetdgesediqhhdidnkaiqndipdqk  
vddkndknavnkeekhdng  
annseetkvk  
>tr|Q5HEY7|Q5HEY7\_STAAC  
mssdtnslahtkwncxyhivfapkyrrqviygkikkdigiilrqlcerkgveieaeackdihmlvsippklgvssfvq  
ylkgksslmifdrhanlky  
rygnrkfwckgfyvdtvgrnkkienvi rnlqedi vadqismeyldpftgekknkrkkke  
>tr|Q5HEZ6|Q5HEZ6\_STAAC  
mnkasfdkvvkqlwflnkkekqaldqr lssi dddsvnlkpvtfanaylrqnvfrnketksysmfvtlvmmfayval  
lglflfglitslsgvqffv  
spkvdlsttvviltiigailmfasiyfikivtsyftkllleikfnsk  
>tr|Q5HF03|Q5HF03\_STAAC  
mtykelatflkvlsdssrleildllscge lcadllahfqfsqptlsyhmkalvktnlvttrkignkhlyqlnhnifesv  
innlsvhtsnqrcichnl  
ktgec  
>tr|Q5HF09|Q5HF09\_STAAC  
mallknffiglsnnsflnnaakkvgprlgankvvagntipelintieylnkniavtdnlgefvgtveeshakeqilt  
imdalhqhgvykahmsvkl  
qlgaefdlelayqnlrei llkantynmhinidtekyaslqqivqvlrdlkgefrnvgtviqaylydshe lvdkyqdlrl  
rlvkgaykenesiafqske  
dvdanyikiieqrllnarnftsiathdhriinhvkqfmkenhiekdremefqmygrselaeianegynftiyvpygdd  
wfayfmrrlaerpqnlsla  
vkefvkpaglkrvgiiaalgatvmlglstikk lcrk  
>tr|Q5HF10|Q5HF10\_STAAC  
mmllisfiynnmdnntinrnlhsefaiimllkinekgav  
>tr|Q5HF18|Q5HF18\_STAAC  
mnllkknkysirkykvgifstligtvllsnpngaqa lttddnnvqsdtntqatpvnsqdkdvannrglansaqtprnqsat  
tnqatnqalvnhnngsivn  
qatptsvqsstpsaqnnhdtgnttatetvsnannndvsnntalnvptktnengsgghl tlkeiqedvrhssnkpelva  
iaepasnrpkrraapa  
dpnatpadpaaaavngggevaitapytptdpnannagqnapnevlsfdngirpstnrsvptvnnlpgftlingg  
kvgvfshamvrtsmfdsd  
nknyqaqgnvialgrihgttdndhgd fngieka ltvnpnselifeftmttkngqgatnviiknadtdntiaektveggp  
tlrlfkvpdnvrnlkiqfy  
pkndaitdargiyqlkdgykysfvdsiglhsgshvfverrtmdptatnkeftvttslknngnsgasldtndfvyqvql  
pegveyvnsltkdfpsnn  
sgvdvndmntydaanrvitikstgggtansparlmpdkildlryklrvnnvptprtvtfnetltyktytdfinsaas  
htvstnpytidiimnkda l  
gaevdrriqqadytfasldifnglkrraqtildenrnnvplnkrvsqayidsltnqmghtlirsvedaenavnkvdqmed  
lvnqndel tdeekqaaiqv  
iehkneiignidqtddgvtrikdqgiqt lsgdtatpvvknakkairdkatkqreii natpdvtedei qdalnqlat  
detdaidnvtnattnadve

Tsompanidou\_et\_al\_Supplemental\_FASTA\_File

taknngintigavvpqvtthkkaardainqatatkrqqinsnreatqeeknaalnelqtatnhaleqinqattnadvdnak  
gdglainpiapvtvkkqa  
ardavshdaqhiaeinanpdattqeerqaaidkvnaavtaantnilnantnadveqvktaiqqiqaitpatkvktdakn  
aidksaetqhntifnnda  
tleeqqaaqllldqavatakninaadtnqevaqaqdqgtqniiviqpatqvkttrnvvndkareaitninattgatre  
ekqeaivrntlknraltd  
igvtsttamvnsirddavnqigavqphvttkqtatgvlndlatakkeinqntnatteekqvalnqvdeqelatainning  
adnaevdqaqqlgtkain  
aiqpniivkkpaalaqinqhynaklaeinatpdattndeknaaintlnqdrqqaiesikqantnaevdqaatvaennidavq  
vdvkkqaardkitaevak  
rieavkqtpnatdeekqaavnqinqldqainqinqnqndqvdttttqavnaidnveaevvikpkaiadiiekavkekqq  
qidnsldstnekevasqa  
lakekekalaidqaqtnsqvnqaatngvsaikiiqpetkvkpaarekingkanelrakingdkeataeerqvaldkine  
fvmqamtditnrtngqvd  
dttsqaldsialvtpdhivraardavkqqyeakkreieqaehatdeekqvalnqlannekralqnidqaiandvkrve  
tngiatlkgvqphivikpe  
aqqaikasaenqvesikdtpatvdeideanqlisdtlkqaqqeientnqdaavtdvrnqtikaieqikpkvrrkraald  
sieennkqldairntldt  
tqderdvaiddlknivntikndiaqnktnaevdrtetdgdndnikvilpkvqvkaarsvgvkaeaqnalidqsdlstee  
erlaakhlveqalnqaidq  
inhadktaqvndsinagniiskipattvkatalqqiqniatnkinlikanneatdeeqniaiaqvekelikakqqias  
avtnadvayllhdekneir  
eiqipvirkasareqlttlfndkkqaeianiqatveernsilaelqniydtaiqqidqdrsnqavdktaslnlqtihld  
vhpikpdaektindlar  
vtalvqnyrkvsnrnkadalakaitalklqmdeeltartnadvdavlkrfnvalsdieavitekensllridniaqqtya  
kfkaiatpeqlakvklid  
qyvadgnrmi dedatldikqhtqfivdeilaiklpaekvsvpkeiqpapkvctpikkeethesrkvekelpntgsegm  
dlplkefalitgaallarr  
rtknekes

>tr|Q5HF27|Q5HF27\_STAAC  
mfgvvpkplwskqyananernqinlpthpiliqtaqynliidagigngklsekqlrnfvgvdeeshiiaadlanynltpkdid  
yvlmthmfhdhaagldqqa  
ghaifenaiahvqqdewhefiapniskstywdknkgdysnkllilfekhfepvlgikmqhsgghsfghtiitiesqgdka  
vhmgdifttahknplwvt  
ayddyqmqsirekermipyfiqqqywflyfyhdenyfavkysdngenidayilretlvdnn

>tr|Q5HF33|Q5HF33\_STAAC  
mswfdklfgedndsndlihrkkkrrqesqni dndhdsllpqndiysrprgkfrfpmvsvayenenveqsadtisdekeq  
yhrdyrkqshdsrsqkrhr  
rrrnqtteeqnyseqrgnskiqqsi kykdshyhtnkpqgtyvsaingiekethkpkthnmysnntnhrakdstpdyhke  
sftksevpsaifgtmkpkk  
lengripvskpsekvesdkkydyvaktqtsqnkqlaqekqndsvvkqgtaskssdenvssttksmpnyskvdntikie  
niasqiveerirrererv  
lqkrrfkkaalqqreehkneeqdaiqraidemyakqaeryvgdsslnddsldtndstasqlhtngienetvsndenka  
sqnedtndthvdespny  
eevlnqvsttkqlsddevtvsnvtsqhsqsalqhnevndkdelknqsrliadseedgatnkeeysgsqiddaefyelnd  
tevedttsniedntnrna  
semhvdapktqeyavtesqvnnidktvdneielaprkkddqtnlsvnslktndvndnhvvedssmneieknaeitenv  
qneaeseqnveektien  
npkkqtekvstlskrpfnvmtpsdkkrmmdrkkhskvnpvelkpqvskqavsermpasqatpssrdsqesntnayktn  
nmtsnvnenqliqhaete  
ndyqnaqqyseqkpsvdstqteifeesqddnqleneqvdstsssvsevsditeeseetthpntsgqqdnddqkdlqs  
sfsnknedtanenrprtnq  
qdvatnqavqtskpmi rkgpniklpsvslleppqviesdedwitdkkkelndalfyfnvpaevqdvtegpsvtrfelsve  
kgvkvsritalqddikmal  
aakdrieapipgtsrvgievnpnqpttvlrsiiespsfknaesklvamyrinnepllmdiaktphaliagatgsgk  
svciinsi lmsllyknhpee  
lrlldipkmvelapynqlphlvapvitdvkaatqslkwaveemerryklfahyhvrnitafnkapydermpkivivid  
eladlmmmapqevqsar  
iaqkaracgihmlvatqrpvsvnitglikaniptriafmvsssvdsrtildsggaerllgygdmlylgsgmknkpirvqgt  
fvsddeiddvdfikqqre  
pdylfeekeillkktqtqsqdelddvcafmvneghistliqrhfqigynraariidqleqlgyvssangskprdvvyte  
adlnke

>tr|Q5HF41|Q5HF41\_STAAC  
mkvevykgagghnlkdyeetyntfdwkdvqafswsetgkmmayecidrhvdqglgdkia lnykdehrkesytkdmq  
rlnskaanvlsehaevdkg  
drvfi fmsrtpelyfallglvlgigai vgp lfeafmekavadr lenseakv l itnkallprvpvdklplnkki vvvdedve  
dnyidfis lmetasdefdi  
ewlksddgli lhytsgstrqpkglvhvqqamlvhyisgkyvldlqeddvwyctadpgwvtgtsygi fapwlngatnciag

Tsompanidou\_et\_al\_Supplemental\_FASTA\_File

grfspeqwysmiedfkvti  
wytaptalrmmsagddivekydlsslrsilsvgeplnpevikwakkvyglvtvldtwmtetgghmivnyptmdvklgsm  
gkplpgiqaaiiddagne  
ppnrmgnlalkgwpmmymriwknpekyksyfigdwvsgdsaykdedyfwfqgrvddvimgtagervgpfvevesklveh  
eavaeagiigkpdprgei  
ikafvalrkyeptdelkeeriifvkeglhsahaapreiefkdklpktrsgkimrrvlkawelnldagdlstme  
>tr|Q5HF44|Q5HF44\_STAAC  
mtnqdnqhlnhriyhfeikiykaikhvivi fmi fiaivaiaviamslyfhhltktsdslsddalikkvrqipgdellhd  
nknllzeynhsqnsliig  
pktsspnvikaltssedtlfykhdgilpkailramiqdifntdqssggstitqqlvknqvltnektysrkanelrlairl  
ehliskdeiiytylnivpf  
gkynganisgiasasylfgippkdl siaqsayligllqspygytpeykdgtlksdkdlkysiqrqhyvlkrmliedqi  
tekeyndalkydikshlln  
rkkrr  
>tr|Q5HF50|Q5HF50\_STAAC  
mkqfnvlvadpiskdgikalldheqfnvdiqtglseealikiipsyhalivrsqttvteniinaadslkviaragvgvdn  
inidaatlkgilvinapdg  
ntisatehtlamllsmarnipqahqsltnkewrnafkgteylyhktlgvigagrighgvakraqsfgmkilafdpyltde  
kaksitsitkatvdeiaqhs  
dfvtlhtpltpktkglinavffakakpslqiinvarggiidekalikaldegqisraaidvfehepatdsplvahdkiiiv  
tphlgastveaqekvaisv  
sneiieilidgtvthavnakmdl sniddtvksfinlsqtvgelaiqlmynapssikityggdlasidsslltrtiithi  
lkddlqpevniinalmlln  
qqqvtlniennkaetgfsnylevelsndsdsvkvgasvftgfgprivrinnfsvdlkpnqyqivsyhndtpgmvgktgal  
lgkyniniasmtlgrteag  
gdalmilsvdqpvsnniide1kqvgeynqiftteltvqs  
>tr|Q5HF69|Q5HF69\_STAAC  
mtkheqildyieslsigskisvrkiakflnvsegstayraikdadkmgmvatidrvgtvriekrnrneiehlftneivnii  
dgqvlggngkitkmvskfa  
igamelkdi1kyigpktllivgnredvqiealkrgtailitggfkpsnkvinfanehd1pvlsssydtflvaniinkalf  
ngkirkdilivqdimtpld  
dlsvlfdtmkiadykrmanrtghtrfpvvnesyklvgivtsremintkddddeidkvmtrnpiyvnamstvascahmmiwe  
gielipvvssnkktvgvin  
rqdv1ksmqllgrqpmgetindqiakyitmnqdgitivevsp1linhygtvskaafvsiieti qyemrkfkkgvnmien  
lnivyiktvpieshitvrf  
gildivgrnfakievmhsgndkvasalvicqmfdev  
>tr|Q5HFA7|Q5HFA7\_STAAC  
mnecafgtkdpvyldyhhdvhwgqplydskalfl1alesqhaglswltilkkkeaseeafydfepkvaqmtaqdidr1m  
tfpni vhhrrkkleai vngq  
qgy1kieqaygsfskflwsyngkpkdlqyehasdri tvddtatqlskdlkqygfkflgpvtv fsl eaaglydah1qdc  
pskpkhn  
>tr|Q5HFD5|Q5HFD5\_STAAC  
msteplasrmpknideiisqqh1vgprgiirrmvdtkkltsmifyppgigktsiakaisgstqykfrqlnavtntkkd  
mq1vveakmsqgvi11ld  
eihrldkakqdf1lphlengki v1igattsnpyhainpairsraqifelyplndedvrqaltraieddenglkytqpkid  
edamtyfstqsqgdvrsal  
nal1lavlsadndkdgyrhvt1qdakdc1qkgafvsdkdgmhydvm safqksirgsdvnaalhy larlieagdlptivr  
rllvisyediglaspnagp  
rtlaaiesaelr1lpear1psqavie1clspksnsamsaidsal sdirnghvgqipnh1kdghyqgakdlgrsigykyp  
hgyvngyvsqy1pdklkn  
kiyyepkttksseqqlkeiynn1lkqrp  
>tr|Q5HFD9|Q5HFD9\_STAAC  
maikysalnlvpi regedeqtaindmvnl aqh1del syerywiaehnapnlvssata1liqhtlehtkhirvgsggim1  
pnhapli vaefgtmat1f  
pnrvdlglrapgtdmmtasalrrdqhdgvykfpeevs1lqqyfgpahqqayvraypavgknvplyilgsstdsahlaar  
kg1pyvfaghfapqmqkea  
iei ykt1fepsdv1depyvivc1ntivaenddeaqyl assmaqvmvsitrgrmqpvqppthelqniltpreyamamerqk  
isligsentvqqkiqdfme  
tygeveimai syiydkdmq1dsyrrfkvninqinekt1  
>tr|Q5HFF0|Q5HFF0\_STAAC  
mktieeikstpkvmkkpe1lapagnlek1kiavhygadavflggqeyglrsnadnftmeeiaegvefanrygakiyvtt  
niahdenieglesylrn1  
ektgatgiivadplietckevapkleih1stqqs1snykaveyweegldr vvlaretgamemremkekvdieieafih  
gamciaysgrct1snhmta  
rdsnrggccqscrwdye1levddnge1dvfynqgevtpfamspkd1kliesipqmmdigvds1kiegrmksihiyatvvs  
vyrvkidayaadpndfkin  
pew1ieldkcanrdtaffegtpgyeeqmfgqqskssfdfcglvldynedtkiatiqqrnnfkpgqeieffgpeiet  
ftqvveaiydeegns1daa

Tsompanidou\_et\_al\_Supplemental\_FASTA\_File

rhp1qivqikvdrpiyppnmrkeig  
>tr|Q5HFF5|Q5HFF5\_STAAC  
mniekieqii1vkendvkkfkyknfedeieidftdlnhlaahsnqsnqsmnnd1taskandnsdvstndyhdikspmi  
gtfflqdske1tepiavnvg  
dkvknkgdiigyveamkv1nevttvdageiteivadhgtnveydqvlvrik  
>tr|Q5HFG0|Q5HFG0\_STAAC  
mlegiftnsasaieysd1hhkskfdskrlsnakmsfinptqlenktndr11khd11fhdmfvnddwkdkfvefenea1  
skkfinkdidi1fagnygyg  
chggatnktqcsyggvt1sdnnkyddyknipcn1widghqteiel1tavtkkkivtiqele1vqlrny1nekyklyeaggd  
ivkgyvkyynddeqnveyd  
fyn1ngeygrevl1kmyadnktinsdk1h1diylfks  
>tr|Q5HFG4|Q5HFG4\_STAAC  
msdilkcigcgap1qsedknkpgfvphehnmfrddvicrrcfr1knynvevdvglesedf1k11sgladkkgivvvnvdf  
dfegsfinavkriygnkki  
ilaank1d1pkqinrrrvkew1krtarkygleaddvvlisaekgwidd11ssiani1redvviyvgttvngkstlink  
lieasvgekdvvttsrfpg  
tt1dmidipldetsfmydtpgi1qdhqmthlvsekelkiimpkkeikqrvyqlneaq11ffgglaridyvsggkprlvcf  
fsnd1nihrtktekand1w  
rnq1gd11tppgnpqnfd1nevkvav1etgkekrdvmisglgfitigpgakvivrvpknvdvvlrnsil  
>tr|Q5HFG6|Q5HFG6\_STAAC  
mltgkqkrylrs1ahnidpi1fqigkgginenmikqid1tenre1ikvhv1qnnfddkkel1aet1seathselvqvigsm  
iviyreskdnkeie1p  
>tr|Q5HFH1|Q5HFH1\_STAAC  
mv1lyqf11rykdf1tqwklly1savvlmvl1gfi1fwrqddytsrnfenkdtalkqstsens1skvedvqvkdgdnsk  
nkgpvydvk1gavkhpny  
kmtskdrvd11dkaq11ledadvsqin1sekltdqkmi1fiphkgqknvepqi1evnsvhekngtnttkvn1ntasvselm  
svpgvgqakanaiveyrnq  
qgafqeidd1kkvkgfgsktfdk1ksyftt  
>tr|Q5HFH2|Q5HFH2\_STAAC  
maqsh11alrstcqr1svgatvkdnr1iaggyngsvagevhc1degcliedghcirtihaemna11qcakqgvstegat  
iyvthfpc1nctksiiqag  
ikriyyaedyhnhayat11kqsgiefkkipfspeyvaky1tkg  
>tr|Q5HFH3|Q5HFH3\_STAAC  
m1stf1f111lyityrknkivyapis1f1i1fsawylhysqqaifnyinyiernsqfneraqviq1qrqgsdtykgr1s1  
kneiyppf1tdkknfd1kk  
iesrncivkqgfkvndknfv1kl1qsivvqsc1esnrsn1iekhhkqfimnriydsigkfpdrimalitgdvkeveqfke  
rvkeigiyh1lavsgshia  
aivf1iyqplkr1n1p1fvikgitiiv1al1faqytnyapsavraiimtt1vlvitkqikiksiq11lafafiimfilnplv  
vydigfqsfiisffim11  
fp1lqqlsk1qslfiitfiaqlasfivaipsfhqlqvwgflsn1ifvpyysiilfp1silffitshfivgltp1ny1vd1  
sfnfhdw11d1ftrikqsh  
fsvpkfndwi1fivfi1svyyi1fw1lakrkyilvtfwti1i1t11itfptnshhkitm1nvqggsilyeggknqnv1id1t  
gkviddtkqpsysiskyh  
i1pt1nergineley1i1thphndhigeveyi1shikikhiviynkgysnt1m1l1sk1shkynik1mdvrqvssfk1gd  
ss1ffdsfipnsrdkney  
sii1mityqnkkv1lmgdasknnes11kkyn1peidi1kvghhgsktssskefiemikpkis1issgknmyh1pniev  
vkr1q1rsriynsqngq  
vtid1ddn1kvdsssygnasg1  
>tr|Q5HFH7|Q5HFH7\_STAAC  
mdkksekrgikmtvqsayih1pfcvri1ctycdfnkyfi1qnpvdey1dalitemstakyrilktmyvgggtptalsinq1  
er11kairdtftitgeytf  
eanpde1tkekvg11lekygvkrismgvqtfkpe11sv1grthntedi1ytsv1naknagiksis1d1myh1pkqtiedfeq  
s1d1al1dmdiqhissygl1  
lepktqfynmyrkg11k1pned1gadmyq11mskieqspfhqyei1snfal1dghesehknvywfneeyyfgagasgyvdg  
vrytninpvnyhikainke  
skailvsnkps1termeemf1gl1r1negvssr1fkkkfdqsiesvfgqtinn1kekelivekndvial1trngkvigne1v  
feaf1ind  
>tr|Q5HFI9|Q5HFI9\_STAAC  
mngsqal1gnndeh1kaieesfdvvi1hargqevavkgtki1envekaesv1in11kvid1gnnitik1dvea1k1mahnti  
qh11d1lydee1tkdafgkt  
iraktmgqriyvnamknnd1lvfigipagtgtf1lavvyaakq1rkgavkriv1trpaveages1gfl1pgd1kekvdpy1r  
plydglytv1lgreqterfi  
ergii1e1aplaymrgr1ledafv1ldeaqntthaqmkmf1tr1lgfgskmvvtgdqtqid1pkgvksg1keavsr1h1nvkg  
is1ilk1dqsdvvrhplvsk  
i1ehyegen  
>tr|Q5HFJ6|Q5HFJ6\_STAAC  
mnl1trat1rpd1ai1tmsgf1learprvgyyysgksk1gkffnek1rqfevkdym1sqpv1renttvydaictif1ledvst1  
fiinedndfv1gvc1srkd11



Tsompanidou\_et\_al\_Supplemental\_FASTA\_File

rasmigadihkvpi svnmtrmpnvtyleese lviyaadrmeikeidsipivrkkdnqkyevigriskttiakllvalyke  
>tr|Q5HFK0|Q5HFK0\_STAAC  
mislnnr1ttvscflkqgtiadigsdhaylpiyaiqnhlcecgiageviqgpfaavknvaanqlvdridvrlgdglsvi  
qpedvidniticgmggpli  
akilkdgqdklsghprlilqsniqtenlrqtlqqlnyeideimeekghiyeivvaeystelielssdelkfgpkllnn  
kneyfikwqrelealyhi  
ksklnteqhhqrlaqindeiaviervl  
>tr|Q5HFM6|Q5HFM6\_STAAC  
mtetwnfintgskdpyynmamdeallnfvsrgeidpvirfytwnpatlsigyfqlqkeididkvekkgfvlvrrqtggr  
gvldkeltysvvpeshp  
nmpstvtayrvisqgllegfknlgfdtyfavpktpeerqklkqprssvcfdapsweylvvegrkiagsaqtrqkgvilq  
hgsilqdididelfdmfiy  
knerlklmkeafvekavaindisdehitismeeafekgfkkglnielkplelteaq laeveeltekysdewmfrk  
>tr|Q5HFN1|Q5HFN1\_STAAC  
mteftpfddgsnqlnylkfvilrfhgvsrki ckmyrfayfrilevcemakkndyrftykydkflkqygvstfickmyh  
isiedleffevmnr  
>tr|Q5HFN4|Q5HFN4\_STAAC  
mtlknqctpltnrgvertnksaveavdvwvqvtfhitpisaviedviglpitlfkkrnsgiyfyngyefsniklyyssid  
desmgihlqltgtgcrefe  
hllqqlnktwqdfdkclsvanftridiaidddyktylkvp1likkaekaecvsrfragsaingfnlsdgrskgatfyig  
skqsnlycrfyeknyeqaf  
krhcdvediglnwryeiqrkayavncakvl srtdniseivksilhnrlrfisppkdgndkkrwplyrpalifikdte  
klnl1ttrptlksiednldw  
lckqvattldtv1taesmaqseglltdtdfldkilahsqfndehtnrinhylealkqkklkskdc  
>tr|Q5HFN9|Q5HFN9\_STAAC  
mamneialfkgvriqpyqkyidmfasvlafiflvryiylfidyksvkkldiltlfayfkphllylligtaiifvick  
liaqllirfktkdlaemie  
tqgfhnrtvikktteyipidykqteydyptmfykrkktfvihikkdgsrfqdnyleletieipmfnselvekkhigry  
lryefmp1kykkrivmnge  
qesntifydtkiaithqitwdfvkaphglvtgittggktyflfyvirelfrhsevrlldpkvsdlsfmkrvigddkvad  
tkgqilq1reannemeer  
frlmdssdyki gndfrnfdmryfii fdevtaftstldkke1qemndyliniimkgrqagvfmfltaqrpdadvikgnv  
rdq1glrvslgnlsndgyr  
mtfgqtdkefqtihdsdigryitilgqynepilfdap1meqydfvedvkqilnke  
>tr|Q5HFP0|Q5HFP0\_STAAC  
mkhksvyl1cflilpi1l1tsvsayavsnpvgepshavkpkiekydlshyrsiysekgdwnpfgqeeisrqinnvsdfff  
smtkilagvtdyaie1nlfq  
ldvindfadkigdfvgdiyqkllsnlailfiivcfnafiifsvqgnarealkraflimcligfgvgilanagniiirgtn  
nigkdlnniimnstssidg  
nidyhensgmh1rnqlfdmtiyrtylvmnygtvdekeikakgkdrnidilkqdfskkgqdeidkivknevekkdknym  
tqgyvfqlaisvigfiit  
vfmsivflsisfaklifstfalflfl1vswivsfipgfelsvfsafaktlgyiilsacmtflfvivglciklansfie  
pdsqayflnsifiivilf  
vmykkraqiinfvsrgnisfspaigagvmnrqtferfki rheqaqkkakrenqrdepapplqndndlrrrqdkpmp1  
finkdnqkngkrreqqes  
mngndvksasvesnandyskqpkasqqehqvretqrkdiqrspqvvnqplnnenhsinrkeqksvqtaytdtvqkrqi  
qnatqngqsrqsgnrnqpi  
trnsqskdr1keqkdinkhgk  
>tr|Q5HFP1|Q5HFP1\_STAAC  
mvnkkdiakkvigktpigvklklakvii1cvvaftfpv1vmfl1lapd1nkgkddagctvsqgnvsangidkfnenakg  
gklegkgkeiqkiaeknk  
pvni1mai1asesqwgkgenatrqnnp1svmgsksihdstyptiedgl1nagaknlydvyiskgl1dtpkkigpkyapvgas  
ndpnmnarwiptvek1mk  
d1ggseaktscsngkgsikfngklphwsnddpkgknl1ytagqctwyaygmrqkmgkpvstywhdahkwndrakaegykv  
dknpepgalfiaeqgaggh  
dghyghvavvigvsdggktfritemnwega1kvnert1kmtdgysfihdke  
>tr|Q5HFP3|Q5HFP3\_STAAC  
mrrwfvli1glv1l1sacgqkydkeidav1nserksmsessfkkpeksnsdfkvyedgkfitisfvydkdgtvwt1lykk  
nettdkyvkvedmnekeyq  
snhkpvyeenmkk  
>tr|Q5HFQ6|Q5HFQ6\_STAAC  
meitmpklgesvhegtieqwlsvvgdhi deyep1cevitdkvtaevpstisgtiteilveagqtvaiddtiickietadek  
t1netteeiqakvdehtqks  
tkkasatveqtstakqnprrngrfsvpvfklasehdid1sqvvgsgfegrvtkkdimsvienggttaqsdqkvqtksts  
vdtssnqssednsenstip  
vngvrkaiaqnmvnsvteiphawmmievd1atnlvkrnhyknsfknkegynl1tffaffvkavada1kayp1l1nsswqgne  
ivl1hkdinisiavadenk1  
yvpvikhadeksikgiareintlatkarnkqltaedmqggtftvntgtfgsvssmgi1nhpqaailqvesivkkpvin

Tsompanidou\_et\_al\_Supplemental\_FASTA\_File

dmiairnvmvnlcisidhri  
ldglqtgkfmhikqriegytlentniy  
>tr|Q5HFQ7|Q5HFQ7\_STAAC  
mktceqisyhdfkhnnvwyivkivskyrctsd  
>tr|Q5HFR4|Q5HFR4\_STAAC  
mvtikdvalkagvspstvsrvikgnqriseatiskvkkvmeelnyfnpntaartlitnqtykiglvlgkseepirlnpyfi  
nvlngisetcnqhggygtqt  
tvsnmndlmdevykmiqrmvdafillyskendpikqmlidesmpfivigkptsdidhqfthidndnilasenltrhvi  
eggydelifiteknfevs  
kdriqgfetiasqnkinyqietsnerevifnymqnlhtrlkdpnikqaiisldamhlhailsvlyelnieipkdvmtat  
fndsylteiasppqtcidi  
kprmlgqgagaaalni1knkaqdvieividtelkirkstqr  
>tr|Q5HFR5|Q5HFR5\_STAAC  
mknqwwkeavayqvyprsfndshdgidlpgmidkldylkdfgidvwlspmfkspnddngydisdyqeimdefgtmed  
fdrllkgvhdrgmkli1dl  
vvnhtsdehpwfiesksskdnprdwiywdpkipdgsepnnwesifngstweydanteqyyfhlfskkqpdlnwgnpevr  
davfemmnwvfdkgidgfr  
vdaitthikktfeagdlpvpegktyapafdvdmnqpgiqtwlqemkdrs1skydimtvgeangvspddaddwvgeengkfn  
mifqfehlglnsgdshfd  
mnsyksvlnrwqkqlenkgnalfiendqprrvstwgdddkywesatshaavyflqqgtpfiyqqgeigmtnypfesi  
etfndvavkndyqivkaqg  
gdvdallakykdenrdnsrtpmqwddtlnggftngepwpfvnpyktinvaqqledehsvlqfykdliqlrksndvyvyg  
qfdlvdaensqvaytrtl  
nekqvlivgnltnheaelvtpfdlshgevklnfydakvnlkqlrpyeacvie1n  
>tr|Q5HFS1|Q5HFS1\_STAAC  
mncqsesvvr1cvryaeqlsvfeeftvldilgdisvdqisdgtlyytcekfllvlqgnvlvgqii1tnndestcevkyrk  
mf  
>tr|Q5HFT3|Q5HFT3\_STAAC  
mknindrdl1telssywyqnidikkefkvngkrfkqvsynddknsn1ngaadikiye1l1ddkskptgqqtiiyqgtsne  
ainpnnplkssgfgddwlq  
nakl1mndnestdylkqtdqlsnqykikledadr1nsdf1kkymessnfknktivadggnsaggagakyqqgakhpek  
vvatdsami1pyaawqkfar  
prfdnmsfnstnd11twlqdpfikdmpgkrvni1ndgvprldtlidshvgykrkl1nrkdntydtvplikiksvkdteikn  
gkkvkkttin11dmdgrip  
inwvtgdsiarsgrgtlik1n1en1dalsklitgetsgmlaecviflnesfnisenenknfadrkkqlsegfkdkin1fq  
leemertliskinsleeva  
detiesisavkh11pfdal1kerine1fkgiksfiyekvysidneileifknidhdfrdgvseemkh1kvkqnidq  
iknqndiygrqiadirsim  
kqqdatil1dgnfqincsgenmvqglvipsnylgrkmkik1dhiddgikkiadyvqgiydeyaskivdvikylintipkir  
kn1rhaiem1nvkkkefls  
1ipnvtcnyiktklee1dnt1gkwepf1nd1kavsp11dn1ddivknmkplivqmi1fepshyddmfilntqaharl1dqm  
aqqfevvcng1nenegqai  
qtmqdsas11rsn1iqvkeq1ek1avy  
>tr|Q5HFU3|Q5HFU3\_STAAC  
mlfnkvfsri1ayqfn1nshqkdktpqstn1trknkk  
>tr|Q5HFW2|Q5HFW2\_STAAC  
mtikafwqytl1yqrswlmm11icni1lgm1ygyiwygeql1shpwhfkifvpsptaily1visis1liliqkqnsi1dala  
fvt1fkygiwavi1mni1lfi  
ieggd1tvng1v1mfshsimavqai1fyprfkrsmigisvamiwv1ndyidyfhl1qfpyydfitthvwqigv1scc1sv  
fg11lyielnk11kck  
>tr|Q5HFW5|Q5HFW5\_STAAC  
mgkrmkig1tcypsmggsg1iate1lgie1aerghevfitsnipfrirkpl1nmi1fhqvevnqyavfqyppydit1stki  
aevikeyd1d11hmhyavp  
haicg1laremsgkdi1kmtt1hgtditv1gydhs1lqgaikfgieksdivtsvsks1aethei1ietnkei1piynfvre  
nefptkhnta1ksqfgiap  
dekv1ihvsnfrqvkridti1etfakvrekipsk1i1l1gdgpe1vpmrqltke1nveedv1f1lgkqdcvsefyqlsd1v1  
11sekesfg1t11eamktg  
vvpigsnaggi1kevikhgetgvvdvgdcdsasdyair11edkv1ynk1lqknmladiaerfgsel1tdqeyyyyqkmlne  
hnkskge  
>tr|Q5HFX3|Q5HFX3\_STAAC  
mtenkgssqpkngnnggksnskknrnvkrtiiki1gfmia1ffv11l1gill1fayyawkapafteak1qdpipakiydk  
ngel1vkt1dngqrhehvnl  
kdvpksmkdavl1atednr1fyehgal1dykr1f1gaigkn1tggf1gsegast1tqqvvdaf1sqhksigrkaqey1syr1e  
qeyskddi1fqvyl1nki1yys  
dgvvtg1kaaakyyfnkd1kdl1n1laeeay1ag1pqvpnnyniydhpkaaedrkn1tv1ylmhyhkritdkwedakkid1ka  
n1vnrtp1eerqni1dtnqds  
eynsyv1fvk1se1mnnkafkden1gnv1lqsgiki1yt1nmdkdvqkt1qndvdngsfyknkdqqvgat1l1dsktgg1va1sg  
grdfkdvvrn1nqatdphpt

Tsompanidou\_et\_al\_Supplemental\_FASTA\_File

gsslkpflaygpaienmkwatnhaiqdessyqvdgstfrnydtkshgtvsiydalrqsfnipalkawqsvkqnagdapk  
kfaaklglnyegdigpsev  
lggsasefsptqlasafaaianggtynnahsiqkvvtrdgetieydhtshkamsdytaymlaemlkgtfkpygsayghv  
sgvnmgaktgtgtygaety  
sqynlpdnaakdwingftpqytmvwmgfskvkqygensfvghsqqeyppflyenvmskissrdgedfkrpssvsgsip  
sinvsgsqdnnttrsthg  
gsdtsanssgtagssnntrsqqsrnsgglgtgfn  
>tr|Q5HFY0|Q5HFY0\_STAAC  
mgkkmglglsialvvgiavvcImifssqktyfygymnsntnaekvsekdlvkhnkvepsndfkkkkgfvklvskd  
dgktfykqeiikhddvphg  
lmmkihdmhmn  
>tr|Q5HFY1|Q5HFY1\_STAAC  
mkntfnplqrhfyaaifiaplilitisgigyloffpevenniykneffgdsdvkthqtIndavhqvqqyegffvskvs  
ildpynkritlisdmagng  
ryvflhdnqfvdqnakhtysnmrsihsslftentiinyelveitacwmifmilsytyllikkhlisnkskalrwqkw  
amigviiiaipvfvlvltgl  
pwsqfmgskiaqmmtdngdlggelainppksdlnelpwatrknkqpasssekssghgnaampqtkldyqisidkveq  
aqkagikkpfsivypsdkn  
gtfivsnstnsqvtgldivspykeqlyfdqysgkklgtikyddygiakwftwgiplheghlfgilnkiinlfciallv  
aimgfvswwikrtkntavk  
vthrvkkpasisliiclivlgllmpifglslilvfielilyikdrakq  
>tr|Q5HFY2|Q5HFY2\_STAAC  
minkeqldllykllkveksrnealhtinqvikkvylqytcsvfghfsagkstlinllieqdilpsspvpttsntaiv  
svsdnhdianlpnqtyak  
lsnydevremnrqnvdsvveinfqsakfengftlqdtpgvdsnvashqsitesqymysnmi fytvdynhvqselnfkfm  
khindvgipvvfiinqidk  
hqddelsfstfksrveksiadwgiklertfyvskfdhpenelvlssylisldqhretiedytsrtveyiteaqldyiqs  
eiqevledlgiieaeqea  
flnsqghqai seeaqllnnpdelmafknkrknienayimphnmremrsylesmsqdfvvggffnkkkkklqiqqr  
l tatdalqehvnqri qpm  
redmsfvtrfinkkeasdkvl nqhydvkpeieglyqpqtsisntyvltfsdevvkaikkyveqqstpifkeienvqad  
elpteeddkeyqrytel  
nelrqslltknyrhyyihl desldkligrqettyqvadnaqdnrdnqqlnqntattnmsidiqkaldiidsvplfkrtk  
qdihetl tridnkl ikigv  
fgtfsagksslinallgehilvsspnpptaatteisygdesyitlksqsqlldeinavveyqdmstiedfinsdlekl  
kshlnknqlafiqavekhy  
klyvnmleengekhainqqelkksaedeyatfvktvhialmhdwlkgkiivdslglsnqrhtneteqiltssdilv  
syfnhsftdndkafiehm  
dmnqlnenqafkmvinaadlaesqddleavetyvsdalr qvhlqsdifavssrnalqaedkgidqlkqsiqqfvdesks  
ileqqmihqlqqmdrsvye  
mitetfnkadisrrqqrldtydkqrlqhqlidat lqhtdneveeqvyhlnarlkqllddvksvfnsqmtqnsdfne  
kkvstrvyldqihqr lfle  
qs literikkyfnkqlteqiapivqqladhviinpqfnfesanieqpllhidfndmlnalpkqltkrkilnpngqrdih  
esicqstlgllppqmgllr  
qqlelyvqmaveaesqfesfeaniqtqindllafdldttlinqlkdkhqqlktily  
>tr|Q5HFY6|Q5HFY6\_STAAC  
msngkelqknigffsafaimvgtvigsgvffkisnvtevtgtagmalfvwflggiiticagltaaelaaiipetggltk  
ieytygdwgf lsgwaqsf  
iyfpanvaalsivfatqlinl fhl sigslipiaiasalsivlinflgskaggilqsvtlviklipiivivifgifiqsgdi  
tflslipttgnsngfftai  
gsgllatmfaydgiwgvnagelknprkrdlplaisvgigcimavyllinatfltlpiellagnlnaasdt skilfgen  
ggkiitigilisvygting  
ytmtgmr vpyamaerkllpfshlfakltksgapwfgaiqliiaaimmsmgafdtitnmlifviwlfycmsfvaviilrk  
repmmerpykvplypipl  
iailagsfvlintlftqfilaiigilitalgipvyuykkkqkas  
>tr|Q5HG08|Q5HG08\_STAAC  
mcglrsitlgttnieqtkhfmvdi lgnyeellensirfgdadispgrlqfiqvpsqleeshfvigilrtptdsglee  
yaeilsnkdipfttvekn  
gnkyfsl ednng hifsiysnennygvglgmpsfesavnplhqvqglgpvilkvnhvditgqilt nifglevfaeyqpdfn  
adyhvqvfvkvtggllgei  
himpvetemtpyegavdvefetkdadffnqaksrldeveipyqt leqddiesiritensgl sfi ftlqk  
>tr|Q5HG27|Q5HG27\_STAAC  
mvtrsvlkfggssvsdftklkriaemlkervnqdeqlivvvsamgnttdqlmtvstltkpkqqelaallttgeqqts  
ylsmvln digmnakamtgy  
qagiktighhllkskiaqin pqtfeqafqendilvvagfqginehqeltlgrggsdttavala vnsqipceiytdvdgvy  
atdprllpkakrldivseye  
emmemsalgagvletrsvelaknyniplyl gktsnvkgtwimsneeilekkavtgv aldkhmmhv tisyplpdnqlltq  
lfteleegavnvdmsiqv

Tsompanidou\_et\_al\_Supplemental\_FASTA\_File

nldglqlsftikdsdfhgismiletlnkqyealaykinehyvkisligsgmrmsgvaskaflieniipfyqtttsei  
sisyviddfngqqavekly  
dafni  
>tr|Q5HG36|Q5HG36\_STAAC  
msgglplredvpvsetwdlvdlfkddqyyesidalvqqanqfhhtyattlnsieqintalaelenilialdrlnsyael  
rlsvdtsnieaqvlsakls  
ttygkivsqsfvseielelpeeilqqleescpyqhyikqlikqkpfqlsasveqvlatsptlnspydlygttkmlidit  
fdsehdgttypvdyatfe  
ndyednkdpfrrksfksfsdgi rkyqhttaatynmqvqqekieadlrgfesvidyllhsqevtrdmfdrqidmimrdla  
pvmqkyakllqrihglndm  
rfedlki svdpdyepeisiedsknyifgal svlgddytnml reaydqrwidfaqnkgkdtgafcaspyfthsyvfi swtg  
kmaefv lahelghaghft  
laqkhqpyleseasmyfveapstmnemlmanylnfntsdnprfkrwiigsilsrtyyhnmvthlleaayqrevyhkvdqge  
lnaptlneimlnvyknlff  
gdavdmtegae ltwmrqphyymglysytsagltigtvvsqkiknegqpavdawletlkkgsvspvelaniagvditte  
qplkstiqyisd lvdevk  
ltdeieqann  
>tr|Q5HG43|Q5HG43\_STAAC  
mrfvfdidgtlcf dgrlidgtiidtllqlqhdghelifasarpirdllpvlpsvfqhhtligangamisqqskisvikpi  
hdttyhhi fki iqknel dy  
iiddwnyaaql daeniferldphklascidvanidtpikiillnidpaqittildeldkyhqelemihhsneynidit  
aqninkytalqyifdadvk  
yiafgndhndivmlqhasggyiigpseaythailkl dkikhinnaqaickvlksyk  
>tr|Q5HG51|Q5HG51\_STAAC  
milvvdnydsfytynlvdivaqhtdivvqypdddnvlnqsvdaviispgpghplddqqlmkiistyqhkpilgiclgaqal  
tcyyggevikgdkvmhgkv  
dtlkvisshqhlllyqdipeqfsimryhslnspdnfpeelkitgrtkdcisfekerphygiqyhpesfatdygvkiit  
nfinlvkeg  
>tr|Q5HG53|Q5HG53\_STAAC  
mepilemiktltginspsgdteeaiqfvekyakdlygqttltnkgallitvpgkndevqrcitahvdtlgamveikedg  
rlaieiligftynaiegey  
cqiktadagqiygtticlhtsvhvyrnnheiprdqkhmeiridevtseedtkslgisvgnfvsvdprtvtitssgfiks r  
hlldkasvami lqllkklk  
eeqii lphttqfyisneeigyganasidskikeyialdmgalgdgqasdeytsicakdasgpyhkqlkshlvnlckin  
nipykvdiypygsdasaa  
lhagadi rhglfgagiesshamerthidsikatekllayaclspie  
>tr|Q5HG63|Q5HG63\_STAAC  
mkdfds lipgw fkefvhvgtdl iwsqyligllltagffftisskfvqlrmlpemfralverpetledgkkgispfqafai  
sagsrvgtgniagvataiv  
lgppgavfwmwvifafigaasafieatlaqvykvhdkgdggfrgppayitkglnqkwlgivfailititfafvntvqsnt  
iaeslntqynispvitgii  
laivtaiiifggvrsiatlsslivpimaiiyigmvlvillfnldqivpmigtiiksafgieqvtggavgaavlqgikrgl  
fsneagmgsapnaaataav  
phpvkqgliqslgvffdtmlvctataimillysglkfgdnappgvavtqsalnehlgsaggifltiavtlfafssvvgny  
yygqsnief lstrnrvlfi  
frclvvv lvfvgavvtetvwn tadl fmg lmaivniisiiglnsvafalmkdyqkqkkegknpvfkpenleinlfgisaw  
gankyksndkqiflm  
>tr|Q5HG82|Q5HG82\_STAAC  
mnglnsvigamiiidknattvtmnlfiyityyky  
>tr|Q5HG93|Q5HG93\_STAAC  
mptflknqkivfsfvskndimylyfeyyelyknke  
>tr|Q5HG98|Q5HG98\_STAAC  
mtv fsemfiyfhs ltitlyhaiafqnieicrygy  
>tr|Q5HGB1|Q5HGB1\_STAAC  
mlhnhpgqsgfseydlftffkhpsiksmtivtnkgqvkfittsnrfhgkivskfcakyfthiniindshiekllkklysi  
nmikykv  
>tr|Q5HGB4|Q5HGB4\_STAAC  
mipgvnappmhpwcrsttvphvgnrdrkffkeregkyqvegcfiesgalnksdeygikrnrhaqiyynsvrnrdrkqiei  
sktakntninknlqrve  
hifenkyll esgfkqfdpdfymaqsqr lregknikkmdiim  
>tr|Q5HGB6|Q5HGB6\_STAAC  
mmnkynfnydahkivskkydysifikkkv  
>tr|Q5HGB9|Q5HGB9\_STAAC  
mkmtikvrktnkkekiefliigtffiilvilgfkimk  
>tr|Q5HGE9|Q5HGE9\_STAAC  
mktvgealkgrrrlgmtlteleqrtgikremlvhiennefdqlpnknysegfirkyasvvnienpqliqahqdeipsnq  
aewdevitvfnnkdldyk  
skskepiqllvimgitvltitllwimlvlif

Tsompanidou\_et\_al\_Supplemental\_FASTA\_File

>tr|Q5HGK1|Q5HGK1\_STAAC  
mpihrllyfpilnsskkqveiletlinllisvs  
>tr|Q5HGL0|Q5HGL0\_STAAC  
mhinllcsdrhlpqdiwaksnegkwggvdrgalillkhqipffsvgdfdsvskeerqllteqlqikpvqaekadtdlal  
avdkavalgfdstiygat  
ggrldhffgaiqlllkkayykhdvhievidqqnieillpkgqhtvekdkssypyisfipmtddvelslagfkylnlarqmln  
igstltisneieslqakvt  
vhdgllilqirstdln  
>tr|Q5HGL8|Q5HGL8\_STAAC  
mfelkvgiikreanviisnstggkemqvnkviyillaflgsfgihkfyagknmqgilhlifcwtgiphilaisavitv  
fkpadeqgnvtl  
>tr|Q5HGM1|Q5HGM1\_STAAC  
mnmkkillavtggiaaykaidltskltsqgyevrvmtnhaqkfvtplafqaisrnavytdtfeenpseiqhialgdwa  
daiivapatantiaklsvg  
iaddlvtstllatetpkfiapamnvhmyenkrtqqniniikedyhfiempsgflacgyvakgrmeepiqivsvidahfq  
nsnrlanssfqdkralvta  
gptievidpvrfsnrssgkmgyaiaeaalnrgaivtlvagpttledpkdieihvqsaeemfeqvtsrfdeqdivvkaa  
avsdytpidvlehkmkkqd  
gdlsvsfkrtdkilylgehktssyqlyigfaetedienyaqqklrkknadviisnvgdmsigfssddneltmhfknnek  
vnikkgkvvlaaqilde  
etrwq  
>tr|Q5HGN3|Q5HGN3\_STAAC  
mqndemfertvkvpldvnekpqpaqwfslqlhlfamfgatvlpfltgplisaallasgigtlllyilitkaqipaylgs  
sfafitpitiitgltsthsldg  
mlvalfmsgvmyviigilklsgtawlmklppvvvgpvimviglslaptavnmyenpgdmkgynisflivamitllv  
tiivvgffkqfslipvlv  
giivgyvvaifmgivkfdaimsakwidfphiylpfdyvsfhlglvlvmipivfvtvsehighqmvlnkivgrnffekp  
gldksiiigdgvtmfasi  
ggppsttygenigvlatriysiyviggaaviaivlafigkftalissiptpvmggvsillfgiaasglrmlveskvdf  
annrnlviasvllvvgign  
lvfnlkeiginlqiegmaalaalsgiilnllpkkekqnn  
>tr|Q5HGP0|Q5HGP0\_STAAC  
minidiyqhfrqeeyelidqldtkcdqaeqhyapvlthflprgqyilevicgsyedlnvsfyggpnaerkrailspony  
epkesdfeltmeidyepk  
fvtkhghilgtlmslgiereqvgdiivneriqfvltsrlesfimelelqrikgasvklytipvtdmiqsnenwknesatv  
sslrdvvikemirksrti  
akqliekkrvkvnhtivdsadfqldandlisiqggrahitdlggkttkdkthityrtlfk  
>tr|Q5HGP7|Q5HGP7\_STAAC  
mddktkndqesnedkdelelfttrntskrrqrkrskathfsnqnkddtsqqadfddeiylinkdfkkeesndknndsas  
shandniddstsdniene  
dyrynqeidqnesnvisvneqpsapkeqnsdsideetvtkkerkskvtklpltleekrklrrkrqkriqysviti  
vlliaviliumfspklskia  
hvningnnhvstskinkvlgvkndsmytfskknaindeenpliksvaihklpntlnvditeneialvkykgkylpl  
lengkllkgsndvkindap  
vmdgfkgtkeddmikalsemtpvrryiaevtyapsknqsrielfttdglqvigdistiskmkyppqmsqslsrds  
klktrgyidlsvgasfipy  
rgntssqsedknvtkssqeenqakeelqsvlnkinkqsskn  
>tr|Q5HGQ1|Q5HGQ1\_STAAC  
myqpydeqvyns ipkqqpqtkekkvsvrkvvvltkfekvlyitlitviamlsiymlslkmdaydtrgkiadldykidk  
qssensalqseiikknsye  
riyekakkqgmslendnvkvvrsngeakn  
>tr|Q5HGR0|Q5HGR0\_STAAC  
mrllqkaplvtsglvlgllgllgnllkdlsltlnavcgifafliwihllctmikyfnvkeqlnsplvssvfttffmsgflg  
tlylntffsnitfinslit  
piwilclvgimthmifsiylykdfslenvypswtvlfigiaagltapvsgyffigqltviygvatcivlpivfkrllk  
afplqtsikpntsticapf  
slvaaayviafpanafiviiiflllaqifyfyiiiqlpklkfpfspvfaftfpvlvisatalnslpvlmfpdiwkgll  
fievlratvivrfigyl  
hffllkkeqdkflrnasq  
>tr|Q5HGR7|Q5HGR7\_STAAC  
mcklagphseigfpistdnaswrgpnieaggksaynnvqvg  
>tr|Q5HGR8|Q5HGR8\_STAAC  
mgprqlahycklfrqllcwppqlalsveflfeilyvgappieckllhghfhsvnyyqynivepktliyyvlgpsif  
nd  
>tr|Q5HGS9|Q5HGS9\_STAAC  
mkrksnvtiikivtdivatvliiraallnsrkdak  
>tr|Q5HGT1|Q5HGT1\_STAAC  
mskwiivsdnhtesgvlyqiyemhpdadvylhlgdselayddtelslfnrvkgncdfypefeneavakyndvkafythgh

Tsompanidou\_et\_al\_Supplemental\_FASTA\_File

lyqvnrttrdllaekglelg  
clafayghthvakyeyingvhvinpgsisqsrsmeetyaeviiddqtlhgtinfknrhhethishttf  
>tr|Q5HGT8|Q5HGT8\_STAAC  
mldyhltfidllippfssrkqyddlsfnfly  
>tr|Q5HGV2|Q5HGV2\_STAAC  
mrnvkqiatksiiiaislgltyttmigsvladeikypsakfnqpeakdktelttsifdekikenkalellifnqenknv  
teeqqlvdekaqlisdmtg  
kiylqvk1kgqidkeqlvfqndkneefpfvikdekddtivri lieqhmdkinmhvktlaekknldnkemvysihfkekkv  
qhddakevpskhqngennq  
dq1kkdidkkdsqksdtkerrtslftekglndipvqkdkvqqdsnkkienerpkasgtlkvenspptikkvennhkeqp  
kxkdekskkkkkvvekek  
alpafrddsknssq1ssdikeldephkkqym1faagivlatillisahlysrkrngqv  
>tr|Q5HGW4|Q5HGW4\_STAAC  
mineas1aiddide1admi1vasdiyasfeqakqalenndeahllyqsflkskeydevmrfgkyhpydkkvmletrqrk  
rayem1dvvmhykarema1  
qh1idevvtkiayavsehvkietgnpffqtshsgcatggscncs1  
>tr|Q5HGW5|Q5HGW5\_STAAC  
mnksnnhaenpkpkegvgtwvgkdivltskfgqadrviyprfdgyknyvfkdksyivstkreivsvyatgekvnvsp  
1kigqhsaeifnhtsinpe  
psfkvdgkkyefelsdedlktqtl1kygdiyaqvysdqskkvlsvrfltkemladiepyqlnsnstseehnrpveqnp  
nqlis1yevtnemrklkg1  
kplkinsd1ahiasn1lyeatsngsdsveftedalrgqldknhvtykttaqnvgyafndvptlihswnsdihrsr1lns  
kydemggdvmrduys1if1  
ek  
>tr|Q5HGW6|Q5HGW6\_STAAC  
mpeddfv1skrhsvsven11invlfftivl1lfrwlidekvnyksrriifswifnisflfteiki  
>tr|Q5HGX5|Q5HGX5\_STAAC  
mtnkredvrn1aiiahvdhgktt1vde1lkqsgifrenehvdramsndierergitilakntavdykgtrinildtpg  
hadfggeverimkmvdgvv  
1vvdayegtmpqtrfv1kka1eqn1kpvvvnk1dkpsarpegvvdev1d1fieleandeqlfpvvyasavngtas1dp  
ekqddn1qsl1yet1idyvp  
ap1dndsdep1qfva1ldydyvgrigigrvfrgkmrvgdnvs1ikldgtvknfrvtkifgyfglkrleieeaqagd1ia  
vsgmedi1vgetvtphdhq  
ea1pvl1ridept1emt1fkvnns1p1fagregdfvtarq1qer1nqql1etdvs1kvsntdspdtwv1vagr1el1hs1ilienmr  
regye1qvs1kpv1i1keid  
gvmcepfervqcev1p1enagavies1garkgemvdm1tt1dng1l1tr1ifnv1pargm1gytt1efms1mtrgygi1nht1feefr  
prikaq1ggrrngal1ismd  
qgsastyai1gl1edrgvnm1epg1tevyegmi1vgehnrend1l1vni1tktkh1qtnvrsatkdqtqt1mnr1p1ilt1lea1lqfi  
nddel1vvvt1pesi1rlrki  
1nknvrekeakrikqmmqene  
>tr|Q5HGX6|Q5HGX6\_STAAC  
mkqkkskni1fwv1si1avv1vl1fs1favgas1nvpmm1l1t1fill1vat1fgig1fttkkyrendw1  
>tr|Q5HGY1|Q5HGY1\_STAAC  
mtgeqftq1krpvsr1tekv1gw1cwvm1l1v1l1vit1mfialvs1fsn1tsian1lent1lnnafi1q1llagngy1nttq1fviw  
1qngi1wai1ivy1fivc1llis  
fla1ismn1ri1sgfl1flisa1v1tip1vl1l1v1t1liip1ilff1iamm1fir1kdkvem1vapqyye1yngpi1dyre1pvyerp  
qp1kddy1dvpkye1k1dks  
ntvydqeqerd1kydq1f1kraveseynhderteeps1vsrqaky1kqk1steelgi1eddg1yae1pevp1kelkaqq1krekae  
ikakkk1krkayn1qrmker  
rknqpsavs1qrrm1feerr1qiy1nndi1seerns1sev1kdkkeqe  
>tr|Q5HGY2|Q5HGY2\_STAAC  
mkrfl1q1i1ga1lvvgm1cl1t1shw1fks1keqv1htnq1kiy1vynw1gey1idp1elikk1feket1giqv1vyet1fdsneameak1rng  
gth1ydvaf1psey1tvq1klkr  
dh1l1l1p1idhn1kvpni1kn1dsdymnms1fdrgnkys1lpyff1gtvgi1lynke1kypnes1fswks1lynpk1fknq1illvd1gare1i  
igms1nk1lgy1n1ndrn1shh  
1keaerd1tk1lapq1vrg1vvg1dei1tmm1l1qn1egni1avv1wsg1vaap1vq1egdk1yny1vipkegs1nlw1fdnm1vipk1taqn1kega  
yk1f1mn1f1ldak1nnk1qntef  
vgyat1pn1kaarq1l1pke1ikdd1hrf1yptk1keqer1levy1kd1lgpe1vl1sey1nen1fl1nfkms1lk  
>tr|Q5HGY4|Q5HGY4\_STAAC  
mrntnk1f1l1ipy1llwm1v1fi1v1p1v1l1iy1fs1fding1hfs1ftny1qqi1fttky1lkmfays1ilyaas1iti1it1tisypaay  
i1trsk1fqni1l1mimi1iptw  
in1l1l1ktya1fig1l1shdg1vin1qff1h1fn1lps1fn1l1ftt1ga1flv1vasy1iy1ip1fmil1pif1nsmkaip1nn1l1qass1dl1gas1pf  
yt1frk1vimp1l1tkegv1mtgi  
qvt1fips1l1fmi1tr1iagn1kvin1igta1ieeq1fl1tiqny1gm1gstia1fliv1fma1fili1itk1ssn1grg  
>tr|Q5HGZ2|Q5HGZ2\_STAAC  
mkf1gk1tiav1v1ass1v1lagct1tdk1keikay1lkqv1dk1kddeep1iktvg1kkia1eldek1kkk1l1tedv1nsk1dtavrg1kav1kd1  
ikn1addr1ke1feke1eda1ik  
kseqdf1kkak1shvd1nidndv1kr1kev1kq1lddv1l1keky1l1hsdyakay1kav1nsekt1lfky1lnqndat1qqgv1nekskaieqn

Tsompanidou\_et\_al\_Supplemental\_FASTA\_File

ykk1kevsdkytkvlnkvq  
kekqdvdfk  
>tr|Q5HGZ6|Q5HGZ6\_STAAC  
mterkcacnk1fsilvrgpnienfekkfyrqcelgcpqqreigfpistdnvswggttk  
>tr|Q5HH28|Q5HH28\_STAAC  
mnkf1kyf1i11alv1ivvpivfat11fktsqdafessqdsknanrqsn1rdnkvnpeeqpisilflgiddndgrkkgq  
daehrsdami1ttfnqsk  
hqirm1siprdtisiyipkvgyydkithahayggpiaamdsveatmvpvdyvrvnmkafveavnelggiyydvpyd1ne  
pntddtgkikikkgyqk1n  
gdealavartrhdsdlkrqqrqmeliki1fqkaqevdsidk1dnviqivgknakhn1tnseikalakmy1tndveikta  
qlkgkddm1ngiyyhpsv  
es1qkyan11rkdl1spindknfd1dqrvinhygs1ip1tp1dns11rkeqndttkdktsnensdstnnsdssnqqqp  
atdqnsnqnqgggtqqapqa  
snnqngvvn  
>tr|Q5HH39|Q5HH39\_STAAC  
mthykfyeanvetnqv1vflhgflsdsrtyhnhiekftdnvhvitid1pghgedqssmdetwnfdyitt1ldrildkykd  
ksit1fgysmgrvalyya  
inghipisn11lestspgikeeanqlerr1vddarakv1diagielvndweklplfqsqlelpveiqhqirqr1sqsp  
hkmakalrdygtgqmpn1w  
pr1keikvpt11lageydekfvqiakkmanlipnskcklisatghtihvedsdefdtmilglf1keeqnd  
>tr|Q5HH42|Q5HH42\_STAAC  
mkkdeersemgygrigrqyrqrdiwq1kgmgfs  
>tr|Q5HH44|Q5HH44\_STAAC  
mvwddmele1vkh1pkdmv1daiekscvdatyrtfyqhilvyevenkvagciisysgenelkyekawell1dpekikqyg  
tplpvkeakddeyyietia  
tfaayrgrgiatk11ts11esnthvks1ncdinneaalklykkvgfisdgqielykmyhhlivk  
>tr|Q5HH51|Q5HH51\_STAAC  
mfyachfkvkiggviltrtyniigilsc1isfiimalpmiwytasalwffpgaimi111slvivficyiktqnq1h111iv  
1ni111ffs1p111s  
>tr|Q5HH56|Q5HH56\_STAAC  
mnkiskaltwfijsfi1fh1ilfimwgehqeywlytgimliagisyvfyqrdiesnr11tsigvgiitailimlq11f  
s1itsn1sysslikelart  
gvnwkwqmlvt11fvipchelymrtvlqkelthfsipkwailitacss1fiy1dnwwivtfifvaqvil1syeytr  
riattsvaivai1111if  
na  
>tr|Q5HH59|Q5HH59\_STAAC  
mkyntnvkhttleafvttvnd1gieliinea1revrkrq1ieliddalvnkdeaafnqytaeykn1leaf1ge  
>tr|Q5HH64|Q5HH64\_STAAC  
miyekwilknvngkmrysikkmc11y1affq  
>tr|Q5HH72|Q5HH72\_STAAC  
msefktgkinkhvl1ysn11nrdvt1siylpesynqlvkynvilcfdgldflrfgriqrtyeslikeariddaiivgfhye  
dvdkrreefhpqgsrsh1t  
iqsvgkeilpfd1stf1tkvgnar11vgd1agsial1tal1typtifsrvam1sphsdekvl1dk1nqcankeq1tiwhv  
ig1dekdf1lptngkradf  
1tpnrelaeqikkyntiyyydefdgghqwkdwkpl1sdillyf1skntddqlye  
>tr|Q5HH73|Q5HH73\_STAAC  
mieklvtflnevvwskplvyg11itgvlft1lrmrffqvrhfkemir1mfqgekspngissfqaiams1agrvgtgnivgv  
stai1figpgavfwmwita  
flgassafiest1gq1fkrvenneyrggpaiyieygiggkfgkiygiifaivti1svg111pgvqsna1assmhna1hvp  
q1m1ggivv1lg1iifgg  
vrsianvatavv1pmai1yilmaviiiciniqevpal1falifksafglqsafggivgamieigvkrglysneagggtgph  
aaaaevshpskqglvqaf  
svyid11fvctatali11isgtyntvdgtvnangtph1ikdgg1yvenatgkdysgtamyaqagidkafhgsgyqfdptf  
sgvgsyfiafal1fffaftt  
i1syyit1etnvay1trnqnqvssifiniarvi11fatfygavktadvawafgd1gvglmawl1ni1aiwilhkpavnal  
kdyeiqkkr1ngnnavyq  
pdpnk1pnavfw1ktyper1kqarakk  
>tr|Q5HH74|Q5HH74\_STAAC  
m1nkvwf1rtgialim1f1lik1fmevhevftpiati1gsvflpflisgflfyic1lpfn11ekvgfprwasittim1alf  
a1ig1liva1fvapi1isn1  
n1isqtpal1qkaeqi1k1falaqmdk1pedvtsritnmvksmgdgvtni1sns1qyits1listif11imvpffliym1kd  
hek1pavak1ffkgerkvf  
fvd11td1nft1ksy1ggqvtvsvilg1flyigysi1d1pyip11vl1fagvan1ipflgsw1sfapaailgiidsptt1fi  
wvc1it1iah1qlegni1tp  
nvmgks1sihp1ti1vvi1aagd1ggft1v1iavp1yav1ktvvsni1fkyrqri1dkansvkd  
>tr|Q5HH82|Q5HH82\_STAAC  
mtt1pydi1gka1ydm1dyfyt1vekder1nh1fpgd1faetsrkqkqf1tqf1ggpniyteehghpml1rkrhidftite  
ferdaw1lenmqtainraaf

Tsompanidou\_et\_al\_Supplemental\_FASTA\_File

pqgvgydlferlrltanhmvns  
>tr|Q5HH91|Q5HH91\_STAAC  
menilevnqikkykiktglqktqyvkdvdvsfsikkqgtfglvgesgckstlgkviirledatsgsiivngeditr  
lqgkklrksrqyqmi fqd  
pyaslnpmqmvgdii sepi lnykk l pkeeikkevlyllkcvgl sedayykyahefsggqrqrvgiaralalrpslivade  
pvsaldsvsqvlnllkd  
lqeqfnlsylfi ahdlsvvkhisdvigvmylghiveiasdkeiyenpkhpytkalissipqidkhnnnriilkgelpsp  
nppqgcpfhtrcpiaqdmc  
kksmpelkdigneqvacyvdkvgdln  
>tr|Q5HH93|Q5HH93\_STAAC  
mgklikeyisillivvlvsacgkssnkdegvkdattetskhkggtlnvaltappsgvyssllnsthadsvvegyfnesl  
latdkkirpkayaswkd  
epakkiefkikkgikwhdgnelkiddwiysiev lankdyegayypsveni qgakdyhegktdhisglkkiddytmqvtf  
kkqenyltgfitgplskk  
ylsdvpikdlaksdkirky pigipykvkkipgeavqlvkfddywqgkpal dkinlkvidqaqii kamekgdidvanda  
tgamakdakssnaglkvl  
apsldygligfvshdydkkanktgvrpkayedkelrkamlyaidrekwikaffngyaseinsfvpsmhwiaanpkdln  
kydpekakkil dklgykdr  
dgdgfredpkgnkfeinfkhygsnptfeprtaaikdfwekvglktnvklvefgkyndlanaskdmevyfrswaggt  
dpsdlyhtdrpqnemrtvl  
pkdqyl dda ldfekvgidekkrkdi ykwqkymndelpglpmfqqksitivndkvrnl dieigtdqsl nltke  
>tr|Q5HH95|Q5HH95\_STAAC  
mkndevllsiknlkqyfnagknevraienisfdiykgetlglvgesgcksttgksiiklnditsgeilyegididqir  
krkdllkfnkkqimifqdp  
yaslnprlkvmdivaegidihlatdkrdrkrvyd lletvlg skehanryphefsggqrqrigiarvlavepefiade  
pisdldvsigaqvvnllk  
lqregrgtflfi ahdlsmvkiydriavmhfgkiveigpaeeiyqnp lhdytksllsaipqdpesersrkrfsyid  
nnhlrq lhei rpnhfvfst  
eeeaqlrenklvtqn  
>tr|Q5HH98|Q5HH98\_STAAC  
mkmpgspfnaklnaeqkeil nekyg lndpvtqylhylvkvvtgdfgnsfyhnqpvdlikprllpsfemgl tamfi  
gvilg llgvaatkqns  
vdyttvisv iavsvpsfvlavllqyv favl rwpfvagwegfstav lpslalsavlatvaryiraemiev lssdyill  
arakgnstmrvl fghalrn  
alipiit iivpmlasiltgtltieni fgvp glgdqfvrsittndfsvimaitllfstlfivsi fivdilygvidp  
rivrqgkk  
>tr|Q5HH99|Q5HH99\_STAAC  
mleegirwgnifsn dlficlflyllllqlhfs  
>tr|Q5HHA7|Q5HHA7\_STAAC  
meilndsvksfeklylgldgfpv i vptdtnynlcs l pndlcidki feykk rskdkplslfidkpedwkygd  
nqntei vdklveifwpgplniilkn  
ktsynym l nnsdsia igcvqntmrrfisyinspiaitsanisgtaddiliteneaikhmgenvrymlrsq  
nknyktss tiikvtdnkiellregdik  
feeikerlgtgiie  
>tr|Q5HHA8|Q5HHA8\_STAAC  
miriqdntirdgmqqsnvrksliikkevlkqinklninsvevgmcttiedefnihqfrdiispekelvvltr  
lnekeikk ivklkihnlvkvillpis  
l hiekl nfnkyiqkikdcldi lkkdkkgvdicfedgtrtsreklkeymeiiskyqrvrtvtfadv  
gcstpleygdif nyfvkkysnii fsahchnd  
lglatantlaailngakqietflgigeragnapieeiitiltkkqiesteftlpdvkytsiniskildf  
qisenkpiig enifkhesgihqdgtkkni  
nmyqylvpsd lglknsqvqfpisni sskil hnk fksivnteeidenisfyklvnkfspevapedt  
vdl lqiikrrskdgnfk  
>tr|Q5HHC3|Q5HHC3\_STAAC  
mylinkidiyvtfhtyfstn snwrqtlkhfl yn l hvflntfk  
>tr|Q5HHD0|Q5HHD0\_STAAC  
mnykigqhkivrvtgiqpygafvetpnhteglihiseimddyvhnllkklfsegqivkakilsiddegk  
lnslkdndyf knyerkkekqsvldeiret  
ekygfqt lkerlpiwikskrai rnd  
>tr|Q5HHE2|Q5HHE2\_STAAC  
minavviavil mmlclcrlnvvisl fisalvgglisgmsiekvinvfgknivdgaevalsyallggfa  
alisysgitdy lvgkiinaihaensrsv  
kvkvtiiallamsimsgnlipvhiafipivipplslfndlkidrrligliigfglcfpyvllpygfgq  
ifqqiiqsgf akanhpiefnmiwkamlip  
smgyivgl liglyvyrkpreyetrkisdsdnvtelkpyilivtivailatflvqtftds mifgalagv  
lvffisraynwy eldakfvegikimayigv  
iltangfagvmatgdi delvktltsitgdnklfsiimmyviglivtlgigssfatipiaslfipfgas  
igldtmalia ligitasalgdsgspdst



Tsompanidou\_et\_al\_Supplemental\_FASTA\_File

lgptaglnvdgqhdhirdtcvpnflfyniplmifgtiaamv  
>tr|Q5HHE8|Q5HHE8\_STAAC  
mfdqvaevierlrfpflrdggdcslidvedgivklqhgacgtcpsstiltkagieralheevpgvieveqv  
>tr|Q5HHE9|Q5HHE9\_STAAC  
mklkpfllpilisgavfivflllpaswftglvnektvednrtsltdqvlkgtliqdklyesnkyypiygsselgkddpfn  
aialnkhankkafllgag  
gstdlinaielasqydklkgkkltfiispqwfthgltnqnfarmsqtqinqmfqqnmstelkrryaqrllqfphvhn  
keylksyaknpketkdsyi  
sgfkenqlikieaiksifamdksplehvkpatkpdaswdemkqkaveigkadttsnkfgirdqywkliqueskrkvrndye  
fnvnspefqdlellvktmr  
aagadvqyvsipsngvwydhigidkerrqavykkihstvdnggkiydmdtkdyekyvisdavhigwkgwvymdeqiaxh  
mkgeppqevdkpkn  
>tr|Q5HHE9|Q5HHE9\_STAAC  
mknlikvdghyfelienyrecfneeafiarysdiidkydyivgdygdqlrlkgfykdsnkkaemskrfsniqdyifeyc  
nfgcpyfvlrhlskqevkk  
lieevhpsdvidddnkldvkiqptiqdteh  
>tr|Q5HHG1|Q5HHG1\_STAAC  
mrltiyhtndihshlheyerikaymaehrprlnhpslyvdldghvdl sapiteatlgkknvallneakcdvatignnmg  
tishealnhlydeakfiyt  
csnvidesghlppnivssyikdidgkiflvaatapftpfyralnwivtdplesikeeielqrgkfdvllivlshcgiffd  
etlcqelpeidvifgsht  
hyfehgeinngvlmaaagkygnylgevnltfeahkvvhtakiipletlpevetsfeeegktlmsnsviqhpvvlkrsmn  
hiteaayllaqsvceytha  
qcaiinagllvkdivkdevteyqhmlphpinmvrvrifgvklkeiaksnkqeymyehaaglgfrgni fgyiylng  
yihstgryylngeeieddk  
eyvltidmytfgryfptlkeipkeylmpelfrdifkekllley  
>tr|Q5HHG5|Q5HHG5\_STAAC  
miaiilifisffffsgsetaltaankakfktheadkgdkkakgikllekpsefittiliginnvanillptlvtimalrw  
gisvgiasavltvviilis  
evipksvaatfpdkitrlyvpiinivfrpitlllnkltidsinrslskqppqehqfskeefktmlaiaghegalneie  
tsrlegvinfenlkvdvd  
tprinvtafasnatyeeyetvmnkpytrypvpyegdidniigvfhslyllawsnkkenqitnysakplfvnehkaewv  
lrkmtisrkhlaivldefg  
gteaivshedlieellgmeiedemdkkekeklsqqqifqqrknrvsi  
>tr|Q5HHH6|Q5HHH6\_STAAC  
mteqmylllflslp1llfigrkthfycldkkngr  
>tr|Q5HHH7|Q5HHH7\_STAAC  
mrkevkslmldiiktllhqvlavliipevlkqlrewhlgyldrknnd  
>tr|Q5HHH8|Q5HHH8\_STAAC  
mnklltrtlialavlttvgsghfssnynginnvakaseitdrdlwknvrda lkeaniidktanetvgvtynlngge  
ssitgtadldelsnfnnkp  
intdsvkridlsrinpngrfdandawkkltkdklekqivkngdtvtihskdkndppisakvgenyngnkgmlnqrdit  
kititk  
>tr|Q5HHH9|Q5HHH9\_STAAC  
mykrifishvilifalilvistpnvlaesqdpkpdelhksskftglmenmkvlyddnhvsainvksidqflyfdliysi  
kdtklngydnvrvefknkd  
ladkykdyvdfganyyyqcyfskktndinshqtdkrktcmgygvtehngnqldkysitvrvfedgknlisfdvqtnk  
kkvtagealdyltrhylvkn  
kkllyefnnspeygyikfienensfwydmmpagdkfdqskyllmyndnkmvskdvkievylttkkk  
>tr|Q5HHI0|Q5HHI0\_STAAC  
msetakqarfveiyrtlnvtqsaikagysansahvtgrllkkphikqyiqeqdkkaidenvltakellhvltnaavg  
detetkevvrkrgeykenp  
ksgkvqlynehvelievpi kpsdr lkardmlgkyhklftdkhd ingnvpifinigewgddeeldkavkdvsnanpht  
vivddipled  
>tr|Q5HHI1|Q5HHI1\_STAAC  
mdkkqikdfvcydkrtrsdvliiddeintdeffsigdensnewmaddnidhivknhleiivdrvandkefyifdsliqg  
rsfkdisnvlceqsvr  
wyetlldkivevie  
>tr|Q5HHI2|Q5HHI2\_STAAC  
mklktknclyyrngdnkseyqlltqfnpafinkkikmcefqiesmyhmsastttcdeimgvsvsypieklvikiiet  
kaglnyknrsinnmalik  
kvlnhytekeqkqvvykymrsngrykpynvierlqvdllyqasikqrserqqrntaienskiarvnayhqssykvv  
>tr|Q5HHI3|Q5HHI3\_STAAC  
metkcelnntkkvanafglneedtnllinavldiknmqeisse lqqseqskqkqlgttlqnlakqnriik  
>tr|Q5HHI4|Q5HHI4\_STAAC  
mktesyfkeynqfvidqqkaie lqerna leskikiidkstyq limgqddkadnlyqatdadedkklkalnkrletkks  
vskevkyqktie lkhqse  
lsslyesekqsalgklkkvdayneiideiedi ndryedehqqyasiysqeqlyddkearealngyfreniftsy ingnd

Tsompanidou\_et\_al\_Supplemental\_FASTA\_File

lpyehnnk1f1kr  
>tr|Q5HHI6|Q5HHI6\_STAAC  
mniativnefetragt1lryytg1lrskvqpccklyndpfdmvyvmnnsk1fshvyikdckvrqsfelaspkhtegli  
rsieggyvgyelhdgkqls  
isdmmasqlfedeyfmyglqtyaesnnsdvfck1engfdtdtlegiqsntdvianiemyqlatginepvpelveg1kl  
vtefvqdenatqedykale  
rk1nd1kasyys1sk  
>tr|Q5HHI7|Q5HHI7\_STAAC  
mndkekiynqlhhdapiqipapen1fveyiedgevwyspvcialskahninfydsddvgcidkaatcsikkfnpetge  
feqfskmaqkeitq  
>tr|Q5HHI8|Q5HHI8\_STAAC  
mnknq1ksei1eyikahagtsfveierveennfydkgdgaytsqghpnvfwigwnqeaofdviaelkkdrriemdicep  
ivymvdgkgl1pivrskn  
iktahw1pvtftiskketecv  
>tr|Q5HHI9|Q5HHI9\_STAAC  
medvtneevfemidsrtgvl1nandwksqlrrsattqalkktttinaeilcndes1kg1vqydafekvtk1kr1pywrskg  
dtnywadidttthvishid  
k1ynvqfsrd1idtviekeayqnrhfpiksmieskswdgikriet1fidylgaednhynrevtkkwmmgavariyqpgik  
ydsmi1lyggqvgkstav  
sk1gghwynsqikt1fkgdevykk1qgswiceieel1safqkstiedikgfisaivdiyrasygkrterhprqcvfvgttnn  
yef1kdqtgnrrffpittd  
knkatkspfdd1tpdvqqmfaeakvyfdedptdka111dkeasemalkvqeahsekda1vgeieeflerpipsdywrt  
1eekrsvahdvidqdyik1  
ygdgk1ie1pntkpgayvwrkvcsmeiwkvmmkrddqpqqh1rkidka1rntnycdtvkkqtrygegigkqygfsvd1  
asyykn1kv  
>tr|Q5HHJ0|Q5HHJ0\_STAAC  
mneik1kydtqvsvvhyes1dsrsfksfsmkws1vnk1svpieanykyargvavygdikdntndhgei1kkhrndknv  
iyrnvi1v1dydeindvkq1  
hdaissv1ssvawywh1sfsh1teqarir1yiplnerisaddykytkvlankighkvdegisyqpsrcfalpviqkghif  
ikrvndcpimdvdm1eqws  
keykqsnqspnikytrrdsaywr1afgvsegernt1asitgy1lrryvdpn1vyglvsawasvckppinqsevnntf  
ks1kkdskns  
>tr|Q5HHJ1|Q5HHJ1\_STAAC  
mnweik1mcdievikqkindvatkhawfvedrfvkneletkrehinfsasy1ehriqnehtve1lhvy1kefse1iqkf  
heiekassenfdeesddak  
nsikvae  
>tr|Q5HHJ2|Q5HHJ2\_STAAC  
mnneqkevi1eh1vyq1e1svmn1esyeh1teyngievseisrek1h1elimkwaqel1kn1fq1ekge  
>tr|Q5HHJ3|Q5HHJ3\_STAAC  
mkmy1ayic1vs11t1111aisnmyvafsvyaw1it1gcn1tgg1ene  
>tr|Q5HHJ4|Q5HHJ4\_STAAC  
msrtk1hdvpakentitepkqvvnpl1fakpna1asifgisysvnr1kewekdskgvdd1yys1sstmivisiprfee  
ymkarhkkwm  
>tr|Q5HHJ5|Q5HHJ5\_STAAC  
mv1n1kr1raeriacgitqdemahkmgwkt1rtpyakrengivdigane1fikmaki1gyetn1d1fft1nvp1rkerkn1l  
kgge1nv  
>tr|Q5HHJ7|Q5HHJ7\_STAAC  
my1yekm1vienkeipiddgks1gnfeg1ydn1gilink1serrkaev1yeel1ahh1k1tygn1ldqskfnnrkfenyarr  
hg1fisavpl1reiveaynyg  
vrn1ye1seylq1seeyi1leaieqykkiygigthygeysit1fep1rvfkykei  
>tr|Q5HHJ8|Q5HHJ8\_STAAC  
mrk1lg1alast1ilgacgsndgdkkeesksy1tndivkgfkdnk1nvinekem1redfg1lapmktdeakmfvvqddkna  
rvmkfksdd1kqtkkyyd  
elgkesaafysh1thskgkfl1iqmng1iddatfnkyknsmdkt1k  
>tr|Q5HHJ9|Q5HHJ9\_STAAC  
mnk1fril1tvs1lffft1f1ikn1layadv1gin1rnfyanyepk1qgvssgnfstshq1leyidgkyt1ysqfhneyeakr  
1kdhkvd1fgisysglcnt  
kymygg1tlanq1ldkprnipin1lvngkqnt1istdkvstqkkevtaqe1dik1rkylqneyniygfnk1kkgqeygyqs  
kfnsgfnkgkit1fh1lnnep  
sftyd1fytg1ggaes1fkiyddnkt1dtenf1hdveisyekte  
>tr|Q5HHK0|Q5HHK0\_STAAC  
mkk1isi1llini1ilgvsnsasaqgd1gind1rnfytkkdfvd1kdvkdndtpianq1qfsnesyd1iseskdfnkfsnf  
kgkkl1dvfg1syngqcntk  
yi1yggvatney1ldksr1ipiniwingnht1stnk1vstnk1fvtaqe1dvk1rkylqeeyniyghngtkkgeeyghksk  
fysgfn1gkvtf1h1nndt  
fsyd1fytgdd1lpsk1fkiyednktvesekf1hdvdi1syketi  
>tr|Q5HHK1|Q5HHK1\_STAAC  
mw1lekfnknketkyryykykdp1takwrrsv1lnkngkqsqkaqr1lnerieak1ndktptt1ks1tfhvacdewf

Tsompanidou\_et\_al\_Supplemental\_FASTA\_File

qsyiktsgskrttiktkls  
kIntlkkfvdeditlinkitlsyaqqvfdemdnkgvyvqnkdalsifknvfeytrriyqlqdlflkditlnkriksyde  
vkakrnkylelneiqlik  
dintkaqkmhsgihkrfylfvalmtefqaIngmrigemlaiqnedidfdnksIningtihwhfdesggfgvkdttkess  
yrtiglsrsceilkail  
enkkdskwndgylrnrfvftnhkgnpmqterfnkilreaakdvgidkevsshilrhshisllsqgvsllkaimdrvghsd  
hrttisiyshvteqmdkdm  
mnkleqvklg  
>tr|Q5HHK7|Q5HHK7\_STAAC  
mlniqdvshlskkeqkaynrvesvengnlpvlpciemdIkemqetlnqskiggmpflksfkdipldennvpmvllaqi  
nlddlpeqqelfpvkegil  
qfwissedqmygmsenlkgnninsrlvyikepitdlsleniqahlsldadnedipfsgafsiefrlskqtitctdykyd  
edvialwnkvnpsfalksm  
fggydelmepvcntftakepfnqlggypyfdqidprtdnqelkmydrvllqidstrdgnssiwgdlgianilvkstdle  
amkfdymyswdcs  
>tr|Q5HHL1|Q5HHL1\_STAAC  
melgqaianrrsvkkfkrdmhiddallyqaiakaadapnhgmrepwrvvhvpkdrldgmskdiskfafpneldkqqchyd  
avtklqgmlllilktdprq  
rqndenyfafgayaqnlmlllyeagigtcwksplyiydpkvrktlgikkdevlagflyltdlegdmpkaprknrlitly  
>tr|Q5HHL4|Q5HHL4\_STAAC  
mieiktlnndfneykrlvstvneeftqdshysqtmtdtlihdilnqgspkicivfgcyenetliataaleqiryvgkehk  
slikynfvtnndksinse  
infiiinyarqnyeylltsivsnigakvfysalgfdilgfeaknigintydehwlfydlink  
>tr|Q5HHL6|Q5HHL6\_STAAC  
mlllaktlylrmhgqtlfnfkgliqgfgdspitelgiaqaqkarsyyetkginfdlyasstqerasdtlenvapnqsyqr  
fkglkewhfgifegesvyl  
fdnlykpedlfgdrivpfkgearqqveerivktlhdimsqtknnavvshgtimgvflryclkldealkhngncnilkf  
eydngtfkfveldpnl  
>tr|Q5HHL8|Q5HHL8\_STAAC  
mfgqytkwcviiIkthdeivkrhktcplhllsai  
>tr|Q5HHM1|Q5HHM1\_STAAC  
mnelteqkytiakfyklyiersnkgetetvanffgdakdarenyfcdryqdfntncqilinqkyltgevladdniynis  
ilnktfiefeqnfg  
>tr|Q5HHN2|Q5HHN2\_STAAC  
mkkvmgillastliigacghqdsakkestshkkkndeelelekefkskknmdikikgdtivsdkfeakikepfiin  
ekdekkyiafkmaitakk  
ddkdlnpssishdyinitqddkntvnlrdgylsdkkykdwtehnqdqikkgktaqamfiyelrgdgninlnvhkysed  
ktvdsksfkfslktedfs  
hraetreeaekkekefeeykkeqerekekekqkdddhsgldev  
>tr|Q5HHN3|Q5HHN3\_STAAC  
mnaalkqeeatwgnvqgvsqalmgtgikdstarsigfwsqvgqali  
>tr|Q5HHN4|Q5HHN4\_STAAC  
mneelemlrlllmkqsieqlaealapnlktrdlvllrymysykeinmldsyflqlatnkeqitkkqfktklenirevpei  
pirqvndilegyknselyv  
elinsilk  
>tr|Q5HHP7|Q5HHP7\_STAAC  
mrvvgvqphseigssqflqamqvvgvqphreigfpietgngswggttk  
>tr|Q5HHR1|Q5HHR1\_STAAC  
miwyfsaaffpcvllvlfsvitrskwvgtltililigasiykeyfhnewiifidvvsllagylidqlfkhqdedr  
>tr|Q5HHR6|Q5HHR6\_STAAC  
mlweesyftsvkyfkkceevkrvcylsfkksv  
>tr|Q5HHS6|Q5HHS6\_STAAC  
mlfylvfhftisfistvlfsiifnapkrllvacgfvgaiawtiyqltvdlefgkvgasflgslilglmshtmsrrykrpvi  
ifivpgiiplvpggaayqa  
trflvsndytsavntflvtlsgaiafgilvseilylytrikqlygkikgkykksynmnr  
>tr|Q5HHU2|Q5HHU2\_STAAC  
mclmynethnivlkrkrhnilcfvckcfiyeeitfksnlqkfnsyqliviflenvlswkwisndvnttysdfytfnp  
yklfqsqi  
>tr|Q5HHU7|Q5HHU7\_STAAC  
mtagpqrhregfpietdnaswrgpnieklerqflqtmqvvgvgnikkyfffrn  
>tr|Q5HHV1|Q5HHV1\_STAAC  
mikfknvtkrygkhvavdnisfninegeffvligpsgcgktttlkminrlilhsygyiyfkdkpisdyvyemrwdigyv  
lqqialfphmtikeniaqv  
pqmkkwkekdiakrvdellemvglepekyknrkpdelsgqrqrvgviraladppvilmdepfsaldpisreklqddli  
elqtkikkaiifvthdiqe  
amklgdkielneghiejidtepegfknpqsefvkqfmgshleddapcveenaiirdldimkpidevtsmsaypivydq  
pievlyqlleserviymq  
edsvgqyvidrkdi fkylsqkkevaqhd

Tsompanidou\_et\_al\_Supplemental\_FASTA\_File

>tr|Q5HHW7|Q5HHW7\_STAAC  
mlneiqlnngypmpsvglgykisedmtkvvnaaidagyrafdtayfydneaslgralkdngvdredlfittklwndy  
ggyektfevfynksienlqt  
dylldflihwpcadglflfetykameelyeqgkvkaigvcnfnvhhlekmaqssikpmvnqievhyfnqqelqefcdr  
hdikvtawmplmrnrglld  
dpvivkiaekyhktpaqqvvrwhlahnrriipsqtprkriqenidildfnleltevaeidalnrnarqgknpddvkigd  
k  
>tr|Q5HHX1|Q5HHX1\_STAAC  
mmiitekrhelileellhkdfllqelidrtgcsastirrdlsklqqlgklqrvhggamlkenrmveanlteklatnlde  
kkmiakiaangindnecfl  
idagsstlelikyiqakdiivvtnglthveallkkgiktimggqvcentlatigssameilrrycfdkafigmngldie  
lgltpdegealvkqtams  
lanqsfvlidhskfnkvyfarvpillesttiitsekalnqeslkeyqqkyhfiggtl  
>tr|Q5HHY4|Q5HHY4\_STAAC  
mkklttilfqykipvlfmflvstglgiivitqniliadflakiihqfqlwivlfillgvlrratvqflnqwlgdtdla  
fkvkhmlrqrviyknnghp  
igeqmtitenidglapfyksylpqvfksmmvpliiiamffihfntalimlitapfiplyiifglktrdeskdqmtyl  
nqfsqrflniakglvtlkl  
fnrteqtekhyydstqftrltmrilrsafisglmlfismgliglvaleatlslvvfhnidfktaaiailapefynai  
kdlgqafhtgkqsegasdv  
vfefleqpnyneflkyeenqkpfqltdisfryddsdrvlndlnleifkgdqialvgpsgagkstlthliagvyqpt  
igtistnqrdlnigilsqq  
pyifsasikenitmfkdienntieevldevglldkvqsftkgintiigeggemlsggqmrriecrllvmkpdlvifdep  
atglidigtehmiqnvlfqh  
fkdttmiviahrdntirhlqrrlyienrliaddrnisvntengddl  
>tr|Q5HI01|Q5HI01\_STAAC  
makscihiltneyatrrcqdgivlwpidgeielqkfrkskiieddiyinhldvfsiknnkktimlylssdwfaelgf  
tffnyhytaklikssynlk  
c1llkltyryldnqplndadirklqdiikiiakeasmdkkaaqnyryayygdldrdeleyiqvnrqltlksvadklfv  
sksnlssqfhlmgmgfkk  
yidtlkigksieilltdstisnisehlgfssstyskmfksymditpneyrnlskyncklmlkpeplvgkmvqevkeii  
llyiehyknhltdvhide  
dkfetpklfqtvigintytemklvfllegifktllnknsqvffimpilkskntmseeekftiiktiiesdlkiafninn  
iettyfveeafmsvfrqis  
pnelshhnyevhfvdlslemeirtiyrmilklnimlnvklglnitclfekpsvfkslvsqikrklkfdsliidnanlss  
pymgesdelllkni lhfkl  
nlkqvinedieqekliflvenhkllnkerdlsnsapliyktlsalyhnfdgfglnifdnhqafnamhlydkngfkt  
lglilekfiyvspkpyen  
sysifdienyyclyidwrviesetimsnfedsqyvinfknnvlnkylivietldensgnihliskekrdkyewnps  
llskidnylkpaieikehn  
fsdnslninvtfnalyyiikigkk  
>tr|Q5HI06|Q5HI06\_STAAC  
mtfneii fknfrqnlshyaiylfslitsvlyfsfvalkyahklmtesypiikegsqvgysylffiiiafllyanvlf  
krseyelaalyqtglgskfn  
iiyilmleqllifiitailgiiigifgsklllmivftllgikekvpiifslravfetlmligvayfltsaqnfilvfkqs  
isqmsknnqvkethnkit  
feevvliglignvittgyylslnivqyydsigtlmlfillstvigaylffkssvsvfkmvkkfrkgvisvndvmfsssim  
yrikknafslvmaisa  
tvsvlcfaaisraslssekytaphdvtikdqkanqlaselnnqkiphfnykevihtklykdnlfvdkakepynvtit  
sdyipntdlkrgqadlfv  
aegsikdlvkhkhgkaiigtckhhvniklrkdinkiyfmdvdldggptfvlnkdqyeirkytkakhivsqfgfdlkhk  
kdaalalekknkvdksiet  
rseaiississlgtgllfvtsflgitfliavcciiyikqidetedelenysilrklgftqkdmarglkkkimfnfglplvi  
alshayftslaymklmgtt  
nqipvfivmglyicmyavfavtaynhskrtirhsi  
>tr|Q5HI13|Q5HI13\_STAAC  
mnkdnkwtmitalfitvisvllaflhklqhydqitnenhankdkiniknknvriyqnltynrvfpsnklidiitpvdmsna  
klpvifwmhgggyiagdkq  
yknpllakiaeqgyivvnvnyalapqkyptliqmnqatqfikenkmnlpidfnqviiggdsagaqlasqftaiqtndr  
lreamkfdqsfkpsqikga  
ilfggfynmqtvretefprieqlfmksytgeedweksfkni sqmstvkqstknypptflsvgdsdpfesqniefskklqel  
nvpvdtlfydgthhlhgy  
qfhlnkpesidnikkvllflsrntsssgiqteekpqiensnelplnpln  
>tr|Q5HI16|Q5HI16\_STAAC  
mpkiilvshskeiasgtsllkqmagdvdiipigglpdgsigtsfdiieveltkleddalcfydidgssemnvdmaiemyd  
gnhrvllkvdapivegsfia  
avklsiggsiddalaeikqsf  
>tr|Q5HI20|Q5HI20\_STAAC

Tsompanidou\_et\_al\_Supplemental\_FASTA\_File

mtnrenptlklfslsyiglsmlillitlfistlfgdakiqastieaifnynpsnqqniineiriprniaavivgmalav  
sgaiiqgvtrngladpali  
glnsgasfalaltvlpntsfliilmfagflgailggaivlmigrsrrdgnpmriilagaavsamltalsqgialafrl  
nqvtvftwtaggvsgettwh  
lkwaipligialfiiltiskqltilnlgelakglgqnvtmirgicliiamilagiavaiagqvafvglmvpfiarflig  
tdyakilpltalggilvl  
vadviarylgeapvgaisfigvpyflylvkkgrsi  
>tr|Q5HI25|Q5HI25\_STAAC  
mkrenplfflkklswpvglivaaitisslgsllvplftgrivdkfsvshinwnliaifggifvinaallsqglglyll  
skigekeyairsvlwehi  
iq1kmpffdknesgqlmsrltdtkvinefisqklnllpsivtlvgsliimfilwdkmtlltfitipifvlimplgri  
mqkiststqseianfsgll  
grvltemrlvkisnterleldnahknleiyklglkqakiaavvqipsgivmlltiaailgfgaleiatgaitagtliam  
ifyviqlsmpnlstlvt  
dykkavgassrieyimqepieptealedsenliddgvlsefvhdfkydvkkliddvsfqipqqvsvafvpgpsgsksti  
fnliermeyeiesgdikygll  
esvydip1skwrrkigyvmqsnsmmstgirdnilyginrhvsdeelinylaklanchdfimqfdegydtlvgerglklsqg  
qrqridiarsfvknpdill  
Ideatanldseselkigealetlmegrttiviahrstikkagqifldkqgvtkgthselmashakyknfvvsqkld  
>tr|Q5HI38|Q5HI38\_STAAC  
meifetilifiavvilssfvhtfipkvplafiqiflglmlfitipvqfnfdselmvtmiapl1fvegvnvsrvhlrky  
ikpvmmmalglvittvigv  
glfihwiwpd1pigaafaiiaailcptdavavqaitkgkvlpkgamtilegesllndaagiiisfkiavgvltgafslvda  
vqlfliasiggavvgllig  
malvrfrl1lmrrgyeninmftiiqlltpfvtyliaelfhasgiaavvaglvhgferdrimqvrtqlqmsynhtwnilg  
yvlngfvfsilgflvpevi  
ikiiktephnlifligitivvalavylfrfvwvyvlypyfy1aispfqkmmtkndddnpttekppkrslyalimtlcgvh  
gtislaialt1pyflagh  
aftyrnd11fiasgmviislvaqvllp11tkpaktvignmsfkvariylleqvidylnqkstfetsfkygnvikeyhd  
klaf1ktvekddenskele  
rlqkiafnvetk1leslvdegqitnsvlenyryaertqvyrqas1irmivllrgallkrrvqtrvnsass1svtdnlm  
elnkinklvhynvvsr1sk  
ettkdntlevgmvcdgy1mrien1tpsnffnsasedtitkiklnalreqrilre1idtddevsegta1klreainydemv  
ivdsmt  
>tr|Q5HI57|Q5HI57\_STAAC  
mtfnkvllswivilii1ttsiylfwqlgdiindvfnqsilinrvlprllealltgmiltvaglifqtvlnnaladsftlgl  
sgatfgsglalflgl1t1w  
ipv1fsitfslit1itvlvitsvlsqgyprililsglmigalfns1lyflil1kprk1ntianylfggfgdaeynsvisi  
aitfiialfgifilnqlk  
llqlgelksqslglnvq1ityialciasmitainvayvgiigfigmvipqlirkwqwkqslgrq1alnivtggqimvmad  
figshilspvqipasiia  
ligipvlfym1isqskrlh  
>tr|Q5HI74|Q5HI74\_STAAC  
mlceskiinknpkyriikyndeylm1idiistwis1ffpfinwfpkryvkisreefenlnivkpakknvfwpvagistlf  
avt1rkyth11dtqldrkl  
viaicci1tfigil1fyvr1ikksslniyntknkrskii1ipt1knfcl11fryaffilwtvifsyallsmsyqniivyfa  
witaimgff1vnialiidk  
nihvilkn  
>tr|Q5HI81|Q5HI81\_STAAC  
m1efniavhv1af1tkhhseknss1ael1tcl1npvqlrrvt1q1vd1kmidtirgkdggylandqsadvs1atlykhf  
v1ekehtr1ftgdegshc  
qiarniattmshyqqdeqni1infyngktikdviediqked1cheni  
>tr|Q5HI87|Q5HI87\_STAAC  
mdlaskyfnvnrwyidhssglepmqsfa1ddtfcsvgkdisdnvrtwihqhtvilgihdsrlpflkdgidyltneig  
ynaivrnsgglgv1dqgv  
1nisl1mfkgqtettideaftvmy1liskmfenenvdidtmeiehsycpgkfd1sidgk1fagisqrrvrggiavqiylcv  
egsgseralmmqt1fyehal  
kgevtkfkypeiepsmas1et11nktitvqdvml11yaikdlggvlnmtpitqeeqwrydyfdkmiernkkmidqmq  
>tr|Q5HI92|Q5HI92\_STAAC  
mekknkqidrgdlkqn1sekwaiaygscigwafii1pgdwikqsgpiaasigivigallmiliavsygalverfpvsg  
gafafsl1sfgrvsvffss  
wfl1tfgyv1cvvalnatafsl1vkfl1pdvlnngklytiagwdvyitei1iatvll1vfm1vtirgasvsgslqyyfcvam  
vivv11mffgsffg1n1fal  
en1qp1aepskgw1svivv1svapwayvgfdn1pqt1aefn1fapnktfklivys1laas1tyvvmilytgw1stshqsl  
ngq1w1tgavt1gtafgyig  
lgv1aiaimmg1ftg1ngflmsssr11fsmgrsgimptmfsklshkyktpyvaii1lvgs1liapw1grtal1twivdmss  
tgs1ayf1tcl1saak1fs  
ynkqsntyapvyktfaiigsfv1f1a111vpgspaal1apsyiallgw1iig1liffviry1pk1knmdndelsr1ilnr

Tsompanidou\_et\_al\_Supplemental\_FASTA\_File

senevddmieepekektk  
>tr|Q5HIA3|Q5HIA3\_STAAC  
mliikfdnyifdfdgltadtkkcevatqsafkacgltepsskeithymgipieesflkladrpldeaalaklidtfrht  
yqsiekdyiyefagiteai  
tslynqgkklfvvsskksdvlernlsaignhliteavgsdqvsaykpnpegihtivqrynlnsqqtvyigdstfdvema  
qragmqsaavtwgahdars  
llhsnpdfiindpseintvl  
>tr|Q5HIA8|Q5HIA8\_STAAC  
mtderrhvlvifphpddetfssagtlanyiqkgipvtiacltlqgmgrnlgppfatreslpsirereleackvigtdl  
rkmglrdktvefepyeheid  
gmiksliddtnpsliisfyppyavhpheatadavirtvermpkeerprltlvaafsndatealgepdinqnditdfkelki  
kafeahasqtgpf1kqlas  
peidgkqhsfltvepywtyhfs  
>tr|Q5HIB0|Q5HIB0\_STAAC  
mnyfvgnslgvnlgtiekainrlnlfkemgrpaqcvflswrylyrnaqnyitssdyinmydffqeatylernepfawl  
sywtdechyt1khvenshd  
fryidqerflmyahfqdkyri1dyvnhfidsqrrkvkrdfydvrqflscsrilvdkqqt1ceffynpegdtklekyfsyk  
dgkpevqkiivvyankqyf  
fnnete1gaffikqlyqhgd1ffsdrnvytapi1n1tpesipvvav1hsthiknidal1dsspfknvykamfen1sryrai  
ivsteqqkl1dvekrinhti  
pvnipvgysetidtpvqtl1dqrsvkl1svaryspekql1hqqi1elkr1vsyvpkiel1hmygfgseskkl1neliqygle  
nhvylrgfl1sn1dqeyda  
yl1litsnmegfsl1lles1ahgvpvisydikypnel1tsdfngyl1tkndedal1fdkvkyvidhpevqqr1skgslak  
aqqyskas1ikqwdqfvr1  
i  
>tr|Q5HIB8|Q5HIB8\_STAAC  
mnygipqna1itiagtvgvgkst1tqaladkl1nfktsfenvehnpy1dkfysdferwsfhl1qiyflaerfkeqkrmfey  
gggfvqdrsiyedvdi1fak  
mheegtmskedfktysd1fnamvmtpyf1pkpdm1ylecnydevidri1ergremeintdpeywkkl1fkryddw1nsfn  
acpvvrin1neydi1hkdp1e  
sl1n1pminkiar1iqtyrqvdtr  
>tr|Q5HIE1|Q5HIE1\_STAAC  
mkydl1ttqdst1krnna1ndkdfek1vmd1qp1li1rriktfgfnhyd1led1yqe1li1rmyrsvqt1dfdsgeqpftnyvqc  
l1itsvkydy1rky1latnkr  
mdn1lineyrv1typca1krfdvenny1nk1laike1licqfky1safekdvmy1mceqykpreiaq1lmhvkekviyna1qrck  
nkikryf1kmi  
>tr|Q5HIH7|Q5HIH7\_STAAC  
mr1ndari1fevrkk1fl1kl1qriknna1fym1keycr1lynndev  
>tr|Q5HIK0|Q5HIK0\_STAAC  
mqiy1st1tel1dydks1ns1iees1fdnpetswqarakvkh1rkspcynfe1leviaknenndvvghv1lieveinsddkty  
yg1aias1svhpe1lrgqk1  
grg1lvqaveerakaqeystvvdhcfdyfek1gyqnaaehdik1efgdap1lvky1wdn1tdaphg1vkfpehfy  
>tr|Q5HIK6|Q5HIK6\_STAAC  
meikq1ryfi1evakrehi1setale1niaqsaisrqit1leqe1lnvs1fkkqgrnit1tsegk1lfnealri1eh1dstie  
qf1qshg1tknksiy1gyde  
sdvshml1pl1iqtfh1qndthvips1lehd1ti1nsv1ngnidigfte1tpeirkhkq1nml1pl1feehy1lyapsddpitm  
athp1liq1fehshiy1clap  
faetvkkq1rki1tksdvyt1issqplaqy1l1rqkegyi1ssqni1h1peskswidik1dhtel1krticaitkepytksdigi  
l1l1liqg1mtktstfh  
>tr|Q5HIL3|Q5HIL3\_STAAC  
mkr1lig1viva1vl1aacggnndkkvt1igvasndtkawekvkelakkddidveikhfsdyn1pnka1ndgdidmna1fqhf  
af1ldqy1kka1hkgtkisa1s  
ttv1lap1giysdki1kdvkkvkdgkvvipndvsnqara1kl1leaaglik1kkdfglagtvkditsnphk1kitavdaqqt  
ara1sdvdi1avinngvatk  
agkdpkndpi1fleksnsd1avkpyi1nivavndkd1dnktyakive1lyhskeaqa1qedvkdgekpvn1skdeikaiets1  
ak  
>tr|Q5HIL6|Q5HIL6\_STAAC  
mkk1tk1ihggh1ttddytgav1t1piyqtst1y1qddidg1lrgqye1srtanptr1ssvesviat1lengkhgfaf1ssgvaais  
avvm1ldkgdhi1l1nsdv1y  
ggtyra1tkvf1trf1gievdfvdtthtdsivqairpttkml1fietspn1lrvtdikksaei1akehglisvvdntf1mtpyy  
qnp1ld1gidiv1hsatky1l  
gghsdv1vag1vatsddk1laer1afisnstggil1gpqdsy1llvrgikt1gl1rmeqinrsviei1ikml1qahpavqqvf1hpsi  
esh1nhdv1hmaqadghtgv  
iafevkn1tesakq1likatsyyt1laes1gaves1isvpa1lmthasipadi1rakegitdgl1vrisvgiedted1vdd1lkqa1  
dt1  
>tr|Q5HIL7|Q5HIL7\_STAAC  
mityd1ign1tp1vl1lehysddk1vkiyak1eqwnpggsvkdr1lgky1lveka1iegrvragqtiveatagntgig1l1aiaanr  
hh1kckif1apygf1seekin

Tsompanidou\_et\_al\_Supplemental\_FASTA\_File

imialgaevsrtsqsegmhgaqlaarsyaekygavymnqfesehnpdyfhtlgpeltalqqidyfvagigsggtftgt  
arylkqhvhvcyavepegs  
v1nggpahadtegiqewpiflerrlvdgiftikdadafrnvkslainegllvgsssgaalqgalnlkaqlsegtivv  
vfpdgsdrymskqifnyee  
nnneqen  
>tr|Q5HIL8|Q5HIL8\_STAAC  
mkrqqsqwkstgfi lasagsaiglgamwkfpymagi ygggaflamfliftifvglp1limeftvgkmgrtyttqiyskl  
tgkkwlniigwngnlavfi  
lfgfysviggwiviyigqvlwqlvifqrinhlqemnfavispnwltvlgqgiffatmiivmlgvekglekaskvmp1  
lfvfliviviks1tdgal  
egvkfilqprvseitadgilfalgsfftlslgttgmitasyaskdmtikssaisivmni fvsvlaglaifpalhsfg  
yepqegp1l fkvlpmvfs  
qmhlgtl fylgflv1flfaaltssisl1elnvsnftkndntkrkkvavigsilvfiisipatlsfgilkdvrfgagtifd  
nmdfi vsvnlmp1galgtt  
lvvgqll dkk1lqqyfgkdrfr1fsgwylykiyampvviilvfivqlfs  
>tr|Q5HIL9|Q5HIL9\_STAAC  
mmswkyygvipevdlycnvveilwalh1k1l1cgemlgi  
>tr|Q5HIM5|Q5HIM5\_STAAC  
mlsfqllfslfvialialisgl1flapvmpmryik1hlyilvmpv1favigffgihgqhvlgpfkidrlswllagfvma  
lgiikfsmry1l1gdhhy  
rhyfplftaitstfaslawmsed1rlmalcwgit1l1clt1l1mvrnfkwpresaklssmtflcgw1afvgaivtiyatg  
ewrvpqhivhptws1ltnv  
11v1avmipaaqfpfhrw1iesvtaptpvsaimhagivnaggviltrfapifdngfals1111lssisv1l1gsgislvqv  
dykrqlvgstmsqmgfmlv  
qcalgvysaaiih1l1hgi fkat1flqsgsivkrfnipkqasakdaygwiwvgrv1aiivaf1fwmsdrsayev1sali  
lgws11vswnqmvafskgr  
marlvgmil1aiivtfiyvithnyfyav1qnitthattptvsviisv1lifgsl1siwvarhryskafevlyvwl1v1g  
earskaieshpny1kky1  
>tr|Q5HIN2|Q5HIN2\_STAAC  
mksikrigl1cisl1l1iifvtscdgdnkiigdskeeqikksfakt1diypiknledlydkegyrdgefkkddkgtw1irs  
emkiqlkgenlesrgavle  
inrnrtrtakghyivrevvedsdgmthnhtkrypvmennkmiplkpiddekvkkeeefnffvqygnfkelenykedevs  
ynpevpiysakyqlknsdy  
nveqlrkryniptqkapk111kgsng1kgssvgyknieftfienkeenyftdsiyfnpsedk  
>tr|Q5HIN8|Q5HIN8\_STAAC  
msenfklrkmkvg1vsvai1tmlyim1ngqaeasenqnal1snivdnqekqnnvnqavqpqntnetskvanfvk1ndi  
kpgdtsiqgt1l1pnqf1l1  
t1dkkdsvsvedsdssfvmsdkdgnfkyd1ngrkivhnqei evsssdpylgddeedeveetsteevgaeesteakaty  
t1pryekayeipkeqlkek  
dghhqvfi1epitegsg1ikghtsvkgkval1sinnkfinfetnanggpneeaksgsegiwmpiddkgyfnfdktrfdd  
1elkkndeisl1tfappedd  
ealksl1fktkvts1ledidkaetkydhtkvekvkvlkdvked1hvdei ygslyhtekgk1ldkegtkvikgktkfanav  
kvdsel1gegqf1pd1qv  
ekgefsvdvdhagfr1qngel1nftvvdpitgel1sgnfvsknidiyespeekadrefdermentpayhklhgdki vgyd  
tngfpi1twfyp1gekkver  
kap1lek  
>tr|Q5HIP0|Q5HIP0\_STAAC  
msntqkknvpe1rfpgfegeweek1gd1tdrvirknknleskkl1tisgq1glidqteyfsksvsskn1enytliknge  
faynksysngyp1gaikr1  
trydsgv1sslyicfsiksemskdfmeayfdsthwyrevsgiavegarnhgl1nsvndfftilikyps1leeqqikgkff  
sk1drqieleeqk1le1lq  
qkkgy1mqk1fsqe1rfkdengedypdwenski1eky1kernersdkgqm1svt1nsg1ikfse1drkdnsskdk1snykvvr  
knd1ayns1mrmwqgasgks  
nyngivspaytv1lyptqntss1figykfkthrmihkfk1nsqgl1tsd1wn1kyk1lkn1idip1leeqekigdf1kkmd  
1l1iskqk1mk1e1lekekqs  
fl1qk1mf1  
>tr|Q5HIP2|Q5HIP2\_STAAC  
menfdv1gg1nft1fmeig1gfmthkpk1r1nddid  
>tr|Q5HIP5|Q5HIP5\_STAAC  
mki1tti1akts1al1gl1ttg1v1ttt1qaanatt1ps1st1kveapq1st1pp1st1kieapq1skpnatt1pp1st1kveapq1tanatt1pp  
st1kv1tt1pp1st1nt1pp1mq1st  
ksd1tp1qs1pt1tk1qv1pte1npk1fk1d1rayy1tk1ps1lef1kne1gi1l1kkw1t1r1fm1nv1vp1dy1fiy1kia1lv1gk1dd1kky1ge1gv1hrn  
vdv1fv1v1leenn1yn1lek1ysv  
gg1it1ks1nsk1kv1dhk1ag1vrit1ked1nk1gt1sh1dv1se1fk1it1keq1s1le1ld1fk1l1rk1q1li1ek1n1ly1gn1vg1sg1kiv1ik1m1k1ng1gky  
t1fel1hk1kl1qen1r1mad1vins  
eqik1nie1vn1k  
>tr|Q5HIQ0|Q5HIQ0\_STAAC  
mnim1tgat1gh1l1gth1tnqai1anhi1dhf1hig1vrn1vekv1ped1wrg1kv1pvr1q1ldy1fnq1es1mve1af1kg1md1tv1v1f1psi1ih1ps1f

Tsompanidou\_et\_al\_Supplemental\_FASTA\_File

kripevenlvyaakqsgva  
hii figgyadqhnnpfhmspyfgyaarlatsgidytyvrnamymdpkpylpeImmhkliypagdgrinyitrndiar  
gviaaiiknpdtwgkrylls  
gysydmkelaaileasgteikyepvsletfaemydepkgfgallasmydagarglldqesndfqqlvndqpqtlsfllq  
eni  
>tr|Q5HIR3|Q5HIR3\_STAAC  
mnafltliniivlvi fivi lhmmarkhisfakrvftalgigivfgvllhliyghsnavitstsdwfnivgqgyvallqmi  
vmplifisivaaftkiqig  
ekfakigsli fifligvtiaaivgvvya lvfgldastinl gnaeqargseiakqakdltahtlpqqilellpknpldf  
tgqratstiaavifasfig  
faylrvarqpdhgellkraidaiysl vmaivtfvlrltpygvla imantlstsdfgaiwtl gkfliasyaalitmyiih  
lii lsllgispiryvkktl  
evlifaftrsrsagalplnvqtqtrrlgvpegianfaatfglsigqngcagiypamlaimvapvanveidlqfivtliav  
viissfgvagvggatfas  
ilvltlnlplvalagvlisveplidmgrtalnvndsm lagtgtakl tkhwkdtfdsndnaaltsh  
>tr|Q5HIS6|Q5HIS6\_STAAC  
mlnfdeqjaklkqmniffniidtekaneilrknyffklayfrknfeknggyfiefaylsdlatidmklrytmhlhltld  
iehslykylvklitenqe  
dgykiideflcidksysnsnfdtnsrtpveemetkiknkneifkhnkrgqlpeklnkyqnpawvciefmqllgqfvsf  
lnfykyndeelrvani  
mplvkni rnkshnqpiianlnydsrlp qylfekgnnigisrnmfgiknfidtfatlelnhqvcsnaiiqaryhdldqlq  
krykrnesyynnalakrf  
fia ldkii dfnrpkv  
>tr|Q5HIT4|Q5HIT4\_STAAC  
mse lsksedqritktkdeqikqidi sdikpnpyqprktfdenhln dladsikqygilqpivlrktvqgyyivvgerrfra  
skiaglkvysaiikdltd  
dmmelavienlqredlnaieeasyr lmtdlkitqevakr lsksrpyianmlrlhlpkkiadmvdgrltsahgrtl  
laikdeqqmlrlakrvvke  
kwsvrylenhvnelknvssksetdkvdi tkpkfikqqrqlreqygtkvd isikksvgkisfefdsqedfvriieqlnrr  
ygz  
>tr|Q5HIU3|Q5HIU3\_STAAC  
mttlnvdsvknqykdsdfklqdasltistnetvlgikngsgkstlinilvgnrhkdngsitffgehtvddveykehi  
gvvfdlrvpnkltikdi  
kvfqs iymtwnsqkffdlikyfelplqt kiktfsrgmrmkialtia lshdvkllil deatagmdvsgreevmeiledfva  
qgggiliss hisediehla  
dklvf mkgdgrmlteqkdi llaqyivttedkdveipkhliiasrlskgyqilvkdyaeienaep lkhiddatkiimrg  
ev  
>tr|Q5HIV3|Q5HIV3\_STAAC  
mignldinqsnrhynaywrgpnkeadeksaynnvqvgdgpqhreigsvistdnaswrgpnienfekkykqcklagpqr  
efrkeilqamqvgeggqi  
>tr|Q5HIV6|Q5HIV6\_STAAC  
maklemnkntplefglysgdhllnplkgekvsyqrineieaskladeagidvfavgeshqehfttqahtvvlgaiag  
atkhi kvssstii satdp  
rvvfedfatldlishgraeivagrasrtgfdlfgyd lkdydel feeklglllelnkteritwsgkyrpe lnmkifprp  
idnilpiwrvaggppasai  
kagkqgvpmmitl ggpamnfgksidayrqaateagfdaspkslpvstaslyftaettqdamrefyphlntgmsfirvgv  
ypkqqfanssdyrealmv  
spqqiiekilyqhelyghqr fmaqldfggvpfenvmknielign diipaikkhlsk  
>tr|Q5HIV7|Q5HIV7\_STAAC  
mni vghhhi smytkdakrnkdfytnvlg lrlveksvndnpsmyhlyfygdevgtagtilsffeipnaghkqpgtetiyrf  
sllvnpqaalhyfekrlen  
ngikserlyy lggqgvfkdeddle iillvndsfevphqwqh nayseipqayqilgigpvelrvrnaartveflenvlgy  
rkrdnksfdvltlapqgly  
sdfvvi eqqqrerpgrgyihhiavntpqmsdl daiykk lqqpqsngiidryffkslyyrhnsim yefateapgftid  
tpveqls  
>tr|Q5HIV8|Q5HIV8\_STAAC  
mnflkpakhikplpenqidtykr lrlqvflg ifigyagyylrnkfnslampalqeqgftkaelgfalsavsia ygfskf  
fmgtvsdrsnarilvlgl  
altaivnlmgfvpffts gigmfvllflngwfqgmwppsgrvlvhwfsvsergsktalwnvahnvgggimapiaawgi  
tttafinfgylkgfegvfi  
ypallal iiaisyvli rdtpqsqglppieiykndfatsdkk tlete lttkeilfkyvlnnkwwaiafani fvyfvryg  
vldwapvylseekhfdlka  
sgwayflyewagipgtllcgyisdkl fkgrrgpagfffm lgvtfvliywlnppgnawldnvs liaigfliygpvmligl  
qaldyvpkkaagtaagltg  
lfgylfgavmanivlgavvdkfgwdvgflltaisvfamlsfiltnkvqgetvhh  
>tr|Q5HIW5|Q5HIW5\_STAAC  
mqailnfi vdi lsqpailvaliafiglivqkkpaatitstikt ilglilsagadvvrslepfgkifqhafgvqgilp  
nneavslalkdfgttaa l



Tsompanidou\_et\_al\_Supplemental\_FASTA\_File

imvcgmivniliarftnlkyifltghhtfymaaflaiiltvshikgwltivigalvlglimavlpallqptmrkitgndq  
valghfgsisyfaagavgg  
lfkgskssteeikfpkglsflrestisisitmallyfiaclfagvsyvhesisdgnfivfsligqvtfaagvfiiiltgv  
rlilaeivpafkgiseklv  
pnskpaldcpivfpyaqnavligffvsfitgvigmfllfllfggvvilpgvvahfflgataavfgnarggikgaiagaaln  
gilitflplflplflgelg  
gaattfsdtflavgivfgnavkymglfgailfiiivgattillkgrqkeqq  
>tr|Q5HIW8|Q5HIW8\_STAAC  
mqsskwnamsllmddkktkaevlRtaideadaivigigagsasdgftyvgerftenfpdfiekyrffdmIqaslhygys  
wqeywafesrfitlnyldq  
pvgqsylalkslvegkqyhiittnadnafdvadydmthvfhiqgeyilqqcsqhchaqtyrnddlirkmvvaqqdmIipw  
emiprcpkcdapmevnrkrk  
aevgmvedaeffaqlhrynafleqhddkvlyleigigyttpqfvkhpfrmrtrknenalymtmkkayripnsiqerti  
hltedistlitaalrndst  
tknnnigettedvlnrtd  
>tr|Q5HIX3|Q5HIX3\_STAAC  
myrykpllqsihlpgniki snrfvlspmtvntstkegyitkedlayaarrnsagmqvtgaayiepygqlfeygfnidhd  
acipgltnmastmkqhsI  
aiiqIahagrfsnqaiInfgkvygspmtlhspiehdviamshenkinsiiqqyrdatIraikagfdgveisiaqrlligt  
ffstfsnkrtldhygadsIk  
nrarlcIevmravqevideapdnfIlgfratpeetrsgdlgytIdefnqlInwvmdvsniqylaiaswgrhiyqntsrt  
pgdhfgrpvniIvyeIag  
ripliasgginspesaldalqhadvmgmsppfvtepdfvhklaeqrphdinIefsmadledIalphaafkdivkmmdyge  
glkkhtrdalrqlaqnyhd  
sss  
>tr|Q5HIX6|Q5HIX6\_STAAC  
mlmtknqaekwfdnsIlgkqfnpdgwygfqcydyanmffmlatgerIlglyaynipfdnkakiekygqiiknydsflpqkI  
divvfpskygggaghveiv  
esanlntftsfgqwnwgkwtngvaqpgwgpvetrvhvydnpmfyrInfpnnIsvgnkakgiikqattkkeavikpk  
kimlvaghgyndpgavng  
tnerdfirkyitpniakylrhaghevalyggssqsqdmqdtaygvnvgnkkydglywvksqgydivleihldaagesas  
gghviissqfnadtidsi  
qdviknngqirgvtprndllnvnvsaeininyrlselgfitknkndmdwiknydlyskliagaihgpiggIvagnvkt  
sahnqknppvpagytIdkn  
npykkeqgnytvankgnvrldgystnsritgvlpnnttitydgaycingyrwityiansgrryiatgevdkagnris  
sfkgfsti  
>tr|Q5HIX9|Q5HIX9\_STAAC  
mpkIIsptfediktwyqIkeyskeIawyvdmevidkeeyaiitgekypenles  
>tr|Q5HIY1|Q5HIY1\_STAAC  
msnleksvainIentahyenisnIditftrtgesdssvllfniiIknqplflseenikariairgkgvmvvaIeildpfk  
gvIlfqIpnvikrdgsyq  
aqvsvaeIgnsdvvvertitfnveksIlfsmipsetklhyivefqeIektimdrakamdeaiIkngedyasIiekakekgl  
sdiqIaksssidelkqlan  
srIsdlenkaqaysrtfdeqkrymdekheafkqsvnsgglvtsgstsnwqakitkddgkimqitgfdfnpeqrigdst  
qfiyysqainyprdvstng  
tveyIvvtstykrmtyrpnngtnkvfvkrkeagswsewseIaindyntpfetvqsaqskanmaesnakIyaddkfnkrysv  
ifdgtangvgstlylnesI  
dqfIlIIfygtfpggdftefgspfggkIsInpsnlpdgdngggvyefgltkssrtsItisndvyfdIgsqrgsganan  
rgtinkiIgvrk  
>tr|Q5HIY2|Q5HIY2\_STAAC  
menlylikdlgalagrdrakeiqnlqrieqfalgttefkIhqaktmqhfaeqiyyngsrqaavnksIqsqinalvva  
prnnsaneivqarvvnge  
tfdtlkehlddwetktqInkeetiIrelnktkqeIldieyrfepdkqefIvftelapItnavmqsfwfdnrtgivyntqar  
nngymIIsrlrpnqgfIdss  
IivggghgthngyriddeIwiysfIlngnntIvrfkytpnveisygkygmqdvftghpekpyitpvinekenkiIyr  
ierprsqwelensmyiei  
rsIddvdknIdkvIhkisipmrInetqpmqgtfdekylywytgdsnpnnrnyIafdlIetgeayqvnadyggtdIsf  
pgefaeaegIqiyydkdsg  
kkaImIgvttvggdgnrthriImigqrgIleIhsrgvpfImSdtggrvklpmpdkIknIgmItepglylytdhtvqi  
ddfplprewdagwflvark  
ppqtggdviqIInrnsyanmmtfervIsgrtgdiIsdwnyvpknsgkwervpsfitkmsdiIvIgmSfyttdtdtkrftd  
fpterkgvagwnlyveasn  
tggfvhrIvrnsvtasaeIlnknydskiIsgpwtIhegriIs  
>tr|Q5HIY6|Q5HIY6\_STAAC  
mnekvegmlleIkdhIgvqegmkgIkrqIgvvnsemkanIsafdkseksmekyqarikgIndrIkVqkkmysqvedelk  
qvnanyqkaksIsvkdveka  
yIkIveankkeklaldkskaIksnteIkkkaenykrtnqrkdayqkIkqIrdaeqkIknsnqattaqIkrasdavqk  
qsakhkaIveqykqegnqv

Tsompanidou\_et\_al\_Supplemental\_FASTA\_File

qklkvqndnlksndkiessyaktntklkqtekefndlnntiknhsanvakaetavnkekaaInnlersidkassmktf  
nkeqmiagshfgklsagad  
vmskkfssigdkmstlgrtmngvstpitlglgaaalktsadfeqmsrvgaiqaasskdksmsnqavdlgaktsksane  
vakgmeelaalgfnakqtm  
eampgvisaaeasgaemattatvmasainsfglkasdanhvadllarsandsaadiqymgdalkyagtpakalgvsiedt  
saaiavlssnglegsagat  
alrasfirlanpskntakemkklgihlsdakgqfvmgelirqfqdnmkgmtreqklatvativgteasgflalieagp  
dkinsyskslnsngeskk  
aadlmkdnlkgaleqlggafeslaievkdltpmiragaegltkldvgfthlpgwvrkasvglalfgaaigpavlaggll  
irtvgsaakgyaslnrria  
entilsntnskamslgltlflgsttgktskgfkglagammfnlkipinvlksaklaillpflknglglaaakslfavs  
ggarfagvalrfltgpiaga  
titaitiaykvftaydrvwfrnginglgetikffggkiiggavrklgefknylgsigksfkefksdkmdgykslsdd  
dllkvgvnkfkqfmqtmgt  
askkasdtvkvlgkgsketekalekyvhyseensrimekvrlnsgqisedkakkllkietdlnnliaeiernkkel  
ktqelidkysafdeqekqn  
iltrtkekndlrikkeqelnqkikelkealsdgqisenerkeieklenqrrditvkelstekeqerilvrmqrrnay  
sideaskaikaekarkar  
kkeydkyeddvaiaknnvlsksekdkllaiadqrhkdevrkakskkdavdvvkkqnkdikemdlsgrvykntekw  
wnglkswwsnfredqkkks  
dkyakeqetarrrnrenikkwfgnawdgvtktgeafskmgrnanhfggemkkmwsgikgipsklswwsakssvgyht  
kaianstgkwfgkawqsvk  
sttgsiynqtqkysdasdkawahsksiwkgtskwfsnayksakgwldmanksrskwdnisstawsnaksvwkgtskwf  
gnsykslkwtgdmysrah  
drfdaiyssawsnaksvfngfrkwlsktydwirdigkdmgraaadlgnvankaigglnsmigginiskaitdknlikp  
iptlstgtlagkqvadns  
galtpqtfavlnrdrgsgnapgggvqevihradgtfhapqgrdvvpvlvgvdsvinandtlklqrmgvlpkfhggtkkkkw  
meqvtenlgkkagdfgska  
kntahnikkgaeemveaagdkikdgaswlgdkigdvwdyvqhpqglvnkvmsglninfggganattvkiakgaysllkkkl  
vdkvkswfedfggggdgsy  
lfdhpiwqrfgsytgglnfngrhygidfgmptgtniyavkggiadkvwtddyggngsiqiktganewnymhlskqlarq  
grrikagqligksgatgnf  
vrgahlhfqlmggshpndtakdpekwlslksgsvrsgsgvnaasawagdirraakrmgvnvtsgdvgniiisliqhes  
ggnagitqsslrdivnlq  
gnpakgllyipqtfrrhyavrgnhniysgydqlaffnrywrsqfnprggwspgpryangglitkhqlaevgegdkq  
emviplrrkraiqlteqv  
mriigmdgkpnitvndtstvekllkqivmlsdkgnkltdaliqtvsqdnnlgsndairglekilskqsghrananny  
mgltn  
>tr|Q5HIZ2|Q5HIZ2\_STAAC  
msveikgipevlnklesvygqamqaksdkaalneaseffikalkefesfkdtgasieemtkskpytkvgsqeravliw  
vgpmnrkniihlnehgytr  
dgkkytprgfgviaktlaaserkyreiikkeiar  
>tr|Q5HIZ6|Q5HIZ6\_STAAC  
msmkakyfkmkrkskskeifiygdivsdkwfesdvtatdfknkldeIgdiseidvhinssggsvfeghaiymllkmhpa  
kinyvdalaasiasviam  
sgdtifmhknsflmihnswvmtvgnaeelrktadllektavnsayldkaldqehlkqmldaetwltaealsfgli  
deilganeiaasiskeqyk  
rfenvpedlkkdvdkitkidvdtseIvetpkessleekerekikreceilkmtmny  
>tr|Q5HIZ7|Q5HIZ7\_STAAC  
mnaviakenvtrikkllidnwidqstsklydfspwknsrfwgvinnletnetifsaitklnsma splkmyedykvvn  
tevsdlltvspnnsIssf  
finqietirnekgnayvierdihqpsklflnnpdvemlienqsrelyysihaatgnklivhnm dmlhfkhivasnmv  
qgispidvlnkntdfdnv  
rtfnltemqkpdsmflkygsnvgekerqqvledfkqyyeenggilfqepgveieplpkkyvsedivasenltrervanvf  
qlpsvflnarsntnfakne  
elnrfylqhtllpivkqyeefnrklltktdreknyrfkfnvksylratsatqaevyfkavrsgyytindi rewedlppv  
eggdkplisgdlypidtpI  
elrkslkggdknvnes  
>tr|Q5HJ00|Q5HJ00\_STAAC  
mtkhnniykhrksygydwfyhskawkkIreialdrdnylcqmcIrediidakivhhiyvdedfnkalldnlnmsvcy  
schnkih andndksnlkki  
rvlki  
>tr|Q5HJ02|Q5HJ02\_STAAC  
mkmkInelekdsakerrwnsgdiklliahpasaghlnlqqgghiiwvfgltwsllelyqqanarlyrqgnhtti hhi  
mtdntidqrvykalqnkel  
tqeeImkaikariakhk  
>tr|Q5HJ04|Q5HJ04\_STAAC  
mtkqilrllflamyelgkyvteqvyimmtanddveapsdyekiraevsw

Tsompanidou\_et\_al\_Supplemental\_FASTA\_File

>tr|Q5HJ06|Q5HJ06\_STAAC  
mtevkiktisggvyfvktaepfekyvermtsfnngiyastiikkptyiktdtiesitlieehgk  
>tr|Q5HJ07|Q5HJ07\_STAAC  
mtqylvttfkdstgplpheitvardnqftftvveaenkeeakekeyeaqvkrdaikasqlfenirecgk  
>tr|Q5HJ12|Q5HJ12\_STAAC  
mki kvkkemrldelikwarenpdlsgkiffstgfsdgfvrfhpntkdstssfipidipfivdiekevteetkvdrlie  
lfeiqegdynstlyentsi  
kecl ygrcvptkafyilnddl tmtliwkdge llv  
>tr|Q5HJ14|Q5HJ14\_STAAC  
mtdsarkeylnrffgskrylyqdnervahihvvnngtyyfhghivpgwqgvkktfdtaeelyetikqsdl eyeeqkqltlf  
>tr|Q5HJ15|Q5HJ15\_STAAC  
msivkingkpykftehene likngltpgmvakrvrggwall ealhapygmlaeykevvl skimereskeremarqrrk  
eaelrkkkphlfnvpqkhp  
rgryacylmendi fvkvvk  
>tr|Q5HJ16|Q5HJ16\_STAAC  
mklnevfatnlrvimardnsvqdlnhetgvsrstisgykngkaemvnlvldkladalgvnvsel ftrnhnthkledwi  
kkvvnv  
>tr|Q5HJ17|Q5HJ17\_STAAC  
mqqqayinatidiri pteveyhhfddvddekda lakrlddnpgellkysitirhayieve  
>tr|Q5HJ19|Q5HJ19\_STAAC  
mevhyssktnewttpphl fddl seefsftldpcst denakcrkyytvkdnqliqdwse divmppygrsikrwwkkaye  
eslkgatvvc lipartdt  
ywhdyifnkaddi rflrgrl kfgdsknsapfpsai ivyrgaq  
>tr|Q5HJ21|Q5HJ21\_STAAC  
mntmqfksllksmyeetkqndpivanvyietgwavnrlldnne lspfddydkvekkimneinwkkthikec  
>tr|Q5HJ22|Q5HJ22\_STAAC  
mnyggfeiestiatllkqpdvleki rvkdymftnekfktffnyvmdvgkidhqeiy lkatkdkefl dadtitklynsdf  
igygferyqqel lesyql  
nkanelvtefkqptnqnfnnlideldlktitnk kedgkfkveefveelysdspkkqiktgyklmdykigg lepsqli  
viaarpsvgktgfalnmml  
niaqngyktssffslettgtsvlkrm lstitgie ltkikeirnltpddl tklt namdkimklgidisdksnitp qdvraqa  
mrhsdgqqvifidylqlmd  
tdakvdrrvavekisrdlki anetgaiivllsq lnrgvesrqdkrpm lsdmkesggi eadaslam llyrddyynr dded  
sitgksivecniaknk dge  
tgiiefeyykktqrfft  
>tr|Q5HJ23|Q5HJ23\_STAAC  
mpmsktqalei ikkvryvynidfdkpklemwidvlsqngdyqptakavdgyinsnppppnlpaimrkapkkvsiepvdn  
etathqwmqndpeyvkr  
kia ldnfmnk laefggdne  
>tr|Q5HJ24|Q5HJ24\_STAAC  
mgevswikl kvgmfdskikyiealperdtiitiwkl ltlsgkyneqgyim lsenlpyneemlanefnrp insirlaiq  
tfetl gmi ekvngvikvtn  
wekhqsl dsakakheknklrqryrerqkklleakrnvtvtl rndteeeereeeeyknkeereavfsssiky iianl  
ddkltpnqmeqlgfaiiddi  
gtnafevvkvgveytkssahggylikvlnwakenvktkedaehkiaprkn ttddivaqmekel sdd  
>tr|Q5HJ25|Q5HJ25\_STAAC  
mpkitsyitqddgtttvvisgvelgnketllldngfdvevdvni dpf qitgkqrrkifalvk dieehtgqpm dymrhmf  
iefvrtygyderis lsncl  
trtqasqi eatldwtfyndip lsyktsnllkqdksflywstvnrcvicgkphadlahyeavgrgmnrnkmnydkhvl  
alcrehhneqhaigvksfd  
dkyh lhdswi kvderlnkmlkgedngrsivdkt  
>tr|Q5HJ27|Q5HJ27\_STAAC  
mteqtlfeqln sknvnhdteqnglty lawsyahqelkkidpnytvkvhefphpdintenyfvpylatpegyfvqsvtv  
kdstetewlpvldfrnksl  
akgsattfdinkaqrkrcfvkasa lhg lglyinygeel psasndite leeringfvslsqekgrdatidk tmrwlkisni  
nklsqkqiaearqkl dagl  
kql dseekq  
>tr|Q5HJ29|Q5HJ29\_STAAC  
myykagei knki infngfefkvsamkrhdgisi qvkdmmnvp lksfhvvdlselyiamdamhdvinewieentdeqdrli  
nlvmkw  
>tr|Q5HJ30|Q5HJ30\_STAAC  
maknikteqhytkdfsgyrneednfvanqelvtvitlneyrklie ikavkdkeedtylckyfaer kneklekeniklk  
nkiyelqneedneeceey  
eeyked  
>tr|Q5HJ31|Q5HJ31\_STAAC  
msdyksylvavlcftv laivlmpflyfttawsiagfasiatfi fykeyfyee  
>tr|Q5HJ32|Q5HJ32\_STAAC  
mpkii vpptpentyrgeekfvkkl yatptqihqlfgvcrstvywnlkyrednl gvenlyidysptgtliniskleeyli

Tsompanidou\_et\_al\_Supplemental\_FASTA\_File

rkhkkwy  
>tr|Q5HJ33|Q5HJ33\_STAAC  
mknyyhllsfdddlandaandllkegwdivhvgtklvkilnngqaynteyvlggtnqyekyledcqqseldyfqlmffcgy  
>tr|Q5HJ34|Q5HJ34\_STAAC  
medmkelyslkiqkknlnnkqknlmsvinqcielenfsyteikkvlylidreqylannrrkt  
>tr|Q5HJ35|Q5HJ35\_STAAC  
mklnhdvrl1111eiesnkkgipe1trhnfndnifdkydfetvmysllkleakficcdlkfiegrvvswiidditwsg  
hefldnirdnktwnekvsv  
vnktsmslnlmgklafqylsqkfnlt  
>tr|Q5HJ36|Q5HJ36\_STAAC  
mmqaqnkkviiyydeegnrrpidiqindgyelmvrsyfinntieeipylnnnlyalvdgyefkld  
>tr|Q5HJ40|Q5HJ40\_STAAC  
mqalqtfnfkelprtveinenepylvgkdiaeilgyarsdnairnhvdsedklthqfsasqnrnmiiinesglyslifd  
askqskneki retarkfkr  
wvtsdvlpairkhgiyatdnvieqt1kdpdyiitvltteykekeqnl11lqqeigelkpkadyvdeilkstgtlattqiaa  
dygisaklnk11hear1q  
rkvnkqwllysehmgsytesdtiaivrsdgretdvlqtrwtqkgrlkiheimtefyeanlga  
>tr|Q5HJ41|Q5HJ41\_STAAC  
msi11fpqhphsadgyrnyrmylnaahiiassrsh11nvdvdkrkyikk  
>tr|Q5HJ42|Q5HJ42\_STAAC  
mqdqs1klvklq1kyhn1sgqieaydks1keirytrd1fnkh1smnnaefaglemvedeitkklrsaikefqkvkald  
k1ngvesdnkvt1tewrk  
vnq  
>tr|Q5HJ43|Q5HJ43\_STAAC  
mqwnlik1rkerkctqedlan11nistegyr1kelgkhqfkndemfiadffdenigdiflptkytkrkrts  
>tr|Q5HJ45|Q5HJ45\_STAAC  
mkktsisavferkfimkitnckikketivyevltsgnqpfteyelpkd1sshnarkylefisksidgdkl1tkeds1  
>tr|Q5HJ46|Q5HJ46\_STAAC  
mthniekrink1ktsgnpkfkk1dsdihy11krfegeknhkgfypkfkqgeivfvdgfinvnkefsnshfaivmnkndsn  
tedivnvip1sskenkky1  
kmnfd1kweyyl1r1f1n1isaqnsailkevfdkkyqknntefitkdyfsefidsleienklnkidrninnivsaidkv  
kklkgnsyacin1sfqisk  
frikv1ppkiknpvidssdim11inrin1n1lqipdir  
>tr|Q5HJ47|Q5HJ47\_STAAC  
mwfekfknknetkyryykykdpdytdkwkrvsv1nkntkqsqkeamfrleekikeklnkssselktl1tfhalldew1  
eyhiktsgfkvt1dn1kt  
riknikknssqnl1nkidtkymqtfine1snvysanqvkrqlghmkeaikyavkfynypnehl1nsvtlpkksktiedi  
ekeeakmy1n1lemeqviqi  
rdfi1ndnmmqyrarilvagavevqaltgmrigella1qvkdvd1knktidingt1hriknagfghkdt1tktagkrki  
ainsrianv1kkimlenkk  
mqqwepsyvdr1gfi1fttcqgnpmqgsrinkr1ssaes1ninkkvtt1hrthi11laemni1kaimkrvghtdekt1  
ikvythvtekmdreleqk1  
ek1vy  
>tr|Q5HJ62|Q5HJ62\_STAAC  
mkkqvii1sg1ml1fs1ffgagn1ifppm1ghtagqnmwigmlgfallgillpfitvivvafydegvesvgnrihpwfgfif  
avviymsgafygipraan  
vayeigtrh1lpvhnqwt1iifaiffaivywis1npskivdn1gk11tp1111mval1siavifnpe1sapkdkyit  
hpfisg1legyftmd1lva  
lafsvvi1ngykfkgltdrmki1kyvcfsgliaa11lgmiyfalayvgastapgnfkdgtdiltynsl1rlfsgf1n1lvg  
mtvilact1tcig1vnaca  
tftkhhvpkfsyki1falifsiig1f1ft1gl1emilkiavp11tliypvsialvlisfanmfstfrfswayrlatvit1ii  
silqilnsfn11hgvilks  
fmm1pladid1aw1vpfml1faiigfiidvfi1rrpkqatt  
>tr|Q5HJ66|Q5HJ66\_STAAC  
mtfeek1sqmyneiane1sgmipvewekvytiayvddgegevfn1ytkpgsed1nyysdipkdcnsvskdifknsfwkvyr  
mfde1retfkked1lepwt  
cefdft1rkgn1kvsfdyidwik1lfgf1psgkenyymkkf1g1lpdmeyemee1ravekyvkeqe  
>tr|Q5HJ68|Q5HJ68\_STAAC  
mtfeek1sklyneiane1ssmipvewekvytmayiddgggevf1fn1ytkpgsed1nyytdipkeynsvsvqvfdd1wmd1yd  
1fkn1rn1fkeeg1lepwt  
cefdft1rdgk1nvsfdyidwansef1g1mgrehyymkkf1giwpekeyainwkkikdyvkeqdeae1  
>tr|Q5HJ69|Q5HJ69\_STAAC  
mipvewekvytmayiddgggevf1fn1ytkpgsd1nyytdipkeynsvsvqvfdd1wmd1yd1feelrd1fkeeg1lepwtsc  
efdf1tsegk1kvsfdyidw  
intefdq1grenyymkkf1g1vpemeyemeeikeidqyikeqdeaei  
>tr|Q5HJ70|Q5HJ70\_STAAC  
mtfegk1sqmyneiane1sgmipveweqvftiayvtdqagevi1fn1ytkpdsde1nyysdipkdcnsvskdifknsfwkvyr

Tsompanidou\_et\_al\_Supplemental\_FASTA\_File

mfde1retfkeeglepwts  
cefdftdrgklnvsfdyidwintefdq1grqnyymkkfgvipemeyemeevkeieqyikeqeeaeq  
>tr|Q5HJ72|Q5HJ72\_STAAC  
mtfeeklseiyankianeisgmipvewdqvftiayvndrggeivfnytkpgsdelnytyipreynvsekvfydlwtdlyr  
lfkklrnafkeedlepwts  
cefdftdrgklnvfdyvdwmnsefgpiakenyymkkfgvlpetyeinkvkeidqyvkeqdeael  
>tr|Q5HJ74|Q5HJ74\_STAAC  
mtfeeklsemysejankiismipvewekvyamayideecgevfynyepssdelfyysvikynllkssfmdsvyelhd  
qfeelrevfieeglepwts  
cefdftkedklnvsfdyidwintefdq1grenyymkkfgvlpetyeinkvkeieqyikeqee  
>tr|Q5HJ79|Q5HJ79\_STAAC  
mttkenidtlrkpgaqalslslflilfsc1tfffglgyerfpnylkittieliivisllqwirfidfekesaqkykk  
iyarflvvinvlttitvfy  
alcnlyfaavqnyhdlnfynwlmgsisiiisylllviggmftllklpkvtrwggkthfglllta1ssfiyiekiiey  
ilvnpvveskfiiivsm1v  
iagafvafqfimqysrfyifelnteddd  
>tr|Q5HJ95|Q5HJ95\_STAAC  
mskklkiipiiivlll1ggiawgyaffantpknty1kseqqtakmykdyfndrfenevkfkekmkdnslsslelsad  
asdeivkg1gipksvvnas  
kikmsyghdpkkeksminleptiadsalqkflaadkdkhyfesplfkgkysvnnsdllstyskltgedetakengitn  
qq1n1nt1fnnaqqgsdy  
skiaekyselivdk1dddnfdkgkkeeikvngkykvrpvt1t1sradtkkitlavleakkdkdklklmeeqgarkdfe  
kdikkaiddvketkkdefa  
kiqskiytektivkreititdkennktkiigtntleddklkl1dya1dfdqdkytyaeakytikgvsskekdnyndkye  
fgkkteydeskik1dnqek  
vdgtkrqdkgk1tvaldkysdeneftfennidsvknntqkst1nigikyaeepinfilksstklkadidfdsgakdfn  
slsskdrek1ekeiekngg  
kmfesilkkask  
>tr|Q5HJA0|Q5HJA0\_STAAC  
mctgftiqtl1nqvllgrtmdydyp1dgsavtpnrnyrwsrtgttqgtygfigtgtdmegfiygdgvnehgvaistqy  
frgyssygsthkadamnit  
qneivtwilvyttsiedmkqqasqihvvavy1ndigevpplhyhvsdatghtvevsfkegevvikdnpigv1tnhpdlnw  
hysnlrqyinisypatan  
llegvtieplgneagtfglpggftsterfvrmtfmkaniaqndkemdlnafy1ldavnipigivrphdadnhytmyqt  
vin1ttrtlyikygsnel  
valkl1td1lnrkdmti1fkpekhitirk1ndnq  
>tr|Q5HJA4|Q5HJA4\_STAAC  
mrreni11r1ipfndydnknfkmfivikntkvi1lknk1vfefqsikkhnemmyielcd  
>tr|Q5HJB8|Q5HJB8\_STAAC  
mkfsvivptynsekyitel1nslakqdfpktefevvvddcstdqt1qivekyrnk1n1kvsq1etnsgggpkprnvalk  
qaegefvlfvdsdyinke  
tlkdaaafidehsv1l1kmgvngrgvpqsmfketapevt1lnsriiyt1sptkiyrta1l1kndiyfpeelksaedq  
1ftmkaylnanrisv1sdk  
ayyyatkreghmssayvspedfyevm1riaveilntdleahknqilaeflnrhfsfsrtngfslkvkledqpqwinal  
gdfiqavpervdalvmskl  
rpl1hyarakd1dnrtveesyrgqyyrfd1vdgklniqfnegepyfkgidiakpkvkm1afkfdnhkivtel1nefm  
igeghydvr1klhsrnkhh  
tmyvplsvnankqyrfnimledikaylpkeiwdvfl1evqigtevfevrvgnrnkyaytaetsalih1nndfyr1tptyf  
tkdfnnislyftait1tds  
islklkgknki1l1tgl1drgyvfeegmasv1kddmvmgm1sqtsenevqil1skdikkrdfknivk1ntahityplnk  
>tr|Q5HJC2|Q5HJC2\_STAAC  
mikntikk1iehsiyttfk1l1sk1pnkn1iyfesfghgqysdnpkalyey1tehsdaq1iwgvkkygheh1fqqhnvpyvt  
kfsmkwflamprakawmin  
trtpdwlyksprtty1qtwhgtp1kkig1di1snvkm1gtntqnyqdgfkkesqrwdy1vspnpystsi1fqnafhvsrdki  
1etgyprndk1shkrndte  
yingiktr1nip1dkkvimyaptwrdeai1regsyqfnvfdieal1rqa1dddyvill1rmhylv1vtridehddfvkdvsd  
yed1sdly1l1sda1vtdys  
svmfdfgv1krpqi1fyayd1dkygde1rgfymdykkel1pgpivenqta1ida1kqidetaneyieartvfyqkfcsl1edg  
qasqricqti1fk  
>tr|Q5HJD0|Q5HJD0\_STAAC  
msryfpiv1tfdvtvistt1lakfcdspfel1qsl1rfyvinh1s  
>tr|Q5HJD2|Q5HJD2\_STAAC  
mggq1vhkenim1n1satdkesv1sqmsdv1fqngfvkstfkdauidrekefatgl1ph1lcsvaiphtdvehinhrtigv  
av1lekevpfiemgt1dqqt  
evki1vfm1amdkvddq1kl1lq1mqi1fqseek1eqil1rtkdetil1at1indyleyn  
>tr|Q5HJD4|Q5HJD4\_STAAC  
mkrki1mdcdpghddai1al1lagaidsp1eilavttvagnsvdknttna1nvl1dimgrqdi1avakgadrpl1kpaafas  
eihgesgl1dgpkl1pstpsr

Tsompanidou\_et\_al\_Supplemental\_FASTA\_File

qavampasdviiinkvmtsdtptvatgpltnvatalirepriaehiesitlmgggtfgnwtptae fniwvdaeaakrvf  
esgitinvfgldvthqvla  
ddhvierfesinnpvaqfvvellqffkkykthfnmdggpihdactilyllqpelftmvpvni diehqsplygtmavdl  
nhvtgkpanayfatavdve  
evwnlidhklrtye  
>tr|Q5HJD6|Q5HJD6\_STAAC  
matmyevrsvdivafinvtfealsssctvvspqiasarqss  
>tr|Q5HJE3|Q5HJE3\_STAAC  
mtclkgitwhdlqhiikgdvigli palavanlpaevl ravlaqhdyhtpndltfilandihs lgaaplddfiermik  
rvimsiltassktaqamkn  
ndieayflpggi iathyrqsngllpgvltkig lntavdprygggkvnttrttdlvs lvtindetylhytfpsvdvallrg  
tyadqggniy l t qeaylse  
cyhvalnakanhgkviqvka l vddyqlkpnevvipgnlvdyvyvtedeknrqviqshylpalsgeeridgipepalpf  
nsrklilrraaqfltygdt  
isigyginne l snllheecvehdvqpil dvgiffgfvgsrehfgmynadvrmphdrawdfi ynngvsvaylsfaevdqy  
gnvnvsyfndrlngcggfi  
ditqsvnkiifsgt f v agshvschnqrlnietegqnqkfvsdvshidfnaqysqsleqei yfvtdravfeltnqgklkie  
iapgl dlhkdi l nqmafkp  
i i adhlklidtsiykekwwgqlkqsihkv  
>tr|Q5HJE4|Q5HJE4\_STAAC  
mndfwiktrsd f d d d k p a v i d h a k q t s w t y q q l n a r a d n m a h y l t s q g v k g d v i g i f a p n d i a i l d l l f a c f k t g a v f l  
plnwrlnpkeiaaivedaq  
lkllyfaekhlssltdidqnl l h m d i d v a q y d e i v n p d y h q p f a t p v e p q d l a a l i y t s g t t g s p k g v m f s y e s f v h n g  
anleltykfnsnyitivist  
pmfhvlgfndtvlpvlmsggtlilqryfngeelndmiaaqyhptfi imiptmyystlrasnfnpenframdyiiqggsqpl  
psiaafkqygininiingyg  
lteaplvlvntpenskrkpmsigkavmfvdarilddngeevptgeigelaikaknvtpgywnkpaetakafhgrylltgd  
lakmdndgdi fi idrkkel  
iitggenvlpsevenalaehplvdrcvvvgdydhpkkygesiaaaailredephyaeilnqhmrslagykvprmyvpvthm  
plnstqkpkklairqmmnd  
kvsqt1  
>tr|Q5HJE5|Q5HJE5\_STAAC  
mtfeketv l k t l f p e d v l s i a k g l t d g e v e f l q q v d s l l e s k y r e n i n q h w i d a t v p e d y f k d l g e l n y f n n p l l y k d r p  
nakmpsq l f q f f m s y l l a r  
fdislal l g v h q g l g h n t f y f g g s k e q i a k y v p k l q s h e l r t c f a l t e p e h g s d v a g g l e t v a e r q g d t w i n g e k k w i  
ggahvsdvipfavnetg  
kphcfvvrpeqdgvdiev d n k i a l r i v p n a l i k l t n v k v d e a d r l q n i t s f k d i a k i l y s t r a g v a y m a t g g m a g a l r a  
tldyvterkqfgkpi skyq  
liqeklammggnlagamatcaqlanmqahgeydevatstakmmnalrlretvamgrgitggngiladdydiarffsdaea  
iytyegtheinalvigral  
tgdsafv  
>tr|Q5HJE8|Q5HJE8\_STAAC  
mfnhyishsfinktkllqpaststgfnfsl l h s i t k r i r f i q n q p f  
>tr|Q5HJG1|Q5HJG1\_STAAC  
mtklkvvgvigggi a q d r h i p a l l k l k d t v s l v a v q d i n t v q m i d v a k r f n i p h a v e t p s e l f k l v d a v v i c t p n k f h a d  
lsiealnhgvhvlcekpma  
mtteecdrmieaanknhklltvayhyrhtdvaitakkaiesgvvgkplvarvqamrrrkvpwgwvftnkallqgggs l i d y  
gchlldslslwllgkdmvph  
evlgtktnqlskqpnqindwgtfdhtkfdvddhvtsymtfanrasmqfecswsanikedkvhvs l s g e d g g i n l f p f e i y  
epfrgtifeskanvehned  
iagerqarnfvnalcgieeivvkpearnvnalieaiyrsl d n k s i q l  
>tr|Q5HJH0|Q5HJH0\_STAAC  
mvinlndkqtkskeglisvshplaakigkdvldqggnamdaviaiqlalnvvepfasgigggylllyeqstgsitafd  
aretapehvd k q f y l d d s g  
eyksffdmthgktvavpaipklfdyihkryaklsledlinpaie laieghaanwatekysrqharl tkyhetaqv f t h  
engywregdwivqpelgkt  
fqilreqgfnafykgdiakqlvnnvkacggtit ledlakydiqikapisatfkdydiysmgpsssggitviqilkll ehv  
dlpsmgprsvdyllhliqa  
mhlaysdraqyladdnfhevqvslidddy l k a r s t l i d s n k a n i d i e h g v v s d c i s h t d v e e n h t e t t h f c v i d k e g n i  
asfttsigmiygggitipg  
ygvllnttdgfdvvdggineiapyrplsnmptivmyhgkpi l t v g a p g a i s i i a s v a q t l i n v l v f g m d i q q a i d e p  
riysshpnriewepqfsqs  
tj l a l i a h g h a m e h k p d a y i g d v h g l q v d p t t y e a s g g s d d t r e g t v m g g e v l v i r k q p l p y r q m y s d g f r l y f n d v q l  
plladqvrwmhdkyvvdes  
vvriifpevsahiedlrsyenagenyidiawlarkyayqvtlkddglyltddytsvkrntnayrydrdsitr  
>tr|Q5HJH3|Q5HJH3\_STAAC  
myhkafykfvlsvlspilyavikfffsakrknfyannseiseieqalhqyky l s q q s s t q i h k e a l k i f k a q s n t  
ssknieqahfstyfenlvf

Tsompanidou\_et\_al\_Supplemental\_FASTA\_File

hkfimikvilalpmflltlfylqplvryiferivmaviviigvsvftilyfspldaaysilgqnatkaqihqfnvlhh  
lnepyfiqlwdtikgvftf  
dlgttykgnevvtkavgeripitiivavlaImvaliaaipigiisamkrnswlditlmiialiglsipsfwqglfilaf  
slkldilppsympehpsl  
ilpvlvigtsiaasitrmttrssvlevmrsdyvltayakglsttqvvikhilknaiipivtlvgllvae11ggsavteqvf  
ningigryivkqlipdip  
avmggvvyisivislanliidifyalidpk1rseinerk  
>tr|Q5HJH4|Q5HJH4\_STAAC  
msnllenvslnvqfnydettvqavknvsfelrkkhilgivgesgsgksitaksilgl1pdypdhtltgeiifngqslnn1  
stsalqqirgkdisimifq  
plsslprlrigkqitevifqhkrvskseaksmtidilekvgikhatrqfdayphelsggmrrqvmiamalilkpqilia  
depttal dastqngllq1m  
kslyeytetsiifithdlgavyqfcddivmkgdsvvesgtvesifkspqhtytkrlidaipdihqtrpprplnndillk  
fdrsvdytspsgslyrav  
ndinlarkgetlgi vgesgsgkstlaktvvg1kevsegiwyne1plslfkdelkslrqeiqmi fqpfasinprfkv  
idvikrpli1hgkvkndd  
iiktvs1lekvgldqtflyryphelsgqrqrvsialavepkvivdeavsal dsvsiqkdiellkqlqldfgityl  
fithdmgvineicdrvavm  
kngeivelnntedi1khpqsdyaqlisevaviak  
>tr|Q5HJH7|Q5HJH7\_STAAC  
mdnrnminrvfsqilhqiaiknksdvdeaydfyiqgpkniinvikmkslynylkkysyrneyfykntilnk11lgrhsi  
nttal sempigksiadfi  
llngkgvveyekte1dkldr1dnqindyevfnyvvitndkhlnkvmaykdttvgilvlttrnt1sevqpkenns11  
ntkamynflrkeerkria  
qnhmdvptyndfteydv1fdvfkeipmtklhnmiselkkrngmkeykdeflaapaeikf1lyfakmtkkdknklyhflk  
ed  
>tr|Q5HJI2|Q5HJI2\_STAAC  
mtgfsvy1gqpldeayikrmikqgyqmi ftsvqi peddetkyhyftkl1n1lkheqvtylidanpsiltpsfydh1rqy  
daqfmiridhstsieaiea  
imaqglkcc1nasii srellts1hqqlndft11sfchnyyprpdtglsvdlvnkkneliyqfnpkaqiygfvgsdlrgp  
lhkg1ptieatrhshpva  
ak11qetgvsevlvgds1iemraqqlidfckhrhft1cieevfddtvtylfdmchkvrpdnpenvirsetsrqicphsi  
qpqfttqrrigsvtvdnl  
ngryqgemqivrqt1sahdnvnvvaqiked1pl1sciepnndtfdqktreckk  
>tr|Q5HJI6|Q5HJI6\_STAAC  
mdyapytaenvvqanank1idvfrknngfiafvrvnfydgkdvlqpnamis1ppkegddysrfh11dkrdddavidkrhf  
safvgtdld1qlrrrgidat  
iv1ggvathigvdttdardayq1nynqffvtdmmsaqnet1hqfpidnvfplmgqtittndf1n1ln  
>tr|Q5HJI7|Q5HJI7\_STAAC  
mkkk1tfkenmfigsm1fglffgagn1fpihl1gqaagsnvfian1glflitaig1pflg1iaig1sktsg1feiasrvnk  
tyayiftialy1vigpffa  
lprlattsfeiafspflspkqitlyl1fifsvffviawffarkpsrileyigkflnpvflv11ai11lfafihplggisd  
apisqyqshalngfldg  
ynt1dalaslafgiiivatikk1gienptdiaketiksgtisiimmgiytl1aimgt1signfkl1senggialaqitqy  
ylngygi1v11slivmac1  
ktaig1l1afsetfeh1fpkmnylaiatvsvfisflfanvgtkiimysvpv1mflyplai1aliv1t1fsskfhhskliy  
qcti1fftmi1a1vdglkas  
pefisstsfst1infsqy1pl1sdigmgwv1sligfiigfiiykikhrkipqa  
>tr|Q5HJJ4|Q5HJJ4\_STAAC  
mimgn1rfqqeyfryknntestthrnaywvklaknveatkmya1stivqqhasirhffdvttddn1tmilheflpfi  
ikqvpssanydleaaffkq  
elstyhfndsp1fkvklfqfadaay1l1dfhvs1fddsqidi1fdd1cnayrgntvintrqhahinrnddkdnqdashi  
aldsnyfrlennsdihids  
yfpikhpfeqalyqtyliddmts1dmas1lavsvylanhimsqqhdvt1gihvpsh1pnd1hgnivpl1t1tidakdvqrf  
ttdfnkcv1qnmsqlqcak  
ssl1slet1f1hcyhmmsscndviedvhqihdahtsladie1fphqhgfk1iynsaayd11siet1sdlvrniylqiteen  
gnkrttvde1n1mterdiq  
lyddin1s1peiddaqtvt1feqqveatpnhvavqfdgvfityqt1narandlahr1rnqygvepndrvaviaeksiem  
iamigv1kaggayvipd  
nypsdreqey1kdvtpkvvityqalyengkqinhid1nkiawknid1skcnt1edhayviytsgttgnpkgt1iphrg  
ivr1vhqnhyvplneetti  
llsgtiafdaatfeiygal1nggk1livakkeq11npiaveq1inendvntmw1tss1fnqiaseriev1v1skyl1ligge  
v1nakwvd11ngkpkhpgi  
ingygptent1f1t1tynipnkvpnr1pigkpi1gthvyimqgerrcgv1gipge1ctsgfg1aagyl1nqpe1tadkfidks  
ninq1myrsgdivr11pdg  
nidyl1rkdkqv1k1rgfrie1sevehaleri1qginkavvivqnhdqdyivayyeamht1shnkiksq1rmt1peymipv  
nfmhieq1ip1tingk1dkk  
alpimdyvtdtdayvapstdteh11cqifadi1hvnqvgihdnffelgg1skat1lvnri1eastgkrl1qigdl1kqptvf

Tsompanidou\_et\_al\_Supplemental\_FASTA\_File

elaqaiakvqeqnyevipe  
tivkddyvlssaqrmyllwksnhkdtvynvpflwrlsseInvaqlrqavqrliarheilrtqyivvddevrqrivadva  
vdfeevntthftdeqeimrq  
fvapfnlekpsqirvryirspLhaylfidthhiindgmsniqlmndlnalyqhklllpklqykdysewmshrdmtkhrq  
ywlsgfkdevpilsLptdy  
vrpniktngammsftmnmqmrqllqkyvekhqitdfmffmssvmtllsryarkddvvvgsvmsarmhkgteqmlgmfan  
tlvyrgqpspdkmwtfqlq  
evkemsleayahqeypfeclvndldqshdasrnpLfdvmlvlqnnetnahfghsklthiqksvtakfdlsfiieedr  
dytiniyentdlyhsetvr  
hmgncqmimidyilkhqdtlqicdipngteeLlnwvnthvndrmLnvpgnksiiisyfnevvsrqgnhvalvmndltmtye  
tlrnyvdaiahlLsngvg  
ngqrvalftersfemiaamlatvkvgasyipididfpnkrqgailledakvtavmsygeiettlpviqlenakgfveske  
neqyddlhgnqlentamld  
nemyaiytsgttgmpkgvairqrnlLnlvhawstelqldnevflghanivfdasvmeiyccLlngthlvipdreervnp  
eqllqllinkhrvtvasipl  
qmcsvmedfyiekLitggatstasfvkyiekhcgtyfnaygpsestvitsywshhcgdlipetipigkplsniqvyimsd  
gllcgimgpgeLciagdsL  
aigylnrpeLmadkwqnnpfkgklyhsgdlarytsdgqiefLgridkqvkvngyrieldeienailairgisdcvvtvs  
hfdthdlnayyvgeqqve  
qdlkqylndqlpkymipkthidcmplttndkvdtrlpnpspiqqsnkvysepsneieqtfdvdfgevlkqndvgvdd  
dffelggnsleamLvvshL  
krfghhismqtlgyktvrqivnymyqngqslvalpdnlseLqivmsrynlgiledslshrpLgntlltgatgflgayl  
ievLqgyshriycfi radn  
eeiawyklmtnLndyfseetveimLsni evivgdfecmddvvlpenmdti hagardhfghddefekvvnvqgtvdvirL  
aqghharliyvstisvgt  
fditdtedvtfseadvykqlltspytrskfyseLkvleavnngldgrivrvgnLtnpyngwrhmrniktrfsmvmndll  
qldcigvsmampvdfsfv  
dttarqivalaqvntpqiiyhvlspnkmpvksLlcevkrkeielvsdesfneilqkdmyetigLtsvdreqqLamidtt  
Ltkimnhisekwptitnn  
wlyhwaqyikti fnk  
>tr|Q5HJJ7|Q5HJJ7\_STAAC  
mntidhtkeqqfsnlvrsyrkeyvgkgnpsirvsfkdnwai ahmtgvlskvesfyLndkrnesmlhytrtekikqmyke  
idvnemeslvgakfvklft  
didLnddevisifvfdksie  
>tr|Q5HJJ8|Q5HJJ8\_STAAC  
mtletlikeql dphlvevdegtyyprtfiqqLfvdgyfgeaalrkaevieavsqsclttgfcLwcqlafstylenatqp  
hlndlqqqlLsgeilgat  
glsnmpksfndlekLnltehtyvdgqlvvsgrmpavsniedhyfgaiskhessdefvmfilranqdgitLvektnlfgvn  
gsatyqitLnvvvvpgsqi  
ithdakqaatirpqqiayqipigLsikslelidafsnvqnginqyleydveafkkryrqlreeyyailddgnLtshL  
nelisLkkdigyLlLdnq  
asvvnggsraytpyspqrkLkegfffaaltptLrhlgkleaelkg  
>tr|Q5HJK6|Q5HJK6\_STAAC  
mcLnfrednvmkkimvifgtrpeaikmapLvekidhngnfeanivitaqhrdmLdsvlSifdiqadhdLnimqdqqtag  
LtanalakLdsiineeqpd  
milvhgdttttfvgslaafyhqipvghveagl rthqkyspfpeelrvmvsniaelnfaptviaaknlLfenkderifi  
tgntvidalsttvqndfvs  
tiinkhkgkvvlltahrrenigepmhqi fkavrdladeykdvvfiypmhrnpkvraiaekylsgrnrielielpdaief  
hftnqsyLlLtdsggie  
eaptfgkpvlLrnhterpegveagtsrvigt dydnivrvnkqLieddeayqrmsqannpygdgqasrriceaieyyfgl  
rtdkpdefvplrhk  
>tr|Q5HJK7|Q5HJK7\_STAAC  
mkltvvglyigLptsimfakhgvdlvgvdinqatidkLqsgqisieepglqevyeevlssgklkvsttpdasdvfiav  
ptpnnddqyrscdisLvmr  
aldsilsflekgntiivestiapktmddfvpkvienLgftigediylvhcpervlpgkileelvhnnriiggvteaciea  
gkrvyrtfvqgemietdar  
taemskLmentyrdvnialaneltkicnnLinvLdviemankhprvni hqpgpgvgghclavdpyfiiakdpenakliq  
tgreinnsmpayvvdttkq  
iikvlsgnkvtvfgLtykgdvddirespafdiyeLlnqepdievcaydphveldfvehdmshavkdasvlLilsdhsefk  
nlsdshfdkmkhkvi fdk  
nvkssfedvsyynynignifnidk  
>tr|Q5HJK8|Q5HJK8\_STAAC  
mrknliitgvhyignaLkdkLiegghqvdqivnrnqlwkstsfkdydvl ihtaalvhnnspqarLsdymqvmlltkqL  
aqkakaedvkqfi fmsLma  
vygkeghvgsdqvdqtqtpmnpntnygiskfaeqalqelisdsfkvaivrpmpiygahcpgnfqrlmqLskrlpiipni  
nqrsalyikhLtafidqL  
islevtgvyhpqdsfyfdtssvmyeirrqshrktvlinmpsmLnyfknLsvfrklfgnliysntlyennaleiipgkm  
slviadimdetttkka



Tsompanidou\_et\_al\_Supplemental\_FASTA\_File

>tr|Q5HJL1|Q5HJL1\_STAAC  
makkvfimdsvkttiigtllialglqflaypiinqrvgneafgsiltiytiititsvvlngtlnnirlnmlyksnhyw  
kfasillisiiliesiali  
vflyffnlniidiiflilllnlmlcriylnvffrmtlkynqilyialiqflglliglflyyltqnwivcfitselatiy  
tlvklrgltigeygsednn  
vvdymllstnslnnllyldrillpiiggtavtisflstfigkmlatflypinnvlsyisvnesdnikkqylktnl  
iaiaalcvmiicypitii  
ivsllynidsslyskfiilgnigvfnavsimiqtlntkhasitlqanymtlhtitfifitilmtiafngffwtlfs  
niikyvilniiglskfin  
kkdvd  
>tr|Q5HJL3|Q5HJL3\_STAAC  
mriInivssnivqdrvlkqietikgvtddykiivgmnsqatnkrlelncnyrllgskvdpknisklikrirfatgvi  
reikaykpdvihandfdvl  
lmvylsnykkanivydaheiyaknafinkvpliskfvesiekhivkhrvnafvtvshaakeyyqskgykkanvitnapi  
lndsrefkeienfkeivvyg  
qqivmdrgyeeffiassafkqnapsfiirgfgpheevikelisynpenirldkpvekelvdklaesnvgvltkpvsin  
feytvsnkifecihaglpv  
ilspvkehilynekykfgivlkevtpleiakavrklrdnhdlfnhlrqnaikaskilnwqieserlvelykf  
>tr|Q5HJM4|Q5HJM4\_STAAC  
mkkikyksltvsaiivatvslsalpqslaitesqptkqqrvtlfdhrshgqtagaadwvsdgafsdysdiqkqgydvkaid  
ghsniteaslksskifvip  
eanipfkeseqaaivkyvkggnvviisdhynadrlnlridsseamngyrrgayedmskgmnaeeksstamqgvkssdw  
stnfgvrfrynalgdlns  
nivsskesfgitegvksvsmhagstlaitnpekakgivytpelpakskshavdqgiyngggkaegpyvaiskvgkga  
afigdsslvedsspkyvre  
dngekkktydgfkeqdnkllnnitawmskdndgkslkassltdtktklldferperstepekepwsqppsgykywdpt  
tfkagsygsekqadpqpnt  
pddhtppnqnekvtfdipqnvsvnepfemtihlkgfeanqtlenlrvgiykeggrqigqfsskdndynppgstlptvka  
dengnvtikvnalesme  
gskirklgdktlittdfk  
>tr|Q5HJN7|Q5HJN7\_STAAC  
menghnsklltlliglavfiqqssviagvnvsiadfitllilvyllffanhllkanhflqffiilytyrmiitlcllff  
ddlifitvkevlaskvya  
fvviyfyfmgmifklngskkvivtsyissvtiglfciaglnksp11mklllyfdeirskglmndpnyfamtiitlvla  
ykyihnyi fkvlacgillw  
sltttgsktafiilvlaiyffikk1fsrnnavsvmsvimlillcftfyninyylfq1sdlalpsldrmapifeegfa  
s1ndsgsersvwinaisv  
ikytlgfgvgldvyvhigsqingillvahnty1qi faewgilfgalfiifmlyllfelfrfnisgknvtaivvmltmiy  
fltvstfnnsryvafilgii  
vfivqyekmerdrnee  
>tr|Q5HJP0|Q5HJP0\_STAAC  
mervlitggagfigshlvdlddqdydyvvlndnyrtgkreniksladdhvfeldireydaveqimktyqfdyvihlaalvs  
vaesvekpilsqeinvvat  
lrlleiikkynnhikrfifassaavygd1pdlpkdsqslilplspyaiddkygerttlnycslyniptavvkffnvfgpr  
qdpksqysgviskmfdfsfe  
hnpkftffgdglqtrdfvyvydvvsrvl1imehkdaighgynigtgtftnllevyriigelygksvehefkearkgdikh  
syadislka1gfvpktyv  
etglkdyfnfevndieevtakevems  
>tr|Q5HJP7|Q5HJP7\_STAAC  
mqqlslkhrlnngdsvygfnsipdplmieviaasgydfvvidtehvaindetlahliraeeahiipivrvtavidrdi  
ikvldmgargiivphvkd  
etvehivklrlyppqglrslnggrmarfgrtp11damemanehimviamiedvegvmaddiaqveglmivegaadlsq  
slgipwqtrddqvtsvhq  
ifevvnahgkhfcalpredediakwqagvqtfilgddrgkiyrhlsaslatkqkdeg  
>tr|Q5HJP8|Q5HJP8\_STAAC  
mnqtilnrvktrvmhqlvssliyenivykasyqdgvgfhftieghdseyrftaekthsfdri ritspiervvgdeadttt  
dytqllrevvftfpkndek  
leqfive11qtelkdtqsmqyresnppatpetfndyefyameghqyhsyksrlgftlsdnlkfgpdpvnpvklqlaid  
kdkvettvsrnvvvnemlr  
qqvgdktyehfvqqieasghvndvemi pvhpwqfehviqvdlaeerlngtv1wlgesde1yhpqqsirtmspidttkyy  
lkvpisitntstkrvlaph  
tienaqa1tdwlkqiqqdmylkdelktvflgevlqgsylntqlspykqtqvygalgviwreniyhmlideedaipfnal  
yasdkdgvppienwikgyg  
seawtkqflavairpmihmlyyhgiafeshaqnmmlhengwptria1kdfhdgvrfrkrehlseaashl1tkpmpeahkk  
vnsnsfietdderlvrdfl  
hdafffiniaei1fiekqygi dee1qwqvwkgiieayqea1pelnyqhfd1feptiqvekl1ttr11sdselrihhvt  
nplgvnggindattiset  
>tr|Q5HJQ2|Q5HJQ2\_STAAC

Tsompanidou\_et\_al\_Supplemental\_FASTA\_File

mlylnrsdieqaggnhsqvyvdaltealtahandfvqplkpylrqdpenghiadriampshiggehaisgikwigskh  
dnpskrnmerasgviiInd  
petnypiaavmeasliissmrtaavsviaakhlakkgfdltiigcgligdkqlqsmleqfdhiervfydqfseacarfd  
rwqqqrpeinfiatenake  
avsngvvtctvtddqpyieydwlqkgafisnismdvhkevfkadkvvvddwsqcnrekktinqlvlegkfskealha  
elgqvtgdipgreddei  
illnmpgmaiedissayfiyqqaqqnigttnly  
>tr|Q5HJQ5|Q5HJQ5\_STAAC  
mllkpkqyiviaglciaivailsImigntlvspgtvialfnfndsendlhdvvtgarasrtiaalltgaalavsgllmq  
ltnrpiaspplfgvnagav  
ffvifsitfiqisfkmivviafngaiivvtlvvalgmfrqtlfsphrvilagaaiamlftaftqgilimnetdlqglf  
wlsqsvslrniwditwip  
lvllilialfasmaahiniImtsddiatglgniklikwmiimlismlagisvavagsivfvglivpniskrllppnykyl  
ipftalagailmiisdiva  
riiikplelpigvvtavigaivliyimkkgrqr  
>tr|Q5HJR3|Q5HJR3\_STAAC  
myysygyeafarpkkpenvenksayligsglaslaaacflirdgqmegskihileelpkaggsldgenmplkgyvrrg  
remenhfecldwlfirsips  
leidnasvldefywlakedpnysrcrviekqqrvtgdgftltktaikeildlcltneedladdvitdvfsdfffnsnf  
wiywktmfafepwhsamem  
rrylmrfvhhisgladfsalkftkynqyeslvlpmveylkshgvqfeydvkvedikidvttsqkiareilidrngnaesi  
kltindlvfvtngsites  
tygdndtpapptdelgswtlwknlarqspefgnpdkfcqnikpkkswfsatsttnkeiidtiesickrdplagktvtg  
gittindsawqmsftinrq  
qqfkdpeneistwiyalydsvngdyikkpitemcsneicqewlyhlgvstdkiedlakhasntipvmpyitsyftra  
igdrplvphqsnlafiq  
nfaeterdtvftteysvrtameavyqllnidrgipevinspfdlrvlmdaiyelndhqdlreitkdskmqklalagflkk  
ikgtyiesllkehkl  
>tr|Q5HJR4|Q5HJR4\_STAAC  
msvtevi fsfllgglgifylglkimgdglqasagdrldilnkftsnvlgviagivvtliqsssgttvitiglvtagfm  
tlkqaigvimganigtvt  
afiiigidleyampilalgaflifffkrskinnigrilfgfgslffglefmgdavkplaslbgfkqlmldmstnpilavi  
vgagltalvqssatigil  
qefyqdlislnaaiplvgdnigtittailaslagsiaakraalvhvifnligviiftiflppvihlisllqdlwhlkp  
amtiaavshgfnitntliq  
lpfvaglawivtklvpgkdiaddykqhlndlvvyhagvalqetqkelqnvqqivlsmfedireitkddkklkkleqk  
hqavetindsirnylvris  
tkaitkadverlavmfdvnrslkvaelteeyvaqlkrqhdeditrtdaqrmdklfnhvaesfdkaidmldvydktkk  
deiversresfniehlrk  
ghikrlnrgecttkgglliydmigvlerigyhsrnvsealvglnddvptdeeiattei  
>tr|Q5HJR5|Q5HJR5\_STAAC  
mdgyllrcsknldiymeriyvkvmairfnegdv  
>tr|Q5HJR7|Q5HJR7\_STAAC  
mnqqlietlkskegkmierrylhghpelsfhedetakyaefykgkdvevetnvgrgikvtdisgkpgktlairadfd  
alpitedtqlsfasqngv  
mhacghdahtaymlvlaetlaemkdsftgkvvvihqpaeevppggaktmiengvldgdvhlvghvmstmkgtkvyrrg  
yvqtgraffklkvqgkgh  
gssphmandaiavagsyfvtaqltvvsrrlspfetgvvtigsfdgkqfnnvikdvveiegdvrgltdatkatiekeikrls  
kgledmygtctleynddy  
palyndpefteyvaktlkeanldfgvemcepqpsedfayakerpsafiytgaavengeiyphhhpkfniseksllisa  
eavgtvvllylkgdn  
>tr|Q5HJS6|Q5HJS6\_STAAC  
msqlndtllsawllieslspgevnftaedilsaehfkngakqaqlqsfdeyfeiwnaerfiiseeksetgelikfyrrhc  
fryneinlkiqdidfyse  
ihnpngthcygytfntdkhgkvidsihipmimsalkeieknknieekfndsvekfvqkvkeiladepineflkkmd  
kaydeyfsvlnskkdglfg  
hyvaiyvkdsdlpqpfnffisdielkarkspnqtlidyiegevesqrievidenkemfdkflhpsrlpdgrwpsqtefr  
lslmqqlavnqitsgneri  
ssvngppgtgkttllkdi fahlvvergkelaklnpkdafvktkihetddkyvllkesiakykmvassnngavenisk  
dlpkieeiirnepkckfpk  
yeqnyanlaheikdfaeiaedligesawglfsgvfgkstninqvlshmlkqdandigfakllqnennrmsynelmsewqs  
hgrafleelrhvemlkees  
iraydvynkesfskieqvinseksieeqvyhldnetlrdnkeiedlndrinyivkqietlneliksikesnkgfinkl  
kamfnseedesykdhnkek  
qqlltqqlelekckknkhdvsklkekeklikqltkvqlqldelnsqlqeleayrieskitipekdfwsdnyderqvt  
nlwtsdelqyrramlflra  
miIhkllliannttiyyaindfkdrklidanpdkvhnawnmhlifpvvsttfasfksmyggipkdfidylfiideagga  
ipqaavgalyrskkvav

Tsompanidou\_et\_al\_Supplemental\_FASTA\_File

dpjqiepvvtleshlidnirknyhvepylvskeasvqsvadnanqygfwksdatdsnqktwigiplwvhrclkmftia  
nqiaynnkmvlpnsnitkvq  
ktgwydvkgnavqkqfvkeghevvglladdwieaikgknepsfvspfsavqqikrmlkqqlptridierkinqw  
vdksigtvhtfgkeaqkv  
yfvigtndtqdgavnwscekpnllnvavtrakkefyvigdmqriqmkpfyetifkernvk  
>tr|Q5HJS8|Q5HJS8\_STAAC  
mnfndleifitvceasinkaaiklryaqnsisqrisklnelelvgvllfrnqkgakatkageeflayskkvlrdtetikn  
kknntmsilcse1lfnyl  
seseimmsnnsinfissgnirkaikknydkvisfikindsnyrlsnvdtmkvtlysngsnydkeallinkdefcplrk  
itldnkldsqrvmoids1a  
ainlvkqgkga1lpmtfenkrdivqdisikefenvyutyhnhh  
>tr|Q5HJT1|Q5HJT1\_STAAC  
mnlyqsniekvtdnrhskganfnhddyeqilikvlesdiiifstplywysmsas1klfidrwteslrdtqidnfkeimsq  
kkyli1iiggdnph1kaqp  
lvnqfklife1f1m1t1nyr1f1igegnpfd1lnds1q1fe1lan1l1alkkgdiyd  
>tr|Q5HJT2|Q5HJT2\_STAAC  
mtdllkiknfr1fflaei1safgvgistvganwylidktnds1llgim1aln1sv1sgflasp1iggladkynrrni1lity  
llqvily1livialvmigf  
etylvigf1avngigwttymatsrs1vkqil1kpdqytdans1leis1qtgmfiagg1sgilykingftliamtimmfli  
si1m1fr1lhvdkp1hseee  
stns1l1qey1l1gw1k1fdn1mmi1f1fg1vis1ipmvftmi1fnis1lpgyvyn1vl1ssv1q1fg1sdm1lyg1ggl1cag1lis1ails  
kk1stkv1li1f1ly1fil1vin  
sal1fi1wins1af1yl1figs1fil1gys1siri1ymntaimntvsdkyvgrsftiwt1sis1ll1qs1liap1flgr1wine1indk1fgfy  
i1il1s1l1ifvt1ll1vnkt  
dkikyahkee  
>tr|Q5HJU5|Q5HJU5\_STAAC  
m1ysvgnr1lgn1l1tgiekaminrhnl1fknh1sitsk1l1fasw1spr1l1hfn1s1lfqie1dd1s1lyd1vl1qds1in1ks1ihk1dwi  
thwtkecny1tkfientnd  
ikiyeksnymyv1h1fndsnyq1h1dy1nh1fdvn1qrki1rrd1lydsrg1flsc1rt1l1tnq1kv1ce1hyt1pegt1kf1qk1ff1npe  
lensq1s1q1li1yntds1q1ky  
fnndqel1afaie1k1lykng1di1f1sdkn1intapi1fnt1set1p1lav1h1sthvkn1idm1yes1diknty1khv1fnn1lnry1sg1  
iv1stkq1q1ldis1arinnei  
pvht1p1vg1y1deh1ftn1l1krnn1hs1innk1i1svary1spek1q1nhq1ielv1sk1like1fpni1q1lh1yg1fg1keeky1k1q1liteyn  
lennv1flrg1frn1l1sae1ig  
dayms1lits1nme1gfn1gl1letiteg1ppvgyn1skyg1pse1l1lnnengy1linkndk1de1lynrvn1ll1dkt1lrdt1fsqeci  
khs1kaf1sski1vmk1wedrf  
stinssye  
>tr|Q5HJU6|Q5HJU6\_STAAC  
mefehk1lek1lisevnnkte1innyv1ffs1lgk1ssvka1qv1ll1kktny1lkq1disk1l1k1fk1kks1gef1pewik1ldiv1t1stek1l  
fke1l1kkt1l1intrrny1vdfg  
iaf1dsqwn1fav1l1pee1inana1fv1rpdnt1tkel1fl1sekn1nyl1rkyttnk1kaf1ssefyne1kev1kfy1tg1ffig1deev1hel  
yseg1y1k1g1l1rk1vnd1l1nei  
dq1lies1tn1flq1m1ldng1kyiygy1fph1dne1ig1fy1n1l1r1h1ss1tya1lie1g1s1yl1g1ks1l1q1pve1ka1dyi1iln1ql1fe1ig1dk  
ay1fd1tee1e1ne1ik1lg1na  
sfi1fav1cey1l1k1hed1np1kf1lesaq1kvak1gil1smid1edyet1th1l1nyp1d1sv1kek1fri1yyd1gea1al1l1rly1qk1den1elw  
lktven1lmdrf1iekky1wqy  
hdh1w1lgyct1nelv1qin1pd1kyf1efg1ikv1nny1ldy1kn1rett1fpt1fle1mlatyr1lvq1kak1dtg1ree1lvnn1l1ideq1ylid  
vini1rady1qr1vg1ff1ype1ia  
myfkn1ps1ri1l1gs1ff1ikh1hg1yrv1rid1die1hyl1sgy1vq1y1lafnr  
>tr|Q5HJU8|Q5HJU8\_STAAC  
m1lvig1l1gg1fis1gl1vg1gga1ivi1y1pa1ll1l1pp1l1fg1l1ptysayias1gl1t1ssq1v1ff1st1l1sg1s1l1kay1kn1k1n1fs1rt1l1l1nm1g1sg  
mvig1sil1gall1atv1fns1qf  
vni1y1y1i1i1all1al1ilm1fik1v1tp1st1shik1fnrv1l1it1ig1gi1gl1v1sg1iv1gagg1afi1ip1v1ll1v1f1kl1p1mm1v1v1t1ns1ivia1f  
issig1afi1ik1l1l1qgy1ipin  
saip1l1il1gs1il1ft1pl1gm1k1ig1qkip1dsi1qk1giv1sil1ivia1i1klif  
>tr|Q5HJU9|Q5HJU9\_STAAC  
meynkk1min1ri1hri1qg1l1ng1vik1m1eeek1nck1dvis1ql1sask1ssi1qrl1mgi1i1isen1l1vec1vk1m1seens1eds1qal1ine1ave  
l1l1ksk  
>tr|Q5HJV0|Q5HJV0\_STAAC  
msqyktkh1ind1ftkkel1qe1l1ssk1g1lidvr1hpe1felghik1nal1hsven1ietfk1qsk1nktyy1ycksgn1rs1rkas1qla  
qrgydv1vn1ldggy1taye1qq  
hhnd1l1skv1ked1reik1dnrkt1fnys1l1qcpg1pivni1skeik1nia1g1dqie1vv1tdhg1flndik1svk1qtg1ht1lvr1lnd1fg  
nei1rai1iq1keen1nie1vth  
tksg1tt1iv1l1fsge1ldkava1ami1angaka1agr1dvt1fct1fwg1lna1l1kki1qs1rik1kk1giak1l1fd1m1lpn1sp1in1mp1isk1mn  
mfg1l1gn1l1mm1ry1vm1kkn1v1d  
t1lps1lidqave1ggv1kl1iact1ms1dm1vgi1tkeel1rdd1vey1ggv1gay1igyteqan1h1l1fi  
>tr|Q5HJV1|Q5HJV1\_STAAC  
mffk1qfy1dkh1l1sqasy1l1gc1qt1geami1dpi1rd1l1ssy1rvadeeg1l1titha1eth1had1fasg1irdva1ik1lnani1yv1sg

Tsompanidou\_et\_al\_Supplemental\_FASTA\_File

esddt1gyknmpnhthfvq  
hnddiyvgnik1kv1htpghtpesisf11tdegagaqvpmg1fsgdfifvgdigrpd11ekavkvegsseigakqmfksi  
esikd1pdyiqiwpghgag  
spcgks1gaitst1gyekqtnwafsenneatfidk1isdqppphfaqmkkinqfgmlyqpytvyapatntnr1tfd1  
rskeayhgghiegtinipy  
dknfinqi1gwy1nydqein1igdyh1vskatht1q1igyddiagyq1pqskiqt1rsihsed1tgnesh1ldvrndnewnn  
gh1sqavhvphgk11letd1  
pfnkndviyvhcqsgr1ssiaig1lehkgyhni1invnegykdiq1s  
>tr|Q5HJV2|Q5HJV2\_STAAC  
mydfley1hryciksinnweavad1sckvergnvstgyyvkqdrividdsdiippiikisgsyiaadilvtryldgmgefi  
kvsk1dqssyewfmfvee  
tr1frgteivvyqf1kyl1fthtyehkneekriekhmknii1dnqfrgqh1ndiv1rdmkddnmlfynfdiydtnvlykei  
deek11rilde1sntdnyk  
a1fnii1senqkkfwksnik1pivsecsdgi1ntttd1yayvnkyisnki1fcdnyl1tknevvd1fyfnhgsdfnn1fkmqgt  
g1tkskfkqgnk1kiheyii  
avtyvn11nhsymkyinaesyypskki1kgmkndykhkftdsf1sd1fvmvdd1twir1rdsf1dyigg1knkeisedeneyi  
eq1iqfvi1lskfgymnven  
hfnyien1nt1nnelt1lrsefahi1sndmyn1lfgn1fdvntwkkdysn1fyntqntiptek1di1ssfikqydkpi  
erdehgkhvkakvfeg1sd  
fhkrvkk1gfdnndv11h1r1lemsvhenkyd  
>tr|Q5HJV3|Q5HJV3\_STAAC  
msykqedd1fkk1knri1gisin1pegqft1fhd1nrranvqcskavqqnvgrwfayfvkqaprvpfi1igkntng1lyvm  
kvgnp11ndsnp1skggvr  
>tr|Q5HJV4|Q5HJV4\_STAAC  
mshhdi1fr1g1yh1dtmgwhkt1ppkkdgdek1kvvtm1ssc1maveakfwhv1lenteki1isngk1deht1f1dsd1l1ttrk1p  
s1ikyghs1ineny1kd1sy  
a1q1mr1dempts1d1ydgsg1ietphgyivmi1dti1ytsk1yqd1l1ss1dpiv1dsay1lepkg1tkd1w1nmy1nev1kgh11le  
lavvfg1s1alvts1flkykr  
ei1efagi1fs1ftg1qs1stg1k1staa1lavsvagn1ptkgn1q1l1frsw1natr1na1lesyl1sn1fgi1piv1del1ssat1fkdt1g1l  
ys1aeg1qgr1rsnv1hgev1k  
tpknw1gts1vist1seys1ift1saqnd1glrv1rtie1ineq1ft1nat1nad1nik1kava1nhgh1v1plva1qyl1nredevi1qwfyk  
evd1wfeak1nsetn1ntgir  
mfkry1avi1ttsaki1grv1lat1didi1akir1dyfi1dyha1tvsers1ladka1ievit1qfva1qnr1gkfs1ddta1lkn1mfeny1gli  
a1lkdnh1ievki1iasv1fknm  
11ehh1fqd1vnnv1vna1lrdk1gfies1dhri1ttrk1rtvkd1gngk1kq1s1lvfyh1kl1dseyasi1fg1tkdaep1ikaein1dnk1ki  
leswkk1qnd1lidf  
>tr|Q5HJV5|Q5HJV5\_STAAC  
mkqai1gy1rqst1tkq1s1laaqk1qtie1alakkhni1qyit1fysdk1qsg1rtdkrngy1qqite1li1qqg1qcdv1lccyr1nr1lhrn  
1kna1kl1mk1lcqkyh1vhi1  
svhdgy1fdm1ka1fdr1kl1ni1fis1lae1lesdn1igeqv1kng1ikekak1qgkmit1thap1fgyhyhng1tft1d1tvkapt1vkavfn  
yy1lqgy1y1kka1aqy1leadd  
kfinr1kpy1qvrni1l1npny1cgrv1inqy1gqyen1mpaiv1stti1yeeaqv1trt1qkp1vkrkpsen1l1kqk1kpcy1cdst1tnm  
t1rkkh1ht1ryy1vcp1qnmn  
asrfv1ce1fk1g1ina1qe1letsv1latc1qdf1fq1nq1lysk1inht1iqr1lkrqrd1ietk1t1nheq1liek1laqdk1idaet1freqt  
qs1lrq1skp1iss1isty1qir  
kafqni1iqqr1ft1nm1lpy1ideini1sknks1lagiy1fkne1plnivk1qtm1elsiv  
>tr|Q5HJV6|Q5HJV6\_STAAC  
mkttt1qe1lkqy1tr1fq1l1snnet1wece1leaaeni1ptr1fvd1ht1plah1t1ldty1tyndel1helsi1y1pflmy1tnn1qlis  
igy1ldh1fdm1df1yl1tdtkn  
t1ider1h1l1kegg1trhe  
>tr|Q5HJV7|Q5HJV7\_STAAC  
mnw1ikva1qis1vtvine1vidim1kek1qnggk  
>tr|Q5HJV8|Q5HJV8\_STAAC  
mninry1trgise1h1sl1dl1q1il1wnmv1kerdn1qpdt1dyl1h1fr1l1keden1lsi1iheq1qpty1kleyhy1tny1iknq1nalpk  
kvy1vi1redd1vdv1fyyvm1l  
peey  
>tr|Q5HJV9|Q5HJV9\_STAAC  
mntik1st1inteai1fsd1deq1hry1l1kktw1dekk1pact1v1tmyph1ldgv1sl1dl1ttv1l1lnq1lanteqy1gavy1lvn1lfsn1ir  
tpen1lkhik1npy1deht1di  
1mkais1esdt1v1laygay1akrp1v1drveq1vmem1l1kphkk1kvk1l1inpvt1neim1hp1n1pkar1qkwil1ks  
>tr|Q5HJW3|Q5HJW3\_STAAC  
mkkiki1vpl1ilivvv1vgf1gy1fyask1dein1ntidai1edkn1fkqvy1kdssy1isksd1ngevem1terpiki1ynsl1gvkd1ini  
qdrk1ikk1vsk1nkk1rvdaqy  
ki1ktny1gni1drnv1qfn1fvk1edgmw1k1dwdhsvi1ipgm1qkd1qsi1hien1l1ksergki1ldrnn1velant1gtaye1igiv1pknvs  
kkdy1kai1ake1s1isedy1ik  
qqmdq1nw1vqdd1tfvp1lktv1kk1mdey1sdfakk1fh1tt1netes1rny1plekat1sh1l1gyvg1pin1seel1kqkey1kyg1kddavi  
gkk1gl1ek1lydk1k1qhedgy  
rvti1vddn1sntia1ht1liekkkk1gdgk1diq1l1tidak1vqksi1ynm1kndy1gsgtai1hpqt1gell1alv1stps1ydv1p1fmy1gmsn

Tsompanidou\_et\_al\_Supplemental\_FASTA\_File

eeynk1tedkkep1lnkfq  
ittspgstqkiltamiglntklddktsyki dgkgwqdkdswggynvtryevvngnidlkqaiessdniffarvalelgs  
kkfekgmkk1gvgedipsd  
ypfynaqisnknldneilladsgyqgeilinpqvilsiyalenngninaphllkdtknkvwkniiskeninlltdgm  
qqvvnkthkediyrspanl  
igksgetaelkmgqgetgrqigwfi sydkdnpmmmainvkdvdqdkgmasynakisgkvydelyengnkkydide  
>tr|Q5HJW6|Q5HJW6\_STAAC  
mli flsydfvrac1prgmaraislshilfpqasaltksvififirilteilirgivkailskiadkrfvksssk  
>tr|Q5HJW7|Q5HJW7\_STAAC  
mlesreq1sveeyetffnrfdnqefdfere1tqdpyskvylysiedhirtykiek  
>tr|Q5HJX9|Q5HJX9\_STAAC  
mls1ciesdk1vl1stp1lkgfkdvend1lk  
>tr|Q5HJY3|Q5HJY3\_STAAC  
mfskiqpkatiatialvvalaly1vpglglifalfatipgivlnknsiqsfgisalitviittvlgn1fvlsailvl  
iasliigqllkertskeri  
lyvttvams1isliafml1qtfgrippsasivkpfkqtlheaitmsgadanmtqileegfrqatvqlpgfiiitflivl  
inlivtfpilrkfkia1tpv  
fklplfawqmsgillwiyiiviic1lftgqpsvfqsillnfqlvls1lvmiyqglsvihffgkakglpnavtilllvigtil  
tptthivgl1gvid1s1n1  
krimknsk  
>tr|Q5HJY4|Q5HJY4\_STAAC  
mfkeertmtnytvd1n1lgefitesgevidn1rlryehvyghqplvvvchaltgnh1tygtddypgwwreiidggyipi  
hdyqfl1fdvigs1pfgss  
plndphfppk1t1rdivrnergiqalgydkiniliggs1ggmqamellynqqfevdkaillaatsrtssysrafneiar  
qaihlggkegl1s1arq1gf  
ltyrsksyderftpdvfvayqqhqgnkfkehfd1ncylt1ldvldshnidrgrtdvthvfknletkv1tmgfidd1lyp  
ddqvralgerfkyhrhffv  
pdnvghdgfl1nfstwapnlyhf1n1khfkrk  
>tr|Q5HJY6|Q5HJY6\_STAAC  
mth1sfrqgvqecilt1lgyagvgisfgivassqnfsileiv1lclviyagaaqfimcalfiagtpisaivltvfi1vns  
rmfl1smlapnfkytgfw  
nrvg1s1vtdetfgvaitpylkgeaindrwmhgl1nitay1fwaiscvagal1fgeyisnpqt1gl1dfaitamfi1flaiaq  
fesitksr1riyiv1liav  
ivmm1s1smfmpsy1ailiaatisaalgvmmeg  
>tr|Q5HJY9|Q5HJY9\_STAAC  
mlaaracv1sfgs1gl1tvathp1nhsal1hsrcpeamvidindtkmltkmie1tdsil1igpg1gvdfkgnaitfl1qniqp  
hqnl1vdgdait1fsk1kp  
q1ptcrv1ftph1kewer1sgipieeqtyernreavdr1gatv1lkkhgteiffkdedfkl1tigspamatggmgdt1agm  
itsfvqgfdn1keavmsat  
ythsfi1gen1akdmyv1ppsr1ineipyamkq1es  
>tr|Q6G5U3|Q6G5U3\_STAAS  
mkrt1iivt1v1l1i1s1l1vrneh1drfn1l1kekvsyakvpkdtqdyrni1tvyskngkekksyk1df1gydptkeyvk  
vnhkgkyvrsieyitkif1  
af  
>tr|Q6G5U4|Q6G5U4\_STAAS  
mkkfk1f1dfst1l1isgl1f1fffkeneei1pessn1l1tisnwdksnkskvl1dviesgagniqi1i1ksvkd1dnkke  
ffvfnskrnnsdf1rnkts  
l1t1psd1l1nrei1kgkyyi1gehfnveeltse1lkkag1tseveyinr1n1l1ff1elvidnd1l1vpfi1flgvly1lyflydrgy  
n1kfyai1q1l1hgfst1tri1  
fhni1hiki1iyw1l1v1tai1ffian1li1hian1eldf1l1m1firrfiv1l1fvfacit1l1wlisys1l1l1k1sipl1l1kgkkyk  
fsi1fmg1ftk1cimv1l1sf  
l1laqn1naytk1kn1y1dsekiwqk1dnny1tleisp1n1rnseekq1ilet1niyn1likseq1lg1l1kn1n1ianpd1knyip  
engnvff1nnn1f1nfykni  
nhdfkmi1dnhsdk1invf1ppr1l1yqk1sei1qkn1hgwidf1qkqn1kvdvqvl1sknsv1fsfdr1ttn1k1fgy1ldspivm1l  
t1dd1t1gdfy1laavs1qgy  
l1fkdl1dt1kq1l1kdn1h1eeei1sgitnyk1dsv1nel1netk1tkmi1titv1ii1nvfilliatvfeti1qyfsw1nkkq1l1l1rki  
hgys1l1fssnvry1tis1l1  
sim1ayt1th1l1fgsk1l1fiimsia1i1qh1l1qiay1ikylekyfkd1l1mrei  
>tr|Q6G5U6|Q6G5U6\_STAAS  
msyrc1mivn1ri1el1ilyideq1nkqsrkntfr1f1l1ilyfiyfcynk  
>tr|Q6G5U7|Q6G5U7\_STAAS  
mkk1l1flivm1al1vsacs1nss1shake1nd1lekkynahigvya1dtksg1kev1kfn1sdr1fayastskainsa1illeqvpyn  
k1lnkkv1hinkddivayspi  
l1ekyv1gkdi1t1kel1ieasmtysdntannki1keigg1kkvkqr1kel1gdkv1tnpvrye1el1nyysp1ksk1kdtstpaafgk  
t1lnk1liang1k1skknknf1  
l1d1mfn1kn1gdt1likdgv1pkdyk1vadk1sgqai1tyasr1ndvafvypk1gqsepiv1l1viftn1kdnksdkpndk1isetaksvm  
kef  
>tr|Q6G5U8|Q6G5U8\_STAAS

Tsompanidou\_et\_al\_Supplemental\_FASTA\_File

makllimsvvsfcfifl1lvffryilkryfnyslnykvwyltvlaglipfipikfsfikfnvnvnqaptveskshdlnhn  
iittkpvqefatdihkfnw  
dsidnictviwivlviiisfkflkallylkyllkkslylneneknidtilfnhqykknirkaeaiqspitfwygyi  
ilipssyfksvdkrlkyi  
ilheyahaknrtdlhlifnifsiimsynplvhivkrkiidneveadrflnninknefktyaesimdsvlktsffnkn  
ilshsfngkksllknrlin  
ikeadlkkqsklilificiftffimiisqqlmgqsltdynykkplqsdyqildesknfgsnsgsfvmysmkdkyyiyn  
ekesrkryspdstykiyla  
lfgldrhiisdksrmswnhkhylfeswnkeqdIntamqnsvnwyferisnqipknytaaqlkqlnygnenlgsykywm  
edslkisnleqvivfknmm  
eqnnhfskkaknqlssllikknekyelygktgtgivingkyngwfvgyvitnhdkyyfathlsdgnpsgknaeliseki  
lkgmgvlnng  
>tr|Q6G5V1|Q6G5V1\_STAAS  
mtknqnfietkeykrfaefcdacikyqyigicygqpgvgktlssryytndtiekqvnhrwedlaskttddilsvdkif  
ynapaekqtklndlysit  
aidlgqklhvvnkyghehskhysdmfkyidliivdeidrllkvqhleqlraiydehnlamifigmpgiekksrypqlys  
rigfahefdnlskdethhi  
leykcqdlgfdlkledftdyeaittiikitkgnfrlihrifaqidrimdingldkistevvetardslvigir  
>tr|Q6G5V2|Q6G5V2\_STAAS  
msntkikyqifisstyldli eerqavveavl snnipagmel fnssksqweittqwinesdavilll gssygtidseen  
isytemeynfakslgkpiy  
vfemnkastesaeakskldefktkvkenrlispnindiselkskvsqtliqsvpseikensgwirvqdcgknvkkikkld  
aiqrdldtydfllkee lyki  
fmyvktfyfghtpfddsyiedienyllnyennphksfmkikvydyknflkhlknllilikqgkplaqaghfklsfyeed  
lklkqnykatlvdikgln  
khfykecdrcl kaynifieginkhlye  
>tr|Q6G5V3|Q6G5V3\_STAAS  
msyentcdvicvhedkvnnalsfledksskllnilekicdekklii lslikedelcvcdislilkmvastshhlrl  
yknevldfykdgkmayyfi  
kddeireffsknqegf  
>tr|Q6G5V4|Q6G5V4\_STAAS  
mrcimiqtvvaaavlyiatavdllvilliffaraktrkeyrniyvgqylgsiililvsllafvl nyvpekwilglgl  
piylgikvaiyddcegekr  
akkelnekglsklvgtvaivtiascgadnigl fvpvftlsvtnlltlfvfliliffvlvftaqklanipgigeivekfs  
rwimaiiyialglfiien  
dtiqtilgfif  
>tr|Q6G5V5|Q6G5V5\_STAAS  
mksvkr1see1gvsqktifnnikrlnietikqentsfikedtdieki iqrvnenkkkyg fesatedkqkkesdninfesk  
sdaqiveilknqintlnng  
iekqesrhettiefyrkelqerskllenqqvala esnkkiqklenqlekehlnypfdtstnarqnvdaqektyttspvn  
inrdqeetketeiqykdis  
gsqsdestqgeeaqredvsanpndndsdi eekseeteakkgfwsrlfng  
>tr|Q6G5V7|Q6G5V7\_STAAS  
mhirqyekgyfydtlkcidknrrvykrqeyiytksnknfvckrtkprtirrssgffgelalivyii fyhvygannqit  
>tr|Q6G5V8|Q6G5V8\_STAAS  
mklaeaikeqrelkgwsqeelanil kvsrqsvskwesaknypsldiliamsdlfgis lehlikgdarfkkvilegnyres  
nrvpsivdflydfwwlffp  
vagflvwaihsfmg  
>tr|Q6G5W0|Q6G5W0\_STAAS  
mnihsllktfihnklllyqcqtikgvqlfktlll cgkntpfmwqkhsfyvaktlll cgkntplgieipccsraeqapk  
fkkiyknilkssrglpi fh  
pkk  
>tr|Q6G5X1|Q6G5X1\_STAAS  
mqkhmevfymnngtvkwfnaekgfgfieqenggdvfvhfsiasdgyktleegqkvtfeitegqrgdqavnvqvt  
>tr|Q6G5X2|Q6G5X2\_STAAS  
mkfre1vkqsyedlknllvtwvnyialamivivlsvttpiigipagllggayylkrreekgk  
>tr|Q6G5X5|Q6G5X5\_STAAS  
makgnngikwsslimgvllmlavviftfpiefyaitwliglflingviqiiyrrkaka1vggnqnwilfmgivdilf  
glivifnvgassaffiymf  
afwfi fssiag1ftftgsgslklisvifnllgivfgvillfnplmgivfistmiaiafvfgviyvvdala  
>tr|Q6G5X6|Q6G5X6\_STAAS  
mlmniaklenylqidssrynrsiealnnyatrflmtvpfenidvqnskpisinidalfnkivhdkrggfcyelntffka  
ylqqkgfnpalmsatihtp  
gggrslngshaslvvsindvfvyvtdvgfgd1pihai pitssehtqpitdisgtfrafinedkdi fyvqkfendhwhtky  
eae fkpqi edfnsni eyn  
qtnpdsifvqhl1itmpqs fgratmsenhl1ltrngssek1avtknnykhflekyfglditinriekq  
>tr|Q6G5X7|Q6G5X7\_STAAS  
mtvfknerlswlpyiaivilhvigfsflwiagkdhhlifmggilaytlglrhafdadhiaaidntvrkllqqrkdpsgv

Tsompanidou\_et\_al\_Supplemental\_FASTA\_File

gfyfshghssvflmavfl  
gsvkwakdelphfdiggtigtlvsgfflvligvlnliilislilnfaklrreheeaevdallesrglvsrfvgyfkyf  
litrswhvlpigflfglgf  
dtaseiallalssgasqgaisfigilsipilfasgmslldtdlgvumkyaynwaffnpirkiyynititaisvmaalvig  
miellqiladklldhgafw  
afigsiefdylyilvalflitwlissliwkfgriehkws  
>tr|Q6G5X8|Q6G5X8\_STAAS  
mtlpkigkpatralnsggiytlevsqtkslmemhgvpgkaisileqalfqhqlhfktevqsslpfkltdgvscnhap  
krqgmidfivataaldiel  
lrslvttewiwsvpgrfdiygpqiliqueisnhynqvaslnihssithgclgsmhgieilktgkeihfahffefenhkkda  
klskvtsyivvg  
>tr|Q6G5Y1|Q6G5Y1\_STAAS  
mentvkyrkfilpivvgliwaltpfkpdavdptawymfaifvatiacitqmpigavsiigftimvlvgivdmktava  
fgnnsiwljamaffisrg  
fvktglgrrialhfvlfgkktlglaysivgvdlilapatpsntaraggimfpiikslesfsgskpkdgsarkmgafvlf  
tefqgnlitaamfltamag  
nplaqnlasstsnvhitwmnwflaalvpglislivvpfiikyiyptvketpnakswaenelatmgkiaaekfmigifv  
valtlwivgsfihidatlt  
afiaalalllgtvltwqdiinetgawntlwfvsvlvlmadqlnklgfpwlsksiatslgglswpivlvililfyfyshy  
lfastahisamyaallgv  
aiaagapplfsalmlgffgnllastthyssgpapilfssgyvtqkrwmtmlilgfyfiwiwlgslwmkvigif  
>tr|Q6G5Y2|Q6G5Y2\_STAAS  
mnknvlfkfmvfmllniitpfnknealaardisstnvtldtvsptkiedggkttvkmtdfddksvkiqngdtikvawpts  
gtvkiegysktpvlvkvge  
qvgqavitpdgaitfndkveklsdvsgfaefevqgrnlqtntsdskvatitsgnkstnvtvhkseagtssvfyyktgd  
mlpedtthrvrflninnk  
ryvskditiqkqggqldlslninvtgthsnyysgsnaitdfekafpgskitvdntkntidvtipqgygsynsfsin  
ytkkitneqqkefvnnsqa  
wyqehgkeevngksfnhtvhninanagi egtvkeklvklqdkdkapiankvfklskkdgsvvdnqkeieiidangi  
anikalpsgdyilkeieap  
apytfdkdekeypftmkdtdnqgyfttienakeiektkdvsaqkvwegtqkvkptiyfklyqddnqnttpvdkaeikkle  
dgttkvtwsnlpendknk  
tikylvkevnaggettpegytkkenglvvtntekpiettsisgekvwddkdnqdgkrpekvsvnllangekvktdlvt  
etnwkyefknlpkydegkk  
ieyvtvedhvkdyttdingttitnkytpgetsatvtnkwdnnnqdgkrpteikvelyqdgkatgktatlnesnnwthtw  
agldkakgqqvkytveel  
tkvkgytthvdnndmgnlvtnkytpettsisgekvwddkdnqdgkrpekvsvnllangekvkavdvtsetnwkyefkd  
lkydegkkieyvtvedhvk  
dyttdingttitnkytpgetsatvtnkwdnnnqdgkrpteikvelyqdgkatgktaklnesnnwthtwagldkakgqq  
vkytveeltkvkgytthvd  
nndmgnlvtnkytpettsisgekvwddkdnqdgkrpekvsinllangekvktdlvtsetnwkyefkd  
lkydegkkiey  
tvedhvkdyttdingttitnkytpgetsatvtnkwdnnnqdgkrpteikvelyqdgkatgktatlnesnnwthtwagldkakgqqvkytveeltkv  
kgytthvdnndmgnlvtn  
kytpeknkpiypekpkdktpptkpdhsnkvkptppdkpskvdqkdkntkpenplkelpktgmkiitswitwvfig  
ilglylilkrkfn  
>tr|Q6G5Y9|Q6G5Y9\_STAAS  
mgnylvlsdfiglsdgavsamgyvaytvssdirvenlthdippydiwvasyrlyqtvkywpgktvfvsvvdpvgvsdrrs  
iacltysghyitpdngsl  
shikhyegikkvieidevksrlphseeshtfhgrdvayngarlaankiaferlgqainvdsiealeireatknedsvtg  
sidiidirfgslwtnipla  
flksleivhgnnlvvtiyhqdkkvyqnikfarsfadvnvgeplvyvnslnigvavnqdsfsdlyhigtgndwtihlsk  
apsi  
>tr|Q6G5Z2|Q6G5Z2\_STAAS  
mnqyntigfhpnsrihqlnatvkllflvvsisamvtydtrylilivssillfkyahiewkqrvfvkfilfftilni  
iayyifdpeygvkiynqrt  
elingigrftltsqelfylfnlilkyistvplaliflftnsshfaaslnqlgvnykisyavslalryipdiqetyfnis  
qaqgargydnkkakftsr  
vkgikrivlplifssieridistamelrqfgqykrtrwyvkkqlkkddyvvlcltllillmlvvtlfflnnsryfnpy  
>tr|Q6G615|Q6G615\_STAAS  
mytfdagsltarenyklligsiprpiavttnqdasvnaapfsffnivnhppmiaiavqraggkrkdalniertdg  
fvvhiteddnvqdinetaa  
playgdseisrteislststtiktpgikdakmrfecklsqmillgdvldgadligeivtyhidddiyegdfkinphalq  
avsr lagndyaklggfti  
krpek  
>tr|Q6G617|Q6G617\_STAAS  
mrtnnhitldaielssgwnynskletgknaallsdillrdikvlssnakgdadiletelravinsqnegksvdalkns  
taplknnltklkeqldktt

Tsompanidou\_et\_al\_Supplemental\_FASTA\_File

h

```
>tr|Q6G618|Q6G618_STAAS
mrkimrillcasii vs gcsfipknqtksipktvsvkdydgkyigehkkrnevflkhhkdeaikkykdyvkdftfydckin
lvdaytnks gsfsekskvdg
isvvgtvnydvpfqllfvesngitistftpghinetsaavsammykryeheieqarlklkseiekdsy yamseklqv
kqefngvtrqyl nfrtdsi
ddldkfkkefkpvmh lkgdafnqq lqsl inkypqi qknmksefiaydkeknretvkn yawnl qksindimqsy pstkfv
qfykddvpsmvdgngrlk
sdt nvisieggkydenk
>tr|Q6G621|Q6G621_STAAS
mlkllqqeyeki ykrml ytc filfiyil gtnisivsyndmqv khesffkia isnmggdvntlniftlg lgpwltsmiil
mlisyrnmkymkqtslek
hykeriltlilsviqsyfviheyvskervhqdnilytililvtgtmllvwladknsrygiagppivmvs iiksmmhqkm
eyidashivialliilvii
tlfillfiellevripyidlmnvsatnmksylswkvpagsitl mmsisafvflksgihfils mfnksisddmpmltfds
pigisvylviqmllgyfls
rflintkqkskdflksgnyfsgvkpgkdterylnyqarrvcwfgsalvti iigiptyftlfvphlsteiyfsvqlivlvy
isiniaetir tylyfdkyk
pflsqyw
>tr|Q6G624|Q6G624_STAAS
mlknktfkvtwnyisq ttfmygskvsfsngevtfinplmpsglpihewlmlkqfskyksapslpilrrgqhyklhdfda
tpagsvyfiii fynkngtk
lsteivksnsitiqypdeayaykikmmnaasts l vfrcltitemthqddleyksmrvtkidnqygndkinvii aepsdv
yptisndflklfghvwlve
rwmeddikenikqlkddlqsqdtl tainlisygksnvfatyvaqhl dckvyrtshedddlkewlkehvpgnhelkdtv
evyfk eeqdnhl nym sr lm
npvrfl dyl d vsk l nggevnet
>tr|Q6G627|Q6G627_STAAS
miklfdyfnhsrklyesfkaskleedltivlndngflpddvispyqffadnhntenmkprffnqvtpafweikgnns
atindmgrlrgki fyqsge
rprivsrvefddqqrvrfdyyskngikfaqtvydlnrkailkkymtaegkeviyenfvtsd vil dwqgksyffpskla
fvlfvikql eitehhfvin
slalpfsvlynlpskgsdvlvwqehcngnvpgnmq l mckgdmkrhcni i ipdkneyetm l ni adakvqs ril qggylyny
rsrnyrtkeivil tnsdq l
rnikvlvetl p d f k f h i a a i t e m s d k l m q l d q a n v h l y p s i n i d r v n e l y q l c d i y l d i n e g n e i l n a v e q a f d y e l l i
lgyrtahhakvtl sehlf
ehndeitmeskdqliqml es lkdqqqf qdall aqkaheisreqfeqvfkqales
>tr|Q6G628|Q6G628_STAAS
makyrgepfqlyvklscstmmatsiiltnilpydaqaasekdteiskeilskqdlldkvdka irqieqlkqlsaskahy
kaqlneaktasqideiikr
aneldskdnksshtemnggsdi dskldqllkd lnevssnvdr gqqsgedd lnamkndmsqtattkhgekddkndeamvnk
aledldhlnqqihkskda l
kyaskdpavsttdsnhevakt p nndgsg hvv l n k f l s n e e n q s h s n r l t d k l q g s d k i n h a m i e k l a k s n a s t q h y t y h k
l n t l q s l d q r i a n t q l p k n
qksdlmsevntkeriksqrniileelartddkkyatqsil esifnkdeadkil kdirvdgktdqqiadqit rhidqlsl
ttsddllts lidqsqdksl
lisqilqt kl gkaeadklakdwtnkg lsnrqivdq lkkhfastgdtssd ilkailn nakdkkqaietilatrierqkak
lladlitki etdq nki fnl
vksalngkaddllnlqkrlnqtkkdidyilspivnrpsll drlnkngktt dlnk l an l m n q g s n l l d s i p d i p t p k p e k t
l t l g k g n g l l s g l l n a d g n
vs l p k a g e t i k e h w l p i s v i g a m g v l m i w l s r r n k l k n k a
>tr|Q6G631|Q6G631_STAAS
mknafklfkmdlkkvakt pavwi ilagla ilpsfyawfnlwamwdpygntghikvavvnedkgdii rgkknvngntmvnt
lknksfdwqfvsrekadh
eikmgkyfagiypskftheitgtl rkqpqkadvefkvnqkinavaskltdtgssvvvekaneqfnktvtralleanka
gl tieenvpt inkiknavy
sadkalpkindfankivylnnhqad l dkyandfrkl gnykgdil daqkklnevngaipqlnekaklilal nnympkieka
lnfaaddvpaqfpkinqgl
niasqgidqangqlndakgfv tqvrsrv gdyqdairraqdlnrrnqqqipqnsaannetsnsapaagngvastppsapsg
dtapnnnvtqntapnsna
pvsttpqstsgkkdgqsfadittqvstanentqnitdkdvksmeaal tgsllslsnl dtqakaaqkdsqalrnisygi
lasdkpsdfresldnvks g
leyttqynqqfidt lkeieknevdl skeidkvkaannrineslrlvnqlsna l kngssgtaeatkll dq lskldss lss
frdyvkkdlnsslvsisqr
imdelnkgqta lsnvqsklntidqvinsgqailkngktridr l q t v l p s i e q q y i s a v k n a q a n f p k v k s d v a k a a n f v r
ndlpql e q r l t n a s v n k
nlptllngydqavgl l n k n p q a k k a l s d l a d f s q n k l p d v e k d l k k a n k i f k k l d k d d a v d k l i d t l k n d l k k q a g i a
npinkktvdvfpvkdygsg
```



Tsompanidou\_et\_al\_Supplemental\_FASTA\_File

mtpfyta1svvwgallmvs11tvdnkhkslesvlttrqvflgkagffimlglmlqalivsvgd11ilkagvespvlflvit  
ifcsiifnsivytcvsl1g  
npgkaiav11vlqiagggtfpittpqffqnispylpftyaidslretvggivpeilitkliiltlfgigffvvg11l  
kpvtddlmlkrvsekvdsn  
vte  
>tr|Q6G633|Q6G633\_STAAS  
mkivaitscpangihtymaqekleqvakemgvdikvetqggvgaenvl1ttdieeadgviaadkqvdl1srfvgrline  
nvregihnrp1griinq  
dapiyqsetnyhskdrksgskiqmvyqhlmgvsvfmpfivvg11iaialt1ggettskglvipddsfwksienigs1  
afkfmvpi1agya1vsia1d  
kpg1vpgm1gga1aadgsfygsdagagflggivagflagya1kwikdikvpkamapimp1iiipi1ssvvvg11ififlig  
apisnifealt1wksmqg  
ani1ilami1gami1afdm1gppvkvaf1fgsaliaegnyavmgmvavavctppig1glatfvqykfnhseremgkasft  
mg1f1gitega1pfaagdp1  
ri1pani1gami1asvia1aggv1gdrvahggpivav1ggidh1v1wfifavivgs1vtmtt1v111krntpviavdapaqhtq  
1h1dt1tqhdtevdndvkt  
akhsd1nkhs1hfdqqtmi1tdhdmsrneaidm1ihk1kicryvehtsh1kna1leremesttaigm1vaiphaksdvk  
qpivavmkn1hgvkwd1s1d  
gs1lpq1li1fliavp1nsq1dth1k1lqr1ska1mndetrq1slinan1stteiy1n1lmki  
>tr|Q6G634|Q6G634\_STAAS  
m1drh1k1l1qffik1npsk1hissneiaehv1vsnr1tvrndihv1nsfmddi1vsikskgyq1ntsqt1letiterythiq  
sykek111smayq1lmh1k  
sq1t1q1leqdy11skt1v1ndyfvri1qqwcqkfnia1tikkkq1g1v1d1gd1tnditna1ih1nq1lssghv1hed1ilnel1pd  
shqrm1sh1i1get1lqgh1si  
ettdi1qi1q1l1ih1li1i1krkq1s1se1dt1nhdsk1isqscik1qiner1gyd1nekvin1mfsffia1yhfnk1ldigierif  
iqsyidr1li1elmqqr1hip  
fneds1ilq1n1lynh1fskay1lritqni1y1lnp1vieikk1lyp1fvnt1feaidk1laidtdiemsedeia1flti1hfqaai1er  
rtktq1lnv1viacy1y1glvs  
nfl1etk1inn1see1svintik1lenithy1hfdndv11itthdipkqt1n1ilpkh1ttikvap1fseddrhk1irlv1vkqkq1n  
pvqahh1hmd1tvn1flvvnte  
qksrhtv1qi1feeaq1ilqahhaivegy1iesalerek1sssty1gnfmaiphgdpek1vlqshv1lifr1tkdv1fwrqhdv1klv  
ffla1ishk1dka1ftkqmmq1  
ian1dddsvnh1lcs1ddhs1lkq1lfey1qe  
>tr|Q6G635|Q6G635\_STAAS  
mealy1kk1l1itivi1v1l1igal1gfaiyaa1inhst1sssnnqeqen1kathkkteteend1qqdds1adk1adknq1nngnvtndn  
qpssq1snvp1nnh1stapsnt  
qpaqpkds1nskn1nthd1ggsqs1stnnq1nqq1ntppanks1nntnt1ssk1qtpqaqspkn  
>tr|Q6G641|Q6G641\_STAAS  
mnmnesgd1nk1skss1lig1lvigsm1iggafn1msdm1ggkagglai1igwi1taigm1is1lafv1qn1tnerpel1dgg1isy  
aqag1fgd1fv1gfi1sawgy1wf  
saf1gnvay1at1l1msav1gnff1p1fk1gnt1psi1ivas1llwg1vh1fl1ik1gvetaaf1insiv1tvak1lip1illvi1icmi1af  
nfd1t1fkt1g1ffgmt1seg1lp  
fswast1msq1vk1stml1tvw1vfi1egavi1fssrak1nkk1d1vgsat1vig1lis1vli1iy1fl1tv1laq1gvil1qnhis1ql1dps1ma  
qvl1ati1vg1wg1st1lvn1ig1l  
i1sv1lgaw1l1gwt1lage1lpfiv1akd1gl1pkw1faken1kngap1vna1llit1n1lv1ql1fl1ism1lft1qsay1qf1af1lassa1ilyp  
ymfsaf1yq1vky1tlehr1qqa  
ttkqwt1igi1asiy1aiw1iyaag1iny1ll1tm1lyip1allv1ysiv1qkn1qtr1iksdy1ilfmi1iiv1lav1ig1lik1llmg1tin  
vf  
>tr|Q6G647|Q6G647\_STAAS  
mkk1lav1ilt1vg1ly1fafkkyqervnqapniey  
>tr|Q6G648|Q6G648\_STAAS  
m1svk1kat1kfavan1iiv1stvf1ssvtpai1aqsd1kssk1desfav1gnt1knpknvif1v1gd1gm1gps1fntayryy1kndphakem  
tptaf1dsy1lkg1tr1n1tysnd  
pkqni1tdsaag1taf1ssgh1ktynga1igvds1nkqkvktv1lerake1kgk1stgl1v1stael1datpaayaahv1tsrddkneiak  
qfykdk1ingkhkvd1l1gg  
gakyf1gks1ngn1dkk1fkndgyd1latnske1l1sksd1kdv1gl1fadkn1plaidask1deps1adm1qqs1alsk1lernkkgff1  
mvegas1ids1ahs1ndit1gv  
msemeg1feka1fd1ai1qyak1khk1dt1lvat1adh1stgg1tigkdkgyewnpq1piksmk1hsgsym1tekmakgedpek1vinegy  
gfefs1qddm1kkv1kkn1k1l  
kr1llk1kek1deks1akvet1qtkal1qhai1qkp1vndksy1tgwts1dght1gedvnt1yag1prses1fsgn1ientesaki1fd1fk  
>tr|Q6G653|Q6G653\_STAAS  
mkl1r1l1whiv1rrq1fitqr1lvi1pfilavsv1lmi1eyt1vsig1lnsyik1qknd1flvpfi1ianff1malt1fifif1yanh1fm  
msqrr1kefs1f1mt1l1gmt1kk  
smr1liv1vmet1il1qf1i1svvsi1aggy1l1gai1ff1fi1qkim1gsevat1ryyp1fd1fvam1fit1lii1av1lmgm1l1if1n1lfsin  
fqr1pity1qhrs1d1ssvis1rw  
lryv1liv1igs1aaly1gyfial1qdd1t1fga1ffkiwiv1ig1lvi1igtya1ffv1gisei1i1sil1qqv1skvyy1hpry1ffv1vvg1mr1v  
r1lkmnav1slati1l1lct1f1  
ivt1l1tmt1l1t1tyrdm1nht1tk1litndy1d1s1fsd1nsk1sqierq1t1enikrdi1qgs1vnak1dfkvyett1l1fras1leknrayy1k

Tsompanidou\_et\_al\_Supplemental\_FASTA\_File

lkqasddipidfignegai  
fsrqsvmitaftaqdynryhqknlhldnqsigmitnvpifkkqskvglnnevfkvqldahalnmmiqdsmvlivkdnn  
qlqkvkgfyahqkntis  
infvfgkktltsqiklskkydasinsksemvmwdrltgglifvvgvvsivlvigiflmyyqkvseayanqhnydi  
mkkllgldngriakitrnqm  
tflfaipitvalihtlissnivytllnmiginnhifltsyvlaviiisflymamykitsiyakvihqqrn  
>tr|Q6G655|Q6G655\_STAAS  
mklnsnsnspftekqvteinnllqtletesqqwlsqfllansndttsdsnqqqletevwqqsqiseeqatsttymlnkep  
hieanqrhvtvlygsesgn  
amrlaeifserlsdighqvvlmsmdeydttniaqledlfiitsthegeppdnawdffeflednapnlnhvrysvlalg  
dqtyeffcqagkdvdalle  
nlgaeickrvdcdidyedaekwmadiinmidttsegiqsesvisesiksakekkysklmpyqaevlaninlngthsnk  
etrhiefllddfsesyepg  
dcivalpqnpelevklimlmgwqpqspvpindhgdtpivealtshfeftkltpllknadiyfdneelseriqdeswa  
reyvinrfdidlitdfpti  
elqpenmyqilrklppreysissfmatpdevhitvgtvryqahgrerkgvsvhfaerikpgdivpiylkknpnfkfpm  
kqdiipvimigpgtgiapfr  
aylqereelqmtgkwlffgdqhrssdflyeeieewlengnltrvdlafsrdehkeyvqhrimeeserfnewieqgaa  
iyicgdekcmakdvhaik  
dvlvkerhisqeeaeitlrqmkqqqryqrdvy  
>tr|Q6G666|Q6G666\_STAAS  
mniydeyrsyvieelddcltiqknndtayydvleaindlnsdslcvlnhlyinegqeetfeqkflrrnkhlnkvdgfkal  
rflrprtagrhyiitlwe  
nrqafyhwqnsaeykthkhrgtskgadvkiiinrelsynirieladm  
>tr|Q6G668|Q6G668\_STAAS  
mnlsligiviiivfthaefqlnagdsnvfltwdirgltsyifslilvalvsklilifitrrqts  
>tr|Q6G671|Q6G671\_STAAS  
mrllkvlfhfiiaifisfmllwmtmldfinsqshlkalnldflipsdntpfileiichlligslivyfvllfhtskr  
lylcyiplfflfiaylpf  
lvfiaqrpiqfsvteligwiithiffmslmalviprik  
>tr|Q6G672|Q6G672\_STAAS  
mymkahqliqedehyfaxgrikyypividhygatlvdiegkyidllssassqnvghaprevteaikaqvdkfihyt  
paymyheplvrlakklicei  
tpgdfekrvtdltsgdandgiikfaraytgrpyiisftnayhgstfgslmsaislnmrkhygpllngfyhipfpdkyr  
gmyeqpqsveeylaplk  
emfakypadevacivietiqdggllpevpgyfealekicrehgiliavddiqqgfgrtgwtssvshfnftpdlitfgk  
slaggmpmsaivrkeimn  
cleapahlfittganpvsceaalatiqmiedqslqasaekgeyvkrmdqvwskynsvgdvrgkglisigidivsdcklkt  
rdgsaalikicnycfehgvv  
iiavagnvlrfqplvityeqldtaIntiedaltaeagnldqydisggw  
>tr|Q6G675|Q6G675\_STAAS  
mtnvlyqhgltgtlmaglllegtatinelehgngiatltsdgevilgdgkayhanehkefielkgdekvpysitnfk  
asktfsllqllsqddvfaqi  
knemlsenlfsavkiygtfkhmhvrmmpaqpppytrlidsarrqpeekrqnirgaivgfftpelfhgvgsagfihfadd  
eraygghvldfevddvve  
iqnfetfqghfpvnetfvkakidykdvaeireae  
>tr|Q6G676|Q6G676\_STAAS  
mlsvaiigpgavgttiayelqslphttligrhaktityytpphapaqdivvkgyedvtntfdviiiavkthqldaviph  
lthlahedtliilaqngyg  
qlhisfknvcqavvyisgkkgdvvthfrdyqlriqdnaltrqfrdlvqdsqidivleaniqqaiwykllvnlnginsit  
algrqtvaimehnpeirtlc  
rqllldgcrvaqaeglnfseqvtvdtimtiyqgydemgtsmyydivhqqpleveaiqgfiyrrarehnltdtpyltdiysf  
lrayqqnm  
>tr|Q6G680|Q6G680\_STAAS  
mnqhlignpkltvthvnevkaginhivvdsvygnqemimekdvtemrdgeklyinifrpnkdgkfpvmsadtygkdn  
kpkintmgalwptlgaip  
ssftpeesdpdpgfwvndyvvvkvallrgsdkskgvlspwskreaedyeviewaanqswsngnigtngvsylavtqwvva  
slnpphllkamipweglndm  
yrevafhggiptdgyfyrftwtqgi farwtdnpniedliqaqqehplddfwkqhqvqlsqiktplltcaswstqglhrgs  
fegfkqavseekwlyvhgr  
kewesyarenlerqksffdfylkeenndwkdtpvhiyevrdqfykgefksasafpnteytplylnaenhtlnhakis  
sayvaqydsedkrqdvsk  
ytdkdtelvgnmnlklwvstksdmdldfagikkldrgrnevnfpdfnhiengqvatgwlrsvshreldeqkestiaqpwh  
khetelklsqdeivpveie  
llpsgtlfgqgetlevvkgseivignstpgmktryeheetvnkgmhmiyggkydsqliipivn  
>tr|Q6G689|Q6G689\_STAAS  
metigsiyylkegsqklmiinrgpiveienqymfdysackypigvvedeiyyfneenidsvifkgysdqdevrfqelfe  
nmkqnldeiqrgevtpq

Tsompanidou\_et\_al\_Supplemental\_FASTA\_File

>tr|Q6G691|Q6G691\_STAAS  
mhmlvkydmrtghytpinephylvishadklatekaklrllliikqklidislaesvsspiasehvieqltlfqherr  
hlrpkisatflawlliflm  
falpigiyqfsdwfnqyvsawieyItqtllnhdilqhilfgdygvlslgtyslvalpvvilislstaidqgtlks  
wmiwaiepsmlwiglqgnd  
ivpllegfgcnaaaIsqaahqchtctktqcmlsifgsscsyqigatlsifsvagkswlfmpylilvllggilhnriwlk  
kndqqlsvlpydrqlhmp  
nirgmlmqmwqniqmfiyqalpifiticlivsilstpilnvlsqiftpilsllgisselspgilfsmirkdgmllfnlh  
qgallqgmtatqllllvff  
sstftvcsvtmtmllkhlggqsalkligkqmvtslslvigvgiivkivmlii  
>tr|Q6G698|Q6G698\_STAAS  
mkdilvigatgkqgnavvkqllledgwyvsaItrnkkncklsdighphlsivegdlsdnvslqsamkgyglysiqipivkd  
dyseelrqgmkiieiaege  
niqhiyvstaggvnrnrtpghfevlakienrlmesninatvikpsffmdnflriakvederitlpefinpnikftmissi  
diakiasyifahpqsftq  
sieigsdevtlseaatifsevtgkstviegefvsgvaekqweekgyevdfelmaeinptrlsIsdwlkvqynk  
>tr|Q6G6A1|Q6G6A1\_STAAS  
mtsifvfaylnntsdnmlfrqmicacllanvqhssivclnntccivdirclntkiggidvsetdepqgferthnilnin  
qnrqslmtfiisklkslkl  
qriinargkkridyrIsynfyityydtveikkidceytyampiailirhtmsfdnahffaqlrhpvl  
>tr|Q6G6A3|Q6G6A3\_STAAS  
mknsisqnselldkeignfsnllqytfilssflksintieerhsnayqkgtlfvrsvsaliyhqhn  
>tr|Q6G6A4|Q6G6A4\_STAAS  
mtsiktitpkdfirvlsgvaigivaglvpnailgeifkyfmdyhipfktllgvvvaiftvpaligalvamkfdlspIa  
iavvasaayvgsgaaqfkn  
gawmitgigdIntmitaaiaavlfilliqrhrgsmalivfptvvggisgaigvlilpytkmittaignmvngftelqpiv  
msilismvflsiisplst  
vaiafaigisglaagsasigisateavliigtskvnrIgvplsvffggvkmmipnmvkypilmlpilIttaivsglvsalv  
gihgtkesagfgfigmvgp  
inafkfmevdsawlsvllivvaffvvpvtawladiiyrkvfrlytndifkfmG  
>tr|Q6G6B4|Q6G6B4\_STAAS  
mIsnkIaniPdsyfghtmgrkiehgpIplInmavgiPdgpTpggiidhfqqaItipenqkygafhgkeafkqaiVdfyqr  
qynvtldkedevciIygtk  
nglvavptcvinpgdyvlIpdpgytdylagvlIadgkpvpInlepphylpdwstvdSqiidktkliyltyPnnptgstat  
kevfdeaiakfkdtDtkiv  
hdfaygafgfdaknpsilasengkdvaieIyslSkgnmsgfrvgfavgnkdmiqalkkyqthtnagmfgalqdaaiyal  
nyddflleeqsnvfktrrd  
rfeamlakadIpfvhakggiyvwIetppgydseqfeqflvqeksilvapgkpfngnryvrislaIddqkldeaairlt  
elayIye  
>tr|Q6G6B5|Q6G6B5\_STAAS  
mtkikiImsvrredmpyiIkaeaekhhvevdiItealtddnvegvgaydglsIsqiplsehvykrIneldikqiaqrsagf  
dydlelankynlivsnvp  
syspnsiaefavnqainvvrhfnqIqtkvrehdfrweptilsksidIkvavigtgrigrvvadifangyqsdvvaydpf  
pnakiatyvdykdtieeav  
egadivtIhvpatkynhyIlnaelfkfkkgavfvncargslvdtkaIldaldngvikgaalDtyeferklfpsdqrgkt  
IIndpllesIidredviltP  
hiafyteaavknIivdaIldatIldvlqtgdtrIrvn  
>tr|Q6G6B8|Q6G6B8\_STAAS  
miamriliIgtvailiilglvktIqdhemtndtsrqlsdnkdddkihlInnfknlhakefnpsdff  
>tr|Q6G6C1|Q6G6C1\_STAAS  
mketdlrviktkaIsssllqlleqqIqtitvnqicdnalvhrttfykhfydkydIleylnqltkdyfardisdrInh  
pfqtisdtinnkedIrdia  
efqeedaefnkvlknvcikimhndiknrdrididsdipdnIifyiydsIiegfmhwikdekidwpgeeidkiIhkvini  
kik  
>tr|Q6G6C7|Q6G6C7\_STAAS  
meyksyydspvgrleIvsdggsIltavIfenqqgdstreentsIaIfreatqwlDayfkgdnpeitiPlkptgshfqqcwv  
nelrqvpygtlttygaiak  
kvgkllnkpksaqavggavgsnplsiivpchrvgktgsltgfggtinnkikIlelenidmsklyvpkhstkp  
>tr|Q6G6C9|Q6G6C9\_STAAS  
mqnldknfrhlSrkekIqqIvdkqwlseeqfdIlnhplideevansIenviaqgalpvglIlniivddkayvvpmmve  
epsvvaasygakIvnqtg  
gfkvtvsserimigqivfdgvddtekIsadikaIlekqihkiadeaypsikarggyqriaIdtfpeqqllslkvfvdtkda  
mganmlntileaitafIkn  
efpqsdilmsilSnhatasvvkvqgeidvkdIargertgeevakrmerasvlAqvdihraathnkgvmngihavvlatgn  
dtrgaeasahayasrdggy  
rgiatwrydqdrqrIgtievpmtIaivgggktvIpiakaslellnvesaqelghvvaavglAqnfAACraIvsegiqqg  
hmsIqyksIaivvgakgde  
iakvaealkkeprantqaaerilqdlrsqq

Tsompanidou\_et\_al\_Supplemental\_FASTA\_File

>tr|Q6G6D8|Q6G6D8\_STAAS  
mvkqlnsveafrefihqyplavvhvmdqcsvchavlpqiedlmqsyppnplavinqsveaiagelniftvpvdlifmn  
gkcmhrqgrfidmqrfehh  
lkqmdsvnndvdeh  
>tr|Q6G6E6|Q6G6E6\_STAAS  
miryakkedlnailaiyndaiinttavytyepqtidervawfetkqrkhepifvfeengsvlgfatfgsfrpwpaylyti  
ehsiyvdasargkgiasql  
lhhliveakakgyralvagidasnkaqiqhkfafkhagtltvngfknqwlafyeldlqd  
>tr|Q6G6E8|Q6G6E8\_STAAS  
mstlklefksisnkiytlgvlfiflflgyflpigidkvsksysqfffssytvatqlglfllsfviayfinkeysnk  
ntlfykligniftffyk  
vavlfecvfiilsitiisiiysdfshylliilflsilqyilvvgtismvspnilislgisivywigsvilvainkn  
ifgivapfeasntmyrave  
kilnneftmcppteintvsffvllfivntivllsrkrwlkigm  
>tr|Q6G6F6|Q6G6F6\_STAAS  
mmehifregqkgaptlilhtgtgdefdlplgealnenyhllsirgqvsengmnyfrklgegvydeedlefrgqella  
fikeaaeryefdiekavl  
gfsngsniaimlrmseapfkkaallyaplypvevtstkdlsvsvllsmgkhdpiplaaesqvinlfktrgavveevw  
ngheitetgltagqqlgk  
>tr|Q6G6G1|Q6G6G1\_STAAS  
mdvltiehltkkignktilvedsvfklkrqivglvgangagkttlmkivilgyssfqsgnfvinskdsksnigaliengp  
iypfmsgyenlklneskn  
tqdidkivsqhmdyihkkaktyslgmkqklgiaiaflnepqfiildepmngldpkavrdvrelivqkaqegvtfliss  
hilselvkitnsiliinkg  
kivtetseeekqfkndndenvlleieredqa  
>tr|Q6G6G4|Q6G6G4\_STAAS  
mkenlekyirspliglisifliilyfliyrvegnfcviilycllplfvntslilyviifryfkk  
>tr|Q6G6G5|Q6G6G5\_STAAS  
miipaiigylcgnfqfglvatgltahiyvfkgsrsklrviiicnlafaicmmlgtltaktplvfgmtllivtvipfyi  
ftalkiagpsstffivtfs  
lpinlpiapeealyrgfailvggilatmmvilitivfsknkaeeqaiqndfkliskllhtyndksaflqvaktavdnfkas  
dkllitstssndklsrrfq  
klillhtsaqqiyselelnakqirplpdeliemmdhiaqldnseenvrywrkevtvteefqnlfnhimkidemvhane  
ariayeadmrkplyskriy  
qnltdsivfrntlrytaimmiafiaimfdfekaywiplsahtillgtstihaiergmarglgtilglvllsvillfsi  
ptpvavilmgiaalfteal  
vganyaiaavfitiqvilmgnglasqnltniafprvidvamgiviaiiglvlgqrtasallpnvmaevvrkeatlphy  
fsenykddvyqkntamnl  
svklnnmtqvynaangel fsdktliqnyypsalfaleeisfmlnramanedrltineqlmgeylatfeniakhlelntele  
ikilpdlpqnyiqsamnn  
iqhnsfcerdknv  
>tr|Q6G6H0|Q6G6H0\_STAAS  
mkymigvdigtstksvlydengt fmkhqigydlhtpnvdvseenpdel fdavlm tikyvmreskvnkddikfvsfsaq  
mhsliamdqkhqrltnnit  
wadnraakyatvinevhdgnaiyqrtgtpihpmsplvki fwmkhewqdvfqrtakfadiktyifyhlfdyiidysmasa  
tgmfnletldwdvgalell  
glskemlpeivpttyvmkgmkeryatlmgl nedtpfvigasdgvlnslgvnsvgkgevavtigts gairtvidkprtdyk  
grifcyvltedhyviggpv  
nnggvllrwlrdellasevetakrlgvdpydvltqiakrvkpgadgli fhpylageraplwnanargsffgltlshkkeh  
miraalegvlynlytvyla  
lievmnetpkmi katggfaksevwrqmsdiftelvpesyessclgacvlglkavgdiedfsivssmvgatnnhmpfe  
envavyqelvsifinlsrs  
ltenyeqi adfqrqhmaenktq  
>tr|Q6G6H4|Q6G6H4\_STAAS  
mksnlrygirkhklgaasvflgtmi vvgmgqekeaaaseqnnntveesgssaterkasetqtttnvntidetqsysats  
teqpsqstqvtteeaptv  
qapkvetsrvdlpsekvadkettgtqvdaqpsnvseikprmkrstdv tavtekevveekatgtdvtskveveegseiv  
ghnketnvnphnaervt  
lkykwkfedgikpgdydfdtl snnvethgisplrkvpdikskddnilavgvmderkiryftdyinnknlmaelnlnl  
fidptvtkqgkqtvekl  
genkiskefdikylgdvkdngwtvngritlldkenskiihlayinpkksdmtsitingffakggltygnvptvkvyeyl  
rsdel pesvyantndqekf  
kdvtndmsdkl t l sengsykltlda lnkksyvvsfegkynendkell frtnlhgyhanygyyyyyypvs l twdngvafysn  
naqgdgkdkpndpiiekse  
pieldikseppvekhe lgttieesndskpidfeyhtavegveghaegiieteedsihvdfeesthenskhhadvveyeed  
tnpgggqvitesnlvefde  
estkgiltgavsdhntvedtkeyttesnl iel vde l peehgqaqgpieeitennhishsglgtenghnygvieeieen  
shvdi kselgyeggnsgn

Tsompanidou\_et\_al\_Supplemental\_FASTA\_File

qsfeedteedkpkyeaggni vdi d f d s v p q i h g n k g d q s f e e d t e k d k p k y e h g g n i i d i d f d s v p h i h g f n k h t e i e  
edtnkdkpnyqfgghnsvd  
feedtlpqvsgnhnegqti eedttpptpptepevsepetptpptepevsepetptpptepevsepetptpptepevpaepg  
kpvppakeepkkpskpv  
gkvvtpvieinekavaptkkaqskkse lpetggeestnkgilfgglfsilgfallrrnkknhka  
>tr|Q6G6H8|Q6G6H8\_STAAS  
mrdkkgpvnkrvdflnklnkysirkftvgtasiligs lmylgtqqeaeaaenienpttlkdnvqskevkieevtnkdt  
apqgveaksevtsnkdtie  
hepsvkaedis kkedtpkevadvae vqpkssvthnaetpkvrkarsvdeg sfditrdsknvestpitiqgkeh fegygs  
vdiqsnpedlkvsevrtn  
nksigknel tgalqlknkvsfkndefnirvannhqs vttgadwgwflfskdgdneylqkkgilgpkgmensagfkidtg  
ynfkdpmdkeekqagggfk  
gygtfvktgadgttakvgtniptrgkadsf qyadnsidtt dgkfhgql lnnlklayneksgimraeyagkiweanisdl  
gldkseaynflitssqrn  
tsqgvyanqwmrtdlnstfkltpnlvntektveipfetrknk lqpggeervkqegqpgsktittpitvnl tgek  
vgegqpteeitkqpvdkiv  
efggekippqghkdi fdpnl ptdqtekvpgkpgikn pdtgkvi eepvddvikhgpkgtgtpetktveipfetrknk lqpg  
geervkqegqpgsktitt  
itvnl tgek vgegqpteeitkqpvdkivefggekippqghkdi fdpnl ptdqtekvpgkpgikn pdtgkvi eepvddvik  
hgpkgtgtpetktveipfet  
krefnklqpggeervkqegqpgsktittpitvnl tgek vgegqpteeitkqpidkivefggekippqghkdi fdpnl ptd  
qtekvpgkpgikn pdtgkvi  
ieepvddvikhgpkgtgtpetktveipfetrknk lqpggeervkqegqpgsktittpitvnl tgek vgegqpteeitk  
qpvdkivefggekippqghk  
difdpnl ptdqtekvpgkpgikn pdtgkvi eepvddvikhgpkgtgtpetktveipfetrknk lqpggeervkqegqpg  
sktittpitvnl tgek v  
eggpteeitkqpidkivefggekippqghkdi fdpnl ptdqtekvpgkpgikn pdtgkvi eepvddvikhgpkgtgtpetkt  
veipfetrknk lqpg  
ervkqegqpgsktittpitvnl tgek vgegqpteeitkqpvdkivefggekittqghkdi fdpnl ptdqtekvpgkpgik  
n pdtgkvi eepvddvikhg  
pktgtgtpetktveipfetrknk lqpggeervkqegqpgsktittpitvnl tgek vgegqpteeitkqpvdkivefgge  
kpkdpkqpenpekpsrpth  
psgvpnpdngl skdrakpnevshmdkndkvkski akksvanqekkraelpktgaestqkglifssiigiaglmllar  
rrkn  
>tr|Q6G6H9|Q6G6H9\_STAAS  
mlylevlknrnflyllignflrrscfvlfslqi iwftveltnqsslklsmmvmsqtlpfiifgiffgaysdkhnkkkily  
lsdlisliiiipllait  
snlnyltlltistaitiincytdpafrailpeiideehlatsnalidslrgsniilpaligvivilvgnvgvfficsil  
lflgfi fnallkytnismi  
drhskefdsetweflkskeipfiii qfacilintglwvalplfisnilkegvgyglatsclgiasllmslimglls  
ekrlifkfsigvlwvgig  
siinvfsvail yigatlvlggsieg ltrsvaiqiktphlmgvfsisstsnyaadtlsnglisliipllslnifis  
ggaiism lslag lrfvkks  
m  
>tr|Q6G6I0|Q6G6I0\_STAAS  
mlrs lckhnrilinaikvgiemkykislalnaiiigslilcilisrgydiyvilipiltilaslinl fcdikkh  
>tr|Q6G6I1|Q6G6I1\_STAAS  
mtvnivfsvfcismvligiyvaitkdftlisfinqttiadhknqiyiftlcislsavflmssilsfeydfialaf l  
ltialllialfyvcfykit  
kyp  
>tr|Q6G6I5|Q6G6I5\_STAAS  
msrllndfnqslkkgfidkdi shkgnytpkllvnnknekvlstiidelqk cetfysvafitesglaslkaqll dlnkg  
vkgkilt snylgfnspkmy  
gellklnkevrltdiagfhakgyifehkyssm vigs n ltsnalkvnyehvll stmkngdlvsvknefellwqkst  
plttqwiksykesfeyrs  
eklaeveqtqml ladkvksveivpnlmqaealrslkairdkakdali isatgtgktil caldvrevnpnkflfivhne  
gilnrakeeffkvlpknd  
sdfglltgkhrvdakyl fatiqtl srddn fkd fdenefdyivfdeahrsaastyqrvfnyfkpkfmlgmtatpersdel  
sifelfdyniayeirlqaa  
lesdilcpfhfygvt dyvhgikeddvtklryltsdervnyi i qktdyygysgeilqglifvsskkeaydladklsskgi  
ksvaltgddsvnyrqivie  
klkegkinyiitvdlfnegidipevnqvm l rptessii fiqq lgrglrkssnkeyvtvidfignyktnylipialsgdq  
sqnkdnkyltndsing  
vstinfeevakkqiynsl davslnqnlilkayeevenrlghmp l lmdfiqqhsidpsvifskfsnyyeflvrynkidtl  
l tenesknlvffsrqiap  
lkridslvlellkneltydelknkm lnevkditeddidtsl rildfsfynagi ekiygs piiecnermir l sdaftnal  
snqtfkifledlielskyn  
nekyqkgknglil ynky s redfski fnwnkngssvimgy m irsqempifitydkhedisdstkyedeflsqdelkwftks

Tsompanidou\_et\_al\_Supplemental\_FASTA\_File

nrtlkskevqkilskrakg  
ikmyifvqkkdddgiyfyylgtagiiegsekqdkmpngsnvvtmdlaaldkavrddiiryitn  
>tr|Q6G6J2|Q6G6J2\_STAAS  
mnkxhvfviiigvilcivicivatviylkvkydekekqkaiyykeqqueritlylkhntkepntiksvhfts1krqpmgdavie  
gyinenkkadfvaygspeh  
nyqfggsliksknlstllkpahtktppdikkeldskkndr  
>tr|Q6G6J3|Q6G6J3\_STAAS  
mskkkililitsimlilivsvasyfkmkydekekqkaiyykeqqueritlylkhntkepntiksvhftkletsmpmsavie  
gyinenkkddfvayvспен  
nfqfvgdlikserlse1lkpanqlkspddikke1nkk  
>tr|Q6G6J4|Q6G6J4\_STAAS  
mnkxhvfviiigvilcivicivvtaihfkikydekekqkaiyykeqqueritlylkhntkepntiktvhftnfetsmpmsavie  
gyinenkkdnftayatpeh  
nyqfggamiesserlse1lkpahtkspddikke1nkkksh  
>tr|Q6G6J5|Q6G6J5\_STAAS  
mskkhgfviiigvilcivasviylkmkydekekqkalyykeqqueritlylkhntkepntiksvhfts1krqpmgdavie  
gyinenkkadfvaygspeh  
nyqfggtmieserlse1lkpanqlkspekikeeldkkegh  
>tr|Q6G6J7|Q6G6J7\_STAAS  
mtskhqkgsivnrflsvvekginklpdpsv1fflmcvglaimtwfis1fnsvkhpgthqtiyikniishdgtmimnd  
tiknfsefpalg1vlavmi  
gigvaektgyfdklmivsvnrprflilptiiligilgstagdaatiilpplaam1fikigyhipiagltmayasavggfa  
anivvgmqdalvysftepa  
trivdsiktvmamnyfiaasvv1lpti1lvttkliiprlgqyddrlmhddeetsshitdeahalkwanisfivti  
illiiitaiephsflrnakt  
gs11ddaplingvgliilvvflvpplvygilskeikntkd1gkmfgdavgsmtfivivffaaqllaylkwslngiiaav  
kgakllehgngiv1ilgii  
vl1samvnm1igsasakwgilgpi1fvpm1il1igfhpafqviyrvgsitn1pitpmpylp111tyaqydkrmlgalls  
slmpysialsvwtvfvi  
wfl1gipvgpggpi1fvk  
>tr|Q6G6J9|Q6G6J9\_STAAS  
mlkekesfr1lyqairei1adkigdnq1etnsvs1111dfdehevfde1ylailky1ntvsienishsel1nlientipe  
drdintfvknkii1gfann  
yfpelqvlaneiksdmass1k  
>tr|Q6G6K0|Q6G6K0\_STAAS  
mnrqviefskynpsgnmt1lvshkhdaseyasianqlmaathvcceqvgfiestqnddgn1dflvmsgnefcgnatmsyi  
h1lqesh11kdqgfkvkvs  
gcsdlvqcaihdcqyevqmpqahr1vpttinmg1hswkaieiiyetyvhyvipkvqtteiqh1veafvreqq1wshkyk  
tv1gmmlfdeqrqf1lqpliy  
ipeiqsliwenscgs1tasigvfnnyqrndackdftvhqpggsilvtskrchqlgyqtsikgqvttvatgkayie  
>tr|Q6G6K1|Q6G6K1\_STAAS  
mnnfnneik1l1qqylekfeahyerv1qddqyiealet1mddysefilnpiyeeqfnawrdveekaqlikslqyitaqcv  
kqvevirarr1ldgqastt  
gyfdniehcidiefgqcsiasndk11lv1gsgaypmtliqvaketgasvigididp1qavdlgrivnvlapnedititdqk  
vselkdikdvthi1fssti  
plkysileelyd1tnenvv1amrfgdgikai1fnypsqetaedkwqcvnkhmpqqifdialykkaaikvgitdv  
>tr|Q6G6K4|Q6G6K4\_STAAS  
mfkfilkria1mfp1lvivv1f1tyitnenpavtilhaqgtpnvtpeliaetnekygfndp1liqyknw1leamqfn  
fgtsyitgdpvaerigpaf  
mnt1kl1ti1ssvmvmtsi1ilgvvsal1krqkftdr1svaffl1talpsywiasiliiyvs1k1n1l1p1ts1gl1t1g1pesyil  
pvivitiayaaiyfrnvr  
smveq1nedyv1yl1rasgvksit1mlhvl1nalqvavsi1fcm1sipmimg1lvvieyifawp1lgq1sl1kailehdfpviq  
ayvlivav1fivfnt1ladi  
inal1npr1regar  
>tr|Q6G6K8|Q6G6K8\_STAAS  
mkgamawp1rl1yil1tmffsan1lnvfipl1rghd1gatntv1givm1gayml1tamvfrp1wagqiarv1gpikvl1riili  
inaia1liiygftg1legyf  
arvmqgvctaffsmlq1lgiida1peehrsegv1sl1fstipn1lig1plvavgiwnannislfaivii1fialtttffgyr  
vtfaeqep1tds1kiekmpf  
navtvfaqqf1knkel1nsgimivasivfgavstfvplytvs1lgfanagifltiqaiavvvarfylrkyipsdgmwhpky  
mvs1l1l1viasfvafgp  
qvgaiifysa1ligmtqamvypt1tsylsv1lpkvgrnml1glfiacad1gis1lggal1mpisdlvgfkwm1licgm1v  
jivimims1l1kkptprpass  
1  
>tr|Q6G6L0|Q6G6L0\_STAAS  
msntnkhyieeeyateqsrffkrdigfilyiflvn1lpiiv1lftf1glvavftqqapwgfsfpismnisyllaviisla  
ifrrmhedafipm1rsqiv  
asakykwhilisft1sv1l111nhfnifa1nvdaftvfdiyp1likgygsis1liaifsl1tiilntlicqlifrhiliqel

Tsompanidou\_et\_al\_Supplemental\_FASTA\_File

srliplkitivlsviletl  
yyyyyintwwefipalilassatylylksyrnfmvsyfyqlavilvlhifm  
>tr|Q6G6L1|Q6G6L1\_STAAS  
mtflvmqfivniivvgfltvivigliwikdkrqsqhsvlrnypllariryisekmgpelrqlfsgdnegkpfsrnd  
yknivlagkynsrmtsfgt  
tkdyqdgfyiqntmfpqrneisvdnttllstfiykianerlfsreeyrvptkidpyylsddhaiklgerlkhpfilkri  
vgqsgmsygalgknaital  
skglakagtwmntgegglysehlkngndiifqigpglfgvrdkegnfseglfkevaqlsnvrafelklaagaktrgghme  
aekvneeiaikrnvepykt  
inspnryefihnaedlirfdvdlqqlgqkpvfkiivsvkvseietlvrtmveldkypsfitidggeggtgatfqelqdg  
glplftalpiivsgmlkeyg  
irdkvklaasglvtpdkiaialglgadvniargmmisvgcimsqqchmntcpvgvattdakkekalivgekqyrvtny  
vtslheglfniaavgvss  
pteitadhivyrkvdgelqtihdylklis  
>tr|Q6G6L2|Q6G6L2\_STAAS  
mklcslivvalvciaalsacgkeqtktzegdvsgkhvltcitykddkvlkqstintikyddlmgdkdeakklfaksesi  
fkdlkgvkykvdykdkkai  
ehldidytevdmklknrlgvstkenkdisfeklekqlkhrglkekdkmddk  
>tr|Q6G6L6|Q6G6L6\_STAAS  
mlleikdlvykasdriildhislkvdkgesiaiiGPSGSGKSTFQKQICNLISPTSGELYFKGKPYNDYDPEELRQRISY  
lmqsdlfgetiednmi fP  
slarndkfdkrakqlikdvglghyqlsevenmSgGERRIAIARQLMYTPDILLLDESTSALDVHNKEKIEIIFKLV  
eqdvaimwihsdqsmrh  
fqkritivdgkiskveelnqhe  
>tr|Q6G6L7|Q6G6L7\_STAAS  
msntalgltalviiipiiisykeglhiikdlivatlravqlilglfllyhifkindkwllilcvlviinaswntisra  
spvmhhvfwisflaifigt  
alplagtiatgaigftanevipigglanngliainlayqnlDrafvqdgtniesklslaatkaskgairesirlaiv  
ptidsvktgylvsipgmmt  
gliigvvpplqaikfqlvfvfihttatimsaliatylysgqffnarhqlvarntdvkses  
>tr|Q6G6L9|Q6G6L9\_STAAS  
mkiinttgqihgigtqgdldifligipyaepvhdnrfkhstlktqwsepideiqpippqpdnkledffssqsttfehe  
dclylniwwkqhndqtkkp  
iiyfyggsfenghgtaelypahlvqndiivitcnyrlgalgylDWSYFNKGFHSNGLSDQINVIKVVHQFIESFGGD  
annitlmqqsagsmsiltl  
lkipdiepyfhkvvllsgalrldtksarnkaqyfqlmldyldtdvtslstddilmaklkqsrGPSKGLDIYAPI  
ktdyiqnnypttkpiacy  
tkdegdiytseggklsparfidimelndiplkyedvqtakqslaitchcyfkqpmkqflqqlniqdsnaqlwlaefawh  
dtssahyrsayhildmvfw  
fgnlqilaahqypttahlkflsrqmndlanfaksgkmpwpmynherryrtyq  
>tr|Q6G6M1|Q6G6M1\_STAAS  
msekqsneqveaflnkesqwqeeykylralifneteleaykwmhpcytlNknvvlhghfknyvallfhkgailedkyh  
tliqqtekvqaarqlrfen  
lteiqarseeikyylaeaikaekagkkvemkkteeyvipkeleakfeempqllessfykltpgrqhqiyyihigqakrsetr  
qkrvekyinqilegkghd  
k  
>tr|Q6G6M2|Q6G6M2\_STAAS  
mlsikhltkisygnkavddisldiqsgefiatfigtsgsgkttalrminrmieategqieidgkdvrsmnpvelrrsigy  
viqqiglmphmtikenivl  
vpkllkwtkeekdrakeliklvdlpesflerypaelsggqqqrigvvralaaeqdiilmdepfgaldpitrdtlqdlvk  
tlqrklgktfifvthdme  
aikladkicimsegkvvqfdtpdnilrhpandfvrdfigqnrliqdrpndktvegvmikpitiqaeatldavhimrqr  
vdtifvvsdnhllgflidi  
edinqqirghktlrdmmqqhiytvqidsklqdsvrtilkrnirnvppvddqqlvglitravvdivydtiwgdsedtva  
aehvgedtasskvheqht  
nvkvrDIGDDKs  
>tr|Q6G6M4|Q6G6M4\_STAAS  
mkkikyilvfvlsltvlsGCSLPGlGSKSTKNDVKITALSTSESQIISHMLRLLIEHDTHGKIKPTLVNNGSSTIQHN  
alingdaniSgvryngtdl  
tgalkeapikdpkkamiatqqgfkkkfdqtfdsygfantyaFmvtketakkyhletvsdlakhskdrlrgmdsswmnrk  
gdgyegfkkeygfdftvr  
pmqiglvdaInsekldvalgystdgriaaydlkvlkddkqffppyaasavatnellrqhpelkttinkltgkistsemq  
rlnyeadgkgepavvae  
flkkhhyfdkqkgghk  
>tr|Q6G6M6|Q6G6M6\_STAAS  
mdtskqfrgdnrlilgivilgvtfwlfaqlvnlvvpqlqstysdvgtiniavslsalFaglfivgagdvadkfgrvkit  
yvgliilnvvgsliliiitpl  
pafliigriiqglsaacimpstlaiineyyigtrrqralsywsigswgsgictlfgglmatyigwrsifvvsilltlla

Tsompanidou\_et\_al\_Supplemental\_FASTA\_File

mylikhapetkaepikgmk  
aeakkfdviglvilvvtmIslnviiqtqtshfglvspililglivvficslvgfvyenkikhplvdfsfknrgysgatis  
nflingvaggalivintyy  
qqqlgfnssqtgyisltlyliavlsmirvgekiIsqhgpkprlllgsgftviglillsltflpemwyivssivgyllfgtg  
lglyatpstdtavasapdd  
ksgvasgvykmasslgnafgvavsgtvytvlaanlnlnlggftgmmfntllaivafvlilllpknqtnl  
>tr|Q6G6M7|Q6G6M7\_STAAS  
mkjiaigsgalgsfgaklfqagydvtildytshveavkqhglNitingeafelnipmyhndqpdesydvvflfks  
mq1kevmedmkphidneti  
vvctmnglkheeviagyvaqsqivrgvttwtaglespghshllgsgpveigelvdegkenvikvadllneaelngviskd  
lyqsiwkkicvngtanals  
tvlecnmaslnessyakcliyltqeivhvatidnvhlnvdevfeylvdlnekvgahypsmyqdlivnnrkteidyinda  
vatlgkqrhieapvnrfit  
dlihtkesqrhaqd  
>tr|Q6G6N2|Q6G6N2\_STAAS  
marklhrelnnrhiqliaiggaigtglfngsgqtisltgplsllftymiigvvlfafmralgellsntrfnsfvdianey  
lgpfggfvigwtywlcwiv  
ssmsdltamgqyafawypqvpnwitvlfivlilisfnllgarlfgelefwfsiikvvtiamvivglvliffsfkthygh  
asftnliShggmfpqgtfg  
flmsfqiavysfigieligvtagetkdpektlpkainnpirillfyigllvimsvipwndidpnsspfvklftligvp  
faagvvnfvvltaaasatn  
sgiySNSriIfglSqqglgpkvlnktnshgvpysmlvssialliaallnyifpnaiqlfiyvttlstvlflvwamiiv  
aylmylkkhpeahknskfk  
liggkpiayiiLaffffvfiLffsdetraaiyispfwfiflfffykkyktaeklayeqrqnsgghfrydnq  
>tr|Q6G6N5|Q6G6N5\_STAAS  
meyqlqqlasltlvigiketyengraqqhiagfwqrcyqegviadlqlknngdlagilglciselgkmsymiavtgdns  
adikeydvitlasskymvf  
eaqgavpkavqqkmeevhhyihqyqadtvsapffelyqgdgttsekyiteiwpvkg  
>tr|Q6G6N7|Q6G6N7\_STAAS  
mkrtdkyrdsyqydnqnhrrqsedasyrqyakgdpeehperyyngdrdyrreqileeeneksrrskkwyiiailli  
ivaiFvtralInndsdkvi  
ndpkvsqnykkqvenqdgqinqqvdnakeniknnqktddiiknlqnqidnlkqqeqnkadskltqfyqdqinklteanna  
lknnasqgkiesmLndint  
kfdsikskleslfdkenggan  
>tr|Q6G6P1|Q6G6P1\_STAAS  
mavvrgfgvfrcsiyvvinysideqgvqciFvilq  
>tr|Q6G6P2|Q6G6P2\_STAAS  
mkgvtytmnqtnwikiLsgfasdskwkimlsillsiisvfgslvpywavfkiilmminnaytinsimvyifialiyis  
qvccfgastmlshitayei  
lseirkklaqklmrplgvveskkigekniFvdkvetielpLahmipevignllsaaiflyimlidwrmasallvtip  
isifafkkvmsgfnetyae  
qmksnnymsaivefiegieviktfnqsqssykykdavdnykihtlnwfkntwgymnlgasvlpstflgilpvgmylis  
inqlnyaefflcivlslgv  
vapiknftnyvnhlksiyaLtevnqilsleelvlstkfkkpqhyeiafnvvgfsynkdkddlVfkhlsftvpennftai  
vgasgsgkstiaklisryw  
dvtsgetiigginikdieskqlndlvfgvqdnflnlntfkeniklgnpeatdeavekaaklaqcheFiekLpdgydtnv  
gtvgdklsggekqrvtiar  
milkdapiivLdeatayvdpneqkiqeaInvtqdktliviahrlstiqhadqiiVlgkqqilekgshhlllklngnyk  
kmwdthmhtkdwgingtghn  
>tr|Q6G6P4|Q6G6P4\_STAAS  
mriFitsntdvktyvtkhlyhalKtrghrvciFkpfqteerqdgtpdlevfknecdlsyditlytfkqpvspHlaf  
kmtdqiflnkqrvldkvkv  
ldkefdfiliegaggiavpiyegtddfytmkdLindcadcvlsvlpsklgaisdaiVhdyvnqnvSasnfLimnrytds  
yiekdnqitigkltnktvy  
tfeehatyenfseafLkqligvkneLhttt  
>tr|Q6G6P7|Q6G6P7\_STAAS  
mmfqqeqidllqqkglYrsLksvgyidrqyievenkrctnytsndylglgqiafdkddferfmrkysyhlsssrLisgsst  
ayeeietmlagwlgysact  
ilnsgydanlalFniFkntncvvsdQenhasiidgiklsglekviykhldiadlekrlekyPNqNipkiiisdsafstn  
gdvvdigqlvsLkhkynat  
liLdvshsfgiensnyqgvdiltssLskacgayggvllssndvkdmlinhgrpliyssslpiynlyfikrnieklinad  
drtrtklnslskyfnqklka  
lnvnynssnspikfieFddieaaenihqtllkhhvftsylryptvtkpmLrislsyfhteQdidrlfeilhqed  
>tr|Q6G6Q6|Q6G6Q6\_STAAS  
mskkqkltmiiLmggffglnetllvtaLpsimkdfEisyTqVqwlTtaflLtnGiviPlsalviqryttrqvflvgi  
siffLgtllggLsphfatl  
lvariiqaLgagimmpLmmttildvfqpbergkymgigflviglapaigptlsgylveyfnwrsLfHvvapiaaavtflig  
fktiknvgttikvpidfis



Tsompanidou\_et\_al\_Supplemental\_FASTA\_File

vi fsvlgfggll ygtssisekgfdnpivll smiggvvlvalfvlrqyrilstpllnfavfknkqftvgiimgvtmvsimg  
setilpifvqnlhralsd  
sgltllpgaivmfmsmtsgalyekfgprklaivgmaivvittayfvvmedeqtstimlatvyairmvgialglipvmtht  
mnglkpemnahgssmtntv  
qqiagsigtaal itilshasknfsptmsdyngmnki dmmnqikvdtmlhgyhagflfallitvisffcsfmlqgkkkevdsrq  
>tr|Q6G6R4|Q6G6R4\_STAAS  
marlnitfspqafedykyfqndkkmvkkinellksidrnga legigkpeklsnltgyysrrinhehrlyvtvddnhik  
iasckyyh  
>tr|Q6G6S0|Q6G6S0\_STAAS  
mngniivahgmrhgrnqaleafise lvkddihhydiaflesehqdletvmttliqsgvdhfkivp11ifsamhyldkip  
nivhemkrrypdkvevse  
plgthplmrrlieqricd alageeqvgvmvahgningkftkaheelqictqn1qiskptyartlygeisfthdlesis  
kryqk1ivvplf1ydgrlv  
nkvkqmqndmvintdihitpsinfdpilkqiindrleslmipmki  
>tr|Q6G6S2|Q6G6S2\_STAAS  
metkekikvttideltp1igkkvivkdkevg1fltesgkihahnicphkqgp1segtvsgeyvfcplhdqkid1ntg1v  
qepdegcvdyvevtdgn  
vyicl  
>tr|Q6G6S3|Q6G6S3\_STAAS  
msveeygkvy1igaggnpnlytkkaerli readvilydr1vnp1ilqyan1tteiidvgkkpyakhiqqekindcivea  
arrynkvvrlkggdpaifg  
rvgeevdt1nehhaifeivpgvtsasaavatmqtgl1tmrtvaksvtfstghfdseenevvnslvnggt1aiymgvkr1  
gk1itqiqqytdidypiai  
vfqascfnefvkg1rlniisk1qhysieakpgici1gevvgytenvsttsnptqqfyvvsqskhdalmlcehlydegyg  
c1lnpnntsngtyhssqyd  
yydafikqqenvtyistdradantv1ch  
>tr|Q6G6S4|Q6G6S4\_STAAS  
mgkfg1nffkptekfngnws1lesksrewekmyrerwshdkevrtthgvnctgscswkvfvkngvitwenqtdyps1cgp  
dmp1eyep1rgcprgasfswy  
eysp1rikypyi1rgk1wd1wtea1eenngnrvaawas1venedkakqykqargmgghvrsnwkdvteiaaq1lytiky  
gpdriagftpi1pamsi1sy  
aagarfi1n1l1ggem1sfydwya1ppaspqi1wgeqtdvpessdwynasyi1mwgsnvp1trtpdahf1mtevyrgtkvis  
vapdaenvk1fadnw1apn  
pgsdaai1aqgmthvi1lqehyvnqpn1erfi1nyakqytdmp1fl1m1dedengykagrfl1rasd1lqgtteqgewkpvihdais  
ds1lvvpngtm1gqrweegk  
wn1k1etedgsk1npt1smaeggye1eti1qfpyf1dsdgdgi1n1rpi1ptrqvt1angdkvriati1fd1masqygvr1rdhk  
1eskg1yddaeskytpawqe  
aisgvkqsvvi1qvakefaqnaidtegrsmi1imgagin1hwfn1sdti1yrsi1n1lvm1l1cgcqgvngggwahyvgqekcrpieg  
wstvafakdwggppr1lqng  
tswfyfatdqwk1yeesn1vdr1ksp1laktee1khqhpady1nvaar1glw1psypqfnkns1l1faeakdegidsneai1kr  
ainevkskqtqfaiedpd1  
kkn1hpks1fiwrsn1issakgqeyfmk1h1l1gksg1l1atpnenekpee1itwreettgk1dl1vvs1l1dfrmtatp1lysd1v  
1paatwyekhd1s1stdmhp  
yv1hpfnpaidp1wesrsdwdiykt1akafsemakdy1lpgt1fkdv1t1p1shdtkqe1istpygvkdwskgeieavpgrtm  
pnfaiverdytkiydkyvt  
1gpv1lek1kgv1gahgvs1fgv1seqyee1ksm1lgtwsd1tndds1vr1anr1p1ridtarn1vadai1s1s1satngk1s1qksyed1leeq  
tgmp1lkd1s1s1s1eraaek1sf  
1ni1tsq1previ1ptav1fpgsnkqgr1rysp1ftt1nier1vp1frt1l1tgrqsy1yvd1hev1fqf1ges1l1pvykpt1l1ppmv1fgnr1dkk  
ikg1gtdal1v1ryl1tphgkw  
ni1hsm1yqdnk1hm1l1t1f1rgg1pt1wi1s1nedaek1hdi1qdndw1levyn1rngv1vtaravi1shrmpk1gtm1fmyhaqdkhi1qtpgse  
itdtrg1gshnap1trih1kp  
tq1lvggya1qi1syhfny1gpi1gnrd1lyvavr1k1m1kevnw1led  
>tr|Q6G6S6|Q6G6S6\_STAAS  
minfdn1fkkyqes1fgymaqq1cfpek1tfhpkt1feeti1stdh1payed1vafr1nmmt1f1s1eik1aiytd1td1fdtkkap1ly  
mtynk1fdtqkergq1mlak1  
kv1lyem1fg1emvdne1sdy1lp1m1lqf1l1qvaewr1ndpraeni1qli1imi1iedgtyv1manal1gedn1npyayv1iaqrkt1kl  
c1l1tspk1gvkhha  
>tr|Q6G6T1|Q6G6T1\_STAAS  
maytyt1lkd1ie1itgvtkrt1lhydeig1l1vpdkndknyrvykq1dlek1lqk1il1lks1fd1diakikqy1isydneq1l1rk1  
l1seqvsk1ldkk1sd1l1ql1r  
rsvcefi1ng1h1s1lidts1lnkt1l1sqy1dkeas1kyghtkayqs1firr1kds1l1sqd1irhk1l1tti1fnk1fnhms1shy1piq1dcs  
d1lv1fewka1fmnt1iad1fdde  
t1l1cci1akt1yed1dtr1fkdy1fnsydnq1l1asy1seavny1fl1snvks1sdnf  
>tr|Q6G6T2|Q6G6T2\_STAAS  
m1lfkna1fiymks1fnidk1v1l1t1tyi1fydcekv1niri1fpy1  
>tr|Q6G6T9|Q6G6T9\_STAAS  
msnsqai1qaienv1latskvg1l1stayn1kpn1srymvfyndg1l1tytktni1hsakv1keikdn1paayv1l1gynd1ttnrs1fve

Tsompanidou\_et\_al\_Supplemental\_FASTA\_File

meatievvtgdqkvidwlwe  
tqdkdffsskedpelcvlkvtpqsvklmndksldtpikidl  
>tr|Q6G6U0|Q6G6U0\_STAAS  
mtcqkkihhtlstipsrninnimvlfslstklntingetkdvsniihngdiyninhgenielmipvfyfyqqddd  
ffngylrhlqssnyiks  
liadlistptrsslmgknigqsiddtllkeafiridheylpnialsnpvfidcvnyihdnidahlskdiamhcnisesy  
csnlfvrylsmnfkdyfts  
iklvnainlllstkhsittvselagfnshtnfanqfknylhfspkqfrslvskiteppqihfqqdnvsqftelistidlt  
aqlatnttdihiddfnpkd  
rsqrakvfvrfnsfnelfqfi fneyydingehlpkpvvfiddihdieisqtnynllnrcfeklfekniglaiaikstqqf  
etmkqliltflqgnqdykt  
skklvkfmlvfcsnsmtaeeihlchlkkknkeikysvtvdgfl etystveqvydvmqrkfhyyfidiensktathli  
tknqhyhqtthfeqykkf  
ildsgisstqfvynnlsvgfkynndgknpialsdivyhiallryggisyqllddhsnyislynkygspplmhlykm  
frpfvnedieitnyvlsr  
kdnyyhflfnkindrymsdvkqdfi fhnelpqdsImiiktlnhehgsiqhllpisdqlvyiekeildeldktnypkte  
avgeetgrtfekl nhdev  
kyicfkps  
>tr|Q6G6U8|Q6G6U8\_STAAS  
mkkvtydijptcedycalrinagmspktraeaekglpnalftvtlydkdwligmgrvigdggtafqivdiavksyqqggy  
gsqimehimkyiknsvses  
ayvsliadypadklytkfgfiptepdsggmyikf  
>tr|Q6G6U9|Q6G6U9\_STAAS  
mkklyknrsfnsllmsrllinagdslyyvsttwivlqwtqnp llvgltntllmipmcisflfgplvdalplkktlfltp  
lqclllsliaslnligyl  
vygliilvaiamfctqigypaqskaipllvkkdqlldansamsvayqgtdvimnsisgiivaiaffplysinsliflia  
clfmInvnipnitnparnn  
psylqnkegvlgiknslllvaalvsgvinfglglytwiplkadhlggayyygllmalfsiglivgsliptyikkinlg  
ygkllillntisgllilv  
nyiprnffii lfpvafmtisitnislasiqqkvipehllarlttiitsisaislpmgsfiggiliknlgidytlviggal  
fiiasii ffitpysrlpk  
iekiehyhifgiqki gnnh  
>tr|Q6G6V0|Q6G6V0\_STAAS  
mietfkafvidkdesgkvtpfkqlsptdfpkgdvlikvhysginykda latqdhnavvksympigpidlagtiveseap  
gfekeqevivtsydlgvsh  
yggfseyarvksewilkpdtlteesmygtagytaglaierlekvgmnie dgplvrgasggvgtlavlmInelgykv  
iastgkqdvsdqll elgak  
evidr1pveddhkkpl asstqwacvdpvggeginyvtrlnhsgsiavigmtagntytnsvfphilrgvnilgidsvfta  
mklrqrwvrrlakdImpen  
lhekqv itfde lpeqlnkvikhenkgrividfgvdk  
>tr|Q6G6V3|Q6G6V3\_STAAS  
mikqinvsnmqkfesqlmkaqsegythvpyaneimiyqsmldavqlypksivvdytvdgqykndchyfgqssiniadwa  
qnnnyypnliyaiqqtldl  
ihyysvetifdlailltkgdlsidghvfdfkapiatsasiwetiktiedfdmmsqfylnkmayidhhpipfrnlfied  
seqlnspdnwlystkfmlp  
kwlykiakqradnkqlqnfglytkqpnvldhivfigdhhyignsky lftyfvkhnpmacyfvtdrrgphfispnse  
radelinsarvvivendip  
etlqpngtliqlhggtpimqlfldskepiknietpfiyrakrynrlqfdyvihsaddishfyqtafpshqanvlaygnpk  
hgyllqkrnesttqqykk  
sfkindqkpvll yapiglvsaqqpllsdalfkayhvvvqgvdeailpeaalvapkylsaqdli lmsdvvitdysniifda  
maidktvalytpnhsqye  
sqgvnediwrhlskiwytdrql linnlisqaipvikypiqhkeqplesisqlll skmtnsq  
>tr|Q6G6W8|Q6G6W8\_STAAS  
mtttfiiisyiilaliivgvinflirsrkkgrqqkeqqfttrqsnqskfkasldktt dqstqrmtheelrvdnqddhs  
qvslngytkgsekdqeaft  
nnggeavaaknpeseykvnekikkeknfi fgegvsrgkilaallfgmfia ilnqtllnvalpkintefnisastgqw  
lmtgfm lvn gilipitayl  
fnkysyrklflvalvftigslcaismnfimmvgrvlqagigavlmp lgsiviitityppekrgaamgtmgiamilapa  
igptlsgyivqnyhwnvmf  
ygmfiigijailvgfvwfklyqytnpkadipgii fstigfgallygfseagnkgwgsveietmfaigiifiilfvirel  
rmkapmlnlevlkfptftl  
ttiinmvmlslyggmi lli piylnlrgfsaldsgllllpgslimgllgp fagkll dtiglkplafgiavmtyatwelt  
klnmdtpymtimgiyvls  
fgmafimmprvtaaina lpgrlashgnaf lntmrqlagsigtailvtvmttqtqhlsafgeeldktnpvvdhmrilas  
qyggqegamkvllqfvnk  
atvegindafivatifsiaailclflqsnkkakataqkl dadnsinhe  
>tr|Q6G6W9|Q6G6W9\_STAAS  
mtnqnqrlepfdetfqqsnihrgekrygkkkrs lvs mi iq iivviltaiagysmwkqpi fnivftkesvdfdgiknfneti

Tsompanidou\_et\_al\_Supplemental\_FASTA\_File

gkmhglninlgnindlqqg  
idrllilvngffilcivslvitiltivfnrtvlkvvnllvltimlvitlyfsyiikalageiadalckyylnvppdqvit  
eadaihngiillgcsigll  
vislffrnrmprlk  
>tr|Q6G6X0|Q6G6X0\_STAAS  
mirnrvmnsvvnyllhnrsmfknqdqverffykreienrkhhkqpstlnvkanleklslddmqvfrfnfrhqidkkil  
yihggfna lqpsfhrwl  
dkitlstlyevvlpipyktpefhiddtfqaiqrvydqvlvsevgpqnvvvmgdsggalalsfvqslldnqqplpnklyli  
spildatlsnkdisalie  
qdavlsqfgvneimkkwanglp ltdkrispingtieglppvymfgggremthpdmklfeqmm lqhhqyiefydypkmvhd  
fpiypirqshkaikqiaks  
iddvtqnn  
>tr|Q6G6X2|Q6G6X2\_STAAS  
mviikqlfthtqtvtsefidhnnmhdanyniifsdvvnrfnyshglslkerenlaytlf tlehttyllels lgdvftv  
tlyidydykrhlfltl  
kedgtlastnevmmmginqhtrrsdafpesfstqiahyyknqptitwpeqlghkiaiphkgalk  
>tr|Q6G6X7|Q6G6X7\_STAAS  
mkvnasltilkichtamftfkrvsisankifhnkvtylhfyns  
>tr|Q6G6X9|Q6G6X9\_STAAS  
meqlpqvgfmxsvlfwknyvnfkgrsrrseywmalwhlilmvpavcvliinlflffisiaadnetlivmsilmiilts  
vytfvyslatfipnialcv  
rrfhdisrtmlfpmimtvfsiifyivlqiidsydsdftlmpmglnillvlyfyvlgltivmivflcfdskpanyges  
pkypstiknqpv tsetpkt  
peetdnq  
>tr|Q6G6Y3|Q6G6Y3\_STAAS  
mivevehqrqsvdlikidndetkiiftnygarvsvwkyhdnivilgnvveadefyhspfkfgasigrysgridnakfk  
kgkeyqleknghehlhg  
chglndk lfdyeirneiaqikvifktvlksaddhfpgdidvtithiydadhqwsieyeavaseditfsptnhvyfnlrd  
nnvvdnhri ssngldmyvl  
dernivtgdi ldhev fednkiklsdiftsqhaqlsqmtrfggl dhpftvgehkmymvenhefmlevdtdm phvvfftn  
qp dewdspfn iykphsgft  
letqflpndinlygekapsilkagevfnsksfrieekvend  
>tr|Q6G6Z1|Q6G6Z1\_STAAS  
mgldkdvavtwrryfhqfpe lsdkefkttkikidiltehirildlplatglvaevggglsciavradidalpiqelveqd  
fksenegvmhacghdihma  
silatavklkeiegtlgrvkfifqpaee lghgafkiiethalkdvqavlgfhndpsrsvgtfaiktgait savdrfefh  
ikgvghaakpeqndpvi  
vlaqlinsiqsivsrnl sfafeavvtigqiscgntwnviadhayvqgtvrsfdpvvrklvetrlqdiadglaqaynmkin  
lnythlpgavmndea lthk  
aiaavahvgykvemmqpl tige dfgsgysqhfpsvfaligshseydlh hpqykpderilekvpeyfvfvrllhe  
>tr|Q6G6Z2|Q6G6Z2\_STAAS  
maaqp rtkfkttdy ekqevpglqsempapdcgetsyqghqrlqgykilvtggdsaignraaiayakegadvainyl  
pseeqdaevr qviesgq  
kavlipgdi rdeqfnydlveqayqqlggldnvtlvaghqqyhddihgfttetfetnvyp lfwtvqakaley lkp gas  
itttssvqgyhpspi lhd y  
aaskaaiisl tksfsee lgpkgirvncvappgfwsp lqisggqpqskiptfgqktp lgragqpvelcgyvllaseessy  
ttgqvfgvsggvqid  
>tr|Q6G6Z4|Q6G6Z4\_STAAS  
mktstffivcekevfligkqvkrmevhkksnawalp lllfvalflvggiitgdftsmp lnavaititvival lmrkesfa  
kkvevftkgaghsniilm  
lifilagafsn taekmggvkstvnlg lslipenliivglfvicmfvsismgtsvgtvaaiapvygfaqatdvptal ama  
tvvggamfgdn lsmisdt  
iaavrtqhtk mdkdfrvnfkivlpgailtiilyfltn gislnhaksy dynlikvpyilvlv lallgvnviivliggtl  
lagiig lidgsfgwmgll  
avskgiismedia miall igglvgiiqhnggie wllqfv rskvkskr gaelgiaslvsvadiatanntisiimsgplakn  
iadeydvdsrksasildf  
ggcfqgl lypspqv isaagvagi splmlfpysiy pillgv cglia ilfnfpklknts qemkh  
>tr|Q6G6Z5|Q6G6Z5\_STAAS  
makfnvenehvevevel ykfspelvy eawtkkdl lkwf mtsartnkeieadvkeggkyrivdqqrngkvnviegiyes  
lvmdeyvkmtigmpglset  
qdvieeffere tggqm lfyys lvekerrftn leykqkkkeyhdamvhg felmfdkmyh vietstqq  
>tr|Q6G6Z8|Q6G6Z8\_STAAS  
mlidkfetyi iniag lndrtrrkk lsklcksvqfcdalqfsinkqfnqyvleislpkqq lpyfisl sfhqysifqvlsp  
kkine lldsdnlyqsakrf  
dinidglqdafikdkvidimnmfqnh tdi tytl nks hahiictpei fakllhtiatr nidilsanyr sssmskaris  
>tr|Q6G703|Q6G703\_STAAS  
mlkqillratkivsvlavaffiinyigmekpdilylvgrtiiat lafilicltvftiinsperkiklgttlpialiiigii  
fgaifltvqigvitgliig

Tsompanidou\_et\_al\_Supplemental\_FASTA\_File

viatfiwelielnkkggrss  
>tr|Q6G710|Q6G710\_STAAS  
mkrsskskmslpkklflwvfgilvtilavavyvaakifitgnkihnlrdnhselrdkkvslnldgdpftialfgvdsda  
drkkkgggersdsimilsi  
npkttkteivsiprdtraeivgrgtteki ahayayggpnmavksleklnmvpidhyatidmdglhnmidsiggvdvsnd  
tftvdgvrftkgqthvng  
dqalkfirsrkeegagdfgrqqrqqivleamankiaspssithfnslnmeiqnnvktldtlgdlnirsnykdandt  
khq1sggggqsdglyyfi  
pseqskaestkl1kdnle  
>tr|Q6G717|Q6G717\_STAAS  
mlffvatylfifppi fki lifsntinfkttlslnidpvfphynihsstvpklyhlhqyaltslihks  
>tr|Q6G720|Q6G720\_STAAS  
mkiaivgsgngavtaavdmvskghdvklycrnqsisfkqnaiekggdfnneqderfvkftdisddmeyvlkdaeivqvi  
ipssyieyyadvmaehvtd  
nqliffnmaaamsirfmvledrhietkplaeantltygrvdfenaavdlslnvrrieffstydrsc1ndcydkvssi  
ydh1vkeesliktnlengn  
pevhpgptllnvgridyagefalykegitkhtvrllhaielerlnlgrrlg felstakessrierylerdkedep1nr1f  
ntspvfsq1pgpnhvesry  
l1tediayglvlwsslgrvidvptpnidaviviastilerdffeeigl1tveeigl1dk1dleky1k  
>tr|Q6G722|Q6G722\_STAAS  
mkasifvstl1tkn1smysrfdmpkfgcvngcm1filyrvnrigenrnfeiftnsiffieikkankalet1la  
>tr|Q6G741|Q6G741\_STAAS  
masismsdiycngtifenddeqliyltpsfprytsntwiykktpqerw1kdl1erqhl1htnqgsnyha1fsfpeneq1d  
nhw1mamfkdm1felgime1  
yaiesdalan1prnsdveiaivdeshiday1kvayqfs1pfgkdyadaheemvrehyqkdvikr1vay1lnnepigvvdvi  
esenyie1d1gfgv1eqfrh  
qgigstiqs1iaeyaisknhkpi1lvadgedtakdmyakqgyvyqsfcyq1lkedign  
>tr|Q6G745|Q6G745\_STAAS  
mlkinvkyq1knt1iriniddtepk1yavrgpsigkttv1nmiag1rkadeaie1vngq1l1tdtakv1n1k1qrrigy  
1fqdyq1f1pnm1tvyknt1f  
maepseh1dq1qt1n1dh1mkqypmt1sggeaq1valara1stkpd1l1l1dep1fss1ld1ttkdesit1vk1rifnewq1p  
i1fvthsn1y1eaq1mahe1i  
tig  
>tr|Q6G746|Q6G746\_STAAS  
msqerysrq1l1fkqige1gqsk1nqkcali1igmga1gthvaeg1vragiakli1vdrdyie1fsn1lqrqt1fteeda1kmm  
pkvvaakkh1l1al1rsdvd1  
ddyiahvdy1flethgqdvdi1datdnfetrq1l1ddfaykhr1pwi1yggv1vqsty1teaaf1pgktpc1fnc1vpq1paln  
l1tcd1tv1gvi1q1pav1tmats1  
q1rdamkv1lteq1pidtk1tygdi1wdgshys1fgfskmqrsdct1cgdvps1py1lnkneq1ryat1cgrdtv1qyenasi1thdi  
lvq1flkq1h1n1yrs1symv  
mfefkghr1vafk1ggr1f1ihgm1trtsdath1mn1l1fg  
>tr|Q6G750|Q6G750\_STAAS  
milqivgykks1gk1t1mrh1vs1fkshgy1tvat1khhghgkedi1ql1qdsdv1d1hm1kh1feagadq1siv1qgf1yq1qt1vtr1v1dn  
q1l1tqi1ieks1vtid1niv1  
veg1fk1nad1fek1vv1yrnee1l1qv1l1qq1snvc1ys1inv1reh1d1t1afeq1w1l1nk1k1ndc1dt1qt  
>tr|Q6G756|Q6G756\_STAAS  
mtngq1s1nk1spi1ftks1ft1n1ffvn1fiv1yl1cm1yl1l1vvi1agys1kqaf1das1d1slag1lv1vg1lfiv1g1s1igr1fat1gk1fv1n1q1gp  
k1r1l1fig1l1ial1i1t1q1ly1f  
idg1s1laf1l1fv1r1ling1iatav1ttat1gtiaay1vtp1vrnk1seg1s1l1fs1sl1vl1gta1gp1flgm1l1itk1ypid1l1fi1c1vil  
g1l1gl1i1s1l1fik1v1d1fevt1n  
nktet1n1vidk1pr1fs1ihq1fi1kea1ip1vavim1l1lig1vtyasi1lty1l1qaf1aler1h1l1vta1asy1fficy1aiasi1l1trpi1agr1md  
dkneni1iv1pafim1l1fs1f  
vc1l1issy1qsw1l1l1lagac1lg1ygn1l1ssam1qsi1aikv1sp1iky1giat1stfy1vg1ldag1vg1fg1ps1fl1gl1fth1mf1sy1sei1fg1f  
maala1i1tm1lv1fy1l1hgr1h  
vtrnamn  
>tr|Q6G758|Q6G758\_STAAS  
mil1k1fd1hi1hy1dq1ldr1fs1fpg1dvik1hsggy1hhk1ygt1fnk1lgy1inenyie1l1dvennek1l1kmaktiegg1vafat1qiv1q  
ekyeg1gf1knic1l1rt1nniea  
vkn1k1qs1erve1v1gpi1qmer1dthk1dg1kv1kwq1lly1imn1qd1de1k1pp1ffi1qwee1sdsm1rtk1k1lqy1fq1k1qfs1ietv1v1k1sk  
nrsqt1vs1nw1k1wfd1mdive  
endhy1td1l1l1knddi1y1fri1edg1kv1sky1hsvi1kdaq1ats1p1sysi1fir1gai1y1r1fe1pl1v  
>tr|Q6G759|Q6G759\_STAAS  
mrti1ils1l1fi1imn1vai1imt1sq1l1tvny1fsl1rvil1ift1fils1iffil1ik1ssr1lnn1ilt1ilsiv1lai1ihmg1ilah1st1yv  
y1ly  
>tr|Q6G761|Q6G761\_STAAS  
mik1k1l1l1qfs1lgnk1fai1flmv1lv1lggy1vasak1kle1l1pnv1qnp1vis1vtt1t1mpgat1p1qst1qde1issk1idn1qvr1slay1vk  
nvtq1s1iqn1asi1vtveyen  
ntdmd1kaee1q1k1keidk1k1fkdev1gqpe1l1rnsm1daf1p1v1lays1fsn1kend1l1kkv1tkv1lneq1lipk1lqtvd1g1v1qnaq1l1ngq

Tsompanidou\_et\_al\_Supplemental\_FASTA\_File

tnreitlkfkqnelekygl  
taddvenylktatrttptglfqfgdkdksivvdgqyqsvdafkninipltfaggqgqsqsqsdknqnsamsdvnqaspqq  
nksapnnisgmptaklg  
dladitvgdvrtstsktngkdavnltqitkaqdvntvqvakdvqrkidtfdvdenkdfnvtkmtdtakpvekslytmvekas  
lgtivaiivillflnrjrt  
taisiisiplslmalialklsdvslniltlgaaltvaigrviddsivvveniyrrltdseeqlkgenliisattevfkpi  
msstlvttiivflplvfvsq  
svgemfrpfalafslasllvsitlvpaalatfkkgvkrnkqhgeglgvvsttykklhwslnhkwiviilstlil  
vvtivfggprlgtstfisag  
ddkflaitytpkpgeteqavlhakdvekylkqkhhvktiysvggssvpdptgstnsmaimveydndtpnfdeadvki  
khdgfkhpgeknqdlgt  
gagnksvevtvkqpsmdaikstvkdieqkmkqvkglanvksdlsqtydqeikvdqnkaaengisasqlamhlnenlpek  
tvtvkengktvdvkvkqn  
kqtdwsedklnnitlkkptggtiklgniatlvktttpsklteqgdyattvsakvtnkdvggttrqvmkinnldkpnv  
kvniggasddinnamtqla  
famlaiiivylilvitfkgglapftilfslpftvigviiallitgetisvpsligmlmligivvtnaivlidrvinneq  
qgmemkealieaggtrirp  
ilmtaiatigalvp11fgqdssiliskglaatvigglisstl11lvvvpviyeilftlkkrftr  
>tr|Q6G762|Q6G762\_STAAS  
mqfyliillailylivsfisifkmevfvtrilriimgvlllflvaltmmsfpenwwfvllllvgnvevtgfkmlkkl  
kgvnilnmslffiviyfi  
ltivlf  
>tr|Q6G764|Q6G764\_STAAS  
mteqftmiillialgyflkrinfikatdsqvialvlnvtlpslvivnlnsaelklsfsilpilmiygivakmiavwff  
rkydnhmrgsvgmmtgamn  
iglfayplievipkgtglyfvmadiggafvmfgytyfvgsyfsesdqdfkylgkkl11qsvplvtyivmfilnishih  
lphvaidffsilshanmp  
smillgvmnftlerkyipatikylclhyglalvagllvyvllpsvddmikttllvtwmfpvgvaiisgyiqfkyrtlpf  
igmttnltiisiiilyvy  
qavfv  
>tr|Q6G768|Q6G768\_STAAS  
mknyfqfdkygtfkrilggittflsmayilavnpqvlslagvkgvsedmkmdqgaifvatalaafvgs1fmgliakyp  
ialapgmglnaffaftvvl  
tmgipwqvgltgvlfsgiffailvtvgfreviinaipyqmkmavsagiglfittfvg1qssgiivknestlvtlghltdpp  
vllaifgivitvilyaikl  
pgsifigmiitavgmftg1iqmpsigvgkipsieptfgaafekdpsqlltiqfliviltflfidffdtagtlvavat  
qagimkdnk1pragralfs  
dlativgsvfgttttsyiestsgvavgartgfasivtgccfl1alffspliavvtsavttpalvvvgvlmaanfaein  
wksfevavpafitiimmp1  
sysiatgiacgfifypitmliskkhkevhpimylvmlvilyfi1fvhg  
>tr|Q6G769|Q6G769\_STAAS  
mmknkngpk1slaligiflilceffygipflgatfilsfgwqplifnallyliltiillvnrqnairpiaaipifgivgsf  
laiipflgihwifflm  
ilfvllvlsaptyipknarvitytkdghre  
>tr|Q6G7A6|Q6G7A6\_STAAS  
mkdfi1fwkkafipvyfivam1vfl1lrfyiktdnfsmylmiifliclgtasiinyknr  
>tr|Q6G7A8|Q6G7A8\_STAAS  
mtdkkytaadmvidtlknngveyvfgipgakidylfnaliddgpelivtrheqnaammaqgigr1tgkpgvvlvtsgpgv  
sn1ttglltatsegdpvla  
lggqvkrd11rlthqsidnaallkysskyseevqdpes1sevmtnairiatsgkngasfisipqdvisspveskaislc  
qkpnlgvpseqdindviea  
iknasfpvllagmrssadetnairklvertnlpvvetfqgagvisrelenhffgrvglfrnqvgedllrksdlvvtigy  
dpeyeasnwnkeltdqii  
nidevqaeitnymqpkkeligniaktiemisdvdepfinqqhldeleqlrahideetgikatheegilhpveiiismqk  
v1tdettvtvdvgshywm  
arnfrsynprh1lfsngmqlgvalpwaisa1vrpntqvsvagdgglf1ssqdl1etavrknlni1q1i1wndgkynmve  
fqeemkykrssgvd1fgpvd  
fvkyaesfgakglrvtnqee1eaaikegyetdgpvlidipvnykdnik1stnmlpdvfn  
>tr|Q6G7B2|Q6G7B2\_STAAS  
mktkevvalmni1sdtlryyekvgvipvnrdenyriyndsdl1nwiylvkn1rnagvsies1iefcrlaqlpkneniqa  
qqkqilnkqleelnenlkt  
ihdard11qyki1dnydnhiakinasdnhddnver1werk  
>tr|Q6G7B4|Q6G7B4\_STAAS  
miyhfsiitlitgimhitmyfvpfesrkmp1fmtiifti  
>tr|Q6G7C7|Q6G7C7\_STAAS  
mmqnkqil1fnk1pegmpqedt1kieetdtpkl1esdglvqtlyisvdpymrgmrtkadsyvqpf1eigkpi1vshvvakvid  
st1adykkgdvvvgmlpwr  
i1nhvqadqitkvpttdvpl1dyl1sv1gmpgqtayhgl1digqpkagdtvvvsaasgavgs1vvgqiakikgcrvvgiagg

Tsompanidou\_et\_al\_Supplemental\_FASTA\_File

dkkvnyltgtlgfdagidy  
kkedfaea laqavpdgidyvfenvggtvgdevfkhlnrfarvpcgaisynhpeadigpriegtlikkqvmrgflvse  
fanafkeaseqlatwvqeg  
kiqsqvtiedgfenaphafknlftgdnfgkqvikvte  
>tr|Q6G7D3|Q6G7D3\_STAAS  
mnlNli fkeqtlkfnkeeqetylf1qqhnsdwani fkemilqgrdkvtqr1vtsmhrenlvkartqskkilrldimldi  
stthileiqfppakqtllya  
pitgehafdridvegpfiykdditntitrvhhpneileciliieapdlknaasdqfqqdlinsatnmtfaisyqalsmqhd  
saplfniensedsylrse  
qavieghplhpgaklrkglnalqtflyssefnqplikivlihsklgrtmslskdydttvhq1fpelikqleneftpkfn  
fndyhimivhpwqlddvlh  
sdyqaevdke1iieakhtldyyaglsfrtlvpkypamsphiklstnvhitgeirtlseqtthngplmtrilndilekdvi  
fksyastii devtgi hfy  
eqdevdyqterseq1gtlfrkniyqmipqevtpmipsslvatypfnnespivtlkryqsaas1snfessakswietysk  
allglv1plvtkygialea  
hlqnaiatfrkdglldtmyirdfeg1ridkvqlnemgystshfheksriltdsktsvfnfkafystvqnhlge1iltiska  
sndsnlerhmwyivrld  
nifdq1vlsthsnqvnenrineikdtmfapfidykcvtmrldeahhytyikvnnplyrenn  
>tr|Q6G7D6|Q6G7D6\_STAAS  
mahvni1skikynakvlqtvfqsknmqftpvikciagdrtives1kalginhvaesrldniisiadqdltytllrtpak  
keisdmi ekvdsiqtel s  
tihqinevaevlgkhhkil1mvdwkdgregvltydvldyikei1h1knihfvglafnfmcfksdapsdddifminrfvsa  
vereigyrlkii sggnessm  
1pqllyndlgkine1riget1frgvdttttqaiamlyqdaitleaeileikprvntqthesflqaidigyltdtkvdnis  
pmdqhini1gassdh1mld  
1ngqghyqvgdhisfs1nyea1shsmymkn1hkvyiddskidtl1qnfdvkspamvnyq  
>tr|Q6G7D8|Q6G7D8\_STAAS  
maikeissqsaidhkrkrtrt1tyivs1cflf1ficylnmaigsskinfsdivhyvtghtdtkatfl1hnmrmpriaglf  
igg1lavsg11mqamtrnp  
laspkifgvssgasffivfvttiipsleyyalylgvigafigg1tvyt1sgatkgmtpiklalagmaih1ffssmtegi  
ilnensneqvmfw1vgs1s  
smkwdei1tilpwl1galivt1figrqltime1gddiakglgninkvriiig11viiltgmsvsvagpigfvglivphi  
vkryvsknylvmiplt1fii  
gad1111sdvl1sr1itypiespvgivtsfvga1yfl1fitikgvkri  
>tr|Q6G7E5|Q6G7E5\_STAAS  
mrlksii1tvia1ilimfmsaiessi1s1alptikqdl1nagn1s1iftayfialvianpivgellsrfkiiyvaiaagl11  
fsigsfmcgl1stnftm1ii  
srviqgfgsgvlms1sqivpk1afeiplrykimgivgsvwgissiigp11gggilefatwhwl1fyinipiaiaia1ilviw  
tfhfpeeetvakskfdtkg  
1t1fyvfig1imfallnqg1111nfl1sfilavvamcl1fkvekhvssp1pvvefnrsit1lvfitd11taic1mgfnlyi  
pvy1qeql1g1spl1qsg1vi  
fp1slawit1nfn1hriek1srkviy11sft111vssii1sfgik1pv1iafv1ilag1sfgyiytkdsvivqeetsp1  
qmkkmmsfyg1tkn1lgasi  
gstimgylyaiqsgifgpnl1hvn1savavisig1liv1wvffkeqssqske  
>tr|Q6G7F0|Q6G7F0\_STAAS  
mdfsnffqn1st1kivts1ld11ivwyvly11itvfkgtkaiq11kgilvivigqqismiln1tatskl1fdiviqgvla  
1ivifqpeirra1eq1grg  
sflkrytsntyskdeek1iqsvskavqmakrrigalivfeketglqdyietgiamsdnisqellinvfipntplhdgam  
i1ggtkiaaaasy1pl1sds  
pk1sksl1gtrhraavgisevsaftvivseetgdisvtdgkl1rrdisneifeellaehwfgtrfqkkgvk  
>tr|Q6G7F7|Q6G7F7\_STAAS  
mfckyfhnki1ki1kqffcftfskylychiddt1fnfvtiltklifvyie  
>tr|Q6G7G4|Q6G7G4\_STAAS  
mshshhhhdh1mshvtt1nnkv1fisfl1iglymfie1iig11ans1all1sdgihmfsdt1fslgvalvafiyaeknattt  
ktfgykrfev1aal1fngvt  
1fv1silivfeakrffvpsevqskem1iisiig1livnivva1ffmfkggdts1h1nmrgaf1h1vig11l1gsvgaitaail  
iwafgwti1adpiasi1lvs  
i1lksawg1tkssini1megtpsdvd1devitt1kksdri1qsvhdchvwtis1ndmna1schvvvdht1tmkece11leni  
ehd11h1n1ihhmti1q1etp  
nhkhdesi1csgthshshnhhahhahah  
>tr|Q6G7G8|Q6G7G8\_STAAS  
mkqf1lyia1vcgviag1gaf1hipqpsmtiprivailgi1sam1tfkdkqisas1kfsa11inv1pl1cgtfvasn  
>tr|Q6G7H5|Q6G7H5\_STAAS  
mni1ry11g1g1fsvig1v1h1ftr1erqfrni1pkc1pl1rktav1vtgifei1lfg1a11ikrpsqcl1kntin1fl1lavfpani  
ymavkkl1pl1gdq1l1ptwq1  
yl1r1pmqfv1mg1ikk1  
>tr|Q6G7I4|Q6G7I4\_STAAS  
mski1ntq1ligi1fn1lekqs1lei1qmaaql1qai1ggegyvyv1kgydd1qffes1filhsder1kssrkl1daikdfkeidst

Tsompanidou\_et\_al\_Supplemental\_FASTA\_File

drvllfapfyndqvaldig  
klidldidvvlisnkpktddfdphlvhfidlstprpivytedydkivqphamaInyvydytqmiemtrdlel  
>tr|Q6G7I9|Q6G7I9\_STAAS  
mperertspqyesfhelyknyttkeltqkaktlklnysklnkkelvlaimeaqqmekdgnymegilddiqpdgygfirt  
vnyskgekdiyisasqirr  
feikrgdkvtgkvrpkpdnekyygllqvdfvndhnaeevkkrrphfqaaltplyderiketetqnystrimdlvtpiglg  
qrglivappkagktsllke  
ianaistnkpdaklfillvgerpeevtdlersveaaevvhstfdepehhvkvaelllerakrlveigedviilmdsitr  
laraynlvippsgrtlsgg  
ldpaslhkpkaffgaarnieaggsiltalatalvdtgsrmdmiyeefkgtgnmelhldrklserriipaieigrsstrike  
elliskseltdtlwqlrnlf  
tdstdfterfirklnksknnedffkqlqksaeestktgrpii  
>tr|Q6G7J3|Q6G7J3\_STAAS  
mvnykekldeahltqqkgfeqtraewlmlvdfqwttrtdfvvhmhdmpkamimkfdlalqrmllgepiqyivgfasfyg  
rtfdvnsncliipreteev  
mlhflqqleddativedigtgsgvlatlkcekpdlnviatdisleamnmarnaekhsqiqfltgdaikplinedikln  
glisnppyidekdmvtmsp  
tvtrfephqalfadnhgyaiyesiedlphvmekgspvvfeigynqgealksiilnkfpdkkidiikdinghdrivsfkw  
>tr|Q6G7J9|Q6G7J9\_STAAS  
mmkkimti fgtrpeaikmaplvka leqekml epivvvtahremldsvlstfeikpydlnimksgqtlseitsksitql  
eqviquepdmvlvhgdtm  
ttfagglaafynqvpighveaglsydkyspfpeevnrqlvgvladlhfaptknaashllsegkysesvvvtgntaidam  
kytvddnyksnimdkyhdk  
kfilmtahrrenigkpmeni fkavrrlideytdlalvypmhknpkvrevaqkilgshdrielielpdvdfhnfakksyf  
iltdsggiqeeapsfnkp  
lvlsvterpegveagtlkvigtqnqnyqaakelidderlyhqmseasnpygdgfaserivnhikyylnliteklsdf  
>tr|Q6G7M1|Q6G7M1\_STAAS  
mqqsdivisaakkymesihqndytghdiahvyrvtalaksiaenegvndtlvielacllhdtdvdekvvdanklyvelksfl  
sslslstedqehilfiinn  
msyrngkndhvtlslegqivrdadrldaigaigvartfqfaghfgepmwtehmsldkiindlveqlppsaikhffekllk  
leslmhtdtakmiakerhd  
fmmmylkqfftewnyhd  
>tr|Q6G7M4|Q6G7M4\_STAAS  
mihqntiytagieteeqvsqleterisnmigvhqvniniidgqvtsyetpanlnsiekeiydegykivi  
>tr|Q6G7M8|Q6G7M8\_STAAS  
minvtlkqiqswipceiedqflnqvingvtidsraisknmlfipfkgenvdghrfvskalqdgagaafyqrgtpidenvs  
gpiiwvedtltalqqlaqa  
ylrhvnpkviavtgsngktttkdmiesvlhtefkvkktqgnynneiglpiltileldndteisilemgmsgfheieflnl  
aqpdiavitnigeshmqdl  
gsregiakakseitiglkdngtfydgdep1lkphvkevenakcisigvatdnalvcsvddrdttgisftinnkehylp  
ilgkhnmknatiaiaavgh  
lglyntiyqnlnkvsitgmrmeqhtlenditvindaynasptsmaaidt1stltgrirililgdvlelgenskemhigv  
gnyleekhidvlytfnea  
kyiydsqqqhvekaqhfnskddmievltsdlkahdrvlvkgsrgmkleevnaliss  
>tr|Q6G7N5|Q6G7N5\_STAAS  
msdytklkskpskallyyitnglefilsvavyvifyfiwlrfevphylllyillvlgalstlklcikplwqyhrfkykd  
qlsvqyrtsfliyeektsr  
ierlqylsiksnpiskvlnlykvgfntaghtiy1pmmshddvkiieartmsnlrgvesdv  
>tr|Q6G7P5|Q6G7P5\_STAAS  
makesksanevspeqinqwikheqenktndaqdklvkhyqklieslaykyskgqshhedlvqvgmvgligainrfdmsfe  
rkfeaf1vptvigeikryl  
rdktwsvhvprrikeigprikksdeltaelerspsiseiadrlevseevleamemgqsynalsvdhsieadkdgstvt  
lldimgqddhydltkrm  
ileki1pilsdrereiqctfieglsqketgeriglsqmhsr1qrtaikk1qeaahq  
>tr|Q6G7P6|Q6G7P6\_STAAS  
mdnqlinsiiekyqfskkqieavltlleekntvpfiaryrkeqtggldevqikqiddeyqymvnlqkrkeeviknieqqg  
llteelkndilkqnklqrv  
edlyrpfkqkkktrateakrkglep1aiwmkarkhevsieekaqqfineevqsvedaikgaqdii1aeqisdnpyrki1  
kdmyhqqvlttskkknaed  
ekgiefemyaysepi1krianhrvlavngekekvsvkfefdttsvedfiarqeinhhnnvrsyileaikds1kr1ivps  
iereihad1tekaenhaid  
vfsen1rn1llqppmkgkqilgvdpafrtgcklavinpfgt1iakgviyphppvskkeaaekdfvqmvkaydvqliaign  
gtasreteqfvadlikkhq  
lpvqfiivneagasvysaseiardefpdfqveersavsigrvqdp1selvkidpksigvggyqhhdvnqkalenaltfvv  
etavnqvgvdvntass1l  
qyvsg1ssqiakni1ayreengaikhnel1skikrlgaktfeqsigflrivdgsep1dntsihpesykvtyq1ldklgfg  
gnd1gsdal1kak1ns1dmd  
elaie1qvgvptledi1ks1kapnrdprdefetp1ksdv1sied1qegmk1sgtvrnvdfgafvdigvkqdg1vhvsk

Tsompanidou\_et\_al\_Supplemental\_FASTA\_File

lskkfvknpmdivsvgdiv  
dvwiysidknkdkvsltmidphe  
>tr|Q6G7Q5|Q6G7Q5\_STAAS  
mnekhnigestlikinnldemnqfaiflveqlksgdlillngdlgagkttltqfigkalgvrrtinsptfniiksyrkn  
lk1hmdcyrledsdedlg  
fdeffedqaitviewsqfkdllpathlsinistisentrqielfaqgehyeqikeaiihefaah  
>tr|Q6G7Q6|Q6G7Q6\_STAAS  
mnsllidtsnqplsvalmqndevlaeitttdskqnhsvglmpaisqlfeqskiakqldaiivaegpgsytgllrigvtvak  
ilaya1dvklygvsslka1  
aatidhtdkllvpvfdarrqavytgifqwqngqlvtiledqymsiealrafledlnqpfyiygkdtiklqdelqgeviaq  
lpnasvmyqlidkpsdvht  
ftpkylhlaeaernwinqn  
>tr|Q6G7R2|Q6G7R2\_STAAS  
mwmifsgllivggllgfvmqrtrfcltggrdmyvqknkmfyalliaitiqsiglliltatdilkpahsfpilgtiigs  
fifgigvlaggcatgtwy  
ragegligswialvlyavtaaitktgilkpvmkinqptvnvsdmsqtgtgipfwglvviltiitilvvrtnnkkvrva  
vpklkqrytgyrylfekr  
yhpfaaivigliiallawpmsastgrndglgittpsanlvhflitgetkfidwgvlvlvgifigsyiaargsrefkwrllp  
dkitiirnsaiggi cmgfga  
svaggcsignglvetatmtwgwialasmi vgwvwmshfiivrmpkkvqqqsakvkqqtqiv  
>tr|Q6G7R7|Q6G7R7\_STAAS  
mrrlfsigealidfipnitanlkdvqftfkqiggapcnvactvqklgqqaymitqlgndafgdsiietissigvdvskv  
yrneantafvslteag  
erdfsyrkpsadmlfepsfvndivndvvhfcsvdlvdspmrdaahyqlitktlnangtvvfdpnvrlplwdnaedlr  
qtihtflplahivkvsdee  
lefigtihdeneaiqslftgnvtvviytkgadgaavylknginhysgykvkpvdttgagdafigavisrilatdvlnlt  
qlfenegeeilafsnrvaa  
ivttkygainslptlqeveqaf  
>tr|Q6G7R9|Q6G7R9\_STAAS  
mealndynyvlfvqvsvl mffisafisgirykksdyiyigivlssvyffdkigsislvvitifiiflyfki rlysvf  
lvmvtqiilycanfyiii  
fsyitishsvfivlpliflvvyvsisyalayilnrilkringtylslnkkfltvitivivitfsllfaysqidasdasti  
kqysllflgiiillsilif  
iysqftlkemkykrngeeietyyeytlkieainnemrkrfrhdyvnilttseyireddmtglrdyfnknivpmkdnlqmn  
alklngienl kvreikgl  
takilraqemnipisieipdevtrinlnmidlnrsigiildnaieasseiddpiirvafiesensvtfivmncaddipr  
ihelfqesfstkgegrgl  
lstlkeiadnadnvlldtiengffiqkveiinn  
>tr|Q6G7S5|Q6G7S5\_STAAS  
msyhwfkkmlstsililssslglathtveakdnlgekpptlnhnitpsvnsenmnetgtphesnqtgnegtgsn  
srdanpdsnnvkpdsnnqn  
pstdskpdpnnqpspnkpdnpkpkpdpdkpkpnpnpkpnpsdpdpqpgdsnhsggsknggtwppn  
asdgsnqqwqpnngqns  
qnpdgnfdvsqrflalangaykynpylnqinklgkdygevtdeidiyirkqnfsgnaylnglqqqsnyfrfqyfnplk  
seryyrrldeqvlalitge  
igsmpdlkkpedkpdskqrsfephekddftvkkqednkksastayskswlaivcsmmvvfsimlflfvkrnkknknes  
qrr  
>tr|Q6G7T0|Q6G7T0\_STAAS  
mseltakqarfvneyirtlnvtqsaikagynansahvtacrllkkphikqyiqeqdkiidenvl take1lhvlnatvg  
detetkevvrkreykenp  
qsgkvqlvynehvelievpi kpsdrlkarem lgykhklftdkhdingnvpifinigewdggdegldkavkdvsndnpnht  
vivddipledyesirfl  
>tr|Q6G7T2|Q6G7T2\_STAAS  
mfnsdfeklnqlcklyddlgyptnendlkkrlkkitnhddyfllllikenkiigls gmckmmfyeknaeymrilafvih  
sefrkkgygkrlladseef  
skrlnckaitl nsgnrnerlsahklysdngyvsntsgftkql  
>tr|Q6G7T9|Q6G7T9\_STAAS  
mktrcydgkkwqyefkhegkryrkkgfrtkreansagldklnelrsgfnidnyit leeyfenwiktykqpvvkentyrhy  
rnalqhiqkhhikgmel sk  
inrqvyqkfindyskehaketirktngairsaldda dydgifknpaykvnkagkptksekekfisvteyeilkdhvrk  
krtrsslal fimictgrv  
sgarniktehinqvntifiderktdtspryisiaksdmkhimdvistfaisydygifkeagsiinlqainnalksacr  
nnipitshalrhthcsyl  
lakgvsihyiskrlghkniatitsvyshlleekfneedkktkilesm  
>tr|Q6G7U1|Q6G7U1\_STAAS  
mki frvltvsl ffffflknlayadvginlnrfyanyqpek1qgvssgnfstshqleyidgkyls qfhneyeakr  
lkdhkvdi fgisysglcnt  
kymyggitlanqnlkprnipinlvwngkqntistdkvstqkkevtaqeidikl rky1qneyniygfnkttkkgqeygyks



Tsompanidou\_et\_al\_Supplemental\_FASTA\_File

kfnsgfnkgkitfhlnnep  
sftydlfytgtggaesflkiyndnktidaenfhldevisyekte  
>tr|Q6G7U4|Q6G7U4\_STAAS  
mnlrrdtmeqitltkeecveqcinkdlklldyrvqqilegvlsesttygdarnkletlkiiaeshfktehasviyklalk  
kldekinatpik  
>tr|Q6G7V1|Q6G7V1\_STAAS  
myykgdvcqkvinvdgfdklavkkqdysilvnlldedrfidginitdendlytalidinqsyewieentderdri  
nlvmrw  
>tr|Q6G7V3|Q6G7V3\_STAAS  
mdikinkltisnfaciakesfnfdgkdtkiyggnatgktttatalqwlldfkgldgstksfnpvplnekneenyeliptv  
faefeidgkittfkkeshp  
kytingktrnrkeysrsrtkkqyindesikvkdykaridelidedvflitnpqafnlldwkkrrsllfeiakpindedvi  
ktnddfkelnnlkgdheie  
tkkkiltdkikinkdikdipirinqtqqnkqdvpefdndryaiikqeieqleneridiqngaeenlrnqladkqselk  
riednnsasnenkihtltn  
elhvengtvanlkrllkqkqqaheenrrnqllehhkgllksdleakakqkfeyladdnvcscgqqlpaeqvneareka  
qkfnaskskelietqtsin  
hiisegkkipiieklednnnlqikineaeersariqnkinklktthvdvtqdeykavmleineinqrsnirktiqd  
kvsgiddkiseltqeksei  
evsrseksnkhlddviselrneedrlldekeyshnlyilkeftttkvkmlteninnefdiaefklfntlvngeleetc  
sttvngveydsgltnnasri  
nvgldiintlskhfkvtapifidnaesvteliktesqqiqlivneqdkklrmeti  
>tr|Q6G7V7|Q6G7V7\_STAAS  
mtgwisidrsiqnhwlfkekrtfskfeawiyllmeanhskakvpignqivtvergqrlltsiltsldlfnwsrfkvkftld  
llesdgmlevkttskytli  
tivnydfyqseggrnqhndikptskqhqsniptskqhqtntnndnkdnnkvnnekkaaaafdfqdnfgfity  
nlddlnylidsfendsdei  
vtaslkiaakdrnkvtwgyaksilntwlnanlksieqvrafekqqieskkqtykphvkqskektpkwldgtretktaevd  
enlekdreaefikrlnskwe  
>tr|Q6G7V8|Q6G7V8\_STAAS  
mdafdkiyflfdhdgnkmfsvtphfdgrhlvvgiketkfngrwylldyeIntlidneqmelghqtnlfeyi  
>tr|Q6G7V9|Q6G7V9\_STAAS  
meieikfnefnapmgsprprfstkgryvhtymptnytkhkkyllsqmprlnlenalkielafyftppeswskkkaqai  
gqkvtkpdidnliktvld  
acnghvwkddnqiteitsskrygiepkiiirreei  
>tr|Q6G7W4|Q6G7W4\_STAAS  
mynrkeiremidywmknidskvydnestsiaagyqsampkagttsnkvlvkvinknalrkydylinkiafidey  
eeyitnekdyhilqmlkqr  
eshnrimsilidigrndfysrvkdivnilynqqetdtsytsdssdtsyksytsd  
>tr|Q6G7W5|Q6G7W5\_STAAS  
meiskyqeiatrthndelnlnesitcyglgtqstgnvtdlikqhmfcnpidkgiminelsealnlianltnvlginld  
eiahsvntilmkpnqti  
nldngikqgdkvlfqgskylvdgsignllisndkddrqtvdvkvkvdke  
>tr|Q6G7W6|Q6G7W6\_STAAS  
msimkrchgptcnvlinhnesycdkhkqyanenyndlrrrnppeylrfyksktwqnmrrivllehdficvscgnqatmvd  
hivptkidwarrldksnlq  
plcdachnqktkedlkkyl  
>tr|Q6G7W9|Q6G7W9\_STAAS  
mdlkinvffnflvanlvsilflglfvvnvsmkafgqngllcigitlvisilnhesnqers  
>tr|Q6G7X0|Q6G7X0\_STAAS  
mgyfyknekrdlqyneddllqmmvqtllpgfqgkllrqykdieairhsdiftavmmiasdlarmpirvtvngqinysdrivn  
llntrpnpmyngyifklvv  
fvsalltshgyieitrdktgepmntfrktseielksdargrlyyfhqridsngnniervkfedmlidikfysldgingl  
slldtlsrtiesdnngkdf  
lnnflrngthaggi lkmkgvldnkardrareefhksfsgtkqagkvvvl desmtdql evdtevlklirenksstreia  
gvfgiplhkfgietanmsi  
tdandylstlkpyitcvcaelnfkfndeyvrefkfdtteirrvdektqaeidkinidsgkmnideirrdglapipgg  
ngsihrvdlnhvnieivde  
yqmnksratdkklkggeene  
>tr|Q6G7X1|Q6G7X1\_STAAS  
mvrkmsketrvgniievrsndnmemviegayalkfdtwsenlggfketisrralendlsdvrcldhpsqiigrtksgt  
leletddvglkyrcklpnt  
tfardlyenmrvgninqcsfgfmlddkgdevrfdegeniykrtltaireltdsvvtypayktdvdkpalrsietvkkeq  
rkkeleirllkksilnniw  
>tr|Q6G7X5|Q6G7X5\_STAAS  
mkfnsklneridfedvservngnmpkpktilyscfaciqeskesdtqtnlntgskfiktiiirdtrgdykptnkhyv  
lhegrfnikyvkpdyqdk  
sylriygevvi

Tsompanidou\_et\_al\_Supplemental\_FASTA\_File

>tr|Q6G7X7|Q6G7X7\_STAAS  
minvtklirnaiiannitdevnvfnytidhfhktdkpiiriypfpnpdyaddneisreyhyqidvwwsqdepneqv  
ekive1lkvinfqcyrep  
lyesdvmsfrhii rakgsilsmkleen  
>tr|Q6G7X9|Q6G7X9\_STAAS  
mertsielitgftktgkpyqkylakpiitlfeti qgsklgkl nka fkgadfdl teefn nsvteqeeyknkqeeye  
nrmavqmevleevldfive  
afdngftsie lqkglpnggegiekigqligritggepsdtkkfvtenqk  
>tr|Q6G7Y3|Q6G7Y3\_STAAS  
mihvldfndkiidflstddpslvraihkrnvndnsemlellisseraekfrerhrviirdsnkqwfrefiinwvqdtmdgy  
teieciasyadittakpy  
apgkfekkitsealkdvl sdtgwevseqteydg lrttswtsyqtryevlkqlcttyk mldfyielsntvkgrvvlkk  
kns l fkgkeieygd lvg l  
trkidmseiktaliavgpendkgrlelvvtddeaqsqfnlptryiwgiyepqsddqnmnetrlrslakte lnrksavm  
syeitstdlevtypheis  
igdtvrkvhrdfnpplyveaeviaeeyniisenstytfgqpkfekes lreefnkrlniihqklndnisnintivkdvd  
geleyferkihksdtpen  
pvndmlwydtsnpdvav lrrywngrwiatepndveklggitreka l fselnnifinlsiqhasllseatellnseyldn  
dlkadlqasldavldvynq  
iknnlesmtpetatigrldvtqalfleyrkk lqdvtydvedvki aisdrfkl lqsqytdekykealei iatkfgltvned  
lqlvgepnvksaieaare  
stkeqlrdyvkt sdyktdkdgiver l dtaeaerttlkgeikdkvt lneyrngleeqkytddqlsd lsnpeikasieqa  
nqeaealksyidaqddl k  
ekesqayadgkiseegraiqdaqakleakqnaelkarnaekkanaytdnkvestdaqrkt ltrygsqiiqngkeik l  
rttkeefnatnrtnsnln  
eivqnvtdgttiryddngvaqalnvgrgirlnadkidingnrein lliqnmrdkvdktdivnslnlsregldinvnrig  
ikggdnryvqi qndsie l  
ggivqrtrwgrkrstddi ftr lkdgh l rfrnntaggslymshfgistyidgegedgsgstiqwwdktysdsgmngitins  
yggvvaltsdynriiidsy  
asanie sreapiylspntknkpg lnrfaft lsnadsayetdgyimfdsdenykygagl rfskrsnkg lqvvnngdyatgg  
dttiesgmkgfnlvkrddg  
nsyvsiqsydl lavgdnagrvasnsiykrtysapan l hitsagtigratsakkykisi enqyineddqfshskeik l  
pirtwfdkyeseimakele  
sgkkl sddtfkl srhtgliaeeveelgfnefvyddngeiegiaydr l wvh lipiiknqqskiekleeline  
>tr|Q6G7Z0|Q6G7Z0\_STAAS  
mkytearar l rwyggryi dfgwgyqcadlavdyiywlleirmwgnakdai nndfknmatvyentpsfvpqigdvavf  
tkgiykqyghigl vfnngn  
tnqflileqdydgnantpak l rwdnyygcthfirpkykseg l mknitnkvkppaqa kvgsaskitvgskapynlkwskg  
ayfnakidglgatsatryg  
dnrtnyrfdvqqavyapgtliyvfeiidgwcriywnhnewiwherlivkevf  
>tr|Q6G7Z5|Q6G7Z5\_STAAS  
mkfkttkceksnni fkrseinnsesekglwgism lllfl lllflgitacs ssihfin  
>tr|Q6G7Z9|Q6G7Z9\_STAAS  
mrhaylqncvycvyciytesdrgt l mki l knsdfpiyeqikqvkqn l kghvapgehlpsmrelakdlqvs l ittkr  
ayedlekdgfvttirgkgt  
fvkeqdssilkekqfftienlvkelvneaqaiemsleelqdi ltfiyeess  
>tr|Q6G800|Q6G800\_STAAS  
mnaie lsnvnyssdqfn l knisfkvpqgfv tgfigngagkttir l imdlyqpqtgvirvleedma l npielknrigfv  
ysenyfnerwttkqlekmi  
apfyrkwdhqv fefylekfd l pinksikt fstgmkmk lslavafshhaelyi fdeptsg l dplarnellei iqqeliden  
ktifmsthiisdlekiady  
iihl sdgevilngskeql l qryqvvs gaied l ddelas l liyehkrtgfig l tehaqv fkeilghkvniitpsien l mv  
ylekrkpkyhenik l meeg  
f  
>tr|Q6G803|Q6G803\_STAAS  
mri lnlvkydlysi fkspltylailvssliatqsil mansmdnpkhiivysvfaaakwllliigl mfvvktitrdfsq  
gtiqlymskvktrvgyiis  
ktisiilisi l falihyvilivvqassngkn l afskyv dnlwffli fl l fgl fl fl l itlasqktami fslgvflvlivp  
fikpfitfiprygekv l da  
fdyipfay l tdkmissnfdfsnwqwwis lgsivifflnilyvakkdi  
>tr|Q6G805|Q6G805\_STAAS  
mlylnkykervtsvriqnrwvfil fl flicsfv gliglyqyrhtktvd l snleindik l nekfdkkyevnkkikfdrfkf  
ynskahpdl tvkvrekdni  
vkgi l vrdekihtnfdggigspinnaien l gfgckrtkvgn d fssvkiyidrdnh l kln llyqdleikrieffsk  
>tr|Q6G812|Q6G812\_STAAS  
mnieqkfydskaffntqqtkdisfrkeqlk l skaiksyedilealytd l gknkveayateigit l ksikiarke l kn  
wtktknvdtpl y l fptksy  
ikkepygtvliiapfnypfq l v fep l igaiagnta i kpseltpnvarvik r l inetfdanyievi eggieetq l ih l

Tsompanidou\_et\_al\_Supplemental\_FASTA\_File

pfdyvfftgsenvgkivyq  
aasenlvptlemggkspvividetanikvasericfgkftnagqtcvapyilvhesvkddlitalsktlrefyqgniqq  
spdygrivnlkhyhr1ts1  
lnsaqmniivfgghsdederyieptl1dhvtsdsaimqeeifgpilpiltyqs1deaiafiahrpkplslylfsedenatq  
rvine1sfgggaindtlmh  
lanpklpfgvgasgmryhgkysfdtftheksyifkstrlesgvhlppykgkfyikaffkn  
>tr|Q6G815|Q6G815\_STAAS  
myinmkdygltginktkdtraiqha1nrgrckpttvyipkgtydickpltiygnnt11ldnetilrrchsgp11knghrf  
gfyrgynghshihkggkl  
dmngvsypynntamciqhaediqligvtiknvvsghaidacginglyikscsfegfidysgerfyseaiqlidiqvpqafp  
kfgttdgtitknviedcy  
fgpse1pemgswnraigshasrhnrnyenihi rnnifediqgyaltplkykdafiinnkfinceggierylgvrdgknaad  
vmtgkdlgsqaginmniig  
nefkgsmskdaihvrnynnvkhkdv1ivngtnfnstqsih1ledidtvflspveagiqvttinvdeikk  
>tr|Q6G837|Q6G837\_STAAS  
mhkid1ttnnfqmrri1lq1vialfvilftykwalgvtavdqni1inlvgyfagfi1111helihralf11fkdkdsk  
pmfnikkdrilfgtadacf  
nkwwfsiim1sp1111stg1111likvfygss1ifmfsmhtaycfid1111valtissfkyvqqdedsiylyhqpaq  
>tr|Q6G843|Q6G843\_STAAS  
mkptk1i1kdasy1hsktsitf1kdvvieednkiyyfdtsatfedqevkfefal1f1dsmdn1khmdydnvteiyfiep  
dlhftiidfnqellciyid  
fdsg1rhnmatesgis1rinvaksdftkfinelas1h  
>tr|Q6G844|Q6G844\_STAAS  
ms1niyacnfkkghaiydkkrrghksmfyalrsyigss  
>tr|Q6G855|Q6G855\_STAAS  
mtnykek1qqyael1vkvgmnvqpkqpvfirssvet1elth1iveeayhcgasdvrvvysdptlkr1kfenesvehfanh  
eiksydvearmdyvkrkaa  
n1alisedpdlmdgidsq1qafqqnara1fkgymesvqknqfpwvaafpskawaksvypel1sveeayikfidevfdiv  
ridgndpvenwrqian1s  
vyaq1qqknyhalhyvsegtd1tvg1aknhiwedatsyvngeqafianipteevftapdrnrvgvtnkl1plsyngt  
iidqfk1mfkdgei1dfsa  
ekgeav1kd1intdegssr1gevalvpddspi1srntifynt1fdenaach1aigsayafni1qggtemtveekiasg1nd  
snvhvdfm1gssdl1tygi  
fedgske1vfengwastf  
>tr|Q6G857|Q6G857\_STAAS  
mnsvk1kqpvsiyndpwesyndvkehqg1t1sni1eftttn1cnmrcshcavgyt1q1tdpep1dmd1iyrr1deipn1rt  
msitggepmf1skks1rnvv  
kpl1kyahrgiytqmsn1t1lpqdry1diaeyidvmhishnwg1tdefanvfgamkkqpp1kak1klyeqm1snart1  
seqgm1fvs1aetm1nqst1p  
hlrk1ihqevvhdmkcsrhe1hpmypadfasq1nvl1t1aemkktihdi1ldfrdediwm1fgt1pvfpc1kddedqk11sr1  
rtaknvttrndp1dgrsr1n  
vnyftgnvi1vtdfgdetgtisni1qkdk1tdvfdkw1ssdlaks1nchcsefsc1gpnv1vknmyypnmd1fdknerhmkq  
pqiiqf  
>tr|Q6G863|Q6G863\_STAAS  
mgssiv1k11kvthyyrnkqkkyw1pfgydaedid1nnis1hiyqgealgi1gepesska1vgq11lagaikpdkgkvvc  
ted1fygyiedqsl1hqtv  
eaytaq1vq1fpyeindhkaeqi1qyah1gdyktkpvni1skaayaq111siarssksni11nhvidyltpqfmerai1e  
1tndyienn1t1visigddi  
dkisqvsny1awfshgq1rmegs1kqvipsfkeherdr1s1nskeeienfd1dwkknrtripemtynfkrverynhakpp  
kflvrfwt1asgt1lg1al  
mm11ifn1nigi1isitdftnratmqnenkdp1ygeklaygiafngsvdmqgdkqvtipkysvvtitgensknyrvtadnkty  
yvsdk1leyfnpaglyqth  
sfkk1apymksnysnyayfnsq1hkkhssvikt1vpdddnr1fvasvtqppi1q11fndnnq1ygvypivdkkelkdkfn  
innniwi1tkvngycian1  
kedkwiyie1  
>tr|Q6G871|Q6G871\_STAAS  
mqkgeqfpi1fk1enqdg1vtindt1kgkka1iyfyrndntptctieacdfrdn1emfnd1dvavygisgdskkkhqnfie  
khg1nfd11vdedfklake  
tgvyq1kksf1gkesmgivrtt1fi1deqgkv1dvi1ekvkvtqieelkn1lg  
>tr|Q6G872|Q6G872\_STAAS  
mkvvg1nrmrevetelqrrfsd1dfkfykkaseipesd1ad1di1lvygdggineaf1qrcpn1kwiawfatgvnt1pldy  
iadhgi11tngkgvqakq1  
seyi1afi1ddykkmk1sydnqrqhiydskitgkr1sgqtv1flgtgaiatrtak1akafnm1lig1sksgqnkdefdei  
yties1est1pnadii1na  
1petqetih11kkkhfelmkdealfinigrsivkeal1iev1kskvi1rhay1dvfenep1kpnhelyelndv1titahit  
gndyeakyd11di1fknn1v  
nflnknd1i1enevdakkgy  
>tr|Q6G877|Q6G877\_STAAS

Tsompanidou\_et\_al\_Supplemental\_FASTA\_File

mdtkqlkqdiidaytigidsigfttadpfdelkqkleyhangyasgfeesdialrtepklsiptarsiaiaavgypnk  
lkgapksvrgdrgrlfara  
swgqdyhtimrkrldmlasfieskvpdveiksmvdtgvl sdravaeraglgfvgrngfvinpklgtwtylgemlvsipfe  
pddplldscgdcticvdr  
ptsalvnggqlnsqkcisflqtqkgympdqyrykignrlygcdtcqqvcpknginteqqdiilepeilkprlvpllrms  
nkefkqtyghlagawrgkk  
piqrnaillglahfnevdaipekkvattderpmirataywaigqilgeeardfinanydgedaevqnemikgldtrre  
>tr|Q6G881|Q6G881\_STAAS  
mesqltiscklaelqhsigigfpistdianwngnpqhrkigssistnsvswgnspntetgrksasmiikklnkmlpnfi  
fkiinpi  
>tr|Q6G882|Q6G882\_STAAS  
msgvinyqfrlmgvlifkielellyyyvwytnqcfmlykvilavvncspqt  
>tr|Q6G899|Q6G899\_STAAS  
mtvkveqltggygkrpvikdinfelnkgeivgliglngagksttikhmlgltpmegslsisdininddieayrrklsyi  
pespviyeeltleehiemt  
amaydirdeamnrvmp1lktfrlene1kvfshfskgmkqkvmiicafivnpelyiidepflglpdlgiqsmldlmvek  
knegrtvlmsthilataer  
ycdrfiildegevafgdlealrqqtglhkqtlldiyihvtqggdvha  
>tr|Q6G8A7|Q6G8A7\_STAAS  
makldlnslndehvkl1line1kypethidvnelktivaserqeiisfklgikylltikrgniekdrfsisiifkdy  
htlvridinggthdnpdgt  
iapkshihyindkydkdrfayein1kdfpdinlynvymfleyennikdle  
>tr|Q6G8B0|Q6G8B0\_STAAS  
mekvldldvqvkgnntndsagderitshlfcsgcektgsfnsfcc  
>tr|Q6G8B2|Q6G8B2\_STAAS  
mtiyepssicmirtp1svffn1f1nteqikysdlq1naqkesilttfnlyct1qeinfgdgnkkvrdakesllky  
lirmstrptpfgllsginl  
ghfvnepr1kvgnsigkyvkdgewlyk1vsyiesideyyqnlkviwnskahiindriylneqsaiylnnkdtfsfsik  
nse1lvfikttvtnnitf  
snlaekingefeinditkvkvyihnlvskeiystirpplsysdnllyilnk1slhnddfvkkireiqklilayekteig  
fgeelykdi1hhmkalfk  
kny1qidtkidiminnylhqdianiseaayllwllsrnigftdlkv1hnrfikeygfeqlvnikdlisditgfgttifq  
eetdggnivmlkqkflha  
lrrndeivinekdves1indneinhyhapmsadvyaelylgrfynqynelivispltasfnagatfgrfhhlidtetlak  
lehekghyyqkmi1cddnve  
misinnipkyprnhvlnthdsyey1nlgssnsyskyeltl1ddiyvgatfnklylyssq1nkrvlfesnmyfnlkecn  
lyr1lreismesvkciem  
ndvsidsfsyspri1ryknv1kpaywkinemvlp1pkneewdqf1kyqefn1pnivnlvygdnk1lln1slanhryll  
mkeykkhkrvrlvesflpq  
skndhvyeivtpiykssyrgeieipkykntdiydkdwfalhihidkpsqdtfiidnlypfvkh1kdkgdikeyflmr  
yikqgd1kl1r1frndeny  
aeiysilknw1phvrqttevsvdyefvsyepffryggkntineieaffeydtnlavniendfkfdrpyivaisimylfe  
mfsisneermeivnnyvpt  
sfkskdi1rpfknelvticnpannfeymakhysgiy1r1kdgnqilsk1neglkk1t1tkrsriigs1ihmrcn1rifgidk  
dqetfv1sivkeivktqkh  
wcgdknd  
>tr|Q6G8B4|Q6G8B4\_STAAS  
meayimgenvlic1cgsvsnishyielkskfdevnviastngrkfingeilkqfcdnyydefedpflnhvdiankhd  
kii1lpatstntinkiangi  
cdn1l1tichtafek1s1f1pnm1rmwenpvtqnni1r1lkdygvs1ypanisesyelasktfkknvapepykvlefi  
>tr|Q6G8B9|Q6G8B9\_STAAS  
mntkflgk1vasalvt1gtglhssylgldtnkvvtakaekmtdgqlwkkvrds1hdsdi1lsneyetinvtylls  
ngysssvsapgnddgghlt  
qs1dfkg1kq1d1tkenvyddfknk1dakntwnsltek1kg1gl1qngqkvs1yssds1spvsgkvgegvtsggent1tk  
rfinkitid  
>tr|Q6G8C7|Q6G8C7\_STAAS  
msnqnl1fdelekkgyk1edi1ftkeeikkykaedqlragktqyvetgkdtatly1ssaytktiaalgagaisvisaltggl  
vgagvggflgsiaasnidt  
skgyv1kl1tkknaageyv1tgekwyq  
>tr|Q6G8D2|Q6G8D2\_STAAS  
mkfkai1vaia1s1s1l1tacganqhkennsksndtnkktqtdnttqsdntdkqmpqeaedivrndykarganenqtlnyk  
tn1ersneheyyveh1vrd  
avgtp1krcaivnrhngti1ini1fddmsekdeefafkkrspkynpgmsdhdetdgesedi1qhhdndnka1qndipdqk  
vddksdknavnkeekhdng  
tnnseetkvk  
>tr|Q6G8D5|Q6G8D5\_STAAS  
mkks1kfkgmki1clmly1l1f1l1sscgtnnkivqrfei1qghnetigs1yfsadyahirgiekgtvkyfvdkvgs1krylfi  
eyipdnv1ncksdwfk1k

Tsompanidou\_et\_al\_Supplemental\_FASTA\_File

ykkdkittyvyliehldevfhlsvlqdmnripidiaddvatmgksphqndrmtlklnkn  
>tr|Q6G8E0|Q6G8E0\_STAAS  
mgfkrkrmpiesfthqfeitylsddlqvkalmmtphevnrivvylrggkgqvrvragrImqfsdsqtlvigpyyrg  
nngsegkdefyrgdlnvdt  
qlrlhdkyphafihmvgsrfglqgl1tfdqlpvtsyiwggvsdidlmyeervdlrgmlrrmighpkkdraayearq  
aipninenppilivhgk  
dqvggihhayladqlelkgathetfyqmaeghvprppamvetlyikefmnqvelhs  
>tr|Q6G8E1|Q6G8E1\_STAAS  
mpnshhsfngsstsshkvpvpyamhvalcikylsltqrklflftkstysylhgahf  
>tr|Q6G8E4|Q6G8E4\_STAAS  
mmdlsspivigliiavvialiffvlflvtlgskkvkrqteekyeqqeqniksheealekeriqnkktitkqedynhm  
vstkdreidalklfsknh  
eyvtdmrligirerlvkekrirpedmhimaniflpgdgnnierishvltrtglyiidsqllkghvyngisggqfkdlp  
pmeqvfdtldlksrpqti  
vmdqndkrs1sfvnysdqieaikqlaedlqkelgakytptsilyfnpknegdvtisnynqnsavkvlvgaeqldeffnk  
fvfhgriqynvedlqqmmd  
kiesfn  
>tr|Q6G8E5|Q6G8E5\_STAAS  
mevktfyngntmpqigltfrvendencmesvkyaieqgyrsidtakvygneeqvagiraglestgiaredlfitksly  
fedfgrenvaaayea1sr  
lglkyldlylvhwpgtneavmvdtwkgmedlyknnkvknigvsnfepheleallaqvsikpvinqveyhpyltqhk1kly  
laaqhivmeswsp1mnaqi  
lndetikdiaqelgkspaqvvlrwnvqhgvtipksvtpnrissenfqidfelSdeqmtridglNqdkrigpdpktfeg  
>tr|Q6G8E9|Q6G8E9\_STAAS  
msrskkyfylsslmii1sfffntnnvflsglfnfiki1lfcsvinsivlilsiiifadrsiks1kpdadwiriasks1pw  
iilivilvhifsvrtfgr  
i  
>tr|Q6G8F2|Q6G8F2\_STAAS  
mqdnstkylliyiqtatsnhletncvflhcdyilkvpinklvsyyakhlhssqsvlietaknilninklvpiyinpki1f  
plkhkrapiqi1yahyiv  
gmtaienstlihfqegiqlvdepfslvskkcheslalkhfientisn  
>tr|Q6G8F4|Q6G8F4\_STAAS  
mdyahlnlehffarnddlvirdradfvminnftnemmyrdgqiegtidlnqyyknrsnaasfimm1dykketk  
>tr|Q6G8G0|Q6G8G0\_STAAS  
mftgiveeigvkvsvqirqsrvtieieahkitadmhigdsisvngac1tvidfdqtsftvqvikgtenktyladvkrqse  
vnleramsngngrfgghfv1  
ghvdelgtvskinetanakiitiqcsqhinnqlvkqgsitvdgvs1tvfdkhdnsfdihlipetrstis1skklgdkvh  
letdv1fkyvenilnkdkd  
qlsvdk1rafgr  
>tr|Q6G8G7|Q6G8G7\_STAAS  
mgnhfqyafenkryhtwnyh1knkfgqki1fkvaldggfdcpnr1dgtvahggctfcsaagsgd1fagnradsia1vqfkeike  
kmhekwh1egkyi1ayfqaft  
nthapvev1kekfepl1kepgvvg1sigtrpdc1pddvveyladlnqrtylwvelglqtihqstsdlinrahdmktyydg  
vak1rkhninvcthiing1  
pgedydmmatakevaqmdvqgiki1h1h1lkgtpmvkqydkgl1t1f1mtqeeytn1vvdqlevippemivhritgdgp1d  
imvgpmwsvnkwev1ngid  
aelarrnsyqgl1rykskvkq  
>tr|Q6G8G8|Q6G8G8\_STAAS  
mni1pksvww1vigmalnitgssflwp1ntiymkqelgks1tvag1vlminsfgmvign1l1ggs1fdkl1ggyktiligtft  
cl1cstt1l1nffhgwpwyav  
w1vm1gfgggmi1paiyamagavwpnggrqtfna1ylaqnigvavgaamggfvaefsfnyiflan1imyvvfalvavtqf  
nieinakvkyptqlditgk  
knkarfis1vl1camfaicwvayiqwestiasftqsini1smaqysv1wt1ngimilvaqpl1kpi1y1llkgn1kkqmfv  
ii1fm1sffvtsfaenfti  
fvvgmi1l1tfgemfwpavptianq1lapdgkqgyqgfvn1saatvgkafgpf1ggvlvdafnmrm1f1gmm1ll1v1fal1l  
1mvfkenntqpkki1da  
>tr|Q6G8H1|Q6G8H1\_STAAS  
mnl1kknkys1rkykvgi1fst1igtv1l1snpngaqa1ttdnnvqsdt1nqatpvnsqdkdvannrg1ansaantpnqsat  
tnqatnqa1lvnhngsivn  
qatp1svqs1tps1aqnn1h1tdgnttatetvsnannndvasnnt1l1vnpnkt1nengsggh1t1l1keiqedvrhssdkpelva  
iaepasnrpkrs1rraapa  
dpnatpadpwa1aaagnggapvai1tapytptdpnannagqnapnev1sfd1ns1rpstnrsvpsvtvvdn1lpgft1ing  
kvgv1shamvrtsmfeags  
nrtyqaqgnv1algr1sgtdasnhgdfngieks1tvnp1selife1ntmp1tkngqatnvi1knad1ndtiaektveggp  
t1rl1fkvpdnvrn1kiqfv  
pknda1tdargiyq1kdgykyysfvdsig1hsgshvyverrtmeptatnkeftvtts1knngnsgas1d1defvykiq1  
pegveyvns1tkdfpsn  
sgvdvndm1nvtydaanrvit1kstgggttnspar1mpdkil1d1kyk1rvnnvptprtvtfndt1tyktytqdfinsaaes

Tsompanidou\_et\_al\_Supplemental\_FASTA\_File

htvstnpytidiimnkda1  
gaevdrriqqadytffasldifndlkkraqtilaenrnnvplnkrvsqadidtltnmqmhtlirsvedaenavnqkadqmed  
lvnqndeltdeekqaaivq  
ieehkgniiigdigttdgdvtrikdqqigtlsqdtatpvvkpnakkairdkatkqreinatpdatedeiqdainqlat  
detdaidnvtatnadve  
taknngintigsvvpqythkqaardainqatatkrqqinsnreatqeeknaalnelqtatnha1eqinqattnadvdnak  
gdglainpiapvtvkkqa  
ardavshdaqhjaeinanpdatqeerqaaikvnaavtaantnilnantnaeveqvtknaiqqiqaitpatkvktdakn  
aidksaetqhntifnnnda  
tleeqqaaqllldqavatakninaadtnqevaakdqgtqniivviqpatqvktarnvndkareaitninatpgatre  
ekqainrvntlnralt  
igvtsttamvnsirddavnqigavqphvttkqtatgvlnlatakkqeinqntnatteekqvalnqvde1atainniq  
adtnaevdqaqllgtkain  
aiqpniykkpaalainqnyaklaeinatpdatndeknaaintlnqdrqaaiesikqantnaevdqaatvaennidavq  
vdvkkqaardki1aevak  
rieavkqtpnatdeekqaavnqinqldqafnqinqnqndqvdttttnqal1aidnveaevvikpkaiadi1ekavkekqq  
qidns1dstdnekevasqa  
lakekeka1aaidqaqtnsqvnaatngvsai1iiqpetkvkpaarekinqkanelrakinqdkeataeerqvaldkine  
fvnqamtditnnrtngqv  
dtsqal1dsialvapehivraardavkqqyeakkqei1eqaehatdeekqvalnqlannkklalqinqavtndvkrve  
tngiatlkgvqphivikpe  
aqqaikasae1nqvesikdtpatvde1deanqlisdtl1kqaqqeientnqdaavtdvrnqtikaieqikpkvrrkraald  
sieennknql1dairntldt  
tqderdvaidtlnkivntikndiaqnktnaevdrtetdgnndikvilpkvqvkaarsvgvkaeaqnalidqsd1stee  
erlaakhlveqal1nqaidq  
inhadktaqvndsidagniiiskikpattvkatalqqiqniatnkinlikanneatdeeqniaiaaqvekelikakqqias  
avtnadvayllhdekneir  
eiepvisrkasareq1tt1fndkkqaeianiqatveernsil1aqlqniydaigqidqdrsn1a1vdktasln1qtihld  
vhpikpdaektindlar  
vtalvqnyrkvsdrnkadal1kai1alk1qmdeektartnadvdav1krfnval1sdi1eavitekens11ridniaqqtya  
kfkaiatpeglakvkv1id  
qyvadgnrmi1edat1ndikqhtqfivdeilaik1paeamkvspkvi1qapkvctpi1kkeethesr1kvekel1pntgseem  
d1plkefalitgaal1arr  
rtknekes  
>tr|Q6G8H2|Q6G8H2\_STAAS  
myqti1i1gggpgsl1maavaaseqsssv11iekkkg1grkl1kissgggrcnvtnr1pyaei1knipngkfl1yspfsifdne  
siidffesrgvkl1keedhg  
rmfpvsnkaqdvvd1vt1tierqhvtikeeeavsrie1vntdq1ftvhtqnsyeshs1viatggtsvpqtg1stgdgykfa  
qd1ghtitel1fptevpits  
aepfiks1nr1kg1sl1kdvel1sv1lkkngkkrishqmdm1fthf1gisgpaal1rcsqfvykeqknqktqhis1maidafpel1nh  
eq1kqhits11s1dtpdkii  
kns1hg1ieery11fm1legagidenttshh1snqql1nd1vnm1fkg1fvk1vngt1pidkafvtgggvs1keiqp1ktmmsk1  
vpg1fl1cgevl1dihgytgg  
ynitsal1vtghvag1yaghyshasme  
>tr|Q6G8H4|Q6G8H4\_STAAS  
mridkfl1anmgv1trnevq1ll1kkg1lvnveqv1kspkthiependkitvrgel1eyienvyim1nkp1kdyisatedhhs  
ktvid1l1peyqhl1niftvg  
r1ldkdtel11i1tndgdfnhe1m1spnkhvskkyevi1sanpiteddi1qafkegvt1sdgkvkpa1ltyidnqtshvtiyeg  
kyhqvkrmfhs1iqnev1h1  
rrikiad1le1dsn1dsgeyr11tendfdk1nyk  
>tr|Q6G8I0|Q6G8I0\_STAAS  
mkigdis1ihy1nggntkmdggamfgvvpkp1wskqyananernqin1l1p1thp1li1qtaqyn1i1dagigngk1sekq1rnfg  
vdeeshi1td1anyn1tpk  
didyv1m1thmh1fdhaag1tdqaghai1fenai1hvvqqdewhefiatn1rskstywdknkgdysnkl1l1fekhfepvp1gikm  
qhs1gghs1fghti1itiesqg  
dkavhm1gdi1fpttahknp1lwvtayddypmqsi1rekermi1pyfi1qqqyw1l1fyhdeny1favkysddgeni1dayi1l1ret1vd  
nn  
>tr|Q6G8I9|Q6G8I9\_STAAS  
mtqqqnnkrt1knkhtyqnepl1nrkdfvvsfi1tga1lvsal1glyfknkvyqkadd1kvkeqel1sqkfeerk1tq1leetva  
ftkerveg1fl1nkskneqaa  
lkaqqaa1keevsann1dtsqeaqei1qeaqreaqetdksvavsneeskaval1kvskeesqaer1anaakqkqak1tpg  
skesq1tea1faekpvkn  
d1keipq1lvtkkndvsesetvni1dnkdtvkqkeakfengvit1rkadektntntavdkksgkqskkt1tps1nkrnaskastn  
kts1gqkkqhnk1kssqgakk  
qssssk1stqknng1tsnksk1tnakssnasktpnakvekanskiekrtfnd  
>tr|Q6G8J3|Q6G8J3\_STAAS  
mnh1l1ktyqsedyyi1hd1kqfvi1egp1tyed1ka1l1fdah1tafrdaedqyeal1leitt1pegriyvarq1dqlivgyvtfhy  
pdeierw1stgn1py1lie1g

Tsompanidou\_et\_al\_Supplemental\_FASTA\_File

ai evs in fr q l h la ek li q l s l st p e fe dy i vit te y y wh d l k n s k l d v f dy k k l m q r l m a t g g l e i f a t d d p e i t s h p  
a n c l m a r i g n i t l e q q a  
f d d i r y m n r f f f  
>tr|Q6G8K2|Q6G8K2\_STAAS  
m y k f f q n l g r s l m l p v a i l p a a a i a g i g n t l n a l h a t p k i a m f f t t v g t t i l e q l g i l f a i g v a i g m a k k n d g a v a l a a  
t l g y f l v t v v l s p m k l a p l  
l g m k a s e i n s a f e k m n g n v f v g i v i g l i a a y a y n k f s e i e l p l a l s f f s g k r l v p i m t a f y c t f l v v i l l f l w p l l y s w  
i v k f g e s i v g l g s f g a f i y  
g v a n r l l i p t g l h h a l n s v f w f d t i g i n d i g k f q s g k d a i k g i t g r y q a g f f p i m m f g i p a a a l a m y h t a k t t q k k q v y g  
w f l a s s v a a f f v g v t e p i e  
f a f m f v a p i l y v v h a l l t g l s l f i a a t f h w t a g f s f s a g l i d y v l s l i n p v s n h p l m l l v q g v v f f i l y y v i f r v v i q v f  
n l n t i g r g e n e l v d p t v v k  
d n i a p g e n d i k q s k y h q h a i q i l e g l g g q e n i v n l t n c a t r l r l e l k d t s i i d q q k i k n a g a v g v t v n g k h s t q v i v g t h  
v q q v a d e i e k h l  
>tr|Q6G8K4|Q6G8K4\_STAAS  
m k q f n v l v a d p i s k d g i k a l l d h e q f n v d i q t g l s e e a l i k i i p s y h a l i v r s q t t v t e n i i n a a d s l k v i a r a g v g v d n  
i n a a t l k g i l v i n a p d g  
n t i s a t e h t l a m l l s m a r n i p q a h q s l t n k e w r n a f k g t e l y h k t l g v i g a g r i g l g v a k r a q s f g m k i l a f d p y l t d e  
k a k s l s i t k a t v d e i a g h s  
d f v t l h t p l t p k t k g l i n a d f f a k a k p s l q i i n v a r g g i d e k a l i k a l d e g q i s r a a i d v f e h e p a t d s p l v a h d k i i v  
t p h l g a s t v e a q e k v a i s v  
s n e i i e i l i d g t v t h a v n a p k m d l s n i d d t v k s f i n l s q t v g e l a i q l m y n a p s s i k i t y g g d l a s i d s l l t r t i i t h i  
l k d d l g p e v n i i n a l m l l n  
q q q v t l n i e n n k a e t g f s n y l e v e l s n d s d s v k v g a s v f t g f g p r i v r i n n f s v d l k p n q y q i v s y h n d t p g m v g k t g a l  
l g k y n i n i a s m t l g r t e a g  
g d a l m i l s v d q p v s n n i i d e l k q v g e y n q i f t t e l t v q s  
>tr|Q6G8K6|Q6G8K6\_STAAS  
m h q h d f k v q t s w q g g r n n v g n v q g d i l s e n i s i p a s l g g v l g t n p d e l l v s a a s s c y i i s l a a t l e r a k f t d i s i e q q s  
i g t a c l n n g k f s m s k i v h h  
p q i q i p s d q i a q l e k r l p k l i t i a d n n c m i s n a v r n n v d i k i y p i i q a k  
>tr|Q6G8K7|Q6G8K7\_STAAS  
m t l n k l k d e l q i v s h r g l p s d f p e n t m v g y r e v m g l n v a m l e i d v h l t k d q h f v i h d e t i d r t s d g k r i s d y t l s q l k  
s f d f g s y k d v a f k g e r i p t  
l d e v l s l c l k y d k k l l i e l k s p n l y e i e c k l l a f l e e k k v d a t q v v i q s f d i e c i e k l n t l g s i y e l g v l c s k r n y w y k  
k p n f s r i a q i a s y v n p n y a  
l v t r k f v d k a h h h q l q v m p y t v n k l k t g e k l r q m g v d g l i t d n p k l f i k  
>tr|Q6G8K9|Q6G8K9\_STAAS  
m t t i n p t n y t l l k k q a a s l i e d e h m i a i l s n m s a l l n d n l d q i n w v g f y l l e q n e l i l g p f q g h p a c v h i p i g k g v c g t  
a v s e r r t q v v a d v h q f e g h  
i a c d a n s k s e i v v p i f k d d k i i g v l d i d a p i t d r f d d n d k e h l e a i v k i i e k q l a  
>tr|Q6G8N4|Q6G8N4\_STAAS  
m m k f h h r l m l l i s s i l i i s f v t l g i i h a s i t y v l s e k h e q a l a t d a r s y i y l v q d n e i d k v k e i v k q n i d l l i t k h d k  
k v f s s g k l k a i p n s d s y i q  
k r d f f i f n k k v n g y h w i k g y n n d i t e m h w t l w k y l i l t c l v l i c l y f a s r s f k r t l i r p i q e v t y a t q l l a n g y y h i r  
v p e s n v v e t k a l f v s t n d l  
a r r l q k l n n e q k i q s n r l k t t i e n i p s a i l m i d r n g k i v v a n k a y y e q f n i s h n i e q v g y h g y v n t e i e q l i l e s f k v e k  
p i y e q l e v a i n q v h a k y f d  
i s c v p i l t r s q k s l g q i l v m h d i t n l k q l e n l r r e f v a n v s h e l k t p i t s i k g f a e t l i d g a k n d a e s l d m f l n i i l k e  
s n r i e s l v t d l l d l s h i e q  
h t e l d t d y m l s d l t r r i i d n m m t q a n q n i s i h t d i e k d v i v k a e s k i a q v i t n l l t n a i n y s y e d g d i n v r v y r d d f  
r v i f e v q d f g i g i k l e d q q  
r i f e r f y r v d k a r s r d s g g t g l g l s i t k h i v e a h q g n i e v n s q v g k g s t f k v i l k d y k e  
>tr|Q6G8P1|Q6G8P1\_STAAS  
m g r q a f e f g l r p k d q f k v m q h f d l n t n h l e v l n r l y t p l i g t q a v g l y h f m t q f v k e s h n e t l i l s h y i f m n e l k i n l l e  
f r q q m d l l e a i g l l k a f v k  
h d e q e t q f v y g l i q p p s a h l f f n d p m l s i f l y s e v e h r r f h e l k k y f e y q q i d l s e f k q v t r q f t d v f k v p s t k i d i d t s  
d i p i n e p y q g i d l s n e s f d  
f e m l r q m l g k h f i s q d i v t k d a k r l i t q l a t l y g l t a d g m k h v i l n s i t s g q q l s f e e m r k q a r s y l m e h e n q m p k l q v  
k s p a t s s t g k s s e v n p k p  
q s d e w f e l l e q t s p i d m l a s w s e s e p t i s q k a m v e l i e r e k m s f g v i n i l l q f v m l k e d m k l p k a y i l e i a s n w k k k g i  
k t a k e a y n y a k k v n q p k n e  
g s s g n y q r g s y f g q r n r i s e k t p k w l e n r d k p s e e d s a k d n s v d d q q l e q d r q a f l d k l s k k w e e d s q  
>tr|Q6G8P2|Q6G8P2\_STAAS  
m k q f k s i i n t s q d f e k r i e k i k k e v i n d p d v k q f l e a h r a e l t n a m i d e d l n v l q e y k d q q k h y d g h k f a d c p n f v k g h v  
p e l y v d n n r i k i r y l q c p c  
k i k y d e e r f e a e l i t s h m q r d t l n a k l k d i y m n q r d r l d v a m a a d d i c t a i t n g e q v k g l y l y g p f g t g k s f i l g a i a n  
q l k s k k v r s t i i y l p e f i r  
t l k g g f k d g s f e k k l h r v r e a n i l m l d d i g a e e v t p w r d e v i g p l l h y r m v h e l p t f f s s n f d y s e l e h h l a m t r d g e e

ktkaariervkslstpyf  
lsgenfrnn  
>tr|Q6G8P8|Q6G8P8\_STAAS  
mskfdeqiiivvpreiifnneknnfngflnknkpegqni fda lsqyevkrrgdmeedpsykqlisyc llenehgeilvyer  
lsgggearlhggssigvgg  
hmdvpgae sinev lrvnaqrelee evglseqdsqnmeiyg finddnnevkvhigvfvkitvstndveaketdtlrikw  
vegniesyddfetwsali  
lqdl  
>tr|Q6G8R0|Q6G8R0\_STAAS  
mtmiyrnnfivfvl sffisillysshvllp fmfpgpiiasicvkvfkldikwpfl lselgivilgvqigstftknvmdi  
kdnwlsii vvsisilliai  
vmafikkiarintetailsvipgaltqmlvmaeqdkranllvsvltqtsriifvvvlvpfisyffhdgnmhangkltkv  
lplsqvlnigqivilaiai  
fiyvlimskikfptfqllaplivilvwnfstgltftldhwllnmaqliymirigvqiahllsdlkgrlaiaaitiqnimli  
igalimvyvihffdnnpin  
elflgaapggvnqivilvalatgadvamitsyhi friffilfiiapginyflkyrsnkred  
>tr|Q6G8R3|Q6G8R3\_STAAS  
mnyleslywihertkfgikpgvkrmewmlaqfnnpqnnikgihvggtngkgstvayl rta lvengyevgtftspfi etfn  
eriglngvpisndaivelv  
srikpvsemmeretdlgvatefeiitammflyfgeihpvd fviveaglgikndstn vftpvl siltsigldhtdilggty  
ldiardkgaiikpnvpiy  
avkneda lkyvreraieqhakpie ldreivvvsqndeftyrykdyeleti ilsm lgehqkqnaalaitalie lneqglie  
ldfnkmidgiesvrwtgri  
eqvhdkplii ldgahn sesidalidtikqyhdkekvdil fsaingkpinemvkhls liahtfyatefd fpkalrkeeivg  
siendeiqldddyvefikn  
yqgd tl vitgslyfisevksldfea l  
>tr|Q6G8T3|Q6G8T3\_STAAS  
mikpkykwkltkpaeyisdeltsklkltpivkkilesksii deqai es iisdt dinhdalqlsdmtktierikraiande  
kilvygdydadgtsttil  
vtlql lgaqvgwhipnrftegygpnelafrnahdegitliitvdngiqghneikmvqdlgvdivtdhheigstlpeay  
aivhpmhpsfnypfqqlcg  
agvayklaqal ienvpdyfkaivaigtiadlvsltdenrslvkqglkv lndqcptsvkallkeagyndnideetigfiig  
prlnavgrlddaslancell  
mtddeeeaaflaeqvehfnrerkdivatiteeamamaetkvkkgdlflllakenwhegvlgivaskivetfalptlilni  
dreqnhakgsarsidqvs m  
feilsahqgliakfgghhmaagmtmdienieslaeglnkwmkelskttsl dpvkqvdl lltenditiknirdmnr lrpfg  
tdfsrpi femddlsvssvk  
aigqknhlkl tlgesniaal fwqngl lepelqdeqpinil gsvqinewngnqspqii iqdiamneqqildyrskrkslp  
ftendeni vvl ihpksdkv  
naneyyygee ikqqt dkvv lrdlptsmedl snslqqlqfsqlyivlqhnhsiyfdgipnmdifkkykalitkqetniqk  
egml l cqhlsvkpd tlkfm  
lkvfl dlkfv tqedg lirinqqpdkrsidsskvyqlrqqrmdvekq llyqdfseikwiksqsl  
>tr|Q6G8U7|Q6G8U7\_STAAS  
meiyadyaattpvkpevdammmyinshygnpssihakgrdarkyl desrrqiaql lgadtheiiftsgatesnntaikg  
ivkaneg lgnhiitskieh  
hsvlhvfeqleregfdvtyl dvddtgaidldqle etitdktilsvimfvnnevgtvqqiydiqdiaetnayfhvdavqa  
ighldvkfdefeidamsit  
ahkfggpkvgallvkdhvtldypqlggeqelkrragtenlaqivgmakalqlaeknrddnnihlmnlkeqflvklqera  
ipfelngsmtatghivnl  
yfpfvetm ltlldmaqi yvssgsactagstqps hvl damfedeersnhsirfsfnel tteneinaivaieihkiyfkfk  
ees  
>tr|Q6G8W1|Q6G8W1\_STAAS  
msikilqpgl fstvqdlgrkgyehigfsgagamdqsfkvaqll inndgpaieytligptiqfntqntfvitggsvna sl  
nntjismnsvilaekgdil  
kigaitkgargyltfghsinvppiaesyathtrssiggfkgrkll andvitvkinndfkenigktihlqddl penniih  
ilggp qfeafsearakiv  
nhpyliteqsdrmgyrlegdsvapinqadi isepval gsvqvpndgqpiillndkqtiggytkiatvckfdl pkl aqmkp  
qdtiqfkwisf qeavdknr  
eqmsl fnei l kshqktpi fdtssl rhtskklatilkgdl  
>tr|Q6G8W6|Q6G8W6\_STAAS  
mgyrtlksi fhehneskmkeeytkrfnslasfntnini ipmengkkvndleyplffmvtknl skkqelisinsrkidra l  
nslpyaareqyfn dl lide  
lqstneienvfstkqeiahalnqaseflkfrglvdqykeielnkkikvdnvrdiraiydklvsneineqdkldgel frk  
nfvghdgstnkyihvg lq  
petkiveyigem ltflykfdapqpfkimashylfeyihpfydgngrvgrfiiakllsdydnytal tfsyvinrnkskyy  
kafmtashlncgd ltefi  
dtmlell iagqeridelipkmdatek ltllylshyqidyeflyllsmdklfngkrnr ltlidlenilgvgrvkinnti  
kkydnylvkiks rpiyei



Tsompanidou\_et\_al\_Supplemental\_FASTA\_File

sdeflnsiik  
>tr|Q6G8W7|Q6G8W7\_STAAS  
mtnsasaieysdlhhkskfdskrlsnakmsfinptqlenkntndrllkhdllfhdmfvnddwkdkfkefenealskkfi  
nkdidifagnygygchggg  
tnktqcsyggvtlsdnnkyddyknipcnlwidghqaeieltavkttkkkivtiqelvdqlrnylnekyklyeqggdivkgy  
vkyhndeqnieynfynln  
gegyevlkmadnktinsdklhldiyfks  
>tr|Q6G8Y0|Q6G8Y0\_STAAS  
mlyvalsmivgvlwnsskvlstflflllyityrknkivyapisflfiifsswylhysqqafinyinyiernsqfneraq  
vqiqrqsdytykgrlsk  
neiyppfltnkknfdlkkiesrncivkgqfkvndnkfvtklqsvvqsclesnrsnliekhkqfimnriydsgikfodr  
imalitgdvkeineqfker  
vkeigiyhllavsgshiaavfliykplkrlnlplfvikgitiivlalfaqytnyapsavraimttlvlitkqikikg  
iqllafafiiimfilnplvv  
ydgfqsfsfiisffimllfpflqqlsklqslfiitfiaqlasfivaipnfhqqlwvqfslsnlifvpyysiilfpilsilff  
itshfivgltpnlvldls  
fnfhdlldlftrikqshfsvtkfnwifiiifisvyyifwllakrkyilvtwtiiltliltfptnshhkitmlnvqg  
gdsilyeggknqnvlidtg  
gkviddtkqpsysiskyhlptlnergineleylilthphndhigeveyiishikikhieinyngyssntlmllsklshk  
yniklidvrqvssfkldg  
sflffdsfipnsrdkneysiitmiyqnkklvllmgdasknneslllkkynlpeidilkvghhgsktssskefiemikpki  
slissgknmyhlpnievv  
krlqrisriynsqngqvtidlddnlkvdsnsygnasgl  
>tr|Q6G8Y1|Q6G8Y1\_STAAS  
msdnivaiygdvpelevkqsaeiisqflksdrddfnfvkynlyeteiapiveetltpffsddkailvknyiftgekpa  
kdmahvnqliiefiekydg  
enlivfeiyqnklderklktlkkharlkkieqmseeikkwiqsklnenfkdikrdaldlfieltginfnivsqueiek  
lilflgdrptinkqdvngi  
inrsleqnvfllteyiqkrkkeqaihvkdlitmkeepikllalitsnyrlfyqckilsqkgysgqqiaktigvhpvrk  
lalggvrhyqldehlniid  
acaetdyklkssymdkqilelflsl  
>tr|Q6G8Z5|Q6G8Z5\_STAAS  
msvgilifvisviisiittmrenshkdrqkqppqktstdnepkkgffeeiertfkeiseelneeeksskrkyddtlp  
plfdeipkeepskpvpv  
mapkkqpetkpmtekpi tvpkaepveqkhrpsrqdnsdeirrqleksl rddiktirtidrekekqiakmekrardiied  
kylsertkrklkqlnsq  
nvekdltkafqfdkdevingmiwseilakpkql  
>tr|Q6G8Z6|Q6G8Z6\_STAAS  
mpgiqiqiddmngsqalignndehlkaieesfdvvi hargqevavkgtkienvekaesvlinllkvidlgnnitikdveaa  
ikmahntiqhlldlydee  
itkdafgktraktmgqriyvnamknndlvfgigpagtgktflavvyaakqlrkavkrivltrpaveageslgflpgdl  
kekvdpylrplydglytv  
greqterfieriieiaplaymrgrtledafvildeaqnmthaqmkmltrlgfsgkmvvtgdqtqidlpkgvksqglea  
vsrlhvkgisilkldqsd  
vvrhplvskiihyegen  
>tr|Q6G908|Q6G908\_STAAS  
makhpfeqfnlesslidavkdlnfekpteiqnriiprilkrtnligqsqtgtgkshafllplmqldiseikepqaivvap  
trelaqlydaanhlsqfk  
agvskvfjggtkiekdrqrcnaqpqliigtprindlaktghlvhlasyvideadlmidlgliedvdyiaarledna  
nifavfsatipqqlqpflnk  
ylshpeyvavdskkqknknieffliptkgaakvektlnlidilnpylciifcnsrdnandlarslneagikvgmihgglt  
perkqmkri rnlefgyv  
iasdlasrgidiegsvhinfvdpndidffthrvgrtgrgnykgvaitlyspdeehnisliedrgfvfntvdikdgeike  
vkahnqrqarmrkdhdln  
qvkknvrskiknkvpkykklkqevemkrqerkqfskqqrqkrkqkkg  
>tr|Q6G914|Q6G914\_STAAS  
mlkrleksndeivqntinkrinfigvivfiavlvrlrgylqiaaggshykqiikndenitvnesvprgrildrngkv  
vdnaskmaitytrgrkttq  
semldtaeklsklkmdtkkiterdkkdfwiqlhpkkakammtkeqamladgsikdqdydkqlskirksqldelesskd  
qlai fremnagtvldpqr  
iknedvsekeyaavsqqslklpgvntsmdwdrkypygdtrgi fgdvstpaegipkeltehylskgysrndrvgksyley  
qyedvrgkkkemkyttk  
sgkvtssvlnpgargqdlkltididlqkevealldkqikklsrqgakmdnammvqnpkngdilalagkqinksgkmt  
dydigtftsqfavgssvkg  
gtllagyqnkai kvgetmvdelpfhfggltkrsyfnknghvsindkqal mhsnsnymfktalklagdpyysgmalpsdis  
spaqlrrglngvlgvkt  
gidl pnetrgqiepltnnpgnyldlsigqydytptlqlsqyvstianagyriqphiglthestnkdevgplkkkingtv  
lnkvntekeikqieqgfk

Tsompanidou\_et\_al\_Supplemental\_FASTA\_File

mafndkdgtgyvsfkdtvvpntagktgtaevfqngeprvnstyigyvpidpklafsivytntqpvpppwltggdlgrdvin  
yyfkqlgkddknkdkdk  
>tr|Q6G921|Q6G921\_STAAS  
mrissltlglvdtntyfiendkavilidpsgesgkiikklnqinkplkailthahfdhigavddivdrfdvpvymheae  
fdflkdpvkngadkfkqyg  
lpiitskvtpeklnegsteiegkfnvlhtpghspgsltyvfdefavvgdtlfnngigrtdlykgdyetlvdsiqdkife  
legdplfpghgpyttvdd  
eqlnpflhg  
>tr|Q6G927|Q6G927\_STAAS  
milskvtnkfvlfqkipllikrhvysinvkafsliemlvammvisitllivpdlirlsktfliesrdlttvdfeffsrdi  
lddfkdvdrndieirqhri  
ilhkgemeyklnkkiikvvndrgnitminnvtaftaniyyksiikititvkvgtntvqtktiyv  
>tr|Q6G933|Q6G933\_STAAS  
mtetwnfintgskdpyynmdeallnfvsrgeidpvirfytwnpatlsigyfqlqkeididkvkekgfglvrrqtggr  
gvldhkeltyshivpeshp  
nmpstvtayrvisqgllegfknlgfntyfavpktpeerqklkqprssvcfdapswyelvvvegrkiagsaqtrqkgvilq  
hgsilqdididelfdmfiy  
knerlklmkeafvekavaindisdkhitisqmeefekgfkkglnielkplelteaqlaeveeltekysdewmfrk  
>tr|Q6G934|Q6G934\_STAAS  
mrniifylvliiaaiglvmldafisivrmlvsfaviagiilyffiltedqrkyrkamrkykrnrk  
>tr|Q6G936|Q6G936\_STAAS  
msritqvhrieqkhlдайилsdynrrylsgftgtsgaliiskdkqylitdfryidqatkqapnyeiinrkstiigeik  
elhgfenfenvgfeqhvs  
ydtylelnksrslisisntvdkiirdvkaeeialiqkaanivdetyeyiltvvkagmtekelkaileskmlgelgadgps  
fdtivasghrgalphpvas  
dkiekgdmiltldfgaynycsditrtfaigepdklkeiyqivlesqmkaeineirpgmtgaeadaisrnyleskgygk  
efghslghgigleihgppm  
lartiqdklqvnncvtvepgvyiegllgiriieddilengcqvftkctkdilivlt  
>tr|Q6G938|Q6G938\_STAAS  
mnfkeikeliei ldkstlteiniedtkgkvtlkkeketeiitpqi sqmpveaaampmpqvqstdsnkteapkptsdnhkt  
inapmvgtfykspspdeea  
yvqvgdtvsnettvcileamklfneiqaesgeiveilvedgqmveygqplfkvk  
>tr|Q6G939|Q6G939\_STAAS  
mkkvlianrgeiavriiracrdlgiqtvaiysegdkdalhtqiadeaycvgptlskdsynipnilsiatstgdcgvhpg  
ygf laenadfaelceacql  
kfigpsyqsikmgikdvakaemikanvpvpgsdgllmkdvseakkiakkigypviikataggggkgirvardekeletg  
frmteqeaqtafngglym  
ekfi enfrhieiqivgdsygnvihlgerdcti qrrmqklveeapspilddetrremgnaavraakavnyenagtiefiyd  
lndnkfyfmemntriqueh  
pvtemvtgidlvklqlqvamgdvlpkqedikltghaiefri naenpyknfmpspgkieqylapgygvriesacytnt  
ippydsmvakliiheptr  
deaimagira lsefvvlgidttipfhikllnndifrsqkfnfnleqnsimndeg  
>tr|Q6G946|Q6G946\_STAAS  
mlqtlsikqfaiieeleiqfsdglvtlsgsetgsgksiiidaigqligmrassdfvrhgekkaviegifdideskdaihil  
knmdidvdedflvkreif  
ssgkslckinnqvtvlqdlrkvmqellidihgqhetqslkqkyhltdlnyaesryqdlldkyhqtfnqykakkqeledl  
esadqallqrldlmkfgle  
elseahlkegeieqleidikriqnseklsalannahmtltdenaidrlyelsnhlltindivpnkydklkedidqfyi  
ledakhelydemantefde  
qvlneyesrmllnnlkrkygkdiseliayqeklnneinkienyeqstsqllreeinalynqvievqalskqrrivarel  
rdhivseiqlmqkdanle  
isfkkleepnidgiefveflispnkgeplkslnkiasggelsrimlalksifvksrgqtailfdevdsgvsgqaaqkmae  
kmr diaeyiqvicishlpq  
vasmsdhllisksskddrtttqvqelisddkvdeiarmi sgasvtdltrenaremiqhnqrrr  
>tr|Q6G947|Q6G947\_STAAS  
msekgydlvllgggtagyvaairasqlgkkvaiverqllggctlhkgciptksllksaevfqtvkqaamfgvdvkdanvn  
fenmlarkedinnqmyqgv  
khlmqhnhidiyngtgri lgtisfspqsgtiseyedgedslpnqfvliatgsspaelpflsfhdhki lssddilslkt  
lps sigi gggvigmefas  
lmidlgvdvtvieagerilptesqasqllkkslsargvkfyegikl sendinvnedgvtfeissdiikvdkvllsigrk  
pntsdiglnntkiklstsg  
hiltnefqtedkhiyaagdcigklqlahvgskegvavdhmfegnpipvnynmmpkciysqpeiasiglnieqakaegm  
kvksfkvpfkajgkavids  
hdtnegysemvidqsteeivginmigphvtelineasllqfmngsalelglthahpsisevlmelglkaesraihv  
>tr|Q6G953|Q6G953\_STAAS  
mineqrllntffelvqidsetgnesti qpilkekfi alglvdkedeaakhpklgannlvctmnstieegevpklyltshm  
dtvvpainvkpivkddgyi  
ysdgttilgaddkaglaamlevlqvikeqqiphgqi qfvitvgeesgligake lnselldadfgyaidasadvgttvvga

Tsompanidou\_et\_al\_Supplemental\_FASTA\_File

ptqmlisakifgkthast  
pkegvsainiaakaisrmklgqvdeittanigkfhggsatnivadevileaeashdperiktqvkhmtdivfettaselg  
gkaevtveqsyppgfkndn  
eavvkiagesarnlglstantiisgggsdgsiintfgipsvilgvgyekihttnerpikslnllasqvleikivarqsk  
>tr|Q6G955|Q6G955\_STAAS  
meklnqvmlyvddvdkakafwtetlefvvvsetplaedyvavevsptkdaetsltimakefiekyspevnlgtpsllmfke  
knfdalysklndlglgtghd  
ivemngqrvfnfqdgggnyfavsd  
>tr|Q6G956|Q6G956\_STAAS  
mvtikdvalkagvspstvsrvikgnqriseatiskvkkvmeelnyfpntaartlitnqtykiglvkkgseepirlnpyfi  
nvlngisetcnqhgysgtqt  
tvsnmndlmdevykmiqrmvdafillyskendpikqmlidesmpfivigkptsdidhqfthidndnilasenlthrvi  
eggydelifitekgnfevs  
kdriqgfetvasqfnldyqietsnerkvi fnymqnlhtrlkdpnikqaiisl damlhailsvlyelnieipkdvmtat  
fndsylteiasppqtsidi  
kprmlgqqagsailnilknkaqdvieiviidtelkirkstqr  
>tr|Q6G962|Q6G962\_STAAS  
mmkqghfivtggtsglglisvrkl1lenkvhtl1vrdivkatrifeqelgktinvipcdlndlksiqalqfedntsfdfg  
iysaglygfsidshsfse  
mietyqlnlisfnvlytv1rpyltsnahivgissqaafstqanaahygaskagfyalmnalrlespnlhimtvnvpidt  
pfhqkadpsmkymkrmgki  
mldanqlaediyygiktkqlleinrpkwmhhal kmyqiaprffercfpklfnka  
>tr|Q6G963|Q6G963\_STAAS  
mncqsesvvrvcryaeqlsvfeeftvlidlgdisvdqisdstlyytcekfllvlqgnvlgvqiitnndestcevykrk  
mf  
>tr|Q6G965|Q6G965\_STAAS  
mdlnektidrtviyngki vdvieihvtvlpngetstrelvyhngavavcavtpkkevvlvkqyrkpvekplleipagkled  
dedrveaakreleetygi  
akelthvvdmygspgfcdeqlsiyfndleegtvlhdedefvevikvpienvksmlmkeiedaktialqhl1lnynhs  
k  
>tr|Q6G975|Q6G975\_STAAS  
mkindrdiaelssywyqdi nekkdfkvngkrfkqidnyndnsndmngaadiktyellndqgnptgqqtiyyqgtsne  
ainpnnplkssgfgddwlq  
naklmndnestdylkqveefansyrqkikdasvl denefrrkytkpynyknktivadgggnseggagakyqgakhpek  
vvatdsami pyaawqkfar  
prfdnmisfnstndlltwlqdpfikdmpgkrvni sdgvprldalidshvykrklnrkdntydtvplikiksvkdteikn  
gkkvkkttinil dmdgrip  
inwvtgdsiarsgkgtliklnlenlda lsklitgetsgmlaeviflnesfnisenenknfadrkkqlsegfkdkinlfq  
leemertliskinal eeva  
detiesisavkhllpdfalda lkerinel fkgiksfi ekvydsidneileifknidhdfrdgvs eemkhlkvvkqnieq  
iknqndiygrqi adirsim  
kqqdatil dgnynisngemvqgla lpsnylgrkmkil kdhiddgikkiadyvqgiydeyaskivdvikylintipkir  
knlrhaiemlnvkkkefls  
lipnvtcnyiktlee lndtlgkwepflndlkavspilndhlddivknmplivqmi fepshyddmfilntqaharldqm  
aqqfevvcnglnenegqai  
qtmqdsas lirsnl iqvkeql ek lavy  
>tr|Q6G976|Q6G976\_STAAS  
mfkrtklililiati lsgcsttnnesnnetksvpeemeaskyvgqgfqppaekdavefakkkhdkiakrgeqffmdnfglk  
vkatnvgsgdgvevvhc  
ddhdvfnasipfdksiidssl rsedkgddmstlvgtvlsgefeyraqekydnylkffkenekkyqytgftkeainkt  
qnsyenyfyivaniptl  
qeyrkyeplikknnlnfkkgmkqarkgvgykaaievhttlfsrssnfskdkl dddvidl sestkklhlnfentkiflql  
akstistnrvnysdnesir  
ieve  
>tr|Q6G978|Q6G978\_STAAS  
mfkrikililiati lsgcsttnnesnketksvpeemeaskyvgqgfqppaekdaiefakkkhdkiakrgeqffmdnfglk  
vkatnvgsgdgvevyvhc  
ddhdvfnasipfdksiidssl rsedkgddmstlvgtvlsgefeyrahkeeldnltevlkeykskykytgytenaimkt  
qnsgrneyyyltaipytl  
deykyfqp likedksfrdgi rnskkqlkdksrpyvvtl fstkdnftkdntidemidfsevlkkkniphdl nvs lqi  
snkyinttrpnyskkdvie  
vgvfnhe  
>tr|Q6G981|Q6G981\_STAAS  
mqhiiktalqqtfnktnksiynilvgkkshqtf dacsqqqlslyhs lpllkypsfelflekin efnaemeimlhpryt  
fesmgqtfqaiql lvtms  
ntkqhvfhfvpisqnnkiqetvki vynyikenqlqidfenelhnlfkaitlkgpcylhyylqgydepmytrqqvs liekl  
sqqql feyemnnlvtmmfe  
lesgeyti lski imkptllnqtyitytkll eqftmediaaqqqvki tiedhvleilikgym snyddyveledqlqlfnf

Tsompanidou\_et\_al\_Supplemental\_FASTA\_File

yyqhrgerlkfykeqfddt  
syfqlkvlivgfergdlnva  
>tr|Q6G991|Q6G991\_STAAS  
mettvsklerqieerlkgvseyesininhrlgkllsdydipdvakvaclditdsmrhllditynhlskhsiligdlisah  
fytllaejndlsfqnejsk  
aiveinelksslhqaIndyeisqaivkietlfpayitlshfginideseinylfedmsdyppsyfkkynqsevkhylhd  
iqksylksrgn  
>tr|Q6G993|Q6G993\_STAAS  
maklnmneikkveqrlekaikskdsvleqaslhllssggkrvrpafvilssqfgkdeqtseqtyqvavalelihmaltv  
hddvidksdkrrgkltisk  
kwdqttailtgnflalaglehlmavkdnrvhqlisesivdvcrgelfqfqdqfnsqqtiinylrnrinrktaalliqistev  
gaitssqsketvrklkmig  
hyigmsfqiddvldftstekkkgkpvgsdllnghitlpillemrknpdfklkieqlrrdsdrkefeeciqiqirksdsin  
eskavsskylskaldlise  
lpdghpksllsltkkmsrnt  
>tr|Q6G9A1|Q6G9A1\_STAAS  
mtintfwqytlqrswlmmllnicnlgmiygyiwygeqlshtpwhfki fvpdsptailflvisismiliqkqnsiidala  
fvtlkygiwavimnlfli  
ieggditi vnglilmfshsimavqaiyfprfkrsmigisvamtwwflndyidyfhlqfpyydfitthvwqigvlscclsv  
fglllyielnkllkck  
>tr|Q6G9A4|Q6G9A4\_STAAS  
mkigitycypsmggsgiatelgiklaerghevfitsnipfrirkplnmi fhqvevnqyavfqyppyditlstkiaevi  
keygldllhmhyavphaic  
gilaremsgdkikimttlhgtdivlgydhsllqgaikfgieksdivtsvskslaqethei ietnkeiipiynfvrenepf  
tkhntalksqfgiapdekv  
lihvsnfrqvkridti ietfakvrekipskllllgdgpe lvpmrqltkelnveedvflgkqdcvsefyqlsdvlvlllse  
kesfgltlleamktgvvpi  
gsnaggi kevikhgetgfvdvgdcdsasdyairlledkvlynklqknmladiaerfgselitdqeyyyyqkmlnehnks  
kge  
>tr|Q6G9A9|Q6G9A9\_STAAS  
mdkyqlkarpvvirreldhysdlgldeqdlvillkliyasetnskqpsiel lqkgstmqprditmviqnliqrellelq  
vqkdeegrfteymnl dpff  
eklshil kqqsmetkeqnskekfkqlfrlledtfarp lspyei etlnqwidvdkhsai iqaaldeanslnklsfkymdr  
illnwkknnvktid dsrki  
rekfnkpkmthtvktvpkfdwlngenldgk  
>tr|Q6G9B0|Q6G9B0\_STAAS  
mvskkkalemdivianmfpdaceelkhdnpfeltiavl lsaqctdvlnrvttelfkkyktpedylavsdeelmndirsi  
glyrnkaknikklcslid  
qfngqipqthkeleslagvrktanvmsvafdepslavdthvervskrlginrwkdnvrqvedrlc svipdrwnssh  
qliffgryhclarkpkcdi  
cplledcregqkrykaslkea  
>tr|Q6G9B2|Q6G9B2\_STAAS  
mtenkgssqpkknnggksnksknrvkrtiiki igfmiaffvvl llgillfayyawkapafteaklqdpipakiydk  
ngelvktldngqrhehvnl  
kdvpksmkdavl atednrfyehgal dykrlfgaigknl tggfgsegastltqqvvkdaf lsqhksigrkaqeylsyrle  
qeyskddifqvylnkiyys  
dqvgtikaaakyyfnkdlnlaeeaylaglpqvpnnyniydhpkaaedrkn tvlylmhyhkritdkwedakkid lka  
nlvnrtaeerqnidtnqds  
eysyvnfvkse lmnkafkdenlgnvlqsgikiytnmdkdvqktlqndvdngsfyknkdqqvgatil dsktgg lva isg  
grdfkdvvnrrnatdphpt  
gsslkpf laygpaienmkwatnha iqdessyqvdgstfrnydtkshgtvsiydal rqsfnipalkawqsvkqnagnapak  
kfaaklglnyegdigpsev  
l ggsasefsptqlasafaai anggtynnahsiqkvvtrdgeti eydhtshkamsdytaymlaemlkgtfkpygsayghv  
sgvnmgaktgtgtygaety  
sqynlpdnaakdwingftpqytmvwmgfskvkqygensfvghsqqeyppflyenvmskissrdgedfkrpssvsgsip  
sinvsqsdnnttrsthg  
gsdtsanssgtaqsnnntrsqqsrnsggl tgifn  
>tr|Q6G9C7|Q6G9C7\_STAAS  
makinfaatkgnpgi stcaivikedeqhytythelgemdnhtaewaaciya leharelnvqnal lytdskiiadsieag  
yvknanfkyfdqieiefek  
dfdllfvkwipreqnkeanqhaqqa lyklikknk  
>tr|Q6G9C8|Q6G9C8\_STAAS  
gcgtemi fsqnl fr rptptcivcrnwesnfl lgpipnlhiiv  
>tr|Q6G9E4|Q6G9E4\_STAAS  
msqwkrisl l ivftlvfgi affhesrlgkwidnev yefiyssefittsimlgatkvgev wamlcislllvaylmlkrh  
kiealffal tma lsgilnp  
al knifdrerptllrliditgfsfsg hamgstayfsgiyllnrlnqgnsk giliglcaamillisisrvylgvhyptd  
iagiiggvfciilstlll

Tsompanidou\_et\_al\_Supplemental\_FASTA\_File

rnklin  
>tr|Q6G9E5|Q6G9E5\_STAAS  
mwgdv1cgidnhfq11lyisenhcqleiktffeyflrivnkthdyailenkkicish  
>tr|Q6G9F3|Q6G9F3\_STAAS  
msdrfikfndeqldakqvmmlqdlar111kneqtqvkiqkfpypnpvqnv1itswfwshrpshiemaglktdvmlaaygy  
hmmdvqivnevvdktfkh  
pkfyqqlfk1ledmrv1nsikverpstaklid1r1dtrisytesqikvyrtktqytd11f1ylehaf1sqdffdiipsihs  
d1ddi1vnmf1y1pnffqn  
qnsednmylaqr1myqvdd1kedm1neyyy1pktlynt1aspefdd1krtdasqvdgqddtsedddnsekadskads  
eskggay1emelheggse  
t1gndearegdatddmtmmtkkgksndt1nreegdavqgsqafqldgvnknveikwqipeiepqyv1eyqeskqdvqy  
eikdliqiikk1tiereqrd  
arf1n1tkgr1qkd1inwfiddqy1fykkqdl1sksfdatft11idasasmhdkmaetkkgv1fhet1ka1nikhe11sf  
sedafdsddhaqpn1ine1  
inydystfekdqpri1malepqqdnrdgvairvaser1mrrnqhqrflivf1sdgepsafnysqdg1idtyeavemsrkfgi  
evfnv1fsqdp1tedveqt  
ihniygqyai1fvegvalpgh1sp11kk111ks1  
>tr|Q6G9F6|Q6G9F6\_STAAS  
mryni1sh1fgv1vgipvaf1tsifgmialdvsf1idmsigivgf1mty1piqk1tsrky1neig1trkdyry1rnq1nht  
hqk1rgi1ktyvni1rsikd  
frq1ndiyq1rsiyttvrqrpasfykvegffyshidna1n1vdaytr1akmpkksineqqkleqtrit1devkrt1iad  
1kr1neddyer1dieme1n  
k1hqkhhqd  
>tr|Q6G9G7|Q6G9G7\_STAAS  
mtk1lavgst1vgtkm1et1nrkdipfde1v1fssarsagkevefqqktytvqel1tdarasehfdyv1msaggg1tsehf  
ap1fekagai1vidnssqr  
maed1d1ivpevneptf1trg1ianpncsti1qsvp1kv1qdayg1krvayttyqavsgsmkgk1dlaegvngkapeayp  
hpiy1nnv1phidv1f1engy  
tkeeqkmi1detrki1napd1kv1tatcarvpvqds1hsveidvt1lekeataedika1fdqddrv1vdnpenneypmainst  
nkdevfvgr1rrds1lent  
fhwctsdn11kgaa1navqv1eqvmr1kgan  
>tr|Q6G9H6|Q6G9H6\_STAAS  
msqg1pl1redvpvsetwd1vd1fkddqyyesida1lvqqanqfhhtyatt1nsieqintalaeleni1ialdr1snayael  
r1svdtsnieaqv1sak1s  
ttygk1ivs1sfvesei1elpee1lqq1leescpyqhyik1likqkpfq1sasveqv1at1spt1nspyd1lygttkm1dit  
f1dsfeh1dg1t1ypvdyatfe  
ndyednkepef1rrks1fks1f1sdgi1rkyqhttaaty1nmqvqqeki1ead1rgfesvidy1l1hsqevtrdmfdrqidmimrdla  
pvmqkyak11qri1hg1ldnm  
rfed1ki1svdpdyepe1siedsknyi1fga1sv1gddytnm1reaydqrwidfa1qnkgk1dtgafcaspyf1thsyv1f1swtg  
kmaeafv1lahe1lghaghft  
1aqkhqpy1leseasmyfveapstm1nem1many1fntsdnprfkrwvigs1ilsrtyy1hnmvth1leaayqrevyhkv1dqge  
s1napt1neim1nvykqff  
gdavdmtegae1twmrqphymg1lysytsag1tig1tvvsqkiknegqpavdaw1et1kkggs1vspvelaniagv1ditte  
q1pksti1qyis1dvdevek  
1tdeieqann  
>tr|Q6G9I3|Q6G9I3\_STAAS  
mnr1ekhaktf1i1m1im1fwi1fmsfi1fqk11fpps1knn1t1tyeal1kyyth1kgyy1g1dhiskgiayiacv1lipfnfff  
r1fnd1kkdn1ny1ni1st1f  
111y1f1vngis1li1ggftaeft1s1isesni1hnnhefavnl1fryvi1qeggis1fstylvcnfsi1imw1ffscs11kerkp1v  
vr1cl1pi1isc1kl1i1i11f  
yf1qy1fwsy1ik1n1lhksy1f1  
>tr|Q6G9J2|Q6G9J2\_STAAS  
md1fykkikanvtpe1v1laq1hskki1ilestnqq1tkgrysvvi1fdiygt1t1dndv1svst1kesyqiserpyh1yttki  
nedyhni1qdeq1ks1lpfis  
gyvg1tcsfd1vrhef1pk1qsi1q1ledhkqhdvr1ymveqv1yvf1dhykde1lyiatnqfsnstks1denrvnksied1tkiq  
pfmptq1df1dktkeiqsni  
seerfi1emi1qyfkeki1tegd1mfqv1vpsriykyahasq1lnq1sfq1yqn1krqnp1spymy1lnidqpyivg1sspes1fvs  
vk1dqiv1ttnpi1agt1qrge  
ttq1dnenm1kq11ndpkecsehrm1vd1grndi1hrvskig1tskitk1mvi1ekyehvmhiv1sevtgkinq1n1spmtvian1  
1ptgtvsgap1k1raieriy  
eqyphkr1gvy1sggy1inc1nhn1dfalair1tmmideqy1inveagcgv1vydsipekelnetk1kaks11levsp  
>tr|Q6G9K8|Q6G9K8\_STAAS  
mi1ysite1earyaetdkmgv1yhgnyatwfevar1dyisk1lgsfyadmekqgi1ispvtd1nvnykksifypekvkvktw  
ekysr1rsvykyei1fnekq  
elattg1stel1iciked1tfkpir1dryfpdwheayskv1qt1nnegktveimdd1ds1  
>tr|Q6G9L8|Q6G9L8\_STAAS  
mmfynkyknvsty1i1i1f1vssaafai1f1lsani1sahseqvemtdhqiknntinkayehkdptn1nseqr1dgkvfal1n  
>tr|Q6G9M0|Q6G9M0\_STAAS

Tsompanidou\_et\_al\_Supplemental\_FASTA\_File

mdtpkkqqafanniqmnmksdvektlnkpkrvtfneygkwytyyddynnfimisykdkvnalytnqniitskskik  
yntpksvvrqrlgepetei  
vkgrrvryeqnnkeydvfhknhiyttvfydkhrrnvtavlqvsdamenr1keqygapsksladsfelqnfdlvnaarkqh  
qlftlkyskqnssetarkhs  
kdmannhyfdhtnlkgqspdr1kkdgitfnsagenlaygqvssiyahqglmsighrknilndtfkilvgvdfndekq  
pftwentyg  
>tr|Q6G9N0|Q6G9N0\_STAAS  
mkklniallglgtvsgsvvkiieenrqqiqdtlnkdivikhilvrdskkrlnisqyhltedvneilnddsldiivevm  
gjiptvdwlrta1knkkh  
vitankdl1lavh1k1led1aengvalkfeasvaggipivnainnglnanniskfmgilngtsnfilskmtkeqttfea  
ldeakrlgfaeadptdve  
gvdaarkvvi1tsylsfnqvik1ndvkrrgisgvtltdinvadqlgykikligkiyengkvnasveptlidkkhqlaave  
deynaiyvigdavgdmtfy  
kgagslatgsavsd1lnvalffesd1htlpphfeiktdktremmsdaeinikeksnffvvvnhvkgsienfenelka  
ilpffhrs1rvanydnqsy  
avivglesspeelitkhgyevdkvypvegv  
>tr|Q6G9N1|Q6G9N1\_STAAS  
mactmkvskfggssvsnatqikkvlnivnsdperkivivsapgkrhdndikttdllirlyekvinhldyhdkkreiiqry  
ddivkelqmdesilrtidv  
tlehyinq1knepr1ldal1scgedfnaqlialynnsqgiptkyispkeagifvtdvpqeaqildsayseikk1rdyde  
kliipgffgvshegyivtf  
prggsditgai1ssgvratiyenftdvsгийkanpniikdpelieityremrelsyagfsvfhdeaqplykdripvvi  
kntnrpqdkgtfivhdrei  
naknvisgiscdkdftvinikky1mnrqvgftrkilgvlednnisfdhmpsgidtisivmrskqiqnketkv1neirqc  
dvde1siehd1ailmivge  
gmknvigtankithalaeskin1kminqgaseismmfghvddaekav1steyfcyhvalkn1cdkn  
>tr|Q6G9N3|Q6G9N3\_STAAS  
msfyvvl1iiiva1igilvlnqrysnskidtevyarkqliknkalsaeaelrsqmlssnndvghhayknakrelrkil  
dsylengk1kydiivtsn  
latkhpffeyarsfdfiivsdiglinvdvkswgektfyhfdvpdehdteisnsniekvvghyisqqyhdqfnssrksiyt  
ftetvqpnrviydfydydp  
yqlaannakal1kdhieqnf1kfvqstgviyfsdgtvni1qgseerdkyvdtvstks1rriiseaie1skhp1nkeqvdaq  
itai1fk  
>tr|Q6G9N8|Q6G9N8\_STAAS  
mil1sylvkiefkvimrkkt1l1silfpvifyilftsile1pedv1kpkfykeymysmtvys1l1sfl1t1fpldiinekne  
wrqrlmvtppfttsyyisk  
vktm1qfaia1lvi1fmvghfykgvamsavqwl1esg1flw1gas1l1itfgilfs1l1ndiqktsalanivtiglavlgglw  
fpintf1pnw1qhvhv1lps  
yhlrk1gvdiasnhhin1isfaill1yalgsilavycishkrae  
>tr|Q6G9P0|Q6G9P0\_STAAS  
mrytfsnd1gt1fti1laigfiin1v1afiiiflernrrtasstwaw1fv1fv1pligfily1lffgrtvsark1nkngk  
v1tdfdg1l1kqqiesfdkg  
nygtdnk1qvqkhhd1vrml1mdqdgfl1tennkvdhfidgndlydqvl1qdiknakeyihleyytfaldg1gqrilka1eek  
1kqgl1evki1lyddvgskkv  
kmanfdhfks1ggeveaffask1p1l1nfrmn1nrhrki1vidgq1gyvggfnigdeyl1gl1k1gywrwth1riqqdavda  
1q1rfildwnsqahrpqfe  
ydvkyf1pkngp1l1nspiqiaasgpasdwhqieygytkmimsaksvyl1qspyfipdnsyinaikiaaksgvdvhl1mipc  
kpdhpl1vywatsnasd1l  
ssgvki1tyengfi1hskmcl1iddemsvgtanmdfrsfe1nfevna1fydek1akd1rvayehditkskq1tkesyarnp  
1svkfkes1ak1vspi1  
>tr|Q6G9P2|Q6G9P2\_STAAS  
misfendy1legahekv1kr1vdtn1vqasgygfdqftaqaeikikdtidcpnatir1fv1ggtqtnqvvin1smlesyegvi  
sadtghvavheggai1eysg  
hkvi1tipskegkvsasdvetyemetfksdfk1kdhmv1fpgmvyi1shpteygt1yskseleelckvckqyq1p1fmdgar1gy  
g1msdqsdmtikdiakycd  
vfyiggtkigal1cgeaivftknepkqfttrikhhgallakgr1tgiqfle1lftdnlyfnisrhaiemankm1kdg1finkg  
yrlyf1dsptnqqff1ilsne  
kiael1eqkvkfaw1wekyddqhrv1rfatswatteen1nk1le1i  
>tr|Q6G9P3|Q6G9P3\_STAAS  
mi1hhfhki1ttt1i1l1fksrqikvntaqini1fkyik  
>tr|Q6G9P6|Q6G9P6\_STAAS  
m1hnhpgqsgfs1ng1k1mfignksiqt1ttivtnysv1vkhiskts1ynqsqvykimkdikqsitmrneav1dn1lkq1yn  
ktyikrkdk  
>tr|Q6G9P7|Q6G9P7\_STAAS  
meknesni1tdvtqneeg1dnsdeqsqqnektfsqeevsq1ikeri1arerksderikdavqeaek1akmk  
>tr|Q6G9P8|Q6G9P8\_STAAS  
m1kdakennds1nevay1l1kdgkvtkvygdqdsvs1fapgekate1l1fnskpnsivm1hnhpgqssfs1tdly1l1fifnsik  
t1tivtnkgqtky1l1tktkte

Tsompanidou\_et\_al\_Supplemental\_FASTA\_File

yckstcidcikkynknknkkfnhkdidmilkrlynsngniykv  
>tr|Q6G9Q0|Q6G9Q0\_STAAS  
mfkvnysilssypeyniavswqr1regktikski  
>tr|Q6G9Q2|Q6G9Q2\_STAAS  
mnqfkeiyntiek11ndksisnyrinqdtgvsyggiselrsgkrkvnnltletaeklynyqkqleimi  
>tr|Q6G9Q3|Q6G9Q3\_STAAS  
mncydei fntikklienkeissyqinkdtgisygninamrrgerrienlslnakilyeyakkvl  
>tr|Q6G9Q7|Q6G9Q7\_STAAS  
maqqihtknk1ekav1vgvhaqddkqfnfestmeelss1setcqlvlgqitqnrdrvdrkyvvgkgmeeiqafief  
kdidvvitndelttagsks  
lnealgvkiidrtqlileifalrarskegklqvelaqldyl1prlqghgks1sr1gggigtrgpggetklemdrrhirtrm  
neikhqlrtveehreryrn  
krnqnqvfqvalvgytnagksswfnv1aneetyekdqlfat1dpktrqiqindgfnliisdtvgfiqklptt1iaafkst  
leeakgad11vhvvdsshp  
eyrtqydtvndlikqldmshisqivi fnkkdlcdhasncpasd1pnvfvs skndgk11vktlfideikrqltyydetia  
tnnadrlyflkqhtlvte1  
kydeienvyrikgfkk  
>tr|Q6G9R5|Q6G9R5\_STAAS  
mlim1fnyslydt1nt11hipyengffnmlyd  
>tr|Q6G9S2|Q6G9S2\_STAAS  
mkdt1msiqi1pktpnndnvi pyvdeaiki idesgmhfrvgpletvtqgnmneclililqslnermvelecpssiisqvkfy  
hvpdgitiet1tekyde  
>tr|Q6G9T3|Q6G9T3\_STAAS  
mkalv1ggsgsigseivkq11tdgfevyvqyrrtdineltskfnddkvrfiqad1sqtididktfgdiksl dcliyasgq  
slygv1qdmkdhdidacyq  
lnv1qlir1cryfvdv1rqsndngriivissiwgetgasmetiystmksaq1gfvkalsqelal tsvtvnaiapgvfagnm  
asewqedelqamitelppq  
r1ilpsevahtcaylyhpnarsvtgtiqkvngawyi  
>tr|Q6G9T5|Q6G9T5\_STAAS  
msrqsqpnihikvspttkfktttivfkfmapleydtttars11sk11vratkkwptdksfnh1adlygayvnstiskfk  
dqhv1tfs1eivnery1rn  
ges1fnqgl11qeiwnp1ienkafndfnvnekt1lakkieamvdnkaqysflk11dhmfeneaykylstgqleqiph  
itaetlyhtyqsmindq  
svyvvgnvepesvekqirekfa1kpfdkhqfshth1hdeevdyiveyddvdqak1nmgyrftqygqsgyaa1fvvnm  
mfggdpsv1fnevrekqs  
laysihsqidgkngylfv1sgvssdkyetakdti1sefekikagdfteeklelakkiishryesedrpkssiieimhnqi  
1leqpqsketfindiqkvs  
redivsvaekaf1dtiyv1tkggdk  
>tr|Q6G9U1|Q6G9U1\_STAAS  
mkvievthpiqskqyntedvamafgffdgmhkghdkvfdilneiaears1kkavmtfdphpsv1nprkrkrtty1tp1sd  
kiekisqhdidycivvnfs  
srfanvsvedfvenyi1knnvkeviagfdftfgkfgkgnmtvlqeydafnttivskqeienekisttsirqd1ingelqk  
andalgyiysikgtvvqge  
krgrt1gfptan1qpsddy11prkgvyavsieigtenklyrgvanigvkptfhdpnkaevvievni1dfedniygervtv  
nwhhflrpeikfdgidplv  
kqmdkksraky1lavdfgdevayni  
>tr|Q6G9X1|Q6G9X1\_STAAS  
mlkkw1nsnvkqffvitfsvil1t1ilfsthiydyivngtvfsgagdgfrqmpfqmylyeh1ssfsslydasfgl1ggdy  
mkg1syyys1splmwnfl  
fikigetvgifnptt1hfwpnqlimamiraitfvvtfylfki1hfkstnmiatilygmstvviiyfnftwsfygslly  
1lp1silgleryfqarkig  
ifivaial1t1fsnfysyqaii1gcyylr1iftykydivsrtqklicvisatv1sv1ssvfglftgisaf1endrknq  
pnvdipfltp1ldyhyfffs  
dgyfytisiltiva11sfklyrfyfyrlfaivtvl1figslsqyfdsafngfsfperrwvylalsssalcglfiqhlst  
1nmkyylirtipvsia11  
yv11spthplalivgi11lmv1lavilkfslwrykkltvailvlivmiqqivilnknknmaikpyqqs1stlkqhdyhsny  
vnq1ikkinqnatgpfnr1  
dymdya1nspfiyhyngislyssi1fngdilkyydktlqinmpidknstyr11gnrqnl1slwnvdnri1rvnhddn1pyg  
fkiksehkdnkvri1hskn  
tihypsahitnkvfsnkel1ksp1dkeqam1qgivsnktkdvnthfkankn11sdstik1nsaawqsptkhl1qvknngg  
1tvq1pksvsnqfkdl1yfe  
mdle11spdkahdvkneytqernk1tykyrrfvtpvtirikasdrir1slpkgkyrvn1kgygedyttlkdasnslea  
vkvsatkqgytitknkss  
gyiv1ptaynqgmatsgdqs1kveqvnvgmtgikapknitkiqlsyapppyy11tititifiicssiiftrwarqk  
>tr|Q6G9X8|Q6G9X8\_STAAS  
msffkr1kdkfatnkeneevks1teeqqdk1edthsesstqand1aenaevkkkprk1seadfdddglisiedfeeie  
aqkmgakfkag1eksrqnf  
qeqln1liaryrkvdedffea1eem1itadvgnfvmt1tee1rmeaqrrniqdted1revivekiveiyhqedd1nseam

Tsompanidou\_et\_al\_Supplemental\_FASTA\_File

nledgrlnvilmvgvngvg  
ktttigklayrykmegkkvmlaagdtfragaidqkvwgervgvdvisqsegsdpaavmydainaaknkgvdilicdtag  
rlnktnlmqelekvkrvi  
nravpdapheallclattgqnalSqarnfkevtntvgivlktldgtakggivlairnelhipvkyvglgeqlddlqpf  
pesyvyglfadmieqnee  
ttvendqivteekddnhgsk  
>tr|Q6G9Z6|Q6G9Z6\_STAAS  
mienvrslafdtiqdijnegaysnrinevlsenelnamdkalfteivgytvkrkftldfykpfvktkikawvrqllwm  
siygyvylkvpnhaiine  
aveiakerggyhngnvngilrtmmrsdlpdfnei adpkkrmaieysmpkwiidhwathyglektetilqsfllettsttv  
ranltraslddiiekldqde  
gydvekdhd1pyclhiggqpiihsrsfdkgfvsiqdkssmfvahimnvdrhdhvl dacsapggkachiaevlmpegqvda  
sdihdhkidlinfnikk1r  
ltnikafqhdatkpydktydkilvdapcsglgvmrhkpeikytskqhieslvelqleilenvknnvkiggeiystcti  
eqlenenviytflknnknf  
efepfqhpitgelvktlqimpqdfnsdgffitkirkdn  
>tr|Q6GA06|Q6GA06\_STAAS  
mdipkittflmfnnqaeavklytslfedseiitmakygenpgdpgtvqhsiftlngqvmaidansgtelpmpaisl  
fvtykdtiemerlfnlgld  
egailmpktnmpyrefawvqdkfgvsfqlalpe  
>tr|Q6GA18|Q6GA18\_STAAS  
myhnsnanfvngitlnvrknelkpfyedilglninetltsiqyevgqnnhvitlvelqngreplmseaglphiaiklp  
qisdlanllihlseydip  
nggiqpaslsffedpegngfkfyvdkdeaqwrqndlvkidi rplnvprlvshatkllwlgipddaiigalhikthls  
evkeyyldyfgleqsaymd  
dysiflasngyyqhlamndwvsatkrvenfdtyglavdfhypetthlnlqpgdgiyrfnhieved  
>tr|Q6GA28|Q6GA28\_STAAS  
mmddktkndqgesnedkdelelfttrntskrrqrkrskathfsnqnkddtsqqadfddeiylinkdfkkeqsndennda  
ssrannnidstsdnien  
edyrynqeiiddqnesngiafdneqqsapkeqngdsndeetvtkkerkskvtqlkpltleekrklrrkrqkriqysviti  
lvlljavi liymfsp1ski  
ahvningnhvstskinkvlgvkndsrmtyfskknaindleenpliksvaihklpntlnvditeneiialvkykgkylp  
llengklkgsndvkiinda  
pvmgdfkgtkeddmikal semtpevrriaevtyapsknkqsrielfttdglqvigdistiskmkyyppqmsqslsrds  
gk1ktrgyid1svgasfip  
yrgntssqsesdknvtkssqeenakeelqsvlnkinkqsskn  
>tr|Q6GA31|Q6GA31\_STAAS  
makqkikikknkigavllvg1fgllffilvlrisyimitghsngqdlvkaneky1vknaqqpergkiydrngkvladv  
eryklvavidkkasansk  
prhvvdkketakklstvinmkpeeiekr1sqkkaqiefgrkgtnltyqdklkiekmnlpgisllpeterfyngnfash  
ligraqknpdtgelkga1g  
veki fdsylsgskgs1ryihdiwgyiapntkkeqpkrgddvhltdidsniqvveealdgmveryqpkdlfavvmdaktg  
eilaysqrptfnpetgkdf  
gkkwandlyqntyepgstfksyglaaaiqegafdpdkkyksghrdimgsrisdwnrvwgweipmslgftysntlmmlh1q  
dlvgadmkswyerfgfgk  
stkqmfdeapggqigwsnelqaktssfgqstvtvpqmlqaqsaffndgnmlkpwfvnsvenpvskrqfykgqkqiagkp  
itkdtakveqldlvvns  
kkshaanyridgyevegktgtaqvaapnggyvkgppnyfvsfmgdapknkpvivyagmslaqkndqeayelgvskafk  
piment1kylnvgskdtdt  
snaeyskvpdvegqdkqkaidnmsakslepvtigsgtqiakaqsikagnkvlphskvllltdgd1tmpdmsgwtkedviaf  
enltnikvnlksgsfvshq  
siskgkltekdkidvefssenvdsnstnnsdsnsddkkksdsktdkksd  
>tr|Q6GA39|Q6GA39\_STAAS  
meglfnaikdtvtaainndgaklgtisivsivengvgllgklfgf  
>tr|Q6GA41|Q6GA41\_STAAS  
mr1qkap1vtsg1vlgl1gn1kdl1sl1navcgifa1liwih1lctmikyfnvkeq1nsp1vssvfttffmgsf1g  
tty1ntffsnitfinslit  
piwilclvgimthmii fsiky1kdfs1envypswtv1figiaia1gl1tapvsgyffigq1tviygvfatsiv1pivfkr1k  
afplqtsikpntsticapf  
slvaaayviafpanafivii flilaqiyfyiiiqlpkllkefsvpfsaftfplvisata1kns1pvlmfpdiwkg1l  
fievllatvivlrvfigyl  
hff1kkeqdkf1rnasq  
>tr|Q6GA43|Q6GA43\_STAAS  
mentinesekkrkflkmpgafmilfil1tvvaviatwvipagaysk1syepssqelkivnphnqvkkvpgtqqeldkmgv  
kiki eqfks gainkpvsi p  
ntyer1kqhpageqitssmvegtieavdimvfilvlggligvvasgsfsgllaltkktkghefmlivfvsilmiigg  
tlcgieeavafyplvpi  
fialgydsivsvgaiflassvgstfstinpfsviasnaagttftdglywrigacivgai fvisylywyckkikndpkas



Tsompanidou\_et\_al\_Supplemental\_FASTA\_File

ysyedkdafeqqwsvlkdd  
dsahftlrkkiiltlflvlpfpimvwgvmqtqgwwfpvmasafliftiimfiagtgksglgekgtvdafvngasslvgsvl  
iiglarginlvlnegmisd  
tilhfssslvqhmsgplfiivllfiffclgfvipsssglavlsmpifapladvgiprfvivtvyqfgqyamflaptgl  
vmatlqmlnmryshwfrfv  
wpvavfvlifggglitqvliys  
>tr|Q6GA47|Q6GA47\_STAAS  
mnnitkkiiltstllllgtastqfpntpinssseakayyinqnetvneltkyysqyltfsnstlwqkdngtihatll  
qfswyshi qvygpeswgn  
nqlrnksvdfgikdgetidsfalsqetftggvtpaatsndkhyklvntykdkketftggfpvyegnpvltlkeldfri  
rqtlikskklynnsyngg  
ikitgadnnytidlskr1pstdanryvkkpnakievileksn  
>tr|Q6GA48|Q6GA48\_STAAS  
mskniitkniiltstllllgtvlpqnqkpvfsfyseakaysigqdetnelikyqtqphfsfsnkwllyqydnngniyvelk  
ryswsahislwgaeswgn  
nqlkgryvdvfglkdkdtdqlwswyretftggvtpaakpsdktynlfvqykdklqtiigahkiyqgnkpvltlkeidfra  
realiknkilynenrnkgk  
lkitgggnnytidlskr1hsdlanvyvknknkitvdvlf  
>tr|Q6GA53|Q6GA53\_STAAS  
myniivyiacinfgliivplltndadfvwtsssllymilltsiilivyiktkdslqltifilnialiilycapllfiy  
vf  
>tr|Q6GA55|Q6GA55\_STAAS  
mgppqreigspitdnaswrgpnieklhdqfqqtmqvgvgpnteageksayknvqvggapternritnsnkqcklagpqh  
reigspitdnaswgrtsi  
kkyffffrn  
>tr|Q6GA58|Q6GA58\_STAAS  
mikiiltillllcilsylvtnrkkpflflktlfmgvvffifigylslaisaviygiiqfitidfgsfllmgiililissi  
fqlfivrllfrkknvdlte  
vvvlehliqwf1vyfaiyqavnekmdindinidnfqsvffdvsnlnlvilptliiswvtfnyrmrsyk  
>tr|Q6GA60|Q6GA60\_STAAS  
mknfigksilsiaaisltvstfageshaqtkvekyneyqtnfkkqvnkkvvdqakavnlfkrtrtvathrkaqravnl  
hfqhsyekkk1qrqidlv  
kyntlk  
>tr|Q6GA61|Q6GA61\_STAAS  
mkriivilenvivddpirlnhvdylvksvllksiklrfqevrkfeilvkimrihi  
>tr|Q6GA72|Q6GA72\_STAAS  
mvidfiiiffvyfvmvgfrrgfwlsmihlsatvslwiasqfyksiverlivfipypkttafnttfafhfnhlqnrfea  
ivafmlitlfcfkfilylii  
vtfdkiiayqnihi fsramgmivgvfmitiivlhfthlyllalypnealqhqklsivshslifhipylsaftinl  
>tr|Q6GA83|Q6GA83\_STAAS  
mrnvkqiatksiaaislgltyttmigsvladeikypsakfnqpeakdktelttsifdekikenkalellifnqenkv  
teeqqlvdekaqlisdmtg  
kiylqvk1kgqidkeqlvfqndkneefpfvikdekddtivriieqhmdkinmhvktlaekknldnkemvysihfkekkv  
qhddakevpskhqgnnq  
dq1kkdidkksqskdtkerrtslftekglndipvqkdkvqqdsnkkienerpkasgtlkvenspvtvkkvennhkeqp  
khkdekskkkkkvvekek  
alpafnrddsknssqlssdikeldephkkqyilfaagivlatillisahlysrkrngqv  
>tr|Q6GA94|Q6GA94\_STAAS  
mkkvnrni1nav1vgagfvsllminkkvstkkqtipaffkgnapyifahrggmalrpeqtqlafdyakqlgvdgfeta  
vrltkdqqlivfhdatvdr  
ttngsgkvsahlaelkkldaayhfkdingltpyrghahtailtfdellkqypdmyinvldkdapesyegsiapqimfdt  
iaenqafdrv1vtsfykeq  
ivrfnkiaqgsvaigasqqevteaf1kyhllggryyqplaqtqmpthfkgidltssrfikwlnmniipgyygvnsid1  
mndlyqkgahtivtdrpd1  
aqqfkqtipnk  
>tr|Q6GAA0|Q6GAA0\_STAAS  
mkqikk11vanrgeiairifraaaeldistvaiysnedksslhrykadesylvgsdlgpaesylneriidvakqanvda  
ihpgygf1seneqfarrca  
eegt1kfigphlehlmdfgdkvkarttaikadlpvipgtdgpiksyelakefaeeagfplmikatsggggkgmrvireese  
ledafhrakseaksfgns  
evyieridnpkhi evqyideygnivhlferdcsvqrrhqkvvevapsvglsp1lrqricdaaiqlmenikyvnagtve  
flvsgdefffi evnprvqv  
ehtitemvtgidi vktqilvaagad1fgee inmpqqkdittlgyaiqcritteditndfmpdtgttiayrsggfgvrld  
agdgfqqaeispyyds1lv  
klstha1sfkqaekmvrslremri rgvktnipflinvmknkkftsgdyttkfi eetpel fdiqps1drgtktleiygnv  
tingfpnvekrpkpdyela  
s1ptvssskiasfsgtkql1devgpkgvaewkkqddv11tdttfrdahqsl1latrvrtkdmniaasktadvfdgfsle  
mwggatfdvaynflkenpw

Tsompanidou\_et\_al\_Supplemental\_FASTA\_File

erlerlrkaipnvlfqmllrasnavgyknydpnvihkfvqesakagidvfri fdfslnwvdqmkvaneavqeagkisegti  
cytgdi lnpersniytley  
yvk lake lereg fhi laikdmagllkpkaa yeligelksavdlpihlhthdtsnglltykqaidagvdi idtavasmg  
ltsqpsanslyyalngfpr  
hlrt diegmeslshywstvrtyysdfesdikspnteiyqhempggqysnl sqqaks lglgerfdevkdmyrrvnflfgdi  
vkvtpsskvvgdmalymvq  
ndldeqsvitdgykl dfpesvvsffkgeigqpvngfnkd lqavilkqgealtarpgeylepvdfekvre lleeqqgpvt  
eqdiisyvlypkvyegyi q  
trngygnlsll dtptfffgrngetveieidkgrliikletisepdengnr tiyyamngqarriyikdenvhtnanvkv  
kadksnpshigaqmpgsvt  
evkvs vgesvkanqplliteamkmettiqapfdgvikqvtvnngdtiatgdllieiekatd  
>tr|Q6GAA3|Q6GAA3\_STAAS  
miqikgavkfpitldsttwi fddrkvsiedlek gvf dgs kpidfednhewnrailegqtnpptlnseikykkramlegs f  
vinmtpffkhsephdsatt  
irlsnehdhldipidllpylffqfakdgrlysdngvdsfiynqedgysyrinhvthievi  
>tr|Q6GAA7|Q6GAA7\_STAAS  
malygfaqqliqeagirikqlmeqnl tietksnpndlvtnvdkatedfifd tiletypnhqvlgeeghghdidtskgtw  
vvdpidgtlnfvhqgenfa  
isigi yidgkpyagfv ydvmadvlyhakvgegayrgsqplkplndsnlrqsiiginpnwltkpilgeifkeivndrsar  
aygsaa leivsvatgnlea  
ymtprlqp wdfagg lvi lyevngqasnllgepl tisgpn silvgnrglhqeisndylephhdaliqlheqrfrkrsk  
>tr|Q6GAB0|Q6GAB0\_STAAS  
mrkpelimawiansisiy llvmgl syfslksgnasqree lakqlsqnggkvsldmlqtmgalai illistlygifat  
icikgrrklsiilfviai i  
vs lmaln liaivlwvimmilskkesketthkddeyih  
>tr|Q6GAB4|Q6GAB4\_STAAS  
mrntnkfl lipyllwvifiivpvvlliyfsfldinghfsftnyqqif ttkylkmfaysilyaalititltisypaay  
itrskfqnilmimi iptw  
inlllkt yafigllshdgvinqffhlfnlpsfnllfttgaf lvvasyiyipfmilpifnsmkaipnllqassdl gaspf  
yfrkvimpltkegvmtgi  
qvtfips lslfmitrliagnkvinigtaieeqfltiqnygmstiaiflivmafiliitkssngrg  
>tr|Q6GAD3|Q6GAD3\_STAAS  
mkiatlnkgketkyfngyplieeediysqdh lkegdi fqi vtdksqyvatayvgrqhkg lgwvlytdkaqeintaaffvk l  
fntalaerdyfndigt na  
frl fnaegdvgg ltidnydghlliqwyskgyikfyail eavrkvfdyksiye kvrfdseysggfvegdapefpivie  
enftfynvdl edglmtgif  
ldqkevrkklrdqyakerhvl nlf sytgafsviaaseas tsvdlanrsrl teenfglnaidpksqyiyvmdtfdfyk  
yaarhghsydtividppsf  
arnkkrtfsvqkdydklingaln l ssegtlllctnasvyp lqkfntikt leesgvdyeltev mglpkdfkthphykp  
sky l kavfvnirh  
>tr|Q6GAD6|Q6GAD6\_STAAS  
mskg lklseilvtvlisvfvaviynlwwfvynvgqatg lhleqltngvwfmaavcyliipkpgiallaefaagagetii  
mrfdipti vyafiqglac  
elvfai fkyqsrsvmamlagfctai aafpidyfygylnevagwnl tlfivfrl isgavvagvlsyllvkal dktgvtkl  
frpaakedydn l  
>tr|Q6GAD7|Q6GAD7\_STAAS  
mlkvsdlrlkypsqqrki fhdlnitidkkekvl llgpsgcgkstllnvlsgivpnlielpmkydelivdplsgvifqdpd  
sqfcmpkvyee lafvlenr  
qvpredmdaliinalnmvnlvntpetyikdlsggm kqklaivetilqqsktlf ldeptamldvqatedlwtklielwedq  
tvvivehkvkhiwhvdv r  
ilmdyngni iadecpei ilqkyvhllseygvwhprawefapsrvdfpttshllqfkngr iirgkstllsfsdleiglge  
wititgangsgkttllesi  
mqlikyqgdvyfenr ltkikaakhmylv yqnpelqfitnsvydeinihfhnlskdqsddetiqlklldlqnvk dqp  
yelsigqkrrlsvata lss  
kadiifldeptfgldshntfqlklfqkrinlqgsivmthddei ierypsrrl kisdgall dcdgdtnv  
>tr|Q6GAD8|Q6GAD8\_STAAS  
mmvirmyeqwkvrqsfvddvniitklflgii lfffii fvhndfml yitilmvlvllmfngtqfkitaitisigfall  
sslfmilyngshtilkfg  
fihitteslvrglhvs lrtiaisffgilia ltsqvvmi fysl mqlhkvkskvayafmaairmiplmissliqlrrslkmr  
yqmi daanyrglkrfkhli  
ipllsqnrkqhqlsvameskgfrdgp rtyyynvpfsykdiifiivliai itlayycsitlpitgidvrlgrvg  
>tr|Q6GAE6|Q6GAE6\_STAAS  
mktielhitlqpqvldtqqgtl travhd lgyaqvndirvgkvl ymtvdevsdekvhniittlseklfantvieeysykv l  
ddekana  
>tr|Q6GAG2|Q6GAG2\_STAAS  
mts lkerdyffdnarail llvvfghmlqpytsgdkylsaly lviysfhmptflfisgyfaknidkpyylekiskr livp  
ymiffaffsiyyfltgksd  
elqldpfnpvfalwflitlfffhvilvivrrfnpykvlsvsiisigagfsdnidsylsisrtivffpifylgyiftkkh

Tsompanidou\_et\_al\_Supplemental\_FASTA\_File

tai fknkklipvsii tfil  
ffivvyihpinadwllgsspytslenegqsifspfkrllilygiiliamtaflnlmstkkklytyigsrtlyvyllhglii  
givrgefeypfdnpi slmt  
ylylisisviiyvlstnfvckwtnpi inlqrpsqfkd s  
>tr|Q6GAG8|Q6GAG8\_STAAS  
mahynnyeanvetnqvllvllhgf1sdsrtyynhidkytdichvitidlpghgedqssmdetwnfdyittlldrildkykd  
ksitlfgysmggrvalyya  
inghipisnlllestspgikeeanqlerrlvddarakvldiagielfvndweklplfqsqlelpveiqhqirqr1sqsp  
hkmakalrdygtgmpnlw  
prlkeikvptlilageydekfvqiakkmanlipnskcklisatghtihvedsdefdtmilgflkeeqnd  
>tr|Q6GAH0|Q6GAH0\_STAAS  
mkwmatgvleddivkeiygsskewvsvevkl1sqsl1dpstl1fh1tdneagdrfymr1lndnrtsyfgykaiqlfknnsknkq  
sifkdweklkhnitfihpq  
sekhhlrvvggfgfsshksddewrefglnhfv1pevl1istdnngtfltytvkresftvealnd1md1fnnisdidvdeqi  
geitrediykddwrq1lv  
eaiesinneekivlarr1likfdkdisipyilkqayskeknsyifllesqdsifftsqtpeqlikvnkilst kavagtik  
rsqdededtknveaf1kdn  
knliehrfvvdsilhdikpyitelhydtkpilkndhlyhlyteikaplkddsysislidnlhptpalggypkefamdfie  
qkefgtrglygapvgydi  
yddcefivairsmlikkaqat1fagcgvkdsdpdse1aetnlkftpmnalgvdmngks  
>tr|Q6GAH2|Q6GAH2\_STAAS  
mirqarpedrfdiaklvymvddmelelvkh1pkdmvldaiekscvdatyrtfyqhilvyeveskvagciisysgenelk  
yekawell1d1peeikqygt  
plpvkeakddeyyietiatfeayrgrgiatkl1ts1lessthvkwslncdinneaalklykkvgfisdgqielykhmyhh  
livk  
>tr|Q6GAH5|Q6GAH5\_STAAS  
mnrnivklvfm1ilvvavagcgqkdteektemttikdelgtekikknprvvvleysfadylaaldmkpvgiaddgssk  
nitksvrdkigayesvgsr  
ppnmevisklkpdliiadvsrhkkikselkiaptimlvsgtdynanieafktvakavgekegekrlekhdkilaei  
rkkieqstlksafafg1sr  
agmfinnedtfmgqf1lkmgiqpevtkdkttthvgerkggpyiylneelaninpkvmilatdgktdknrtkfidpavwks  
lkavkdnkvdydvdrnkwlk  
srgiiasemaedlekiakak  
>tr|Q6GAH7|Q6GAH7\_STAAS  
mkkifmmvhel1dvknkgmtssmfnrskedydadipadivtfdyknydeiika1kkqgkmdrrtkmynvfeyfkqisnk  
hfksnk1lykhiser1knt  
ieieeskgisryfdittgtiyairksksekvidffkdnkrierfsfidnkvhmketfndnkvcyqvfydekgyypisr  
ninannavgktyv1vnkk  
efknn1alcvyylek1ikdskdsimicdpggsfpmfntnhknaqkygvihvnhhenfddtgafkkseyiienanking  
v1l1teagr1d1lnqfdve  
niftisnfvkihnaphfqtetikvghisrmvptkrid1lievae1vkkdsvkfhiygegsvkdkiakmiedknlernv  
flkgyt1tpqkcl1edfklv  
vstsqyeggl1smieamiskrpvavfdikygpsdfiednkngylienhnikmadkilqlvndv1aaefgskarenie  
kystesilekw1nl1fns  
>tr|Q6GAH8|Q6GAH8\_STAAS  
mekgifyndnanv1kldtnqlnenikvidd1fknyeqidptieieingntkl1k1ngyfiasii1sp1nl1nk1lnlyveeefy  
htynelivkyteveke  
>tr|Q6GAH9|Q6GAH9\_STAAS  
mfyachfkmkiggv1l1rtyniigilsc1isfiimalpmiwytasalwffpgaimil1slv1vivficyiktqnqlh1lliv  
l1ni1ll1ffs1p1lls  
>tr|Q6GAI1|Q6GAI1\_STAAS  
mkyiia1llglivsitiafti1hhpil1drfnpl1kteysyakvpkgtqyvnitaysergek1dyk1l1tfn1gfspsrtyve  
ikhkgqyvisityvekedt  
pkevrqe  
>tr|Q6GAI2|Q6GAI2\_STAAS  
knkifgtily1t1algl1staayasteyaeggtwshgvgskyvwsy1yghgkghgataigkyrsfsgytragvkakasatk  
hncwvnrayyniy  
>tr|Q6GAI7|Q6GAI7\_STAAS  
mvsmykntnvkhttleafvttvnd1gieliinea1revrkrqlieliddal1vnkdeaafnqytaeyknleaf1ge  
>tr|Q6GAI8|Q6GAI8\_STAAS  
mysqniyvirkgdmv1rpa1fdddq1rngsei1rfdktri1qnpfkvqki1ersckfygntylgkkaetnritgisskpi1  
l1tp1lfptyffp1thsdrqne  
niw1nmhyiesikel1knrkckvtfinnesi1lhvsyhs1whqynnsi1fy1yrvd1kqsrmi1sknpdqpidynkat1nvfea  
l1trys1fedk  
>tr|Q6GAI9|Q6GAI9\_STAAS  
mmekneninve1l1ttsdmhshf1ngdygsniyragtyvnqvraqnhrv1ll1dsggs1ags1aayyyaivapykrhpmik1  
mnr1mhydasgvspsefkfg  
l1sfl1trsialarfpw1sanieynvtkepyfstpycik1hfgd1kiaivgvtadgl1meneysemeqdvsiekt1lvaskrwi1r

Tsompanidou\_et\_al\_Supplemental\_FASTA\_File

yiheveepdfliiviyyhggl  
nkisnstknkassneaeaklmeelgvidlmitahqhtivgqdhetyyvqagqdakevhlsinfkkrtrttydvesidsk  
vidlneyeedqellldltfy  
drkavaywsqeisidkglmlsvnglqdlvcqthpfsqllhdaihlfaddditcvhvpnmgekglsgqirnedlyhaypyp  
dkpmdmtisggnikdiley  
syshldfvneqlsttiidetlctmwqgfnyeidmnpqegqrvmldqidlsksyrvtmtdycyrnyknylnkaiihesyde  
tmstliaeklrpnhyisc  
sdnfiivknr  
>tr|Q6GAJ2|Q6GAJ2\_STAAS  
mlmtknqaekwfdnslgkqfnpdlffgfgqcydyanmffmlatgerlqglyaynipfdnkariekygqiiknydsflpqkl  
divvfpskygggaghveiv  
esanlntftsyygnwngkgwtngvaqpgwgpvtrhvhyddpmyfirlnfpdkvsvgdaksvikqatakkqavikpk  
kimlvaghgyndpgavng  
tnerdfirkyitpniakylrhaghevalyggssqsqdmqdtaygvnvgnkdyglywvksqgydivleihldaagenas  
gghviissqfnadtidsi  
qdviknngqirgvtprndllnvnvsaeinmyrlselgfitnkkdmdwiknydlyskliagaihgpigglvagnvkt  
sahnqknppvpaytldkn  
nvpkykedgnytvavknvrdgystnsritgvlpnnatieydgaycingyrwityiansgqrryatgevdkagnris  
sfgkfsti  
>tr|Q6GAJ3|Q6GAJ3\_STAAS  
mdakvityrivlilalvngflankgispivdeesvssilvtvalyttykdnptsqegkwanqklkkykaenkyrkatg  
qapikevmtptnmndtndl  
g  
>tr|Q6GAJ7|Q6GAJ7\_STAAS  
msnleksvainlentahyenisnlditftrgesdssvllfnitknqplflseenikariairgkgvmvappleildpfk  
gvlfqflpndvikrdgsyq  
aqvsvalgnsvvvertitfnvekslfsmpsetklhyivefqeletimdrakamdeaikngedyasliekakekgl  
sdiqjaksssidekqlan  
sritdlenkaqtysrafdeqkrymddkheafkqsvnsgglvtsgstsnwqkakitkddgkimqitgfdfnpeqrigdst  
qfiyvsqainyprgastng  
tveylvvtstykrmtyrpntgnkvfvkrkemgswsdwselalndyntpfetvqnaqskantaesnaklytddkfnkrysv  
ifdgtangvgstlylnesl  
dqfllifdygtfpggdftefgnpfgggkislpsnlpdndgdgggyvefgltsrstsltisndvyfdlgsrrsganan  
rgtinkiigvrk  
>tr|Q6GAJ9|Q6GAJ9\_STAAS  
mateevkikalendkqyfpahwkaingipyagssdiglpqdgisvddknkldnlkigeagiiqnsivqkspngklw  
kitvddsgklgtvlfy  
>tr|Q6GAK0|Q6GAK0\_STAAS  
mdyhdhlsvmdfnelicenlldvdygsfkeyyelnearyitftvyrthnsfvfdllicenfiyhgekytikqtapkve  
gdkvfievtayhimyefqn  
hsvesnklddssetgktpesldeylrygfanqktsvkmykiigdfkrkvpidelgnkngleyckeavdlfgciipn  
dteicfyspetfyqrsekv  
iryqyntdvsatvstlelraiki fgkkytaeekknypikttdinysngfikegtyrtetigskatikfnckygnstv  
rftikkgsqggiyklildg  
kqikqiscfaksvqsetidliknidkgkhvlemi flgedpknridiasnkakpcmyvgtekstvl nliadnsgnrnyka  
ivdyvadsakqfgyryant  
qtnedietqdkllfakqindtpkte ldvnyigyeki eprdsvffvhelmgyntelkvvkl drshpfnai devsfne  
ikdmvqi qqa lnrri vaqd  
nrnyqanrinhl ystlnspfetmdigsvli  
>tr|Q6GAK2|Q6GAK2\_STAAS  
mnekvegmllekl dhlgvqegmkg lkrqlgvvnsemkanlsafdkseksmekyqarikglndrlkvqkkmysqvedelk  
qvnanyqkakssvkdeka  
ylklveankkek laldkskealksntelkkaenqkrtnqrkqdayqklkqlrdaeqklknsnqattaqlkrasdavqk  
qsakhkalveqykqegnqv  
qklkvqndnlksndkiessyaktntklkqtekefndlnntikhnsanvakaetavnkekaalnnersidkassmktf  
nkeqmi aqshfgklasqad  
vmskkfssigdkmstlgrtmtmgvstpitlglaalktsadfeqqmsrvgai aqasskd lksmsnqavdlgaktsksane  
vakgmee laalgfnakqtm  
eampgvisaaeasgaemattatvmasainsfgl kasdanhvadllarsandsaadiqymgdalkyagtpakalgvsiedt  
saaievl snsglegsagt  
alrasfir lanpsktakemkklgihlsdakgqfvmgelirqfdnmkgmtreqklatvativgteasgflalieagp  
dkinsyskslksnsgeskk  
aadlmkdnlkgaleqlggafes laievgkdltpmiragaegltkldvgfthlpgwvrkasvglaifgaaigpavlaggl  
irtvgsaakgyalnrria  
entilsntnskamkslgqltflgsttgktskgfkglagammfnlkipinvlksakla ilpflknglglaaks lfavs  
ggarfagvalrfltgpijs  
titaityaykvfktaydrvwfrnginglgetikffggkiiggavrklgefknlylsgisgksfkekfskdmkdgykslsdd  
dlkvgvknfkgfmqtmgt

Tsompanidou\_et\_al\_Supplemental\_FASTA\_File

askkasdtvkvlgkgvsketekalekyvhyseensrimekvrlnsgqisedkakkllkietdlnnlaeiekrnkkele  
ktqelidkysafdekekqn  
iltrtkekndlrikkeqelnqkikelkekaltdgqisenerkeieklenqrrditvkeksktekeqerilvrnqrnrnay  
sideaskaikeakarkar  
kkevdkyeddvaiaknnvnlsksekdkllaiadqrhkdevrkakskkdavdvvkkqkndidkemdlsgrvykntekw  
wnglkswwsnfredqkkks  
dkyakeqeetarrrnrenikkwfgnawdgvsktgeafskmgrnanhfggemkkmwsgikgipsklssgwssakssvgyht  
kaianstgkwfgkawqsvk  
sttgsiynqtkqkysdasdkawahsksiwrgtskwfsnayksakgwltmanksrakwdnisstawsnaksvwkgtskwf  
snsykslkgwtgdmysrah  
drfdaiyssawsnaksvfngfrkwlsktydwirdigkdmgraaadlgnvankaigglnsmigginiskaitdknlikp  
iptlstgtlagkvatdns  
galtpqtfavlnrdrgsnapgggvqevihradgtfhapqgrdvvpvgvdsvinandtllkqrmgvlpkfhggtkkkdw  
ldqkgnigkkagefgata  
kntahnikkgaemveaagdki kdgaswlgdkigdvwdyvqhpqklvnkvmsglninfggganatvkiakgaysllkkkl  
vdkvkswfedfgggdgsy  
lfdhpiwqrfgsytgglfnnggrhygidfgmptgtniyavkggiadkvwtdyggnsiqiktganewnwymhlskqlarq  
gqrikagqligksgatgnf  
vrgahlhfqlmqgshpndtakdpekwlkslkgsgvrsgsgvnaasawagdirraakrmgvnvtsgdvgniisliqhes  
gnnagitqsslrdivlq  
gnpakgllyipqtrhyavrgnnyisygdqllaffnnywrsqfnprggwspgpryangglitkhqlaevgegdkq  
emviplrrkraiqlteqv  
mriigmdgkpnntvndtstvekllkqivmlsdkgknltdaliqtvsqdnngsndairglekilskqsghrananny  
mggltn  
>tr|Q6GAK6|Q6GAK6\_STAAS  
maegggsykvqfkrlyvgvfnpeatkvvrmtwedekggtvdlnitglapdlvdmfasnkrvwmkkqgtnevksdmsifn  
ipsddlntvigrtkdngt  
swvgentrapyvtvigesedgltgqpyvvalkgtfslsiefktrgekaeapeptkltdwmnrkvdvdgtsqgivygy  
hegkegeaeffkkvfvgyt  
dsedhsedsagslps  
>tr|Q6GAK8|Q6GAK8\_STAAS  
mlnklesvygkqamqaksdkalneaseffikalkefesfkdtgasieemtskpytkvgsqeravliewvgpmnrknii  
hlnegytrdgkkytprgf  
gviaktlaaserkyreiikkeiar  
>tr|Q6GAL3|Q6GAL3\_STAAS  
mnviakenivtrikkllidnwidqstsklydfspwknsrfwgvinntletnetifsaiklinsmaslplkmyedykvvn  
tevsdlltvspnnsissfd  
finqietirnekgnayvlierdiyhpqsklflnnpdvemlienqsrelyysihaatgnklivhnmmlhfkhivasnmv  
qgispidvlnkntdfdnv  
rtfnltemqkpdsmlykgsnvgkekrqqvledfkqyyeenggilfqepgveieplpkkyvsedivasenltervanvf  
qlpsvflnaksntnfakne  
elnrfylqhtllpivkqyeeefnrklltktdreknryfkfnvksylratsatqaevyfkavrsgyytindi rewedlppv  
eggdkplisgdlypidtpl  
elrkslkggdknvnes  
>tr|Q6GAL4|Q6GAL4\_STAAS  
mdlvtikilnepspkllttwyaevqvtgkiktskyvrkecdrhlrylenggwvfdelahrpirfiekfckpskgskrq  
lvpwqhfiigsifgvvh  
ketklrrfkeali fmgkrngktttisgvanyavsqdgengaeihllanvmkqarilfdeskamikaspkl dknfrtlrde  
ihdatiskimpqasdsdk  
ldglnthmgi fdeihfkdyklisviknsraarlqplliyittagyqldgplvdmveagrtdldqiedertfyylasld  
ddddindssnwi kanpnl  
vsinldemkeewekartpaergdfitkrfni fanndemsfidyptlqkneivsleelegrpctigydlsetedftaac  
atfalngkvavlswhip  
khkveysnekipyreweedgltvqdkpyidyqdvlnwiikmnehyyvekitydranafklnqelknygfeteetrqgal  
tlspalkdlkemfldgkii  
fnnpnlmkwyinnvqklldrngnwlpksqsryrkidgfaafntytdimnkvsdsgegniefisikdimr  
>tr|Q6GAL5|Q6GAL5\_STAAS  
mkltkkqlkeyiedyksddmlinlyletyefyrcrlrdelknsdlmmehtnkagasnivknplesieltktvtl nllks  
mgltaaqrkki vqeggfg  
dy  
>tr|Q6GAL6|Q6GAL6\_STAAS  
mtkqnntykhgrksyrydwfyhskawkklireialdrdnncqmciregkitdani vhhivvtedfskaldlenlmsvcy  
tchnqihandknkdkyknk  
kfrveki  
>tr|Q6GAL7|Q6GAL7\_STAAS  
mgntiydikpgtfkyieseiylnenkkeinrlmeilnptkel dtnivygpqlkgepvrttelmatrlltnkmlrnlee  
mveaveseylklpedhkkv  
irlkywnrdkklkieqigdachmhrntvttirknfvkaiyahagik

Tsompanidou\_et\_al\_Supplemental\_FASTA\_File

>tr|Q6GAL8|Q6GAL8\_STAAS  
maidfkhpsqkyaidkvidnekyglfldmglgktvstltafseqlldtkkmlviapkqvaktwvdevdkwnhlnh1k  
vslvlgtpkerndaIntea  
diyvtntentkwlcqykkewpfdmvvide1stfkspsqrfksikkk1plinrfiglgtgtpspnsldlwaqvyldrg  
erlessfsryreryfkpth  
qvsehifkwe1rdgseekiykqiedic1smkakdyldmpdrvdtkqtvv1sekerkvyeeleknyileseeegtvaqng  
aslsqkllqlsngavytde  
edvrlihdkkldkleeiiesqgppi11fynfkhdkerilqrfeattledsnykerwnsgdik1liahasaghglnlq  
qgghiiwvfgltwsl1elyq  
qanarlyrqgqhntti1h1hmtdntidqrvykalqnkeltqeelmkaikaikariakhk  
>tr|Q6GAM0|Q6GAM0\_STAAS  
m1dkvtqietikydrvsysyaasr1stywtntnmawsdfmqklaqtvrtked1teynkmskseqadikdvvgfvggy1k  
egkrragqvmnrsm1tdi  
dyaadmtdi1smfydfayc1ysthkhreispr1r1v1p1krvnadeyegaigrkvadivgmdyfdtttyqphr1mywps  
tsndaeffftyed1p11np  
dkilneyvdwtd1lewptssreesktr1adkqgdpeekpgivgafcraytieeaietfipdlyekhstnrytyhegsta  
gg1vlyennkfayshhntd  
pvsqgm1vnsfd1vr1hlygaqedakttdpvnr1psykamqraqndevvkkqlindkmsdamqdfdeiensddawset1  
e1tskgtfkasipniei1  
rndpn1kgkiafneftkqieclgkmpwntnfk1rqwqgdss1rsyiekiydhsgtktdaiisvaiqnayhpvrdy1  
nki1swdghkrlek1fiky1  
gvedtevnrtttkka1tagiarvmepgckfdym1tlygpgvgksa11kk1lgawfsds1svvtgkeayealqgvw1mem  
aelaatrkaeveaikhfis  
kqvdrfrvayghyiedfprqci1figttnkvdfl1rdetgrrfwpmtvnpervewnsk1tkdeidqiwaekyyeegge  
1fl1npeleemrsiqskht  
eespytgi1dey1ntpipsnwd1ti1ferrrfyqgdvdm1ptgnvdyvernkvcal1evfvecfgkdkgdsrgsmeirkis  
n1lrq1dnwsvydgnksgk  
irfgkdygvqjayvrdes1ed1i  
>tr|Q6GAM1|Q6GAM1\_STAAS  
mkt1rei1ydkyenen1rt1i1l1hsgkafpvtniisenstfliiktsktishklvliykneiknirff  
>tr|Q6GAM5|Q6GAM5\_STAAS  
mker1kaflyf1msif1fpftf1y1layhhfedkqhflttcieyielvyilfmsilgkkvnepfnideidfw1rfgfk1  
krytg1skegik11rqeip  
v1rydkpevtrdyieyidinytadtyycfykdgtfrfyddytnqklkgnidseffkkeswn11vqkgkrisddi  
>tr|Q6GAM6|Q6GAM6\_STAAS  
mtqylvttfkdstg1phehitvardnqtftvveaeskeakekyeeqvkrdavik1sryrrgin  
>tr|Q6GAM7|Q6GAM7\_STAAS  
mrertki1yrgwnkeifilqgknm1vig1rqifdelkrsyegyki1vvi1evdfeik  
>tr|Q6GAM8|Q6GAM8\_STAAS  
mtnt1ttdqlqe1l1q1qkefddrip1trn1ndtvasmi1iefvwint1leffknkkqpgkpldtqldeiady1afslq1t1  
t1vdeed1eettevmvd1i  
enevt1pk1hsvyfvhvmht1teqfvkgidnsivqvl1impflyantyyisidqlidaykkkmkrnherqdg1adagkgyv  
>tr|Q6GAM9|Q6GAM9\_STAAS  
mnnrekieqsv1sasayngndtegl1kevedvykkaqafdeilegitnamqhsvkegie1deavgimaggvvykyeeeqe  
nd  
>tr|Q6GAN0|Q6GAN0\_STAAS  
mtft1sdeqykn1ctnfnk1sdk1l1hka1kdceeykkqrde1igdiak1rdcnke1lekkasawdrycksvekdl1nefgnd  
dervkfgme1n1nki1fmedd  
tne  
>tr|Q6GAN2|Q6GAN2\_STAAS  
mki1kvkkemr1de1ikwarenpd1sqgkiffstgfsdgvfrfhpntnkcstssfipidipfivdiekevteetkfdrl1e  
vyeiqegvyksa1lhkgis1  
nerfeddn1fptkafy1l1ndmtmt1iwkdgelve  
>tr|Q6GAN3|Q6GAN3\_STAAS  
mki1kiekemn1pe1iqwawdnpk1sgnkrfysndverncfvtfhvdsilc1nvtgyvsindkftvqeei  
>tr|Q6GAN4|Q6GAN4\_STAAS  
mtdsgrkey1nqffgksylyqdnervahthvngnyyfhghivpgwqgvkktfdtaee1etyikqsdl1eyeeqk1t1f  
>tr|Q6GAN5|Q6GAN5\_STAAS  
msi1snrkvd1metqdnvkq1pahytygdi1e1idfieqvtaqyppqlafai1gnaiky1srap1knghed1akakfyvqraf  
d1we  
>tr|Q6GAN8|Q6GAN8\_STAAS  
mkf1m1dietyssndi1skcgaykyteaedfeili1aysidggaisaidmtkvdnepfhadyetfkialfdpavkkyafna  
nfertclakhfnkqmppee  
wic1tmvnsmrig1pas1dkvgevl1r1qnqkdkagkn1iryfsipckptkvnggrtrn1pehd1ekwqqfidycirdveve  
mtianki1kdfpvtaieqay  
wvfdqhi1ndrgik1skslm1ganv1dkqskee1lkqakhitg1enpsptq1llaw1kaeqg1dipn1qkktvqdy1krat  
gkakkml1eir1qmsktsvk  
kynkmhdm1mcndervrg1fqfygagtgrwagrgvqlqn1tkhyis1dte1e1iard1ikeqrfdd1d111nvhpqd11sq1v

Tsompanidou\_et\_al\_Supplemental\_FASTA\_File

rttftaegnelavsdfsa  
iearviawyakeqwrldvfnthgkiyeasasmfnvpvesitkgdplrqkgkvselaalgyqggagalkamgalemgi een  
elqglvdswrnanpnivnf  
wkacqeaaintvksrkthhthglrfymkkgflmielpsgralaypkasvgenwsgvvefmgldlnrkwsklkyggk  
venivqatardllaisjar  
leasgfkivghvhdeviveipkdsnglkeietimkpvdwakglnlndsgftspfymkd  
>tr|Q6GAN9|Q6GAN9\_STAAS  
mkakvlnktkvitgkvrasyani fkprsmqegqeakysisliipksdtstikaieqaieaakeegkvskfggkvpanlk  
plrdgdtereddnyqday  
finasskqapgi vqdrrnrltdsgavvsdgyirasinlfpfntngnkgiavglnniqlvekgeplggasaaeddfdel  
ddedfl  
>tr|Q6GAP0|Q6GAP0\_STAAS  
mkl dhsnrahaklsasgakwlnccppsikasegiadkssvfaeegtfahelelyfslkyegltqfefnkafqnykrnqy  
yseeleyveeyvanveek  
ynea1srdddvia1fetkldlgkyvpesfgtdvii fsggvleiid1kygkgievsaidnpqlrlyglgayells1mydi  
htvrmtiiqpridnfstee  
lpisrllqwgtdfvkplarl ayngegefkgashcrfckikhsctraymqnvpqkpph1sdeeiaellyklpdikkwa  
deveqyaldqakendknyp  
gwk1vegrsrmi1tdtkatlek1veagykpeditetk11sitnlek1ligkafskitegfikkpqqk1t1atesdkrpa  
k1saeddfdk1  
>tr|Q6GAP1|Q6GAP1\_STAAS  
mav1edi fee1k1lnkn1rv1ntel1stvdssivqekvkeapmskeetaqpesieevkvtsad1tkdyvl1svgkeflkkad  
tsdkkefrnk1nelgdk1  
stieedhyetivdfmnarina  
>tr|Q6GAP2|Q6GAP2\_STAAS  
myyktgdvcqki invdgdfdr1rvkkraysveiv1dhegsidgl1vsdendlytal dilkqtiyewiefntdeqdkli  
n1imkw  
>tr|Q6GAP3|Q6GAP3\_STAAS  
msntyksyliav1cftv1ai v1mpflyfttawsiagfasivt1mfykeyfyee  
>tr|Q6GAQ0|Q6GAQ0\_STAAS  
mglyeelcinnekiki eedq1pnfqpgcymngkiyirrn1seirkaevlyeelahhk1tygnildqskwinrkfenyar  
rhgftsavplheiveahny  
gvrnlyelsey1qlsesyileaeqykkiyigigthygeysitfep1rvfkykei  
>tr|Q6GAQ1|Q6GAQ1\_STAAS  
mkkvig111vst1altacgekekpkkeenksqtqkhkdsctknhqekpkkvedknppinsvqnnatnqsqaqnnqfsh  
sd1snnapaninendsqnt  
n1ndeyvvspgwtkdeqakafeeykkgkeeeearagasavpganin  
>tr|Q6GAQ2|Q6GAQ2\_STAAS  
metnetid1mnyvefpkryteakgk1vaqpittinsarrvengdmtvcyildqdddvidfifdrdi1tvffpengtetde  
yfceiifnsddtftlkr1s  
nyvtikdrsymskindvnitgkvvr1frdfk  
>tr|Q6GAQ3|Q6GAQ3\_STAAS  
mnggenvsenkgeirngesgdqk1tsgqves1iqepkkk  
>tr|Q6GAQ4|Q6GAQ4\_STAAS  
mqi1111i1ttgipgytyya1snkn1vyfdsdnkkvilaffsvsvfif11t1s1fsgqnnvnq1fqk1tftkt1saliv  
s111111tefvytkiiei  
ynifsnhrksn1kkvet1pvh11kyednkykmf1tvkdfegni1iekglndysrkhnrn11ldtrfnanyedfkt1se  
yndsyl1dfenkvkley1yi  
dkkk1iiss  
>tr|Q6GAQ5|Q6GAQ5\_STAAS  
mwfekfknknetkyryyeykykdp1ytdkwkrvsv1lnkntkqsqkeamfr1leekikek1lnkssselkt1tft11dew1  
eyhiktsgskvt1lnnikt  
rvknikknsake111nk1ldtkymqmfin1ssiystnq1ryq1ghmkeaikyavkfydypneh11tgvk1pkkrktiedi  
ekdeakmynyle1qqvigi  
rdfilnyns1hyrtriliagalevqaltgmrigella1qikdvd1knktidingt1hrikcntgfygdttkttgskrni  
tinsrtakv1kkimlenkk  
mkqwkpsydrg1fttskgnp1qidkink11slaes1ninkkvtt1hrthis11vemvns1kaimkrvghtdekt1  
ikvythvtekmdreldrkl  
ekliy  
>tr|Q6GAQ6|Q6GAQ6\_STAAS  
m1mdps1i1py1wv1vv1vf1leg11aadnaivmavmvkh1ppeqrkka1fyg11gafvfr1fal1flisiianfwfiqaag  
avy1iymsi1kn1wqffkhp  
eiespeagdnhhydesgeeikasnkswgtv1kiefadiafaidsmlaalaiavt1pkvgihfggmd1gqfvvmf1ggmi  
gvilmryaatwfvellnky  
pglegaa1fai1vgwvkv1vmmv1ahpdia1v1pehfphgv1wqsi1fwtv1ig1vi1gw1gsvvknkkshk  
>tr|Q6GAR4|Q6GAR4\_STAAS  
miekl1vtf1nevvs1kplvyg11itgv1ft1rmrffqvrhfkemir1mfqgekspngi1ssfqaiams1agrvgtgnivgv  
stai1figgpgavfwmwita

Tsompanidou\_et\_al\_Supplemental\_FASTA\_File

flgassafiestlqqifkrvenneyrggpaiyieyigggkfgkiygiifaivtiisvgl11pgvqsnaissmhnaihvp  
qwlmgaivvvilg1iifgg  
vrsianvatavvpfmaiyyilmaviiiciniqevpalfalifksafglqsafggivgameiegkrglysneagqgtgph  
aaaaaevshpskqglvgaf  
svyidtlfvctataliilisgtynvtdgtvnangtphlikdggiiyvenatgkdysgtamyaqagidkafhgsgyqfdptf  
sgvgsyfiafalfffafitt  
ilsyuyitetnvayltrnqnqvssifiniarviilfatfygavktadvawafgd1gvg1mawl1niiaiwi1hkpvana1  
kdyeiqkkr1ngnynavyq  
pdpnk1pnavfw1ktyper1kqarakk  
>tr|Q6GAR5|Q6GAR5\_STAAS  
mlnkvwfrtgialim1filik1fmevhevftpiatiigsvflpflisgflfyiclpfqnslkvfprwasittim1alf  
aiiglivafvapiiisnin  
n1isqtpalqkeaeqikfalaqmdk1pedvtsritnmvksmgdgvtnilsnslqyitslistif1limvpffliym1kd  
hekfiavakffkgerkvf  
fvd11td1nft1ksyiqgqvtsvilgifyigysiid1pyip11vl1fagvanlipflgsw1sfapaa1giidsptt1fi  
wvcii1tiahq1legniitp  
nvmgk1sihpl1tiivv1laagd1ggft1vliavplyav1ktvsvni1fkyrqriidkansvkd  
>tr|Q6GAT2|Q6GAT2\_STAAS  
mvk1ilkr1glmp1l1i1isivv1slai1qpgdpfsd1ngkikqea1naqrek1gl1ndsishqyirwvnhvihgd1ges  
ikykrpvidvieeripnti  
1lgamsliityiisfal1gitsgrysys1tdyvtqifny1mlaipsfiagvfai1fifsfelqwf1p1qgsvdin1kegtfey  
ymskiyht1palt1gl1s  
tagyiqy1rndi1ensk1kdyv1tarskg1smnkiynkhi1rnslipi1tflgadi1v1ilggavit1etifsyngigk1fle  
sv1ggdyp1m1malt1ffsf  
lg1gn1isdi1tygf1dpr1rsn  
>tr|Q6GAT3|Q6GAT3\_STAAS  
men1levnq1kkyk1ktg1l1qktqyv1kavddvs1fsikkgt1f1vgesg1cgk1st1gkvi1r1ledatsg1siivngeditr  
1qgk1l1rksr1qqy1qmi1fqd  
pyas1npmq1mvgdi1sepi1nyk1l1pkee1kkev1y1l1kcv1gl1seday1kyah1efsgg1qr1rvgi1aral1rps1livade  
pv1sal1dvs1vqs1v1n1l1kd  
1qeqfn1sy1fiahd1svvkh1sdvig1vmy1ghiveiasd1kei1yen1pkhpytkal1issip1qidk1hnn1ri1lk1gelp1sps  
npp1ggcp1f1htr1cpi1akdkc  
ken1pg1kdi1gdeh1qv1acf1yvn1kv1gd1ng  
>tr|Q6GAT4|Q6GAT4\_STAAS  
mnv1l1evkd1lets1kin1new1atven1sfel1skge1vgiv1gesg1cgks1il1sksi1k1l1pek1sk1snge1v1fdgk1ridt  
1nek1q1l1di1rgndi1ami1fq  
ep1mtal1npv1fti1kn1ql1ves1ikshk1k1skeann1akd1l1kkvgi1arqde1il1nsyph1ql1sggm1rqrv1mi1ama1isc1spk1li  
ade1pttal1dvti1qaq1ild1  
1ke1l1qket1qma1immi1thd1svvaef1cdk1vl1vmyag1qive1fgg1ike1il1hnpk1hpyt1qk1l1stip1kl1kee1qr1letie1givp  
si1qaf1hvn1kcr1fan1rcn1kk  
md1cnn1qsp1kmh1vced1ivr1ch1lyk1ney1kei  
>tr|Q6GAT5|Q6GAT5\_STAAS  
mgk1liky1is1illiv1vl1sacg1kssn1kdeg1v1kdat1kte1ask1hkggt1l1val1tapp1sgv1yss1l1nsthad1avvegy1fnen1  
1tidk1kir1pksy1iasw1kdi  
ep1akki1efk1kkgi1kwhd1gne1lkiddw1ysiev1ankdy1egay1psven1iqg1akdy1heg1kadhi1sgl1kkid1dytm1qv1tfd  
kk1qeny1tgfi1tgp1l1skk  
y1l1sdvp1kdl1aks1dki1rkyp1ig1gpy1kvk1kiv1pgeav1ql1vk1fddy1wqg1kpa1ldkin1lkvi1dqaq1ikame1kgdi1dv1tnda  
tg1amak1dak1ssn1ag1klv1s  
aps1ldyg1lig1fvsh1dydk1kantg1kvr1pkyed1kel1rkam1layid1rekwi1kaffng1yase1ins1fvps1mhwi1aad1pkel1ndy  
kyd1pek1akk1l1dk1lyk1dr  
dgd1g1fred1pkgn1kfe1infk1hys1gsn1ptfep1rta1aikdf1wek1vg1l1ktnv1kl1ve1fgk1y1ned1an1ask1dme1vy1frsw1ag1gtdp  
dps1dy1htdr1pqnem1rty1l  
pk1sdqy1l1dda1ldfdk1vgi1dekk1rkdi1ykw1qym1ndel1pg1l1pmf1qgks1itiv1ndk1vrn1ldie1igt1dq1sly1n1tkea  
>tr|Q6GAT6|Q6GAT6\_STAAS  
mtrk1frt1l1l1l1i1atia1sgc1anddgi1ysdk1qv1frki1l1ssd1l1ts1l1dts1l1itde1isse1vta1qtfeg1lyt1lgk1gd1kpv1lgv  
ak1af1peks1ggk1tl1kv1klr  
sd1akws1ng1dkv1taq1dfvy1awr1ktvd1pkt1g1se1fay1img1dik1nas1distg1kpv1eq1lgika1lddet1qid1lek1pvpy1inq1l  
al1ntf1ap1qnek1vak1kyg1kn  
yg1taadr1avyng1p1fk1vdd1wk1qed1kt1l1skn1qy1wdk1knv1kl1dkv1ny1kvik1dl1qag1as1lyd1tes1vdd1avit1ad1qv1ny1k1dn  
kg1ln1fv1l1ttgt1ffv1km1nek  
qyp1dfk1nkn1rl1ai1aqaid1kkgy1vds1vk1nngs1ipsd1t1tak1gi1akap1ng1kdy1ast1m1nsp1lkyn1pke1arah1wdk1kakke1lgk  
nev1tfs1mnted1tp1daki1sa  
ey1iks1qvekn1pgv1tl1kik1ql1p1fk1qr1v1s1el1sn1feas1lsgws1adyp1dpm1ay1etmtt1gsa1qnt1dwn1key1dq1ll1kvar  
tk1l1al1qp1nery1en1l1kkae1e  
mf1l1gdap1vapi1yq1kgv1ahl1tnp1qv1kgl1iyhk1fgp1nns1lkhvy1idks1idket1g1kkkk  
>tr|Q6GAT9|Q6GAT9\_STAAS  
maen1knn1s1indh1sna1m1thts1da1iss1dfi1ire1ld1nqep1em1qres1kn1fw1qdawa1ql1krn1klav1vgm1igli1iiv1faf  
ig1pv1ink1hdya1eqn1vehrn



Tsompanidou\_et\_al\_Supplemental\_FASTA\_File

lpakipvl dkvpfl pfdgkdadgkdaykaanakenywfgt dqlgrdlwtrtwkgaqis lfigvvaamldi figvvygais  
gffggrvdtimqrilevia  
sipnlivvilfvli fepsiwtiilamsitgwlgmsrvvrgef lklknqefvmasktlgaskfkli fkhilpntlgaivvt  
smftvpsaiffeaf lsfig  
igvpapqts lgs l vndgram lliyphe l fipamils lllilffyl fsdgl rda fdpkmrk  
>tr|Q6GAU0|Q6GAU0\_STAAS  
mgkyi fkrfiymlisl fiiititffl mklmpgspfn daklnaeqkeil nekyglndpvatqylhy lknvvtgdfgnsfqy  
hnpvwdlikprllpsfem  
gl tamfigvilg lligvaaatkqns wdytttvis via svpsfv lavllqyv favklr wfpvagwegfstavlps lals  
aavlatvaryiraemiev l  
ssdyillarakgnstmr vl fghalrna lipiitii vpm lasil tgtltieni fgvp glgdqfvrsittndfsvimaitll  
fstl fivsi fivdi lygvi  
dprirvqggkk  
>tr|Q6GAV3|Q6GAV3\_STAAS  
mnyt lqcyidcgdptqris krnstgnarl c  
>tr|Q6GAX0|Q6GAX0\_STAAS  
mkskyep lfdkvel pngvel rnrflv lapl thiss nddgtis dvel pyiekrsqdv gitinaasnvsvdgka fpgqpsiah  
dsdieglkr latamkknga  
kalvqi hhggaqalpel tpggdv vapspis lksfgqkqehsaremtneeieqaikdfgeatrraieagfdgveihganhy  
lihqvspynrrndvwan  
qykfpvavieev lkakeaygnkdfivgyrlspeaespgitmeiteelvnk ishmpidyihvsmmdthattregkyagqe  
rlplihkwingrmp ligig  
siftadealdavenvgdlvaigre lll dyqfvekikdgredeiinyfdperednhhltpnlwhqfnegfyplprkdk  
>tr|Q6GAY1|Q6GAY1\_STAAS  
mhwtiiggigqgtaiakll ssgl ttdrltiidphetf cqrnsftnriempylrspivhhvhppqfh l kqfakqhqytn  
afygyprpel t mfmhdia  
haskyql edclvqglvqtl dkqedkwhik ledgqi ittdcvviaigstnipfmpdil kdkqnvni fekehqvvydkt  
dhivgs gitaahla lkl n  
hdndkkih lwnk dieihdfdadpgwlgpknmstfl stksmpernaivqrerhkgsmpheylrlkkhikngrinvhktpl  
itqisdg l intennsvpyq  
qimvatgfeqd fmsqpl ikql iqnydapinecnypviseklewipnlfvagcfadlel gpfgrnvmggrkaaerieqaf l  
klqqysa  
>tr|Q6GAY2|Q6GAY2\_STAAS  
mthll etfemsidhqedglvvi smpvtdkvkqpfgy l hggasialgetacs lgsanlidttkfiplglemnanhihsakd  
ghvtataei ihgksthv  
dikikndkeq l itvmrgtvaikplk  
>tr|Q6GAY4|Q6GAY4\_STAAS  
mnfkl nntlsneintli igipehlnqlerisfnhiditesler lkhqhiigskvgkiyttafdvqdqtyrlitv glgnlk  
trsyqdm lkiwghlfqyik  
sehiedtyll mdsfiskydqlsdvl macgiqseratyefdh yksskkapfktnl n liseslieldfihegisigqs inla  
rdfs nmpnv ltpqtfaed  
ivnhfktkvkvdvkd ydtlvsegfgllqavgkgs khkprlv tityngkdkdeapialvgkgitydsggysikt kngmat  
mkf dmcaanvvgiieas  
rlqlpvni vglacaenmineasmkpddvftalsgetvevmntdaegr l vladavfyanqyqpsvimdfatltgaaival  
gddkaafesnskvi lndi  
lqissevdemvfelpitaterasikh sdiadlvnhtnggkalfaa sfvthfsgqtphihfdiagpattnkasyngpkgp  
tgfmiptivqwlkq  
>tr|Q6GAZ1|Q6GAZ1\_STAAS  
mklkpflpilisgavfivflllpaswftglvnektvednrts ltdqvlkgtli qdklyesnkyypiygsse l gkddpfnp  
aialnkh nankkafllgag  
gstdlinavelasqydklkgkkl t fii spqwfthngltnqnf darmsqtqinqmfqqknmstelkr ryaqrllqfphvhn  
keylksyaknpketkdsyi  
sgfkenqliki eais l famdksp lehvkpatkpdasw demkqkaveigkad ttsnkfgi rdqywkliqueskrkvrrdye  
fnvnspefqd lellvktmr  
aagadvqyvsipsngvydhi gidkerrqavykkihstvdnggkiydmtdkdyekyvisdavihgwkgwvymdeqia kh  
mkgepqpevdkpkn  
>tr|Q6GAZ8|Q6GAZ8\_STAAS  
myfvdkdl tqklaylqal tddyheskhnhyaferiaqml iessvdignmiidafil rdpignykdvidilel envitket  
qqainktv girkqftdyt  
aldiki impmfdalpyyqfitevtflhqenvpvtafgkgenq  
>tr|Q6GB02|Q6GB02\_STAAS  
mrltiyhtndihshlheyerikaymaehrprlnhpslyvd lgdhvdlsapiteatlgkknval lneakcdvatignegm  
tishaelnhlydeakfivt  
csnvidesghl pnnivssyikdidgkivilfaatapftpfyralnwivtdplesikeeielqrgkfdvlivlshcgiffd  
etlcqelpeidvifgshth  
hyfehgeinngvlmaaagygnylgevnltfeahkvvhtakiiplktlpevetsfeeegktlmsnsviqhpvvlkrsmn  
hiteaayllaqsvceytha  
qcaiinagllvkdivkdevteydi hqmlphpinmvrvr lfgvklkei iaksnkqeymyehaaglgfrgni fgyi l ynlg

Tsompanidou\_et\_al\_Supplemental\_FASTA\_File

yihstgryylngeeedk  
eyvltidmytfgryfptlkelkeylmpelfrdifkekllley  
>tr|Q6GB03|Q6GB03\_STAAS  
mlltitllvligglisaiigsivgigggiivptmvylgvehgllhnittqvaigtssvilivtglssslgylkktkqvdk  
ngsiflfgllpgsllgsfi  
sryltfesfnlyfgiflifvailmvrnkikpfkifdkpkyektyvdakgktyhysvplfafittfligiltglfgigg  
galmtplmlivfrfpphva  
vgtsmmiffssvmssighiaqghvawgyaiiliissyfgakigvkvnsiksdtvvtllrtvmlmgilyliirali  
>tr|Q6GB14|Q6GB14\_STAAS  
mqqfkwinilkfamgtsdlvpgvsggtiallgiynqfiasisgifsrrfwsftflipiiigmlamgslsnlfnyll  
sqhhiptmfffngliigiv  
pyllkisnyktsfttkhymmviagiailivitlmngdkhagetltsstliikyfiagmcassamllpgisgsfmllvf  
gfygtvmlaisevklifa  
glpillaavgfgvlagfiisskiiqyflthklmtfaliigfvvgslfavfpglptnivmwfvslvvfiigfivsltlgri  
taene  
>tr|Q6GB16|Q6GB16\_STAAS  
mkk1fglilvltfavvlaacngnksdskitvlgaspaphaeilekakpllekkgyeldiktindyttpnkllkgei  
danyfghtpylntekkdkg  
yki vsagdvhl epmavyskkykslkelpkgatvyvsnpaeqgrflkffvdaglikvkkgvkiedakfsditenkkdikf  
nknksaeflpkikyqnedad  
aviinsnfaielklnpkkdsiavesakdnpyanliavkeghqddkkikalievlskdiqdfinekyngavipak  
>tr|Q6GB19|Q6GB19\_STAAS  
mnsldikdvttfyedkhlifgytptcgtckvsermldianeilqlp1lkidlnfypqfckdmqimstpilllknkde  
vkriyafksvtdl1enlk  
>tr|Q6GB21|Q6GB21\_STAAS  
mterkcacnk1fsilvrgpntenfekkyrcklmgpnkekldsqflqtmqvgvgrnkfceniisvplprliyyty  
>tr|Q6GB22|Q6GB22\_STAAS  
mlniqdvshlskkeqkaynrvesvenglvp1pciemvlkemkeetlnqskiggmpflksfkdipldennvpmvllaqi  
nldnlpeqqelfpvkegi  
qfwissedqmygmsenlkgnninsrlvyikepitdlsleniqahlsldadnedipfsgafsiefrlskqtitctdykd  
edv1alwnkvnpsfalksm  
fggydelmepvcntftakepfnlqgygyfdqidprtdnelkmydrvl1qidstrdgnsiiwgdlgianilvkstdle  
amkfdmymyswdc  
>tr|Q6GB33|Q6GB33\_STAAS  
mdnhnqcnynpqnvsldwecfiisksemldgvpnelintwldkdiitpfsirndeinfktdiwdalihhnwyysn  
>tr|Q6GB44|Q6GB44\_STAAS  
mknkllv1slgalcvsqiwesnravasvgeknpyvseslkltnknksrtveeykkslddliwsfpldnerfdnpeyk  
eamkkyqgrfmaedealkk  
ffseekkikngntdnllyglsheryesvntlkkqseeflkeiedikkdnpe1kdfneeeq1kcdlelnklenqilmg  
ktfyqnyrdvleskld  
limgykdeerankkavnkrmlenkkedletideffsdiidktrpnnipvledekqeeknhknmaqlksdteaaksdeskr  
skrskrs1ntqnhkpasqe  
vseqqkaeydkraeerakflnqkikktpvsvleydfekhgridnendkklvvsaptkkptspttytettqvpmptve  
rqtqqqiinyapklagln  
geshdfthhspttsnhthnnvfeetsalprksgslvgisqidssh1terekrvikrehvreaqklvdnykdthsy  
kdrlnaqqkvntlsegkq  
rfnkqinkvyngk  
>tr|Q6GB50|Q6GB50\_STAAS  
mnlkqsieeiinqpeyepmsvsdfqdalglssadsfrdlikvlveleqsgliertktdryqkhhsskghsklikgtlsqn  
kkgfaf1rpededmedi fi  
pptkinraldgdviveihqskgehkgkiegevkseiexsvtqvvgtysearhfgfvipddkrimqdi fipkgqslgavd  
ghkv1vqitkyadgsdnpe  
ghisailghkndpgvdi1siyyqhgieiefpdevlqaeavpdhi enteikgrhd1rdeltitidgadaklddaisvkk  
langntqltvsiadvsyyv  
tegsaldkeaydratsvylvdrvipmiphr1sngicslnpndr1t1scrmeidasgrvvkheifdsvihsdymtydav  
nqittekdpnireqykeit  
pml1aqdl1snrl1qmrkrrgeidfdineakvlvnedgiptdvqlrqrgegerliesfmlianetvaehfskldvpfiyr  
vheqpkdr1rqffdfitn  
fgimikgtgedihpttlqkvqeevegrpeqmvistmmlrsmqqahyddvnlghfglsaeyythftspirrypd1tvhrli  
rkyli eksmdnkevkrwed  
klpelaehtskrerraieardtde1kkaeymiqhi gdefegivssvanfgmfie1pntiegmvhianmtddyrfeerq  
maligerqakvfrigdtvk  
kvthvdvder1idfqivgmp1pkndrsrpargkti qaktrgksldksksddkgrkkkgsqrkgknerkndksngskhk  
pfykdksvkkarrkkk  
>tr|Q6GB51|Q6GB51\_STAAS  
mqikl1pkpfffeegkravll1hgftgnssdvrlgrflqkkgytsyapqyeghaappeeilksspfwfkda1dgydylv  
eqgydei vvag1slggdfa  
1k1sl1nrdvkgivtmcapmggktegaiyegfleyarnfkkyegknqetidnemdhfkptet1kelsealdtikdqvdevf

Tsompanidou\_et\_al\_Supplemental\_FASTA\_File

dpilviqaendnmidpqsan  
nyiydhvdsddkdi kwysqsgvhviti dkekeqvfedyqflesldwse  
>tr|Q6GB67|Q6GB67\_STAAS  
maqknnnvpmtfddafyrkmakqkfkqreykraaeyfekvlelspddleiqidyaqclvqlgiakkaehlfydniinyr  
hledsfyelsqlnievnep  
nkafllfginyvvsddqdyrdeldqmfvdvkyqseeqieleaqlfvvqilfqylfsqgrlkdaknyvlhqpqevqdhrrvr  
nllamcylylgeydtakal  
yeallqedstdiyalchytlllyntkeneqyqkylkilnkvvpmnddesfklgvlsvlykqyrasqqllyplykkgkfls  
iqmyna laynyylgeede  
shyywdklkqiskveighapwvienskevfdqhilpllsdshyrlygiffldqngkeivmtesiwqvlennnyekl  
yltylvqgltnklfdihr  
glltlyqnelfvsendlmvawinqgeliiaekvldtdvepyigafiylyfknqprnvtkkqittwlgitqykinkmiefl  
lsi  
>tr|Q6GB80|Q6GB80\_STAAS  
mdnvtrykitesssqssqayhlsfelseqqsyasehivrairkrqtilliyavtgagktemmfqgiqyariqgdniaivs  
prvdvvveiskrikdafln  
edidilhqqsrrqfeghfvcvthqlyrfkqhfdtifi devdafplsmdknlqqaalkssskvehatimyatppkqllse  
ipheniiklparfhkkslp  
vpkyryfklhnnkiqkmlrylrdqinnqrytlvffnietmiktfsvyqkkitklyvhsedvfrfekveqlrnghfdv  
iftttilergftmanldv  
vidahqytqeaaliqigrvgrklecptgkvlfhegvsmmiqakkeiqrmnklaalkrgwide  
>tr|Q6GB88|Q6GB88\_STAAS  
mkvlvamdefhgiissyqanryveeavasqietadvvqplfngrhellsvflwsggqyripvhdadmnevegvygqt  
dtgmtviegnflkqkkipi  
vertsyglgemikhaldndakhvvislggidsfdagagmlqalgaqfydgrvvdmrqgagvikyirrmmsnlhpkme  
tariqvmsdfssrlygkqs  
eimqtydahqlnhnqaaeidnliwyfsefksekliaigpverggagggiaavlnglyqaeiltshalvdqlthlenlve  
qadliifgeglnendqlle  
ttlriaelchkhkvaiaicataekfdlfesqgvntamntfidmpetytdfkmglqirhytvqslkllkthfnvev  
>tr|Q6GB91|Q6GB91\_STAAS  
mysnvqpfinsdlnfcfsqyteiesllfnlldspvkytkhiggthhfkystepildilvgvenlhditsldekrlnyvg  
fyrllhkyknkkvmmakfnn  
fheklqqvrllhiqmntqtfesylaaldylstnddiaqlfhtkkhqilqhslltirqyemqkqyfeflckkyll  
>tr|Q6GB95|Q6GB95\_STAAS  
miqvenlktinnqmi ledisi diekgkllstligp ngagkstllsaicrlirfdngevki dgqlmsdyknndlskkisil  
kqtnhtemnitveqlvnfg  
rfpyskgrl tkedhdvnda ldlqlqdi rnrnikslsgqrqrayiamtiaqdteyilldeplnndmkhavqimqtlk  
mlahkmnkaivivlhdinf  
ascysdqivalkngqlvksdlkdnviqssvlsdlydmniqiehirnqriclyfkd  
>tr|Q6GB96|Q6GB96\_STAAS  
mrnnnkimlliavtllismlyl fvgidfeifeyqfssrlrkfiliilvgaaitsvifqaitnrrlltpsimgldavy  
lfikvlpvflfgiqsvvvt  
nyvlnfilitlmitmlfalilfqgikighfsiyfilligvllgtffrsitgfiqlimdpesflaiqssmfanfnsnsl  
vifsavllvillvitilll  
pyldvlllgraeainlgisyekltrillvsvlsvstalgvpitflglitvnlahelmkyehkyiliaticlswisl  
fsaqwvvenvfeattemsi  
lidliggsyfiy llvrrrnaq  
>tr|Q6GBA9|Q6GBA9\_STAAS  
mmqqt lshyfyetfrpgqeeiiskvl dhrnvlglvptgggksicyqvpgl llggttivisplislmkdqvdqlkamgiq  
aaflnsstqkeqqrrieka  
lsngeiqflyvaperfenryflnm lqrikihlfafdeahciskwghdfrpsynviskvftlpqdfthialtatatvevq  
qdireklniaqtdqiktst  
krnllifkvnptyqrkfil dyikthdedagiiycstrkqveelqea lesqkiesviyhaglsnkereeaqndflfdrvk  
vvvatnafgmgi dksnrvf  
vihynmpgdlesyyqeaqragrdglksecillfserdinlheyfitvsqaddydkmgekltkmiqytkkkcleativ  
hyfepnekleecqcsncv  
qqdksynmtqea kmisciarmkqqesysviiqvlrgestdyikygydqisthglmkgyttselshlidelrfkgflne  
ndeilmcdtsikkllsnev  
evfttpfkqkatekvfintvegdrvlfsqlvevrkkl sskltiapvisfsdytleefakrkpaskqadminidgvgsykl  
khycpafletiqnykakv  
>tr|Q6GBB6|Q6GBB6\_STAAS  
mrienyryylteneykqyhiqlkgfikkyvatkladvgevihfaqaqqrqgryvslylsyeaakyfnhvmcths lkgdd  
iyavaysfekaesinstye  
hqtisyvskhhfsfvessevmmtnikrvqqaivegetyqvnytarltdniyypistlyerltqfsngnyta llqtdeiqva  
sispel ffkqgqfnvndv  
iiskpmkgtmprgkteaedqyyktlqtsskdraenmivdl l rndigrisqsgsikvyklffieayktvfqmtsmvsgt  
lktntdl tqiltsl fpcgs  
itgapklntmkyikql essprgiycgaiglllpteddkmi fnipir tieykygqaiyvgagitidskpkdevnefyakt

Tsompanidou\_et\_al\_Supplemental\_FASTA\_File

kilem1

>tr|Q6GBB7|Q6GBB7\_STAAS  
milvidnndsftynlidyiktqtkltvqvvgidnlliedvinmkpkaivispggpnppddypilnevleqfyqrvpilgvc  
lgfqci vsyfggniihgyh  
pvhghttqlrhtnegifgglpqnfvmryhsliadgatfpnc1kitakndeaiimafehitfpvfgvqyhpesilseygy  
rqvelflskvgdycenri

>tr|Q6GBC7|Q6GBC7\_STAAS  
mlnei qilnngypmpsvglvykisdedmtkvvnaaidagyrafdtayfydneas1gralkdngvdredlfittklwndy  
qgyektfe yfnksienlqt  
dyl d1flihwpcadglfl etykamee1yeqqkvkaigvcnfnvhhlek1maqssikpmvnqievhyfnqqelqefcdr  
hdikvtawmplmrnrgl1d  
npv1vk1aekyhktpaqqv1rwhlahnr1i1pkstpkriqenid1ldfn1el1tevaeida1nrnarqgknpddvkigdl  
k

>tr|Q6GBC8|Q6GBC8\_STAAS  
metstiisliifillia1ttvfv gsefalvki ratrieq1adegnkpakivkkmian1dyy1sacqlgitvts1glglwlg  
eptfek1lhpifeainlpt  
al1tttisfavsfiivtylhv1lgelapksiaiqhtek1alvyarplfyfgnimkpliwlmgnsarvii1rmfgvnpdaqtd  
amseeeki1i1nnsyngge  
inqtelaymqni1fsfderhakdimvp1rtqmit1nepfnvdell1etikehqf1trypitddgdkdhikgfinvkefl1teyas  
gktikiakyihelpm1set  
trisdalirmqrehvhms1i1deyggtagil1tmedileevgeirdefdddevndivkidnktfqvngrv1l1dd1teefg  
iefddsedid1tiggw1qsr  
ntn1qkddyvd1t1tydrwv1vseidnhqi1wv1lnyefnearpt1igqsdedekse

>tr|Q6GBC9|Q6GBC9\_STAAS  
mseli1yngkvytedgki1dngyihvkdgg1vaigegddkaaidnd1ttnkiqvidakghv1lpgfidih1hggygqdamdg  
sydglkylsen1l1seg1tts  
ylattmtqstdki1dka1ltniakyeaqdvhnaaeivgih1legpfi1senkvgaqhpqyvvrp1fidkikhf1qetanr1likim  
tfapevegakea1etykdd  
i1fsi1ghtvatyeeaveaveergakhvth1ynaatpfqh1repgvf1gaaw1nda1l1temivdgthshpasvaiayrmkgner  
f1y1ltdamrakgmpegey1d  
l1ggqkv1tvqsq1qar1l1anga1agsi1lkmnhg1l1rn1isftgd1ldh1lwrvt1lnqaia1lgid1drkgsikv1nkdad1lv1l1dd  
m1nvkstikqgkv1htfs

>tr|Q6GBD1|Q6GBD1\_STAAS  
miytvtfnpsidy1v1ftndfki1dgl1nratatykfaggk1ginvsrv1k1ldvesta1lgfaggfpgkfi1d1t1nnsai1qsnf  
i1evded1trin1vk1lktg1qet  
ei1napgph1it1stqfeq1llq1iknttsedi1vivagsvpss1ipsdaya1qiaq1taqtg1ak1lvvdaekelaesv1lpyhpl1fik  
pnkde1evmfnt1tvns1dtd  
v1kygr1l1vdkg1aqs1v1sv1l1ggd1gai1y1dke1sikavn1p1qgkv1vnt1vgsg1dst1vagmv1agiasg1l1tieka1fq1qavacg1ta  
t1afded1latr1daieki1ksq  
vt1isv1ldge

>tr|Q6GBD4|Q6GBD4\_STAAS  
mgkgmtvkn1l1flgfvavi1tvcl1ig1l1latneda1lakvhtint1lnainvstedtykkkmd1lnihtakssevnenmkk  
qn1hf1khrvn1nanksns1fneq  
ecqvi1adryadk1hindnyg1lerisk1tnhgyn1yv1snd1nstskqhs1isnqgi1tk

>tr|Q6GBD6|Q6GBD6\_STAAS  
mk1lqksnht1l1lv1lekgedivec1t1tfaddq1d1t1ftsvsg1igacddv1vk1ffn1l1ttkqyeek1hiteple1l1ts1l1gnisr1  
dng1hfah1hatfgt1qsyet  
fsgh1akaisatae1i1l1tvtd1diqrsfkdavg1ln1l1dpq

>tr|Q6GBD7|Q6GBD7\_STAAS  
mmqsryariy1fl1l1fiv1s1l1fetki1fqf1mt1n1l1flay1pf1els1l1l1l1fkpnkkyewp1l1fi1ys1fiv1l1l1pnt1fymvtd  
l1ih1lnq1fqfn1fyag1ln1se  
wkyf1ty1l1lgv1flavy1m1li1yfe1il1t1tshrw1lnr1livv1lm1f1ngf1giy1gr1fl1r1hsvy1ffnepl1hvl1nhiles1tl  
ktam1fvc1fmvm1qaa1l1lf  
gkgvr1nk

>tr|Q6GBD9|Q6GBD9\_STAAS  
maiav1lnrm1frme1hnp1l1feyiyqqkedi1dacyfi1ipeed1mssas1d1lkaqfyrgt1lqr1fyqs1lhaek1ltpyvmsyddi1s  
fckenni1sevvt1agdim1sy  
h1leeydi1lhqrs1lfneari1avt1l1irgnhyfkask1tmnqqg1epykv1fts1fykkwrpy1l1rhrdv1yhyd1lksfed1viaspdd  
l1vfdd1iaf1gss1qie1eqnw  
qh1fldqdi1qnyes1grdy1l1pevl1tsq1l1sva1layg1l1ldi1e1iefnd1l1arydede1anyeafire1lifrefy1v1lmtqypetsy  
qafk1pkyr1q1ikwsq1neadf  
nawce1gqt1gfpi1daa1ime1l1tqt1gfmhnr1mr1mv1sq1fl1tkd1l1fidwt1wge1kffrkh1lidydaas1nihg1wqwsast1gtdav  
py1frm1fnp1l1rqser1fdaka  
ly1kty1l1pi1fnq1idaky1l1hdt1qrnes1l1feqqie1lgshy1prqmvd1hqekrt1qv1lat1fkald

>tr|Q6GBE2|Q6GBE2\_STAAS  
meqimi1nhyv1hfsr1l1vggf1wranew1kmtake1l1nyf1ine1l1verg1ttmd1hadiy1gdyqces1l1fgna1ld1spel1rnkiqivt  
kcg1i1l1psk1qfd1ftng1hry  
d1l1sskh1ivksveq1sl1n1lvdy1lds1l1l1hr1sss1l1mdpe1qvada1tk1lvkqg1k1ksfgvsn1fnhsqyq1l1nqy1imker1lhi

Tsompanidou\_et\_al\_Supplemental\_FASTA\_File

singlelspyhvdsldqgt  
mdsmynhvqimawspffagkifdkedikaqrimkvvqsiadkygvsdtavmiawlkiphrimpilgtsqlkridqaie  
glqlnlddqswfdiytaii  
gqdiip  
>tr|Q6GBE3|Q6GBE3\_STAAS  
mknkdekirisiiingflgsgkttllthyiselkndekikiimnefgtfdidsnsisneievhslingcvccd1kqelv  
yelkaialkgdvnhviiet  
tgiahplellvacqdpqivnffekpiiygvldatrflerhqytentvslmedqlklsdmiinkidlitddrleridkql  
gmicasiptykttygkvs1  
eeldltvkdreisshhhhhhgiksmytftgpidrqlfyqfimklpesv1rlkgyvsfrdqpnaiyefqayaglpydgi  
gmqlpltiiviigetldtnh  
irnqldmlqft  
>tr|Q6GBE6|Q6GBE6\_STAAS  
mkk1tiilfqykipv1mflvstglgilvitqniliadflakiihqfqlwiv1fillgv111ratvqflnqwlqgd1a  
fkvkhmlrqrviyknnghp  
igeqmtitenidglapfyksylpqvfksmmvpliiiiiampffihfntalimlitapfip1fyiifglktrdeskdqmy1  
nqfsqrflniakglvtlk1  
fnrteqtekhiyddstqfr1tmr1lrsaf1sg1mlefism1gig1valeat1slvvfhnidf1ktaaiaailapefynai  
kd1gqafhtgkqsegasdv  
vfe1leqpnnnefl1kyeenqkpf1q1tdisfrydnsdr1vlnd1nleiyingdqialvgpsgagk1st1thliagvyqpt  
igt1stnqrd1nig1lsqg  
pyif1sas1keni1tmfkdienn1tieev1devg1ldkvqsftkginti1igeggem1sggqmrriecr11vmkpd1vifdep  
atg1diqtehm1qnv1fqh  
fkdttmiviahrdnt1rh1lqrr1yiengr1iaddr1nisvnitengdd1  
>tr|Q6GBG0|Q6GBG0\_STAAS  
mksaegwidelqleshpeggyfretirev1kdgrrapfssiyf11tddnishfhridadevwyhagds1tihminpdge  
yttat1gtdiqngdv1qyv  
vpkg1ti1fassie1fsntys1vgcmcpafefkqfel1fkqselitqyph1ksviyekyalk  
>tr|Q6GBI0|Q6GBI0\_STAAS  
mmkkl1inkketf1tdm1leg1liahpeld1iantvivkkakkehgvai1vsggsghepahagfvaegm1daavcgevftsp  
tpdkileakavtdgdgv1  
lvvknyagdvmnfemaqelaemeginvqtvivrrdiavtnevqrrgvagtvfvhklagylaekgys1teiks1rveallpe  
iks1sigma1iepp1lypttgky  
gfdieddkmeig1gihgek1gihreevkdi1dhivgt1ldelykevtandvil1mvngmggtp1selnivtkyiqn1laartv  
nvakwfv1gdymts1dmqgf  
sitivpnkpeyleaf1lapttsqyfk  
>tr|Q6GBI2|Q6GBI2\_STAAS  
mtnrenstpl1kflay1iig1smil1lit1fist1ligdakiqastiieaifnynpsnqqni1ineiriprniaavivgmalav  
sgai1qgvtrns1adpali  
g1nsgasfalal1tyav1lnts1fli1mfagf1lgail1ggaiv1migrsrrdgfnp1mri1lagaavsam1laalsqgialafr1  
nqvt1fwtaggvsgttwsh  
1kwaip1ligial1fi1ltiskql1ti1n1ges1akgl1gqnv1tmirgic1liami1lagiava1agqva1fvg1lmvphiar1flig  
tdyak1lpl1tal1ggilv1  
vadviary1geapvgai1sfigvpyf1lylvkkgrsi  
>tr|Q6GBI5|Q6GBI5\_STAAS  
mfl1ini1ig1iv1fli1giav1fsrd1rkn1iqwqs1g1ilv1v1n1flawffiyfdwgqkavrgaangiawvvsahagtgfafas  
1tnvkm1dmavaal1fpil1  
ivp1fdi1myfni1l1pki1iggigw1lakvtrqpkfesffgiem1flgntealav1sseql1krnm1emrv1ltiamms1svsga  
ivgayvqmvpgel1v1taip  
1nivnai1ivsc1ln1pvsveekedi1y1s1knneverqpffs1flgds1vlaagk1vl1iiafvis1falad1l1drfin1litgm  
iagw1gikgs1fg1nq1lgv  
fmy1pfal1lg1pydeaw1vaqqmak1ivtnefv1mgeiskdi1asytph1ravitt1flisfanfstigm1igt1kgivdkk  
tsdfv1skyv1pmm1l1sgilv  
s1l1taafv1glfaw  
>tr|Q6GBI6|Q6GBI6\_STAAS  
mdidvnl1lqafvyfksfek1rhns  
>tr|Q6GBI8|Q6GBI8\_STAAS  
mkn1is1ii1l1cl1tsim1tpyaqaansdv1tpvqaanqygyag1saayeptsavnvsqtgq1lyqynidtkwnpasmtk1m  
tmy1l1leavnkgq1s1lddt  
vtmtnkeyim1st1pel1sntk1lypgqwti1ad1l1qitvsnssnaa1ilakkvskntsdfvd1mnnkakaigmk1nthfvnp  
tgaensr1rsfaptkykdq  
ertvttardyai1ld1lhviketpki1ldftkqlaptthavtyy1tfnfs1legakms1pgtdg1lktgssdtany1nhtittkr1gk  
frinqv1imgagdykn1lgge  
kqrnm1mgnal1mersfdqykyvki1skgeqringkkyvend1ydv1psdfskkdyk1lvedgkvhadyprefinkdygpp  
tvevhqpi1iqkantvaks1m  
weeh1plfti1ggac1vag1alivhmi1inr1frkrk  
>tr|Q6GBJ1|Q6GBJ1\_STAAS  
mnv1likkfyh1lvvri1skmitp1qv1dkphiv1mmt1pedikpi1kalinssyqktv1l1t1pkqapyl1sel1sddvdviem1n

Tsompanidou\_et\_al\_Supplemental\_FASTA\_File

rtlvkqikalksaqmiid  
nylll1ggynktsnqhiivdqtwhasgalknfgltdhqvdvsdktmvqqyrkvyqatdfylvgceqmsqcfkqslgateeqm  
lyfglprinkyytadratv  
kaelkdkygitnkla1yvptyredkadnraidkayfekclpgytlinklhpshsiddvssidststlmlmsdiisdy  
sslpieaslldiptifyvy  
degtydkvrglnqfykaipdsykyvteedlimtiqekehllnplfkdwkyntdkslhqlyteyidkmvtk  
>tr|Q6GBK9|Q6GBK9\_STAAS  
mskinhitivlsftkvdangkqtefkrfaninpdasndqiktfsklrierltgetynnielikslsi  
>tr|Q6GBL0|Q6GBL0\_STAAS  
mtktlelsfkssldkpvklq1pqlnvvteqvardsmna1vdlniiksngtitkvhsaqiidktttvlfedkk  
>tr|Q6GBL1|Q6GBL1\_STAAS  
mllfyiigvlvgmlipiqtsvnsr1slytkspfytsf1sfsvgticliilniiinpevftihfynnqsfnytwvvgllg  
vsfltg1llllpk1gatlt  
viatvagqiiimgviidtf1fgatihdfnl1kaigvll1ivgivimnqfnknll1tdqkyl1fwll1gfi1fgffpiqt  
tinsalashthspafaslv  
sftigsitllil1taifnrslk1ktsh1kfgklkpiyftggilgmafvtaniilmphmgaalttligmfgqilmgilidhf  
glfgspkiamtsrktigll  
ciltgii1lrlf  
>tr|Q6GBM0|Q6GBM0\_STAAS  
mlgtde1ykvlyehlgpqqfwwpadndiemmlgailvqnrwrnaeia1nqvkehthfnphilelpietlqsl1hssgyf  
ksksltikt11twlarhhf  
nyqeinerykglrkel1slkgigsetadvllvyifgriefipdsytrkiydklgyentknydq1kkvvtl1phftnqda  
nefhalldvfgkhyfrdkd  
iknydf1epyfkk  
>tr|Q6GBM2|Q6GBM2\_STAAS  
msskl1dkkvs1qtkqvlkqhnekekfefttegtwqqrqsnfiryveqiedatvntikvddsvklirkgdinm1hfve  
gqttttfydisagripldv  
ktlri1hfvsgdggklkihyelyqdnemgisyqeyinykeige  
>tr|Q6GBM3|Q6GBM3\_STAAS  
mkdsenlvffgfevl1fvfykmayiyealikygivn  
>tr|Q6GBN2|Q6GBN2\_STAAS  
metllceteninknpkyriikykeylmidlvstwlalffpminwlipkkyvki1sekdftlnivktakinsfwpvagst  
vlfgvmlrryshl1fvkye  
ysivilicci1ilg1flffly1nqklk1qiynenknksnki1ifptlkslcl1sivlyiylgggsfftiymlltievqni1  
lfitl1fvif1ff1flnmc  
lydnkvhl1fksngiekf  
>tr|Q6GBN4|Q6GBN4\_STAAS  
mlcesrqi1knpkyrv1rynneyfmvd1vstwityffaminwflpkkyakiseneferlnivepvknnvfwpvagssvl1f  
giilrkygnffnvqfekq1  
aitvffimligmli1fyfynkk1l1ki1fntvvnknrvvl1ptfkqgl11vfayfflgsasiftl1tillttesqni1ifl  
twviismfff1vnmasign  
knvhv1rine  
>tr|Q6GBP0|Q6GBP0\_STAAS  
msidmyl1drsnqassvgn1sqtmsnydalekai1tqfindv1kgkaytsakqffstvl1pl1stsmk1sdl1tkqacd  
fvsrytsevdsl1kesel  
eedirs1sqitryen1nn1kkhasdnqqaissnqqi1q1t1gqqkheleek1rkl1refnqkspeifkeveefqkivqqg  
1tqaqnfwnfstnqfnips  
gkel1dwakashkyl1kvamgiehkaeket1nkadvikayakehpeddipksilkyindnkdsikrdiglditst1le  
qginaskfgvfi1taggv  
kqpapnsfvevkrtsgnvfiengskfakggkyl1kgvavvgf1gmydd1anddktfgealshngmtlaagsagtavga  
glatfv1gsnpgvwi1ag  
lamstv1algt1iyqnni1fg1kdkvdwvghkidnsidvkkttksmsdsvgnavseakni1snhinpmkwaw  
>tr|Q6GBP1|Q6GBP1\_STAAS  
mnefn1avhvl1af1tkhshkfnss1ael1tcl1npvql1rvttq1vd1lkmintirgkdggyl1sndrsadvslatlykhf  
v1ekehtr1ftgdegshc  
qiarniattmshyeqdeqni1infykgtikdviediqked1cheni  
>tr|Q6GBP2|Q6GBP2\_STAAS  
mktyd1ivi1gfeagkt1akyaastgqhavieqspkmyggctinigciaskt1vhdg1legksfeasynrknvna1ln  
knyh1laddnni1dv1dfka  
qfksntevn1ldqhddi1adsitaphi1intgatsvipnikgl1dqakhvfdstg1lninyqpkh1vivgggyialefasmf  
an1gskvtv1ergesfmp  
edqdvvahait1denkgt1lhtnvetel1ssdnhhttvhtnvgnf1eadav1laigrkpn1tdal1entdiel1gdrgeikvn  
ah1qttvphi1yaagdvkgg  
1qftyis1ddyri1ksalygnqsr1tdnrggvpytvfidppl1svgl1tskeaaaqhydyteh1llvsai1prhkinndprg  
1fkvvinnenmi1gatly  
gkqseelini1kla1dqni1pytv1rdniythptmaesfnd1fnf  
>tr|Q6GBP4|Q6GBP4\_STAAS  
miqvkapgklyi1ageyavtepgyksv1ia1drfv1tatieeadqykgtihska1lhn1pvtfsr1dedsiv1sdphaakq1ny

Tsompanidou\_et\_al\_Supplemental\_FASTA\_File

vvtaiejefeqyaksdiam  
khfhltidsnlddsngkhyglgssaavlvsvikvlnefydmklsnlyiyklavianmklqslsscgdiaavsvysgwlays  
tfdhewvkhqiedttveev  
liknwpghieplqapenmevligwtgspassphfvsevrkksdpsfygdfledshhcvekliahfktnnikgvqkmvr  
qnrתיqrmdkeatvdiet  
eklkyldiaekyhgasktsaggdgcgitiinkdvdekiydewtkhgikplkfniyhgg  
>tr|Q6GBR3|Q6GBR3\_STAAS  
msnainietlfniiientlnrlgdlfsviaiaitsflyihivtsyliknmvlqyqiylglkfdynrqvylilikilih  
yimlticilkftlseyg  
>tr|Q6GBR6|Q6GBR6\_STAAS  
maefsdylilidelkmtlshveadefstfaskilhaehifvaggrsgfvansfamrlnqlgkqahvvgesttpaiksnd  
vfviiisgsgstehlrllad  
kaksvgadivlittnkdsaignlagtnivlpagtkydeqgsaqplgsifeqasqlfldsvvmglmtemnvteqtmqqnha  
nle  
>tr|Q6GBV4|Q6GBV4\_STAAS  
mkydlttqdstikrnnaindkdfeklvmqlpilirriktfgfnhydledlyqeilirmyrsvqtfdfsgeqpftnyvqc  
litsvkydylrkylatnkr  
mdhlineyrvtypcaikrydvennylnklaikelirqfkylsvfekdvmylmceqykpreiaqlmhvkekviynaiqrck  
nkikryfkmj  
>tr|Q6GBW2|Q6GBW2\_STAAS  
makkkvifecmacgyqspkwmgkpcngawnqmeivekaanpkhgvtkelagkvqklnsikhettprvlt dsae frv  
lgggivsgslvliggdpgi  
gkstlllqicaslsqkkkvllyitgeeslsqtklraerldedsselqvlaetdleviyqtvkeeqpdlvvd siqtiyhpe  
issapgsvsqvrestqslm  
niakqmniatfivghvtkeqgiagprllehmvdvlyfegdeh hayrilravknrfgstnemgiefmkqsglkgvnpse  
mfleerstnvpgstivatm  
egtrpllievqalvtpttfnprmatgidhnrslmavlekkenyillqqqdayikvaggvkltepavdlsvivatass  
fkdkavdgl dcyigevglt  
gevrsvsrieqrveaaklgfkrvii pknniggwtypegigvigtvthealsfalhs  
>tr|Q6GBY3|Q6GBY3\_STAAS  
mahtitivglngyiddlplgiyfkfktqdkvyartldhpvieslqdel t fqsfdhveyeahdqfedvyndivaqlveaan  
ekdivyavpghprvaettt  
vklalalaktndtidvkvlggksfidvfeavnvd pndgftlldatslqevtl nvrthtltitqvysamvaanlkitl mery  
pddypvqivtgarsdgadn  
vvtcplyelhdhenafnnltsvfvpkii t stylyhdfdfatevidtlvdedkgcpwdkvqthetlkrylleetfel feai  
dneddwhmieelgdi llqv  
llhtsigkkegyidikevitslnakmirrhphifgdanaetidldkeiwsakdaegkqprvkfekvfaehflnlyektk  
dksfdeaslkwlekgesn  
t  
>tr|Q6GBZ1|Q6GBZ1\_STAAS  
mkiinttrlpealgyshatvngmvytsgqiplnvdgeiv sadvqaatkqvl enlkvvleeagsdl nsvakatifikdm  
ndfqkinevyggyfnehkp  
arscvevarlpkdvkveielvskikel  
>tr|Q6GC03|Q6GC03\_STAAS  
mpnviqvqfkgakgleyytpndiqvdi ddwvveskrgieigivknp lmdiaeedvvlplknii rvaddkdidkfcner  
daenali lckdivreggl  
mrlnvceytl dkskvi fntaddridfrklvki laqhlktrielrqigvrdeakllggigpcgrslccstflgdfevpsi  
kmakdqnl slnptkisgac  
grlmcc1kyendyyeevraqlpdigeaie t pdngkvvalnildismqvklegheqpleykleetm h  
>tr|Q6GC10|Q6GC10\_STAAS  
mnyqalymyrpqs fedvvgqehvktlrnaiskekqshayifsgprgtgktsiakvfakainclnst dgepcnechick  
gitqgtnsdvieidaasn  
gydei rni rdkvkyap selkykvyiidev hmlttgafna llktleppahai filattephkipptiisraqrfdfkais  
lnqiverlkfvadaqqiec  
edealafiakaseggmrda lsimdqaiafgdgtltlqdal nvtgsvhdealdhl fddivqgdvqasfkkyhqfitegkev  
nr lindmiyfvrdtimnkt  
sekdt eyralmnl eldmlyqmidl indtlvsirfsvnqnvhfevllvklaeqikgppqvianvaepaqi asspntdvl lq  
rmeql e qelktlkaqgvsv  
apvqksskkpargi qksknafsmqqiakvldkankadikllkdhwqevidhaknndkkslvsllqnsepvaasedhvlk  
feeeihceivnkddkrss  
iesvvcni vnkvkvvqpsdqwrvt eylnqrknegddmpkqqaqtdiaqkaktl fgeetvhvidee  
>tr|Q6GC12|Q6GC12\_STAAS  
mwevaflyvkd fsseidvqfe  
>tr|Q6GC22|Q6GC22\_STAAS  
mskmi kcvclveetadki llqvrrnrekyypggkieegesrvqallrevkeelnltl t mdeieyigtivgpaypqqdm l  
telngfral tkidwenvti  
nneitdi rwidkndali apavkwietyggkhdk  
>tr|Q6GC25|Q6GC25\_STAAS

Tsompanidou\_et\_al\_Supplemental\_FASTA\_File

mkrliglvivalvllaacgsnndkkvtigvasndtkawekvkelakkddidveikhfsdynlpnkaldngdidmnafqhf  
afldqykkahkgtkisals  
ttvlaplgiysdkikdvkkvkdgakvvi pndvsnqaralklleagliklkkdfglagtvkai tsnphlkitavdaqqt  
aralsdvdiavinngvatk  
agkdpkndpifleksnsdavkpyikivavndkdldnktyakivelyskskaqkaqedvkdgekpvnl skdeikaietsl  
ak  
>tr|Q6GC31|Q6GC31\_STAAS  
mgiapevwmwrdrvdi dgvvcgeilahvysvep gilm  
>tr|Q6GC35|Q6GC35\_STAAS  
mkrtkgeieaeiskaitqwekdf lgrgs lsvksdilrdmviislqgiltpaeyrvdstnegllnikrtrselvesgeqd l  
ndiifkitgikvmsfhsdl  
stvtgeriivfklednlekhi  
>tr|Q6GC37|Q6GC37\_STAAS  
mlsfqllfslfvialialisglflapvmpmryiklhlyilvmpvl favigffgihgqhvlgpfkidrlswllagfvma  
lgfiikfsmryllgdhhy  
rhyfplftaitsfaslawmsedlrmlalcwgmtllcltllmavnrfwkvpresaklssmtflcgwafvgaivtiyatg  
ewrvpqhmsnstwsltnv  
llvlavmipaaqpfhrwliesvtaptpvsaimhagivnaggviltrfapifdngfalsllilssisvllgsgislvqv  
dykrqlvgstmsqmgfmlv  
qcalgvysaaiihlihlhgi fkatlflqsgsivkrfnipkqasakdaygwi vmgrv laiivaflfwmsdrsayevlsali  
lawsllvswnqmvafskgr  
marlvgmiliaivtfiyvithnyfydvlqnitthattptvsviisvvilifgslsivarhryskgfavlyvwlvnlg  
earskaieshpnlylky1  
>tr|Q6GC38|Q6GC38\_STAAS  
msevnaainvlltlvtrvfqskratqfctwpiylgidyeh  
>tr|Q6GC39|Q6GC39\_STAAS  
makipvtvlsy lsgskttllnhilqnregriavi vndmsevnikdlvadgggl srtdek lvelsngcicctlrddll  
keverlvkkggidqivies  
tgiseppvaqtfsyidde lgidltaicrldtmvtvvdanrfvhinsedllmrdqsvdetdersiadllidqvefcdv  
liinkidliiseelaklek  
vlsalqptakiiktinsevd lkev lntqrdfekasesagwikel esgghashtpeteeygissfvykrrlpfhakrfnd  
wletmpnvnvrskgiwla  
qynhvacllsqagsscnihpvtwyvasmseaqqtqi laerqdvaaewdpeygd rhtqfviigt dldeekltkel dactlvn  
aqeidadwqqfedpyqwqi  
rpar  
>tr|Q6GC40|Q6GC40\_STAAS  
mlfvilvlyiigitfllsvfgskteglstkhtlytigsaiitiaifisigyaiqyltaalygl  
>tr|Q6GC43|Q6GC43\_STAAS  
mkdkyki dpgpi kynteettaiskisyeienaklygiksktigrqidqlkeakkfpsnleyvdsytdslngvttsaflnk  
dtgkvtlqmtgtniqgeaf  
kklkegefsrqnftnaletvkdgyadlkilyspasdqnyrantqefinkikskydidfitghslggrdavvl gmsngip  
nivvynpapisitslnpns  
pdgkrllelyknykgntrfvaenda ltenlkkykhyvffgndkvfngkghemegflteeqkaikke lklqgyaean  
nksfvkhsnnaisklasie  
llranmmttnggg lsssqkvleslta ltaqsfsq liddeinqikkmynekkkkf gknwedaqkagkavgedlsvngvl  
naldegvnessmvrepeq  
misakerqlstigssvsnyimrvr l sineivdkdqv lasqiggll  
>tr|Q6GC49|Q6GC49\_STAAS  
mkfkvlvatamvgvlatgvvgysnqadakvysqnglv l hddanflel syidvll dknadqatkdn lrsyfadkglhs  
ikdiinkakqdgfdvskyey  
hvk  
>tr|Q6GC50|Q6GC50\_STAAS  
mrenfklrkmkvglsvaitml yimtngeaeasegsqtvknpkv nateeeikvgsqpvnqnevsseqtkknfvnl dpikp  
gaqkvtgttlpshii l mni  
dgksadsvdggsdlvfadengrfeyplhnrki vhnqei evsssspd lgddeedeveedstekagteentdakatytt  
pryekayeipkeqlkekdg  
hhqvfi epi tegsg iikghtsvkgkvalsinnkfinfeerakdgiskedt kassdgvwmpinekyfd fdfkkn pfdnle  
lkkndeisl tfapddede a  
lkslifkktvts ledi dkaetkydhtkvekvvlkdvkedlhvdei ygslyhteaggkil dkqgtke itgktkfanavvk  
vysdlgdaq lfpdiqvdn  
gkfsfdaekagfr lqnget lnfavvkpitge llhgfvskyidvyespekkerefeek lentpayhklhgdkivgydvq  
gnpstwfyp lgekkverka  
pklek  
>tr|Q6GC52|Q6GC52\_STAAS  
msntqkknvpel rfpgefegeweeklgdl ttkigsgktpkgsenytnkgipflrsqnrngkln lndlv yiskdiddem  
knsrtyygdvllnitgasi  
grtainsiveihanlnhvcii r l kkeyy nffgqyllsrkgkrki flaqsgsreglnfkeianlki ftptifeeqki  
gefiskldrqi eleekle



Tsompanidou\_et\_al\_Supplemental\_FASTA\_File

llqqkkgymkqifsqelrfkdeegkdypdwksksiqeifenkgtaletefnfdgnykvisigsystyndqnrvn  
knkktekyilskgdlamvl  
ndktkdgiigrsifidkdnqyinqrterlipfaendnkflwflmntdlirnkikgmmqgatqvyinyssiklisisqlp  
lleqqkirgfllevlsgit  
tkqlhkidqlkerkkafllqkmfi  
>tr|Q6GC53|Q6GC53\_STAAS  
msitekqrqqaelhkkllwsianlrgnmdasefrnyilglifyrflsekaeqeyadalagedityqetwadeeyredlk  
aelidqvgyfiepqdlfsa  
mireietqdfdiehlatairkvetstlgeesendfiglfsdmdlssstrlgnnvkertaliskvmvnlddlpfvhsdmeid  
mlgdayefligrfaatagk  
kagefytpqqvskilakivtdgkdklrhvydptcgs1llrvgketqvyryfgqernnttynlarmnmllhdvryenfd  
irnddtlenpafllghtfda  
vianppysakwtadskfenderfsgyglapkskadfafiqhmvhylddegmavvlphgvlfrgaaegvirrylieekn  
yleaviglpanifygtsip  
tcilvfkcrqedyvlfidasndfekgknqnhltdaqverintykrketidkysysatlqeiadndynlnipryvdtf  
eeeapidldqvqqdlknid  
keiaeveqeinaylkelglvlkde  
>tr|Q6GC54|Q6GC54\_STAAS  
mhqsislscfglrfmdstpi finikipptsksfstsqtqm1  
>tr|Q6GC57|Q6GC57\_STAAS  
mmkftaiakai fvlglittsvmitenqsvnakgyekmnrlydtnklhqysgpsyeltnvsgqsqgyydsnvllfnqq  
nqkfqvfllgkdenkykek  
thgl dvfavpe lvdldgrifsvsgvtkknvksifelrtpnllvkkiddkgfsydefffiqkeevslkeldfkirklli  
kkyklyegaadkgrivnm  
kdenkyeidlsdklgfermadvinseqiknievnlk  
>tr|Q6GC58|Q6GC58\_STAAS  
mklktlakatalaglittgvitsegqavqakekqervqlydikdlhryssesfe fsnsgkvenyngsnvvrfnqenq  
nhqlflsgkdkdkykegle  
gqnvfvvelidpngrlstvggvtkknqssetntplfikkvyggnldasiesflinkeevslkeldfkirqhlvknygl  
ygttkygitfnlkdgek  
qeidl gdlqfehmgdvlnskdiqniavtinqi  
>tr|Q6GC59|Q6GC59\_STAAS  
mklkalakatlvlglatgvittesqtvkaaestqgqnykslkyyskpsielinvdglyrqhltdkgayvwknlkdy  
igllgedskkfksdvygd1  
daflvieeepvkgrqysiggi sktnskefkerevdvkvtrkadrdttstkdsfkitekieslkeldfklrqklmkeenl  
yda inhrkgki vvkmedk  
fytfeltkklqphrmgdtidgtkikeinveleyk  
>tr|Q6GC60|Q6GC60\_STAAS  
mkmaaiakas lalglatgtitslhtv naseheakyenvtkdifldr dyysgaskelknvtgyryskggkhylifdkhq  
kftriqifgkdierfkark  
npgldifv vkearenrgtvfsyggvtkknqdaydyinaprfaqirdegdgiatygrvhyiykeieslkeldfklrqyli  
qnf dlykkfpkdskikvim  
kdgyytfelnkklqtnrmsdvidgrniekieanir  
>tr|Q6GC62|Q6GC62\_STAAS  
mkmrtitkts lalglittgaitvttsvkaekiqstkvdkvptlkaerlaminitagansattqaantrqertpklekap  
ntneektsaskiekisqpk  
qeeqktlnisatpapkqesqttesttqqtktmtppstntppmqstksdtpqsptikqaqtdmtpkyedlrayytkps  
fefekqfgflkpwttvrf  
mnvipnrfiykialvgkdekkykdgpydnidvfivlednkyqlkkyvsgitktnskkvnkvelsitkkdnqgmisrdv  
seymitkeieslkeldfkl  
rkqliekhnlygnmgsgtivismknggkyt felhkkqlqehrmadvidgtnidnievnik  
>tr|Q6GC63|Q6GC63\_STAAS  
mkmksivkislllglatgvnttektepvhaekkpivisenskklkayytqpsieyknvtgyisfiqpsikfmniidgnsv  
nnialigkdkqhyhtgvhr  
nl nifyvnedkrfegakysiggit sandkavdliaearvikadhigeydydfpfkidkeamslkeidfk lrkylidnyg  
lygemstgkitvkkkygk  
ytfeldkklqedrmsdvinvt didrieikvrka  
>tr|Q6GC64|Q6GC64\_STAAS  
mkfkaiakas lalglatgvitsnvqsvqaktevqqseadlklyyngpsfeykkvtgygfiegkdrfidfiyngqynki  
slvgsdkdkyneevnpdidi  
vfvvregngrqadnhsiggitktnrgvyydyihtpileikkgkeepqsslyqiykedislkeldfklrkqlisqsglysn  
glkqgqitit mndgtthti  
dlsqklekermgesidgrqiqilvemk  
>tr|Q6GC65|Q6GC65\_STAAS  
mnimltgatghl gthitnqai anhidhfhigvrnvekvpedwrgkvprvql dyfnpesmvevfkgmdtvvfipsi ihpsf  
kripevenlvyaakqsgva  
hiifigyadqhnnpfhmspyfgyaarllatsgidytyvr mamypd lkpylpelmmhkliypagdrinyitrndiar  
gvia iiknpdtwgkrylls

Tsompanidou\_et\_al\_Supplemental\_FASTA\_File

gysydmkelaailseasgteikyepvsletfaemydepkgfgallasmafydagargllldqesndfqqlvndqpqtlsqsfllq  
eni  
>tr|Q6GC67|Q6GC67\_STAAS  
mvnigvvgfgglvwrfgglvwrfggcerigcgl  
>tr|Q6GC68|Q6GC68\_STAAS  
mekvailvdggyyrkisakvygkvtakeradelysycnrhlkethfkeeiynklyrifyydcpidkivyhpllkkvnf  
sntdtkkwtedffkemskk  
rkvalrlgeleysveynlkysitkklngsidlndlkekdfsllsqkgvdmkigldiaslsfkhqvdkiliagsdf  
vpaaklartegidfvlds  
gadirnllshidgrrtcdekfkfylnqlfk  
>tr|Q6GC69|Q6GC69\_STAAS  
milisscligdnvrydggnglnvrllklidsgkaihacpellglliprepaeiigdgfdvwndaakvvtisnkdvtd  
ykhgaitlklkkyqcdt  
vilkanspscgsgeiydgnftgnkkkgvgvatalinegikvydentffdqnmnetivhek  
>tr|Q6GC71|Q6GC71\_STAAS  
mnimvpeekgsitlskeaaiifatakfkpfhnriknpqktnpflklhenkks  
>tr|Q6GC72|Q6GC72\_STAAS  
mktknlhfiysidlnlikdnalfhnyisqetkkfqtlnpsiahflkhaikmndqnsirtyliidksdleimgyfc  
lkivniklekdvsgtkkd  
idlknidydlntntmdkgrvydenglinkdydvfeqfeneeyeatlidketgeiikfnsieakssalplvilaava  
dte  
>tr|Q6GC76|Q6GC76\_STAAS  
mknllvtgyttgilkiigqmllavaisltiyfayimesllfgflqtvtslvllicslvlawtsfivtllliivlsgify  
fgend  
>tr|Q6GC79|Q6GC79\_STAAS  
mvrllwatscdemmgvisveigvpislwgsavnyyqkiveptiwilcpigifllnsi  
>tr|Q6GC80|Q6GC80\_STAAS  
mdksleinlkelegimykekvidvkeydnlkvtfetldapkseiptpftieqmlklykletknylfeikskekcvellhs  
vgyynlkhfmynefgkdep  
knfdevyilykfdryllkqlfslvnmlethirniilevymleieynnkpstlfyldklyfekvndeykysakklefnr  
lqnvwraiekkksndnvk  
hnikkyniipawvlfqnsfgdlstfyrtplyrnkvskrienliekntgisiklpekllcawlnsirflrnriahtdi  
iyginftntcakhhsdeem  
yvniekykyqqrvtflamkkifmsmpenniewnetltkienksehniklsrlgviennlsyfkik  
>tr|Q6GC83|Q6GC83\_STAAS  
mknllsvghllamyagai lvpivgtslkftpeqiaylvtvdi fmcgvatflqankvtgtglpivlgctftavapmili  
gqtkgidvlygslfsgil  
viiipffshlvkffppvvtgsvvtiiginlmpvamnylagggakdygdvknillgmltliiilvlqrfttgfikiai  
liglvtigtigagllgmvd  
nqvnhagwlgipvpfrfsgfsfdvtstlvffivaivsliestgvyhalseitgkklerkdfrkgytaeglaivlgsifns  
fpytaysqnvglvslgsk  
knnviygmvlilicgcipklgalaniipvlpggami amfgmvmaygsilghidfkqnlliiavsvglgtgisavp  
qafkglgqfawltqngiv  
lgaisaiilnfffnngikyqteenvk  
>tr|Q6GC87|Q6GC87\_STAAS  
mltkefaqrvelsekqvrkivqhleergyqlskteyrgreatdfkeediefkdiadvkqtnsydlafdelekekdfllq  
vivkndknlptnqnvagl  
vedlrleiqmreerhllgqmmnqvhqqqelkelqnltskidsnseslkaiqtsqeaieaqasqakvlaestnkvek  
navtedkadskskvagvn  
tstdaktadkdnagdgttkvdkedqisateai ekasveqskngnaaetsnkeatidaeaqhdaeqqvaeahaeaskqa  
tsndsleakaendstasgs  
emsepkpqeekkgffarlnl  
>tr|Q6GC93|Q6GC93\_STAAS  
mldvhfiyprklqnaceyfnlptqkegfevtmhalrpenihkiyhdmdkteqkfietlisngnpvtiinkrdvnllklt  
hlgfvyqlnedeffvnnff  
lryinsevlndaygefesldtinhmnlneevlrvrqhtrlndvtlehallktndelkticrqygikgfsnknkqnlvel  
imtaffnnhii eqvfsna  
tlfefdilssilesddnyrlnneitkfelqlinfdnfltihfyyyydfeydclilpndvrkhienvnqvngndfekav  
nqfvneqtienslaefkna  
lelsfmedevldmllededfgttdslrsdaitqliseikkglidkkdilplriilgsvnlygilstnhllyllqrfyda  
tfskeelqysldttagtel  
yyveddfvfhpvlfdvveseasgidisddgyyvpasveeliyydrhhyllksdqakeitsylrkqinmknkiekeyvne  
iimllrtiptskliqpimq  
lfidnailnvnqndalliekatharnhlrlwslqghrdipn  
>tr|Q6GC94|Q6GC94\_STAAS  
mkkrlilstflasalitgcasdqsdnedhhtstgi hapksakletkdi fnsdkknsdisdaemkqai ekylsvnsdil  
enkyimqhkldkqidsqtk  
vtekqaetlshlslavkndlhfkfvtennipkeykpvellmnyfkalnstianvdedieklsyqpqnkinvvdvptk

Tsompanidou\_et\_al\_Supplemental\_FASTA\_File

yagdvnkkqqdkikdf1ks  
kg1ksdvidk  
>tr|Q6GC95|Q6GC95\_STAAS  
mdsefkaikkasnsnm1ldaqqmmlaklishf  
>tr|Q6GC97|Q6GC97\_STAAS  
mtiylvrhgesksnydnkhfrsyfcgqldvpltdtgtsaddlcydfkekqikhvyvsd1l1rtqqtfehifpydiasttt  
p1lrerslgvfegeykdei  
sanpkyekyfnppfkdfrrhsfsqapegesyedvyqrvehfmnhvvnedtqkddivivahqvvirclmvyfnkvsreea  
vd1kvenckpyiie  
>tr|Q6GC98|Q6GC98\_STAAS  
mttqsfi fmni1ldgatqrhpfficcqilaf1fpkfphin111fnpilstfsniihidhfhankkddn  
>tr|Q6GCA2|Q6GCA2\_STAAS  
mktilktitylaltiigayaa1f1ktidshg1tdqfnplvkedvsyvkttevestrmdq1rsysqsafnkegketq1my  
tatfdv1kphrylki1thkgh  
hvetfeevkqvpkks1rqiesiiacl1yymvq1  
>tr|Q6GCA4|Q6GCA4\_STAAS  
migelklekddt1aeikpmlnfdeqiak1kqmni1ffniidtekane1l1rknnhffklayfrknfekknnggyfiefay1sd  
1atidmkl1rytm1h1t1di  
ehs1kclv1kl1t1ennqedgykiidef1cidksysnsnfdtnsrtpvevmetkiknkneifk1hmnkrqqlpekl1nkyqqn  
ppawvciefmq1lgfvsf1  
nfyykkyndeelrvani1mplvkn1rnksahnqpiian1nydsrspqylfekgnnigisrnmf1giknfidtfatle1hnq  
vcsnai1qaryhd1dq1qk  
rykrnesyynnalai1krffia1dkii1dfnrpkv  
>tr|Q6GCB2|Q6GCB2\_STAAS  
mse1sksedqritktkdeqikqidi1s1dikpnpyqprktfdenh1nd1adsikqygilqpiv1rktvqgyyivvgerrfra  
skiag1kyvsai1kd1tde  
dmmelavien1qred1nai1eeaesyr1mtd1kitq1qevakr1sksrpyianm1r11h1pkkiadm1vkdgr1tsahgr1  
1aikdeqqm1r1akrvvke  
kwsvry1enhvne1knvssksetdkvdi1tkpkfikq1qerq1reqygtkvd1siksvgkis1fefdsqedf1riieq1nrr  
ygk  
>tr|Q6GCB3|Q6GCB3\_STAAS  
mkdtq1aqit1tddstg1aianp1h1staykhpkl1qstgfdytrtknptrstfetcfak1ehgiasfatssgmsaiql1c  
n1fkphdei1vsfd1lyggt  
fr1fefy1eqqynikfkyvdf1t1yeqvekei1dktval1fiep1snpqmiaidv1kpyyq1ckakg1l1siidntf1tpyl1stp  
1aegadiv1hsatky1ggh  
ndv1agvvtvkdes1aq1l1fd1fhnm1tgat1spidsy1l1rg1kt1h1rieraqsnark1lakkcqs1qaidev1lysgqtgm  
1s1r1nkaysvak1len1d  
ici1faes1ggtet1vtfpytq1thvdmpdaekdkrgideyl1r1sl1gvenyedierdi1qaldkaqigeiv  
>tr|Q6GCB9|Q6GCB9\_STAAS  
mvnal1tpkh1aekragfhe1ffd1ifvya1qkiahv1l1ttqngsisad1ffkyivms1flw1lmwshqtfftnrfgqvtfk  
dvs1fmmf1nmf1mvf1sns1  
ypdfekt1ffp1fl1cva1my1sig1qy1l1h1rtg1dygd1kr1tcqafasvafvis1f1s1f1sl1vl1pqs1hyipg1flgv1faat  
g1ipf1qky1lv1spvnm1mh1  
verfs1l1t1ii1fge1v1lg1lassfsidhfsyiy1fqm1ilis1fgvywi1itenyinhk1l1ssigf1r1syth1l1inialgvi  
naa1v1fsn1nk1nd1l1fein  
mmy1sv1li1fyig1lw1itpy1fhne1tnaky1iss1gilvvsy1i1s1l1fkghdqvmi1svsvatf1cim1liy1fknqr1rnkhe  
>tr|Q6GCC2|Q6GCC2\_STAAS  
mki1ryig1y1l1gg1vgg1iggi1gnfdg1gien1tfaty1tnvv1visivati1i1ilveaiv1lmnqrralkykr1lvdeevd  
idatdqy1ellanryv1ngs  
ilsviq1t1iafv1l1i1fvvg1qaeanam1fflipffasai1fntq1ft1fnrk1fddrmpkiadknytekr1leildegerhie1  
ialfktyain1sil1ilai  
figsysiatg1ngsfs1l1li1iaifiynafsy1l1krrrfy  
>tr|Q6GCC6|Q6GCC6\_STAAS  
mvhfse1l1rhrl1vkil1svitv1vyv1vss1fw1mtpfityitrahvs1hafs1f1temiqiyvmi1ffiafclispvmfyqlw  
afvapg1lhnerqfiykys  
ffsv1l1fi1fgvafafyvgfpmi1qfalk1sl1t1nispvigfakylie1l1rwl1ftfgil1fq1pil1figlakfglidtts1k  
hyrkyiyfacv1las1iap  
pd1t1n1i1l1t1p1l1l1fefstfivkftyrgkp1pth  
>tr|Q6GCC8|Q6GCC8\_STAAS  
mtneyeqvndstqfsrrtfl1kmlgiggagvaigsgvgsms1fksmfntpedpekdayefygvqpgittptqktcnfval  
d1kskdrdaikamf1kwtv  
madrmm1dgdkvgkpsnnp1mppvdtgesig1lgask1titfgi1skslmkkig1l1sskipdafkd1lphfpndq1liddysdgi  
miqacsndsqs1fvahv1n1  
vrpfrdi1kv1rwaqsgfi1sakgk1etsrn1mafkdgtinprksnq1kdyvfiddgwakhgtycvvrriqihietwdrta1e  
eqeatfgrkrhsgap1tgg  
kefdeid1k1akdshgey1idkda1tr1akeantsi1l1rrafnyvdgtdddrtgnfetg1l1fiaf1qkatkqfidiqn1l1gsnd  
k1neyithrgsasf1vlpg  
vskggy1get1fd

Tsompanidou\_et\_al\_Supplemental\_FASTA\_File

>tr|Q6GCD3|Q6GCD3\_STAAS  
maklemnkntplefglyslgdhllnplkgekvsyegrineieaskladeagidvfavgeshqehfttqaptvvlgaiaq  
atkhikvsssstiiisatdp  
vrvfedfatldlishgraeivagrasrtgfdlfgydldkydelfeeklglllelnkteritwsgkyrpeInmki fprp  
idntlpiwrvaggppasai  
kagkqgvpmmitlpgpamnfkgsidayrqaateagfdaspkslpvsiaslfytaettqdamrefyphlntgmsfirvgv  
ypkqqfanspdyrealmvq  
spqqiiekilyqhelyghrfmaqldfggvpfenvmknieligndiipaikkhlsk  
>tr|Q6GCD4|Q6GCD4\_STAAS  
mni vghhhismytkdakrnkdfytnvlgrlveksvndpnsmyhlfygdevgtagtilsfefipnaghkqpgtetiyrf  
sllvpnqaalhyfekrldn  
ngitserlyllyggqevfkdeddleii llvndsfevphqwqhnyseipqayqilgigpvelrvrnaartveflenvlgy  
rkrdnksfdvltlapqgly  
sdfvviqqgqrpggryihhiaintpqmsdl daiykkllqqqtqsnsgiidryffkslyyrhnsim yefateapgftid  
tpleqlsqllnlpdfl eae  
reqiesklhei  
>tr|Q6GCE3|Q6GCE3\_STAAS  
mmnkvlvtggtgfvgrmriisrlleqgyevqtti rdlskadkviktmqdnqisterl mfveadlsqdehwdeamkdckyv  
lsvaspvffgktddaevma  
kpaiegiqri lraeahagvkrvmtanfgavgfsnkdksitneshwtne depglsvyekskllaekaawdfvenenttv  
efatinpvai fgpsldahv  
sgsfhl lenllngsmkrvpqiplnvvdvrdvae lhilamtneqangkrfiatadgqinlleiaklikekrpeiaqkvstk  
klpdfvlslgakfnhqake  
gkllldmnrnsnerakilgwepiatqkeailaavdsmakyhli  
>tr|Q6GCE5|Q6GCE5\_STAAS  
mmqsskwnamsllmddktkqaevlrtaideadaivigigagmsasdgftyvgerftenfpdfiekyrffdmqlqasl hpyg  
swqeywafesrfitlnyld  
qpvgqsy lalkslvegkqyhiitnadnafdvadydmthvfhiqgeyilqqcsqhchaqtyrnddlirkmvvaqqdm lip  
wemiprcpkcdapmevnr  
kaevgmvedae fhaqlhrynafleqhddkvlyleigigyttppfvkhpqrmtrknena lymtmkkayripnsiqert  
ihlstedistlittalrnds  
ttqnnigetkdvlnrtd  
>tr|Q6GCF0|Q6GCF0\_STAAS  
mteikdkvjtkdafalpytiikaknqptkgaivyihggglmfgkandlspqyidiltehydliqlsyrllpevsldcie  
dvyasfdaiqsqysncpif  
tfgrrsgaylslliardrdidgvidfygysrintepfkttnsyaykiaqsvnetmiaqltsptpvvdqiaqrflivyva  
rgtgkwinminiadytdsk  
yniapdelktlppvfi ahcngdydvpveesehimnhvphstfervnknehdfdrpndeaitiyrkvvdflnaitmm  
>tr|Q6GCF2|Q6GCF2\_STAAS  
mnqyhsnaqqpsawrffvyslvgilcfffipftingntifvdhvhairsiigplmpyvalimiligtalpivrtrfmts  
itnlvitl fkvagamigim  
yvfki gpsi lfkanygpflfeklmp l silipvgaialsllvgygll efvgyvimepimrpifktpgksavdavasfvgsy  
slgllitnrvykqgmynkr  
eatiiatgfptvsatfmiivaktlg lmp hwnlyfwitlvitfvvtaitawlp pit nesteyngqegeqevaiegsrlkt  
ayaeamkqnal tpslvknv  
wdnlkdglemtvgilpsil sigflglivanytpfidwlg yifypfiyifpiadqallakasaisivemflpsllvtkaam  
stkfvvgvsvsaiiffsa  
lvpcilateikipvkl i i wfl rvalsllitipvallifg  
>tr|Q6GCF4|Q6GCF4\_STAAS  
mkfenrvqryqhlftktdkrivnyirngysdafstinslthaigtspatmtrfshkl dyenfqdlkfniqqemetvie  
nspiiqrihkyhqqiiqqt  
gefidndiiqtfdklqssrhilfaglgssgl satefyymirmglkgnvtt dshlmkisasllshsdmfiamsngnts  
elisaaevakshgayvvai  
tnfegskltdcadl vlltt dqs rntdhqfintqiatlflidivsyhllentnlsqtyqhtksiildnk  
>tr|Q6GCF7|Q6GCF7\_STAAS  
mkeigfgtlnwvaviyil lamlfigvyftkrasqstnsfftasgrlpswvvgfsiyattlsaitfmstpekafldwsi  
agniaivaiiplliyfyvp  
ffklkvtsayeylearfgpsirvigsllfvvyhlgrvaiviylptlaitsvsdmnp yivaslvgllicilytflggfegv  
vwsdfiqgvillggalvii  
ilgvmnikggfgtvfadaiehkklisadnwklntaaaai p i i flgni fnnlyqytasqdvvqryqasds lketnkslwn  
gilalisaplfygmgtmly  
sfytheavlpkgfntssvpyfiltempfvaglliaaifaaqstisslsnsisacisidikqrrffgkgerhev nfar  
fiiiagi fgfgmslylia  
snsndlwdlflfv tglfgvplagvfavgi ftkrntfgvicglilgiifayvyngvgkgnspfyvstisftvafvfayil  
sfivpskhkkditgltife  
kdkpstyiskmatkk  
>tr|Q6GCG2|Q6GCG2\_STAAS  
mlkfenvtksfdggnrieavkdt nfeinkgdialvgpsgsgkstfltmagalqtptsghilinnqdittmkqkalakv

Tsompanidou\_et\_al\_Supplemental\_FASTA\_File

rmseigfilqatnlvpfl  
vkqfftllkkknkvnmsnedyyqqlmsqlgtsllnklpseisggqqrvaiaakalytnpsiiladeptaaldtenaievi  
kildqakqrkkaciivth  
derlkaycdrsyhmkgdgvlnlenetve  
>tr|Q6GCG3|Q6GCG3\_STAAS  
mflawneirrnklkfgliigvltmisyllflslglanglinmkegidkwqaeavlnkdanqtvqqsvfnkkdienkyk  
kqatlktgeivsnghqkd  
nvlvfgvekssflvpslieghkatknevladetlnkngfkigdtlslsqsdekhlivgftesakynaspviftndatia  
kinprltgdkinavvrdt  
nwkdcklqgeleavsinfdienlpgykpqnltlnfmisflfvlsatvigiflyvmtlqktslfgilkaqgftngylanv  
isqtlilalfgtafgllt  
gvtgaf1pdavpvkfdvltllvfaivlmivsvlgs1fsiltirkidplkaig  
>tr|Q6GCG4|Q6GCG4\_STAAS  
mkiiskyiaiaslsvavtvsapqtnstafakssaevqqtqqasipasqvnlnqnmavawyqnsaeakaly1qgyns  
akvqldkeikkngkghkla  
ialdldevtdnspyqgyasihnpfpegwhewvqaakakpvygakeflkyadkkdvdiyyisdrdkekdlkatqknlkq  
qgipqakkshillkgkddk  
skesrrqmvqkdhklvmlfgdnlldftdpkeataesrealiekhkddfgkkyiifpnpmygsweatiynnykasdkakd  
klrknaikqfdpktgevk  
>tr|Q6GCG9|Q6GCG9\_STAAS  
mtfeeklsqmyneianeisgmipvewekvytiayvddeggevvfnytkpgsdelnytyipreynvsekvfydlwtdlyr  
lffklrnafkeedlepwt  
cefdftregnlkvsfdyidwiklfgfpgskenyymkkfgvlpeteyemeeirevekyvkdqe  
>tr|Q6GCH0|Q6GCH0\_STAAS  
mtfeeklsqmyneiaideisgmipveweniytiayvtdqggevi fnytkpgsdelnytyisrdyniseeifddlwmnlyy  
lfmnlrdlffkkeglepwt  
cefdftsegklkvsfdyidwintefdq1grenyymkkfgvlpemeyeinkvkeieqyikeqdeae1  
>tr|Q6GCH1|Q6GCH1\_STAAS  
mtfeeklsqmyneianki ssmipvewekvytiayvddqggevvfnytkpgsdelnytyipreynvsekvfydlwtdlyr  
lffklrnafkeedlepwt  
cefdftirdgklnvfdyvdwmnsefgpsgkenyymkkfgvlpeteyeinkvkeieqyikeqdeae1  
>tr|Q6GCH2|Q6GCH2\_STAAS  
mtfeeklsqmyneianki ssmipvewekvytiayvddqggevi fnytkpsedelnytyisrdyniseeifddlwmnlyy  
lfmnlrdlffkkeglepwt  
cefdftregnlkvsfdyidwiklfgfpgskenyymkkfgvipeteyeinkvkeieqfikeqdeae1  
>tr|Q6GCH3|Q6GCH3\_STAAS  
mafeeklnemyneianki ssmipvewetvyamayvnersgevfnytepsdel fyysvlnkyniprsefmdsvyelyk  
qfdnlrelfi eeglepwt  
cefdftirdgklnvsfdyidwvnsefgpmgrehyymkkfgiwpekeyainwkkikdyvkeqdeae1  
>tr|Q6GCH5|Q6GCH5\_STAAS  
mtfeekqsemynki aneisgmipvewekvytiayvndqggevi fnytkpgsdelnytyisrdyniseeifddlwmkvyr  
mfdelretfkkkeghepwt  
cefdftirdgklnvsfdyidwlnntefdq1slenyymkkfevipemeykmeieikeieqyikeqeeaei  
>tr|Q6GCH6|Q6GCH6\_STAAS  
mtfeeklnemyneianki ssmipvewakvyamayideesgevvfnyteprsdelfyysvikynisrsgfmnsvyelh  
qfeklrelfi eeghepwt  
cefdftkegklkvsfdyidwlnntefdq1grenyymkkfgvipemeyemeeikeieqyikeqdeaeq  
>tr|Q6GCH8|Q6GCH8\_STAAS  
mttkenidtlrkpgaaalslslflilfsc1tfffgl dyerfpnyl kittiie1iivisllqwirfidfkestqkykk  
iyarf1viinvl ttitvfv  
alcnlyyfaavqnhydlnfywlmgtisiiisyl1lviggmftllklpkvtrkrggkthfgll1talssfiyiekieiey  
ilipnvveskfiiivsmmv  
iagaaqvafqfimqysrfyifelnteddd  
>tr|Q6GCH9|Q6GCH9\_STAAS  
mtfeeklsqmyneianki ssmipvewekvyamayiddeggevfyytepgsnelyyysvlnkydisese fmdsayelyk  
qfqklrni fkkkeghepwt  
cefdftnegklkvsfdyidwintefdq1grqnyymkkfgvipemeyemeevkqieqyikeqeee  
>tr|Q6GCI0|Q6GCI0\_STAAS  
mtkdielyltadynekssi qsvidaieggdfldvdtmddavsdvss1dedgais1tssvvgpqqsklmgyyyqnel yda  
sqldskmkeiidtpfiedi  
dkafkgitnkleni likngghgrdtygasgkiakgdakksdsvsiedeilksdqefvkvldqhykemkkedkksks  
dfekmmtqgascdymtva  
aeleeqkkkeaeieiaalagmvvlscinpvagavaigaysaysaanaatgknivtgrkl skeerimegls1lip1pgmgf  
1kgagkslmlgfkgekf  
avktglqktmqqavsrispkmgmmknsvl nqsrnfaqnthvgqml snmrgqathtvqqsrnwigqqaqnvkrivngldk  
eiahpfkqqlapagmggik  
faett1rnmgqnmkravtpqnhvthgpkdsmvrsegkhsvs sheinsskyvespnytkvefgehyar1rpkk1kaniey  
ttptghiyrt dhkgriev

Tsompanidou\_et\_al\_Supplemental\_FASTA\_File

yvdnls1kdggrnhaqrvtvggedr1pdddghliarmfggskdi dnlvaqskfinrsfkengqwykleklwekaiksgk  
sienvkvevkykgnsqprt  
efsvryningeqflkniink  
>tr|Q6GCJ3|Q6GCJ3\_STAAS  
mktihlfriyhsf11kkwyl1iy11filaa1vit1tti qhvteddnhfni gvvdkdqssetkli1nsigkgsnlgnvsi  
kayddkqaht11kkhk1qg  
yfvfdkgmtkafykqgel1psvytydqsmksv1sq1tdsvyqrlmrsmggilafqdlapkashsdsinvmt d1litgl  
nrsqafnlepihlydtgsy  
yaitgf1ttvfi fals1ftv1kmnqdtv1kar1kmfhfsker11iirv1litwfytm1wsivgvv1wivfsipntfelynwp  
tlaihlsyyvtf1ilw111  
iel1ttg11nsiskvilaivilv1sg1tiptif1qhiangvfniqp favvtnq11leil1nyile1hpsf1ysfia11ii  
n1av1vwryrq  
>tr|Q6GCJ4|Q6GCJ4\_STAAS  
mkpyiq1vvfkqwlqy11vttivialv1igigyrvahdnfkipitiqdl dqttasksfvnkikqsdvvtikkvdedesy  
ieddvtkkaeilsmqipkg  
fsqk1kenr1ketiqlygrddfiggiaveivssslyeqqipniyehledmkqhqsidainksykhkhtpeskikfvs1tk  
qaqsisis1ifavilfvs  
avqvvlhyr1nqqaalqr1sqyh1trfklystyvmtht11111v1lavsl1ysqpl1sifylks11111iyeigivfilf  
hiqtishr1fmtfiyalam  
givyliifm  
>tr|Q6GCJ5|Q6GCJ5\_STAAS  
mieinn1skryrnkqifnh1tmsfidsnr1tv1lgdngagkst11rmiagi ekandgtinyfgekwnqrqi qnhigyvpqd  
ialfehmtvaen1ffks1  
cknpindttineylqqlnfddtsakvst1sggnkrkinilvg11gqpril1ildeptvgid1ksrhdiq11nimkskli  
il1tth11devealaddik1  
igqdpfyqhv1ledkqwaytyy  
>tr|Q6GCJ7|Q6GCJ7\_STAAS  
mctgftiq11nqv11grtmdydyp1dgspavtprnyrwtstrgttgqtqygfigtgd megfiygdgvnehgvaistqy  
frgyssygsthkagannit  
qneivtw11gyttsiedmkqqasqihvvavy1ndigevppl1hyvsdatghsvevsfkegevvikdnpigv1tnhpd1dw  
hysnlrqyini spypatak  
11egvtiepl1neam1tm1pggftsterfvrmafmkaniaqndkemd1mna fy11davnipigivrphdadnhytmyqt  
vin1ttrtly1kyygsnel  
valkl1td11nrkdm1tikpekhitirkl1ndnq  
>tr|Q6GCK5|Q6GCK5\_STAAS  
mskeaghtflak1gktr1rpggkeatdw1iqqgafsqdkqv1evacnmcttsiylahtygchiqgv dinkka1ekaqeni  
saaglesyiqvqqanavk1  
pfdnqfdi1v1neam1tm1pitikeka1reyyrv1kpgg111thdivivneshathvvks1saainvvnspqtk1gwld1  
ynqagfnhvhyhtgpm1m  
tpkg1iydegivgtiki1inna1kkenrmpfckmftmtkl1rkdmnyitfvakked  
>tr|Q6GCL4|Q6GCL4\_STAAS  
mmkfsv1vptynsekyitel1nslakqdfpktefevvvddcstdqtlqivekyrnk1n1kvsq1etnsgggpkprnval  
kqaegfvl1fvdstdyink  
et1kdaaafidehhsdvl1ikmkgvngrgvpqsmfketapevt11nsriiyt1sptkiyrtt11kdndiyfpeelksaed  
qlftmkay1nanrisv1sd  
kayyyatkreghmssayvspedfyevm1riaveilnad1eeahkdqilaef1nrhfsfsrtngfslkvk1ledqpqwina  
1gdfiqavpervdalvmsk  
1rp11hyarakdi1nyrtveesyrgqyrfdivdgk1niqfnegepyfegidiakpkvkmatafkfdnhkivtel1nef  
migeghydvr1kl1hsrnkk  
htmyvp1svnankqyrfnim1ledikay1pkekiwdvf1levqigtevfevrvgnrnkyaytaetsal1h1nndfyr1tpy  
ftkdfnnislyftait1td  
sis1kl1kgknki11tg1drgyvfeegmasv1kddmimgm1sqtseneve11skdikkrdfknivk1ntahmtys1k  
>tr|Q6GCL5|Q6GCL5\_STAAS  
mvkskiy1dkiywervq1fveghsen1d1ledsnfv1rn1tetrtmkandvkidgnqfvcrfnvaildngyy1pedky1lv  
neqel1dya1q1n1pdvinda  
yqnlkpeqeeeyne1etqngkinf11qtylkefrkggi skktvytvtpeissdvnefv1dvvvttpevksiyivrkykel  
rkyfrkqsfntrqfi1kai  
fnttkffh1kkgntv1ftsdsrptmsgnfeyiynem1rqnl1dkkydihtvfkanitdrrgiidkfr1py11lgkadyifvd  
dfhpliytvrfrsreqviq  
vwhavgafktvgfstrtgkkggpfids1nhrsyt kayvssetdipfyaeafgikeknvptgvprtdv1fdeayatqikqe  
medel1pi1kgkkv1lfapt  
frgsghtahypffki1dfer1aryceknavv1fkmhpfvknr1niadkhkqyfvdsdfrevndil1fitd11isdys1  
iyeyavfkkpmi1fyaf1e  
dyittrdfyepyesfvpgkivqsfdalmdal1dnyegekvip1dkhfkyqmgrsser1vrn1fgs  
>tr|Q6GCL8|Q6GCL8\_STAAS  
mikntikk1iehs1yttfk11sk1pnkn1iyfesfghkqysdnpkalyey1tehsdaq1iwgvkkgyehi1fqhnpvyvt  
kfsmkwfl1amprakawmin  
trtpdw1yksprtty1qtwhgtpl1kkig1di1snvkm1gtntqnyqdgfkkesqrwdy1vspnpystsi1fghafhvsrdri

Tsompanidou\_et\_al\_Supplemental\_FASTA\_File

letgyprndklshkrndte  
yingiktrlnipldkkvimiyaptrwrddeai regsyqfnvnfdiealrqaidddyvillrmhylvtridehddfvdvsvd  
yedisdlylisdalvt dys  
svmfdfgvlkrpqi fyaydlkygdelrgfydykkelppivenqatalidalkqidetaneyieartvfyqkfcsledg  
hasqricqtifk  
>tr|Q6GCL9|Q6GCL9\_STAAS  
mlgpltriexllqahfrsvnycqynfvehrtliyvpacs  
>tr|Q6GCM0|Q6GCM0\_STAAS  
mlirsingktpegavpvedrgpnteadeksaynnvqvgvaetap  
>tr|Q6GCM1|Q6GCM1\_STAAS  
mtktkqaihidniywervqlyieghsegvdltsqqfvlrnl tetktleanemkidgntficrfnvailddgyylpmdkyl  
fvyhdqleyigqlnpnid  
qayaa lnee qieeyne lttqngkvnyllaydakvfrkggvsqhtvyt itpeiasdvnefvfdieitlpqeksgviatsah  
wihkgghkasfesrflfk  
aifnltkllhikrsktilftsdsrpnlsngnfkyvydelrkvdfdydiktvfkanitdrkwrkfrlpyllgkadyif  
vddfhp liytvrfrpsqei  
iqvw havgafktvgfsrtgkkggpfidslnhrsyt kayvssetdipfyaeafgi reenvvptgvprtdvl fdeayatqik  
qemedelpiikgkvlfa  
ptfrngnghtahypffk idferlarycekhn avl fkmhpfvknrl nisrehrqyfidvsdhrevndilfvtdllisdys  
liiyavfkkpmi fyafd  
ledyittrdfyepyesfvpgki vqsfda lmdal dneyevekvvpfldkhfkyqdgrrsserlvkd lfr  
>tr|Q6GCM2|Q6GCM2\_STAAS  
minqvyl vaprqfdvtynnvdiygnhvivrplylsicaadqryytgrrdenvl rkk l pmslvheavgevvf dskgvfek  
gtkvvmv pntptekhdvia  
enylpssyfrssgydgfmqdyvmmahdrivlpnaidlstisytelvsvsyhaiqrferksiplktsfgi wgdgnlyit  
aillrklypeakiyvfgkt  
dyklshfsfvddi ftvni pddlkinhafecvggkgsqvalqqivehispegsiallgvselpevntrlvlekgtlig  
ssrsgskdfeqvdlrky  
pdiveklallkgheinvctmqdivqafemd l stswgktvlkwti  
>tr|Q6GCN0|Q6GCN0\_STAAS  
mlkgsnmngdnqqilreivlnptihgklesifgl srrqlgyriqkinlwleqegypklertsqgnfivsseimtlfkr  
dvseqm l ngnvifsiet  
rryylmlmlfskenamslnhfsidlqvsntvihdinhvkeqlenhgls l kysrkhgyeivgdefevrrffik lidqrln  
hditksev lka l n ltfedi  
ayqkdkikqveqflksrfidks lss lpyvlcvirriqsghvmp lninyqylrdtkeyqateimtl epdlpeaklyl  
tlhl l stsvqwt dlqesdn  
isnl tmaiaqmihhfeqitfiniedkek l sqql l h ltpafyriky n l tdrdelinplqnyqslf hmvkqscqslteyf  
gks l pdneiay l tmlfggs  
lrrqdenfdgki kaiivctqgtsvsqmmlyelrnl fpeiiflda is l rtfeny l dydivfspmfv l thkk l fitkval s  
eneqrklrkevmyinkes  
adidkeink l malier tttvnditelrdgledfianysistingsivtqnkt l dladliparhvkrihhvenideaia k  
asdlvanhfidi kyihem  
qqvfddsymvimqniaiphaysekhvhktamsmlilqepiym sdgtaihiivpiaavdkvth l rallqlrdvaqndaik  
riiqsrknsdvneilk nys  
nkearengwdsn  
>tr|Q6GCN1|Q6GCN1\_STAAS  
mpdisvlrvfvl dynghdn l imieicmlkmlqktqntkiyskfqllyfkr lksqki  
>tr|Q6GCN5|Q6GCN5\_STAAS  
mlteqekdikqtvp l lkekgeitsifypkmfka hpe l lnmfnqtnqkrmqssal aqavmaaavnidn lsvikpvimp  
vaykhcalqvyae hpyivg  
enllkai qdvtgleendpviqawakaygiadvfiqiekeiydqmmwigf kpfkitnikqesediksftveteeydfsef  
tpgqyitvdvssek lpyra  
krhysivsgeknh ltfgvkrdvttehegevstil hdei kegdminlaapvggfv l enttepqlflgsgigvtp l vamyea  
asakgl dtqmvqvaeneqh  
lpfkdnfnsiashhdnaklyth l kdkqgyigae l qaf l ankpei yicggtkflqsmieal kslnydmdrvhyetfipr l  
svav  
>tr|Q6GCN8|Q6GCN8\_STAAS  
mkfkr l atifsav l v lsgcgs m hssgkd l nis l plktksiapyetdvpvkigaaes l fktndqgkiekalvksyhqndt  
t l dielkdnikfngqk l t  
aekvksslensmkksdlvkys l pissitakgqk l tiktnsaypelvselanpfmai ytdaksdvntqtpvgtgpyqikdy  
kqrkis l snfkdywqgkp  
kl dhitvtyqedgnnrvrnlesqkdd l itdvpvnkvqdiennqnlkvskesgfrts l lmyhntnkkmtksvreal dhiid  
rqgiadhiyqgyakpat sp  
fndkipyikepltkqnieqakt l lakdgytkehplkik litydgrpel skiaqvlqsdakkanieidiks vddiegy l k  
drsawdatmysfgtiprgd  
tgyffnqaykkdga inkgdynnsnvdd l inqlnhtvdvkerhn isndiik lssrdvpnsyia yndqivaanakvknykvt  
pegylidyr ttier  
>tr|Q6GCP1|Q6GCP1\_STAAS

Tsompanidou\_et\_al\_Supplemental\_FASTA\_File

mnfdwikt r s d f d d d k p a v i d h a k q t s w t y q q l n a r a d n m a h y l t s q g v k k g d v i g i f a p n d i a i l d l l f a c f k t g a v f l  
p l n w r l n p k e i a a i v e d a q  
l k l l f y a e k h l s s l t d i d q n l l h m d i d v a q y d e i v n p d y h q p f a t p v e p q d l a a l i y t s g t t g s p k g v m f s y e s f v h n g  
a n e l e t y k f n s n y i t i v s t  
p m f h v l g f n d t v l p v l m s g g t l i l q r y f n g e e l n d m i a q y h p t f i i m i p t m y s t l r a s n f n p e n f k a m d y i i q g g s q p l  
p s i q a a f k y g i n i i n g y g  
l t e a p l v l v n t p e n s k r k p m s i g k a v m f v d a r i l d d n g e e v p t g e i g e l a i k a k n v t p g y w n k p a e t a k a f h g r y l l t g d  
l a k m d d d g d i f i e r k k e l  
i i t g g e n v l p s e v e n a l a e h p l v d r c v v v g y d h p k y g e s i a a a i l r e d e p h y a e i l d q h m r s r l a g y k v p r m y v p v t h m  
p l n s t q k p d k l a i r q m m n d  
k v s q t l  
>tr|Q6GCP3|Q6GCP3\_STAAS  
m t i n k v t v l g a g t m g a q l a a l f v n a g l k v k l l d i v v d k n d p n l i a k k s y d k i t d k k r p l l f d l n l a s h l t y g n f d d d l v n  
d d a d l y i e a v k e d i e i k h a  
v w q q v l q h a k e d a l f a t n t s g i p i n a i a q t f n e k d q e r f f g l h f f n p p r i m k l v e l i p t s h t k e s i i l d v k n f a q n v l g k  
g v i v v n d v p g f v a n r v g t q  
t m d i m y r a e q h k l s i v d v a l t g q a i g r p k t g t y a l s d l v g l d i a v s v i k g m q q v p e e t p y f h d v k i v n t l f d n g a l g r  
k t k q g f y k d k e t k a r l v y  
d v e k q d y v p v s q p q l p i l n e f n k d l v h n l d v i f n a q d e a g l f l w e t l r n n f y s a i n v p k a t d d f r d i d r a l v w g f n w k l  
g p f q l w d a m g y e r v k t r m e  
d e i g d l p q w i s d l d g g f y k q d e t i e y a t p v s h f v k d e l w d k g d a k l s v t h d d q l l l k l q s k n n v i t d e f n d a l v d a i d l l  
e n d h y t s m v i y a d g n n f s v  
g a n l f l m k k a h e d g l v d d v v a q s i d k l h y s f n r l k y s l k p v v t a v q g r a l g g g c e l v l y s p i v v a a s e t y i g l v e a g v g l  
l p s g g g l a e m a d r i l r t s h  
k f d d k q a s m t k v l t n i a f a k v s t n a f e a r r y g y l r d t d t i i f n t a q r v e v a l k r a k y e a e t n y i p n p r h q y i a l g e d f k a  
l i g g g l d a q r r g h f i s d h d  
y h i a l n i a t i l a g g d l p r n t f i n q r y i q s l e k i g f i d l l k s k s y e r i a h m l k t g k p l r n  
>tr|Q6GCP5|Q6GCP5\_STAAS  
m k k q i i s l g a l a v a s s l f t w d n k a d a i v t k d y s g k s q v n a g s k n g k q i a d g y y w g i e n l e n q f y n i f h l l d q h k y a e k e  
y k d a v d k l k t r v l e e d q y l  
l e r k k e k y e i y k e l y k k y k k e n p n t q v k m k a f d k y d l g d l t m e e y n d l s k l l t k a l d n f k l e v k k i e s e n p d l k p y s e s e  
e r t a y g k i d s l v d q a y s v y  
f a y v t d a q h k t e a l n l r a k i d l i l g d e k d p i r v t n q r t e k e m i k d l e s i i d d f f i e t k l n r p k h i t r y d g t k h d y h k h k d  
g f d a l v k e t r e a v a k a d e s  
w k n k t v k k y e e t v t k s p v v k e e k k v e e p q s p k f d n q e v k i t v d k a e t t q p v a q p l v k i p q g t i t g e i v k g p e y p t m e n  
k t l q g e i v q g p d f p t m e q n  
r p s l s d n y t q p t t p n p i l e g l e g s s s k l e i k p q g t e s t l k g t q g e s s d i e v k p q a s e t t e a s h y p a r p q f n k t p k y v k y r  
d a g t g i r e y n d g t f g y e a r  
p r f n k p s e t n a y n v t t n q d g t v t y g a r p t q n k p s k t n a y n v t t h a n r q v s y g a r p t q n k p s k t n a y n v t t h a n g q v s y g a  
r p t q n k p s k t n a y n v t t h a  
n g q v s y g a r p t y k k p s k t n a y n v t t h a d g t a t y g p r v t k  
>tr|Q6GCP6|Q6GCP6\_STAAS  
m t t q m k i k t y l v a g i k a a l d t t g i k l a s k s e t t s h t y q h a l v d q l h e l i a n t d l n k l s y l n l d a f q k r d i l a a h y i a k  
s a i r t k n l d q m t k a k h r l e  
s i y d s i s n p l h s q n n  
>tr|Q6GCP8|Q6GCP8\_STAAS  
m n y k y n s d r k e s i c n f k s e g a y a s f s i e y r v l a r r s k y m r q l l q w l k e d v f v s s y a d k e c d v l l k v g f q y h h l a d v e w v i  
i c y l h m n m s l f k f l l t l s n  
e k y  
>tr|Q6GCQ6|Q6GCQ6\_STAAS  
m k i g v f s v l f y d k n f e d m l d y v s e s g l d m i e v g t g g n p g d k f c k l d e l l e n e d k r q a f m k s i t d r g l q i s g f s c h n n p i s  
p d p i e a k e a d e t l r k t i r l  
a n l l d v p v v n t f s g i a g s d d t a k k p n w p v t p w p t a y s e i y d y q w n e k l i p y w q d l a e f a k e q d v k i a i e l h a g f l v h t p y  
t m l k l r e a t n e y i g a n l d p  
s h l w w q g i d p i a a i r i l g q a n a i h h f h a k d t y i n g e n v m y g l t d m q p y g n v a t r a w t f r t v g y g h s p y v w a d i i s q l i i  
n g y d y v l s i e h e d p i m s v e  
e g f q k a c q t l k s v n i y d k p a d m w w a  
>tr|Q6GCQ8|Q6GCQ8\_STAAS  
m m t i k v g i i g c g g i a n g k h m p s l q k v e n v e m i a f c d v d i s k a a s a e a y g t d n a k v y d d y k a l l k d d t i d v i h v c t p n d s  
h c e i t v a g l h a g k h v m c k t  
p m a k t t a e a q m i d t a k s t g k k l t i g y q n r f r a d s q f l h q a a q r g d l g d i y f g k a h a i r r a v p t w g v f l d e e a q g g g p l  
i d i g t h a l d l t l w m m d n y e  
p e s v m g s t f h k l n k q h h a a n a w g s w n p d e f t v e d s a f g f i k m k n g a t i m l e s a w a i n s l e v d e a k c s l s g t k a g a d m k d g  
l r i h g e d m g t l y t k h v e l e  
n k g v d f y e g n e v d e a e e e a k a w i d a v v n d t e p v v k p e q a m v v t k i l e a i y q s a k s g k a i y f e  
>tr|Q6GCR3|Q6GCR3\_STAAS  
m t k r p k r i a t i i i f l s l l f t i i y i d d i q k w f n q y t d k l t q n h k g q g h s k w e d f f r g s r i t e t f g y q h s p f d g k h y g i d  
f a l p k g t p i k a p t n g k v t r



Tsompanidou\_et\_al\_Supplemental\_FASTA\_File

ifnne1ggkv1qiaedngeyhqwy1h1dkynvkvqdrvkagdi1aysgntgkqttgah1hfqrmkggvgnayaedpkpfi  
dq1pdgerslyd1  
>tr|Q6GCS0|Q6GCS0\_STAAS  
msn1levns1nvqfnydettvqavknvsfelrkkh1lgivgesgsgksitaksilg1l1pdypdht1tgeiifngqsl1n1  
stsalqqirgkdisimifqd  
plss1npr1t1gkqitevl1fqhkrvskseaksmtidilekvgikhatrqfdayphelsggmrrqrvmiama1il1kpkqilia  
depttal1dastqng1l1qlm  
kslyeytetsi1fi1thd1gavyqfcd1v1vmkdgs1vvesgtvesi1fkspqhtytkr1lidaipdihqtrppr1nnd1llk  
fdrsvdytspsgs1lyrav  
ndin1gir1kget1lgivgesgsgkst1aktvvg1kevsegfiwynel1pl1s1fkdelks1r1qeiqmi1fqdpfasinprfkv  
idvikrpl1ihgkvkdndd  
iikt1vvs1lekvg1dqsflyryphelsggrrqrvsiara1avepkvivcdeavsaldvsiqkdiel1kql1qldfgityl  
fi1thdm1gvineicdrvavm  
kngei1el1ntedi1k1hpkqsdyakq1isevaviak  
>tr|Q6GCS8|Q6GCS8\_STAAS  
mielknvyrtfkn1gdknirv1k1dinihinagefiaim1g1psgsgkst1inil1gfidreyhgeyl1fegsnyqtqsdnqlani  
rnktvgfvfqn1k1ihnt  
ileni1smpl1vytnmtierknkvmtv1sav1gd1gkgdftpsk1sggqqrvaiara1innpkfi1adeptgal1dsdtski  
imd1fts1nrdnht1t1ilv  
thdrkvaekadri1ih1lggriqheevik  
>tr|Q6GCS9|Q6GCS9\_STAAS  
mrrkrkwl1iv1cv1l1v1itisqil1khfn1ygteskeaynty1tvekerq1d1l1gqkayprevktyykn1qvgytl1gvqvadgq  
tvkkgdkvn1s1tstgktg  
agi1kqisel1p1syee1n1s1lhenda1hl1pesn1d1gelansksis1aspi1fksn1n1sel1skygvi1idd1s1l1piragys1leik  
vp1na1k1ipksv1tkgnv  
fi1vnkns1ivekrn1rikringdi1ivekg1kpgdk1likpkst1mnd1gd1kveiss  
>tr|Q6GCT0|Q6GCT0\_STAAS  
ms1sk1p1l1nhfan1iri1qpk1liik1fl1t1lii1vtyt1fvsg1svdyk1l1seag1sets1laqiki1fsqisi1ffsr1vsv1f  
t1f1i1il1vis1rim1rsdantk  
sif1sat1s1yil1ftnais1li1l1tiqisag1sl1idysits1ni1fakgn1ril1gtfd1l1qffvqayil1tvm1ligtsk1sirasti  
wgi1yl1l1i1it1fs1l1is1isi  
q  
>tr|Q6GCT8|Q6GCT8\_STAAS  
mkqri1gay1lida1ihragvdki1fgvp1gdfn1af1l1ddi1sn1pnd1wv1gntne1n1asyaadgyar1ng1laal1vtt1fgv1gelsa  
vng1i1agsyaer1ipvia1itg  
ap1raveh1agkyvh1s1l1gegt1fddyrk1mfahitvaqgyitpenat1teipr1l1intaiaer1rvh1hl1pidvaiseieiptp  
fev1taak1dtdasty1el1t  
sk1lhqskqpi1i1tgheins1fh1hqe1ledfvnqtq1ipvaq1s1lgk1gafneen1pyymgi1ydgkiaedki1rdyv1d1nsd1il1ni  
gak1l1tdsat1agfsyqfnid  
dv1vm1nhhnik1iddvtnde1s1ps1l1kq1sni1sytnnat1fpayhr1pts1pdytvgtepl1tqqtyf1kmmqnf1lkpndv1iad  
qgts1ff1gayd1al1yknntf  
igq1plwgs1gyt1pat1lgsq1ladkdrn1l1l1igdgs1ql1tvqai1stm1irqhikpvl1fv1nnd1gytver1ihgmyep1ynei  
hm1wdyka1lpav1fgknvei  
hd1vesskd1qdt1fna1ingh1pdvm1hfvevkms1vedapkk1lidi1akafsqqn  
>tr|Q6GCV1|Q6GCV1\_STAAS  
mt1let1likeq1dph1vevdegtyyprt1fiqq1fvdgyfgeaal1r1knaevieav1sqsc1l1ttg1f1wcq1laf1stylenatqp  
h1nnd1l1qq1l1sgei1lgat  
g1l1sn1pms1fnd1lek1n1lehtyvdgq1lv1vsgrmpav1sn1iqedhyfga1iskhess1defvm1fil1ranqdg1it1vekt1n1fl1gvn  
gsatyqit1lnq1vvpq1sqi  
i1thdak1qfaat1irp1qfiayq1ipig1lgsik1s1le1lidaf1snaqngin1qyleydv1eafkkryr1ql1reeyya1il1ddgn1tsh1  
nel1s1l1kkd1igy1l1l1dvng  
asv1vnggs1raytp1spqvrk1keg1fffaal1tpt1rh1lg1kleaelkg  
>tr|Q6GCV3|Q6GCV3\_STAAS  
mkr1s1i1vi1igi1fi1tgcdwq1rtskepsknaq1nqqv1ikigy1lpithsan1l1mmtk1l1sqynh1pkykle1lvk1fnnwp1l1md  
a1n1sgridgast1iel1lamk  
skq1kgsnik1kavalgh1hegnv1imgqkgm1h1nefn1ngddy1hfgi1phrysthy1l1leel1rkq1lkik1pghfsyhem1spaempa  
al1sehri1tgysvaep1fgal  
gek1lgkgt1khgddv1pdayccv1lv1rge1l1dqhk1dvaqafvqdykks1g1fkmndr1kqsvdim1thh1fkqsrdv1l1tqsaaw  
tsygd1l1tikpsgyqe1tt1  
vkq1hh1fnppay1ddfveps1lykeasrs  
>tr|Q6GCV4|Q6GCV4\_STAAS  
miki1qq1qh1hfgshkvi1hnfn1ldiskgeiv1tfigksgcgkst1l1ni1igg1fih1pssgrvi1idneik1qqpspd1l1mfqhhn  
l1lpwkt1indni1rigfrqki  
sdee1naq1k1vd1legrgkh1fpeq1sggm1kqrv1al1crahv1hkp1nvi1l1mdep1gal1daftryk1l1qdq1lvq1khktq1sti1l  
vth1d1idea1iy1sdriv1l1g  
egcni1isqye1itash1prs1rndsh1l1kvrne1imetfa1lnhh1qvepeyy1  
>tr|Q6GCV7|Q6GCV7\_STAAS  
mterk1cacnk1l1fsi1lvrg1pnten1fek1kyrqck1l1gcp1qh1refr1kei1l1qamq1vgv1gq1rnk1fceni1isv1pl1pr1l1fwim1l1hh

Tsompanidou\_et\_al\_Supplemental\_FASTA\_File

1ndfrqf1

>tr|Q6GCW0|Q6GCW0\_STAAS

mr1ilivigliftalgiagavlp1lpttpf1lvavfcfarssdrfynwlinqkiykeyvenfy1hrgytlqqkikilis1  
yivigfsiymvdlavrig

liimviiqtav1ftfvkt1pksnhkiee

>tr|Q6GCW2|Q6GCW2\_STAAS

mc1nfrednvmkkimvifgtrpeaikmap1vkeidhngnfeanivitaqhrdm1dsvlsifdiqadhd1nimqdqqt1ad  
ltanalak1dsiineeqpd

milvhgdttttfvgs1aafy1hqipvghveagl1rthqkyspfpeel1rvmvsniael1nfaptviaakn1lfenkdkerifi  
tgntvidalsttvqndfvs

tiinkhkgkvvil1tahrrenigepm1hqifkavrd1adeykdvvfiypmhrnpkvraiaekylsgrnrieliel1daief  
hnftnqsy1v1tdsggiqe

eaptfgkpv1v1rnhterpegveagtsrvigt1dydnivrvnkq1ieddeayqrmsqannpygdgqasrriceaieyyfg1  
rtdkpddefvplrhk

>tr|Q6GCW4|Q6GCW4\_STAAS

mrkn1litgvhgyigna1kdk1lieqghqvdqinvrnq1lwkstsfkdydv1ihtaalvhnnspqar1sdymqvm1l1tkq1  
aqkaksedvkqfi1fms1ta

vygkegqvksdq1dtqtpmnp1t1nygiskfaeqalqel1sdsfkvaivrppmiygahcpgnfqrlmq1skrlpiipni  
nng1rsaly1khl1tafidq1

is1evtgvyhpqdsfyfdtssvmyeirrqshrktv1inmpsv1nkyfnk1svfrk1fgn1iysnt1yennalevipgkm  
s1viad1mdetttkdka

>tr|Q6GCW5|Q6GCW5\_STAAS

mkr1fdvvs1iygl1v1spil1lita1likmespgpai1fkqkrpt1nel1fniykfrsmkidtpnvat1d1mdstsyitktg  
kvirktsidel1pql1nv1k

gemi1vgprpa1ynqyeli1ekrtkvvht1irp1gvtg1aqvmgrdd1td1dqkvaydhyy1lthqsmm1dmyi1yktikn1vt  
seghh

>tr|Q6GCX0|Q6GCX0\_STAAS

mriai1lgatnikhms1lshy1lnhid1ninevdi1ytdkydieehi1qginnyykykvdikedwtfikkaiayrfrpyamk  
i1kenrydfvi1wgsytgh

l1fks1flekhyknkfi1ni1rdyffennk1ikyrmk1ivdasrvtt1sseg1fk1pksekyrii1synmsi1resnvt1dgf  
kk1rwpin1igf1gnvrfne1i

nq1like1landsr1fhmqy1fgt1sekle1vfaren1finit1fsggfd1ketpky1neidi1ln1lfgnqnia1d1talsirmyy  
a1f1nkp1i1ttd1tftate

ankf1gl1gfsinpen1kg1igde1mdwynn1dvmd1nhkreayr1ndviennk1qfyqe1igrifne

>tr|Q6GCX1|Q6GCX1\_STAAS

mek1kl1mtiv1gtrpe1i1r1sstikacdq1fnqil1vhtgqnydyt1nq1iffdd1el1rqp1dhyleavgsn1getmg1ni1akt  
ydv1l1reqpdal1il1gdtn

sc1laavsakr1k1ipvf1hmeagnrcfdqnvpeei1nrkivdhvsdvn1pytehsr1ry1l1degfnkani1fvtgsp1mtevieah  
rdk1inhsd1v1nkl1glepqq

yil1vsahreen1idnek1nfks1lma1ndiakkykmpvi1ysthprswk1kieesk1fedp1vkk1k1pfgff1d1yna1lqkda1fvv  
l1ds1gt1seess1ik1fpgv

lirtsterpe1v1dkgtv1ivgg1itynn1liqsvelaremqnnep1midaidyk1dtnv1stkvvki1iqsykdi1nrntwrk

>tr|Q6GCX4|Q6GCX4\_STAAS

mahl1svk1rl1l1al1ids1l1vtfs1v1fsy1ilepyf1k1tysvkl1l1laais1l1fishhisafif1nmyhrawe1yasvsel1ili  
vkav1tts1iv1tmvv1t1vt

gnr1p1f1r1ly1litwmm1h1l1iggsr1l1fwriyrky1lggks1fnkkpt1lv1vgagqagsm1l1rqm1ksdemk1lep1lavdd1dehk  
rni1titegv1kv1gk1iadip

elvrkyk1k1k1i1iaipt1g1ger1l1keinni1chmdgve1l1kmpniedvm1sgelevn1q1kkveved1l1grdpve1ldmd1isne  
l1nkt1il1vtgaggs1ig1sei

crqvcnfyper1i1l1ghgensi1y1inrel1nr1rfgknv1divpi1advqn1rarmfeimetykpyavyhaaahkhvpl1meenp  
eeavrnn1l1gtkntae1aak

naevk1kfvm1st1dkavnppnvmgaskriaemi1iqs1l1ndethr1tnfvavr1fgn1v1l1srgsvi1pl1fksqieegg1pvtv1thpe  
m1tryf1mtipeasr1v1l1qag

alaegge1fv1ldmgepv1k1vd1arn1lik1sgkkeddi1rityt1girp1gekm1feel1mnkdev1hpeqv1fekiyrgkvqhmkn  
eveai1qdi1vndfs1kek1i

nyangkk1gdnyvr

>tr|Q6GCX5|Q6GCX5\_STAAS

midih1h1l1pni1ddgpt1netem1d1l1kqattq1gvte1i1vtsh1lhpry1t1piekvkscl1nhies1leevqal1n1kfy1y1gqe  
i1ritdqi1l1ndi1drk1vitgi

ndsry1l1ie1f1psnev1phytdq1l1ffe1l1qskgfvp1ia1hpernkaisqnl1dilyd1linkgalsqv1ttas1lagisgrkirk1la  
iqmienn1thf1igsdahnt

ei1rpf1l1mkd1l1fndkk1l1rdy1yedmngfi1snak1lvddkk1k1krmpq1qdyk1qrwfg1

>tr|Q6GCX6|Q6GCX6\_STAAS

mskkent1t1l1fvyek1pk1stisek1frgirs1nimf1skangevkr1l1vtsek1pgagk1st1vsvn1vaityaqagykt1l1vidgdm  
rkptqny1fneqnnng1l1ss

li1grttm1seait1steien1d1l1tagp1vppn1pseli1aserfkelvd1l1fnkrydi1i1vdtppvntv1tdaq1lyaraikds1l1  
vidsekndknevkkakalm

ekagsn1lgv1lnktk1vd1ksssyhy1ygde

Tsompanidou\_et\_al\_Supplemental\_FASTA\_File

>tr|Q6GCY4|Q6GCY4\_STAAS  
mtqeiakynvhtkahrkrlkrwliaivvlaiiwwafagvpslelksksleilksifsglfhpdisyiyipdgedllrgl  
letfaiaavgtfiaaiici  
plaflgannmvlrpsvsgvskfilsvirvfpeivmalifikavpggsfsgvialgihsvgmglgllaediegldfsaies  
lkasgankiktlfavipq  
impaf1slilyrfelnrsasilgligaggigtplifaiqtrswdrvgiiliglvmvaivdlisgsirkriv  
>tr|Q6GCY7|Q6GCY7\_STAAS  
mnveyskikkavp11flfvfslvidnsfk1svaiaddlnisvttvswqatlaglvigigavvyaslsdaisirtlfy  
gviliiigsiiigyifqhqf  
alllvgriiqtaglaaetlyviyvaky1skedqktylg1stssys1slvigtlsggfistylhwtmflialivvftlp  
flfk1lpkenntnkahldf  
vg1ilvatiattvmlfiftnfnwlymigaliaiivfalyiknaqrplvnksffqnkryasflfivfvmyaiqlgyiftfpf  
imeqiyhlqldtts11lv  
gyivavivglsgkige1ynskqaiitailialslilpafavgnhisifvismiffagsfalmyap11neaiktidlnm  
tgvaiqfynliinvavsvg  
iaiaaalidfkalfnpgndalsshfgiiliilgmsivglvlfvslnrwtqsek  
>tr|Q6GCY8|Q6GCY8\_STAAS  
mkstphikpmdveiaetv11pgdp1rakfiaety1ddveqfntvrnmfgftgtykgkkvsvmgsgmgmpsigiysyeli  
htfgckk1rvgscgamqe  
nidlydviiaggastnyvqqyqlpghfapiasyqllekavgtardkgvrhvgvnlssdifynadttaserwmmrgil  
gvemesaalymnaiysve  
algvftvsdhl1hetsttpeereraftdmieialslv  
>tr|Q6GCZ0|Q6GCZ0\_STAAS  
mkklatvgslivtst1vfssmpfqnahadttsmnvsnkqsqnvqnrhryggvvpqgmtqaqyteleka1sq1sagsnmqd  
ynmkydatqniadkynvi  
ittnvgvfkphavrmdnghalpltkdgnfyqtnvdanginhggsemvqntghmsqqghmnqnthmnqqphmqghmqss  
nhqmmspanmhssnhqmn  
qsnkkv1paagesmtssiltasiaa11lvsglflafrrrstnk  
>tr|Q6GCZ2|Q6GCZ2\_STAAS  
mksds1keni1yqglyqlirtmtpl1tipiisrafgpsvgivsfsvn1vqyflmiasvgvqlyfnrviaksvndkrqls  
qqfwdifvsk1flalvfa  
mymvvitifidyyli1fl1lqgiyiigaald1swfyagtekfkips1snivasgivilsvv1fvkdqsd1slyvftiaivt  
v1nglplfiylkryisfvs  
vnwihvwlfrsslay11pngq1nlytsiscv1glvgtyqqvgifsnafniltvaiimintfd1vmipritkmsiqqsh  
s1tk1snmniql1l1tip  
mvfgliaimpsf1wffgeefastvplmt1lailvliiplnmlisrqy11lvnkirlynasitigavmnlv1clvliyfy  
giygaaiarlitef11iw  
rfvdi1kinvkl1nivstiqcviaavmmfiv1gvvnhy1pptyat11liaigivvy11lmm1mknqyvqilr11rhkti  
>tr|Q6GCZ3|Q6GCZ3\_STAAS  
menghnsk11t11liglavfiqqssviagvnvsiadfit11ilvy11ffanh11kanhflqffii1lytyrmiit1cl1ff  
dd1ifitvke1lastvkya  
fvviyfy1gmi1fk1gnskkvivtsyi1ssvtig1fci1ag1nksp11mk1lyfdeirskgl1mndpnyfamtqiit1vla  
kyihnyi1fk1lacg11lw  
s1tttgsktafi11v1laiyffikk1fsrnavsvsm1vim1l1l1cftfyniny11fqlsd1dalps1drmasifeegfa  
s1ndsgsersv1winaisv  
iky1t1g1fgv1ldvyhigsqingi11vahnty1qifvewg1lfgal1fi1fmly11fel1frfnisgknvtaivvmltmiy  
fl1tvsf1n1sryvaf1lgi1  
vfivqyekmerdrnee  
>tr|Q6GCZ5|Q6GCZ5\_STAAS  
mkk1q1kkwkcrendieavhnnkgyayqrk1dkleevrksyypikraid11sil11fl1tpimvifaiaividspgnpi  
ysqvrvgkmgk1ikiy1kr  
smcknaeknga1wadkdddritnvgk1fir1ktride1pql1invk1gms1figprperpe1f1s1sevig1feqrcl1vtpg1  
tg1aq1qgyd1tpqk1k  
ydmkyihkgs1mmelyisirt1mvvitgegsr  
>tr|Q6GCZ7|Q6GCZ7\_STAAS  
mfynilgv11vm1stdaldsdiith1rts1in1flpih11salknpyc  
>tr|Q6GCZ9|Q6GCZ9\_STAAS  
meknveksf1k1glyfqiayiv1mait1cgfvicyglifglf1y11sgstadysivt1visaiis1fvi1sivpviv1las  
d1fkeriskgvi11vlaii  
alv1cnfvsai1wfvsa1silgrkk1vstadttti1qkskgnanqashkdtckkel1dsq1dmmehpe1fknpttkn1leg1nee  
ihkdeattk1vdsdntqppi  
eskdhvskkd  
>tr|Q6GD03|Q6GD03\_STAAS  
mqqls1khr1nngdsyvgifnsipdp1mieviaasgydfvvidtehva1ndetlah1ira1e1a1hiipivrvta1vidrdi  
ikv1dm1gargi11vphv1kdr  
etvehivk1sryppq1lrs1nggrmarfgrtp11dam1eman1himviamiedvegvm1aiddiaqvegl1dmivegaad1sq  
s1gipwqtr1ddqvtshvq1h  
ifevvnahgkhfcalpredediakwqaqgvqt1filgddrgkiyrh1sas1atskqkgddg

Tsompanidou\_et\_al\_Supplemental\_FASTA\_File

>tr|Q6GD04|Q6GD04\_STAAS  
mnqtilnrvktrvmhqlvssliyenivvykasyqdgaghftieghdseyrftaekthsfdriritspiervvgdeadttt  
dytqllrevvftfpkndek  
leqfive11qtelkdtqsmqyresnppatpetfndyefyameghqyhsyksrlgftlsdn1kfgpdfvpnvklqwlaid  
kdkvettvsrnvvvnemlr  
qqvgdktyehfvqqieasgkhvndvemipvhpwqfehviqvdlaeerlngtv1wlgesde1yhpqqsirtmspidttkyy  
1kvpisitntstkrvlaph  
tienaag1tdwlkqjqqdtylkde1ktaflgevlgqsy1ntq1spykqtqvygalgviwreniyhmlideedaipfna1  
yasdkdgvpfienwikqyg  
seawtkqflavairpmihmlyyhgiafeshaqnm1ihengwptrialkdfhdgvrfrkrehlseaash1tlkpmpeahkk  
vnsnsfietdder1vrdf1  
hdafffiniaei1fiiekqygideqrqwqwkdiieayqea1pelnnyqhfd1feptiqvekl1ttr11sdselrihhvt  
nplgvggindattiset  
>tr|Q6GD05|Q6GD05\_STAAS  
mqnkeliqhaayaai1erilneyfreenlyqvppqnhqwsiq1selet1tgefrywsamghmyhpevw1idgkskitty  
keaiari1qhmagsadnqt  
avqqhmaqimsdidnsihrtary1qsntidyvedryivseqslylgphfhtpkasgfsead1ekyapechtsfq1hyl  
avhqdv11tryvegkedqv  
ekvlyq1adidiseipknfi11pthpyqinvlrhpqymqyseqgl1kd1gvs1gds1vypt1ssvr1tvfska1niyl1klpih  
vki1tnfi1r1nd1leqi1erti  
daaqviasvkdevetphfklmfeegyral1pnl1gqt1vepemd11t1nsamivregipnyhadkdi1h1vas1fetmpdspm  
sk1sqv1eqsg1apeawle  
cyl1nr1t1l1pi1kl1fsntg1isleahvqnt1ielkdgipdvc1fvr1d1legic1sr1tiatek1qlvpnvvaasspvvyahdeawh  
r1kyyvvn1h1gh1lvst1g  
katrnev1lwq1vah1r1mtwkkeyannavfvdcved1yqtptiaakan1msk1ndcganpiythipn1pichnkevsyces  
nns  
>tr|Q6GD07|Q6GD07\_STAAS  
mqnhtavntaqt1i1rd1lvdal1fed1iagivsn1s1ditkengqt11iyeretqq1kipvyfsa1nmfryessqp1tiegra  
skq1l1taefwqt1anmnc  
d1shewevarveeg1t1taatq1lakq1sel1dashpfvmseqfas1kdrpfhplakekrg1readyqvyqaelnqsfp1mv  
aavk1thm1ihgdtanide1  
en1t1apikeqatdm1ndqg1s1id1dyv1fpvhpwqyqhi1p1nvfakeisek1lv1l1p1kfgdyl1sssmr1lidigapynh  
vkvpfamqslgal1r1l1tpr  
ymkng1eqaeq1l1rq1iekde1akymvc1detawwsymqgdndi1fdkq1gh1t1vq1rkyep1vakndtq1lvsmaalaan  
dr1t1yqmi1cgkdn1skndv  
m1t1fed1iaqv1flkv1t1sfm1qygal1pe1hgqni11s1fedgrvqkcv1rdhdtvriykpwtahq1sl1pkyvvredtpnt1i  
ned1et1ffayfqt1lavsvn  
lyai1daiq1d1fgvsehelms1lkq1il1knevati1swvttdq1lavrhi1fdkq1twpfkq1il1p1lyqrdsgggsmpsg1tt  
vp1n1pmvtyd  
>tr|Q6GD12|Q6GD12\_STAAS  
mtek1nk1k1dnyh1l1fal1flaivsvvsmmsgssfi1p1qr1v1myfinpndsmdqft1ev1r1l1prit1ailagaalgmsglm  
lqn1v1knpiaspdi1igitg  
gas1savvfi1affsh1t1ih1l1p1fav1lgga1iamm1ll1vfqtkgqirptt1i1igismqt1fia1lvqg1l1ittkq1saaka  
yt1w1vgs1y1gat1fkdti1l  
gmvi1lavvp1l1fl1vipk1mki1s1iddpva1ig1gl1hvqrmk1liq1litst1ilvsma1is1lvgn1ig1fvgl1iaphi1aktivrgsya  
kk1l1msam1igaisiviad1  
igr1t1fl1pkevpagvfi1aafgapffiy1l1l1tvkk1  
>tr|Q6GD14|Q6GD14\_STAAS  
mkkkn1ysi1rk1lgvgiasvt1gt1l1sggvtpaanaaqhdeaqqnafyqv1nmpn1nadqrngfiqs1kddpsqsanvl1g  
eaqk1ndsqa1pkadaqqnn  
fnkdqqsafyei1nmpn1neaqrngfiqs1kddpsqstnvl1geakk1nesqa1pkadnnfnkeqqnafyei1nmpn1neeq  
rngfiqs1kddpsqsan1l  
seakk1nesqa1pkadnkfnkeqqnafyei1h1p1n1neeqrngfiqs1kddpsqsan1laeakk1ndaqa1pkadnkfnkeq  
qnafyei1h1p1n1teegrn  
gfiqs1kddpsvskei1laeakk1ndaqa1pkadnkfnkeqqnafyei1h1p1n1neeqrngfiqs1kddpsqsan1laeakk1ndaqa1pkadnkfnkeq  
dgnkpgkednnkpgkedgn  
gvhvvpkpgdtvndiakangttadkiaadnk1adknmi1kpgqe1vvdkkqpanhadankaqa1petgeenpfigttvfgg1  
s1al1gaal1lagrrre1  
>tr|Q6GD15|Q6GD15\_STAAS  
mt1l1tvp1ndvng1salvaavpi1fl1cl1tvfkmkiyaalt1l1vvt1lival1fvfel1pvrvsagaitegvvagifpigy  
iv1mav1lykvsiktgqfs  
i1iqdsiasisedqriq1l1ligf1cfna1f1legaagfgvpiaicav1l1liq1lgfep1kaam1cliangaagafgaig1lpvsiid  
tfn1sggvtt1dvarysa1  
t1p1il1nfi1p1fv1lvf1vidgmk1gikei1lpv1iltvsgtytg1l1l1ti1fhgpe1ladi1ps1latmv1lafvcrkfkpkni1fr1  
kesehkiqkrtpkeivfaw  
spfv1l1tafv1l1vwsapffk1l1fqpgga1les1vik1pipntvsd1spkgial1rd1ligatgtaill1tvi1itil1tk1kwks  
agall1vea1ikelw1lpi1lti  
saila1akvmtygg1l1tvaigqgiakagai1fp1fspv1lgw1igv1fmtgsvvnnt1fapiqatvaqqistsgs1l1lvaantag

Tsompanidou\_et\_al\_Supplemental\_FASTA\_File

gvaaklispqgsiaiaataav  
kkvgeesallkmtlkysii fvaficvwtfilitlif  
>tr|Q6GD16|Q6GD16\_STAAS  
mskirsftilslliyllamcvtvvtysklptkvpihynlagdadnfadkwvlllinsafiviwliffiagryyerfakws  
hynhtpreiraiklflstl  
nleimsymsiftvleiwqihhhqfnllwfnmifiiiigltlvifc11ptihkmrdsq  
>tr|Q6GD19|Q6GD19\_STAAS  
mnetyrggnklllgivlgvitfwlfaqslnvvpnlqqsfgadmgtisiavsltal fsgmfvvgaggladkigrvkmtni  
glllsiiigsaliiiitnlp  
llilgriiqgvsaacimpstla imktyyegaerqra lsywsigswgsgicslfggavattmgrwififsiiivavlsml  
likgtpetksevtnthkfd  
vagllivlvmllslnvvitkgaalgyslwffgliaivivaffiflkvekkvdnplidfk1fenkpytgatisnflngv  
agtlivantfvqqglgyta  
lqagylsitylimvlmrvgekl1qkmgskrpmllgtfivvigialislvflpgifyviscvvgylcfglglgiyatps  
tdtaisnapldkvvasgi  
ykmasslggafgva isgavyagavaatsihtgamialwvnlmgimafia ilfaipnddkrvkdak  
>tr|Q6GD20|Q6GD20\_STAAS  
mnqqlietlkskegkmierrylhghpelsfhedetakyaefykgkdvevetnigprgikvtidskpgk1lairadfd  
alpitedtgl sfasqngv  
mhacghdahtaymlvlaetlaemkdsftgkvvvi hqpaeevppggakamiengvldgdvhlvgvhvstmktgnvyypg  
yvqtgraffklkvqkgggh  
gssphmandai vagsyfvta lqtvsrrlspfetgvvtigsfdgkqfenvikdvveiegdvrgltdatkatieteikrls  
kglea1ygvttctleynddy  
palyndpefteyvaktlkeanldfgveiceppsedfayyakerpsafiytgaavedgeiyphhhpkfniseksllisa  
eavgtvvl dylkgdn  
>tr|Q6GD22|Q6GD22\_STAAS  
mgipdp1snpsdp1l gdswwvgd1kkrqekklittvi apehdekhrenkskmmksekqlinq1inhghtfksdfknvak  
gdwvnmkamqd1dklgnelk  
kimn  
>tr|Q6GD23|Q6GD23\_STAAS  
mfeeykkiddlenayeielkriereiqlsd1kyhlrreneqsydaflylknkmnyseesnakvrrlveefdyeadtyir  
qkelkledykeeirreyiq  
qsekimeak  
>tr|Q6GD24|Q6GD24\_STAAS  
makaeyeidpgk1tsnseetsaisnisiyeienandn1dneki rggitk1kkgnfpknldyidsytdpstgttatafln  
kdtgkvvtvmagntfhhgdq  
lkrvalssmspl1fppskqdmkdvrgtmkdgvadlaigvgmvnykgkhfantqqfienlqkkyeidvtvghslggrdaif  
lglryniknvaynpaple  
vksirnkfggqlfrntt1pdeky1kelmdnydgditkvitqkdgl dylvkrtdh1tcgdv1rinngqghamenflgekeq  
reieelmlvkgyrdandk  
afkal1kntekklgkideisk11qtnggalsssqk11letlvafsvaeglskmdqelqqlknmfn1mdkfeanwkda  
geasdivgkhl1sypekvs  
ldnggvnesklatephneikdklnkitd1skkynsy1qqieksineivakdqqlagqigdl1  
>tr|Q6GD30|Q6GD30\_STAAS  
mndmlis1vipvfallviggiiwmiiegivhiskknkaidnffnqvnkvsetykfattfl1lilatagisqfylyyivsa  
llfwlviltfagiiflm  
pyglcfl1pfykqkkkqt1fkymvyttig1sic1g1slvlvhttkiymdeggvryyygsfvmkqaggyaylalav1st11  
ivakkatnknkeietvdnt  
nimer  
>tr|Q6GD31|Q6GD31\_STAAS  
mnfndlei f1tvceasinkaaik1ryaqsnisqris1k1enelgvv1lfrnqkgakatkgaeeflayskkl1rdtetikn  
kmmntmsilcse1lfny1  
seseimmsnnsinifissgnirkaieknydkvisfikindsnyrlsnvdtmkvt1ysngsnydkeallinkdefcplrk  
it1dnk1dsqrvmeids1a  
aiin1vkqkgkka11pmtfenkrdivqdi skifevnyytnhimh  
>tr|Q6GD34|Q6GD34\_STAAS  
mtmitc1fgssrkdgsaiaven1lkn1kvnfvnlyqsniekvtdnrhskganfhnddyeqilikvlesdiiifstplyw  
ysmsas1klfidrwtes1r  
dtqidn1fkeimsqkyliliiiggnphtkaqplvnqfk1lifemnitnyrfligegnpfdilndsqfieelaninlalk  
kgdiy  
>tr|Q6GD35|Q6GD35\_STAAS  
mtd1l1k1knfr1fflaei1safvgvistvganwy1idktnsdq1lgim1aln1v1sgflaspiggladkynrrniility  
llqvily1llivia1vmigf  
etylvigfai vngi gwtty matsrs1vkqil1kpdqytdans1leis1qtgmfiagglsgilykingftliiamtimmfli  
sifmlfr1lhvdkpthsee  
stns1lqey1lgwkfl1kdnmmi1figvisi1pmvftmi1fnis1lpgyvynvl1k1ssvqfgfsdmlygigg1caglisails  
kkistkvli1filyfilvin  
salfiwinsafyl1figsfilgysissiriymntaimntvsdkyvgrsftiwtss1ll1qsfiapflgrwineindkfgfy

Tsompanidou\_et\_al\_Supplemental\_FASTA\_File

iiililsllifvtlllvnkt  
dkikyahkee  
>tr|Q6GD42|Q6GD42\_STAAS  
mtmnydkkminrinriqqqlngiikmmeegkdckdvtqisasksslqrlmgiiisenliecvkaaaddeessqelinea  
vnllvksk  
>tr|Q6GD44|Q6GD44\_STAAS  
meyksynkmsnnilsillsdknfdnkmvstgysilselpcivayknndiaglltykvydeyieislsdfvenkgigsh  
lldyaeiiasdmskrsisv  
ittnenikalyfyqknkyritdvifdavtearkikpsiptidkngieirdeivltkyl  
>tr|Q6GD45|Q6GD45\_STAAS  
minkikilfsflalllsftsyaakedlhdkseltdlalanaygqynhpfiikeniksdeisgekdlifrnqgdsgndlrvk  
fatadlaqkfkknkvdiy  
asfyykcekiseniseclgyggttlnseklaqerviganvwvdgiqketelirtnkknvtlqeldikirkielsdkykiyyk  
dseiskgliiefdmktprdy  
sfdiydlkgendyeidkiyednktlksddishidvnlytkkkv  
>tr|Q6GD46|Q6GD46\_STAAS  
mrhni fynrsefpmidnfvkqvlklikekrtnnvkkswdwdkgdqyktlvhdklpkqlkahikedkysvvgkvatgnyskv  
pwisiydenitkeskdgyy  
lvylfhpegegiylslnggwskisnmfprdknaakqraltlsselnkyitsnefntgrfyaaenkdsydlkndypsgys  
hsirikyydlnegftee  
mlydlkkflelfnelaskvktfydglvnrideiqedseieeriaraqdtklkqveapkgvipkykkgvskttkndseie  
ksnkenktgkvgeklaik  
yfnldidnkidedkkeqfrnilndnpgsqhghgydlvafdpntntdeaiekfieiktsissnieepffmslnemfalkeyk  
kkyililrifnvsgeepqfy  
fidpyanysefkdvddlidkvfnveaiqykvfgek  
>tr|Q6GD47|Q6GD47\_STAAS  
mkksvrllyhmiyecnekrnkflndlmsefnisrstalrdikeiealgvplysstgknggymtignrnqtkiaitdeelka  
lvftlssisnsvklpfgte  
yqeilkklynnskkelinqyneifqyfnedyqfksykinfeiirltigsksfkicysqnylkeqykgigilyknqqwy  
fvvniasklvkllniski  
kevyemgetkeceitmqnfqqfmvenentidiqirsniiglnilkgylwsdymienineetylfkskvmqdinfiakl  
ivtcganvkvefpislkka  
ikteltkiinly  
>tr|Q6GD48|Q6GD48\_STAAS  
mnfqvspyfliienadglkrlyeelgaktlyiqrikdrptdkqlnidkkdlnkidqcvlqfgdikimiaddteglpitq  
gnnislctfdhveetkrv  
ydliekgevevkafspefytegygyvrpygislhlftrkrk  
>tr|Q6GD49|Q6GD49\_STAAS  
mnlrghenrlkflkydvtipishlklllegqkkdgeggrltdsyycfssylkdnskkvlgtfncgyhiaedllklsnqdkl  
plfnpfkvinkgnlqgvt  
nkgndinrqrkqynevallqlsnainliicyegnikelstikyetedkyyysepydskikavntiignlfdkklvekis  
einvngeirkfdfslltnk  
ikkyeiqnnfe  
>tr|Q6GD50|Q6GD50\_STAAS  
mnkievykfvkvkqlyvqliklyrtnmdmshktqkdfllneindifkekdidsdfitsiddvkltkkkaehllnelkvy  
iqdfeipsssqlikfrkv  
kkllkrpdinlidtkeisylgwndnssnrkyivyknlddkfegiygeispnkvgkfckicnqesdtslflnktkhnksgt  
ytkkgdyicydsfkcnqnl  
ddinnlyefivkik  
>tr|Q6GD51|Q6GD51\_STAAS  
mteinesslsktvypvgtelsideyeivknkimvlgkekwtllnephyyyliedfietydkktskkgmlmgvkyfivne  
ilnrcltteqiakelcnk  
dwe  
>tr|Q6GD52|Q6GD52\_STAAS  
msvletklsqmsksakiarnmklpdeidrllrkrierinkkrkptssnirdleksnqlvtkqqkladlqveytkiekk  
inetkinlqkeqsrnqkk  
ssmldkntkgnneeimeklntnsdqineisnqikkavnqkeiiedvflshssldkedyvskiseklikeglkvfedvkvf  
eigksqtetmmgilsrfl  
vvvflspnfiesgwsryeflslnreineehviiipihkvsvedvraynpylvdkyalntsdfsieeivekiyqvivns  
kn  
>tr|Q6GD53|Q6GD53\_STAAS  
mkrsvesfseihqvlknryrdnslwlfgrhsnlwslvpkagrapydkydeetfyawkrqamiflketysdwdmltiaqh  
hglatrlldwfnplvaaf  
favqtyedcdaviyayllkksdmnmkgatpfkskwikkvpnglasrvvrqsgiftihepptsieanlsekeelhkiik  
khyrkkllreelsygyinel  
slfpdlglsshvnmwimeinpyasnnitqelnsine  
>tr|Q6GD54|Q6GD54\_STAAS  
mwfrnfsyfihkidsefi leeyledylpkeyrpnficgkaqpsetiyvsyfinqdeqtveqhtvecdktgffideipkhf

Tsompanidou\_et\_al\_Supplemental\_FASTA\_File

iknkmhyfidsgskididk  
llnefidqgtailnildndletyfyndyletinhttefakkiankamkeirknieleqikqqvsymknadqvsslesfkd  
lkhtilkqhrdlslnkvdd  
iisdfltryliyekqdsyvkkdissinksqyfkklvieglirerksnsqyfeiansikpsshnnslngsdeidqfrq  
avigislnlydhndtyfkf  
irsimkkssrkvnltiddiisknnidkfmkknklnsnelfylttiedtfhftlftaitdlidkvvnvssriieeasqy  
dilialhslnslknelnti  
idkheenlirfeslingyvrrntqkivilvrntieqhpelmtkiedslislnndyniseiysretfnndyngildklmiqvi  
ndfyklr1kklnsasklly  
>tr|Q6GD55|Q6GD55\_STAAS  
mtyeqeddfkl1krri1gigfv1pegqvftfhdlnrranvqcskavqqnvgrwfayfvknapsvpfiigkntngllym  
kvgnplqdsnpskggvr  
>tr|Q6GD56|Q6GD56\_STAAS  
mshyifeagpyqldakawrktfppkkdgdkekvvpissivveakfwhasentekiiisngkdehtfesdilttrnlp  
slikyghsinesyirdlly  
alqlmrde1ptsdlydgsigietphgyivmvdtyvtskqydlaslepivdsayllepkgtfkdwlnmymnevkgllle  
lavifgisalvtaf1khh  
evefagiifstgqssstgkstaalavsvagnptkgnktlfrswngtrnalegylsnnygipmvfde1ssatfkdtgll  
ysiaegqgrqrsnvhgev  
tpknwgtsvistseysiftdsaqndglrvrtieineqfttnatnadnikkavalnyghvlp1vaqylinreeviqwfkd  
ehhwfkaklkseantgir  
mfkryavittsaqilgrvlatnidiakirdyfidythtvsersladkaievitqfvaqnrqkfsddtalnmiengli  
alkddyievkiiatvfkdm  
lkeqhfqdvnnvvnalrdkgfiesdrdrittkrtvkddygkkqslvfylh1kl1dseyasifgltkdaepikakin1dnkkm  
leswkkqnddlidf  
>tr|Q6GD57|Q6GD57\_STAAS  
mkqai1gylrqsttkqqs1aaqqtikalaekhniqhitfysdkqsgtrtdkrngyqqiteliqqgqcdv1ccyrlnr1hrn  
1kna1klm1lcqtyhvhl  
svhdgyfdmdkafdr1kl1nifislaelesdnigeqvknigekkarqgk1itthapfgyhyhngtftidtvksptvkavfn  
yylqgygykka1aqyleadd  
nfinrkpyqvrni1lnpnycgrvinqygqyenmpaivsttiyeeaqvtrtqkqvkckpsen1kqkikcpsychst1tm  
tvrkpdhs1ryyvcqpnmn  
narfvcefkginageletsvlatcqdffqnqqlyskinhtiqr1krqrdieikttlnheqlieklaagkidaetfkeqt  
hs1hqskpissisayqir  
kafqni1qqrft1nm1lpyideinisknslagi1yfknep1nivkqtmk1siv  
>tr|Q6GD58|Q6GD58\_STAAS  
mdkmkk1vggy1rvsterqvegysieqitqieqycqfngyelvdiyadrgisgksmnrpelqrm1ndakngk1dcvmv  
yknr1arntsdl1tvee  
1hrqnevffs1sermeknstgk1mlqil1asfseferntileni1ngqhqralkgyyqgn1plgynnipdnkkelminqh  
eanivkyifesyakghgyr  
kiana1nhkgvytkkgnpfsinsityilvnpfyigkiqfakykdwnekrrkg1ndkpii1adgkhp1isqelwdkvqsrk  
kqvsqkpqvhgkgt1ltg  
iihpcqcgapmaasntnt1kdgtkkri1ryyscnfrnkgskvcsansvradviekyvmdqileivksdkv1kqvvervn  
qdnqvdaa1nhdiaykq  
qfdevnik1kn1vqtiednpd1tsa1kptihqyetk1nditnqmnq1kqqnqekpsydtkqiaa1lqrifqniesmdks  
q1ka1yltv1dridirkde  
nhkkqfyvt1kl1nnei1kq1fn1nn1dev1l1stss1fl1pqt1lyfqi  
>tr|Q6GD59|Q6GD59\_STAAS  
mktttqelkqy1tr1fq1snnetwecealeeaenilprfvdhtplahl1tletytyynde1helsiypflmyannq1is  
igyl1dhfdmdf1yl1tdtkn  
ti1derh1l1qkgge  
>tr|Q6GD60|Q6GD60\_STAAS  
mkinryitkgiskq1s1d1q1l1wnmvkdrdnq1ntdy1h1fk1qeden1s1theqeqpaykleyhytny1knqna1pk  
kvyv1reddvdvfyym1l  
peey  
>tr|Q6GD61|Q6GD61\_STAAS  
mntikstih1tea1fsddkqhry1l1kktwdekkpactvitmyph1dgv1s1d1ttv1il1nq1anseqygavy1vn1fsnik  
tpen1khi1kepydkht1dih  
1mktisesdvt1laygayakrpvviervsqvmem1kphkkkvk1l1npatneimhp1nparqkw1tk  
>tr|Q6GD62|Q6GD62\_STAAS  
mnhettqsdwrtvpnc1lasqny1sivkg1vhftaiedeel1dkiyddfmddsi1ttv1nnd1qti1inhy1lk  
>tr|Q6GD63|Q6GD63\_STAAS  
msefkrhqqt1sinvqkqan1iwnvadi1rglykphgykvilpmtvikr1hdt1l1ktrdkv1ktaentqsindvmrer1l  
knasgysfynts1ytfet1  
ladpaniesnfray1ngf1senmqdi1nnfkfdveittmadndv1fyv1qefnkaday1gpdkmtstdmgyvfeelvrkfs  
esyneeagahftsrdi1yl  
mtd1l1iedkdt1fkehvfktvydqtmgtsqm1samterihdmndtaevatfgqel1npetya1skadtmi1rggdenma1  
gst1tsdrfegftfdycis

Tsompanidou\_et\_al\_Supplemental\_FASTA\_File

nppfgvdwkkdqkavkaehelgelgrfgvglprvsdggllfqlngisklketgrmaiinhgsalfsgnpgageslirqyv  
iendwlegiqlpndlfn  
tgi stywiitkdkspervgkvqlvdasmyekrrknigekrvdi seacremivqaygefndkeyylgdgtveskil kne  
sfgrtrvtierpqrndengd  
ivyknngsksvdtnlrdtedipltedineyferielpfnqdamdrkkdkigyeipftrlfykytpepseviserikql  
eesi knfqalsgkevdt  
e

>tr|Q6GD64|Q6GD64\_STAAS  
msremkysgi ewigyipkywtitklniidfsgyafksel ftdisdnkkvitiks fntkeiildnlsysneslkfptky  
llknndilfamsggtgkn  
llieqvddlyyinqrvgiirssfskfiyyyintglfseyinlfssgsaqpnisatdiqnfiaalpeketikkieiyinyq  
lkiisniidttyqsieelk  
kykqsliteavtkgidpnvemkesgndwigsipsnwsvrkikhdfnlkgrigwqgltsneyqtvgyplitgtdfkkgiir  
wscvriseerfeepdih  
ikendllitkdgtigkvalatnvpkkslnsgvllireklntinkkfmyynllsnmfwnwysnngastikhlyqqgf  
ynysyaipllheqqivqy  
lddkvstidrliedtkvikelenykksliyeyvtgkkev

>tr|Q6GD65|Q6GD65\_STAAS  
misvknkeinfedieaslvqyggwesvrfqdthydaniaaldptvllfvkqtqpknwkryvsiyrtnaeqkflkrln  
eithgihlvlrkgiirdg  
vsfkvyfqpasInteniknyearnfqcvrfqysnkyrntidmvlmingiplvalelnqytgqneharlqfeqdrd  
pkelifqfnsrflvyfavd  
hfnvltmtklakgntyflpfdqgsngpgrvggagnpsnpsgyptsylwenvltsyqllidiferfmleekklifpryh  
qldvkkllisdtqhhgpgk  
nyliqhsagsgksnsiawlaylaslshnedqpiyssvivvtdrtvlrdqlqntlmsfehtvgqvetigdnktsqdlkta  
indqkkiiittlqkfpviy  
deidntagsrfailvdeahssqtgssaaklkhaladkeaslkeyqefeesvedqslddqdqivqtllsqgqhdnlffaf  
tatpkektiemfgtkqadg  
syhpfhisymsrqaieegfilnlqnymtyntsykiaksi eedpelpkteavraiakyqslhpwvlrqaeimieqfrsvt  
qkavqgrgkamivtasrlh  
avrymqefkkyikekgytdmdvlvafsgtveddgiey tepkmnlthseriqenqlkeafhsedfnllivaekyqtgfde  
pllhtmfvdkrirgvkavq  
tlsrlnrtmpgktdtfdlfdvntaeeyeaqpfyeatslkeeininliydtqsklrkfhiyndddiqvmklrnraqkq  
qndqllgrlssvlrpvisr  
ysdlpedvqydfvrlrnfknwinyiaqidrtfdkelleesiftgfllkfipekqrnyidiedkvkleyyklqedfkgdi  
alvnedvengqlahpsevn  
atvrpeeydslni ihkinerfpndftqgdrvlvknmretlinntdaklvnmaqnnseemfanslfqqqfqdf lidqyn  
qgeaayskmfsnrdfydt  
vyqllakdyrwlrsqkadnfa

>tr|Q6GD67|Q6GD67\_STAAS  
miywcmvnggnemkalllktsvwlvlfsvmglwqvsnaaeqhtpmkahavttidkattdrqqvpptkeaahhygea  
atnvsasaqgtaddtnkv  
tsnaptnkpttavsttgnkrhdvdaqqastqkpthatfkl snaktaslsprmf aanvpqttthkilhtndihgrlaeek  
grvigmaklktvkeqekpd  
lmldagdafqglplsnqskgeemakamnavgydamavgnhefdfydqllklegmldfpmllstnvykdgkrafkpstivt  
kngirygiigvttpetkkt  
trpegikgvefrdplqsvt aemmriykdvdtdfvvishlgidpstqetwrgdylvkqlsqnpqlkkritvidghshtvlqn  
gqiynnda lvtgtalanil  
gkiftfnyrngevsnikpslinvkdiventpnkalaeqinqadqtfraqtaevii pnntidfkgerddvrtretnlgnai  
dameaygvknfskktdfav  
tngggi rasiakgvtrydlisvlpfgntiaqidvkgsdvwtafehslgapttqkdgktvl tanggllhisdsirvyydm  
nkpsgkrinaiqilnketg  
kfesidlkrvyhvtmndftasggdgy smfggpreegisl dqvlasylktanlakydmt epqrmllgkpvaseq pakgqqg  
skgsesgkdtqpigkekvm  
npakqpatgkvvlpahrgtvssgtegsdralegtavssksqkqlanmsapkgsahekqlpktgtdqssspaamfvltg  
igliatvrrrkas

>tr|Q6GD68|Q6GD68\_STAAS  
msrli rmsvlasgstgnatfvenekgsllvdvgtgkkmee lfsqidrniqdlngilvthehidhikglglvarkyqlpi  
yanektwqai ekkdsripm  
dqkfi fnyetksia gfdvesfnvshda idpqfyi fhnykkftilt dtgyvsdrmkgmirgsdafifeshdvdm lrmc  
rypwtkqri l gdmghvsn  
edaghamtdvigtntkriylshlsqdnm kdlarmsvgvlnehdidtekevllcdtdkaiptpiyti

>tr|Q6GD77|Q6GD77\_STAAS  
mlnsikevkiiaivknmgvayvfskiqpkat iatia lfvvalaly lvpglglifalfatipgivilwnksiqsfgisali  
tviittvl gntfvlsaiil  
vliasliigllkertskerilyvttvamslisliafmllqtfgrippsasivkpfkqtl heatmsgadanmtqileeg  
frqatvqlpgfiiitfli  
vlinlivtfpilrkfk iatp vfkplfawqmsgillwiyiiviicllftgqpsvfqsillnfqlvls lvmiyiqglsvihff



Tsompanidou\_et\_al\_Supplemental\_FASTA\_File

gkagkplnavtillliigt  
iltptthivglgvidlslnlkrimknnsk  
>tr|Q6GD80|Q6GD80\_STAAS  
mthlsfrqgvrecvptllgyagvgisfgivassqnsfisleivllclviyagaaqfimalfiagtpisaivltvfivns  
rmflsmlapnfktygfw  
nrvglslytdetfgvaitpylkgeaindrwmhgnitaylfwaiscvagalgeyisnpqalgldfaitamfi flaiag  
fesitksrlriyivliiav  
ivmmlslsmfmpsyliailiaatisaalgvmmr  
>tr|Q6GDA2|Q6GDA2\_STAAR  
miinletqqihfdleheipyfqspeknrirdidvlnkkqisniinvi fnnqsktkctflseylypvkfrektrigrffn  
itnwyeeihshadekyviat  
ikniknkdli dyslyikkglvepfivfy nqenifyisnavidiisvskdtlgyiksefndhcasy  
>tr|Q6GDA3|Q6GDA3\_STAAR  
mkfrelvkqsyedlknltvtwynvia laiivivlstvttpiigipagllggayylkrreekgk  
>tr|Q6GDA4|Q6GDA4\_STAAR  
mtfnhivlknlrqnlkhyamylfslffsivlyfsfttlqftkgvnnddsm aiikkgalvgsiflfiiviflmyanhlfv  
krtrtrefalfqligltrqn  
ilkmlaleqmivfiitgvvgvlgciagaqlllsivsklmslsinlsihfepmalvltilmliiayililfqsslflkrrs  
ilsmmkdsvktdvttakvt  
vievisglgiamialgyematemfgtfkalmtamtspfiilfltvvgaylffrsvsli fktlkkskngrvsitdvvft  
ssimyrmkknamsltiiai  
isavtvtvlcfaalsksntdqtltsmapndfnvasqdaqfesklsqqhitfsknyyetitv dnvkdqviltengsdsg  
rtnsilsantkltgnnaii  
tntkslpnvinihlndlvvkgtknetfrvtqedkdkvypnlifnspvievspekyqqlktqnnvhtfygydikqtsqk  
kkaqaiakqfgdkii tydd  
mkkevdatngilifvtsflglaf lvaagciiyikqmdetedel snfrilkrigfthtdmlkglllkitfnfglp lliail  
havfaaiafmlmgnsifm  
pviiiviytliyivfaliafvhsnklikkti  
>tr|Q6GDA5|Q6GDA5\_STAAR  
mtlsvqhvshtyggkhtfqalkdinfdiqkgefvaimgpsgsgkttllnvlssidqissgsviangqelnklnqal ak  
frkeslgfifqdyislp l  
tvkenimlp lsvqkmskatmeenya ittalgiyd lgnkypselsggqqartaara fvhkqiiifadeptgal dsksan  
dllqrleemnk sfdttivm  
vthdpvaasfaervimlkdgqih tqlyqegrskqafykdivhlqsvl ggvsn di  
>tr|Q6GDA6|Q6GDA6\_STAAR  
mekgnqgikwsslimgvlllmavviftfpiefyairliglflvlingviqivyrkaka lvggnqnwil fmgivdilf  
glivifnvgassaffiy mf  
afwfi fssia glftfsgs lklisvifnllgivfgvillfnplmgivfistmiaiafvfvgviyvvdala  
>tr|Q6GDA7|Q6GDA7\_STAAR  
mniakledylqieptrynqpsiealnyyatr fmltvpfenidvqngkpisv didalfnkivhdkrggfcye lntffkayl  
qqkgfnpe lmsat ihtpgg  
grsqngshaslvvsinnvf yvtdvgfgdlplnaipitlpddtqqitdisgt fraifnsedkdi fvyqkyennhwh tkyea  
efkareieefdqnieynqt  
hpdsvfvkhllitmpqsfgratmfenhl tltkdgtp ek laitkdnykqfltkyfglnvtisrlensdn  
>tr|Q6GDA8|Q6GDA8\_STAAR  
mtvfknerlswlpyiaivillhvigfsflwiagkdhhilfgmgilaytlglrhafdadhiaaidntvrkllqqrkdpsgv  
gfyfshghssvflmavfl  
gysvkwakdelphfqdiggtigtlvsgfflvligvlnliislinl faklrreheeaevdallesrgfvsrfvgpyfk  
litrshwvlp lglflglf  
dtaseiallalssgasqqaisfigilslpilfasgmslldtdlgvmmkyaynwaffnpirkiyynititaisviaalvig  
miellqiladkl dlhgafw  
afissiefdylyilvalflitwlissliwkgfrieghkwsk  
>tr|Q6GDB1|Q6GDB1\_STAAR  
mentvkyrkfilpivvgll iwaltpfkpdtvdptawymfaifvatiacitqmpigavsii gftimvlvgivdmktava  
gfgnnsiwl iamaffisrg  
fvktglrrialhfvlfgkktlglaysivgvd l ilapatpsntaraggimfpiikslsesfgskpkdessrkmgaflvf  
tefqgnlitaamfltamag  
nplagnlasstsnvhitwmnwflaalvpglvslivvpfiikyipyptvketpnakswaenelatmgkialaekfmigifv  
ialtlwivgsfihidatlt  
afiaalallltgvltwqdi lnetgawntlvwfsvlv lmadqlnklgfipwlsksiatslgglswpivlvililfyfyshy  
lfasstahisamyaa llgv  
aiaagapplf salmlgffgnllastthyssgpapilfssgyvtqkrwmtmlilgfyfi iwiglslwmkvigif  
>tr|Q6GDB2|Q6GDB2\_STAAR  
mnknvlfmvfiml lniitp lfnkneafaardisstnvt dltvpski edggkttvkmtd ddkngkiqngdtikvawpts  
gtvkiegysktvsltvkge  
qvgqavitpdgati fndkvek lsdvsgfaefvqgrnlqtntsd dkatitsgnkstnvtvhkseagtssvfyyktgd  
mlpedtthrvflni nek  
ryvskditi kdqiqggqql d l stlni nvtgthsnyysgpna itdfekafpgskitvdntkntidvtipqgygslnsfsin

Tsompanidou\_et\_al\_Supplemental\_FASTA\_File

ytkitneqqkefvnnsqa  
wyqehgkeevngkafnhtnhiinanagiegtvkgekvkqdkdtkapianvkfklskkdgsvvkdnqkeieiktdangi  
anikalpsgdyilkeieap  
apytfdkdkkeypftmkdtdnqgyfttienakeiektkdvsakvwegtqkvkptiyfkykqddnqnttpvdkaeikkle  
dgttkvtwsnlpendkngk  
tikylvkevnagkdttepytkkedglvvtntekpiettsisgekvwddkdnqdgkrpekvsvnllangekvetvdvts  
etnwkylfkdipkydegkk  
ieyvtedhvkdyttdingttitnkytpgetsatvtnkwdnnnqdgkrpteikvelyqdqkatgkttatlnesnnwthtw  
tgldekakgqqvkytveel  
tkvkgytthvdnndmgnlivtnkytpettsisgekvwddkdnqdgkrpekvsvnllangekvktdvtsetnwkyefkd  
pkydegkkieyvtedhvk  
dyttdingttitnkytpgetsatvtnkwdnnnqdgkrpteikvelyqdqkatvktatlnesnnwthtwtgldekakgqq  
vkytveeltkvkgytthvd  
nndmgnlivtnkytpettsisgekvwddkdnqdgkrpekvsvnllangekvktdvtsetnwkyefknlpkydegkkiey  
vtedhvkdyttdingttit  
tnkytpgetsatvtnkwdnnnqdgkrpteikvelyqdqkatgkttatlnesnnwthtwtgldekakgqqvkytveeltkv  
ngytthvdnndmgnlivtn  
kytpeknkpiypekpkdktpptkpdhsnkvkptppdkpskvdqkdkntkpenplkelpktgmkiitswitwvfig  
ilglylilrkrfns  
>tr|Q6GDC3|Q6GDC3\_STAAR  
mhkkyllffllsvallyscskqnekaqnksvnpneyamhkskmdewtyhgqvyhvfyhplidpkvaftgdthqak  
gnndwmitvsefkkslne  
yknnyiiivnphdvydlsshhvakkvklpkgkpliisiddmnyysymrhgyadrllvldknkhvsettdskghatysd  
dndivpilnkfvkehpdfs  
lgekgvvaltgyegvlygrtneitskdytknkkaaevvramkrdgsfashsyghinfektsldgikrdtkrwkdeve  
pivgktdmfvfphgaqdrh  
tqaydylvdkaqfkfiagvgpnnftdisatnvyqdrvaidglnlfevkylkppffnpenvyskqdrqffkgnrdyee  
>tr|Q6GDC7|Q6GDC7\_STAAR  
miyidknespvtpldqkmtmsiisatpynlypdaayeqfkeayakfyglspeqiiagngsdeliqklmlimpegpvltln  
pddffmyqayaaqvnreiaf  
vdarsdltdfletitkidevqpsffimsnphnpsgkqfdtafltaiadkmaingyfvideayldygkaydvemaphil  
rmrtlskafgiaglrllgv  
mstvetiqriqtiehpypnlvftlniatyifrhreetsrfltmqrqlaeqlkqifdthvadkmsvfpsnanfvltkgsaa  
qqlgqvyvqqgfkprfyde  
pvmkgyvrysiatasqlkqleeivkewsakydlskttkhs  
>tr|Q6GDD4|Q6GDD4\_STAAR  
mifsqnlfrprtptcivcrnwesnflgprqlalpvefgnplslcwgpakvll  
>tr|Q6GDE1|Q6GDE1\_STAAR  
mtntrrstsslivheqpkspisekfrgirsnimfanpdsavqsivitseapgagkstiaanlavayaqagyktlivdgm  
rkptqhyifnlpneglls  
llnwstyqdsiisteiedldvltsgpipnpseletsrafanlydtllmynfviiidtpvntvtdaqflskftgnvvy  
vnsennnkdevkkgkeli  
eatgakllgvvlnrmhkdkssasyayygtdes  
>tr|Q6GDE3|Q6GDE3\_STAAR  
mvlrkvimqldqiaalenigfspeeaatpealklrviqiqetfivaekndevigyingpvikeryisddlfnvpanns  
eggyisvlgllvapnyqgg  
giagrllnyfenlaknqhrhgvltcreslisfyekygyrnegvseschggikwynlvknikkddev  
>tr|Q6GDE6|Q6GDE6\_STAAR  
milryvtnlklakeiyqskpkqlqedkgmielfehtfglqkelvkyvgiaeattaalysasfinknisrlaslstigils  
aaaykhfeagqgkkaqaha  
ldllglatlslltdfscnkk  
>tr|Q6GDE8|Q6GDE8\_STAAR  
mnyspkqgvrsghlphdpfksstvpripgwistvskdgkdnlapysyqnltdwppmvmfaanqsvlgdherkdtvknae  
etgwfywnmatydlreavn  
lsskalppeedefeyagvtkeacieapgyrvkespvhfeceyvqtiiriptgdtvstvidigrvaqvhiddkfilndgkl  
diksikpiarlgyydytvv  
neifemkapsaskeelaglegrnfdnqsdnke  
>tr|Q6GDF1|Q6GDF1\_STAAR  
mprkfrvlqigddlepiqhkkqsvwdyfdiglfefdsygeaieaiveaegrfdfiyiqapyseltnllqmisepyn  
tyvdesfwsveyeqdenvq  
kyvqp1hyrneernnklevsfsgygdkvspklalvhpnfkgdvvyqgnseltsgefgkefkpiaswqnnlvdykd  
kviqiwpefdidgavelqy  
tfrliqtgadgalieqiiitddmldspleiptkpfdayisvtvkargngtvhlgpihkrwsrldmqfllggsrfvdsqr  
qefiyyfhpqdmkppnlv  
fsgyrtaegfegyymmkrmapfligdprveggsfyisgsseyeqgiinvieetleklnfkshelelsglsmgsfgaly  
gaqlnpqaiivgkplnvig  
tiaehmrllrpeefgtaidvlsnegdtsqasiqalnqkfwqtfqkkslsqtvfaiaymqhddyphafqellpvltahq  
arvmnrslpgrhndspti

Tsompanidou\_et\_al\_Supplemental\_FASTA\_File

aswfvnfyniiledkfgvrqhaekqni  
>tr|Q6GDF6|Q6GDF6\_STAAR  
makyrqkpfqlyvklscstmmatsiiltinlpydaqavsekdeiske11skqd11dkvdkanrqieqlkqlsaskahy  
kaqlneaktasqideiikr  
aneldskdnkgsqiemngrsdi1skldq11kd1nevsskvdrgqqsdedd1namkndmsqtattkhgekddkndeamvnk  
aledldh1sqjihksedsa  
vsttdnnhevaktppndgshgv1nkflsneenqshsnrltdklqgsdkinhamiek1aksnastqhytyhk1nt1qsl  
qriantqlpknqksdlmse  
vnkteriksqrniileelartddkkhatqrilesifnkdeadkilkdirvdgktdqqiadqitrhidqls1ttsdd1lt  
slidqsqks11isqilqt  
klgkaeadklakdwtnkg1snrqivdq1kkhfastgdtssddilkailnakkkkqaietilatrierqkak1ladlitk  
ietdqnkifnlvksalngk  
add11nlqkr1nqtkkdi1dyv1spivnrps11dr1nkngktt1nk1an1mnqgsn11dsipdiptkpekt11lgkng  
11sg11nadgnvslpkage  
tikehw1pisvivi1gmw1miw1srrnk1knka  
>tr|Q6GDF9|Q6GDF9\_STAAR  
mknafl1fkmd1kkvakt1pavwi1lag1ailpsfyawfn1wamwdpygntghikvavvnedkgd1irgkknvngntmvnt  
1kknksfdwqfvsrekadh  
eikmgkyfagi1yipskft1eitgt1rkqpqkadvefkvnqkinavask1tdtgssvvvekaneqfnktvtral1eeanka  
gl1tieenvptinkiknavy  
sackalpkindfankivyl1nnhqad1dkyandfrkl1gnykgdi1daqqk1nevngaipql1nekak1ilal1nnympkieka  
1nfaaddvpaqf1pkinqg1  
niasqgidqangq1ndakgfv1tqvrsvrgdyqea1rraqd1nrrnqqq1pqnsaannetsnsapaangvtstppsapng  
ntppnnvtqntapnsna  
pvsttpqstsgk1kdgqs1fadi1ttqvstanentqnitdkdvksmeaal1tgs11s1sn1ldtqakaaqkdsqal1rnisygi  
1asdkpsdfres1dnvksq  
1eyttqynqqfi1dt1keieknenvd1skeidkvktannrines1rlvnq1sna1kngssgtaeatk11dq1sk1dss1ss  
frdyvkkd1nss1vsisqr  
imdel1nkgqta1snvqsk1ntidqvinsgqs1l1kngktridrl1qtv1psieqqy1saiknaqanfpkvsdvakaanfvr  
nd1pql1eqrl1tnatasvnk  
n1pt11ngydgavq11nknqpakka1sd1adfaqnkl1pdvekd1kkankifk1k1dkddavdk1id1tknd1kkqagia  
n1pinkktvdv1fpvkdygsg  
m1tpfyta1svwvga11mvs11tvdnkhks1lepvl1ttrqv1flgkagffim1lgl1qalivsvgd11il1kagvespvl1flit  
ifc1si1fns1vytcvs11g  
npgkaiaiv11vl1qi1aggggtfpi1q1t1p1ffqni1spyl1p1fty1aids1retvgg1vpe1ilitk1li1l1t1fg1g1ffv1vg1l1l  
kpvt1dpl1mkrv1sekv1dqs1n  
vte  
>tr|Q6GDG2|Q6GDG2\_STAAR  
m1ldrh1kl1l1qffiknpsk1hissneiaehvnvsnr1tvrndihvinsnfmddi1vsikskgyq1ntsqt1letiterythiq  
sykek111smayq1lmh1nk  
sq1t1q1leqdy11sktv1l1ndyfvri1qqwcqkfnia1l1tikkkqg1iv1vdgtdnditna1ih1nq1l1ssghvhved11l1nel1pd  
shqrm1sh1i1qet1l1qghsi  
et1ddi1qi1q1l1ih1l1i1krkqs1se1dt1nhdak1isqscikq1iner1lgyd1nekvinmfsffia1yhfnk1digierif  
iqsyidr1li1elmq1rihvp  
fneds1l1qqn1lynhfskay1lritqniy1l1nnp1vie1ikk1lyp1fvnt1lfeaidk1laidtdiemsedeia1fl1tihfqaai1er  
rtktq1l1nv1viacyy1gl1gvs  
n1fletk1inn1see1svintik1leni1thyhfdnvd11it1thdipkqt1l1qm1pkh1stikvap1l1fseddrhki1ihv1kqkqn  
pvqahhhm1d1tvn1fl1vvnt1qah  
qkprhtvqi1feeaqk1il1qahhaivegyiesal1ereksssty1gnfmaiphgdpekvl1qshvli1frtkdv1pwrqhdvklv  
ff1aisqk1dtaftk1qmmq1l  
ian1dddsvnh1l1cs1dnhs1lkq1lfey1qe  
>tr|Q6GDG3|Q6GDG3\_STAAR  
mkkfl1itvvi11l1igal1gfaiyaa1nhstssnhneqdnkathqkkdtevn1hqkidentn1ntnenqnsnngvtngnqsstp  
stvqnn1gstapant1qpsnp  
nqsn1snqsn1nqggss1p1stnnqnhkqant1papnksn1nantnesskqaspsqpqs1skn  
>tr|Q6GDG5|Q6GDG5\_STAAR  
mrkfsryaftsmatv11l1ss1ltpaa1as1dtnhkpats1dinfeitqksdavka1kel1pksenvknhyqdysvtdvktddkkg  
f1thyt1l1qpsvdgv1h1pdk1e  
vkvhadksgkv1l1ng1dtdak1kvkptnkvt1skdeaadkafnavki1dknkakn1qddvikenkveidgdsnkyiyniel1i  
vt1tpe1ishwkvk1id1adtga  
vvektn1l1vkeaaatgtgkvg1l1gdtkdin1insidggf1s1led1thqgk1sayn1fndqtgqat1l1tnedenfvkddqragvda  
nyyakq1tydy1ykn1tfgres  
ydnhgs1pivs1l1thvnhyggqd1nrnaawi1gdkmi1ygdgdgrt1ftn1sgandvvahe1l1thgvtqetan1eykdqsgalnes  
fsdv1fgyfv1dded1l1mged  
vytpg1kegdal1rsmsn1peqfgq1pshmkdy1vtekdnggvhtn1sgipnkaaynvi1qai1gkskseqi1yyra1l1teyl1tsnsnf  
kdckdal1yqaak1lydeqt  
aeqvy1eawnevgve  
>tr|Q6GDG9|Q6GDG9\_STAAR

Tsompanidou\_et\_al\_Supplemental\_FASTA\_File

mmnesgdnlksksslglvlgsmiggafnmsdmggkagglaiigwiitaigmislaflvfqnltnerpeldggiysy  
aqagfgdfvgfisaawywf  
safignvayatllmsavgnffpifkngntlpsiivasllwgvhflilkgvetaafinsivtvaklipillviicmiaf  
nfdtftkgffgmtsegvlp  
fswastmsqvkstmlvtvwvfigiegavifssraknkdkvgsatviglisvliiyflltvlaqgvilqnhisqldpsma  
qvlasivggwstlvnig  
iisvlgawlgwtllagelpfivakdglfpkwfakenkngapvnallitnilvqlflismlftqsayqfaflassailyp  
ymfsafyqvkytlehrqqa  
ttkqwtigiiasiyaiwliyaaginyllltmllyipallvysivqknnqtrlikdsyilfmiiivlaviglikllmgtin  
vf  
>tr|Q6GDH7|Q6GDH7\_STAAR  
milvmlsplliiffivlsileerkrtkkkqlekekantlnqntndtessnqepsllqakeqkdnkg  
>tr|Q6GDH8|Q6GDH8\_STAAR  
mkiliveddfviaeslasekkwnygvivveqfddilsifnqhqpqlvllidinlptlngfhwcqeirktsnvpiifissr  
idnmdqimaiqmgddfie  
kpfnlsltiakiqallrrtydlsvandsltvkgctlildeakvvyqeqsqslstelqilkllfqnedkysvrtaliec  
wesenfiddntlavnmtrl  
rkklnitigvndfiitkknvgykv  
>tr|Q6GDH9|Q6GDH9\_STAAR  
mtflksitqeiaivivifalfglmfylyhlpalayllalgvilllllfigikylsfvktisqqqqienlenalyqlkne  
qieykndvesyfltwvhqm  
ktpitaaqlllerdepnvvrvrqeviqidnytslalsylkllnetsdisvtkisinnirpiimkysiqfidqktkihy  
epchhevltivrwtslmie  
qlinnalkyargkdiwiefdeqfnqlyvkdnigigiseadlpkifdkgysgyngqrqsnsiggifivkqisthtnhevsv  
vskqnegttftiqfpe  
>tr|Q6GDI3|Q6GDI3\_STAAR  
mklntsnsfpftekqvteinnllqtltessqqwlsqfllansndttsdsnqqqletevwqqsqiseeqetsttymlnkep  
hieanqrhvtvlygsesgn  
amrlaeifserlsdighqvvlmsmdeydttniaqledlfiiitsthgegeppdnawdffefleddnapnlhvrvsvlalg  
dqtyeffcagkdvdaile  
nlgaerickrvdcdiyeedaekwmadiiniidttsegiqsesvivesiksakekkysksnpyqaevlaninlngtdsnk  
etrhiefllddfsesyepg  
dcivalpqnpelevklsmlgwdpqspvpindhgdtpiaeaaltshfektltlpllkndiyfdneelseriqdeswa  
heyvinrdfidlitdfpti  
elqpenmyqilrklppreysissfmatpdevhitvgtvryqahgrerkgvcsvhfaerikpgdivpiylkknpnfkfpm  
kqipvimigpggtgiapfr  
aylqereelgmtgkwlffgdqhrssdflyeeieewlengnltrvdlafsrqehkeyvqhrimeeserfnewieqga  
iyicgdekcmakdvhaik  
yvlvkerhisqeeati lrqmkrqryqrdvy  
>tr|Q6GDI8|Q6GDI8\_STAAR  
mkkekvmwttftigtvavllfavipmmafpkasediitginsaisdsigsiylfmglaifcfvmyiafgykgnvtlgkas  
dkpefntftwaamlfcagi  
gsdilwgyvieuafyqvpngaksmsdealaqatqygmfhwgpiawaiyvlpalpigylvfkkqpykisquecpilk  
qtdkfvkvvdilfigl  
lgaatslalgvplisagierltgldgknmilrsailtitvifaissyglkkgiqklsdinwvlsfvllafifiigpt  
vfimettvtgfgnmlrdff  
hmatwlepfggikgrketnfpqdwtyfyswwlvypfiglfia riskgrlkevvlgtiigtlgcvlffgifynyavy  
lqisqqfnvtqylnthgte  
atiievvhlpfplmivlflvsafllattfdsgsyilaasqkkvveplranrlfwafalcllpfslmlvggerale  
vltkasilasvplivifif  
mmisfliligrdrikletraeklkeverrslrivqvseeeqddnl  
>tr|Q6GDI9|Q6GDI9\_STAAR  
mmtrsqnkqqleqakdivinsigqtmlygtnrsvgnlygtmvfegsmtldemrhqlqmskpsmsagvkkleqfdivkq  
qftrgsrkqhfiakdfffi  
ffrnfftkkfqreidinveavkdaqaiinpllessdlteatqeahkikaqldhthvyewleqlteaiesgeifkyfpi  
peqssdskn  
>tr|Q6GDJ3|Q6GDJ3\_STAAR  
mniydeyrsyvieelddcltiqknndtayydvleaindlnsdltcvlnhlyinegqeetfeqkflqrnkhlqnvdfkalf  
rflrpntagrhyyiitlwe  
nrqafyhwqnsaeykthkhrgtsgadvkiinrelsynirieladm  
>tr|Q6GDJ4|Q6GDJ4\_STAAR  
myerklvmqksalfapekyniiseiekyshipdkkailyhntegedisvtyqqleiqsnkvgvnlashglskgdvlimm  
prsiatyelyiaalklva  
iipcsemrltkdlqyrihgeinavialepftvefekideydaletkfviaqkgdwisleaekenasnklemadttrddm  
ailsytsgtgnpkavthc  
hgwgfahlmqapkhwlcineddvwataapgwqkwvswpflsvlgsgatafvfngrfspetyellqkyqinvlcctpte  
yrmmaklqnlnydlthlh  
savsageplnrevveqfkkyfnltvrdgygqtestlligflkdtpprigrismgkipdssvtvvddegnsvpantkgniav

Tsompanidou\_et\_al\_Supplemental\_FASTA\_File

pldlpalfkgyykeperta  
kaqtgkyyitgdlahvdddgyfwfegrrddiissgytigpfeveda1tnhpavkecavvakphdirgnivkafvilqdh  
tagdttlvkelqqfvknev  
apykypreiefvddlpktnsgkirrvelrdaei ekwqqkdsnq  
>tr|Q6GDJ8|Q6GDJ8\_STAAR  
mr1kvlfhfiiaaifisfmllwmtm1fdiisnqshlka111nldflipsdntpytleiichlligsviyfvfvl1fhtskr  
lyylcyiplvflfialypf  
lvfiagrpiqfsvteligwiithiffmslmalviprik  
>tr|Q6GDJ9|Q6GDJ9\_STAAR  
mymkahqliqedehyfaksgrikyyp1vidhgygatlvdiegktyid11ssassqnvghaprevteaikaqvdkfihyt  
paymyheplvrlakk1cei  
apgdfekrvtfgltsdandgiikfaraytgrpyiisftnayhgstfgslsmsaislnmrkhygp11ngfyhipfpdkyr  
gmyeqpqansveeylaplk  
emfakyvpadevacivietiqgdggl1epvpgyfealenicrengiliavddiqqgfgrtgwtssvshfnftpd1itfgk  
slagmpmsaivgrkeimn  
cleapah1fttganpvsceaalatiqmiedqsl1qasaekgeyvkrmdqvwskynsvgdvrgkgl1sigidivsdkn1kt  
rdasaalkicnycfehgvv  
iavagnv1rfqpp1vityeqldtalntiedaltaeagnldqydisgqgw  
>tr|Q6GDK7|Q6GDK7\_STAAR  
mqh11gnpk1tvthvnevkgainhivvdsvygnqemimekdvtemrdgeklyinifrnkdgkfpvmsadtygkdn  
kpk1tnmgalwptlgaip  
ssftpeesdpdgfwvndyvkvvalrgsdkskgv1spwskreaedyeviewaanqswsngnigtngvsylavtqwwva  
slnpph1kampiweglndm  
yrevafhggitdtgfyrfwtqgi farwtdnpniedliqaqqehplfddfkwqrqvp1sqiktp11tcaswstqglhnrsg  
fegfkqaaseekwlyvhgr  
kewesyaren1erqksffdfylkeenndwkdtphviyevrdqfykgefksasaf1pnteytplylnaenhtlnhakis  
sahvaqydsedrkdvsfk  
ytfdkdte1vgnmn1klwvsttdsdmd1fagikk1drrgnevnfpdfnhiengqvatgw1rvshrel dqekstiaqpwh  
khetel1ksqdeivpveie  
11psgt1fkqgetlevvkgseivignstpgmktryeheetvknkgmhiytgskydsqliipivn  
>tr|Q6GDL3|Q6GDL3\_STAAR  
mneqwl1eh1pkdikei1spvsggdvneayrvetdtff11vqrgrkesfyaaeiaglneferagitaprviasevngd  
aylvmtyleegasgsqrq1  
gq1vaqlhsqqeegkfgfs1pyeggd1sfdnhwqddwctifvdkrmdh1kdel1nrglwdandikvydkvrrqivaele  
khqskps11hgd1wggny  
flqdgrrpal1fdpap1ygdrefdigittvfggftsefydaynkhyplakgasyr1efyrly11mvh11kfgemyrdsvths  
mdk11qdtt  
>tr|Q6GDL5|Q6GDL5\_STAAR  
msnk1dginkmitakhkqmd1ydekqevkalidesdalnhsieqlyqhlgeryyssnmasrmeqfrdefhfakrrstea  
lyeqqqq1qhd1rkaeeem  
id1emrrnieiemvtkeenkwkq  
>tr|Q6GDL8|Q6GDL8\_STAAR  
mhm1evkydmr1gthyp1nephylvishadkl1tatekalkr11iikqkl1dislaesvsspiasehvieq1t1fqherr  
h1rpkisatflaw11if1m  
fal1pigiayqf1sdwfnqyvsawiey1tqt11nhdilqhilfgdygvl1sgtyslvalpvvil1s1stavidq1tgfs  
wmiwaiepsm1riglqgd  
ivp11legfgcnaaaisqaahqchtctktqcms1isfgsscsyqigat1sifsvagksw1fmpyl1l1v11ggil1hnrwlk  
kndqql1svp1pydrq1hmp  
nirgm11qmwnq1mfivqal1pifit1cliv1s1ltpil1nvl1sqiftp1s11gissel1spgil1fsmirkdgm11fn1h  
qgal1qgmtatq1111vff  
sstftacsvtmtm11kh1l1ggqsa1kl1igkqmvts1sl1vigvgiivkivm1i  
>tr|Q6GDL9|Q6GDL9\_STAAR  
mkivi1ggf1ggkttv1nh1laes1kes1kpavimnefgkmsvdgalvsediplseltegciccamkadvseq1hqly1  
keqpd1vfi1ecsgiaepvs  
v1dact1p1lapftt1thm1igvvdasmykhiksfpkdiqgl1fyeq1layc1sv1fvnkidsadvettsk11kd1evinpead  
iqvgmhgsvt1p1svsqmt  
atsdnkhes1hkt1nhqfvqspakctkaqf1krlac1p1thiyrl1kgf1m1fedtahty1liqftqgqyel1tpvafskkvp1ey  
1v1igk1g1skedyq1leq  
>tr|Q6GDM1|Q6GDM1\_STAAR  
mksit1feehy1viediqketmna1s1adp1kgv1pmkvm1leg1ektgtfnadel1shhderiq1fmnqdvq1qv1syngn1psn  
1vgkaiel1cqkandq1lan  
yiaqypnr1fv1gf1at1pinepeaaareferc1nd1g1fkga1im1graqdg1fd1dqdydi1fktaen1gvpiy1lh1pavnsdi  
yqsykgn1ypevta1at1fac  
fgygwh1divg1haih1vl1sgifdrypk1nmi1ghwgef1pff1lermde1faeh1nhpvsy1fknnfy1itpsgm1tkpqf  
d1vkkeagidri1yaadyp  
yiepek1gv1f1de1gl1tdeekeki1sytngak11gl1ssn  
>tr|Q6GDM5|Q6GDM5\_STAAR  
mkd11v1gatgkqgnavkq11ledgwyvsa1trnk1nrk1sdighph1sivegd1sdsvs1qsamkgkyglysiqipivkd

Tsompanidou\_et\_al\_Supplemental\_FASTA\_File

dvsee1rqqmkiieiaeqe  
niqhiyvstaggvnrnrtpghfevlakienrlmesninatvikpsffmdnflriakvederitlpefinpnikftmissi  
diakiasyvfehpqsftqh  
sieigsdevtlseaatifsevtgkstviegefvsgvaekqwlseekgyevdfelmaeinptrls1sdwlkvqdykn  
>tr|Q6GDM8|Q6GDM8\_STAAR  
mtsifvfaylnntsgnmlfrqqmicpc1lanvrhssivclnntcrivdtrclntkiggigvsetdepqgfehthnrlnin  
qnsqslmtfitsklksklk  
qhiiiargnkridyrlsynfyttydnveikkidceytyamaiailirhtmsfdnahffaqlrhpvl  
>tr|Q6GDM9|Q6GDM9\_STAAR  
mtesksidprivrtkqllvdaf1kisrekklsqitvkditdiatlnratfyahftdkedlldytlsvtilkdlnndnlsis  
nvinekvlrnifisiasyi  
kdaaksce1nseafcnkahqrinneledi faimlensypehqrdivnsgsflaagisglahwfntssetadvfidrnl  
pflihhiahf  
>tr|Q6GDM0|Q6GDM0\_STAAR  
mtsiktitpkdfirvlsgvaigivaglvpnailgeifkyfmdyhipfktllgvvvaigftvpa1galvamkfd1spla  
iavvasaayvgsgaaqfkn  
gawmitgigdlintmitaaiaavlfilliqhrvgsmallivfptvvggisgaigililpytkmittaignmvngftelqpiv  
msilismvflsiisplst  
vaiafaigitglaagsasigisateavliigtskvnrlgvplsvffggvkmmpnmvkiplmlpil1ttaivsglvsalv  
gihgtkesagfgfigmvgp  
inafkfmevdsawlsvllivvaffvvpvtawladiiyrkvfrlytndifkfmg  
>tr|Q6GDM9|Q6GDM9\_STAAR  
mtkikimsvrde1mpykawaekhhvevditkealtdnvegvagydgls1sqqip1sehvykr1nelgikqiaqrsagf  
dtydle1ankynlivsnvp  
syspnsiaefavnqainvvrhfnqiqtkvrehdfrweptilsksikdlkvavigtgrigrvvadifangyqsdvvaydpf  
pnakiatyvdykdtieeav  
egadivtlhvpatkynhylfnael fkhfkdkdavfvncargslvdtka1lda1dngvikgaaldtyeferklfpsdqrgkt  
lndplleslidredviltp  
hiafyteaavenlivda1datldvlqtgdtr1rvn  
>tr|Q6GDP6|Q6GDP6\_STAAR  
makflykmg1fiakykwsaviawivavaailiplatnapkfdndikmtglesldtnkkiekhnqdsekaqirvvfkttk  
ddg1vqpsitkdkiktldd  
ikkdkhidkisdpyenkqinkdktafaditydvsqts1kdgsrdnvksh1kdlrdnhnvqtel1tgtgmtstevvggnse  
lvgiivafvllitfgsvi  
aag1piisaliglasvgiis1ltyafdipnvt1tlavmiglavgidya1filfryrqvmktetdyikgiglavgtagasa  
vifagvtvviavcglslvg  
idflavmgfasaisvifavfsal1lpa1sifhkhikvnlqsnfkdkid1tpwskfitgnalaav1lglilvaaaipv  
shmr1gipddgvkpadstq  
kkaydiisd1kfgfngqipmlinvdkdkddp1q1q1d1qsvykdkdkknvdivtppqmskdn1yalmvvpkqgpn1ae  
stndlvhd1rdynkdaqdk  
ygfkteisgqsvinidmsk1lneaiplfatvivv1aff1lmivfrsilip1kavlgfv1slmat1gftt1vmqdgfmkg1  
fgiettgpm1af1lpvitig  
ilfglamdyevflmsriheysktgndysikvlg1kesgpvivaalimfsvffafvfqedvmiksmgmalafgv1fdaf  
vvrmm1ipa1tk1fgkgs  
ylpawlnriiprvdi1ghalekyktvesqeseakdskeydt1tkvypqgatn1vskhqdvhgqddarsiv1ddktmal1yq  
evkqqsass1flydalmdy  
qnkhq1n1skqgatnieq1lnkniek1nq1lekn1rnks  
>tr|Q6GDP9|Q6GDP9\_STAAR  
msvii1n1l1flaifgalytlvkffkrskqgkcg1tcd1drccg1teqhtanhfpgk  
>tr|Q6GDQ1|Q6GDQ1\_STAAR  
mvyksyysp1vgr1elvsdgvsl1tav1fenqddgtreents1aifkeatqwl1dayfkgdnpeitip1kptgshfqqcvw  
nelrqipygt1t1tygaiak  
kvgk1ldkpkmsaqavggavgsnplsiivpchrvgktgsl1tgfggtinnk1l1elenidmsklyvpkhstkp  
>tr|Q6GDQ4|Q6GDQ4\_STAAR  
mkyk1ilfr1liafav1fsadfiyqsveqthqshaavnysknqctwwafkrraqvgkpvsnrwnagnaknwyynarkskya  
tgrtprkfavmqstagyyg  
hvavveqvykngs1kvseynfyrp1kynt1rv1skkaarnfnyiy  
>tr|Q6GDQ5|Q6GDQ5\_STAAR  
msfyefmqsf1gddt1lge1vdwinqdsnfprevkshseil1syfrtnpcpesisvpvikral1svfnqftnvq  
>tr|Q6GDQ6|Q6GDQ6\_STAAR  
mdikhmkyfi1evvkqggmtnask1lyiaqptiskaikdienemgtp1ldrskrh1l1tdagqif1yekskeiva1ydy1ps  
emer1ng1etghinmgmsa  
vmnmk1ilini1gafhqypnvtyn1ienggktieqqi1indevdigvt1lpvdhhi1fdy1t1l1ked1rl1ivsrehr1lake  
tvk1led1agedfi1fnkdf  
ylndk1ienaknvgfvpntvaqisqwhvied1vtne1gisil1ptsiseq1ngdvk1l1riedahvhwe1gvvwkdkq1sh  
at1tkwieflkdr1lg  
>tr|Q6GDQ9|Q6GDQ9\_STAAR  
makikanealvka1qawdiyh1lygipgdsidavvds1rtvrdqfkfyhrheevasl1aaagytk1tgkigval1sigppg1

Tsompanidou\_et\_al\_Supplemental\_FASTA\_File

ihllngmydakmdnvpqli  
lsgqtnstalgtkafqetnlqklcedvavynhqi ekgdnvfeivneairtaye qkgvavvicpndl ltekikdttknkpv d  
tsrptvvspsykdkkavk  
linkskpvm ligvgakhakdelrefiemakipvihs lpakti lpdhphysignlgkigtksyqtmqeadllimvgtny  
pyvdy lpkknika iqidtn  
pknihrfninvgivgds kiahql tenikhvaerpf lntlerkavwdk wmeqdknnskpl rperlmasinkfikdda  
visadvgtatvwstrylnl  
gvnnkfi isswlg tmgcglpgamaskiaypnrqai aiagdgafqmvmdfatavqyd lpl tvfvlnnkqlafikyeeqaa  
geleyavdfsmdhakfae  
aaggkgytik sasevdaiveealaqdvptivdvydpnaaplpgkivneealgygkwafrsitedkhl dldqippsvaa  
krfl  
>tr|Q6GDR4|Q6GDR4\_STAAR  
mynhsalrlkgiilaivgac lwl ggtvsdf lfykninvdwyv tarlvsvgvfl lmykmmqpkrsifsvfqdrmlg  
kllifsilgm lvvqayma  
sintgnaaiatl lqyiapvyi iifvirgvak ltlfdv laiimtllgtflll tngsfnlvvnpas lfwgilagvalafy  
tiypsdllnrfgsilvgw  
amlisgvam l rhpiwhiditkwdisi ilflifgi iggtalafyffids lqyisakett lfgtvepvvaviass lwlhva  
fkpfqivgi ilimililil  
slkrqpetlde  
>tr|Q6GDR6|Q6GDR6\_STAAR  
mdillgvgtlv l vlvimtl flkyapygkqla lsgaacat flppaf l syaiggvf dikfl qdigdlags lsgiavgilt  
clnlgvapvfavivglvlh  
dfkllpafiaaygvaflikwiekkvpegld livvil fapaa fglasiitpgvlat lkqigsavtavgdnnpyalavilg  
lvipvtgmtpl ssmvltsl  
lgltgvpmaigaltctgssfvnl ilfrkl niggpskafavciepl tqidliaqpvqlygtnaligvvnacivtfsglvi  
gvkgmatpiagailvfgfn  
navtsivtiatviivsvilay iigtlinkfnl m ninfkmpskknhikesv  
>tr|Q6GDR7|Q6GDR7\_STAAR  
maksydyqsafdi igpvmg psssttagavkignsarailgdipknieihyes faqthqghgt dvaivggamgystfdn  
rikssleiaaddgikidiv  
eeegdsigqhpncayiks frndgryie iigisiggtikikgihinglevdlnhglpilvvdgnmtkaqvn hfindindm  
kl dckdefimidedkclvv  
iplnkaisestlntikekysdvnvsyin  
>tr|Q6GDR9|Q6GDR9\_STAAR  
mircakkedlnailaiyndai inttavtyepqtidervawfetkqrkhepi fvfeengsvlgfatfgsfrpwpaylyti  
ehsiyvdasargkgiasql  
lhhliveakakgyralvagidasnka siqlhqkfafkhagtltnvgfknqwl dlafyeldlqd  
>tr|Q6GDS1|Q6GDS1\_STAAR  
mvkaiavdmdgt fl dskktydk lrfeanftel rnr d itfiaasgnqyak lksifgdrdmyfisengaviykgnelynyks  
fnrqvfqqvdylnmqs i  
dq l vicglksayil khtseafkedtrfyqh lkeids lqqlpeddyvkiafninrethpnvdeevatqfsndiklvssgh  
dsidimpnmtkqgal krl  
ldkwgmsse lmafgdannkdmlafakhsyvmenshdeelfniasavapsndkqgvltiieqevlkk  
>tr|Q6GDS3|Q6GDS3\_STAAR  
mafhdktatqvtnie lnvrld lmttfyknilglsvkssddnttv lsvgtgghtl tlhlledgrqtspreagl fhiafll  
pttedlanflyfvaqknmg  
igagdhlvsealyfndpegngievyrd rpssswewqngkvkmdtlevdsqtll thrtdegwqvpakgmighlhlkthdl  
daayqcyieqlgfqhvsdf  
pral fms tnhyh hiaantwqsnqarqnaqsyl thvdiyqpdasthtftapegfditvhsntdlvpek  
>tr|Q6GDS4|Q6GDS4\_STAAR  
micmsnleikqgenkfy igddenhalaeityrfvdneinidhtgvsdelggqvgkklvkavveharenh lkiiascsf  
akhml ekedsyqdvylg  
>tr|Q6GDS7|Q6GDS7\_STAAR  
mmehifregqngaptl il l hgtggdefdl lplgealnenyhllsirgqvsengmryfkr lgegvydeed lafrgqellt  
fikeaaerydfdiekavl  
gfsngsnia inlmlrseapfkka llyaplypievrstkk lsdvsvll smgkhd pivplaa seqvinl fkrtraqveevw  
ngheitetgltagqqilek  
>tr|Q6GDS8|Q6GDS8\_STAAR  
mri kes iivafavgvvvgagfatgqei f qfftshgaysi sgiivtgllitl ggmivmhtghh lksrnhdsinyflyp  
siargfdi iltmfmlslai  
imtaggastihqsfnlpywlsalilvvfilatl flkfdrlia vlgvtpfliaivimiavyyfttshfdftaanndaqih  
kqks l spgwwfdainyas l  
qiaaafsflsvmgskvkyrdstlygg liggliitfl mminlglisqfdkikhvd lptlklatqmspsigiimsvimilv  
iyntvvg lmyafasrfsvp  
fsrryfi i iit mavityistfigfisligkvfpimg lfgfillipvlykglitkritgkshid  
>tr|Q6GDT0|Q6GDT0\_STAAR  
mgtlikqecfkl fkkkstfiapivfillmvaqgyiatkyneiftpqesftsayingfswfafl lliqastiismefhygti  
knll yreysrttmivskii

Tsompanidou\_et\_al\_Supplemental\_FASTA\_File

tlfiiisliyfvitiiiasivigs1ffndlnifessgnqls1lnqlllvs1gtfvgwlv1s1t1llssatnstgvaiavgi  
vfyfassi1laviqtallek  
idw1kwnpinmmn1m1qtvkqfkskstk1elhel1figniayisif1il1vvf1fkkni  
>tr|Q6GDT1|Q6GDT1\_STAAR  
mdv1tieh1tkkignk1t1ddvsf1k1rgqiv1g1vgangagk1t1mkv1ilgyssfqsgnfv1nsk1dksn1gali1enpg  
iypfmsgyen1k1l1neskn  
tqdidk1vsq1hmdeyihkkaktys1gmqk1giaiaf1nepqfi1ldepmg1dpkavrdvrelivqkaqegvtfliss  
hilselvkitns1li1inkg  
kivtetseee1kqfknd1env1l1diieredqa  
>tr|Q6GDT2|Q6GDT2\_STAAR  
mtkfgyk1i1ddi1ink1ng1l1spgdk1ysqrk1akyynvkstviqaldilksygi1dtiekkgiyvsqykwnsyitnn  
ihwqdyignsfsknnqyyi  
qkineiefntdivr1gtge1lspk1lipnhi1fkk1l1tndiees1qtnyepkgn1klrieivkymkrrgvdcninnic1tsg  
avqg1kl1jadg1l1ipqski  
i1etpsyins1rtwhni1raki1p1sinyikqn1nifk1l1nsdyrshs1fycipt1l1hptqntyskeekqki1dqchkegip  
ivedsiysd1w1f1spnqqis  
mka1knsdnv1ylg1s1sktvspg1rigwi1adekvi1h1lad1kmqndygass1sqyiattw1snyhedhlyk1k1ielk1r  
ksifiks1k1kh1skfgywn  
epqgsfyiwf1k1svpn1k1l1fneaiken1l1hpgeiyd1nksyirf1s1sysidkeeidqslk1kl1sei1n1rirt  
>tr|Q6GDT3|Q6GDT3\_STAAR  
mt1k1lekavf1smeikk1d1k1l1mkkdnyhni1falifdw1lv1lgsacis1iymsn1liiyi1si1ilg1srmaf1dn1mheachr  
s1lftnk1fynkwi1ac1l1laf  
p1fts1ftt1ycnsh1fk1h1rn1wdeekdp1tkryriv1g1dkp1qkdvk1k1fi1nhivk1vl1f1hvpkyv1lgtvsan1lysr1dtpk  
sei1wtrni1fw1vti1t1sim  
fnfw1lyv1lyw1fip1l1ttfqi1rywaemaehsg1n1ndse1l1tasrnt1fgmpwti1f1fhph1dn1fh1lvh1l1fpaiphyn1kk  
ahi1l1mkdqkyreahhctg  
ffk1t1l1pgfysv1vkdi1ctpniv1gkgedan  
>tr|Q6GDT4|Q6GDT4\_STAAR  
miqpv1hgi1l1a1g1li1p1lgaqnv1fvfnqganqk1minalpvvitag1l1cdt1f1i1i1av1lgvs1l1lms1lpv1ql1fiyiv1g1  
ff1l1ymaws1lwkekpnt1e  
nyepm1stkkq1g1faisv1l1npha1mdtv1g1v1g1ssasv1sg1lek1il1fc1iatimvsw1wff1l1ailgk1v1gsidrtgkyi1  
f1nk1ssi1i1i1avsiv1vk  
ni1kl1l1  
>tr|Q6GDT7|Q6GDT7\_STAAR  
mi1pai1igy1l1cgnf1qfg1l1vatg1lahiyv1fk1g1psrsk1l1rtvi1icn1lafaicm1l1gt1tatt1pl1vfgmt1l1livt1vipfyi  
ftalki1ag1ps1t1ffiv1tfs  
l1pin1l1piapeeal1yrgfai1vggv1atmmv1l1it1l1sknkaeeqai1qndf1k1isk1l1hayndksaf1sqvaktavdsf1kas  
dk1l1l1itsn1ssdk1l1sgrf1q  
k1l1l1l1l1htsag1giyse1lle1nakqir1p1pde1liemmdhi1t1qrddrnknvrywrkevtvteefqn1fnh1ilkidemvhane  
ari1ayaemr1k1plyskriy  
qn1t1l1dsiv1frnt1l1ryaa1immia1fia1l1mfd1fekayw1plsah1t1v1l1gt1stihai1ergmarg1l1gt1il1gv1l1sv1ill1fsi  
ptpvav1l1mgiaa1l1fteal  
vganytiav1v1itiq1v1l1nglasqn1t1niaf1prvidvamgivi1a1i1gl1fv1lgqrtasa1l1pyvmaevvrkeat1fhy1  
f1senqykddvyqkntam1l  
svk1l1nmtq1vynaangel1fsdkt1liqnyyps1fal1eeis1fm1l1nramanedr1lineq1l1mgey1latfeniakh1el1ntele  
ik1il1pd1lpqny1iqsam1n  
iqhng1frerdknv  
>tr|Q6GDT8|Q6GDT8\_STAAR  
mfnmf1h1fi1imva1f1nmyni1levkemp1ftmk1gypek1wkefevikrqaieianam1kegylekdvvpiaakkakdwyrals  
keeikaleenfvqfhtat  
mekpevdseyatt1dneehiqeqsnqdk1syf1dses1gnqsggv1r1qrep1l1mdgphpkvvesfkdv  
>tr|Q6GDT9|Q6GDT9\_STAAR  
myvdrkps1ly1led1rhdfkns1l1skfengdeaf1dt1l1gfvel1dhiyssa1l1keistk1s1l1ddnfn1hiykhnp1ihmerrvk  
emr1s1l1iek1l1nrkgl1qisae  
takeh1l1diagi1rvvcny1l1ddiylieem1l1kqedv1likrkd1yiqhpkengyrs1lhivvsipv1flaervev1l1pveiqirt  
igmdmwas1lehki1ryknka  
etekyrd1l1kecateiteven1l1qqihseite  
>tr|Q6GDU0|Q6GDU0\_STAAR  
msnystgelak1l1cnv1ttr1tiqydrk1gil1kpqgft1egkrrvyteqqrqt1el1l1l1kdl1gca1s1didm1l1kgegt1kt1n  
t1l1tmkq1qe1nq1qv1kqqa  
v1ldk1knvq1yvneast1pith1k1dieh1vmsksaemk1s1r1rniwisagi1gi1qyssi1l1ssilmknkwp1flial1p1fmigy  
g1g1t1iy1yqrkvay1l1cpnc  
qhi1f1sps1lwavikakhtatt1rr1fecp1nchethycievpkthmgte  
>tr|Q6GDU2|Q6GDU2\_STAAR  
mkym1gvd1gt1t1stksv1ydengt1fimkhq1igydl1htpnvdvseenpdel1fdav1l1mtikyimreskvnqddik1fvsfsaq  
mhs1liamdqqhqr1l1tnnit  
wadnraak1yatvinevhdgnaiyq1rtgt1pihpms1l1akifmwk1hewqdv1f1rtakfadiktyi1fyh1l1fdryi1idysmasa  
tgmfn1let1ldwdv1gale1l1



Tsompanidou\_et\_al\_Supplemental\_FASTA\_File

gi seem l p e l v p t t y v m k g m k e r y a t l m g l n e d t p f v i g a s d g v l s n l g v n s v g k e v a v t i g t s g a i r t v i d k p r t d y k  
g r i f c y v l t e d h y v i g g p v  
n n g g v v l r w l r d e l l a s e v e t a k r l g v d p y d v l t q i a k r v k p g a d g l i f h p y l a g e r a p l w n a n a r g s f f g l t l s h k k e h  
m i r a a l e g v l y n l y t v y l a  
l i e v m n e t p k m i k a t g g f a k s e v w r q m m s d i f d t e l v v p e s y e s s c l g a c v l g l k a v g d i e d f s i v s s m v g a t n n h t p i e  
e n v a y y q e l v s i f i n l s r s  
l t e n y e q i a d f q r k h m a e n k t g  
>tr|Q6GDV0|Q6GDV0\_STAAR  
m k k v i n v v g a i i f s d n k i l c a q r s e k m s l p l m w e f p g g k v e k n e t e k d a l i r e i r e e m k c d l i v g d k v i t t e h e y d f g i v  
r l t t y k c t l n k e l p t l t e h  
k s i e w l s i n e l d k l n w a p a d i p a v n k i m t e g  
>tr|Q6GDV1|Q6GDV1\_STAAR  
m s r l l n d f n q s l h k g f i d k h i s h k g n y t p k l l v n n k n e k v l s t i i d e l q k c e t f y f s v a f i t e s g l a s l k a q l l d l s n k g  
v k g k i l t s n y l g f n s p a g g  
g e l l k l k n v e v r l t d i a g f h a k g y i f e h k d y s s m v i g s s n l t s n a l k v n y e h v l l s t m k n g d l v d s v k n e f d l l w q n s t  
q l t q q w i n s y k e s f e y r s l  
e k l a e v e q t q m l l a d k v k s v e i v p n l m q a e a l r s l k a i r d k a d k a l i i s a t g t g k t i l c a l d v r e v n p n k f l f i v h n e  
g i l n r a k e e f k k v l p t k n d  
s d f g l l t g k h r d v a k y l f a t i q t l s r d d n f k q f d e k e f d y i v f d e a h r s a a s t y q r v f n y f k p k f m l g m t a t p e r s d e l  
s i f e m f d y n i a y e i r l q a a  
l e s d i l c p f h y g v t d y v h g i k e d d v t k l r y l t s d e r v n y i i q k t d y y g s g e i l q g l i f v s s k e a y d l a d k l s s k g i  
k s v a l t g d d s v n y r q i v i e  
k l r e g k i n y i i t v d l f n e g i d i p e v n q v m l r p t e s s i i f i q q l g r g l r k s s n e y v t v i d f i g n y k t n y l i p i a l s g d q  
s q n k d n y k k f l t n n d s i n g  
v s t i n f e e v a k k q i y n s l d a v s l n q n k l i l k a y e e v e n l g h m p l l m d f i q q h s i d p s v i f s k f s n y y e f l v r y k k i d a l  
l t e n e s k n l v f f s r q i a p g  
l k r i d s i v l e e l l k n e l t y d e l k n k m l n e v k d i t e d d i d t s l r i l d f s f y n a g i e k i y g s p i e c n e r m i r l s d a f t n a l  
s n q t f k i f l e d l i e l s k y n  
n e k y q k g k n g l i l y n k y s r e d f s k i f n w s k n g s s v i m g y m i r s q e m p i f i t y d k h e d i s d s t k y e d e f l s q d e l k w f t k s  
n r t l k s k e v q k i l s h r a k g  
i k m y i f v q k k d d d g i y f y l g t a g y i e g s e k q d k m p n g s n v v t m d l a l d k a v r d d i y r y i t n  
>tr|Q6GDV5|Q6GDV5\_STAAR  
m t y h e r v l a l r a e s k r t a f d f r f e d l f s k e e w l s m s l a e r q a e a k a f r h e i k k l d d v r m p f s s a h d a q v k l y n v v y s y n g  
i k r n f k q v e n e g f  
>tr|Q6GDV8|Q6GDV8\_STAAR  
m l k k k i l m l t s i l i l i s v a s i y f k m k y d e k e k q k s i y y e q q a r i t y l k h n t i e p n t i k s v h f t n l e t s p m g s a v i e  
g y i n e n k e d d f v a y a s p e n  
n f q f v g d l i k s e r l s e l l k p a h q l k s p d d i k k e l n k k  
>tr|Q6GDV9|Q6GDV9\_STAAR  
m s k k k i l i l t n i m l i l i s v a g i y f k m k y d e k e k q k s i y y e q q e r i t y l k h n t i e p n t i k s v h f t n l e t s p m g s a m i e  
g y i n e n k k d n f t a y a t p e h  
n y q f g g a m i e s e r l s e l l k p a q k l k s p d d i k k e l n k k k g h  
>tr|Q6GDW1|Q6GDW1\_STAAR  
m p y n y k k q n g e l m s v m s q g e k f i h q s p v n d e l s a l i k l l i s k i n g c h y c v d i h k k e l k e l g v t q m k i d e v l s f r h l d l f t  
d q e k v t l e f a e m l n s i k d f  
k k f e i i d r l k s f y d e e q i i d l v f v n q i n g w n r l n i i s d k l  
>tr|Q6GDW2|Q6GDW2\_STAAR  
m t s k h q k g s i v n r f l n s v e k i g n k l p d p s v l f f l m c v g l a i m t w i s l f n v s v k h p g t h q t i y i k n i i s h d g f t m i m n d  
t i k n f s e f p a l g l v l a m m i  
g i g v a e k t y f d k l m i s v n r a p r f l i l p t i i l i g i l g s t a g d a a t i l p p l a a m l f i k i g y h p i a g l t m a y a s a v g g f a  
a n i v v g m q d a l v y s f t e p a  
t r i v s d s i k t n v a m n w y f i a v s v v l l p t i l l v t t k l i i p r l g y d d r l m h d d h e e t s s h i t d k e a h a l k w a n i s f i v t i  
i l l i i t a i p e h s f l r n a k t  
g s l l d d a p l i n g v g l i i l v f l v p g l v y g i l s k e i k n t k d l g k m f g d a v g s m g t f i v i v f f a a q l l a y l k w s n l g i a a v  
k g a k l l e h q n g i v l i l g i i  
v l s a m v n m l i g s a s a k w g i l g p i f v p m l i l i g f h p a f t q v i y r v g d s i t n p i t p m p y l p l l l t y a q y d k r m k l g a l l s  
s l m p y s i a l s i a w t v f v i i  
w f l l g i p v g p g g p i f v k  
>tr|Q6GDW7|Q6GDW7\_STAAR  
m s k l l m i g t g p v a i q l a n i c y l k s d y e i d m v g r a s t s e k s k r l y q a y k k e k q f e v k i q n e a h q h l e g k f e i n r l y k d v k n  
v k g e y e t v m m a c t a d a y y d  
t l q q l s l e t l q s v k h v i l i s p t f g s q m i v e q f m s k f s q d i e v i s f s t y l g d t r i v d k e a p n h v l t t g v k k k l y m g s t h s n  
s t m c q r i s a l a e q l k i q l e  
v v e s p l h a e t r n s s l y v h p p l f m n d f s l k a i f e g t d v p v y v k l f p e g p i t m t l i r e m r l m w k e m m a i l q a f r v p s v n l l  
q f m v k e n y p v r p e t l d e g d  
i e h f e i l p d i l q e y l l y v r y t a i l i d p f s q p d e n g h y f d f s a v p f k q v y k n e q d v v q i p r m p s e d y y r t a m i q h i g e m l g  
i k t p m i n q f l t r y e a s c k t  
y k d m h q d q q l s s q f n t n l f e g d k a l v t k f l e i n r t l s

Tsompanidou\_et\_al\_Supplemental\_FASTA\_File

>tr|Q6GDW8|Q6GDW8\_STAAR  
mrkltkmsamllasgliltgcggnkgleekkenkqltyttvkdigdmnphvyggsmsaesmiyepivrntkdgikpllak  
kwdvsedgktytflrddv  
kfhdgtpfdadavkknidavqenkkhswlki stlidnvkvkdkytvelnlkeayqpalaelamprpyvfvs pkdfkngt  
tkdgvkkfdgtgpfklgeh  
kkdesadfnkndqywgexsklnkvqakvmpagetaflsmkkgetnfafddrgtdsldkdslkqlkdtgdyqvkrsqpmn  
tkmlvvns gkkdnavs dkt  
vrqai ghmvnr dki akeildgqekpatql faknvt d infdm ptrkydlkkaeslldeagwkk gkdsdvrqkdgknl emam  
yydkgsssqkeqaeylqae  
fkkmgiklningetsdkiaerrts gdydlmfnqtgwll ydpqstiaafkakngyesatsgienkdkkiysiddafkiqng  
kersdayknilkqiddegi  
fipishgsmtvvapkdlekvaftqsqyel pfnemqyk  
>tr|Q6GDX3|Q6GDX3\_STAAR  
mkgamawpflrlyiltlmffsanailnvfip l rghdlgatntvigivmgaymltamvfrpwagqiiarv gpikvlriili  
inaialiiyftgleg yfv  
arvmqgvctaffsmlq lgiidalpehrsegvslyslfstipnligplvavgiwnannis lfaiviifialtttffgyr  
vtfae qepdtsdki ekmpf  
navtvfaqffknellnsgii mivasivfgavstfvplytvs l gfanagifltiqaiavvvarfylrkyipsdgmwhpky  
mvsvlslviasfvvafgp  
qvgaiif ygsailigmtqamvyptltsylsfvlpkvgrnmllglfiacadlgislggalmpisd lvgfkwmylicgm l v  
ivimimsllkkptprpans  
l  
>tr|Q6GDX5|Q6GDX5\_STAAR  
mtfltvmqfivniiigfl ltmvigliwlikdkrqsqhsvlrnypllariryisekmgpelr qylfsgdnegkpfsrnd  
yknivlagkynsrmtsfgt  
tkdydqgfyiqntmfpmpqrneisvdnttllstfiykianerlfsreeyrvptkidpyylsddhaiklgeh l khpfilkri  
vgqsgmsygalgknaital  
skglakagtwmntgegg lseyh lkgngdiifqigpg lfgvr dkegnfseg l fkevaqltnvrafelklaqgaktrgghme  
aekvneeiakir nvepykt  
inspnryefihnaedlirfvdlqq l gqkpv gfkivsvskvseietlvr t mveldkypsfitidgg eggtgatfqelqdg v  
glplftal pivsgml ekyg  
irdkvklaasgklvtpdkiaialglgadfvniargmmi svgcimsqqchmntcpvgvattdakkekalivgekqyrvtny  
vtsl heglfniaavgvss  
pteitadhivyrkvdgelqti hdyklklis  
>tr|Q6GDX7|Q6GDX7\_STAAR  
mnqsvklklh l t d vngi agyemqvkeamrnyi epvsdq i ednlggi fgkkaengqysim isghmdevgfmvtkidkhg  
fisftpv ggvwnqvm l sqk  
vtitt ds gkeirgi igskpphvl tpeerkkpmeiknmfidigvsskeeeagvevgnmvtpysefev l tndkyl takaf  
dnrygc alave lkr l kde  
niginlysgatvqeev glrgakvaantikpdlaiavdvgi aydtpgmsgqtsdskl gggpvvimmdatsiahqglrk hik  
dvakkhnievqwdttppgg  
tdagsihvanegiptmtigtvlrymhsnsv l nvddyensvrlvteivrs lndetyknimw  
>tr|Q6GDX8|Q6GDX8\_STAAR  
mlleikdlvyeasdrvilnhinlkvdkgetiaigpsgsgkstfqklicnlispts gtl yfkgkpyddyepelrrhis y  
lmqqsdlfgetiednmi fp  
slarndkfdkkrakql ikdvglghyqlsskiehmsggerqriaiarqlmytpdillldestsaldinnkekienii fkl a  
dqgvaimwithsddqsmrh  
fqkritivdgqisntee l nqhe  
>tr|Q6GDY0|Q6GDY0\_STAAR  
msimrlftfilsifivgmvemmvagimnlmsqdlhvseavvgqlvtmyaltfaicgpilvkltnrfssrpvllwtllifi  
igngiia vapnfsilvvgr  
iissaaaaliivkvlaitam l sapknrgkmiglv ytgfsganvfgvpigtv igdlvgwrytflfliivsiivgflmmiy l  
pkdqeigrpvnheapshe  
nhvtskilrpaevakyl iitflvl iansvtfvfinplil snghdmsfvslallvngiagvigtslggifsdkitskrwl m  
isvsifi vmmllmnlilpg  
sglllaglfiwnimgwstnpavqsgviqhveg dtsqvmsswnmssl nagigvggi igglvmthsvqaitytsaiigs l gl  
ivvftlknnhyaktfkss  
>tr|Q6GDY1|Q6GDY1\_STAAR  
mkiinttggqihgigtqgdldifligi pyaepvhdnrfkhstlktqwsepidateiqpipppdnkledffssqsatftehe  
dclylni wkhndqskkp v  
iiyfyggsfenghtaeliqpahlvqnddiiv itcnyrlgalgyl dwsyfnkgfhsnng lsdqinvikvwhqfiesfggd  
annit lmgqsagsmsiwt l  
lkipdi epyfhkvvl lsgalrldtlesarnkaqhfk l mldyldtdvts l stddilm l maklkqsr gpskgldli yapi  
ktdyiqnnypttkpi facy  
tkdegdiyitseqkkl spqrfidimelndi plkyedvqtakqslait hcyfkqpmkqflqq l niqdsnaqlwlaefawh  
dtssahyrsayhil dmfvw  
fgnlqilaahqypttah l kflsrqm qndlanfaksgkmpwpm yhnerryrtyq  
>tr|Q6GDY3|Q6GDY3\_STAAR

Tsompanidou\_et\_al\_Supplemental\_FASTA\_File

msekqsneqveaflnkesqweeykylralifneteleaykwmhpcytlnnknvvlhgfknvya11fhkgailedkyh  
tliqqtekvqaarqlrfen  
leeiqarreeikyiaeaikaekagkkvemkkteeyvipkeleakfeempqllessfykltpgrqhqiyyihigqakrsetr  
qkrvekyinqilegkghmd  
k

>tr|Q6GDY4|Q6GDY4\_STAAR  
mlsikhltkisygnkkavddislidiqsgefiufigtsgsgkttalrminrmieategqieidgkdvrsmnpvelrrnigy  
viqqiglmthmtikenivl  
vpkllkwtkeekdkrakeliklvd1pesflerypaelsggqqqrigvvralaaeqdiilmdepfgaldpitrtdtlqdlvk  
tlqrklgktfivthdmd  
aikladkicimsegkvvqfdtpdn1l rhpandfvrdfigqnrliqdrpndktvegvmikpitiqaeat1ndavhimrqr  
vdtifvvdrdnh1lgf1di  
edinqqirghks1retmqqhiyvtqidsklqdsvrtilkrnvrnvpvddqqr1vgli1tranvvd1vydtiwgdsedtva  
aeyvgedtasskvheqht  
nvkvr1digdds

>tr|Q6GDY5|Q6GDY5\_STAAR  
mieflhehggqlmsktlehfyisiva11laiivavpigi11sktkrtani11tvagvlqtiptlav1aimipifvgvkt  
aiva1fiyv11pi1nntv1  
gvqni1snikeagksmgmtqfqlmkdvelplalplilggir1ssvyviswatlasvvgagglgdfifng1nlydplmivt  
atv1vtala1gvdal1alv  
ekwvvpkg1kvsg

>tr|Q6GDY6|Q6GDY6\_STAAR  
mkkikyilvv1v1slvt1sgcslp1gskstkndvkitalstsesqiishmlr1liehdthgkikptlvnn1gsstiqhn  
alingdanisgvryngtd1  
tgv1keapikdpkkamiatqqgfkkkfdqtfnsygfantya1fvmvketakkyh1etvsv1akhskd1rlgmdsswmnrk  
gdgyegfkkeygfdftvr  
pmqig1vyda1nsek1dva1gystdgriaayd1kv1kddkqffppyaasavatne11rqhpe1kttink1tgkistsemq  
r1nyeadgk1kepavvae  
f1kkh1yfdk1qkgghk

>tr|Q6GDY8|Q6GDY8\_STAAR  
mdtskqfrgdnr11lgiv1gvt1fw1faqs1vn1lvpl1qstys1sdvgt1niav1sal1fag1fiv1gag1vadk1fgrvkit  
ygl1lnv1gs11i1itp1  
paf1iigri1qg1saac1impst1ai1neyyigtr1r1qalsy1wsig1swgsgict1fggl1vatyig1wrs1fv1sill1t1la  
my1likhapetkaepikgmk  
aeakkfdvig1vl1vvtm1sl1nvi1tqtshfg1lvsp1il1gliv1vfics1lvf1vyen1kikhpl1vdfs1fknrgysgatis  
nf1l1ngvaggalivintyy  
qq1lgfn1ssqtgyis1ty1lav1smi1rvgeki1sqhgkpr11l1gsgftvig1l1l1stf1pemwyiv1ssivgy1l1fgtg  
1g1yatp1stdt1avasapdd  
ksgvasgvymass1gnafgvavsgtvytv1aan1ln1n1ggftgmmfn1laiva1flv1ll1vpknqtn1

>tr|Q6GDZ2|Q6GDZ2\_STAAR  
mfngfkr1i1igppkknrelkdekiskfkg1al1ssda1ssvaygpeqil1t1svvgavatwyt1piagav1l1laalims  
yrqi1yaypkggg1aymvs1k  
tn1gekwl1laggs1l1vdy1l1tvav1ssgadafvaafps1yghkv1iac1l1vl1fil1n1lrg1tesatv1sy1pvy1f1i  
glv1l1fi1gtfrvatgdiq  
phmhasvgtavpgvt1f1l1kaf1ssgass1tgvea1snavn1f1repsannavkt1iamgsilaf1l1vgivglayvygimp  
qtettv1s1qlamqi1fdna  
afyfvqattvml1v1laantgftafpmlaasmkdkymprmftrvgrdl1gysnsi1il1glv1ai1liivfdgmed1li1ya  
vgvf1pft1laqfgmvi1kwi  
herpknw1sk1svn1l1ggivt1fivfmi1l1tkfsqvpil1f1l1pfv1v1ff1kinkhyrdiaeq1r1sdi1dvhnvevdrn1  
aivpitsittavdksiyya  
qm1anndviavhvsfgdedekafqekwkrhfpdvr1vilhseyr1siirp1srfidkinrkandqnymitvvi1pefitkkr  
whn1l1hnqts1rmk1ly1iy  
qknv1vct1ipfk1kk

>tr|Q6GDZ5|Q6GDZ5\_STAAR  
mki1gti1ad1hidrh1nkktsedy1lea1veivkykn1d1l1liagdi1snhyq1l1thqf1tq1tkq1ldipvk1fvp1gnhd1lweves  
mttqdi1wnnyksmsq1lv1g  
kpfi1vneewa1i1ghtgwydysfaaqrfs1de1l1qrgkhygatwqdker1swgtsdqnl1skiaaeqvk1d1levgnrrvilv  
thv1thp1dfiv1pmp1hri1fd  
fynaf1gts1dfn1p1yamfd1pys1imghvh1frksv1mddgrcy1l1pc1lgypr1qwr1sedy1qe1ineti1qi1ei

>tr|Q6GDZ8|Q6GDZ8\_STAAR  
mqsskttkhfs1l1l1it1lgvmtafgpl1tidmyvps1pkvqgdfg1sttseiql1t1sftm1ig1al1gqfi1fgpl1sda1fgrkr  
iav1sil1i1fil1asgl1smf1v  
dq1pl1fl1t1rfi1qgl1tgggv1vi1akasagdkfsgnalakflasl1mvngi1it1lap1laggl1alsvatwrs1ift1ilt1val  
i1l1igvasq1l1pkt1pkee1k  
qvn1f1ssv1kdfgs1l1kkpafi1pml1qgl1tyvm1l1fsy1ssaspfi1tq1klyn1mtp1qqfs1imfavngv1gliivsqv1all1vek  
l1rh1ill1i1ilt1iqvvgva  
l1i1l1t1tfh1pl1w1l1iaff1l1nvc1pvts1igpl1gft1mameert1gsgnass1l1gl1fqfi1lggavap1vg1kgefntspymi  
i1ifitail1vs1qi1iyfkm

Tsompanidou\_et\_al\_Supplemental\_FASTA\_File

ikkqhva

>tr|Q6GE00|Q6GE00\_STAAR

mqlqkiviapdsfkesmtaqqvgnikqafntvygkthydiipmadggegtdalihatgatkytvivndplmrpieac  
yaradeqqiaiemaaasg  
ldllekeernplytssygtgelikdahnhgaktiilgiggsatndggtgmlsalgvkftdvngdlmqmngdnlahiaqid  
itnldsr1kevtfkvacdv  
snpllgengatyiygpqkgadakmipklfdamshyhdkimctgksvniqpgsgaaggmgallafcettltkgidvvfd  
itdfhqrikdadlvitgeg  
rmdyqti fgktpvgvalaakqyhipviaicgs1genyqhvydfgidsaysiisspstledvlnseqnllntatdiaril  
klq

>tr|Q6GE02|Q6GE02\_STAAR

mspflllrvrnqcaknatrqplkaevmmsinklnirhtpplcvkvtpemlgdhyiisfiyyisrniktlpkyflvvyatl  
itif

>tr|Q6GE04|Q6GE04\_STAAR

mkgvtytmnqntwiki1sgfasdskwkimlsillsiisvfgslvpywavfkiilminnaytinsimvyifivliayis  
qvccfgastmlshitayei  
lseirkklaqlmrplgvveskkigelknifvdketielplahmipevignllsaaflyimlidwrmasallvtip  
isifafkkvmsgfnetyae  
qmksnnymsaivefiegieviktfnqsqssykykdavdnykihtlnwfkntwgymnlgasvlpstflgilpvgmylis  
inqlnyaefflcivls1gv  
vapiknftnyvnhlksiyaaltevnqilsleelvlstfkfkkpquhyeiafnvvgfsynkdkddlvmkhsftvpennfia  
vgasgsgkstiaklisryw  
dvtsgaitiggidikdieskq1ndlvfgvqdnfllnltfkeniklgnpeatdeavekaaklaqche fieklpdgydtnv  
gtvgdklsggekqrvtiar  
milkdapiivldeatayvdpneqkiqea1nvltdkktliviahr1stiqhadqiivlgkqqilekqshhlllklngnyk  
kmwdthmhtkdwgintghn

>tr|Q6GE06|Q6GE06\_STAAR

mri fitsntdvktyvtkhlyhaltrghrvci fkpqfkeerqdgtpdlevfknecdlsyditstlytfkqpvspflaf  
kmanqiflnkqcvldkvkv  
ldkefdfilegaggiavpiyegtddfymtkd1indcadcvlsvlpsklgaisdaihvqdyvnqnvssanflimnrytgs  
yiekdnqitigkltnktvy  
tfeehatyenfseaf1kq1igvknelhttt

>tr|Q6GE07|Q6GE07\_STAAR

mnytqqlkqkdseyvwhpftqmgvyskeea1iekkgksylydtngnyldgyaslwnvvhghnnylnkvikkqlnkia  
hstllgssnipsieleakl  
ieitpsnlrvkfytsdgsasveiaikmayqywkndrekyaknkfitlnhgylhgdigavsvggiktfhkifkd1ifen  
iqvespsfyrnsnydenem  
mtailtnieqilierndeiaqfilepli qgatglfvhpkqf1keveklckkydvlllcdevavgfgrtgkmfacnhedvq  
pdimclgkai tggylplaa  
t1tsqkiynaf1sdshgvntffhgtytgngivctvalenirlyekckllsqiettsstlekqlhalkrhrnvgdvrgrg  
lmfgvelvtdkdstplei  
ekverivrnckenglmi rnlenvitfvplsmnskevktmvri fkkavhnildrkc

>tr|Q6GE11|Q6GE11\_STAAR

mtskditqisviaa1tilavlkipsiipglfdq1sapaa1lilaffgikkyflggl1ss1lllvfgvfnpinviisiif  
rviajavvyl1kinv1slv  
lasvlgslvsr1ilsvilnlpvww1lnaipgviftlivaiplyl1lkrkmav1lr

>tr|Q6GE18|Q6GE18\_STAAR

mstkqkl1tm1imlmgffgl1net1lvtalpsimkdfeytqvqlttaf1l1ngiviplsalviqryttrqvflvgi  
siff1gt1l1gg1sphfat1  
1vari1qal1gagim1mmtti1dvfqphergkymg1fg1v1glapaigpt1sgylveyfnwrs1fhvvapiaaavtflig  
fktiknvgttikvpidfis  
vifsv1gfgg1lygtssisekgfdnpi1vsmiggiv1valfv1rqyr1stpl1nfavfknkqftvgi1imgvtmvsig  
setilp1fvqn1lhrsald  
sg1t1l1pgaivmafmsmts1galyekfgprk1alvgmaivvittayfvvmdeqtstimlatvyairmvgialglipvmtht  
mq1l1kpe1n1ahgssmtntv  
qq1agsigtaal1it1lshasknfsptmsdyngmnkiemmnqikidtm1lhgyhagflfallitvisffcsfmlqgkkkev  
shq

>tr|Q6GE19|Q6GE19\_STAAR

mkr1l1fvviafvfi1aacgnsskdeaskdsktinvgtegyapfsfhdkdgl1tgydidvikavakaeg1kl1kfnet  
wdsmfag1dagrfdvianq  
vginpdrekkykfskpytfssav1virenekdikfdndvkgk1laqtftsnygklakdkgaditkvdfnqsm1llskr  
vdgtfnds1s1y1dykkqkp  
nakikaikgnaeqksafafskkvddetvqkfdngl1kkieengelakigkkwfgqdvsksk

>tr|Q6GE20|Q6GE20\_STAAR

mfln1nseq1haldaakqafgpm1leglvkysipit1vtfv1glialftalmristskvlrsiarvyvsiirgtpmivq1  
fiifgyipe1lgr1l1tndad  
nqwt1apvvaai1g1sl1nvgayaseiirggiisipkqgteaaysigmtyrqtiqriilpqairvsipalngntflslikdt  
s1lgfilvaemfrkaqeva

Tsompanidou\_et\_al\_Supplemental\_FASTA\_File

sttveyltiyvlvalmywvvcfiisiiqqiyesyiergyrs  
>tr|Q6GE24|Q6GE24\_STAAR  
mtkklltlfivsmlltaccgkkesattsskngkplvviygdykpyckeldekvmpkfrknyidnhkveyqfvnlaf1gk  
dsivgsrashavlmypaks  
flfdqkqlfaaqgdenkewltkelldkhikqlhldketenkiikdyktkdskswkaaekdkkiakdnhiktptafinge  
kvedpydyesyekllkdk  
k  
>tr|Q6GE25|Q6GE25\_STAAR  
miiknysyarqnlkalmtkvnddsdivtvtstddknvimsesdynsmmetlylqqnpnaehlaqsiadlergktvtdk  
idv  
>tr|Q6GE30|Q6GE30\_STAAR  
miknktvedtystkaiivdsissvqmkqvmvqptpgrymlksmmagfl1sivtvmfgiktqfasthvdglinlmgaiia  
fslglvlvvtntselltsn  
fmyftvgwykvvslnkmmwillycflgnilggfv1ffl1mkyahvmtpentqal1alvqkktvdstwl1niftkgifcnff  
inigi1fismqfkggltkaf  
fiacgvivfvmgyehvfnaglyagmvffn1davswlhvlnknivfaf1gnfvggg1fvglvyaf1ngkrnrleqq  
>tr|Q6GE31|Q6GE31\_STAAR  
manttir1anendava1hqlmheaftplrelgidwpsvnan1davkenidknttfvmtiddeiistitvrypwgsvksis  
gypfvwwfatnpeyegky  
gsqll1tyveetflrdt1kaaavt1gtsar1hpwll1kiyekrgyeiysehendgd1gvimrkvliperfdetilgppf  
>tr|Q6GE32|Q6GE32\_STAAR  
mngniivahgmrrgrnqaleafise1vkddihhyhiaflesehqdletvmt1iqsgvkqlkivp111fsamhylkdip  
nivhemkrrypdkvevse  
plgthplmteimqridevrudemqqvgvvvahgningkftkaheelqtcvqhlqinkptyartlygeisfihdledia  
rqyqk1ivvpl1f1ydg1rlv  
nkvkqgmndmvi1ndi1h1t1ps1nfdp1lkqi1ndr1es1nds1nenika1l1tk1s  
>tr|Q6GE33|Q6GE33\_STAAR  
makqklvmignmagirtieeilerandlyditvigkepypnyrim1snilqnkmtveetimpyewyeehdik1itnd  
pvvdvdranqnvttangie  
vaydkli1fatgskafvipvgst1psvigwrtiddteqmmniaktkkkaivigg1l1glecarg1ldqgmevtv1h1aew  
1memq1drkagnm1kadle  
kqgmkfemqantte1lgeddvegvkladgreiptd1v1mavgi1rpytevakess1dvnrgivvndvmqtsdsnvayavgec  
aehngkvyglvap1yeqgk  
vladh1tnketngykgsttfts1kvsgcd1ysagqivenaeikgieifnsvdnnykki1fkdg1nvv1gav1ygdiddgsrf  
ynmmkkgstedyt1vs1l1  
tkggeeas1siadmaddet1cg1ngvdkgtivnaitengfttveevtatktagnscgkckpqiailqht1gdd1fvaakp  
ag1cgctd1trdqiv1tqir  
akg1l1ktskevrvh1nfknkggpcrpa1nyy1nmv1phd1hederes1rfaneryhani1qndgt1fsvipqmr1ggvtdadq1  
ir1gevakkyhvp1lvkvtg  
sqrvg1lygvkkee1pniwed1gmrsasaygk1trsvkscvgkefcrfgtqy1tr1gir1ekt1feyid1tphk1fkmvsgcp  
rscvesgvkdfgi1sveng  
fqiy1ggngg1tevekaef1ttvetedevik1l1cga1mqy1retgiyaertapw1rr1l1gfenv1kev1ldperqnel1ferim1d  
akkaveaepwea1tsnaqa  
rkifevekv  
>tr|Q6GE35|Q6GE35\_STAAR  
msvnygkvyl1gagp1gnpny1tkkaer1l1readv1lydr1vnp1l1l1qyskstte1idvgk1kpyakh1qqekinecivea  
arrynkvv1rk1ggdpai1fg  
rvqeevdt1nnfniafeivpgvtsasaavatmq1gt1mravaksvt1fstgyfdseenevdvna1vnggt1aiymgvkr1  
ekiiaqi1qytdidypiai  
vfqascfn1fvvkg1r1snivgk1lehyaieakpgci1igevvytenvsttsnptqqfyvsvgskpda1ml1ceh1ydegyg  
c1lnpndtsngtyhssqyd  
yydtf1kqgen1tyistdradtntv1ch  
>tr|Q6GE37|Q6GE37\_STAAR  
mkikaqyamv1n1ldkc1ig1htcsvtckntwt1nrpgaeym1wfnvetkpgvgypkrwedqehykggw1nrkgk1el1ksgs  
riskia1l1gki1fynpdmpl1i  
kdyepwnyneh1ttaksgnhspvarayseitgdnieie1wgnp1wed1lagghvtgpkdpnikkieedik1qf1det1fmm1y  
lpr1ceh1c1npscvasc1ps  
gamykrdedg1v1vdq1dacrgwrycmtg1c1pykkyvfnwkt1nkaekct1fc1prieagmptvcsetctgrmry1lgv1lydad  
rvheaasavdek1lyekq1  
dif1npfdeeviaqaekdg1sydwieaaqns1piy1klaiey1klaf1lhpefrt1mpmv1wycpp1spimsyfegkntnqnpda  
ifpaieemr1pieylani1f  
tagdtkpvkeal1qrmammrsymrsqvtqppfdtsr1ler1gl1terqtkdmyr1l1gl1akyedr1fviptshketyldtyhaqg  
stgynygg1ehfg1dnceg1cg  
vavgs1gktg1geiy1nenfyg1g1frd  
>tr|Q6GE38|Q6GE38\_STAAR  
minfdn1fkkyqes1fgyiaq1l1cfpek1t1fhpk1tfoot1skdhpgydd1iafrnmmt1f1s1eikaiytd1tdf1tkkap1y  
mtynk1fdtq1kerqam1lak1  
kvlyemfg1lemvdne1sdy1lp1ml1qf1l1qvaewr1ndpraee1niq1li1mi1iedgtyvmana1gednnpayv1qalrkt1kl

Tsompanidou\_et\_al\_Supplemental\_FASTA\_File

cltspkgvkhha  
>tr|Q6GE39|Q6GE39\_STAAR  
mlnqflwvifpylclvvfvaghiaryrydkfswtaksse lierkr lmwgsllfhlgii pvvffghvvgl lipkswmdaagv  
sehlyhigavyigsifgii  
tlvgmfl l tarrvtksirr lssasdi fvnfl lllivfmgcyat lvtvqhpdfnyrts lsiwfrql fmlkpdas lmsgv  
piafkihi l l gftimacwp  
ftr l vhwsvpl tyinrry iyrknkv  
>tr|Q6GE40|Q6GE40\_STAAR  
mtpeaiiedrrfget l dki rkeegydfaaiafyesnkpsspikwhyvsgnknnrfkliilrkgrglagtmktgkrmiia  
nvg l a l gpeekidypil l s  
es l tav l avplwyknqvygv l l fgqrdgrs l pki fndddiqrkfgi fnddk  
>tr|Q6GE43|Q6GE43\_STAAR  
mykini i rdsdvykni l ktp l ndrdsi ftkel vpfkkkfevqqipihndakqtmsaiql dafqkspkdlrmsdqmsiq  
yl nndfwsncey l kvaid  
qfanyssi ssvnyhftv l l gdsqkplmy l nknrggdggipgyimiy l vpststinsmks l iahevnhmryqyidwdgg  
slieliaeglaenyves l  
ygakhigpwtntnwsrdnvkikntiynhlhkhifesmpflygddinklqgrsivglshaagyacgyhlvkyflqktni  
pievatt l paqkiinevnd  
fwhtht l  
>tr|Q6GE45|Q6GE45\_STAAR  
mnfnqfenqnfngnpsdtfkd l gkqvfnfyfttspfvtniyetdelyyleaelagankedisidfnnnv l tiqatrsaky  
ksgkl i l derno fesi r qf  
dfeavdkqnitafeng l l tit l pkikpsndttsstsisipis  
>tr|Q6GE48|Q6GE48\_STAAR  
mal fkrki s l pmqvvia l vlgvvgl l llygqenvanyikpfgdvfl nlikmivpvvfcs l alsisnvgesktvgrygwk  
tilyfeiittiaiglgiif  
gn l fkp gagl dptklpkgdiskyqstahaaeqstygnhfidtivhiiptnffea l nkge l l piiffavffgl glaavgk  
aepvkeflsgsleavfwmi  
nkilklapl gvfaficttiitfgasalpl l k l v l vvvfamvffvfailglvawmcginimniirilksel l l afstsss  
eav l pvmkkmenfgspk d  
itsfvipigytfn l dgsalyqsi aal fvaqmygmh l t l seqiv l m l t l mitskgmaavpgtsiv l l t l gamglpaqgl  
al i i gvdri l dmvrtc vnv  
ignalstiviakwenvydkakggey l ksi  
>tr|Q6GE50|Q6GE50\_STAAR  
mkkkkfgf l gis l ia i m l ivciv l vimmmtgkkdtyyigimkdnatiekmisekdesieknvklpsdadvsvkkgdvfv  
ykladsdki i kvkvdhdd  
vphglmmki hdmgk mhmkh  
>tr|Q6GE51|Q6GE51\_STAAR  
msnsqaiqaienv l atskvgv l staynknpsrymi fyndgl tlytktnihsakvkeikdnpaayv l llyndttnrsfve  
meatieivteqevldw l we  
tqdk sffsskedpelcv l rvvpqsik l mndks l dtpikid l  
>tr|Q6GE54|Q6GE54\_STAAR  
mnykqsaedi l naiggeen l damahcatr l r l v l ndes l vneea l nmdvvgkgtfstggqyqi i igsgtvnkvfselek l  
tgkeasttsevkaqsaknm  
npvqrfvkm l sdi fvp i paivaggl l mgl nni l takdl f fsgks l idvysqfaglaeminvfanapft l l piligfsaa  
krfggnpfl gaa l gmi l v h  
ps l msaydfpkaveagkaipywdfvghinqvgyqqv l pmlvaayilasiekglrkviptv l dnl l t p l l sifitaf l t  
fsfvgpitrqlgyw l s dgl  
twlyefggaigglifgllyapivitgmhhsfiavettliadatktggsfi fpiatmsnvaqggaaiaaffiikqnkk l kg  
vasaagisallgitepamf  
gvnlklrypfigaivgsgigsayiaffkvkaialgtaglpgfisinpvhagwlhyfvgmtisfivaitvt l l lskrkank  
evve  
>tr|Q6GE56|Q6GE56\_STAAR  
mkedrri rktktsikqaf tkl l l qekdlekitirdittradinrgtfylhyedkym l l admedeyisel t t y t qfd l l rgs  
siediantfvnni l knifq  
hih dnl efyhti l qlertsqle l kinehiknmqryisinhsggipemyfysyvs gatisiikywvmdkqpisvdelak  
hvhnivfngplrimaenr l  
hksnl ds l t  
>tr|Q6GE57|Q6GE57\_STAAR  
mni fkn l l wiapiatmi i l vifslafypaynpkpkdlpigil nedkgtti qdknvni gkkl edkl l l dsdnkikwkv d  
sekdl ekdl kdqi fgvai  
idkdfskdamsktqkvmsdskkeemqqkvasgeippqvqqmkqkmgnqqvevkqakfktivsegsslqgsqiasav l tg  
mgdninaqitkqsl et l ts  
qnvkvnaading l tnpvkvdnek l nkvdh qaggnapfl m fmpiwigsivtsi l l ffafrtsnnivvqhriiasigqmif  
avvaafagsfvyiyfmggi  
qgfdfdhpnriai fvala l gfvgl i l gvmv l gmksipiffi l m f f s m q l v t l p k m l pesyqkyvydwnpfthyatsv  
rellylnhhielinstmwmf  
igfmi fgavsslisaivrkhstkrtevps

Tsompanidou\_et\_al\_Supplemental\_FASTA\_File

>tr|Q6GE60|Q6GE60\_STAAR  
mvkvtydiptcedycalrlnagmspktreaaekglpna1ftvtlydkdr1igmgrv1gdggtvfqivdiavlksyqgqgy  
gsqimehimkyiknaves  
tyvsliadypadklyakfgfmpptepdsggmyiky  
>tr|Q6GE61|Q6GE61\_STAAR  
mtetfkafvidkdesgkvtpfkqlsttdl1pkgdvl1kvhysginykda1atqnhnavksyppmipgidlagtiveseap  
gfekegeqvivtsydlgvsh  
yggfseyarvksewivklpdt1tleesmiygtagytaglaierlekvgmniedgpvlvrgasggvgtlavlm1nelgykv  
1astgkqdvsnq11elgak  
evidr1pveddhkkpl1stwtqacvdpvggeginyvtr1nhsgsiav1gmtagntytnsvfph1lrgvnilgidsvfta  
mkl1rqrwrr1akdlkpen  
1heikqv1tfde1peq1lnkvikhenkgrividfgvdk  
>tr|Q6GE62|Q6GE62\_STAAR  
magi1ke1skqdase1velatrtfydtfgsyddndfdqffkdnytvekftqeinhvdsfhyfyqedganvgyikmnins  
aqteemgety1evqriyfl  
kdfqgggrgsq11alaekiaqehnkxkiw1lgvwehnpraqafykrhgfkvvgehhfqtgdvtdtdlimekel  
>tr|Q6GE64|Q6GE64\_STAAR  
mikq1nvsnmqkfesq1mkaqseg1thavpyaneimiyqsm1davqlypksivvdytvdgqykndchyfgqssiniadwa  
qnnnyppn1iya1qqt1dl  
1hyysveti1fd1a1l1t1lkgdl1sidghv1fdkpl1atsasiwetiktiedfdmmsqfy1lnkmayidhhpipfrn1fied  
seq1nwpdsw1lystkfm1p  
kwlykiakqradnkq1qn1glytkqpnv1kdhiv1figdhyqyignsky1lftyfvkhn1pmtacyfvtd1drrgphfispkse  
kadelinsarv1lvendip  
et1qpngt1liq1hqgt1pmq1fl1dskepiknietpfyrakryn1rw1qfdyvihsaddishfyqtafpshqan1laygnpk  
hqy1l1qkrnesttqqqyk  
sfk1ndqkp1v1lyapig1v1saq1p1sda1fkayhvvvqgvdetm1peea1vapky1saq1d1ilmsdvitdysniifda  
maidktvalytpnhsqyie  
sqgvnediwrh1skiwyt1drq1l1inn1isqaipvikypq1qqkeq1plesisq1l1skmts1nk  
>tr|Q6GE65|Q6GE65\_STAAR  
m1vntfnpfdn1l1ss1iaaip1v1f1l1cl1tvfkmkgiyaa1tt1lv1t1liaipffk1lpvgiasgavvegffqgiipigy  
ivmmav1llyki1tvesgqf1  
tiqds1tnisqdriq1v1ligf1naf1legaagfgvpiaica1l1l1tq1lgfnp1kaam1cl1vanaasgafgaigipvgvve  
t1kl1pgdvs1v1gvsqsat1  
t1lai1nfi1ipf1li1fi1idg1frgvet1pailvsityt1tqg1l1tvfsgpeladi1pp1l1tm1alavfskkfqpkihyrv  
nkdeei1epakahsakav1h  
aws1pfi1v1tvi1m1wsapffkn1f1pnga1ss1v1fkfn1pgtvse1vthkplv1t1ni1igq1t1gta1l1ti1it1ilmsk1kv  
fkda1gr1fgvtfkelw1lpv  
l1tic1fi1a1sk1ttygg1saamgqgiakagnvfpv1spilgw1g1v1fmtgsvvnns1lfapiqasvaqqigtsgs1l1vsan  
tv1ggvaak1ispqsiat  
aavk1qv1kese1l1kmt1lkysvc1l1ficiwtf1ils1l  
>tr|Q6GE68|Q6GE68\_STAAR  
meatiak1dkv1v1tkynkhhv1ne1smsinkge1l1g1ig1psgsk1ttik1l1gmekidsgsaeifahkmpnrka1nr1gy  
mgqtda1yen1tahen1lef  
ygr1sg1kgn1kdn1ekhiv1vn1leqa1lnkkvaqfsggmkr1slait1laepeli1ildeptvgidpkl1rqqiwqqfkq  
mtkdgksv1vitthvmdae  
rcdkv1glivdgr1faidtp1n1kqrfnv1dtieavfikae1evcqs  
>tr|Q6GE69|Q6GE69\_STAAR  
mdqtaftdsrv1tk1tir1hdgmvn1l1ktkayndi1tvk1diceksqisr1ttfythyktdkdfiysy1nt1l1keakkkf1kse  
t1tqai1ffkkm1y1fw1seg  
q1l1m1lgdesayk1hqv1kks1qqrie1nfvpv1ntkml1ttkekyf1l1ifmcnai1gvl1qd1wvkr1gykespkevaeimn  
kifenafr  
>tr|Q6GE79|Q6GE79\_STAAR  
mnd1thfnkrspi1fii1l1gs1taiga1s1dmf1pg1pdi1rhdfqt1ttsnaq1t1l1smf1mig1lafgn1fagpisdstgr1rkp  
li1ami1ift1as1lgivfvh  
niw1mva1rf1l1qgvtggaav1sraiasdmysgnel1tkfma1l1m1vngiapvvaptiggi1lnysvwr1mvf1ilti1fgfv  
mv1gs1l1kvpes1l1vt1nre  
sss1g1ktm1fkn1fki1l1ktprfv1pml1iqg1mtfv1l1fty1isas1pfi1qkiygmtai1qfswm1fagigit1li1ssq1l1tgy1vd  
fid1sq1l1mrg1mtmi1qi1igv  
il1vti1v1l1nhwnfwi1laigfi1liapvtgvat1gftiamd1ess1grg1ss1l1glvq1f1fggi1asp1vgvkgedn1pipyi  
iii1ata1vili1l1qi1ynmk  
vfk1tnr  
>tr|Q6GE80|Q6GE80\_STAAR  
mkrqakie1igna1vd1maeypfqe1stkmicaycni1rstfydykdkfd1l1dt1nsk1hkekfqf1l1sal1h1hnfenikqd  
k1k1lyk1ffiii1akyikrne  
qffkdi1lv1typmkt1fidiy1n1ardyyqkimndyst1vt1nkq1lyvtyi1ggqagv1finw1l1sngcnespeevadi1llanti  
kl1qnq  
>tr|Q6GE82|Q6GE82\_STAAR  
mtt1fi1isyiv1lali1vgvin1l1l1rsrrk1krqq1keqhfatr1qsnqskfkasd1dr1ttdq1ssqhtareearidnkdnqn

Tsompanidou\_et\_al\_Supplemental\_FASTA\_File

qvslnkqtegeqqdqsft  
dnnesdeevyaaknpnseeeykvekikkehknfi fgegvsrgkilaallfgmfiaailnqtllnvalpkintefnisastg  
qwlmtgfm1vngilipita  
ylfnkysyrklflvalv1ftigslicaismnfpimmvgrvlqagigavlmp1gsiviitiyypekrgaamgtmgiamila  
paigpt1sgyivqnyhwnv  
mfygmfiigila1vgfvwfklyqyttnpkadipgii fstigfgallygfseagnkgwgsveietmfaigiifiilfvir  
elrmkapmlnlevlkfptf  
tlttvinnmvmlslyggm1lpiylnlrgfsaldsgllllpgslimgllgpfgaklldtiglkplai fgiavmyatwe  
ltnlndtpymtingiyv1  
rsfgmafimmvmtaainalpgrlashgnaf1ntmrqlagsigtailvtvmttqttqhl safgeeldktnpvvdhmr1  
asqyggqegamkv1lqfvn  
klatvegindefivatifsiaailclflqsnkkakataqkidadnsinhe  
>tr|Q6GE86|Q6GE86\_STAAR  
mviiqt1fthtqtvtsefidhnnmhdanyniifsdvvnrfnyshgls1kerenlayt1ftlehttyl se1slgdvftv  
tlyidydykr1h1fl1t1t  
kedgt1astnevmmmginqhtrrsdafpesfstqiahyyknqptitwpeqlghkiaiphkgalk  
>tr|Q6GE87|Q6GE87\_STAAR  
maltiryqttypfkvvddikeipkdativwydfdepneqenewfka hfsfndlevddaingmprazyksykydyqylvfh  
simgsnyspialnifiqdn  
vlvtyhht1les1nkvvkykmt1dae1dcadvil1ldmmvdkyfnfvya1edsvyhfedr hvddrfnkmvmdsvfklr  
sdlikvkrvlfpmqelid  
mkqngdliidnkhslyiqhiddhlikqrniirtaqemtneirenfesysfrmsimqv1tlvsvisp1t1fiagiymn  
fvnmpalhlhygyyiclav  
mfviavvliiffrrkkwf  
>tr|Q6GE91|Q6GE91\_STAAR  
mkvnas1tikichtamfmfkrvsisankifhnkvyt1hfyns  
>tr|Q6GE92|Q6GE92\_STAAR  
mfhcnlpfvnhiyifnyyryn1qds1sshfisivihfgk  
>tr|Q6GE93|Q6GE93\_STAAR  
meqlpqvgfmsfv1fwknyvnfkgrrrseywymmlwhlilmpavcvliis1fiffisiaadnealivmsilmiilts  
vytfvys1atfipn1alcv  
rrfhdisrtm1fpmimtvfsiifyiv1qiidsydsdft1mpmglni1lv1lyfvy1gl1timiv1flcfdskpanyges  
pkypssiknqsvtsetpkk  
agtsetpktpeetdnq1  
>tr|Q6GE94|Q6GE94\_STAAR  
mg1viehvtkrfkgmtavndms1elesgkmlgflgrngagktttfrmi1gl1septeghityngkk1dktmynrigylpee  
rg1hgk1tvee1ky1at1  
kgmskteiqq1sywlerfditenrkkrids1skgnqqkiq1lasm1hkpe1l1ldepfsg1dpvnve1lkeavkd1ndw  
gstivysshrmehveelcd  
dvcil1dkgq1vvs1gdnhrasngnkkviesett1pd1thirgi1hsenmkqgl1q1t1enedvskdiyqvahqgyvkr  
fqvveps1qdi1fiekvggk  
da  
>tr|Q6GE97|Q6GE97\_STAAR  
mivevehqrqgv1likidndetkiiftnygarvswkyhdn1v1gsvveadefyhspfkfgasigrsgridnakfk1  
qgkeyq1eknngehl1hgq  
chgl1dnk1fdyeirneiaqikvifktv1ksaddhfpgdidvtithiydadhqwsieyeavasedt1fsptnhvyfn1nrd  
nnvvdnhrissnq1dmyv1  
dernivtgd1ld1hev1fednkik1sdi1ftsqaq1sqmtrf1gg1dhpftvgehkmyvenhefm1evdt1dmp1hvff1fn  
qp1dewdsp1fniy1kphsgft  
1etqf1pnd1n1ygekapsi1kagevfns1ktsfrieekvend  
>tr|Q6GE98|Q6GE98\_STAAR  
misiha1stgkiq1d1pysskrpmsa1dktki1sqt1w1sstgftgdeqaykdhggphkavcgf1skhnyalyqdd1ps1pt  
hamfgen1tfdy1desdy  
fgnqyr1geal1evseirepcwkiqakynip1d1vkrmstsgktgyfrv1kqgyvspndq1ly1iqeapiehr1svqq1nd  
lyyndrqndm1ryal1nnp  
f1sptrrdk1qkmynr1tk  
>tr|Q6GEA3|Q6GEA3\_STAAR  
mki1q1ey1f1ai1vkyns1ftkaa1q1f1hisqps1tat1kkmead1gyd1ftr1stkdikitekgiqfyryase1vqqyr1stme  
kmyd1svt1sepriki1g1tle  
stnqwian1lirkh1sdy1peqqyr1yeihdkhqsieq1l1fn1h1aitnekithedirsip1yeesy1llapketfknq1w  
vden1p1li1pnknsqvrk  
h1ddyfn1rnr1rpnv1vetdrfesavgfvh1gl1gyai1prfyyqs1fhtsn1leykkirpn1crkiyinyhkk1rhse1qvht  
fvqqc1dy1ygl1lea1  
>tr|Q6GEA6|Q6GEA6\_STAAR  
maa1qdprtk1fkttdy1ekq1evpg1qsemtpapdc1getsy1qgnqr1lqgykmlvtgg1dsai1graa1iayakegadva1ny1  
pseeq1daq1evr1q1ieesgq  
kav1lipgd1rdeq1fnyd1veqayq1lgg1dnvt1vag1hqqy1hddi1hgft1tea1tet1fetnvyp1fwtvq1kale1y1kpgas  
i1ttt1svq1gynpsp1l1hdy



Tsompanidou\_et\_al\_Supplemental\_FASTA\_File

aaskaaiisltksfseelgpkgrvncvappgfwspqlsggqpqskiptfgqktpgragqpvelcgtyvllaseessy  
ttgqvfgvsggvqid  
>tr|Q6GEA7|Q6GEA7\_STAAR  
malivsrailflilalalgiatvfpeqklpvyilftlfvvaivsnvwlthqnvkkihikfdkhvayflgvlsgllyigf  
viytltigsydvlpjiiifa  
isivlvqilenilgisirnrtrpsnkqlkviseqsaqqfkvislilvsvsivfifialmlkwwlilaisiivliiitvami  
vyekyyttn  
>tr|Q6GEB0|Q6GEB0\_STAAR  
mfldehinrnfkdlnndlhiahfinthvdecknmkiqdlafthasnatihrftrklgfdgysdfksylkfesnkthql  
psnsidsfkqeidstfsyl  
ervdyqltekmtastiylygtgraqlnvaseaqrilltlnhhvivilhdehelkmiInksepndlffiiislsgethell  
evtnllqlrqkyfisvttm  
kdntlaqkanyrvyvsntfylvtdgtdyssfisyhiffetlvkyneyllhndisn  
>tr|Q6GEB3|Q6GEB3\_STAAR  
myravifdfdgtiidteqhlfnvinkhlemhnadpisidfyrrsiggaatldhhlkaigsenkdklyeehltsttlp  
midtikslmafllkqrhipm  
aiatssvkaeimptfkalgldeyievvvgredevqkdpelylsavqqlnymptqclaiedsvngataaiaagldvivr  
tnkmtsraqdfsndvyvkd  
idydqivarfftk  
>tr|Q6GEB5|Q6GEB5\_STAAR  
mttaligvivlillifvpnyramksakeqgsnatratimvgidiilivliivtlllkym  
>tr|Q6GEC0|Q6GEC0\_STAAR  
menekkkyltkdiawrdliipiigvifalyaltiaayigpilfygyeidsnlifvatitqalaytigigafylfhlkvmps  
rlragfayikkywlrslit  
yialililyteymtqflpkhlqysetanelelnkmfevpaflpvafllivivgpiveeivfrhiligelgkkfnfiams  
ivsvflfafihtvdakspf  
efgpylilsilvftyiksgnrlgstialhiannfvsfvisisiya  
>tr|Q6GEC2|Q6GEC2\_STAAR  
mtdktlqqidkliswllkqidnvipqlimemttetkrhrfdlvtndkqiqqfqqflathfpehqlaeeksnemitne  
inhlwimdpidgtanlvkq  
qedyciilayfyegkpmlyvydyphkklykairgegafcnfgkmeppsllkledaiisfnaqvmldtvqldfdafsy  
rlvgacglmsrvakgqfg  
ahintnkpwdiaaqflfaellnlkmttdlgkaidhllkgapfiisnkachetvllkilnanggyqkyr  
>tr|Q6GED0|Q6GED0\_STAAR  
mkkltvattltagigtalvghaqhadaaenytnynnttqtntttttttttssishsgnlytagqctwyvydkvggeigs  
twgnannwaaaaggagftv  
nhtpskgailqsseppfghvayvesvnsdgsvtisemnysggpfsvsrtisaseagnynyih  
>tr|Q6GED3|Q6GED3\_STAAR  
mmtrkptflesistmivmvivvvtgfvffdipiqlvlliasayaawiakrvglwtqldetgiaerlntampaililavg  
iivgswmfsgtvpaliyyg  
ldllnpsyflisaffisavtvsatgtawgsastagialisignqlsispgmaagaiagavfgdkm脾sdttnlalvt  
kvnifkhihsmmwttipas  
iigllwfvigvqfkgshndkqiqtllselaqiyqiniwvwpiliviivcllfkmatvpamlissfsaiivgtfnhhfkm  
tdgfkatfsgfndsmihqs  
hisfsyksllleggmmstqilvtifcgyafagivekagclevllttiskgihsvgllicitviccialvfaagvasivi  
imvgvlmkdlfekyqvsrs  
vlsrtledsstmvlplipwgtsgiytnqlhvsvgeffiwtpcylcaiaaiygtgigikkssnsrlt  
>tr|Q6GED4|Q6GED4\_STAAR  
mtklienlkasifvstltnksmysrfdapkgcvngcmfilyrvnrigrnrsfeiftnpif  
>tr|Q6GED7|Q6GED7\_STAAR  
mskfkvkr1tahilmkvindmlkysfhl1t1tqvkl1n1lvkydndsnsasidr1l1kmeiqskmallqmlsylvlnnhqw  
llkardqrdqrkl1tisink  
mhidkiymnne1sdyierfygqytdfscdyvsyllssqell1n1kcylnmcqlsleelyvlgiln1hkqqltvkelqg  
efhhipifavspilkl1ilk  
glvkkercelderrvikt1rekfskvtmliqacynylekgiqvl1nk  
>tr|Q6GED8|Q6GED8\_STAAR  
mildnvpnd1fptekkgpsvlgiieyqvqganefegafiatnerlimvdmngqfyrsisyneiekidydgqtimfkf  
nignvpmhdiksnnevfmv  
eyvkqhmiv  
>tr|Q6GEE7|Q6GEE7\_STAAR  
mkmidvllknisqvl1snkwtglfiliglfvadwtvглаamigsiiayafaryinyseaeindglagfnpvltaialti  
fldksgldivitmiatllt  
lpvaaavrevl1rpykvpm1tmpfvivtwftillsgqkvfdts1klmpqnienvfnndrihviqslfegfsqvfi eas  
viggvciligi1iasrkaa  
llaviasllsfiiva1lggnyddinqglfgynfv1maialgytftainpyistflgvl1tvvvqlgtttll1epfglpa1  
tlpfiivtwillfagikh  
kvda  
>tr|Q6GEE8|Q6GEE8\_STAAR

Tsompanidou\_et\_al\_Supplemental\_FASTA\_File

mekinwilnrriisflivhstflfikvec  
>tr|Q6GEE9|Q6GEE9\_STAAR  
mndmnsflitteiqrkwi ekfvigdtfkakaeyndqhsqfpykniewlikegygkltlpkeyggegatiedmvilqsf  
lgeidgataalsigwhvsuv  
gqiyeqklwsqdmleqfaveinngalvnravseaemgsprtrgprsthavkaddgyilngvktysmskalthiivaayi  
eelksvgfflvdrnlpgve  
iadnwdvlgmratshdli lndvkvp1kh1vetekskasngwilhipscylgiaqaarnyavdfaiqhspnsiegtiatl  
ptvqqnlgkmetlllcarq  
flwstakgyqytaesqirnataskvmvmnqglevidlamrivgakslemnrplqryyrdmraglhppmedaaytnia  
ksitdtf  
>tr|Q6GEF0|Q6GEF0\_STAAR  
mkklllpliiimllvlaacgnqgeknnkaetksykmdgdktvdi pdkpkriavvptyagglkklganivavnqqvdqskv  
lkdkfkgvtkigddiekv  
akekpdliivystdkdikkyqvaptvvvdynkhkyleqqemlgkivgkedkvkawkkdweettakdgkeikkaigqdat  
vs1fdefdkklytygdngw  
rggevlyqafglkmqpeqqkltakagwaevkqeeiekyagdyivstsegkptpgyestnmwkn1katkeghivkvdagty  
wyndpytldfmrkd1kek1  
ikaak  
>tr|Q6GEF1|Q6GEF1\_STAAR  
mtkkvyfnhdggvddlvslfl1lqmenvqligvstigadcylepslsasvkiinrfskediqvapsyergknpfpkewrm  
haffmdalpi nepvkha  
snvrdeafedi iqt1krqsekv11ftgpltdlaka1qkdssivqyiek1vwmggtflpknveepehdgsaewnaywd  
peavkivfdsdieidmval  
estnqvpltdvrrwanerqytgldflgvsyaavpplthfitnstyflwdvlttayignkdlvhsiekkvdvisygpsq  
gktfeckdgrkinvinhd  
naffdyitalakkvn  
>tr|Q6GEF2|Q6GEF2\_STAAR  
mttkqlvytalmtaiia1glvpvip1pfssvip1qnigiflagvilgrkygt1svivf11lvvaglp11sggrggigv  
fagpstgf111ypvvafmi  
gairdrfineinfwilfvgilvfgvia1dvigt1imgmiinipftkaisislalpgdilkaivasligtallnhsqfrq  
imglk  
>tr|Q6GEF3|Q6GEF3\_STAAR  
mshismsdincdgtifenndkqliyltpi fpqrytsntwlykkmptqeqw1kd1krqhq1htnqgsnyha fspeneqld  
dtwmaifkdmnfe1gime1  
yaiesdalan1prnsdveiaivdeshiday1kvayqfs1pfgrdyadahekmvrehyqkdvikr1vay1nnepigvvdvi  
esenyiel dgfgvleqfrh  
qgigstmqslvgeyal srnhkpvilvadedtakdmyakqgyvysfcyqil kedign  
>tr|Q6GEF5|Q6GEF5\_STAAR  
mkmkrfiaivma1flvlagcsnsndnqdnkkaadngkkqeiqvaaas1tdvttklasefkkehknadikfnyggsal  
rkqiesgapvdvfmsantk  
dvda1kdknkahdtykyakns1vl1igdkdsnytsvkd1kgndk1algevtvpagkyakqyldnn1fkeveskivyakd  
vkqy1nyvekgnakqgfvy  
ktdlykqnkk1dtkvikevelkkpityeagatsdsk1akewmef1ksdkakeilkeyhfta  
>tr|Q6GEF6|Q6GEF6\_STAAR  
mpdltpfwis1rvavistiivtilgifiskwlyrrkgswwkvlsl1l1pivlpptvlgfilli1fsprgpigqffanvl  
hlpvvft1tgaviasvsv  
fplmyqhtvqglrgidtkmintartmgasetkif1kl1l1plakrsilagimmsfara1gef gat1mvagyipnktnt1pl  
eyf1veqgreneawlwl  
vlvafsvivistin1lnkdkykev  
>tr|Q6GEF7|Q6GEF7\_STAAR  
mlkinlkyqlknt1iriniddtepkivyavrgpsgigkttvlnmiag1rkadeaieivngqlltdtaknvnvkiqrrigy  
1fqdyqlfpmntvyknitf  
maepseh1dqliqt1nidh1mkqypmt1sggeaqrv1alalstkpdl1l1depfss1ddttkdesitlvkri1fnewqip  
i1fvthsn1yeaqmaheii  
tig  
>tr|Q6GEF8|Q6GEF8\_STAAR  
msqerysrqi1fkqigeigqkninqkcaliigmga1gthvaeglvrakiakliivdrdyie1fsnlqrqt1fteedalkmm  
pkvvaakkh1la1rsdvdi  
ddyidhvdyf1ethgqdvdiidatdnfetrqlindfaykhripwi1yggvvqstyteaafipgktpcfnclvpq1paln  
1tcdtv1gviqpavtmats1  
qlrdamkv1teqpidtkitygd1wegshysfgfsmqrtacttcgdvpsypy1nkneqryat1cgrdtvqyentsithdi  
1vqf1kqhgl1nyrsnsymv  
mfefkghrivafkggrfl1hgmtrtsdath1mnl1fg  
>tr|Q6GEG4|Q6GEG4\_STAAR  
mkvlyfaeikdi1qkagediv1eqaltvqqfen1lferypqi1nkkf1qvavneefvqksdfiqpndtvalippvsgg  
>tr|Q6GEH1|Q6GEH1\_STAAR  
mrtiils1fiimnivaiimtsqpltvnyfs1rviliff1filsiffiliksrl1nnilt1sialaiihmgilahstyv  
yly

Tsompanidou\_et\_al\_Supplemental\_FASTA\_File

>tr|Q6GEH3|Q6GEH3\_STAAR  
mikkllqfslgnkfaiFlmvvlvlggyasaklklellpvnqnpvisvttsmpgatpqstqdeisskidnqvrslayvk  
nvktqsiqnasivtveyen  
ntdmkaeeqllkkeidkikfdevgqpeLrrnsmdafpvlaysfsnkendllkvtkvlnaqliklqtvdgvqnaqlngq  
tnreitlkfkqnelekygl  
taddvenylktatrttpLglfqqfgdkdksivvdgqyqsvdafkninipLtlaggqgqsqsqsdnkqnsamsdvnqasppq  
nksksasnnisgmptaklg  
dladitvgdvrtisiktngkdavnLqitkaqdantvqvakdvqrkidtfdvdenkdfnvtkmtaktakpvekslytmvekas  
Lgtivaiivillflrnr  
taisiiisiplslmalialklsdvslniltlgaLtvagrviddsivvveniyrrLtdseeqLkgenliisattevfkpi  
msstlvttiivflplvfvsq  
svgemfrpfalafslasllvsitlvpaLaatlfkkgvkrnkqhgeglgvsttykklhwslnhkwiviilstliL  
vtivfvggprlgtfsisag  
ddkflaitytpkpgteqavlNhakdvekyLkqkhhvktiqysvggsspvdpstnsmaimveydndtpnfdeadvki  
khadgfkhpgewnqdlgt  
gagnksvevtvkgpsmdaikstvkdieqkmkqvkglanvksdlstqydqyeikidqnkaaengisasqlamhlnenlpek  
tvttvkengktvdvkvkqn  
kqtdwsedklnnitlkkptggtiklgdiatlvktttptskltqeqgdyattvsakvtnkdvggttrqvmskinnldkpnv  
kvniggasddinnamtqla  
famlaaaiivylilvitfkglapftilfslpftvigviiallitgetisvpsligmlmligivvtnaivlidrvinneq  
qgmemkealieaggtrip  
ilmtaiatigalvplfgqdssiliskglaatvigglisstlltLvvvpviyeilftlkkrtfkr

>tr|Q6GEH6|Q6GEH6\_STAAR  
mteqftmiillialgyflkrinyikatdsqvialvlvntlpslvivnlnsaelklsislpilmiyyivakmiavwff  
rkydnhmrgsvgmmtgam  
iglfayplieviwpktglifygmadiggafvmfgityfvgsyfsesdqdfkylgkklLqsvplvtyivmfilnishih  
lphvaidffsilshanmpL  
smillgvmLnfLterkyipatikylclhyglalvagllvhvllpsvddmikttllvtwmfpvgvaiisgyiqfkyrtlpf  
igmttnltiisiiilyvy  
qavfv

>tr|Q6GEH8|Q6GEH8\_STAAR  
msivqlydiqtiksfihsnyesasylyklpqqyneidvLitdaiespgvfsikendsikailLsfaydknkfkvigpfv  
adnyvlsvetfetlftmt  
snqpdavfnfsfeegiqqykpLmkviqasynftdyieartrleedmhqpniiPyhkgfyrafsklhtttfkyqaqspq  
diidsldhhhflfvseg  
llkgylyleidsqqsiaeiKyfsshvdyrlkgiafellayalqyafdnfdirkvyfkiRnkknklierfnglgfhinyey  
ikfkfesrnvkdqtipe

>tr|Q6GEL9|Q6GEL9\_STAAR  
mrglymtsskyieylqteveggllDrkrasinpkdvaqhisafanaeggkLvigiedngeisgnhskakkkevyieapf  
ehlyripkytyeieevkkr  
dgtmdeilifdiepsydaiitlkddsylvLrindksrklthnqitnleydrgrrrfeelveyssiedvneelvdefkqlL  
ntnvdnekllkargfmreg  
kltvaglllfnshinvylpgarirfmryegtkeesgtrlnivkditfdkalpvairarafintqlreytflgkegrfv  
lpeypefawfegminsivh  
rrydnqgdhirikmddrleisspgalpasvtlenikeerysrnpklaaalqykwvresnegvgriLdemkqyflddpv  
ysepnnssvqlalknna  
rkkretgrvsniitpelfeslneqqelivrhlynqgeltaskianiiqrsvptarkrlkeleemniisthgsskndpkrt  
yylgfe

>tr|Q6GEM0|Q6GEM0\_STAAR  
midsvfwkkafipvyfivamlvflLfrfyiktnnfsiyLmiiflmlgtasiinyknrr

>tr|Q6GEM1|Q6GEM1\_STAAR  
mlaylrmrslvndgllklsfyggllkmlyfdgllkmlflai

>tr|Q6GEM2|Q6GEM2\_STAAR  
mtdkkytaadmvidtlknngveyvfgipgakidylfnaliddgpelivtrheqnaammaqgigrLtgkpgvvlvtsgpgv  
snlttglltatsegdpvla  
LggqvrndllrLthqsidnaalLkysskyseevqdpeslsevmtnairiatsgkngasfisipqdvisspveskaislc  
qkpnlgvpseqdindviea  
iknasfpvllagmrssadetnairklvertnlpvvetfqgagvisrelenhffgrvglfrnqvgedllrksdlvtigy  
dpeyeasnwnkeletqi  
nidevqaeitnymqpkkeligniaktiemisekvdepfinqhldeleqlrthideetgikatheegilhpveiiismqk  
vltddttvtvdvgshyiw  
arnfrsynprhlLfsngmqlgvalpwaisaLvrpntqvsvagdgglfssqdetavrknlniiqliwngkynmve  
fqeemkykrssgvdfgpvd  
fvkyaesfgakglrvtnqeeleaaikegyetdgpvlidipvnykdniklstnmlpdvfn

>tr|Q6GEM3|Q6GEM3\_STAAR  
masvlyqhgltlmagllkgtasinelLqhgdlgiatLtsngeviLfdgkayhanehkefvelkgdeltpyatvtfkv  
adtsyetkdkseavfaei  
kekmlsenlfsavkisglfkkmhvrmmpaqeppytrLidsarrqpeqtetyvkgavvgfftpelLfhgigsagfhvhfand

Tsompanidou\_et\_al\_Supplemental\_FASTA\_File

drnfgghvldfevedvkve  
iqnietfeqhfpiqdedfinanidykdiadeireae  
>tr|Q6GEM6|Q6GEM6\_STAAR  
mnktnfgdylnksksrkiyki fdqnlkrefsywqfrklfksytwqsdvhelkvctqndgtieqiwidkanqfgvavtwkd  
nsigfvmrplinydaikn  
ettlkyavpttdcyevfwggdnelynyhylyphqryaidlvikenhkyknlgkvnadyfcfgkdiiapangtvekvvng  
vqdnsigstkesqflgnyi  
vikhaeneysliahlqqysii vnegqnvkygdi igkvgnsgnstephihfqvmndknieactsl kirfinnrelikgdvv  
cglqge  
>tr|Q6GEM7|Q6GEM7\_STAAR  
mtyrmkkwqklstittlmagvitlnggefrsidkhqiavadtnvqtttdyeklrniwldvnygydkydenndpdmkkkfeat  
eneaeakllkemktesdrky  
lwesskdldtksadmtrtynriekiseamkhkntklktdenktkvkdalewlhknaygkepdkkvadltsnfknktsrnt  
nlwmdyeigtpralntnl  
illqedftdeekkytapikt fapdsdki lssvgksepakgnlvdiskvlllesieedkdmkksidsfntvftyaqn  
satgkerngfykdgsyidh  
qdvpytgaygvvllegisqmpmiketpfndsnqndttlkswidgfmpliykgemmdlsrgraisrenetshsasatvm  
ksllrldtmdkstkakyk  
kivktsvedssykqtdylssysdiskmkslmedstistngltqqlkiyndmrvtyhngldfafglsmtsknvayes  
ingenlkgwhtgagmsyly  
nsdvkhyrdnfwatadmkr lagttldneepkstdvkkssktfvvgtkfddqhasigmdfenqdkltakksyfilndki  
vflgtgikstdssknpvtt  
ienrkandyklykddtqttnsdnqetnsfllestnstqnnigyhfleskitvkkeshgkwsdinksqkdiqktdeyye  
vtqkhsntdskeyvlypg  
lskdvfkaskkvttvkqeddffhvkdnesvwaginysdsaktfeinntkvevkakgmfiltkkddntyecs fynpestn  
svdieskismtgysink  
ntstsnesgvrfe ltk  
>tr|Q6GEM9|Q6GEM9\_STAAR  
mnhieiskdvkipvlfgfvfqi ppeqtaeavkaikagyridtaqsyl netevgqgieasgidrselfittkwienvn  
yediksierslqrlnldy  
idlvlihqpyndvygswralee lketgkikaigvsnfgvdrivdl gihnqi qpvni e inpfhqeeqvaalqqenvvv  
eawapfaegknqlfqnl  
qaiadkynksiaqvilrwlverdivvlaks vnpermaqnl didf felteedkqiatleesnsqffshadpemikaltsr  
el dv  
>tr|Q6GEP4|Q6GEP4\_STAAR  
mknksvslvfwsvlvi cti fva fgai fpkqlekltqnitsfialhfswyllllvlvilfv cvyilfsryasitlgeeged  
pefslpswfam lfsagmgi  
glvfwttae pishafkltpihkagtqsaindamqfsffhwgi hawavygivalvfayfsfhkgypglvsatltpllgeka  
mrgplggaidvlaviatvt  
gvaatlfgfalqineglhflfnvpsnftmqviliviatilftwsawsgidkgiktlsninmllafvllglfivgptlyi  
lntftnglgnyanffsms  
lripsggqkfqlnwti fyawwi swapfvgi fiarvskgrtikefilglvlpalvcfiffavfgasaiylqdnhae  
iakaatetatfatlhqyl  
gfvls l itllvimi ffvtsadsatyvlgm lsssgdinpksfvkvs wgiimalfaiimiytggtqaiqnlliaalpfsv  
iamjwsllkslseekprn  
snkvlikhrdpdvleyrsshiden  
>tr|Q6GEP6|Q6GEP6\_STAAR  
mannhnqngqdstqqvinflkvfkrivgflafllia ilfltlgfwktiliivlcligvgigymkdrkqdfmnlrws  
>tr|Q6GEP9|Q6GEP9\_STAAR  
mtkyffssflflgnwigqiglnwfvlttyhnavylgivnfcrlvpillsvwagaiadkydkgrllritissflvta  
ilcvltsyftaipisvii  
yatlrgilsavetplrqailpdlsdkisttqavs fhsfiinicrsigpaiagvilavyhapttflaqsicyfiavllclp  
lhfkvtkipedatrymplk  
viidyfklhmegrqifitsllimatgfsyttllpvltnkvfpgkseifgiamtmaiggiaatlvlprvlkyigmvnmmy  
lssflfgiallgvvhniv  
imfictlglfswarttnrvyfqnkvdyergkvl siimdrgmip lgsllmsicadvfgivrtf simgisticitmv  
fyfinrklklkleeshgi  
s  
>tr|Q6GEQ1|Q6GEQ1\_STAAR  
mahvniniskikynakvlqtvfqs kniqftpvikciagdrtiveslkalginhvaesrldniismadqdltytllrtpak  
keisdmi ekvdmsiqtel s  
tihhinevaevl gkkhki llmvdwkdgregvlytdvldyikei ihlknihfvglafnfmcfksdapsdddifminrfvsa  
vereigyr lki jsgnssm  
lpqll yndlgkine lri getl frgvdttt nqaiamlyqdaitleaeileikprvntqthesfiqaidigyl dtkvdnis  
pmdqhini lgassdhlmld  
l ngqghyqvgdhisfsl nyea lshsmymknlhkvyiddskidtl lqnfdvkspamvny  
>tr|Q6GEQ2|Q6GEQ2\_STAAR  
mrglktfsilglivalflvaacgntdnsskkesstkdtisvkdengtvkvpkdakrivvleysfadalaaldvkpvgiad

Tsompanidou\_et\_al\_Supplemental\_FASTA\_File

dgkkkriikpvreki rdyt  
svgtrkqpnleeiskl kpdli adssrhkginke lnkiaptl slksfdgdyqnidafkti akaldkekegekr laehdk  
linkykdeikfdrnkvlp  
avvakagllahpnysyvgqflnelgfkna lsdvvtkg lskylkgyplql dtehlad l npermi imtdnakksaefkklq  
edatwkklnavknnrvdiv  
drdvwarsrglisseemake lve lskkeqk  
>tr|Q6GEQ7|Q6GEQ7\_STAAR  
mtgkthascgmlvgalttgyfqtdi fssvtviilatlasllpdichtqskigrfrkvisffvr lifghrtfthsilfi ai  
iafl lqiigt pnyyaaai  
iglvshvildmi tpkgvklfyp lpfvntkpiqftkgglvd lslatalmigtvv lfpfindi isnwntkfl  
>tr|Q6GEQ9|Q6GEQ9\_STAAR  
msksseksndtivetfkdi iplsfgeei gnaashgvaalltllvlpyaavhsyia ygtlasvsmsiyvisifmmfissti  
yhsmqnetphkiylriidh  
smiyvaisgtytpilltvvgwigwtvfillwgttlwgilyksiavknqkls livylvmgwvgiillpiifirtswifi  
lfi flggvsyti gawfyag  
knrpyf hmiwhi fiviasllh liailyfm  
>tr|Q6GER7|Q6GER7\_STAAR  
myknyntqlt lpietsvripqndi sryvneivetipdsefdefhrhgatsyhpkmmlkiilyaytqsvfsgrriekll  
hdsirmmwlaqngtpsykt  
infrvnpntdali eslfiqfhsqcl kqnliddnsi fidgtkveananrytfvwkksi qnhesklnenska lyrdlveek  
iipeikedgdsdl tieeid  
ligshldkeiedlnhsiqnedctqirkqtrkk rteikkfkkkfd dyserkskyeeqksil kdrnsfsktdhd atfmr mke  
dhmknqglkpgynlqiatn  
sqfvl sydlfnqntdtrt lipfltm i qntfgy lpeyivadagy gseqnymai iddfnktplitygm fikdktrkfk sdif  
ntqnwkydelndeficpn  
krigfkryayr ndrygfkrdf klyecddcsacs l rqqcmkpn sksnkkimkny nwey fkaqinqkl sepetkkiysqrki  
dvepvfgf mkailgftrms  
vrginkvkrelgfv lmalnirkivarravy yqihlkkadfyqi inrnqlfyia  
>tr|Q6GES0|Q6GES0\_STAAR  
mllstrekemialli kyhgqyitih diaqqlavssrtihrelkgveayltsfsl tlerankkg lritgadsd lndlkqsi  
aqhqtid l sveeqkviij  
aliquakepvkys laeqigsvqt lakmlddleldlnkyqlslsrkrgegiylv gteskkreflsqlm vnnlnstsvysv  
ienhfvfhslnqihkdfvd  
lerifnverllmdylsalpyql tessylt ltvhivlsisrikngeyvalnddiyds vqntfehkvase l adklgqi ydvt  
fnlaeiaf itihrgakrk  
nln dtslnnrceenika fvkkvemi sgmtfad ldtlv dgl tllhlnpainrlqanietynpltdmikfyprlfenvrla  
lndcwpdlifpeseiafiv  
lhfggsiknqgnrflni l vvcssgm gtsrllstrleqv fseieritqasvdlksldl sqydgii stvnldidspyltvn  
pllpdsdisyvaqflntks  
tfqetrkssnmjkd dvhietkdidgnts feneqtsyltsvfekhl sdekseq l mhhmrsgl tll dsvkivstevkqwq  
tyiadylyqc dvi ndptsf  
aell eqrlidnpgwi l spypvaiph lrdnmikhpmilitvle epl t lpsiqndnqtikymismfip dndfmaslisdlse  
flslklesidtfmenpge l  
etllrnkflerikkqfi  
>tr|Q6GES2|Q6GES2\_STAAR  
mfckyfhnki lki l kqffcftfskyl rshiddt lfnvtfil tklifvyiedcvma lytkdshih  
>tr|Q6GES4|Q6GES4\_STAAR  
mliqldqvgrmkqgktil kniswqinegdkwilyglngagkttllnilnayepattgyvnlfgkmpgkv gystetvrqhi  
gfvshsllekfqegervid  
vvisgafksigvyqdi ddevrneahqllklvgmsakaqyigy l stgekqrvmi aralmgppqv lild epaagldfi are  
sllsildslsdsyptlami  
yvthfieeitgnftki lllkdgesvqqgliddi ltsenmsrffqknvavqrwnnr fsmamle  
>tr|Q6GES5|Q6GES5\_STAAR  
mdnykai fldmdgti l hennqastytkdv inrlrekgykv flatgrshseihqlvp edfavngi issngt igevdgeiif  
khglslaqvqqi inlakrq  
qiyyevfpfegnrvs lkedetw mrdmirsqdpingvshsewssrqdalagki dwvtkfpegeyskiylfssnlekitafr  
delkqn hvqlqisvsnssr  
fnaetmayqtdkgtgikemi ehfginqketlvigdsndramefghy tvamknarpei qal tsvdtayt needgaaky l  
akhflad  
>tr|Q6GES6|Q6GES6\_STAAR  
mtygsivailcalfviffipyme kdkkkk  
>tr|Q6GES7|Q6GES7\_STAAR  
msdfemlmivl tiiglv listqdhkk  
>tr|Q6GES8|Q6GES8\_STAAR  
mftyfksafknakpqlitliyaliafaviavvllanfqlakyvqtiaiy sqfgqkppvdayl kvia vlliaavvs lfv  
lvqifigitnvmkramshe  
kvkftdlfi afkkgnylksvliglv siamiivslslltsllykl fspvsemimsvqssyadsth lvgia ittsi iivv  
llikaiitwlll ipifnfm

Tsompanidou\_et\_al\_Supplemental\_FASTA\_File

tsfvestndkvkthlangfkamkngqkttffkffigil11lnlviilfktpvgylisfntqslsqsvaeniirvytvitiil  
fvvihavilmgivqyylkr  
gqkitdkvktadknkkvvtstepkntkvttsvetktekaqdslnnttktmtsdkpednqpk  
>tr|Q6GES9|Q6GES9\_STAAR  
mshshhhhdhmshvtttnkkvlfisfliiglymfieiegllanslallsdgihmfsdtfslgvaliafiyaeknattt  
ktfgykrfevlaalfngvt  
lfvisilivfeakrffvpsevqskemliisiiglivnivvaffmfkggdtshlnmrgaflhvigdl1gsvgaitaail  
iwafgwtiadpiasilsv  
iilksawgitkssinilmegtpsdvdi deviatikkdsriqsvhdchvwtisndmnalschvvvdhtltmkecelleni  
ehd1lhlnihhmtiqletp  
nhkhdesiicsgthshshshhahhhahvh  
>tr|Q6GET2|Q6GET2\_STAAR  
mplflqpilktklwggqr1sefgyqlndttgecwcvshapngtseingpyqgqtl driwsehrelfgdfpskdfpllt  
kivdareslsihvhpdnsy  
afehengqygksecwyiidaedaeivigtlaesreevanhvqhtiesilryikvkpgefyfipagtvtissgilaye  
tmqssdi tyrl ydfnrqdn  
qyngprlniekaldviqnaplpnlpeseienhkcthivsndfft1vkweisgtlnymkprefclvtv1egegqmivd  
geifklttqtnfiltsed1  
dsvfegdf1misyv  
>tr|Q6GET4|Q6GET4\_STAAR  
mtaetnyfwlncgynrwnhnep1vgqta1fesgahfnpsqgfracfkakvgdqvi fyqvqtdtg1lgcgeiisvetgaqn  
kivrqfrfneqlkpl tady  
1krsealefmsnmket1fnqitaefdlisglgkgeikipryfflaetee fepgnqytiythtyngikrnyghfytqle  
egdniifynrtknqsvvgi  
gevskhihekppigrntstvievsyekditpit1stlnkhpklknlyflqenakqaiasmsqaqydaiiemsdnnglks  
pfemvgkpdmlESEKEEA1  
kpfillvdrkeeg1kaand1lqkananpvi ttghpdfsedmlygkylpnetgal yregfitq1mpkkdk sylvidnfn  
ridtdi fqtyinv1egyev  
t1pryngdgnmikwsrqkdsfyyfnpnwhivgitydsleeikekyseqflkytrivkvkhd  
>tr|Q6GEU2|Q6GEU2\_STAAR  
msekqqil dyietnkysyieishriherpelgneeifasrtlidrlkehdfieieteiaghatgfiatydsdl dgpaigfl  
aydalpglghacghniig  
tasvlgai glkqvldqiggkvvvl gcpaeggengsakasyvkagvidqidi almi hp gnetyktidtlavdvldvkfyg  
ksahasenadealnal dam  
isyfngvaqlrqhikkdrvhgvi ldggkaani ipdytharfyttramtrkel dil tekvnqiar gaaiqtgc dyefgpiq  
ngvnefiktpkl ddfaky  
aeevgeavidddfygsgtdtgnvshvptihphikisrnlvghthrfreaaasvhgdealikgakimalmg1el1tnqd  
vyqdiieehahlkgnk  
>tr|Q6GEU3|Q6GEU3\_STAAR  
mtnngnepnl1sdlydkdvvytsrpsyisnpwlpkdehqs nftgrellianqlpvivheasatdklhqlfqvigkevp  
nsiytfnnqqsyenlikql  
ahkenkkyfyihdeti1nqqyaldktlfvalnkaripewtngkflpkrkvkieqfeneiknwepfvikpgddl p  
taggygvmicyhdad1qka  
itrikqataetsnl1ieqkieekanycvqfayses1giqylgaatq1tdkygfyngenttnvpehvieagrqimengvn  
qgffgvagfd11vdeddnv  
yaid1nfrqngstsm11lane1nsgyqkfysyhskgdnthffntilkyvkegsl yplsyddgdwygedkvksrfgc1whg  
dsketv1eneraf1ae1eh  
y  
>tr|Q6GEU9|Q6GEU9\_STAAR  
mskilntqligi fnrlekqsleiqmaaql iqai ggegyvyvkygddlqffesfilhsderlksrkl daikdfkeidst  
drv11fapfyndqvaldiq  
klialdidvvlisnkpktddfpdh1vhfid1stprpivtyedydkivqphama1nyvyydiytqm1emtrd1e1  
>tr|Q6GEV9|Q6GEV9\_STAAR  
mdtkiwdvreynd1qqypkineikdiv1ngglig1ptetvyglaanatdeavakiyeakgrpsdnplivhihskgqlk  
dftytl1dprveklmqafwp  
gpisfilp1kpgylcrkvsgl1ssavrmshsvgrqllqi inep1aapsan1sgrpspttfnhvyqdl1ngridgivaq  
qseeglestvldctsfpyk  
iarpgsitaamitei1pnshahadyndteqpi apgmkykhsyntpl1tiitdieskigndgdwssiafivpsnkva fip  
seaqfiqlcaddndvkqas  
hnlydv1hs1denenisaa1ygfelndntea1mnrmlkaagnhiikgcel  
>tr|Q6GEW4|Q6GEW4\_STAAR  
mmkkiti1fgtrpeaikmap1vka1eqekml1epivvtaqhrem1dsv1stfeikpkyl1nimksgqt1seitsksitq1  
eqv1q1ekpdmv1vhgdtm  
ttfagg1aafynqvp1ghveag1rsydkyspfpeevnrq1vgv1ad1hfaptknaash11negkysesvvtgntaidam  
kytvddnyksn1mdkyhdk  
kfi1mtahrren1gqpmeni1fkavrr1ideytd1alvypmhknkvr1dvahkilgghdrieliel1dvidfhn1fakqsyf  
11tdsggiqeeapsfnkp  
1v1rsvterpegvdagt1kvvgtheqdvyaakelidder1yhqmseasnpygdgfaserivnihikyyl1n1itekpsdfn

Tsompanidou\_et\_al\_Supplemental\_FASTA\_File

>tr|Q6GEW5|Q6GEW5\_STAAR  
msrfynifkqyiqylylilgglylftthafilgliigtgsaintvifesyakakrpdthistgmmwrylvaiia  
cmiwyfnkshsvsiigiiig  
lmisyvvviiirp1lkvsk  
>tr|Q6GEY0|Q6GEY0\_STAAR  
mifsnlfrprtparltriexl1qahfrsvnycqynfvehrtliyvpactiyyiceikktgtyrefpdiqsksylyny  
wlamhkwlmq  
>tr|Q6GEY6|Q6GEY6\_STAAR  
mqqsdiisaakkymesihqndftghdiahvyrvtalaksiaenegvndtlvielac11hdtvdekvdankqyvelksfl  
ssls1stedqehilfiinn  
msyrngkndhvtlslegqivrdadrldaigaigvartfqfaghfgepmwteqmsldkinddlveqlppsaikhffekllk  
leslmhtdtakmiakerhd  
fmmmylkqfltewnyhd  
>tr|Q6GEZ4|Q6GEZ4\_STAAR  
mqskiliieddhaith1ldvaltdyynvttaenatqahfkqidkpdvilldlglpdkdglcliseirqhtdipiivis  
arqeeqtiiqaldngandy  
mtkpfvnde1rarirvieriakshqetnivftngllsidfgsksvinnqevh1tpnefs1lellsnhkgkvltiyemilk  
riygyvntemps1rvhmt  
slrqklsqchedakdikthprigym1qwkek  
>tr|Q6GEZ5|Q6GEZ5\_STAAR  
msnteslnigkkrgsltiyigspvgvktfemlsnaielfqsnvdiklgyiephqrde1naeqlpkiatnftkghshh  
fqyldvdriieesptivli  
de1ahtnisrdrhkrymdieeilnhgidvhtlniqhies1ssqielmtgvhkerpdyfimsadvlevvdispeqli  
krlkagkvykkdrldvafs  
nfftyahlse1rt1l1rtvad1msdkekvrnhkts1kphiaavaisgsiyneavikeafhiaqkehakftaiyidvfeks  
rqykdskqvhqh1mlaks  
lgakvkvvysqtvalgl1dewcknqdvtkliigqhirnkrrdffnkplidh1msfehkykieivpikqipvelkmnkspyr  
pkgkrfaidm1kmi1iqii  
cvmmg1wiylqldkhesstii1mifligi1llsiwtrsyiigflaaiinvfvfnyffteprytfeyvrfdyptfivsil  
siltsallkqikfyaatk  
kqlyrtd11fqfndsikqytven1linagyqinql1qsitiyvinqskviktiplqnhidnktqqheqalswvikner  
qagattdtfpginkw1ipi  
gtspikgilaidygssqvinpydasilesmlnel1lavenvt11kqtresmlqaerqlthsnflrsishdirpt1tting  
nldilvshskdmsiiekek  
1lvhsfqesqyly1lvtni1sltk1qssnvqik1qpylvselveeidmilerrh1kkritvsssvdlqfihidsklilqa  
1fnlienavkhtstdtkin  
lsiryasdeqiefavidegpgisieeqki1fepfytgsnkyfkdnqkesmg1glylvqtilhkhqsn1qykpnqphgsif  
yfnidtdfnegdi  
>tr|Q6GF00|Q6GF00\_STAAR  
msepqk1hpiisyfngi1naikqni1vfffi1vifq1kdfdytnpesylwigivfvfflisyisqivgimntrywiednyfi  
1ttg1fnkkrkel1nikriq  
svdmtqgvvnqm1iggvd1qiktspdgiv1sviskqgeyleryidq1qtelktevaqksstekndncnhdiegnvediae  
gr1devqntdsm1nqknkr  
1piyqmfkes1fmamtsaigvt1aalvpiygavre1ipwsk1nheisqwqvsvsisvlii1llv1iaayiigtitmi  
rfygfsvml1eneq1kieyg  
1fnkmkvtvptkrlqavverqsyirr1fgytaihfii1tsdfenkki1eddndsgsvpilpfikrdkayqi1qnlvpdlsy  
qqvnegm1sgfhrhflip  
si1vi1magigcyfwnq111fti1tvvi1gl1fvikgylvykhagfkmtdeqitiqnfv11kriiyyfkaqhi1gfdtwq  
ht11krnn1nnfs1vavkq  
vgaqsin1kyasskdvqi1kswylrgende  
>tr|Q6GF01|Q6GF01\_STAAR  
msdykfmsphakkvmr1sav1fwipiafv1liafn1nwl1fweildnyisivssvii1llvaift1viapvyrykhcya  
fekhh1rvrngi1fl1dekv  
ipyfriqni1d1vgpimrryr1at1tlytaggqaeielidresearr1krwl1nerhiennknee  
>tr|Q6GF09|Q6GF09\_STAAR  
makesksanevspeqin1qwikheqenntdaqdk1lvkhyqklies1aykyskgqshhed1vqvgmvg1ligainrfdmsfe  
rkfeaf1vptvigeikry1  
rdktwsvhvprrikeigprikksdel1taelerspsiseiadr1evseev1eamemgqsynalsvdhsieadkdgstvt  
1ldimgqqddhyd1tekrm  
ileki1pi1sdrereiqctfiegl1sqketgerig1sqmhvsrlqartaikk1qeaahk  
>tr|Q6GF12|Q6GF12\_STAAR  
mkifigtm1tfl1fvcs1ivcgffaykiyfptdaenkseipnhmqenkhekenthninngseanenfnknkrieni1edk  
qkaya1msiprh1pesek  
aiydkvistaiqn1nngvneedfr1keiydgiqsvqpp  
>tr|Q6GF18|Q6GF18\_STAAR  
msktqhevqn1dpl1kmaes1lepeq1nekt1ndmrsgsev1veal1kenvdyl1fgypggav1plydtfydgkikhil1arh  
eqgavhaaegyarsvsgktg  
vvvvtsgpgatnvmgtid1ahcds1pl1vvftgqv1atpgigk1dafqead11smtspitkqnyqvrvedipkivheafhva

Tsompanidou\_et\_al\_Supplemental\_FASTA\_File

nsgrkpvpvdfpkdmgv1  
atnvd1cdeinipgyevvtepenkdidtfsllkeakkpvlagagingksksnqlltqfvnkhqiptvtlllglgavpye  
dt1flmggmhgsyasnma  
ltecdllinlgsrfddrlaskpdafapnakivhvdidpseinkvihvd1ggiadckrflec1ndknvktiehsdvwkhcq  
nnkqkhpfk1geedqvfc  
pqqtieyigkitngeaivttdivgqhmqwaaqfypfknhgqvwtsgg1gtmgfipssigaklanpdktvvcfvgdggfqm  
tnqemallpeyglvdkiv1  
inngt1gmvkqwqdkffnqrfshsvfngqpdfmkmaeaygvkgflidkpeqleeqldtafayqgpaliervispteavn  
mvpsgksnhemeg1  
>tr|Q6GF21|Q6GF21\_STAAR  
mnsllidtsnqplsvalmqndevlaeitttdskqnhsvqlmpaisqlfeqskiakqldaiivaegpgsytg1rigvtvak  
tlayalvdklygvsslka1  
aatidhtdkllvpvfdarrqavvtg1fqwngq1vtiledqymsidalrafledlnqpfyigkdtvklqddlqgdviaq  
lpnasvmyqlidkpsdvht  
ftpkyhklaeaernwinqknn  
>tr|Q6GF22|Q6GF22\_STAAR  
mdqskeq1nremtkedvpqvfdierrsfndsswtidafyheieqnnfakyfvlefeqqiigylglwividqaqittva  
iddnyrgyglqgmllkygi  
nyashtcdvms1evrvnnkvaqhyen1gfqyggkrknyygegedamvmwvnlnd  
>tr|Q6GF28|Q6GF28\_STAAR  
mihelgtvqmvcpfp1ieaqkmat1qsgdelkidfdctqateaipnwaaengypvtneyeqidnaswtitvqkv  
>tr|Q6GF29|Q6GF29\_STAAR  
mn1ndt1fmf1ct11vw1mtpg1slfygg1vqskna1ntvmqsmaaiv1vtfvitvgftisfgegn1wfgnweytf1nh  
vgfatgedisphiplalfm  
1fqmmfctiaisilsgsiaekmkfipy11fvviwta1vyspvahwwgggwink1glvldfaggtvvhitsgvsg1vlaim  
igkgnkhsestphn1iit1  
iggt1fw1gw1gygfnvgsaftfdqiam1aftntvisasagaigw1leyifkktts11g111galag1vvitpaagyvty1  
satimaliggi1ccyiviny  
ikvklkyhda1dafgihgvvggi1gav1taffqskkanpdiengfiytdvhi1lvqilcvtavvifsivmtfiiakvik1  
itp1svteqetnig1dkiv  
hgehayfege1nrfnkhiry  
>tr|Q6GF31|Q6GF31\_STAAR  
mtewtreeryqriedvtdyftk1kqavdqskfrqqfhiqpetg11ndpng1ifykgkyyvshqwfplgavhglkywyny  
tsdd1infkaegp1lnpdt  
kydshgvysgsafeyng1lymytgnhrdnhwqrhasqmiarlkedgsvekfpkpvisqqpegytshfrdpkvfkygeky  
yaiigaqnnqqgr11lyn  
tedi1nwhy1ge1nte1ddfygmwecpdyfnvdnqdv1licpqqiepkcdqfnnyqsgyilgkfdiek1tyehenfvel  
dngfdfyapqt1f1dekgr  
v11gwmgl1pei1eyptdnegwahc1t1prv1nvengq1kqrpypalek1rhnketa1gyankftrk1hpyegkqyeliidi  
1ndatevyfelrtsktss  
t11aynkrenki1ldrdsq11ptnvegtrtrstilet1pkqlqifvdtssieifcndgerv1tsrifptedalgi1ktste  
sgqvy1qftkyd1kdehk  
>tr|Q6GF32|Q6GF32\_STAAR  
mrr1fsigeal1dfipnitnan1kdvqfttkq1ggapcnvactvqk1gqqahmitq1gndafgdsii1etissigvdvskv  
yrtneantalafvs1teag  
erdfs1fyrkpsadm1fepsfvndidvndvvhfcsvd1vdspmrda1hyq1itkt1nangttvfdpnr1plwdnaed1r  
qtih1t1f1plahivkvsdee  
1efitgihdeneaiqs1ftgnvtvviytkgadgaavylknginhyhsgykvksvdttgagdafigavisrilatdv1n1t  
q1fenegeeilafsnrvaa  
ivttkygains1pt1qeveqaf  
>tr|Q6GF34|Q6GF34\_STAAR  
mealndynv1fvivqvs1mffisafisgirykksdyiyiigiv1ssvyffdkirsislvvitifiiflyfki1rlysvf  
1vmvtq1i1lycanfyviii  
fsy1i1tishsvfi1v1pif1lvvyvsisyalayilnrilkringty1slnkk1fltvitvivitfsl1faysqidasdasti  
kqs111flg1i1i11s1ilif  
iysqft1kemkykrnqeeietyeyt1kieainnemrkfrhdyvni1lt1seyireddmtg1r1dyfnknivpmkdn1qmn  
a1k1ngien1kvreikg11  
tak1lraqemnipis1ieipdevtrin1nmid1srsigi1ldnaieasseiddpiirvafiesensvtfivmncaddipr  
ihel1fqesfstkgegrgl  
1st1kei1adnadn1v1ldt1iengffiqkve1inn  
>tr|Q6GF35|Q6GF35\_STAAR  
mkk11nkvie11vdffns1gyraayincdf11deaevpkeltq1he  
>tr|Q6GF38|Q6GF38\_STAAR  
mkvqi1yq1pi1fgdssknetq1tqwfeknmnaevdv1v1pemwnngyd1leh1nekadnn1gqsfsfikh1laekykvdiva  
gsvsni1rnqi1ntafsvn  
ksgk11neydkvh1vpm1rehe1ftagenvaepfqlsdgtyvtq1licyd1rfpe11ryparsgaki1afyvaqwpmsr1qh  
whs11karaiennmfvi1gt  
nstgfdgnteyaghsiv1npgnd1vge1nesadil1tvd1n1neveqqrenipvfksik1dlyk



Tsompanidou\_et\_al\_Supplemental\_FASTA\_File

>tr|Q6GF39|Q6GF39\_STAAR  
mglfkdkkamtfdnameerrsiynlkdsisisddelesmiahavkhvpsffnsqstrivlllndnnkfwdntkailke  
vmgenrdfepteqkidnfk  
hsygtilyenqdvvsqleqmpnyydnfaiwstqtnamhqfaiwatalatkgigaslqhynplvdemtsnefnipkskwk  
iaqmpfgdi reaagektfn  
pvedrfvikk  
>tr|Q6GF40|Q6GF40\_STAAR  
msyhwfkkml1stsm1ilsssslglathtveakdnlgekpptnlhnhvtspsvnsemnnetgtphesnqagnegtgs  
nsrdanpdsnnvkpdsnnq  
npspskdpdpnnpnpnpkpdpdkpkpnpdpkpdpdkpnpdpkpdpdkpnpdpkpdpnpnpnpkpdpnpnpnp  
pnpnqpgdsnqsggskngg  
twpnasdgsgnqgwpngnqgnsqnpntgndfvsqrflalangaykynpyilnqinqlgkeygevtdeidiyirkqfs  
gnaylnglqqqsnyfrfqy  
fnplkseryrnldqvla litgeigsmpdlkkpedkpskqrsfephekddftvkkqednkksastayskswlaivcs  
mmvvsimlflfvkrnk  
nknesqrr  
>tr|Q6GF44|Q6GF44\_STAAR  
mssmatisittdykftkksaqk lidameinennsnvknktnikatikstceienllkdyrsn  
>tr|Q6GF45|Q6GF45\_STAAR  
mtvkvisl1eltgdqevkrkipsvlnilnsfetisisgsesahdvdlflknksiafdrqnlrthlvfsqfknkqilv  
gyftisnkplvfkytyvr  
>tr|Q6GF46|Q6GF46\_STAAR  
mlkisantlkkklyqkgethsgndnliiqgyliaqieknyseealatksinandlltlayvkvleganifggsyiwieye  
dvdr1refyrkfgfteikd  
htsennlkmalki  
>tr|Q6GF53|Q6GF53\_STAAR  
mferkfimkitnckikretviyevltsgnqpftye1pkdlsshnarkylefisksklgdgkltkeds1  
>tr|Q6GF55|Q6GF55\_STAAR  
mkkydiavlfdetmnehmnspevavslkdlsvkvysyynppnrynlnkkihkipedvilkapkypdiyqeilyl  
lkeshliiahna1fdiavl  
ktnnyydlpvpnfmyvdsinifrsfhaissfklenlcslydidkeklhsakfdv1alskmlislaknnkhysvklklyhy  
mpkqyirfskysnsptklf  
dsgfqkihmki seinkievesvipilkdknvftgnfdtekqdlmiltrkkgayirsdvtaktdilvegvqddkykdvng  
lvskqrkareyvgngakiq  
flneedlinlike  
>tr|Q6GF58|Q6GF58\_STAAR  
mniqvatklamekgisirrenqdvgyilptnlqryqclvvsrhykkkrqtaagrwwpsaddliaddwil dy  
>tr|Q6GF63|Q6GF63\_STAAR  
mvyidplknvrfsinnvinsveisksmaikqslkpkylidiinrnninlfsdfkvdfhlnnliemfnlnrsfssltfqr  
nlfseetiks fkel yrfdd  
eivlqaqqtirdfyinptaistlaea instypineqstykrhdefvkriendfphpfkkli rwsngiaagadiqifvtny  
inendlihqnsli vaivcl  
lsflstycshskk  
>tr|Q6GF66|Q6GF66\_STAAR  
mkl1l1laptsnsdkr1tklihfqyktknggsq1  
>tr|Q6GF67|Q6GF67\_STAAR  
mtknykdmteerdl1laekngel fevvneinketefavllfstvgvsngdtssshcalgdivglanllnendyhdia  
nviemyklkkl1gladnke  
dendvlqng  
>tr|Q6GF72|Q6GF72\_STAAR  
mtagtqqamnfeshrlctikakqelrigtwsilpfdiehdanepvafllqstlgykvlyvtdtkylkykfngithmmlev  
nyieqmqenikngsvhst  
lanrimeshfslahaigm1kandltrleeihlih1ssqnsnakyiksei qvtgapvyvgg1  
>tr|Q6GF74|Q6GF74\_STAAR  
mdafdkyy1fdhdgnkmfsvtphfkdvrlvvg1khtkfngrrwylldye1ktlidneqmelghqtslfeyi  
>tr|Q6GF75|Q6GF75\_STAAR  
markarivtindkpyrfskfemeli eshgitagmvskrvkdgwelheamdapegtr1seyrekktierleqarlerkler  
krkreaelrrkkph1fnvp  
qkhprgryacy1lendi fvkvvk  
>tr|Q6GF76|Q6GF76\_STAAR  
mtdnarkeylnqffgfkrylyqdnervahihvngtyyfhghivpgwqsvkktfdtaeeleiyikqhgleyeeqkqltlf  
>tr|Q6GF78|Q6GF78\_STAAR  
mnnreqieqsvi sasayngndteg1lkeiedvykkaqafdeilegmtnaiqysvkegveldeavgimagqvvykyeeeqe  
neh  
>tr|Q6GF79|Q6GF79\_STAAR  
msisvgdkvfnpetnstleivqlvgdirthyklsdgsiislidfvvkpihlikeeqend  
>tr|Q6GF80|Q6GF80\_STAAR  
mtnt1qvr1lsenarmpernhktdagydi fsaetv1lepqekaviktdvavsipegvyglltsrsgvsskthlvietgki

Tsompanidou\_et\_al\_Supplemental\_FASTA\_File

dagyhgnlginikndeerd  
gipflyddidaeledglisildikgnyvqdgrgirriyqinkgdklaqlvivpiwtpelkqveefesvsergakgfgssg  
V  
>tr|Q6GF87|Q6GF87\_STAAR  
mvntpgskkskaikilgeragarlrdnfnkpcitp11  
>tr|Q6GF90|Q6GF90\_STAAR  
msilekifktrkditymldldmiedlsqayvkr laidsciefvaravaqshfkvlagnriqkndvyyklnikpntdlss  
dsfwqqvjyikliydnevl  
vvsdske1liadsfyreealyddifkdvtkdytyqrtftmqeviylykynnkvthfveslfedygkifgrmigaqlkn  
yqirgilksassaydekni  
eklqaftnk1fntfnknqlaiapliefgyeelsggknsmpfse1selmrdaiknvalmigippglyretadlekt  
1vfekvcltp11kkigne1  
naklitqsmylkdtrieivgvnkdp1qyaea1dklvssgsftrnevrimlgeepsdnpeldeylitknyekansgende  
kekdent1kggdedesgd  
>tr|Q6GF94|Q6GF94\_STAAR  
mtidd11vkfkslekidhnsedey1kq11kmsyeriknqcgvfelenligqelilinaryayqdllehfnndyrpeiidf  
s1s1mevsedeesv  
>tr|Q6GF95|Q6GF95\_STAAR  
mkkvfkkprittkr1ntrvhfykytenngpeagekeek1lyscwasidgwlreleqaisngtqndiklyirdpqqdylp  
seehyleiesryfknrlni  
kqvsp1dnkdfim1rggyss  
>tr|Q6GF98|Q6GF98\_STAAR  
rrnfvtkpassetavksvni1pdsikt1kvgdtyd1nvvvepsnqsk11kyttqtnivsin1sdgqvtaeaqgiatvkatv  
gnmsdtitinvea  
>tr|Q6GFA1|Q6GFA1\_STAAR  
mgerik1sig1d1daan1nrsfaeikrnfkt1nsd1k1tggnfkyteksthsyqrike1dgtitgykknvdd1akqyg  
kvsqeqgensaeaq1rqe  
ynkqane1nfleke1ekttefeefkkaqveaqmaesgwgktskvfesmgpk1tkmgdglksigkg1migvtapvlgia  
aasgkafaevdkg1dvtq  
atgatggelkk1qnsfkdvynfpadaetvggvlgevntr1gftgk1esatesf1kfshitgsdgvqavqlitramgda  
gieadeyqsv1dmvakaq  
asgisvdt1adsitkygapmramgfemkesia1fsqweksgvnteiafsg1kkaisnwgkagkdpreefkktlaeiertp  
diasats1aieafgakagp  
dladaikggrfsyqeflktiedsqgtvnqt1kdsesgserf1kvamnk1k1vgadwasiesafapvmeelikk1svavdw  
fss1sdgskrsivi1fggia  
aaigp1v1fg1gafistignavt1ap11asivkagglis1f1stkvpilgtvftaltgpigivlgvlaglavaf1aiyaks  
etfrnfvngain1svkqtfs  
nfiqfiqpfid1svknvfkqavsaidfakdiwsqingffnengisivqalqnicfikai1efil1nfvikpimfaiwqvm  
qfiwpavkalivstwenik  
gviqgalni1ilg1fikfss1ftgnwrgvwdgivi1mkgtvq1iwnliq1lwfvgkilgvvryfgg11kg1sigiwgvikgi  
ftks1saiwnatksifgl  
ynsvksi1ftnmknw1sstwnniksntvgkahl1ftgvrskfts1wnatkdiftk1rnwmsniwnsikdntvagiagr1wdr  
vni1fgsmrdglks1iski  
kdhi1g1mvdavkrg1n1k1ieg1n1wv1gg1k1gmdk1pk1htg1te1ht1ttr1lvkngkiardt1fatv1gdkgsgngp1ngfrnem  
iefp1ngkrv1tpntdt1tay  
1pkgs1kvyngaqtysm1ngt1prfs1gtmwk1diksgassafnwtkdki1gkgtkw1gdkvgd1vdfmenpgk11nyileaf  
gidfns1tkmg1giagdi1k  
aawsk1kksatdwi1ken1eamggd1vgg1ldpdki1nyhygrtaaytaatgrp1fhegvdfpfvyqevrtpm1ggr1trmpf  
m1sggy1nyvki1tsgvidm1  
fah1knfsk1sppsgtm1vkpgdvvg1tgntgf1stgph1lfem1rrngr1hfdpepy1rnakkkgr1siggggatsgsgatyas  
rv1rqaq1silgg1rykgkwi  
hdqmm1rvakresnyqsnavn1nwdina1qr1gdpsrg1fqi1gstfranakrgytynnpvhqgisamqyivrry1ggwgf1kra  
gdyay1atggk1vfdgwyn1g  
edghpewi1ptdpar1rndamki1hyaaaevrgkkasknkrpsq1sd1ngfddps111kmi1eqqqq1a111kiaqsn1dvi  
adkdyqpi1ideyafdkkvn  
asi1ekr1rerqestkvkfrkggiaiq  
>tr|Q6GFA3|Q6GFA3\_STAAR  
mihv1ldfndki1idf1stddps1lvraihkrnvdnsem1ellisseraekfrkrhrvii1rdsnkqwrefi1n1wvqdtm1dgy  
teieci1asyladittakpy  
apgkfe1kttseal1kdv1sd1tgwevseqteydg1rttswtsyqtryev1kq1lcttykm1vdfyielssntvkgr1yv1kk  
kns1l1fkgkeieygd1lvgl  
trki1dmseik1taliav1gpendkgkr1el1v1tddeaqsqfn1p1mryiwgiyepqsd1dqnmetr1ss1lakte1nkrksavm  
syei1tstd1levtyph1e1is  
igdtvrvkhrdfnpp1lyveaeviaeeyni1isenstyt1fgqpkfkesel1reefnkr1n1lihqk1ndnisnintivkdivd  
geleyferki1hksdtp1pen  
pvndt1wydtsn1pdvav1lrrywngrwieatpndvek1ggitrekalfsel1nifin1siqhas1l1seatelln1sey1v1dn  
d1kad1qas1ldavi1dvynq  
iknn1lesmtpetatigr1vdtkt1fl1eyrkk1qdvytdvedvki1aisdrfk1llqsqytdekykealei1atkfg1ltvned

Tsompanidou\_et\_al\_Supplemental\_FASTA\_File

lqlvgepnvksaieaare  
stkeqlrddyvktstydktdkgiverldtaeaerttlkgeikdkvtlneyrngleeqkqytdqslsdlnspeikasieqa  
nqeaqea1ksyidaqddlk  
ekesqayadgkiseegraiqdaqakleakqnaelkarnaekkanvytdnkvkestdaqrktltrygsqiiqngkeikl  
rttkeefnatnrtnln  
eivqnvtdgtti ryddngvaqa lnvpggrirlnadkidingnreinlliqnmrdkvdkdivnlnsregldinvnrig  
ikggdnryvqi qndsie l  
ggivqrtrwgrkrstddiftr1kdghl rfrnntaggslymshfgistyidgegedggssgtiqwwdktysdsgmngitins  
yggvvaltsdnrvvlesy  
assnikskqapvlypntdkvpglnrfaftlnadnayssdgyimfgsdenydygagirfskernkglvqivngryatgg  
dttieagygfmlkrrdg  
nryihqstdllsvgsddagdriasnsiyrrtysaaanlhitsagtigrstsarkykl sienqyndrdeqlehskailln  
pirtwfdkaeseilarelr  
edrkl sedtykl dryvgliaevenlg1kefvtyddkgeiegiaydr1whlipvikeqqlrikkleesknaq  
>tr|Q6GFA5|Q6GFA5\_STAAR  
makeiinnterfilvqidkegtervvyqdfsttsemvnaqdfkseenakkiaetlnllyqltnkkqrvkvkevvd  
rtdlssdktvdsetm  
>tr|Q6GFA7|Q6GFA7\_STAAR  
mkrvtyivlhsskdrkhtasevgkccqyvskisemyrvkmksfyiidkykkgiviycisk  
>tr|Q6GFA8|Q6GFA8\_STAAR  
mkktafi111fialtwttsp1vngsekseeinekd1rkkselqgaalgnlkqiyynekaktenkeshdqflqhtilfkg  
fftnhswyndllvdfdskd  
ivdkykgkkvdlygaygyqcaggtpnktacmyggvtlhdnrlteekvpinlwl dgkqntvpletvktknknvtvqel  
dlqarrylqekynlynsdv  
fdgkvqrglivfhtstepsvnydlfgaqqnsntllriyrnktinsenmhidilyts  
>tr|Q6GFA9|Q6GFA9\_STAAR  
msklrwwlseykevpmvalkslerrlmitistmlqfglflialiglviklielsnkk  
>tr|Q6GFB6|Q6GFB6\_STAAR  
mknhtniinillvvnsthtfltnstffnnsasdfcfiigaiiff1igifvaiygmkratywlnllilftnifyflhfcv  
llllkyigfklfiyegcvl  
lft  
>tr|Q6GFB9|Q6GFB9\_STAAR  
myknymtqltlpietsvripqndisryvneivetipdsefdefrhrgatsyhpkmmlkiilyaytqsvfsgriekll  
hdsirlmwlaqngtpsykt  
infrvnpntdaliesslf1qfhsqclkn1iddnsifidgkveananrytfvwkksiqnheskl nenska1yrdlveek  
iipeikedgdsdltieeid  
ligshldkeiedlnhsiqnedctqirkqtrkrteikkfkkkfddyserkskyeeqksilkdrnsfsktdhdafmrmke  
dhmkngq1kpgynlqiatn  
sqfvlsyd1fqnpdtrtlipfltmiantfgy1peyvadagyqseqnymaiiddfnktp1itygmfikdktrkfkdsif  
ntqnkyde1ndeficpnn  
krigfkryayrndrygfkrdfklyecddcsacs1rqqcmkpnsksnkkimkynweyfkaqinqklsepetkkiysqrki  
dvepvfgfmkailgftms  
vrginkvkre1gfv1malnirkivarravyqihlkkadfyqiinnrqlfyia  
>tr|Q6GFC0|Q6GFC0\_STAAR  
mnp1aqs1neqlqgsnatafam1sd1gqnmfypkgilsqsaeaksttynatigmatnkdgkmfass1damfnd1tpdeif  
pyappqgieelrd1wqqkm  
1rdnpe1sidmrsripvtnal thg1slvgdlfvnqddtillpehnwgnylvfntrnganlqtypifdkdghytt1d1ve  
alqsynkdkvimi1nypnn  
ptgytphkevttiveika1ankgtkviavddayyglfyedvytqslftaltnl1hsnailpirldgatkeffawgfrv  
gfmtfgtsdqttkeveleak  
vkg1irsni1ssgplptqsavkhvlknnkqfdkeieqniqt1keryevtkevyvadqyhsqwqaydfnsgyfmaikvhvd  
pealrkhlidkysigvia1  
natdiriafscvekddiphvfdsiakaid1r  
>tr|Q6GFC3|Q6GFC3\_STAAR  
mkhay1qncvycvyciytegrgtl mki1lknnsdfpiyeqikqkvqnilkghvapgeh1psmrelakdlqvs1ittkr  
ayed1ekdgfvtti1rgkgt  
fvkeqdss1lkekqfftienlvkelvneaqaiemsleelqditlfiyeess  
>tr|Q6GFC4|Q6GFC4\_STAAR  
mnaievsnvnyssdqfn1kni1sfkvpqgfvgtgfigrngagktti1rlimdlyqpqtgvirvleedmalnpielknrigfv  
yaenyfnerwttkqlekmi  
apfyrkwdhqvfefylekfd1pinksiktfstgmkmk1slavafshhaelyifdeptsgldplarnellei1qqeliden  
ktifmsthi1sdlekiady  
i1h1sdgevilngskeq1lqryqvvs1gaied1delas1liffehkrtgfigl1tehaqv1fkeilghkvnittpsien1mv  
yl1ekrkpk1yhenik1meeg  
f  
>tr|Q6GFC7|Q6GFC7\_STAAR  
mri1nlvkydfys1fksplty1ailvss1iatqsilmansmdnpkhiivysvfaakwll1iig1mfvvtitrdfsq  
gtiqlymskvktrvgyiis

Tsompanidou\_et\_al\_Supplemental\_FASTA\_File

ktisiilisiilfalihyvilivvqassngknlafskyvndlwfflilflffglflflitlasqktamifslgvflvlivp  
fikpfitfiprygdkvlda  
fdyipfayltdkmi ssnfdfsnwqwwvislgsiviffilnilyakkdi  
>tr|Q6GFD2|Q6GFD2\_STAAR  
mqqvtsdimtfrgshfelgvktgkwlqptp11knrekewkkrvprfdidvnetyqifqtyapqiweelmglsilkmptr  
qiilnfgghyrtfdlkesgc  
tvfqgkdfmvrnydyhpatydgryllyqptdsglaqigpvsrvtgrmdgmnesglmtgynfmhrkkpangfvcymigrli  
lencrnvteaiql1keiph  
rssfsyilmkslnhaivevtprsidvrydnictnhfeilthenrnytkeskerlartisqtdndldmttafk1fnnpqy  
eisky1fkswsgtihtsm  
hpetl1tayftlgenappeiidfkswl dgqdl1nithftgnidtdl1tfank  
>tr|Q6GFE1|Q6GFE1\_STAAR  
mqlyylgpkgtfsylacrqyfseneatfqpksnlfeviksvaddtsigvvpienti egtinivada laqqdvfahgeir  
ldinfalyngsntdsdik  
kvysiapaisqttnyihqhfdydyvdstiqsltkiengvaaiaplgsgeaygftpidthiedyphnvrflviknqqf  
dqnatslmflitpmhdkpg  
llasv1ntfalfninlswiesrp1ktqlgmyrffvqadsaittdikkviailetldfkvemigafn  
>tr|Q6GFE3|Q6GFE3\_STAAR  
myqleds1m1hndlyginmaesywndniekmavfdlyfrkmpfnsgyavfnglkrvidfiehf gfsksdleylksigy  
kddf1sy1kd1kftgsirs  
mgegelcfnep11rveapliqaqlietil1nivnfhtlittkasrirqiasndklmefgtrraqeidaalwgaraayig  
gfdstsnvraklfgipvs  
gthahafvqtygdeyvafkkyarhkncvflvdtfhtlksgvpnai kvakelgdkinfvgirlsdgdiaylskearrmld  
eagftetkiasnd1deet  
its1kagqakvdswwgvtklitgydqpalgavyklvaienedgsysdriksnaekvttpgkknvyriinkktgkaegd  
yit1enenpydeqplklfh  
pvytykmfkfksfeaidlhhniyenglvyqiptedesrdylaagqlsqiwdenkrflnpqeypvd1skacwdnkhhkrife  
vaehv kemeedne  
>tr|Q6GFE7|Q6GFE7\_STAAR  
meqfel1s1dkfkcseakyy1niegewhpqdlndsp1kfilstsdssdyickyintehkqltlynknssivieifip  
ndnkil1timntealgtsp  
rmtfikhk  
>tr|Q6GFF4|Q6GFF4\_STAAR  
mkrt1v11itai1ilaacgnhkddqagkdnqkhnssnqvkeiatdknvqgdnyrt11pfkesqarg11qdnmansyngg  
dfedg11n1skevfptdky  
lyqdgqf1dkktinay1n1kytkreidkmsekdkkdkkanen1g1npshegetdpekiaekspay1snileqdfygggd  
kgkn1kgmtiglamnsvy  
ykekdgptf1skk1ddsevkkqgkqmase1sr1rend1kdipihfaiykssedsitpgefitqataeksqtklnewh  
nineksal1psstaadye  
n1nnfkqfnd1lqsyfsnftqavgkvkfvdkkpqr1vvd1pidyyggaetigitqyvteqankyfdkidnyeirikdgn  
qpra1sktkddkepqvhi  
ysn  
>tr|Q6GFG5|Q6GFG5\_STAAR  
mrqwtaihlak1arkasravgkrtd1pgqiarkvtdil1rklaeqvddivfisgtngktttsnlightlkanniqi ihn  
neganmaagjtsafimqst  
pktkiavieidegsiprv1kevtpsmmvftnffrdqmdrfgeidimvnniaetisnkgik11ngddpfvsr1kiasdti  
vyygmkaahahefeqstme  
srycpncgr11qdyihynqighyhcqcgfkreqakyeisrfdvapflh1nindekydmkiagdfnaynalaaytv1rel  
g1neqainkgfetytsdng  
rmqyfkkerkeamin1aknpagmnas1svgeqlegekvyvis1ndnaadgrdtswiydadfelkskqqieaiivtgtrae  
elq1r1k1laevevpiiver  
diykataktmdykgftvaipnyts1apm1eq1nrsfeggqs  
>tr|Q6GFG7|Q6GFG7\_STAAR  
mkptkvilkdasy1hsktsitfilkdvvieednkiyyfdtsatfedqeikfefal1dsdmdn1kyieydnvteiyfiep  
dlhfti1dfnqe11ciyid  
fdsg1r1hsmvtesgvs1rinvtksqgftkfinelvs1h  
>tr|Q6GFH0|Q6GFH0\_STAAR  
mnyveryieqf1ratvrnnikhy11m1dekkn1ddymhy1itkkeq1sklids1mltlenkyidiveafiqicareinn  
qei enikselnkveayyaq  
ietqiqtstekiatektsylinymnava  
>tr|Q6GFH4|Q6GFH4\_STAAR  
mskkdhsssky1nsvkeageeskkknksnki1dvdrtyiepqfqskkpkkddqvff1sr1nkpakykksnflsyliyr  
igkddasg1aaqmtyhfv1  
amfpm11f1t11pffnikqsqitnm1snapaetstliksvigditqnssg11siglilaiwsasngmtaimnsfnvay  
yvedsrngiv1kl1svvft  
vmgvvfvvalapl1gsvishf1fgp1gfdeqvkwifn1iriv1p1111fivfivlysvapnvk1k1ksv1pgavftsi  
iwlagsfgfwyisnfgny  
sktygsiagi1111lwlyitsfiiivgaeinaiihqrsvikgktp eeaa1ehddnnknhynentryeydedtnathqrty

Tsompanidou\_et\_al\_Supplemental\_FASTA\_File

hvdehpsdtypeddknikd  
kivdklkkd  
>tr|Q6GFH8|Q6GFH8\_STAAR  
mtnykek1qqyaellvkvgnvqpkqpvfirssvetlelthliveeayrcgasdvrvvysdptlkr1kfenesvehfanh  
eiksydvearmdyvkrkaa  
n1alisedpd1mdgidsqklqafqqnara1kfgymesvqknqfpwvvaafpskawakrvypelsveeayikfidevfdiv  
ridgndpvenwrqhianls  
vyaqklqqknyhalhyvsegtdltvg1aknhiwedatsyngkeqafianipteevftapdrnrvdgyvtnk1plsyngt  
iidqfklmfkdgeiidfsa  
ekgeav1kdlintdegsrr1gevalvpddspisnrntifynt1fdenaachlaigsayafniqqgtemtveekiasg1nd  
snvhdfmigssdltiygi  
fedgske1vfengnwastf  
>tr|Q6GFI0|Q6GFI0\_STAAR  
mnsvk1kqpvsihndpweayndvkehqgl1t1snieltt1n1cmrcshcavgyt1q1tdpepldmd1iyrr1deipn1rt  
msitg1gepmfskks1rnvv  
kpl1kyahnrgiytqmnsn1t1pqdry1diaeyidvmhishnwg1tdefanvgfgamkkqpp1kak1klyeqm1sna1t1  
seggmfvsaetm1nqst1p  
h1rki1hqvvhdmkcsrheihpmypadfasq1nvt1laemkktihd1ldfrdediwm1fgt1pvfpc1kddedqk11sr1  
rtaknvttrndpdgrsr1n  
v1vftgnv1tdfgdetgt1sniqkdk1tdvfdk1lss1laks1nchcsefsc1gpnv1vknmyypnmdfdknerhmkq  
pqi1qf  
>tr|Q6GFI8|Q6GFI8\_STAAR  
mdtathiaigv1talatqdpamastfgatatt1ivgs1ipdgdtv1k1kdnatyishrgithsipftilwpilitfli  
ftffsgthp1fhvwmwaqla  
v1flhv1vdi1fnsygtqalr1pitnkwiq1svintfdpi1ftv1lcigiv1wvvg1hplavffpiialliiyymirfkmravi  
kqgal1kaiqqehhpvkfv  
aptik1mewrvaiqtadahyvgkaygrnv1v1sdkverqk1st1dsilwkvkgnkdi1rt1f1nfssiy1rwq1tt1ladgsteir  
l1d1ry1kndhysfvaiah  
vtkdnv1dhsy1gwvftedk1qrk1yak  
>tr|Q6GFI9|Q6GFI9\_STAAR  
myqqss1fken1ihw1fdenqremprwt1npyyiw1sevm1q1tqvt1vidy1hrf1verf1tvev1sqasedev1kyweg1  
gyysrarn1fhta1kevhdk  
yeg1vpkdpdqfka1kgvgpytqaavmsiaynvp1atvdgnv1rvwsr1nddyrdik1qstrksyeqel1pyvtteag1f  
nqammelgalictpknp1c  
l1fcpvqenceafdkgtfekl1pvksknvskkvi1eqsv1firnnqgqy1l1qkrsek1l1hgmwqfpmfkseharremtekigh  
diqpvetp1felkhqfth1  
twkikvyavsgt1nier1pddmiwfd1sdrdqyt1fpvpm1skiyqfing  
>tr|Q6GFJ4|Q6GFJ4\_STAAR  
mqkgeqfpi1fk1enqdg1tvi1ndt1kgkkaiv1fyprndt1tptctteacdfrdn1emfnd1dvavygisgdskkkqh1nfie  
kyg1nfd1l1vdedfklake  
tgvyq1kksf1gkesmgiv1rtt1fi1deqgk1vdviekvktqieelkn1lg  
>tr|Q6GFJ5|Q6GFJ5\_STAAR  
mkvvg1nrm1revetelq1rfsdvdfkfykkaseipesd1an1dilvgydggineaf1rrcpn1kwiawfatgvnt1pldy  
iadhg1l1tngkgvqakq1  
seyi1af1l1ddykkmk1sydnqrqhiydskitgr1sgqt1v1f1lgtgaiatrtaklakafnm1lig1sksgqnkdefdei  
yties1lest1pnadivina  
l1petqetih1l1kkkhfelmkdealfinigrsivkealliev1k1srvirhay1ldvfenep1kpnhelyeldnvtitahit  
gndyeakyd1l1dfknn1v  
nflnkng1lienevdakkgy  
>tr|Q6GFK2|Q6GFK2\_STAAR  
mamnfk1vfdnsq1lvaeyaadi1rkqfn1npttiagfhl1dtdqapv1delkkniekhavdfsqin1ldyddkksyfealgv  
pagqvy1piayekdaie1ia  
dk1ktkenkgk1t1lqvvs1deqgk1nvs1rqg1mearei1lvvtgankrdvveklyqengktsfepad1kahrmv1vild  
keaaag1pedvkayftsr1f  
a  
>tr|Q6GFK4|Q6GFK4\_STAAR  
mlgkywiq1l1iatviis1isikafplaigaly1piifkviklq1n1l1skgliddvnaqt1fiksnqsgivisviccllitgi  
lyt1ldgfyas1tgv1gt1  
valnpyt1t1vsav1yi1taiatveatk1tkyrn  
>tr|Q6GFK6|Q6GFK6\_STAAR  
mkfk1ipen1fnd1s1r1dfq1k1kvpkkd1hh1nmskdi1tindkpar1mdkvhtgddv1fvptideksnyvpsyrayaqikyed  
ddmai1vmkpkgvkthpnd1  
kesnt1lmnhv1iytvd1sdyvepihr1dqetvg1l1vaknp1mkkil1drml1ednditriykanvka1l1pkpqtidmpigkd  
kfh1snkrrrvsptgqraith  
i1ltskmi1ketvcg1leik1ldtgrthq1rvh1laeighpvigdp1lygd1st1rq1le1esykiefvh1ptkevisvs1ldd  
>tr|Q6GFL3|Q6GFL3\_STAAR  
miks1lei1ygyqfvqrki1efknfteifgeneagk1stiafih1silfgfptkkskepr1lepr1gnqyggk1vl1liddg1  
eieveri1kgsaqqdvkvy1

Tsompanidou\_et\_al\_Supplemental\_FASTA\_File

pngavrddawlgkklnyisktkyqgifsfdvlgldihrnlnekqlqdyllqagalgstefstsmrevinrkkdelykksq  
knpiinqqieqlkqlesqi  
reeeakletyhrlvddrdkssrrlenlkhnlqnlskmheekqkevalhdhsqewksleqqlniepitfpekgydryekar  
ahkqslerdiglrnerlag  
lkeeatqlepvkgsdidafislnqqeneiknefeltaiekdiankqrkdellqanigwsethhdvsseamksyvseqi  
knkqeqaayikqlerslee  
nkiednavhseldsveekivpeetfekkkkeysqqvielekenlysklkerfeieqqekqkrqklrrttfilltlvgigl  
tvfsfisnmifgiifavl  
tlvfvigiimskskveyyseatdeievikaqlaildenyldfdldeqyri rdhwqqa lknkdileekrqyiegrlnda  
kgrhdelqstvenvkdeley  
lsskisndlivdsistmanikaldqhisdlngqrqqlvqeldtfynhaeavtksqfvyfnklslfhdvqqwlksaedtne  
kwrinaentklvtneinh  
naqleenneketailfdfinvgteedfyqhedyqytsnlrsfndltkylenqnysyelssslekttaqleedhllat  
qvdeyneqylemqaqvsdl  
saqinhmetdttlanlrheyhslknqln diakdwaslsylqslvdehikqikdkrlppvineaveilkhltdgrytminy  
nedsitvkhvngqlydpve  
lsqstkellyvalrislikvlrpyyppflivddafvhfdkkrtkmlnylrslsehyqvlyftcvkdnivpskevitlkn  
ieeggkr  
>tr|Q6GFL7|Q6GFL7\_STAAR  
varlrsrsqfliltaylffkikqcinemtleiryflsslfygsneclitnysktlfvvi fp  
>tr|Q6GFM1|Q6GFM1\_STAAR  
mrnqattlfnkrhlalrkeknyynkfi fngfhmvflillgafifgygewlkhiptninfsliaavivaltsifmprrll  
keadkifllpfekhmsqfm  
rhailysyfariliqliiivimfplfyninqhnvafyicfgvsalifpyvglrlrwqwyqsglktwqvnlsifiifalty  
ylllapkwyitfvmvalpv  
lieflvkkykpgflypwekmi aiehrhmnyykfvnmftdvkhlkesavr rsyldillpvpgknkfn snamy lflfirsf  
igrdadfnii frlviiavl  
liwvlsyplvtaiigclfyvii llqmaqfysqqayglwpqvwvpedkvikgyeqflyrlmfvictvfaltfiikhmtlf  
yvvlifyivglltirsii k  
klkyqetllrd  
>tr|Q6GFM6|Q6GFM6\_STAAR  
mtdvii vshmgnsrnhwyqwl ehnl tlegydvtlfnfespeantvdqwieamtkqinvrkkdtyfvthglgsitalkyi  
emidqpiegffsiagfked  
aenidldidlsnvtidydnikkkvdfnyglsskndkyvsyketqrlmna legnlrivedgghfleedgfetftalqdrmq  
dymtr  
>tr|Q6GFM7|Q6GFM7\_STAAR  
mlnvllliinliaicsvnnayaneenkiedlckkssvddialhnikdymtrftinestvlttekfl didllfknftw  
ldgksaefkd lkvefssse  
iskeyfgktvdi gyvvykahchgehqvktactyggvtphe nkl sepkeigvavykdnvntfivtt dkkkvtaqeldi  
kvrtkl nnyklydrmtsd  
vqkyikfshsheskesfy ydlfyikgnlpdqylqi yndnktidssdyhidvylft  
>tr|Q6GFM8|Q6GFM8\_STAAR  
mkriiivvllfcysqnhiatadvgl nlrnyygsypiedhqinipdnrlshqlv fskdnstvtaefknvedvkkfknr  
advygl sysgyc lknkym  
yggvtlagdyleksrcipinlwvngnlk tistdkvstnkki vtaqe idtklrrylqee nyi ygfndtnkgrnygtkskff  
sgfntgkisfhlndgtsfs  
ydlfdtgtggaesflki yndnktvetdkfhl dveysykdes  
>tr|Q6GFM9|Q6GFM9\_STAAR  
mkkikysfilvfilffnikdl syaagd igvgnl rnyfkydyid lkgvtdknl pianql efstgtndlisesnndeisk  
fkgkmdifgidyngpckt  
kymyggatlsqgylnsarkipinlwingkhktistdkiatnkklvtaqe idvklrrylqee nyi yghnngkgkeygyks  
kfysgfngkvlfhlndek  
sfsydlfytgdlpvsflki yednkiesekfhl dveysyvdn  
>tr|Q6GFN0|Q6GFN0\_STAAR  
mklfafi fivkscsllfm lngnpkpeqlnkaseftglmdnmrylyddkhvseinikaqekflqhdllfkingskidgsk  
ilktefnns lsdkyknkn  
idlfgtnyyyqcyfsadnme lndgrliektcm yggvtehdgnqidknnstndshnilikvfenerns lsfdiptnkknit  
aqeidykvrynllkhknly  
efnsspyetgyikfiegnghs fwydmmpesgekfyptkyllyndnktvesksinvevhltk  
>tr|Q6GFN1|Q6GFN1\_STAAR  
mr1fciaaiiitllclinnnyvnadvkndlkkksdidssklfnltsyytditwqldesnkistdql nntiilkdidis  
vlktsllkvefnssdlanq  
fkgknidiyglyygnkcvglteektsclyggvtiydgnqldeervigvnnvfdgiqqegfvikt kkvqvte ldkvrf  
klenlyki ynkdtgni qkq  
ciffhshnhqngsfy ydlynikgsvgaeffqfysdnrtvsssnyhidvflykd  
>tr|Q6GFN4|Q6GFN4\_STAAR  
mkeiilkqvwlvwti lvtssffsigtpgiaaipfslsiyalsklilvknkfvepdlvtlqn lkeknksinienqkikreiqe  
lknlkkl d lissieegtke l

Tsompanidou\_et\_al\_Supplemental\_FASTA\_File

ehitsylndelkydieltypfdlvevdssqintyikkqmkekellnleevkifnvstenkrhqnacqakqairlnaet  
sqlinkvnsknieismqni  
fksyeginki fetdnvripetlldiklemldlmhkyqvkiedekiirreerarlkeieqaekemekkkelldkdirhnn  
eikkltmylnntdlqveke  
lyiekireldqslknlnserenvedrkdnaqsgfvyiisnigsfgenyvigvtrrlepmdrinelssasvpfevdhal  
ifsenafelknkleyfkk  
ykvkvngrkeffkvnineikdkvlsehinstvqfidepkaiqyretlrltsl  
>tr|Q6GFN5|Q6GFN5\_STAAR  
mikqvlrkslhtvkehidsnfqknlfslvifpflfvpyiidiilvhlsnnqeyfkllssishiflmffvtaislyail  
sipltsnscrkssfrkisk  
viyflvffylshhinidiskmdsswhfyalflcffiiisyklttekimkvckwifneesndeglrqtqklfl  
>tr|Q6GFN6|Q6GFN6\_STAAR  
mncnlaqaktmikptgiandtgksveemmcrrsqvnwkiain  
>tr|Q6GFN7|Q6GFN7\_STAAR  
msnnanygkllhlvtskltnieenpqlsnyesyylleknliktqfikstksrclyeettyhiltngdilnqpgnlklw  
t  
>tr|Q6GFN9|Q6GFN9\_STAAR  
mnkniiksiaaltiltsvtgvtmvegiqqtakaehnvtkitntsispykgilrvgaatgfvvgkntiltnrhvkv  
qvgstvlahpngendtggy  
ykvkkipyagsadlaiveedsvypknkksenteiltlaseakanervaivgypapyknkhmyqstgtvlsingdk  
lvsdafaegngsgspvfn  
knevgvlysgdqighskkesysvyltpeikkfiadntek  
>tr|Q6GFP1|Q6GFP1\_STAAR  
msitekqrqqaelhkkllwsiandlrgnmdasefrnyilglifycflsekaeqeyadalesgedityqeawadeeyredlk  
velidqvgfyfiepqlfsa  
miheietgdfdiehlatairkvetstlgeesendfiglfsdmdlssrlgnnvkertaliskvmvnlddlpfvhsdmeid  
mlgdayefligrfaatagk  
kagefytpqqvskilakivtdgdkl rhvydptcgslllrvgketqvyryfgqernnttynlarmnllhdvryenfd  
irnddtlenpaflgntfda  
vianppysakwtadskfenderfsgyglapkskadfafi qhmvylddegtmavvlphgvlfrgaaegiriirryliekn  
leaviglpnifygtsip  
tcilvfkkcrqddnvlfidasndfekgknqnl sdaqveriidtykrkktidkysysatlqeiadndynlnipryvdtf  
eeeapidldqvqqdlknid  
keiaieeqeinaylke lgvlkde  
>tr|Q6GFP2|Q6GFP2\_STAAR  
msntqtknvpelrfpgfegeweeklgdlikvns gkdykhlekgdipvygtggymts vsepseidavgigrkgtinkpy  
leapfwtvdtl fycpky  
etdilfilslfrkinwkvdestgvpslskqtinkinrfvpsnkeqqkigeffikldrqielleqklellqqqkkgymqk  
ifsqelrfkdengndypnw  
eekki ediasqvygggt pntkikefwngdipwiqssdvkvnlll rqcnkfisknsielssaklipansiaivtrvgvgk  
lclvefdyatsqdflls  
lkydklysllytmkkisanlqgtsikgitkkelldsiikiphnleeqqkigdlfykidkyisfnkckieilkslkqg  
llqkifi  
>tr|Q6GFP3|Q6GFP3\_STAAR  
meklneaiknyidsdel falfidgqwgvgktyyiknilkefddkieiryislyglqnlyeiksiiisklintstknlrk  
vlksmknfvvpylnmnnf  
sdnilryiddnsllkiknslmknksaalliiddvermsdkvsfeeflgfirndlidyl dckvlfignl delnkkadfhkn  
sekiisrilkfpnnrevam  
divksnlpklfvknitkdel fngffdisdekkeiifekskqnlnykyhlnmrtlnlvvsnfkliinkmqdeikykskd  
fkittlyislfislfilyne  
frsgnl geseikdlqftyndfnlnlntktsialfkylyknnelanyvffdielknlllygifdesiflknitnnfkeedak  
adllnvlkeffkl sese ll  
ekeiqaeiikdknnenfnkyvkaylsllnlkgknylidgikiseledelvdnydlhqnnlivgdtinrldlvsfsneq  
lyeeikslkdrlinkrttl  
mtsyngyletilngdftnrklkeayigmkdidtieiinylnlksvnelkssnekiinlsafikdnhcnddnialeyi  
igemkklkdgtkdrvtqmc  
fsmli dtlkdi  
>tr|Q6GFP5|Q6GFP5\_STAAR  
mnl sda lsrsvsdmsyenldkdqtydf lggdykvi ekrdtdqngfrayvfapvikgkvdksql ligyagtdpyslndirt  
dlqlpihhntnnlkinny  
kdlnksti hkkyntikdkndlfsfsslnnkalfgdlwaakfaptqmdesdaftesvkkkypdsei hplghslgaf laqy  
nlikhnl dngttfaapnvy  
hsftgdffkdidngvydskirnihfddpinnlffnprigknitsmphydgfitnlp ligqhtlksyndfdadgnvkem  
peleqfnddqlnrrfqlf  
dpfgiksrffdsikidssilnrtsendfdpfailnkkdklfesndldiegfnnkqkedlsidlnpfddelndedep lipk  
rgdskklkaekksivkktk  
sskns gkvi iqpdvnrnastirdrlflytqiitaldeyreetmsganrildkyqsel lsgshefitpndleqymeil  
svegssgnfkfynsglmd

Tsompanidou\_et\_al\_Supplemental\_FASTA\_File

liqaldqknkdl1qfaeklefaankfeekdleesdvfglfs

>tr|Q6GFP6|Q6GFP6\_STAAR

mirktkviiiiliiiaailmmfaymshkqkkehyaiaiekridlffkhnlnnyknmkvtdfhktpmggyfivgyinddkk  
yfqasidsgsnngyqkni  
gyhddklgklfkekdpyklsvdeiekehldkneyeadplfffsgpie

>tr|Q6GFP8|Q6GFP8\_STAAR

mtnkmmkwqlstittlmtgvialnngefrnvdkhqiavadtnvqtpdyeklkkwldvnygydqydennqdmkkkfdak  
ekeakkllddmkttdnrt  
lwsgaenletnsshmtktyrniekiaesmqhkntvltkvenlkikealdwmhknvygknpkvedltnkrkgqttpkn  
nslnwwdyeigtpraltnt

lllmdmltkdemknyskpiestyapssdkilssvgesedakgnlvdiskvkllesvieedvdmllksidsfnkvftyvq  
dsatgkgrngfykdgsyid  
hqdvpytgaygvlllegisqmmmpikespfkttqdnatlsnwidegfmpliykgemmdlsrgraisrenetshtasatvm  
ksllrlnndtmddstkrnyk

qivktsvnsdssynnylnsysdiakmklmndstiskndltqqklyndmrvtyhnkdldfafglsmtskniaryen  
ingenlkgwhtgagmsyly  
nsdvkhyrdnfwatadmtclpgttllndmpstntkndksfvvgtklknkyasigmdefnqdkltakksyfilndkivfl  
gtgikstdssknpvtsven

rkangyklfkddieittsdvnaqethsvflsndtkknigyhfldkpkitvkkeshgkwseinksqkkddkkdeyyevt  
qthntsdskyayvlypgls  
ksdfksknnvsvikqdedfhvikndgvfagvnsdntksfdingitvelkekgmfvikkddkaykcsfynpetnta  
snieskifikgytinksv

insndagvnfelk

>tr|Q6GFP9|Q6GFP9\_STAAR

mmkkkyililiviliglviaythnkktkdhietqekrinlyfkynlnnyssmkvtsfkktpmggyivdgyvnhnkny  
dfkvlisvtdnhqfedsig  
yddktfgklfkekdhknelkpkdikkehldkseyeaepplfffsgrie

>tr|Q6GFQ0|Q6GFQ0\_STAAR

mmkkkyiliiivsviligmivisyahnkqkkdhyietqekridlffkynlnhykslvtrfkkspmdsyfiggyinnkdy  
efqafinvgrkqfardig  
ydeeklgklkeqevktwktvdqiiknehldkseyeaepplfffsgsl

>tr|Q6GFQ1|Q6GFQ1\_STAAR

mkkryvfvvvaillivliayafhkskkehyietqekridlyfkhnlnhyksmkitkfqkspvnayfikgyinnkdykqk  
fqayintgdegnqfnssig  
ykeekigrllkekdakdriltvdeiekehldkneyeaepplfffsgsl

>tr|Q6GFQ3|Q6GFQ3\_STAAR

mntkylylnfdkiyeekdfnvlhvdinlkiseikesnevlysidstcklnhydpklesyrdsiyllnerlnnynfng  
kkewklfylykeligtfei  
lyddtstnyyrggandwpmkaglrrndiiddlkkefeniyedmaykypdlieytclnkkeykaedfkkrenmaylqhy  
glrttlliditenpfiallf

>tr|Q6GFQ4|Q6GFQ4\_STAAR

ltsnsqvfnnatldmyninpkihseqnlfsvkmi sknkriiaqkgaffnfekllifqneqvnrdkinkiplvrklf  
sydykelkrelnqtqsaf  
qklkitreelknhsrikedlkriinlmtktehdmdseksndykeleylikriikdesvikidkemedlkkklylda  
rlkkeeiltseylrpeick

>tr|Q6GFQ7|Q6GFQ7\_STAAR

elrekllqyhyveselfpdvyrhigyisnflsnqtnnrtinknnisenlvdllklen  
msnqfkseeerrqeqfafaqqnqnyyqgqkkskkwfwgcgclvlfiliiigisactagitgnlgnssketnkt  
hkigetvkngdlevtvnsv  
etmksvgpslaptnakgiffvadvtikngkeaaltidssmfklksgdktfeadntgmsanqsdngsienfflqrinpd  
staqkivfdvsenianak

>tr|Q6GFQ8|Q6GFQ8\_STAAR

dkklevisslfsvkkiftldsdaktskakkkdqdevavassnsdvnysyasattpattssadtdsedseksskdedkq  
nasksdnssveksesneet  
apvepmpshskpttseappsqnihnedsmydaste  
mlkgcgglisfiilililacsmmfsnndnstsnqssktqltqkdedksenmpEEKsesetdkdlqsteevpanenten  
nqheideitttdqsdein  
tpnvaeesqddlkdllkekqpsdhqstqpktpstetnkqqsfanckqlrvypngvtadhpayrphldrkdkrac  
epdky

>tr|Q6GFR1|Q6GFR1\_STAAR

rativmalyqmfvllsfsvaygatasglsnkqleslkatkptriklkwtpqimhqvrlreldfhqvlidaneslnrq  
dftqlqllareqvyieep



Tsompanidou\_et\_al\_Supplemental\_FASTA\_File

ftdismlddvvdgtippialdekatslsainliklynvkvvvlkpfrlggi dkvqtaidtlkshgkvvvggmyeygls  
ryftamlarkgdyppgdvtp  
agyyfeqdvvahsgilkegrlefrpplvditqlqpy  
>tr|Q6GFR3|Q6GFR3\_STAAR  
mrvkfrdkdnrqvnlftfkndneiadgnhvlaiptfknqllftkhnlgiefpggkregessaeaitrelyeetgakvkn  
ihyaqytiethdqtdfvk  
dvyfievelvskndyletagpvlncindielaqrsfllqdstilkcvervqslgyfyqt  
>tr|Q6GFR4|Q6GFR4\_STAAR  
mdfkrkrmpiesfthqfeeitylsddlqvkalmmtphevkriyvylrggkgqvrvragrlnmqfsdsqtlvigpyyrg  
nngsegkdefyrgdlnvdt  
elrlldhkyppqafihmvgsrfgllqgl1ftfdlpvnsyiwggvsdidlmyeervdlrgmlrrmighpkkdraayearq  
aipninenpaillivhgk  
dqvggihhayladqlelkgamhetfyqmaeghvprppamvetlyikefmnqvelhr  
>tr|Q6GFR7|Q6GFR7\_STAAR  
mmdlsspvvigliiaavvialiffvlflvalgskkkvkrqteekyeqqeqnikkshealekeriqnkktitkqqedynhm  
vstkdreidaiklfsknhs  
eyvtdmrligirerlvkekrippedmhimaniflpgdgnierishlvltrtglyiidsqllkghvyngisggqfkdlp  
pmeqvfdtldlksrpqti  
vmdqnddkrslsfvnysdqieaikqlaedlqkhlgakytptsilyfnpknegdvtsynqnsavkvlvgaeqldeffnk  
fvfhgriqynvedlqqmmd  
kiesfn  
>tr|Q6GFR8|Q6GFR8\_STAAR  
mevktfyngntmpqiglgtrvendencmesvkyaieqgyrsidtakvygneeqvagagiraglestgiaredlfitskly  
fedfgrenvaayearlsr  
lglyldlylvhwpgtneavmvdwtkgmedlyknnkvknigvsnfepehleaallaqvsikpvinqveyhpyltqhkly  
laaqhivmeswsp1mnaqf  
lndetikdiage1gkspaqvvlrwnvqhgvvtipksvtpnrisenfridfelsdeqmtridglnqdkrigdpdktfeg  
>tr|Q6GFS1|Q6GFS1\_STAAR  
msrskkyfylsslmii1sfffntnnvflsglfnfklilfcsvinsivlilsii1fadrsikslkpdadwiriaskslpw  
iilivilvhifsvhtfgf  
i  
>tr|Q6GFT1|Q6GFT1\_STAAR  
mtykelatylkilsdssrleildllscgelcaddl1ehfqfsqptlsyhmkalvktnlvttrkignkhlyqlnhnifesv  
innlskvhtsnqrcichn1  
ktgec  
>tr|Q6GFT2|Q6GFT2\_STAAR  
mrvaigmgtagvsvlrelvkhpkfnqldidlyddkvnmgqgvpfqndssellinmpskkmslnl1ddetefwkwykqtd  
fnfdepaylprfvfghymk  
sylsmytkkypnistnynkvqeiytynsnidetnlytyicttseqswqtydyvfltcgtfayhdpylnkgkgyiatpyp  
tyntldevnelddiaiiigt  
glasldvrvyvaahpk1pimttsrsanlpsvrgtmidvtfkyltkdklndikkhhfngapldtlvslflkecaeydidf  
eklvhrrtgnhjadlkydl  
arptemgifiqsiieylenlwiwnslsiedqhfnqyskmiqlnsnppprtaelielienkslilkkdledvkhgdg  
klyyfsyknqesvdiynv  
inatgakshlnel1dqqdqliknlenrqivqahpmggiqii1petnqv1sprfgtlnmiaigqmtngvkn1rngvkmiveq  
vahtvsqlydalesneqeq  
rsdnq  
>tr|Q6GFT8|Q6GFT8\_STAAR  
mwkweaendakgvviahnilehtgryayvitmlrrngyhvimgd1pgggqtsrankgqienfqtyhesl1dwlkianey  
kiptyvlvgvlggl1l1n1  
lekvelpiegmm1ispml1qkngknrkdkslvsnigkiskdtrfnvgvepkdltrnleiveetvndgmlkkatyhwyt  
inetmkdtmahihdiqmp  
tllmygtkd1ivetraidefkekyqtpelyfkawqgyfhevhnepervmryiltflnsvntmgfiveddeivei  
>tr|Q6GFU0|Q6GFU0\_STAAR  
mkl1erilpfsk1likqhitpesivvdatcgngndt1flaeqvpeghvygfdiqd1alentrdkvkdfnhvslvkdgheni  
ehhindahkgghidaaifn1  
gylpkgdksivtkpdttiqainallslmstegiivlviyhgghsegqlekqall1dylstleqkhaqv1kyqflnqrnhapf  
icaiekis  
>tr|Q6GFU2|Q6GFU2\_STAAR  
mnikpsvwwlvigmalnitgssflwplntiymkqelgksltvaglv1minsfgmvign1l1ggs1fdkl1ggyktiligtft  
c1cstt1l1nffhgwpyav  
wlvmlgfgggmi1paiyamagavwpnggrqtfnaiylaqnigvavgaamggfvaefsfnyiflanlimyvvalvavtqf  
nieinakvkyphlditgk  
knkarfislvl1camfaicwvayiqwestiasftqsini1smaqysvlwtngimilvaqplikpily1lkgnlkkqmfvg  
iifm1sffvtsfaenfti  
fvvgmiiltfgemfvwpavptianqlapdgkqgyqgvnsaatvgkafgpf1ggvlvdafnmrmf1gmmv1l1vfall1  
l1mvfkenntqpkkida  
>tr|Q6GFU4|Q6GFU4\_STAAR

Tsompanidou\_et\_al\_Supplemental\_FASTA\_File

mksittde1k1leskpqvivdvrtdeetamgyipnaklipmdtipdnlnafnkkytyivcaggvrsakvveyleang  
idavnveggmhawgdegle  
iksi

>tr|Q6GFU5|Q6GFU5\_STAAR

mnllkknkysirkykvgifstligtvllsnpngaqa1ttdhmvqggsnqalpnsqntnadtnrdivndsqntpnahat  
dntstnqaltnhqndvan  
qvgpapiqpsaspagnnnsnanstatepaantnnnlasnntlnvpntdnndsarhl1t1keiqedvrhssdkpelvai  
aeasnprpkrsrraapt  
pnatpadptatpadptagnsapvaitapytpttdpnannigqnapnevsfddnnirpstnrsvptvtvvdnlpgytli  
nggkvgvfshamvrtsmfd  
sgdaknyqaqgnvialgrirgndtndhgdfngiektltvnpnselifeftmttknyqgmtnliiknadndtvicekvva  
ygpwrllkvpensh1ki  
qfvpkndaitdargiyqlrdgykydfvdsiglhsgshvyverrtmeptatnkeftvttslknngnfgasfntddfvyk  
iq1pegveyvns1tkdfp  
sgnsqvdindmnvtydaanriitiktstgggtgnsparlmpdkildlkyklrvnnpvtptrvtfndtlyktysqdfinsp  
aeshtvstnpytidiimk  
dalqaevdrriqqadytfasldifndlkrraqtildenrnnvplnkrvsqadidslanqmghtlirsvdaenavrkvdd  
medlvnqndeltdEEKqaa  
iqvieehkneiignigdqttddgvtrikdqgigtlsqdatpvvkpnakqairdkaakqreihhtpdatqdeiQdalnq  
1ttdetdaidvntnatna  
dvetakngintigavapqvthkqaardainqatatkrqqinsnreatqEEKnaalnelqtatnha1eqinqattnddvd  
takgdglainpiapvtv  
kqaardavshdaqhiaeinanpdqtqeerqaaiekvnaavavantnilnantnadveqvktnaiqqiqaiapatkvktd  
aknaidqsaetqhnaifnn  
ndatleeqqaqqlldqavataqninaadtnqevaqqdqgtqniivviqpatqvktadarnavnekareaitninatpga  
trekqea1nrvtlknra  
1ndigtsttamvnsirddavnqigavqphvttkqtatgvltdlatakkqeqnqntnatteekqvalnqvddqdlatainn  
inqadnaevdqaaqlgk  
ainaiqpniykkpaa1aqtngqhsaklveinatpdatddeknaaintlnqdrqqaiesikqantnaevdqaatvaennid  
avqvdvkkqaardkita  
vakrieavkqtpnatdeekqaavnqinqldqafnqinqntndqvdattnqainaidnveaevvikpkaiadiEKavke  
kqqidns1dstdnekeva  
1qalakekekalaa1daqtnsqvnqaatngvsaiki1qpetkikpaarekinqkanelraqinqdkeataeerqaaldk  
indlvakamtntndrtng  
qvndstnqalddialvtpdhivraardavkqqyeakkheieqaehatdeekqvalnqlannekralqinqaiandvk  
rvesngiatlkgvephiv  
kpeaqeikasadnqvesikdtphattde1deanqqindtlkqqqqdidnttqdaavndvrnqtikaieqikpkvrrkra  
aldnidessnnqldairnt  
1dttqdernvaiaalnkivnaikndiaqnktnaevdqteadgnnikvilpkvqkpaarqsvsakaeaqnalidqsd1s  
teerlaakh1veqalng  
idqinhadktaqvnqnsidaqniiskikpattvkatalqqiqniatnkilkanneatdeeqnaaivqvekelikakqq  
iagavtnadvayllhdgkn  
eireiepvinkkataraq1tt1fndkkqaeianvqatveernsilalq1qniydaigqidqdrsnqavdktatlnlqti  
d1dvhpiikkpdaektind  
larvthlvqnyrkvsdrnkadalaitalklqmdelktartnadvdav1krfnvalgdieavitekensllridniaqq  
tyakfkaiatpeqlakvka  
1idqyvadgnrmvdedat1ndikkdtqliideilaik1paevikaspkvgqpapkvctpikkedkqevrkvvelpntgs  
eemdlplkelalitgaal  
arrrskkekes

>tr|Q6GFU6|Q6GFU6\_STAAR

myqtiiiggpsglmaavaaseqndvlliekkkg1grklkisgggrcnvtnrlpyaeiiknipngkf1yspfsiidne  
siidffesrgvklkeedhg  
rmfpvsnkaqdvvd1vttienqhvtikeeeavsrievntdqtftvhtqnnsyeshslviatggtsvpqtgstgdgykfa  
qd1ghtitel1fptevpits  
aepfiksrlkg1slkdvelsvlkkngkkrihqmdmlfthfgisgpaa1rcsqfvykeqknqktqhismaidt1fpe1nh  
eq1kqh1ts11sdtpkii  
kns1hg1ieery11fm1eqaeidenttshh1snqq1nd1vnmfkgfvfknvng1pidkafvtgggvs1keiqpctmmsk1  
vpg1f1cgevdihgytg  
yn1tsalvtghvaglyaghysasme

>tr|Q6GFU7|Q6GFU7\_STAAR

mseskemvrgtflitisilitkvlglfiipfnyliggqenmapftyayapyniaiaavatagvplaaskyvaykaynaigay  
kvsqkfykssfivmsitgv  
lgf1vlyflapyisel1arnvhdkngsvdditwiiriismvvi1fipvatwrgifqgyksmgptavsevteqiarvif  
iligsylvlnvfdgsilla  
ngiatfaavgaiigiftlwywrkrkhnidrmvesdytdidvsykgmykeiiasipfvivslnyplfnlvdqfthnga  
1slvgipsqlqdi1ffnmln  
mstnkivm1pts1sagfavs1ipyiktfaegr1hemhqirtsigvlmfitvpa1sigimalaaplftvfygydpivlgh  
dphhdgsr11fyypavai1

Tsompanidou\_et\_al\_Supplemental\_FASTA\_File

isllsvtasmlqgldkqklvtyvilasvaiklalnyplimlftpgavlstsiallfaigcnfyilkkyakfkfsyswih  
fakiflysfiimmigveavf  
fianflfleptklgyliiiiilgvtvgiliygtitikrldedeflgeipeklrrrvrflr  
>tr|Q6GFV4|Q6GFV4\_STAAR  
mttikgeepfyiqnqksghmksekipsvgfitepicfi  
>tr|Q6GFV5|Q6GFV5\_STAAR  
mkkliflivialvlsacnsnsshakeIndlekkynahigvyaIdtksgkevknfsdkrfayastskainsailleeqvyn  
klnkkvhinkddivayspi  
lekyvgkditlkalieasmtysdntannkiikeiggikkvqrlelgdkvtnpvryeielnyyspkskkdtstpaaafgk  
tlnkliangklksenkkfl  
ldlmnnksgdltikdgvpkdykvadksqaityasrndvafvypkgqsepivlviiftnkdnksdkpndkli setaksvm  
kef  
>tr|Q6GFV6|Q6GFV6\_STAAR  
makllimsivsfcfi flllffryil kryfnym lnykvwyltllaglipfipikfslfkfnvnnaqptveskshdlnhn  
inttkpiqefttdihkfnw  
dsidnictvwvivilvilsfkflkslllylkyllkqslylneneknkvdtilfnhqyknvirkaeti qspitfwygyi  
ilipssyfksvdkrlkyi  
ilheyahaknrtdlhliifnifsiiimsynplvhi vkrki ihdneveadrflnninknefktyaesimdsvl nvpffnkn  
ilshsfngkksllkrrlin  
ikeanlkkqsklilificiftflmviqsqflmgqsitdynykkplhndyqildkski fgsnsgsfvmysmkdkyyiyn  
ekesrkryspnstykiyla  
mfgldrhi indensrmswnhkhypfdawnkeqdIntamqnsvnwyferisdqipknytatqlkq lnygnknlgysykywm  
edslkisnleqvivfknmm  
eqnnhfskkaknqlsssllikknekyelygktgtgivingkyngwfvgyvitnhdkyyfathlsdgkpsgknaeliseki  
lkemgvlnngq  
>tr|Q6GFV8|Q6GFV8\_STAAR  
mki gyarvstglnlnlqedrlnaygceki fsdhisgskskrpgldkaiefarsgd tivvwrldrlgrnmedlitl vnel  
nergvsfhsleenitmdks  
sstgqlfhlfaafaefernlilerssagriaarargryggrpeklnqkdlnllktlydngtpiktiaeqwqvsrttiyr  
ylnkleekedekqgevsn  
>tr|Q6GFV9|Q6GFV9\_STAAR  
mknkekylnfseakrkeatqkyni ikpfilgkqslssiskskia l stlyrwnklykeqgl tglihntrvdkgehklkq  
niideikrlalknkrnsia  
tihrkianyciennfykpsyqvysii kampksvidfshqgekyqnykdliqiressrpneiwqadhtlldiyildqkg  
ninrplwltiimddysraia  
gyfisfdapnaqntaltlhqaiwnknntnwpvcgipekfytdhgsdftshhmeqvaidlkinlmfsvkgvprgrgkierf  
ftvnqtfleqlpgyinn  
dtssdlidfnfeeklyfliedynqkehsaiqstpinrwnshffpnmpssleqldlleipksrkisgdihfqgfr  
ysntnl tayvgeyvliry n  
pndmaei rvfyrdelfctaispdladysidikeiqharsqrrkhlkqniaspsttdlikeesygysspqettknvkkkr  
yrnd  
>tr|Q6GFW1|Q6GFW1\_STAAR  
mki gdisihylnggntkmdggamfgvvpkplwskqyananernqinlpthpiliqtaqynliidagigngklsekqlrnfg  
vdeeshitadlanynltpk  
didyvlmthmhdhaaglt dqaghafenaihvvqqdewhefiapnirskstywdknkgdysnklilfekhfepvpgikm  
qhsghsfghtiitiesqg  
dkavhmgdiftptahknlwvtayddypmqsi rekermipyfiqqqywflyfhydenyfavkysddgesidayilretlvd  
nn  
>tr|Q6GFW7|Q6GFW7\_STAAR  
mswfdklfgedndsndlihrkkkrrqesqni dndhdsllpqndiysrprgkfrfpm svayenenveqsadtisdekeq  
yhrdyrkqshdsrsqkrhr  
rrrnqtteeqnyseqrgnski sqsikykdshyhtnkpgtyvsaingiekethsksthniysnntnhrakdsttdyhke  
sftksevpsaifgtmkpkk  
lengripvskssesvedkqkydyvaktqtsqnkhleqekqkdsvvkqgtaskssdenvssttkstpnyskvdntikie  
nyasqiveeirrererkv  
lqkrrfkka lqqkreehkneeqdai qra idemyakqaeryvgdsslnddsldtnstasqlhtneiedeavsndenkka  
siqnedtdthvdespyny  
eevslnqvsttkqlsddevtvsdvtsqrqsalqhnevnnqdelknqsrliadseedgatneeysgsqid daefyelnd  
tevedttsnsedntnrda  
semhvdapktqehavtesqvnnidktvdneielaprkkddqtnlsvnslktndvndghvvedssmneiekqnaeitenv  
qneaaeskqnveektienv  
npkkqtekvstlskrpfnvmtpsdkkrmmdrkkhskvnpelkpvqskqaasesktatqntpsstsdqsentnayktn  
nmtsnvnnqllighaate  
ndyqnaqqyseqkpsadstqteifeesqddnqleneqvdstsssvsevsditeeseetthqntsgqqdnddqkdlql  
sfsnqnedtanenrprtnq  
pdvatnqavqtskpmirkgniklpsvslleqpvi epdedwitdkkkelndalfyfnvpaevqdvtegpsvtrfelsve  
kgvksritalqddikmal  
aakdiri eapipgtsrvgievpnqnpttnlrsiiespsfknaeskltvamgyrinnepllmdiaktphaliagatgsgk

Tsompanidou\_et\_al\_Supplemental\_FASTA\_File

svcsinsilmsllyknhpee  
lrlldpkmvelapynghlphvapvitdvkaatqslkwaveemerryklfahyhvrnitafnkapydermpkivivid  
e1adlmmmapqeveqsar  
iaqkaracgihmlvatqrpsvntitglikaniptriafmvssvsdrtildsngaerllgygdmlylsgsmnkpirvqgt  
fvsddeiddvdfikqgre  
pdylfeekellkktqtqsqdelddvcafmvneghistliqrhfqigynraariidqleqlgyvssangskprdvvyte  
adlnke  
>tr|Q6GFX0|Q6GFX0\_STAAR  
mtqqqnnkrtlknkhtyqneplnrkdfvvsfitgalvgsalglyfknkvyqkaddlkvkeqelsqkfeerktqleetva  
ftkervegflnksknegaa  
lkaqqaakeeasannlsdtsqeaqeiqeaqreaqtetdksaavsneeskasaalkaqaakeeasannlsdtsqeaqai  
qevkkaeaqetdksadvsn  
eeskastlnvskeesqaerlanaakqkqakltpgskesqltealfaekpvakndlkeipllvtkkndvsetvntdnkdtv  
kqkeakfengvitrkadek  
tpnntavdkksqkqskkttpsnkrnaskastnktsgqkkqhnkkasqgakkqssssnsttktqnkskatnakssnaskk  
snakvekaskiekrtfnd  
>tr|Q6GFX4|Q6GFX4\_STAAR  
mnhlkyqsedyihdkqfviiegplthedlkaltdayltafrdaedqfealleittlpegriyvarqdklivgyvtfhy  
pdeierwstgnlpylieig  
aievsinfrqlaekliqlslstpefedyivitteyywhwdlksklvdfdykklmqrmatggleifatddpeitsnp  
anc1marigknitleqqqa  
fddirylnrfff  
>tr|Q6GFX7|Q6GFX7\_STAAR  
mfmlttpirwylidnnyqyqlvlivahpn  
>tr|Q6GFX8|Q6GFX8\_STAAR  
mtngdnnhqlnhriyqfekiyaikhvivfifmifiaivaiaviamslyfhhltktsdlsddalikkvrqipgdellhdh  
nnknllzeynhsqnsliig  
pktsspnvikaltssedtlyfkhgdgilkpailramiqdifntnqssggstitqqlvknqvltnektysrkanelrlairl  
ehllskdeiiytylnivpf  
grdynganisgiasasylfgvppkdlsiaqsayligllqspygytpeykdgtlksdkdlkysiqrqhyvlkrmliedqi  
tkkeyndalkydikshlln  
rkk  
>tr|Q6GFY0|Q6GFY0\_STAAR  
msdfnhdhsttnhsqtpryrrpkfpwftvivaliagiigallvlgigkvlnstilnkdgstvqttnnkgnqldgqsk  
kfgtvhemiksvsptivgv  
inmqkassvddllkgksskpseagvgsgviyqinnnsayivttnnhvidganeirvqlhnkkqvkalvgkdavtdiavl  
ientkgikaiqfansskvq  
tgsvfamgnplglqfansvtsgiiisertidaettgntkvsvlqtdaainpgnsggalvdingnlvginsmkiaatq  
vegigfaipsnevkvteig  
lvkhgkidrpsigiglinlkdipeereqhltdsedgiyvakadsdidlkkgdiiiteidgkkikddvdlsylyenkkpg  
esvtvtvirgdktkevkvk  
lkqqkeqpkqrqrserqspgqdrdrffr  
>tr|Q6GFY2|Q6GFY2\_STAAR  
mykffqnlgrslmpvailpaaaiagigntlnalhaapkiamffttvgttileqlgilfaigvaigmakndgavala  
algyflvtvvlspmklapl  
lgmkaseinsafekmngnvfvgivigliayaynkfsetelplalsffsgkrlvpimtafyctflvillflwpllysw  
ivkfgesivglsgfagfvy  
gvnrlliptglhhalnsvfwfdtigindigkfqsgkdaikgitgryqagffpimmfgipaaalamyhtakttkkqvyg  
wflassvaaffvgvtepie  
fafmfvapilyvhalitglsflivatfhwtagsfsaglidylslinpsnhplmllvqgvffilyyviivrviqv  
nlnitigrgeneivdptvvk  
dniappendikqskyhnhaiqileglggqenivnltnatrhlhelkdtssiidqqkiknagavgtvngkhstqvivgth  
vqqvadeiekh  
>tr|Q6GFY3|Q6GFY3\_STAAR  
mkkilfdvdgvflseercfdvsaltvye1lmdkcyglhshidwetltdndiqdirnriqkdkilnklskglnsnwdm  
lfivfshlidi1kklshd  
eieafmyrdepvelkqnistniadrflneqlplqlfdnvkvgknniyaaleefattelhvsdanlfls1kgalwtlaqe  
vyqewylgsklyeevekki  
arttftkyiyqeiilrpvdevkvllndlkgagfelgiatgryptetvvpfenlgllpyfeadfiatasdvleamypq  
arplgkpnpsyaalngn  
krdkyesyinkqdnivnkddvfigds1adllsaqkigatfigt1sglkgkdaageleahhadyvinhlge1rgvldn1  
>tr|Q6GFY4|Q6GFY4\_STAAR  
mkqfnvlvadpiskdgikalldheqfnvdiqtglseealikiipsyhalivrsqttvteniinaads1kviaragvgv  
inidaatlkgilvinapdg  
ntisatehslamllsmarnipqahqsltnkewrnafkgte1yhtlgvigagriglgvakraqsfgmkilafdpyltde  
kaks1sitkatvdeiaqhs  
dfvtlhtpltpktglinadffakakpslqiinvarggiidekalikaldegqisraaidvfehepatdsp1vahdkiiiv  
tphlgastveaqekvaisv

Tsompanidou\_et\_al\_Supplemental\_FASTA\_File

sneiieilidgtvthavnapkmdlnsiddtvksfinsqtvgelaiqlmynapssikityggdlasidslltrtiithi  
lkddlgepveniinalmln  
qqvtlniennkaetgfsnylevelsndsdsvkvgasvftgfgprivrinnfsvdlkpnqyqivsyhndtpgmvgtgal  
lgkyniniasmtlgrteag  
gdalmilsvdqpvsnniidelkqvgeynqiftteltvqs  
>tr|Q6GFY6|Q6GFY6\_STAAR  
mhqhdvfkvtswqggrrnvnvqgdilsenisipalggvgigtndemlvsasscyiislaatlakftdisieqqs  
igtaclnngkfsmskiivh  
phiqipsdqiaqlkrpkliitiadnncmisnavrnvdikiypiiqak  
>tr|Q6GFY7|Q6GFY7\_STAAR  
mtlnklkdelqivshrglpsdfpentmvgyrevmglvnamleidvhltkdqhfvihdetidrtsdkgkriadytlsqk  
sfdgfsykdvafkgeript  
ldevlsclkfdkkllielkspnlypgieckllafleekkvdatqvviqsfdiecielntlgsiyelgvlcskrkywyk  
kpnfsriaqiasyvnpya  
lvtrkfvdeahhhqlqvmptyvnlktgekrlrqigvdglitddpklfik  
>tr|Q6GFY9|Q6GFY9\_STAAR  
mttinptnytllkkqaasliedehmiaailnsmsallndnlqdinwvgfyllenelilgpfqghpacvhipigkvcgt  
avserrtqvadvhqfkg  
iacdanskseivvpifkddkiigvldidapitdrfddndkehleaivkiiiekqla  
>tr|Q6GFZ1|Q6GFZ1\_STAAR  
miyldnaattkafeevldtylknqsmynpnsphkaglqadqllqqakvqindmvntnmtydvvftsgatesnnialkg  
vayrkfdtareiitsvleh  
psvlevvryleeregfkvkyvdvtdkgtidlqhfndlmsdkvglvtcmvnnvtgqiqipqmaeviknypkahfhvdav  
qafgkismdfnnvdsisl  
ghkfnglkgqgvllvnhiqniepiiqgggqeygvrsgtvnlpndiamvkammanenlealnafvtelnndvrqflsqyq  
gyinsstsgspfvlnisf  
pgvkgevlnafskydimisttsacskrnklnvlaamglstdksiegsirlsfgatttkediarfkeifiiyeeikel  
lk  
>tr|Q6GFZ3|Q6GFZ3\_STAAR  
mdlntmiiiiifgfiaafidsvvggglistpallaiglpssvalgtknlassfgsltsaikfirsgkvdlyvvaklf  
gfvflasacgayatmvps  
qilkpliiialssvfiiftllkkdwgntrtftqftfkailfaalfiligfydgfvvggtgsfmlfvllifgfdflsaagn  
akvlnfasnigalvlfmvl  
qqvdyviglvmaasmivgsyagahfaikqgvgykvlfiiitaililknafdyiqqfv  
>tr|Q6GFZ5|Q6GFZ5\_STAAR  
maeqtimerl fhs ldekaktlnnengqsfienglameqvytnergll eqstlqdrkafqfaylslmqeeki qanhqi  
tpdsiglllgflverfmnn  
qeelhivdiasgtghlsatvkevlpeiavmhhlievdpvlsvshlanfleipfdvypqdaimplpleadivigdfpv  
gyypidersrdflgfeeg  
hsyshyllieqainalkdagayflvpsniftgehvkqlekyiatetemqaflnlptlfknekarksililqkkksget  
ksvevlanipdfknpsqf  
qgfmetlnqwmtdtnrpkk  
>tr|Q6GG03|Q6GG03\_STAAR  
mistmneimkci edndtiihrhvrpdpdaygsqglkyiiaqkfpqkqvfvavgeasslsfigeldnidktyqdalvi  
vcdtanapridderystgr  
klidihhpavdqgdinlvntnasstseiiydlishfndeavnkdiasvlylgivgdtrflfntsehtmeiagkli  
ghdidhnaillnkmmekdpk  
mlpfqgyvlqhfelmdgfcqvkit edvleqfgiqpneasqfvntiadikglkiwfvavdegseircrlrskgqliindi  
aqdfggghpnasgvsvns  
wdefeqlakalrtkln  
>tr|Q6GG10|Q6GG10\_STAAR  
maeklqrelsnrhiqliaiggaigtglflgagqtialtgpsilltyiigfmlfmfmgrlgeiitqntefksfadvtnty  
igpfagfvwtgywfcwii  
tgmaevtavakyvsfwfpeipnwisalfcvllmsfnllsarlfgelefwsikiatiiglivvgfvmilfayktqfgh  
asftnl yehgvfpkgasgf  
fmsfgmal fsfvgiemi gvtagetkdpvktipkainsvpirilifyvgalavimsiipwqqvdpdnspfvklfaligipf  
aaglinfvvltaaasscns  
gifsnsrmlfglssqqappnfsktnkygvphvaifassallvaallnyifpdatkvftyvttistvlflvvwgliia  
yinyrsktpdlhkkatykl  
fggkymgyli fvffi fvfgll finvetrai yfipi wfill gfmlyrykriaaksnn  
>tr|Q6GG11|Q6GG11\_STAAR  
maelqrglegviaaetkissiesqltyagydidlaenaqfeevi flwnyrlnpneeelahlkgklnqymtlnprvyth  
feeyvtdhvhpmtalrtsl  
syiahfdpdaenesdenryeramriqakvaslvtafarvrqdkepikpnpdlsyaanflymlrgelptdieveafnkali  
lhadhel nasaftarcavs  
slsdmysgi vaavgs lkgplhganeqvmtml seigsienvdayldekfankdkvmgfghrvykdgdpraky lremsrqi  
tkdagree lfemsvkmekr  
maeekg lipnvdfysasvyhcmephdlftpi favsrsagwiahileqykdnrirprakyigetnrkyipleerk

Tsompanidou\_et\_al\_Supplemental\_FASTA\_File

>tr|Q6GG14|Q6GG14\_STAAR  
mmkfhhr1m1lissiliisfvltlgiihasityvlsekheqalatdarsyiy1vqdneidkvkeivkqnid1litkndk  
kvfssgk1kptktidnysq  
kkdvfi fnkkvngyhvwi kgynnditemhwtlwkyliltclvvlliclyfasrsfkrtilirpiqevtyatqllangyyhir  
vpesnvetkalfvstnd1  
arrlqklnneqkiqsnr1kttienipsailmidrngkivvankayyeqfnishnieqvgyhgvynteieqlilesfkvek  
piyeqlevainqvhakyfd  
iscvpiltrsqs1ggilvmhdi tn1kqlen1rrefvanvshe1ktpitsikgfaetlidgakndaes1dmf1niilke  
snries1vtd11d1shieg  
hteldtdymn1sdltrriidnmmqtanqknisihteiekdvivkaqueskiaqv1tn11tnainysyedgdinrvvyrdff  
rvifevqdfgigikledqg  
ri ferfyrvdkarsrdsggtgl1sitkhiveahqgni evnsqvkgstfkvilkyke  
>tr|Q6GG16|Q6GG16\_STAAR  
mnk1v1idgns1sfracy1p11snkagihtnavygfam1leki1keekpnh1vafdagkttfrhekyseykggrqktp  
pelseqfpyirql1dayhi  
kryeldnyeaddiigt1skeadkagfqtiiitgdrdl1tqlatdnvtiyytkkgvtdvdhytpdfiaekyngltpnqiidm  
kg1mgdtsdnipgvagvge  
ktaik1lnqfdtvegvyeh1deisgk1kek1qnskenalmskelatinvds pievk1led1lmthqdeqqekiel fkk1e  
fkq1ladidqsasgedaie  
kfeietsfdnvdfts1keatihfeldggnylrnnilkfslftgekhivinaddiinyaelvswlenpntkkvvydakkt  
yvashrlgidignisfdim  
1asyiidpsrtisdvqsvvs1yqgsfvkddvs1yggk1kfkvpedd1npyvasitdaiyfakpnmdkqleeynqvella  
d1e1plak1lsemeeigiy  
tdvhd1eemekeiqek1dv1irnihaagedfninspkqlgv1fet1ql1pvikkktgystavdv1eqlqgehpiidiy  
leyrqlsk1qstyveglqk  
visddqrihtrfnq1laqtgr1ssvdpn1qnipvr1eegrkirkafkptsksdsvilsadysqielrvlahitqdesmkea  
fingddihtatamkvfge  
adqvds1mrrqakavnfgivygisdygl1sqslgitrkkakafidylasfpgvkqymsdivkdakalgvfet1lhrriy  
pdi1srnfn1rgfaertam  
ntpiqgsaadi1klamvkaqmkettyqak111qvhd1efevpksevdsfsefveeimenalq1dvp1kvdssygatw  
y dak  
>tr|Q6GG22|Q6GG22\_STAAR  
mkqfksi1intsqdfekriekikkevindpdvkqfleahraeltnamided1nvl1qeykdqqkhydgkhfadcpnfvkghv  
pelyvdnriki1rylqpc  
kikydeerfeaelitshhmqrdt1nak1kdiymnhrdr1dvamaaddictaitngeqvkglylygpfgtgksfilgaiian  
qlkskkvrstiiylpefir  
t1kggfkdgsfek1lhrvreani1m1ddigaeevtpwvrdevigp11hyrmvhelptffssnfdyselehlamtrdgee  
k1kaari1ervks1stpyf  
1sgenfrnn  
>tr|Q6GG24|Q6GG24\_STAAR  
mskvqnesnvvkr1g1kdrhismiaiggcigtgl1fvtsggaih1daga1galigyaiigimvffl1mts1gematy1pvsgs  
fstyatrfvdps1gfalgw  
nywfnwvvtvaaditiaaqviqywtpl1qgipawawsal1vii1fsl1ns1svrvygeseyw1alikkvtviviaig1l1ti  
vgimgghvvgfeifnkgeg  
p1l1ggn1ggs11s1lgv1liagfsfqgteligitagesenperavpkaikqvfwri1l1fyil1aifvigmlipydssal1mg  
ggndvatspft1lvfkngaf  
afaasfnavil1tsv1lsagnsgmyastrm1ysmskdk1lafetfgktnkngvpym11vtaiivvii1fvvqsvtegayqyi  
vaasgl1tgfiawvgiavsh  
yrfrrafdkqnydksk1kytakwfpfpgpi1faailcivvii1gqdvdfiktgdfnfsrflitymgipvflaffiyhklrykt  
kkip1eqvd1rqdvsmdel  
kg  
>tr|Q6GG29|Q6GG29\_STAAR  
msdi1qfnpsskk1ykdi1kraeqdqnyd1myeyivqyerqfelteeiammkrml1yetgsf1elreetiv1l1ktgiqqyd  
al1miyyvks1lig1eqyfea  
vev1hqii1devkdhktrmal1hp1kefaksk1iedekr1tqsl1tdfdt1smreqth1il1klidngh1fqfqtvlyilksnm  
ysykl1s1lmiel1rfanct  
qel1tiekygmd1tfvpan1kg1leht11kekvipnvmel1negal1haeeahh1mnhs1imiypidiet1fetnkwinaye  
cyfkn1gl1kcel1qs1daf  
nfiqq1d1nnns  
>tr|Q6GG36|Q6GG36\_STAAR  
mkpvvmtqtndmqsd1vsi1ihkpfidikp1nfdih11nqrydw1ifssknvkvffky1kginvdniavigskaqyce  
s1girvdfmpndfsqegf1  
esfnqtnqki1lpsse1arp11saa1sednevvkid1lytsvpnkqni1qdvkemiehqquidaltfssssavryyfnegfvp  
kfk1syfaigeqtartiksy  
qqpv1taeigt1les1lieki1lesrg  
>tr|Q6GG39|Q6GG39\_STAAR  
mi1kvhi1cfvvtasgycy1nkreaqaa1  
>tr|Q6GG40|Q6GG40\_STAAR

Tsompanidou\_et\_al\_Supplemental\_FASTA\_File

mtmiyrnnfivfvlssffisillysshvllpfpmpgpiiasicvkvfkldikwplllselgivilgvqigstftknvmdi  
kdnwlsiivsisillial  
vmafikkiarintetaislsvipgaltqmlvmaeqdkranllvsltqtsriifvvlvpfisyffhdgnmhangkltkv  
lplsquvlnigqivilaia  
fivylimskikfptfqllaplivlivwnfstgltftldhwllnmaqliymirigvqiahllsdlkgrlaiaitinqnimli  
igalimvyiiffdnnpin  
elflgaapggvngivlvalatgadvamitsyhifriffilfiapginylkyrsnkred  
>tr|Q6GG41|Q6GG41\_STAAR  
mnecafgtkdpvyl dyhdhvvgp lydska lfkllalesqhag lswlt ilkkkeayeeafydfepkvaqmtahdidr l m  
tfpni vhrkkleai v nqa  
qgy lkieqafgs fskflwsyvngpkpdlqyehasdritvddtatqlskdlkqygfkflgpvtv f s fleaglydahlkdc  
pskprhn  
>tr|Q6GG43|Q6GG43\_STAAR  
mnyleslywihertkfgikpgvkrmewmlaqfnnpqnnikgihvggtngkgstvayl r talvengyevgtftspfi etfn  
erislngvpisndaivel  
srikpvsemmeretdlgvatefeiitammflygeihpvdviveaglgikndstnvtfpilsiltsigldhtdilggty  
ldiardkgaiikpnpvpiy  
avkneda lkyvreraieqhakpieldreivvvsqndeftyrykdyeletiilsm lgehqkqnaalaitaliele neqglie  
ldfnkmidgjesvrwtgri  
eqvhdkpliiidgahnseidalidtikqyhdkekvdilfsaingkpinemvkhlsliahtfyatefdfpkalrkeevg  
sienddiqlvddyvefikn  
yqgdtlvitgslyfisevskldfeal  
>tr|Q6GG44|Q6GG44\_STAAR  
mvvllsyscscisf flyqfisieetsfdylhrrskcdycnsslkwe lmpii s flllkgrcrnchkrislthffgetfal  
ipivfikydftynatlf i  
ttypvlliftmtditslml dcrliiicyivslslsitypvafiiismtthifyflfrsyigygdvllisalslffplqft  
iyvii ftfviag lvalitm  
ifkpikllplvpfi f i s f f i n s lfyndihqflggvyf  
>tr|Q6GG51|Q6GG51\_STAAR  
mtlfi i igvlvpmvymqlniknepvtrknl litlalstlgilvta lagvivotkeafpllsvaigsiitgivwgl l lsgs  
yalirflsnafgrk  
>tr|Q6GG53|Q6GG53\_STAAR  
mrli fsmikniiaviaiivi yialkyapflkeqdw npvnhdndqmnqv t qptndaqhvysgekeys l kendliknvp l s  
qiknvfkmidkl ef mavg  
mnr mayndqy i i qrgdefi lykfgdesmr vyntefemq d l n e l g q n l q l k p e n a y q  
>tr|Q6GG54|Q6GG54\_STAAR  
maeqskqkqaneqqkaqlfarwrqlqnsnsessndtr  
>tr|Q6GG67|Q6GG67\_STAAR  
mkkssriiaflllvvllfag maatyksv i knvnlgldlqggfevlyqvdp l nkgdkidkka l qstaqt lenrvnvlgvse  
pkiqveepnrirvqlagvt  
dqnearkilssqanl t i rdaedkvk lsgsdi kqgsakqefkqetnqptvtfkvkdknkfkvteeiskkrndvmvwl df  
kkgdsykkeaqkknkpfis  
aasvdqpinsdsveisggfkgqegvkkakqiaellnagslpvd l keiysnsvgaqfgqda l dktvfasfigvaliy l fml  
gfyr lpglvaiaialt tyiy  
l t l v a f n f i s g v l t l p g l a a l v l g v g m a v d a n i i m y e r i k d e l r i g r t i k q a f s k a n k s s f l t i f d s n l t t v i a a v l f f  
fgessvkgfatml l l g i l m  
ifvtavflsrflsl l vssni fknqywlfgvkknrhdinegvdvhd l ktsfekwnfvklakpligvsilivvvglvily  
ifklnlgidfssgtrvdfq  
skqaitqqkveqvvgsglkadqiqingkdnkvatvqfkddltraqdgnksdnikskfgdtpqintvspiigqelaknam  
laliyasigi i i y v s l r f e  
wrmglssv l a l l h d v f i i v a i f s l f r i e v d l t f i a a v l t i v g y s i n d t i v t f d r v r e n l q k v k i t t e q i d d i v n r s i r  
qtmtrsintvltv i v v v v a  
i l f f g a p t i f n f t l a l f i g l i s g v f s s i f i a v p l w g i m k k r q l k k s p k h l v y k e k s n d e k i l v  
>tr|Q6GG68|Q6GG68\_STAAR  
mikpkykwkltkpaeyisdeltsklk ltpivkkilesksiideqaiessi dtdinhda l q l s d m t k t i e r i k r a i a n d e  
kilvygdydadgvtsttil  
vttlql l g a q v g w h i p n r f t e g y g p n e l a f r n a h d e g i t l i i t v d n g i q g h n e i k m v q d l g v d v i v t d h e i g s t l p e a y  
aivhpmhpsfnypfqqlcg  
agvayklaqalienvpdyfka lvaigtiad lvs l tdenrslvkqglkv lndqcptsvkallkeagyndnideetigfiig  
prlnavgrl d d a s l a c e l l  
mtddeeaaf laeqveqfnrerkdivatiteeamamaemkvkngdlfll lakenwegvlgivaskivetfalptlilni  
dreqnhakgsarsidqvs m  
feilsahqeliakfgghhmaagmtmdienies laeglnkwmkelskttsl dpvkpvdvlltenditiknirdmnr l r p f g  
tdfsrpi femddlsvssvk  
aigqqknhlkl t lgesniaal f w q n g h l e p e l q d e q p i n i l g s v q i n e w n g n q s p q l i i q d i a m n e q q i l d y r s k r k s l p  
ftendeni v l i h p k s d k v  
naneyygeei kqtdkvv lrd lptsmed l s n s l q l q f s q l y i v l q h n h s i y f d g i p n m d v f k k c y k a l i t k q e t n i q k  
egml l c q h l s v k p d t l k f m

Tsompanidou\_et\_al\_Supplemental\_FASTA\_File

1kvf1d1kfvtqedg1irinqqpdkrsidsskvyqlrqqrmdvekqlllyqdfseiknwksq1s  
>tr|Q6GG75|Q6GG75\_STAAR  
mkhqfsrne1aighqgl1lkqqtvvilvgggvgsfaaealartnighiilidkddvdi1tnvrqlhal1ttvtvgqskvs1  
meeriklinpdckvtp1hm  
fyteetyeeifdnydidyfvdasdtimykvhlmece1drgikvissmgaanktdptrftisdiskthtdpmaki1rq1k1k  
klgirkgtipvvfsdespiv  
iredvkd1vgdknainrkgqmpssnafvpsvvglicasyvndv1kdipvrrikdkgq  
>tr|Q6GG79|Q6GG79\_STAAR  
msfidkakkavekfknsdneqvknvkdki1neytgsnneekkenedkek  
>tr|Q6GG80|Q6GG80\_STAAR  
maikysal1n1vpi1regedertaindmvkl1aqh1del1syerywiaehhnap1n1vssatal1liqht1ehtkhirvgsggim1  
pnhap1ivaefgtmat1f  
pnrvd1gl1gragtdmmtasal1rrdqhdgvykfpeevs1l1qqyfgpahqqayvraypavgknvplyilgsstsdahlaar  
kg1pyvfaghfapqmqkea  
ieiykt1fepsdv1depyivc1ntivaenddeaqyl1assmaqvmvsitrgrmqpvqppthe1qnilt1preyamamerqk  
is1igsentvqqki1qdfme  
tygevneimaisiydkdmq1dsyrrfknvinq1neknt1  
>tr|Q6GG83|Q6GG83\_STAAR  
midqqt1yqyiqngkieeal1qal1fgnieedpti1enyinagiv1ladaneiekaerffqkal1tidpknvgvfy1n1anvyyn  
q1ryqesik1lyqgal1qtei  
eqvdcn1ymi1gmaf1n1lesfk1al1pyl1mtaae1dkdkdaevqfygyl1vl1cqlemfneaitq1khv1tidknhvdaryn1gl  
al1fmkneni1devi1thfkea  
vtidpkh1l1sqhal1ktftkmkeee  
>tr|Q6GG89|Q6GG89\_STAAR  
mdd1nkky1id1lhqh1qns1sievl1refaevnevpi1vdr1t1d1lik1q1irmnnvkn1leig1taigy1ssmqfasi1sddihvt1t  
i1ernetmi1qyakn1lvthh  
fenqvri1iegna1eqfenvndkvdydmi1fidaakaqskkf1feiytp1l1khqgl1vitdnv1lyhgfvsdigivrs1nvrqmvk  
kvqdynew1ikppgytt1nf  
l1niddg1aisikge  
>tr|Q6GG94|Q6GG94\_STAAR  
mdvrfinegt1imi1yfenki1seetyrnvtamvrwi1rekeileiqdivpsyrav1iyfdeqaitpsk1lien1el1nkfneknv  
havnqtns1i1kipvqygg1t  
ygpdi1eevakhn1ritveqvi1ekhtskpyli1ym1lgfmpgfpyl1gg1deq1lhtprnrqpr1k1ihagsvgi1annqtg1lypsds  
pggwqi1igrtp1kvfsser  
epmsmyeagewi1qfyai1deqefiqierdi1sdgnfnvddwvvienvn  
>tr|Q6GG96|Q6GG96\_STAAR  
mniekieqi1k1lvkendvkkfkyknfedeie1idftdsnh1laahsnqsnqsmnnd1taskvndnsdvstndyhdikspmv  
gtff1qdske1tepi1vkvq  
dkvknkgdi1gyveamkv1nevtt1dvageiteivadhgt1nveydqvl1vrik  
>tr|Q6GG97|Q6GG97\_STAAR  
m1rc1lianrgei1avri1racreygietvavyakgdeqsl1vh1ladqaicigeant1dsyl1nidriisaaitganai1hpg  
ygf1sestk1faqtveeggi  
afigptkk1memmgdkitarqtvhagvpvipgsndavnhvseiek1akdigypvikaasgggkgirivkkaed1eka  
fkeaksegkkyfdddrvyv  
eafipvakhvevqvmgdgqdnvyl1gerdcsvqrknqk1ieespcaal1teerrqqicndavkvaraanyrsagtief1vt  
dnahyfiemnar1iqvehtv  
temraerd1vaaqyl1lehnh1l1pfsqndi1qfnghv1earinaenpekkf1qptpgkvta1h1l1pqgf1nvr1vds1l1yhgyqvs  
pyyds1vakvi1vksdras  
aidk1rat1demvidg1fst1tad1fyav1nyp1lyrdgdakdv1dik1flekhqivkgve1  
>tr|Q6GG99|Q6GG99\_STAAR  
mgrn1k1khresdfekt1nhkr1l1l1gsv1f1matsaigpaf1tqtavftsqf1asfafaill1siidigaqiniwri1lvvt  
g1rgqeisnkvp1pg1gtvi  
sil1iaf1gg1lafn1igni1agag1gl1nai1fg1ldvkwgaaitaifaili1fvsksqk1imdvvsmilg1ivmil1vvayvmfvsnp1p  
ygda1fvht1fapeh1pml1vl  
piit1lvgtv1ggyit1fagahri1dsgikgkqyl1p1fvnqsaigil1ttgimrt1l1flav1lgvvvtgvt1ssenppasvfeh  
aigpi1gkni1fgiv1lfgaam  
ssvigsaytsat1flkt1l1hks1kersn1livivfivistmi1fl1figkpi1s1l1liagaingwilpit1lgailiaskkksivgd  
ykhpnwmfi1fgivav1vti  
l1tgi1fsfke1v1q1lf  
>tr|Q6GGA0|Q6GGA0\_STAAR  
mifsn1l1fr1rptpar1l1tri1eks1l1qv1hfrsvnycqynfvehrt1is1flac1s1fmsrsq1m  
>tr|Q6GGA4|Q6GGA4\_STAAR  
msdi1kc1igc1gap1q1sedknkpgf1vpehnmfgddvic1rrcfr1kn1ynevqdvgl1esed1fl1k1l1sg1ladkk1g1ivn1vvdvf  
dfegs1finavkrivgnkki  
ilaank1d1l1pkqin1krrvkew1krtarkys1leadv1v1isaekgw1gid1l1ssiani1renedvyivgttnvgkst1link  
lieasvgekdv1tts1rfpg  
tt1dmi1dip1detsfmydtpgi1iqdhqmth1lvseke1ki1impk1keik1qrvyq1l1neaqt1l1ffggl1aridv1sggkrp1licf  
fsnd1n1ihrtk1tekand1w



Tsompanidou\_et\_al\_Supplemental\_FASTA\_File

rnq]gdlltppgnlqnfdlnevkavrletgkekrdvmisglgfitigpgakvivrvpknvdvvlrnsil  
>tr|Q6GGA6|Q6GGA6\_STAAR  
mltgkqkrylrslahnidpifqigkgginenmikqidtdlenrelikvhvlqnnfddkkelaelseathselvqvigsm  
iviyreskenkeielp  
>tr|Q6GGA8|Q6GGA8\_STAAR  
mniekavr1ske1pekrynhs1rvaetaik1aeiydgdtskvelagvlhdfckyddl1gmyqivrqyelgndllsygse  
ilhgpvcaimeheygind  
eev1maikyhttgrqqmtktek1ifiadyiepgrtipgvddirdmaynqgsldktiyeiskrtvlfliqkditvynktid  
c1nyynsderikdd  
>tr|Q6GGA9|Q6GGA9\_STAAR  
mnsqellaiavdaidnkkgedtislemkgisdmtdyfvvthgnerqvqaiaravkevaneqnievkrmegy nearwili  
dladvvhvfhkdernyyn  
ieklyqdaplesyqqvay  
>tr|Q6GGB1|Q6GGB1\_STAAR  
myqfllrykdf1aqwklyiisavvlmvligfifwrqddytsrdfenkdtvlkqstsensslskledvqvkdgdnsknkg  
pvyvdikgavkhpnykmt  
skdrvd1ldkaq1lddadvsqin1sekltdqkmi fiphkgqknvepqfgansvhvkngntntkvn1ntasvselmsvp  
gvqqakanaveyrnqqa  
fqeidd1kkvkgfgsktfdk1nsyftt  
>tr|Q6GGB2|Q6GGB2\_STAAR  
merikweeyfmaqsh1la1rstcqr1svgatvkdnrriaggynsvagevhcidedgclidghcirtihaemnal1qca  
kqgvstegatiyvthfpc1  
nctksiiqagikriyyaedyhnheyatk11kqsgiefkkipfspeyvaeyl1tkg  
>tr|Q6GGB7|Q6GGB7\_STAAR  
mtvqsayihpfcvriptycdfnkyfiqnpvdeyldalitemstakyrnlktmyvgggtptalsinqler11kairdtf  
titgeytfanpdeltkek  
vq1lekygvnrismgvqtfkpe11svlgrthntediysvlnaknagiksisld1myh1pkqtiedfeqsld1aldmdiq  
hissyglilepktqfynmy  
rkgl1k1pned1gadmyq1lmskieqspfhqyeisnfaldghesehknvywfneeyyfgagasgyvdgvrytninpvnh  
yikainkeskailvsnkps  
1termeeemflgl1r1negvssrrfkkkfdqsiesvfgqtinn1kekklivekndaialtnrgkvignevfeaf1ind  
>tr|Q6GGC3|Q6GGC3\_STAAR  
mqryfidqnadvsqrffittkkedihihtnmrydvgskiiltfndqtvylceiaditsdkiavd1kekqnintel1pvdvt  
icsgl1kadkyew1lqkat  
elgassfiavsmersivk1neakvakkierwqkiikeaaeqsyr1vipsiqfesnlklicdtidnydyiliaheeeakdg  
elsnfkqtlqqfkaqdkvl  
mifgpegl1seneis1fsntstvvg1gprilraetap1yalsaisyeke1mg  
>tr|Q6GGC6|Q6GGC6\_STAAR  
msynnflqmtt1lestagdtwveqvsniivqif1l1tcltflgfyqlyskkinaaggiat1s1l1l1flgfl1qgnvn  
mhsil1fsigvilvvielf  
vvgavigi1gmilitisitt1gdn1l1fmlanvival1ltivewilvkifnrkip1fdkvilkdstnsesgynshdnrsh  
1vgktaqtvt1l1rpagiif  
ceneridavsdgnf1l1rnktvki1evegtrvvrevd  
>tr|Q6GGC8|Q6GGC8\_STAAR  
msvgil1fvisviisittmrenshkdrqkppqktstdnepkkggffeeiertfkeiseelneeeksskrkyddt1p  
plfdel1pkeepskpvvep  
mapkkqgetkpmtekpi1vtpkaepveqkhrpsrqdnsdeirrqleks1rddiktirtidrekekqiakmekrardiied  
kylsertkr1k1kq1lnsq  
nvekd1tksafqfdkdevingmiwseilakpkq1  
>tr|Q6GGE1|Q6GGE1\_STAAR  
makhpfeqfn1less1idavkd1nfekpteiqnrriiprilkrtn1ligqsqtgtgkshaf1l1plmq1lidseikeppaivvap  
tre1laq1lydaanh1sqfk  
agvsvkvf1ggtdiekdrqrcnaqpqliigtprind1aktgh1hvh1asy1videad1mid1g1iedvdyiaar1edna  
n1avfsatipeqlqpflnk  
ylshpeyvavdskkqknknieffliptkgaakvekt1n1idilnpyl1civfcnsrdnand1ars1neagikvgmihgg1t  
prerkqmqkri1r1n1efqyy  
iasd1asrgidiegsvh1nfdvpndidffthrvgrtgrgnykgvaitlyspdeehnis1iedrgfvfntvdikdgelke  
vkahnqrqarmrkddh1tn  
qvknkvrski1knkvkpgykkkfkqevemkrqerkqfskqqrnrqkrkqknkg  
>tr|Q6GGE9|Q6GGE9\_STAAR  
mtknei1rkyi1hkmtfnkaekrkadt1rnqffateeykeanaialv1sfnhevdtfsiieqalmdhkri1fvpkmdy1n  
hqmtfkei1fn1kdi1dvdkk  
giyyptskgettnn1d1ivvpgvgfddgyri1gygggydrflanyqtktis1lydfqitsfepesfdqpvdkliiyqsa  
>tr|Q6GGF0|Q6GGF0\_STAAR  
mnikqfwkti1yywi1ry1nfdivsrekddqeiw1ahkrkkqvvi1fkqhikstqeirfdkakv1lehkdeianfisfepqsf  
efyyftesefseeq1nevs  
tirikfnv1rhtkdl1ikhpnif1ar1isedndkktymfykrkv1tdn1fdkymqkfspatyti1fvn1liw1cmily1n  
nfsdvk1ldv1gg1lvhf1nv

Tsompanidou\_et\_al\_Supplemental\_FASTA\_File

hgewyri vtsmflhfsfehilmnmlslfifgkiveaigswrmltvyfiaglfgnfvslsfntttisvsgasgafgligs  
ifammyvsktfnkmlgqll  
liaivilvgvslfmsninhahiggfigglitligyyykvrnriwilligmlvifialqiriftikedniynklikdd  
mtsgnydnaqni vkqtink  
nyaddqtyylsgmimatinsksegmtewerglrmfpksgllnfelaianslnddekaikyvrkaInadpkntdyinlek  
el tksnesknk  
>tr|Q6GGF6|Q6GGF6\_STAAR  
mklqwintfklhskkrqlskaqqidllsnlcnllkygftlyqsqfllnlqmtynkqlgttilseisngapcnkilslig  
ysdtivlqvylaerfgnii  
dyleetvnykmvnrkseqrllktlqyplilvsifiामीiilnlvtvipqfqlytsmniqlssfqktsffitslptiivv  
mliivsm laiimkliynnll  
nmInkinfvmlplisgyfqlfkyfvtnevllyfykngitlqsivdvyinhssdpfrqflgkyllytsemgyglpqilek  
lkcfkpqlikfvllqgekrq  
klevelklysqilvkqiedkaikqtqflqpilflilglfivaiylvimlpmfqqmqsik  
>tr|Q6GGF8|Q6GGF8\_STAAR  
mqirkqsaf tmiemlvmmllisiflll tltskglslnrviddeaniislitelnyiksqaianqgyinrvfyensdtikv  
ienkirkflklkvvgkiinv  
akvdiaafdkgninkfgsitidnnsiyriifhiekgriryekl  
>tr|Q6GGG0|Q6GGG0\_STAAR  
milskvtnkfvlfqkipllikrhvysinvkafslie mlvammvisitllivpdllrlnktfliesrelttvdfeffsrdi  
ledfkgvdrndieirqqri  
ilhkgemieykinnkii kvvndrgnitminnvtaftaniyyksiikititvkvgnlqtktiyv  
>tr|Q6GGG9|Q6GGG9\_STAAR  
msritqvhrilegkhl daiiilsdynrrylsgftgtsgaliiskdkqylitdfryidqatkqapnyeiinrkstiigeik  
ellhgenfenvgfehhvs  
ydtylelnksrislisisntvdki rdvkdadeialikaadivdetyeyiltvakagmtekelkaileskml elgadgps  
fdtivasghrgal phgvas  
dkiekgdmj tldfgayfngycsditrtfaigepdklkeiyqivlesqmka ineirpgmtgaeadaisrnyleskgygk  
efghslghgigleiehegpm  
lartiqdklqvnnctvepgvyieggi rieddil itengcqvftkctkdilvlt  
>tr|Q6GGH1|Q6GGH1\_STAAR  
mnfkeikelieildkstle iniedtkgkvtkkeketeiitpqi sqmpfeaaampmpqvqstdnnkteapkptsdnhkt  
inapmvgtfy kspspdeea  
yvqvgd tvsnettvcileamklfneiqaeisgeiveilvedgqmvveygqplfkvk  
>tr|Q6GGH9|Q6GGH9\_STAAR  
mlqtlsikqfaieeleiqfsgdltvlsgetgsgksiiidaigqligmrassdfvrhgekkaviegifdideskdaihil  
knmdidvdedflvkreif  
ssgkslckinnqtvtlqdlrkvmqell dihgqhetqslkqkyhl tll dnyaesryqdll dkyhqtfnqykakkqgledl  
esadqallqrldlmkfgle  
el seahlkegeiegleidikriqnseklsalannahmtl denaidrlyelshlltindivpnkydklkedidqfyi  
ledakhe lydemantefde  
qvlneyesrmlnlnlkrkygkdise liayqeklnneinkienyeqstsq lreeinalynqviev gqaalsqrrivarel  
rdhi vseiqnlqmkanle  
isfkkleepnidgiefveflispnkgeplkslnkiasggelsrimlalksifvksrgqtailfdevdsgvsgqaaqkmae  
kmr diaeyiqvicishlpq  
vasmsdhllisksskddrtttqvqel igddkvd eiarmisgasvdtltrenaremiqhnqrhr  
>tr|Q6GGI0|Q6GGI0\_STAAR  
msekqydlvllgggtagyvaairasqlgkkvaiverqllggctlhkgciptksllksaevfqtvkqaamfgvdvkdanvn  
fenmlarkediinmqyggv  
khlmqhnhidiyngtgrilgtsifspqsgtisveyedgesllpnqfvliatgsspaelpflsfhdhki lssddilslkt  
lpssvgiiggvgimefas  
lmidlgvdvtvieagerilptkskqasqllkkslsargvkyegikl sendinvnedgvtfeissdiikvdkvllsigrk  
pntsdiglnntkiklstsg  
hiltnefqtedkhiyaagdcigklqlahvgskegvvavdhmfegnpi pvnynmmpkciysqpeiasiglnieqakaegm  
kvksfkvpfkaigkavids  
hdanegysemvidqsteievginmigphvtelineasllqfmngsalelglttahapsisevlmelglkaesraihv  
>tr|Q6GGI3|Q6GGI3\_STAAR  
meitmpklgesvhegtieqwlsvvgdhideyep lcevitdkvtaevpstisgtiteilveagqtva idtiickietadek  
tnetteeiqakvdehtqks  
tkkasstveqtsstsknqprnngfrspvfk lasehdidlsvvgsgfegrvtkkd lmsvienggttaqsdkqvqtqsts  
vdrssnqsseddsenstip  
vngvrkaiaqnmvnsvteiphawmmievdatnlvnrnhyknnfnknegyntffaffvkavada lkaypllnsswqgne  
ivlhkdinisiavadenkl  
yvpvikhadeksikgiareintlatkarnkqlttedmqggtftvntgtfgsvssmgi inhpqaailqvesivkkpvvin  
dmiairsmvnlcisi dhri  
ldglqtgkfmhikqrieqytlentniy  
>tr|Q6GGI5|Q6GGI5\_STAAR  
mlkl npykigfrtikta vgmtlgviiskllgl dnyassailvvlcikhtkvhslqaiisrlvscflvlflgsaifsllgq

Tsompanidou\_et\_al\_Supplemental\_FASTA\_File

spivlgjivllfipltvv  
kvqegvitscvillhvfnaksidahlivnetlllliglsiaftmnlmmpsldkqldeykckieqqiadi fskysyiceky  
edtiaiefeallnikkak  
siafrdvknhfvrnensyyhyfdmreeqvellmrmpkpliesichkdp1lndvasllkeiglrvnsndytamrlhnyetr  
lkldelplptthkalsra  
siiqilneleeylqiksqfsglkmhseva  
>tr|Q6GGI6|Q6GGI6\_STAAR  
mineqrllntflelvqidsetgnestiqipilkekfislgldvkedeaakhpklgannlvctmkstieegevpklyltshm  
dtvvpainvkvkddgyi  
ysdgttilgaddkaglaamlevlqvikeqqiphgqi qfvitvgeesgligakeInselldadfgyaidasadvgttvvga  
ptqmlisakifgktahast  
pkegvsainiaakaismk1gqvdeittanigkfhggsatnivadevileaeashdperiktqvkhmtdvfettaselg  
gkavvtveqsypgfkindn  
etvvkiaqesarnlglsantii sggsgdsiintfgipsvilgvgyekihttnermpikslnllasqvleikivarqsk  
>tr|Q6GGI8|Q6GGI8\_STAAR  
mknsqni v cigaanidkqlylkselvnkssnpvssisvsggvarylalnigklnskktilltllgndkeadyilneankf  
idlkhiki enmtgmfts  
vidyngemicgfadmdiylnlnkylnekieviknadcvvdsnipkesiqyliqlcgksnipigiipasikkvrnilkn  
lakidyli fnkkeaeafwn  
vs1ntksdykkikkiskstseiknivitngnddifytngelsifknvqqssni indtgagdvfsasvfhywlenyevdnyl  
emalfnacstvstiyntsm  
in  
>tr|Q6GGI9|Q6GGI9\_STAAR  
meklnqvmlyvddvekakafwteilefvvsetplaedyvavevsptkdaetsltimakefiekyspevnlgtps1mfke  
knfdalysklnldlgl tghd  
ivetngqrvfnfqdgqnyfavsd  
>tr|Q6GGJ0|Q6GGJ0\_STAAR  
mvtikdvalkagvspstvsrvikgnqriseatiskvkkvmeelnyfpntaartlitnqtykiglvlgkseepirlnpfyi  
nvl1gisetcnqhggygtqt  
tvsnmnd1mdevykmi kqrmvdafillyskendpikqmlidesmpfivigkptsdidhqfthidndnilasenltrhvi  
eggydelifitekgdfevs  
kdr1qgfetvasqfnldyqi ietsnerevifnymqnlhtr1kdpnikqaiisldam1hlailsvlyelnieipkdvmtat  
fndsylteiasppqtsidi  
kprmlgqqagaa1n1lnkkaqdvie1viidtelkirkstqr  
>tr|Q6GGJ6|Q6GGJ6\_STAAR  
mmkgqhfi vtggtsglgl1sivrkl1lenkvhvt1lvrdvdkatri fdqelgktinvipcd1nd1ksiqalqfednt1fdgf  
iysaglygfsisdhsfse  
mietyqln1isfnvlytv1rpyltsnahivgissqaafstqanaahygaskagfyalmnalrlespn1himtvnvgpidd  
pfhqkadpsmkymmki  
m1danqlaedi1ygi ktkqle1nrpkwmhhal kmyqi aprffercfplfnka  
>tr|Q6GGJ7|Q6GGJ7\_STAAR  
mncqsesvvr1cvryaeqlsvfeeftv1di1sdi svdqisdstlyytcekf11vlqgnvlgvqv1tndeltcevkyrk  
mf  
>tr|Q6GGJ8|Q6GGJ8\_STAAR  
mqkni1ksgialselglgcm1gtd1kkaeqi idcavengityfdtadmydkginesvvgalfkyqrrddivigtkvgn  
r1tkdgsttwdpsksyike  
avkgs1kr1gidhidlyqlhggtiddp1detisafdelkqegii raygissirpnvidyylkhsqietimsqfnlidnrp  
es1ldaihnddvkvlargp  
vskg1ltsnsvnl1dnkfkdg1fdyshdelgetiasikeiesn1salfsylv1tshdvlgsiivgassvdqlkenienyht  
kvs1dqiktataravkdley  
tnh1v  
>tr|Q6GGK2|Q6GGK2\_STAAR  
mqqalinfyyqfhtkqhyf1chdi ledawkaeknyskqdavvs1ilfatacyhyrrn1kgayksfnkskei iqnakdrd  
aly1n1ndyq1liekqiak  
1naakpfssv1lpi tpdferi ikanyppydynhetatdpfivdhmrrdrseviaakeeaiqlrkhrn  
>tr|Q6GGK8|Q6GGK8\_STAAR  
mwfekfknknetkyryykykdp1ytdkwkrvsv1lnkntkqsqkeamfrleekike1lnkssselkt1tfhall dew1  
eyhiktsgsk1t1lnniki  
r1rn1kryssen11lnk1dtkymqi fink1sdiysqnqvtrqlgdmkgaikyavkfynypney11tnvkipkrrktiedi  
ekdeskmynylemnqvlqi  
rdhi1ndnk1hkrnr1iasilevqaltgmrigelqalqekdid1lnktinitgtihrikyeegfykdttktis1skrsi  
sinsrtveifk1iilenkm  
1krwnssyvdr1gfi fttkkgnp1cnnqi agv1kkttkalnmnkvtthtfrhthit11vemvslkaimkrvghvdekt1  
iriythvtekmdreltqk1  
enips  
>tr|Q6GGK9|Q6GGK9\_STAAR  
mqi11111ittgipgytyya1snkn1vyfnsdnkkv1laffsvsvfi11t1s1fsgqnnvnl1fqk1tftkt1saliv  
siliiii1tefvytkiiei

Tsompanidou\_et\_al\_Supplemental\_FASTA\_File

ynifsnhrksnnlkkvetlpvhllkyednkykmfivtkdfegniiekglndysrkhnrnilldtrfnanyeafktlse  
yndsyldfenkvkleylyi  
dkkkliiss  
>tr|Q6GGL1|Q6GGL1\_STAAR  
metnktidlmnyvefpkryteakgklvaqpittinsarrvenedmtvcyildqddvmdfifdrdiitvycpgngtatde  
yfceiifnsddtftlkr1s  
nyvtikdrsymskindvntgkvvr1frdfk  
>tr|Q6GGL2|Q6GGL2\_STAAR  
mkkvigll1vstla1tacgekekpkkeenksqtqkhkdskpktqqekmkkvedknppnnsiqnnsnnqnsqnnq1nnn  
sdpsnntpaninkndsqt  
n1ndeyvvsrgwtkdeqakafeeykkgkedearagasavpganin  
>tr|Q6GGL3|Q6GGL3\_STAAR  
mgkyeelmkcevevketqrvprgfdgwygegeifirps1sernklevlyeelahhk1tygnildqskfnnrkfenyarr  
hgfiavplreiveaynyg  
vrnlyelsey1q1seeyi1eaeiqykkiygigthygeysitfep1rvfkykei  
>tr|Q6GGL4|Q6GGL4\_STAAR  
mnsttsnr1kqamkssn1kq1divnkaksmeemetgik1sktd1sqyvnkgvtpgqklyvlakilnvseaw1lgydvesk  
riddkerdkfnhqetiag  
hankdeftpeeweeienfmqvwvdrkk  
>tr|Q6GGL5|Q6GGL5\_STAAR  
mcfdsaligriekygnryafayaig1sers1slk1ndkigwrdeiakacellsipreeiqvyffnykvqnn  
>tr|Q6GGL6|Q6GGL6\_STAAR  
meqit1tkee1kei1akevrnaikgekpissgaiskvrinnddleeink1nfakd1slgr1rk1nhpi1lkyqhgfe  
sihgkvyyvqvdhdirkl1t  
1sifgvt1nsd1seseyn1aakiyrdiknylyiyekrvseltiddfe  
>tr|Q6GGL8|Q6GGL8\_STAAR  
mqaqnkkviyyyydeegnrrpldiqindgyelmvrshfinntieeipyvnnnlyalvdgyefkl1d  
>tr|Q6GGL9|Q6GGL9\_STAAR  
mkl1nhdcvr1111eiesnkkigep1trhnfnndni1fdkydfetvmys11kleeakficcd1kfiegrsvswiidditwsg  
hef1dnirdnktwnevkrv  
vnktssms1n1mgk1afqy1sqkfn1t  
>tr|Q6GGM3|Q6GGM3\_STAAR  
mpki1vpptpentyrgeekfvkkl1yatptqihq1fgvcrstvywn1kdyredn1gvenlyidyspigtl1niskleeyli  
rkhkkwy  
>tr|Q6GGM4|Q6GGM4\_STAAR  
msdyksyliav1cftv1aiv1mpflyfttawsiagfasiatfi1fykeyfyee  
>tr|Q6GGM5|Q6GGM5\_STAAR  
mt1qqk11shfatydnfnssddvvetfgiskthakst1sk1kkkgkiemeswgiwrviessqlh1svverkkeileeqfel1  
ar1neqsedpreieerik1  
mir1anqf  
>tr|Q6GGM6|Q6GGM6\_STAAR  
mailedifeel1kn1rv1ntel1stvdssivqekvkeampkeetaql1esieevketstd1tkdyv1svgkeflkkad  
tsdkkefrnk1nelgadk1  
stikeeyek1vdfmkarina  
>tr|Q6GGM7|Q6GGM7\_STAAR  
mkl1dhsnrahak1sasgkqwn1ncppsikasegiadkssvfaeegtfahe1selyfs1kyeg1tqfefnkafqnykrny  
ysee1reyveeyvanveek  
ynea1srddvial1fetk1dlgkyvpesfgtgdvii1fsggvlei1dkykggievsaidnpq1rlyglgayell1smydi  
htvrmti1qpridn1fstee  
1pisr11qwgtdfvkpl1arlayngegefkgagshcrfckikhsctrayemqdvppkph11sdeeiaellyk1pdikkwa  
devehya1dqakendkny  
gwk1vegrsr1rmi1tdtkam1lek1veagykpeditetk11sitn1lek1ligkkafskitegfiekpqqk1t1atesdkrpai  
kqsaeddfk1  
>tr|Q6GGM8|Q6GGM8\_STAAR  
mkakv1nktkvi1tgkvrasyahi1fepshmqegqeskyss1liipksdtstikaieqai1eaaakeegkvskfggkvpan1k1  
plrdg1dterreddvnyqday  
finasskqaggi1dqnk1r1tdsgtvsvgdyirasin1fpfntngnkgiavg1lnniq1lvekgepl1ggasaaeddfdel1d  
dedf1  
>tr|Q6GGM9|Q6GGM9\_STAAR  
mrfmni1dietyssnd1skcgaykyteaee1feili1aysidggaisaidmtkvdnep1hadfetfki1al1fdpavkkyafna  
nfertcl1akhfnkqmppee  
wictmvnsm1rig1pas1dkvgevl1r1qnqkdkagkn1l1ryfsipckptkvnggrtrn1pehd1lekwwqfidyci1rdveve  
mtiahki1kdfpvtaieqay  
wvfdq1hindrgik1l1sk1lm1ganv1dkqskeel1nqakhitg1lenpnsptq1llaw1kndqg1dipn1qkktvqey1keat  
gkakkml1eir1qmsktsvk  
kynkmhdm1mcsdervrg1ffqfygagtgrwagrgvq1qn1tkhyis1dtelei1ard1likeqrfdd1d111nvhpqd11sq1v  
rt1ftaeegne1avsd1fa  
iearviawakeqwr1dvfnthgkiyeeasqmfnpvesi1tkgdp1rqkgkvsela1gyqggaga1kamgalemgieen

Tsompanidou\_et\_al\_Supplemental\_FASTA\_File

elqglvdswrnanpnivnf  
wkacqeaaintvksrktththglrfymkkgflmielpsgralaypkasvgenwsgsqvvefmgldlnrkwsklkyggkl  
venivqataridlaisiar  
leasgfkiivghvhdeviveiprgsnglkeietimknpvdwakglnlnsdgftspfydkd  
>tr|Q6GGN4|Q6GGN4\_STAAR  
mtdsarkerlnqffgskrylyqdnervahvehvngtyyfghyktmfkgvktfdtaeeleiyikqhdleyeeqkqptlf  
>tr|Q6GGN5|Q6GGN5\_STAAR  
makikrkkmtlllelvewannpeqveskvfsdrmgltgecsevfhstdghgyftkvvtdkdi ftveiteevtedtefd  
c1ve1ndiegfeiyendsi  
relidgtsrafyilnedktmtliwkdge1vv  
>tr|Q6GGN6|Q6GGN6\_STAAR  
mmqtykvc1c1kffaskcdyk1kkhyfvkstneekatnmv1k1rkk1pfetasievekveai  
>tr|Q6GGN7|Q6GGN7\_STAAR  
miqptree1infmkkhgaenvdsitdeqsairhfraqskvfkderdeykkqrdeliediaklrkrneelenmwrvtvknel  
lgyehycfki relhpesk  
anrigalyiggkstadiilsrmeeldgtnefyeflgmeedtne  
>tr|Q6GGN8|Q6GGN8\_STAAR  
mnnrkqieqsvisasayngndtegl1keiedvykkaqafdeileglpnamqda1kgdiyldeavgimtsqvvykyeeeqe  
nd  
>tr|Q6GGN9|Q6GGN9\_STAAR  
mtnt1tidqlqe1l1qikefddriptrnlndtvasmiiefvewintleffknwkkqpgkpldtqldeiadylafslqlt1  
tivneedleettevmvdlf  
enevt1pk1hsyfvhvmht1teqfvkgidnsivqvl1mpflyantyysidqlidaykkkmkrnherqdgtagdaggyv  
>tr|Q6GGP0|Q6GGP0\_STAAR  
mrertkiirygnwkeifilqgknmviglrqifdelkrlyegykiivpiievdfek  
>tr|Q6GGP1|Q6GGP1\_STAAR  
mtqylvttkdssglpnehftaardnqftftveaeskeakeyesqntpivyytnskvtlferpseevlgs1fek  
>tr|Q6GGP2|Q6GGP2\_STAAR  
mfntpkmlpekhtevfktykngtpeekaeiegcfiktvdedsefyspmlas1neqq1ksmlrqv1flidtgddndd  
>tr|Q6GGP3|Q6GGP3\_STAAR  
mikqilr1if1lameylgkyvteqvyimmtanddvevpsdfekiraevsw  
>tr|Q6GGP4|Q6GGP4\_STAAR  
mviaiiifelii1mclai1alev1  
>tr|Q6GGP6|Q6GGP6\_STAAR  
m1dkvtqietikydrdvsysyaasr1stywtnhnmawsdfmqklaqtvrtked1teynkmskseqadikdvvgfvgy1k  
egkrragqvmrsm1tdi  
dyaaqdmtdi1smfydfayc1ysthkhreispr1r1v1plkrnvadeyeagrkvadivgmdyfdtttyqphr1mywps  
tsndaeffftyed1p1ldp  
dti1neyvdwtdtlewptssreesktr1adkqgdpeekpgivgafcraytieeaietfipdlyekhstnrytyhegsta  
gg1vlyennkfayshhntd  
pvsqmlvnsfd1vr1hlygaqedtkttdtpvnr1psykamqraqndevvkkqlindkmtamedfdeiennddvset1  
eitskgtfkasipniei1  
rndpn1kgkivfneftkqieclgkmpwnnfki1rqwqgdss1rsyiekiyidihsgktdai1svamqnayhpvr1dyl  
nki1swdghkr1lek1fikyl  
gvedtevnrtttkka1tagiarvmepgckfdym1tlygpqvgksa11kk1ggawfsds1svvtgkeayealqgv1mem  
aelaatrkaeveaikhfis  
kqvdrfrvayghyiedfprqci1figttkvdf1rdetggrrfwpmtvnrpervevnwsk1tkdeidqiwaekyyeegge  
1fl1npeleemrsiqskht  
eespytgi1dey1ntpipsnwdd1tiferrrfyqgdvdm1ptgnvdyvernkvcal1evfvecfgkdkgdsrgsmeirkis  
ni1rq1dnwsvydgnksqk  
irfgkdygvqiyvrdes1ed1i  
>tr|Q6GGP7|Q6GGP7\_STAAR  
mkest1ekylveitk1ng1clkwvapgtrgvpdrii1mpegkyfvmekqekgl1hp1qkyvhrqfenrdhtvyv1wnk  
eqvntfir1mvggtfgd  
>tr|Q6GGP9|Q6GGP9\_STAAR  
mgntiydikpgtfkyiesey1n1nenkeinr1rmeil1nptkel1dtnivgypl1qkgepvrttelmatr11tnkm1rnlee  
mveavesey1k1pedhkkv  
ir1kywnkdkk1kieqigdachmhrntvt1irknfvkaiyahagik  
>tr|Q6GGQ0|Q6GGQ0\_STAAR  
mtkhnniykhrksygydwfyhskawkk1reialdrdny1cqmc1eggkitdakivhhivyl1ndfnkaly1nn1msvch  
achnki1handkkavktki  
kfvki  
>tr|Q6GGQ2|Q6GGQ2\_STAAR  
mdsvtikv1nepspk11ttwyaeqvtqgkiktskyvkkecerh1ry1lenggwvfdelahrpirfiekfckpskgskrq  
1vl1qpwhfi1igs1fgvvh  
ketkl1rrfreal1f1mgrkngktt1sgvanygvsqdgengaeih1lanvmqaril1fdeskamikaspilsrefrpl1rde  
1hydktiskimpqasdsdk  
ldgl1nthigi1fdei1hefkdyk1isviknsraar1qp1li1yittagyql1dgp1ldmvemgrdi1dgviedertfyylas1d

Tsompanidou\_et\_al\_Supplemental\_FASTA\_File

ddddmndssnwi kanpnlg  
vsidleemkeewekakrtpraergdfitkrfni fanndemsfidyqtlqknndviaiddlegrpctigydlsetedftaac  
atfal dngkvav lshswip  
khkveysneki pyreweedglltvqdkpyidyqdvlnwi ikmnehvveki tydranafklnqelknygfeteetrqgal  
tlspalkdlkemfldgkii  
fnnpnlmkwyinnvqlkl drngnwlp skqsryrkidgfaaf lntytdimnkvsdsgegniefisikdimr  
>tr|Q6GGQ4|Q6GGQ4\_STAAR  
msmkakyfqmkrkskskgei fiygdivsdkwfesdvtatdfknkl delgdiseidvhinssggsvfeghaiynmlkmhpa  
kiniyvda laasiasviam  
sgdti fmhknsflmi hnsvwmtvgnaeelrktad llectdavsnsayldkakkldqehlkqml dtetwltaeaal sfgli  
deilganeiaasiskeqyk  
rfenvpedlkkdvdkitkiddvdtse lvetpkessml eekekrekikreceilkmtmy  
>tr|Q6GGQ6|Q6GGQ6\_STAAR  
msleeiklwl ridynfend lieglisakse lllsgvpdydkddleyp l fctaiky i iardyesrgysndqsrskvfnek  
glqkmlklkkw  
>tr|Q6GGQ7|Q6GGQ7\_STAAR  
mefnefkdrayffqyvngpypdeekmlyscfckiy npsmkdreilkatesks gltiimrsskiey l pqtntl vkids  
alysdklfniveiridtpd  
igyntvvlsek  
>tr|Q6GGR4|Q6GGR4\_STAAR  
mnekvegmltelkl dhlgvqegmglkrqlgvvnsemkanlsafdkseksmekyqarikglndrlkvqkkmysqvedelk  
qvnanyqkakssvkdeka  
ylklveankkek la l dkskeal kssnte l kkaenqykrtnqrkqdayqklkql rdaeqklknsnqattaqlkrasdavqk  
qsakhkalveqykqegnqv  
qklkvqndnl sksndkiessyaktntklkqtekefndlnntiknhsanvakaetavnkekaalnnlersidkassmktf  
nkeqmi aqshfgklasqad  
vmskkfssigdkm tslgrtmtmgvstpitlg l gaa l ktsad fegqmsrvgai aqasskd l ksmnsqavdlgaktsksane  
vakgmee laalgfnakqtm  
eampgvisaaeasgaemattatvmasain sfgl kasdanhvad l larsandsaadiqymgdal kyagtpakal gvsiedt  
saaievl snsglegsagat  
alrasfir lanpskntakemkklgih lsdakgqfvmgelirqfdnmkgmtreqklatvativgteasgflalieagp  
dkinsysks l ksnsgeskk  
aadl mkdn l kga leqlggafes laievgkd ltpmi ragaeg ltklvdgfth lpgwvrkasv glal fgasigpavlaggl  
iravgsaakgyaslnrria  
entil sn tnskams lglqt l flg sttgktskgfkg lagam lfn l kpinvlknsak lail pfk lllkng l glaaks l favs  
ggarfagval kfltgpi ga  
titaitiaykvftaydrwefrn gning l getikffggki iggavrkl gefkny l gsigks fkekfskdmkdgyks l sdd  
dl l kvgnk fkgfmqtmgt  
askkasdtvklvgkvsketekalekyvhyseennrimekvr l nsgqitedkakk l lkiead l sn l iaieiekrnkkele  
ktqelidkysafdeqekqn  
il trtkeknd l rikkeqelnqkikelkeka lsdgqisenerkeiek lenqrrditvkel sktekeqerilvr mqrnrnsy  
sideaskai keaekarkak  
kkevdkyeddviai knnvn l sksekdl laiadqrhkdevrkakskkdavdvvkkqnkdidkemd l ssgrvykntekw  
wngl kswsfnfredqkkks  
dkyakeqeetar nreni kkwfgnawdgvs kstgeafskmgrnanhfggemkkmwsgikgipsk l ssgwssakssvgyht  
kaianstgkwfgkawqsvk  
sttgsi ynqt kqkysdasdkawahsksiwkgtskwfsnayksakgw l tdmanksrskwdnisstawsnaksvwkgtskwf  
snsyks lkgwtgdmysrah  
drfdai sssawsnaksvfngfrkw l srtyewi rdigkdmgraad l gknvanka iggl nsmigginkiskaitdknlikp  
ipt l stgt lagkvatdns  
gal tqpt fav l ndrsgn apgggvqevihradgt fhapqgrdvvp lgv gdsvinand tkl l qrmgv l pk fhggtkkkkw  
meqvt en l gkkagdfgska  
kntahn i kkgaeemveaagdk i kdgasw l gdk i gdvwdyvqhp gklvnkvmsgl nifggganatvki akgays l lkkkl  
vdkvkswfedfggggdgsy  
lfdhpiwqrfgsy tgg l nfngrhygidfqmptgt niyavkggi adkvwt dyggnsiqiktganewnymh l skqlarq  
gqrikaggl igksgatgnf  
vrgahl hfqlmgshp gndtakdpekwlks lkgsgvrsgsgv nkaasawagdi rraakrmgvnvtsgdvgnii sliqhes  
ggnagitqssal rdinvlq  
gnpakgl l qyipqtfrhyavrg hnniysgydql laffnnsy wrsqfnprggwspsgpryangglitkhqlaevgegdqk  
emvip l trrkraiqlteqv  
mrii gmdgkpn ni tvnndtstvek l lkqivm l sdkgnk l tda l iqt vssqdn l gsndairglekil skqsghrananny  
mgltn  
>tr|Q6GGR7|Q6GGR7\_STAAR  
mateevkikal l endkqy fpathwkaingvpyagssdidglpqdgiisvddknkl dnlki geagiiqnsivqkspngklw  
kitvddsgklgtvlfy  
>tr|Q6GGR9|Q6GGR9\_STAAR  
msnl eksvain l entahyen i sn l ditfrtgesnssv l lfnitknnqpl l lseenikariai rkgvmv vappleildp fk  
gv l kfql pndv i krdgsyq

Tsompanidou\_et\_al\_Supplemental\_FASTA\_File

aqysvae1gnsdvvvvertitfnveks1fsmipsetklqyivefqelektimdrakamdeaikngedyasliekakekg1  
sdiqiaksssidedlkqlan  
shisdlenkaqaysrtfdeqkrymdekheafkqsvnsgglvtsgstsnwqkakitkddgkimqitgfdfnpeqrigdst  
qfiyvsqainyprgvstng  
tvey1vvtstykrmtyrpngtnkvfvkrkeagswsewelaindyntpfetvqsaqskanmaesnaklyaddkfnkrysv  
ifdgtangvgstlylnes1  
dqf111fygtfpggdftefgnpfgggkisl1npsnlpdndgngggvyefgltkssrts1tisndvyfdlgsqrgsganan  
rgtinkiigrk  
>tr|Q6GGS3|Q6GGS3\_STAAR  
mdakvetryivlilalvngflankgispivddetissil1tvvalyttykdnptsqegkwanqklkkykaeskyrkatg  
qapikevmtptnmndtnd1  
g  
>tr|Q6GGS4|Q6GGS4\_STAAR  
m1mtknqaekwfdnslgkqfnpdgwygfqcydyanmffmlatgerlqglyaynipfdnkakiekygqiiknydsflpqkl  
divvfpskygggaghveiv  
esan1ntftsfgqnwngkgwtngvaqpgwgpvtrrvhydnpmfirl1nfpnn1svgnkakgiikqattkkeavikpk  
kimlvaghgyndpgavng  
tnerdfirkyitpniakylrhaghevalyggssqsqdmqdtaygvnvgnkkydglywvksqgydivleihldaagesas  
gghviissqfnadtidsi  
qdviknnlgqirgvtprnd1lnvnsaeininyrlselgfitknkndmwikknydlyskliagaihgpigglvagnvkt  
sahnqknppvpaytldkn  
nvpkykeqgnytvanvkgnnvrdgystnsritgvlpnnttitydgaycingyrwityiansgrryiatgevdkagnris  
sfkfsti  
>tr|Q6GGS5|Q6GGS5\_STAAR  
m1kkaklilial11sgcsttnnesnketksvpeemeaskyvggqfppaekdaiefakkkhdkiakrgeqffmdnfs1k  
vkatnvgsgdgvvevvhc  
ddhd1vfnasipfksiidss1rsedkgddmstlvgtvlsgfeyraqekeydnlykffkdnkkyqytgftkkainkt  
qngyeneyfyivanipt1  
qeyrkyep1ikknn1nfkkgmkearkgvykaeievht1fskssnfskdkk1ddvid1sestkk1h1nfentkiflq1  
akstistnrvnysdnesir  
ieve  
>tr|Q6GGS6|Q6GGS6\_STAAR  
mfkrtklilial11sgcsttnnesnnetksvpeemeaskyvggqfppaekdaiefakkkhdkiakrgeqffmdnfg1k  
vkatnvgsgdgvvevvhc  
ddhd1vfnasipfksiidss1rsedkgddmstlvgtvlsgfeyraqekeydnlykffkdnkkyqytgftkeainkt  
qngyeneyfyittipyn1  
teyrdyfepl1nksdsefskel1snvkkq1kdksk1svtt1fskknnytkksnsenvikmaeeikkekeipngid1sikf  
sdnkintvknpyngkstse  
ygvfd  
>tr|Q6GGS9|Q6GGS9\_STAAR  
mqhiiktalqqtfnktnksiynilvgkkshqtfddacsqqqlslyhslp1lkypsfelflenitefnaemeimlhpryt  
fesmgqtfqaiql1vqtm  
ntmqdfrfvpisqnnkiqetvkiynyikenqlqidfenelnlfkaitlkgpcylhyylqgydepmytrqqvs1iek1  
sqql1fefemnn1vtmmfe  
lesgeytilskiimkpt1lnqyitytr1leqftiediaaqqvkiintiedhvleilikgymnyddyveqedqlqf1nf  
yqhrger1kfykeqfdt1  
syfqlkvli1vgfergd1nva  
>tr|Q6GGT3|Q6GGT3\_STAAR  
mkh11vihtggtismsgdsnkvvtdinpis1hqdvinqaaidelnfnvpsphmtiqhvkq1kdiileavtnkydg  
fvithgtd1eetaf11d1  
ilgieqpvvitgamrssneigsdglynyisairvasdekarhkgvmvfvndeiharnvtkthtsntntfqsphngplgv  
1tkdrvqfhhmpyrqale  
nvnekl1nplvkaymgmpgdisfysregidgmviealgqgnmpsa1legiqqlvs1nipiv1vsrsfngivspityaydg  
ggyqlaqqgf1fsng1ngp  
kar1k11val1snn1dkaeiksyfe1  
>tr|Q6GGU1|Q6GGU1\_STAAR  
mak1nmneikkveqr1ekaikskdsvleqas1h11ssggkrvrpafvil1ssqfgkdeqtseqtyqvavale1ihmatlv  
hddvidksdkrrgk1tisk  
kwdqttailtgnf11algl1ehl1mavkdnrvhqlisesivdvcrge1fqfdqfnsqqtiiynlrrinrktalliq1stev  
gaitssqsdketvrklm1g  
hyigmsfqiiddv1dftstekklgkpvgsd11nghit1pillemrknpdfk1kieqlrrdserkefeeciqiirksdsid  
eakevsskylskaln1ise  
1pdghpks111s1tkkmsrnt  
>tr|Q6GGU6|Q6GGU6\_STAAR  
mediykliddinlqklen1dsrvneaittdnda1filgetlynfglmpqglevfrvlyhkydpdeselliyfieglmsen  
qtdealey1syvepspek1  
mleadlyqqimmevaik1qea1elepndpiihfalaemlydygqylratseyetvletgeyqvgvnl1fsmadcs1q  
sgnysdairlydeinedem

Tsompanidou\_et\_al\_Supplemental\_FASTA\_File

tsedyllkkaisydknditqeaikimttllskdpdyiqgyllylslyeneknypdaietgkeglrlsqfykelmyttgcle  
iehgdanegvlllkqalev  
dnayqepllilisdlyrneedyeaieilntyvdeedldptfiwhlafaygqeerdkeaqhffelayptmktnidfmsdyyf  
yliiegqmeqaitilnql  
elepsnenwhde lsrlqs  
>tr|Q6GGU8|Q6GGU8\_STAAR  
mtinklwqytlqrswlmmllcnlmgmygyiwygeqlshtpwqfki fvpdsptailflvisisliliqkqnsiidala  
fvtlfkygiwavimnlfj  
ieggdiltvnglvlfmshsimavqaiyfyrfrkrsmigisvamtwvflndyidyfhlqfpyydfitthvwqigvlscclsv  
fglllyielnkllkck  
>tr|Q6GGV0|Q6GGV0\_STAAR  
mksmvemqrevdeyigqfktgyfsp lanlarlteevglareinhtygekkkkdseeantikaelgdnlflclansmg  
idmtesfnetmekfntrdk  
nrfkrk  
>tr|Q6GGV1|Q6GGV1\_STAAR  
mkigitycpsmggsgiatelgiklaerghevfitsnipfrirklpnmifhqvevnqyavfqyppyditlstkiaevi  
keydldllhmhyavphaic  
gilaremsgkdkimttlhgtdivlgydhsllqgaikfgieksdivtsvskslaqetheiienkeiipiynfvrenefp  
tkhntalksqfgiapdekv  
lihvsnfrqvkridtiieftakvrekipskllllgdgpe lvpmrqktkelnveedvlflgkqdcvsefyqlsdvlvlllse  
kesfgltlleamktgvvpi  
gsnaggi kevikhgetgfvdvgsdsasdyairlledkvlynklqknmladiaerfgselitdqeyyyyqkmlnehnks  
kge  
>tr|Q6GGV3|Q6GGV3\_STAAR  
mskysqdvllqlyknkpnysgqsiaeslnisrtavkkvidqlklegckidsvnhkghllqqlpdiwyqgiidqytkssa  
lfdfevydsidstqlaak  
kslvgnqssffil sdeqtkgrrfnrhws sskgqglwmsvvlrpnvafsmiskfnlfialgir daiqhfsqdevkvkwpn  
diyidngkvcgfltemvan  
ndgieaiicgiginltqql edfdesiry ratsiq lhdknkldryqflerllqei ekrynqfltlpfseireeyaasniw  
nrtllftendkqfkgqaid  
ldydgylivrdeageshr lisadidf  
>tr|Q6GGV9|Q6GGV9\_STAAR  
mtenkgsqpkknngnggksnksknrvkr tiiki igfmi affvlllgillfayyawkapafteaklqdpipakiydk  
ngelvktldngqrhehvn  
kdvpksmkdavlai ednrfyehgal dykrlfgaigknltggfgsegastltqqvkdaf lsqhksigrkaqeaylsyrle  
qeyskddi fqvyl nkiyys  
dgvvtgikaaakyyfnkdldnlaeeaylaglpqvpnnyniydhpkaaedrktvlylmhyhkritdkwedakkidlka  
nlvnrtaeerqnidtnqds  
eynsyvnfvkse lmnkafkdenlgnvlqsgikiytnmdkdvqktlqndvdngsfyknkdqvgatil dsktgglvaisg  
grdfkdvvnrnqatdphpt  
gsslkpf laygpaienmkwatnhaiqdessyqvdgstfrnydtkshgtvsiyda lrsfnipalkawqsvkqnagnapak  
kfaaklglnyegdigpsev  
lgsasafspqlasafaaianggtynnahsiqkvvtrdgetieydhtshkamsdytaymlaemlkgtfkpygsayghv  
sgvnmgaktgtgtygaety  
sqynlpdnaakdvwingftpqytmvwmgfskvkqygensfvghsqqeyppflyenvmskissrdgedfkrpssvsgsip  
sinvsgsqdnntnrsthg  
gsdtsanssgtaqsnnntrsqq  
>tr|Q6GGW1|Q6GGW1\_STAAR  
mllinrgvfdlndfir lkvfssynihdkimylyrkflldldntfenklnqii  
>tr|Q6GGW2|Q6GGW2\_STAAR  
mndvvesliyevnmqqnfenvksqqqdhdfyqtvkpytehidsllneiklhreffievpmnsrkfellianieqlsve  
chfkrtsrk lfielksvq  
ydlqnil dgvtkegtyg  
>tr|Q6GGW7|Q6GGW7\_STAAR  
minkeqldllyklkveksrneallhtinqvikkvylqytcsvfghfsagkstlinllieq dilpsspvttsntaiv  
svsdnhdianlpnqtyak  
lsnydevremnrqnvdesveinfqsakfengftlqdtpgvdsnvashqsitesqymytsnmi fytvdynhvqselnfkfm  
khindvgipvvfiinqidk  
hqddelsfatfksrveksiadwdiklehtfyvskfdhsenelgalstylvsldqhretiedytsrtveyiteaqldyiqs  
eiqevledlgi eae feqa  
flnsqhqai seeaqllnnpdelmaf lknkrknilenayimphnmrem lrsylesmsqdfnvvgllfnkkkkklqiqqrll  
ltatdalqehvnqqi rqp  
redmsfvtrfinkkeasdkvl nqhydvkpe mieglyqpqtsisntyvltfsdevvkaikkyveqqstpi fkeienvqad  
elpteessddlkeyqrytel  
nelrqs lttknyrhyyihl desldklvdqrettyqv atdnakdnrdnqqlnqntattnmsidiqaldiidsvplfkrtk  
qdihetlridnklikigv  
fgtfsagksslinallgehilvsspnpttaatteisygdesyitlksqsqlldeinavveyqdisfstiedfinsdlekl  
kshlnknqlafvhavekhy



Tsompanidou\_et\_al\_Supplemental\_FASTA\_File

nlyvsmlegekhaiqqelkkwsaedeyatfvktvhialmhdwlkgkiivds1g1hsnnqrhtneteqiltssdlilyv  
syfnhsftdndkafiehmklk  
dmnq1nenqafkmvinaadlaesqddleavetyvsdalrkvhlqsdi favssrnalqaedkgidqlkqsiqqfvdvesks  
ileqqmihq1qqmdhsyve  
mitefetnkadjsrrqhr1tvykdkqr1qhqlidat1qhtdneveeqvyhlnar1klq1l1ddiksvfnsqmtqnsdfnee  
kkvstkvyl1dqihqr1fle  
qsliterikkyfknqlteqiapivqqlad1hvi vnpqfnfesanieqpl1hidfndmlnalpkqltkrkilnpgqrdih  
esicgst1g1l1ppqmg1lr  
qq1elyvkqmadeaesqfesfeaniqtqind1lafdl1dt1l1nq1kdkhq1ktily  
>tr|Q6GGW8|Q6GGW8\_STAAR  
mpnk111vdgmal1frhfyats1hkqfmynsqgvptngiqgfvs1hfsaiheirpthvavcwmdmgqstfrndmfgykqn  
rsappeel1ppqfdyvkeis  
eqfgfvnigvknyeadvigtlaqqystdndvyiitgdkd11qcindnvevwl1kkgfniynryt1hrfneeyalepqq1  
idikafmgdtadgyagvkg  
igektai1k1iqqysvenvidalsagqrnk1nd1delylskrlaeihtqvp1dsealfekmsfatt1nhilsicne  
helhvsqkyisshf  
>tr|Q6GGX5|Q6GGX5\_STAAR  
myneilg1vtfiatfv1mvlmyrffgkqgliawvaigtiianiqviktveifgisat1gnvmfasiylatdi1ndiygr  
vakravw1gfsst1imiiv  
mq1s1hfiapedmaqkalhai fdvvprialgsivayiiqhidvfifsl1kkvfssdktf1raygstflssiidtaif  
vaiafigslpgtvvfeifi  
ttyv1k1astvfnvpfgyiaksfyrkgk1dk1dqy  
>tr|Q6GGX6|Q6GGX6\_STAAR  
msr1ltyseqnalakidd1mtyncqcpiktr1rk1legtkahhfcinecsigkeikqlgnelq  
>tr|Q6GGX7|Q6GGX7\_STAAR  
mqi1s1setpnhntmk1t1sesregmtsdytkvddsqpafind1kvegvks1fhvmdfisvdkendanwetv1pkvea  
vfe  
>tr|Q6GGY9|Q6GGY9\_STAAR  
mir1gkmsd1dq1n1lveeake1mkehndeqwddqypl1ehfeediakdylyvleendkiygfivvdqdaqewyddidwp  
vnregafvihrltgskeyk  
gaatel1fnyvid1vkargaev1ltdtfa1nkpaqgl1fakfgfhkvgeql1meyppydkgepfyayykn1ke  
>tr|Q6GGZ1|Q6GGZ1\_STAAR  
msqwkr1s1l1ivft1lvfgi1affhesr1gkwidnevye1f1yssesf1ttsim1gatkvgevwam1cis1ll1vay1mlkrh  
kiealffal1mal1sgiln1p  
a1kn1fdrerpt1l1r1iditgfsf1psghamgstayfgssiyl1nr1nqgnsk1gil1glcaam1ll1sisrvyl1gvhyptd  
i1agi1ggvfc1il1st1ll  
rnk1in  
>tr|Q6GGZ2|Q6GGZ2\_STAAR  
mwgdv1l1c1g1idnhfql1l1y1senhc1q1etktffeyfl1rivnkthdyailenkkicisq  
>tr|Q6GGZ7|Q6GGZ7\_STAAR  
mcgl1rs1t1g1ttnieqt1khfmvdi1gl1ncee1l1lens1r1fgdad1spgtr1qfi1qv1pseql1eeshfv1g1gl1rtptd1sglee  
yae1l1ssk1d1pftt1vke1ln  
gnkyfs1lednghi1fs1ynennygv1gl1mps1fesavn1l1hqvq1gl1p1v1l1kvnhvdi1tgq1l1tni1fg1evfaeyqp1fdn  
adyhvq1v1k1igtg1l1ggei  
h1mpvetem1tpaygavdq1vefetkdvd1ffnqaksr1deve1pyqt1leqddies1ritens1gl1sfi1ft1lqk  
>tr|Q6GH00|Q6GH00\_STAAR  
msdr1fik1fndeql1dakqvm1l1qd1ar1l1l1kneqt1qvki1k1qfpy1npvqnv1l1tswf1shrpshiemag1ktdvm1laaygy  
h1mdvq1v1nevvd1k1t1fk1h  
pkfyq1gl1fk1l1edmr1v1ns1ikverp1stak1id1l1rd1tris1ytes1q1kvyr1tk1qytd1l1f1y1leha1f1sqd1fd1dips1hs  
d1l1ddi1l1vnm1f1y1l1pn1ffq1n  
qnsedn1my1aqr1imyqvd1d1l1kedm1l1neyy1l1pkt1lynt1aspefed1l1krtdas1qv1dg1qdd1t1seddd1nesekad1sksads  
esk1ggay1leme1l1hegg1nse  
t1l1gn1deareg1dat1dd1m1tdm1tk1kg1ksnd1l1nreeg1dav1g1sq1af1q1ldgv1nk1veik1wq1pe1iep1qy1v1leyq1esk1qdv1qy  
e1kd1li1qi1k1ktiereqrd  
arf1n1tkgr1l1qkd1l1nw1f1iddqy1k1fykk1qd1l1sks1fdat1f1l1idas1asm1hd1k1maet1k1kgv1l1fhet1ka1ln1k1he1il1sf  
sedaf1ds1dd1hv1qp1ni1inei  
inyd1st1fek1dg1prima1lep1qdd1nrd1gvair1vaser1l1mrr1nq1hr1fl1iv1fsd1geps1af1nys1qd1gi1d1tye1avem1sr1k1f1gi  
ev1fn1v1f1sqd1pi1tedveqt  
ihni1yg1qy1aif1veg1vah1pgh1sp1l1kk1l1l1ks1l  
>tr|Q6GH03|Q6GH03\_STAAR  
mryni1sh1fg1v1vg1ip1vaf1l1ts1if1gia1l1dvs1fl1dms1ig1iv1gl1mty1l1pi1q1k1l1tsr1ky1l1neig1l1trk1dy1ri1rn1q1lnht  
hq1kl1rg1l1k1tyv1n1rs1ikd  
frq1ndi1y1q1s1rs1y1tt1vr1q1r1pas1fyk1veg1ff1ysh1idna1l1n1vday1tr1ak1mpk1ks1ineqq1k1leq1trit1l1devk1rt1liad  
l1kr1neddyer1di1em1eln  
kl1hq1khh1qd  
>tr|Q6GH08|Q6GH08\_STAAR  
mtv1kyn1qngel1md1gis1l1kt1iaq1sfg1t1pt1ivydel1qi1reqm1rry1hraf1k1dsg1l1kyni1syaskaft1cl1mqv1kl1vaeed1q1l  
dv1vse1gely1ta1eag1feps

Tsompanidou\_et\_al\_Supplemental\_FASTA\_File

rihfghnktkheiryalennigyfvidsleeielidryandtvqvvrvnpgveahthefiqtggedskfglsiqygl  
ikainkvqqskyklkgvh  
chigsqiegteafietakivlrlkeqdiqvellnlgggfgikyvegdesfpiesgikditdaikseikvlgidapeigi  
epgrsivgeagvtlyevgt  
ikeipeinkyvsidggmsdhirtalzydakyqallvnrneeaddsvtiagklcesgdiikdaklpssvkrgdylailstg  
ayhysmasnynqmkkpsvf  
flkdgkarevikrqsrlrqliindtk  
>tr|Q6GH14|Q6GH14\_STAAR  
mtklavvgatglvgtkmlletlnrknipfelvlfssarsagkevefqqktytvqeltdarasehfdyvlmsagggts  
aplfekggavidnssqwr  
maedidlivpevneptftrgiiianpcstiqsvvp1kv1qdayglkrvayttyqavsgsmgkdkdlaevngkapeayp  
hpiynnvlphidvflengy  
tkeeqkmidetrkilnapdlkvtatcarvpvqdshsveidvtlekeataedikalfdqddrvvldnpenney  
nkdevfvgrirrdslent  
fhvwctsdnllkgaalnavqvlqvmr1kgan  
>tr|Q6GH15|Q6GH15\_STAAR  
mvtrsv1kfggssvsdfkikriaem1kervnqdeqlivvvsamgnttdq1mtvst1tktpkqqela111ttgeqqts  
ylsmv1ndigvnaamtgy  
qagiktighh1kskiaqinptfeqafqendilvvagfqgindhqel1t1grggsdttavalavsnqipceiytdvdgvy  
atdpr11pkakr1divsye  
emmemsalgagv1etrsvlaknyniplyl1gk1snvkgtwimsneeilerkavtgv1dkhmmhv1tisyp1pdnq11tq  
1fteleegavnvdmsiqiv  
n1dgl1sftikdsdfhqismilkt1knqyealaykinehyvkis1ligsgmrdmsgvaskaf1t1liennipfyqtttsei  
sisyv1ddfngqqavekly  
dafni  
>tr|Q6GH20|Q6GH20\_STAAR  
mettdnrrqs1vdqqlvqkh1ssrtvknkvfkliflact11glv1lia11tqtlikgvsh1n1qfftnfsstpsmagvk  
galigs1wlm1siip1s1i  
1gigtaiyleeyaknnkftqfvkisisnlagvpsvfvgl1gyt1fvvgagiealkmgnsilaaaltmt11ilpiivssq  
eairavpnsvreatyglga  
nkwqt1rrv1paalp11tgfils1sralgetapl1vligipt11latprsil1dqfsalpiqif1twakmpqee1qnvasa  
gi1v11vili1mngvai1  
rnkyskkf  
>tr|Q6GH23|Q6GH23\_STAAR  
msqgl1plredvpvsetwd1td1fkddqyyesidalvqqanqfhhtyatt1nsieqintalaelenilialdr1snyael  
r1svdtsnieaqv1sak1s  
1tygkivsq1sfveseilelpeeilqq1ekscpyqhyik1q1kqkpfq1sasveq11ail1spt1nspydlygttkm1dit  
f1sfeh1dg1t1tpvdyatfe  
ndyednkdp1fr1rks1fks1fsdgi1rkyqhttaatynmqvqqekiead1rgfesvidy11hsqevtrdm1fdrqidmimrdla  
pvmqkyak11qri1hg1ndm  
rfed1k1svdp1dyepe1siedsknyi1fgal1sv1gddytnm1reaydqrwidfaqnkgkdtgafcaspyf1thsyv1f1swtg  
kmaefv1lahelghaghft  
1aqkhqpy1leseasmyfveapst1nem1many1fnksdnprfkrwvigsil1srtyyhnmvth1leaayqrevyrkvdqge  
s1napt1neim1nvyk1ff  
gdavdmtegae1twmrqphyygm1lysytsag1t1igtvvsqkiknegqpavdaw1et1kkgsvspvelaniagvditte  
q11k1st1qy1isd1vdevek  
1tdeieqann  
>tr|Q6GH29|Q6GH29\_STAAR  
mg1ldias1rsiergfnnyqsecvin1ksfsetqhetevkgsngkvyr1cyidmehprkskcncpladgrrvickhmi11  
ftaspeaankhi1im1neve  
edyh1rrnmwids1kemindmsee1rday1nm1iehgemael1gl1deedefy  
>tr|Q6GH36|Q6GH36\_STAAR  
milvvdnydsftyn1vdi1vaqhtdvi1qypdddnv1nqsvdavi1spgpghp1ddqhlmk1i1ssyqdkpilgic1lgaqal  
tcyyggevikgdkvmhgkv  
dt1kvishh1qhl1lyqdvpeqfsimryhs1isnpdnfpeelkitgrtddc1iqsfehkerphygiqyhpesfatdygk1it  
nfinyvkkg  
>tr|Q6GH37|Q6GH37\_STAAR  
mdvfyk1kikanvtpel1aq1hskk1i1lestnqqatkgrysivi1fdiygt1t1dndv1svst1kesyqiterpyhylt1tki  
nedyhni1qdeq1kpi1pfi1s  
gyvg1tcsfd1vrh1efpk1lqsiq1ledhkqh1dvr1ymveqvyvfdhykde1y1iatnqfsnstksd1enrvnksied1tkiq  
p1fmp1tq1df1d1fktkei1qsn1i  
seerfiemi1qyfkeki1tegd1mfqv1psriykyahhanq1n1q1t1fq1lyq1n1krqnp1spymy1nidqpyivg1sspes1fvs  
vkdqiv1ttnpi1agt1qrge  
ttq1dnemkq11ndp1kecsehrm1vd1grndi1hrvskig1tskit1lmviekyehvmhivsevtgein1q1n1spmtvian1  
1ptgtvsgap1lraieriy  
eqyphkrgvysggvgyincnhd1falairtmmideqyinveagcvvydsipekelnetk1kaks1levsp  
>tr|Q6GH38|Q6GH38\_STAAR  
mepilemikt1tgin1spsgdteai1qfvekyakd1gyq1tt1tnkga11itvpgkndevqrcitahvdt1gamvkeikedg

Tsompanidou\_et\_al\_Supplemental\_FASTA\_File

rlaeliggftynaiegey  
cqiktdagqiygticlhetsvhvyrnnheiprdqkhmeiridevtseedtkslgisvgdfvsfdprtvtitssgfiksr  
hlddkasvami1k11kk1k  
eeqii1phtttqfyisnneeigyganasidskikeyialdmgalgdgqasdeytsicakdssgpyhkq1ksh1vnlckin  
nipykvdiypygsdasaa  
lhagadirhglfgagiesshamerthidsikatek1lyayclspie  
>tr|Q6GH40|Q6GH40\_STAAR  
mynyh1ledrdv1cjdqksffasvsciekglp1etklavvadtkrqgsvvlaatpk1kelgiktgsr1feiphrndiyi  
inpsmrky1nsvaiskia  
lryippedlhqysideffmdvtdsyhrfsstvhafcer1kreiyeetgiyctvgigsnm1lskiamdveakhnqngiaew  
ryqdvptklwpiqplrdfw  
ginrrteak1nkrigftigd1akypykflkkefgilgvdm1hangidqskvrekhhisnpsicksqilmrdyhfdeakv  
vmqeliedvasrvrarkkv  
artihfafgysdeggvhkqyt1kdptn1ekdiyvmmhfadk1cnkqalyrt1sis1sqfinederq1s1fedeyqrkrd  
eclaktidq1h1kyskgiv  
skavsfteagtkhgr1glmaghkm  
>tr|Q6GH49|Q6GH49\_STAAR  
mkdfds1ipgwfkfsvhvgt1iwsqylig111tagffftisskfvqlrmlpemfralverpetledgkkgispfqafai  
sagsrvgtgniagvataiv  
lggpgavfwmvviafigaasafieat1aavykvhdkggfrgppayitkgl1nqkwlgivfailititfafvntvqsnt  
iaes1ntqynispvitgii  
laivtaiiifggvrsiat1sslivpimaiiyigmvlvillfnldqivpmigtiiksafgieqvtggavgaav1qgikrgl  
fsneagmgsapnaataav  
phpvkqgliqslgvffdtm1vctataimilysglkfgdnappqvavtqsalneh1gsaggifltiavt1fafssvvgny  
yggqsnief1stnrvilfi  
frcfvvv1vfvavvtetvwtad1fmg1maivniisiigl1snvafalmkdyqkqkkegknpvfkpenlein1fgisaw  
gankyksdk  
>tr|Q6GH56|Q6GH56\_STAAR  
mnssspenpngkyspviysaivvaivv1lgaf1peqfnvytnnikmwitek1gwyylil1ttiivffci1flifspigkl  
klgkpnkpefnti1swfam  
1fsagmgig1vfygaaepmahfatpptadpkteaytea1rstffhwgfhawavygvvalalaysqfrkgepg11srtlr  
p1lgdkvepgigifidvls  
vfati1vgvavslmgalqingglh1y1fnvpnntfvqaiiivvtilfiasawsg1skgiqylsn1nig1gtilmvaaliv  
gptv1inm1tsstgsl1n  
tfl1fnsfdta1n1pkrewmsswt1yywgww1swspfvgvfiarvskgrsirefisgv11vpavsvfwfsvfgvlgi  
gkkykei1fdmtpetq1fgv  
fnhvpfgiv1s1ia11iasffitsadsatfv1gmqt1f1g1npsrm1kvvwigisqal1afv111aggngaeal1naiqs  
aai1safpfsfvv1lmmvs  
fykdanqerkf1gl1t1tpnkhr1qeyiksqqedyesdilekrqsrriekkdn  
>tr|Q6GH59|Q6GH59\_STAAR  
mkt1kga1fms1kpkvdi1dv1lymfqeyekgvsf1y1id1t1q1ldivnt1ypkykykthgiet11tqkqynhyskel1  
kvvney1n1sqstqdiaik  
ynirs1tqvkni1kmytv1gkei1knqspktgvyimkarkt1feervt1ivey1lnhkqsyrevaehfn1sygqiyqvw1hkyq  
ahgkng1vdgrgk1gkpk1sm  
mtpee1qkeaei1qal1kagnr11emendv1kkfqa1eremi1qrenksrhtkrskr  
>tr|Q6GH66|Q6GH66\_STAAR  
mmfynkyknvstyiii1flvssaafai11sanvsahseqvymtdh1q1knt1inkayehkdptn1nse1qrdgkvfal1n  
>tr|Q6GH68|Q6GH68\_STAAR  
mdtpk1kq1fafn1ni1qm1msk1sdevkt1nkpkrvt1fneyg1tkwytyydg1dynn1fimvsy1kdkvna1lytnq1ni1tsk1kik  
cntpks1vvrqr1gepetei  
vkgrvryeqn1keydv1fhknhiy1ttvfydkhrrn1nvtav1qv1sdamen1r1keqygapsk1sladsfel1qnfd1vnaerkqh  
q1st1kyskq1nsetarkhs  
kdmaknhyfdhtn1kgqsp1fdr1kkdgi1afnsagen1aygqv1ssiyahqgl1msi1ghrkn1ilndt1fkil1gv1gvdfndekq  
p1fwtenytd  
>tr|Q6GH75|Q6GH75\_STAAR  
mtnykvv1ldm1dt11nsdnvi1seetany1tai1qdegyy1vlasgr1ptegmi1ptard1kl1pehhsy1iis1yngsk1tin1mtn  
eevevsks1igk1qdfdeivd  
ycrdrgffv1tyhdgq1iydse1heymnieae1tg1pmkrvddikayiqddvpkvmgvdyanitearid1ngvfndnvda  
ttskpf1f1efmakdvskgn  
aikal1chk1gysvdqvia1fgds1mndks1mfevagi1aiamgnasdel1kqyadeit1dhnengiphalk1l1  
>tr|Q6GH77|Q6GH77\_STAAR  
mrrwqglveefkahlpvntpk1t1negntplihcenmseilgidlyvyk1eganptg1sfkdr1gmvmavtkakeqgk1kiv  
ic1astgnts1saaayaara  
glkai1vvi1pegkia1lg1ksqavmygaeivsi1egn1fdealeivkei1aksgeielvns1vnp1ri1egqktg1sfeivqq1ldgea  
pdil1aipvgnagnitaywk  
gfkeyheakgsq1pkm1fgf1qaegaspi1vqnkvikn1petiatair1ignpaswdkatnalkesng1lidsvt1ddeileayq1m  
ttkegv1fsepasn1siag1  
ik1hrqgk1lpqgk1kvai1tgng1kdp1dta1s11dn1pik1lpndk1dsi1idyikga1

Tsompanidou\_et\_al\_Supplemental\_FASTA\_File

>tr|Q6GH80|Q6GH80\_STAAR  
mrvnemnakeqlvdnlmktssqfkhfgevamqlfndelklpsiveicverkrldivkvpqsyallyidkqdqaiak  
edlslskiakvyvqndtt  
imsifvydvndewifrlpnrirpksniyfhslnwdvdyikpeivlmydlmqhhqyhhsnykrvidalsyyqffilkf  
vvgqrikdaiqrinn  
>tr|Q6GH81|Q6GH81\_STAAR  
msfyvvliliiivaligilvlnqrysnskidtevyarkqlikknkalsaeaelrsqmlssnndvghhayknakrelrkil  
dsylengklkydiivtsn  
latkhpffeyarsfdiivsdiglinvdvkswgektfyhfdvpdehdtemsnsniekvvghyisqqyhdqfnssrksiyt  
ftetvqpnrvydydydp  
yqlaannakalkdhieqfnfkvqstgviyfsdgtvniigseerdkyvdtvstkslrriseaieiskhplnkeqvnq  
itafk  
>tr|Q6GH82|Q6GH82\_STAAR  
mksnkslamivvaiivglafqfmmhkgpffkgtnhetvqdlngkdkvhvqrvvdgdtfianqngkeikvriligvdtpe  
tvkpnptvpqpfqkeasnys  
kktltnqdvyleydkkqdrygrtlayvwiskdrmykelvekglarekyfspngkyrnvfiqaqnkakqqklniwsk  
>tr|Q6GH84|Q6GH84\_STAAR  
misliiaedqnmrlrqamiqlklhgdfeiladvngldaikiieahpdvildiemsgmtglevlseirkkplnikvii  
vttfkrpgyfekevandvd  
ayvllkersieelvetiykvynkkeysaslmstfftdgtvrnytsvridklfadnrfdawkkaneqgwi  
>tr|Q6GH85|Q6GH85\_STAAR  
mkflkdtisaeissilylifpiagiffnevygptwlyiisvivfslsylvilvinnrlntlmfyilliihyfiicyfvfs  
vhpmllsfffysafaipt  
fknnvkkmatnlfiltmicftitylvhndyfvamtiyyvillivfdnlkkvkdreyykeieeknryintliteqerhr  
igqdlhdthghvfaslsk  
selaykiidsdtenakaelainklsreslnkvreiddirlpsfieeiesickilkdadiqftfenkelaqllsptkqs  
ilvmiareainnvikhana  
skvhgqlramnehklqfiidngegidsgceiksisqrvkhlngtlevesnkgtkliiemptggia  
>tr|Q6GH86|Q6GH86\_STAAR  
milsylkiefklvllrkkttlililfpvifyilftsildlpedvkpkfykeymysmtvysllsflttfpldiineqng  
wrqrlmvtptfttsyvik  
vvtmqlqfaialvifmvghfykgvemsavqwlesgiflwlgasllitfgilfsllndiqktsalanivtiglavlgglw  
fpintfnpwqlghvahvlps  
yhlrklgvdiasnhhinlisfviiilyalgsiiavycishfkrae  
>tr|Q6GH89|Q6GH89\_STAAR  
meqiklktftsetlellesninelgseeaanlklvnitikeieertfpnneefnailtlnsvk  
>tr|Q6GH91|Q6GH91\_STAAR  
mlihyfhkittttiiillksrqikvntaqinnfkyik  
>tr|Q6GH92|Q6GH92\_STAAR  
mnlqsyigklvkltnnkiiligkvidfdkiddnfdgnsieidtgritydisenkikdiqitk  
>tr|Q6GH93|Q6GH93\_STAAR  
mipgvnaspmhpwrsttvphlgnwrdfkffkeregkyrvenntemklgevhytktgfhvpyikke  
>tr|Q6GH94|Q6GH94\_STAAR  
milimidsqldgnvtakelesfkelveferiekanknsnkdk  
>tr|Q6GH95|Q6GH95\_STAAR  
mifdskpnsivmlhnypgqsgfseydlftffkhspsiktivtnkeqvkitksdrfqgkivskfctkyfthiniindsy  
iekllkklysinmikvvr  
>tr|Q6GH98|Q6GH98\_STAAR  
mdimlkhealehylmnkynlhyieahklteikynsilin  
>tr|Q6GHA1|Q6GHA1\_STAAR  
mstgnlilsderfdlkdinfnqigkihignvyietikekvhytktgahivpyidk  
>tr|Q6GHA3|Q6GHA3\_STAAR  
mpgekatellfdskpnsivmlhnhpgqsgfslndlavftinnsiktmtivtnkgrikfisktehfekevmmkkmianllie  
ksldvistkdierllkely  
nndnii  
>tr|Q6GHA5|Q6GHA5\_STAAR  
mipgvnappmhpwrsttvphvgnwrdfkffkeregkyqvevkeaklqekaknqmkiemiesgkikieinpekqrhslghk  
lylknkiyalqnderfpsy  
tilsielelndllkysmtgkilvdkfgfnrkeiinfektigkayaggkyintaygkihysktgshivpfvskek  
>tr|Q6GHA6|Q6GHA6\_STAAR  
miiimrk1kednqvivyeyipqdkiekkgteitvnlsvkvidyklskvenegilirydksfhailnfidenkfpneyiy  
awy  
>tr|Q6GHA7|Q6GHA7\_STAAR  
mfkvnysilssyppdiylnslavgvafeiigesyhkneikfitqrrkilsfddeidnlelinmldglkcefeqtnqslk  
sykkkfvnnyfyfenieykm  
fslkevnnfientykyvlhghldkkerlkktekelns  
>tr|Q6GHA9|Q6GHA9\_STAAR  
mseykkkieieliesnltyeiskktgvsqyvlslrqgkrevdnltlnttekyeyankvl

Tsompanidou\_et\_al\_Supplemental\_FASTA\_File

>tr|Q6GHB1|Q6GHB1\_STAAR  
mqfkeiyntiekllndksisnyrinqdtgvsyggiselrsgkrkvnnltletaeklynyqkqleimied  
>tr|Q6GHB2|Q6GHB2\_STAAR  
miimteftpffdgnsqlnyrkfvilrfhgvskrkickmynfayfrilevcemakndyrftykdykflkqygvstytick  
myhisiedleffevmnr  
>tr|Q6GHB5|Q6GHB5\_STAAR  
meavvdwvqvtfhitpisaviedviglpitlflkkrnsgiyfyngryefsniklyyssddesmgihlqltgtgcrefehhl  
qqlnktwqdfdkclsna  
nfridiaiddyktylkvp11ikkaekaecvsrfrsgsaingfnlsdgrskgatfyigskqsnlycrfyeknyeqafkrh  
cdvediglnryeiqrka  
yavncakvlrtdniseivksilhnnlrfispkdgndknkrwplyrpalifikdteklnttrptlksiednlwdlck  
qvattldtvltaesmaqse  
glltdtdfldkilahsqfndehtnrinhylealkqkklksdkc  
>tr|Q6GHB6|Q6GHB6\_STAAR  
mkiiskyiltrfsgkghfdipkeqrrvipkfnrrkmivicfysllaillillllasfikatranndskeavnktnmiqk  
kyednantvqyspkllya  
dkfidtymniskdskelesrekelkyfpsydkkpeektsdterklnskefynikrkdktiiqyivnydvnitekkevk  
vkkkkkndkddeyette  
ekqrkvqnqilinipiksenkyvvveypyftipdsqlnkakmvednlkdnkrednpkakafiedffnkysssksddma  
ylmndpeglegtrevsqir  
eirlypkgddyvakveilmkdkdspenlehytlditkdkgyyvknmtnsigg  
>tr|Q6GHB7|Q6GHB7\_STAAR  
msglfnflvlgadrs1ggvgdwisnevgtgiglvv1vvgivkwasgkyghmvilfvvggflflvskgpeqvfnaiagvw  
kmi fgg  
>tr|Q6GHB8|Q6GHB8\_STAAR  
mdkkaynlkrtfeqpivmeyftdkfrinkgfrldfwatflivwilflflfwy11qpvimsigglmfyftvpyyitkyi  
vklkqdgkklffflwdfvi  
fvfnvqlrkvkl sydeevyhdkkitfk  
>tr|Q6GHC0|Q6GHC0\_STAAR  
mamneialfkgvrippyqkyidfmfagvlafiflvryiylfidyksvkkldiwtlfayfkphllylligtaiifvick  
liaqllirfktkdlaeimie  
tqgfhnrtvikktteyipidykqteydyptmfykrkktfvihikkdgsrfqdnyleletieipmfnselvekhhigry  
lyefmp1kykkrivmnge  
qesntiydtkiaithqitwdfvkaphglvtgitgggktyflfyvirelfrhsevr11dpkvsdlsfmrkviqddkvad  
tkgqilq1reannemeer  
frlmdssdykigndfrnfdmryfiifdevtaftstldkkelqemndyliniimkgrqagvfmfltaqrpdadvikgnv  
rdqglrvslgnlsndgyr  
mtfgqtdkeftihdsdigryisilgqynepilfdap1meqydfvedvkqilnke  
>tr|Q6GHC1|Q6GHC1\_STAAR  
mkhksvyl1cflilpil11tsvsayavsnpvgepshavkpkiekyd1shyrsiysekgdwnpfgqeeisrqinnvsdfff  
smtkilagvtdyaie1lfq  
ldvindfadkigdfvgdiyqkllsnlailfiivcfnafii1svqgnarealkraflimcligfgvgilanagniiirgtn  
nigkdl1nii1mnstssidg  
nidiyhensgmh1rnq1fdmtiyrtylvmnygtvdekeikakgkdrindilkldydkksekelddivkdevekknkym  
tqgyvfqklaisvigfiit  
lfmsivflsisfaklifstfalflflflvswivsfipgfelsvfsafaktlgyiilsacmtflfvivglciklansfid  
pdsqnayflnsifiivilf  
vmykkraqi1nfvsrngisfspaigagvmnrtqerfnk1rheqaqnkakrenqrdepapplqndndlrrrqykmp1  
finkenqkngkrreqqes  
mngndvksasvesnannyskqpqkasqqehqvretqrkdiqrspqvvnqplnnenhsinrkeqksvqtaydtdvqrqi  
qnatqqsrsqsgnrnqpi  
trnsqskdr1keqkdinkhgk  
>tr|Q6GHC2|Q6GHC2\_STAAR  
mklakvii1cvvafft1pvi1vmf11apdsnkdkddagctvsngnvsangidkfnenakggklegkgeiqkiaeknkvp  
vnifmaiiasesqwgkgen  
atrqnplsvmgksihdstyptiedgl1nagaknlydvyiskgl1dtpkki1gpyapvgasndpnmmnarwiptvekimkd  
lggseaktscsngkgsik  
fngklphwsnddpkgkgnlytagqctwyaygmqrkmgkpvstywhdahkwndrakaegykvdknpepgalfiaeqgagghd  
ghyghvavv1gvsdggktf  
ritemwegafkvnert1kmtdgysfihdke  
>tr|Q6GHC4|Q6GHC4\_STAAR  
mrrwfvli1glv11sacgqkydkeidev1k1ekesi1qdvkntkkyknversksykyi1ndgevi1mtympfkdsntkvs  
rvykinqtsdqeedsnid  
pekfekdnkpvyeennmkk  
>tr|Q6GHC5|Q6GHC5\_STAAR  
mncydei1yntikk1lienkeitsyqinkdtgisyninamrrgerrien1slknakilyeyakkvl  
>tr|Q6GHC9|Q6GHC9\_STAAR  
maqqqihdtknk1ekav1vgvhaqddkqfnfestmeelss1setcqlv1lgqitqnrdrvdrkyvvgk1eieiqafief

Tsompanidou\_et\_al\_Supplemental\_FASTA\_File

kdidvvitndelttagsks  
lnealgvkiidrtqilileifalrarskegklqvelaqldylprlqghgkslsrlgggigtrgpgetklemdrrhirtrm  
neiklqlrtveehreryrn  
krnqnqvfqvalvgytnagksswfnvlaneetyekdqfatldpktrqiqindgfnliisdtvgfiqklpttliaafkst  
leeakgadllvhvdsshp  
eyrtqydtvndlikqlmdshisqivifnkklcdhasnrpsadlpnvfvsskndgdkllvktlfideikrqlttydeaia  
tnnadrlyflkqhtlvte  
kydeienvyrikgfek  
>tr|Q6GHD3|Q6GHD3\_STAAR  
mtekgfkltvqdntrievkvntdvdskgiihfhgmaehmerydklahalskhgfdvirhnrghginidestrghydd  
mkrvigdafaevaqtvrgrv  
dkpyiighsmgsviarlfvetyppyvdglilsgtgmyplwkglpvkvqlitkiygaekrvewvnqlvsnsfnkkirp  
lrtqsdwssnptevdnfi  
kdpysgfnvsngllyqtaymhtsqknikklnhampillvsgyddplgdygkilkaniyrkagiknvkvnlyhhr  
hevlfekdhkiwedlkw  
lnqfykk  
>tr|Q6GHD7|Q6GHD7\_STAAR  
mliilfnyslydtlnslthipyengffnmlyd  
>tr|Q6GHE1|Q6GHE1\_STAAR  
mksrklaitalliainvvlssiiiplgpvkaapvqhfvnvlsavivgpwyglaqalissilrvlfgtgtafafpgsmig  
vllasmfyiyrkhihmaav  
gevlgtgvigsliciplayflglqdfvikplmitfivssaigsiisyfllltkkrgilqrfik  
>tr|Q6GHE2|Q6GHE2\_STAAR  
mynkddvlkqadniankiknldtiktyqqieaqihqnqtiktmdmlkhhkqavnfqnygkqnaleqsehtiqsieaei  
ntlpiveqfqtseyeanql  
lkmfvstmetrlnhnhkakhsd  
>tr|Q6GHE4|Q6GHE4\_STAAR  
mkdtlmsvqiipktpdndnviyvydeaikiidesglhfrvgpletvqgnmnecliliqslnermvelecpsiisqvkfy  
hvpdgitietltekude  
>tr|Q6GHE5|Q6GHE5\_STAAR  
mptfkdfrrnnvkpnwcpqgdfsvqaaikaaaniglepeqvaiitgigcsgrlsgyinsygvhsihgralplaqgvkma  
nkdltviasggdgdgyaig  
mghtihaarrrnmntyivmdnqiyltkgqtspsavgvfvtkttkgnieknavpelaalssgatfvaqgfssdikgltk  
liedaindhgfsfvnvsp  
cvtynkintydwfkehltsvddienydstdkqlatktvieheslvtgivyqdketpsyesqikelddtplakrdikited  
tfnalteqfi  
>tr|Q6GHE6|Q6GHE6\_STAAR  
mkpqlswkvggqgqgeiestgeifatamnrkgylygyrhfssrikgghtnki rvsttpvhaisddldiliafdqetid  
vnhyemredsiiladakak  
pvkpegchaqlielpftatakelgtaImknmvaigatsalmlntntfeelitnmfsskkgdkvvevniqalnegyqlmq  
rlseidgdfelestalpl  
lymigndaiglgaiagsqfmaaypitpasevmeymi aniskvngaviqteteiaavtmaiganyggvraftasagppls  
lmmeaiglsgmtetplvi  
ntqrggstglptkqesdlmqmiygthgdi pki vvaptdaedafyltmeafnaeqyqcpvivilsdllqlslgkqtvek  
dynrieikrgeiqsdier  
eeddkgyfkryalstngvsprpipgvkkgihhitgvehneegkpsesasnrqqmekrmrkieqlliespveanlheda  
dilyigfistkgaiqegsn  
rlnqqgikvntiqirqlhpfptsviqdavnkakkvvvvehnyqqqlasiikmnvnihdkienytkydgtpflpheieekg  
kiateikemv  
>tr|Q6GHF1|Q6GHF1\_STAAR  
msiaiaavgseillgqiantngqflskvfneigqnvlehkvigdnkkrlessvrhalekydtviltgglgptkddltkht  
vaqivgkdlvidepslkyi  
esyfeeqqemtpnnkqalviestvlanhhgmapgmmvnfenkqiillpgppkemqpmvknellshfinhriihsel  
lrfagigeskvetvlidli  
dkqtnptiaplqgshevyirltanadskeqaqslipvkqeildrigeyyygsddt lieqavikkinepfviydgitnga  
lyhr1kevdlndvlgmin  
hnenfvdinkpieqqlkdavqfvnklfnvssaiilleydgvvhigydnlefkteqfkm sesrllknrsqyalirlln  
wlrttn  
>tr|Q6GHF4|Q6GHF4\_STAAR  
mtvaekkewyleyeieinrpgllgdvssllgmigisivtingvdqgkrglliktdnlekverfeqiargineieitklkk  
pelrdrlavrhgryieqda  
kdkktfrferedlgllvdf1aelkfeeghkligirgmprvgktesivagsvcakhrwlfisstlikqtvrslikgeyda  
nhvyiidgavtaresnph  
qelvnevmtlpsikvvehpdlfvetstctmedfdyieelrenenqei hyeemkkqtvqsknldfgdpfgggfgffe  
>tr|Q6GHF5|Q6GHF5\_STAAR  
mka1vlgsgsigseivkqltdgfevyvqyrtidelnknfnddkvhfiqadlsqtididktfgdikslcliyasgq  
lygv1qdmkdhdidacyq  
lnv1qlir1cryfvdvlrqsdngrivissiwgetgasmetiystmksaq1gfvkalsqelaltsvtvnaiapgvfagnm

Tsompanidou\_et\_al\_Supplemental\_FASTA\_File

asewqedelqamitelppq  
rlvlpsevahtcaylyhpnrsvtgtiqkvngawyi  
>tr|Q6GHF6|Q6GHF6\_STAAR  
mkeryyelidervfeqelenglrflfiipkpgfqktfvtyttqfgslndqfklpgdqfvtvpdgvahflehklfekeeed  
lftafaenaqanaftsfd  
rtsylfsatdniennikrlltmvetpyftketvdkekgiaeeikmyqeppgyklmfntlramyqqhpirvdiagsvesi  
yditkddlylcyetfyhps  
nmvlfvvgdvdpeaicriivkqhedarnkvnqpkierglvdepdvkeafvtesmkiqsprlmglgfnkplqeapqkyvqr  
dlemslffelifgeetdfy  
qnlldneglidtdfgyqfvleptysfsivtsateepdklkkllldelrdkkgnfqdaefellkkqfigefisslinspeyi  
anqytklyfegvsvfdmld  
ivenitldsinetsslylnldqqvdsrleikk  
>tr|Q6GHG3|Q6GHG3\_STAAR  
mkvievthpiqskqyitedvamafgffdgmhkghdkvfdilneiaearsllkavmtfdphpsvvlmpkrkrtyltpisd  
kieklsqhdidycivvnfs  
srfanvsvedfvenyiiknnvkeviagfdftfgkfgkgnmtvlqeydafnttivnkqeienekisttsirqdlngelqk  
andaigyisikgtvvqge  
krgrtigrptaniqpsddyllprkgvyavsieigtenklyrgvanigvkptfhdnpkaevvievni dfedniygervtv  
nwhhflrpeikfdgidplv  
kqmnddksrakyllavdfgdevayni  
>tr|Q6GHI7|Q6GHI7\_STAAR  
mkfstlseeefntnytkkhfkhytqsie lynyrnkinheahivgvkndkneviaacll teari fkykyfyshrgplldyf  
daklvcyffkelskfiykn  
rgvfilvdpylie nldangriiknynsvivkmlgkigy lhgqyttgysnksqirwsvldldkdenqllkemeyqtr  
rnikktieigkvedlsie  
etnrfyklfqmaeekghfhnedyfkrmqeiydkamkiacidlneyqdklkiqlklienemmtvnralnenpnskkn  
ksklnglnmqllssinnris  
kteeliledgpvldlaaalfictddevyylssgnpkynqymgayhlqwhmikyakshninrynfygitgvfsdeaddfg  
vqfkkqgnahveeligdf  
ikpvrpilykfkliyk  
>tr|Q6GHJ3|Q6GHJ3\_STAAR  
mlkkwlnsnvkqflvitfmsviltlilfsthiyeyivngtvfsgsgdgrqmpfqmylyehlssfslydasfglggdy  
mkglyyyyslspmwlnfl  
fikigetvgifnpttihfwptnqlimamvraittfvvtfylfki lhfkrstnmiatilygmstvviiyfnftwsfygnlly  
llplsilgleryfqarkig  
ifivaialtlfsnfyfsyyqaiigcylyrliftykydivsrtqklicvisatvsvlssvfglftgisaflendirkqn  
pnvdipfltpldyhyfffs  
dgffititiltivalisfklyrfyfyrifaivtwlfigslsqyfdsafngfsfperrwvylalsssalcglfiqhlst  
lnmkyyli rtipvsiaall  
yvllsptphlalivgiilqmvlavil kfs l wrykkltvailvlivmiqqivil dnnknmaikpyqqs lsslkqhdysny  
vnqlikkinknatgpfnr  
dymdsyalnspfiyhngislyssi fngdilkydktlqinmpidknstyrllgnrqnlslwnvndrirvnhddnlpvg  
fkinsehkdnkvrwihskn  
tihypsahitnkvfsnkelkspldkeqam lqgivsntkdvnthfkanknlldstiklnsaawqsptkhl lqvknngg  
ltvqlpksvsnqfkdllye  
mdlellspdkahdvkneytqernklykyrrfvtpvtirikasdrirlslpkgyrvnlkgygedyttlkdasnslea  
vkvrktkqgytitknkss  
gyivlptaynqgmkatsgdqslkveqvngvmtgikapknitkiqlsytppyyllititifi gicsiiftrwarqk  
>tr|Q6GHK0|Q6GHK0\_STAAR  
msffkrldkfatnkendevkslteeqgdkledthsegstqdvndlaenaevkkkprklseaddddglisiedfeeie  
aqkmgakfkagleksrqnf  
qeqlnmlisryrkvdedffea leemlitadvgfntvmtlteelrmeaqrniqdtedlrevivekiveiyhqedd nseam  
nledgrlnvilmvgvngvg  
ktttigklayrykmegkkvmlaagdtfragaidqlkvwgervgvdvisqsegspaavmydainaaknkgvdilicdtag  
rlqkntlnmqelekvkrvi  
nravpdapheallcl dattgqnal sqarnfkevtntgiviltkldgtakggivilairnelhipvkyvglgeqlddlpfn  
pesyvyglfadmieqnee  
ttvendqivteekddnhgak  
>tr|Q6GHK1|Q6GHK1\_STAAR  
mvyllksidaigfksfadqtnvqfdkgvtaivgpngsgksnitdaikwlvgeqsakslrgskmediifsgaehrkaqnyae  
vqlrldnhskklsdenev  
ivtrrlyrsgeseyyinnrarlkdiadflldsglgkeaysiisqgrvdeilnakpidrrqiieesagvlkykkrkaesl  
nkldqtednltrvedilyd  
legrvp1keeaaiakeyktlshqmksdivvtvndidqytnrnqldqrlnldlqqqqankeadqrlsqqi qykgkrh  
qldndveslnyqlvkatea  
fekytgqlnv1verkkngsetnaryeeeqenliellenisseiseaqdykslkskqkelnavireleeqlyvsdeahde  
kleelikneyytlmseqsdv  
nndirflkhtieenevksrldsr1vevfeqlkdiqqqikttkkeyqqtneksavdkeikniekdldtktkaqneyeek

Tsompanidou\_et\_al\_Supplemental\_FASTA\_File

lyqayrytekmktridsla  
tqeeeytyffngvkhi lkakne lkgihgavaei idvpskltqaietalgaslqhvidsekdgrqaiqflkernlgrat  
flplnviqsravatdiksi  
akeangfisiaseavkvapeyqni ignllgntiivdh lkhanelaraikytrivtlegdivnpggsmtgggarksksil  
sqkdel ttmrhqledylrq  
tesfeqqfkelkiksdqlselyfeksqkhntlkeqvhhfemeldrlttqetqikndheefekndgytsdksrqtsek  
ethlesikas lkrledeie  
rytklskegkes ltktgqtlhqkqsdlavvkeriktqqqtidrlnnqsqqtkhq lndvkeki affnsdevmgeqafqnik  
dqingqqrtrtrlsdeldk  
lkqqrle neqidaqeatlqvchqdi laienhyqdikaesklvlihhaidh lndeyqltverakseystsdesidalrk  
kvklmkmsidelgpvnlna  
ieqfeelnerytflsegrtdlrkaketleqi isemdqevterfketfhaiqghftamfkqlfgggdae lqlteadyltag  
idivvqppgkklqhlsls  
ggeral taiallfaikvr sapvildeveaaldeanviryakyl nel sdetqfivithrkgtmefadrlygvtmqesgv  
tklvsvn lntiddvlkeeq  
>tr|Q6GHL8|Q6GHL8\_STAAR  
mienvrslafdtiqdilinegaysnlrinevlsene lnmvdka lfteivgytvkrkytldfy lkpfvtkkikawvrqllwm  
siyqyvyldkvpnhaiine  
aveiakerggyhngnvngilrtmmrsdlpdfnei adpkkrmaieysmpkwiidhwathygleetetilqsfl ettsttv  
ranmtraslddiiek lqde  
gydvekdhd lpyclhiggqpiihsr sfdkgfvsiqdkssmfvahimnvdrhdhvl dacsapggkachiaevlmp eqvda  
sdihdhkidlinfnikk l r  
ltnikafqhdatkpydktydkilvdapcsglgvmrhkpeikytqskqhieslvd lqlleilenvknnvkiggeiistcti  
eq lenenviytflknknf  
efepfqhpi tgelvktlqimpqdfnsdgffitkirkdn  
>tr|Q6GHM2|Q6GHM2\_STAAR  
mkk tlgc lllimllv vagsfggnhk lssksee skqetvkkeseekdpdlekfeeiekkmkgikdaps ldkldplmte  
ksftnsgigqwkdykelm  
gkvel adyrftkdskgssikdvda ffgkkgikrkvie thddvkqvywyvdpdgkki gnsntpvfyaeimtkykdglv  
yasvepgsyvihkdaiky  
ddysklkklsltkl dhpkpvpysvaqiksfgvpltsvsf mthgskdtkdevmpalayftf spknyedksn dpkvlnlv  
gm dflnassdfgnahfvvl  
skyikeyesnyetasdds lk  
>tr|Q6GHM7|Q6GHM7\_STAAR  
maydglftkkmvslqflttgrvhkinqpdndtilmvvrqnrqnhqlllsihpnfsrlqlttkkydnpfnppmfarvfrk  
hleggiesikqigndrri  
eidikskdeigdtiyrvtileimgkhsn l ilvdenrkiiegfkh ltpntnhyrtvmpgfn yeapptqhkmnpyditgaev  
lkyidfnagniakqllnqf  
egfsp l itneivnrrqfmsstlpeafdevmaetklp tpi fhknhetgkedfyfiklnqfnddtvtyds lndll drfyd  
argerervkqrandlvrfv  
qqqlhkyqnlakli eeyeqsknk dteqlygelitaniyrikqgdevtalnyytneevvip l nptkspsanaqyyykqy  
nrmktrere lqhqiqltkd  
nidystieqllhsvh dideirde laeqgfmkqrknqt kkkkaqiqlqhyvstdgddiyvgknnqndyltnkkakkt  
htw lhtkdipgshvvi fnd  
apsdtti keaamlagyfskagnsgqipvdytliknvhkpsgakpgfvtydnqktlyatpdyehiqkmkqs  
>tr|Q6GHM9|Q6GHM9\_STAAR  
mndktsndlygkikhcnefinhsndsn lssshdvdess tkqkhiknkttin hnddlfk hvkdi l rkqgqi  
>tr|Q6GHN6|Q6GHN6\_STAAR  
mqndemfertvkvpldvnekpqaqwfslqlhlfamfgatvlvpfltg l pisaall asgigt llyilitkaqipaylgs  
sfafitpiitg l sths lgd  
mlvalfmsgvmyviigiliklsgtaw lmkllppvvvgpvimviglslaptavn mamyenpgdmkgynisflivamitllv  
tifvqgffkqflslipvlv  
giivgyvvaifmgivkfdaimsakwidfphiylp fkdypsfhlg l vlmipivfv tvsehighqmvlnkivgrnffekp  
gldksi igdgvs tmfasi  
ggppsttygenigvlaitriysiyviggaa viaivlafigkftalissiptpvmggvsillfgiiaasglrmlveskvdf  
annrn l viasvillvvgign  
lvfnlkeiginlqiegmalaalsgii ln l ilpkkekqnn  
>tr|Q6GHN8|Q6GHN8\_STAAR  
metyefnitdkeqtgmr vdkllpelnsdwsrnqidwikaglvvandkvksnykvklndhivvtekeveadilpenln  
ldiyyedddvavykpkgm  
vvhpspghytntlvnglmyqikd lsgingeirp givhridmdtsgllmvakndia hrglveqlmdksvkrkyialvhgni  
phdygtidapigrnkndrq  
smavvddgkeavthfnvl ehfkdyt lvecqletgrthqirvhmk yigfplvgdpkygpkktldiggqal hagli gefhpv  
tgeyerhaelaqdfedll  
dtirk rda  
>tr|Q6GHP0|Q6GHP0\_STAAR  
myhnsnanfvngitlnvrknelkpfyedvlglniinetltsiqyevgqnnhvitlvelqngrep l mseagl fhaiklp  
qisdlanllihlse ydipv



Tsompanidou\_et\_al\_Supplemental\_FASTA\_File

nggiqpasls1ffedpegngfkfyvdkdeaqwtrqndlvkidi rplnvprlvshatkllwlgipddaiigalhikthls  
evkdyyl dyfgleqsaymd  
dysiflasngyyqhlamndvwsatkrvenfdtyglai vdfhynetthlnlqgpdgiyyrfnhieved  
>tr|Q6GHP3|Q6GHP3\_STAAR  
mpftpneiknkefsrvkngleptevanfleglsteierlkedkkqlekvieerdtniksyqdvhqsvsdaliqaqkagee  
tkqaaekqaeaiiakaea  
anqmvgdavekarrlafqtedmkrqskvfrsrfrmiveaqldllknedwdyllnydl daeqvtlenihhlhendlkpdev  
asntsdnnqqsndsettkk  
>tr|Q6GHQ1|Q6GHQ1\_STAAR  
mmdkktkndqgesnedkdelelfttrntskkrrqrkrskathfsnqnkddtsqqadfddeiylinkdfkkeqgneennda  
sshandniddstsdnien  
edyrynqetddqnesngiavdneqhsapneqnsdsndeetvtkkerkskvtqlkpltleekrvrrkrqkriqysviti  
lvllia viliymfplskski  
ahvningnvhvstskinkvlgvkndsrm ytfskknaindleadpliksveihkqlpntlnv diteneia lvykygkylp  
llengkllkgsndvkinda  
pvm d g f k g t k e d d m i k a l s e m t p e v r r y i a e v t y a p s k n k q s r i e l f t t d g l q v i g d i s t i s k k m k y p p q m s q s l a r d s s  
gk1ktrgyid1svgasfip  
yrgntstqsesdknvtkssqeenqakeelqsvlnkinkqsskn  
>tr|Q6GHR0|Q6GHR0\_STAAR  
mgykniliidfdtdivfydaeeawafyymanvfnhkatkddf1tfkkinhqhweafqqn1tksevlserfvnyfkhqhme  
vdghradv1frnglaeakv  
kyfdqtletive1skrhnlv ytvngvtetqkrrlnqtp1hkyikkifiseetgyqkpnpeffnyvndigederqhsii v  
gds1tsdilgginagiatc  
wfnfrgfdhnpgiipdyeinswkqlneivr  
>tr|Q6GHR3|Q6GHR3\_STAAR  
mr1gkap1vtsg1v1g11g1gn11kd1s1t1naicgifafliwih11ctmlkyfnnvkeqlnsp1vssvfttffmsgflg  
tty1ntffsnitfinn1it  
piwilclvgimhmhi1fsiky1kdfs1envypswtv1figiaia gltapvsgyffigq1tviygfvatciv1pivfkr1k  
afplqtsikpntsticapf  
slvaaayviafpkanafivi11111aqifyfyiiiqlpk11kepfspvfsaftfplvisatalkns1pvlmfpviwkg11  
fiev1latviv1rvfigy1  
hff1kknqdkf1rnasq  
>tr|Q6GHR4|Q6GHR4\_STAAR  
mth1tkv1dt1tgicv11fskyfvtyanmvfdwn1rwy11gniph1piilfilmfifgvpsemikdrqrknngv  
>tr|Q6GHR5|Q6GHR5\_STAAR  
mentinesekkrfk1kmpgafmi1fil1tvvaviatwvipagaysk1syepssqelkivnphnqvkkvpgtqqel1dkmgv  
kikieqfksgainkpsvip  
ntyer1kqhpapgeqitssmvegtieavdimvfilv1lggligvvqasgsfesg11altkktkghefmlivfvsilmiigg  
tlcgieeeavafypilvpi  
fia1gydsivsvgaiflassvgstfstinpfsvviasnaagttftdglywrigacivgai fvisylywyckkik1kdpkas  
ysyedkdafeqqsw1kdd  
dsahft1rkkii1t1fv1pfpimvwgvm tqgwwfpvmasaflifti1imfiagtgks glgekgtvdafvngass1vgvs1  
i1glargin1v1negmisd  
ti1hfsss1vqhm1sgplfiiv11fiffclgfi vps1ssglav1smpifapladvgiprfvivottyqfgqyam1flaptg1  
vmat1qm1nmryshwfrfv  
wpvva1fv1ifggv1itqv1iys  
>tr|Q6GHR8|Q6GHR8\_STAAR  
mknkn1tkn1v1sta1111gttstqppkapisfsseakaynisenetnineliky1tqph1sfsgkw1wqnpngtihat1q  
twvwythiqvfgpeswgn1  
nq1rdkyvdi1fgtkdedtiegywtydetftggvtpaatssdkpyk1flkykdkqqtmiigg1efyqgnkpvit1kel1dfrv  
rqt1liknkk1lyng1efnkgg  
iritgggnhytid1skk1k1tdtnsyvknprhaeievileksh  
>tr|Q6GHR9|Q6GHR9\_STAAR  
mkn1tkk1i1sialtmigtatsqsphspis1msseakaynisetnvneltky1tqrh1tfsnkw1wqkdn1gtihat11  
q1swfshiqvfgpeswgn1  
nq1rnkyvdi1falkdyetwrtym1a1qetftggvtpvakpsdkhyk1nvtykdkagtfigeyqfytgkpv1t1kevdfr1  
rqt1liknkk1lyng1d1nkgh  
iki1tggsnnytid1skr1k1stdanryvkn1pqtahie1illekss  
>tr|Q6GHS0|Q6GHS0\_STAAR  
mrkcimk11ilmt11111gttatqtsnsp1nvstdakayhigqdetnineliky1tqpl1tfsnrw1lyqyddgniyvefk  
ryswsah1rlwgaeswgnv  
nq1rdryv1dvfg1kdedtsq1wvyr1dftggvtpaaspsdkpys1fvqykdk1qti1gahkmyqgnkpv1t1keidfra  
ret1liknki1lyhenrnkgk  
1ki1tggsn1dftid1skr1hsd1anvyvkn1pkitvevlid  
>tr|Q6GHS2|Q6GHS2\_STAAR  
mte1nei1naiq1sfesqsgy1k1sknsgvpyqtvqdlrngk1tkiedarfrti1k1lysy1ts1keqs  
>tr|Q6GHS4|Q6GHS4\_STAAR  
mvfkdw1e1nv1vysgkhev1vtnens1fv1dedy1vaia1ny1dnk1kvshvnygseftidasnkv1almihnpniden

Tsompanidou\_et\_al\_Supplemental\_FASTA\_File

>tr|Q6GHS5|Q6GHS5\_STAAR  
myniiviyiacminfgliivplltndadfvwtsssllymilltlliliviyiktkdslqltifilsvallilycapllfiy  
vf  
>tr|Q6GHS6|Q6GHS6\_STAAR  
mnkhinkttkhledykkvqqrnseetnrgclksaamlivlflfiifgivacsthvnfffq  
>tr|Q6GHS7|Q6GHS7\_STAAR  
myeqciqkigetniniivrnimhkiaylnlknisapidkfkrsmkrsdfysmsilleekvncrtchdakyne  
>tr|Q6GHS8|Q6GHS8\_STAAR  
mkfkkyivagtlavllsttavstldgnkadasskkyiiqsefhdkriaeelkslldqsyvndlaagslnpyykrmimmn  
qyrakaalksnfakmaea  
kvgleniykeideiir  
>tr|Q6GHT0|Q6GHT0\_STAAR  
miikiltillllclisylvtknkkpflflktlmgvfvifigyislaisaviygiiqfitidfgsfflmgiiililissi  
fqlfivrllfrkknvdle  
vvvlehliqwflyvyfaiyqavnekmdindinidnfqsvffdvsnlnlvilptliiswvtfnyrmrsyk  
>tr|Q6GHT3|Q6GHT3\_STAAR  
mskwivvsdnhtesgilyqiyeahpdadmylhlgdsefeyddtelslfrrvkgncdfypefeneavakcndvrafythgh  
lyqvnrtryllaeqarel  
cvfafyghthvakyeyingvhainpgsisqsrsmeesyaevliddqtlqgtvnfknrqhetishttf  
>tr|Q6GHT6|Q6GHT6\_STAAR  
mteqsvkntpqheiqskpkqktvklkirkqdtsskpyeetfeipyrenlnviaclemeirnpvnikgektppvwdmnc  
leevcgacsmvingrarqs  
csaivdqleqpirlepmtfpvirldqvdrsmfdnlkrmkawipidgtydlgpgprmpckrqtayelskcmctgcvcle  
vcpnvtennkfvgaaqisq  
vrlfnlhptgsmtkderlnalmgtggllqcgnsqncvncpkiplttsiaamnettfhmfsffgsdheve  
>tr|Q6GHT8|Q6GHT8\_STAAR  
maqsknefyllrihsllgiiipigafllvhlvnhqatqgaeafnkasnfmeslpfliiveflfiyipllyhglfghiiaf  
takenvghysifrnwmfff  
qrvsgiltfifiqihlwqtrllqkafygkevnydlmhetlqhpgwaifyiicivavfhhfanglwsflvtwggllqspksqr  
vftwvslivflvisyigt  
aiafm  
>tr|Q6GHU2|Q6GHU2\_STAAR  
mtkkdviklleqiatymelkgentfkisayrkaaqslelderpldeisdvteikgigkvaevindyretgesqylqqllq  
eevpeglipllkiqglgsk  
kiaklykelnivdkaslvacengkvselsgfakkteqnilavkqlgakkdrypidqmrlnqeiidyidtlkyidqys  
sagsfrfrfkemskldfii  
stdnpkavqqllnlpnkvevavngtkvslelayddetigvdfrlieprafyhtlqhftgskehnrirqlakardev  
seygieqadgtliqyde  
kijehfnvnpfippamredgsefdkdlsnitlddingdihmhttsfdgafsiirdmveaniakgykfmvitdhsqslrvan  
glqverllrqneeikaldk  
eyseidiysgtemdilpdgsldydeilaqldyvigaihqsfnqseeqimerlanacrnpvvrhiahptgriigrdyk  
pnieqlmalaeetntvlei  
nanphrldlsadvirkypnvlktintdahhtnhldfmygvataqkgfvtkdrvinalsreafkdfienniklkk  
>tr|Q6GHU3|Q6GHU3\_STAAR  
miidfiiiiifvyfvivgfrgfwlsmihlsativslwiasqfyksiverlivfipypkttafnttfafhfnhlqnrfea  
ivafllmialfckfilylii  
vtdkiiayqnihi fsramgmivgvfntiivlhftlyllalypnealqhqllkisivshslifhipylsaftinl  
>tr|Q6GHU8|Q6GHU8\_STAAR  
meqitsaqnrikqanklkkkrerdkglalieghlieayqsgivitqlfaieparldqqiiayaqevfeinmkvaes  
lsgtvtppqffaiiekpqy  
diskaqqvllidrvqdpnglgtlirtadaagmdavimekgttdpqdkvlrasqgsvfhlpvmtqldltdfitqfngpvpyg  
talenavaykevtssdsfa  
lllnegegvnpellahattqnliipiygkaeslnvaiagsillyhlg  
>tr|Q6GHU9|Q6GHU9\_STAAR  
mvlafvttihdtdgrffnehkhannkllkrsli  
>tr|Q6GHV1|Q6GHV1\_STAAR  
mrmkrfltivqillviiiiifgykivqtyiedkqeranyeklqqkfqlmskhqahvrpqfeslekinkdivgwiklsgt  
slnypvlqgktnhdylnld  
ferehrrkgsifmdfrnelkilnhntilyghhvgdntmfdvledylkqsfyekhkiiiefdnkygkyqlqvfsayktttkd  
nyirtdfendqdyqqflde  
tkrksvinsdvnvtvkdktmstcedaysettkrivvvakiikvs  
>tr|Q6GHV4|Q6GHV4\_STAAR  
mrnvkqiatksijaiislgiltyttmigsvladeikypsakfnqpeakdkteltssifdekikenkalellifnqenkv  
teeqqllvdekaqlisdmtg  
kiylqvkllkgqideqllvfqndkneefpfvikdekddtivrillieqhmdkinmhvktlaekkdldnkemlysihfekkv  
qhddakevpskhqenqng  
dqllkddiddkksqskdi kertrslftekgldnipvqkdkvqqdsnkkienerpkasgtlkvenspvtvkkvenhkeqp  
kxkdekskkekvvvekek

Tsompanidou\_et\_al\_Supplemental\_FASTA\_File

alpafrdddsknssq1ssdikeldephhkkqym1favgielatillisahlysrkrqnv  
>tr|Q6GHW2|Q6GHW2\_STAAR  
mrviagkhkskalesmegrnrptmdkvkegifslydvsgigld1fagsgalgiealsrgidkvi fvdqnfkavkviks  
nlanldleaqsevyknnad  
ralka1skrdiqfdvifldppynkg1idka1k1isefn1lkengiivcefsnheeidyqpfmikyhygltdt1lllegk  
e  
>tr|Q6GHW5|Q6GHW5\_STAAR  
mkkvnrni1nav1vgagfvss1lminknkvitkkqtipaffkgnapyifahrggmalrpeqtqlafdyakqlgvdgfdt  
vr1tkdqqlivfhdatvdr  
ttngsgkvsah1aelkkldagyhfkdingltpyrghahtailtfdellkqypdmyinvldkdapesyegsiapqimfdt  
iaenqafdrv1vtsfykeq  
ivrfnkiaqrsvaigasqgeveaf1kyh1lggryyqplaqtqfmpthfkgin1tssrfikw1ndmnpvipygygvnsid1  
mndlyqkahtivtdrpd1  
aqqfkqsinnkq  
>tr|Q6GHW7|Q6GHW7\_STAAR  
mkkliirvvgv1f1vgf1iy1fyspr1kfdv1enpnkgnkvrseqvnksnhaenpkpkegvgtwvgkdikv1tskfgq  
adrpyprfdgyknyvfkd  
nsyyivstkreivsvyatgenvnvsp1kigqhsaeifnhtsinpepsftvdgkkyefelsdedlktqtlkygniyaqv  
ysdqqskkv1svrfltkem  
ladiepyrlnsnstseehnkrpveqnpnq1islyevtnemrklkg1kplkinsdlahiasnlyeatsngsdsvefteda  
1rgg1dknhvtykttaqnv  
gyafndvpt1ihswmnsdihrs1lnskydemggdvmrduys1flek  
>tr|Q6GHW8|Q6GHW8\_STAAR  
mgvpilptisttcivisa1iaigwrliwkreidkhknvmlaaavfaltffliyasrtifigntafggpasikkytif1  
ffhinlatiggilglvqi  
tafkdkynvhrkfgpfasviwfctaitgvavy1llyvlypggettslikatfgh  
>tr|Q6GHX1|Q6GHX1\_STAAR  
mkqikk11vanrgeiairifraaaeldistvaiysnedkss1hrykadesylvgsdlgpaesylnieriidvakqanvda  
ihpgygf1seneqfarrca  
eeg1kfigphlehdmgfdkvtartakad1pvipgtdgpiksyelakefaeeagfplmikatsggggkgmrivrees  
ledafhrakseaksfgns  
evyieridnpkhi evqvi gdehgnivh1ferdcsvqrrhqkvvevapsvglst1rqr1cdaaiqlmenikyvnagtve  
flvsgdefffi evnprvq  
ehtitemvtgidi vktqi1vaagad1fgee inmpqqkditt1gyaiqcritteditndfmpdtgttiayrsggfgvrld  
agdgfqaespyyds1lv  
k1stha1sfkqaekmvrslremri rgvkt niplinvmknkkftsgdyttkfi eetpel fdiqps1drgtktleyignv  
tingfnpvekrpkpdyela  
s1ptvssskiasfsgtkq1ldevgpkgaewkkqddv1ltdttfrdahqsl1atrvtkminiasktadvfdgfsle  
mwggatfdvaynflkenpw  
erler1rkaipnvlfqm1lrasnagvyknydpnvi hkfvsakagidvfri fids1nwvdqmkvaneavqeagkisegti  
cytgdi1npersniytley  
yvk1akeleregfhi laikdmag1lkpaayeligelkaavdlpihlthdtsngl1tykqaidagvdi idtavasmg  
1tsqpsanslyalngfys  
h1rtdiegmess1shywstvrtyysdfesdikspnteyqhempggqysn1sqqaks1glgerfdevkdmyrrvn1fgdi  
vkvtppsskvvgdmalymvq  
nd1deqsvitdgyk1dfpesvvsffkgeigqpvngfnkd1qavilkgqealtarpgeylepvdfekvrelleeeqqgpvt  
eqdi1syvlypkvyeqyiq  
trnqygn1s1ldtptfffgrngetveieidkgkrl1iketisepdengnrtyyamngqarriyikdenvhtnanvkp  
kadksnpshigaqmpgsvt  
evkvsvgetvkanqpl1iteamkmettiqapfdgvikqvtvnngdtiatgdllieiekatd  
>tr|Q6GHX2|Q6GHX2\_STAAR  
mknfrsilryigktskfidyp1lvtyiv1slig1vmvysasmvpatkgt1tggidvpgtyfynrqlayvimsfiivffia  
flmnvkl1snikvqkgmi  
tivs111111v1gkdingkswin1gfmnlqasellkia1ilyipfmiskmprv1skpk1ilspiv1algtflvflqk  
dvgqt1111111v1iifys  
g1gvnkvlrfgipav1gl1vvfvialmagw1psyltarfst1tdpfqfesgtgyhisn1laignggvfgk1gnsamk1  
gylpephtdfifaiceel  
g1igg11vit1effivrafqfanktssyfyk1vcvgiatyfgsqtfniggisatipltgvp1lpfisfgssmis1sia  
mg111ivgkqikvdqqrkk  
qqqkvdi1rrqfn  
>tr|Q6GHX6|Q6GHX6\_STAAR  
mtnkredvrniaiaihvdhgktt1vde1lkqsgifrenehvdramsndierergitilakntavdykgtlinildtpg  
hadfggeverimkmdgvv  
1vvd1ayegtmpqtrfv1kka1eqn1kpvvvnki dkpsarpegvdev1ldfieleandeql epvvyasavngtas1dp  
ekqddn1qsl1yetiidyvp  
apidsndep1qfval1dyndyvgrigigrvfrgkmrvgdvns1lik1dgtvknfrvtkifgyfglkrleieeaqagd1ia  
vsgmedinvgetvtphdq  
ea1pv1ri dept1emt1fkvnns1p1fagregdfvtarq1qer1nqq1etdvs1kvsntdspdtwv1vagr1el1hs1ilienmr

Tsompanidou\_et\_al\_Supplemental\_FASTA\_File

regyelqvskpqiikeid  
gvmcepfervqcevpenagavieslgarkgemvdmtdngltrlifnvpargmigyttfmsmtrgygiinhtfeefr  
prikaqiggrngalismsd  
qgsastyailgledrgvnfmepgtevyegmivgehnrendltnitkktkhqtnvrsatkdqtqtmnrpriltlealqfi  
nddelvevtpesjrlrkki  
lnknvrekeakrikqmmqene  
>tr|Q6GHX7|Q6GHX7\_STAAR  
mkqkkskni fwwfsilaviflvlfsvavgasnvpmmltfillvatfgigfttkkyrendwl  
>tr|Q6GHX8|Q6GHX8\_STAAR  
malygfaqgliqeagirikqlmeqnl tietksnpndlvtnvdkatedfifdtil etypnhqvlgeeghghdidtskgtvw  
vvdpidgtlnfvhqgenfa  
isigi yidgkpyagfvydvmadvlyhakvgegayrgsqplkplndsnlrqsiiginpwltpkplgeifkdvvnisrsar  
aygsaaleivsvatgnlea  
ymtprlqpwwdfagglvilinevdglasnlreplrtisgpnsvlvgngvhrailgvylephrdaliqlheqrfkrksk  
>tr|Q6GHY2|Q6GHY2\_STAAR  
mtgeqftqikrpvsrltekvlgwlcwvmlvlvtvitmfialvsfsnntsiantentlnnafiqqllagngynttqfviw  
lqngiwaiivylivcllis  
flalismsnirilsgflflisaivtipvlvllivtliipilffiiammfirkdkvemvapqyyeengpiydyrepvyerp  
qpkddydvpkyekekdks  
ntvydqelerdkydfpkraivesynhderteeepsvlsrqakykqksteelgi eddgyyaepvdpkelkaqqkrekae  
ikakkkekrkaynqrmer  
rknqpsavsqrrmnfeerrqiynndiseernssevdkkqe  
>tr|Q6GHY3|Q6GHY3\_STAAR  
mkrflqligalvvgmlcltlshwfskeqvhtnqkiyvynwgeyidpelikkfeketgiqvvyetfdsneameakirng  
gthydvafpseytvqklkr  
dhlllpidhkvpniknl dsdymmsfdkgnkyslpyffgtvgilynekepnesfdswkslynpkfknqillvdgarei  
igmslnklgynlndrnshh  
lkeaerdltklapqvrvgvgeidtmml eqnegniavwsgvaapl vqegdkynyvipkegsnlwfdnmvipktaqnkega  
ykmfnlldaknnkqntef  
vgyatpnkaarqllpkeikddhrfyptkqeql evykdlgpevlseynefnfkmslk  
>tr|Q6GHZ9|Q6GHZ9\_STAAR  
mdtveisrfltamtlavhii fatigvmp lmfai aeflgirkndlqyiamakrwakaytitvavgvvtgtiiglqlslw  
ptfmemgghvialplfmet  
fafffeailfsllytwdrfknkwthflisipviiggsfsaffitsvnsfmntpagfelkngkmvqvpieamfnpsfiv  
rsfhvittagmtmafvi as  
iaafklrrnqpkdtyvhkka lkm smivgffstllsm lagdlsakflhkfqpeklaayewhfdtsshaklllfgvldekt  
qqvkgaielpgllsfladn  
svktkvqglndfpls lhppmivhyffdlmvtmgilcfvisgvyvltlmfklrnfsthkwml ygilltgpasm laiefgw  
fltemgrqpwi vrgymrva  
eaatqaggi tfvtlfgilytilmytcayvlirmfknkpayedvnr lakkqgeiek  
>tr|Q6GI04|Q6GI04\_STAAR  
mkialnkgketkyfngyplieediysqdhlkegdi fqivtdksqyvatayvgrqhkglgwvlytdkaqevntaffvkl  
fntal aerdyfngidgtna  
frlfnagdgvggltdnydghlliqwyskgykfyail eavrkvfdyksiye kvrfkdseysggfvegdapefpivie  
enftfynvdledglmtgif  
ldqkevrrklrdqakerhvl nlf sytgafsviaaseassttsvdlanrsrl teenfglnaidpksqiyvmdtfdfyk  
yaarhghsydtividppsf  
arnkkri fsvqkdydklitgalnlssegtlllctnasvplkqfkntiktleesgvdyeltevmglpkdfkthphykp  
skylkavfvnirh  
>tr|Q6GI05|Q6GI05\_STAAR  
msflrkhaeifsyiligivslftgllilnlp likqlnggkkvdthvhnvweflnaffseikvmsrfignfpivsaivi  
iifgilvmlightllrtik  
ydydisiffvlvigimyfiitlilm tqvygffavifiipftihigyivykdelnqenvknhymwiivsygisylitqialy  
gridaneiesidilsvnaf  
fiimwllgqmaiwnflflrralpltkqelgeeepelsrtskgnvtntqkihklqldkttteyarktrrsvldkirakrd  
kfkkkvndiidiqeddipd  
wmrkpkwvkpmyvelfcgvviflftflefnnrnalfvsgdwklsqtqyviewvtllillfiiiayiattltfhlkgkfyy  
lqlfmg silffklltefin  
imihglllsvfitptllmllaiisyslqlrerp  
>tr|Q6GI08|Q6GI08\_STAAR  
mlkvsdlr lkypsgqrkvfdhlnitidkekvlllgpsgcgkstllnlsgivpnlielpmkydelivdplsgvifqdpd  
sqfcmkvyeelafvlenr  
qvpredmdalijanalnmvnlvntpetyikdls ggmkqklaivetilqsktfldeptamldvqatedlwtklieledwq  
tvvivehkvkhiwnhvdrv  
ilm dyngni iadecpeii lkyvhllseygvwhprawefapsrvdfpttshllqfkngriirgkstllsfsdleiglge  
wititgangsgkttllesl  
mqllikyqgdvyfenhltkikaakhmylvynpelqfitnsvydeinihfhl skdqsd detiqlklldlenvkdqhp  
yelsigqkrrlsvatalss

Tsompanidou\_et\_al\_Supplemental\_FASTA\_File

kadiifldeptfgldshntfqliklfqkrinlgqsivmvthddeierypsrrlkiisdgalldcdgdtv  
>tr|Q6GI09|Q6GI09\_STAAR  
mmvirmyeqwkvrvsfvddvniitklflgiilfffiifvhnfdmlyitilmvlvflmfngtqfkitaitisigfall  
sslfmilyngshtilkfg  
fihitteslvrglhvslrtiaisffgiliaaltsqvvmifyslmqhlkvkskvayafmaairmiplmissliqlrrslkmr  
yqmidaanryglkrfkhl  
iplsqnirkahqlsvameskgfrdgprtyyynvpfsykdvifiivliaiilayycsitlpitgiddvrlgrvg  
>tr|Q6GI17|Q6GI17\_STAAR  
mktielhitlqpqvldtqgqtltravhdlgyaqvndirvgkvlmymtvdevsdekvhniittlseklfantvieeysykv  
edekena  
>tr|Q6GI20|Q6GI20\_STAAR  
mkvavimgsssdwkimgescnldyfeipyekqvvsahrtpktmvqfasearergidiiiagaggaahlpgmvaslttlp  
vigvpietkslkgidslls  
ivqmpggipvattaiagaagnagilaarmlsiqnpslveklnqyessliqkvedmqnelq  
>tr|Q6GI38|Q6GI38\_STAAR  
mthynnyeanvetnqvlvflhgflsdsrtyhnhidkftdnhyvitidlpghgedqssmdetwnfdyittlldrildkykd  
ksitlfgysmggrvalyya  
inghipisnlllestspgikeeanqlerrlvdearakvldiagielfvndweklplfqsqlelpveiqhqirqrslsqsp  
qkmakalrdygtgqmpnlw  
prlieikvptliilageydekfvqiakkmanlipnskcklisatgthivedsdefdtmilglfkeeqd  
>tr|Q6GI40|Q6GI40\_STAAR  
mkwmatgvleddivkeiydsskewvsveklqsqldpstlflhtdneagdrfymrlnndrtsyfygkaiqlfknnsknkq  
sifkdweklkhnitfihpq  
sekhhlrvggqfsshksddewrefglnhfvlpvlistdnngtfltytvkreftvealndltdlfnnididvdeqi  
geitrnediykddwrqlvv  
eaisinneekivlarrllikfdkdisipyilkqayskeknsyifllesqdsifftsqtpeqlikvnkilstkavagtik  
rsqdededtknveafkdn  
knliehrfvvdsilhdikpyitelhydtkpkiikndhlyhlyteikaplkddsyislidnlhptpalggypkefamdfie  
qkefgtrglygapvgydi  
yddcefivairsmlikkaqatl fagcgvkdsdpdse laetnlkftpmnalgvdmgks  
>tr|Q6GI41|Q6GI41\_STAAR  
msnqyqqystvkkywhlmphtltasvvpvlvgtaaskiyflgsedhikislfiamllacllliqaatnmfneydykkg  
ddhesvgiggavrnmgsp  
elvlrlaiafyilaaiglf laanssfwllpvgvlvcmapvglytggpfpiswtpfgelfsgvfmgmfiiviaffiqtni  
qsyviwlsvpivitiqlin  
mannirdrvkdkasgrktlpiilgknaslftmaimyfiayafivltiikpggslyfllallsfpmpvkvirrfkndtp  
ptmmpamaaagktntffgl  
lyalgiyistlfagi  
>tr|Q6GI42|Q6GI42\_STAAR  
mirqarpedrfdiaklvymvddmelelvkhlpkdivldaiekscvdatyrtfyqhvlyveienkvagciisysgeneik  
yekaweqldlpeeikqygt  
plpvkeakddeyyietiatfeayrgrgiatklltsllesnthvkwslncdinneaalklykkvgfisdgqielykmyhh  
livk  
>tr|Q6GI43|Q6GI43\_STAAR  
mkvnkaiyvivalflgglgihkfyadkfgqglfhllffwtgiptiisiihaiivftkkadkdgyiifpkn  
>tr|Q6GI45|Q6GI45\_STAAR  
mnriivklvfmlllvavagcgqkdteektemttikdelgtekikknprkvleysfadylaaldmkpvgiaddgstk  
nitksvrkigayesvgsr  
ppnmevisklkpdliidvrsrhkkikselkiaptimlvsgtdynanieafktvakavgekegekrlekhniklaei  
rkkieqstlksafafglsr  
agmfinnedtmgqflkmgipevtkdktahvgerkggpyiylneelaninpkvmilatngktdknrtkfidpavwks  
lkavkdnkvdydvrnkwlq  
srgimasesmaedlekiakak  
>tr|Q6GI47|Q6GI47\_STAAR  
mekgifydnanvlkldtnqlnenikviddiknyeieptieieingntklklngyfiassiplnlklnnlyveefy  
htynelivkytevke  
>tr|Q6GI48|Q6GI48\_STAAR  
midefeiklnwliirkhydvtilisgtsviipsv  
>tr|Q6GI49|Q6GI49\_STAAR  
mffachfkmkiggviltrtyniigilscslisfiimalpmiwyvasalwffpgaimillslvivficyiktqnqlhllllv  
lniilffsllp111s  
>tr|Q6GI50|Q6GI50\_STAAR  
mieikdltiqgnthilkklnlkfqcgsyaligksgcgkstllntiaglektgkqyvyfngqleqfksnfyrdklgylf  
qnyglivnlvnenldig  
aykkskkekeqkiryieqfglsnslkrkvhtlsggeqqrvalirmmlkdpivmladeptgalpdktgqmiqsldli  
denkvllilathdmainqc  
deiidleqyrkvasm  
>tr|Q6GI53|Q6GI53\_STAAR

Tsompanidou\_et\_al\_Supplemental\_FASTA\_File

knkifgtilylsalglstaayasteyaeggtwshgvgskyvwsyhhahkghgataigkyrsfsgytrasvkakasatk  
hnlrvnrayyniy  
>tr|Q6GI54|Q6GI54\_STAAR  
mraslidggylskggwclwhytl1kgkaycdiyckritfnvkfryvyrhfhwcssrnn  
>tr|Q6GI58|Q6GI58\_STAAR  
mvsmkyntnvkhttleafvttvndlgieliinealrevrkrqlieliddalvnkdeaafnqmaeyknleafige  
>tr|Q6GI60|Q6GI60\_STAAR  
mmekneninveilttsdmhshflngdygsniyragyvqvraqnhrvilldsggslagslaayyyaivapykrhpmikl  
mnrmyhdasgvspsefkgf  
lsfltrsialarfpwlsanieynvtkepyfstpycikfhfgdlkiaivgvtaglmeneysemeqdvsiektlvaskrwr  
yiheveepdfliivihgg  
nkisnstknkkassneaelmeeigvidlmitahqhtivgqdhetyyvqagqakevhlsinfkkrtttydvesidsk  
vidlneyeedqelldltfy  
drkavaywsqeiisdkgglsvnglqdlvcqthpfsqllhdaihafdnditcvhvpnmgekglngqirnedlyhayyp  
dkpmdmtisgnikdi ley  
syshldfvneqlstiidetlctmwqgfnyeidmlepqrvmldqidstksyrvtmtdycyrnyknylnkaiihesyde  
tmstliaeklrpnylisc  
sdfvfvknr  
>tr|Q6GI61|Q6GI61\_STAAR  
msifsqflkrsspqqgivilyyivavflllnlpyvhkpgvevnpidtlfvavsgisvtglspisivdtystfgqliil  
vilniggiyvmaigtmlwv  
vlghigirerqlimlndnknmtmsgtvkliidivksifvievlgamllafyfyrdnpdlkyaimgqvfvsisattnggld  
itgkslipyahdyfvqai  
ifliilgsigfpvllvkvaiqrvtnfrfslftkittstylflfivglailfehnhafkglshwqslfyslfqsatt  
rsagltidvttlsdptni  
imgilmfigsspsvvggirtttfaililflinfsnadtksikvynrevhimdiqrsfavftmatiltflgmliisate  
ngkltflqvffevmsafgt  
cglslgvtstdiskvvlmvlmfigrvglisfiimiagrrepdkfhyperiqig  
>tr|Q6GI65|Q6GI65\_STAAR  
mvnkrlldegktidvylfealndqiiiaipdwfwsyqmamtlneetcfeailmqflvfkeeeeaesiasqldwietykk  
ekd  
>tr|Q6GI70|Q6GI70\_STAAR  
mdislnfnhyidlksiknlclmkkfepvtnenydfiemplvvdgnyvllkiyqekdaliklhyqevlnsrksviqes  
divrisrsilnealdins  
ikyksdtfgltiisdadnyttlirtilaqqvsieqsnklflfintygeifeInnkeytflnwdkifsriykeqkvlvgt  
tnnrkqaiitlaelhkng  
lrenvlqvissikgigswtvqmfmfqqfphvafenipvadiglhraieknhdlphksidkskgesyfqnmksidvfkywy  
iymve  
>tr|Q6GI71|Q6GI71\_STAAR  
mnkliytsygdgnillidsfiklvidfkyipinptkslgyyistsihndkgeclrdclslemicdelwvfidnkyip  
egvrleiaswlkyksspvk  
yisipsllenssindlflfdddsnilkekeisevpkkselrpvcinilpehkyidwikyhlfynkfvpldylsikp  
yiyfdniehykselsllne  
rcnnisvmpyyvsedfnlfsfseckipkyikkdwaittmenkn  
>tr|Q6GI73|Q6GI73\_STAAR  
miekltvflnevvsckplvygllitgvlftlrmrffqvrhfkemirlmfqgekspngissfqaiamslagrvgtgnivgv  
staifiggpgavfwmwita  
flgassafiestlqqifkrvenneyrggpaiyieygiggkfgkiygiifaivtiisvgl11pgvqsnaiaasmhnaihvp  
qwlmggiviivlglifgg  
vrsianvatavvpfmaiylilmaviiiciniqevpalfaliksafglqsafggivgamieigvkrglysneagqgtgph  
aaaaaevshpskqglvqaf  
svyidtlfvctataliilsgtynvtdgtvngangtphlikdggivyentatgdysgtamyaqagidkafhgsgyqfdptf  
sgvgsyfiafalfffafatt  
ilsyysi tetnvayltrnqnnqvssvfiniarviilfatfygavktadvawafgd1gvglmawlniaaiwilhkpavnal  
kdyeiqkkr1gsgynavyq  
pdpnk1pnafw1ktyper1kqarakk  
>tr|Q6GI76|Q6GI76\_STAAR  
meflslvivvlaaf1tpiivnrlnin1pvvvaeilmgivignsflniverdsilnilstlgfiflmflsgleidfkafk  
kdkrarqgqnddessipgh  
lnlaltvfafimiisil1ayvfkwlglvddvllmviistis1gvvptlkemnimrttigqfillvavladvtmillt  
vygaingqggtiwlgi1  
vvftaisylgvqfkrmsflqklmdgttqigiravfalillvalaegvgaenilgaf1agvvvs11npdeemvekl dsf  
gygffipiffimvgvdl ni  
pslikepklliiipilivafiisklipvmfirrwfdmktiasaf11tst1slviaaakiserlnaisaetsgililsav  
itcvfvpiifkklfpvpde  
fnrkievsligknqltipiaqnltsqlydvtlyyrkdlsdrrqlsdditmieiadyeqdvlerlg1fdrdivvcattnddd  
inrkvaklakthqvervic  
rlesttdtelvdsgieifssylsnki11kglietpnm1n11snvetslyeiqmlnykyeniqlrnfpfggdiifvriir

Tsompanidou\_et\_al\_Supplemental\_FASTA\_File

nnesivphgdtglrygdr1  
ivtgakeyvdelkqelefyf  
>tr|Q6GI77|Q6GI77\_STAAR  
msmntdekervqeelydetlldqylenddidqfrdeflalthyeqseyfedttdenrqkifqylspeevanffdqldidd  
deyellfdkmmatyashi1  
eemsydnvdi1neltkpkvas11t1mkkddaneika11hydedtaggimtteyls1kahtpvkealllvkaqapdaeti  
yvi1fvvdddgklvgvls1r  
d1ivaendayiedimnervisvvnaddqedvaqvmrddydfmavpvidyqdh11giitiddildvmdeasedysrlagvs  
didstnds1iktalkr1pw  
liiltflgmitatigrfektlenval1aafipiisgmsgsgtqslavsvrnttgeineqskfrialreagsgv1sgv  
vcstilftiivaiahqpl1  
alivags1tcamtvgtfvgsmp11mkn1nidpavasgpfittindiismliyfglatsfmayli  
>tr|Q6GI78|Q6GI78\_STAAR  
mkfkyhisqqetvktflrhdhfskktvsaikngalivndepvtvrkqlmpndileihlpreipsvnlipyarklevlye  
dafviivtkpnnqncpsr  
ehpheslieqvlhycqehgeninphivtr1drnttgivifakyghihh1fskvn1kkiytc1vygkthtfgiieanirrs  
kdsiitrevasdgyakts  
yevinqndkys1ckvh1htgrthqirvhfqhighpivgdslydgfhdkihgqvlqctqiyfvhpinknniyitidyqll  
klfnq1  
>tr|Q6GI82|Q6GI82\_STAAR  
matnheiefkqmitasiynklqekyfkdsvlfkqvnyyidtpdfklkehrsalrirkvknqyem1ktkpakvg11leyni  
vdikpemnl1isndnlpdd  
irqiiveqfgvkdtt1silgal1t1tyrqetkykgd11v1dkseyfdttdyefevkdynqglekfqs11neln1ehhqpl  
nkvrffkkket1snnin  
>tr|Q6GI90|Q6GI90\_STAAR  
mykynmtgl1tpietsvripqndisryvneifetipdsefdefrhrgatsyhpkmmlkiilyaytqsvfsgriek11  
hdsirmmwlaqdqtpsyt  
inrfrvnpntdalies1fiqfhsq1kqn1iddksifidgkveasanrytfvwkksiqnyesk1nenskalyrd1veek  
iipeikengdsd1tieeid  
ligsh1dkeied1nhsiqnedctqirkqtrkkerteikkfkkkfdyserkskyeeqksilkdrensfsktdhd1atfmmke  
dhmkngq1kpryn1qiatn  
sqfvl1sydl1fqnptdtr1l1p1f1tmiqntfgy1peyivadagyqseqnymaiiddfnktp1itygmfikdktrkfsdif  
ktqnwkyde1ndeficpnn  
krig1kryayrndrygfkrdfk1yecddcsacs1rqqcmkpnsksnkkimkynweyfkqaqinq1sepetkkiysqrki  
dvepvfgfmkailgftms  
vrginkvkre1gfv1malni1rkivarravyqih1kkadfyqi1inrnq1fyia  
>tr|Q6GI91|Q6GI91\_STAAR  
mkt1kgal1fms1kpkvdi1dv1lymfqeyekgvsfqlid1t1q1ldinvnt1ypkykyykthgiel1t1qkqynhyskel1  
kvvney1nsnqstqdiaik  
ynirsstqvkni1kmytvgeiknqspktgvyimkarkt1feervtivey1nhkqsyrevaehfnisygqftsgfisik  
hmvkmd  
>tr|Q6GI93|Q6GI93\_STAAR  
mqnkskspfki1alskfi1h1nkiam1svif1liitivsi1iapliapfpvnqqd11nikgemtaqnilgtdsggrdnfsr1ly  
agris1sigitstigm1li  
gitvgvisgyfgg1vdt11mritefvm1fpflifaiv1naalgdkiknpygsail1vlviiv1swggiar1vrgkv1qek  
eneyflaaksigtptykii  
1kh1l1pni1svv1vqat11fagmi1vvesg1s1f1gfgi1skaipswgn1sdaqegdv1sgkpw1iwmp1aimit1tilsinf  
vgeg1kdafnprgr  
>tr|Q6GI94|Q6GI94\_STAAR  
menilevnqvkkykiktgl1qktqyvkvavddvsfsikkgtf1vgesg1cgkst1gkvi1rledatsgsiivngeditr  
1qgkkl1rksrqyqmi1fqd  
pyas1n1pmqmv1gdi1sepi1nykk1pkeeikke1vly11kcvgl1sedayy1kyahe1fsggqrqrv1giaral1rps1livade  
pvsal1dvs1vqs1v1n11kd  
1qeqfn1s1ylfi1ahd1svvkh1sdvigvmy1ghiveiasdkei1yenpkhpytkalissipqid1knri1ilkgelpsp  
nppqgcp1fht1rcp1aqdmc  
kksmpel1kdi1gnehqvacfyvdkvgd1nd  
>tr|Q6GI95|Q6GI95\_STAAR  
mnv11evkd1ets1kinnew1atvenisfel1skgevl1givesg1cgksil1sksi1k11pekisk1sngevi1fdgkridt  
1nekq11di1rgndi1ami1fq  
epmtal1npvft1knq1vesikshk1skeann1akd11kkvgiarqde1l1nsyphq1sggm1rqrv1miamaiscspk1li  
adepttal1dvti1qaq1ld1  
1kelqketqmaimmi1thd1svvae1fcdkvl1vmyagqivefggikei1l1hnpk1hpytqk11stipk1keeqkr1letiegivp  
siqafhvnkcrfanrcnkk  
1di1cnnqspk1mhvced1virch1lyqneykei  
>tr|Q6GI97|Q6GI97\_STAAR  
mtrk1kt1li1ifvatia1sgcanddgiysdkgqvfrki1sad1ts1dts1litdeissevtaqt1feglyt1gkgdkpv1lgv  
akafpekskdgkt1kvklr  
sdakwsngdkvtaqdfvyawrktvdpktgsefayimgdiknasdi1stgk1kpv1eq1gika1ddet1qid1lekpvp1yinq11

Tsompanidou\_et\_al\_Supplemental\_FASTA\_File

aIntfapqnekvakkygkn  
ygtAADravyngpFkvddwkqedktllsknqyywdkkkvkldkvnykvikdlqagaslydtesvddavitadqvnkykdn  
kglnfvlttgTffvkmnek  
qypdfknknrlraiaqaidkkgvdsvkngsipsdtltakgiakapngkdyastmnsplkynpkearahwdkakkeLgk  
neLsfsmntedtpdakisa  
eyiksQveknlpGvtlkikqlpFkqrVseLsnfEasLsgwsadypdpMayletmttgsaqnntdWgnkeydqllkvar  
tklalqpneryenlkkaee  
mflgdapvapiyqkgvahlnpqvkgliyhkfgpnnsLkhvyidksidketgkkkk  
>tr|Q6GI99|Q6GI99\_STAAR  
mterilelndlhvsfditagevqavrgvdfylnkgetlaivgesgsgksvttkaitklfqgdtgrikkgeilflgedlak  
kpeneliklrgkdismiFq  
dpmtslnptmqigkqvmeplikhknyskaqakklaLeilnlvglpnaekrfkayphqfsggqrqriViatalacepkvli  
adepttalDvtmqaqildl  
mkelqqkidtaifiThdIgvvaniadrVavmyggqmvEtgdvneifydpkhpYtwgllssmpdlsttndtpllaipgap  
pdllhpkgdafarrsqa  
ldidfkveppwfkvsPthfvkswllDarapkelpeLvkqrmkmpmnyekplkvervsfnek  
>tr|Q6GIA2|Q6GIA2\_STAAR  
mlkkwlgmalitpmltffiwwfnshtiitylnilfyvsliifisiflillvqegifdatsygfrrlkyqmssskkkksis  
ddpffnpqevkkehyfvst  
wiiplllinilyfimtivilslilv  
>tr|Q6GIA8|Q6GIA8\_STAAR  
mnkllilgiylyrifrsayfYlpfllyflvqgysiiqleilmasygiaafLfslykeckfkicnlkdsnlvseifkii  
glllllyqnqylilvvaqi  
llglSsymmtgvdtaikrniTnekyvqnksnsymflsllisgiigsylyginikwpiimtgifSiltiirctIvenr  
eLnligetkgkikkflpee  
kfwilhysflralilgffigfipiniyndlklNnsqfisvltcytvmgylssryltkylnykvseiclvifliiytyqs  
fiavtismiFlgissgltr  
pqtinklsssnlrvmlnyaetlyfifniaflmggyltigitqylilfiaLlifiyliiifyftrreqhetkn  
>tr|Q6GIA9|Q6GIA9\_STAAR  
meilndsvksfeklylqlqdgfpvivptdtynlcsLpnndlcidkifeykkrskdkplslfidkpedwklygdnqntei  
vdklveifwpgplniijkn  
ktsynymlnnsdsiaigcvqnktmrrfisyinspiaitsanisgtandiliteneaihmgenvrymlrsqnkntnyktss  
tiikvtdnkiellregdik  
feeikerlgtgiie  
>tr|Q6GIB4|Q6GIB4\_STAAR  
mnytlqcyidcgaptqriskrnstsnsawerspnwIsnfyk  
>tr|Q6GIB6|Q6GIB6\_STAAR  
mqphlicldldgtllndnkeissytkqvlneLqqrghqimiatgrpyrasqmyheLnlttpivnfngayvhpkdknfk  
tcheildlgiagniaggLq  
qqvsnjiaevkdyvfinnhdprlfegfsmgnpriqtgnllvhlkesptsilieaeskiPeiknmlthfyadhiehrrw  
gapfpvieivklginKarg  
ieqvrqflniernniaafgdedndiemieyarhgvamenglqelkdvanitfnnedgigrylndffnlriyyc  
>tr|Q6GIB8|Q6GIB8\_STAAR  
myknymtqltlpietsvripqndisryvneivetipdsefdefrhrgatsyhpkmmlkiilyaytqsvfsgrriekll  
hdsirlmwlaqngtpsykt  
inrfrvnpntdalieslfiqfhsqclqknliDnsifidgTkveananrytfvkkSiqnesklnenskaLyrdlveek  
iipeikedgdsdltieeid  
ligshldkeiedlnhsiqnedctqirkqtrkkrteikkfkkkfdySerkskyeeqksilkdRnsfsktdhdafmrmke  
dhmkngqlkpgynlqiatn  
sqfvlSydlfnqptdtrtlipfltmiantfgylpeyivadagygseqnymaiiddfnktpLitygmfikdktrkfkSaif  
ntqnwkydeLndeficpn  
krigfkryaylndrygfkrdfklyecddysacsLrqcmkpnsksnkksmknynweyfkqainqklsepetkkiysqrki  
dvepvfgfmkailgftms  
vrginkvkreLgfvLmalnrkivarravyqihlkkadfyqiinrnqlfyia  
>tr|Q6GID2|Q6GID2\_STAAR  
mkskyepLfdkvvlpngvelrnrflapLthiSnddgtisdielpyiekrSQdvgitsnaasnvsvdgkafpgqpsiah  
dsdieglkrLatamkknga  
kalvqihhggaaLpeltpdgdvVapsislksfgqkqehsaremtneeieqaikdfgeatraieagfdgveihganhy  
lihgfvsPynrrndvwan  
qykfpiaVieevlkskevygnkdfivgyrlspeaespgitmeiteelvnkiShmpidyihvsmdthataregkyagge  
rLplihkwingrmpligig  
siftaddalDavenvgdlvaigrellldyqfvekiKdgredeiinyfDperednhhltpnlwhqfnegfyplprkdk  
>tr|Q6GID5|Q6GID5\_STAAR  
mklyrfshktsygvTiveengddvlkveqvikhpKqgdlnhptetegvffherkaLshfekrytkrsqLrdfnvdvlr  
yedsLqqaitdletklktq  
qtkhaemsLaslarlKedyslqyenfk  
>tr|Q6GIE4|Q6GIE4\_STAAR  
mthlletfemsiDhqedglvvismpvtdkvkqpfgyLhggasiaLgetacsLgsanlidttkfiplglemnanhihsakd



Tsompanidou\_et\_al\_Supplemental\_FASTA\_File

grviataei ihggksthvw  
diki kndkeqli tvmrgtvaikplk  
>tr|Q6GIF1|Q6GIF1\_STAAR  
mehsvsviygadvi cscvnaptskdiydlqpllkrkypnisfkytyiditkdndnltdhdldqfierieqdel fypl it  
mndeyvadgyiqtkqitrf  
idqklvne  
>tr|Q6GIF8|Q6GIF8\_STAAR  
mvkivvsrkpdkfyqq lsklgdvvmwqks lvpmpkdqfvta lrdadacfit lseqidaeilaqspnlkvianmavgydn  
idvesatannvvvntntpnv  
l tettael gftlmlatarriveaekyveadawqswgpyllsgkdvfnstvgiygm digkafarrlqgfn tkilyhnrsr  
hkdaeadfnatyvsfetl  
aesdfiictap ltkethhkfnaeafeqmkn daifinigrqivdeta lidaldnkeilacgl dvl anepidhthplmgrd  
nvlitphigsasvttrdnm  
iqlcinnieavmtngvphnpvn  
>tr|Q6GII0|Q6GII0\_STAAR  
mnsl dikdvttfyeegkhliygytptcgtckvserml ditneilqlpllkidlnfyppqfckdmqimstpilll mnkdk  
vkriyafqsvtdll enlk  
>tr|Q6GII1|Q6GII1\_STAAR  
maivnkvi ivegksdkkrvqvvaepvni cthgtmsidkl ddmieslydkqvfv ladsndegdrirnwfkryl sesehi  
fidktycqvancpkqylah  
vlskhgftckketpfl pinnerlvlvne  
>tr|Q6GII2|Q6GII2\_STAAR  
mlni qdvshlskkeqkaynr fvesvengnl pvl pciemd lkemqee tlnqskiggmpflksfkdipl dennvpmvllaqi  
nln dlpeqqel fpvnegil  
qfwissedqmygmsen lgnninsrlvyikepitd lslkdiqah lksldadnedipfsgafsiefr lskqtitctdykyd  
eddlalwnkvnp sfalksm  
fggydel mepvcntftakepfnqlggypyfdqi dprtn dqelkmydrvllqidstrdgns siiwgd lgianilvkstdle  
amkfddymyswdcs  
>tr|Q6GII5|Q6GII5\_STAAR  
mqaiksn esfksvinsdtpv i vkfeagwcpdcramdlwi dpiveqyndyqwy tvnrde ledvvvnevmgipsllvfkg  
dkiahlhsanak speqves  
flaetfk  
>tr|Q6GIJ1|Q6GIJ1\_STAAR  
mvtai ihgfilaig l ipllgaqnvfi fnqganqkyryvlpai itaglsd slfiiiavvgvsiiimslpilqaiiyivgl  
iflmy mawtiwhdkpstdg  
eaqim spmkqvsfal svsl nphaildtigvigssaalysgsnkiaftiacisvswlwffllailgkmvgsidktgkllt  
iinkissiiiiivalmlq  
kliqllf  
>tr|Q6GIJ2|Q6GIJ2\_STAAR  
maktlyl m rhggtlfnfkgliqgfgdsp ltelgiaaqkarsyyetkginfdlyasstqerasdt lenvapnqsyqrfkg  
lkewhfgl fegesvylfdn  
lykpedlfgdrivp fkgearqqvedrivkt lhdimsqtknalvshgtimgvflryclkldealkhnigncnilkfeyd  
ngtfkfvelidpn  
>tr|Q6GIJ7|Q6GIJ7\_STAAR  
mnyikrtlilililfvvvspinspktiadnk ysei qddkfqlqpgdiiitkgpvmwgffghcsiaiddktilqiepgdkp  
ttqsfesfknyasgkndw  
mkvyrcsyggagkkaadwvknyentnhrylvtlnlnskkftyctki iyaykfgvseksvksyglhiispyaikdnfid  
pyklrlvkay  
>tr|Q6GIK3|Q6GIK3\_STAAR  
mkkklvlvtmstl fatqfmsnhanastesvdknfvvpsgink iptydefk kapkvnsnladnknfvasedklnkia  
dpsaaskivdknfavpesk  
lgiivpeykeinnrvnttnpaskqvdkqivakdpevrfitqnkvnrhrittqthykkvitsyksthvhkhvnhats  
ihhhftikpseaprythps  
qsqsl iinhfavpgyhghkvvtpgqasiri hhfcavpqinsfkvip syghnshrmhvpsfnnttathqnakvnkty  
kyfitykvvkgvkkhfsfs  
kshgckivkpalnikvnyqyavpsnsphvvpefqgilpaprv  
>tr|Q6GIK5|Q6GIK5\_STAAR  
mqir qihghd faqvdlir tafensehgygnese lvdqir lsdtydnnel vavlnqnevvg hllsevyldneaqreigl  
vlapvsvdihhqngkigkr  
liqalerea ilkgynfivl gwpnyanlgyqrasmydi pyppdgipdeaflike lkvns lagktgtinytsafe ki  
>tr|Q6GIK7|Q6GIK7\_STAAR  
mkkvmgillastlilgacghhqsakkestshkkk endneelneelkefkskknmdikikgd tivsd kfeakikepfi in  
ekdekkkyiafkmejtakk  
ddkdlnpssishdyini tddkntvnlrdgyllsdknykdwtehnqdqikkgktaqamfiyelrgdgninlnvhkysed  
ktvdsksfkfslktedfs  
hraetreevekkekefeeeekerekekekqkdddhs gldev  
>tr|Q6GIK8|Q6GIK8\_STAAR  
mndls lssflkr snkfmqfncfic liliivfyiigmni qdfsd fpskdlnhkvtynl ngfleifvnnafivp fvsllisi

Tsompanidou\_et\_al\_Supplemental\_FASTA\_File

ipipylyfiptistijysls  
viigvtfsyklnegiaifigilphgileiytsielsmlfllnayirknsmlfrkrketlpnffvllksivkcyllifl  
pvaflcalieitvtptvyk  
fltnii  
>tr|Q6GIL0|Q6GIL0\_STAAR  
mnlkqsieeiinqpeyepmsvsdfqdalglssadsfrdlikvlveleqsgliersktdryqkhhsskgqsklikgtlsqn  
kkgfafllrpkdedmedi fi  
pptkinraldgdrtiveihqskgehkgkiegevk siekhsvtqvvgtysearhfgfvipddkrimqdi fipkqslgavd  
ghkvlvqitkyadgsdnpe  
ghisailghkndpgvdi lsiyqhgieiefpdeveleaeavpdhienteikgrhdrlrdeltitidgadaklddaisvkk  
langhtqltvsiadvsyyv  
tedsal dkeaydratsvylvdrvipmiphrlsngicslnphvdr ltlscrmeidasgrvvkheifdsvihsdyrmydav  
nqiitekdpniregykeit  
pml dlaqdl snrl iqmrkrgeidfdiseakvlvnedgiptdvqlrqrgegerliesfmlianetvaehfskldvpfiyr  
vheqpkedr l r q f f d f i t n  
fgimikgtgedihpttlqkvqeevegrpeqmvis tmm l rsmqqahyddvnlghfglsaeyythftspirrypdltvhrli  
rkyli eksmdnkevkrwed  
klpelaehtskrerraieserdtdelkkaeymiqhigdefegivssvanfgmfie l pntiegmvhianmtddyrfeerq  
maligerqakvfrigdtvk  
vkvt hvdvderlidfqi v g m p l p k n d r s q r p a r g k t i a k t r g k s l d k s k s d d k g h k k k g k r k g k n r k n d k s g n s k h k  
p f y k d k s v k k k a r r k k k  
>tr|Q6GIL3|Q6GIL3\_STAAR  
madrtinkeiktgrfiatasiaf sil l i i h y f v s l n d a t a k a l l n l t n q n t s d k a i d y i l n s f r f t g i m y i l a y l a g f i t f  
wnrhtyvwfmfavyvsns  
lftlinlsitiqaikaahgayltl piliviigsvalaiymlvvsirkstfnr  
>tr|Q6GIL9|Q6GIL9\_STAAR  
mkdl l q a q k l i p d l i d k m y k r f s i l t t i s k n q p v g r r s l s e h m d m t e r v l r s e t d m l k k q d l i k v k p t g m e i t a e g e q l  
isqlkdyfdiyaddnr lse  
giknkfqi kevhvpgdadnsqsvkte l g r q a g q l l e g i l q e d a i v a v t g g s t m a c v s e a i h l l p y n v f f v p a r g g l g e n  
vvfqantiaasmaqqaggy  
yttmyvpdvnsettynt l l e p s v i n t l d k i k q a n v i l h g i g d a l k m a h r r s p e k v i e q l q h h q a v g e a f g y y f d t q q q  
ivhkvtig l q l e d l e s k d  
fi favaggkskgeaikayltiapkntv litdeaaakiile  
>tr|Q6GIM2|Q6GIM2\_STAAR  
mkgie l n n p f l n k g t a f t n e e r k q l g l e g l l p a n v r t l e q q a e q c y e q f k a k q t d f e k r l f l m a i f n r n r t l f y k l t s e  
hlvefmpiiydpviaqsie  
qynenfsrpqdavflsvdrqdieqelrnvangrdirlivvtdaegilgigdwgvdgvdiaigklivytaaaginpaqvl  
pvsldvgtneq l l n d e l y  
lgnrhkrvddetyytfvdkfvsavrkeypnallhwedfgrghaknildkyedtlptfnddiqgtgivtlagvlgalnisk  
vdytnqtf l v y g g g t a g m g  
itnilkdelikqdv sedkanqhfyimdkqgl l f d d m d d l t e a q q v f a k n r e f s n t v n w k n l k e v i e n i k p t v l i g t s t q  
tgafte d a v k e m l k h t e r p  
mifp l s n p t k l a e a t a q d l l k w t n g k a l i g t g i p y n d i e y n g v n y s i g q a n n a l m y p g l g l g l i a s k a k k v n q q i l s a a s  
h a l g g m v n p d e p g a a v l p p  
vek i h q c s r a i a k a v a g s v i d q g l n a e t i d d i e a i e a e i w y p e y k s y i  
>tr|Q6GIM8|Q6GIM8\_STAAR  
maqknnnvi p m t f d d a f y r k m a n q k f k q r e y k r a a e y f e k v l e l s p d d l e i q i d y a q c l v q l g i a k k a e h l f y d n i i y n r  
h l e d s f y e l s q l n i e v n e p  
nkaf l f g i n y v i v s d d q d y r d e l d q m f d v k y q s e e q i e l e a q l f v v q i l f q y l f s q g r l d a k n y v l h q p q e v q d h r v v r  
n l l a m c y l y l g e y d t a k a l  
yeallkedst diyalchyt l l l y n t k e n e q y q y l k i l n k v v p m n d d e s f k l g i v l s y l k q y r a s q q l l y p l y k k g k f l s  
iqmyna laynyyy l g e e d e  
shyywdk l k q i s k v e i g h a p w v i e n s k e v f d q h i l p l l q s d d s h y r l y g i f l l d q l n g k e i v m t e s i w q v l e n l n n y e k l  
y l t y l v q g l t l n k l d f i h r  
g l l t l y h n e l f v s e n d l m v a w i n q g e l i a e k v d l t d v e p y i g a f i y l y f k n q p r n v t k k q i t t w l g i t q y k l n k m i e f l  
l s i  
>tr|Q6GIN5|Q6GIN5\_STAAR  
mgvhqy f k r l s d m e r l i r l p g k f k y f e h n v a a h s f k v t k i a q y l a t v e e y h g r k i n w k s l y e k a l n h d f a e v f t g d i k t p  
v k y a s s e l k k l f s q v e e m  
vetf i e e e i p l q y r d v y k r l q e g k d d s l e g q i l s v a d k i d l l y e t f g e i q k r n p e e l f f e i y e m s l e t i i q f d h l a s v q  
d f i n n i i p e m l t e n f i p r t  
e l r e t t m n i l n k g k e e n e  
>tr|Q6GIN6|Q6GIN6\_STAAR  
mkks l t v t v s s l a f l a l n n a a h a q h g t q v k t p v q h n y v s n v a q a t q s p t t y t v v a g d s l y k i a l e h h l t l n q l y s y n p  
g v t p l i f p g d v i s l v p q n k  
v k q t k t v k s p v r k a s q a k k v v q p v q q a s k k v v v k q a p k q t v a k t v n v a y k p a q v q k s v p t v p v a h n y n k s v a n r g n l y a  
y g n c t y y a f d r r a q l g r s i  
g s l w g n a n n w n y a a k v a g f k v d k t p e v g a i f q t a a g p y g h v g v v e s v n p n g t i t v s e m n y a g f n v k s s r t i l n p g k y n y i

Tsompanidou\_et\_al\_Supplemental\_FASTA\_File

h

>tr|Q6GIP0|Q6GIP0\_STAAR  
mnc1scgaklyentiynl fkkpnr ldrckenwdnikldikarrsrc lkyldqneaycl dckflsahfnlmeqlycq  
fqydg lmkemihqyfskd  
yylcellahl ieipqtstydyivpipsspahdl srtfnpveavl kakgirfdkil kmsnrpkqshlttkerladenpfid  
tel dlngkeillvddiytt  
gltihragcklyaknirkfkvfafar

>tr|Q6GIP9|Q6GIP9\_STAAR  
mkv lvamdefhgi issyqanryveeavasqietadvvqvp lfngrhell dsvflwqsgqkyripvhdadmnevegvygqt  
dtgmt viegnl flkqkkipi  
vertsygl gemikhaldndakhvvisl ggidsfdagagml qalgaqfyddegrvvdmrqgagvikyirrm dmsnlhpkme  
tariqvmsdfssrlygkqs  
eimqtydahqlnhnqaaeidnliwyfse lfkse lki aigpverggaggiaavlnglyqaeiltshalvdql thlenlve  
qadliifgeglngqllle  
ttt lriaelchkhkvaiaia cataekfd l fesqgv tamfntfidmpesytdfkmg lqirhytvqslkl l kthfnvev

>tr|Q6GIQ5|Q6GIQ5\_STAAR  
mkk t vlylvavmflaacgnnsdkeqsksetkgskdtkviennyk mrgekdg sdakkvketvevpknpknavv l dyga  
 l dvmkemgl s d k v k a l p k g  
eggks l p n f l e s f k d d k y t n v g n l k e v n f d k i a a t k p e v i f i s g r t a n q n l d e f k k a a p k a k i v y g a d e k n l i s s m k q  
ntenigkiydkedkake l n  
kd l d n k i a s m k d k t k k f n k s v m y l l v n e g e l s t f g p k g r f g g l v y d t l g f n a v d k n v s n s n h g q n v s n e y i n k e n p d v i l  
amdrqqavsgkstakqal n  
npvlknvkaikedkvynldpk l wyfaagsttttikqidelevk

>tr|Q6GIQ6|Q6GIQ6\_STAAR  
miqvgnl tktinnqm l d d i s i e i e k g k l t s l i g p n g a g k s t l l s a i c r l i r f d e g e v k i d g q l m s d y k n n d l s k k i s i l  
k t n h t e m n i t v e q l v n f g  
rfpyskgr l t k e d h e i v n d a l d l l q l q d i r k r n i k s l s g g r q r a y i a m t i a q d t e y i l l d e p l n n l d m k h a v q i m q t l k  
mlahkmnkaivivlhdinf  
ascysdqivamkngqlvksdlkdnv iqssv l s d l y d m d i q i e h i r n q r i c l y f k d

>tr|Q6GIQ8|Q6GIQ8\_STAAR  
mkyllkgklllllll l l l l i l l i i s l f i g v s e l s i k d i f h l s d s q q n i l f s s r i p r t m s i l i a g s s l a l a g l i m q m m q n k f v s  
pttagtmewaklgilia l l  
ffptghillklvfavicsi sgtflfvkiidfikvkdvifvp l l g i m m g g i v a s f t t f i s l r t n a v q s i g n w l n g n f a i i t  
sgryeilysiplla l t y l  
fanhftivmgkdf t n n l g l s y e k l i n i a l f i t a t i t a l v v t v g t l p f l g l v i p n i i s i y r g d h l k n a i p h t m m l g a i f  
vlfsdivgri v v y p y e i n i  
gltigvfgtii flillmkgrknyaaq

>tr|Q6GIR4|Q6GIR4\_STAAR  
mtqqnshgnqi qdipqtgffghprglgv l f f v e f w e r f s y y g m r a l l i f y m y f a v t d n g l g i d k t t a m s i m s v y g s l i y m  
tsipggwi adritgtrgat  
llgavfiiighic l s l p f a l i g l f t s m f f i i g s g l m k p n i s n i v g r l y p e n d r r m d a g f v i f y m s v n m g a l l s p i l q h  
fvnvknfhggfliaavgma  
lglvwyvlfnrknlgsvgmkptnpltpaekkygliigsvilaivliivigaltns l s f n l v s n t v l v l g i a l p i i y f t l  
i i r s k d v t d t e r s r v k a f i  
plfilgmfvwai qeggsnvl niygiehsdmk l n l f g w k t n f g e a i f q s i n p l f i l l l a p i i s l l w q k l g t k q p s l p v k f a  
igtflagasyiligivgya  
sgsnfsvnwvilsyiicvigelcl sptgnsaavklapka fnaqmm siwyltnasaqaingtlvklieplgqtnyfi flg  
vvaiivttivlafspliik  
amkgir

>tr|Q6GIR6|Q6GIR6\_STAAR  
msleafhvankmhilgpqqrefrkeilqtmqvgagpqhkeilfl

>tr|Q6GIR9|Q6GIR9\_STAAR  
mtnffdilserkqglfstmiehiqisfialliataiavplgilltktktiseivmniaailqtips lallglmiplfgig  
rvpaiialvvyallpilrn  
tytgikevdpslieaakgigmkpfrl tkvelpiampvimagvrtamvliigtatlaaligagg l d l l l g i d r n n a s l  
illgaipaallaiifdlil  
rfmaklsykkllmtlgvivmiiilaiaipmfaqgdkitlagklgsepsiitmykilieetkntvevkdgm g k t a f l f  
nalksddidgyleftgtvl  
gel t k e p l s k e e k k y d q a k q s l e k k y q m t m l k p m k y n n t y a l a v k r d f a k q h n i r t i g d l n k i k d q l k p g f t l e f n d r  
pdgykavqaynlnldnr  
tmepklryqainkgninlidaystdaelkqydmvvlkddkhvfppyqgaplfkesflkkhpeikkplnklenkisdedmq  
mmnykvtknedpytvakd  
ylkakglik

>tr|Q6GIS0|Q6GIS0\_STAAR  
mikfknv tkrydkhvavdnisfdinegeffvligpsgcgktttlkminrlilhsegyiyfkdkpisdypvyemrwdigyv  
lqqialfphmtikeniagv  
pqmkkwkekdidkrvde l emvglepekyknrkpde l s g g r q r v g v i r a l a a d p p v i l m d e p f s a l d p i s r e k l q d d l i  
elqtiki k t i i f v t h d i q e

Tsompanidou\_et\_al\_Supplemental\_FASTA\_File

amklgdkicllneghieqidtepgfknnpqsefvkqfmgshleddapcveenairdldimkpiddevtsmsaypivydnq  
qievlyqhl seservivmq  
edvggyvidrkdkfkylsqkkevaqhd  
>tr|Q6GIS2|Q6GIS2\_STAAR  
meaykiehlnksyadkijfdnldl si segekiglvgingtgkstllkviggiddftanvmhpnqyri ryssqkqdlnd  
mtvfdavlsdttttrik  
qyeqavqayaddqsdklfrmmdaqdamdqhdawdynaeiktisklgihttkyikelsggqkkrvvlaktlieqpdll  
lldeptnhldfesiswlin  
yvkqyphtvlfvthdryflnevstriielnrgklasypgnyesyiemraereltlqkqqkqralykeelawmragakar  
ttkqqarinrfdlenevn  
qqykddkgeInlaysrlgkqvfeledlska indkvlfehlteti iqgerigvvgp ngagkttllnilsgedqqfegklkt  
gqtvkvayfkqtdetldrd  
irmidylreeseiakekdgtsvsitqll erflfpsathgkkyklsggeqkrlyllrllvhqpnvllldeptndldtetl  
tiledyihftfggtvitvsh  
dryflnkvaqsywfi hdgqmekiigt fedesykksldknkstlkqhskssttvrknglsykekleyeqlmkrieqae  
rmeeidvlmieasadygki  
kelneekqleiqydl ditrwseleeikeqq  
>tr|Q6GIS4|Q6GIS4\_STAAR  
msiieksgl fssfqdfgrryehdgvipcgaldt laheianrl vandkneatlemtnkmatirfteptli alaggnvka  
yegmtispyklyll dkgd  
vlkfretsytsrvylavggfel dawlgnsstdfnvkiggfkgtrtldqgdeiklkrdytarhhl fenlahtkqtdwgid  
gyalsfnym sdvfhvknk  
gtedfkedairfvkhdykvtskanrmgmmlegekikafyedmppyqtvkkgtiqikrdgtpiillndhytlgsypqigt  
iasyhltklaqkpgsrllk  
fqfidil taeknlvkysnwlnqlfhgieyrmql emmk  
>tr|Q6GIS5|Q6GIS5\_STAAR  
mkiysqgdqai vvaiekevsksltedllt lrsylieqnypfieivpsesdmmyvdardmikhhniqspflymkalies  
ihlnikhdfnqqdlieipi  
vygskygpdl esllkhykikletfielhskaqyfvsmmgyspgfsyltglnkklyinh tskqkkfipagsvvl egkkcgi  
vtdtindwlvigytpsl  
fnpkesdfarlk lgdnikfrpinenelevgafkdvnhn  
>tr|Q6GIS8|Q6GIS8\_STAAR  
mrieynyryyl teneykqyhiqlkgfikkyvatkladvgevi hfaqaqqrqgryvslylsyeaakyfnhvmcths lakdd  
iyavaysfenaesinstye  
hqttyvskhhfs fvessevmtnikrvqqaivegetyqvnytarltdniyypistlyerltqfsngnyta llqtdeiqva  
sispel ffaqgqfnvndv  
iiskpmkgtmprgkteaedqqyktlqtsskdraenvmivd llrndigrisqsgsikvyklffievyktvfqmtsmvsgt  
lktntdl tqiltsl fpcgs  
itgapklntmkyikql essprgiycgaiglllpteddkmi fnipirtieykygqaiyvgagitidskpkdevnefyakt  
kil eml  
>tr|Q6GIS9|Q6GIS9\_STAAR  
milvidnndsftynli dyiktqtkltvqvvgidnlliedii nmkpkai vispgpgnppdypilnevleqfyqrvpilgvc  
lqfcivsyfggniihgyh  
pvghhttqlrhtnegifqglpqnfnvmryhsli adgatfnc lkitakndeaiimafehitfpvfgvyhpesilseygy  
rqvel flskvgdycenri  
>tr|Q6GIT3|Q6GIT3\_STAAR  
mivyilinaiavv litgfnlyrhmqhls l samll sitinafintfiidkynfitlctitmfiiwtilqfyidkklkpv  
itdqkfiailti vvs l t q  
rvtdfss tqsi ymsiflapaifi iggiml f istfns l desaennkikk lmikglii inisfivmmvlt pywyliv  
lifllflwqkvkyf  
>tr|Q6GIU0|Q6GIU0\_STAAR  
metstiisliifillialttvfvgsefalvk iratrieq l adegnkpakivkkmianldyy lsacqlgitvtslglgwlg  
eptfekllhpi feainlpt  
al tttis favsfiivtylhvvlgelapksiaiqhteklalvyarplyfgnimkpliwlmngsarviirmfgvnpdaqtd  
amseeeki iinnsyngge  
inqtelaymqnifsfderhakdimvp rtqmitlnepfnvdelldtikehqftrypitddgdkd hikgfinvkeflteyas  
gktiki anyihelpmiset  
trisdalirmqrehvhmsli ideyggtagiltmedileeivgeirdefdddevndivkidnktfqvngrvll dldteefg  
iefddseditiggwlsr  
ntnlqkddyvdttydrwvsei dnhqi iwvm l nyefneprptigqsdedekse  
>tr|Q6GIU1|Q6GIU1\_STAAR  
mseliinygkvyteddkidngyihvkdqgqivaigevddkaaidndtt nkiqvidakghvlp gfidihihgg ygqdamdg  
sydglkylsenll segtts  
ylattmtqstdk idkalini akyeveqdvhnaaeivgihlegpfi senkvgaqhpqyvvrp fidkikhf qetanglikim  
tfapevegakealetykdd  
iifsihtvatyeaveaaergakhvthlynaatsfqhrepvgvfgaaw lnda lhtemivdgthshpasvaiayrmkgn  
fyllitdamrakgmpegeyd  
lggqkv tvqsqqarl tngalagsil kmnhglrn l isftgdtldh lwrvtsl nqai algidrksikvknkdadlvilddd

Tsompanidou\_et\_al\_Supplemental\_FASTA\_File

mnvkstikqgkvhtfs  
>tr|Q6GIU2|Q6GIU2\_STAAR  
mrvtelltkdti amd lmandkngvide lvnql dkagk lsdiasfkeaih nresqsttgigegiaiphakvaavkspaiaf  
gkskvgvdyqsl dmqpahl  
ffmiaapeggaqth l dalak lsgl mdenvrek l lhasspeev lai idhaddeatkeeeaeaeaaqqvataeqsskqsne  
yvlavtacctgiahtymar  
dal kqadkmgiki kvetngssgikh l teqdiknatgiivaadvhvetdrfdgknvvevpvadgikrpeelinkaldts  
rkpfvardgqrkgnsndsq  
ek l spgkafykh l mngvsn l plvisggil maivflfgansfdpkssyna faeqlwnigsk safaliipilsgfiarsi  
adkpgfasgl vggmlaisg  
gsgfiggi iagfl agyltgqkv mtrkl pqa leglkptli yplltvtatg l lmiyvfnppaswlnh l lldglnn lsgsni  
vllglv igammaidmgppf  
nkaayvfatgalie gnaapitaamiggmipplaiatam l i frkftkeqrgsi ipnyvmgmsfitegaipfaaadpl rvi  
psmmigsgiggaiaglgs  
ritaphggi iivigt dgahl lqtli alvvgtlvsaliygl ikpkl teteie asksmde  
>tr|Q6GIU3|Q6GIU3\_STAAR  
miytvtfnpsidyvif tndfkidg l nratatykfaggkginvsrvlkt l dvestal g faggfpgkfi idt l nnsai qsnf  
ievdetrinvklktgqet  
einapghitstqfeql l qiknttsedivivagsvpssipsdayaqiaqitaqtgaklvvdaekelaesvlpyhplfik  
pnkdelevmfnttvnsdad  
vikygr l lvdkgasvivilggd gaiyidkeisikavnppgkvvntvsgdstvagmvagiasgl siekafqqavacgta  
tafdedlatrdaiekiksq  
vticvl dge  
>tr|Q6GIU4|Q6GIU4\_STAAR  
miitekrhelileelshkdf l t l qelidrtgcsastirrd l sklqqlgklqrvhggam l kenrmvean l teklatn l dek  
kmiakiaangindneclfi  
dagsstlelikiyqakdiivvtng l thveal l kkgiktim l ggqvkentlatigssameil rrycfdkafigmng l die l  
gltpdegealvkqtams l  
anqsfv l idhskfnkv yfarvp l lesttiitsek alnqes l keykqkyhfiggt l  
>tr|Q6GIU8|Q6GIU8\_STAAR  
mklqksnhtil l vlekgedivecitnfaddqdl tftsvsgigacddvvlkffnl ttkqyeekहितeple l t l lgnisrl  
dnghfah l hatfgtqsyet  
fsghlakaiivsataei l lvtvdwdi qrsfndavg l n l ldlq  
>tr|Q6GIU9|Q6GIU9\_STAAR  
mmqsryiar iyf l i l fivslfetki qfmln l flayipfels l l l r l fkpknkyewpl fiiysfiv l l l pntfymvtd  
l i h l n q f q f n f y a g l n l g e  
wkyfty l l l g v f l a v y v m l i y f e i l t l t s h r w l n r l i v v l m f l n g f g i y i g r f l r l h s v y f f n e p l h v l n h i e s l t l  
ktamfv c f m v m q a a i l l f  
gkgvr l nk  
>tr|Q6GIV2|Q6GIV2\_STAAR  
msevkkvkvkheqqkkek t k k q y k p f w i m s f i i l i v l l l p a p s s l p i m a k a v l a i l a f a v i m w v t e a v s y p v s a t l i i g  
l m i l l g f s p v q n l g e k l g  
n p k s g s a v l a g s d l g t n h a l s l a f s g f a t s a v a l v a a a l f l a a m q e t n l h k r l a l l v l s i v g n k t r n i v i g a i i v s i v  
l a f f v p s a t a r a g a v v p i l  
l g m i a a f k v s k d s k l a s l l i i t s v q a v s i w n i g i k t a a a q n i v a i n f i n h q l g f d v s w g e w f l y a a p w s i v m s i a l y f i m  
i k v m p p e i n t i e g g k d l i k  
e e l h k l g p v s a r e w r l i v i s m l l l l f w s t e k v l h p i d s a s i t i a l g v m l m p k i g v m t w k h v e n k i p w g t i i v f g v g i s l  
g n v l l k t g a a q w l s d q t f g  
v l g l k h l p i a t i a l i t l f n i l h l g f a s a t s l s s a l i p v f i s l t s t l h l g d q s i g f v l i q q f v i s f g f l l p v s a p q n m l  
a y g t g t f t v k d f l k t g i p l  
t i v g y i l v i v f s m t y w k w l g l l  
>tr|Q6GIV4|Q6GIV4\_STAAR  
meqiminhyvhfsrlvqgfwrane w k m t a k e l n y f i n e l v e r g i t t m d h a d i y g d y q c e s l f g n a l d l s p e l r n k i q i v t  
k c g i i l p s k q f d f t n g h r y  
d l s s k h i v k s v e q s l i n l n v g y l d s l l i h r p s p l m d p e q v a d a l t k l v k q g k l s f g v s n f n h s q y q l l n q y i m k e r l h i  
s i n q l e l s p y h v d s l q d g t  
m d s m y q n h v q i m a w s p f a g g k i f d k e d i k a q r i m k v i q s i a d k y g v s d t a v m i a w l v k i p h r i m p i l g t s q l k r i d q a i e  
g l q l n l d d q s w f d i y t a i i  
g q d i p  
>tr|Q6GIV5|Q6GIV5\_STAAR  
mknnkdeki risiingflsgktt l lthyisel l kndekikiimnefgtvdidsnsisneievhslingcvccd l kqel v  
yelkaialkgdvn hviea  
tgiahple l l vacqdpqivnffekpiiygvl datrflerhqtentvs l medqlkl s d m i i n k i d l v t d d s i e k i d k q l  
s l i c a s i p t y k t t y g q v s l  
e e l d l p g k d r e i s s h h h h h h g i k s m t y t f t g p i d r q l f y q f i m k l s e s v l r l k g y v s f r d q p n a i y e f q y a y g l p d y g i i  
g m q l p l t i v i i g e t l d t n h  
i r n q l d m l q f t  
>tr|Q6GIV8|Q6GIV8\_STAAR

Tsompanidou\_et\_al\_Supplemental\_FASTA\_File

mkl1ttilfqyki fvp1mflvstglgilvitqniliadflakii rhqfqglwivlfillgvlllratvqflnqwlgdtdla  
fkvkhmlrqrviyknngph  
igeqmti1tenidglapfysylpqvfksmmvpliiiiamffihintalimlitapfiplyiifglktrdeskdqmtyl  
nqfsqrflniakglvtlkl  
fnrteqtekhiyddstqftrltmrilrsaf1sglmllefism1lgig1valeat1nlvvhnidfktaaiaailapefynai  
kd1ggafhtgkqsegasdv  
vfe1leqpnnnef1lkyeenqkpf1q1tdisfryddsdr1v1nd1n1ei1fkgdqialvgpsgagk1st1thliagvyqpt  
igt1singrd1nig1lsqg  
py1fsasikeni1mfkdienn1tveev1devg1ldkvqsftqginti1ieggem1sggqmrrie1cr1l1vmkpd1vifdep  
atg1ldig1tehm1qnv1fqh  
fkg1ttm1viahrdnt1rhl1qrr1lyienr1liaddr1nisvnitengdd1  
>tr|Q6GIW0|Q6GIW0\_STAAR  
mdkkkvikfminvlpivlpiverkrikqhpdvqkvtatskvasktsaa1sntasdvkeyvgdkkqdfenkrelkkfa  
rehdpayiekkgek1akqn  
rkdadmki1qkniekrhkeeqkarekneiqrikdmkksqkyevkag1tpnk1dektekkgd1laeknrkeiakmkk1  
qkniekrhkeeqkrqead  
kariks1fkkykdyvaksasqqnkenntea  
>tr|Q6GIW6|Q6GIW6\_STAAR  
mrt1nkdehny1kqianihet1l1sqaesnykctk1sialryem1csr1ehtndkiyiyenegq1iafiwghfsneksmvn  
ie1llyvepqfrklgiatq1  
kia1lekwa1tmn1kris1stihksn1pmis1nkd1gyqvshvkmykdid  
>tr|Q6GIW8|Q6GIW8\_STAAR  
mnyfrykqfdkdvitvavgyylrya1syrdisel1regiyvhstiyrvvqeyapilyqiwkknkqayykwhidetyi  
kikgqwnylyraidaght  
ldis1rkkrdnhsaytfikr1likqfgkpqmi1tdqapstkvamskvikdfk1tpnchctsky1nnlieqdhrikvrkis  
yqsintakntikgieciyg  
lykknrrs1qiygfsprvisimlas  
>tr|Q6GIW9|Q6GIW9\_STAAR  
mdkqvrntteivrlakqksqktrekvdka1skfsiegkainfnsi1akeanvskswlykehdirqries1rerqitsnvvs  
kpkksrsee1ikt1krr  
vme1kknkk1qnq1qklygdlynke  
>tr|Q6GIX0|Q6GIX0\_STAAR  
mtkdmcevy1hedkvnrakd1lakqnpmdvakvfka1sddtrvkiayv1s1legelcvcdvani1esstatashh1r1lk  
n1giakyrkegkvvyys1d  
dehvkq1vekaflyqrevasig  
>tr|Q6GIX2|Q6GIX2\_STAAR  
myknymtq1t1pietsvripqndisryvneivetipdsefdefrhrgatsyhpkmmlkiilyaytqsvfsgriek1l  
hds1rmmw1a1nqt1psykt  
inrfrvnpntdalies1fiqfhsq1kqn1iddnsifidg1tkveananrytfvwkksiqnhesk1nenskalyrd1veek  
iipeikedgdsd1tieeid  
l1gsh1dkeied1nhsiqnedctq1rkqtrkkrteikkfkkkfd1dyserkskyeeqks1lkdrnsfsktdhd1atfmr1mke  
dhmkngq1kpgyn1qiatn  
sqfv1syd1fqnpdtrt1ipfl1tmiqntfgy1peyv1adagy1gseqnymai1ddf1nktpl1itygm1fkd1ktrk1fksd1f  
ntq1nwkyde1n1defic1pnn  
kri1gfkryanr1ndryg1fkrdfk1yecddcsacs1rq1qcmkpn1sksnkkimkynwey1fkaqin1q1sepetk1kiysqrki  
dves1vfg1fmka1ilg1ftrms  
vrg1nk1vkre1lgfv1ma1nrkiaa1qravhykinikkadfhqi1inrn1q1fyia  
>tr|Q6GIX5|Q6GIX5\_STAAR  
mk1gyarvstg1qn1n1qedr1naygceki1fndhmsgskskrpg1dkaie1farsgd1tivvwr1dr1grnmed1it1vne1  
n1ergvs1fhs1leeni1tmdks  
sstg1l1fh1faafaefern1l1erssagriaarargrygrpekl1nkqdl1k1lktlydngtpik1tiaeqqvsr1t1tyr  
y1nk1ledeksdk  
>tr|Q6GIX6|Q6GIX6\_STAAR  
mks1lkskafiyg1l1ftfiavis1l1gsk1lp1ldkigaltia1liai1lyrh1fkgye1payrsgia1fsskr1l1klai1lyg1k  
l1niyd1vig1gsd1vl1idig  
vil1fsig1m1l1nkyikgdkn1l1l1lgigt1gv1cga1aa1avsp1lks1rekdsaisigivaligt1fslaytvi1ysiftis  
pevf1gws1gts1l1heiahvi  
lasdf1sg1qea1smg1l1gk1grv1fl1ip1lsi1il1imrk1kshsenekkr1idvpy1fl1gfvm1al1fhtyvs1lphmvmqi1dn  
ittic1l1mam1val1g1lnvsf  
kd1kdra1fk1pliavi1vsic1stvt1fivak1yfys  
>tr|Q6GIX7|Q6GIX7\_STAAR  
mds1kv1tevv1kts1ftka1aen1lyts1qps1sr1dikr1le1eydvki1fe1frhskms1tsd1gekl1fya1lqrer1eqn1rhd1  
kmqpdi1sgd1tig1ssy1ty  
geyr1sqh1ad1aknypelyihvyl1nnsd1tv1qhiknntid1gi1e1kevqsni1hsrriaqdeiv1lirkksssnksic1f  
i1rergs1gtr1vyqena1sqm  
tss1sylve1nntn1iknmv1hadkgfsivskst1tpyd1lek1levtn1dikryf1lvihkdkyidtk1nevikn1is  
>tr|Q6GIX9|Q6GIX9\_STAAR  
mefyqmpmfnkv1mnh1r1lekyqd1m1isqkdfevgnsiy1n1lvkdieeksqnisqkfivsqleeqpwnakemtikdpd

Tsompanidou\_et\_al\_Supplemental\_FASTA\_File

gnlitltsqsnisdtdfekl  
mkktskdy  
>tr|Q6GIY0|Q6GIY0\_STAAR  
mikfvkkleesimkkffmffvc1ltvflsfnfvnslfdgsvflesfiyslvftlvflglegdkekkk  
>tr|Q6GIY1|Q6GIY1\_STAAR  
mvikrletvylynfrylyyimnnilvqapkslnkckak  
>tr|Q6GIY2|Q6GIY2\_STAAR  
mrfmneilvhimttaisgclvtlfgylhkrdkk  
>tr|Q6GIY3|Q6GIY3\_STAAR  
mirieeftkgnmkyilkvtrisfvnapnpefavvrgflvnm  
>tr|Q6GIY4|Q6GIY4\_STAAR  
mklaeaikegre1krwsgeelanilkvsrqsvskwesaknypsldiliamsdlfgislehlikgdarfkkvilegnyres  
nrapsivdflydfwvlfpp  
vagflvwaihsmg  
>tr|Q6GIY6|Q6GIY6\_STAAR  
mnhshlktfihnk1lyyqctikgvqlfkt1llcgkntplgieipc  
>tr|Q6GIY7|Q6GIY7\_STAAR  
myknyntqlt1pietsvripqndisryvneivetipdsefdefrhrgatsyhpkmmlkiilyaytqsvfsgrriekll  
hdsirmmwlaqngtpsykt  
infrvnpntdalisefiqhsqclqnliddnsifidgtkveanarytfvwkksiqnhesklnenska1yrdlveek  
iipeikedgdsdltieeid  
ligshldkeiedlnhsiqnedctqirkqtrkkerteikkfkkkfdyserkskyeeqksilkdrnsfsktdhdattmrmke  
dhmknqg1kpgynlqiatn  
sqfvlsydlfnqptdtrtlipfltmiantfgy1peyvadagyseqnymaiiddfnktp1itygmfikdktrkfkdsif  
ntqnwkydelndeficpnn  
krigfkryayrndrygfkrdflyecddcsacs1rqcmkpnsktnkkimkynweyfkaqinq1sepetkkiysqrki  
dvepvfgfmka1lgftrms  
vrginkvkre1gfv1malnirkivarravyqihlkkadfyqiinrnq1fyia  
>tr|Q6GIY8|Q6GIY8\_STAAR  
mik1envfvkgnkni1dgcfnfekgsyalvgesgagkst1lniagfedvsqgsiyiedk1llkkkvdfyryt1gy1f  
qfallenqtsqnlglal  
kfkknkdnm1kkev1kkvg1ldikrivss1sggeqqrvalarl1kdpki1ladeptgs1dtkngkivid1llk1ld  
enktmivvthd1elakrfd  
vivnise1rs  
>tr|Q6GIY9|Q6GIY9\_STAAR  
mkrt1iivt1v1lii1s1llvrneh1drfnp1lkekvsyavpkdtqdyrnitvyskngekksyk1df1gydptkeyvk  
vnhkgkyvrsieyitkdip  
sf1k  
>tr|Q6GIZ0|Q6GIZ0\_STAAR  
mkkfk1f1dfst1llisg1l1lfffkeneei1pessn1ltisnwdksnskskvl1dviesgagnqniqi1ksvkdfdnkke  
ffvfnskrnsdfirnkts  
1l1tspd1lnreikgkyyi1gehfnveeltse1kkag1tseveyinrn1lffellvidnd1lvpf1flgvly1lyflydryg  
nlkfyaiqklhgfsttri  
fhnihi1kiyw1l1t1tiffian1liihian1eldf1mfirrfiv1l1fvfacitt1lw1s1s1llk1s1p1t1k1gk1gyk  
fs1fmg1tftk1cimv1l1sf  
1laqn1naytk1kniydsekiwqk1dnyyt1eispnir1nseekq1ilet1n1y1lik1se1q1lg1ll1knn1ianpdknyip  
engnvff1nnf1nfykni  
nhdfkmi1vnhsdk1invfipr1lyqksei1qknhgwidf1qkqnkkvdvq1sknsvs1fsdr1ttn1kfgyl1dspivm1l  
tpdd1tgdfy1laavs1ggy  
1fkdl1dt1kq1l1kdn1h1ee1sgitnykds1v1nel1netk1tkmi1titv1ii1nvfilliatvfeti1qyfsw1nkkq1ll1rki  
hgys1fssnvry1tis1ll  
sim1ayt1th1ifgsk1llfiimsia1iqh1l1qiay1kylekyfkd1lmrei  
>tr|Q6GIZ2|Q6GIZ2\_STAAR  
msyrc1mivn1ri1e1l1yideq1nkqskkt1ldyfys1sil1fifai1nkey  
>tr|Q6GIZ4|Q6GIZ4\_STAAR  
mt1laiv1f1l1t1tfviwqpk1ldigitaligavvai1tgvs1sdv1eltv1givwnat1tfvavil1s1l1ildeig1ffews  
aihmvkasngng1kmfvfi  
m1l1gaivaa1ffandga1l1tpiv1lamvrn1lgnqkvispfiiasgfiadtts1plivsn1lvn1vsadyfdigfi1eyfsr  
mi1pni1fs1ias1ilv1wly  
frks1pktfdten1sdpk1saikdsk1fk1swiv1lav1lvgy1vsefiqipvs1iagi1af1f1v1larkskavhtkqvikg  
apwniv1v1fs1gmy1lv1vfg1  
knvg1ittv1l1gdv1ltnisny1l1fssim1gig1fiaaf1ssimn1mptv1lidaia1igqssatg1l1kegm1vyanvigs1dl1gpk1t  
p1gs1at1l1w1h1v1t1qkgv  
k1swgty1fktg1i1itip1v1l1vt1l1g1y1l1t1liif  
>tr|Q6GIZ5|Q6GIZ5\_STAAR  
msykelst1ilk1s1dssr1e1ld1l1scge1l1cad1l1ehf1qfsqpt1shhmks1vdne1lv1ttrk1dgnkhwy1lnhail1ddi  
iqn1ni1ints1nqrcvcknv  
esgdc

Tsompanidou\_et\_al\_Supplemental\_FASTA\_File

>tr|Q6GIZ6|Q6GIZ6\_STAAR  
mnkkneliafimstvlvlfvgtflvqlenlyilipytilgfinavyltvrainitknrrfckvk  
>tr|Q6GJ04|Q6GJ04\_STAAR  
msqntnhsyyhqnhagaiksvwlyfmywiifgigcylgqflplswrqplsfgliliilatlvferarrfgliishiya  
vvigllsyatfttylqnl  
pdifyknialaifafiafgiigyffvgdassigkylfvltitliiasligiflqnpifytiitvvslllfllytlydfnr  
lkrgdyspremgfnlfnl  
lniikdilylanmfr  
>tr|Q6GJ05|Q6GJ05\_STAAR  
mkklafaitatsgaaflthhdaqastqhtvqsgeslwsiaqkyntsvesikqnnqldnvlvfpqqvisvggsdaqnts  
tspqagsasshtvqagesl  
nianrygvsvdqlmaannlrgylimpnqtqipngsggttptattgsngnassfnhqnllytagqctwyvfdrraqags  
pistywsdakywagnaand  
gyqvnntpsvgsimqstpgpyghvayvervngdgsiliseznytygpynmnyrtipasevssyafih  
>tr|Q6GJ08|Q6GJ08\_STAAR  
msfneiifknfrqnlshyaiylfslitsvvlffsfvalkythsinitetypiikegsqvgysflffiiivafllyanvfl  
krrsselalyqtlglskfn  
iiyilmfeqllifsitailgitigifgskillmivftllgikekvpiifsfravfetllligvayfltaaqlilvlkqs  
iselskhngakqmmhnikt  
feevilgilgiiisgyyslrvhydaigvlmfilfatvigaylffkssvslvfkiiksfkkgvisvndvmfsssim  
yriqknafsltvmiisai  
tlsvlcfaaistratlseikytsphdvtikdqkanqlaselnnrkiphfynykevihklykddldikakepynvtit  
sdkiyiptdlkrqadlfv  
aegaidlvkhkhkgkavigtkkhvdiklrkdinkiyfmdvdlggptfvlndqdyqeirkytkpkhivsqfgfdlkhk  
kemaletaknkvdsiet  
rseaiisslgtgillfvtsflgisfliavcciiyikqidetedelenysilrklgftqkdmakglkfkiafnfglplvi  
alshayftslaymklmgtt  
nqipifivmglyicmyaifamtaynhskrtirhsi  
>tr|Q6GJ14|Q6GJ14\_STAAR  
mtrsalkpfknkrvmvtgrihrvlfknyldrhtsfkpnvrillkdvivsgvsidhlwlyetnkyyalamelihqrvkfsa  
nvppykinrnnnlfvqdy  
gikrkgnlvteeayiqnnqyqdkiyeklpdidfrledfysken  
>tr|Q6GJ16|Q6GJ16\_STAAR  
mmmnkeatkigfayvgivvgagfstgqevmqfftkyglwaylgiisgfilafigrqvakigtafeatnhestlqyvffe  
kfskvfdyiliffifgiav  
tmiagagatfeesyntptwlgalimtlaiyvtllldfnkivralgvvtpflivlvvliagvylfkghvs laevnqvpea  
siwkgiwfgtiygglafsv  
gfstivaiggdtekrvtvsgagamyggiyvtllalinfalqseyptiknasiptlannihpliatvlsvimlavmynt  
ilglmysfaarftepyssk  
yhi fivimmiagylsfvgfaelinklytimgyvglfivvaviikyfkrknadkhhia  
>tr|Q6GJ17|Q6GJ17\_STAAR  
mqhlikkhvlngefdlvrqlmsetdfmefeeayissahevesmmfytcildmikyeesemhdlaflllvypseyega  
dsayyhadasikltdgkev  
ksllqmlllhaiptrvisdkkafdiakqilklpnnnvarnvlkdtakrmdnvvdinehqrnar  
>tr|Q6GJ18|Q6GJ18\_STAAR  
mpkiilvshskeiangtkslkqmagdvdiipigglpdgsigtsfdiiealtkldddalcfydidgssemnldmaiemyd  
gnhhvlkvdapivegsfia  
avklsiggsiddalaeikqsf  
>tr|Q6GJ19|Q6GJ19\_STAAR  
mkvndmkarllnleefkhheseiteldraigdgdhgvnmvrgfsslkdklddssmqslfkstgmalmsnvggasgplyg  
fsfvkmsavakddmdnqdf  
ikliqafaeavesrgkvtlnektmydvvaraaklngetlftndlqqladntkdmvatkgraayfgeeskgypdgaqs  
mvyilnaligdedna  
>tr|Q6GJ20|Q6GJ20\_STAAR  
mmkklinkketfltdmiegmliahpelldiantvivkkakkeqgvaivsggsghepahagfvaegmldaavcgevftsp  
ipdkileaikavtdgdgv  
lvvknyagdvmnfemaqelaemeginvetvivrdiavtnevqrrgvagtvfvhklagylaekghslteiksveallpe  
iksimgaiepplvpttgky  
gfdieddkmeigigihgekghreevkdi dhivgtlldeleykevtanevilmvngmggtplselnivtkyiqnlaartv  
nvakwfvgydymtsldmqgf  
sitivpnkpeyleafapttsqyfk  
>tr|Q6GJ22|Q6GJ22\_STAAR  
mtnrenptlklfysiiglsmillitlfistligdakiqastieaifnynpsnqqniineiriprniaavivgialav  
sgaiiqgvtrngladpali  
glnsgasfalalyavlntsfliilmfagflgailggavlmigrsrrdgnpmriilagaavsamltalsqgialafrl  
nqvtvftwtagvsgttwsh  
lkwaiplistialiiiltiskqltilnlgeslakglgnvntmirgicliiamilagiavaiagqvafvglmphiarflig  
tdyakilpltalggilvl



Tsompanidou\_et\_al\_Supplemental\_FASTA\_File

vadmiarylgeapvgaiisfigvpyflylvkkggrsi  
>tr|Q6GJ24|Q6GJ24\_STAAR  
mktvkdliilvvlgsfiifaagvnafiisgnlgeggvtglaiilyafhispaitsnflvnaaliaigykflskrmsyltil  
vtilisifslsteswqvet  
gnsivnaifggvsvglgigviiaggtagttilariatkyldvstpyallffdmivvaisltpioldkvlvtvislyig  
tkvmeyvieglntkkamti  
istnrdklakaidedqigrgltilnghgyytreekdvlyvvisktqvskakrlikqidkdaflvihdvrdivyngflade  
>tr|Q6GJ25|Q6GJ25\_STAAR  
mfliniiglivflgiavlfsrdkniqwqsigilvvlnlflawffiyfdwgqkavrgaangiawvvsahagtgfafas  
ltnvkmmmdavaalfpili  
ivplfdilmyfnlplkiiggigwllakvtrqpklesffgiemmflgntealavsseqkrmnemrvltiammsmssvsga  
ivgayvqmvpgelvltaip  
lnivnaiivscllnpsvveekediyslknneverqpffsflgdsvlaagklvliiaafvisfaladlfrfinlitgl  
iggwigikgsfglnilgv  
fmyppalllglpydeawlvaqqmakkiivtnefvvmgeiskdiasytpphravittflisfanfstigmiigtlkgidkk  
tsdfvskyvpmmlsgilv  
slltaafvglfaw  
>tr|Q6GJ26|Q6GJ26\_STAAR  
mdidvnlqafvyfksceklnhns  
>tr|Q6GJ28|Q6GJ28\_STAAR  
mknliisiiilclttsimtpyaqaansdvtpvqaanqygyaglsaaeyptsavnvsqtgqlllyqynidtkwnpasmtklm  
tmyltleavnkgqlslddt  
vtmtkeyimstlpeisntklypgqvwtiadllqitvsnsnaaalilakkvskntsdfvdlmnkakaigmknthfvnp  
tgaensrlrtfaptkykdq  
ertvtardyai dlhviketpkildftkqlaptthavtyytnfnsllegakmslpgtdglktgssdtanyntittkrk  
frinqvimgagdyknlgge  
kqrnmngnalmersfdqkyvki lpkgeqringkkyvendlydvlpsdfskkdyklvvedgkvhadyprefinkdygpp  
tvevhqpiiqkantvaksm  
weehplftiiggacvlaglalivhmiinrlfrkrk  
>tr|Q6GJ32|Q6GJ32\_STAAR  
mkvwfngmsaigtvkehvnkfyliqr laqfqvki inhsnylgvawelinpvmqimvywmvfglgirsnapihgvpfvyw  
llvgismwffinqgilegt  
kai tqkfnqvskmfnplsiptiyvtsrfyghlglllviacmftgiypsihiqlliyvpfcffltasvlltstlgv  
lvrtdqmlmqailrilfyf  
spilwlpknhgisgliheimkynpvyfiaesyraailyhewyfmhkwlmlynfgivai ffaigaylhmkyrdqfadfl  
>tr|Q6GJ37|Q6GJ37\_STAAR  
mletkdlnlflgnkhvlnknlslipvrgei igimgpngagkssliksligefnatgkllhnkpiqqqlqhityipqkah  
idldfpisveqvilsgcyk  
eigwfrprnksardklkqllsdleleslrhrqiselsggqlqrvlvaralmsesevyfldepfvgidfsseklimtkien  
lkqqgklliliihhdlskak  
qyfdriillnqtlryfgdseeamsvtrlnetfmsstdcsdpsqsrnitc  
>tr|Q6GJ40|Q6GJ40\_STAAR  
msnikivtligfftmfivgvsdlivvgmlnemskefhvsnaligqlvtlyavafsilsplltkvtsqindkllvsclil  
fiifsmllttvmtnyfflci  
vri fmagiaslitvklmstganivpveykasvianiyvgfisaanilgipigtliashynwkipfyiaiaitflcllgiml  
fipnkshysinnhskyqlv  
nfrgtlimlglflimmi snsm lftyieplvkskghsiwivslclffsagiavlgsklgnnltekkgyriagniiivyii  
simsilltgqnvillilsi  
ftwnlfhwgtnptvqyal lfkflkgdpsqilsydisilnlgiglgsliggilfsidnqfnlsivvamilamvssillktav  
htekn  
>tr|Q6GJ49|Q6GJ49\_STAAR  
msktnhitivlsftkltdngkqtefkrrfaninpevsndqiktfsklerltgetynniviksvisi  
>tr|Q6GJ50|Q6GJ50\_STAAR  
mktklelsfkssldkpvklqlpqlnnivteqvardsmna lvdlnilksnsgaitkvhsaqiidktttvlfeakk  
>tr|Q6GJ51|Q6GJ51\_STAAR  
mllfyiigvlvgmlipiqtsvnsrsllytkspfytsfifsvgticlivlnifinpdvflhffsnqtfnytwfvvgllg  
vgytgnllllpklgatlt  
viatvagqimgvii dtfglfgatihdfnlkaigvllliigivimnqfnknllltdqkylfwlllgfifgffppiqt  
tinsllashthspafasl  
sftigsitllil taifnrslkktshlkfgklkpiyftggilgmavfvsniilmphlgaalttligmfgqilmgilidhf  
alfgspkiamtsrktigll  
ciltgii flrlf  
>tr|Q6GJ53|Q6GJ53\_STAAR  
mknvtinpqil tyqiegkdpiillhgldgnlagfedlqhqlassykvitydlrghgkssksesydlndhvedlkilme  
klniheahilghdlggvva  
klftdkyayrvkslttiaskkddlihsftqlliqyddiagfnkseyallfkslfrnqektmkwyqkqriysiksedds  
avairslihkdepmylkk  
rtcvptllingehdplikdknhfkleahflnvtkki fehsghaphieepeaflyylnflksvs

Tsompanidou\_et\_al\_Supplemental\_FASTA\_File

>tr|Q6GJ54|Q6GJ54\_STAAR  
mrindkillenedyfnhkglsphliddikekvitdiknsekdkdyieykrkspaqiilmiqrnlfalqmpviffiin  
filsylydkqyvqfai  
gmslfyc lvi fpm tivvy lrvsqny lrsnk iemvgtiaiaisllliilqafnitwgvipitnfgqhfffffigiilvia  
gifykrlefsgigllfcqk  
tvdami hnpqsaqtfsliiwi llvvlviyftirlssrtr l  
>tr|Q6GJ58|Q6GJ58\_STAAR  
mtfnkvllswivilittsiylfwqlgdindvfnqsilinrvlprllealltgmiltvaglifqtvlnnaladsftlgla  
sgatfsglalfglttlw  
ipvftsitts litlitv lsvlsqgypvri lsglmigalfns llyflillkprklntianylfggfgdaeysnvsii  
aitfiialfgifiilnqlk  
llqlgelksqslglnvqiityialciasmitainvayvgiigfigm vipqlirkwqwkqslgrqlalniviggqimvmad  
figshilspvqipasiia  
ligipvlfym lisskr lh  
>tr|Q6GJ60|Q6GJ60\_STAAR  
mlgtde lyk llyrhmgpqnw w padndiemmlgailvq ntrwrnaeialnqikehthfnphilelpietlqslirpsgyf  
ksksltiktlltwlarhhf  
nyqeineryk gelrkel lslkgigsetadvllvyifgriefipdsytrkiynklgyentksydqlkkvvtlphnftnqda  
nefhalldvfgkhyfrdkd  
ikncdflepyfkk  
>tr|Q6GJ62|Q6GJ62\_STAAR  
msskl dkkvs ihtkqvlkqhnekekefttegtwqqrqsnfiryveqiedatvntikvddsvklirkgdinmnlhfve  
gqttttfydisagriplev  
ktlri lhfvsdgdklkihyelyqdnekmg syqeyinykeige  
>tr|Q6GJ68|Q6GJ68\_STAAR  
mkqfvnlgksdvevfpi algtnavgghnl ypn ldeeqgkdvrqainhginlldt ayiygpersee lvevvkeypreqi  
kiatkshefdengevhqn  
nqpeylkqqvens lkr lqtdyidlyyihfpddntpkd qavaalqelkeggkikavgvsnftldqlkeankdgydvvqle  
ynllhreneav lqycvdhq  
itfipyfpl asgilagkydentkfsdhrtrrdfkpgvfeenvrvkalesiaaahqtsianivlafyltrpaidviipg  
akraeqvienikaadivls  
ddei qyidel fpied  
>tr|Q6GJ69|Q6GJ69\_STAAR  
mlceviai yknpkyriikynde ylmvni innwlv lfipllnw ltpkryikisqeelen lntfkpaknafwpa l gssvlf  
svtfrkymp lfnvrlekti  
viaiffvvlgi lffyl nlnrr lalsvftmneksqkmi llpn lkhffffiifaylyfggfsfftlyalitidvqniifi  
cwgavtmffffi inivpigi  
kkahvillkks  
>tr|Q6GJ70|Q6GJ70\_STAAR  
myylkltrwkndglagftassvssilvywt nqrnefgikgkndwighkl dgdidsvkkstekavdsvgnvvegsksisn  
hispkks w  
>tr|Q6GJ72|Q6GJ72\_STAAR  
msidmyldr srnqassvgnl sqtmnsnydalekai tqfinddal kgkaytsakqffstvlip l stsmkt lsd ltkqacdn  
fvsrytsevdsislkese l  
eedirs lsqqitryen lnnlkkhasdnqqa issnqqi irtlgqqkheleeklrklrefnqkspeifkeveefqkivqqg  
ltqaqnfwnfstnqfnips  
gkel dwakasheky lkvamgkieqkaeket l nkadfavikayakehpeddipksimkyindnkdsikrdiglditstlle  
qgginaskfgvfintaggy  
kqpapns fvevkrtsgnvf iengskfakggkylgkgvagvfgigmyddmanddktvgealshnal ttgigigagagmt  
atialfasnpgwaviggf  
vfgsvstm lvdwayqnnkagikdkadwvghkl dgdidvkkstekavdsvgeatksisnhlnpmksw  
>tr|Q6GJ73|Q6GJ73\_STAAR  
mnl efniavhv lftl tkhhsekfnss lael tcln pvqlrrvttqlvd l kmintirgkdggy landrsadvslatlykhf  
vlekehtr lftgdegshc  
qiarniattmshyqqdeqnni infykektikdviediqkedlcheni  
>tr|Q6GJ74|Q6GJ74\_STAAR  
mktydlivigfgkagkt lakyaastgqh vavieqsskmyggct invgcipsktlvhdg legksfeasynrkn dvvnalnn  
knyhll addsnidv ldfka  
qfksntevnlldqhgdvdsitaphi iintgatsi ipnikgl dqakhvdstglln isyqphlvivgggyialefasmf  
anlgskvtvl ergesfmp r  
edqdvvaha itdlenkgialhtnvette lssdnyhttvhtnvg nfeadavllaigrkpntdlalentdielgdrgeikvn  
ahlqttvphi yaagdvkkg  
lqftyis lddyri ksslygnqsr tdnrgsvpytvfidpplsrvg ltskeaaaqhydytehql lvsai prhkinndprg  
l fkvvinnenmi l gatly  
gkqseelin iklaidgnipytilrdniythptmaesfnd lfnf  
>tr|Q6GJ77|Q6GJ77\_STAAR  
miksgkarahtnialikywgkkdegliipmnsisvtlekfytetkvtfndql tqdqfwngekvsgkeleki skymdiv  
rnr rigidwyaiesdnfv p

Tsompanidou\_et\_al\_Supplemental\_FASTA\_File

taaglassasayaalaaacnqaldlqlsddksrlarigsgsasrsiyggfaewekgyndetsyavplesnhfeddlami  
fvvinqhskkvpsrygmsl  
trntsrfyqywlhdidedlaeakaaqidkdfkrigeveenglrmhatnlgstppftylvqesydvmaLvhecreagypc  
yftmdagpnvkiIvekknk  
qqiiklltqfdnnqiidsdiatgieie  
>tr|Q6GJ78|Q6GJ78\_STAAR  
mtrkgygestgkiilgehavtfgapaiavpfngkikvliealesgnyssiksdydgmlydapdhkslvnrfevlnn  
iteplavtiqtnlppsrgl  
gssaavavafvrasydfllgksltkeeliekanwaeqiahgkpsgidtqtivsgkpvwfkgghaetlktlsldgymvvidt  
gvkgstrqavedvhklced  
pqymshvkhigklvlrasdviehhkfealadi fnechadlkalvtshdkieqlmkigkengaiagkltgagrsgsmllla  
kdIptaknivkavekagaa  
htwienlgg  
>tr|Q6GJ79|Q6GJ79\_STAAR  
mdlaskyfnvnrwryidhssglepmqsfaiddtfcesvgkdisdnvrtwihqhtvilgihsrlpflkdgidyltneig  
ynaivrnsgglgvldqgv  
lnislmfkgqtettideaftvmylliskmfedenfdidmeiehsycpgkfdlsidgkkgfagisqrrvrggiavqiylcv  
egsgseralmmqtfyehal  
kgevtkfkypeiepscmasetlInktitvqdvmllyaikdlggvlnmtpitqewqrydyfdkmiernkkmidqmq  
>tr|Q6GJ83|Q6GJ83\_STAAR  
mdinseeqkqevlikdvmlaariIlesgaegtrvedtmtriaklgysesnsfvntntviqftlhsefprifritsrdt  
nlkisiqankisrqitne  
islaektqllekyvakrdsslpfkgfaaamiamsflylqggrlidvltailagslgylvtkildrklhaqfipefigsl  
vigiiavightliptgdla  
siiiavmpivpgvlnaiqdlfgghmlmfttkslealvtafgigagvgsvlilv  
>tr|Q6GJ85|Q6GJ85\_STAAR  
mekknkqidrgdlkqnlsekfvwaiaygscigwgafilpgdwikqsgpiaasigivigallmiliavsygalverfpvsg  
gafafsflsfgrvsvffss  
wfltfgyvcvvalnatafslvkfllpdvlnngklytiagwdvyiteiiaatvlllvfmlvtirgasvsgslqyyfcvam  
vivvllmffgsffgnnfaI  
enlqplaePSkgwlvsvivsvapwayvgfdnlpqtaeefnfapnktfkIivysllaaslyvvmilytgwlltshqsl  
ngqlwtgavtqtafyig  
lgvIaiammgi ftgInglmsssrllfsmgrsgimptmfsklshkyktpyvaiiflvsvsliapwlgrtaltwivdmss  
tgvsIayfItclsaklfs  
ynkqsntyapykftfaiigsfvsfiflaIllvpgspaaltapsyiallgwliigIiffviryPkIknmdndelsrlInr  
senevddmieepekektk  
>tr|Q6GJ87|Q6GJ87\_STAAR  
mvnretliarieqelvqaeqaqhdhdfekhmyaihiltslyaptsntphigeqqmnhrianhnqmphsqitqsthqvtaa  
eieamggkvnthshhhnk  
sysqpsnqqqrIatdddigngesifdf  
>tr|Q6GJ91|Q6GJ91\_STAAR  
mkfneiwineylalvnddnpihneiVpgqlvsqmmImamsleanqcqinyvKpilinenikfieeheqeiiaInddGeik  
ikislstkk  
>tr|Q6GJ95|Q6GJ95\_STAAR  
msnainietltniiientnlrnlgdIsvviaiaitsflyihivssyliknmvlqyqiylglkfdfyNrQvylIkiIih  
yimltrciikftlsegyl  
>tr|Q6GJ97|Q6GJ97\_STAAR  
mkfenyifdfgdlatdkkcevatqsaFkacgltepsaqdishymgipieesflkladrpldeatlaklidtfrhtyqs  
iekdyiefagiteaitsl  
ynqgkklfvvsskksdvlernIlsaiglnhliteavgsdqvsaykpnpegihtivqrynlnsqqtvyigdstfdvemaqha  
gVpsaavtwgahdarsllh  
snpdfiindpseintvl  
>tr|Q6GJA4|Q6GJA4\_STAAR  
mnyfvgnslgvnlgtiekaiInrlnlfkemgrpvqcvflswrylyrnaqnyitssdyinmydffqeatyIernepfdwl  
sywtdechytlkhvenshd  
fryidqerflmyahfqdpkyriIldvnhfdsqrrkvkrdfydvrgrflscsrilvdkqqtIceffynpegdtklekyfsyk  
dgkpevqkiivvyankqyf  
fnnetelgaFFikqlyqhgdlffsdrnvytapiInltpesipvvavlhsthiKnidalDsspfknvykamfenIsryrai  
ivsteqqklIvekrinhti  
pvvniPvgysetiDtpvtldqhsvklisvayrspekqlhqqiellvkrIvpyvpkvelhmygfgseskklneliqygle  
nhvylrgflsnldqeysda  
ylslitsnmegfslalleslahgvpvisydikyggelitsdfngyIitkndedaIldkvkyvidhpevqqrIskgsIak  
aqqyskaslikqwdqfvrI  
I  
>tr|Q6GJA9|Q6GJA9\_STAAR  
mikIiatdmDgtllnaaheisqpnidaikyaeqgitvviatgrafyeaqapvadtdltvpyiclngaevrdetfnvmst  
shlnkslvhkitnvlkdag  
iyyqvysraiytedpqrldiyidiaeragqhanverikngiqrriDngtlkvvdnydaIenipgelimkilafdgnle

Tsompanidou\_et\_al\_Supplemental\_FASTA\_File

kidkaskilaespnlaiss  
ssrgnieithsdaqkialetiaerlgiemkdvmaigdnlndvsmlekvgyvpmengaeevkkiakyvtdtnensgvk  
aimkllreqqv  
>tr|Q6GJB1|Q6GJB1\_STAAR  
mnpkfiaiegpigvgksslahklsqtdfyeekeiitenpflsdfyediskwsfqtemfflcnrykqfqdvtqlnqgvvs  
dyhikhkni fakntlssve  
fqkfskiydl tedmimpnmiifldadldvlksriakrnrsfehqi edeyllklkkdyreyyeslqsnsgnvvlidttsi  
df1kneqdyedilhiilpm  
igditne  
>tr|Q6GJB2|Q6GJB2\_STAAR  
mnygipqna iitiagtvgvgkstltqaladkl nfktsfenvehnpyldkfysdferwsfhlqiyflaerfkeqkrmfey  
gggfvqdrsiyedvdi fak  
mheegtmskedfktysdlfnamvmtpyfppdvmiylecnydevidriergremeintdpeywkklfkryddwinsfn  
acpvvrini ney dihkdp  
slnmpidkiariiqtyrqvdtr  
>tr|Q6GJB9|Q6GJB9\_STAAR  
mldwfglanckenktiqlrrylhqype lsfefqthdyivnqlsq lscdi etpigrngikatfkg lgtgptialradfa  
lpveelndvpyksknpgcm  
hacghdghtailltvaeildekhll egnvvlifqygeeimp ggsqemidagclenvdriygthlwsgyptgtihsraga  
imaspedfsvtikgrgghg  
akphetidpivimaefilsaqkiisrtidpvkqavlsfgmiqagtt dsvipdqafckgtvrtfdskiqehvmhkmdkllq  
glaiandieydl nyikgy l  
pvhnekayqvikeatndlhrfnesdlmmigedfshylkvrpgaffltgcnegskgitaphhnpkfdidekslkyavav  
flkieleqv fkt n  
>tr|Q6GJE2|Q6GJE2\_STAAR  
mnivklmviii yliigsalgi iipei andlglnssflknhyvdgiigsifmflifgvfirrvtnaiigleh fimrrsa  
veilfatigliigllisvm  
vsfilesignsifnhfipviitillcyfgfqfglkkrdeml mflpeniarsmsqhtksatpk iidtsaiidgrilevirc  
gfidgnilipqgvinelqi  
vadsndsvkrekgkrgldilnel yldyptkvi hptkths didtmllklakqyhasi ittdfnlnkvchvhgikalnvnd  
lseaikpnvhqgdqllhi l  
tkmgkepgqavgylddgtmvvvdnknligshvnlevvsllqtssgrivfakkiedtvs l  
>tr|Q6GJE6|Q6GJE6\_STAAR  
mlcencqlneaelkvkvtsknkteekmvcqtcaeghpnwqaneqpeyqehqdnfeeafvvkqilqlhatkhginf qeva  
fkeekrcpschmtlk diah  
vgkfgcancyatfkddi idivrrvqggqfehvgktphsshkialkrkieekneylkk lveiqdfeeaaivrdeikalka  
esevqhdda  
>tr|Q6GJF2|Q6GJF2\_STAAR  
mktlkgal fmsi kpkvdi dvllymfqeyekgvsfy lidtlqldinvtlypkykkykthgietll tqkqynhyskelkl  
kvvneylnsqstq diaik  
ynirsstqvkniwkytvgeiknqsptgvyimkarkt tfeervtiveyylnhkqsyrevaehfnisygqiyqvw hkyq  
ahgknglvdgrgkpkpsm  
mtpееqkaaeiqalkaqrll emendvkkfqa leremiqrenksrhtkrskr  
>tr|Q6GJF3|Q6GJF3\_STAAR  
mcrlgisrasykwvhyqsseleleneqlkreiesiyhkyngiygyrriiyirilklgkqvrnkriyrlmkelnlkavi  
rqkrkpyrrstpqitsenk  
lnrqfditpknw ltdvtefkikegskiy lsaiydlgakrivsyelgpsn nqlvfktfnqai ekventkgilfhsdrg  
fqytsktfkhldecgmig  
smsrvskcidngpmegvwtiksei frgnkhfknsveeatki hdfilffnheritlkmadv  
>tr|Q6GJF5|Q6GJF5\_STAAR  
miqaylglsgnigdresqlndaiki lneydginvsnissiyetapvgyteqpnflnlcveiqttltvlqlleclkteec  
lhrvrkerwgp rtdvdi l  
lygeemidlpnlsvphpr mnerafvlip lndiaanvi eprsklvkd lfvddsvr ryk  
>tr|Q6GJG3|Q6GJG3\_STAAR  
msievgnklkgkvtgikkfgafvelpegksglvhi sevadnyvenvedhlsvgdevdvkvl siaddgkislsikkakdrp  
rrqhtskpshkpvqkaed  
fekkl snflkdsedk ltsikrqtesrrggkgsrr  
>tr|Q6GJG6|Q6GJG6\_STAAR  
mehtitivglngyid dlp lgiykflmtqdkvyartldhpvieslqdel t fqsfdhvyeahdqfedvyndivaqlveaan  
ekdivyavpghprvaettt  
vklalaktndidvkvlgkgsfidvfeavnvd pndgftll datslqevtl nvrthtlitqvys smvaanlkitlmery  
pddypqv i vtgarsdgadn  
vvtcplye l dhdenafnnltsvfvpkittptylyhdfdfatevidtlvdenkgcpwdkvqthetlkrylleetfel feai  
dneddwhmi eelgdillq v  
llhtsigkkegyidi kevi tsnakmi rrrhphi fgdanaetid lkeiwskakdaegkqprvk fekvfaehflnlyektk  
ksfdeaalqwl ekgesn  
t  
>tr|Q6GJG7|Q6GJG7\_STAAR

Tsompanidou\_et\_al\_Supplemental\_FASTA\_File

mkhkeafngvvvltaalivikilsavyripyqnilgdtglyayqqvypivalgmilsmnaipsaitqinigkyhsdeayak  
avayiqvlvglmllfiaifvf  
anniahmmgdshltpmiqaaslsfifigmlgvlrqyyqsannmtvpaisqvieqvrvgiivtviivdrgwtiyeagt  
iailastigflgssiyva  
hrpffkfmvntakivwkqfalsvli faisqlivilwqvidsvtiikslqairvpfdvaitekgvydrgasfiqmglivt  
ttfsfalipllsdaikmn  
qvlmnrnyanaslkitilistaagiglinllplmngvffktndltltsvymitvicvslimmdmallqaqhavrpiivgm  
taglvikfilnjlirllsg  
iigasistvvsliifgtiiahavtrkyhlhamrrffinvlgmvfmsivvqcvlnivtthgritglvellcaavlgiaial  
ffyi frfnvlytykeltylp  
fgsklyqikkgr  
>tr|Q6GJI4|Q6GJI4\_STAAR  
mlkenerfdqlikenfsiqnddvfsfstadallghftkprtkdivldlcsngviplllfakhprhieqveiqktlvdm  
arrtfqfndvdeyltmh  
dlknvtkvfkpsqytlvtcnpfyfkenqqhqhkeahkarheimctledcmiaarhllkeggrlnmvhradrmdvlfe  
mrkvnjepkvvfiysvg  
ksaqtivvegrkgnqgleimppfyinedgnyseemkevyyg  
>tr|Q6GJI7|Q6GJI7\_STAAR  
mdeqqqltnayhsnkshaylfegddaqtmkqvainfaklilcqt dsqetkvstynhpdfmyisttenaikkeqveqlv  
rhmqplpiestnkvyied  
fekltvqgensilkfleppndtiaillstkpeqildtihsrqhvyfkipidkekfinrlveqdmkpvaeimistyttqi  
dnalalnee fdllalrksv  
irwcellltnkpmaligiidllkqaknkqlsliatavngffedihtkvnvedkqiysdlkndsdaqaklsfnqlilm  
fdqlteahkllnqnvnptl  
vfeqivikgvs  
>tr|Q6GJJ0|Q6GJJ0\_STAAR  
mkqpinlkeslnqeeaislhvpghknmtighlsqilsmtdkteipglldlhpeevilkmskqvekhsdydgyflvngt  
tsgilsviqsfsqkkgdil  
marvvhksvlhaldisqgeghfiethqspntnhynkvnlsrlnndghklvvltypnyygetfnveevikslhqlnipvli  
deahgahfglqgfpdstln  
yqadyvvqsfhktlpa ltmgsvlyihknapyreniieylsyftsspsylimaslesaaqfykydstlffakraqliec  
lenkgfemlqvddplklli  
kyegftghdiqnwfmnahiyeladdyqalailplwhhddtylfdslrkiedmilpkksvskvktqllttegnykpr  
feyvtwcdlkkakgkvlar  
hivpyppgipii fkgetitenmielvneyletgmivegiknnkilvede  
>tr|Q6GJJ7|Q6GJJ7\_STAAR  
mwevaflymkfdssgmdaqfe  
>tr|Q6GJJ8|Q6GJJ8\_STAAR  
makqkkfmiyealkedi lngqi qygeqipsehdlvqlyqssretvrkaldlla ldgmiqkihkgkslvivyqevtefpfs  
elvsfkemqeemgvaylte  
vvnevveahevpevqhalninsse lihvtrtrlnqhvkivdedyflksivsdigndvasdsiydylekvlnl nisy  
sksitfepfdeqayqlfgd  
vsvasatvrsivylentmpfqyniskhlanefkfnfdrtrtk  
>tr|Q6GJK0|Q6GJK0\_STAAR  
mavkredvkaivtaiggkdnleaathcvtrlrllvldeskvdkealsnna lvkqgfkadhqyqivigpgtvedvykqfid  
etgaqaskdeakkaaagk  
gnpvqrlilkldgdi fipilpaivtagllmginnlltmkg lfgpkelivmypiadi snminviantafiflpaligwssm  
rvfggspilglvlgli lmh  
pqlvsqydlakgniptwnlfgleikqlnyqqvlpvliaayvlakiekglnkvvhdsikmlvvgpvallvtgflafiig  
pvalligtgitsgvtffg  
hagwlggaiygllyaplvitglhmf lavdfqlmgsslggtylpviva isnicqgsaafgawfvykrkrmvkeeglalts  
cisgm lgvtepamfgvnlp  
lkypfiaaistscvlgaivgmnnvlgkvvggvpafisiqkefwpylvvtgiaivvpciltivmsnfskqakeived  
>tr|Q6GJK4|Q6GJK4\_STAAR  
mflkyrnlfkpfniilglfciafigailftfnnenfynkpigqi idvkhvsstptkdaqnrdikyknqlkvkilngqf  
agetttinhqyvksqadse  
afrthekvllhisnkpsdayiekkrdtltviitglfltlvllvgrkvglsilsilnsiailiaiyihqhsnlnfl  
lmtiamicstiltllvtg  
whmrtlitiastiigtflsiglteliymtdgkgyketmfnlslppkdiflasvlislgaimdvaitiasgmheilqr  
tphismrrwalagrniqgd  
imgtmtnilfsyls galpmlfliflknantvtytismnwsleiaraltggigivltipitilfmeifetlrrakg  
>tr|Q6GJK5|Q6GJK5\_STAAR  
mnavfilalllflmjiifggkkgfisytlflnfailiisivliifgvpiyvvtfffciiigacnlfvlnsynvktqaaf  
istivttillitliylsvy  
fghlqgfstegqdetyvysmnigidmiqfmvftiilaviaavidltitisspiyelhqvnptltqyel fsgmrvgreil  
atsantiylaffggqlalf  
iwffklkysfghi inskifaqefisiilggiavaisipitawitaflikrpsrqrkndesin  
>tr|Q6GJK7|Q6GJK7\_STAAR

Tsompanidou\_et\_al\_Supplemental\_FASTA\_File

mskmi kcvclveetadki llvqvrnrekyfpggkieegesvphallrevkeelnltlmtdeieyigtivgpaylqqdm1  
telngfraltkidwenvti  
neitdi rwikdndaliapavkwietydgkhdk  
>tr|Q6GJL0|Q6GJL0\_STAAR  
mkrli glvivalvl aacgsnndkkvtigvasndtkawekvkelakkddidveikhfsdynlpnkaldgdidmnafqhf  
afldqykkahkgtkisals  
ttvlaplgvysdki kdvkkvkdgakivipndvsnqaralklleaaglikkkdfglagtvkditsnpkhlkitavdaqqt  
aralsdvdiavinngvatk  
agkdpkndpifleksdsdavkpyinivavndkdldnktyakivelyskskaqkalqedvkdgekpvnlskdeikaietsl  
ak  
>tr|Q6GJL3|Q6GJL3\_STAAR  
mnkktklihgghttddytgavttpiyqtstylqddigd lrggyeysrtanptrssvesviaslengkhgfafssgvaais  
avvmlldkgdhiilnsdyv  
ggyraltkvfrfgvevfdtthtdsivqairpttkmlfietspnlrvtdikksaeiakehglisvvdntfmltyy  
qnpdlgidivlshatky1  
gghsdvvaglvatsddklaerlafisnstggilgpqdsyllvrgiktglrmeqinrsvieiikmlqahpavqqvfhpssi  
eshlnhdvhmaqadghtgv  
iafevntesakqlikatsyytlaeslgaveslisvpalmthasipadirakegitdglvrisvgiedtedlvddlkaal  
dt1  
>tr|Q6GJL4|Q6GJL4\_STAAR  
mitydliqntplvllehysddkvkiyakleqwnpggsvkdr1gkylvemaiqegrvrageqtiveatagntgiglaiaaer  
hh1kckifapygfseekin  
imialgadvsrtsqsegmhgaqlaarsyaekygavymnqfesehnpdyfhtl gpe1tsalqhidylvagigsggytgt  
arylkqhhvqcyavepegs  
v1nggpahahdtegi gsekwpiflerslvdgi ftikdqdafrnvkslakhegl1vgsssgaalqgaln1kaqlsegtivv  
vfpdgsdrymskeifnyee  
ndye  
>tr|Q6GJL6|Q6GJL6\_STAAR  
mwrldvgdmdgvvcgemlaqvysvepeilm  
>tr|Q6GJL8|Q6GJL8\_STAAR  
midkkltspkmtvplfialivfigmfysvvtngewlknidmgs1twftdyfgepqrqyvnn1fnnymtfsaeigdvkgv  
vlisiivtiilfikqrhla  
vwfvtylvsgvimnklikdvtl rprpynhlavdtgfsfpgshnastllyfalmi iisvaaktmtkvl salvmgilwls  
ilfcrlyfhahyfsdvgg  
tslaiiwvalflmvpyfihrrqrv  
>tr|Q6GJL9|Q6GJL9\_STAAR  
mlcilqikhcieiticyfqqfstiyiytegvgrinrvifvyialitlvrfftpihpsfsnliywifvlyfipiilcv  
igfkaekliatmviipnfl  
gilyrlyayvthilfm  
>tr|Q6GJM3|Q6GJM3\_STAAR  
mseanaainvll11tvtrvfqpkramkfctrpiyahldhedh  
>tr|Q6GJN4|Q6GJN4\_STAAR  
mkfkkvlvatamvgvlatgvvygneadavysqnglv1hddanflehsyidv1ldknadqatkdn1rsyfadkg1hs  
ikdiinkakqdgfdvskye  
hvk  
>tr|Q6GJN7|Q6GJN7\_STAAR  
msntqtknype1rfpgfegeweekkvge1lefnglnkgkeyfgsgssivnfkdvfnrs1ntn1tgkvnvnskelkny  
svekgdvfftrtsevi ge1  
gypsvi1ndpentvfgfv1rgrpksgid1innfkryvfftnsfrkemitkssmttral tsgsainkmkviypvsakeq  
rkigdffskldrqi leeq  
kle1lqqqkkgymqkifsqelrfkdensedypwhenskieky1kernersdkgqmsvtinsgiikfse1drkdnsdkd  
snykvvrkndiaynsrmw  
qqasgrsnyngivspaytvlyptqntss1figykfkthrmihkfkinsqgltsdtn1kykqlkninidipvleeqekig  
dffkkmdiliskqkikiei  
lekekqsflqkmfl  
>tr|Q6GJN8|Q6GJN8\_STAAR  
msitekqrqqaelhkk1wsiand1rgnmdasefrnyilglifyrflsekaeqeyadalagedityqeawadeeyredlk  
aelidqvgfyiepqdlfsa  
mireietqdfdiehlatairkvetstlgeesendfiglfsdmd1sstr1gnnvkertaliskvmvnlddlpfvhsdmeid  
m1gdayefligrfaatagk  
kagefytppqqvskilaki vtdgkdk1rhvydptcgs1l11rvgkeakvyryfgqernnttyn1armnm11hdvryenfd  
irnddtlenpaf1ghtfda  
vianppysakwtadskfenderfsgyglapkskadfafi qhmvyh1ddegtmavv1phgv1frgaaegii rryliekn  
yleavig1panifygtsip  
tcilvfkkrqddnvlfidasndfekgknqnh1sdaqveriidtykrketidkysysatlqeiadndyn1nipryvdtf  
eeeapidl1dqvqqdlknid  
keiaei eqeinay1ke1gv1kde  
>tr|Q6GJN9|Q6GJN9\_STAAR

Tsompanidou\_et\_al\_Supplemental\_FASTA\_File

mhqsisslsrfrclrvmpipismnikfppstskfstershhqm  
>tr|Q6GJP0|Q6GJP0\_STAAR  
mkltalakvtlalgilttglttshgshakqnqksvkhdkcalhryytgnfkemkninalrhgknlrfkyrgmktqv  
llpgdeyrkyqrrhtgld  
vffvqerrdkhdisyvvgvvtknktsgfvstprlnvtkekgedafvkgypydikkeeislkeldfklrkhliekgylyk  
tksdgrikislkdgsfyn  
ldlrtlklfkhmgevidskqikdievnlk  
>tr|Q6GJP1|Q6GJP1\_STAAR  
mkltaiakatlalgitlgtvmtaesqtvnakvkldeqrkyinmlkdyysqesyestnisvksedygsvnlfnqrnk  
nfkvfligddrnkykelth  
grdvfavpelidtkggiysvggitkknvrsvfyvshpglqvkkvdpkdgfsikelffiqkeevslkeldfkiirkmlvek  
yrlkygasdkgrivimkd  
ekkhaidlseksfdmfdvldskqiknievnln  
>tr|Q6GJP2|Q6GJP2\_STAAR  
mkltlakatlalgitlgtvitsegqavqaaekqervqhlhdirldhryssesfeysnvsgkvenyngsvvrfrnkdq  
nhqlfllgkdeqykeglq  
gqnvfvvqelidpngrlstvggvtkknktsetntplfvnkvngealdasidsfliqkeeislkeldfkiqqvlvnygl  
ykgtskygkiiinlkdenk  
veidlgdklqfermgdvlnskdirgisvtinqi  
>tr|Q6GJP3|Q6GJP3\_STAAR  
mkmtaiakaslalsilatgvitstaqtvnaseheskyenvtkdifldrduysraskelknvtgyryskggkhylifdknr  
kftriqifgkdierrickr  
npgldifvveaenrngtvysyggvtkknqgaydylsaprffvikkevqgavsvhvkryyiykeeislkeldfklrqyli  
qdfdykkfppkaskivtm  
kdggyytfeinlklqtnrmsdvidgrniekianir  
>tr|Q6GJP5|Q6GJP5\_STAAR  
mkmtqiaktslalslittgasivttqsanaevasalkteqaiskiqkvttspnvpqpsqptpsvttppspnvqpqs  
pqptpnpttphssnvetkq  
pqspstkqaqkeinpkylrtyytkpslefekqfgfmkpwttvrfmnpvipdwfiykiavlgkddkkykdgpydniidvf  
ivlednkyqlkksyvggit  
ktnskkvdhkaelsitkkdekki shddseykitkeeislkeldfklrkqlieqhlygnigsgtiviktnggkytfe  
hklqehrmadvidgtsie  
rievnlkss  
>tr|Q6GJP7|Q6GJP7\_STAAR  
mkmsiakvslvlgilatgvntvteqpvaenkhvqvsqnsknlkayytqpsveyknvtgyissiqpkpgtkflnmiegn  
tvnnalavgkdekyhtgv  
hrnldifyvnedkrfegakysiggitkasdkvvdqvaearvikedhtgeydydffpfkidkeamtikevdfkirklidh  
yglyemssgtvtvqmky  
gkytielddklqedrmedivkvididrievkvka  
>tr|Q6GJQ1|Q6GJQ1\_STAAR  
mvsigvlqfgdvvggledlsgmdfrlrvfqpnfykqr  
>tr|Q6GJQ2|Q6GJQ2\_STAAR  
mnimvpeekgsitlskdaatifatakfkpfqnrknnpqktnpflklhenkks  
>tr|Q6GJQ3|Q6GJQ3\_STAAR  
fkkygyfittreerfssefklqkvrlyengpkneiireydlttstfnsnikqhqtgsfnhqdnlsdekliklrke  
vqhlkmendvllkqillitr  
rnrnhltecvsi fnih  
>tr|Q6GJQ8|Q6GJQ8\_STAAR  
mknllsvqhllyamyagai lvpivgtslkftpeqiaylvtvdi fmcgvatflqankvtgtglpivlgctftavapmili  
gqtkgidvlygsflsgil  
viiiapffshlvkffppvvtgsvvtiiginlmpvamnylagggakdygdvknillglmtliiilvlqrfttgfiksi  
liglvtigtigagllgmvd  
nqvnhagwlgipvpfkfsgfsfdvtstlvffivavsliestgyvhalsetgkklerkdfrkytaeglaivlgsifns  
fpytaysqnvglvslsgak  
knnviygmvvlllicgcipklgalaniiplvlggami amfgvmaygvsilghidfkqnlliiavsvglgtgisavp  
qafkglegqfawltqngiv  
lgaisaiilnfffnngikyqteenvk  
>tr|Q6GJR1|Q6GJR1\_STAAR  
mefkti qsvkdphynealklydtkl nls ltedkriikrslennktendyvfivglendvvslatahyeattnsafliy  
fakdlpnhdeltqtlhqi  
ehelnllsnlvhsrsinfnlmevpkepadltqdnqli ehrrqflyehqferqteidyihptndgthkkvdflkknikl  
tkdiygtsvksnyi lkyvf  
angiarei ydlleemd lrkpf  
>tr|Q6GJR2|Q6GJR2\_STAAR  
mltkefaqrvelsekqvrkivqhleergyqlskteyrgreatdfkeediefkdiadkvkqtnsydlafdelekekdfiq  
vivkndknlpnqnvag  
vedrllei qmreerhllgmmnqvhhqqqelkelqnlq lttkidsnseslkaiqtsqeaieaqasqakvlaessnkven  
ntatdekaeskdskvagvn

Tsompanidou\_et\_al\_Supplemental\_FASTA\_File

tstdakttdkaenagdgatkvdkedqisateaiekasveqpkndkaaetsnkeatvdaeaqhdaeqqvaeahaeaskqa  
tsndsleakaendstasqs  
emsepkpqeekkgffarlnl  
>tr|Q6GJR3|Q6GJR3\_STAAR  
mifsqnlfrprtparltriexllqahfrsvnycqynfvehrtliyvpactq  
>tr|Q6GJR5|Q6GJR5\_STAAR  
mnafltliniivlviivilhmmarkhisfakrvftalgigivfgvllhlvygthsnvitstsdwfnivgqgyvallqmi  
vmplifisivaafkqiqig  
ekfakigsllififligvtiaaivgvvyaImfgldastinlgnaeqargseiakqakdltahtlpqqilellpknpldf  
tgqratstiaavifasfig  
faylrvarqpdhgellkraidaiyslvaivtfvlrltpygvlaimantlstsdfgaiwtlglkfliasyaalitmyiih  
liilsllgispiryikktl  
evlifaftrsrsagtlplnvqtqtrrlgvpegianfaatfglsigqngcagiypamlaimvapvanveidlqfivtliav  
viissfgvagvggatfag  
ilvlstlnlpaalagvlisveplidmgrtalnvndsmagtgakltkhwkdtfesndnaaltsh  
>tr|Q6GJR9|Q6GJR9\_STAAR  
mldvhfiyppklqnceyfnlptqkegfevtihalrpenihkiyhdmdkteqkfietlisngnpvtiinkrdvnllklt  
hlgfvyqinedeffvnnlf  
lsyinsevldestygefesldtinhmnlneevlrvrqhtrlnvdtlehallktndelkticrqygikgfsnknkqnlvel  
imtaffnnhiieqvfst  
tlfefdilssilesdanyrlnneliefeklqlinfdnfltsfyyyydfeydclilpndvrkhienvnqvngndfekav  
nqfvdeqtienslaefena  
lelsfmedevldmllehdffedfgttdslrsdaitqliskikkglidkkdilplriilgsvnlygilstnhllyltqrf  
ydatfskeelqysldtlag  
telyyieddfvfhplfdvveseasgidisdegyvvasveeliyydrhhyllksdqaikeftsyllrkqinmkndiekey  
vneiimllrtiptsklvqp  
imqlfidnailnnvqndalliekatharnhlrlwslqghrdip  
>tr|Q6GJS1|Q6GJS1\_STAAR  
mdrefkaikkasnsmlldaiwywlkcivskishf  
>tr|Q6GJS2|Q6GJS2\_STAAR  
mkvritfiilailstivclflaamhptgpntvtfeqpylftlniimvlvalpalilainmsfrissailqflgaisw  
fflslilsltqftptlas  
fitsiilfisaiitlaiggksfdkndsh  
>tr|Q6GJS4|Q6GJS4\_STAAR  
mttqsfifmniilldgatqrhpffiqilvflfptsshvnl11fnpilptfsniihidhfhankkddn  
>tr|Q6GJS8|Q6GJS8\_STAAR  
mktilkitylftiigayaalfilktidshgtdqfnplvkeddsyvkttevestrmdqllrsysqsafnkegketqly  
tatfdvkphrylki thkgh  
hvetfeevekeevpkkaldklsr  
>tr|Q6GJS9|Q6GJS9\_STAAR  
mnrktpttdglmrhirdnkqiingsteknqlrnigfyfhgfkgydfflnkeeeInfekfsehalysfdteiknlfykh  
vmfcetaiknrllieivcvn  
sgfdlds1fqsltyykspsgsskykklknttrlrrdiydmihehcnskyiyhyihqdrtvplyavfelftlgnlvf  
ftrcmsqnlnieaqkqlk  
yspafdqsldi gdiidcmkglrnaiahngvlydcrfktgetsnr1keylavkmdihnlfdriidylillilicsglsy  
skaelqriirqfeqnlfdl  
rskisestydkigvrarplrslnknfinnldfyktd  
>tr|Q6GJT2|Q6GJT2\_STAAR  
lysgygyfyrqfmpkpfeshnkqlkilrrrgmevpssakrdlenenyyniingykdlfelldvngnflvpdkykqgthfk  
evfslyklrdkfrnvlley  
llvfethiksrisyyfsekyrephsylyfknysdtsktdsivkmvatfssvmsnrknkplkhyinthngvplwilvnyl  
tlgnvskmysnldddrlle  
vakdykrklrkytrvqitpsdvdsilqqahmfrnvaheerlydykidraksrani fanynkidykeyvptmngsyvf  
dllislc1flnkhdylk  
knmdklisnyshsfytitiddlytkmnpdqtkildml  
>tr|Q6GJT3|Q6GJT3\_STAAR  
msetakqarfvenyirtlnvtqsaikagysansahvtgcrllkkphikqyiqeqkdkiidenvltake1lhvltnaavg  
detetkevvrgeykenp  
qsgkvqlvynehvelievpi kpsdr1kardmlgkyhklftdkhdngdvpifinigewgddee1dktvkdvsnanpht  
vivddipled  
>tr|Q6GJT4|Q6GJT4\_STAAR  
mdkqqikgfvcdyhertrsdvli dddintdeffsigdensnewmaddnidhivknhlemivdqvandkefyifdsliqg  
rsykdi ss1ecseqsvrl  
wyetlldkivevie  
>tr|Q6GJT5|Q6GJT5\_STAAR  
mkl1ktncllyrngdnklseyqlltqfnpafinkkikmcefqiesmyhlsastttcdeimgivsvsypieklvikiiet  
karlqnyknrsisnmvllk  
tvlnhytekeqkqvvykmrsngrykpynvierlqvdllyqasikqrserqqrniaienskiarvnayhqssshkvv



Tsompanidou\_et\_al\_Supplemental\_FASTA\_File

>tr|Q6GJT7|Q6GJT7\_STAAR  
msefevkektylnpnehrqvlvnrntsnkyitkkl1nqlgyeynssnerwlrrvinslvydygypigcsykpseryy  
iitteqekqgamrsikkla  
dgsmkryealkriev  
>tr|Q6GJT8|Q6GJT8\_STAAR  
mniativnefetragt1lryytgl1ehskvqpccklyndpfdmvyvmmnk1fghvyikdckvrksfelaspkhtegli  
rsieggyvye1hdgkqls  
isdmmasqlfedeyfmyglqtyvesnnsdvfeylengfdtdtlegiqsntdvianiemyqlatgineparelveg1kl  
vtefvqdenatqedykale  
rk1nd1kasyys1sk  
>tr|Q6GJU0|Q6GJU0\_STAAR  
metgksdv1dki ekinkkdsalqeiipkgyeiehhqcgvalyqlipskkegepdkkvfitntipqiterfediesnevsf  
nm1fydnktpvniavsae  
idsrql1klvnkklvtsststklvdyiniskrynpp1nvkvatrlghvkgyfiypyqevmkdsnvklfsndkgfqkli  
dsfrskgt1qgysskvfaq  
ikdlpmvmvmyaslgsv1lrefglqpfiveisgststgkft1nlvssvwtgtsdlittwsstqnsiesmasflnsfpmf  
kddtrnthpkfvasatynf  
ssgesksrsn1n1lnakkewrn1listgessianmadekagvsarvvt1qppypdnfdft1dksfrenygtlglafi  
kqyeskkdvynafesyqr  
yfnqgsneimqrlgrafal1qvtgevlndidgfehdhfk1ieqaydsmvknktidkpkql1eel1qyl danrnnivgd  
gydsvnygdvkavykhdf1  
ciknetvknklghemqtitgqwdkkgyl1kdkkriqkqvkhsqrhlgyaikkeieelgfdfsishnpytesy  
>tr|Q6GJU1|Q6GJU1\_STAAR  
mneikleydthsvvhyes1dsrsfksfskpkwsk1vnk1svpieanykyargvavygdikngandhgeiikkhrndknv  
iyrdv1v1dyeind1kql  
heissalinvawfwhtsyshrteqarirlyiplnerisaddyrkyskvlankighkvdegsyqpsrcfalpviqkghif  
ikrvndcpimdvdm1eqw1  
keyeqsnvsvgytrrdskywre1cfttgegrnna1aslvgh1l1rchvndyivysfallwgqfackppmkeqeinat  
fqs1lnkhynn  
>tr|Q6GJU2|Q6GJU2\_STAAR  
mnweind1fsd1kl1kdrfed1kdnhgwhfeelyphepnh1nkdeliregasyherrihnnqmfd1fhlyieqfdnie  
kfyekassenfgeesdd  
aknsikvae  
>tr|Q6GJU3|Q6GJU3\_STAAR  
meikqkyqlskvvki1levvlyeedkfqsdkdyhyqdka fyeyalk1lvhng1fn1laeldfedevfl1ldevtmt1sdvmk  
etqhvyrsvidekgehkh  
ttdrkghvigmlawal1dyivgnieev1  
>tr|Q6GJU4|Q6GJU4\_STAAR  
mrkqvii1tktvvgwynikdtqhn1m1nippkvfeqyfpdvskdvk1rv  
>tr|Q6GJU6|Q6GJU6\_STAAR  
mptk1qdfpskentvtepeqvvnplfakpntlagifgisysvnr1lkewekdhkgindlyys1sstmivisiprfee  
ymkarhkkwm  
>tr|Q6GJU7|Q6GJU7\_STAAR  
mhkg1kinayil1kvrgdfmfmvkevaq1l1riserhtyk1l1qknviph1tkiggkilvker1letlekekvk  
>tr|Q6GJU8|Q6GJU8\_STAAR  
mvesndelkkelgrflksirkqkgtaseiskmqysqghisgiengvksfnsnkliesylmnikdtneeynfyvdeiak  
itknkvk1nkvsntkme  
iidrmdipysrefisfddnneksftifnisind1hfh1qdinnykfykgirltdndkknidkilnnyfenksviikent  
kt1rdknenweqlvkl1sdy  
iddk1dkkn  
>tr|Q6GJV8|Q6GJV8\_STAAR  
mse1ksedqri1tktkdeqikqidi1sdikpnpyqprktfdenh1nd1adsikqygilqpi1v1rktvqgyyivvgerrfra  
skiag1kyvsaiikd1tde  
dmme1avien1qred1naieeasyr1mtd1kitqqevakr1sksrpyianm1r1l1h1pkkiadmvdgr1tsahgrt1  
laikdeqqm1r1akrvvke  
kwsvry1enhvne1knvssksetdkvdi1tkpkfikqqrq1reqygakvdisikksvgkisfefesqddfvr1ikqlnrk  
ygk  
>tr|Q6GJV9|Q6GJV9\_STAAR  
mkdtqlaqit1tddstgai1npih1staykhpkl1qstgfdytrtknptrstfetcfaklehgi1sfatssgmsaiql1c  
n1fkphdei1vsfdlyggt  
fr1fefyeqqydkfkyvdfdyeqvekitdktval1fep1snpmiaidv1kpyyqlckakg1l1siidntfl1tpyl1stp  
laegadiv1hsatkyiggh  
ndv1agvvtvkdelaqkl1fdfnmtgat1spidsy1l1lrg1kt1h1rieraqsark1laekcqs1qaidevlysgqtm  
1s1r1nkaysvak1len1d  
1cifaes1ggtet1vtfpytqthvdmpdaekdkrgidey1l1r1s1l1gvenyedierdi1qaldkaqigeiv  
>tr|Q6GJW0|Q6GJW0\_STAAR  
mt1sketevi1fwr1rgveyhsanpp1ydsstfhqts1ggdvkydyarsgnpnre1leeklar1leqgkfafafasgiaais  
av1l1tfksgdhv1lpddvy

Tsompanidou\_et\_al\_Supplemental\_FASTA\_File

ggtfrl teqilnrfniefttvdttkleqiegaiqsntkliyietsnpckfkitdikavskiaekhellvavdntfmpplg  
qsp111lgadivihsatkfl  
sghsdliagavitiamealyliqngtgnmlsaqdswtlakh1ktfpirfkqsvenaqkivsflkqdeisevyypgl  
tathleqaknggavigfrl  
adeskaqqfvda1t1plvsvs1ggvetilshpatmshaalpeevrgergitfglfrlsvgldepdeliadikyalkeafn  
esiphtler  
>tr|Q6GJW1|Q6GJW1\_STAAR  
msqflth1kdnvlvadgaigtilysegldtcpeaynlshpdkverihrsyieagadvigtntyganfeklkrfgledkvk  
aihqaavriakkaankdty  
ilgtvggfrgikqedislqtilyhteiqidtlieegvdallfetyytleeltvisrtrkkydipiiaqltasntnylvn  
ggaineglkqlvqcganiv  
glnchhgphhmqesfthielpehaylscypnas1ldiensefkysdnaqyfgvaqnliregvr1iggccgttpehikfi  
kesigt1kpvndkkvipip  
tkalfnpsqnkvrqsltskvrqerptviieltdpkh1dtrffeniaklekanvdavtladnslatvrisniaaaslikqy  
yniep1vhitcrdrnligl  
qsh1lg1sligvneilaigtgpskvgh1pgatnvydvnskgltelalrfnqgintdgdalkkthfniagafnpnrkld  
gavkrlekkiesgmsyfit  
qpvysekiieiyhatkh1nkpffigimpiasyknaflhnevpgikmsdeilqqfeavkddkaktrelslklskldit  
vheyfnglyiitpfqnv  
slelaaysksitahkeail  
>tr|Q6GJW7|Q6GJW7\_STAAR  
mtt1ln1drvnkqykssdfklqdas1tistnetvg1igknsgkst1n1ilvgnrhkdngsitffgeehaidvveykehi  
gvvfd1rvpnk1tikdid  
kvfqs1ymtwnsqkffdlkyfelplqtktfstrgmrmkialtia1shdvk1l1ldeatagmdvsgreemelledfva  
qggg1l1sshisedieqla  
dk1vfmkdgrm1teqkdi1laqygivttedkdveiph1iasr1skgkyqilvkdyaeienaep1khiddatkiimrg  
ev  
>tr|Q6GJW8|Q6GJW8\_STAAR  
mkilryigy111gg1vggi1ggi1gnfdglgien1tfathnnvvvisiati1i1i1eiv1lnqrralkykr1vdeevd  
neetdqyellanrhv1ngs  
ilsilqtvial1v1i1fvvgaevngi11flipffasafntqft1fnrrfddrmpkiadknytekrleildegehhie1  
ialfktiyain1sililaii  
figsysiatgingsfs111iaifiynafsy11krrrfy  
>tr|Q6GJW9|Q6GJW9\_STAAR  
mnr1kelrardg1nqtq1akqagvsrqtisliernnfmpsv1taikiarifnekvetifiieedev  
>tr|Q6GJX0|Q6GJX0\_STAAR  
mafkl1saiqqahqftgvd1fkl1kafkdmgmtynivniqdgatvvhqseddivtssvksnhpvapssnqsivqdv1tr  
hqqgtdf1etfcdemaqag  
iykwhidiqagtctyid1qeqaiiselipq  
>tr|Q6GJX2|Q6GJX2\_STAAR  
mvhfse1rqr1vk111sfviavivvyvssfwmtpfityitrahvslhafsftemiqiyvmiiffiafcfispvmfyqlw  
afiapglhnergf1ykys  
ffsv11fcagvafayvgfpmi1qfalk1sl1nispvigfakylie1irw1ftfgilfqlpilfmg1akfd1id1tys1k  
hyrkyiyfacfv1asi1ap  
pdit1n111t1p1111fefs1mfivkfts1rnd1ssq  
>tr|Q6GJX3|Q6GJX3\_STAAR  
mkhy1tkiati1i11vmv1fsfg11ksqaaeqqs1sdvysvitdaksal1sns1skdnk1kaieqvvsavkkl1lednseg  
navksnrk1ledakandq  
kdt1sq11tk1s1iayeek1askdagskik11qqvdakdaamtkaikdknaeles1nns1nqiwtsnetvirnydanqyg  
qieva11ql1ria1hksp1d  
takvshawttfksnidhvd1ksgtsandqyhvsq1nde1lekaikaidnnq1sdadaal1thfieiwpyvegqitkdgaly  
tkiedk1pyqsv1deh1k  
ahvkdglvd1nnqikevvghs1svdvmi1flreglev11ivmt1ttmtrnvkdkkgtasviggaiaglv1siv1aitfv  
et1gnsgm1resmeag1gi  
vav11mfivgvwmhkr1snakrwndmiknmytnaisngnlv1latig1isvlregvev1ifymgmigelatkdfvigiala  
iv1livfal1frfivr1ip  
ifyi1frv1sifi1imgfkm1gvs1qk1q11gamprhviegfptinw1lgfypsyepliaqaayimvvail1fkfk  
>tr|Q6GJX4|Q6GJX4\_STAAR  
mtnye1qvndstqfs1rrt1f1kml1giggagvaigasgvgs1mws1fks1mfntpedpekdayefygvqsgittptqk1cnfval  
d1kskdrdaikamfkkwtv  
madrmm1dgdtvgkps1nnp1mppvdtgesig1gask1titfgi1sk1mkkig1sskipdafkd1lphfpndq1iddysdgi  
miqacsnds1qvs1fhavh1l  
vrpfrdi1vkvrwaqsgfi1sakgketprn1mafkdgtinprksnq1kdyvfiddgwakhgtycvvrriqihietwdr1ale  
eqeatfgrkrhsgap1tgg  
kefdeid1kakdshgeyi1dkdahtr1lakeantsi1lrrafnyvdgtdrdrtgnfetg11fiafkatqqfidiqnn1gsnd  
k1neyi1thrgsas1flv1pg  
vskggy1get1fd  
>tr|Q6GJX6|Q6GJX6\_STAAR

Tsompanidou\_et\_al\_Supplemental\_FASTA\_File

mfgmkvneqir1kileahdtealfnlvnrnsrlrewlpwvdateqpsdtrafiksgllqfadngngfcgiwyegt1vgv  
ig1heinhmhrktslgyyl  
dkqfeghgmtqaveal1kycfdeielnrieisaavnneksqaiper1gftregmlrdnellngiysssyiys1lkseyne  
eg  
>tr|Q6GJX8|Q6GJX8\_STAAR  
maklemknptlefglyslgdh1lnp1kgekvsyeqrineiieaskladeagidvfavgeshqehfttqahtvvlgaiaq  
atk1kivsssstiisatdp  
vrvfedfat1dl1shgraeivagrasrtgvfd1fgyd1kdydelfeek1g1lle1nkteritwsgkyrpe1nrmkifprp  
idnt1piwravggppasai  
kagkqgvpmmit1l1ggpamnfkgsidayrqaateagfdasps1pvstas1fytakttqdamrefyph1ntgmsfirvgv  
ypkqqfanssdyrealmgv  
spqqiiekilyqhelyghqrmaqldfggvppfenvmknieligndiipaikkh1sk  
>tr|Q6GJX9|Q6GJX9\_STAAR  
mni1vghh1smytkdakrnkdfytnv1gl1r1veksvndqnp1smyh1fygdevgtagtilsf1feipnaghkqpgtetiyrf  
s1lvpnqaa1h1yfekr1en  
ngikserlyy1ggqevvfkdedd1ei1llvndsfevphqwhnayseipqayqilgigpvelrvnaartveflenvlgy  
rkrdnksfdv1t1lapggly  
sdfvvi1eqqqrerpprgyihhiavntpqmnd1daiykk1qqppqsngiidryffkslyyrhnsim1yefateapgftid  
tpveq1gsq1n1pdf1lea  
reqiesk1hei  
>tr|Q6GJY0|Q6GJY0\_STAAR  
mnf1kpakhikp1penqidtykr1r1qv1lgi1figyagyyl1rknfslampalqeqgftkaelgfalsavsiaygfskf  
fmgtvsdrsnari1flv1gl  
v1tai1vnl1mgfvpffts1gimfv1l1f1ngwfqgm1gwppsgrv1vhwfsvserskta1wnvahv1gggimapi1aawgi  
t1tafin1fyg1kgfegvfi  
ypall1ai1aaisyl1rdtpqsq1lppieiykndfatsdkkt1ete1ttkei1lfkyv1nnkw1wai1fani1fvyfvryg  
v1dwapvyl1seekhfd1ka  
sgway1flyewagipgt1l1cgyisdk1fkgrrgpagfffm1gvtvfv1iyw1nppgnaw1dnvs1iaig1f1ygpvm1lig1  
qal1dyvpkkaagtaag1tg  
1fgyl1fgavmaniv1gavvdkfgwdvgfi1l1tai1svfam1sfil1twk1vgqetvhh  
>tr|Q6GJY1|Q6GJY1\_STAAR  
myksk1l1kyif1seesdvkd1teekynqdyea1tfs1fkeetyqs1r1akktptkagyfv1tcwtkdenncnq1pyskeafady  
1mi1videe1sgy1lfpre  
1l1vek1gil1ttfehkgkma1frvypkwc1nq1nkraeqtqkwqck1yffey  
>tr|Q6GJY4|Q6GJY4\_STAAR  
m1syrqie1ily1l1hegtfipintianq1lgsprtiqydiaieqyaetyhyqvsr1nkaagikvttanttilne1lehnl1t  
nqihfskder1thialk1f  
ett1dpv1stk1q1laq1dnvsr1rti1addikmi1qaq1dqyh1kl1nyvhnkgfni1geedhyrkayahfihqymkqaapfi1ead1  
fnsesialvr1raik1t1ns  
enyh1lvqsaidg1lyh1ria1qr1nenfs1fdipineidkwrhtnqy1a1askmien1erscnv1tfpesei1fit1hl1l1gsk  
mtehtassit1feyh1dsq1n  
ihel1itcv1sqel1gidmskdnk1hts1lithikpaihrikydm1lqpn1lrqevmrrypqieavskhispieqdaairf1ned  
el1tyitihf1assier1vath  
kqsmikv1v1l1csg1g1tsq1llksk1lnh1ypefhiw1daysiy1q1lees1ll1qdnidv1stvpceisavpvihvdpfinqqs  
rqk1nq1i1ndsre1qrv1mkm  
atdgks1lad1l1pehri1inkqpl1siesaitvavqpl1indgivnsnytaailkq1leqfgsymvisphialihagtdyvqng  
vgfal1tyftegi1fgskan  
dpvh1l1vit1latdhpna1h1ka1lgq1lsec1snd1crqdf1ldgnifkikqhialtmtkev  
>tr|Q6GJY8|Q6GJY8\_STAAR  
mmnkv1lvtggtgfvgr1isr1leqgyevqtti1rd1lskadkvik1mqdngi1ster1mfvead1sqdehwdeamkdck1yv  
1svaspvffgktddaevma  
kpaiegiqr1l1raaghagkrv1vmtan1fgav1gfsnkdknsit1neshwt1nedepg1svyeksk1laekaawdfvenenttv  
efatinpvai1fgps1dahv  
sgsfh1l1en1l1ngsmkrvpq1p1nvvdvrdvae1h1lamtneqasgkrfiatadgqid1l1eiaklikekrpeiaqkvatk  
k1lpdfi1l1s1gakf1nhqake  
gk1l1ldmnr1vsnerakt1l1gwepiatqeeailaaidsmakf1h1i  
>tr|Q6GJZ0|Q6GJZ0\_STAAR  
mmqsskwnams1l1mddk1tk1qaev1rtaideadaivigigagmsasdg1ftyvgerf1tenfpdfiek1yrf1fdml1qas1l1hpyg  
swqeywafesr1fit1l1nyld  
qpvgqsy1al1ks1lvedkqyhi1ttnadna1fdaaeydmthvfhiqgeyil1qcsqhchaq1tyr1ndd1l1rkmvvaqqdml1p  
wemi1prcpkcdapmev1nkr  
kaevgm1vedae1fhaq1l1qrynaf1leqhkddk1v1yleigigyt1tpqfvk1hpfqrm1trknena1lymtmkkayripnsiqert  
ih1l1tedi1st1littal1rnds  
ttqnni1getk1dv1lnrtd  
>tr|Q6GJZ5|Q6GJZ5\_STAAR  
mteikdkv1tkdafel1pyti1kakhqptkgaiv1yihggg1l1mfgkand1spqyidil1tehydliq1lsyr1l1pevs1ldciid  
d1fts1fdai1qsqysncpi1f  
tfgrssgay1s1l1liardrdidgvidfygysgintepfkmansy1yaki1aqsvnetv1laql1tsptpi1qdqiaqr1fliyg1ya

Tsompanidou\_et\_al\_Supplemental\_FASTA\_File

rgtgewinminiadytdsk  
ynispnelktlppvfiahcngdydvpveesehihnhvphstfervnknehdfdrpndeaitiyrkvvdflnaitta  
>tr|Q6GK03|Q6GK03\_STAAR  
mnilfaitgiafalvafllfsydrknidfkktlimifiqvlivi fmmnttigltitlta lgsffeglinvskagin vfgd  
iqnknngftfflnvllplvf  
isvligifnyikvlpfiikyvgiainkitrmgrlesyfaistamfgqpevytltikdiipklsraklytiatsgmsavsmt  
mlgsymqmiepkfvvtavm  
lnifsaliasvinpyksddtdveidnltkstetktlngktgkpkkvaaffqmigdsamdgfkiavvvavmllafislmea  
inimfgsvglnfkqligyv  
fapiaflmgipwseavpagslmatklnitnefvamldfknvlgdvsartqgiisvylvsfanfgtvgiivgsikgisdkqg  
ekvasfamrlllgstlasi  
isgsiiglv  
>tr|Q6GK08|Q6GK08\_STAAR  
mflawnei rrrkklkfgliigvltmisyllflslglanglinmkegidkwqadaivlnkdanqtvqqsvfnkkdienkyk  
kqatlkqtgeivsnghqkd  
nvlvfgvekssflvpslieghkatkdnvlnadetlnknkgfkgidtlslsqdek l h iv g ftesakynaspviftn datia  
kinprltgdkinavvvrtd  
nwkdkklnqeleavsin dfienlpgykpnltlnfmisflvisatvigiflyvmtlqktslfgilkaqgftngylanvv  
isqtlilalfgtafglllt  
gvtgafldpavpvkfdvltllvfaivlmivsvlgsflsiltirkidplkaig  
>tr|Q6GK13|Q6GK13\_STAAR  
mksikkdikvykeqnmnkiaskvntikt dikqedsnthvykngkvivigilykdrekmyyfayeikdgkaeinrei  
dpikymkdhkadyedenve  
veknvvcfl  
>tr|Q6GK14|Q6GK14\_STAAR  
mtfeeklsemyneianki ssmipvewekvytmayiddggge vffnytkinsdelnyytdipkeynisvqvfdlwm dlyd  
lfeelnlfkeeghepwt  
cefdft rdgklnvsfdyidwansefgpmgrehyymykkfgiwpekeyainwvekikdyvkeqeeael  
>tr|Q6GK15|Q6GK15\_STAAR  
mtfeeklsqmyneianeisgmipi ewekvytmayiddeggevfyyt epgsnelyyt svlnkydisesefmdsayelyk  
qfqnlnri fkeegyepwt  
cefdftkegelkvsfdyidwintefdq lgrqnymykkfgvipemeyemeevkeieqyikeqdeaeq  
>tr|Q6GK17|Q6GK17\_STAAR  
miifilltvfal fyiamiaslfksegfsiigildivilttliyfyvfgasfdndlnsflafmngsfvymyyaiks l w  
vkpklvnyiiakeigeskd  
vieeqeldlqtskirgiyffiaiaalliitklrmqpelqadaismnpvfifigviiiliwlvldiyrkkkygiflktiv  
plvttwiiiativls  
>tr|Q6GK18|Q6GK18\_STAAR  
mmknvayktyfdvtmddyedilkdftnlaiskgkttgpltfavtqidlqkrmidl fsvgkcfksneelsyrtyfcl d  
nm lhgri tsnnfitdeial  
ledmnefasdnltftssyhtmrksfsgeqgwidvkakvyend  
>tr|Q6GK20|Q6GK20\_STAAR  
mkiqei vgnikrayltpliifvilfslffdlimyfygnlqgklpiyldvflifaavvfilymfqeksgevkveksnviry  
ltnvvagysmvllvasiy  
vfgvagygdvfnwlgii lmlfvswfalflfyknefdsenpnktvnviai iiklsafgglyfirtvvpntadeekfitl  
siliniavdlllvrsyfn  
alyksvkkdiengvdd  
>tr|Q6GK23|Q6GK23\_STAAR  
miklnqasvskeissirtngqglkqsnqgnvlnsktnlvtfkeyvnmfedyqsal snyeniieqdt tamdtvteivendr  
eiagqink  
>tr|Q6GK30|Q6GK30\_STAAR  
mvimkkti lltmttltl fmspn saqaytndsktleakka hpnaqfkvnkdtgaytytydksnapnnnhqnqsrtdnh  
qhanghdlnnqyhsslsg  
qythindaidshtppqtspsnlt paipnvednddelnna fskdnkglitgidldelydelqiaefndkaktadgkplal  
ngkii dqplitsknnlyt  
agqctwyvfdkrakdghtistfwgdaknwegqassngfkvdrhptrgsilqtvngpfghvayveknidgsil isemnw  
geyivssrtisasevssyn  
yih  
>tr|Q6GK32|Q6GK32\_STAAR  
mktihlfriyhsflkkwyl iiyllfilaa lltlttiqhvteddnhfnigvvdkdqssetklilnsigkgsnlgknvsi  
kayddkqahtllkqkllg  
yfvfdkgmtkafykqgelpi svtydqqsmsvlsq l tdsvyqr l m rsmggilafqdlapakshsdsinvmtdllitgl  
nrsgafnlepihlydtgsy  
yaitgflttvfi falslftvlk mnqdtvlkarlkmfhfskerll iiralitwfytm lwsivgvvwivfsipntfelynwp  
tlaihlsyyvtflilwlll  
iellttgllnsiskvilaivilvsgltiptiflqhiangvfniqpfavvtqnll eilnnyilel hpsfylsfialli  
nlavlvwryrq  
>tr|Q6GK37|Q6GK37\_STAAR

Tsompanidou\_et\_al\_Supplemental\_FASTA\_File

mnntqssprsniiiaimlsaltywlfafsfinigplvgqytstspavlnlsislsfatgimvvaagdiadkigqlrmtym  
mgliismfasllliisdit  
alliigrilqglsaailpstvgvlnnqfkgehlrraisylmistvvgiglagviggliafnfgwqtnfiisigiafia  
lllkgtpkvsqshshrhpf  
dykgmsifavmigsftllltqgfeqgwfstfsficlsifiittlifiiierrhevpidfsvlnrnpfigaflnnfvlns  
glgvtvffiyagthlgls  
aaqsglvtlpyaivavamirlgekatlrfggkmlliigplfpvigitiismstlqpsqyiaavvigfvicainglvatp  
gltiaifsmpekvglatg  
lykmsgtlggafgialsttvfsmqlnyapsvaatvtfivsvlmlilglsaymiipktvks  
>tr|Q6GK39|Q6GK39\_STAAR  
mfivmknkviilnki fvfeksikkhnkmmylecd  
>tr|Q6GK45|Q6GK45\_STAAR  
mtklpqnfmggalaanqfeggydkggkglsvldvmtsgahgkarqitesidpnhyypnhegidfyhrykedialfkemg  
lkcrlrtsjawtrifpngde  
dvpneeglafydrideliaaqgiepvvtlshfeiplhlakhyggfrnrevvnyfwhfarvvferykdkvtywmtfneinn  
qmdtsnpi flwtngsvalt  
endnpeevlyqvahellasa lavrlgeinpkfkigtmi shvpiypyschpkdmeaqianlrffffpdvqvrqyypsy  
akkmlarkgydfwgqegdd  
silqqgtvdyigfssymstavkhdvdtvvenivnglnhsvenphiatsdwgwaidpdglrytlnvlydryqlplfive  
ngfgavdevvdghihddyr  
ieylkahitaaieavdqgdvdligytpwgiidivstftgemkkrygliyvdrndgrgtmerlkksdfwyqqviasngd  
kl  
>tr|Q6GK59|Q6GK59\_STAAR  
mlgpltriexllqvhfrsvnycqynfvehrtliyvpacs  
>tr|Q6GK60|Q6GK60\_STAAR  
marllreqcsktgaptqkltsyqlttmcrlgwlrrhprkpgpviknsiyrilq  
>tr|Q6GK61|Q6GK61\_STAAR  
mtkktqaihidniywervqlyieghsegvdltsqqfvlrnl tetktleanemkidgntflcrfnvailddgyylpmdkyl  
fvyhdqleyigqlnpniid  
qayaa neeqieeyne lttqngkanyv laneakvfrkggvsqhtvytitpeiasdvnefvfdiditlpqeksgviatsah  
wlhkqghkasfesrsflfk  
aifnitklhikrsktilftdsrpnlsngnfkyvydelrqkvdfdydiktvfkanitdrkwrkfrlpyllgkadyif  
vddfhp liytvrfrpsqei  
iqvwhavgafktvgfsrtgkkggpfidslnhrsyt kayvssetdipfyaeafgi reenvvptgvprtdvl fdeayatqik  
qemenelplikkkvilfa  
ptfrngnghtahypffkidferlarycekhnavvl fkmhpfvknrl nisrehrqyfidvsdyrevndilfvtdllisdys  
liyeyavfkkpmi fyafd  
ledyittrdfyepyesfvpgkivqsfdalmdaldnedyevkvvpfldkhfkyqdgrsserlvkd lfr  
>tr|Q6GK62|Q6GK62\_STAAR  
minqvyqlvaprqfdvtynnvdi ygnhvirpvy lsi caadqryytgrrdenvl rkk l pmslvheavgevvf dskgvfek  
gtkvvmvpntptekhdvia  
enylassyfrssgydgfmqdyvmmahdrivlpndidlstisytelvsvsyhaiqrferksiplktsfgiwdgnlgyit  
aillrkllypeakiyvfgkt  
dyklshfsfvddiftvnqipddlki dhafecvggkgsqvalqqivehispegsiallgvselpvevntrlvlekgltlig  
ssrsgskdfeqvvdlyrky  
pdivekla l lkgheinvtmqdivqafemd l stswgktvlkwti  
>tr|Q6GK66|Q6GK66\_STAAR  
mka l vktreghgnle l ldkvatpl ddkvki kvhyagicgtdihtyeghykvnfpvtlghefsgeivevgadvkdfkvgd  
rvtsettfyvceceyces  
kdynlcnhrkgigtqvdaftnyviareesl hhipdevsyqsaamteplacahhgvskiqvnsgdvavvmgpgpigllva  
qvlkskgatvvvtgldndk  
vrldkaeahmdyvvnllqqtdlktyingitdgygadvvvecsgavpaarqgldilrkkgfysqigifkdaeitfdmekvi  
qkeitvvgrsqkpadwep  
slqlmadglvnaealvtkiydi skwdeayqhlksgegikal l kplldenegen  
>tr|Q6GK67|Q6GK67\_STAAR  
msyftdfvrgfl d l gatvilpvvifllglffrqkigaaf rsgltigvafvgiflvidllvknlgpaaqamvknlgvslnv  
idvgwpatssiawassvaa  
fiiplgiivnvllvtkvtkmndiwnfwyftaamvyavsgsiwqallaavifqviclkvadwtapmmseffdlpgv  
siatgstisyapgiylvkl  
lqrvpnlkldadpetiqkrfgafgesifvgllilgligvlagykpgdiinlgmsmaavmvlmprmvkilmeglmpvses  
artwlnkrfgereiyigld  
aavalghpavistalilvpi tvllavilpgnqvlpfgdlatipfvafivgaagniihsvivgtimiaislyiatdvap  
iftdmakgtvqmpkgsse  
issidqgnivnyliklfs lfn  
>tr|Q6GK69|Q6GK69\_STAAR  
mgqqvlvhenimlnl satdkesvl sqmsdv l fngfvkstfk davidrekefatglp th l csvaiphtdvehinhrtigv  
avlekevpfi emgtldqqt  
evkivfm lamdkvddqkl l lqq lmqi fqseekleqil rtkdetilat l indylkyn

Tsompanidou\_et\_al\_Supplemental\_FASTA\_File

>tr|Q6GK70|Q6GK70\_STAAR  
mpdlsvlrvfvl dyngnlimieicmlkmlqktqntkiyakisialf  
>tr|Q6GK71|Q6GK71\_STAAR  
mkrkiimdcdpghddaiailagaidspileilavttvagnsvdknttnalnvl dimgrqdivvakgadrpliklvafas  
eihgesgl dgpklpstpsr  
qavampasdviiinkvmtsdtptivatgpltnvatalirepriaehiesitlmgggftgnwtptaefniwvdaeaakrvf  
esgitinvfgldvthqvl  
dehverfesinnpvagfvvelqffkkykthfnmdggpihdactilyllqpelftmvpvni diehqsplygtmavdl  
nhvtgkpanayfatavdve  
evwnlidhklrtye  
>tr|Q6GK72|Q6GK72\_STAAR  
mkslfekaqqfgksfmlpiaailpaaglllgiggalnspntvkaypilditllqniftlmsaagsivfqnlpvifaigvai  
glrsrdkgtaglaallgfl  
imnatmngllitigtakdqlaqqgmvlgigtvetgvfggiitgimtailhnykhkvllppygffggsrfvpivtaf  
aafllgvlmffiwpsiqag  
iyhvvgfvtktgaitgvfygfilrllgplglhhi fylvfwqta lggtlevkghlvqgtqni ffaqlgdpdvtkyysgvsr  
fmsgrfittmfgl cgaala  
iyhtakpehkkvvggllmsaaltsfltgiteplefsflfvapilyvihaffdglafmmadifnitigtfsggfidflf  
gvlggnsktnylyvipigi  
wfclyyivfrflitkfnfktpgredkaaaqqveateraqtivaglggdnieivdcatrlrvtlhqndkvdkvllest  
gakgviqqgtgvqviygph  
vtvikneieellgd  
>tr|Q6GK77|Q6GK77\_STAAR  
mkfkrlatifsavlvsccgsmhssgkdlnislpktksiapyetdvpvkigaaeslfktn dqgkiekvlvksyhpndt  
tdielkdnikfngqklt  
aekvksslensmkksdlvkyslpissitakgkltiktssaypelvselanpfmai ytdaksdvnqtpvgtgpyqikdy  
kqsrkislsnfkdywqgkp  
kldhivtyqedgnnrvrnlesqkddlitdvpvnkvqdiennqnlkvskesgfrtsllmynhtnkkmtksvreal dhiid  
rqqiadhivqgyakpatsl  
fndkipyikepkltkqnieqaktllakdgytkehplkiklitydgrpelskiaqvlqs dakkanieidiks vddiedylk  
drsawdatmysfgtiprgd  
tgyffnqaykkdgaikgdynnnvddlinqlnhtvdvkerhni sdiiklssrdvpsnyiayndqivaanskvknkyvt  
pegiylydyrttier  
>tr|Q6GK78|Q6GK78\_STAAR  
mssastqstkttdihnesidkqmeakahetaqntdlknearslfdnatksigr lagndeslnlnlkdmfsevfkphtkne  
adeifiagtakttpaicdi  
seewgkpwlfsvrfiaftvtfiglwmaaifnntnaipglifigaltvplsglfffy esnafknisifeviimffiggvf  
sllstmvlyrfrfvfsdqve  
rfgsltffdaflvglveetgkaliivyfvnkltknlnglligaaigagfavfesagylnfalgenvp lldivftraw  
taigghlwsvaivgaai vi  
akeqhgfefkdi fdkrfliffllsavglhgiwdtslti lgsdtlkifilivivwilvfilmgaglkqvnllqefkeqqkk  
vde  
>tr|Q6GK84|Q6GK84\_STAAR  
mqeayivaygrsaakakqgal fherpddvaakvlqgv lkridgkfnkmiedvivgtafpeg lqqniartialrtgls  
dtvpgqtvnrycssglqti  
aiaanqimagqgdi l vaggvelmsavpmggnepntnptlqyddigasypmgltaenvasqfdvsredqdayavrshqray  
daqrdgrfkdei ipiqvns  
veytnvgpkvhtni fdqdefi rpdttmealakl rtvfkadgtvtagtsaplsdgagfvvlmsgdkvkelgvtpiarfvgy  
kavgdpkimgigpayaip  
evlslslsvedidli elneafasqtiasikevgldisrtnvnggaialghplgatgamltarllnemgrpdsrygmvt  
mcigvgmgaaifeivr  
>tr|Q6GK85|Q6GK85\_STAAR  
mkkqiislgalavasslftwdnkadai vtkdyskesrvnenskydtpipdwylgsilnr lgdqiyyakeltkyeygeke  
ykqaidklmtrvlgedhyl  
lekkaqyeaykkwfehhksenphsslk k ikfddfdlyrltkkeynelhqs lkeavdefnsevkniqskqkdllpydeat  
enrvtngiydfvceidtl y  
aayfnhsqyghnake l rakldiilgdakdpvritnerirkemddlnsi iddffmdtnmrplnitkfnpnihdytnkpe  
nrndfdklvketreiana  
deswkrtrtvknygesetkspvvkeekvveepqlpkvgnqgedkitvgtteeapl piaapl vkipqgtiqgeivkgpeylt  
menktlqgeivqgpdfptm  
eqnrpslsdnytqpttpnplkgiegnstkleikpqqtestlkg tqgessdi evkppatetteashyparpqfnktpkyv  
kyrdagtgi reyngtfgy  
earprfnkps etnaynvttnqdgvtvsygarptqnpksetnaynvtthangqvsygarptqnpksetnaynvtthangqvs  
ygarptqnpksetnaynvt  
thadgtatygprvtk  
>tr|Q6GK86|Q6GK86\_STAAR  
mttqmiki tylvagikaalldttgiklasksettshtyqhqalvdqlheliantdlnklshlnl dayqkrdilaahyia k  
sairtknldqmtkakhrle

Tsompanidou\_et\_al\_Supplemental\_FASTA\_File

siydsisnplhsqnn  
>tr|Q6GK94|Q6GK94\_STAAR  
mnffdi hki p nkgi p lsvqrklwl r nfmqaffvffvymamyli r n nfk a aq p fl kee i g l s t l e l g y i g l a f s i t y g l g  
k t l l g y f v d g r n t k r i i s f  
l l i l s a i t v l i m g f v l s y f g s v m g l l i v l w g l n g v f q s v g g p a s y s t i s r w a p r t k r g r y l g f w n t s h n i g g a i a g g v a l  
w g a n v f f h g n v i g m f i f p s  
v i a l l i g i a t l f i g k d d p e e l g w n r a e e i w e e p v d k e n i d s q g m t k w e i f k k y i l g n p v i w i l c v s n v f v y i v r i g i d n w  
a p l y v s e h l h f s k g d a v n t  
i f y f e i g a l v a s l l w g y v s d l l k g r r a i v a i g c m f m i t f v l f y t n a t s v m m v n i s l f a l g a l i f g p q l l i g v s l t g f v p  
k n a i s v a n g m t g s f a y l f g  
d s m a k v g l a a i a d p t r n g l n i f g y t l s g w t d v f i v f y v a l f l g m i l l g i v a f y e e k k i r s l k i  
>tr|Q6GK96|Q6GK96\_STAAR  
m k i g v f s v l f y d k n f e d m l d y v a e s g l d m i e v g t g g n p g d k f c k l d e l l e n e d k r q a f m k s i t d r g l q i s g f s c h n n p i s  
p d p t e a k e a d e t l r k t i r l  
a n l l d v p v v n t f s g i a g s d d t a k k p n w p v t p w p t a y s e i y d y q w n e k l i p y w q d l a e f a k e q d v k i a i e l h a g f l v h t p y  
t m l k l r e a t n e y i g a n l d p  
s h l w w g g i d p i a a i r i l g q a n a i h h f h a k d t y i n q e n v n m y g l t d m q l y g n v a t r a w t f r t v g y g h s p y v w a d i i s q l i i  
n g y d y v l s i e h e d p i m s v e  
e g f q k a c q t l k s v n i y d k p a d m w w a  
>tr|Q6GK97|Q6GK97\_STAAR  
m t k l k v g v i g v g g i a q d r h i p a l l k l k d t v s l v a v q d i n t v q m i d v a k r f n i p h a v e t p s e l f k l v d a v v i c t p n k f h a d  
l s i e a l n h g v h v l c e k p m a  
m t t e e c d r m i e a a n k n c k l l t v a y h y r h t d v a i t a k k a i e s g v v g k p l v a r v q a m r r r k v p g w g v f t n k a l q g g g s l i d y  
g c h l l d l s l w l l g k d m v p h  
e v l g k t y n q l s k q n q i n d w g t f d h t k f d v d d h v t s y m t f a n r a s m q f e c s w s a n i k e d k v h v s l s g e d g g i n l f p f e i y  
e p r f g t i f e s k a n v e h n e d  
i a g e r q a r n f v n a c l g i e e i v v k p e a r n v n a l i e a i y r s d l n k s i q l  
>tr|Q6GK98|Q6GK98\_STAAR  
m m t i k v g i i g c g g i a n g k h m p s l q k v e n v e m i a f c d v d i s k a a c a e a y g t d n a k v y d d y k a l l k d d t i d v i h v c t p n d s  
h c e i t v a g l h a g k h v m c e k  
p m a k t t a e a q k m i d t a k s t g k k l t i g y q n r f r p d s q f l y k s a q r g d l g d i y f g k a h a i r r r a v p t w g v f l d e e a q g g g p l  
i d i g t h a l d l t l w m m d n y e  
p e s v m g s t f h k l n k q h d a a n a w g s w n p d e f t v e d s a f g f i k m k n g a t i i l e s a w a i n s l e v d e a k c s l s g t k a g a d m k d g  
l r i h g e d m g t l y t k h v e l e  
n k g v d f y e g n e v d e a e e e a k a w i d a v v n d t e p v v k p e q a m v v t k i l e a i y q s a k s g k a i y f e  
>tr|Q6GKA1|Q6GKA1\_STAAR  
m s k i l k y i t l a v m l i v t a c g p n r s k e d i d k a l n k d n s k d k p n q l t m v d g d k q m a f y k k i t d q y t k k t g i k v k l v n i g  
q n d q l e n i s l d a p a g k g p d  
i f f l a h d n t g s a y l q g l a e i k l s k d e l k g f n k q a l k a m n y d n k q l a l p a i v e t t a l f y n k k l v k n a p q t l e e v e a n a a k  
l t d s k k k q y g m l f d a k n f y  
f n y p f l f g n d d y i f k k n g s e y d i h q l g l n s k h v v k n a e r l q k w y d k g y l p k a a t h d v m i g l f k e g k v g q f v t g p w n i n e y  
q e t f g k d l g v t t l p t d g g k  
p m k p f l g v r g w y l s e y s k h y w a k d l m l y i t s k d t l q k y t d e m s e i t g r v d v k s s n p n l k v f e k q a r h a e p m p n i p e m r q  
v w e p m g n a s i f i s n g k n p k  
q a l d e a t n d i t q n i k i l h p s q n d k k g d  
>tr|Q6GKA7|Q6GKA7\_STAAR  
m v k l t t k i a s l k l f a s y a i a t y i l v i l t s a l n l f k g y v a d t f y i a e t l l i v l t i l i i l t t e q t w k h h d l w r r i v e v l l  
l l m t l t g n v f t l l m f v s i r  
r y q r t s q i h s y n g w e s f i r k t t r h r i a i i g l l i l v y m l t l s i v s q f t f d t t l a t k n q f n a l l h g p s l a y p f g t d d f g r d l  
f t r v v g t k l t f s i s i s v  
v i a v v f g v l l g t i a g y f n h i d n l i m r i l d v v f a i p s l l l a v a i a s f g a s i p n l i a l s i g n i p s f a r t m r a s v l e i k r m  
e y d a a r i t g e n t w n i i w r  
y i l p n a i a p m i v r f s l n i g v v v l t t s s l s f l g l g v t p d v a e w g n i l r t g s n y l e t h s n l a i v p g i c i m f v v l a f n f i g d a  
v r d a l d p r i h  
>tr|Q6GKA8|Q6GKA8\_STAAR  
m y h k a f y k f v l s v l s l p l f l y a v i k f f f s a k r n f y a n n s e i s e i e q a l h q y k y l s q q s s t q i h k e a l k i f k t q s s n t  
n s k n i e q a h f s t y f e n v l f  
h k f i i i k v i l a l p m f i l l t i y l q p l v r y i f e r i v m a v i i g v i v s v f s i l y f s p l d a a y s i l g q n a t k a q i h q f n v l h h  
l n e p y f i q l w d t i k g v f t f  
d l g t t y k g n d v v t k a v g e r i p i t i i v a v l a l i v a l i a i p i g i i s a m k r n s w l d i t l m i a l i g l s i p s f w q g l l f i l a f  
s l k l d i l p p s y m p e h p i s l  
i l p v l v i g t s i a a s i t r m t r s s v l e v m r s d y v l t a y a k g l s t t q v v i k h i l k n a i p i v t l v g l l v a e l l g g s a v t e q v f  
n i n g i g r y i v q k l i p d i p  
a v m g g v v y i s i v i s l a n l i i d i f y a l i d p k l r s e i n e r k  
>tr|Q6GKB0|Q6GKB0\_STAAR  
m d n r n m i n r v f s q i l h q i a i k n k s d v v d e a y d f y i q g p k n i n v i q m k s l y n y l k k s y r n e y f y k n t m l n k l l l g l h s v  
n t t a l s e m p i g n i a d f i  
l l n g k g v v y e i k t e l d k l d r l d n q i n d y e v f n y v v i t n d k h l n k v m a r y k d t t v g i l v l t s r n t l s e v q k p k e n n s l l

Tsompanidou\_et\_al\_Supplemental\_FASTA\_File

nskamynflrkeerkrvia  
qnhmdvptyndfzeydvlfdvfkeipmtklhnmifelkkrngmkeykdeflaapteikfllyfakmtkkdknklyhflk  
dtnpphft  
>tr|Q6GKB2|Q6GKB2\_STAAR  
mvlityqiilfliislsyyltlnhfmavtvgnftsifgmfaailfmyyyllkspeynqrkrfkfihitnliiitfstf  
vlvhlalklffni  
>tr|Q6GKB8|Q6GKB8\_STAAR  
mkqrigaylidaihragvdkifgvpqgdnlaflddiisnpnvdivgntnelnasyaadgyarlnglaalvttfvgvgsa  
vngiagsyaeripviaitg  
aptraveqagkyvhhslegftddydkmfahitvaqgyitpenaateiprlintaiaerrpvhlhlpidvaiseieiptp  
fevtaaktdastyellv  
sklhqskqpiiitgheinsfhlhqeledfvnqtqipvaqlslgkafneenpyymgiydgkiaedkirdyvdsdlilni  
gakltdsatagfsyqfnid  
dvmlnhhnikiddvtndeissllqqltdisyttnasfpayhrptspdytvgteplttqytfkmmqnlkpnndviad  
qgtsffgdydlaelyksntf  
igqplwgsiygtlpatlgsqldakdrnllligngslqltvqaistmirqhikpvlfvinnogytverlihgmyepynei  
hmdykalpavfggknevi  
hdvesskdleqvntinghpdvmhfvevkmsvedapkkliidiakafsqqnk  
>tr|Q6GKC6|Q6GKC6\_STAAR  
mkvfmqlqsnlksieelisqrswsykkprtvyrynqdklmhrldilvqygiqhdgtllphewhyhisprgkadivqh  
nrdgqpiyvslysyypiv  
cvvdkpvgidiekisqrlwrtlvctfstneahqicslndfyqiwtqkesftkligeglikglidiydmqshfyqsrev  
kfkqfifdqfmvqvcflgq  
apwgykkvsvfqlss  
>tr|Q6GKC7|Q6GKC7\_STAAR  
mimgnlrfqqeyfryknntestthrnaywvklaknieatkmmyalstivqhasirhffdvttddnltmlheflpfie  
ikqvpssanydleaffkq  
elstyhfnDSPlfkfklfqfadaayilldfhvisfddsquidiflddlcnayrgntvintrqhahlnrddkdnqdashi  
aldsnyfrlennsdihids  
ylpikhpfeqalyqtylidmstidmaslavsvylanhimsqhdvtlgihvshlpndlhgnivplttidakdvcqrf  
tdfnksvlqmsqlqac  
sslsletihcyhgmsscndviedvhqihdahtsladieifphqhgfkiiynsaaydlisietlsdlvrniylqitken  
gnkrttvdelnImterdiq  
lyddinlspeiddaqtvtlfeqqveatpnyvavqfdgvfityqtlarandlaqrlnqygvpepndrvaviaeksiem  
ivamigvlkaggayvipd  
nypsdreqeylkdtpkvvityqvvyengkrdinhidlnkiawknidnlskntledhayviytsgttgnpkgtliphrg  
ivr1vhqnhyvplnektti  
llsgtiafdaatfeiygallnggklivakteqllnpialeqlinendvntmwltsslnqiaserievlvplkylligge  
vlnakwvdl1nqrpkhpgi  
ingygp tenttfttynipnkvpnrpigi kpi lgthvyimqgerrcgv gipgelctsgfglaagyl nqpe ltadk fikds  
ninqlmyrsgdivrllpdg  
nidylrkdqykigrfrielsevehaleriqginkavvivqnhdqdyivayyeamhtlshnkiksqrmtlpeymipv  
nfmhieqipitingklkk  
alpimdyvtddayvapstdehllcqi fadi lhnvqvgihdnffelggshlkatlvvnri eastgkr lqigd llqkptvf  
elaqaiakvqeqnyevipe  
aivkddyvlssaqrmyllwksnhkdtvynipflwr1sse lnvaqlrqavqhliarheilrtqyivddevrqrivadvv  
adfkevnthtftdeqeimrq  
fvapfnlekpsqirvryirsp1hayl fidthhi indgmsniqlmndlnalyqhkl1llplklqkydysewmshrdmtkhrq  
ywlsgfkdevpils1lptdy  
vrpniktngamsftmqqmrqllqkyvekhqitdfmffmsvmtllsryarkddvsvmsarmhkgteqmlgmfan  
tlvyrqpsldkmwtqflq  
evkemsleayehqeypec1vndldqshdasrnp1fdvmlvlqnnetnhahfghsklthiqksvtakfdlsfiieedcd  
dytini eyntdlyhsetvr  
hmgncmimidyilkhqdtlqirdipngteellnwvnthvndrmlnvpgnksii syfdevvsrqgnhvalvmndltmtye  
tlhnyvdai ahml1sngvg  
kgqpvalitersfemiamlatvkgasyipididfpkkrqgailadakvtavmsygvieittlpviqlenakgfveske  
neqyddlhgdqlentamld  
nemyaiytsgtgmpkgvairqrnllnlvhawstelqldnevflqhanivfdasvmeiyccllnghtlvipdreervp  
eqlqqlinkhrvtvasip1  
qmcsvmedfyiek1itggatstasfvkyiekhcgyfnaygpsestvitsywshqcgdlipetipigkplsnivyimsd  
gllcgimpge1ciagsl  
aigyinrpe1madkwqnnpfgkgklyhsgdlarytsdqieflgridkqvkvngyrieldeienailairgisdcvvtvs  
hfdthdilnayyvgeqqme  
qdlkqylndhlpkymipktityidcip1ttndkvdtr1pnpspi qsnkvysepsneieqtfdvdfgev1kqndvgvdd  
dffelggnsleam1lvshl  
krfghhismqtlgyqktvrqivnymhqns1valpdnl selqivmsrynlgiledslshrp1gk1ltgatgflgayl  
iealqgyshriycfiradn  
eeiawyklmtnlndyfseetvemmlsni evivgd fecmddv1penmdti ihagartdhfgdddefekvnnvqgtvdvir1



Tsompanidou\_et\_al\_Supplemental\_FASTA\_File

aqghharliyvstisvgt  
fdidtedvtfseadvykqglltspytrskfysekvleavkngldgrivrvgnltspyngrwhmrniktrfsmvmndll  
qldcigvslaempvdfsfv  
dttarqivalaqvntpqiiyhvlspnkmpvksllcevkckeielvsdesfneilqkqdmmyetigltsvdreqqlamidtk  
ltkimdhisekwptitnn  
wlyhwaqyiktifnk  
>tr|Q6GKC8|Q6GKC8\_STAAR  
mkr|sttlkvr|lisnflqliittafipfia|y|tdmlsq|sivgiy|lvglvvlkfp|lsiisgylieifpk|llvliyqatm  
vim|lvfmg|ifgshq|lwqii  
gfcvayai|fti|vwglq|fpvmdt|lmdaitedvehyiykisywmt|n|svaigallgg|lmygysm|lllfliaacif|livlfi  
lyiwl|pqrnqv|kqsddk  
hasryq|k|qimni|frsyk|lv|kdrnym|llisgfsiimm|gefsissya|air|k|dqfetis|igsydit|gakmla|illmintv  
vvi|l|tysiskiv|k|idfk  
k|alitg|lliyivgysg|ty|nqfg|llvfm|iatvgei|ispiv|seqr|fki|pkakrgtysavna|l|ghfset|lar|giv  
l|gaf|l|tt|qm|g|ymfiv|lt  
igasm|lvagv|fggqkqvntn  
>tr|Q6GKC9|Q6GKC9\_STAAR  
msnsavffvifl|kqatcnty|fkevkiy|h|gemdmkiva|l|peavegqdn|llntkka|gl|ktfleergqefi|iladnged  
ldkh|lpdm|dvi|isapfypa  
ymtreriekapn|k|l|aitagvgsdhvd|laaseh|nigvvevtg|sntvs|vaehavmd|ll|llrnyeeghrqsvegewn|lsq  
vgnhahe|l|qhkt|igi|fgfg  
ri|gqlvaer|lapfnvt|l|qhydpinqqdhk|l|skfv|sfde|lvstsdait|ihap|l|tpetdn|l|fdkdv|l|srmk|khsylvntarg  
kivnrda|l|vealase|h|lqg  
yagdv|vypq|papadhpwr|tmprnamt|vhysgmt|lea|kriedg|vkdi|lerff|nhepf|qdkdi|ivasgri|asksytak  
>tr|Q6GKD4|Q6GKD4\_STAAR  
mikiq|l|qh|hfgshkvi|hnfn|l|diskgeivt|figksgcgk|st|l|niigg|fihpssgrvi|idneikq|qpspdc|l|mlf|qhhn  
ll|pwt|indni|rigf|qqki  
sdeeinaq|k|l|vd|legrg|khfpeq|l|sggm|kqrval|crahv|hkpnv|ilmdep|l|galda|ftryk|l|qdq|lvq|lk|khtesti|l  
v|hdideaiy|l|sdriv|llg  
egcni|isqyei|tashpr|srndsh|ll|kirneimetfa|l|nhh|qvepeyy|l  
>tr|Q6GKD7|Q6GKD7\_STAAR  
mngkkant|inryky|fhvdh|qkiq|qsskkt|l|wasli|it|l|lftvie|fvvg|lvsns|l|allsdsf|hmlsdv|l|algl|smlaiyf  
askkptaryt|fgyl|rfeil  
aaf|ng|l|aliv|isiwilye|aivri|yppiesgimf|masig|llvni|iltvil|vrs|l|kqednini|qsalwhfmgd|llnsi  
gvivavv|liyftgwri|ids  
iisiv|isli|l|rggyk|itrnaw|l|lmesvpq|h|l|tdq|i|adiknidg|l|dvhef|hlwsittehys|l|sahvv|ldkkyegdd  
yqaidqvss|l|lkekygiah  
stl|qien|l|q|lnp|l|depyfdk|lt  
>tr|Q6GKE1|Q6GKE1\_STAAR  
mc|l|nfrednvm|k|kimvi|fgtrpea|ikmap|l|vkeidhngn|feaniv|itaqhrdml|dsvl|sifdiqadhd|l|nimqdqqt|lag  
itana|ak|lds|i|ineeqpd  
milvhgd|t|t|t|t|fvgs|laafyhq|ipvghveag|l|rthqkysp|fpeel|nrvmvsniael|nfaptviaakn|llfenkdkesifi  
tgntv|ida|l|sttvqnefv  
ti|inkh|kgk|kvi|l|tahrrenigepmhqi|fkavrd|ladeykdv|vfiy|pmhrnpkvraiaekylsgrnrieliel|dalef  
hnftnqsy|lv|l|tdsggi|qe  
eaptfgkp|vl|l|rnhterpegveagtsrvigtdydnivrvnk|l|ieddeayqrmsqannpygdgqasrriceaieyyf|gl  
rskpdefv|p|lrrk  
>tr|Q6GKE6|Q6GKE6\_STAAR  
mr|nkfigds|f|mi|l|ssgiaqv|il|ittpi|itr|lysptefgefti|fsniamilipiinaryd|llivntkndrsanilsqi  
sflis|l|l|l|l|lipifais  
awlypn|fi|ldfi|fiiim|flvs|ltniftny|l|nkerkyk|v|slin|vfragsmallqiifgl|l|algs|gligfslsyiagi  
t|lgykt|f|k|khfnivrdkee  
tkal|flenknq|lvystps|illns|l|sfsvvffigilytntevgiygmairvl|gipvti|is|gl|skifmqandyieygn  
frn|ll|k|fss|ilv|visiil  
yvp|ly|fsee|l|vni|l|ghsvdaitvikivipl|fvirlivstvs|lsvivlqkqle|lilqalfligttatfviskmlnlt  
f|l|n|fvs|intvvlivsymif  
fia|lyyfaknkqfkns  
>tr|Q6GKE9|Q6GKE9\_STAAR  
mriailgatnikhms|llshyl|nhid|l|ninevdi|ytdkydieeniqginnykykvdkedwtfikkaiayyrfrpyamk  
ilkenhyd|fv|vwgsytgh  
l|fks|f|lekhyknkfi|l|ni|rdyffennk|likyrmk|kivdasr|l|tt|l|ssegf|l|k|flpksekyrii|synmsi|iresnvtdef  
kkrwpin|ig|fign|vrfnei  
ngk|like|landsr|fhmqy|fgtgsek|levfaren|finnit|fsggfd|leetpky|l|neidil|nn|l|fgnk|nia|ldtalsirmyy  
a|l|f|nkpi|itt|ddtftate  
ankfg|l|g|fsvnpen|l|kgigde|l|mdwynn|l|nvm|dinhkreayr|ndviennkqfyqeigrifne  
>tr|Q6GKF0|Q6GKF0\_STAAR  
mek|l|k|mti|vgt|rpe|ir|l|sstikacdqyfnqilvhtgqnydyt|l|nqif|ddle|l|rqpdhy|leavgsn|l|getmgni|akt  
ydv|ll|reqpd|all|ilg|dtn

Tsompanidou\_et\_al\_Supplemental\_FASTA\_File

sclaavsakr1kipvfhmeagnrcfdqnvpeeirnkivdhvsdvn1pytehsrlyldegfnkani fvtgspmtveieah  
rdkinhsdvl nklgleppq  
yilvsahreendneknfksl mna indi akkykipviysthprswkkieeskfefdp1vkqlkpfgfddyna1qkda fvv  
1sdsgt1seessilkfpgv  
lirtsterpevl dkgvti iggitynnliqsvelaremqnnepmidaidykdtnvstkvvki iqsykdi inrntwrk  
>tr|Q6GKF1|Q6GKF1\_STAAR  
mnivitgakgfvgnlkadltsttdhhi fevhrqtkeeelesa1lkadfvvhlagvnrpehdkefslgnvsyl dhvldil  
trntkkpail1sssiqatq  
dnpygesklqgeqllreyaeygntvyiywrpn1fgkwckpnynsviatfcykiarneeiqvnnrnvel1tnyvddivae  
ikraiegnptiengvptvp  
nvfkvtlgeivdllykfkqsrldrt1pkldn1fekdlystylsy1pstdfsyp1lmnvddrgsftefiktpdrqgvsvni  
skpgitkgnhwhhtknef  
lvvsgkgvirfrhvdneieyyvsgdklevvdipvgythnienlgtdmvtimwvnmfdpnqpdyflev  
>tr|Q6GKF3|Q6GKF3\_STAAR  
mah1svklr1lilalids1ivtfsvfvsyylepyfktysvkl1lilaaislfishhisafifnmyhraweyasvselili  
vkavttsivitmfvvtivt  
gnrpfrrlylitwmmh1iliggsrlfwrirykylggksfnkkptlvvgagqagsmlirkmlksdemklepvlavdddeh  
rnititegvkvqgkiadip  
elvrkykikkiiiaiptigqer1keinni chmdgvel1kmpniedvmgsgelevnqlkkveved1lgrdpvelmdmisne  
ltnktilvtgaggsigsei  
crqvcnfyperi1lghgensiylinrelrnrfgknvdivpiadvqnrarmfeimemykpyavyhaaahkhvplmednp  
eeavrnnilgtkntaeaa  
naevkkfvmistdkavppnvmgaskriaemi qslndethrtnfvavrfgnvlgsrgsviplfksqieeggpvvtvthe  
mtryfmitpeasrlvlqag  
alaeggefvldmgepvkivdlarnliklsgkkediriftgripgekmyeelmnkdeihpeqvfekiyrgkvqhmkcn  
eveaiiqdivndfskekii  
nyangkkgdnyvr  
>tr|Q6GKF4|Q6GKF4\_STAAR  
midihhnlpniddgptnetemld1l1rqattqgvtevitshh1hprytpiekvksclnhiesleevqaln1kfyggq  
iritdqilndidrkvitgi  
ndsrylliefpsnevphytdqlffe1qskgfvpiiahpernkaisqnlidilydlinkgalsqvttaslagisgkkirkla  
iqmienn1thfigsdahnt  
eirpflmkdlfndkklrdyyedmgfisanlvvddkkipkrmpqqdykqrwfgl  
>tr|Q6GKF5|Q6GKF5\_STAAR  
mskkenttt1fvyekpkstisekfrgirsnimfskangevkr1lvtsekpgagkstvsnvaityaqagyksliidgdm  
rkptqnyifneqnnngl1sn  
liigrttmseaitteidnld1ltagpvppnpteligerfkelvlnfnerydiiivdtpvntvtdaqlyaraikds1l  
vidsekndknevkkaktlm  
ekagsnilgvinlkakvdksssyhygyde  
>tr|Q6GKF7|Q6GKF7\_STAAR  
mltipekenrgskeqevaimidaladkgkalealskksqeeinhivhqs1aavdqhmvlaklaheetgrgiyedkaik  
nlyaseyiwnsikdntvg  
iigedkegltyaepigcvtptnptsttikamiaiktgnpii fahpsaqesskraaevvleamkagapkdi  
qwievpsieatkqlmnhkg  
ialvlatggsgmvsaystgkpalvgpgnvp syiektahikravndi igsktf dngmicaseqvvidkeiykdvtnef  
kahqayfvkkdelqrlena  
imneqktsikpdivgksaveiaelagipvpentk1iaeisgvgsdyp1sreklspv1alvkaqstkqafqicedtlhfg  
glghtavihtedet1qkdf  
glrmkacr1vntpsavggigdmynelips1tlgcsygrnsishvsatd1lniktiakrrntqi fkvpaqi yfeena  
ims1ttmdkiekvmi vcdp  
gmvefgytktvnvlrqrteppqiki fsevepnpstntvykglemmvdfqpd1ialgggsamdaakamwmffehpetsf  
fgakqkfl digkrtykigm  
penatficipstsgtgvsevtpfavitdsetnvkyp1adfaltpdvaiidp qfvmsvpksvtadtgmdvlthamesyvs  
asdytrglslqai1k1tfey  
lksvekgdkvsrekmhnastlagmafanaf1giahsiahkiggeygi phgranail1phii rnakdpqkhal fkyef  
fradtdyadiakflglkgn  
ttealveslakavyelgqsvgiemnlksqgvsee1nesidmaelafedqcttanpkealiseikdi iqtsydykq  
>tr|Q6GKG0|Q6GKG0\_STAAR  
msniafyvsvdhgyif1tdftrsnyqpmg1lanhvieqdrdqyqsfkidngdflqgspfcnyliahsgssqplvdf  
ynrmafdfgtlgnhefnig  
lpylkd1lrr1nypvlcaniyendst1tdngvyfvgdqvtvgvigt1tqfiphweqpehiqsltfhsafatlqqlpem  
kryadiivvcyhggfekdi  
esgtptevltgenegygmleafskdidi fitghqhrqiaerfkqtaviqpgrtvtvgkv1stdeyenvsvescellpv  
iddptftideddqi rkql  
edwldyeittlpydmmi nhafearvaphpftnfmnyal1leksgadvactal fdsasgfkqvvtmrdvinnypfpntfkvl  
avsgfklkqaiersaeyfd  
vknsvsadv1lepqpqhfydi yggvsyihvgrpkqrvsnmmiqghavdlkqytyicvnyravggggydmyidap  
vvdkiqvegaqllidflsn

Tsompanidou\_et\_al\_Supplemental\_FASTA\_File

nk1mrpqvvdvkvek  
>tr|Q6GKH3|Q6GKH3\_STAAR  
mksds1keniyygqlyqlirtmtplitiipiisrafgpsgvgivsfsfnivqyflmiasvgvqlyfnrviaksvndkrqls  
qqfwdifvskflalvtfa  
mymvvitifidyyli1flqgiyigaeldiswfyagtekfkipslnivasvivlsvvifvkdqsdlslyvftiaivt  
vlnqlplfiylkryisfvs  
vnwihvwqlfrsslalypngqlnlytsiscvvlglvgtyqqvgifsnafniltvaiimintfdlvmipritkmciaqsh  
sltktlannmniqliltip  
mvfgliaimpsfylwffgeefastvplmtilailvliiplnmlisrqyllivnkirlynasitigavmnlvlclvliyfy  
giygaaiarlitefflliw  
rfiditkinvklnivstiqcviaavmmfivlgvvnhylpptmyatl1liaigivy11lmmtmknqyvqilrhlrhkti  
>tr|Q6GKH5|Q6GKH5\_STAAR  
mkiicytkadnggaqthliqlanhfcvhhdvyyivgnhgpmieqldarvnniiehlvspidfkqdilavkvlalq1fsk  
ikpdvihlshskagtvgr  
akfiskskdrvvtahgwaftegvkpkkflylviek1msritdsiicvsdfdkqlalkyrfnr1klttihngiadvpa  
vkqtlksqshnnigevvgm  
lpnkqdlqindstkhqfvmiarfaypklpqn1iaaieilklnshhahftfigdgp1ndcqqqvqag1endvtflgnv  
inash11sqydtfiliskh  
eglpisiieamatglpviashvggise1vtdngicivnnqpetiakvleky1idsdyikmsnqsrkrylecfteekmike  
vedvnygkstq  
>tr|Q6GKH6|Q6GKH6\_STAAR  
mkk1qrkkwkcreeigieavrnkgyayqrk1dtleevkkgypikraid1vlsiv11fl1t1pimfi1faiaividspgnpiy  
sqvrvgkmgk1ikiy1lrs  
mcknaekngaqwadkddritnvgkfi1rktridel1pqlinvk1gmsfigprperpefvel1fssei1gfeqrclvtpg1t  
glaq1qgg1d1tpqqk1ky  
dmkyihkgs1mme1yis1rt1mvvitgegsr  
>tr|Q6GKH8|Q6GKH8\_STAAR  
m1stdaldcdi1th1rasvinfl1iqs11salknpyc  
>tr|Q6GKI2|Q6GKI2\_STAAR  
mri1vqp1eqlkaqshpvchyid1vg1ehh1qhitss1psncqmyyamkansert1ldtisqyvegfevasqgeiakgl  
vfkpanhi1fggpgk1tdee  
1ryavsegvqri1hvesmhelqr1nailededktqhi11rvn1agpfpnat1hmagrptqfgis1edevddvieaalampni  
h1dgfhfhs1snn1dsn1h  
vdv1klyfkkakawsekhqf1pkhin1gggigvnyad1tsqf1ewdnfvenfkt1liveq1emedvt1nfecgrfivahigyy  
vtevd1dikkvhgawya1lr  
gg1tq1fr1p1vswqhn1hpf1di1ryk1dnpys1fekvs1srqdt1lvgl1ctpkdvfareiq1eai1stgdv1vfkyagaygws1  
shhdf1shphpefiyl1tqt  
kede  
>tr|Q6GKI4|Q6GKI4\_STAAR  
mnq1tilnr1vktrvmyq1vss1liyenivvykasyqdgvg1yftie1gndseyrftaekthsfdrir1tspiervvgdeadt1t  
dytq11revvft1fpkndek  
1eqfivellqtelkdtqsmqyresnppatpetfndyefyameghqyhpsyksr1gft1sdn1kfgp1dfvpnvklqwlaid  
kdkvettvsr1nvvnm1r  
qqvgdktyehfvq1ieasgkhvndvemipvh1p1wqfehviqvd1aeer1ngtv1wl1gesde1yhpqqsirtmspidttkyy  
1kvpis1tntstkrv1laph  
tiena1aqitdwlkq1qqdq1tyl1kde1ktaf1gev1gqsy1ntq1spyk1tqvyga1gviwreniyhmlideedaipfna1  
yasnkdgvp1fienwi1kqyg  
seawtkq1flava1r1pm1hm1lyhgiafeshaqnm1lihengw1p1trialkdfhdgvr1fkreh1seaash1tlk1p1m1peahkk  
vnsnsf1etdder1vrdf1  
hdaff1finiaei1lfiekqy1gideklqkwkvgi1eayqea1fpe1lnnyqhfd1feptiqvekl1ttr11sdselrihhvt  
nplgv1ggi1tdattiset  
>tr|Q6GKI5|Q6GKI5\_STAAR  
mqnkeliqhaahaai1erilneyfreenlyqvp1qn1hqs1qlselet1tgqfaywsamghmyhpevwlidgk1sk1l1t1ty  
keaiari1qhmagsadnqt  
avqghmaq1msdi1d1nsi1hrtary1qsntidyaedryivseqs1ylghp1fhptksasgfsead1ekya1pechtsf1qlhy1  
avhqdv11tryvegkedqy  
ekvlyq1ladidi1seipkdfi11pihpyq1inv1rqhpqymqyseqg1ikdl1gvsgdsvyptssvrtv1fska1niy1kl1pih  
vki1tnf1irtnd1leq1erti  
daaqvi1asvkdevetphfkl1mfeegy1ral1pnl1gqtvepemd11t1nsamivregipnyhadk1dihv1las1fetmpdspt  
sk1sqvi1eqsg1lapeaw1g  
cyl1dr1t11pi1kl1fsntg1sleahvqnt11ielkdgi1pevcyvrd1legic1sr1tiatekq1lvpnvvaasspvvyahdeawh  
r1kyyvvn1h1gh1lvst1g  
katrnev1v1wk1vahrlmtwkkeyannavfidcedvlyqtptiaakanlmsk1ndcganpiy1thipn1pichnkevsyces  
nns  
>tr|Q6GKI6|Q6GKI6\_STAAR  
minqsiwrsnfrilwl1sqfia1ag1tlv1p11piymas1qn1svveiq1wsgiaiaapavttmiaspiwgk1gdki1srkw  
m1lra11gl1avc1fl1ma1lc  
t1p1qf1v1vr11qg11fgg1vvdassafasaepaedrgkvlgr1qssvsags1vgp1l1ggvtasilgfsa1llmsiav1t1fi

Tsompanidou\_et\_al\_Supplemental\_FASTA\_File

vcifgalklietthmpksq  
tpninkgirrsfqc1lctqgtrfii vgvlanfamymltalsplassvnhtaiddrsvigflqsafwtasilsaplwgr  
fndksyvksvyifatiacg  
csailqglatnveflmaarilqgltytsaliqsvmfvvvnachqq1kgtfvgttmsmlvigqiigs1sgaaitsttppatt  
fivmgivfavsslfljicst  
itnqindhtlmlwelkqksak  
>tr|Q6GKJ2|Q6GKJ2\_STAAR  
mtekinkkdnyh1ifaliflavsvsvmmvgssfiplqrvlmyfinpndsidqftlevlrlpritlailagaalmsglm  
lqnvlnkpiaspdiigitg  
gaslsavvfi affshltihllp1favlggaiamvillvfqtkghirpttliiigismqtlfialvqgllittkqlsaaka  
ytwlvglygatfkdtfi1  
gmviavvip11flvipkmsisilddpvaiglg1hvqrmkliqlisstilvsmaislvgnigfvgliaphiaktivrgsya  
kkl1msamigaisiviad1  
igrt1flpkevpagvfiaafgapffiy111tvkk1  
>tr|Q6GKJ4|Q6GKJ4\_STAAR  
mkkknisyirk1gviasvtlgt11sggvtpaanaaqhdeaqqnafyqvlmpnl1nadqrngfiqs1kddpsqsan1vg  
eaqk1ndsqapkadaqqn1  
fnkdqqsafyei1nmpnl1neeqrngfiqs1kddpsqstnl1geakk1nesqapkadnnfnkeqqnafyei1nmpnl1nee  
rngfiqs1kddpsqsan11  
aeakk1nesqapkadnkfnkeqqnafyei1h1pn1neeqrngfiqs1kddpsqsan11aeakk1ndaqapkadnkfnkeq  
nafyei1h1pn1teeqrn  
gfiqs1kddpsvskei1aeakk1ndaqapkeednnkpgkednnkpgkedgnkpgkednnkpgkedgnkpgkednnkpgke  
dgnkpgkedgnkpgkedgn  
kpgkedgnkpgkedgnkpgkedgnvhhvvpkgdtvndiakangttadkiaadnk1adknmikpgqelvvdkkqpanhada  
nkaqalp1petgeenpfigtt  
vfgg1s1algaal1agrrre1  
>tr|Q6GKJ5|Q6GKJ5\_STAAR  
mt11tvnpfdnvg1salvaavpi1fl1cl1tvfkmkgi yaalt1lvvt1ival1vfel1parvsagaitegvvagifpigy  
iv1mavwlykvsiktgqfs  
iiqdsiasisedqriql11igfcfnaf1legaagfgvpiaicav11iq1g1fep1kaam1cliangaagafgaig1pvsii  
tfn1sgvtt1dvarysa1  
t1pilnfiipfv1vfidvdkmgikeilpviltvsgtyt1q111ti1fhgpeladiips1atmvv1afvcrkfkpkni1fr1  
easehkiqkrtpkeivfaw  
spfviltav1vwsapffk1f1qpggales1vik1pipntvsd1spkgialr1d1ligatgtail1tviitilitk1kwks  
agallveaikelw1p1lti  
saila1akvmt1ygg1tvaigqgiakagai1f1fspv1gwigv1fmtgsvvnnt1fapiqatvaqqistsgs11vaantag  
gvaak1ispqsiataav  
kkvgeesal1kmt1kysiifvaficvwtfilit1if  
>tr|Q6GKK0|Q6GKK0\_STAAR  
mnqqlieal1kskedkmveirry1hqhpe1sfhedetakyiaefyk1gkdvevetnvgprgikvtidsgkpgk1lairadfd  
al1pitedt1g1sfasqk1gv  
mhacghdahtaym1vl1aet1aemkdsftgkvvvi1hqpaeevppggakamiengv1dgvdhv1gvhvmstmetgnvy1rpg  
yvqtgraffk1kvqgk1ggh  
gssphmandai1vagsyfvta1qtvsrr1spfetgvvt1igsfdgk1qfnvikdvveiegdvrg1tdatkatiekiekr1s  
kg1ealygtct1leynddy  
pal1yndpefteyvakt1lead1efgveicep1qpsedfayyakerpsafiytgaavedgeiyphhpkfkiseks11isa  
eavgtv1dyl1kgdn  
>tr|Q6GKK4|Q6GKK4\_STAAR  
mkkfnwi1na1sgs1tdknettee1kgakfi1lyaysm1v11alvisnifihilepk1sittqi1iv1lilies1ig1rf  
1keydvkr1gk1dkenk1nsk  
dfvk1ksil1vail1fts1al1tagtvadiy1gftd1gnt1rsd1ivwsiggi1fg1vcytmedkk  
>tr|Q6GKK6|Q6GKK6\_STAAR  
mndm1is1vipvfall1viggi1wmi1egi1vhi1skkn1aidn1ffnk1vkv1setyk1fatt1fl1ilatagisq1fylyy1vse  
fl1fl1v1ft1gi1agi1flm  
py1g1cf1p1lyk1qkkk1qt1fk1kymaytt1ig1siy1g1sl1vl1vhttki1ymdeggvryy1ygs1fvmk1qaggyay1alav1st11  
ivakkatnknk1kietv1dnt  
niter  
>tr|Q6GKK8|Q6GKK8\_STAAR  
mtffiv1p1m1fl1fvyl1pnyn1fiti1finivii1ffsig1l1tthi1idk1ksn1k  
>tr|Q6GKL0|Q6GKL0\_STAAR  
meyksynkmsn1is1il1sekn1fdnkmv1stg1sy1il1sel1pcivaykn1divg1l1tykvydeyie1i1s1dsfvenk1gigsh  
11nyaei1iasdmsk1rs1sv  
ittnenika1lyfyqkn1kyritd1v1fdavteark1kipsipemgengie1irdeiv1kkc1  
>tr|Q6GKL2|Q6GKL2\_STAAR  
mkqrnr1v1avvm1igafvgv1lnqt1m1ttil1peimk1dftvs1staq1l1tti1fm1lvng1imipita1fl1ierft1rs1l1ffnatcf  
1migs1fic1m1gin1fpm1l1l  
grs1qal1gagi1mp1l1tqt1l1fim1fppekrgm1am1gm1fg1lvig1fapa1igpta1agw1fvni1fdwry1fl1v1l1igmid1fvfy1l  
s1pnite1skpn1dk1svi

Tsompanidou\_et\_al\_Supplemental\_FASTA\_File

lsvsfgglllygfstagnlgwshpmvyitiiiaavilvtvfifrqlklespllefrvfykyndfsvamilivlmfmlfignl  
tilpiymqtmkwsplsg  
lillpgglimglispvtgkldkiggrilsimglmtimigallmaqfsqnttqlyviisfsvtmlgnamitpmttqaln  
alprqyahgtamntirg  
vsaaigtgilvtlmtglgktslsgsqglihglditfyvaliafigttaaaffirkh  
>tr|Q6GKL3|Q6GKL3\_STAAR  
mllrhvintyvgskifksslpkvqnsdemaqqfeqgfglsrsmrlagafemigslllftsifgklgkklvvtgimini  
vmgtaiynhykaghgykga  
qaaskffflnvlsllvlsltrnk  
>tr|Q6GKL4|Q6GKL4\_STAAR  
mtetkaidthahlwnedyldklglsgqtevakginqsaskedlekrfkmmddagvdlqiisatpqpqwgtkeeahqs  
aqeindlyerlvqqypdrf  
laygavslpyvdqaeaaqallkdefvgiaiptivkdkvsvadkqfepffaamnelnatiyihptgcaqspvndyql  
ewvigaplestfitlqlik  
neipqkypnikfhishlggalpffmtrikdnyedwnafnidpyevlnrqfwydtanfhepslinsietfgkdkfmmgsdf  
pyfqdekytrgvdyiknsn  
idpdtngilrgnaiefyqieenhh  
>tr|Q6GKL7|Q6GKL7\_STAAR  
mlnhhfqkfiseidtlvlkvisritviaices  
>tr|Q6GKL8|Q6GKL8\_STAAR  
minikniymlsyafvtlnkkgyqklateqfenifdlysaillikgissqlnsglhheyieqtdslkvirgkvdvknsiqg  
lgvlsqrinciyeftlnt  
ymnkilktmkcliktdisrknkiklrlvhfnvdtldyrniqwyhsfdrnnqytkmlisicylifqgviqteskgqn  
dlmvfvdqqisrlyekfi  
leykkefpevlvtssniqswldnddnvmlpvmrsdimlrykdkcliidakfykntlnhyydtkkihstnlyqiftyvk  
nqqlnlkkkaiqvsgmlly  
aktdenivlndkfhmgsqiiiktldlncnftiikkqlngivndifllk  
>tr|Q6GKL9|Q6GKL9\_STAAR  
mmkciidktwvsyykeladkltdyqnkryelievkeykktgikfptlasdnvldmidpftifalfnknsmretnkvkil  
telaselnikskipsvdfs  
iptvnnlnatyyfnkdygkndndietlwtlftaalnfanypsednklfihsfdknitktgngnskitsglywiapetfan  
fdrsiwyifdtyklpkel  
ineqlpkpekltgrhylelinmlkqvllkqveveindfidlsyeswhysemineanrnkfdsnikeivvsendniqnrsr  
ttkviipygkqefldevfid  
esdydrlvqllrrkrnviqqppgvgtflakrlaysligskckerikliqfhqsysyedfimgyrptssgfelttgtyf  
dfckkadkdrdneyfliid  
einrgnlskifgelmliesdkrdeeliilysgerfsvprniyivgmmntadrsaildyaalrrrfafynmqpafhttkf  
kklkainntelesvinci  
eglnkeivqddmlngngfvighsyfsniecidkdeelsniefeipmleeywfdepskinvwseklnrsinn  
>tr|Q6GKM0|Q6GKM0\_STAAR  
mmlltifvlseyvsslivsnlperdenlidkayekiiqqyisknirtrngrkelvknfyntdlpaiphtklrdalahein  
kvdlnnrkydnsrgnrrn  
eniievsideiineleewflnlefp  
>tr|Q6GKM1|Q6GKM1\_STAAR  
msynhlterarievlrgenyslrsiarklkrsvstisreisrnnlnqsyqaetaqnyetkrklcgrptrftpelgni  
ikyylkchwspeqivgrll  
qngicfktiyrwinsnminfelisclrqkgkrqpketrqkfngripisqrpkkeikrntfghweadtivssrgskgci  
atfaerksryyyvcvmpdr  
ssnsmetainnlkhlpkgavktitvdrgekfcyqniengfninvyfadvysawqrgtntengllreffpkktdlakv  
nqeqlnyaldisinyrprkc  
lnwkfpyevlcedllhln  
>tr|Q6GKM4|Q6GKM4\_STAAR  
mefhlitrrerlfssefklqmvrllyengkprneiireydltpsplgkwikqyqntgtfnhdnlsdeekeliklrkevq  
hlkmendilkqaalimgk  
>tr|Q6GKM6|Q6GKM6\_STAAR  
mneeilrevadifigddrdsidyktgnelvrffnhyfnkgdiyqapfswlyvvhkltliqerkinqfftlilshy  
ikyelkideveaakqaaka  
klfnkrlnhygyyigttnaryfmdkdedtesigygyaniylqkstglavkklkeeyltdssiksrfrkrefdltksf  
tnplfinvfefnesdysyt  
meladetlkdyiesktiselekvkiimkilkamsqahsenkihrdisksnvlmfrgkvkisdllgknldeihshqftd  
ngvgqykycapemyslkq  
adkqsdvflgrlfnimtgvnvnhhlfrgvsdkatnsskeyrfedanemlklqrileyhssakhvekcqeklkrgvf  
ddeseefimtrsdqqlcm  
vlssnnneqaclrymqknessadliesinrkyqefcgrfedypfaklaymilcnnfsyrvnetaarvlnyvawsvnr  
fsaqdlikglinrgvepli  
eeklkdn  
>tr|Q6GKN5|Q6GKN5\_STAAR  
mdnmlyinydvikrgclmestykkrkgltiylgyspgvgktyemlsgidqyqegadikigyiephqrpetnalvqqlpe

Tsompanidou\_et\_al\_Supplemental\_FASTA\_File

istssrkfgshtfhyidvs  
kii eanpdvvlidelahntniskerhlkrykdieeilshgidvwttlniqhieslsgqialmtgiqvtervpdqfitsada  
fevvdispnmliaqrkagk  
vykkerletafsnfftyenl telrelt lrtvadimsqgqqyktkhtditphiavaisgsiyneriarearraaykehak  
ftavyidvfetpsesrkqd  
hyvhknmlakalgaekvlyaqdiakaltdwcdlafvklvlvgseqprwkdyfkqsli eqinhvphhfkleivpihyi  
hskdptntpkqaqkssrlt  
veimkmlviqticvllgiwvynldksessaiillmffigiivlsiwtqsyli gffasilnvfvnyfftvprftlemyrf  
eypitfatsifasiftsai  
lknlkqhqs lterqlyrtnimlqfnqsikesysierllniagdqihqllnqdvtfliqskkvaasnsfgnrsissdkt  
hdaetlswvienesragkl  
tdtfgpskflcipigtnpvkgvisirftdetyidtydnsil dsm lnditlaienvdllkqtrqsilkaereatrsnflhs  
ishdirtp ltsimgnl dm l  
kyhneh lndqqael tasygeaqylhtlvtnilsltklessdiqirtpylveelleefeeg lirrhqanhviienedd  
aslinidskliilqvlfnli  
dnalkhaeshseiklvhvhqhetnkikfemidcgkigipeerqlifnpysgdnfkdnkds lglglylvqlilkqhnsel  
yqntpqgsi fyfylvnp  
iemegamdenniigr  
>tr|Q6GKP0|Q6GKP0\_STAAR  
mtqt npsfnpsprykskkgwykdkppkek ggmpteveiagpivienkfidpktntekviitdedqkeivessdil ttqkl  
pslmkygfsinekytkdlg  
yalqqmrnqlpisylyegvgilet pfgpivslseyttkefdnkspsdaicdnpydltpkgtdfnwfnmylkevkslll  
elavvfgisalvtsflkhk  
hetefagii fsgtqgsstgkstaas lavsvagnptkgnel frnwatrnalegylsnngipivfde lssatfrdtg l  
lysi tegqgrqrsnvhgev  
ktpknwgtsvistseysi fndsaqndglrvrtieineqfttnatnadnikkavalnyghvlp lvakylinredeviqwyf  
kev dwfeaklkdetntgi  
rmfkryavittsakilgrvlstdidiani rdyfidyhtvt sersladkaidviiqfvaqnr gkfsdegalknmfenygl  
islkddhi evkmi anvfkq  
mlnnhqfqdvnnvvnalrdkgfiladrgrqttkrsvkdns gkkqslvfyhklldvefasilgltkdksllqnwtpsndk  
aakelfksanegig lsgvh  
edf  
>tr|Q6GKP1|Q6GKP1\_STAAR  
mkqvigy lrgstmkqqs laaqkaieaitekhh iqhinfysdkqsg rkdnrsgyrqitqliqqgqcdilccyrlnrlhrn  
lknal kllklcqtyrvhil  
svhdgyfdmdqafdrfkl nifislae lesdnigeqv rnglqekakqgrlitthapfgyeyhngt fiinqnesptvkavfn  
yyikghgykkaiaqlleedn  
tyinrqp ygvrnii inpnycgrvnnqygqfdnmfsvstsiyeaqrlrlqkqtqtps dnlkqkikpcnatltnm  
tir kknhtlryyvcpknmn  
asrfvcd fkginaqtledkvlevcrdfyqnqriytkiksaidkrikrq rniekhhtltqkqlieklaaggi daetfreqt  
qslrqppqr ttinghiq  
ntiqniiqrftlnmlpyideilitksktlmg iyfkneplnivnqttqssia  
>tr|Q6GKP2|Q6GKP2\_STAAR  
mqqltkrvgiyvrvstemqstegysidginqikeycdfhhfevkdiyadrgisgksmnrpelqrilkdakdgyidcvm  
vyktnrlarntsdllkive  
dlhkqnveffs lsermevntssgklmlqilasfsefernnivenvfmgqtrraqegyyqgnlp lgydkipnskhelinq  
heanivkyifesyakghgy  
rkiana lnhkgyvtkkgkpf sissityilanpfyigkiqfakykdwsekr rkg lndkpviaegkhs piinqdlwdkvqmr  
kkqvsqkppvhgkgt nllt  
giihpcpgapmaasntntlkdgtkkri ryyscsnfrnkgskvcsansvradviedyvmkqileivksdkviqrvvthv  
nqenqv dgaal hhdia ykq  
qqydevqiklnnliktiedn pdltsvirpsiqkyekqlnditninqlnqqnedkplfdakeiskllqhi fhdikhi ek  
srlkaly lsvidridikkd  
gnhkkqfyvtlklnei ikqlfnnq ldevhlstsslflpqtlylti  
>tr|Q6GKP8|Q6GKP8\_STAAR  
mdkqvrntteivr lakqskktrekvdka iskfsiegkv infnsi akeanvskswlykehdirqries lrerqitanvvs  
kpkkssrseeilikt lkr  
vmelekenkkl nqaiql ygdlynke  
>tr|Q6GKQ2|Q6GKQ2\_STAAR  
mnmt ydkkminrinriqqglngv vkmmeekdckdiitqlsaskgsi qrlmgi iisenliecvktaenessqelinea  
vnllvksk  
>tr|Q6GKQ4|Q6GKQ4\_STAAR  
miks imlvi tpvksicipsfylryikynikqiknvkns ligyl dcinvknlniqr lciknrhigt  
>tr|Q6GKQ5|Q6GKQ5\_STAAR  
mdnktye issaewevmni iwmkkyasanni eei qmqkdwspktirtlitrlykkgfidrkkdnki fgyyslveesdiky  
ktsknfinkvyk ggnslv  
lnfveked lsqdeie  
>tr|Q6GKQ6|Q6GKQ6\_STAAR

Tsompanidou\_et\_al\_Supplemental\_FASTA\_File

m]ssflm]siissllticviflvrmllykytqnimshkiwllvlvstliplipfykisnftfskdmnrnvsdttsvsh  
mldgqqssvtkd]ainvng  
fetsnitym]lliwvfgsllclfy]mikafrqidviksslessylnerlkvcqskmqfykhitisyssnidn]pmvfglv  
ksqivlptvvvetmndkei  
eyiilhelshvks]hdli]fnqlyv]vfkmi]fwfn]paly]skt]mmd]ndce]kvc]drn]vlki]lnr]hehi]ryges]ilk]silk]sqh  
innvaaqyl]g]fns]niker  
vki]aly]d]smp]k]pnr]nr]krivayivcsis]l]li]qap]l]sahv]qqd]kyet]n]vsy]kkl]n]q]lapy]f]kg]fd]gs]f]v]l]n]ere]qaysi  
ynepesk]q]ry]sp]nsty]kiy  
]al]maf]d]q]n]l]s]ln]hte]q]q]w]d]k]h]q]yp]f]k]ew]n]q]d]q]n]l]n]ss]m]k]ys]v]n]w]y]ye]n]l]n]k]h]l]r]q]dev]ks]yl]d]lie]yg]nee]is]g]ne]ny  
wness]l]k]isa]ie]q]v]n]l]kn  
mk]q]h]m]h]f]d]n]ka]iek]vens]mt]l]k]q]k]d]ty]ky]v]g]k]t]g]t]g]i]v]n]h]ke]ang]w]f]v]g]y]vet]k]d]nt]yy]f]ath]l]k]ged]n]ange]ka]q]q]is  
er]l]k]em]eli  
>tr|Q6GKR0|Q6GKR0\_STAAR  
m]l]i]f]l]s]y]d]f]v]r]a]c]l]p]r]g]m]a]r]a]i]s]h]i]l]f]p]q]a]s]a]l]t]k]s]v]i]f]i]f]i]r]i]l]t]e]i]l]i]r]g]i]v]k]a]i]l]s]k]i]a]d]r  
>tr|Q6GKR4|Q6GKR4\_STAAR  
m]p]i]f]i]l]s]v]l]s]s]l]p]k]a]r]l]s]k]n]k]i]f]i]v]f]r]f]s]s]v]t]d]k]t]t]q]n]k]k]d]t]r]e]v]s]r]i]f]y]s]a]i]a]p]d]c  
>tr|Q6GKR7|Q6GKR7\_STAAR  
m]s]f]f]d]g]f]e]l]v]l]s]y]l]d]t]y]r]n]n]v]i]f]i]l]v]a]e]r]c]v]e]l]v]c]m]c]f]k]v]l]k]t]l]k]i]g]c]t]e]k]p]h]l]k]l  
>tr|Q6GKR8|Q6GKR8\_STAAR  
m]n]y]f]r]y]k]q]f]n]k]d]v]i]t]v]a]g]y]l]r]y]t]l]s]y]r]d]i]s]e]i]l]r]e]r]g]v]n]v]h]s]t]v]y]r]w]v]q]e]y]a]p]i]l]y]q]i]w]k]k]k]k]k]k]a]y]y]k]w]r]i]d]e]t]y]i  
k]i]k]g]k]w]s]y]l]r]a]i]d]a]e]g]h]t  
l]d]i]w]l]r]k]q]r]d]n]h]s]a]y]a]f]i]k]r]l]i]k]q]f]g]k]p]q]k]v]i]t]d]q]a]p]s]t]k]v]a]m]a]k]v]i]a]f]k]l]k]p]d]c]h]c]t]s]k]y]l]n]n]l]i]e]q]d]h]r]h]i]k]v]r]k]t]r  
y]q]s]i]n]t]a]k]n]t]l]k]g]i]e]c]i]y]a  
l]y]k]k]n]r]r]s]l]q]i]y]g]f]s]p]c]h]e]i]s]i]m]l]a]s  
>tr|Q6GKS2|Q6GKS2\_STAAR  
m]i]i]y]w]c]m]t]v]n]g]n]e]m]k]a]l]l]k]t]s]v]w]l]v]l]f]s]a]m]g]l]w]q]v]s]s]a]e]q]h]t]p]m]k]a]h]a]v]t]t]i]d]k]a]t]t]d]k]q]q]v]p]t]k]e]a]a]h]y]g]e]a  
a]t]n]v]s]a]s]a]q]g]t]a]d]t]n]n]k]v  
t]s]n]a]p]s]n]k]p]s]t]a]v]s]t]v]n]e]t]r]d]v]t]d]t]q]q]a]s]t]q]k]p]t]r]t]a]t]f]k]l]s]n]a]k]t]a]s]l]s]p]r]m]f]a]t]n]v]p]q]t]t]h]k]i]l]h]t]n]d]i]h]g]r]l]a]e]k  
g]r]v]i]g]m]a]k]l]k]t]v]k]e]q]e]k]p]d  
l]m]l]d]a]g]d]a]f]q]g]l]p]l]s]n]q]s]k]g]e]e]m]a]k]a]m]n]a]v]g]y]d]a]m]a]v]g]n]h]e]f]d]f]g]y]d]q]l]k]k]l]e]g]m]l]d]f]p]m]l]s]t]n]v]y]k]d]g]k]r]a]f]k]p]s]t]i]v]t  
k]n]g]i]r]y]g]i]g]v]t]t]p]e]t]k]t]k  
t]r]e]p]e]i]k]g]v]e]f]r]d]p]l]q]s]v]t]a]e]m]m]r]i]y]k]d]v]d]t]f]v]i]s]h]l]g]i]d]p]s]t]q]e]t]w]r]g]d]y]l]v]k]q]l]s]q]n]p]q]l]k]k]r]i]t]v]i]d]g]h]s]h]t]v]l]q]n  
g]q]i]y]n]n]d]a]l]a]q]t]g]t]a]l]a]n]i  
g]k]i]t]f]n]y]r]n]g]e]v]s]n]i]k]p]s]f]i]n]v]k]d]v]e]n]t]p]n]k]a]l]a]e]q]i]n]q]a]d]q]t]f]r]a]q]t]a]e]v]i]i]p]n]t]i]d]f]k]g]e]r]d]d]v]r]t]r]e]t]n]l]g]n]a]i]a  
d]a]m]e]a]y]g]v]k]n]f]s]k]k]t]d]f]a]v  
t]n]g]g]g]i]r]a]s]i]a]k]g]k]v]t]r]y]d]l]i]s]v]l]p]f]g]n]t]i]a]q]i]d]v]k]g]s]d]w]t]a]f]e]h]s]l]g]a]p]t]t]q]k]d]g]k]t]v]l]t]a]n]g]l]l]h]i]s]d]i]r]v]y]y]d]m  
n]k]p]s]g]k]r]i]n]a]i]q]i]l]n]k]e]t]g  
k]f]e]n]i]d]l]k]r]v]y]h]v]t]m]n]d]f]t]a]s]g]g]d]g]y]s]m]f]g]g]p]r]e]e]g]i]s]l]d]q]v]l]a]s]y]l]k]t]a]n]l]a]k]y]d]t]t]e]p]q]r]m]l]l]g]k]p]a]v]s]e]q]p]a]k]g]q]q]s  
s]k]g]s]e]s]g]k]d]a]q]i]g]k]d]k]v]m  
d]p]a]k]q]p]a]p]s]k]v]v]l]p]a]h]r]g]t]v]s]s]g]r]e]g]s]d]r]a]l]e]g]t]a]v]s]s]k]s]g]k]q]l]a]s]m]s]a]p]k]g]s]t]h]e]k]q]l]p]k]t]g]t]d]q]s]s]p]a]a]m]f]v]l]v]a]g  
i]g]l]i]a]t]v]r]r]r]k]a]s  
>tr|Q6GKT1|Q6GKT1\_STAAR  
m]n]r]q]s]t]k]k]a]l]l]i]p]f]v]i]m]i]t]a]i]v]l]m]g]v]w]f]i]n]s]l]i]a]l]i]a]s]i]v]l]v]m]i]i]v]s]i]v]l]f]r]q]a]l]m]k]m]d]s]y]v]d]g]l]s]a]q]i]s]t]t]n]k]a]i  
k]h]l]p]i]g]i]i]v]l]d]e]n]d]h]i]e]w]v  
n]q]f]m]t]d]h]m]e]a]n]v]i]s]e]s]v]n]e]v]f]p]n]i]l]k]q]l]d]r]v]k]s]v]e]i]e]y]n]q]y]h]f]q]v]r]y]s]e]n]d]h]c]l]y]f]f]d]i]t]e]q]v]t]n]e]l]y]e]n]s]k]p]i]a]t]l]f  
l]d]n]y]d]e]i]t]q]n]m]n]d]t]q]r]s]e]i  
n]s]m]v]t]r]v]i]s]r]w]a]t]e]y]n]i]f]f]k]r]y]s]d]q]f]v]a]y]l]n]q]i]l]a]d]l]e]s]k]f]d]i]l]s]q]l]r]e]k]s]v]g]y]r]a]q]l]t]l]s]i]g]v]g]e]g]t]e]n]l]i]d]l]d]e]l  
s]q]s]g]l]d]a]l]g]r]g]g]d]q]v]a]i]k  
s]i]n]g]n]v]r]f]y]g]g]k]t]d]p]m]e]k]t]r]v]r]a]r]v]i]s]h]a]l]k]d]i]l]a]e]g]d]k]v]i]m]g]h]k]r]p]d]l]a]i]g]a]a]i]g]v]s]r]f]a]m]m]n]l]e]a]y]i]v]l]n]e]t]d]i  
d]p]t]l]r]r]v]m]n]e]i]d]k]k]p]e]l]r]e  
r]f]i]t]s]d]d]a]w]d]m]m]t]s]k]t]t]v]i]v]d]t]h]k]p]e]l]v]l]d]e]n]v]l]n]k]a]n]k]v]v]i]d]h]h]r]r]g]e]s]f]i]s]n]p]l]l]i]y]m]e]p]y]a]s]s]t]a]e]l]v]t]e]l]l]e]y]q  
p]t]e]q]r]l]t]r]l]e]s]t]v]m]y]a]g]i  
v]d]t]r]n]f]t]l]r]t]g]s]r]t]f]d]a]a]s]y]l]r]a]h]g]a]d]i]l]t]q]h]f]l]k]d]d]v]d]t]y]i]n]r]s]e]l]i]r]t]v]k]v]e]d]n]g]i]a]i]a]h]g]s]d]d]k]i]y]h]p]v]t]v]a]q]a]a]d  
e]l]l]s]l]e]g]i]e]a]s]y]v]v]a]r]r]e]d  
n]l]i]g]i]s]a]r]s]l]g]s]v]n]v]q]l]t]m]e]a]l]g]g]g]h]l]t]n]a]a]t]q]l]k]g]v]t]v]e]e]a]i]a]q]l]q]q]a]i]t]e]q]l]s]r]s]e]d]a  
>tr|Q6GKT3|Q6GKT3\_STAAR  
m]t]n]y]t]v]d]t]l]n]l]g]e]f]i]t]e]s]g]e]v]i]d]n]l]r]l]r]y]e]h]v]g]y]h]g]q]l]v]v]v]c]h]a]l]t]g]n]h]l]t]y]g]t]d]d]y]p]g]w]r]e]i]d]g]g]y]v]p]i]h]d]y]q]f]l]t  
f]d]v]i]g]s]p]f]g]s]s]p]l]n]d]p]h]f  
p]k]k]l]t]l]r]d]i]v]r]a]n]e]r]g]i]q]a]l]g]y]d]k]i]n]i]l]i]g]g]s]l]g]g]m]q]a]m]e]l]l]y]n]r]q]f]e]v]d]k]a]i]l]a]a]t]s]r]t]s]s]y]s]r]a]f]n]e]i]a]r]q]a]i]h]l]g]g  
k]e]g]l]s]i]a]r]q]l]g]f]l]t]y]r]s]s]k  
s]y]d]e]r]f]t]p]d]e]v]v]a]y]q]q]h]q]g]n]k]f]e]r]f]d]l]n]c]y]l]t]l]l]d]v]l]d]s]h]n]i]d]r]g]r]t]d]v]t]h]v]f]k]n]l]e]t]k]v]l]t]m]g]f]i]d]d]l]y]p]d]d]q]v]r]a]l  
g]e]r]f]k]y]h]r]h]f]f]v]p]d]n]v]g]h]d  
g]f]l]l]n]f]s]t]w]a]p]n]l]y]h]f]l]n]l]k]h]f]k]r]k  
>tr|Q79ZU0|Q79ZU0\_STAAR  
m]t]g]e]t]v]v]y]k]n]e]m]l]v]p]l]r]r]f]t]a]t]e]i]n]l]f]f]a]m]c]n]k]l]k]e]q]d]t]n]t]l]r]l]s]f]d]e]l]k]k]l]s]n]y]s]p]e]t]r]n]i]n]r]f]a]n]d]l]n]v]y]k]k]m]l]n]l  
t]i]r]y]e]d]d]v]i]e]r]f]v]l]f]n]h]y  
r]i]h]k]r]e]q]y]l]e]i]s]t]s]s]n]k]h]i]n]s]i]t]n]n]f]t]k]f]e]l]k]e]m]t]r]l]k]s]t]y]s]k]n]m]f]r]l]l]k]y]k]h]t]g]y]l]k]i]h]i]d]d]f]k]n]r]l]d]i]p]k]s]y]r]m]t  
d]i]n]k]n]v]f]k]p]i]i]e]l]g]s]i]f]n

Tsompanidou\_et\_al\_Supplemental\_FASTA\_File

nltinkikakkgrkiewieftfdaekrihnkrpqmskikdsrqyvrrektpkwleersyekppkdydpqlakeredf1  
kqlelnwe  
>tr|Q79ZU4|Q79ZU4\_STAAW  
mliifvhiiapvisgcavaytywlskrnk  
>tr|Q79ZW1|Q79ZW1\_STAAW  
mrkfsryaftsmavtllstlspaalaidsknkpansdikfevtqksdavkalkepksevnkniyqdyavtdvktddkg  
fthytlqpsvdgvhpadke  
vkvhadksqkvvlingtdtakkvkptnkvtlskddaadkafkavkidknkakanlkdvkikenkveidgdsnkyyvneli  
tytpeishwkvkidaqtge  
ilekmnlvkeaaetgkgkvlgdtkdininsidggfslledlthqgklsafsfndqtgqatlitnedenfvkdeqragvda  
nyyakqtydykdtfgres  
ydnqgspiyslthvnnnyggqdnrannaawigdkmiygdgdgrtftslsgandvvaheithgvtqetanleykdqsgalnes  
fsdvfyfvddedflmged  
vytpgkegdalrsmnsnpefggpahmkdyvftekdnngvhtnsgipnkaaynviqaignkskseqiyyralteyltsnsnf  
kdckdalyqaakdlydeqt  
aeqvyeawnevgve  
>tr|Q79ZW2|Q79ZW2\_STAAW  
mkkskrleivstivkkhkiykeqiiisyieefgvrysattiakdlkelniyrvpidcetwiykainnqteqemrekfrh  
ycehevlssiingsyivk  
tspgfaqqinyfidqlnieeilgtvsgndttliltasndmaevyvaklfk  
>tr|Q79ZZ9|Q79ZZ9\_STAAW  
mriikesiivafafvgvvvgagfatgqeiqffftshgaysisgiivtgllitlggmvvmhtghhlsrnhdsinyflyp  
siargfdiiltmfmlslai  
imtaggastihqsfnlpywlsalilvafilatlflkfdrliaavlvgvtpfliaivimiavyyfttshldftaanndaqih  
kqkslspgwwfdainyasl  
qiaaafsflsvmgskvkyrdstlyggliggliitflmminlglisqfdkikhvd1ptlklatqmspsigiimsvimilv  
iyntvvg1myafasrfsvp  
fsrryfiititmavityistfigfisligkvfpimglfgfillipvlykglitritgkshid  
>tr|Q7A001|Q7A001\_STAAW  
mmygypekwlqemttgegiaaelrlgivnghiaegtlltenqmakqfnvsrspirdafkllqqnqliqlermgahvlpfg  
eqekkemydrlmlsfaf  
srvknqerlpivkemkkqlemmkvavkfedaesftkhdfefhetlikasnhqylnsfwshlkpvmmalvltsmrqrmqqn  
pqdferihhnhqvfidave  
qydsqilkeafhlnfddvgkdiegfwln  
>tr|Q7A007|Q7A007\_STAAW  
mkkvinvvgaiifsdnkilcaqrseemslplmwefpggkieknetekealireireemkcdlivgdkvitteheydfgiv  
klttykctlnkelptlteh  
ksiewlsineldklnwapadipavnkimteg  
>tr|Q7A020|Q7A020\_STAAW  
mshnenklagrgaylslivyiiisivkyvtgfvfnsaavrada1nmtdiivslaviiglkisikpadrnhpyghlkse  
nissllvsfvimfvgiqvv  
iqnaprlfkeddvvpnaitiivslisglvmlivfavnr1akrtkssslnsaakdnlsdsvsigtaiglftqigfpiv  
diilatllgllivytgfgi  
fkeaimlsgdfnetelayrndilevdevqevksikgryhgssvfidvtivvdanlslveahqicdnvehh1hkkgiss  
vyvhpepdh1  
>tr|Q7A044|Q7A044\_STAAW  
mkkmilinvitvvvllaigiagfyfwnkttsyvttdnakvngdqikiaspasgqikslnvkqgdkldkgdkvatvtvqqq  
dgetkdmdl1kmpqkgtiak  
ldgmegsmvqagnpiayaynlddlyvtanidekdikdvevgkdvdvtidgqkasikgkvsigkataasfslmpssnsdg  
nytkvsqvipvkitlesep  
skqvvpqgmnaevkihkn  
>tr|Q7A061|Q7A061\_STAAW  
mttemndvtnhqpnrksndenimamliy1lslftsiigpliiwllkkdesk1vdragknylnytisyi1wsvlvvitli  
gvfliatdisfiiiigfii  
tfigilsifafsilsvftiicvkyngqeyvipltirfi  
>tr|Q7A093|Q7A093\_STAAW  
mkkifvii1lavaiigsiitvvsqrqaqtfkiiqqqvfvkkip1flfhgfggsansekfmvkqaekrgvtdkdiita  
yvskdgavtfkgklrkdav  
npivkielenrqqyl1dknaawfknv1tklqseynfdkfnfvghsmgnl1tfaqymmygndks1pq1nkqvniagtfnv  
lnmnedvnei1vdkgdkps  
rmnqpyqglrvl1kdiykkggiev1niygd1kdgthsdgrvsns1skslky1l1gnspksyreskyegepaqhsq1henenv  
ane1idf1wkk  
>tr|Q7A0B8|Q7A0B8\_STAAW  
mperertspqyesfhe1yknyttkel1tqakt1kl1tnysk1nkel1vlaimeaqqmekdgnymegil1ddiqpdgygf1rt  
vnyskgekdi1yiasqir1r  
feikrgdkvtgkvrkpkdnekyyg1lqvdfvndhnaeevkk1rphfqa1t1plypderiket1tetqnystrimdl1vtpiglg  
qrg1ivappkagkts1lke  
ianaistnkpdak1fi1l1vgerpeevtd1ersveaaevvhstfdeppehhvkvael11lerak1r1veigedvi1lmdsitr



Tsompanidou\_et\_al\_Supplemental\_FASTA\_File

laraynlvippsgrtlsgg  
ldpaslhkpkaffgaarnieaggsltlatalvdtgsrmdmiyefkgtgnmelhldrklserripaidigrsstrike  
elliskseldtlwqlrnlf  
tdstdfterfirklkrsknedffkqlqksaeestktgrpii  
>tr|Q7A0E3|Q7A0E3\_STAAW  
mkrlligillcnlflitacsasvdktsnstkttidykienetlkvpekprvavltgfyvgdfiklgikpiavsditkdss  
ilkpylkgvdyigendver  
vakakpdlivvdamdknikkyqkiaptipytynkynhkeilkeigklttnedkakkwieewddktrkdkkeiqskigqat  
asvfepeqkiyiyinstwg  
rgldivhdafgmpmtkgykdklqedkkgysikeniskyagdyiflkspsygkfdfekthtwqnieavkkghvisyae  
dywftdpitlehlsrsklkk  
eilnkk  
>tr|Q7A0E5|Q7A0E5\_STAAW  
mdiaiciaifslfltalkeyyldymkdslnidviptrsfnylvddkssynditfinftkfpisvidvefdiknkvnqkt  
fkpirykdknysipftlpg  
yesvectflleeypviewdvtikvttknkiyikpviesrtehresepqvtelstankvsalsnpkdgflkkflyhlpk  
>tr|Q7A0G3|Q7A0G3\_STAAW  
mkkfffigllfvvfftaatiifwsydknkygkqydktkddafdnvsinldstelrikrgnqfrvkydgdndiliniv  
dktlksdkrsktrgyaid  
mnpfhenkktltiempdkmkrlnlssgagsvrisdvdlentisiqsingevviknsndaidsktnnsstyisksnikns  
nikvvigtlqidksqikqs  
iflnhdgdiiefknmpskvdakastkqgdirfkydskpedtilklnpgtgdsvvknkftngkvgksdnvlefytidgnik  
ve  
>tr|Q7A0I9|Q7A0I9\_STAAW  
mdtathiaigvgltalatqdpamastfgatattlivgslipdgdvtlklkdnatyishrgithsipftilwpilitfli  
ftffsgtnpfhvwmaqila  
vflhvfvdifnsygtqalrpitnkwiqlsvintfdpiiftvlcigivlwviglhpfavffpiaalliiyimirfkmravi  
kqqaalkaiqqehhpvkfvf  
aptikfmewrvaiqtadahdyvgkaygrnvvfsvdkverqtlstdsilwkvkgnkdiirtflnfssiyrwqttladgsteir  
lidlrylknhdysfvaiah  
vtndnvidhsyigwvftedklqrklyak  
>tr|Q7A0J5|Q7A0J5\_STAAW  
mpvikinnlnkvfgdnevlkdiinleinqgevvaigpsgsgkstllrcmnllevptkgqvi fegndltekgqvdkl rqk  
mgmvfqfnl fphkkvvdn  
iilapklkkdnndelhealslldkvglkekadvypnqlsggqqrvaiaaramhpdivlfdeptsaldpevvgdvk  
vmkdlakegmtmvvthem  
gfakdvsdkvifmadgvvvesgtpvei feqqhertqnf larv  
>tr|Q7A0M1|Q7A0M1\_STAAW  
makgnlfkailgiggavaavlvtrkdsrdklkaeynkyqdpqsykdnakdkatqlgtianetikevktnpkeyanrlkn  
npkaffeeekskfteydnk  
tdesiekgkfddeggaapnnnlrivteedlkknkna lsdke  
>tr|Q7A0M8|Q7A0M8\_STAAW  
msdfnhtdhsttnhsqtpryrrpkfpwftvivaliagiigallvlgigvlnstlnkdgstvqttnnkgnqldgqsk  
kfgtvhemiksvsptivg  
inmqkassvddllkgksskpseagvgsgviyqinnnsayivtnnhvidganeirvqlhkkqvkaklvgkdavtdiavl  
ientkgikaidfansskvq  
tgdsvfamgnplglqfansvtsgiiisassertidaettgntkvsvlqtdaaainpgnsggalvdingnlvginsmkiaatq  
vegigfaipsnevkvteiq  
lvkhgkidrpsigilnldkipeereqlhtdredgiyvakadsidllkkgdiiteidgkkikddvdlsylyenkkpg  
esvtvtvir dgktkevkvk  
lkqqkeqprqsrserqspgqdrdffr  
>tr|Q7A0N7|Q7A0N7\_STAAW  
mmkfhhrmlmlissiliiisfvltlgiihasityvlsekheqalatdarsyylvqdneidkvkeivkqnidllitkhdk  
kvfssgklkaipnsdsyiq  
krdvfi fnkkvngyhwikgynnditemhwtlwkyllitclvvlliclyfasrsfkrtilrpiqevtyatqllangyyhir  
vpesnvetkalfvstndl  
arrlqklneqkiqsnrlkttienipsailmidrngkivvankayyeqfnishnieqvyghyvnteieqlilesfkvek  
piyeqlvainqvhakyfd  
iscvpiltrsqsllgillvvhdi tnkqlenlrrefvanvshe lkt pitsikgfaetlidgakndaesldmflniilke  
snrieslvtdlldshieq  
hteldtdymnlsdltrriidnmmtqanqknisihtdiekdvivaqeskiaqvitnlltnainysyedgdinvrvyrddf  
rvifevqdfgigikledqg  
ri ferfyrvdkarsrdsggtglglsitkhiveahqgnievnsqvgkgstfkvilkyke  
>tr|Q7A0N8|Q7A0N8\_STAAW  
mnklvlidgnlsfrafyalpllnskagihnavygfamllekilkeekpnhflvafdagkttfrhekyseykggrqktp  
pelseqfpyirqlldayhi  
kryeldnyeaddiigtlskeadkagfqtiiitgdrdl tq latdnvtiyytkkgvtdvdhytpdfiaekyngltpnqi idm  
kg lmgdtsdnipgvagvge

Tsompanidou\_et\_al\_Supplemental\_FASTA\_File

ktaiKllnqfdtvegyvehldeisgkklkeklnskedalmskelatinvdspievkledtImthqdeqqekielfkkle  
fkqlladidqsdasvedaie  
ktfeietsfdnidftslikeaahfelDggnylrnnilkfslftgekhivinaddinnyvelvswlenpnskkvvydakkt  
yvashrlgidiqnisdmdim  
lasyiidpsrtisdvqsvslygqsfvkddvsyggkfkfvpdedvlnpyvasitdaiyfakpnmkqleeynqvella  
dlelplakilsemeeigif  
tdvhdleemekeiqekldvli rnihdaagedfninspkqlgvvlfetlqlpvikkktgystavdvleqlqgehpidiyi  
leyrqlsklqstyveglqk  
visddqrihtrfnqlaqtgrlssvdpnlqnipvrleegrkirkafkptskdsvilsadysqielrvlahitqdesmkea  
fingddihtatamkvfgye  
adqvdsImrrqakavnfgivgyisdgylsqslgitrkkakafidylasfpgvkqymsdivkdakalgyvetllhrrryi  
pditsrnfnlrgfaertam  
ntpiqgsaadiiklamvkfaqmkettyqaklllqvhdelifevpksevdsfsefveeimenalqldvplkvdsygyatw  
ydak

>tr|Q7A0N9|Q7A0N9\_STAAW  
msdiiqfpnsskklykdi kraeqdqnydlmyeyivqyerqfelteeiammkrmllyetgsflelreetivllktgiqqyd  
almiyvksliglgyfea  
vevihqiidevkdhktrmalhplkefakskliedekrltqsltdfdtIsmreqthliiklidnghfqfqtvlyilksnt  
ysynlislmielrfanct  
qeltikeygmdvtfvpanlglghtlkekvipnmetlndgalhiaeeahhmnhsimiypidietlfetnkwinaye  
cyfknmlglkcelqsidaf  
nfiqqldlnnns

>tr|Q7A0P3|Q7A0P3\_STAAW  
mnecafgtkdpvylnyhdhvqqplydskalfkllalesqhaglswltilkkkeayeeafydfepkvaqmtaqdidrIm  
tfpniVhhrkkleaiVnqa  
gylkieqaygsfskflwsyVngkpkdlqyehasdritvddtatqlskdlkqygfklgpvtvfsfleaglydahlkdc  
pskpkhn

>tr|Q7A0Q5|Q7A0Q5\_STAAW  
mkkssriiaflllvvllfagmaatysviknvlglldlqggfevlyqvdpInkgdikiKkalqstaqtlenrvnvlgvse  
pkiqueepnrirvqlagvt  
dqnearkilssqanlirdaedkvklsgsdikqgsakqefkqetnqptvtfkvdknkfkvteeiskkrdnvmvwlfd  
kkgdsykkeaqqknpkfiS  
aasvdqpinsdsveiSggfkgqegvkkakqiaeIlnagslpvdIkeiysnsVgaqfgqdaIdktvfasfigvaliyIflmI  
gfyrlpglvaialtlyiy  
ltlvafnfigsvltlpglaalvlvgvmavdaniImyerikdelrigrtikqafskankssfltifdsnlttviaaavIff  
fgessvkgfatmlIlgilm  
ifvtavflsrflslIvssni fknqfwlfgvkknrhdinegvdvhdIktseknfvklakpligvsilivvvglvily  
ifklnlgidfssgtrvdfq  
skqaitqqkveqvkdsglkadqiqingkdnkvatvqfkddltraqdnklsdnikskfgdtpqintvspiigqelaknam  
laliyasigiiyvsIrfel  
wrmglssvlallhdvfiivaifslfriedlftiaavltivgysindtvtfdrvrenlqkvkvittteqiddivnrSir  
qtmtrsintvltvivvva  
Ilffgaptifnftlalfiglsgvfssifiavplwgimkkrqlkkspkhklvykeksndekilv

>tr|Q7A0Z7|Q7A0Z7\_STAAW  
mnisnentvtliaviaaiigiflqiffklplivtavlsillgifvgfivylivsfynkrkn

>tr|Q7A102|Q7A102\_STAAW  
mneietiseieklltnntpysisknsgvprqtvtldkvgktkikeakfktiiklyeyartlenktec

>tr|Q7A129|Q7A129\_STAAW  
mndktsndlygkikhcnefinhsndsnlsshdvdesstkqkhiknkttidhnddlfkvhkdilrkqqi

>tr|Q7A131|Q7A131\_STAAW  
mpftpneiknkefsrvkngleptevanfleqlsteierlkedkkqlekvieerdtniksyqdvhqsvsdaliqaqkagee  
tkqaaekqaeaiiakaeaq  
anqmvgdavekarrlafqtedmkrqskvfrsrfrmIveaqldllknedwdyllnydldaeqtlenihhlhendlkpdev  
aanaqnasntsdnnqqs  
dsettkk

>tr|Q7A1A2|Q7A1A2\_STAAW  
msmntdekervqeelydetlldqylenddidqfrdeflalhtyeqseyfedttdenrqkifqylspeevanffdqldidd  
deyelldkmmatyashi  
eemsydnvdiIneltkpkvaslltlmnkddaneikaIlyhdedtaggimtteylslkahtpvkealllvkaqapdaeti  
yivfvdddgklvgvlsIrl  
dIivaendayiedimnervsvnvaddqedvaqvmrdydfmavpvidyqehlIgiitiddildvmdeasedysrlagvs  
didstndsikiIktalrIpw  
liiltflgmIatIlgrefektIenvallaafipiisgmmsgngtqslavsvrnttgeineqskfrialreagsgvIsgv  
vcstiltIivaiyhqplI  
alivagstcamtvgtfvgsmpIlnklnidpavasgpfitindiismIlyfgIatsfmayli

>tr|Q7A1E5|Q7A1E5\_STAAW  
maivnkviivegksdkkrvqvviaepvniicthtgmsidklldmieslydkqvfladsddegdriIrnwfkrylsesehi  
fidktycqvancpkqylah

Tsompanidou\_et\_al\_Supplemental\_FASTA\_File

vlskhgftckketp1lpninnerlvlvne  
>tr|Q7A1H4|Q7A1H4\_STAAW  
mkkvtvlylvavmf1aacgnnsdkeqsksetkgsdtkvkiennykmrgekkgdsdakkvketvevpknknnavvldyga  
ldvmkemglsdkvkalpk  
eggkslpnflesfkddkytnvgnlkevnfdkiaatkpevifisgrtanqknldefkkaapakivvygadeknligsmkq  
ntenigkiydkedkakein  
kdldnkiasmkdktknfnktvmyllvnege1stfgpkgrfgglvydtlgnavdkkvsnsnhgqnsneyvnkenpdvil  
amdrqqa1sgkstakqaln  
npv1knvkaikedkvynldpk1wyfaagsttttikqieeldkvk  
>tr|Q7A1J0|Q7A1J0\_STAAW  
minyiladmi ftyp1qltffillmshs1lkqis1keiinyfrgrknrgekiddpltdrg  
>tr|Q7A1J8|Q7A1J8\_STAAW  
mtnedkrfeqlrferkfviipyliyaviv11lnifysd1kitmtlfglffaynvvilfiafikhykrt111sliltv1sg  
aaffgiivyginhf  
>tr|Q7A1K3|Q7A1K3\_STAAW  
mkstaqltkennvkslr1sntdreifenymtymrsdfrvnphdteliinrilkqllsaeqhgllaldffnhdpkahaik  
lkampnetfkni fkyiyqh  
iv11ligivsf1kgf1gffmekngsnlyfvsfpfsvvvgffivflfiwfsfktiqlqcfnsnwiwiftylai111ivgff  
yvffipqsl1afgpyiqvs  
nvwfiifsfivmpig1rierniskhshtfl  
>tr|Q7A1K7|Q7A1K7\_STAAW  
maksc1h1ltnneyatrrcqdgiv1fwpidgeielqkfrkskiieddiyiinhldvfsiknnkktimlylssdwfaelgf  
tffnyhytaklikssynlk  
c111k1tyryldnqplndadir1qdiikiakeasmkkaiaqnqyryayygd1rdeleyiyqvnqr1tlksvadklfv  
sksn1ssqfhl1mgmgfkk  
yidtlkigksie111tdstisniseh1gfssstyskmfksymditpneyrn1skynclmlkpeplvgkmvqevkeii  
1nyiehyknh1tdvhide  
dkfetpk1fqtv1qintytemklvfllegifkt1lnknsqvffimp1ilkskntmseeekftiiktiiesd1kiafnind  
iettyfveeafmsvfrqis  
pnelshhnyevhfvd1s1meirtiyrm1l1hnim1nvkl1gnitcl1fekpsvfks1vsqikr1kfds1iidnan1ss  
p1lmgese111kni1hfk  
n1kqvine1dieqek1if1nvenhk1lnkerd1snsap1iykt1salyhndfgf1nifdnhhtfnamhlydkngfkt  
1gl1lekfiyevskpkyen  
syysifdienyyc1viydwrviesetimsnfedsqyvinfknnv1ndkyliviet1densgnih1liske1rdkyewnps  
11skidny1kpaieikehn  
fsdns1ninvtfnalyiikigkk  
>tr|Q7A1L3|Q7A1L3\_STAAW  
mkpkv11aggtgyigky1seviendaeltiskypdnkktddvemtwiqcdifhyeqvvaamnqidiavffidptknsak  
itqssard1t1iaadnfr  
aaainqvkkviy1pgsrydnetier1gaygtpvettn1vfkrslvnvelqvsydvrrstmkv1lpgwt1knvvnh1fia  
wmgytkgtfvktekshdqf  
kiyiknkvprlavfkietadgiit111sgslvkkytnqgklefrlikesavvyihlydyipr1fwpiyyfiqapmqk  
mmihgfevdcrikdfqsr1  
ksgenmkytk  
>tr|Q7A1M3|Q7A1M3\_STAAW  
mkvwfngmsaigtvfkehvnfyliqr1aqfqvkiinhsny1gvawelinpvmqimvywmvfg1girsnapihgvpfvyw  
11vgismwffingqilegt  
kai1tkfnqvskmnfp1si1ptyivtsrfygh1g1111viiacmftgiypsihiiq11iyvpfcff1tasvt11tst1gv  
1vrdtqm1mqailr1llyf  
spilw1pknhgis1glihemmkynpvyfiaesyraailyhewyfm1dhwk1mlynfgivai1ffaigay1hmkyrdqfadf1  
>tr|Q7A1N6|Q7A1N6\_STAAW  
mnkvtinpq1q1tyqiekgdpi11hg1dgn1agfed1qhqlassykv1tyd1rghgkssksesy1ndhved1kilme  
k1niheah1ghd1ggvva  
k1ftdkyayrvks1ttiaskkdd1ihsftq11iqyqddiagfnksey111fsklfrnqektmkwyqkqriysikseds  
avairs111hkdepmy1kk  
rtcvpt11ingehd1ikdknhfk1eah1nvtkki1fehsgaphieepeafmny1n1flksvs  
>tr|Q7A1T3|Q7A1T3\_STAAW  
mtnndtim1rhyvpqdysm1leafq1sesd1kfvtpeenitaamsdnerypivvmdgrqcvaft1hrkgkvapfsdnqd  
avffrsfsvdqyrnrngig  
kvvmeklasfi1stfqdineiv1tvntdnphama1yrqqgyqymgdsmfigrpvhimaltik  
>tr|Q7A1U9|Q7A1U9\_STAAW  
mflawnei1rrnk1kfg1i1gvl1tmsy11f11sg1ang1inmkegidkwqadaiv1nkdanqt1vqqsvfnkkdienkyk  
kqat1kqtgeivsnghqk  
nv1vfgvekss1lvps1ieghkatkdnv1adet1knkgfkigdt1sl1sqdek1hivgftesakynaspviftndatia  
kinpr1tgdkinavvrdt  
nwkdkk1nqe1eav1ndfien1lpgykpn1t1nfmis1flvisatvigiflyvmt1qkts1fgilkaqgftngylanvv  
isq111a1lfgtafg111t  
gvtgaf1pdavpvkfdv1t11vfaiv1mivsv1gs1fs1iltirkidplkaig

Tsompanidou\_et\_al\_Supplemental\_FASTA\_File

>tr|Q7A1X1|Q7A1X1\_STAAW  
milsilliffcirIvsIksinhskqIkadgaveygvknskflaithvliyvlagveafinkdtfsfangiglvilifay  
imlfmviktIggiwtIklf  
ilpnhpiiksglykitkhpnyfIniipeligvlllthatyttillvpyayflyvrikqeekImni  
>tr|Q7A1X4|Q7A1X4\_STAAW  
mkkndllvmsvvyiltsvimfyngIlskqfftyvvgfpiiyfgyiclvnlikkrsrnn  
>tr|Q7A1X7|Q7A1X7\_STAAW  
mIkIhkkIawtgikgsaittfitalyngssvwnalavagiafgggagtavaalIgratvmrfikrvgvrktaaw  
>tr|Q7A206|Q7A206\_STAAW  
mktjtqelkqyithlfqIlsneawecealeeaaenIperfindsplvhltletytyyndeIhelsiypflmyannqlis  
vgyl dhfdmdflyltdtqn  
iiderhllkqgggdhe  
>tr|Q7A207|Q7A207\_STAAW  
mkinryitrginesipldlqilIwhmvekkdnqphtdylhifklqedenIlsithegeqptykleyhytneyeknqnalpk  
kvyvireddvdafyyvmll  
peey  
>tr|Q7A208|Q7A208\_STAAW  
mmIkvilyaytqsvfsgrkiekmlndsirmmwlsqnqkpsyktinqfrvnpkvdaIlesIfiqfysqcvkqnliddkaif  
idgtkieananrytfvwwk  
siqnheskmnedskalyhelvtnkiipeikedhdneltkeeidIlgshldkeiedInqhinnekctktrkqirlkrtkik  
kykkqindyferkyryefq  
ksilkdrrnsysktdydatfmrmedhmknngqlkpgynIqiatnsqfvlsynvyqnpdtrtmipflnsiqetyghlpeyi  
vadagygsesnykaiiddf  
nrtpIitygmfikdktkkyksdi fntqnwnydeindeficpnkrIlgfkryayrhdkygykrdfklyecddcsecplknq  
cmfnfsktnkkimkynwe  
yfsqinkklsepetkniysqrkidvepvfgfmkailgftmsvrglnkvkreIlgfvImalnirkvvaqraennqkiykk  
dnfyiisieiivffhlsknf  
msrthydlffyc  
>tr|Q7A2J5|Q7A2J5\_STAAM  
mnyfrykqfnkdvItvavgyIryalsyrdiselIregrvnhstvyrvwqeyapvlyqiwkkkkkkayykwrvdetyi  
kikggwcyIlyraidaght  
ldiwlrkrdhqsayafikrlIkqfgkpqmiitdqapstkvamakii kvfkIkpndchctskylnnfieqdhrhikvrktr  
yqsvntakntIkgieciyg  
lykktvgIfrstdfhhatklvic  
>tr|Q7A2J6|Q7A2J6\_STAAM  
mnyfrykqfnkdvItvavgyIryalsyrdiselIregrvnhstvyrvwqeyapvlyqiwkkkkkkayykwrvdetyi  
kikggwcyIlyraidaght  
ldiwlrkrdhqsayafikrlIkqfgkpqkviitdqapstkvamakvikafkIkpndchctskylnnlieqdhrhikvrktr  
yqsintakntIkgieciya  
lykknrrslqiygfspcheisimlas  
>tr|Q7A2J8|Q7A2J8\_STAAM  
manigyarvstrdqslldIqidalnsfgceki fsekvsgkrvnrteIdkcldyIregdtIviyklldrIgrttkqlidlaqw  
lennielqi idm nintkd  
pmgkmmfftmmsafaeleanllsertkkglesarargnmgrkampqekkeyikhlydtkeytggeiakktvnsrdtvryi  
lrefkk  
>tr|Q7A2K2|Q7A2K2\_STAAM  
mtfnhivfknIrgnlkhyamylsIffsivlyfsfttlqftkgvnnddsmiikkgalvgsifIiiviflmyanhlfv  
krtrrefalfqIgltrqn  
ilkmIaleqmivflitgvvgvlcgiagaqlIIsivsklmsIlnIshfepmalvltifmliiayvlilfqsalfkrrs  
Ilsmmkdsiktattakvt  
taevisgvlgiamiaIgyymatemfgtfkalmtamtspfiiflItvvgaylffrsvslifktIkkskngrvsitdvvft  
ssimymkknamsItiiai  
isavtvvlcfaaIlsksntdqItIsmapnefnvatqdaqfetkIlsqqqitfsknayetitvDnvkdqvitlengsdg  
rtnsIlsannkvtgnnai  
tntksIpniihInkdIvkgtknetfrvtqedkgrvypInIsfnspvvevspekyqqlktqnnvhtfygydikqtsqk  
ekaqaiaqfgdkvityde  
mkkevdatngIIfvtsflglafIvaagciiyikqmdetedelsnfrilkrigfthtdmlkglllkitfnfglpIIaiI  
havfaaiafmlmgnsifm  
pivvivvytIiyItfaliafvhsnklikkti  
>tr|Q7A2N8|Q7A2N8\_STAAM  
mkkllmffivspIlatiatdftvpvlssnqiiktakastndnikdlldwyssgsdtftnsevlDNSlgsmrikntdg  
sisliifpspyyspafatk  
ekvdIntkrtkksqhtsegtyihfqi sgvtntekItpielplkvkvhgkdspIkywpkfdkkqlaistldfeirhqItq  
ihglyrssdktggywkitm  
ndgstyqsdlSkkfeyntekppinideiktieaein  
>tr|Q7A2Q6|Q7A2Q6\_STAAM  
mkniklmlrfyaaaiiitllclinnnyvnaevdkkdIkkksdlssklfnItsyytditwqldesnkistdqllnntii  
IknidisvltkssIkvfnf

Tsompanidou\_et\_al\_Supplemental\_FASTA\_File

ssdlangfkgknidjyglyfngkcvglteektsclyggvtihdgnqldeekvigvvnvfdgvgqegfviktkkakvtvqe  
ldtkvrfklenlykiynkd  
tgniqkgciffhshnhqdqsfydlynvkgsvgaeffqfysdnrtvssnyhidvflykd  
>tr|Q7A2U7|Q7A2U7\_STAAM  
mqsiaeketyhlptehlqvfnvikntsnkyitkktiInqlgyeynssnerwlrrvinslvydygyypigcsykpseryyi  
itteqekqqamrsikklad  
gsmkryealkrikv  
>tr|Q7A2X1|Q7A2X1\_STAAM  
mrkiichlvllikflskklhlywidmtinvvlqit  
>tr|Q7A2X7|Q7A2X7\_STAAM  
msdnlslfidyindniygseikreklenlnfqfaiknveknivydelkslditiiesqdsyknklkrIfsvllqskki  
>tr|Q7A2Y9|Q7A2Y9\_STAAM  
mnetyrggnklllgivlgvitfwlfaqslnvvpnlqqsfgadmgtisiavsltalFsgmfvvgaggladkigrvkmtni  
glllsiigsaliiiitnlp  
llilgrvlgqvsaacimpstlaimktyyqgaerqraIsywsigswgsgicslfggavattmgwrwififsiiivavlsml  
likgtpetkseitnthkfd  
vaglivlvvmlslnvvitkgaalgyslwffgliaivivaffiflnvekkvdnplidfkIfenkpytgatisnflngv  
agtlivantfvqqglgyta  
lqagylsitylimvllmirvgeklkmgskrpmllgtfivvigialislvflpgifyviscvvgylcfglglgiyatps  
tdtaisnapldkvgvasgi  
ykmasslggafgvaisgavygavaatsihtgamialwvnlmgimafiaailfaipnddkrvkdak  
>tr|Q7A2Z4|Q7A2Z4\_STAAM  
mkttlvveddeailhidvaltmnykvvtaktgkeadfrlrteqpdiiildlglpdidglsliqqfrdfvdtpiivis  
arteeqtivevldrgandy  
mtkpfnidelrarivalrmsrstetiqrftngpltidfdaksvlneqsvhltpnefqltilchhvgkvltvyqvlk  
slygyvnhtemaalrvhma  
slrkklnytqdpntekkliithprigyqmqlh  
>tr|Q7A2Z6|Q7A2Z6\_STAAM  
myfnqsdkfeqlkkkligisfnlpegeeftfhdlnsranvqcskavqqnvgrwfayfvkhaprvpfiigkdthghlvy  
ktgnphynsnpskggvr  
>tr|Q7A301|Q7A301\_STAAM  
mdianmtimlligvlggfigsligiggaiiypaililplligipaysayasgltsqvffstlsgslnarkqpafspk  
lvymgggmligsmlgail  
aslnatfvntvyviiailalilmfikvkpttqetkskplliivgfgigvisgivgaggafiiipvllaflklpmntvv  
nnsiaiafissvgaffikl  
mqgyipvesaifliie  
>tr|Q7A336|Q7A336\_STAAN  
msvsdqimkglldgailgliaqgetygyeimtklknqefpeisegsiypvlmrlnkkgyvdttikksnggprkyytit  
dsglkelkvfkskwqalnk  
gminlfggendvn  
>tr|Q7A344|Q7A344\_STAAN  
minterlnlmpssshlielynicsshpqnianiytpkglhnskldtqrwiekwqnhwqyqfyfvlvkkidcsvigicgye  
yrqlkqetvlnlfyklhps  
feggyaceaitainfvnyidqetvkvirtnkcnqrsinlaerlkfkrdkamddiinqqdivfyk  
>tr|Q7A376|Q7A376\_STAAN  
mkkllitiviivligalgfaiyaainhstssnnqeqenksthkkteteendqqddsadktdknqngnndtndnqpsp  
snvppnhstvpstqpaq  
ndsnsnknnthgggsqsstnnqnnqqntppanksnntntpskqtpqaqspkn  
>tr|Q7A393|Q7A393\_STAAN  
mnmplmidltnknvvivggvasrraqtlnqyvehmtvisptiteklnqmvnngvviwkekefepsdivdaylviaatn  
eprvneavkqalpehalfn  
nvgdasngvvpfosalhrdkltsvstdgaspltksimaelealypssyssidflytcrqkikvlditynekqllsq  
ivsqeylnhdkqaqflaw  
dvr  
>tr|Q7A3B3|Q7A3B3\_STAAN  
mtalfpyiafenskealayeevfgatdvkrlevgeeqashfgmtkeeaqeatmhaefvlgvklcsdsfgradkinng  
isllidyvnnkedadvk  
afyekikdhssieieIpfadqfwggkmgvftdkygvrmllhgqdytaiqq  
>tr|Q7A3B5|Q7A3B5\_STAAN  
mtketdnkktvatsdnkdtqqnqteederqngyrktdldleieqlremmktgenetkndykkfkvflistlvivi  
laiirfvhkmi  
>tr|Q7A3D1|Q7A3D1\_STAAN  
mifsnlfrprtparltriexllqahfshsvncqynfvehrtliyvpawh  
>tr|Q7A3H4|Q7A3H4\_STAAN  
mkkwtnrlmtiagvvlilvaaylfakphidnylhdkdkdeki eqydknveqaskdnkqqakpqipkdkskvagyieipd  
adikepvypgpatpeqlnr  
gvsfaeneslddnisaghtfidrpnqftnlkaakkgsmyfkgvnetrkykmtsirdvkptdvevldeqkgkdkql  
tlitcdydynektgvwekrk

Tsompanidou\_et\_al\_Supplemental\_FASTA\_File

ifvatevk  
>tr|Q7A3I8|Q7A3I8\_STAAN  
meqiiitefisarfgyaafililenvlpivpseilftaglmsvkslslitlfiiatiasfigllilyicrliseerl  
yrfidrhgkwiklskdlr  
randwfkkygvwavficrfipvlrvlitipagvnrnmvvtftvisligttiwnfglillgrtldsdsfgmlmtglhtysri  
myvviiiaviyfairygk  
rkrvk  
>tr|Q7A3J0|Q7A3J0\_STAAN  
mfnmfhfiimvynmyniilevkempftmkgypekwekefevikrqaieianamlkegylekdvpiaakkakdwyrals  
keeikalteenfvqfhtat  
mekaevdseyattdneehiqeqsnqdkisyfdesiqnqsggvrrqrepmdgahpkvvesfkdv  
>tr|Q7A3J5|Q7A3J5\_STAAN  
mfneiwplisvvlgivillvliigfkIntfisliitsmitalmlgipltkimetiiekmgstlghialiflglailgkll  
adgggatriadtliqkfgg  
khvqwamlvaafigialffevglvlliplvftvakranvsvlklglpmvtaIsvthgflpphpgpvviakelkanvgdv  
llygmiaaipvtliagpif  
nkvaqkmipsaytregdisalgaqkeftdqempgfgmslltatlpvilmlvstitqIvtghdkptnlfesiiymigtagt  
amliavlfaivtmglmrkr  
kmnhimesvtnaiypigmlliiigggtfkqvlidggvgntiakmfegtemspillawivaavIrialgsatvaaisttg  
ivlp1lqssdvvalvlla  
igagsvilshvndagfwmfkeyfgltvketfltwslletiiisvgiifilfislfv  
>tr|Q7A3J8|Q7A3J8\_STAAN  
mksnlrygirkhklgaasvflgtmiivvgmgqekeaaaseqnttveesgssateskasetqtttnvntidetqsysats  
teqpskstqvtteeaptv  
qapketemksqedlpsekvadkettgtqvdiagpsnvseikprmkrsadvtavsekevaeekatkgtvtnkvevtess  
leghnkdsniivnpnaqr  
tlkykwkfggegi kagdydfdtlsdnvethgistlrkvpelksstedkvmanqvinertiryftdyinnkkdltaelnl  
nlfidpvtvtkqgsqkvev  
tlgqkvskedfikyldgvdrgmgtvngridtlneekgfshfayvkpnnqsltsvtvtgqvtsgyqsannptvkvyk  
higsdelaesvyakldts  
kfedvteknlsytsnggytlnlgdlnskdvyikyegyedqnakdlnfrthlsghykyppppppppppvqltwngva  
fysnnakgdgkdkpndpi  
eksepidldikseppvekheIgtieesndskpidfeyhtavegaeghaegiIeteedsihvdfeesthenskhhadvve  
yeedtnpgggqvtttesnlv  
efdeestkgivtgavsdhttvedtkeyttenslielvdelphehgqaqgpieeitennhhishsglgtenghnygvide  
ieenshvdikselgyeggg  
nsgnqsfeedteedkpkyeaggnivdidfsvpqihgqnnqnsfeedteedkpkyeaggniididfsvpqihgfnkhn  
eiieedtnkdkpnyqfgh  
nsvdfeedtlpkvsgqnegqqtieedttptptpvpsepptptpvpsepgeptppkpevpsepptpvpptpvp  
sepgkpvpakeepkpsk  
pveqkvvtpvieinekvkavptkqkqskselpetggeestnkgmlfgglfsilglvllrrnkknka  
>tr|Q7A3K4|Q7A3K4\_STAAN  
mlrslckqnrilinaikvgiemkykislalnaiiigslilcilisrgydiyvilipiltilaslinlicdikkhk  
>tr|Q7A3M9|Q7A3M9\_STAAN  
msklmigtgpvaiqlanicylksdyeidmvgrastsekskrlyqaykkeqfevkiqneahqhllegkfeinrlykdvkn  
vkgeyetvmmactadayd  
tlqqslsetlqsvkhvliisptfgsqmiveqfmskfsqdievisfstylgdtrivdkeapnhvlttgvkkllymgsthsn  
stmcqrisalaeqlkiql  
vvesplhaetrnsslvyhpplfmndfslkai fegtdvpvyvylfpegpimtli remrlmwkemmaillqafrvpsvnl  
qfmvkenyprpetldegd  
iehfeilpdiIqeyllyvrytailidpfsqpdenghyfdfsavpfkvykneqdvvpqiprmpsedyyrtamiqhigkmlg  
iktpmidqfltryeascqa  
ykdmhqddqIssqfntnlfegdkalvtfkleinrtls  
>tr|Q7A3N0|Q7A3N0\_STAAN  
mrkltkmsamllasgliltgcgngkleekkenkqlyttvkdigdmnphvyggsmsaesmiyepIvrntkdgikp1lak  
kwdvsedgktytfhlrdv  
kfhdgttfdadavkknidavqqnklhswlki stlidnvkvdkytvelnlkeayqpalaelamprpyvfvspkdfkngt  
tkdgvkfdgtgpfklgeh  
kkdesadfnkndqyweksslkvqakvmpagetaflsmkkgetnfaftddrgtdslkdkslkqlkdtgdyqvkrsqpmn  
tkmlvvnsgkknnavsdt  
vrqai ghmvnrkIakei ldgqekpatql faknvtdinfdmprkydlkkaeslldeagwkkgkdsdvrqkdgknlmam  
yydkgssskeqaeIqae  
fkkmgi klningetsdkiaerrtsgdylmfnqtgwll ydpqstiaafkakngyesatsgienkdkkiysiddafkiqng  
kersdayknlkqiddegi  
fipishgsmtvvapkdlekvsftqsqyelpfnemqyk  
>tr|Q7A3N7|Q7A3N7\_STAAN  
msntnkhyieeyateqsrfkrdigfilyiflvnlpiiivlftglvavftqqapwgfsfpismnisyllaviisla  
ifrrmheda fvpmi rtqi

Tsompanidou\_et\_al\_Supplemental\_FASTA\_File

astkykwhilisftlsvlfl1llyfydfalnvdaftvfdiyp1irdydsislivmlwltiilntlicqlifrhiliqel  
srliplkitivlsvilet1  
yyppyintwwefipalillassatylylksnrnfmvsyfyqlavilvlhifm  
>tr|Q7A3R2|Q7A3R2\_STAAN  
mq1qkiviapdsfkesmtaqqvgnikqafntvygntlhydiipmadggegtdalihatgatkytvivndplmrpieac  
yaradeqqiaiemaaasg  
ldllekeernplytssygtgelikdalnhgaktiilgiggsatndggtgmlsalgvkftdvngdl1qmnganlahiaqid  
itnldsr1kevtfkvacdv  
snpl1engatyiygpqkgadakmipklfdamshyhdki kmctgksvnqipgsaaggmgaa1lafcettltkgidvdfd  
itdfhqrikdadlvitgeg  
rmdyqti fgktpvgvalaakqyhipviaicgs1genyqhvydfgidsaysiisspstledvlqnseqn11ntatdiaril  
klq  
>tr|Q7A3R4|Q7A3R4\_STAAN  
mspfl11rvrnqcaknatrqplkaevmmlinklnihhtpplcvkvtpemlgdhyiisfiyyisrnikvrvrkflvvyat1  
itif  
>tr|Q7A3S0|Q7A3S0\_STAAN  
mmfqqeidl1qqkglyrslksvgyidrqiyevenkrctnytsndylglgqiafdkddferfmrkysyhlsssr1isgsst  
ayeeietmlagwlgysact  
ilnsgydanlalfnikntncvvsdqnhasiidgiklsglekviykhldiadlekrlekypnqnipkiiisdsvfstn  
gdvvdigq1vs1khkynat  
lildvshsfgienysnyqgvdi1tss1skacgayggvilssndvkdmlinhgrplyssslpiynlyfikrnieklinad  
drtrtklnslskyfnqklka  
lnvnyssnspikfiefdieaaenihqt11khhvftsylryptvtkpm1ris1syfhteqididrlfeilhqed  
>tr|Q7A3S7|Q7A3S7\_STAAN  
mnfv11tsdefnafttkhfshtqsaihyhnrvd1kgdvh1vgvkddngqviagc11teart1kffkyfythrgpvmdyt  
nqslvafffkalt1sy1khh  
nclylvdp1ylien1rnadgeivksydnrafvrtmdklgykhqgfpvgysmsqirw1sv1d1kdktedq11kemdyqtr  
rnikktydigvktkt1tid  
etqtf1fd1fhmaeekhgkfr1lpyfeemqklyddham1klayid1neylkt1q1kqq1taelsgveealeespnskkn  
ktrtqleqq1nsnrkid  
ntieqieqdgavlnlasal1fynehevyy1ssgsnpkynaymgayhlqwemikfakahhidrynfygitgdysessedyg  
vqfkkgnahveeyigdf  
ikpikp1lykvqtylnhkr  
>tr|Q7A3T0|Q7A3T0\_STAAN  
miknysyarqnlkalmtkvndsdmvtvtstddknvimsesdynsmmetlylqqnpnaehlaqsiadlergk1tkd  
idv  
>tr|Q7A3W2|Q7A3W2\_STAAN  
mvktydiptcedycalrinagmspktraeaekglpna1ftvtlydkdr1ligmrvigdggtvfqivdiavksyqqgdy  
gslimehimkyiknsvsves  
ayvsl1adypadklyakfgfmp1tepds1ggmyiky  
>tr|Q7A3X4|Q7A3X4\_STAAN  
m11n111ifilivicplifnytl1n1t1cyilvvisif1sliysimtytfpwsmfvtfiiisiim1fkhyrlfshtsr1  
fikk11sfsykfvlytsal  
1fistiqspivkgl1smw1ailc1s111tficylvwtvsyrhrsyrnkevdiiv1lgagiftefvtpmlaar1dra1diyqq  
qasatk1ivsgggpdepi  
sealamqryl1ahgvktdi1meshsintytnflyskqiinnlyheavkivcvtsqfhlral1raqlgl1sidvgvsh  
pyhff1hvl1kdy1gvmyq  
yr111tlyc1ssw1f1c1yaafiyns  
>tr|Q7A3Y4|Q7A3Y4\_STAAN  
mikqlfthtqtvtsefidhnnhmdanyniifsdvnrfnysgh1slkerenlayt1ftlehttyl1sels1gdvftvt1  
yidydykr1h1f1t1tke  
dgt1astnevmmmg1nqhtrrsdafpesfstqiahyknqptitwpeqlghkiaiphkga1k  
>tr|Q7A418|Q7A418\_STAAN  
mkk1vtatt1tagigta1vgqahadaaenytnynnyntttttttttttssishsgnlytagqctwyvydkvgge  
igstwgnannwaaaagag  
ftvnhtpskgai1qssegp1fghvayvesvnsdgsvtisemnysgp1fsvsrtisaseagnynyih  
>tr|Q7A426|Q7A426\_STAAN  
mnvnvednakvt1tsqgatk1yktpsnhveqyqtfnlkdnayleyvadpi1ayenakfyqhntfn1nssslfytdiltp  
gysktgeafkyqymh1ne  
iyiedelvtyn111n1pnkqsineigymehyshygsayfihedvnqklidsvyetissysntf1dcrvaisqlp1thgfavr  
ifayrtqiiekilgtiqsy  
iaenydrkl1dflrky  
>tr|Q7A431|Q7A431\_STAAN  
mdkikci1nr1isf11ivhstf1f1fkvec  
>tr|Q7A443|Q7A443\_STAAN  
mtnqgs1nkspi1f1ksft1nffvnfivylcmy111vviagyskqafdasd1lag1vvg1fivgsligrfatgkfvnqipg  
kr11fig1ialiitq1lyf  
idgslaf1ifvr1ngiataavttatgtiaayvtpvnrksegis1f1s1sv1lgtai1gp1f1gm1litkyaid11fiicvil

Tsompanidou\_et\_al\_Supplemental\_FASTA\_File

gilgliislfikvdfevtn  
nktetdvinkprfsihqfiakeaipvavimlligvtyasiltylqafalerhlvtaasyfficyaiaslitrpiagrmd  
dkneniivypafimlflsf  
vclissyqswlillagacglgygnlssamsiaikvspikygiatstfyvgldagvgfgpsflglfthmfsyseifgf  
maalaitmlvyflihgrh  
vtrnamn  
>tr|Q7A446|Q7A446\_STAAN  
mrtiilsflfiimnivaimtlsqpltvnyfslrviliffthfilsiffilikssrlnniltilsilviihmgilahstyv  
yly  
>tr|Q7A452|Q7A452\_STAAN  
mifsqnifrrptptcivcrnwesnfsllgplpnlhiivs  
>tr|Q7A476|Q7A476\_STAAN  
mnvrnsykvkhkylkvnrsnmityksnqysasaeycgktvevqvdydqkqh  
>tr|Q7A488|Q7A488\_STAAN  
mnhieiskdvkipvlfgfvgfipqeqtaeavkeaikagyridtaqsylnetevgqgieasgidrselfittkwienvn  
yedtiksierslqrlnldy  
ldvlilhqpyndvygswraleelkengkikaigvsnfgvdrivldlghnqiqpvngieinpfhqqeeqvaalqqenvvv  
eawapfaegknqlfqnql  
qaiadkynksiaqvilrwlverdivvlaksvnpermaqndidfdelteedkqiatleesnsqffshadpemikaltsr  
elvd  
>tr|Q7A492|Q7A492\_STAAN  
mqnkqilfnkipegmpqedtfkieeidtpklesdgvlvqtlvisvdpymrgmrtkadsyvqpfeigkpivshvvakvids  
tladykkgdvvvgmlpwri  
inhvqadqitkvpttdvpldlylsvlgmpgqtayhglldigqpkagdtvvvsaasgavgsvvgqiakikgcrvvgiaggd  
kkvnyltetlgfdagidyk  
kedfaealaqavpdgidvfyfenvggtvgdevfkhlnrfarvpvcgaissynhpeadigprijgtlikkqvmrgflvsef  
anafkeaseqlatwvqegk  
iqsqvtiedgfenaphafknlftgdnfgkqvkvte  
>tr|Q7A495|Q7A495\_STAAN  
mnlilifkeqtlkfnkeegetylflqqhnsdwanifkemilqgrdkvtqrlvtsmhrenlvkartqskkilsrdlimldi  
stthileiqfppqakqly  
pitgehafdrivedgpfyikdditntitrvhphneileciliieapdlknaasdqfqqdlinsatnmtfaisyqalsmqhd  
saplfniensedsylrse  
qavieghplhpgaklrkglnalqtflyssefnqplikivlihskslrsmtslskdydtvvhqlfpdlikqlenefnfn  
fndyhimivhpwqlddvlh  
sdyqaevdkeleieakhtldyyaglsfrtlvpkypamsphiklstnvhitgeirtlseqtthngplmtrilndilekdvi  
fksyastidevaghfyfyn  
eqdevdyqterseqlgtlfrkniyqmipqevtpmipsslvatypfnnespivtlkryqsaaslsdfessakswietysk  
allglviplvtkygialea  
hlqnajatfrkdglldtmyirdfeglrirdkaqlnemgystshfheksrilttdsktsvfnkafystvqnhlgeilitiska  
sndsnlerhmwyivrld  
nifdqvlvsthksnqvenrineikdtmfapfidykcvtmrldeahhytyikvnnplyrenn  
>tr|Q7A4A5|Q7A4A5\_STAAN  
mmskstksndtivetfkdiiplsfgeeignaashgvaalltllvlpyaavhsyiahgtlasvsmsiyvisifmmfisst  
iyhsmqnetphkiylriid  
hsmiyvaisgtytpilltvvggwigtvfillwggtlwgilyksiavkvnqklsliyvlvmgwgviillpiifirtswif  
ilfiflggvsytigawfya  
qknrpyfmiwhifiviasllhliailyfm  
>tr|Q7A4B6|Q7A4B6\_STAAN  
mdnvkaifldmgtihennqastytkdvinqlrekgykvflatgrshseihqlvpqdfavngiissngtigitgevdgeiif  
khglslaqvqqitnlakrq  
qiyevfpegnrvslkedetwmrdmirsqdpingvshsewssrqdalagkidwvtfpegeyskiylfssnlekitafr  
delkqnhvqlqisvsnssr  
fnaetmayqtdkgtgikemiahfghqetlvigdsndramfefghyvtamknarpeiqaaltsdvtaytneedgaakyl  
akhflad  
>tr|Q7A4B7|Q7A4B7\_STAAN  
mtmskssdalfnsltqsfeliiegvyneivtdnlkivmykprkestsgrinrrfk  
>tr|Q7A4B9|Q7A4B9\_STAAN  
miffrkvnaffpvklclmirfclesccifrrhllitfhnrskfifkyisskciictg  
>tr|Q7A4C6|Q7A4C6\_STAAN  
mtaetnyfwlncgynrwnhneplvgqtalesgahfnpsqgfrakkkavgdqvi fyqvqtdtllgcgeiisvetgaqn  
kivrqfrfneqlkplady  
lkrsealefrmsnmketlfnqitaefdliglgkgeikipryfflaeteefepgnqythythtyngikrnyghfytqle  
egdniifynrtknqsvvgi  
gevskhihekppigrtnstvievsyekditpitlsltnkhpklknlyflqenakqaiasmsqaqydaiiemsdnnglks  
pfemvkkpdmlesekeel  
kpfillvdrkeeglkaandllqkananpittghpdfsedmlygkylpnetgalyyregfittlmpkkdkstylvidnfn  
ridtdifqtyinvlegyev



Tsompanidou\_et\_al\_Supplemental\_FASTA\_File

t1prynkdgnmi kwsrqkdsfyyfnpnwhivgitydsleeikekyseqflkytrivkvkhd  
>tr|Q7A4C8|Q7A4C8\_STAAN  
msnqgdvvelelnqqvanwtvaytklhnfhwyvkgpnffslhvkfeelyneasqyvde laerilavggnpvgtltecleqs  
ivkeaakgysaeqmveels  
qdftniskqlenaieiagnagddvsedmfimgqtsvdkhnwmfksyls  
>tr|Q7A4D5|Q7A4D5\_STAAN  
makefcfegitlkafdeqyrsaindfdlnerqqiyslpekeiddaindvrianvaindknevvgffvlhryyqhegyd  
tpenvvyirs]sinekygg  
fgygtkimmslpqyvqgvfpdfnhlylvvdaendnawnlyeragfmhtatkeegpigkerlyyldldskhvsslklees  
rsevtvhiinlmidggkv  
gfialeqigermniaaievdkysrfgngissalrqlptylrknydnlnvitmilfgennfdkplclnsnfveieqtddyv  
vfekylny  
>tr|Q7A4D9|Q7A4D9\_STAAN  
mvnykek1deaahlqqkgfeqtraewlmldvfqwtrtdfvvhmhdmpkamimkfdlalqrmllgepiqyivgfasfyg  
rtfdvnsncliprpeteev  
mlhfllqleddativedigtgsgvlatlkcekpdlvniatdisleamnmarnaekhsqiqfltgdaikplikegikln  
glisnppyidekdmvtmsp  
tvtrfephqalfadnhgyaiyesigdlphvmekgspvveigynqgealksiilnkfpdkkidiikdinghdrivsfkw  
>tr|Q7A4G2|Q7A4G2\_STAAN  
mqskiliieddhaithldvaltdyynvtadnatqahfkidiqdkpdvilldglpdkdglcliseirqhtdipiivis  
arqeeqtiqaldngandy  
mtkpfvnde1rarirvieriakshqetnivftngllsidfgsksvinnqevhltpnefslllellshhkgkvltiemilk  
riygyvnktempslrvhmt  
slrqklsqchedakdikthprigyqmlqwek  
>tr|Q7A4H5|Q7A4H5\_STAAN  
mikinnldemngfamflveqksgdlillngdlgagkttltqfigkalgvrrtinsptfniiksyrgknklhhmdcyr1  
edsdedlgfdeffedqait  
viewsqfikdl1pathlsinistisentrqielfaqgehyeqikeaiihefaah  
>tr|Q7A4I3|Q7A4I3\_STAAN  
mknisdialagvskstvsrflnngsvskktsek1triaehdyqpnqfaqs1rarqthligaiiprmnsyavdetikgl  
akqcqkyesqll1nytgln  
ieaeiqaletlarskvdgvlmatditerhievinkmnpivivgqqheqlhsivhddykagqiiigewigqqgyqqvevf  
svsekdiavgihrkrgll1d  
qlakyqikpnihetnftyveaqkdvanv1enveqvdaavgatdialaaykyysdkndvmkphqiygfggdpmtqlvsps  
iktihynyfeagqcameei  
qqmlkkqdmypsvtdvni  
>tr|Q7A4I6|Q7A4I6\_STAAN  
miptfssiiflffklkyyaivtilvtmiimylnsfatvgflfltlrkytt dpail1plyilsfssvs1latylvriskkf  
kksylslnktymiiisfv1  
fatfaffyiystntssngdslipyalvfigliifisvivilmslftlkemkykrnqeeietyyeytlkieainnemrkfr  
hdyvnilttlseyireddm  
ig1rayfnknivpmkdn1gmnaik1ngien1kvreikglitakilraqemnipisieipdevssin1nmid1srsigiil  
dnaieasteiddpiirvaf  
iesensvtfivmncaddiprihel1fquesfstkgegrgl1stlkeiadnadnvl1dtiengffiqkveiinn  
>tr|Q7A4I7|Q7A4I7\_STAAN  
mnt1vnmffdfiiklakaigivggvnacssl1fdepkvpaeltnlydk  
>tr|Q7A4I9|Q7A4I9\_STAAN  
mkvqiylpiifgdssknetqitqwfeknmnaevdvvlpemmwnngydlehlnekadnngqsfsfikhlakkykvdiva  
gsvsnirnyqifntafsvn  
ksgqlineydkvhlvpm1rehefltagenvaepfqlsdgtyvtqlicydlrfpellryparsgafiafyvaqwpmsrlqh  
whs1lkaraiennmfvig  
nstgfdgnteyaghsivinpngdlvge1nesadil1tdl1n1neveqqrenipvfksikldlyk  
>tr|Q7A4J6|Q7A4J6\_STAAN  
mnneqkeviehvvyqle1svvn1lesyehteyvngievseisrekhl1limkwaqelknnfqlekge  
>tr|Q7A4K6|Q7A4K6\_STAAN  
mse1takqarfvneyirtlnvtqsai1kagysansahvtgcr1lkkphikqyiqeqkdkvidenv1take1lhv1tnaavg  
detetkevkvkrgeykenp  
qsgkvqlynehvelvevpikpsdr1kardm1gkyhklftdkhdngnvpifinigewdgdde1dktvqevsnanpnht  
vivddipl1ed  
>tr|Q7A4K8|Q7A4K8\_STAAN  
mkk1l1kt1iasalv1ttvgsgfhssnyngin1nvakaeqtdnalwknvrda1kdani1dktdnenvkvtykiengge  
ntiegtan1eni1sts1nnpk  
inpnqvtk1nitrknsnypnidanntwkk1tek1kek1nivngdnvs1l1stdpkdetvfgkvgedksnvsnryinpkdin  
eiqitkk  
>tr|Q7A4L2|Q7A4L2\_STAAN  
mrdterni1nifkt1fdeyt1snqral1eiernhhgylsinflhyhdsyktkn1lvqiheinpds1herikn1iiev1rgh  
rk1kkg  
>tr|Q7A4N2|Q7A4N2\_STAAN

Tsompanidou\_et\_al\_Supplemental\_FASTA\_File

mkiiiknnsdfpiyeqikqkvkqnilkghvapgehlpmsrelakdlqvsliittkcrayedlekdgfvttirgkgtfvkeqd  
ssilkekqfftienlvkel  
vneaqaiemsleelqdiiltfiyeess  
>tr|Q7A4P5|Q7A4P5\_STAAN  
mnieeqkfydskaffntqqtkdifrkdqllklskaiksyedilealytdlgnkveayateigitlksiknarkelkn  
wtktknvdtplylfpktsy  
ikkepygtvliiapfnypfqlvfepfigaiaagntaikipseitpnvarvikrlinetfdanyieviaggiheetqtlhl  
pfdyvfftgsvngkivyq  
aasenlvptlemggkspvividetanikvasericfgkftnagqtcvapyilvhsvkddlitalsktlrefygniqq  
spdygrivnlkhyhr1tsl  
lnsaqmni vfgghsdederyieptlldhvtsdsaimqeeifgpilpiltyqsldeafiaihqrpklsllylfsedenatq  
rvine1sfgggaindtlmh  
lanpklpfgvgasgmryhgkysfdtftheksyifkstrlesgvhlppykgkfyikaffkn  
>tr|Q7A4P9|Q7A4P9\_STAAN  
mqlyylgpkgtfsylacrqyfseneatfqpsnlfevikavaddtsigvvpiegsiegtinivadalaqqdvfahgeir  
ldinfalyngtdsisdik  
kvysiapaisqttnyihqhfdydydstiqsltkiengvaaiaplgsgeaygftpidthiedyphnvrflviknqqqf  
dqnat1mfli1tpmhdkpg  
llasv1ntfalfnin1swiesrplktqlgmyrffvqadsaittdikkviailetldfkvemigafn  
>tr|Q7A4Q0|Q7A4Q0\_STAAN  
myqledds1mlhndlyqinmaesywndnihekmafvdlyfrkmpfnsgyavfnglkrvidfiehfsgfse1leylksigy  
kddf1sylvkdkftgsirs  
mqege1cfgnep1l1rveapliqaqlietillnivfhtlittkasrirqiasndklmefgtrraqeidaalwgaraayig  
gfdtsnvrakl1fgipvs  
gthahafvqtygdeyavfkyaerhkncvflvdtfhtlksgvpnaikvake1gdkinfvgir1dsgdiaylskearmld  
eagftetkiiiasnd1deet  
its1kaqqakvds1wgvgtklitgydqpalgavyklvaieneegsysdriks1snaekvt1pgkknvyriinkktgkaegd  
yit1enenpydeqplklfh  
pvhtykmk1fiksfeaid1hhniyengklvyqmp1tedesreylaag1qsiwdenkrfl1npqey1pvd1skacwdnk1hkri1fe  
vaehvkemeedne  
>tr|Q7A4Q6|Q7A4Q6\_STAAN  
mkrt1v1l1itai1fi1aacgnhkddqagkdnqkhnssnqvkeiatdknvqgdnyrt1l1pfkesqarg1l1qdnmansyngg  
dfedg1l1n1skevfptdky  
lydqgqf1dkktinay1npkytkreidkmsekdkkdkkanen1g1npshegetnpekiaekspay1snileqdfygggdt  
kgknikgmt1glamsvyy  
ykkekdgptf1skk1ddsevkqgkqmasei1sr1rendd1kdipihfaiykqssedsitpgefitqataeksqtk1newh  
n1neksa1lpsstaadye  
n1nnf1kqfnd1lqsyfsnftqavgvkfvdkkpqr1vvd1pidy1gqaetigitqyvteqankyfdkidnyeirikdgn  
qpralisktkddkep1qvh1  
ysn  
>tr|Q7A4R5|Q7A4R5\_STAAN  
mqhekmndern1tmkptkvi1rdasy1hsktsitf1lkdv1eednkiyyfdtsatfedqevkfefal1f1dsdmdn1khmd  
ydn1pvteiy1fiepd1l1hfti  
idfngel1lciyid1fdsg1l1rhnsmatesgis1riniaksdftkfinelasly  
>tr|Q7A4T4|Q7A4T4\_STAAN  
mr1lgari1fktgiai1lamsias1l1pddvg1kalagvsavvamqpsiyrsfktvsdqalgnii1gailsvtmvtifsdnfi1  
mgvtvivi1liai1l1fkfn1lah  
vatlasvtali1imgqhtgsfyitafyrfv1vmigvi1ss1vnfv1l1ppk1fetkiyyn1nissdi1fmwfk1vl1ndt1tefn  
nikqdshn1kqrveklei  
ydyseer1pitkkhihqnrkki1l1frevvqttrqayev1n1ksryqndly1l1nnf1l1qik1d1d1s1tafheqilas1sk  
karynvthvdyel1dnpqkk  
d1l1stf1qhel1nhpyqteysfanvmqivaaieeyrh1leh1driris1fftyhrs1dadieiveedfd1  
>tr|Q7A4W4|Q7A4W4\_STAAN  
mtksvai1igagit1g1ssay1l1kqdpnidvti1feasnrpggki1qsy1rkdgy1miel1gpsyl1grktimtelakdigleqdi  
vtnttgqsy1ifaknk1lypi  
pggs1imgi1ptdi1kpfvttk1lisp1lgk1rag1d1l1kkpi1mqdgd1svgaffrar1gnev1en1liep1mggiy1gtdidk1s  
1mstf1pn1fkeeeafgs1i  
kgmkdek1nr1kqrq1lypgapkgqfkqfkgh1ssfi1eal1eqdvknkgvtiryntsvddi1itsqkqy1kivysnqqedvfdg  
v1vttphqv1flnwfgqdp1a  
fdyfk1mdst1tvatv1lafdekdi1entydgtgfv1artsdtditactwt1skkwpfttpegkvl1rayvgkpgd1tvddht  
dne1lsv1vrrd1sqmmtfk  
gdpefti1vnr1lpsmpqyhvghiqqiri1qahikqtypr1rv1tgasfeav1g1pdcit1qgkva1eeviael  
>tr|Q7A4Z0|Q7A4Z0\_STAAN  
msnqfkseer1r1qweqf1qaf1qnq1nq1hqqy1gqk1skk1gw1fwg1cgc1vl1fili1i1igisactagvtgn1lggnsskeant  
hkigetv1kngd1levtvns1v  
etmksv1gps1lapt1nakgi1fvadv1tiknkgkeal1tidssmf1klksgdktfeadntg1smsanqsdng1siensffl1qrinpd  
staqk1ivfd1vseni1anak  
dkk1leviss1lsvkkitfd1sdakkt1skakdkkdq1te1vavassnsdnvny1easatt1patt1ssad1tdsed1sek1skdedkq

Tsompanidou\_et\_al\_Supplemental\_FASTA\_File

nasksdksvekseesneet  
atvepmpqskpttseappsqnnhnenmydaste  
>tr|Q7A4Z6|Q7A4Z6\_STAAN  
mpnshhsfngsstsshkvpvpyamh vaplciky ls l tqrkl flftkstysylhgahfh  
>tr|Q7A545|Q7A545\_STAAN  
mtlnklkdelqivshrglpsdfpentmvgyrevmglnvamleidvhltkdqhfvihdetidrtsdkgriadyt lsq lk  
sfdfgsykdvafkgeript  
ldevls|clkydkllie l kspn lypeieckllafleekkvdatqvviqsfdiecielntlgsiyelgv l sskrnywyk  
kpnfsriaqiasyvnpnya  
lvarkfvdkahhhq l qvmpytvnlktgek l rmgvgdlitdnplfik  
>tr|Q7A595|Q7A595\_STAAN  
meiyadyaattpvkpevdamm i ynshygnpssihakgrdarkyl desrrqiaql l gadtheiiftsgatesnntaikg  
ivkaneqlgnhiitskieh  
hsvlhvfeqleregfdvty l dvddtgaid l dqleetitdkt l vsimfvnnevgtvqqiydiqdiiaetnayfhvdavqa  
igh l dvkfdefeidamsit  
ahkfggpkvggallvkdhvt l dypqlggeqelkr ragtenlaqivgmakalqlaeknrddnnihl mnlkeqflvklqera  
ipfelngsmt datghivnl  
yfpfvevemml t l l dmaqiyvssgsactagstqps h v l damfedeersnhsirfsfne l tteneinaivaeihkiyfkfk  
ees  
>tr|Q7A5B6|Q7A5B6\_STAAN  
msqyaemslvydqltgdqpyekwfeivknhckdesn l digcgtgsltvqlea l gnv t gmd l svdm l tvaaksanvwl  
egdmtsfd l qqfdiitif  
cdslny l qdetavietfinvyhhltdsgvfi fdvhtvykmm t l fnnqsyiddkgdi flawdavqgd l plsvyhdmtffir  
hedetysrfdeshfqr t fd  
ekty l swlaqvgfkhvetfdfnidehnedter l ffiakk  
>tr|Q7A5C2|Q7A5C2\_STAAN  
mtvqsayihipfcvri ctycdfnkyfiqnqpvdey l dalitemstakyrnlktmyvgggtptalsinq l erllkairdtf  
titgey t feanpdel t ke k  
vq l l ek ygvnri smgv t f kpe l l sv l grthntedi y t sv l naknagiksis l d l myh l pkqtiedfeqs l d l aldmdiq  
hissygl l lepktqfynmy  
rkg l l k l pned l gadmyq l lmskieqspfhqyei snfal dghesehknvywfneeyygf gagasgyvdgvrytninpvnh  
yikainkeskailvsnkps  
l termeeemf l gl r l negvsssr f kkkfdqsiesvfgqtinn l kekelivekndaial t krgkvignevfeaf l ind  
>tr|Q7A5D7|Q7A5D7\_STAAN  
mnidkqfwk t iyywiry l nfdivsrekddqe i w l ahkrkkqvvi f kqhikstqeirfdkakv l ehkdeianf isfepqsf  
efyyftesefseeqlnevs  
pirikfnv i rhtkd l ikhmpni flar l isedndkktymfykrkv l tdnf l dkymqkfspatytiifvnv l iwlcmily l n  
nfsdvk l l dvgg l v hfnv  
hgewyri v t smf l hfsfehi l mnm l s l fi fgkiveai igswrml t vyfiagl fgnfvslsfn t t t sv gasgai fglis  
ifammyvsktfnkmlgq l  
lialvilvgvslfmsn i nivahiggfigg l l it l igyyykvrnri fwilligmlvifialqiriftikedniynklkdd  
mtsgnydnaqni v kqtink  
nyaddqtyy l sgminatinsksegmtewerg l rmfpksg l l nfelaians l nddeka l kyvrka l nadpkntdyinlek  
el t ksnesknk  
>tr|Q7A5E9|Q7A5E9\_STAAN  
mrniifylv l iiaaig l v m l daf i fsivrm l isfaviagi i y l iyyffil t edqrkyrkamrkykrnrkr  
>tr|Q7A5G5|Q7A5G5\_STAAN  
mnkqwwkeavayqyprsfndsnhdgig d l pgmi d k l dy l kd l gidviw l spmfkspnddngydisdyqeimdefgtmed  
fdcl l kg i h d r g m k l i l d l  
vvnhtsdehpwfiesksskdnprkrdwyiwqdpkqdgsepnnwesi fngstweydanteqyyfhl fskkqpd l nwg npevr  
davfemmnwvfdkgidgfr  
vdait h i kktfeag d l pvpegktyapa f d v d m n q p g i q t w l q e m k d r s l s k y d i m t v g e a n g v s p d d a d d w v g e e n g k f n  
m i f q f e h l g l w n s g d s h f d  
vnsyksv l nrwqqlenkgwnal fi enhdqprrvstwgdddkywesatshaavyflqqgtpfiyqqgeigmtnypfesi  
etfndvavkndyqivkaqg  
gdvdallakykdenrdnsrtpmqwddt l nggftngepwpfn l nyktinvaqqledehsv l qfykd l i q l rksndvyvyg  
qfd l vdaensqv faytrt l  
nekqvlivgn l tnheael t v p f d l shgevk l fnydakvn l k q l rpyeacvie l n  
>tr|Q7A5H8|Q7A5H8\_STAAN  
menesskdtntetksvpeemeaskyvggfgppaekdaiefakhrkefekvgeqffkdnfg l kvkatnvvgkddgvevy  
vhcedhgifnas l p l y k d  
aihqkgs m r s n d n g d d m s m m v g t v l s g f e y r a q k e y d n l y k f f k e n e k k y q y t g f t k e a i n k t q n v g y q n e y f i t y l s  
rnlkeyrkyyp l i h k n d k  
efkegmqrarke l dytansntvat l fstndkknrkekinvid l sekiertkmpikntittq l g n k l i g t k k a r f d d k k  
vvsfgafede  
>tr|Q7A5I8|Q7A5I8\_STAAN  
mkh l l v i h t g g t i s m s q d s n k v v t n d i n p i s m h q d v i n q a q i d e l n p f n v p s p h m t i q h v k q l k d i i l e a v t n k y y d g  
fvi thgt d t l e e t a f l l d l

Tsompanidou\_et\_al\_Supplemental\_FASTA\_File

ilgjeqpvvitgamrssneigsdglynyisairvasdekarhkgvmvfvndeihartarvntkthtsntntfqspnhgplgv  
ltdkdrvqfhhmpyrqqaie  
nvndklnvplvkaymgmpgdi fsfysregidgmviealggnippsalegiqqivslnipivlvsrsfngivsptyaydg  
ggyqlaqqgfifsnsgngp  
karlkllvalsnldkaeiksyfel  
>tr|Q7A5K5|Q7A5K5\_STAAN  
mdkyqlkarpvvi rrelldhysdlgldeqdlvillklyasetsnkqpsielkqgstmqprditmviqnliqrellelq  
vqkdeegrfteymnl dpff  
eklshilkqsmetkeqnskekfkqlfrvledtfarplspyeietlnqwidvdkhsaiiqaaldeanslnklsfkymdr  
illnwkknnvktidddsrki  
rekfnkpkmthtvktvpkfdwlngenldgk  
>tr|Q7A5L3|Q7A5L3\_STAAN  
mfqllavcpmgleavvareiqelgyetnvengriffegdasaiivkanlwlrtadriki vgrfnattfdelfeqtkalp  
esiidkegnfvpqgrsvks  
tlhsvpdcqaitkkaiverlrraynekgwlnesgakypvevailkdnvlltidtsgsglnrrgyrlaqgeapiketlaas  
lirlanwkgdtp lidpfcg  
sgtiaieacliaqniapgfnrefvseqwnimpaniyddyrdeadkmadydkeievyasdidpemveiakrnaeevglsdi  
ikfsvkdvntltidteepv  
alignpppygerigdreveemyryigklmkqhpflstyiltsnefeylvnrkatkrklfngyiectyyqywgkkterk  
tien  
>tr|Q7A5L7|Q7A5L7\_STAAN  
mpnkllvdgmalfrhfyatslhkqfmynsqgvptngiqgfvrhifsaieirpthvavcwmqgstfrndmfdgykqn  
rsappeelipqfdyvkeis  
eqfgfvnigvknyeaddvigtlaqqystdndvyiitgdkdlqcindnevwlkkgniyrytlhrfneeyalepqq  
idikafmgdtadgyagvkg  
igektaikliqqysvenvidalsagqrnkindldeylskrlaeihtqvpidsealfekmsfattlnhilsicne  
helhvsqkyisshf  
>tr|Q7A5N2|Q7A5N2\_STAAN  
mtnptrtkrcggdvlcgidnhfqlllyisenhcqletkffeyflrivnkthdyailenkkicish  
>tr|Q7A5S1|Q7A5S1\_STAAN  
mvsmlvvlhkwtvfiqhlmnisggesie  
>tr|Q7A5T8|Q7A5T8\_STAAN  
mrvnemnakeqlvdnlmktssqlfkfhgevamqlfndelklpsiveicverkrldivkvpqsyallyidkqdqaiak  
edlslskiakvyvqyddtt  
imsifvydvndewifrl dpniripksniyfhslnwdvdyikpeivlmydlmqhhqyhhsnykrvidalsyyqffilkf  
vvgeqrikdaiqrinn  
>tr|Q7A5V9|Q7A5V9\_STAAN  
mlfnyslydtlntllhipyengffimlyd  
>tr|Q7A5W1|Q7A5W1\_STAAN  
mksrklaitaliainvlssiiiplgpvkaapvqhfvnl savivgpywylaqalissilrvlfgtgtafafpgsmig  
vllasmfyirrkhi fmaav  
gevlgtgvigsliciplayflgldffikplmitfivssaigsiiisyflilitlkkrgilqrfik  
>tr|Q7A5W4|Q7A5W4\_STAAN  
mkdtlmsiqiipktpndnvipyvdeaikiidesglhfrvgpletvqgnmnecliliqslnermvelecpsiisqvkfy  
hvpdgitietl tekyde  
>tr|Q7A5W8|Q7A5W8\_STAAN  
msnpskfedaediakeslklyinayr laerystiatncydtaevikelkktdlqlk  
>tr|Q7A5X4|Q7A5X4\_STAAN  
msrqspnihikvspttkfktttivfkfmapleydtitarsllskllvratkkwptdksfnhladlygayvnstiskfk  
dqhvittfsl eivneryln  
geslfnqgl dllqeiwnp lienkafndfnvnektllakkieamvdnkaqysflklldhmfeneaykylstggleqiph  
itaetlyhtyqsmindqc  
svyvvgnvpevesvekqirekfal kpfdkhqfshthlhdeevdyiveyddvdqaklnmgyrfptqygqsgyaa fvvfnm  
mfggdpsvvl fnevrekqs  
laysihsqidgkngylfvls gvsdkyetakdtiisefekikagdfteeklelakkvii shryesedrpkssiieimhnqi  
lleppqsketfindiqvs  
redivsvaekafldtiyvltkggdk  
>tr|Q7A5Y6|Q7A5Y6\_STAAN  
miklflkllywahfstkqihqflmaypnvikeegrkkdsylcewvnrreenvlllrkyafikldhndiikelqklkvsyi  
tymdseypvllkeiyqfp  
llykgniklinmmhhlavgardstsytqqsleflsndkskyltivsglaqgadamahqialkynlptiavlafghqt  
hypkstlalnkieekglv  
iseypphtpiakyrferpnriisgl skgvliteakeqsgshitidfaeqnrnvylpgsmfnpmtkgnllriqegakvv  
lnandifedyyi  
>tr|Q7A613|Q7A613\_STAAN  
mevicgsyedlnvsfyggpnaerkraii spnyepkesdfeltlmeieypekfvtkhqhilgtlmslgiereqvgdii  
neriqfvltsrlesfimle  
lqrikgasvlytipvtdmiqsnenwknesatvsslrldvvikemirksrtiakqliekkrkvvnhtivdsadflqand

Tsompanidou\_et\_al\_Supplemental\_FASTA\_File

lisisqgfgrahitdiggkt  
kkdkthityrtlfk  
>tr|Q7A614|Q7A614\_STAAN  
mdinvlatifkfilfvveyyfgmiiyfftswvpsiretkvgyflakiyepflqpfrkvippigiidissiaaiivlvlf  
qkgllqifnwiliqlq  
>tr|Q7A684|Q7A684\_STAAN  
miyafigitvllwllficyiiasidfgagffaahskltgdekkinhlsrylnpvwevtnvffvffvfgvfgffpesiky  
lgtvllvpgsialimislr  
nsfyafenygqdtklawmimygvsllipaslstaltiteggyinvrnvidldwvqlllspfawsvflaiisvlyiss  
gfltyyakkandepaynl  
rqwhiflppmiiclfvflslriqnsehfysavfdywmfaisflffalaslltffkkgglaflvfvilqmmfaffgyg  
isklpyllypfvkitdayv  
npemgwtlvivfilglllllpslilllrlfvfdkeyvegkks  
>tr|Q7A6B0|Q7A6B0\_STAAN  
mthykyeanvetnqvllvllhgflsdsrtyynhidkytdichvitidlpghgedqssmdetwnfdyittlldrildkykd  
ksitlfgysmggrvalyya  
inghipisnlllestspgikeeanqlerrlvddarakvldiagielfvndweklplfqsqlelpveiqhqirlqrlsqsp  
qkmakalrdygtgqmpnlw  
prlkeikvptlilageydekfvqiakkmanlipnskcklisatghtihvedsdefdtmilgflkeeqnd  
>tr|Q7A6B5|Q7A6B5\_STAAN  
mkvnkaiyvivalflgglgihkfyadkfgqglfhllffwtgiptiisiihaifviftkkadkdyiifpkn  
>tr|Q7A6B6|Q7A6B6\_STAAN  
mnrnivklvfmliilvvavagcgqkdteektemttikdelgtekikknprkvvleysfadylaaldmkpvgiaddgstk  
nitksvrkigayesvgsr  
ppnmevisklkpdliadvshrkkikselkiaptimlvsgtdynanieafktvakavgekegekrlekhdkielai  
rkkieqstlksafafglsr  
agmfinnedtmgqflikmgipevtkdkthtthvgerkkgpyiylneelaninpkvmilatdgktdknrtkfidpavwks  
lkavkdnkvydvdrnkwlk  
srgiasesmaedlekiakak  
>tr|Q7A6D8|Q7A6D8\_STAAN  
mlnlenktyvimgiankrsiafgvakvldqlgaklvftykrkersrkelekllleqlnqpeahlyqidvqsdeevingfeqi  
gkdvgnidgvvhsiafanm  
edlrgfsetsregflaqdissysltivaheaklmpeggsivattylggefavqynvmgvakasleanvkyalaldlg  
pdnirvnaisagpirtlsa  
kgvggfntilkeieeraplkrnvdqevgktaayllsdllssgtgenihvdsgfhaik  
>tr|Q7A6E5|Q7A6E5\_STAAN  
msqqlsreeqerkypeytwdltti fkddeafeaafkevenelgkeeqfkghigdsaelynaleledtlgkglekvyvya  
hllkqgdttndkytgmes  
ahqliikfssawsflvpeilqidedkiqsfvnsydklqkfafdlklinekrphilldaetekllteaqdalstpsnvymf  
snadlvfedaidkdgnahp  
ltqgtfikylesddrk1resafrnvykaygahnntlgatlagevkkvfnarthnyktarekalsnnhipenvydnlvkt  
vhkylp1lhrytelrkel1  
gldd1kmydlytp1k1k1kfempyeeakewmlkalepmgeeylnvvekgl1nrrwvdyenkgrsggyssgahltnpfil  
lnwsntisdlytlvhfgh  
sahsyfsrkfqpsnssdyti fvaevastcneal1sdymdkhlddekr1111nqelerfrat1frqtmfaefehkihaiee  
agepltptrmneeyaklnk  
lyfgdsvetdediskewsriphfymnyvyqyatgysaaqslshqiltegpavdryineflkkgssnypieilknagvd  
mttpepieqacevfeqkln  
afeklmka  
>tr|Q7A6E6|Q7A6E6\_STAAN  
mlvalneekervlatta1rktqyfcpcvgkqvilkrglkvishfahkhlaeqkcfnnetikhykskllilaqmiqqgckv  
ei epflkeikqipdilinn  
kyvie1qyspi pykqilqrteglkkmgkvswwllndvdychnkvkfnhfs1finpitrlhtfnlekkqimmfqqiqyl  
gghkyvaekrnakie1fn  
eapcdyhavyk1skfainqiyikyrwqnsvl eptlsamyqlqltdqevvnygyifpeqiyienhpiewqlqvdlwlkng  
ksklvndnl1nyfk1kkfiv  
alesktaiiek1linny1nicdrgndvqilf  
>tr|Q7A6E7|Q7A6E7\_STAAN  
mqnkskspfki1srfihnkiam1siif1liitivsiiapliapfpvnqdd1lnikgemtaqnilgtdsggrdnfsr1ly  
agris1sigitstigm1li  
gitvgvisgyfggvd1l1mritefvm1fpflifaivlnaalgdiknpygsaiilvlviiv1swggiarlvrgkvlqek  
eneyflaaksigtptykii  
lkhl1pn1lsvvivqat1lfagmivvesg1sflgfgiskaipswgn1sdaqegdv1sgkpwimppaimit1tilsinf  
vgeg1kdafnprgr  
>tr|Q7A6H0|Q7A6H0\_STAAN  
mqphlic1ldgt1l1ndnke1ssytqvlne1qqrghqimiatgrpyrasqmyhel1n1t1pivnfngayvhhpkdknfk  
tcheild1giaqni1gglq  
qyqvsni1aevkdyv1innhdpr1fegfsmgnpriqtgn1lvh1kesptsilieaeskipaiknmlthfyadhiehrw

Tsompanidou\_et\_al\_Supplemental\_FASTA\_File

gapfpvieivklginkarg  
ieqvrqflnidrnriiafgdedndiemieyarhgvamenglqelkdvannitfnnedgigrylndffnlriyyc  
>tr|Q7A6K1|Q7A6K1\_STAAN  
mipygdftfflialiallpviihgflgkrsyiyngvvtafmivlifssdkhnlfdqkylsvqlisfiivyvwqvlilmfy  
yhskpknnsfskfvvmv  
silplalvkvllqstwlqghqihfheshkliefvgflgisvtfksvqlimeirdgsikeikvwkliqfisffptisspid  
rykrfvkddkkvptgneyr  
elvlkaihmiimgflykyivayfintyaimplqlldhgfvnlwlymyayslylffdfagyslfaiafsylfgiktppnfd  
kpfkaknikdfwnrwhmtl  
sfwfrdcjymrslyfmsrkkllksqfamsnvaflinffimgiwhgievyiyvyglyhaalfigygyerwrkkhprwqn  
gfttalsivitfhfvtfgf  
lifsqli  
>tr|Q7A6M5|Q7A6M5\_STAAN  
mntiesqfdkvaedydfvnelndysffvsnmppkgraldigcsgllveklasydevvgididnqmlldakskrqlt  
ntvylnmnaeqlnfnkfd  
fivsrthhhlddiasviqqmekllneegrivildnvsevetpptyvyklgaiqeflphcfkfgiknairiynhntsksw  
lehlasdkylseqnyydl  
ekllpgcqfhkmgwamgvvwtk  
>tr|Q7A6N0|Q7A6N0\_STAAN  
mrrsqasiqtghydd  
>tr|Q7A6N2|Q7A6N2\_STAAN  
mvtaiihgfilaigliplgaqnvfi fnqganqkyryvlpaiitaglsdslliiiavvgvsiiimsipvlqaiiyvgl  
iflmyawtiwhdkpstdg  
eaqii spmkqvsfalsvsl nphaildtigvigssaalysgsnkiaftiacisvswlwffllailgkmvgsidktgkllt  
iinkissiiiiivalmilq  
kligllf  
>tr|Q7A6P5|Q7A6P5\_STAAN  
mknkllvlslgalcvsqiwesnhasavvsgeknpyvskalelkdknsksnsyenyrdslslisslsfadyekyeepeye  
kavkkyqqkfaeddalkn  
flneekki knadisrksnllgltherysyifdtlknkqeflkdieeiqlknsdlkdfnnteqhnadveinnlenkvlm  
vytyfntnkdeveelye  
ldliivevqdkdkkravnqrm lnrkkedlefiidkffkqiqerpesipaltseknhnqtmaiklkadteaakndvskr  
skrsln tqnnksttqaise  
eqkaeyqrkseal kerfinrqksknesvsvliddedndendrqlvvsapskkpttpttytettqvpmptverqtqqqiv  
yktpkplaglngeshdftt  
thqspttsnhtnnvfeetsalprksgslvgisqidsshltrekrvikrehvreaqklvdnykdthsykdrlnaqq  
kvntlseghqkrfnkqink  
vynk  
>tr|Q7A6U6|Q7A6U6\_STAAN  
milvidnndsftynlidyiktqtkltvqvvgidnlliedvinmkpkaivispggpnddypilnevleqfyqrvpilgvc  
lqfqcivsyfggniihgyh  
pvhghttqlrhtnegifqglpqnfvmryhsliadgatfpcnlkitakndeaiimafehirfpvfgvqyhpesilseygy  
rqvelflskvgdycenri  
>tr|Q7A6V0|Q7A6V0\_STAAN  
milyilinaiavvlitgfnlyrhqmqlslsamllsitinafintfiidkynfitlctitmfiiwtlqfyidkklkpv  
itdqkfaiiiltivvsltq  
rvtdfsstqsiymsipflapai fiiggimlfistfnsldetaennkikklmikgliiinisfivmmvltpywylly  
lifllflwqkvkyf  
>tr|Q7A6V1|Q7A6V1\_STAAN  
mntkyflavgavasvltlgacgnsnsqdqgnkteqtktsedsnvktdkthlgtgfsskngetvegkaeikngklmltny  
ksskqpdlyvyltkngdik  
ngkeiamvdydkekqtfdlknvdlskydevtiyckkahvifggaklk  
>tr|Q7A6V5|Q7A6V5\_STAAN  
mki rvvipcfnegevitqthqqlteilsqdssvkgydynmlfiddgsttdtidemqhlaidrhvsfisfsrnfgkeam  
iagyqstefdavimidcd  
lqhppeyipkmvegfmegydvakiakdrsgenfsrktlshlyykvncfveevqfddgvdfllsqravksiasleeyn  
rfskglfewigyntkvfty  
qnverqkgeskwsfkklnfygidglisfnsklrmmiylglfifsisalyiylfinimisgvnipgyfstiaailllgg  
iqlisigvveyigriyye  
vkarpyiiqatnlssiendekdthkvysk  
>tr|Q7A6W1|Q7A6W1\_STAAN  
mitekrrhelileelshkdflltelidrtgcsastirrdlsklqqlgklqrvhggamlenrmieanlteklatnldek  
kmiakiaangindnecifi  
dagsstlelikyiakdiivvtnglthveallkkgiktimggqvkentlatigssameilrrycfdkafigmngldiel  
gltpdegealvkqtamsl  
anqsfvlidhskfnkvyfarvp1lesttiitsekalnqeslkeyqqkyhfiggtl  
>tr|Q7A6W8|Q7A6W8\_STAAN  
mseekhvveheqqkkektkkqkpfwivmsfiilivlllpapsslpmakavlaialafavimwvteavsyvpsatliig

Tsompanidou\_et\_al\_Supplemental\_FASTA\_File

lmllllgfsqvqnlgeklg  
npksgsailagsdlgtnhalslafsgyatsavalvaaalfaaamqetnlhkrallvlsivgnktrnivigaiivsv  
laffvpsataragavvpi  
lgmiaafkvsksklaslliitsvqavsniwigiktaaaqnvainfinhqlgfdvswgewflyaapwsivmsvalyfim  
ikvmppeintiieggkdlik  
eelhklgppsprewrlivismllllfwstekvlhpidsasitiialgvmlmpkigvmtkwkhenkipwgtiivfgvgisl  
gnvllktgaaqwlsgdtfg  
vlgklhlpiaatialiitfnilihlgfasatslssalipvfisltstlhlgdqsigfvliqqfvisfgflpvsapqnm  
aygtgtftvkdfkagipl  
tivgyilvivfsmtywkwlgll  
>tr|Q7A6Z0|Q7A6Z0\_STAAN  
mfskkkdkfmvqleemvfnldraaiefgkmdfnthldlkaysdniktyeshgdelvhqvitdlnqftitpiederils  
daiddvldaieetaamfem  
ysieydeymaefvndniqkavaemklavglldvdkklshmrhisinikefetncdgilrqsikhifnsetdpitlikiki  
yesmeeiadkccqivannfe  
tiimkns  
>tr|Q7A6Z5|Q7A6Z5\_STAAN  
mahiiirrvsikdvenfismlakiydespymfytpgeydpvtsaskqlleeyitsphkvifvaesdeqlvgfafvnttpfq  
rikhvaidlgvkklyqhr  
gigqalldaimawclnnqihreanvpinnqapalelfsadfqieglvkdklfidgkyddymmakiin  
>tr|Q7A6Z6|Q7A6Z6\_STAAN  
mtrsalpkpfnkrvmvtgriqrvlfknyldrhstfkpnvrillkdvfvsgvsidhlwlyetnkyyalamelihqrvkfsa  
nvppykinrnnnlfvqdy  
gikrkgrliteeyannqyqdkiyeklpdidfrledfysken  
>tr|Q7A700|Q7A700\_STAAN  
mkvndmkarllnleetfkkheseiteldraigdgdhgvnmvrgfsslkdklddssmqslfkstgmalmsnvggasgplyg  
fsfvkmsavtkddmdnqdf  
itliqafaeavesrgkvtlnektmydvvaraaklengetlftndlqqladntkdmvatkgraayfgeeskgypdgaqs  
mvyilnaligdedna  
>tr|Q7A715|Q7A715\_STAAN  
mnylnsnffnttiqlniyiivivaacyiaihqyrhkpvlnyldvilnyipvlthefghvlnklaggrakdlvivtsprer  
qqtllqqgfaitqsrhlagg  
wlttiggyllmppimlliglasshyqipsffiftyllifiyfliltsrkgsipvvitlisimlyfilkdeniveiqllvtm  
syqyilgvllgevlqsswt  
iaklftqrpsqwdgsalkeishvpifiystiwiifnlyavnillkythlin  
>tr|Q7A731|Q7A731\_STAAN  
mllfyiigvlvgmlipiqtsvnrslytkspfytsfifsvgticliilniiinpevftihfynnqsfnytwvvgllg  
vsfltgllllpklgatlt  
viatvagqiimgviidtfglfgatihdfnlkaigvlllvgivimnqfnknnllltdqyillfwlllglfigffppiqt  
tinsalashthspafasl  
sftigsitlliltaifnsslkktshlkfgklkpiyftggilgmavtaniilmpmgaaattligmfgqilmgilidhf  
glfgspkiamtsrktigll  
ciltgiillrlf  
>tr|Q7A736|Q7A736\_STAAN  
mdlfrkdgtshystlgegypivlihtvldnysvfnklaaqlaksfqvvlidlrghgysdkprhieikdfsddivellk  
ylyieevafvchemggiig  
adivrypeftsslmlvnptsiegeipeerlfrkyahiiirndpekqdkflnkrkyrprkmnrlkhvvdneistkee  
iqavkevfknadisqytrn  
vvvptkiiagefgerttrleakevadliqnadfevyqessafpfveeqerfvediasfinkhhdekhv  
>tr|Q7A738|Q7A738\_STAAN  
mtfnkvllswivilittsiylfwqlgdindvfnqsilinrvlprllealltgmiltvaglifqtvlnnaladsftlgla  
sgatfgsglalfglttlw  
ipvftsitfslitlitvltvitsvlsqgypvrililsglmigalfnslllyflillkprklntianylfggfgdaeysnvsii  
aitfiialfgifiilnqlk  
llqlgelksqslglvqlityialciasmitainvayvgiigfigmvipqlirkwqwkqslgrqlalniviggqimvmad  
figshilspvqipasiia  
ligipvlfymlisqskrhl  
>tr|Q7A744|Q7A744\_STAAN  
mtnayvdllveekvfkdpihryihvedqliwdliktkefqrlrrirqlgtlylsfhtaehsrfgshlgvyevrrlide  
sfighdawdnkdrplalca  
allhdhghpfsfsfekifntdheaytqaiitgdtevnalrkvspefprevaevinkthhklvismissqidadrmdy  
lqrdayftgvsygaafdmer  
ilrlmrpskdevlikesgmhavenfimsryqmywqi yfhpsvrggevl nnc lkrakqlynegyefklhphdfipffet  
vtieqyveldeavvtyyle  
kwtkeddailsdlsarfinrdlfkyipfdgsiitiselqelfeagginpdyyfvseafsdlypydrpgsnrkpihlrlq  
dgtireisnqslvihsitg  
inrqdyklyypremvakikdktireaienlinein  
>tr|Q7A749|Q7A749\_STAAN

Tsompanidou\_et\_al\_Supplemental\_FASTA\_File

m1ceskiinknpkyriikyndeylmidiistwislffpfwnfwfipkryvkisreefenlnivkpkknvfwvasistlf  
avtlrkytllltdtqldkk1  
viaiccttffigilifyvrlikksslniyntknkrskiiiptlknfcftlfgyvflifwtvifsyallsmsyqniivyfa  
witaigfflvniaaliidk  
nihvilkn  
>tr|Q7A753|Q7A753\_STAAN  
mlvilqlpchiisktnrisllifimkkqskmslktfkrriyvkmtydlivigfgkagktlakyastgqhavieqsskm  
yggtcinigcipsktlvhd  
glegksfeasynrknvvnalnknnyhlladdnidvldfkaqfksntevnlldqhgdivdsitaphiiintgatsiipn  
ikgldqakhvfdstgllni  
syqpkhlvivggyialefasmfanlgskvtvlergesfmpredqdvvahaitdlenkgialhtnvettelssddhhtt  
rtvngnfeadavllaigrk  
pntalalentielgdrgeikvnaqlqtsvphiyaagdvkglqftyislddyriiksaalygnqsrttdnrgsvpytvfi  
dplsrvgltkskaaahy  
dytehqlvsaiprhkinndprglfkvvinnenmllgatlygkqseeliniklaidqniptyvlrdniythptmaesf  
ndlfnf  
>tr|Q7A776|Q7A776\_STAAN  
mtderhvlvifphddetfssagtlasyiqkqipvtyacltlgqmgrnlgnppfatreslpsirereleackvigitdl  
rkmglrdktvefepyeheid  
gmiksliddtnpsliisfygyavhpdeheatadavirtvermpkeerprltlvafsnatealgepdinqnditdfkelki  
kafeahasqtgpfllkqlas  
peidgkqhsfltvepywtyhfs  
>tr|Q7A784|Q7A784\_STAAN  
mtndiyfmlaieeakkaaqgevpigaiitkdevarahnretlqqptahaehiaieraakvlgswrlegctlyvtl  
epcvmcagtivmsriprvv  
ygaddpkggcsgslmnllqsnfnhraivdkgvlkeacstllttffknlrankstn  
>tr|Q7A791|Q7A791\_STAAN  
mspvttsryqggahrg  
>tr|Q7A7B0|Q7A7B0\_STAAN  
mahtitivglngyiddlplgiyflktqdkvyartldhpvieslqdeltfqsfdhveyeahdqfedvyndivaqlveaan  
ekdivyavpghprvaettt  
vklalaktndidvkvllgkgsfidvfeavnvdngftlldatslqevilnvrthlitqvysamvaanlkitlmery  
pddypvqivtgarsdgadn  
vvtcplyeldhdenafnnltsvfvpkiiistylhdfdfatevidtlvdedkgcpwdkvqthetlkrylleetfelfeai  
dneddwhmieelgdi11qv  
llhtsigkkegyidikevitslnakmirrhphi fgdanaetidllkeiwsakdaegkqprvkfekvfaehflnlyektk  
dksfdeaslkwlekgesn  
t  
>tr|Q7A7C4|Q7A7C4\_STAAN  
mlplkniirjaddkdidkfnclnerdaenailckdivreqglmdrlnvnceytlkdksvifnftaddridfrklvki laqh  
lktrielrqigvrdeakll  
ggjgpcgrslccstflgdfepvsikmakdnslnptkisingacrllmcclyendyyeevraqlpdigeaietpdngkv  
valnildismqvklegheq  
pleykleietmh  
>tr|Q7A7C9|Q7A7C9\_STAAN  
makqkkfmkiyealkedi lngqi qygeqipsehdlvqlyqssretvrka1dlla1dgmikihgkgs1viyqevtefdfs  
elvsfkemqemgvaylte  
vvvnevveahevpevqhalninsse1ihivrtrlnqhvki vdedyflksivsdignvasdsiydylekvlnlnisys  
sksitfepfdeqayqlfgd  
vsvaysatvrsivylentmpfqyniskhlanefkfnfdrriik  
>tr|Q7A7D4|Q7A7D4\_STAAN  
meikqlryfi evakrehiseta1elniaqsaisrqitllqe1nsvl fkkqgrnitltsegkllfnealriiehl dstie  
qfqsghl tknksi yigyde  
sdvshmlpliqtfhlnqndthvipsllhdhtiinsvlngnidigfteltpeirkhkqlhmlplfeehylyapsddpitm  
athppliqfehshiyclap  
faetvkkqlrkitksdvytissqplaqyllrqkegyiissqnihl peskswidikldhtelkrticaitkepytksdigi  
lltliqq1mtktstfh  
>tr|Q7A7F2|Q7A7F2\_STAAN  
mlqinglgi fcigcswwyvrnirdlcs1tryifvacfmfdtrs1rhs  
>tr|Q7A7F3|Q7A7F3\_STAAN  
makipvtv1sgylsgskttllnhilqnregrriaivndmsevnikdlvadgglsrtdek1velsngcicct1rddll  
keverlvkkggidqivies  
tgiseppvaqtfsyidde1gidltaicrldtmvtvvdanrfvhdinsedllmrdqsvdetdersiadllidqvefcdv  
liinkidli seeelaklek  
vlsalqpiakii kttnevdlkev1ntqrfdfekasesagwikel esgghashtpeteeygissfvykrrlpfhakrfnd  
wlesmsnvvrrskgi v1a  
qynhvac11sqagssnihpvtywvasmseaaqtqilaerqdvaaewdpeygdrtqfviigtel deekltkel dac1vn  
aqeidadwqqfedpyqwqi



Tsompanidou\_et\_al\_Supplemental\_FASTA\_File

rpar

>tr|Q7A7F4|Q7A7F4\_STAAN

mnm1fvilvlyvigiafi11svfgskteglstkhtlytigsaiitiaifisigyaiqyltaalygl

>tr|Q7A7F5|Q7A7F5\_STAAN

mtliepdmnlrmpdisttvetlnliskmeaqkenirsviapehkhkykdienglkgeekvlieqmaqhceafkanfkgaaggdwvksamseidsikddl

kkins

>tr|Q7A7G8|Q7A7G8\_STAAN

mk1kniakas1algi1ttgmitttaqpvkastlevrsqatqdlseyykgrgfeltnvtgykygnkvtfidnsqqidvtlt

gnek1tvkdddevsnvdfv

vvregsdksaittsiggitktngtqhkdvtqvn1svskstgqhttsvtseyysiykeeis1keldfklrkhlidkhdly

ktepkdskiritmnggy

tfelnkklqphrmgdtidsrniekievn1

>tr|Q7A7H6|Q7A7H6\_STAAN

mnmktiakts1algi1ttgaitvttqsvkaekiqstkvdkvptlkaerlaminitagansattqaantrqertpklekap

ntneektsaskiekisqpk

geeqs1nisatpapkqeqsqttesttpktkvttppstntppmqstksdtpqsptikqaqtdmtpkyed1rayytkps

fefekqfgf11kpwtvrf

mnavipnrfiykialvgkdekkkydgydnidvfiv1ednkyqlkkysvggitktnskkvdhkaelsvtkkdnqgmisrdv

seymitkeeis1keldfkl

rkqliekhnlygnmgsgtivismknggkytfe1hkk1qehrmadvi egtnidkievnik

>tr|Q7A7H9|Q7A7H9\_STAAN

mniistilii1fvaleffiyimyletiattskktsetfnisvdk1kdkn111knqgvnyngligv1liyg1fissnpkeic

tailvyiigvaiygg1ssn

isiffkqgt1pv1alislw

>tr|Q7A7I0|Q7A7I0\_STAAN

mvpeekgsit1skeaaifatakfkpfknriknnp1ktnpf1klhenkks

>tr|Q7A7I2|Q7A7I2\_STAAN

mskninqansk1ntsnkk1kqaysksdknmkviymphw1efysiaihsdvtsnkkryyksfsrgtvvyvklgsnigsef

sgnhfcv1dnkdnkget

vtivp1sskgnkny1k1nesv1n1tatd1kkqi1disskvqaltqkyrdid1k1stedk11sn1nqkanelyrvigvys

khkgkdtvynisaittisk

rriskindsdptgti1seddmneiekq1kikffsn

>tr|Q7A7K1|Q7A7K1\_STAAN

mekdd1aeikpmlnfdeqiak1kqmni1ffni1dtekaneil1rknyffklayfrknfeknggyfiefay1sdlatidm

klrytm1hl1tdiehs1kc

1v1k1itennqedgyki1def1cidksysnsnfdtnsrtpveemetkiknkneifkhmnkrgqlpek1nkyyqnpawvc

iefmq1gqfvsf1nfyykk

yndeelrvani1mplvknirnsahnqpiian1nydsrspqylfekgnnigisrnmfgiknfidtfatle1hnqvcnai

iqaryhd1dq1qkrykrne

syynnal1akrffialdki1dfnrpkv

>tr|Q7A7K9|Q7A7K9\_STAAN

mt1sketevidwrrrgveyhsanpplydsstfhqts1ggdvkydyarsgnpnre1leeklar1egqkfafafasgiaais

av11tfksgdhv1lpddvy

ggtfr1teqilnrfniefttvdttk1leqiegaiqsntkliyietsnpckf1tdikavskiaekhellvavdntf1mtp1g

qsp11lgadivihsatkf1

sghsd1lagav1tnea1sealy1iqngtgm1saqdswt1akh1ktfpirfkqsvenaqkivs1flikqdeisevyypg1

ttah1eqaknggav1gfr1

adeskaqqfvdal1t1plvsvs1ggveti1shpatmshaal1peevrqergitf1g1fr1svgl1edpdeliadi1kya1keafn

esiph1tier

>tr|Q7A7L0|Q7A7L0\_STAAN

msqf1tq1kdnv1vadgaigt1lysegl1d1tcpeayn1shpdkverihrsyieagadv1qntnyganfek1krfg1ledkvk

aihqaavriakkaankdty

ilgtvggfrgikqedis1qtilyhteiqid1tieegvdal1fetyy1leeltvisrtrkkydipiiaqltasntny1vn

gqaineg1kq1lvqcganiv

g1nchhgphhmgesfthielpehaf1scypnas11diensefkysdnaqyfgqvaqnliregvr1liggccgttpehikfi

kesiq1tkpvndkkvipip

tkal1fnpsqnkvrs1tskvqerptviiel1dtpkh1d1drffeniak1dkanvdav1ladnslatvrisniaaas1ikqy

yniep1vhitcrdrn1lig1

qsh11g1sligvnei1aitgdpskvgh1pgatnvydvnskgl1telal1rfnqgintdgdal1kkrthfniagafnpnrk1d

gavkr1lekkiesgmsyfit

qpvyseki1iei1yathk1lnkpf1figimpiasykna1fl1hnevpgikmsdeil1qqfeavkddkaktrel1sk1skd1id1t

vheyfngly1i1tpfqnved

s1elaaysksitahkeai1

>tr|Q7A7M1|Q7A7M1\_STAAN

mvkhy1tkfvam1itaamvcsfg11ksqaaeqqs1sdvysvitdaksal1snns1s1ndnkqkaieqvvsavkkl1s1lednse

gnavksdvrk1ledakandn

qkdt1sq1tks1liayeek1askdagski11qqqv1dakdaamtkaikdknkaeles1nns1nqiwtsnetvirnydanqy

Tsompanidou\_et\_al\_Supplemental\_FASTA\_File

gqievallqlriaihkspl  
dtakvshawttfksnidhvkksdtsandqyhvsqldalekaikaiddnqldadaalthfieiwpyvegqiqtkdgal  
ytkiedkipyyqsvldehn  
kshvkdglvdinnqikevghsysfvdmii flreglevllivmtlttmtrkvkdnkgtasviggaiaglvsilaitf  
vetlgnsgilresmeaglg  
ivavilmfivgywmhkrsnakrwndmikmyanaisngnlvllatiglisvlregvevii fymgmigelatkdfiigial  
aivilivfavlfrfivrli  
pifyifrvlsififimgfkm lgvsiqklqllgamprhviegfptinwlgfypsyepliaqaayimvvailifkfk  
>tr|Q7A7M4|Q7A7M4\_STAAN  
mfgmkvneqitlki leahdtealfnlvnrsrns lrewlpwvdateqpsdtrafikrgllqfadngngfcgiwyegt lvgv  
iglheinhmrktslgyyl  
dkqfeghgmtqavealikycfeeldlnrieisaavneksraiperlgftregmlrdnellngiysssyiysllkseyd  
qk  
>tr|Q7A7M6|Q7A7M6\_STAAN  
mnivllsgstvgsktriamddl knelevineghqielmdlrelelefsvgknyldttgdvykl ttslmqadvifigfpif  
qasipgal knvfdllpvna  
frdkviglvatagsskhylipehllkpi lsymkahtmqtyvfieekdfsnqqivnddvvrllkalaqftmrtakvqqqv  
eeennqydf  
>tr|Q7A7N6|Q7A7N6\_STAAN  
myliepirngeyitdgaialamqvyvnhifl dedilfpuycdpkveigrfntaievnqdyidkhsi qvrrdtgggav  
yvdkgavnmccileqdtsti  
ygdfrfyqpaikalhtlgatdviqgrndltlngkkvsgaamt lmnriyggysllldvnyeamdkv lknrkkiaskg  
iksrrarvghlrealdeky  
rditieefkn lmvqt lgiiddikeakryeltdadweaideladkkyknwdnygkspkyeynrserlssgtvditiseq  
nriadcrygdffgggdi k  
dveea lqgtkmtredlmhq lkldivvyfgnvtveslvemils  
>tr|Q7A7N8|Q7A7N8\_STAAN  
mkk lanyl wvekvgl yv fsmtpe lqddigtvgyvefvspdevkv ddeivsieasktvidvqtp lsgt tierntkaeeep  
tilnsekpeenwlfkl dddv  
dkeaf lalpea  
>tr|Q7A7Q3|Q7A7Q3\_STAAN  
mkkqvii sglmlfsl ffgagnlifppi lghtagqnmwigmlgfaltgill pfitvivvafydegvesvgnrihpwfgfif  
avviymsgafygi praan  
vayeigrh ilpvhnqwtliifaaiffaivywislnpskivdnlglklltp lllmlvallsiavifnpealsapkdkyit  
hpfisgsl egyftmdlva  
lafsvvivngy kfgltdrmkilkyvcfsgliaaillgmiyfalayvgastapgnfdgdtiltynslrvfgsfgnivfg  
mtvilac lttcigl vnaca  
tftkkhvpkfsy kifalifsiigflfttlglemilkiavplltliypvsialvlisfanmfstfrfswayrlatvitlii  
silqilnsfnllhgvilkw  
fmm lpladidlawlvpfml faigfiidv irrpqatt  
>tr|Q7A7Q5|Q7A7Q5\_STAAN  
meksikimtiigivigglatv fsl lmlv laasgvmttdvsttvngevdpvdaetaaaiftvlflslfifgiisiilgaig  
mfkasknkkmsgill iiga  
visgniitfalwlvsgiklltnkpkdeisdls  
>tr|Q7A7Q6|Q7A7Q6\_STAAN  
mkri lvvflmlaiilagcsnkgekyqkdi dkvykeqnmkiaskvqntikt dikqedsnthvykdgvivigiqlykdr  
ekmyyfayeikdgkaeinr  
eidpikymkdhkadyedenvevekd  
>tr|Q7A7R5|Q7A7R5\_STAAN  
mtfeeklskiyneianeisnmpvewekvytmayiddgggeffnytkpgsddl nyytdipkeynisvqvfdllwmdlyd  
lfeelrdl fkeedlepwts  
cefdftregklkvsfdyidwintefdq lgre nyymkkgfvgvipemeyemeevkqieyikeqee  
>tr|Q7A7V4|Q7A7V4\_STAAN  
mkalklygvedlryednekpviesandvkvratgicgsdtsrykkmgpyikgmpfghefsgvvdaigsdvthvngdk  
vtgcpaipcyqceyclkge  
yarcek lfvigsyepgsfaeyvklpaqnv lkvpdnvdyieamvepsavvahgfyksniqpgmtvavmgcgsigllaiqw  
arifgaahiaididahl  
diatslgahqtinskeenlekfienhyanqid laie ssgakvtigqiltl pkkggevvllgipyddieidrvhfekilrn  
el tvcgswnc lssnfp gke  
wtatlhymktdkdvkpiishflplek gpetfdklvnkkerfdkvmftiy  
>tr|Q7A7V8|Q7A7V8\_STAAN  
mkqvlvacgagiatstvvnaieemakehnikvdikqikitevgpyedtal lvttamtkkeykfpvinarnfltgigie  
etkqqil telqk  
>tr|Q7A7W3|Q7A7W3\_STAAN  
mlteqekdi ikqtp lllkekgtetsi fypkmfkahep llnmf nqtnqkrmgqssalaqavmaaavnidnlsvikpvimp  
vaykhcalqvyahy pivg  
enllkaiqdv tgl eehdpviqawakaygviadvfiqiekeiyd qmmwigf kpfkitnikqesediksftveteeydfsef  
tpggyitvdvssdklpyra

Tsompanidou\_et\_al\_Supplemental\_FASTA\_File

krhysivsgekhltfvgkrdrvtehegevstilhdeikegdminlaapvggfvlenttepqlflgsgigvtplvamyea  
asakgltdqmqvaeneqh  
lpfkdnfnsiashydnaklythlkdkqgyigteelqafllankpeiycggtkflqsmiealkslnydmdrvhyetfipr  
svav  
>tr|Q7A7X2|Q7A7X2\_STAAN  
mkkqiislgalavasslftwdnkadaivtkdyskesrvnekskkgatvsdyyywkiidsleaqftgaidlledykygdp  
ykeakdrmltrvlgedqyl  
lkkkideyelykkwykssnkntnmltfhkynlynltmneyndifnslkdavyqfnkevkeiehkndlkqfdkdgedkat  
keyvdlvseidtlvvtyya  
dkdygehakelrakldlilgtdnphkitnerikkemiddlnsiidddffmetkqnrpsitkydptkhnfkeksenkpnf  
dklveetkkavkeadeswk  
nktvkkyeetvtsppvkeekveepqlpkvgnqqevkttagkaeettqpvaqplvkipqetiygetvkgpeyptment  
lqgeivqgpdfltmeqnrp  
slsdytqpttpnpi leglsgsskleikpqqtestlkgiqgessdievkpqqatetteasqygprrpqnktpkyvkyrda  
gtgi reyngdtfgyearpr  
fnkpsetnaynvttnqdgstvsgarptqknpsetnaynvtthangqvsygarptqkpksetnaynvtthangqvsygar  
tqkpksetnaynvtthang  
qvsygarptykkpsetnaynvtthangqvsygarptqkpksetnaynvtthadgtatygprrvk  
>tr|Q7A7Z3|Q7A7Z3\_STAAN  
mlvlnnlqkkftnskmlnvnakfrsgsincivgngagkttllniissilmpktdvylnsesifenstlkkeifytp  
vnpffyenlsakdnlylic  
slynrkidqitiectikdvglinedlnipvynfssgmkkqlnfasmllvdsnvllldepfnaldhvaqknftrilkglvs  
kekiiiftshlpntilels  
eniyllkdgcftdkrkaqsfnqttletwlllesqkevipyeek  
>tr|Q7A7Z9|Q7A7Z9\_STAAN  
mrrkrkwlivicvllvltisqilkhfnygteskeayntyvtekerqldlqgkayprevktyyknqvgytlgvqvadgq  
tvkkgdmlinykinskrq  
qlvdkindtqhiitevylnitkglnnreiqkklieyqtl yeaqqqlyqydsqnrdsmyasfdgkimiknidndsnpqi  
lyliskeshiktsvtefdl  
nkvvkkgdvnlsitstgktgagikqiselpisyeenlslhendalhlpesnndgelansksisaspifksnnnselsky  
gviiiddslpiragyslei  
kvplnaikipksvltkgnvfivnknsivekvrnirikringdiivekglkpgdklikqpkstmdgdgkveiss  
>tr|Q7A802|Q7A802\_STAAN  
mvltiyqiilffjisllyltnhymavtvgnftsifgmfaailfmyyyllkspeynqrkrfkfhithnliiafstf  
vlvhlaklffsi  
>tr|Q7A816|Q7A816\_STAAN  
mdthtkeqqfslvrsvrkeyvgkgnsvrsvfkdnwai ahmtgvlskvesfylnkdrnesmlhytrtekikqmykeidv  
nemeslvgakfvklftdid  
lndevisifvfdksie  
>tr|Q7A839|Q7A839\_STAAN  
mfddkiliitggtgsfgnavmkrflsdnikeirifsrdekkqddirkkynnsklkyfigdvrdsqsvetamrdvdyvpha  
aalkqvpseffpveavkt  
niigtenvlqsaiahqnvkviclstdkaaypinamgiskammekvfvakrnrirseqtlicgtrygnvmasrgsviplfi  
dkikagepltitdpdmtrf  
lmsledavelvvhafkhaetgdimvqkapsstvgdlatallelfadnaieiegtrhgkkaetlltreeyaqedmgdy  
frvpadsrdlnysnyvetg  
nekitqsyeynsdthiltveeikeklltleivrnelndykasmr  
>tr|Q7A841|Q7A841\_STAAN  
midihhilpniddgptnetemmdllkqattqgvteivtshhlhpryttpiekvksclnhiesleevqalnlfyygqe  
iritdqilndidrkvitgi  
ndsrylliefpsnevphytdqlffeqlskgfvpiiahpernkaisqnlidilydlinkgalsqvttaslagisgkkirkla  
iqmiennlthfigsdahnt  
eirpflmkdlfndkklrdyyedmgfinsnaklvvddkkipkrmpqqdykqrwfgl  
>tr|Q7A845|Q7A845\_STAAN  
metikqevresivkgiagykydvrnernevkkrmvisdayaftksnhiesqvakhlenfvkyikenagpswkylkfifnk  
deeknnimfilknedyfde  
knsvsgkslvadknpsknylevlmaknrndinfgtvgedfeighqmtadsilfnikegsnrndinsyfltiityridkeskq  
laaikgwlpnpetsaimv  
ddltelekiekriveredyhideelevelkndgelelidvehafgisidegndmieser  
>tr|Q7A856|Q7A856\_STAAN  
menghnsklltllliglavfiqqssviagvnvsiadfitllilvyllffanhllkanhflqffiilytyrmiitlcllff  
ddlifitvkevlaskvya  
fvviyfyllgmii fklngskkvitvsvyissvtiglfciaglnkspllmkllfydeirskglmndpnyfamtqiitlvla  
ykyihnyi fkvlacgillw  
sltttgsktafiilivlaiyffikklsfnavsvsmlvimlillcftfyninyllfqlsdlavpsldrmasifeegfa  
slndsgsersvvinailv  
ikytlfgvgldvyvhigsqingillvahntyliqifaewgilfgalfiifmlyllfelfrfnisgknvtaivvmltmiy  
fltvsvfnsryvafilgii

Tsompanidou\_et\_al\_Supplemental\_FASTA\_File

vfivqyekmerdrnee  
>tr|Q7A863|Q7A863\_STAAN  
mmqq1s1khr1nngdsvyg1fnsipdplmieviaasgydfvvidtehvaindetlahliraaeahiipivrvtavidrd  
iikvldmgargiivphvkd  
retvehivk1sryyppg1rs1nggrmarfgrtp1ldamemanehimviamiedvegvmaiddiaqvegldmivegaad1s  
qs1g1pwqtrddqvtshvq  
hifevvnahgkhfcalpredediakwqaqgvqtfilgddrgkiyrh1sas1atskqkgddg  
>tr|Q7A868|Q7A868\_STAAN  
mnrem1y1nr1sdi1eqaggnhsqvyvda1tea1tahahndfvqplkpyl1rqpenghiadriiampshiggehaisgikwi  
gskhdnpskrnmerasgvi  
11ndpetnypiavmeas1issmrtaavsviaakhlakkgfkd1tiigc1ligdkqlqsm1eqfdhikrvfvydqfseaca  
rfvdrwqqqrpeinfiate  
nakeavsngevvitctvtdqpyieydw1qkgafisnisimdvhkevfikadkvvddwsqcnrekktinq1lvlegkfske  
alhaelgq1vtgdipgred  
ddei11n1pmgmaiedissayfiyqqaqqnigt1n1y  
>tr|Q7A892|Q7A892\_STAAN  
matkkdvhd1flnhvnsnavktrkmmgey1iyydsvvigglydnr1lvkatksvrhqlqdn1t1vspypgakemilipdit  
eain1tn1feliknd1kn  
>tr|Q7A895|Q7A895\_STAAN  
mffkqfydn1hsqasy1vgcqrtgeai1idpvr1skyievadseg1titqatethihadfasgirdvavr1naniyvsg  
egeda1gyknmpsktqfvk  
hgdi1qvgnvkl1ev1htpghtpesif11td1gggssvpmg1fsgdf1fvgdigrpd1leksvqikgsteisakqmyesv  
qnikn1pdyvqiwpghgag  
spcgkalgaipistigyekinwafneidetkfies1tsnqpapphhfaqmknvqfmgm1yqsydvypldnkrvaf1  
rskeafhgghtkgtinipy  
nknfinqi1gwy1dfekdid1ligdkstvekakht1qligfdkvagyr1pksgistqsvhsadmtgkeehv1dvrndeewn  
gh1dqavn1phgk11neni  
pfnkedkiyv1hcqsgvrssiavgileskgfenvvni1regyqdfpes1k  
>tr|Q7A896|Q7A896\_STAAN  
mnydkminrinriqgq1ngi1kmm1eegkdckdvtqisaskss1qr1mgiiisen1iecvkvaaddeessqelineavn  
1lvksk  
>tr|Q7A8A3|Q7A8A3\_STAAN  
mnsdfss111di1eliqshii1vnkndhs1iy1nemes11lyvysv1invtsink1flyeetntvfrcitssinenmdc  
iinhspnellmflydleqr  
fnnfinr1n1kepknrhtypt1nsvyielnplql1sedtyfssinvaelinrqsirkn1fk  
>tr|Q7A8A4|Q7A8A4\_STAAN  
msv1kwvssynnerdawfv1lyppskasscft1ivdvalfse  
>tr|Q7A8A9|Q7A8A9\_STAAN  
mtqgwwf1pvmasaf1iftivimfiagtgyg1gekgvt1dafvngass1vgvs1iig1argin1lv1nkgmisdt1ihfsss  
ivqhm1sgplfi1jv11fiff  
c1gfivpsss1glav1smpifap1adtvgi1prfvivttyqfgyam1flaptg1vmat1qm1nvryshw1rfvwpvavf1  
ifggg1litqv1iys  
>tr|Q7A8B4|Q7A8B4\_STAAN  
mtqtnps1fnps1rykskkgykdkppkekggmptevei1agpivienkfidpkn1tekviitdedqkeivessdilttqk1  
ps1mkgyf1sinekytkd1g  
yalqmmrnq1lpis1y1egvgi1etpfgpivs1sei1yttkefdnksp1daicdnayd1tpkgtfdnwf1nmy1kevkg111  
elavvfg1salvts1flkhk  
hetefagi1fsftgqs1stgkstaas1avsvagnptkgn1et1frnwnatrnalegy1snnfgipiv1fde1ssatfrdt1g1  
lys1itegg1rgrsnv1hgev  
ktpknw1gtsv1istsehs1fnds1aqndg1lrvrtie1ineqft1natnadnikkavalnyghv1plvakylinrede1v1qwy  
kev1dw1feak1kddksntgn  
rmf1kryav1ittsak1ilgrv1latdidiak1ir1dyfidyhg1htis1ers1ladkaidv1i1qfvaqnr1gkfs1degal1knm1feny1g1  
is1kddh1ievkmianv1fkg  
m1lnnhq1fqdvnnvna1lrdkgf1ladrgr1ttkrs1vkdns1gkks1lvfyh1kl1dvefas1ilg1tkdks1liqnw1tpandk  
aakel1fksaneg1g1psgvh  
edf  
>tr|Q7A8C7|Q7A8C7\_STAAN  
mkyddfi1vgetf1k1ks1l1hiteee1i1qfatt1fdp1qym1hidkekaeqsr1fkgiiasgm1ht1sis1fkl1wveegkygeevvagt  
qmnnv1kfi1kpvy1pgnt1ly  
iae1itnkks1ikkeng1lvtvs1stynenee1ivfkgevtal1nns  
>tr|Q7A8C8|Q7A8C8\_STAAN  
m1l1tv1yghrg1lpskapentias1fkaaseveginw1le1ldvaitkdeq1lii1hddylert1tnmsgeitelnydeikdasagsw  
fgek1fkdeh1ptfddv1vki  
ane1ynm1n1nve1lkgi1tgpng1al1sksmv1kqveeq1tn1nqnqev1lissfnv1lvk1laeeimpqynravifhtts1fredwr  
t1ldycn1akivntedak1lt  
kakv1kmv1keagye1lnvwtvnkparanq1lanwgvdgi1ftdnadk1mvh1sq  
>tr|Q7A8D4|Q7A8D4\_STAAN  
m1lvc1mc1fkv1kt1kig1ctekph11k1

Tsompanidou\_et\_al\_Supplemental\_FASTA\_File

>tr|Q8NUE2|Q8NUE2\_STAAW  
mnihs1ktfihnk1lyyqcqtikgvq1fkt111cgkntpfmwqkhsfyvakt111cgkntplgieipccsraeqapkkv  
fkkiykni1kssrgatyfs  
s  
>tr|Q8NUE3|Q8NUE3\_STAAW  
miqnyqks1dt1kk11svmyeiktknvggwfhkekqetgnivitktdfkytkqikaaqmi1ddyeciksgks1kkaekq  
nes1vne1tshmenek1v  
eefnd1agryny11senekdkelnyt1k1fnqvfk1iksmmkeeryht1inhidnh1dnski revmtidnndeaffkkk  
yqaqerei1fkedredgyt  
1  
>tr|Q8NUE4|Q8NUE4\_STAAW  
meeeygken1lyatvvhmdei1p1mhygvvpi1tkdgr1sakevvgnkka1tefqdrfntyinkqgyd1krgisrq1tkekh  
dqvsrykqkteyhkqmhmr  
>tr|Q8NUE5|Q8NUE5\_STAAW  
msysi1rvkvksktntrg1qrh1qrenknyenidid1sksy1nyd1vndtkfdfnkkidekieknykgkrkirtdaikh  
idg1itsdnvffnq1see  
tk  
>tr|Q8NUE6|Q8NUE6\_STAAW  
mkkfk1f1dfst111isg11f1fffkeneei1pessni1tisnwdksnsksk1vdviesgagniqi1k1svkdfdnkke  
ffvfnskrnsdfi1rnkts  
11tspd11nreikgkyyi1gehfnveeltse1kkag1tseveyinrni1ff1elvidnd11vpfi1flgvly1lyflydrgy  
n1kfyaik1lghfsttri1  
fhnihiki1ywl1vtai1ffian1li1hian1eldf1mfirkfiv11fvfacitt11wlisys111k1sipl1ikgkkyk  
fsifmgtftkcmv11isf  
1laqn1naytk1kniydsekiwqk1dnyyt1eispirnseekq1letniyn1ikkseq1gg111knnianpdknnyip  
engnvffinnf1nfykni  
nhdfkmi1dnhsk1nvfi1ppr1qyqksei1qknhgwidf1qkqknkvdvq1sknsvsfsfdr1ttn1kfgyl1dspivm11  
t1dd1tgdfy1aavsqgy  
1fk1d1t1kq11kdnh1eee1sgitnykds1vne1netk1kmi1itv1ii1nvfilliatvfeti1qyfswnkkq111rki  
hgys1fssnvry1tisi11  
sim1aytthi1fgsk111fiimsia1iqh11qiayik1kyfkd1mrei  
>tr|Q8NUE7|Q8NUE7\_STAAW  
mkkkfvssc1tst1lfgt11gvtykaeatvhvaggvshgigkhyvwsy1shnkrnhgstavgkyss1fsgvarpgvqsk  
asapkawggk1tfs1h  
>tr|Q8NUE8|Q8NUE8\_STAAW  
mrwksmi1vgyarvssndq1n1erq1en1ktfcaeki1ftekqsgksi1enrpv1qea1n1flrmgdrfvvesid1lgrnydevv  
gnp11dkf1mkd1i1q1lam  
vseqerneskr1raqgi1qvakekgvykgrp11yspnakdpqkri1yhrv1em1eegqs1ski1akevni1trqti1yrikndn  
d1i  
>tr|Q8NUF2|Q8NUF2\_STAAW  
mmppnaqnta1t1hqa1wnkndtnwpvcgi1pekfytdhgsdftshhmeqvaid1kin1mfskvgvprgrgkierffqtvn  
qt1fleq1lpgyinnndt1psn  
1infhnfeek1ryf1iedynqkehst1i1htpi1shwnsnhffpnm1ps1leq1d1111eipksrkvh1sdgihf1qgfrysntn  
1eayvgeyv1i1ryn1pdma  
ei1rvfyrdef1lcta1cpei1adysid1kdi1qharsqrrk1h1kqnia1spsttelikeekncgysp1qettknvkk1kryrnd  
>tr|Q8NUF4|Q8NUF4\_STAAW  
msntkikyqi1fiss1ty1d1ieerqavveav1nsn1ipagme1fnssksqwe1itqwinesdavi111gssygtidseen  
i1sytemeynfaks1gkpiy  
1vfemnkastes1aeks1k1defk1tkvken1risp1n1disel1skvsqt1mqsvpse1ikensgwi1rvqdcgknvkk1kk1d  
ai1qrd1dtydf1lkee1yki  
fmyvktfy1fqhtp1fdds1y1iedi1eny11nyennphks1fmki1kvydykn1flkh1kn1il1likqgkpl1aqagh1k1s1fyeed  
1k1l1qknykat1vdik1gn  
khfykecdrc1kayni1fiegin1k1lye  
>tr|Q8NUF7|Q8NUF7\_STAAW  
mqgy1mqti1tefeetha1ymrrk1nmkqyni1fnqs1fk  
>tr|Q8NUF8|Q8NUF8\_STAAW  
msik1lyn1eeyrekfy1qipkvff1tnpkyik1sndakmawg1lrd1d1sikngv1dsktgniy1fyyknen1pnq1n1nckk  
dkviki1kke1n  
>tr|Q8NUG2|Q8NUG2\_STAAW  
mtfnhiv1fkn1rqn1khyam1lfs1ffsiv1yfsftt1qftkgv1nndsmai1kkgalvgsif1fiivif1lmyanh1fv  
kr1rtrefa1l1fg1l1gl1trq  
i1kml1aleqm1v1flit1gvvgv1l1cgi1agaq111sivsk1ms1sin1sihfepma1v1l1tifm1liayv1l1l1fqsal1l1krrs  
i1lsmm1kdsi1ktdvt1takvt  
vie1visg1v1gi1amia1lgy1matem1fgt1fka1l1tmamt1spfi1l1fl1tvvgay1l1ffr1ssvs1l1fkt1l1kkskngrvs1itdv1vft  
ssimyr1mkn1nams1l1tia1i  
isav1tv1l1cfaa1l1ksnt1dq1t1smapne1fnvat1qdak1qfet1k1sqqq1it1fsknayeti1tv1dnv1kdqv1it1leng1sdg  
rtns1il1sannk1l1tgnnai  
tntks1lpni1ini1h1nk1d1lvvkg1tknet1frvt1qedkg1kvyp1n1l1sfnsp1viev1spekyq1l1ktqnnv1ht1fygyd1k1qtsqk

Tsompanidou\_et\_al\_Supplemental\_FASTA\_File

ekaqtiakqfgdkvityde  
mkkevdatngilifvtsflglafivaagciiyikqmdetedelsnfrilkrigfthtdmlkglllkitfnfglplliail  
havfaaiafmlmgnisfm  
pvivvivvytliyitfaliafvhsnklikkti  
>tr|Q8NUG7|Q8NUG7\_STAAW  
mnteykkgiflalsayilwgilpiywqfvdeigafeilafriifsaimifilavqkqrnafqrdmnqllgkpiqllai  
vvagyvitlnwgtfiwvavt  
nghvlgtslgyyinplvsillaiflkerfnkfewlailfafigvlymtlkigefpivsiilalsfgtygllkkvvhida  
issitiectivtapagliyv  
iywqghqmsfglnmssfwllfsgaitaipiliflsagakriplsligfiqyvgptimfvlgifvfkepfnidqlitfifi  
wtgivilyslsqyiklkkhp  
vaktl  
>tr|Q8NUG8|Q8NUG8\_STAAW  
mlinearlyrnvfvsmrnlrnlkryidf  
>tr|Q8NUH0|Q8NUH0\_STAAW  
mnknvlfmfvimllniitplfnknealaardisstnvtldlvsptkiedggkttvkmtdfddksvkiqngdtikvawpts  
gtvkiegysktvpltvkge  
qvgqavitpdgatifndkveklsdvsgfaefvqgrnlqtntsdskvatitsgnkstnvtvhkseagtssvfyyktgd  
mlpedtthvrwflninnk  
ryvskditiikdiqggqldlslninvtgthsnyysgsnaitdfekafpgskitvdntkntidvtipqgygsynsfsin  
ytkitneqqkefvnnsqa  
wyqehgkeevngksfnhtvhninanagiegvtkgeklvklqdkdtkapianvkfklskkdgsvvkdnqkeieitdangi  
anikalpsgdyilkeieap  
apytfdkdkkeypftmkdtdnqgyfttienakeiektkdvsaqkvwegtqkvkptiyfklykqddnqnttpvdkaeikkle  
dgttkvtwsnlpendkngk  
tikylvkevnaqgedttpegytkkenglvvtntekpiettsisgekvwddkdnqdgkrpekvsvnlangekvkavdvts  
etnwkyefkdlpkydegkk  
ieyvtedhvkdyttdingttitnkytpgetsatvtnkwdnnnqdgkrpteikvelyqdgkatgktaklnesnnwthtw  
tgldkakgqqvkytveel  
tkvkgytthvdnndmgnlivtnkytpettsingekvwddkdnqdgkrpekvsinllangekvktldvtsetnwkyefkd  
pkydegkkieyvtedhvk  
dyttdingttitnkytpgetsatvtnkwdnnnqdgkrpteikvelyqdgkatgktatlnesnnwthtwagldkakgqq  
vkytveeltkvkgytthvd  
nndmgnlivtnkytpettsisgekvwddkdnqdgkrpekvsvnlangekvkavdvtssetnwkyefkdlpkydegkkiey  
tvedhvkdyttdingtti  
tnkytpgetsatvtnkwdnnnqdgkrpteikvelyqdgkatgktatlnesnnwthtwagldkakgqqvkytveeltkv  
kgytthvdnndmgnlivtn  
kytpekpnpkiypekpkdktpptkpdhsnkvkptppdkpskvdqdkdnktpenplkelpktgmkiitwitwvfig  
ilglylilrkrfns  
>tr|Q8NUH1|Q8NUH1\_STAAW  
mtktvfdvidmglylvnyvdtwvkekilddyhkpfsntihwqfghvltifesaavtgkenidlniyrplfgngsspd  
ewkgevpsigtileglqt  
perarklteddlaielkqpivgcnleellvlnaihiplhagkieemsrilknlk  
>tr|Q8NUH5|Q8NUH5\_STAAW  
maiylfctilvlvavgaltnrirdkdkrdilssvlllissislllygviin  
>tr|Q8NUH9|Q8NUH9\_STAAW  
mnqyntigfhpnsrihqlnatvklflvvsisamvtydtrylilisvssillfkyahiewkqrvfvkfilfftilni  
iavyifdpeygviynqrt  
elingigrftltsqelfynlilkyistvplaliflftnpsphaaslqngvnykisyavslalryipdiqetyfnis  
qaqargydnskkafts  
vkgikrivlplifssieridvistamelrqfgqkrtrwyvkkqlkkddyvvlcltllllmlvvtlfflnnsryfnpwy  
>tr|Q8NUI0|Q8NUI0\_STAAW  
minterlnlmpssshlielynicshpqaniytpkglhnskldtqrwiekwrnhwqyqfyfvlvkkidcsvigicgye  
yrqlkqetvlnlfyklhps  
feggyaceaaitnfvnyidqetvkvirtknqrsinlaerlkfrdkamddiinqqdivfyk  
>tr|Q8NUI1|Q8NUI1\_STAAW  
miyidknespvtpldektmtsiasatpynlypdaayeqfkeayakfygllpeqiagngsdeliqlmlimpkpaaltln  
pdffmygayaaqvnreiaf  
vdagsdltdfletitki devqpsffimsnphnpsgkqfdtafltaiadkma lngyfvideayldygmaydvemaphil  
rmrtlskafgiaglrvgvl  
istagtiqriqkiehpyplnvftlniatyifrhreetrvtlmtqrqlaeqlkqifdthvadkmsvfpsnanfvltkgsaa  
qqlgqyveqgfkprfyge  
pvmkgyvrysiatapqlnqleeivkewsakydlskttkhs  
>tr|Q8NUJ0|Q8NUJ0\_STAAW  
mytfdagsltarenyklignisiipriafvttlnqdasvnaapfsffnivnnhppmiaiavqraggkrkdalniergd  
fvvhitdednvqdinetaa  
playgdselsrteislsttiktpgikdakmrfecklsqmllgdvldgadliigeivtyhiedsiyegdfkinphalq  
avsrlagndyaklggifti

Tsompanidou\_et\_al\_Supplemental\_FASTA\_File

krpek  
>tr|Q8NUJ1|Q8NUJ1\_STAAW  
mrkimrillcasii vs gcsfipknqtk sipktsvsvkdydgkyigehkkrnevflkhhkdeaikkykdyvkdftfygdckin  
lvd daytnksgfsekskadg  
isvvgtvnydvpfqllfvesngitistftpghinetsaavsammykryeheieqarlklkseiekdsyamyseklqv  
kqefngvtrqyl nfrtdsi  
ddldkfkkefkpvmh lkgdafnqq lqsl inkypqi qknmksefiaydkeknretvkn yawnl qksindimqsy pstkfv  
qfykddvpsmvdgngrlk  
sdt nvisieggkydenk  
>tr|Q8NUJ2|Q8NUJ2\_STAAW  
mnyspkqgv rshglphdpfksstvprpigwi stvskdgkdn lapysyqnl twdppmv mfaanqsvlgdherkdtvknae  
etgwfvwnmatydl reavn  
lsskal ppeedefn fagvtkekcieapgyrvkespvhfecyvtiri ptdgpvstvddivigrvaqvhiddkvildngkl  
diksikpiarlgyydytvv  
neifemkapaaskee laglegrnfdnqsdeki  
>tr|Q8NUJ6|Q8NUJ6\_STAAW  
mprkfrvlqiggddlepi fqhkk gvswdyfdig l fefdsgyveaieaiveaegrfdfiyiqapysetltnllqmisepyn  
tyvdesfwsveyeqdenvq  
kyvvqplh yrneernnk leavsfsgygd kvspklalvhpnfkgdvvyqgnsetlsgefgkfkpiaswqnnlv ydkd  
kviqiwp efdidgavelqy  
tfrliqtgadgalieqivl tddml dsp lei ptkpfdaysvtvkargngtvhl gpihkrwsrldmgqfl l ggsrfvdsqr  
qefiyyfhp gdmkpp l nvy  
fsgyrtaegfegyy mkrmapfl ligdprveggsfyisseyeqgi invidetleklnfkshelilsgl smgsfgalyy  
gaqlnpqaiivgkplvni g  
tiaehmrllrpeefgtal dvlvsnegdtsqasiqal nqkfwqt fqkkslsqtvfaiaymqhddydpnafqellpvltahq  
arvmnr sipgrhnddspti  
aswfvnfy niiledk fgrvqhaekqni  
>tr|Q8NUJ7|Q8NUJ7\_STAAW  
mmihlplqvgl l i fttl fwkts lgef nm lknktfkvtwnyisqttfmygskvsfsngevtfinplmpsglpihewlmlkq  
fskyksaps lpi lrrgghy  
klhfd datpagsvyfi i fynkngtklsteivksnsit iqypdeayaykikmmaasts l vfrcltitemthqddleyk  
smrvtkiddnqygnkinv  
iaepsdv ypti sndflkl fghvwlverwmeddikenikqlkddlqsqdtl tainlisygsksnvfatyvaqhl dckvyr  
tshedddlkewlkehvp gn  
helkdt nvevyfkee qdnhl nym sr lmpvrfldyl dvsklnggevnet  
>tr|Q8NUJ9|Q8NUJ9\_STAAW  
mtiynifgigwassgveyaqayrakllrrtnqdtkfvlfdi qseniqtltqnigfk dqeviwlyqyfsdisi apttyt  
lddiere l gheisfrerng  
kivrlyfngkssfv tcy lqneqkdvdraefvinsmlvrkdfysytrifseyyapadnkaklymrqfy nedgsiayneyi  
dgdssiyv fedavlynkte  
fiayflqrlnl trddivil drasdigqavl qhkgdskvgvvi hadhysnm mseqhilwnnyeyqfskakyidffit at  
diqnhm vcrqfeg yqgyrp  
rvyti pgsidal sypl srkpyami sasrlanekhidwlvkavivakrqvpel tfdiyegsektrlrkiidthraqdy  
irllghvkldeiyndyelf  
lsastsegfgltlmeavgsglmgilnvnygnptfi rdgengylvpfdtdedsvddviaklahai vmyfngpqtphdis  
yevaqqf mtqdiilkwetl  
vqevlhd  
>tr|Q8NUK0|Q8NUK0\_STAAW  
miklfdyfnhsrklyesfkaskleedltivlndngflpddvispyqffadnhntenmkprffnqvtpafweikgnns  
atindmgrlrgki fyqsge  
rprivsrvevfddqqr vrfvdyyskngikfaqtvydlnrkailkky mtaegkeviyenfvtsd vil dwqgksyffpskla  
fv l f f i k q l e i t e h h f v i n  
slalpfsvlynlpskgsdvlvwqehcngnvpgnmq l mckgdmkrhcni i ipdkneyetm l ni adakvqs rilqggylyny  
rsrnr ytk e i v i l t n s d q l  
rnikvlvetl p d f k f h i a a i t e m s d k l m q l d q y a n v h l y p s i n i d r v n e l y q l c d i y l d i n e g n e i l n a v e q a f d y e l l i  
lgyrqtahhakvtl sehlf  
ehndeitmeskdqliqmleslkdqqqfqdallaqkaheisleqfeqvfkqales  
>tr|Q8NUK2|Q8NUK2\_STAAW  
mpknkiliy l l s t t l v l p t l v s p t a y a d t p q k d t t a k t t s h d s k k s n d d e t s k d t t s k d i d k a d n n t s n q d n n d k k f k t  
iddstsdsnni idfiyknl  
pqtninglltknk yddnys l t t l i q n l f n l n s d i s d y e q p r n g e k s t n d s n k n s d n s i k n d t d t q s s k q d k a d n q k a p k s  
nntk p s t s n k q p n s p k p t q  
pnqsnsqpasddkanqkssskdnqmsdsal dsil d q y s e d a k t q k d y a s q s k k d k n e k s n t k n p q l p t q d e l k h k s k p  
aqsfnn d v n q k d t r a t s l f  
etdpsisnndsgqfnvvdskdtrqfvksi akdahrigqndiyasvmiaqail esdsgrsalakspnhnlfgikgafeg  
nsvpfntleadgnklysin  
agfrky p s t k e s l k d y s d l i k n g i d g n r t i y k p t w k s e a d s y k d a t s h l s k t y a t d p n y a k k l n s i i k h y q l t q f d d e r m  
pdldkyersikdyddsde

Tsompanidou\_et\_al\_Supplemental\_FASTA\_File

fkpfrvsvsdmpyphgqctwyvynrmkqfgtsisgdldahnwnnraqyrdyqvshstprhaavvfeagqfgadqhyghv  
afvekvnsdgsivisesnv  
kglgiiishrtinaaaeeelsyitgk  
>tr|Q8NUK3|Q8NUK3\_STAAW  
mknaflfkmdlkkvaktavwiilaglaipfsyawfnlwamwdpygntghikvavvnedkgdiirgkknvngntmvnt  
lknksfdwqfvsrekadh  
eikmgkyfagiypskftheitgtlrkqpqkadvefkvnqkinavaskltdtgssvvvekaneqfnktvtralleanka  
gltieenvptinkiknavy  
sadkalpkindfankivylnnhqadldkyandfrklgnykgdildaqqklnvngaipqlnekaklilalnnympkieka  
lnfaaddvpaqfpkinggl  
niasqgidqangqlndakgfvtrsvrgdyqdairraqdlnrrnqqqipqnsaannetsnsapaagngvastppsapsg  
dtapnnvtqntapnsna  
pvsttpqitsgkkgqsfaditttqvstanentqnitdkdvksmeaaltsllslsnnldtqakaaqkdsqalrnisygi  
lasdkpsdfresldnvksq  
leyttqynqqfidtlikeiknenvdlskeidkvaannrineslrlnvqlsnaikngssgtaeatkllldqskldssls  
frdyvkkdlnsslvsisqr  
imdeinkgqtaalsnvqsklntidqvinsgqailkngktridrqlvtlpsieqqyisavknaqanfpkvsdvakaanfvr  
ndlplqleqrlnatavnk  
nlpnlngydgavglknknpqakkaalsdladfsqnklpdvekdllkankifkklkddavdklidtlkndlkkqagii  
npinkktvdvfpvkdygsg  
mtpfytaalsvwgalmsvlltvdnkhkslesvlttrqvflgkagffimlgmlqalivsvgdllilkagvespvlflvit  
ifcsiifnsivytcvslg  
npgkaiaivllvliagggtfpittpqffqnispylpftyaidslretvggivreiliktliiltlfgigffvvgllil  
kpvtdplmkrvsekvdqsn  
vte  
>tr|Q8NUK6|Q8NUK6\_STAAW  
mklilitiviivligalgfaiyaaiahstssnnqeqenkathkkteteendqqddsadkadknqngnvtndnqpsq  
snvnnhstapsntqpaq  
kdsnsknthdggqsstnnqnnqqntppanksntntsskqtpqaqspkn  
>tr|Q8NUL4|Q8NUL4\_STAAW  
mtflksitqeiaivivifalglmflylhlpalayllalgvillllifigikylsfvktisqqqqienlenalyqlkne  
qieykndvesyfltwvhqm  
ktpitaaglllerdepnvvrnrveviqidnytslalsylkllnetsdisvtkisinnirpiimkysiqfidqktkihy  
epchhevltvrwtsllie  
qlinnaikyargkdiwiefdeqsnqlyvkdnigigiseadlpkifdkgysgyngqrqsnsngiglfivkqisththpvs  
vskqnegttftiqfpde  
>tr|Q8NUL7|Q8NUL7\_STAAW  
mnmplmidltnknvvivggglvasrraqtlsqyvehimvispeiteklnmvdkgvviwekefefpsdivdaylviaatn  
eprvneavkqalpehalfn  
nvgdasngnvfpsalhrdkltisvstdgaspltksimaealealypssyssidflytcrqkiklldmnhsekqllsq  
ivtkefindtkqaqflawl  
dkk  
>tr|Q8NUL8|Q8NUL8\_STAAW  
mnsdnmwlvmglliiisivglliakkinpvvgmtiipclgamilgysvtdlvlgffakglldqvinvvimfifaiiffgim  
ndsglflkplvkrliimtrg  
nvvivcamtaligtiaqldgagavtflsipaallplykalmnkyllilllalsaaimmvpwggpmarvaavlkaksvn  
elwyglipiqiigfiliml  
favylgfkeqkrkkaierneipqtqidvhlvevyerdqdrfvpkgrartkswikwntaltlavilsmliinippe  
famiqvsalvinfksvd  
eqmerlrahapnalmmaavviaagmflgvlnetgmalkaiatnlikvipaevgpylhiivglvgvpldlitstdayyfav  
piveqtagqfgvpsvstay  
smvigniigtfvspfspalwlaiglaeanmgyikeyaffwiwgfavmlviamlmgivti  
>tr|Q8NUL9|Q8NUL9\_STAAW  
mtlldikqgggyiakiesnsfvdgegvrcsvyvsqpcfnvcgynkasqkfrygekytdeilaieldcdhdyisglsll  
ggefpcnlditlnlvkafr  
arfgnkktiwwtgflveylandcaerrellsyidvlvdglfiqhlfkpdlpykgslnqriidvqqsisharmieyivs  
>tr|Q8NUM2|Q8NUM2\_STAAW  
mqksalfapekyniiseiekyshipdkkailyhntegedivsvtyqqlieqsnkvgnvlashglskgdvlimprsiaty  
elyiaaklqvaiipcsem  
lrtkdlyqriythgeinavialepftvefekikeydaltkfviagqkdgwisleaekenasnklemadttrddmailsyts  
gtgnpkavthchgwgfah  
lqmapkhwlcineddvwataapgwqkwvswpflsvlgsgatafvnfrfspetylcllqkyqinvlcctpteyrmakl  
qnldydlthhsavsage  
plnrevveqfkkynfltvrdgygqtestlligflkdtprigsmgkigpgssvtvddegnsvpantkgniavpldlpal  
fkgyykepertakagtgy  
yitgdlahvdddgyfwfegerrddiissgytigpfevedaltnhpavkecavvakphdirgnivkafvilqdhtagddtl  
vkelqqfvknevapykypr  
eiefvddlpktngskirrveldrsei kwqqkdsnq



Tsompanidou\_et\_al\_Supplemental\_FASTA\_File

>tr|Q8NUM3|Q8NUM3\_STAAW  
mflltwdirgltseyifslilvalvsklilifitrrqrts  
>tr|Q8NUM7|Q8NUM7\_STAAW  
mhintvngrgmymaskahqliqedehyfaksgrikyyp|vidhgygat|vdiegktyid|lssassqnvghaprevteaik  
aqvdkfihytpaymyhepl  
vrlakk|ceitpgdfekrvtd|tgsdandgiikfaraytgrpyi|sftnayhgstfgs|smsais|nmrkhygp|lmgf  
yhipfpdkyrgmyeqqan  
sveey|aplkemfakyvpadevacivietiqgdg|lepvggyfealekicrehgiliavddiqqgfgrtgwtssvshfn  
ftpd|litfgks|lagmpms  
aivgrkeimnc|leapah|fttganpvscea|latiqmiedqs|lqasaekgeyvrkrmdqvwskynsvgdvrgk|lsgigi  
divsdkk|ktrdgsaalki  
cnycfehgvvii|avagn|lrfqpp|lvityeq|ltda|ntieda|lta|eagn|ldqydisgqgw  
>tr|Q8NUN0|Q8NUN0\_STAAW  
mtnvlyghgt|gtlmg|llegtatine|lehgn|giat|tgsdgevi|fdgkayhanehkefielkgdekpyasitnfk  
asktfs|lqqlsqddvfaqi  
knem|sen|fsavkiygtfkhmhvrmmpaqpppytr|lidsarrqpeekrqni|rgaivgfftpe|lfhgvgsagfhihfvd  
eraygghv|ldfevddvvve  
iqnfetfqqhfpvnn|etfvkaki|dykdvae|eireae  
>tr|Q8NUN4|Q8NUN4\_STAAW  
mli|ftdnanaennkpegvnens|lipvrqpdanygpvsdi|arvkk|dn|lidgkdpdvik|klddnevpnnavkakdsk  
ivsdcrh|l|khpdn|lidgt  
kdpnvin|q|knangtsnnsavn|psikandihtksnkqmakqqs|ih|dsksksvhkqql|kelpktgvnnesntaimal|fig  
lil|lvs|lvtrfik|lnshq  
>tr|Q8NUN5|Q8NUN5\_STAAW  
mnqh|l|gnpk|lvthvnev|kaginh|ivdsvqyenqemimekdv|tvemrdge|klyini|frpnkdgk|fpvmsadtygkdn  
kpk|itnmga|lwpt|lgaip  
ssftpees|pdpgfw|pndyvvv|kvalrgsdkskgv|spwskreaedy|yeviewaanqswsngnigtngvsyl|avtqwwva  
s|lpph|lkami|pweg|lndm  
yeva|fhgg|ipdtg|fyr|fw|tqgi|farwtd|npnied|liqaqqeh|l|fddfwkqhqv|lsqiktp|l|tcaswstqg|l|hnrgs  
fegfkqav|seekw|lyv|hgr  
kewesyy|aren|lerqks|ffdfyl|keenndwk|dtp|hviyevrdq|fykgefksa|safp|pnteyt|ply|naenht|lnhakis  
sayvaqy|dsedk|rqdvsfk  
ytfdkdte|lvgnm|kl|lwvstkd|sddm|dfagik|kl|drrgnevn|fpdfnhiengqvatgw|lrvshre|ldqekstiaqpwh  
khetel|k|lsqde|ivpveie  
l|lpsgt|l|fkqget|levv|vk|gseiv|ignstpgm|ktryeheetv|nk|gmhmiy|tggydsq|liipivn  
>tr|Q8NUN7|Q8NUN7\_STAAW  
mtal|fpyia|fenskeai|ayyeef|gatdvkr|levgeeqash|fgmtkeea|qeatmhae|fevl|gvkvl|csdsf|gradkingg  
is|l|lidydvnn|kedadkve  
afyeqi|kdhssie|iel|pfadq|fwggkmgv|ftdkygv|rwm|hgqdytaiqq  
>tr|Q8NUN9|Q8NUN9\_STAAW  
mneqwl|eh|l|pkdikei|spvsggdvneayrvet|dtdtff|llvqrgrkesf|yaaeiag|lneferagitaprvi|asgevngd  
ayl|vmtyleeg|asgsqrql  
gqlvaq|l|hsqqeegk|fgfs|lpyeggdi|sfdnhwqddwcti|fvdkr|ldh|kde|llnrglwdandikvydkvrrqivaele  
khqskps|l|hgd|lwggny  
flkdgrpa|l|fdpap|lygdref|digittv|fggftsefydaynkhyplakgasyr|lefyr|lyl|lmvhl|l|kfgemyrdsvahs  
mnkil|gdts  
>tr|Q8NUP0|Q8NUP0\_STAAW  
mstvqsd|f|ktns|asss|iksavet|cnnvskpdkdest|tvs|gnn|nahsv|idd|lmsknqsvaeai|rtasdniqkvgeafdqt  
dmigneigkn  
>tr|Q8NUP1|Q8NUP1\_STAAW  
msnk|lde|inki|i|takhkqmd|lydekrevka|lidesda|lnhsidqlyqhl|geryyssenmasrmeqfrdefhfakrrstea  
lyeqqqq|iqhgi|rkaeeem  
idlemrrnve|ietvt|keenkwkq  
>tr|Q8NUP2|Q8NUP2\_STAAW  
mqhhkvai|igagaagig|matl|kdfgitdvi|ilekgtvghs|fkhwpkstr|t|t|psftsngf|gmpdmnaismdtspaftfn  
eehisgetyaeyl|qvvanh  
yelni|fentvvt|nisvddayti|attteiyhadyi|fvatgdyn|fpk|kpfkygihy|seiedf|dnfnkgqyv|viggnsgfd  
aayqlakngs|dialytstt  
g|lndpdadpsvr|l|spytrqr|lgnvikqgariemnvhytvkdi|dfnngqyhisfdsgqs|vhtp|hepilatg|fdatknpivq  
qlfvtt|nqdik|l|tthdest  
rypni|fmigatv|endnak|lcyiykfrarfav|lah|l|tqregl|pakqdvienyqknqmyl|ddysccevsctc  
>tr|Q8NUP4|Q8NUP4\_STAAW  
mkivi|iggf|l|gggkttv|lnh|laes|lkes|lpavimne|fgkmsvdga|lvsedip|seltegciccamkadvseq|lhqlyl  
keqpdiv|f|iecs|giaepvs  
vl|dact|l|tpilap|fttithm|igvidasmykhiks|fpkdiqgl|fyeq|layc|svl|fvnkidsadv|ttsk|l|k|d|levin|pead  
iqv|gmhgs|vtl|p|svrqmt  
atsdnkhks|l|hqmi|nhqfv|qspakctkaefikr|lac|lpshiyr|lkgf|mtfedtahty|liqftqgqye|ltpvafskk|vpey  
lvligk|giskedy|qc|leq

Tsompanidou\_et\_al\_Supplemental\_FASTA\_File

>tr|Q8NUP6|Q8NUP6\_STAAW  
mksitfeehyvi ediqketmna isadpkgvpmkvm leglekktgftnade lshhderiqfmmnqdvqivlsyngngpsn  
lvqqkaie l cqkandqlan  
yiaqypnr fvgfatlpinepeaa areferci ndlgfkga limgraqdg fldqdkydi ifktaen ldvpiyl hpapvnsdi  
yqsyykgnypevtaatfac  
fgygwhidvgihaihlv lsgifdrypklnmiighwgefipfflermdealfae hlnhpvsyyfknnfyitpsgm ltkpqf  
dlvkkevgidri lyaadyp  
yiepek lgvflde lgtdeekeki sytngak l l g l sann  
>tr|Q8NUP7|Q8NUP7\_STAAW  
mslnkeqrritceelqahfeest lsvqmiaek l nvttedvekv lamtap l g i fshqlqr fihlvwdvrdvindnikngq  
tpepyty l kgekedywflr  
>tr|Q8NUP9|Q8NUP9\_STAAW  
msetdepqgferthni l ninqnrqslmtfiiskl kstlkqriinargkkridyr l synfyityydtveikkidceytyam  
paili rhtmsfdnahffa  
qlrhpv l  
>tr|Q8NUQ0|Q8NUQ0\_STAAW  
mtsikti tpkdfi frv lsgvaigivag lvpna ilgeifkyfmdyhip fkt l lgvvva i qftvpa l iga l v amkfd l sp la  
iavvasaayvgsaaqfkn  
gawmitgig d l intmitaa iavl filliqhrvg smalivfptvvggisgaigvl ilsytkmitta igma nvmngftelqpiv  
msilismv fsl i i i sp l st  
vaiafaigis glaa gsa sigisateav l iigt skvnr l gvp lsvffggvkmmipnmvkypil mlpil ttaivsg lvsalv  
gihgtkesag f g f i g m v g p  
inafkfmevdsawlsv l livvaffvvpvtaw ladiiyrvkvrlytndi f k f m g  
>tr|Q8NUQ8|Q8NUQ8\_STAAW  
mtkiki msvr dedmpyika waekhhvevdi tkeal tddnvegvagy d g l s l s q q i p l s e h v y k r l n e l g i k q i a q r s a g f  
dtydle lankyn l i v s n v p  
syspnsiaefavnqai nvrhrfnq i qtkvrehdfrwepti l s k s i k d l k v a i g t g r i g r v v a d i f a n g y q s d v v a y d p f  
pnakiatyvdykdtieeav  
egadivt l h v p a t k y n h y l f n a e l f k h f k k g a v f n c a r g s l v d t k a l l d a l d n g v i k g a a l d t y e f e r k l f p s d q r g k t  
lndplles lidredvilt p  
hiafyteaavkn l i v d a l d a t l d v l q t g d t r l r v n  
>tr|Q8NUR0|Q8NUR0\_STAAW  
mrilitgtvaili l i l g l v k t i q d h e m t n d t s r q l s d n k d d d k v i h l n n f k n l h a k e f n p s d f f  
>tr|Q8NUR4|Q8NUR4\_STAAW  
makflykmg t f i a k h k w s a v i a w i v i v a a i l i p l a t n a p k f d n d i k m t g l e s l d t n k k i e k h f n q d s e k a q i r v v f k t t k  
ddgi v q p n i t k d i k k t l d d  
ikkddkhi dki s d p y e n k q i s k d k t t a f a d i t y d v s q t s l k d g s r d n v k s h l k d l r d n h n v q t e l t g t g m t s t e v g g n s e  
l v g i i v a f v v l l i t f g s v i  
aag l p i i s a l i g l a s g v g i s l l t y a f d i p n v t l t l a v m i g l a v g i d y a l f i l f r y r q v m k t e t d y i k g i g l a i g t a g s a  
vifagvtvviavcglsvg  
idflavmgfasaisvifavfsal t l l p a l i s i f h k r i k v n k l q s n f k k d i d t p w s k f i t g n a l a a v l l g l i l v a a a i p v  
shmr l g i p d d g v k p a d s t q  
kkaydiisd k f g e g f n g q i p m l i n v k d k d d p q g l q d l q s v y k d i k k k n v d i v t p p q m s k d n d y a l m v v i p k k g p n a e  
stndlvhd l r d y h k d a q d k  
ygfkteisgqsvini dmskklneaip lfatvivv l aff l l m i v f r s i l i p l k a v l g f v l s l m a t l g f t t l v m q d g f m k g l  
fgiettgpm l a f l p v i t i g  
i l f g l a m d y e v f l m s r i h e e y s k t g d n d y s i k v g l k e s g p v i v a a l i m f s v f f a f v f q e d v m i k s m g m a l a f g v l f d a f  
vvrmm l i p a l t k l f g k g s w  
ylpawlnriiprvdi eghalekyktvesqeseakdskeydt t f k i y p q g a t n v s k h q d v h g q d d v r s i v l d d k t m a l y q  
evkqsassfflydalidy  
qnkhl nskqqvtnieqlnkniekl nq l l e k n l r n k s  
>tr|Q8NUR6|Q8NUR6\_STAAW  
msvii n i l i f l a i f g y a l y t l v k f f k r s k q g k c g t c d i n r d c c g t e q t a n h f p g k  
>tr|Q8NUS1|Q8NUS1\_STAAW  
makikanealvka l qawdi dhlygipgdsidavvds l r t v r d q f k f y h r h e e v a s l a a a g y t k l t g k i g v a l s i g g p g l  
ih l l n g m y d a k m d n v p q l i  
lsgqtnstalgtkafqetnlqklcedvavynhqi ekgd nv feivneairtaye qkgvavvicpnd l l t e k i k d t t n k p v d  
tsrptvvs pkykdikkavk  
l i n k s k k p v m l i g v g a k h a k d e l r a f v e a a k i p v v h s l p a k t i l p d d h p y s i g n l g k i g t k t s y q t m q d a d l l i m v g t n y  
pyvdy l p k k n i k a i q i d t n  
pkni g h r f n i n v g i v g d s k i a l h q l t e n i k h v a e r p f l n k t l e r k a v d k w m e q d k n n s k p l r p e r l m a s i n k f i k d d a  
visadvgtatvwstrylnl  
gvnnkfi i s s w l g t m g c g l p g a m a s k i a y p n r q a i a i a g d g a f q m v m q d f a t a v q y d l p l t v f v l n n k q l a f i k y e q q a a  
geleyavdfsmdhakfae  
aagkytyi ksasevdaiveealaqdvpti vdyvdpnaaplpgkivneea lgygkwafrsitedkhl d l d q i p p i s v a a  
krfl  
>tr|Q8NUS9|Q8NUS9\_STAAW  
mkkwtnrlmtiagvvl i lvaay l fakphidny l h d k d k d e k i e q y d k n v k e q a s k d k k q a k p q i p k d k s k v a g y i e i p d

Tsompanidou\_et\_al\_Supplemental\_FASTA\_File

adikepvypgpatpeqlnr  
gvsfaeeneslddqnsiaghtfidrpnqftnlkaakkgsmyfkgvnetrkykmtsirdvkptdvevldeqkgkdkql  
tlticddynektgwekrk  
ifvatevk  
>tr|Q8NUT0|Q8NUT0\_STAAW  
mklefkksisnkiiytlgvlfiflfllygylpigidkvslsysqfffsytvatqlgfllfsviayfinkeysnkntl  
fykligdni ftffykkvav  
lffeclvfiilsitiisijysdfshy11liilfslvilqyilvvgtismvspnilislgisivywigsvilvainknifg  
ivapfeasntmyravekil  
nnestfmcpteiintvsffvllfivntivlllsrkrwlkigm  
>tr|Q8NUT1|Q8NUT1\_STAAW  
mvkaiavdmdgtfl dskktydkrsfeafte lnrnditfiaasgnqyaklksifgdrdmyfisengaviyngnelynyks  
fnrqvfqqvdylnmngsi  
dq1vicg1ksayilkhtseafkedtrfyyhqlkeidslqqlpeddyvkiafninrethpvnveevatqfsndiklvssgh  
dsidiimpnmtkgqalkr1  
ldkwgmsse1mafgdanndkdm1afakhsyvmenshdeelfkiasavapsndkqgvltiieqevlnk  
>tr|Q8NUT3|Q8NUT3\_STAAW  
mafhdktatqvtnie1nvrld1d1mttfyknilglsvkssddnttv1svgtgght1t1h1ledgrqtspreaglfhia111  
pttedlanflyfvaqknmg  
igagdh1vsealyfndpegngevyrdpssswewqngkvkmdtlevdsqt11thrtdegwqmpakgmighlhlkthd1  
daaygcyieqlgfqhvsdf  
pral1mstnhyhhaantwqsnaqarqnaqsylthvdiyqpdasthtftapegfditvhsntdlvpek  
>tr|Q8NUT4|Q8NUT4\_STAAW  
msnleikqgenkfyigdenhalaeityrfvdneini dhtgvsdelggqvgkklvkavveharenh1kiascsfakh  
mlekedsyqdvylg  
>tr|Q8NUT5|Q8NUT5\_STAAW  
mannhellgihhvta mddaernykfftevl gmr1vkktvnqddiytyhtffadvgsagtdmtffdfpnitkgqagtns  
itrpsfrvpnddalmyeq  
rfdefgvkhegiqelfgkkvlpfeevdgqvyqlisde1negvapgvpwkngpvvdkaigy1gpieikvsyfddfknile  
tvygmttiahednvallev  
geggnggqvilikddkgpaarqgygevhhsfrvkdhaieawatkykevginnsgivnr fyfealyarvghilieistd  
ppf1enkreyieseipfntkr  
>tr|Q8NUT6|Q8NUT6\_STAAW  
mlipvnciitt1qqknakstnlmk  
>tr|Q8NUT8|Q8NUT8\_STAAW  
mgtlikqecfk1fkkkstfiapivfil1mvaaggyiatkynki ftpqesftsayingfswfa11liqastiismefhygti  
kn1lyreysrttmivskii  
t1fiisliyvitiiasivigs1ffnd1nifessgnqls1lnq111vs1gtfvgwlv1s1t111ssatnstgvaiavgi  
vfyfassi1laviqtallek  
idw1kwnpinmmn1m1qtvekgfskstk1elhel1figniayisiflilvfvifkkn1  
>tr|Q8NUU0|Q8NUU0\_STAAW  
meqii1efisrfgyaaifil1lenv1pivpseiiltfag1msvksh1silt1fiiatipsfig11lilyicrliseer1  
yrfidrhgkwik1kskdlk  
randwfkkygvwavf1crfipvlrvlitipagvnrmmvvtftvis1igttiwnfgl11lgrt1sdsfgmlmtglhtysri  
myvviiiaviyfairyigk  
rkrvk  
>tr|Q8NUU4|Q8NUU4\_STAAW  
mfnmfhfiimvynmyni1evkempftmkgypekwdfevikrqaieianam1kegylekdvpiaakkakdwyrals  
keeikal eenfvqfhtat  
mektevdseyattdneehiqeqsnqdkisyfdesiqnsggvrqrep1mdgphpkvvesfkdv  
>tr|Q8NUU5|Q8NUU5\_STAAW  
msnystgelak1cnvttrtiyydrkgilkpqgftegkrvyteqqrqt1el1111kdlgca1sdim11kgegtlkt1n  
t11tmkqqeinqqvqkqqa  
v1nkiknvqyyvknkastspith1kdiehvmsksaemksirriwisagiigi1qyssii1sailmknkwpflialp1fmigy  
gigvtfyyqqkvay1cpnc  
qhi1fsp1lwqvikakhtatrrfecpncethycievpkhamsteqleishiqhnn  
>tr|Q8NUU8|Q8NUU8\_STAAW  
mksn1rygirkhk1gaasv1lgtmivvgmgqekeaaaseqnttveesgssaterkasetqtttnvntidetqsysats  
teqpsqstqvtteeaptv  
qapkvetrvd1pskvadkettgtqvdtaqpsnvseikprmkrstdvta1tekeveeakatgtdvtskveveegseiv  
ghnnketnvvnpnaervt  
1kykwkfedgikpgdyfdft1snnvethgis1prkvpdiksddn1lavgkvmderkiyrtftdyinnkn1maeln1n1  
fidptvtkqgkqtvevk1  
genkiskefdikyl1dgvkdnwgtvngrit1ldkenskiihlayinpkksdmtsitingffakgglytgnvptvkvyey1  
rsdel1pesvyanndqekf  
kdvtdmsk1t1sengsyk1t1da1nkksyvvsfegkynendkellfrtn1hgyhanygyyyyyypvs1twdngvafysn  
naqgdgkdkpndpiekse

Tsompanidou\_et\_al\_Supplemental\_FASTA\_File

pieldikseppvekhehtgtieesndskspidfeyhtavegveghaegiieteedsihvdfesthenskhhadvveyeed  
tnpgggqvitesnlvefd  
estkgitgavsdhtvedtkeyttesniei l vdelpeehgqaagpиеeittennhishsglgtenghngnygvieieen  
shvdikselgyeggqnsngn  
qsfeedteedkpkyeeggndividfdsvpqi hgqkngdqsfedtekd kpkye hggniididfdsvphihgfnkhteie  
edtnkd kpn yqfgghnsvd  
feedt l p qvsgnhnegqqtieedtt l p t p t p e v p s e p e t p t p t p e v p s e p e t p t p t p e v p a e p g k p v p p a k e e p k k p s  
kpveggkvvtpvieinekv  
kavaptkkaqs kkselpetggeestnk g i l f g g l f s i l g f a l l r n k k n h k a  
>tr|Q8NUV5|Q8NUV5\_STAAW  
msrllndfnqslkkgf idkdi shkgn ytpk l l v n n k n e k v l s t i i d e l q k c e t f y f s v a f i t e s g l a s l k a q l l d l s n k g  
vkgkiltsnylgfnspkmy  
gellklknevrltdiagfhakgyifehkdysmvi gssnltsnalkvnyehvllstmkngdlvsvknefellwqkst  
plttqwiksykesfeysrl  
ekl aeveqtqml ladkvkksveivpnlm qaealrslkairdkakdka liisatgtgkt ilca l dvrevnpnkflfivhne  
gilnrakeeffkvlpi knd  
sdfglltgkhrvdaky l fatiqtlrrddnfnkqfdene fdyivfdeahrsaastyqrvfn yfkpkfm lgmtatpersdel  
sifel fdyniayeirlqaa  
lesdilcpfhfygvtdyv hqgikeddvtk l r y l t s d e r v n y i i q k t d y y g s g e i l q g l i f v s s k e a y d l a d k l s s k g i  
ksvaltgddsvnyrqivie  
klkegkinyiitvdlfnegidipevnqvvmlrptessii fiqq lgrglrksskeyvtvidfignyktny lipialsgdq  
sqnkdn ykkfltnndsing  
vst infeevakkqiynsl davslnqkn l i l k a y e e v e n l g h m p l l m d f i q q h s i d p s v i f s k f s n y e f l v r y k k i d t l  
l tenesknlvffsrqiapg  
lkridslvlee l kneltydelknkm lnevkditeddidts l r i l d f s f y n a g i e k i y g s p i e c n e r m i r l s d a f t n a l  
snqt fki fl e d l i e l s k y n  
nekyqkgkng l i l y n k y s r e d f s k i f n w n k n g s s v i m g y m i r s q e m p i f i t y d k h e d i s d s t k y e d e f l s q d e l k w f t k s  
nrt l k s k e v q k i l s h r a k g  
ikmyifvqkkdddgiyfyylgtagiye gsekqdkmpngsnvvtmdla ldkavrddiyiai  
>tr|Q8NUW1|Q8NUW1\_STAAW  
mskkkilitsim l i l i s v a s i y f k m y d e k e q k a i y y e q q a r i t y l k h n t k e p t i k s v h f t k l e t s p m g s a v i e  
gyinenkkddfvyaspen  
nfqfvgdl ikser l s e l l k p a n q l k s p d d i k k e l n k k  
>tr|Q8NUX0|Q8NUX0\_STAAW  
mskllmi g t g p v a i q l a n i c y l k s d y e i d m v g r a s t s e k s k r l y q a y k k e k q f e v k i q n e a h q h l e g k f e i n r l y k d v k n  
vngeyetvmmactadayy d  
tlqqlsletlqsvkhv ilisptfgsqmiveqfmskfnkdi evi sfsty l g d t r i v d k e a p n h v l t t g v k k k l y m g s t h s n  
stmcqrisalaeqlkiql  
vvesplhaetrnssl yvhpp l f m n d f s l k a i f e g t d v p v y v k l f p e g p i t m t l i r e m r l m w k e m m a i l q a f r v p s v n l l  
qfmvkenypvrpetldegd  
iehfeil pdilqeyll yvrytailidpfsqp denghyfdfsavpfkvykneqdvvqiprmpsedyyrtamiqhigklmg  
ikt p m i d q f l t r y e a s c q a  
ykdmhqdqh l s s q f n t n l f e g d k a l v t k f l e i n r t l s q  
>tr|Q8NUX1|Q8NUX1\_STAAW  
mrkltkmsamll asgliltgcggngk l e e k k e n k q l t y t t v k d i g d m n p h v y g g s m s a e s m i y e p l v r n t k d g i k p l l a k  
kwdvsedgktyt f h l r d d v  
kfh dtg p f d a d a v k k n i d a v q n k k l h s w l k i s t l i d n v k v k d y t v e l n l k e a y q p a l a e l a m p r p y v f v s p k d f k n g t  
tkdgvk k f d g t g p f k l g e h  
kkdesadfnkndqywgeksk l n k v q a k v m p a g e t a f l s m k k g e t n f a f t d r g t d s l d k d s l k q l k d t g d y q v k r s q p m n  
tkmlvvns g k k d n a v s d k t  
vrqaighmvrndkiakeildgqekpatql faknvtdinfdmpt rkydlkkaes l l d e a g w k k g k d s d v r q k d g k n e m a m  
yydkgsss q k e q a e y l q a e  
fkkmgik l n i n g e t s d k i a e r r t s g d y d l m f n q t w g l l y d p q s t i a a f k a k n g y e s a t s g i e n k d k i y n s i d d a f k i q n g  
kersgaykn l k q i d d e g i  
fipishgsmt v v a p k d l e k v s f t q s y e l p f n e m q y k  
>tr|Q8NUX2|Q8NUX2\_STAAW  
mfkfilkria l m f p l v i v s f m t f l l t y i t n e n p a v t i l h a g g t p n v t p e l i a e t n e k y g f n d p l l i q y k n w l l e a m q f n  
fgtsytgd p v a e r i g p a f  
mntlkl ti s s v m m i t s i l g v v s a l k r g k f t d r a i r s v a f f l t a l p s y w i a s i l i i y v s k l n i l p t s g l t g p e s y i l  
pvivitiayagi y frnr r  
smvegl n e d y v l y l r a s g v k s i t l m l h v l r n a l q v a s i f c m s i p m i m g g l v v i e y i f a w p g l g q l s l k a i l e h d f p v i q  
aylvlav l f i v f n t l a d i  
ina l l n p r l r e g a r  
>tr|Q8NUX3|Q8NUX3\_STAAW  
mtlltvkh l t i t d t w t d q p l v s d v n f t l t k g e t l g v i g e s g s g s i t c k s i i g l n l e r l g v t g e i i f d g t s m l s l s e s q l  
kk y r g k d i a m v m q g s r a f  
d p s t t v g k q m f e t m k v t h s m s t q e i e k t l i e y m d y l s l k d s k r i l k s y p m l s g g m l q r l m i a l a l a l k p k l i i a d e p t t  
aldti tqydvleafidikk

Tsompanidou\_et\_al\_Supplemental\_FASTA\_File

hfdcamifishdltvinkiadrvvmmkngqli eqgtresvlhphvytkyllstkkkindhfkvmrgdvhd  
>tr|Q8NUX4|Q8NUX4\_STAAW  
mikikdveksyqsahvfkrrrtprivkgsfecpigatiaaigesgsgkstlsrmlgi ekpdkgcvtlndqpmhkkkvrr  
hqigavfqdytsslhpfqt  
vreil fevmcqcddgqpkdvmevqaitlleevgl skaymdkypnm lsgeaqrvaiaaraicinpkylfdeaissldmsiq  
tqildllihlretrqlsyi  
fithdiqaatyldqliifkngkieeqiptsalhksdnaytreli ekqlsf  
>tr|Q8NUX6|Q8NUX6\_STAAW  
mifsqnlfrptparltri eksllqahfrsvnycqynfveh  
>tr|Q8NUY8|Q8NUY8\_STAAW  
mimlsikhltkisygnkavddisldiqsgefi afigtsgsgkttalrminrmieategqieidgkdvrsmnpvelrsi  
gyviqqiglmphmtikeni  
vlvpkllkwtk eekdrakeliklvd l pesflerypaelsggqqqrigvvralaaeqdiilmdepfgaldpitrtdlqdl  
vktlgrklgkttfivthdm  
deaikladkicimsegkvvqfdtpdnl rhpandfvrdfigqnrliqdrpndktvegvmikpitiqaeatlndavhimrq  
krvdti fvvdsdnhllgfl  
diedinggirghktlrdmmq qhiyvtqidsklqdsvrtikrni rnvppvddqqr lvgli tranvdivdydtiwgdsedt  
vqae hvgedtasskvheqh  
ttnvkvr digddks  
>tr|Q8NUZ3|Q8NUZ3\_STAAW  
mskifvtgatg ligiklvqr l keeghevagfttsengqqklvavnv kayigdil kadtidqal adfkpei iinqitdlkn  
vdmaantkvr iegsknlid  
aakkhdvkkviaqsi afmyepgeg laneets ldfnstgdrkvtvdgvvgleetarmdeyvvl rfgwlygpgtwygkdgm  
iynqfmdgqvtl sdgvtstf  
vhlldavetsiqaih fengiynvaddapvk gsefaewykeqlgvepnidi qpaqpfervgsnekfkaagggtli yktwkdg  
mpik  
>tr|Q8NUZ6|Q8NUZ6\_STAAW  
mki gti adlhidrhnktsedy lealveivkykkldilli agdisnhyql thqfitq ltkql dipvkfvpgnhdlweves  
mttqdiwnnyksmsqlvg  
kpfivneewai ightgwydysfaaqrfsleh lqkgkhygatwqdkeriswgi sdqnl skiaaeqvkkdilevgnrrvilv  
thvvthp dfi vpmphrid  
fynafigtsdfnplyamfdipysimgvhfrksviddgrcylcplgyprqwr sediyqeineti qiiei  
>tr|Q8NUZ9|Q8NUZ9\_STAAW  
mq lqkivi apdsfkesmtaqqvgn i kqaftnv ygnt lhydi ipmadggeg ttdal mhatgatkytvi vndpl m rpieac  
yaradeqqia i emaaasg  
ldllekeernplytssygtgelikdalnhgakti ilgiggsatndgg tgm lsalgvqftdvngdl lqmnganlahiaqid  
itnl dsrlkevtfkvacdv  
snpllgengatyiygpqkgadakmi pldfamshyhdki kmctgksvnqipgs gaaggmgalla fce t ltkgidv vfd  
itdfhqrikdadl vitgeg  
rmdyqti fgktpvgvalaakqyhipviaicgsl genyqhvydfgid saysi isspstledvlqnseqnllntatdiari l  
klq  
>tr|Q8NV00|Q8NV00\_STAAW  
mspfl l lrvrnqcaknatrqplkaevmmsinklnirhtpplcvkvtpe mlgdhyi isfiyyisrnikvrvrflvyat l  
itif  
>tr|Q8NV02|Q8NV02\_STAAW  
mnnqtnwikilsgfasdskwkiml sil lsiisvfsglvpywavfk iilminnaytinsimvyifialiayisqvccfga  
stm lshitayei lseirkk  
laqlmr lplgvveskkig elkni fvdkvetielplahmipevignllsaaiflyimlidwrmasallvtipisifafk  
kvmsgfnetyaeqmsnny  
mnsaivefi egieviktfnqsqssykykdavdnykihtlnwfkntwgymnl gasvlpstflgilpv gmyl isinqlnya  
efflci v lsgvvapiknf  
tnyvnhlksiqyaltevnqilsl eelvlstfk kppqhyeiafnv gfsynkdkddl vfkhl sftvpennftaiv gasgsg  
kstiakl isrywdvtsgei  
tiggini kdiesq lndlvfvgqdnfl nltfkeniklgnpeatdeavekaaklaqchefiek lpdgydtnvgtvgdk l  
sggekqrvtiarmi lkdap  
iivldeatayvdpdneqki qealnvltqdktliviahr l stiqhadqiivlgkqqilekgshllikl ngnykkmwdthm  
htkdwgintghn  
>tr|Q8NV05|Q8NV05\_STAAW  
mnytqqlkqkdseyvwhpftqmgvyskeetii ekkgksylydtngnyk l dgyaslwnvvhghnkylnkvikkqlnkia  
hstllgssnipsielakl  
ieitpsnlrkvfysdtgsaveiaikmayqywkni drekyakknkfitlnhgyhgd tigavsvggikt fhkifkdlifen  
iqvespsfyr snydenem  
mtailtnieqilierndeia gfilepliqgatglfvhpk gflkeveklckkydvll icdevavgfgrtgkmfacnhedvq  
pdimclgkai tggylplaa  
t ltsqki ynaflsdshgvntffhghtytgnqivctvalenirlyekrkl l shiettsstlekqlhal krhrnvgdvrgrg  
lmfgvelvtdkds ktp lei  
ekverivrckenglmi rnlenvitfv pvl smsnkevktmvrifk kavhnildrck  
>tr|Q8NV08|Q8NV08\_STAAW

Tsompanidou\_et\_al\_Supplemental\_FASTA\_File

mtskditqisviaailtilaalkipsiipglfdqlsapaallilaffgikkyflgglssllllvfgvfnpinviisiif  
rviajavvyl1kinvlslv  
lasvlgslvsrlllsii1nlpvwwvllnaipgviftlivaiplyl1rkrmavllr  
>tr|Q8NV11|Q8NV11\_STAAW  
mskkqkl1mii1tm1mggffgl1net1lvta1psimkdfeisytqvqwl1ttaf11tngiviplsalviqryttrqvflvdi  
siff1gt1l1gg1sphfat1  
lv1ari1qalgagimpm1mmt1ldvfqphergkymg1fg1vig1lapaigpt1sgylveyfnwrs1fhvvapiaavtflig  
fktiknvgttikvpidfjs  
vifsv1gfggl1ygtssisekgfdnpiv1lsmiggv1valfv1lrqyr1stpl1nfavfknkqftvgi1imgvtmvmig  
setilpi1fvqn1lhrsald  
sg1t1lpgai1vmfmsmtsgalyekfgprk1alvgmai1vittayfvvmdqst1mlatvyairmvgialglipvmtht  
mng1k1pemnahgssmtntv  
qqi1agsig1ta1l1tilshasknfsptmsdyngmnki1dmmnqikvdtm1hgyhagfl1fallitvisffcsfml1qgkkkev  
srq  
>tr|Q8NV13|Q8NV13\_STAAW  
miq1lnnihksfndvevikgid1sveqgevvt1igrsgsgktt1l1rminaleiptegtvvngktytskdkksqievrkqs  
gm1vfqsyn1fphktalenv  
meg1litvkk1kkdeargks1el1ekvg1lthvkdqrphal1sggqqrvai1aralampkvm1fddeptsal1dpelvndvlkv  
ik1dlanegmtmvivthemr  
fakevsnniv1fihem1igeqeapeemfnrpkteel1rrfl1vinee  
>tr|Q8NV17|Q8NV17\_STAAW  
mtikvednkii1fsrtieapiekvfdayttka1fekwfhpkdastkvfrfnavsggdafyaiktptmtsyt1aeyktvkrp  
yl1eyidsfatp1qgaktk  
mpsmki1t1sfsksnttkttvtstsvfptkeaaqqvin1mgveqgm1nqt1dq1dal1k  
>tr|Q8NV20|Q8NV20\_STAAW  
mmi1rlaseqdaek1qq1mheaftpl1relgidwpsvnan1davkenidknttfvmtiddei1stitvryp1wgsvksisgyp  
fv1wwfatnpeyegkgygsq  
ll1tyveeaf1rdt1ksaavt1gtsar1hpw1l1kiyekrgyeiysehenddg1g1vimrkv1liperfdetil1gppf  
>tr|Q8NV23|Q8NV23\_STAAW  
msveeygkvy1igagpgn1pny1tkkaer1l1readvilydr1vnp1l1lqyan1ttei1dv1gkkpyakhiqqekindcivea  
arrynk1vvr1k1ggd1pai1fg  
rvqeevdt1neh1iafeivpgvtsasaavatm1qtgl1tmrtvaksvt1fstghfdseenev1dvn1lvnggt1aiymgvkr1  
gki1itqi1qqykdi1dypiai  
vfqascfnefv1vkg1r1sni1isk1qhysieakpgici1gevgvytenvsttsnptqq1fyv1vsgskhda1ml1cehlydegyg  
c1l1npn1tsngtyhssqyd  
yydafi1kqgen1tyi1stdradantv1ch  
>tr|Q8NV26|Q8NV26\_STAAW  
meg1fsv1nfd1fkkyqesfgymaqq1cfpek1tfhpk1tfeet1stdhpayed1vafrnmmtf1slseikaiytdtfdftk  
kap1lymtynk1fdtqkergq  
m1lak1kv1yemfg1emvdne1sdy1p1m1qfl1qvaewrnp1iaeeni1qli1miiedgtyvmanal1gednnpayvi1qal1r  
kt1k1c1t1spkgvkhha  
>tr|Q8NV28|Q8NV28\_STAAW  
mii1aeg1aenyves1ygkah1igpwvtntnwsrdnvkiknti1ynh1l1h1khi1fesmpy1ygddink1qgrpiv1gl1shaagya  
cgyh1lvkyf1l1ktnip1iev  
att1paqki1inevtefwht1t1  
>tr|Q8NV29|Q8NV29\_STAAW  
myki1ni1rsdsvykni1kap1indr1siftkei1lv1pfkkk1fevq1hmpiynddkqtmsai1qfl1dafqkspkelvetdqmsiq  
yl1nndfwsncekyl1kvaid  
qfsnys1sfqvsnyhftv1l1gdsqkpl1my1lnk1nrggdg1gipgyimi1ylv1pstst1nsmks1liahevnhmryqyy  
>tr|Q8NV34|Q8NV34\_STAAW  
mker1gyieql1wreekyh1v1l1hsqqsyqmi1rna1ktd1sl1hqvqqm1iddal1lieps1sigsvcnafdhm1wgyfkkcaneeerq  
qsk1l1kadf1ngkid1tqt1  
l1df1lael1ankydvqy1l1qsrv1ntkrkr  
>tr|Q8NV35|Q8NV35\_STAAW  
mnyk1qsae1inaig1geen1damahcatr1rl1v1l1ndes1vneeal1nm1dvkgt1fstgg1yqi1i1gsgtvnkvfselek1  
tg1keastt1sevkaqsaknm  
np1lqrfvkm1sdi1fvpi1paivagg1l1mg1lnn1l1takd1ff1sgks1lidvysq1faglaemin1vfanapft1lpil1igfsaa  
kr1fggn1pf1gaal1gmi1lvh  
ps1lmsaydf1pkaveagkaipywdvfg1h1nqvgyqqv1pml1vaay1ilasi1ekgl1rkviptv1dn1l1tp1l1sifitaf1t  
f1sfv1gpi1trq1lgyw1sdgl  
tw1lyefgga1gg1l1fg1lyapivitgm1h1sfi1avett1liadatktggs1f1fpiatmsnvaq1ggaiaaaffi1kqnkk1kg  
vasaag1sall1gitepamf  
gvn1kl1rypfi1gai1vgsgigsayiaffk1vkaia1l1gtag1pgf1sinpv1hagw1lhyfv1gmtisfi1aitvt1l1lskrkank  
evve  
>tr|Q8NV40|Q8NV40\_STAAW  
magi1ikeiskqnase1velatrtfydtfgsyyddkdfdqffkdnytvekftqeinhvdsfhyfyqedganvgyikmnins  
aqteemgetylevqriyfl  
kdfqgggrgsq1lielaekiaqehnk1khiw1lgvwehn1praqafykrhg1fkvvgehhfqtgdvtdtd1limekel

Tsompanidou\_et\_al\_Supplemental\_FASTA\_File

>tr|Q8NV42|Q8NV42\_STAAW  
mikqinvsnmqkfesqlmqaqsegythvpyaneimiyqsmldavqlypksivvdytvdgqykndchyfgqssiniadwa  
gnnyypnliyaiqqtldl  
ihyysvetifdla1l1tkgdlsidghvvdffkapiatsasiwetiktiedfdmmsqfylnkmayidhhpipfrnlfied  
seqlnspdnwlhstkfmlp  
kwlykiakqradnkqlqnfglytkqpnvlkdhivfigdhhqyignskylftyfvkhnpmacyfvtdrrgphfispnse  
radelinsarvvivendip  
etlqpngtliqlhggtpimqlfldskepiknietpfyrakrynrlqfdyvihsaddishfyqtafshqanvlaygnpk  
hgyllqkrnesttqqykk  
sfkindqkpv1lyapiglvsaqqplpsdalfkayhvvvqgvdeailpeevalvapkylsaqdli1msdvitdysniifda  
maidktvalytpnhsqyie  
sqgvnediwrhlskiwytdrql1innlisqaipvikypqihkeqplesisq1l1skmtnsq  
>tr|Q8NV43|Q8NV43\_STAAW  
mlvntfnpfdn11ssliaaipvfl1cl1tvfkmkgiYaaittlvvt1liaipffklpvgiAsgavvegffqgiipigy  
ivmmav1lykitvesgqfl  
tiqdsitnisqdqriqv1ligfafnaflegaagfgvpiaicall1tqlgfnplkaam1clvanaasgafgaigipvgvve  
t1klpgdsv1lvsqsat1  
t1aiinfiiipfl1fiivdgfrgvetlpailvvsitytltqg11tvfsgpeladiipp11tm1alavfskkfqpkiyrv  
nkdeejepakahsakavlh  
awspfi1vtvimiwsapffkn1flpnga1sslvfkn1pgtisevthkplv1t1niigqtgtail1tiitilmskkvn  
fkdagrlfgvtfkelwlpv  
lticfilaiskittyggl1saamggiakagnvfpv1spilgwigvfmtgsvvnns1fapiqasvaqqigtsgs11vsan  
tvggvaak1ispqsiaiat  
aavkqvkesel1kmt1kysvc11ificiwtfils11  
>tr|Q8NV44|Q8NV44\_STAAW  
mkn1kns1fis1iig1s1s1ffsm1fadgkyyp1npqstigilythftettvmlisiilw1ligvff1lgd1fkytdw  
sitkatimhfittyvgflp  
lam1agwfp1tvhyliiftiifivvyvliwiiqffknknyvntink1kq1k  
>tr|Q8NV52|Q8NV52\_STAAW  
mirnrvmnsvvnky1l1hnrsmfknqdqverffykreienrkkhkqpst1nvkanlek1s1ddmqvfrfnfrhqidkkil  
yihggfna1qpspfhwr11  
dkit1stlyevv1piyptkpefhiddtfqaiqrvydqlvsevqpqvvmgdsggalalsfvqs11dnqqplpnklyli  
spildat1snkdisdalie  
qdav1sqfgvneimkkwang1pltdkrispingtieglppvymfgggremthpdmklfeqmm1qhhqyiefydypkmvhd  
fp1yprqshkaikqiaks  
idedvtqnn  
>tr|Q8NV56|Q8NV56\_STAAW  
mie1naitt1clacily1lgkaivnhvnflkricipapvigglifailvaal1dsfgmvkikldasfiqdfmlaffttig  
lgas1kl1fk1ggk1111yf  
mfca1isvignivgvs1akv1nikp1lg1tagsmsmegghnaaaygktiqlgidsal1taalaat1gl1vfggligppv  
vkfl1kryn1kpqhsddtf  
kdysqva1neh1hskfnatevffiqftivvfc1mavgsyfsh1ftsqtginvpiyvgs1fvavivrnisesfnfnivd1ki  
tnqigdv1algi1s1alms  
iq1ieiyk1aipl1iivlvqvvm1lfav1il1frgl1gkdydaavmvggfigh1glgatpnaman1dvitkkygns1pkaylv  
vpivga1fid1igviving  
fiqwf1s  
>tr|Q8NV58|Q8NV58\_STAAW  
mfhcn1pfnhiyi1fncyryn1qds1sshfisivnhfgk  
>tr|Q8NV60|Q8NV60\_STAAW  
mhkfwatft1tyikkikaksfvi1fm1iaa1mig1snidki1nmfddgpdki1gvaapneqiykvfkqqantfhsdakftk  
vsiedae1evk1khk1ldkay  
iikvnr1rt1ggti1sekrvshedsqkvqal1taiqtnmvage1ninked1qkl1qaqskvdkvisndevdkvsegqkif  
nyal1aygi1f1mffiv1ny  
asqjame1asektsrviemiitsispiqhi1fakilgviavavtqi1iliv1mavici1fafd1kd11lqgfnvemnq1swqii  
ivgi1ssivgimayv1laa  
ilgs1tsried1nqslmp1t1l1gmiafyiaiftinnpdgr1alitsyipflapfqlvvraqtsg1qiyevilss1isivm  
vavliw1iaiktykds1v1tf  
erg1fns1mkrv1fkk  
>tr|Q8NV62|Q8NV62\_STAAW  
misi1ha1stgki1qdl1pysskrpmrsa1dktki1sqt1w1sstgftgdeqaykdhggphkavcgfskhnya1yqdd1pt1pi  
hamfgen1tf1dy1desdvy  
fgnqyr1geal1ievsei1repcwki1qakynipdlvkrmstsgktgyfrv1kqgyvspndq1y1iqeapiehr1svqq1ne  
lyy1ndrqndm1rya1l1nnp  
fl1spt1rdk1qkmy1nrt1k  
>tr|Q8NV64|Q8NV64\_STAAW  
mki1iq1leyfla1vkyns1ftkaa1qfl1hisqps1tatikkmead1gyd1ftr1stkdikitekgi1qfyryase1lvqqyr1stme  
kmyd1svt1sepriki1gt1e  
stnqwian1lirkhhs1dypeqqyr1yeihdkhqsieq11fn1hi1aitneki1thediksi1plyeesy11lapket1fknq1nw

Tsompanidou\_et\_al\_Supplemental\_FASTA\_File

vdvenlpilpnknsqvrk  
hlddyfnrnrnrpnvvetdrfesavgfvhlglygaiiprfyyqsfhtsnleykkirpnlgrkiyinyhkkkrkhseqvht  
fvqqcdylygllea  
>tr|Q8NV67|Q8NV67\_STAAW  
maaqdprtkfkttdyekqeqevpglqsempapdcgetsyqghqrlqgykilvtggdsaigraaaiayakegadvainyl  
pseeqdaqevrqvieesgq  
kavlipgdi rdeqfnydlveqvyqqlggldnvtlvagyqqyhddihgftteaftetfetnvypfwvtvqkaleykpgas  
itttssvqgynpsilhdyl  
aaskaaiisltsfseelgpkgirvncvappgfwspqlqsggppskiptfgqktpgragqpvelcgtyvllaseessy  
ttgqvfgvsggvqid  
>tr|Q8NV71|Q8NV71\_STAAW  
mfqklisifatsflvwmvaavigfispqhvatlgkwpyllgivmlgmgltitpndfkmvfkapraviigvclqfsimp  
tlaifiaksfhlpdiavg  
vilvgccpggtsnmsylakanvalsvsittvstllapfvtpaliylfanewlevsflsmlwsvvqvvlipialgivilq  
iinrkiaekastalpiisv  
vaislilavvggskhqilttglliflvvilhnlvlygtigywlarllklrdqdkavsievqmngslavslaalhfnpi  
aavpgavfsfihnitgpil  
akywskkl  
>tr|Q8NV72|Q8NV72\_STAAW  
mttaligvivlillifvpnyramksakeqgsnatratiivgidiilivliivtllllym  
>tr|Q8NV74|Q8NV74\_STAAW  
mennelqrglsarqimialggvigvlfmgatstikwtgpsvilayliagifflimrangemiylnpttgsfatfasd  
yihpaagymtawsnifqwi  
vvgmseviavgeymkfwfpeiptwipgvaiillmaanlfsvkafgefefwfalikkvtilmiaggliffgfgnggh  
avgisnlwtnggfmpngiv  
gfffalshivigsyqgveligitagetkdpqknivkavngviwrilifylgaifvivsvypwnqlgdigspfvatfakigi  
tfaaglinfvvlttaamsgc  
nsgifsasrmiytlahkgempkiftkimrngvplytviavslgiligallnvilplyidgaksifvyvysasilpgmipw  
fmilfshlrfkllhpeele  
ghpfkmpggavtnyltilflilvlgmvfnvetrisvligvifltivtiyyfiryknknvkk  
>tr|Q8NV75|Q8NV75\_STAAW  
minetkymrqqitnliqititkyntlmtdniqthiykfnqivtneInkfkgetlyiinenqvsyeyiitllnkrplr  
qvdygnkiqylfyhtqls  
nalfaikfah  
>tr|Q8NV76|Q8NV76\_STAAW  
mmkitsysytqsefsgrriekllhnsirmmwlaqdqtpsytinlfrvnpntdalislfiqfhnkmhikkadfyqiin  
rnqlfslpknlmsrplylr  
intyy  
>tr|Q8NV77|Q8NV77\_STAAW  
mtdktlqqidkliswlkqidnviqqimemttetkrhrfdlvtndkqiqqqfqqflatyfpehqllaeksnamitne  
inhlwimdpidgtanlvkq  
qedyciilayfyegkpmlyvydyphkklykairgegafcnigkmeepslkledaaisfnaqvmnltdvqdlfdasfsy  
rlvgacglmsrvakgqfg  
ahintnkpwdiaaqflfaellnkmtdldgkaidhllkgapfiisnkachetvklilnanggyqkyr  
>tr|Q8NV79|Q8NV79\_STAAW  
mkiaiiagiggltaaalqeqghtikvfeknesveigagigigdnvlkklgnhdlakgiknagqilstmtvlddkdrll  
ltdvklksntlnvtlprqt  
lidiiksyvkdaiftnhevthidnetdkvtihfaeqeseafdlcigadgihsrvqsvnadskvlyqgytcfrgliddi  
dlkhpdcakeywgkgrvg  
ivpllnqaywfittinskenhkyssfgkphlqayfnhypnevreildkqsetgillhniydllkplksfvygrtillgda  
ahattpnmgqgagameda  
ivlvcfntydfekalqrydkirvkhtakvikrsrkigkiaqyrsrlvavrnrmmkmpnalaagqtkflykskek  
>tr|Q8NV82|Q8NV82\_STAAW  
mmtrkptflesistmivmvivvvtgfvffdipiqlliiasayatwiakrvgltwqdlekgiaerlntampailiilavg  
iivgswmfsqtpaliyyg  
ldllnpsyflisaffisavtsvatgtawgsastagialisignqlgippgmaagaiagavfgdkmsplsdttlnaalvt  
kvnikhishmmwttipas  
iigllvwfiagfqfkghsndkqiqtllselaqiyqiniwvvliviivcllfkmatvpamlissfsaiivgtfnhhfkm  
tdgfkatsfgfndsmihqs  
hissvkslleqggmmsmtqilvtifcgyafagivekagclevllttiskgihsvglitviccialvfaagvasivi  
imvgvlmkdlfkyqvsrs  
vlsrtledsstmvlplipwgtsgiytnqlhvsveeffiwtvpcylcaiaiiygyftgigikkssnrlt  
>tr|Q8NV84|Q8NV84\_STAAW  
mtdnyslhiyksmkssvkeanlkiiywlqgtgvvsinlqqydvkrndvtvimlndlyqidghddsvccvvevsaktflk  
fmnanymrgkiltnevas  
tfrilikyliyiskiqqsynandkiinymcvelmslntydgsrhlvaeevhdylnnhhkkinkrdvinqvsitnkalsd  
mvkatpysnfiaqylnhirl  
ehclidiltskkipieeiasshgfnhysrfihlfketygntpklikrysptshsinhsqveidknieifddtnqssss



Tsompanidou\_et\_al\_Supplemental\_FASTA\_File

mreidipfeptkrsqmygp  
kniyikgsnfymdyytikqiiqrIgvnpenIhiivtidtsnelsieqitlllqkivnynvvnvfrikheykelltster  
gkieklvati fntmfesnr  
ckiaflindlnttaiqklkrIldnyigvfeIyhlpekelntrydkeidhlidyfilplrqi eqvsiasckii cdvdlin  
enndlkekitmsdfnkvt  
lltnyt kfrglmhmsiiseaskeinl trlsififiinlnqlrgvivyqndtmivtkfkhevqcviclpaallnensda  
irlsckglqqfshaktkqi  
vlsidkdnhtsengvIvndimqqhsywkani fierniydhsImvssnsivhIkyhlei  
>tr|Q8NV85|Q8NV85\_STAAW  
mskfkvkrI tahilmlkvindmlkysfhltltqvklInllvkydndsdsnsasidsllkmeiqskmallqmsyl nnhqw  
llkgrdqrdrkltisink  
mhidkiymnneIsdyier yfgqytdfscdyvsyllssqel frnlkcylnmcqI tleelyvlgilnlhkqgl tvkelqg  
efhhpi favspilklilk  
glvkkercel derrvivi tikrekfskvtmI iacynylekgiqvl nnk  
>tr|Q8NV86|Q8NV86\_STAAW  
mil dvnvndI fptekkgpsvlgi eykvqgenefegafiatnerlimvdmngqfyrsisyneiekidydgqtimfkf  
nignvpmhdiks dnvemfv  
eyvkqhmi v  
>tr|Q8NV87|Q8NV87\_STAAW  
mnvnednakvtI tsqgatk iyktpsnhveqyqtfnlkdnaylevadpi iayenakfyqhntfnlnssslfytdiltp  
gysktgeafkyqymhI ne  
iyiedelvt ydnlllnpnkqsineigymehyshygsayfi hedvnqklidsvyetissysntf dcrvaisqlpthgfavr  
ifayrtqiiekilgiis y  
iaenydrkl dflrky  
>tr|Q8NV91|Q8NV91\_STAAW  
mkiidvllknisqvvlIsnkw tglfiligI f vadwtiglaaivgsiiayafaryinyseaeindglagfnvltaialti  
fldksgldivitmiatlI t  
lpvaaavrevl rpykvpmI tmpfvivtwftillsgqvkfvdtslklmpqni etvnfnsndrihfiqslfegfsgvfieas  
viggvciligiIiasrkaa  
llaviasllsfiivaIlggnyddinqglfgynfvImaialgytftainpyistflgvlltvvvqlgtttll epfglpaI  
tlpfiivtwillfagikh d  
kvda  
>tr|Q8NV92|Q8NV92\_STAAW  
mndmdnsflitteiqrkwiekfki rdtfkakaeyndqhsqfpykni ewlikegygkl tlpkayggegati edmvilqsf  
lgeIdgataIsigwhvs v  
gqiyeqklwsqdmIeqfaveinngaIvn ravseaemgspt rgrpsthavkaddgyI ngvkytsmskaI thiivaayi  
eelegvgffIvdrnlpgve  
i adnwdvl gmrateshdliI ndvkvpI khIvetekskapngwilhipscylgiaqaarnyavdfai qhspnsiegtiatI  
ptvqqnl gkmetllI carq  
flwstakgyqqykdds qirnst saskvmvmngglevidlamrivgakslemnrplqryyrdmraglhnppmedaaytnia  
ksitdtf  
>tr|Q8NV96|Q8NV96\_STAAW  
mpdltpfwisIrvavistiivtvlgi fI skwlyhrkgswwkvl esllilpivlpptvl gfilliifsprgpigqffanvl  
hlpvftltgaviasvivs  
fpImyqhtvqgfrgidtkmintartmgasetki flklilplakrsilagimmsfaraI gefgatImvagyipnktntIpl  
eiyflveqgrenewIwvl  
vlvafsi vvistinllnkdkykev d  
>tr|Q8NV98|Q8NV98\_STAAW  
msqerysrqilfkqigeigqskinqkcali igmgal gthvaeglvragiakliivdrdyie fsnlqrqtI fteedaI kmm  
pkvvaakkhlIalrsdvdI  
ddyiahvdyyfl ethgqdvdi idatdnfetrql indfaykhr ipwi yggvvqstyteaafipgktpcfnclvpqlpaIn  
l tcdtvgviq pavtmatsI  
qlrdamkvI teqpidtki tygdidwgshysfgskmqr sdcttcgdvpsypylnkneqryatI cgrdtvqyenasithdi  
lvqflkqhqlnyrsnsymv  
mfefkghrivafkggrflI hgmtrtsdathImnllfg  
>tr|Q8NVB3|Q8NVB3\_STAAW  
mknqpkI slaligi flilceffygipflgatfilsfgwqplifnallyliltiillvnrqnairpiai ipifgivgsfla  
iipflgilihwllfflmiI  
fvIvvl saptyipknarvitytqykdghre  
>tr|Q8NVB6|Q8NVB6\_STAAW  
mknkIiigrylpinsfvhhdprakImfvflfiiliffchspI tyIwv falilfimrlakiqlwflikgltpiff flift  
lmmhifl tkgyvIvewhg  
itietngileglyisIrligivmiatimI tIstspidI tdaferllapI kmfkI pvhqI smimsialrfiptI mdeldkii  
laqksrgseissgniatri  
ksfiplIvplfIsafqraeeI avamevrgydanvkrtsyrqlkwqlrdtI slimiipiaailfvIkysgv  
>tr|Q8NVB8|Q8NVB8\_STAAW  
mitgrIcsnhrgsmeeI rdenqtitqep  
>tr|Q8NVB9|Q8NVB9\_STAAW

Tsompanidou\_et\_al\_Supplemental\_FASTA\_File

mkdsifwkkafipvyfivamlvfllfrfyiktdnfsmylmiifliclgtasiinyknrr  
>tr|Q8NVC0|Q8NVC0\_STAAW  
msdggliidvkcncynnfwm sclvngdlkllfyggllkmlflai  
>tr|Q8NVC2|Q8NVC2\_STAAW  
masvlyqhgltgtlmagllkgtasinelqhgdlgiatltsngevi fldgkayhanehkefvelkgdeltpyatvtkfv  
adtsytkdksseavfaei  
kekmlsenlfsavkisl fkkmhvrmmpaqepytr lidsarrqpeqtetyvkgsvvgfftpelfhgigsagfhvhfand  
drnfgghvldfevedvkve  
iqnietfeqhfpigdedfinanidykdiadeireae  
>tr|Q8NVC3|Q8NVC3\_STAAW  
mtyrikkwqklstittlmagvitlnggefrsidkyqiavadtnvqtpdyeklrntwldvnygydkydekndamkkkfeat  
eneakkllsemktesdrky  
lwenskdldtksadmtrtryniekiaeamkhkdktklidenkkkvkdalewlhknaygkepdkkvadltsnfknktsrnt  
nlwmdyeigtpralntll  
illndqfsndekkytapiktfapesdkilssvgqpeqakgnlvdiakvlllesieedkditknsidafnkvfityvqs  
natgkerngfykdgsyidh  
qdvpytgaygvvllegisqmpmiketpfnktdqndttlkswidgfmpliykgemmdlsrgraisrenetshtasatvm  
ksllrldamddstkakyk  
qivktsvksdssygqndtlssysdismkslmedstistngltqqlkiyndmdrvtyhknldfafglsmtsknvayes  
ingenlkgwhtgagmsyly  
nsdvkhyrdnfwatadmkr lagttleneepkgtdvkkssktfvvggkfdqhasigmdfenqdkltakksyfilndki  
vflgtgikstdssknpvtt  
ienrkangytllytddkqtasdnqgtnsvfl estnkpknnigyhf lneskitvkkeshgkwsdinksqkqdsqsktnqyye  
vtqkhsntdskeyvlypg  
lskddfntkkdkvtvkkqdddfhvkdnesvwagnysdstqtfiinntkvevkakgmfilkkkddktyecs fynpestn  
tasdiessimtgysitnk  
ntstsnesgvrfe lqqtlnkddn  
>tr|Q8NVC7|Q8NVC7\_STAAW  
melrfwnsefgfrnstfgiqnynewkiliiac lmtwfcdfylmncffv  
>tr|Q8NVD0|Q8NVD0\_STAAW  
mqnkqilfnkipemqpedtfkieetdtpklesdgvlvqtl yisvdpymrgmtkadsyvqpfeigkpivshvvakvids  
tladykkgdvvvgmlpwri  
inhvqadqitkvpttdvpldlylsvlgmpgqtayhgll digqpkagdtvvvsaasgavgsvvgqiakikgcrvvgiaggd  
kkvnyltgtlgfdagidyk  
kedfaea laqavpdgidyvfenvggtvgdevfkhlnrfarvpvcgais synhpeadigpriqgtlikkqvmrgflvsef  
anafkeaseqlatwvqegk  
iqsqvtiedgfenaphafknlftgdnfgkvikvte  
>tr|Q8NVD3|Q8NVD3\_STAAW  
mtkyffsssfllflgnwigqiglnwfvlttyhnavylgivnfcrlvpilllsvwagaiadkydkgrllritissflvta  
ilcvltsyftaipisviii  
yatlrqilsavetplrqailpdlsdkisttqavs fhsfiinicrsigpaiagvilavyhapttflaqaicyfiavllclp  
lhfkvtkipedatrymplk  
viidyfklhmegrqifitllimatgfsyttllpvltnkvfpgkseifgiamtmcaiggiiatlvlprvlkyigmvnmmy  
lsslfgiallgvvhniv  
imficitliglfsqwarttnrvyfqnkvdyergkvl siimmdrgmiplgsl lmsicadvfgivrtf simgisticitmv  
fyfinrklklkleeshgi  
s  
>tr|Q8NVD4|Q8NVD4\_STAAW  
mvylewakadrniqyrvinaiikeriypeqtfisqkgs lieiqyhmhvtieivrksaleryeftgditylnkgetslii  
tleglldvlnhdfdi pise  
rlreelihsrds lvetyqmshrqtllsqsfkfsrlpqdinffswlqhvkdsktddltyse slvpeghpthpltktklp  
ltmeevrayapefekeipl  
qimmi ekdhvvctamdndqfiideiipeyynqirvflkslgkseyrailvhpwqydhtigkyfeawiakkiliptpf  
tilskatlsfrtmslidkp  
yhvklpvdaqatsavrtvstvtvdgpklsyalqnm lnqypgfkvamepfgeyanvdkdrarqlacii rkpheidgkgat  
vvsaslvnknpidqkvivd  
sylewlnqgitkesittfierysqalippi afiqnygialeahmqntvvnlghpfdiqflvrldlggsridletlqhrvs  
dikitndsliadsidavia  
kfqhaviqnqmaeli hhnfydcveeaelnfvqqvvhainptlphanelkdilfgptitvka llnmrmenkvkqylni  
eldnpiikkev  
>tr|Q8NVD6|Q8NVD6\_STAAW  
mrglktfsilglivalllvaacgntdnsskkesstkdtisvkdengtvkvpkdakrivvleysfadalaaldvnpvgiad  
dgkkkriikpvrekigdyt  
svgtrkqpnleesk lkpdl iadssrhkginke lnkiaptlslksfdgdykqninsfktiaka lnkekegekr laehdk  
linkykeikfdrnqkvlp  
avvakagllahpnysyvgqflnelgfkna lsdvvtkglsky lkgpylqldteh ladlnpermi imtdhakkdsae fklq  
edatwkklnavknrvdiv  
drdvwarsrglisseemake lvelskkeqk

Tsompanidou\_et\_al\_Supplemental\_FASTA\_File

>tr|Q8NVE2|Q8NVE2\_STAAW  
makveltrrrrnfvavmliisafvailnqtllntalpsimrelninestsqwlvtgfmvngvmipltaylmdriktrpl  
ylaamgtfllgsivaalap  
nfgvmlarviqamgagvlpmlmqftlftlfskehrgefamglaglvifqfapaigptvtgllidqaswrvpfiivgialv  
afvfglvsissynevkytk  
ldkrsvmystigfglmlyafssagdlgftspivigaliismviyylfirrqfnitnallnlrvfknrtfalctissmiim  
msmvgpalliplyvqnsls  
lsallsglvimpgaiingimsvftgkfydkygprrliytgftiltittimlcfllhtdtsytylivvyairmfsvsllmmp  
inttginslrneeishgta  
imnfgvmagslgtalmvtlmsfgakiflstpsphltateikqqsiaigvdisfafvavlmaayvialfirepkeiesn  
rrkf

>tr|Q8NVE4|Q8NVE4\_STAAW  
mdngdvddaltqgkaaidaiqvdatvkpkanqai evkaedtkesidqsdqltaektealamikqitdqakqgitdattt  
aevkakaggleafdhiqi  
dstekqkaieetaaldqieagvndadatteekeafnaledilskatedisdqttnaeiatvknsaleqlkaqrinpv  
vkknaieairevvnkqiei  
iknadadasakeiartdlgryfdrfadkldktqtntevaelqnvtipaieaivpqpndpdandtngtdnddatansana  
tpentgqpnvsettdngka  
dasptpnnsdaatgettvtsatddakdkpqnannssadastnsptmdndvtskpevestnngttkpvttetdnatpaes  
ttnnstttatnenaptgs  
tttapttasteaassadskdnayvndskqnaevnnsaesqstngkvaqpsenkakaekdgrdstnqsmvesttetlpsa  
ditepnvpsntskdkeest  
snqtdagqlksetnvasneadkspskadtevsnpkptsasseakekmtstnvsqkddtatadndmqtsvgsvannkakd  
mqndtqtsvgpvannkat  
qndganaspavtvsngshsmhqdmInvtkteenkanaksdqqgkvkpkqqaktlpdtgmshnddlyaelalgammafli  
rrftkkdqgte

>tr|Q8NVE5|Q8NVE5\_STAAW  
mllstrekemiallikyhgqyitihdiaqqlavssrtihrelkgveayltsfsltlerankkgllriagtdsdlnlkqsi  
aqhqtidlsveeqkviyy  
aliqakepvkqyslageigvsvqtlakmlddleldlnkyqlslsrkrgegiylvgteskkreflsqlmvnnlnstsvsv  
ienhfvfhslnqihkdfvd  
lerifnverllmdylsalpyqltessyltltvhivlsisrikngeyvalnddiydsqntfehkvaseadklgqi ydvt  
fnqaeiafitihlrgakrk  
nlndstlnnrceenkikafvkvemisgmtfadldtlvdgltlhlnpainrlqanietynpltdmikfkyprlfenvrila  
lndcwpdlifpeseiafiv  
lhfggsiknqgnrflni lvcssgmgtsrllstrleqvseieritqasvsdlksldlsqydgiiistvnldidspyltvn  
pllpdsdisyvaqflntks  
tfgethdkssnmidkddvhvetkdidgntsfeneqtsyltsvfekhl sdekseqlmhmrsgltllsvkivstevkqwq  
tyiadylyqcdaindptsf  
aellqerlidnpgwilspypvaiphlrndmikhpmlitvleepilipsiqndnqtikymismfipnddfmaslvsdlse  
flslklesidtfmenpge  
etllrnkflerikkqfi

>tr|Q8NVE7|Q8NVE7\_STAAW  
mliqldqigrmkqgktilkki swqiakgdkwilyglngagktllnlnlayepatsgtvnlfgkmpgkvgysaetvrqhi  
gfvshsllekfqegervid  
vvisgafksigvyqdiideevrneahqllklvgmsakaqyigylstgekqrvmiaralmgppqvllildepaaqldfiare  
sllsildslsdsypmlami  
yvthfieeitsnftkllldgesvqqgliddiltsenmsrffqknvavqrwnnrfsmamle

>tr|Q8NVE8|Q8NVE8\_STAAW  
mdnvkai fldmdgtihennqaspytkdvnr lrekgykvflatgrshseihqlvpqdfavngiissngtigelvgeiif  
khgls laqvqqi tn lakrq  
qiyevfpfegnrsvlkedetwmrdmirsqdpingvshsewssrqdalagkidwvtfkpegeyskiylfssnlekitafr  
delkqn hvqlqisvsnssr  
fnaetmayqtdkgtgikemiahfgihqetlvigdsndramfefghy tvamknarpei qal tsvdtaytneedgaakyl  
akhflad

>tr|Q8NVF0|Q8NVF0\_STAAW  
msdfemlmvvl tiiglvlistqdhkk

>tr|Q8NVF1|Q8NVF1\_STAAW  
mftyfksafknakpqlitliyaliafaviavvllanfq lakyvqtiaiy sqfgqkppvdaylkviavlliaavvslfv  
lvqifigitnvmkramshe  
kvkftdlfi afkkgnylksvliglvsiamiivslslltsllyklfspvsemimsvqssyadsthligiaittqsiivv  
llikaiitwlllipvfnfm  
tsfvestndkvkthlangfkamngqkttffkffigilllnliilfktpvgylisfntqslsqsvaenirvytvmtil  
fvvihaiilmgivyqylkr  
gqkitkdkvktadknkkvvttepknkvendkvttsvetktekaqds lndnttktmtdskpednqpk

>tr|Q8NVF4|Q8NVF4\_STAAW  
mpivydgnciycynyvliqhdlprnyqfatlkgevgqqffkqhpeaanksvilqkgdciyfesqaiiklitalpnr  
tkllvgglwlvpkpvrnfg

Tsompanidou\_et\_al\_Supplemental\_FASTA\_File

yrmfannrnrnmwktthwqpnndyeksffliddnakvkltd  
>tr|Q8NVF8|Q8NVF8\_STAAW  
msekqqildyietnkysyieishriherpelgneefasrtlidrlehdfeieteiaghatgfiatydsdglgpaigfl  
aeydalpglhacghniig  
tasvlgaiqlkqidqiggkvvvlgcpaeggengsakasyvkagvidqidalmihpngetyktidtlavdvlvdkfyg  
ksahasenadealnaldam  
isyfngvaqlrqhikkdqrhvghvildggkaaniipdytharfytramtrkeldilteknvqiargaaigtgdyefgriq  
ngvnefiktpklddlafaky  
aeevgeavidddfgygstdtgnvshvptihphikigrnlvghthrfreaaasvhgdealikgakimalmglelitnqd  
vyqdiieehahlkgnk  
>tr|Q8NVG7|Q8NVG7\_STAAW  
mdtkiwdvreynedlqyypkineikdivlmggliglpptetvyglaanatdeeavakiyeakgrpsdnpilvhihskgqlk  
dftytlprveklmqafwp  
gpisfilplkpgylcrkvsgglssvavrmshsvgrqlqineplaapsanlsgprspstfnhvyydlngridgivaq  
qseeglestvlcdtsfpyk  
iarpgsitaamiteilpnsiahadyndteqpiapgmkykhsyntpltiitdieskigndgkdwssiafivpsnkva  
fip  
seaqfiqlcgddndvkqas  
hnlvdvlhsldeneniisaayiygfelnnteamnrmkaasniikgcel  
>tr|Q8NVG9|Q8NVG9\_STAAW  
mNkiiverltkdaqifekedrkiafcvathrnykdengeivcdylfckafgklasniekytnqgtlvgitgqmrsk  
ykdqgthfvteilyetik  
fmspksqneilsdsildidsqnidnhdlllei  
>tr|Q8NVH1|Q8NVH1\_STAAW  
mifsnlfrprtparltriexllqahfrsvnycqynfvehrtliyvpacimtyiceikkpehienspiysnlkvtyiti  
n  
>tr|Q8NVH2|Q8NVH2\_STAAW  
maemncsdpydlwlvpt  
>tr|Q8NVI0|Q8NVI0\_STAAW  
msnteslnigkkrgsltiyigyspgvgktfemlnsaielfqsnvdikigyiephqrdetnalaeqlpkittnftkhgshh  
fqyldvdriieesptivli  
dehahnisrdhrymdieeilnhgidvhtlniqhieslssqielmtgihvkervpdyfimsadvlevvdispeqli  
krlkagkvykkdrldvafs  
nfftyahlseirtlrlrtvadlmsdkekvrhnhktslkphiavaisgsiyneavikeafhiaqkehakftaiyidvfe  
kn  
rqykdskqvqhhlmlaks  
lgakvkvysqtvalgl dewcknqdvtkliigqhirnkwrdfntplidhlmsfehshykeivpikqipvelkmnkspyr  
pkgrfaimlkmliqii  
cvmmgliwyqldkhesstiiilmiifligiillsiwtrsfiiigflaaiinvfvnyffteprytfeyrfdypitfivsil  
t  
siltallkqikfqsitk  
kqlyrtdllfqfndsikqytvenllinagyqinqllqqsitiyvinqskviktiplqnhidnttqqheqalswvikner  
qagattdtfpginkwlipi  
gtspigilaidyqssqvinpydasilesmlnelslavenvtllkqtresmlqaerqlthsnflrsishdirtpittimg  
nldilvshskdmsiekeq  
llvhsfqesqylyllvtnlsltklqssnvqiklqpylvselveeidmilerrhlkkritvsssvdlqfihidsklilqa  
lfnlienavkhtstdtkin  
lsiryasdeqiefavidegpgisleeqqkiefpytgsnyfkdnqkesmglylvqtilhkhqsnlqykpnpqphgsif  
yfnitdfnegdv  
>tr|Q8NVJ1|Q8NVJ1\_STAAW  
mstqhevqnidplkmaesleleqlnektlndmrsgsevleallkenvdylfgyppgavplydyfydgkikhilarh  
eggavhaaegyavsvgktg  
vvvvtsgpgatnvmgtidahcdslplvvftgqvapgiqkdafqeadilsmtspitkqnyqvrvedipkiveafhva  
nsgkrkppvvidfpkdmgv  
atnvdldceinipgyevvtepenkdidtflsllkeakkpvlagaginqsksnqlltqfvnkhqiptvtllglgavpye  
dtlflgmggmhgsyasna  
ltecdllinlgsrfdrrlaskpdafapnakivhvidpseinkvihvdlgiiadckrfleclndknvetiehsdvwkhcq  
nnkqkhpflgeedqvfc  
pqqtieyigkitngeaivttdivgqhmwaaqfypfknhgqwtsgglgtmgfgipssigaklanpdktvvcfvgdggfqm  
tnqemallpeyglvdkivl  
inngtlqmvkqwdkffnqrfsnsvfngqpdfmkaeaygvkgflidkpeqleeqldaafayqgpaliervispteavtp  
mvpsgksnhemeg  
>tr|Q8NVJ2|Q8NVJ2\_STAAW  
mikinnldemqfaiflveqlksgdllllngdlgagkttltqfigkalgvrrtinsptfniiksyrgknklhhmdcyr  
edsdedlgfdeffedqait  
viewsqfikdllpathlsinistisentrqielfaqgehyeqikeaiihefaah  
>tr|Q8NVJ3|Q8NVJ3\_STAAW  
mnklrrqlfmsllidtsnqlsvalmqndevlaeittdskqnhsvqlmpaisqlfeqskiakqqldaiivaegpgsytg  
lrigvtvakilayalvkl  
ygvsslkaataidhtdkllvpvfdarrqavytgifwqngqlvtiledqymsiealrafledlnqpfyigkdtiklqd  
elqgeviaqlpnasvmyql

Tsompanidou\_et\_al\_Supplemental\_FASTA\_File

idkpsdvhtftpkylhlaeaernwinqkn  
>tr|Q8NVJ6|Q8NVJ6\_STAAW  
mstnqtflifviaiipltsvigivgrymsrqrllksmetlwqtispleafirpnshfdyeyklykekfeshslvddkts  
dlnmnaifhkmnynltaig  
emklyaclrgmlsitnksllslfndnaefrknvtyhlaigktvpytfdpqiitpvkrqnilflcpflpvisfavifinsq  
vgillflmsclfniiisat  
lkrtyeddlksifyasnvlkqgytiskikhappqevnfkqfrtarhltsvlaevndedigamviklvklifmldyvlfhs  
iqksytthmnelkncfdyi  
aeldnhyalmyrrtlecytepqiddsndgivfseithpliadvandfslsqnilltgsnasgkstmksiainiilas  
aiqtvtaskfvyqpgivft  
smanaddvlsqsyfmaelksikriveipdnqkiycfideifkgtntteriaasesvlsflheksnfrviaathdielae  
llkqryenyhfnevienn  
ihfdykikpgkantrnaieillkitsfpakiyerakdnvpi  
>tr|Q8NVJ7|Q8NVJ7\_STAAW  
mllqlnhisksfgediftvdvfevktgerigivgrngagkstmkiitgvenydsngvskiknlklgyltqqmtlnsn  
atvfeemskpfehikrme  
likeetdwlshandydsdytkthmsryeslnsqfeqlgyqyeskiktvlhglfseedfnkpindfsggqktrlsiaq  
mllnepdllldeptnhld  
lettkwledylryfkgaiivishdryfldkivtqi ydvalgdvkryvgnyeeffiqrldlyyqkrmqeyesqqaeikrlet  
fveknittrastsgmaksrr  
kilekmeridkpmldaksaniqfgfdrntgndvmhvknleigyqtaitkpsievskgdhiaaigpngigkstkliktian  
qqkalgdiftganlqigy  
ydgkqae fksktildyvwdqypmnekdiravlg rflfvqddvkkiiindlsggekarlqlallmlqrdnvlildeptnh  
ldidskemleqalqhfegt  
ilfvshdryfinglankvfdltidggkmylgdyqyyiekveeaealkahqeeqsvnvqaheksmeqssyhnqkeqrreqr  
klrqiseceneietlett  
ilqideqltqpevynnpqkanelaiqqdseqlehamskweelqqk  
>tr|Q8NVK0|Q8NVK0\_STAAW  
mllndtiffmflctllvwlmtpglslfygglvqsknalntvmqsmavlvtfvwtvgftisfgnglwfgnweyftlnh  
vgfatgedisphippalfm  
lfqmmfctiaisilsgsiaekmkfipyllfvviwta lvspravhwgggwinklgvldfaggtvvhitsgvsglvlaime  
igkgnkhsestphnliitl  
iggjfvwigwgygnvgsaftfdkiamlaftntvisasagsigwileyifkkttsllglll galaglvvitpaagyvtyl  
satimaliggiicyiviny  
ikvklkyhdaldafgihvgggiigaaltavfqsakkanpdiengfiytdihiilvqilcvtavvifsivmtfiiakvikl  
itplsveltegetnigldkiv  
hgehayfege lnrfnkhiry  
>tr|Q8NVK1|Q8NVK1\_STAAW  
mknisdialagvskstvsrflnngsvskktsek ltrriaehdyqpnqfaqlrarqthligaiiprmnsyavdetikgl  
akqcqkyesqllinytgn  
ieaeiqaletlarskvdgivlmatditerhievin kmnvpivivgqqheqlhsivhddykagqi igewigqqgyqqvevf  
sysekdiavghrkrgrld  
qlakyqikpnihetnftyv eaqkdvanal enveqv davvgatdialaaykyysdkkdvmpkphqiyfggdpmqtqlvsps  
iktihynyfeagqcameei  
qqmlkkqdm psvtvdvni  
>tr|Q8NVK2|Q8NVK2\_STAAW  
mtewtreeryqriedvdteyftklqqvdqskfrqqfhiqpetgl lndpnglifykgyyvshqwfplgavhglkywyny  
tsddlinfkaegpilnpt  
kydshgvsygsafeyngllymytgnhrdnhwqrhasqmiarl kedgsvkfpkpvisqqpegytshfrdpkvfkyseky  
yaiigaqndqqgrlllyn  
tediinwhy lgeintelddfgymwecpdyfnvdnqdvilicpqgiepkgdqfkniyqsgyilgkfdieklyehenfvel  
dngfdfyapqtfldkgr  
vligwmg lpei eyptdnegwahcltiprvlnvengqlkqrpypaleklrhketalgyankftrklhpyegkqyeliidi  
ldndatevyfelrtskts  
tliaynkrenkitldrds glptnvegttrstildtplkqlqifvdtssieifcndgervltsrifptedal giktste  
sgqyylqftkydlkdehk  
>tr|Q8NVK4|Q8NVK4\_STAAW  
mealndynvlfvqvslmffisafisgirykksdyiyiigivlssvyffdkigsislvviti fiiiflyfki rlysvf  
lvmvtqiilycanfyiii  
fsyitishsvfivlpi flvvyvsisyalayilnrilkringtylslnkkfltvitvivitfslfaysqidasdasti  
kqslflfgiillslif  
iysqftlkemkykrneeietyyeyt lkieainnemrkfrhdyvnillt lseyireddmtglr dyfnknivpmkdnlqmn  
alklngienlvkreikgl  
takilraqemnipisiepdevtrinlnmidlrsigiildnaieasseiddpiirvafiesensvtfivmncaddipr  
ihelfqesfstkgegrgl  
lstlkei adnadnvlldtiengffiqkveinn  
>tr|Q8NVK7|Q8NVK7\_STAAW  
mkvqiyqlpiifgdsskneaqitqwfeknmnaevdvvvlpemwnngydl ehlnekadnngqsfsfikhl aekykvdiva

Tsompanidou\_et\_al\_Supplemental\_FASTA\_File

gsvsni rnyqifntafsvn  
ksgqlineydkvhlvpm lrehefl tagenvaepfq lsdgtyvtql icydlrfpellryparsgaki afyvaqwpmsrlqh  
whsllkaraienmfvi g  
nstgfdgnteyaghsivinpngdlvge lnesadiltvdlnlneveqqrenipifksikldlyk  
>tr|Q8NVL0|Q8NVL0\_STAAW  
mitivmkk lsmwiqtimsrtsilknisthsfrythcalliesgvhikeiqerl rhkdinttmniyakitnsykkdashkf  
shqmedvs  
>tr|Q8NVL1|Q8NVL1\_STAAW  
mkwsdidfenntisitktyynpnnkkkfqi lppktessigkisvdpnvikvl rdykinvqnnwknelyndnhcnektin  
vdtnhvytyqhtqkylyal  
iqihtlriahrircth  
>tr|Q8NVL2|Q8NVL2\_STAAW  
mmtddndvndhiiknhiemivdr latdkefyifdsliqgl syqdissal dcseqsvilwyetil dki vgvik  
>tr|Q8NVL4|Q8NVL4\_STAAW  
mdninknekfrvlstiait isfilnfgl fislaisinsmgkqcislnllsddtfavisvmttlgtailggiapsiyg  
iftspidkkssfraisdwe  
qeqrnnvkdlmm llpftllsilivifiqfayskl fntiaiiifiiilvmmfflillicykitvmicryfske  
>tr|Q8NVM1|Q8NVM1\_STAAW  
mktarcydgkkwgyefkhegkryrkkgfrtkreanyagldklnelrsgfnidnyitleeyfenwiktykqpvvkentyrhy  
rnalqhiqkhkigkme lsk  
inrqvyqkfindyskehaketirktngai rsalddalydgfi fknpaykvnykagkptksekek fsvteyeilkdhvrk  
krtrsslalfimictgcrv  
sgarniktehinqvntifiderktdtspryisiaksdmkhimdvistfaisydgyifkeagsiinlqainnalksacrv  
nnipiitshalrhthcsyl  
lakgvsihyiskrlghkniaittsvyshlleekfneedkkttkilesm  
>tr|Q8NVM2|Q8NVM2\_STAAW  
mkkllisilliniilgvsnasagdigidlnrfytkkdfinlkdvkdndtpianqlqfsnesyd liseskdfnkfsnf  
kgkkl dvfgisynnqcntk  
yiyggitatneyldkprnipiniwingnhtistnk vstnk kfvtaqeidikl rrylqeeyniyghngtkkgeeyghksk  
fysgfnigkvtfhlnndt  
fsydlfytgddglpksflkiyednktvesekfhldvdisyketk  
>tr|Q8NVM5|Q8NVM5\_STAAW  
mcydysrlsgkivekygtqynfaiamk l serslslk lngkvgwk dseiwkaiqlldipvekihlyffkekvhvi  
>tr|Q8NVM6|Q8NVM6\_STAAW  
mqal ktk snigemfniqekengeiaisarelyka levkkrfsawaeinlkhfkenrdftsvltstvvngavrql edyal  
tl dvakhvammstegkfd  
freyfiqvekawspemimqral kiantinqletkierdkpkivfadavattktsilvgelakiikqnginigqrrlfe  
wlrqngfl ikrkgvdynmp  
tqysmerel feiketsithsdghtsisktpkvtgkqqyfvnkflgekqts  
>tr|Q8NVN6|Q8NVN6\_STAAW  
markarivtindkpyrfskfemeli eshgitagmvskrvkdgwelheamdapegtr lseyrekktierleqarlerkler  
krkrgrtrrk lkevqllkwv  
sclki  
>tr|Q8NVN8|Q8NVN8\_STAAW  
mneqiigsiytlaggvvlsvkei fryftdsn lqrkkinleqiypiyldc fkkakkmigayiipteqhefl dffdi evfn  
nldkqskkayenvigfrqm  
inl snrvkamedfkmsfnnefstnqiffnpsfvmetaia ineyqkdisylkni inkmenraynhidsfitseyrrkind  
ynlyldkfeeqfsqkfk in  
rtsikeri iinlnkrrfk  
>tr|Q8NVN9|Q8NVN9\_STAAW  
mmwittmivfai lllvcisinsdrareiqalryindy lldevvktkgynglkeyrielkrmnndikk  
>tr|Q8NVP4|Q8NVP4\_STAAW  
mtdyvtkyakkvvsgei lasl kniqvckrhlsfmenppngchwdnhlsnkaikfvem lpdpktnqmp lme fqkfi vgs l  
ygwrrggqymftkayisma  
rkqgk slivsgmsvnel lfgqypkfnrqi yvasstyqqaqti fkmassqvn lmrskskfi rekt dvrktdiedvl sssvf  
ap lsnnpdavidgkdptvai  
lde lasmpddemysrftgmt lqknpl tllvstagdn lnsqmyqeykyikri lneevradnyfvyaemdsqeevqdetk  
wikamp lleskehrkti lq  
nvkadi qdelekgtsyhkli knfnlwqaqreds lldi sdweqvi tpm pningkdvyigvd lsr ldd ltsvgfi fpnddk  
kvflshsfig lrtneleq  
skrdkinyelaiergeaettqsdsgmidykqvidfivkfitthd lnvqavcydpwnaqs fittiesmal dwplievqgsf  
kalsqsikefrmwvaderi  
qhndnm lltsvnav lirdgednvkinkmnrqkidpiisi itaftearmhefgenwtekyeseefgf  
>tr|Q8NVP6|Q8NVP6\_STAAW  
mgi fyknekrd lqynedd lqmmvqt lpgfqgk l rkykdieairhsdi ftavmmiasdlarmpirvtvngqinysdrivn  
l lntprnpmyngyifklvv  
fvsalltshgyieitrdktgepmn l tfrktseielksdargrlyyfhqridsngni ernvkfedml dikfysl dding l  
s lldt lsr tiesdnngkdf

Tsompanidou\_et\_al\_Supplemental\_FASTA\_File

lnnflrngthagglkmgkvlndkkardrareefhksfsgtkqagkvvvl desmtdqlevdtevlkli renksstreia  
gvfgiplhkfgi etanmsi  
tdanldylstlkpyitcvcaelnfkfndeyvnrefkfdtteirrvdektqaeidkinidsgkmnideirqrdglapipgg  
ngsihrvdlnhvnie lvde  
yqmksratdkklkggeene  
>tr|Q8NVP8|Q8NVP8\_STAAW  
mktkeelqseisdi krqidlkvkyatra lnndelekaekleqeitdlrsqiqekqeeldklikekdgtsennqqsvevnea  
rtyrnqanindlgisiqnt  
kvtsqevrdfteyletrndiqggs lktdsgfvvipeeivtdilklikevefnldkyvtvkrvtngsgkypvvrqsevaale  
kveeleenpelavkpfqgl  
aydinthrgyfrisreaiedakvnlqelklwmartiaatrnkaiidvitkgstgstssgfekegkkl evkkakslddik  
dainlnvkpnyehnvai vs  
qtmfakldkmdklgnlylqpdvkektqqrllgakieilpdevlgqkgnntliignlkdaivl fdrsqqaswt dymhfg  
ec1miavrqcridyksa  
ivi eyddsergegd1g1lea  
>tr|Q8NVP9|Q8NVP9\_STAAW  
mamyevkksytdlekgyylksgkrvemt vkraeyvnkklkehgvilervkee  
>tr|Q8NVQ0|Q8NVQ0\_STAAW  
mq1taeelklkkhckidhnsedd1lei yyswafheiasavtdepskyidwfkshpl faraiyplasyfenriayldrd  
ls1aphmv1stvhklrgsf  
eqfl esendei  
>tr|Q8NVQ1|Q8NVQ1\_STAAW  
mmkfnsnk1neridfcedvservngnmpkpktkilyscfacieskesdtqtnlntgskfiktiiirdtrgdykptnkhy  
vlheggrfnikyvkpdyqd  
ksylriygevvi  
>tr|Q8NVQ4|Q8NVQ4\_STAAW  
mieklkqaprflklnlqhfadtgvsgiaigvsnfyyapilkdtenewetgagtrirflkeievdrpqdteedygddmva  
tavsngklsvkttfvtvpa  
ddkaf1ngakkgvggykygakdippdvai vfernrhdessesvgl fkgkftrssikgqtkqdkvefqnddvegnfidrlf  
desshvtgydkkgsttgrd  
yvfmetfgktydefmssrgeqnmepvekemkktekevtsvntdeqvtvkvdatkqlsattepsgqkvtyavteggqya  
svtstglvkgl aegnatvt  
atagkqtdtvqitvqsnlem  
>tr|Q8NVQ6|Q8NVQ6\_STAAW  
mpihffldiveski etkrtaksfkdif  
>tr|Q8NVQ7|Q8NVQ7\_STAAW  
mpnpi gnmvikvldgsgfnrgvtgl nrqmkmvsrelsanlsqfsrydnslekskikvegl skkqkvqaqitkelkdsyd  
klsketgensaktqaaaak  
yneayaklnqyere lnqatqelkdmqreqka lntamgklgtfnfnfgpk1qeignsmknvgrnmtmyvtapvvagfavaa  
kkgiefddsmrkvkatsga  
tgeefea1kkkaremgattkfsasdsaealnymalagwdsqmmeg1sgvmdlaasgeel gavsdivtdgltafglkak  
dsghfadvlaqtsskantd  
vrglgeafkyvapvagalygtiedtsiaig1msnagikgekagtalrtmftnlssptramgnemerlgisitdsngkmip  
mrklldq1rekfkh1skdq  
qassaati fgkeamsgalai nasdedyqkltsidsstgaskrmatmesglggklrtlrsqleelal tiydriepalk  
iivsafskvvtwvklpts  
iq1avvefgl fvavlgplvfmgfl fismgnamtvlgpllinvknasglfaf1rtkiaslvklfpilgvsissltlpitl  
ivgalvgigiafyqaykrs  
etfrninvla isgvana fkaakla1qgffd1fkgdskgavtleki fppetvagi qnvntirttffkvvdaivgfakeig  
aq1asfwkengseitqalq  
niagfikatfefi fnfi ikpimfaiwqvmqfiwpavkalivstwenikgviqgalniilgfikffss1ftgnwrgvwdgi  
vmilkgtvql iwnliqlwf  
vgkilgvvryfgglkgli sgiwgvikgif tkslsaiwnatksifgfl ynsvksiftmknwlsstwnniksntvgkaks  
lftgvrskftslnatkdil  
ftklrnwmsniwmsikdntvgiagr1wdkvrnifgsmrdglksi igkikhigmvдавkr glnkli eglnwvggklgmd  
kipklhtgtehttttrlv  
kngkiardtfatvgdkgrngngpfrnemiefpngkrvlt pntdttayl pkgskvyngaqtysmlngtlprfsigtmwkd  
iksgassafnwtkdqigkg  
tkwlgdkvgdvmfdi dnpkllnyvlqafgvdfss1tkgmgi agditkaawskikksaikwledafaesgdggvldmnl  
rylyghataaytretgrpfh  
egldfdyiyepvpstingraqvmpfhnggygkwkivkga leviyahlskykvktgqqrvvgqtvgisngtgfstgphlh  
yemrwnghrhdp1pwlrkn  
ngggkstpggngaanarraikaani lggrykaswitnemrrvasresnytanavnwdsnaragipsrgmfqmidpsfr  
ayaksgynnplnphqais  
amryivgkwvprtgs wraafkragyayatggkvynglyhlgeegypewi iptdpsraneahkl1alaandi dnrsknkr  
pnnlpnpsisnsdtnyih  
lenkl davinclvs1vesnqvi adkdyepvinkyvfedevnnsidk rerhestvrfrfrrggtii  
>tr|Q8NVQ9|Q8NVQ9\_STAAW

Tsompanidou\_et\_al\_Supplemental\_FASTA\_File

mihvldfndkiidflstdpsslvraihkrvndnsemlellisseraekfrerhrviirdsnkqwfrefiwnvqdtmdgy  
teieciasyladittakpy  
apgfekkitsealkdvlstdgwevseqteydglrtswtswyqtryevlkqlcttykmvldfyielssntvkgrvvlkk  
knslfkgkeieygdvlg  
trkidmseiktaliavgpendkgkrlelvvtddeaqsqfnlprtryiwgiyepqsddqnmnetrlrslakteInkrksavm  
syeitstdlevtypheii  
igdtvrvkhrdfnpplyveaeviaeeyniisenstytfgqpkfkeselreefnkrlniihqklnndnisnintivkdvd  
geleyferkihksdtpen  
pvndmlwydtsnpsdvavlrrywngriewatpndveklggitrekaIfselnnifinlsiqhasllseatellnseylvdn  
dlkadlqaslavidvynq  
iknnlesmtpetatigrldvtqalfleyrkkldvytdvedvkiAISdrfkllqsqytdekykealeiiatkgfltvned  
lqlvgepnvksaieaare  
stkeqlrdyvktsdyktdkgdgiwerldtaeaerttlkgeikdkvtlneyrngleeqkqytdqsdlsnpeikasieqa  
nqaqaalksydaqddlk  
ekesqayadgkiseeegrdaqakleakqnaelkarnaekkanaytdnkvestdaqrktltrygsqiiqngkeikl  
rttkeefnatnrtnln  
eivqnvtdgttiryddngvaqlnvvgprgirlnadkidingnreinliiqnmrdkvdkdivnlnsregldinvnrig  
ikggdnryvqiandsiel  
ggivqrtwrgkrstddiftrldkghlrfrrntaggslymshfgistyidgegedggsgtiqwwdktysdsgmngitins  
yggvvaltsdynriiidsy  
asanesreapiylspntknkpglnrfaftlnsadsayetdgyimfgsdenykygaglrfskrsnkglvqvngdyatgg  
dttiesgmgnfvlvkrddg  
nsyvsiqsydlavgsgdnagdrvasnsiykrtysapanlhitsagtigratsakkykisiengyineddqfshskeilk  
pirtwfdkyeseimakele  
sgkklSddtflsrhtgliaeeveelgfnefvdyddngeiegiaydrLwvhlipiiknqqskiekleeline  
>tr|Q8NVR0|Q8NVR0\_STAAW  
malflyknlrfsfnmaneiikkterfilvqidkegtervlyqdfvgsfttsdsasyaqdfkseenakkivetlnllyqlt  
gnqngkvkvkevdrtdls  
sdksvdsetm  
>tr|Q8NVR4|Q8NVR4\_STAAW  
mkfkslittalagviastganfntneasaaakpldkssstlhghgsniqipytitvngtsqnllsstfnknqniSykd  
ienkvksvlyfnrgisdi  
lrslskqaeytvhfngtkkvidlksgiytadlntsdikaiSvndtkkqpkdkakanvqpytitvngtsqnllsnltf  
nknqniSykdlegkvksvl  
esnrgitdvdlrslskqakytnfnkngtkkvidlksgiytanlinssdiksiniinvdtkkhienkakrnyqvpysinlgt  
stnilsnlsfsnkpwnyk  
nltsqiksvlkhdrqiseqdlkyakkaytyvfknngkriqlnSknytanlvhakdvkrieitvktgtkakadryvpyt  
iavngtstpiLsklksnk  
qlisykylnkvksvlksergisdlldlkfakqakytyvfknngkqvvnlsdiftpnlfSakdikkididvktgskakad  
syvpytiavngtstpiLsk  
lksnkqlisykylnkvksvlksergisdlldlkfakqakytyvfknngkqvvnlsdiftpnlfSakdikkididvqy  
tkskkk  
>tr|Q8NVR5|Q8NVR5\_STAAW  
mkfpvtinkfenivsnfvfynaskitindlsiklksaiandqgitkhdieLaeravykvyfknngsskyvdlkteyker  
vfkatdikkvdielkf  
>tr|Q8NVR6|Q8NVR6\_STAAW  
mnpLaqslneqlqqs natafamlsdlqnmfypkglSqsaeaksttynatigmatnkdgkmfassldamfndltpdeif  
pyappqgieelrdlwqqkm  
lrdnpeLsidnmslpivtnalhglsLvgdlfvnqgdtilldphnwgnyklvfntnrganlqtypifdkdghytttdsLve  
alqsynkdkvimiLnyppn  
ptgytpthkevttivdaikaLadkgtkviavvddayyglfyedvytqslftalSnlnsnailpvrldgatkeffawgfrv  
gfmtfgtsdqttkeveak  
vkgLirsniSSgplptqsavkhvlknkqfdkeieqniqtLkeryevtkevyadqyhshwqaydfnsgyfmaikvhvd  
peelrkhliekysigviaL  
natdiriafscvekediphvfdsiakaidlr  
>tr|Q8NVR9|Q8NVR9\_STAAW  
mkallirnfklrrytliiyvllltlypfyimldstckffyllqsfisptiliiwildaghlfrlnrrlgndsyyfymslp  
vskkqllnanyitcivltl  
igtLvislyayeadviepnsiyfstayafvisnflsipaSfqtelrrvkpygiyvftiilvpflfsiaivlvnyfl  
lsqssfpdlysylnigfl  
iisivilivnyfkqLnkintrkfkgsr  
>tr|Q8NVS6|Q8NVS6\_STAAW  
mqlyylgpkgtfsylacrqyfsekettfqpsnlfevikavaddtsigvvpensiiegtinivadaLaqqdvfahgeir  
ldinfalyngtdsidsik  
kvysiapaisgttnyihqhqfdydyvdstiqsltkiengvaaiaplgsgeaygftpidthiedyphnvtrflviknqqf  
dqnatslmflitpmhdkpg  
llasvlnftalfnlnswiesrplktqlgmyrffvqadsaittdikkviailetldfkvemigafn  
>tr|Q8NVS7|Q8NVS7\_STAAW



Tsompanidou\_et\_al\_Supplemental\_FASTA\_File

myqlbedds1mlhndlyqinmaesywndniehkmavfdlyfrkmpfnsgyavfnglkrvidfiehfgfsesdleylksigy  
kddflsyldkdkftgsirs  
mgegelcfnep1lrveapliqaqlietillnivnfhtlittkasrirqiasidklmefgtrraeidaalwgaraayig  
gfdstsnvraklfgipvs  
gthahafvqtygdeyavfkkyarhkncvflvdtfhtlksgvpnaikvake1gdkinfvgirldsgdiaylskearrmld  
eagftetkiiasnd1deet  
itslkaqqakvdswwgvtklitgydqpalgavyklvaienedgsysdriksnnaekvttpgkknvyriinkktgkaegd  
yitlenenpydeqplklfh  
pvhtykmkfkfsfeaidlhhniyengklvyqmpstedesreyla1glqsiwdenkrflnpqeypvdlskacwdnkhhkrife  
vaehvkeemedne  
>tr|Q8NVS8|Q8NVS8\_STAAW  
meqfel fsidkfkcnseakyylniiegewhpqdlndsp1kfilstsdssdyickyintehkq1tlynknssivieifip  
ndnkil1timntealgtsp  
rmtfikqks  
>tr|Q8NVT2|Q8NVT2\_STAAW  
mkrtlv1l1itai filaacgnhkddqagkdnqkhnssnqvkeiatdknvqgdnyrt1lpfkesqarg1lqdnmansyngg  
dfedg1ln1skevfptdky  
lydqgqf1dkktinaylnpkylkreidkmsekdkkdkkanen1glnpshegetdpekiaekspaylsnileqdfygggdt  
kgkn1kgmtig1amnsvyv  
ykkekdgptfsklddsevkqgkqamaseilsrlrendd1kdipihfaiykqssedsitpgefitqataeksqtklnewh  
nineksal1psstavdyde  
nlnnnfkqfndnlqsyfsnftqavgvkfvdkkppqr1vvd1pidyyggaetigitqyvteqankyfdkidnyeirikdgn  
qpralisktkddkepqvhi  
ysn  
>tr|Q8NVT7|Q8NVT7\_STAAW  
mqhekmndern1tmkptk1i1kdasy1hsktsitf1kdvvieednkiyyfdtsatfedqevkfe1al1f1dsmdn1khmd  
ydn1pvt1eyfi1epd1lhfti  
idfngel1lciy1dfds1grhsnmatesgis1rinvaksdftkfinelas1h  
>tr|Q8NVU0|Q8NVU0\_STAAW  
mskkdhsssky1nsvkeaqeesknksnpk1dvdrtyiepqqfqsckpkkddqvff1sr1nkpakykkdsn1sylyirig  
kddasgl1aaqmt1yhf1lam  
fpm1l1f1l1t1l1pffnikqsqitnm1snapaetst1iksvigditqns1sgg1l1sig1l1aiwsasngmtaimnsfnvaydv  
edsr1ngiv1k1l1svvftv  
mgvfvva1al1pt1gsv1sh1f1fgp1g1fdeqvkwif1n1iriv1p1i1i1fiv1v1ysvapnvk1k1ksv1pgavfts1i1w  
1agsfg1gwy1snf1gnysk  
tygsiagi1i1l1l1w1y1tsf1i1ivgaeinai1h1qrs1vik1gkt1peeaa1ehddnkn1hynentryeydedsnathqrtyhv  
dehpsd1ty1pedd1kn1kdk1  
vdk1kkd  
>tr|Q8NVU1|Q8NVU1\_STAAW  
mtnykek1qqyae1l1vkvgm1nvqpkqp1vfir1ssvet1el1th1iveeayhcgasdvrvvysdpt1kr1kfenesvehfanh  
e1ksyd1vearm1dyv1krgaa  
n1al1isedp1lmdg1dsqk1qaf1qqnara1fkgymesvqknqf1pwvvaaf1pskawakrv1pelsveeayik1fidev1div  
ridgndp1venwr1qhian1s  
vyaqk1qknyha1hyv1segtd1tv1glaknhiwedatsy1ngkeqafianipteevftapdrnr1vdgyvtnk1p1syngt  
i1dqf1k1mfkdgei1dfsa  
ekgeav1kd1intdeg1srr1geva1vpddspi1srnt1fynt1fdenaach1aigsaya1fni1qggtemtveekiasg1nd  
snvh1vdfm1gssd1ti1ygi  
fedgske1lvfeng1wastf  
>tr|Q8NVU5|Q8NVU5\_STAAW  
myqss1fken1li1hw1den1qrem1pwr1qttn1pyyiw1sevm1lq1tqvkt1vidyyhr1fver1fpt1vev1sqasedev1kyweg1  
gyysrarn1fh1tai1keyvdk  
yeg1vpkdp1dqfka1kgvgpyt1qaavms1iaynv1latv1dgnv1frvwsr1nddyrd1k1qstrksyeq1l1pyvtteag1f  
nqam1melgal1ict1pknp1c  
l1fcpvqencea1fdkgt1fek1lpvksknvskk1vieqsv1li1rnnqgqy1l1qkrrek1l1hgmwqf1p1mfeseharrk1mteki1gh  
di1qpvet1pife1lkhqfth1  
twk1kvyav1sgain1iet1pddmiw1fd1sdrdqyt1fpvpmskiy1qfing  
>tr|Q8NVV0|Q8NVV0\_STAAW  
mdtkq1lkqdi1dyay1tigids1gfttad1pfde1kqk1leayhangyasg1feesdia1lrtepk1sl1ptars1i1aiavgy1pnk  
1kgapksvrg1dr1rg1farv  
swgqdyht1imkr1ldm1as1fieskvpdveiksmvdtg1vsdravaerag1lgfvgrngfv1inpklgtwty1lgem1vsipfe  
pdp1l1dscgdcti1cvdrc  
ptsalvgngq1lnsqkci1sfl1tqtkgym1pdqyryki1gnr1lygcdt1cqvc1pknrg1inte1qddi1ilepe1ilkpr1lv1l1rms  
nkefkq1tygh1agawrgk1k  
piqrna1lg1ahfnevda1ipe1lkkvat1tderp1mirataywaig1qil1geear1d1finany1dqedaevqnemikg1ldtrre  
>tr|Q8NVV2|Q8NVV2\_STAAW  
meqrtr1al1keiaef1neetemysmtqga1kyl1iegsnftt1gwi1ffinsvgehelvshva1l1pqs1tadhchyikdg1scw  
cvkafnqrr1lmkasni1vnc  
srin1askafpsqndni1th1hatvp1ksgqe1qf1g1l1nvaspnte1iysded1el1lesvaf1qlgsaikriy1ltdrekeaa1kin

Tsompanidou\_et\_al\_Supplemental\_FASTA\_File

ernr1ard1hdsvnqmlfs  
vkl1tahaaygmsnesiakqafktieetsqnavnemraliwqlkpvglegqlihaltaysklihiqlnvvveglidlsnei  
eeniyralqecinnvkkha  
dtnkmd1tlkqmdi1yidvidygggfeidnvqiasshginnikqrvk1l1rgrvtfhsqptkgtqiqtftipik  
>tr|Q8NVV5|Q8NVV5\_STAAW  
mvkfi1hcsd1h1dspfkskshispkifedvqksayesfknivdia1qqdvdfviiagdl1dsenrt1raeiflkqqfer1  
qneqi1fvvchgnhdp1ss  
kissnwpd1nsvfsvknvetyea1tksetiyihgfsyenrasyenkideypssqgqkigihigvlhgtyskssvnerytef  
i1ed1n1sklyhywalghih  
erqq1sdmpviny1sgniqgrhfneqgekgc1liegdh1kl1k1kfyptqyirfeeatietdkt1skqglyeviqnfkeqvre  
egkafyr1t1vinset1s  
pqd1l1qveem1t1dyeenenqfv1yidelkvqyaqndespl1vnefsae11vdqtvfdkamsd1y1npraskf1ddygtfdht  
al1vnraee1lkaemrgeq1n  
dn  
>tr|Q8NVV6|Q8NVV6\_STAAW  
mrni1en1npgdsvdhff1vhkatqgvtaqgkdy1mt1h1lqdk1sgeieakfwtatkndmatikpeeivhvk1gdi1nyrgnkq  
mkvnq1rlattedq1k1kteq  
fvdgap1spaeiqeeishy1l1dienan1qritrh1l1kkyqerfytpaasshhnfasg1syhvl1tm1rvaksicdiyp1  
l1nks1llysg1i1hdigkvr  
e1sgpvatsytveg1l1ghisiasdevveaare1niegeeim1l1rhmilshhg1kleygspk1pyl1keaeilcyidnidar  
mnmfekayk1ktdk1gqftd1k  
ifg1enrrfynpe1s1d  
>tr|Q8NVV7|Q8NVV7\_STAAW  
mf1lckrqidinarfg1lpriafmsavati1m1flvsyevmy1f1sntpl1sdrhf1l1f1l1l1vfmtypl1hksih1l1ff1pyrksf  
kvh1k1tkrkwl1fyntyv1n  
qpvhkfyfc1n1l1pl1i1l1samfvyl1tilfpqyghyfm1l1a1nfgis1td1l1y1l1k1i1i1fsnygyieehstgin1l1k1k1  
knpyh1  
>tr|Q8NVV8|Q8NVV8\_STAAW  
metk1f1sst1rsrsq1l1l1l1vtay1ff1likc1qinemt1e1iryf1ss1lfynsne1mftnyrnts1fvvifa  
>tr|Q8NVV9|Q8NVV9\_STAAW  
mtvkveq1tggygkrpvikdinfel1nkgeivg1ig1ngagk1sttik1hmlg1l1tpmegs1sisdin1nddieayrrk1s1y1  
pespviyee1t1leehiemt  
amaydi1drdeamnramp1l1ktfr1lene1kvf1pshf1skgm1kqkvmi1c1afivnpelyi1idepf1gl1dpl1giqsm1dl1mvek  
knegrtv1msthi1lataer  
ycdrfi1il1degevvafgd1lea1rqqtg1lhkqt1lddiyhvtqggdvha  
>tr|Q8NVW0|Q8NVW0\_STAAW  
mhnqatt1fnkr1halrkeknnyynkfi1fnghfmv1l1l1l1l1gafi1fgygew1khiptn1nfs1liaaviva1tsifp1mrp1l1  
leadki1f1l1pfekhmsqfm  
rhailysy1fari1liq1liivimfpl1fyin1qhnvafyic1fgvsal1fpyvg1rl1rwqwyqsg1ktwqvn1lisfitfal1ty  
y1l1l1apkwya1fvmvalpv  
li1ef1l1vkkykpg1f1ypwek1mia1iehrh1mnyyk1fvnmftdvk1h1kesavrrsy1ldi1l1pv1pkgs1kfn1samy1l1f1f1rsf  
i1ngrdafn1i1fr1lvi1av1l  
l1mvw1sypl1vtai1gcl1fvyi1il1l1qmaqfys1qqayg1lpq1vwpv1peekv1kgyeq1flyr1l1mfvictv1favt1fi1khmt1f  
yv1l1fyivg1l1tirs1iik  
k1kyqet1l1rd  
>tr|Q8NVW2|Q8NVW2\_STAAW  
mttfdak1k1kkey1ldwynqt1efsn1snnvvr1dtpfk1dns1dn1liya1lydqsrdmit1l1tddgyt1fd1lenngis1nks  
kkrk1k1feeh1saygikyn  
dkthei1fvq1tnfknfnkskhn1l1qc1l1fvndmy1l1sn1pksq1n1ftedvank1dehniyygr1d1pi1gssgvvh1nfdffis  
akknq1kek1fina1snpnns  
mi1ikski1tdamqakk1krhrqnefi1f1l1nds1kke1ineh1nkn1l1heny1stidysel1dekig1l1i  
>tr|Q8NVW6|Q8NVW6\_STAAW  
mntiyepssi1cmi1rtp1l1sveffn1f1l1nteqikysd1l1q1naqmkesi1l1tttfn1lyct1qe1nfdgd1nkkvrdakes1l1ky  
l1irmstrptpf1gl1sgin1l  
ghfvneptr1k1vgnsi1qkyvkv1d1gew1y1k1lvsyiesideyyq1n1kviw1nskahi1ndriy1l1neqsaiy1l1nnk1dts1fsik  
nse1l1l1vfik1ttvt1nnn1tf  
sn1laekingefe1nditk1kvkvyih1n1vskei1y1stirp1pl1sysdn1nyil1nks1l1hnddfv1k1kireiq1kl1ilayekteig  
fge1y1kdi1ih1mkal1fkc  
kny1l1q1dtki1dmi1ny1lhq1diatniseaay1l1w1l1srn1nig1ftd1k1vl1hnr1fi1eky1gfeq1lvnik1dl1sdi1tg1fg1t1fiq  
ee1tdgn1nivm1lkqk1fl1ha  
l1rnndeivinekdves1l1indneinhyhapmsadvaely1l1grfynqyne1l1vis1pl1tasfnagat1fgrfhh1lidtet1lak  
lehekghyyq1kmi1cdd1nve  
mi1sinnipkyprnhn1v1l1nhdsyeys1n1lgssnsyskye1l1t1ddiyvgat1fnk1ly1yssq1nkrv1l1fesn1myn1fl1kecn  
lyr1l1reitmesvk1ciepm  
ndvsi1dsfsysp1ri1ryknv1l1kpaywkinemv1l1p1pkneewdq1fl1kyqeqfn1pnivn1vygd1nk1l1l1n1slanhry1l1  
mkeyk1k1khrv1l1ves1fl1pq  
skndhvyey1vtpi1y1k1ssyrgpeieipkykntdi1eydkdwfa1hi1hidkpsqdtfi1dn1ypfvk1h1kdkgdi1eky1fl1mr  
yikqgd1l1kl1r1l1frndeny

Tsompanidou\_et\_al\_Supplemental\_FASTA\_File

aeiysilknlphvrqttevsvdyefvsyepffryggkntineieaffeydtnlavniendfkdrpyivaisimylfe  
mfsisneermeivnnyvpt  
sfkskdi rpfknelvticnpannfeymakhysgiyri lkdgnqilsklneglkktlttkrsriigslihmrncrifgidk  
dqetfvlsivkeivktqkh  
wcgdknd

>tr|Q8NVW7|Q8NVW7\_STAAW  
midmnlilkkkfgeisevddfiskastetdyfepstlshgipgiilfldayqkvfdinteqivhkyimklapylqsgqyn  
nslfgglsgiafsmdlasq  
ngknyqnilnmidghivneienkfdqilqeplnplnydtvsglagigryllnrvidenefvkaiksilyvfkdiaqyskns  
wvvpqesqflesdknyfte  
gninlglahgvlgpmsl falcvikgitienhqhilkdmykfimdekcfnherwlqrydlisernhfnfirngwcygntgv  
mttlfligqalqddeiikm  
skkvmqlqvndkdenlisptichglssqilm ltimnlnfelnevsvdyitvlinklishykedylnfidinenkqdvfks  
rkvglllegelgvyltmtl  
kntkilneknwtanaflis

>tr|Q8NVW9|Q8NVW9\_STAAW  
mkiikraisiililslisitmsnasaseelysveykntatfnklvkkkslnvynipelhvaqikmtkmhanalanyk  
ndikyinacstcstcitsekt  
idrtsneslfsrqwdmknitngasyddlphkiantiaidtgvmknhdldknnfstdsknlvplngfrgtepeetgdvh  
dvndrkghgtmvsqtsan  
gkligvapnknftmyrvfsgsktel lwskaivqaandgnqvini svgsyilldkndhqtfrkdekveydalqkainyak  
kkksivvaaagndgidvnd  
kqklklqreyqnggevkdv pasmdnvvtvgstdqksnlsefsnfgmnytdiaapggsfaylnqfgvdkwmnegymhkeni  
lttanngryyqagtslat  
pkvsgalalidkyhlekhpdkaie llyqhgtsknknkpf sryghgelvdykalinvanqkas

>tr|Q8NVX9|Q8NVX9\_STAAW  
msntqtknvpel rfpgefegeweeklgnlttkigsgktpkggsenytnkgipflrsqnrngklnlnldlvyiskdiddem  
knsrtyygdvllnitgasi  
grtainsivethanlnqhvcii rlkkeyyynffgqyllsrkgkrkiflaqsggsreglnfkeianlki ftptifeeqki  
gkffskldrqielleekle  
llqqkkkgymqkiftqel rfdengeeypewenkfikdifi fennrrkpitsslrekglypyygatgiidvykdylnfe  
erlligedgakwgqfetss  
fianggywvnnhahvksndhnlffmnylnfkel rafvtgnapaklthanlcninlkipclteqdkvsallksidnkmn  
nqmnriellkerkkelkq  
mfi

>tr|Q8NVY0|Q8NVY0\_STAAW  
mkrstngnekfldtlirlnltkieelgkini lnhiyseyffrdllnivygslenhkkqknafdlidntnkiiiqvta  
tckkqkiedtlkkeyltnk  
meegyrlkfi fignqnnniknknfsnphnil fdskkdiiltqdlceeflnlninkqdhaiellkkel spllfedslylk  
eefineklefnisnlasry  
tannvdvtinkii egisitnnfkytnisylkelkgyiendil dkmksyakniylnfkkifsnleqsvnyleleefe  
ekkylyseiylideinid  
pyifltehnechnykseneklelqymskiekvllkyqtylketckel fypyllvqgeagigkshllahlskklrden  
hiyflfgfftknedpwh  
qilndlevtnsvdnflrsisnaketkkrafiida lnegegkr lwgnyfqsfinhikkysnialif sirtpfedvilpk  
naiqdnivvfqhegfske  
enynpivsfcdfyglelpklpilnpefnplflklmceycvknkfedqtisvae lftnvlktvnlnlskedkfdkni  
nvvqkvikglvelmndsef  
nqlyeesytkvnniakeyqvksnrfl ealidenilikntgykgemii yfsyermgdyflseyllekyrnvdkrdlvtkl  
qsdekvttryfqkeddlsyn  
rgline lfiklanefnie lfevfpqfknnynmiysfinslvwrkdgsiskhtkcyisdnvipydafrnnfldvllikmpq  
knhp lniwalhklkqcnl  
gkrdf lwtqyisinnekvfeinw lfsnykk ldeetaekymi fltwifsatnklrdlgtkslvklfktfptkiigllkl  
fennndpyiverlyasvlg  
atlridiceihieianyiyeei fdkemvyphilmrdyarqtieyislskdisninlekirppyksnwykkeyslnidddy  
ikslknkl dshlhfsidki  
knsmtteygrgtgaygdfgryvfgyavrnnwvkgfksdqdl snialmri femgydaklhgedmwnvrydnfnnsierisk  
kyqwiayyeilaklvdkfp  
dvqysglwddyi rdi dptllle idkeskilvpsplpshqsnewvntkvfdetklfleididnhryiclsskfnfekre  
keipfedrdscyflamgyf  
ynkedsneiikgyennydriniprahsiylyeyyweayknykegy ltesdgklcpaiyeyfweldysvkdksisfyip  
ckeivdyfsligteegvkw  
tkfgeticinskllfednecllikesllnflntkkl sigwkiylekis lrdrqewynvfyddgkynkkiikndmskir  
rnf

>tr|Q8NVY3|Q8NVY3\_STAAW  
mypcfvalsi flhfitaiykr rrrcei ilaynfiprltifi

>tr|Q8NVY6|Q8NVY6\_STAAW  
mdrlkyslkvgilal llfctlnylvpmqsna fsi i yssi favllmllvyiflgilkk

Tsompanidou\_et\_al\_Supplemental\_FASTA\_File

>tr|Q8NVY7|Q8NVY7\_STAAW  
mkviekvhyedi lepeivqliqplvkdkmdqlfitsehfaididkllfqlnlkvkyikmegntsgylsgrtiyinnhshi  
nntrfaiarelgrylykik  
dnndnslnklnhemiyesdvnqfsvdllmpkkqiealvynfyevnninlssglseke  
>tr|Q8NVY8|Q8NVY8\_STAAW  
mekneyiakynesqlldatysqavayllnkygavtdddykeksytrflngeiksitkgkytrageglychhisedkfqn  
lsdlrfisefkysynyqkk  
enlvycdlielhlihaiitkesngqfgvaglcqmikptvidwyiseynpkpawmqatkaraylprilvekllikiddmlk  
eieiydflesr  
>tr|Q8NVY9|Q8NVY9\_STAAW  
mitfeniqqlekytlnmtmhglfnqklkligiisidnaehtlftpymmetlsslmgkdsivdlihkgteledfaafnlisiedt  
vtvclqrteellnqykve  
fndkilinwrimqk  
>tr|Q8NVZ1|Q8NVZ1\_STAAW  
msnqfkseeerrqweqfqaqanqanqanqyqgqkkskkgwfwgcgglvlfiliiigisactagitgnlgnssketnkt  
hki getvkngdlevtvnsv  
etmksvgpsiaptnakgtfvvadvtiknkgkealtidssmfklksgdktfeadntgmsanqndngsiensfflqrinpd  
staqkivfdvsenianak  
dkklevislfsvkkitfdlsdaktskakkdkqdevaassnsdnvsyeasattpattssandseeneqsskdedkq  
naskdksseveksesneet  
atvesapqskpvtseappnqnnhnedsmydaste  
>tr|Q8NVZ2|Q8NVZ2\_STAAW  
mntennknqrsvknsergmkgcgglisfilliillacsmmfnsndnstsngsstkqltqkdenkedkpeekset  
atdedlqsteevpanente  
nnqheideittkdqsdeintpnaedksqddlkddlkekqssnhhqstqpktsptetntqqsfanckqlrqvypngv  
tadhpayrphldrkdakra  
cepdky  
>tr|Q8NVZ5|Q8NVZ5\_STAAW  
mkltalhfkysepfsqivtpkvltlthrdclfieliddkgnayfgecnafqtdwydhetiasvkhvieqwfednrnksf  
etyeaalklvdslentpaa  
ratiymalyqmfvhlpfsfvaygatvsglsnkqleslkatkpariklkwtpqimhqirvlrelefhfqividanesldrq  
dftqlqllareqvlyieep  
fkdismldevvdgtippialdekatslldiinlielynvkvvvlkpfrlggidkvqtaidtlkshgkvkviggmyeygls  
ryftamlarkgdypgdvtp  
agyffeqdvvahsgilkegrlefrpplvditqlqpy  
>tr|Q8NVZ7|Q8NVZ7\_STAAW  
mpnshhsfngsstsshkvpvpyamqvalcikylsltrklflftkstysylhgahfh  
>tr|Q8NW02|Q8NW02\_STAAW  
mifsqnlfrprtparltriexllqahfrsvnycqynfvehrtliyvpacdnpsnlfis  
>tr|Q8NW06|Q8NW06\_STAAW  
maklnvevfadgadieemkaayknkqvdfgttntpslmakagvtdykafaeeavkeipdasisfevfaddletmekeaaill  
kqygenfvkipivntkge  
stiplikklsadnvrlnvtavytieqvkeiteavtegvptyvsvfagriadtgvdpplmkeavkvthskdgvkllwasc  
relfnviqadeigadiitc  
padvvkkvntnlgrdine lsvdtvkgfakdiqssglisil  
>tr|Q8NW07|Q8NW07\_STAAW  
mqkfkdfyddlsvtrgnyfltlmaaffitiilfigivsevhllysmllivlvgllllrlfkinlfsfkkltlsqviyii  
ggalliygldnlylyfhdv  
paneqqleqerntpfiysiftvtiipaiveeivfrgmiiirvifrkhflflglivsslvfaslhesdtwigylpylysgli  
fgiyyiktrlevvifmhf  
lnnllallfiwg  
>tr|Q8NW11|Q8NW11\_STAAW  
mrvaigmgtagvsvlrelvkhpkfnqldidlyddkvnmgqgvfndssellinmpskkmslnlddetefwkwykqqt  
fnfdepaylprfvfghymk  
sylvftkkyppnistnykvqeyitnsnidetnlytyicttneqswqaydyvfltcgtfayhdpylnkgkgyiatpyp  
tyntldevnelddiaigt  
glasldvvryvaahhpklpitmtsrshlpsvrgtmidvtfkyltkdklndikkhhfgnapldtlvslflkecaeydidf  
kklvyrrtgnhiadlkydl  
arptemgifiqsmiehlkenlnwiwnslsiedhqfnqkyskmiqlnsnmpprtaelielienslilkdledvkhgdg  
klyyfsyknqesvdiynv  
inatgakshnelddqdlknlenrqivqahpmggiqipetnqvisprfgltnmiaigqmtngvknlrngvkmiveq  
vahkvsqlydalesneqqq  
rsdnq  
>tr|Q8NW12|Q8NW12\_STAAW  
msqfmdyaiqlanmvqgqgvnppvgavvvkegrivgigahlrkgdkhaevqaldmaqqnaegatiyitilepcshfgstp  
pcvnkiidckitkvyatk  
dnsldthgdetlrahgievecvdderasqlyqdfkakahqqlpqi tvkvsasldgkqandngqsqwi tnekvkqdvylr  
hrhdavltgrrtvelddpq

Tsompanidou\_et\_al\_Supplemental\_FASTA\_File

ytrriqdgknpi kvilsksgnihfnqiyqdestpiwi ytenpnlttnqthieiiylkscdl ttilhnllykrgvgtllve  
agptttseflqsnyidefi  
lyyapkliggsgnyqfyqtdndvieipdanqfeivhse llnqnvkltrkk  
>tr|Q8NW19|Q8NW19\_STAAW  
mnl1kknkysirkkyvgifstligtvll1snpngaqa lttddnnvqsdtngatpvnsqdkdvannrglansaantpnqsat  
tnqatnqalvnhngsivn  
qatptsvqsstpsaqnnhtdgnttatetvsnanndvasnnttl nvpnktnengsgghl t lkeiqedvrhssdkpelva  
iaepasnrpkrrraapa  
dpnatpadpgaaaagnggapvai tapytp ttdpnannagqnapnevlsfddnsirpstrsvpsvtvvdnlpgftlingg  
kvgvlshamvrtsmfeags  
nrtygaqgnv lalgrisgtdasnhgdfngieks ltvnpnselife fntmptkngggatnviiknadntdiaektveggp  
t lrlfkvpdnvrnlkiqfv  
pkndaitdargiyqlkdgykyysfvdsiglhsgshvyverrtmeptatnkeftvtts lknngnsgasldtdefvykiql  
pegveyvnns ltkdfpsnn  
sgvdvndmrvtydaanrvitiktstgggttnspar lmpdkil dlkyklrvnnvptprtvtfndt ltyktytqdfinsaas  
htvstnpytidi imnkda l  
qaevdrriqqadyt fas ldi fnd lkkraqtilaenrnnvplnkrvsqadid t ltnqmght lirsvdaenavnqkadqmed  
l vnqndel tdeekqaaiqv  
ieehkgni igdigdqttdgdvtrikdqqigt lsgdtatpvvkpnakkairdkatkqre iinatpdatede iqdainqlat  
detdaidnvt nattnadve  
taknngintigs vvpqvthkqaardainqatatrqqinsnreatqee knaalnel t qatnhaleqinqattnadvdnak  
gdgl nainpiapvtvkkqa  
ardavshdaqhiaeinanpdatqeerqaa idkvnaavtaantni lnanntnaeveqvkt naitqgiqaitpatkvktdakn  
aidksaetqhtifnnda  
tleeqqaaqll dqavatakninaadt nqevaqa kddgtqni vviqpatqvkt darnvvndkareaitninatpgatre  
ekqea inrvnt lknraltd  
igvtsttamvnsi rddavnqigavqphvttkqtatgv lnd latakkeinqntnatteekqvalnqv dqelatainning  
adtnaevdqaqqlgtkain  
aiqpni vkkpaa laiqnqhynak laeinatpdatndeknaaint l nqdrqqai esikqantnaevdqaatvaennidavq  
vdvkkqaardki taevak  
rieavkqtpnatdeekqaavnqinq lkdqafnqinqnqndqvdt ttnqal naidnveaevvikpkai adiekavkekqq  
qidns ldstdnekevasqa  
lakekeka laaidqaqtnsqvnqaatngvsaiki iqpetkvkpaarekinqkanel rakinqdkeataeerqvaldkine  
fvnqamdi tnnrtngqv d  
dttsgal dsialvapehivraaardavkqqyeakkqei eqaehatdeekqvalnqlannkklalqinqavtndvkrve  
tngiat lkgvqphivikpe  
aqqaikasaenqves ikdtp hatvde ldeanql isdt l kqaqqeientnqdaavtdvrnqtikaieqikpkvrrkraald  
sieennknql dairnt ldt  
tqderdvaid tlnki vnti kndiaqnktnaevdr tetdgn dikvilpkvqv kpaarqsvgvkaeaqnalidqsd lste  
erlaakh lveqal nqaidq  
inhadktaqv nqdsidaqni iskikpattvkatalqqiqniatnkinlikanneatdeeqniaiaaqvekelikakqqias  
avtnadvayll hdekneir  
eiepv isrkasareql t l fndkkqai eaniqatveernsil aqlqniydaigqidqdrsnqvdktas lnlqti hld  
vhpikpdaekt inddlar  
vtalvqnyrkvsdrnkadal kaitalk lqmdeeltartnadvdav lkrfnvalsdieavitekens l lridniaqqtya  
kfkaiatpeqlakvklid  
qyvadgnr midat lndikqhtqfivdeilaik l paeamkvspkviq papkvctpikeethesrkvekel pntgseem  
dlplkefalitgaallarr  
rtknekes  
>tr|Q8NW21|Q8NW21\_STAAW  
mseskemvrgtflitisilitkvlglvfi ipfnyliggqenmapftyayapyniaiaavatagvplaaskyvakynaigay  
kvsqkfykssfvimsitgv  
l gflvlyflapyisel t larnvhdkngwsvdditwiiriismvvi fipvlatwrgifqgyksmgptavsevteqiarvif  
iligsylvlnvfdgsilla  
ngiatfaavgai igift lwywrkrkhnidrmvesdytdidvsygkmykei iaysipfvivsl nyp lfnlvdqfthnga  
lslvgipsqlqdi ffnmln  
mstnkivmip t l sagfavsl ipfitktfaegr lhemhhqirtsigvl mfitvpasigimalaaplftvfygydpivlgh  
dphhdgsr l l fyyapvail  
islsvtasmlqqidkqklvtyvilasvviklal nyp l iml fhtpgailstsi allfaigcnfyil kkyakfkfsyswih  
fakiflysfimm l gvelvf  
flanlfl eptklgyliiii l gvtvgil iygtitikt rladeflgeipekl rrrvrflr  
>tr|Q8NW25|Q8NW25\_STAAW  
meqfyql gwt l dsaggasgeaymaeqdgqkl flkrnsnpfiaal saegivpk l vwtkrietgevvtaqhkwngrelssne  
mkqtrvah l l kkihnsrpl  
l sm l krmemepitpeim l nkinas l srev l thhiv rks l ty leehips l dsrfft vvhgdvnhnnw l l sdrdel flvdwe  
gami adpaidigm l l nyv  
pqqqwsew l etygvqes l n l nkrmkwytv iqsig l vqwyeekrykdmntw l kfl nqvmnsnmfi  
>tr|Q8NW27|Q8NW27\_STAAW

Tsompanidou\_et\_al\_Supplemental\_FASTA\_File

mkigdisihylnggntkmdggamfvgvpkplwskqyanernqinlpthpiliqtaqynliidagigngklsekqlrnfq  
vdeeshiidlanynltpk  
didyvlmthmfhdhaagldtqaghai fenaihvvqqdewhefiapnirskstywdknkgdysnkliifekhfepvpgikm  
qhsghsfghtiitiesqg  
dkavhmgdiftptahknpwvtayddypmqsi rekermpi yfiqqqywf lfyhdenyfavkysddgenidayilretlvd  
nn  
>tr|Q8NW28|Q8NW28\_STAAW  
mtklkyiptiiaavaiviistisiiqyinrkrynpvkvlnvksyfmnvkgsyivyepfvhpetdkyrlvyqggittikn  
gnihydfyadaytgevin  
iver  
>tr|Q8NW29|Q8NW29\_STAAW  
mninkkvtlqriqtltelhgagpfeeevknymtqqmapyvdefienrmggffgvkksknpnakrvmiaahmdeigfmitn  
itkngmiqftnlggvandi  
wqqrllviknrrngdkiiqvsnipkhfirtgsegapeikdltldigaqnedevrergidigdtivphtpftqlsehrysak  
awdnrygcvlaieilellk  
dielvdlyvganvqeevlgakasaemidpdvafvdcspandvksqplsgelgkgtlirikdgtmilkpvrdrlyl  
klveahdiehqqymspggt  
dggeihkanigiptavigvcaryihstsvfdirdyfaarsllseaicnldnnqietlqyk  
>tr|Q8NW31|Q8NW31\_STAAW  
mswfdklfgedndsddlihrkkrrqesqni dndhdsllpqndiysrprgkfrfpmvayenenveqsadtisdekeq  
yhrdyrkqshdrsqrhr  
rrrnqtteeqnyseqrgnski sqsikykdshyhtnkpgtyvsaingiekethsksthmynsnntnhrakdstpdyhke  
sftksevp saifgtmkpkk  
lengripvskpsekvesdkqkydvaktqtsqnkql eqekqndsvvkqgtaskssdenvssttksmpnyskvdntikie  
nyasqiveeirrererkv  
lqkrrfkka lqqkreheknee qda iqraidemyakqaeryvgdsslnddsldtdnstdasqlhtngienetvsndenka  
siqnedtndthvdespyny  
eevslnqvsttkqlsddevtvsnvtsqhqsalqhnvevndkdelknqsrliadseedgatnkeeysgsqiddaefyelnd  
teadedttsni edntrna  
semhvdapktqehavtesqvnni dktvdnei elaprhhkddqtnlnvns lktndvndghvvedssmneiekhnaeitenv  
qneaeseqneveektienv  
npkkqtekvstlskrpfnvmtpsdkkrmmdrkkhskvnpelkpvqskqavseskpasqaapssrfdsqesntnayktn  
nmtsnvennqlighaete  
ndyqnaqqyseqkpsadstqteifeesqddnqledeqvdqstsssvsevsditeeseetthpntsgqqdnddqkdlqp  
sfsnqnedtanenrprtnq  
qdvatnqavqtskpmi rkgpniklpsvsll eepqviesdedwitdkkkelnda lfyfnvpaevqdvtegpsvtrfel sve  
kgvkvsritalqddikmal  
aakdri eapipgtsrvgievnpnqpttvnlrsiiespsfknaeskltvamgyrinnepl lmdiaktphaliagatgsgk  
svci nsilmsllyknhpee  
lrlldipkmvelapynglphlvapvi tdvkaatqslkwaveemerryklfahyhvrnitafnkapydermpkivivid  
eladlmmmapqeveqsia r  
iaqkaracgihmlvatqrpvsnvitgli kaniptriafmvsssvdsrtildsggaerllgygdmlylgsgmnkpirvqgt  
fvsddeiddvdfikqqre  
pdylfeekellkktqtqsqdel fddvcafvmneghistliqrhfqigynraariidqleqlgyvssangskprdvvyte  
adlnke  
>tr|Q8NW32|Q8NW32\_STAAW  
mtqqqnkrtilknkhtyqneplnrkdfvvsfitgalvgsalglyfknkvyqkaddlkvkeqelsqkfeerktqleetva  
ftkervegflnkskneqaa  
lkaqqaakeevsannl sdtseqaeiqeakkeaqaedksaavsneeskaaa lkaqqaakeeasannl sdtseqaeiqe  
qakkeaqaedksaavsn  
eeskaaa lkaqqaakeeasannl sdtseqaeiqeakreaqaetdksvavsneeskava lkskeesqaerlanaakqk  
qakltpgskesqlteal fa  
ekpvakndlkeipqlvtkknvsesetvni dnkdtvkqkeakfengvitrkadektntntavdkksgkqskkttpsnkrn  
askastnktsgqkkqhkk  
ssqgakkqssskstqknqtsnkskttnakssnasktpnakvekanskiekrtfnd  
>tr|Q8NW35|Q8NW35\_STAAW  
mnhlkyqsedyyihdkqfvi egp ltyedlksltfdahltafrdaedqyealleittlpegriyvarqdqlivgyvtfhy  
pdeierwstgnlpylie lg  
aievsinfrqlhlaekliqlslstpefediyivitteyywhwdlknskldvfydklmlqr lmatggleifatddpeitshp  
anc lmarigknit leqqa  
fddiry mnrfff  
>tr|Q8NW36|Q8NW36\_STAAW  
mkvevykgaggkhnldkyeeiyntfdwkdv eqafswsetgkmmayecidrhvdqglgdkia lnykdeyrkesytkdmq  
rlsnkaanv lsehaevdkg  
drvfi fmsrtpe lyfallgv lkigai vgp lfeafmekavadr lenseakvli tnka llprvpvdkl pnlkkivvdedve  
dnyidfi slmetasdefdi  
ewlksddgli lhytsgstgppkgvlhvqqamlvhyisgkyvldlqeddvwyctadpgwvtgtsygi fapwlngatnciag  
grfspeqwysmi edfkvti

Tsompanidou\_et\_al\_Supplemental\_FASTA\_File

wytaptalrmlmsagddivekydlsslrsilsvgeplnpevikwakkvyglvtltdtwwmetetgghmivnyptmdvklgsm  
gkplpgiqaaiiddagnev  
ppnrmgnlaikkgwpsmmyriwnpekyksyfigdwyvsgdsaykdedgyfwfqgrvddvimgtagervgpfesklveh  
eavaeaggiikpdpvrgei  
ikafvalrkgyeptdelkeeir1fvkegl1sahaapreiefkdk1pktrsgkimrrv1kawelndagdlstme  
>tr|Q8NW38|Q8NW38\_STAAW  
mfml1tppirlylidnnyqyql1vlivahpn  
>tr|Q8NW43|Q8NW43\_STAAW  
myyhqpl11tpgptvpdaimreiqapmvghrskdfediaqqafqglkpifigsqndvliltssgtsvleasmlnivped  
hfvvsvsgafgnrfkqiaq  
tyyknvhiydvwtgeavdvkdfinf1st1nvevkavfsqycetsttvlhpihelgnainqfnsniyfvvdgvscigavdv  
dinkkdidvsvsgskaim  
lppglafvayshrakerfkevttpkfyldlnkyissqadnstpftpnvs1frgvnayvetvkaegfnhviarhyairnal  
rsalkald1t11vndkdas  
ptvtafkpntndevkiikdelknrfkitiaggqgh1kgqilrighmgkispfdilsvsialeiiltehrkvnnyigkgisk  
ymeivihei  
>tr|Q8NW48|Q8NW48\_STAAW  
miyldnaattkafeevldtylknvqsmynpnsphkag1qanql1qqakaqinaminsktnydvvtsgatesnnal1kg  
iayrkfdtakeiitsvleh  
psvlevvryleahgfkvkyvdvkkdgsinlehfkelmsdkvglvtcmvnnvtgqiqipqmakviknypkahfhvdav  
qafgkismdlnnidsis1s  
ghkfnng1kgqgv11vnhiqnveptvhgggqeygvrsgtvnlpndiamvkamkianenfealnafvtvlnndvrqf1nkyh  
gvynsstsgspfvlnisf  
pgvkgevlvnafskydimisttsacskskrnlnevlaamgl1sksiegsirlsfgatttkediarfkeifiiyeeikel  
1k  
>tr|Q8NW50|Q8NW50\_STAAW  
mdlntmiiii1lfgfiaafidsvvggglistpallaig1ppsvalgtknklassfgs1tstikfirsgkvdlyvvaklf  
gfvflasacgayiatmvp  
qilklp1111alssvfi1t11kkdwgntrtftqftfkailfaalfiligfydgfvvggtgsfmlfv11vfgdf1saagn  
akvlnfasnigalvlfmv1  
gqvdyviglimatsmiagsytgahfaikqgvgykvlfiiitaililknafdyiqqfv  
>tr|Q8NW62|Q8NW62\_STAAW  
msqkv1vddesivt11kynletagyevvafdgdealekveseqpd11ildvmlpkkdgidvcktvrtnkn1vpilml  
takndefdrv1glelgadd  
ymtkpfsprevvarvkaillrsqfvkeveevddditigsirirpdyfevykhnelleltpkefellylierqgrvitre  
hmlntvwnyefagdsrivd  
vhish1rdklednpkkpqliktvr1gylkerpkeq  
>tr|Q8NW63|Q8NW63\_STAAW  
mktiq1hkttl1liai11fytfmgil1p1mhdd1qwfnsnyntdilkvfgas1ngryignifeiavhvs1rwl1syglis  
mgiiwmihitrckawtsy  
yllafslml1ipsaiyadtygwafgfyntatst1s1fiiyycinaiiykekqpsvtvlfyvlcffgq11lrm  
>tr|Q8NW64|Q8NW64\_STAAW  
m11rsiimenvt1f1c1il1laflyeftanrt1nyk11fsfmiatigt1imfsnpyrki1fegseyqqvsnnqg1fskf  
aemists1pygvifsqii  
lsmiaaliy111rsdryvhl1tkrriimigfit1plyy11fynqf11nkntdig1vgfvnvivcgyfafsifvgiyls  
indrktqit1lys1liaicv  
sast1vi1t1piepgn1f1vyti1hvi1i111kefrkyksinvf1kgas1vlaviy1safiyvhyehkrvq11kqqikd  
hprqevytves1pfehymh  
hpspinknyqewfnnyeelpkmtkvkiy1pfgsdds  
>tr|Q8NW66|Q8NW66\_STAAW  
mgrqafe1gl1rpkdqf1kvmq1hfd1ntnh1lev1nrlyt1pligt1qav1g1yhf1mt1q1fvkeshnet11shy1f1mnelkin1le  
frqqmd11lea1g11kafvk  
hdeqet1q1vyq11iqppsah1ffndpmlsiflysevehrrf1helkkyfeyqqid1sefkqvtrqftdvfkvpstkididts  
dipinepyqgid1snesfd  
fem1rqm1gkhf1sqdivtkdakr1itq1lat1ygl1tadgmkhvilnsit1sgq1sfeemrkqarsy1lmehenqmpk1qv  
kspat1sstgks1sevpk1p  
qsdefel1eqtspidmlaswsesept1sqktmveel1erekmsfgvin111qfvm1kedm1k1pkayileiasnwkkkgi  
k1takeaynyakkvnqpkne  
gssgnyqkrqsyfgqrnr1skektpkw1enrdkpseedsakdnsvddq1leqdrqaf1dk1skkweedsq  
>tr|Q8NW79|Q8NW79\_STAAW  
mfgsvnai1g1tserpd1nyddngghf1h1rsvdtndeaq11l1qtm1v1sl1qtieeynenir1nyk  
>tr|Q8NW80|Q8NW80\_STAAW  
mikpkkykw1tkpaey1sdel1tsk1kl1tpivkk1lesks1ideqai1s1s1td1nhda1q1s1dmtktierikraiande  
k1lvgydydadgtst1t11  
vt1q11lgagvgwhipnr1ftegygpne1af1rna1hdeg1t1i1tvdng1iqghneikmvq1d1gvdv1vtdh1heigst1peay  
aivhpmhpsfnypfq1l1cg  
agyay1kaqal1ienvpdyfkaivaigt1ad1vs1tdenrs1vkq1g1kv1ndqcpts1vka11keagyndnideetigfiig  
pr1navgr1ddas1lacc11

Tsompanidou\_et\_al\_Supplemental\_FASTA\_File

mtddeeeaaflaeqvehfnrerkdivatiteeamamaetkvkkgdlflllakenwegvlgivaskivetfalptlilni  
dreqnhakgsarsidqvm  
feilsahqeliakfgghmaagmtmdienieslaeglnkwmkelskttslpdkvqvdvlltenditiknirdmnrllrpfq  
tdfsrpi femd d l s v s s v k  
aigqqknhlkltlgesniaalfwqnghepelqdeqpinilgsvqinewngnqspqiiiqdiamneqqildyrskrkslp  
ftendenivvlihpksdkv  
naneyyygeei kqqt d k v v l r d l p t s m e d l s n s l q q l q f s q l y i v l q h n h s i y f d g i p n m d i f k k y k a l i t k q e t n i q k  
egmllcghlsvkpdtkfm  
lkvfl d l k f v t q e d g l i r i n q p d k r s i d s s k v y q l r q r m d v e k q l l y q d f s e i k n w i k s q l s  
>tr|Q8NW82|Q8NW82\_STAAW  
maikysalnlpiregedertaindmvkl a q h l d e l s y e r y w i a e h n a p n l v s s a t a l l i q h t l e h t k h i r v g s g g i m l  
pnhapli vaeqfgtmatlf  
pnrvdglgragp d m m t a s a l r r d q h d g v y k f p e e v s l l q q y f g p a h q q a y v r a y p a v g k n v p l y i l g s s t d s a h l a a r  
kglpyvfaghfapqmqka  
ieiyktl f e p s d v l d e p y i v c l n t i v a e n d d e a q y l a s s m a q v m v s i t r g r m q p v q p p t h e l q n i l t p r e y a m a m e r q k  
isligsentvqqkiqdfme  
tygevnemaisiydkdmql dsyrrfkvninqinektl  
>tr|Q8NW85|Q8NW85\_STAAW  
midqqt iy q y i n g k i e e a l q a l f g n i e e n p t i i e n y i n a g i v l a d a n e i e k a e r f f q a l t i d p k n g v v f y n l a n v y y n  
q r y q e a i k l y q q a l q t e i  
eqvdcnymigmafnglesfkla l p y l m t a a e l d k d k d a e v q f y g l v l c q l e m f n e a i t q l k h v l t i d k n h v d a r y n l g l  
al f m k n e d i d e a i t h f k e a  
vtidpkhl l s q h a l k t f t k m k e e e  
>tr|Q8NW86|Q8NW86\_STAAW  
msdptlfdysmikgtveail f q n s d n f y t v l k v d t i e t n e d f d t m p t v v g f l p n i v e g d v y t f k g q v d h p r y g k l k a e  
t f e k e m p q t k e a i i s y l s s  
d l f k g v g k k t a q n i v n t l g d n a i n d i l d d h s v l e k v s g l s k k k q k q i a e q i s a n q e s e k i m i r l h d l g f g p k l s m a i y q f  
y l g d t l t i l d r n p y q l i y d  
i k g i g f n k a d q l a r n i g i a y n d n e r l k a a l l y t l e e e c i k q g h t y l p i n v v i d l t v d v l n y q d e e v i e p e k l d e m l q y l n  
e e k r l i i d n e q v a i p s l y y  
seiksvqnl frikthtnkl teieqsdlqm higeiedanqvnyasqkealqtainskvmlltggpgtgkttvikgively  
a e i h g l s l d y d d y v n d d y p  
v v l a a p t g r a s k r l q e s t g l e a m t i h r l i g w n q d t k p e d i l e n e i n a r l i i d e m s m v d t w l f h q f l s a v p l d a q l i f v g  
d e d q l p s v g p g q v f k d l i e  
s k a i p r v n l t e v y r q d g s s i e l a h r m k l g q k i d i t q r f h d r s f i n c q a n q i p t v v e k v v t s a v n k g y t m a d i q v l a p m  
y k g n a g i k r l n q v l q d i l n  
p k k k d t r e i e f g d v v f r k g d k v l q l v n r p n d n i f n g d i g v i v g i f w a k e n a l n k d v l v d f e g n e i t f t k q d m m e l t h a y  
c t s i h k s g g s e f p i v i m p i  
v k q y f r m l q r p i l y t g l t r a k m s l v l l g d p e a f d i g l k t n g q a r l t q l c t l l k n y f n s e d e e m l e n t a t n d t g a s q t t i d  
d q v e a p m s s n d s g e v t s d s  
t k t d i n v l t e a t m f k i d p m i n m g e i t p y d f i e r  
>tr|Q8NW91|Q8NW91\_STAAW  
mktieeikstpkvmkpe llapagnlek l k i a v h y g a d a v f l g g e y g l r s n a d n f t m k e i a e g v e f a n r y g a k i y v t t  
n i a h d e n i e g l e s y l r n l  
e k t g a t g i i v a d p l i e t c k e v a p k l e i h l s t q q s l s n y k a v e y w k e e g l d r v v l a r e t g a m e m r e m k e k v d i e i e a f i h  
g a m c i a y s g r c t l s n h m t a  
r d s n r g g c c q s c r w d y e l l e v d d n g e l d v f y n q g e v t p f a m s p k d l k l i e s i p q m m d i g v d s l k i e g r m k s i h y i a t v v s  
v y r k v i d a y a a d p d n f k i n  
p e w l i e l d k a n r d t a p a f f e g t p g y e e q m f g q q s k s p f d f c g l v l d y n e d t k i a t i q r n n f k p g q e i e f f g p e i e t  
f t q v v e a i y d e e g n s l d a a  
r h p l q i v q i k v d r p i y p n n m m r k e i g  
>tr|Q8NW92|Q8NW92\_STAAW  
mdvr fineqti mi yfenki seetyrnvtamvrwi rekeileiqdivpsyravliy fdeqaitssklienlelnkfnknv  
h a v n q t n r i k i p v q y g g t  
y g p d i e e v a k h n r i t v e q v i e k h t s k p y l i y m l g f m p g f p y l g g l d e q l h t p r r n q p r l k i h a g s v g i a n n q t g l y p s d s  
p g g w q i g r t p l k v f s s e r  
e p m s m y e a g e w i q f y a i d e q e f i q i e r d i s d g n f n v d d w v i e n v  
>tr|Q8NW94|Q8NW94\_STAAW  
mlrclianrgeiavrii racreygi etvavyakgdeqslvhvhladqaicigeanalgsylnidriisaaqitganaihpq  
y g f l s e s t k f a q t v e e g g i  
a f i g p t k k t m e m m g d k i t a r q t v h h a g v p v i p g s n g a v n h v s e i e k l a k d i g y p v v i k a a s g g g g k g i r i v k k a e d l e k a  
f k e a k s e g k k y f d d d r v y v  
e a f i p v a k h v e v q v m g d g d n f v h l g e r d c s v q r k n q k l i e e s p c a a l t e e r r q q i c n d a v k v a r a a n y r s a g t i e f l v t  
d t a h y f i e m n a r i q v e h t v  
t e m r a e r d l v a a q l y l l e h n h l p f s q s d i q f n g h v i e a r i n a e n p e k k f q p t p g k v t a l h l p q g f n v r v d s l l y h g y q v s  
p y d s l v a k v i v k s h d r a s  
a i d k l k a t l d e m v i d g f s t t a d f l y a v l n y p l y r d g d a k d v d i k f l e k h q i v k g v e l  
>tr|Q8NWA4|Q8NWA4\_STAAW



Tsompanidou\_et\_al\_Supplemental\_FASTA\_File

myqfllrykdflltqwklyiisavvlmvligfifwrqddytsrnfenkdnalkqstsensslskvedvqvkdgdnsknkg  
pvyvdvkgavkhpnykmt  
skdrvvdlllkaqlledadvsqinlseklttdqkmi fiphkgqknvepqigvnsvhvkngntnntkvnlnntasvselmsvp  
vggqakanaveyrnqgga  
fgeiddlkkvkgfgsktfdklksyfti  
>tr|Q8NWB1|Q8NWB1\_STAAW  
mqryfidqnadvsqrffittkkedihihtnmrydvgskiiltfndqtvylceiaditsdkiavdlekekqintelpvdt  
icsglikadkyewllqkat  
elgassfiavsmersivklneakvakkierwqkiikeaaeqsyrllvipsiqfesnlklicdtidnydyiliayeeeakdg  
elsnfkqtlqqfkaqdkvl  
mifgpeggleneislsfntstvvglgprilraetaplyalsaisyekelmg  
>tr|Q8NWB2|Q8NWB2\_STAAW  
mstvfahltlgckvnyeteaiwqlfkeanyervdfeanadvfintctvtntgdksrqiiirrairqnpdavicvtgcy  
qtssaeimeipgvdvvgt  
qdrhkllyidefrkerqpingvgnimknrkyeelvpyfdrtraslkiqegcnfctfciipwarglmrsrdpekve  
qatqlvnsykeivltgih  
tgyygdldynlaqlrdletingleririssieasqltdevidvlerstkvvrhlhiplqsgsdvllkrmrkytmdr  
fserlthkhalpdlavts  
dviygfpgeteaefgetydfivkhkfseihvfpysprigtpaarmddqideeiknervhklitlsnqlgklyaskfdqdv  
levipeegdttegtlvgya  
dnymkvqfegdesligqivkkitqanypnegqai kvvdfatnksdrevlv  
>tr|Q8NWB8|Q8NWB8\_STAAW  
mislnnrlltvsrflkqgtiadigsdhaylpiyaiqnhlcecgiageviqgpfaavknvaanqlvdridvrlgdglsvi  
qpavidniticmggpli  
akilkdqgdksqhrlllqsniqtenlqrtlqqlnyeideimeekghiyeivvaeystqlielssdglkfgpkllnn  
kneyfikkwqrelealyhi  
ksklnteqhhrlaqindeiaviervl  
>tr|Q8NWC2|Q8NWC2\_STAAW  
mlkrllkeksndeivqntinkrinfigvivfifavlvllrgylqiaqgshykqiikndenitvnesvprgrildrngkv  
vdnaskmaitytrgrkttq  
semldtaeklslkikmdtkkiterdkkdfwiqlhpkkakammtkeqamladgsikdqydkqllskirksqldelsskd  
qlaifremnagtvldpqm  
iknedvsekeyaavsqqslsklpgvntsmdwdrkypygdtrgfigdvstpaegipkeltehylskgysrndrvgksyley  
qyedvrgkkkemkyttk  
sgkvtssvlnpgargqdlkltididlqkevealldkqikllrsqakmdnammvqnpkngdilalagkqinksgkmt  
dydigtftsqfavgssvkg  
gtllagyqnkai kvgetmvdelpfhfggltkrsyfnknghvsindkqalmhssnvymfktalklagdpyysgmalpsdis  
spakllrrglngvlgvkt  
gidlpnetrgqi ep ltnnpgnyldlsigqydytptlqlsqyvstianagyriqphiglthiestnkdevglkckingtv  
lnkvnntekeikqieqgfk  
mafndkdgtgyvsfkdtvvttagktgtaevfqngeprvnstyigyapidpkla fsivytnqpvpppwltggdlgrdvin  
yyfkqlgkddknkdkdk  
>tr|Q8NWC3|Q8NWC3\_STAAW  
mnidkqfwktyiwyrylnfdivsrekddqeiwlahkrkkqvvi fkhikstqeirfdkakvlehkdeianfisfepqsf  
efyyftesefseeqlnevs  
pirikfnvirhtkdlkhmpniflarlisedndkktymfykrkvldnfldkymqkfspatytiifvnvliwlcmiyl  
nfsdvklldvglvhfnnv  
hgewyri vtsmfllhfsfehilmnmls lfi fgkiveaigswrmltvyfiaglfgnfvs lsfntttisvgasgai fgligs  
ifammyvsktfnkmlgqll  
lia livilgvslfmsnini vahiggfigglitligyykvnrnifwilligmlvifialqiriftikedniynklikdd  
mtsgnydnaqni vktink  
nyaddqtyylsgmimatinsksegmtewerglrmfpksgllnfelaianslnddekal kyvrkalnadpknadyinlek  
el tksnesknk  
>tr|Q8NWC6|Q8NWC6\_STAAW  
mksykckgsflidsmagfliliglitlllipmmnqm qasinhklqtidaskvilttvskinidaskvilttvskinkeelk  
kgvtigkydiksqdqica  
isknttsyqktciqy  
>tr|Q8NWD3|Q8NWD3\_STAAW  
mklvsvigatlllagcgsqnlapleekttldrednhqlkl diqelnqqisdskskikglekdkenskktasntkiklm  
nvtstydykvakalsyyn  
diekdvsknkgdknvqsklnqisndiqsahtsykdaidgls lsd dkktsknidklnsdlnhafddikngyqnkdkkqlt  
kgqal sklnlnaks  
>tr|Q8NWD4|Q8NWD4\_STAAW  
msritqvhri leqkhldaiiilsdynrrylsgftgtsgaliiskdkqylitdfryidqatkqapnyeiinrkstiigeik  
ellhgenfenvgfehhvs  
ydtylelnksrislisisntvdki rdvkdadeeialiqkaanivdetyeyiltvkvagmtekelkaileskml elgadgps  
fdtivasghrgal phgvas  
dkiekgdmitldfgayngycsdi trtfaigepdklkeiyqivlesqmka ineirpgmtgaeadtisrnyleskgygk

Tsompanidou\_et\_al\_Supplemental\_FASTA\_File

efghslghgigleihegpm  
larti qdkl qvncvtvepgvyieg lggirieddil itengcqvftkctkd livlt  
>tr|Q8NWD6|Q8NWD6\_STAAW  
mtnlpmnkli devnne lsvainksvmdtql eesml ysl naggrirpv llll tldsl ntey elgmksaialemihtysli  
hddlpamdnddyrrgkltn  
hkvygewtail agdal tkafelissddrl tdevkikvl qrlsiasghv gmv ggm ldmqsegqpidletlemihkktg  
alltfavmsaadianvdda  
tkehlesysyhl gmmfqi kddl dcygdeaklgkkvgsdl ennkst yvsllgkdgaedklyhrdaavdel tqideqfnt  
khll eivdl fysrdh  
>tr|Q8NWD9|Q8NWD9\_STAAW  
meitmpkl gesvhegtieqwl vsvgdh ideyep lcevitdkvtaevpstisgtite ilveagqtva idtiickietadek  
tnetteeiqakvdehtqks  
tkkasatveqfttakqngprnng rfsppv fklasehdidl sqvvgsgfegrvtkkdimsvi enggttaqsdkqvqtks  
vdtssnqssednsentip  
vngvrkaiaqnmvnsvteiphawmmi evdatnlvnrnhyknsfknkegynl tffa fvkavada lkayp llnsswqgne  
ivlhk dinisiavadenkl  
yvpvikhadeksikgiareintl atkarnkql taedmqggtftvntgtfgsvssmgi inhpqaa ilqvesivkkpvin  
dmiairnmvnlcisi dhri  
ldglqtgkfmnhikqrieqytlentniy  
>tr|Q8NWE4|Q8NWE4\_STAAW  
mnkqwwkeavayqvyprsfndsnhdgigdlpgmi dkl dyl kd lgi dviw lspm fks pnddngydisdyqeimdefgtmed  
fdcllkgvhdr gmkli ldl  
vvnhtsdehpwfi esksskdnprdwiywdpkpdgsepnnwesi fngstweydanteqyyfhl fskkqpdlnwgnpevr  
davfemmnwfdkgidgfr  
vdai thikktfeagdl pvpegktyapa fvdvdmnqpgi qtwl qemkdrs lskydim tvgeangvspddaddwvgeengkfn  
mifqfehlglnwsgdshfd  
vnsyksvl nrwqkql enkgwnal fi enhdqprrvstwgddd kywyesatshaavyflqqgtpfiyqqgeigmtnypfesi  
etfndvavkndyqivkaqq  
gdvdal lakykdenrdnsrtpmqwddtl nggftngepwpfvnpykti nvaqq ledesvl qfykdliql rksndvyvyg  
qfdlvdaensqv faytrtl  
nekqvlivgnltnheael tvpfdl shgevk lfn ydakvnlkql rpyeacvie ln  
>tr|Q8NWE5|Q8NWE5\_STAAW  
mdvikqiqgai vyi edrl lepfnl qe lsd yv gl spyhl dqs fkmiv gl speayararkmt laandvingatrl vdiakky  
hyansndfandfsdfhgvs  
piqastkkdelqierlyik l sttertpypyrleetddislvgyarfidtkyl shpfnvpdfledllidgkikel rrynd  
vspfel fviscplenglei  
fvgvpserypahlesrflpgkhcakfnl qgeidyatneawyyiesslqltl pyerndlyvevyp ldisfndpftkiqlwi  
pvkqspyded  
>tr|Q8NWE7|Q8NWE7\_STAAW  
mkgqhfi vtggts gl glsivrkl lenkvhtl lvrvdvkatri feqel gktin vipcd lnd lksi qal qfedntsfdgfi  
ysaglgyfksis dhsfsem  
ietyqlnlisfnvlytv l rpyltsnahivgissqaafstqanaahygaskagfyalmnal rlespnlhimtvnvvgpidtp  
fhqkadpsmkyakrmgkim  
ldanqlaedi ygiktkql einrpkmhhal kmyqi aprffercfpk lfkna  
>tr|Q8NWE9|Q8NWE9\_STAAW  
mqknilksgisl selglcmsgl gtdl kkaeqi idcavengityfdtadmydk ginesvvgkallkyqrrddivigtkvgn  
rltkdgstkw dpsksyike  
avkgs lkr lgidhidlyql hggtidp ldetisafdelkqegii raygissirpnvidyylkhsqietimsqfnlidn rp  
esll daihnndvkv larpg  
vskgl ltsnsvnl dnfkdgi fdyshdel getiasikeiesnl saltfsyl tshdvlgsi ivgassvdqlkenienyht  
kvsldqikt ararvkdley  
tnhlv  
>tr|Q8NWF1|Q8NWF1\_STAAW  
mqqal infyyqfhtkqhyfl chdi ledawkaennyskqdavvs l il fatacyhyrrnllkgayksfnkskei iqnakdrd  
alylnlndyql lieqqiak  
lnaakpfssvil p i t p dferi i kanypdyndqetst d p f i v d h m r r d r s e v i s a k e e a i q l r k h r r n  
>tr|Q8NWF4|Q8NWF4\_STAAW  
mkkfigsvl tttli lggcsamenesnkdtntetksvpeemeaskyvgggf qppaekdaie fakkhrke fekvgeqffkdn  
fgl kvkatnvvgkddgvev  
yvhcedhgi vfnas lplyk daihqkgs mrsndngddmsmmvgtvl sgfeyraqkekydnlykffkenekkyqytgftkea  
inktnvgyqneyfytyl  
srnlkeyrkyep l i h k n d k e f k e g m q q a r k e l d y t a n t d a v s t l f s t k k n f t k d n t v d d v i e l s n k l k e k p n m p q k s q v  
tiqlgkssintkkpfyddi  
npieg  
>tr|Q8NWF5|Q8NWF5\_STAAW  
mngaadiktyellndqgnptgqgti iyqgtsnea inpnplkssgfgddwlqnaklmndnestdylkqveefansyrqk  
ikdasvldenefrrkykktk  
pynyknktivadggnsaggagakyqqakhpnekvvatdsami pyaawqkfarprfdnmi sfnstndlltwl qdpfikdmp

Tsomanidou\_et\_al\_Supplemental\_FASTA\_File

gkrvnisdgvprrldalids  
hvgyrklnrkdntydtpvlikiksvkdteikngkkvktinitlmdgripinwvtgdsiarsgkgtliklnlenlda  
sklitgetsgmlaevifl  
nesfnisenenknfadrkkqlsegfkdkinlfqleemertliskinaleevadetiesisavkhllpdfaldaikerine  
lfkgiksfiyekvysidne  
ileifknidhfrdgvseemmkhlkvvkqnieqiknqndiygrqiadirsimkqqdatildgnyqinysgenmvqglalp  
snylgrkmkilkdhiddgi  
kkiadyvqgiydeyaskivdviylyintipkirknlrhaiemlnvkkkeflslipnvtcnnyiktkleeldntlgkwepfl  
ndlkavspilndhlddivk  
nmkplivqmi fepshyddmfisrkaltpvfssv  
>tr|Q8NWF8|Q8NWF8\_STAAW  
msenkgeirngesgsdqkltsgqvesliqepkkk  
>tr|Q8NWF9|Q8NWF9\_STAAW  
metnktidlmnyvefpkryteakglvaqpittinsarrvenedmtvcyildqdddvmdfifdrdiitvycpengtatde  
yfceiifnsddtftlkr1s  
nyviikdrsympskindvnitgkvvr1frdfk  
>tr|Q8NWG0|Q8NWG0\_STAAW  
mkkvig111vst1altacgekekpkkeenksqtqkhkdkpktqqekmkkvedknppnnsiqnnsnnqnsqnnq1nn  
sdpsnntpaninendsqnt  
n1ndeyvvsppgwtkdeqakafeeykkgeeeearagasavpganin  
>tr|Q8NWG1|Q8NWG1\_STAAW  
mlpdnldgvgld1ilikrglsdrekagilfeelahnklytgdiadyskfnnrkfenyarrhgfisavplheiveahnyg  
vrnlyelseylqlsesyil  
eaielykkyigigthygeysitfep1rvfkykei  
>tr|Q8NWG2|Q8NWG2\_STAAW  
mrtsaieglikqlrkennvnltdfaikigvnkstlsryengsrkipmediaeiaanalkvtpy111knrqpenevqhra  
ahlegetddewqrv1dya  
dyirskrk  
>tr|Q8NWG3|Q8NWG3\_STAAW  
myefnvrkmaeriakgisismakk1gmtpgtyskkenghirinvddlakvievl1pqdkcgiffityrvskmstkqeq  
ts  
>tr|Q8NWG4|Q8NWG4\_STAAW  
mniqeatkiatkn1vsmtrkdwkeshrtki1ptndsflqciisnsdgn1irywqpsadd1mandwevinptrdqel1kq  
f  
>tr|Q8NWG5|Q8NWG5\_STAAW  
mplisdefdtltdkqgyilsvlykydylecvklgsvk1tcnfnfsakdihtkyfqklhfedvkydlnklknsqflngvyas  
ntiyhvtisdktvvyfene  
fknn1ksiiidsiskiasii1pg1  
>tr|Q8NWG6|Q8NWG6\_STAAW  
mnkksegldiriprvfrrdhapves1tenerr1rkeilesikkgyysyleinkvfya1dre1qyrannski  
>tr|Q8NWG7|Q8NWG7\_STAAW  
mpkii1vptpentyrgeekfvk1yakptei1hqlfgvsrstvynw1kyyheddlgikn1ciiyspagqlinipkleayli  
krqekil  
>tr|Q8NWG9|Q8NWG9\_STAAW  
mt1qqkilshfatydnfnppddvvevfgvskthakst1sr1kkkgkvemeswgkwrvieaq1h1tvverkkeileeqfel1  
ar1neqsddpreiedrik1  
mir1anqf  
>tr|Q8NWHO|Q8NWHO\_STAAW  
mailedifeel11nnn1rv1ntel1stvdssivqekvkeampkeetaql1esieevketsad1tkdyv1svgkeflkkad  
tsdkkefrnk1nelgadk1  
stikeehyekivdfmnarina  
>tr|Q8NWH3|Q8NWH3\_STAAW  
mrfmni1dietyssndi1skcgaykyteaedfeil1iaysidggaisaidmtkvdnepfhadfetfki1al1fdpavkkyafna  
nfertclakhfnkqmppee  
wictmvns1r1g1pas1dkvgevl1r1qnqkdkgkn1iryfsipckptkvnggrtrn1pehd1ekwqqfidycirdveve  
mtiahkikdfpvtaieqay  
wvfdqh1ndrgik1skslm1ganv1dkqskee11nqakhitglenpnsptq1law1kddqg1dipn1qkktvqeyl1keat  
gkakkml1er1qmsktsvk  
kynkmhdm1mcsdervrg1fqfygagtgrwagrgvq1qn1tkhyis1dteleiard1likeqrfdd1d111nvhpqd11sq1v  
rttftaeegnelavsd1fsa  
iearv1awyakeqwr1dvnthgkiyeasasmfnvpvesitkgdpl1rqkgkvsel1algyqggagalkamgalemgieen  
elqglvdswrn1anpn1v1nf  
wkacqeaaintvksrkththgvr1fymkkgf1miel1psgral1aypkasvgen1swgsqvvefmg1d1nrkws1k1kyggk1  
venivqatard11laisiar  
1easgfki1vghvhdevivei1prgsng1keietimkpv1dwakg1n1nsdgft1spfymkd  
>tr|Q8NWH5|Q8NWH5\_STAAW  
marrkvirv1rikg1mt1revsekyhispe11ryrykhk1mrgde11cgrkdsks1deveymksqik1deekereki1rkai  
1nlyqrnvraeyeeerkr

Tsompanidou\_et\_al\_Supplemental\_FASTA\_File

1rpwlydgtppkhsrdpywfdvtynqmfkkwsea  
>tr|Q8NWH6|Q8NWH6\_STAAW  
msiisnrkvdnnetqdnvkqpahytygdieiidfieqvtaqyppqlafaignaikylsraplknghedlakakfyvdrvf  
dlweg  
>tr|Q8NWH7|Q8NWH7\_STAAW  
matqkqvdyvmslqddleledcekytdeqvkamshkevsnvienyktisrneeIyecmsfglpnc  
>tr|Q8NWH8|Q8NWH8\_STAAW  
mtdsarkerlnqffgskrylyqdnervahihvngtyyfhghivpgwqsvkktfdtaeeIeyikqhgleyeeqkqltlf  
>tr|Q8NWH9|Q8NWH9\_STAAW  
mmnreqieqsvisasayngndtegl1keiedvykkarafdeilegmtnaiqhsvregieldeaigimgqvvykyeeeq  
eney  
>tr|Q8NWI1|Q8NWI1\_STAAW  
mewkrlnkvvphpviknknksvyvtkdnvkevqkeldffeifneevlltgflsfqripiyiiwinpkshktpryyfan  
heierfeflede  
>tr|Q8NWI2|Q8NWI2\_STAAW  
mleiidqrda1leekclnddwwyeldywlknkrkseneqididrvlklfeelkr  
>tr|Q8NWI3|Q8NWI3\_STAAW  
mnnl1tvdq1ke1l1q1qkefddriptrn1ndtiasmiefaewntleffknwkkqpgkpldtqldeiadylafslqltl1  
ivdeedleettevmvd1fe  
nevt1pk1hsvyfvhvmht1teqfvkgidnsivqvlimpflyantyysidqlidaykkkmkrnherqdgtagkgyv  
>tr|Q8NWI4|Q8NWI4\_STAAW  
mleifligfgvylfyriaiiflkskktihntiyemlmlatimistfaykhqkthiliaflvmffmsklkqvqgsyee  
>tr|Q8NWI5|Q8NWI5\_STAAW  
mtqylvttfkdstgrkhthitraksnqkftvveaeskeeaerkyeaqvkiirrdgdakengnd  
>tr|Q8NWI6|Q8NWI6\_STAAW  
mpkktvtidvden1lvvasneise1leydse1msadedgdnrdieekrdalkqaiqiidklwtgv  
>tr|Q8NWI7|Q8NWI7\_STAAW  
mvvkeilr1l1fl1lameylgkyvteqvyimmtanddveapsdyekiraevsw  
>tr|Q8NWI8|Q8NWI8\_STAAW  
mwivisivilaif1l1l1ssishkmtiealeymsylfkqlvkngvegledyeneverirkrfks  
>tr|Q8NWJ1|Q8NWJ1\_STAAW  
mlyh1lhqccitkndatptitfythvlhhskdatsdtt1  
>tr|Q8NWJ2|Q8NWJ2\_STAAW  
mpdriiimpegktyfvemkqekgk1hp1qkyvhrqfenrdhkvyvlnkeqvntfirmvggtfgd  
>tr|Q8NWJ3|Q8NWJ3\_STAAW  
maidfkphysyqyaidkvidnekyglf1dmg1gktvst1tafse1q1ldtkkmlviapkqvaktwvdevdkwnhlnh1k  
vslv1gtpkernda1ntea  
diyvtknentkw1cdqykkepfdmvvide1stfkspsqrfksikk1plinrfigl1tgtpspns1qdlwaqvy1idrg  
erlessfsryreryfkpth  
qvsehifkwe1rdgseekiyqiedic1smkakdy1dmpdrvdtkqtvtv1sekerkvyeeleknyileseeegtvaqng  
as1sqk1l1q1sngavytde  
edvr1ihdkk1dkleeieesqgpi1lfynfkhdkerilqrfeattledsnykerwnsgdik1liahpasaghgln1q  
qgghiiwvfg1twslelyq  
qanar1yrqgnhtti1hhimtdntidqrvykalqnkel1tqeelmaikariakhk  
>tr|Q8NWJ4|Q8NWJ4\_STAAW  
mgntiydikpgt1fykieseylnenkeikr1rleilnptkeqdsniyvgplqkgepvrttelmatr1ltnkmlrnlee  
mveavesey1klpedhkkv  
ir1kywnkekklkmeqighechmhrntvttirknfvkavayhagik  
>tr|Q8NWJ5|Q8NWJ5\_STAAW  
mtkhnniykhgrksyqydwfyhskawkk1reialdrdnylcqmc1redivtdanivhhiyvdedfnkal1d1n1msvcy  
schnkihandndksnikri  
rviki  
>tr|Q8NWJ6|Q8NWJ6\_STAAW  
mk1tkkqlkeyiedykssd1linlyietyefyrc1rdelknsd1miehtnkagasnivknplsieltktvtl1n1lks  
mgl1taqrkkivqeeeggfg  
dy  
>tr|Q8NWJ7|Q8NWJ7\_STAAW  
mtikv1nepspk1l1ttwyaevtqgkiktskyvkkecerh1rylenggwvfdelahrpirfiekfckpskgskrqlv1  
qpwqhfi1gs1fgwvhet  
kl1rrfkeali1fmg1rknkgtt1sgvanyavsqdgengaeih1lanvmkqarilfdeskamikaspklrenfrpl1rdeihy  
datiskimpqasdsdkldg  
1nthmgi1fdeihfkdyl1sviknsraarl1qp1liyittagyl1dgp1vnmveagrtd1driedertfyylas1ddd  
d1ndssnwikanpl1gsvi  
d1demkeewekakrtpdergdfitkrfni1fanndemsfidypt1lqknndi1s1delegrpctigydl1setedftaacatf  
aldngkvav1thswipkhk  
veysnekipyieweedgl1tiqdnpyidyqdv1nwi1ikmnehvvekiydranafk1nqelknygfeteetrqgal1ts  
palkd1kemf1dgki1fnn  
nplmkwyinnvq1kl1drngnw1pskqsryrki1dgfaaf1ntytdimnkvvskdkegniefisikdimr

Tsompanidou\_et\_al\_Supplemental\_FASTA\_File

>tr|Q8NWJ8|Q8NWJ8\_STAAW  
mnaviakenvtrikkklidnwidsasklydfspwknksfwgvinntletnetifsaitklnsnmaslplkmyedykvvn  
tevsdl1tvspnns1ssfd  
finqietirnekgnayvlierdiyhpqsklfl1npdvemlienqsrelyysihaatgnklivhnmddlhfkhivasnmv  
qgispidvlnknttdfnav  
rtfnltemqkpdsmfkygsnvstekrqvledfkqyyeenggilfqepgveieplpkkyvsedivasenltrervanvf  
qlpsiflnarsntnfakne  
elnrfylqhtllpivkqyeefnrkl1tktdreknryfkfnvksylratsatqaevyfkavrsgyytindi rewedlppv  
eggdkplisgdlypidtpl  
elrks1kggdknvnes

>tr|Q8NWK8|Q8NWK8\_STAAW  
mnekevegmt1elkldhlgvqegmkg1krqlgvvnsemkanlsafdkseksmekyqarikglnr1kvqkkmysqvedelk  
qvnanyqkaks1svkdveka  
ylk1veankkek1aldkskealkssntelkkaenqykrtnqrkdayqklkqlrdaeqklknsnqattaqlkrasdavqk  
qsakhka1veqykqegnqv  
qklkvqndn1sksndkiessyaktntklkqtekefndlnntiknhsanvakaetavnkekaalnnersidkassemktf  
nkeqmiqshfgk1asqad  
vmskkfssi1gdkmts1grtmtmgvstpit1lg1gaa1ktsadfeqqmsrvgai1qasskd1ksmsnqavdlgaktksane  
vakgmee1aalgfnakqtm  
eampgvisaaeasgaemattatvmasain1sfg1kasdanhvad1larsandsaadiqymgdalkyagtpakalgvsiedt  
saaievl1sng1egsqagt  
alrasfir1anpskstakemkkl1gih1sdakgefvgmgelirfqdnmkgmtreqklatvativgteaasgflalieagp  
dkinsysks1knsngeskk  
aad1mkdn1kga1eq1ggafes1aievgkd1tpmi1ragaeg1tk1vdgft1pgwvrkasv1aifgasigpavlagg1l  
iravgsaakgyas1nrria  
entil1sntnskams1gl1qt1fl1gsttgktsk1g1k1agam1fn1kpinv1knsak1ail1pfl1kng1g1laaks1fav  
ggarfagval1kfl1tgpi1ga  
titaitiaykvfktaydrvewfrnging1getikffggki1ggavrkl1gefkn1yl1sigks1fkek1fskdmkdgyks1sdd  
dl1kvgnk1fk1gm1qtm1gt  
askkasdtvk1lgk1gvsketeka1ekyvhyseenrimekvr1nsgqitedkakk1l1kiead1snn1iaeiekrnkke1e  
ktqelidkysafdeqekqn  
il1trtkekd1rikkeq1nqkike1keka1sdgqi1senerkeiekl1enqrrdi1tvke1sktekeqeril1vrmqrrnay  
sideaskai1kaekarkar  
kkevdkyeddvia1knnvn1sksekdl1ai1adqrhkdevrkakskkdavdv1vkkqkndidkemd1ssgrvykntekw  
wng1ksws1n1fredqkkks  
dkyakeqeetar1nreni1kkwfgnawdgvtktgeafskmgnan1hfggemkkmwsgikgipsk1ssswsakssvgyht  
kaianstgkwf1gkawqsvk  
sttgsi1ynqtk1kysdasdkawahsksiwkgt1skwfs1nayksakgw1tdmanks1rskwdni1sstawsnaksvwkgt1skw  
snyks1kgwt1gdm1srah  
drfdai1ss1sawsnaksv1fng1frkw1srtyewi1rdigkdm1graaad1gknvanka1igg1nsmigginkiskaitdkn1ikp  
ipt1stgt1agk1vatdns  
gal1tqpt1fav1ndrgsgn1apgggvqevi1hradgt1fhapqgrdv1vpl1vgvds1vinand1tk1lqrmgv1pk1fhgg1tkkkdw  
ldq1kgn1igk1kage1fgata  
kntahn1ikk1gaeem1veaagdk1kdgasw1gdki1gdvwdy1vqhp1gk1lvnkvms1g1nif1ggan1atvki1akgays1lkkk1  
vdkvksw1fed1fggg1gdgsy  
lfeypiw1qrf1gryt1gg1n1fnggr1hygi1dfgmpsg1tnvy1avk1ggi1adkvwt1dygg1nsiq1iktganew1nwmh1l1skq1larq  
gqrikag1g1igk1sgat1gnf  
vrgah1hf1ql1mqg1shp1gnd1tak1pek1w1ks1kgsg1vrsg1svnka1asawag1dirraakrmgv1nvtsg1dvgni1is1liqhes  
gnnagi1tqssa1rdin1vlq  
gnpak1g1l1qyip1qt1frhyav1rgnhni1ysgyd1q1l1affn1ryrs1qfn1prggw1sp1sgpr1ryang1litkh1qlaev1gegdkq  
emvip1l1trrk1rai1ql1teqv  
mri1g1mdg1kpnni1tvnnd1stvek1l1kqivm1s1dkgnk1l1tdali1qt1vss1qdnn1gsnda1ir1gleki1l1skqs1ghrananny  
mgg1l1tn

>tr|Q8NWL1|Q8NWL1\_STAAW  
mateevkika1lendkqy1fpathwkaingipyagssdi1dgl1pdgii1svddknk1dkl1kigeagii1qnsiv1qkspngk1w  
kitvdds1gk1gtv1l1fy

>tr|Q8NWL2|Q8NWL2\_STAAW  
menly1ikd1gal1agrdy1rakeiqn1qrieqfal1gttefl1hqkaktiqhfaeqi1yng1rsqaavnks1l1sqinal1vva  
prnnsaneiv1qarv1nvnge  
tfdt1keh1ddwet1ktqin1keetire1nktkqe1ldieyrfepdkqef1fvte1lap1tnavmqs1fwfdnrtg1ivymtqar  
nngym1sr1rpn1gqfidss  
l1ivgggh1gth1ngy1ridde1lwiys1fi1ngn1nent1lvr1fkytp1nveis1ygyk1ymqdv1ftgh1pekpyit1pvinekenkilyr  
ierprsqwe1lensm1ny1iei  
rs1ddvd1kni1dkv1l1hki1sipmr1tnet1qpm1qgv1t1fdeky1lywt1gds1npnn1nyl1tafd1let1geeay1qvnady1ggt1dsf  
pgefae1aeg1qi1yyd1kds1g  
kka1m1lgvt1vgg1dgn1rthri1fmig1qrgi1lei1hsrgvp1fms1dtg1grv1kpl1mpr1dk1kn1lgm1tepg1ly1ytd1htvqi  
ddf1p1prewr1dagw1fl1evk  
ppqt1ggd1v1qil1trnsy1arnm1mtferv1sg1rtgdi1sdwny1vpkn1sgkwerv1psfi1tkms1diniv1gms1fyl1tdd1tkr1ftd

Tsompanidou\_et\_al\_Supplemental\_FASTA\_File

fpterkgvagwnlyveasn  
tggfvhrlvnrsvtasaei1lknydsktssgpwtlhegriis  
>tr|Q8NWL3|Q8NWL3\_STAAW  
msnleksvainlentahyenisnlditftrtgesdssvllfnitknnqplllseenikariairgkgvmvvapleildpfk  
gilkfqlpndvikrdgsyq  
aqvsvaelgnsvvvvertitfnvekslfsmpsetklhyivefqelektimdrakamdeaikngedyasliekakekg  
sdiqiaksssidekqlan  
shisdlenkaqaysrtfdeqkrymdekheafkqsvnsgglvtsgstsnwqkakitkddgkimqitgfdfnpeqrigdst  
qfiyvsqainyprgvstng  
tveylvvtstykrmtyrpngtnkvfvkrkeagswsewse laindyntpfetvqsaqskanmaesnaklyaddkfnkrysv  
ifdgtangvgstlylnesl  
dqfiliifdygtfpggdftefgspfgggkislnpsnlpdgdnggggyvefgltsksrtsltisndvyfdlgsqrgsganan  
rgtinkiigvrk  
>tr|Q8NWL5|Q8NWL5\_STAAW  
mlkliisptfediktwyqlkeyske diawyvdmevidkeeyaiitgekypenles  
>tr|Q8NWL6|Q8NWL6\_STAAW  
mdakvityrivlila1vnqflankgispipvddetissii1tvvalyttykdnptsqegkwanqklkkykaenkyrkatg  
qapikevmtptnmndtnd  
g  
>tr|Q8NWL7|Q8NWL7\_STAAW  
mlitknqaekwfdnslgkqfnplfygfqcydyanmffmiatgerlqglyaynipfdnkarikeygqiiknydsflpqkl  
divvfpskygggaghveiv  
esan1ntftsfgqnwngkgwtngvaqpgwpetvtrhvhyddpmyfir1nfpdkvsvgdkaksvikqatakkqavikpk  
kimlvaghgyndpgavng  
tnerdfirkyitpniakylrhaghevalyggssqsqmdytaygvnvgnkdyglywvksqgydivleihldaagesas  
gghviissqfnadtikksi  
qdviknngqirgvtprnd1lnvnsaeininyrlselgfitnkdmwiknydlyskliagaihgpigg1vagnvkt  
sahnqknppvpagytpdkn  
npykktgyytvanvkgnnvrdgystnsritgvlpnnatikydgaycingyrwityiansgrryiatgevdkagnris  
sfkfsav  
>tr|Q8NWM2|Q8NWM2\_STAAW  
mfkrtkliliiat1l1sgcsttnnesnetksvpeemeaskyvgqgfppaekdaiefakhrkefekvgeqffkdnfglk  
vkatnvvgkddgievyvhc  
ddhgi vfnaslpkydaihqkgmsrnsndngddmsmmvgtv1sgfeyraqkekydnlykffkenekkyqytgftkeainkt  
qnvgykneyfyityssrsl  
keyrkyyep1ikndkefkegmerarkevnyaadtdavat1fstkknftndnteddvie1sdklyn1knkpkstitiqi  
gkptintkkafyddnrpie  
ygvhskge  
>tr|Q8NWM3|Q8NWM3\_STAAW  
mfkrik1liliiat1l1sgcsttnnesnetksvpeemeaskyvgqgfppaekdaiefakhhkdkiakrgeqffmdnfglk  
vkatnvvgsdgvevyvhc  
ddhdivfnasipfdksiidss1rsedkgddmst1vgtv1sgfeyrahkeeldn1tevlkeykskykytgytenaimkt  
qnsgrnreyyyltaipytl  
deykkyfqp1ikeddksfrdgmrskkq1kdksrpyvvt1fstkdnftkdntidemidfsevlkkkniphdl1nvs1qi  
snkyinttrpnyskkdvie  
vgvfnhe  
>tr|Q8NWM4|Q8NWM4\_STAAW  
mlhdilrnkfgfesfkpggqeiiesimsqhtl gilptgsgkslcyqiptylsgkptliisplis1mddqvmqlkingek  
rvtcihsgmdeiekkhnik  
clrhstrfiflspel1lqpsnfklismidfgmivldeahclsewgydfrphyaligkvtkhfkeavvlaltataphlqdd  
ltemlaiqfnvikttnrnp  
nisfkh1nfhddedkiew1lpflqqsgptiiyvsskkmc1lnlaqliydsgfltgihgdmnyqerhtvqqqflndipii  
vatsafgmginckdirtii  
hfh1stspnsyiqeigragrdgelsqais1fqpddkyilet1lfadmitteedvqnfeigeflapdkqdv1tt1hsfysig  
a1kqifkqsfkrkqlgffr  
migyckldqcrky1leffgeyppaqdrccndsnitdia1lnkkkvirsigfdek1qn1flr  
>tr|Q8NWM7|Q8NWM7\_STAAW  
mkh11vithgttimsqdsnkvvtdntnpi smhqdvinqyaqidelnpfnvpsphmtiqhvkq1kdiileavtnkydyg  
fvithgtt1leetaf11ld1  
ilgieqpvtitgamrssneigsdglynyisairvasdekarhkgvmvfvndeiharnvtkthtsntntfqsphngplgv  
ltdrvqfhhmpyrqqa1e  
nvndkl1nvp1vkaymgmpgdisfysregidgmviealgggnippasalegiqq1vs1nipiv1vsrsfngivspityaydg  
ggyqlaqqgfifsn1ngp  
kar1k1l1valsn1dkaeiksyfel  
>tr|Q8NWN2|Q8NWN2\_STAAW  
mknisiilgilmfiklme1lygai1dkp1npitkii1f1tliiyfylvkeliiflkskynksa  
>tr|Q8NWN6|Q8NWN6\_STAAW  
mediykliddin1qlen1dsrvneaittdnda1filgetlynfglmpqglevfrvlyhkydpdeselliyfieglmsen

Tsompanidou\_et\_al\_Supplemental\_FASTA\_File

qtdealeylysyvepspek1  
mleadlyqqinmmevaiaklqeaalelepndpiihfalaemlyydgqylratseyetvletgeyqvnvnlfsrmadcs1q  
sgnysdairlydeinedem  
tsedyllkaiasydknditqeaikimtt1lskdpdyiqgylylqslenyeknypdaietgkeglr1sqfykelmyttgcle  
iehgdanegvlllrqalev  
dnayqep1lilsdlyrneedyeaie1llyvdeed1dptfmwhlafaygqeerdkeaqhffelayptmktnidfmsdyyf  
ylteigqkeqaitilnqll  
elepsnenwhde1sr1qs  
>tr|Q8NWN8|Q8NWN8\_STAAW  
mssiftmiyfvilmvlp1waqhkvsnyekysqvrstsgktgrevaleilhangiydvevvkgegfltdhydpkkkvvs  
lspanydrpsvagtaiaah  
evghaiqdhqgywflrfraalvpvanlgsslmysimlgiiltaigsafgsta1wigag1mslav1fsiv1lpvefdass  
ramkqitalnivnekeykh  
arkvl1saaamtyvaatavavaelvriillarssd  
>tr|Q8NWP1|Q8NWP1\_STAAW  
mskysqdv1q1lyknkpnysgqsiaes1nisrtavkkvidq1klegckidsvnhkgh1lq1lpdiwyqgiidqytksa  
1fdfsevydsidstqlaak  
ks1vgnqssff1lsdeqtkggrfrnrhwssskgg1wmsv1rpnvafsmiskfn1fia1girdaiqhfsqdevkvkwpn  
diyidngkvcgfltemvan  
ndgiaiicgigin1tq1lenfdesirhratsvq1hdknk1dryqfler1l1qeiekrynqfl1t1pfseireeyaasniw  
nrt1lftendkqfkgqaid  
1dydgy1ivrdeageshr1isadidf  
>tr|Q8NWP4|Q8NWP4\_STAAW  
mtnitkevfd1leqeidvfaknkt1gsseakpy1deyhskii1dyfkqvnditgnidfdk1nqypvvpnmfkerydymier  
kyhfmgyrqmktfktelik  
mnasyqtr1knkqv  
>tr|Q8NWP7|Q8NWP7\_STAAW  
mnd1ves1iyevnmqgnfenvksqqqdhdfyqtvkpytehidsml1neik1hrefiievpmnsrkfellianieqlsve  
chfkrtsrk1fik1ksvq  
yd1qni1dgvtkegtgd  
>tr|Q8NWP9|Q8NWP9\_STAAW  
mgkkmg1g1sialivigiavvc1mi1fssqktyfgymnsntnaekvvsekdg1vkhn1kvepsndf1kpkkgdfvklvskd  
dgktfykqei1vkhdvphg  
1mmki1hdmhmn  
>tr|Q8NWQ0|Q8NWQ0\_STAAW  
mkntfnplqr1hfyaaifiapl1it1tisgigylffpevenniykneffgdsdvkthqt1ndavhqveqqyegffvskvs  
1depynkrit1sdmagnq  
ryv1fdhnnqfvadqnakhtysnmrsihss1ftentiiny1vel1tacwmifmi1sgty1likkhlisnkska1rwqkwh  
amigvii1aipvfv1vtgl  
pws1gfmgski1agmmdtngd1ggela1nppksd1nel1pwatrkknqpassek1gssghgnaampqtk1dyqisidkveq  
aqkag1kkpfs1vypsdkn  
gtfiv1sntsngvtgl1dvspykeqt1yfdqysgkklgtikyddygi1akwftwgipl1hegh1fgilnki1n1fvciallv  
aigmgf1vswikrtkntavk  
vphrvkkpasis1iic1liv1gl1mp1fg1sl1ilvfielilyikdrakq  
>tr|Q8NWQ1|Q8NWQ1\_STAAW  
minkeq1d1lyk1kkeveksrneal1htinqvikkvyl1qytcsvfghfsagkstm1l1ieqd1l1psspvttsntaiv  
svsdnhd1ian1pnqtyak  
1snydevremnrqnvdvesveinfqsakfengft1qdtpgvdsnvashqs1teqymysnmi1fytdynhvqsel1nfkfm  
khindvg1pvf1inqidk  
hqddel1sfstfksrveksiadwgik1ertfyvskfdhpenel1v1ssylis1dqhretiedytsrtveyiteaq1dyiqs  
eiqev1ed1gieeae1feqa  
f1nsqghqai1seeaq1l1nnpde1maf1knkrkni1enay1imphnmrem1rsyl1esmsqdfnvggffnkkkkk1qi1qqqr1  
1tatdal1qehvnq1rqpm  
redmsfvtr1finkkeasdkv1nqhydvkpemied1yqpqtsi1sntyv1tfsdevvkaikkyveqqstpi1fkei1envqad  
e1pteesdd1keyqrytel  
nel1rqs1ttknryhyih1des1dk1igrqettyqv1atdntqdnrdnq1l1nqntattnmsidiqkald1isdvp1fkrtk  
qdi1het1tridnk1ikigv  
fgtfsagkss1ina1l1gehil1vsspnpttaatte1sygdesyit1ksqsq1l1deinavveyqdm1systiedfins1lek1  
ksh1lnknq1lafi1qavekhy  
klyvnm1engekha1nqqe1kkwsaedeyat1fvktvhia1mhdw1kgki1vds1gl1hsnqrhtneteqi1tssd1ilyv  
syfnhs1ftdndkafiehm1k  
dmnq1nenqafk1m1vinaad1aesqdd1eavetyvsda1lrqvh1qsdi1favssrna1qaedkgidq1kqsi1qqfvdesks  
i1leqqmihq1kqmdrsyve  
mitefetnkadi1srrqr1tvykdkqr1qhql1idat1qhtdneveeqvyh1nar1kl1q1l1ddvksvfnsqmtqnsdfnee  
kkvstkvyl1dqihqr1fle  
qs1l1terikkyfnkq1teq1api1vqql1ad1hvi1vpqfnfesanieq1l1hidfndm1na1pkq1l1tkrki1n1pngqrdih  
esi1cqst1gl1lqpqmg1l1r  
qq1el1yvkq1maveaesqfesfeaniqtq1ind1laf1d1dt1l1nq1kdkhq1l1kti1ly

Tsompanidou\_et\_al\_Supplemental\_FASTA\_File

>tr|Q8NWQ2|Q8NWQ2\_STAAW  
mpnk11lvdgma11frhfyatslkhqfmynsqgvptngiqgfvrhifsaieirpthvavcwdmgqstfrndmfdgykqn  
rsappeeliqqfdyvkeis  
eqfgfvnigvknyeaddvigtlaqqystdndvyiitgdkd11qcindnvevwl1kkgfniynryt1hrfneeyalepqq1  
idikafmgdtadgyagvkg  
igeaktaik1iqyqsvvenvidalsagqrnkndndelylskrlaeihtqvpidseslfekmsfattlnhilsicne  
helhvsqkyisshf  
>tr|Q8NWQ8|Q8NWQ8\_STAAW  
mifsqn1frptptcivcrnwesnfs11gpipnlhiivs  
>tr|Q8NWR3|Q8NWR3\_STAAW  
mm1kiilyaytqsvfsgrriek11hdsirmmwlaqntpsyktinrfrvnpntdalies1fiqfhsqcl1kqnlidhnsif  
idgtkveananrytfvwwk  
sipnhesklnensktlyrd1veeklisik  
>tr|Q8NWS2|Q8NWS2\_STAAW  
mtatwsvnk1if1qna1tvknnqplmavvknnayhyd1efavtqfihagidtfstts1reaiqirqlvdatifl1mnavy  
efd1vrehqihmt1ps1ty  
yynhkndlagihvh1efen11hrsgfkd1neikev1kdhhnqnakmi1sgl1wthfgyadefdvsvdynversqwmeivea  
11segyqfd1ihaqnsasf  
yregqi11phhtharvgialygsrpyss1nqhdivqs1tvkahviqvrevqagdycgysfafevtknntklavvdigygd  
g1lrtrakhealingkryp  
ira1mmshmfvevdgnvhaqdevi1ynndirideytfkgvganseqlsamnhds1kkeyisndc  
>tr|Q8NWS6|Q8NWS6\_STAAW  
mtklavvgstglvgtkm1et1nrknipfde1v1fssarsagkevefqqktytvqel1tdarasehfdyv1msagggtsehf  
apl1fekagai1vidnssqwr  
maedi11vpevneptftrgii1anpcstiqsvvp1kv1qdayglkrvayttyqavsgsgmkgkkl1aegvngkapeayp  
hpiy1nnv1phidvflengy  
tkeeqkmidetrki1napd1kv1tatcarvpvqds1hsveidvt1lekeataedika1fdqddrv1vdnpenney1pmainst  
nkdevfvgr1rrdds1lent  
fhw1wtsdn11kgaa1navqv1eqvmr1kgan  
>tr|Q8NWS7|Q8NWS7\_STAAW  
m1vtrsv1kyggssvsdf1tkikriaem1kervnqdeq1ivvvsamgnttdq1mtvst1tkap1kqela1111ttgeqq1tvs  
y1smv1ndigv1nakamtgy  
qagik1tighh1kskiaq1n1pqtfeqafqendi1lvvagfqq1inehqel1tt1grggsdttava1avsnq1pceiytdvdgvy  
atdpr11pkakr1divsye  
emm1emsa1lagv1etrsv1aknynip1y1lgt1snvkg1twimsnee1lekkavagva1dkhmmhv1tisyp1pdnq111tq  
11fte1eegavnvdmsiqv  
n1ldg1q1sft1kdsdfhq1smilet1knqyea1aykinehyvki1sligsgmrdmsgvaskaf1t1liennipfyq1tttsei  
s1syv1iddfngq1qavek1y  
dafni  
>tr|Q8NWT0|Q8NWT0\_STAAW  
mkv1ilg1ftrmsvrg1inkvkrelgfv1ma1nrkiaaqravhykihik1kanfhqi1nrnq1lfya  
>tr|Q8NWT1|Q8NWT1\_STAAW  
m1tsstnkv1aliekn1nkkgk1hndki1pvilaaisaisi1tt1lgilit11letitff1tripitef1f1st1wnptg1sdpkfg  
iwa1liigt1k1itv1atifa  
vpvg1gaaiy1seyasdrarri1kpile1lagiptivfgffaltfvtpv1rsfipglgefnaispglvvgimivplits1  
sedamasvpnk1iregaygl  
gat1k1evatkvv1paatsgivasiv1aisraigetmiv1laagssptas1s1tssiq1tmtgyiveiatgdatfgsniyys  
iyav1gft1fi1ft1imn11s  
qwi1skrfreey  
>tr|Q8NWT2|Q8NWT2\_STAAW  
mettdn1nrqs1vdqq1vqkh1ssrtvknkvfklif1lact11glv1v1ial11tqt1likgvsh1n1qff1tnfs1stpsmagvk  
ga1lig1slw1mlsi1ipls1i  
11gigtai1yleyakn1kftqfvk1isisn1lagvpsv1vfgilgyt1fv1ggagiea1kmgnsila1aa1tmt11ilpi1ivssq  
eai1ravpnsv1reasyglga  
nkwt1tirrv1paalp1gil1tgfils1sra1lgetap1vl1igipti1latpr1sildqfsalpiq1ftwakmpqee1fqnvasa  
gi1v11v1il1mngvai1l  
rnk1fskkf  
>tr|Q8NWT7|Q8NWT7\_STAAW  
m1tr11li1hcynyn1mmv1m1ly1hqht1ligangami1sqskisv1kipihtdyhh1ilki1qkye1ldyi1dddwnyaaq1dae  
nai1fer1dphk1lasc1dva  
nid1tpikv111nidpaq1itt1de1lnkyhqe1lemihs1neyniditaq1inkyta1lqy1fdadvkya1afgndhndivmlq  
hassgy1igp1seaythai1  
k1ldk1ikhinnaga1ickv1ksyk  
>tr|Q8NWT8|Q8NWT8\_STAAW  
mr1fvfd1dgt1cfdgr1idqti1id11q1qhdgheli1fasahinwrkwcydfta1kdfcyq1t1nsyryispylkn1skv  
>tr|Q8NWU5|Q8NWU5\_STAAW  
mep1ilemikt1tgi1nspsgdteeai1qfvekyakd1gyq1tt1tnkga11itvpgkndevqrcitahvdt1gamvkeikedg  
r1laie1liggftynaiegey



Tsompanidou\_et\_al\_Supplemental\_FASTA\_File

cqiktdagqiytgcticlhetsvhvyrnnheiprdqkhmeiridevttseedtkslgi svgdfvsfdprt vitssgfiksr  
hlddkasvaiilql1kklk  
eeqiiilphtqtqfysi nneeigyganasidskikeyialdmgalgdgqasdeytsicakdasgpyhkqlkshlvnlckin  
nipykvdiypygsdasaa  
lhagadi rhglfgagiesshamerthidsikatekllayaclspie  
>tr|Q8NWW4|Q8NWW4\_STAAW  
mdtpkqqafafnniqmmsksdvektlnkprvtfnegtkwytyyddynnfimisymkdkvnalytnqniitskskik  
yntpksvvrqr1gepetei  
vkgrvryeqnnkeydvfhknhiyttvfydkhrrnvtavlqvsdamenr1keqygapsksladsfelqnfdlvnaerkqh  
qlftlkysqnsetarkhs  
kdmannhyfdhtnlkgqspdr1kkdgitfnsagenlaygqvssiyahqglmsighrknilndtfkilvgvdfndekq  
pfwtenytg  
>tr|Q8NWW4|Q8NWW4\_STAAW  
mffvpffigeaktmrytfsndlgtlftiilaigfiinlvlafiiiflernrrtasstwawlfvlvlp1igfilylffgrt  
vsarklnknngkvltdfdg  
llkqqiesfdkngygdtnkqvqkhhd1vrm1lmdqdgfltenkvdhfidgndlydqvlqdiknakeyihleytfa1dg  
lggri1kaleek1kqglev  
kilyddvsgskvkmanfdhfs1ggeveaffasklp1lnfrmnrrnrhrkiividgqlgyvggfniigdeylg1gk1gywr  
th1riqgdavdalqlrf1  
dwnsqahrpqqfeydvkyfknngplnspiqiaasgpasdwhqieygytkmimsakksvylqspyfipdnsyinaikiaa  
ksgvdvhlmpckpdhplv  
ywatysnasdl1ssgvkiytyengfihskmcliddemsvsgtanmdfrsfe1nfevna1fydek1akdlrvayehditks  
kqltkesyarnp1svkfke  
slak1vspil  
>tr|Q8NWW6|Q8NWW6\_STAAW  
mriedayrkdvii1l1nneeyegvtdyenefesetgnlvdiqtdfavysfdeteiksir1lk  
>tr|Q8NWW7|Q8NWW7\_STAAW  
mphvgswrdkffkeregkyqvevkeak1qekaknqmkiemiesckmieincekqnghmlghhlynenkkraillnkk1ps  
yti1sid1lne1lrekms1  
gnlilsdel1fdmkei1fnq1igkvhidnvyietrkgvhysktgahivpyidk  
>tr|Q8NWW8|Q8NWW8\_STAAW  
msiqqldgyisiedffkhmdel1skeelekeinqskskyq  
>tr|Q8NWX1|Q8NWX1\_STAAW  
mlfnskpnsivmlnhhpgqssfs1tdly1fifnnsikt1tvtknkgqtkyltktkkeyckstcidckkynknknkknkfnh  
kdidmilkr1ynsgni1yk  
vr  
>tr|Q8NWX3|Q8NWX3\_STAAW  
mseykkkieliesnl1tgye1skk1ef1ntyfhn  
>tr|Q8NWX4|Q8NWX4\_STAAW  
mkdiskivadvest1apyfkeieetayinqekvl1nafhvkatesdlqgstgygyddfgrdhleeiyaqafkaedaivrp  
qi1sgthaitialqsl1kh  
gdely1itgspyd1llev1gvngngies1mehgvsykdiak1kegkidiesv1dgvsertkviaiqrskgydqrpsiplde  
ieqvitr1kevhpnili1f  
dncygefverrepi1ecgadliags1iknpggglakiggyiagrkdliercgyr1tapgigkeagas1nal1emyqgffla  
phvvsqslkgalfts1fle  
kmmnttpkyekrtdliqtvkfktkeqmisfcqsiqhaspinahfspepsympgyeddvimaagtfiqgssielsadgp  
irppyeayvqgg1tyehvk  
iavtravnq1keqgli  
>tr|Q8NWX8|Q8NWX8\_STAAW  
mlfnyslydt1nt1lhi1pyengffnmlyd  
>tr|Q8NWX1|Q8NWX1\_STAAW  
mkpqlswkvqggggeg1estgeif1atamnrkgylygyrhfssrikgghtnknirvsttpvhaisdd1diliafdqetid  
vnhhemredsi1ladakak  
pykpegchaqlie1l1pftatake1gta1mknmvaigatsal1m1ntntfeeli1tmf1skkgdkvvevniqal1negyqlmq  
r1pei1dgfe1estdal1ph  
lym1gndaig1gai1aagsqfmaaypi1pasevmeymi1anskvngaviqtedeiaavtmaiganyggvraftasagp1s  
1mmeaig1sgmtetplvi  
ntqrggpstg1ptkqeqsd1mqmi1yghgdi1pki1vvaptdaedafyl1tmeafn1aeqyqcpvivilsd1ql1slgkqtvek1  
dynr1eikrgei1qsdier  
eeddkgyfkryal1tsngvsprp1pgikgghit1gvehneegkpsesasnrqqmekrmrkieq1liespvean1qheda  
dilyigfistkgai1qegsn  
r1nqqgikvntiqi1rql1hpfptsvi1qdavnkakkvvvvehnyqgqlasi1k1mnvni1hdki1enytkydgtpfl1pheievkg  
kiiateikemv  
>tr|Q8NWX5|Q8NWX5\_STAAW  
mkeryyelidervfeqe1eng1rl1fvi1pkpgfaktfvttyttqfsg1dnqfkl1gqdfvtvpdgvah1lehkl1fekeeed  
1ftafaednaqanaftsf1  
rtsyl1fsatdni1ennkr1l1tmvetpyftketvdkekgi1aeekmyqeppgyk1mfnt1ramyqqhpirvdiagsvesi  
yditkddly1cyetfyhps

Tsompanidou\_et\_al\_Supplemental\_FASTA\_File

nmvlfvvgdvdpeaicrivkqhedarknvqpkierglvnepedvkeafvtesmkiqsprlmfngfknkplqeapqkyvqr  
dlemslffelifgeetdfy  
qnllnegliddtfgyqfvleptysfsivtsateepdklkklllde1rdkkgnfqdaafe1lkkqfigefisslnspeyi  
anqytklyfegvsvfdmld  
ivenitldsinetsslylnldqqvdsrleikk  
>tr|Q8NWY7|Q8NWY7\_STAAW  
msemnavynvkqyilnlikqnkleygdq1psnlsiarelnvktddvyeaiqaliteqvikdnfeegtsvkslppffyp1n  
elisiqqmiknagfecgte  
ylnfdeqpatmldanllsveegypvtierlrtadgепivycldkiakkelcteyqmsngsilsaikesnhnicyadt  
eieavnyeprievlnasp  
heglillkiithyneldepilyslnymkns1vqfkitrki  
>tr|Q8NWZ2|Q8NWZ2\_STAAW  
mssnelllateylekekkipravlidiaealitaykknysarnvrvelnmdqgtfkviarkdvveevfddrdevd1st  
alvknpayeigdiyeedvt  
pkdfgrvgaqaakqavmqr1rdaereilfeefidkeediltgiidrvdhryvyvnlgrievlseaerspnekyipneri  
kvyvknveqttkqppiyvs  
rshpgllkr1feqevpeiydgtvivksvareagdrski svfsenndidavgacvgakgarveavveelggekidi vqwe  
dpkvfvknalspsqvlvi  
vdetnqstivvvpdyqlslaigkrqnarlaakltgwkidiksetdareagiypvveakvteedval edadttesteev  
ndsvetnvekese  
>tr|Q8NX03|Q8NX03\_STAAW  
mviqwypghmakakrevseq1kkvdvvelvdaripysrnpmidevinqkprvvi1nkkdmsnlnemskweqffidkgy  
ypvsvdakhgkn1kkveaa  
aikataekferekakglkprairamivgipnvkstlinklakrsiaqtgnkpgvtkqqwikvgnalqll1dtpgilwpk  
fedeevgkklsltgai kds  
ivhldevaiygl1nfliqhlar1kshynievpadaei iawfdaigkkrglirrgneidyevieliiydirnakignycf  
difkdmteelandann  
>tr|Q8NX09|Q8NX09\_STAAW  
mvy1ksidaigfksfadqtnvqfdkgvtaivgpngsgksnitdaikwvlgeqsaks1rgskmediifsgaehrkaqnyae  
vqlrldnhskk1svdenev  
ivtrrlrsgeseyyinndrar1kdiad1fldsglgeaysiisqgrvdeilnakpidrrqiieesagvlkykkrkaes1  
nk1dqtedn1trvedilyd  
legrveplkeeaiakeykt1shqmksd1vvtvhdidqytnnrqldqr1nd1qgqqankeadqrlsqqiqqykgkrh  
q1dndves1nyqlvkatea  
fekytgq1nvleerknqsetnaryeeeqen1mel1enisneisgaqdyks1kskqkelnavireleeqlyvsdeahde  
kleekneyytlmsegsdv  
nndirflkhtieeneaksr1dsr1vevfeqlkdiqqikttkkeyqqtnkelsavdkeikniekd1tdtkkaqneyeek  
lyqayrytekmktrids1a  
tqeeeytyffngvkhilkanke1kgihgavaeiidvpsk1tqaietalgas1qhvidsekdgrqaiqflkernlgrat  
flp1nviqsrvatdiksi  
akeangfisiaseavkvapeyqniign1lgn1iivdh1khanelaraikyrtrivtlegdivnpggsmtgggarksksil  
sqkde1ttrhq1ledylrq  
tesfeqqfkeliksdq1selyfeksqkhnt1keqvhhfemeldr1ttqetqikndheefekndgytsdksrqt1sek  
ethlesikas1kr1edeie  
rytk1skegkesvtktqqt1hqkqsd1lavvkeriktqqtidr1nnqnqqtkhq1kdvkeki1fnsdevmgeqafqnik  
dqingqgetrtr1sdelk  
1kqqr1elneqidaqea1qvchqdi1aienhyqdikaeskl1dvl1hhaidh1ndeyq1tverakseytssedialrk  
kvk1mkmsidelgpvn1ra  
ieqfeelnerytflsegrtd1rkaket1eqi1semdqevterfketfhaiqghftavfkq1fgggdaelq1teady1tag  
idivvqppgkklqhlsls  
ggeral1aial1failkvr sapvildeveaaldeanviryakylne1sdetqfivithrkgtmefadrlygvmtmesgv  
tk1svn1ntiddv1keeq  
>tr|Q8NX15|Q8NX15\_STAAW  
mleaqfftdtgqhrknedaggi fynrt nq11vlcdgmghkagevaskfvtdelksrfean1ieehqaenw1rnnik  
dinfqlyhyaqenaeykgm  
gttcvcalvfeksvviavgdsrayvinsrqieqitsdhsfvnh1vltgqitpeafthpqrniitkvmgtdkrvspdlf  
ikr1nfydy111nsdgltd  
yvkdn1kr11vkegtiedhgdq1mq1aldnhskdntfilaaiegdkv  
>tr|Q8NX21|Q8NX21\_STAAW  
mia kv1dvasksvdykfdy1ipeqlesviqpgvrvi vpfgrtiqgyvmevtaepdaq1dvsk1kkiievkdiqpelts  
elia1sewmgsthvikris  
mlevmlpsa1kakykka fkmkddielpsa11qkfdkhgyyyykdaqnndiq11mk11kddiveekt1ltnitkktkra  
vrvi egyhpdev1aklekv  
ikqydl1yay1seeqk1f1tdiedmgfskss1dgl1kkgyvekydavverdpfkdrvfeqeskq1tedqykayeaika  
kivsqegetf11hgvtgsg  
ktevylqtiedv1sqgkqamm1vpeialtpqmvlrfkrrfgddvav1hsg1sngerydewqkirdgrarvsvgarssvfa  
pfn1gl1iideehestyk  
qedypryhareiaqwrseyhhcpvilgsatpc1esyaraekgyh11slpnrvnqqa1peidivdmree1segnrsmfsk

Tsompanidou\_et\_al\_Supplemental\_FASTA\_File

d1reaiqlr1drqeqvvlf  
lnrrgyasfmlcrdcgyvpcpncdisltyhktt1lkchycgyqetppnqpcncesehirqvgtgqkveellqqefed  
ariirmvdvdttskkahek  
lltefekngndi1lgtqmiakglpypnitlvglvlnadtm1nlpdfrasertyqlltqvagrgrhekagqviiqtypndh  
ysildvqkndy1tlyfyrqem  
eyrk1gkyppyyylinf1tishkemkkvmeasqvhk1llqhltekalvlgpspaalarinnefrfqi1lvkyksep1lqa  
iqflddyhekfikela1  
kidi1dpqmmm  
>tr|Q8NX23|Q8NX23\_STAAW  
maydglftkkmveslqflttgrvhkinqpdndtilmvvrqnrqnhqll1sihpnfsrlqlttkkydnpfnppmfarvfrk  
hleggiiksikqigndrri  
eie1kskdeigdtiyrtilvleimgkhsn1ilvdenrkiiegfkh1tpntnhyrtvmpgfnyeapptqhkinpyditgaev  
lkyidfnagniakqllnqf  
egfsp1itneivsrqfmsst1peafdevmaetk1p1tpi1fhknhetgkedfyfik1nqfnddtvtyds1nd1ldrfdy  
argerervkqrand1vrfv  
qqqlhkyqnlak1ieeyeqsknk1dteqlygelitaniyrikqgdkevta1nyytneevvip1nptkspsanaqyykqy  
nrmktrere1qhqi1tkd  
nidystieq1lhh1svh1deide1rdelaeqgfmkqrknqtkkkkaqi1q1qhyvstdgddiyvgknnkandy1tnkkakkt  
htw1htkdipgshv1fnd  
apsdt1ikeaam1agyfskagnsq1pvdyt1iknvhkpsgakpgfvtydnqktlyatpdyeliqkmkqs  
>tr|Q8NX26|Q8NX26\_STAAW  
metyefn1t1dkeqtgmrvdk1l1pe1nsdwsrnqi1qdwikag1lvvandkvksnykvk1ndhivvtekevvead1lpen1n  
1diyyedddvavvyktkgm  
vvhpspghytnt1vng1lmyqikn1sgingei1rpgivhridmdtsg1l1mvakndiahrglveq1mdksvkrkyialvhgni  
phdygt1dapi1grnkndr1q  
smavvddgkeavthf1v1ehfkdyt1vecq1etgrthqi1rvhmkyigf1v1vgdpkygpkkt1digga1hag1ligfeh1pv  
tgeyerhael1pqdfed1l  
dtirk1rda  
>tr|Q8NX27|Q8NX27\_STAAW  
mkailgft1rmsvrginkv1krelgfv1maln1rki1aaqravhyki1hikkadfyqi1nrk1l1f  
>tr|Q8NX31|Q8NX31\_STAAW  
mrvkdn1qqi1stq1ndk1sekn1fstkp1nvi1avtkyvtierakeayeagi1rhfgen1legf1lqkkae1psdavi1hfigs1lq  
srkvkgy1ndvdy1fhaldr  
1slake1nkraehk1kcf1lqvnvsgeaskhgia1ledvdqfidd1lkykdieivg1mtmap1tddeay1rs1fkq1rl1kke  
eiqr1n1leyapcde1smgm  
sndy1liaveegatfv1rigtk1lvgeee  
>tr|Q8NX34|Q8NX34\_STAAW  
mddktkndq1gesnedkde1el1ftrnts1krr1qrkrskathfsnqkddts1qqad1fdeeiy1linkdfk1keqsndenndsas  
srannn1idd1st1dsniene  
dyrynqei1ddqnes1giafdneq1qsapkeqngdsndeetv1tkkerkskvtq1kpl1tleekr1lrrkrqkriqysviti1  
v1li1avi1liymf1sp1lksia  
hvningn1nhv1stskinkv1lgvkn1dsrmyt1fskknain1deenpl1ksveihkq1lpnt1nvdi1tenei1alvkykgkylp1  
leng1k1l1kgsndvki1ndap  
vmdg1fkgtk1eddmika1lsem1tepvrrya1evtyapskn1qsrie1lfttdg1lqvigdistisk1mkyypqmsq1s1rsdsg  
k1ktrgy1d1svgasf1ipy  
rgntss1qs1esdknvtk1ssqeenqakee1qsv1nkinkq1sskn  
>tr|Q8NX39|Q8NX39\_STAAW  
mtg1laeaiantv1qaaqhdsvk1lgt1sivdivangv1lgk1lfgf  
>tr|Q8NX41|Q8NX41\_STAAW  
mrnqi1k1l1dsd1lss1hisk1qtgvpq1stihrmrkn1ers1dnms1lkn1aellyk1fans1fsn1e  
>tr|Q8NX45|Q8NX45\_STAAW  
mkkn1imnk1vl1sta1l1l1gt1tstq1pktpi1sfs1seakayni1senet1neli1kyytqph1sl1snkw1lwqkpn1gsi1hat1q  
twvwyshiqv1fgseswgn1i  
nq1lrnk1yvd1fgtkdedt1vegywtydet1ftggv1tpaat1ssdkpyr1fl1kysdkqqt1ig1ghefykgnkpv1tl1kel1dfri  
qt1liknk1klyng1efnkgq  
iki1tadgnny1tid1l1skk1k1tdtnryvkn1pkn1aqie1vileksn  
>tr|Q8NX53|Q8NX53\_STAAW  
mvddpi1r1nhvdy1lvksv1l1ksik1lrfqevrkfeilv1kimnrihi  
>tr|Q8NX61|Q8NX61\_STAAW  
mv1l1tfvt1ih1dtd1dgrff1nehkhannk1l1khs1i  
>tr|Q8NX63|Q8NX63\_STAAW  
mrmkrf1ltivqi1llvvi1ii1fygkivq1tyiedkqeranyek1qqkfqm1mskhqahvr1pqfes1lekinkdivgwik1sgt  
s1nypv1lqgk1tnhdy1ln1d  
ferehrrkgs1fmdfrne1lkn1nhnti1lyghhvgdntm1fdv1ledy1lqsfyekhki1efdnkygkyq1qvfsayk1tttkd  
ny1rtdfendq1dyqqf1de  
tkrksv1nsdvn1vtvkdrim1t1stceday1settkrivv1vaki1kvs  
>tr|Q8NX80|Q8NX80\_STAAW  
mifsqn1lfr1rpt1ptyivcrnwesn1fs1l1gptp1q1a1lpvef1lfeilyvgapd

Tsompanidou\_et\_al\_Supplemental\_FASTA\_File

>tr|Q8NX82|Q8NX82\_STA  
mdtveisrfltamtlavhii fatigvmpImfaiaefl girkndlqyiamakrwakaytitvavgvvtgtiiglqlslw  
ptfmemgghvia lplfmet  
fafffeaiflsiylytwdrfknkwthflisipviiggsfsaffitsvnsfmntpagfelkngkmvnpieamfnpsfiv  
rsfhvittagmtmafvias  
iaafkl1rnraqkdtvyhkka1kmsmivgffstllsm1agdl sakflhkfqpeklaayewhfdtsshaklllfgvldekt  
qqvkgaielpgl1sfladn  
svktkvqglndfpkshppmivhyffdlmvtmgilcfvisgvyvltlmfkk1rkfsthkwmlygilltgpasm1aiefgw  
fltemgrqpwi vrgymrva  
eaa tqaggi tfvti lfgilyiilm ytcayvli rmfknkpayedvnr1lakkqggeiek  
>tr|Q8NX86|Q8NX86\_STA  
myeqwkvrsfvddvniitklflgiilfffii fvhnfdfmlyitilmvl1mfngtqfkitaifitisigfallsslfm  
ilyngshtilkfgfihit  
teslvrglhvs1rtiaisffgilia1tsqvvmifyslmqhlkvkskvayafmaairmip1missliqlrrslkmryqmid  
aanyrglkrfkhliip1s  
qnirkahqlsvameskgfrdgprrtyyyynvpfsykdiifiivliaiitlayycsitlpitgiddvrlgrvg  
>tr|Q8NXA4|Q8NXA4\_STA  
mel1vkhlpkdmvldaiekscvdatyrtyqhilvyeveskvagciisysgene1kyekawell1d1peeikqygtplpv  
keakddeyyietiatfeay  
rgrgiatkllts1lessthvks1ncdinneaalklykkvgfisdgqielykhmyhhlivk  
>tr|Q8NXA5|Q8NXA5\_STA  
mrqfikrivktilvgvikfirnk1sgksshptdnkh  
>tr|Q8NXA9|Q8NXA9\_STA  
mielkd1tiqgnthi1kkl1nk1kfqcgsyaligksgcgkst11ntiaglektgkqyvyfngqleqfksnfyrdklgylf  
qnyglidn1tvnenldig1  
aykkiskkekeq1kiryieqfg1sns1krkvht1sggeqqrvalirm1kdpivmladeptgalpdktgqmi1qslfdlv  
denkv1ilathdmainqc  
deid1eqyrkvasm  
>tr|Q8NXB1|Q8NXB1\_STA  
mnievplsal1ivyfiyyi fekninfkayaiky1ngft1rkiifenfskkctywvtliisqillttsvlwilnytgnd1  
filr1vl1sclfil1tisvi  
n1wtflm1n1n1n1anmikgkqhftirfintvcksillvlianvmientsvikd1nkiketekywnv1ddytyiefapyh  
etkqslidnmvrseq1vka  
seaenna1l1fkpkgdsvdndn1fspdegv1lvnnqfwsiyhkqfqpdpiknqknnveviipqkfhamrneinqayhswf  
efvqnknkesk1siqfin  
kndyri1ftdardsrh1sfiieapiivnvqasd1sndfyyamisggylfknydalvkniekyh1dgeisgitnykdsvme  
myhenn1kl1tv1nfsqii  
ai1liiii1fdvkyfeqhrk1lvikk1fgyst1ranyqy1linnivv1figiltv1l1hsqyimmi1fatiivvqillqi  
cslyyhgr1rfnevi1kef  
>tr|Q8NXB2|Q8NXB2\_STA  
mkwfk1i1dvt1f1ia1i11fvtykenee1pdtkyp1avtdwnkkyskneykrinqfaknenvaiykstsnytnknv  
dkdiyvfnskattitpfn  
akynihy1sddel1kkiskev1  
>tr|Q8NXB3|Q8NXB3\_STA  
misiana1h1m1sfgmfivtfigivvai1n1snkk  
>tr|Q8NXB4|Q8NXB4\_STA  
mnkiska1twfiisfi1fh1il1fimwgehqeywlytgim1lagisyvfyqrdieskr11tsigvgiitailim1ql1f  
s1itsn1syss1ikelart  
gnwkwqm1vt11fvipckelymrtv1qkel1thsipkwvail1taicss1fiy1dnwwivt1fivaqvil1syeytr  
riattsva1qvai1ll1if  
na  
>tr|Q8NXB6|Q8NXB6\_STA  
mmekneninve1l1ttsdmhshf1ngdygsniyragyv1nqvraqnhrv1l1dsggslagslaayyyaivapykrhpmik1  
mnrmyhdasgvspsefkg  
1sfl1trsialarfpw1saniey1nvtkepyfstpycikhfgd1kiaivgtadglmeneysemeqdvsiekt1vaskwir  
yiheveepdf1ivi1yhggl  
nkisnstknkkassneaek1mee1gvid1mitahqhtivgqdhetyyvqagqdalevh1sinfkkr1tttydvesidsk  
vid1neyeedqel1d1t1fy  
drkavaywsqei1sdkg1m1svng1qd1vcqthpfsq1l1hdai1h1afdnditcvhvp1mngekg1sgqirned1yhaypyp  
dkpmdmt1sgqnikdi1ley  
sysh1dfvneq1s1ti1idet1ctmwqgfnye1dmnqepgqrv1mdqid1sksyrv1tmdycyrnykny1knai1hesyde  
tmst1iaek1rdpnyhisc  
sdfivknr  
>tr|Q8NXB7|Q8NXB7\_STA  
msifsq1lkrsspqqg1v1yyivaiva1f111n1pyvhkpgvevnpid1lfavsgisvtgl1spisivdtystfgq1i1l  
v1lniggigvmaigt1mlwv  
v1lghig1r1erq1im1dnkn1tmsgtvkl1iidivksifvie1vgam1lafyfyrdnpd1kyaimqgvfvsisattngld  
itgks1lpyahdyfvqai1

Tsompanidou\_et\_al\_Supplemental\_FASTA\_File

ifliilgsigfpvllvkaqiqrvtfnfrfslftkittstylflfivgvlailfehnhafkglswhqslfyslfqsatt  
rsagltidvttlsdptni  
imgilmfignsspsvvggirtttfaililflinfsnadsiksikvynrevhimdiqrsfavftmatiltflgmliisate  
ngkltflqvffevmsafgt  
cglslgvtstdisdiskvvlmilmfigrvglisfiimiagrrepdkfhypheriqig  
>tr|Q8NXC1|Q8NXC1\_STAAW  
mvnkrfidegktidvylfealndqiiiaipdwfwsyqmamtIdeetcfeailmqlfvfkeeeeaesiasqldwiyetykk  
ekd  
>tr|Q8NXC6|Q8NXC6\_STAAW  
meflslvivvlaaflltpiivnrlninflpvvvaeilmgivignsflniverdsilnilstlgfiflmlfsgleidfkafk  
kdkrarqgqndessipgh  
lnlaltvfafimiisillayvfwlglvddvllmviiistislgvvvptlkemnimrttigqfillvavladvtmillt  
vygaingqggstiwligil  
vvftaisylgvqfkrslqkldmgttqigiravfaliillvalaegvgaenilgaflagvvvsllnpdeemvekldsf  
gygffipiffimvgvdlni  
pslikepklliiipilivafivsklipvmfirrwfdmkttiasaflltstslsviaaakiserlnaisaetsgililsav  
itcvfvpii fkklfvppe  
fnrkievsligknqlltipiaqnltsqlydvtlyyrkdlsdrrqlsdditmieiadyeqdvlerlglfdrdivvcattddd  
rlesttdttdelvdsgiefssylsnkllkglieptnmlnllsnvetslyeiqlnkyeniqlrnfpfggdiifvriir  
nnesivphgdtqlrygdr  
ivtgakeyvdelkqelefyf  
>tr|Q8NXC7|Q8NXC7\_STAAW  
mkfkyhisqetvktflarhdfskktvsaikngalivndepvtvrkqlmpndileihlpreipsvnlipyarklevlye  
dafiiivtkpnnqncpsr  
ehpheslieqvlhcgengeniphivtrldrnttgivifakygyihhlfskvnllkkytclvygkthtsgieanirrs  
kdsiitrevasdgyakts  
yevinqndkyslckvhlhtgrthqirvhfqhigpivgdslydgfhdkihgqvlqctqiyfvhpinknniyitidykql  
klfnql  
>tr|Q8NXC9|Q8NXC9\_STAAW  
matnheiefkqmitasiynklqekyfkdsvlfkqinyidtpdfklkehrsalrirkvknqyemtlktpakvgllleyni  
vdikpennliisndnlpdd  
irqiiveqfgvkdttlsilgalattyretkykgdllvldkseyfdttedylefevkdyngqlqkfqslnelelnehqpl  
nkvrffkkketlsnnin  
>tr|Q8NXD1|Q8NXD1\_STAAW  
mlvalneekervlatta lrtktyfcpcvgkqvilkrqlkvisfhahkhlaeqkcfnetikhyksklilaqmiqqqgfkv  
eiepfleikqipdilin  
kyvieqyspiyqilqrteglkkmgysvswllndvdychnkvkfnhfqsmfinpfrklhtfnlekkqimmfqqiqyl  
gghkyvaekrnakisel  
eapcdyhavyklskfainqiykycrwqnsvlptlsamyqlqldqevvnygyifpeqiyiknhpiewqlqvdllwlng  
ksklvndlnyfkllkfv  
glesktaiieklinnylnicsdrgndvqilf  
>tr|Q8NXD2|Q8NXD2\_STAAW  
mqnkskspfkiarsfihnkiamlsiiifllitiisiiapliapfpvnqddllnikgemaqnilgtdsggrdnfsrllly  
agrislsigitstigmll  
gitvgvisgyfggvdttlmritefvmfpflifaivlnaalgdiknpygsaiilvlviivlswggiarlvrgkvleqk  
eneyflaaksigtptykii  
lkhllpnilsvvivaqtllfagmivvesglsflgfgiskaipswgnmsdaqegdvisgkpwimppaimittlilsinf  
vgegldafnprgr  
>tr|Q8NXD4|Q8NXD4\_STAAW  
menilavnqikkykiktglqktqyvkdvsfsikkgtfglvgesgckstlgkviirledatsgsiivngeditr  
lqgkklrksrqyqmi fqd  
pyaslnpmqmvgdii sepi lnykklpkeekkevlyllkcvgl sedayykyahfsggqrqrvgiaralalrpslivade  
pvsaldivsvqsqvl nllkd  
lqeqfnlsylfiahdlsvvkhisdvigmylghiveiasdeiyenpkhpytkalissipqidkhnnriilkgeelpsp  
nppggcphtrcpiakdkc  
kenipqlkdigdehqvacyvkvvgdln  
>tr|Q8NXD7|Q8NXD7\_STAAW  
mtrkfrtlililiatia lsgcanddgiysdkgqvfrkilssdltsldtslitdeissevtaqtfeglytlgkgdkpvlv  
akafpekskggkllkvklr  
sdakwsngdkvtaqdfvyawrktvdpktgsefayimgdiknasdistgkpkveqlgikalddetlqidlekpvpyinqll  
alntfapqnekvakkygkn  
ygtaadravynqpfkvddwkqedktllsknqyywdkknvklkvnykvikdlqagaslydtesvddavitadqvnkykdn  
kglnfvlttgffvkmnek  
qypdfknknrlraiaqidkkyvdsvkngsipsdtltakgiakapngkdyasttenspikynpkearahwdkakke lkg  
nevtfsmntedtpdakisa  
eyiksveknlpqvtlikqlpfpkqrvslelsnnfeaslsgwsadydpmayletmttgsaqnntdwnkeydqllkvar  
tklalqpneryenlkkaee

Tsompanidou\_et\_al\_Supplemental\_FASTA\_File

mflgdapvapiyqkgvahlnpqvkgliyhkfgpnnslkhvyidksidketgkklk  
>tr|Q8NXD8|Q8NXD8\_STAAW  
mkndevllsiknlkqyfnagknevraienisfdiykgetlglvgesgcksttgksiiklnditsgeilyegididqkir  
krkdllkfnkqimifgdp  
yaslnprlkvmdivaegidihhlatdkrdkrkrvyd1letvglskehanryphfsggqrqrigiaralavepefiade  
pialdvsiaqavvnllk  
lqrrgitflfiahlsmvkiysdriavmhfgkiveigpaeeiyqnp1hdytksllsaipqdpesersrkrfsyihdea  
nnh1rq1heirpqhfvfst  
eeeeaq1renklvtqn  
>tr|Q8NXE5|Q8NXE5\_STAAW  
mklilgiylyrifrayfypfllyfliqgysiiqleilmasygiaaf1fslykeckfkcicnlkdsnlvseifkii  
glllllyqnylilvvaqi  
llglssystemagvdtiikrnitnekyvqnksnsymflsllisgiigsylyginikwpiimtgifsiliiiiirct1venr  
elnligetkqkikklflee  
kfwilhsflralilgffigfipiniyndlklennlqfivlctcyvmgfvssrylkylnykvfseiclvifliiytyqs  
fiavtismi1fgissgltr  
pqtinklssssnlrvm1nyaetlyfifniaflmggyltyigtqiylilfisllifiyliiifyftrreqhenkn  
>tr|Q8NXG2|Q8NXG2\_STAAW  
mkn1vl1gggygnmrimsrlttslpqdyvt1vdrrmpfhg1kpefyalaagtkssdkdvrnkfnpnpqvtvygeindid  
ldaqivsvgnskiydeli  
idlgcedkyhnpqaeeythsiqtlskardtfsiselpegakvgivgag1sgielaselresrsdleiylydrgrprilr  
nfpk1skyvakwfaknnv  
tvvpnsnikvepgkiyncdepkdid1vwtagiqpvevvrnlpidinsngrvivnqyhqvptyrnvvyvvgdcad1lphap  
saqlaevqgdqiadv1kkq  
wlneplpdkmpelkvqg1vgs1gdkggfayimdrvtvgrlasilksv1wlykyhng  
>tr|Q8NXG4|Q8NXG4\_STAAW  
mvki1vsvrkipdkfyqqlsklgdvvmwqks1vpmpkdqfvta1rdadacfit1seqidaeilaaqspnlkvianmavgydn  
idvesatannvvvntnprv  
1tettaelgft1mlaiarriveaekyveadawqswgpy11sgkdvfnstigiymgdigkafarr1qgfntnilyhnqsr  
hkdaeadfnatyvsfet11  
aesdfiictapl1tkethhkfnaeafeqmknadai1finigrqivdeta1idalnkeilacgl1dvlane1pidhthplmgrd  
nvl1tphigsasvtrdnm  
iq1cinnieavmtngvphtpvn  
>tr|Q8NXG6|Q8NXG6\_STAAW  
mr1tiyhtndihsh1heyerikaymaehrpr1nhpslyvd1gdhvd1sapiteat1gkknval1neakcdvatignegm  
tishealnhlydeakfi1v  
csnvidesgh1pnnivssyikdidgk11fvaatapftpfyralnwivtdplesikeeielqggkfdv1iv1shcgiffd  
et1cqelpeidvifgshth  
hyfehgeinngv1maaagkygny1gevn1tfeahkvvhtaki1p1kt1pevetsfeeegkt1msnsviqhpv1krsmn  
hiteaay11laqsveytha  
qca1inag11vkdivkdevteydhqm1lphpinmvr11fgvklkei1aksnkqeymyehaag11gfrgnifggyilynl1g  
yihstgryy1ngeeieddk  
eyv1gtidmytfgryfpt1ke1pkey1mpefl1rdifkell1ey  
>tr|Q8NXH1|Q8NXH1\_STAAW  
mttdilniseeq1vdyskahnepswmte1rkkal1tet1empkpdkt1rkwdf1skqhdvkgdvyqs1sq1pesvre  
iidvdhsknl1viqhnntia  
ytqvddnaskdg1veglada1mnsd1lvqkyf1mkd1avtvdehritalhta1vnggv1fvyvpknvvvehpvqyv1lhde  
nasfynhvi1vteesaevt  
yveny1nsasgeg1n1i1seviagansnitygsvdymdkgftghii1rrgiteadasinwal1gmnegsqi1dnttn1fg  
drstss1ksv1igtgeqki  
n1tski1vqyketdgy11khgvmkehassv1ngigiyikhggtksianqesrv1ml1sehargdanp11lideddvqaghaa  
svgrvdpdq1ly1lmsrgis  
qraer1vi1hgfl1dpvvrel1piedvkrq1revierkvs1k  
>tr|Q8NXH8|Q8NXH8\_STAAW  
mqai1ksnes1k1svinsdtpv1vkfeagwcpdcramd1widpiveqykdyqwytvnrde1edvvvenvmgips11vfkng  
dkia1h1hsanakspeqves  
flaetfk  
>tr|Q8NXH9|Q8NXH9\_STAAW  
melqqaianrrsvkkfkrdmhidda1lyqai1ekaadapnhgmrepwr1vvhv1pkdr1gdmsk1diskf1afpne1dkqqchyd  
avtk1ggm11111ktdprq  
rqndeny1fagayaqn1m111yeagigt1cwkspl1yidpkvrkt1gikkdev1sgfly1td1leedmpk1aprkn1rnlitly  
>tr|Q8NXI2|Q8NXI2\_STAAW  
mvtai1ihgf1laig1il1plgaqnv1finqganqpyryv1paiiaag1sds11111avvgvs1iims1plv1qaiiyivg1  
if1mymawti1whdkp1stdg  
eaqim1spmkqvs1fal1svs11lnpha1ldt1g1vig1ssa1lysgsn1kiafti1acis1vsw1wff11ailgemvgsidktgk11t  
iink1lss11111ivalm1lq  
k1iq11f  
>tr|Q8NXI7|Q8NXI7\_STAAW

Tsompanidou\_et\_al\_Supplemental\_FASTA\_File

mkrkvlvltmgvicatqlwhsnhanalvsesvetnfvvksdndknllqthteitteekfsvveksqIntlkslsndnyie  
ydLhtnqtgikkgwlygys  
eidsshftdrdrkvrirrdhvkeaslin dykytqkyedlakatakvstlsqshqnylnkqidkvnnkiektekr  
>tr|Q8NXI9|Q8NXI9\_STAAW  
mlgktfyqnyrdveslyskldlimgykdeerankkavnkrmlenkkedletideffs didktrpnnipvledekqek  
nhkniaqlksdteaaksde  
skrskrskrsln tqnhkpasqevseqqaeydkraeerkarfl dnqkikktpvvsleydfekhgridnendkklvvsapt  
kkptspttytettqvpmp  
tverqtqqqiinyapqlaglngeshdfttthqspttsnthnvvfeetsalpgrksqslvgisqidsshltrekrv  
ikrehvreaqklvdnykdt  
hsykdrlnaqqkvntlseghqkrfnkqinkvyngk  
>tr|Q8NXJ0|Q8NXJ0\_STAAW  
mknkllvslgalcvsqiwesnrasavvsgeknpyvseslkltnknksrtveeykkslddliwsfpnl dnerfdnpeyk  
eamkkyqgrfmaedealkk  
ffseekkikngntdnldylglsheryesvntllkkqseeflkeiedikkdnpe lkd fne  
>tr|Q8NXJ2|Q8NXJ2\_STAAW  
mqirqihghdfaqvdq lirtafensehgygnese lvdqirlsdytdnnlelvavlnqevvghglsevyldneaqreigl  
vlapvsdihhqnkgigkr  
liqalereailkgynfivlgwptyyanlgyqrasmydiypydgipdeaflike lkvns lagtgtinytsafe ki  
>tr|Q8NXJ3|Q8NXJ3\_STAAW  
miniisaigsigtfinalfyfvsvsqlyqmki sflpalgfnqillereedqlnimsateehhkhdyiklynlgggaak  
kiaievlngndkviqkkyv  
nilpskegympinknvyee lertiengyeadlnvrmttyyhnsr kqqevilkqgidcfntynnkeiydlqfi  
>tr|Q8NXJ4|Q8NXJ4\_STAAW  
mkkvmgillastlilgacghhqsakkestshkkkendneelneelkefkskknmdikikgdtivsdkfeakikepfiin  
ekdekkkyiafkmeitakk  
ddkdlnpssishdyini tqddkntvnlrdgyllsdkkykdwtehnqdqikkgktaqamfiyelrgdgninlnvhkysed  
ktvdsksfkfsklktedfs  
hraetreevekkekefeeykkeqerekekekqkdddhs ldev  
>tr|Q8NXJ5|Q8NXJ5\_STAAW  
mkkrl1fvivj1lfi fssnhtvlngdvpggnl rnyfkyeyvnlknvkdknspeshrleesykndtlyae fdneyit sd  
lkgknvdvfgisykygsns  
rtiyggvtkaennkldspriipinliingkhqtvttksvstdkkmvtaqeidvklrky lqdefniyghndtgkkeygts  
skfysgfdkgsvvfhindg  
snfsydlfytgyglpesflkiykdnktvdstqfhl dveiskr  
>tr|Q8NXJ6|Q8NXJ6\_STAAW  
mksr fiscvilifalilvlftpnvlaesqpdptdelhksseftgtmgnmkylyddhyvsatkvsvdkflahdliyni  
sdklknydkvkte llned  
lakkykdevvdvygsnyyvncyfsskdnvgkvtggktcmgygikthehghfdngnlqnv lirvyenkrntisfevqtdkk  
svtageldikarnflinkk  
nlyefnsspyetgyikfiennngntfwydmpagdkfdqsky lmyndnktvdskrvkievhl ttkng  
>tr|Q8NXJ7|Q8NXJ7\_STAAW  
mkklltktlialaslvtvgsghssnynginnvkaaettdrdlwnvrda lkeaniidktanetvgvtyslnngge  
ssitgtadlde lsnfnkp  
intdsvkridlsrinpngrfdandawkk ltdklkekqivkngdtvtihskdkndppisakvgddyndhkqlmlfkdid  
kitin  
>tr|Q8NXJ8|Q8NXJ8\_STAAW  
mfyikqlfvflssylpffilfvsninykckeklgtglefksmislliiiiitilisflylickkkkaikfsdds kfket  
eynflnyfatflip lstfk  
pgeldsvilnismllflifymqtqsyfy nifsmfnsifkdqsgnfvitdydlqelqskiienyefkyininkkvhii  
lkkhqkn  
>tr|Q8NXJ9|Q8NXJ9\_STAAW  
msysnefnlikkvneys lddveksqlyfvkki ftkdkdnkkrs wlamnvatniirkihkivdtavqds viyksnge  
dvkksvkkytptsnnnee  
ilvtdyny lndqpeefikkllhkesekmlteemqfftyslndnqtayfigkvekl naikngliakftedgklkgndqf  
gikdhvgvilydkniyilk  
kyifevlfdleekflketkhhinnisnkhfigldvylesiknnrnitrkiskavekfnengidysninsdnfkskidii  
nqhgedfkl nknqleiek  
dtdidsitrli tddyftil tdsfgyne  
>tr|Q8NXK0|Q8NXK0\_STAAW  
mvsdfesndkitevelmhynpkvinskikamrsqieslyhlnmhvitnendmlsvsyp ldklvlyiieekdkleyym  
ktaqdrlnl fkdiknyse  
neqqdvmryml ssgkvknegvierlkvdiykesikr qerqnkree l hriefdkhleqvkkels  
>tr|Q8NXK1|Q8NXK1\_STAAW  
mkefkeqfgyqlsnfddmdikgyanlyqkdigkdvsmieqglkqlsitetevllpeqinrkllgvlnmnev nqsntwvg  
l tkqlvssennfnigelp  
tarkevfkellvncelpqslrevititddehvesips ltyikdklatngielslngsskyfdrreghiytevsdsvvhgs  
drtl d d l l keifinecvay

Tsompanidou\_et\_al\_Supplemental\_FASTA\_File

ettllldknssgldkgnqdlslngqikevsntsdydgikqamkdipqtfrnrvsivmntehtklikeiaqmglggl  
agdlslfnvtnvvtda  
hdvfvdfghaiyakyepimynkkkaalkgiyqfalnyvfdikiipe11rivnik  
>tr|Q8NXX3|Q8NXX3\_STAAW  
mnrnrnkqijleyikndstsfeieenvfeeqgfykngaytsghnkniifwvgwneefnigadlkrdgliemqicpp  
myyldgkgklpivknkn  
ikidhwlpvtfslvn  
>tr|Q8NXX4|Q8NXX4\_STAAW  
maikkkdriigvkeleipqelklvpnwvlwraewnekqqnygkvpysingyrasttnkktwcdfesvsieyevdeqysgi  
gfvlsdgnnfvcldidnai  
dekgqinseialkmmrltycekspsgtglhcfkkgklpdrkkkrtdldielydsarfmtvtgtigqndicdnqevlnt  
lidayfkenlpvndvree  
sntnmqlsdediinimmkskqdkikdl1qgtyesyfdssseavqsllhylaftygknkqmeriflnynntdkweskr  
gnttwggleldkaiknqkt  
vytksidfnviggskdvkqlnqlgheertkmeekwieggkrgrkpttispihcayilnehltfilfddeentklamy  
qfdegiytqnttiikrvis  
ylepkhnsnkadeviyhltmvdikektnspylipvkngvfnrktkqlsftpcifttkidtsyvrqdivpeingwnid  
rwieeiacndnqvkl1lwq  
vindsmngnytrkkaiflvngnngkgtfqellsnvigysniaslknvnefderfklsvlegktavigddvpvgvyvddss  
nfksvvtgdpvlvefknkp  
lyratfkctviqstngmpkfkdkgtgtrllivpfnanfngikenfkikediyknqvleyvlykainldfetfdipda  
sekmlvfkedndpvygfk  
vnmfdqwtirkvpkyivyafykeycdengyna1ssnkfykqfehyleneywktdaqqrydneelakriynfndnrnyiepi  
esgknyksyekvklkai  
>tr|Q8NXX5|Q8NXX5\_STAAW  
mweiknlmcdlki1kekfedlkdnhghfedlylhepnhtlnkddvikegfsyherrihndqmfdl11lytekfdelit  
rfdalekassfadqsqdna  
>tr|Q8NXX6|Q8NXX6\_STAAW  
mneqkeviqdiyntleavayntsmeyihncvdgkkelienvneeh1qaiiewalqqiennfdendtemeel  
>tr|Q8NXX7|Q8NXX7\_STAAW  
mkl1nlfyit1ts11ti111aisnmyvafsvygmmtvgfnltgglene  
>tr|Q8NXX8|Q8NXX8\_STAAW  
mtklaypmllyitrkekgtqkkvaskldispqryqlkesgkai1necqilsemydmpidel1fsskikvge  
>tr|Q8NXX9|Q8NXX9\_STAAW  
miifrlkeimeeknlkisd1heqtgisrnsiss11ngktrgiqfdtlekitlalnvadvadlfknvneliiklddiskve  
tyrrskkfkekkniiivkky  
avncdliedndlkkgfipyeisie1nnppeieikiqfdysnlfnlylikfledcnfk111vnylskkiyclenkrineik  
sfysipdekvyi1ssfpqi  
firrrlrdnngifenie1nkiine1nfnsnyntysdqit1thknkk  
>tr|Q8NXL0|Q8NXL0\_STAAW  
miaikhnl1shniykdtkrtyyfrityydsntrkyitrkgfkrkdavkkcnemmedlegvgqlnr1pfdklveeyi  
dwysarrktssvkal1ktht  
nh11pyfksidvfkmttdvmkfqnkklkegysgdy1kkmhvylvs11nhamkfhelkqvaslvgnfeiesqkr1nyw  
tleqfnqfygalvtqqkl  
ffkl1fysgarkgeiraltwrdrvnfedefihinktgyhgevtapktksairdiylpthmddikdyliwykenniykddy  
v1fgtffktysestidrfw  
tta1kvlddq1pdgqtfprivihelrhshasm1vnhgasimviaqr1ghadsnevynrygh1ypstqkeivky1  
>tr|Q8NXL1|Q8NXL1\_STAAW  
miingwk1ynnshin1nfdnknsiqaisqmpafwvyfedlqkeeiidinpk1cleinkdnktik1fdk  
>tr|Q8NXL6|Q8NXL6\_STAAW  
msnqnydynknedgskkkmsttakvvsiatv1111gg1v1fayvdhsnkakermlneqkqeqkekrqkenaekerkkk  
qqeekeqne1dsqanqyq  
1pqanqyqyppqqqaptkqrpakeendkaskdeskdiddnasqdkpddnqkktddnkqpaqpkppqqptpkpnnnqq  
nnqsnqqakppapqnsqs  
ttnkqnnandk  
>tr|Q8NXM1|Q8NXM1\_STAAW  
mkk11tvtvssv1af1a1nnaahaqqhgtqvktpvqhnvsnvqaqtqspttytvvagdslykia1ehh11tnqlysynp  
gvtp1ifpgdvis1vpqnk  
vkqtakvtpvrkasqakkvvkqvqqaskkvvkqapqavaktvnavaykpaqvqksvptvpvahnyksvanrgnlya  
ygnctyyafdrraq1grsi  
gslwgnannwnyaakvagfvkvtpevgai1qtaagpyghvgvesvnpngt1tvsemnyagf1vksrt11npgkynyi  
h  
>tr|Q8NXM3|Q8NXM3\_STAAW  
mlyavtgagktemmfqgi1qyariqgdniavsprvdvveiskrikdaf1nedidilhqsrqqfeghfvvctvhqlyrf  
kqhfdti1fidevdaf1sm  
dknlqqa1kssskvehatiymtatppkq11seipheniik1parfhkks1vpkyryfk1nnnkiqkmlryilqddinnq  
rytlvffnietmiktfsv  
ykqk1tk1tyvhsedvfrfekveqlrnghfdviftt11ergftman1dvvidahqytqea1iqiagrvgkrlecptgk



vlfhhegvsmnmiqakkei  
qrmnk1alkrgwide  
>tr|Q8NXN4|Q8NXN4\_STAAW  
mikfknvtkrygkhvavdnisfnegeffvligpsgcgktttlkminrlihlseguyfkdkpisdypvyemrwdigyv  
lqqialfphmtikeniaqv  
pqmkkwkekdidkrvdellemvglepekyknrkpdelsggqrqrvgviraladppvilmdpfsaldpisreklqddli  
elqtikiktiifvthdige  
amklgdki11neghiejdtpegfknnpqsefvkqfmgshledvapcveenaiirdldimkpidevtsmsaypivydq  
pievlyqllseservimq  
edsvggyvidrkdfkylsqkkevaqhd  
>tr|Q8NXN5|Q8NXN5\_STAAW  
meaykiehlnksyadktifdnldl1sisegekiglvgingtgkstllkviggiddftanvmhpnqyriryssqkdlned  
mtvfdav1ssdttl1riik  
gyeqavqayaddqsdklfrmmadaqdamdqhdawdynaeiktisklgihdttkyikelsggqqkrvvlaktlieqpdll  
l1deptnhldfes1swlin  
yvkqyphvt1fvthdryflnevstrie1nrgklasypgnyesyiemraerevs1kqqqqqralykeelawmragakar  
ttkqqarinrfd1enevn  
qqykddkge1n1aysrlgkqvfeled1skaindkvlfeh1teiiqgerigvvgpngagkttlln1lsgedqqfegklkt  
gqtvkvayfkqtdet1drd  
irmidy1reeseiakekdtsvsitq1lerfl1fpsathgkkyk1sggeqkrly1l1r1lvhqpnv1l1deptnd1dtet1  
tiledyihftggvtivtsh  
dryflnkvaqsywfi1hdggmekiigtfedyesyks1dknkst1kqqkssttvrrkng1sykekleyeq1mkrieqaev  
rmeeidv1mieasadygki  
kelneekeq1eiqyd1ditrwsleeikeqq  
>tr|Q8NXN8|Q8NXN8\_STAAW  
mq1fetmkienghiprltyhtnrkcsser1nfkfdewarne1ndvttkyhsgqyr1kiv1naesefetivsp1pekss  
ftakqvlpkvvnptfinn  
ktterkh1ahnhetd1l1ltsedgkv1efdignivieedgkwytpsykddf1kgcmrdy1idsdk1vekdfnkneliyky  
hneir1flins1revadv  
h1c1  
>tr|Q8NXN9|Q8NXN9\_STAAW  
mrieynyryylteneykqyhiq1kgfikkyvatkladvgevi1hfaaqqrqgryvs1ylsyeaakyfnhvmcths1akdd  
iyavaysfekaesinstye  
hqtsyvskh1hfsfvessevmtnikrvqqaivegetyqvnytar1tdniyypistlyer1tqfsngnyta1l1qtdeiqva  
sispel1ffqkgqfnnvndv  
iiskp1mkg1tprgk1teaedqyykt1qtsskdraenvmivd1l1r1ndigrisqsgsikvykl1ffi1eayktvfqmtsmvsgt  
1ktntd1l1qil1ts1fpcgs  
itgapk1ntmkyik1qlessprgiycgaig1l1l1pteddkmi1fnip1rtieykygqaiyvgagitidskpkdevnefyakt  
kilem1  
>tr|Q8NXP3|Q8NXP3\_STAAW  
mrvtel1tkdti1amd1mandkngvide1vnq1dkagk1sdvasfkeaih1nresqsttgigegiaiphakvaavkspai1af  
gkskagvdyqsl1dmqpah1  
ffmi1aapeggaqth1dalak1sgil1mdenvrek1l1hasspeev1ai1deaddevtkeeeaeaeaqqvataeqsskqsneq  
yvlavtacctgti1ahtymar  
dal1kkqadkmgik1kvetngssgiknh1teqdienatgi1vaadvhv1etdrfdgknvvevpvadgikrpeelinkaldts  
rkpfvardgqrkgnsndsq  
ek1spgkafykhl1mngvsn1lplvisggl1mai1vfl1fgvdsf1kpsseynafaeql1wnigsksafaliipilsgfiarsi  
adkpgfaag1lvggm1aisg  
gsf1ggi1ag1lagyl1tggvkamtrk1pqa1leg1kpt1liyp1l1tv1tatg1l1miyvfnppasw1nh1l1ldg1l1n1lsgsni  
v1lg1l1v1gamma1dm1ggp1f  
nkaayvfatgal1iegnaapitaam1ggm1pp1aiatam1l1frk1ft1keqrgsi1pnyvmgmsfitegaipfaaadpl1rvi  
psmm1gsg1gga1ial1gl1s  
ritaphg1i1v1vgtdgah1l1qt1lia1l1vg1l1vsal1iyg1lik1pkteteieasksmde  
>tr|Q8NXP7|Q8NXP7\_STAAW  
mtvkn1fl1gfvav1l1tvcl1ig1l1latneda1akvhktint1nainvstedtykkmdil1nihtakasevnenmkkqnhf  
khrvnanksnsfneqecqv  
iadryadkhindnyglerisktnhgynyvysndnstskqhsisnqgiitk  
>tr|Q8NXP8|Q8NXP8\_STAAW  
maiav1l1nr1mfr1mehnp1l1feyiyqqkedi1dacyfi1peedmssasdl1kaqfyrgt1l1qrfyqsl1haek1l1tpyvmsyddi1s  
fckenni1sevt1agdim1sy  
h1eeydi1h1qrs1l1neari1avt1l1rgnhyfkasktmnqqgepykv1fts1fykkwrpyl1rhrdvyhyd1ksfedfviaspdd  
1vfddi1afgssq1ieq1nk1w  
qh1fd1dqdi1qnyesgrdy1l1pevl1tsq1l1svalayg1l1ldi1ei1fnd1l1arydedeanyea1fire1lifrefyyv1lmtqypetsy  
qafkpkyrq1ikwsqneadf  
nawcegqtg1fp1idaa1imel1tqtgfmhnr1mrmvvsq1fl1tkd1l1fidwtwgek1f1rkh1lidydaasni1hgqwsastgtdav  
pyfr1mfn1pi1rqserfdaka  
lyiktyl1pi1fnq1idaky1l1hd1tqrnesn1feqqie1lgshyprqivdhqekrtqvl1atfka1ld  
>tr|Q8NXP9|Q8NXP9\_STAAW

Tsompanidou\_et\_al\_Supplemental\_FASTA\_File

mseekhvveheqqkkektkkqkqkpfwivmsfiilivvlllpapsslpmakavlaifafavimwvteavsyvsatliig  
mlllgfspvqnlgeklg  
npsksailagsdlgtghalslafsgyatsavalvaaalflaaamqetnlhkrallvlsivgdktrnivigaiivsiv  
laffvpsataragavvpi  
lgmiaafkvsksklasllitsvqvasiwnigiktaaaqnivainfinhqlgfdvswgewflyaapwsivmsvallyfim  
ikvmppeintiieggkdlk  
eelhklgvpvprewrlivismlllwfstekvlhpidsasitiialgvmlmpkigvmtwkhvenkipwgtiivfgvgisl  
gnvllktgaaqwlsdqtfq  
vlgkhlpiiatialitlfnilihlgfasatslssalipvfisltstlhlgdqsigfvliqqfvisfgflpvsapqnm  
aygtgtftvkdfkagip  
tivgyilvivfsmtymkwlgll  
>tr|Q8NXQ0|Q8NXQ0\_STAAW  
meqiminhyvhfsrlvqgfwranewkmtakelnyfinelvergittmdhadiygdyqceslfgnaldispelrnkiqivt  
kcgiiilpskqdfdtnglry  
dlsskhivksveqslinlnvdyldsllhrssplmdpeqvadaltklvkqgklsfgvsnfnhsqyqllnqyimkerlhi  
sinqlelspyhvdsldqgt  
mdsmynhvqimawspfgagkifdkedikaqrimkvvqsiadkygvsdtavmiawlkiphrimpilgtsqlkridqae  
glqlnlddqswwfdiytai  
gq dip  
>tr|Q8NXQ2|Q8NXQ2\_STAAW  
mktrlkfvdkdlllavvgvcgslvalamfflsgymvtqsalgaplyalmilvvtvklfgflraitryverlishkatf  
tmldrivrqqfkgklnvvp  
nyyrklssdlisrmisrvealqniylrvyppvvgigtalvtvivlafisighallimvsmfltlvvpwlskkartl  
kkhaaneqarflnhfydyk  
agmdelrrfnqinhyrdnlmaklnhfdklqlkeqrfltiydfilniamlsifgslvlgliqinagqlniymtsivlmv  
lflfeqavpmtnvayykad  
tdqalhdinevisvpstngknlndkydatniyevkdasfkywnqptyvlsdinfnvrgekiaivgpsgsgkstllqim  
aglyqldsgsirfenmdmf  
eidkdkfeslnvllqsqqldfgtirqnlftdekdeavqaifkqldlehlalerqidldghtlsgeiqrlaiarmllkd  
tastwildeptaldkqns  
lkvmdlieahaetlivathdltllsrfetiivmingkiveknyqqlanqgalwnmiqyna  
>tr|Q8NXQ3|Q8NXQ3\_STAAW  
mkklttilfqyki fpv lmf lvstg lgil vitqnil iadflaki irhqf qglwiv lfill gvl lllratv qflnqw l gdtla  
fkvkhmlrqrviyknnghp  
igeqmtitlenidglapfyksylpqvfksmmvpliiiiamffihfntalimlitapfiplyiifglktrdeskdqmyl  
nqfsqrflniakglvtlkl  
fnrteqtekhlyddstqftrltmrilrsaf lsglml efism l g l g l v a l e a t l s l v v f h n i d f k t a a i a i l a p e f y n a i  
kdlggafhtgkqsegasdv  
vfe fleqpnnefllkyeenqkpfqltdisfrydnsdrvlvndlnleiyngdqialvgpsgagkstlthliagvyqpt  
igtistnqrdlnigilsgq  
pyifasakenitmfkdienntieevldevglldkvsftkgintiieggemlsggqmrriecrllvmkpdlvifdep  
atglidqtehmiquvlfqh  
fkdttmiviahrdntirhlqrrlyienrliaddrnisvnitengddl  
>tr|Q8NXQ9|Q8NXQ9\_STAAW  
mfaallqiknyklfvanmflgmgiavtvpvylvlfatkd l g m t t n q y g l l l a s a a i s q f t v n s i a r f s d t h h f n r k i i i  
ilallmgalgfsiyffvdt  
iwlfillyai f q g l f a p a m p l y a s a r e s i n v s s k d r a q f a n t v l r s m f s l g l f g p f i g a q l i g l k y a g l f g g t i s i  
ilftvlvqvfkykdlnikh  
pistqqhvekiapnmfkdktl l l p f i a f i l l h i g q w m y t m n m p l f v t d y l k e n e q h v g y l a s l c a g l e v p f m i i l g v l s s  
rlqtrtlliygai f g g l f y  
fsigvfknyfymmlagqvflaiflavllgigisyfqd il p d f p g y a s t l f s n a m v i g q l g g n l l g g a m s h w v g l e n v f f v s  
aasiml g m l i f f t k n q k i  
tkedvist  
>tr|Q8NXR3|Q8NXR3\_STAAW  
mkklafaitatsgaaaf l t h h d a q a s t q h t v q s g e l s w s i a q y n t s v e s i k q n n q l d n n l v f p g q v i s v g g s d a q n s s n  
tspqagsasshtvqagesl  
niasrygvsvdqlmaannlrgylimpnqt l q i p n g g s g g t t p t a t t g s n g n a s s f n h q n l y t a g q c t w y v f d r r a q a g s  
pistywsdakywagnaand  
gyqvnntpsvgsimqstppgyghvayvervngdgsilise mnytygpy n m n y r t i p a s e v s s y a f i h  
>tr|Q8NXR4|Q8NXR4\_STAAW  
mtfneiifknfrqnlshyaiylfslitsvlyfsfvalkyahklmtesypiikegsqvgysylffiiiafllyanvlfi  
krrsyelalyqtlglskfn  
iiyilmleqllifiitailgiiigifgsklllmivftllgikekvp i i f s l r a v f e t l m l i g v a y f l t s a q n f i l v f k q s  
isqmsknnqvketnhnkit  
feevl g i l g i v l i t t g y y l s l n i v q y y d s i g i l m f i l l s t v i g a y l f f k s s v s l v f k m v k k f r k g v i s v n d v m f s s i m  
yrikknafslvmiaisai  
tvsvlcfaaisraslsseikytaphdvtikdqkanqlaselnnkiphfnykevihtklykdnlfdvkakepynvtit  
sdkiypntdlkrqgadlfv

Tsompanidou\_et\_al\_Supplemental\_FASTA\_File

aegsikdlvkhkhhgkavigtgkhhvniklrkdinkiyfmdvdlggptfvlndkdyqeirkytkakhivsqfgfdlkhk  
kdaalalekvknkvdksikt  
rseaiasslgtgillfvtsflgitfliavcciiyikqidetedelenysilrklgftqkdmarglkkfkmfnfglplvi  
alshayftslaymklmgtt  
nqipvfivmglyicmyavfavtaynhskrtirhsi  
>tr|Q8NXR8|Q8NXR8\_STAAW  
missnnkrrqwialavfsillflgctwsitsgeynipverffktligqgdaidelilldfrlprmmtilagaalsisga  
ivqsvtknpiaeggilgin  
agggfaialfiaigkinadnfvvylplisilggiataliifisfnknegvtpasmvligvglqatalyggstitimskfdd  
kqsdfiaawfagniwgded  
pfviaflpwvliiipyllfksntlni ihtgdniarglgvrlsrerlilffiaavlssaavavagsisfiglmphiakri  
vgprhqlflpiailvgac  
lviadtigkivlpggvpagivvaiigapyflylmyktnv  
>tr|Q8NXR9|Q8NXR9\_STAAW  
mtnrenstplkflayiiiglsmillitlfistligdakiqastieaifnynpsnqqniineiriprniaavivgmalav  
sgaiiqgvtrns ladpali  
glnsgasfalalyavlntsfliimfagflgailggavlmigrsrrdgfnpmriilagaavsamltalsqgialafrl  
nqvtftwtaggvsgttwsh  
lkwaipligialfiiltiskqltlnlgeslakglgqnvtmirgicliiamilagiavaiagqvafvglmphiarflig  
tdyakilpltalggilvl  
vadviarylgeapvgaiisfigvpyflylvkkggrsi  
>tr|Q8NXS0|Q8NXS0\_STAAW  
mktvkdliilvvlgsfifaagvnafiiisgnlgeggvtglaiilyafhispaifnnavliaigykflskrsmlytip  
vtilisiflslteswqvet  
gnsivnaifggvsvlgigvii laggttagttilariatykdvstpyallffdmivvaisltvipldkvlvtvislyig  
tkvmeyvieglntkkamti  
istnplakaidedqigrgltilnghgytreekdvlyvvisktqvsakrlikqidkdaflvihdvrdivyngflade  
>tr|Q8NXS2|Q8NXS2\_STAAW  
mkrenplfflkklswpvgliavaaitisslgsllvplftgrivdkfsvshinwnliaifggifvinalsglgllyll  
skigekiiyairsvlweh  
iqikmpffdknesgllmsrltddtkvinefisqklpnllpsivtlvgslimlildwkmtlltfitipifvlimiplgri  
mqkiststqseianfsgll  
grvltemrlvkisnterleldnahknleiylglkqakiaavvqipsgivmlltiaailgfgaleiatgaitagtlam  
ifyviqlsmpinlslvt  
dykkavgassrieyemqepieptealedsenliddgvlsefhvdfkydvkilddvsfqipqqvsvafvgpsgsgksti  
fnliermeyiesgdikygl  
esvyniplskwrrkigyvmqsnsmmsgtirdnilyginrhvsdeelinyaklanchdfimqfdegydtlvgerglklsgg  
qrqridiarsfvknpdill  
ldeatanldseselkigealetlmegrttiviahrilstikkagqii fldkgqvtgkgtshselmashakyknfvvsqkltd  
>tr|Q8NXT3|Q8NXT3\_STAAW  
mlipiqtsvnsrlslytkspfytsfisfsvgticliilniinpevftihfynnqsfnytwvvgllgvsfltgntlllp  
klgatltviatvaggiimg  
viidtfglfgatihdfnlkaigvlllivgivimnqfnknlltdqkylfwlllgfifgffppiqtinsalashths  
pafaslvstfigsittllil  
taifnrslklktshlkfgklkpiyftggilgmavtaniilmphmgaaltligmfqilmgilidhfglfgspkiamts  
rktigllciltgiillrlf  
>tr|Q8NXT4|Q8NXT4\_STAAW  
mdlfrtkdgtshystlgegypvlihtvldnysvfnklaaqlaksfqvvlidlrhgygskprhieikdfsddiveilk  
ylyieevafchemggiig  
adivrypftsslmvnpstsiegeipeerlfrkyahii rnwdekqdkflnkrkyrprkmnrlkhvdtneistkee  
iqavkevfknadisqytrn  
vvvptkiiagefgerttrleakevadliqnadfevyqessafpveeqerfvedtasfinkhhdekhv  
>tr|Q8NXT5|Q8NXT5\_STAAW  
mtfnkvllswivilittsiylfwqlgdindvfnqsilinrvlprllealltgmiltvaglifqtvlnnaladsftlgla  
sgatfgsglalflglttlw  
ipvftsitfslitliivlitsvlsqgypvriilsglmigalfnsllyflillkprklntianylfggfgdaeynsvisi  
aitfiialfgifiiinqlk  
llqlgelksqslglvqlityialciasmitainvayvgiigfigmvipqlirkwqwkqslgrqlalniviggqimvmad  
figshilspvqipasiia  
ligipvlfymlisqskrlh  
>tr|Q8NXT6|Q8NXT6\_STAAW  
mkksliafilifmlvlsgcgmkdndkqgsndngsskspsyhrivslmpsniteilyelglgkyivgvstvdvdkvkegk  
qfdalnlnkeellkekpd  
ilaheskatankvllslekqgikvvyvkdasidetynfkgqiklthhdkaeqlveetkdnidkvidsipahhkksk  
vfievsskpeiytagkhtf  
fndmlekleaqnvydingwvntkesiiknkdilisteaktrsdymdiikkrqgfnkinavkntrievngdevsrpg  
prideglkelrdairyk  
>tr|Q8NXT9|Q8NXT9\_STAAW

Tsompanidou\_et\_al\_Supplemental\_FASTA\_File

mdkkvsiqtkqv1kqhnekekfetttegtwqqrqsnfiryveqiedatvntikvddsvklirkgdinmnlhfvegqtt  
ttfydisagrip1dvktlr  
ihfvsgdggk1kihyelyqdnemgisyqeyinykeige  
>tr|Q8NXU7|Q8NXU7\_STAAW  
mid1vstwl1flpminw1ipkkyvkiskkefdd1nivkpvknkafwpvagstilfgvtfrkyipslniqleknmvivic  
caiflgvli1fl1nrklr  
leiynnssskgkii1fps1knfcftifyyflfggl1simal1sm11t1npqniigfigwlvmtagff11nmssiidkkiyv1  
sktntvek  
>tr|Q8NXU8|Q8NXU8\_STAAW  
mlceteninknpkyriikydeylmid1vstwla1ffpminw1ipkkyvkisekdfet1nivktakinsfwpvagstvl1f  
gvmlrrysh1fivkyeysi  
vilicci11g1ffly1nqk1klqiynenknksnkii1fpt1ks1clsivlyiylgggsfftiym11tievqni11fi  
t1fvi1ff11nmcslyd  
nkvhv1fksngiekf  
>tr|Q8NXV0|Q8NXV0\_STAAW  
mlcesrqiynkpyrvirynneyfmd1vstwityffpminw1ipkkyakisenefer1nivepvknnvfwpvagssvl1f  
gi1rkygnffnvqfekq1  
aitvffim1igml1fyfyl1nkk1t1ki1fntnvknrvv1iptfkqgl1ivfayfflgsasift1tillttesqni11fi  
twviismff11vnm1sign  
knvhv1lrine  
>tr|Q8NXV1|Q8NXV1\_STAAW  
met11ceskvinknpkyriikydeylmid1asnwi1ffpfinw1ipktyvkitkndyek1nivkpvknksigwtifag  
iv11gg1vrrnty1fdq1  
eelivwsscf1g1lei1ffycyl1nkk1t1niy1nesknel1kl1r1psfknictifyy1ftg1fmsy1gafy11v1fenvqnl  
ilyvsw1f1m1f1m1m1h  
siidkkvhi1f1ksnk  
>tr|Q8NXV2|Q8NXV2\_STAAW  
mlceskiinknpqyriikydeylmid1i1stwi1ffpfinw1ipkryvkisreefen1nivkpkknvfwpvagist1f  
av1rkyth11dtq1drk1  
viaicct1fig1l1fyvr1lik1ss1niy1ntknkrski1li1pt1knf1cl1t1fry1aff1lwt1v1fsy1all1smsy1qni1ivyfa  
wi1taim1gff1v1nia1i1idk  
nihv1lkn  
>tr|Q8NXV4|Q8NXV4\_STAAW  
mlceteiinknpkyrvikyddeylmvdv1stwl1vyffpfinw1ipkrcakisreeyek1ntvkpvknknfwpvvggt11l  
gatsrkyih11ni1glekrs  
vif1cfv1f1ci1i1ffv1l1nrk1kl1kvfdnkkee1qi1lvpt1knav1ilygy1lliggmsil1al1sm11t1lenqnl1t1fia  
wgm1gl1m1ff1m1nit1livnk  
tvkv1kr  
>tr|Q8NXV5|Q8NXV5\_STAAW  
mlyesniinknpriikykyndylmid1vstwl1v1ffpfinw1ipkkyvqisreefdn1nivkpvknkalwpvigsill1f  
gtmfrdk1iy1pdsh1leknc  
vii1c1sv1ll1si1lvfy1yl1nqkv1ksiy1nrr1ssngkimi1f1sfkn1cfv1l1fsy1ffc1ggl1sim1fdv1l1s1siqni1ivfia  
wv1mt1m1ff1f1m1ssi1idk  
kihvi1yl1rsyky  
>tr|Q8NXV6|Q8NXV6\_STAAW  
mlfnvkvin1knpkyrvqyndeyl1id1vstwl1vyffpfinw1ipkryak1sekelen1nvdkqnkn1fwpvtgssfl1f  
vv1l1rkyvht1fevq1dnki  
l1s1l1cf1g1fig1iaafy1yl1nkk1kl1kiyddn1dnenkvi1lvpt1fdk1gsf1v1fty1ll1ggcsil1fliw1lmt1k1pqnl1vfi  
mw1i1ti1ff1f1s1m1gs1sn  
kkvyak1kkq  
>tr|Q8NXV9|Q8NXV9\_STAAW  
mkytd1ivi1gf1geagkt1akyaastgqhvavieqspkmyggct1inigciaskt1vh1dg1legks1feasynrkn1dvna1lnn  
knyh1l1addn1dv1dfka  
qfksntevn1ldq1hddi1adsitaphi1intgatsvipnikgl1dqakhv1dstgl1lninyqpkh1vivgggy1ialefasmf  
an1l1gskvtv1l1erges1f1mpr  
edqdv1vah1td1lenkgt1lhtnvettel1ssdn1h1ttv1htnvgn1feadav1laigrk1pntd1al1entdiel1gdrgeikvn  
ah1qt1tv1phi1yaagdv1kkg  
l1qft1y1s1l1ddy1ri1ksa1lygn1qsrttdnrgsv1pftv1fidpp1srvg1ltskeaaaqhydyteh1llvsai1prhkinndprg  
l1fkv1vinnen1m1lgat1y  
gkqseelini1k1la1dqni1pytvl1rdniythptmaesfnd1fnf  
>tr|Q8NXW3|Q8NXW3\_STAAW  
mqsfafddt1fcesvgkdi1sdnvr1rtwi1hqhtv1l1gihdsr1lp1l1kdgidyl1tneigynaiv1rns1gg1gv1ldqgv1lnis1  
mfkgqtett1ideaftvmy1  
l1skm1fenen1vdi1tmei1ehsycpgkfd1sidgk1kfagi1srrvr1ggi1avqi1yl1cvegs1gseral1mmqt1fyehalkgevt  
kfkypei1epscmas1let1l  
nkt1itv1qdv1mf1ll1yaik1d1lggv1nmtpi1tqeew1qrydy1fdkmi1ernk1midqmq  
>tr|Q8NXW6|Q8NXW6\_STAAW  
mekknkqidrgd1kqn1sekfvwai1yag1scigw1gaf1lpgdw1kqsgpiaasigivigt1llmiliavsygalverfpvsg

Tsompanidou\_et\_al\_Supplemental\_FASTA\_File

gafafsflsfgrvysffss  
wfltfgyvcvvalnatafslvkfllpdvlnngklytiagwdvyiteiiaivlllvfmlvtirgasvsgslqyyfcvam  
vivvllmffgsffgnfal  
enlqplaepskgwlvsvivvsvapwayvgfdnlpqtaeefnfapnktfkliivsllaaslyvvmilytgwlstshqsl  
ngqlwltgavtqtafgyig  
lgvlaiaimmgi ftglnflmsssrllfsmgrsgimptmfsklhskyktpyvaiiflvgsliapwlgrtaltwivdmss  
tgvsiaiyfitclsaa klfs  
ynkqsntyapvyktfaiigsfvsfifla111vpgspaaltapsyiallgwliiglifviryplknmdndelsrlilnr  
senevddmieepekektk  
>tr|Q8NXW7|Q8NXW7\_STAAW  
mlnretliarieqelvqaeqaqhdhdfekhmyaihiltslyastsntphigeqqmnrrianhnqmpqsqitqpthqvtaa  
eieamggkvnthsahhnhk  
sysqpsnqqqr latdddigngesifdf  
>tr|Q8NXW8|Q8NXW8\_STAAW  
msviaiaitsflyihivtsyliknmvlqyqiylglkfdfy nrqvylikilihiym lticilkftlsegy  
>tr|Q8NXX3|Q8NXX3\_STAAW  
mnyfvgns lgvnlgtiekaiinrnlfkemgrpaqcvflswrylyrnaqnyitssdyinmydffqeatylernepfawl  
sywtdechyt lkhvenshd  
fryidqerflmyahfqdpkyri ldyvnhf dsqrrkvrdfydvr gflscsrilvdkqqt lceffynpegdtklekyfsyk  
dgkpevki ivvyankqyf  
fnnetelgaffikqlyqhgdlffsdrnyv tafi nltpesipvvavlhsthiknidaldsspfnvykamfenlsryrai  
ivsteqqkl diekri nhti  
pvvni pvgyseti dtpvqtl dqrsvklisvaryspekqlhqqi elikrlvsyvpkielhm yfgseskklneliqkygle  
nhvylrgflsnldqeysda  
ylsli tsnmegfslalleslahgvpvisydikygpnelitpdfngylitkndedal fdkvkyvidhpevqqr lskgslak  
aqqyskaslikqwdqfvr l  
i  
>tr|Q8NXX4|Q8NXX4\_STAAW  
mnyilgtileskitgvekaqinrlklfkqhgisskcvyvkwnpysy tyakqhqi endvftmydyfqai nykktkqv nwi  
qywekscrytlkfvensnd  
vriydeeqfimyahfldkgyhhlnyvnyfdhkrkvrkrel ydgrgflscsrilgegqrivlenyytpngeivi qkyfddi  
kgkntl tkvil nedqhqqf  
fdtedel vqyflhq lcknndqi il drp helgnviaglnqsipvivvlhsth ladtgngiks fyktvfnnl trykaivvst  
eqqcqdisgyienkipvin  
ipvgyanlkyqfdinqeknhii siarlvenkqikhqvevikqlv tkhpniqlniyghgnglseyrqlvedyhlsehvk  
fhgfkthinee iakaelml  
stskmegf glalles lsvgtpvisydvdygp seliqdgfngylvpqgdinqmvekv dql nntqklqqfsinsiesaqy  
nattistkwqniln  
>tr|Q8NXX8|Q8NXX8\_STAAW  
mikliatdm dgtllnaaheisqpnidaikyaqeggitvviatgrafy eaqapvadtdl tvpyiclngaevrdetfnvmst  
shlnkslvhkitnvlkdag  
iyyqvysraiytedpqrldiyidiaeragqhanverikngiqrridngtlkvvdnydai enipgelimkilafdgnle  
kidkaskilaespnaiss  
ssrgnieithsdaqgialetiaerlgiemkevmaigdn lndlsmlekvgy pvamengae evkkiakyvtdtnensgvk  
aimkl lreqqv  
>tr|Q8NXY4|Q8NXY4\_STAAW  
ml dwfglan kenktiqlrrylhqype lsfefqthdyivnqls qlscdi etpig r ngikatfkg lgtgptialravfda  
lpveelndvpyksknpgcm  
hacghdghtail ltvaelidehkhll egvvli f qygee impggsqemidagclenvdriy gthl wsgyptgtihsraga  
imaspedfsvtikgrgghg  
akphetidpivimaefilsaqkiisrtidpvkqavlsfgmiqagtt dsvipdqafckgtvrtf dsdiqnhvmdkmdkl lq  
glai andinydlnyikgy l  
pvhnekayqvi keatndlhvrfnesdlmmigedfshylkvrpgaffltg cgneskgitaphhnpkfdideks lkyavav  
flkijieleqv fktn  
>tr|Q8NXY5|Q8NXY5\_STAAW  
mshydedpsvisneqri qyqlnhhkidlitdngvf skdkvdygsdvlvqtfl kahppgskriadv gcygpi glmiak  
vsphhsit mldvnhralal  
veknkingidnai vkesdalsavedksfdfiltnppi ragketvhri feqalhr ldsngel fvviqkkqgmpsakkrmn  
elfgnvevvnkdkgyyilr  
sika  
>tr|Q8NY01|Q8NY01\_STAAW  
mlkenerfdqli kedfsii qnddvfsfst dal lghftkprtkdivldl csgngvip lll fakhpri egveiqktlvdm  
arrtfqfndvdeyit mhhm  
dlknvtkvfkpsqytlvtcnp pyfkenqqhqhqkeahkiarheimct ledcmiaarhllkeggrlnmvhraerlmdvlfe  
mrkvnj epkvvfiyskvg  
ksaqtivvegrk ggnqgle impffiyinedgnyseemkevygg  
>tr|Q8NY04|Q8NY04\_STAAW  
mdeqqqltnayhsnklshayl fegddaqtmkqva in faklilcqt dsq cetkvstynhpdfmyisttenaikkeqveqlv

Tsompanidou\_et\_al\_Supplemental\_FASTA\_File

rhmq1piestnkvyiied  
fekltvqgensilkfleepndntiaillstkpeqildtihsrclhvfyfkpidkekfinrlveqdmkspvaemistytqqi  
dnamalneeFD11alrkxv  
irwcellltnkpmaligiidllkqaknkqls1tiaavngffedi ihtkvnvedkqiysdlkndidqyaqklsfnqlilm  
fdqlteahkklngvnp1  
vfeqivikgvs  
>tr|Q8NY06|Q8NY06\_STAAW  
mkqpi1nkles1nqeeais1hvpghknmtigh1s1smtmdkteipgl1dd1hhpeevilesmkqvekhsdydayflvngt  
tsgilsviqsfsqkkgdi1  
marnvhksvlhaldisqgeghfiethqsp1tnhynkvn1sr1nndghklav1typnyygetfnveeviks1hq1n1pvl1  
deahgahfglqgfpdst1n  
yqadyvvsfht1pal1tmgsvlyihknapyretiieylsyfqtsspsylimas1esaaefyktydstvffdkraqliec  
lekkgfem1qvddp1k11i  
kyegftghdiqnwfmnahiyeladdyqvlav1plwhhddty1f1s11rkiedmilpkksvskvktq11ttegnykpr  
feyvtwcd1kkakgkvlar  
hivpyppgipii1fkgetitenmielvneyletgmivegiknnkilvede  
>tr|Q8NY09|Q8NY09\_STAAW  
mqiy1st1tel1dyk1s1nsieesfddnpetswqal1akvkh1rkspcynfeleviaknenndvvgv1lieveinsddkty  
yglaias1svhpe1rgqk1  
grglvqaveerakaeystvvvdhcfdyfek1gyqnaaehdik1esgdap1lvkylwdn1tdaphg1vkfpehfy  
>tr|Q8NY11|Q8NY11\_STAAW  
mskeidwrksvvyqiypksfndttgngigdingiiek1dyik1lgvdyiw1tpvyespmndngydisnyleinedfgtmd  
dfek1ikvahqkdl1kvm1d  
ivinh1stehewfkearkskdnpyrdyffr1sedgpptnwhskfggnawkfdsetdeyyl1h1fdvsqad1nwdnpevrq  
slyrivnhwidfgvdgfrf  
dvin1iskgefkdskigkefytdgprvheflhel1nrq1fgntdm1tv1gmssttiencikytqperqel1svfnfhh1k  
vdyvdgekwt1nak1dfhk1  
kkil1mqwrgi1ydg1gwnai1f1wcnhdqprvvs1rfgddtseemriqsakmlaialhmlqgtpyiyqgeeigmt1dphftsia  
qyrdvesinayh1l1segh  
eadv1til1gk1sr1dn1rtpmqwsddvnagftagkpwi1disenyhqvnrqal1qnkesifytyqk1liq1lrhthdiitygd  
ivprfmdhdh1fvyerhyk  
nqqlvianfsasavdl1peg1laregrvviqtgtvenntisgfgaivietna  
>tr|Q8NY12|Q8NY12\_STAAW  
mavkredvkaivs1aiggken1eaathcvtr1rl1vlkdeskvdkda1sna1lvkgqfkadhqyqivigpgt1vdevykfid  
etgaq1easkdeakqaaqk  
gnpvqr1lik1lgdi1fipi1paivtag1lmginn1l1tmkg1lfgpkaliemyppiadisni1nviastafif1paligwssm  
rvfggspilgi1vlg1ilmh  
pq1vsqydlakgni1ptwn1fg1eikq1lnyqgqvlpv1iaayvlakiekgl1nkvvhdsikml1vvgpva1llvtgflafiig  
pvall1gtgitsgvtfifq  
hagwlggaiygl1yap1vitgl1hmf1lavdfq1mgss1lggty1wpiva1sni1c1qgsaafgawfvyrkrkmvkeegla1ts  
ci1sgml1gvte1pam1fgvn1p  
1kypfiaa1stscv1gai1vgmnnv1gkv1vggvpafisi1qkefwpvylivtaiaivvpcil1tivmshfskqkakeived  
>tr|Q8NY13|Q8NY13\_STAAW  
mgefkgf1mkydkqyl1ge1sl1vdr1khkayqqrftkedasi1qgarcmdc1gtpfc1qtgqy1gretig1cpig1nyipewnd1v  
yhqdfktayer1setn1nfp  
dftgrvc1papesacv1mkinresia1kgierti1idea1fengwv1apkvpsrrr1dekvaiv1gsgpag1aaae1n1l1gyqvt  
iyeraresg1l1mygipnm  
k1dkdvrrr1k1meeag1tfingvevgv1didkat1leseydai1l1ctgaqkgrd1plegrmgd1ghfamdy1lteqtq1ln  
geidditi1takdknviig  
agdtgadcvata1rencksi1vqfnkytk1peaitftenasw1pampvf1kmdyahqeyekf1gkepraygv1qtmrydvddk  
ghirg1lytqi1leggengmv  
mkegper1fwpad1vl1sig1fegteptv1nafnik1tdrnriv1addt1nyqtnnekv1faagdar1rgqsl1vvwaikegrgvaka  
vdqylaskvcv  
>tr|Q8NY14|Q8NY14\_STAAW  
mhnek1ikg1lydyreehdacg1gfyandmknrshdi1dks1lem1lrr1dhr1ggvgadgitgdgagimteip1faffkqhvt1d  
fdipgegeyavgl1ffsker  
ilgseheav1fkkyfegeg1silgyrnvpvnkdai1akhvad1tmpviqqvfidi1rdiedvekr1flarkq1lefystqcd1el  
yfts1srkti1vykgw1rsd  
qikklytd1sdd1yqsk1gl1vhsrfstnt1f1pswkrahpnrm1mhngeintikgnvnm1rarqhk1liet1fgedqhk1vfqi  
vdedgsdsai1vdna1lef1s  
lamepekaam1lipepw1lyneandanvrafyefysyl1mepwdgptmi1sfcngdk1gal1tdrng1lrpgryt1tkdnfiv1fs  
sevgv1dvpesnvafkgq1  
npgk1ll1vdfkqk1nvienn1dkgai1age1pykawi1dnhkvdfdfeni1qyqdsqwkdet1flk1lqrqfaytkeeihkyiqel  
vegk1kdpigamgydapi1av  
1nerpes1lfnyfk1ql1faqvtnppi1dayreki1vtse1s1ylggegn1lapdetv1driq1lkrpv1neshiaaidqehfk1ty  
1stv1yegd1ledale1algre  
avn1avkqgaqi1vl1ddsg1l1vdsngfampm1lai1shvhq1llikad1lrm1stsvak1sgetrevhhvac1layganaivpyla  
qrtveq1t1tegl1qgtvvd

Tsompanidou\_et\_al\_Supplemental\_FASTA\_File

nvktytdv\segvikvmakmgi stvqsyqgaqi feaiglshdvidryftgiqsklsgisidqidaenkarqqsddnylas  
gstfqwrqqgqhafnpes  
ifllqhackendyaqfkayseavnknrtdhirhllfkactpididqvepvsdivkrfntgamsygsisaeahetlaqam  
nqlggksnsgeggedakry  
evqvdgsnkvsai kqvasgrfgvtsdylqhakeiqikvaqgakpgeggqlpgtkvypwiaktrgstpgiglisppphdi  
ysiedlaqlihdlnkankd  
adiavklvsktgvgtiasgvakafadkivisgydggtagspktsiqhagvpweiglaethqtlklnlrsrvkletdgl  
ltgkdvayacalgaeefgf  
ataplvvlgcimmrvcchkdtcpvgvatqnkdlralyrgkahvvnfmhfiagleireilaslgkrvedlvgrtdllqrs  
tlkvnskaasidvekl1cp  
fdgpntkeiqqhnlehgfdltnlyevtkpyiaegrrytsftvneqrdrvgitgseiskqygeagl pentinvytng  
agqslaayapkg1mi hhtg  
dandyvgk1sggtv1vkapfeerqnei iagnvsfygatggkafingsagerfcirnsqvdvvvegigdhgleymtgghv  
inlgdvgnfnggmsggia  
yvipdvaeafvenqldt1sftkikhqeekafikqml eehvshtnstraihvlkhfdriedvvkvipkdyqlmmqkihl  
hkslhdnedeaml aafydd  
sktidakhkpavvy  
>tr|Q8NY15|Q8NY15\_STA  
meikqlryfi evakrehiseta lelniaqsaisrqitlleqelnsvl fkkqgrnitltsegkllfnealriehldstie  
qfqsghl tknksiyigde  
sdvshml1pliqtfhlqndthvipn1ldhdtiinsvln gnidigfteltpeirkhkqlhmlplfeehyhlyapsddpitm  
athppliqfehshiyclap  
faetvkkqlrkitksdvytissqplaqyl1rqegyissqnihl peskswidikldhtelkrticaitkepytksdigi  
lltliqqlmtktstfh  
>tr|Q8NY16|Q8NY16\_STA  
mnavfilal1llflmiifggrkgfisy1tlflnfailiisivliifgvpiyvvtfffciiigacn1fvlnsynvktqaaf  
istivttil1itliylsvy  
fghlqqfstegqdetyvysm nigidmvqfmvftiilaviaavidltitisspiyelhqvnptltqyel fqsqgmrvgreil  
atsantiylaffggqlalf  
iwwffklkysfghii nskifaqefisiilggiavaisipitawitaflirkprsrkrndesin  
>tr|Q8NY17|Q8NY17\_STA  
mikvc1veetadki1lvqvrnrekyyfpggkieegesrvqall revkeeln1tltmdei eyigtivgpayppqdm1tel  
ngfral tki dwenvtinne  
itdirwidkdndali apavkvwietyggkhdk  
>tr|Q8NY18|Q8NY18\_STA  
makcsksqr1ss1lnvagfivdgyngykyhakk1vyls1glstvgtvldfyisiksprkfkavavvtlitngarlft  
sirkvkhey  
>tr|Q8NY19|Q8NY19\_STA  
mkr1igl1vival1laacgsnndkkvtigvasndtkawekvkelakkddidveikhfsdynlpnka1ndgdidmnafqhf  
afldqykkahkgtkisals  
ttv1aplgt1ysdkikdvkvdgkavvipndvsnqarak1leaaglik1kkdf1ag1agtvkaitsnpkh1kitavdaqqt  
aralsdvdia1nngvatk  
agkdpkndpif1eksnsdavykpyinivavndkd1dnktyakivelyskeaqkalqedvkdgekpvnl skdeikaiets1  
ak  
>tr|Q8NY20|Q8NY20\_STA  
mfgsd1dsaql1qa1yetlymvsial1lgavigiplgv1lvitrkqgiwvniqhvl npiinilrslpfiilliaivpf  
tklvvgtsigttaai vpl  
vyvapyiar1vens1levdegiieaakamgasplqiiryflipealgs1vlaittaiigligstamagavggggigdlal  
vygyqrfdttviiitv1  
viiqvigt1gnvlarfirrh  
>tr|Q8NY22|Q8NY22\_STA  
mnkktk1ihggh1tddygtgavt1piyqtstyl1qddigdl1rqgyeysrtanptrssvesvitalengkhgfafssgvaais  
avvm1ldkgdhi1lnsdvy  
ggyraltkv1frf1gievdfvdtthtdsivqairpttkmlfietspn1lrvt dikksaeiakehglisvvdntf1mtpyy  
qnp1dlgidiv1hsatky1  
gghsdvvag1vatsddk1aer1afisnstggilgpqdsy1lvrgikt1glrmeqinrsvie1ikmlqahpavqqvf1hpsi  
esh1nhdvhmaqadghtgv  
iafevkntesakq1likatsyyt1laes1gaves1isvpalmthasipadirakegitdglvrisvgiedted1vddlkqal  
dt1  
>tr|Q8NY23|Q8NY23\_STA  
mmkrqqsqwkss1tgfi1lasagsa1glgamwkfpymagi ygggaf1amflifti1fvglp1limeftvgkmgrtyttqiysk  
1tgkkwlni1gwn1lavf  
ilfgfysviggwivi1yigqvlwq1vifqrinh1qemnfeavisnpw1tvlgggi1fi1fatmiivm1lgvekglekaskvmmp  
1lfvfl1iiv1ks1t1dga  
legvkf1lqprvse1tadgilfal1gqsfft1slg1ttgmi1tyasyaskdmtikssaisivvmni1fvsvlag1aipalhsf  
gyepqegpg11fkvlpmvf  
gmh1gt1f1ylgl1vl1f1faaltssis1lle1nvsnftkndntkrkkvavigsilvfiisipatl1sfgilkdvrfgagtif  
dnmdf1vsnv1mplgalgt

Tsompanidou\_et\_al\_Supplemental\_FASTA\_File

tlvvgqlldkkllqqyfgkdrfrlfsqwylyikyampvviilvfivqlfs  
>tr|Q8NY25|Q8NY25\_STAAW  
mriktpspsylkgtnghailhsftgtnrdvkhlaaeIndqgfsyapnypghl11kdfmtynvddwveevkayqf1  
vnegyesiatgvsllgml  
tlklaghyp1kriavmsapkeksddglielhvyysqrmsdilndqqassaqlaaiddyegeitkfqhfiddimtnlnvi  
kmpanilfggkdapsyets  
ahfiyehlgsvdkelnglkdshhlmthgegrdi leenvirffnal t  
>tr|Q8NY32|Q8NY32\_STAAW  
mtliedmtlrmpldisttvetlnliskmnaqkenirsrvapehkhkykdienglkgeekvlieqmahhceaafkanfkga  
qgdwvksamseidsikddl  
kkins  
>tr|Q8NY42|Q8NY42\_STAAW  
mklkniakasalglittgmitttaqpvkaieqsr1svtskdtqelkkyysgtgynfnvsgyregnkmiidgpqlnv  
tllgtdkerfkddedyegl  
dvfvvregsgkhadnisiggitktnknqykdpvqvnlltsksngqntasvtseyysinkeeis1keldfklrkqlidk  
dlyktepkdskikvsmkng  
gytfe1nkk1qphrmgdtidsrnikkievn1  
>tr|Q8NY44|Q8NY44\_STAAW  
msitekqrqqaelhkk1wsiandlrgnmdasefrnyilg1ifyrflsekaeqeyadalagedityqeawadeeyred1k  
aelidqvgfyfiepdlfsa  
mireietqdfdiehlatairkvetstlgeesendfiglfsdmd1sstrlgnnvkertaliskvmvnlddlpfvhsdmeid  
mlgdayefligrfaatagk  
kagefytppqvsakilakivtdgkdklrhvdyptcgs111rvgketqvyryfgqernnttynlarmm11hdvryenfd  
irnddtlenpaf1ghtfda  
vianppysakwtadskfenderfsgyglapkskadfafi qhmvylddegtmavvlphgvlfrgaagvirryliekn  
yleaviglpanifygtsip  
tcilvfkkrqgedyvlfidasndfekgknqnhltdaqueriintykrketidkysysatlqeiadndynlnipryvdtf  
eeeapidldqvqqdlknid  
keiaeveqeinay1kelglv1kde  
>tr|Q8NY45|Q8NY45\_STAAW  
mkltaiakaa1alglittgt1ttevhshgkqkqsvnkhdkealyryytgktmemknisal khgknlrfkfrgikiqv  
llpgndkskfqrseygl  
vffvqekrdkhdifytvggviqnnktsgvvsapilniskekgedafvkgypyyikkekittkeldyklrkhliekgylyk  
tiskdgrvkis1kdgsfyn  
ldlrsklfkymgevi eskqikdievn1k  
>tr|Q8NY46|Q8NY46\_STAAW  
mkftalakatalglittgvftteskavhakveldetqrkyi1n1hqyysesfeptnisvksedyysnvl1nfkqrnk  
afkvf11gddknkykekth  
glvdfavpelidkggiysvggitkknvrsvfgfvsnp1qvkkidpkhgfsinelffiqkeevs1keldfkirkmlvek  
yrlykgasdkgriv1nmkd  
ekkyvid1sekl1sfdmfdvmdskqiknievn1n  
>tr|Q8NY47|Q8NY47\_STAAW  
mkftaiakailfv1lgttsvmitenqsvnakgkyekmnrlydtnklhqyysgpsyeltnvsgqsqgyydsnvl1fnqqnq  
kfvf11gkdenkykekth  
glvdfavpelvd1dgrifsvsgvtkknvksifelrtpn1lvkkiddkdgfsydefffiqkeevs1keldfkirk11ikk  
ykyegaadkgriv1nmkd  
enkyeid1sd1gfermadvinseqiknievn1k  
>tr|Q8NY51|Q8NY51\_STAAW  
mkittiakts1alglittgvi1tttqaanattppstkvtpqqvanattpsstkvapqqaanattpsstkvapqskpn  
attpsstkvapqqaanat  
tppssnvdtsppqspttkqvpteinpkfkd1rayytkps1efkneigilkkwttirf1m1vvpdyfiykialvgkddkky  
gegvrnvdvfv1leenny  
n1ekysvggitksnkkvdhkagvritkednkgitshdvsefkiteqis1keldfklrkqlieknlygnvsgskivik  
mknngktyfelhkk1qenr  
madvidgtnidnievn1k  
>tr|Q8NY52|Q8NY52\_STAAW  
mkmrtiakts1alglittgaitvttsvkaekiqstkvdkvptlkaerlaminitagansattqaantrqertpklekap  
ntneektsaskiekisqpk  
qeeqkt1nisatpapkqesqtttesttqtkmttppstntppmqstksdtpqsptikqaqtdmtpkyed1rayytkps  
fefekqfgf11kpwtvrf  
m1vipnrfiykialvgkdekkykdgpydnidvfv1lednkyqlkkyssvggitktnskkvnkhvelsitkkdnqgmisrdv  
seymitkeis1keldfkl  
rkqliekhnlygnmgsgt1vikmknngktyfelhkk1qehrmadvidgtnidnievn1k  
>tr|Q8NY56|Q8NY56\_STAAW  
mniistilii1fval1effyimy1letiattskktsetfni1svdk1kdkn1n11knqgvnyngligilliyglfissnpkeic  
aailvyigvaiygg1ssn  
isiffkqgt1pv1al1ism1w  
>tr|Q8NY57|Q8NY57\_STAAW



Tsompanidou\_et\_al\_Supplemental\_FASTA\_File

mekvailvdggyyrkisakvygkvtakeradelysycnrhlkethfkeeiyinklyrifyydcppidkivyhpllkknvfn  
sntdtkkwtedffkemskk  
rkvalr1ge1seysvechnkysitkklngsidlndlkekdfs1slqqkgvdmkigldias1sfkhqvdkiiliagsdf  
vpaaklartegidfvldsl  
gadirn1slhidgrrtcdekfkfylnqlfk  
>tr|Q8NY59|Q8NY59\_STAAW  
melsifyngqffvalveykmenkskfiqytfgnepddievldfihhq1mkmiddvqtivytknisrkvnpkklqrqiake  
qkkpkystqaqiaikkele  
lkkkqkrkrykekrdafqkrkreikkvkakekhkgh  
>tr|Q8NY61|Q8NY61\_STAAW  
mksvni1l1lptelknlmenkdmeniltyfmsneisdek1vsylsnlanqintieyhemvasiyhfhfnidnaydlay  
yhywqslaisqfnan1ly  
efleilgepdfnmisheniqlvankilerdpnklaikeyin  
>tr|Q8NY62|Q8NY62\_STAAW  
mgyrietrtfelegklk1ptfqr1lvsnnqkqeffst1kdgfpfsgsillyeyendnkyslidglqrystmvdmenpt  
nyiefedftlkiaelykga  
sestkaevvnyaedilkiiekyidstkenkvnelakkmvdkfpvlgetdirdeitqiqsdvityfnqldisnvkipc  
iffegeete1aevfqr1ns  
ggkkl1skyqvfaahwdryeveldkysdeilkvieryer1nndrgilienfdpkemetsrvin1selcyglgkvisde  
lqaffkestedicnelgfg  
tmlivfgiptnkmnelpykyqmknknieilfekivkiykiinnkfkeafsmvssredkyetsftr1qimsffsslw  
issysieldenkntfsikq  
tkslkknqqvilsni1iyaydivirkywsgtgdrlmdiyisqnrylklakevfrnellrweeninktsiniqtdek  
miitfiankfrsfysslnd  
nldyehifsrklyklhkgnaiipagslgnim1ldsginrrkkekflysaididkasitgtienqyvnsfypdkrtidti  
eidiidekydsklikmiknr  
gdklieevvvelyk  
>tr|Q8NY63|Q8NY63\_STAAW  
mat1kdvktgkkel1pstakdkngkvtliyefkdgklgfyvqktqkergvgkcvsgaggavtggttlglagagvgvtv  
ipvigtvsggvvgavggav  
gggltgatfc  
>tr|Q8NY64|Q8NY64\_STAAW  
mfvcisfalvkgetdvntavktsepiavfivih1splivnlqnqmfci  
>tr|Q8NY65|Q8NY65\_STAAW  
mkitkaigs1vl1tav1ltsvsp1tnaneiqtnntktahqsyeningvkinrnp1lpmpeaqqriggtkvvkaikliin  
nrgkaknviqqvggkkaat  
ifdkgysgivelkp1lkwsevpanavgdavkrgainaglsksdagiistvvkeaiawlf  
>tr|Q8NY66|Q8NY66\_STAAW  
mledngdir1lyqsieelasvlgqsqfetkts1l1fvqmd1rysvfekvqtdfmkylahknsdeikyidlikienalpe  
dke1sinvinsiiigfann  
yypilqslvpei1qssygitinknfnidsidf  
>tr|Q8NY67|Q8NY67\_STAAW  
mvwatscdemmgvisveigvpislwgsavnyyqykiveptiwi1lcpig1fl1lnsi  
>tr|Q8NY73|Q8NY73\_STAAW  
mefkti1qsvkdphyneal1klydtk1n1sl1tedkriikrslennktendyv1fvg1lendvvslatahyeattnsafliyl  
fakd1snhdelmtqtlhqi  
ehel1n1sl1vhsrsin1flmmevpkepad1tqdn1li1ehrrqflyehqferqteidyihptndghtkkvd1flkknik1  
tkdiygtsvksny1lkyvf  
angiareiiyal1leemdlrkpf  
>tr|Q8NY75|Q8NY75\_STAAW  
mq1nvnmmkfd1rwhkgickqiv1n1vekgek  
>tr|Q8NY76|Q8NY76\_STAAW  
mnaf1t1iniiv1l1fiv1lhm1markhisfakrvftal1gigivfgv1l1h1vygths1nit1stsdwfnivgqgyvallqmi  
vmp1l1fisiva1aftkiqig  
ekfakigs1l1f1l1igtvtiaaivgvvya1lvfg1ldastin1l1gnaeqargseiakqakd1taht1l1pqqile1l1pknp1ldf  
tgqratstia1v1fasfig  
fay1rvarkqpdhge1l1kraidaiys1vmaivtfv1rl1tpyg1v1aimant1stsdfgaiwt1lgk1fliasyaal1tmyi1h  
li1l1l1gisp1ryvkk1t1  
ev1l1fa1t1srssaga1pl1nvqtqtr1lgvpegianfaatfg1l1sigqngcagiypam1aimvapvanveid1qfivt1liav  
vi1ssfgv1agvgg1atfas  
ilv1st1n1lpva1agv1isvepl1dmgrta1nvndsm1agtgtak1tkhwdk1t1f1sdndnaal1tsh  
>tr|Q8NY81|Q8NY81\_STAAW  
mkvritfi1l1al1stivc1fl1tamhptgpntvtfeqpylft1nii1mv1valps1vl1aiydym1sfrissailq1flgaisw  
ff1s1l1s1tq1ft1p1t1las  
fitsi1l1fvsai1t1laiggk1svdkndfh  
>tr|Q8NY84|Q8NY84\_STAAW  
mfgfigm1li1gg1igwaagaimgk1dipggil1gni1agi1gswvgk1lfgqwgpe1l1gsiy1l1paligs1i1liaivt1l1lra  
mrk

Tsompanidou\_et\_al\_Supplemental\_FASTA\_File

>tr|Q8NY86|Q8NY86\_STA  
mfkkndsknsi1lksils1giyggftgiypkadastqnspsvqdkqfqkveevpnsekalvkklydrysqntingksn  
ksrnwvyserplnenqvri  
nlegtyrvadrvtprkntlnkevvtlkelldhiirfahisyglymgehlpkgnivintkdggkyltleshkelqkdrenv  
kintadiknvtfklvksvn  
dieqv  
>tr|Q8NY87|Q8NY87\_STA  
mekddt1aeikpmlnfdeqiaklkqmni ffnidtekaneilrknnhffklayfrknfeknggyfiefaylsdlatidm  
klrytm1h1t1diehslkc  
lvkljitenngedgykiideflcidksysnsnfdtnsrtpeevmetkiknkneifkhmnkrqqlpeklnkyqnpawvc  
iefmq1gqfvsflnfyykk  
yndeelrvanilmp1vkni rnsahnqpiianlnydsrspqylfekgnnigisrnmfgiknfidtfatlelnhqvcnai  
iqaryhdldq1qkrykrne  
syynnalakrffialdkiidfnrpkv  
>tr|Q8NY91|Q8NY91\_STA  
mksedqritktkdeqikqidisidikpnpyqrktfdenhlnladsikqygilqpivlrktvqgyyivvgerrfraski  
aglkyvsaiikldtdedmm  
elavienlqredlnaieeaeasyqrlmtdlkitqqevakrlsksrpyianmlrllhlpkkiadmvdgrltsahgrtllai  
kdeqqmlrlakrvvkekws  
vrylenhvne1knvssksetdkvdi tkpkfikqerqlrepygtkvdisksvgkisfefdsqedflriieqlnrirygk  
>tr|Q8NY93|Q8NY93\_STA  
msqfl1tqlkdnvlvadgaigtilysegl dtcpeaynlshpdkverihrsyieagadvitntyanfeklkrfgledkvk  
aihqaavriakkaankdty  
ilgtvggfrgikqedis1qtilyhteiqidtlieegvdallfetyydlleltnvisrtrkkydipiaqltasntnyln  
ggaineg1kqlvqcganiv  
gl1nchhgphhmqesfthielpehaylscypnasll diensefkysdnaqyfgvaqnl ihegvrliggccgttpehikfi  
kesigt1kpvndkkvipip  
tkalfnpsqnkvrs1tskvqerptviiel dtpkhl dtdrffeniakldkanvdavtladnslatvrisniaaaslikqy  
ynieplvhitcrdrnligl  
qshllg1sligvneilai tgdpksvghlpgatnyvdvnskgl telalrfnqgintgdal kkrthfniagafnpvrkld  
gavkrlekkiesgmsyfit  
qpvysekiieiyhatkhlnkpffigimpiasykna1flhnevpgikmsdeilqqfeavkddnaktrelslklskldid  
vheyfnglyiitpfqnv  
slelaaysksitahkeail  
>tr|Q8NY96|Q8NY96\_STA  
mttllnvdvrnkqykdsdfklqdasltistnetvgligkngsgkstlinilvgnrhkdngsiaffgeehaaddveykehi  
gvvfd1rvpnk1tikdid  
kvfqs1yttwnsqkffdlkyfelprqtkiktfsrgmrmkialtia1shdvkllil deatagmdvsgreevmelledfva  
qgggil1sshisedieqla  
dklvfmkdgrmilteqkdil1aqygi vttgdkdveitkhliiasrlskgkyqilvkdyaeienaep1khiddatkiimrg  
ev  
>tr|Q8NY98|Q8NY98\_STA  
mnr1kelrardglnqtqlaklagvsrqtisliernnfmpsvltaikiarifnetvetvfii eedev  
>tr|Q8NY99|Q8NY99\_STA  
maft1saiqqahqqftgvdfpk1fkafkdmgmtynivniqdgatvvhqseddivtssvkstipvaqksnqsivqdv1tr  
hqqgtdfetfcdema  
iykwhidiqagtctyid1qdqavise1ipq  
>tr|Q8NYA1|Q8NYA1\_STA  
mvkhylikfvam1itaamvcsfg1lksqaakqqs1sdvysvitdaksalsnnsisndnkqkaieqvvsavkkl1s1ednse  
gnavksdvrk1ledakandn  
qkdt1sq1tks1iayeek1askdagskik1lqqvdakdavmtkaikdknkaeles1nns1nqiwtsnetvirnydanqy  
qqieva1lq1ria1hksp1  
dtakvshawttfksnidhvdkksdtsakdqyhvsq1nde1ekaikaiddnq1sdadaal1thfieiwpyvegq1qtkdga1  
ytkiedkipyyqsv1dehn  
kahvkdglvd1nnqikevghsysfvdmii1flreglev1livmt1ttmtrnvkdkkgtasviggaiaglv1siila1itf  
vet1gnsgilresmeag1g  
ivav1lmfi1vgvwmhkrsnakrwndmiknmyana1sngnlv1latig1isvlregvevii1fymgmigelatkdfiigial  
aiviliifa1lfrfivrl1  
pifyi1frv1sifi1imgfkm1gvs1qk1q1lgamprhviegfptinw1lgyfptyep1iaqaayimvva1il1fkfk  
>tr|Q8NYA2|Q8NYA2\_STA  
mwsfksmfntpedpekdayerfygkvqpgittptqktcnfvad1lkskdrdaikamfkkwtvmadrmmgdgkvgkpsnpl  
mppvdtgesig1gask1ti  
tfg1skslmkkig1sskipdafkd1phfpndq1iddysgd1imi1qacsndsqs1fhavhnlvrpfrdivkvrwaqsgfis  
akgketprnlmafkdgtin  
prksnq1kdyvfiddgwakhgtycvvriqihietwdrta1eeqeatfgrkrhsgap1tggekfdeid1kakdshgeyi  
dkdahtr1akeants1lrr  
afnyvdgtddrtgnfetg1l1fiafkatkqfidid1qnn1gsndk1neyithrgsas1flv1pgvskgy1get1fd  
>tr|Q8NYA4|Q8NYA4\_STA

Tsompanidou\_et\_al\_Supplemental\_FASTA\_File

mfgmkvneqiiikileahdtealfnlvnrnsrlrewlpwvdateqpsdtrafikrgllqfsdngngfcgiwyegtlvgv  
iglh einrmhrktslgyyl  
dkqfeghgmtqavealikycfeeldlnrieisaavnneksraiperlgtfregmlrdnellngiysssiyisllkseyd  
qk  
>tr|Q8NYA9|Q8NYA9\_STAAW  
mykskllkyifseepevkdltteekynqdyealetfsfkeetyqsrlakktptkagyfvctwtkdenncnqyskeafady  
lmiivideelsgyflfpre  
llvekgilttfehkgkmafrvypkwcnglnktagqtqkwqckyffey  
>tr|Q8NYB3|Q8NYB3\_STAAW  
mqailnfivdilsqpaivaliafiglivqkkpaatitsgtiktigflilsagadvvvrslpefgkifqhafgvqgivp  
nneavslalkdfgttaa  
imvcgmivniliarftnlkyifltghhtfymaafilaiiltvshikgwltivigalvlglimavlpallqptmrkitgndq  
valghfgsisyfaagavvg  
lfgkksksteekfpgklsflrestisisitmallfyiacifagvsyvhesisngqnfivfsligqvtfaagvfiiiltgv  
rllaeivpafkgiseklv  
pnskpaldcpivfpyaqnavligffvsfitgvigmfilflfggvvilpgvvahfflgataavfgnarggikgavagaaln  
gilitflplflplflgelg  
gaattfsdtdfltvgivfgnavkymglfgailfiiivgataillkgrqkppq  
>tr|Q8NYB4|Q8NYB4\_STAAW  
mnkvltvggtgfvgmriisrlleggyevqttirdlskadkvikmqdngisterlmfveadlsqdehwdeamkdckyv  
svaspvffgktddaevmak  
paiegiqrilraeahagkrvmtanfgavgsnkdknsitneshwtnedepplsvyekskllaekaawdfvenenttve  
fatinpvaifgpsldahvs  
gsfhllennlsgsmkrvpqiplnvvdvrdvaeihilamtneqangkrfiatadgqinlleiaklikekrpeiaqkvstkk  
lpdfvlslgakfnhqakeg  
kllldmnrnvsnerakillgwepiatqkeilaavdsmakyhli  
>tr|Q8NYB5|Q8NYB5\_STAAW  
myliepirngeyitdgaialamqvynqhi fldedilfpyycdpkveigrfntaievnqdyidkhsi qvvr rdtgggav  
yvdkgavnmccl eqdtsi  
ygdfrfyqpai kalhtlgatdviqsgrndltlngkkvsgaamtlnnriyggysllldvnyeamdkvlpnrkkiaskg  
iksvrarvghlrealdeky  
rgitiefknimvtqilgiddikeakryeltdadweaide lvdkkyknwdwnygkspsyeynrserlssgtvditisveq  
nriadcrifgdffgggdik  
dveea lqgkmtredlthqlkqldivvyfgnvtvgs lvemils  
>tr|Q8NYB8|Q8NYB8\_STAAW  
mfsmtpelqddigtvgyvefvspdevkvddeivsieasktvidvqtp lsgt tierntkaeeptilnsekpeenwlfkl d  
dvdkeaf lalpea  
>tr|Q8NYC0|Q8NYC0\_STAAW  
myrykpllqsihlpngiki snrfvlspmtvntstkegyitkedlayaarrnsagmqvtgaayiepygqlfeygnidhd  
acipgltnmastmkqhgsl  
aiiq lahagrfsnqailnfgkvygspmtlhspiehdviamshenkinsiiqqyrdatlraikagfdgveisiaqrlliq  
ffstfsnkrtdhygadslk  
nrarlclevmrvqevidekeapdnfilgfratpeetrsgdlgytidefnqlidwvmdvsniqylaiaswgrhiyqntsrt  
pgdhfgrpvniqivyehlag  
ripliasgginspesal dalqhadvmgmsppfvtepdfvhklaeqrphdinlefsmadledlaiphaafkdivkmmdyge  
glkkhtrdalrql eqnyhd  
sss  
>tr|Q8NYC3|Q8NYC3\_STAAW  
mqyhsnaqqpsawrffvyslvgilcffi pftingntifvdhvhairsiigplmpyvalimiligtalpivr rtfmts  
itnlvitl fkvagamigim  
yvfki gpsilfkanygpflfeklmppls ilipvgaialsllvgygllefvgyvempimrpifktpgksavdavasfvgsy  
slgllitnrvykqgmykr  
eatiiatgfstvsatfmiivaktlg lmpwhnlyfwitlvitfvvtaitawlppitnesteyngqegeqevaiegsrlkt  
ayaeamkqnaltps lvknv  
wdnlkdglemtvgilpsil sigflglivanytpfidwlg yifypfiyifpiadqallakasaisivemflpsllvtkaam  
stkfvvgvsvsaiifsa  
lvpcilateikipvkwliiifl rvalsllitipvallifg  
>tr|Q8NYC8|Q8NYC8\_STAAW  
mkeifggtlnwvaviy l lamlfigvyftkrasqstnsfftasgrlpswvvgfsiyattlsaitfmstpekaf ltdwsi  
agniaivaiiplliyfyvp  
ffkklkvt sayeylearfgpsirvigsllfvvyhlgrvaiviylptlaitsvsdmpyivaslvgllicilytflggfegv  
vwsdfiqgvil lggalvi  
ilgvmnikggfgtvfadaiehkklisadnwklntaaaapiiflgnifnnyqtasqdvvqryqasds lketnkslwn  
gilal isapl fygmgmtly  
sfytheavlpkgfntssvpyfiltemppfvaglliaaifaaqstissl nsisacisidikqrffgkgerhev nfar  
fiiiagi fgfgmslylia  
snsndldlflfvvtglfgvplagvfavgi ftkrntfgvicglilgii fayvyngvgkgnspfyvstisftvafvfayil  
sfivpskhkkditgtl tife

Tsompanidou\_et\_al\_Supplemental\_FASTA\_File

kdkpstyisktatkk  
>tr|Q8NYC9|Q8NYC9\_STAAW  
mnilfaitgiafalvfalvflsfdrknidfkktlimifiqvlivlfmmnttigltitltaigsffeglinvskaginfvfgd  
iqnknngftfflnvllplvf  
isvligifnyikvlpfiikyvgiainkitrmgrlesyfaistamfgqpevyltikdiiprlsraklytiatsgmsavsma  
mlgsymqmiepkfvvtavm  
lnifsaliasvinpyksddsdeidnltkstetksvngktgkpkkvaffqmigdsamdgfkiavvvavmllafislmea  
inimfgsvglnfkqligyv  
fapiaflmgipwseavpagslmatklnitnefvamldfknvlgdvsartqgiisvylvsfanfgtvgiivgsikgisdkqg  
ekvasfamrlllgstlasi  
isgsiiglvl  
>tr|Q8NYD5|Q8NYD5\_STAAW  
mkkqvvisgmlfslffgagnlifppmlghtagqnmwigmlgfaltgillpfitvivvafydegvesvgnrihpwfgfif  
avviymsigafygipraan  
vayeigtrhllpvhnqwtliifaaiffaivywislnpskivdnlgklltpllllmvsllsiavifnpsalsapkdkyit  
hpfisgsllegyftmdlva  
lafsvvivngyfkfgltdrmkilkyvcfsgliaaillgmifyalayvgastapgnfkdgtdiltynslrvfgsfgnlvfg  
mtvilacttciglvnaca  
tftkkhvpkfsyki falifsiigflfttlglemilkiavplltliypvsialvlisfanmfstfrfswayrlatvitlii  
silqilnsfnllhgvilks  
fmmllpladidlawlvpfmlfaiigfiidvfirrpqatt  
>tr|Q8NYD6|Q8NYD6\_STAAW  
meksikimtiigiviglatvflllmvlaasgvmttdvsttvngevdpvdaetaaaitvflflflfifgiisiilgaig  
mfkasknkkmsgilliga  
visgnitfalwlvsgiklltnnkpkeidsls  
>tr|Q8NYD7|Q8NYD7\_STAAW  
mtfeeklsqmyneiadeisgmipvewekvytiayvddegevvfnytkpgsdelnytyipreynvsekvfydlwtdlyr  
lfkklrnafkeedlepwts  
cefdftregnlkvsfdyidwiklgfgpsgkenyymkkfgvlpetyemeeirevekyvkdqe  
>tr|Q8NYD8|Q8NYD8\_STAAW  
mtfeeklsqmyneiadeisgmipveweniyaivtdqggevi fnytkpgsdelnytydisrdyniseeifddlwmnlyy  
lfmnlrdl fkkeglepwt  
cefdftsegklkvsfdyidwintefdqlgrenyymkkfgvlpemeyemeevkeieqyikeqdeae1  
>tr|Q8NYE2|Q8NYE2\_STAAW  
mtfeeklnemyneisnkissmipvewekvytmayiddggevvffnytkpnsdelnytydipkeynisvqvfdlwmndlyd  
lfeelrnl fkeeglepwt  
cefdftregtlvnsfdyidwntefdqlgrenyymkkfgvipemeyemeeikeieqyikeqdeaei  
>tr|Q8NYE3|Q8NYE3\_STAAW  
mtfeekqsemynkianeisgmipvewekvytiayvndqggevi fnytkpgsdelnytydipkdcnvsndifmdlwmkvyr  
mfdelretfkkeghepwt  
cefdfttrdgklkvsfdyidwntefdqslenyymkkfevipemeyemeeikeieqyikeqeeaei  
>tr|Q8NYE5|Q8NYE5\_STAAW  
mefllliivvaglyyiyiltavmysekivvlpiiiyaivfvigityifigdsydqlnfnvilymgslyfawmafrnlwn  
rplllkykntdsssgivn  
kseynsveslrinieiakyggiisliavivltvmtlkstpqitaetrdlsisffilslfiiifavwdliirvrkgafa  
fvvirpifscwlfilnmi  
lsrlv  
>tr|Q8NYE8|Q8NYE8\_STAAW  
mhdmtkdieyltadydnekssiqsvidaiegqdfldvdtmddavsdvssldedgaisltssvvgpqqsklmgyyqnel  
dyaqldskmkeiidtpfi  
edidkafkgitnvklenilikngggghrddygasgkiakgdakksdsdvsideilksdqefvkvldqhykemkkedkkl  
sksdfekmmtggascdynt  
vaeaeelleqkkkeaeieiaalagmvvlscinpvagavaigaysaysaanaatgknivtgrklskeerimeglsliplpg  
mgflkgagkslmlkgfkgg  
ekfavktglqktmqavsrispkmgmmknsvl nqsrnfaqnthvgqmlsnmrgqathtvqqsrnwigqqaqnvkrivng  
ldkeiahpfkqqlapagmg  
gikfaetttlrnmgnmkravtpqnhvthgpkdsivrsegkhsvs sheinsskyvespnytkvefgehyarlrpkklkan  
ieyttpghiyrtdhkgri  
kevyvdlslkdggrnnhaqrvtvggedrldddgghliarmfggskdi dnlvaqskfinrsfkengqwykleklwekaik  
sgksienvkvevykygnsq  
rptefsvryningeqflkniink  
>tr|Q8NYE9|Q8NYE9\_STAAW  
mtlsgkivskaetiahvvelesisqkydeiaqnfqkiaqlnyyssekashsmengyssaatvisglkglstlgggvnm  
saqkffeadehwgtefakl  
yynieg  
>tr|Q8NYF0|Q8NYF0\_STAAW  
mmkdvkridyfsyeeltlilggsklplvnfel fdpnsfeekaaliekelvtendkltdagfkvatlvreyisaivnirin  
dmyfapfsyekdeyilslr

Tsompanidou\_et\_al\_Supplemental\_FASTA\_File

fknggfqiriinkdiawwsivqsyp1lmrqeksndwdfkqidet1enlnnesidtigrvleieiyhqgdpqqslyniy  
eqnd111iryplkdkvlnv  
higvintfirelfgfntdenhinkaee  
>tr|Q8NYF7|Q8NYF7\_STAAW  
mskk1kiijpiivv111iggiawgvyaaffantpknty1kseqqtakmykdyfndrfenevkfgekmdnsf1sslelsad  
asdeivkg1gipksvvnas  
kikmsyghdpkkeksminleptiadsalchkfqlaadkdkhyfesplfkgkysvnnsd11stysk1tgedeetakengitn  
qq1n1nt1fsnaqaggsdy  
skiaekyselivdk1dddndfdkgkkeeikvngedykvrpvt1t1sradtkit1av1eakkdkd1kk1meeqgatkdf  
kdikkaiddvketkkdefa  
kiqskiytekhtivkreititdkennktkikgtnt1eddk1kl1dya1dfdqdqkytyaeakytikgvsskekdnkysdye  
fgkkteydeski1dnqek  
vdgtrkrdqgk1tvaldkysdeneftfennidsdvknntqkst1nigikyaeepinfilksstklkadidfdsgakdfn  
s1sskdrek1eikekngg  
kmfes1kkask  
>tr|Q8NYF9|Q8NYF9\_STAAW  
mkpyiq1vvfkqwlqy11lvttivialv1igigyrvahdnfkpitiq1dqttasksfvnkikqsdvyvtikkvdedesy  
ieddvtkkeai1smq1pk  
fsqk1kenr1ketiq1ygrddffiggiaveivssslyeqqipniyehledmkqhqsida1nksyhkhtpeskikfvs1tk  
qaqsis1s1ifavilfvs  
avqvvlh1r1nqqaalqr1sqyh1srfl1styvmtht11111v1lavsl1sqpl1s1l1fy1ks11111iyeigivfilf  
hiqtishr1f1mtfiyalam  
givyliifm  
>tr|Q8NYG3|Q8NYG3\_STAAW  
mnntqssprsn1i1aim1saltyw1faqsfinig1vgqyqtspav1n1s1s1tsfatg1f1mvaagdiadkig1lrmt  
mgliismfas1111isdit  
all1igrilqg1saa11lpstvgv1nnqfkgehl1rraisylm1stvggig1agvigg1iatnfgwqtnfiisiviafiai  
111kgtpkvsqshsrhpf  
dykms1favm1gsft111tqgfeqgwfstfsf1c1s1fi1tt1ifi1ierhev1pfd1fsv1n1r1p1figa1f1nn1fv1ns  
glgvtv1vffiyagth1gl1s  
aaqsg1vt1pyaivavami1r1gekat1rfggk1m1iig1lp1fvigiti1smt1q1sasqyvia1ig1fvica1ng1lvatp  
gl1tia1f1smpnekvg1atg  
1ykmsgt1ggafg1al1sttvfsm1q1nyapsvaatvtfivsv1ml1g1s1saymi1p1ktvks  
>tr|Q8NYG4|Q8NYG4\_STAAW  
mfivmkn1tkv1i1n1nki1fvfeks1kkh1nemmyielcd  
>tr|Q8NYG7|Q8NYG7\_STAAW  
mtnkvv1lgstnvdq1fl1tveraqpget1hveeaqkafgggkganqaiatarmqadttf1tkigtgdvadf1ledfkaah  
idtsy1i1k1steaktgqafi  
tvnaegqntiyvygganmtmtpedvinakdai1nadfvvaq1levpipai1safeiakahgvttv1n1papakal1pne11s1  
idiivpnetae11sgikv  
tneqsmkdnany1f1s1g1iktvl1it1lgkqgyfatknqsqhieaykvnaidttaagdtfigafvs1r1nksqdn1adaidfg  
nkass1tvqkhgaqas1p1  
1eevnqv  
>tr|Q8NYG9|Q8NYG9\_STAAW  
mtklprnfmwggalaanqfeggydkggkglsv1dvm1tsgahgkarq1tksidqnhypnhegidfyhrykedialfnemg  
1k1r1ts1awtr1f1p1ngde  
dvpneeg1afydri1fdeliaqdiepvvt1shfemp1hlakhyggfrnrevvdyf1vhfarvvferykdkvtywmtfneinn  
qmdtsnpi1flwt1nsgval1t  
endnpeev1yqvahhellasalavr1lgeinpkfkigtmi1shvpiypyschpkdmmeaqian1r1fff1pdvqvr1gyypsy  
akkmlarkgydv1gwgqegdd  
s1l1qqgtvdy1g1fsyymstavkhvd1ttvennivngg1nhsvenphiatsdwgwaidpdgl1ryt1n1v1ydryq1p1five  
ngfgavdevvdgh1hddyr  
iey1k1ahitaa1eavdqgdv1ligytpwgi1divsfttgemkkryg1iyvdrnddghgtmer1kkdsfywyqqviasngd  
k1  
>tr|Q8NYH0|Q8NYH0\_STAAW  
msnkykeqaqdi1tavggvenivdatydtkcitihmqhtipstanevkqivdvtsvaendaqlvik1ngnvdevyqq1qr  
1iknanveesentdn1nsq  
dtsy1ipqkv1t1pi1lvkapiagrri1l1kevrd1s1frekmvgeg1aikaheeskviapfng1ismivptkhavriqsedgv  
divih1gvntvd1legk1gk  
cfvkqndrveagqt1l1qfdqy1iqqqgynadvivvisnsad1gkvel1tmnei1ttedv1fki1fkn  
>tr|Q8NYH1|Q8NYH1\_STAAW  
mlkyehiakq1nafihqskfkpgdk1psvtq1keryqvskestika1gl1leqdg1iyqaqsgiyvrniadanrinvfkt  
ngfsks1gehrmtskv1lf  
kematppksvqdelq1naddtvyy1er1rfvddd1v1cieysy1hkeivky1nddiakgs1fdylesnmk1rigfsd1ffn  
vdk1tsseas1l1q1stgep  
c1ryhqtfy1mtgk1pfdssdivf1yrhaqfy1pskk  
>tr|Q8NYI1|Q8NYI1\_STAAW  
mka1vktreghgn1e1ldkevatp1ddk1vkikvhyag1cgtdi1htyeghykv1nfpvt1lghefsgeivevgadvkdfkvgd

Tsompanidou\_et\_al\_Supplemental\_FASTA\_File

rvtsettfyvcneceycks  
kdynlcnhrkgigtvdgafnyviareeslhhipdevsyqsaamteplacahhgvskiqvnsdgvavvmgppigllva  
qvlkskgatvvvtgldndk  
vrlkdaeahmdyvvnlgqtdlktyingitdgygadvvvecsgavpaarqgldilrkkgfysqigifkdaepfdmekvi  
qkeitvvgrsrsqkpadwep  
slqlmadglvnaealvtkiydi skwdeayqhlksgegikallkplldenen  
>tr|Q8NYI2|Q8NYI2\_STAAW  
mngdnqqilreivlnptihgkelesifgl srrqlgyriqkinlwleqegyplertsqgnfivsseimtlfkrdvseqqm  
l ngnnvifsietrryylml  
mlfskenamslnhfsidlgvskntvihdinhvkeqlenhgslskysrkhyeivgdefevrrffiklidqrlnhditkse  
vlkalinltlediyqkdk  
kqveqflksrfidkslsslpyvlcvirrriqsghvmplninyqylrdtkeyqateimtlepdlpeaklyltlhllst  
svqwtldqesdnisnlma  
iaqmihhfeqitfiniedekelsqqlllhlt pafyrikynltdrdelinplqgnyqslfhmvkqscqslteyfgkslpdn  
eiyaltmfggsrrqden  
fdgkikaiivctqgtsvsgmmlyelnrlfpeiifldaislrftfenytdydivfspmfvlt hkk lfitkvalseneqrkl  
rkevmyinkesaeidkei  
nklmalierttvnditelrdgledfianysistingsivtqnktldladliparhvkhrihvenideaiakasdlva  
nhfidikiyihemqqvfdds  
ymvimqniaiphaysekhvtamsmlilqepiymdgtaihiivpiaavdkvthlrallqlrdvaqndaikriiqsrk  
nsdvneilkynskearen  
gwdsn  
>tr|Q8NYI7|Q8NYI7\_STAAW  
mssastqstksdihnesinkqmeakahetaqnadlktearslfdnatksigrlagndeslnlnlkdmfsevfkphtkne  
adeifiagtakttpaicdi  
seewgkpwlfsvfiaftvtfiglwvmaai fntnaipglifigaltvplsglffyesnafknisifeviimffigvfv  
sllstmllyrfvvsdqfe  
rfgsltffdaflvglveetgkaliivylvnkltknlnglligaaigagfavfesagi lnfalgenvp lldivftraw  
taiggghlwsaivgaavi  
akeqhgfefkdi fdkrflifflsavglhgiwdtsltvlgstdlki filivivwilvfilmgaglkqvnllqefkeqqkk  
vde  
>tr|Q8NYI8|Q8NYI8\_STAAW  
mkqjtwhdlqhiikgdviglpalavanlpaevl ravlaqhdtyhtpkdltfilandihslgaaplddfiermikrvi  
msiltassktaqamknndi  
eayflpqgiia thyrqsngllpgvltkig lntavdpryggkvnttrtddlvs lvtindetylhytfpsvdvallrgtya  
dqggniy ltqeaylsecyh  
valnakanhgkviqvkalvdgyqlkpnevvi pgnlvdyvyvtedeknrqviqshylpalsgeeridgipepalpfnsr  
klilrraaqfltygdtisi  
gyginne lsnllheecvehdvqpi ldvgifggfvgsrehfgmynadvrmphdrawdfiyngvsvaylsfaevdqygnv  
nvsyfndrln gggfidit  
qsvnkii fsgtfvagshvschnqrlnietegqnqkfvsdvshidfnaqysqsl eqevyfvteravfeltnqglklieiap  
glldlhkdilnqmafkipia  
dhklidtsiykekwgqkqsihkv  
>tr|Q8NYJ0|Q8NYJ0\_STAAW  
mtfeketylktlfpedvlsiakgltdgeveflqqvdsll esyreninqhwidatvpedyfdlge lnyfnnp llykdrp  
nakmps qlf qffmsyllar  
fdisl atllgvhg lghntfyfggskeqiakyvpklqshelrtcfa ltepehgsdvaggle tvaerqgd twingekkw  
ggahvsdvipfavnetg  
kphcfvvrpegdvdiendkia lri vnalikltnkvdeadrlnitsfkdiakilystragvaymatggmaga lra  
tl dyvterkqfgkpi skyq  
liqeklammggnlaqamatcaqlanmqahgeydevatstakmmnalrlretvamgrgitggngiladdydiarffsdaea  
iytyegtheinalvigral  
tgdsafv  
>tr|Q8NYJ1|Q8NYJ1\_STAAW  
mtinkvtvlgagtmgaqlaalfvnaglkvklldivvdkndpnlia ksydkitdkkrplldlnlashltygnfdddln  
ddadlyieavkedi eikha  
vwqqvlqhakedal fatntsgipinaiaqtfnekdqrffglhffnpprimklveliptshtkesiildvknfaqvnlgk  
gvivvndvpgfvanrvgtq  
tmndimyraeqhklsvdvdaltgqaigrpktgtyt lsdlvgl diavsvikgmqqvpeetpyfhdkivnt lfdngalgr  
ktkqgfykkdketkarlv  
dvekdyvpsqpqlpifnefnkdlvhnldvifnaqdeaglf lwetl rnnfyysainvpkatddfrdidralvwgfnwkl  
gpfqlwdamgyervktrme  
deigdlpqwisdldggfykqdetieyatpvshfvkdelwdkgdaklsvthddqlllklqsknnvitdefndalvdaiddl  
endhytsmviyadgnnfsv  
ganlflmkkahedglvddvvaqsidklhysfnrlkysl kpvvtavqgralgggcelvlyspivvaasetyiglv eavgvl  
lpsggglaemadrlrtsh  
kfdkqasmtkvltniafakvstnafearrygl rdttdiifntaqrvevalkrakyeaetnyipnprhqiya lgedfka  
liqqqldaqrrghfisdhd

Tsompanidou\_et\_al\_Supplemental\_FASTA\_File

yhialniatilaggdprntfinqryslekigfidllkskksyeriahmlktgkplrn  
>tr|Q8NYJ2|Q8NYJ2\_STAAW  
mqeayivaygrsaakakqgalpherpddvaakvlqgvlkridgkfnkmiedvivgtafpegllqqniartialltgls  
dtvpgqtvnrycssglqti  
aiaanqimagqgdilvaggvelmsavpmggnepntnptlqyddigasypmgltaenasqfdvsredqdayavrshqray  
eaqrdrgrfndeipi qvns  
veytnagpkvhtni fdqdefi rpdtmealakl rtfvkadgtvtagtsaplsdgagfvvlmsgdkvkelgvtpiarfvgy  
kavgvdpkimgigpayaip  
evlslnlsvedidlielneafasqtiasikevgldisrtnvnggaialghplgatgamltarllnemgrpdsrygmvt  
mcigvgmgaaifeivr  
>tr|Q8NYJ3|Q8NYJ3\_STAAW  
mkkqiislgalavasslftwdnkadaivtkdysgksqvnagskngkqiadgyywgii enlenqfynifhlldqhkyaeke  
ykdavdklkrvleedqyl  
lerkkekyeyikelkykypntqvkmafdkydlgdltmeeyndlsklltkaldnflvkkiesenpdlkpysese  
ertaygkldsldvqaysvy  
fayvtdaqhktea lnlrakidli l gdekdpirvtnqrtekemikdlesiidffietklnrpkhitrydgtkhdyhkhkd  
gfda l vketreavakades  
wknktvkkyeetvtsppvkeekveepqspkfdnqqevkitvdkaettqpvaqplvkipqgtitgeivkgpeyptmen  
ktlqgeivqgpdfptmeqn  
rpslndnytqpttpni leglegsskleikpqqtestlkgtdqessdievkpqaletteashyparpqfnktpkyvkyr  
dagtgi reyngdtfgyear  
prfnkpsetnaynvttnqdgvtvygarptqnkpsktnaynvtthangqvsygarptqnkpsktnaynvtthangqvsyga  
rptqnkpsktnaynvttha  
ngqvsygarptykkpsktnaynvtthadgtatygprvtk  
>tr|Q8NYJ5|Q8NYJ5\_STAAW  
mkriskdiwavfklllyqnkgrfsinalllqlimifisstylillfnmmlkvagqsq l tinwteivshpasvillii fil  
svafliyvefsllymvyva  
gfdrqii tfksifknafvnrkl igvpviffviylmlmpianlglssvltkniyipkflteelmkttkgiiygtfmia  
vfilnflkliftlpltilnr  
qslfknmr l swqitkrnkfrlvieivileliigailtliisgatylaicvdeegdkflvssilfvvlksalffyy l ftkl  
slisvlvhlkqenvldqp  
glefkyppkrksrffii smvlavtcfigynmyllynntintnisiighrgfedkgvensipslkaaakanveyveltdi  
mtkdkgfvvshdnlnkr l t  
gvnknisesnfdvvg l kmrqngheak l vs l defietakqsnvk l lvelkphgkepadytqrvidilkkhgvehqyrvms  
ldydvmtklkkeapy l kcg  
y iiplqfghfkets l dffviedfsysprlvnqah lenkevtywtingeed l tky l qtnvdgiitddpaladqikeekkde  
tyfdrsirilfe  
>tr|Q8NYK4|Q8NYK4\_STAAW  
mskilkcitlavvml l ivtacgpnrskedidka l nkdnskdkpnq l tmvvdgdkqmafykkitdqytkktgikvklvnig  
qndqlenis l dapagkqpd  
iff l ahdntgsay l qglaaeik l skdelkgfnkqal kamnydnkqlalpaivetta l fynkklvknaptleeveanaak  
ltdskkkqygm l fdaknfy  
fnypflfgnddyi fknngseydihq l glnskhvknauer l qkwydkgylpkaathdvmig l fkegkagqfvtpgwniney  
qetfgkdlgvttlptdggk  
pmkpf l gvrwgylseyskhkywakdlmlyitskdt l qkytdemseitgrvdkssnplkvfekqarhaepmpnipemrq  
vvepmgnasifisngknk  
qal deatnditqnikil hpsqndkkgd  
>tr|Q8NYK9|Q8NYK9\_STAAW  
mvilndkqtkskeglisvshplaakigkdv l dqgnamdaviaiq l alnvvepfasgigggy l llyeqstgsitafd  
aretapahvdkqfy l ddsq  
eyksffdm tthgktvavpaipklfdyihkryak l sledl inpaielaieghaanwatekysrqhar l tkyetaqv fth  
enqywregdwivqpelgkt  
fqilreqgfnafykgdiakqlvnnvkacggtit ledlakydiqikapisatfkdydiysmgpsssggitviqilk l lehv  
dlpsmgprsvdy l hhl iqa  
mhlaysdraqyladdnfhevvpqsliddnylkarst l idsnkanidiehgvsdcishtdveenhtetthfcvidkegni  
asfttsigmiygsgitipg  
ygvllnttmdgfdvvdggineiapyrplsnmptivmyhgpilvtvgappaisiiasvaqtlinvlvfgmdiqqaidep  
rvysshpnriewepqfsq  
tilalialarghamehkpdayigdvhglhvd l ntrdasggaddtregtvmggev l sirkp l lspeiyndthrvyfvndvq l  
plladqvrwmhdkyvwdes  
vriifsevsahied l rsyenagenyidiawlarkkgyqvalkddgyl l tddtytsvkrntnayrydrdsitr  
>tr|Q8NYL1|Q8NYL1\_STAAW  
mvklttkias l kl fasyaiatyilviltsa l nlfkgyvadtfyiaet l liv l tiilii l lttetqtkhhd l wrrivev l l  
llmt l tgnvft l lmfvsir  
ryqrtsqihsyngwesfirkttrhriaig l l l l v m l t l s i v s q f t d t t l a t k n q f n a l l h g p s l a y p f g t d d f g r d l  
ftrvvvgtkl t f s i s i s v  
viaivfgv l lgtiagyfnhidn l imril d v v f a i p s l l l a v a i a s f g a s i p n l i a l s i g n i p s f a r t m r a s v l e i k r m  
eyvdaaritgentwni iwr

Tsompanidou\_et\_al\_Supplemental\_FASTA\_File

ylpnaiapmivrfslnigvvvlttsslsflglgvapdvaewgnlirtgsnylethsnlaivpgvcimfvvlafnfigda  
vrdaldprij  
>tr|Q8NYL3|Q8NYL3\_STAAW  
mstfrlsfnklfycgfsnisskflfnteqiflhdreglctpfsirdivclvtptlpassf  
>tr|Q8NYL4|Q8NYL4\_STAAW  
mnsiftytylkfnlryfirrkfeivkrslnvttkilflikliifsslllfistimladyfsdyidfieyyfyasmfiyiv  
fipliprtkllinpmkqql  
lyrsslrevdifnlijasdvllkkfvgyfnllivgmaislyhispfifnlkvfcaliyfstisyviqiifinikvistkkl  
fsyhycvfnfmmgsivsvi  
gfvvsfllvnllikpflvfstyvikskktfewysyfqdikneviinekvmqlldyisptifmrlnfvnisfviitial  
fialyyfnkigfwyrkedi  
ylsstninfslpisikaittiqlkhwisnkeevnlhkpfyisysiwfflglcliyfsqmaynqlanavifililntitrd  
sfsagtdfftkslrfdsd  
ksiglyrmsntdfkqiydkslslirfigketilailaiflnqdiylyiigfeiiiintviipnslsllpsylsphfnh  
qhyselesfeeqlfledtv  
fdkvknflssyflilfvgylsqrnyidimifiiifnilalilvslfirfskqkitkswrkrdlyl  
>tr|Q8NYL5|Q8NYL5\_STAAW  
misftfkvdekikypfnrdielvnqvdgvlaklkenkeegieatitnvqkksdifiikkqnlhsfkvgrgfdkedne  
lrkkivvindqvaktvfn  
naigkslyieggfveigitdklydsstvimpentfnyymghlhqglptlqiiedgynkktvkkvesllnkkgsqsv  
lgeytytdteeiiksdki  
fdsityfvaavagislfiagigvmvmyisvaerteeiairrafgaksrdielqlfliesilicvtsgfiglilgvvfati  
idvltptyiksvsvlssvi  
iavsvsiliglfgwiparaaskkelidiik  
>tr|Q8NYL6|Q8NYL6\_STAAW  
mrkvlniftiafksilknkgrnifmigiigissvitimslnggfklllnfqlapenkk  
>tr|Q8NYM0|Q8NYM0\_STAAW  
mtgfsvylgqpldeayikrmikqgyqmi ftsvqi peeddetkyhyftkl1nllkheqvtlyidanpsiltpsfyehlrqy  
daqfmiridhstsieaiea  
imagglkcclnasiisrelltslhqqlndftllsfchnyyprpdtglsvdlnkkneliyqfnpkaqiygfivgsdlrgp  
lhkgllptieatrhshpva  
akllqetgvslvgdliemrqakqlidfckhrhftlciievfdttvtylfdmchkvrpdnpenvirsetsrqicphsi  
qpqfttqrrigsvtvdnl  
ngryqgemqivrqtlsahdnvnvaqiikedlpllsiepnndtfdqktreckk  
>tr|Q8NYM4|Q8NYM4\_STAAW  
mkkkltfkenmfigsmfglffgagnlifpihlgqaagsnvfianlgflitaiglpflgiaigisktsglfeiasrvnk  
tyayiftialylyvgpffa  
lprlattsfeiafspflspkqitlylfi fsfvffviawffarkpsrileyigkflnpvflvllaiillfafi hplggisd  
apiskqyqsna lfn gfl dg  
yntldalasalafgiivatikklgienptdiaketiksgtisiimmgiytlaimgtlsighfkl senggialaqitqy  
ylgnygivilslivmvac1  
ktaiglitafsetfehlfpkmnylaiatvvsfisflfanvgltkii msvpvlmflyplaialivltl fsskfhhscli y  
qctiiffmiaalvdglkas  
pefisstsfstlinfnsqkylp lsdigmgwvvlsligfiigfiyikikhrkipqa  
>tr|Q8NYM8|Q8NYM8\_STAAW  
mtkrqmgifiyagiigglsgivklgwevmfprrtpernatnppqellqglgfssefthqytfsmel pwwsfivhfsf  
siviaiycilvkkyayla  
mgqgavfgiaiwvlfhliimpimhtvpavwdqpfqehl seffghivmmtielvrqhfvyrykln  
>tr|Q8NYM9|Q8NYM9\_STAAW  
mtvfmqlqsnlksieelisqsrwsykkprtvnyrynqdklmhrldgilvqygiqhdgtllphewhyhisprgkativqh  
nrdgqpiyvslsypiyv  
cvvdkepvgidiekisqrldwrtlvctfstneahqicslndfyqiwtqkesftkligeglikgl diydmtqshfyqsrev  
kfkqfifdqfmvqvcflgq  
apwgykkvsvfqlss  
>tr|Q8NYN0|Q8NYN0\_STAAW  
mimgnlrfqqeyfrikntestthrnaywvklaknveatkmya1stivqqhasirhffdvttddnltmlheflpfie  
ikqvpsssanyleaffkq  
elstyhfn dsp lfkvklfqfadaayilldfhvsifddsqidiflddlcnayrgntvintrqhahinrnddkdnqdashi  
aldsnyfrlennsdihids  
yfpikhpfeqalyqtyliddmstidmaslavsvlanhimsqqhdvtl gihvpshlpndlhgnivpltl tidakdvcqrf  
ttdfnkcvlqnmsqlqcak  
sslsletifhcyhhmsscndviedvhqi hdahtsladieifphqhgfkiiynsaaydl lsietlsdlvrniylqiteen  
gnkrttvdeln l mterdiq  
lyddinls lpeiddaqtvtvlfeqqveatpnhvavqfdgvfityqtl narandlahrlrnqygvepndrvaviaeksiem  
iamigvklaggayvpdl  
nypsdrqeyilkdvtpkvityqalyengkqinhidlnkiawknidnlskcntledhayviytsgttgnpkgtliphrg  
ivr1vhqnhyvp1neetti  
llsgtiafdaatfeiygallnggklivakkeqllnpiaveqlinendvntmwltsslnfqiaserievlvplkylligge



Tsompanidou\_et\_al\_Supplemental\_FASTA\_File

vlnakwvdllngkpkhpgi  
ingygp tenttfttynipknvprnripigkpi lgthvyimqgerrcgvigpge lctsgfglaagyl nqpe ltadk fikds  
ninq lmyrsgdivrllpdg  
nidylrkdqkqvkirgfrielsevehaleriqqinkavvivqnhdqdyivayyeamhtlshnkiksqrmtlpeymipv  
nfmhieqipitingkl dkk  
al pimdyvtd dayvapstdtehllcqi fadil hvnqv gi hdnff elggshlkatlvvnri eastgkrlqigdl lqkptvf  
elaqai akvqeqnye vipe  
tivkddyvlssaqrmyllwksnhkdtvynvpflwrlsse lnvaqlrqavqrliarheilrtqyivddevrqrivadva  
vdfeevnt hftdeqeimrq  
fvapfnlekpsqirvryi rslhayl fidthhi indgmsniqlmndlnalyqhklllpklqykdysewmshrdmtkhrq  
ywl sqfkdevpils lptdy  
vrpniktngamsftm nqmrql lqkyvekhqitdfmffmsvmtllsryarkddvvvgs vmsarmhkgteqmlgmfan  
tlvyrgqpspdkmw tqflq  
evkems leayehqeypfeclvndldqshdasrnlfdvmlvlqnnethahfghsklthiqksvtakfdlsfiieedr  
dytini eyntdlyhsetvr  
hmgncmimidyilkhqdtlqic dipngteellnwvnt hvndrmlnvpgnksiisyfnevvsrqgnhvalv mndltmtye  
tlrnyvdai ahml lsnvgv  
ngqrvalfters femiaamlatvkgasyipididfpnkrqgail edakvtavmsygei ettlpviqlenakgfveske  
neqyddlhgnqlentamld  
nemyaiyts gttgmpkgvai rqrnl nlvhawstelqldnevflqhanivfdasvmeiyccllnghtlvipdreervnp  
eqllqqlinkhrvtvasipl  
qmcsvmedfyiek litggatstasfvkyiekhcgtyfnaygpsestvitsywshqcgdlipetipigkplsniqvyimsd  
gllcgigmpge lciagds l  
aigyinrpe lmadkwqnnpfgkgklyhsgdlarytsdgqief lgridkqvkvngyri eldeienailairgisdcvvtvs  
hfdthdilnayyvgeqqme  
qdlkqylndhlpkymi pkti thidymplttndkvdtr lnpnstiqs nkvysepsneieqtfdvdfgevlkqndvgvdd  
dffe lggnsleamlvvshl  
krfghhis mqtlyqyktvrqivnymhq nqqs lvalpdnl selqivmsrynlgvledslshrpigntlltgatgflgayl  
iealqgys hriycfi radn  
eeiaryklmtnlndyfseetvemmlsni evivgd fecmddvvlpenmdti ihagartdhfgdddefekvnvqgtvdvir l  
aqghharliyvstisvgt y  
fdidtedvtfseadvykqglltspytrskfyse lkvleavnngldgrivrvgnltspyngrwhmrniktrfsmvmdll  
qldcigvsmampvdfsvf  
dttarqivalaqvntpqi iyhv l spnkmpvksll ecvkrkeielvsdesfneilqkq dmyetig ltsvdreqqlamidtt  
l tkimnhisekwptitnn  
wlyhwaqyikti fnk  
>tr|Q8NYN1|Q8NYN1\_STAAW  
msgavffviflkqatcnty fkevkiyhlgemdmkivalfpeavegqenql lntkka lglktfleerghefiiladnged  
ldkhl pdmdviisapfypa  
ymtreriekapnlklaitagvgsdhvdlaaasehnigvvevtgsntvs vaehavmdllillrnyeehgrqsvegewnl sq  
vgnhahelqkktigifgfg  
rigqlvaerlapfnvtlqhydpinqd hkl skfvsfde l vstsdaitihap ltpetdn lfdkdvl srmkkhsylvntarg  
kivnrda lvealasehlqg  
yagdvwypqapadhpwr t mprnamtvhysgmtleaqkriedgvkdilerffnhepfqdkdiivasgriasksytak  
>tr|Q8NYN8|Q8NYN8\_STAAW  
mkkimvifgtrpeaikmaplvkeidhngnfeaniv itaqhrdml dsvl sifdiqadhdlnimqdqqt lagltanalakld  
siineeqpdmilvhgdttt  
tfvgs laafy hqipvghveagl rthqkyspfpeel nrvmvsniael nfaptviaaknllfenkdkerifitgntvidals  
ttvqndfvstii nkhkgk  
vill tahrr enigepm hqifkavrd ladeykdvvi ypmhrnpkvraiaekylsgrnri eliepldaiefhnftnqsy l v  
ltdsggi qeeaptfgkpv l  
vlnrhterpegveagtsrvigt dydnivrnkql ieddeayqrmsqannpygdgqasrri ceaieyyf glrt dkpdefvp  
lrhk  
>tr|Q8NYN9|Q8NYN9\_STAAW  
mkl tvvglyig lptsimfakhgvdlvgdinqqtidklqsgqisieepglqeiye evlssgklkvsttpeasdvfi iav  
ptpnnddgyrscdislvmr  
al dsilpflkkgnti ivesti apktmddf vkpvienl gftigediylvhcpervlp gkileelvhnnriiggvtkaciea  
gkrvyrtfvqgemietdar  
taemsklmentyr dvnialaneltki cnnlninvldvi emankhprvni hqpgpgvgghclavdpyfiiakdpenakliq  
tgreinnsmpayvvdttkq  
iika lsgnkvtvfgltykgdvddi respafdiyel l nqepdievcaydphveldfvehdmshavkdaslv lilsdhsefk  
nlsdshfdkmkhkvi fdtk  
nvvkss fedvsyynygni fnfidk  
>tr|Q8NYPO|Q8NYPO\_STAAW  
mrknilitgvhyigna lkdklieqghqv dqi nvrnqlwksts fkdya l ihtaalvhnnspqarl sdymqvnml ltkql  
aqkaksedvkqfi fms tma  
vygkeggvgksdqid tqtprmpntnygi skkfaeqalqel isdsfkvaivrppmiy gahcpgnfqr lmq lskrlpiipni  
nqrsalyikh ltafidql

Tsompanidou\_et\_al\_Supplemental\_FASTA\_File

islevtgvyhpqdsfyfdtssvmyeirrqshrktvlinmpsvlnkyfnklsvfrklfgnliysntlyennnalevipgkm  
slviadimdetttkdka  
>tr|Q8NYP2|Q8NYP2\_STAAW  
msekkiililcqyfypeyvssatlpqlaedlianhinvdvmcgpweysnhkqvsktemhrigicirrlkysrfnkskvg  
riinffsflskfviniipkm  
lkydqilvysnppilplipdv1hr1lkkkysfvvydiapdnaiktgatrpqsmidklmryinrhvyknaenvivlgtemk  
nyllnhqisknadnihvip  
nwydmrqlqdnriyndtfkayreqydkillysgnmgqlqmetlisflklndkqpqtltlilcghgkkfadvktaiethri  
envkmfefltgtdyadvlk  
iadvciaslikevglgvpsknygylaakka1vlmdkqsdivqveqydagiqidngdahaiynfinthsskelhemge  
rahqlfkdkytreintmky  
ynllk  
>tr|Q8NYP3|Q8NYP3\_STAAW  
mrlnkfigdsflmilssgiaqviliittpiitrlyspdefgetifsniamilipiinaryd1livntkndrsanilsqi  
sflisllilililipifais  
aclypnfilfdiifiiimflvslniftnylnkerkykvlslinfragsmallqiifglalagslgligfslsyiagi  
tlgyktfkhhfnivrdkee  
tkalflenknqlvystpsillnslsfsvvffigilytntevgiygmairvlqipvtiislglskifmqandyiehgn  
frnlllkfssilvsviil  
yvp1ylfsee1vni1lghsvdaitvikiviplfvirlivstvs1svivlqkqlelilqalfligttatfviskmlnlt  
flnfvshintivlivsymif  
fialyyfaknkqfkns  
>tr|Q8NYP4|Q8NYP4\_STAAW  
mivktfmskifrlmtp1llfykkeyltgyyfenkvagw1wawkavpfkllgints1pfpaditvrmhnpnivfdknd  
ihifqspgtyfnfsaviy  
igrvvyiapnvgiitanhniknlkshapedvkiignyswigmnsvilpgvelgehtivgagsvvtksfpegnvviggnpa  
kikkki  
>tr|Q8NYP5|Q8NYP5\_STAAW  
mnkiyntsylvia1lmfpc1mlgdkp1lflapisyvgvklfifsnnpnfkfskivydvlgflrlvfiipamivffqdsti  
dn1plggayfnqaviymv  
efiigs1fili1sk1fkhevsvrnsft1sgssiyivfvlvicgifvafpevrknisfliiktdamgrgteatsglvlf  
vmlfqlalal1fliaayas  
ykkkykenpkiiyvvlplaigilnislivgerrsyqlytmvav1tvsvilfskhkrriniiisvgifv1almtlykelyv  
fnyssysealnstsvsnlk  
ivdt1qsyfygpniasidylnyngsfkqylfdntravfgfnffldkkqlitsqlfnqliygskqltghlissagygi  
iyfgplffylnlianiffa  
flseyiirkshslevifigtyimrlitsifshptplitlismilvvyviaiipgiikkftkkvgie  
>tr|Q8NYP8|Q8NYP8\_STAAW  
mnivitgakgfvgnlkad1tsttdhhi fevhrqtkeeelesa1lkadvvhlagvnrpehdkefslgnvsyl dhvldil  
trntkkpail1ssiqatq  
dnpysesklqqeql1reyaeyngtvviyrwn1fgkwckpnynsviatfcykiarneeiqvndrnvel1nyvddivae  
ikraiegtptiengvptvp  
nvfkvtlgeivdl1yfkfksr1drt1pk1dn1fekdl1stysyls1pstdfsyp1l1mnvddrgsftefiktpdrgqvsni  
skpgitkgnhwhhtknekf  
lvvsgkgvirfrhvnndeiieyyvsgdklevvdipvgythnienlgdtmvtimwvnmf1dpnqpdyflv  
>tr|Q8NYQ2|Q8NYQ2\_STAAW  
mest1eltkikev1qkn1kiliilp1lfliaivtffvlspkyqantqilvntqtkgdnppqmaeqvsniaqlvntykei  
vksprildevskd1ndkys  
psklssmlti1ngentq1iniqvksghkqdsekiansfakvtskqipkimsvdnvsilskadgtavkvapk1  
>tr|Q8NYQ5|Q8NYQ5\_STAAW  
msnaer1shfms1npevr1wdi1qtnfkakalkekvyieydkikat1wnrrsmrvefnpnklshdev1wlkqniisyl1dd  
vsftr1dlafdfef1lndy  
yalsdksakkti1fygrnvkpetkyfgvrnsdrfiriynknknkimqm1k1iqhfygvwk1n  
>tr|Q8NYQ6|Q8NYQ6\_STAAW  
msniafyvsvdhgyifptdftsrnqyqpmg1l1anhvieqdrdqyqsfkidngdflqgspfcnyliahsgssqplvdf  
ynrmafdfgt1gnhefnvg  
lpylkd1lrr1nyp1lcaniyendst1dngvkyfqvgdqtvgvig1ttqfiphweqpehiqsltfhsafeilqy1pem  
krhad1ivvcyhggfekd1  
esgtp1ev1tgenegyam1eafskdidi1fitghqhrqiaerfkqtavi1ppgtrgttvgrv1stdeyen1svescellpv  
iddstft1deddql1rkq1  
edw1dyeitt1pydmtinhafearvaphpftnfmnyal1leksdadvactal1fdsasgfkqvvtmrdvinnyfpntfkvl  
avsgak1keaiersaeyfd  
vkndevsvs1adfl1gpkpqhfn1ydiyggvsy1ihvgrpkkqrvsnmmiqghavd1kqytyicvnyravgggqydmfidap  
vvkdiqvegaq1l1idf1sn  
nn1mr1pqvvd1fkvek  
>tr|Q8NYQ7|Q8NYQ7\_STAAW  
mkk1y1ks1l1tvsai1vatvs1salpqs1ai1thesqptkqqr1vt1fdrshgqtagaadwvsdgafsd1yads1qkqgydvkaid  
ghsniteas1ksski1fvip

Tsompanidou\_et\_al\_Supplemental\_FASTA\_File

eanipfkeseqaai vnyvkqggnvvfis dhynadrlnrdisseamngyrrgayedmskgmnaeeksstamqgvkssdwl  
stnfgvrfryna lgdlns  
nivsskesfgitegvksvsmhagstlaitnpekakgivytp eqlpakskwshavdqgiyngggkaegpyvai skvgkga  
afigdsslvedsspkyvre  
dngekkktydgfkeqngklln nitdwmksdsgkslkasgltdtktkll dferperstepekepsqppsgykywdpt  
tfkagsygsek gdpqnt  
pddhtppnqnekvtfdipqnvsvnepfemti hkgfeanqtlenlrvgiykeggrqigqfsskdndynppgystlptvka  
dengnvtikvna kvl esme  
gskir1klgdktlittdfk  
>tr|Q8NYQ8|Q8NYQ8\_STAAW  
mkkfkclfvlm]avivfaaacgnsssldnqknasndsdsks ggykpkeltvqfvpsq nagtleakakplekllskelgip  
vkvsvstnyntiveamksk  
kvdv gflppta ytlahdqkaadlllqaqrfgvkedgsas kelvdsykseilvkkdskiks lkd lkgkialqdvststagy  
tflamlkneaginatkdm  
kivnvkghdqavisllngdvdaavfndarntvkkdqpnvfkdrilkl tqaipndtisvrpdmkdfqeklkafidia  
kskeghkiisevyshegyt  
etkdsnfdivreyeklvkdmk  
>tr|Q8NYR4|Q8NYR4\_STAAW  
mtqtqpkf1tiyntl ykeiqigkypsg halptekelcarfdvsrmtlrqaikllaedgivestr gkghfvipqtnaqhas  
smdqfkhpldqillarvsm  
ssinyrvdleseytnhlfanhsavi ameryyqkdnhskqadafcftfip lnv idtfkvntqneddmktfveqtiysna  
yqsd lkmsitkaphfnhs  
hvf dgdthcwl iietlyaqtpypiminkwyipq eiseltl tri rqsdy  
>tr|Q8NYR6|Q8NYR6\_STAAW  
mksds lkeniyygqlyqlirtmtpl itipiisrafgpsvgivsfsvnivqyflmiasvgvqlyfnrviaks vndkrqls  
qqfwdifvsklflaltvfa  
mymv vitifid dyli fl lqgiyi gaa ldiswfyagtekfkips lsnivasgivilsvv vifvk dqsdl slyvftiaivt  
vlnqlplfiy lkryisfvs  
vnwihwqlfrss layllpnq lnlytsiscvvl glv gtyqqvgi fsnafniltvai imintfdlv mipritkmsiqqsh  
sltktlannmniqlil tip  
mvfgliaimpsfylwffgeefastvplmt ilailvliiplnmlisrqyllivnkirlynasitigavmnlvlclvliyfy  
giygaaiarlitef illiw  
rfvdi tkinvklnivstiqcviaavmmfivlgvvnhy l p p tmyatlll iaigivvylll mmtmknqyv wqilrllrhkti  
>tr|Q8NYR7|Q8NYR7\_STAAW  
menghsklltlll iglavfiqqssvi agvnvsiadfitllilvyllffanhllkanhflqffii lytyrmiitlcllff  
ddlifitvkevl astvkya  
fvviyfy l gmiifklgnskkvivtsyi issvtig lfcii aglnksp l lmk llyfdeirskgl mndpnyfamtiitlvla  
kyihnyi fkv lacgillw  
sltttgsktafi ilvlaiyffikk lfsrnasvsvmlvimlillcftfy ninyllfq lsdldalpsldrmasifeegfa  
slndgsersvwwina isv  
ikyt l gfgvg l vdyvhigsqingill vahntylqifaewgilfgal fii fml yllfel frfnisgknvtaivvmltmliy  
fltvsf nnsryvafilgi  
vfivqyekmerdrnee  
>tr|Q8NYR8|Q8NYR8\_STAAW  
mkiicytkadnggaqthliqlanhfcvhhdv yvivgnhgpmieql darvnviiiehlvgpidfkqdilavkvl aqlf sk  
ikpdvihl hsskagtvgr i  
akfiskskdrivftahgwaftegvk pakkflylviek lmslitdsiicvsdfdkqlalkyrfnrlklttihngiadvpa  
vkqtlksqshn nigkvvgm  
l p n k q d l q i n a p t k h q f v m i a r f a y p k l p q n l i a a e i l k l h n s n h a f t f i g d g p t l n d c q q q v a q a g l e n d v t f l g n v  
i n a s h l l s q y d t f i l i s k h  
eglpisii eamatglpviashvggise l vadngicmmnnpetiakvleky lid sdyikmsnqsrkrylec fteekmike  
vedvyngkstq  
>tr|Q8NYS0|Q8NYS0\_STAAW  
mmfynilgvllvlmlstdaldsdiithlrtslinflpihllsalknpyc  
>tr|Q8NYS2|Q8NYS2\_STAAW  
mssiigkiaiwigivaqiyfsvvfrmisiniaggsdyetifllglilalftvlptiftaiymesysviggal fivyaai  
alcl ynffssilwliggil  
liwnkyskdestdenekvdiestenqfeskdkitke  
>tr|Q8NYS3|Q8NYS3\_STAAW  
mri vqpvieqlkaqshpvchyidlvglehhlqh itlslpsncqmyyamkansertildtisqyvegfevasqgeiakgl  
afkpanhiifggpgktdee  
lryavsegvqrihvesmhelqrlnailededktqhillrvnlagpfpnatlhmagrptqfgis edevddvieaalampni  
hldgfhfhsisnlnsdnlh  
vdvkl yfkkakswsekhrfp l khinlgggigvnyad ltsqfewdnfvenfktliveqemedvtlnfecgrfivahigyy  
vtevl di kkvhgawya ilr  
gg tq q fr l p v s w q h n h p f e i y r y k d n p y s f e k v s i s r q d t t l v g q l c t p k d v f a r e v q i d a i s t g d v i v f k y a g a y g w s i  
shhdf1shp hpefiyltqt  
kede

Tsompanidou\_et\_al\_Supplemental\_FASTA\_File

>tr|Q8NYS4|Q8NYS4\_STAAW  
mnqtilnrvktrvmhqlvssliyenivvykasyqdgvghtieghdseyrftaekthsfdriritspiervvgdeadttt  
dytqllrevvftfpkndek  
leqfive11qtelkdtqsmqyresnppatpetfndyefyameghqyhsyksrlgftlsdn1kfgpdfvpnvklqwlaid  
kdkvettvsrnvvvnemlr  
qqvgdktyehfvqqieasgkhvndvemipvhpwqfehviqvdlaeerlngtv1wlgesde1yhpqqsirtmspidttkyy  
1kvpisitntstkrvlaph  
tienaag1tdwlkq1qqdqtylkde1ktaflgevlgqsy1ntq1spykqtqvygalgviwreniyhmlideedaipfna1  
yasdkdgvpfienwikqyg  
seawtkqflavairpmihmlyyhgiafeshaqnmmlhengwptrialkdfhdgvrfrkrehlseaash1tlkpmpeahkk  
vnsnsfietdder1vrdf1  
hdafffiniaei1fiiekqygideqrqwqwkdiieayqea1pe1nnyqhfd1feptiqvekl1ttr11sdselrihhvt  
nplgvggindattiset  
>tr|Q8NYS5|Q8NYS5\_STAAW  
mqnkeliqhaayaai1er1neyfreenlyqvppqnhqwsiq1selet1tgefrywsamghmyhpevw1idgkskitty  
keaiar1lqhmagsadnqt  
avqqhmaqimsdidnsihrtary1qsntidyvedryivseqslylgphfhtpkasgfsead1ekyapechtsfq1hyl  
avhqdv11tryvegkedqv  
ekvlyq1adidise1pkdfi11pthpyqin1vrqhpqmqyseqglikd1gvsgdsvyptssvrtvfska1niylk1pih  
vkitnfirtndleqierti  
daaqviasvkdevetphfklmfeegyral1pnl1gqtvepemd11t1nsamivregipnyhadkdi1h1vas1fetmpdspm  
sk1sqvieqsg1apeawle  
cyl1nrt11pi1kl1fsntgis1eahvqnt1ie1kdgipdvc1vrd1legic1srtiatekq1vpnvvaasspvvyahdeawh  
r1kyyvvn1h1gh1vst1g  
katrnev1wq1vahr1mtwkkeyannavfvdcved1yqtptiaakan1msk1ndcganpiythipn1pichnkevsyces  
nns  
>tr|Q8NYS7|Q8NYS7\_STAAW  
mnremly1nrsdieqagghs1qvvyda1tea1tahahndfvqplkpy1rqdpenghiadriiampshiggehaisgikwi  
gskhdnpskrnmerasgvi  
11ndpetnyp1avmeas1issmrt1aavsviaakhlakkgfd1ti1gcgl1gdkq1qsm1eqfdhiervfydqfseaca  
rfvdrwqqqrpeinfiate  
nakeavsngvvi1tctvtdqpyieydw1kqgafis1isimdvhkevfikadkvvd1dwsqcnrekktinq1lvlegkfske  
alhaelgq1vtgd1pgred  
ddei11n1pmgmaied1issayfiyqqaqqnigt1nly  
>tr|Q8NYS8|Q8NYS8\_STAAW  
m1lkpyqiviag1cl1aivails1lmignt1vspgtv1qal1fnfdsend1hdvvtgarasrtia11tgaalavsg11mqa  
1trnpiasp1lfgvnagav  
ffvi1fsitfi1q1s1fkmivvia1flgai1vvt1lvva1gmfrqt1fsphrv1lagaaiam1ftaftqgilimnetd1qg11f  
w1sgsvs1rniwd1pwiip  
1v1i1i1ia1f1smaah1ni1m1tsddia1ig1gnik1likwmi1m1ismlagisvavagaivfvglivpniskr11ppnyky1  
ipftalaga1im1isdiva  
rii1kple1lp1gvvtav1igai1v1iyimkkgrqr1  
>tr|Q8NYS9|Q8NYS9\_STAAW  
mmsgssfi1p1qr1v1myfi1npndsmdqft1ev1r1p1rit1ailagaal1gmsgl1mqv1knpiaspdi1igitggas1savv  
fiaffsh1t1h1l1p1fav1  
ggaiamm111vf1qtkgq1rptt1i1igismqt1fia1lvqg11ittkq1saakaytw1vgs1y1gatfkd1i1lgmvilavv  
p11f1v1pkmk1si1l1ddpv  
aig1gl1hvqrmk1liq1itst1ilvsma1slvgnig1fvglia1phiakt1vrgsyakk11msamigaisiviad1igrt1flp  
kevpagv1fiaafgapffiy  
111tvkk1  
>tr|Q8NYT3|Q8NYT3\_STAAW  
myysygnyeafarpkkpenvenksay1igsg1as1laacfl1rdgqmegskih1leelpkaggs1dgenmp1kgyvvrgg  
remenhfec1wd1lfrsips  
lei1dnasv1defywl1nkedpnysrcrviekqgqr1vtdgdft1tkkaikei1d1cl1tneed1ddvitdvfsdfffnsnf  
wiywktmfafepwhsamem  
rrylmrfvhhiggladfsa1kftkynqyes1v1lpmvey1kshgvqfeygvkvedikvdvttsqkiare1ilhrhgaesi  
k1tvdd1lvfvtngsitess  
tygdndtpapptde1ggs1w1lkn1larqspefgnpdkfcqnipqks1wfsatsttnkdi1idtiesickrdplagktvtg  
gi1t1indsawqisft1nrq  
qqfkdqpkne1stwiya1lysdvngdy1kkp1itecsgneicqewlyh1gvptdkied1akhasntipvmpyitsyf1mtra  
igdrp1lvphqsqnl1afig  
nfaeterd1vt1t1teysvrtameavyq11nidrgipevinstfd1rv1mdaiye1lndhqdlre1tkdskmqk1alagf1kk  
ikgtyies11kehk11  
>tr|Q8NYT5|Q8NYT5\_STAAW  
mnqq1iet1kskegkmi1er1ryl1hqhpe1sfhedetakyiaefyk1gkdvevetnigpreikvtidsgkpgkt1airadfd  
alp1tedtg1sfasqngkv  
mhacghdahtaym1v1laet1laemkdsftgkvvvi1hqpaeevppggakamiengv1dgvdhv1gvhvmstmktgnvy1rpg  
yvqtgraffk1kvqgkgh

Tsompanidou\_et\_al\_Supplemental\_FASTA\_File

gssphmandai vagsyfvta lqtvsrrl spfsetgvvtigsfdgkqfnvikdvveiegdvrgltdatkatietekrls  
kglealygtvtctleynddy  
palyndpefteyvaktlkeanldfgveicepqpssedfayyakerpsafiytgaavedgeiyphhhpkfniseksllisa  
eavgtvvl dylkgdn  
>tr|Q8NYT7|Q8NYT7\_STAAW  
mvgdlkkrqekklittviaphehdekhrenkskmmksekqlinqlinhgthfksdfknvakgdvwnkamqldklgnelkk  
imn  
>tr|Q8NYT8|Q8NYT8\_STAAW  
mmfeeykkiddlenayeielkriereiqlsdlkylrreneqsydaflylnknmyseesnakvrrlveefdyeadtyi  
rqkelkledykeeirreyi  
qqsekimeak  
>tr|Q8NYT9|Q8NYT9\_STAAW  
makaeyeidpgkitsnseetsaisni syeienandnndnekirgqitklkkggnfpknldyidsytdpstgttatafln  
kdtgkvtvgmagtnfhgdq  
lkrvalssmspllfppskqdmkdvrgtmkdgvadlaigvgmvnykgkhfantqqfienlqkkyeidvtvghslggrdaif  
lglyrnyknvaynpaple  
vksirnkfgsqflfrnttfdpdekylkelmdnydgditkvitqkdgl dylvkrtdhltcgvdrinngqghamenflgekeq  
reieelmlvkgyrdandk  
afkalkntekklgkideikskllqtnggalsssqkllletlvafsvaeglskmdqelqqlknmfnlmdkfeanwkdv  
geasdivgkhl sypekvsal  
ldnggvnesklatephneikdklnkitdlskkynsylqqieksineivakdqqlagqigdl  
>tr|Q8NYU3|Q8NYU3\_STAAW  
mkkciktlf1s1ilvmsgwyhsahasds1skspenwmsklddgkhlteinipgshdsgsftlkdpvksvaktqdkdy  
tqmksgrffdi rgrasad  
nmisvhgmvylhhe1gkflldakyy1saypnetivmsmkkdydsdskvtktfeeifreyyynpqqynlfytgsnanpt  
lketgkivlfnrmggyi  
ksgygadtsgiqwadnatfetkinngslnlkvqdeykdydkveavknlakaktdsnkdnvylnflsvasggsafnst  
ynyashinpeiaktikang  
kartgwli vdyagytwpgyddivseiidsnk  
>tr|Q8NYU5|Q8NYU5\_STAAW  
msqllnnt1sawllies1spgevnftaedi1sahfknagakqaqlsfdeyfeiwnaerfiiseeksetgelifkfy rhc  
fryneinlkiqdi fddyse  
ihpnngthcygytfntdkhgkvivdsihipmimsalkeieknknanieekfndsvekf vqkvkeiladepinefklkmd  
kaydeyfsvlnskkgd1fg  
hyvaiyvkdsdlppqefnsffisdiekarkspnqtli dyiegveesqrievdenkemfdkflhpsrlpdgrwpsqtefr  
1slmqqlavnqitsgneri  
ssvngppgtgkttllkdi fahlvvergkelaklnpkdafvktkihetddkyvylkesiakykmvvasnngavenisk  
dlpkieeiirnpekckfpk  
yeqnyanlahelkdfaeiaedligesawglfsgvfgkstinqv1shmlkqdandigfakllqnennrmsynelmsewqs  
hgrafleelrhvemlkees  
iraydvyknncesfskieqvinseksieeqvyhldnetlrdnkeiedlndrinyivkqietlneliksikesnkgfinkl  
kamfnseedesykdhnkek  
qql1tqql1eleckknkhd1vsk1kekelikqltkvqlqldelnsq1qeleayrieskitipekdfwsdnyderqvt  
nlwtsdelqyrram1flra  
milhk1111jannttiyya1ndfkdrrklidanpdkvhnawnvmh1ifpvvsttfasfksmyggipkdfidylfideagga  
ipqaavgalyrskkvav  
dpiqiepvvtleshlidnrknyhvpeylvskeasvqsadnanqygfwksdatdsnqktwigiplwvhrclkmftia  
nqiyannkmv1psnitkv  
ktgwydvkgnavqkqfvkehgkvvg1laddwieaiekgknepssfv1spfsavqqikrmlkqqlptridierkinqw  
vksigtvhtfgqkeakv  
yfvigt dntqdgavnwscekpn1lnvavtrakkefyvigmqriqm kpfy etifkernvk  
>tr|Q8NYU9|Q8NYU9\_STAAW  
mnl1ilksflvtsetkn1tkasel1nysqstvsthi eklerqldvklfyrkkygmelteeglayvkyakvildsnseyer  
eikglynkkvnisinmges  
qylryynki sewlaehpyvn1kfsahsnfyikeeianfksdislitdekiinsnltaipiteerl1fvtnkemkdfkl  
ndiqnht11vtekgcsyre  
qlemi1lykysfstqmief1gies1kkh1knsggial1pefivadelenks1fqidvdvdipnlettliinpesnkqvle  
sfvkdvfl  
>tr|Q8NYV0|Q8NYV0\_STAAW  
mitclfgssrkdgnsa1aven1ln1kvnfvnlyqsniekvtdnrhskganfhnddyeqil1kvlesdiiifstplywys  
msas1klfidrwtes1rdt  
qidnfkeimsqkylil1iggnphtkaqplvnqfklifefmnitnyrfligegnkpfdil1ndsqfieelan1lalkkg  
diy  
>tr|Q8NYV1|Q8NYV1\_STAAW  
mtd1lki knfr1fflaei1safvgistvganwylidktnsdqllgim1aln1sgflaspiggladkynrrniility  
llqvilyllivialvmigt  
etylvigfainvgiwttymatsrs1vkqil1kpdqytdans1leis1qtgmfiagglsgilykingftliiamtimfli  
sifmlfr1hvd kpthsee

Tsompanidou\_et\_al\_Supplemental\_FASTA\_File

stnsllqeyllgwkf1kdnmmififgvisiipmvftmifnislpgyvynv1klssvqfgfsgdmlgyigg1caglisails  
kkistkvli1fl1nfilvin  
salfiwinsafylfigsfilgysissiriymntaimntvsdkyvgrsftiwtss1llqsfiapflgrwineindkfgfy  
iilils1l1fv1llvnkt  
dkikyahkee  
>tr|Q8NYV7|Q8NYV7\_STAAW  
mdivnivimlligvfggfisglvgvggaiiypaillpp1fgapaysayasgltsqvffst1sgslkarkktefspq  
lvlymgggmiigsm1gaf1  
an1fdatfvntvyiia1la1t1mfikvkssekssfnkyllviig1figiisgivgaggafiiipillv1fk1pmntvv  
ansiviafissigafvik1  
iqgyiplydalfliigsii1fapig1k1skkvpni1qkwii1ivfaii1q1l1  
>tr|Q8NYV9|Q8NYV9\_STAAW  
mydsetgdiqkgyikfhtkssfyd1fdfkvkkrvdflkfyndnelistkkl1hidiylfnk  
>tr|Q8NYW0|Q8NYW0\_STAAW  
mvrlykngkprneiireydltpsalgkwikqhqtg  
>tr|Q8NYW1|Q8NYW1\_STAAW  
mckv1kiprstydsikrkdnk1tkddsneravini1fnsnrkvfgarrkiarimkkn1lsvvytkakyknykpketnekr  
ikn1lnrafnreqpmetlv  
sd1tykvagtwhyc1fid1fnreivgysagknkdan1lvska1srinh1leqin1fhtdrgkdfdn1ldevlesfkik  
ys1stkscpydnavaeatm  
kamrsefvkqm  
>tr|Q8NYW2|Q8NYW2\_STAAW  
midnfvkq1k1likekrtnnv1kksdwdkgdqykt1vhdk1pkq1kahikedkysvvgkvatgnyskvpwisiydenitke  
skdgy1lvy1fhpegegiy  
1slnggskisnmfprdknaakqra1t1sse1nkyitsnefntgrfyaaenkdsydlkndypsgyshgsirikydlne  
gfteeemlyd1kkf1e1fn  
elaskvtktfydglvnr1dei1qedseieeri1aqidkt1kqveapkgvipkykkvskttkndseieksnkenk1tgkvg  
ek1al1kyfnd1idnkided  
kkeqfrni1ndnpgsqhghgyd1lafdp1ntdeaie1kfeie1ktsissnieepffms1nemfalkeykkyl1l1rifnvs  
eepqfy1dpyanysefk1  
vdd1idkvfnveai1qykvfgek  
>tr|Q8NYW6|Q8NYW6\_STAAW  
msyt1feigpfa1dsfgwketippkkdgdsekvvmaspiivnarfsdpitgvekl1itnngkkd1fesd1l1ttrn1ps  
likygysinekyirs1sya  
1q1mrdr1p1se1yegvgi1etpfgylis1dkv1ksiqfnqsspsypivdsayd1tpkg1fdn1wfnmyidevkg1l1le1  
avifgisalvts1fk1khke  
iefagi1fsftgqs1tgk1staa1lavsvagnptk1gnet1frswnatrna1legylsnnygipivfde1sst1rdttg1ly  
siaegqgrqrsnv1hgevt  
pknwgtsvistseysi1fnds1qndglrvrtieineqftt1natnadnikkavalnyghv1plvakylinredeviqwyke  
vdwfeak1kdetnntgirm  
fkryavittsak1lgrv1stdidiani1rdyfidyhtvt1sers1adkaidvi1qfvaqnr1gkfsdegal1k1nmfenyglis  
1kddhievk1ianv1fkqm1  
nnhqf1qdvnnvna1lrdk1gfi1adrgr1ttrsvkd1nsgk1qslvfyh1kl1dvefas1lg1tkdks1l1qnwtp1sndk1aa  
kel1fksaneg1g1psgv1hed  
f  
>tr|Q8NYW7|Q8NYW7\_STAAW  
mkqvigyl1rqstmkqqs1aaqkaieaiaekhh1qhinfysdkqsg1rkdnrsgyrqitq1liqqgqcdilccyr1ln1lhrn  
1kna1k1k1lcq1tyhv1l1  
svhdgyfdmdqafdr1k1ni1fis1lae1lesdn1geqvrng1lqekakqgr1litthap1fyeyhngt1fiinqnesptvkavfn  
yyikghgyk1kiaq1leedn  
tyinrqpyqvrni1inpnycgrvnnqygqfdnmf1psivstsiy1eqaqr1rlqk1tk1qtps1dn1k1k1k1cpc1nat1tnm  
tir1kknht1ryyvc1pknm  
asrfvcdfk1g1naqt1ledkv1levcrdfyqnr1ytk1ksaidk1rik1qrniek1hht1tqk1q1iek1laqgi1daet1freqt  
qsl1rqqpqr1ttsing1hiq  
ntiqni1iqkrft1nm1lpyide1ilitkskt1mgiy1fknepl1nivnqt1tqssia  
>tr|Q8NYW8|Q8NYW8\_STAAW  
mqqlk1tkrvgiyvr1stemq1stegysidgqin1q1keycdf1h1fevkdi1yadrg1sigksmnr1pelq1rilkdakdgyidcvm  
vyktr1larntsd1lkive  
dlhkqnveffs1sermevt1ssgk1mlq1lasfsefernnivenvfmgqtrraqegyyqgn1plgydkipns1khelminq  
heanivkyi1fesyakghy  
rkiana1nhkg1yv1tkgk1pfsissityi1anpfiy1gki1qfakykdwsekr1rg1lndkpv1aegkhs1piinqd1wdkvqmr  
kkqvsqk1p1qvhgk1gtn1lt  
gi1hpcq1c1g1p1maasnt1tnt1kdgtk1kri1ryy1scsn1frnk1gskvcsansvr1anviedyvmk1qileivksdki1ervvarv  
nqenqvd1cas1lhdi1aykq  
qqydevq1k1ln1kti1edn1pd1t1svi1rpsi1qkyek1q1ndi1tyqin1q1knq1nedkt1fdake1isk1l1qhi1fhdik1hiek  
sr1ka1ly1sv1dridik1kd  
gnhkkq1fyvt1k1lnnei1kq1lfnkq1ldevh1stss1l1pqt1ly1ti  
>tr|Q8NYW9|Q8NYW9\_STAAW

Tsompanidou\_et\_al\_Supplemental\_FASTA\_File

mntikstihateafsdsdeqhyrlkktwdekkaactvityphldgvlslldttvliinqlanserygavylvnlfsnir  
tpenlkhiknpydehtdih  
lmkaisesdtvilygayakrpvvidrveqvmemlkphkkkvkklinpvtneimhplnparqkwilks  
>tr|Q8NYX0|Q8NYX0\_STAAW  
mlsilhfmigclnlietsvllrilyvvyrashetakealgdkelraiahelktktvkdmsvdwskrdsakakmrqvrrl  
lkkygyppdlqkmaveqvv  
eqaelmasqq  
>tr|Q8NYX3|Q8NYX3\_STAAW  
mkalllktsvlvlifsvmgllwqvsnaaeqhtpmkahavttidkattdrqqvpptkeaahhygeaatnvsasaqgtadd  
tnnkvtstnaptknpttavs  
ttgnkrhdvdaqqastqkpthatfklsnaktaslsprmfaanvpqttthkilhtndihgrlaeekgrvigmaklktvke  
qekpdlmldagdafqglpl  
snqskgeemakamnavgdamavgnhefdfygdqllklegmldfplstnvykdgkrafkpstivtkngirygiigvttp  
etkkttrpegiqvefrdp  
lqsvtaemmriykdvdtfvvishlgidpsetwrgdylvkqlsqnpqlkkritvidghshtvlqngqiynndaivqtgt  
alanigkitfnyrngevs  
ikpslinvkdventpnkalaeqinqadqtfraqtaeviiipntidfkgerddvrtretnlgnaiadameaygvknfskk  
tdfavtngggi rasiakgk  
vtrydlisvlpfgntiaqidvkgsvwtafehslgapttqkdgktvl tangglhisdsirvydymnkpsgkrinaiqil  
nketgkfesidlkrvyhvt  
mndftasggdysmfggpreegislqvlasyllktanlakydmtqpqmllgkpvaseqpakgqgsgksesgkdtqipg  
kekvmnpakqpatgkvvl  
pahrgtvssgtesdralegtavssksqkqanmsapkgsahekqlpktgtdqssspaamfvltvgigliatvrrrkas  
>tr|Q8NYX5|Q8NYX5\_STAAW  
mnnehiksvilallvlmsvvltymvwnfspdianvdntdskksetkplttptakmdttitpfqiihskndhpegtiat  
vsnvkltkplknkevksv  
ehvrrdhnlimpdlssdftlfdftydlplstylgqvlmnakvpnhfnfnrlvidydaddnivlyaiskdrhdvklttt  
tkndhfl dalaavkkdmqp  
ytdiitnkdtidrtthvfapskpekltktyrmvntisvekmnailfdstivrssksqgttynntgvanyndknekyhy  
knlsedeassskmeetipg  
tfdfinhgghflnedfrlfstnnqsgeltyqrfngyptfnkegsnqi qvtwgekgvfyrrsllrtdvvlnsednktlp  
klesvrsslannsdinfek  
vtniaigyemqndshnhievqinseivprwyveydgewyvyndgrle  
>tr|Q8NYX7|Q8NYX7\_STAAW  
mnrqstkkallipfvimiiitaivlmgvwfifnslialiasivlvmiivsivlfrqalmkmdsyvdgl saqisttnkai  
khlpigii vldendhiwv  
nqfmdthmeanvisesvnefpnilkqldrvksveieynqyhfqvrysendhcllyffditeqvqtnelyenskpiaatlf  
ldnydeitqnmndtqrsei  
nsmvtrvisrwateyniffkryssdqfvaylnqkiladleeskfdilsqllreksvgyraqtltsigvgegtenlidlge  
sqsgldlalgrggdqvai  
singnvrfygktdpmekrtrvrarvishalkdilaegdkviimghkrpdldaigaaigvsrfammnleayivlnetdi  
dptlrrvmeidkkpelre  
rfitsddawdmstkttvividthkpelvldenvlnkanrkvidhrrgesfisnplliymepyasstaeltelleyq  
pteqrllrlestvmyagii  
vdrnftl rtsrtfdaasy lrahgadt l tqhflkddvdtyinrselirtvkvedngiaiahgsddkiyhpvtvaqaad  
ellslegieasyvvarred  
nligisarslgsnvqltmealggghltnaatqlkgvtveeai aqlqqaiteqlrseda  
>tr|Q8NYX8|Q8NYX8\_STAAW  
mfskiqpkatiatiaialvfaalyvpvglifalfatipgivilwnksiqsfgisalitviittvl gntfvlsaiilvl  
iasliigqllkertskeri  
lyvttvamslisliafmlqtfgrippsasivkpfkqtlheaitmsgadanmtqileegfrqatvqlpgfiiitflivl  
inlivtfpilkfkiatp  
fkplfawqmsgillwiyiiivicllftgqpsvfqsillnfqlvlsvlmyiqglsvihffgkakglpnavtillliigtil  
tptthivglgvidslsl  
krimknnsk  
>tr|Q8NYY0|Q8NYY0\_STAAW  
mithmmllililcgivtlliriipfimi skvqlpdvvrwlsfipitlftalvidsiiqqtphgegytlnipyialip  
tviilsitrsltitiisgi  
vimaalrfff  
>tr|Q931E2|Q931E2\_STAAM  
migifvialtlwivgsfihidatltafiaalalllgtvltwqdilnetgawntlwfvsvlvmadqlnklgfipwlsksi  
atslglswpivlvilif  
yfyshylfasstahisamyaaalgvaiagapplfsalmgffgnllastthysgpapilfssgyvtqkrwmtmnlilg  
fvyfiwiglglslwmkvig  
if  
>tr|Q931E3|Q931E3\_STAAM  
mentvkyrkfiliipvvgllialtpfkpdavdptawymfaifvatiiaitqmpigavsii gftimvlvgivdmktava  
gfgnnsiwliamaffisrg

Tsompanidou\_et\_al\_Supplemental\_FASTA\_File

fvktglrrrialhfvklfgkktlglaysivgvdlilapatpsntaraggimfpiikslesfsgskpkdgsarkmgaflvf  
tefqgnlitaamfltamag  
nplaqnlasstsnvhitwmnwflaalvpglvsllivvpfiikyipptvketpnakswaenelatmgkiaalenl  
>tr|Q931E8|Q931E8\_STAAM  
miipaiigylcgnfgfglvatgtlahiyvfkgsrsklrvtiicnlafaicmmlgtltaktplvfgmtllivtvipfyi  
ftalkiagpsstffivtfs  
lpinlpiapeealyrgfailvggilatmmvilitivfsknkaeeqaiqndfklisrllhtyndkaafqvaktavdsfkas  
dkllitstssndklrrfq  
klillhtsaqqiyselelnakqirplpdeliemdhiaqlndsdenvrywrkevvtteefqnlfnhilkidemvhane  
ariayeadmrkplyskriy  
qnltdsivfrntlrytaimmiaifialmfdfekaywiplsahtillgtstihaiergmarglgtlglvllsvillfsi  
ptpvavilmgiaalfteal  
vganyaiavvfitiqvilmnglasqnltniafprvidvaigivaiiglvlgqrtasvllpnvmaevvrkeatlhfyl  
fsenykdnvyqkntamn  
svklmmtqvynaangelfsdktliqnyypsifaleeisfmlnramanedrltineqlmgeylatfeniakhlelntele  
ikilpdlpqyniysammn  
iqhngfrerdknv  
>tr|Q931F3|Q931F3\_STAAM  
mkmnklvkssvatsmallllsgtanaegkitpvsvkvdvkvtylkttatadsdkfkisqiltfnfikdksydkdtlvk  
atgninsgfvkpnndydf  
sklywgakynvsiissqnsdvvnvdyapknqneefqvqntlgytfggdisisnglsgglngntafsetinykqesyrttl  
srntnyknvgwgveahkim  
nngwgyprgdsfhptygneflagrqsayagqnfiaqhqmpllsrsnfnpeflsvlshrqdgakkskitvtyqremdly  
qicwngfywaganyknfkt  
rtfkstyeidwenhkvklltdketennk  
>tr|Q931F5|Q931F5\_STAAM  
makqklvmignmagi rteeilerandlyditvigkepypnyrimlsnilqnkmtveetimpyewyeehgielitnd  
pvievdranqsvttangie  
vsydklifatgskafvipvgstlpsvigwrtiddteqmmniaktkkaiviggllglecarglldqgmevtvlhlaew  
lmemqldrkagnmlkadle  
kqgmkfemqantteiledvdegvkladgreipadlvvmavgirpytevakessldvnrnivndvmqtsdsnvayavgec  
aehngkvvglvaplyeqgk  
vladhlnketngykgsttfts1kvsgcdlysagqivenaeikgieifnsvdnykklf1kdgnvvgavlygdidgdrf  
ynmmkkgestedytlvsll  
tkggeeaslsiadmaddeticgcnvgdkgktivnaitengfttvevtaktkagnscgkckpqiailqhtlgddfvaakp  
aatcgctdltrdqivtqir  
akglktskevrhvlfnknkggpcrpainnylnmvyphdederesrfaneryhaniqndgtfsvipqmrvgvtdadql  
irlgevakkvhvplvkvtg  
sqrvglygvkkee1pniwedlgmrsasaygktrsvkscvgkefcfrfgtqytrlgirlektfeyidtpfkfkmvgvsgp  
rscvesgvkdfgiisveng  
fqiyiggnggtevekaefl1ttvetedeviklcgalmqyyretgiyaertapwlrrlgfenvkevll1dperqnelferimd  
akkaveaepweaitsnaqa  
rkifevekv  
>tr|Q931F7|Q931F7\_STAAM  
mknhflaelankydvqyl1qsrvlntkrkr  
>tr|Q931F8|Q931F8\_STAAM  
mkerghieqlwreekyhvl1hsqsyqmirnalctdls1hqvqqmiddalliepsigsvcnafdhmwyfkkcaneeer  
qskllkadfingkidtqt1  
ldflgsppnvvgi  
>tr|Q931F9|Q931F9\_STAAM  
mg1viehvtkrfgkmtavndis1elesgkmlgflgrngagktttfrmlgl1septeghityngkkl1dktmynrigylpee  
rgl1hgkl1tveeekylat1  
kgmskteiqqisywlerfditenrkkrids1skgnqqkiqllasm1hkpellildepfsgldpvne11keavkd1ndw  
gstiyvsshrmehveelcd  
dvcildkgqlvsgdinhvrasngnkvviesettl1pd1tnirgiihsenmkqgl1q1tinedvakdiyqvahqgyvkr  
fqvveps1qdi1fiekvggk  
da  
>tr|Q931G0|Q931G0\_STAAM  
mki1qleyflaivkynsftkaaql1hisqps1tatikkmead1gydl1ftrstkdikitekgiqfyryaselvqqyrstme  
kmydl1svtseprikigt1e  
stnqwian1irkhhsdypeqqyrlyeihdkhsieqs1fnihlaitnekihethedirsiplyeesyillapketfknqw  
vden1pl1lpnknsqvrk  
hlddyfnrrnirpvnvvetdrfesavgfvh1glgyaiiprfyyqs1fhtsnleykkirpnlgrkiyinyhkkkrkhseqvht  
fvqqcdylygl1lea1  
>tr|Q931G9|Q931G9\_STAAM  
mr1ksiitvialilimfmsaiessi1s1alptikqdl1nagn1s1iftayfialvianpivgellsrfkiiyvaiaagl11  
fsigsfmcgl1stnftmlii  
srviqgfgsgvlms1sqivpk1afeiplrykimgivgsvwgissig1p1l1gggilefatwhwl1fyinipiaiaailviw



Tsompanidou\_et\_al\_Supplemental\_FASTA\_File

tfhfpeetvakskfdtkg  
ltlfyifqstfknn  
>tr|Q931H0|Q931H0\_STAAM  
mqsglvi fplsvawitlnfnlhrieklsrkvlyllsftlllvssiiisfgiklpvliavflilaglsfgyiytkdsviv  
qeetsplqmkkmmsfygl  
knlgasigstimgylyaiqsfigpnlhnlvsavavisiglivlvvffkeqssqske  
>tr|Q931H6|Q931H6\_STAAM  
makesksanevspeinqwikehkenntdaqdklvkhyqklieslaykyskgqshhedlvqvgmvgligainrfdmsfe  
rkfeaflvptvigeikryl  
rdktwsvhvarrikeigprikksvdeltaelerspsiseianrlevseevleamemgqsynalsvdhsieadkdgstvt  
lldimgqddhydltkrm  
ilekllpilsdrereiiqctfieglsqketgeriglsqmhvsrlqartaikklaqaahk  
>tr|Q931H7|Q931H7\_STAAM  
mwmifsgllyvgglgyvmqrtrfcltggfrdmyvqknnkmfyalliaitiqsiglliltatdilqipahsfpilgtiigs  
fifgigivltggcatgtwy  
ragegligswialvlyavtaaitktgilkpvmkinqptvnvndmsqttgipfwglvvlitititilvvrtnnkkvrva  
vpkqkrytgyrylfekr  
yhpfaaiviglliallawpmsastgrndglgittpsanlvhflitgetkfidwgvlvlvgifigsyiaargsrefkwrp  
dkitirnsaiggi cmgfga  
svaggcsinglvetatmtwqgwialasmi vgwvtmshfi fvrpmkkvqqqsakvkqqtqiv  
>tr|Q931I0|Q931I0\_STAAM  
mfni nidedearellegainarvdelakekyfmytel snylnlskptieellinngmkyymvgstyrfkksdvdefmeq  
ltahmniqnndfkqvnikk  
llearq  
>tr|Q931I2|Q931I2\_STAAM  
maddnidhivknhlemivdqvandkefyifdsliqgrsfkdisnvlecseqsvrlwyetlldkivevie  
>tr|Q931I6|Q931I6\_STAAM  
mrdskpnyccykvsmypnwqgykradligqssyiknndvvi fneafdngasdkllsnvkkeypyqtpvlgrsqsgwdkt  
egsysstvaedggvaivsk  
ypikekiqhvfksgcgfdndsngfvytkiekngknvhvigtqtsedsrccgagndrkiraeqmkeisdfvkkknipkde  
tvyiggdlvnkgtpfekd  
mlknlvndvlyaghnstwdpqnsiakynypngkpehldyiftdkdhkqpkqlvnevvtckpkpwdvya fpyyyvyndf  
sdhypikaysk  
>tr|Q931J0|Q931J0\_STAAM  
mfrnmnsfkdrllkqimserkisqsel srrtgi grnsisdylnkyeakqdkvfelakalnveawlmgfdisknrkienn  
diasyiskltpprqknvln  
yaneqldeqntkgdnivdinsykdriavnvgcvsagvgerlhgetlftemvkapipphdlaalkvngdsmepmfkdgei  
ifvektknknqgigifi  
eeeayvkkvfveddrllvslnkeyrdlhfyresvrivgkvil  
>tr|Q931J1|Q931J1\_STAAM  
miynfdysllyermaerysqsslanaipisrtsinhklqgknlftqweikricelleipptkvgryyfeqnvqktvqts  
>tr|Q931J8|Q931J8\_STAAM  
msniyksylvavlcftvlaivlmpflyfttawslagfasiaailiffkeyfygk  
>tr|Q931K7|Q931K7\_STAAM  
markariyvindkpyrftksemelieshgitagmvskrvkdgwelheamdapegtrlseyrektierleqarlerkler  
krkkeaelrrkkphlnvnp  
qkhprgryacylmendivkvkk  
>tr|Q931K9|Q931K9\_STAAM  
mnyetgfqigvmearllkmrqrdykkqrdelegidiaklrerneelenmwrvtvknellgryehccfkirelhpeskanr  
igalyigkstadilism  
eeldgtnefyeflgmeddtne  
>tr|Q931L3|Q931L3\_STAAM  
mrertkviyrgwnkeifilqgknmnaviglrqifdelkrsyegykiivpievdfek  
>tr|Q931L5|Q931L5\_STAAM  
mwemikqilrllflamyelgkyvteqvyimmtanddvearrvitsferr  
>tr|Q931L8|Q931L8\_STAAM  
msvkvigdkalerelekrfgikemvkvqdkaliagakviveevkkqlkpskdtgalinevsfskpewingkrtitvywrg  
skdrykivhlieyghvqkg  
tgkfikpkamggvnrairgqgnkyfetlkrekkll  
>tr|Q931M1|Q931M1\_STAAM  
midtikvnnktipwlyvergfeipsfnyvltentvdgrsgsiygrresysfdiplvvrndylshngikthddvlnel  
kffnyeeqvkllqfkskdw  
wnayfegpiklhkeftipvkftikvvltdpykysvtgnkntaisdqsvvnsqtadtplivearaikpssyfmitknded  
yfmvgddevtkevkdympp  
vyhsefrdfkgwtkmitedipsndlggkvvgdfvisnlgegykatnfpdakgwvgagtkrglpkamtdfqitykciveqk  
gkgagrtahiydsdgkll  
asi gyenkyhdkighivvtlynqkgdpkkydyqnpimynldrivvymrlrrvgnkfsiktwkfdhikdprrkpidm  
dekewidggkfyqrpasii

Tsompanidou\_et\_al\_Supplemental\_FASTA\_File

aiysakyngykwmemnglgsfnteilpkpkgardviiqkgdlvki dmqaksvvi neepmlseksfgsnynfvdsygseli  
iqpenvfddttvkwdryl  
>tr|Q931M3|Q931M3\_STAAM  
myyytlfifvynkkisfllyytfqisyllginntsqllhlyascllscvipctylfsikiksqrctdqkhyllhlpky  
>tr|Q931N0|Q931N0\_STAAM  
mhlfccklykrndngkktksnsllkkvatlaalanlllvgaltdnsakaeskkddtdlklvshnvymlstvlypnwrllt  
>tr|Q931N2|Q931N2\_STAAM  
mskkdhssskylnsvkeageeskkknksnpkiddvdrtyiepqfqskkpkddqvfflsrlnkpakykkdsnflsyliyr  
igkddasglaaqmyhfv  
amfpmllfltlpffnikqsqitnmllsnaetstliksvicditqnsqgllsiglilaisasngmtaimnsfnvay  
dvedsrngivlklsvvft  
vymgvfvvalalptlgsvishfllfgplgfdeqkwifnlirivlpiiiiifiivlysvapnvtklksvlpjavfts  
iwlagsfgfwyisnfgny  
sktygsiagiiillwlyitsfiiivgaeinaiihqrsvikgtpeeaalehddnnknhynentryeydedsnathqrty  
hvdhpsdtypeddknikd  
kivdklkkd  
>tr|Q931N5|Q931N5\_STAAM  
msntqtknvpeirfpgfegeweeklgnlttkigsgktpkgsenytnkgipflrsqinrngklnlndlvyskdidem  
knsrtyygdvllnitgasi  
grtainshivethanlqhvciiirkkeyyynffgqyllsrkgkrkiflaqsggsreglnfkeianlki ftptifeeqki  
qffskldqqieleekle  
llqqkkcyiqkifsqelrfkdeegnnykgwnkkqlkdvlfnkrtnineneyplissrqglllqsdykdrktfaesn  
igyfilpknhityrsdd  
gikfnlnlmidvgiiskyyvfkigidanqyyltlhlnyqlkkeyikyatsqlvlsqkdlqniktklpsyeeqqkigd  
ffseidrlevkqsskvgrl  
kvrkke1lqkmfv  
>tr|Q931N9|Q931N9\_STAAM  
mnlkknkysirkkyvgifstligtvlll snpngaqaaltdnnvqsdtntqatpvnsqdtvannrglansaantpnqsat  
tnqstnqalvnhnngsian  
qatptsvqsstpsaqqnnhtdgnttatetvsnannkdvvsnttlvnpktnengsgghl tlkeiqedvrhssdkpelva  
iaeqasnrpkrrraapa  
dpnatpdaaaaaagnggapvaitapytptdpnannagqnapnevl sfddngirpstrsvpsvtvvdnlpgftlingg  
kvgvfshamvrtsmfdsgd  
aknyqaggnvialgrikgnndndhgdngieksltvnpnselifeftmttknyqgvtnliiknadndtviaeksvaygp  
iwr1fkvpensh1kiqfv  
pkndaitdargiyqlrdgykydfvdsiglhsgshvyverrtmeptatnkeftvttslkngnfgasfntddfvykvql  
pegveyvnns1tkdfpss  
sgvdmndfnvtydaanrvitikstggsgnsparlmpdkildlkyklrvnnvptprtvtfndtltyktytqdfinspaes  
htvstnpytidiimnkda1  
gaevdrriqqadytfa1d1fndlkrraqtildenrnnvplnkrvsqadids1tnqmghtlirsvdaenavnkvdqmed  
1vnqndeltdeekqaa1qv  
ieehkneiignigdqtdtdgvtrikdqgiqt1sgdtatpvvpknakkairdkatkqreinatpdatedeiqda1nqlat  
detdaidvntnatnadve  
iaknngintigavvpqythkqaardainqatatkqqinsreatqeeznaalnel tqatnha1eqinqattnadvdnak  
gdgl1nainpiapvtvkkqa  
ardavshdaqhiaeinanpdatqeerqaa1dkvnaavtaantnilnantnadveqvktnaiqqiqaitpatkvktakn  
aidksaetqhtifnnda  
tleeqqaaqll1dqavatakninaadtnqevaqaqdqgtqniiviqpatqvktarnavndkareaitninatpgatre  
ekqea1nrvtlknraltd  
igvtsttamvns1rddavnqigavqphvttkqtatgv1nd1latakqeinqntnatteekqvalnqv dqelatainniq  
adtnaevdqaq1gtkain  
aiqpni vkkpaa1aqinqhynak1aeinatpdatndeknaaintlnqdrqqaiesikqantnaevdqaatvaennidavq  
vdvkkqaardkitaevak  
rieavkqtpnatdeekqaavnqinq1kdqa1nqinqntndqvdttnqavnaidnveaevvikpkaiadi ekavkekqq  
qidns1dstdnekevasqa  
lakekekalaa1dqagtnsqvnqaatngvsaiki1qpetkvkpaarekinqkanelrakinqdkeataeerqvaldkine  
fvnqamtditnnrtngqv  
dttsgal1dsialvapehivraardavkqyeakkqei eqaehatdeekqvalnqlanneklalqinqavtndvkrve  
tngiatlkgvqphivikpe  
aqqaikataenqvesikdtpatvde1deanqlisdtl1kqaqqeientnqdaavtdvrnqtikaieqikpkvrrkraald  
sieennknq1dairntldt  
tqderdvaidtlnkivntikndiaqnknaevdrtetdgnndikvilpkvqvkaapaarsvgvkaeaqnalidqsd1stee  
erlaakhlveqalngaidq  
inhadktaqvndsidagniiskikpattvkatalqqiqniatnkinlikanneatdeeqniaiaaqvekelikakqqias  
avtnadvayllhdekneir  
eiepv1nrkasareqltt1fndkkqaeianiqatveernsil aqlqniydtaigqidqdrsnqvdktas1nlqtihld  
vhpikpdkagr1mmilha  
s11

Tsompanidou\_et\_al\_Supplemental\_FASTA\_File

>tr|Q931P0|Q931P0\_STAAM  
mqnyrkvsnrnkadalkaitalklqmdeeltartnadvdavlkrfnvalsdieavitekensllridniaqqtyakfka  
iatpeqlakvkvlihdqyva  
dgnrmi dedatln dikqhtqfivdeilaikl paeatkvspkeiqpapkvctpikkeethesrkvekel pntgsegmdlpl  
kefalitgaallarrtrkn  
ekes  
>tr|Q931P2|Q931P2\_STAAM  
mygtiiggppsglmaavaaseqsssvlliekkkgllgrklkisgggrcnvtrnlpyaeiiknipgngkflyspfsifdne  
siidffesrgvklkeedhg  
rmfpvsnkagdvdtlvttierqhvtikeeeavsrie vntdqftvhtqnnsyeshslviatggtsvpqtgsgtdgykfa  
qdlghtitel fptevpits  
aepfiksrlkglsldvelsvllkngkkri shqmdmlfthfgisgpaalrcsqfvykeqknqktqhismaidafpelnh  
eqlkqhitslikstierls  
kyv  
>tr|Q931Q5|Q931Q5\_STAAM  
maikysalnlpiregddertaindmvkl aqhl delsyerywiaehhnapnlvssata lliqhtlehtkhirvsggiml  
pnhaplivaeqfgtmatlf  
pnrvdglgrapgt dmtasal rrdqhdgvykfpeevsllqqyfgpahqqayvraypavgknvplyilgsstdsahlaar  
kglypvfaghfapqqmkea  
ieiyktl fepsdv ldepyvivic lntivaenddeaqyl assmaqvmvsitrgrmqpvqp pthdlqniltpreyamamerqk  
isligsentvqqkiqdfme  
tygevneimaisiydkdmqldsyrrfknvinqinekkhfim  
>tr|Q931R2|Q931R2\_STAAM  
msritqvhri legkhl daiiilsdynrrylsgftgtsgaliiskdkqylitdfryidqatkqapnyeiinrkstiigeik  
ellhgenfenigfeghhvs  
ydtylelnksrislisisntvdki rdvkdvdeialiqkaanivdetyeyil tvvkagmtekelkaileskml elgadgps  
fdtivasghrgal phgvas  
dkiekgdm itldfgayngycs ditrtfaigepdklkeiyqivlesqmka ineirpgmtgaeadaisrnyleskgygk  
efghslghgigleiehegpm  
lartiqdklqvncvtvepgvyieglggirieddil itengcqvftkctkdilvlt  
>tr|Q931R4|Q931R4\_STAAM  
msytsvlfknftfy ligiafsnmsgafttfvfp lmi lktgsafqvgivsa lsfipyailgl pagalidrlnkktimkc  
adiirfvsylsipvlsffn  
mlsifqiyyvaiisgigli fhsisevsiipsivkeed lasansiyatqnvseflgpiigglllytymgysilifidsmtf  
llsffsliliki etksifn  
qeklsknflsdvkv gfdyllsnstirvmavvvslnliispyyiyivmfvkedmnqssqalglvlgisslgaligslsa  
sflklfnfgkliviilfl  
dtifrmlpfstyifilipllgltymtqsilniaiitlrqkkcsenmlgrvnsvfktmvfafripigllfggillenkggf  
yaltisavlfipvlvlyilk  
nrfyqveey  
>tr|Q931R5|Q931R5\_STAAM  
mlkkaklil iavlvlsgcstieneskkdrntetntetksvpeemeaskyvgggfppaekdaiefskkhkdkiakrgeqf  
fmdnfglkvkatnvgsgd  
gvevfvhcddhdvfnasipfdksiesdsslrsedkgddmstlvgtvlsgefyrakheelndl tevlkeykskykytgy  
tenaimktqnsgrneyyy  
ltaipytldeykryfqplikeddksfrdgmrnskkqldkksrpyvvtlfstkdnftkdntidemidfsevlkkkniph  
dlnvslqisnkyintkrpn  
yskkevievgvfnhekannd  
>tr|Q931S0|Q931S0\_STAAM  
mtlfdmpnylwi ttlimi lltifcclvl nkwfvsavitfvilglv affipnfqdikyqpllg yaaf laimsllisflly  
ftrnrkerkarklekqie  
kygyesaelrrkdck  
>tr|Q931S5|Q931S5\_STAAM  
mednkmnrslnsrhismiaiggaigtglfvatgnisqagpggailaylvigvmlyflmssigelatfypvsgsfssyst  
rfidssl gftmglywalw  
slvtsvdvivasnlyfwdt fkhfhpitwslifitil lllnifsvksfgetefwsl ikvltiivfvi fgflmifgilgg  
htygfenytkgqapfvggi  
sgflgvllvagfsvggtevvavt agesddpkksmpkaikqvwrillfyvlsiavigaiipytdpsllrassisqspft  
ivfdrvgiafaasvnavi  
ltsllsaansgyttgrmlyslssdkkapqflsklnkttklplral lttayvviviiyanfn snavnllleigsmiiv  
vvgssiwsi rlrqaikkq  
gqdpnkvlpykapfyp lgpivittllflfggsveyilkdqwlnafknflplilal iyfihkiikhktkfvkletinlk  
phdydnqn  
>tr|Q931S6|Q931S6\_STAAM  
msdkii iengeiilndstshirtnqqsqitlsdeyirkklkd ddlviqknhngtikiitsnvndtilylqq lhinl dd  
ieiqkvsivdsyfnnkkqr  
gsnydtkll enri  
>tr|Q931S7|Q931S7\_STAAM

Tsompanidou\_et\_al\_Supplemental\_FASTA\_File

miqisninksfnkrcvlnkisfdieqgkcialigkngagkstlidilignvnansgeifdkdkllqsenrsimfqktmfp  
dq1kvieiinlyqsfyenp  
lplleeiie1tkfdssqlnqfvnklsggqarlldfvlsligqpqlilldeptstmdieireyfwsi  
>tr|Q931T0|Q931T0\_STAAM  
mlkkwlnstvkqffvitfiviltlilfsthiydivngtvfsgagdgfrqmpmfqmylyeh1ssfsslydasfglggdy  
mkg1syys1splmwlfl  
fikigetvgifnpttihfwptnqlimamiraitfvvtfy1fki1hfrstnmiatilygmstvvivyfnftwsfygnlly  
llpls1lgleryfgqrkig  
ifivaialt1fsnfysyyqaiiigcylyrliftykydivsrtqkfcvisatv1svlssvfglftgisaf1endrkn  
pnvdipfltpldyhyfffs  
dgfyit1siltival1sfklyrfyfyr1faivtwilfigslsqyfdsafngfsfperrwvial1sssalcglfiqhlst  
1nmkyylirtipvsiall  
yvllspt1plalivgi1lmlavil1kfs1wrykkl1tvail1vlivmiqqivil1dnnknmaikpyqqs1st1kqhdyhsny  
vnqlikkinqnatgppnri  
dymdya1nspfiyhngislyssifngdilkydykt1qinmpidknstyr1lgnrqnl1slwnvdnri1rvnhddn1pyr  
fk1nsehkdnkvrwi1hskn  
tihypsahitnk1vsnkelksp1dkeqam1qg1vsnntkdvnthfkankn11sdstik1nssawqsptkhl1qvkqngg  
1tvq1pksvsnqfkd1lye  
mdle11spdka1hdvkvneytqernk1tykyrrfvtpvtirikasdri1slpkgyrvn1kgygedytt1kdasnslea  
kvsktkqgyt1tknkss  
gyiv1lptaynqgm1katsgdqslkvaqngvmtgikapknitkiqlsytpppyyllititifgiicsiiftrwarqk  
>tr|Q931T3|Q931T3\_STAAM  
mnnnitk1i1stt1l1l1gtaftqfpntpinssseakayyinqnetvnel1kyysqyl1tsfnst1wqkdngtihats1  
qfswyshi1qvypeswgn1  
nqlrnksvdi1fgikdgetidsfalsqetftggvtpaatsndkhyk1nvtykdkketftggfpvyegnkv1tl1keldfri  
rt1likskklynsynkqg  
iki1tgt1dnytid1skr1pstdanryvkkpqnakievileksn  
>tr|Q931U6|Q931U6\_STAAM  
mts1kerdyffdnarai1l1lvvfghm1lqpytsgdkylsaly1viysfhmptfl1f1sgyfaknidkpyylekiskrlivp  
ymi1ffaffs1yyf1tgksd  
elq1dpfnpvfalwfl1it1fffhvil1vivrrfnpykvlsvsiii1sigagfsdnidsylsisrtivffpifylgyiftkkh  
taifknkklipvsii1t1fi1  
ffii1yvi1hpinadw1lgsspyts1enegqsifspfkr1lilygi1liamtafl1n1mstkkklytyigsrtlyvy1llhg1li  
givrgfewypfdnps1mt  
y1dl1sis1vi1vyv1stnfvckwtnpi1n1lqrsqfks  
>tr|Q931U8|Q931U8\_STAAM  
mmekneninve1l1ttsdmhshf1ngdygsniyragtyvnqiraqnhrvil1dsggslagslaayyyaivapykrhpmik1  
mrm1hydasgvsps1efkfg  
1sfl1trsialarfpw1lsanieynvtkepyfstpycik1hfgd1kiaivgv1tadgl1meneysemeqdvsiekt1vaskrwi1r  
yi1heveepdf1ivi1yhggl  
nk1s1nstknk1kassneak1mee1lgvid1mitahqhtivgqdhetyyvqagqake1vh1sinfkkrtt1tydvesidk  
vid1neyeedqe1ld1t1fy  
drkavaywsqe1isdkgl1msvng1qd1vcqthpfsq1llhda1qlafgnditcvhvp1ngekg1sgqirnedlyhayyp  
dkpmdmt1sgqnik1di1ey  
sysh1dfvneq1sl1ti1idet1ctmwqgfnyeidm1nqepqrvml1dqid1l1ksyrvtmt1dycyrnyknyl1knai1hesyde  
tmst1liaek1rdpny1risc  
sdfv1vknr  
>tr|Q931U9|Q931U9\_STAAM  
mk1l1fkvckmrgipi1ftfink1drv1gkepfel1deieet1nietypm1nwpigmqsf1fgi1drksktiepf1rdeenil1h1n  
ddf1e1eedhai1tndsaf1eq  
aiee1ml1veeageaf1dnda1l1sgd1ltpvffgsa1anfgvqnf1nayvd1fapmpnarqt1kedvevspfdds1fsgfi1k1qa  
nmdpk1hrdria1fmr1vsga  
fergmdvt1lqrtnkkqki1trsts1fmaddketvnhavagdi1glydtgnyqigdt1vggkqtys1fqd1lpqftpei1fmkvs1a  
knvmkqkh1fhkgieq1lvqe  
gai1qykt1l1htnqi1ilgavq1l1qfev1fehrmkneynvdv1mepvgrkiarwi1enedqit1dkmnts1silvkdrydd1lv1f1  
fenefatr1wfeek1fleik1  
ys1l  
>tr|Q931V0|Q931V0\_STAAM  
mn1l1kqevesrkt1fai1shp1dagkt1l1tek1lyfsgai1reagt1vkgkktgkfgd1qvtgnes1nqrgvgyf1lyt  
>tr|Q931V1|Q931V1\_STAAM  
mnqwdqf1l1tpykqavde1kvk1lkgmrkqyevgeqaspiefvtgrvki1asi1idkankrqip1fdr1reemydiag1l1rmmcq  
fved1dvvn1l1lqrkdfk  
vi1eerdy1rntkesgyrsyhvi1iey1piet1lqgqk1filaeiqirt1lamnfwat1ieht1lrykydgaypdei1qhr1l1eraeaa  
y1l1deemseik1nei1qeaqk  
yytqkrskk1hend  
>tr|Q931V4|Q931V4\_STAAM  
mwnknr1l1tqm1s1iey1pi1qagmagsttpk1vasvsns1gg1gtigagyfntq1l1edeid1yvrq1l1tsns1fgv1nv1fvpsqqsy  
tssqienm1naw1l1kpyrra1

Tsompanidou\_et\_al\_Supplemental\_FASTA\_File

hleepvkiieeqgfkchidtiikkqvpvcftfqi qnesierlkeanikligtatsvdeai anekagmdaivaqgsea  
gghrgsflkpknglpmvgd  
islvpqivdvvsipviaagimdgrgvlasivlgaegvqmgtafltsqdsnasellrdai insketdtvvtkafsgklar  
ginnrfeemsqyegdipd  
ypiqnel tssirkaaanigdkel thmwsqgsprlatthpantimsniinqinqimqyk  
>tr|Q931V5|Q931V5\_STAAM  
mhdgsvfiakirfkrdtspnikprqfivissdnglylfletesvinkvkfnlsnikrsslkyhiltseeslrcgfnvhta  
vncyelfyceyfpeilsk  
qrdl pieilkdiqgkvsikeeel niedckiskqelinlnpklr  
>tr|Q931V8|Q931V8\_STAAM  
mldiiktll ehqvlavliipev lkql rewhlgyldrknnd  
>tr|Q931W1|Q931W1\_STAAM  
megnfknvkl iyegeeytkiyagniqvkkpssfviklpknkypdsieestakwtingvepnksyqvtienvrsgimr  
vsqtnlgsselgisgvnsg  
vaskninfsnpsgtlyvtisdvysgsptltie  
>tr|Q931W2|Q931W2\_STAAM  
mykikdvetriknvgdlgdigcrfytedentasi rigindkqgridlkahgltrhlhlfmedgsifknepliiddvkg  
fltykipkkvikhagyvrc  
klflekeee kihvanfsnivdsgiesavakeidvklvddaitrilkdnatdl skdfkekiddvisyieknesrfkga  
kdkgesgqpgakgdtgk  
geqgtpgkngtvvsinpytkmwridgkdt dikaepell dkinianvegledklqevetikdtlndsktytdskiaelvd  
sapesmntlrelaeaiqnn  
sisesvlqqigskvstedfegfkqslnslyadknhstikqiegl enalskksdinhshderyllsnaftkeeadklyq  
pigssqpslniwtgsetey  
nylyqkdpntlylikg  
>tr|Q931W7|Q931W7\_STAAM  
mvvdnfskddnlielqttsqynpvidtnisfyedrgrtgvl nfvavtknkp lsiskhnamtsivlktndfdehgayisd  
el tivdaingrmqyvipne  
flkytgrvhaqayftqngsnviverqfsfniqndlisnfdgkklvyiksidltesvkeeedl kkslsdtkslvtei  
dsringqqrleikqneav  
qmitttdkavqyinsef qkivdkeqai fervneveqqingadlvkgnsttnwqkskltddygkai esseqsieavl rha  
nssmiihitnakdvpekad  
igtlekpgqgdvddgssfdestytsksvglvvyvvdnntaratwypddsndeytkyiygtwypfykkn dgnltkqfve  
eisnntlnqakqyvdgklq  
sjswqqhkltehngsqisqknl ynakgnleal gagnyyvtsvpdlpgivesyegylsvfvkddanklfnftpsnkkvytr  
sitngrldsquatpnehkt  
avlf dgaangvgrinl teaytnyai lfi sgytggvieafsltsipnaiqlsktnvvsdsgngggsyec litkesgttl  
kidndvyl dlsgktgsgan  
anrvtinkivgw  
>tr|Q931X1|Q931X1\_STAAM  
mteykikatieasvakfkqid savksvqkfrvadqtkdvelnandkklqtkivakksldafsnkkvkakldakiedl  
qqkaleasfel nql dskev  
tpevklqkqltkdiaeaeaklselekkrvnidvnadnskfnrvlvkskaslealnrskakai ldvdnsvanskikrtke  
elksipnktrsrldvdtrl  
siptiyafkksldalpnkkttkvdvtnglkkayay iikandnfqrqmgnl anmfrvfgtvgsnmvgglltssfsilipv  
iasvvpvfallnaikvlt  
ggviallgavaiagagfvafgamaisaikm lndgtlqassatneykka ldgvsawtdiikqnqsai fttl angln tvkt  
amqslqppffsigrmeea  
sqsvlkwaqnsqvasrffnmmnttgvsvfnkl lsaaggfgdglvvnftqlapl fqw sadwldr lqgsfnwansaagens  
itr fi eytktnlpiignif  
knvfvginnlmnafsgsstgifsleqmtakfrewseqvgqsqgfkdfvsiyiqtnqplimqligniarglvafatamapi  
asavlravaitgwianlf  
eahpataqlvgvii tlvgafrfliapilavmdflgp laarlvalv tkfgwaktgtlvlskamtslkgpiklvtaifqllf  
gkiglinrnaitglvtvfgi  
l ggpit ivigviaaiaiaifvlfnknegfrnfi inawnaikt fmv tvwnvlktvasvwnailkaittavtnvynfimiv  
wnqivaylqglwngiaia  
ttvwnllvtiittvfttmtivmtiwtaiwftl stiwntiitiattiwnllvtvittvfttmtiamtiwnaiwftlqt  
wntivtvatkvwnaittai  
stalqaawsfisniwntiwsflsgil ttiwnkvvsiftqvstisdkmsqawnfivtkgmqvwstittstlinfvnrviqg  
fvnvnkvsqgmtnavnki  
ksfigdfvsagadmirgli rigiqmagqlvdaaknvakaldaaksa lgihspsrefmdvgmysmlgfvkgidnhsskvi  
rnvsnvadkvvdafqptln  
apdisstgnlnl ggninaqvqhthsiet spnmktvkvefdvnda ltsivngrnkrnseyyl  
>tr|Q931X2|Q931X2\_STAAM  
mltqeferyklafairdaatknvgtenkpk eeyvfnnandv lpyeeniqrlnegkd irfsserdeyepqneffkviae  
fnkq  
>tr|Q931X3|Q931X3\_STAAM  
mnveingkslelsfgfkflreidnr lglkveqasigqgvsm lpgvlesgnpvvige vliastshlkkqaitinnideald

Tsompanidou\_et\_al\_Supplemental\_FASTA\_File

eiaenigleefgsdilte1  
gkrpmtrnlvevveteekpaea  
>tr|Q931X6|Q931X6\_STAAM  
mnidgldallnqfhdmktniddvddilqenakeyvvraklkarevmnkgywtgnlsrni rykktgdlyqtitshaaysg  
flegtrymeaepfmwpvy  
evirkstaeelkalfe  
>tr|Q931X8|Q931X8\_STAAM  
mttladvkkriqkdekqdeqleeiikscsqllsmlpieveqiperfsymikevavkrynrigaegmtseavdgrsnay  
e1ndfkeyeaiidnyfnar  
trtkkgravff  
>tr|Q931Y3|Q931Y3\_STAAM  
msntdkylrdiarelkgirke1qkrnetviidanldsvrsavlakkekkyneplf  
>tr|Q931Y5|Q931Y5\_STAAM  
mlkvnefetdtdlrgniny1fndeanvvytydgtesdl1qnvnevskyiehhmdyqrpr1kvl1sdyeygktn1veltrr  
keeymadnrvahdyasyis  
dfingyflgnpiqydddkdv1eaeafnd1ndveshnrslgld1siygkayelmirnqddetrlyksdamstfviydnt  
iernsiygvryl1rtkpidk  
tdedevftvd1ftshgvryl1tsrtngl1k1tprenvfeshsfermpitefsnnerkgydyekvit1idlydnaesdtany  
msd1ndam11ikgn1n1dp  
vevrkqkeanv1fleptvyadsegretegsvdgg1y1kqydvqgteaykdr1nsdihmftntpmkddnfsqtsgsamk  
y1fg1leqrktk1eg1ftk  
glrrrak11let1kntrsidankdfntvryvyrn1pk1s1ie1kayidsggk1sqt1lms1fsffqdp1evkkieede  
kesikkaqkgykdprdin  
ddeqddtkd1tdvdkke  
>tr|Q931Z1|Q931Z1\_STAAM  
mmikk1knmdwfdi1fivg1l1r1fgvia1m1lvvispiytvasyqnkevyqgtitdkynkrqdkedkfyiv1dnkqviensd  
11fk1k1k1f1s1adiqar1k1vg  
dkvevktigyrihf1n1ypv1yevkkvdk  
>tr|Q931Z4|Q931Z4\_STAAM  
mtdvki1kt1sggyfvk1taepf1ekyvermts1fngyiyast1ik1qptyikt1dtiesit1ieergk  
>tr|Q931Z5|Q931Z5\_STAAM  
mtqyl1vttf1k1dstgqph1eftavrnd1qft1vveaeskeakekyeaqvrdaik1l1gq1l1feni1recgk  
>tr|Q931Z7|Q931Z7\_STAAM  
mmn1reqieqsv1sasayngndtegl1keiedvykkarafde1ldgmtnaiqhsvkegig1deavgimtgqvykyeeeq  
end  
>tr|Q931Z8|Q931Z8\_STAAM  
mpktdsarkey1nqffgskrylyqdnervahihvngtyyfhghivpgwqsvkktfdtaee1eyikqhgleyeeqkq1t  
1f  
>tr|Q931Z9|Q931Z9\_STAAM  
maktarivrihdkpyrfskfemeli1eshg1tpgmvskrvkdgwel1heamdapegmr1seyrekktier1eqarlerkler  
qrk1keae1rrkkph1fnvp  
qkhsrdpywfdttynqm1fkkwqev  
>tr|Q932A1|Q932A1\_STAAM  
mpkekyly1redgted1k1v1kykenenevys1tgahfsdekkimtdsdl1krfkgahg1l1yeqel1g1qat1fdi  
>tr|Q932A3|Q932A3\_STAAM  
mesfqn1akkpt1kkqi1ieqafd1kcencgrkydykfddgsefkhgcdcemiyakqstenyhkrnrrrkaer1fkqsi  
mned1tkatfdnynptneq  
lyakn1ceryannft1dnkqsl1iqgsfgtgksh1smsivksvakgytvlymnpq1listikntynntamteqelaq  
i1sdvd1mvfd1dyginme  
fatskmfelies1rigkhn1fttn1dekemtknkd1qri1s1rimsnt1likmdgqdyrtrg1kl  
>tr|Q932A4|Q932A4\_STAAM  
mtdqpsyys1itanvrydnr1tdsek1l1fae1ts1snkygyctasngyf1at1ynvvetisrrisn1tkfgy1kiei1ke  
gnevkqrkmypl1tqssi1pi  
dakintpidnsvntpidanvkennts1in1tr1nnts1nnnsatdvtheqfeewklynkkkdkkmsftkfksc1kkhsfe  
qimqgtrey1k1t1tdkqyq  
khpktf1tnesyndyseeikaevnnqyvda1f1qrasqssi1n1pf  
>tr|Q932B0|Q932B0\_STAAM  
mkqtvtyi1rhrdmpiy1tnkptdnnsdi1systnrnrarefngmeeasinmdyhkaikktvtetieyeevehd  
>tr|Q932B3|Q932B3\_STAAM  
mmkns1qake1avilsvskskagqi1re1nke1ledegyiairgripvqlarkk1fpyhd1sderimeelkkene  
>tr|Q932B6|Q932B6\_STAAM  
mqalqtfnfeel1pvrt1evd1gepyfigkdvadi1gyangrda1skhvdeddkkvltsrnttlen1pnrg1tavnesglys  
1ifssk1lesakr1fkrwvts  
dv1pai1rkygiyatdnvieq1tkdpdyi1itv1teykekeqnl1l1q1eig1elkpkadyvdeil1k1stgt1attqiaadygi  
saq1kn1l1hear1qrkv  
kqwv1ysehmgksytdsdti1vrsdgre1tv1qtrwtqkgr1kiheimtefyean1gga  
>tr|Q932B7|Q932B7\_STAAM  
mkacly1sndk1fveidn1ekviksghrgtveiskekikss1ftngsytfvgdkivaiasakiefiefid

Tsompanidou\_et\_al\_Supplemental\_FASTA\_File

>tr|Q932B8|Q932B8\_STAAM  
mpeqlsvrkwr1vrdlkqgevad1gvnaktvghwekddtn1snvtvya1aklydievdqikv  
>tr|Q932C0|Q932C0\_STAAM  
mglyeelcinnekikieetdq1pnfqpgcymngkiyirrn1sevrkaevlyeelahhk1tygnildqskwinrkfenyar  
rhgfsavplreiveayny  
gvrnlyelseylqlseeyileaeieykkigyigthygeysitfep1rvfklhhid  
>tr|Q932C3|Q932C3\_STAAM  
mpvykddntgkwyfsirykdvygnkrkmqrgfstkreakraeai1ndvnegysdsktdyvfhhylensdlrpktkrr  
kqneyhkhfkakfghikmn  
kitqngcqeifrkylienvastnsartiwsfgkvvinyakkyfgl1rtdptisikiprvkpkpkfmmreefeerikdieeq  
dyrelft1mfytglrigea  
malvwtodynkykkeisinktmdisnrtyprpktssedivlpkfinmt1terhqrekelnkyfdersyfi1fggmapkh  
yshvqkkfqkafphyniha  
1rhsyasy1anngvdi1vlqslmrhaqit1etmgtyshlytqkkhdai1fdk  
>tr|Q932C6|Q932C6\_STAAM  
msrvlifslesic11tgsaivdeteikevvvkkcisqhtivtifiv1ddkl1fle1vfiicnyttstfninv  
>tr|Q932C9|Q932C9\_STAAM  
mkr1ligi11cs1fil1tacstsvdktststktidykiengkt1kvpekprvav1tgfyvgdfiklgikpiavsditkds  
i1kpy1kgvdyigendvek  
vakakpdl1ivvdamdknikkyqkiaptvpytynkynhkeilkeign1tnnedkakkwieewedktrkdkkeiqskigqat  
asv1fepdekqi1yinstwg  
rgldivhda1fgmpmtkqykdk1qedkkgyasikeniskyagdy1flskpsygkfd1fekthtwqnieavkkghvisykae  
dywftdpit1eh1rsk1kk  
e1lnksh  
>tr|Q932D0|Q932D0\_STAAM  
makkvk1snqqahr1fmkvseeyegsn1tts1n1gl1nvlyqiat1peperskehitsngetkipy  
>tr|Q932D4|Q932D4\_STAAM  
mnietvvnefetragt11ryytg1lessrethfafkiyndpfdmvyvmmkgklyghvyikdckvrqsfelaspkhtegli  
rsieghyvgyelhdgkhl1s  
isdmmash1fedeyfmyglq1tyaesnnsdvfey1engfddt1legiqssntdvianiemyqlatginepapelveg1kl  
vtefvqdenatqedykale  
rk1nd1kasyys1sk  
>tr|Q932E0|Q932E0\_STAAM  
mnneqkeviehvvyqle1simn1fesyeh1teyvdgiev1vseispekhl1elimkwcaqel1kn1fq1lekge  
>tr|Q932E1|Q932E1\_STAAM  
mkmy1tyic1vs11ti1111aisnmyvafsvygmmtvygfn1tgg1ene  
>tr|Q932E2|Q932E2\_STAAM  
mtk11typm1y1trkekgdtqkkvask1gispqryq1kesgkai1fn1necqil1semydmpidel1fsskikvegsrq  
>tr|Q932E5|Q932E5\_STAAM  
msyn1n1shniyk1dak1gtyy1fri1tyy1dksnr1kyi1trkg1fkqrkdavkkcnemmdel1egvgh1nr1pfdk1veeyidwy  
sar1rkt1ssvka1kth1tnnh  
11pyfksmdv1fkm1ttqdv1mkfqnk1keghsgdy1lkkmhvyl1vs11nhamkfhe1lkqnv1slvgn1feiesqkr1nywt1e  
qfnqfy1eal1atqqk1ffk  
11fysgarkge1ral1twd1infdd1fih1inkt1dyhgevt1apktksair1diyl1pthm1y1dikdy1liwykenniykddy1vf  
gtfykay1sest1drwftna  
1kv1deq1p1ngq1nf1privi1hel1rhshasm1vn1gasvmi1iaqr1ghsdt1tevy1nrygh1ypst1qkeivky1  
>tr|Q932F2|Q932F2\_STAAM  
mnkdnkwtmi1tal1fi1tv1sv111tfh1kqhydq1t1nenhankdk1iniknkvriyqnl1tynr1vfpn1skldi1itpvdmsna  
k1pvi1fwmhgggy1iagdkq  
ykn1p1lakia1eaggy1vvnvnyal1apqykypt1liqmnqatqfikenkml1pidfnqvi1iggdsagaql1asqftaiqtndr  
1reamkfdqs1fkpsqikga  
i1lfggfynmq1tv1retefpriq1f1mksytgeedweks1fkn1sqmstvkqstknyppt1f1svgdsdpfesqniefskkl1qe1  
nvpvd1l1fydgth1hhqy  
qfhl1nkpesid1nikkvl1f1srnt1sssgiqteekp1qmenpsnel1p1n1p1n  
>tr|Q932G4|Q932G4\_STAAM  
mqkkviaa1igt1saisavaatqanaatth1tkp1gesvwa1snkygisiak1ks1lnn1tsn1lifpnqvl1kvsgssn1stsns  
srpstnsgggsy1ytvqagd  
s1s1iaskygttyqkims1ng1lnn1ffiy1pgqk1kvtgnastnsgsatt1tnrgynt1pvfshqnl1ytwgqctyhvf1nr1raei  
gkg1stywnann1wdnaaa  
adgyt1dnrptvgsiaqtdvgyghvmfverv1nndgsil1vsemnysaapg1iltyrtv1payqvnyryih  
>tr|Q932G8|Q932G8\_STAAM  
mkfkkvl1vatamvgv1latgvvygnqadavvsqng1vl1hddan1fle1helsyidv1l1dknadk1lqktt  
>tr|Q932G9|Q932G9\_STAAM  
msitekqrqqae1l1hkk1lws1and1rgnmdase1frny1ilg1l1fy1rfl1sekaeqeyada1sgedit1yqeawadeeyred1k  
aelidqvgfy1iepqd1fsa  
mi1reietqdfdieh1lata1rkvetst1geesendf1gl1fsdmd1s1str1gnvkertal1iskvmvnl1dd1p1fvh1sdmeid  
m1lgdayef1igrfa1atagk  
kagefytpqqvski1akiv1tdgkdk1rhvydptcgs1g1l1rvgketqvyry1fgqernntty1n1armm1l1hdvryenfd

Tsompanidou\_et\_al\_Supplemental\_FASTA\_File

irnddtlenpafngntfda  
vianppysakwtadskfenderfsgyglapkskadfafi qhmvyhlddegtmavvlphgvlfrgaaegvirryliekn  
yleaviglpvni fygtsip  
tcilvfkccqddnvlfidasndfekgknqnhlsdaqveridtykrketidkysysatlqeiadndynlnipryvdtf  
eeeapidlqvgqdlknid  
keiaeeieqeinaylkelgvlkde  
>tr|Q932H0|Q932H0\_STAAM  
mkmknjakisl11glatgvntttekpvhaekkpivisensklkayytqpsieykntvgysisfiqpsikfmniidgnsv  
n1aligkdkqhyhtgvhr  
nlnifvnedkrfegakysiggitsandkavdliaearvikadhigeydydffpfkivkeamslkeidfk1rkylidnyg  
lygemstgkitvkkkygk  
ytfeldkklqedrmsdvinvtididrieikvrka  
>tr|Q932H1|Q932H1\_STAAM  
mndftteiltlankgdlnel frvhlekavntllkte1tafl dyekydrigfntgnsrngsydrvtkteygelhlqiprd  
rngefkqqtvpayrrndt  
leetvihlfrkgitmseiadliekmyghytpqtmsnitksfteevtafngrelhdryaaaymdatyiplkrktvakeai  
hiavgirpdgskevl syai  
aptesitiweeil1dlqerglknvllf1tdglkgmvga1srfypkarfqhccvhsrni shkvrddrkevcdffkmvyq  
asskeval eargtfaekkw  
tsypkvvesilndh11tfydfplairksiyntliesfnkqikkyshrkeqfqneesmerflvssfdtyngkflgrshk  
gfqaeegeleqm1sqlien  
>tr|Q932H4|Q932H4\_STAAM  
melkyvipnmektfgqleyagegnieqrringrptilsrsynlystiqraddivilpseagekhfesdekvl inphit  
aegyki gnrgrftnyimhad  
dmvka  
>tr|Q932I2|Q932I2\_STAAM  
mvnvfenlkl1klmdkdgwvidsfyfrykqnyivlvklfekeekvpeya11kleflkendfndmlavyansvkl ytdt  
ktireyfgieyssenlgdv1  
fqfsqt1arf1ptevsekknedqkeamcfs1sqdsedprkkycfsvrnrplkgngelgkrspfnkntrlyrpslyer1  
gsdtn1sfrysmnpdeet  
degiakwtknkie  
>tr|Q932J0|Q932J0\_STAAM  
mkgdkeahatp1hdrkgvksmkpssfqetienqfdyickqviederkydfkhldr1sakevsfsdidnylvnsfstvdy  
vtdfqlfk1fgl rinvesd  
11sealrh1sekknrni11hyfmdmsdveiael1n1nrstvyhrisglamikefmkecke  
>tr|Q932J1|Q932J1\_STAAM  
mitvtkkdlve1gygtsfsadi1kkake1mitkghiyyqsrkl drvpreaveeilgirfsnenrse  
>tr|Q932J2|Q932J2\_STAAM  
mefkti qsidkphynea1klydtk1n1s1tedkri1krs1ennktendyv1fvg1endvvslatahyeattnsafliy1  
fakdlpnhdeltqt1hq1  
ehel1n1sn1vhsrsin1fmvevpkepad1tdng1iiehrrqflyehqferqteidyihptndghtkkvd1flkknik1  
tkdiygtsvksnyi1kyvf  
angiareiiyal1lemd1rkpf  
>tr|Q932J3|Q932J3\_STAAM  
mnflkpakhikpl pengiddtykr1rlqv1g1figyagyyl1rknfslampalqeqgftkaelgfalsavsiaygfskf  
fmgtvsdrsnar1flv1gl  
al1taivn1lmgfvpfftsgigimfv11flngwfqmgwppsgrv1vhwfsvsersgsktalwnvahnvgggimapiaawgi  
tttafinfgylkgfegvf1  
ypal1a1iaa1syv1irdtpqsqglppieiykndfatsdkkt1ete1ttke1lfkyv1nkwvwaiafani fvyfvryg  
v1dwapvy1seekhfd1ka  
sgwayflyewagipgt1l1cgy1sdklfkgrrgpagffflm1gvtvfvliyw1nppgna  
>tr|Q932J4|Q932J4\_STAAM  
mlig1qaldyvpkkaagtaag1tg1fgylfgavmanivlgavvdkfgwdvgf11ltaisvfam1sfiltnkvgqetvhh  
>tr|Q932J7|Q932J7\_STAAM  
mtkdiely1tadydnekssi1qsvidaieggdf1dvdt1mddavsdvss1dedgais1tssvvgpqqsk1mgyyyqnel yda  
sqldskmkei1dtpfiedi  
dkafkgitnvk1enil1knggghgrdygasgkiakgdakksdsvs1deilksdqefvkvidqhykemkkedk1sk1s  
dfekmmtggascdymtvae  
aeeieeqkkkeeaieiaalagmvv1scinpvagavaigtysaysaanaatgknivtgrk1skeerimeg1slip1pgmgf  
1kgagks1mk1gfkgekf  
avktg1qktmqavsr1spkmgmmknsv1nqsrnfaqnthvgqm1snmrgqathvqqsrnwigqqaqnvkrivnng1dk  
eiahpfkqqlapagmggik  
faett1rnmgqnmkravtpqnhvthgpkdsmvrseghsvsshe1n1skyvespnytkvkygeqyar1rpkk1kaniey  
t1ptghiyrt1dhkgriev  
yvdl1slkdggrnhaqrvtvggedr1pdddggh1iarmfggskdi1n1vaqskyinrsfkengdwyk1ek1wekaiksgk  
sienikievkykgnsqrpt  
ifkveyeingkrni1rri1nk  
>tr|Q932K0|Q932K0\_STAAM



Tsompanidou\_et\_al\_Supplemental\_FASTA\_File

mr1r1rreni11r1lipfndydnknfkmfivmknkviilknkifvfeqsikkhnemmyielciekf  
>tr|Q932K1|Q932K1\_STAAM  
mtfeketv1kt1fpedv1siakgltdgeveflqqvds1lesnyreninqhwi datvpedyfd1gelnyfnnp1lykdrp  
nakmpsq1fqffmsy1lar  
fdislat1lgvhg1ghntfyfpgskeqiakyvpklqshelrtcfaltepehgsdvaggetvaerqgdtwingekkw  
ggahvsdvpvfvavnkktg  
kphcfvvrpeqdgvdievidnkialrivpnalik1tnkvdeadr1qnitsfkdiakilystragvaymatggmagalra  
t1dyvterkqfgkpiiskyq  
1iqek1ammqgn1aqamatcaqlanmqahgeydevatstakmmnalr1retvamgrgitggngiladdydiarffsdaea  
iytyegtheinalvigr1  
tgdsafv  
>tr|Q932K3|Q932K3\_STAAM  
mnffdihk1pnkgiplsvqrklwlrnfmqaffvffvymamy1irnnfkaaqpflkeeigl1stlelgyig1afsityglg  
kt11gyfvdgrntkriisf  
11il1saitv1imgfv1syfgsvmg11iv1wglngvfqsvggpasystisrwaprtrkrgrylgfwntshniggaiaggval  
wganvffhgnvigmfifps  
via11igiat1figkddpeelgwnraeeiweepvdenids  
>tr|Q932K7|Q932K7\_STAAM  
msniafyvsvdhgyifptdftrsnyqpmg11lanhvieqdrdqyqsfk1dngdflqgspfcnyliahsgssqplvdf  
ynqmafdfgt1gnhefnyg  
1pylkd1rr1nypv1caniyendst1tdngvqyfvgdqvtvgvig1ttqfiphweqpehiqsltfhsafet1qqh1pem  
krhadi1vvcyhggfekd1  
engtptev1tgenegyam1eafskdidi1fitghqhrqiaerfkqtaviqqgtrgttvqkv1stdeyenvsvescellpv  
iddstftideddhh1rkq1  
edw1dyei1t1pydmt1inhafearvaphpftnfmnyal1eksadvactal1fdsasgfkqvvtmrdvinnypfntfkv1  
avsgak1keaiersaeyfd  
vqndevsvs1adflgpkpqhfnydiyggvsy1ihvgrpkqrvsnmmiqghavd1kqyty1icvnyravgggqydmf1dap  
vvkdiqvegaq11idflsn  
nn1mr1pqvvd1fkvek  
>tr|Q932K8|Q932K8\_STAAM  
mnh1heh1kl1pvdkid1hetfep1r1lektkssi1eaddfi1rhpilvtamqhgrymvidgvhryts1kalgckkvvpqei1h  
etqys1stwqhkvpgvwv  
et1qqehr1pwttetrqeapfi1tmchgdtqylytkd1geahfqvwekvvasysgccsveriaagqtypc1sqqdv1mkyq  
p1sykeiegvvhkgetvpa  
gvtrfnisgrc1n1qvp1a11kqdddveq1rnwkqfladkfanmrcytekvy1veq  
>tr|Q932L3|Q932L3\_STAAM  
mktttqelkqy1tr1fq1sni1etwecealeaenil1perfindsplah1t1etytyynnelhd1siypflmyannq1is  
vgy1nhfdmdf1y1tdtkn  
t1iderh11reggthhe  
>tr|Q932L4|Q932L4\_STAAM  
mndnekrv1reiynhhn1srtq1skn1einkatissilnk1kyks1lvnevgegdstksggrkpi11kvnhlygyfis1d1  
tyssvevmnyfdgnvikh  
esydl1pdekvs1is1ikkhidiqek1dtyng1lgvsvs1ihgvvdneqhvty1pfhetegisiakkikeitnvpvvne  
an1salyernfnhn1synn  
1ialsihkgigag1iinng1yrgangeageigt1vskvsdnveifhkiedifskeal1hn1snq1nekmt1skliqfyn  
eknpvvveemeqfink1av  
1ihnlntqfnpna1yincp1fnempeileaiknqfkqysrneiqik1tsnvkfat11ggt1aiiqkv1qindiyl1dika  
>tr|Q932L9|Q932L9\_STAAM  
mkal11ktsvw1v11fsvmg1wqvsnaaeqytpikahvvt1idkattdkqqvtptkeahqfgeaatnvsasaqgtade  
innkvtsnafsnkpstavs  
tkvnethdvd1tqqastqkptqsatft1snaktas1sprmfaanvpqttthki1htndihgrlaeekgrvigmak1ktike  
qekpd1m1dagdafqglp1  
snqskgeemakamnavgydamavgnhefdfydq1kk1legm1dfpm1stnvykdgkrafkpstivtknsirygiigvttp  
etktrpegi1kgvefrdp  
1qsvtaemmriykdvd1fvvish1gidpstqetwrgdy1vkq1sqnpq1kkritvidghshtv1qngqiyndalaqgtg  
al1anigkvtfnyrngevsn  
ikps1invkdvenvtpnka1aeqinqadqtfraqtaevi1pnntidfkgerddvrtretn1gnaiadameaygvknfskk  
tdfavtngggi1rasiakgk  
vtrydl1sv1pfgntiaq1dvkgsdvwtafehslgapttqkdgktv1tanggl1hisdsirvyymnkpsgkrinaiqil  
nketgkfenid1krvyhvt  
mndftasggdgy1smfpgpreegi1ldqv1asy1ktaniakydttepqrm11lgkpavseqpakqqgskgsesgkdvqipg  
ddkamnpakqpatgkv11  
pthrgtvssg1tegsgrt1legatvssksqng1vrmsvpkgsahekq1pktgtngssspaamfv1vagigliatvrrrkas  
>tr|Q932M1|Q932M1\_STAAM  
mktikmiadelgvtkgtivnnakr1nisfekenginyikdndylki1ekitkkektthnkesvknel1fnentakvekyih  
nnsnsset1k1tkvne1ekq  
ieifetrakndekyien1tkq1ldqqs1nvt1nk11enq1is1lennk1iq1lesq1leerq1kysfdttmnrqin1pq  
eatfteesqin1qqk1ekc1q

Tsompanidou\_et\_al\_Supplemental\_FASTA\_File

ptevnhkni teenkhdstde ltkedkfvektkndssdnreveppkkrfwsrlfgn  
>tr|Q932M2|Q932M2\_STAAM  
mnradi fki f dvelniti flgalvatfiyfisymnvnelitlcltla fpayllkisrsfevilleekiknskikicdkd  
riereilvkkn lidellfp  
nrvikkyt ltiliysigii i l l l l l c m l s y g i g e n v n f i w r l l a c y v t s v t v i i v a l i i m i m i f d l i i g l l l n f q i f l k n  
kkyddf l  
>tr|Q932M3|Q932M3\_STAAM  
makigy arvstq dqs l d g g i d t l e e y g c e r i f s e k a s g r k t k r t e l d k c l d y l r e g d i l v v y k l d r l g r t t k q l i e l s q w  
l d e n s i d l h i i d m n v s t k d  
amgkmfft v l l q s  
>tr|Q932M4|Q932M4\_STAAM  
mihdyidqpkyskacas l d d g f e d a f q y t v q g n s h r l k s t n l i e r l n q e v r r r e k i i r i f p n q t s a n r l i g a v l m d l h d  
ewiyssrkyinfdk  
>tr|Q932M5|Q932M5\_STAAM  
mtefmeev l i d d n m v f d i d n l k g f l n d t s s f g f i a k e n n k i i g f a y c y t l l r p d g k t m f y l h s i g m l p n y q d k g y g s k l l  
s f i k e y s k e i g c s e m f l i t  
d k g n p r a c h v y e k l g g k n d y k d e i v y v y d y e k g d k  
>tr|Q932M6|Q932M6\_STAAM  
mfkftdi n l a r e a k n r l i h d y i d q p k y s k a c a s l d d g f e d a f q y t v q g n s h r l k s t n l i e r l n q e v r r r e k i i r i f p n q  
t s a n r l i g a v l m d l h d e w i  
y s s r k y i n f d k  
>tr|Q932M7|Q932M7\_STAAM  
mnr gliy g l h k s k k k i h n i w y v l a i t l l i v g i a y y l i s l n n a k g q v k e f e k l v q h n d y n s i a k k l s n k e e t l s e n d a k n f  
v l f v k s k e n q e y n e q i q k  
i k s n i e  
>tr|Q932M8|Q932M8\_STAAM  
m m t t i v l l k s y l i k k k l y l k m m l k t l c y l l k v k k i k n n t m s k y k k l k v i l n k n k d n t v y g s i t d q y g n n l i t i k k n g k t  
f f f i d k l e f k p t y q r l c e r  
i  
>tr|Q932M9|Q932M9\_STAAM  
m k e f n n t g i y k y q g e n a k k v i a e s n q t t e l g k f f i g k y s i k t d k t i e d s i h n g t l t g k i d i d l s n r g n n k i y a d e d f n q  
s w f k v k l n n d s l l e k n s y k  
l l i d d k d v d y n s k k t y g k y n p t e l s v y a i g l e g k e f k t n r i n i r r n y d n k p q n l k l s f k e s q i r d y e s k s k v k e k a k  
s y i k e y t k e l n k a y k k k d y  
k y i s d y v k n n s q l e k q l k k q v k s k s k v k f k d v k i n n v k r d k n k i y i e l s k t n g n v f q t k y t l d y d n v s n e f l v e d s h d n  
>tr|Q932N1|Q932N1\_STAAM  
m r f t p r g i l n n t d y e l n s e f y y v p a s d k q m d q r d m t n k s i v g n l v y r n n f y n e v y t q p v y d l d d s n e k y q t p h i i s i d d  
s e f d y n l t n l d d y f t k d t a  
n k g y e k l v n a i k s e e i t y f d s d i n e v d d f t q q d e y s n d w y t n t f v d l v l s m k g y s y h v e p n r e s v i e d s h i i t e n d i t y n  
v s y n p e k h h l y i n d f p a i p  
i e e n d n i r l l n d n l t q d m e k t v l l q s  
>tr|Q932N2|Q932N2\_STAAM  
m e d l h y q i i r k e r s n s y m m n k s c l v k k l l n k q e  
>tr|Q932N3|Q932N3\_STAAM  
m m s a f a e l e a n l l s e r t k k g l e a a r a g r k g g r p s l p d h k k r e i k f l y d e q k l s g e e i a e q t g v s r s t v y r i i k e s r k i  
>tr|Q932N4|Q932N4\_STAAM  
m n i n s q n p v m s v n e s m k i f k a q v m l r n l k l l s e w i v k g d  
>tr|Q932N5|Q932N5\_STAAM  
m t l v c t k f n h d a k s t d y l n i s i e e d t l q y i d p n l i k v i s n r e v g k v a t l a q r a q e i d v f f e k i i d i h l s d f s d t q k r n e  
f r k l f s h f s e p h h l r l g f s  
q k g n t g k g t t a s e l i n l f m n e d i l s i i l n d d g l t i p q k a p l i r n f g d d k l s d l t s n i i m n v i i d f n k s m i q s f p e m k s f l  
s k e t v t y y y f s t n g i w e t y  
d f t p f l f d g n k t l l v p k l f t t y n q t s s l d l m i r v y i e e e i r l q k q r n t t k m t k k q f i n e f i k g h r m d n m t y f f l n t s s  
k s h k k f q k e l d s k a n e r g n  
n n k d d n  
>tr|Q932N6|Q932N6\_STAAM  
m f s i i f v s i v a p i i v g v i i t l f s h w l n n r d k q  
>tr|Q932N7|Q932N7\_STAAM  
m k s t l a q p s p f v s a l f g k f s p y t v l a p s s a l a v a e k p v n v n e l a n n k v g s n d r f f i k l s p l i e f v f s l s h r y i k h k m t y r  
k c i c l t i h k  
>tr|Q932N8|Q932N8\_STAAM  
m k k r s l l p t l l l a s s l t f t g f s a t a n a e d g a k t v y g e n l p n s a d t n g d g w a n v d f n t s s l p q s a q n q i s e l s k q k d s g e l  
t q i e y n e k v s s v f n e y g s q  
s t d i q n n e r t q q k r p f g g v i p n c m t q e e y q e l e s h v p n p n s v s t e k y n q i v k n e s q k i a n e e n k t i n t p q g v l t p v t e n  
k n k s s e g m k n q d s n s q v l p  
e t g e s n q s d i l s i i g a s g l l i l g i s l l i f r k k a i  
>tr|Q932N9|Q932N9\_STAAM  
m k k i i l p i l i v s l s v i l v s c n n d s e h h n d n n s s d t n t s e n k d n e a s n e i d e k t n t s d s a d n s e s s n k q n k e k n d n k k q e

Tsompanidou\_et\_al\_Supplemental\_FASTA\_File

knndsnnkkqqstdknksyl  
nnfnskeieyarvwyqlistrndlkgiknvvyteipkgskvnpqaknsaiyekvvkleapmraggsvtysngdgtinv  
ynni pykwensqnsdysqm  
nkitkkaieenietvyikpydnktvaklaskirynk  
>tr|Q932P0|Q932P0\_STAAM  
mntfvgvitykrleeigfnvhkvfkmpekqal fedlyhyvryvpckaealtmvaldsdelihyficcymeraylln  
>tr|Q932P1|Q932P1\_STAAM  
metki ghqikl rksknmsqeklaeklgvsrhisnwerevsnpdlk tileitklfnvslnqlikgveimqvnkyvysal  
affl gfgahkfyvkkknkn  
allyllfcwtgipgvigmvvgvltl mprpsdsenniein  
>tr|Q932P2|Q932P2\_STAAM  
mnkgyfmlrvtninratknivasasyrsdealysertdekikfrnhtikpesmiltqhapewtkdrqrlwnevdkvekn  
naktknprlakevllslpn  
dfdrevqteltkdfiksefvdkgmvadisihrddinnphahvlltqrpfnadgtwgkktktrtqydengnailnkngnk  
rkqerfadfdkfkevrkhwe  
lknqysereqs lrrydsrsfeagglekiaeipltreeyrleqnerkrcekegieyqpvtuyyqkneqirrynrgesql  
fsdkekeqaqneirlfiqn  
aneqvs kneqsysilfdryqrdvgyseaketiktfsastfgrkiqndllkneikrrqlkyaknydenyqfrkeiesk  
gysqqefvntvetnykall  
neknklesreekrkeiyqsakdvylteseknhlivqqmypkshhhfshdeka fivdeaqkgni ikathvqylfkqnnnip  
ndvll edtykkaskdi ffs  
qkhlnlekdsfeynvelqfikekekeidsykehiddlridigdknfekvkdqtpnekvqlliklekynhvdqeeviek  
hingvdrndhdnriehene  
qtnhinlptinasdf lmyanetekanni hqkkkkkqernnqmrr  
>tr|Q932P3|Q932P3\_STAAM  
mskikqtditklsqlekqiaqlkeqkkkqeeqlsnkiggyflnkldlnminssdelykimdkvige fnkdieqnsnenk  
enl tedkin  
>tr|Q932P4|Q932P4\_STAAM  
mpnfekynlsvkterfyqlpkyl fedayfkmsaeakimya llkdrfel slqnewvdknnyfi fsnkh lceylgyae  
qkiiklkkelikfnlltqe  
rvgl nknprlyllkpnidyieashikelpsnqfqnnefgsrtvnlsgqelpnsqsntdyndtdyiktynndmydlndrk  
ltyssnhtnshnyyskfn  
dealkfqllee lpsiqsylvnsfvseikliksvllkakt sfnsidayylledmefeivnlkrfkatl iqknetveam  
qgylmkslksefaevhtln  
krrdhlpitslfnq  
>tr|Q99QG1|Q99QG1\_STAAM  
mdnqqdnhikllnpl tlaymgdavl dgyvrtyivlklkskpnklhqmskkyvsaksqaqtleylmeqewftdeemdlkr  
grnakshkakntdvqtyr  
kssaieavigflylekreerlea ll nkiitivner  
>tr|Q99QR6|Q99QR6\_STAAM  
mnlfrqqkfsirkfnvgifsal iatvtfistnpttasaaeqnpaqpnpadantqpnanagaqanpaaqpanqggqa  
npagga aqpagqgnqadpn  
naaqaqpgnqaapanqaggnnatpnnnatpanqtqpanapaaaqpaapvaanaqtqdpnasntgegsinttltfddpa  
istdenrqdptvtvtdkvn  
gyslinngkigfvnse lrrsdmfdknnpnyqakgnvaalgrvnandstdhgnfnngitktvnpkpdseliinf ttmqtns  
kqgatnlvikdakkntela  
tvnvaktgtahl fkvptdadrldlqfipdntavadasrittnkdgykyysfidnvg l fsgshlyvknrdlapkatnkey  
tinteigngnfgaslkad  
qfkyevtlpggvtyvnds lttfpngnedstvlknmtvnydq tankvtftsqqvttargthtkevlfpdkslkl sykvnv  
anidtpknidfnekltyrt  
asdvvinnaqpevtltadpfsvavemnkda lqqvnsqvdnshyttasiaeynk l kqqadtil nedanhvetanrasqad  
idglvtklqaalidnqaa  
aeldtkaqekvtaaqskkvtqdevaalvtkinndknnaie inkqttsqgvttekdngiavleqdvitptv kppakqdi  
iqavttrkqqikksnaslq  
dekdvandkigtkaikdidaattnaqveaiktka indinqtt pattakaaaleefdevvqaqidqaplnpdttneev  
aeaierinaakvsgvkaie  
atttaqdlervkneeifkienitdstqt kmdaykevrqaatar kaqnatvsnatdeevaanaavdaaqteglhdiqvkv  
sqqevadt kakvldkinai  
qtqakvkpaadtevenayntrkqei qnsnastteekeaaytel dakkqeartnl daantnsdvttakdngiaainqvqaa  
ttkksdakaeiaqkaserk  
taieamndstteeqqaakdvdaqvvtanadi natantdvdnaktneatiaaitpdanvkpaakqai adkvqaqetai  
danngstteekeaakqvq  
tektaadaa idaahsnveveaaknaeia kieaiqpatttkdnakqai atkanerktai aqtqditaeieaanadvnav  
tqansnieaansqndvdqa  
kttgetsidqvtpvknkatarneitailnklqei qatpdatdeekqaadaeantengkanqaisaattnaqvdeakan  
aeaa inavtpkvkqqaak  
deidqlqatqtnvinnqnatneekeaa iqqlatavtdaknnitaatddngvdtakdagknsiqstqpatavksnaknev  
dqavttqnqaidnttgatt

Tsompanidou\_et\_al\_Supplemental\_FASTA\_File

eeknaakdlv\kakekayqdi\l naqtndvtqikdqavadiqgitadttikdvakdelatkanieqkaliaqtadatteeke  
eqanqqvdaqltqgnqnie  
naqsiddvntakdnaiqaidpiqastdvktnaraelltemqnkiteilnnettneekgndigpvraayeeglnninaat  
ttgdvttakdtavqkvqql  
hanpvkkpagkkel dqaadkktqieqtpnasqqeindakqevdte\l nqaktndqsstneyvdnavkegkakinavktf  
seykkdalakiedaynakv  
neadnsnastsseiaekqklaelkqtadqnvqatskddievqihnd\ldniindytiptgkkesattdlyayadqkknni  
sadtatqdekqqaikqvd  
qnvqta\leninnvgdngvd\ddal\l tqgkaa\ldtiqvd\atvkpkanqai eakaedtkesidhsdql\taektealamikqit  
dqakggitdat\taeveka  
kaqgleafdniqidstekqkaiee\leta\ldqieagv\ndadatteekeaf\tnaledi\l skatedi\sdq\tnaeiatvkn  
a\leq\l kaqrinpvvknal  
eai revvnkqie\i iknadadasakei artd\l gryfdrfadk\ldktqtntevaelqnv\tipaieaivp\qndpdandtngt  
dnndatansnanatpentg  
qpnvsettdngkadasp\tpnnsdaatgettvtsatddakdkp\qannssadastnsptm\ndvtskpevestngttdk  
pvtetdnatpaestnnns  
ttatnenaptgstatapttasteaassadskdnasvndskqnaevnnsaesqstngkvaqpkksenkakaekdgrdstng  
smvesttet\l psadi tepn  
vpsntskdeestnqtdagq\l ksetnvasneadksp\skadtevsnkp\stssasseakdkmtstnvsqkddtatad\ntdq  
ksvgpvannkakdmq\ntdt  
qksvgsaannkatqndganasp\atvsngshsmh\qdm\l nvtkpeenkanaksdqgkv\kpkq\qakt\l pdtgmshnd\l py  
aelal\lgamafl\l rrrftkk  
dqqtee  
>tr|Q99QR7|Q99QR7\_STAAN  
mrdskpnyccykvsmypnwgqykrad\l igqssyi knndvvi fneafdngasdk\l lsnvkkeypyqtpv\l grsqsgwdkt  
egsysstvae\ddggvaivsk  
ypikekiqhvfks\cgfdnds\ngkfvytkiekngknvhvigt\tsedsr\cgaghdrki raeqmkeisdfvkkknipkde  
tvyiggd\l nvnkgtp\efkd  
mlkn\l nvdv\l yaghnstwdpqsnsiakynypngkpeh\ldyi ftdkdhkpkq\l vnevvt\ekpkp\wdvya\l fpyyyvyndf  
sdhypikaysk  
>tr|Q99QR8|Q99QR8\_STAAN  
mlaidt\l falhsin\l sqhrnitvatph\l kwcyfywkcvs\l gisn\l vktpakneknspvpagyt\l dknndrikkr\l vitq\l  
pmlkvit  
>tr|Q99QS0|Q99QS0\_STAAN  
mmvkk\l ksns\l kkvat\lalan\l l\l vga\l tdn\sakaeskkddtd\l klvshnvym\l stv\l ypnwr\l l\l t  
>tr|Q99QS2|Q99QS2\_STAAM  
mkkk\l inksnnvkfpvt\l inkfenivsn\l efvfnaskit\l ind\l sik\l ksamandqgitkhdig\l aeravykvyf\l kngsskyv  
d\l kteykderv\l katdikk  
vdielkf  
>tr|Q99QS7|Q99QS7\_STAAN  
mimfv\l cgfi\l fp\l tvta\l gqv\l fpeqang\l svkqdgkvigsk\l igqqwtepyfh\l grisavny\l mnanevkesggpasgg  
snygnsnpe\l kkrvqetik  
qegk\l issd\l avtasgsg\l dpditv  
>tr|Q99QS9|Q99QS9\_STAAM  
my\l gyspgvgktyem\l sngidqyqegadikigyi\l ephqrp\l etnalvq\l lpeistssr\l kfgshtfhyidvskiieanpdv  
lidelahtniskerh\l kry  
kdieeilshgidv\l tt\l niqhies\l sgqialmtgiq\l vtervpdqf\l itsadafevvdispn\l iqr\l kagkvykker\l eta  
fsnfftyen\l telrel\l tr  
tvadimsqk\l gqyk\l tkhtditphiava\l isgsiynervi rearraaykehakftavyidvfetpsesr\l qdhyvhkn\l mla  
kalgaeikv\l yaqdiakal  
tdwcd\l afv\l klv\l gqseqprw\l kdyfkqs\l lieqinhvph\l hfk\l eivpihyih\l sdkptntpkqaqkssr\l tveimkmlviq  
ticv\l lgiwvyn\l dksess  
ai\l llmffigiiv\l siwtqsy\l ligffasilnvfvfn\l yfftvprft\l emyrfeypitfatsifasif\l tsailkn\l khqhs\l  
terqlyrtnim\l qfngsik  
esysier\l lniagdqihq\l l\l nqdv\l tvfl\l iqs\l kvaasnsf\l gnrsi\l sssdkthdaet\l swienesragk\l tdtfpgskfl  
cipigtnpvk\l gvisirftd  
etyidtydns\l idsm\l ndit\l aienvd\l lkqtrqsilkaereatrsn\l flshshdir\l tpsimgn\l dmlkyhneh\l ndq  
qgae\l ltasygeaq\l lht\l  
vtn\l is\l tklessdiq\l rtpylvee\l leefeeg\l lrrhqanhviieneddas\l inidsk\l ilqv\l fnlidna\l khaesh  
seik\l hvqhetnkikfemi  
dcgk\l gipeerq\l ifnpyysgd\l nfkdnkds\l glgl\l ylvq\l ilkqhnsel\l eqpntpqgsi\l fyf\l yltv\l npiemegamden  
niigr  
>tr|Q99QT0|Q99QT0\_STAAM  
msd\l eeg\l hrkr\l isygg\l lkeihkk\l n\l d\l dteeg\l dihtdd\l ekadedgfsi\l iamwnwerknyfike  
>tr|Q99QY6|Q99QY6\_STAAN  
mkyfi\l pawyddq\l rwwqdt\l tvpyyq\l qnktefddmi\l smgmh\l lend\l dyq\l liv\l nhapn\l rtf\l hryd\l yetkyssvfdei  
qgfs\l hhapqainyhh\l kw  
d\l d\l vefvytpyl\l kcv\l tseq\l tytniyfsqegysiwfeeferdq\l qrryi\l fddrgyl\l sair\l yfddqgeasyqy\l ltingdcv

Tsompanidou\_et\_al\_Supplemental\_FASTA\_File

Thed1kngrvtvskryghh  
yqteynmaqli eekfqami aqqiheddhdvivasdarhnrqianhipakllsysffknrnetvsdeeqsivknahliv  
dsmqlerdli shqekyqre  
ntmiritpferqspnissqlmetfigvwidgmsdadlqqmmqrlvdyiaqedyyrllillsrhqndipmwlrecitsvne  
eyqakqnadvnvsalmtpe  
dqddiiaavktihaehdvvealrtlrividmskepdllylqisaisagipqingqtdyvsdydngriintvdelldalnyy  
lfylknwnyayayslkliid  
ayaskniinqldeli legendat  
>tr|Q99R14|Q99R14\_STAAM  
mllevkhvkkvygkgl natta lnqmn lsvgagefvaimgesgsgkstllnliasfdgltegdii vdgahl nmmknkska l  
yrqqmvgfvf qdfnl lptm  
tnkenimmp lila garkrkdieqrhvqlavqlhlegflnkypseisggqkriaiaralvtkptilladeptgal dsktsk  
almm l fqeihqleqti lmv  
thsnidasyaervi fikdgrlyheiyrgeesqlafqqrirts lalvnggsvni  
>tr|Q99R23|Q99R23\_STAAM  
mmtrs qnkqqql eqakdivinsigqtm dlygtnrsvgnlygtmvfegsmt l demrhqlqmskpsmsagvkk l qefdivkq  
qftrgsrkqh fiaekdff i  
ffrnfftkkf qreidinveavkdaqai inpl lessdl teaet qeaqkikaql dhthvyewleql teaiesgeifkyfpi  
peqpsdsen  
>tr|Q99R29|Q99R29\_STAAM  
mhprktlqlplilkiiln laligiviivl thtefq l nagdsnvfl l nwdi rgltsyifsf l ilvalvsklilifitrrqr  
ts  
>tr|Q99R37|Q99R37\_STAAM  
mlsvai igpgavgtti ayelqqs l phttligrhaktityytvphapaqdivvkgyedvtntfdviiiavkthql daviph  
ltylahedtlii laqngyg  
ql ehipfkncvqavvyi sgkkgdvvthfrdyql riqdnal trqfrdlvqdsqidivleaniqqaiwykllvnl ginsit  
algrqtva imhnpeirilc  
rqllldgcrvaqaeg l nfseqtvd t imtiyqgypdemgtsmyydivhqqpleveai qgf iyr rarehnl dtpyl d tiysf  
l rayqnm  
>tr|Q99R41|Q99R41\_STAAM  
mtkifkisflil l lvvissyygesfv l adnnpivnsengsdnnfesgtiernqnel yevgdystpl ter vfgkdqrtvvn  
nilqrpykqtv l l nmtfsn  
nrvykgtgtm igkdiv l taahnvyskddkgwakki dvyagvngqtytigkafshkffvsktwinn l tiv  
>tr|Q99R42|Q99R42\_STAAM  
maiiklnsn l gnktyl t l nthi skgenie isgfpgdksdnr qykgkgl esfdenemyy tvdt fsgqsgsair dsknni  
igvhaygryn hnsgrind  
lkl dyinywigkyrshpynkkvkvikskyiywknie ittkgdnklikkdkaytaklyynipngykyyslydeknrwmgyf  
nsndikvvk  
>tr|Q99R43|Q99R43\_STAAM  
mkkvis l fva ilsv l iftdnanaennpegvnensn l ipvrqpdanyppgvsdi arvkk l dn lidgtkdpnvikql kddn  
evpnavkakdskivsdcr  
hllkhpdl lidgtkdpnvinql knangtsnnsavnpsikandihtksnkmaqqs ihl dsksksvhkqql kelpktgvn  
nesntaimalfigl l llvv  
slvtrfik l nshq  
>tr|Q99R47|Q99R47\_STAAM  
minaepi iskmknqkinydkvl kkl igqwerea irpki l l hscapcstyt l efl tqadiai yfansnihpkney l rra  
kvqe qfvedfnrktganvk  
yieapyephkfvkmvkdke ladekegg l rctac femr l divakaavehgydyfgsait l spkknaqlinelgmdvqkiyd  
vnylpsdfkkskgyersie  
mcndyni frqcygcgvfaamqqgidfktvnkeakfleqypd  
>tr|Q99R54|Q99R54\_STAAM  
mqhkhvai igagaagigma it l kdfgitdvi i lekgtvghs fkhwpkstrtitpsftsngfgmpdmnaismdtspaftfn  
eehisgetyaey l qvvanh  
yelni fentvvt n isaddayti atttetyhadyi fvatgdynfpkkpfkygi hyseiedfdnfnkgqyv viggnesgfd  
aayqlakngsdialytstt  
glndpdadpsvr l spytrqr l gnvikqgari emnvhytvkdi dfnngqyhisfdsgqsvhtpheapilatgfdatkpnivq  
qlfvttngdik l tthdest  
rypnifmigatvendnak l cyiykfrarfavlah l l tqreg l pakqevienyqknqmy l ddysccevstc  
>tr|Q99R58|Q99R58\_STAAM  
mksitfeehyvi ediqetmna isadpkgvpmkvml eglekktgftnadelshhderiqfmmnqdvqiv l syngspsn  
lvqkaielcqkandqlan  
yiaqypnr fvgfat l pinepeaaareferci nd l gfkgalimgraqdgfl dqdkydi ifktaen l dvp iy l hpapvnsdi  
yqsyykgnypevtaatfac  
fgyghidvgihaihlvlsgifdrypk l nmi ighwgefipfflermdeal faehl nhsvsyfyfksfyitpsgm l tkpqf  
dlvkkevgidri l yaadyp  
yiepeklgvfl delgl tdeekeki sytngak l l g l ssnn  
>tr|Q99R91|Q99R91\_STAAM  
meykkiliri l liafav l fsadftyqsveqthqshaavnysknqctwwafkrraqvgkpvsnrwgnaknwyynarkskya

Tsompanidou\_et\_al\_Supplemental\_FASTA\_File

tgrtprkfavmqstagyyg  
hvavveqvykngsikvseyfyrp1kyntrv1skkaarnfnyiy  
>tr|Q99R96|Q99R96\_STAAM  
makikanea1vka1qawdihlygipgdsidavvds1rtvrdqfkfyhvrheevasl1aaagytk1tgkigvalsigggp1  
ih11ngmydakmdnvpq1i  
1sgqtnsta1gtkafqetn1qk1cedvavynhqiekgnvfeivneairtaye1qkgvavvicpd11tekikdttknkpv  
tsrptvvspsykdi1kavk  
links1kpvml1igvgakhakdelrefiemakipvihs1pakti1pddhphysign1gkigtksyqtmqead11imvgtny  
pyvdy1pkknika1qidtn  
pkni1ghrfn1nvg1vgdskia1hq1teni1khvaerpf1nkt1erkavwdkwm1eqdknn1skp1rper1masinkfikdda  
visadvgtatvwstry1n1  
gvnnkfi1issw1gtmgcg1pgamaskiaypnrqai1aiagdgafqmvmdfatavqyd1p1tvfv1nnkqlafikyeqqaa  
geleyavdfsmdhakfae  
aaggkgytik1sasevdaivee1aqdvptivdvyvdpnaap1pgkivnee1gygkwaf1rsitedky1d1dqippisvaa  
krf1  
>tr|Q99RA6|Q99RA6\_STAAM  
mir1cakked1nai1aiyndai1inttavytykpqtideriawfetkqrnhepi1vfeengsv1gfatfgsfrpwpayqyti  
ehsiyv1dasargk1iasq1  
1qr1liveakakgyrt1vagidasneasik1hqkfnfk1hag1t1nvgykfdywd1lafyeld1kd  
>tr|Q99RB3|Q99RB3\_STAAM  
maf1hdk1tatqvt1nie1nvr1d1d1mttfykn1lg1svkssddnt1t1svgtgg1ht1t1h1ledgrqtspreag1fhi1af11  
ptted1an1flyfvaqknmg  
igagdh1vseal1yfn1dpegn1gievyrd1rps1ssw1eqngkvkmd1t1levdsq1t11thrtdegwqgmpakgmigh1h1kthd1  
daaygcye1eq1gfqhv1sdf  
pra1l1fms1tnhyhh1hiaantw1qs1nqarqna1qsyg1thvdi1yqp1dast1ht1ftapegfd1itvhsntd1lvpek  
>tr|Q99RB6|Q99RB6\_STAAM  
min1nhel1lgi1hhvtam1ddaernykffte1v1gmr1lvkktvnqddi1y1tyhtffaddvgsagtdmtffdfpnitkgqagtns  
itrps1frvpndda1lmyeq  
rfdefgvk1hegi1qel1fgkkv1lpfeevdgqvyq1l1sde1ndgvapgvpwkngpvvdka1iygl1gpieikvsyfddfkni1e  
tvygm1ttia1hednva1l1ev  
geggnggqvi1likddk1gpaarqgygevhhs1frvkd1hdaieawatkykevginnsgivnr1fyfeal1yarvghilieistd  
gp1fmedepye1t1geg1s1  
ppf1lenkreyie1se1rpfntkr  
>tr|Q99RC1|Q99RC1\_STAAM  
mgv1t1ieh1tkki1gnk1t1ledvs1fk1krqgi1vg1lgangagk1t1mkv1ilgyss1fqsgnfnv1nskdsksnigal1ienpg  
iyp1fmsgyen1kl1neskn  
tqdi1dkivs1ql1hmd1eyi1hk1kaktys1gm1kqk1giaia1flnepqfi1ildep1mg1ldpkavrdvrelivqksqegvtfliss  
hi1selvki1t1nsi1li1inkg  
kiv1tetsee1ekqfkdnd1env1lei1eredqa  
>tr|Q99RC7|Q99RC7\_STAAM  
msnystge1lak1cnvttr1tiqyydrk1gil1kpqgft1egkrrvyteqqr1t1el1l1l1kd1lgca1sdi1dm1lkgegt1kt1n  
t1l1tmkq1qei1nqqv1kqqa  
v1nki1knvqyyvneastsp1ith1kdi1ehvmsksaemk1sir1rniwisagi1igi1qyssi1mssil1mknkwpflial1p1fmncy  
gi1gvt1fy1qqkvay1l1cpnc  
qhi1fsps1lwavi1kakhtat1rr1fecp1nchethycievpk1ahm1steq1leishiqhnn  
>tr|Q99RE0|Q99RE0\_STAAM  
mtvni1v1fsi1vfc1ismv1il1giyvaitkdf1t1isyinq1tti1adkhknq1aiy1ft1cis1sav1flmssil1cfeydfial1sflf  
l1tia1l1l1ial1fyvcfykit  
kyp  
>tr|Q99RE5|Q99RE5\_STAAM  
mssk1keay1d1adk1l1ssk1gik1sva1tgdds1vnyrqiviek1kegkinyi1itvd1fnegidipevnqvvml1rptessi1ifiq  
q1lgr1gl1rksankeyvt1vid  
fi1gnyk1tny1lipia1lsgd1qs1qnk1dnyk1k1fl1tnnds1ingv1stinfeevakkqi1yns1davs1lnqn1k1ilkayeeven1lgh  
mp1l1mdfi1qqhs1idpsvif  
skfs1nyyef1l1rykkid1al1teneskn1lvffsrqi1apgl1krids1lv1ee1l1knel1tyde1lknkm1nevkditeddidts1  
ri1ldfs1fynagi1ekiygsp  
iiec1nermi1r1sdaftna1snqt1fkif1led1iel1skynnek1yqkgng1l1lynkysredfski1fnwnkngssvimgymir  
sqemp1fi1tydkhed1sds  
tkyedef1sqdel1kwftksnr1t1kskevqki1lshrakgi1kmyi1fvqkkdddgi1fyf1ylgtagyie1gse1kqdkmpngsnv  
tmd1al1dkavrddi1yryit  
n  
>tr|Q99RF0|Q99RF0\_STAAM  
mfttyk1n1el1enaydeerk1ql1ndafnqi1del1rhqtrkkceqmydhfly1lkhkmnysedamirmtr1iesfdretnq1rir  
hhemk1ledykdel1rrey1lk  
qsdri1egde  
>tr|Q99RG1|Q99RG1\_STAAM  
mkr1lenkvavvtgastgi1gqasaia1aqegay1lavdiaeavsetvdkik1sngdnakaynvdisdeqqvdfvdsikeqf  
gridv1l1fnnagvdnaagri

Tsompanidou\_et\_al\_Supplemental\_FASTA\_File

heypidvdykimnvdmrgti lmtkmm lplmmnqggsivntssfsfgaedlyrsgynaakgavinftksiaieygrdgirs  
naiapgtietplvdkltgt  
seddagktfrenqkwmtplgrl gkpeevaklvvflasddssfitgetiridggvmaytwpgemlsddswkrtle  
>tr|Q99RH1|Q99RH1\_STAAM  
mifsknlfrprtparl trieksllqahfrsvnycqynfveh  
>tr|Q99RI2|Q99RI2\_STAAN  
msekqsneqveaflnkesqwqeeykylralifneteleaykwmhpcytlnnknvvlhgfknvvalfhkgailedkyh  
tliqqtekvqaarqlrfen  
lteiqarteeikyylaeai kaekagkkvemkkteeyvipkeleakfeempqllessfykltprqhqyiyhigqakrsetk  
qkrvekyinqilegkghd  
k  
>tr|Q99RI3|Q99RI3\_STAAM  
mimlsikhltkisygnkkavddisldiqsgefi afigtsgsgkttalrminrmieategqieidgkdvrsmnpvelrnni  
gyvigiglmphmtiken  
vlvpkllkwtkeekdkrakeliklvd lpesflerypaelsggqqrigvvralaaeqdiilmdepfgaldpitrtdlqdl  
vktlqrklgktfifvthdm  
deaikladkicimsegkvvqfdtpdni l rhpandfvrdfigqnrliqdrpndktvegvmikpitiqadat lndavhimrq  
krvdtifvvsnnhllgfl  
diedinqgigrhkslrdtmqhiytvqidsklqdsvrtilkrnrvnvpvddkqrlvglitravnvdivydtiwgdseda  
vqtehvgedtvsskmheqh  
ttnvkvr digdds  
>tr|Q99RJ1|Q99RJ1\_STAAM  
mfngfkrliigqpkknrelkdekiskfkgla ilssdalssvaygpeqil itlsvvgavatwyt lpiagav lillaalims  
yrqiiyaypkkggaymvs  
tnlgekwwllaggsllvdyiltvavsisgadafvaafpslyghkvliac llvlfililnlrgltesatvlsypvylfii  
glvili figtfrvatgdiq  
phmhasvgtavpgvtlfl lllkafssgassltgveaisnavtnfrepssannavktliamgsilafllvgivglayvygimp  
qtettvlsq lamqifgdna  
afyfvqattvmlv laantgftafpmlaasmskdkymprmftrvgrdlgysnsi ilglv laiilivfdgmedliplya  
vgvfipftlaqfgmvi kwi  
herpknwlsklsvnl ggi vtfivfmil ltkfsqwpilifl pfvviff l kinkhyrdiaeq lrsdidvlnvdvdrnl  
aivpitsittavdksiyya  
qmlanndviavhsfgdedekafqekwkrhfpdvr lvi l hseyrsiirp isrfidkinrkandqnymitvvi pefitkkr  
whnl lhnqtslrmklyliy  
qknvncvctipfkllk  
>tr|Q99RJ3|Q99RJ3\_STAAN  
mlvssialliaallnyi fpaiaqlfiyvttl stvlflvwamiivaylmylkkhpeahknskfkliggkpiayiilafff  
fvfllffsdetraaiyis  
pfwfiflfffykkyktnaeklayeqr qndsghfrydnq  
>tr|Q99RJ4|Q99RJ4\_STAAN  
marklhrelnrrhiqliaiggaigtglflgsgqtisltgsl lftymiigvvlafafmralge lllsntrfnsfvdianey  
lgpfggfvigwtywlcwiv  
ssmsdl tamgyafafwypqvpnwitvl fivlilisfnllgarlfgelef wfsiikvvtiamvivglvliffsfkthygh  
asftnlshggmfpggtfg  
flmsfqia vysfigieligtvagetkdpektl pkainnvp irillfyigglvmsvipwndidpnsspfvklftligvp  
faagvvnfvv ltaasatn  
sgiynsrilfglsqgglgpkvlnwral finvsfincitysslvklhfp  
>tr|Q99RJ5|Q99RJ5\_STAAN  
mkigtjadlhidrhkktsedy lealveivkykkl diilliagdisnhyqlthqfitqltkql dipvkfvpgnhd lweves  
mtqdiwnnyksmsqclvg  
kpfivneewaiightgwydysfaaqrfsleh lqkgkhygatwqdkeriswgisdqnl skiaaeqvkkdilevgnrrvilv  
thvthpdfi vpmphrifd  
fynafigtsdfnplyamfdipysimgvhfrksvmdggrcylcpclgyprqrsedyqeinetiqiiei  
>tr|Q99RJ7|Q99RJ7\_STAAM  
meyqlqqlas ltlvgiketyengraqqhiagfwqrcyqegviadlqlknngdlagilglcipeldgkmsymiavtgdns  
adiakydvtl asskymvf  
eaqgavpkavqqkmeevhhyihqyqantvksapffelyqgdttsekyitei wmpvkg  
>tr|Q99RL6|Q99RL6\_STAAN  
mkrllfvmi afvfi laacgnsskdk eankdskti nvgtegt yapfsfhdkdgl tgydidvikavakeeglk lknets  
wdsmfagldagrfdvianq  
vginpdrekkykfskpytfssavlvi renekdikdfddvkgkkl aqftsn ygklakdkgaditkv d gfnqsm d lllskr  
vdgtfnds l syl dykkqkp  
nakikai k gnaeqsrsafafskkaddetvqk fndglkkieengel akigkkwfgqdvsksk  
>tr|Q99RL7|Q99RL7\_STAAM  
mivqlfiif ygi pelgrllndadnqwtlapvvaaiigls l nvgayaseiirggi isipkgqteaaysigmt ygqtiqri  
ilpqairvsipal gntfls  
likdtsllgfilvaemfrkaqevasttyeyl tiyvlvalmywvcfiisiiqqiyesyiergyrs  
>tr|Q99RM6|Q99RM6\_STAAM

Tsompanidou\_et\_al\_Supplemental\_FASTA\_File

mienkktvedtystgai vdsi sssvqmkqvmvqtpgrymlkammagflsivtvfmfgiktqfanthvdglinlmgai a  
fslglilvvltnselltsn  
fmyftvgwykvvsvkkmtwillycflgnilggfvlffl mkfahvmtpentqalta lvqkktvdstwl niftkgifcnff  
inigi fismqfkggltkaf  
fiacgvvvfvmgyehvvnaglyagmvffnldavswlhvlnkivfaflnfvvggigifvglvyaflngrnrleqq  
>tr|Q99RM8|Q99RM8\_STAAM  
mngniivahgmrhgrnqaleafise lvkddihhydiafl eseqdletvmttliqsgvdhfkivpllisamhyldip  
nivhemkrrypdi kvevse  
plgthplmrrlieqricdalagdeqqvgvmvahgningnftkaheelqicaqlqinkptyartlygeisfthdlesis  
kryqkli vvpflfydgrlv  
nkvkqmqmndm vintdihftpsinfdpi lkqiindrleslmipmki  
>tr|Q99RN0|Q99RN0\_STAAM  
metkekikvttideltp ligkkvivkgevglfltesgtihai hnicphkqgp lsegtvsgeyvfcplhdqidlntgiv  
qepdegcvdvyevetdgn  
vyicl  
>tr|Q99RN3|Q99RN3\_STAAM  
mki kaqvamvlnldkcigchtcsvtckntwtrnrgaeymwfnnvetkpgvgypkrwedqehykggwvlnrkglelksgs  
riskialgkifynpdmp li  
kdyepwnynyehlttaksgkhspvarayseitgdnieiewgnweddlagghvtgpkdpni qkieedikfqf detfmy  
lprlcehlnpscvascps  
gamykrdedgivilvdqdacrgwrycmtgcpykkyvfnwktkaekctfcfprieagmptvcsetctgrmrylgvll ydad  
rvheaasavdekglyekql  
diflnpfdeeviaqaekdgigydwieaaqnspiyklaieyklafplhpefrt mpmvwyccplspimsyfegknttqnpda  
ifpaieemrlpieylani f  
tagdtepvkga lqrmammrsymrsqvtqqpfdtsrlerlgiterqt kdmrllglakyedrfviptshketyldtyhaqq  
stgynyggehfqdncegcg  
vavgskgtgqeynenfyggi frd  
>tr|Q99RN4|Q99RN4\_STAAM  
minfdnfkkyqesfgymaqq lcfpekltfhpktfootiskdhpayedlvafnvmmtfslseikaiytdtfdftkkaply  
mtynkfdtqkergqmlakl  
klyemfglemvdnel sdy lplmlqflqvaewrndpraeniqli imiiedgtyvmanalgednnpayvialrktlkl  
cltspkgvkhha  
>tr|Q99RS2|Q99RS2\_STAAM  
mtnpnqrlepfdetfqqpnihrgekrygkkkrs lvsmiiqiivvil taiagysmwkqpi fnivftkesvdfdgiknfneti  
gkmhqlninlgnindlqqg  
idrllilvngffilcivslviti ltvfnrtvlkvvnillvltimlvitlyfsyiiktlaqeiada lkkyylnvppdqvit  
eadaihngiillgcsigll  
vislffrnrmprlk  
>tr|Q99RS3|Q99RS3\_STAAM  
mirnrvmnsvvnkyllhnrsimfknqdqverffykreienrkhhkqpstlnvkanleklsldmqvfrfnfrhqidkkil  
yihggfna lqpsfhwrl  
dkitlstlyevvlpipyktpefhiddtfqaiqrvydq lvsevghqnvvmgdgsggalalsfvqsll dnqqplpnklyli  
spildatlnskdisalie  
qdavlsqfgvneimkkwanglpltdkrispingtieglppvymfgggremthpdmklfeqmm lqhhqyiefydypkmvhd  
fpiypirqshkaikqiaks  
idedvtqnn  
>tr|Q99RT3|Q99RT3\_STAAM  
mhkfwatftlyikkikaksfvi fmiiiaal miglsnidkii nmfdgdgpdki gvaapneqiykvfkqqantfhsdakftk  
vsiedaekevkhhkl dkay  
iikvqnrtlqgtiisekrvshedsqkvqalltaiqtnmvagelninkedlqklqaqskvdkvisndevdkvsegqkif  
nyalaygiiflmffivl ny  
asqamejasektsrviemi itsispiqhi fakilgviavavtqi ilivlmavici fafdldllqgfnvemnqlswqii  
ivgiissivgimayvllaa  
ilgs ltsriedlnqslmpltl lmgiafyiaiftinnpdgqlalitsyipflapflvvraqtsglqiyevilsslisivm  
vavliwiaiktykdsvltf  
erglfnsmkrvfkk  
>tr|Q99RU4|Q99RU4\_STAAM  
mgldqavtwrryfhqfpe lsdkefkttkikidiltehhiril dplmtglvaevggglsciavr adidalpiqelveqd  
fksenegvmhacghdihma  
silatavklkeiegtlgrvkfifqpaee lghgafkii etdalkdvqavlgfhndpsrsvgtfaiktgait savdrfefh  
ikvggghaakpeqcndpvi  
vlaqlnsiqsivsrnl safdeavvtigqiscgntwnviadhayvqgtvrsfdpvvrklvetrlqdiadglaqaynmkin  
lnythlpgavmndealthk  
aiaavahvgykvemnep l t igedfsgysqhfpsvfaligshseydlh hpqykpderilekvpeyfvfvkrllhe  
>tr|Q99RV0|Q99RV0\_STAAM  
mnaikrfgsamivpvmfaffgivilgfatl fknptimgsladqhtfwkfwsviesggwvifthmevvfvvglp lslakk  
apghaalaa lmgylmfntf  
inailtqwphftganlek gvenvpglksiagiatl dtnilggiiisaiitwihnryyskr l pemvgvfqgltfvvtisff



Tsompanidou\_et\_al\_Supplemental\_FASTA\_File

vm1plaa1tcviwptvqhg  
igsmqhfii asgyigvwlyhflervliptglhhfiyapi evgpvvvnhglkaewlqhlnefakstklkeqfpygfm1qg  
ngkvfgclgialamyattp  
kenrkkvaallipatlavvvgitepleftflfiapy1fv1havlaasmdt1myafgvvngm1ggl1dfistnw1plgke  
hwgtyvaqviig1ifvaiy  
ff1frfl11kfdi1p1pgrkkteeevk1fskqdyknkkgsdsvskrastgneyedkaay1dglggkenikdvtnc1tr1r  
1tvydeskvadteyft1hqq  
mahglvkskgsiqv1vvgmtvpqvreafeqmvedqssedk  
>tr|Q99RW2|Q99RW2\_STAAM  
mtdkt1qqidk1icsw1kqidn1vipq1l1memttetkrhrfd1vt1nvdk1iqqqfqqflathfpehq1laeeksnem1tne  
inh1w1mdp1dgtan1lvkq  
qedyci11ayfyegkpm1syvyd1p1hkk1yka1rgega1fcng1kmepps1kledai1sfnaqvm1ldtvqd1fdasfsy  
r1vgacg1dsmrvakgqfg  
ah1ntpkp1wdiaaqf1fae1ln1kmtt1dgka1dh1kgapfi1snkache1t1k1lnanggyqkyr  
>tr|Q99RX5|Q99RX5\_STAAM  
mtdnys1hiy1skm1mssv1kean1ki1yw1lqgt1gvvs1nlq1ydvkrndvt1vim1nd1yq1idgh1ddsvccvvevsakt1fk  
fmnanym1rgkil1tnevas  
tfril1kyl1iysk1kqqs1ynandki1n1ymc1velms1ntydgsr1h1vaeevh1dyl1tnnh1hkk1nrkdvin1qvsitnka1sd  
mfkatp1synfi1qyl1nhir1  
ehclidi1ltsk1piee1ishgfn1hysrfih1fketygntpk1irkrysptshsinhsq1lveidkni1el1fdntnqssss  
mreid1pfeptk1rsqmyqg  
kniy1kgsnfyw1m1dyyt1kqi1qr1gvn1len1hiiv1tidtsn1elsieqit1ll1qkivnynv1v1v1frikheykell1tster  
gkiek1l1vati1fnmt1fesnr  
ckiaf1ind1nttai1qkl1kr1idny1igvfeliyh1lepkelnthydkeidh1lidyfil1pr1qieqvs1iacskiicdv1din  
ennd1leki1tmsdfnkvte  
11tnyt1kfrg1limhmsi1seaskein1tr1sifi1fiin1lnq1rgivi1yqndtmivtkfkhevqcvic1lpaallnensda  
ir1lscg1lqqfshaktkqi  
v1sidkdnhtsengv1vndimq1qhsywk1anfierniydhs1lmvssnsivh1lkyhlei  
>tr|Q99RY5|Q99RY5\_STAAM  
mkiidv1l1kni1sqv1lisnkw1t1g1f1ilig1fvadwt1glaaivgsi1ayt1farfinyseae1vndg1lagfnpv1ltaialti  
1ldksg1ldivi1tmia1l1t  
1pvaa1avrev1rpykvp1m1tmpfviv1twfti1l1sgqvk1fvdts1klmpq1nietv1nfsnndrihf1iqs1lfegfsqvfieas  
viggvc1ilig1iliasrkaa  
1lavias1l1sfi1va1l1ggnyddin1qgl1fgynfv1maia1lgyt1fktainpyist1flgv1l1tvvv1qlgtt1l1epfg1pal  
1l1pfiiv1twi1l1fagikh1d  
kvda  
>tr|Q99S54|Q99S54\_STAAM  
mkvkl1r1tcvysa1frayv1khvv1fnryf1mkgyq1qmspkgt1rietktghqaq1fdwkegin1fktndnqivs1nigv1ll1sy  
sr1fvimkv1tmnkssdv1fn  
1ftqafe1m  
>tr|Q99S57|Q99S57\_STAAM  
msafdfn1fgps1inqdvd1dftd1r1figkyeniv1f1dsnv1vsknr1styfikchh1ken1rkak1ens1en1rkhyskyk1  
liideig1yl1pigseaa1kif  
fqinrfkv  
>tr|Q99S67|Q99S67\_STAAM  
mtyrmk1kwqk1st1it1l1magvit1nggefrs1dkhqi1avadtnv1qtpdyek1rntw1ldvnygyd1kydekndamkkk1fdat  
ekeae1k1l1ssmktesgrty  
1wdsak1d1nksadm1r1rtyrniekiaeamr1hpkt1l1ntdenkkk1vkdalew1lhknayg1kepdnk1vkel1tenfkitd1sskk  
ka1lnwwdye1igtpr1slnt  
1l1l1ndqfs1neekkk1ftapikt1fapksde1l1ssvgkaepak1ggn1vdiakv1l1lesiieedk1dmmknsidsfnkv1ftyvq  
dsatd1kerng1fykdgsyid  
hkdvpyt1gaygv1l1legisq1mmpmiketp1fndktq1nntt1kswiddg1fl1piykgemmd1srgrais1renetshsasatv  
mks1l1r1sdamdd1stkaky  
kkivk1tsvksd1ssygqndt1l1ssysdi1skmks1medst1stng1l1tqq1kiyndm1drvtyh1nkdl1dfafg1smtskn1vare  
singen1kgwht1gagmsy1  
ynsdv1khyrdn1fwatadm1kr1lagttt1leneepk1gtdvk1ksskt1fv1ggtk1fddqhasig1mdfenq1dkt1takksy1fil1ndk  
iv1fl1gtgik1std1sskn1pvt  
tienr1kangyt1lyt1ddk1qtasdn1qgtnsv1f1lestnk1pknn1igyh1flneski1tvkkesht1gkwsd1nksqk1dsktn1qyy  
evt1qkhsnt1dskyay1lyp  
gl1skddfnt1kkdkvt1vkq1ddd1fhv1vkdnesv1wagvnysn1stqt1fdin1ntkvev1kakgm1fil1knkdd1ntyecs1fyn1pest  
ntasdi1eskis1itgysitn  
knt1stsnesg1vhfel1tk  
>tr|Q99S70|Q99S70\_STAAM  
mkykh1fai1it1itg1vm1tamy1v1p1fgyh1kipi1fagmai1ftvy1fsnkksid1etni1fskknr1nknkq  
>tr|Q99S88|Q99S88\_STAAM  
mahvni1niskikynakv1l1q1tvf1qskni1qft1pvikci1agdr1tives1k1algin1hvaes1rdni1isiadq1d1tyt1l1rtpak  
ke1isdmi1ekvdmsi1qtel1s  
tihqinevaev1lgkkhki1l1mvdwkd1gregv1tydv1ldyikei1ih1kni1hfvgl1afn1fmc1fksdaps1ddd1fminrfvsa

Tsompanidou\_et\_al\_Supplemental\_FASTA\_File

vereigyr1kiisggnssm  
lpqlllyndlgkine1riget1frgvdtttnqaiamlyqdaitleaeileikprvntqthesflqaivdigyldtkvdnis  
pmdqhini1gassdh1m1d  
1ngqghyqvvdhisfs1nyealshsmymkn1hkvyiddskidt11qnfdvkspsamvnyq  
>tr|Q99S92|Q99S92\_STAAM  
mdsfsrkeivigr1kfitms1gill1flvpipveqdqkqttl1pvaf1agvlkdv1ggvmpflivtiit1lsgitlicst  
ilkdk1kpdglmnafnvr  
igw1ilri1lavfawmtflrigskviysdetgg11fss11pt1vav1faa1flp11meyg11em1gpi1frpvmrplft1  
pgrstvdn1asfigdgtvg  
v1itsrqygegyysrreatvisttfsvvsitfaivvaetv1hm1qnf1afy1svivsc1vaavimpriwplnkipdeyake  
vpesartealpegktalrh  
gfdtatevg1kapgvidffksg1ktvidmwfvilpvvmsigtatiianytpffvilgkpfvpfle1mqipeaaqasqi  
igfadmf1ps1liegvqn  
ditrfvigalsisq1ly1sevgg1v1gskipvsigklfmi1firtit1lpiis1mah111  
>tr|Q99S94|Q99S94\_STAAM  
mtgkthascgmlvgalttgyfqt1dfssvtviilatlas11pdichtqskigrfrkvisffvr1ifghrtfthsilfi  
iaf11qi1qtpnyyaaai  
ig1vshv1ldmi1trgvk1fyp1lpfnvktpiqfktgg1vd1slata1mvgtvvy1fqpfindiisnwntkf1  
>tr|Q99SB2|Q99SB2\_STAAN  
miyytmvns1vqssyadsth1giaittqs1iiiv1likaiitw11lipi1nfmts1vestndkvkthlangfkamkngq  
ktffkffig1111n1lii11  
fktpvgyl1sfn1tqslsqsvaeni1rvyvtvmti1lfv1hai1mgivqy1lkrqgkitkdkvktadkdkkvvtepkntk  
vengkvttsvetk1tekaqd  
s1ndt1tktmts1dkpednqpk  
>tr|Q99SB3|Q99SB3\_STAAN  
mftyfksafknakp1l1it1iya1iafaviavv1lanf1akyaq1tiaysqf1gkppvday1kviav1liaavvs1fv  
1vqi1figitnvmkramshe  
kvkftd1fiafkkgny1ksv1ig1vsiamiiv1sl1ts1lyk1fspvsemimnts1yqe  
>tr|Q99SB4|Q99SB4\_STAAM  
mshshhh1dhmshvttnk1kv1fis1fliig1lymfie1igg1lans1al1sdgi1hms1d1tfs1lgvalvafiyaeknat1tk  
tfgykrfev1aal1fngvt1  
fv1is1iliv1fea1krff1vpsevqskem1iisi1ig1livnivva1ffm1fkggdtsh1n1mrgaf1lhvig1dl1gsvgaitaa1li  
wafgwti1adpiasi1lvsvi  
ilksawgi1tkssini1megt1psd1vdi1devitt1k1kdsri1qsvhd1chw1tisndmna1schvvvdht1tmkecell1nie  
hd11h1n1ihhmti1q1letpn  
hkhdesi1csg1thshshnhhahhhahvh  
>tr|Q99SB6|Q99SB6\_STAAN  
mp1f1qpi1k1tk1wggqr1sefgyq1ldndtt1gecwcvsahpngtsei1ngpyqgq1tdriwsehrelfgdfpskdfp1lt  
kivdares1sihvhp1d1nsy  
ayehengqyg1ksecwyi1daeedaeiv1gt1laesreevanhvqhgtiesi1lyikvkpgefyfipagtvhtissgilaye  
tmqssdi1tyr1ydfnrqdn  
qyndrplni1eka1ldviqynap1pni1pesei1enhkcthis1ndff1lvkweisgt1nymkprefclvtv1legegqmivd  
geifk1ttgt1nfiltsed1  
dsvfegdf1t1misyv  
>tr|Q99SD7|Q99SD7\_STAAN  
mperertspqyes1fhe1ykn1yttkel1tqakt1kl1tnysk1lnkelviaimeaqmekdgn1yymegilddi1qpdygflrt  
vnyskgekdi1yis1asq1rr  
feikrgdkvtgkvrkpkdnekyg1l1qvdfvndhnaeevkk1rphfqa1t1plypderiket1etqnystrimdlvtpig1g  
qrg1liv1appkagkts1l1ke  
ianai1stnkpdak1f1il1vgerpeevtd1ersveaaevvhstfdeppehhvkvae1l1lerak1r1veigedvi1l1m1dsitr  
larayn1vippsgr1t1sgg  
ldpas1hkpkaffgaarnieaggs1tilata1vdtg1srmdmiyefkgtgnme1h1ldrklserri1paidigrs1strke  
el1isksel1dt1wq1l1rn1f  
tdstdf1terf1irk1krskned1ffk1qlksaeestktgrpi1  
>tr|Q99SG1|Q99SG1\_STAAM  
m1nki1vivgr1tkdaqi1fekedrkiatfcvathrnykdengeivcdyl1fckafgk1lasniekytnqgt1vgitgqmrsrk  
ydkdgqth1fvte1lyvetik  
fmspk1sqnnei1sdsi1ldidsq1nidnhd1lei  
>tr|Q99SH8|Q99SH8\_STAAM  
msntes1nigkkr1gsl1tiyig1spvgk1fem1snaie1l1fqs1ndikigiyiephqrdetna1aeqlpkitt1nftkghshh  
fqy1ldvdri1eesptiv1i  
de1ah1tnis1rdrhekrymdieei1nhgidvht1lniqhies1ssqielmtgvhvkervpdyfimsadv1levvdispeqli  
kr1kagkvykkdr1dvafs  
nfftyah1selrt1l1rtvad1msdkekvrhnhkts1kphiava1sgsiy1neavikeafhiaqkehakftaiyidvfekn  
rqykdsqkqv1hqh1mlaks  
lgakvkvy1sqtval1gdwecknqdvtk1iigqhi1rnkwrdf1ntplidh1msfeh1sykieivpikqipvelkmnkspyr  
pkgrkrfaidm1kmi1liqi1  
cvmmglwiyq1ldkhes1ti1lmi1fligi1llsiw1trsf1igflaai1nvfvfnyffteprytfevyrfdypitfiv1ilt

Tsompanidou\_et\_al\_Supplemental\_FASTA\_File

siltsallkqikfqysitk  
kqlyrtdllfqfndsikqytvtvenllinagyqinqllqqsitiyvinqskviktiplqnhidnttqqheqalswvikner  
qagattdtfpginkwlipi  
gtspikgilaidygssqvinpydasilesmnelslavenvtllkqtresmlqaerqlthsnflrsishdirptltting  
nldilvshskdmsiiekeg  
llvhsfqesqylyllvtnlsltklqssnvqiklqpylvselveeidmilerrhllkkritvsssvnlqfihidsklilqa  
lfnlienavkhtstdtkin  
lsiryasyeqiefavidegpgisleeqqkifepfytgsnkyfkdnqkesmglylvqtilhkhqsnlqykpnqphgsif  
yfniytdfnegdv  
>tr|Q99SI7|Q99SI7\_STAAM  
meefkqhykgldesltcqdvelikkcekytdevirkdvlpedivdihknyiltlntredvftldvlqeivkgfgys  
yrdyqrldvklqvhdkeid  
lasslqqtmkt dipqfdisiqgvisvaaqkvsgdyfnlidhndgtmsfavadvigkgipaalamsmikfgmdsyghsq  
psdglkrlnrvvekninqn  
mfvtmfyglyeemnhllycssaghepgyiyraekeeefeisvrgrvlgissqtryqqeipiyladdliiiltdgvtearn  
segtfidkqkllleyikkhk  
hmhpqdivqiiyeailklqnpnkddmtiliikrvn  
>tr|Q99SL8|Q99SL8\_STAAM  
masyekrgntwryrislgkdaetgkykysinsgfkrksdakhhaemverqlrngdyiapststfkqvaddwisqyanek  
vsvrarekaihhaierfk  
nkpiqtikkhdyqrfvndisiqysknyvdsivtstnmi fkyaydmkli rilpsegikrpkkkvsveeledteihkkflek  
delqfleiaknhhspqns  
fevfytlaytgmrage lla lkw didfenntin itkty n pnnkkqyqiltpktessigkisvdphvikllknykvdvq  
dtwknelyv dnnfvftdvn  
gypvikklqlwikailkktntnkqisthsfrhthcallieagvhikeiqerlrhkdinttmniyakitnsykkdasqk  
fslmenvskdlf  
>tr|Q99SM6|Q99SM6\_STAAM  
mdkeqllkkyiyeyvkeykeipiyqledlfkeinhdyygrtsithdkdenivfswgnkitmfalielvkseqldlvrgs  
fimrylldgrvplplaic  
ypedgqtdvpswvpmvlrinkeekik  
>tr|Q99SN2|Q99SN2\_STAAM  
mdkkqikdfvcdyhkrtisdliddeintdeffsigdensnewmaddnidhivknhlemivdqvandkefyifdsliqg  
rsfkdisnvlcseqsvrl  
wyetlldkivevie  
>tr|Q99SN9|Q99SN9\_STAAM  
mkrtrcydgkkwqyefkhegkryrkkgfrtkreansagldklnelrsgfnidnyitleeyfenwiktykqpvvkentyrhy  
rnalqhiqkhkigkme lsk  
inrqvyqkfindhskehaketirktngairsalddalydglifknpaykvnykagkptksekekfisvteyeilkdhvrk  
krtrsslalfimictgcrv  
sgarnikiehinqvntifiderktdtspryisiaksdmkhimdvistfaisydygifkeagsiinlqainnalksacr  
nnipiitshalrhthcsyl  
lakgvsihyiskrlghkniaittsvyshlleekfneedkkttkilesm  
>tr|Q99SP0|Q99SP0\_STAAM  
menfnynnikkllvlenvidkvveykydye llyntiknqtl ymndyevakvsekhl neni n n lrgtvnldekci lsltyl  
>tr|Q99SP1|Q99SP1\_STAAM  
mkkvsvimptfnngelhr t i ssvlnqtmkst dyeli i iddhsndngetlnvikkykglvrfkqlkknsgnasvprntgl  
kmskaeyvffldsddlhe  
raledlynqkennsdliigyvegkgrsvpkai fekgnvakadiidnsifyalsvlkmfkksvidknkikfktskta  
edqlftjeflmnsknsyk  
tdyeyyivvndfessnhlsvnkstgnqyfati neiykai ykspiyknqekrhqlagkyttrllrhgqkknfanskmkyed  
kiewlnnfsktinkvprds  
dkyvtqifnllklearqndllavmiadkll  
>tr|Q99SP5|Q99SP5\_STAAM  
mktlkelrtdygl tqkelgd lfkvssrtiqnmekdstnikdsllskym safnvkyddifl gneyenfvftndkkksiila  
fkekqts  
>tr|Q99SQ4|Q99SQ4\_STAAM  
myyktgdvcrkifnv d gdfq lrvkkraysveivldhegsidgl lvsdendlytal dilkqsiyewienntdeqdrli  
nlvmkw  
>tr|Q99SR2|Q99SR2\_STAAM  
meieikfnevfnapmgsprprfrntgrfvq tymptsytkhkayiqgqmpklnleralkieldfyfp llkswskkkksemv  
gqykvtkpdi dnlktvld  
acnghvwkddnqiteitsskrygiepkiiirreei  
>tr|Q99SR3|Q99SR3\_STAAM  
markarivtindkpyrfskfemeli eshgitagmvskrvkdgwelheamdapegtrlseyrekk tierleqarlerkler  
krkreaelrrkkphlfnvp  
qkhsrdpywfdntynqm fkkwsea  
>tr|Q99SR5|Q99SR5\_STAAM  
mtmtynarkeylnqffgskrylyqdnervahihvngtyyfhghivpgwqsvkktfdtaeeleiyikqhgleyeeqkqlt

1f

```
>tr|Q99SR9|Q99SR9_STAAN
mtqylvtffkdstgqphehfttarndnqftftvveaeskeeaerkyeaqvkrgaviklqglfenirecgk
>tr|Q99SS1|Q99SS1_STAAN
mmwimtivfai111vcisinsdhareiqalrymndy11devvktkgyngleeyrielkrinndikk
>tr|Q99SS8|Q99SS8_STAAM
mtinlsetfanaknefinavngepqrqnelygdminqlfeetklqakaeaervsslpsaqs1sanqrsffmdinkv
nykeekllpeetjdrifed
1ttnhplladlgiknaglr1kflksetsgvavwgkiygeikgqldaafseetaiqnkltafvvlpkd1ndfgpawierfv
rvqieeafavaletaf1kg
tgkdqpig1nrqvqkgvstegaypekeeggt1tfanpratvnel2qvfkystnekgsavkgnvtmvvnpsdafevq
aqyth1nangvyvta1pfn
1nviestvqeagkv1tyvkglydgy1agginvqkfket1aldmdlytakqfaygakdnkvaavwk1dlkghkpa1egt
eet1
>tr|Q99ST6|Q99ST6_STAAN
mgerikglsgld1daan1nrsfaeikrnfkt1nsdlk1tgnnfkyteksthsyqrikel1dgtitgykknvdd1akqyg
kvsqeggensaeakl1rqe
ynkqanel1flekelektttefeefkkaqveaqrmaesgwgktskvfesmgpk1tkmgdglksigkglmigvtapvl1gia
aasgkafaevdkgl1dtvq
atgatggl1kklqnsfkdvgnfpedaetvggvl1gevntr1gftgkelesatesflkfshitsgdgvqavql1tramgda
gieadeyqsv1dmvakaag
asgisvdt1ladsitkygapmramgfemkesialfsqweksgvnteiafsgl1kka1snwgkagkdpreefkkt1laei1rtp
diasats1laieafgakagp
d1adaikggrfsyqefl1ktiedsqgtvnq1fkdsesgserfkvamnk1klvgadvwasiesafapvmeelikk1svavdw
fss1sdgskrsivi1fggia
aai1gpvfvgl1gafistvgnavtv1ap11asiakaggl1sfl1stkvpilgtvfta1tgpigivlgvl1aglavaf1aiy1kks
etfrnfvngaiesv1kq1tfs
nfi1qfi1qpf1dsvkni1fkqaisaivdfakdiwsqingffnengisivqal1qnicfikai1efil1nfvikpimfaiwqvm
qfi1wpavka1livstwenik
gvi1qgaini1ilgi1kvfss1ftgnwrgvwdgivi1mlkgtvqliw1nli1qlwfv1gkilgvvry1fgg11kgl1iti1wvai1gv
fkks1saiwnatksif1gfl
fns1vksif1tmknw1sstwnniksntvgkahl1ftgvrskf1tsw1natk1difik1rnwmsniw1nsikdntvgiagr1wdr
vrni1fgsmrdg1k1si1igki
kdhi1ggmvdavkrg1nkl1ieg1n1wv1ggk1gmdk1pk1lhtg1teht1ttr1v1kngkiard1tfatv1gdkg1rgngp1ngfrnem
ief1p1ngkrv1tpnt1dttay
1pkgs1kvyngaqtysm1ngt1prfs1igtmwk1diksgassafnwtkdq1igkg1tkw1gdkvgdv1dfienpgk11ny1ileaf
gidf1n1tkgmgi1agdi1tk
aaw1skikksatdwi1k1eamggg1dv1ggi1ldpki1nyhygr1taay1aatgr1pfhegv1dfpfvyqevr1tpm1ggr1trmp1f
msggy1gnyvki1tsgvi1dm1
fah1lkn1f1sk1sppsg1tmvkpgdv1vg1tgnt1gf1stgph1lfem1rrngr1hfdpepy1rnakk1kgr1siggg1gat1sgsgat1yas
rv1rqaq1sil1ggryk1gkwi
hdqmm1rvakresny1qsnavn1nwdi1naqrgdps1rg1l1fq1ig1stfranakrgy1tnfn1pv1hqq1isamqy1ivr1rygd1gfkra
gdyay1atgg1kv1fdgwyn1lg
edgh1pew1iptd1par1ndamk1lhyaaaevrg1knasknrps1ql1ssvng1fddps111kmi1eqqqq1ia111kiaq1sndvi
adkdy1qpi1ideya1fdkkv1n
asi1ekr1rerq1estkv1kfrk1ggia1iq
>tr|Q99ST8|Q99ST8_STAAN
mi1h1v1dfndki1idfl1stddps1lvrai1hkr1rvnd1nsem1ell1isseraek1frer1hrvi1irdsnk1qwrefi1inwv1qdt1mdgy
te1eci1asy1lad1ittakpy
ap1gk1fek1tt1seal1kdvl1sdtg1wev1seq1tey1dgl1rtts1wts1yq1tryev1lk1ql1ctty1kmv1ldfy1iels1sntv1kgryv1lkk
kns1l1fk1gke1iey1gkdl1vg1l
trk1idm1sei1kta1iav1gpend1kgr1le1lv1td1dea1qs1qfn1lp1mry1iwgi1yep1qs1ddq1nm1etr1l1ssl1akte1lnkr1ks1avm
sy1eit1std1lev1ty1phe1is
ig1d1tvrv1khr1dfn1pp1lyvea1evia1eeyni1isen1styt1fg1qp1kef1kesel1reefn1kr1n1li1hqk1lndnis1nintiv1kdvd
ge1ley1ferki1hks1dtp1pen
pv1ndm1lwy1dts1npdv1avl1rry1wng1rwi1eat1pnd1vek1l1ggit1reka1lf1sel1nni1fin1lsi1qhas1l1seate1ln1sey1lvdn
d1kad1lqas1ldav1idv1ynq
ikn1n1es1m1pet1atigr1l1vdt1qa1lf1eyr1kkl1qdv1td1ved1kia1isdr1fk1l1qs1yt1deky1keale1i1atk1fg1l1tvned
l1ql1vge1pn1vksa1iea1eare
st1keq1l1rdy1v1kts1dyk1tdk1dgi1ver1d1tae1aert1l1kge1ik1dkt1l1neyr1ng1leeq1k1yt1ddq1l1sd1l1sn1pe1ikas1ieqa
n1qea1qea1lksy1ida1qd1dlk
ekes1qay1ad1gki1see1qrai1qda1qak1leak1qnael1karnaek1kanay1tdnk1vkest1daqr1kt1l1trygs1qi1iqng1keik1l
rtt1keef1nask1rtl1sr1la
di1tvnam1k1gi1yl1ry1dengait1sht1idk1dgvki1sgdkvd1itanref1nv1vann1nkv1gkndiv1nsl1nsneg1ldin1vr1rig
ik1gg1nan1ry1vq1vqnd1fie1l
gg1iv1qr1tw1kgkr1st1ddi1ftr1l1kdgh1l1rfr1nnt1aggs1lym1sh1fgi1sty1idge1ged1gg1ssgt1iqw1wdk1tys1dsg1mng1it1ins
y1gg1v1al1ts1dyn1ri1i1dsy
as1anies1reapi1yl1spnt1kn1kpg1l1nr1fa1ft1snads1ayet1dgy1im1fgs1deny1ky1gag1l1rfs1krs1nkg1lvq1vvng1dy1at1gg
```

Tsompanidou\_et\_al\_Supplemental\_FASTA\_File

dttesgmgnkfnlvkrrdg  
nsyvsiqsydllaavgsdnagdrvasnsiykrtysapanlhitsagtigratsakkykisiennyineddqfshskeilk  
pirtwfdkyeseimakele  
sgkklssdtfklrshtgliaeeveelgfnefvdyddngeiegiaydrwlwhlipiiknqqskiekleeline  
>tr|Q99SU6|Q99SU6\_STAAM  
mktyseararlrwyggryidfdgwygyqcadlavdyiywlleirmwgnakdainndfknmatvyentpsfvpqigdvavf  
tkgiykyghiglvfnggn  
tnqfliileqnydgnantpaklrwdnyygcthfirpkykseglnmkitnkinppaqkavgksaskitvgskapynlkwskg  
ayfnakidglgatsatryg  
dnrtnyrfdvqqavyapgtliyveiidgwcrywnhnewiwherlivkeaf  
>tr|Q99SV0|Q99SV0\_STAAM  
mknhtniinillivnslthfltlntsfnsasdfciigaiiffliigifvaiygmkratywl1111lftnifyflhfcv  
1111kyigfklfiyl  
>tr|Q99SW5|Q99SW5\_STAAM  
metsvripqndisryvneivetipdsefdefrhhrgatsyhpkmmlkiilyaytqsv  
>tr|Q99SX0|Q99SX0\_STAAM  
myinmkdygltginktkdtraiqralnrgrckpttvyipkgtydickpltiygnnt111dnetilrrchsgp11knghrf  
gfyrgynghshihikggkf  
dmngvsypynntamcihaediqligvtiknvvsghaidacginglyikscsfegfidysgerfyseaiqldiqvpqgafp  
kfgtttgtitknvviiedcy  
fgpse1pemgswnraigshsrhryyenihi rnnifediqgyaltplkydafinnkfinceggiry1gvrldgknaad  
vmtgkdlgsqaginmniig  
nefkgsmskdaihvrnyynnvhkhdvli vngtfnstqsihledidtvflspveagiqvttinideikk  
>tr|Q99T04|Q99T04\_STAAM  
mnsvklkqpvsiyndpwesyndvkehqgl11sniefttt11cnmrcshcavgyt1qtvdpepldmdliyr1deipn1rt  
msitggpmsfksksirnvv  
kpl1kyahhrgiytqmsn111p1qdry1diaeyidvmhishnwg111defanvfgamkkqpp1kak1klyeqm1sna1rt  
seqgmfvsaetm1nqst1p  
hlrk1hqe1v1hd1m1k1cs1rhe1h1p1m1p1ad1fas1q1n1v11t1a1em1k1t1h1d1l1d1fr1de1i1w1m1f1g1t1p1v1f1p1c1k1d1d1e1d1q1l1s1r1  
rnannv1tr1nd1pd1gr1sr1n  
v1v1ft1gn1v1t1d1fg1de1t1g1t1s1n1i1q1k1d1k1t1d1v1fd1k1w1s1s1d1a1k1s1n1c1h1c1s1e1f1s1c1g1p1n1v1k1n1m1y1p1n1m1d1f1k1d1n1e1r1h1m1h1k1  
q1i1q1f  
>tr|Q99T17|Q99T17\_STAAM  
mkvvg1n1rm1re1v1e1t1e1l1q1r1f1s1d1l1d1f1k1f1y1k1k1a1s1e1p1e1s1d1l1a1d1i1l1v1g1y1d1g1g1i1n1e1a1f1l1q1r1c1p1n1k1w1i1a1w1f1a1t1g1v1n1t1p1l1d1y1  
i1a1d1h1g1i111t1n1g1k1g1v1q1a1k1q1l  
s1e1y1i1a1f1i1l1d1d1y1k1m1k1s1y1d1n1q1r1q1h1y1d1s1k1i1t1g1k1r1l1s1g1q1t1v1l1f1g1t1g1a1i1a1r1t1a1k1a1k1a1f1n1m1l1i1g1l1s1k1s1g1q1n1k1d1e1f1d1e1i1  
y1t1i1e1s1l1e1s1t1p1n1a1d1i1i1n1a1  
l1p1e1t1q1e1t1h1l1k1k1k1h1f1e1l1m1k1d1e1a1f1i1n1i1g1r1g1s1i1v1k1e1a1l1l1e1v1l1k1s1k1v1i1r1h1a1y1l1d1v1f1e1n1e1p1l1k1p1n1h1e1l1y1e1l1e1n1v1t1i1t1a1h1t1  
g1n1d1y1e1a1k1y1d1l1d1i1f1k1n1l1v1  
n1f1l1n1k1n1g1l1i1e1n1e1v1d1a1k1k1g1y1  
>tr|Q99T19|Q99T19\_STAAM  
msnannadnkqffski1nsigagvvia1vpna11gevlk1fksgneile1ltyqlviliql1fmafiigvlaahqfkfngag  
aai1vg1ts1a1m1i1g1s1g1a1v1v1s1n1  
n1s1f1m1l1k1g1i1d1i1n1t1s1l1v1v1i1a1c1l1i1y1m1v1l1q1n1k1l1g1s1f1e1l1i1l1p1v1l1p1i1v1s1g1g1i1l1t1p1y1i1r1k1i1t1q1a1i1g1n1v1i1h1s1f1t1d1n1p1l1  
m1s1i1l1s1v1a1f1s1l1m1v1t1p1i1s1l  
v1a1i1a1t1a1s1l1n1g1l1g1s1g1a1n1l1g1i1v1a1a1c1v1t1f1l1g1s1l1r1v1n1s1i1g1v1n1a1v1l1l1i1g1a1a1k1m1m1i1p1v1y1l1k1n1l1i1s1i1p1l1t1i1n1g1i1t1g1i1a1y1v1  
q1v1k1g1t1p1l1s1a1g1f1g1y1t1g1l1v1g1p1  
i1n1a1f1n1r1m1s1g1d1p1t1m1n1i1l1a1l1g1y1f1v1i1p1f1v1s1a1f1i1v1h1e1l1c1k1k1f1i1p1i1y1s1n1d1i1y1k1f1e1v1p1k1q1  
>tr|Q99T29|Q99T29\_STAAM  
meqrtr1a1l1l1k1e1i1a1e1f1l1n1e1e1t1e1m1y1s1m1t1q1g1a1k1y1l1i1e1g1s1n1f1t1t1g1w1i1f1f1i1n1s1v1g1e1h1v1s1h1a1l1p1q1s1l1t1a1d1h1c1h1y1i1k1d1g1s1w1  
c1v1k1a1f1n1q1r1r1l1m1k1a1s1n1i1v1n1c1  
s1r1i1n1l1a1s1k1a1f1p1s1q1n1d1i1t1h1h1a1t1v1p1l1k1s1g1q1e1q1f1g1i1n1v1a1s1p1n1t1e1i1y1s1d1e1d1e1l1l1e1s1v1a1f1q1l1g1s1a1i1k1r1i1y1l1t1d1r1e1k1e1a1a1k1i1n1  
e1r1n1l1a1r1d1l1h1d1s1v1n1q1m1l1f1s1  
v1k1l1t1a1h1a1a1y1g1m1s1n1e1s1i1a1q1a1f1k1t1i1e1k1t1s1q1n1a1v1n1e1m1r1a1l1w1q1l1k1p1v1g1l1e1q1g1l1h1a1l1t1a1y1s1k1l1m1h1i1q1l1n1v1n1v1e1g1l1d1l1s1n1e1i1  
e1e1n1i1y1r1a1l1q1e1c1i1n1v1k1k1h1a1  
d1t1n1k1m1d1l1t1l1k1q1m1n1d1l1y1i1d1v1d1y1g1q1q1f1e1d1n1v1q1i1a1s1s1h1g1i1n1n1i1k1q1r1v1k1l1l1r1g1k1v1t1f1h1s1q1p1t1k1g1t1q1i1q1f1t1p1i1k1  
>tr|Q99T30|Q99T30\_STAAM  
mnkvi1v1d1d1h1y1i1v1r1q1g1l1r1f1l1s1t1i1e1n1e1v1l1q1d1f1a1d1e1t1f1l1e1y1l1k1e1h1e1h1p1d1i1v1l1d1l1v1m1p1g1m1n1g1i1e1t1e1y1i1k1a1h1y1e1i1k1v1l1  
v1l1t1s1y1v1d1d1e1h1v1i1s1a1i1n1k1g1a1  
d1g1y1e1m1k1d1v1e1p1q1l1i1e1t1i1r1r1v1m1n1g1e1k1m1i1h1p1k1a1q1d1v1e1t1v1s1q1k1p1h1y1t1n1k1l1s1k1r1e1i1e1v1l1r1e1m1v1k1g1k1t1n1k1e1i1a1e1t1f1v1s1e1k1t1k1  
t1h1v1s1h1i1f1s1k1l1q1v1s1d1r1t1q1a1  
i1y1a1m1e1n1k1l1i1  
>tr|Q99T35|Q99T35\_STAAM  
mi1k1s1l1e1i1y1g1y1g1q1f1v1r1k1i1e1f1n1k1n1f1t1e1i1f1g1e1a1g1k1s1t1i1a1f1i1h1s1i1l1f1g1f1p1t1k1s1k1e1p1r1l1e1p1r1l1n1q1y1g1g1k1l1v1l1l1d1d1g1l1  
e1i1e1v1e1r1i1k1g1s1a1g1g1d1v1k1v1y1l1  
p1n1g1a1v1r1d1d1a1w1l1q1k1l1n1y1i1s1k1k1t1y1q1g1i1f1s1f1d1v1l1g1l1q1d1i1h1r1n1e1k1q1l1q1d1y1l1l1q1a1g1l1g1s1t1e1f1t1s1m1r1e1v1n1r1k1k1d1e1l1y1k1k1s1g1  
k1n1p1i1n1q1q1i1e1q1l1k1q1l1e1s1q1i1  
r1e1e1e1a1k1l1e1t1y1h1r1l1v1d1d1r1d1k1s1r1r1e1n1l1k1h1n1l1n1q1l1s1k1m1h1e1e1k1q1k1e1v1a1l1h1d1h1s1q1e1w1k1s1l1e1q1l1n1i1e1p1i1t1f1p1e1k1g1v1d1r1y1e1k1a1r1

Tsompanidou\_et\_al\_Supplemental\_FASTA\_File

ahkqslerdiglrnerlag  
lkeeatqlepvkgsdidafislnqgeneiknkefeltaiekdiankqrkdeldqanigwsethhdvsseamksyvseqi  
knkqeqaayikqlerslee  
nkiednavhseldsveekivpeetfekkkkeysqqvielekenlysklkerfeieqqekqkrqkllrttfilltlvgigl  
tafsfisnmlfgiifavl  
tlvfvigiimskskevdyseaitdeieeikaqlaildenyldfdldeqyri rdhwqqa lknkdileekrqyiegrlnda  
kgrhdelqstvenvkdeley  
lsskisndlivdsistmanikal dqhisdl nqqrqqlvqel dtfynhaeavtksqfvfnkls l fhdvqqwlksaedtne  
kwrinaentklvtnelnhl  
naqleennekitalfdfinvgteedfyqhedyqtytsnl srfndl tkyl enqnysyelsss l sekttaqleedhl lat  
qvdeyneqylemqaqvsdl  
saqinhmetdttlanlrheyhslnqnlndiakdwaslsylqslvdehikqikdkrlpqvineaveilkhltdgrytminy  
nedsitvkhvngqlydpve  
lsqstkellyvalrislikvlrpyyppflivddafvhfdkkrtkmlnylrs l sehyqvlyftcvkdnivpskevitlnk  
ieeggkr  
>tr|Q99T56|Q99T56\_STAAM  
mh1kln dedlnylvnlskeileqynikl detckgdinitscnseyfftlsyflkpgkatinfrecrynyslrlnln dgf  
hknsneki rgnrini fse  
kefiqkadgathmkayplpyni fddssdfvkqlftlleytktnhdnikipietnl fmsw  
>tr|Q99T58|Q99T58\_STAAM  
mntkflgkttlvasalvlttlgtglhssylgln tnkvvtakaekmtngqlwkkvkds lidsniisgneneeitvtyvnk  
tgyssvsaygnnddfss  
tpsnfslkeidlkkdnvpsddfnttvs geds wktltsklkekglvtdgqvtihcndksdntkssvsgkvgadlts gng  
ttfkkrfidkitid  
>tr|Q99T65|Q99T65\_STAAM  
meviqknahqysvpamckvlkiprstyydsirkdknitkddsveraainifnsnrkvfstriknhlndkgltvsgqk  
igr1  
>tr|Q99T69|Q99T69\_STAAM  
mkfkai vai t l s f s l l t a c g a n q h k e n n s k s n d t t k k t q e t d n t t q s n t e k q m t p q e a e d i v r n d y k a r g a n e n q t l n y k  
t n l e r s n e h e y y v e h l v r d  
avgtplkrcaivnrhngtiini fddmsekdkeefeafkkrsypkngmsdhdktdgesedi qhhdndnka iqndtpdqk  
avdkndknavnkeekhdnh  
aknsaetkvk  
>tr|Q99T77|Q99T77\_STAAM  
mdfkrkrmpiesfthqfeeitylsddlqvka l m m t p h e v n r i v v y l r g g k q v g r v r a g r l m q f s d s q t l v i g p y y r g  
nngsegkdefyrgdln dvt  
qllrllhdkyphafihmvgfsrgglqgl l t f q d l p v t s y t i w g g v s d i d l m y e e r v d l r g m l r r m i g h p k k d r a a y e a r q  
aipninen spplivhggk  
dqvggihhayladqlelkgathetfyqmaeghvprppamvetltyikefmkqvelhs  
>tr|Q99T84|Q99T84\_STAAM  
msryvneivetipdsefdefrhrgatsyhpkmmlkiilyaytqsvfsgriekllhdsirmmwlaqdqtpsytinrfr  
vnpntd alieslfiqfhsq  
clknlnidnnsifidgt  
>tr|Q99T88|Q99T88\_STAAM  
maklnvevfadgadi eemkaayknkqv d g f t t n p s l m a k a g v t d y k a f a e e a v k e i p d a s i s f e v f a d d l e t m e k e a a i l  
kqygenfvkipivntkge  
stiplikklsadnvrlnvtavytieqvkeiteavtegvptyvsvfagri adtgvdp l p l m k e a v k v t h s k d g v k l l w a s c  
relfnviqadeigadiitr  
padvvkkvntnlgrdine l s v d t v k g f a k d i q s s g l s i l  
>tr|Q99T90|Q99T90\_STAAM  
mnkasfdkkvkkqlwflnkkekqaldqr l s s i s d d d s v n l n k p v t f a n a y l r q n v f r n k e t k s y s m f v t l v v m m f a y v a l  
lgflfglitslsgvqffv  
spkvd l s t t v i l t i i g a i l l m i v s i y f i k i v t s y f t k k l l e i k f n s k  
>tr|Q99TA2|Q99TA2\_STAAM  
mallknffiglsnnsflnnaakkvgprlgankvvagntipelintieyln dkniavtdnlgefvgtveeshakeqilt  
imdalhqhgvykahmsvkl s  
qlgaefdlelayqn l reillkantynnmhinidtekyas l q q i v q v l d r l k g e f r n v g t v i q a y l y d s h k l v d k y q d l r l  
rlvkgaykenesiafqske  
dvdanyikiieqrllnarnftsia thdhriinhvkqfmkenhiekd r m e f q m l y g f r s e l a e e i a n e g y n f t i y v p y g d d  
wfayfmrrlaerpqn l s l a  
vkefvkpaglkrvgiiaalgatvmlglstikk l crk  
>tr|Q99TA5|Q99TA5\_STAAM  
mkl erilpfsk l i k q h i t p e s i v d a t c g n g n d t l f l a e q v p e g h v y g f d i q d l a l e n t r d k v k d f n h v s l i k d g h e n i  
ehindahkg h i d a a i f n l  
gylpkgdksivtkpdttiqains l l s l m s i e g i i v l v i y h g h s e g q i e k h a l l d y l s t l d q k h a q v l q y q f l n q r n h a p f  
icaiekis  
>tr|Q99TB0|Q99TB0\_STAAN  
mnlkknkysirkyvgifstligtvllsnpngaqa l t d n n v q s d t n q a t p v n s q d t n v a n n r g l a n s a q n t p n q s a t

Tsompanidou\_et\_al\_Supplemental\_FASTA\_File

tnqstnqalvnhnngsian  
qatptsvqsstpsaqnnhtdgnttatetvsnannkdvsnttlvnpnktngsgghltlkeiqedvrhssdkpelva  
iaeqasnrpkrrsraapa  
dpnatpadpaaaaagnggapvaitapytpttdpnannagqnapnevlsfddngirpstnrsvpsvtvvdnlpgftlingg  
kvgvfshamvrtsmfdsgd  
aknyqaqgnviaIgrikgndtndhgdngieksltvnpseIifeftmttknyqgvtnIiiknadndtviaeksvaygp  
iwrIfkvpenvshIkiqfv  
pkndaitdargiyqlrdgykydfvdsigIhsgshvyverrtmeptatnkeftvttsIknngnfgasfntddfvykvql  
pegveyvnnsItkdfpssn  
sgvdmndfnvtydaanrvitIktstggsgnsparImpdkilDlkyIrvnnvptprtvtfndtItyktytqdfinspaes  
htvstnpytidiImnkdaI  
qaevdrriqqadytfasIdifndIkrraqtildenrnnvplnkrvsqadidsItnqmghtIrsvdaenavnkkvdqmed  
Ivnqndeltdeekqaaiq  
IeehkneiignidqtdddgvtrikdqqiqtIsgdtatpvvkpnakkairdkatkqreIinatpdatedeiqdaInqlat  
detdaIdnvtntatnadve  
iaknngintIgavvpqvtHkqaardaInqatatkrrqqinsreatqeeknaalnelIqtatnhaleqinqattnadvdnak  
gdglnaInpiapvtvkkqa  
ardavshdaqhiaeinanpdatqeerqaaidkvnaavtaantInlantnadveqvtknaiqqiqaitpatkvktdakn  
aidksaetqhntifnnda  
tIeeqqaqqllDqavatakqniNaadtngavaqakdqqtnivviqpatqvktDarnavndkareaitninatpgatre  
ekqeaInrvntIknraItd  
IgvsttamvnsIrdavngIqavqphvtkkqtatgvInDlatakkeinqntnatteekqvaInqvdqelataInning  
adtnaevdqaqIgtkain  
aiqpniVkkpaaIaqInqhynakIaeinatpdatndeknaaintInqdrqqaiEsIkqantnaevdqaatvaennidavq  
vdvkkqaardkIaeavak  
rieavkqtpnatdeekqaavnqInqlkdqainqInqntndqvdtttngavnaidnveaevvikpkaiadieKavkekqq  
qidnsIldstnekevasqa  
lakekekaIaaIdqaqtnsqvnqaatngvsaiKiIqpetkvkpaarekingkanelrakinqdkeataerqvaldkine  
fvnqamtdiInnrtnqqvd  
dttsqalDsiavapehivraardavkqqyeakkqeiEqaeatdeekqvaInqlanneklalqInqavtndvkrve  
ngiatIkgvqphivIkpe  
aqqaIkataenqvesIkdtphatvdeIdeanqlIsdtIkkqaqeiEntnqdaavtdvrnqtikaieqikpkvrrkraald  
sieennkngIdairntItd  
tqderdvaIdtInkiVntIknDiaqnktnaevdrtetdgndnikvilpkvqvKpaarqsvgvkaeaqnalIdqsdIsteE  
erIaakhIveqalngaidq  
inhadktaqvnqdsIdagnriiskIkpattvkatalqqiqniatnkinIlikanneatdeeqniaiaaqvekelikakqqias  
avtnadvayllhdekneir  
eIepvinrkasareqIlttlfndkkqaieaniqatveernsilaaIqniydtaigqIdqdrsnaqvdktasInIqtihdId  
vhpIkkpdaektIndIar  
vtalvqnyrkvsnrnkadaIkaItalkIqmdeeltartnadvdavIkrfnvalSdieavitekensllridniaqqtya  
kfkaiatpeqlakvkvIId  
qyvadgnrmiDedatInDIkhtqfivdeilaikIpaeatkvspkeiqpapkvctpiKkeethesrkvekelpntgsegm  
dlplkefalitgaallarr  
rtknekes  
>trIQ99TC3|Q99TC3\_STAAM  
mswfdklfgedndsnddIhrkkkrrqesqniDndhdsllpqndiysrprgkfrfpmsvayenenveqsadtisdekeq  
yhrdyrkqshdsrsqkrhr  
rrrnqtteeqnyseqrgnsKisqqsiKykdshyhtnkpqgyvsaingiekethkskthnmysnntnhrakdstpdyhke  
sfktsevpSaifgtmkpkk  
IengripvskpsekvesdkqkydyvaktqtsqnqIeqekqndsVvkqgtaskssdenvsstksmpnyskvdntikie  
niasqiveeIrrererkv  
IqkrrfkkaIqqkreehkneeqdaIqraIdemyakqaeryvgdssInddsdItdnstdasqIhtngienetvsndenKqa  
siqnedtndthvdespyny  
eevsInqvsttkqlsddevtvsnvtsqhqsalqhnvevndkdelknqsrIadseedgatnkeeysgsqiddaefyeInD  
tevdedttsniedntnrna  
semhvdapktqehavtesqvnndktvdneielaprhhkddqtnInvnsIktndvndghvvedssmneiekhnaeitenv  
qneaaseqnveektienv  
npkkqtekvtIskrpfvnmtpsdkkrmmdrkkhskvnpelkpvqskqavseskpasqaapssrsdsqesntnayktn  
nmtsnnvennqIghaete  
ndyqnaqqyseqkpsadstqteifeesqddnqIeneqvdstsssvsevsditeeseetthpntsgqqdnddqkdIqp  
sfqnqnedtanenrprtnq  
qdvatnqavqtskpmiRkgnikIpsvsIleppqviEsdedwiDdkkkelndaIfyfnvpaevqdvtegpsvtrfelSve  
kgvksritalqddikmaI  
aakdriEapipgtsrvgiEvpnqnpttvnlrsiiespsfknaeskIvtamgyrinneplImdiaktphaliagatgsgk  
svciInsilmsIlyknhpee  
IrlIIdpkmvelapynqIphIvapviDvkaatqslkwaveemerryklfahyhvrnitafnkkapydermpkivivid  
eIadImmmmapqeveqsIar  
iaqkaracgihmIvatqrpsvniIgtlikaniptriaIfmvsssvdsrtiIldsggaerllgygdmlyIlgsgmknkpirvqgt

Tsompanidou\_et\_al\_Supplemental\_FASTA\_File

fvsddeiddvdfikqgre  
pdylfeekellkktqtqsqdel fddvcafvmneghiststliqrhfqigynraariidqleqlgyvssangskprdvvyte  
adlnke  
>tr|Q99TC6|Q99TC6\_STAAM  
mtqqndkrtlnknhtyqneplnrkdfvvsfitgalvgsalglyfknkvyqkaddlkvkeqelsqkfeerktqleetva  
ytkervegflnksknegaa  
lkaqqaai keeasannlsdtsqeageiqeakreaqaeadksvavsneeskasaalkvqqaai keeasannlsdtsqeagei  
qeakkeagaetdksaavsn  
eepkaval kaqqaai keeasannlsdtsqeagevqeakkeaqekdsdtstkdasaaakvevskpesqaerlanaakqkqa  
kltpgskesqlteal faek  
pvakndlkeipqlvtkkndvsetetvni dnkdtvkqkeakfengvitrkadektnttavdkksgkqskkttpsnkrnas  
kastnktsgqkkqhknkss  
qgakkqsssskl tqknnqtsnknskttnakssnasktpnakvekanski ekrtfnd  
>tr|Q99TD1|Q99TD1\_STAAM  
mkvevykgagkhnlkdyeetyntfdwkdvqafswsetgkmmayecidrhvdqglgdki alnykdeyrkesytykdmq  
rlsnkaanvlsehaevdkg  
drvfifmsrtpelyfallgv lkigai vgp l feafmekavadr lenseakv l itnkall prvpvdkl pnlk k i v v d e d v e  
dnyidfis lmetasdefdi  
ewlksddg l i l h y t s g s t g q p k g v l h v q q a m l v h y i s g k y v l d l q e d d v y w c t a d p g w t g t s y g i f a p w l n g a t n c i a g  
grfspeqwysmi edfkvti  
wytaptal rmlmsagddi veykdlsslrsilsvgeplnpevikwakkvyglvtl dtwmm tetgg h m i v n y p t m d v k l g s m  
gkplpgiqaai iddagne l  
ppnrmgnl aikkgwpsmmyriwknpekykyfigdwvsgdsaykdedyfwfqgrvddv imtagervgpfevesklveh  
eavaeagi igkpdvrgei  
ikafval rkyeptdel keeir l fvkegl sahaapreiefkdkl p k t r s g k i m r r v l k a w e l n l d a g d l s t m e  
>tr|Q99TE5|Q99TE5\_STAAM  
mttinptnytllkkaasliedehmiai lsnmsallndnl nqinwvgfyll eqnelilgpfqghpacvhipigkvcgt  
avserrtqvadvhgfegh  
iacdanskseivvpi fkd d k i i g v l d i d a p i t d r f d d n d k e h l e a i v k i i e k q l a  
>tr|Q99TF9|Q99TF9\_STAAM  
mistlneimkci edndtii hrhvrpdpdaygsqglkyi i q k f p q k v f a v g e a e s s l s f i g e l d n i d d k t y q d a l v i  
vcdtanapri d d e r y s t g  
kl i k i d h h p a v d q y g d i n l v n t n a s t s e i y d l i s h f n d e a i v n k d i a s v l y l g i v g d t g r f l f n t s e h t m e i a g k l i  
ghdidhna llnkmmekdpk  
mlpfqgyvlqhfel mddgfcvki tedvleqfgi qpneasqfvntiadikglkiwvfavdegseircrl rskgqliindi  
aqdfgggghpnasgsvns  
wdefeqlatal rtkln  
>tr|Q99TG1|Q99TG1\_STAAM  
mslrdealemhkrnggklevkpnkvtnkeelslayspgvaepckdiyedkrkvydytikngtvavitdgtavlglnig  
peasipvmegkavl fksfa  
glingpialnttdteei iktvkll epnygg inledi saprcfeieerl kketn i p v f h d d q h g t a i v t m a g l v n a l r v v n  
kdiakikvvlngagaagia  
ivkllayagvrnmvmdsrgaifegrsygmnpkdvvakwtknkdiegsleevkdadvfigsvana l s q d m v k s m a d n  
piifamanpnpei ipddak  
aagarvvtgrsdypnqinnvlafpgifrgaleveathineemkkaaveaiadlidsselnedycipgpfdkrvapsvar  
nvakaamesgvari evdpq  
dvydktmkltdlq  
>tr|Q99TH2|Q99TH2\_STAAM  
mnklvlidgns lsfrafyalpllnskagihtnavygfamll ekil keekpnhf l v a f d a g k t t f r h e k y s e y k g g r q k t p  
pelseqfpyirqlldayhi  
kryeldnyeaddiigtlskeadkagfqtiiitgdrdl tqlatdnvtiyytkkgvtdvdhytpdfiaekyngltpnqi idm  
kg l m g d t s d n i p g v a g v e  
k t a i k l l n q f d t v e g v y e h l d e i s g k k l k e k l q n s k e d a l m s k e l a t i n v d s p i e v k l e d t l m t h q d e q q e k i e l f k k l e  
fkql l s d i d q s a s v e d a i e  
ktfeietsfdnidfts lkeaa ihfel dggnyl rnnil kfs l f t g e k h i v i n a d d i n n y a e l v s w l e n p n t k k v y d a k k t  
yvashrlgidignisfdim  
lasyii d p s r t i s d v q s v v s l y g q s f v k d d v s i y g k g k f k v p e d d v l n p y v a s i t d a i y f a k p n m d k q l e e y n q v e l l a  
dlelplakilsemeegif  
tdvhdleemekeiqekldvli rni hdaagedfninspkqlgvvl fetlqlpvikkktgystavdvleqlqgehpiidiy  
leyrqlsklqstyveglqk  
visddqrihtrfnqtl aqtgrlssvdpnlnqipvrleegrkirkafkptsksdsvilsadysqielrvlahitqdesmkea  
fingddihtatamkvfgye  
adqvds l m r r q a k a v n f g i v y g i s d y g l s q s l g i t r k k a k a f i d d y l a s f p g v k q y m s d i v k d a k a l g y v e t l l h r r r y i  
pdi ts r n f n l r g f a e r t a m  
ntpiqgsaadi iklamv k faqmkettyqaklllqvhdeli fevpksevdsfsefvee imena l q l d v p l k v d s s y g a t w  
ydak  
>tr|Q99TK0|Q99TK0\_STAAM  
mvvl syscsci fsflyqfisietsfdylhrrskcdycnsslkwyelmpii sfl l l k g r c r n c r k r i s l t h f l g e t f a l



Tsompanidou\_et\_al\_Supplemental\_FASTA\_File

ipivfikydfityvnatlfi  
ttyvflifftmditslmlcdrliiycivslslsmiypvafiiismtthifyflfrayigygdvllisalslffplqft  
iyvilftfviaglvalitm  
ifkpkllplvpffifisffinslfyndihqflggvyf  
>tr|Q99TK3|Q99TK3\_STAAM  
mrlifsmikniiaviaiiviyaalkyapflkeqdwnpvnhdndqmnqvtqptndaqhvvyvsgekyslkendliknvpls  
qiknvfkmidkqefmavsg  
mnrmayndqyiggrgdefilykfgdesmrvyntefemqqdlnelgqnlqlkpenayq  
>tr|Q99TK5|Q99TK5\_STAAM  
mrtlyyfligilfyidtaigllipmhigkfelvfvphltfmyilmvvyrgfgvslllsiflgvmtdivfgyfygvyflf  
gyilflalidrffki fykd  
hsmliiilastlllevyvaliygmigfiqfdiifvvrllptlimfvllimlypliikflkktndidmkrqw  
>tr|Q99TP8|Q99TP8\_STAAM  
myeqgdi vkgyvkyhnddeqnevdfynl ngegyevl kmyadnktinrdklhldiyfks  
>tr|Q99TR2|Q99TR2\_STAAM  
msdnivaiygdvpelevkqsaeiisqflksdrddfnfvkynlyekeiapiveetltpffsddkailvknayiftgekap  
kdmahnvdliefiekydg  
enlivfeiyqnklderkkltktlkkharlkkieqmseeikkwiqsklnenfkdikrdaldfieltginfnivsqeiek  
lilflgdrptinkqdvngi  
inrsleqnvfliteyiqkrkkeqaihvkdlitmkeepikllalitsnyrlfyqckilsqkgysgqqiaktigvhpvrk  
lalggvrhyqlde llnivd  
acaetdyklkssymdkqililelflsl  
>tr|Q99TS2|Q99TS2\_STAAM  
msynnflqmttilestagdtwveqvsniivqiftliltcltflgfvyqlyskkinaagiatlslilflgfligqgnv  
mhsilifsigvilvvief  
vvgavigiigmlititittlgnllfmlanvivalitvewilvki fnrkipfldkvilkdstnsesgynshdnrsh  
lvgktaqtvtl rpagiif  
ceneridavsdgnfilrnktvki levegtrvvvrevd  
>tr|Q99TT6|Q99TT6\_STAAM  
mislnnrlltvsrflkqgtiadigsdhaylpiyaiqnhlcecgiaageviqgpfaavknvaanhveridvrlgdglsvi  
hpedvidniticgmggpli  
akilkdqgdklsqhpri llsniqtenl rqtqqlyeiideiimeekghiyeivvaehstqlielssdelkfgpklln  
kneyfikkwqrelealyhi  
ksklnteqhhqrlaqindeiaviervl  
>tr|Q99TU1|Q99TU1\_STAAM  
midallnfdmryslisgilgfiaplifavvrrlsliadalshvtl ggisfgmfltimptlvfinpmwfgilfaiv  
gallieklrtsytaygeia  
ipiimsagialsaisfladgfnqeivglfsgisavnisdlttiiviaiivvlfitl fykel filsfdeyskvigihk  
wiqflfivivamvisasmr  
vvgillvsal itlpiaismritksfkqil llsvflgelsvilglvlafymdispggvivvllvillmitmayqkrmkfk  
kganineyk  
>tr|Q99TU9|Q99TU9\_STAAM  
mrissltlglvdtntyfiendkavilidpsgesekiikklnqinkplkailthahfdhigavddivdrfdvpvymheae  
fdfldkdpvknqadkfkqyg  
lpiitskvtpel negsteiegfkfnvlhtpghspsltyvfdefavvgdtlfnngigrtdlykgdyetlvdsiqdkife  
legdlplfpghgpyttvdd  
eqlnpflhg  
>tr|Q99TW3|Q99TW3\_STAAM  
mkkllsvigatlllagcgsqnlapleekttdlrednhqlkl diqelnqqisdskskikglekdkenskktasntkiklm  
nvtstydkvakalsynd  
iekdvsknkgdknvqsklnqisndiqsahtsykdaidgslsdddktksnikdlnsdlnhafddikngyqnkdkkqltk  
gqaalsklnlnaks  
>tr|Q99TY5|Q99TY5\_STAAM  
mvtikdvalkagvspstvsvikgnkriseatiskvkkvmeelnyfpntaartlitnqtykiglvlgseepirlnpyfi  
nvlngisetcnqhgygtq  
tvsnmndlmdevykmiqrmvdafillyskendpikqmlidesmpfivigkptsdidhqfthidndnilasenl trhvi  
eggydelifiteknfevs  
kdriggfetvasqfnldyqietsnerevilnymqnlhtrlkdpnikqaiisldamhlhailsvlyelnieipkdvmtat  
fndsylteiasppqtcidi  
kprmlgqagsailnilknkaqdvie lviidtelkirkstqr  
>tr|Q99U01|Q99U01\_STAAM  
mnkindrdl telssywyqdinkdndftvngkrfkqvdeyndngnknkkgasdlkiyelldekgkptgeqtmiyqgtsne  
ainpnpnlksldigddwlq  
naklmdnsnkstdylkqsdefadlyrdklndankl skynftqkygvspnyknktivadggnsaggagakyqgakhpnk  
vvatdpamvpyaawqkfar  
prfdnmisfnstndlltwlqdpfikdmpgkrvni sdgvprldalidshvygkrklnrkdntydtvpl ikiksvkdteikn  
gkkvktititlmdgrip  
invwtgdsiarsgrgtliklnlenlda lsklitgetsgmlaecviflnesfnisenenknfadrkqqlsegfkdkinlfq

Tsompanidou\_et\_al\_Supplemental\_FASTA\_File

leemertliskinsleeva  
detiesisavkhllpfdaldakerinel fkgiksfi ekvydsidneileifknidhdfrdgvseemkhllkvvkqnier  
iknqndiygrqiaeirsim  
kqqdatil dgnfqincsgenmvqglvipsnylgrkmkilkdhiddgikkiadyvqsiydeyaskivdvikylintipkir  
knlrhaiemlnvkkkefls  
lipnvtcnyiktkleel dntlgkwepflndlkavspilndhlddivknmkplivqmlfepshyddmfiltqaharldqm  
aqqfevvcnglneneggai  
qtmqdsaslrnsliqvkegleklavy  
>tr|Q99U04|Q99U04\_STAAM  
mlkkaklililavlvlsqstieneskdrntetntetkvspeemeaskyvgqgfppaekdaiefakkkhdkkiakrgeqf  
fmdnfglkvkatnvvgsgd  
gvevyvhcddhdvfnasipfdksiidssslrsedkqddmstlvgtvlsgefyrakheelndltevlkeykskykytgy  
tenaimktqnsgrneyyy  
ltaipytldeykryfqlikeddksfrdgmrnsskqkdkrsryvvtlfstkdntfdntidemidfsevlkkkniph  
dlnvslqisnkyintkrpn  
yskkevievgvfnhekantnd  
>tr|Q99U33|Q99U33\_STAAM  
mskysqdvllqlyknkpnysgqsiaeslnisrtavkkvidqlklegckidsvnhkghllqqlpdiwyqgiidqytkssa  
lfdvfsevydsidstqlaak  
kslvgnqssffil sdeqtkgrgrfnrhwsstkqglwmsvvlrpnvafsmiskfnlfialgirdaiqhfsqdevkvkwpn  
diyidngkvcgfltemvan  
ndgjeaieicgigintqqlenfdesirhratsiqldhknkldryqflerllqeiekrynqfltlpfseireeyaasniw  
nrtllftendkqfkgqaid  
ldydgylivrdeageshrlisadidf  
>tr|Q99U40|Q99U40\_STAAM  
mndvvesliyevnmqgnfenvksqqqdhdfyqtvkpytehidsmlneiklhrefiievpymsnrkfellianieqlsve  
chfkrtsrklfielkksvq  
ydlqnildgvtkegtyg  
>tr|Q99U47|Q99U47\_STAAM  
minkeqldllylkkveksrneallhtinqvikkvylqqytcsfvghfsagkstlinllieqdilpsspvttsntaiv  
svsdnhdianlnqntyak  
lsnydevremnrqnvdesveinfqsakfengftlqdtpgvdsnvashqsitesqymytsnmi fytdynhvqselnfkfm  
khindvgipvvfiinqidk  
hqdde lsfstfksrveksiadwgiklertfyvskfdhpenellevlssylisldqhretiedytsrtveyiteaqldyiqs  
eieqvedlgi eaeafeqa  
flnsqqhqai seeaqllnnpdelmafknkrknilenayimphnmremrsylesmsqdfnvggffnkkkkklqiaqqqr  
l tatdalqehvnqqirqpm  
redmsfvtrfinkkeasdkvlnqhydvpemiedlyqpqtsisntyvltfsdevvkaikkyveqqstpifkeienvqad  
elpteesddlkeyqrytel  
nelrqs lttknryhyihl desldkligrqettyqvattndtqdnrdnqqlnqntattnmsidiqaldiidsvplfkrtk  
qdihetl tridnklikigv  
fgtfsagksslinallgehilvsspnpptaatteisygdesyitlksqsqlldeinavveyqdisfstieefinwdlek  
kshlnknqlafiqavekhy  
klyvnm l engekhai nqelkkwsaedeyatfvktvhialmhdwllkgkiivdslglhsnnqrhtneteqiltssdlilyv  
syfnhsftdndkafiehm  
dmnqlnenqafkmvinaadlaesqddleavetyvsdalr qvhlqsdifavssrnalqaedkgidqlkqsiqqfvdesks  
ileqqmihqlqgm d rsyve  
mitefetnkadisrrqr l tdydkqr lqhqlidat lqhtdneveeqvyhlnarlkql lddvksvfnsqmtqnsdfnee  
kkvstkvyl dqihqr l fle  
qsliterikkyfnkqltkqiapivqqladlhvi vnpqfnfesanieqpllhidfndmlnalpkqltkrkilnpgnqrdih  
esicqstlgllqpqmgllr  
qqlelyvqmaveaesqfesfeaniqtqindllafdldttlinqlkdkhqqlktily  
>tr|Q99U57|Q99U57\_STAAM  
mltfseqntlakiddl mntycnqcpiktr l rklegkthahfcinecsigkeikqlgnelq  
>tr|Q99U79|Q99U79\_STAAM  
msdrfikfndeqldakqvmmlqdlarlll kneqtqvkiqkfpypnpvqnv lit swfwshrpshiemaglktdvmlaaygy  
hmmdvqivnevvdktfkh  
pkfyqqlfkll edmrvlnsikverpstaklidlrldtrvsytesqikvyrtktqytdllflylehaf l sqdffdipsihs  
dlddilvnmflyl pnfqqn  
qnsednmylaqrimyqvddil kedmlneyyy l pktlynt laspefddlkrtdasqvdgqddtsedddnesekadsksads  
eskggayleme l hegqse  
tlgndearegdatddmtdmmtkkgksndtlnreegdavgsqafqldgvnknveikwqipeiepqyvleyqueskdvqy  
eikdliqi ikktiereqrd  
arfnl tkgr l qkdlinwfid ddyklyfkkqd l sksfdatftllidasasmhdmaetkkgvvl fhet l kalnikheilsf  
sedafdsddhaqpnineil  
inydystfekdprimalepqddnrdgvairvaser l mrrnqhqrflivfsdgepsafnysqdgii dtyeavemsrkfgi  
evfnvflsqdpi tedveqt  
ihniygqyai fvegvahlpghlsp l lkk l l l ksl

Tsompanidou\_et\_al\_Supplemental\_FASTA\_File

>tr|Q99U91|Q99U91\_STAAM  
mvtrsvlkfggssvsdfstkikriaemlkervnqdeqlivvvsamgnttdqlmtvstltkpkqqela111ttgeqqtv  
ylsmv1ndigvnakamtgy  
qagiktighhlskiaqinpqtfeqafqendilvvagfqginehqelttlgrggsdttavalaavsnqipceiytdvdgvy  
atdprllpkakrldivsye  
emmemsalgagvletrsvlaknyniplylgktnsnvkgtwimsneeilekkavtgvaldkhmmhvtsyplpdnqlltq  
lfteleegavnvdmsqiv  
nldglqlsftikdsdfhqismiletlnqyealaykinehyvkisligsgmrdmsgvaskafliennipfyqtttsei  
sisyviddfngqqavekly  
dafni  
>tr|Q99UA6|Q99UA6\_STAAM  
mnriekhaktfii1m1im1fwi fmsfifqkllfppsknlttyealkyythlkgyygdhiskgiayiacvlipfnfff  
rfndikkdnnynniistlf  
lllyflvngisliiggftaefstisliisesnihnnhefavnlfryviqeggisfstylvcnfsiimwllffscsllkerkp  
vrclpliisc1klilililf  
llsillviyqtqsaqilfifidflnfvalilvylctnppnrgidkiacvk  
>tr|Q99UD2|Q99UD2\_STAAM  
mlylifsiiivalfmgtivivirmkaqnyvpnekkivlppffmatgalmyvvyprltgsemleafiigllfstvliwtsr  
fevkgteiymkrskafpvi  
lislliiirtvmkifisneidpge1ggmffllafcmivpwaamlykykklkktlin  
>tr|Q99UD6|Q99UD6\_STAAM  
mfynkyknvstyiii1vssaaafai1lsanvsahseqvyemtdhqikntinkayehkdptngeqrdgkvfaln  
>tr|Q99UE8|Q99UE8\_STAAM  
mkl1niallg1gtvgsgvvi1eenrqiqdtlnkdivikhilvrdskskrplnisqyhltedvneilnddsldiivevm  
ggiptvdwlrta1knkkh  
vitankd1lavh1kl1ledlaeengvalkfeasvaggi1vnainglnanniskfmgilngtsnfilskmtkeqttfea  
ldeakrlgfaeadptddve  
gvdaarkvvi1tsylsfnqvik1ndvkrngisgvt1tdinvadqlgykikligkiyengkvnasveptlidkkhqlaave  
deynaiyvigdavgtmfy  
gkgagslatgsavsd1lnvalffesd1htlpphfelktdktremmsdaeinikeksnffvvnhvkgisienfene1ka  
ilpffhrs1rvanydnqsy  
avivglesspeeli1tkhgyevdkvypveg  
>tr|Q99UF2|Q99UF2\_STAAM  
mksnks1ami1vva1i1vgv1afqfmnhtgpfkkgtnhetvqdlngkdkvhvqrvvdgdtfianqngkeikvr1igvdtpe  
tvkntpvqpfqkeasny  
kkt1tnqdvyleydkkqdrygrtlayvwi1skdrmykelvekg1arekyfspngkyrnvfi1eaqnkakqqk1niwsk  
>tr|Q99UF8|Q99UF8\_STAAM  
mffvpffige1ktmrytfsnd1gt1fti1laigfiinlv1afiii1lernrrtasstwaw1fv1fv1pligfilylffgrt  
vsark1nknngnvl1tdfdg  
llkqgiesfdkngygd1nkqvqkhhd1vsm1lmdqdgfltenkvdhfidgndlydqvlkdiknakeyihleytfa1dg  
1gkri1ha1leek1kqglev  
kilyddvgsknvmanfdhfs1ggeveaffask1pl1nfrmnrrnrhki1vidgqlgyvggfnigdeylg1gk1gywr  
th1riggdavdalq1r1fil  
dwnsqahrp1qfeydvkyf1pkngp1gnspi1qiaasgpasdwhqieygytkmimsaksvylqspyfipdnsyinaikiaa  
ksgvdvhl1mpckpdhplv  
ywatfsnasd1l1ssgk1y1tyengfi1hskmcl1ddeivsvgtanmdfrsfe1nfevna1fyden1akdl1rvayehditks  
kq1tkesy1anrpl1svk1fke  
slak1vspil  
>tr|Q99UT9|Q99UT9\_STAAM  
mentinesekkr1fkl1mpgafmi1f1l1tvvavi1atwipagaysk1syepssqel1kivnphnqvkkvpgtqqel1dkmgv  
kikieqfks1gainkpv1sip  
ntyer1kqhpapeqit1ssmvegtieavdimvfilv1lggl1igvvasgsfesg1la1tkktkghefml1ivfvsilmi1igg  
tl1cgieeeeavafy1pilvpi  
fia1gydsivsvgaif1lassvgstf1stinpfsvvi1asnaagttftdglywrigacivgai1fvisylywycktikndpkas  
syedkdafeqqsw1kdd  
dsahft1lrk1i1l1flv1lpp1mvwg1vmtqgww1fpvmasa1flifti1imfi1agt1gksg1gekg1tvdafvngass1vgvs1  
i1ig1argin1v1negm1sd  
ti1hf1ss1lvqhm1sgp1fi1iv1l1fi1ffc1lgfivp1sssg1lav1smp1ifap1adtvg1iprfv1vttyqfgqyam1flaptg1  
vmat1qm1nmryshw1frfv  
wpvva1fv1ifggg1vitqvl1ys  
>tr|Q99UU4|Q99UU4\_STAAM  
mtemvfyki1yvvt1pqla1svf1f1eflyvgapptciv1crisf  
>tr|Q99UU6|Q99UU6\_STAAM  
mktriv1ssvt1l1l1gs1l1mpv1naads1diniktgttdigsnttvktgd1lvytdkengm1hkkvfysf1iddknhk1llv  
irtkgti1agqyr1vyseega  
nksg1awpsafkvql1lpdnevaqi1sdyprns1dtkeymst1tygfng1nvtgddtgkigg1iganvsight1kyvqpdf  
kt1lesptdkkv1gwkv1fn  
nmvnq1nwgpydrdswnpvygnq1l1mktrngsmkaaen1l1dpnkass1l1ssg1fspdfatvitmdrkaskqqt1nidviyerv

Tsompanidou\_et\_al\_Supplemental\_FASTA\_File

rddyq1hwtstnwkgtntk  
dkwtdrsserykidwekeemtn  
>tr|Q99UU9|Q99UU9\_STAAM  
mkfkkyiltgtla11sstgiatiegnkadassldkyltesqfhdkriaeelrt11nksnvya1aags1nppykrtimn  
eyrakaalkkndfvsmada  
kva1ekiykeideiinr  
>tr|Q99UV3|Q99UV3\_STAAM  
mvdnpiwlnhvdy1vksv11ksik1rfqevrkfeilvkimnrihi  
>tr|Q99UW4|Q99UW4\_STAAM  
maqfknkvnsindqlftivgednpehi ryvah1vddkikelgykaag1dtsrkailtavnimhekvlleenrr1kqqi  
hk1qqreq  
>tr|Q99UY3|Q99UY3\_STAAM  
mkkvnrnilnav1vgagf1ss11minknkvitkkqtipaffkgnapyifahrggmalrpeqtqlafdyakqlgvdgftd  
vrltkdqqlivfhdavdr  
ttngsgkvsah1laelkk1daayhfkding1tpyrghahttiltfdellkqypdmyinvdlkdapesyegsiapqimfdt  
iaenqafdrv1vtsfykeq  
ivrfnkiaggsvaigasggevteaf1kyh11ggryyqplaqtqfmpthfkgid1tssrfikw1ndmniipgyygvnsid1  
mndlykgahtivtdrpd1  
aqqfkqtipnk  
>tr|Q99UY8|Q99UY8\_STAAM  
mkqikk11vanrgeiari fraaaeldistvaiysnedkss1hrykadesylvgsdl1gpaesyl1nieri1dvakqanvda  
ihpgygf1seneqfarrca  
eegikfigph1eh1dmfgdkvkarttaikad1pvipgtdgpiksyelakefaeeagf1mikatsggggkgmrvireese  
1edafhrakseaksfgns  
evyieridnphievqivdehgnivh1ferdcsvqrrhqkvvevapsvgl1spt1rqricdaaiqlmenikyvnagtve  
flvsgdefffienvprvq  
ehtitemvtgidi1vktqilvaagad1fgee1nmpqqkditt1gyaiqcrittedit1ndfmpdtgti1ayrssggfgvr1d  
agdgfqqae1spyyd11v  
k1sthai1sfkqaekmvr1remrirgvktnipfl1invmkkkftsgdyttkfi1eetpe1fdi1qps1drgtk1leyignv  
tingfpnvekrpkpdyela  
s1ptvssskiasfsgtkq11devgpgvaewvkkqddv11tdttfrdahqsl1latrvrtkminiasktadvfdkdfs1e  
mwggatfdvaynfl1kenpw  
er1er1rkaipnvl1fqm11rasnavgyknydpnvi1hkfvsesakagidvfri1fids1nwvdqmkvaneavqeagkisegti  
cytgdi1npersniytley  
yvk1ake1eregfhi1aikdmag11kpaaye1ige1ksavd1pih1lthdtsng11tykqaidagvdi1dtavasmsg  
1tsqpsans1yya1ngfpr  
h1rtdiegmes1shywtvrtysdfesdikspnteiyqhempggqysn1sqqaks1glgerfdevkdmr1rvn1f1gdi  
vk1tpsskvvgd1malymvq  
nd1deqsvitdgyk1dfpesvvsffkgeigqpvngfnkd1qavilkgqeal1tarpgylepvdfekvrel1eeeqgpvt  
eqdi1syv1lypkvyeqyiq  
trngygn1s11dtp1fffgmrngetveieidkgr1iik1letisepdengnr1tiyyamngqarriyikdenvhtnanvkv  
kadksnpshigaqmpgsvt  
evkvs1vgetvkanqpl1iteamkmettiqapfdgvikqvtvngdtiatgd11ieiekatd  
>tr|Q99UY9|Q99UY9\_STAAM  
mvysasmvpatkgt1tggi1dvp1gtyfynrq1ayvimsfiivffiaf1mnvkl1snikvqkgmiitivs11111t1vigkdi  
ngskswin1gfmnlqase1  
1k1ai1ilyipfmi1skm1prv1skpk1ilspiv1al1gctflv1flqkdvgt11lililvaiifysgigvkv1lrfgipav1  
gflv1vfvialmagw1psyl  
tarfst1tdp1qf1esgtgyhi1sn11aignggvfgkg1gnsamk1gyl1pephtdfi1faiice1gl1igg11vitleffiv  
yrafqfanktssyfyk1vc  
vgiatyfgsqtfn1ggisatip1tgvp1lpfi1sfggssm1s1siamg11livgkqikvdqqrkkqqkvdirrqfn  
>tr|Q99UZ2|Q99UZ2\_STAAM  
mrqvc1ic1dakv1fidertteskr1knpi1rtfm1cddcksr1dtpk1raqahyp1d  
>tr|Q99V13|Q99V13\_STAAM  
mse1i1vytqndc1ppctfvkny1nehq1dfeern1nqqyrnemid1fdaf1stpf11l1ngn1pmyhvd1deinkv1niq  
>tr|Q99V16|Q99V16\_STAAM  
mkiat1nkgketkyfngyp1ieeediysqdh1kegdi1fqivtdksqyvatayvgrqhkglgw1ltydkaqeintaffvk1  
fnta1aerdyf1nidgtna  
fr1fnaegdgvgg11tdnydgh1liqwy1skgiy1kfyai1eavrkvfdyksiye1kvrfdseysggfvegdapefpivie  
enftfynvd1edg1mtgif  
1dqkevrkk1rgqyakerh1n1fsytgafsviaaseas1ttsvd1anrsr1teenfg1naidpksqiyvmdtfdfyk  
yaarhghsydtivi1dpps1f  
arnkkrtfsvqkdyk1linga1ni1sseg111ctnasvyp1kqf1knt1kkt1leesgvdyel1tevmg1pkdfkthphykp  
sky1kavfvn1rh  
>tr|Q99V19|Q99V19\_STAAM  
mrrahakp1ttksckvkegymrrahakp1ttksckvkegymhraakp1ttkgckeeegymhaha  
>tr|Q99V51|Q99V51\_STAAM  
matgvl1eddivkeiygsskewvsvevk1sqs1dpst1fh1tdneagdrfymr1ndnrtsyfgykaiq1fknsknkqsif

Tsompanidou\_et\_al\_Supplemental\_FASTA\_File

kdweklkhnitfihpqsek  
hhlrvvggqfsshksddevefrglnhfvlpvlistdnngtfltytvkresftvealndlmdlfnnsdidvdeqigei  
trnediykddwrqlvveai  
esinneekivlarrrikfdkdisipyilkqayskeknsyifllesqdsiffstpeqlikvnnkilstkavagtikrsq  
dededtknveafldknknl  
iehrfvvdsilhdikpyitelhydtkpiklndhlyhlyteikaplkddsysislidhlhptpalggypkefamdfieqke  
fgtrglygapvgyidiydd  
cefivairsmlikkaqatl fagcgivkdsdpdse laetnlkftpmnalgvdmngks  
>tr|Q99V61|Q99V61\_STAAM  
mfgtilyltla glstaayaste yaeggtwshgvg skyvwsyyyghkgghgataigkyrsfsgytragvkakasatknc  
wvnraynyi  
>tr|Q99V68|Q99V68\_STAAM  
mmekneninveilttsdmshflngdygsniyragyvniqiraqnhrvilldsggslagslaayyaivapykrhpmikl  
mrmhydasgvspsfkgf  
lsfltrisialarfpwlsanieynvtkepyfstpycikhfgdlkiaivgtadglmeneysemeqdvsiektlvaskwir  
yiheveepdfli viyhgg  
nkisnstknkkassneaelmee lgvldmitahqhtivgqdhetyyvqagqake lvhlsinfkkrtrtttydvesidsk  
vidlneyeedqell dltfy  
drkavaywsqeijsdkglmsvnglqdlvcqthpfsqllhdaiqlafdnditcvhvpmmngekg lsgqirnedlyhayyp  
dkpmdmtisgnikdi ley  
syshldfvneqlsttiidetlctmwqgfnyeidmnpqgqrvmldqidltkysrvtmdtycyrnyknylnkaiihesyde  
tmstliaeklrpnyrisc  
sdfvknr  
>tr|Q99VA3|Q99VA3\_STAAM  
maenknnlsindhsnaamthtsdaiassdfiireldlnqepemqresknfwqdawaqlkrnklavvgmigliiivifaf  
igpvinkhdyaepnvehrn  
lpakipvlkvpflpfdgkdadgkdaykaanakenywfgtqldgrdlwtrtwkgaqislfivvaamldifigvvygais  
gffggrvdtimqri levia  
sipnlivvilfvli fepsiwtiilamsitgwlgmsrvvrgefllklnqefvmasktlgaskfklikhilpntlgaivvt  
smftvpsaif feaf lsfig  
igvpapqtslglvndgramlliyphelfipamilsllilffylfsdglrdafdpkmrk  
>tr|Q99VB0|Q99VB0\_STAAM  
mkintefkgnnipyeyaagadisldingnpiksfpfeitelpkdtkylawslidydaipvcgfawihwsvanvsitgdsi  
sikadlsrtkgdyvqgkns  
ftsgllaedfseienhyvgptppdkdhqyel tvyal dhslnlknngfylneflkevnqhkidqtsinligrki  
>tr|Q99VB3|Q99VB3\_STAAM  
miriqdntirdgmqgsnvrksliikkevlkqinklninsvevgmcttiedefnihqfrdilspekelvvltrlnekeikk  
ivklkihnlvki lllpisd  
lhikeklnfsnkyi qkikdcldi lkkdkkgvdicfedatrtsrek lkeymeiiskyqrvrtvtfadvvcstpleygdif  
nyfvkkysniif sahchnd  
lglatantlaailngakqietflgigeragnapieeiitiltkkqiesteftlpdyktsiniskildfqisenkpiig  
enifkhesgihqdgtkkni  
nmyqylvpsdglknsqvvpfipisnisskikhkfkisvnteeidenisfyklnkfspevapedtvdl lqiikrrskd  
gnfk  
>tr|Q99VD3|Q99VD3\_STAAM  
mddyvhnkkflsegqivkakil siddegklnslkndyfknyerkkekqsvldeiretekygftlkerlpiwikqsk  
rairnd  
>tr|Q99VE1|Q99VE1\_STAAM  
mptvil teaayevkdm lkanempdgylikvngggctgltygmgaeapgendevleyfglklvdkedapv lngttid  
fkqslmgggfqi dnpnaia  
scgsgssfrtakvagnpenc  
>tr|Q99VG2|Q99VG2\_STAAM  
mttdilniseeqlvdykahnepswmte lrkka lkl tetlempkpdktklrkwdfsfkqhdkgdvdyqs lsqlpesvre  
iidvdhsknlviqhntia  
ytqvddnaskdgvivegladal mnhsdlvqkhfmkdavtvdehritalhtalvnggvfvyvpknvvvehpvqyvvlhddk  
nasfynhviivteesaevt  
yvenylsnasgegnqlniiseviagansnitygsvdymdkgftghiiirrgiteadasinwalglmnegsqiidnttnlfg  
drstsslksvvvgtggeqki  
nltskivqyketdgyilkhgvmkehassvfngigyikhggtksi anqesrvmlsehargdanpillideddvdqaghaa  
svgrvdpdqlylmsrgis  
greaelvihgfl dpvvrelpiedvkrqlrevierkvs  
>tr|Q99VG6|Q99VG6\_STAAM  
mkk lfglilvl tfavv laacngnks gsd dkkitv gaspaphaeilekakpllekkgydl diktindyttpnkllkgei  
danyfghtpylntekkdkg  
yki vsagdvhl epmavyskkyks lkelpkgatvyvsnpaeqgrflkffvdaglikikkgvkiedakfsditenkkdikf  
nnkqsaeflpkiyqnedad  
aviinsfaieqklnpkkdsiavesakdnpyanliavkeghqddkkikaliev lqskdiqdfinekyngavipak  
>tr|Q99VH1|Q99VH1\_STAAM

Tsompanidou\_et\_al\_Supplemental\_FASTA\_File

mepvcntftakepfnqggypyfdqidprtdnqelkmydrvlldqidstrdgnssiiwgdlgianilvkstdleamkfdy  
myswcds  
>tr|Q99VH2|Q99VH2\_STAAN  
mlniqdvshlskkeqkaynrfsvesvengnlpvlpciemdlekmeqetlsqskiggmpflksfkdipldennvpmvllaqi  
nlnlpeqqelfpvnegil  
qfwiessedqmygmsenlkgnninsrlvyikepitdlsleniqvhlksldadnedipfsgafsiefrlskqtitctdykyd  
edvialwnkvnpfsalkfn  
hsiinnss  
>tr|Q99VI8|Q99VI8\_STAAM  
mnelkqeakytiakfyklyiersnnetetvanffgdakdarenyfcdryqdfntncqilinqkyltgeilddniynis  
ilnktfiefeqnfg  
>tr|Q99VJ9|Q99VJ9\_STAAN  
msrvlifslesiclltqsaivdeteikevvkkcisqhtivaifivlddklflflvfiicnyttstfninv  
>tr|Q99VK1|Q99VK1\_STAAN  
mnlkqsieeiinqpeyepmsvsdfqdalglssadsfrdlkvleleqsgliertktdryqkkskghsklikgtlsqn  
kkgfaflrpededmedi fi  
pptkinraldgdviveihqskgehkgkiegevk siekhsvtqvvgtysearhfgfvipddkrimqdi fipkgqslgavd  
ghkvlvqitkyadgsdne  
ghisailghkndpgvdi lsiyqhgieiefpdevlqaeavpdhienteikgrhdlrdeltitidgadaklddaisvkk  
langntqltvsiadvsyyv  
tedsaldekeydratsvylvdrvipmiphrlsngicslnphvdrtltsrmeidasgrvvkheifdsvihsdyrmydav  
nqii tekdpniregykeit  
pmlqlaqdl snrl iqmrkrgeidfdiseakvlvnevgiptdvqlrqrgegerliesfmlianetvaehfslnvpfiyr  
vheqksdr lrgffdfitn  
fgimikgtgedihpttlqkvqeevegrpeqmvi stmm l rsmqqahyddvnlghfglsaeyythftspirrypdltvhrli  
rkyli eksmdnkevkrwed  
klpelaehtskrerraieaerdtde l kkaeymiqhi gdefegivssvanfgmfie l pntiegmvhianmtddyrfeerq  
maligerqakvfrigdtvk  
vkvt hvdvderlidfqi vgmplpkndrsqrpargkt iqaktrgks l dksksddkgrkkkgkqrkgknqrndksgnskhhk  
pfykdksvkkarrkkk  
>tr|Q99VK2|Q99VK2\_STAAM  
mqikl p k p f f e e g k r a v l l h g f t g n s s d v r q l g r f l q k k g y t s y a p q y e g h a a p p e e i l k s s p f w f k d a l d g y d y l v  
eqgydei v v a g l s l g g d f a  
l k l s l n r d v k g i v t m c a p m g g k t e g a i y e g f l e y a r n f k k y e g k n q e t i d n e m d h f k p t e t l k e l s e a l d t i k d q v d e v f  
d p i l v i q v e n d n m i d p q s a  
n y i y d h v d s d d k d i k w y s q s g h v i t i d k e k e q v f e d i y q f l e s l d w s e  
>tr|Q99VP2|Q99VP2\_STAAM  
mektktl n l r t r w v i l m k t m e e k k y n h i e l n n e v t k r r e d g f f s l e k d q e a l v a y l e e v k d k t i f f d t e i e r l r y l v d n  
d f y f n v f d i y s e a d l i e i t  
d y a k s i s f n f a s y m s a s k f f k d y a l k t n d k s q y l e d y n q h v a i v a l y l a n g n k a q a k q f i s a m v e q r y q p a t p t f l n a g r  
a r g e l v s c f l l e v d d s l n  
s i n f i d s t a k q l s k i g g v a i n l s k l r a g e a i k g i k g v a k g v l p i a k s l e g g f s y a d q l g q r p g a g a v y l n i f h y d v e e  
f l d t k k v n a d e l r l s t i s  
t g l i v p s k f f d l a k e g k d f y m f a p h t v k e e y g v t l d d i d l e k y y d d m v a n p n v e k k k n a r e m l n l i a q t q l q s g y p y l m  
f k d n a n r v h p n s n i g g i k m  
s n l c t e i f q l q e t s i i n d y g i e d e i k r d i s c n l g s l n i v n v m e s g k f r d s v h s g m d a l t v v s d v a n i q n a p g v r k a n s e l  
h s v g l g v m l h g y l a k n k i  
g y e s e e a k d f a n i f f m m m n f y s i e r s m e i a k e r g i k y q d f e k s d y a n g k y f e f y t t q e f e p q f e k v r e l f d g m a i p t s e d  
w k k l q q d v e q g l y h a y r l  
a i a p t q s i s y v q n a t s s v m p i v d q i e r r t y g n a e t f y p m p f l s p q t m w y y k s a f n t d q m k l i d l i a t i q t h i d q g i s t i l  
y v n s e i s t r e l a r l y v y a h  
y k g l k s l y y t r n k l l s v e e t s c s i  
>tr|Q99VQ9|Q99VQ9\_STAAN  
mrieynyryyl teneykqyhiqlkgfikkyvatkladvgevihfaqaqqrqqgryvslylsyeaakyfnhvmcths lakdd  
iyavaysfekaesinstye  
hqt syvskhhfs fvessevmmtnikrvqqai vegetyqvnytar l t d n i y p i s t l y e r l t q f s n g n y t a l l q t d e i q v a  
s i s p e l f f q k g q f n n v d n v  
i i s k p m k g t m p r g k t e a e d q y y k s l q t s s k d r a e n v m i v d l l r n d i g r i s q s g s i k v y k l f f i e a y k t v f q m t s m v s g t  
l k t n t d l t q i l t s l f p c g s  
i t g a p k l n t m k y i k q f e s s p r g i y c g a i g l l l p t e d d k m i f n i p i r t i e y k y g q a i y g v g a g i t i d s k p k d e v n e f y a k t  
k i e m l  
>tr|Q99VT7|Q99VT7\_STAAN  
mkklttilfqykipvlmflvstg l g i l v i t q n i l i a d f l a k i i r h q f q g l w i v l f i l l g v l l l r a t v q f l n q w l g d t l a  
f k v k h m l r q r v i y k n n g h p  
i g e q m t i l t e n i d g l a p f y k s y l p q v f k s m m v p l i i i a m f f i h f n t a l i m l i t a p f i p l f y i i f g l k t r d e s k n q m t y l  
n q f s q r f l n i a k g l v t l k l  
f n r t e q t e k h i y d d s t q f r t l t m r i l r s a f l s g l m l e f i s m l g i g l v a l e a t l s l v v f h n i d f k t a a i a i l a p e f y n a i  
k d l g q a f h t g k q s e g a s d v

Tsompanidou\_et\_al\_Supplemental\_FASTA\_File

vfefleqpnynefllkyeenqkpfqltdisfryddsdrvlvndlnleifkgdqialvgpsgagkstlthliagvyqpt  
igtistnqrdlnigilsqg  
pyifsasikenimfkdiennatieevldevglldkvsftkgintiieggemlsggqmrrielcrllvmkpdlvifdep  
atgldiqtehmigqnlvfhq  
fkdttmiviahrdntirhlqrrlyiengrliaddrnisvnitengddl  
>tr|Q99VU1|Q99VU1\_STAAM  
mkriavycgaskghdpsyvqkaydlgkyfaeqgyelvfagsgimgaiqdgvlnhggkaigvmpkmldeheitsqrkte  
lilvdsmerknkmaelad  
afvmapggagsleeffemyswaqigihekpiayningffnplqtmidhmieegfidpkyralapldctkesliesilnf  
kplgtrsyd  
>tr|Q99VV6|Q99VV6\_STAAM  
mklafaitatsgaaaf1thhdaqastqhtvqsgeslwsiaqkyntsvesikqnnqldnnlvfpgqvisvggsdaqntsn  
tspqagsashtvqagesl  
niasrygvsvdqlmaannlrgylimpnqtqipngsggttptattgsngnassfnhqnllytagqctwyvfdrraqags  
pistyswdakywagnaand  
gyqvnntpsvgsimgstpgpyghvayvervngdgsiliseznytygpynmnyrtipasevssyafih  
>tr|Q99VW7|Q99VW7\_STAAM  
mqfftkyglwaylgviisgfilafigrqvakigtafeatnhestlqyvfgkfskvfdyiliffllfgiavtmiagagatf  
eesyniptwlgalimtlai  
yitllldfnkivralgivtflivlvliagvyfkgghvslaevnqvpeasiwkgiwfgtiygglafsvgfstivaigg  
dtekrvtsgagamyggiy  
tvllalinfalqseyptiknasiptlannihpliatvsvimlavmyntilglmysfaarftephysknyhifiiimmv  
agylsfvgfaelinklyt  
imgyvglfivvaviikyfkrknadkkhia  
>tr|Q99VX8|Q99VX8\_STAAM  
mkvwfngmsaigtvkehvknyfliqlraafqvkiihnsnylgvawelinpvmqimvywmvfglgirsnapihgvpfvyw  
llvgismwffinqgilegt  
kai tqkfnqvskmnflsiptyivtsrfyghlglllviacmftgiypsihiqlliyvpfcffltasvtlltstlgv  
lvrdtqmlmqailrilfyf  
spilwlpknhgisglihemmkynpvyfivesyraailyhewyfmhkwlmlynfgivaiiffaigaylhmkyrdqfadfl  
>tr|Q99VY5|Q99VY5\_STAAM  
meifetiliifavvillssfvhtfipkvlafiqiflglmlfitpipvqfnfdselmvtmiaplffvegvnvsrvhlrky  
ikpvmmmalglvittvigv  
glfihwiwpdlpigaafaiiaailcptdavavqaitkgkvlpkgamtilegesllndaagiiisfkiavgvltgafslvda  
vqlfliasiggavvgllig  
malvrfrltmlrrgyeninmftiiqltpfvtyliaelfhasgiaavvaglvhgferdrimqvrtqlqmsynhtwnilg  
ylnqfvfsilglfvlpevi  
ikiiktephnliifligitivvalavylfrfvvyvlypyfyfaispfqkmmtkndddnpttekppkrslyalimtlcgvh  
gtislaialtlypyflaghh  
aftyrdllfiasgmviislvaqvlpltkpaktvignmsfkvariyleqvidylnqkstfetsfkygnvikeyhd  
klafktvekdndenskele  
rlqkiafnvetkleslvdegqitnsvlennyriaertqvyrqaslirrmivllrgallkrrvqtrvnsasslsvtdnlm  
elnkinklvhynvvsrlsk  
ettkdntleigmvcdgylmrienltpsnffnsasedtitkiklnalreqririlrelidtddevsegtalklreainydemv  
ivdsmt  
>tr|Q99W01|Q99W01\_STAAM  
mdlndqikavvfdlegtlldrvksrekfieeqyerfhdylihqvladfkkafielddedndkpdlykeiikrfhvdrldtw  
kdlnfdmfemhfyrvfyfy  
dtlytleklsqkgfqiavngskkikqfrlshslgmhvinylstsetvgfrkphpkifedmidqlglvpeqimyvqgda  
lndvaparamgmvsvykq  
edaeiepleeevdfittveelltilpikndnkgenygsiy  
>tr|Q99W04|Q99W04\_STAAM  
mlgtdeleykllyrhmgpqnwwpadndielmlgailvqntwrnaeiaalnqikehthfnphilelpietlqslhssgyf  
ksktlktlktlltwlarhhf  
nyqeinerykglrkelllskgigsetadvllvyifgriefipdsytrkiydklgyentknydqllkkvvtlphnftnqda  
nefhalldvfgkhyfrdkd  
iknydflepyfkk  
>tr|Q99W22|Q99W22\_STAAM  
mdlaskyfgnvwryidhssglepmqsfaiddtfcesvgkdisdnvrtwihqhtvilgihdsrlpflkdgidyltneig  
ynaivrnsngglgvldqgv  
lnislmfkgqtettideavtmylliskmfedenvdidtmeiehsycpgkfdlsidgkkfagisqrrvrggiavqiyllcv  
egsgseralmmqtfyehal  
kgevtkfkypeiepscmasetllnktitvqdvmllylaikdlggvlnmtpitqewqrydyfdkmiernkkmidqmq  
>tr|Q99W37|Q99W37\_STAAM  
mkfdnyi fdfdgtdladdtkkgevatqsaafkacgltepskskeithymgipieesflkladrpldeaalaklidtfrhtyqs  
iekdyiyefagiteaitsl  
ynqgkklfvvsskksvdlnlrsaiglnhliteavgdqvsaykpnpegihativqrynlnsqqtvyigdstfdvemaqha  
gvpsaavtwgahdarsllh

Tsompanidou\_et\_al\_Supplemental\_FASTA\_File

```
snpdfiindpseintvl
>tr|Q99W44|Q99W44_STAAM
mnyfvgnslgvnlgtiekainrlnlfkemgrpaqcvflswrnylyrnaqnyitssdyinmydffqeatylernepfawl
sywtdechytlkhvshd
frydqrerflmyahfqdkyriildyvnfhdsqrrkvkrdfydvrgrflscsrilvdkqqtlfceffynpegdtklekyfsyk
dgkpevqkiivyankqyf
fnnetelgaffikqlyqhgdlffsdrnvytapifnltpesipvvavlhsthiknidalsspfknvykamfenlsryrai
ivsteqqkldekrinhti
pivnipvgysetidtpvqtlldqrsvklisvaryspekqlhqielikrlysvypkielhmygfgseskklneliqygle
nhvylrgflsnlgeysda
ylslitsnmegfslalleslahgvpvisydikygpnelitpdfngylitkndedalfdkvkyvidhpevqqriskgslak
aqqyskaslikqwdqfvr
i
>tr|Q99W82|Q99W82_STAAM
mhiligiigiiffalafifssdrknirwkyvgillaiqlifafillkttmgikviggisngfnylllkaadgvnfvfgg
iqyidpkqppfffsvllpi
vfisaiigilqytkilpliiinvlgfliskingmgrlesynavaaaailgqsevfisikkqlpyipkqrlytltasamstvs
asiigayftliepkyyvta
vvnlfggfiasiiinpykvneddllveeteerqqsffemlgeyildgfkvavivgamligyiaiaiallmgivsnifs
tvsagaiwdfqtligfvf
apfafvgvpwqdvagqsvmatkllsnefvamqalglksdlsehakgvtsvflvsfanfssigiisgaikslndkkgd
varfglklfllfgatlvsvfis
aaiagffi
>tr|Q99W92|Q99W92_STAAM
mqkafnrnlviviigviiifglfsylnngnmpkqltynqfteklekglktleiqqqnvymvsgtkndedysstilyn
nekelqkitdaakkqngvk
ltikeekqsvfvsilstlipvviallfiifflsqaqggsggrmmnfgskakmydnkrrvrfsvdvagadeekqelie
ivdfldknkkfkemgsrip
kgvllvgppgtgkllaravageagapffsisgsdfvemfvgvgsrvrdlfdnaknapciiifideidavgrqrgagvg
gghdereqtlngllvemdg
fgenegimiamnrpdiidpallrpgrfdrqivqgrpdvkgreailvhaknkpdetvdlkaisqrtpgfgadlenl
lneasliavregkkidmr
dieeatdrviagpakksrviskkernivahheaghtigmvldeaevvhkvtivprgqaggyammllpkqdrflmteqeell
dkicgllggrvsedinfne
vstgasndferatqiarismvtqygmskklgplqfghsngqvflgkdmqgepnysqiayeidkevqrivkeqyerckqil
lehkeqliliaetllteet
lvaeqislfyegklpeidydaakvvdedsefndgkfgksyeeirkeqledgqrdesedrkeekdiaedkheadksdek
depahrqapniekpydpnh
pdk
>tr|Q99WB4|Q99WB4_STAAM
mavlylvgtpignladi tyravdv lkrvdmia cedtrvtsklcnhydiptlksyehnkdkqtafiieqlelgldvalv
sdaglp lisdpgyelvva
reanikvetvpgpnagltalmsglpsyvytflgflprkekeksavleqrmhenstliiyesphrvtdlktiakidatr
qvs lgre ltkkfeqivtdd
vtqlqaliqugdvplkgefvi liegakanneiswfd dlsinehvdhyiqtsqmkkpkqaikkvaerqlktnevnyihqi
S
>tr|Q99WB9|Q99WB9_STAAN
mdeqqqltnayhsnk lshaylfegddaqtmkqva infaklilcqt dsq cetkvstynhpdfmyisttenaikkeqveqlv
rhmnqlpiestnkvyied
fekltvqgensilkfleppndtia illstkpeqildtihsrcqhvyfkpidkekfinrlveqnmskpvaemistytqi
dnaialneefdlla lrvsv
irwcellltnkpmaligiidllkqaknkqls ltiaavngffedi ihtkvnvedkqiysdlkndidqyaqklsfnqlflm
fdqlteahkkl nqnvnptl
vfeqivikgvs
>tr|Q99WD1|Q99WD1_STAAM
mhneklikglydyreehdacgigfyanmdnkrshdiidkslem lrrldhrgvggadgitgdgagimteipfaffkqhvt
fdippegeyavglffsker
ilgseheavfkkyfegeglsilgyrnvpvnkdaiakhvadtmpviqqvfidi rgiedvekr lflarkql efystqcdlel
yfts lsrktivkgw lrsd
qikklytdl sddlyqsklglvhsrfstntfpswkrahpnrm lhngeintikgnvnmraraqhkl ietl fgedqhkvfqi
vdegdsasaidnalefls
lamepekaamllipepwlyneandanvrafyefysylmepwdgptmifcngdkl galtdrngl rpgrytitkdnfivfs
sevgvvdv pesnvafkgql
npgklll vdfkqkvienndlkgaiage lpykawidnhkvd fdfeni qyqdsqwkdetl flk lqrqfaytkeehkyiqel
vegkdpigamgydapiav
lnerpes lfn yfkql faqvt nppi dayreki vtse lsy lgggnll apdetvldriqlkrpvlneshlaaidqehfk lty
lstvyegdl edalealgre
avnavkqaqilv lddsglvdsngfampmllai shvhqllikad lrmstslvaksgetrevhhvac llayganaivpyla
```



Tsompanidou\_et\_al\_Supplemental\_FASTA\_File

qrtveqltltteglggtvvd  
nvktytdvlsegvikvmakmgistvqsyggaqi feaig lshdvidryftgtqsklsgisidqidaenkarqqsddnylas  
gstfqwrqqgqhafnpes  
ifllqhackendyaqfkayseavnknrtldhirllefkactpididqvepvsdivkrfntgamsygsisaeahetlaqam  
nqlggksnsggedakry  
evqvdgsnkvsai kvasgrfgvtsdylqhakeiqikvaqgakpgeggqlpgtkvypwiaktrgstpgiglisppphdi  
ysiedlaqlihdlnkankd  
adiavklvsktgvgtiasgvakafadkivisgydggtagspktsiqhagvpweiglaethqtlklndlrsrvkletdgl  
ltgkdvayacalgaeeffg  
ataplvlvgcimmrvchkdtcpvgvatqnkd lralyrgkahhvvnmfhiaqelreilaslgkkrvedlvgrtdllqrs  
tlkanskvasidveklcp  
fdgpntkeiqqhnlehgf dlnlyevtkpyiaegrrytsftvneqrdvgvitgseiskqygeaglpentinvytng  
agqslaayapkg lmi hhtg  
dandyvgkglsggtvikapfeerqnei agnvsfygatggkafingsagerfcirnsgvdvvvegigdhgleymtgghv  
inlgdvgnfngqmsggia  
yvipsdveafvennqldt lsfkikhqeekafikqml eehvshtnstraihvlkhfdriedvvkvipkdyqlmmqkih  
hkslhndedeamlaafydd  
sktidakhkpavvy  
>tr|Q99WE2|Q99WE2\_STAAN  
mnkktkl ihgghttddytgavttpiyqtstylqddigd lrggyeysrtanptrssvesviaalengkhgfafssgvaais  
avvmlldkgdhiilnsdv  
ggtyraltkvfrfgievdfvdtthtdsivqairpttkmlfietspnlrvtdikksaeiakehglisvvdntfmpyy  
qnpldlgidivlshatky  
gghsdvvaglvatsddklaerlafisnstggilgpqdsyllvrgiktglrmeqinrsvieiikmlqahpavqqvfhpsi  
eshlnhdvhmaqadghtgv  
iafevntesakqlikatsyytlaeslgaveslispalmthasipadirakegitdglvrisvgiedtedlvddlkaal  
dtl  
>tr|Q99WE3|Q99WE3\_STAAM  
mitydligntplvllehysddkvkiyakleqwnpggsvkdr lkgylvekaiqegrvrageqtiveatagntgiglaiaanr  
hhlkckifapygfseekin  
imialgadvsrtsqsegmhgaqlaarsyaekygavymnqfesehnpdyfhtl gpe ltsalqqidyfvagigsggtftgt  
arylkqhhvqcyavepegs  
vlnggpahahdtegi gsekwpiflerrlvdgi ftikdqdafrnvkslainegllvgsssgaalqgaln lkaqlsegtivv  
vfpdgsdrymskqifnyee  
ndye  
>tr|Q99WF0|Q99WF0\_STAAM  
mlsfqllfslfvialialisglflapvmpmryiklhlyilvmpvl favigffgihgqhvlgpfkidrlswllagfvma  
lgfiikfsmryllgdhhy  
rhyfplftaitsfaslawmsed lrlmalcwgmtllcltllmavnrfwkvpresaklssmtflcgwafvgaivtiyatg  
ewrvpqhivhptwslltnv  
llvlavmipaaqfpfhrwliesvtaptvsaimhagivnaggviltrfapifdngfalsllilssisvllgsgislvqv  
dykrqlvgstmsqmgfmlv  
qcalgvysaaiihlilhgifkatlflqsgsivkrfnipkqasakdaywimgrvlaiivaf lfwssdrsayevlsali  
lawsllvswnqmvafskgr  
marlvgmil iavtviyvi thnyfydvlqnitthattptvs viisv vilifgslsiwvarhryskgfavlyvwlvnlg  
earskaieshpnylkky  
>tr|Q99WH1|Q99WH1\_STAAN  
msitekqrqqaelhkl lwsian d lrgnmdasefrnyilgli fyrf lsekaeqeyadalsgedityqeawadeeyredlk  
aelidqvgfyfiepdlfsa  
mireietqdfdiehlatairkvetstlgeesendfiglfsdmdlssrlgnnvkertaliskvmvnl d d lpfvhsdmeid  
mlgdayefligrfaatagk  
kagefytpqqvskilakivtdgkdlrhvydptcgsllrvgketqvyryfgqernnttynlarmnmllhdvryenfd  
irnddtlenpaf lgn t fda  
vianppysakwtadskfenderfsgyglapkskadfafi qhmvhyl ddegtmavvlphgvlfrgaaegvirrylieekn  
yleaviglpvni fygtsip  
tcilvfkkrqddnvlfi dasndfekgnqnhlsdaqveriidtykrketidkysysatlqeiadndynlnipryvdtf  
eeeapidldqvqqdlknid  
keiaieqeinaylke lgv l kde  
>tr|Q99WH2|Q99WH2\_STAAM  
mvriaytkrmhqsissl rfc lcvmpipismnikippptskfstsqhnm  
>tr|Q99WH3|Q99WH3\_STAAM  
mkftalakatalalgitlgtlttevhshgakqnqksvnkhdk ealyryytgkmemknisal khgknl rfkfrgikiqv  
llpgndkskfqrseygl  
vffvqekrdkhdifytvggviqnnktsgvvsapilniskekgedafvkgypyiyikkekitlkel dyklrkhliekgylyk  
tiskdgrvkislkdgsfyn  
ldlrsklkfymgevi eskqikdievnlk  
>tr|Q99WH8|Q99WH8\_STAAN  
mkittiaktsalgl lttgvit ttttqeanattpsstkeapqstppstkeapqskpnattppstkv etpqqtpnattps

Tsompanidou\_et\_al\_Supplemental\_FASTA\_File

stkvetspqspttkqvptei  
npkfkdlayytkpslefkneigiilkkwttirfmnivpdyfiykialvgkddkkydegvhrnvdfvvlleeknkygver  
ysvggitksnkkvdhkg  
vritkednkgti shdvsefkitkeqis lkeldfklr kqlienhnlygnvsgskivinmknngkyt felhkk lqenrmadv  
idgtnidnievnik  
>tr|Q99WI7|Q99WI7\_STAAM  
mhnknefnkklkdfigsdkrma l vkg yiney k l t t v l r a l n n s d y t k g t i h t r s i g n l k q i v d n r i i p k n i t q n k i f k l s  
n l t l e v n l y e r n t i y h g d f  
a i y y p v e s a l i i e t d t p r l i n h i n n n p v q k i f i i t t n d s f n t l e l e k i v d e t i i y d l k q e d p k y e i l y k n k h g k l p y  
>tr|Q99WJ5|Q99WJ5\_STAAM  
mnafltliniivlvifivilhmmarkhisfakrvftalgigivfgvllhlvygthsnvitstsdwfnivgqgyvallqmi  
vmp lifisivaaftkiqig  
ekfakigs lififligvtiaaivgvvya l v f g l d a s t i n l g n a e q a r g s e i a k q a k d l t a h t l p q q i l e l l p k n p f l d f  
t g r a t s t i a v v i f a s f i g  
f a y l r v a r k q p d h g e l l k r a i d a i y s l v m a i v t f v l r l t p y g v l a i m a n t l s t s d f g a i w t l g k f l i a s y a a l i t m y i i h  
l i i l s l l g i s p i r y v k k t l  
e v l i f a f t s r s s a g a l p l n v q t q t r r l g v p e g i a n f a a t f g l s i g q n c a g i y p a m l a i m v a p v a n v e i d l q f i v t l i a v  
v i i s s f g v a g v g g a t f a s  
i l v l s t l n l p v a l a g v l i s v e p l i d m g r t a l n v n d s m l a g t g t a k l t k h w d k d t f e s n d n a a l t s h  
>tr|Q99WK0|Q99WK0\_STAAM  
mkvritfiilailstivclflaamyptgpntvtfeqpylftlniilmvlvalpslvlaiydymfrissailqflgaisw  
ffls l i l s l t q f t p f t l a s  
f i t s i i l f i s a i i t l a i g g k s v d k n d s h  
>tr|Q99WK1|Q99WK1\_STAAM  
mhkvr snimtiylvrhgesksnydnkhfrsyfcgqldvpltdtgtk sadd l c d y f k e k q i k h v y v s d l l r t q q t f e h i f p  
y d i a s t t t p l l r e r s l g v f  
e g e y k d e i s a n p k y e k y f n d p n f k d f r h s f s q a p e g e s y e d v y q r v e h f m h v v n e d t q k d d i v i v a h q v v i r c l m v y f  
n k v s r e e a v d l k v e n c k p y  
i i e  
>tr|Q99WK4|Q99WK4\_STAAM  
mmhilynlrtkhnleide laqqlnekygtkyeahqiwewenhhhepkfkdamhladffdapyemfleskvkeyqkhlee  
vdirmdk  
>tr|Q99WK5|Q99WK5\_STAAM  
mk l k s l a v l s m s a v v l t a c g n d t p k d e t k s t e s n t n q d t n t t k d v i a l k d v k t s p e d a v k k a e t y k g q k l k g i s f e n s n  
g e w a y k v t q q k s g e e s e v l  
v a d k n k k v i n k k t e k e d t v n e n d n f k y s d a i d y k k a i k e g q k e f d g d i k e w s l e k d d g k l v y n i d l k k g n k k q e v t d a k  
n g k v l k s e q d h  
>tr|Q99WL1|Q99WL1\_STAAM  
mlnr v l v g r l t k d p e y r t t p s g v s a t f t l a v n r t f t n a q g e r a d f i n c v f r r q a d n v n n y l s k g s l a g v d g r l q s r  
n y e n e g r r v f v t e v v c d s  
v q f l e p k n a q n g g q r q n e f q d y g g f g g q q s g q n s y n n s n t k q s d n p f a n a n g p i d i s d d d l p f  
>tr|Q99WL7|Q99WL7\_STAAM  
msksedqrittkkdeqikqidi sdikpnpyqrktfdenh lnd ladsikqy gilqpivlrktvqgyyivvgerrfraski  
a g l k y v s a i i k d l t d e d m m  
e l a v i e n l q r e d l n a i e e a e s y q r l m t d l k i t q q e v a k r l s k s r p y i a n m l r l l h l p k k i a d m v k d g r l t s a h g r t l l a i  
k d e q q m l r l a k r v v k e k w s  
v r y l e n h v n e l k n v s s k s e t d k v d i t k p k f i k q q e r q l r e y g t k v d i s i k k s v g k i s f e f d s q d d f v r i i e q l n r r y g k  
>tr|Q99WN9|Q99WN9\_STAAM  
mni v g h h h i s m y t k d a k r n k d f y t n v l g l r l v e k s v n q d n p s m y h l f y g d e v g t a g t i l s f f e i p h a g h k q p g t e t i y r f  
s l l v p n q a a l h y f e k r l d n  
n g i t s e r l y y l g g e g v v f k d e d d l e i i l l v n d s f e v p h q w q n a y s e i p q v y q i l g i g p v e l r v r n a a r t v e f l e n v l g y  
r k r d n k s f d v l t l a p q g l y  
s d f v v i e q q q r e r p g r y i h h i a i n t p q m s d l d a i y k k l q q q t q s n s g i d r y f f k s l y r h n s i m y e f a t e a p g f t i d  
t p l e q l g s q l n l p d f l e a e  
r e q i e s k l h e i  
>tr|Q99WP1|Q99WP1\_STAAM  
myksk illkyifseesevkd l teekynqdyea l t f s f k e e t y q s r l a k k t p t k a g y f v t c w t k d e n n c n q p y s k e a f a d y  
l m i i v i d e e l s g y f l f p r e  
l l v e k g i l t t f e h k g k m a f r v y p k w c n q l n k t a g q t q k w q c k y f l n t n k k s y g  
>tr|Q99WP8|Q99WP8\_STAAM  
mnkv l v t g g t g f v g m r i i s r l l e g g y e v q t t i r d l s k a d k v i k t m q d n g i s t e r l m f v e a d l s q d e h w d e a m k d c k y v l  
s v a s p v f f g k t d d a e v m a k  
p a i e g i q r i l r a a e h a g v k r v m t a n f g a v g f s n k d k n s i t n e s h w t n e d e p g l s v y e k s k l l a e k a a w d f v e n e n t i v e  
f a t i n p v a i f g p s l d a h v s  
g s f h l l e n l l n g s m k r v p q i p l n v v d v r d v a e l h i l a m t n e q a n g r f i a t a d g q i n l l e i a k l i k e k r p e i a q k v s t k k  
l p d f i l s l g a k f n h q a e g  
k l l l d m n r n v s n e r a k t l l g w e p i a t q e e a i l a a i d s m a k f h l i  
>tr|Q99WQ7|Q99WQ7\_STAAM

Tsompanidou\_et\_al\_Supplemental\_FASTA\_File

mnqyhsnaqqpsawrffvyslvgilcffiipftingntifvdhvlairsiigplmpyvalimiligtalpivrtrfmts  
itnlvitlflkvagamigim  
yvfkigpsiifkanygpflfeklmpplsilipvgaialsllvgygllefvgvymepimrpifktpgksavdavasfvgsy  
slgllitnrvykqgmykr  
eatiatgfstvsatfmiivaktlglmpwhnlyfwitlvitfvvtaitawlpitnesteynggegeqevaiegrlkt  
ayaeamkqnaltpslvknv  
wdnfkdglemtvgilpsilsigflglivanytpfidwlygifypfiyifpiadqavlakasaisivemflpsllvtkaam  
stkfvvgvsvsaiiffsa  
lvpcilateikipvwklliiwflrvalsllitipvallifg  
>tr|Q99WR0|Q99WR0\_STAAM  
myyiaidiggtqiksavidkqlnmfdyqqistpdnksekitdkvyeivtgymkqyqliqpvigissagvdeqkgeigya  
gptipnykgtnfkrllksl  
spyvkvkndvnaallgelklhqyqaerifcmtlgtgiggayknnqghidngelhkanevgyllrptenttfeqraatsa  
lkkrmidggftrsthvpl  
feaaeegddiakqilnewaedvaegiaaqiqvmydpgliligggiseqgdnlkiyiepkvahylpkdyvyapiqttsknd  
aalygc1q  
>tr|Q99WR2|Q99WR2\_STAAM  
mkevgfgtlnwvaviyylamlfigvyftkrasqstnsfftasgrlpswvvgfsiyattlsaitfmstpekafldwsi  
agniaivaiipliyfyvp  
ffkklkvtstayeylearfopsirvigsllfvvyhlgrvaiviylptlaitsvsdmnpvivaslvgllicilytflggfegv  
vwsdfiqgvillggalvii  
ilgvnnikggfgtvfadaiehkklisadnwklntaaaapiiflgnifnnyqyasqdvvqryqasds1ketnkslwn  
gilalisaplfygmgtmly  
sfytheavlpkgfntssvpyfiltemppfvaglliaaifaaqstisslnsisacisidikqrffgkdsrhevnfar  
fiiiagi fgfgmslylia  
snsndlwdlflfvgtlfgvplagvfavgiftkrtntfgvicglilgii fayvnygvkgnsfpvstisftvafvfayil  
sfivpskhkkditgtlfe  
kdkpstyisktatnk  
>tr|Q99WR3|Q99WR3\_STAAM  
mnilfaitgiafalfvaf1fsfdrknidfkktlimifiqvlivlfmmttigltitlalsffeglinvskaginfvfgd  
iqnkgftfflnvllplvf  
isvligifnyikvlpfiikyvgiainkitrmgrlesyfaistamfgqpevytltikdiiprlsraklytiatsgmsavsma  
mlgsymqmiepkfvvtavm  
lnifsaliasvinpyksddsveidnltkstetksvngktgkpkkvaaffqmigdsamdgfkiavvvavmllafis1mea  
inimfgsvglnfkqligvy  
fapiaflmgipwseavpagslmatk1itnefvamldfknvlgdvsartqgiisvylvsfanfgtvgiivgsikgisdkqg  
ekvssfamrlllgstlasi  
isgsiiglv1  
>tr|Q99WR5|Q99WR5\_STAAN  
mksvmpsnsvkdvtagdsfcaavvyswlngmstediliagmvnaktietkytvrqnlldqqlyhdmedykngkftkvy  
>tr|Q99WR6|Q99WR6\_STAAN  
msdsekeilkrjkdnpfisque1aeaglsrpsvaniisg1iqkeyvmgkayvlnedypivcigaanvdrkfyvhkd1va  
etsnptstrsiggvarni  
aenlgrlgetvaf1sasgqsewemikr1stpfmnl dhvqqfenastgsy1aliskegdmtygladmevfdyitpeflk  
rshllkkakciivdlnlgk  
ea1nflcayttkhqiklvittvsspkmknmpds1haidwiitnkdetetylnlki  
>tr|Q99WS5|Q99WS5\_STAAM  
mifeel1sqmyneianeisgmipvewekvytiayvdegegevfnytkpgsdelnyytipreynvsekvfydlwtdlyr  
lffklrnafkedlepwtsc  
efdftregnlkvsfdyidwiklfgfpgsgkenyymykkfgvlpetyemeeirevekyvkdqe  
>tr|Q99WS8|Q99WS8\_STAAM  
mtfeelisklyneianeissmipvewekvytmayiddgggevfnytkpgsddllyytdipkeynisvqvfdlwmldlyd  
lfeelrdlfkeedlepwtsc  
cefdftsegklkvsldyidwintefdq1grenyymykkfgvipemeyemeeikeieqyikeqdeael  
>tr|Q99WV2|Q99WV2\_STAAM  
mnntqssprsniiiaim1saltyw1faqsfinigplvgqyqtspavln1sis1tsfatgimvaagdiadkigqlrmtym  
mgliismfasllliisdit  
alliiigrilqgl1saail1pstvgvlnnqfkgehlrraisylmistvggiglagvigglia1nfgwqmnfiisiviafiai  
lllkg1tpekvsqshrhpf  
dykmsifavmigsftll1tqgfeqgwfstfsficsifiiittlifiierrhevpidfsvlnrpf1gaf1nnfvlns  
lgvtvffiyaqthlg1s  
aaqsglv1lpyaivavami1r1gek1trf1ggk1m1iig1lfpvigit1ismtq1sasqyvia1ig1fvica1ign1lvatp  
gl1tia1fsm1pek1vg1atg  
lykmsgt1ggaf1al1sttvfsm1q1nyapsvaatvtfivsv1ml1g1s1saymi1pk1tvks  
>tr|Q99WV7|Q99WV7\_STAAM  
mtnkvvilgstnvdqfl1tveraqpget1hveeaqkafgggkqanqaiatarmqadttf1tkigtgdvadfiledfkaah  
idtsy1i1ktteaktgqafi  
tvnaegqntiyvygganmtmtpedvinakdai1nadfvvaql1evpi1ai1safeiakahgvttv1n1papaka1pne1l1s1

Tsompanidou\_et\_al\_Supplemental\_FASTA\_File

idiivpneteae11sgikv  
tneqsmkdnanyfls1gikvtvitlgkqgtyfatknqsqhieaykvnaidttaagdtfigafvsrlnksqdn1adaidfg  
nkassltvqkhgaqasip1  
leevnqv  
>tr|Q99ww9|Q99ww9\_STAAM  
mikntikk1iehsiyttfk1lslpnknliyfesfhgkqysdnpkalyeyltehsdaqliwgvkkggyehifqqynvpyvt  
kfsmkwflamprakawmin  
trtpdwlyksprttylqtwhgtp1kkig1di snvkm1gtntqnyqdgfkkesqrwdylvspnpystsi fqhafhvsvrdki  
letgyprndklshkrndte  
yingiktrlnipldkkvimyaptwrdeai regsyqfnvfdiealrqa1dddyvillrmhylvtridehddfvkdvsd  
yedisdlylisdalvt dys  
svmfdfgv1krpqi fyayd1dkygde1rgfymdykkelppivenqta1ida1kqidetaneyieartvfyqkfcs1edg  
qasqricqti fk  
>tr|Q99wx5|Q99wx5\_STAAM  
mkalvktreghgn1e11dkevatplddkvkikvhyagicgtdihtyeghykvnfpvt1ghefsgeivevgadvkdfkvgd  
rvtsettfyvcneceycks  
kdynlcnhrkgigtqvdgvftnyviarees1hipdevsyqsaamteplacahhgvskiqvnsqdvavvmgppig11va  
qvlkskgatvvvtg1dndk  
vr1dkaea1hmdyvvn1qqtd1ktyingitdgygadvvvecsgavpaarqg1di irkkgfysqigifkdaeipfdmekvi  
qkei tvvgsrsqkpadwep  
slq1madglvnaea1vtkiydi skwdeayqhlksgegikallkpl1denegen  
>tr|Q99wy7|Q99wy7\_STAAM  
mssastqstksdihnesinkqmeakahetaqnad1ktears1fdnatksigrlagndes1n1n1kdmfsevfkphtkne  
adeifiagtakttpaicdi  
seewgkpw1fsrvfi aftvtfig1lwmaaifnntnaipglifigaltvplsg1fffyefnafknisifeviimffiggvf  
s11stmvlyrfvvsdqfe  
rfgs1tffdaf1vg1veetgkaiivvyfvnk1ktnkilng1ligaaigagfavfesagi1nfalgenvp11divftraw  
taigg1lvwsaivgaai vi  
akeqhg1fekdi fdkrf1iff1savglhgiwdts1tv1gsdt1kifilivivwilvfilmgag1kqvn11qkefkeqqkk  
vde  
>tr|Q99wy8|Q99wy8\_STAAM  
mkqitwhd1qhi1kdgdvig1palavan1paev1rav1aqhdtyhtpkd1tfilandihs1gaap1ddfierrmikrvi  
msi1tassktaqamknndi  
eayflpqqi1athyrqsnq11pgvitkig1ntavdpryggkvnttrtdd1vsv1vtindetylhytfpsvdval1rgtya  
dqgniy1tqeay1secyh  
valnakanhgkvi1vqkav1ddyq1kpnevvipgn1vdyvyvtedeknhrqviqshylpalsgeeridgipepalpfnsr  
k1ilrraaqf1tygdtsi  
gyinne1sn11heecvehdvqpi1dvgi fggfvgsrehfgmynadvrmphdrawdfiynngvsvay1sfaevdqygnv  
nvsyfndr1ngcggfidit  
qsvnk1iifsgt1fvagshvschnqr1nietegqnqkfvsdvshidfnaqysq11leqevyfvtdravfeltnqg1klieiap  
g1d1hkdi1nqmafkipia  
dh1klidtsiykekwwg1kqsihkv  
>tr|Q99wy9|Q99wy9\_STAAM  
mnfdwiktrsd1dddkpavi dhakqtswtyqq1naradmahy1tsqgvkkgdvigifapndia1d11facfktgavf1  
p1nwr1npkeiaaivedaq  
1k11fyaekhl1ss1tdidqn11hmdidvaqydeivnpdyhqpfqatpvepqd1aaliytsgttgs pkgvmfsvyesfvhng  
anle1tykfnsnyitivist  
pmfhv1g1fndtv1pv1msggt1ilqryfngeelndmiaaqyhptfi imiptmyyst1rasnfnpenframdyi1qggsqpl  
ps1qaa1fkqygin1ingyg  
1teapl1v1vntpenskrkpmsigkavmfvdari1ddngeevptgeigelaikaknvtpgywnkpaetakafhgry11tgd  
lakmdddgd1fi idrkkel  
i1tggen1psevena1aehp1vdrcvvvygdhpkkygesiaaai11redephyae1ldqhmsr1lagykvrmyvpvthm  
p1nstqkpk1laira1mmnd  
kvsqt1  
>tr|Q99wz0|Q99wz0\_STAAN  
mtfeketv1kt1fpedv1siakgltdgeveflqqvds11lesnyreninqhwi datvpedyfd1gelnyfnnp1lykdrp  
nakmpsq1fqffmsy1lar  
fdi1lat11gvhgg1ghntfyfggskeqi akypk11shelrtc1faltepehgsdvaggetvaerqgdtwvingekkw  
ggahvsdvi1pvfavnkktg  
kphcfvvrpeqgdvdi ev1dnkia1rivpna1ik1tnkvdeadr1qnitsfkdiakilystragvaymatggmaga1ra  
t1dyvterkqfkgkpi skyq  
1iqek1ammqgn1agamatacaq1anmqahgeydevatstakmmna1r1retvamgrgitggngiladdydiarffsdaea  
iytyegtheina1vigr1  
tgdsafv  
>tr|Q99x05|Q99x05\_STAAN  
mmtikvgi1gcggi1angk1hmps1qkvenvemiafcdvdi skaasaaeygtdnakvyddykallkddtidvihvctpnds  
hceitvag1hagkhvmcek  
pmakttaeaqkmi1dakstgkkl1tigyqnrfrpdsqf1hqa1aqrg1dgiyfghakairravptwgvf1neeaqgggpl

Tsompanidou\_et\_al\_Supplemental\_FASTA\_File

idigthalldtlwmmdnye  
pesvmgstfhklnkqhdaanawgswnpdefvedsafgfikmkgatiilesawainslevdeakcs1sgtkagadmkg  
lrihgedmgtlytkhvele  
nkgvdfyegnevdeaeekawidavvndtepvvkpeqamvvtkileaiyqsaksgkaiyfe  
>tr|Q99X06|Q99X06\_STAAM  
mtkkknikaigiysfiammfviilypllwtfgislnpgtnlygakmpdnatfknyafllfddssqyltwyknltivas  
analfsvifvtltayafsr  
yrfvgrkyglitflilqmfplmamvaiyillntigllsdfgltlvyiggsipmnaflvkgyfdtipkeldesakidga  
ghmriflqimlplakpila  
vvalfnfmgpfdmfdlplkllrspekftlavglfnfindkyannftvfaagaimiavpiaivflflqrylvsglttgatk  
g  
>tr|Q99X19|Q99X19\_STAAM  
mgclvyllnidlgkmiyaqdlnlqeiiffhnliyffsai fgfltlgllnigmllinsgmlgffiahgiysnqlksillvl  
aphaifeilalliafstfs  
gflsylyqrmvkkknknkmfhnfvttiitviltiiasllevyvtin  
>tr|Q99X22|Q99X22\_STAAM  
mrkvlntiafksilknkgrniftmigiigissvitimslnngfkktaadqfsdagagkqaelisftfkvdekikyp  
fnqrdielvnqvdglak  
lkenkegieatitnvqkksdifiikkqnhsfkvgrgfdkednelrkkivvinqvaktvfnnnaigkslyiegggfev  
igitdklydsstvimpen  
tfnyymghlhqglptlqiiedgynkktvkkvesllnkkgsvglgeytydteeiiksidkifdsityfvaavagisl  
fiagigvmnvmyisvaert  
eeiairrafgaksrdielqfliesilicvtsgfiglilgvfatiidvltpdyiksvs1ssviiavsvsiligllfgwi  
paraaskkelidiik  
>tr|Q99X35|Q99X35\_STAAM  
mkkkltfkenmfigsmfglffgagnlifpihlqqaagsnvfianlgflitaiglpflgiaigisktsglfeiasrvnk  
tyayiftialylvigpffa  
lprlattsfeiafspflspkqitlylfi fsfvffviawffarkpsrileyigkflnpvflvllaiillfafi hplggisd  
apiskqyqshalnfgldg  
yntldalasalafgiiivatikklgienptdiaketiksgtisiimmgiytlaimgtlsighfkl senggialaqitqy  
lgnygivllsivmvacl  
ktaiglitafsetfehlfpkmnylaiatvvsfisflfanvgltkii mysvpvlmflyplai alivltlfsskfhhskiy  
qctiffmtiaalvdglkas  
pefissstfsqtlinfsqkylp1sdigmgwvvlsligfiigfiyikikhrkip  
>tr|Q99X41|Q99X41\_STAAM  
mtvfmqlqsnlksieelisqsrwsykkprtvnyrynqdklmhrlgdilvqygiqhdgtllphewhyhisprgkadivqh  
nrdgqpiyvs1sysypyiv  
cvvdkepvgidiekisqrlwrtlvctfstneahqicslndfyqiwtqkesftkligeglikglidiydm tqshfyqsrev  
kfkqfifdqfvmvqvcflge  
apwgykkvsvfqllss  
>tr|Q99X43|Q99X43\_STAAM  
mkr1sttlkvr1isnflqlittafipfia lytdmlsqsi vgiylvglvvlkfp1siisgylieifpkllvli yqatm  
vimlvfmgvfgshqlwqi  
gfcvayaiti vwg1qfpvmdtlmdaitedvehyiyki symmtn1svaigallgglmygysml11fliaaciflivlfi  
lyiwlpqdrnqvkgssdkr  
hasryqlqimnifrsyqlvlkdrnymllisgfsiimmgefsissyairlkdqfetisigsyditgakmlaillmintv  
vvi1lty1s1skvvlkidfk  
kalitglliyivgysgltynqfgllvfmia tvgeiispivseqr fkiipkargtysavnalghfsetlarlgiv  
lgvfltslqmglymfivlt  
igasm1vagvfggkqvntn  
>tr|Q99X46|Q99X46\_STAAM  
mtletlikeql dph1vevdegtyyprt fiqq1 fvdgyfgeaalrknaveieavsqsclttgfc1wcqlafstylenatqp  
hlnd1qq11sgeilgat  
g1snpmksfndleklnlehtyvdgqlvvsgrmpavsnqedhyfga1skhessdefvmfilranqdg1t1vekt nflgvn  
gsatyqit1nqvvpqsqi  
ithdakqaatirpqiayqipiglsiksslelidafsnanginqyleydveafkkryrqlreeyyailddgn1tsh1  
selis1kkdigy11ldvnq  
asvnggsraytpyspqrk1kegfffaaltpt1rhlgkleaelkg  
>tr|Q99X59|Q99X59\_STAAM  
mrkn1litgvhgyignalkdk1ieqghqvdqinvrnqlwksts fkydvl ihtaalvhnnspqarl sdymqvm11tkql  
aqkakaedvkqfi fms1ma  
vygkegqvgsdq1dtqtpmnp1t1nyg1skkfaeqalqelisdsfkvaivrppmiygahcpgnfqr1mq1skrlpiipni  
nng1rsalyikh1tafidq1  
is1evtgvyhpqdsfyfdtssvmyeirrqshrktvlinmpsvlnkyfnk1svfrk1fgn1tysntlyenna1levipgkm  
slviadimdetttkdk1  
>tr|Q99X66|Q99X66\_STAAM  
mskkenttt11fvyekpkstisekfrgirsnimfskangevkr11vtsekpgagkstvsvnvaityaqagykt1vidgdm  
ckptqnyifneqnnng1ss

Tsompanidou\_et\_al\_Supplemental\_FASTA\_File

liigrttmseaitsteienldlltagvpnpseeligserfkelvdlfnkrydiiivdtpvntvtdaqlyaraikdsll  
vidsekndknevkakalm  
ekagsnigviiInktkvdksssyhyygde  
>tr|Q99X68|Q99X68\_STAAM  
mfigknl eyvrklnalsrkelsekivseqaiwqyetknmmpeiskiydmstifnvkssyfi seqpeellinsvdkhsia  
fraknykvstklInkqyyq  
amylsnltsylfsfvtpidniilslnnldellngnleslnkkesikeiakvvrakilqdesneallfmlekagiviyek  
rindsidaysfwskdqtpf  
iilgtnrngvavrrnfdlahelghlvhrhiqfdllspeeyktieheadifasefllpeafkdkfdqmtkksnpdylavl  
kekwyvsiqaiamrayylg  
lmsstqyryfwaslnkkgykskeplddviemsrpvkmnsllklyfdrniltppkllnylkvdetflnhlaginlklfkdy  
vnenreynitnlyk  
>tr|Q99X71|Q99X71\_STAAM  
mkkikysltvsaiivatvlsalpqslaithesqptkqqrvtlfdrrshgqtagaadwvsdgafsdysdiqkqgydvkaid  
ghsniteaslksskifvip  
eanipfkeseqaaivnyvkqggnvvfisdhynadrnl nridsseamngyrrgayedmskgmnaeeksstamqgvkssdw  
stnfgvrfrynalgdlns  
nivsskesfgitegvksvsmhagstlaitnpekakgivytpel pakskwshavdqgiyngggkaegpyvaiskvkgka  
afigdsslvedsspkvyr  
dngekkktydgfkeqdgkllnnitawmskdsdgkslkasgltdtktklldferperstepekepwsqppsgykywdpt  
tfkagsygekgadppnt  
pddhtppnqnvisfdipqnvsvnepfevtihlkgfeanqtlenlrvgiykeggrqigqfsskdndynppgstlptvka  
dengnatikinakvlesme  
gskirklkgdktlittdfk  
>tr|Q99X72|Q99X72\_STAAM  
mknfkyllfvmlavivfaaacgnssldnqknasndsdsksqgykpelvtqfvpsqmagtleakakplekllskelgip  
vkvsstnyntiveamksk  
kvdvgflpptaytlahdqkaadlllqaqrfvgkedgsaskelvdsykseilvkkdskiksldklgkkialqdvsttagy  
tfplamlkneaginatkd  
kivnvkghdqavisllngdvdaavfndarntvkkdqpnvfkdrilkl tqaipndtisvrpdmkdfqeklkafidia  
kskeghkiisevyshegyt  
etkdsnfdivreyeklvkdmk  
>tr|Q99X78|Q99X78\_STAAM  
mnveyskikkavpillerfvfslvidnsfkisvaiaddlnisvttvsqatlaglvigigavvyaslsdaisirtlfy  
gviliiigsii gyifqhqf  
plllvgriiqtaglaaetlyviyvakylskedqktylgstssyslslvigtlsggfistylhwtmflialivvftlp  
flfkl l pkenntnkahldf  
vgllivatiattvmlfiftnfwlymigaliaiivfalyiknaqrplvnksffqnkryasflfivfvmayaiqlgyiftfpf  
imeqiyhlqldttslllv  
gyivavivgalsgkigeylnskqaiitailialslilpafavgnhisifvismiffagsfalmyapllneaiktidlnm  
tgvaigfynliinvavsvg  
iaiaaalidfkalinfpngndalsshfgiililglmsivglvlfvilnrwtqsek  
>tr|Q99X94|Q99X94\_STAAM  
mnqtilnrvtvmhqlvssliyenivvykasyqdgvgfhftieghdseyrftaekthsfdri ritspiervvgdeadttt  
dytqllreavftfpkndek  
leqfivel lqtelkdtqsmqyresnppatpetfndyefyameghqyhsyksrlgftlsdnlkfgpdfvnpvklqlaid  
kdkvettvsrnvvvnmelr  
qqvgdktyehfvqqieasghvndvemipvhpwqfehviqvdlaeerlngtvllwgesdelyhpqqsirtmspidttkyy  
lkvpisintstkrvlaph  
tienaaitdwlkqiqqdmylkdelktvflgevlqgsylntqlspykqtqvygalgviwreniyhmlideedaipfnal  
yasdkdglpfi ekwikgyg  
seawtkqflavairpmihmlyyhgiafeshaqnmmlhengwptrialkdfhdgvrfrkrehlseaashltlkpmpeahkk  
vnsnsfietdderlvrdfl  
hdafffiniaeilfiekqygideqrqwqwkdiieayqea fpe lnyqhfdlfeptiqvekl ttrllsdselrihhvt  
nplvgggindattiset  
>tr|Q99X97|Q99X97\_STAAM  
mqnhtavntaqaiilrdlvdallfediagivsnseitkengqtllyeretqqikipvyfsalnmfryessqpitierv  
skqpltaefwqtianmnc  
dlshewearveeglttaatqlakqlseldashpfvmseqfaslkdrpfhplakekrglreadyqvyqaelnqsfplmv  
aavkktmhimgdtanidel  
enltvpikqatdmldqglssidvylfpvhpwqyqhilpnvfateiseklvllplkfgdylssssmrs lidigapynh  
vkvpfamqslgalrltpttr  
ymkngeqaeqllrgliekdeakymvcdetawwsymgqndi fkdqlghl tvqlrkypevlakndtqqlvsmalaan  
drtlyqmicgkdniskndv  
mtlfediaqvflkvtsfmqygalpelhgqni llsfedgrvqkcvlrdhdtvriypwltahqlslpkyvredtpntli  
nedletffayfqt lavsvn  
lyaiidaiqdlfgvsehelmsllkqilknevatiswvttldqlavrhilfdkqtwpfkqillp llyqrdsggsgmpsgl t t  
vpnpmvtyd

Tsompanidou\_et\_al\_Supplemental\_FASTA\_File

>tr|Q99XA0|Q99XA0\_STAAM  
mllkpkvqivjaglciaivailslmigntlvspgtvialfnfdsendlhdvvtgarasrtiaalltgaalavsgllmqal  
ltnpiaspglfgvnagav  
ffvifstfiqigsfkmivviaflgaiivtilvvalgmfrqtlfsphrvilagaaiamlftaftqgilimnetdlqglf  
wlsqsvslrniwdipwip  
lvllliliafismaahinilmstddiatglgniklikwmiimlismlagisvavagsivfvglivpniskrllppnyky  
ipftalagailmiisdiva  
riikplelpigvvtavigaivliyimkkgrqr  
>tr|Q99XA1|Q99XA1\_STAAM  
mmigssfipqrvmlyfinpndsmdqftlevlrlpritlailagaalgmsglmlqnvlnkpiaspdiigitggaslsavv  
fiaffshltihllplfav  
ggavammillvftkkgqirptiliiigismqtlfialvqglittkqlsaakaytwlvgslygatfkdtiilgmvilavv  
plflvipkmkisilddpv  
aiglglvhqrmlqilqitstilvsmaislvgnigfvgliaphiaktivrgsyakllmsamigaisiviadligrtflp  
kevpagvfiaafgapffiy  
llltvkk  
>tr|Q99XA6|Q99XA6\_STAAM  
mnklrdttflsylvftiilwgsafpmikiaIndfsaeslsafrlilatillpfviikkltpeirdipvifilgfcgfv  
yhtalnfgetlisagisgi  
lvsttpifssalayiflkehfskwnwllsvafigisiisiskddyttinvlgvfiillasfseslyftfqkkyiekygf  
iaftlytimasspfmlifi  
peiindihgatftsivsvlylaifptiipyvllayivksvgvsdatmslyltpivslllsyllldelpttlaiggiitl  
lgvlsnffqnt  
>tr|Q99XA8|Q99XA8\_STAAM  
micsqtlfrypthmiflmkhnymidciillnllqtchftlkiyiisddilqviyk  
>tr|Q99XA9|Q99XA9\_STAAM  
memsvtevi fsflgglgiflyglkimgdglqasagdrldilnkftsnvlgviagivvtiliqssgttvitiglvtag  
fmtlkqaigvimganigtt  
vtafiigidlgeyampialalgafliffkrskinnigrilfgfgslffglefmgdavkplasl d gfkqlmldmssnpila  
vivgagltalvqsssatig  
ilqefyqqdlislnaaiplvlgdnigttitailaslagsiaakraalvhvifnligviiftiflvvihlisllqdvwhl  
kpmtiaavshgfnitntl  
iqlpfvaglawivtklvpgkdiaddykqhlndlvyhagvalqetqkelqnvqqivlsmfedireitkddkklikkle  
qkhqavetindsirnylv  
istkaitkadverlavmfdvnrslkvaelteeyvaqlkrqhdediritedaqrmdklfnhvaesfdkaidmldvydkt  
kkdeiversresfniehkl  
rkghikrlnrgecttkggllyidmigvlerigyhsrnvsealvglnddvptdeeiattei  
>tr|Q99XB0|Q99XB0\_STAAM  
mnqqliealkskedkmierrylhghpelsfhedetakyaefykgkdvevetnvgrgikvtdisgkpgktlairadfd  
alpitedtgl sfasqngv  
mhacghdahtaymlvlaetlaemkdsftgkvvvi hqpaeevppggakamiengvldgdvhlvgvhvmstmktnvyyrpg  
yvqtgraffklkvqgkgh  
gssphmandai vagsyfvta lqtvsrrl spfetgvvtigsfdgkqfnvikdvveiegdvrgltdatkatiekeikrls  
kgledmygtctleynddy  
palyndpefteyvaktlkeanldfgvemcepqpsedfayyakerpsafiytgaavedgeiyphhhpkfniseksllisa  
eavgtvldylkgdn  
>tr|Q99XC2|Q99XC2\_STAAM  
medlkeslkslgwwdlffaipmflifaylpnyfitiflniviiiffsigliltthiikidsntk  
>tr|Q99XD7|Q99XD7\_STAAM  
miymntikntiyteaiskdekhryllkktwdekkpactvitmyphldgvlslldttvlllnqlanserygavylvnlf  
sniktpenlkhikepydkh  
tdihlmkaisestvilygayakrpvverveqvmemlkphkkkvkkl inpatneimhp lnpkarqkwtkla  
>tr|Q99XD8|Q99XD8\_STAAM  
mflntiesqfdkvaedydfvnelndysffvsnmppkgraldigcgsllveklasydevvgidisnqmlldlaksqrq  
ltntvylnmnaeqlnfnk  
fdfivsrthfhhlddiasviqqkellneegrivilndvsevetpptyvyklgaiqeflphcfkfgiknairiynhntsk  
swlehlasdkylseqnyyd  
lyekllpgcqfhkmgwamgvvwtk  
>tr|Q99XE0|Q99XE0\_STAAM  
mffkqfyednfsqasylicqrtgeamiidpirdltkylkvadkegftitkaethadfasgirdvanklnasiyvsvd  
egkdefnyknmpkqthfvk  
hqdiylgkiklevlhtpghppesiflltdeggssipmglfsgdfifvgdvgrpdllekavnvegstkiqakmqysiqsi  
qfaatlpdyiqiwpghgag  
spcgkalslptttlgyekinnwafnvkdetsfietltnqpapphfsqmkkinqfgmqypynvypssntqtafdl  
rskeafhghmhgtinipf  
nktfinqigwyl dyd  
>tr|Q99XE1|Q99XE1\_STAAM  
meligdkstvvqaihalqligfenvksyrlpqtivtssihssemtgeehnvldvrnddewrkghlkqaihiphgkllne

Tsompanidou\_et\_al\_Supplemental\_FASTA\_File

dipfdkndliyvhcqsgr  
ssiavgileykgftnivnrggyqhlpafk  
>tr|Q99XG0|Q99XG0\_STAAM  
mithnmmlililcgvitliriipfimi skvqlpdvvrwlsfipitlftalvidsiiqqtphgegytlnipyialip  
tvilsitrsltitiisgi  
vimatlrfff  
>tr|Q9AC60|Q9AC60\_STAAN  
mksvkk1seelgvskqti fnnikrlnietikqentsfikedtdiekiirrvnenkkkygfesttedkqkksdninfesk  
sdaqiveilknqidl nng  
iekqesrhettiefyrkelqerskllenqqvalesnkkikqlenqlekehlnypfdtstntrqnvdakektyttnpvn  
inrdqetketeiqykd is  
gsqsdestggeeakkedvpanlndndsdi eekseetepkkgfwsrlfgs  
>tr|Q9AC61|Q9AC61\_STAAN  
mfgdqrqeatkyvikegyqdiyflnkngeyyfevrsawrgkhiirvkdglgwrkeivte  
>tr|Q9AC62|Q9AC62\_STAAN  
mitffndifcsflsliakhyqshpyiylsliynniy  
>tr|Q9AC63|Q9AC63\_STAAN  
mklaeaikeqrelkrwsqeelanilksvrsqsvskwesaknypsldiliamsdlfgislehlikgdarfkkvilegnyre  
>tr|Q9AC65|Q9AC65\_STAAN  
mnhshlktfihnklllyqcqtikgvqlfktlllkgkntplgieipccsrseqapkfvkkyknilks  
>tr|Q9AC66|Q9AC66\_STAAN  
miqnyqksldtlkllsvmyeiktknvggwfhekqetgnivitktyfekytkqikaaqmilddyewiksgkslkkseka  
neslvneltsvhmeneklv  
eefndlaqrynyllsenekkdkelnytlklfnqvfkiks mmeeryhtlinhidnhldnski revmtidnde qffkkk  
yqae  
>tr|Q9AC67|Q9AC67\_STAAN  
meeeygkenllyatvvhmdei tphmhygvipitkdgrlsakevvgnkka ltefqdrfntyinkqgydlkrgisrqltkeh  
dqvsgykqkteyhkqymyr  
ekqiedhlk  
>tr|Q9AC68|Q9AC68\_STAAN  
msysiirvvkvsksntnrgiqrenknyenididlsksylnydlvndtkfdfnkkidekieknykgkrkirtdaikhidgl  
itsdnvflinyllkkrqnsf  
lsmkrswkkntvkkifymrqiwmr  
>tr|Q9AC69|Q9AC69\_STAAN  
miklenfvkgnkni l dgcfnfegkgsyalvgesgagkstllniagfedvsqgsiyiedkllkkkvdfyrytlgylf  
qnfallenqqtisqnl d l a l  
kfkknkdnmnlkkevllkvgldldikrivsslsggeqqrvalarlilkdpkiiladeptgsldtkngkividlllkll d  
enktmivvthdlelakrfd  
vivnise lrs  
>tr|Q9AC71|Q9AC71\_STAAN  
mkkfklf1dfstlll isglflflffkeneei ipessniltisnwdksnskskvl dviesgagnqniqiiksvkdfdnkke  
ffvfnskrnnsdfirnkts  
lltpsdllnreikgkyyiigehfnveeltselkkagltseveyinrnillfelvidndllvpfiflglvlyllyflydrgy  
nlkfyaiqlhgfsttrii  
fhnihikiiywlvlttiffianiliihianleldflmfirrfivllfvfacittllwlisyslllksipltlkgkkyk  
fsifmgtftkcimvlisf  
llaqnlnaytklknidysekiwqkldnyyt leispnirseekqiletniynlikkseqlglllknnnianpdknyip  
engnvffinnfnfykni  
nhdfkminhdnsdkinvfprlqyqkseiqknhqwidfqkqknkvdvqvlsknsvsfsdrttnlkfgyldspivmll  
tpddltgdlylaavsqgy  
lfkdldtlkqllkdnhleeeisgitnykdsvl nelnetkktmiititviiinvfilliatvfetiqyfswnkkqlll rki  
hgyslfssnvryltisill  
simlaytthilfgskillfiimsiaiqhllqiyayikylekyfdlmrei  
>tr|Q9AC72|Q9AC72\_STAAN  
mkkkfvssciasitlfgtlgvtykaeatvhvaggvwshgigkhyvwsysshkrnhgstavgkyssfsgvarpgvqsk  
asapkawgnktfysl h  
>tr|Q9AC73|Q9AC73\_STAAN  
mtilaiiviltltfviwqpkgldigitaligavvaiitgvvslsdvlevtgivwnatltfvavilislildeigffews  
aihmvkasngnglkmfvfi  
mllgaivaaffandgaaliltpivlamvrnlgnqkvi pfii asgfia dttslplivsnlvnivsadyfdigfiyfsr  
miipnifsliasilvlwly  
frksipktfdtenl sdpksaikdskl fklswivlavllvgylvsefiqipvsiiagiafifvilarkskavhtkqvikg  
apwnivvfsigmylvvfgl  
knvgittvlgdvlnisnyglfssimgmgfiaaf lssimnmpvtlidaiagqssatgilkegmvyanvigsdlgpkit  
pigs latllwlhvltqkgv  
kiswgyfktgiiitipvlvftllgyltliif  
>tr|Q9AC74|Q9AC74\_STAAN  
msykelstilki lsdpsrleildllscge l cadll ehfqfsqptlshhmkslvdnelvtt rkdgnkhwyqlnhailddi



Tsompanidou\_et\_al\_Supplemental\_FASTA\_File

iqnlniintsngrcvcknv  
ksgdc  
>tr|Q9AC75|Q9AC75\_STAAN  
mtknqnfietkeykrfaefcdacikyqyigicygqpgvgkltssryytnwdtiekqvnhrwedlaskttddilsvdkif  
ytapaekqsgksienrpfv  
qevlnflrmgdrivesidrlgrnyeeiiqtvnylkdeqvlimitslpmnevignp1ldkfmkdliiqilamiseqern  
eskrqqagqivakekgy  
kgrpvllyspnakdpqkrlyyrvvleeggksistiakevgitrqtiyriknsk  
>tr|Q9AC76|Q9AC76\_STAAN  
mknkeyltnfseakrkatqkyniikpfilgeqslssiskskgialstlyrwnksykeqglkgliyatkadkgtrkiep  
kiideierlalmnkrsia  
tjhrkttnyckennfdipsykqiysvikampksvidfshqgekyqnykdliqiressrpneiwqadhtl1ldifildqkg  
nirpwl1tiimddysraia  
gyflsfdapnqntal1lhaqwknndtnwpvcgipekfytldhgsdftshhmeqvaidlkinl1mfskvgvprgrgkierf  
fqtvnqtfleqlpgyinn  
dtpsnl1infhnfeeklryfliedynqkehstihhttpisrwnshffpmpssleql1l1l1leipksrkvhsgdihfqqfr  
ysntnlaayvgeyvl1ryn  
pndmaeirvfyrdelf1ctaicpeiadysidikdiharsqrrkh1kqniaspsttelikeekncgyspqqettknvkk1kr  
yrnd  
>tr|Q9AC77|Q9AC77\_STAAN  
mkigyavstglqnlnlqedr1ntygceki fndhmsgskskrpgldkaiefarsgd1vvr1dr1grnmedlit1vnel  
nergvsfhsleenitmdks  
sstggl1fh1faafaefern1l1erssagriaarargryggrpeklnqkdln1lktlydngtpiktiaeqwhvsrttiyr  
ylnk1edkedekqgevsn  
>tr|Q9AC80|Q9AC80\_STAAN  
mkl1ifl1via1v1sacnsnshake1nd1ekkynahigvya1dtksgkevknfsdkrfayastskainsailleqvpyn  
klnkkvhinkddivayspi  
lekvygkdi1t1kelieasmtysdntannkiikeiggikkvkqrlkelgdkvtnpvryeielnyyspkskkdtstpaafgk  
tlnk1iangk1skknknfl  
1d1mfnnkngdt1ikdgvpkdykvadksgqaityasrndvafvypkgqsepiv1viftknknsdkpndk1isetaksvm  
kef  
>tr|Q9AC82|Q9AC82\_STAAN  
mfnavvvrksasnvsvykvvdesh1skgdvlkvvyssinykdm1alqykggvirdypmipgidfagivessndkfke  
gdnv1vtgydvgvthtgff  
seyaqpgewivpiqqemsikesmvygtagftaalsifelekygmniksqpeilvsgatggvgsvaiqilhkigyenita  
ivrkekqieiakklgakqv  
iieddnkplkkgifdyfl1dtvgsnvtlyglkr1nyqgvatvcgnvagnslnanilpfilrgikligidsvyvdhired  
iwskl1anewnigns1lyne  
igfeefyktidq1lkgqhlgrtilkv  
>tr|Q9AC83|Q9AC83\_STAAN  
mftdg1iiespisqasideerrcit1l1ifvhi1apvisgcavaytywlskrnk  
>tr|Q9AC88|Q9AC88\_STAAN  
mis1innsndfitleetskyvksdfl1tddeknqeivsd1lekgyrkrmlsygg1l1kqkhkiln1ddaedgn1intsd  
edkttdeekkh1qlpqfgi  
skskiii  
>tr|Q9AC89|Q9AC89\_STAAN  
mqnqyftvqenykerfyqipkvfftsenykn1tndmkiaayailrdr1n1siknswdedgniyfvsneklmeilnckke  
k1tk1kkglendg1liqkr  
rg1nkpn1ly1mkpivterdiykiekeendvepygekdvrfsnvqkfenrtsrskierpevrksntndtdfndidfndt  
enndmnd1ndikykneisn  
hsnhsnqfthnfdk1em1l1qefpeql1tny1lkydyrd1e1ikavil1kakksfnsrhedmhymlediedeilts1kr1kka  
ihdrvgkgketiksmqay  
1mqtil1teleethalymrrknmkqynifnq
